# Supplementary material
Source: PubMed Central journal article supplement (PMC3675816)
Supplement: supp_M112.023887_mcp.M112.023887-3.pdf [file supp_M112.023887_mcp.M112.023887-3.pdf]

Scan number 1323 Raw file LNCAP\_Silac\_23F10\_set1\_01  
 Method ITMS; CID Pepti... 100.45

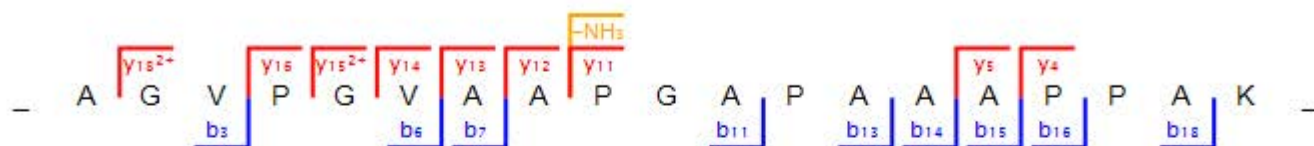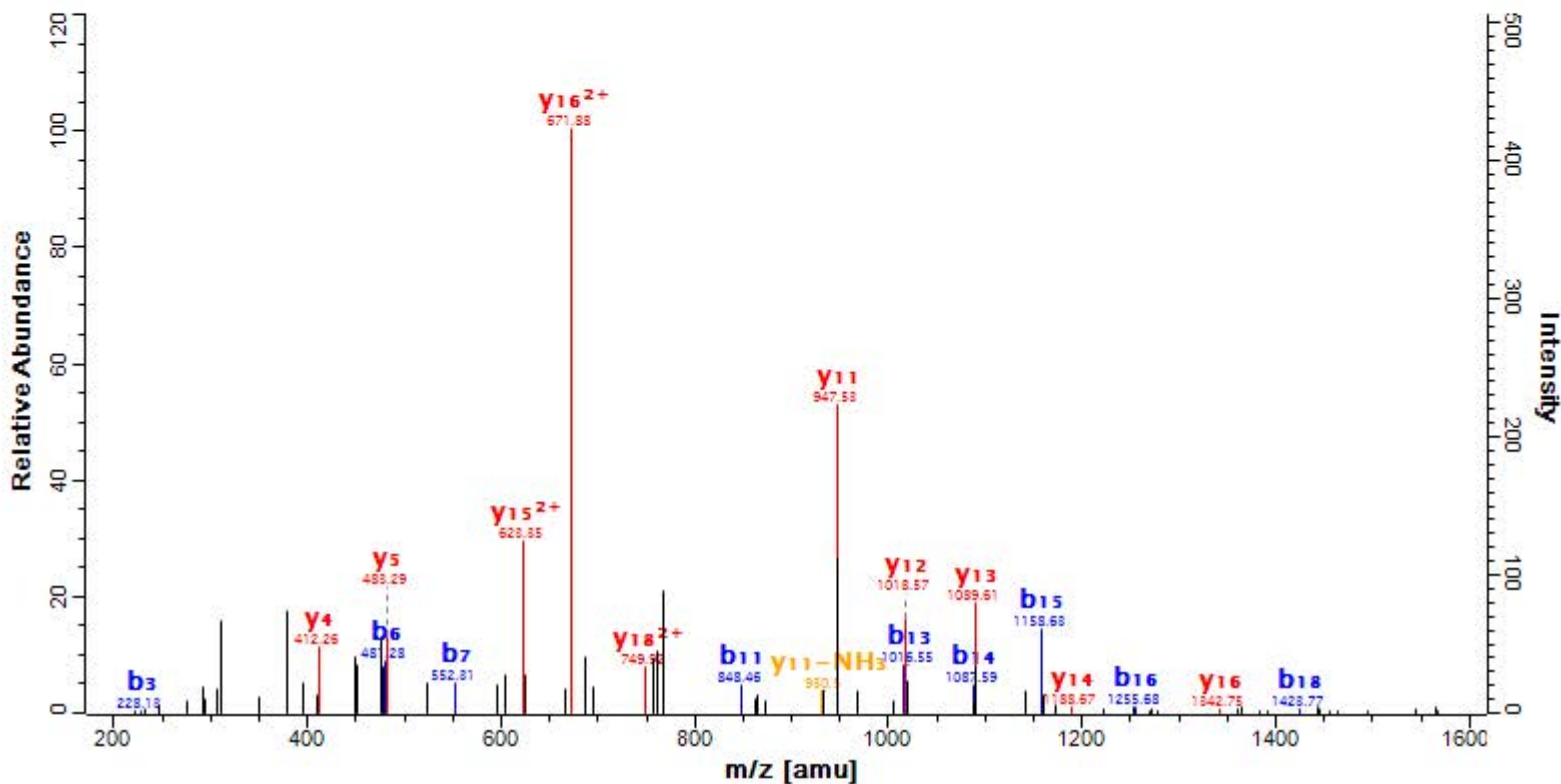

#### precursor information

|                   |                 |
|-------------------|-----------------|
| Mass:             | 1568.86763      |
| m/z:              | 785.44109       |
| Charge:           | 2+              |
| Retentiontime:    | 17.471033096313 |
| Score:            | 100.4537        |
| Mass Error [ppm]: | 0.10063         |
| PEP:              | 0.00044045      |
| Precursor Type:   | ISO             |

| b ion     |          |    |     | y ion    |          | y <sup>2+</sup> ion |                    |
|-----------|----------|----|-----|----------|----------|---------------------|--------------------|
| Δ dalton  | mass     |    | seq | Δ dalton | mass     | Δ dalton            | mass               |
|           | 72.04439 | 1  | A   | 18       |          |                     |                    |
|           | 129.0659 | 2  | G   | 17       | 1498.838 |                     | 749.9225 -0.4971   |
| +0.0189   | 228.1343 | 3  | V   | 16       | 1441.816 |                     | 1441.816           |
|           | 325.187  | 4  | P   | 15       | 1342.748 | +0.051677           | 671.8775 +0.267501 |
|           | 382.2085 | 5  | G   | 14       | 1245.695 |                     | 623.3511 -0.03205  |
| +0.024726 | 481.2769 | 6  | V   | 13       | 1188.674 | -0.10517            | 1188.674           |
| +0.08124  | 552.314  | 7  | A   | 12       | 1089.605 | -0.06178            | 1089.605           |
|           | 623.3511 | 8  | A   | 11       | 1018.568 | +0.00017            | 1018.568           |
|           | 720.4039 | 9  | P   | 10       | 947.5309 | -0.04792            | 947.5309           |
|           | 777.4254 | 10 | G   | 9        | 850.4781 |                     | 850.4781           |
| -0.09401  | 848.4625 | 11 | A   | 8        | 793.4567 |                     | 793.4567           |
|           | 945.5152 | 12 | P   | 7        | 722.4196 |                     | 722.4196           |
| -0.01427  | 1016.552 | 13 | A   | 6        | 625.3668 |                     | 625.3668           |
| -0.08495  | 1087.589 | 14 | A   | 5        | 554.3297 |                     | 554.3297           |
| -0.02978  | 1158.627 | 15 | A   | 4        | 483.2926 | -0.10988            | 483.2926           |
| -0.04397  | 1255.679 | 16 | P   | 3        | 412.2554 | +0.121813           | 412.2554           |
|           | 1352.732 | 17 | P   | 2        | 315.2027 |                     | 315.2027           |
| +0.086976 | 1423.769 | 18 | A   | 1        | 218.1499 |                     | 218.1499           |
|           |          | 19 | K   | 0        | 147.1128 |                     | 147.1128           |

#### general information

|                       |           |
|-----------------------|-----------|
| Annotation:           | 14 of 19  |
| AminoAcids Coverage:  | 74 %      |
| Intensity Coverage:   | 51 %      |
| Peak Coverage:        | 24 %      |
| Protein Localisation: | 20 ... 38 |

Scan number 1599 Raw file LNCAP\_Silac\_23F10\_set1\_01  
 Method ITMS; CID Pepti... 112.55

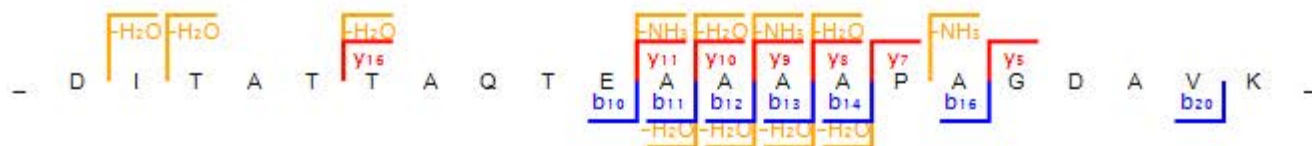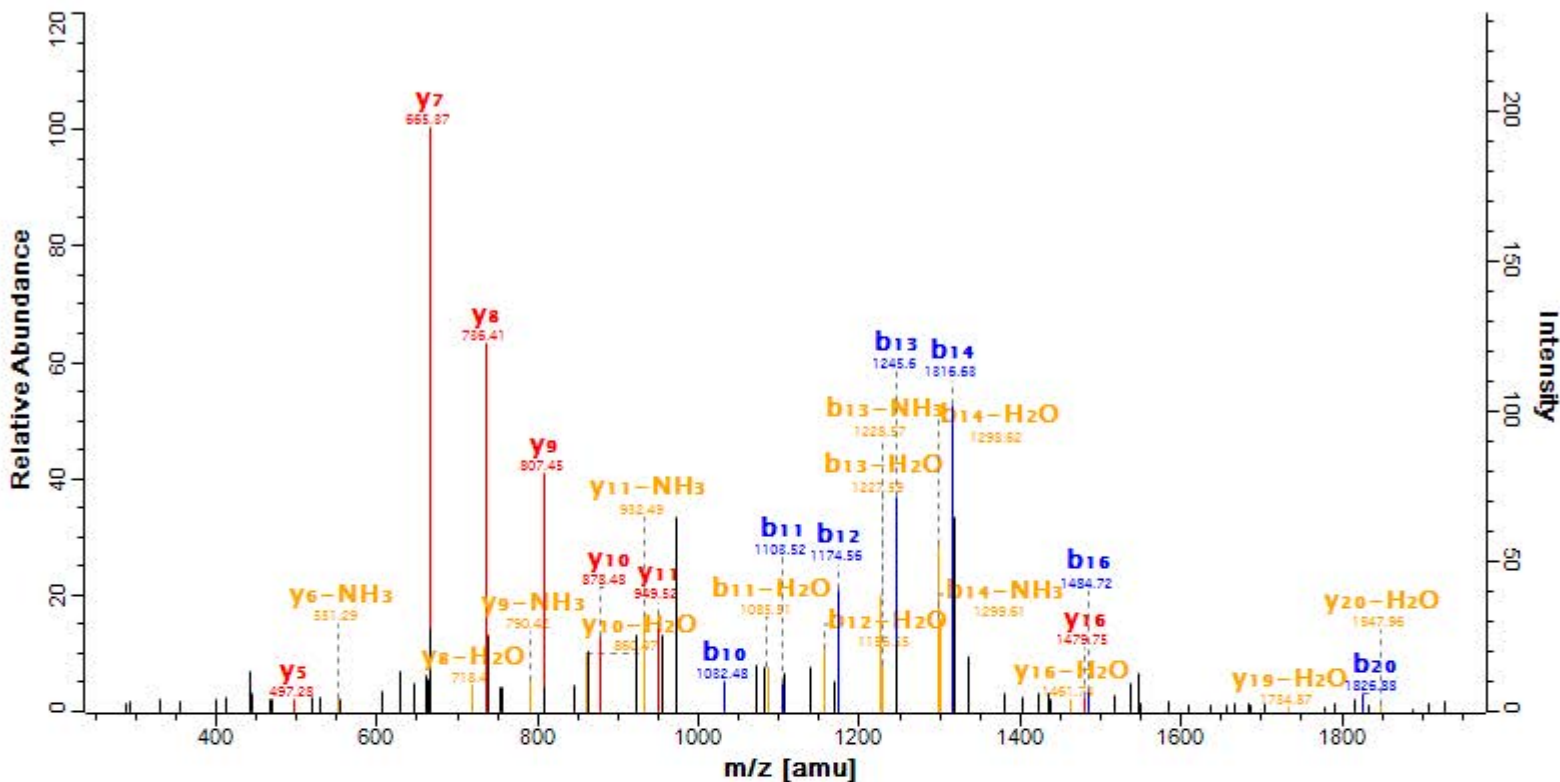

precursor information

|                   |                 |
|-------------------|-----------------|
| Mass:             | 1971.97513      |
| m/z:              | 986.99484       |
| Charge:           | 2+              |
| Retentiontime:    | 20.175220489502 |
| Score:            | 112.5493        |
| Mass Error [ppm]: | 0.10928         |
| PEP:              | 3.0954E-09      |
| Precursor Type:   | MULTI           |

| b ion           |               |     |   |                 | y ion         |            |
|-----------------|---------------|-----|---|-----------------|---------------|------------|
| $\Delta$ dalton | mass          | seq |   | $\Delta$ dalton | mass          |            |
|                 | 116.034219499 | 1   | D | 20              |               |            |
|                 | 229.118283479 | 2   | I | 19              | 1865.96944629 |            |
|                 | 330.165961953 | 3   | T | 18              | 1752.88538231 |            |
|                 | 401.203075741 | 4   | A | 17              | 1651.83770384 |            |
|                 | 502.250754215 | 5   | T | 16              | 1580.80059005 |            |
|                 | 603.298432689 | 6   | T | 15              | 1479.75291158 | +0.0667906 |
|                 | 674.335546477 | 7   | A | 14              | 1378.7052331  |            |
|                 | 802.394123988 | 8   | Q | 13              | 1307.66811932 |            |
|                 | 903.441802462 | 9   | T | 12              | 1179.6095418  |            |
| -0.0510459      | 1032.48439556 | 10  | E | 11              | 1078.56186333 |            |
| -0.0512945      | 1103.52150935 | 11  | A | 10              | 949.519270234 | -0.0836013 |
| -0.1587208      | 1174.55862313 | 12  | A | 9               | 878.482156447 | +0.1433318 |
| -0.1550631      | 1245.59573692 | 13  | A | 8               | 807.445042659 | +0.0256605 |
| -0.1312638      | 1316.63285071 | 14  | A | 7               | 736.407928871 | +0.0715633 |
|                 | 1413.68561456 | 15  | P | 6               | 665.370815083 | +0.0461161 |
| +0.4556164      | 1484.72272835 | 16  | A | 5               | 568.318051231 |            |
|                 | 1541.74419207 | 17  | G | 4               | 497.280937443 | +0.1931226 |
|                 | 1656.77113511 | 18  | D | 3               | 440.25947372  |            |
|                 | 1727.80824889 | 19  | A | 2               | 325.232530688 |            |
| -0.142654       | 1826.87666281 | 20  | V | 1               | 254.1954169   |            |
|                 |               | 21  | K | 0               | 155.127002984 |            |

general information

|                       |               |
|-----------------------|---------------|
| Annotation:           | 13 of 21      |
| AminoAcids Coverag    | 62 %          |
| Intensity Coverage:   | 58 %          |
| Peak Coverage:        | 30 %          |
| Protein Localisation: | 1011 ... 1031 |

Scan number 1974 Raw file LNCAP\_Silac\_23F10\_set1\_01  
 Method ITMS; CID Pepti... 173.28

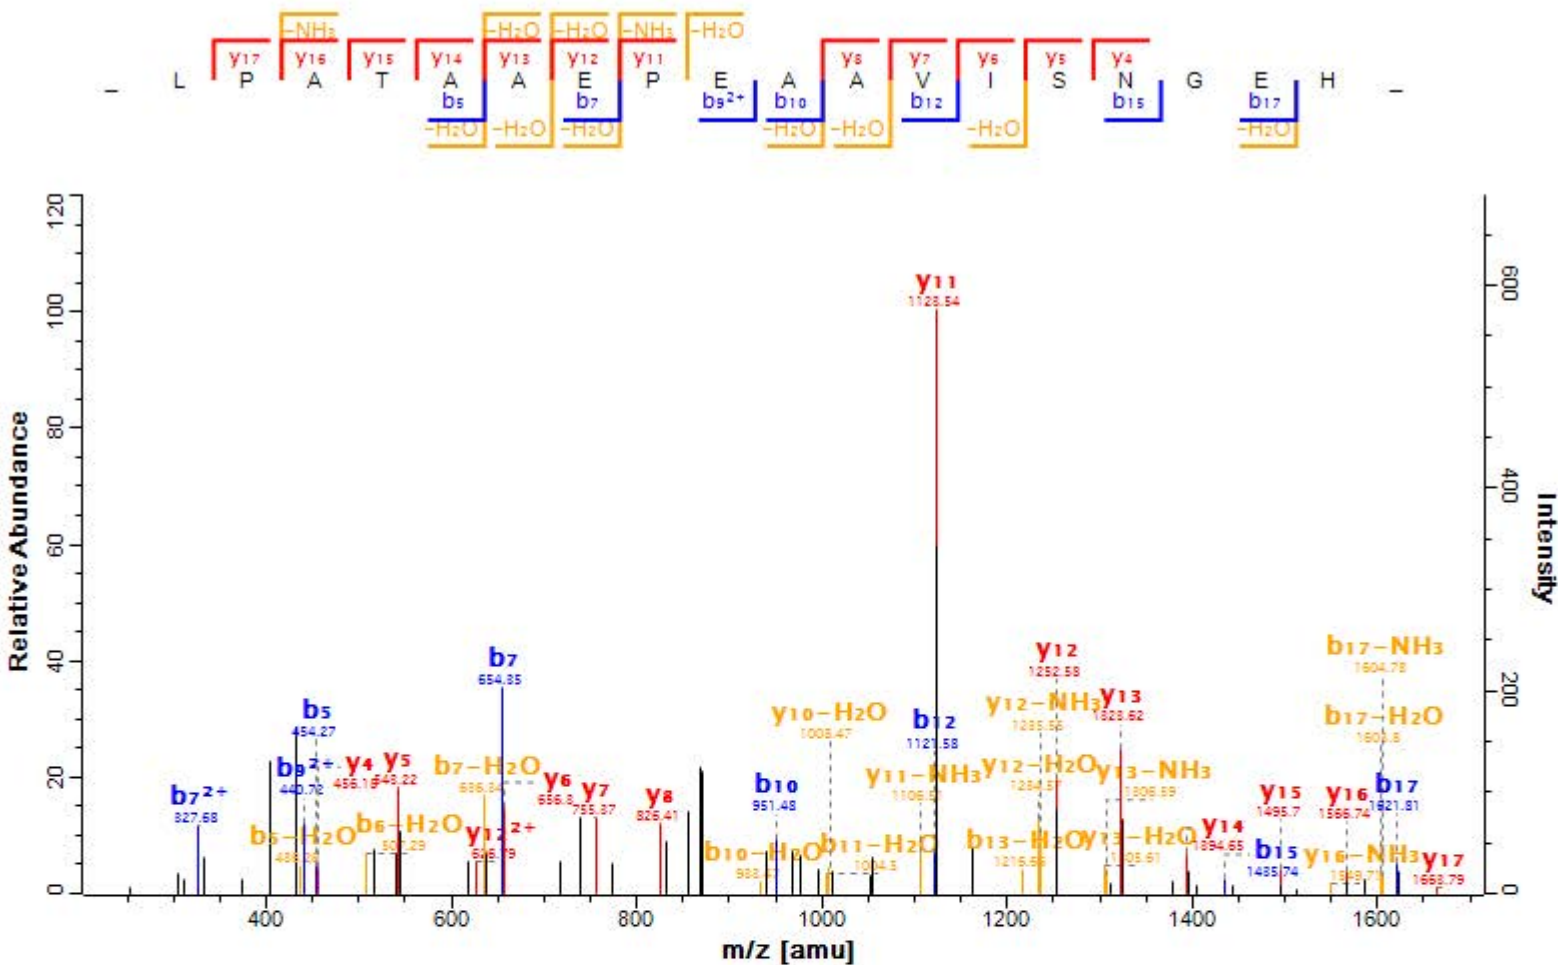

#### precursor information

|                   |                 |
|-------------------|-----------------|
| Mass:             | 1775.86939      |
| m/z:              | 888.94197       |
| Charge:           | 2+              |
| Retentiontime:    | 23.764400482177 |
| Score:            | 173.2785        |
| Mass Error [ppm]: | 0.22113         |
| PEP:              | 3.9844E-18      |
| Precursor Type:   | ISO             |

| b <sup>2+</sup> ion |        | b ion    |        | seq |   |    | y ion    |         | y <sup>2+</sup> ion |        |
|---------------------|--------|----------|--------|-----|---|----|----------|---------|---------------------|--------|
| Δ dalton            | mass   | Δ dalton | mass   |     |   |    | Δ dalton | mass    | Δ dalton            | mass   |
|                     | 114.09 |          | 114.09 | 1   | L | 17 |          |         |                     |        |
|                     | 211.14 |          | 211.14 | 2   | P | 16 | 1663.8   | +0.0371 | 1663.8              |        |
|                     | 282.18 |          | 282.18 | 3   | A | 15 | 1566.7   | -0.027  | 1566.7              |        |
|                     | 383.23 |          | 383.23 | 4   | T | 14 | 1495.7   | +0.1138 | 1495.7              |        |
|                     | 454.27 | +0.0641  | 454.27 | 5   | A | 13 | 1394.7   | -0.018  | 1394.7              |        |
|                     | 525.3  |          | 525.3  | 6   | A | 12 | 1323.6   | -0.132  | 1323.6              |        |
| -0.4                | 327.68 | +0.0009  | 654.35 | 7   | E | 11 | 1252.6   | +0.0969 | 626.79              | -0.324 |
|                     | 751.4  |          | 751.4  | 8   | P | 10 | 1123.5   | +0.0661 | 1123.5              |        |
| -0.384              | 440.72 |          | 880.44 | 9   | E | 9  | 1026.5   |         | 1026.5              |        |
|                     | 951.48 | -0.117   | 951.48 | 10  | A | 8  | 897.44   |         | 897.44              |        |
|                     | 1022.5 |          | 1022.5 | 11  | A | 7  | 826.41   | +0.0268 | 826.41              |        |
|                     | 1121.6 | -0.094   | 1121.6 | 12  | V | 6  | 755.37   | +0.069  | 755.37              |        |
|                     | 1234.7 |          | 1234.7 | 13  | I | 5  | 656.3    | +0.1565 | 656.3               |        |
|                     | 1321.7 |          | 1321.7 | 14  | S | 4  | 543.22   | +0.1067 | 543.22              |        |
|                     | 1435.7 | -0.06    | 1435.7 | 15  | N | 3  | 456.18   | +0.0503 | 456.18              |        |
|                     | 1492.8 |          | 1492.8 | 16  | G | 2  | 342.14   |         | 342.14              |        |
|                     | 1621.8 | -0.132   | 1621.8 | 17  | E | 1  | 285.12   |         | 285.12              |        |
|                     |        |          |        | 18  | H | 0  | 156.08   |         | 156.08              |        |

#### general information

|                       |             |
|-----------------------|-------------|
| Annotation:           | 15 of 18    |
| AminoAcids Coverage:  | 83 %        |
| Intensity Coverage:   | 50 %        |
| Peak Coverage:        | 44 %        |
| Protein Localisation: | 503 ... 520 |

Scan number 2270 Raw file LNCAP\_Silac\_23F10\_set1\_01  
 Method ITMS; CID Pepti... 263.45

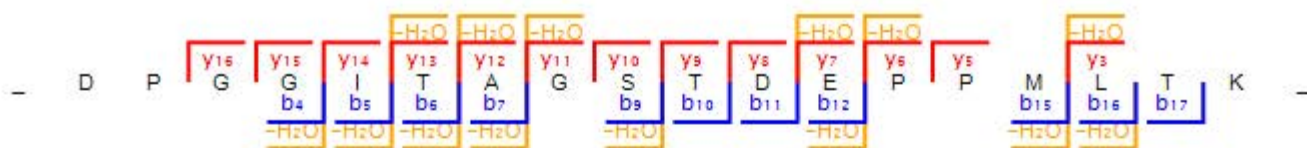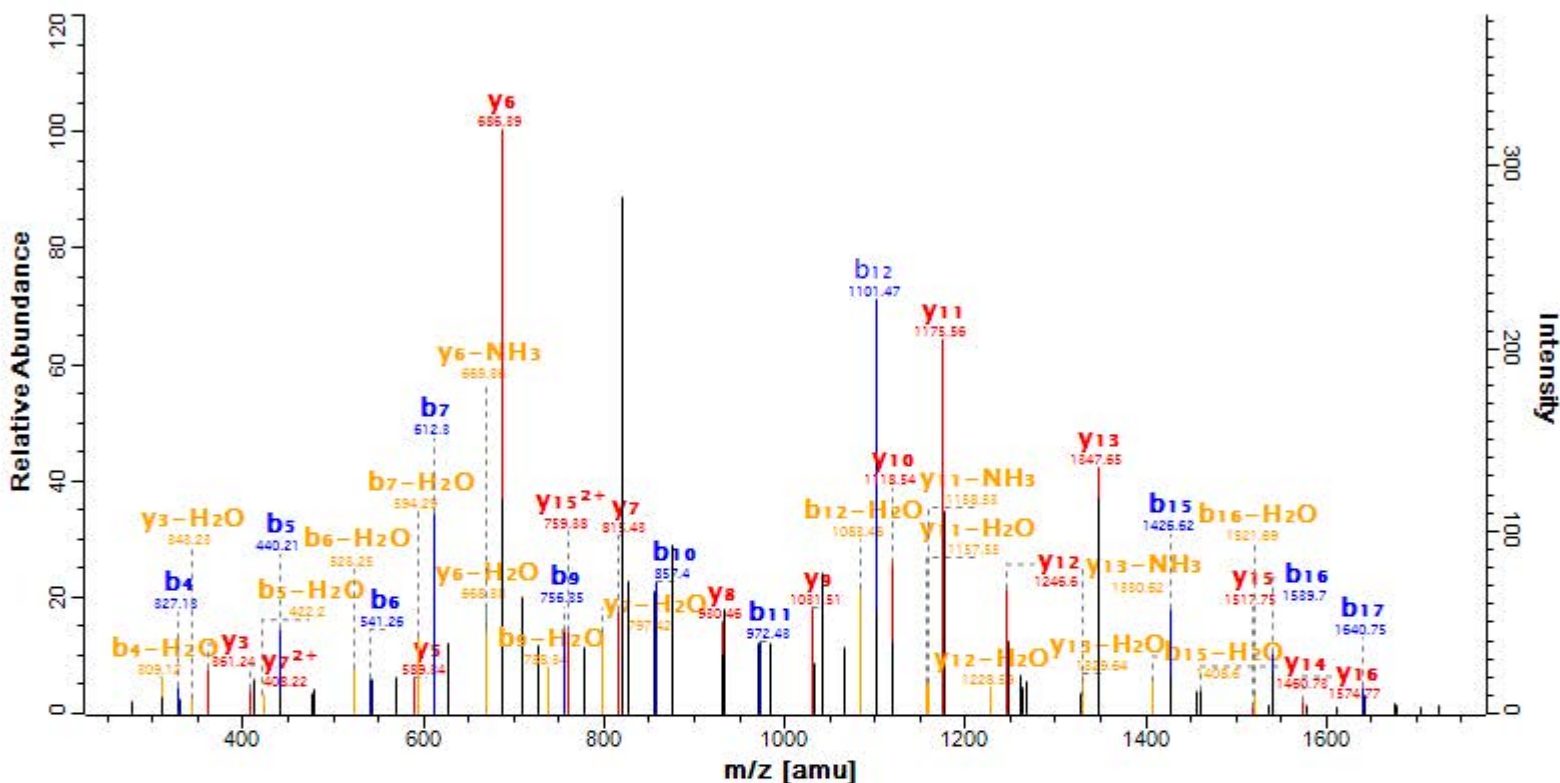

#### precursor information

|                   |                 |
|-------------------|-----------------|
| Mass:             | 1785.84409      |
| m/z:              | 893.92932       |
| Charge:           | 2+              |
| Retentiontime:    | 26.327394485473 |
| Score:            | 263.448         |
| Mass Error [ppm]: | -0.77603        |
| PEP:              | 4.9663E-70      |
| Precursor Type:   | MULTI           |

#### general information

|                       |             |
|-----------------------|-------------|
| Annotation:           | 15 of 18    |
| AminoAcids Coverage:  | 83 %        |
| Intensity Coverage:   | 53 %        |
| Peak Coverage:        | 46 %        |
| Protein Localisation: | 148 ... 165 |

| b ion     |          |     |   | y ion    |          |           | y <sup>2+</sup> ion |          |
|-----------|----------|-----|---|----------|----------|-----------|---------------------|----------|
| Δ dalton  | mass     | seq |   | Δ dalton | mass     | Δ dalton  | mass                |          |
|           | 116.0342 | 1   | D | 17       |          |           |                     |          |
|           | 213.087  | 2   | P | 16       | 1671.826 |           | 1671.826            |          |
|           | 270.1084 | 3   | G | 15       | 1574.773 | -0.04099  | 1574.773            |          |
| +0.142489 | 327.1299 | 4   | G | 14       | 1517.752 | -0.11658  | 759.3794            | +0.04635 |
| +0.079238 | 440.214  | 5   | I | 13       | 1460.73  | +0.115215 | 1460.73             |          |
| +0.171513 | 541.2617 | 6   | T | 12       | 1347.646 | -0.10346  | 1347.646            |          |
| +0.117065 | 612.2988 | 7   | A | 11       | 1246.598 | +0.135263 | 1246.598            |          |
|           | 669.3202 | 8   | G | 10       | 1175.561 | -0.062    | 1175.561            |          |
| +0.169408 | 756.3523 | 9   | S | 9        | 1118.54  | -0.13209  | 1118.54             |          |
| -0.28495  | 857.3999 | 10  | T | 8        | 1031.508 | +0.0048   | 1031.508            |          |
| +0.227966 | 972.4269 | 11  | D | 7        | 930.4601 | +0.018665 | 930.4601            |          |
| -0.02758  | 1101.469 | 12  | E | 6        | 815.4332 | +0.098891 | 408.2202            | -0.09747 |
|           | 1198.522 | 13  | P | 5        | 686.3906 | -0.00317  | 686.3906            |          |
|           | 1295.575 | 14  | P | 4        | 589.3378 | -0.14169  | 589.3378            |          |
| +0.080559 | 1426.615 | 15  | M | 3        | 492.285  |           | 492.285             |          |
| -0.07138  | 1539.7   | 16  | L | 2        | 361.2445 | +0.040579 | 361.2445            |          |
| +0.373011 | 1640.747 | 17  | T | 1        | 248.1605 |           | 248.1605            |          |
|           |          | 18  | K | 0        | 147.1128 |           | 147.1128            |          |

Scan number 2307 Raw file LNCAP\_Silac\_23F10\_set1\_01  
 Method ITMS; CID Pepti... 83.18

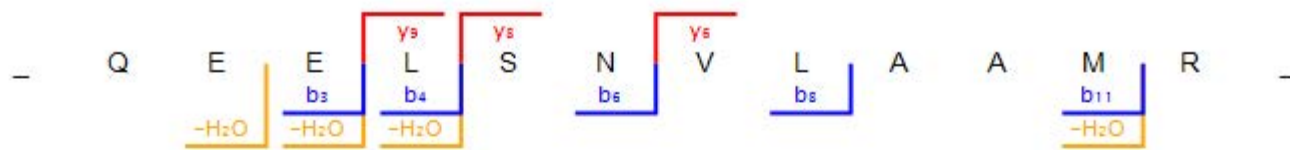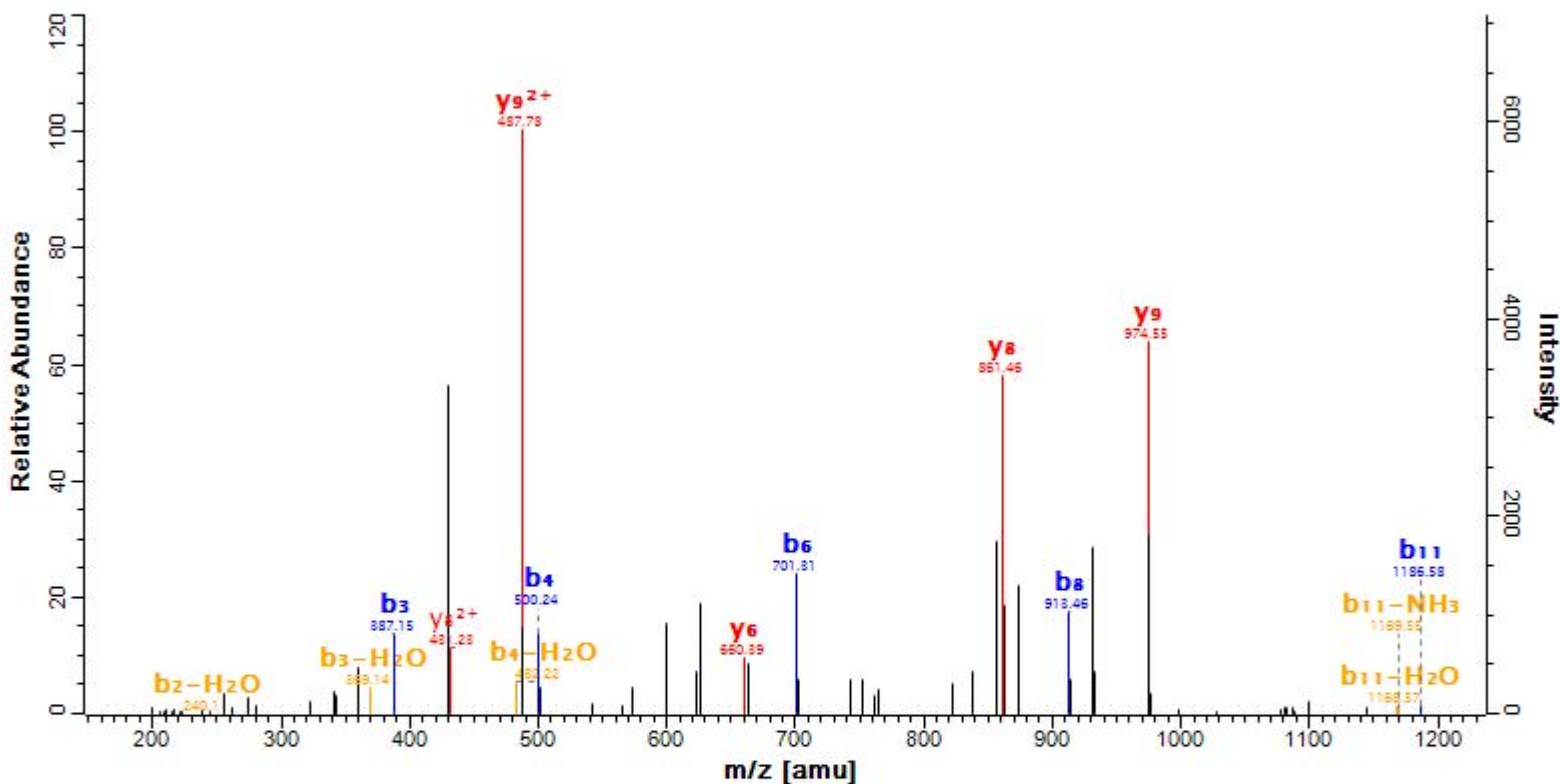

#### precursor information

|                   |                 |
|-------------------|-----------------|
| Mass:             | 1359.68139      |
| m/z:              | 680.84797       |
| Charge:           | 2+              |
| Retentiontime:    | 26.670885086059 |
| Score:            | 83.1822         |
| Mass Error [ppm]: | -0.19348        |
| PEP:              | 0.0018356       |
| Precursor Type:   | MULTI           |

#### general information

|                       |           |
|-----------------------|-----------|
| Annotation:           | 9 of 12   |
| AminoAcids Coverage:  | 75 %      |
| Intensity Coverage:   | 47 %      |
| Peak Coverage:        | 19 %      |
| Protein Localisation: | 86 ... 97 |

| b ion     |          |    |     |    | y ion    |          | y <sup>2+</sup> ion |           |
|-----------|----------|----|-----|----|----------|----------|---------------------|-----------|
| Δ dalton  | mass     |    | seq |    | Δ dalton | mass     | Δ dalton            | mass      |
|           | 129.0659 | 1  | Q   | 11 |          |          |                     |           |
|           | 258.1084 | 2  | E   | 10 | 1232.63  |          | 1232.63             |           |
| +0.031394 | 387.151  | 3  | E   | 9  | 1103.588 |          | 1103.588            |           |
| +0.136844 | 500.2351 | 4  | L   | 8  | 974.5452 | -0.07159 | 487.7762            | -0.4957   |
|           | 587.2671 | 5  | S   | 7  | 861.4611 | -0.05796 | 431.2342            | +0.129826 |
| +0.083434 | 701.3101 | 6  | N   | 6  | 774.4291 |          | 774.4291            |           |
|           | 800.3785 | 7  | V   | 5  | 660.3861 | -0.03806 | 660.3861            |           |
| -0.07411  | 913.4625 | 8  | L   | 4  | 561.3177 |          | 561.3177            |           |
|           | 984.4997 | 9  | A   | 3  | 448.2337 |          | 448.2337            |           |
|           | 1055.537 | 10 | A   | 2  | 377.1966 |          | 377.1966            |           |
| -0.04454  | 1186.577 | 11 | M   | 1  | 306.1594 |          | 306.1594            |           |
|           |          | 12 | R   | 0  | 175.119  |          | 175.119             |           |

Scan number 3013 Raw file LNCAP\_Silac\_23F10\_set1\_01  
 Method ITMS; CID Pepti... 176.94

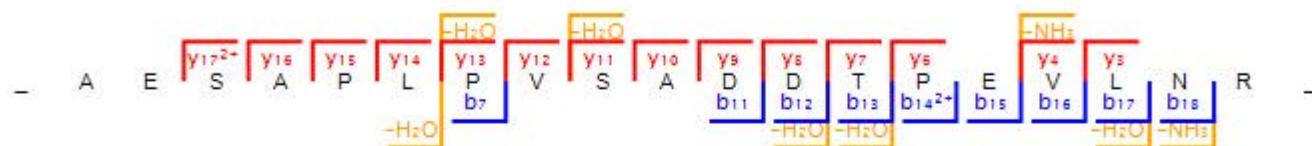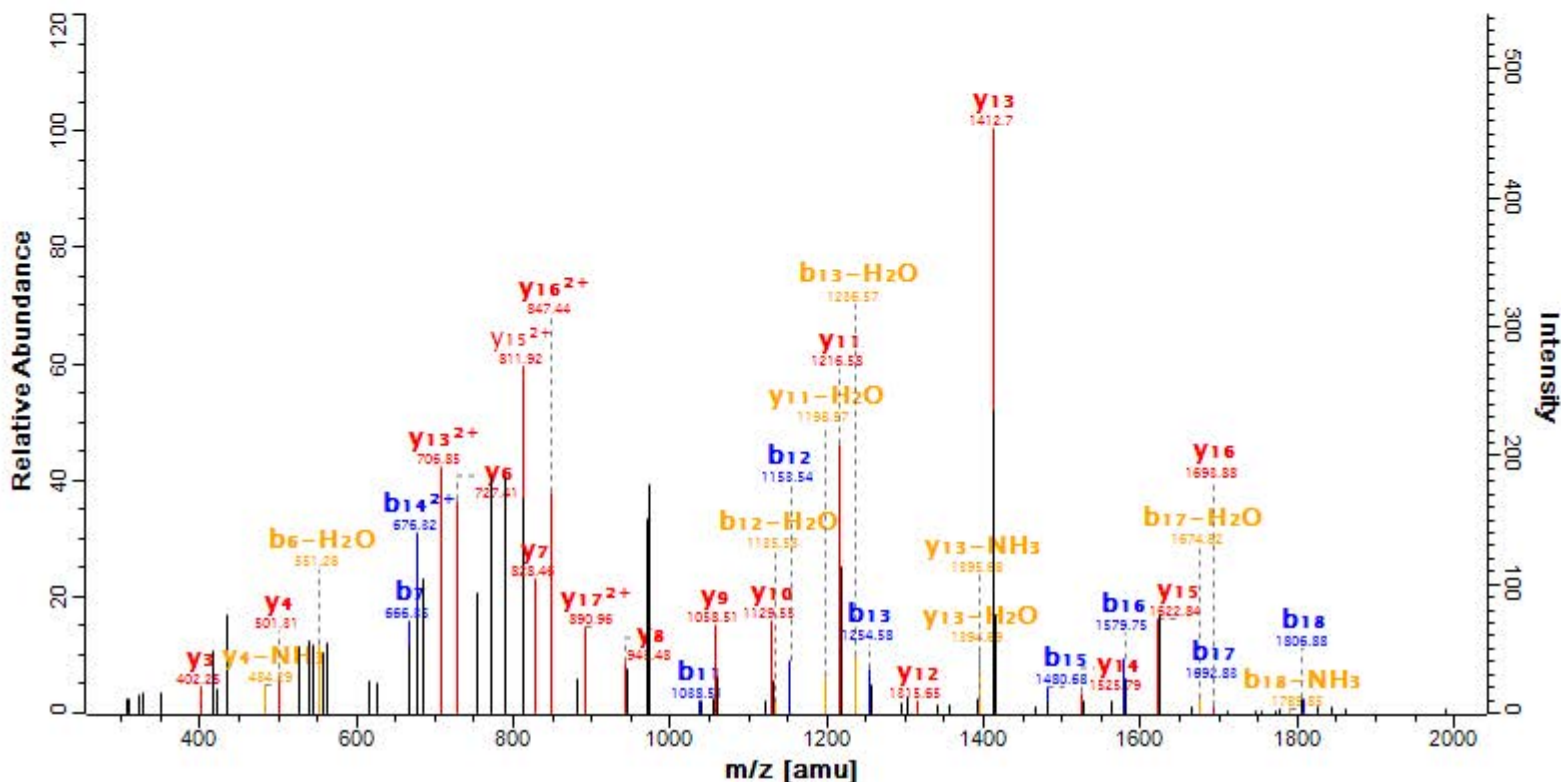

precursor information

|                   |                 |
|-------------------|-----------------|
| Mass:             | 1979.97982      |
| m/z:              | 990.99719       |
| Charge:           | 2+              |
| Retentiontime:    | 33.027172088623 |
| Score:            | 176.9393        |
| Mass Error [ppm]: | -0.091309       |
| PEP:              | 2.1483E-34      |
| Precursor Type:   | MULTI           |

| b <sup>2+</sup> ion |        | b ion    |        | seq |   |    | y ion    |         | y <sup>2+</sup> ion |         |
|---------------------|--------|----------|--------|-----|---|----|----------|---------|---------------------|---------|
| Δ dalton            | mass   | Δ dalton | mass   |     |   |    | Δ dalton | mass    | Δ dalton            | mass    |
|                     | 72.044 |          | 72.044 | 1   | A | 18 |          |         |                     |         |
|                     | 201.09 |          | 201.09 | 2   | E | 17 | 1910     |         | 1910                |         |
|                     | 288.12 |          | 288.12 | 3   | S | 16 | 1780.9   |         | 890.96              | +0.2546 |
|                     | 359.16 |          | 359.16 | 4   | A | 15 | 1693.9   | -0.382  | 847.44              | +0.1747 |
|                     | 456.21 |          | 456.21 | 5   | P | 14 | 1622.8   | -0.133  | 811.92              | +0.0018 |
|                     | 569.29 |          | 569.29 | 6   | L | 13 | 1525.8   | +0.2004 | 1525.8              |         |
|                     | 666.35 | +0.0989  | 666.35 | 7   | P | 12 | 1412.7   | -0.054  | 706.85              | +0.3018 |
|                     | 765.41 |          | 765.41 | 8   | V | 11 | 1315.6   | -0.031  | 1315.6              |         |
|                     | 852.45 |          | 852.45 | 9   | S | 10 | 1216.6   | +0.0073 | 1216.6              |         |
|                     | 923.48 |          | 923.48 | 10  | A | 9  | 1129.5   | -0.005  | 1129.5              |         |
|                     | 1038.5 | +0.001   | 1038.5 | 11  | D | 8  | 1058.5   | +0.0178 | 1058.5              |         |
|                     | 1153.5 | -0.149   | 1153.5 | 12  | D | 7  | 943.48   | +0.0682 | 943.48              |         |
|                     | 1254.6 | -0.049   | 1254.6 | 13  | T | 6  | 828.46   | +0.0707 | 828.46              |         |
| +0.0158             | 676.32 |          | 1351.6 | 14  | P | 5  | 727.41   | -0.004  | 727.41              |         |
|                     | 1480.7 | -0.18    | 1480.7 | 15  | E | 4  | 630.36   |         | 630.36              |         |
|                     | 1579.7 | -0.16    | 1579.7 | 16  | V | 3  | 501.31   | +0.006  | 501.31              |         |
|                     | 1692.8 | -0.197   | 1692.8 | 17  | L | 2  | 402.25   | +0.1684 | 402.25              |         |
|                     | 1806.9 | +0.2824  | 1806.9 | 18  | N | 1  | 289.16   |         | 289.16              |         |
|                     |        |          |        | 19  | R | 0  | 175.12   |         | 175.12              |         |

general information

|                       |           |
|-----------------------|-----------|
| Annotation:           | 16 of 19  |
| AminoAcids Coverage:  | 84 %      |
| Intensity Coverage:   | 48 %      |
| Peak Coverage:        | 34 %      |
| Protein Localisation: | 39 ... 57 |

Scan number 3686 Raw file LNCAP\_Silac\_23F10\_set1\_01  
 Method ITMS; CID Pepti... 58.92

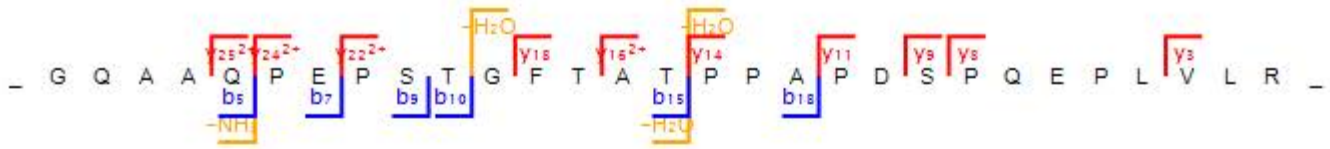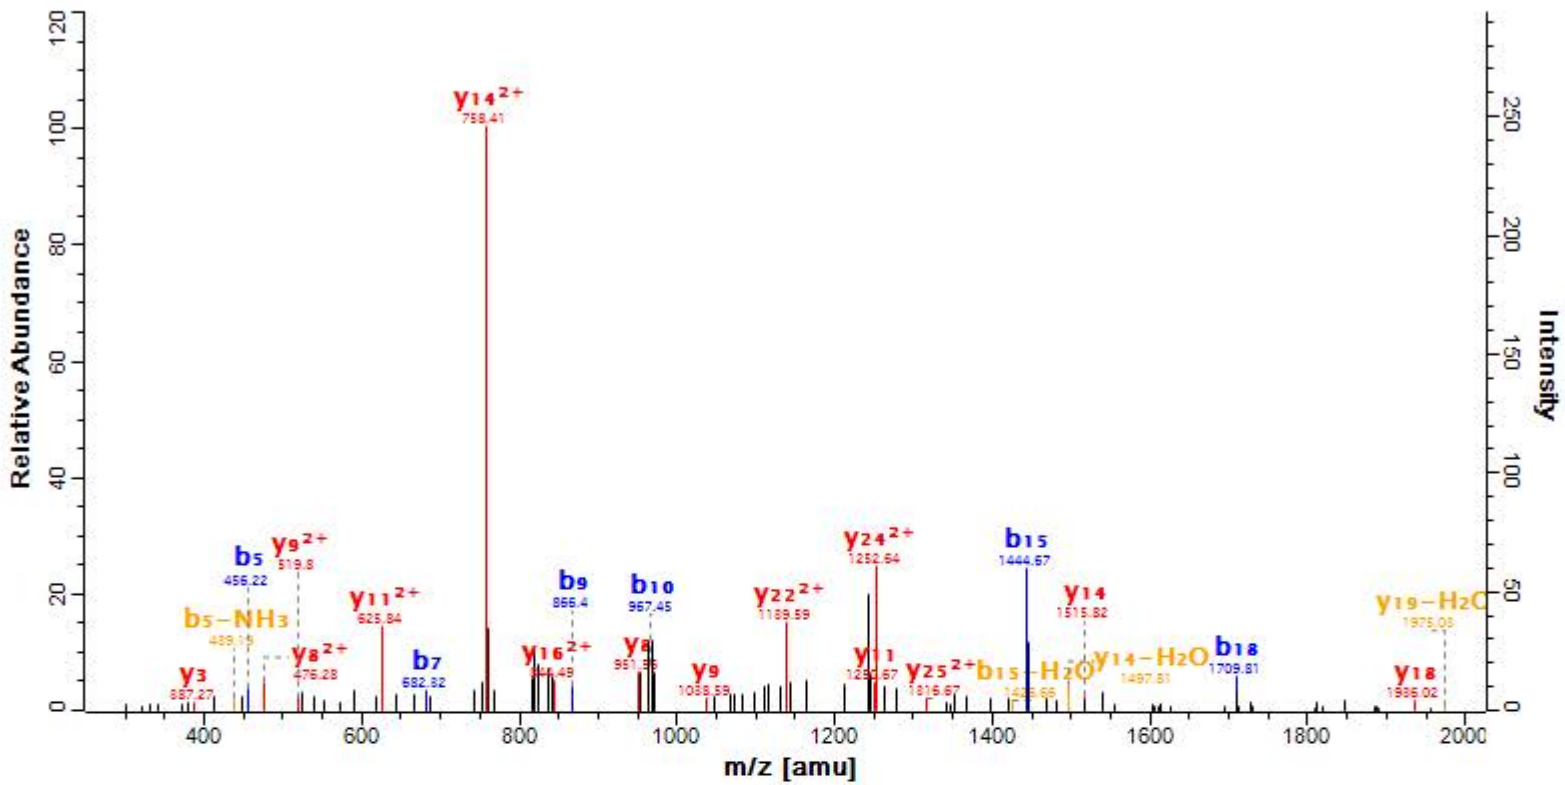

**precursor information**

|                   |                 |
|-------------------|-----------------|
| Mass:             | 2958.47259      |
| m/z:              | 987.16481       |
| Charge:           | 3+              |
| Retentiontime:    | 38.791988372802 |
| Score:            | 58.92403        |
| Mass Error [ppm]: | 0.093055        |
| PEP:              | 1.6924E-05      |
| Precursor Type:   | MULTI           |

| b ion     |          |     |   | y ion    |          | y <sup>2+</sup> ion |                    |
|-----------|----------|-----|---|----------|----------|---------------------|--------------------|
| Δ dalton  | mass     | seq |   | Δ dalton | mass     | Δ dalton            | mass               |
|           | 58.02874 | 1   | G | 28       |          |                     |                    |
|           | 186.0873 | 2   | Q | 27       | 2902.458 |                     | 2902.458           |
|           | 257.1244 | 3   | A | 26       | 2774.4   |                     | 2774.4             |
|           | 328.1615 | 4   | A | 25       | 2703.362 |                     | 2703.362           |
| +0.179871 | 456.2201 | 5   | Q | 24       | 2632.325 |                     | 1316.666 +0.206869 |
|           | 553.2729 | 6   | P | 23       | 2504.267 |                     | 1252.637 +0.288282 |
| +0.08076  | 682.3155 | 7   | E | 22       | 2407.214 |                     | 2407.214           |
|           | 779.3682 | 8   | P | 21       | 2278.171 |                     | 1139.589 +0.310692 |
| +0.27258  | 866.4003 | 9   | S | 20       | 2181.119 |                     | 2181.119           |
| +0.215135 | 967.448  | 10  | T | 19       | 2094.087 |                     | 2094.087           |
|           | 1024.469 | 11  | G | 18       | 1993.039 |                     | 1993.039           |
|           | 1171.538 | 12  | F | 17       | 1936.017 | -0.16858            | 1936.017           |
|           | 1272.586 | 13  | T | 16       | 1788.949 |                     | 1788.949           |
|           | 1343.623 | 14  | A | 15       | 1687.901 |                     | 844.4543 -0.23105  |
| -0.11634  | 1444.67  | 15  | T | 14       | 1616.864 |                     | 1616.864           |
|           | 1541.723 | 16  | P | 13       | 1515.817 | +0.027059           | 758.4119 +0.165104 |
|           | 1638.776 | 17  | P | 12       | 1418.764 |                     | 1418.764           |
| -0.06868  | 1709.813 | 18  | A | 11       | 1321.711 |                     | 1321.711           |
|           | 1806.866 | 19  | P | 10       | 1250.674 | +0.09951            | 625.8406 +0.103978 |
|           | 1921.893 | 20  | D | 9        | 1153.621 |                     | 1153.621           |
|           | 2008.925 | 21  | S | 8        | 1038.594 | -0.19786            | 519.8007 +0.114779 |
|           | 2105.977 | 22  | P | 7        | 951.5622 | -0.08172            | 476.2847 +0.142725 |
|           | 2234.036 | 23  | Q | 6        | 854.5094 |                     | 854.5094           |
|           | 2363.079 | 24  | E | 5        | 726.4509 |                     | 726.4509           |
|           | 2460.131 | 25  | P | 4        | 597.4083 |                     | 597.4083           |
|           | 2573.215 | 26  | L | 3        | 500.3555 |                     | 500.3555           |
|           | 2672.284 | 27  | V | 2        | 387.2714 | -0.12104            | 387.2714           |
|           | 2785.368 | 28  | L | 1        | 288.203  |                     | 288.203            |
|           |          | 29  | R | 0        | 175.119  |                     | 175.119            |

**general information**

|                       |            |
|-----------------------|------------|
| Annotation:           | 16 of 29   |
| AminoAcids Coverage:  | 55 %       |
| Intensity Coverage:   | 48 %       |
| Peak Coverage:        | 24 %       |
| Protein Localisation: | 78 ... 106 |

Scan number 3706 Raw file LNCAP\_Silac\_23F10\_set1\_01  
 Method ITMS; CID Pepti... 90.78

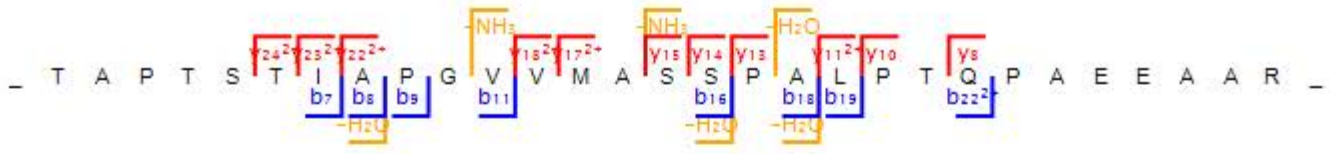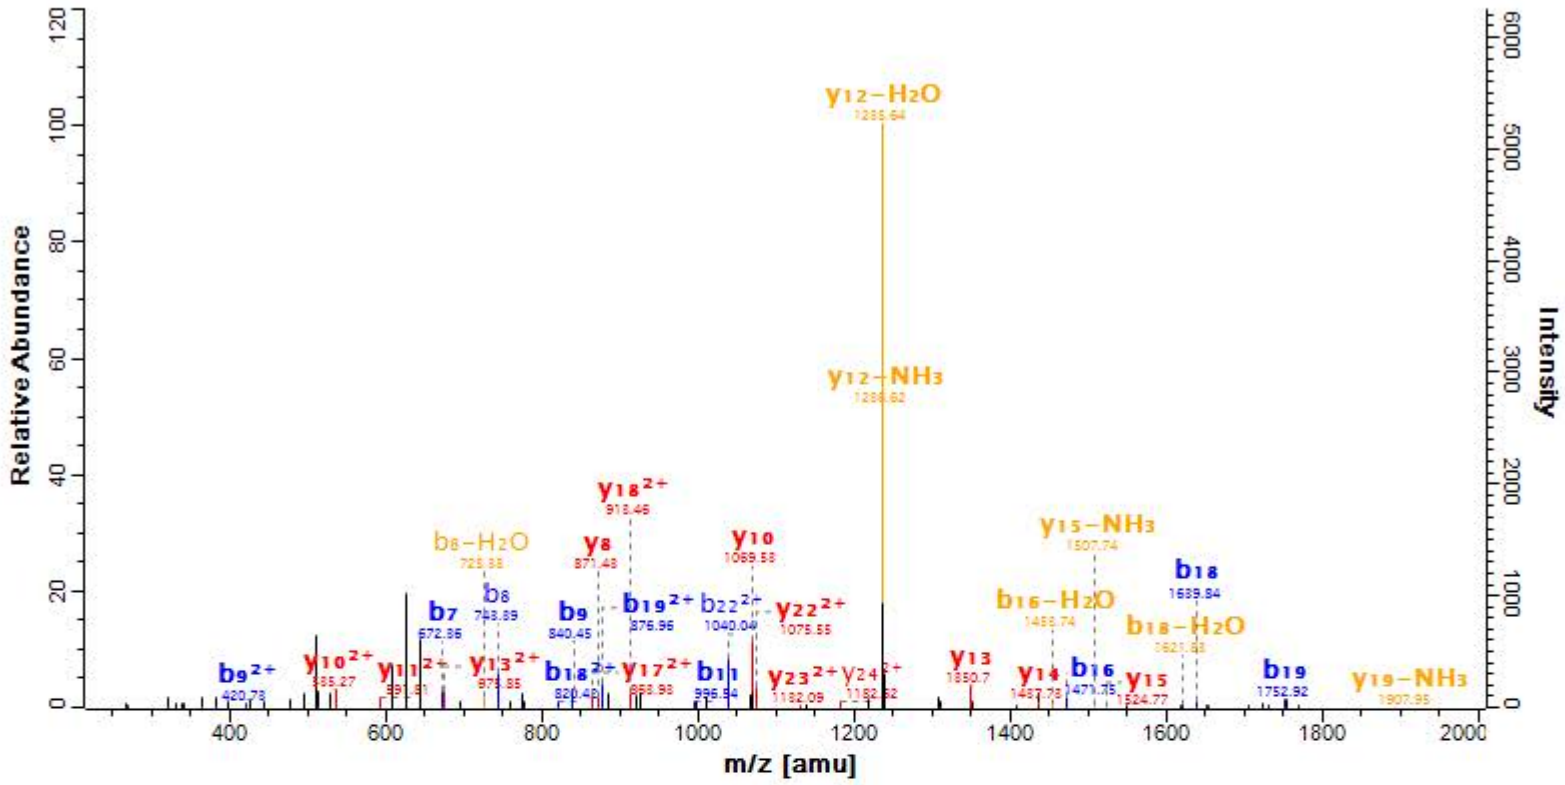

precursor information

|                   |                 |
|-------------------|-----------------|
| Mass:             | 2820.43368      |
| m/z:              | 941.15184       |
| Charge:           | 3+              |
| Retentiontime:    | 38.950019836425 |
| Score:            | 90.77802        |
| Mass Error [ppm]: | 0.32827         |
| PEP:              | 1.2094E-13      |
| Precursor Type:   | MULTI           |

| b <sup>2+</sup> ion |        | b ion    |        | seq |   |    | y ion    |         | y <sup>2+</sup> ion |                |
|---------------------|--------|----------|--------|-----|---|----|----------|---------|---------------------|----------------|
| Δ dalton            | mass   | Δ dalton | mass   |     |   |    | Δ dalton | mass    | Δ dalton            | mass           |
|                     | 102.05 |          | 102.05 | 1   | T | 28 |          |         |                     |                |
|                     | 173.09 |          | 173.09 | 2   | A | 27 | 2720.4   |         |                     | 2720.4         |
|                     | 270.14 |          | 270.14 | 3   | P | 26 | 2649.4   |         |                     | 2649.4         |
|                     | 371.19 |          | 371.19 | 4   | T | 25 | 2552.3   |         |                     | 2552.3         |
|                     | 458.22 |          | 458.22 | 5   | S | 24 | 2451.3   |         |                     | 2451.3         |
|                     | 559.27 |          | 559.27 | 6   | T | 23 | 2364.2   |         |                     | 1182.6 +0.1031 |
|                     | 672.36 | +0.0459  | 672.36 | 7   | I | 22 | 2263.2   |         |                     | 1132.1 +0.4386 |
|                     | 743.39 | +0.0095  | 743.39 | 8   | A | 21 | 2150.1   |         |                     | 1075.5 +0.066  |
| -0.363              | 420.73 | -0.477   | 840.45 | 9   | P | 20 | 2079.1   |         |                     | 2079.1         |
|                     | 897.47 |          | 897.47 | 10  | G | 19 | 1982     |         |                     | 1982           |
|                     | 996.54 | +0.0456  | 996.54 | 11  | V | 18 | 1925     |         |                     | 1925           |
|                     | 1095.6 |          | 1095.6 | 12  | V | 17 | 1825.9   |         |                     | 913.46 +0.0844 |
|                     | 1226.6 |          | 1226.6 | 13  | M | 16 | 1726.8   |         |                     | 863.93 -0.028  |
|                     | 1297.7 |          | 1297.7 | 14  | A | 15 | 1595.8   |         |                     | 1595.8         |
|                     | 1384.7 |          | 1384.7 | 15  | S | 14 | 1524.8   | +0.114  |                     | 1524.8         |
|                     | 1471.7 | -0.077   | 1471.7 | 16  | S | 13 | 1437.7   | -0.221  |                     | 1437.7         |
|                     | 1568.8 |          | 1568.8 | 17  | P | 12 | 1350.7   | -0.26   |                     | 675.85 +0.0217 |
| +0.1713             | 820.42 | -0.339   | 1639.8 | 18  | A | 11 | 1253.6   |         |                     | 1253.6         |
| +0.1269             | 876.96 | -0.165   | 1752.9 | 19  | L | 10 | 1182.6   |         |                     | 591.81 -0.021  |
|                     | 1850   |          | 1850   | 20  | P | 9  | 1069.5   | +0.0191 |                     | 535.27 +0.1647 |
|                     | 1951   |          | 1951   | 21  | T | 8  | 972.47   |         |                     | 972.47         |
| +0.1919             | 1040   |          | 2079.1 | 22  | Q | 7  | 871.43   | +0.3664 |                     | 871.43         |
|                     | 2176.1 |          | 2176.1 | 23  | P | 6  | 743.37   |         |                     | 743.37         |
|                     | 2247.2 |          | 2247.2 | 24  | A | 5  | 646.32   |         |                     | 646.32         |
|                     | 2376.2 |          | 2376.2 | 25  | E | 4  | 575.28   |         |                     | 575.28         |
|                     | 2505.3 |          | 2505.3 | 26  | E | 3  | 446.24   |         |                     | 446.24         |
|                     | 2576.3 |          | 2576.3 | 27  | A | 2  | 317.19   |         |                     | 317.19         |
|                     | 2647.3 |          | 2647.3 | 28  | A | 1  | 246.16   |         |                     | 246.16         |
|                     |        |          |        | 29  | R | 0  | 175.12   |         |                     | 175.12         |

general information

|                       |             |
|-----------------------|-------------|
| Annotation:           | 15 of 29    |
| AminoAcids Coverage:  | 52 %        |
| Intensity Coverage:   | 58 %        |
| Peak Coverage:        | 32 %        |
| Protein Localisation: | 256 ... 284 |



Scan number 4124 Raw file LNCAP\_Silac\_23F10\_set1\_01  
 Method ITMS; CID Pepti... 96.01

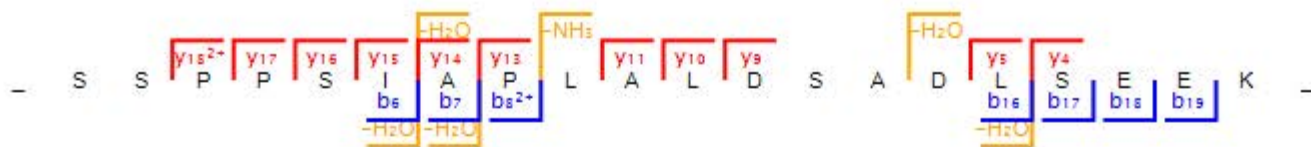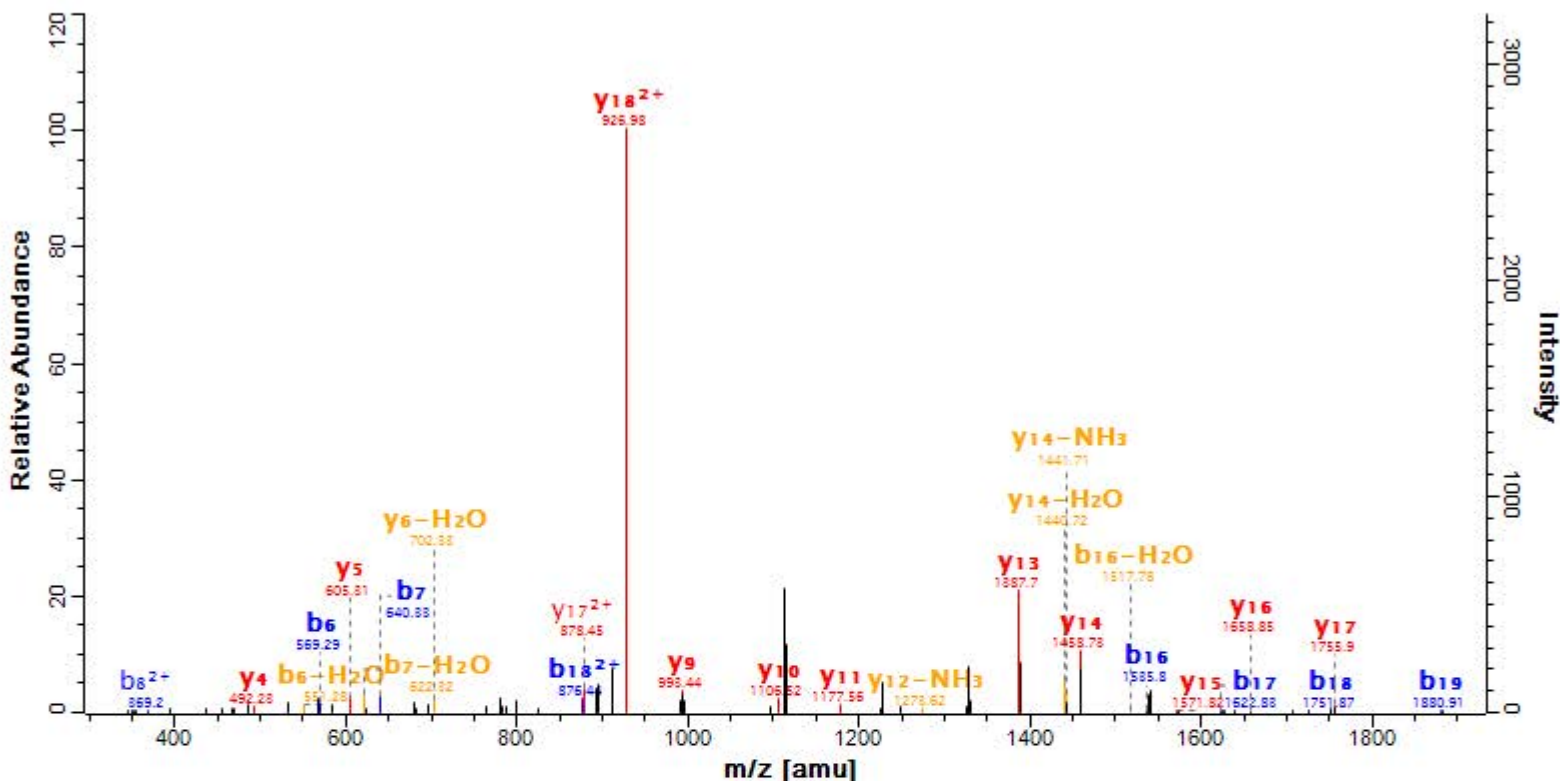

#### precursor information

|                   |                 |
|-------------------|-----------------|
| Mass:             | 2026.01008      |
| m/z:              | 1014.01231      |
| Charge:           | 2+              |
| Retentiontime:    | 42.572048187255 |
| Score:            | 96.01244        |
| Mass Error [ppm]: | -0.27354        |
| PEP:              | 3.4867E-06      |
| Precursor Type:   | MULTI           |

| b <sup>2+</sup> ion |        | b ion    |        | seq |   |    | y ion    |         | y <sup>2+</sup> ion |         |
|---------------------|--------|----------|--------|-----|---|----|----------|---------|---------------------|---------|
| Δ dalton            | mass   | Δ dalton | mass   |     |   |    | Δ dalton | mass    | Δ dalton            | mass    |
|                     | 88.039 |          | 88.039 | 1   | S | 19 |          |         |                     |         |
|                     | 175.07 |          | 175.07 | 2   | S | 18 | 1940     |         | 1940                |         |
|                     | 272.12 |          | 272.12 | 3   | P | 17 | 1853     |         | 926.98              | +0.2414 |
|                     | 369.18 |          | 369.18 | 4   | P | 16 | 1755.9   | -0.06   | 878.45              | +0.065  |
|                     | 456.21 |          | 456.21 | 5   | S | 15 | 1658.8   | +0.1086 | 1658.8              |         |
|                     | 569.29 | +0.1221  | 569.29 | 6   | I | 14 | 1571.8   | +0.0692 | 1571.8              |         |
|                     | 640.33 | +0.1483  | 640.33 | 7   | A | 13 | 1458.7   | -0.071  | 1458.7              |         |
| +0.042              | 369.2  |          | 737.38 | 8   | P | 12 | 1387.7   | -0.035  | 1387.7              |         |
|                     | 850.47 |          | 850.47 | 9   | L | 11 | 1290.6   |         | 1290.6              |         |
|                     | 921.5  |          | 921.5  | 10  | A | 10 | 1177.6   | +0.0059 | 1177.6              |         |
|                     | 1034.6 |          | 1034.6 | 11  | L | 9  | 1106.5   | +0.0508 | 1106.5              |         |
|                     | 1149.6 |          | 1149.6 | 12  | D | 8  | 993.44   | -0.05   | 993.44              |         |
|                     | 1236.6 |          | 1236.6 | 13  | S | 7  | 878.41   |         | 878.41              |         |
|                     | 1307.7 |          | 1307.7 | 14  | A | 6  | 791.38   |         | 791.38              |         |
|                     | 1422.7 |          | 1422.7 | 15  | D | 5  | 720.34   |         | 720.34              |         |
|                     | 1535.8 | -0.025   | 1535.8 | 16  | L | 4  | 605.31   | +0.1176 | 605.31              |         |
|                     | 1622.8 | +0.1534  | 1622.8 | 17  | S | 3  | 492.23   | +0.0943 | 492.23              |         |
| -0.045              | 876.44 | -0.076   | 1751.9 | 18  | E | 2  | 405.2    |         | 405.2               |         |
|                     | 1880.9 | +0.0328  | 1880.9 | 19  | E | 1  | 276.16   |         | 276.16              |         |
|                     |        |          |        | 20  | K | 0  | 147.11   |         | 147.11              |         |

#### general information

|                       |             |
|-----------------------|-------------|
| Annotation:           | 16 of 20    |
| AminoAcids Coverag    | 80 %        |
| Intensity Coverage:   | 52 %        |
| Peak Coverage:        | 28 %        |
| Protein Localisation: | 183 ... 202 |

Scan number 4124 Raw file LNCAP\_Silac\_23F10\_set1\_01  
 Method ITMS; CID Pepti... 96.01

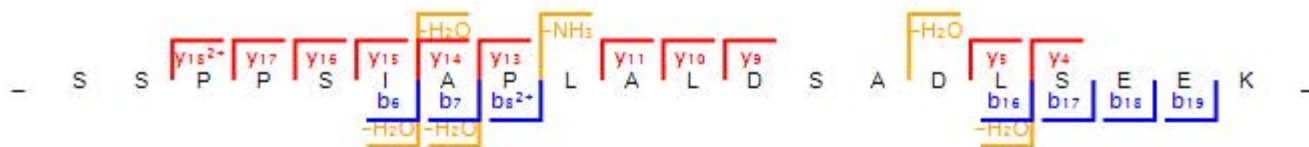

#### precursor information

|                   |                 |
|-------------------|-----------------|
| Mass:             | 2026.01008      |
| m/z:              | 1014.01231      |
| Charge:           | 2+              |
| Retentiontime:    | 42.572048187255 |
| Score:            | 96.01244        |
| Mass Error [ppm]: | -0.27354        |
| PEP:              | 3.4867E-06      |
| Precursor Type:   | MULTI           |

| b <sup>2+</sup> ion |        | b ion    |        | seq |   |    | y ion    |         | y <sup>2+</sup> ion |         |
|---------------------|--------|----------|--------|-----|---|----|----------|---------|---------------------|---------|
| Δ dalton            | mass   | Δ dalton | mass   |     |   |    | Δ dalton | mass    | Δ dalton            | mass    |
|                     | 88.039 |          | 88.039 | 1   | S | 19 |          |         |                     |         |
|                     | 175.07 |          | 175.07 | 2   | S | 18 | 1940     |         | 1940                |         |
|                     | 272.12 |          | 272.12 | 3   | P | 17 | 1853     |         | 926.98              | +0.2414 |
|                     | 369.18 |          | 369.18 | 4   | P | 16 | 1755.9   | -0.06   | 878.45              | +0.065  |
|                     | 456.21 |          | 456.21 | 5   | S | 15 | 1658.8   | +0.1086 | 1658.8              |         |
|                     | 569.29 | +0.1221  | 569.29 | 6   | I | 14 | 1571.8   | +0.0692 | 1571.8              |         |
|                     | 640.33 | +0.1483  | 640.33 | 7   | A | 13 | 1458.7   | -0.071  | 1458.7              |         |
| +0.042              | 369.2  |          | 737.38 | 8   | P | 12 | 1387.7   | -0.035  | 1387.7              |         |
|                     | 850.47 |          | 850.47 | 9   | L | 11 | 1290.6   |         | 1290.6              |         |
|                     | 921.5  |          | 921.5  | 10  | A | 10 | 1177.6   | +0.0059 | 1177.6              |         |
|                     | 1034.6 |          | 1034.6 | 11  | L | 9  | 1106.5   | +0.0508 | 1106.5              |         |
|                     | 1149.6 |          | 1149.6 | 12  | D | 8  | 993.44   | -0.05   | 993.44              |         |
|                     | 1236.6 |          | 1236.6 | 13  | S | 7  | 878.41   |         | 878.41              |         |
|                     | 1307.7 |          | 1307.7 | 14  | A | 6  | 791.38   |         | 791.38              |         |
|                     | 1422.7 |          | 1422.7 | 15  | D | 5  | 720.34   |         | 720.34              |         |
|                     | 1535.8 | -0.025   | 1535.8 | 16  | L | 4  | 605.31   | +0.1176 | 605.31              |         |
|                     | 1622.8 | +0.1534  | 1622.8 | 17  | S | 3  | 492.23   | +0.0943 | 492.23              |         |
| -0.045              | 876.44 | -0.076   | 1751.9 | 18  | E | 2  | 405.2    |         | 405.2               |         |
|                     | 1880.9 | +0.0328  | 1880.9 | 19  | E | 1  | 276.16   |         | 276.16              |         |
|                     |        |          |        | 20  | K | 0  | 147.11   |         | 147.11              |         |

#### general information

|                       |             |
|-----------------------|-------------|
| Annotation:           | 16 of 20    |
| AminoAcids Coverag    | 80 %        |
| Intensity Coverage:   | 52 %        |
| Peak Coverage:        | 28 %        |
| Protein Localisation: | 183 ... 202 |

Scan number 4138 Raw file LNCAP\_Silac\_23F10\_set1\_01  
 Method ITMS; CID Pepti... 111.57

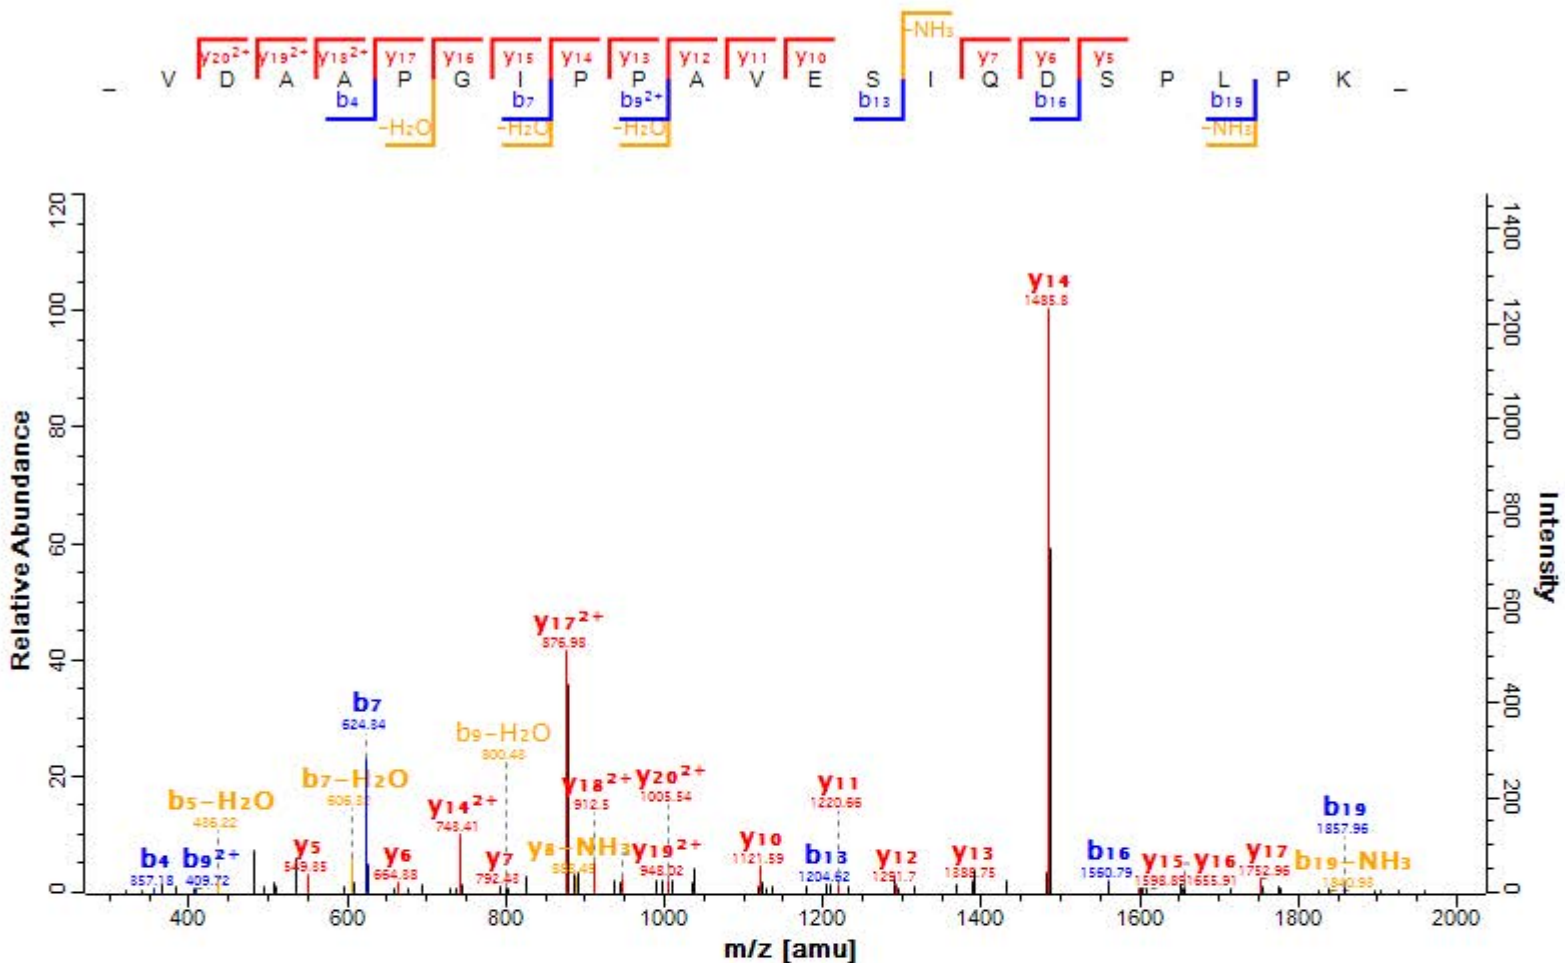

precursor information

|                   |                 |
|-------------------|-----------------|
| Mass:             | 2100.11134      |
| m/z:              | 1051.06295      |
| Charge:           | 2+              |
| Retentiontime:    | 42.698543548584 |
| Score:            | 111.5698        |
| Mass Error [ppm]: | 0.49921         |
| PEP:              | 3.543E-09       |
| Precursor Type:   | MULTI           |

| b <sup>2+</sup> ion |        | b ion    |        |    |     |    | y ion    |         | y <sup>2+</sup> ion |         |
|---------------------|--------|----------|--------|----|-----|----|----------|---------|---------------------|---------|
| Δ dalton            | mass   | Δ dalton | mass   |    | seq |    | Δ dalton | mass    | Δ dalton            | mass    |
|                     | 100.08 |          | 100.08 | 1  | V   | 20 |          |         |                     |         |
|                     | 215.1  |          | 215.1  | 2  | D   | 19 | 2010.1   |         | 1005.5              | -0.143  |
|                     | 286.14 |          | 286.14 | 3  | A   | 18 | 1895     |         | 948.02              | +0.1361 |
|                     | 357.18 | +0.048   | 357.18 | 4  | A   | 17 | 1824     |         | 912.5               | +0.0523 |
|                     | 454.23 |          | 454.23 | 5  | P   | 16 | 1753     | +0.3052 | 876.98              | -0.035  |
|                     | 511.25 |          | 511.25 | 6  | G   | 15 | 1655.9   | +0.1791 | 1655.9              |         |
|                     | 624.34 | -0.049   | 624.34 | 7  | I   | 14 | 1598.9   | -0.375  | 1598.9              |         |
|                     | 721.39 |          | 721.39 | 8  | P   | 13 | 1485.8   | -0.012  | 743.41              | +0.2023 |
| +0.4439             | 809.72 |          | 818.44 | 9  | P   | 12 | 1388.8   | +0.3225 | 1388.8              |         |
|                     | 889.48 |          | 889.48 | 10 | A   | 11 | 1291.7   | +0.2896 | 1291.7              |         |
|                     | 988.55 |          | 988.55 | 11 | V   | 10 | 1220.7   | +0.1008 | 1220.7              |         |
|                     | 1117.6 |          | 1117.6 | 12 | E   | 9  | 1121.6   | -0.108  | 1121.6              |         |
|                     | 1204.6 | -0.143   | 1204.6 | 13 | S   | 8  | 992.55   |         | 992.55              |         |
|                     | 1317.7 |          | 1317.7 | 14 | I   | 7  | 905.52   |         | 905.52              |         |
|                     | 1445.8 |          | 1445.8 | 15 | Q   | 6  | 792.43   | +0.1943 | 792.43              |         |
|                     | 1560.8 | -0.17    | 1560.8 | 16 | D   | 5  | 664.38   | -0.02   | 664.38              |         |
|                     | 1647.8 |          | 1647.8 | 17 | S   | 4  | 549.35   | +0.0809 | 549.35              |         |
|                     | 1744.9 |          | 1744.9 | 18 | P   | 3  | 462.32   |         | 462.32              |         |
|                     | 1858   | +0.1568  | 1858   | 19 | L   | 2  | 365.26   |         | 365.26              |         |
|                     | 1955   |          | 1955   | 20 | P   | 1  | 252.18   |         | 252.18              |         |
|                     |        |          |        | 21 | K   | 0  | 155.13   |         | 155.13              |         |

general information

|                       |             |
|-----------------------|-------------|
| Annotation:           | 17 of 21    |
| AminoAcids Coverag    | 81 %        |
| Intensity Coverage:   | 49 %        |
| Peak Coverage:        | 26 %        |
| Protein Localisation: | 152 ... 172 |

Scan number 4181 Raw file LNCAP\_Silac\_23F10\_set1\_01  
 Method ITMS; CID Pepti... 270.35

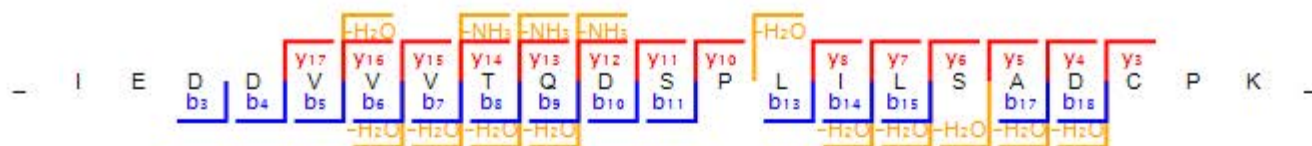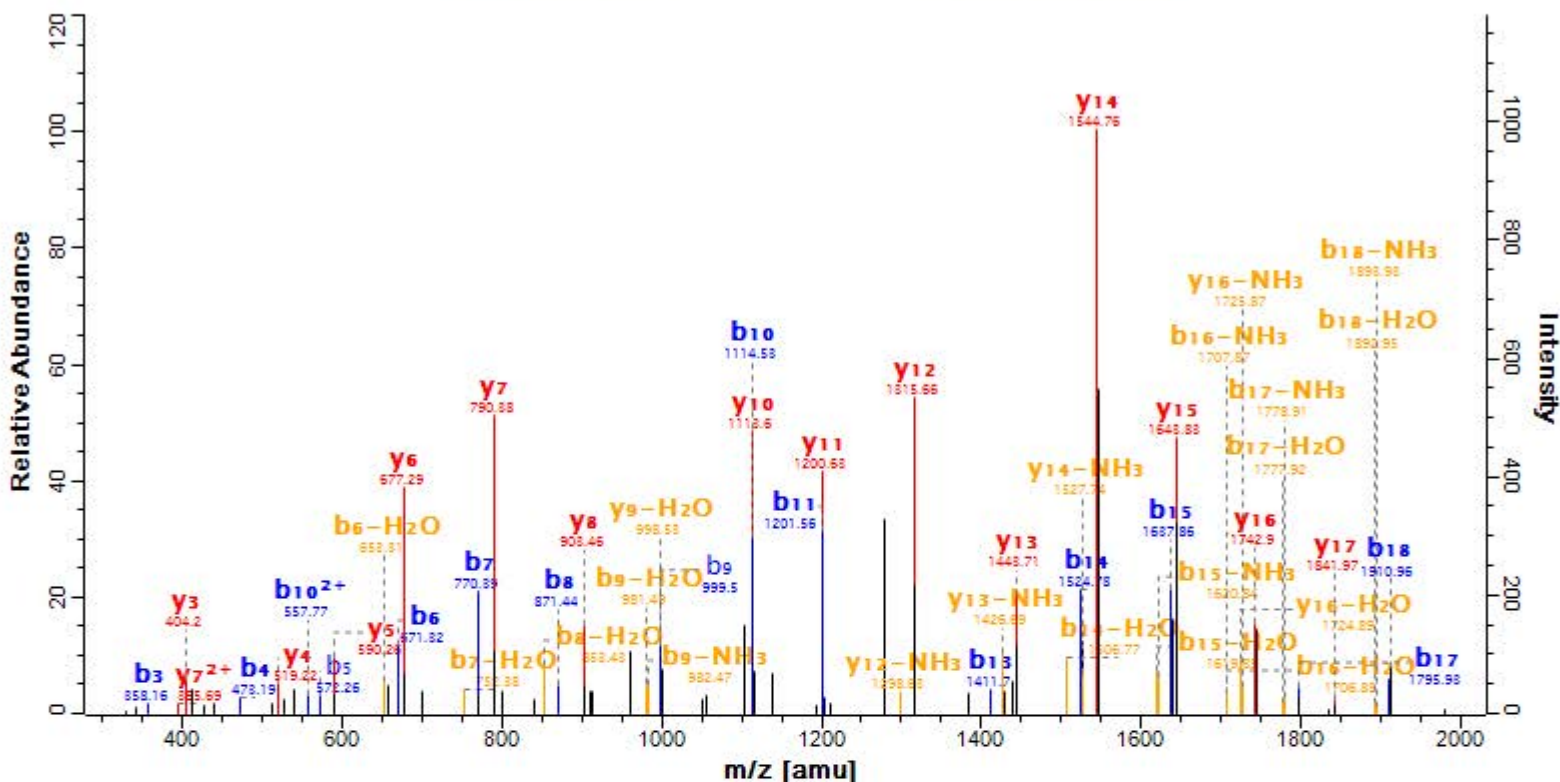

precursor information

|                   |                 |
|-------------------|-----------------|
| Mass:             | 2313.14136      |
| m/z:              | 1157.57796      |
| Charge:           | 2+              |
| Retentiontime:    | 43.043979644775 |
| Score:            | 270.354         |
| Mass Error [ppm]: | 0.15749         |
| PEP:              | 4.9617E-99      |
| Precursor Type:   | MULTI           |

general information

|                       |             |
|-----------------------|-------------|
| Annotation:           | 17 of 21    |
| AminoAcids Coverag    | 81 %        |
| Intensity Coverage:   | 66 %        |
| Peak Coverage:        | 50 %        |
| Protein Localisation: | 474 ... 494 |

| b <sup>2+</sup> ion |         | b ion    |        | seq |   |    | y ion    |         | y <sup>2+</sup> ion |        |
|---------------------|---------|----------|--------|-----|---|----|----------|---------|---------------------|--------|
| Δ dalton            | mass    | Δ dalton | mass   |     |   |    | Δ dalton | mass    | Δ dalton            | mass   |
|                     | 114.09  |          | 114.09 | 1   | I | 20 |          |         |                     |        |
|                     | 243.13  |          | 243.13 | 2   | E | 19 | 2201.1   |         | 2201.1              |        |
|                     | 358.16  | +0.1892  | 358.16 | 3   | D | 18 | 2072     |         | 2072                |        |
|                     | 473.19  | +0.0966  | 473.19 | 4   | D | 17 | 1957     |         | 1957                |        |
|                     | 572.26  | +0.1132  | 572.26 | 5   | V | 16 | 1842     | -0.262  | 1842                |        |
|                     | 671.32  | -0.025   | 671.32 | 6   | V | 15 | 1742.9   | -0.106  | 1742.9              |        |
|                     | 770.39  | -0.069   | 770.39 | 7   | V | 14 | 1643.8   | -0.125  | 1643.8              |        |
|                     | 871.44  | -0.077   | 871.44 | 8   | T | 13 | 1544.8   | -0.067  | 1544.8              |        |
|                     | 999.5   | -0.006   | 999.5  | 9   | Q | 12 | 1443.7   | -0.045  | 1443.7              |        |
| +0.471              | 5557.77 | +0.0285  | 1114.5 | 10  | D | 11 | 1315.7   | -0.08   | 1315.7              |        |
|                     | 1201.6  | +0.0696  | 1201.6 | 11  | S | 10 | 1200.6   | -0.052  | 1200.6              |        |
|                     | 1298.6  |          | 1298.6 | 12  | P | 9  | 1113.6   | -0.042  | 1113.6              |        |
|                     | 1411.7  | -0.047   | 1411.7 | 13  | L | 8  | 1016.5   |         | 1016.5              |        |
|                     | 1524.8  | -0.158   | 1524.8 | 14  | I | 7  | 903.46   | +0.0326 | 903.46              |        |
|                     | 1637.9  | -0.268   | 1637.9 | 15  | L | 6  | 790.38   | +0.0138 | 395.69              | -0.436 |
|                     | 1724.9  |          | 1724.9 | 16  | S | 5  | 677.29   | +0.0063 | 677.29              |        |
|                     | 1795.9  | -0.182   | 1795.9 | 17  | A | 4  | 590.26   | +0.0543 | 590.26              |        |
|                     | 1911    | -0.278   | 1911   | 18  | D | 3  | 519.22   | +0.11   | 519.22              |        |
|                     | 2071    |          | 2071   | 19  | C | 2  | 404.2    | +0.0862 | 404.2               |        |
|                     | 2168    |          | 2168   | 20  | P | 1  | 244.17   |         | 244.17              |        |
|                     |         |          |        | 21  | K | 0  | 147.11   |         | 147.11              |        |

Scan number 4200 Raw file LNCAP\_Silac\_23F10\_set1\_01  
 Method ITMS; CID Pepti... 240.49

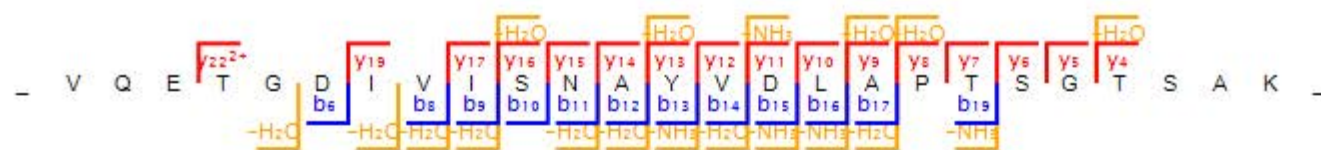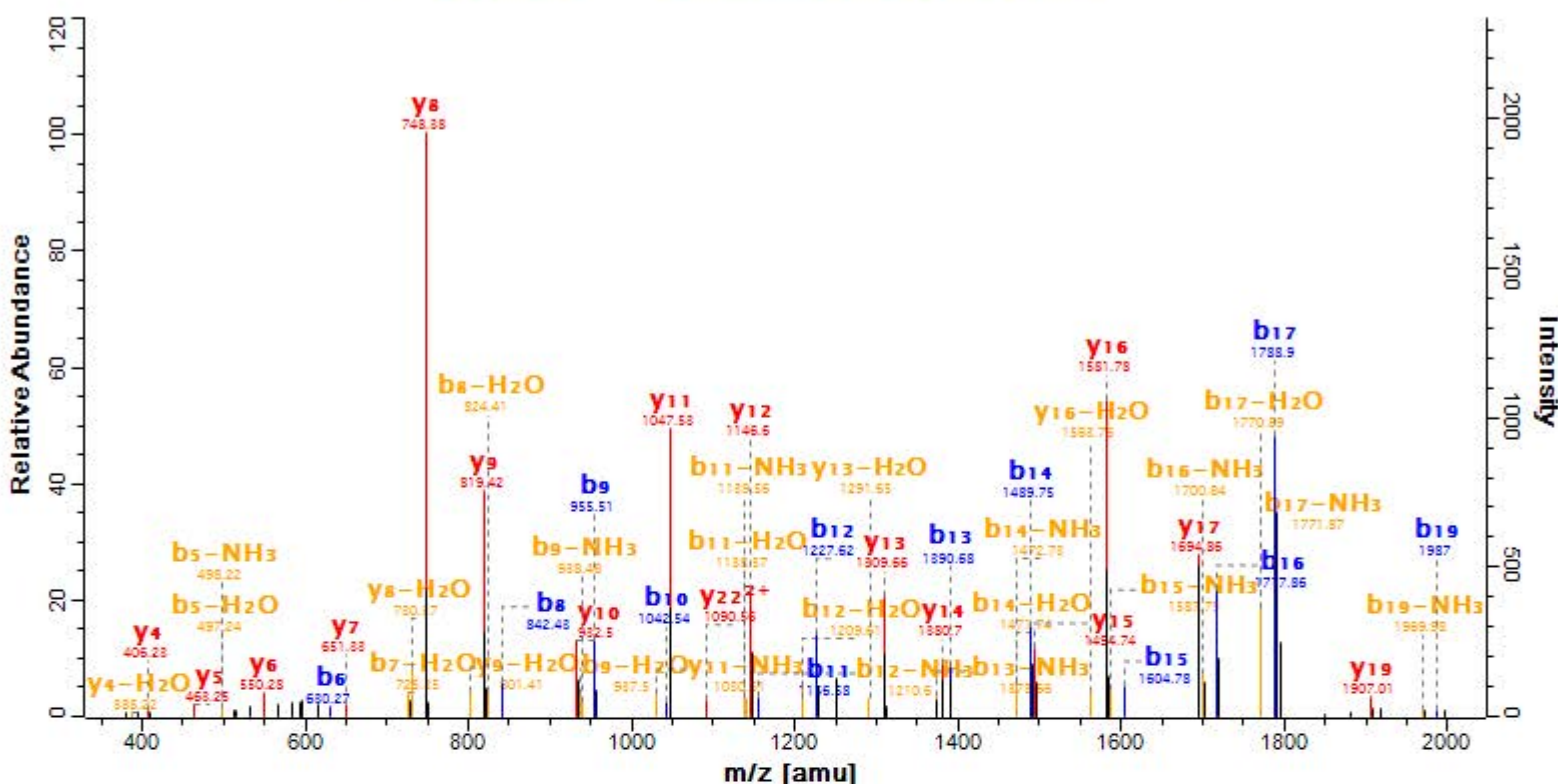

precursor information

|                   |                 |
|-------------------|-----------------|
| Mass:             | 2535.27082      |
| m/z:              | 1268.64269      |
| Charge:           | 2+              |
| Retentiontime:    | 43.217903137207 |
| Score:            | 240.4852        |
| Mass Error [ppm]: | 0.15568         |
| PEP:              | 1.1008E-92      |
| Precursor Type:   | MULTI           |

general information

|                       |             |
|-----------------------|-------------|
| Annotation:           | 19 of 25    |
| AminoAcids Coverage:  | 76 %        |
| Intensity Coverage:   | 67 %        |
| Peak Coverage:        | 53 %        |
| Protein Localisation: | 590 ... 614 |

| b ion     |          | seq |   | y ion    |          | y <sup>2+</sup> ion |           |
|-----------|----------|-----|---|----------|----------|---------------------|-----------|
| Δ dalton  | mass     |     |   | Δ dalton | mass     | Δ dalton            | mass      |
|           | 100.0757 | 1   | V | 24       |          |                     |           |
|           | 228.1343 | 2   | Q | 23       | 2437.209 | 2437.209            |           |
|           | 357.1769 | 3   | E | 22       | 2309.151 | 2309.151            |           |
|           | 458.2245 | 4   | T | 21       | 2180.108 | 1090.558            | +0.222453 |
|           | 515.246  | 5   | G | 20       | 2079.06  | 2079.06             |           |
| +0.308108 | 630.2729 | 6   | D | 19       | 2022.039 | 2022.039            |           |
|           | 743.357  | 7   | I | 18       | 1907.012 | -0.1208             | 1907.012  |
| -0.16175  | 842.4254 | 8   | V | 17       | 1793.928 |                     | 1793.928  |
| -0.07248  | 955.5095 | 9   | I | 16       | 1694.86  | -0.15484            | 1694.86   |
| +0.035388 | 1042.542 | 10  | S | 15       | 1581.775 | -0.07286            | 1581.775  |
| +0.003691 | 1156.584 | 11  | N | 14       | 1494.743 | -0.06414            | 1494.743  |
| -0.04099  | 1227.622 | 12  | A | 13       | 1380.701 | -0.14963            | 1380.701  |
| +0.021046 | 1390.685 | 13  | Y | 12       | 1309.663 | -0.05185            | 1309.663  |
| -0.11622  | 1489.753 | 14  | V | 11       | 1146.6   | -0.04394            | 1146.6    |
| -0.27451  | 1604.78  | 15  | D | 10       | 1047.532 | +0.031552           | 1047.532  |
| -0.26873  | 1717.864 | 16  | L | 9        | 932.5047 | +2.37E-05           | 932.5047  |
| -0.1668   | 1788.901 | 17  | A | 8        | 819.4207 | +0.010174           | 819.4207  |
|           | 1885.954 | 18  | P | 7        | 748.3836 | +0.041062           | 748.3836  |
| -0.00662  | 1987.002 | 19  | T | 6        | 651.3308 | -0.09239            | 651.3308  |
|           | 2074.034 | 20  | S | 5        | 550.2831 | +0.094569           | 550.2831  |
|           | 2131.055 | 21  | G | 4        | 463.2511 | +0.139536           | 463.2511  |
|           | 2232.103 | 22  | T | 3        | 406.2296 | +0.219106           | 406.2296  |
|           | 2319.135 | 23  | S | 2        | 305.1819 |                     | 305.1819  |
|           | 2390.172 | 24  | A | 1        | 218.1499 |                     | 218.1499  |
|           |          | 25  | K | 0        | 147.1128 |                     | 147.1128  |

Scan number 4301 Raw file LNCAP\_Silac\_23F10\_set1\_01  
 Method ITMS; CID Pepti... 80.36

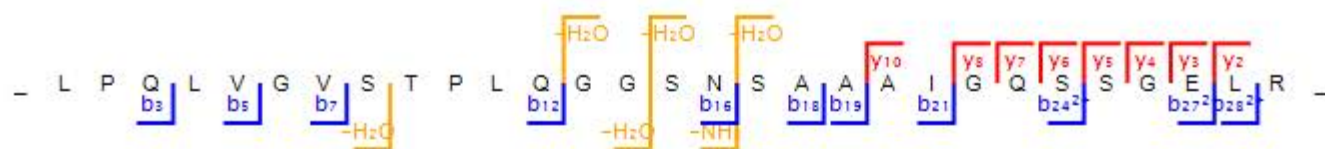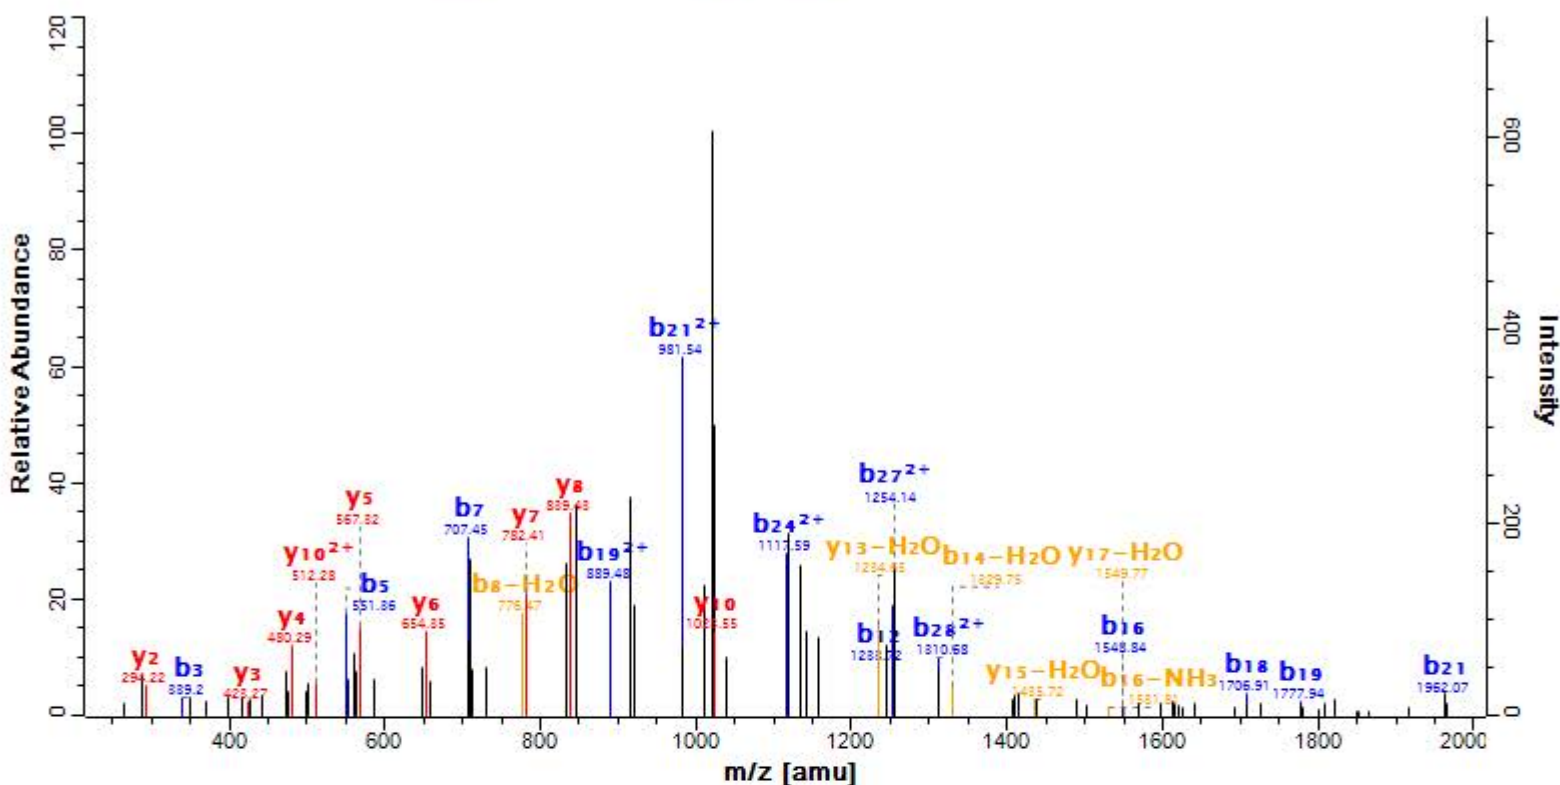

precursor information

|                   |                 |
|-------------------|-----------------|
| Mass:             | 2793.462        |
| m/z:              | 932.16128       |
| Charge:           | 3+              |
| Retentiontime:    | 44.104724884033 |
| Score:            | 80.3587         |
| Mass Error [ppm]: | -0.028645       |
| PEP:              | 3.1862E-09      |
| Precursor Type:   | MULTI           |

| b <sup>2+</sup> ion |         | b ion    |        | seq |   |    | y ion    |         | y <sup>2+</sup> ion |        |
|---------------------|---------|----------|--------|-----|---|----|----------|---------|---------------------|--------|
| Δ dalton            | mass    | Δ dalton | mass   |     |   |    | Δ dalton | mass    | Δ dalton            | mass   |
|                     | 114.09  |          | 114.09 | 1   | L | 28 |          |         |                     |        |
|                     | 211.14  |          | 211.14 | 2   | P | 27 | 2687.4   |         | 2687.4              |        |
|                     | 339.2   | +0.0427  | 339.2  | 3   | Q | 26 | 2590.4   |         | 2590.4              |        |
|                     | 452.29  |          | 452.29 | 4   | L | 25 | 2462.3   |         | 2462.3              |        |
|                     | 551.36  | -0.019   | 551.36 | 5   | V | 24 | 2349.2   |         | 2349.2              |        |
|                     | 608.38  |          | 608.38 | 6   | G | 23 | 2250.1   |         | 2250.1              |        |
|                     | 707.45  | -0.076   | 707.45 | 7   | V | 22 | 2193.1   |         | 2193.1              |        |
|                     | 794.48  |          | 794.48 | 8   | S | 21 | 2094.1   |         | 2094.1              |        |
|                     | 895.52  |          | 895.52 | 9   | T | 20 | 2007     |         | 2007                |        |
|                     | 992.58  |          | 992.58 | 10  | P | 19 | 1906     |         | 1906                |        |
|                     | 1105.7  |          | 1105.7 | 11  | L | 18 | 1808.9   |         | 1808.9              |        |
|                     | 1233.7  | -0.133   | 1233.7 | 12  | Q | 17 | 1695.8   |         | 1695.8              |        |
|                     | 1290.7  |          | 1290.7 | 13  | G | 16 | 1567.8   |         | 1567.8              |        |
|                     | 1347.8  |          | 1347.8 | 14  | G | 15 | 1510.8   |         | 1510.8              |        |
|                     | 1434.8  |          | 1434.8 | 15  | S | 14 | 1453.7   |         | 1453.7              |        |
|                     | 1548.8  | -0.423   | 1548.8 | 16  | N | 13 | 1366.7   |         | 1366.7              |        |
|                     | 1635.9  |          | 1635.9 | 17  | S | 12 | 1252.7   |         | 1252.7              |        |
|                     | 1706.9  | +0.0159  | 1706.9 | 18  | A | 11 | 1165.6   |         | 1165.6              |        |
| +0.0896             | 1889.48 | +0.035   | 1777.9 | 19  | A | 10 | 1094.6   |         | 1094.6              |        |
|                     | 1849    |          | 1849   | 20  | A | 9  | 1023.6   | +0.0806 | 512.28              | -0.018 |
| +0.1443             | 1981.54 | +0.1561  | 1962.1 | 21  | I | 8  | 952.52   |         | 952.52              |        |
|                     | 2019.1  |          | 2019.1 | 22  | G | 7  | 839.43   | -0.029  | 839.43              |        |
|                     | 2147.1  |          | 2147.1 | 23  | Q | 6  | 782.41   | -0.093  | 782.41              |        |
| +0.1107             | 1117.6  |          | 2234.2 | 24  | S | 5  | 654.35   | +0.1656 | 654.35              |        |
|                     | 2321.2  |          | 2321.2 | 25  | S | 4  | 567.32   | +0.0391 | 567.32              |        |
|                     | 2378.2  |          | 2378.2 | 26  | G | 3  | 480.29   | +0.1221 | 480.29              |        |
| -0.186              | 1254.1  |          | 2507.3 | 27  | E | 2  | 423.27   | -0.004  | 423.27              |        |
| +0.397              | 1310.7  |          | 2620.4 | 28  | L | 1  | 294.22   | +0.0975 | 294.22              |        |
|                     |         |          |        | 29  | R | 0  | 181.14   |         | 181.14              |        |

general information

|                       |           |
|-----------------------|-----------|
| Annotation:           | 21 of 29  |
| AminoAcids Coverag    | 72 %      |
| Intensity Coverage:   | 33 %      |
| Peak Coverage:        | 27 %      |
| Protein Localisation: | 50 ... 78 |

Scan number 4372 Raw file LNCAP\_Silac\_23F10\_set1\_01  
 Method ITMS; CID Pepti... 235.25

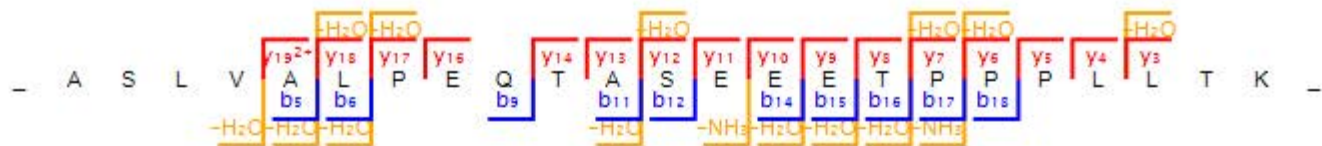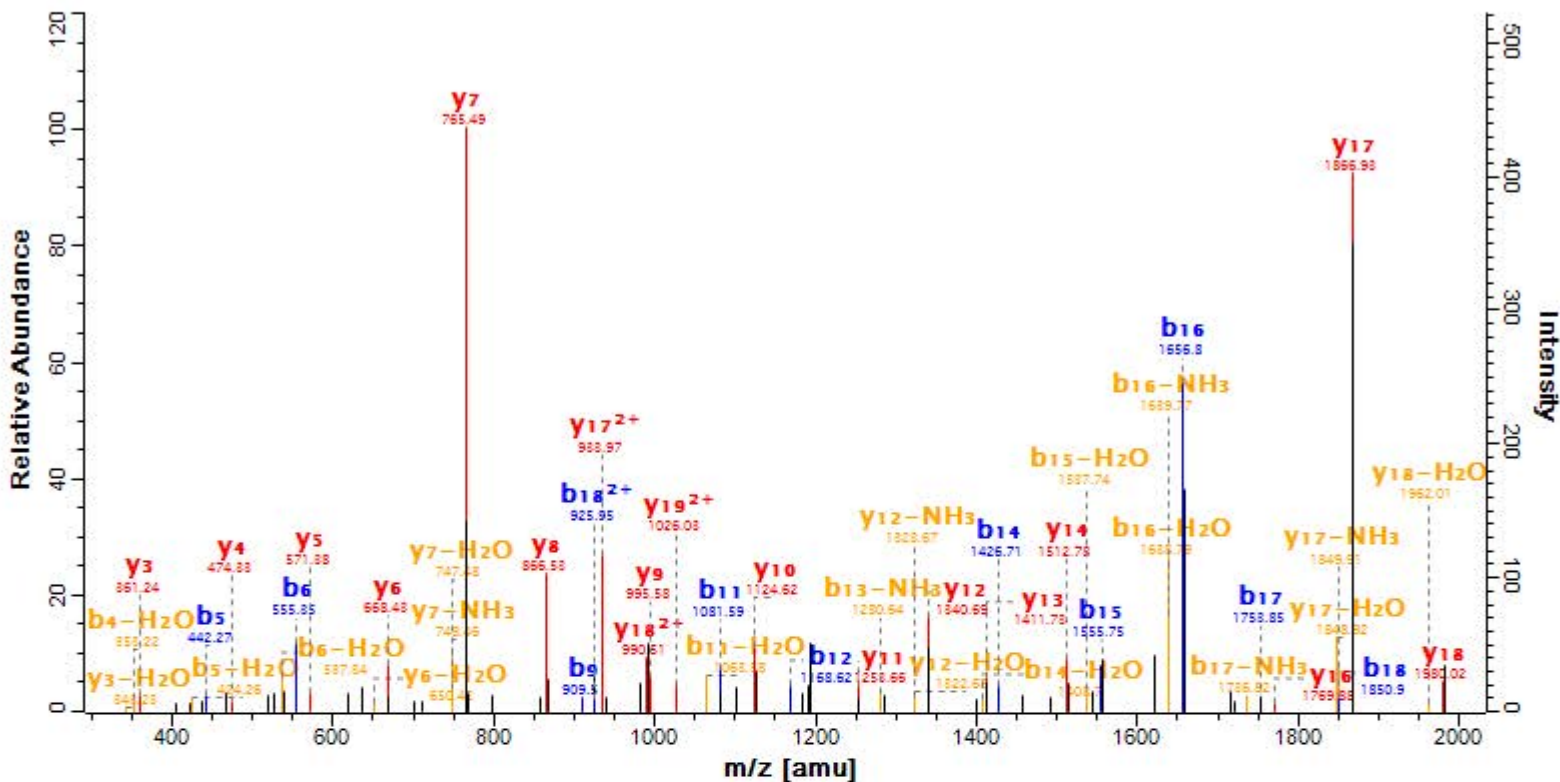

**precursor information**

|                   |                 |
|-------------------|-----------------|
| Mass:             | 2420.2682       |
| m/z:              | 1211.14138      |
| Charge:           | 2+              |
| Retentiontime:    | 44.765167236328 |
| Score:            | 235.2523        |
| Mass Error [ppm]: | -0.18142        |
| PEP:              | 3.0669E-87      |
| Precursor Type:   | MULTI           |

**general information**

|                       |             |
|-----------------------|-------------|
| Annotation:           | 18 of 23    |
| AminoAcids Coverage:  | 78 %        |
| Intensity Coverage:   | 60 %        |
| Peak Coverage:        | 48 %        |
| Protein Localisation: | 301 ... 323 |

| b <sup>2+</sup> ion |        | b ion    |        |     | y ion    |        | y <sup>2+</sup> ion |         |         |
|---------------------|--------|----------|--------|-----|----------|--------|---------------------|---------|---------|
| Δ dalton            | mass   | Δ dalton | mass   | seq | Δ dalton | mass   | Δ dalton            | mass    |         |
|                     | 72.044 |          | 72.044 | 1   | A        |        |                     |         |         |
|                     | 159.08 |          | 159.08 | 2   | S        | 2350.2 |                     | 2350.2  |         |
|                     | 272.16 |          | 272.16 | 3   | L        | 2263.2 |                     | 2263.2  |         |
|                     | 371.23 |          | 371.23 | 4   | V        | 2150.1 |                     | 2150.1  |         |
|                     | 442.27 | +0.2055  | 442.27 | 5   | A        | 2051.1 |                     | 1026    | +0.3536 |
|                     | 555.35 | +0.1416  | 555.35 | 6   | L        | 1980   | -0.195              | 990.51  | -0.073  |
|                     | 652.4  |          | 652.4  | 7   | P        | 1866.9 | -0.083              | 933.97  | +0.2223 |
|                     | 781.45 |          | 781.45 | 8   | E        | 1769.9 | +0.12               | 1769.9  |         |
|                     | 909.5  | +0.0261  | 909.5  | 9   | Q        | 1640.8 |                     | 1640.8  |         |
|                     | 1010.6 |          | 1010.6 | 10  | T        | 1512.8 | -0.192              | 1512.8  |         |
|                     | 1081.6 | -0.25    | 1081.6 | 11  | A        | 1411.7 | -0.181              | 1411.7  |         |
|                     | 1168.6 | +0.0801  | 1168.6 | 12  | S        | 1340.7 | -0.084              | 1340.7  |         |
|                     | 1297.7 |          | 1297.7 | 13  | E        | 1253.7 | -0.057              | 1253.7  |         |
|                     | 1426.7 | -0.249   | 1426.7 | 14  | E        | 1124.6 | -0.086              | 1124.6  |         |
|                     | 1555.7 | -0.159   | 1555.7 | 15  | E        | 995.58 | +0.0725             | 995.58  |         |
|                     | 1656.8 | -0.16    | 1656.8 | 16  | T        | 866.53 | +0.0202             | 866.53  |         |
|                     | 1753.8 | -0.451   | 1753.8 | 17  | P        | 765.49 | +0.0044             | 765.49  |         |
| +0.1199             | 925.95 | -0.054   | 1850.9 | 18  | P        | 5      | 668.43              | +0.0143 | 668.43  |
|                     | 1948   |          | 1948   | 19  | P        | 4      | 571.38              | +0.1061 | 571.38  |
|                     | 2061   |          | 2061   | 20  | L        | 3      | 474.33              | +0.0562 | 474.33  |
|                     | 2174.1 |          | 2174.1 | 21  | L        | 2      | 361.24              | -0.001  | 361.24  |
|                     | 2275.2 |          | 2275.2 | 22  | T        | 1      | 248.16              |         | 248.16  |
|                     |        |          |        | 23  | K        | 0      | 147.11              |         | 147.11  |

Scan number 4408 Raw file LNCAP\_Silac\_23F10\_set1\_01  
 Method ITMS; CID Pepti... 67.11

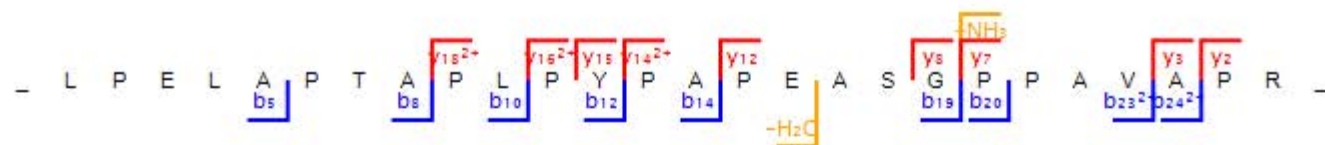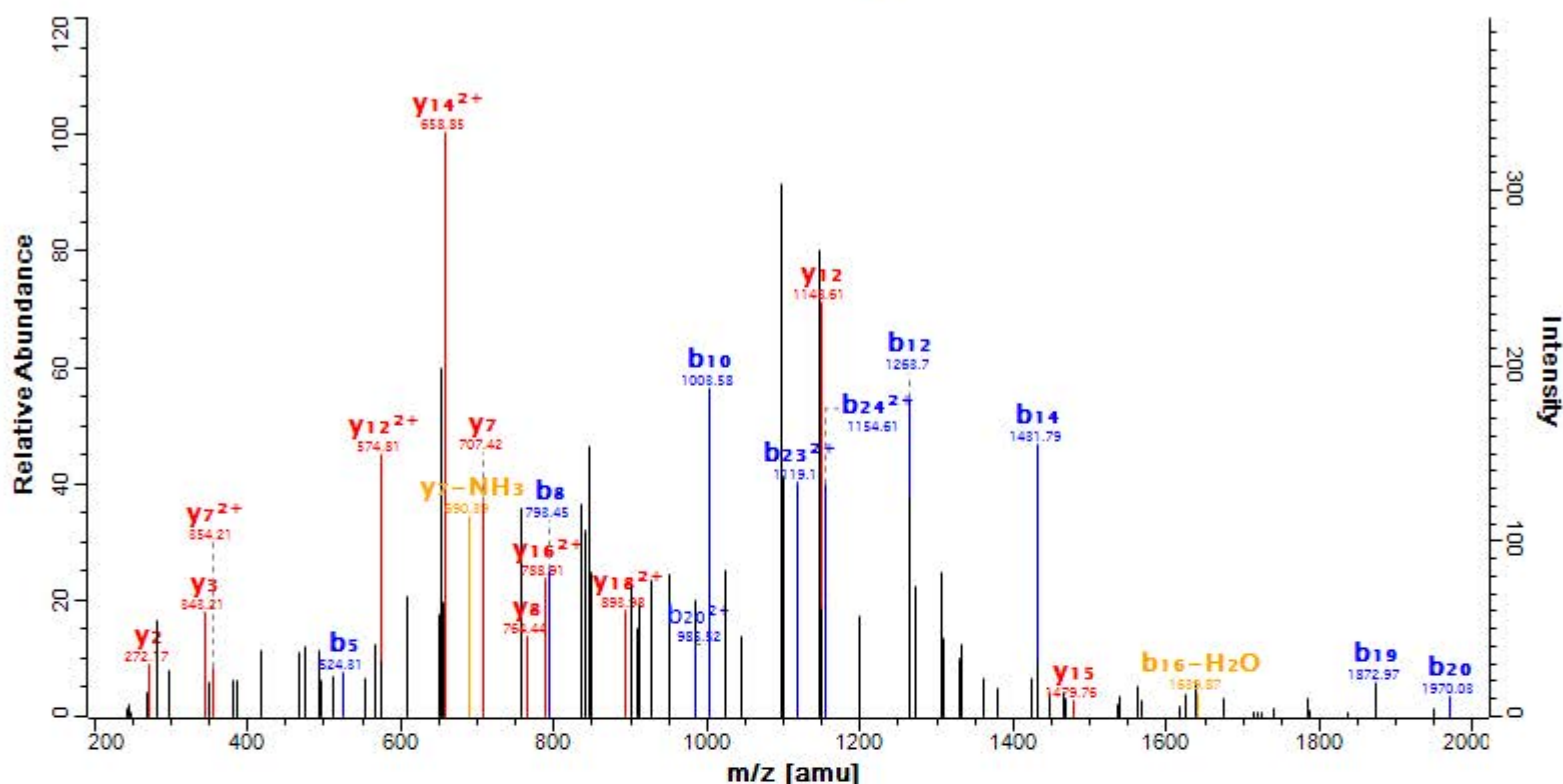

precursor information

|                   |                 |
|-------------------|-----------------|
| Mass:             | 2578.37943      |
| m/z:              | 860.46709       |
| Charge:           | 3+              |
| Retentiontime:    | 45.078979492187 |
| Score:            | 67.10954        |
| Mass Error [ppm]: | -0.035382       |
| PEP:              | 2.647E-05       |
| Precursor Type:   | MULTI           |

| b <sup>2+</sup> ion |        | b ion    |        | seq |   |    | y ion    |         | y <sup>2+</sup> ion |         |
|---------------------|--------|----------|--------|-----|---|----|----------|---------|---------------------|---------|
| Δ dalton            | mass   | Δ dalton | mass   |     |   |    | Δ dalton | mass    | Δ dalton            | mass    |
|                     | 114.09 |          | 114.09 | 1   | L | 25 |          |         |                     |         |
|                     | 211.14 |          | 211.14 | 2   | P | 24 | 2466.3   |         | 2466.3              |         |
|                     | 340.19 |          | 340.19 | 3   | E | 23 | 2369.2   |         | 2369.2              |         |
|                     | 453.27 |          | 453.27 | 4   | L | 22 | 2240.2   |         | 2240.2              |         |
|                     | 524.31 | -0.051   | 524.31 | 5   | A | 21 | 2127.1   |         | 2127.1              |         |
|                     | 621.36 |          | 621.36 | 6   | P | 20 | 2056.1   |         | 2056.1              |         |
|                     | 722.41 |          | 722.41 | 7   | T | 19 | 1959     |         | 1959                |         |
|                     | 793.45 | +0.0347  | 793.45 | 8   | A | 18 | 1858     |         | 1858                |         |
|                     | 890.5  |          | 890.5  | 9   | P | 17 | 1786.9   |         | 893.98              | +0.4105 |
|                     | 1003.6 | +0.069   | 1003.6 | 10  | L | 16 | 1689.9   |         | 1689.9              |         |
|                     | 1100.6 |          | 1100.6 | 11  | P | 15 | 1576.8   |         | 788.91              | +0.3422 |
|                     | 1263.7 | -0.198   | 1263.7 | 12  | Y | 14 | 1479.8   | +0.2444 | 1479.8              |         |
|                     | 1360.8 |          | 1360.8 | 13  | P | 13 | 1316.7   |         | 658.85              | +0.2001 |
|                     | 1431.8 | +0.0174  | 1431.8 | 14  | A | 12 | 1219.6   |         | 1219.6              |         |
|                     | 1528.8 |          | 1528.8 | 15  | P | 11 | 1148.6   | +0.0248 | 574.81              | -0.039  |
|                     | 1657.9 |          | 1657.9 | 16  | E | 10 | 1051.6   |         | 1051.6              |         |
|                     | 1728.9 |          | 1728.9 | 17  | A | 9  | 922.51   |         | 922.51              |         |
|                     | 1816   |          | 1816   | 18  | S | 8  | 851.47   |         | 851.47              |         |
|                     | 1873   | -0.084   | 1873   | 19  | G | 7  | 764.44   | +0.0505 | 764.44              |         |
| -0.2                | 985.52 | -0.301   | 1970   | 20  | P | 6  | 707.42   | +0.054  | 354.21              | +0.2805 |
|                     | 2067.1 |          | 2067.1 | 21  | P | 5  | 610.37   |         | 610.37              |         |
|                     | 2138.1 |          | 2138.1 | 22  | A | 4  | 513.31   |         | 513.31              |         |
| -0.032              | 1119.1 |          | 2237.2 | 23  | V | 3  | 442.28   |         | 442.28              |         |
| +0.0767             | 1154.6 |          | 2308.2 | 24  | A | 2  | 343.21   | +0.094  | 343.21              |         |
|                     | 2405.3 |          | 2405.3 | 25  | P | 1  | 272.17   | +0.169  | 272.17              |         |
|                     |        |          |        | 26  | R | 0  | 175.12   |         | 175.12              |         |

general information

|                       |             |
|-----------------------|-------------|
| Annotation:           | 15 of 26    |
| AminoAcids Coverage:  | 58 %        |
| Intensity Coverage:   | 38 %        |
| Peak Coverage:        | 23 %        |
| Protein Localisation: | 180 ... 205 |



Scan number 4824 Raw file LNCAP\_Silac\_23F10\_set1\_01  
 Method ITMS; CID Pepti... 178.32

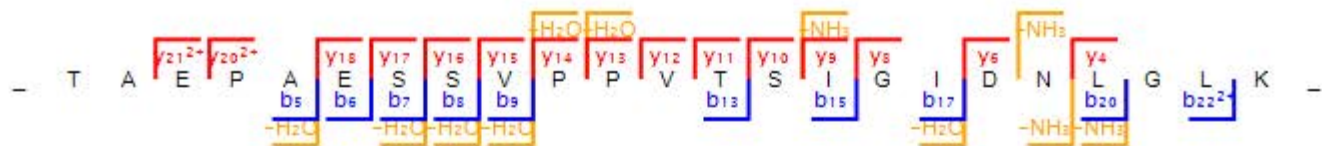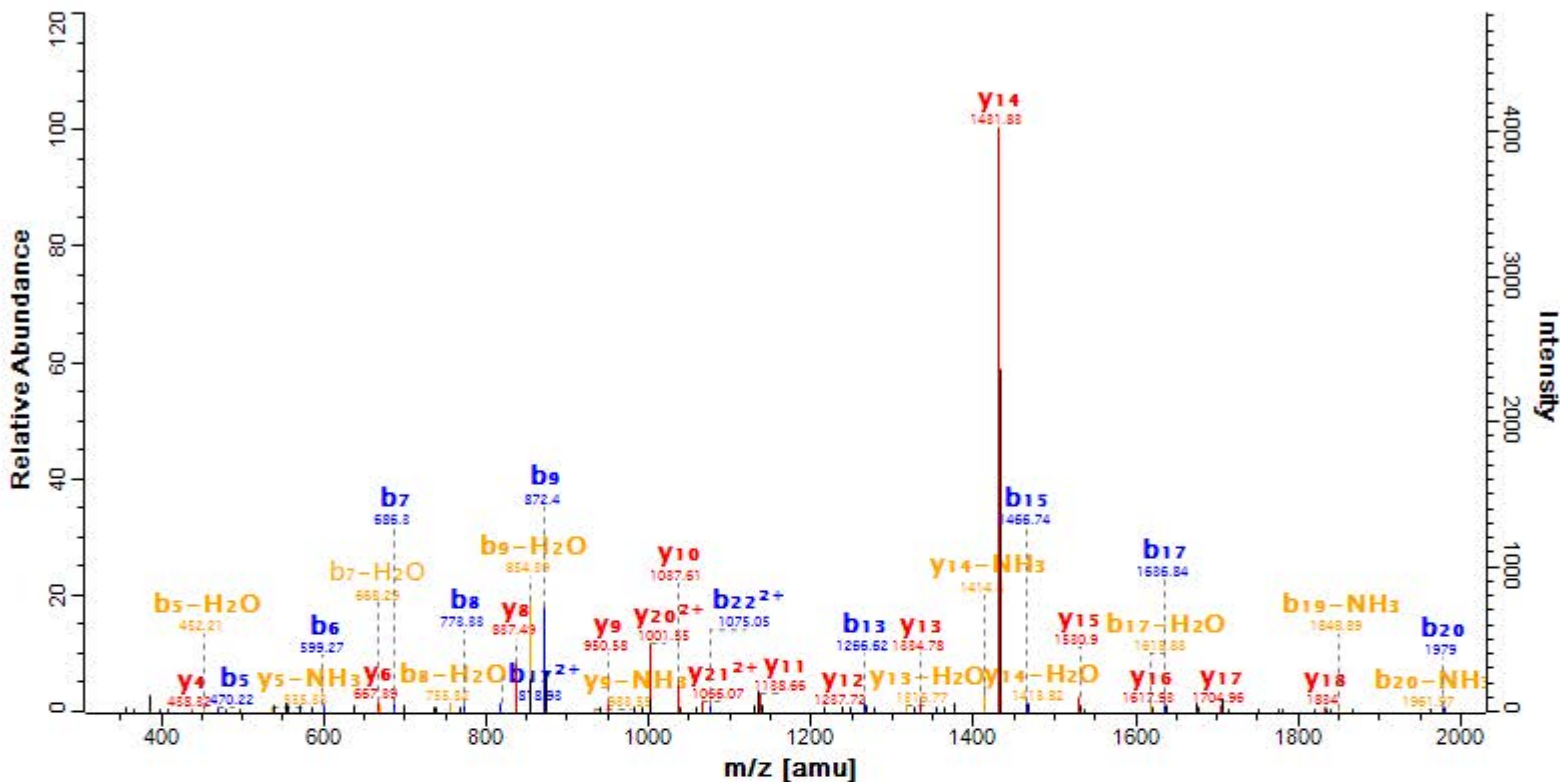

precursor information

|                   |                 |
|-------------------|-----------------|
| Mass:             | 2294.2012       |
| m/z:              | 1148.10788      |
| Charge:           | 2+              |
| Retentiontime:    | 48.491416931152 |
| Score:            | 178.3236        |
| Mass Error [ppm]: | 0.27871         |
| PEP:              | 1.7587E-38      |
| Precursor Type:   | MULTI           |

general information

|                       |             |
|-----------------------|-------------|
| Annotation:           | 19 of 23    |
| AminoAcids Coverage:  | 83 %        |
| Intensity Coverage:   | 59 %        |
| Peak Coverage:        | 37 %        |
| Protein Localisation: | 339 ... 361 |

| b <sup>2+</sup> ion |        | b ion    |        | seq |   |    | y ion    |         | y <sup>2+</sup> ion |         |
|---------------------|--------|----------|--------|-----|---|----|----------|---------|---------------------|---------|
| Δ dalton            | mass   | Δ dalton | mass   |     |   |    | Δ dalton | mass    | Δ dalton            | mass    |
|                     | 102.05 |          | 102.05 | 1   | T | 22 |          |         |                     |         |
|                     | 173.09 |          | 173.09 | 2   | A | 21 | 2202.2   |         | 2202.2              |         |
|                     | 302.13 |          | 302.13 | 3   | E | 20 | 2131.1   |         | 1066.1              | +0.1503 |
|                     | 399.19 |          | 399.19 | 4   | P | 19 | 2002.1   |         | 1001.6              | +0.3506 |
|                     | 470.22 | -0.291   | 470.22 | 5   | A | 18 | 1905     |         | 1905                |         |
|                     | 599.27 | +0.1597  | 599.27 | 6   | E | 17 | 1834     | -0.091  | 1834                |         |
|                     | 686.3  | +0.1175  | 686.3  | 7   | S | 16 | 1705     | -0.237  | 1705                |         |
|                     | 773.33 | -0.071   | 773.33 | 8   | S | 15 | 1617.9   | +0.0005 | 1617.9              |         |
|                     | 872.4  | -0.006   | 872.4  | 9   | V | 14 | 1530.9   | -0.069  | 1530.9              |         |
|                     | 969.45 |          | 969.45 | 10  | P | 13 | 1431.8   | -0.074  | 1431.8              |         |
|                     | 1066.5 |          | 1066.5 | 11  | P | 12 | 1334.8   | +0.1094 | 1334.8              |         |
|                     | 1165.6 |          | 1165.6 | 12  | V | 11 | 1237.7   | +0.2418 | 1237.7              |         |
|                     | 1266.6 | +0.088   | 1266.6 | 13  | T | 10 | 1138.7   | +0.0853 | 1138.7              |         |
|                     | 1353.7 |          | 1353.7 | 14  | S | 9  | 1037.6   | +0.0814 | 1037.6              |         |
|                     | 1466.7 | -0.013   | 1466.7 | 15  | I | 8  | 950.58   | +0.0151 | 950.58              |         |
|                     | 1523.8 |          | 1523.8 | 16  | G | 7  | 837.49   | +0.0035 | 837.49              |         |
| -0.351              | 818.93 | -0.053   | 1636.8 | 17  | I | 6  | 780.47   |         | 780.47              |         |
|                     | 1751.9 |          | 1751.9 | 18  | D | 5  | 667.39   | -0.025  | 667.39              |         |
|                     | 1865.9 |          | 1865.9 | 19  | N | 4  | 552.36   |         | 552.36              |         |
|                     | 1979   | -0.095   | 1979   | 20  | L | 3  | 438.32   | -0.051  | 438.32              |         |
|                     | 2036   |          | 2036   | 21  | G | 2  | 325.23   |         | 325.23              |         |
| +0.1814             | 1075.1 |          | 2149.1 | 22  | L | 1  | 268.21   |         | 268.21              |         |
|                     |        |          |        | 23  | K | 0  | 155.13   |         | 155.13              |         |

Scan number 5345 Raw file LNCAP\_Silac\_23F10\_set1\_01  
 Method ITMS; CID Pepti... 150.37

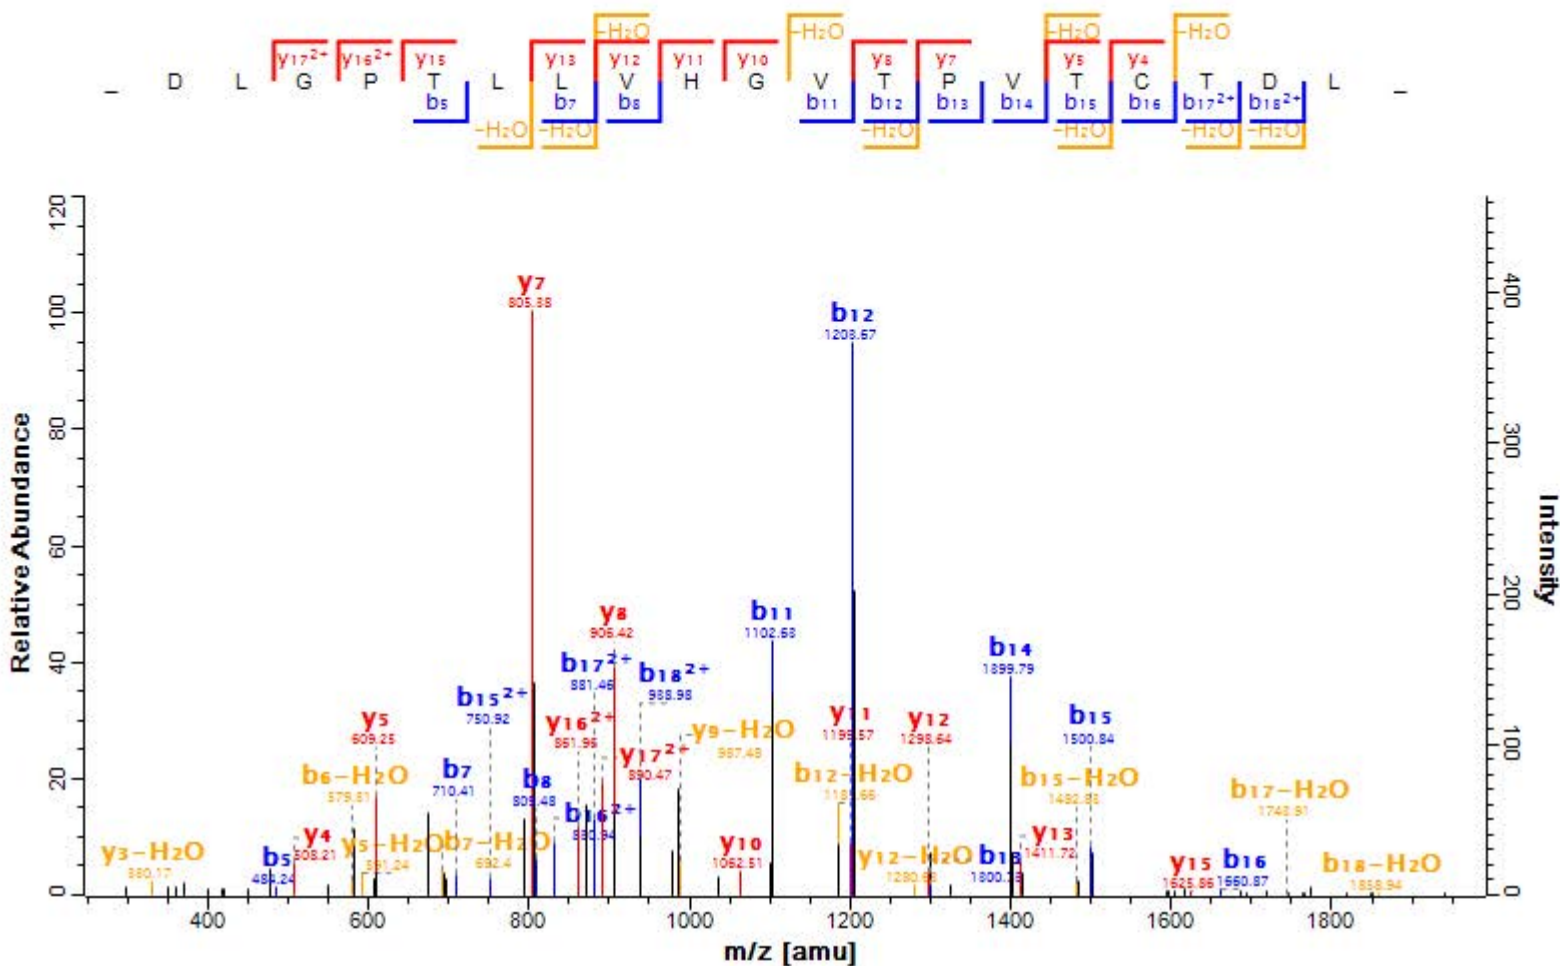

precursor information

|                   |                 |
|-------------------|-----------------|
| Mass:             | 2007.0345       |
| m/z:              | 1004.52453      |
| Charge:           | 2+              |
| Retentiontime:    | 53.022960662841 |
| Score:            | 150.3699        |
| Mass Error [ppm]: | -0.088893       |
| PEP:              | 4.5866E-13      |
| Precursor Type:   | ISO             |

general information

|                       |             |
|-----------------------|-------------|
| Annotation:           | 16 of 19    |
| AminoAcids Coverage:  | 84 %        |
| Intensity Coverage:   | 57 %        |
| Peak Coverage:        | 37 %        |
| Protein Localisation: | 896 ... 914 |

| b <sup>2+</sup> ion |        | b ion    |        |     |   |          | y ion  |          | y <sup>2+</sup> ion |  |
|---------------------|--------|----------|--------|-----|---|----------|--------|----------|---------------------|--|
| Δ dalton            | mass   | Δ dalton | mass   | seq |   | Δ dalton | mass   | Δ dalton | mass                |  |
|                     | 116.03 |          | 116.03 | 1   | D | 18       |        |          |                     |  |
|                     | 229.12 |          | 229.12 | 2   | L | 17       | 1893   |          | 1893                |  |
|                     | 286.14 |          | 286.14 | 3   | G | 16       | 1779.9 |          | 890.47 +0.1862      |  |
|                     | 383.19 |          | 383.19 | 4   | P | 15       | 1722.9 |          | 861.96 +0.312       |  |
|                     | 484.24 | +0.334   | 484.24 | 5   | T | 14       | 1625.9 | -0.458   | 1625.9              |  |
|                     | 597.32 |          | 597.32 | 6   | L | 13       | 1524.8 |          | 1524.8              |  |
|                     | 710.41 | +0.1437  | 710.41 | 7   | L | 12       | 1411.7 | +0.057   | 1411.7              |  |
|                     | 809.48 | -0.066   | 809.48 | 8   | V | 11       | 1298.6 | +0.0007  | 1298.6              |  |
|                     | 946.54 |          | 946.54 | 9   | H | 10       | 1199.6 | +0.0625  | 1199.6              |  |
|                     | 1003.6 |          | 1003.6 | 10  | G | 9        | 1062.5 | -0.087   | 1062.5              |  |
|                     | 1102.6 | -0.035   | 1102.6 | 11  | V | 8        | 1005.5 |          | 1005.5              |  |
|                     | 1203.7 | -0.023   | 1203.7 | 12  | T | 7        | 906.42 | -0.014   | 906.42              |  |
|                     | 1300.7 | -0.175   | 1300.7 | 13  | P | 6        | 805.38 | -0.036   | 805.38              |  |
|                     | 1399.8 | +0.0036  | 1399.8 | 14  | V | 5        | 708.32 |          | 708.32              |  |
| -0.112              | 750.92 | -0.189   | 1500.8 | 15  | T | 4        | 609.25 | +0.033   | 609.25              |  |
| +0.2224             | 830.94 | -0.234   | 1660.9 | 16  | C | 3        | 508.21 | +0.1303  | 508.21              |  |
| +0.3147             | 881.46 |          | 1761.9 | 17  | T | 2        | 348.18 |          | 348.18              |  |
| -0.034              | 938.98 |          | 1876.9 | 18  | D | 1        | 247.13 |          | 247.13              |  |
|                     |        |          |        | 19  | I | 0        | 132.1  |          | 132.1               |  |

Scan number 5514 Raw file LNCAP\_Silac\_23F10\_set1\_01  
 Method ITMS; CID Pepti... 131.26

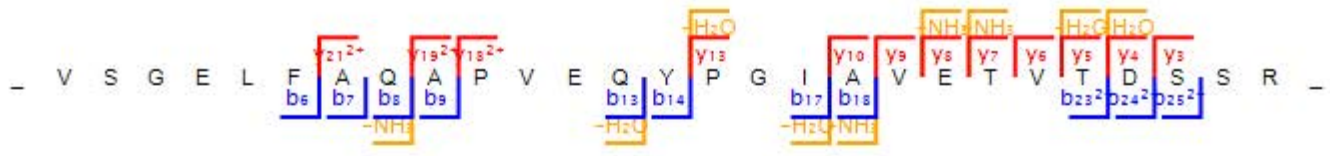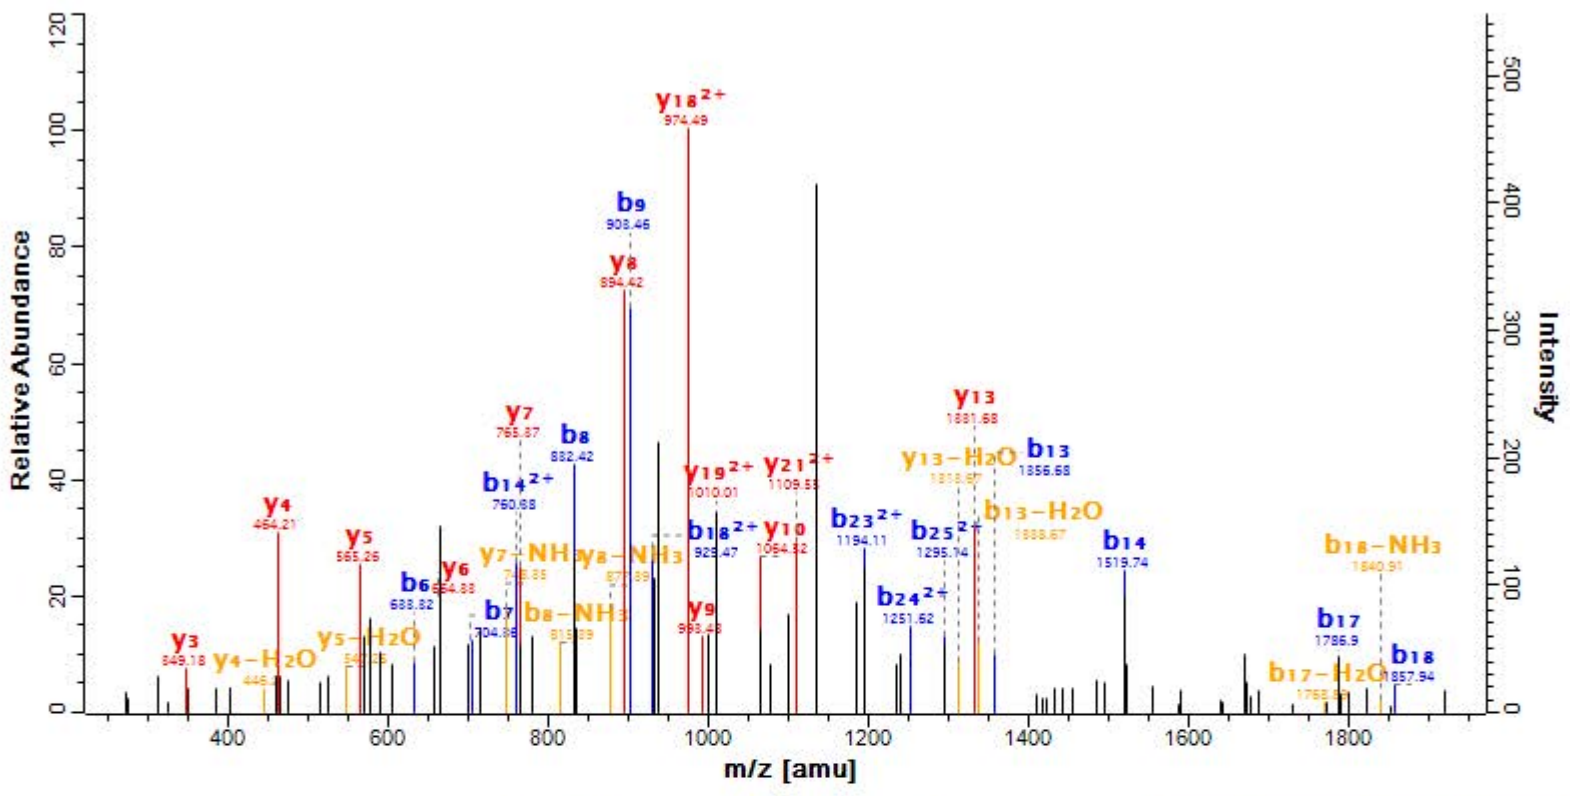

precursor information

|                   |                 |
|-------------------|-----------------|
| Mass:             | 2849.40866      |
| m/z:              | 950.81016       |
| Charge:           | 3+              |
| Retentiontime:    | 54.445831298828 |
| Score:            | 131.2577        |
| Mass Error [ppm]: | 0.11944         |
| PEP:              | 1.648E-18       |
| Precursor Type:   | MULTI           |

| b <sup>2+</sup> ion |        | b ion    |        | seq |   | y ion    |                | y <sup>2+</sup> ion |                |
|---------------------|--------|----------|--------|-----|---|----------|----------------|---------------------|----------------|
| Δ dalton            | mass   | Δ dalton | mass   |     |   | Δ dalton | mass           | Δ dalton            | mass           |
|                     | 100.08 |          | 100.08 | 1   | V | 26       |                |                     |                |
|                     | 187.11 |          | 187.11 | 2   | S | 25       | 2751.3         |                     | 2751.3         |
|                     | 244.13 |          | 244.13 | 3   | G | 24       | 2664.3         |                     | 2664.3         |
|                     | 373.17 |          | 373.17 | 4   | E | 23       | 2607.3         |                     | 2607.3         |
|                     | 486.26 |          | 486.26 | 5   | L | 22       | 2478.3         |                     | 2478.3         |
|                     | 633.32 | +0.0331  | 633.32 | 6   | F | 21       | 2365.2         |                     | 2365.2         |
|                     | 704.36 | +0.1273  | 704.36 | 7   | A | 20       | 2218.1         |                     | 1109.6 -0.25   |
|                     | 832.42 | +0.1151  | 832.42 | 8   | Q | 19       | 2147.1         |                     | 2147.1         |
|                     | 903.46 | -0.018   | 903.46 | 9   | A | 18       | 2019           |                     | 1010 +0.0135   |
|                     | 1000.5 |          | 1000.5 | 10  | P | 17       | 1948           |                     | 974.49 +0.2564 |
|                     | 1099.6 |          | 1099.6 | 11  | V | 16       | 1850.9         |                     | 1850.9         |
|                     | 1228.6 |          | 1228.6 | 12  | E | 15       | 1751.8         |                     | 1751.8         |
|                     | 1356.7 | -0.091   | 1356.7 | 13  | Q | 14       | 1622.8         |                     | 1622.8         |
| +0.2571             | 760.38 | -0.041   | 1519.7 | 14  | Y | 13       | 1494.7         |                     | 1494.7         |
|                     | 1616.8 |          | 1616.8 | 15  | P | 12       | 1331.7 +0.0907 |                     | 1331.7         |
|                     | 1673.8 |          | 1673.8 | 16  | G | 11       | 1234.6         |                     | 1234.6         |
|                     | 1786.9 | +0.3844  | 1786.9 | 17  | I | 10       | 1177.6         |                     | 1177.6         |
| -0.015              | 929.47 | +0.2946  | 1857.9 | 18  | A | 9        | 1064.5 -0.042  |                     | 1064.5         |
|                     | 1957   |          | 1957   | 19  | V | 8        | 993.48 +0.1046 |                     | 993.48         |
|                     | 2086   |          | 2086   | 20  | E | 7        | 894.42 -0.041  |                     | 894.42         |
|                     | 2187.1 |          | 2187.1 | 21  | T | 6        | 765.37 +0.1071 |                     | 765.37         |
|                     | 2286.2 |          | 2286.2 | 22  | V | 5        | 664.33 +0.1474 |                     | 664.33         |
| +0.1755             | 1194.1 |          | 2387.2 | 23  | T | 4        | 565.26 +0.0484 |                     | 565.26         |
| +0.2739             | 1251.6 |          | 2502.2 | 24  | D | 3        | 464.21 +0.0715 |                     | 464.21         |
| -0.166              | 1295.1 |          | 2589.3 | 25  | S | 2        | 349.18 +0.1103 |                     | 349.18         |
|                     | 2676.3 |          | 2676.3 | 26  | S | 1        | 262.15         |                     | 262.15         |
|                     |        |          |        | 27  | R | 0        | 175.12         |                     | 175.12         |

general information

|                       |           |
|-----------------------|-----------|
| Annotation:           | 18 of 27  |
| AminoAcids Coverage:  | 67 %      |
| Intensity Coverage:   | 52 %      |
| Peak Coverage:        | 33 %      |
| Protein Localisation: | 64 ... 90 |

Scan number 5645 Raw file LNCAP\_Silac\_23F10\_set1\_01  
 Method ITMS; CID Pepti... 152.06

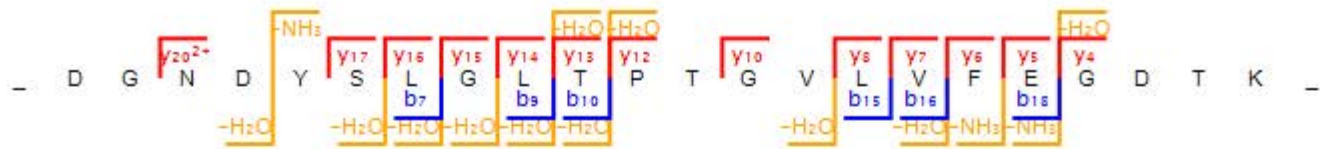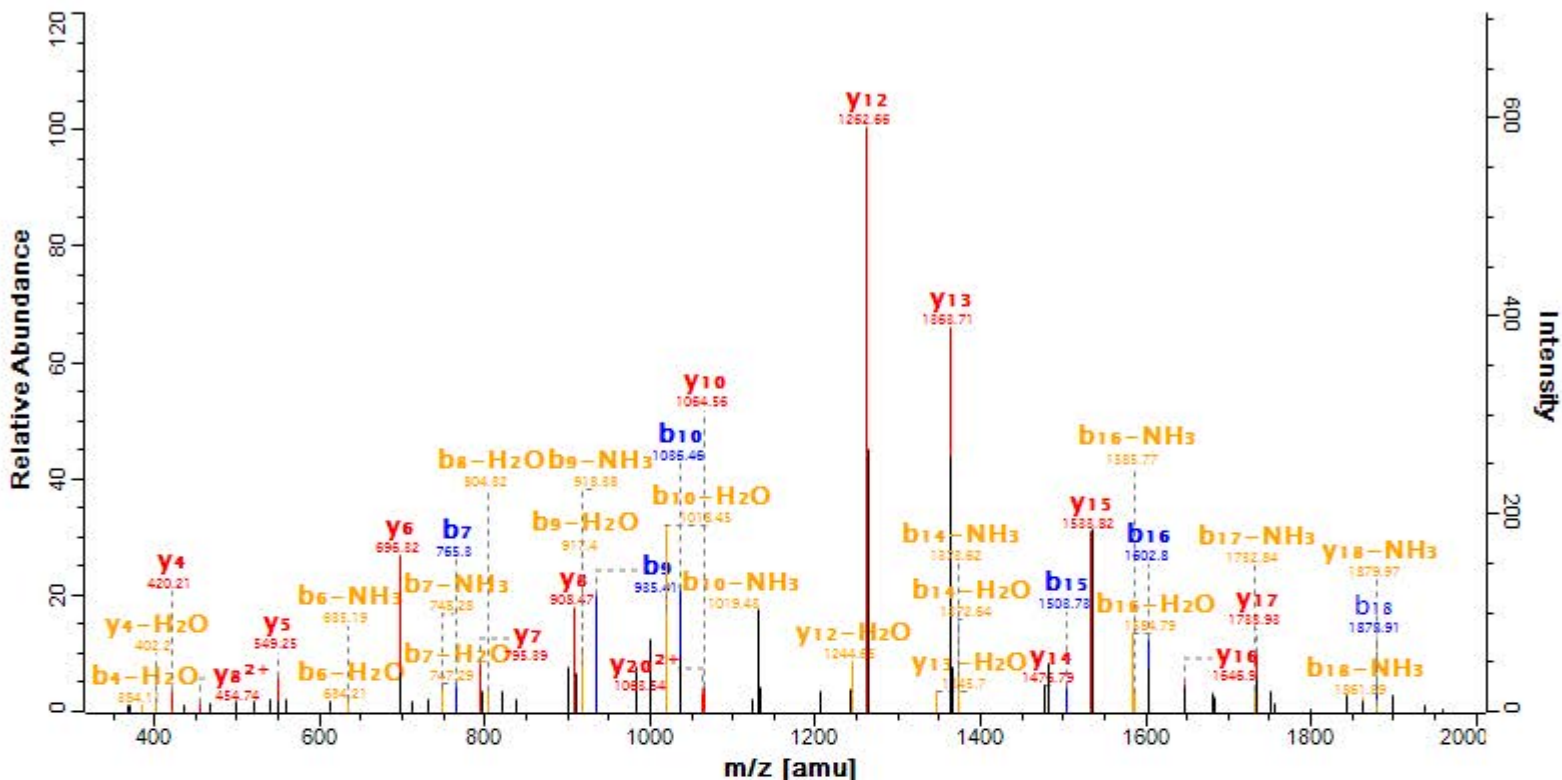

**precursor information**

|                   |                 |
|-------------------|-----------------|
| Mass:             | 2297.10646      |
| m/z:              | 1149.56051      |
| Charge:           | 2+              |
| Retentiontime:    | 55.608203887939 |
| Score:            | 152.0606        |
| Mass Error [ppm]: | 0.058839        |
| PEP:              | 3.9594E-28      |
| Precursor Type:   | MULTI           |

**general information**

|                       |             |
|-----------------------|-------------|
| Annotation:           | 16 of 22    |
| AminoAcids Coverage:  | 73 %        |
| Intensity Coverage:   | 62 %        |
| Peak Coverage:        | 44 %        |
| Protein Localisation: | 241 ... 262 |

| b ion     |          |    |     |    | y ion    |           | y <sup>2+</sup> ion |           |
|-----------|----------|----|-----|----|----------|-----------|---------------------|-----------|
| Δ dalton  | mass     |    | seq |    | Δ dalton | mass      | Δ dalton            | mass      |
|           | 116.0342 | 1  | D   | 21 |          |           |                     |           |
|           | 173.0557 | 2  | G   | 20 | 2183.087 |           | 2183.087            |           |
|           | 287.0986 | 3  | N   | 19 | 2126.065 |           | 1063.536            | +0.382589 |
|           | 402.1256 | 4  | D   | 18 | 2012.022 |           | 2012.022            |           |
|           | 565.1889 | 5  | Y   | 17 | 1896.995 |           | 1896.995            |           |
|           | 652.2209 | 6  | S   | 16 | 1733.932 | -0.09544  | 1733.932            |           |
| -0.15403  | 765.305  | 7  | L   | 15 | 1646.9   | -0.01862  | 1646.9              |           |
|           | 822.3264 | 8  | G   | 14 | 1533.816 | -0.09752  | 1533.816            |           |
| +0.006856 | 935.4105 | 9  | L   | 13 | 1476.794 | +0.02551  | 1476.794            |           |
| -0.00139  | 1036.458 | 10 | T   | 12 | 1363.71  | -0.03911  | 1363.71             |           |
|           | 1133.511 | 11 | P   | 11 | 1262.663 | -0.0383   | 1262.663            |           |
|           | 1234.559 | 12 | T   | 10 | 1165.61  |           | 1165.61             |           |
|           | 1291.58  | 13 | G   | 9  | 1064.562 | +0.108402 | 1064.562            |           |
|           | 1390.649 | 14 | V   | 8  | 1007.541 |           | 1007.541            |           |
| -0.1885   | 1503.733 | 15 | L   | 7  | 908.4724 | +0.078041 | 454.7398            | -0.45064  |
| -0.17634  | 1602.801 | 16 | V   | 6  | 795.3883 | -0.08905  | 795.3883            |           |
|           | 1749.869 | 17 | F   | 5  | 696.3199 | +0.089894 | 696.3199            |           |
| -0.00256  | 1878.912 | 18 | E   | 4  | 549.2515 | +0.087018 | 549.2515            |           |
|           | 1935.933 | 19 | G   | 3  | 420.2089 | -0.02575  | 420.2089            |           |
|           | 2050.96  | 20 | D   | 2  | 363.1874 |           | 363.1874            |           |
|           | 2152.008 | 21 | T   | 1  | 248.1605 |           | 248.1605            |           |
|           |          | 22 | K   | 0  | 147.1128 |           | 147.1128            |           |

Scan number 569 Raw file LNCAP\_Silac\_23F10\_set1\_01  
 Method ITMS; CID Peptide 44.18

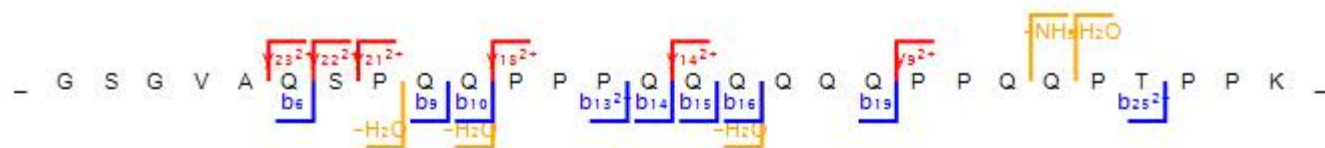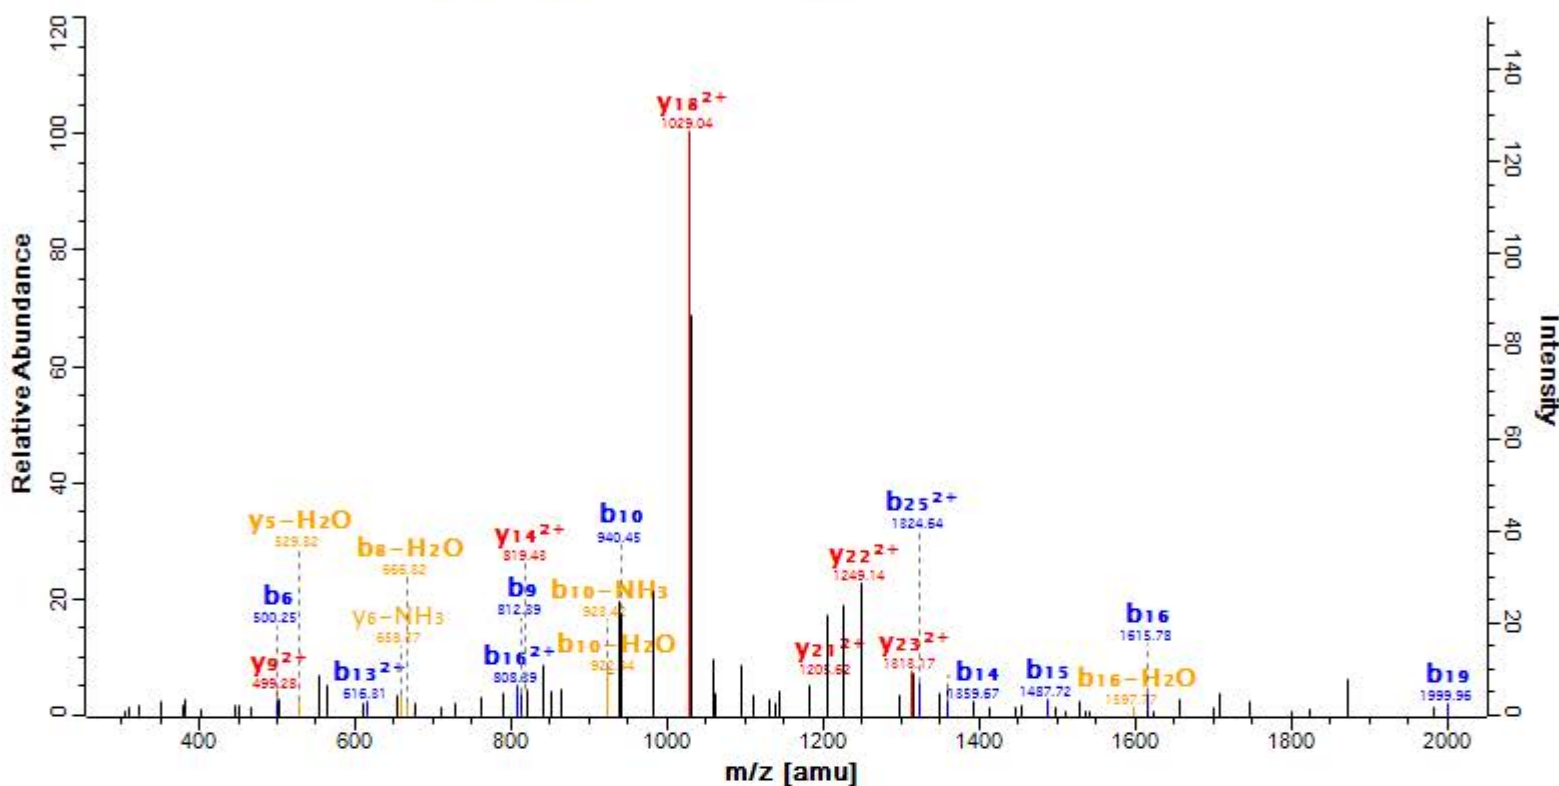

precursor information

|                   |                 |
|-------------------|-----------------|
| Mass:             | 2980.10243      |
| m/z:              | 994.37475       |
| Charge:           | 3+              |
| Retentiontime:    | 9.9029130935668 |
| Score:            | 44.18253        |
| Mass Error [ppm]: | 0.13213         |
| PEP:              | 0.0011718       |
| Precursor Type:   | MULTI           |

| b <sup>2+</sup> ion |        | b ion    |        | seq |   |    | y ion    |      | y <sup>2+</sup> ion |         |
|---------------------|--------|----------|--------|-----|---|----|----------|------|---------------------|---------|
| Δ dalton            | mass   | Δ dalton | mass   |     |   |    | Δ dalton | mass | Δ dalton            | mass    |
|                     | 58.029 |          | 58.029 | 1   | G | 27 |          |      |                     |         |
|                     | 145.06 |          | 145.06 | 2   | S | 26 | 2939.5   |      | 2939.5              |         |
|                     | 202.08 |          | 202.08 | 3   | G | 25 | 2852.5   |      | 2852.5              |         |
|                     | 301.15 |          | 301.15 | 4   | V | 24 | 2795.4   |      | 2795.4              |         |
|                     | 372.19 |          | 372.19 | 5   | A | 23 | 2696.4   |      | 2696.4              |         |
|                     | 500.25 | +0.1125  | 500.25 | 6   | Q | 22 | 2625.3   |      | 1313.2              | +0.006  |
|                     | 587.28 |          | 587.28 | 7   | S | 21 | 2497.3   |      | 1249.1              | +0.1301 |
|                     | 684.33 |          | 684.33 | 8   | P | 20 | 2410.2   |      | 1205.6              | -0.098  |
|                     | 812.39 | +0.1057  | 812.39 | 9   | Q | 19 | 2313.2   |      | 2313.2              |         |
|                     | 940.45 | +0.364   | 940.45 | 10  | Q | 18 | 2185.1   |      | 2185.1              |         |
|                     | 1037.5 |          | 1037.5 | 11  | P | 17 | 2057.1   |      | 1029                | +0.2781 |
|                     | 1134.6 |          | 1134.6 | 12  | P | 16 | 1960     |      | 1960                |         |
| +0.0247             | 1231.6 |          | 1231.6 | 13  | P | 15 | 1863     |      | 1863                |         |
|                     | 1359.7 | -0.086   | 1359.7 | 14  | Q | 14 | 1765.9   |      | 1765.9              |         |
|                     | 1487.7 | -0.499   | 1487.7 | 15  | Q | 13 | 1637.8   |      | 819.43              | +0.32   |
| -0.412              | 1615.8 | -0.029   | 1615.8 | 16  | Q | 12 | 1509.8   |      | 1509.8              |         |
|                     | 1743.8 |          | 1743.8 | 17  | Q | 11 | 1381.7   |      | 1381.7              |         |
|                     | 1871.9 |          | 1871.9 | 18  | Q | 10 | 1253.7   |      | 1253.7              |         |
|                     | 2000   | +0.0204  | 2000   | 19  | Q | 9  | 1125.6   |      | 1125.6              |         |
|                     | 2097   |          | 2097   | 20  | P | 8  | 997.56   |      | 499.28              | +0.3634 |
|                     | 2194.1 |          | 2194.1 | 21  | P | 7  | 900.5    |      | 900.5               |         |
|                     | 2322.1 |          | 2322.1 | 22  | Q | 6  | 803.45   |      | 803.45              |         |
|                     | 2450.2 |          | 2450.2 | 23  | Q | 5  | 675.39   |      | 675.39              |         |
|                     | 2547.2 |          | 2547.2 | 24  | P | 4  | 547.33   |      | 547.33              |         |
| -0.124              | 2648.3 |          | 2648.3 | 25  | T | 3  | 450.28   |      | 450.28              |         |
|                     | 2745.3 |          | 2745.3 | 26  | P | 2  | 349.23   |      | 349.23              |         |
|                     | 2842.4 |          | 2842.4 | 27  | P | 1  | 252.18   |      | 252.18              |         |
|                     |        |          |        | 28  | K | 0  | 155.13   |      | 155.13              |         |

general information

|                       |           |
|-----------------------|-----------|
| Annotation:           | 15 of 28  |
| AminoAcids Coverage:  | 54 %      |
| Intensity Coverage:   | 36 %      |
| Peak Coverage:        | 24 %      |
| Protein Localisation: | 22 ... 49 |

Scan number 5690 Raw file LNCAP\_Silac\_23F10\_set1\_01  
 Method ITMS; CID Peptide 192.09

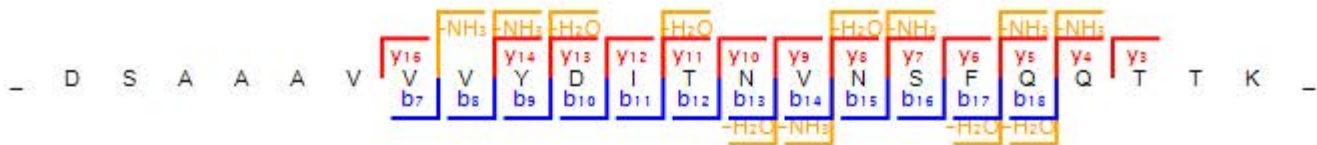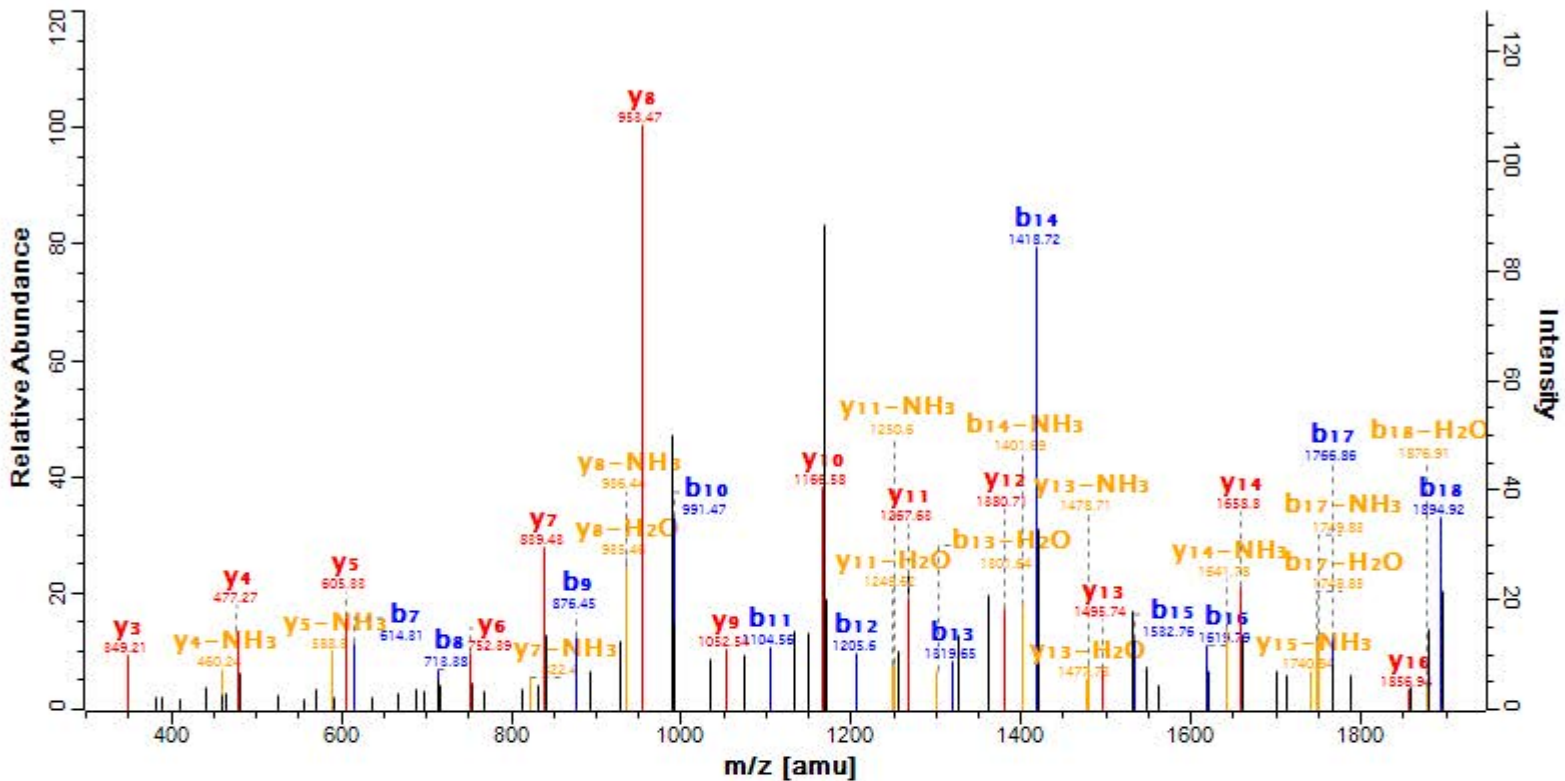

**precursor information**

|                   |                 |
|-------------------|-----------------|
| Mass:             | 2370.17004      |
| m/z:              | 1186.0923       |
| Charge:           | 2+              |
| Retentiontime:    | 56.032505035400 |
| Score:            | 192.0904        |
| Mass Error [ppm]: | -0.11693        |
| PEP:              | 9.2171E-49      |
| Precursor Type:   | MULTI           |

| b ion      |               |     |   |    |               | y ion      |  |
|------------|---------------|-----|---|----|---------------|------------|--|
| Δ dalton   | mass          | seq |   |    | Δ dalton      | mass       |  |
|            | 116.034219499 | 1   | D | 21 |               |            |  |
|            | 203.066247908 | 2   | S | 20 | 2256.15065282 |            |  |
|            | 274.103361696 | 3   | A | 19 | 2169.11862442 |            |  |
|            | 345.140475484 | 4   | A | 18 | 2098.08151063 |            |  |
|            | 416.177589272 | 5   | A | 17 | 2027.04439684 |            |  |
|            | 515.246003188 | 6   | V | 16 | 1956.00728305 |            |  |
| -0.1007941 | 614.314417104 | 7   | V | 15 | 1856.93886914 | -0.0938984 |  |
| +0.0376402 | 713.38283102  | 8   | V | 14 | 1757.87045522 |            |  |
| -0.1741869 | 876.446159559 | 9   | Y | 13 | 1658.8020413  | +0.0125339 |  |
| -0.0094795 | 991.473102591 | 10  | D | 12 | 1495.73871276 | -0.2583661 |  |
| +0.1133657 | 1104.55716657 | 11  | I | 11 | 1380.71176973 | -0.1398703 |  |
| -0.1253529 | 1205.60484505 | 12  | T | 10 | 1267.62770575 | +0.2964886 |  |
| +0.1791318 | 1319.64777249 | 13  | N | 9  | 1166.58002728 | -0.0281474 |  |
| -0.0651854 | 1418.71618641 | 14  | V | 8  | 1052.53709983 | +0.4201756 |  |
| +0.2600512 | 1532.75911386 | 15  | N | 7  | 953.468685915 | +0.0581696 |  |
| -0.2761276 | 1619.79114227 | 16  | S | 6  | 839.425758468 | -0.0337907 |  |
| -0.4022808 | 1766.85955618 | 17  | F | 5  | 752.393730058 | +0.0727616 |  |
| +0.0186339 | 1894.91813369 | 18  | Q | 4  | 605.325316142 | -0.0736682 |  |
|            | 2022.9767112  | 19  | Q | 3  | 477.26673863  | +0.1768954 |  |
|            | 2124.02438968 | 20  | T | 2  | 349.208161119 | +0.2408745 |  |
|            | 2225.07206815 | 21  | T | 1  | 248.160482645 |            |  |
|            |               | 22  | K | 0  | 147.112804171 |            |  |

**general information**

|                       |            |
|-----------------------|------------|
| Annotation:           | 14 of 22   |
| AminoAcids Coverage:  | 64 %       |
| Intensity Coverage:   | 55 %       |
| Peak Coverage:        | 44 %       |
| Protein Localisation: | 85 ... 106 |

Scan number 5937 Raw file LNCAP\_Silac\_23F10\_set1\_01  
 Method ITMS; CID Peptide 161.53

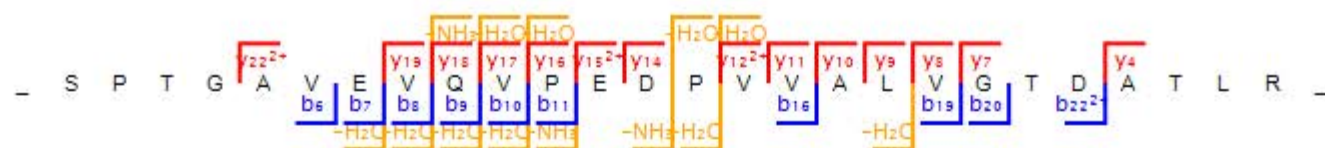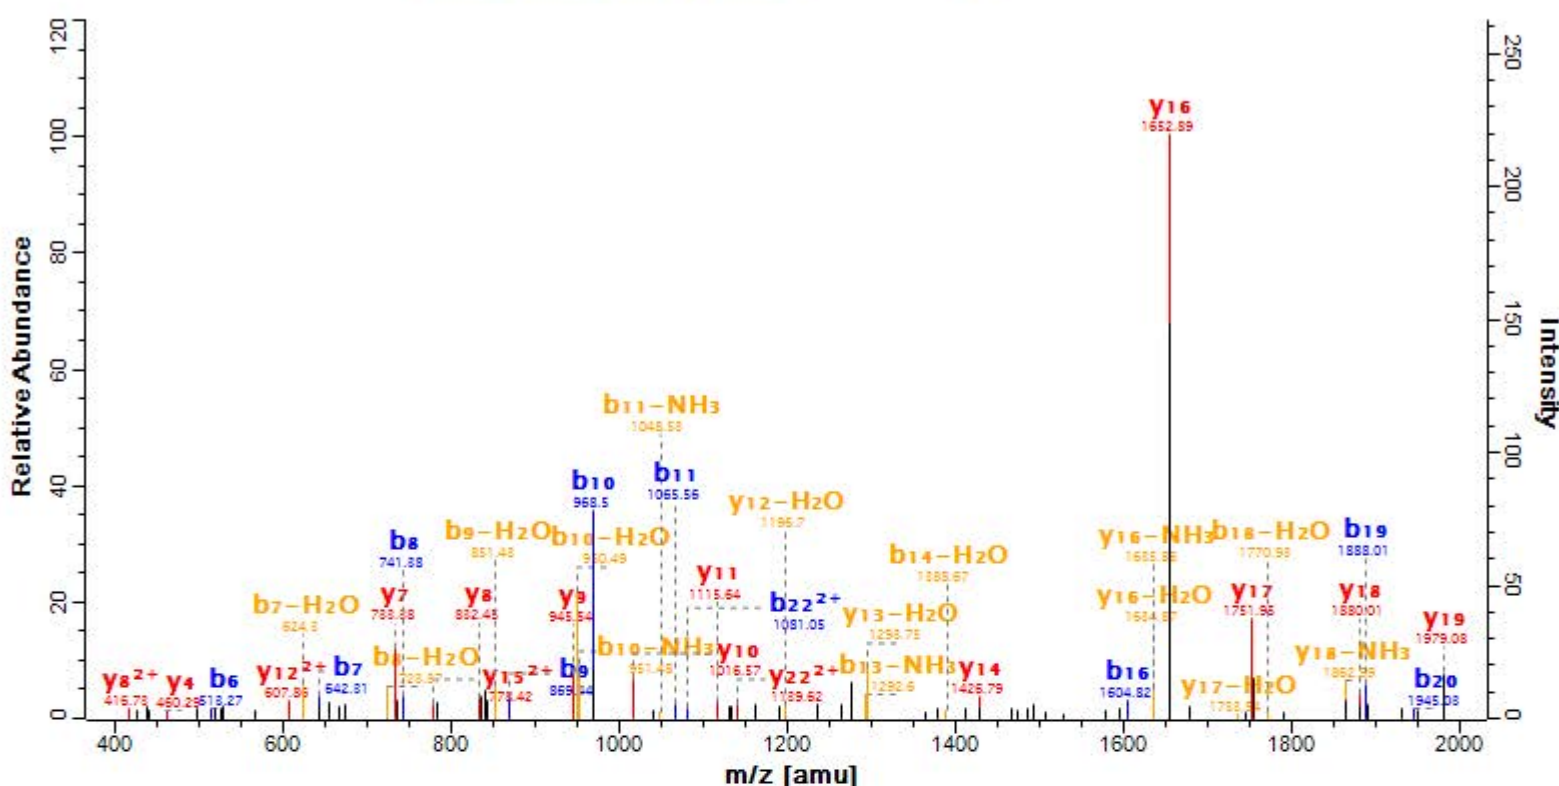

precursor information

|                   |                 |
|-------------------|-----------------|
| Mass:             | 2619.375        |
| m/z:              | 1310.69478      |
| Charge:           | 2+              |
| Retention time:   | 58.419670104980 |
| Score:            | 161.5318        |
| Mass Error [ppm]: | -0.21477        |
| PEP:              | 5.4445E-33      |
| Precursor Type:   | MULTI           |

| b <sup>2+</sup> ion |        | b ion    |        | seq |   |    | y ion    |         | y <sup>2+</sup> ion |         |
|---------------------|--------|----------|--------|-----|---|----|----------|---------|---------------------|---------|
| Δ dalton            | mass   | Δ dalton | mass   |     |   |    | Δ dalton | mass    | Δ dalton            | mass    |
|                     | 88.039 |          | 88.039 | 1   | S | 25 |          |         |                     |         |
|                     | 185.09 |          | 185.09 | 2   | P | 24 | 2533.4   |         | 2533.4              |         |
|                     | 286.14 |          | 286.14 | 3   | T | 23 | 2436.3   |         | 2436.3              |         |
|                     | 343.16 |          | 343.16 | 4   | G | 22 | 2335.3   |         | 2335.3              |         |
|                     | 414.2  |          | 414.2  | 5   | A | 21 | 2278.2   |         | 1139.6              | -0.088  |
|                     | 513.27 | +0.211   | 513.27 | 6   | V | 20 | 2207.2   |         | 2207.2              |         |
|                     | 642.31 | -0.127   | 642.31 | 7   | E | 19 | 2108.1   |         | 2108.1              |         |
|                     | 741.38 | +0.0925  | 741.38 | 8   | V | 18 | 1979.1   | +0.1654 | 1979.1              |         |
|                     | 869.44 | +0.1252  | 869.44 | 9   | Q | 17 | 1880     | +0.1524 | 1880                |         |
|                     | 968.5  | -0.043   | 968.5  | 10  | V | 16 | 1752     | +0.1109 | 1752                |         |
|                     | 1065.6 | -0.209   | 1065.6 | 11  | P | 15 | 1652.9   | -0.045  | 1652.9              |         |
|                     | 1194.6 |          | 1194.6 | 12  | E | 14 | 1555.8   |         | 778.42              | +0.2196 |
|                     | 1309.6 |          | 1309.6 | 13  | D | 13 | 1426.8   | -0.134  | 1426.8              |         |
|                     | 1406.7 |          | 1406.7 | 14  | P | 12 | 1311.8   |         | 1311.8              |         |
|                     | 1505.7 |          | 1505.7 | 15  | V | 11 | 1214.7   |         | 607.86              | -0.434  |
|                     | 1604.8 | -0.146   | 1604.8 | 16  | V | 10 | 1115.6   | +0.0963 | 1115.6              |         |
|                     | 1675.9 |          | 1675.9 | 17  | A | 9  | 1016.6   | +0.0754 | 1016.6              |         |
|                     | 1788.9 |          | 1788.9 | 18  | L | 8  | 945.54   | +0.1563 | 945.54              |         |
|                     | 1888   | -0.14    | 1888   | 19  | V | 7  | 832.45   | -0.001  | 416.73              | -0.456  |
|                     | 1945   | -0.244   | 1945   | 20  | G | 6  | 733.38   | -0.002  | 733.38              |         |
|                     | 2046.1 |          | 2046.1 | 21  | T | 5  | 676.36   |         | 676.36              |         |
| -0.467              | 1081.1 |          | 2161.1 | 22  | D | 4  | 575.31   |         | 575.31              |         |
|                     | 2232.1 |          | 2232.1 | 23  | A | 3  | 460.29   | +0.0289 | 460.29              |         |
|                     | 2333.2 |          | 2333.2 | 24  | T | 2  | 389.25   |         | 389.25              |         |
|                     | 2446.3 |          | 2446.3 | 25  | L | 1  | 288.2    |         | 288.2               |         |
|                     |        |          |        | 26  | R | 0  | 175.12   |         | 175.12              |         |

general information

|                       |             |
|-----------------------|-------------|
| Annotation:           | 18 of 26    |
| AminoAcids Coverage:  | 69 %        |
| Intensity Coverage:   | 59 %        |
| Peak Coverage:        | 43 %        |
| Protein Localisation: | 242 ... 267 |

Scan number 5999 Raw file LNCAP\_Silac\_23F10\_set1\_01  
 Method ITMS; CID Pepti... 190.55

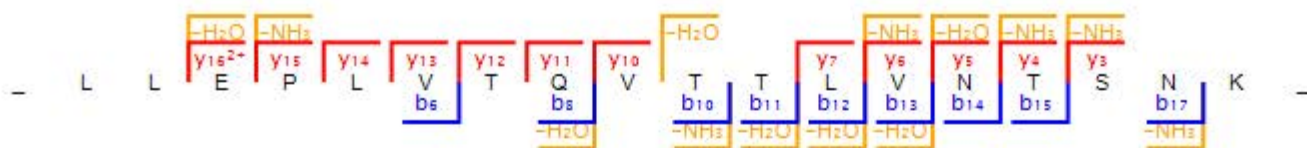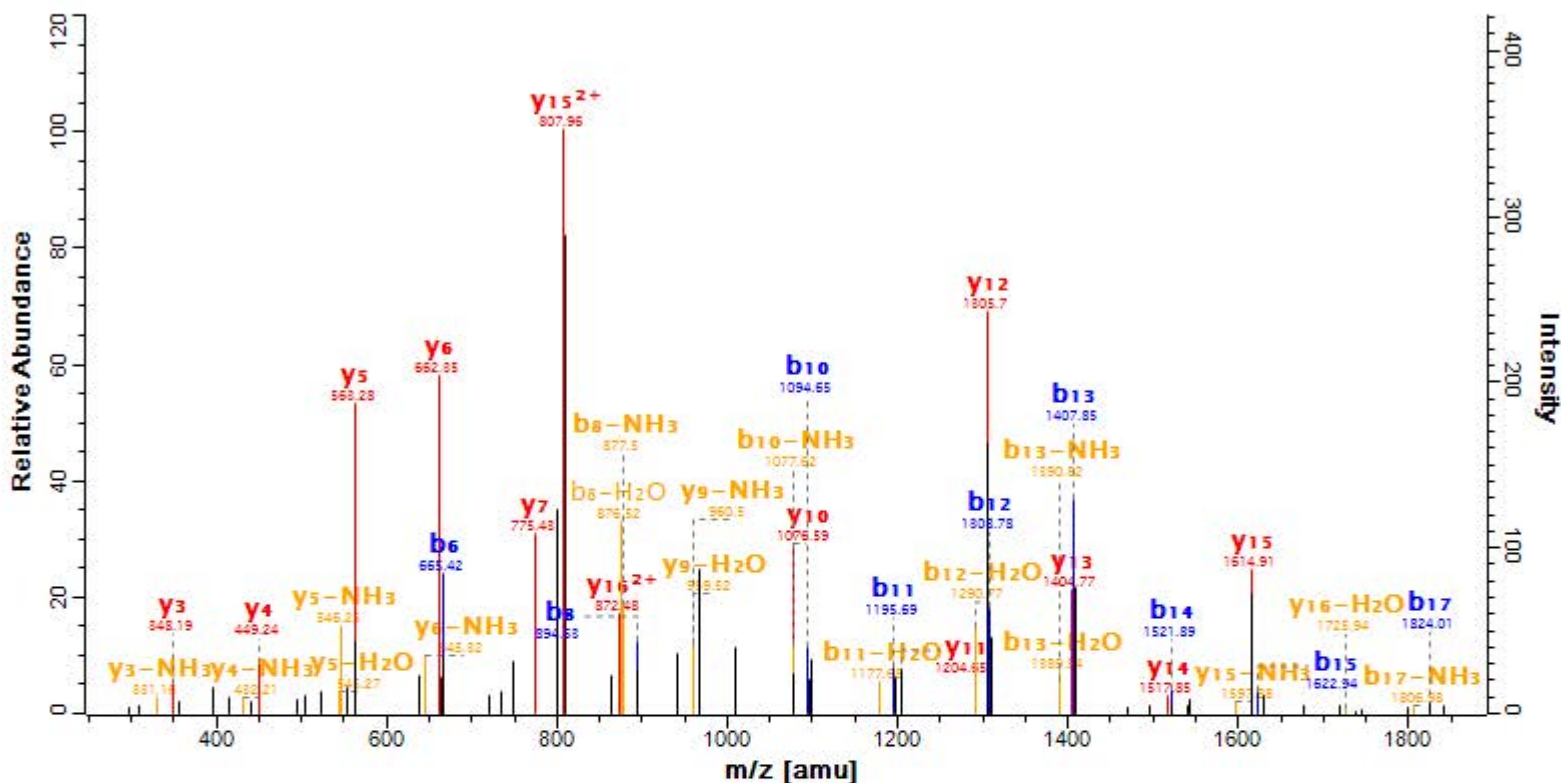

#### precursor information

|                   |                 |
|-------------------|-----------------|
| Mass:             | 1969.10992      |
| m/z:              | 985.56224       |
| Charge:           | 2+              |
| Retentiontime:    | 59.009738922119 |
| Score:            | 190.5502        |
| Mass Error [ppm]: | 0.18553         |
| PEP:              | 1.0163E-34      |
| Precursor Type:   | MULTI           |

| b ion     |          |     |   |          | y ion    |           | y <sup>2+</sup> ion |  |
|-----------|----------|-----|---|----------|----------|-----------|---------------------|--|
| Δ dalton  | mass     | seq |   | Δ dalton | mass     | Δ dalton  | mass                |  |
|           | 114.0913 | 1   | L | 17       |          |           |                     |  |
|           | 227.1754 | 2   | L | 16       | 1857.033 | 1857.033  |                     |  |
|           | 356.218  | 3   | E | 15       | 1743.949 | 872.478   | +0.152258           |  |
|           | 453.2708 | 4   | P | 14       | 1614.906 | -0.14915  | 807.9567            |  |
|           | 566.3548 | 5   | L | 13       | 1517.853 | +0.236251 | 1517.853            |  |
| +0.028177 | 665.4232 | 6   | V | 12       | 1404.769 | -0.0299   | 1404.769            |  |
|           | 766.4709 | 7   | T | 11       | 1305.701 | -0.06501  | 1305.701            |  |
| -0.07906  | 894.5295 | 8   | Q | 10       | 1204.653 | -0.04492  | 1204.653            |  |
|           | 993.5979 | 9   | V | 9        | 1076.595 | +0.010976 | 1076.595            |  |
| -0.06234  | 1094.646 | 10  | T | 8        | 977.5262 |           | 977.5262            |  |
| -0.05997  | 1195.693 | 11  | T | 7        | 876.4785 |           | 876.4785            |  |
| -0.09325  | 1308.777 | 12  | L | 6        | 775.4308 | +0.061588 | 775.4308            |  |
| -0.05778  | 1407.846 | 13  | V | 5        | 662.3468 | -0.00242  | 662.3468            |  |
| +0.026368 | 1521.889 | 14  | N | 4        | 563.2784 | +0.140701 | 563.2784            |  |
| +0.102835 | 1622.936 | 15  | T | 3        | 449.2354 | +0.0752   | 449.2354            |  |
|           | 1709.968 | 16  | S | 2        | 348.1878 | +0.100814 | 348.1878            |  |
| +0.260057 | 1824.011 | 17  | N | 1        | 261.1557 |           | 261.1557            |  |
|           |          | 18  | K | 0        | 147.1128 |           | 147.1128            |  |

#### general information

|                       |           |
|-----------------------|-----------|
| Annotation:           | 15 of 18  |
| AminoAcids Coverage:  | 83 %      |
| Intensity Coverage:   | 59 %      |
| Peak Coverage:        | 42 %      |
| Protein Localisation: | 61 ... 78 |



Scan number 659 Raw file LNCAP\_Silac\_23F10\_set1\_01  
 Method ITMS; CID Pepti... 113.73

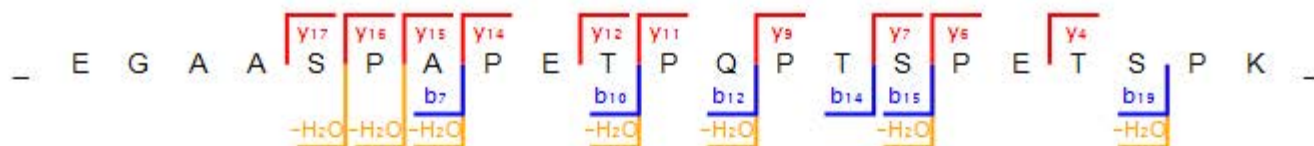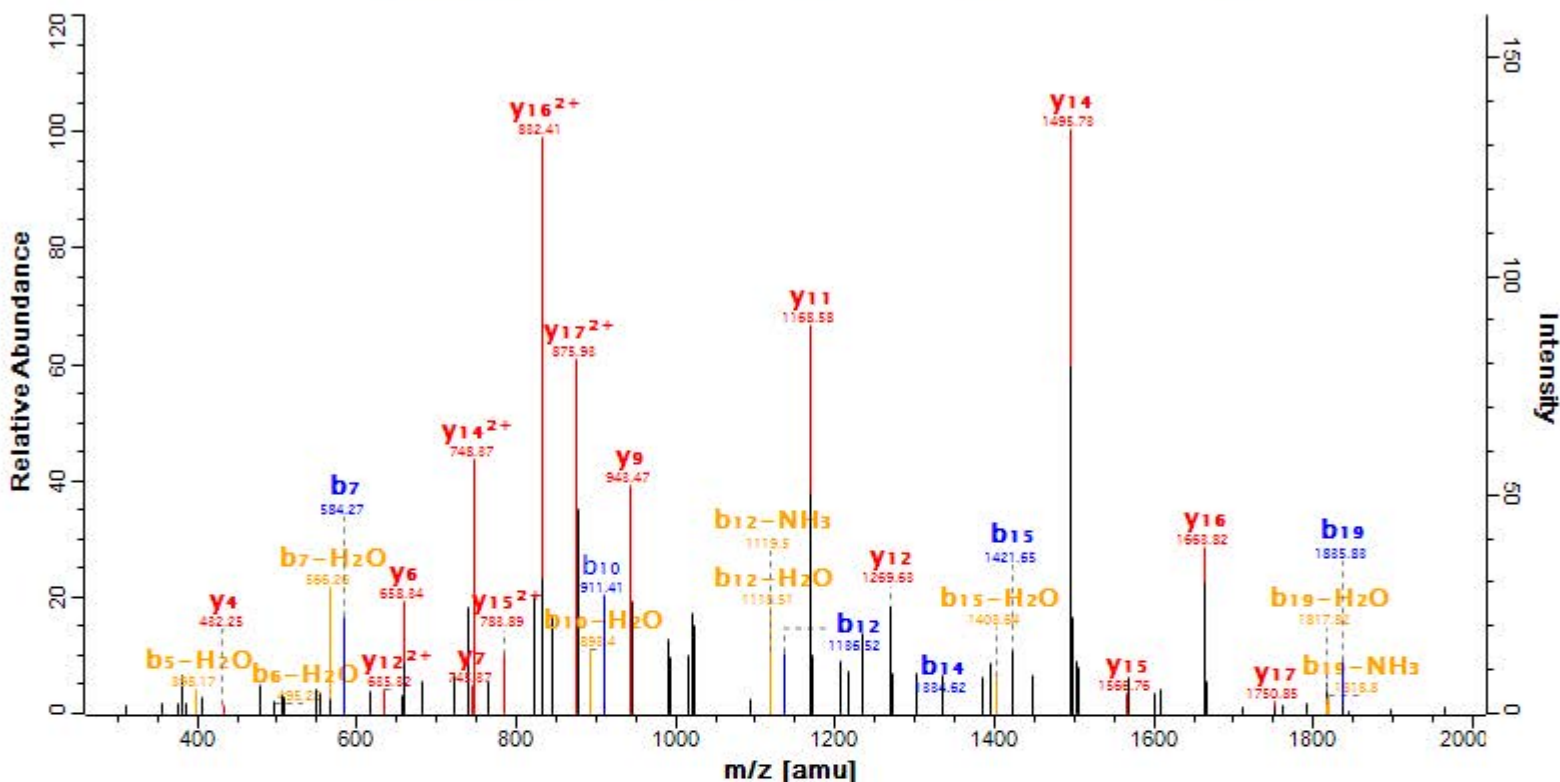

precursor information

|                   |                 |
|-------------------|-----------------|
| Mass:             | 2077.98073      |
| m/z:              | 1039.99764      |
| Charge:           | 2+              |
| Retentiontime:    | 10.844576835632 |
| Score:            | 113.7346        |
| Mass Error [ppm]: | 0.16335         |
| PEP:              | 2.5537E-09      |
| Precursor Type:   | MULTI           |

| b ion     |          |    |     |    | y ion    |           | y <sup>2+</sup> ion |           |
|-----------|----------|----|-----|----|----------|-----------|---------------------|-----------|
| Δ dalton  | mass     |    | seq |    | Δ dalton | mass      | Δ dalton            | mass      |
|           | 130.0499 | 1  | E   | 20 |          |           |                     |           |
|           | 187.0713 | 2  | G   | 19 | 1949.945 |           | 1949.945            |           |
|           | 258.1084 | 3  | A   | 18 | 1892.924 |           | 1892.924            |           |
|           | 329.1456 | 4  | A   | 17 | 1821.886 |           | 1821.886            |           |
|           | 416.1776 | 5  | S   | 16 | 1750.849 | -0.23549  | 875.9283            | -0.07787  |
|           | 513.2304 | 6  | P   | 15 | 1663.817 | -0.03342  | 832.4123            | +0.316443 |
| -1.1E-05  | 584.2675 | 7  | A   | 14 | 1566.765 | +0.069147 | 783.8859            | +0.185476 |
|           | 681.3202 | 8  | P   | 13 | 1495.727 | +0.023985 | 748.3674            | +0.272637 |
|           | 810.3628 | 9  | E   | 12 | 1398.675 |           | 1398.675            |           |
| -0.11875  | 911.4105 | 10 | T   | 11 | 1269.632 | -0.31987  | 635.3197            | +0.08948  |
|           | 1008.463 | 11 | P   | 10 | 1168.584 | +0.051787 | 1168.584            |           |
| -0.07665  | 1136.522 | 12 | Q   | 9  | 1071.532 |           | 1071.532            |           |
|           | 1233.575 | 13 | P   | 8  | 943.4731 | -0.09481  | 943.4731            |           |
| -0.21213  | 1334.622 | 14 | T   | 7  | 846.4203 |           | 846.4203            |           |
| +0.136579 | 1421.654 | 15 | S   | 6  | 745.3727 | +0.161153 | 745.3727            |           |
|           | 1518.707 | 16 | P   | 5  | 658.3406 | +0.112554 | 658.3406            |           |
|           | 1647.75  | 17 | E   | 4  | 561.2879 |           | 561.2879            |           |
|           | 1748.797 | 18 | T   | 3  | 432.2453 | +0.28982  | 432.2453            |           |
| -0.08402  | 1835.829 | 19 | S   | 2  | 331.1976 |           | 331.1976            |           |
|           | 1932.882 | 20 | P   | 1  | 244.1656 |           | 244.1656            |           |
|           |          | 21 | K   | 0  | 147.1128 |           | 147.1128            |           |

general information

|                       |             |
|-----------------------|-------------|
| Annotation:           | 14 of 21    |
| AminoAcids Coverage:  | 67 %        |
| Intensity Coverage:   | 52 %        |
| Peak Coverage:        | 31 %        |
| Protein Localisation: | 372 ... 392 |

Scan number 705 Raw file LNCAP\_Silac\_23F10\_set1\_01  
 Method ITMS; CID Pepti... 282.49

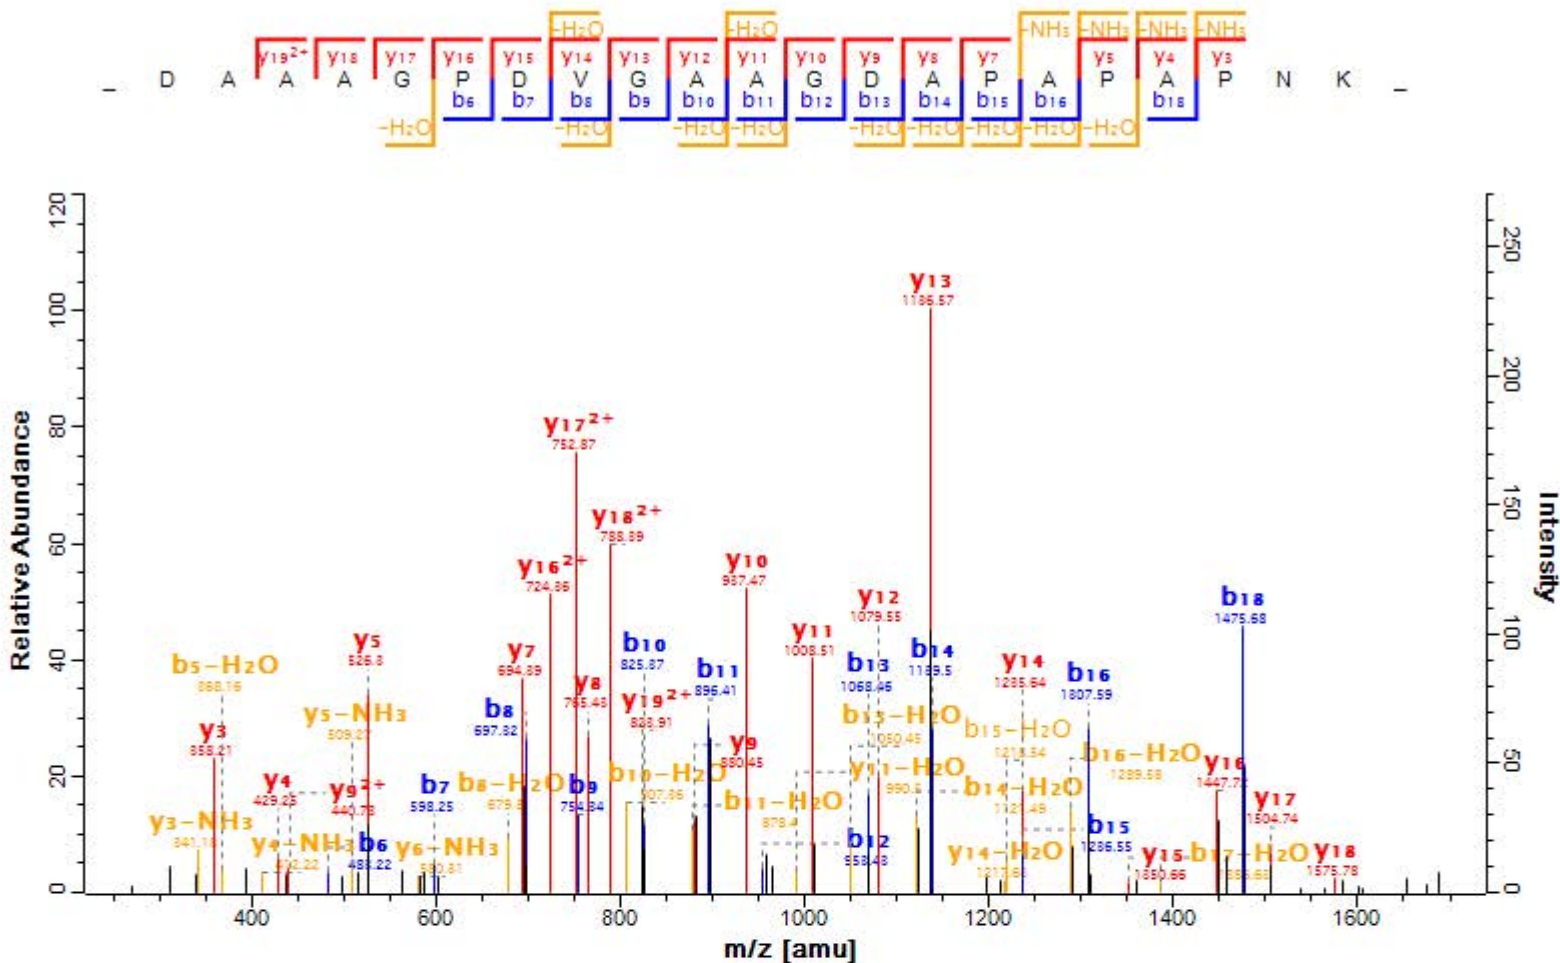

precursor information

|                   |                 |
|-------------------|-----------------|
| Mass:             | 1831.8704       |
| m/z:              | 916.94247       |
| Charge:           | 2+              |
| Retentiontime:    | 11.308469772338 |
| Score:            | 282.4875        |
| Mass Error [ppm]: | 0.1866          |
| PEP:              | 1.9525E-112     |
| Precursor Type:   | MULTI           |

general information

|                       |           |
|-----------------------|-----------|
| Annotation:           | 17 of 21  |
| AminoAcids Coverag    | 81 %      |
| Intensity Coverage:   | 74 %      |
| Peak Coverage:        | 52 %      |
| Protein Localisation: | 33 ... 53 |

| b ion           |          |     |   | y ion           |          |                 | y <sup>2+</sup> ion |           |
|-----------------|----------|-----|---|-----------------|----------|-----------------|---------------------|-----------|
| $\Delta$ dalton | mass     | seq |   | $\Delta$ dalton | mass     | $\Delta$ dalton | mass                |           |
|                 | 116.0342 | 1   | D | 20              |          |                 |                     |           |
|                 | 187.0713 | 2   | A | 19              | 1717.85  |                 | 1717.85             |           |
|                 | 258.1084 | 3   | A | 18              | 1646.813 | 823.9103        | -0.07898            |           |
|                 | 329.1456 | 4   | A | 17              | 1575.776 | -0.01066        | 788.3917            | +0.114873 |
|                 | 386.167  | 5   | G | 16              | 1504.739 | -0.16458        | 752.8732            | +0.229927 |
| +0.169311       | 483.2198 | 6   | P | 15              | 1447.718 | -0.00115        | 724.3624            | +0.2337   |
| +0.044589       | 598.2467 | 7   | D | 14              | 1350.665 | +0.09458        | 1350.665            |           |
| +0.031962       | 697.3151 | 8   | V | 13              | 1235.638 | -0.02594        | 1235.638            |           |
| -0.07318        | 754.3366 | 9   | G | 12              | 1136.569 | -0.05262        | 1136.569            |           |
| +0.089473       | 825.3737 | 10  | A | 11              | 1079.548 | -0.08767        | 1079.548            |           |
| -0.01618        | 896.4108 | 11  | A | 10              | 1008.511 | -0.25435        | 1008.511            |           |
| -0.0111         | 953.4323 | 12  | G | 9               | 937.4738 | -0.04994        | 937.4738            |           |
| -0.20399        | 1068.459 | 13  | D | 8               | 880.4523 | +0.097436       | 440.7298            | -0.43011  |
| -0.00734        | 1139.496 | 14  | A | 7               | 765.4254 | +0.148976       | 765.4254            |           |
| +0.060254       | 1236.549 | 15  | P | 6               | 694.3883 | +0.040887       | 694.3883            |           |
| -0.04705        | 1307.586 | 16  | A | 5               | 597.3355 |                 | 597.3355            |           |
|                 | 1404.639 | 17  | P | 4               | 526.2984 | +0.006192       | 526.2984            |           |
| -0.06491        | 1475.676 | 18  | A | 3               | 429.2456 | +0.063473       | 429.2456            |           |
|                 | 1572.729 | 19  | P | 2               | 358.2085 | +0.049561       | 358.2085            |           |
|                 | 1686.772 | 20  | N | 1               | 261.1557 |                 | 261.1557            |           |
|                 |          | 21  | K | 0               | 147.1128 |                 | 147.1128            |           |

Scan number 7163 Raw file LNCAP\_Silac\_23F10\_set1\_01  
 Method ITMS; CID Pepti... 109.22

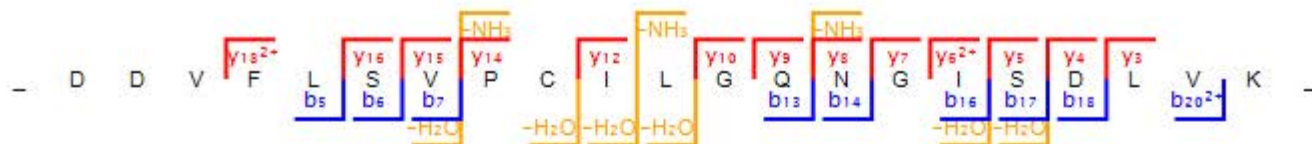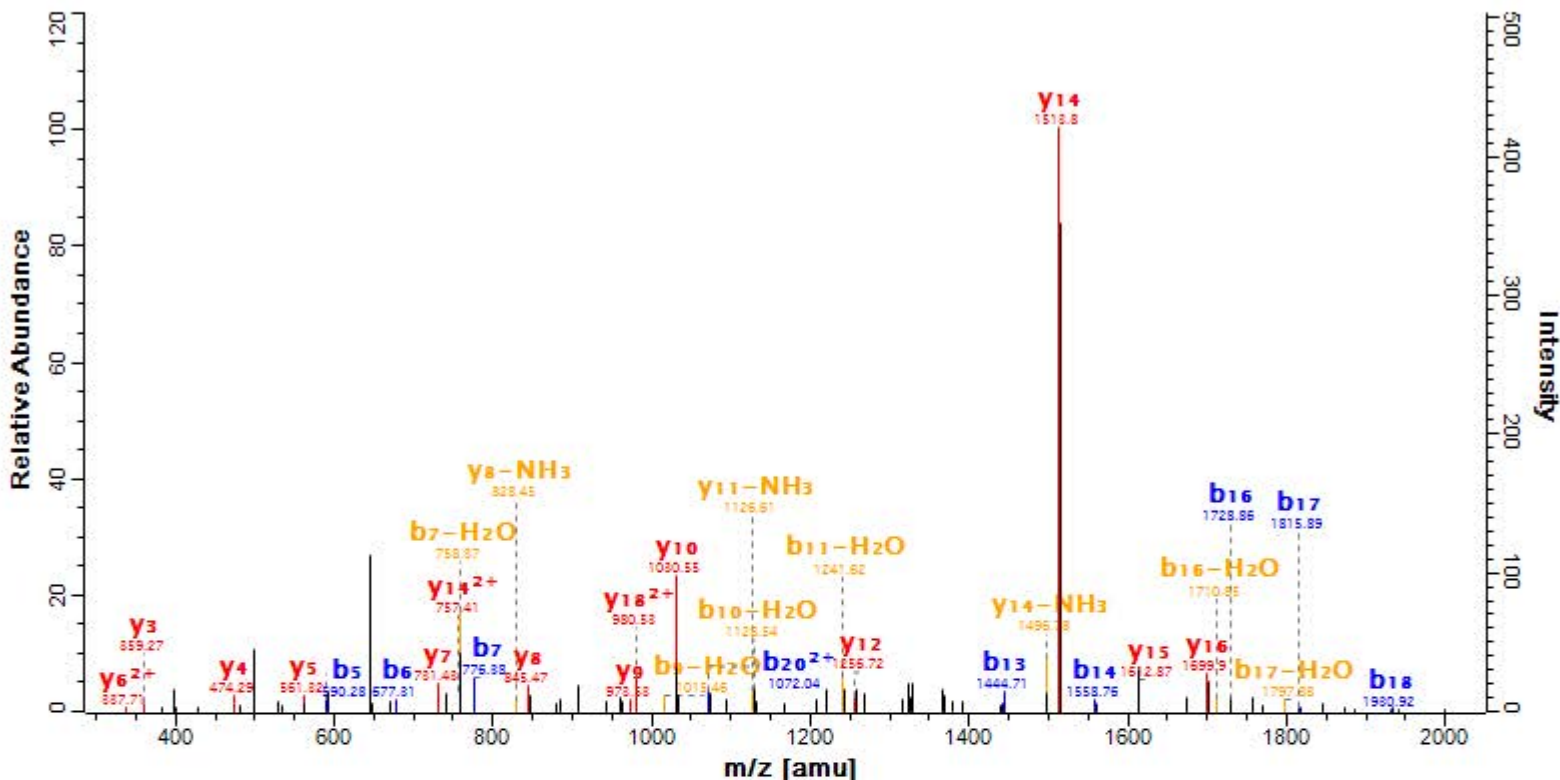

**precursor information**

|                   |                 |
|-------------------|-----------------|
| Mass:             | 2288.17084      |
| m/z:              | 1145.09269      |
| Charge:           | 2+              |
| Retentiontime:    | 71.462028503418 |
| Score:            | 109.221         |
| Mass Error [ppm]: | -0.61112        |
| PEP:              | 4.6165E-09      |
| Precursor Type:   | MULTI           |

| b <sup>2+</sup> ion |        | b ion    |        | seq |   |    | y ion    |         | y <sup>2+</sup> ion |         |
|---------------------|--------|----------|--------|-----|---|----|----------|---------|---------------------|---------|
| Δ dalton            | mass   | Δ dalton | mass   |     |   |    | Δ dalton | mass    | Δ dalton            | mass    |
|                     | 116.03 |          | 116.03 | 1   | D | 20 |          |         |                     |         |
|                     | 231.06 |          | 231.06 | 2   | D | 19 | 2174.2   |         | 2174.2              |         |
|                     | 330.13 |          | 330.13 | 3   | V | 18 | 2059.1   |         | 2059.1              |         |
|                     | 477.2  |          | 477.2  | 4   | F | 17 | 1960.1   |         | 980.53              | +0.392  |
|                     | 590.28 | +0.065   | 590.28 | 5   | L | 16 | 1813     |         | 1813                |         |
|                     | 677.31 | -0.161   | 677.31 | 6   | S | 15 | 1699.9   | -0.119  | 1699.9              |         |
|                     | 776.38 | +0.0875  | 776.38 | 7   | V | 14 | 1612.9   | -0.209  | 1612.9              |         |
|                     | 873.44 |          | 873.44 | 8   | P | 13 | 1513.8   | +0.0071 | 757.41              | +0.2357 |
|                     | 1033.5 |          | 1033.5 | 9   | C | 12 | 1416.8   |         | 1416.8              |         |
|                     | 1146.5 |          | 1146.5 | 10  | I | 11 | 1256.7   | +0.0332 | 1256.7              |         |
|                     | 1259.6 |          | 1259.6 | 11  | L | 10 | 1143.6   |         | 1143.6              |         |
|                     | 1316.7 |          | 1316.7 | 12  | G | 9  | 1030.6   | -0.039  | 1030.6              |         |
|                     | 1444.7 | +0.3625  | 1444.7 | 13  | Q | 8  | 973.53   | +0.2695 | 973.53              |         |
|                     | 1558.8 | +0.2832  | 1558.8 | 14  | N | 7  | 845.47   | +0.0112 | 845.47              |         |
|                     | 1615.8 |          | 1615.8 | 15  | G | 6  | 731.43   | +0.0019 | 731.43              |         |
|                     | 1728.9 | -0.083   | 1728.9 | 16  | I | 5  | 674.41   |         | 337.71              | -0.364  |
|                     | 1815.9 | -0.099   | 1815.9 | 17  | S | 4  | 561.32   | +0.1499 | 561.32              |         |
|                     | 1930.9 | -0.425   | 1930.9 | 18  | D | 3  | 474.29   | -0.026  | 474.29              |         |
|                     | 2044   |          | 2044   | 19  | L | 2  | 359.27   | +0.4154 | 359.27              |         |
| +0.3577             | 1072   |          | 2143.1 | 20  | V | 1  | 246.18   |         | 246.18              |         |
|                     |        |          |        | 21  | K | 0  | 147.11   |         | 147.11              |         |

**general information**

|                       |             |
|-----------------------|-------------|
| Annotation:           | 18 of 21    |
| AminoAcids Coverag    | 86 %        |
| Intensity Coverage:   | 43 %        |
| Peak Coverage:        | 32 %        |
| Protein Localisation: | 314 ... 334 |

Scan number 887 Raw file LNCAP\_Silac\_23F10\_set1\_01  
 Method ITMS; CID Pepti... 155.71

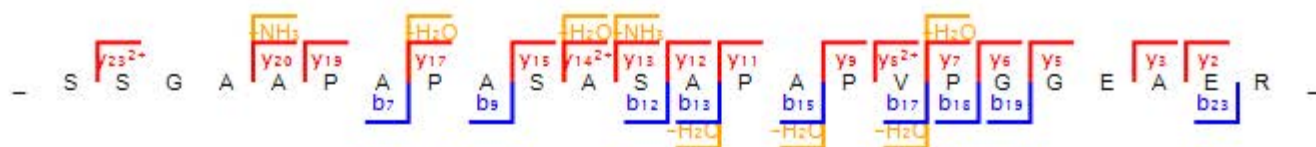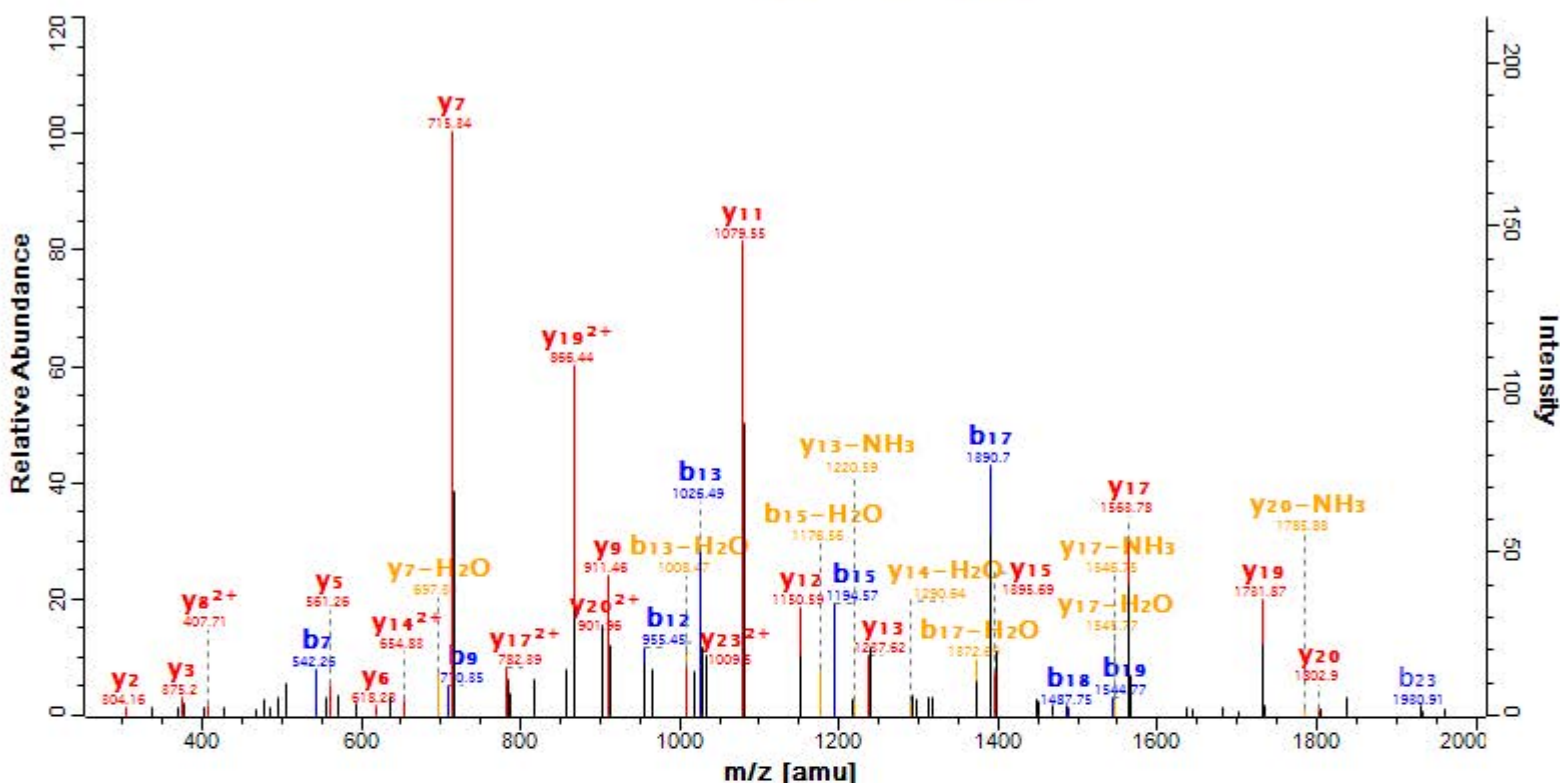

#### precursor information

|                   |                 |
|-------------------|-----------------|
| Mass:             | 2104.01877      |
| m/z:              | 1053.01666      |
| Charge:           | 2+              |
| Retentiontime:    | 13.157961845397 |
| Score:            | 155.7071        |
| Mass Error [ppm]: | 0.12388         |
| PEP:              | 5.6525E-31      |
| Precursor Type:   | MULTI           |

| b ion           |          |     |   | y ion           |          | y <sup>2+</sup> ion |                    |
|-----------------|----------|-----|---|-----------------|----------|---------------------|--------------------|
| $\Delta$ dalton | mass     | seq |   | $\Delta$ dalton | mass     | $\Delta$ dalton     | mass               |
|                 | 88.0393  | 1   | S | 23              |          |                     |                    |
|                 | 175.0713 | 2   | S | 22              | 2017.994 |                     | 1009.501 +0.015596 |
|                 | 232.0928 | 3   | G | 21              | 1930.962 |                     | 1930.962           |
|                 | 303.1299 | 4   | A | 20              | 1873.94  |                     | 1873.94            |
|                 | 374.167  | 5   | A | 19              | 1802.903 | +0.3582             | 901.9552 +0.102281 |
|                 | 471.2198 | 6   | P | 18              | 1731.866 | -0.30183            | 866.4367 +0.20409  |
| +0.14007        | 542.2569 | 7   | A | 17              | 1634.813 |                     | 1634.813           |
|                 | 639.3097 | 8   | P | 16              | 1563.776 | -0.12406            | 782.3917 +0.497197 |
| +0.089133       | 710.3468 | 9   | A | 15              | 1466.723 |                     | 1466.723           |
|                 | 797.3788 | 10  | S | 14              | 1395.686 | -0.03516            | 1395.686           |
|                 | 868.4159 | 11  | A | 13              | 1308.654 |                     | 654.8308 -0.1758   |
| +0.064623       | 955.448  | 12  | S | 12              | 1237.617 | -0.09932            | 1237.617           |
| +0.052045       | 1026.485 | 13  | A | 11              | 1150.585 | +0.080415           | 1150.585           |
|                 | 1123.538 | 14  | P | 10              | 1079.548 | -0.02053            | 1079.548           |
| -0.09496        | 1194.575 | 15  | A | 9               | 982.4952 |                     | 982.4952           |
|                 | 1291.628 | 16  | P | 8               | 911.4581 | +0.107919           | 911.4581           |
| -0.15108        | 1390.696 | 17  | V | 7               | 814.4054 |                     | 407.7063 +0.100934 |
| -0.12278        | 1487.749 | 18  | P | 6               | 715.3369 | +0.06302            | 715.3369           |
| -0.00838        | 1544.77  | 19  | G | 5               | 618.2842 | +0.085083           | 618.2842           |
|                 | 1601.792 | 20  | G | 4               | 561.2627 | -0.02529            | 561.2627           |
|                 | 1730.834 | 21  | E | 3               | 504.2413 |                     | 504.2413           |
|                 | 1801.872 | 22  | A | 2               | 375.1987 | +0.259349           | 375.1987           |
| -0.31023        | 1930.914 | 23  | E | 1               | 304.1615 | +0.2397             | 304.1615           |
|                 |          | 24  | R | 0               | 175.119  |                     | 175.119            |

#### general information

|                       |            |
|-----------------------|------------|
| Annotation:           | 20 of 24   |
| AminoAcids Coverage:  | 83 %       |
| Intensity Coverage:   | 58 %       |
| Peak Coverage:        | 37 %       |
| Protein Localisation: | 92 ... 115 |

Scan number 906 Raw file LNCAP\_Silac\_23F10\_set1\_01  
 Method ITMS; CID Pepti... 85.86

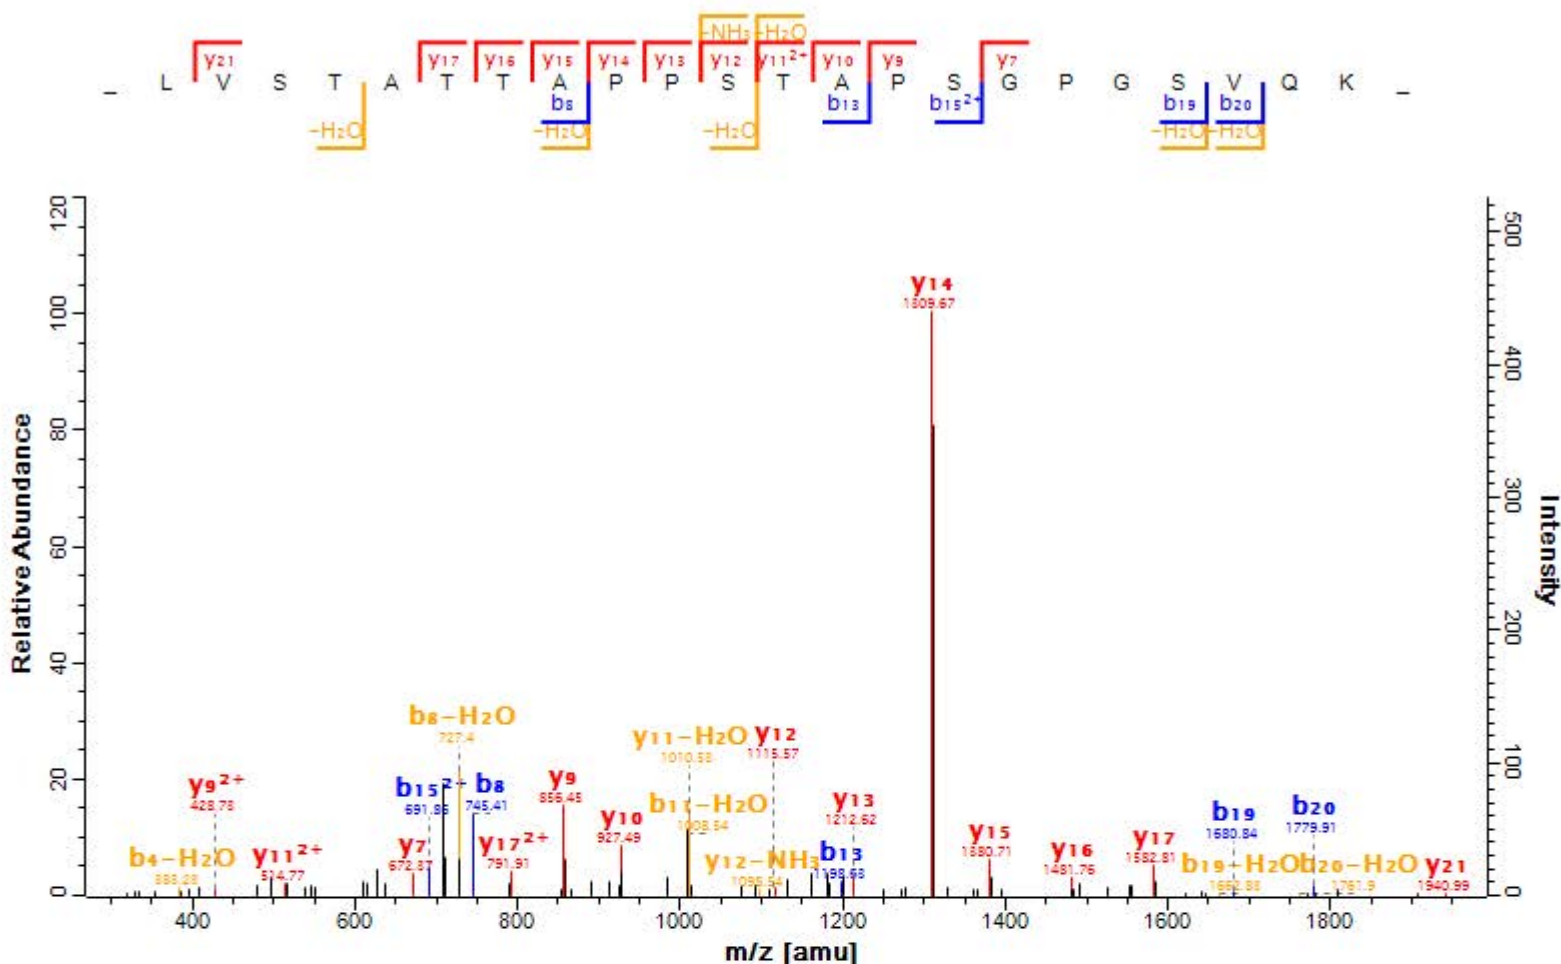

**precursor information**

|                   |                 |
|-------------------|-----------------|
| Mass:             | 2053.06943      |
| m/z:              | 1027.54199      |
| Charge:           | 2+              |
| Retentiontime:    | 13.351268768310 |
| Score:            | 85.85516        |
| Mass Error [ppm]: | 0.13556         |
| PEP:              | 3.952E-05       |
| Precursor Type:   | MULTI           |

**general information**

|                       |             |
|-----------------------|-------------|
| Annotation:           | 15 of 22    |
| AminoAcids Coverage:  | 68 %        |
| Intensity Coverage:   | 49 %        |
| Peak Coverage:        | 28 %        |
| Protein Localisation: | 621 ... 642 |

| b <sup>2+</sup> ion |        | b ion    |        | seq |   |    | y ion    |         | y <sup>2+</sup> ion |         |
|---------------------|--------|----------|--------|-----|---|----|----------|---------|---------------------|---------|
| Δ dalton            | mass   | Δ dalton | mass   |     |   |    | Δ dalton | mass    | Δ dalton            | mass    |
|                     | 114.09 |          | 114.09 | 1   | L | 21 |          |         |                     |         |
|                     | 213.16 |          | 213.16 | 2   | V | 20 | 1941     | -0.085  | 1941                |         |
|                     | 300.19 |          | 300.19 | 3   | S | 19 | 1841.9   |         | 1841.9              |         |
|                     | 401.24 |          | 401.24 | 4   | T | 18 | 1754.9   |         | 1754.9              |         |
|                     | 472.28 |          | 472.28 | 5   | A | 17 | 1653.8   |         | 1653.8              |         |
|                     | 573.32 |          | 573.32 | 6   | T | 16 | 1582.8   | +0.0415 | 791.91              | -0.274  |
|                     | 674.37 |          | 674.37 | 7   | T | 15 | 1481.8   | -0.02   | 1481.8              |         |
|                     | 745.41 | -0.013   | 745.41 | 8   | A | 14 | 1380.7   | -0.081  | 1380.7              |         |
|                     | 842.46 |          | 842.46 | 9   | P | 13 | 1309.7   | -0.055  | 1309.7              |         |
|                     | 939.51 |          | 939.51 | 10  | P | 12 | 1212.6   | +0.0981 | 1212.6              |         |
|                     | 1026.5 |          | 1026.5 | 11  | S | 11 | 1115.6   | +0.4261 | 1115.6              |         |
|                     | 1127.6 |          | 1127.6 | 12  | T | 10 | 1028.5   |         | 514.77              | +0.0418 |
|                     | 1198.6 | -0.034   | 1198.6 | 13  | A | 9  | 927.49   | -0.031  | 927.49              |         |
|                     | 1295.7 |          | 1295.7 | 14  | P | 8  | 856.45   | +0.0047 | 428.73              | -0.458  |
| -0.486              | 691.86 |          | 1382.7 | 15  | S | 7  | 759.4    |         | 759.4               |         |
|                     | 1439.7 |          | 1439.7 | 16  | G | 6  | 672.37   | -0.002  | 672.37              |         |
|                     | 1536.8 |          | 1536.8 | 17  | P | 5  | 615.35   |         | 615.35              |         |
|                     | 1593.8 |          | 1593.8 | 18  | G | 4  | 518.29   |         | 518.29              |         |
|                     | 1680.8 | -0.061   | 1680.8 | 19  | S | 3  | 461.27   |         | 461.27              |         |
|                     | 1779.9 | +0.394   | 1779.9 | 20  | V | 2  | 374.24   |         | 374.24              |         |
|                     | 1908   |          | 1908   | 21  | Q | 1  | 275.17   |         | 275.17              |         |
|                     |        |          |        | 22  | K | 0  | 147.11   |         | 147.11              |         |

Scan number 10193 Raw file LNCAP\_Silac\_23F10\_set1\_02  
 Method ITMS; CID Pepti... 362.73

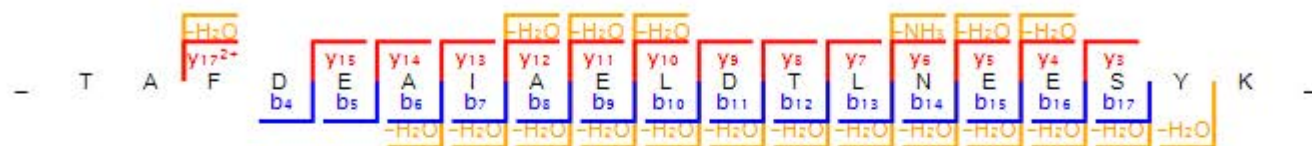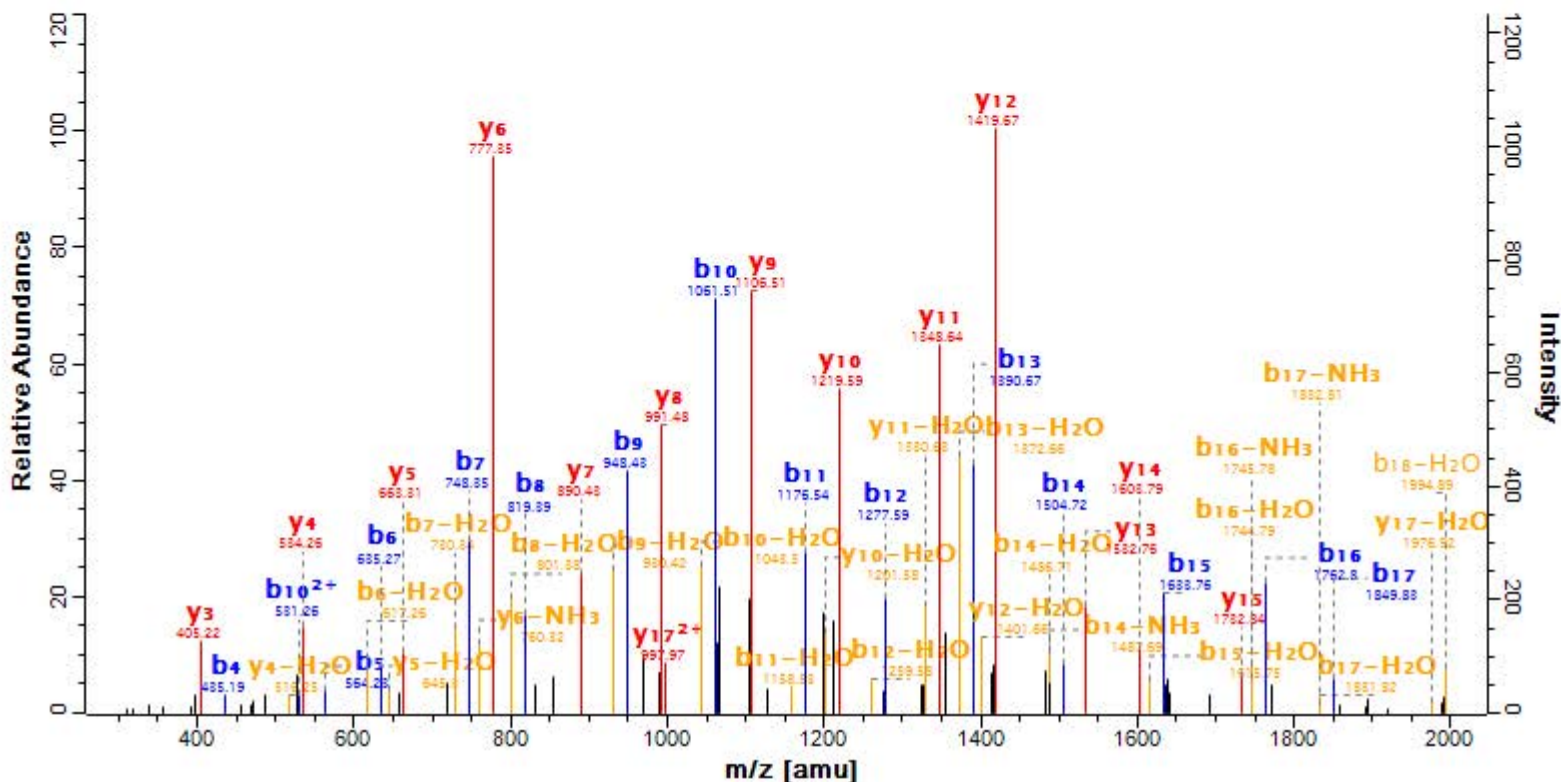

#### precursor information

|                   |                 |
|-------------------|-----------------|
| Mass:             | 2157.99517      |
| m/z:              | 1080.00486      |
| Charge:           | 2+              |
| Retentiontime:    | 62.228397369384 |
| Score:            | 362.7282        |
| Mass Error [ppm]: | -0.093663       |
| PEP:              | 5.5672E-189     |
| Precursor Type:   | MULTI           |

#### general information

|                       |             |
|-----------------------|-------------|
| Annotation:           | 16 of 19    |
| AminoAcids Coverage:  | 84 %        |
| Intensity Coverage:   | 81 %        |
| Peak Coverage:        | 52 %        |
| Protein Localisation: | 196 ... 214 |

| b <sup>2+</sup> ion |        | b ion    |        | seq |   |    | y ion    |         | y <sup>2+</sup> ion |         |
|---------------------|--------|----------|--------|-----|---|----|----------|---------|---------------------|---------|
| Δ dalton            | mass   | Δ dalton | mass   |     |   |    | Δ dalton | mass    | Δ dalton            | mass    |
|                     | 102.05 |          | 102.05 | 1   | T | 18 |          |         |                     |         |
|                     | 173.09 |          | 173.09 | 2   | A | 17 | 2066     |         | 2066                |         |
|                     | 320.16 |          | 320.16 | 3   | F | 16 | 1994.9   |         | 997.97              | +0.1868 |
|                     | 435.19 | +0.0944  | 435.19 | 4   | D | 15 | 1847.9   |         | 1847.9              |         |
|                     | 564.23 | +0.0617  | 564.23 | 5   | E | 14 | 1732.8   | -0.234  | 1732.8              |         |
|                     | 635.27 | +0.0388  | 635.27 | 6   | A | 13 | 1603.8   | -0.09   | 1603.8              |         |
|                     | 748.35 | +0.0404  | 748.35 | 7   | I | 12 | 1532.8   | +0.0376 | 1532.8              |         |
|                     | 819.39 | +0.0301  | 819.39 | 8   | A | 11 | 1419.7   | +0.0052 | 1419.7              |         |
|                     | 948.43 | +0.0566  | 948.43 | 9   | E | 10 | 1348.6   | +0.0289 | 1348.6              |         |
| +0.1135             | 531.26 | -0.093   | 1061.5 | 10  | L | 9  | 1219.6   | +0.1033 | 1219.6              |         |
|                     | 1176.5 | -0.128   | 1176.5 | 11  | D | 8  | 1106.5   | +0.139  | 1106.5              |         |
|                     | 1277.6 | +0.0813  | 1277.6 | 12  | T | 7  | 991.48   | +0.1027 | 991.48              |         |
|                     | 1390.7 | -0.082   | 1390.7 | 13  | L | 6  | 890.43   | +0.2079 | 890.43              |         |
|                     | 1504.7 | -0.083   | 1504.7 | 14  | N | 5  | 777.35   | +0.0815 | 777.35              |         |
|                     | 1633.8 | -0.048   | 1633.8 | 15  | E | 4  | 663.31   | +0.1398 | 663.31              |         |
|                     | 1762.8 | -0.054   | 1762.8 | 16  | E | 3  | 534.26   | +0.0677 | 534.26              |         |
|                     | 1849.8 | -0.1     | 1849.8 | 17  | S | 2  | 405.22   | +0.1416 | 405.22              |         |
|                     | 2012.9 |          | 2012.9 | 18  | Y | 1  | 318.19   |         | 318.19              |         |
|                     |        |          |        | 19  | K | 0  | 155.13   |         | 155.13              |         |

Scan number 10427 Raw file LNCAP\_Silac\_23F10\_set1\_02  
 Method ITMS; CID Pepti... 171.68

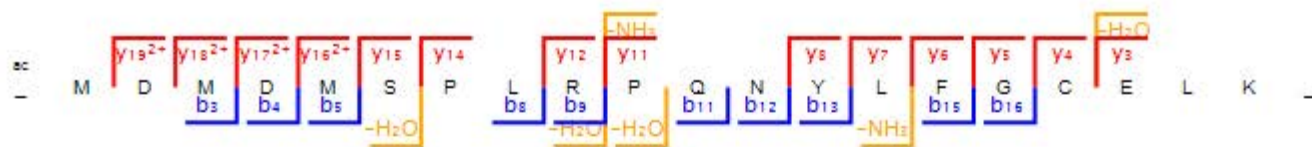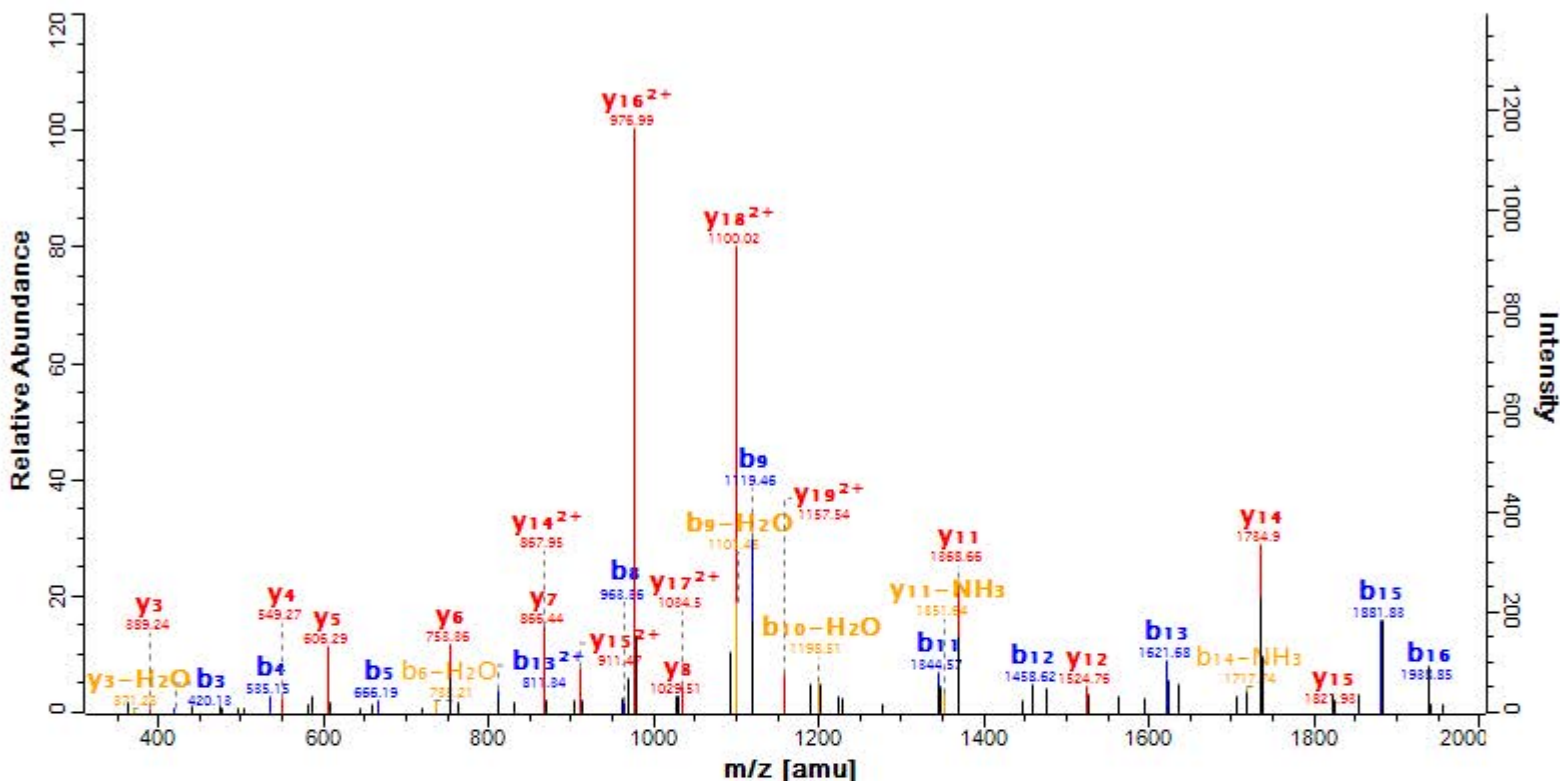

#### precursor information

|                   |                 |
|-------------------|-----------------|
| Mass:             | 2486.10938      |
| m/z:              | 1244.06197      |
| Charge:           | 2+              |
| Retentiontime:    | 63.758819580078 |
| Score:            | 171.6759        |
| Mass Error [ppm]: | -0.34576        |
| PEP:              | 9.487E-36       |
| Precursor Type:   | MULTI           |

| b <sup>2+</sup> ion |        | b ion    |        | seq |   |    | y ion    |         | y <sup>2+</sup> ion |         |
|---------------------|--------|----------|--------|-----|---|----|----------|---------|---------------------|---------|
| Δ dalton            | mass   | Δ dalton | mass   |     |   |    | Δ dalton | mass    | Δ dalton            | mass    |
|                     | 174.06 |          | 174.06 | 1   | M | 19 |          |         |                     |         |
|                     | 289.09 |          | 289.09 | 2   | D | 18 | 2314.1   |         | 1157.5              | +0.1604 |
|                     | 420.13 | -0.079   | 420.13 | 3   | M | 17 | 2199     |         | 1100                | +0.3251 |
|                     | 535.15 | +0.0571  | 535.15 | 4   | D | 16 | 2068     |         | 1034.5              | +0.2727 |
|                     | 666.19 | -0.073   | 666.19 | 5   | M | 15 | 1953     |         | 976.99              | +0.2963 |
|                     | 753.23 |          | 753.23 | 6   | S | 14 | 1821.9   | -0.366  | 911.47              | +0.3203 |
|                     | 850.28 |          | 850.28 | 7   | P | 13 | 1734.9   | -0.043  | 867.95              | +0.2214 |
|                     | 963.36 | +0.0579  | 963.36 | 8   | L | 12 | 1637.8   |         | 1637.8              |         |
|                     | 1119.5 | +0.053   | 1119.5 | 9   | R | 11 | 1524.8   | +0.0259 | 1524.8              |         |
|                     | 1216.5 |          | 1216.5 | 10  | P | 10 | 1368.7   | -0.113  | 1368.7              |         |
|                     | 1344.6 | -0.087   | 1344.6 | 11  | Q | 9  | 1271.6   |         | 1271.6              |         |
|                     | 1458.6 | -0.065   | 1458.6 | 12  | N | 8  | 1143.6   |         | 1143.6              |         |
| +0.03               | 811.34 | -0.101   | 1621.7 | 13  | Y | 7  | 1029.5   | -0.038  | 1029.5              |         |
|                     | 1734.8 |          | 1734.8 | 14  | L | 6  | 866.44   | +0.0491 | 866.44              |         |
|                     | 1881.8 | -0.106   | 1881.8 | 15  | F | 5  | 753.36   | +0.0941 | 753.36              |         |
|                     | 1938.9 | -0.001   | 1938.9 | 16  | G | 4  | 606.29   | +0.134  | 606.29              |         |
|                     | 2098.9 |          | 2098.9 | 17  | C | 3  | 549.27   | +0.1096 | 549.27              |         |
|                     | 2227.9 |          | 2227.9 | 18  | E | 2  | 389.24   | +0.0423 | 389.24              |         |
|                     | 2341   |          | 2341   | 19  | L | 1  | 260.2    |         | 260.2               |         |
|                     |        |          |        | 20  | K | 0  | 147.11   |         | 147.11              |         |

#### general information

|                       |          |
|-----------------------|----------|
| Annotation:           | 17 of 20 |
| AminoAcids Coverage:  | 85 %     |
| Intensity Coverage:   | 62 %     |
| Peak Coverage:        | 34 %     |
| Protein Localisation: | 1 ... 20 |

Scan number 10698 Raw file LNCAP\_Silac\_23F10\_set1\_02  
 Method ITMS; CID Pepti... 141.6

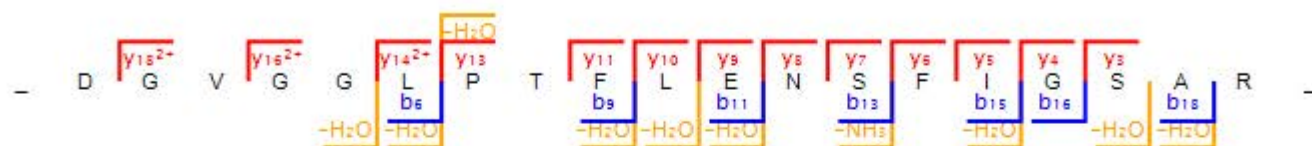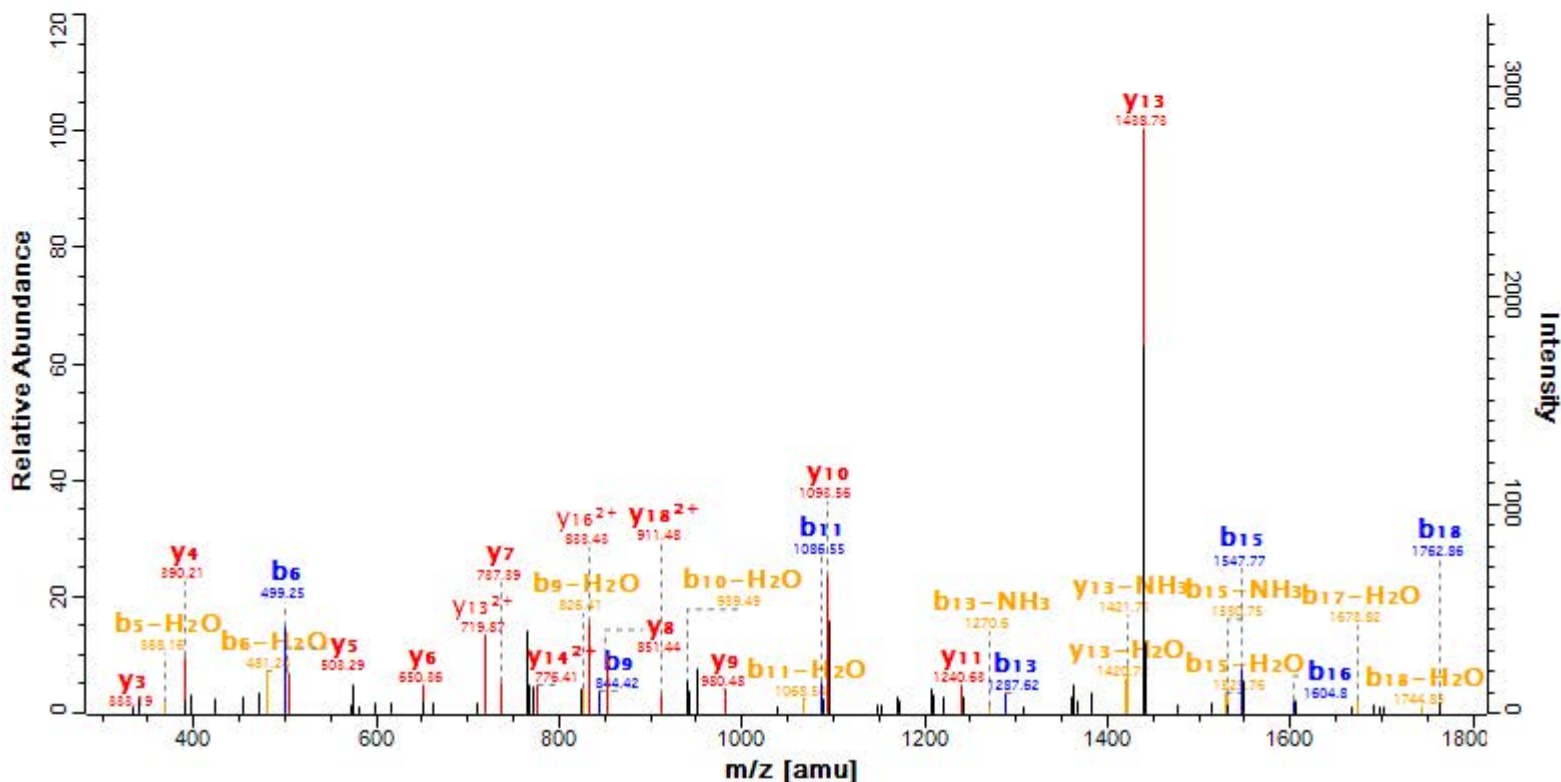

#### precursor information

|                   |                 |
|-------------------|-----------------|
| Mass:             | 1935.96918      |
| m/z:              | 968.99187       |
| Charge:           | 2+              |
| Retentiontime:    | 65.589561462402 |
| Score:            | 141.5988        |
| Mass Error [ppm]: | 0.07294         |
| PEP:              | 8.2978E-19      |
| Precursor Type:   | MULTI           |

#### general information

|                       |             |
|-----------------------|-------------|
| Annotation:           | 15 of 19    |
| AminoAcids Coverage:  | 79 %        |
| Intensity Coverage:   | 54 %        |
| Peak Coverage:        | 37 %        |
| Protein Localisation: | 150 ... 168 |

| b ion     |          |     |   | y ion    |          | y <sup>2+</sup> ion |           |           |
|-----------|----------|-----|---|----------|----------|---------------------|-----------|-----------|
| Δ dalton  | mass     | seq |   | Δ dalton | mass     | Δ dalton            | mass      |           |
|           | 116.0342 | 1   | D | 18       |          |                     |           |           |
|           | 173.0557 | 2   | G | 17       | 1821.949 | 911.4783            | +0.181282 |           |
|           | 272.1241 | 3   | V | 16       | 1764.928 | 1764.928            |           |           |
|           | 329.1456 | 4   | G | 15       | 1665.859 | 833.4334            | +0.245019 |           |
|           | 386.167  | 5   | G | 14       | 1608.838 | 1608.838            |           |           |
| +0.058543 | 499.2511 | 6   | L | 13       | 1551.817 | 776.4119            | +0.191349 |           |
|           | 596.3039 | 7   | P | 12       | 1438.733 | +0.020302           | 719.8699  | +0.200849 |
|           | 697.3515 | 8   | T | 11       | 1341.68  |                     | 1341.68   |           |
| +0.152382 | 844.4199 | 9   | F | 10       | 1240.632 | +0.083025           | 1240.632  |           |
|           | 957.504  | 10  | L | 9        | 1093.564 | +0.01118            | 1093.564  |           |
| -0.06528  | 1086.547 | 11  | E | 8        | 980.4796 | +0.33322            | 980.4796  |           |
|           | 1200.59  | 12  | N | 7        | 851.437  | +0.153035           | 851.437   |           |
| -0.11411  | 1287.622 | 13  | S | 6        | 737.3941 | -0.00796            | 737.3941  |           |
|           | 1434.69  | 14  | F | 5        | 650.362  | -0.05491            | 650.362   |           |
| -0.03661  | 1547.774 | 15  | I | 4        | 503.2936 | +0.053424           | 503.2936  |           |
| -0.20736  | 1604.795 | 16  | G | 3        | 390.2096 | -0.02377            | 390.2096  |           |
|           | 1691.828 | 17  | S | 2        | 333.1881 | +0.037705           | 333.1881  |           |
| -0.20412  | 1762.865 | 18  | A | 1        | 246.1561 |                     | 246.1561  |           |
|           |          | 19  | R | 0        | 175.119  |                     | 175.119   |           |



Scan number 10714 Raw file LNCAP\_Silac\_23F10\_set1\_02  
 Method ITMS: CID Peptide LNCAP\_Silac\_23F10\_set1\_02

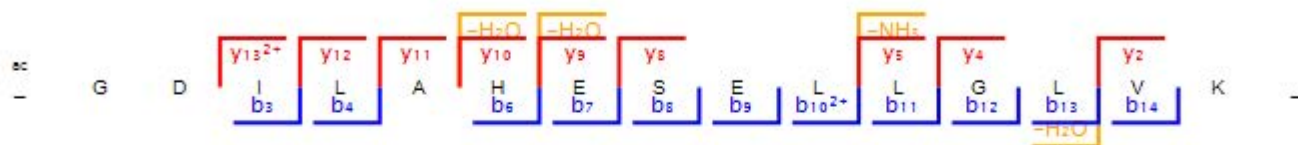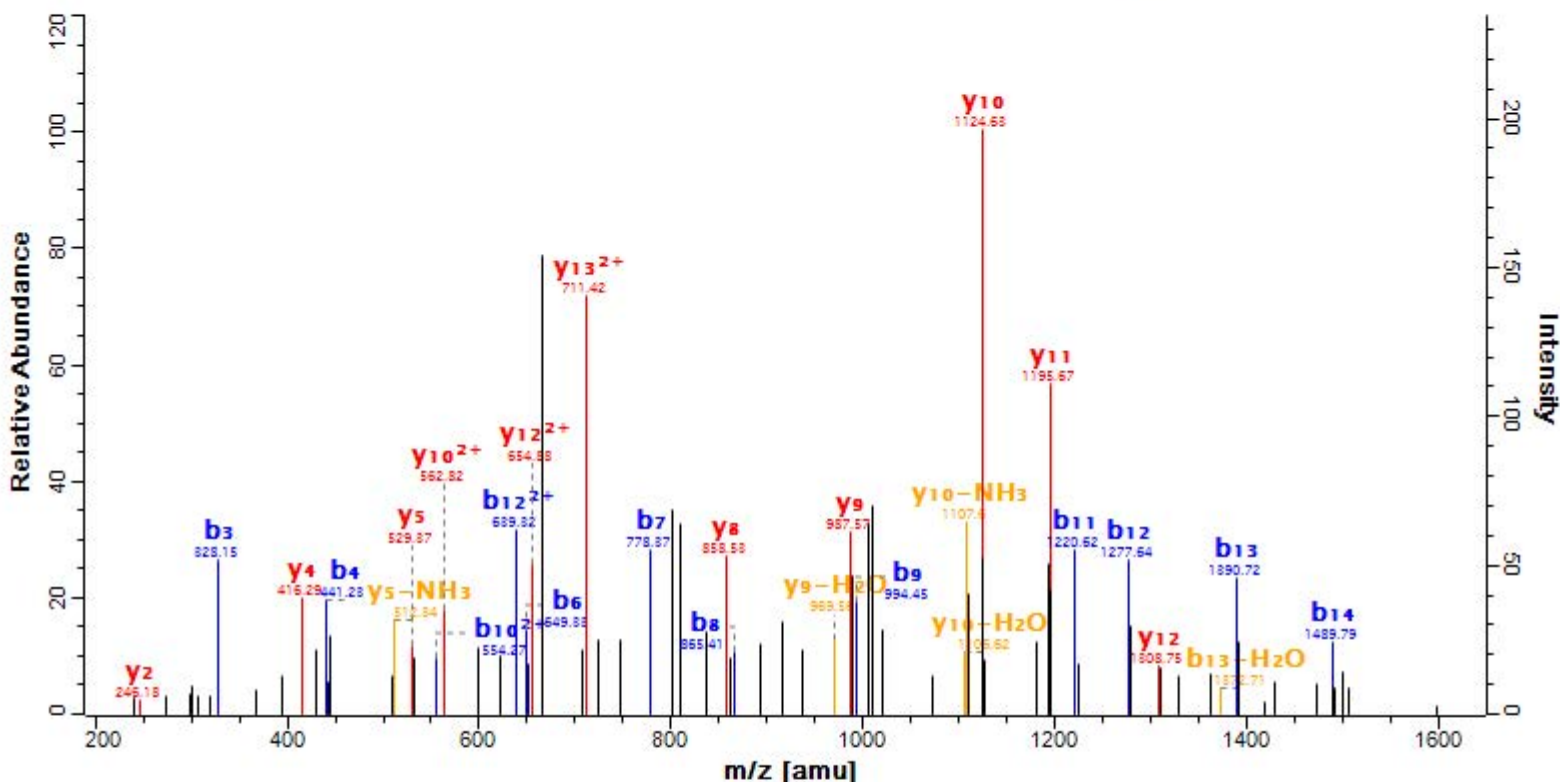

#### precursor information

|                   |                 |
|-------------------|-----------------|
| Mass:             | 1635.85448      |
| m/z:              | 818.93452       |
| Charge:           | 2+              |
| Retentiontime:    | 65.704528808593 |
| Score:            | 156.5997        |
| Mass Error [ppm]: | 0.38229         |
| PEP:              | 1.5278E-45      |
| Precursor Type:   | MULTI           |

#### general information

|                       |          |
|-----------------------|----------|
| Annotation:           | 12 of 15 |
| AminoAcids Coverage:  | 80 %     |
| Intensity Coverage:   | 49 %     |
| Peak Coverage:        | 33 %     |
| Protein Localisation: | 2 ... 16 |

| b <sup>2+</sup> ion |        | b ion    |        | seq |   |    | y ion    |         | y <sup>2+</sup> ion |         |
|---------------------|--------|----------|--------|-----|---|----|----------|---------|---------------------|---------|
| Δ dalton            | mass   | Δ dalton | mass   |     |   |    | Δ dalton | mass    | Δ dalton            | mass    |
|                     | 100.04 | 100.04   |        | 1   | G | 14 |          |         |                     |         |
|                     | 215.07 | 215.07   |        | 2   | D | 13 | 1536.9   |         | 1536.9              |         |
|                     | 328.15 | +0.0533  | 328.15 | 3   | I | 12 | 1421.8   |         | 711.42              | +0.217  |
|                     | 441.23 | -0.075   | 441.23 | 4   | L | 11 | 1308.8   | +0.0552 | 654.88              | +0.1295 |
|                     | 512.27 |          | 512.27 | 5   | A | 10 | 1195.7   | -0.04   | 1195.7              |         |
|                     | 649.33 | -0.035   | 649.33 | 6   | H | 9  | 1124.6   | -0.015  | 562.82              | +0.1615 |
|                     | 778.37 | +0.1822  | 778.37 | 7   | E | 8  | 987.57   | +0.1166 | 987.57              |         |
|                     | 865.41 | +0.2751  | 865.41 | 8   | S | 7  | 858.53   | +0.0674 | 858.53              |         |
|                     | 994.45 | +0.0841  | 994.45 | 9   | E | 6  | 771.5    |         | 771.5               |         |
| +0.204              | 554.27 |          | 1107.5 | 10  | L | 5  | 642.45   |         | 642.45              |         |
|                     | 1220.6 | -0.079   | 1220.6 | 11  | L | 4  | 529.37   | +0.1725 | 529.37              |         |
| +0.1938             | 639.32 | +0.036   | 1277.6 | 12  | G | 3  | 416.29   | +0.0671 | 416.29              |         |
|                     | 1390.7 | +0.158   | 1390.7 | 13  | L | 2  | 359.27   |         | 359.27              |         |
|                     | 1489.8 | -0.103   | 1489.8 | 14  | V | 1  | 246.18   | +0.2148 | 246.18              |         |
|                     |        |          |        | 15  | K | 0  | 147.11   |         | 147.11              |         |

Scan number 10768 Raw file LNCAP\_Silac\_23F10\_set1\_02  
 Method ITMS; CID Pepti... 264.92

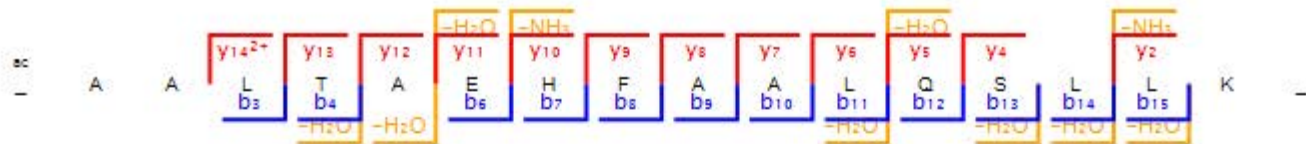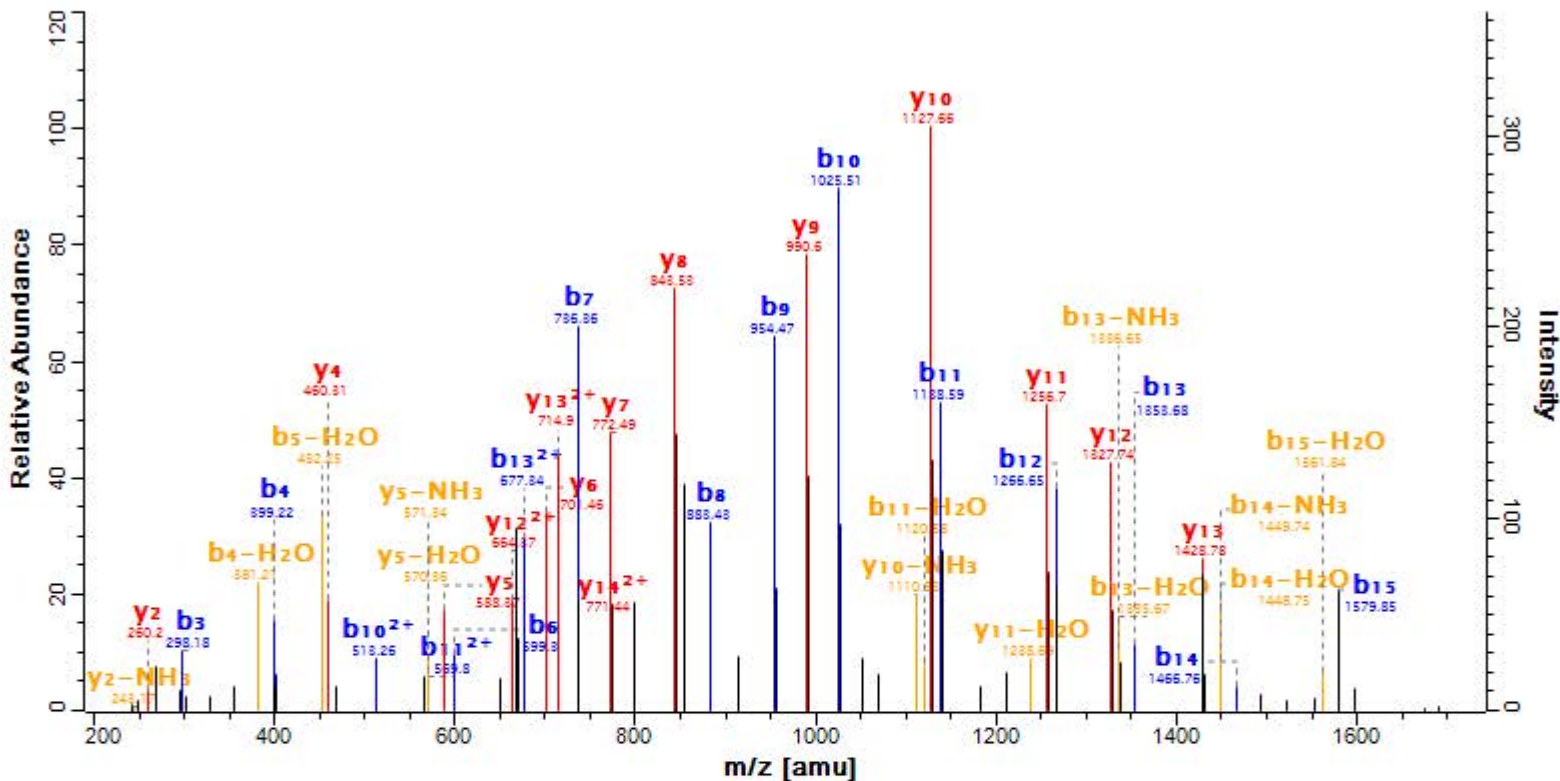

precursor information

|                   |                 |
|-------------------|-----------------|
| Mass:             | 1724.94654      |
| m/z:              | 863.48055       |
| Charge:           | 2+              |
| Retentiontime:    | 66.063385009765 |
| Score:            | 264.9232        |
| Mass Error [ppm]: | 0.24372         |
| PEP:              | 1.343E-74       |
| Precursor Type:   | MULTI           |

general information

|                       |          |
|-----------------------|----------|
| Annotation:           | 13 of 16 |
| AminoAcids Coverag    | 81 %     |
| Intensity Coverage:   | 65 %     |
| Peak Coverage:        | 47 %     |
| Protein Localisation: | 2 ... 17 |

| b <sup>2+</sup> ion |        | b ion    |        | seq |   |    | y ion    |         | y <sup>2+</sup> ion |         |
|---------------------|--------|----------|--------|-----|---|----|----------|---------|---------------------|---------|
| Δ dalton            | mass   | Δ dalton | mass   |     |   |    | Δ dalton | mass    | Δ dalton            | mass    |
|                     | 114.05 |          | 114.05 | 1   | A | 15 |          |         |                     |         |
|                     | 185.09 |          | 185.09 | 2   | A | 14 | 1612.9   |         | 1612.9              |         |
|                     | 298.18 | +0.0528  | 298.18 | 3   | L | 13 | 1541.9   |         | 771.44              | +0.2496 |
|                     | 399.22 | +0.0737  | 399.22 | 4   | T | 12 | 1428.8   | -0.059  | 714.9               | +0.2133 |
|                     | 470.26 |          | 470.26 | 5   | A | 11 | 1327.7   | +0.0877 | 664.37              | +0.3505 |
|                     | 599.3  | -0.042   | 599.3  | 6   | E | 10 | 1256.7   | +0.0282 | 1256.7              |         |
|                     | 736.36 | +0.0213  | 736.36 | 7   | H | 9  | 1127.7   | +0.036  | 1127.7              |         |
|                     | 883.43 | +0.0223  | 883.43 | 8   | F | 8  | 990.6    | +0.0252 | 990.6               |         |
|                     | 954.47 | +0.0409  | 954.47 | 9   | A | 7  | 843.53   | +0.1172 | 843.53              |         |
| +0.077              | 513.26 | +0.0618  | 1025.5 | 10  | A | 6  | 772.49   | +0.1556 | 772.49              |         |
| -0.088              | 569.8  | +0.0281  | 1138.6 | 11  | L | 5  | 701.46   | +0.0038 | 701.46              |         |
|                     | 1266.6 | -0.001   | 1266.6 | 12  | Q | 4  | 588.37   | +0.06   | 588.37              |         |
| +0.1467             | 677.34 | -0.009   | 1353.7 | 13  | S | 3  | 460.31   | +0.0075 | 460.31              |         |
|                     | 1466.8 | +0.2406  | 1466.8 | 14  | L | 2  | 373.28   |         | 373.28              |         |
|                     | 1579.8 | +0.0503  | 1579.8 | 15  | L | 1  | 260.2    | +0.1253 | 260.2               |         |
|                     |        |          |        | 16  | K | 0  | 147.11   |         | 147.11              |         |

Scan number 10887 Raw file LNCAP\_Silac\_23F10\_set1\_02  
 Method ITMS; CID Pepti... 124.78

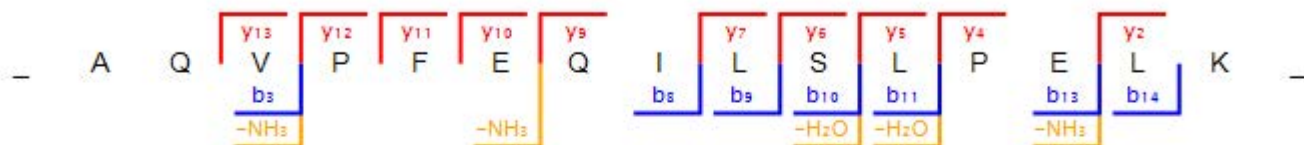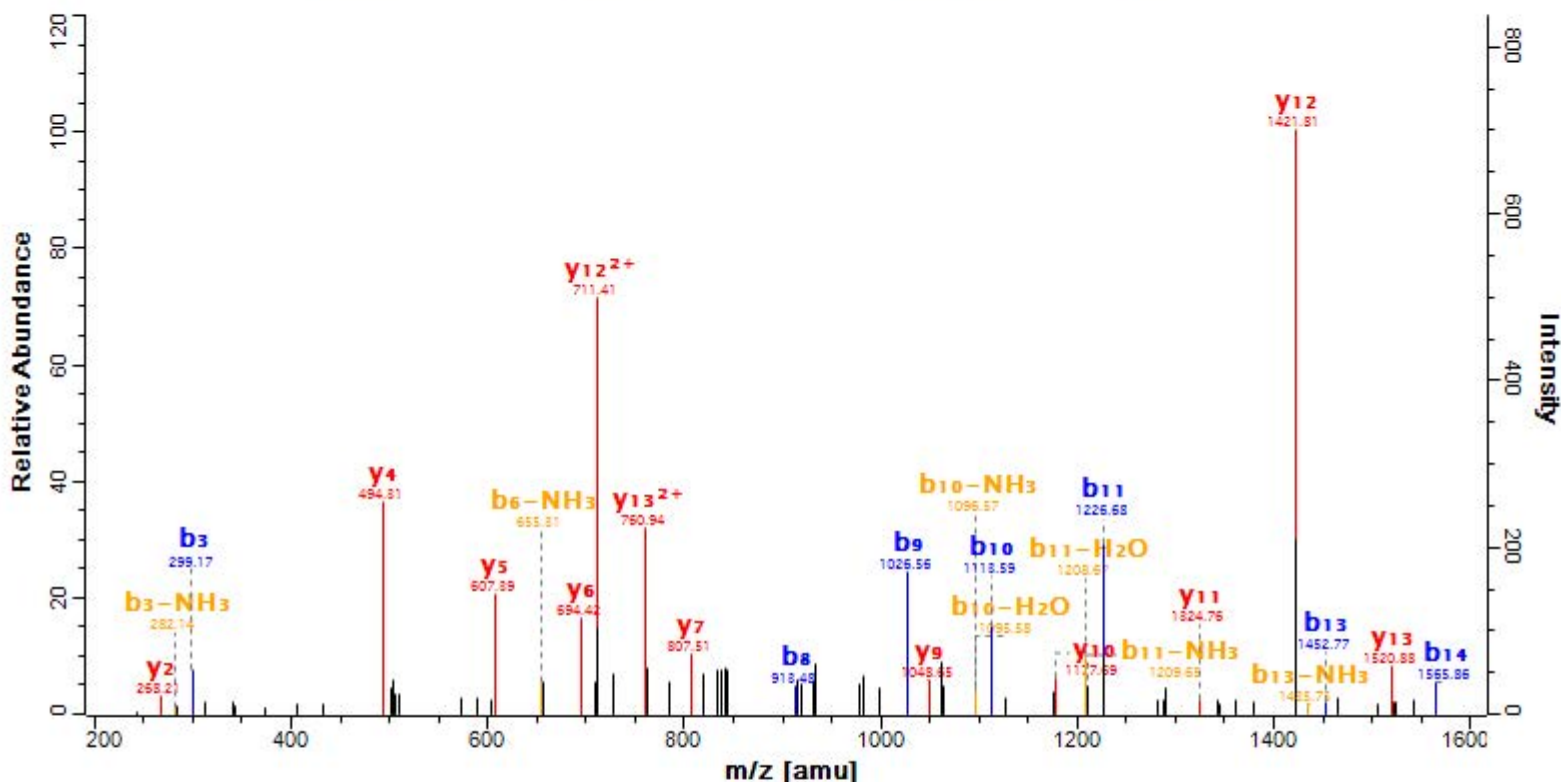

#### precursor information

|                   |                 |
|-------------------|-----------------|
| Mass:             | 1718.96896      |
| m/z:              | 860.49176       |
| Charge:           | 2+              |
| Retentiontime:    | 66.902740478515 |
| Score:            | 124.7764        |
| Mass Error [ppm]: | -0.49931        |
| PEP:              | 2.4585E-06      |
| Precursor Type:   | ISO             |

#### general information

|                       |           |
|-----------------------|-----------|
| Annotation:           | 12 of 15  |
| AminoAcids Coverag    | 80 %      |
| Intensity Coverage:   | 62 %      |
| Peak Coverage:        | 32 %      |
| Protein Localisation: | 51 ... 65 |

| b ion     |          |     |   | y ion    |          |           | y <sup>2+</sup> ion |           |
|-----------|----------|-----|---|----------|----------|-----------|---------------------|-----------|
| Δ dalton  | mass     | seq |   | Δ dalton | mass     | Δ dalton  | mass                |           |
|           | 72.04439 | 1   | A | 14       |          |           |                     |           |
|           | 200.103  | 2   | Q | 13       | 1648.94  | 1648.94   |                     |           |
| +0.100011 | 299.1714 | 3   | V | 12       | 1520.881 | +0.103579 | 760.9443            | +0.039423 |
|           | 396.2241 | 4   | P | 11       | 1421.813 | -0.13709  | 711.4101            | +0.017722 |
|           | 543.2926 | 5   | F | 10       | 1324.76  | +0.326075 | 1324.76             |           |
|           | 672.3352 | 6   | E | 9        | 1177.692 | -0.10881  | 1177.692            |           |
|           | 800.3937 | 7   | Q | 8        | 1048.649 | +0.126169 | 1048.649            |           |
| +0.042958 | 913.4778 | 8   | I | 7        | 920.5906 |           | 920.5906            |           |
| +0.115266 | 1026.562 | 9   | L | 6        | 807.5066 | +0.141552 | 807.5066            |           |
| -0.05287  | 1113.594 | 10  | S | 5        | 694.4225 | +0.184173 | 694.4225            |           |
| -0.06528  | 1226.678 | 11  | L | 4        | 607.3905 | +0.049759 | 607.3905            |           |
|           | 1323.731 | 12  | P | 3        | 494.3064 | +0.117892 | 494.3064            |           |
| +0.418343 | 1452.773 | 13  | E | 2        | 397.2537 |           | 397.2537            |           |
| -0.02864  | 1565.857 | 14  | L | 1        | 268.2111 | +0.086571 | 268.2111            |           |
|           |          | 15  | K | 0        | 155.127  |           | 155.127             |           |

Scan number 11120 Raw file LNCAP\_Silac\_23F10\_set1\_02  
 Method ITMS; CID Peptide 227.67

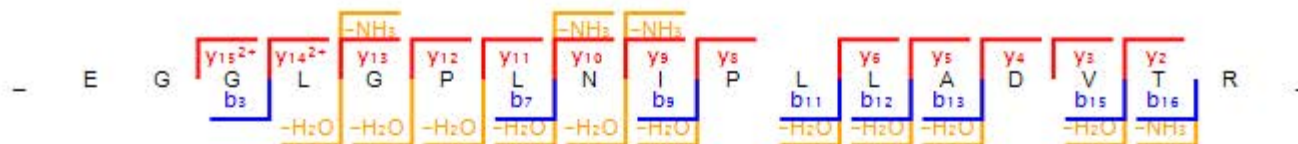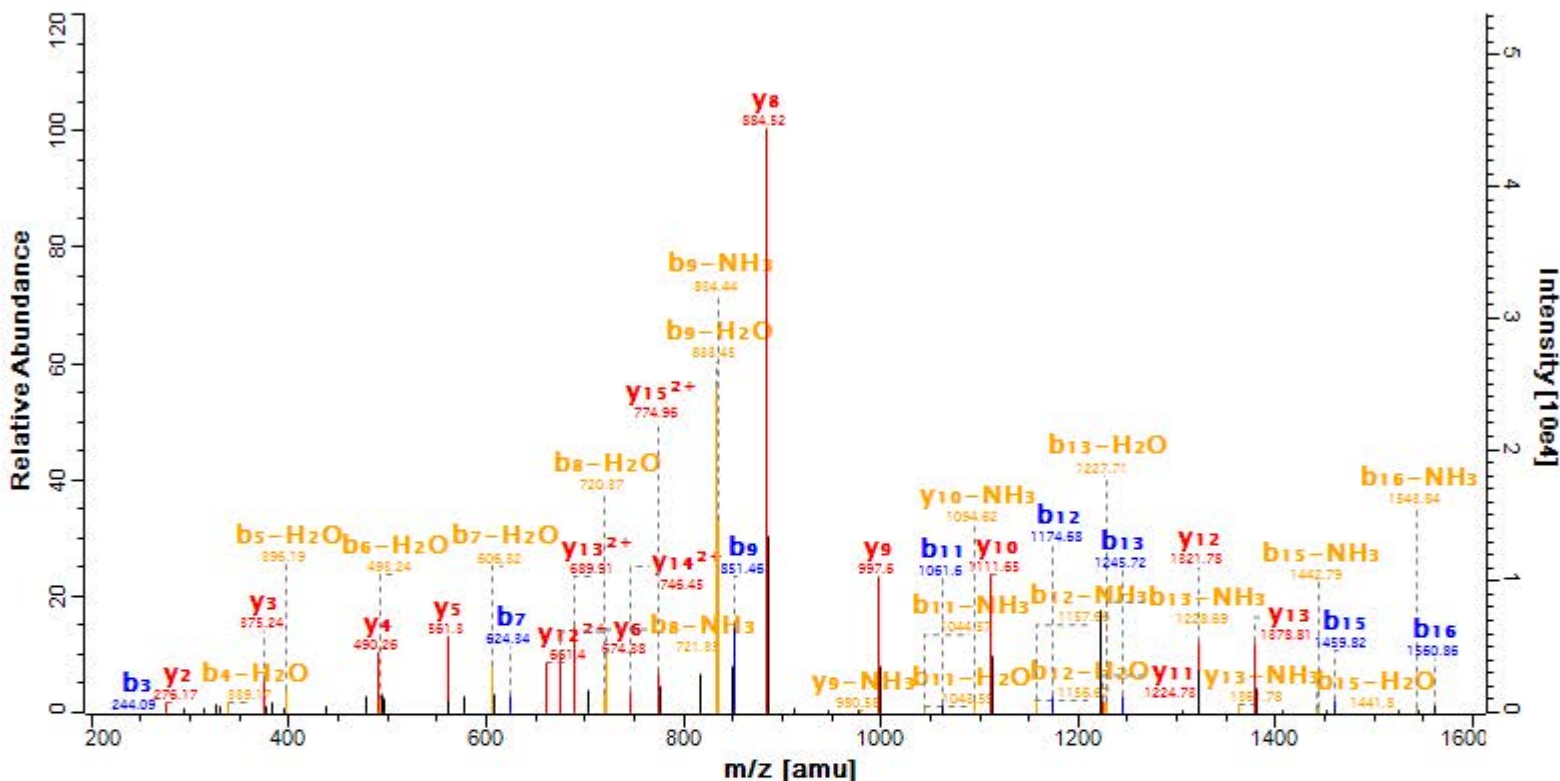

#### precursor information

|                   |                 |
|-------------------|-----------------|
| Mass:             | 1733.96688      |
| m/z:              | 867.99071       |
| Charge:           | 2+              |
| Retentiontime:    | 68.743461608886 |
| Score:            | 227.6734        |
| Mass Error [ppm]: | -0.40848        |
| PEP:              | 6.0539E-48      |
| Precursor Type:   | MULTI           |

#### general information

|                       |            |
|-----------------------|------------|
| Annotation:           | 14 of 17   |
| AminoAcids Coverage:  | 82 %       |
| Intensity Coverage:   | 74 %       |
| Peak Coverage:        | 53 %       |
| Protein Localisation: | 93 ... 109 |

| b ion     |          |     |   |    | y ion    |           |          | y <sup>2+</sup> ion |  |
|-----------|----------|-----|---|----|----------|-----------|----------|---------------------|--|
| Δ dalton  | mass     | seq |   |    | Δ dalton | mass      | Δ dalton | mass                |  |
|           | 130.0499 | 1   | E | 16 |          |           |          |                     |  |
|           | 187.0713 | 2   | G | 15 | 1605.932 |           | 1605.932 |                     |  |
| +0.18238  | 244.0928 | 3   | G | 14 | 1548.911 |           | 774.959  | +0.069158           |  |
|           | 357.1769 | 4   | L | 13 | 1491.889 |           | 746.4483 | +0.371577           |  |
|           | 414.1983 | 5   | G | 12 | 1378.805 | +0.033835 | 689.9063 | +0.275303           |  |
|           | 511.2511 | 6   | P | 11 | 1321.784 | +0.047608 | 661.3955 | +0.269922           |  |
| +0.084403 | 624.3352 | 7   | L | 10 | 1224.731 | -0.03146  | 1224.731 |                     |  |
|           | 738.3781 | 8   | N | 9  | 1111.647 | -1.2E-05  | 1111.647 |                     |  |
| -0.0421   | 851.4621 | 9   | I | 8  | 997.6041 | +0.041145 | 997.6041 |                     |  |
|           | 948.5149 | 10  | P | 7  | 884.52   | +0.090114 | 884.52   |                     |  |
| +0.03323  | 1061.599 | 11  | L | 6  | 787.4672 |           | 787.4672 |                     |  |
| +0.105538 | 1174.683 | 12  | L | 5  | 674.3832 | +0.157667 | 674.3832 |                     |  |
| +0.064518 | 1245.72  | 13  | A | 4  | 561.2991 | +0.010591 | 561.2991 |                     |  |
|           | 1360.747 | 14  | D | 3  | 490.262  | +0.111181 | 490.262  |                     |  |
| +0.187545 | 1459.816 | 15  | V | 2  | 375.235  | +0.094271 | 375.235  |                     |  |
| -0.05398  | 1560.863 | 16  | T | 1  | 276.1666 | +0.090602 | 276.1666 |                     |  |
|           |          | 17  | R | 0  | 175.119  |           | 175.119  |                     |  |

Scan number 11251 Raw file LNCAP\_Silac\_23F10\_set1\_02  
 Method ITMS; CID Pepti... 154.6

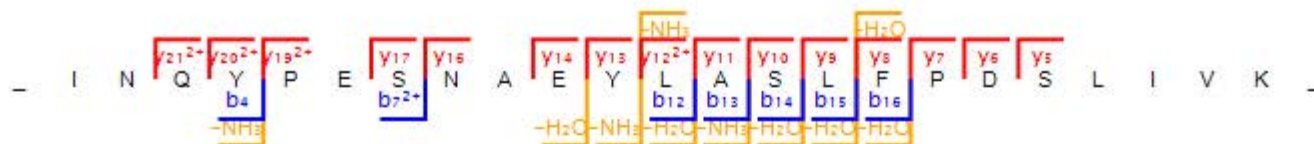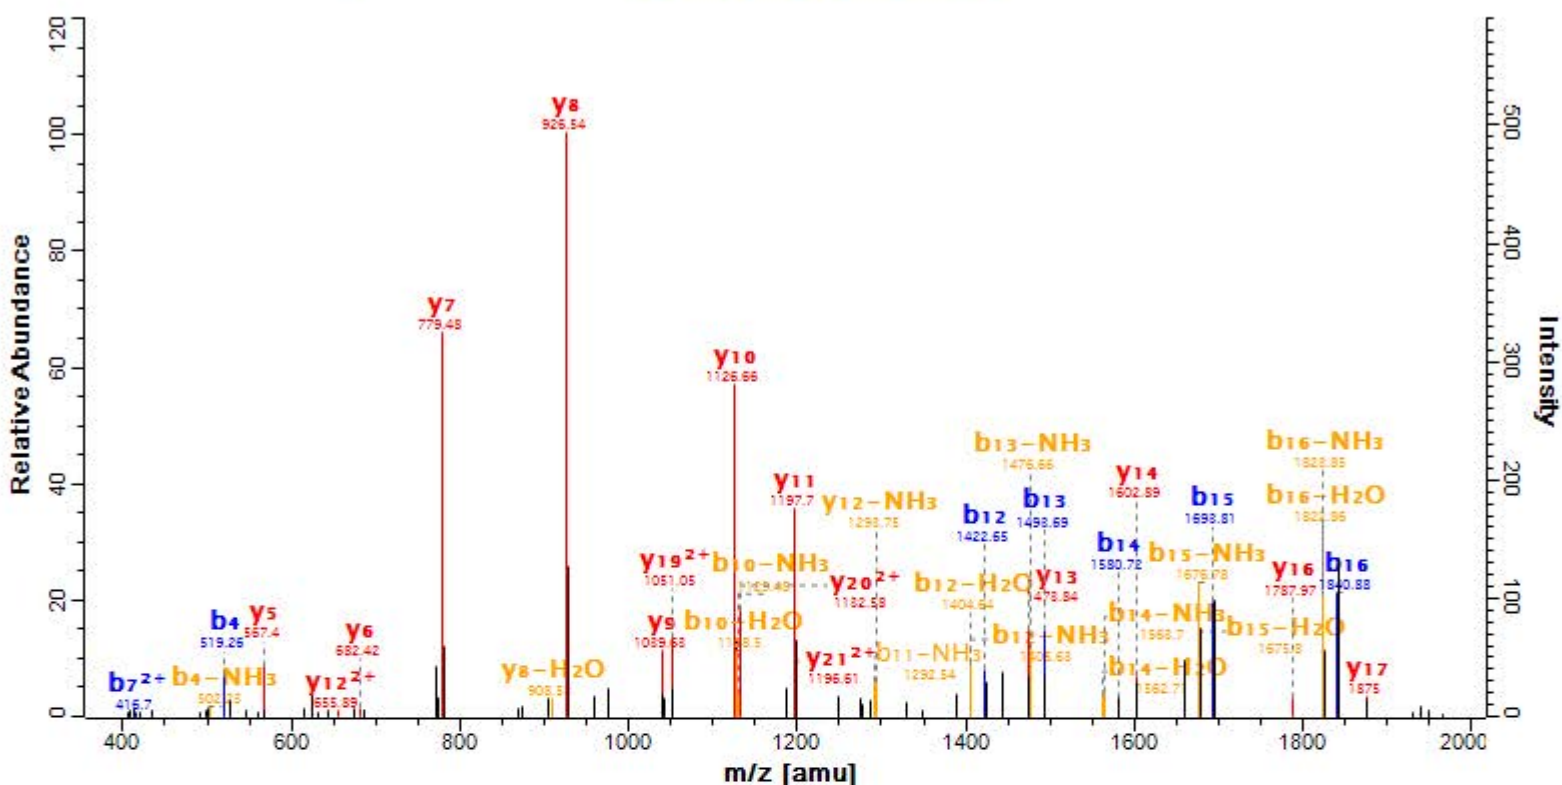

precursor information

|                   |                 |
|-------------------|-----------------|
| Mass:             | 2610.32078      |
| m/z:              | 1306.16767      |
| Charge:           | 2+              |
| Retentiontime:    | 69.754623413085 |
| Score:            | 154.6024        |
| Mass Error [ppm]: | -0.36553        |
| PEP:              | 8.239E-29       |
| Precursor Type:   | MULTI           |

general information

|                       |             |
|-----------------------|-------------|
| Annotation:           | 16 of 23    |
| AminoAcids Coverage:  | 70 %        |
| Intensity Coverage:   | 65 %        |
| Peak Coverage:        | 37 %        |
| Protein Localisation: | 122 ... 144 |

| b <sup>2+</sup> ion |        | b ion    |        | seq |   |    | y ion    |         | y <sup>2+</sup> ion |         |
|---------------------|--------|----------|--------|-----|---|----|----------|---------|---------------------|---------|
| Δ dalton            | mass   | Δ dalton | mass   |     |   |    | Δ dalton | mass    | Δ dalton            | mass    |
|                     | 114.09 |          | 114.09 | 1   | I | 22 |          |         |                     |         |
|                     | 228.13 |          | 228.13 | 2   | N | 21 | 2506.3   |         | 2506.3              |         |
|                     | 356.19 |          | 356.19 | 3   | Q | 20 | 2392.2   |         | 1196.6              | -0.006  |
|                     | 519.26 | +0.1012  | 519.26 | 4   | Y | 19 | 2264.2   |         | 1132.6              | +0.2316 |
|                     | 616.31 |          | 616.31 | 5   | P | 18 | 2101.1   |         | 1051.1              | +0.0837 |
|                     | 745.35 |          | 745.35 | 6   | E | 17 | 2004     |         | 2004                |         |
| -0.241              | 416.7  |          | 832.38 | 7   | S | 16 | 1875     | +0.1628 | 1875                |         |
|                     | 946.43 |          | 946.43 | 8   | N | 15 | 1788     | +0.4624 | 1788                |         |
|                     | 1017.5 |          | 1017.5 | 9   | A | 14 | 1673.9   |         | 1673.9              |         |
|                     | 1146.5 |          | 1146.5 | 10  | E | 13 | 1602.9   | +0.0014 | 1602.9              |         |
|                     | 1309.6 |          | 1309.6 | 11  | Y | 12 | 1473.8   | +0.0126 | 1473.8              |         |
|                     | 1422.7 | -0.099   | 1422.7 | 12  | L | 11 | 1310.8   |         | 655.89              | -0.3    |
|                     | 1493.7 | -0.089   | 1493.7 | 13  | A | 10 | 1197.7   | +0.0013 | 1197.7              |         |
|                     | 1580.7 | +0.0602  | 1580.7 | 14  | S | 9  | 1126.7   | -0.003  | 1126.7              |         |
|                     | 1693.8 | -0.193   | 1693.8 | 15  | L | 8  | 1039.6   | +0.0647 | 1039.6              |         |
|                     | 1840.9 | -0.038   | 1840.9 | 16  | F | 7  | 926.54   | +0.0206 | 926.54              |         |
|                     | 1937.9 |          | 1937.9 | 17  | P | 6  | 779.48   | +0.0317 | 779.48              |         |
|                     | 2053   |          | 2053   | 18  | D | 5  | 682.42   | -0.06   | 682.42              |         |
|                     | 2140   |          | 2140   | 19  | S | 4  | 567.4    | +0.0914 | 567.4               |         |
|                     | 2253.1 |          | 2253.1 | 20  | L | 3  | 480.36   |         | 480.36              |         |
|                     | 2366.2 |          | 2366.2 | 21  | I | 2  | 367.28   |         | 367.28              |         |
|                     | 2465.2 |          | 2465.2 | 22  | V | 1  | 254.2    |         | 254.2               |         |
|                     |        |          |        | 23  | K | 0  | 155.13   |         | 155.13              |         |

Scan number 1171 Raw file LNCAP\_Silac\_23F10\_set1\_02  
 Method ITMS; CID Pepti... 121.18

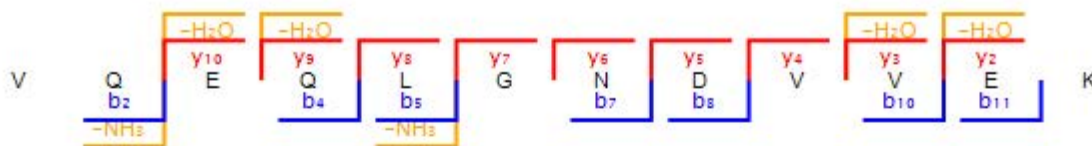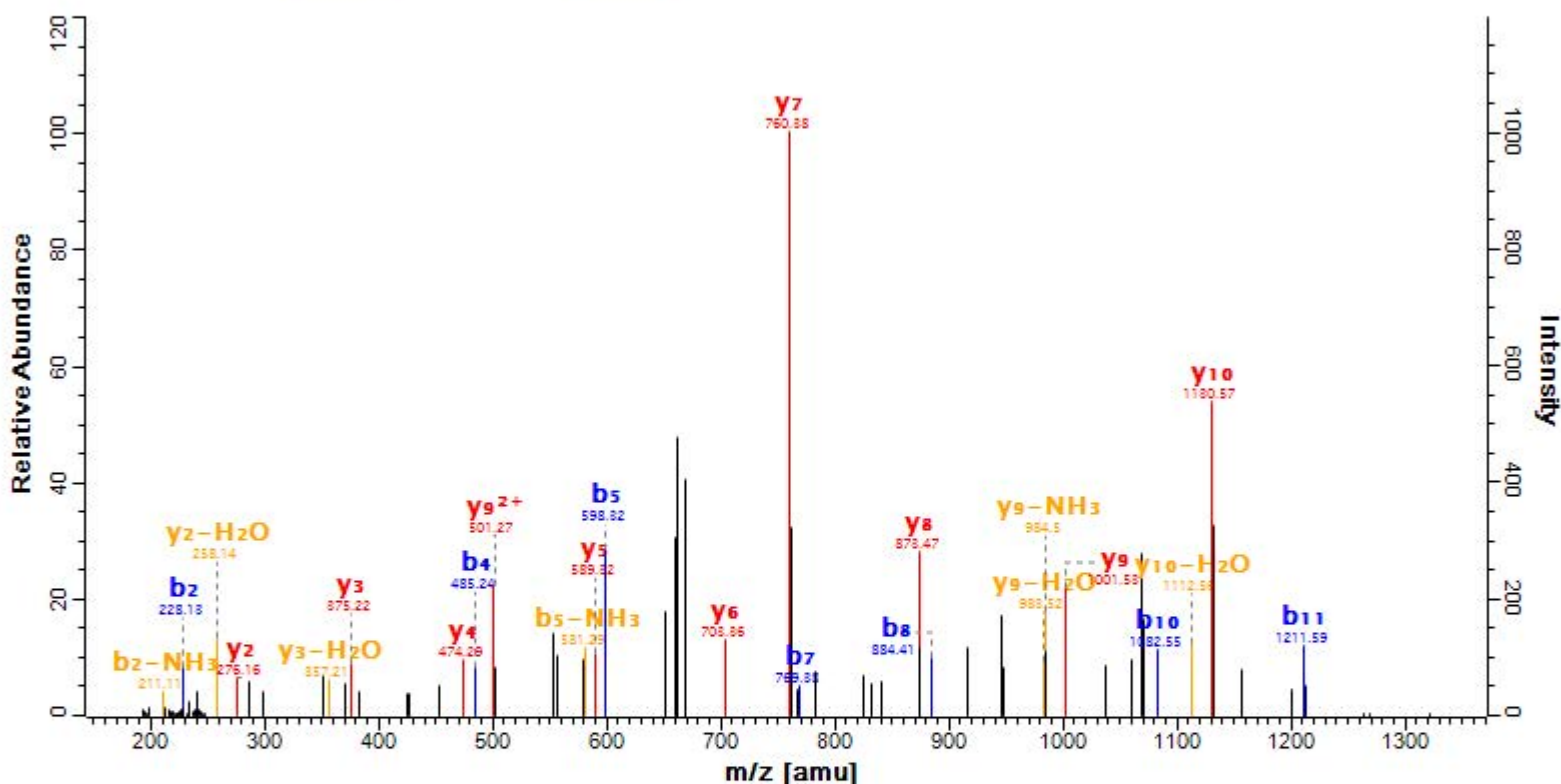

#### precursor information

|                   |                 |
|-------------------|-----------------|
| Mass:             | 1356.68836      |
| m/z:              | 679.35146       |
| Charge:           | 2+              |
| Retentiontime:    | 13.051728248596 |
| Score:            | 121.1825        |
| Mass Error [ppm]: | -0.10671        |
| PEP:              | 2.0404E-05      |
| Precursor Type:   | MULTI           |

#### general information

|                       |           |
|-----------------------|-----------|
| Annotation:           | 10 of 12  |
| AminoAcids Coverage:  | 83 %      |
| Intensity Coverage:   | 44 %      |
| Peak Coverage:        | 25 %      |
| Protein Localisation: | 52 ... 63 |

| b ion     |          |    |     |    | y ion    |           | y <sup>2+</sup> ion |          |
|-----------|----------|----|-----|----|----------|-----------|---------------------|----------|
| Δ dalton  | mass     |    | seq |    | Δ dalton | mass      | Δ dalton            | mass     |
|           | 100.0757 | 1  | V   | 11 |          |           |                     |          |
| +0.039362 | 228.1343 | 2  | Q   | 10 | 1258.627 |           | 1258.627            |          |
|           | 357.1769 | 3  | E   | 9  | 1130.569 | -0.02973  | 1130.569            |          |
| +0.004247 | 485.2354 | 4  | Q   | 8  | 1001.526 | -0.01894  | 501.2667            | -0.01637 |
| +0.015764 | 598.3195 | 5  | L   | 7  | 873.4676 | -0.04264  | 873.4676            |          |
|           | 655.341  | 6  | G   | 6  | 760.3836 | +0.007493 | 760.3836            |          |
| +0.070147 | 769.3839 | 7  | N   | 5  | 703.3621 | -0.06919  | 703.3621            |          |
| +0.073355 | 884.4108 | 8  | D   | 4  | 589.3192 | +0.08641  | 589.3192            |          |
|           | 983.4793 | 9  | V   | 3  | 474.2922 | +0.123668 | 474.2922            |          |
| -0.08612  | 1082.548 | 10 | V   | 2  | 375.2238 | +0.150578 | 375.2238            |          |
| -0.04399  | 1211.59  | 11 | E   | 1  | 276.1554 | -0.0293   | 276.1554            |          |
|           |          | 12 | K   | 0  | 147.1128 |           | 147.1128            |          |

Scan number 11722 Raw file LNCAP\_Silac\_23F10\_set1\_02  
 Method ITMS; CID Pepti... 155.79

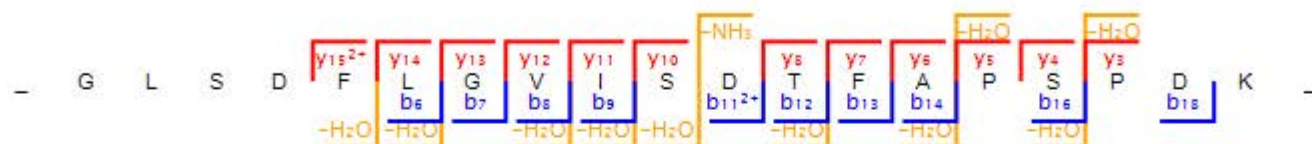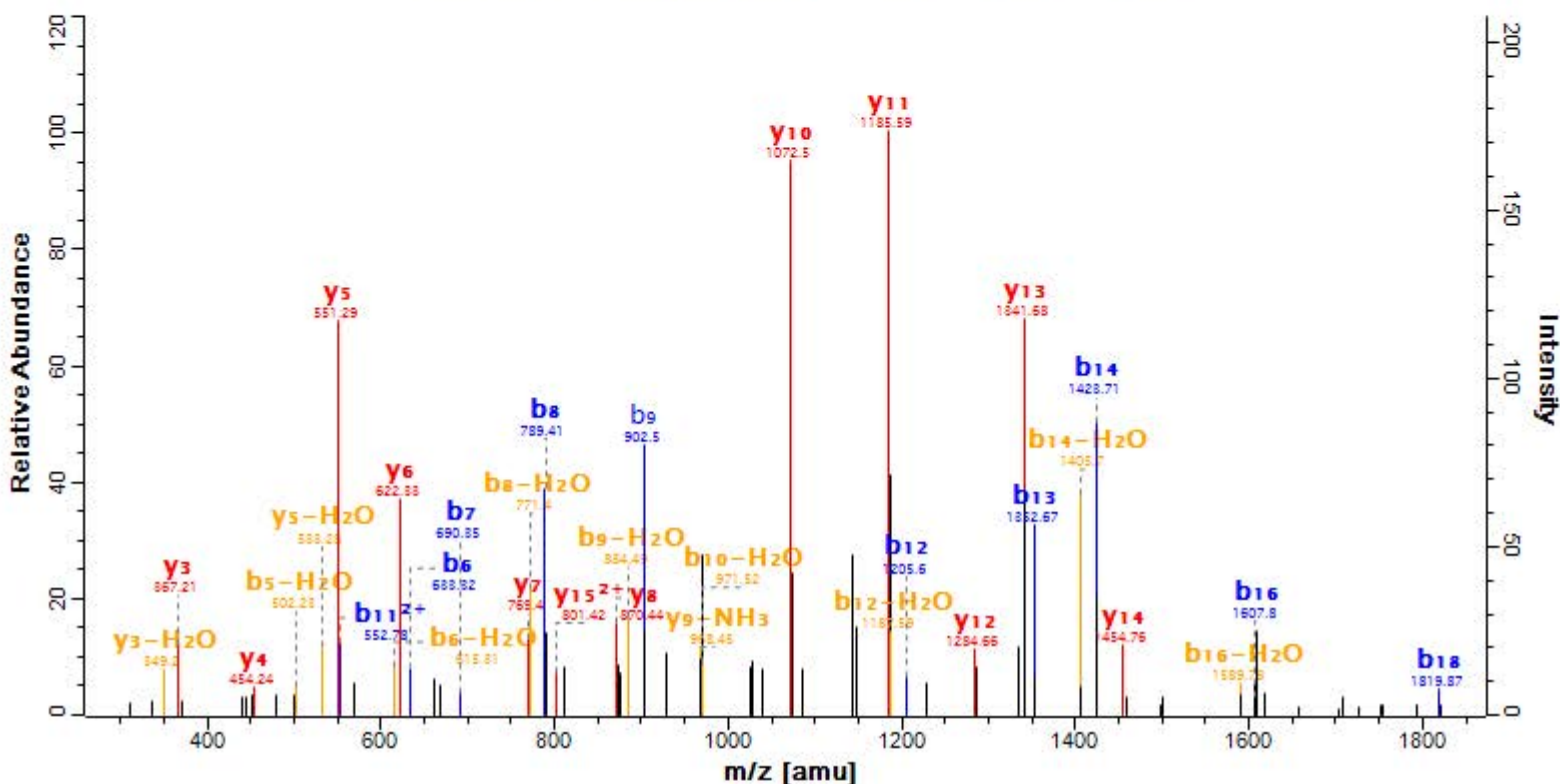

precursor information

|                   |                 |
|-------------------|-----------------|
| Mass:             | 1964.97166      |
| m/z:              | 983.49311       |
| Charge:           | 2+              |
| Retentiontime:    | 74.122528076171 |
| Score:            | 155.7944        |
| Mass Error [ppm]: | -0.74225        |
| PEP:              | 3.1468E-26      |
| Precursor Type:   | MULTI           |

general information

|                       |            |
|-----------------------|------------|
| Annotation:           | 15 of 19   |
| AminoAcids Coverage:  | 79 %       |
| Intensity Coverage:   | 65 %       |
| Peak Coverage:        | 39 %       |
| Protein Localisation: | 94 ... 112 |

| b <sup>2+</sup> ion |        | b ion    |        | seq |   |    | y ion    |         | y <sup>2+</sup> ion |         |
|---------------------|--------|----------|--------|-----|---|----|----------|---------|---------------------|---------|
| Δ dalton            | mass   | Δ dalton | mass   |     |   |    | Δ dalton | mass    | Δ dalton            | mass    |
|                     | 58.029 |          | 58.029 | 1   | G | 18 |          |         |                     |         |
|                     | 171.11 |          | 171.11 | 2   | L | 17 | 1917     |         | 1917                |         |
|                     | 258.14 |          | 258.14 | 3   | S | 16 | 1803.9   |         | 1803.9              |         |
|                     | 373.17 |          | 373.17 | 4   | D | 15 | 1716.9   |         | 1716.9              |         |
|                     | 520.24 |          | 520.24 | 5   | F | 14 | 1601.8   |         | 801.42              | +0.2434 |
|                     | 633.32 | +0.0824  | 633.32 | 6   | L | 13 | 1454.8   | -0.055  | 1454.8              |         |
|                     | 690.35 | +0.0707  | 690.35 | 7   | G | 12 | 1341.7   | -0.09   | 1341.7              |         |
|                     | 789.41 | -0.138   | 789.41 | 8   | V | 11 | 1284.7   | -0.017  | 1284.7              |         |
|                     | 902.5  | +0.0333  | 902.5  | 9   | I | 10 | 1185.6   | -0.079  | 1185.6              |         |
|                     | 989.53 |          | 989.53 | 10  | S | 9  | 1072.5   | -0.032  | 1072.5              |         |
| -0.44               | 552.78 |          | 1104.6 | 11  | D | 8  | 985.47   |         | 985.47              |         |
|                     | 1205.6 | -0.099   | 1205.6 | 12  | T | 7  | 870.44   | +0.1871 | 870.44              |         |
|                     | 1352.7 | -0.002   | 1352.7 | 13  | F | 6  | 769.4    | +0.2197 | 769.4               |         |
|                     | 1423.7 | -0.08    | 1423.7 | 14  | A | 5  | 622.33   | +0.1334 | 622.33              |         |
|                     | 1520.8 |          | 1520.8 | 15  | P | 4  | 551.29   | +0.0903 | 551.29              |         |
|                     | 1607.8 | +0.1786  | 1607.8 | 16  | S | 3  | 454.24   | +0.2341 | 454.24              |         |
|                     | 1704.8 |          | 1704.8 | 17  | P | 2  | 367.21   | +0.0265 | 367.21              |         |
|                     | 1819.9 | +0.052   | 1819.9 | 18  | D | 1  | 270.15   |         | 270.15              |         |
|                     |        |          |        | 19  | K | 0  | 155.13   |         | 155.13              |         |

Scan number 1186 Raw file LNCAP\_Silac\_23F10\_set1\_02  
 Method ITMS; CID Pepti... 131.25

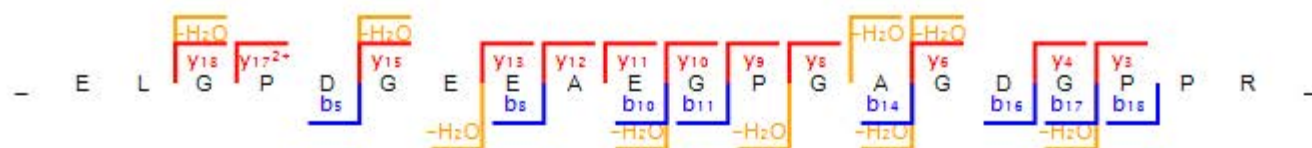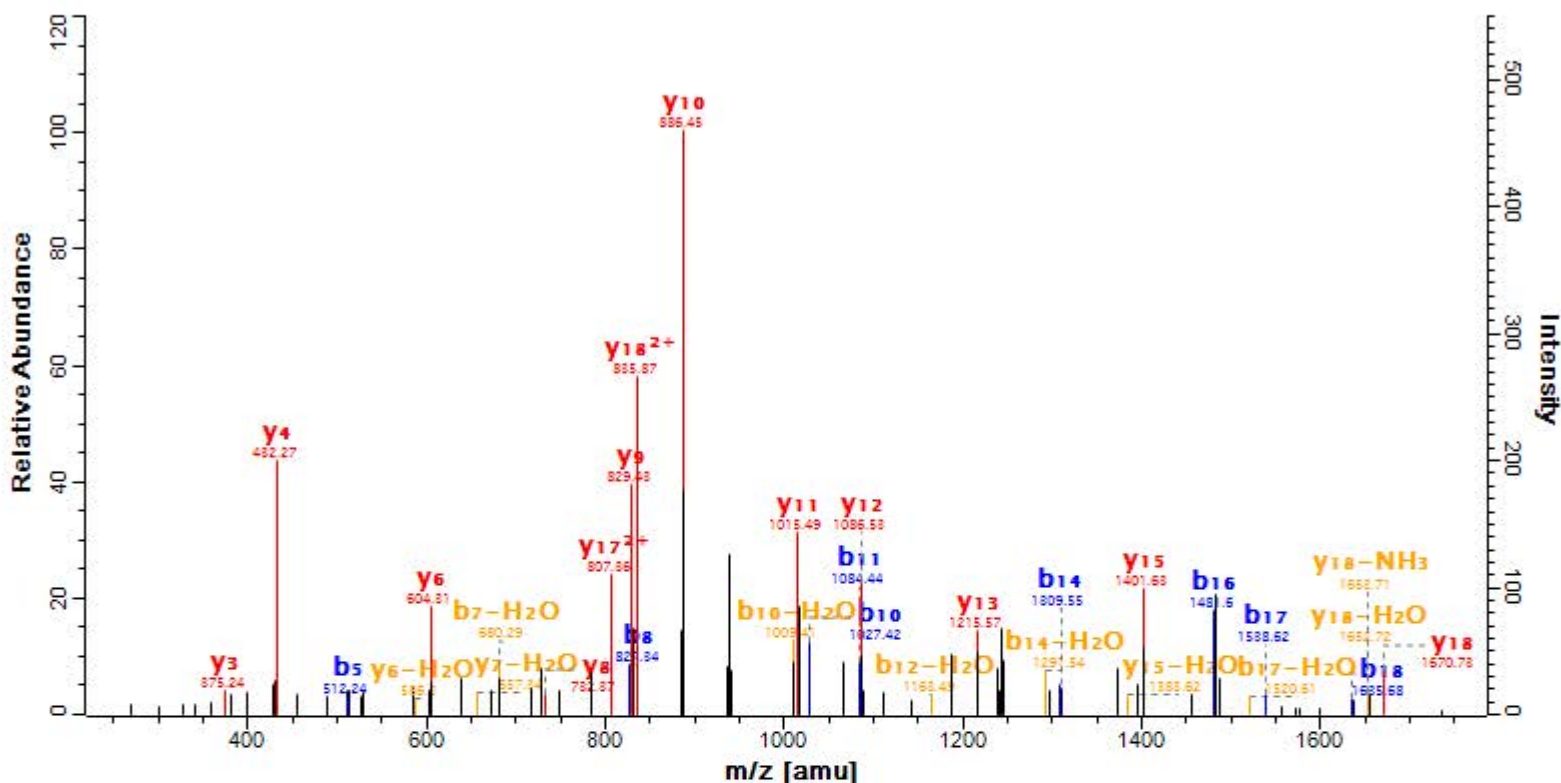

#### precursor information

|                   |                 |
|-------------------|-----------------|
| Mass:             | 1905.83295      |
| m/z:              | 953.92375       |
| Charge:           | 2+              |
| Retentiontime:    | 13.150157928466 |
| Score:            | 131.2486        |
| Mass Error [ppm]: | -0.57993        |
| PEP:              | 2.7031E-13      |
| Precursor Type:   | MULTI           |

| b ion     |          |     |   | y ion    |          | y <sup>2+</sup> ion |          |           |
|-----------|----------|-----|---|----------|----------|---------------------|----------|-----------|
| Δ dalton  | mass     | seq |   | Δ dalton | mass     | Δ dalton            | mass     |           |
|           | 130.0499 | 1   | E | 19       |          |                     |          |           |
|           | 243.1339 | 2   | L | 18       | 1783.819 |                     | 1783.819 |           |
|           | 300.1554 | 3   | G | 17       | 1670.735 | -0.15302            | 835.871  | +0.151051 |
|           | 397.2082 | 4   | P | 16       | 1613.713 |                     | 807.3603 | -0.05587  |
| -0.11413  | 512.2351 | 5   | D | 15       | 1516.661 |                     | 1516.661 |           |
|           | 569.2566 | 6   | G | 14       | 1401.634 | -0.05613            | 1401.634 |           |
|           | 698.2992 | 7   | E | 13       | 1344.612 |                     | 1344.612 |           |
| +0.146039 | 827.3418 | 8   | E | 12       | 1215.57  | -0.03931            | 1215.57  |           |
|           | 898.3789 | 9   | A | 11       | 1086.527 | -0.07826            | 1086.527 |           |
| -0.14595  | 1027.421 | 10  | E | 10       | 1015.49  | -0.11372            | 1015.49  |           |
| -0.13384  | 1084.443 | 11  | G | 9        | 886.4473 | +0.037518           | 886.4473 |           |
|           | 1181.496 | 12  | P | 8        | 829.4258 | +0.069724           | 829.4258 |           |
|           | 1238.517 | 13  | G | 7        | 732.3731 | -0.00147            | 732.3731 |           |
| -0.32807  | 1309.554 | 14  | A | 6        | 675.3516 |                     | 675.3516 |           |
|           | 1366.576 | 15  | G | 5        | 604.3145 | +0.147435           | 604.3145 |           |
| -0.10499  | 1481.603 | 16  | D | 4        | 547.293  |                     | 547.293  |           |
| -0.1477   | 1538.624 | 17  | G | 3        | 432.2661 | +0.024882           | 432.2661 |           |
| -0.13857  | 1635.677 | 18  | P | 2        | 375.2446 | +0.049733           | 375.2446 |           |
|           | 1732.73  | 19  | P | 1        | 278.1918 |                     | 278.1918 |           |
|           |          | 20  | R | 0        | 181.1391 |                     | 181.1391 |           |

#### general information

|                       |             |
|-----------------------|-------------|
| Annotation:           | 16 of 20    |
| AminoAcids Coverage:  | 80 %        |
| Intensity Coverage:   | 54 %        |
| Peak Coverage:        | 33 %        |
| Protein Localisation: | 152 ... 171 |



Scan number 1329 Raw file LNCAP\_Silac\_23F10\_set1\_02  
 Method ITMS; CID Peptide 79.97

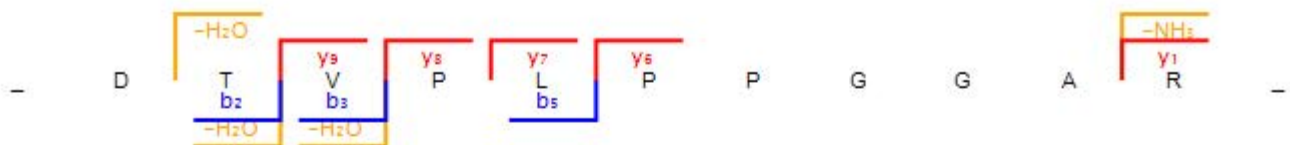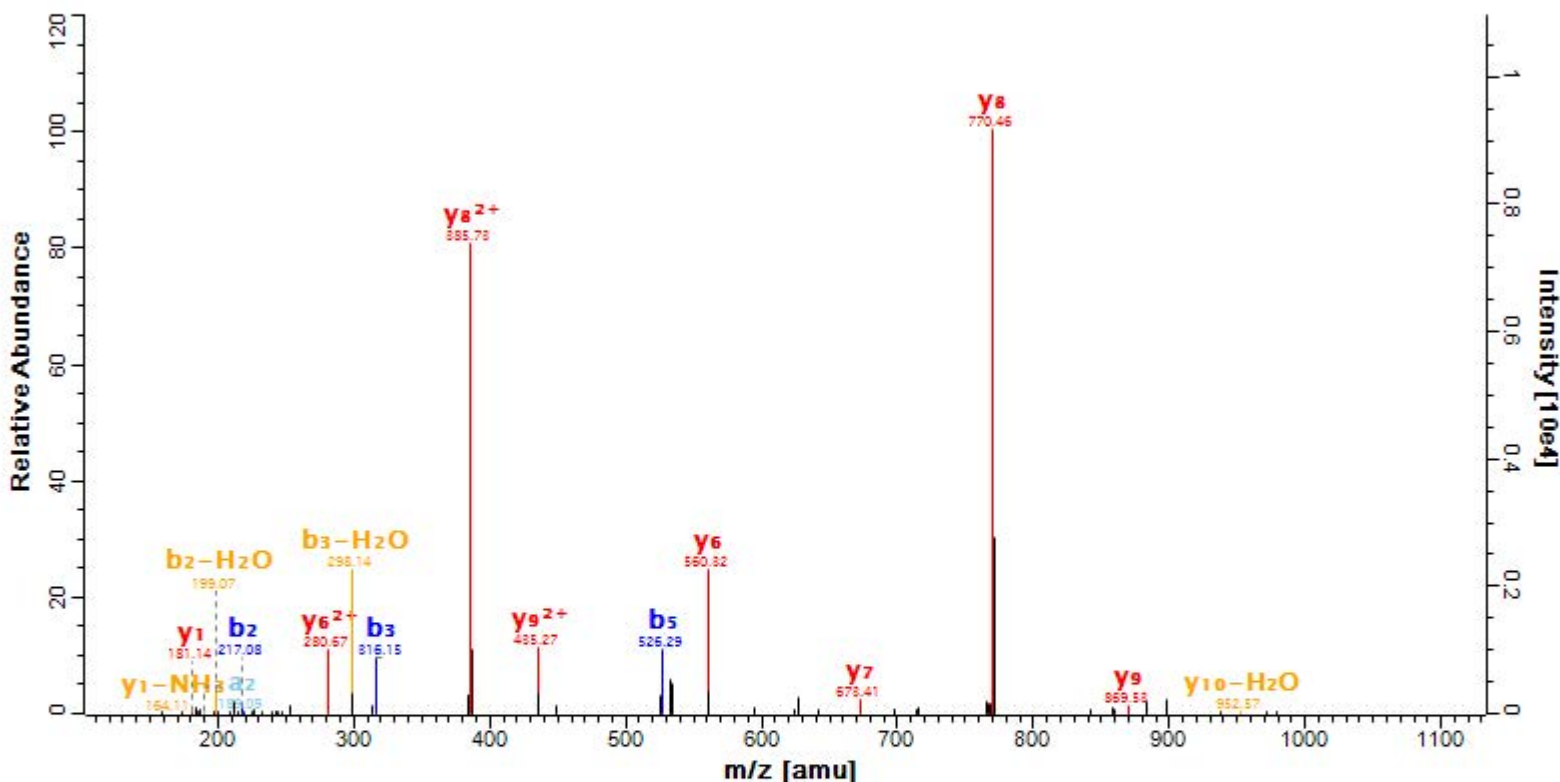

**precursor information**

|                   |                 |
|-------------------|-----------------|
| Mass:             | 1078.57714      |
| m/z:              | 540.29585       |
| Charge:           | 2+              |
| Retentiontime:    | 14.029083251953 |
| Score:            | 79.97385        |
| Mass Error [ppm]: | 0.0333          |
| PEP:              | 0.0036323       |
| Precursor Type:   | MULTI           |

**general information**

|                       |             |
|-----------------------|-------------|
| Annotation:           | 6 of 11     |
| AminoAcids Coverage:  | 55 %        |
| Intensity Coverage:   | 69 %        |
| Peak Coverage:        | 16 %        |
| Protein Localisation: | 118 ... 128 |

| a ion    |        | b ion    |        |    |     |          | y ion  |          | y <sup>2+</sup> ion |  |
|----------|--------|----------|--------|----|-----|----------|--------|----------|---------------------|--|
| Δ dalton | mass   | Δ dalton | mass   |    | seq | Δ dalton | mass   | Δ dalton | mass                |  |
|          | 88.039 |          | 116.03 | 1  | D   | 10       |        |          |                     |  |
| +0.0496  | 189.09 | -0.034   | 217.08 | 2  | T   | 9        | 970.58 |          | 970.58              |  |
|          | 288.16 | -0.048   | 316.15 | 3  | V   | 8        | 869.53 | +0.0944  | 435.27              |  |
|          | 385.21 |          | 413.2  | 4  | P   | 7        | 770.46 | +0.0194  | 385.73              |  |
|          | 498.29 | -0.026   | 526.29 | 5  | L   | 6        | 673.41 | +0.0407  | 673.41              |  |
|          | 595.34 |          | 623.34 | 6  | P   | 5        | 560.32 | +0.0507  | 280.67              |  |
|          | 692.4  |          | 720.39 | 7  | P   | 4        | 463.27 |          | 463.27              |  |
|          | 749.42 |          | 777.41 | 8  | G   | 3        | 366.22 |          | 366.22              |  |
|          | 806.44 |          | 834.44 | 9  | G   | 2        | 309.2  |          | 309.2               |  |
|          | 877.48 |          | 905.47 | 10 | A   | 1        | 252.18 |          | 252.18              |  |
|          |        |          |        | 11 | R   | 0        | 181.14 | +0.1318  | 181.14              |  |

Scan number 1521 Raw file LNCAP\_Silac\_23F10\_set1\_02  
 Method ITMS; CID Pepti... 77.07

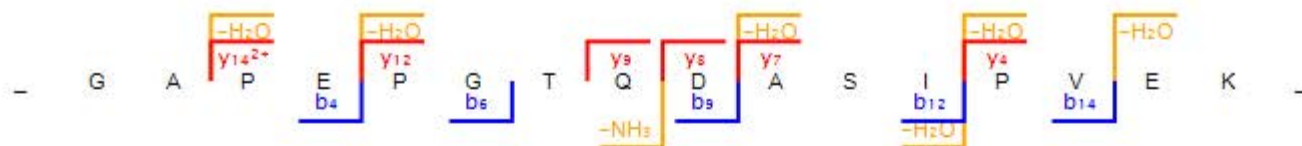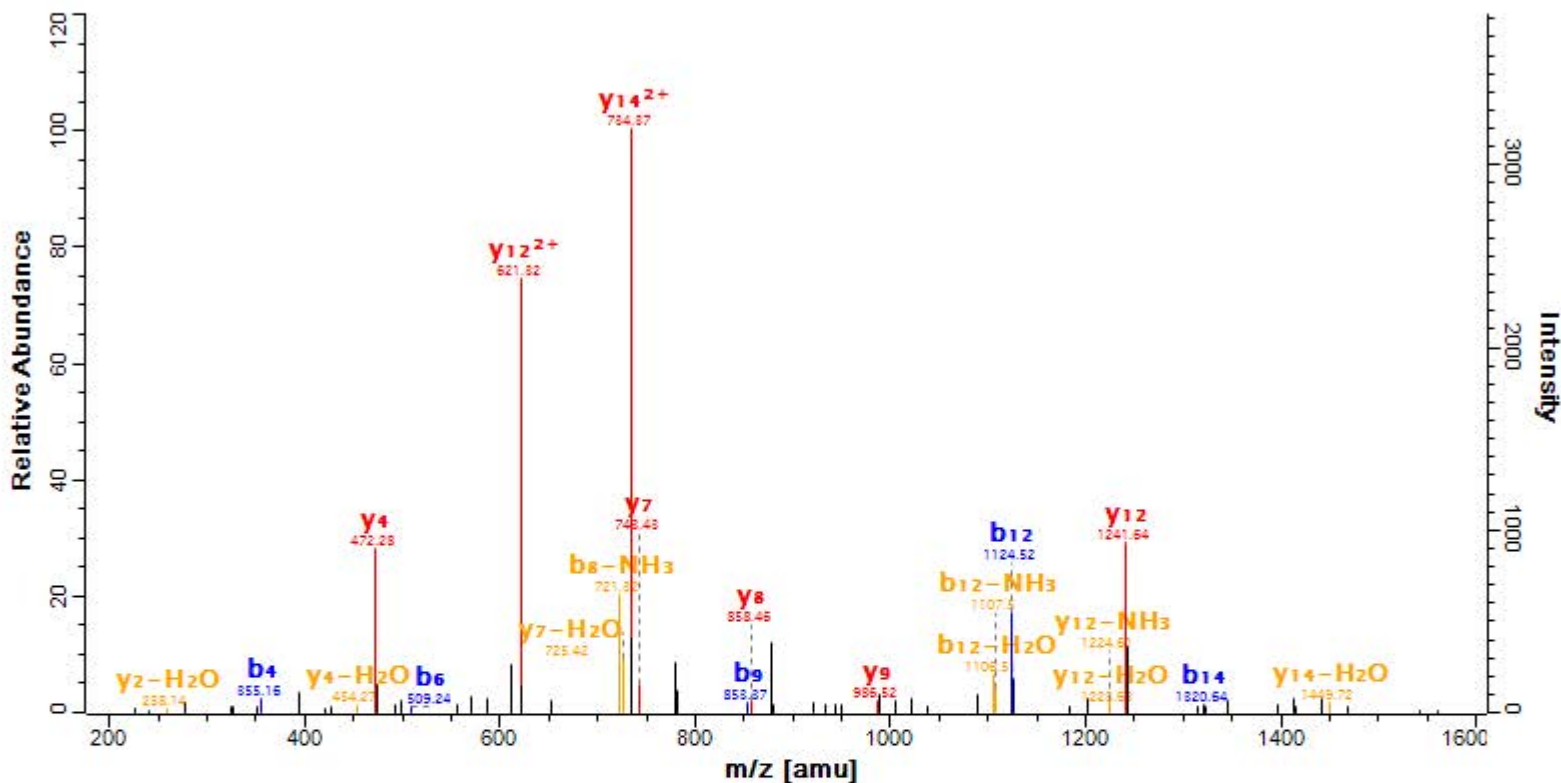

#### precursor information

|                   |                 |
|-------------------|-----------------|
| Mass:             | 1594.78314      |
| m/z:              | 798.39885       |
| Charge:           | 2+              |
| Retentiontime:    | 15.152011871337 |
| Score:            | 77.06827        |
| Mass Error [ppm]: | -0.45487        |
| PEP:              | 0.0002916       |
| Precursor Type:   | MULTI           |

#### general information

|                       |             |
|-----------------------|-------------|
| Annotation:           | 11 of 16    |
| AminoAcids Coverage:  | 69 %        |
| Intensity Coverage:   | 67 %        |
| Peak Coverage:        | 27 %        |
| Protein Localisation: | 188 ... 203 |

| b ion     |          |    |     |    | y ion    |           | y <sup>2+</sup> ion |           |
|-----------|----------|----|-----|----|----------|-----------|---------------------|-----------|
| Δ dalton  | mass     |    | seq |    | Δ dalton | mass      | Δ dalton            | mass      |
|           | 58.02874 | 1  | G   | 15 |          |           |                     |           |
|           | 129.0659 | 2  | A   | 14 | 1538.77  |           | 1538.77             |           |
|           | 226.1186 | 3  | P   | 13 | 1467.733 |           | 734.3699            | +0.193739 |
| +0.101423 | 355.1612 | 4  | E   | 12 | 1370.68  |           | 1370.68             |           |
|           | 452.214  | 5  | P   | 11 | 1241.637 | -0.04248  | 621.3222            | +0.221215 |
| -0.00985  | 509.2354 | 6  | G   | 10 | 1144.584 |           | 1144.584            |           |
|           | 610.2831 | 7  | T   | 9  | 1087.563 |           | 1087.563            |           |
|           | 738.3417 | 8  | Q   | 8  | 986.5153 | +0.061847 | 986.5153            |           |
| +0.130447 | 853.3686 | 9  | D   | 7  | 858.4567 | +0.019228 | 858.4567            |           |
|           | 924.4058 | 10 | A   | 6  | 743.4298 | -0.01029  | 743.4298            |           |
|           | 1011.438 | 11 | S   | 5  | 672.3927 |           | 672.3927            |           |
| -0.02526  | 1124.522 | 12 | I   | 4  | 585.3606 |           | 585.3606            |           |
|           | 1221.575 | 13 | P   | 3  | 472.2766 | +0.136389 | 472.2766            |           |
| -0.1064   | 1320.643 | 14 | V   | 2  | 375.2238 |           | 375.2238            |           |
|           | 1449.686 | 15 | E   | 1  | 276.1554 |           | 276.1554            |           |
|           |          | 16 | K   | 0  | 147.1128 |           | 147.1128            |           |

Scan number 1564 Raw file LNCAP\_Silac\_23F10\_set1\_02  
 Method ITMS; CID Pepti... 219.52

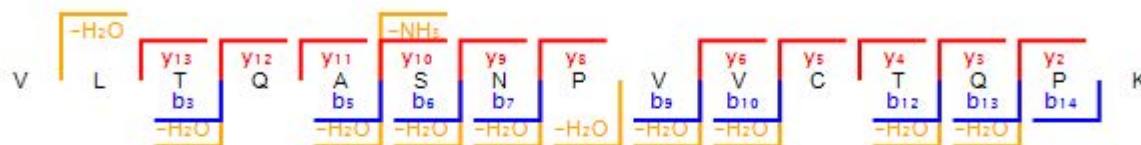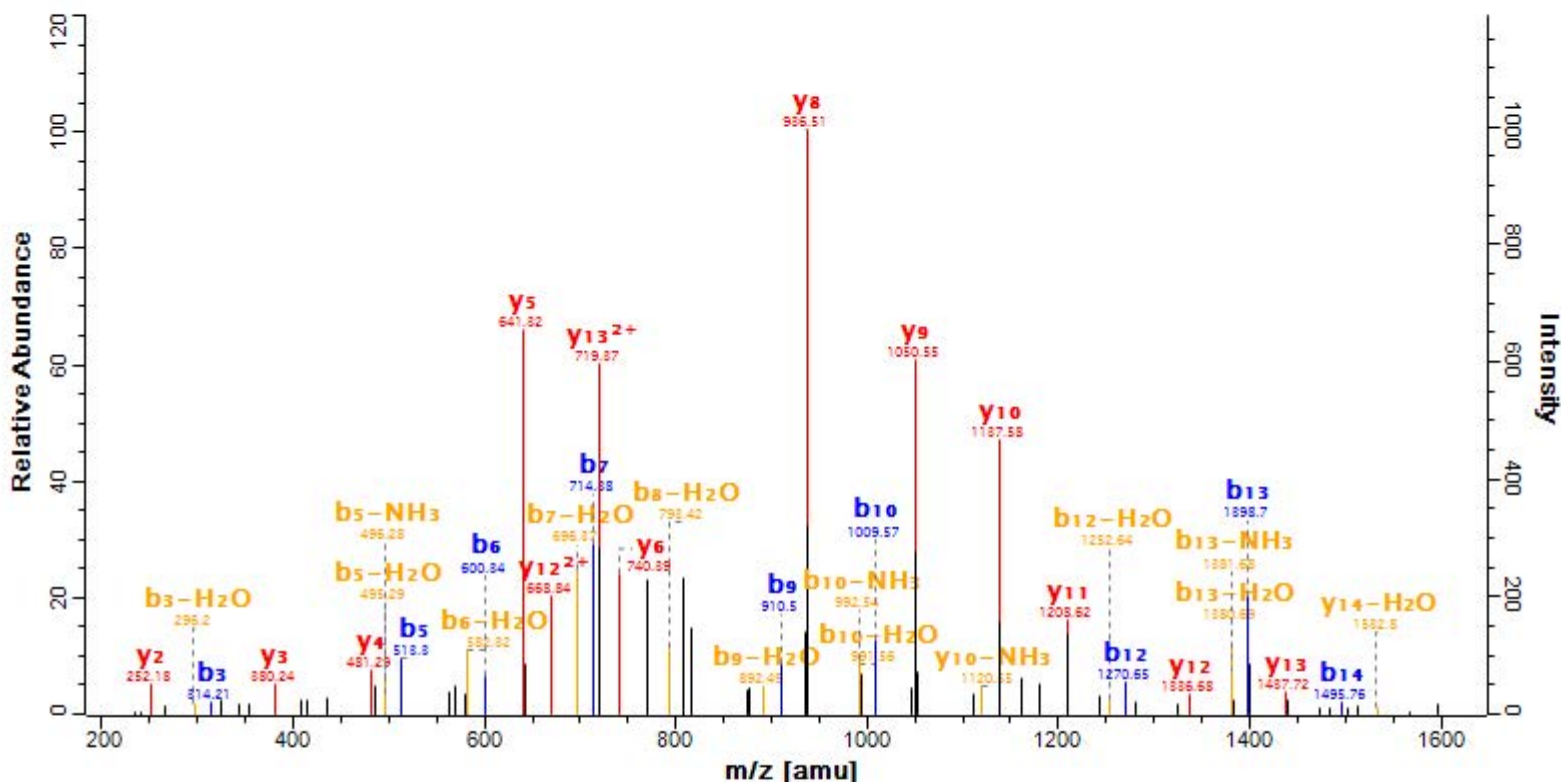

#### precursor information

|                   |                 |
|-------------------|-----------------|
| Mass:             | 1640.85579      |
| m/z:              | 821.43517       |
| Charge:           | 2+              |
| Retentiontime:    | 15.398704528808 |
| Score:            | 219.5162        |
| Mass Error [ppm]: | 0.12301         |
| PEP:              | 3.1394E-36      |
| Precursor Type:   | MULTI           |

#### general information

|                       |            |
|-----------------------|------------|
| Annotation:           | 13 of 15   |
| AminoAcids Coverage:  | 87 %       |
| Intensity Coverage:   | 65 %       |
| Peak Coverage:        | 44 %       |
| Protein Localisation: | 93 ... 107 |

| b ion     |          |     |   | y ion    |          |           | y <sup>2+</sup> ion |           |
|-----------|----------|-----|---|----------|----------|-----------|---------------------|-----------|
| Δ dalton  | mass     | seq |   | Δ dalton | mass     | Δ dalton  | mass                |           |
|           | 100.0757 | 1   | V | 14       |          |           |                     |           |
|           | 213.1598 | 2   | L | 13       | 1550.809 | 1550.809  |                     |           |
| +0.014644 | 314.2074 | 3   | T | 12       | 1437.725 | +0.419333 | 719.3659            | -0.20169  |
|           | 442.266  | 4   | Q | 11       | 1336.677 | -0.11026  | 668.8421            | +0.121103 |
| +0.204749 | 513.3031 | 5   | A | 10       | 1208.618 | +0.092244 | 1208.618            |           |
| +0.013663 | 600.3352 | 6   | S | 9        | 1137.581 | -0.00676  | 1137.581            |           |
| -0.02054  | 714.3781 | 7   | N | 8        | 1050.549 | -0.13525  | 1050.549            |           |
|           | 811.4308 | 8   | P | 7        | 936.5063 | +0.067895 | 936.5063            |           |
| +0.138377 | 910.4993 | 9   | V | 6        | 839.4535 |           | 839.4535            |           |
| -0.03715  | 1009.568 | 10  | V | 5        | 740.3851 | +0.010423 | 740.3851            |           |
|           | 1169.598 | 11  | C | 4        | 641.3167 | +0.128825 | 641.3167            |           |
| +0.038938 | 1270.646 | 12  | T | 3        | 481.286  | +0.019763 | 481.286             |           |
| -0.03966  | 1398.705 | 13  | Q | 2        | 380.2383 | +0.161009 | 380.2383            |           |
| -0.09926  | 1495.757 | 14  | P | 1        | 252.1798 | +0.092389 | 252.1798            |           |
|           |          | 15  | K | 0        | 155.127  |           | 155.127             |           |

Scan number 1648 Raw file LNCAP\_Silac\_23F10\_set1\_02  
 Method ITMS; CID Pepti... 114.63

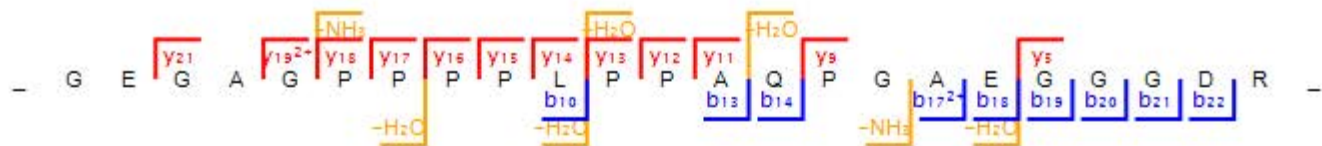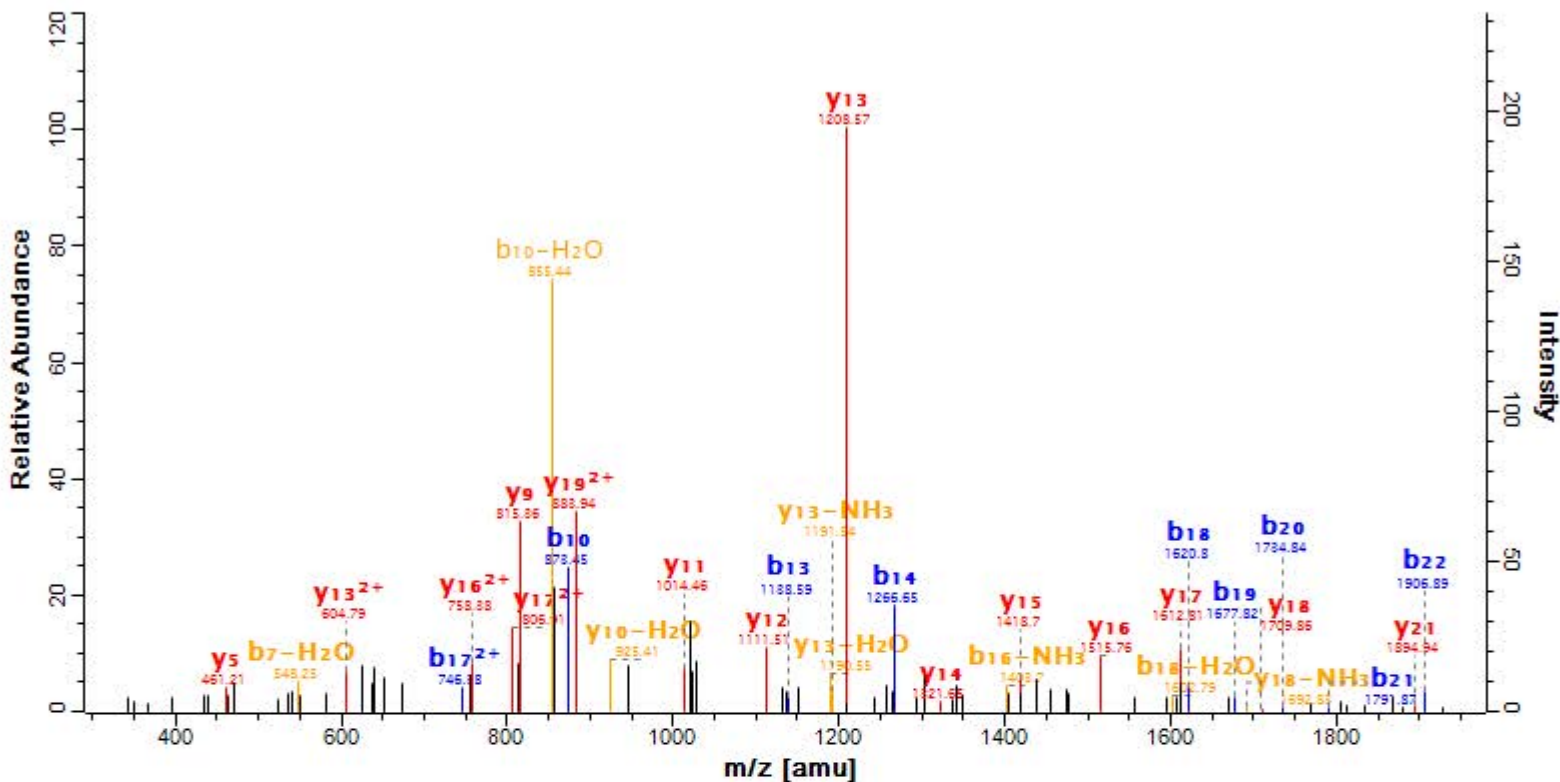

precursor information

|                   |                 |
|-------------------|-----------------|
| Mass:             | 2077.93333      |
| m/z:              | 1039.97394      |
| Charge:           | 2+              |
| Retentiontime:    | 15.869448661804 |
| Score:            | 114.6299        |
| Mass Error [ppm]: | -0.25178        |
| PEP:              | 9.0511E-24      |
| Precursor Type:   | MULTI           |

| b <sup>2+</sup> ion |        | b ion    |        | seq |   |    | y ion    |         | y <sup>2+</sup> ion |         |
|---------------------|--------|----------|--------|-----|---|----|----------|---------|---------------------|---------|
| Δ dalton            | mass   | Δ dalton | mass   |     |   |    | Δ dalton | mass    | Δ dalton            | mass    |
|                     | 58.029 |          | 58.029 | 1   | G | 22 |          |         |                     |         |
|                     | 187.07 |          | 187.07 | 2   | E | 21 | 2024     |         | 2024                |         |
|                     | 244.09 |          | 244.09 | 3   | G | 20 | 1894.9   | +0.0284 | 1894.9              |         |
|                     | 315.13 |          | 315.13 | 4   | A | 19 | 1837.9   |         | 1837.9              |         |
|                     | 372.15 |          | 372.15 | 5   | G | 18 | 1766.9   |         | 883.94              | -0.145  |
|                     | 469.2  |          | 469.2  | 6   | P | 17 | 1709.9   | +0.3965 | 1709.9              |         |
|                     | 566.26 |          | 566.26 | 7   | P | 16 | 1612.8   | -0.131  | 806.91              | +0.0453 |
|                     | 663.31 |          | 663.31 | 8   | P | 15 | 1515.8   | +0.113  | 758.38              | -0.173  |
|                     | 760.36 |          | 760.36 | 9   | P | 14 | 1418.7   | -0.323  | 1418.7              |         |
|                     | 873.45 | -0.004   | 873.45 | 10  | L | 13 | 1321.6   | +0.3741 | 1321.6              |         |
|                     | 970.5  |          | 970.5  | 11  | P | 12 | 1208.6   | -0.039  | 604.79              | +0.027  |
|                     | 1067.6 |          | 1067.6 | 12  | P | 11 | 1111.5   | -0.043  | 1111.5              |         |
|                     | 1138.6 | +0.188   | 1138.6 | 13  | A | 10 | 1014.5   | +0.0667 | 1014.5              |         |
|                     | 1266.6 | -0.134   | 1266.6 | 14  | Q | 9  | 943.42   |         | 943.42              |         |
|                     | 1363.7 |          | 1363.7 | 15  | P | 8  | 815.36   | +0.2035 | 815.36              |         |
|                     | 1420.7 |          | 1420.7 | 16  | G | 7  | 718.31   |         | 718.31              |         |
| +0.3606             | 746.38 |          | 1491.8 | 17  | A | 6  | 661.29   |         | 661.29              |         |
|                     | 1620.8 | -0.118   | 1620.8 | 18  | E | 5  | 590.25   |         | 590.25              |         |
|                     | 1677.8 | +0.0883  | 1677.8 | 19  | G | 4  | 461.21   | -0.109  | 461.21              |         |
|                     | 1734.8 | -0.071   | 1734.8 | 20  | G | 3  | 404.19   |         | 404.19              |         |
|                     | 1791.9 | -0.008   | 1791.9 | 21  | G | 2  | 347.17   |         | 347.17              |         |
|                     | 1906.9 | -0.077   | 1906.9 | 22  | D | 1  | 290.15   |         | 290.15              |         |
|                     |        |          |        | 23  | R | 0  | 175.12   |         | 175.12              |         |

general information

|                       |           |
|-----------------------|-----------|
| Annotation:           | 19 of 23  |
| AminoAcids Coverage:  | 83 %      |
| Intensity Coverage:   | 63 %      |
| Peak Coverage:        | 36 %      |
| Protein Localisation: | 13 ... 35 |

Scan number 2060 Raw file LNCAP\_Silac\_23F10\_set1\_02  
 Method ITMS: CID Pepti... 86.91

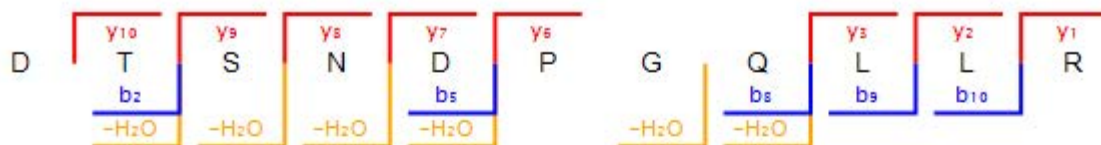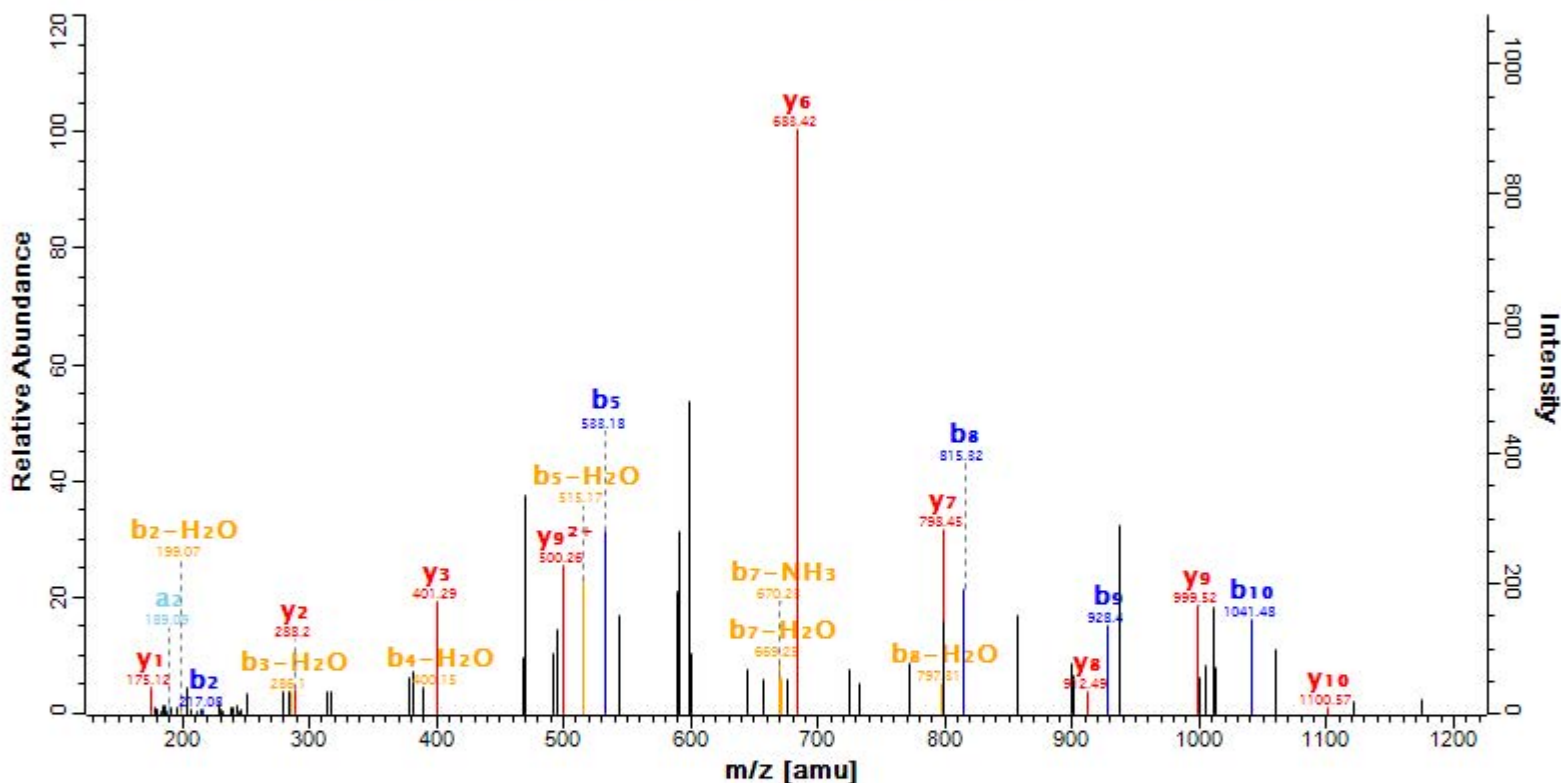

#### precursor information

|                   |                 |
|-------------------|-----------------|
| Mass:             | 1214.58897      |
| m/z:              | 608.30176       |
| Charge:           | 2+              |
| Retentiontime:    | 18.208929061889 |
| Score:            | 86.91063        |
| Mass Error [ppm]: | -0.12734        |
| PEP:              | 0.0021501       |
| Precursor Type:   | MULTI           |

#### general information

|                       |             |
|-----------------------|-------------|
| Annotation:           | 10 of 11    |
| AminoAcids Coverage:  | 91 %        |
| Intensity Coverage:   | 42 %        |
| Peak Coverage:        | 27 %        |
| Protein Localisation: | 264 ... 274 |

| a ion    |        | b ion    |        |    |     |          | y ion  |          | y <sup>2+</sup> ion |  |
|----------|--------|----------|--------|----|-----|----------|--------|----------|---------------------|--|
| Δ dalton | mass   | Δ dalton | mass   |    | seq | Δ dalton | mass   | Δ dalton | mass                |  |
|          | 88.039 |          | 116.03 | 1  | D   | 10       |        |          |                     |  |
| +0.2285  | 189.09 | -0.056   | 217.08 | 2  | T   | 9        | 1100.6 | +0.1486  | 1100.6              |  |
|          | 276.12 |          | 304.11 | 3  | S   | 8        | 999.52 | -0.098   | 500.26              |  |
|          | 390.16 |          | 418.16 | 4  | N   | 7        | 912.49 | +0.0483  | 912.49              |  |
|          | 505.19 | +0.087   | 533.18 | 5  | D   | 6        | 798.45 | -0.015   | 798.45              |  |
|          | 602.24 |          | 630.24 | 6  | P   | 5        | 683.42 | -0.011   | 683.42              |  |
|          | 659.26 |          | 687.26 | 7  | G   | 4        | 586.37 |          | 586.37              |  |
|          | 787.32 | -0.047   | 815.32 | 8  | Q   | 3        | 529.35 |          | 529.35              |  |
|          | 900.41 | +0.0102  | 928.4  | 9  | L   | 2        | 401.29 | +0.0993  | 401.29              |  |
|          | 1013.5 | +0.0437  | 1041.5 | 10 | L   | 1        | 288.2  | +0.0819  | 288.2               |  |
|          |        |          |        | 11 | R   | 0        | 175.12 | +0.1062  | 175.12              |  |

Scan number 2104 Raw file LNCAP\_Silac\_23F10\_set1\_02  
 Method ITMS; CID Peptide 298.31

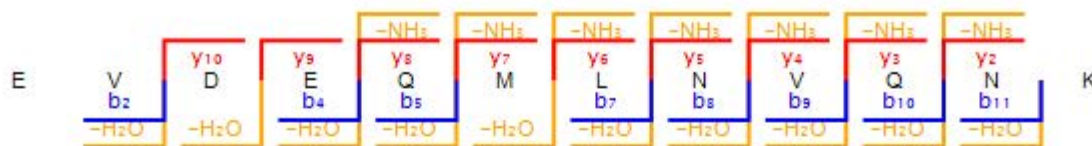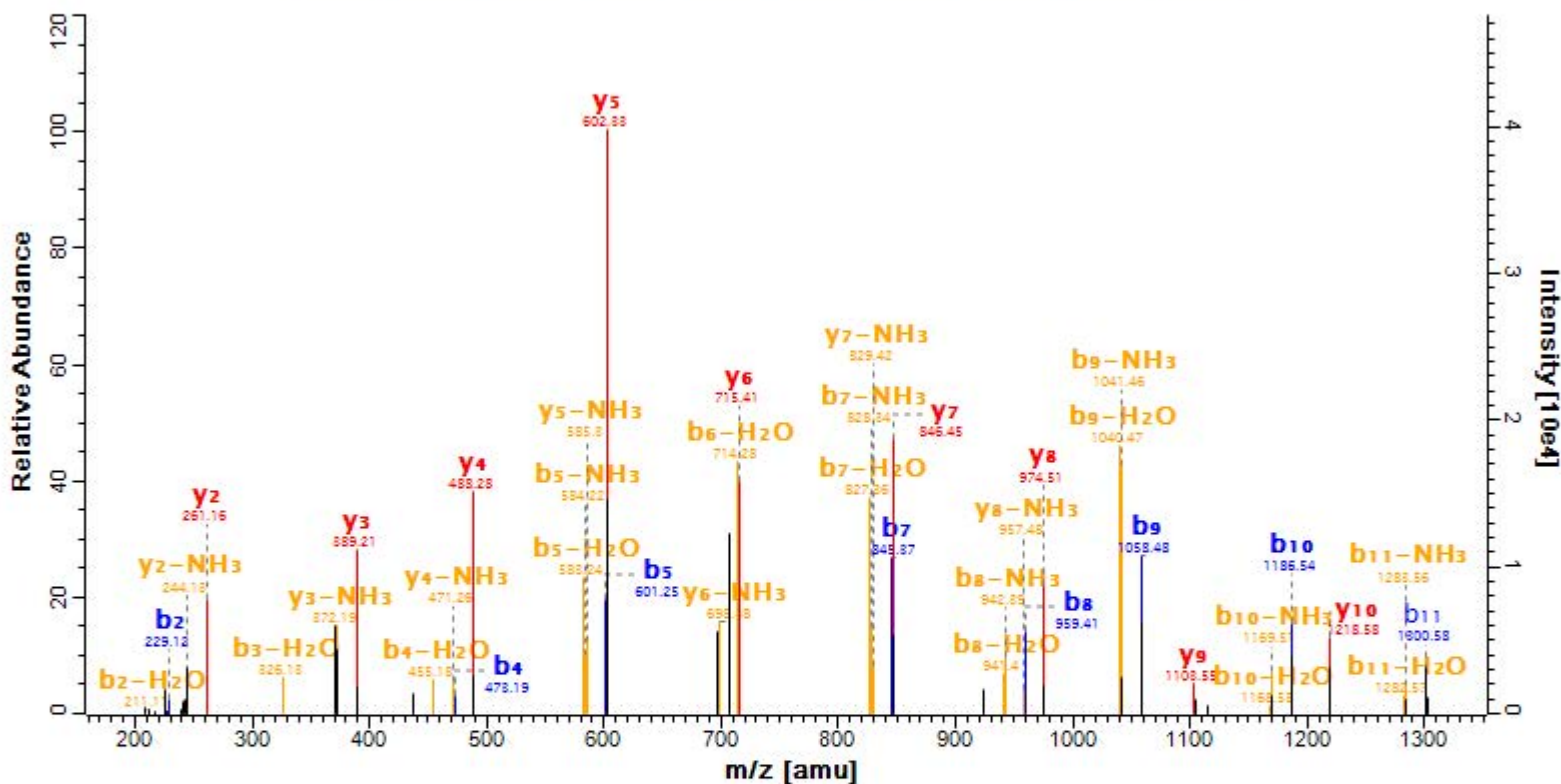

#### precursor information

|                   |                 |
|-------------------|-----------------|
| Mass:             | 1445.68116      |
| m/z:              | 723.84786       |
| Charge:           | 2+              |
| Retentiontime:    | 18.451202392578 |
| Score:            | 298.3076        |
| Mass Error [ppm]: | -0.60933        |
| PEP:              | 3.1436E-78      |
| Precursor Type:   | MULTI           |

#### general information

|                       |             |
|-----------------------|-------------|
| Annotation:           | 10 of 12    |
| AminoAcids Coverage:  | 83 %        |
| Intensity Coverage:   | 76 %        |
| Peak Coverage:        | 53 %        |
| Protein Localisation: | 325 ... 336 |

| b ion      |               |    |     |    |               | y ion      |  |
|------------|---------------|----|-----|----|---------------|------------|--|
| Δ dalton   | mass          |    | seq |    | Δ dalton      | mass       |  |
|            | 130.049869563 | 1  | E   | 11 |               |            |  |
| +0.096484  | 229.118283479 | 2  | V   | 10 | 1317.64672664 |            |  |
|            | 344.145226511 | 3  | D   | 9  | 1218.57831272 | -0.0130051 |  |
| +0.1011819 | 473.187819607 | 4  | E   | 8  | 1103.55136969 | -0.0347681 |  |
| +0.125368  | 601.246397119 | 5  | Q   | 7  | 974.508776591 | +0.0740481 |  |
|            | 732.286881725 | 6  | M   | 6  | 846.450199079 | -0.033451  |  |
| -0.0465438 | 845.370945705 | 7  | L   | 5  | 715.409714473 | +0.0453026 |  |
| -0.1196227 | 959.413873152 | 8  | N   | 4  | 602.325650493 | +0.0483729 |  |
| -0.0621211 | 1058.48228707 | 9  | V   | 3  | 488.282723045 | +0.012565  |  |
| -0.2066361 | 1186.54086458 | 10 | Q   | 2  | 389.214309129 | +0.0510107 |  |
| -0.0397246 | 1300.58379203 | 11 | N   | 1  | 261.155731618 | -0.0180058 |  |
|            |               | 12 | K   | 0  | 147.112804171 |            |  |

Scan number 2174 Raw file LNCAP\_Silac\_23F10\_set1\_02  
 Method ITMS; CID Pepti... 106.3

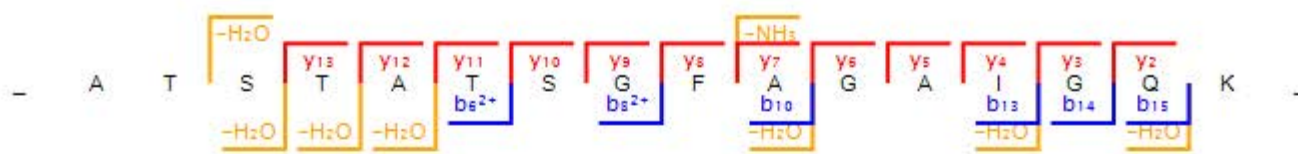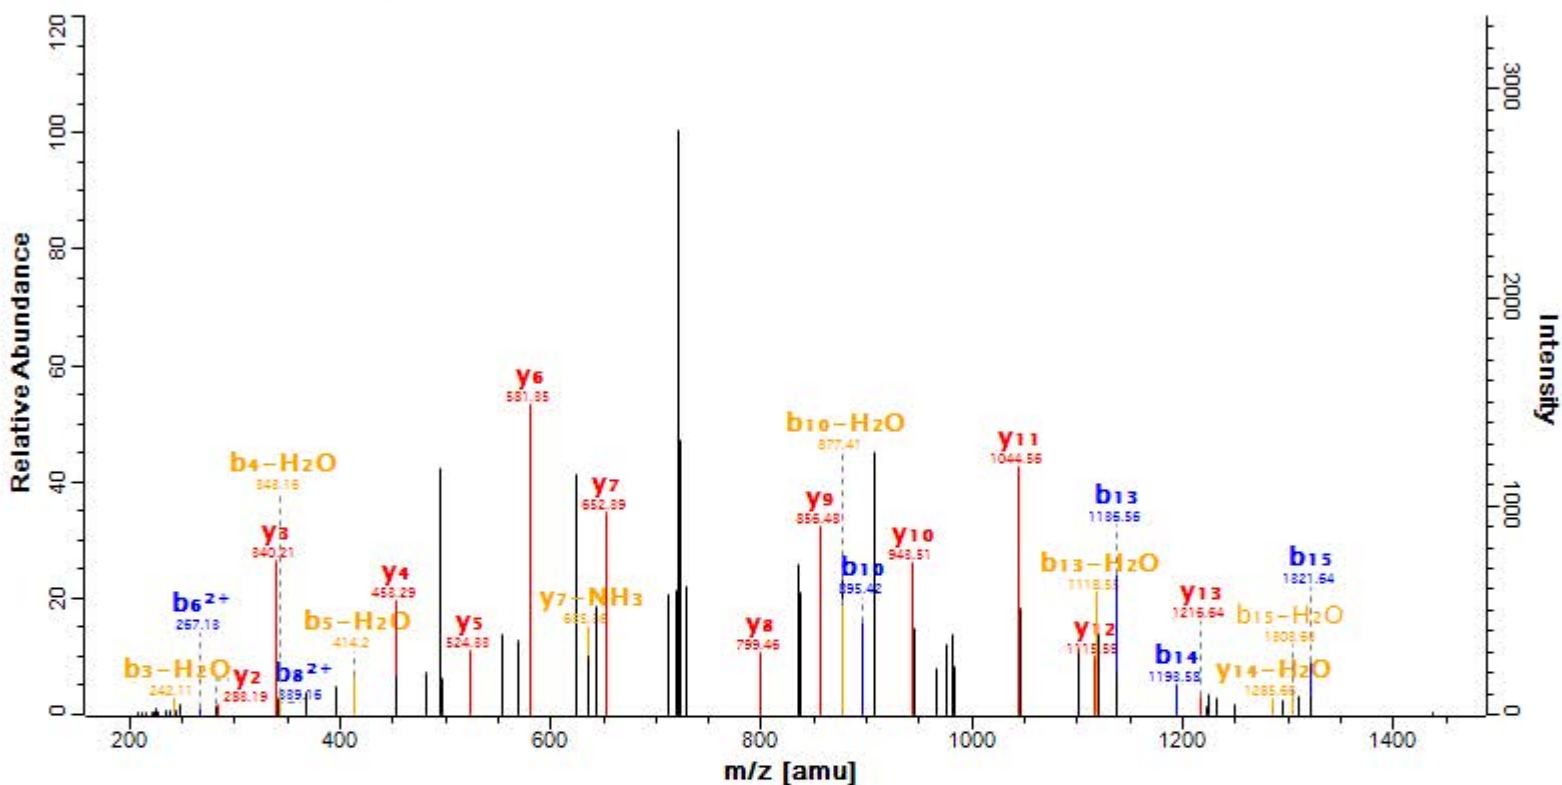

**precursor information**

|                   |                 |
|-------------------|-----------------|
| Mass:             | 1474.75043      |
| m/z:              | 738.38249       |
| Charge:           | 2+              |
| Retentiontime:    | 18.839237213134 |
| Score:            | 106.2999        |
| Mass Error [ppm]: | -0.19437        |
| PEP:              | 4.4937E-05      |
| Precursor Type:   | ISO             |

**general information**

|                       |             |
|-----------------------|-------------|
| Annotation:           | 13 of 16    |
| AminoAcids Coverage:  | 81 %        |
| Intensity Coverage:   | 37 %        |
| Peak Coverage:        | 31 %        |
| Protein Localisation: | 316 ... 331 |

| b <sup>2+</sup> ion |          | b ion     |          |     |   |          | y ion    |  |
|---------------------|----------|-----------|----------|-----|---|----------|----------|--|
| Δ dalton            | mass     | Δ dalton  | mass     | seq |   | Δ dalton | mass     |  |
|                     | 72.04439 |           | 72.04439 | 1   | A | 15       |          |  |
|                     | 173.0921 |           | 173.0921 | 2   | T | 14       | 1404.721 |  |
|                     | 260.1241 |           | 260.1241 | 3   | S | 13       | 1303.673 |  |
|                     | 361.1718 |           | 361.1718 | 4   | T | 12       | 1216.641 |  |
|                     | 432.2089 |           | 432.2089 | 5   | A | 11       | 1115.593 |  |
| +0.029333           | 267.1319 |           | 533.2566 | 6   | T | 10       | 1044.556 |  |
|                     | 620.2886 |           | 620.2886 | 7   | S | 9        | 943.5087 |  |
| +0.054711           | 339.1587 |           | 677.3101 | 8   | G | 8        | 856.4767 |  |
|                     | 824.3785 |           | 824.3785 | 9   | F | 7        | 799.4552 |  |
|                     | 895.4156 | -0.16382  | 895.4156 | 10  | A | 6        | 652.3868 |  |
|                     | 952.4371 |           | 952.4371 | 11  | G | 5        | 581.3497 |  |
|                     | 1023.474 |           | 1023.474 | 12  | A | 4        | 524.3282 |  |
|                     | 1136.558 | -0.05835  | 1136.558 | 13  | I | 3        | 453.2911 |  |
|                     | 1193.58  | +0.356342 | 1193.58  | 14  | G | 2        | 340.207  |  |
|                     | 1321.638 | -0.13327  | 1321.638 | 15  | Q | 1        | 283.1856 |  |
|                     |          |           |          | 16  | K | 0        | 155.127  |  |

Scan number 2359 Raw file LNCAP\_Silac\_23F10\_set1\_02  
 Method ITMS; CID Pepti... 80.31

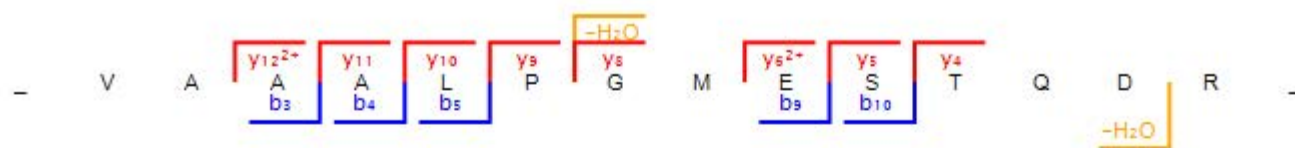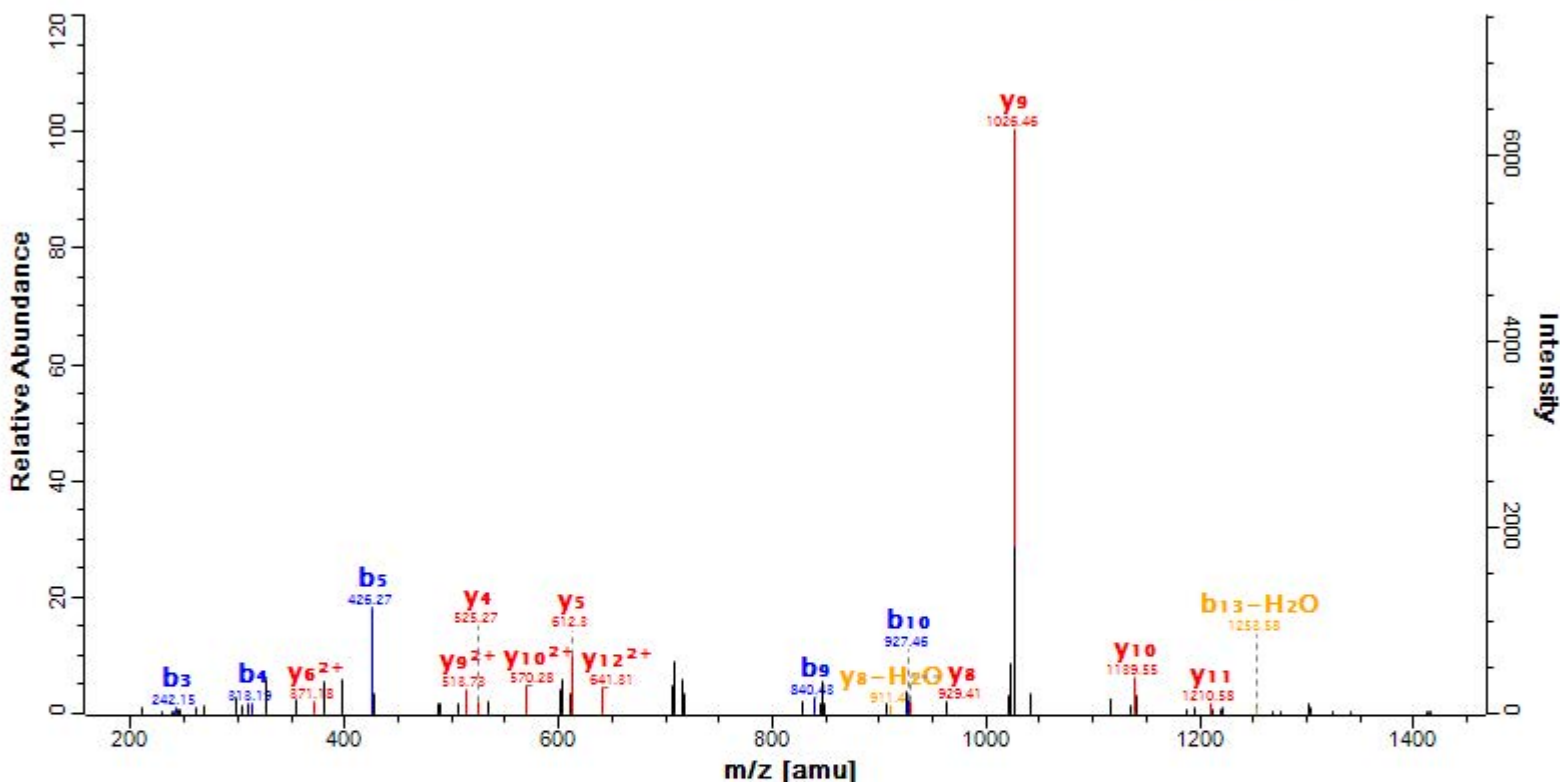

#### precursor information

|                   |                 |
|-------------------|-----------------|
| Mass:             | 1444.69884      |
| m/z:              | 723.3567        |
| Charge:           | 2+              |
| Retentiontime:    | 19.858392715454 |
| Score:            | 80.31177        |
| Mass Error [ppm]: | 0.5586          |
| PEP:              | 0.00098105      |
| Precursor Type:   | MULTI           |

| b ion     |          |     |   | y ion    |          | y <sup>2+</sup> ion |          |
|-----------|----------|-----|---|----------|----------|---------------------|----------|
| Δ dalton  | mass     | seq |   | Δ dalton | mass     | Δ dalton            | mass     |
|           | 100.0757 | 1   | V | 13       |          |                     |          |
|           | 171.1128 | 2   | A | 12       | 1352.657 |                     | 1352.657 |
| +0.107406 | 242.1499 | 3   | A | 11       | 1281.62  |                     | 641.3136 |
| +0.006389 | 313.187  | 4   | A | 10       | 1210.583 | -0.12124            | 1210.583 |
| -0.0214   | 426.2711 | 5   | L | 9        | 1139.546 | +0.021949           | 570.2765 |
|           | 523.3239 | 6   | P | 8        | 1026.462 | -0.05036            | 513.7344 |
|           | 580.3453 | 7   | G | 7        | 929.4089 | +0.273767           | 929.4089 |
|           | 711.3858 | 8   | M | 6        | 872.3874 |                     | 872.3874 |
| -0.25158  | 840.4284 | 9   | E | 5        | 741.3469 |                     | 371.1771 |
| -0.00193  | 927.4604 | 10  | S | 4        | 612.3043 | -0.03301            | 612.3043 |
|           | 1028.508 | 11  | T | 3        | 525.2723 | +0.12689            | 525.2723 |
|           | 1156.567 | 12  | Q | 2        | 424.2246 |                     | 424.2246 |
|           | 1271.594 | 13  | D | 1        | 296.166  |                     | 296.166  |
|           |          | 14  | R | 0        | 181.1391 |                     | 181.1391 |

#### general information

|                       |             |
|-----------------------|-------------|
| Annotation:           | 10 of 14    |
| AminoAcids Coverage:  | 71 %        |
| Intensity Coverage:   | 48 %        |
| Peak Coverage:        | 19 %        |
| Protein Localisation: | 170 ... 183 |



Scan number 2517 Raw file LNCAP\_Silac\_23F10\_set1\_02  
 Method ITMS; CID Pepti... 124.84

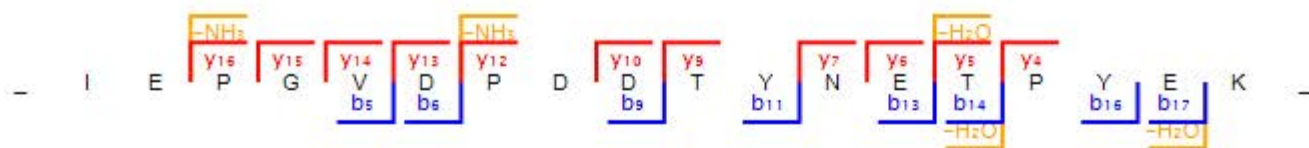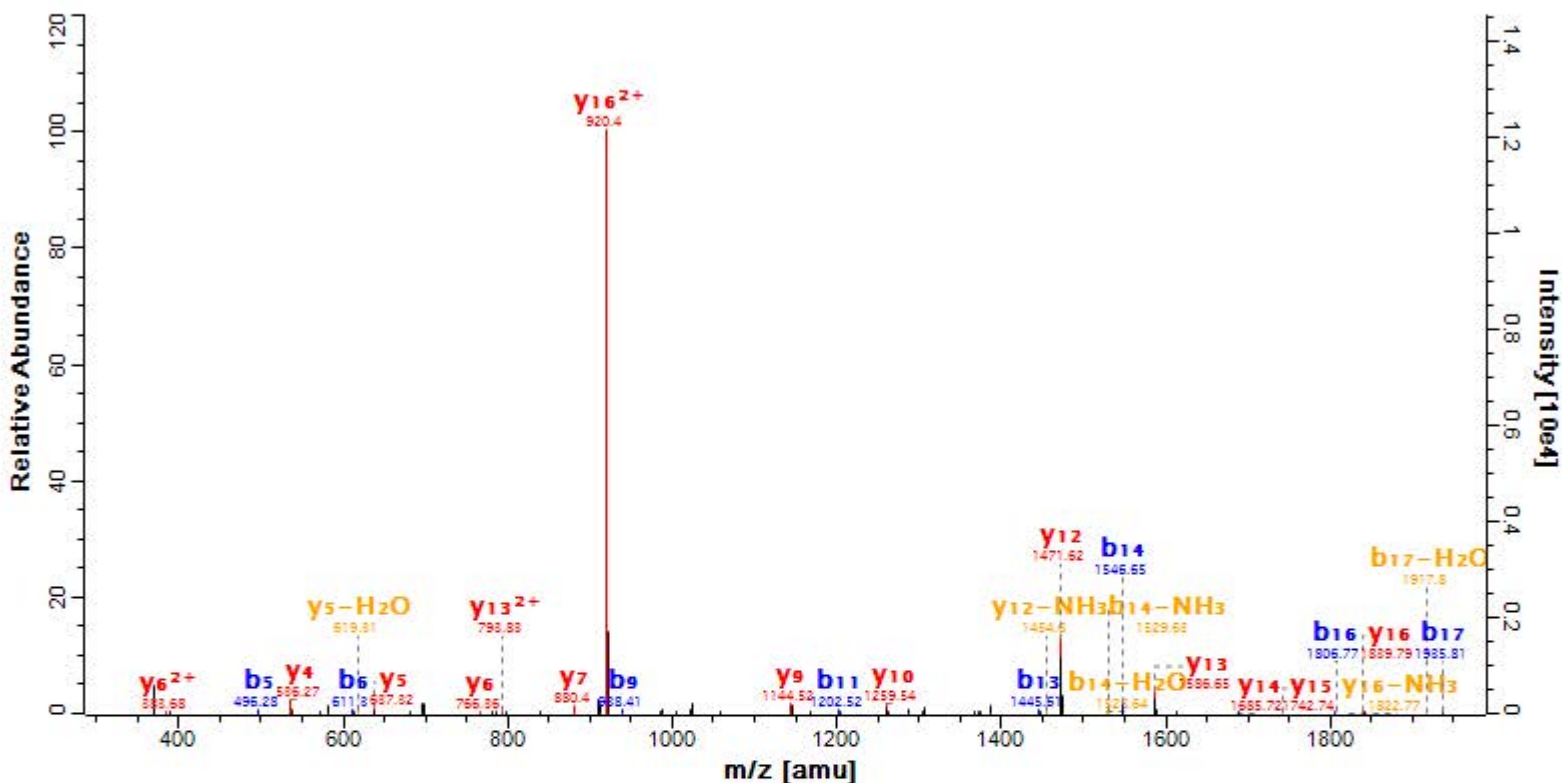

#### precursor information

|                   |                 |
|-------------------|-----------------|
| Mass:             | 2080.91113      |
| m/z:              | 1041.46284      |
| Charge:           | 2+              |
| Retentiontime:    | 20.691112518310 |
| Score:            | 124.844         |
| Mass Error [ppm]: | -0.089082       |
| PEP:              | 2.1154E-12      |
| Precursor Type:   | MULTI           |

| b ion     |          |    |     |    | y ion    |           | y <sup>2+</sup> ion |           |
|-----------|----------|----|-----|----|----------|-----------|---------------------|-----------|
| Δ dalton  | mass     |    | seq |    | Δ dalton | mass      | Δ dalton            | mass      |
|           | 114.0913 | 1  | I   | 17 |          |           |                     |           |
|           | 243.1339 | 2  | E   | 16 | 1968.835 |           | 1968.835            |           |
|           | 340.1867 | 3  | P   | 15 | 1839.792 | -0.30621  | 920.3996            | +0.270807 |
|           | 397.2082 | 4  | G   | 14 | 1742.739 | +0.07663  | 1742.739            |           |
| +0.070471 | 496.2766 | 5  | V   | 13 | 1685.718 | -0.15435  | 1685.718            |           |
| +0.004526 | 611.3035 | 6  | D   | 12 | 1586.649 | -0.10949  | 793.8283            | -0.03299  |
|           | 708.3563 | 7  | P   | 11 | 1471.622 | -0.04398  | 1471.622            |           |
|           | 823.3832 | 8  | D   | 10 | 1374.57  |           | 1374.57             |           |
| +0.042347 | 938.4102 | 9  | D   | 9  | 1259.543 | +0.033411 | 1259.543            |           |
|           | 1039.458 | 10 | T   | 8  | 1144.516 | +0.048269 | 1144.516            |           |
| -0.01214  | 1202.521 | 11 | Y   | 7  | 1043.468 |           | 1043.468            |           |
|           | 1316.564 | 12 | N   | 6  | 880.407  | -0.08181  | 880.407             |           |
| -0.05897  | 1445.607 | 13 | E   | 5  | 766.3618 | +0.228815 | 383.6845            | -0.26573  |
| -0.22579  | 1546.654 | 14 | T   | 4  | 637.3192 | +0.09996  | 637.3192            |           |
|           | 1643.707 | 15 | P   | 3  | 536.2715 | +0.172297 | 536.2715            |           |
| -0.27254  | 1806.77  | 16 | Y   | 2  | 439.2187 |           | 439.2187            |           |
| -0.21308  | 1935.813 | 17 | E   | 1  | 276.1554 |           | 276.1554            |           |
|           |          | 18 | K   | 0  | 147.1128 |           | 147.1128            |           |

#### general information

|                       |             |
|-----------------------|-------------|
| Annotation:           | 14 of 18    |
| AminoAcids Coverage:  | 78 %        |
| Intensity Coverage:   | 67 %        |
| Peak Coverage:        | 29 %        |
| Protein Localisation: | 407 ... 424 |

Scan number 2569 Raw file LNCAP\_Silac\_23F10\_set1\_02  
 Method ITMS; CID Pepti... 241.15

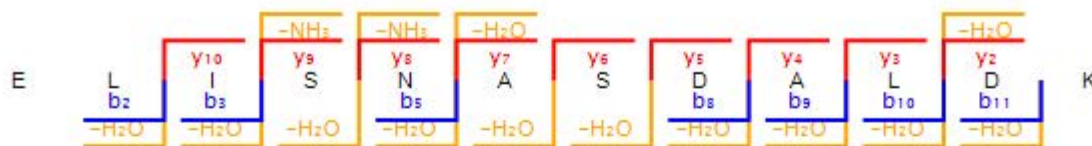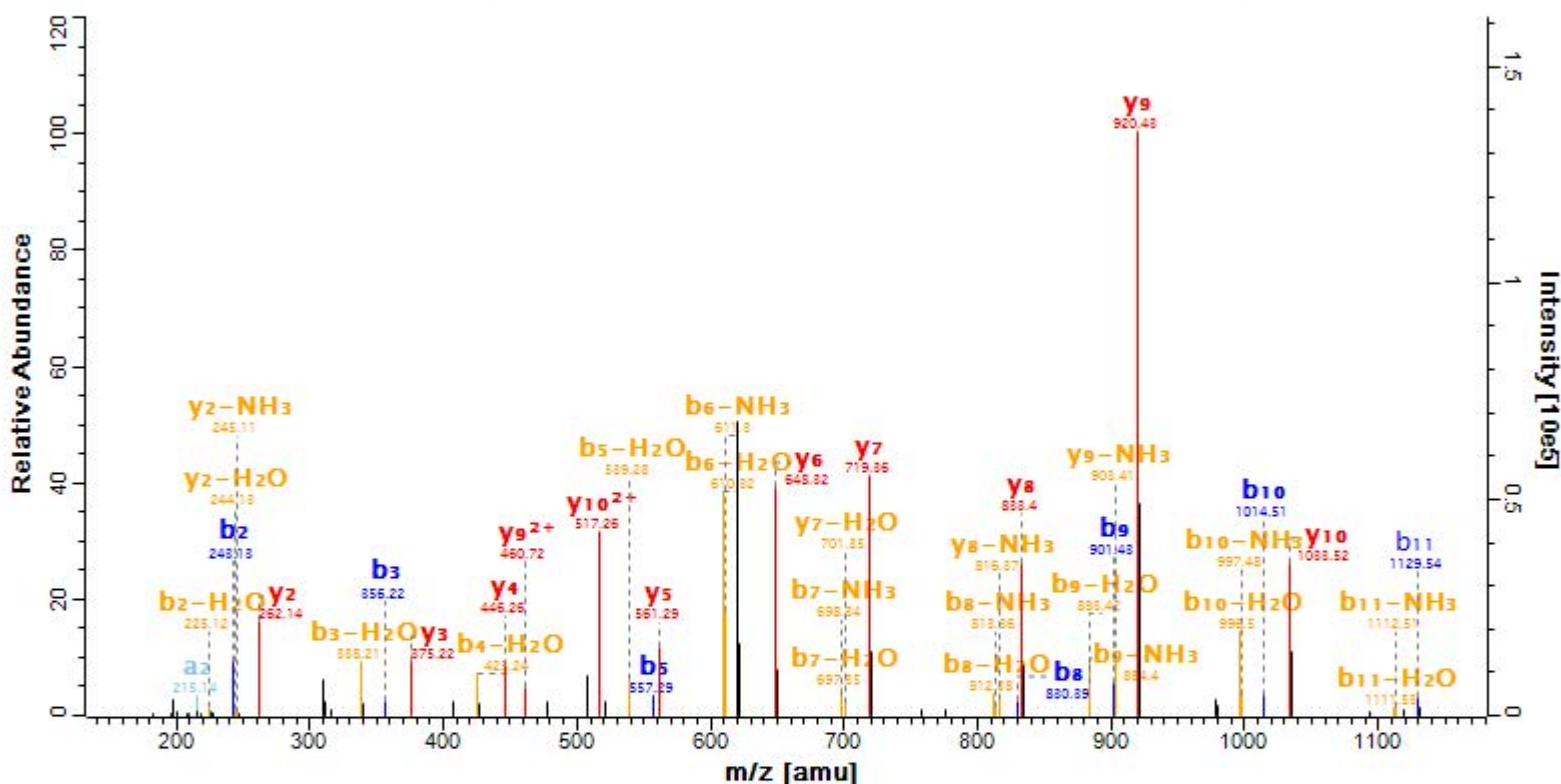

#### precursor information

|                   |                 |
|-------------------|-----------------|
| Mass:             | 1274.63503      |
| m/z:              | 638.32479       |
| Charge:           | 2+              |
| Retentiontime:    | 20.968715667724 |
| Score:            | 241.1508        |
| Mass Error [ppm]: | -0.29801        |
| PEP:              | 3.2273E-32      |
| Precursor Type:   | MULTI           |

#### general information

|                       |           |
|-----------------------|-----------|
| Annotation:           | 10 of 12  |
| AminoAcids Coverage:  | 83 %      |
| Intensity Coverage:   | 73 %      |
| Peak Coverage:        | 50 %      |
| Protein Localisation: | 42 ... 53 |

| a ion    |        | b ion    |        | seq |   |    | y ion    |         | y <sup>2+</sup> ion |         |
|----------|--------|----------|--------|-----|---|----|----------|---------|---------------------|---------|
| Δ dalton | mass   | Δ dalton | mass   |     |   |    | Δ dalton | mass    | Δ dalton            | mass    |
|          | 102.05 |          | 130.05 | 1   | E | 11 |          |         |                     |         |
| -0.02    | 215.14 | +0.0279  | 243.13 | 2   | L | 10 | 1146.6   |         | 1146.6              |         |
|          | 328.22 | -0.038   | 356.22 | 3   | I | 9  | 1033.5   | -0.003  | 517.26              | +0.2171 |
|          | 415.26 |          | 443.25 | 4   | S | 8  | 920.43   | +0.0392 | 460.72              | +0.1453 |
|          | 529.3  | -0.02    | 557.29 | 5   | N | 7  | 833.4    | -0.026  | 833.4               |         |
|          | 600.34 |          | 628.33 | 6   | A | 6  | 719.36   | +0.0231 | 719.36              |         |
|          | 687.37 |          | 715.36 | 7   | S | 5  | 648.32   | +0.0103 | 648.32              |         |
|          | 802.39 | -0.007   | 830.39 | 8   | D | 4  | 561.29   | +0.0188 | 561.29              |         |
|          | 873.43 | +0.3116  | 901.43 | 9   | A | 3  | 446.26   | +0.0197 | 446.26              |         |
|          | 986.52 | -0.091   | 1014.5 | 10  | L | 2  | 375.22   | +0.1138 | 375.22              |         |
|          | 1101.5 | -0.059   | 1129.5 | 11  | D | 1  | 262.14   | -0.003  | 262.14              |         |
|          |        |          |        | 12  | K | 0  | 147.11   |         | 147.11              |         |

Scan number 2768 Raw file LNCAP\_Silac\_23F10\_set1\_02  
 Method ITMS; CID Pepti... 112.02

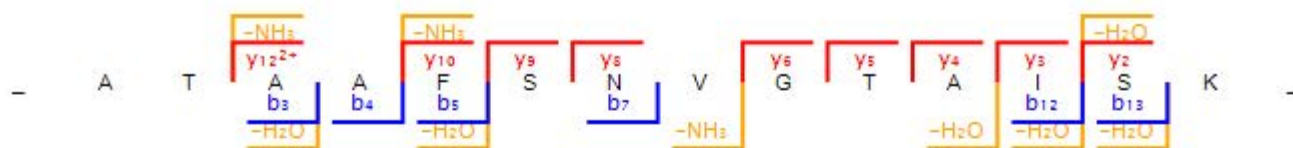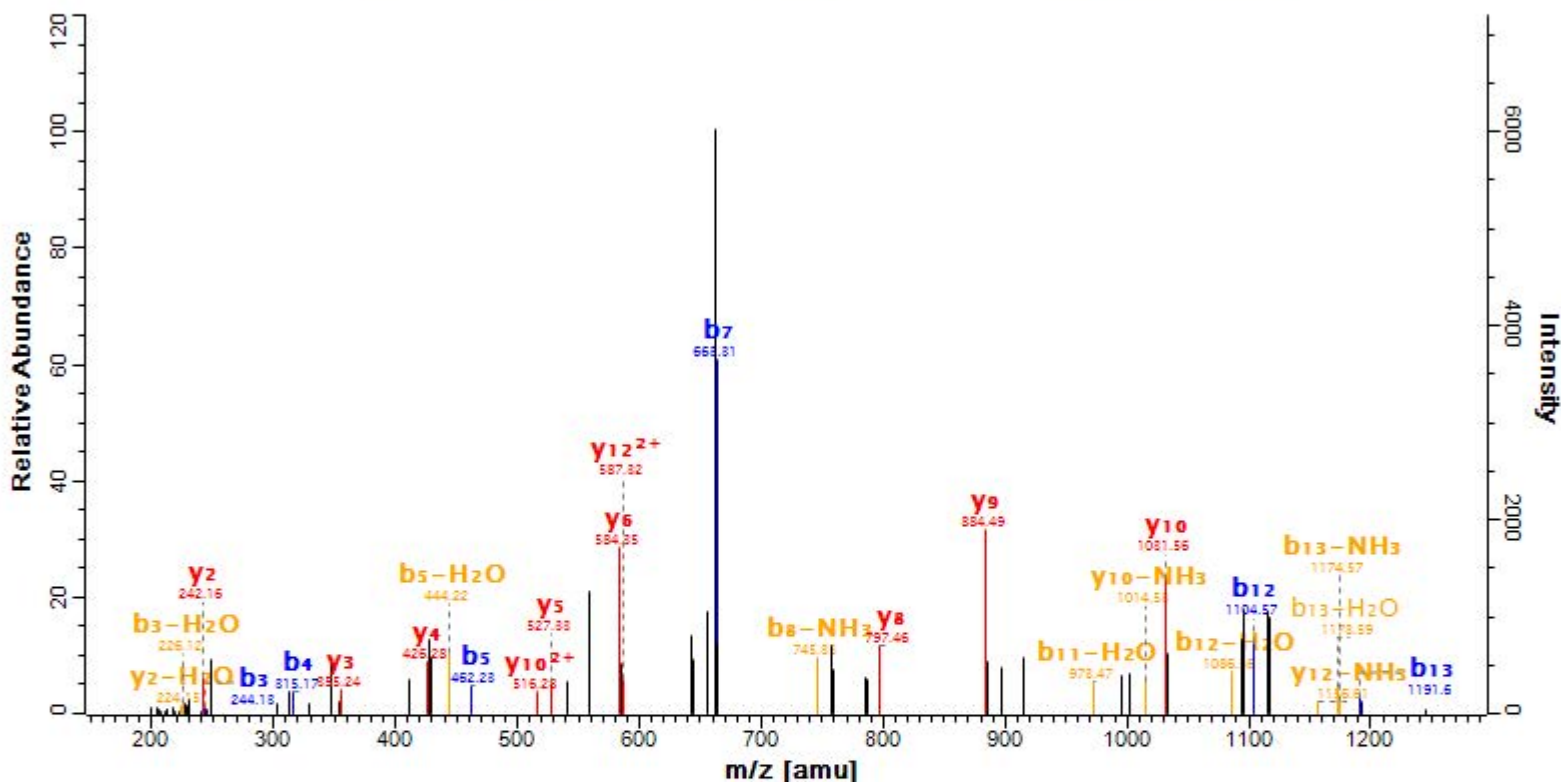

#### precursor information

|                   |                 |
|-------------------|-----------------|
| Mass:             | 1336.69629      |
| m/z:              | 669.35542       |
| Charge:           | 2+              |
| Retentiontime:    | 22.054607391357 |
| Score:            | 112.0222        |
| Mass Error [ppm]: | -1.7778         |
| PEP:              | 4.4575E-06      |
| Precursor Type:   | MULTI           |

#### general information

|                       |             |
|-----------------------|-------------|
| Annotation:           | 11 of 14    |
| AminoAcids Coverage:  | 79 %        |
| Intensity Coverage:   | 38 %        |
| Peak Coverage:        | 29 %        |
| Protein Localisation: | 110 ... 123 |

| b ion     |          |     |   | y ion    |          | y <sup>2+</sup> ion |          |
|-----------|----------|-----|---|----------|----------|---------------------|----------|
| Δ dalton  | mass     | seq |   | Δ dalton | mass     | Δ dalton            | mass     |
|           | 72.04439 | 1   | A | 13       |          |                     |          |
|           | 173.0921 | 2   | T | 12       | 1274.683 |                     | 1274.683 |
| +0.075331 | 244.1292 | 3   | A | 11       | 1173.635 |                     | 587.3213 |
| +0.002588 | 315.1663 | 4   | A | 10       | 1102.598 |                     | 1102.598 |
| +0.046479 | 462.2347 | 5   | F | 9        | 1031.561 | -0.02158            | 516.2842 |
|           | 549.2667 | 6   | S | 8        | 884.4927 | +0.0569             | 884.4927 |
| +0.265224 | 663.3097 | 7   | N | 7        | 797.4607 | -0.01428            | 797.4607 |
|           | 762.3781 | 8   | V | 6        | 683.4178 |                     | 683.4178 |
|           | 819.3995 | 9   | G | 5        | 584.3494 | -0.00279            | 584.3494 |
|           | 920.4472 | 10  | T | 4        | 527.3279 | +0.032952           | 527.3279 |
|           | 991.4843 | 11  | A | 3        | 426.2802 | -0.00372            | 426.2802 |
| +0.108236 | 1104.568 | 12  | I | 2        | 355.2431 | +0.084419           | 355.2431 |
| -0.06063  | 1191.6   | 13  | S | 1        | 242.159  | +0.074443           | 242.159  |
|           |          | 14  | K | 0        | 155.127  |                     | 155.127  |

Scan number 3011 Raw file LNCAP\_Silac\_23F10\_set1\_02  
 Method ITMS; CID Pepti... 89.05

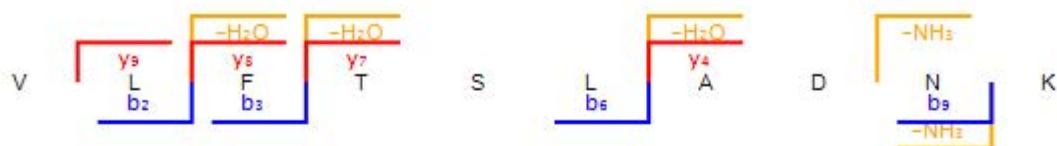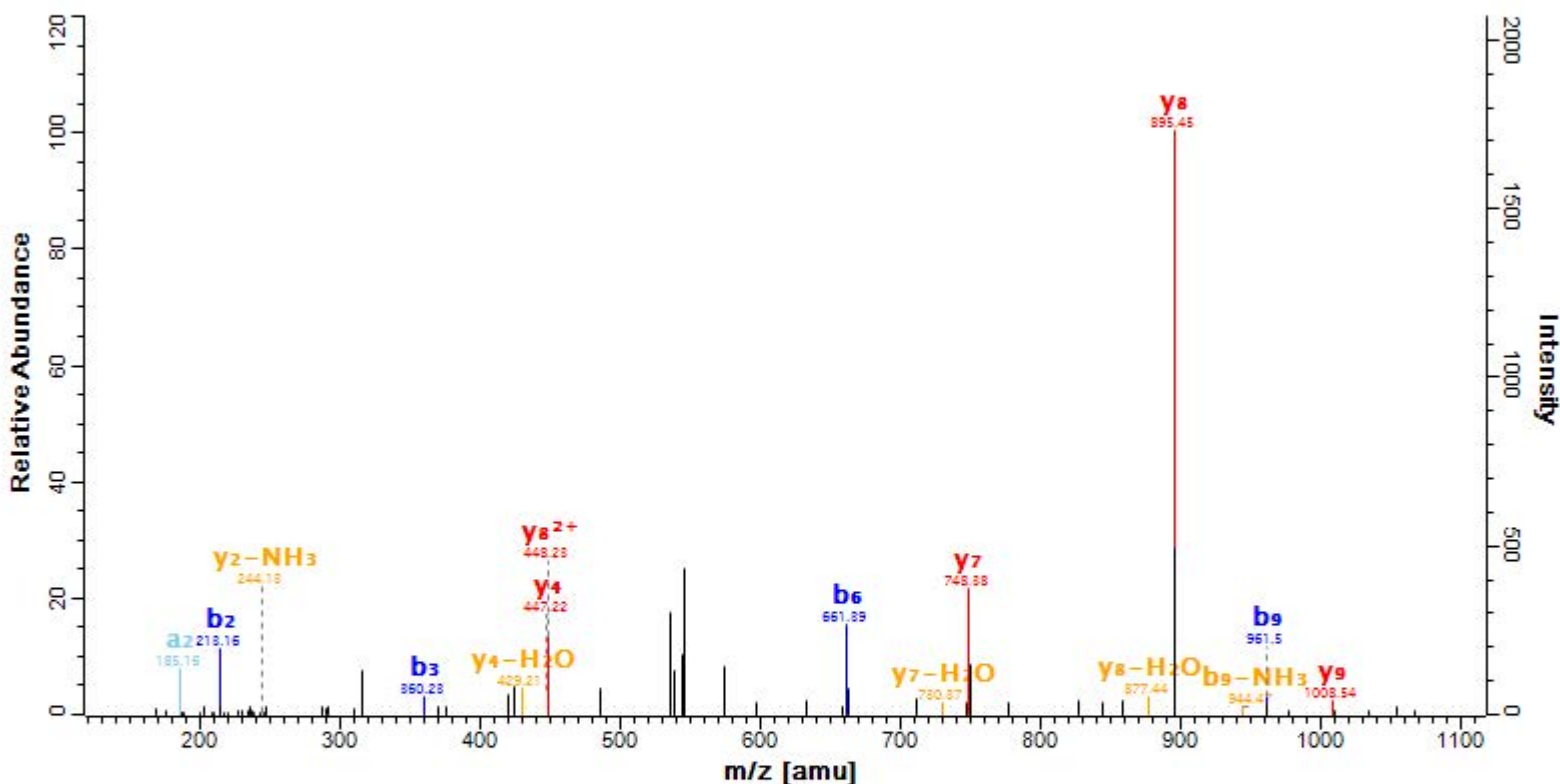

#### precursor information

|                   |                 |
|-------------------|-----------------|
| Mass:             | 1106.59725      |
| m/z:              | 554.3059        |
| Charge:           | 2+              |
| Retentiontime:    | 23.313310623168 |
| Score:            | 89.04736        |
| Mass Error [ppm]: | 0.066782        |
| PEP:              | 0.0023227       |
| Precursor Type:   | MULTI           |

|                       |               |
|-----------------------|---------------|
| Annotation:           | 6 of 10       |
| AminoAcids Coverage:  | 60 %          |
| Intensity Coverage:   | 51 %          |
| Peak Coverage:        | 21 %          |
| Protein Localisation: | 6495 ... 6504 |

| a ion    |        | b ion    |        |    |     |   | y ion    |         | y <sup>2+</sup> ion |         |
|----------|--------|----------|--------|----|-----|---|----------|---------|---------------------|---------|
| Δ dalton | mass   | Δ dalton | mass   |    | seq |   | Δ dalton | mass    | Δ dalton            | mass    |
|          | 72.081 |          | 100.08 | 1  | V   | 9 |          |         |                     |         |
| +0.0375  | 185.16 | -0.031   | 213.16 | 2  | L   | 8 | 1008.5   | +0.3117 | 1008.5              |         |
|          | 332.23 | -0.009   | 360.23 | 3  | F   | 7 | 895.45   | -0.006  | 448.23              | +0.1562 |
|          | 433.28 |          | 461.28 | 4  | T   | 6 | 748.38   | +0.002  | 748.38              |         |
|          | 520.31 |          | 548.31 | 5  | S   | 5 | 647.34   |         | 647.34              |         |
|          | 633.4  | -0.002   | 661.39 | 6  | L   | 4 | 560.3    |         | 560.3               |         |
|          | 704.43 |          | 732.43 | 7  | A   | 3 | 447.22   | +0.4315 | 447.22              |         |
|          | 819.46 |          | 847.46 | 8  | D   | 2 | 376.18   |         | 376.18              |         |
|          | 933.5  | -0.118   | 961.5  | 9  | N   | 1 | 261.16   |         | 261.16              |         |
|          |        |          |        | 10 | K   | 0 | 147.11   |         | 147.11              |         |

Scan number 3258 Raw file LNCAP\_Silac\_23F10\_set1\_02  
 Method ITMS; CID Pepti... 217.64

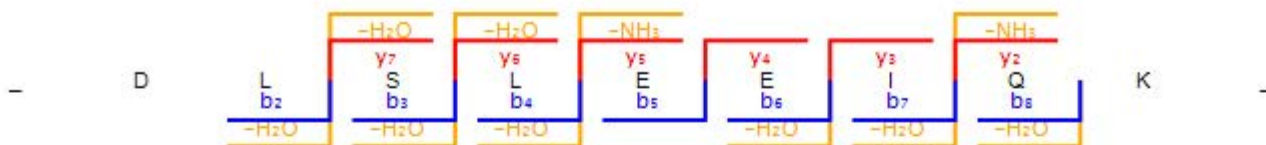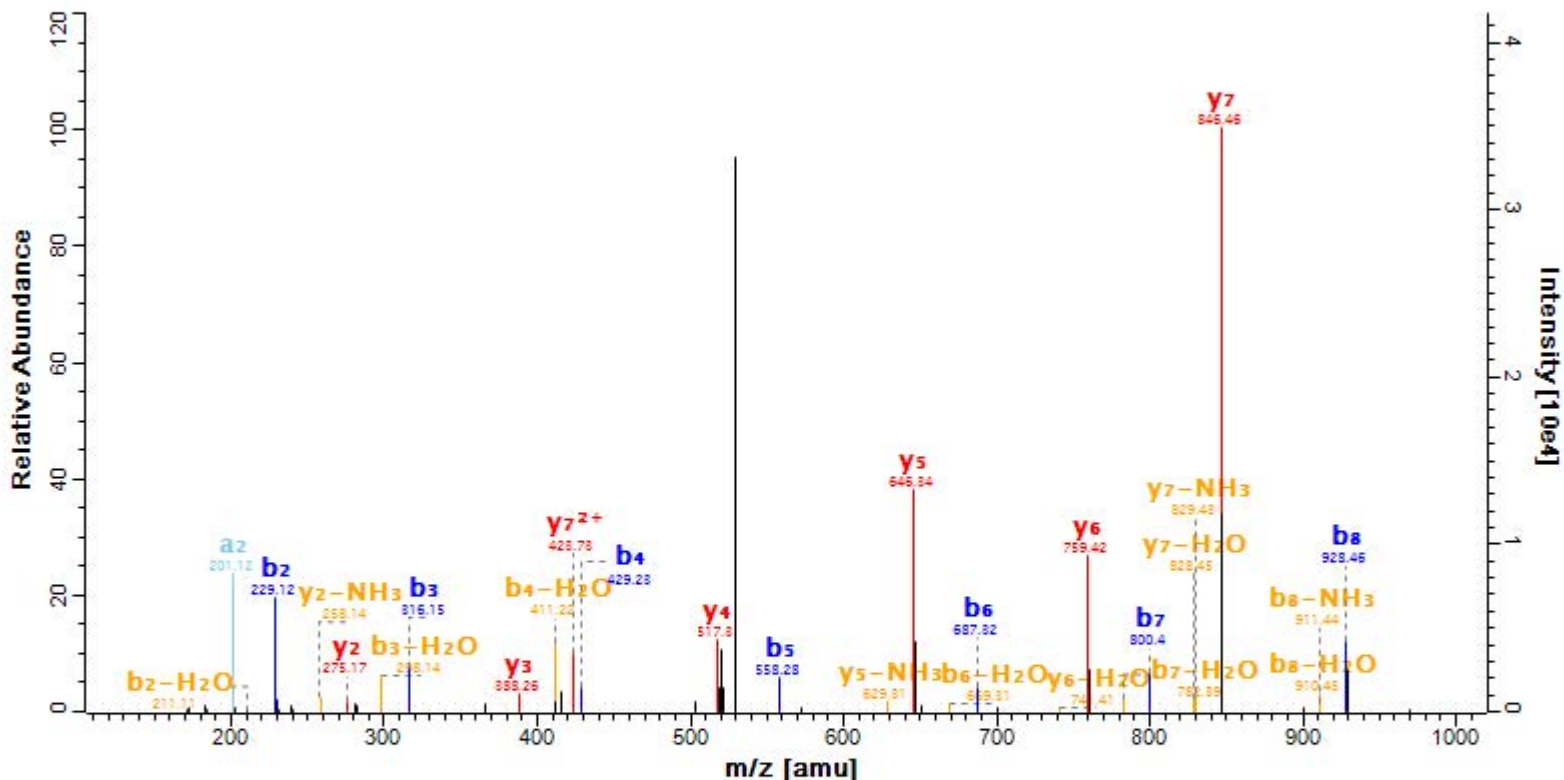

#### precursor information

|                       |                 |
|-----------------------|-----------------|
| Mass:                 | 1073.56049      |
| m/z:                  | 537.78752       |
| Charge:               | 2+              |
| Retentiontime:        | 24.614988327026 |
| Score:                | 217.641         |
| Mass Error [ppm]:     | 0.034209        |
| PEP:                  | 9.9135E-19      |
| Precursor Type:       | MULTI           |
| Annotation:           | 7 of 9          |
| AminoAcids Coverag    | 78 %            |
| Intensity Coverage:   | 61 %            |
| Peak Coverage:        | 41 %            |
| Protein Localisation: | 44 ... 52       |

| a ion    |        | b ion    |        | seq |   |   | y ion    |         | y <sup>2+</sup> ion |         |
|----------|--------|----------|--------|-----|---|---|----------|---------|---------------------|---------|
| Δ dalton | mass   | Δ dalton | mass   |     |   |   | Δ dalton | mass    | Δ dalton            | mass    |
|          | 88.039 |          | 116.03 | 1   | D | 8 |          |         |                     |         |
| +0.03    | 201.12 | -0.104   | 229.12 | 2   | L | 7 | 959.54   |         | 959.54              |         |
|          | 288.16 | +0.0795  | 316.15 | 3   | S | 6 | 846.46   | +0.0337 | 423.73              | +0.2125 |
|          | 401.24 | +0.0296  | 429.23 | 4   | L | 5 | 759.42   | +0.0073 | 759.42              |         |
|          | 530.28 | +0.0966  | 558.28 | 5   | E | 4 | 646.34   | +0.0512 | 646.34              |         |
|          | 659.32 | +0.0314  | 687.32 | 6   | E | 3 | 517.3    | +0.0414 | 517.3               |         |
|          | 772.41 | -0.104   | 800.4  | 7   | I | 2 | 388.26   | +0.1101 | 388.26              |         |
|          | 900.47 | -0.128   | 928.46 | 8   | Q | 1 | 275.17   | +0.0803 | 275.17              |         |
|          |        |          |        | 9   | K | 0 | 147.11   |         | 147.11              |         |

Scan number 3399 Raw file LNCAP\_Silac\_23F10\_set1\_02  
 Method ITMS; CID Peptide 162.94

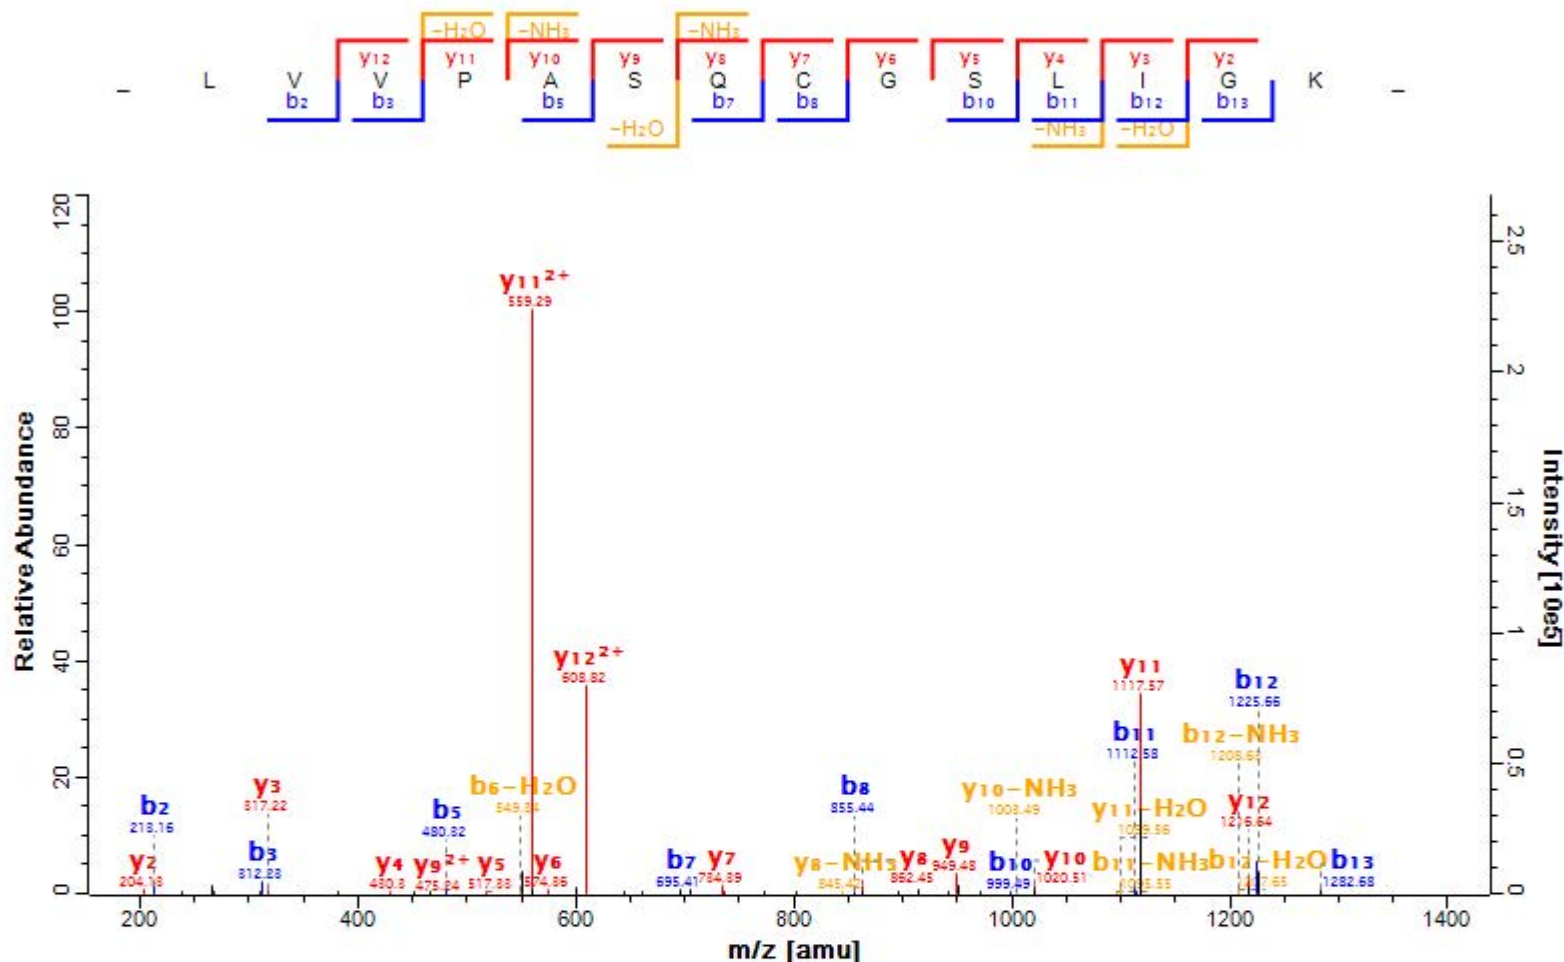

#### precursor information

|                   |                 |
|-------------------|-----------------|
| Mass:             | 1427.78068      |
| m/z:              | 714.89762       |
| Charge:           | 2+              |
| Retentiontime:    | 25.347267150878 |
| Score:            | 162.9437        |
| Mass Error [ppm]: | 0.031923        |
| PEP:              | 1.1644E-10      |
| Precursor Type:   | MULTI           |

#### general information

|                       |             |
|-----------------------|-------------|
| Annotation:           | 12 of 14    |
| AminoAcids Coverage:  | 86 %        |
| Intensity Coverage:   | 85 %        |
| Peak Coverage:        | 40 %        |
| Protein Localisation: | 102 ... 115 |

| b ion     |          |    |     |    | y ion    |           |          | y <sup>2+</sup> ion |  |
|-----------|----------|----|-----|----|----------|-----------|----------|---------------------|--|
| Δ dalton  | mass     |    | seq |    | Δ dalton | mass      | Δ dalton | mass                |  |
|           | 114.0913 | 1  | L   | 13 |          |           |          |                     |  |
| -0.04409  | 213.1598 | 2  | V   | 12 | 1315.704 |           | 1315.704 |                     |  |
| -0.01717  | 312.2282 | 3  | V   | 11 | 1216.635 | -0.08551  | 608.8214 | +0.197871           |  |
|           | 409.2809 | 4  | P   | 10 | 1117.567 | -3.1E-06  | 559.2871 | +0.178611           |  |
| +0.079659 | 480.318  | 5  | A   | 9  | 1020.514 | +0.031948 | 1020.514 |                     |  |
|           | 567.3501 | 6  | S   | 8  | 949.4771 | -0.01858  | 475.2422 | +0.402017           |  |
| +0.345376 | 695.4087 | 7  | Q   | 7  | 862.4451 | +0.029679 | 862.4451 |                     |  |
| +0.073945 | 855.4393 | 8  | C   | 6  | 734.3865 | +0.093322 | 734.3865 |                     |  |
|           | 912.4608 | 9  | G   | 5  | 574.3559 | +0.020089 | 574.3559 |                     |  |
| +0.027899 | 999.4928 | 10 | S   | 4  | 517.3344 | -7.4E-05  | 517.3344 |                     |  |
| -0.0688   | 1112.577 | 11 | L   | 3  | 430.3024 | +0.177707 | 430.3024 |                     |  |
| -0.12247  | 1225.661 | 12 | I   | 2  | 317.2183 | -0.02039  | 317.2183 |                     |  |
| -0.08705  | 1282.682 | 13 | G   | 1  | 204.1343 | +0.111093 | 204.1343 |                     |  |
|           |          | 14 | K   | 0  | 147.1128 |           | 147.1128 |                     |  |

Scan number 3416 Raw file LNCAP\_Silac\_23F10\_set1\_02  
 Method ITMS; CID Peptide 181.68

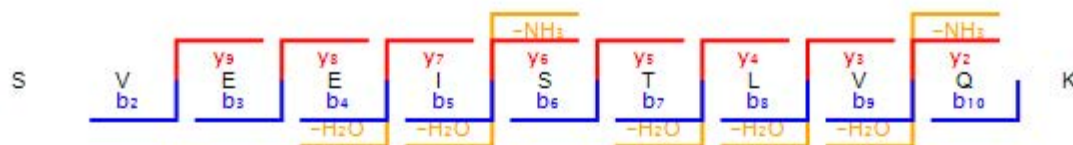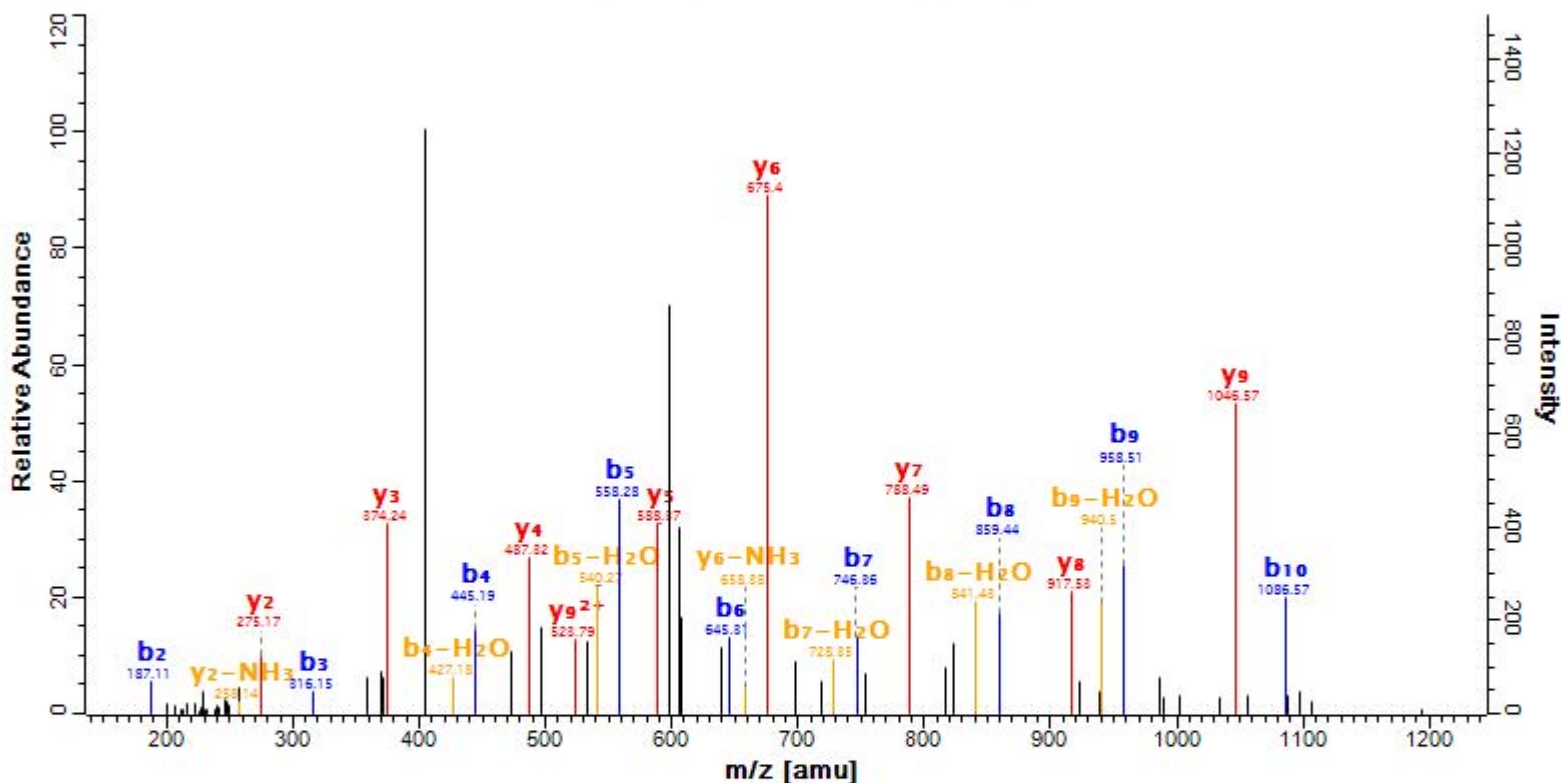

#### precursor information

|                   |                 |
|-------------------|-----------------|
| Mass:             | 1231.66651      |
| m/z:              | 616.84053       |
| Charge:           | 2+              |
| Retentiontime:    | 25.434680938720 |
| Score:            | 181.6812        |
| Mass Error [ppm]: | 0.4266          |
| PEP:              | 1.0593E-08      |
| Precursor Type:   | MULTI           |

#### general information

|                       |            |
|-----------------------|------------|
| Annotation:           | 9 of 11    |
| AminoAcids Coverage:  | 82 %       |
| Intensity Coverage:   | 56 %       |
| Peak Coverage:        | 34 %       |
| Protein Localisation: | 93 ... 103 |

| b ion     |          |    |     |    | y ion    |           | y <sup>2+</sup> ion |           |
|-----------|----------|----|-----|----|----------|-----------|---------------------|-----------|
| Δ dalton  | mass     |    | seq |    | Δ dalton | mass      | Δ dalton            | mass      |
|           | 88.0393  | 1  | S   | 10 |          |           |                     |           |
| -0.14994  | 187.1077 | 2  | V   | 9  | 1145.641 |           | 1145.641            |           |
| -0.21895  | 316.1503 | 3  | E   | 8  | 1046.573 | +0.005919 | 523.79              | +0.093132 |
| -0.01596  | 445.1929 | 4  | E   | 7  | 917.5302 | -0.05928  | 917.5302            |           |
| -0.08648  | 558.277  | 5  | I   | 6  | 788.4876 | +0.067973 | 788.4876            |           |
| +0.01455  | 645.309  | 6  | S   | 5  | 675.4036 | +0.065367 | 675.4036            |           |
| +0.064528 | 746.3567 | 7  | T   | 4  | 588.3715 | +0.087507 | 588.3715            |           |
| -0.1316   | 859.4407 | 8  | L   | 3  | 487.3239 | +0.043145 | 487.3239            |           |
| +0.050844 | 958.5092 | 9  | V   | 2  | 374.2398 | +0.080578 | 374.2398            |           |
| -0.1234   | 1086.568 | 10 | Q   | 1  | 275.1714 | +0.056279 | 275.1714            |           |
|           |          | 11 | K   | 0  | 147.1128 |           | 147.1128            |           |

Scan number 3689 Raw file LNCAP\_Silac\_23F10\_set1\_02  
 Method ITMS: CID Pepti... 240.1

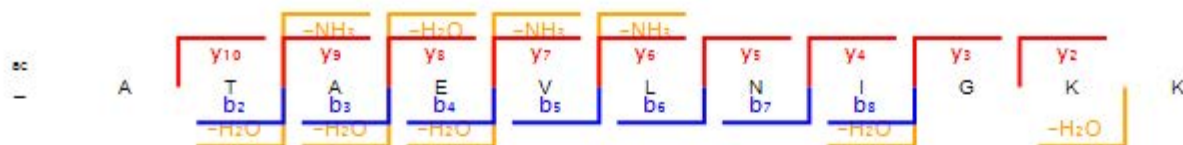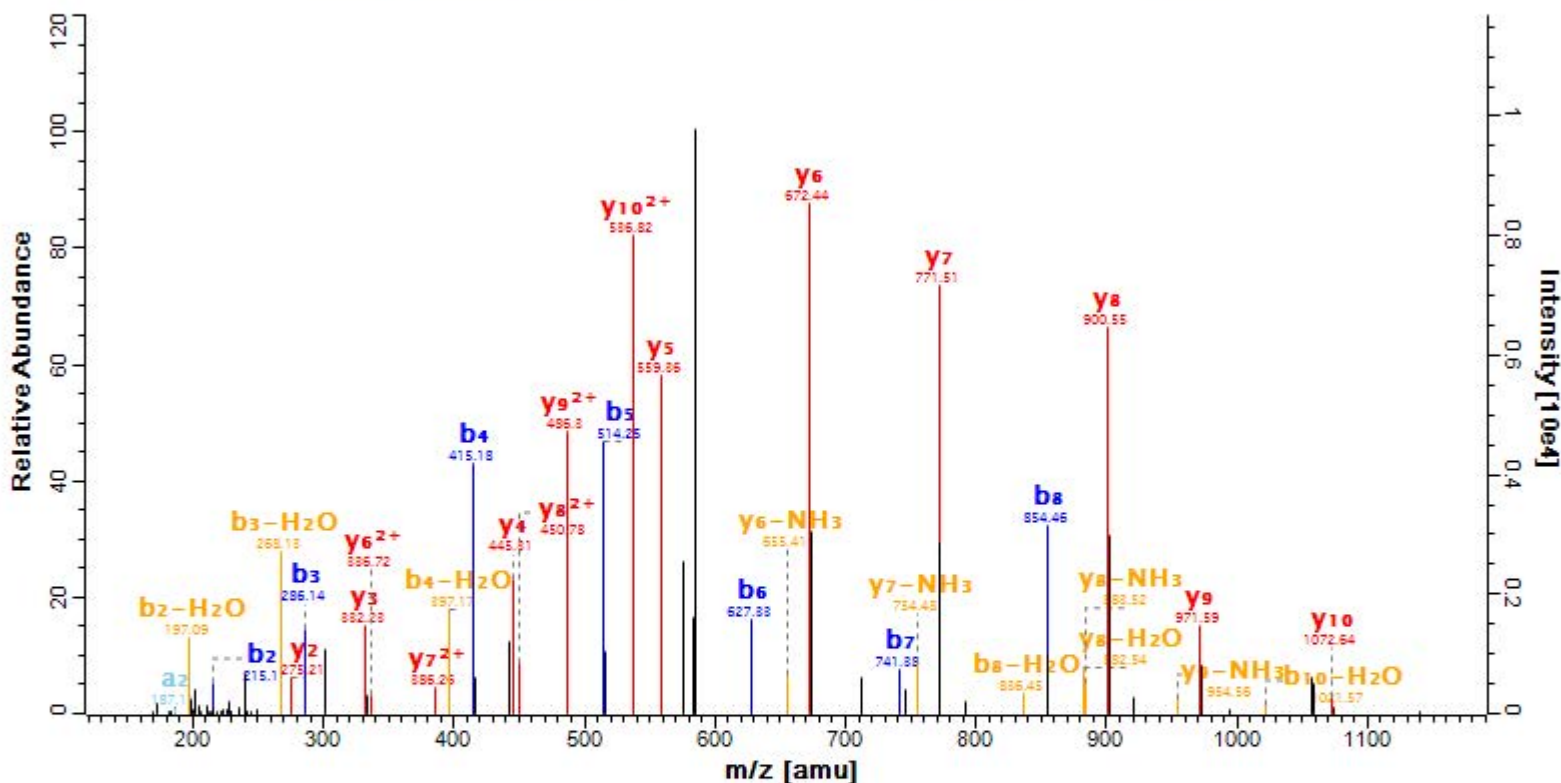

#### precursor information

|                   |                 |
|-------------------|-----------------|
| Mass:             | 1184.6767       |
| m/z:              | 593.34562       |
| Charge:           | 2+              |
| Retentiontime:    | 26.816455841064 |
| Score:            | 240.0957        |
| Mass Error [ppm]: | 0.17517         |
| PEP:              | 7.3412E-29      |
| Precursor Type:   | MULTI           |

#### general information

|                       |          |
|-----------------------|----------|
| Annotation:           | 9 of 11  |
| AminoAcids Coverage:  | 82 %     |
| Intensity Coverage:   | 68 %     |
| Peak Coverage:        | 36 %     |
| Protein Localisation: | 2 ... 12 |

| a ion    |        | b ion    |        |    |     |          | y ion  |          | y <sup>2+</sup> ion |         |
|----------|--------|----------|--------|----|-----|----------|--------|----------|---------------------|---------|
| Δ dalton | mass   | Δ dalton | mass   |    | seq | Δ dalton | mass   | Δ dalton | mass                |         |
|          | 86.06  |          | 114.05 | 1  | A   | 10       |        |          |                     |         |
| +0.0117  | 187.11 | +0.1103  | 215.1  | 2  | T   | 9        | 1072.6 | -0.029   | 536.82              | +0.2537 |
|          | 258.14 | -0.106   | 286.14 | 3  | A   | 8        | 971.59 | +0.0506  | 486.3               | +0.2315 |
|          | 387.19 | -0.049   | 415.18 | 4  | E   | 7        | 900.55 | +0.0336  | 450.78              | -0.003  |
|          | 486.26 | -0.108   | 514.25 | 5  | V   | 6        | 771.51 | +0.0047  | 386.26              | +0.212  |
|          | 599.34 | +0.0023  | 627.33 | 6  | L   | 5        | 672.44 | +0.0344  | 336.72              | -0.034  |
|          | 713.38 | -0.001   | 741.38 | 7  | N   | 4        | 559.36 | +0.0951  | 559.36              |         |
|          | 826.47 | -0.023   | 854.46 | 8  | I   | 3        | 445.31 | +0.1041  | 445.31              |         |
|          | 883.49 |          | 911.48 | 9  | G   | 2        | 332.23 | +0.0849  | 332.23              |         |
|          | 1011.6 |          | 1039.6 | 10 | K   | 1        | 275.21 | +0.0628  | 275.21              |         |
|          |        |          |        | 11 | K   | 0        | 147.11 |          | 147.11              |         |



Scan number 375 Raw file LNCAP\_Silac\_23F10\_set1\_02  
 Method ITMS; CID Pepti... 250.7

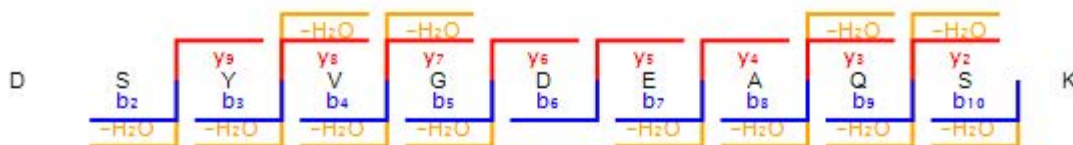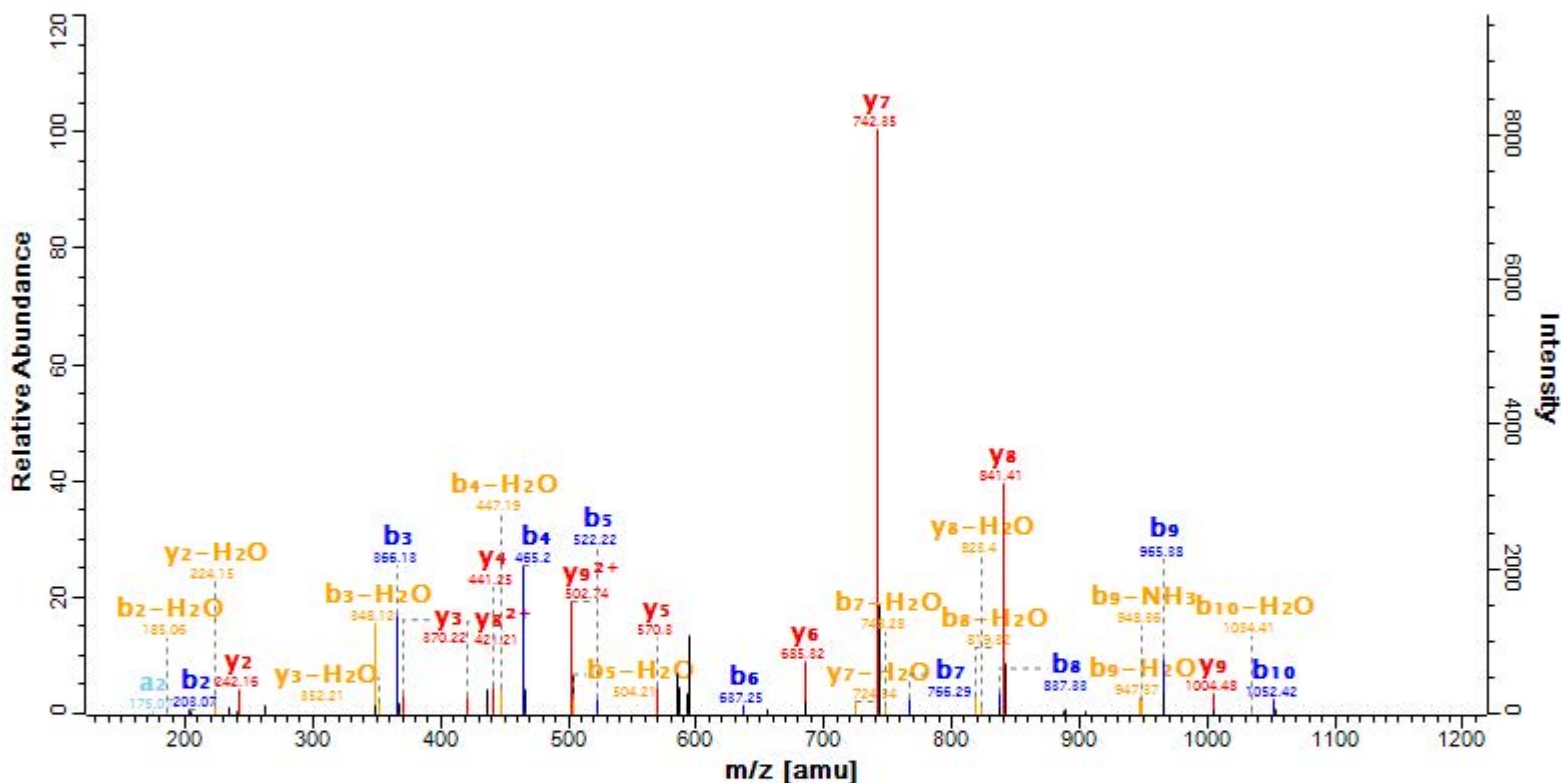

#### precursor information

|                   |                 |
|-------------------|-----------------|
| Mass:             | 1197.51516      |
| m/z:              | 599.76486       |
| Charge:           | 2+              |
| Retentiontime:    | 7.3600916862487 |
| Score:            | 250.6963        |
| Mass Error [ppm]: | 0.16632         |
| PEP:              | 3.0267E-38      |
| Precursor Type:   | MULTI           |

#### general information

|                       |           |
|-----------------------|-----------|
| Annotation:           | 9 of 11   |
| AminoAcids Coverage:  | 82 %      |
| Intensity Coverage:   | 76 %      |
| Peak Coverage:        | 40 %      |
| Protein Localisation: | 51 ... 61 |

| a ion    |        | b ion    |        |    |     |          | y ion  |          | y <sup>2+</sup> ion |  |
|----------|--------|----------|--------|----|-----|----------|--------|----------|---------------------|--|
| Δ dalton | mass   | Δ dalton | mass   |    | seq | Δ dalton | mass   | Δ dalton | mass                |  |
|          | 88.039 |          | 116.03 | 1  | D   | 10       |        |          |                     |  |
| +0.0378  | 175.07 | -0.034   | 203.07 | 2  | S   | 9        | 1091.5 |          | 1091.5              |  |
|          | 338.13 | -0.069   | 366.13 | 3  | Y   | 8        | 1004.5 | +0.0074  | 502.74              |  |
|          | 437.2  | -0.059   | 465.2  | 4  | V   | 7        | 841.41 | -0.054   | 421.21              |  |
|          | 494.22 | -0.035   | 522.22 | 5  | G   | 6        | 742.35 | -0.043   | 742.35              |  |
|          | 609.25 | +0.113   | 637.25 | 6  | D   | 5        | 685.32 | -0.036   | 685.32              |  |
|          | 738.29 | +0.0944  | 766.29 | 7  | E   | 4        | 570.3  | -0.04    | 570.3               |  |
|          | 809.33 | -0.032   | 837.33 | 8  | A   | 3        | 441.25 | +0.0924  | 441.25              |  |
|          | 937.39 | +0.0283  | 965.38 | 9  | Q   | 2        | 370.22 | +0.0387  | 370.22              |  |
|          | 1024.4 | -0.105   | 1052.4 | 10 | S   | 1        | 242.16 | +0.0234  | 242.16              |  |
|          |        |          |        | 11 | K   | 0        | 155.13 |          | 155.13              |  |

Scan number 3764 Raw file LNCAP\_Silac\_23F10\_set1\_02  
 Method ITMS: CID Pepti... 276.41

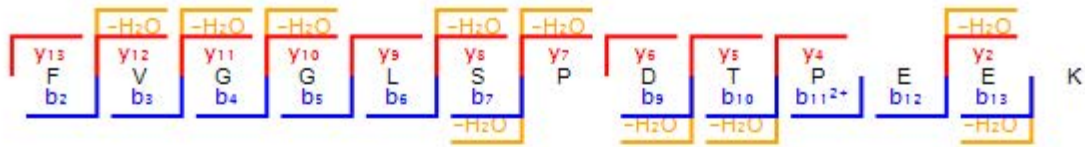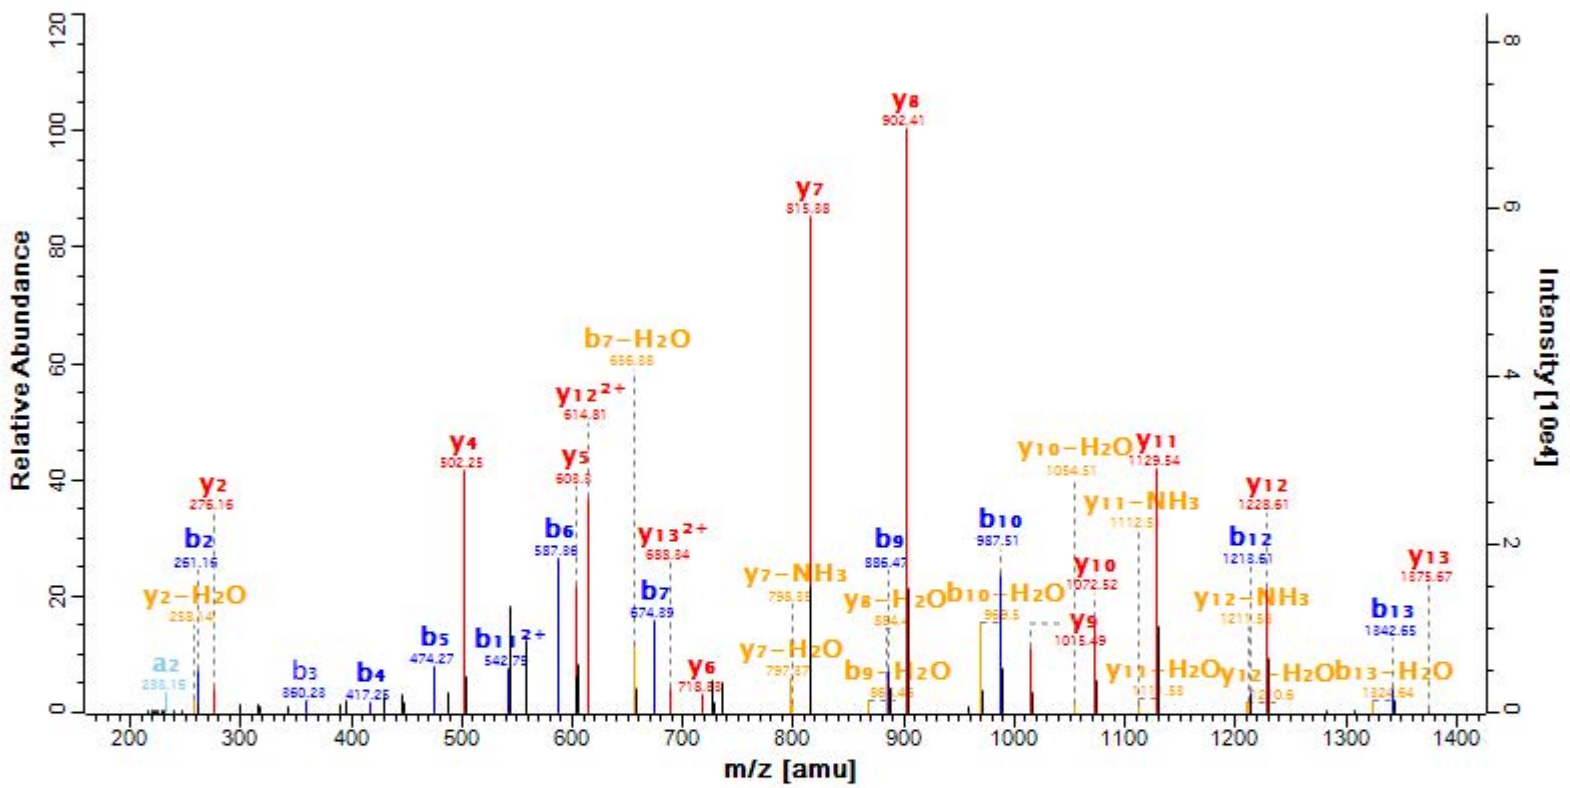

**precursor information**

|                   |                 |
|-------------------|-----------------|
| Mass:             | 1487.75054      |
| m/z:              | 744.88255       |
| Charge:           | 2+              |
| Retentiontime:    | 27.193145751953 |
| Score:            | 276.4098        |
| Mass Error [ppm]: | -0.15798        |
| PEP:              | 1.6548E-61      |
| Precursor Type:   | MULTI           |

**general information**

|                       |             |
|-----------------------|-------------|
| Annotation:           | 12 of 14    |
| AminoAcids Coverage:  | 86 %        |
| Intensity Coverage:   | 74 %        |
| Peak Coverage:        | 43 %        |
| Protein Localisation: | 165 ... 178 |

|        | a ion         | b <sup>2+</sup> ion | b ion         |     |   |               | y ion         | y <sup>2+</sup> ion |
|--------|---------------|---------------------|---------------|-----|---|---------------|---------------|---------------------|
|        | Δ dalton mass | Δ dalton mass       | Δ dalton mass | seq |   | Δ dalton mass | Δ dalton mass |                     |
|        | 86.1          | 114.1               | 114.1         | 1   | I | 13            |               |                     |
| +0.017 | 233.2         | 261.2               | -0.03 261.2   | 2   | F | 12            | 1376 -0.05    | 688.3 +0.16         |
|        | 332.2         | 360.2               | -0.1 360.2    | 3   | V | 11            | 1229 -0.09    | 614.8 +0.16         |
|        | 389.3         | 417.2               | +0.095 417.2  | 4   | G | 10            | 1130 -0.02    | 1130                |
|        | 446.3         | 474.3               | +0.071 474.3  | 5   | G | 9             | 1073 +0       | 1073                |
|        | 559.4         | 587.4               | -0.04 587.4   | 6   | L | 8             | 1015 -0.01    | 1015                |
|        | 646.4         | 674.4               | +0.006 674.4  | 7   | S | 7             | 902.4 +0.01   | 902.4               |
|        | 743.4         | 771.4               | 771.4         | 8   | P | 6             | 815.4 +0.008  | 815.4               |
|        | 858.5         | 886.5               | +0.036 886.5  | 9   | D | 5             | 718.3 +0.037  | 718.3               |
|        | 959.5         | 987.5               | -0.05 987.5   | 10  | T | 4             | 603.3 +0.006  | 603.3               |
|        | 1057          | -0.48 542.8         | 1085          | 11  | P | 3             | 502.3 +0.06   | 502.3               |
|        | 1186          | 1214                | +0.066 1214   | 12  | E | 2             | 405.2         | 405.2               |
|        | 1315          | 1343                | -0.09 1343    | 13  | E | 1             | 276.2 +0      | 276.2               |
|        |               |                     |               | 14  | K | 0             | 147.1         | 147.1               |

Scan number 385 Raw file LNCAP\_Silac\_23F10\_set1\_02  
 Method ITMS; CID Peptide 154.6

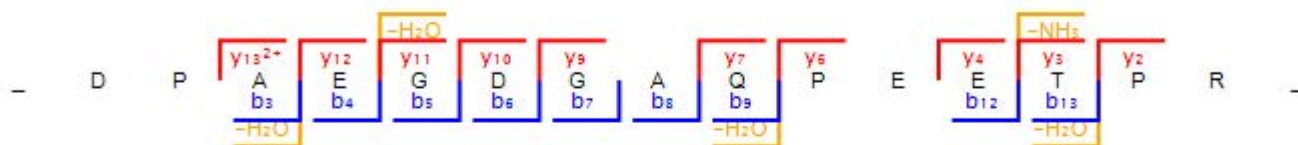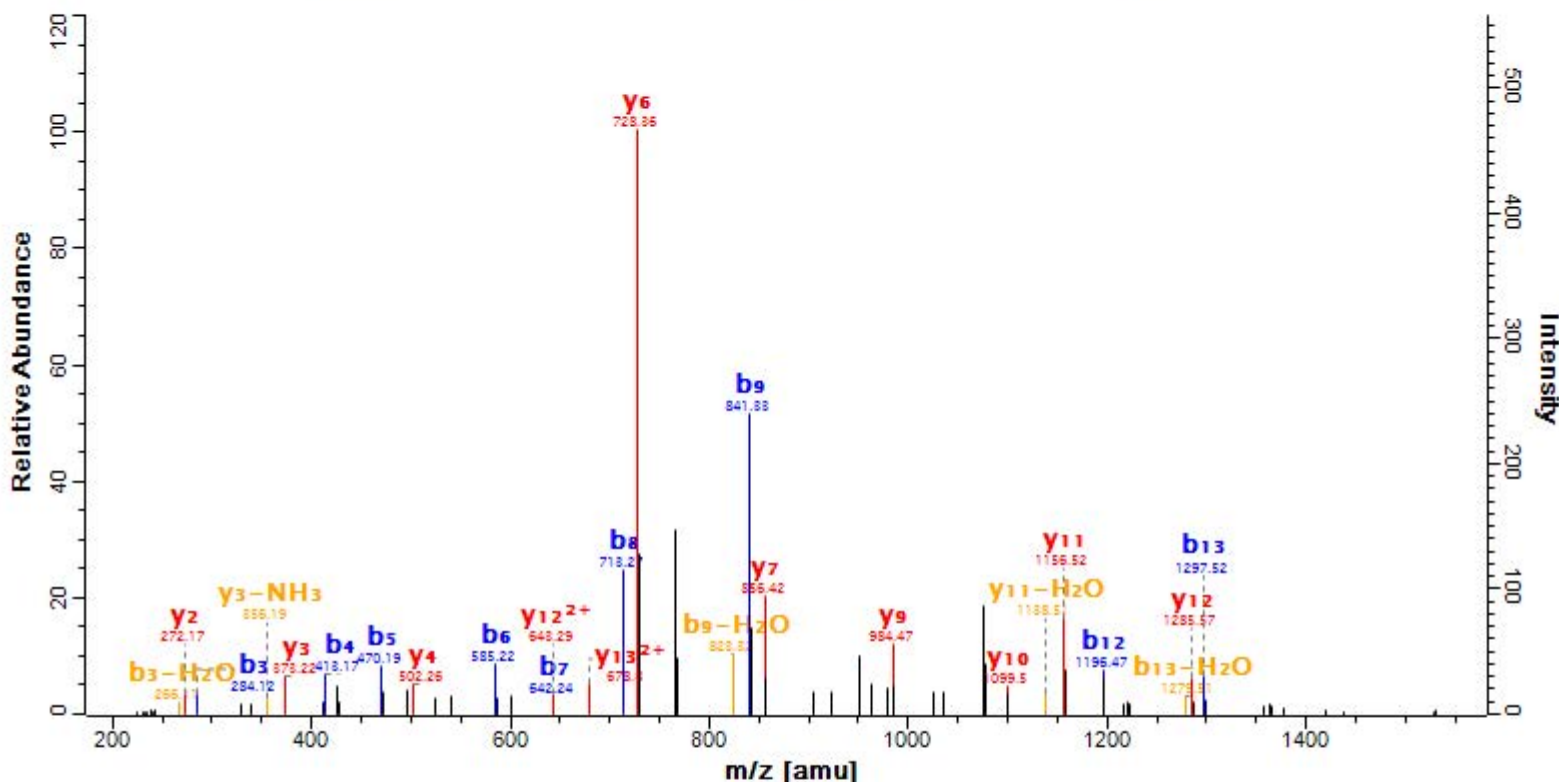

#### precursor information

|                   |                 |
|-------------------|-----------------|
| Mass:             | 1567.67587      |
| m/z:              | 784.84521       |
| Charge:           | 2+              |
| Retentiontime:    | 7.4568734169006 |
| Score:            | 154.5955        |
| Mass Error [ppm]: | 0.52977         |
| PEP:              | 4.6845E-14      |
| Precursor Type:   | MULTI           |

#### general information

|                       |             |
|-----------------------|-------------|
| Annotation:           | 11 of 15    |
| AminoAcids Coverag    | 73 %        |
| Intensity Coverage:   | 55 %        |
| Peak Coverage:        | 31 %        |
| Protein Localisation: | 243 ... 257 |

| b ion     |          |     |   | y ion    |          |           | y <sup>2+</sup> ion |           |
|-----------|----------|-----|---|----------|----------|-----------|---------------------|-----------|
| Δ dalton  | mass     | seq |   | Δ dalton | mass     | Δ dalton  | mass                |           |
|           | 116.0342 | 1   | D | 14       |          |           |                     |           |
|           | 213.087  | 2   | P | 13       | 1453.655 | 1453.655  |                     |           |
| +0.164111 | 284.1241 | 3   | A | 12       | 1356.603 | 678.8049  | +0.153368           |           |
| -0.04419  | 413.1667 | 4   | E | 11       | 1285.565 | -0.0904   | 643.2864            | +0.189259 |
| +0.066607 | 470.1882 | 5   | G | 10       | 1156.523 | +0.001752 | 1156.523            |           |
| +0.111624 | 585.2151 | 6   | D | 9        | 1099.501 | +0.126487 | 1099.501            |           |
| +0.077953 | 642.2366 | 7   | G | 8        | 984.4745 | +0.008105 | 984.4745            |           |
| -0.03948  | 713.2737 | 8   | A | 7        | 927.453  |           | 927.453             |           |
| +0.044884 | 841.3323 | 9   | Q | 6        | 856.4159 | -0.01333  | 856.4159            |           |
|           | 938.385  | 10  | P | 5        | 728.3573 | +0.002885 | 728.3573            |           |
|           | 1067.428 | 11  | E | 4        | 631.3046 |           | 631.3046            |           |
| -0.0205   | 1196.47  | 12  | E | 3        | 502.262  | +0.069311 | 502.262             |           |
| +0.032901 | 1297.518 | 13  | T | 2        | 373.2194 | +0.058132 | 373.2194            |           |
|           | 1394.571 | 14  | P | 1        | 272.1717 | -0.04092  | 272.1717            |           |
|           |          | 15  | R | 0        | 175.119  |           | 175.119             |           |

Scan number 3885 Raw file LNCAP\_Silac\_23F10\_set1\_02  
 Method ITMS; CID Peptide 57.17

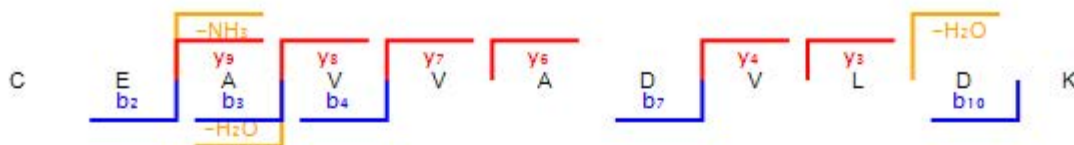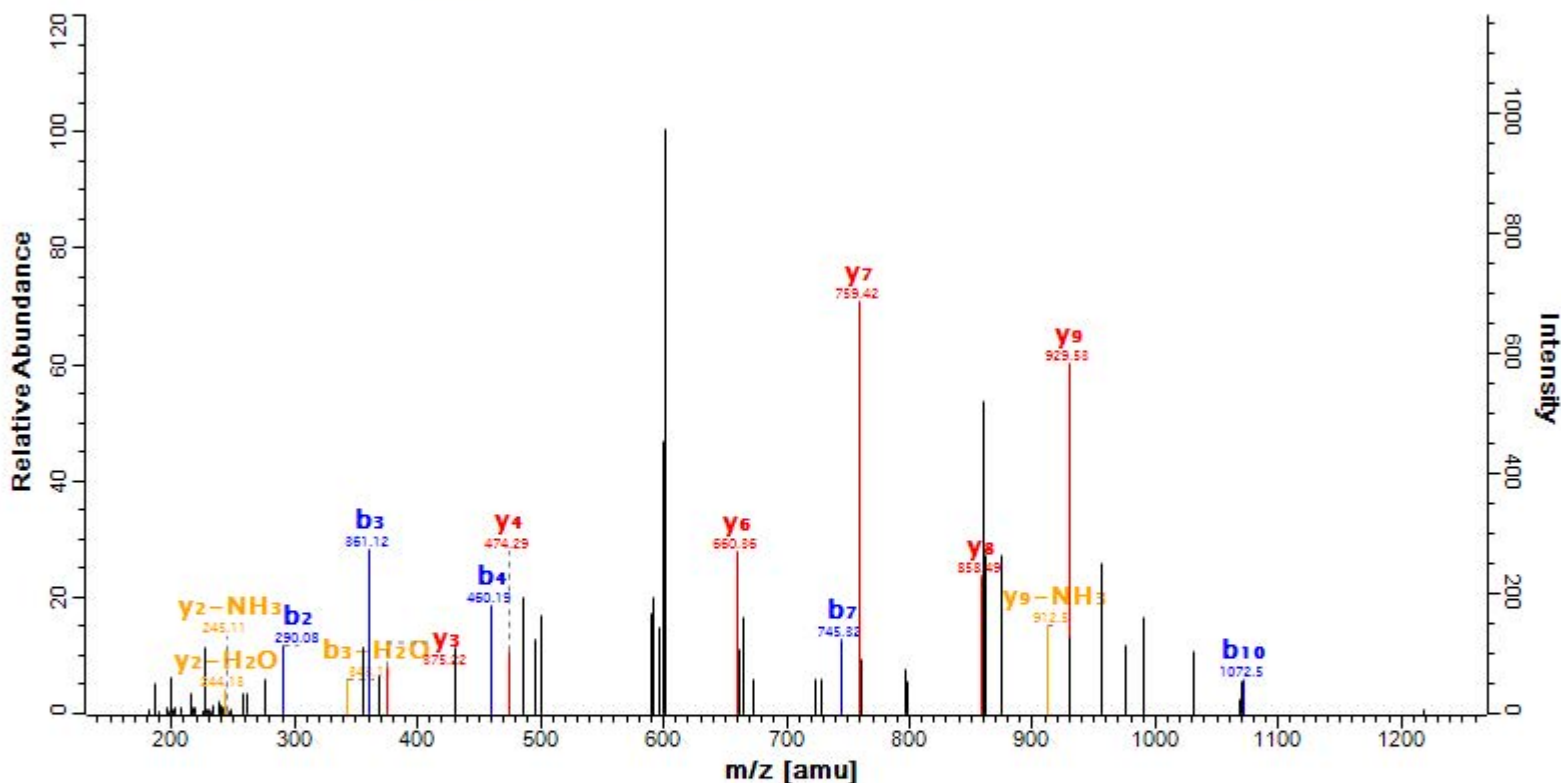

#### precursor information

|                   |                 |
|-------------------|-----------------|
| Mass:             | 1217.59724      |
| m/z:              | 609.8059        |
| Charge:           | 2+              |
| Retentiontime:    | 27.816537857055 |
| Score:            | 57.17472        |
| Mass Error [ppm]: | 0.86365         |
| PEP:              | 0.016341        |
| Precursor Type:   | MULTI           |

#### general information

|                       |             |
|-----------------------|-------------|
| Annotation:           | 9 of 11     |
| AminoAcids Coverage:  | 82 %        |
| Intensity Coverage:   | 32 %        |
| Peak Coverage:        | 18 %        |
| Protein Localisation: | 425 ... 435 |

| b ion      |               |    |     |    | y ion         |            |
|------------|---------------|----|-----|----|---------------|------------|
| Δ dalton   | mass          |    | seq |    | Δ dalton      | mass       |
|            | 161.037924668 | 1  | C   | 10 |               |            |
| +0.019824  | 290.080517764 | 2  | E   | 9  | 1058.57281664 |            |
| -0.0033127 | 361.117631552 | 3  | A   | 8  | 929.530223539 | -0.0572621 |
| +0.1117451 | 460.186045468 | 4  | V   | 7  | 858.493109751 | +0.1469659 |
|            | 559.254459384 | 5  | V   | 6  | 759.424695835 | +0.1183339 |
|            | 630.291573172 | 6  | A   | 5  | 660.356281919 | +0.0604051 |
| +0.0157733 | 745.318516204 | 7  | D   | 4  | 589.319168131 |            |
|            | 844.38693012  | 8  | V   | 3  | 474.292225099 | +0.0782583 |
|            | 957.470994101 | 9  | L   | 2  | 375.223811183 | +0.1853075 |
| -0.0284547 | 1072.49793713 | 10 | D   | 1  | 262.139747203 |            |
|            |               | 11 | K   | 0  | 147.112804171 |            |

Scan number 4541 Raw file LNCAP\_Silac\_23F10\_set1\_02  
 Method ITMS; CID Pepti... 174.39

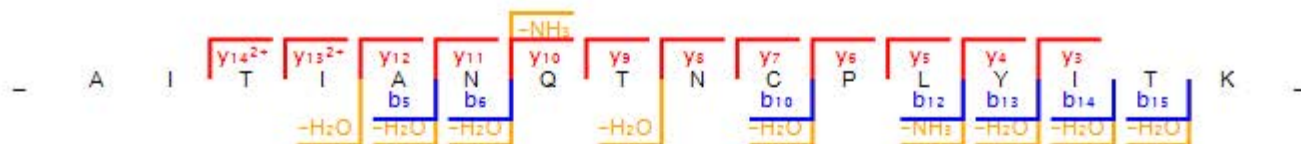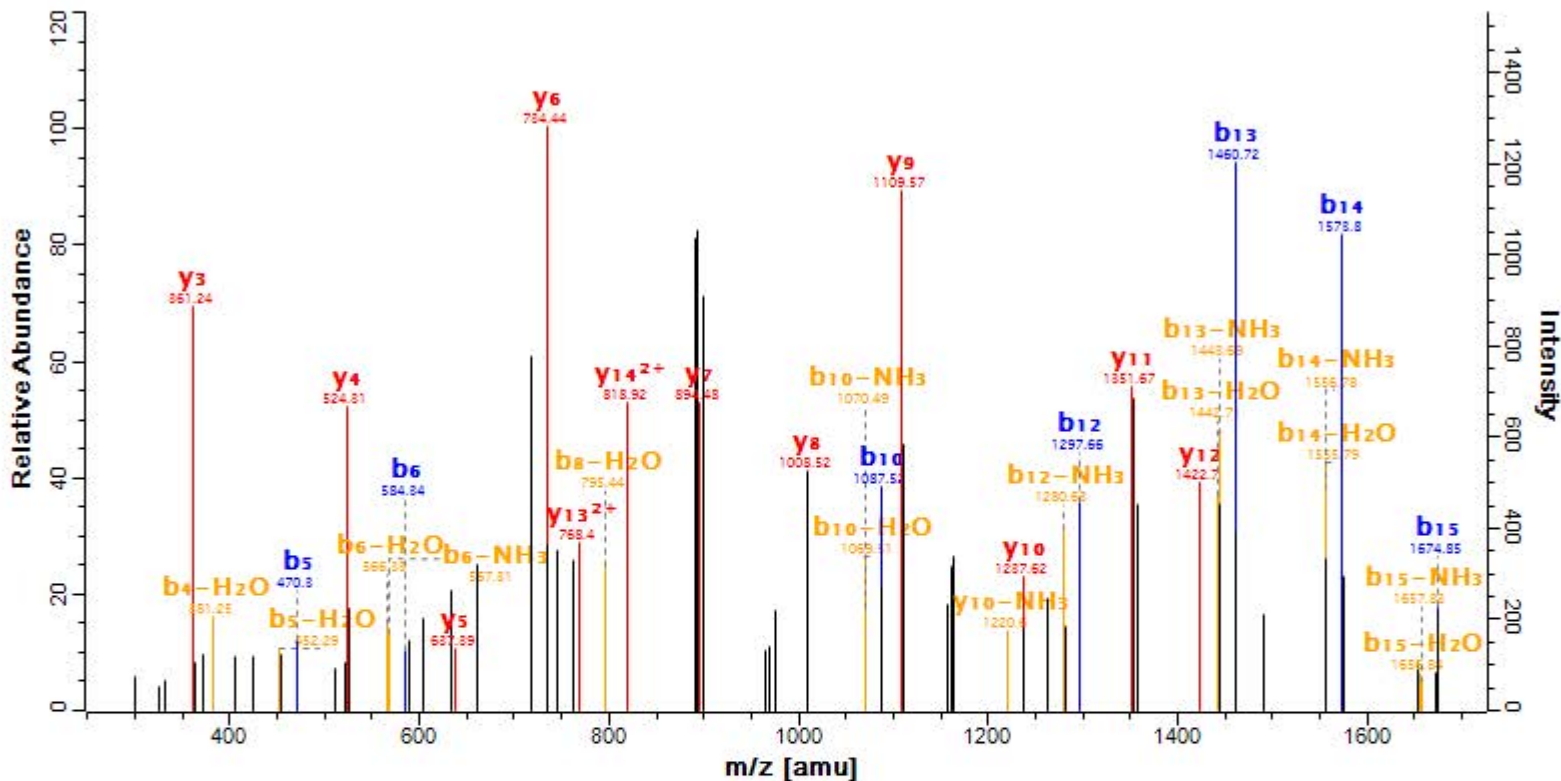

#### precursor information

|                   |                 |
|-------------------|-----------------|
| Mass:             | 1819.95068      |
| m/z:              | 910.98262       |
| Charge:           | 2+              |
| Retentiontime:    | 31.232454299926 |
| Score:            | 174.3949        |
| Mass Error [ppm]: | 0.25477         |
| PEP:              | 1.7665E-22      |
| Precursor Type:   | MULTI           |

#### general information

|                       |             |
|-----------------------|-------------|
| Annotation:           | 13 of 16    |
| AminoAcids Coverag    | 81 %        |
| Intensity Coverage:   | 51 %        |
| Peak Coverage:        | 41 %        |
| Protein Localisation: | 239 ... 254 |

| b ion     |          |    |     |    | y ion    |           | y <sup>2+</sup> ion |           |
|-----------|----------|----|-----|----|----------|-----------|---------------------|-----------|
| Δ dalton  | mass     |    | seq |    | Δ dalton | mass      | Δ dalton            | mass      |
|           | 72.04439 | 1  | A   | 15 |          |           |                     |           |
|           | 185.1285 | 2  | I   | 14 | 1749.92  |           | 1749.92             |           |
|           | 286.1761 | 3  | T   | 13 | 1636.836 |           | 818.9218            | +0.250932 |
|           | 399.2602 | 4  | I   | 12 | 1535.789 |           | 768.398             | +0.080557 |
| -0.01728  | 470.2973 | 5  | A   | 11 | 1422.705 | -0.07128  | 1422.705            |           |
| -0.37887  | 584.3402 | 6  | N   | 10 | 1351.667 | +0.032611 | 1351.667            |           |
|           | 712.3988 | 7  | Q   | 9  | 1237.625 | -0.03603  | 1237.625            |           |
|           | 813.4465 | 8  | T   | 8  | 1109.566 | -0.00639  | 1109.566            |           |
|           | 927.4894 | 9  | N   | 7  | 1008.518 | -0.05075  | 1008.518            |           |
| +0.091014 | 1087.52  | 10 | C   | 6  | 894.4754 | +0.009939 | 894.4754            |           |
|           | 1184.573 | 11 | P   | 5  | 734.4447 | +0.080749 | 734.4447            |           |
| -0.10624  | 1297.657 | 12 | L   | 4  | 637.3919 | +0.059782 | 637.3919            |           |
| -0.19935  | 1460.72  | 13 | Y   | 3  | 524.3079 | -0.10737  | 524.3079            |           |
| -0.10373  | 1573.804 | 14 | I   | 2  | 361.2445 | +0.125662 | 361.2445            |           |
| -0.23258  | 1674.852 | 15 | T   | 1  | 248.1605 |           | 248.1605            |           |
|           |          | 16 | K   | 0  | 147.1128 |           | 147.1128            |           |

Scan number 4913 Raw file LNCAP\_Silac\_23F10\_set1\_02  
 Method ITMS; CID Pepti... 227.06

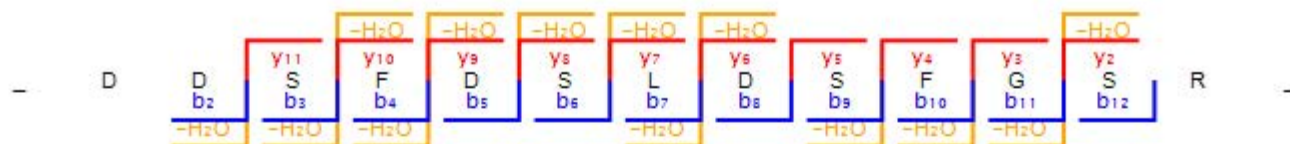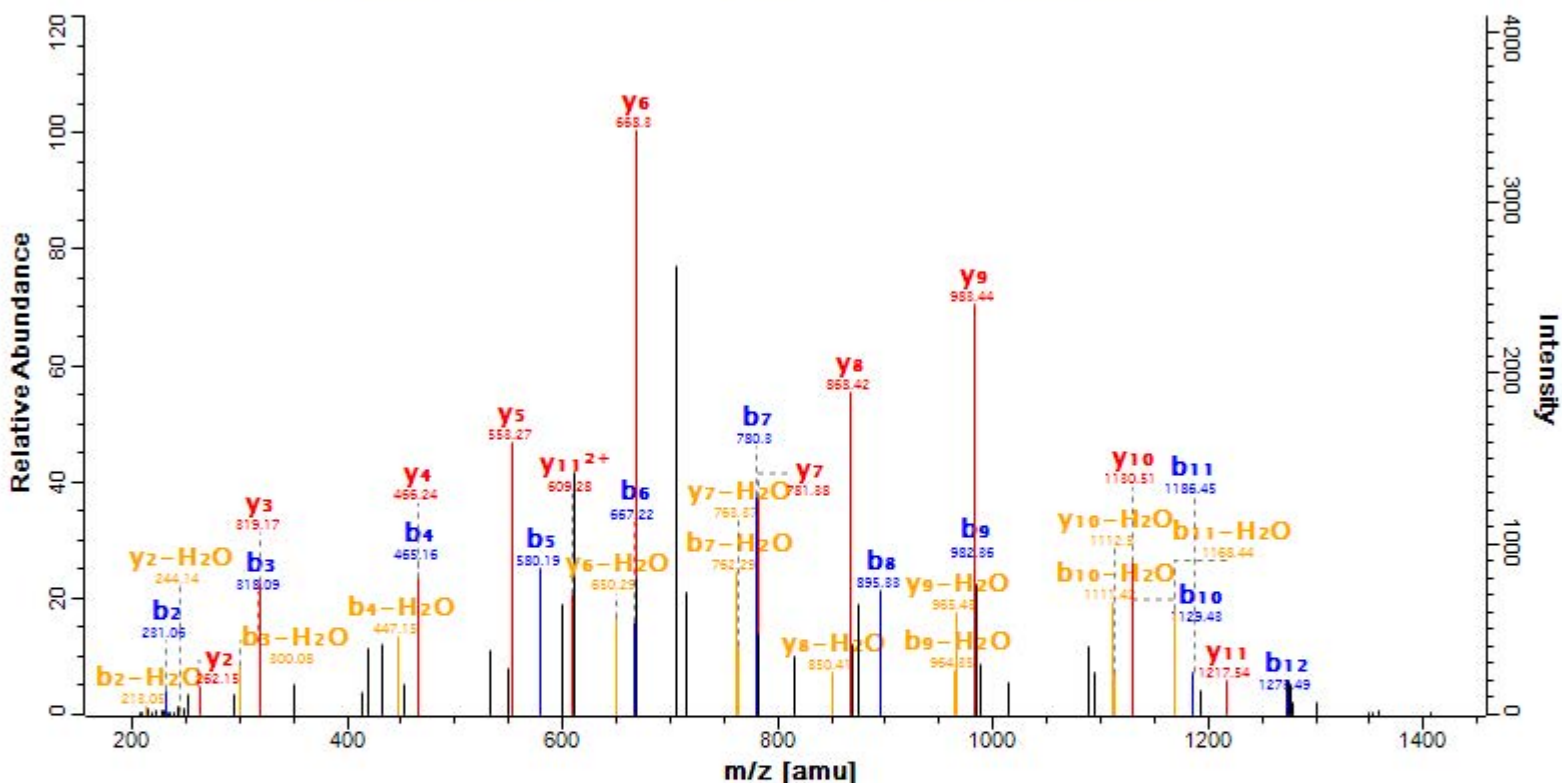

**precursor information**

|                   |                 |
|-------------------|-----------------|
| Mass:             | 1446.58998      |
| m/z:              | 724.30227       |
| Charge:           | 2+              |
| Retentiontime:    | 33.163055419921 |
| Score:            | 227.0594        |
| Mass Error [ppm]: | 0.045372        |
| PEP:              | 9.2468E-29      |
| Precursor Type:   | MULTI           |

**general information**

|                       |             |
|-----------------------|-------------|
| Annotation:           | 11 of 13    |
| AminoAcids Coverage:  | 85 %        |
| Intensity Coverage:   | 65 %        |
| Peak Coverage:        | 43 %        |
| Protein Localisation: | 199 ... 211 |

| b ion     |          |    |     |    | y ion    |           | y <sup>2+</sup> ion |          |
|-----------|----------|----|-----|----|----------|-----------|---------------------|----------|
| Δ dalton  | mass     |    | seq |    | Δ dalton | mass      | Δ dalton            | mass     |
|           | 116.0342 | 1  | D   | 12 |          |           |                     |          |
| -0.05674  | 231.0612 | 2  | D   | 11 | 1332.57  |           | 1332.57             |          |
| +0.390635 | 318.0932 | 3  | S   | 10 | 1217.543 | -0.09983  | 609.2753            | -0.06881 |
| -0.07164  | 465.1616 | 4  | F   | 9  | 1130.511 | +0.001172 | 1130.511            |          |
| +0.019582 | 580.1885 | 5  | D   | 8  | 983.4429 | -0.00518  | 983.4429            |          |
| +0.070317 | 667.2206 | 6  | S   | 7  | 868.4159 | +0.017855 | 868.4159            |          |
| +0.00908  | 780.3046 | 7  | L   | 6  | 781.3839 | +0.064654 | 781.3839            |          |
| -0.09159  | 895.3316 | 8  | D   | 5  | 668.2998 | +0.069616 | 668.2998            |          |
| +0.073217 | 982.3636 | 9  | S   | 4  | 553.2729 | +0.150575 | 553.2729            |          |
| -0.10976  | 1129.432 | 10 | F   | 3  | 466.2409 | +0.047167 | 466.2409            |          |
| -0.15442  | 1186.453 | 11 | G   | 2  | 319.1724 | +0.149638 | 319.1724            |          |
| +0.059038 | 1273.486 | 12 | S   | 1  | 262.151  | +0.211568 | 262.151             |          |
|           |          | 13 | R   | 0  | 175.119  |           | 175.119             |          |

Scan number 496 Raw file LNCAP\_Silac\_23F10\_set1\_02  
 Method ITMS; CID Pepti... 184.99

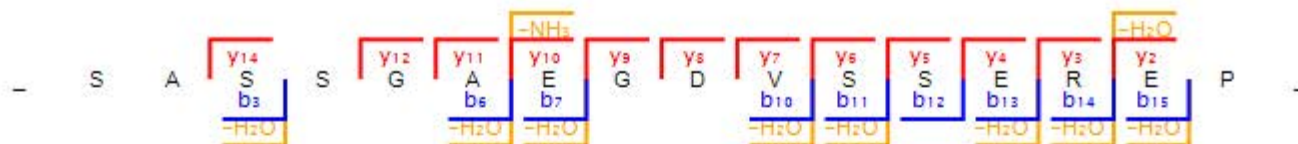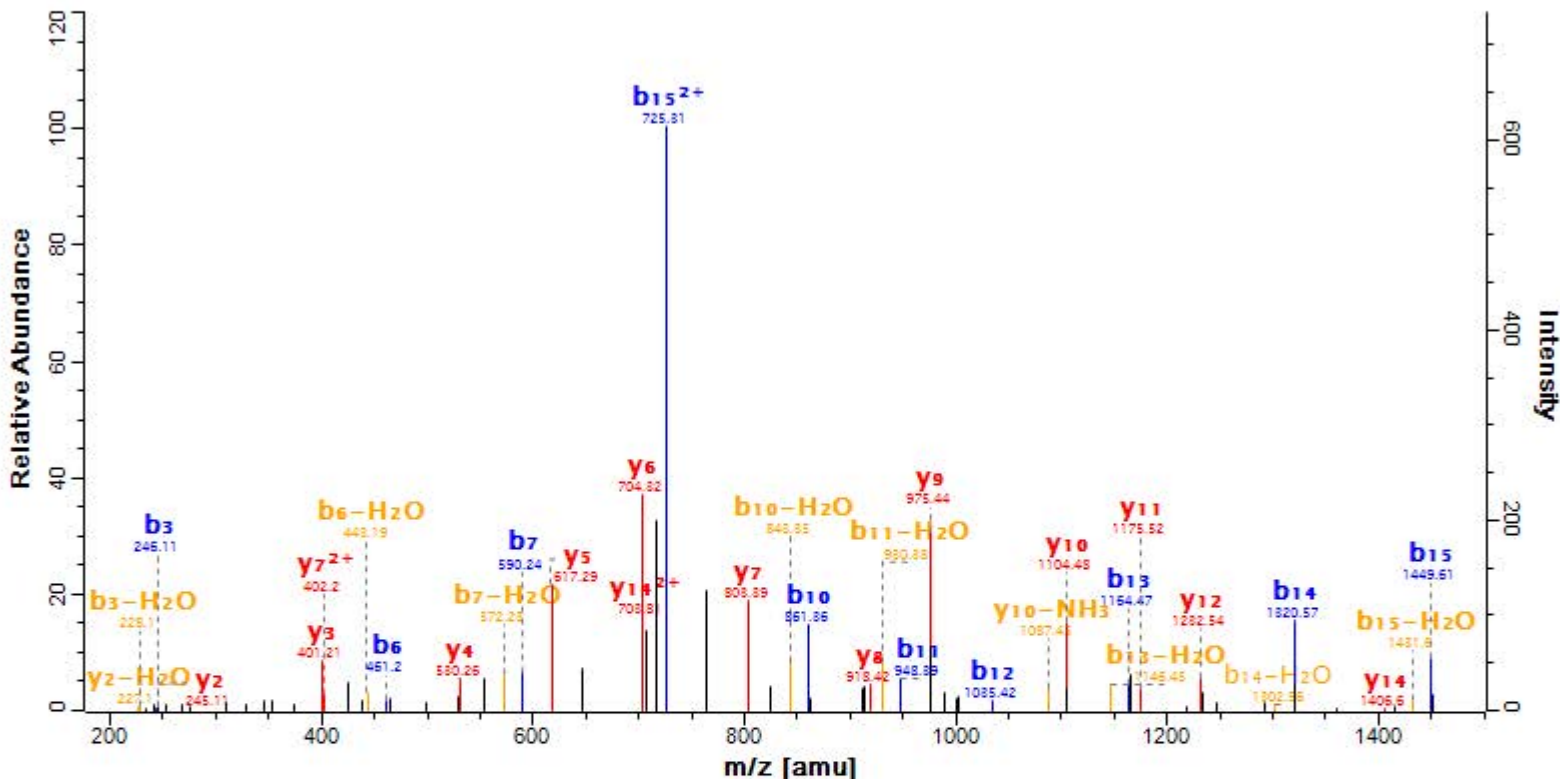

**precursor information**

|                   |                 |
|-------------------|-----------------|
| Mass:             | 1563.66567      |
| m/z:              | 782.84011       |
| Charge:           | 2+              |
| Retentiontime:    | 8.4008684158325 |
| Score:            | 184.9872        |
| Mass Error [ppm]: | 0.51255         |
| PEP:              | 7.8719E-27      |
| Precursor Type:   | MULTI           |

**general information**

|                       |             |
|-----------------------|-------------|
| Annotation:           | 13 of 16    |
| AminoAcids Coverag    | 81 %        |
| Intensity Coverage:   | 66 %        |
| Peak Coverage:        | 44 %        |
| Protein Localisation: | 194 ... 209 |

| b <sup>2+</sup> ion |        | b ion    |        | seq |   |    | y ion    |         | y <sup>2+</sup> ion |        |
|---------------------|--------|----------|--------|-----|---|----|----------|---------|---------------------|--------|
| Δ dalton            | mass   | Δ dalton | mass   |     |   |    | Δ dalton | mass    | Δ dalton            | mass   |
|                     | 88.039 |          | 88.039 | 1   | S | 15 |          |         |                     |        |
|                     | 159.08 |          | 159.08 | 2   | A | 14 | 1477.6   |         | 1477.6              |        |
|                     | 246.11 | +0.005   | 246.11 | 3   | S | 13 | 1406.6   | -0.271  | 703.81              | -0.041 |
|                     | 333.14 |          | 333.14 | 4   | S | 12 | 1319.6   |         | 1319.6              |        |
|                     | 390.16 |          | 390.16 | 5   | G | 11 | 1232.5   | -0.169  | 1232.5              |        |
|                     | 461.2  | +0.0931  | 461.2  | 6   | A | 10 | 1175.5   | -0.049  | 1175.5              |        |
|                     | 590.24 | +0.0926  | 590.24 | 7   | E | 9  | 1104.5   | -0.142  | 1104.5              |        |
|                     | 647.26 |          | 647.26 | 8   | G | 8  | 975.44   | -0.001  | 975.44              |        |
|                     | 762.29 |          | 762.29 | 9   | D | 7  | 918.42   | -0.003  | 918.42              |        |
|                     | 861.36 | +0.1205  | 861.36 | 10  | V | 6  | 803.39   | -0.086  | 402.2               | -0.013 |
|                     | 948.39 | +0.0275  | 948.39 | 11  | S | 5  | 704.32   | +0.1029 | 704.32              |        |
|                     | 1035.4 | +0.0765  | 1035.4 | 12  | S | 4  | 617.29   | +0.1508 | 617.29              |        |
|                     | 1164.5 | -0.321   | 1164.5 | 13  | E | 3  | 530.26   | +0.0922 | 530.26              |        |
|                     | 1320.6 | -0.192   | 1320.6 | 14  | R | 2  | 401.21   | -0.017  | 401.21              |        |
| +0.1651             | 725.31 | -0.065   | 1449.6 | 15  | E | 1  | 245.11   | +0.1299 | 245.11              |        |
|                     |        |          |        | 16  | P | 0  | 116.07   |         | 116.07              |        |

Scan number 5048 Raw file LNCAP\_Silac\_23F10\_set1\_02  
 Method ITMS; CID Pepti... 56.23

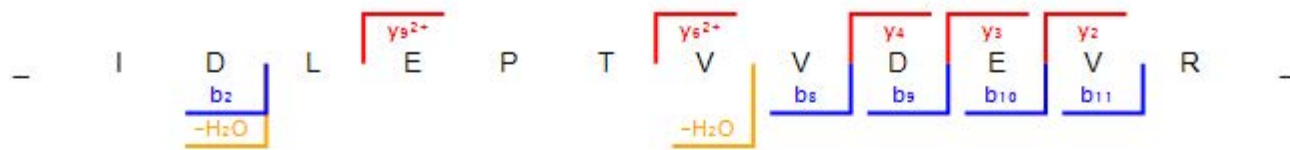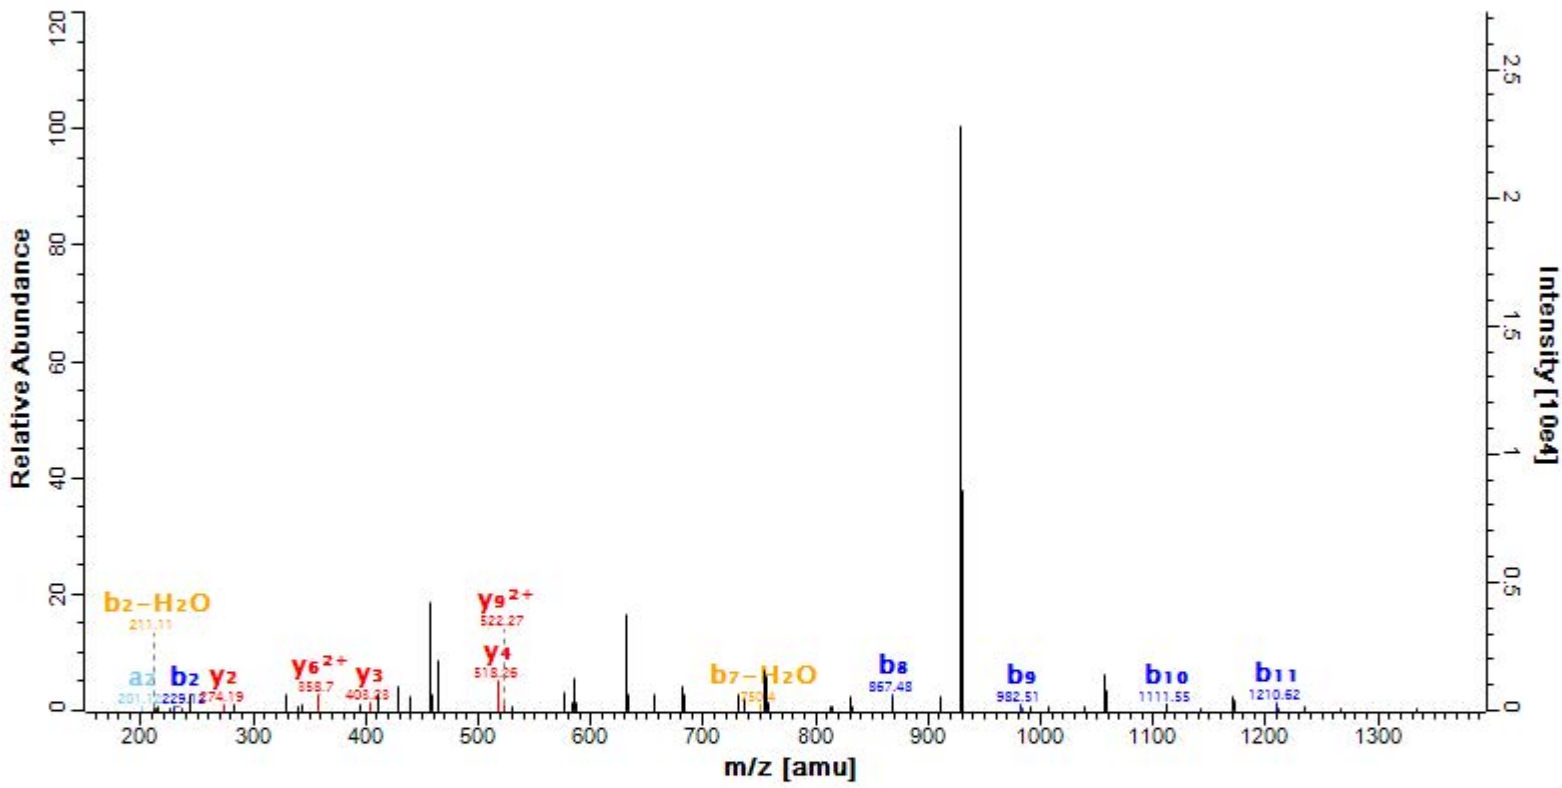

**precursor information**

|                   |                 |
|-------------------|-----------------|
| Mass:             | 1383.72505      |
| m/z:              | 692.8698        |
| Charge:           | 2+              |
| Retentiontime:    | 33.844264984130 |
| Score:            | 56.22507        |
| Mass Error [ppm]: | 0.35218         |
| PEP:              | 0.014011        |
| Precursor Type:   | MULTI           |

**general information**

|                       |            |
|-----------------------|------------|
| Annotation:           | 7 of 12    |
| AminoAcids Coverage:  | 58 %       |
| Intensity Coverage:   | 7 %        |
| Peak Coverage:        | 15 %       |
| Protein Localisation: | 92 ... 103 |

| a ion    |        | b ion    |        | seq |   |    | y ion    |         | y <sup>2+</sup> ion |         |
|----------|--------|----------|--------|-----|---|----|----------|---------|---------------------|---------|
| Δ dalton | mass   | Δ dalton | mass   |     |   |    | Δ dalton | mass    | Δ dalton            | mass    |
|          | 86.096 |          | 114.09 | 1   | I | 11 |          |         |                     |         |
| -0.02    | 201.12 | -0.038   | 229.12 | 2   | D | 10 | 1271.6   |         | 1271.6              |         |
|          | 314.21 |          | 342.2  | 3   | L | 9  | 1156.6   |         | 1156.6              |         |
|          | 443.25 |          | 471.24 | 4   | E | 8  | 1043.5   |         | 522.27              | +0.3865 |
|          | 540.3  |          | 568.3  | 5   | P | 7  | 914.49   |         | 914.49              |         |
|          | 641.35 |          | 669.35 | 6   | T | 6  | 817.44   |         | 817.44              |         |
|          | 740.42 |          | 768.41 | 7   | V | 5  | 716.39   |         | 358.7               | -0.486  |
|          | 839.49 | +0.0007  | 867.48 | 8   | V | 4  | 617.33   |         | 617.33              |         |
|          | 954.51 | -0.131   | 982.51 | 9   | D | 3  | 518.26   | +0.0847 | 518.26              |         |
|          | 1083.6 | -0.28    | 1111.6 | 10  | E | 2  | 403.23   | +0.0801 | 403.23              |         |
|          | 1182.6 | -0.057   | 1210.6 | 11  | V | 1  | 274.19   | -0.084  | 274.19              |         |
|          |        |          |        | 12  | R | 0  | 175.12   |         | 175.12              |         |



Scan number 5184 Raw file LNCAP\_Silac\_23F10\_set1\_02  
 Method ITMS; CID Pepti... 75.24

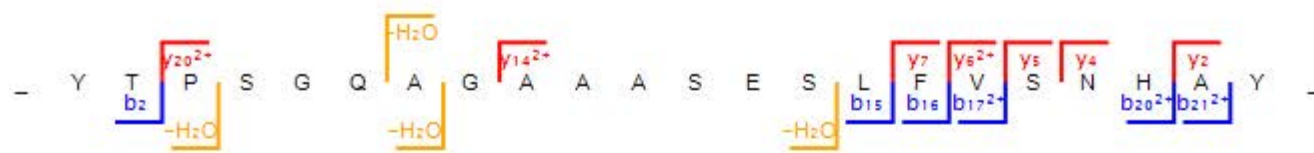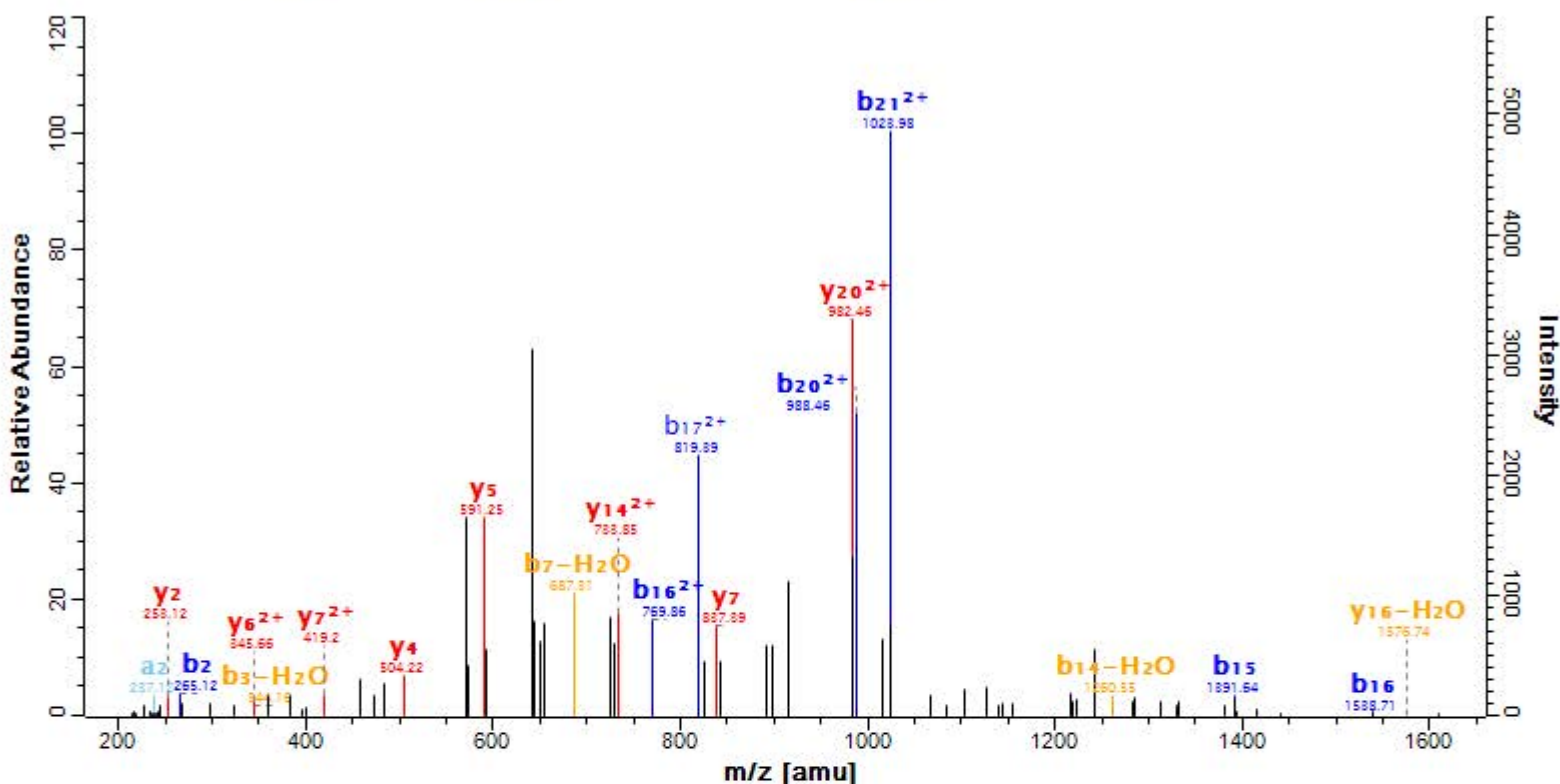

precursor information

|                   |                 |
|-------------------|-----------------|
| Mass:             | 2227.01847      |
| m/z:              | 743.34677       |
| Charge:           | 3+              |
| Retentiontime:    | 34.569225311279 |
| Score:            | 75.23901        |
| Mass Error [ppm]: | 0.13077         |
| PEP:              | 0.0020916       |
| Precursor Type:   | ISO             |

| a ion         |               | b <sup>2+</sup> ion |     | b ion         |               | y ion |             | y <sup>2+</sup> ion |  |
|---------------|---------------|---------------------|-----|---------------|---------------|-------|-------------|---------------------|--|
| Δ dalton mass | Δ dalton mass | Δ dalton mass       | seq | Δ dalton mass | Δ dalton mass |       |             |                     |  |
| 136.1         | 164.1         | 164.1               | 1   | Y             | 21            |       |             |                     |  |
| +0.02337.1    | 265.1         | -0.12 265.1         | 2   | T             | 20            | 2065  | 2065        |                     |  |
| 334.2         | 362.2         | 362.2               | 3   | P             | 19            | 1964  | 982.5       | +0.20               |  |
| 421.2         | 449.2         | 449.2               | 4   | S             | 18            | 1867  | 1867        |                     |  |
| 478.2         | 506.2         | 506.2               | 5   | G             | 17            | 1780  | 1780        |                     |  |
| 606.3         | 634.3         | 634.3               | 6   | Q             | 16            | 1723  | 1723        |                     |  |
| 677.3         | 705.3         | 705.3               | 7   | A             | 15            | 1595  | 1595        |                     |  |
| 734.3         | 762.3         | 762.3               | 8   | G             | 14            | 1524  | 1524        |                     |  |
| 805.4         | 833.4         | 833.4               | 9   | A             | 13            | 1467  | 733.8       | -0.15               |  |
| 876.4         | 904.4         | 904.4               | 10  | A             | 12            | 1396  | 1396        |                     |  |
| 947.5         | 975.5         | 975.5               | 11  | A             | 11            | 1325  | 1325        |                     |  |
| 1034          | 1062          | 1062                | 12  | S             | 10            | 1254  | 1254        |                     |  |
| 1164          | 1192          | 1192                | 13  | E             | 9             | 1167  | 1167        |                     |  |
| 1251          | 1279          | 1279                | 14  | S             | 8             | 1038  | 1038        |                     |  |
| 1364          | 1392          | +0.0671392          | 15  | L             | 7             | 950.5 | 950.5       |                     |  |
| 1511          | -0.01 769.9   | -0.15 1539          | 16  | F             | 6             | 837.4 | +0.048419.2 | +0.20               |  |
| 1610          | +0.292819.4   | 1638                | 17  | V             | 5             | 690.3 | 345.7       | -0.23               |  |
| 1697          | 1725          | 1725                | 18  | S             | 4             | 591.3 | +0.112591.3 |                     |  |
| 1811          | 1839          | 1839                | 19  | N             | 3             | 504.2 | -0.02 504.2 |                     |  |
| 1948          | +0.317988.5   | 1976                | 20  | H             | 2             | 390.2 | 390.2       |                     |  |
| 2019          | +0.2221024    | 2047                | 21  | A             | 1             | 253.1 | -0.06 253.1 |                     |  |
|               |               |                     | 22  | Y             | 0             | 182.1 | 182.1       |                     |  |

general information

|                       |             |
|-----------------------|-------------|
| Annotation:           | 12 of 22    |
| AminoAcids Coverage:  | 55 %        |
| Intensity Coverage:   | 48 %        |
| Peak Coverage:        | 23 %        |
| Protein Localisation: | 397 ... 418 |

Scan number 5351 Raw file LNCAP\_Silac\_23F10\_set1\_02  
 Method ITMS; CID Pepti... 106.28

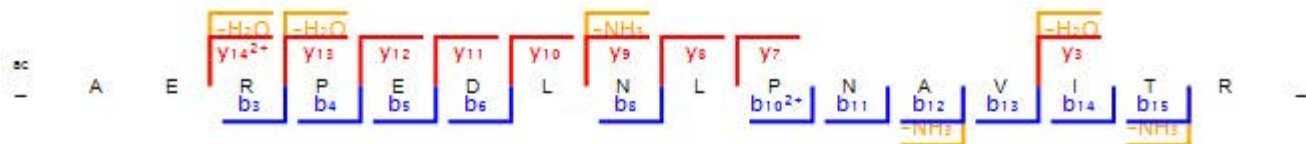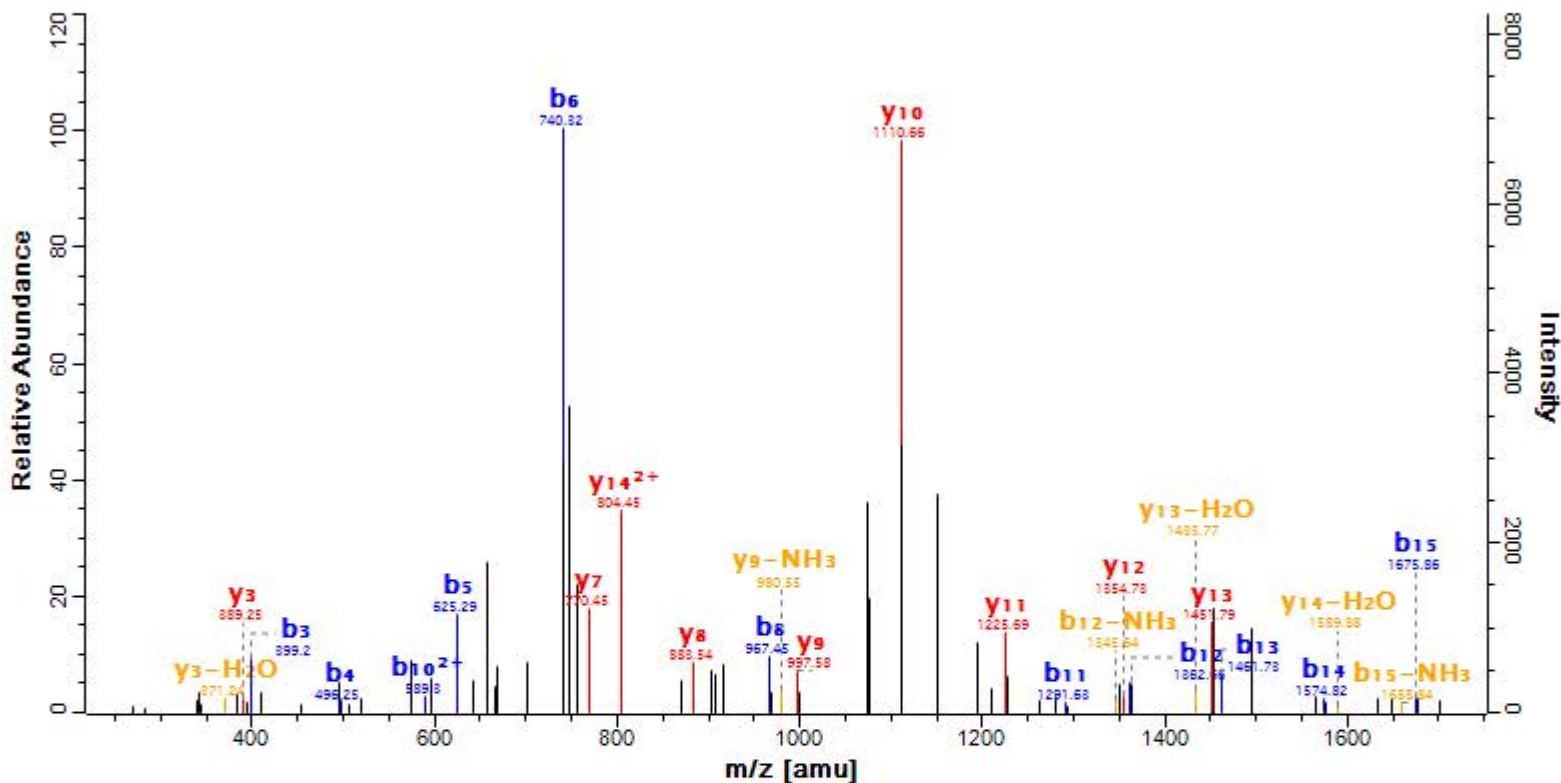

#### precursor information

|                   |                 |
|-------------------|-----------------|
| Mass:             | 1848.96703      |
| m/z:              | 925.49079       |
| Charge:           | 2+              |
| Retentiontime:    | 35.419956207275 |
| Score:            | 106.275         |
| Mass Error [ppm]: | -1.2706         |
| PEP:              | 1.6774E-06      |
| Precursor Type:   | MULTI           |

#### general information

|                       |          |
|-----------------------|----------|
| Annotation:           | 13 of 16 |
| AminoAcids Coverage:  | 81 %     |
| Intensity Coverage:   | 41 %     |
| Peak Coverage:        | 31 %     |
| Protein Localisation: | 2 ... 17 |

| b <sup>2+</sup> ion |        | b ion    |        | seq |   |    | y ion    |         | y <sup>2+</sup> ion |         |
|---------------------|--------|----------|--------|-----|---|----|----------|---------|---------------------|---------|
| Δ dalton            | mass   | Δ dalton | mass   |     |   |    | Δ dalton | mass    | Δ dalton            | mass    |
|                     | 114.05 |          | 114.05 | 1   | A | 15 |          |         |                     |         |
|                     | 243.1  |          | 243.1  | 2   | E | 14 | 1736.9   |         | 1736.9              |         |
|                     | 399.2  | +0.1177  | 399.2  | 3   | R | 13 | 1607.9   |         | 804.45              | +0.3264 |
|                     | 496.25 | +0.1844  | 496.25 | 4   | P | 12 | 1451.8   | +0.2009 | 1451.8              |         |
|                     | 625.29 | +0.1552  | 625.29 | 5   | E | 11 | 1354.7   | +0.0706 | 1354.7              |         |
|                     | 740.32 | +0.0463  | 740.32 | 6   | D | 10 | 1225.7   | +0.0869 | 1225.7              |         |
|                     | 853.41 |          | 853.41 | 7   | L | 9  | 1110.7   | -0.014  | 1110.7              |         |
|                     | 967.45 | +0.0853  | 967.45 | 8   | N | 8  | 997.58   | +0.0823 | 997.58              |         |
|                     | 1080.5 |          | 1080.5 | 9   | L | 7  | 883.54   | +0.1419 | 883.54              |         |
| -0.104              | 589.3  |          | 1177.6 | 10  | P | 6  | 770.45   | +0.1268 | 770.45              |         |
|                     | 1291.6 | +0.13    | 1291.6 | 11  | N | 5  | 673.4    |         | 673.4               |         |
|                     | 1362.7 | -0.111   | 1362.7 | 12  | A | 4  | 559.36   |         | 559.36              |         |
|                     | 1461.7 | -0.082   | 1461.7 | 13  | V | 3  | 488.32   |         | 488.32              |         |
|                     | 1574.8 | +0.0532  | 1574.8 | 14  | I | 2  | 389.25   | +0.0201 | 389.25              |         |
|                     | 1675.9 | +0.161   | 1675.9 | 15  | T | 1  | 276.17   |         | 276.17              |         |
|                     |        |          |        | 16  | R | 0  | 175.12   |         | 175.12              |         |

Scan number 5513 Raw file LNCAP\_Silac\_23F10\_set1\_02  
 Method ITMS; CID Pepti... 124.25

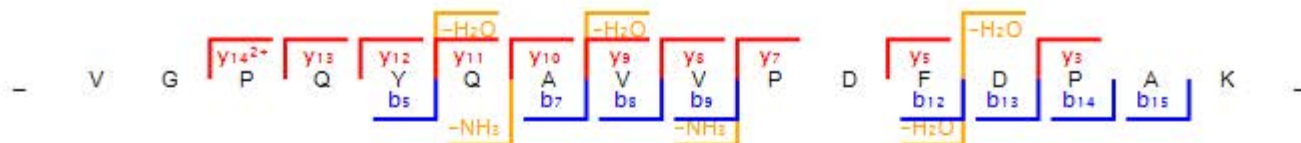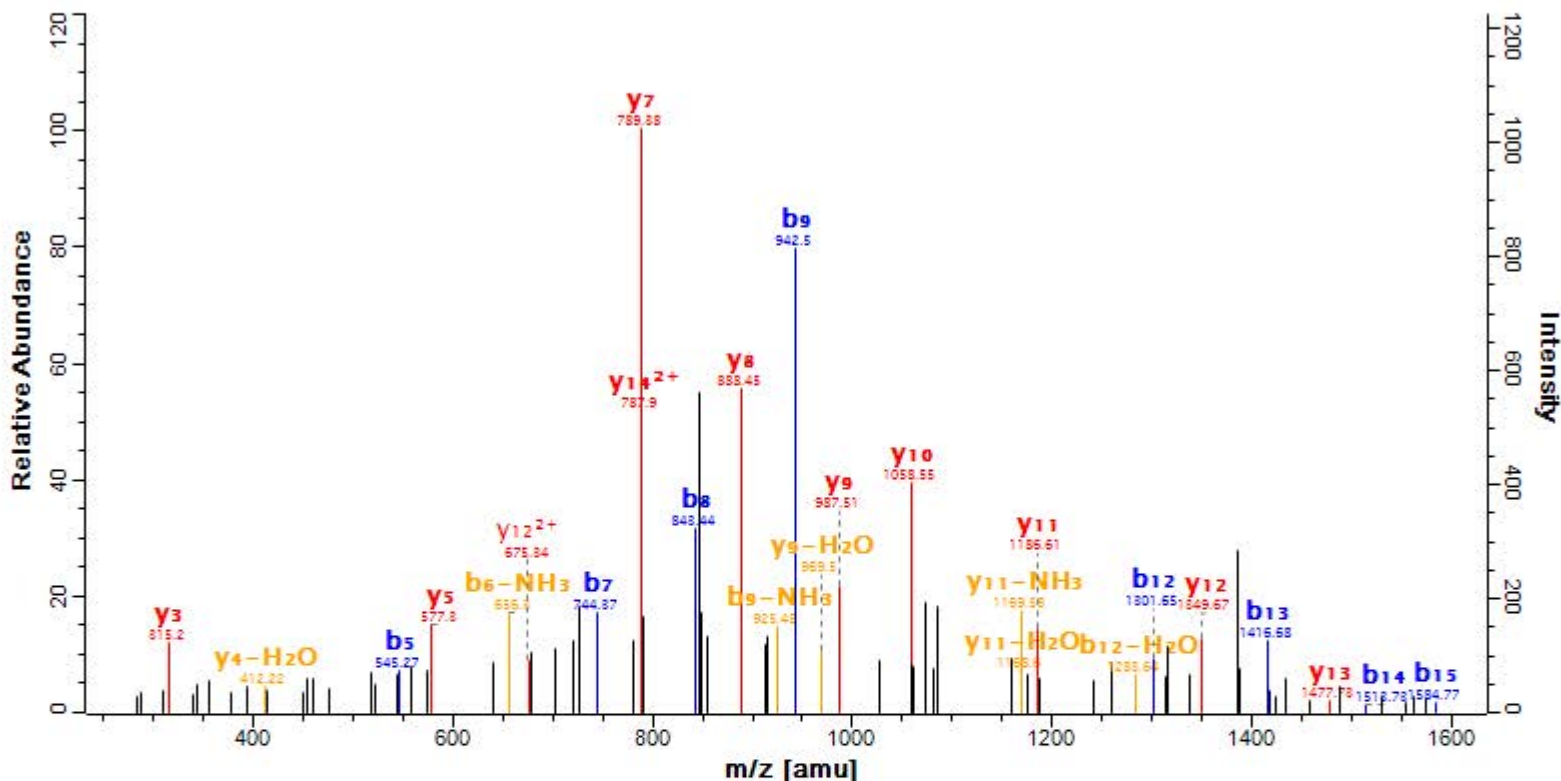

#### precursor information

|                   |                 |
|-------------------|-----------------|
| Mass:             | 1729.87077      |
| m/z:              | 865.94266       |
| Charge:           | 2+              |
| Retentiontime:    | 36.265056610107 |
| Score:            | 124.2509        |
| Mass Error [ppm]: | 1.868           |
| PEP:              | 6.3574E-10      |
| Precursor Type:   | MULTI           |

#### general information

|                       |             |
|-----------------------|-------------|
| Annotation:           | 13 of 16    |
| AminoAcids Coverage:  | 81 %        |
| Intensity Coverage:   | 53 %        |
| Peak Coverage:        | 31 %        |
| Protein Localisation: | 104 ... 119 |

| b ion     |          |    |     |    | y ion    |           | y <sup>2+</sup> ion |           |
|-----------|----------|----|-----|----|----------|-----------|---------------------|-----------|
| Δ dalton  | mass     |    | seq |    | Δ dalton | mass      | Δ dalton            | mass      |
|           | 100.0757 | 1  | V   | 15 |          |           |                     |           |
|           | 157.0972 | 2  | G   | 14 | 1631.806 |           | 1631.806            |           |
|           | 254.1499 | 3  | P   | 13 | 1574.785 |           | 787.8961            | +0.115918 |
|           | 382.2085 | 4  | Q   | 12 | 1477.732 | +0.2555   | 1477.732            |           |
| +0.201504 | 545.2718 | 5  | Y   | 11 | 1349.674 | +0.083487 | 675.3404            | +0.262287 |
|           | 673.3304 | 6  | Q   | 10 | 1186.61  | -0.02408  | 1186.61             |           |
| -0.07638  | 744.3675 | 7  | A   | 9  | 1058.552 | -0.02581  | 1058.552            |           |
| -0.0381   | 843.4359 | 8  | V   | 8  | 987.5146 | -0.03728  | 987.5146            |           |
| +0.10137  | 942.5043 | 9  | V   | 7  | 888.4462 | -0.00457  | 888.4462            |           |
|           | 1039.557 | 10 | P   | 6  | 789.3777 | +0.02179  | 789.3777            |           |
|           | 1154.584 | 11 | D   | 5  | 692.325  |           | 692.325             |           |
| -0.26233  | 1301.652 | 12 | F   | 4  | 577.298  | +0.060787 | 577.298             |           |
| -0.17343  | 1416.679 | 13 | D   | 3  | 430.2296 |           | 430.2296            |           |
| -0.1842   | 1513.732 | 14 | P   | 2  | 315.2027 | +0.200547 | 315.2027            |           |
| +0.055667 | 1584.769 | 15 | A   | 1  | 218.1499 |           | 218.1499            |           |
|           |          | 16 | K   | 0  | 147.1128 |           | 147.1128            |           |

Scan number 573 Raw file LNCAP\_Silac\_23F10\_set1\_02  
 Method ITMS: CID Pepti... 209.89

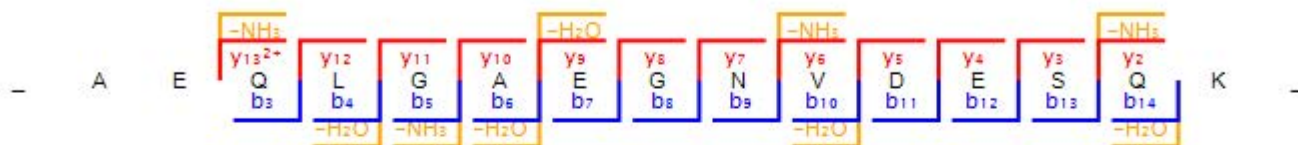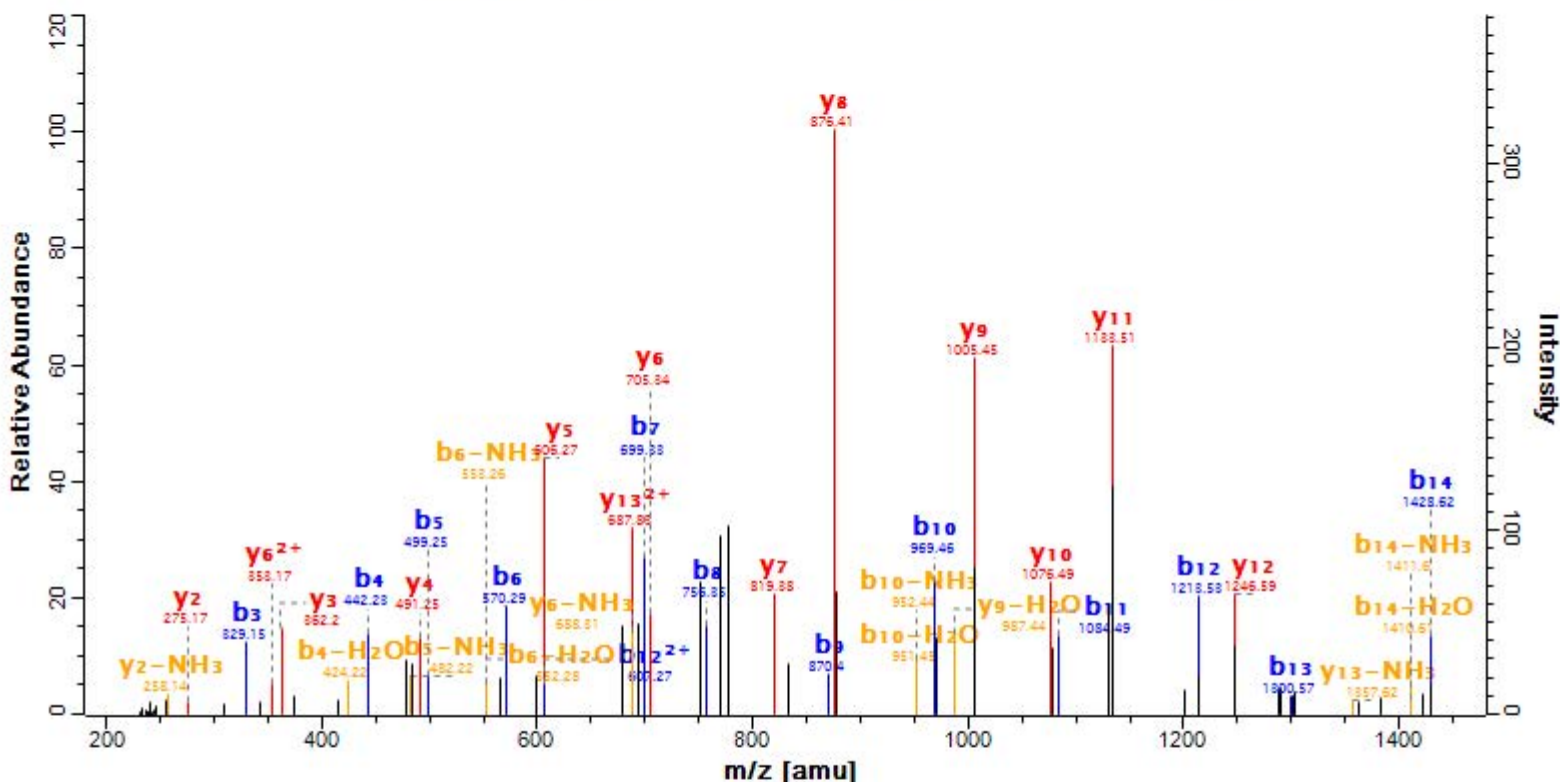

precursor information

|                   |                 |
|-------------------|-----------------|
| Mass:             | 0               |
| m/z:              | 787.86835       |
| Charge:           | 0+              |
| Retentiontime:    | 9.0170564651489 |
| Score:            | 209.8947        |
| Mass Error [ppm]: | 0.095272        |
| PEP:              | 2.0906E-38      |
| Precursor Type:   | PEAK            |

general information

|                       |             |
|-----------------------|-------------|
| Annotation:           | 12 of 15    |
| AminoAcids Coverage:  | 80 %        |
| Intensity Coverage:   | 61 %        |
| Peak Coverage:        | 45 %        |
| Protein Localisation: | 140 ... 154 |

| b <sup>2+</sup> ion |        | b ion    |        | seq |   |    | y ion    |         | y <sup>2+</sup> ion |         |
|---------------------|--------|----------|--------|-----|---|----|----------|---------|---------------------|---------|
| Δ dalton            | mass   | Δ dalton | mass   |     |   |    | Δ dalton | mass    | Δ dalton            | mass    |
|                     | 72.044 |          | 72.044 | 1   | A | 14 |          |         |                     |         |
|                     | 201.09 |          | 201.09 | 2   | E | 13 | 1503.7   |         | 1503.7              |         |
|                     | 329.15 | +0.0446  | 329.15 | 3   | Q | 12 | 1374.6   |         | 687.83              | +0.0855 |
|                     | 442.23 | +0.1114  | 442.23 | 4   | L | 11 | 1246.6   | -0.039  | 1246.6              |         |
|                     | 499.25 | +0.1058  | 499.25 | 5   | G | 10 | 1133.5   | -0.064  | 1133.5              |         |
|                     | 570.29 | +0.0772  | 570.29 | 6   | A | 9  | 1076.5   | -0.003  | 1076.5              |         |
|                     | 699.33 | -0.03    | 699.33 | 7   | E | 8  | 1005.4   | +0.0043 | 1005.4              |         |
|                     | 756.35 | +0.1324  | 756.35 | 8   | G | 7  | 876.41   | +0.014  | 876.41              |         |
|                     | 870.4  | +0.1216  | 870.4  | 9   | N | 6  | 819.38   | +0.0784 | 819.38              |         |
|                     | 969.46 | -0.063   | 969.46 | 10  | V | 5  | 705.34   | +0.267  | 353.17              | +0.1442 |
|                     | 1084.5 | +0.0466  | 1084.5 | 11  | D | 4  | 606.27   | +0.0392 | 606.27              |         |
| +0.1078             | 607.27 | -0.135   | 1213.5 | 12  | E | 3  | 491.25   | +0.2243 | 491.25              |         |
|                     | 1300.6 | -0.383   | 1300.6 | 13  | S | 2  | 362.2    | +0.0666 | 362.2               |         |
|                     | 1428.6 | +0.0057  | 1428.6 | 14  | Q | 1  | 275.17   | +0.056  | 275.17              |         |
|                     |        |          |        | 15  | K | 0  | 147.11   |         | 147.11              |         |

Scan number 6368 Raw file LNCAP\_Silac\_23F10\_set1\_02  
 Method ITMS; CID Pepti... 68.17

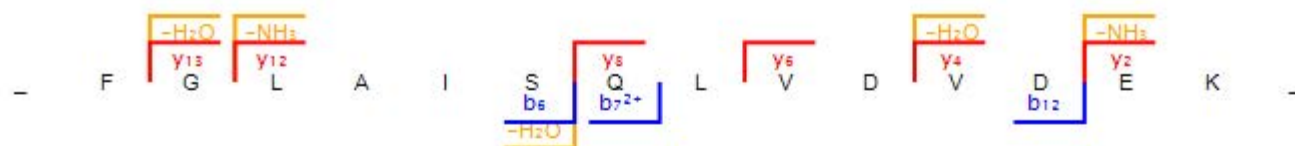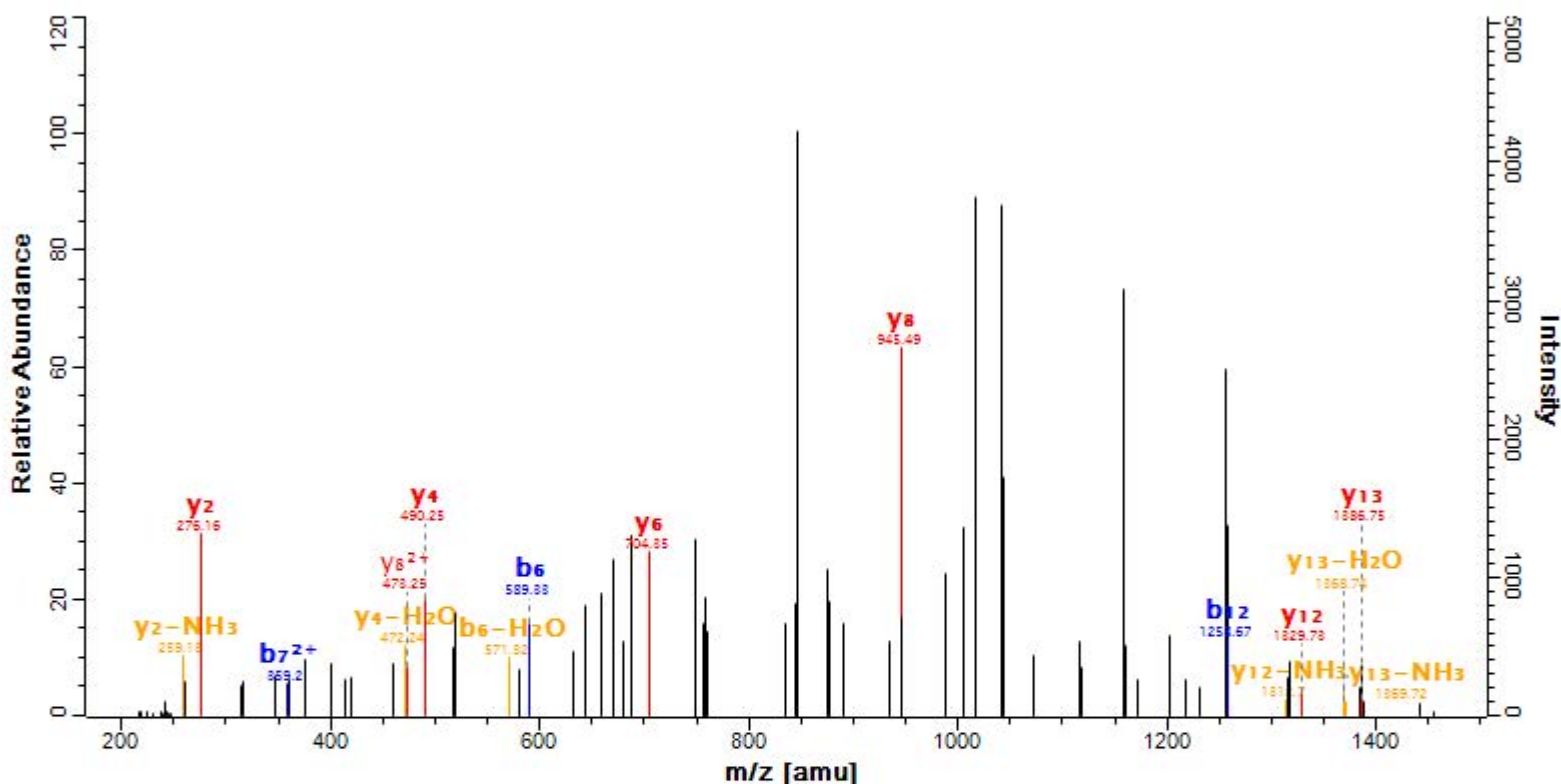

#### precursor information

|                   |                 |
|-------------------|-----------------|
| Mass:             | 1532.8079       |
| m/z:              | 767.41123       |
| Charge:           | 2+              |
| Retentiontime:    | 40.656078338623 |
| Score:            | 68.17118        |
| Mass Error [ppm]: | -0.4704         |
| PEP:              | 0.0032842       |
| Precursor Type:   | MULTI           |

#### general information

|                       |           |
|-----------------------|-----------|
| Annotation:           | 8 of 14   |
| AminoAcids Coverage:  | 57 %      |
| Intensity Coverage:   | 16 %      |
| Peak Coverage:        | 18 %      |
| Protein Localisation: | 76 ... 89 |

| b <sup>2+</sup> ion |        | b ion    |        |    |     |    | y ion    |         | y <sup>2+</sup> ion |         |
|---------------------|--------|----------|--------|----|-----|----|----------|---------|---------------------|---------|
| Δ dalton            | mass   | Δ dalton | mass   |    | seq |    | Δ dalton | mass    | Δ dalton            | mass    |
|                     | 148.08 |          | 148.08 | 1  | F   | 13 |          |         |                     |         |
|                     | 205.1  |          | 205.1  | 2  | G   | 12 | 1386.7   | +0.3771 | 1386.7              |         |
|                     | 318.18 |          | 318.18 | 3  | L   | 11 | 1329.7   | -0.188  | 1329.7              |         |
|                     | 389.22 |          | 389.22 | 4  | A   | 10 | 1216.6   |         | 1216.6              |         |
|                     | 502.3  |          | 502.3  | 5  | I   | 9  | 1145.6   |         | 1145.6              |         |
|                     | 589.33 | +0.0703  | 589.33 | 6  | S   | 8  | 1032.5   |         | 1032.5              |         |
| +0.2187             | 359.2  |          | 717.39 | 7  | Q   | 7  | 945.49   | +0.0825 | 473.25              | +0.1097 |
|                     | 830.48 |          | 830.48 | 8  | L   | 6  | 817.43   |         | 817.43              |         |
|                     | 929.55 |          | 929.55 | 9  | V   | 5  | 704.35   | +0.0957 | 704.35              |         |
|                     | 1044.6 |          | 1044.6 | 10 | D   | 4  | 605.28   |         | 605.28              |         |
|                     | 1143.6 |          | 1143.6 | 11 | V   | 3  | 490.25   | +0.1399 | 490.25              |         |
|                     | 1258.7 | +0.0323  | 1258.7 | 12 | D   | 2  | 391.18   |         | 391.18              |         |
|                     | 1387.7 |          | 1387.7 | 13 | E   | 1  | 276.16   | +0.0969 | 276.16              |         |
|                     |        |          |        | 14 | K   | 0  | 147.11   |         | 147.11              |         |

Scan number 6535 Raw file LNCAP\_Silac\_23F10\_set1\_02  
 Method ITMS; CID Peptide 283.82

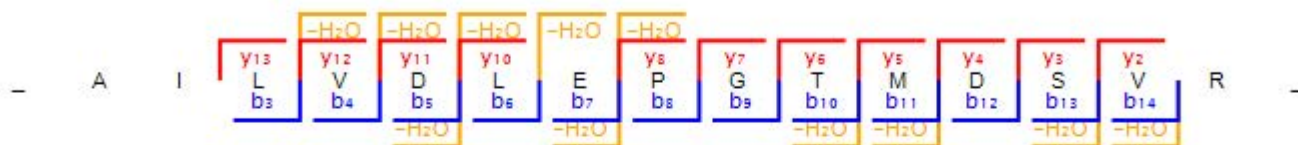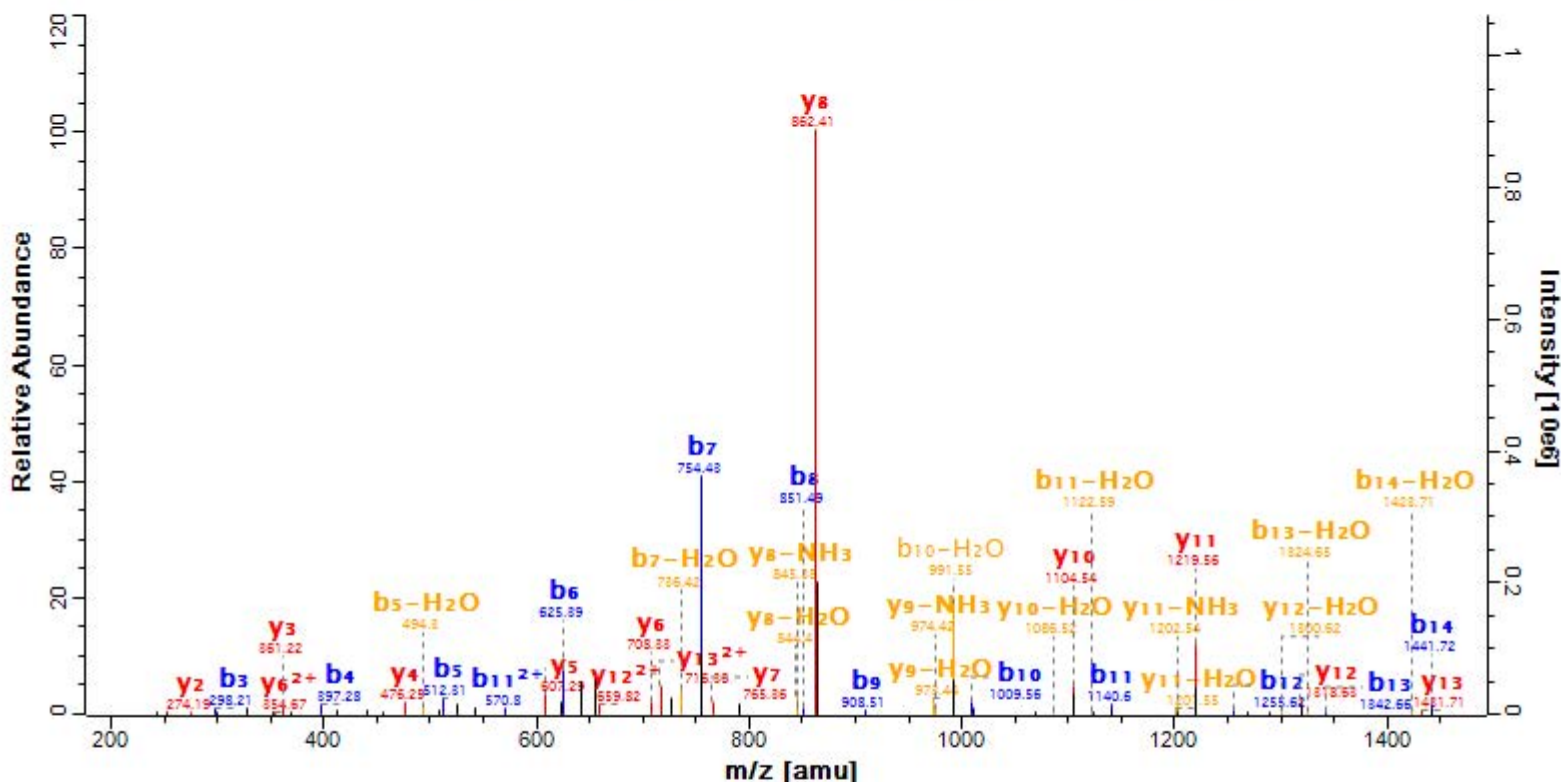

#### precursor information

|                   |                 |
|-------------------|-----------------|
| Mass:             | 1614.82819      |
| m/z:              | 808.42137       |
| Charge:           | 2+              |
| Retentiontime:    | 41.538227081298 |
| Score:            | 283.825         |
| Mass Error [ppm]: | -0.31947        |
| PEP:              | 3.0156E-80      |
| Precursor Type:   | MULTI           |

#### general information

|                       |           |
|-----------------------|-----------|
| Annotation:           | 12 of 15  |
| AminoAcids Coverage:  | 80 %      |
| Intensity Coverage:   | 75 %      |
| Peak Coverage:        | 53 %      |
| Protein Localisation: | 63 ... 77 |

| b <sup>2+</sup> ion |        | b ion    |        | seq |   |    | y ion    |         | y <sup>2+</sup> ion |         |
|---------------------|--------|----------|--------|-----|---|----|----------|---------|---------------------|---------|
| Δ dalton            | mass   | Δ dalton | mass   |     |   |    | Δ dalton | mass    | Δ dalton            | mass    |
|                     | 72.044 |          | 72.044 | 1   | A | 14 |          |         |                     |         |
|                     | 185.13 |          | 185.13 | 2   | I | 13 | 1544.8   |         | 1544.8              |         |
|                     | 298.21 | +0.0166  | 298.21 | 3   | L | 12 | 1431.7   | +0.1139 | 716.36              | +0.1659 |
|                     | 397.28 | +0.0134  | 397.28 | 4   | V | 11 | 1318.6   | +0.0493 | 659.82              | +0.1487 |
|                     | 512.31 | +0.0831  | 512.31 | 5   | D | 10 | 1219.6   | +0.0092 | 1219.6              |         |
|                     | 625.39 | -0.102   | 625.39 | 6   | L | 9  | 1104.5   | -0.053  | 1104.5              |         |
|                     | 754.43 | -0.018   | 754.43 | 7   | E | 8  | 991.45   |         | 991.45              |         |
|                     | 851.49 | +0.1574  | 851.49 | 8   | P | 7  | 862.41   | +0.0851 | 862.41              |         |
|                     | 908.51 | +0.0899  | 908.51 | 9   | G | 6  | 765.36   | +0.1305 | 765.36              |         |
|                     | 1009.6 | +0.01    | 1009.6 | 10  | T | 5  | 708.33   | +0.2251 | 354.67              | -0.324  |
| -0.463              | 570.8  | +0.0571  | 1140.6 | 11  | M | 4  | 607.29   | +0.0467 | 607.29              |         |
|                     | 1255.6 | -0.157   | 1255.6 | 12  | D | 3  | 476.25   | +0.0866 | 476.25              |         |
|                     | 1342.7 | +0.1594  | 1342.7 | 13  | S | 2  | 361.22   | +0.1644 | 361.22              |         |
|                     | 1441.7 | -0.196   | 1441.7 | 14  | V | 1  | 274.19   | +0.1711 | 274.19              |         |
|                     |        |          |        | 15  | R | 0  | 175.12   |         | 175.12              |         |

Scan number 6669 Raw file LNCAP\_Silac\_23F10\_set1\_02  
 Method ITMS; CID Pepti... 76.16

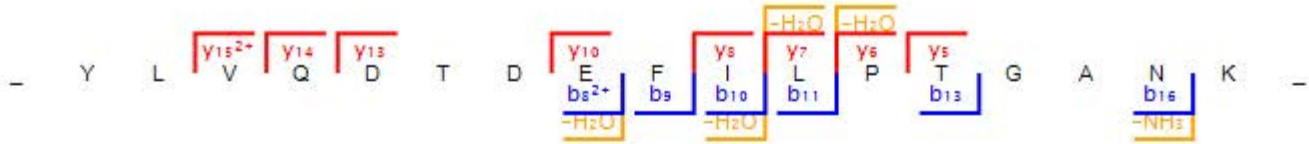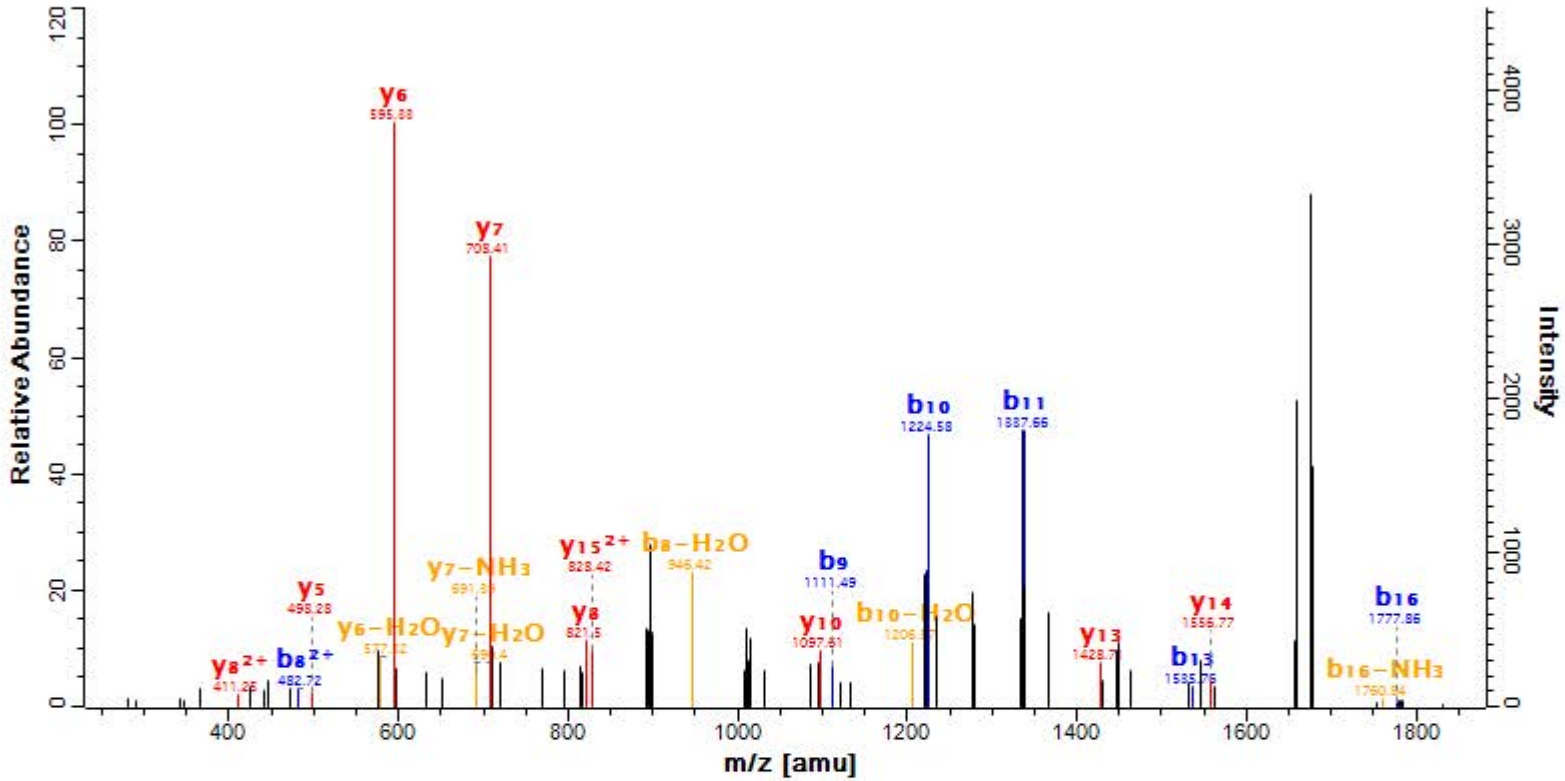

**precursor information**

|                   |                 |
|-------------------|-----------------|
| Mass:             | 1922.96272      |
| m/z:              | 962.48863       |
| Charge:           | 2+              |
| Retentiontime:    | 42.244529724121 |
| Score:            | 76.15792        |
| Mass Error [ppm]: | 0.081485        |
| PEP:              | 0.00014651      |
| Precursor Type:   | MULTI           |

**general information**

|                       |           |
|-----------------------|-----------|
| Annotation:           | 10 of 17  |
| AminoAcids Coverage:  | 59 %      |
| Intensity Coverage:   | 32 %      |
| Peak Coverage:        | 24 %      |
| Protein Localisation: | 52 ... 68 |

| b <sup>2+</sup> ion |        | b ion    |        | seq |   |    | y ion    |         | y <sup>2+</sup> ion |         |
|---------------------|--------|----------|--------|-----|---|----|----------|---------|---------------------|---------|
| Δ dalton            | mass   | Δ dalton | mass   |     |   |    | Δ dalton | mass    | Δ dalton            | mass    |
|                     | 164.07 |          | 164.07 | 1   | Y | 16 |          |         |                     |         |
|                     | 277.15 |          | 277.15 | 2   | L | 15 | 1768.9   |         | 1768.9              |         |
|                     | 376.22 |          | 376.22 | 3   | V | 14 | 1655.8   |         | 828.42              | +0.3392 |
|                     | 504.28 |          | 504.28 | 4   | Q | 13 | 1556.8   | +0.143  | 1556.8              |         |
|                     | 619.31 |          | 619.31 | 5   | D | 12 | 1428.7   | -0.106  | 1428.7              |         |
|                     | 720.36 |          | 720.36 | 6   | T | 11 | 1313.7   |         | 1313.7              |         |
|                     | 835.38 |          | 835.38 | 7   | D | 10 | 1212.6   |         | 1212.6              |         |
| -0.259              | 482.72 |          | 964.43 | 8   | E | 9  | 1097.6   | -0.06   | 1097.6              |         |
|                     | 1111.5 | +0       | 1111.5 | 9   | F | 8  | 968.57   |         | 968.57              |         |
|                     | 1224.6 | -0.192   | 1224.6 | 10  | I | 7  | 821.5    | +0.1099 | 411.25              | +0.0816 |
|                     | 1337.7 | -0.011   | 1337.7 | 11  | L | 6  | 708.41   | +0.0024 | 708.41              |         |
|                     | 1434.7 |          | 1434.7 | 12  | P | 5  | 595.33   | +0.0329 | 595.33              |         |
|                     | 1535.8 | -0.053   | 1535.8 | 13  | T | 4  | 498.28   | +0.0776 | 498.28              |         |
|                     | 1592.8 |          | 1592.8 | 14  | G | 3  | 397.23   |         | 397.23              |         |
|                     | 1663.8 |          | 1663.8 | 15  | A | 2  | 340.21   |         | 340.21              |         |
|                     | 1777.9 | +0.009   | 1777.9 | 16  | N | 1  | 269.17   |         | 269.17              |         |
|                     |        |          |        | 17  | K | 0  | 155.13   |         | 155.13              |         |

Scan number 6752 Raw file LNCAP\_Silac\_23F10\_set1\_02  
 Method ITMS; CID Pepti... 61.96

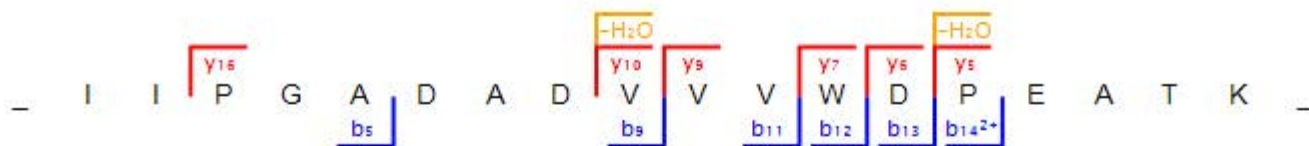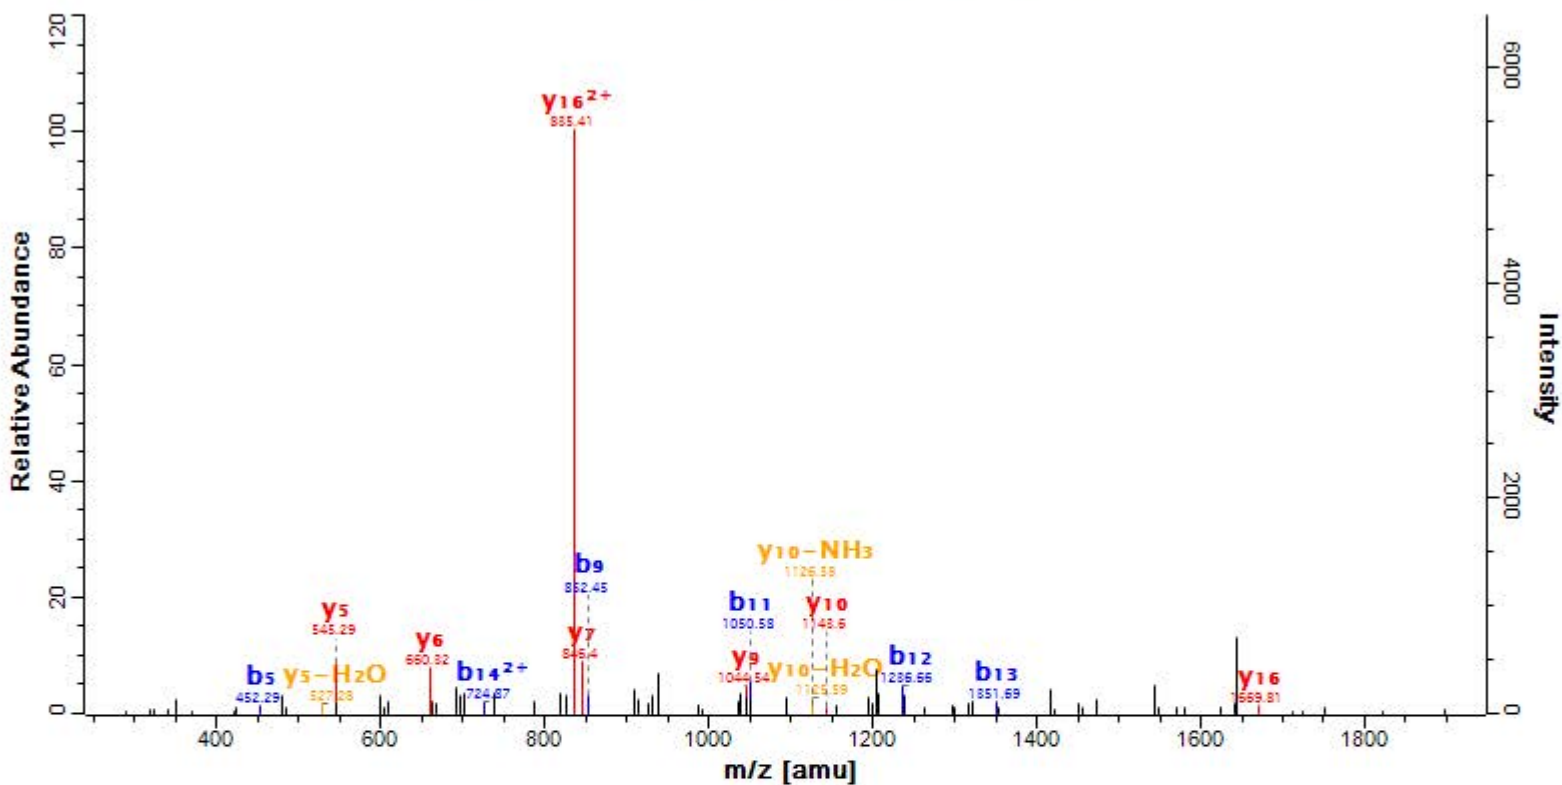

precursor information

|                   |                 |
|-------------------|-----------------|
| Mass:             | 1894.96966      |
| m/z:              | 948.49211       |
| Charge:           | 2+              |
| Retentiontime:    | 42.687789916992 |
| Score:            | 61.96206        |
| Mass Error [ppm]: | 1.0654          |
| PEP:              | 0.0016759       |
| Precursor Type:   | MULTI           |

general information

|                       |             |
|-----------------------|-------------|
| Annotation:           | 8 of 18     |
| AminoAcids Coverage:  | 44 %        |
| Intensity Coverage:   | 48 %        |
| Peak Coverage:        | 17 %        |
| Protein Localisation: | 394 ... 411 |

| b <sup>2+</sup> ion |        | b ion    |        | seq |   |    | y ion    |         | y <sup>2+</sup> ion |         |
|---------------------|--------|----------|--------|-----|---|----|----------|---------|---------------------|---------|
| Δ dalton            | mass   | Δ dalton | mass   |     |   |    | Δ dalton | mass    | Δ dalton            | mass    |
|                     | 114.09 |          | 114.09 | 1   | I | 17 |          |         |                     |         |
|                     | 227.18 |          | 227.18 | 2   | I | 16 | 1782.9   |         | 1782.9              |         |
|                     | 324.23 |          | 324.23 | 3   | P | 15 | 1669.8   | -0.042  | 835.41              | +0.3446 |
|                     | 381.25 |          | 381.25 | 4   | G | 14 | 1572.8   |         | 1572.8              |         |
|                     | 452.29 | +0.1352  | 452.29 | 5   | A | 13 | 1515.7   |         | 1515.7              |         |
|                     | 567.31 |          | 567.31 | 6   | D | 12 | 1444.7   |         | 1444.7              |         |
|                     | 638.35 |          | 638.35 | 7   | A | 11 | 1329.7   |         | 1329.7              |         |
|                     | 753.38 |          | 753.38 | 8   | D | 10 | 1258.6   |         | 1258.6              |         |
|                     | 852.45 | +0.01    | 852.45 | 9   | V | 9  | 1143.6   | +0.3528 | 1143.6              |         |
|                     | 951.51 |          | 951.51 | 10  | V | 8  | 1044.5   | +0.0447 | 1044.5              |         |
|                     | 1050.6 | -0.044   | 1050.6 | 11  | V | 7  | 945.47   |         | 945.47              |         |
|                     | 1236.7 | +0.0015  | 1236.7 | 12  | W | 6  | 846.4    | +0.0966 | 846.4               |         |
|                     | 1351.7 | -0.153   | 1351.7 | 13  | D | 5  | 660.32   | -0.018  | 660.32              |         |
| +0.4367             | 724.87 |          | 1448.7 | 14  | P | 4  | 545.29   | +0.0779 | 545.29              |         |
|                     | 1577.8 |          | 1577.8 | 15  | E | 3  | 448.24   |         | 448.24              |         |
|                     | 1648.8 |          | 1648.8 | 16  | A | 2  | 319.2    |         | 319.2               |         |
|                     | 1749.9 |          | 1749.9 | 17  | T | 1  | 248.16   |         | 248.16              |         |
|                     |        |          |        | 18  | K | 0  | 147.11   |         | 147.11              |         |



Scan number 7204 Raw file LNCAP\_Silac\_23F10\_set1\_02  
 Method ITMS; CID Pepti... 232.6

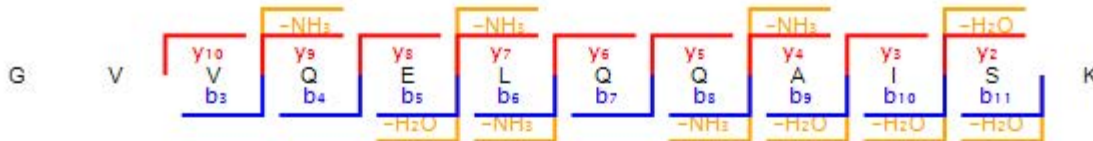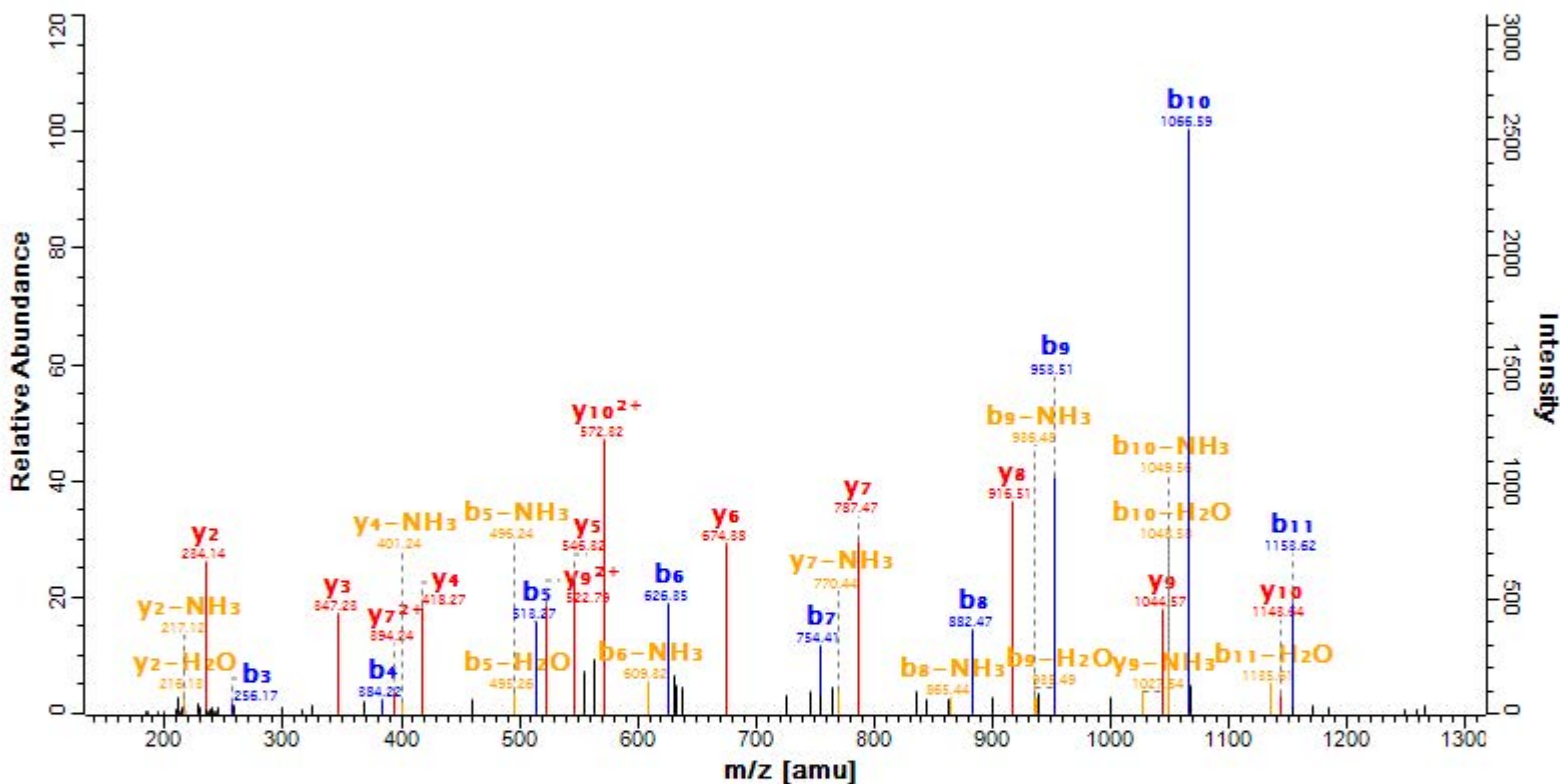

#### precursor information

|                   |                 |
|-------------------|-----------------|
| Mass:             | 1298.71981      |
| m/z:              | 650.36718       |
| Charge:           | 2+              |
| Retentiontime:    | 45.120960235595 |
| Score:            | 232.6023        |
| Mass Error [ppm]: | 0.30503         |
| PEP:              | 6.9433E-32      |
| Precursor Type:   | MULTI           |

#### general information

|                       |            |
|-----------------------|------------|
| Annotation:           | 9 of 12    |
| AminoAcids Coverage:  | 75 %       |
| Intensity Coverage:   | 85 %       |
| Peak Coverage:        | 43 %       |
| Protein Localisation: | 96 ... 107 |

| b ion     |          |    |     |    | y ion    |           | y <sup>2+</sup> ion |           |
|-----------|----------|----|-----|----|----------|-----------|---------------------|-----------|
| Δ dalton  | mass     |    | seq |    | Δ dalton | mass      | Δ dalton            | mass      |
|           | 58.02874 | 1  | G   | 11 |          |           |                     |           |
|           | 157.0972 | 2  | V   | 10 | 1242.705 |           | 1242.705            |           |
| -0.07371  | 256.1656 | 3  | V   | 9  | 1143.637 | +0.096829 | 572.322             | +0.132606 |
| +0.102576 | 384.2241 | 4  | Q   | 8  | 1044.568 | +0.015584 | 522.7878            | +0.096744 |
| +0.406906 | 513.2667 | 5  | E   | 7  | 916.5098 | +0.120366 | 916.5098            |           |
| +0.032132 | 626.3508 | 6  | L   | 6  | 787.4672 | -0.0102   | 394.2373            | +0.497916 |
| -0.12074  | 754.4094 | 7  | Q   | 5  | 674.3832 | -0.00646  | 674.3832            |           |
| -0.0199   | 882.468  | 8  | Q   | 4  | 546.3246 | +0.138608 | 546.3246            |           |
| -0.03193  | 953.5051 | 9  | A   | 3  | 418.266  | +0.085613 | 418.266             |           |
| -0.01589  | 1066.589 | 10 | I   | 2  | 347.2289 | +0.055955 | 347.2289            |           |
| +0.026297 | 1153.621 | 11 | S   | 1  | 234.1448 | -0.00514  | 234.1448            |           |
|           |          | 12 | K   | 0  | 147.1128 |           | 147.1128            |           |

Scan number 7366 Raw file LNCAP\_Silac\_23F10\_set1\_02  
 Method ITMS; CID Pepti... 215.51

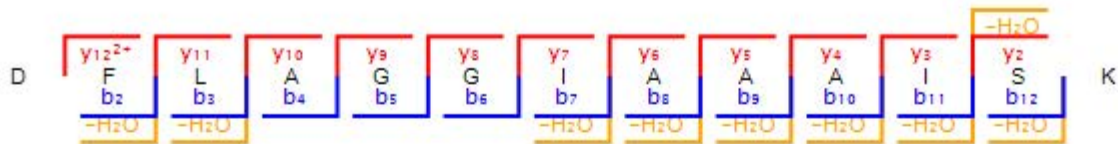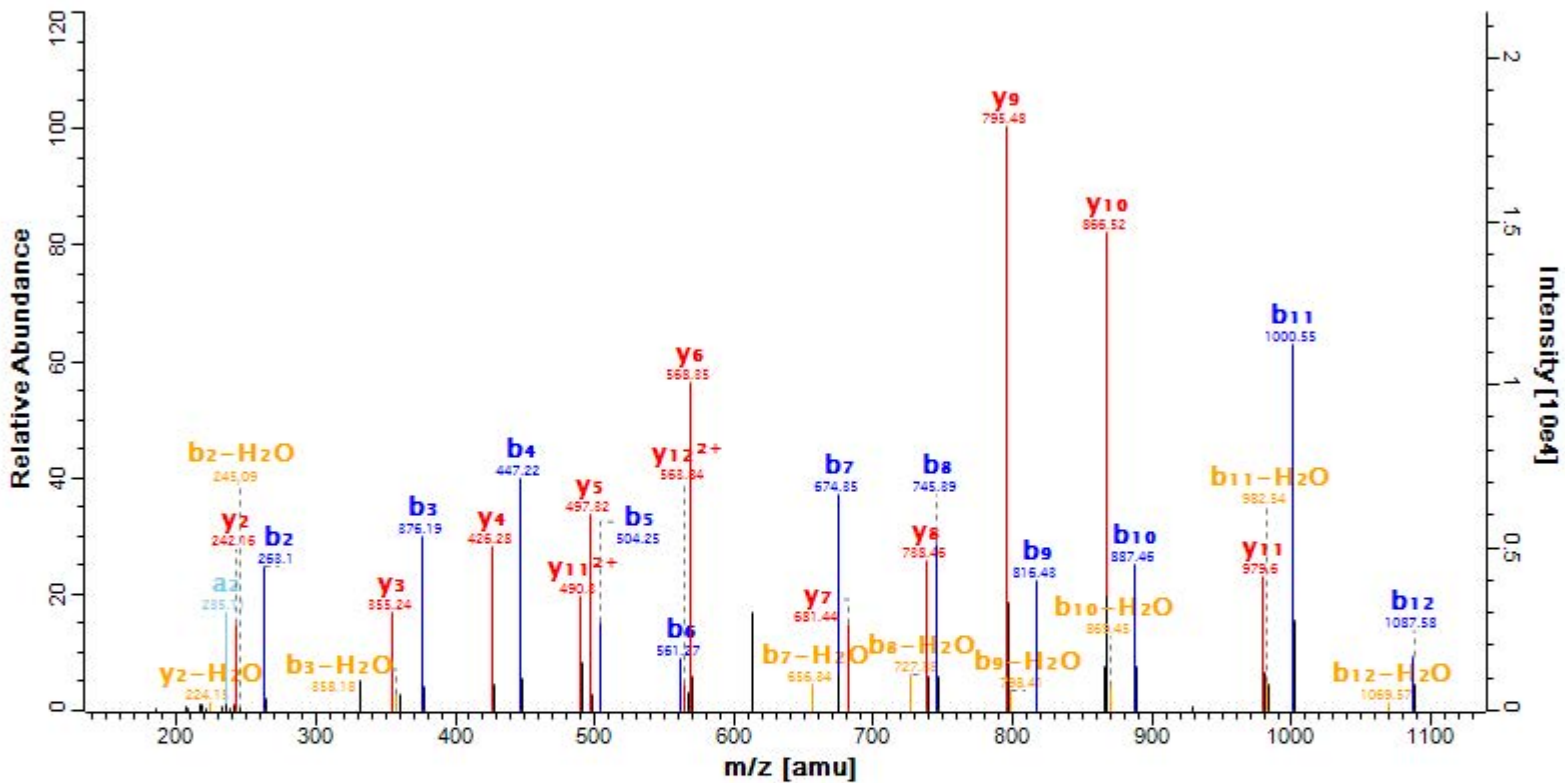

#### precursor information

|                   |                 |
|-------------------|-----------------|
| Mass:             | 1232.67628      |
| m/z:              | 617.34542       |
| Charge:           | 2+              |
| Retentiontime:    | 45.995468139648 |
| Score:            | 215.5075        |
| Mass Error [ppm]: | -0.16677        |
| PEP:              | 8.4682E-24      |
| Precursor Type:   | MULTI           |

#### general information

|                       |           |
|-----------------------|-----------|
| Annotation:           | 11 of 13  |
| AminoAcids Coverage:  | 85 %      |
| Intensity Coverage:   | 80 %      |
| Peak Coverage:        | 46 %      |
| Protein Localisation: | 11 ... 23 |

| a ion    |        | b ion    |        |    |     |    | y ion    |         | y <sup>2+</sup> ion |         |
|----------|--------|----------|--------|----|-----|----|----------|---------|---------------------|---------|
| Δ dalton | mass   | Δ dalton | mass   |    | seq |    | Δ dalton | mass    | Δ dalton            | mass    |
|          | 88.039 |          | 116.03 | 1  | D   | 12 |          |         |                     |         |
| +0.0966  | 235.11 | +0.0775  | 263.1  | 2  | F   | 11 | 1126.7   |         | 563.84              | +0.2765 |
|          | 348.19 | -0.04    | 376.19 | 3  | L   | 10 | 979.6    | +0.0323 | 490.3               | +0.0596 |
|          | 419.23 | -0.007   | 447.22 | 4  | A   | 9  | 866.52   | +0.0511 | 866.52              |         |
|          | 476.25 | +0.0688  | 504.25 | 5  | G   | 8  | 795.48   | +0.1298 | 795.48              |         |
|          | 533.27 | +0.1132  | 561.27 | 6  | G   | 7  | 738.46   | -0.006  | 738.46              |         |
|          | 646.36 | +0.0295  | 674.35 | 7  | I   | 6  | 681.44   | +0.058  | 681.44              |         |
|          | 717.39 | -0.025   | 745.39 | 8  | A   | 5  | 568.35   | +0.0839 | 568.35              |         |
|          | 788.43 | -0.015   | 816.43 | 9  | A   | 4  | 497.32   | +0.0547 | 497.32              |         |
|          | 859.47 | -0.011   | 887.46 | 10 | A   | 3  | 426.28   | +0.0442 | 426.28              |         |
|          | 972.55 | -0.045   | 1000.5 | 11 | I   | 2  | 355.24   | -0.023  | 355.24              |         |
|          | 1059.6 | -0.081   | 1087.6 | 12 | S   | 1  | 242.16   | +0.0477 | 242.16              |         |
|          |        |          |        | 13 | K   | 0  | 155.13   |         | 155.13              |         |

Scan number 8769 Raw file LNCAP\_Silac\_23F10\_set1\_02  
 Method ITMS: CID Pepti... 316.1

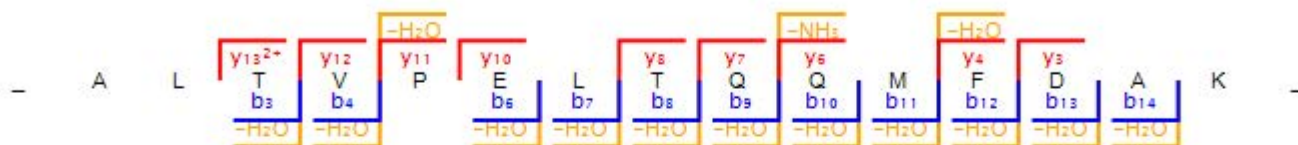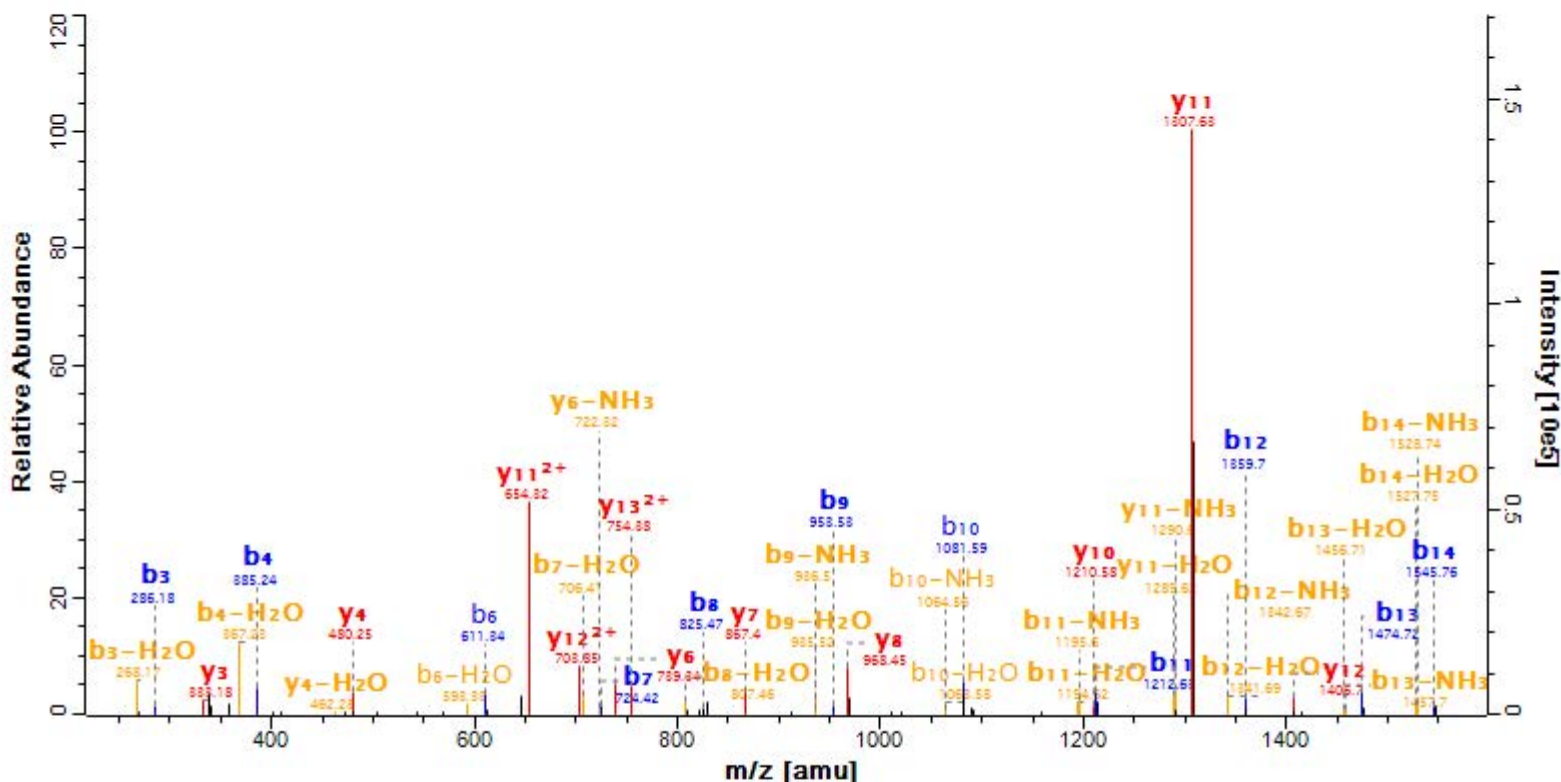

#### precursor information

|                   |                 |
|-------------------|-----------------|
| Mass:             | 1690.85921      |
| m/z:              | 846.43688       |
| Charge:           | 2+              |
| Retentiontime:    | 53.679092407226 |
| Score:            | 316.1029        |
| Mass Error [ppm]: | -0.47109        |
| PEP:              | 9.5501E-108     |
| Precursor Type:   | MULTI           |

#### general information

|                       |             |
|-----------------------|-------------|
| Annotation:           | 12 of 15    |
| AminoAcids Coverage:  | 80 %        |
| Intensity Coverage:   | 76 %        |
| Peak Coverage:        | 54 %        |
| Protein Localisation: | 283 ... 297 |

| b ion     |          |     |   | y ion    |          |           | y <sup>2+</sup> ion |           |
|-----------|----------|-----|---|----------|----------|-----------|---------------------|-----------|
| Δ dalton  | mass     | seq |   | Δ dalton | mass     | Δ dalton  | mass                |           |
|           | 72.04439 | 1   | A | 14       |          |           |                     |           |
|           | 185.1285 | 2   | L | 13       | 1620.83  | 1620.83   |                     |           |
| -0.05473  | 286.1761 | 3   | T | 12       | 1507.746 | 754.3767  | +0.285723           |           |
| -0.01231  | 385.2445 | 4   | V | 11       | 1406.698 | +0.081235 | 703.8529            | +0.265251 |
|           | 482.2973 | 5   | P | 10       | 1307.63  | -0.03993  | 654.3186            | +0.221333 |
| +0.056154 | 611.3399 | 6   | E | 9        | 1210.577 | +0.075948 | 1210.577            |           |
| +0.008222 | 724.424  | 7   | L | 8        | 1081.535 |           | 1081.535            |           |
| +0.035739 | 825.4716 | 8   | T | 7        | 968.4506 | +0.018584 | 968.4506            |           |
| -0.09053  | 953.5302 | 9   | Q | 6        | 867.4029 | +0.056131 | 867.4029            |           |
| +0.005071 | 1081.589 | 10  | Q | 5        | 739.3443 | +0.069542 | 739.3443            |           |
| -0.03627  | 1212.629 | 11  | M | 4        | 611.2858 |           | 611.2858            |           |
| -0.00458  | 1359.698 | 12  | F | 3        | 480.2453 | +0.063441 | 480.2453            |           |
| -0.07462  | 1474.725 | 13  | D | 2        | 333.1769 | +0.10152  | 333.1769            |           |
| -0.05924  | 1545.762 | 14  | A | 1        | 218.1499 |           | 218.1499            |           |
|           |          | 15  | K | 0        | 147.1128 |           | 147.1128            |           |

Scan number 8954 Raw file LNCAP\_Silac\_23F10\_set1\_02  
 Method ITMS; CID Pepti... 102.08

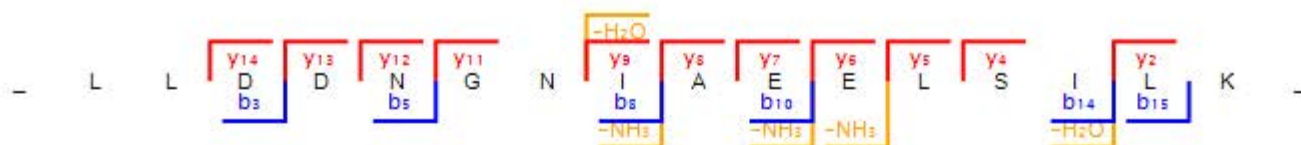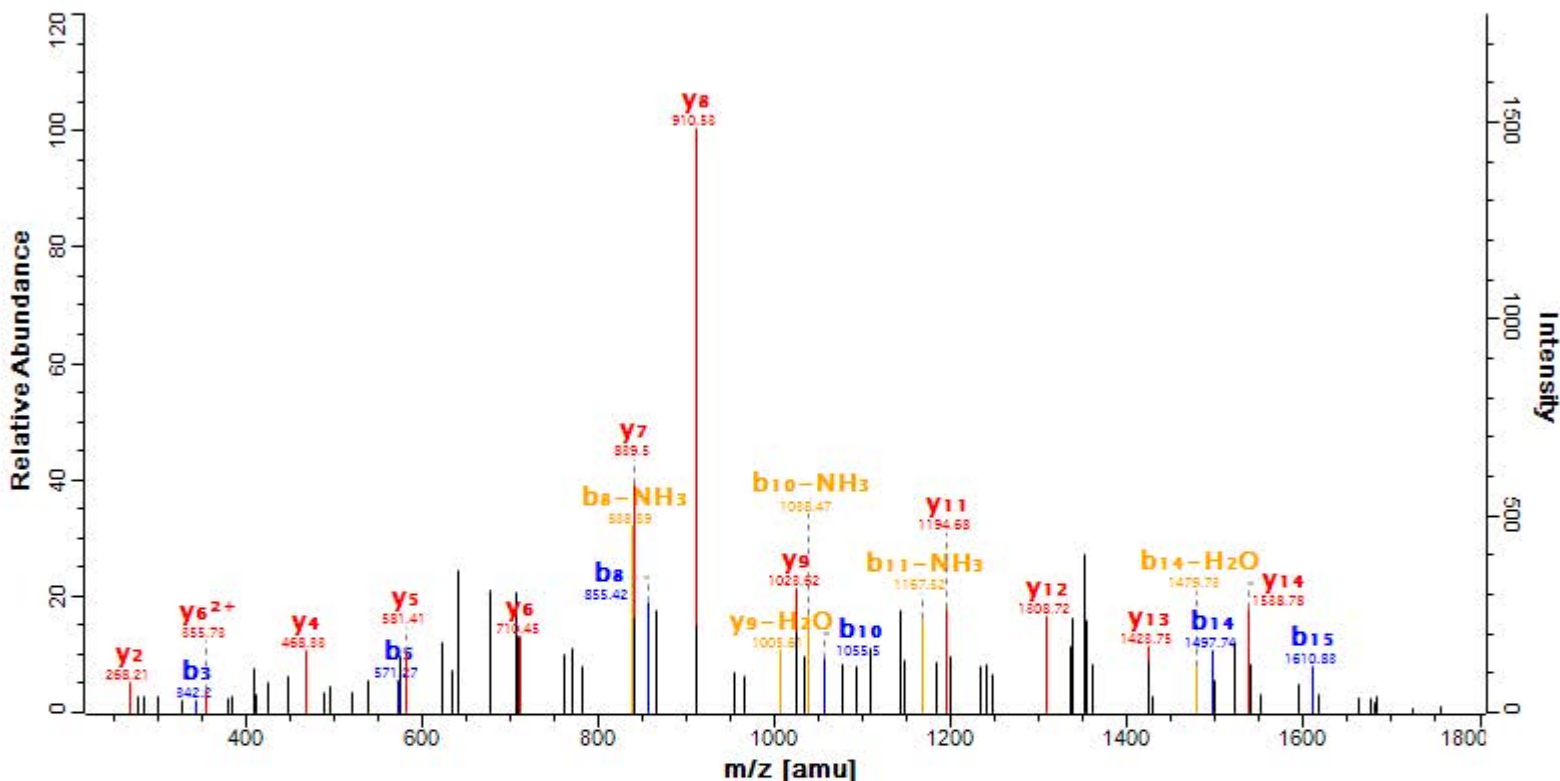

#### precursor information

|                   |                 |
|-------------------|-----------------|
| Mass:             | 0               |
| m/z:              | 882.97763       |
| Charge:           | 0+              |
| Retentiontime:    | 54.747207641601 |
| Score:            | 102.0847        |
| Mass Error [ppm]: | 0.60749         |
| PEP:              | 0.0014631       |
| Precursor Type:   | PEAK            |

#### general information

|                       |             |
|-----------------------|-------------|
| Annotation:           | 12 of 16    |
| AminoAcids Coverage:  | 75 %        |
| Intensity Coverage:   | 42 %        |
| Peak Coverage:        | 26 %        |
| Protein Localisation: | 133 ... 148 |

| b ion     |          |    |     |    | y ion    |           | y <sup>2+</sup> ion |          |
|-----------|----------|----|-----|----|----------|-----------|---------------------|----------|
| Δ dalton  | mass     |    | seq |    | Δ dalton | mass      | Δ dalton            | mass     |
|           | 114.0913 | 1  | L   | 15 |          |           |                     |          |
|           | 227.1754 | 2  | L   | 14 | 1651.863 |           | 1651.863            |          |
| +0.068343 | 342.2023 | 3  | D   | 13 | 1538.779 | -0.0012   | 1538.779            |          |
|           | 457.2293 | 4  | D   | 12 | 1423.752 | -0.37038  | 1423.752            |          |
| +0.212523 | 571.2722 | 5  | N   | 11 | 1308.725 | +0.042306 | 1308.725            |          |
|           | 628.2937 | 6  | G   | 10 | 1194.682 | -0.07419  | 1194.682            |          |
|           | 742.3366 | 7  | N   | 9  | 1137.661 |           | 1137.661            |          |
| +0.032635 | 855.4207 | 8  | I   | 8  | 1023.618 | +0.057034 | 1023.618            |          |
|           | 926.4578 | 9  | A   | 7  | 910.5335 | +0.062058 | 910.5335            |          |
| -0.0132   | 1055.5   | 10 | E   | 6  | 839.4964 | +0.060109 | 839.4964            |          |
|           | 1184.543 | 11 | E   | 5  | 710.4538 | +0.195781 | 355.7305            | -0.48537 |
|           | 1297.627 | 12 | L   | 4  | 581.4112 | +0.086274 | 581.4112            |          |
|           | 1384.659 | 13 | S   | 3  | 468.3272 | +0.164418 | 468.3272            |          |
| +0.01981  | 1497.743 | 14 | I   | 2  | 381.2951 |           | 381.2951            |          |
| +0.286332 | 1610.827 | 15 | L   | 1  | 268.2111 | +0.150383 | 268.2111            |          |
|           |          | 16 | K   | 0  | 155.127  |           | 155.127             |          |

Scan number 909 Raw file LNCAP\_Silac\_23F10\_set1\_02  
 Method ITMS; CID Pepti... 95.09

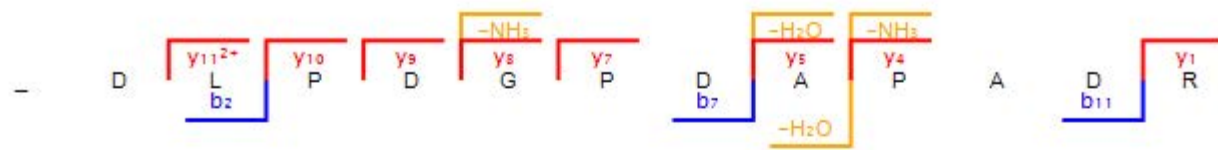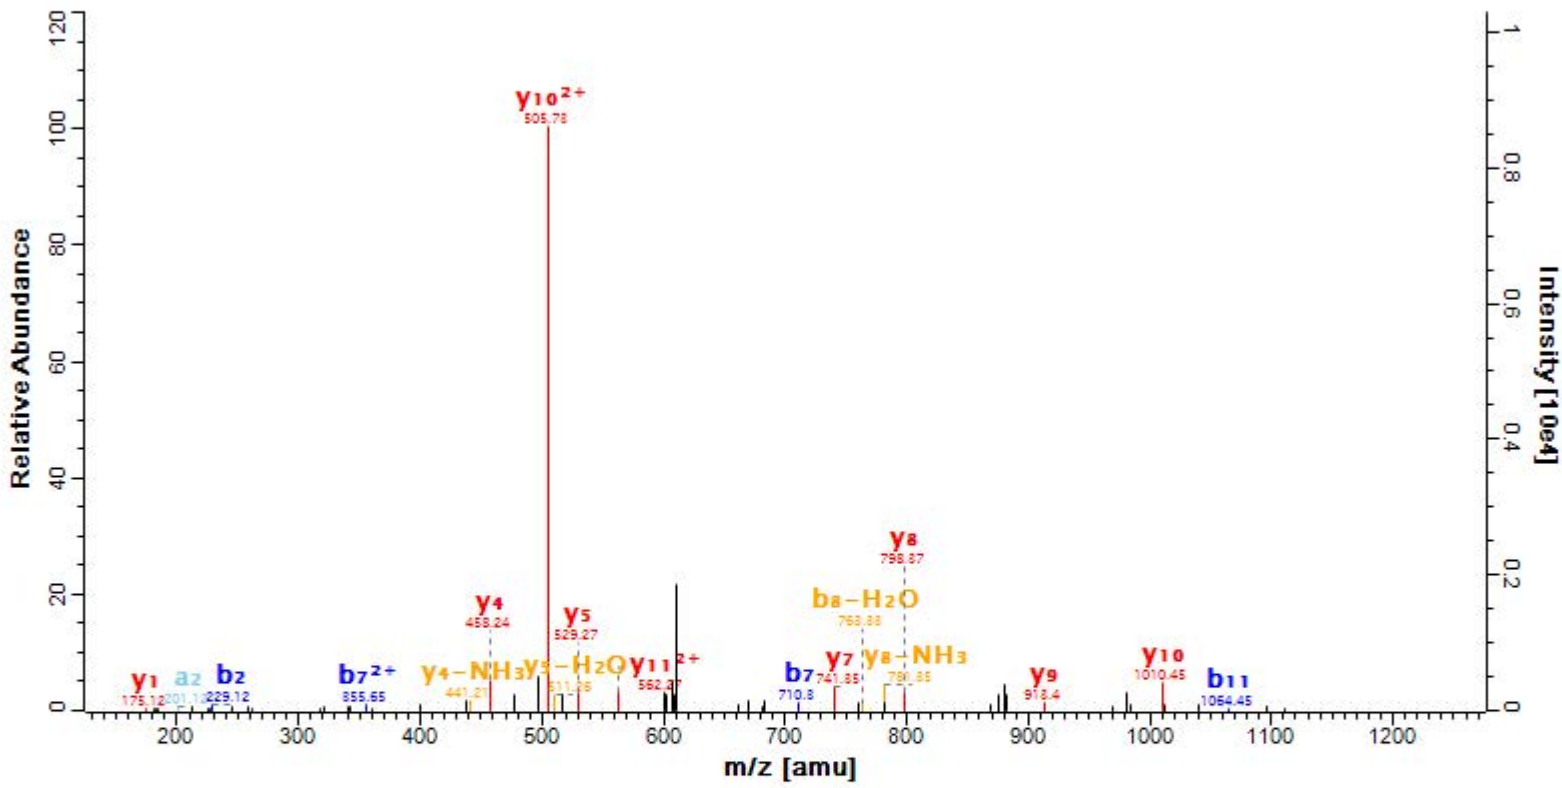

precursor information

|                   |                 |
|-------------------|-----------------|
| Mass:             | 1237.55734      |
| m/z:              | 619.78595       |
| Charge:           | 2+              |
| Retentiontime:    | 11.357996940612 |
| Score:            | 95.09386        |
| Mass Error [ppm]: | -0.1257         |
| PEP:              | 0.00059533      |
| Precursor Type:   | MULTI           |

general information

|                       |           |
|-----------------------|-----------|
| Annotation:           | 10 of 12  |
| AminoAcids Coverage:  | 83 %      |
| Intensity Coverage:   | 61 %      |
| Peak Coverage:        | 19 %      |
| Protein Localisation: | 30 ... 41 |

| a ion         |               | b <sup>2+</sup> ion |               | b ion |               | y ion         |               | y <sup>2+</sup> ion |  |
|---------------|---------------|---------------------|---------------|-------|---------------|---------------|---------------|---------------------|--|
| Δ dalton mass | Δ dalton mass | Δ dalton mass       | Δ dalton mass | seq   | Δ dalton mass | Δ dalton mass | Δ dalton mass | Δ dalton mass       |  |
| 88.04         | 116           | 116                 | 116           | 1     | D             | 11            |               |                     |  |
| -0.04         | 201.1         | 229.1               | +0.11         | 2     | L             | 10            | 1124          | 562.3               |  |
|               | 298.2         | 326.2               |               | 3     | P             | 9             | 1010          | 9505.7              |  |
|               | 413.2         | 441.2               |               | 4     | D             | 8             | 913.4         | 913.4               |  |
|               | 470.2         | 498.2               |               | 5     | G             | 7             | 798.4         | 798.4               |  |
|               | 567.3         | 595.3               |               | 6     | P             | 6             | 741.4         | 741.4               |  |
|               | 682.3         | -0.33               | +0.104        | 7     | D             | 5             | 644.3         | 644.3               |  |
|               | 753.3         |                     |               | 8     | A             | 4             | 529.3         | 529.3               |  |
|               | 850.4         |                     |               | 9     | P             | 3             | 458.2         | 458.2               |  |
|               | 921.4         |                     |               | 10    | A             | 2             | 361.2         | 361.2               |  |
|               | 1036          |                     | -0.16         | 11    | D             | 1             | 290.1         | 290.1               |  |
|               |               |                     |               | 12    | R             | 0             | 175.1         | 175.1               |  |

Scan number 9235 Raw file LNCAP\_Silac\_23F10\_set1\_02  
 Method ITMS: CID Pepti... 102.28

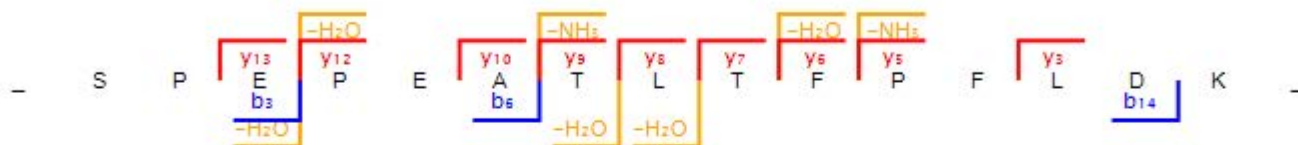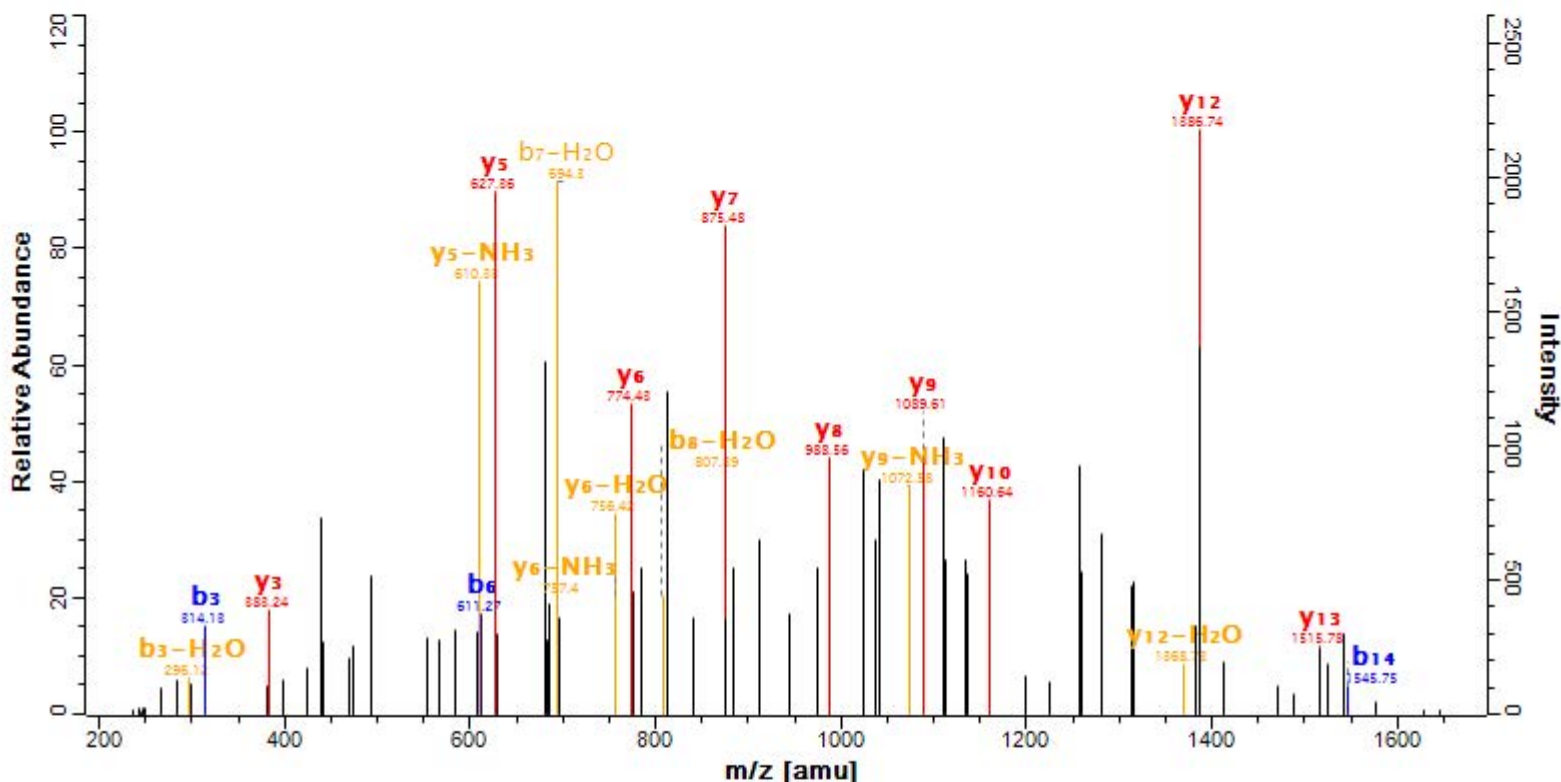

#### precursor information

|                   |                 |
|-------------------|-----------------|
| Mass:             | 1690.8464       |
| m/z:              | 846.43048       |
| Charge:           | 2+              |
| Retentiontime:    | 56.421833038330 |
| Score:            | 102.2768        |
| Mass Error [ppm]: | 0.58789         |
| PEP:              | 1.4583E-05      |
| Precursor Type:   | MULTI           |

#### general information

|                       |             |
|-----------------------|-------------|
| Annotation:           | 10 of 15    |
| AminoAcids Coverage:  | 67 %        |
| Intensity Coverage:   | 39 %        |
| Peak Coverage:        | 22 %        |
| Protein Localisation: | 718 ... 732 |

| b ion      |               |     |   | y ion    |               |            |
|------------|---------------|-----|---|----------|---------------|------------|
| Δ dalton   | mass          | seq |   | Δ dalton | mass          |            |
|            | 88.039304876  | 1   | S | 14       |               |            |
|            | 185.092068728 | 2   | P | 13       | 1612.83485029 |            |
| +0.0410279 | 314.134661825 | 3   | E | 12       | 1515.78208644 | -0.105939  |
|            | 411.187425677 | 4   | P | 11       | 1386.73949335 | +0.0269861 |
|            | 540.230018773 | 5   | E | 10       | 1289.68672949 |            |
| +0.1256897 | 611.267132561 | 6   | A | 9        | 1160.6441364  | -0.0457477 |
|            | 712.314811035 | 7   | T | 8        | 1089.60702261 | +0.0733973 |
|            | 825.398875015 | 8   | L | 7        | 988.559344135 | +0.1015445 |
|            | 926.446553489 | 9   | T | 6        | 875.475280155 | -0.0065912 |
|            | 1073.51496741 | 10  | F | 5        | 774.427601681 | +0.1092636 |
|            | 1170.56773126 | 11  | P | 4        | 627.359187764 | +0.0875285 |
|            | 1317.63614517 | 12  | F | 3        | 530.306423912 |            |
|            | 1430.72020915 | 13  | L | 2        | 383.238009996 | +0.157864  |
| +0.0810949 | 1545.74715219 | 14  | D | 1        | 270.153946016 |            |
|            |               | 15  | K | 0        | 155.127002984 |            |

Scan number 9401 Raw file LNCAP\_Silac\_23F10\_set1\_02  
 Method ITMS; CID Pepti... 183.23

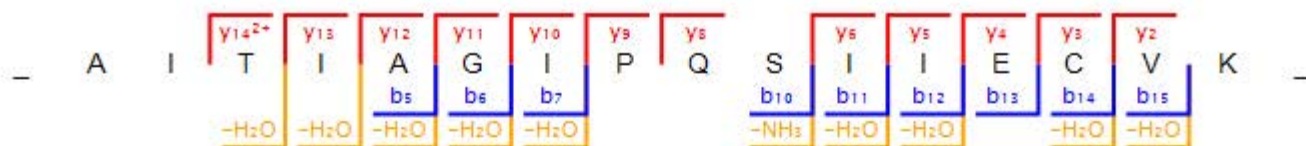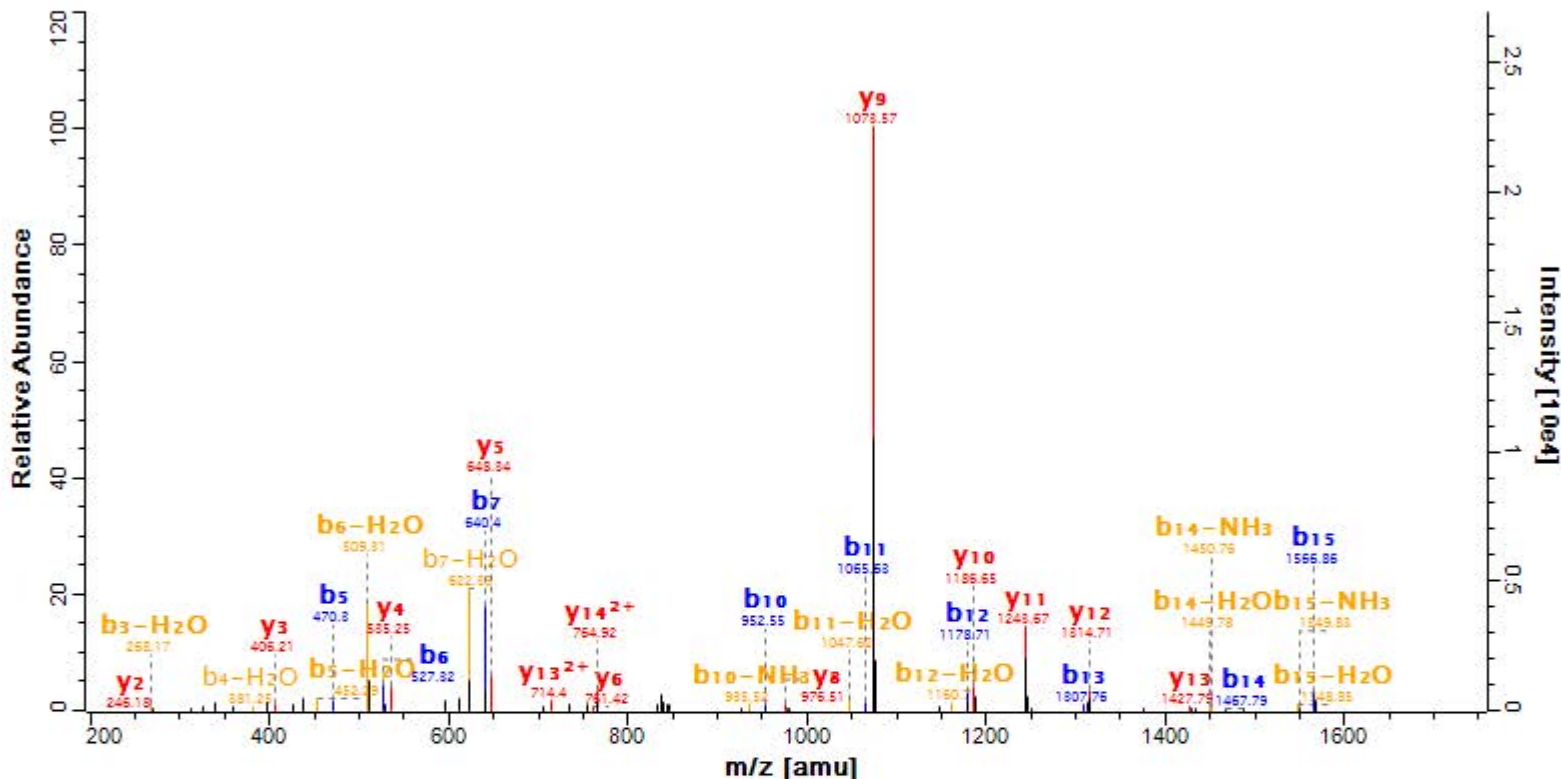

#### precursor information

|                   |                 |
|-------------------|-----------------|
| Mass:             | 1711.95431      |
| m/z:              | 856.98443       |
| Charge:           | 2+              |
| Retentiontime:    | 57.395809173584 |
| Score:            | 183.2319        |
| Mass Error [ppm]: | 0.038865        |
| PEP:              | 1.3254E-23      |
| Precursor Type:   | MULTI           |

#### general information

|                       |             |
|-----------------------|-------------|
| Annotation:           | 13 of 16    |
| AminoAcids Coverag    | 81 %        |
| Intensity Coverage:   | 65 %        |
| Peak Coverage:        | 42 %        |
| Protein Localisation: | 145 ... 160 |

| b ion     |          |    |     |    | y ion    |           | y <sup>2+</sup> ion |           |
|-----------|----------|----|-----|----|----------|-----------|---------------------|-----------|
| Δ dalton  | mass     |    | seq |    | Δ dalton | mass      | Δ dalton            | mass      |
|           | 72.04439 | 1  | A   | 15 |          |           |                     |           |
|           | 185.1285 | 2  | I   | 14 | 1641.924 |           | 1641.924            |           |
|           | 286.1761 | 3  | T   | 13 | 1528.84  |           | 764.9238            | -0.00071  |
|           | 399.2602 | 4  | I   | 12 | 1427.793 | +0.081239 | 714.4               | +0.285394 |
| -0.04432  | 470.2973 | 5  | A   | 11 | 1314.709 | +0.177754 | 1314.709            |           |
| +0.016431 | 527.3188 | 6  | G   | 10 | 1243.671 | +0.039941 | 1243.671            |           |
| -0.01734  | 640.4028 | 7  | I   | 9  | 1186.65  | -0.01501  | 1186.65             |           |
|           | 737.4556 | 8  | P   | 8  | 1073.566 | -0.01103  | 1073.566            |           |
|           | 865.5142 | 9  | Q   | 7  | 976.5132 | +0.201712 | 976.5132            |           |
| +0.07275  | 952.5462 | 10 | S   | 6  | 848.4546 |           | 848.4546            |           |
| +0.204933 | 1065.63  | 11 | I   | 5  | 761.4226 | -0.08622  | 761.4226            |           |
| -0.11497  | 1178.714 | 12 | I   | 4  | 648.3385 | +0.146401 | 648.3385            |           |
| +0.465361 | 1307.757 | 13 | E   | 3  | 535.2545 | +0.108578 | 535.2545            |           |
| +0.023824 | 1467.788 | 14 | C   | 2  | 406.2119 | +0.077501 | 406.2119            |           |
| -0.12149  | 1566.856 | 15 | V   | 1  | 246.1812 | -0.07467  | 246.1812            |           |
|           |          | 16 | K   | 0  | 147.1128 |           | 147.1128            |           |

Scan number 9691 Raw file LNCAP\_Silac\_23F10\_set1\_02  
 Method ITMS; CID Pepti... 170.09

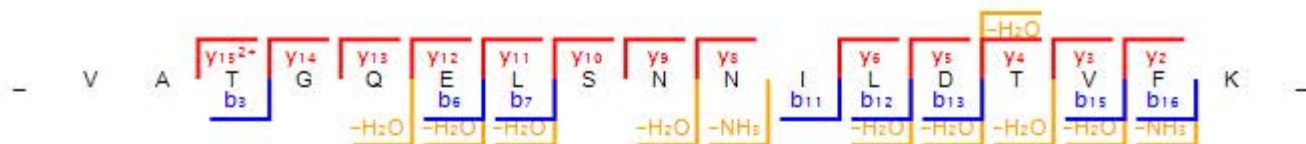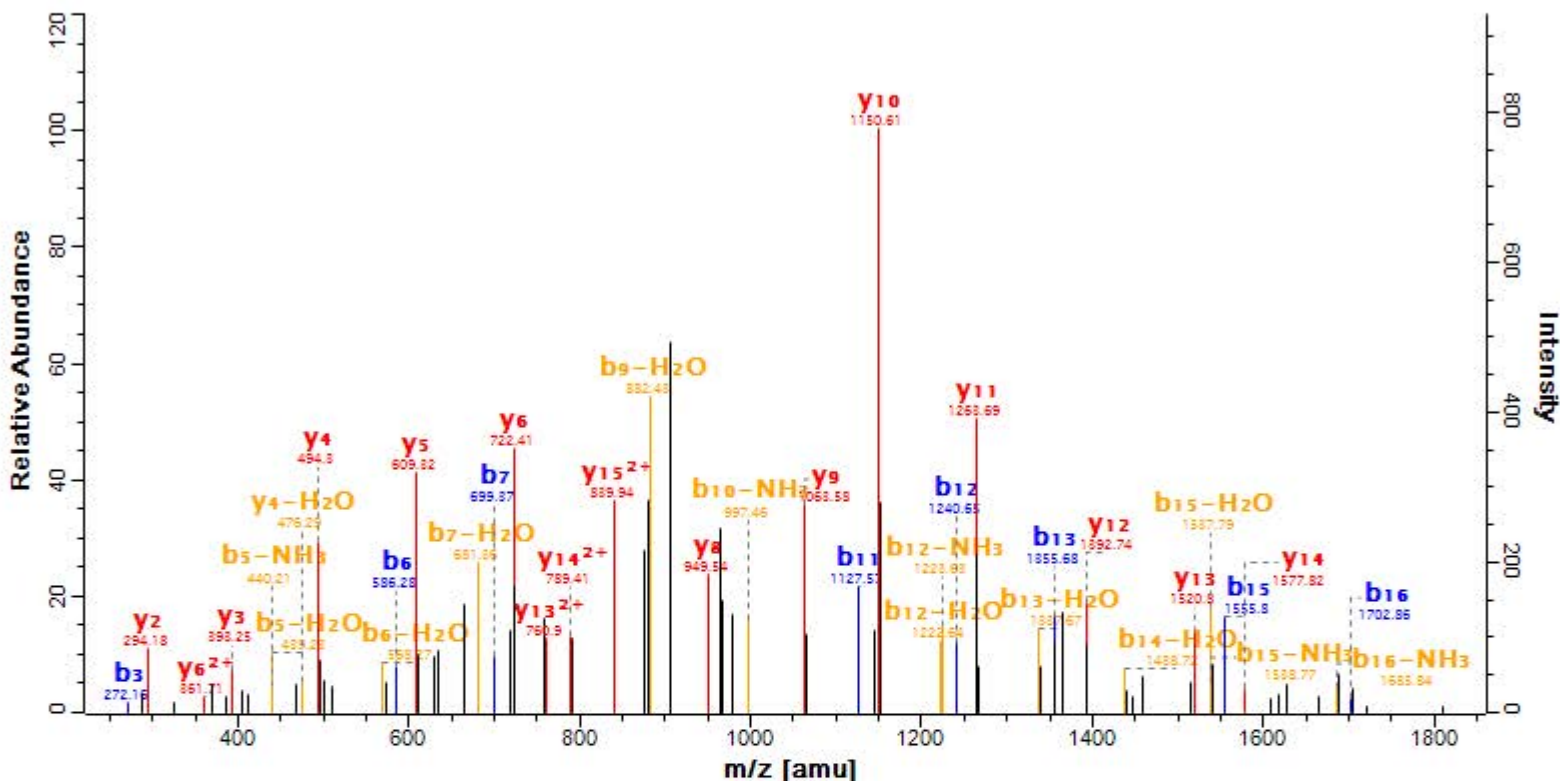

#### precursor information

|                   |                 |
|-------------------|-----------------|
| Mass:             | 1847.96234      |
| m/z:              | 924.98845       |
| Charge:           | 2+              |
| Retentiontime:    | 59.114318847656 |
| Score:            | 170.0869        |
| Mass Error [ppm]: | -0.29905        |
| PEP:              | 1.8895E-29      |
| Precursor Type:   | MULTI           |

| b ion     |          |     |   |          | y ion    |           | y <sup>2+</sup> ion |  |
|-----------|----------|-----|---|----------|----------|-----------|---------------------|--|
| Δ dalton  | mass     | seq |   | Δ dalton | mass     | Δ dalton  | mass                |  |
|           | 100.0757 | 1   | V | 16       |          |           |                     |  |
|           | 171.1128 | 2   | A | 15       | 1749.902 |           | 1749.902            |  |
| +0.193887 | 272.1605 | 3   | T | 14       | 1678.865 |           | 839.936 +0.281021   |  |
|           | 329.1819 | 4   | G | 13       | 1577.817 | -0.33979  | 789.4121 +0.182912  |  |
|           | 457.2405 | 5   | Q | 12       | 1520.795 | -0.19845  | 760.9014 -0.04525   |  |
| +0.100977 | 586.2831 | 6   | E | 11       | 1392.737 | +0.101457 | 1392.737            |  |
| +0.052008 | 699.3672 | 7   | L | 10       | 1263.694 | +0.03614  | 1263.694            |  |
|           | 786.3992 | 8   | S | 9        | 1150.61  | +0.057338 | 1150.61             |  |
|           | 900.4421 | 9   | N | 8        | 1063.578 | +0.137706 | 1063.578            |  |
|           | 1014.485 | 10  | N | 7        | 949.5353 | +0.025909 | 949.5353            |  |
| -0.14017  | 1127.569 | 11  | I | 6        | 835.4924 |           | 835.4924            |  |
| +0.05921  | 1240.653 | 12  | L | 5        | 722.4083 | +0.205879 | 361.7078 -0.4231    |  |
| -0.03805  | 1355.68  | 13  | D | 4        | 609.3243 | +0.072658 | 609.3243            |  |
|           | 1456.728 | 14  | T | 3        | 494.2973 | +0.08245  | 494.2973            |  |
| -0.0317   | 1555.796 | 15  | V | 2        | 393.2496 | +0.132387 | 393.2496            |  |
| -0.32485  | 1702.865 | 16  | F | 1        | 294.1812 | +0.039088 | 294.1812            |  |
|           |          | 17  | K | 0        | 147.1128 |           | 147.1128            |  |

#### general information

|                       |             |
|-----------------------|-------------|
| Annotation:           | 14 of 17    |
| AminoAcids Coverage:  | 82 %        |
| Intensity Coverage:   | 53 %        |
| Peak Coverage:        | 43 %        |
| Protein Localisation: | 356 ... 372 |



Scan number 9711 Raw file LNCAP\_Silac\_23F10\_set1\_02  
 Method ITMS; CID Peptide 186.98

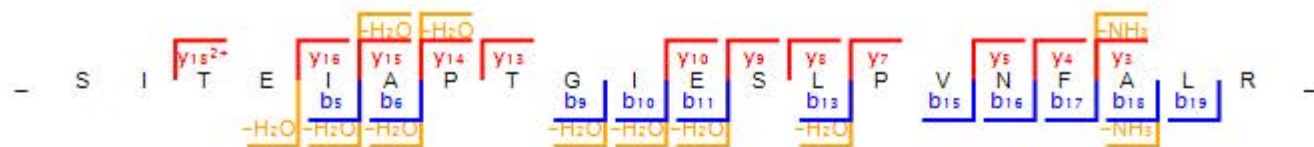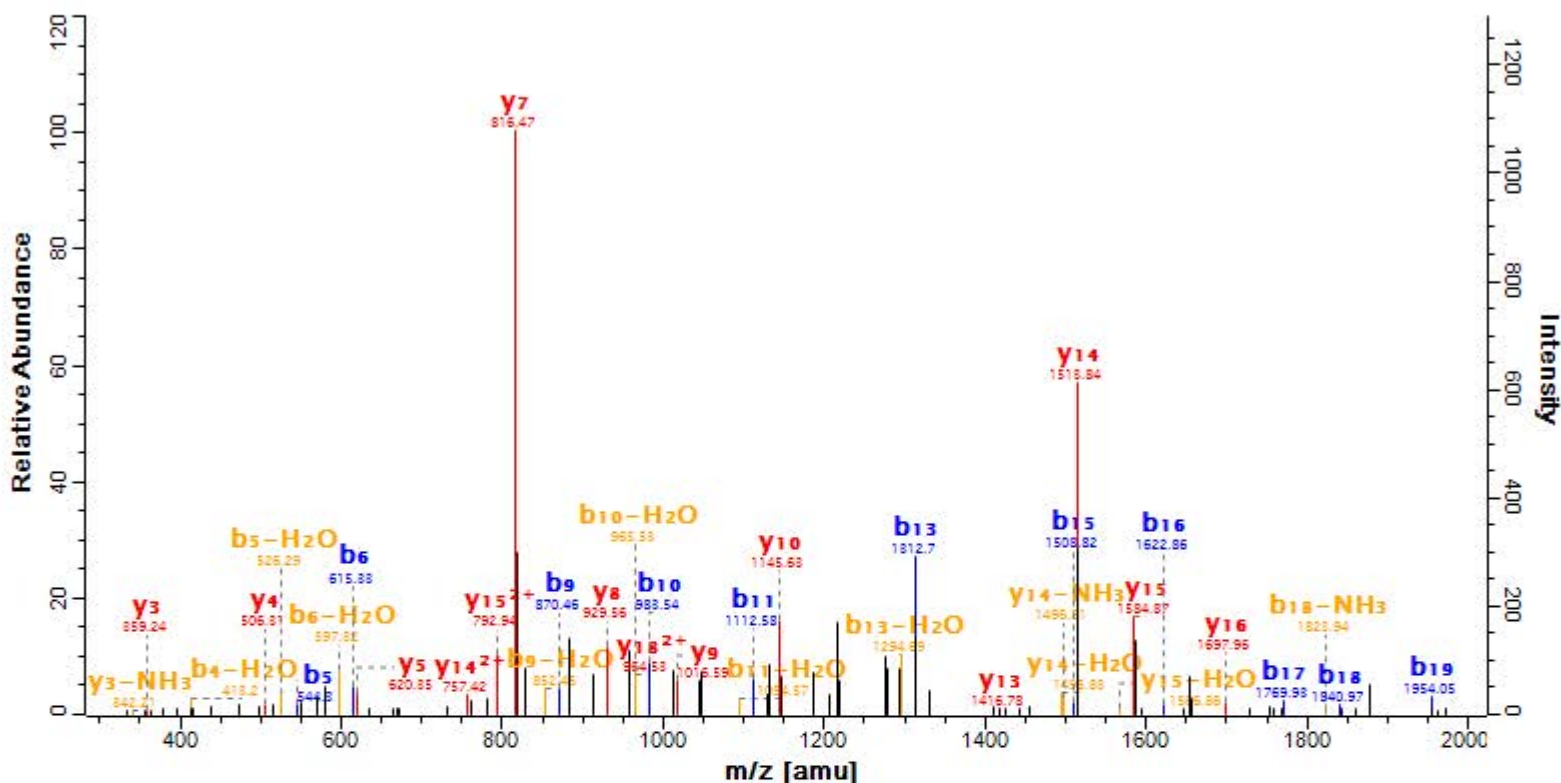

### precursor information

|                   |                 |
|-------------------|-----------------|
| Mass:             | 2127.15737      |
| m/z:              | 1064.58596      |
| Charge:           | 2+              |
| Retentiontime:    | 59.226970672607 |
| Score:            | 186.9782        |
| Mass Error [ppm]: | -0.095916       |
| PEP:              | 2.5741E-47      |
| Precursor Type:   | MULTI           |

| b ion           |          |    |     |    | y ion           |           | y <sup>2+</sup> ion |           |
|-----------------|----------|----|-----|----|-----------------|-----------|---------------------|-----------|
| $\Delta$ dalton | mass     |    | seq |    | $\Delta$ dalton | mass      | $\Delta$ dalton     | mass      |
|                 | 88.0393  | 1  | S   | 19 |                 |           |                     |           |
|                 | 201.1234 | 2  | I   | 18 | 2041.133        |           | 2041.133            |           |
|                 | 302.171  | 3  | T   | 17 | 1928.049        |           | 964.528             | +0.041687 |
|                 | 431.2136 | 4  | E   | 16 | 1827.001        |           | 1827.001            |           |
| -0.11301        | 544.2977 | 5  | I   | 15 | 1697.958        | +0.431532 | 1697.958            |           |
| +0.031393       | 615.3348 | 6  | A   | 14 | 1584.874        | -0.02652  | 792.9408            | +0.282663 |
|                 | 712.3876 | 7  | P   | 13 | 1513.837        | +0.001929 | 757.4223            | +0.209362 |
|                 | 813.4353 | 8  | T   | 12 | 1416.785        | +0.082647 | 1416.785            |           |
| +0.067568       | 870.4567 | 9  | G   | 11 | 1315.737        |           | 1315.737            |           |
| +0.042342       | 983.5408 | 10 | I   | 10 | 1258.715        |           | 1258.715            |           |
| -0.01698        | 1112.583 | 11 | E   | 9  | 1145.631        | +0.000257 | 1145.631            |           |
|                 | 1199.615 | 12 | S   | 8  | 1016.589        | -0.0747   | 1016.589            |           |
| -0.04115        | 1312.699 | 13 | L   | 7  | 929.5567        | -0.00764  | 929.5567            |           |
|                 | 1409.752 | 14 | P   | 6  | 816.4726        | +0.055549 | 816.4726            |           |
| -0.0615         | 1508.821 | 15 | V   | 5  | 719.4199        |           | 719.4199            |           |
| -0.04754        | 1622.864 | 16 | N   | 4  | 620.3515        | +0.169647 | 620.3515            |           |
| +0.138686       | 1769.932 | 17 | F   | 3  | 506.3085        | +0.201039 | 506.3085            |           |
| -0.28979        | 1840.969 | 18 | A   | 2  | 359.2401        | +0.132429 | 359.2401            |           |
| +0.056815       | 1954.053 | 19 | L   | 1  | 288.203         |           | 288.203             |           |
|                 |          | 20 | R   | 0  | 175.119         |           | 175.119             |           |

### general information

|                       |           |
|-----------------------|-----------|
| Annotation:           | 17 of 20  |
| AminoAcids Coverage:  | 85 %      |
| Intensity Coverage:   | 54 %      |
| Peak Coverage:        | 36 %      |
| Protein Localisation: | 61 ... 80 |

Scan number 9776 Raw file LNCAP\_Silac\_23F10\_set1\_02  
 Method ITMS; CID Pepti... 217.48

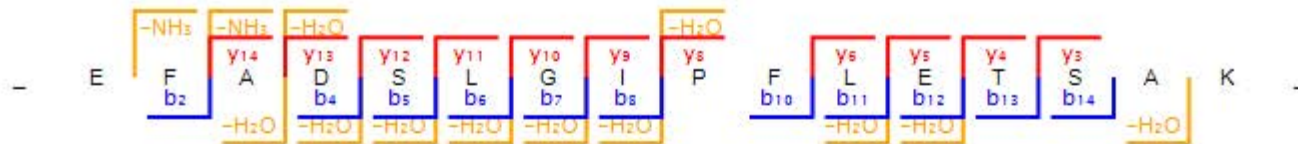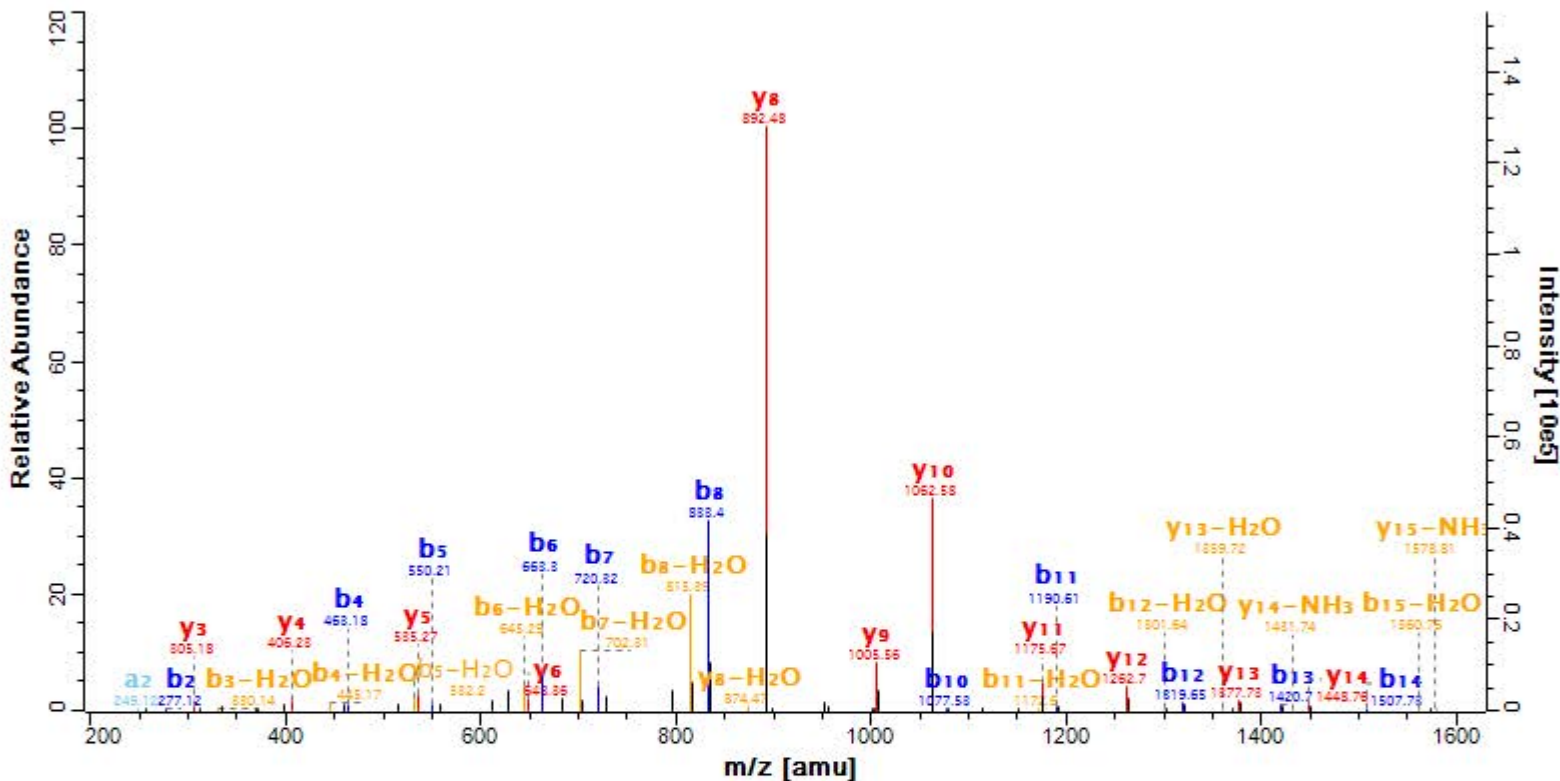

**precursor information**

|                   |                 |
|-------------------|-----------------|
| Mass:             | 1723.86697      |
| m/z:              | 862.94076       |
| Charge:           | 2+              |
| Retentiontime:    | 59.641475677490 |
| Score:            | 217.4788        |
| Mass Error [ppm]: | 0.058929        |
| PEP:              | 6.825E-41       |
| Precursor Type:   | MULTI           |

**general information**

|                       |             |
|-----------------------|-------------|
| Annotation:           | 14 of 16    |
| AminoAcids Coverag    | 88 %        |
| Intensity Coverage:   | 72 %        |
| Peak Coverage:        | 45 %        |
| Protein Localisation: | 138 ... 153 |

| a ion    |          | b ion     |          | y ion |          |      |
|----------|----------|-----------|----------|-------|----------|------|
| Δ dalton | mass     | Δ dalton  | mass     | seq   | Δ dalton | mass |
|          | 102.055  |           | 130.0499 | 1     | E        | 15   |
| +0.1062  | 249.1234 | +0.246768 | 277.1183 | 2     | F        | 14   |
|          | 320.1605 |           | 348.1554 | 3     | A        | 13   |
|          | 435.1874 | +0.237826 | 463.1823 | 4     | D        | 12   |
|          | 522.2195 | +0.187304 | 550.2144 | 5     | S        | 11   |
|          | 635.3035 | +0.056975 | 663.2984 | 6     | L        | 10   |
|          | 692.325  | -0.03114  | 720.3199 | 7     | G        | 9    |
|          | 805.409  | +0.035004 | 833.404  | 8     | I        | 8    |
|          | 902.4618 |           | 930.4567 | 9     | P        | 7    |
|          | 1049.53  | -0.0631   | 1077.525 | 10    | F        | 6    |
|          | 1162.614 | -0.07368  | 1190.609 | 11    | L        | 5    |
|          | 1291.657 | -0.14813  | 1319.652 | 12    | E        | 4    |
|          | 1392.705 | -0.04628  | 1420.699 | 13    | T        | 3    |
|          | 1479.737 | -0.15911  | 1507.732 | 14    | S        | 2    |
|          | 1550.774 |           | 1578.769 | 15    | A        | 1    |
|          |          |           |          | 16    | K        | 0    |

Scan number 9802 Raw file LNCAP\_Silac\_23F10\_set1\_02  
 Method ITMS; CID Pepti... 201.3

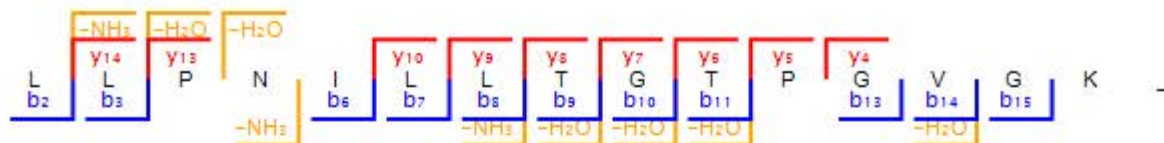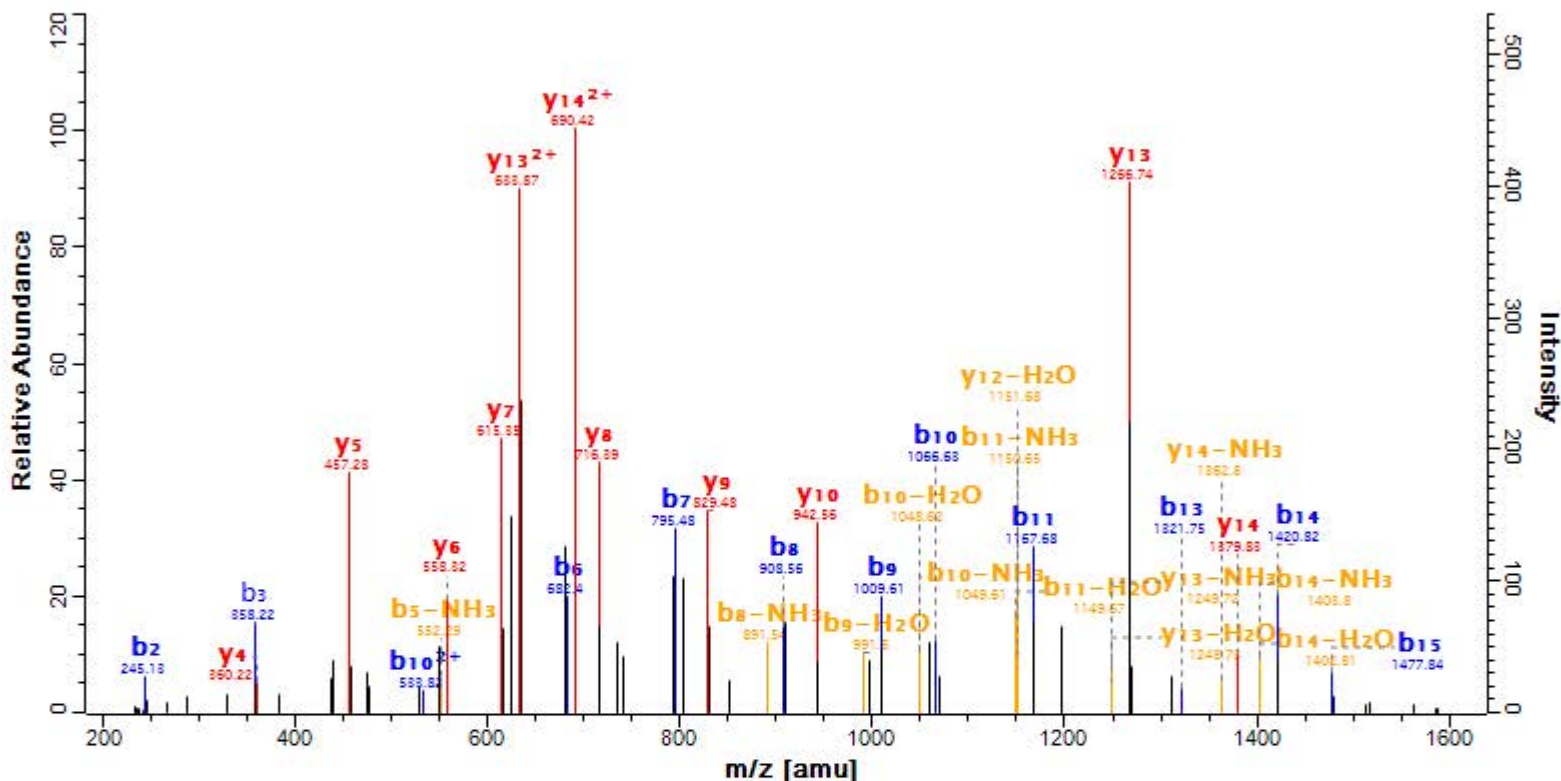

#### precursor information

|                   |                 |
|-------------------|-----------------|
| Mass:             | 1622.94361      |
| m/z:              | 812.47908       |
| Charge:           | 2+              |
| Retentiontime:    | 59.788963317871 |
| Score:            | 201.3038        |
| Mass Error [ppm]: | 0.40571         |
| PEP:              | 9.8581E-28      |
| Precursor Type:   | ISO             |

#### general information

|                       |          |
|-----------------------|----------|
| Annotation:           | 14 of 16 |
| AminoAcids Coverage:  | 88 %     |
| Intensity Coverage:   | 61 %     |
| Peak Coverage:        | 41 %     |
| Protein Localisation: | 1 ... 16 |

| b <sup>2+</sup> ion |        | b ion    |        | seq |   |    | y ion    |         | y <sup>2+</sup> ion |         |
|---------------------|--------|----------|--------|-----|---|----|----------|---------|---------------------|---------|
| Δ dalton            | mass   | Δ dalton | mass   |     |   |    | Δ dalton | mass    | Δ dalton            | mass    |
|                     | 132.05 |          | 132.05 | 1   | M | 15 |          |         |                     |         |
|                     | 245.13 | -0.003   | 245.13 | 2   | L | 14 | 1492.9   |         | 1492.9              |         |
|                     | 358.22 | +0.179   | 358.22 | 3   | L | 13 | 1379.8   | -0.097  | 690.42              | +0.315  |
|                     | 455.27 |          | 455.27 | 4   | P | 12 | 1266.7   | -0.061  | 633.87              | +0.0767 |
|                     | 569.31 |          | 569.31 | 5   | N | 11 | 1169.7   |         | 1169.7              |         |
|                     | 682.4  | +0.0759  | 682.4  | 6   | I | 10 | 1055.6   |         | 1055.6              |         |
|                     | 795.48 | +0.0848  | 795.48 | 7   | L | 9  | 942.56   | +0.1198 | 942.56              |         |
|                     | 908.56 | +0.0906  | 908.56 | 8   | L | 8  | 829.48   | +0.085  | 829.48              |         |
|                     | 1009.6 | +0.0892  | 1009.6 | 9   | T | 7  | 716.39   | +0.1371 | 716.39              |         |
| -0.496              | 533.82 | +0.0143  | 1066.6 | 10  | G | 6  | 615.35   | +0.0728 | 615.35              |         |
|                     | 1167.7 | -0.112   | 1167.7 | 11  | T | 5  | 558.32   | +0.0999 | 558.32              |         |
|                     | 1264.7 |          | 1264.7 | 12  | P | 4  | 457.28   | +0.0684 | 457.28              |         |
|                     | 1321.8 | -0.296   | 1321.8 | 13  | G | 3  | 360.22   | +0.0901 | 360.22              |         |
|                     | 1420.8 | -0.036   | 1420.8 | 14  | V | 2  | 303.2    |         | 303.2               |         |
|                     | 1477.8 | -0.354   | 1477.8 | 15  | G | 1  | 204.13   |         | 204.13              |         |
|                     |        |          |        | 16  | K | 0  | 147.11   |         | 147.11              |         |

Scan number 998 Raw file LNCAP\_Silac\_23F10\_set1\_02  
 Method ITMS; CID Pepti... 92.25

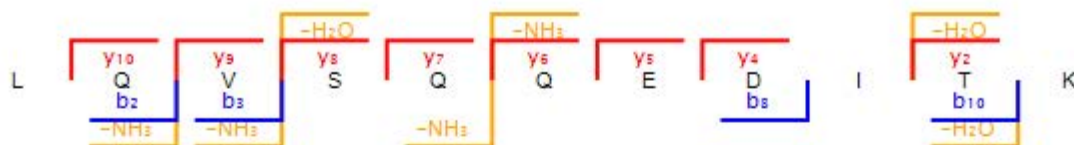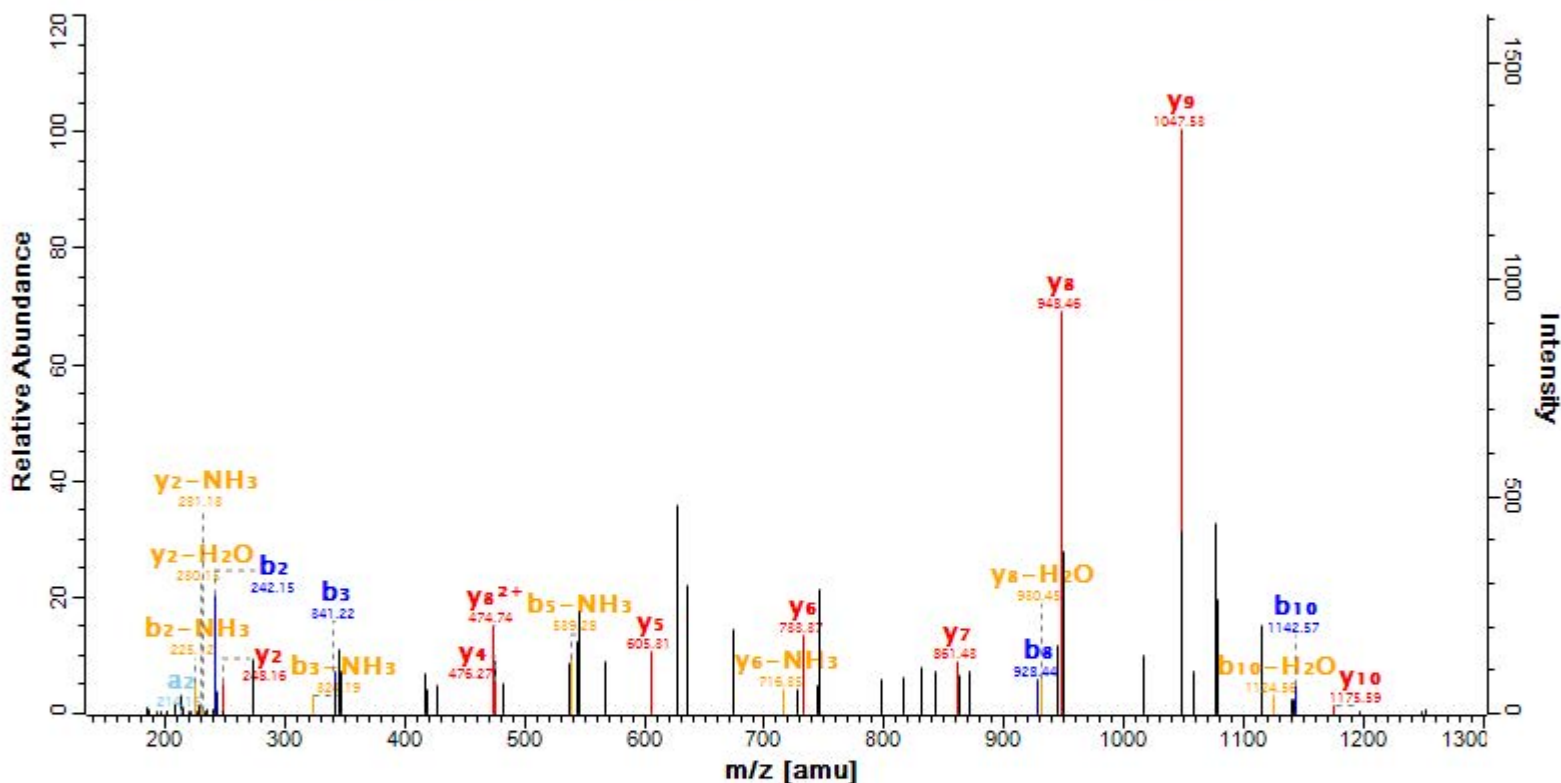

#### precursor information

|                   |                 |
|-------------------|-----------------|
| Mass:             | 1287.66672      |
| m/z:              | 644.84064       |
| Charge:           | 2+              |
| Retentiontime:    | 11.950546264648 |
| Score:            | 92.24657        |
| Mass Error [ppm]: | -0.25461        |
| PEP:              | 0.0015478       |
| Precursor Type:   | MULTI           |

#### general information

|                       |             |
|-----------------------|-------------|
| Annotation:           | 8 of 11     |
| AminoAcids Coverage:  | 73 %        |
| Intensity Coverage:   | 38 %        |
| Peak Coverage:        | 25 %        |
| Protein Localisation: | 205 ... 215 |

| a ion    |        | b ion    |        |    |     |          | y ion  |          | y <sup>2+</sup> ion |  |
|----------|--------|----------|--------|----|-----|----------|--------|----------|---------------------|--|
| Δ dalton | mass   | Δ dalton | mass   |    | seq | Δ dalton | mass   | Δ dalton | mass                |  |
|          | 86.096 |          | 114.09 | 1  | L   | 10       |        |          |                     |  |
| +0.1523  | 214.16 | -0.015   | 242.15 | 2  | Q   | 9        | 1175.6 | -0.214   | 1175.6              |  |
|          | 313.22 | +0.0246  | 341.22 | 3  | V   | 8        | 1047.5 | -0.023   | 1047.5              |  |
|          | 400.26 |          | 428.25 | 4  | S   | 7        | 948.46 | +5E-05   | 474.74              |  |
|          | 528.31 |          | 556.31 | 5  | Q   | 6        | 861.43 | +0.0278  | 861.43              |  |
|          | 656.37 |          | 684.37 | 6  | Q   | 5        | 733.37 | -0.054   | 733.37              |  |
|          | 785.42 |          | 813.41 | 7  | E   | 4        | 605.31 | -0.262   | 605.31              |  |
|          | 900.44 | +0.1228  | 928.44 | 8  | D   | 3        | 476.27 | +0.1007  | 476.27              |  |
|          | 1013.5 |          | 1041.5 | 9  | I   | 2        | 361.24 |          | 361.24              |  |
|          | 1114.6 | +0.1451  | 1142.6 | 10 | T   | 1        | 248.16 | +0.0643  | 248.16              |  |
|          |        |          |        | 11 | K   | 0        | 147.11 |          | 147.11              |  |

Scan number 10072 Raw file LNCAP\_Silac\_23F10\_set1\_03  
 Method ITMS; CID Pepti... 186.05

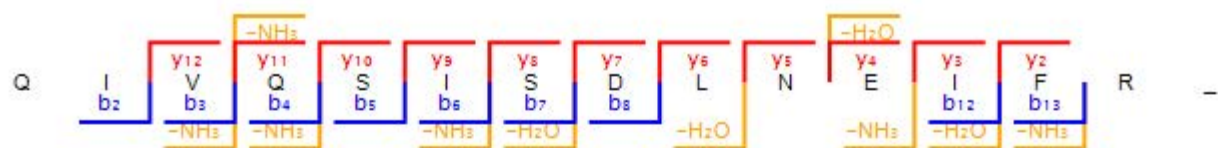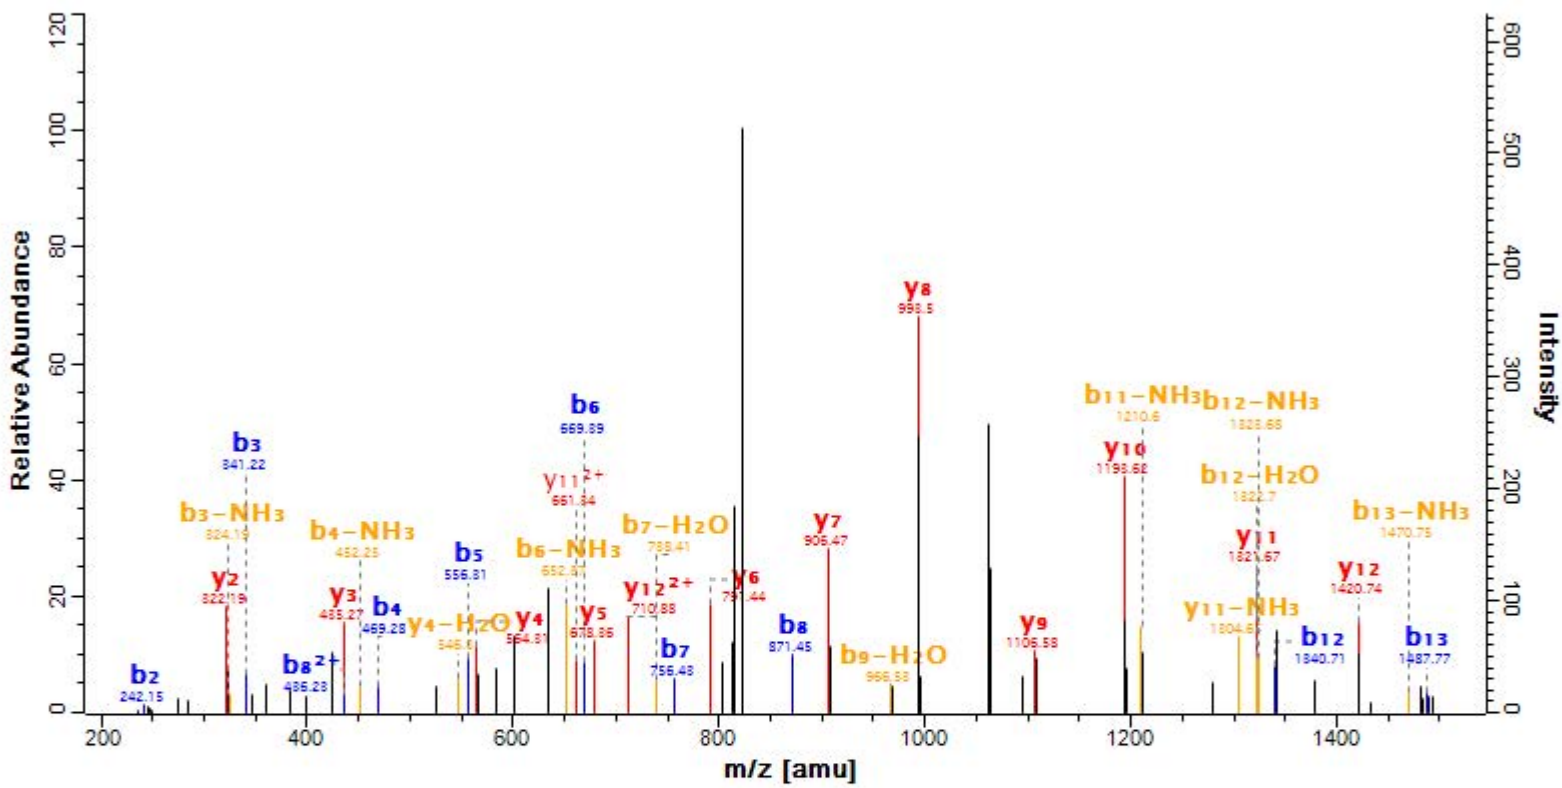

**precursor information**

|                   |                 |
|-------------------|-----------------|
| Mass:             | 1663.75805      |
| m/z:              | 832.8863        |
| Charge:           | 2+              |
| Retentiontime:    | 55.281185150146 |
| Score:            | 186.0512        |
| Mass Error [ppm]: | -0.27852        |
| PEP:              | 1.4098E-59      |
| Precursor Type:   | MULTI           |

**general information**

|                       |             |
|-----------------------|-------------|
| Annotation:           | 12 of 14    |
| AminoAcids Coverage:  | 86 %        |
| Intensity Coverage:   | 42 %        |
| Peak Coverage:        | 43 %        |
| Protein Localisation: | 243 ... 256 |

| b <sup>2+</sup> ion |        | b ion    |        | seq |   |    | y ion    |         | y <sup>2+</sup> ion |         |
|---------------------|--------|----------|--------|-----|---|----|----------|---------|---------------------|---------|
| Δ dalton            | mass   | Δ dalton | mass   |     |   |    | Δ dalton | mass    | Δ dalton            | mass    |
|                     | 129.07 |          | 129.07 | 1   | Q | 13 |          |         |                     |         |
|                     | 242.15 | +0.1111  | 242.15 | 2   | I | 12 | 1533.8   |         | 1533.8              |         |
|                     | 341.22 | -0.132   | 341.22 | 3   | V | 11 | 1420.7   | +0.0805 | 710.88              | +0.2667 |
|                     | 469.28 | +0.0372  | 469.28 | 4   | Q | 10 | 1321.7   | -0.02   | 661.34              | +0.3937 |
|                     | 556.31 | +0.1488  | 556.31 | 5   | S | 9  | 1193.6   | +0.1056 | 1193.6              |         |
|                     | 669.39 | +0.1243  | 669.39 | 6   | I | 8  | 1106.6   | +0.1376 | 1106.6              |         |
|                     | 756.43 | -0.396   | 756.43 | 7   | S | 7  | 993.5    | -0.006  | 993.5               |         |
| +0.2186             | 436.23 | -0.116   | 871.45 | 8   | D | 6  | 906.47   | +0.0366 | 906.47              |         |
|                     | 984.54 |          | 984.54 | 9   | L | 5  | 791.44   | -0.031  | 791.44              |         |
|                     | 1098.6 |          | 1098.6 | 10  | N | 4  | 678.36   | +0.1438 | 678.36              |         |
|                     | 1227.6 |          | 1227.6 | 11  | E | 3  | 564.31   | -0.006  | 564.31              |         |
|                     | 1340.7 | -0.1     | 1340.7 | 12  | I | 2  | 435.27   | -0.03   | 435.27              |         |
|                     | 1487.8 | +0.1035  | 1487.8 | 13  | F | 1  | 322.19   | +0.0719 | 322.19              |         |
|                     |        |          |        | 14  | R | 0  | 175.12   |         | 175.12              |         |

Scan number 1010 Raw file LNCAP\_Silac\_23F10\_set1\_03  
 Method ITMS; CID Pepti... 184.31

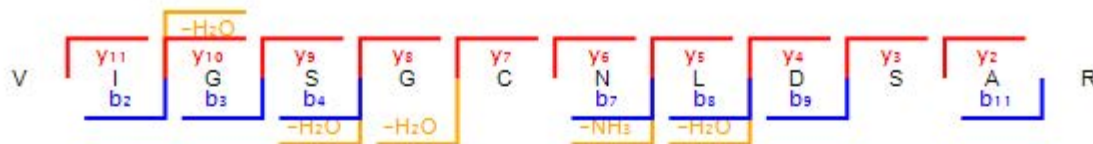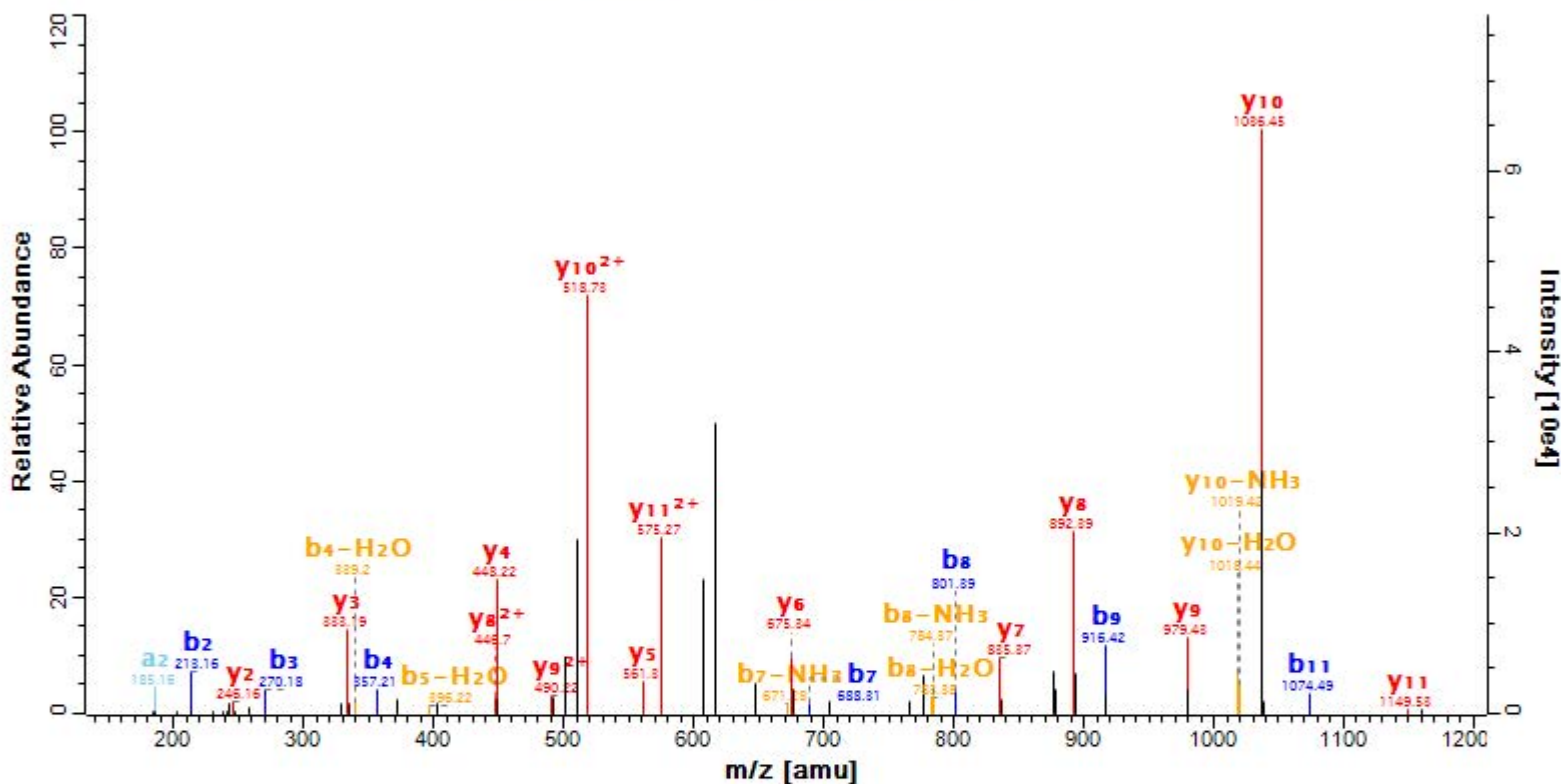

#### precursor information

|                   |                 |
|-------------------|-----------------|
| Mass:             | 1247.59228      |
| m/z:              | 624.80342       |
| Charge:           | 2+              |
| Retentiontime:    | 10.886320114135 |
| Score:            | 184.3138        |
| Mass Error [ppm]: | -0.446          |
| PEP:              | 3.9059E-14      |
| Precursor Type:   | MULTI           |

#### general information

|                       |             |
|-----------------------|-------------|
| Annotation:           | 10 of 12    |
| AminoAcids Coverage:  | 83 %        |
| Intensity Coverage:   | 62 %        |
| Peak Coverage:        | 38 %        |
| Protein Localisation: | 187 ... 198 |

| a ion    |        | b ion    |        | seq |   |    | y ion    |         | y <sup>2+</sup> ion |         |
|----------|--------|----------|--------|-----|---|----|----------|---------|---------------------|---------|
| Δ dalton | mass   | Δ dalton | mass   |     |   |    | Δ dalton | mass    | Δ dalton            | mass    |
|          | 72.081 |          | 100.08 | 1   | V | 11 |          |         |                     |         |
| +0.0251  | 185.16 | -0.128   | 213.16 | 2   | I | 10 | 1149.5   | -0.176  | 575.27              | +0.2556 |
|          | 242.19 | -0.043   | 270.18 | 3   | G | 9  | 1036.4   | +0.004  | 518.73              | +0.2021 |
|          | 329.22 | +0.0191  | 357.21 | 4   | S | 8  | 979.43   | -0.016  | 490.22              | +0.2642 |
|          | 386.24 |          | 414.23 | 5   | G | 7  | 892.39   | +0.0451 | 446.7               | +0.0138 |
|          | 546.27 |          | 574.27 | 6   | C | 6  | 835.37   | -0.022  | 835.37              |         |
|          | 660.31 | +0.1367  | 688.31 | 7   | N | 5  | 675.34   | -0.008  | 675.34              |         |
|          | 773.4  | +0.1053  | 801.39 | 8   | L | 4  | 561.3    | +0.1432 | 561.3               |         |
|          | 888.42 | +0.0767  | 916.42 | 9   | D | 3  | 448.22   | +0.0518 | 448.22              |         |
|          | 975.46 |          | 1003.5 | 10  | S | 2  | 333.19   | +0.0315 | 333.19              |         |
|          | 1046.5 | +0.0334  | 1074.5 | 11  | A | 1  | 246.16   | -0.02   | 246.16              |         |
|          |        |          |        | 12  | R | 0  | 175.12   |         | 175.12              |         |

Scan number 10226 Raw file LNCAP\_Silac\_23F10\_set1\_03  
 Method ITMS; CID Pepti... 151.79

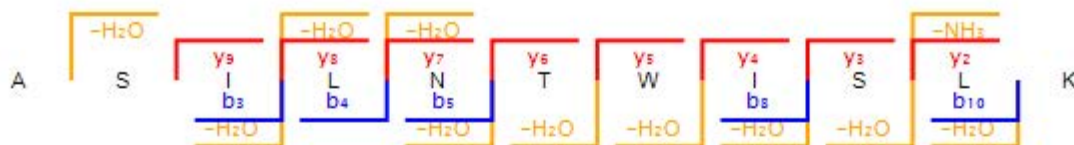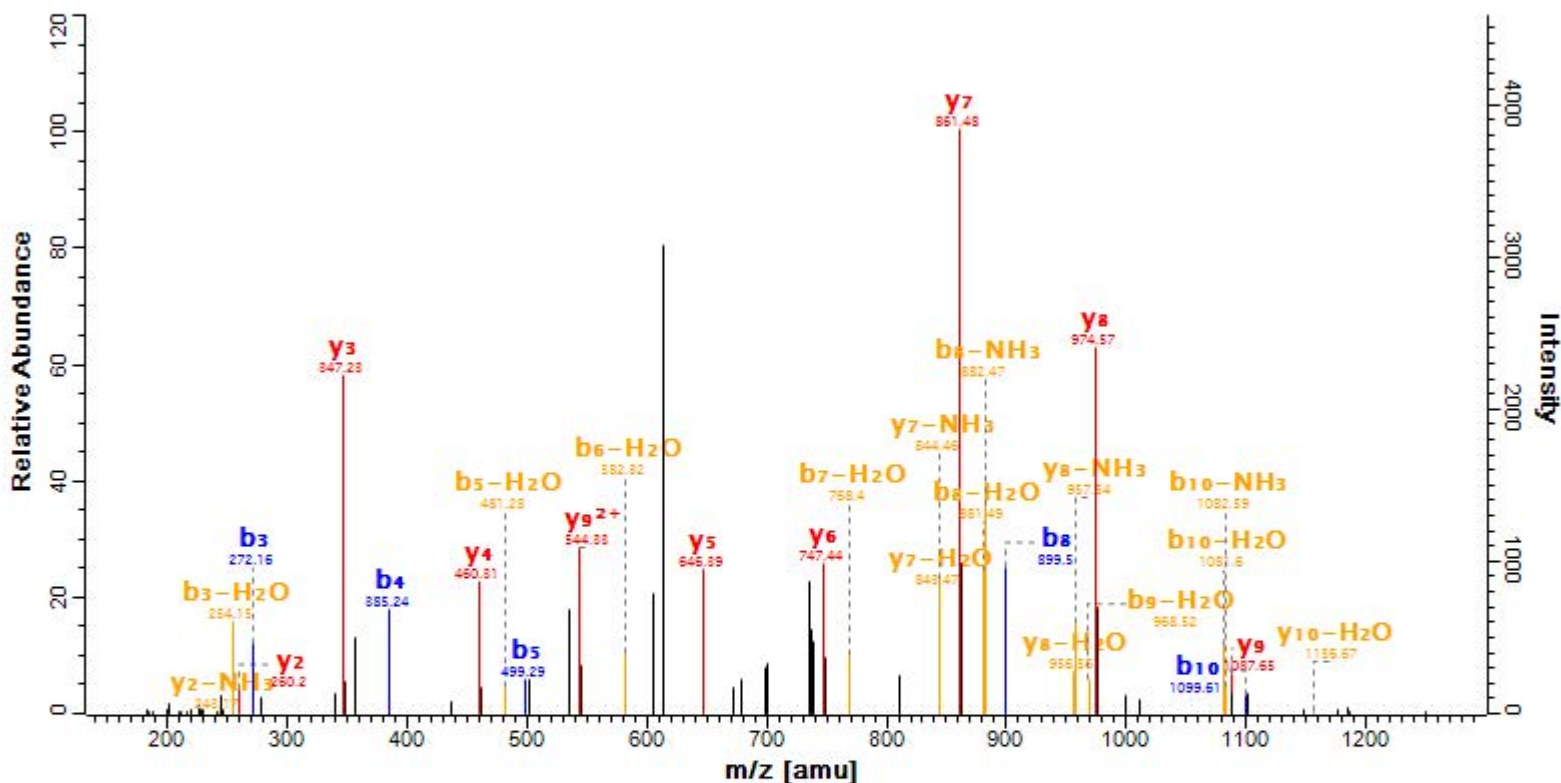

#### precursor information

|                   |                 |
|-------------------|-----------------|
| Mass:             | 1244.71314      |
| m/z:              | 623.36384       |
| Charge:           | 2+              |
| Retentiontime:    | 56.155422210693 |
| Score:            | 151.7877        |
| Mass Error [ppm]: | 0.21069         |
| PEP:              | 3.8263E-06      |
| Precursor Type:   | MULTI           |

#### general information

|                       |             |
|-----------------------|-------------|
| Annotation:           | 9 of 11     |
| AminoAcids Coverage:  | 82 %        |
| Intensity Coverage:   | 63 %        |
| Peak Coverage:        | 34 %        |
| Protein Localisation: | 430 ... 440 |

| b ion     |          |     |   | y ion    |          | y <sup>2+</sup> ion |          |
|-----------|----------|-----|---|----------|----------|---------------------|----------|
| Δ dalton  | mass     | seq |   | Δ dalton | mass     | Δ dalton            | mass     |
|           | 72.04439 | 1   | A | 10       |          |                     |          |
|           | 159.0764 | 2   | S | 9        | 1174.683 | 1174.683            |          |
| -0.06362  | 272.1605 | 3   | I | 8        | 1087.651 | +0.004266           | 544.3291 |
| +0.103781 | 385.2445 | 4   | L | 7        | 974.5669 | -0.00615            | 974.5669 |
| +0.073732 | 499.2875 | 5   | N | 6        | 861.4829 | +0.0383             | 861.4829 |
|           | 600.3352 | 6   | T | 5        | 747.44   | +0.050649           | 747.44   |
|           | 786.4145 | 7   | W | 4        | 646.3923 | +0.07434            | 646.3923 |
| -0.01995  | 899.4985 | 8   | I | 3        | 460.313  | +0.04141            | 460.313  |
|           | 986.5306 | 9   | S | 2        | 347.2289 | +0.01323            | 347.2289 |
| +0.020876 | 1099.615 | 10  | L | 1        | 260.1969 | +0.05005            | 260.1969 |
|           |          | 11  | K | 0        | 147.1128 |                     | 147.1128 |

Scan number 10350 Raw file LNCAP\_Silac\_23F10\_set1\_03  
 Method ITMS; CID Pepti... 228.12

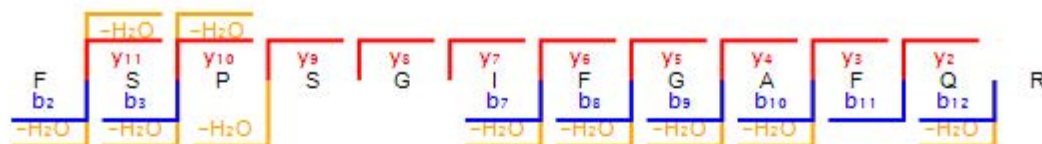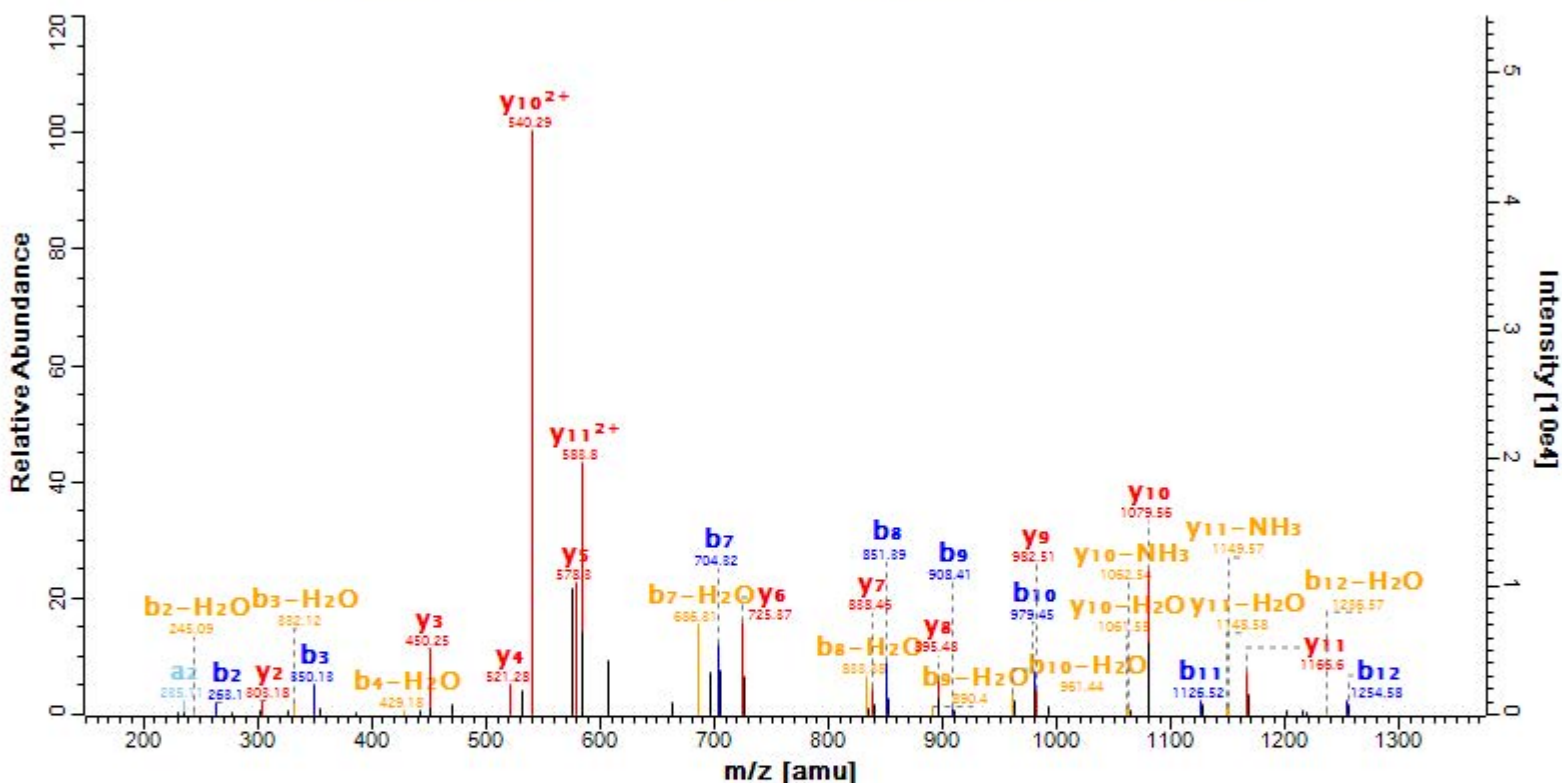

precursor information

|                   |                 |
|-------------------|-----------------|
| Mass:             | 1427.68284      |
| m/z:              | 714.8487        |
| Charge:           | 2+              |
| Retentiontime:    | 56.889518737793 |
| Score:            | 228.1163        |
| Mass Error [ppm]: | -0.36826        |
| PEP:              | 7.4231E-29      |
| Precursor Type:   | MULTI           |

general information

|                       |           |
|-----------------------|-----------|
| Annotation:           | 11 of 13  |
| AminoAcids Coverage:  | 85 %      |
| Intensity Coverage:   | 73 %      |
| Peak Coverage:        | 39 %      |
| Protein Localisation: | 34 ... 46 |

| a ion    |        | b ion    |        | seq |   |    | y ion    |         | y <sup>2+</sup> ion |        |
|----------|--------|----------|--------|-----|---|----|----------|---------|---------------------|--------|
| Δ dalton | mass   | Δ dalton | mass   |     |   |    | Δ dalton | mass    | Δ dalton            | mass   |
|          | 88.039 |          | 116.03 | 1   | D | 12 |          |         |                     |        |
| -0.019   | 235.11 | -0.088   | 263.1  | 2   | F | 11 | 1313.7   |         |                     | 1313.7 |
|          | 322.14 | +0.1136  | 350.13 | 3   | S | 10 | 1166.6   | -0.015  |                     | 583.8  |
|          | 419.19 |          | 447.19 | 4   | P | 9  | 1079.6   | +0.0032 |                     | 540.29 |
|          | 506.22 |          | 534.22 | 5   | S | 8  | 982.51   | +0.0406 |                     | 982.51 |
|          | 563.25 |          | 591.24 | 6   | G | 7  | 895.48   | +0.0882 |                     | 895.48 |
|          | 676.33 | -0.009   | 704.32 | 7   | I | 6  | 838.46   | +0.0652 |                     | 838.46 |
|          | 823.4  | -0.024   | 851.39 | 8   | F | 5  | 725.37   | +0.0464 |                     | 725.37 |
|          | 880.42 | +0.1034  | 908.41 | 9   | G | 4  | 578.3    | +0.0655 |                     | 578.3  |
|          | 951.46 | +0.0688  | 979.45 | 10  | A | 3  | 521.28   | +0.0817 |                     | 521.28 |
|          | 1098.5 | -0.023   | 1126.5 | 11  | F | 2  | 450.25   | +0.1446 |                     | 450.25 |
|          | 1226.6 | -0.159   | 1254.6 | 12  | Q | 1  | 303.18   | +0.1555 |                     | 303.18 |
|          |        |          |        | 13  | R | 0  | 175.12   |         |                     | 175.12 |



Scan number 1045 Raw file LNCAP\_Silac\_23F10\_set1\_03  
 Method ITMS: CID Peptide 204.52

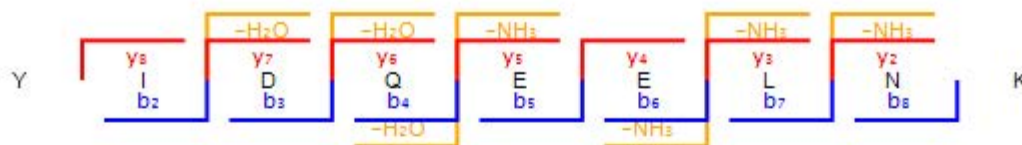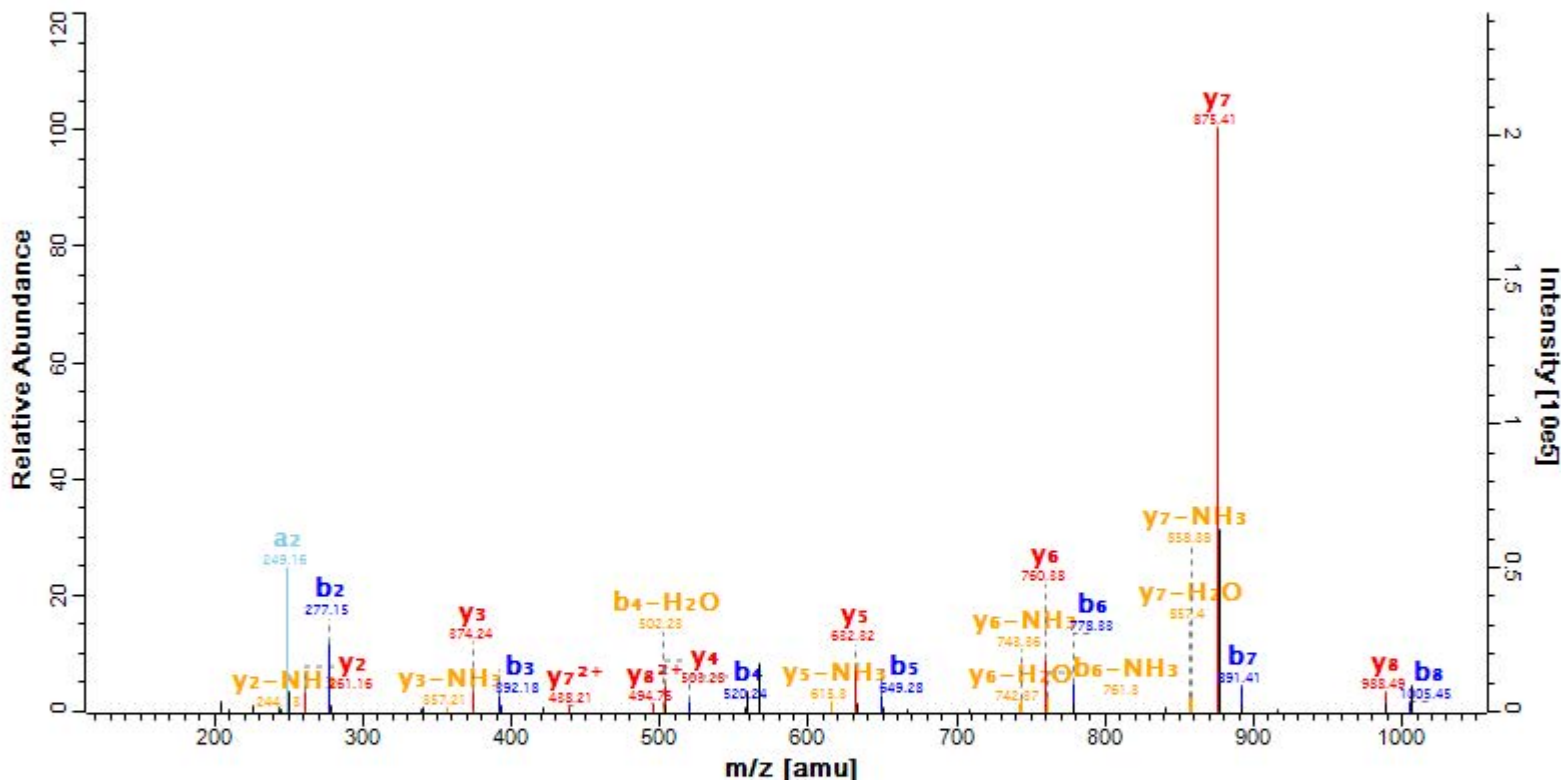

#### precursor information

|                       |                 |
|-----------------------|-----------------|
| Mass:                 | 1150.55047      |
| m/z:                  | 576.28251       |
| Charge:               | 2+              |
| Retentiontime:        | 11.048258781433 |
| Score:                | 204.5235        |
| Mass Error [ppm]:     | -0.13211        |
| PEP:                  | 1.3675E-12      |
| Precursor Type:       | MULTI           |
| Annotation:           | 7 of 9          |
| AminoAcids Coverage:  | 78 %            |
| Intensity Coverage:   | 74 %            |
| Peak Coverage:        | 40 %            |
| Protein Localisation: | 406 ... 414     |

| a ion    |        | b ion    |        | seq |   |   | y ion    |         | y <sup>2+</sup> ion |         |
|----------|--------|----------|--------|-----|---|---|----------|---------|---------------------|---------|
| Δ dalton | mass   | Δ dalton | mass   |     |   |   | Δ dalton | mass    | Δ dalton            | mass    |
|          | 136.08 |          | 164.07 | 1   | Y | 8 |          |         |                     |         |
| -0.043   | 249.16 | -0.037   | 277.15 | 2   | I | 7 | 988.49   | +0.0068 | 494.75              | +0.2322 |
|          | 364.19 | +0.0611  | 392.18 | 3   | D | 6 | 875.41   | -0.038  | 438.21              | +0.2148 |
|          | 492.25 | +0.0696  | 520.24 | 4   | Q | 5 | 760.38   | +0.035  | 760.38              |         |
|          | 621.29 | -0.001   | 649.28 | 5   | E | 4 | 632.32   | +0.0045 | 632.32              |         |
|          | 750.33 | -0.021   | 778.33 | 6   | E | 3 | 503.28   | -0.002  | 503.28              |         |
|          | 863.41 | -0.053   | 891.41 | 7   | L | 2 | 374.24   | +0.134  | 374.24              |         |
|          | 977.46 | +0.144   | 1005.5 | 8   | N | 1 | 261.16   | +0.0723 | 261.16              |         |
|          |        |          |        | 9   | K | 0 | 147.11   |         | 147.11              |         |

Scan number 1050 Raw file LNCAP\_Silac\_23F10\_set1\_03  
 Method ITMS: CID Pepti... 115.71

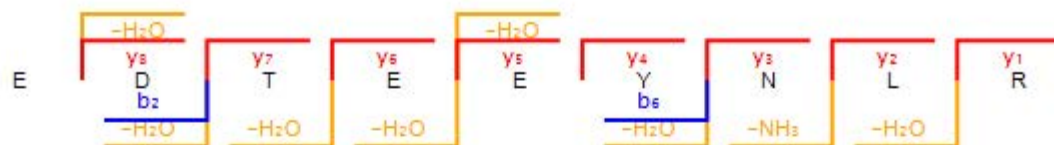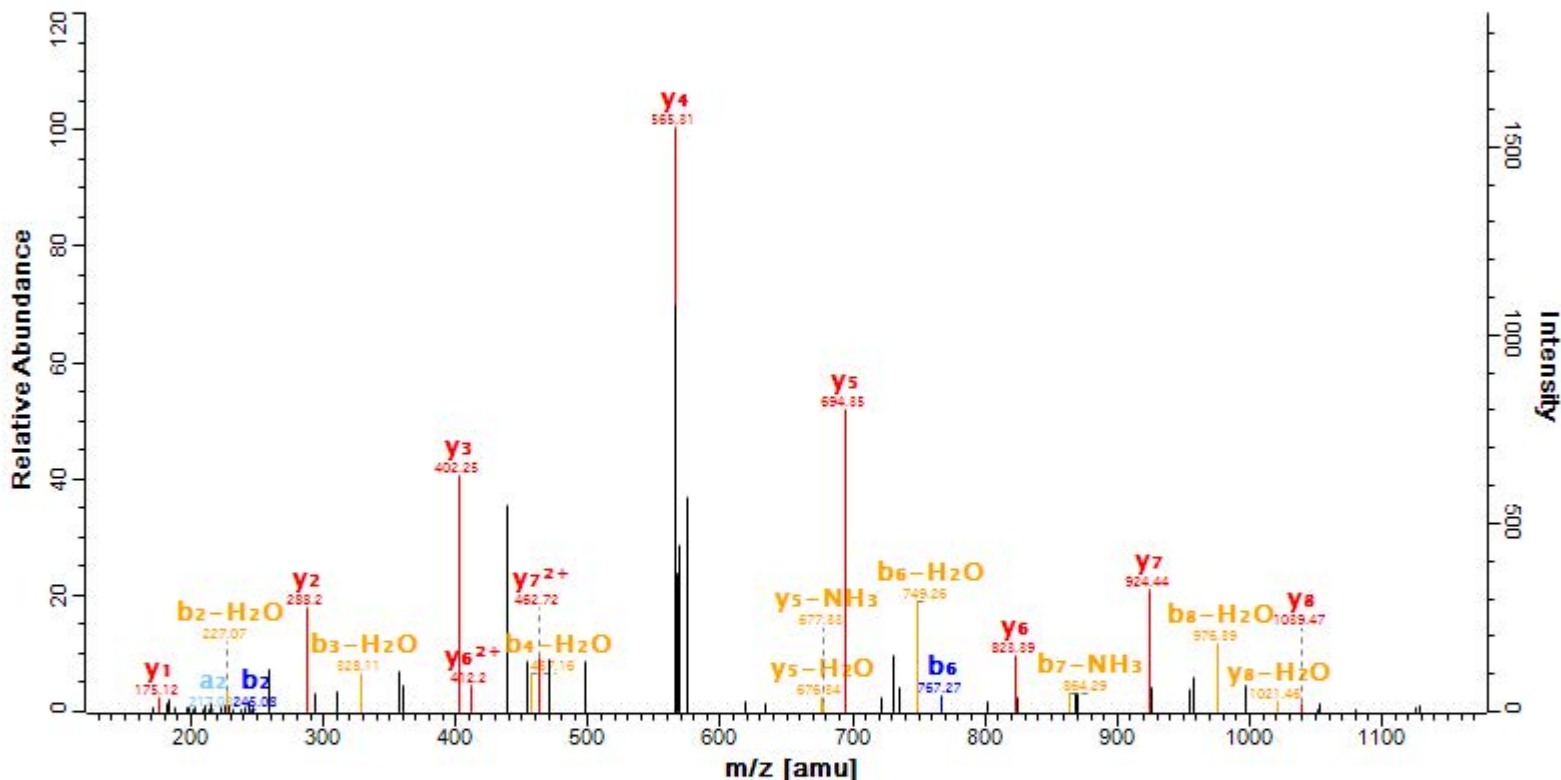

#### precursor information

|                       |                 |
|-----------------------|-----------------|
| Mass:                 | 1167.50411      |
| m/z:                  | 584.75933       |
| Charge:               | 2+              |
| Retentiontime:        | 11.068449974060 |
| Score:                | 115.7144        |
| Mass Error [ppm]:     | -0.24308        |
| PEP:                  | 0.00043883      |
| Precursor Type:       | ISO             |
| Annotation:           | 8 of 9          |
| AminoAcids Coverage:  | 89 %            |
| Intensity Coverage:   | 47 %            |
| Peak Coverage:        | 28 %            |
| Protein Localisation: | 135 ... 143     |

| a ion    |        | b ion    |        |   |     |   | y ion    |         | y <sup>2+</sup> ion |        |
|----------|--------|----------|--------|---|-----|---|----------|---------|---------------------|--------|
| Δ dalton | mass   | Δ dalton | mass   |   | seq |   | Δ dalton | mass    | Δ dalton            | mass   |
|          | 102.05 |          | 130.05 | 1 | E   | 8 |          |         |                     |        |
| +0.0743  | 217.08 | +0.1919  | 245.08 | 2 | D   | 7 | 1039.5   | -0.061  | 1039.5              |        |
|          | 318.13 |          | 346.12 | 3 | T   | 6 | 924.44   | +0.0117 | 462.72              | -0.022 |
|          | 447.17 |          | 475.17 | 4 | E   | 5 | 823.39   | +0.1497 | 412.2               | -0.017 |
|          | 576.21 |          | 604.21 | 5 | E   | 4 | 694.35   | +0.012  | 694.35              |        |
|          | 739.28 | +0.0853  | 767.27 | 6 | Y   | 3 | 565.31   | +0.0281 | 565.31              |        |
|          | 853.32 |          | 881.32 | 7 | N   | 2 | 402.25   | +0.0324 | 402.25              |        |
|          | 966.41 |          | 994.4  | 8 | L   | 1 | 288.2    | +0.0806 | 288.2               |        |
|          |        |          |        | 9 | R   | 0 | 175.12   | -0.014  | 175.12              |        |

Scan number 10521 Raw file LNCAP\_Silac\_23F10\_set1\_03  
 Method ITMS: CID Pepti... 95.85

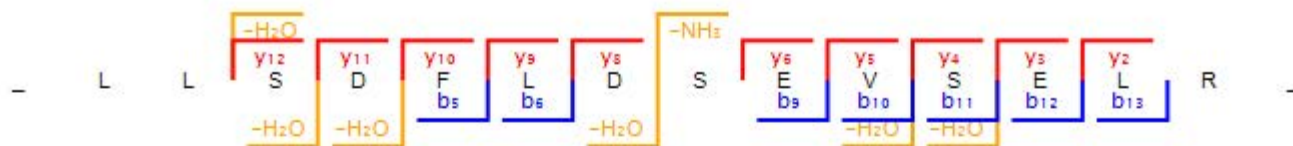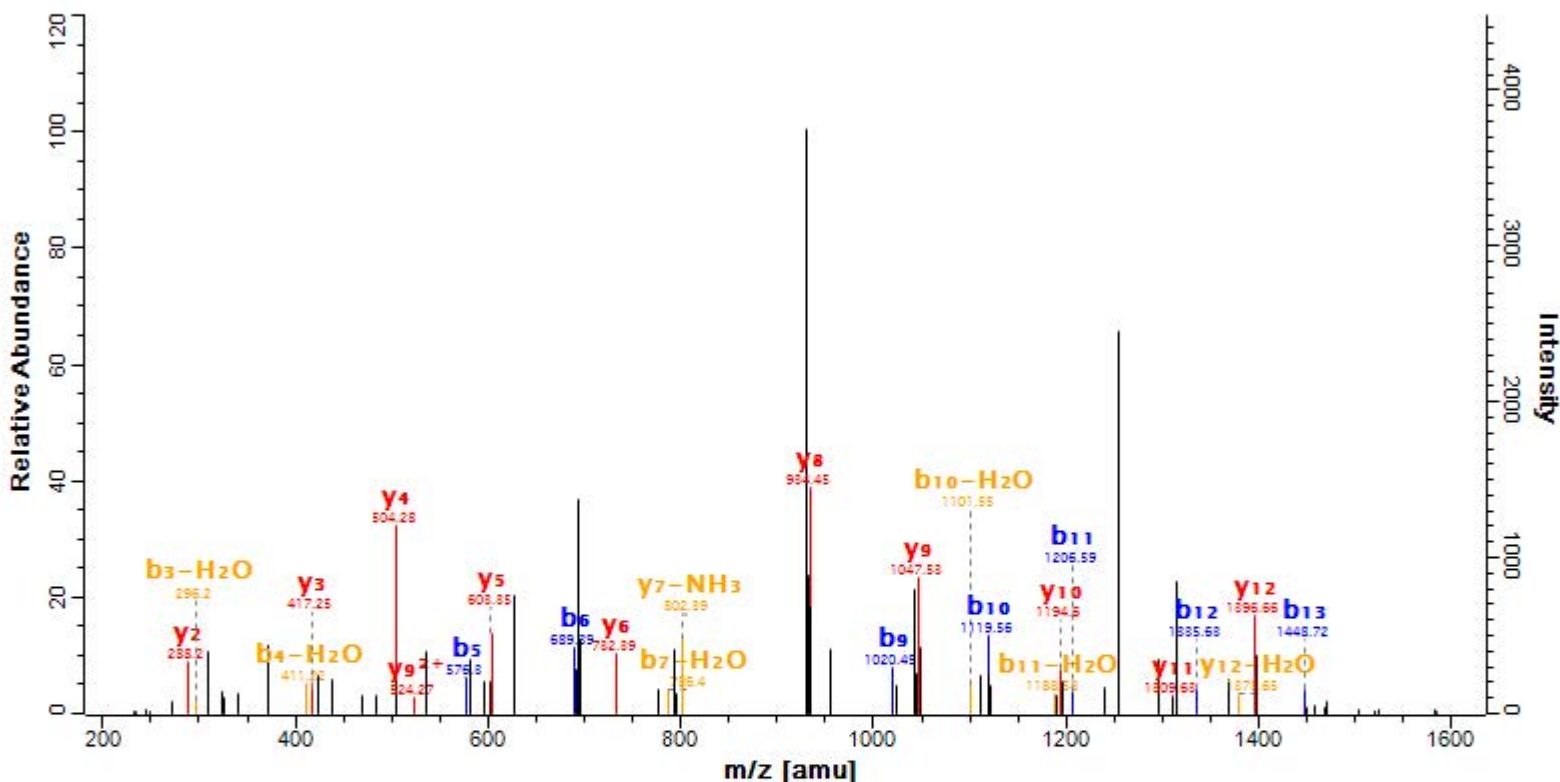

#### precursor information

|                   |                 |
|-------------------|-----------------|
| Mass:             | 1614.86725      |
| m/z:              | 808.4409        |
| Charge:           | 2+              |
| Retentiontime:    | 57.880298614502 |
| Score:            | 95.85367        |
| Mass Error [ppm]: | -0.13693        |
| PEP:              | 0.0011183       |
| Precursor Type:   | MULTI           |

| b ion     |          |     |   | y ion    |          | y <sup>2+</sup> ion |          |
|-----------|----------|-----|---|----------|----------|---------------------|----------|
| Δ dalton  | mass     | seq |   | Δ dalton | mass     | Δ dalton            | mass     |
|           | 114.0913 | 1   | L | 13       |          |                     |          |
|           | 227.1754 | 2   | L | 12       | 1509.743 |                     | 1509.743 |
|           | 314.2074 | 3   | S | 11       | 1396.659 | -0.04945            | 1396.659 |
|           | 429.2344 | 4   | D | 10       | 1309.627 | +0.080116           | 1309.627 |
| +0.291632 | 576.3028 | 5   | F | 9        | 1194.6   | -0.05493            | 1194.6   |
| -0.12465  | 689.3869 | 6   | L | 8        | 1047.532 | +0.024472           | 524.2695 |
|           | 804.4138 | 7   | D | 7        | 934.4476 | +0.021805           | 934.4476 |
|           | 891.4458 | 8   | S | 6        | 819.4207 |                     | 819.4207 |
| +0.005783 | 1020.488 | 9   | E | 5        | 732.3886 | +0.085782           | 732.3886 |
| -0.12605  | 1119.557 | 10  | V | 4        | 603.3461 | +0.139361           | 603.3461 |
| +0.048102 | 1206.589 | 11  | S | 3        | 504.2776 | +0.090954           | 504.2776 |
| -0.06126  | 1335.631 | 12  | E | 2        | 417.2456 | +0.134701           | 417.2456 |
| -0.07929  | 1448.716 | 13  | L | 1        | 288.203  | -0.08916            | 288.203  |
|           |          | 14  | R | 0        | 175.119  |                     | 175.119  |

#### general information

|                       |             |
|-----------------------|-------------|
| Annotation:           | 11 of 14    |
| AminoAcids Coverage:  | 79 %        |
| Intensity Coverage:   | 29 %        |
| Peak Coverage:        | 28 %        |
| Protein Localisation: | 695 ... 708 |

Scan number 10570 Raw file LNCAP\_Silac\_23F10\_set1\_03  
 Method ITMS; CID Pepti... 208.43

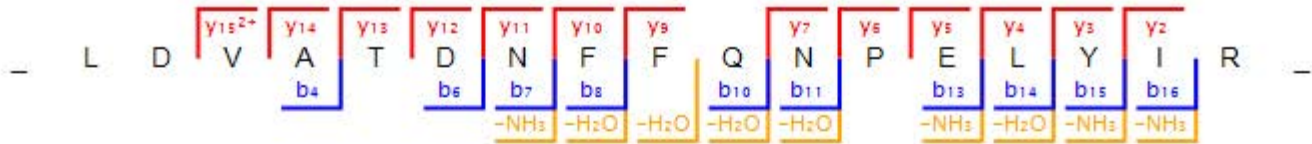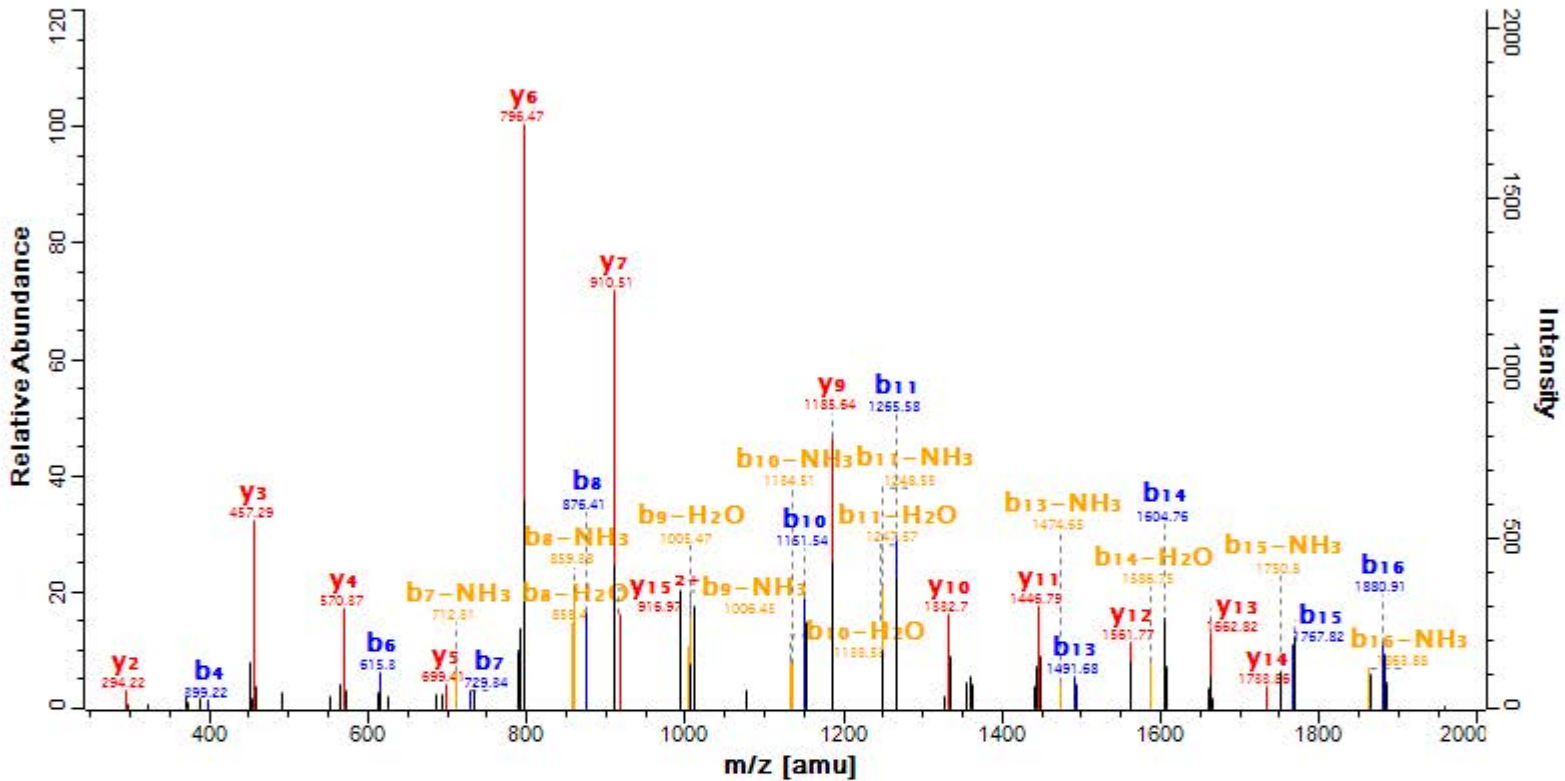

**precursor information**

|                   |                 |
|-------------------|-----------------|
| Mass:             | 2054.01104      |
| m/z:              | 1028.0128       |
| Charge:           | 2+              |
| Retentiontime:    | 58.155178070068 |
| Score:            | 208.4329        |
| Mass Error [ppm]: | 0.067368        |
| PEP:              | 5.2887E-40      |
| Precursor Type:   | MULTI           |

**general information**

|                       |           |
|-----------------------|-----------|
| Annotation:           | 14 of 17  |
| AminoAcids Coverage:  | 82 %      |
| Intensity Coverage:   | 58 %      |
| Peak Coverage:        | 38 %      |
| Protein Localisation: | 37 ... 53 |

| b ion     |          |     |   |          | y ion    |           | y <sup>2+</sup> ion |  |
|-----------|----------|-----|---|----------|----------|-----------|---------------------|--|
| Δ dalton  | mass     | seq |   | Δ dalton | mass     | Δ dalton  | mass                |  |
|           | 114.0913 | 1   | L | 16       |          |           |                     |  |
|           | 229.1183 | 2   | D | 15       | 1947.954 |           | 1947.954            |  |
|           | 328.1867 | 3   | V | 14       | 1832.927 |           | 916.9673 +0.317378  |  |
| +0.046575 | 399.2238 | 4   | A | 13       | 1733.859 | +0.009884 | 1733.859            |  |
|           | 500.2715 | 5   | T | 12       | 1662.822 | -0.08996  | 1662.822            |  |
| +0.144255 | 615.2984 | 6   | D | 11       | 1561.774 | +0.019969 | 1561.774            |  |
| +0.238596 | 729.3414 | 7   | N | 10       | 1446.747 | -0.01132  | 1446.747            |  |
| -0.0775   | 876.4098 | 8   | F | 9        | 1332.704 | +0.038815 | 1332.704            |  |
|           | 1023.478 | 9   | F | 8        | 1185.636 | +0.151784 | 1185.636            |  |
| -0.12551  | 1151.537 | 10  | Q | 7        | 1038.567 |           | 1038.567            |  |
| -0.07847  | 1265.58  | 11  | N | 6        | 910.5088 | +0.052945 | 910.5088            |  |
|           | 1362.632 | 12  | P | 5        | 796.4659 | -0.03486  | 796.4659            |  |
| +0.00244  | 1491.675 | 13  | E | 4        | 699.4131 | +0.143876 | 699.4131            |  |
| -0.01729  | 1604.759 | 14  | L | 3        | 570.3705 | +0.073066 | 570.3705            |  |
| -0.13958  | 1767.822 | 15  | Y | 2        | 457.2865 | +0.091486 | 457.2865            |  |
| +0.034045 | 1880.907 | 16  | I | 1        | 294.2231 | +0.043884 | 294.2231            |  |
|           |          | 17  | R | 0        | 181.1391 |           | 181.1391            |  |

Scan number 10855 Raw file LNCAP\_Silac\_23F10\_set1\_03  
 Method ITMS; CID Peptide 146.79

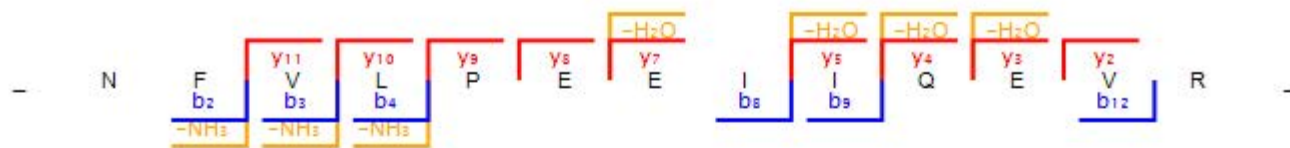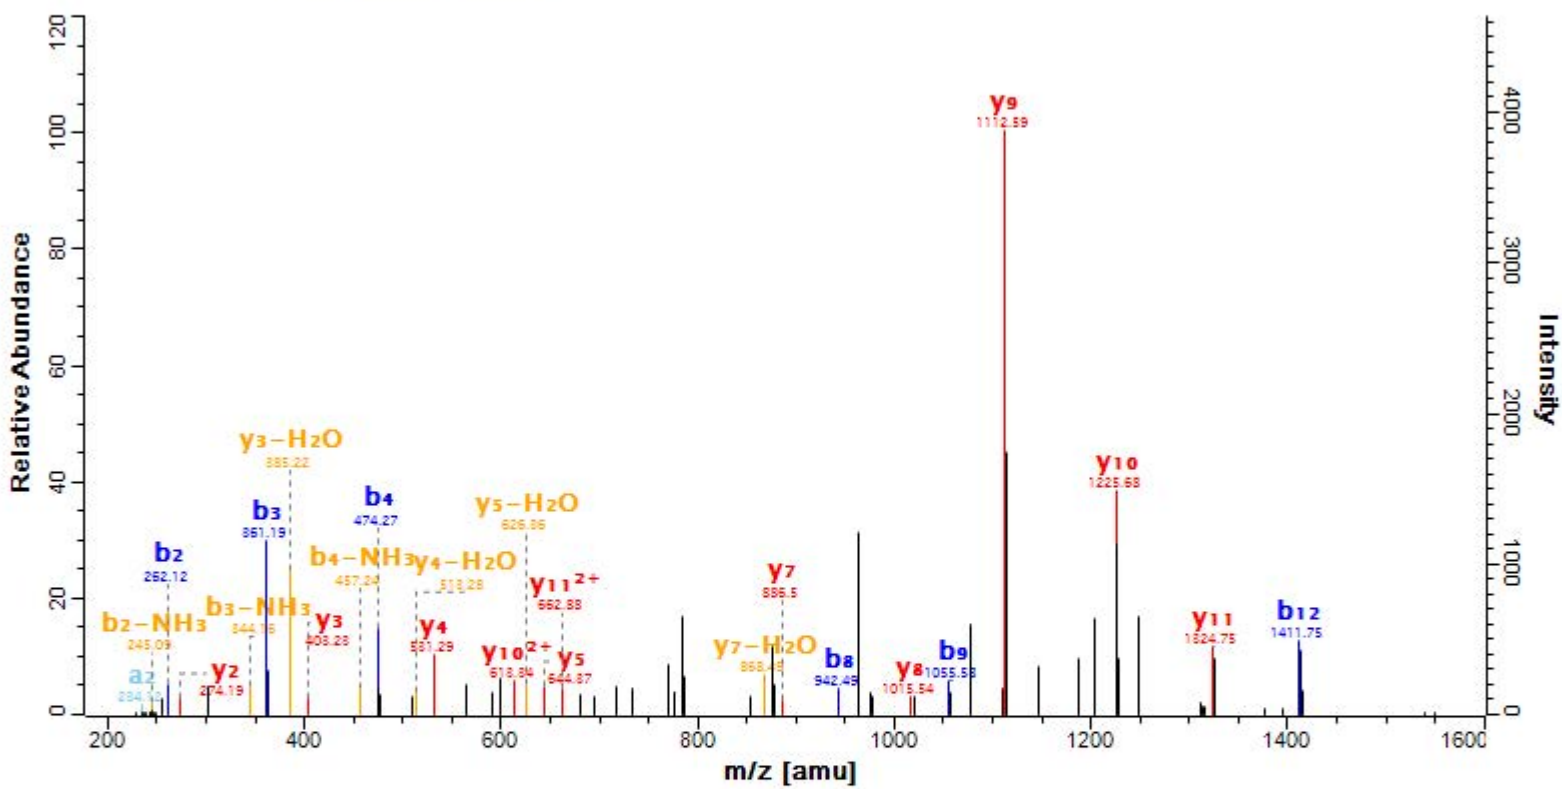

precursor information

|                   |                 |
|-------------------|-----------------|
| Mass:             | 1587.84356      |
| m/z:              | 794.92906       |
| Charge:           | 2+              |
| Retentiontime:    | 59.923324584960 |
| Score:            | 146.7873        |
| Mass Error [ppm]: | 0.058608        |
| PEP:              | 4.6558E-30      |
| Precursor Type:   | MULTI           |

general information

|                       |             |
|-----------------------|-------------|
| Annotation:           | 11 of 13    |
| AminoAcids Coverage:  | 85 %        |
| Intensity Coverage:   | 45 %        |
| Peak Coverage:        | 29 %        |
| Protein Localisation: | 104 ... 116 |

| a ion    |        | b ion    |        | seq |   |    | y ion    |         | y <sup>2+</sup> ion |         |
|----------|--------|----------|--------|-----|---|----|----------|---------|---------------------|---------|
| Δ dalton | mass   | Δ dalton | mass   |     |   |    | Δ dalton | mass    | Δ dalton            | mass    |
|          | 87.055 |          | 115.05 | 1   | N | 12 |          |         |                     |         |
| +0.0901  | 234.12 | -0.004   | 262.12 | 2   | F | 11 | 1471.8   |         | 1471.8              |         |
|          | 333.19 | +0.0024  | 361.19 | 3   | V | 10 | 1324.7   | -0.08   | 662.88              | +0.3687 |
|          | 446.28 | -0.057   | 474.27 | 4   | L | 9  | 1225.7   | -0.022  | 613.34              | +0.108  |
|          | 543.33 |          | 571.32 | 5   | P | 8  | 1112.6   | +0.0354 | 1112.6              |         |
|          | 672.37 |          | 700.37 | 6   | E | 7  | 1015.5   | +0.0517 | 1015.5              |         |
|          | 801.41 |          | 829.41 | 7   | E | 6  | 886.5    | +0.056  | 886.5               |         |
|          | 914.5  | -0.058   | 942.49 | 8   | I | 5  | 757.46   |         | 757.46              |         |
|          | 1027.6 | -0.237   | 1055.6 | 9   | I | 4  | 644.37   | +0.0822 | 644.37              |         |
|          | 1155.6 |          | 1183.6 | 10  | Q | 3  | 531.29   | +0.0521 | 531.29              |         |
|          | 1284.7 |          | 1312.7 | 11  | E | 2  | 403.23   | +0.1099 | 403.23              |         |
|          | 1383.8 | -0.064   | 1411.7 | 12  | V | 1  | 274.19   | +0.0686 | 274.19              |         |
|          |        |          |        | 13  | R | 0  | 175.12   |         | 175.12              |         |

Scan number 10909 Raw file LNCAP\_Silac\_23F10\_set1\_03  
 Method ITMS; CID Pepti... 197.36

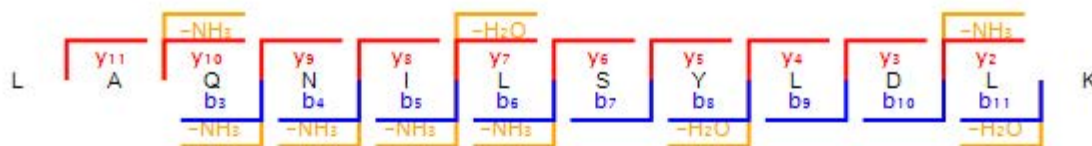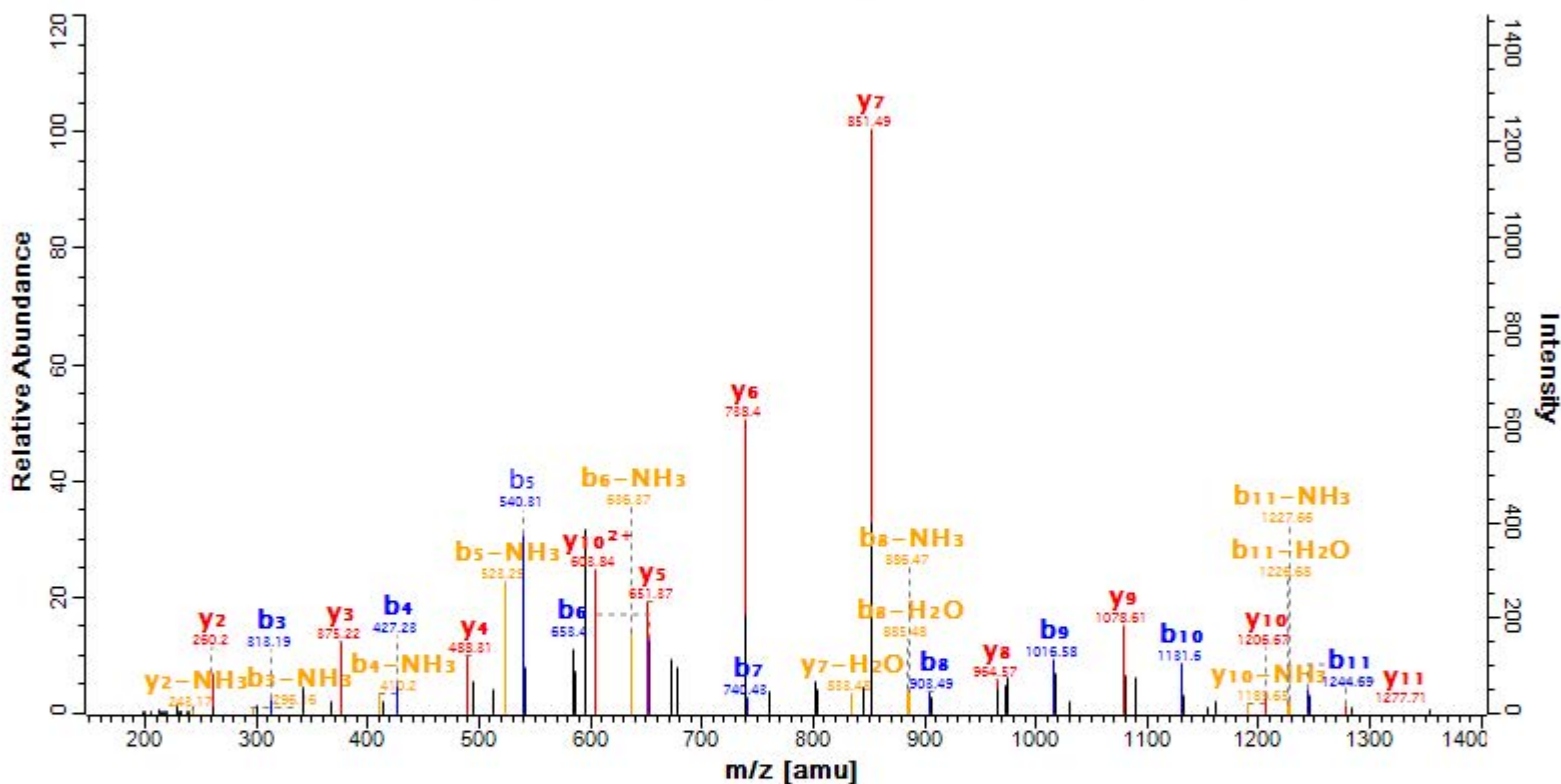

#### precursor information

|                   |                 |
|-------------------|-----------------|
| Mass:             | 1389.786        |
| m/z:              | 695.90028       |
| Charge:           | 2+              |
| Retentiontime:    | 60.279811859130 |
| Score:            | 197.361         |
| Mass Error [ppm]: | -0.55335        |
| PEP:              | 6.7889E-15      |
| Precursor Type:   | MULTI           |

#### general information

|                       |             |
|-----------------------|-------------|
| Annotation:           | 10 of 12    |
| AminoAcids Coverage:  | 83 %        |
| Intensity Coverage:   | 63 %        |
| Peak Coverage:        | 37 %        |
| Protein Localisation: | 471 ... 482 |

| b ion     |          |    |     |    | y ion    |           | y <sup>2+</sup> ion |           |
|-----------|----------|----|-----|----|----------|-----------|---------------------|-----------|
| Δ dalton  | mass     |    | seq |    | Δ dalton | mass      | Δ dalton            | mass      |
|           | 114.0913 | 1  | L   | 11 |          |           |                     |           |
|           | 185.1285 | 2  | A   | 10 | 1277.71  | -0.25539  | 1277.71             |           |
| +0.155131 | 313.187  | 3  | Q   | 9  | 1206.673 | +0.06444  | 603.8401            | +0.173418 |
| +0.09133  | 427.23   | 4  | N   | 8  | 1078.614 | +0.023896 | 1078.614            |           |
| -0.0152   | 540.314  | 5  | I   | 7  | 964.5714 | +0.07195  | 964.5714            |           |
| +0.093063 | 653.3981 | 6  | L   | 6  | 851.4873 | +0.01484  | 851.4873            |           |
| -0.00769  | 740.4301 | 7  | S   | 5  | 738.4032 | +0.031888 | 738.4032            |           |
| +0.115626 | 903.4934 | 8  | Y   | 4  | 651.3712 | +0.138806 | 651.3712            |           |
| +0.105536 | 1016.578 | 9  | L   | 3  | 488.3079 | +0.184434 | 488.3079            |           |
| +0.082927 | 1131.604 | 10 | D   | 2  | 375.2238 | +0.120488 | 375.2238            |           |
| -0.23368  | 1244.689 | 11 | L   | 1  | 260.1969 | +0.141511 | 260.1969            |           |
|           |          | 12 | K   | 0  | 147.1128 |           | 147.1128            |           |

Scan number 10974 Raw file LNCAP\_Silac\_23F10\_set1\_03  
 Method ITMS; CID Pepti... 78.49

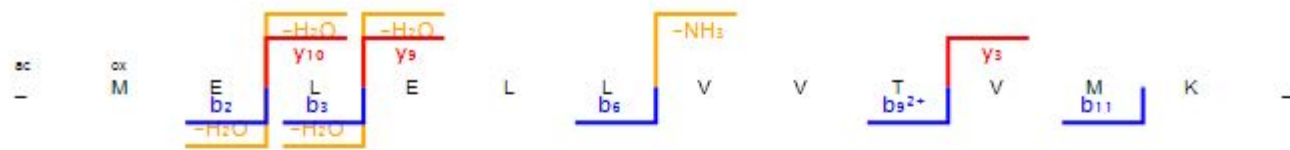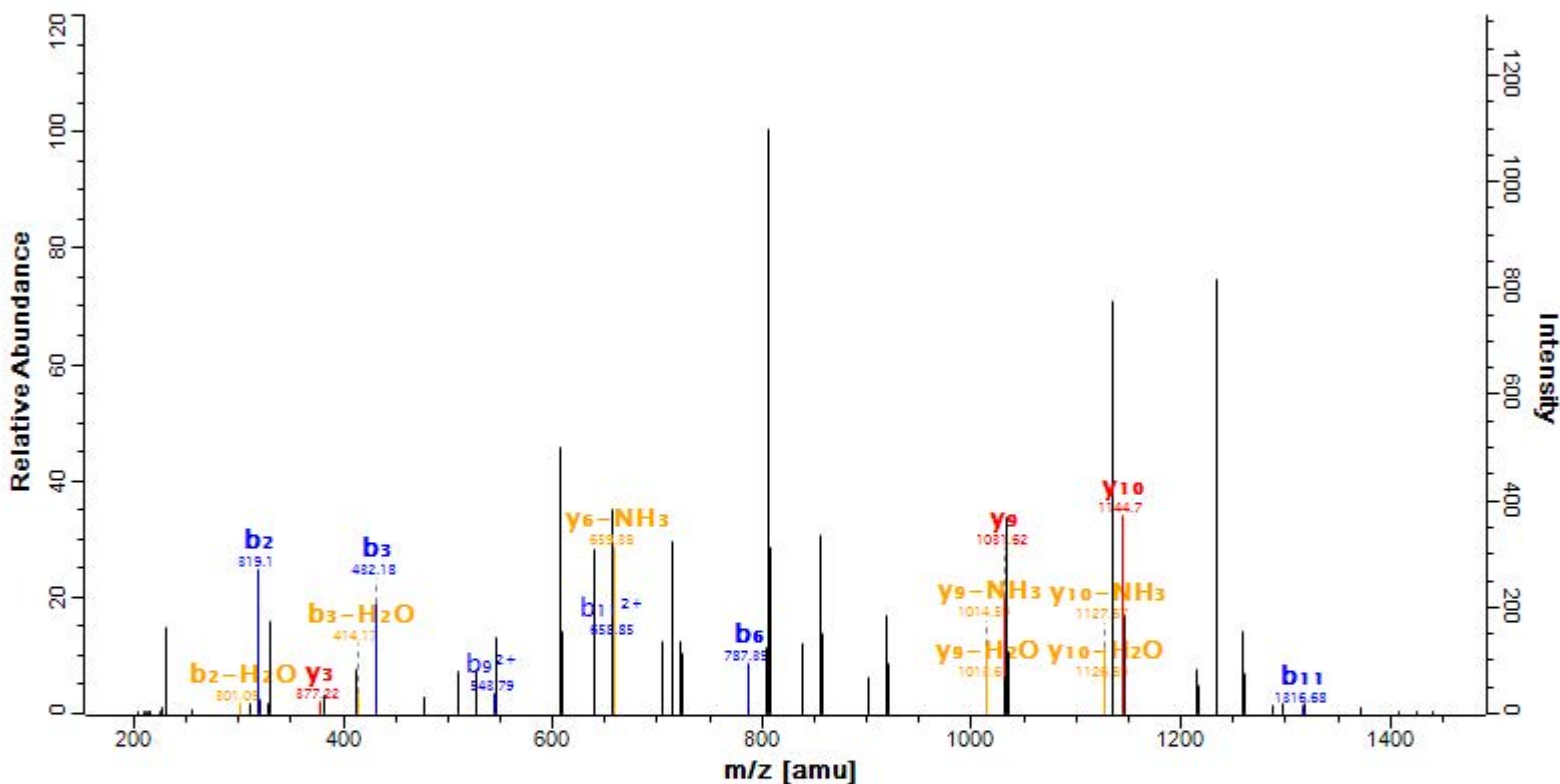

#### precursor information

|                   |                 |
|-------------------|-----------------|
| Mass:             | 1461.78336      |
| m/z:              | 731.89895       |
| Charge:           | 2+              |
| Retentiontime:    | 60.685070037841 |
| Score:            | 78.48815        |
| Mass Error [ppm]: | 0.74046         |
| PEP:              | 0.010877        |
| Precursor Type:   | MULTI           |

#### general information

|                       |          |
|-----------------------|----------|
| Annotation:           | 8 of 12  |
| AminoAcids Coverage:  | 67 %     |
| Intensity Coverage:   | 18 %     |
| Peak Coverage:        | 20 %     |
| Protein Localisation: | 1 ... 12 |

| b <sup>2+</sup> ion |          | b ion     |          |     | y ion |          |                    |
|---------------------|----------|-----------|----------|-----|-------|----------|--------------------|
| Δ dalton            | mass     | Δ dalton  | mass     | seq |       | Δ dalton | mass               |
|                     | 190.0532 |           | 190.0532 | 1   | M     | 11       |                    |
|                     | 319.0958 | +0.163566 | 319.0958 | 2   | E     | 10       | 1273.744           |
|                     | 432.1799 | +0.099521 | 432.1799 | 3   | L     | 9        | 1144.701 -0.16376  |
|                     | 561.2225 |           | 561.2225 | 4   | E     | 8        | 1031.617 -0.10289  |
|                     | 674.3066 |           | 674.3066 | 5   | L     | 7        | 902.5743           |
|                     | 787.3906 | +0.119574 | 787.3906 | 6   | L     | 6        | 789.4903           |
|                     | 886.459  |           | 886.459  | 7   | V     | 5        | 676.4062           |
|                     | 985.5274 |           | 985.5274 | 8   | V     | 4        | 577.3378           |
| -0.25714            | 543.7912 |           | 1086.575 | 9   | T     | 3        | 478.2694           |
|                     | 1185.644 |           | 1185.644 | 10  | V     | 2        | 377.2217 +0.260109 |
| -0.06654            | 658.8456 | -0.14997  | 1316.684 | 11  | M     | 1        | 278.1533           |
|                     |          |           |          | 12  | K     | 0        | 147.1128           |

Scan number 11212 Raw file LNCAP\_Silac\_23F10\_set1\_03  
 Method ITMS: CID Pepti... 65.56

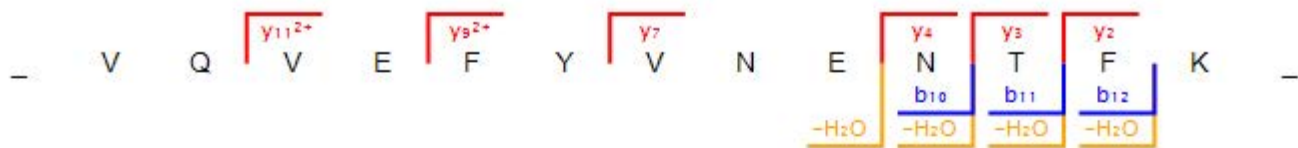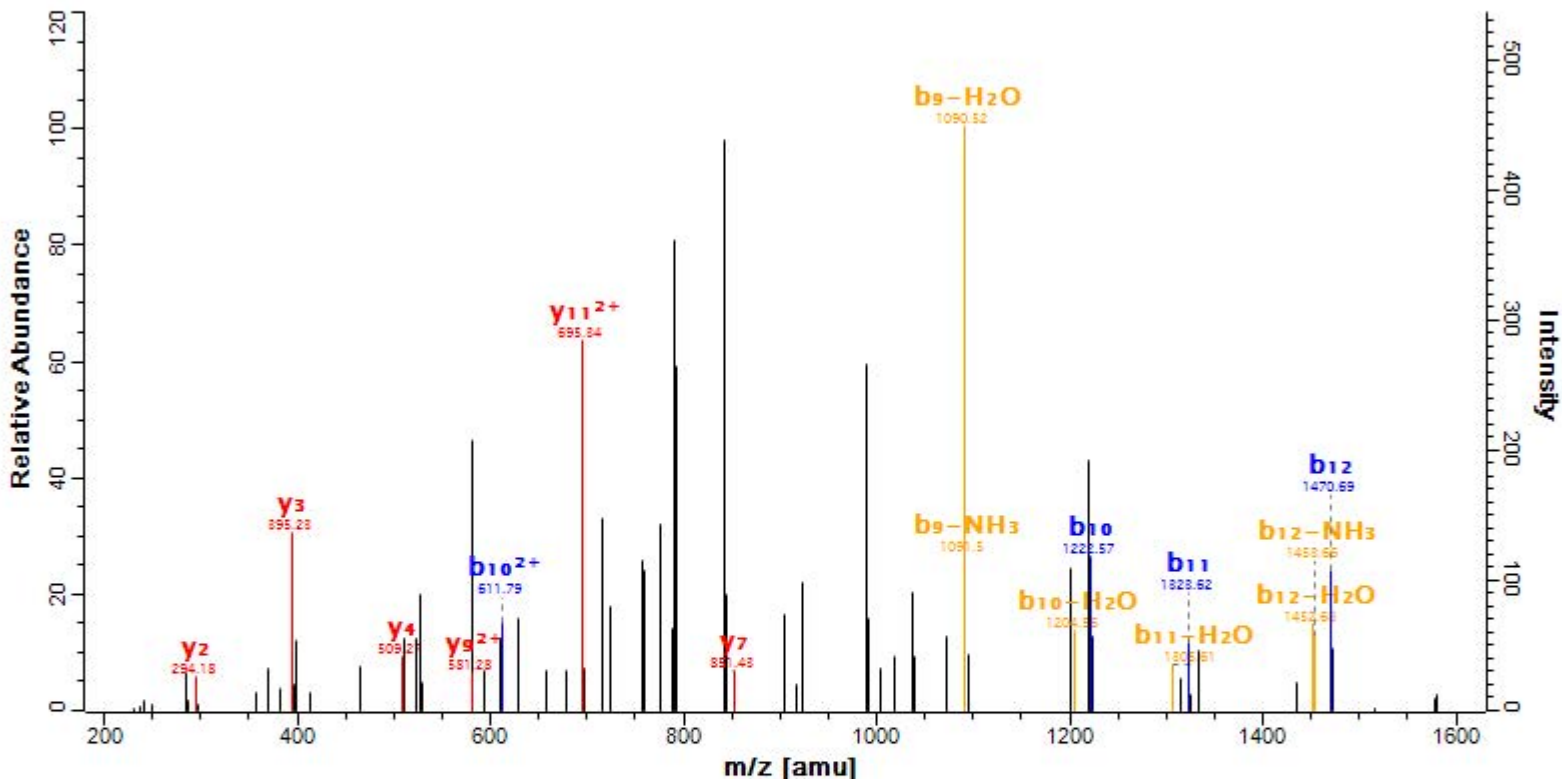

precursor information

|                   |                 |
|-------------------|-----------------|
| Mass:             | 1615.78832      |
| m/z:              | 808.90143       |
| Charge:           | 2+              |
| Retentiontime:    | 62.217681884765 |
| Score:            | 65.56252        |
| Mass Error [ppm]: | 0.057476        |
| PEP:              | 0.005095        |
| Precursor Type:   | MULTI           |

general information

|                       |           |
|-----------------------|-----------|
| Annotation:           | 7 of 13   |
| AminoAcids Coverage:  | 54 %      |
| Intensity Coverage:   | 28 %      |
| Peak Coverage:        | 20 %      |
| Protein Localisation: | 86 ... 98 |

| b <sup>2+</sup> ion |        | b ion    |        | seq |   |    | y ion    |         | y <sup>2+</sup> ion |         |
|---------------------|--------|----------|--------|-----|---|----|----------|---------|---------------------|---------|
| Δ dalton            | mass   | Δ dalton | mass   |     |   |    | Δ dalton | mass    | Δ dalton            | mass    |
|                     | 100.08 |          | 100.08 | 1   | V | 12 |          |         |                     |         |
|                     | 228.13 |          | 228.13 | 2   | Q | 11 | 1517.7   |         | 1517.7              |         |
|                     | 327.2  |          | 327.2  | 3   | V | 10 | 1389.7   |         | 695.34              | +0.0525 |
|                     | 456.25 |          | 456.25 | 4   | E | 9  | 1290.6   |         | 1290.6              |         |
|                     | 603.31 |          | 603.31 | 5   | F | 8  | 1161.6   |         | 581.28              | +0.1316 |
|                     | 766.38 |          | 766.38 | 6   | Y | 7  | 1014.5   |         | 1014.5              |         |
|                     | 865.45 |          | 865.45 | 7   | V | 6  | 851.43   | +0.2008 | 851.43              |         |
|                     | 979.49 |          | 979.49 | 8   | N | 5  | 752.36   |         | 752.36              |         |
|                     | 1108.5 |          | 1108.5 | 9   | E | 4  | 638.31   |         | 638.31              |         |
| -0.409              | 611.79 | -0.06    | 1222.6 | 10  | N | 3  | 509.27   | -0.08   | 509.27              |         |
|                     | 1323.6 | -0.011   | 1323.6 | 11  | T | 2  | 395.23   | +0.1567 | 395.23              |         |
|                     | 1470.7 | -0.077   | 1470.7 | 12  | F | 1  | 294.18   | +0.1094 | 294.18              |         |
|                     |        |          |        | 13  | K | 0  | 147.11   |         | 147.11              |         |



Scan number 11240 Raw file LNCAP\_Silac\_23F10\_set1\_03  
 Method ITMS; CID Pepti... 134.49

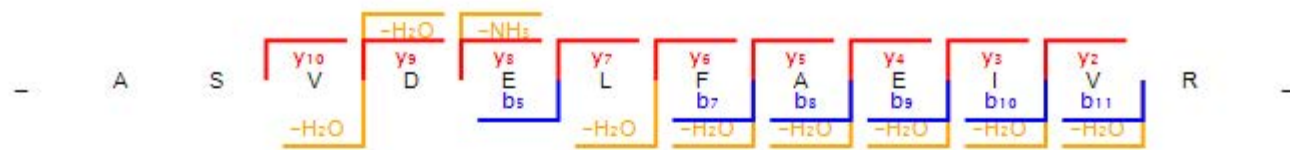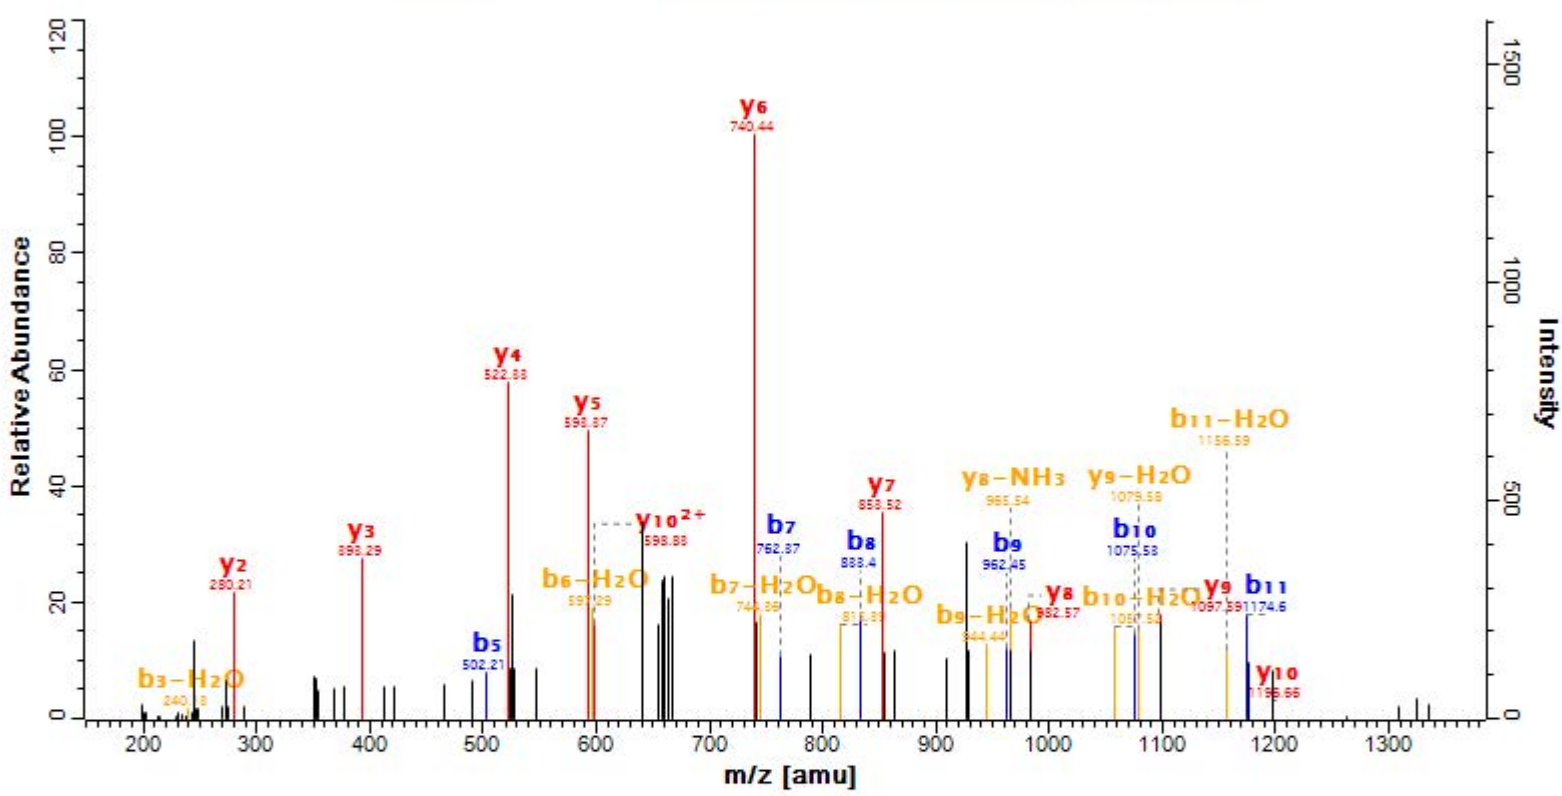

**precursor information**

|                   |                 |
|-------------------|-----------------|
| Mass:             | 1347.70291      |
| m/z:              | 674.85873       |
| Charge:           | 2+              |
| Retentiontime:    | 62.410984039306 |
| Score:            | 134.4899        |
| Mass Error [ppm]: | -0.3878         |
| PEP:              | 2.5331E-05      |
| Precursor Type:   | MULTI           |

**general information**

|                       |             |
|-----------------------|-------------|
| Annotation:           | 9 of 12     |
| AminoAcids Coverage:  | 75 %        |
| Intensity Coverage:   | 54 %        |
| Peak Coverage:        | 29 %        |
| Protein Localisation: | 151 ... 162 |

| b ion     |          |     |   | y ion    |          | y <sup>2+</sup> ion |          |
|-----------|----------|-----|---|----------|----------|---------------------|----------|
| Δ dalton  | mass     | seq |   | Δ dalton | mass     | Δ dalton            | mass     |
|           | 72.04439 | 1   | A | 11       |          |                     |          |
|           | 159.0764 | 2   | S | 10       | 1283.694 | 1283.694            |          |
|           | 258.1448 | 3   | V | 9        | 1196.662 | -0.05085            | 598.8345 |
|           | 373.1718 | 4   | D | 8        | 1097.593 | +0.035992           | 1097.593 |
| +0.066149 | 502.2144 | 5   | E | 7        | 982.5663 | +0.144906           | 982.5663 |
|           | 615.2984 | 6   | L | 6        | 853.5237 | +0.104979           | 853.5237 |
| -0.02987  | 762.3668 | 7   | F | 5        | 740.4397 | +0.04262            | 740.4397 |
| -0.04465  | 833.404  | 8   | A | 4        | 593.3713 | +0.049999           | 593.3713 |
| +0.013835 | 962.4466 | 9   | E | 3        | 522.3342 | +0.023941           | 522.3342 |
| -0.04661  | 1075.531 | 10  | I | 2        | 393.2916 | +0.028875           | 393.2916 |
| -0.18839  | 1174.599 | 11  | V | 1        | 280.2075 | +0.032312           | 280.2075 |
|           |          | 12  | R | 0        | 181.1391 |                     | 181.1391 |

Scan number 11337 Raw file LNCAP\_Silac\_23F10\_set1\_03  
 Method ITMS; CID Pepti... 179.87

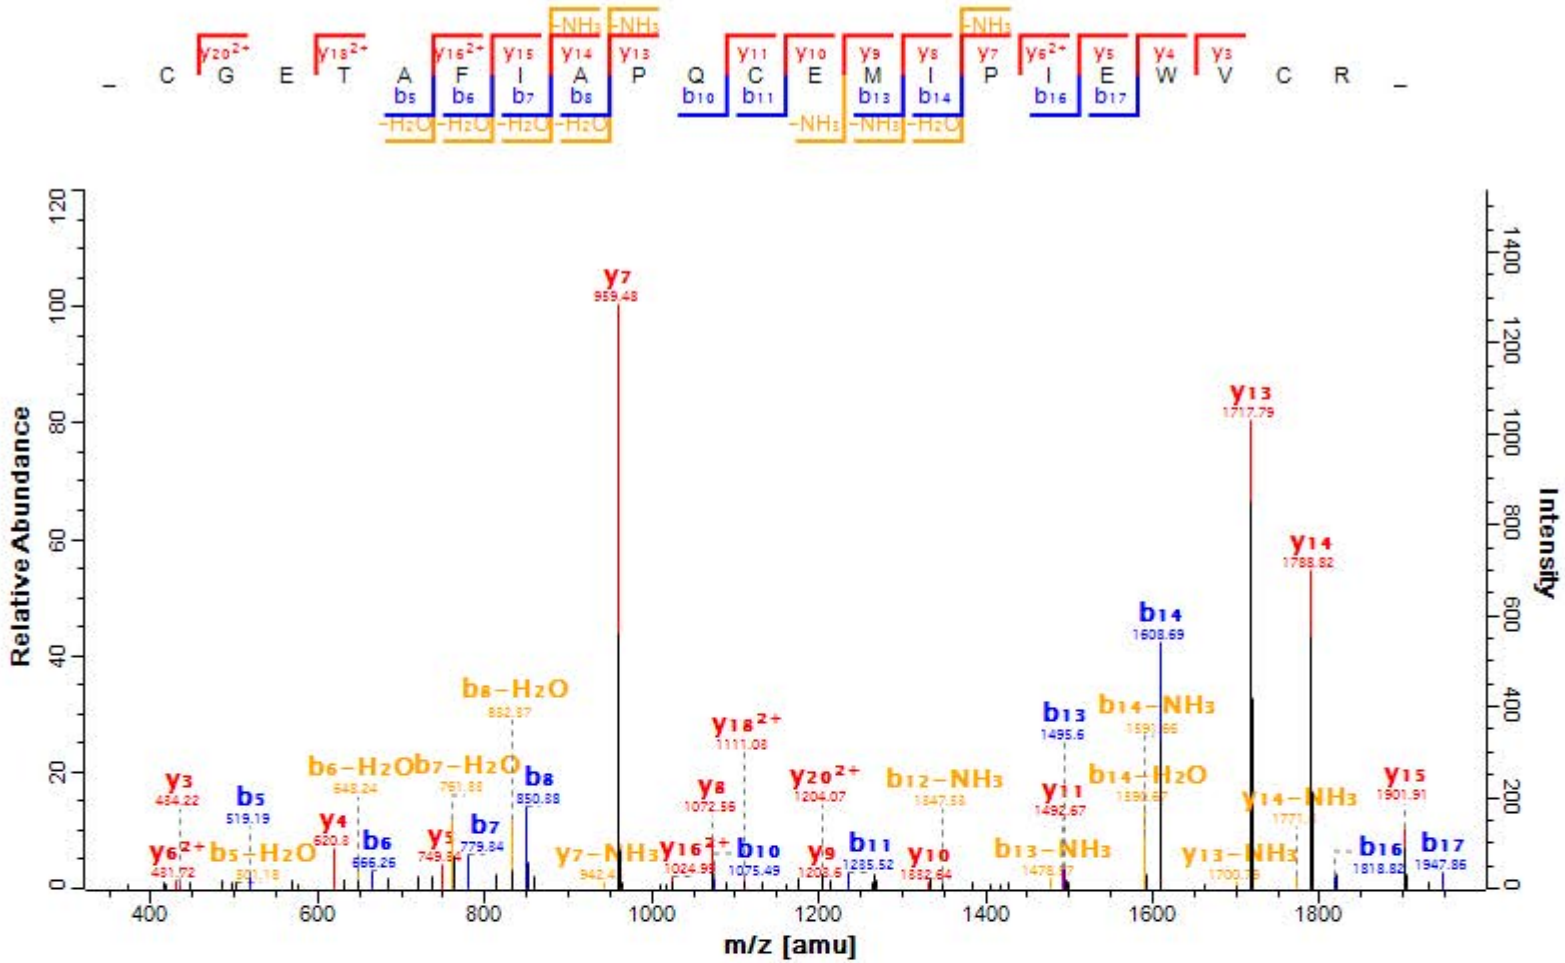

**precursor information**

|                   |                 |
|-------------------|-----------------|
| Mass:             | 2566.14606      |
| m/z:              | 1284.08031      |
| Charge:           | 2+              |
| Retentiontime:    | 63.051090240478 |
| Score:            | 179.8728        |
| Mass Error [ppm]: | -0.63515        |
| PEP:              | 4.8026E-37      |
| Precursor Type:   | MULTI           |

**general information**

|                       |             |
|-----------------------|-------------|
| Annotation:           | 17 of 21    |
| AminoAcids Coverage:  | 81 %        |
| Intensity Coverage:   | 56 %        |
| Peak Coverage:        | 37 %        |
| Protein Localisation: | 107 ... 127 |

| b ion     |          |    |     |    | y ion    |           | y <sup>2+</sup> ion |           |
|-----------|----------|----|-----|----|----------|-----------|---------------------|-----------|
| Δ dalton  | mass     |    | seq |    | Δ dalton | mass      | Δ dalton            | mass      |
|           | 161.0379 | 1  | C   | 20 |          |           |                     |           |
|           | 218.0594 | 2  | G   | 19 | 2407.124 |           | 1204.066            | -0.1062   |
|           | 347.102  | 3  | E   | 18 | 2350.103 |           | 2350.103            |           |
|           | 448.1497 | 4  | T   | 17 | 2221.06  |           | 1111.034            | +0.213545 |
| +0.157953 | 519.1868 | 5  | A   | 16 | 2120.013 |           | 2120.013            |           |
| -0.05377  | 666.2552 | 6  | F   | 15 | 2048.975 |           | 1024.991            | -0.08049  |
| +0.088361 | 779.3393 | 7  | I   | 14 | 1901.907 | -0.01655  | 1901.907            |           |
| +0.003334 | 850.3764 | 8  | A   | 13 | 1788.823 | -0.01037  | 1788.823            |           |
|           | 947.4291 | 9  | P   | 12 | 1717.786 | -0.08605  | 1717.786            |           |
| +0.130457 | 1075.488 | 10 | Q   | 11 | 1620.733 |           | 1620.733            |           |
| -0.14372  | 1235.518 | 11 | C   | 10 | 1492.675 | +0.002342 | 1492.675            |           |
|           | 1364.561 | 12 | E   | 9  | 1332.644 | -0.35507  | 1332.644            |           |
| +0.074226 | 1495.601 | 13 | M   | 8  | 1203.601 | -0.25681  | 1203.601            |           |
| -0.09358  | 1608.685 | 14 | I   | 7  | 1072.561 | -0.0508   | 1072.561            |           |
|           | 1705.738 | 15 | P   | 6  | 959.4767 | +0.030332 | 959.4767            |           |
| -0.14544  | 1818.822 | 16 | I   | 5  | 862.424  |           | 431.7156            | -0.33367  |
| +0.140209 | 1947.865 | 17 | E   | 4  | 749.3399 | -0.0359   | 749.3399            |           |
|           | 2133.944 | 18 | W   | 3  | 620.2973 | +0.150671 | 620.2973            |           |
|           | 2233.013 | 19 | V   | 2  | 434.218  | +0.087985 | 434.218             |           |
|           | 2393.043 | 20 | C   | 1  | 335.1496 |           | 335.1496            |           |
|           |          | 21 | R   | 0  | 175.119  |           | 175.119             |           |

Scan number 11726 Raw file LNCAP\_Silac\_23F10\_set1\_03  
 Method ITMS; CID Pepti... 101.36

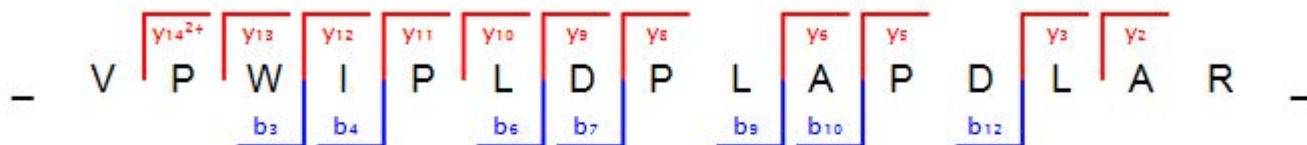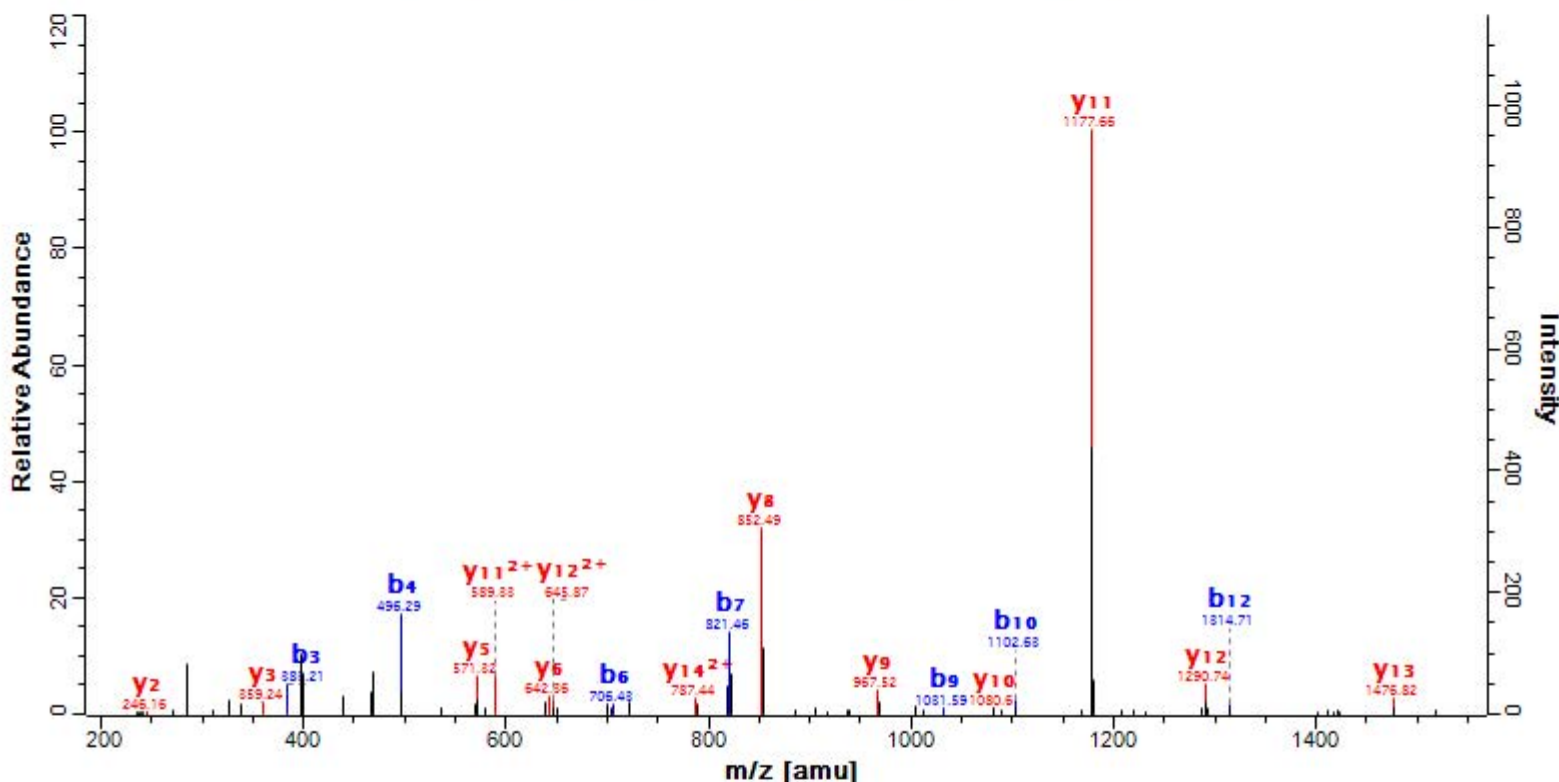

#### precursor information

|                   |                 |
|-------------------|-----------------|
| Mass:             | 1671.93461      |
| m/z:              | 836.97458       |
| Charge:           | 2+              |
| Retentiontime:    | 66.077758789062 |
| Score:            | 101.3571        |
| Mass Error [ppm]: | -0.13109        |
| PEP:              | 2.5108E-05      |
| Precursor Type:   | MULTI           |

#### general information

|                       |             |
|-----------------------|-------------|
| Annotation:           | 13 of 15    |
| AminoAcids Coverag    | 87 %        |
| Intensity Coverage:   | 56 %        |
| Peak Coverage:        | 25 %        |
| Protein Localisation: | 235 ... 249 |

| b ion     |          |     |   | y ion    |          | y <sup>2+</sup> ion |           |
|-----------|----------|-----|---|----------|----------|---------------------|-----------|
| Δ dalton  | mass     | seq |   | Δ dalton | mass     | Δ dalton            | mass      |
|           | 100.0757 | 1   | V | 14       |          |                     |           |
|           | 197.1285 | 2   | P | 13       | 1573.874 | 787.4405            | +0.219856 |
| -0.013    | 383.2078 | 3   | W | 12       | 1476.821 | +0.019284           | 1476.821  |
| +0.017373 | 496.2918 | 4   | I | 11       | 1290.742 | +0.01327            | 645.8744  |
|           | 593.3446 | 5   | P | 10       | 1177.658 | -0.03194            | 589.3324  |
| -0.08717  | 706.4287 | 6   | L | 9        | 1080.605 | +0.067822           | 1080.605  |
| -0.03696  | 821.4556 | 7   | D | 8        | 967.5207 | +0.066864           | 967.5207  |
|           | 918.5084 | 8   | P | 7        | 852.4938 | -0.04303            | 852.4938  |
| +0.018898 | 1031.592 | 9   | L | 6        | 755.441  |                     | 755.441   |
| +0.0228   | 1102.63  | 10  | A | 5        | 642.357  | +0.044233           | 642.357   |
|           | 1199.682 | 11  | P | 4        | 571.3198 | +0.007434           | 571.3198  |
| -0.39541  | 1314.709 | 12  | D | 3        | 474.2671 |                     | 474.2671  |
|           | 1427.793 | 13  | L | 2        | 359.2401 | +0.074995           | 359.2401  |
|           | 1498.83  | 14  | A | 1        | 246.1561 | +0.003449           | 246.1561  |
|           |          | 15  | R | 0        | 175.119  |                     | 175.119   |

Scan number 11768 Raw file LNCAP\_Silac\_23F10\_set1\_03  
 Method ITMS; CID Pepti... 74.84

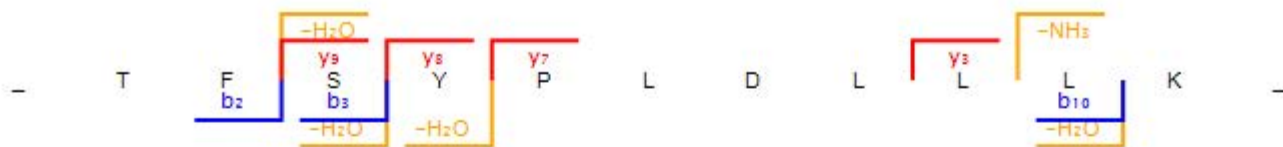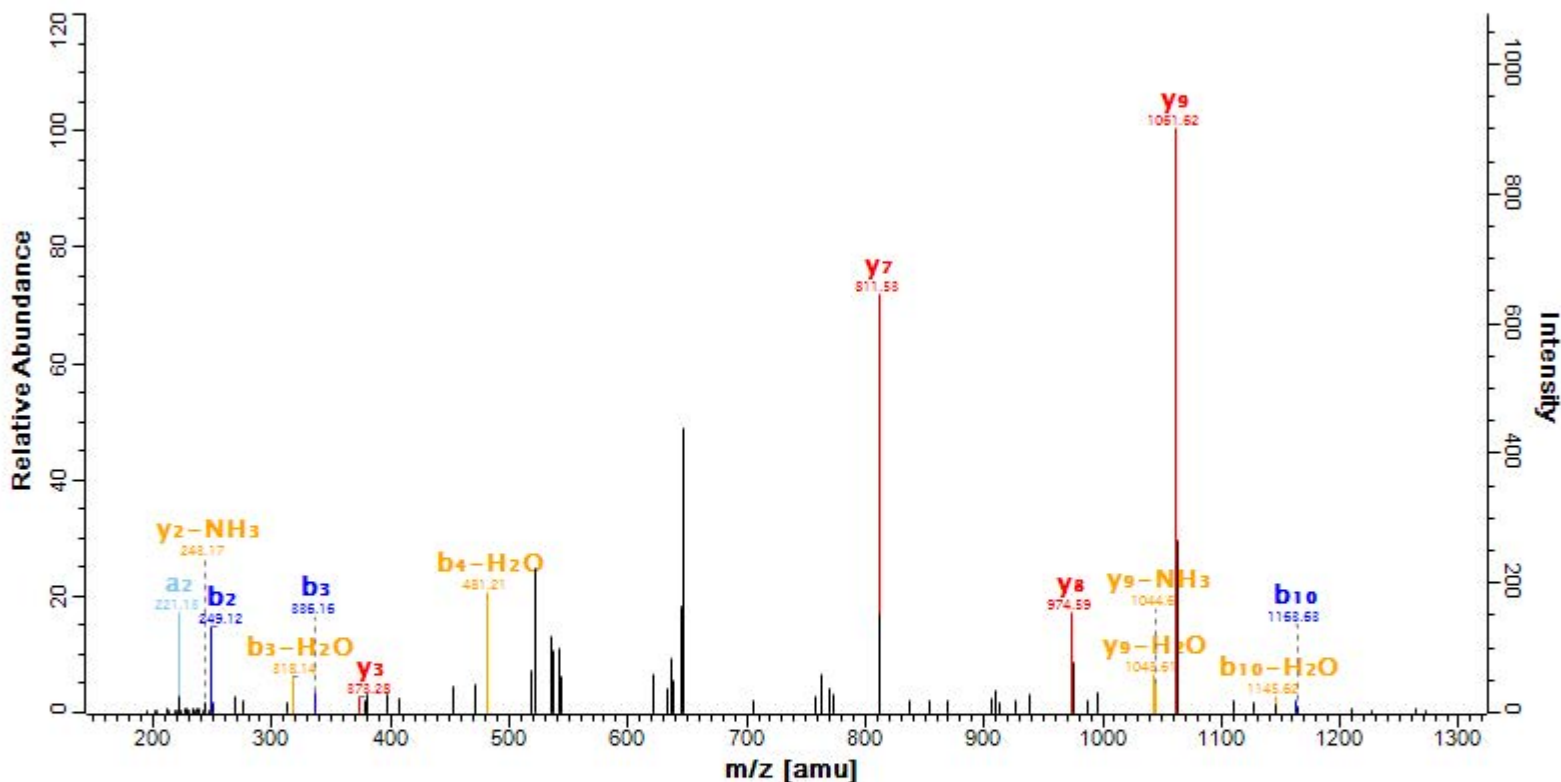

#### precursor information

|                   |                 |
|-------------------|-----------------|
| Mass:             | 1308.73337      |
| m/z:              | 655.37396       |
| Charge:           | 2+              |
| Retentiontime:    | 66.398757934570 |
| Score:            | 74.84109        |
| Mass Error [ppm]: | 0.32527         |
| PEP:              | 0.004729        |
| Precursor Type:   | MULTI           |

#### general information

|                       |           |
|-----------------------|-----------|
| Annotation:           | 6 of 11   |
| AminoAcids Coverage:  | 55 %      |
| Intensity Coverage:   | 46 %      |
| Peak Coverage:        | 16 %      |
| Protein Localisation: | 31 ... 41 |

| a ion     |          | b ion     |          |     |   | y ion    |                    |
|-----------|----------|-----------|----------|-----|---|----------|--------------------|
| Δ dalton  | mass     | Δ dalton  | mass     | seq |   | Δ dalton | mass               |
|           | 74.06004 |           | 102.055  | 1   | T | 10       |                    |
| +0.055445 | 221.1285 | -0.04186  | 249.1234 | 2   | F | 9        | 1208.693           |
|           | 308.1605 | +0.069883 | 336.1554 | 3   | S | 8        | 1061.624 -0.02818  |
|           | 471.2238 |           | 499.2187 | 4   | Y | 7        | 974.5921 -0.00231  |
|           | 568.2766 |           | 596.2715 | 5   | P | 6        | 811.5288 +0.038128 |
|           | 681.3606 |           | 709.3556 | 6   | L | 5        | 714.476            |
|           | 796.3876 |           | 824.3825 | 7   | D | 4        | 601.3919           |
|           | 909.4716 |           | 937.4666 | 8   | L | 3        | 486.365            |
|           | 1022.556 |           | 1050.551 | 9   | L | 2        | 373.2809 +0.091871 |
|           | 1135.64  | -0.25871  | 1163.635 | 10  | L | 1        | 260.1969           |
|           |          |           |          | 11  | K | 0        | 147.1128           |

Scan number 11876 Raw file LNCAP\_Silac\_23F10\_set1\_03  
 Method ITMS; CID Pepti... 127.83

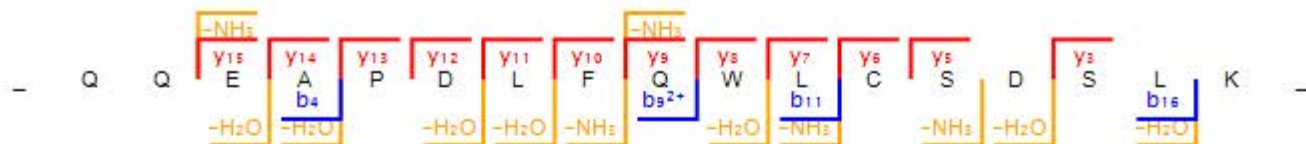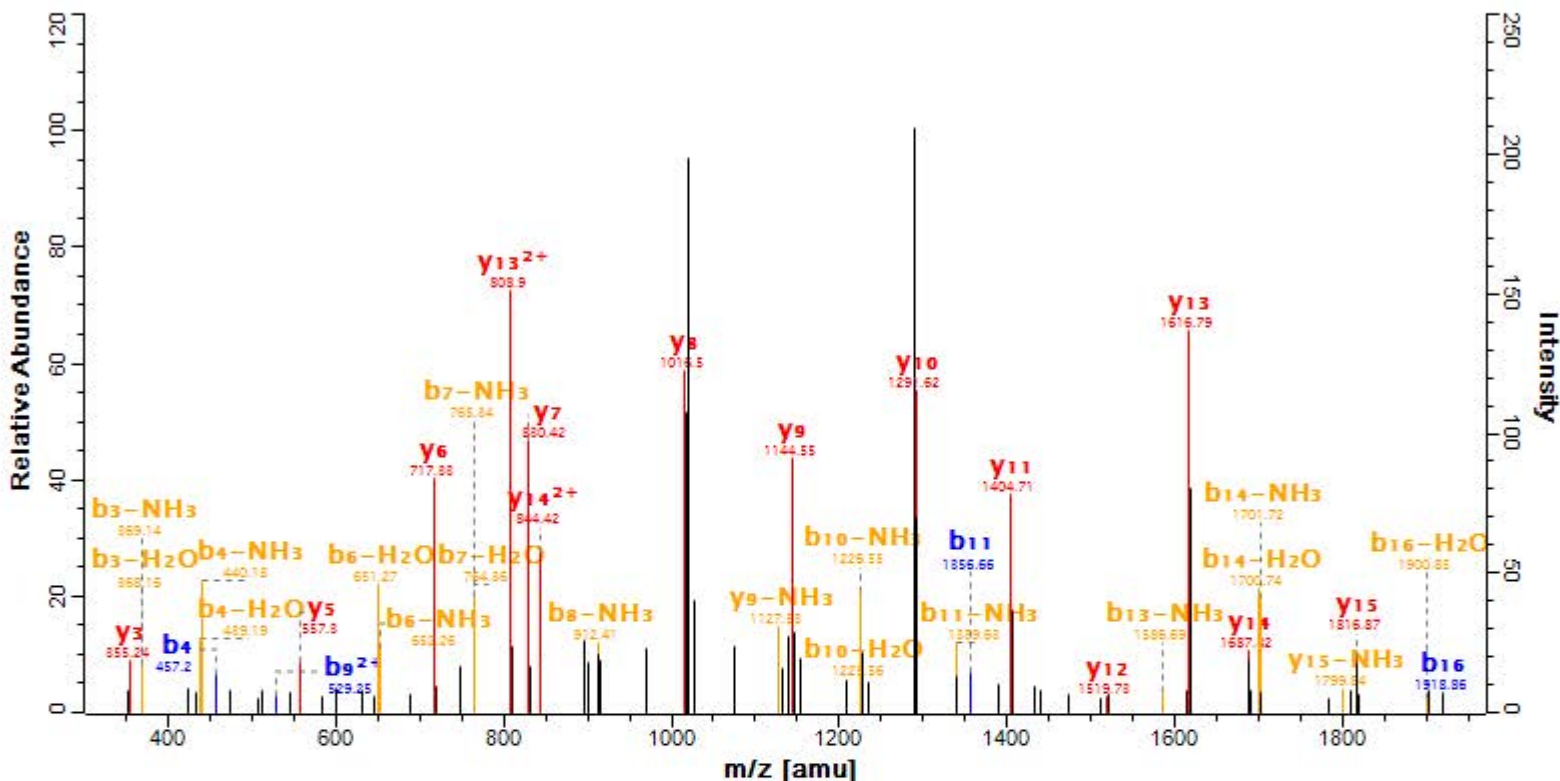

#### precursor information

|                   |                 |
|-------------------|-----------------|
| Mass:             | 2063.96242      |
| m/z:              | 1032.98849      |
| Charge:           | 2+              |
| Retentiontime:    | 67.277984619140 |
| Score:            | 127.8341        |
| Mass Error [ppm]: | 0.085224        |
| PEP:              | 3.6389E-12      |
| Precursor Type:   | MULTI           |

#### general information

|                       |             |
|-----------------------|-------------|
| Annotation:           | 14 of 17    |
| AminoAcids Coverage:  | 82 %        |
| Intensity Coverage:   | 48 %        |
| Peak Coverage:        | 37 %        |
| Protein Localisation: | 124 ... 140 |

| b <sup>2+</sup> ion |        | b ion    |        | seq |   |    | y ion    |         | y <sup>2+</sup> ion |         |
|---------------------|--------|----------|--------|-----|---|----|----------|---------|---------------------|---------|
| Δ dalton            | mass   | Δ dalton | mass   |     |   |    | Δ dalton | mass    | Δ dalton            | mass    |
|                     | 129.07 |          | 129.07 | 1   | Q | 16 |          |         |                     |         |
|                     | 257.12 |          | 257.12 | 2   | Q | 15 | 1944.9   |         | 1944.9              |         |
|                     | 386.17 |          | 386.17 | 3   | E | 14 | 1816.9   | -0.086  | 1816.9              |         |
|                     | 457.2  | +0.1042  | 457.2  | 4   | A | 13 | 1687.8   | -0.156  | 844.42              | +0.3365 |
|                     | 554.26 |          | 554.26 | 5   | P | 12 | 1616.8   | +0.0554 | 808.9               | +0.2351 |
|                     | 669.28 |          | 669.28 | 6   | D | 11 | 1519.7   | -0.149  | 1519.7              |         |
|                     | 782.37 |          | 782.37 | 7   | L | 10 | 1404.7   | +0.0311 | 1404.7              |         |
|                     | 929.44 |          | 929.44 | 8   | F | 9  | 1291.6   | -0.032  | 1291.6              |         |
| +0.0607             | 529.25 |          | 1057.5 | 9   | Q | 8  | 1144.6   | +0.0365 | 1144.6              |         |
|                     | 1243.6 |          | 1243.6 | 10  | W | 7  | 1016.5   | -0.025  | 1016.5              |         |
|                     | 1356.7 | +0.0463  | 1356.7 | 11  | L | 6  | 830.42   | +0.0089 | 830.42              |         |
|                     | 1516.7 |          | 1516.7 | 12  | C | 5  | 717.33   | +0.0356 | 717.33              |         |
|                     | 1603.7 |          | 1603.7 | 13  | S | 4  | 557.3    | +0.017  | 557.3               |         |
|                     | 1718.7 |          | 1718.7 | 14  | D | 3  | 470.27   |         | 470.27              |         |
|                     | 1805.8 |          | 1805.8 | 15  | S | 2  | 355.24   | +0.0512 | 355.24              |         |
|                     | 1918.9 | -0.089   | 1918.9 | 16  | L | 1  | 268.21   |         | 268.21              |         |
|                     |        |          |        | 17  | K | 0  | 155.13   |         | 155.13              |         |

Scan number 1221 Raw file LNCAP\_Silac\_23F10\_set1\_03  
 Method ITMS; CID Pepti... 106.2

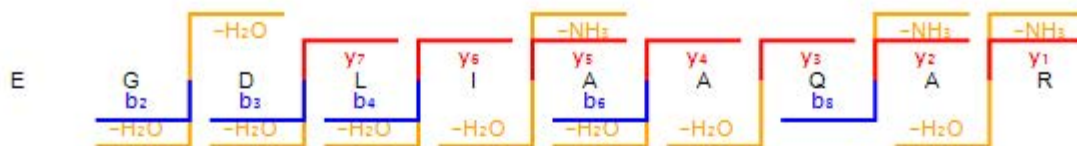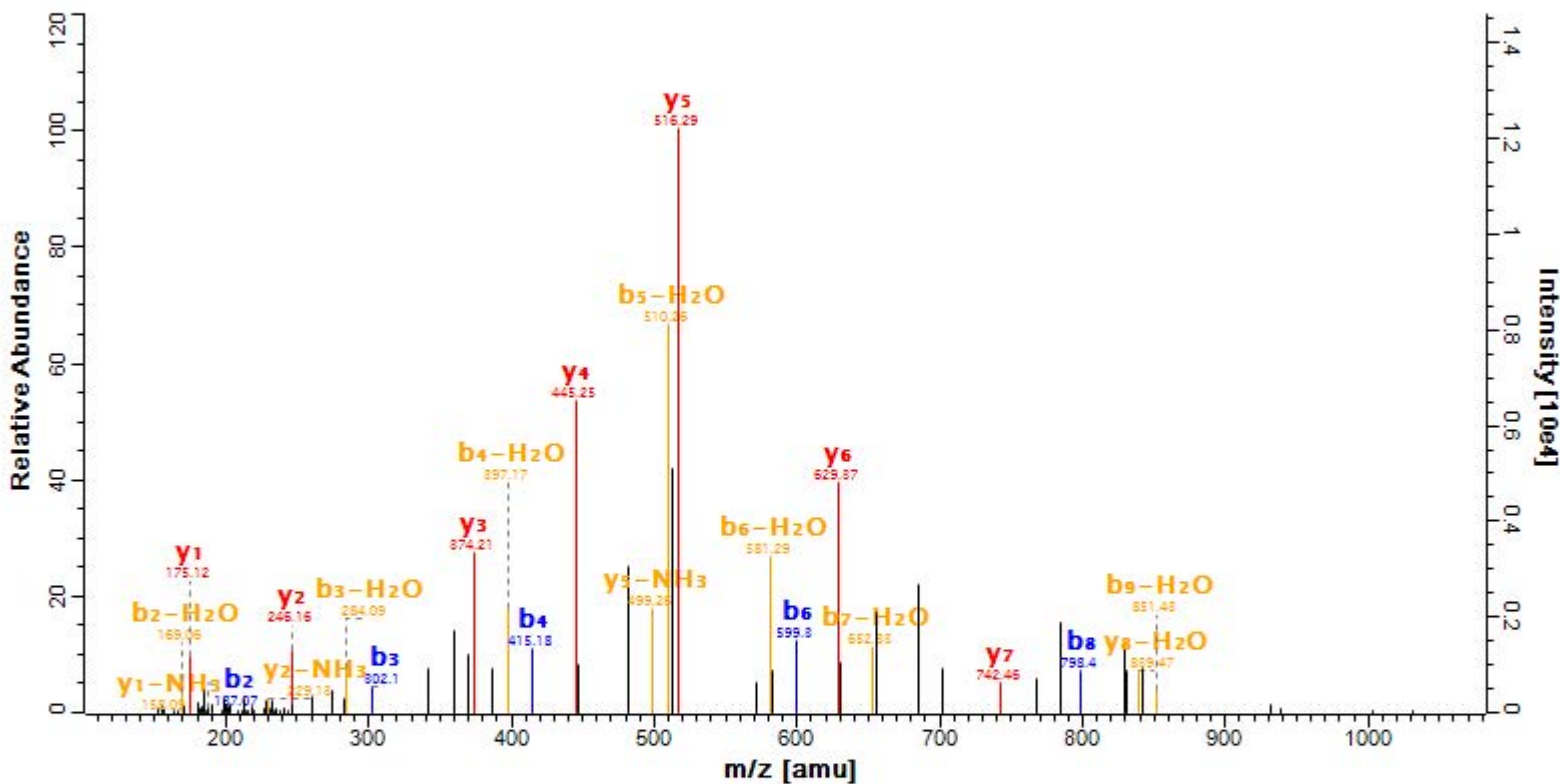

#### precursor information

|                   |                 |
|-------------------|-----------------|
| Mass:             | 1042.5409       |
| m/z:              | 522.27773       |
| Charge:           | 2+              |
| Retentiontime:    | 11.921402931213 |
| Score:            | 106.1988        |
| Mass Error [ppm]: | 0.17154         |
| PEP:              | 0.00067025      |

#### g Precursor Type: ISO

|                       |             |
|-----------------------|-------------|
| Annotation:           | 9 of 10     |
| AminoAcids Coverage:  | 90 %        |
| Intensity Coverage:   | 59 %        |
| Peak Coverage:        | 23 %        |
| Protein Localisation: | 124 ... 133 |

| b ion      |               |     |   | y ion    |               |            |
|------------|---------------|-----|---|----------|---------------|------------|
| Δ dalton   | mass          | seq |   | Δ dalton | mass          |            |
|            | 130.049869563 | 1   | E | 9        |               |            |
| -0.1313156 | 187.071333286 | 2   | G | 8        | 914.505405772 |            |
| +0.0702417 | 302.098276318 | 3   | D | 7        | 857.483942049 |            |
| -0.0851113 | 415.182340299 | 4   | L | 6        | 742.456999017 | +0.1410234 |
|            | 528.266404279 | 5   | I | 5        | 629.372935036 | +0.0215352 |
| +0.0533545 | 599.303518067 | 6   | A | 4        | 516.288871056 | +0.0474937 |
|            | 670.340631855 | 7   | A | 3        | 445.251757268 | +0.0337652 |
| +0.0648409 | 798.399209366 | 8   | Q | 2        | 374.21464348  | +0.0412769 |
|            | 869.436323154 | 9   | A | 1        | 246.156065969 | +0.0753793 |
|            |               | 10  | R | 0        | 175.118952181 | +0.0297905 |

Scan number 12249 Raw file LNCAP\_Silac\_23F10\_set1\_03  
 Method ITMS; CID Pepti... 246.5

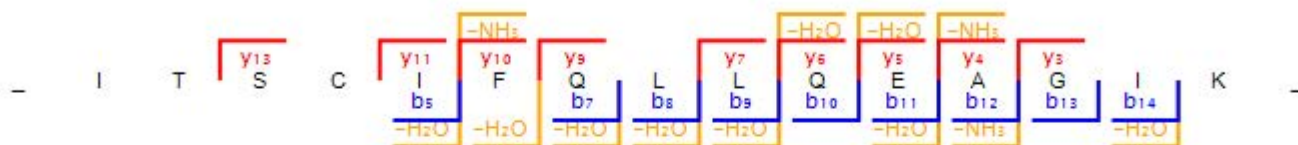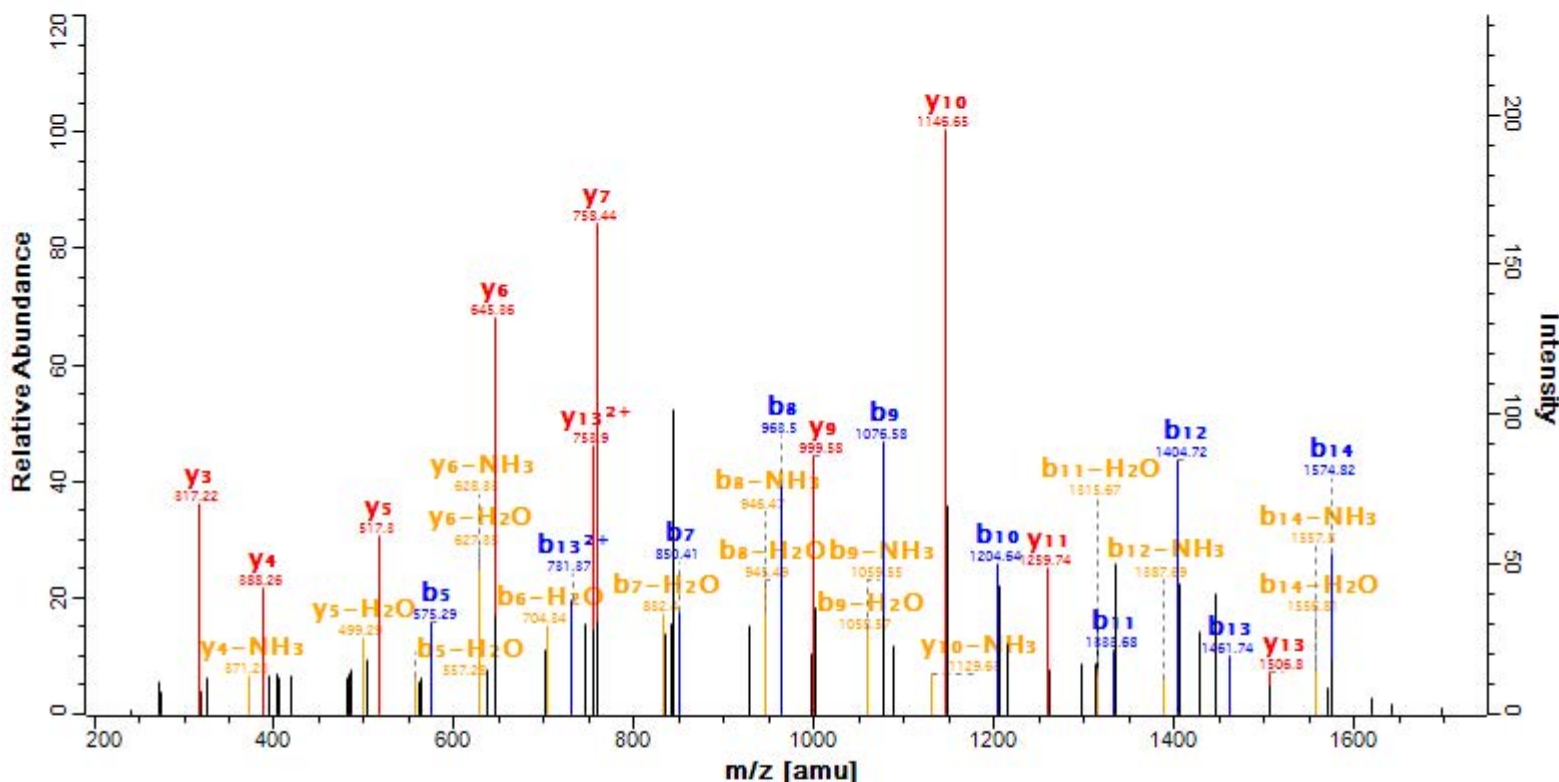

#### precursor information

|                   |                 |
|-------------------|-----------------|
| Mass:             | 1719.92353      |
| m/z:              | 860.96904       |
| Charge:           | 2+              |
| Retentiontime:    | 70.593521118164 |
| Score:            | 246.5004        |
| Mass Error [ppm]: | 0.34146         |
| PEP:              | 6.1525E-47      |
| Precursor Type:   | MULTI           |

#### general information

|                       |            |
|-----------------------|------------|
| Annotation:           | 11 of 15   |
| AminoAcids Coverage:  | 73 %       |
| Intensity Coverage:   | 60 %       |
| Peak Coverage:        | 41 %       |
| Protein Localisation: | 86 ... 100 |

| b <sup>2+</sup> ion |        | b ion    |        | seq |   |    | y ion    |         | y <sup>2+</sup> ion |        |
|---------------------|--------|----------|--------|-----|---|----|----------|---------|---------------------|--------|
| Δ dalton            | mass   | Δ dalton | mass   |     |   |    | Δ dalton | mass    | Δ dalton            | mass   |
|                     | 114.09 |          | 114.09 | 1   | I | 14 |          |         |                     |        |
|                     | 215.14 |          | 215.14 | 2   | T | 13 | 1607.8   |         | 1607.8              |        |
|                     | 302.17 |          | 302.17 | 3   | S | 12 | 1506.8   | -0.392  | 753.9               | -0.068 |
|                     | 462.2  |          | 462.2  | 4   | C | 11 | 1419.8   |         | 1419.8              |        |
|                     | 575.29 | +0.0198  | 575.29 | 5   | I | 10 | 1259.7   | +0.0556 | 1259.7              |        |
|                     | 722.35 |          | 722.35 | 6   | F | 9  | 1146.7   | -0.122  | 1146.7              |        |
|                     | 850.41 | -0.131   | 850.41 | 7   | Q | 8  | 999.58   | +0.0095 | 999.58              |        |
|                     | 963.5  | +0.1121  | 963.5  | 8   | L | 7  | 871.52   |         | 871.52              |        |
|                     | 1076.6 | -0.016   | 1076.6 | 9   | L | 6  | 758.44   | +0.0224 | 758.44              |        |
|                     | 1204.6 | -0.247   | 1204.6 | 10  | Q | 5  | 645.36   | +0.069  | 645.36              |        |
|                     | 1333.7 | -0.392   | 1333.7 | 11  | E | 4  | 517.3    | +0.0749 | 517.3               |        |
|                     | 1404.7 | -0.095   | 1404.7 | 12  | A | 3  | 388.26   | +0.0398 | 388.26              |        |
| -0.206              | 731.37 | -0.023   | 1461.7 | 13  | G | 2  | 317.22   | +0.0194 | 317.22              |        |
|                     | 1574.8 | +0.0617  | 1574.8 | 14  | I | 1  | 260.2    |         | 260.2               |        |
|                     |        |          |        | 15  | K | 0  | 147.11   |         | 147.11              |        |

Scan number 12288 Raw file LNCAP\_Silac\_23F10\_set1\_03  
 Method ITMS; CID Pepti... 150.21

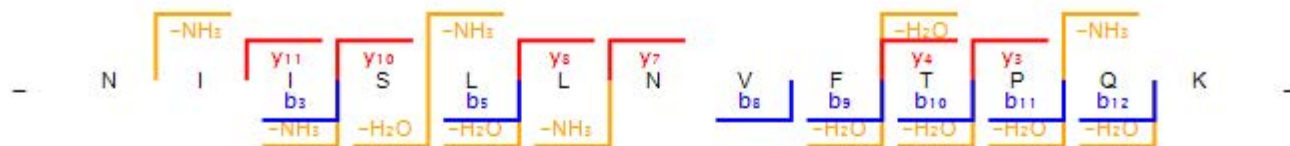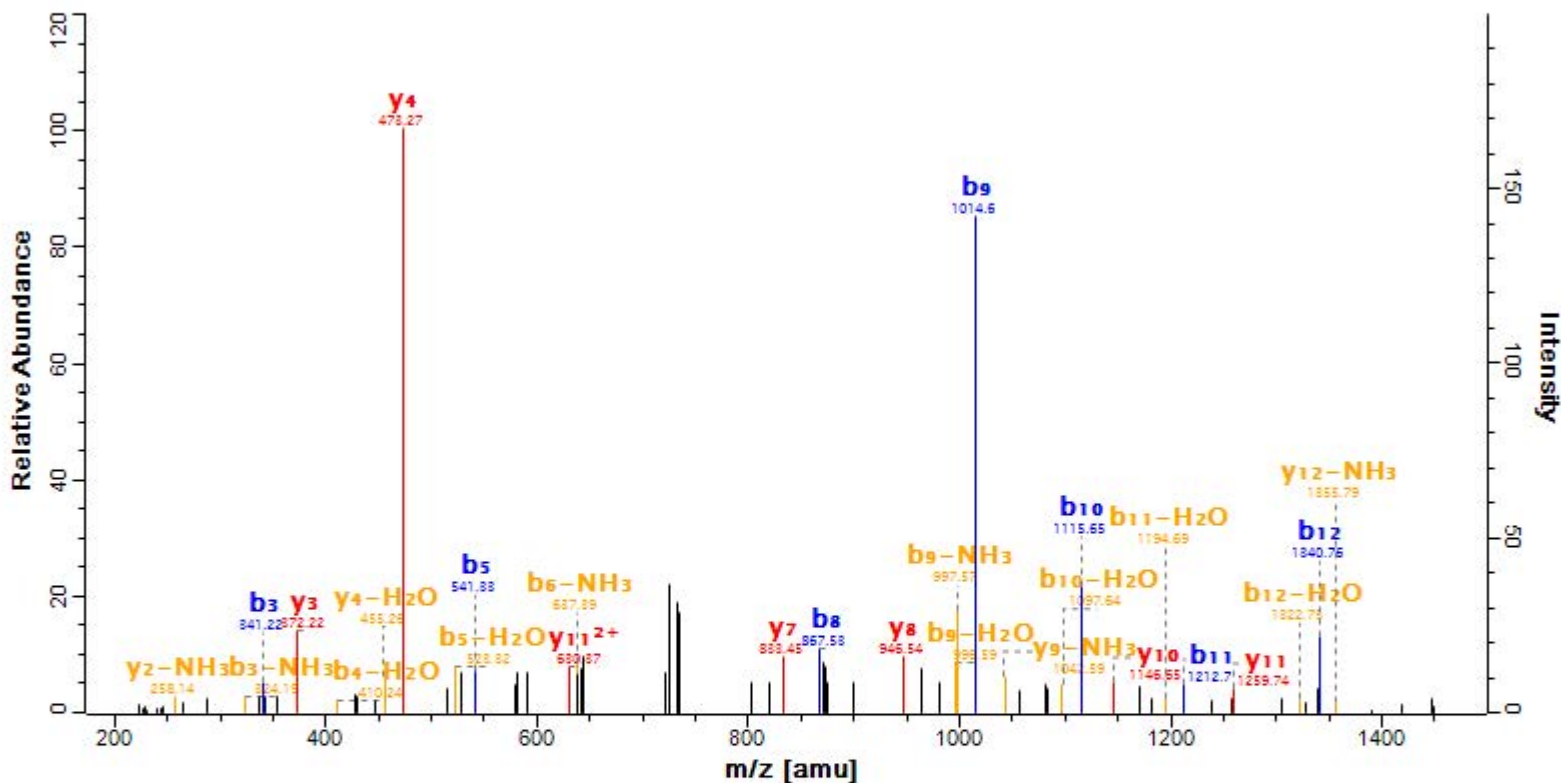

#### precursor information

|                   |                 |
|-------------------|-----------------|
| Mass:             | 1485.85656      |
| m/z:              | 743.93556       |
| Charge:           | 2+              |
| Retentiontime:    | 70.967971801757 |
| Score:            | 150.2146        |
| Mass Error [ppm]: | 0.70666         |
| PEP:              | 1.4048E-07      |
| Precursor Type:   | MULTI           |

#### general information

|                       |             |
|-----------------------|-------------|
| Annotation:           | 11 of 13    |
| AminoAcids Coverage:  | 85 %        |
| Intensity Coverage:   | 59 %        |
| Peak Coverage:        | 34 %        |
| Protein Localisation: | 122 ... 134 |

| b ion     |          |    |     |    | y ion    |           | y <sup>2+</sup> ion |          |
|-----------|----------|----|-----|----|----------|-----------|---------------------|----------|
| Δ dalton  | mass     |    | seq |    | Δ dalton | mass      | Δ dalton            | mass     |
|           | 115.0502 | 1  | N   | 12 |          |           |                     |          |
|           | 228.1343 | 2  | I   | 11 | 1372.82  |           | 1372.82             |          |
| +0.029959 | 341.2183 | 3  | I   | 10 | 1259.736 | -0.12838  | 630.3715            | -0.20265 |
|           | 428.2504 | 4  | S   | 9  | 1146.652 | -0.01416  | 1146.652            |          |
| -0.09999  | 541.3344 | 5  | L   | 8  | 1059.62  |           | 1059.62             |          |
|           | 654.4185 | 6  | L   | 7  | 946.5356 | -0.1048   | 946.5356            |          |
|           | 768.4614 | 7  | N   | 6  | 833.4516 | +0.034077 | 833.4516            |          |
| +0.061418 | 867.5298 | 8  | V   | 5  | 719.4087 |           | 719.4087            |          |
| +0.001061 | 1014.598 | 9  | F   | 4  | 620.3402 |           | 620.3402            |          |
| +0.053419 | 1115.646 | 10 | T   | 3  | 473.2718 | +0.102077 | 473.2718            |          |
| -0.10079  | 1212.699 | 11 | P   | 2  | 372.2241 | +0.178015 | 372.2241            |          |
| -0.08258  | 1340.757 | 12 | Q   | 1  | 275.1714 |           | 275.1714            |          |
|           |          | 13 | K   | 0  | 147.1128 |           | 147.1128            |          |



Scan number 12328 Raw file LNCAP\_Silac\_23F10\_set1\_03  
 Method ITMS; CID Pepti... 132.59

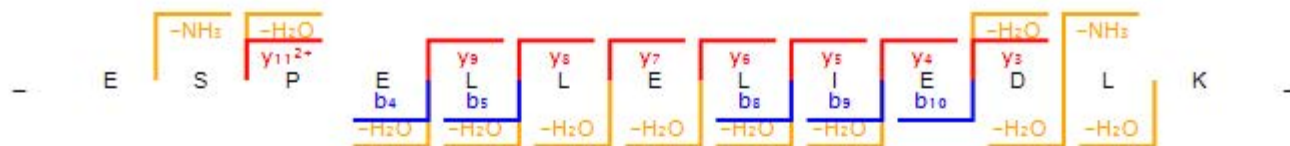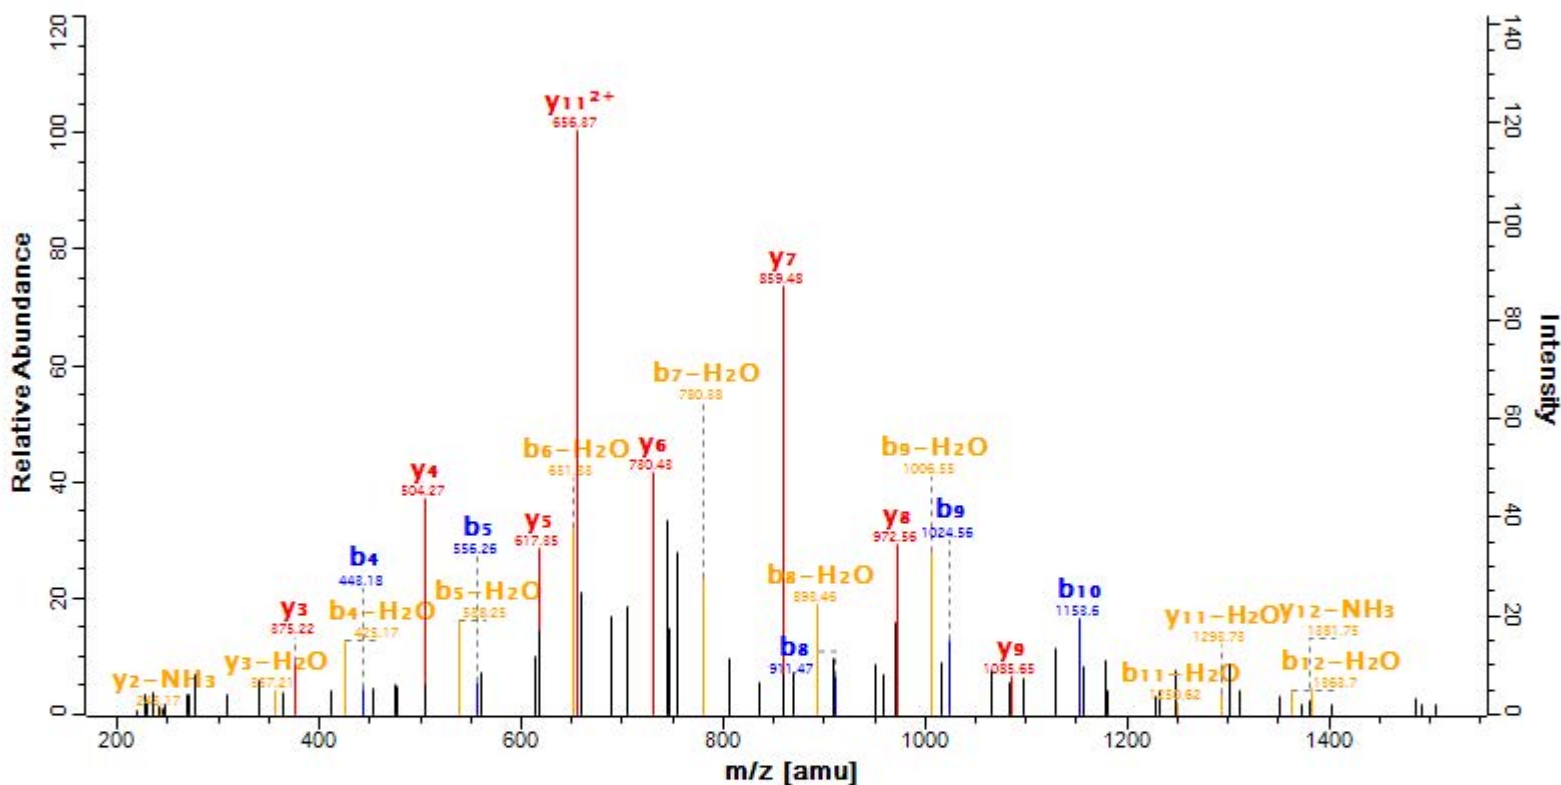

#### precursor information

|                   |                 |
|-------------------|-----------------|
| Mass:             | 1526.80815      |
| m/z:              | 764.41135       |
| Charge:           | 2+              |
| Retentiontime:    | 71.360855102539 |
| Score:            | 132.5867        |
| Mass Error [ppm]: | 0.12575         |
| PEP:              | 1.1899E-06      |
| Precursor Type:   | MULTI           |

#### general information

|                       |             |
|-----------------------|-------------|
| Annotation:           | 11 of 13    |
| AminoAcids Coverage:  | 85 %        |
| Intensity Coverage:   | 56 %        |
| Peak Coverage:        | 30 %        |
| Protein Localisation: | 222 ... 234 |

| b ion     |          |    |     |    | y ion    |           | y <sup>2+</sup> ion |           |
|-----------|----------|----|-----|----|----------|-----------|---------------------|-----------|
| Δ dalton  | mass     |    | seq |    | Δ dalton | mass      | Δ dalton            | mass      |
|           | 130.0499 | 1  | E   | 12 |          |           |                     |           |
|           | 217.0819 | 2  | S   | 11 | 1398.773 |           | 1398.773            |           |
|           | 314.1347 | 3  | P   | 10 | 1311.741 |           | 656.3739            | +0.022541 |
| +0.39263  | 443.1773 | 4  | E   | 9  | 1214.688 |           | 1214.688            |           |
| +0.040256 | 556.2613 | 5  | L   | 8  | 1085.645 | -0.35302  | 1085.645            |           |
|           | 669.3454 | 6  | L   | 7  | 972.5612 | -0.0875   | 972.5612            |           |
|           | 798.388  | 7  | E   | 6  | 859.4771 | +0.053819 | 859.4771            |           |
| -0.21978  | 911.472  | 8  | L   | 5  | 730.4345 | +0.069313 | 730.4345            |           |
| +0.15874  | 1024.556 | 9  | I   | 4  | 617.3505 | +0.06512  | 617.3505            |           |
| -0.10016  | 1153.599 | 10 | E   | 3  | 504.2664 | -0.05455  | 504.2664            |           |
|           | 1268.626 | 11 | D   | 2  | 375.2238 | -0.0144   | 375.2238            |           |
|           | 1381.71  | 12 | L   | 1  | 260.1969 |           | 260.1969            |           |
|           |          | 13 | K   | 0  | 147.1128 |           | 147.1128            |           |

Scan number 1294 Raw file LNCAP\_Silac\_23F10\_set1\_03  
 Method ITMS: CID Pepti... 57.79

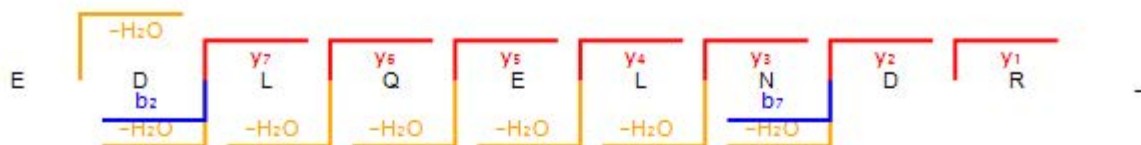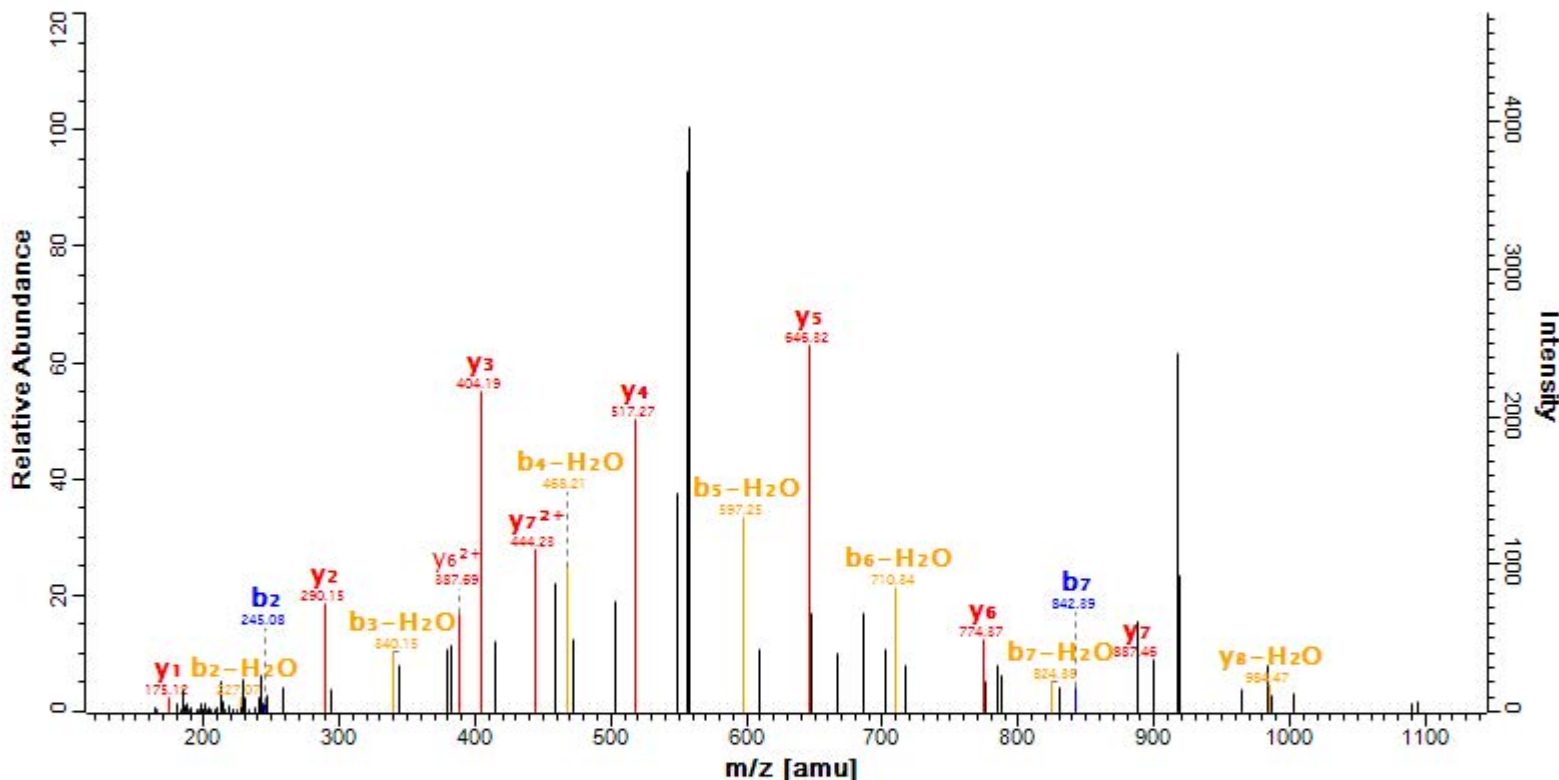

#### precursor information

|                       |                 |
|-----------------------|-----------------|
| Mass:                 | 1130.52046      |
| m/z:                  | 566.2675        |
| Charge:               | 2+              |
| Retentiontime:        | 12.259155273437 |
| Score:                | 57.78501        |
| Mass Error [ppm]:     | 0.066209        |
| PEP:                  | 0.099382        |
| Precursor Type:       | ISO             |
| Annotation:           | 8 of 9          |
| AminoAcids Coverage:  | 89 %            |
| Intensity Coverage:   | 35 %            |
| Peak Coverage:        | 18 %            |
| Protein Localisation: | 33 ... 41       |

| b ion     |          |     |   | y ion    |          | y <sup>2+</sup> ion |          |
|-----------|----------|-----|---|----------|----------|---------------------|----------|
| Δ dalton  | mass     | seq |   | Δ dalton | mass     | Δ dalton            | mass     |
|           | 130.0499 | 1   | E | 8        |          |                     |          |
| +0.046921 | 245.0768 | 2   | D | 7        | 1002.485 | 1002.485            |          |
|           | 358.1609 | 3   | L | 6        | 887.4581 | +0.086251           | 444.2327 |
|           | 486.2195 | 4   | Q | 5        | 774.3741 | +0.067288           | 387.6907 |
|           | 615.262  | 5   | E | 4        | 646.3155 | +0.086864           | 646.3155 |
|           | 728.3461 | 6   | L | 3        | 517.2729 | +0.08716            | 517.2729 |
| +0.039611 | 842.389  | 7   | N | 2        | 404.1888 | +0.044942           | 404.1888 |
|           | 957.416  | 8   | D | 1        | 290.1459 | +0.042581           | 290.1459 |
|           |          | 9   | R | 0        | 175.119  | +0.033788           | 175.119  |

Scan number 1454 Raw file LNCAP\_Silac\_23F10\_set1\_03  
 Method ITMS; CID Pepti... 101.3

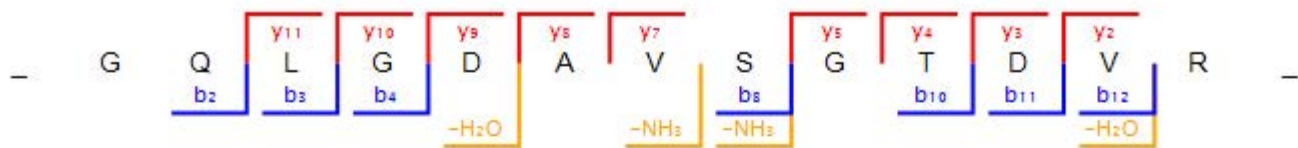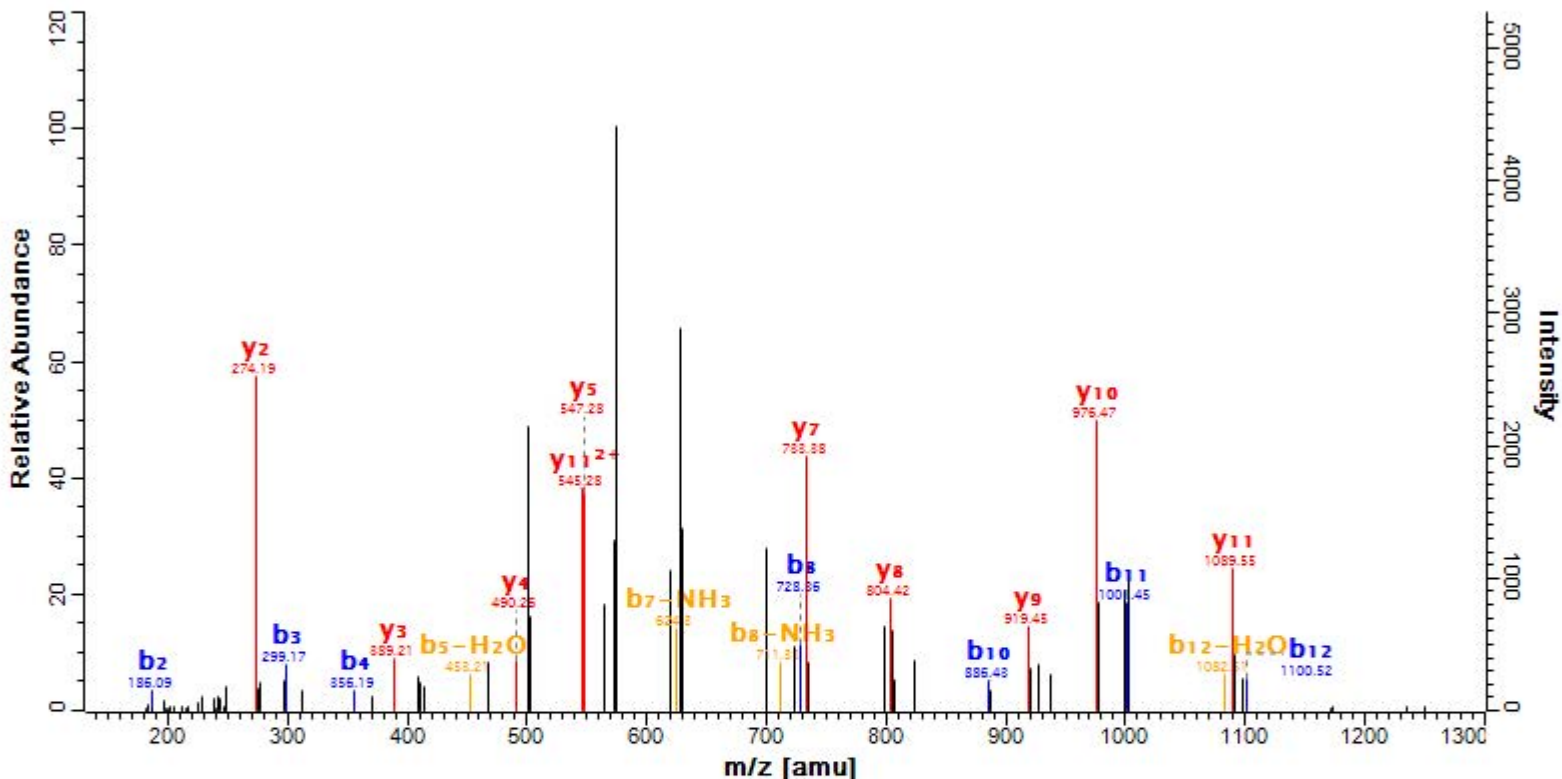

precursor information

|                   |                 |
|-------------------|-----------------|
| Mass:             | 1273.62709      |
| m/z:              | 637.82082       |
| Charge:           | 2+              |
| Retentiontime:    | 13.028048515319 |
| Score:            | 101.3038        |
| Mass Error [ppm]: | 0.66786         |
| PEP:              | 4.7983E-05      |
| Precursor Type:   | MULTI           |

general information

|                       |               |
|-----------------------|---------------|
| Annotation:           | 11 of 13      |
| AminoAcids Coverag    | 85 %          |
| Intensity Coverage:   | 37 %          |
| Peak Coverage:        | 25 %          |
| Protein Localisation: | 1047 ... 1059 |

| b ion     |          |    |     |    | y ion    |           | y <sup>2+</sup> ion |           |
|-----------|----------|----|-----|----|----------|-----------|---------------------|-----------|
| Δ dalton  | mass     |    | seq |    | Δ dalton | mass      | Δ dalton            | mass      |
|           | 58.02874 | 1  | G   | 12 |          |           |                     |           |
| +0.20057  | 186.0873 | 2  | Q   | 11 | 1217.612 |           | 1217.612            |           |
| +0.067266 | 299.1714 | 3  | L   | 10 | 1089.553 | -0.03859  | 545.2804            | +0.281024 |
| +0.160426 | 356.1928 | 4  | G   | 9  | 976.4694 | +0.055    | 976.4694            |           |
|           | 471.2198 | 5  | D   | 8  | 919.448  | -0.00868  | 919.448             |           |
|           | 542.2569 | 6  | A   | 7  | 804.421  | +0.027052 | 804.421             |           |
|           | 641.3253 | 7  | V   | 6  | 733.3839 | +0.076861 | 733.3839            |           |
| +0.107438 | 728.3573 | 8  | S   | 5  | 634.3155 |           | 634.3155            |           |
|           | 785.3788 | 9  | G   | 4  | 547.2835 | +0.053035 | 547.2835            |           |
| -0.11014  | 886.4265 | 10 | T   | 3  | 490.262  | +0.213293 | 490.262             |           |
| -0.16144  | 1001.453 | 11 | D   | 2  | 389.2143 | +0.108994 | 389.2143            |           |
| +0.047614 | 1100.522 | 12 | V   | 1  | 274.1874 | +0.100415 | 274.1874            |           |
|           |          | 13 | R   | 0  | 175.119  |           | 175.119             |           |

Scan number 1473 Raw file LNCAP\_Silac\_23F10\_set1\_03  
 Method ITMS; CID Pepti... 90.15

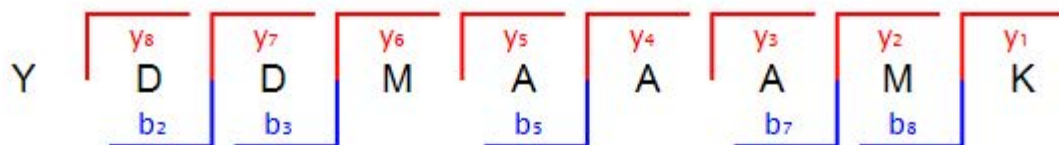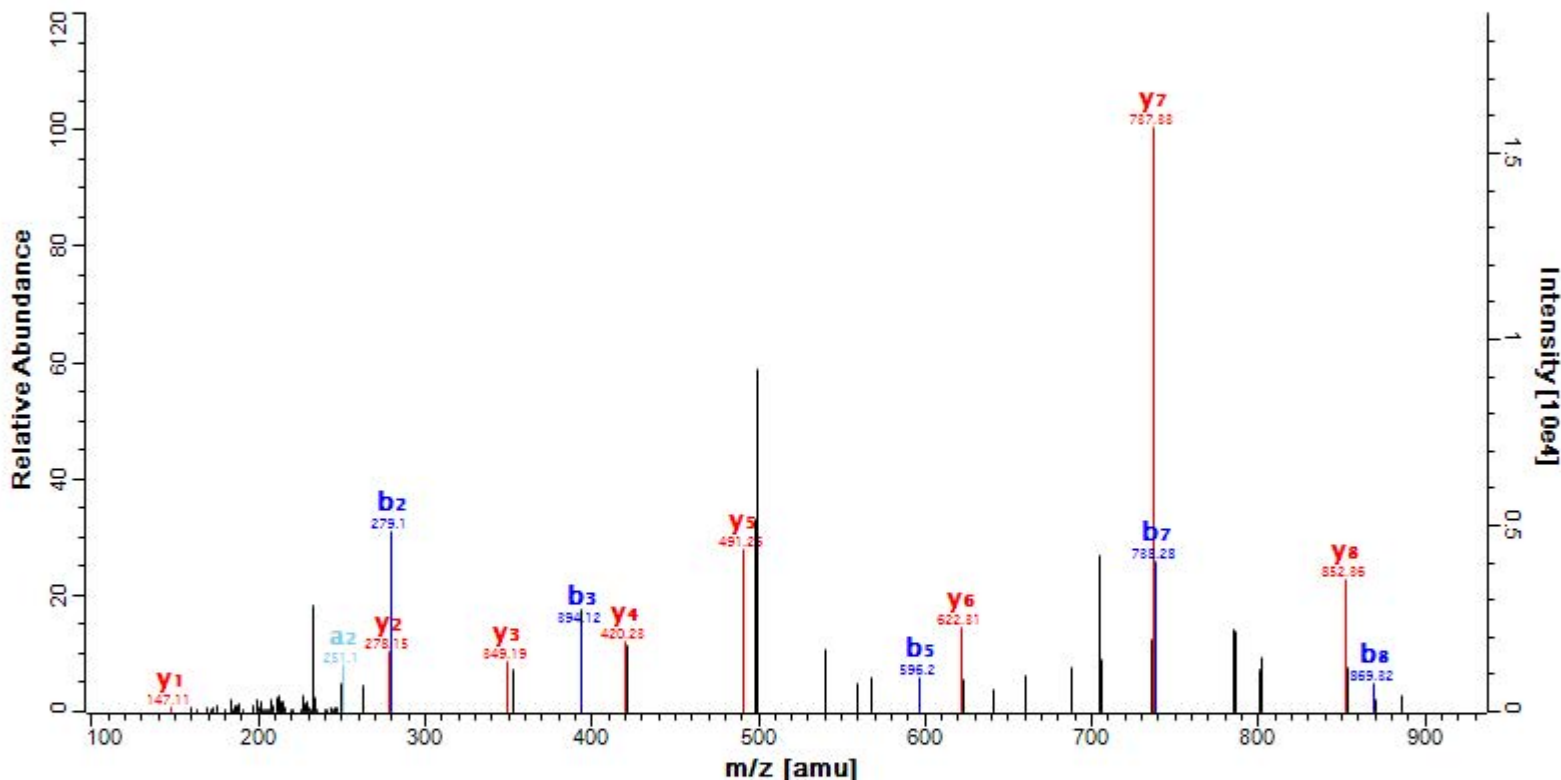

#### precursor information

|                       |                 |
|-----------------------|-----------------|
| Mass:                 | 1014.41493      |
| m/z:                  | 508.21474       |
| Charge:               | 2+              |
| Retention time:       | 13.118606567382 |
| Score:                | 90.15039        |
| Mass Error [ppm]:     | -0.1251         |
| PEP:                  | 0.0052535       |
| Precursor Type:       | MULTI           |
| Annotation:           | 8 of 9          |
| AminoAcids Coverage:  | 89 %            |
| Intensity Coverage:   | 40 %            |
| Peak Coverage:        | 15 %            |
| Protein Localisation: | 20 ... 28       |

| a ion    |          | b ion     |          | seq |   | y ion    |                    |
|----------|----------|-----------|----------|-----|---|----------|--------------------|
| Δ dalton | mass     | Δ dalton  | mass     |     |   | Δ dalton | mass               |
|          | 136.0757 |           | 164.0706 | 1   | Y | 8        |                    |
| +0.02287 | 251.1026 | +0.017259 | 279.0975 | 2   | D | 7        | 852.359 +0.074776  |
|          | 366.1296 | +0.157705 | 394.1245 | 3   | D | 6        | 737.3321 +0.113743 |
|          | 497.1701 |           | 525.165  | 4   | M | 5        | 622.3051 +0.082397 |
|          | 568.2072 | +0.139952 | 596.2021 | 5   | A | 4        | 491.2646 +0.082935 |
|          | 639.2443 |           | 667.2392 | 6   | A | 3        | 420.2275 +0.062736 |
|          | 710.2814 | +0.102955 | 738.2763 | 7   | A | 2        | 349.1904 +0.085049 |
|          | 841.3219 | -0.06851  | 869.3168 | 8   | M | 1        | 278.1533 +0.109223 |
|          |          |           |          | 9   | K | 0        | 147.1128 -0.08158  |

Scan number 1606 Raw file LNCAP\_Silac\_23F10\_set1\_03  
 Method ITMS; CID Pepti... 76.36

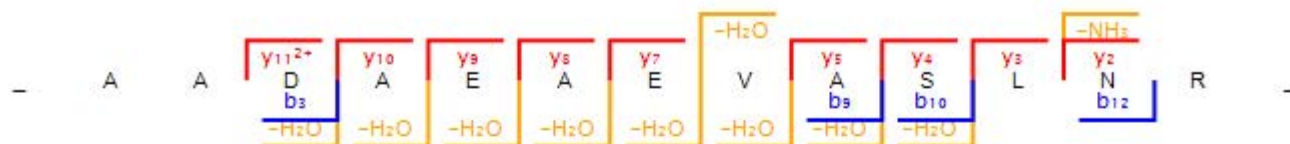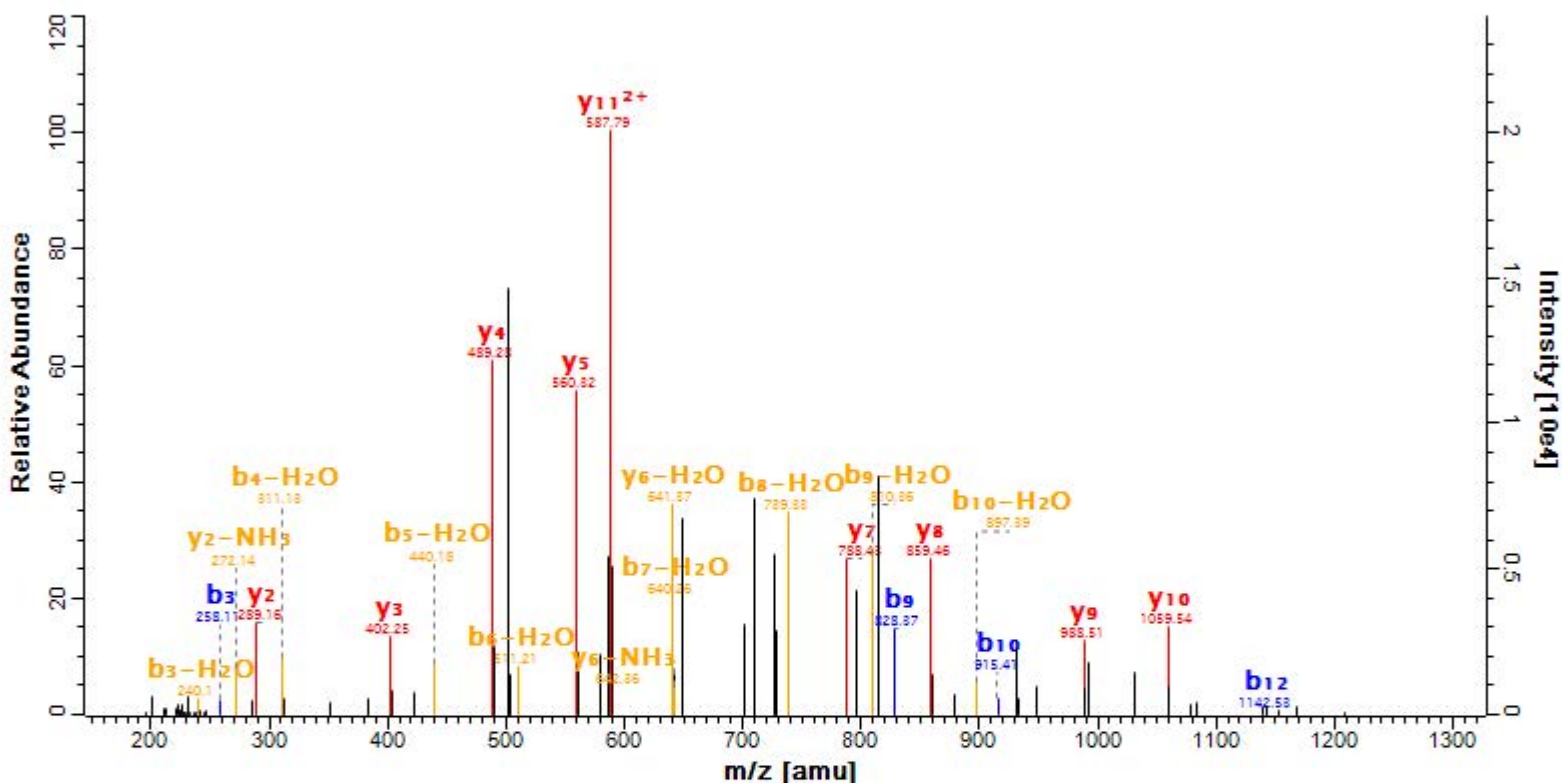

**precursor information**

|                   |                 |
|-------------------|-----------------|
| Mass:             | 1315.63745      |
| m/z:              | 658.826         |
| Charge:           | 2+              |
| Retentiontime:    | 13.738862037658 |
| Score:            | 76.35718        |
| Mass Error [ppm]: | 0.48764         |
| PEP:              | 0.0013111       |
| Precursor Type:   | MULTI           |

**general information**

|                       |           |
|-----------------------|-----------|
| Annotation:           | 10 of 13  |
| AminoAcids Coverage:  | 77 %      |
| Intensity Coverage:   | 51 %      |
| Peak Coverage:        | 28 %      |
| Protein Localisation: | 79 ... 91 |

| b ion     |          |     |   | y ion    |          | y <sup>2+</sup> ion |           |
|-----------|----------|-----|---|----------|----------|---------------------|-----------|
| Δ dalton  | mass     | seq |   | Δ dalton | mass     | Δ dalton            | mass      |
|           | 72.04439 | 1   | A | 12       |          |                     |           |
|           | 143.0815 | 2   | A | 11       | 1245.607 |                     | 1245.607  |
| -0.00566  | 258.1084 | 3   | D | 10       | 1174.57  | 587.7886            | +0.485848 |
|           | 329.1456 | 4   | A | 9        | 1059.543 | -0.02827            | 1059.543  |
|           | 458.1882 | 5   | E | 8        | 988.5058 | -0.08832            | 988.5058  |
|           | 529.2253 | 6   | A | 7        | 859.4632 | -0.00886            | 859.4632  |
|           | 658.2679 | 7   | E | 6        | 788.4261 | -0.00996            | 788.4261  |
|           | 757.3363 | 8   | V | 5        | 659.3835 |                     | 659.3835  |
| -0.06071  | 828.3734 | 9   | A | 4        | 560.3151 | +0.026406           | 560.3151  |
| +0.069498 | 915.4054 | 10  | S | 3        | 489.278  | +0.034833           | 489.278   |
|           | 1028.489 | 11  | L | 2        | 402.2459 | +0.161832           | 402.2459  |
| +0.053651 | 1142.532 | 12  | N | 1        | 289.1619 | +0.085801           | 289.1619  |
|           |          | 13  | R | 0        | 175.119  |                     | 175.119   |

Scan number 1789 Raw file LNCAP\_Silac\_23F10\_set1\_03  
 Method ITMS: CID Pepti... 96.89

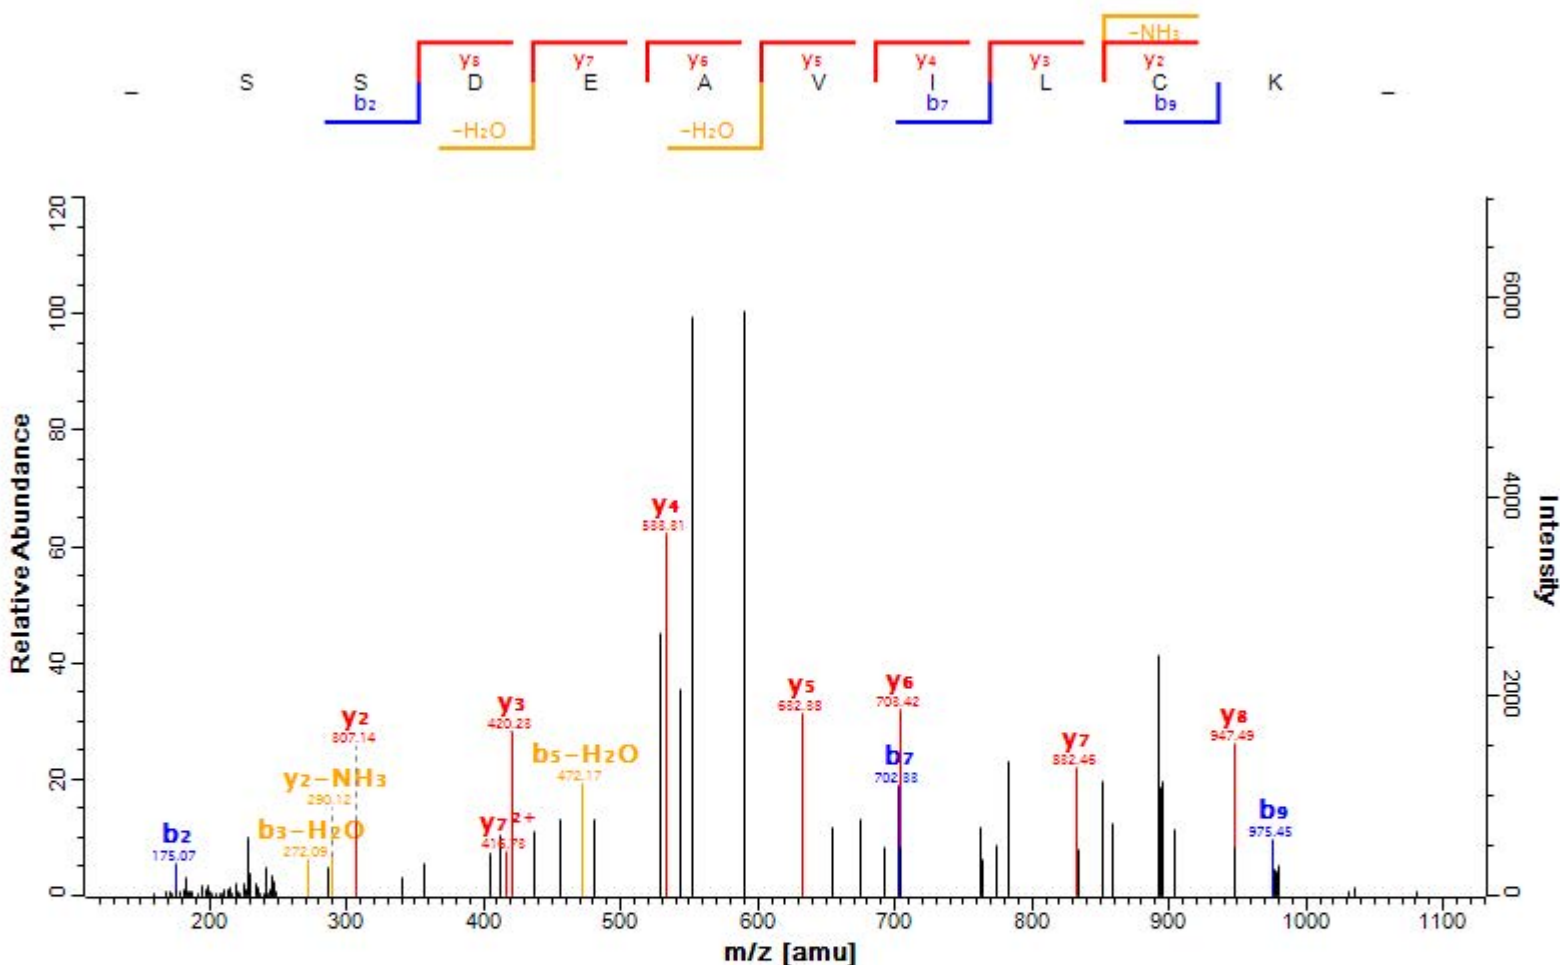

#### precursor information

|                   |                 |
|-------------------|-----------------|
| Mass:             | 1120.54274      |
| m/z:              | 561.27864       |
| Charge:           | 2+              |
| Retentiontime:    | 14.605818748474 |
| Score:            | 96.88979        |
| Mass Error [ppm]: | -0.61368        |
| PEP:              | 0.0014102       |
| Precursor Type:   | MULTI           |

|                       |             |
|-----------------------|-------------|
| Annotation:           | 8 of 10     |
| AminoAcids Coverage:  | 80 %        |
| Intensity Coverage:   | 30 %        |
| Peak Coverage:        | 14 %        |
| Protein Localisation: | 106 ... 115 |

| b ion     |          |     |   | y ion    |          | y <sup>2+</sup> ion |          |          |
|-----------|----------|-----|---|----------|----------|---------------------|----------|----------|
| Δ dalton  | mass     | seq |   | Δ dalton | mass     | Δ dalton            | mass     |          |
|           | 88.0393  | 1   | S | 9        |          |                     |          |          |
| -0.06601  | 175.0713 | 2   | S | 8        | 1034.519 |                     | 1034.519 |          |
|           | 290.0983 | 3   | D | 7        | 947.4866 | +0.042103           | 947.4866 |          |
|           | 419.1409 | 4   | E | 6        | 832.4597 | -0.01482            | 416.7335 | -0.44394 |
|           | 490.178  | 5   | A | 5        | 703.4171 | +0.018561           | 703.4171 |          |
|           | 589.2464 | 6   | V | 4        | 632.38   | +0.08546            | 632.38   |          |
| +0.069014 | 702.3305 | 7   | I | 3        | 533.3116 | +0.042363           | 533.3116 |          |
|           | 815.4145 | 8   | L | 2        | 420.2275 | +0.034019           | 420.2275 |          |
| +0.005327 | 975.4452 | 9   | C | 1        | 307.1435 | -0.03133            | 307.1435 |          |
|           |          | 10  | K | 0        | 147.1128 |                     | 147.1128 |          |

Scan number 2011 Raw file LNCAP\_Silac\_23F10\_set1\_03  
 Method ITMS; CID Pepti... 222.25

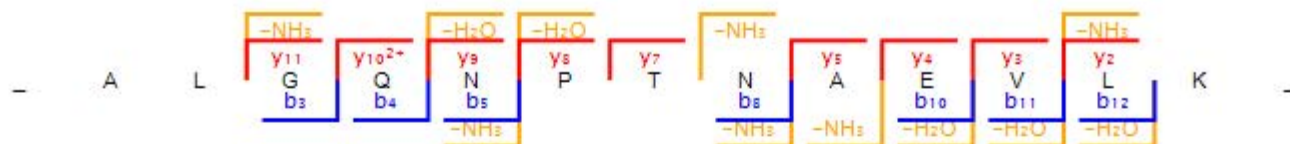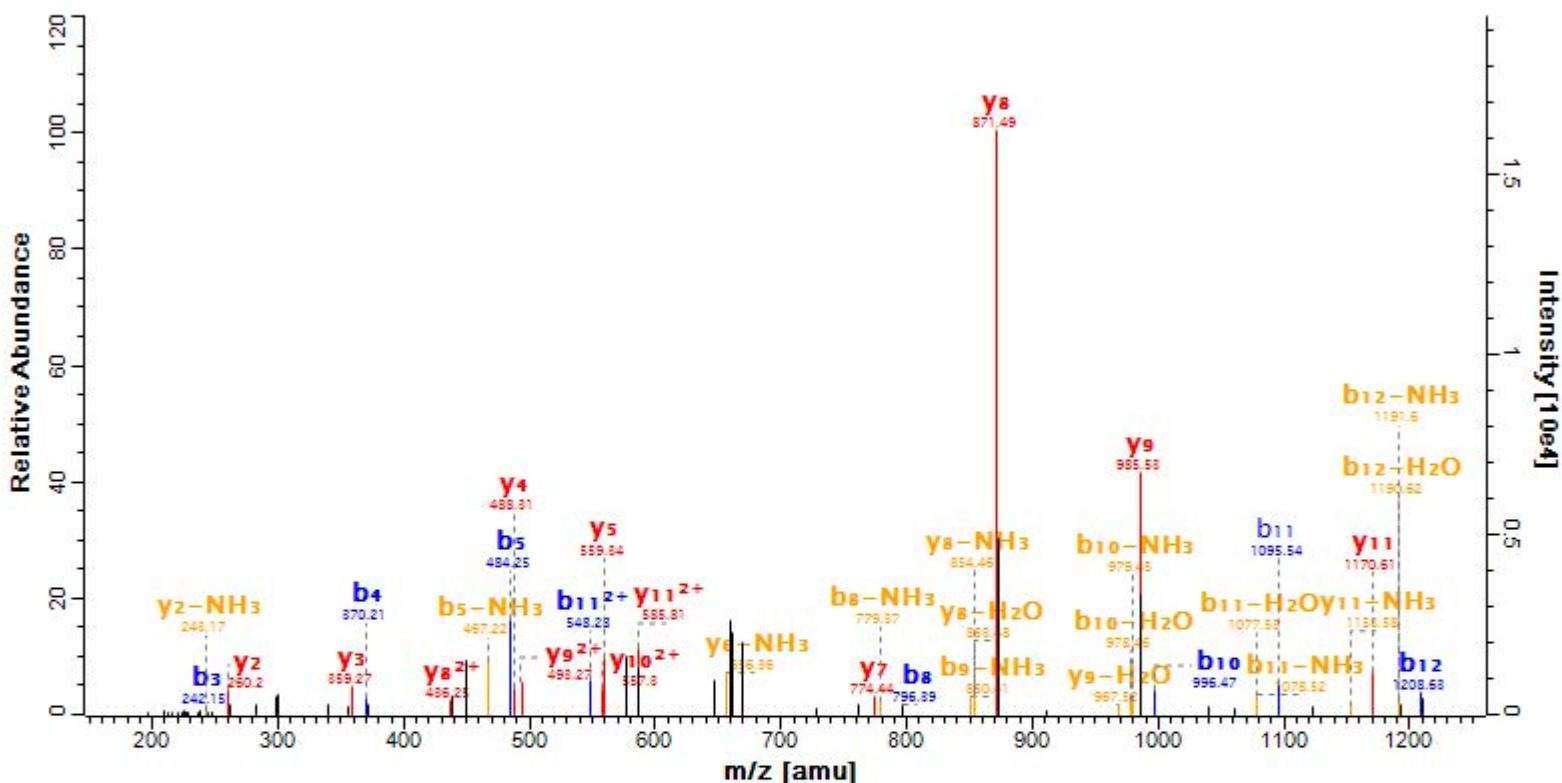

**precursor information**

|                   |                 |
|-------------------|-----------------|
| Mass:             | 1353.72453      |
| m/z:              | 677.86954       |
| Charge:           | 2+              |
| Retentiontime:    | 15.658533096313 |
| Score:            | 222.254         |
| Mass Error [ppm]: | -0.51423        |
| PEP:              | 1.7539E-28      |
| Precursor Type:   | MULTI           |

**general information**

|                       |             |
|-----------------------|-------------|
| Annotation:           | 10 of 13    |
| AminoAcids Coverage:  | 77 %        |
| Intensity Coverage:   | 61 %        |
| Peak Coverage:        | 40 %        |
| Protein Localisation: | 131 ... 143 |

| b <sup>2+</sup> ion |        | b ion    |        | seq |   |    | y ion    |         | y <sup>2+</sup> ion |         |
|---------------------|--------|----------|--------|-----|---|----|----------|---------|---------------------|---------|
| Δ dalton            | mass   | Δ dalton | mass   |     |   |    | Δ dalton | mass    | Δ dalton            | mass    |
|                     | 72.044 |          | 72.044 | 1   | A | 12 |          |         |                     |         |
|                     | 185.13 |          | 185.13 | 2   | L | 11 | 1283.7   |         | 1283.7              |         |
|                     | 242.15 | +0.0357  | 242.15 | 3   | G | 10 | 1170.6   | +0.0295 | 585.81              | -0.005  |
|                     | 370.21 | +0.0919  | 370.21 | 4   | Q | 9  | 1113.6   |         | 557.3               | +0.3801 |
|                     | 484.25 | +0.0696  | 484.25 | 5   | N | 8  | 985.53   | +0.0012 | 493.27              | +0.3362 |
|                     | 581.3  |          | 581.3  | 6   | P | 7  | 871.49   | +0.009  | 436.25              | +0.284  |
|                     | 682.35 |          | 682.35 | 7   | T | 6  | 774.44   | +0.0776 | 774.44              |         |
|                     | 796.39 | -0.047   | 796.39 | 8   | N | 5  | 673.39   |         | 673.39              |         |
|                     | 867.43 |          | 867.43 | 9   | A | 4  | 559.34   | +0.0117 | 559.34              |         |
|                     | 996.47 | +0.0214  | 996.47 | 10  | E | 3  | 488.31   | +0.0727 | 488.31              |         |
| +0.3469             | 548.28 | -0.064   | 1095.5 | 11  | V | 2  | 359.27   | +0.0942 | 359.27              |         |
|                     | 1208.6 | -0.055   | 1208.6 | 12  | L | 1  | 260.2    | +0.0735 | 260.2               |         |
|                     |        |          |        | 13  | K | 0  | 147.11   |         | 147.11              |         |

Scan number 2019 Raw file LNCAP\_Silac\_23F10\_set1\_03  
 Method ITMS; CID Pepti... 60.91

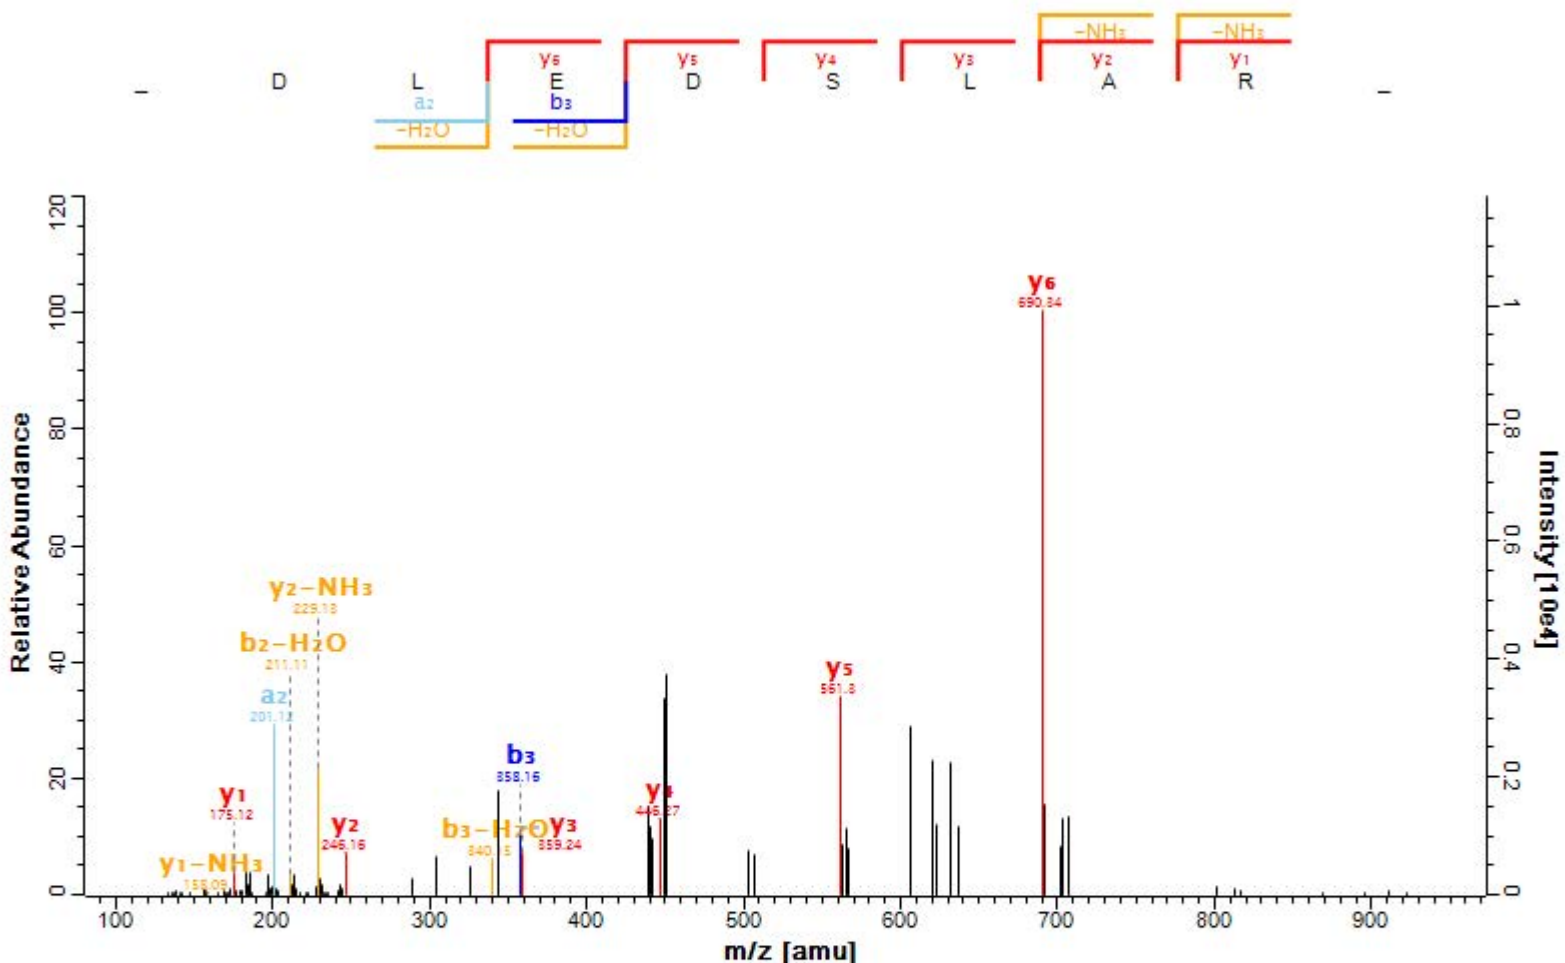

#### precursor information

|                       |                 |
|-----------------------|-----------------|
| Mass:                 | 917.44555       |
| m/z:                  | 459.73005       |
| Charge:               | 2+              |
| Retentiontime:        | 15.696802139282 |
| Score:                | 60.91026        |
| Mass Error [ppm]:     | 0.13488         |
| g PEP:                | 0.037119        |
| Annotation:           | 7 of 8          |
| AminoAcids Coverage:  | 88 %            |
| Intensity Coverage:   | 37 %            |
| Peak Coverage:        | 12 %            |
| Protein Localisation: | 322 ... 329     |

| a ion           |          | b ion           |          |     | y ion           |      |                    |
|-----------------|----------|-----------------|----------|-----|-----------------|------|--------------------|
| $\Delta$ dalton | mass     | $\Delta$ dalton | mass     | seq | $\Delta$ dalton | mass |                    |
|                 | 88.0393  |                 | 116.0342 | 1   | D               | 7    |                    |
| +0.072737       | 201.1234 |                 | 229.1183 | 2   | L               | 6    | 803.4258           |
|                 | 330.166  | -0.01784        | 358.1609 | 3   | E               | 5    | 690.3417 +0.006999 |
|                 | 445.1929 |                 | 473.1878 | 4   | D               | 4    | 561.2991 +0.046663 |
|                 | 532.2249 |                 | 560.2198 | 5   | S               | 3    | 446.2722 +0.180997 |
|                 | 645.309  |                 | 673.3039 | 6   | L               | 2    | 359.2401 +0.115156 |
|                 | 716.3461 |                 | 744.341  | 7   | A               | 1    | 246.1561 +0.080598 |
|                 |          |                 |          | 8   | R               | 0    | 175.119 -0.02374   |



Scan number 2033 Raw file LNCAP\_Silac\_23F10\_set1\_03  
 Method ITMS; CID Peptide 296.17

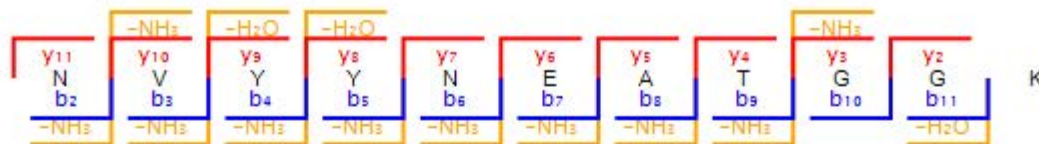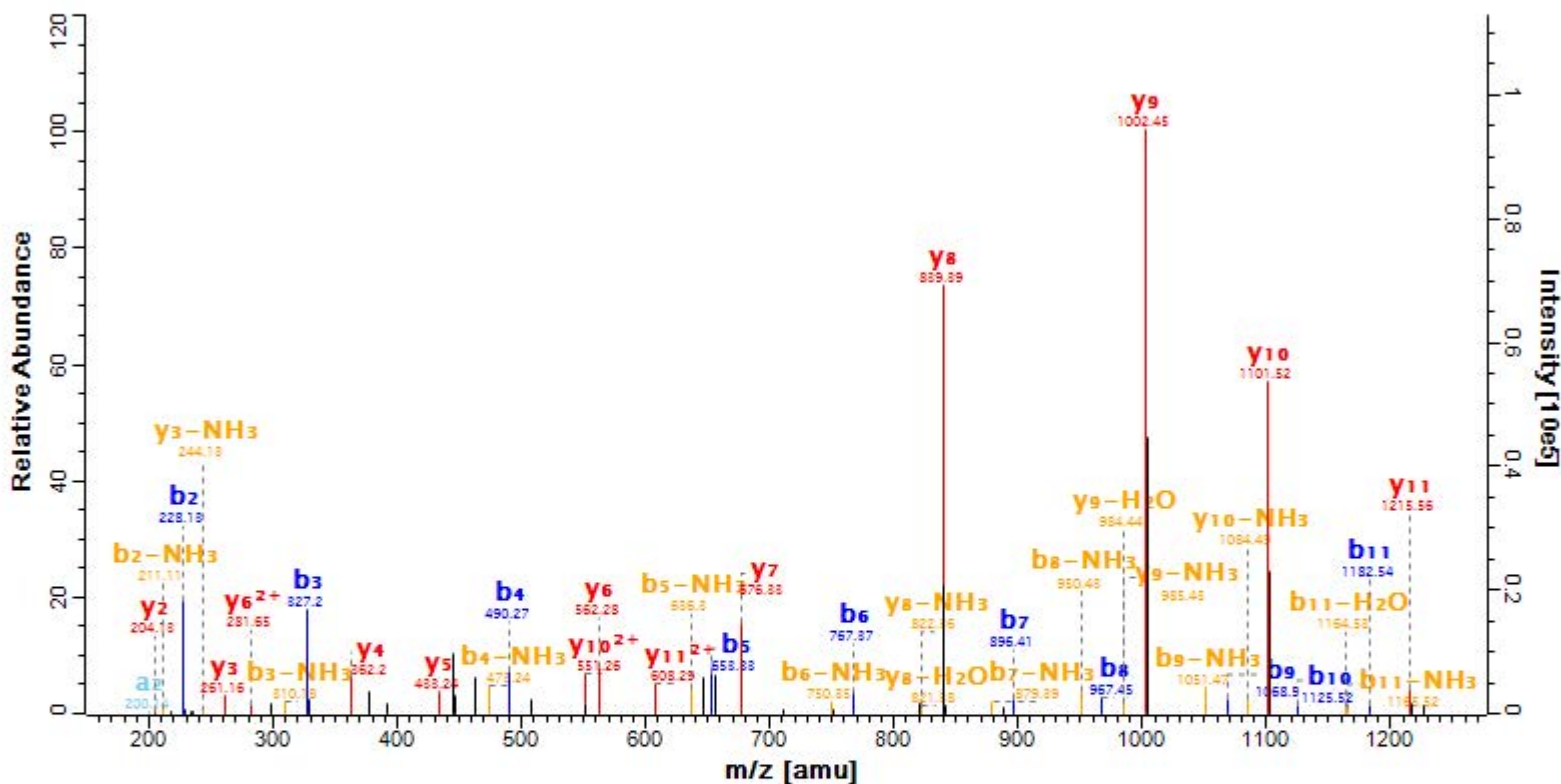

#### precursor information

|                   |                 |
|-------------------|-----------------|
| Mass:             | 1327.64075      |
| m/z:              | 664.82765       |
| Charge:           | 2+              |
| Retentiontime:    | 15.766888618469 |
| Score:            | 296.165         |
| Mass Error [ppm]: | -0.062885       |
| PEP:              | 4.4124E-66      |
| Precursor Type:   | MULTI           |

#### general information

|                       |           |
|-----------------------|-----------|
| Annotation:           | 10 of 12  |
| AminoAcids Coverage:  | 83 %      |
| Intensity Coverage:   | 72 %      |
| Peak Coverage:        | 53 %      |
| Protein Localisation: | 47 ... 58 |

| a ion    |        | b ion    |        | seq |   |    | y ion    |         | y <sup>2+</sup> ion |         |
|----------|--------|----------|--------|-----|---|----|----------|---------|---------------------|---------|
| Δ dalton | mass   | Δ dalton | mass   |     |   |    | Δ dalton | mass    | Δ dalton            | mass    |
|          | 86.096 |          | 114.09 | 1   | I | 11 |          |         |                     |         |
| -0.061   | 200.14 | -0.014   | 228.13 | 2   | N | 10 | 1215.6   | +0.0278 | 608.29              | +0.066  |
|          | 299.21 | -0.01    | 327.2  | 3   | V | 9  | 1101.5   | +0.0111 | 551.26              | -0.043  |
|          | 462.27 | -0.001   | 490.27 | 4   | Y | 8  | 1002.5   | -0.032  | 1002.5              |         |
|          | 625.33 | +0.0197  | 653.33 | 5   | Y | 7  | 839.39   | -0.009  | 839.39              |         |
|          | 739.38 | -0.026   | 767.37 | 6   | N | 6  | 676.33   | +0.0842 | 676.33              |         |
|          | 868.42 | +0.1057  | 896.41 | 7   | E | 5  | 562.28   | +0.1773 | 281.65              | +0.4941 |
|          | 939.46 | +0.0574  | 967.45 | 8   | A | 4  | 433.24   | +0.0867 | 433.24              |         |
|          | 1040.5 | -0.117   | 1068.5 | 9   | T | 3  | 362.2    | +0.0556 | 362.2               |         |
|          | 1097.5 | +3E-06   | 1125.5 | 10  | G | 2  | 261.16   | +0.1066 | 261.16              |         |
|          | 1154.5 | +0.1085  | 1182.5 | 11  | G | 1  | 204.13   | +0.1345 | 204.13              |         |
|          |        |          |        | 12  | K | 0  | 147.11   |         | 147.11              |         |

Scan number 2364 Raw file LNCAP\_Silac\_23F10\_set1\_03  
 Method ITMS; CID Pepti... 50.04

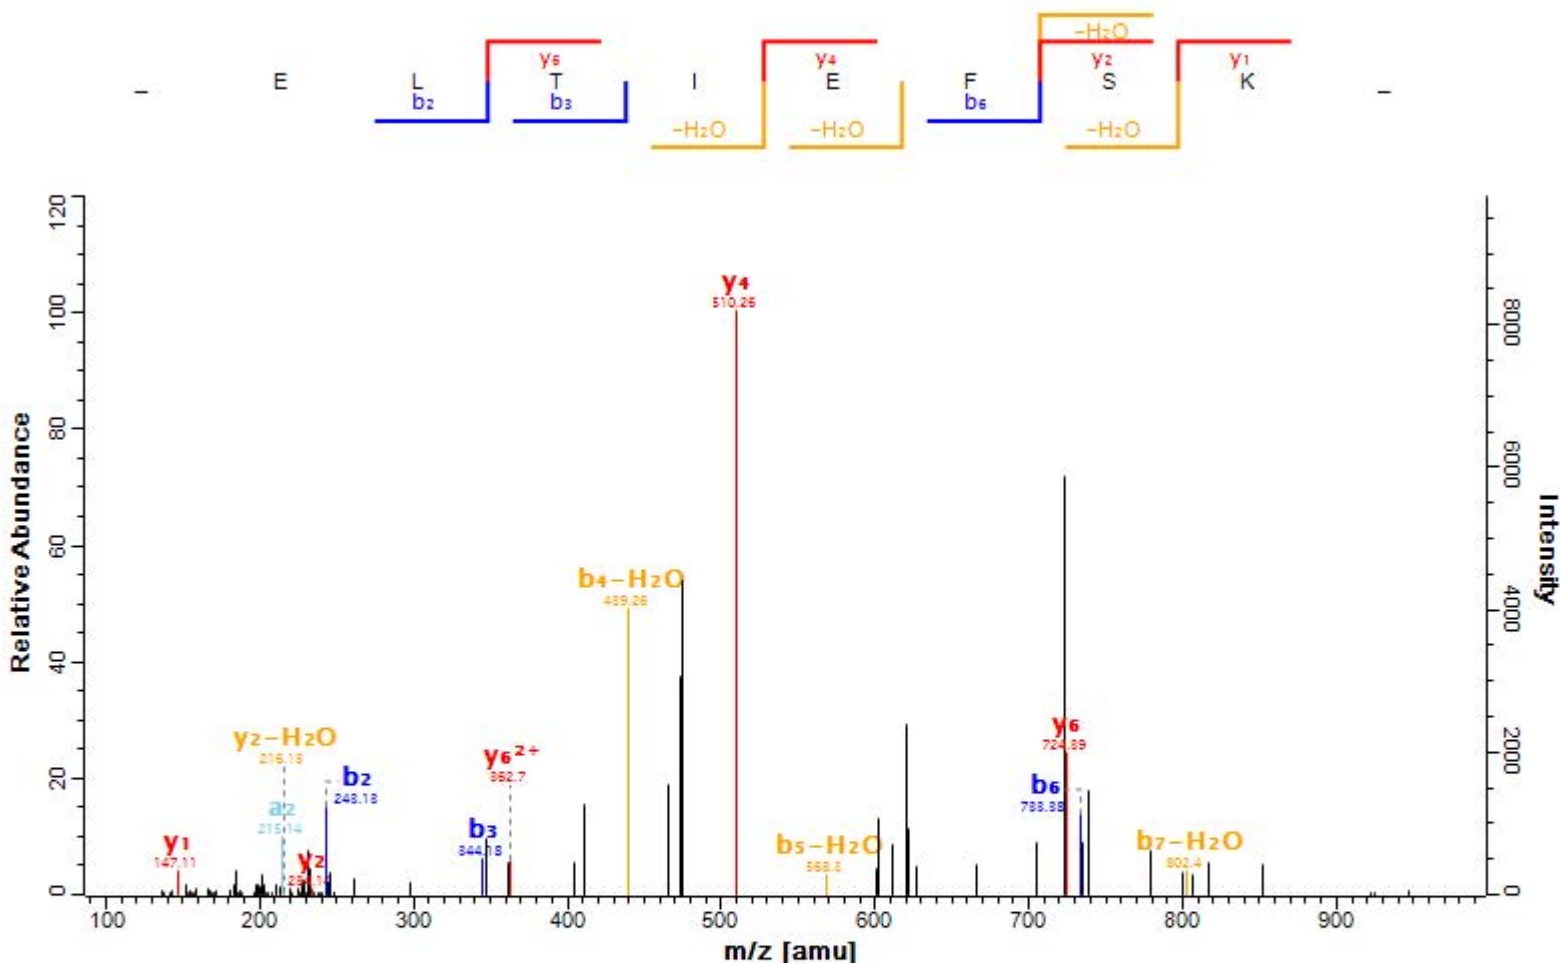

#### precursor information

|                       |                 |
|-----------------------|-----------------|
| Mass:                 | 965.50722       |
| m/z:                  | 483.76089       |
| Charge:               | 2+              |
| Retentiontime:        | 17.364225387573 |
| Score:                | 50.04028        |
| Mass Error [ppm]:     | 0.27122         |
| g PEP:                | 0.058993        |
| Annotation:           | 7 of 8          |
| AminoAcids Coverag    | 88 %            |
| Intensity Coverage:   | 35 %            |
| Peak Coverage:        | 12 %            |
| Protein Localisation: | 1337 ... 1344   |

| a ion    |        | b ion    |        |   |     |          | y ion  |          | y <sup>2+</sup> ion |  |
|----------|--------|----------|--------|---|-----|----------|--------|----------|---------------------|--|
| Δ dalton | mass   | Δ dalton | mass   |   | seq | Δ dalton | mass   | Δ dalton | mass                |  |
|          | 102.05 |          | 130.05 | 1 | E   | 7        |        |          |                     |  |
| -0.042   | 215.14 | +0.0011  | 243.13 | 2 | L   | 6        | 837.47 |          | 837.47              |  |
|          | 316.19 | +0.0457  | 344.18 | 3 | T   | 5        | 724.39 | +0.1777  | 362.7               |  |
|          | 429.27 |          | 457.27 | 4 | I   | 4        | 623.34 |          | 623.34              |  |
|          | 558.31 |          | 586.31 | 5 | E   | 3        | 510.26 | +0.0799  | 510.26              |  |
|          | 705.38 | +0.1639  | 733.38 | 6 | F   | 2        | 381.21 |          | 381.21              |  |
|          | 792.41 |          | 820.41 | 7 | S   | 1        | 234.14 | +0.0067  | 234.14              |  |
|          |        |          |        | 8 | K   | 0        | 147.11 | +0.0822  | 147.11              |  |

Scan number 2437 Raw file LNCAP\_Silac\_23F10\_set1\_03  
 Method ITMS: CID Pepti... 100.02

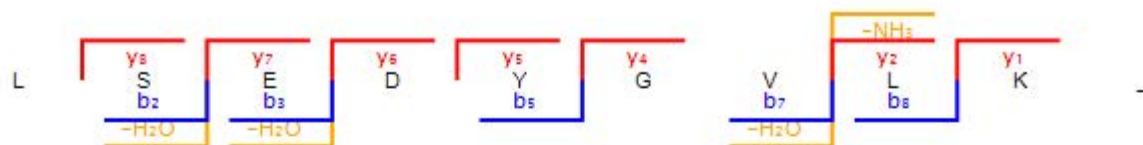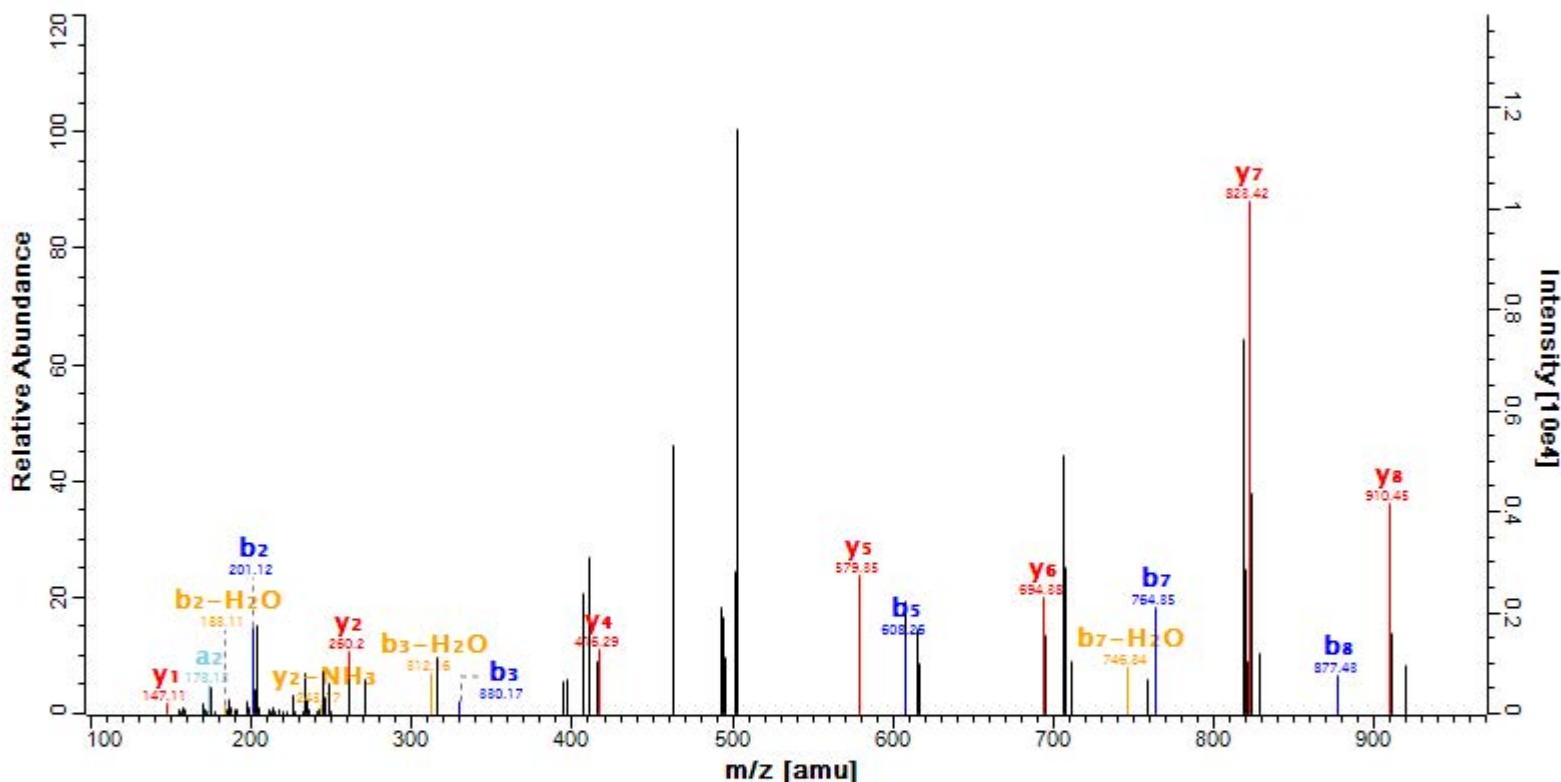

#### precursor information

|                       |                 |
|-----------------------|-----------------|
| Mass:                 | 1022.5291       |
| m/z:                  | 512.27183       |
| Charge:               | 2+              |
| Retentiontime:        | 17.702489852905 |
| Score:                | 100.017         |
| Mass Error [ppm]:     | 0.65839         |
| PEP:                  | 0.0034806       |
| Precursor Type:       | MULTI           |
| Annotation:           | 8 of 9          |
| AminoAcids Coverage:  | 89 %            |
| Intensity Coverage:   | 28 %            |
| Peak Coverage:        | 19 %            |
| Protein Localisation: | 111 ... 119     |

| a ion     |          | b ion     |          | seq |   | y ion    |                    |
|-----------|----------|-----------|----------|-----|---|----------|--------------------|
| Δ dalton  | mass     | Δ dalton  | mass     |     |   | Δ dalton | mass               |
|           | 86.09643 |           | 114.0913 | 1   | L | 8        |                    |
| +0.021372 | 173.1285 | +0.063322 | 201.1234 | 2   | S | 7        | 910.4516 +0.086447 |
|           | 302.171  | -0.12281  | 330.166  | 3   | E | 6        | 823.4196 +0.030158 |
|           | 417.198  |           | 445.1929 | 4   | D | 5        | 694.377 +0.02319   |
|           | 580.2613 | +0.105888 | 608.2562 | 5   | Y | 4        | 579.3501 +0.04702  |
|           | 637.2828 |           | 665.2777 | 6   | G | 3        | 416.2867 +0.053464 |
|           | 736.3512 | -0.0554   | 764.3461 | 7   | V | 2        | 359.2653           |
|           | 849.4353 | +0.093323 | 877.4302 | 8   | L | 1        | 260.1969 +0.13437  |
|           |          |           |          | 9   | K | 0        | 147.1128 -0.05433  |

Scan number 2479 Raw file LNCAP\_Silac\_23F10\_set1\_03  
 Method ITMS; CID Pepti... 164.9

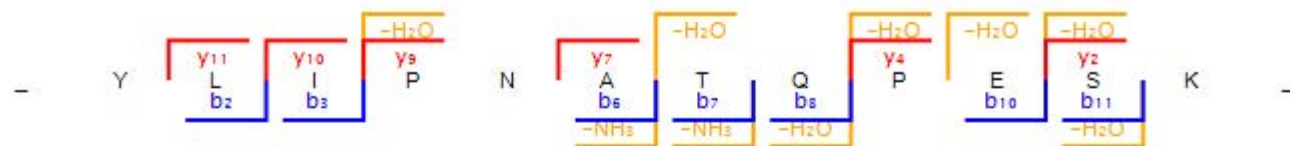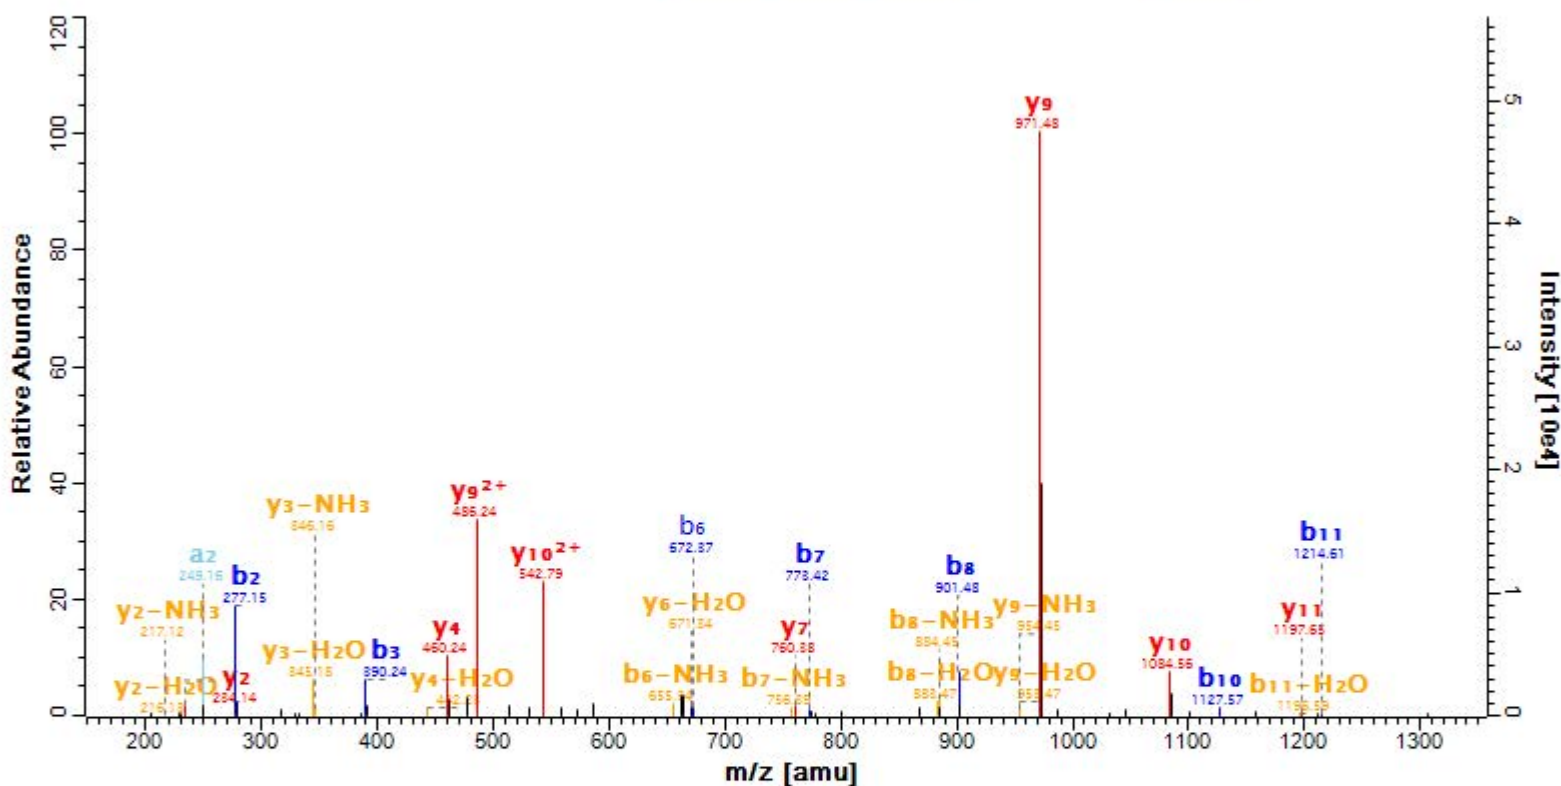

#### precursor information

|                   |                 |
|-------------------|-----------------|
| Mass:             | 1359.70336      |
| m/z:              | 680.85895       |
| Charge:           | 2+              |
| Retentiontime:    | 17.894138336181 |
| Score:            | 164.9017        |
| Mass Error [ppm]: | -0.055182       |
| PEP:              | 1.1436E-07      |
| Precursor Type:   | MULTI           |

#### general information

|                       |             |
|-----------------------|-------------|
| Annotation:           | 9 of 12     |
| AminoAcids Coverage:  | 75 %        |
| Intensity Coverage:   | 73 %        |
| Peak Coverage:        | 34 %        |
| Protein Localisation: | 106 ... 117 |

| a ion    |        | b ion    |        | seq |   |    | y ion    |         | y <sup>2+</sup> ion |         |
|----------|--------|----------|--------|-----|---|----|----------|---------|---------------------|---------|
| Δ dalton | mass   | Δ dalton | mass   |     |   |    | Δ dalton | mass    | Δ dalton            | mass    |
|          | 136.08 |          | 164.07 | 1   | Y | 11 |          |         |                     |         |
| -0.001   | 249.16 | -0.017   | 277.15 | 2   | L | 10 | 1197.6   | -0.023  | 1197.6              |         |
|          | 362.24 | -0.073   | 390.24 | 3   | I | 9  | 1084.6   | -0.09   | 542.79              | +0.1944 |
|          | 459.3  |          | 487.29 | 4   | P | 8  | 971.48   | -0.018  | 486.24              | +0.231  |
|          | 573.34 |          | 601.33 | 5   | N | 7  | 874.43   |         | 874.43              |         |
|          | 644.38 | +0.2455  | 672.37 | 6   | A | 6  | 760.38   | -0.152  | 760.38              |         |
|          | 745.42 | +0.0855  | 773.42 | 7   | T | 5  | 689.35   |         | 689.35              |         |
|          | 873.48 | +0.1709  | 901.48 | 8   | Q | 4  | 588.3    |         | 588.3               |         |
|          | 970.54 |          | 998.53 | 9   | P | 3  | 460.24   | +0.0441 | 460.24              |         |
|          | 1099.6 | +0.0194  | 1127.6 | 10  | E | 2  | 363.19   |         | 363.19              |         |
|          | 1186.6 | -0.213   | 1214.6 | 11  | S | 1  | 234.14   | +0.0761 | 234.14              |         |
|          |        |          |        | 12  | K | 0  | 147.11   |         | 147.11              |         |

Scan number 2712 Raw file LNCAP\_Silac\_23F10\_set1\_03  
 Method ITMS: CID Pepti... 145.72

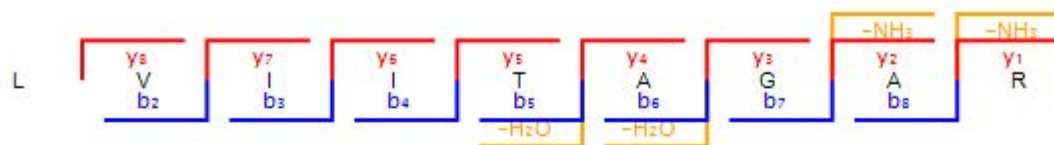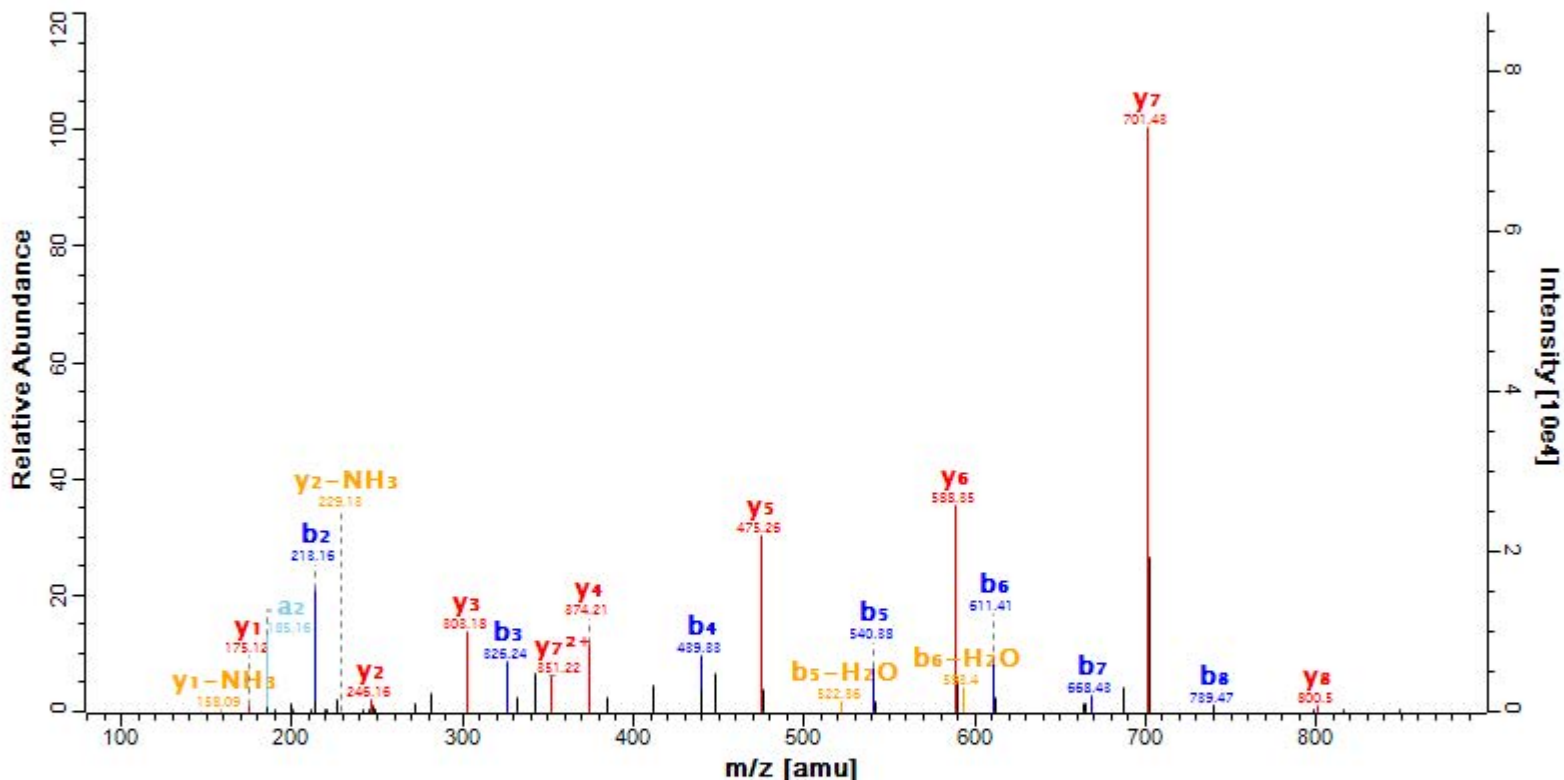

#### precursor information

|                       |                 |
|-----------------------|-----------------|
| Mass:                 | 912.57567       |
| m/z:                  | 457.29511       |
| Charge:               | 2+              |
| Retention time:       | 18.997341156005 |
| Score:                | 145.7233        |
| Mass Error [ppm]:     | 0.021777        |
| PEP:                  | 0.00083664      |
| Precursor Type:       | MULTI           |
| Annotation:           | 8 of 9          |
| AminoAcids Coverage:  | 89 %            |
| Intensity Coverage:   | 76 %            |
| Peak Coverage:        | 30 %            |
| Protein Localisation: | 120 ... 128     |

| a ion    |        | b ion    |        |   |     |   | y ion    |         | y <sup>2+</sup> ion |         |
|----------|--------|----------|--------|---|-----|---|----------|---------|---------------------|---------|
| Δ dalton | mass   | Δ dalton | mass   |   | seq |   | Δ dalton | mass    | Δ dalton            | mass    |
|          | 86.096 |          | 114.09 | 1 | L   | 8 |          |         |                     |         |
| +0.0365  | 185.16 | -0.051   | 213.16 | 2 | V   | 7 | 800.5    | +0.141  | 800.5               |         |
|          | 298.25 | -0.053   | 326.24 | 3 | I   | 6 | 701.43   | +0.0043 | 351.22              | +0.1718 |
|          | 411.33 | +0.0046  | 439.33 | 4 | I   | 5 | 588.35   | +0.0179 | 588.35              |         |
|          | 512.38 | -0.095   | 540.38 | 5 | T   | 4 | 475.26   | +0.0617 | 475.26              |         |
|          | 583.42 | -0.087   | 611.41 | 6 | A   | 3 | 374.21   | +0.0389 | 374.21              |         |
|          | 640.44 | +0.0018  | 668.43 | 7 | G   | 2 | 303.18   | -0.023  | 303.18              |         |
|          | 711.48 | -0.022   | 739.47 | 8 | A   | 1 | 246.16   | +0.105  | 246.16              |         |
|          |        |          |        | 9 | R   | 0 | 175.12   | +0.1275 | 175.12              |         |

Scan number 2792 Raw file LNCAP\_Silac\_23F10\_set1\_03  
 Method ITMS; CID Pepti... 110.53

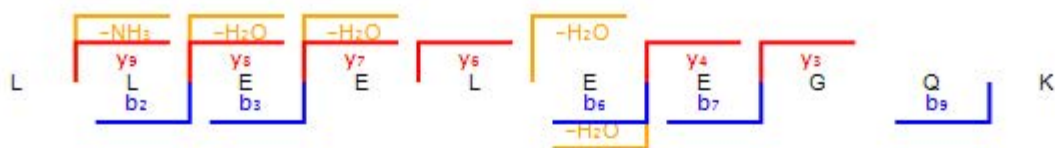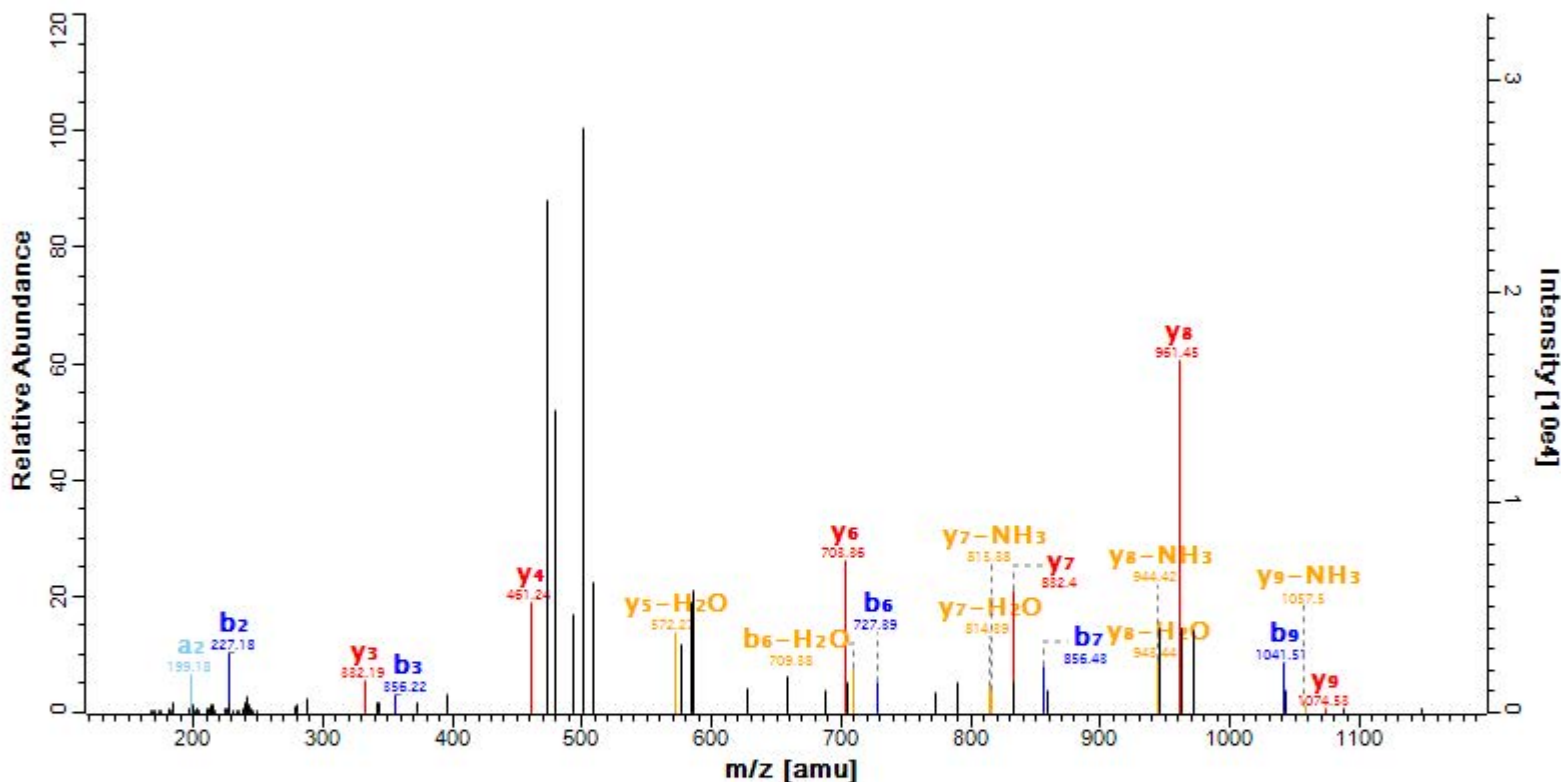

#### precursor information

|                   |                 |
|-------------------|-----------------|
| Mass:             | 1186.60874      |
| m/z:              | 594.31165       |
| Charge:           | 2+              |
| Retentiontime:    | 19.352752685546 |
| Score:            | 110.5336        |
| Mass Error [ppm]: | 0.51497         |
| PEP:              | 0.00049944      |
| Precursor Type:   | MULTI           |

|                       |           |
|-----------------------|-----------|
| Annotation:           | 8 of 10   |
| AminoAcids Coverage:  | 80 %      |
| Intensity Coverage:   | 32 %      |
| Peak Coverage:        | 19 %      |
| Protein Localisation: | 15 ... 24 |

| a ion           |          | b ion           |          | y ion |                 |      |          |
|-----------------|----------|-----------------|----------|-------|-----------------|------|----------|
| $\Delta$ dalton | mass     | $\Delta$ dalton | mass     | seq   | $\Delta$ dalton | mass |          |
|                 | 86.09643 |                 | 114.0913 | 1     | L               | 9    |          |
| -0.03515        | 199.1805 | -0.10341        | 227.1754 | 2     | L               | 8    | 1074.531 |
|                 | 328.2231 | -0.04051        | 356.218  | 3     | E               | 7    | 961.4473 |
|                 | 457.2657 |                 | 485.2606 | 4     | E               | 6    | 832.4047 |
|                 | 570.3497 |                 | 598.3447 | 5     | L               | 5    | 703.3621 |
|                 | 699.3923 | +0.024557       | 727.3872 | 6     | E               | 4    | 590.278  |
|                 | 828.4349 | +0.051116       | 856.4298 | 7     | E               | 3    | 461.2354 |
|                 | 885.4564 |                 | 913.4513 | 8     | G               | 2    | 332.1928 |
|                 | 1013.515 | +0.009405       | 1041.51  | 9     | Q               | 1    | 275.1714 |
|                 |          |                 |          | 10    | K               | 0    | 147.1128 |

Scan number 3022 Raw file LNCAP\_Silac\_23F10\_set1\_03  
 Method ITMS; CID Pepti... 99.57

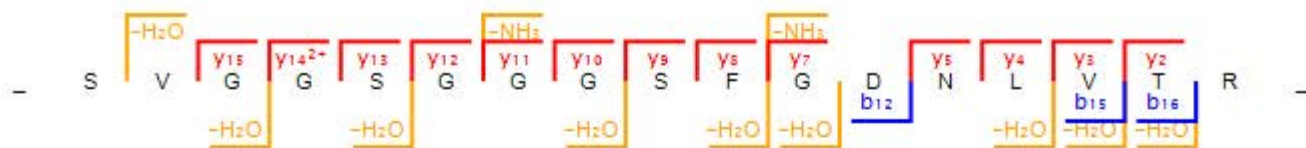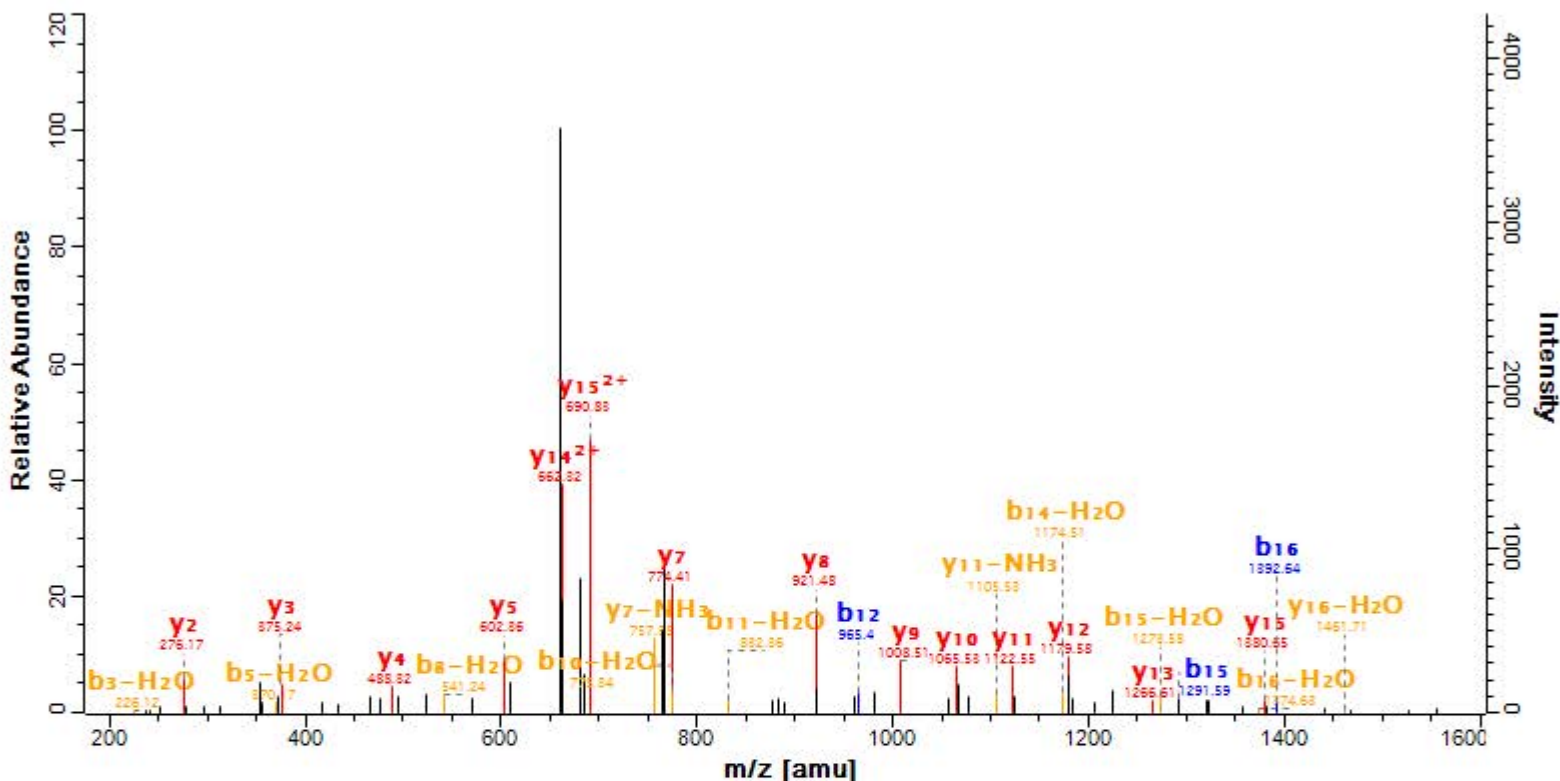

precursor information

|                   |                 |
|-------------------|-----------------|
| Mass:             | 1565.7429       |
| m/z:              | 783.87873       |
| Charge:           | 2+              |
| Retentiontime:    | 20.412982940673 |
| Score:            | 99.56905        |
| Mass Error [ppm]: | -0.31807        |
| PEP:              | 0.00086168      |
| Precursor Type:   | ISO             |

general information

|                       |             |
|-----------------------|-------------|
| Annotation:           | 15 of 17    |
| AminoAcids Coverage:  | 88 %        |
| Intensity Coverage:   | 44 %        |
| Peak Coverage:        | 36 %        |
| Protein Localisation: | 628 ... 644 |

| b ion     |          |     |   | y ion    |          | y <sup>2+</sup> ion |          |           |
|-----------|----------|-----|---|----------|----------|---------------------|----------|-----------|
| Δ dalton  | mass     | seq |   | Δ dalton | mass     | Δ dalton            | mass     |           |
|           | 88.0393  | 1   | S | 16       |          |                     |          |           |
|           | 187.1077 | 2   | V | 15       | 1479.719 |                     | 1479.719 |           |
|           | 244.1292 | 3   | G | 14       | 1380.65  | +0.116492           | 690.8288 | +0.167706 |
|           | 301.1506 | 4   | G | 13       | 1323.629 |                     | 662.318  | -0.24374  |
|           | 388.1827 | 5   | S | 12       | 1266.607 | -0.03956            | 1266.607 |           |
|           | 445.2041 | 6   | G | 11       | 1179.575 | -0.14583            | 1179.575 |           |
|           | 502.2256 | 7   | G | 10       | 1122.554 | -0.0294             | 1122.554 |           |
|           | 559.2471 | 8   | G | 9        | 1065.532 | +0.049927           | 1065.532 |           |
|           | 646.2791 | 9   | S | 8        | 1008.511 | -0.07339            | 1008.511 |           |
|           | 793.3475 | 10  | F | 7        | 921.4789 | +0.003321           | 921.4789 |           |
|           | 850.369  | 11  | G | 6        | 774.4104 | +0.084552           | 774.4104 |           |
| +0.097188 | 965.3959 | 12  | D | 5        | 717.389  |                     | 717.389  |           |
|           | 1079.439 | 13  | N | 4        | 602.362  | +0.045618           | 602.362  |           |
|           | 1192.523 | 14  | L | 3        | 488.3191 | +0.00041            | 488.3191 |           |
| -0.07801  | 1291.591 | 15  | V | 2        | 375.235  | +0.174562           | 375.235  |           |
| +0.139322 | 1392.639 | 16  | T | 1        | 276.1666 | +0.063258           | 276.1666 |           |
|           |          | 17  | R | 0        | 175.119  |                     | 175.119  |           |

Scan number 3138 Raw file LNCAP\_Silac\_23F10\_set1\_03  
 Method ITMS; CID Peptide 197.75

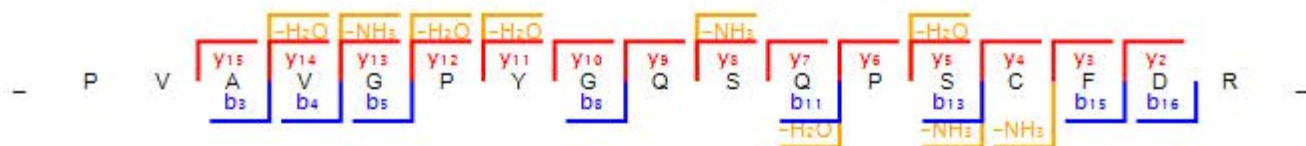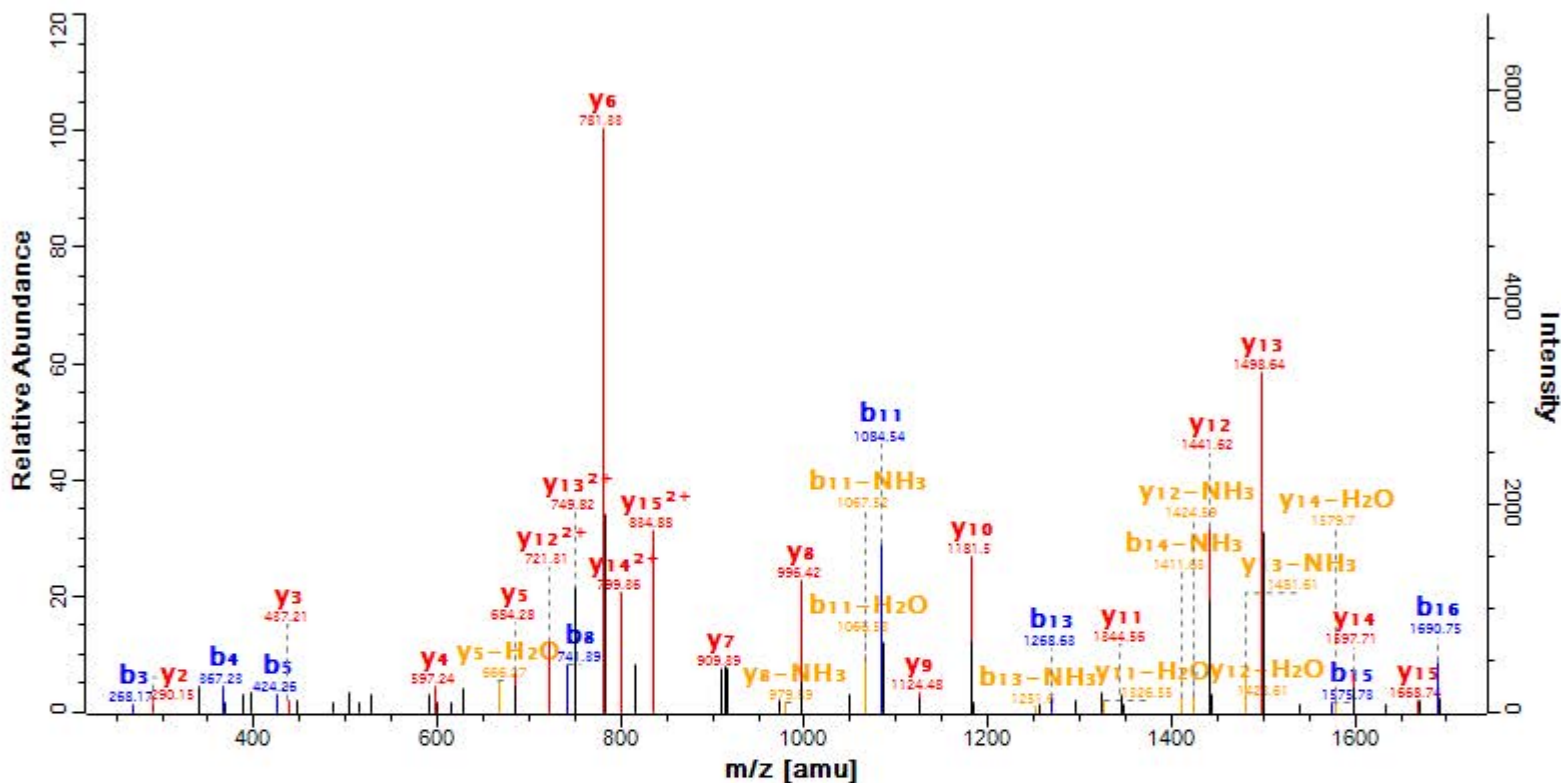

precursor information

|                   |                 |
|-------------------|-----------------|
| Mass:             | 1863.85743      |
| m/z:              | 932.93599       |
| Charge:           | 2+              |
| Retentiontime:    | 20.952625274658 |
| Score:            | 197.7513        |
| Mass Error [ppm]: | 0.027832        |
| PEP:              | 1.5793E-34      |
| Precursor Type:   | MULTI           |

general information

|                       |          |
|-----------------------|----------|
| Annotation:           | 14 of 17 |
| AminoAcids Coverage:  | 82 %     |
| Intensity Coverage:   | 63 %     |
| Peak Coverage:        | 45 %     |
| Protein Localisation: | 2 ... 18 |

| b ion     |          |     |   | y ion    |          | y <sup>2+</sup> ion |          |           |
|-----------|----------|-----|---|----------|----------|---------------------|----------|-----------|
| Δ dalton  | mass     | seq |   | Δ dalton | mass     | Δ dalton            | mass     |           |
|           | 98.06004 | 1   | P | 16       |          |                     |          |           |
|           | 197.1285 | 2   | V | 15       | 1767.812 |                     | 1767.812 |           |
| -0.02424  | 268.1656 | 3   | A | 14       | 1668.743 | +0.214405           | 834.8754 | +0.249255 |
| +0.105343 | 367.234  | 4   | V | 13       | 1597.706 | -0.00288            | 799.3568 | +0.119253 |
| +0.114427 | 424.2554 | 5   | G | 12       | 1498.638 | -0.00734            | 749.8226 | +0.080156 |
|           | 521.3082 | 6   | P | 11       | 1441.616 | -0.03482            | 721.3119 | +0.317939 |
|           | 684.3715 | 7   | Y | 10       | 1344.564 | +0.301509           | 1344.564 |           |
| +0.184574 | 741.393  | 8   | G | 9        | 1181.5   | +0.016937           | 1181.5   |           |
|           | 869.4516 | 9   | Q | 8        | 1124.479 | +0.039622           | 1124.479 |           |
|           | 956.4836 | 10  | S | 7        | 996.4204 | +0.026239           | 996.4204 |           |
| +0.005666 | 1084.542 | 11  | Q | 6        | 909.3883 | +0.117898           | 909.3883 |           |
|           | 1181.595 | 12  | P | 5        | 781.3297 | +0.068444           | 781.3297 |           |
| -0.02859  | 1268.627 | 13  | S | 4        | 684.277  | -0.0713             | 684.277  |           |
|           | 1428.658 | 14  | C | 3        | 597.245  | +0.001808           | 597.245  |           |
| -0.44027  | 1575.726 | 15  | F | 2        | 437.2143 | +0.265244           | 437.2143 |           |
| -0.12298  | 1690.753 | 16  | D | 1        | 290.1459 | -0.05178            | 290.1459 |           |
|           |          | 17  | R | 0        | 175.119  |                     | 175.119  |           |



Scan number 3179 Raw file LNCAP\_Silac\_23F10\_set1\_03  
 Method ITMS: CID Pepti... 107.79

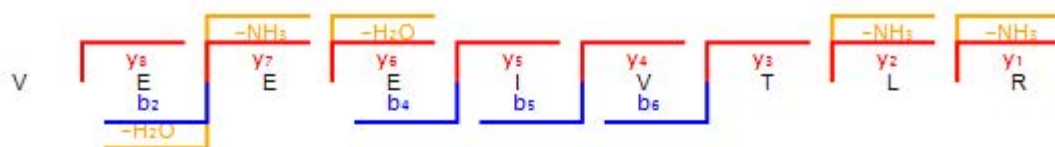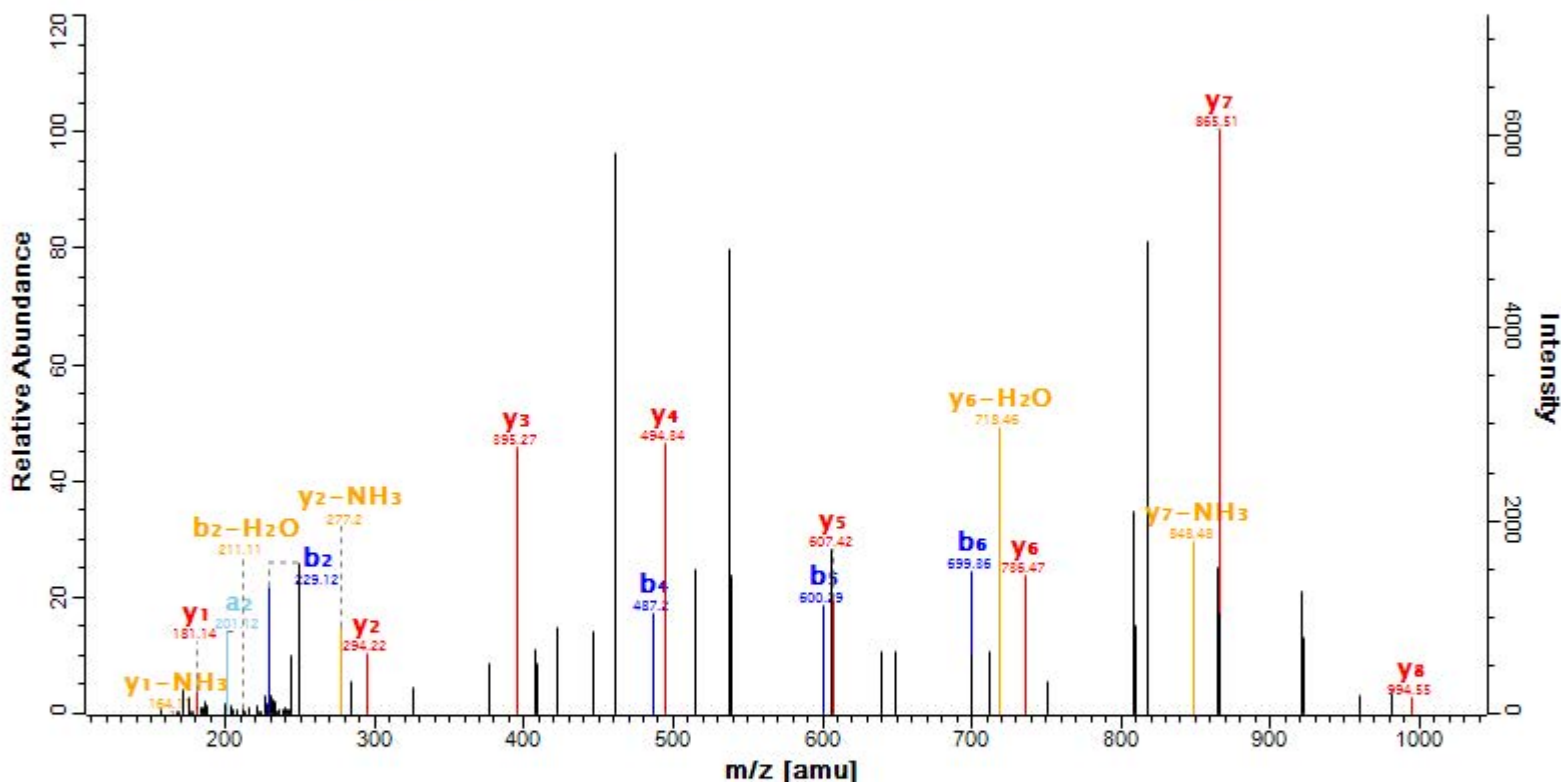

#### precursor information

|                       |                 |
|-----------------------|-----------------|
| Mass:                 | 1086.59197      |
| $m/z$ :               | 544.30326       |
| Charge:               | 2+              |
| Retention time:       | 21.142452239990 |
| Score:                | 107.7878        |
| Mass Error [ppm]:     | -0.10997        |
| PEP:                  | 0.0024621       |
| Precursor Type:       | MULTI           |
| Annotation:           | 8 of 9          |
| AminoAcids Coverage:  | 89 %            |
| Intensity Coverage:   | 38 %            |
| Peak Coverage:        | 20 %            |
| Protein Localisation: | 56 ... 64       |

| a ion           |          | b ion           |          | seq |   | y ion           |                    |
|-----------------|----------|-----------------|----------|-----|---|-----------------|--------------------|
| $\Delta$ dalton | mass     | $\Delta$ dalton | mass     |     |   | $\Delta$ dalton | mass               |
|                 | 72.08078 |                 | 100.0757 | 1   | V | 8               |                    |
| +0.065535       | 201.1234 | -0.02249        | 229.1183 | 2   | E | 7               | 994.5511 +0.004888 |
|                 | 330.166  |                 | 358.1609 | 3   | E | 6               | 865.5085 +0.033077 |
|                 | 459.2086 | +0.075522       | 487.2035 | 4   | E | 5               | 736.4659 +0.143419 |
|                 | 572.2926 | +0.00159        | 600.2875 | 5   | I | 4               | 607.4233 +0.036354 |
|                 | 671.361  | -0.03325        | 699.3559 | 6   | V | 3               | 494.3392 +0.13116  |
|                 | 772.4087 |                 | 800.4036 | 7   | T | 2               | 395.2708 +0.032765 |
|                 | 885.4928 |                 | 913.4877 | 8   | L | 1               | 294.2231 +0.080444 |
|                 |          |                 |          | 9   | R | 0               | 181.1391 +0.017535 |

Scan number 3210 Raw file LNCAP\_Silac\_23F10\_set1\_03  
 Method ITMS; CID Pepti... 170.89

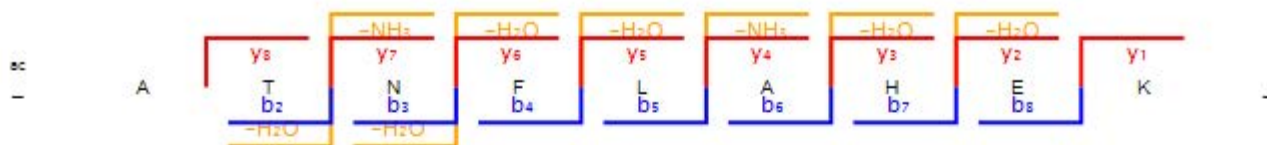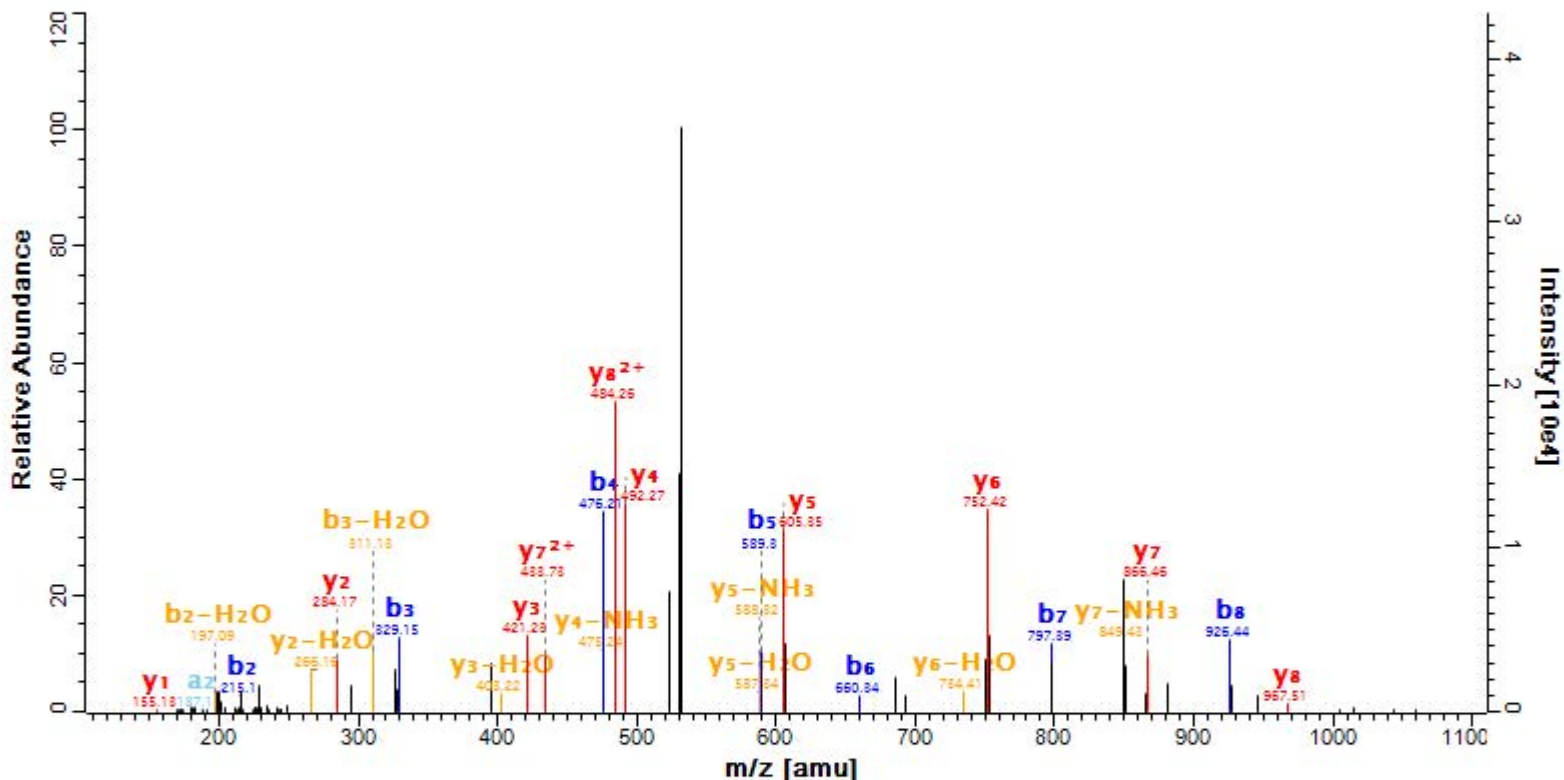

#### precursor information

|                       |                 |
|-----------------------|-----------------|
| Mass:                 | 1071.53504      |
| m/z:                  | 536.7748        |
| Charge:               | 2+              |
| Retentiontime:        | 21.286775588989 |
| Score:                | 170.8887        |
| Mass Error [ppm]:     | 0.12011         |
| PEP:                  | 0.00011205      |
| Precursor Type:       | MULTI           |
| Annotation:           | 8 of 9          |
| AminoAcids Coverage:  | 89 %            |
| Intensity Coverage:   | 51 %            |
| Peak Coverage:        | 28 %            |
| Protein Localisation: | 2 ... 10        |

| a ion    |        | b ion    |        | seq |   |   | y ion    |         | y <sup>2+</sup> ion |         |
|----------|--------|----------|--------|-----|---|---|----------|---------|---------------------|---------|
| Δ dalton | mass   | Δ dalton | mass   |     |   |   | Δ dalton | mass    | Δ dalton            | mass    |
|          | 86.06  |          | 114.05 | 1   | A | 8 |          |         |                     |         |
| +0.0671  | 187.11 | +0.0872  | 215.1  | 2   | T | 7 | 967.51   | +0.158  | 484.26              | +0.2373 |
|          | 301.15 | +0.0803  | 329.15 | 3   | N | 6 | 866.46   | +0.1411 | 433.73              | +0.2147 |
|          | 448.22 | +0.0645  | 476.21 | 4   | F | 5 | 752.42   | -0.019  | 752.42              |         |
|          | 561.3  | +0.0229  | 589.3  | 5   | L | 4 | 605.35   | +0.027  | 605.35              |         |
|          | 632.34 | +0.0369  | 660.34 | 6   | A | 3 | 492.27   | -0.035  | 492.27              |         |
|          | 769.4  | -0.112   | 797.39 | 7   | H | 2 | 421.23   | +0.1016 | 421.23              |         |
|          | 898.44 | +0.0568  | 926.44 | 8   | E | 1 | 284.17   | -0.018  | 284.17              |         |
|          |        |          |        | 9   | K | 0 | 155.13   | +0.0334 | 155.13              |         |

Scan number 3262 Raw file LNCAP\_Silac\_23F10\_set1\_03  
 Method ITMS: CID Pepti... 84.61

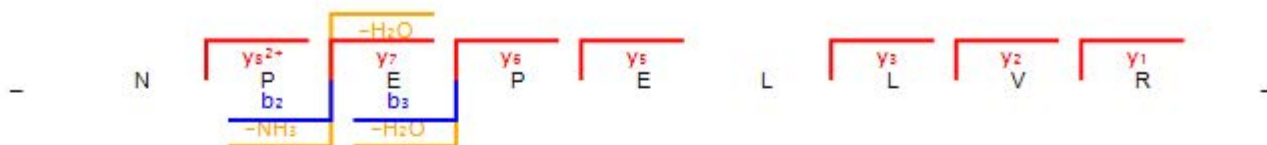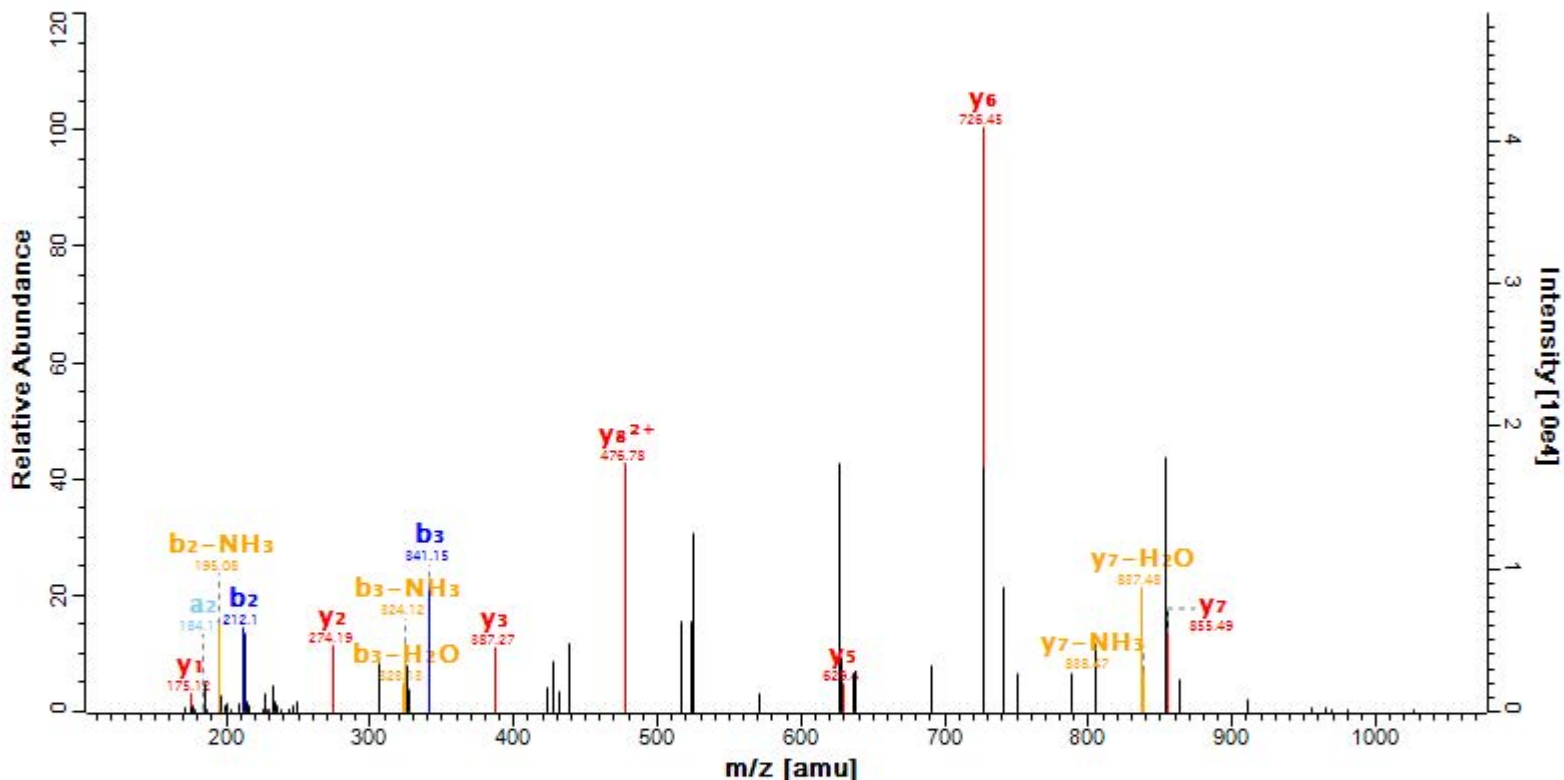

#### precursor information

|                       |                 |
|-----------------------|-----------------|
| Mass:                 | 1065.58217      |
| m/z:                  | 533.79836       |
| Charge:               | 2+              |
| Retentiontime:        | 21.523206710815 |
| Score:                | 84.61463        |
| Mass Error [ppm]:     | 0.29583         |
| PEP:                  | 0.0070919       |
| Precursor Type:       | MULTI           |
| Annotation:           | 8 of 9          |
| AminoAcids Coverage:  | 89 %            |
| Intensity Coverage:   | 40 %            |
| Peak Coverage:        | 18 %            |
| Protein Localisation: | 705 ... 713     |

| a ion    |        | b ion    |        | seq |   |   | y ion    |         | y <sup>2+</sup> ion |         |
|----------|--------|----------|--------|-----|---|---|----------|---------|---------------------|---------|
| Δ dalton | mass   | Δ dalton | mass   |     |   |   | Δ dalton | mass    | Δ dalton            | mass    |
|          | 87.055 |          | 115.05 | 1   | N | 8 |          |         |                     |         |
| +0.1654  | 184.11 | -0.018   | 212.1  | 2   | P | 7 | 952.55   |         | 476.78              | +0.1945 |
|          | 313.15 | -0.023   | 341.15 | 3   | E | 6 | 855.49   | +0.1177 | 855.49              |         |
|          | 410.2  |          | 438.2  | 4   | P | 5 | 726.45   | +0.0402 | 726.45              |         |
|          | 539.25 |          | 567.24 | 5   | E | 4 | 629.4    | +0.0738 | 629.4               |         |
|          | 652.33 |          | 680.32 | 6   | L | 3 | 500.36   |         | 500.36              |         |
|          | 765.41 |          | 793.41 | 7   | L | 2 | 387.27   | +0.1938 | 387.27              |         |
|          | 864.48 |          | 892.48 | 8   | V | 1 | 274.19   | -0.025  | 274.19              |         |
|          |        |          |        | 9   | R | 0 | 175.12   | +0.0141 | 175.12              |         |

Scan number 3280 Raw file LNCAP\_Silac\_23F10\_set1\_03  
 Method ITMS; CID Pepti... 129.82

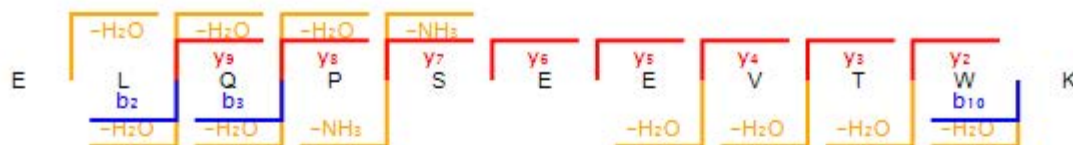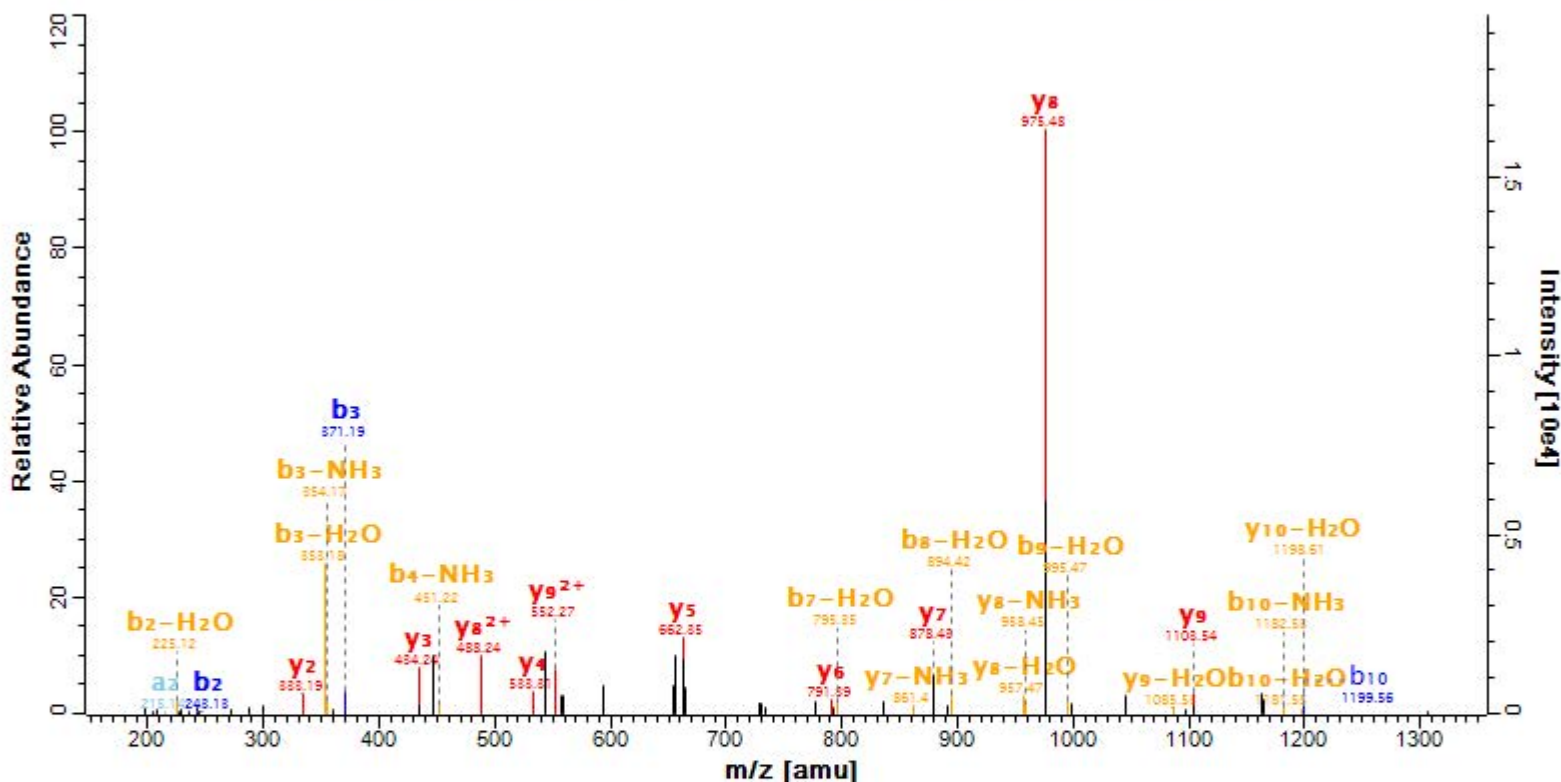

#### precursor information

|                   |                 |
|-------------------|-----------------|
| Mass:             | 1344.65667      |
| m/z:              | 673.33561       |
| Charge:           | 2+              |
| Retentiontime:    | 21.607357025146 |
| Score:            | 129.8187        |
| Mass Error [ppm]: | 0.39089         |
| PEP:              | 0.0001863       |
| Precursor Type:   | MULTI           |

#### general information

|                       |            |
|-----------------------|------------|
| Annotation:           | 9 of 11    |
| AminoAcids Coverage:  | 82 %       |
| Intensity Coverage:   | 60 %       |
| Peak Coverage:        | 35 %       |
| Protein Localisation: | 95 ... 105 |

| a ion    |        | b ion    |        |    |     |          | y ion  |          | y <sup>2+</sup> ion |        |
|----------|--------|----------|--------|----|-----|----------|--------|----------|---------------------|--------|
| Δ dalton | mass   | Δ dalton | mass   |    | seq | Δ dalton | mass   | Δ dalton | mass                |        |
|          | 102.05 |          | 130.05 | 1  | E   | 10       |        |          |                     |        |
| -0.04    | 215.14 | +0.0132  | 243.13 | 2  | L   | 9        | 1216.6 |          | 1216.6              |        |
|          | 343.2  | +0.0019  | 371.19 | 3  | Q   | 8        | 1103.5 | +0.0465  | 552.27              | +0.03  |
|          | 440.25 |          | 468.25 | 4  | P   | 7        | 975.48 | -0.006   | 488.24              | +0.109 |
|          | 527.28 |          | 555.28 | 5  | S   | 6        | 878.43 | -0.032   | 878.43              |        |
|          | 656.32 |          | 684.32 | 6  | E   | 5        | 791.39 | +0.185   | 791.39              |        |
|          | 785.37 |          | 813.36 | 7  | E   | 4        | 662.35 | +0.2121  | 662.35              |        |
|          | 884.44 |          | 912.43 | 8  | V   | 3        | 533.31 | +0.1872  | 533.31              |        |
|          | 985.48 |          | 1013.5 | 9  | T   | 2        | 434.24 | +0.0288  | 434.24              |        |
|          | 1171.6 | -0.145   | 1199.6 | 10 | W   | 1        | 333.19 | +0.193   | 333.19              |        |
|          |        |          |        | 11 | K   | 0        | 147.11 |          | 147.11              |        |

Scan number 3577 Raw file LNCAP\_Silac\_23F10\_set1\_03  
 Method ITMS; CID Pepti... 130.56

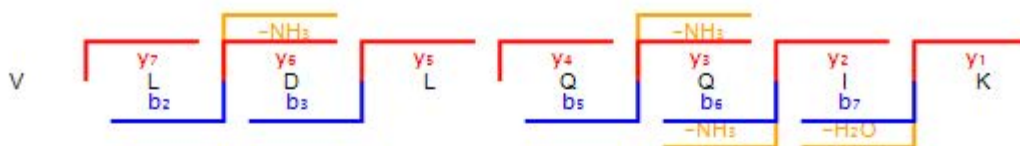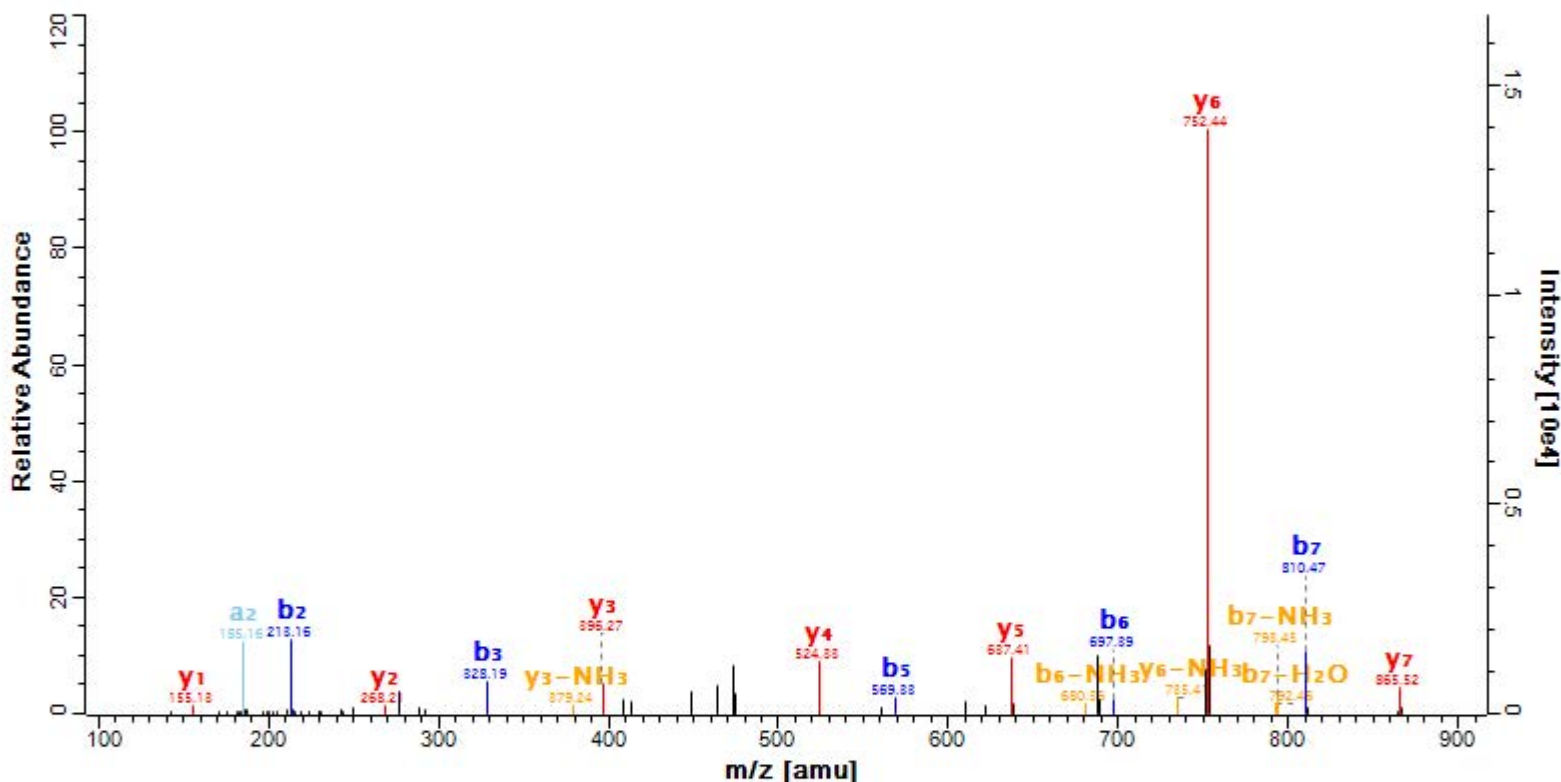

#### precursor information

|                       |                 |
|-----------------------|-----------------|
| Mass:                 | 955.57015       |
| m/z:                  | 478.79235       |
| Charge:               | 2+              |
| Retentiontime:        | 23.014547348022 |
| Score:                | 130.5618        |
| Mass Error [ppm]:     | -0.087316       |
| g PEP:                | 0.0005295       |
| Annotation:           | 7 of 8          |
| AminoAcids Coverage:  | 88 %            |
| Intensity Coverage:   | 69 %            |
| Peak Coverage:        | 23 %            |
| Protein Localisation: | 340 ... 347     |

| a ion           |          | b ion           |          |     | y ion           |      |
|-----------------|----------|-----------------|----------|-----|-----------------|------|
| $\Delta$ dalton | mass     | $\Delta$ dalton | mass     | seq | $\Delta$ dalton | mass |
|                 | 72.08078 |                 | 100.0757 | 1   | V               | 7    |
| -0.01906        | 185.1648 | +0.036809       | 213.1598 | 2   | L               | 6    |
|                 | 300.1918 | +0.028726       | 328.1867 | 3   | D               | 5    |
|                 | 413.2758 |                 | 441.2708 | 4   | L               | 4    |
|                 | 541.3344 | +0.086372       | 569.3293 | 5   | Q               | 3    |
|                 | 669.393  | +0.115502       | 697.3879 | 6   | Q               | 2    |
|                 | 782.4771 | +0.009953       | 810.472  | 7   | I               | 1    |
|                 |          |                 |          | 8   | K               | 0    |

Scan number 3662 Raw file LNCAP\_Silac\_23F10\_set1\_03  
 Method ITMS; CID Pepti... 148.28

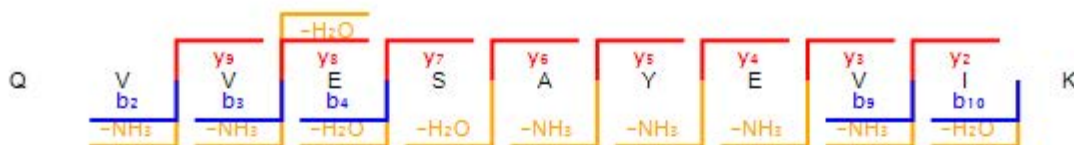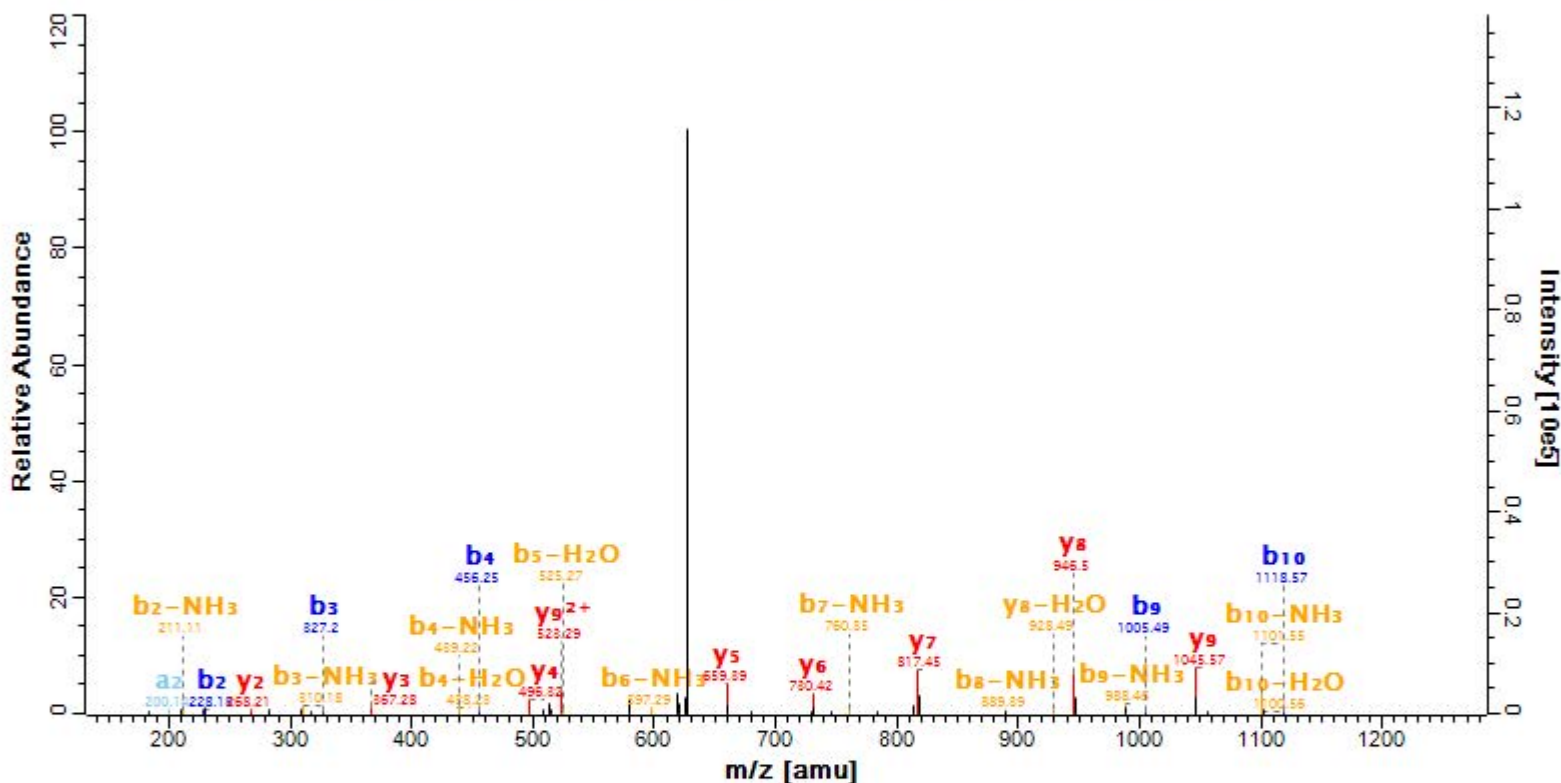

#### precursor information

|                   |                 |
|-------------------|-----------------|
| Mass:             | 1263.67076      |
| m/z:              | 632.84266       |
| Charge:           | 2+              |
| Retentiontime:    | 23.406057357788 |
| Score:            | 148.2801        |
| Mass Error [ppm]: | -0.24238        |
| PEP:              | 4.0733E-05      |
| Precursor Type:   | MULTI           |

#### general information

|                       |             |
|-----------------------|-------------|
| Annotation:           | 9 of 11     |
| AminoAcids Coverage:  | 82 %        |
| Intensity Coverage:   | 29 %        |
| Peak Coverage:        | 33 %        |
| Protein Localisation: | 262 ... 272 |

| a ion    |        | b ion    |        |    |     |          | y ion  |          | y <sup>2+</sup> ion |  |
|----------|--------|----------|--------|----|-----|----------|--------|----------|---------------------|--|
| Δ dalton | mass   | Δ dalton | mass   |    | seq | Δ dalton | mass   | Δ dalton | mass                |  |
|          | 101.07 |          | 129.07 | 1  | Q   | 10       |        |          |                     |  |
| +0.0351  | 200.14 | +0.0606  | 228.13 | 2  | V   | 9        | 1144.6 |          | 1144.6              |  |
|          | 299.21 | -0.017   | 327.2  | 3  | V   | 8        | 1045.6 | -0.015   | 523.29              |  |
|          | 428.25 | +0.0379  | 456.25 | 4  | E   | 7        | 946.5  | +0.0407  | 946.5               |  |
|          | 515.28 |          | 543.28 | 5  | S   | 6        | 817.45 | +0.1498  | 817.45              |  |
|          | 586.32 |          | 614.31 | 6  | A   | 5        | 730.42 | +0.1703  | 730.42              |  |
|          | 749.38 |          | 777.38 | 7  | Y   | 4        | 659.39 | +0.1209  | 659.39              |  |
|          | 878.43 |          | 906.42 | 8  | E   | 3        | 496.32 | +0.1302  | 496.32              |  |
|          | 977.49 | -0.456   | 1005.5 | 9  | V   | 2        | 367.28 | -0.06    | 367.28              |  |
|          | 1090.6 | +0.0579  | 1118.6 | 10 | I   | 1        | 268.21 | +0.0676  | 268.21              |  |
|          |        |          |        | 11 | K   | 0        | 155.13 |          | 155.13              |  |

Scan number 3729 Raw file LNCAP\_Silac\_23F10\_set1\_03  
 Method ITMS; CID Pepti... 91.31

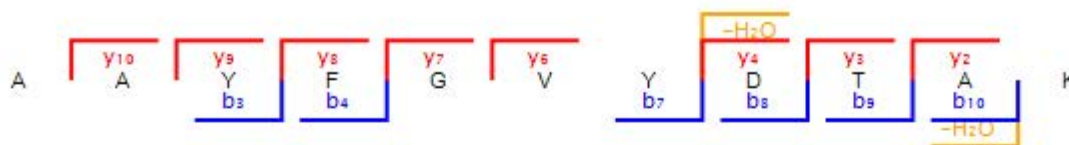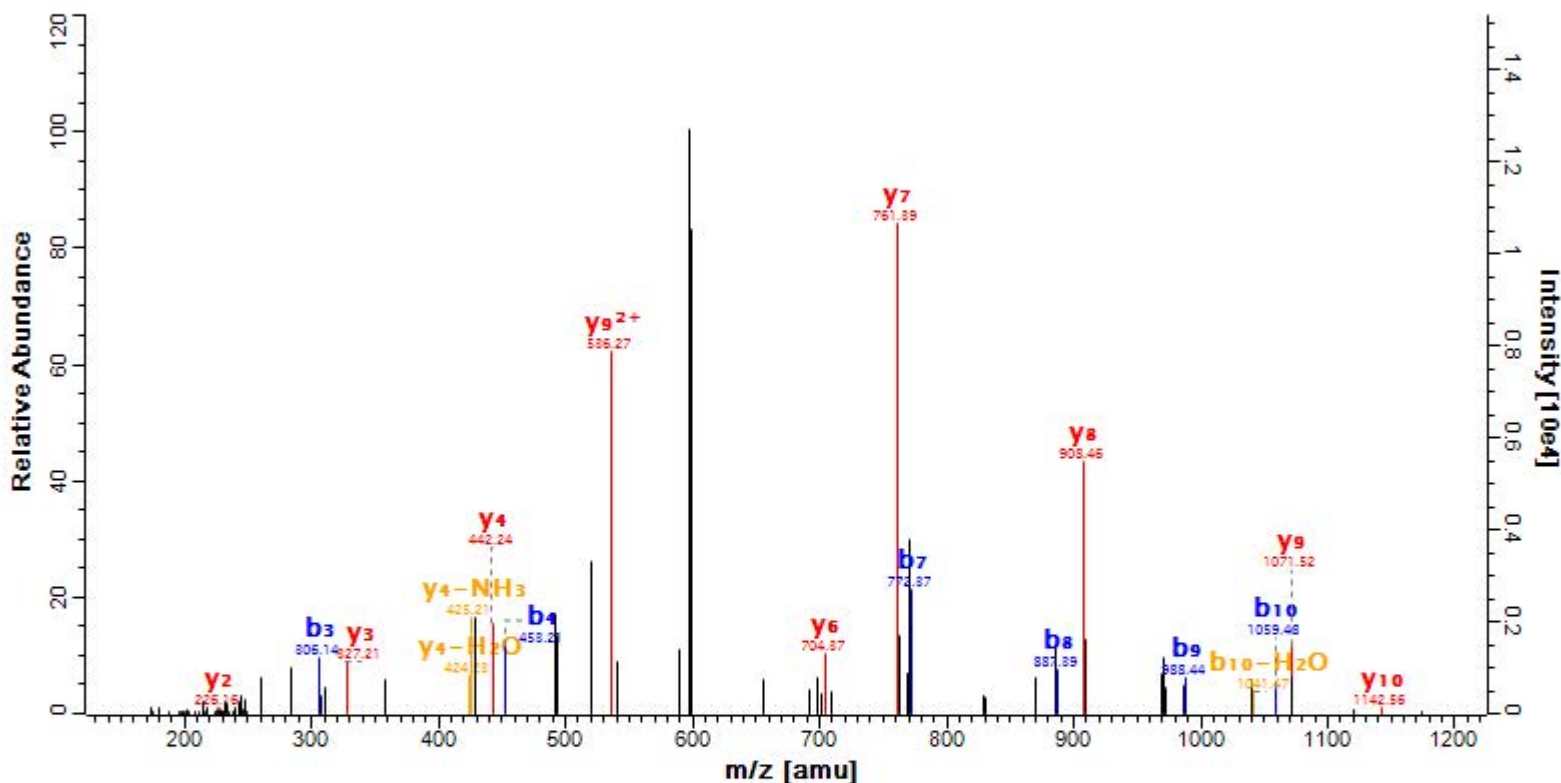

#### precursor information

|                   |                 |
|-------------------|-----------------|
| Mass:             | 1204.57676      |
| m/z:              | 603.29566       |
| Charge:           | 2+              |
| Retentiontime:    | 23.713668823242 |
| Score:            | 91.31331        |
| Mass Error [ppm]: | 0.26836         |
| PEP:              | 0.0016514       |
| Precursor Type:   | MULTI           |

#### general information

|                       |             |
|-----------------------|-------------|
| Annotation:           | 9 of 11     |
| AminoAcids Coverage:  | 82 %        |
| Intensity Coverage:   | 39 %        |
| Peak Coverage:        | 18 %        |
| Protein Localisation: | 189 ... 199 |

| b ion     |          |    |     |    | y ion    |           | y <sup>2+</sup> ion |           |
|-----------|----------|----|-----|----|----------|-----------|---------------------|-----------|
| Δ dalton  | mass     |    | seq |    | Δ dalton | mass      | Δ dalton            | mass      |
|           | 72.04439 | 1  | A   | 10 |          |           |                     |           |
|           | 143.0815 | 2  | A   | 9  | 1142.561 | +0.284902 | 1142.561            |           |
| +0.058842 | 306.1448 | 3  | Y   | 8  | 1071.524 | -0.10816  | 536.2655            | +0.117392 |
| -0.0067   | 453.2132 | 4  | F   | 7  | 908.4604 | +0.068389 | 908.4604            |           |
|           | 510.2347 | 5  | G   | 6  | 761.3919 | +0.039269 | 761.3919            |           |
|           | 609.3031 | 6  | V   | 5  | 704.3705 | +0.111941 | 704.3705            |           |
| +0.143008 | 772.3665 | 7  | Y   | 4  | 605.3021 |           | 605.3021            |           |
| +0.146826 | 887.3934 | 8  | D   | 3  | 442.2387 | +0.100617 | 442.2387            |           |
| -0.03287  | 988.4411 | 9  | T   | 2  | 327.2118 | +0.11456  | 327.2118            |           |
| +0.095176 | 1059.478 | 10 | A   | 1  | 226.1641 | +0.359138 | 226.1641            |           |
|           |          | 11 | K   | 0  | 155.127  |           | 155.127             |           |

Scan number 4084 Raw file LNCAP\_Silac\_23F10\_set1\_03  
 Method ITMS; CID Peptide LNCAP\_Silac\_23F10\_set1\_03

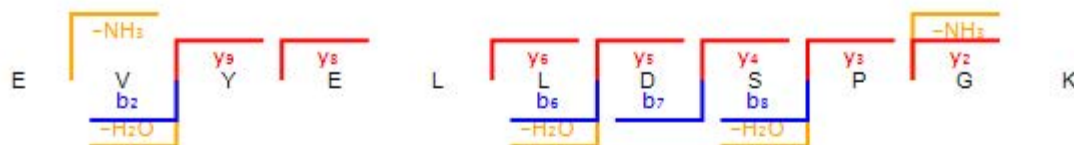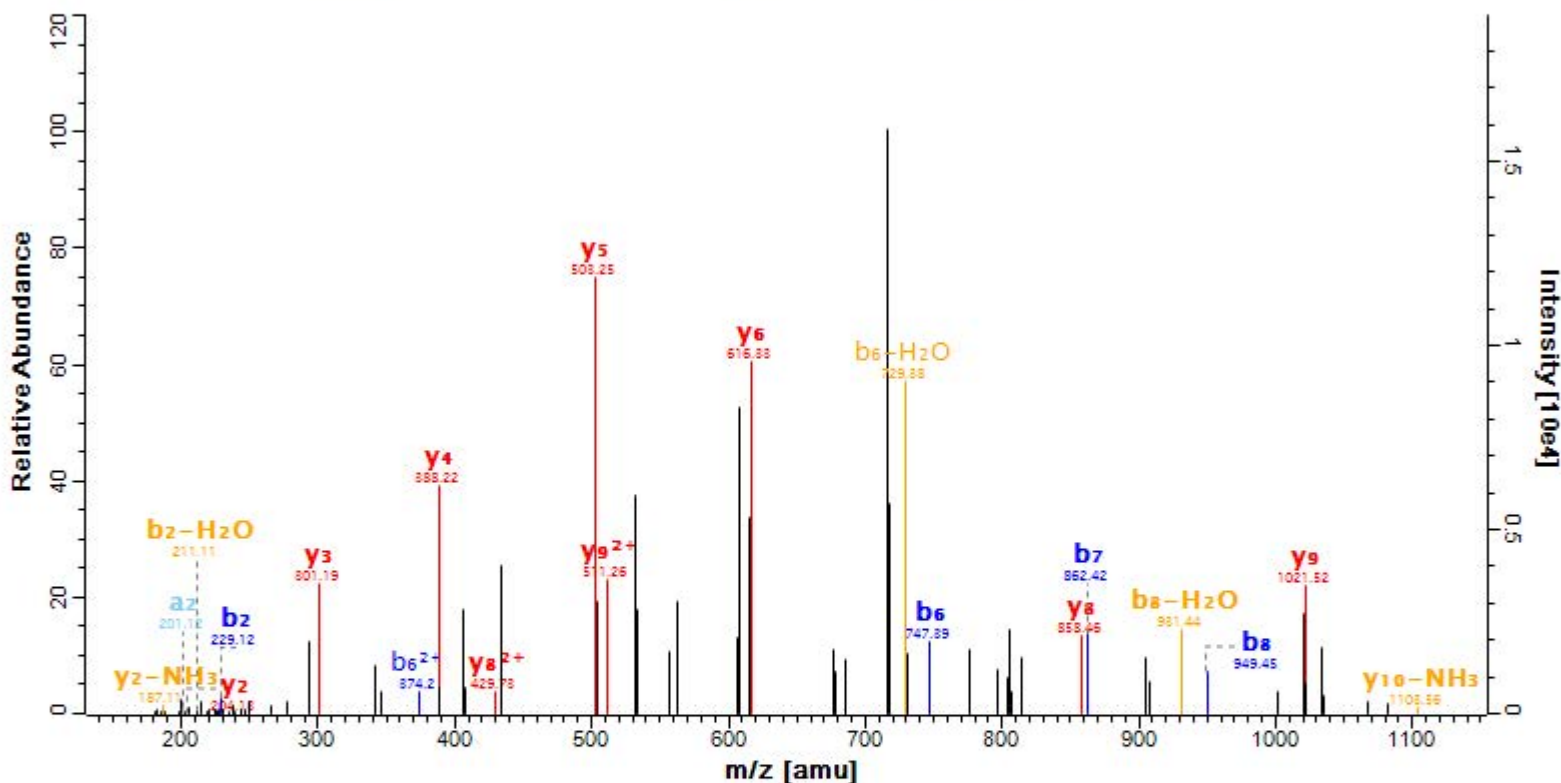

#### precursor information

|                   |                 |
|-------------------|-----------------|
| Mass:             | 1248.62429      |
| m/z:              | 625.31942       |
| Charge:           | 2+              |
| Retentiontime:    | 25.354549407959 |
| Score:            | 93.34519        |
| Mass Error [ppm]: | 0.40524         |
| PEP:              | 0.0014259       |
| Precursor Type:   | MULTI           |

#### general information

|                       |           |
|-----------------------|-----------|
| Annotation:           | 9 of 11   |
| AminoAcids Coverage:  | 82 %      |
| Intensity Coverage:   | 38 %      |
| Peak Coverage:        | 22 %      |
| Protein Localisation: | 46 ... 56 |

|        | a ion         | b <sup>2+</sup> ion | b ion         |       |       | y ion         | y <sup>2+</sup> ion |              |             |
|--------|---------------|---------------------|---------------|-------|-------|---------------|---------------------|--------------|-------------|
|        | Δ dalton mass | Δ dalton mass       | Δ dalton mass | seq   |       | Δ dalton mass | Δ dalton mass       |              |             |
|        | 102.1         | 130                 | 130           | 1     | E     | 10            |                     |              |             |
| +0.015 | 201.1         | 229.1               | +0.083        | 2     | V     | 9             | 1121                |              |             |
|        | 364.2         | 392.2               | 392.2         | 3     | Y     | 8             | 1022 +0.153         |              |             |
|        | 493.2         | 521.2               | 521.2         | 4     | E     | 7             | 858.5 +0.019        |              |             |
|        | 606.3         | 634.3               | 634.3         | 5     | L     | 6             | 729.4               |              |             |
|        | 719.4         | -0.01               | 374.2         | -0.01 | 747.4 | 6             | L                   | 5            | 616.3 +0.14 |
|        | 834.4         | 862.4               | -0.16         | 862.4 | 7     | D             | 4                   | 503.2 +0.123 |             |
|        | 921.5         | 949.5               | +0.164        | 949.5 | 8     | S             | 3                   | 388.2 +0.068 |             |
|        | 1019          | 1047                | 1047          | 9     | P     | 2             | 301.2 +0.01         |              |             |
|        | 1076          | 1104                | 1104          | 10    | G     | 1             | 204.1 +0.005        |              |             |
|        |               |                     |               | 11    | K     | 0             | 147.1               |              |             |



Scan number 4159 Raw file LNCAP\_Silac\_23F10\_set1\_03  
 Method ITMS; CID Pepti... 105.2

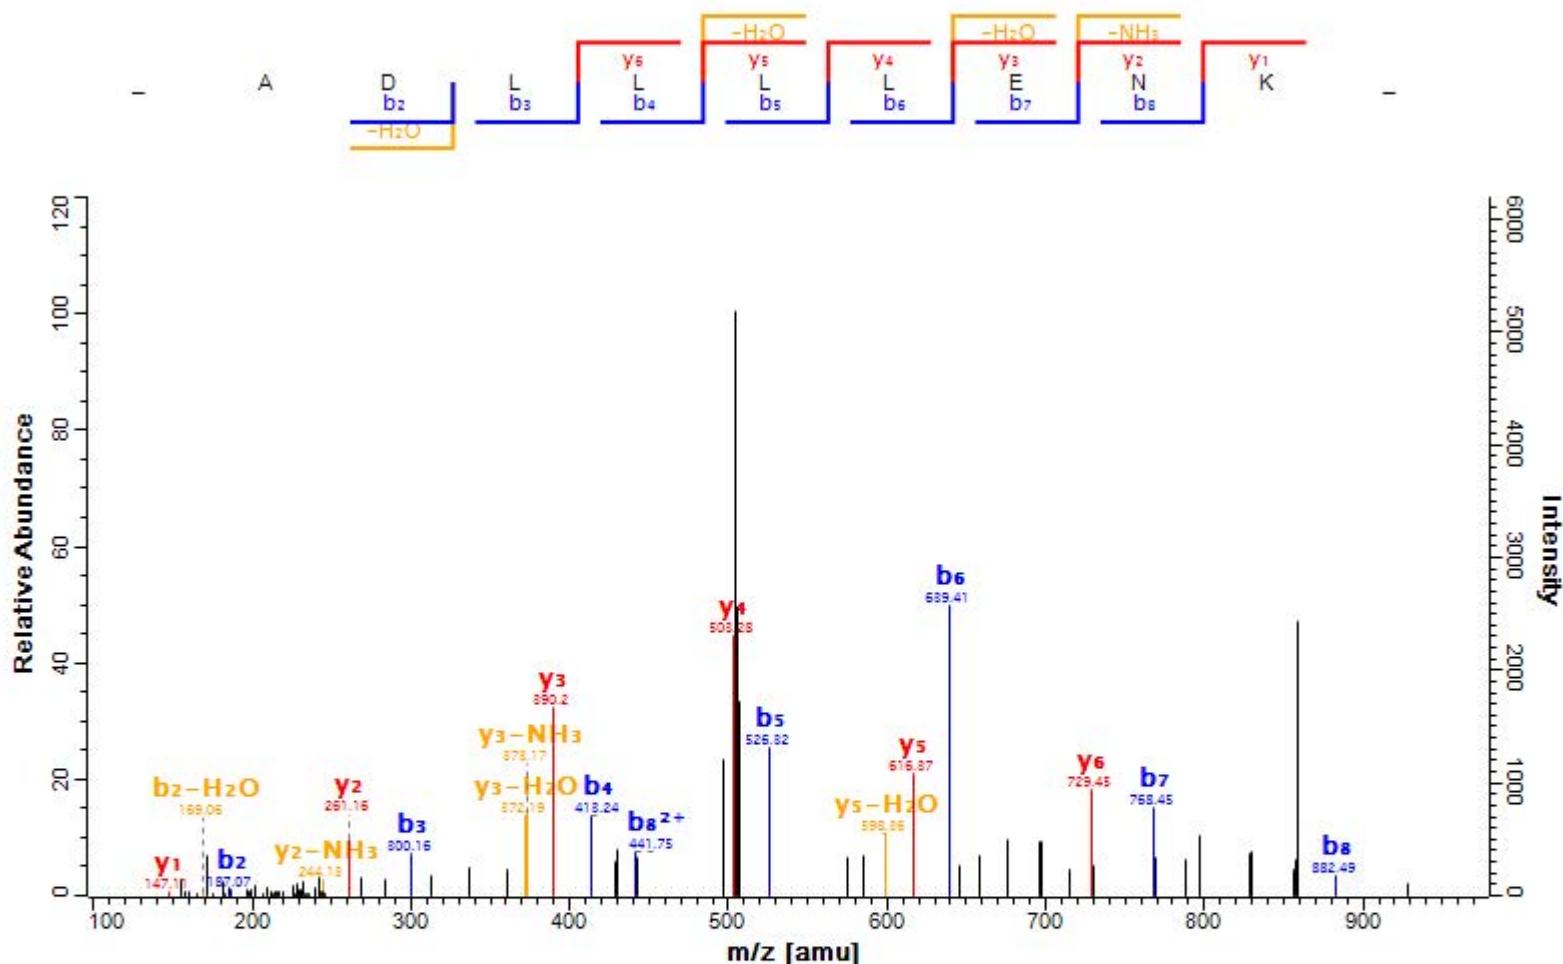

#### precursor information

|                       |                 |
|-----------------------|-----------------|
| Mass:                 | 1027.59219      |
| m/z:                  | 514.80337       |
| Charge:               | 2+              |
| Retentiontime:        | 25.704471588134 |
| Score:                | 105.1952        |
| Mass Error [ppm]:     | 0.81014         |
| PEP:                  | 0.0027161       |
| Precursor Type:       | MULTI           |
| Annotation:           | 8 of 9          |
| AminoAcids Coverage:  | 89 %            |
| Intensity Coverage:   | 39 %            |
| Peak Coverage:        | 20 %            |
| Protein Localisation: | 653 ... 661     |

| b <sup>2+</sup> ion |          | b ion     |          |     | y ion    |      |          |           |
|---------------------|----------|-----------|----------|-----|----------|------|----------|-----------|
| Δ dalton            | mass     | Δ dalton  | mass     | seq | Δ dalton | mass |          |           |
|                     | 72.04439 |           | 72.04439 | 1   | A        | 8    |          |           |
|                     | 187.0713 | -0.15845  | 187.0713 | 2   | D        | 7    | 957.5615 |           |
|                     | 300.1554 | +0.05493  | 300.1554 | 3   | L        | 6    | 842.5346 |           |
|                     | 413.2395 | +0.107402 | 413.2395 | 4   | L        | 5    | 729.4505 | +0.075728 |
|                     | 526.3235 | +0.031272 | 526.3235 | 5   | L        | 4    | 616.3665 | +0.229617 |
|                     | 639.4076 | -0.01263  | 639.4076 | 6   | L        | 3    | 503.2824 | +0.06484  |
|                     | 768.4502 | +0.066175 | 768.4502 | 7   | E        | 2    | 390.1983 | +0.024271 |
| -0.40992            | 441.7502 | +0.221673 | 882.4931 | 8   | N        | 1    | 261.1557 | +0.079437 |
|                     |          |           |          | 9   | K        | 0    | 147.1128 | -0.06341  |

Scan number 4332 Raw file LNCAP\_Silac\_23F10\_set1\_03  
 Method ITMS; CID Pepti... 179.19

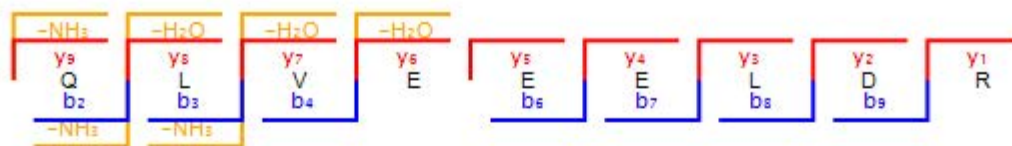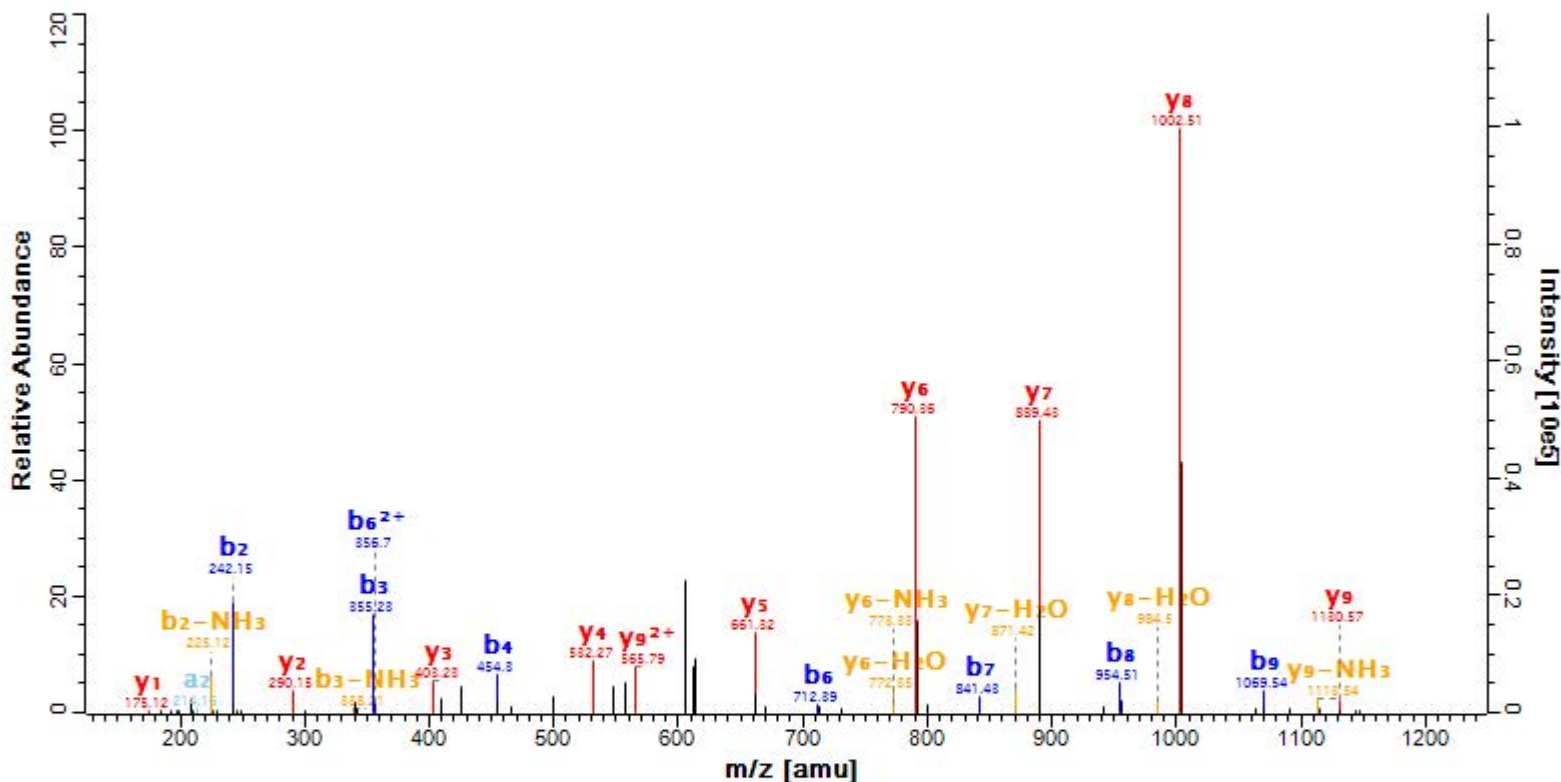

#### precursor information

|                   |                 |
|-------------------|-----------------|
| Mass:             | 1242.64574      |
| m/z:              | 622.33014       |
| Charge:           | 2+              |
| Retentiontime:    | 26.510379791259 |
| Score:            | 179.1947        |
| Mass Error [ppm]: | 0.12521         |
| PEP:              | 3.5828E-06      |
| Precursor Type:   | MULTI           |

|                       |           |
|-----------------------|-----------|
| Annotation:           | 9 of 10   |
| AminoAcids Coverage:  | 90 %      |
| Intensity Coverage:   | 65 %      |
| Peak Coverage:        | 32 %      |
| Protein Localisation: | 56 ... 65 |

| a ion         | b <sup>2+</sup> ion | b ion         |    |     |   | y ion         | y <sup>2+</sup> ion |
|---------------|---------------------|---------------|----|-----|---|---------------|---------------------|
| Δ dalton mass | Δ dalton mass       | Δ dalton mass |    | seq |   | Δ dalton mass | Δ dalton mass       |
| 86.1          | 114.1               | 114.1         | 1  | I   | 9 |               |                     |
| +0.212 114.2  | 242.1               | +0.036 242.1  | 2  | Q   | 8 | 1131          | +0.139 565.8        |
| 327.2         | 355.2               | -0.04 355.2   | 3  | L   | 7 | 1003          | -0.01 1003          |
| 426.3         | 454.3               | +0.082 454.3  | 4  | V   | 6 | 889.4         | +0.078 889.4        |
| 555.4         | 583.3               | 583.3         | 5  | E   | 5 | 790.4         | +0.041 790.4        |
| 684.4         | -0.47 356.7         | -0.21 712.4   | 6  | E   | 4 | 661.3         | +0.009 661.3        |
| 813.4         | 841.4               | +0.201 841.4  | 7  | E   | 3 | 532.3         | +0.049 532.3        |
| 926.5         | 954.5               | +0.153 954.5  | 8  | L   | 2 | 403.2         | +0.089 403.2        |
| 1042          | 1070                | -0.09 1070    | 9  | D   | 1 | 290.1         | +0.107 290.1        |
|               |                     |               | 10 | R   | 0 | 175.1         | +0.071 175.1        |

Scan number 4339 Raw file LNCAP\_Silac\_23F10\_set1\_03  
 Method ITMS; CID Pepti... 94.31

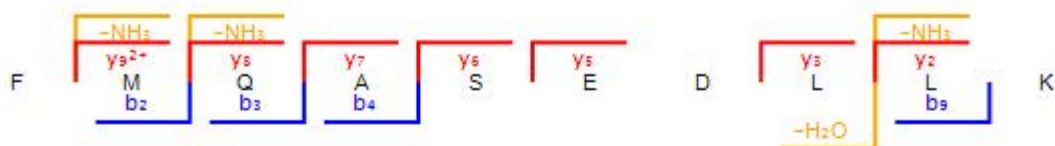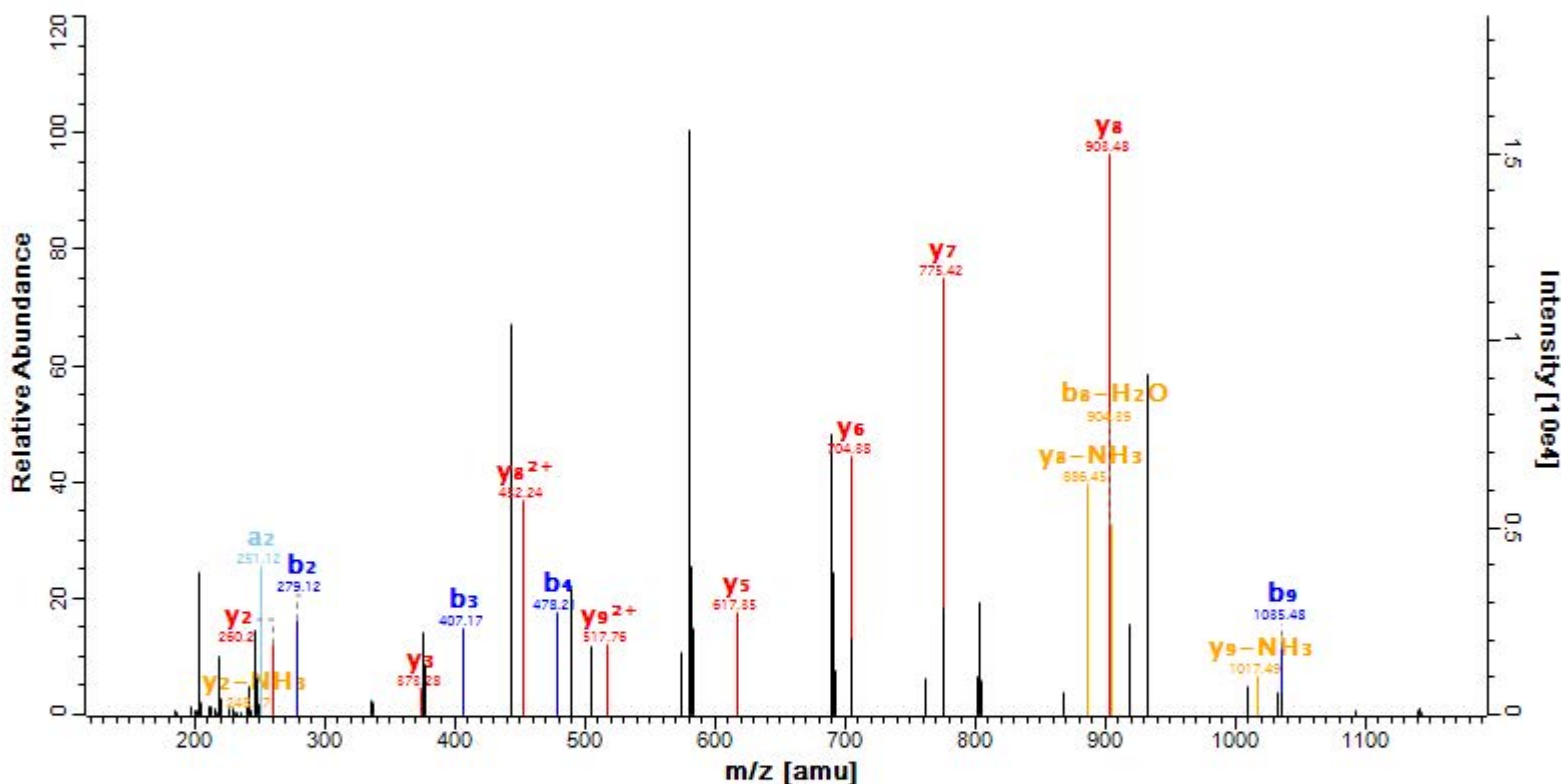

#### precursor information

|                   |                 |
|-------------------|-----------------|
| Mass:             | 1180.57979      |
| $m/z$ :           | 591.29717       |
| Charge:           | 2+              |
| Retention time:   | 26.541650772094 |
| Score:            | 94.30918        |
| Mass Error [ppm]: | -0.019634       |
| PEP:              | 0.0017104       |
| Precursor Type:   | MULTI           |

|                       |           |
|-----------------------|-----------|
| Annotation:           | 7 of 10   |
| AminoAcids Coverage:  | 70 %      |
| Intensity Coverage:   | 40 %      |
| Peak Coverage:        | 20 %      |
| Protein Localisation: | 65 ... 74 |

| a ion           |        | b ion           |        |    |     |   | y ion           |         | y <sup>2+</sup> ion |         |
|-----------------|--------|-----------------|--------|----|-----|---|-----------------|---------|---------------------|---------|
| $\Delta$ dalton | mass   | $\Delta$ dalton | mass   |    | seq |   | $\Delta$ dalton | mass    | $\Delta$ dalton     | mass    |
|                 | 120.08 |                 | 148.08 | 1  | F   | 9 |                 |         |                     |         |
| +0.101          | 251.12 | +0.0977         | 279.12 | 2  | M   | 8 | 1034.5          |         | 517.76              | +0.1137 |
|                 | 379.18 | +0.0434         | 407.17 | 3  | Q   | 7 | 903.48          | +0.0319 | 452.24              | +0.1711 |
|                 | 450.22 | +0.0478         | 478.21 | 4  | A   | 6 | 775.42          | +0.0335 | 775.42              |         |
|                 | 537.25 |                 | 565.24 | 5  | S   | 5 | 704.38          | +0.0373 | 704.38              |         |
|                 | 666.29 |                 | 694.29 | 6  | E   | 4 | 617.35          | +0.0919 | 617.35              |         |
|                 | 781.32 |                 | 809.31 | 7  | D   | 3 | 488.31          |         | 488.31              |         |
|                 | 894.4  |                 | 922.4  | 8  | L   | 2 | 373.28          | +0.2081 | 373.28              |         |
|                 | 1007.5 | -0.027          | 1035.5 | 9  | L   | 1 | 260.2           | +0.0234 | 260.2               |         |
|                 |        |                 |        | 10 | K   | 0 | 147.11          |         | 147.11              |         |

Scan number 4365 Raw file LNCAP\_Silac\_23F10\_set1\_03  
 Method ITMS; CID Pepti... 111.43

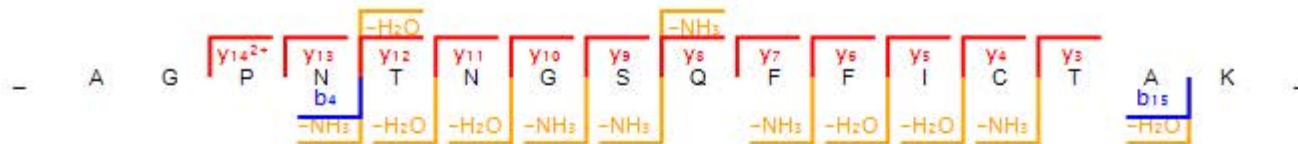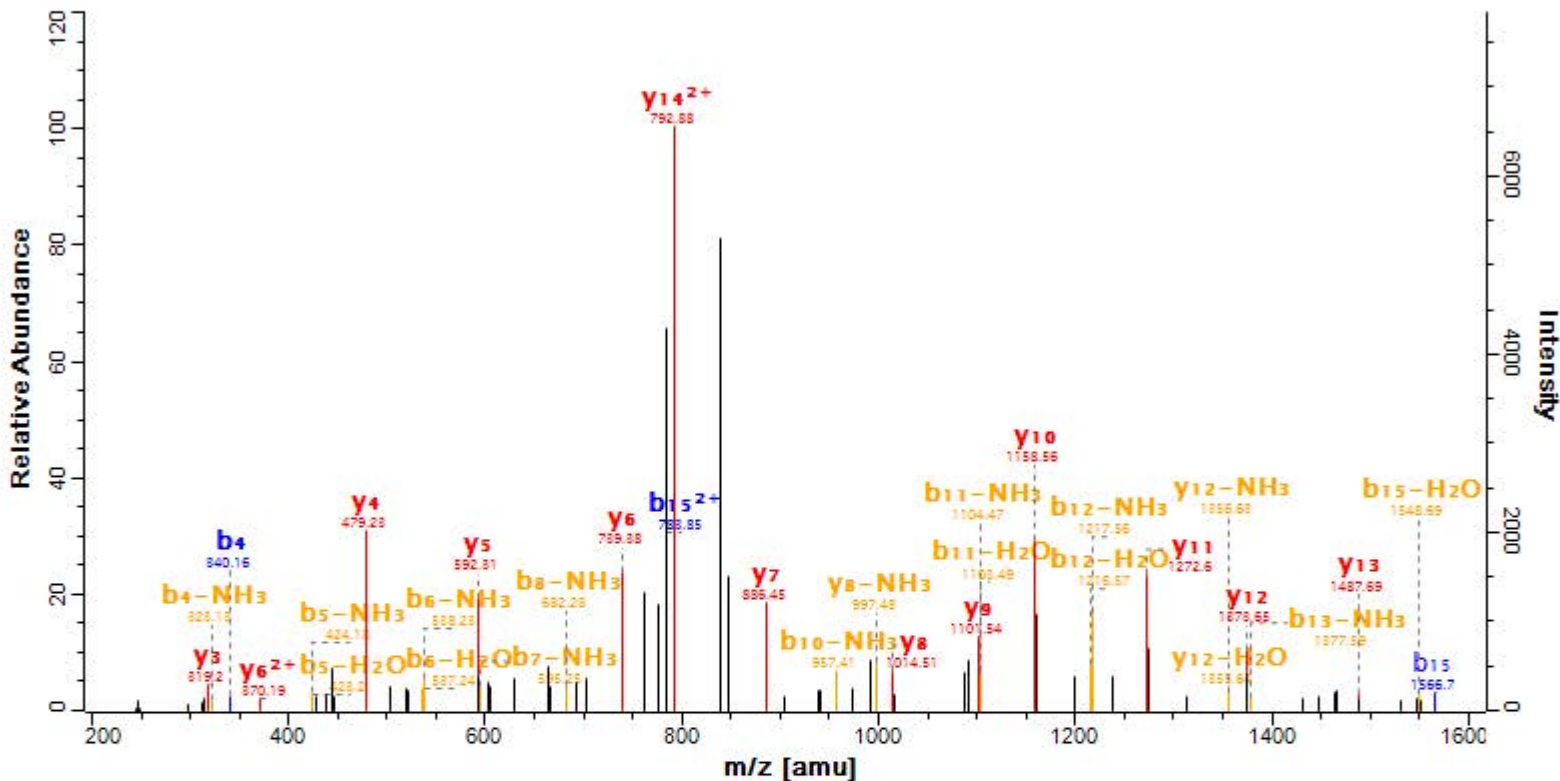

precursor information

|                   |                 |
|-------------------|-----------------|
| Mass:             | 1711.79825      |
| m/z:              | 856.9064        |
| Charge:           | 2+              |
| Retentiontime:    | 26.656530380249 |
| Score:            | 111.4331        |
| Mass Error [ppm]: | -0.32425        |
| PEP:              | 4.3927E-07      |
| Precursor Type:   | MULTI           |

general information

|                       |             |
|-----------------------|-------------|
| Annotation:           | 13 of 16    |
| AminoAcids Coverag    | 81 %        |
| Intensity Coverage:   | 47 %        |
| Peak Coverage:        | 39 %        |
| Protein Localisation: | 103 ... 118 |

| b <sup>2+</sup> ion |        | b ion    |        | seq |   |    | y ion    |         | y <sup>2+</sup> ion |         |
|---------------------|--------|----------|--------|-----|---|----|----------|---------|---------------------|---------|
| Δ dalton            | mass   | Δ dalton | mass   |     |   |    | Δ dalton | mass    | Δ dalton            | mass    |
|                     | 72.044 |          | 72.044 | 1   | A | 15 |          |         |                     |         |
|                     | 129.07 |          | 129.07 | 2   | G | 14 | 1641.8   |         | 1641.8              |         |
|                     | 226.12 |          | 226.12 | 3   | P | 13 | 1584.7   |         | 792.88              | +0.2141 |
|                     | 340.16 | +0.1099  | 340.16 | 4   | N | 12 | 1487.7   | -0.055  | 1487.7              |         |
|                     | 441.21 |          | 441.21 | 5   | T | 11 | 1373.7   | -0.027  | 1373.7              |         |
|                     | 555.25 |          | 555.25 | 6   | N | 10 | 1272.6   | -0.007  | 1272.6              |         |
|                     | 612.27 |          | 612.27 | 7   | G | 9  | 1158.6   | -0.029  | 1158.6              |         |
|                     | 699.31 |          | 699.31 | 8   | S | 8  | 1101.5   | +0.0176 | 1101.5              |         |
|                     | 827.36 |          | 827.36 | 9   | Q | 7  | 1014.5   | -0.058  | 1014.5              |         |
|                     | 974.43 |          | 974.43 | 10  | F | 6  | 886.45   | +0.0615 | 886.45              |         |
|                     | 1121.5 |          | 1121.5 | 11  | F | 5  | 739.38   | +0.0609 | 370.19              | -0.034  |
|                     | 1234.6 |          | 1234.6 | 12  | I | 4  | 592.31   | +0.0709 | 592.31              |         |
|                     | 1394.6 |          | 1394.6 | 13  | C | 3  | 479.23   | +0.0824 | 479.23              |         |
|                     | 1495.7 |          | 1495.7 | 14  | T | 2  | 319.2    | -0.021  | 319.2               |         |
| +0.0262             | 783.85 | -0.142   | 1566.7 | 15  | A | 1  | 218.15   |         | 218.15              |         |
|                     |        |          |        | 16  | K | 0  | 147.11   |         | 147.11              |         |

Scan number 5080 Raw file LNCAP\_Silac\_23F10\_set1\_03  
 Method ITMS: CID Pepti... 159.09

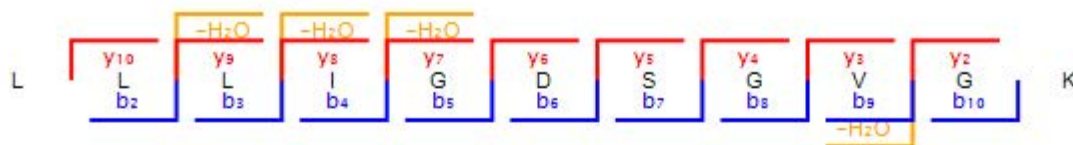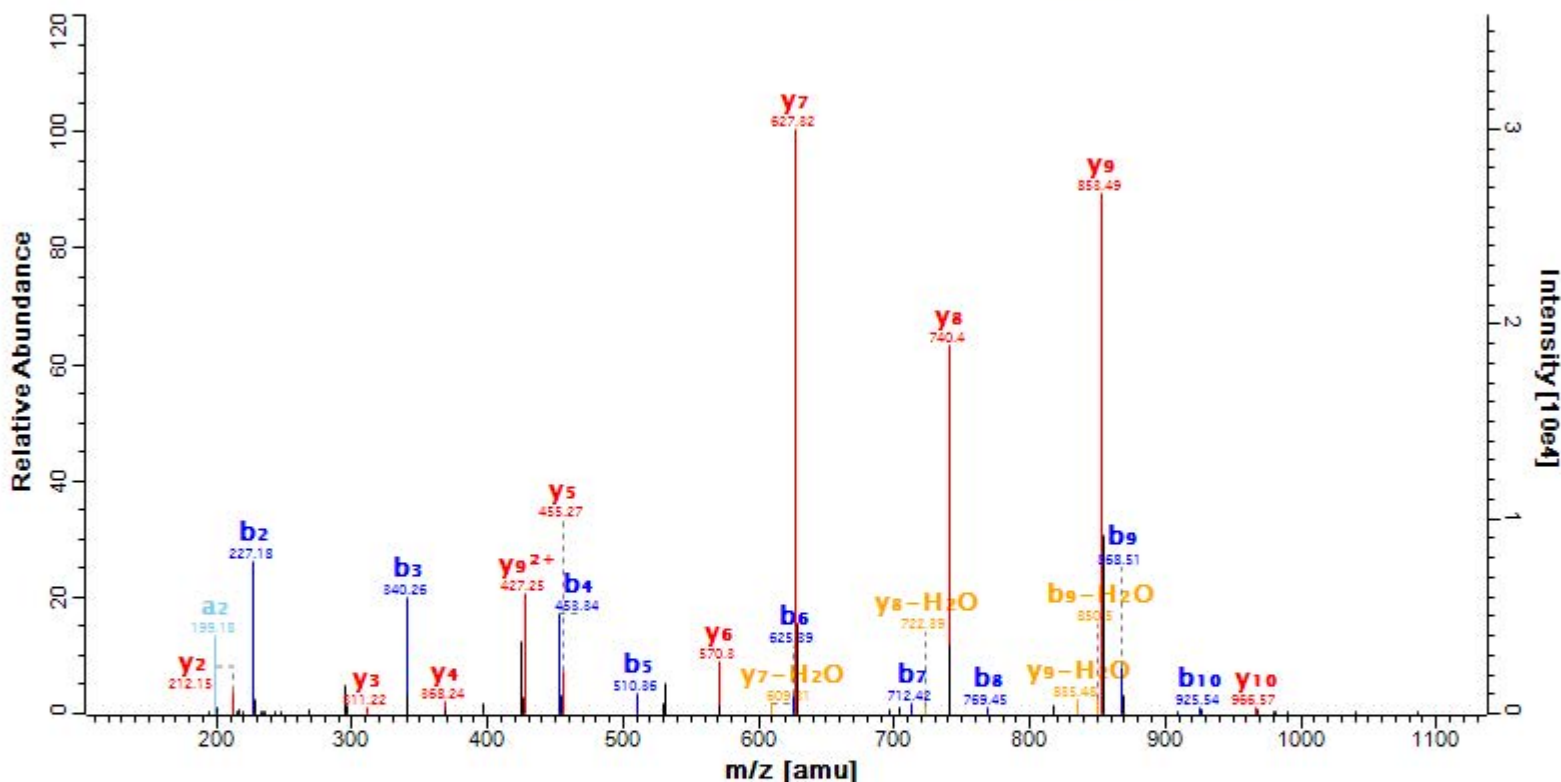

#### precursor information

|                   |                 |
|-------------------|-----------------|
| Mass:             | 1070.63338      |
| m/z:              | 536.32397       |
| Charge:           | 2+              |
| Retentiontime:    | 29.993888854980 |
| Score:            | 159.0863        |
| Mass Error [ppm]: | -0.16606        |
| PEP:              | 2.1152E-06      |
| Precursor Type:   | MULTI           |

#### general information

|                       |           |
|-----------------------|-----------|
| Annotation:           | 9 of 11   |
| AminoAcids Coverage:  | 82 %      |
| Intensity Coverage:   | 77 %      |
| Peak Coverage:        | 31 %      |
| Protein Localisation: | 11 ... 21 |

| a ion    |        | b ion    |        |    |     |          | y ion  |          | y <sup>2+</sup> ion |  |
|----------|--------|----------|--------|----|-----|----------|--------|----------|---------------------|--|
| Δ dalton | mass   | Δ dalton | mass   |    | seq | Δ dalton | mass   | Δ dalton | mass                |  |
|          | 86.096 |          | 114.09 | 1  | L   | 10       |        |          |                     |  |
| -0.046   | 199.18 | -0.076   | 227.18 | 2  | L   | 9        | 966.57 | +0.0802  | 966.57              |  |
|          | 312.26 | -0.031   | 340.26 | 3  | L   | 8        | 853.49 | -0.02    | 427.25              |  |
|          | 425.35 | -0.09    | 453.34 | 4  | I   | 7        | 740.4  | +0.0752  | 740.4               |  |
|          | 482.37 | -0.033   | 510.36 | 5  | G   | 6        | 627.32 | -0.004   | 627.32              |  |
|          | 597.4  | +0.005   | 625.39 | 6  | D   | 5        | 570.3  | +0.1632  | 570.3               |  |
|          | 684.43 | +0.0587  | 712.42 | 7  | S   | 4        | 455.27 | +0.0938  | 455.27              |  |
|          | 741.45 | -0.017   | 769.45 | 8  | G   | 3        | 368.24 | +0.1186  | 368.24              |  |
|          | 840.52 | +0.0067  | 868.51 | 9  | V   | 2        | 311.22 | +0.0876  | 311.22              |  |
|          | 897.54 | -0.066   | 925.54 | 10 | G   | 1        | 212.15 | +0.0875  | 212.15              |  |
|          |        |          |        | 11 | K   | 0        | 155.13 |          | 155.13              |  |

Scan number 5316 Raw file LNCAP\_Silac\_23F10\_set1\_03  
 Method ITMS: CID Pepti... 133.15

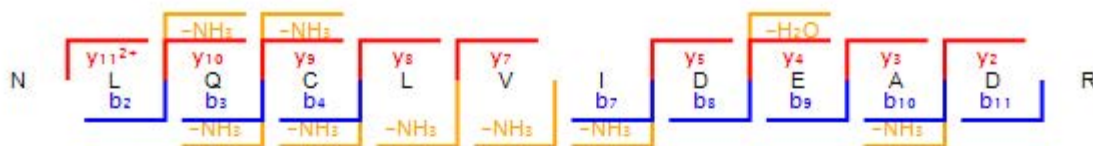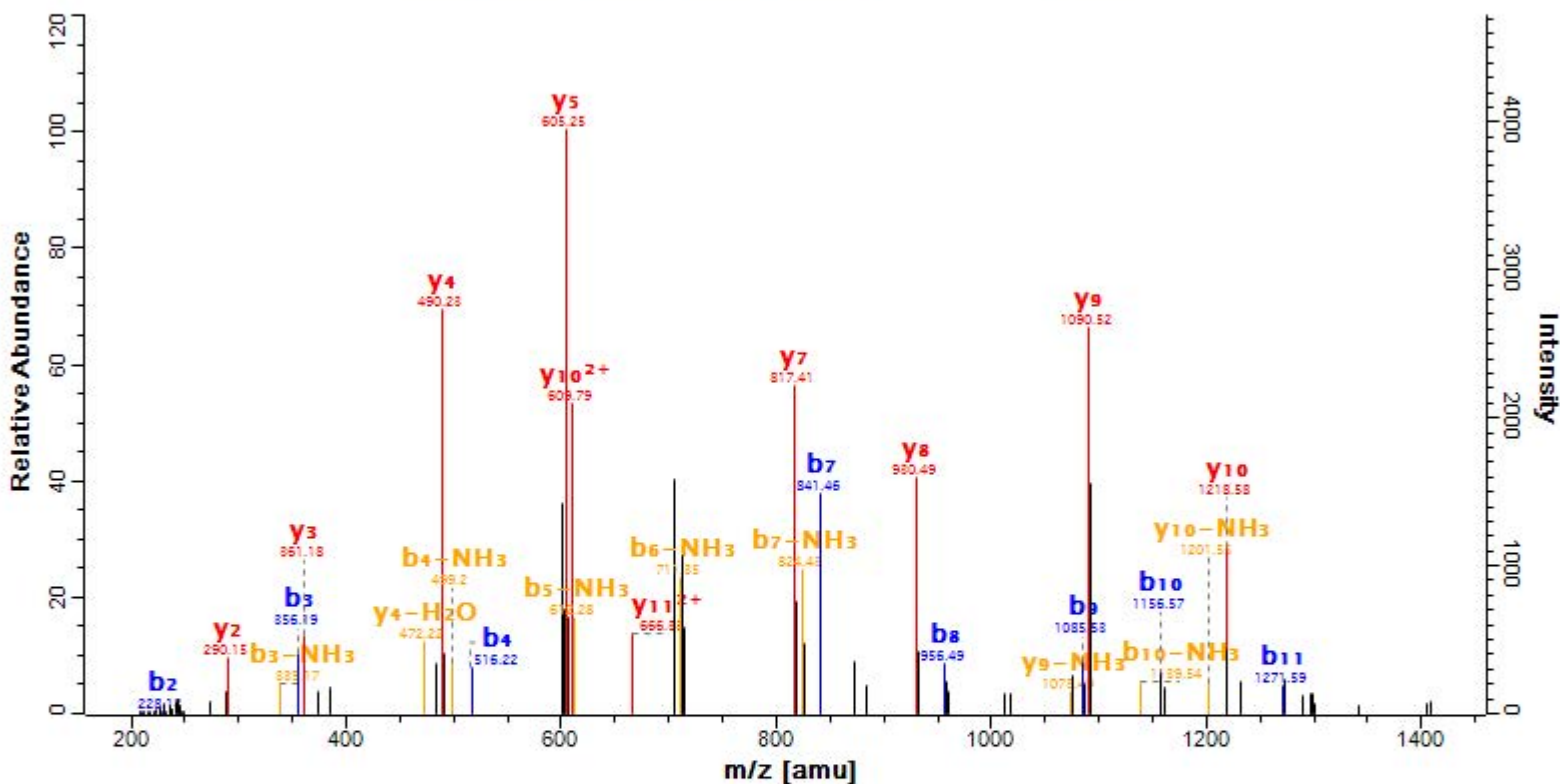

#### precursor information

|                   |                 |
|-------------------|-----------------|
| Mass:             | 1444.6977       |
| m/z:              | 723.35613       |
| Charge:           | 2+              |
| Retentiontime:    | 31.130268096923 |
| Score:            | 133.1483        |
| Mass Error [ppm]: | -0.22369        |
| PEP:              | 6.8343E-05      |
| Precursor Type:   | ISO             |

#### general information

|                       |             |
|-----------------------|-------------|
| Annotation:           | 10 of 12    |
| AminoAcids Coverage:  | 83 %        |
| Intensity Coverage:   | 62 %        |
| Peak Coverage:        | 31 %        |
| Protein Localisation: | 326 ... 337 |

| b ion     |          |    |     |    | y ion    |           | y <sup>2+</sup> ion |           |
|-----------|----------|----|-----|----|----------|-----------|---------------------|-----------|
| Δ dalton  | mass     |    | seq |    | Δ dalton | mass      | Δ dalton            | mass      |
|           | 115.0502 | 1  | N   | 11 |          |           |                     |           |
| -0.17699  | 228.1343 | 2  | L   | 10 | 1331.662 |           | 666.3348            | +0.076367 |
| +0.061305 | 356.1928 | 3  | Q   | 9  | 1218.578 | -0.01862  | 609.7928            | +0.02825  |
| +0.145098 | 516.2235 | 4  | C   | 8  | 1090.52  | +0.009073 | 1090.52             |           |
|           | 629.3076 | 5  | L   | 7  | 930.4891 | +0.048267 | 930.4891            |           |
|           | 728.376  | 6  | V   | 6  | 817.405  | +0.143622 | 817.405             |           |
| -0.07899  | 841.46   | 7  | I   | 5  | 718.3366 |           | 718.3366            |           |
| +0.12557  | 956.487  | 8  | D   | 4  | 605.2525 | +0.003497 | 605.2525            |           |
| -0.11295  | 1085.53  | 9  | E   | 3  | 490.2256 | +0.063399 | 490.2256            |           |
| +0.203822 | 1156.567 | 10 | A   | 2  | 361.183  | +0.090062 | 361.183             |           |
| -0.03674  | 1271.594 | 11 | D   | 1  | 290.1459 | +0.100687 | 290.1459            |           |
|           |          | 12 | R   | 0  | 175.119  |           | 175.119             |           |

Scan number 5492 Raw file LNCAP\_Silac\_23F10\_set1\_03  
 Method ITMS; CID Pepti... 68.28

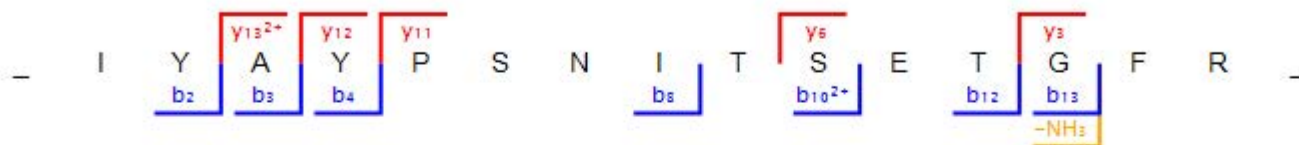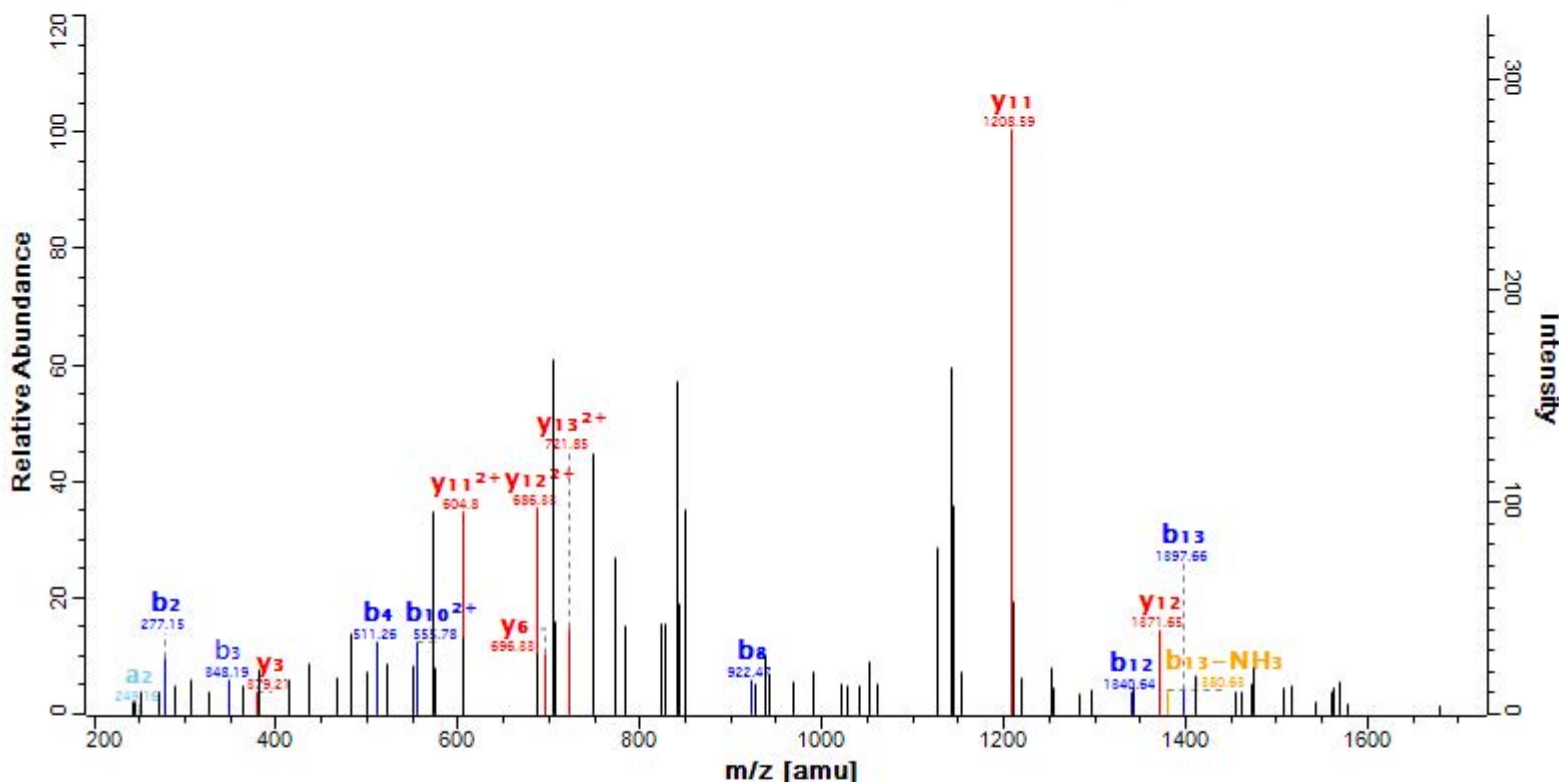

#### precursor information

|                   |                 |
|-------------------|-----------------|
| Mass:             | 1717.83262      |
| m/z:              | 859.92359       |
| Charge:           | 2+              |
| Retentiontime:    | 31.968616485595 |
| Score:            | 68.27738        |
| Mass Error [ppm]: | 0.85474         |
| PEP:              | 0.0019692       |
| Precursor Type:   | MULTI           |

| a ion         | b <sup>2+</sup> ion | b ion         | seq |   |    | y ion         | y <sup>2+</sup> ion |
|---------------|---------------------|---------------|-----|---|----|---------------|---------------------|
| Δ dalton mass | Δ dalton mass       | Δ dalton mass |     |   |    | Δ dalton mass | Δ dalton mass       |
| 86.1          | 114.1               | 114.1         | 1   | I | 14 |               |                     |
| +0.088249.2   | 277.2               | +0.135277.2   | 2   | Y | 13 | 1606          | 1606                |
| 320.2         | 348.2               | +0.063348.2   | 3   | A | 12 | 1443          | 721.8 +0.274        |
| 483.3         | 511.3               | -0.1 511.3    | 4   | Y | 11 | 1372          | +0.068586.3 +0.083  |
| 580.3         | 608.3               | 608.3         | 5   | P | 10 | 1209          | -0.03 604.8 +0.09   |
| 667.3         | 695.3               | 695.3         | 6   | S | 9  | 1112          | 1112                |
| 781.4         | 809.4               | 809.4         | 7   | N | 8  | 1025          | 1025                |
| 894.5         | 922.5               | +0.109922.5   | 8   | I | 7  | 910.5         | 910.5               |
| 995.5         | 1024                | 1024          | 9   | T | 6  | 797.4         | 797.4               |
| 1083          | -0.41 555.8         | 1111          | 10  | S | 5  | 696.3         | +0.035696.3         |
| 1212          | 1240                | 1240          | 11  | E | 4  | 609.3         | 609.3               |
| 1313          | 1341                | -0.33 1341    | 12  | T | 3  | 480.3         | 480.3               |
| 1370          | 1398                | +0.2641398    | 13  | G | 2  | 379.2         | -0.04 379.2         |
| 1517          | 1545                | 1545          | 14  | F | 1  | 322.2         | 322.2               |
|               |                     |               | 15  | R | 0  | 175.1         | 175.1               |

#### general information

|                       |             |
|-----------------------|-------------|
| Annotation:           | 9 of 15     |
| AminoAcids Coverage:  | 60 %        |
| Intensity Coverage:   | 25 %        |
| Peak Coverage:        | 19 %        |
| Protein Localisation: | 212 ... 226 |

Scan number 553 Raw file LNCAP\_Silac\_23F10\_set1\_03  
 Method ITMS: CID Pepti... 74.61

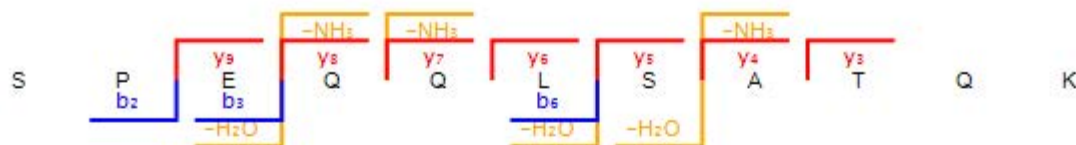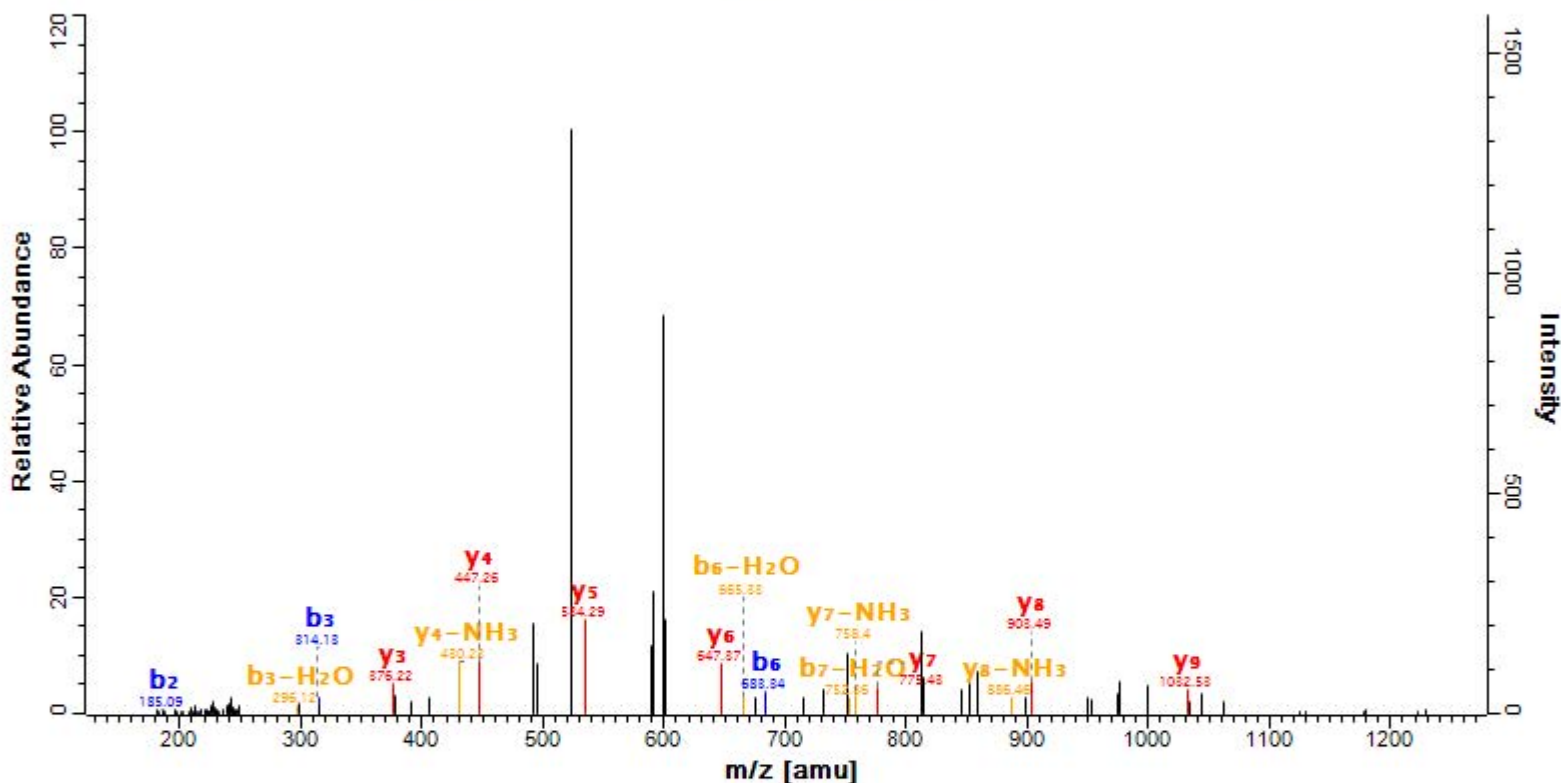

#### precursor information

|                   |                 |
|-------------------|-----------------|
| Mass:             | 1215.61067      |
| m/z:              | 608.81261       |
| Charge:           | 2+              |
| Retentiontime:    | 8.4275236129760 |
| Score:            | 74.61087        |
| Mass Error [ppm]: | 0.93444         |
| PEP:              | 0.026562        |
| Precursor Type:   | ISO             |

#### general information

|                       |            |
|-----------------------|------------|
| Annotation:           | 8 of 11    |
| AminoAcids Coverage:  | 73 %       |
| Intensity Coverage:   | 16 %       |
| Peak Coverage:        | 15 %       |
| Protein Localisation: | 95 ... 105 |

| b ion      |               |    |     |    | y ion         |            |
|------------|---------------|----|-----|----|---------------|------------|
| Δ dalton   | mass          |    | seq |    | Δ dalton      | mass       |
|            | 88.039304876  | 1  | S   | 10 |               |            |
| +0.1704282 | 185.092068728 | 2  | P   | 9  | 1129.58477831 |            |
| +0.1255921 | 314.134661825 | 3  | E   | 8  | 1032.53201445 | -0.0454422 |
|            | 442.193239336 | 4  | Q   | 7  | 903.489421357 | +0.0056958 |
|            | 570.251816848 | 5  | Q   | 6  | 775.430843846 | +0.049808  |
| +0.1054034 | 683.335880828 | 6  | L   | 5  | 647.372266334 | +0.0417962 |
|            | 770.367909238 | 7  | S   | 4  | 534.288202354 | +0.0575008 |
|            | 841.405023026 | 8  | A   | 3  | 447.256173944 | +0.1741239 |
|            | 942.4527015   | 9  | T   | 2  | 376.219060156 | +0.0938671 |
|            | 1070.51127901 | 10 | Q   | 1  | 275.171381682 |            |
|            |               | 11 | K   | 0  | 147.112804171 |            |



Scan number 5631 Raw file LNCAP\_Silac\_23F10\_set1\_03  
 Method ITMS; CID Peptide 122.34

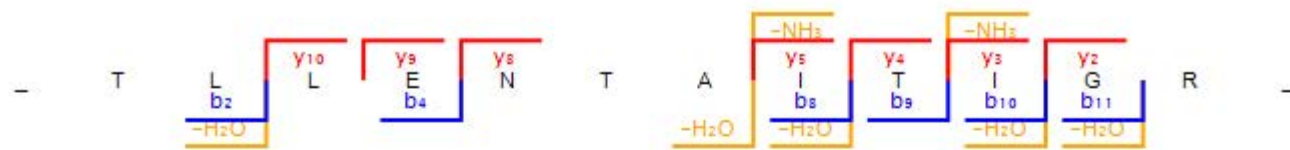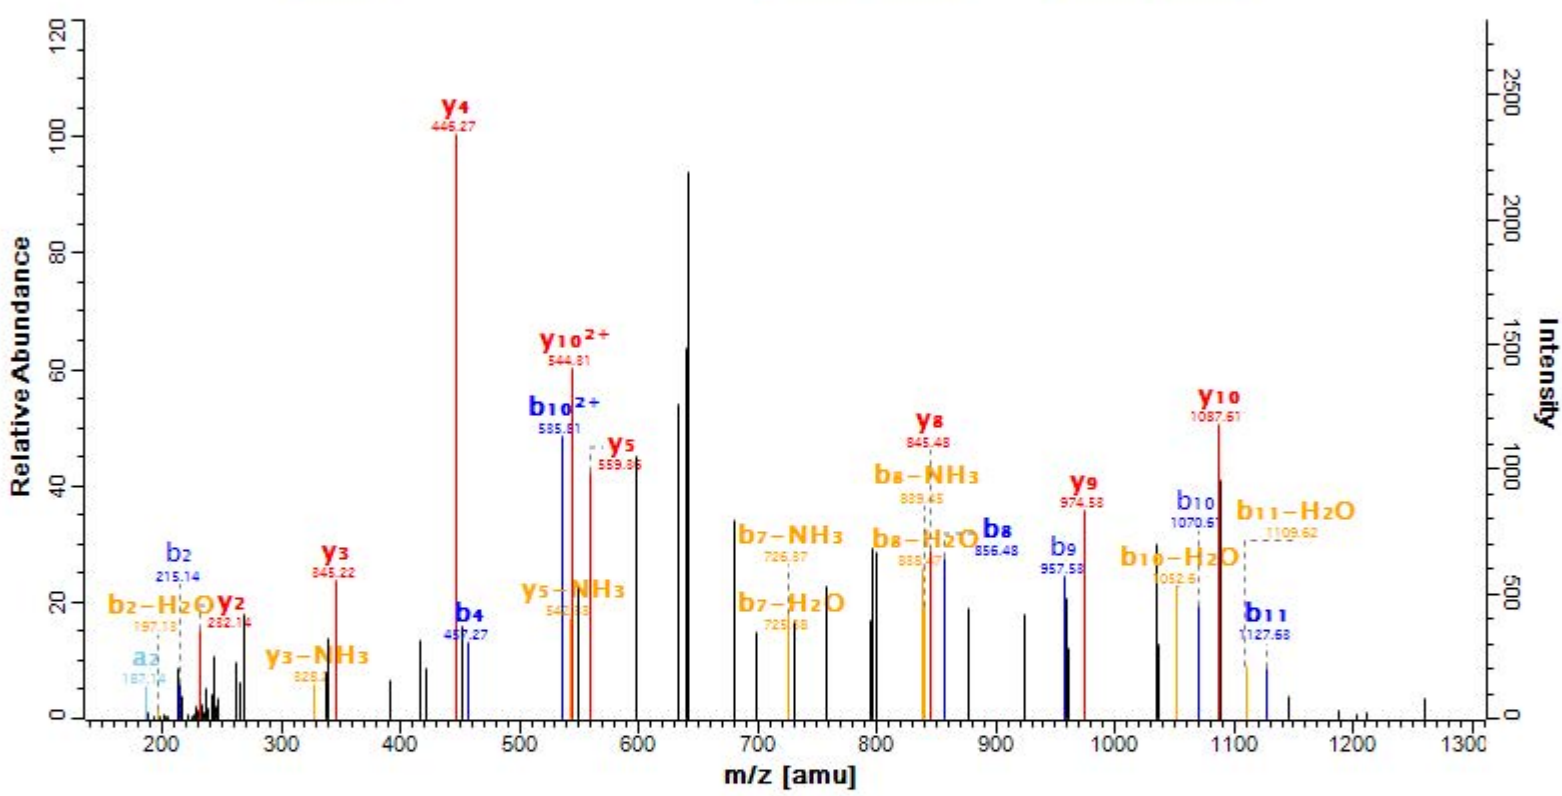

precursor information

|                   |                 |
|-------------------|-----------------|
| Mass:             | 1300.73497      |
| m/z:              | 651.37476       |
| Charge:           | 2+              |
| Retentiontime:    | 32.650928497314 |
| Score:            | 122.3442        |
| Mass Error [ppm]: | -0.076228       |
| PEP:              | 2.0834E-05      |
| Precursor Type:   | MULTI           |

general information

|                       |             |
|-----------------------|-------------|
| Annotation:           | 9 of 12     |
| AminoAcids Coverage:  | 75 %        |
| Intensity Coverage:   | 41 %        |
| Peak Coverage:        | 27 %        |
| Protein Localisation: | 774 ... 785 |

| a ion         |               | b <sup>2+</sup> ion |               | b ion |               | y ion         |               | y <sup>2+</sup> ion |  |
|---------------|---------------|---------------------|---------------|-------|---------------|---------------|---------------|---------------------|--|
| Δ dalton mass | Δ dalton mass | Δ dalton mass       | Δ dalton mass | seq   | Δ dalton mass | Δ dalton mass | Δ dalton mass | Δ dalton mass       |  |
| 74.06         | 102.1         | 102.1               | 1             | T     | 11            |               |               |                     |  |
| +0.095 87.1   | 215.1         | +0.005 215.1        | 2             | L     | 10            | 1201          | 1201          |                     |  |
| 300.2         | 328.2         | 328.2               | 3             | L     | 9             | 1088          | +0.075 544.3  | -0.06               |  |
| 429.3         | 457.3         | -0.01 457.3         | 4             | E     | 8             | 974.5         | +0.045 974.5  |                     |  |
| 543.3         | 571.3         | 571.3               | 5             | N     | 7             | 845.5         | +0.089 845.5  |                     |  |
| 644.4         | 672.4         | 672.4               | 6             | T     | 6             | 731.4         | 731.4         |                     |  |
| 715.4         | 743.4         | 743.4               | 7             | A     | 5             | 630.4         | 630.4         |                     |  |
| 828.5         | 856.5         | -0.04 856.5         | 8             | I     | 4             | 559.4         | +0.021 559.4  |                     |  |
| 929.5         | 957.5         | +0.072 957.5        | 9             | T     | 3             | 446.3         | +0.128 446.3  |                     |  |
| 1043          | -0.19 535.8   | +0.07 1071          | 10            | I     | 2             | 345.2         | +0.028 345.2  |                     |  |
| 1100          | 1128          | +0.071 1128         | 11            | G     | 1             | 232.1         | +0.052 232.1  |                     |  |
|               |               |                     | 12            | R     | 0             | 175.1         | 175.1         |                     |  |

Scan number 5766 Raw file LNCAP\_Silac\_23F10\_set1\_03  
 Method ITMS; CID Pepti... 101.89

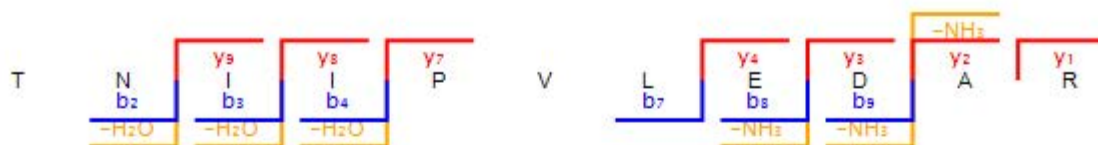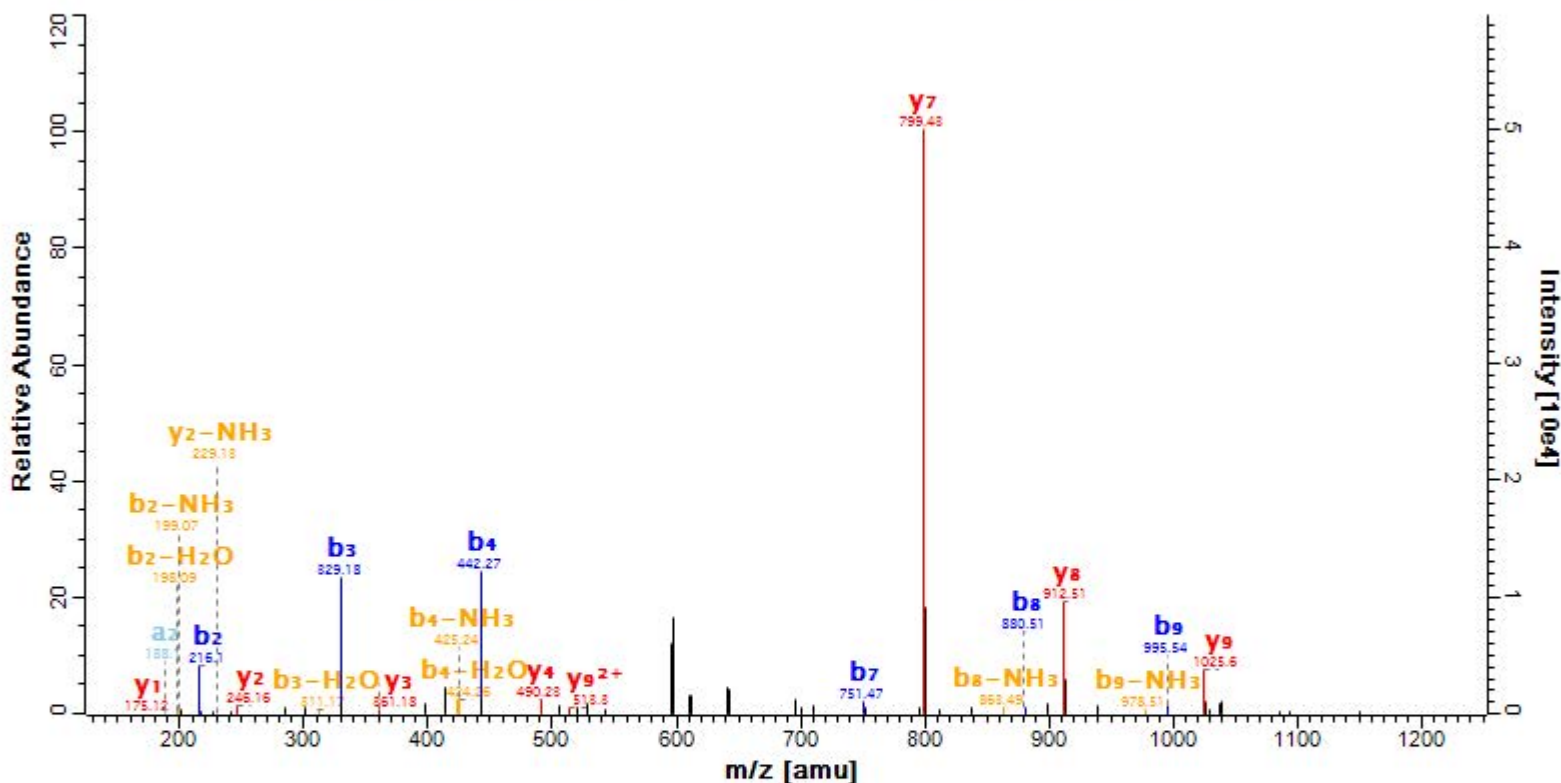

#### precursor information

|                   |                 |
|-------------------|-----------------|
| Mass:             | 1239.68201      |
| m/z:              | 620.84828       |
| Charge:           | 2+              |
| Retentiontime:    | 33.289150238037 |
| Score:            | 101.8882        |
| Mass Error [ppm]: | -0.23374        |
| PEP:              | 0.00047755      |
| Precursor Type:   | MULTI           |

#### general information

|                       |             |
|-----------------------|-------------|
| Annotation:           | 9 of 11     |
| AminoAcids Coverage:  | 82 %        |
| Intensity Coverage:   | 65 %        |
| Peak Coverage:        | 30 %        |
| Protein Localisation: | 220 ... 230 |

| a ion    |        | b ion    |        |    |     |          | y ion  |          | y <sup>2+</sup> ion |  |
|----------|--------|----------|--------|----|-----|----------|--------|----------|---------------------|--|
| Δ dalton | mass   | Δ dalton | mass   |    | seq | Δ dalton | mass   | Δ dalton | mass                |  |
|          | 74.06  |          | 102.05 | 1  | T   | 10       |        |          |                     |  |
| +0.1706  | 188.1  | -0.055   | 216.1  | 2  | N   | 9        | 1139.6 |          | 1139.6              |  |
|          | 301.19 | -0.031   | 329.18 | 3  | I   | 8        | 1025.6 | +0.1009  | 513.3               |  |
|          | 414.27 | -0.025   | 442.27 | 4  | I   | 7        | 912.51 | +0.0276  | 912.51              |  |
|          | 511.32 |          | 539.32 | 5  | P   | 6        | 799.43 | +0.0529  | 799.43              |  |
|          | 610.39 |          | 638.39 | 6  | V   | 5        | 702.38 |          | 702.38              |  |
|          | 723.48 | +0.1104  | 751.47 | 7  | L   | 4        | 603.31 |          | 603.31              |  |
|          | 852.52 | +0.1465  | 880.51 | 8  | E   | 3        | 490.23 | +0.2045  | 490.23              |  |
|          | 967.55 | -0.027   | 995.54 | 9  | D   | 2        | 361.18 | +0.1181  | 361.18              |  |
|          | 1038.6 |          | 1066.6 | 10 | A   | 1        | 246.16 | +0.0258  | 246.16              |  |
|          |        |          |        | 11 | R   | 0        | 175.12 | -0.062   | 175.12              |  |

Scan number 5848 Raw file LNCAP\_Silac\_23F10\_set1\_03  
 Method ITMS; CID Pepti... 238.2

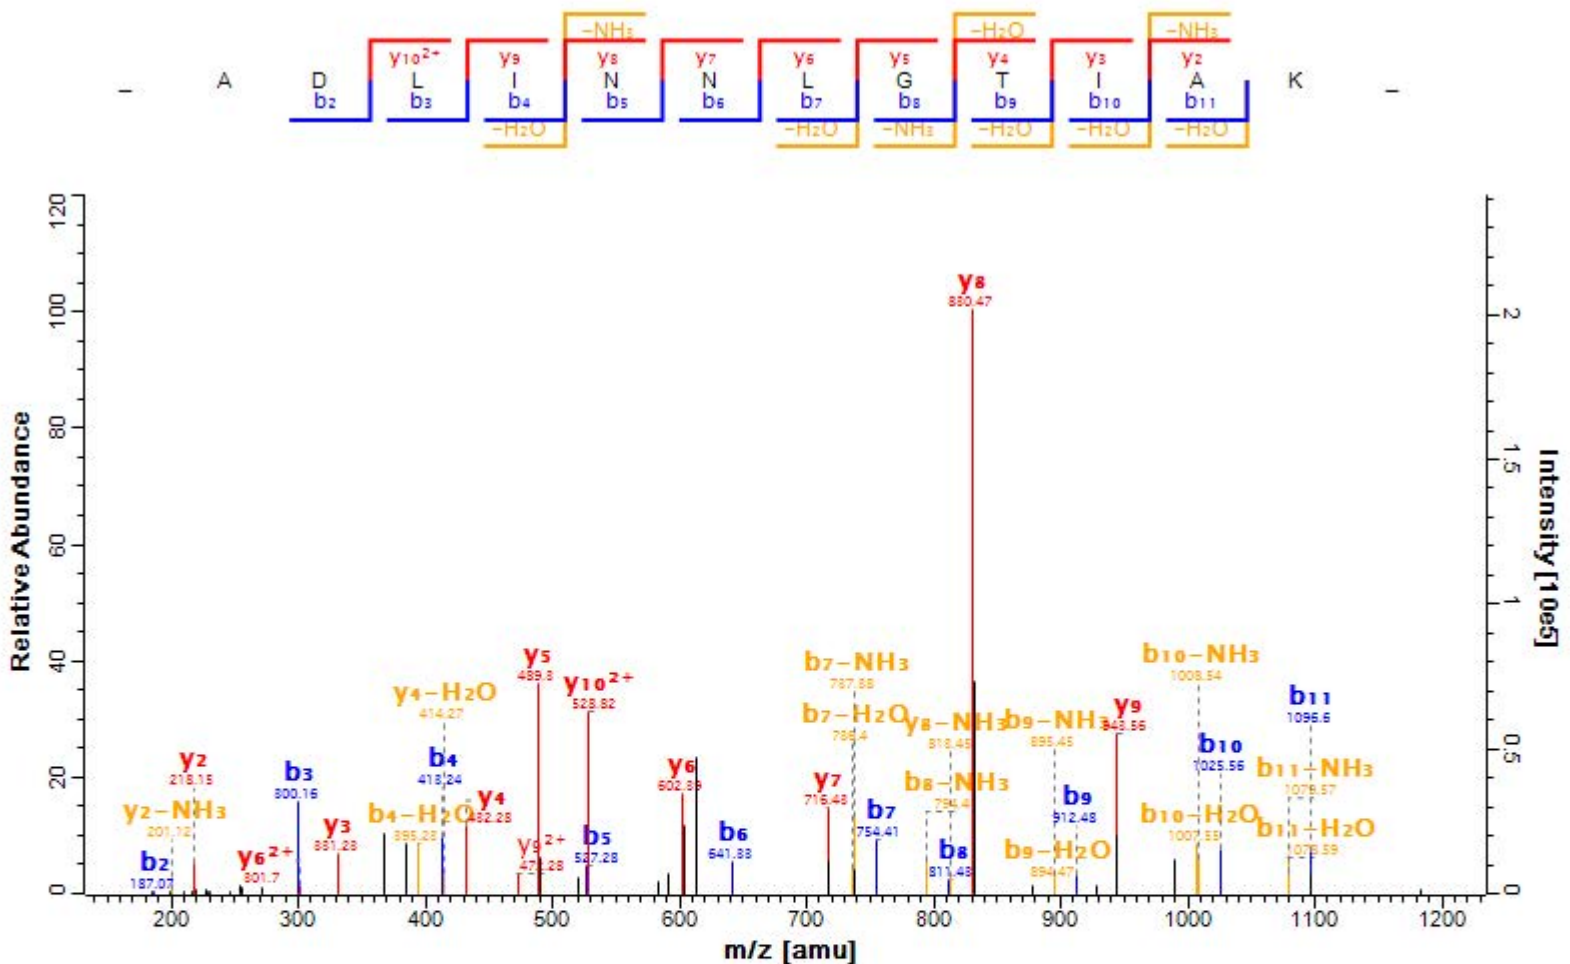

#### precursor information

|                   |                 |
|-------------------|-----------------|
| Mass:             | 1241.69781      |
| m/z:              | 621.85618       |
| Charge:           | 2+              |
| Retentiontime:    | 33.679588317871 |
| Score:            | 238.1957        |
| Mass Error [ppm]: | -0.11655        |
| PEP:              | 4.5118E-32      |
| Precursor Type:   | MULTI           |

#### general information

|                       |             |
|-----------------------|-------------|
| Annotation:           | 10 of 12    |
| AminoAcids Coverage:  | 83 %        |
| Intensity Coverage:   | 72 %        |
| Peak Coverage:        | 47 %        |
| Protein Localisation: | 223 ... 234 |

| b ion     |          |    |     |    | y ion    |           | y <sup>2+</sup> ion |           |
|-----------|----------|----|-----|----|----------|-----------|---------------------|-----------|
| Δ dalton  | mass     |    | seq |    | Δ dalton | mass      | Δ dalton            | mass      |
|           | 72.04439 | 1  | A   | 11 |          |           |                     |           |
| +0.125078 | 187.0713 | 2  | D   | 10 | 1171.668 |           | 1171.668            |           |
| -0.02146  | 300.1554 | 3  | L   | 9  | 1056.641 |           | 528.8242            | +0.186396 |
| +0.021769 | 413.2395 | 4  | I   | 8  | 943.5571 | +0.017905 | 472.2822            | +0.291234 |
| -0.02659  | 527.2824 | 5  | N   | 7  | 830.473  | +0.022868 | 830.473             |           |
| +0.046815 | 641.3253 | 6  | N   | 6  | 716.4301 | +0.093017 | 716.4301            |           |
| -0.02407  | 754.4094 | 7  | L   | 5  | 602.3872 | +0.031086 | 301.6972            | -0.47201  |
| -0.06762  | 811.4308 | 8  | G   | 4  | 489.3031 | +0.067542 | 489.3031            |           |
| -0.00727  | 912.4785 | 9  | T   | 3  | 432.2817 | +0.041826 | 432.2817            |           |
| +0.006261 | 1025.563 | 10 | I   | 2  | 331.234  | +0.050198 | 331.234             |           |
| -0.05258  | 1096.6   | 11 | A   | 1  | 218.1499 | +0.007888 | 218.1499            |           |
|           |          | 12 | K   | 0  | 147.1128 |           | 147.1128            |           |

Scan number 590 Raw file LNCAP\_Silac\_23F10\_set1\_03  
 Method ITMS: CID Pepti... 96.14

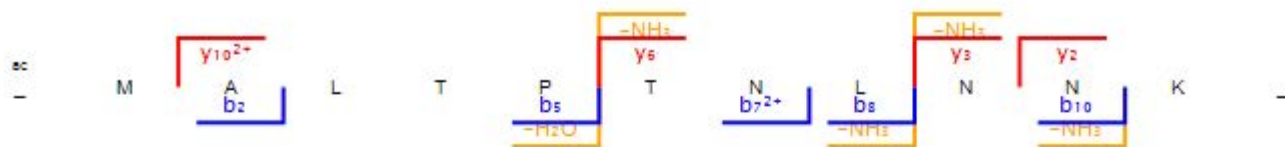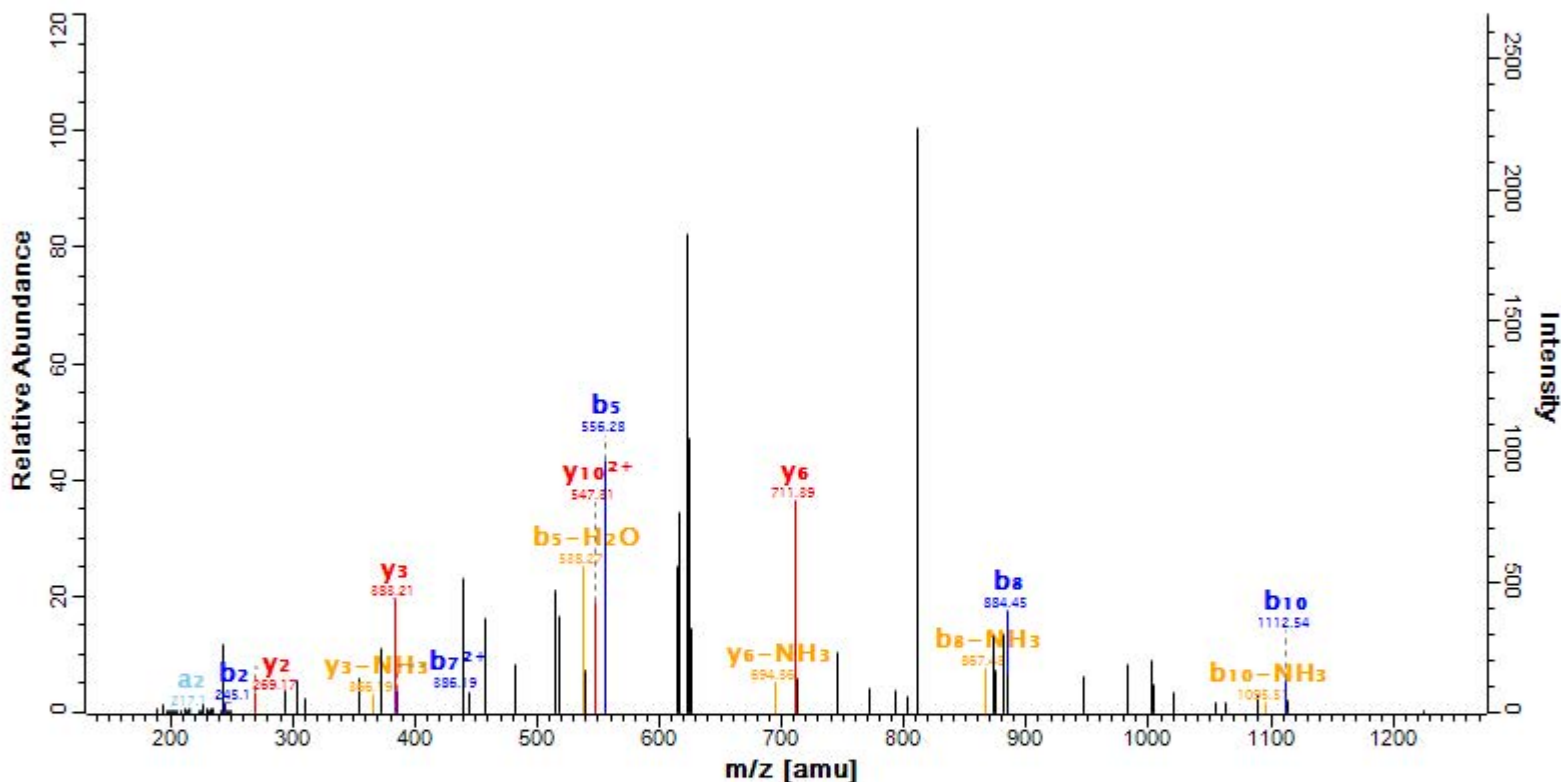

#### precursor information

|                   |                 |
|-------------------|-----------------|
| Mass:             | 0               |
| m/z:              | 633.83021       |
| Charge:           | 0+              |
| Retentiontime:    | 8.6660203933715 |
| Score:            | 96.14293        |
| Mass Error [ppm]: | -5.5665         |
| PEP:              | 0.0048514       |
| Precursor Type:   | PEAK            |

#### general information

|                       |          |
|-----------------------|----------|
| Annotation:           | 7 of 11  |
| AminoAcids Coverage:  | 64 %     |
| Intensity Coverage:   | 24 %     |
| Peak Coverage:        | 17 %     |
| Protein Localisation: | 1 ... 11 |

| a ion         |               | b <sup>2+</sup> ion |               | b ion |               | y ion         |               | y <sup>2+</sup> ion |               |       |
|---------------|---------------|---------------------|---------------|-------|---------------|---------------|---------------|---------------------|---------------|-------|
| Δ dalton mass | Δ dalton mass | Δ dalton mass       | Δ dalton mass | seq   | Δ dalton mass | Δ dalton mass | Δ dalton mass | Δ dalton mass       | Δ dalton mass |       |
|               | 146.1         | 174.1               | 174.1         | 1     | M             | 10            |               |                     |               |       |
| +0.005        | 217.1         | 245.1               | +0.05         | 245.1 | 2             | A             | 9             | 1094                | 547.3 -0.26   |       |
|               | 330.2         | 358.2               | 358.2         | 3     | L             | 8             | 1023          | 1023                |               |       |
|               | 431.2         | 459.2               | 459.2         | 4     | T             | 7             | 909.5         | 909.5               |               |       |
|               | 528.3         | 556.3               | -0.15         | 556.3 | 5             | P             | 6             | 808.4               | 808.4         |       |
|               | 629.3         | 657.3               | 657.3         | 6     | T             | 5             | 711.4         | -0.05               | 711.4         |       |
|               | 743.4         | -0.03               | 386.2         | 771.4 | 7             | N             | 4             | 610.3               | 610.3         |       |
|               | 856.5         | 884.5               | +0.003        | 884.5 | 8             | L             | 3             | 496.3               | 496.3         |       |
|               | 970.5         | 998.5               | 998.5         | 9     | N             | 2             | 383.2         | +0.158              | 383.2         |       |
|               | 1085          | 1113                | -0.13         | 1113  | 10            | N             | 1             | 269.2               | -0.26         | 269.2 |
|               |               |                     |               |       | 11            | K             | 0             | 155.1               | 155.1         |       |

Scan number 6197 Raw file LNCAP\_Silac\_23F10\_set1\_03  
 Method ITMS; CID Pepti... 215.1

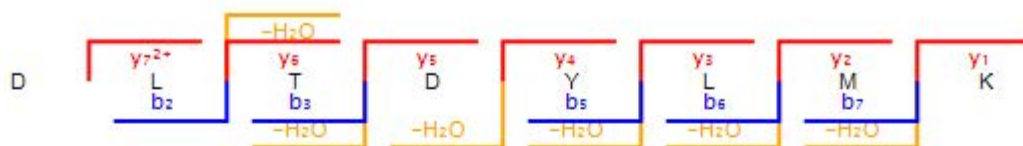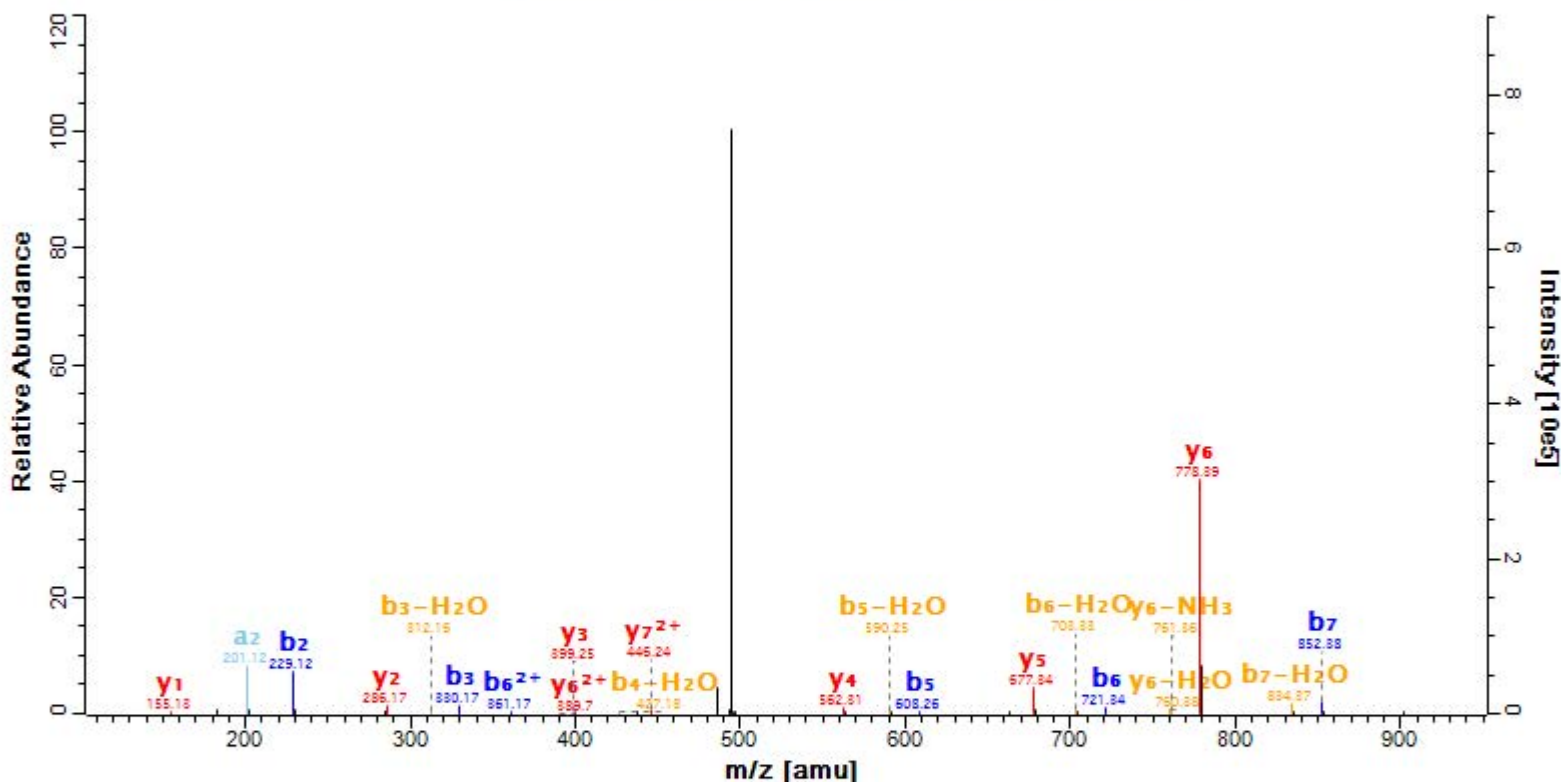

#### precursor information

|                       |                 |
|-----------------------|-----------------|
| Mass:                 | 997.47903       |
| m/z:                  | 499.74679       |
| Charge:               | 2+              |
| Retentiontime:        | 35.362056732177 |
| Score:                | 215.0965        |
| Mass Error [ppm]:     | -0.0066665      |
| g PEP:                | 8.3623E-15      |
| Annotation:           | 7 of 8          |
| AminoAcids Coverage:  | 88 %            |
| Intensity Coverage:   | 38 %            |
| Peak Coverage:        | 39 %            |
| Protein Localisation: | 184 ... 191     |

|               | a ion         | b <sup>2+</sup> ion | b ion         |       |               | y ion         | y <sup>2+</sup> ion |       |
|---------------|---------------|---------------------|---------------|-------|---------------|---------------|---------------------|-------|
| Δ dalton mass | Δ dalton mass | Δ dalton mass       | Δ dalton mass | seq   | Δ dalton mass | Δ dalton mass |                     |       |
|               | 88.04         | 116                 | 116           | 1     | D             | 7             |                     |       |
| +0.08         | 201.1         | 229.1               | -0.1          | 2     | L             | 6             | 891.5               |       |
|               | 302.2         | 330.2               | -0.01         | 3     | T             | 5             | 778.4               |       |
|               | 417.2         | 445.2               |               | 4     | D             | 4             | 677.3               |       |
|               | 580.3         | 608.3               | -0.05         | 5     | Y             | 3             | 562.3               |       |
|               | 693.3         | +0.07               | 361.2         | +0.03 | 6             | L             | 2                   | 399.3 |
|               | 824.4         | 852.4               | -0.03         | 7     | M             | 1             | 286.2               |       |
|               |               |                     |               | 8     | K             | 0             | 155.1               |       |

Scan number 6345 Raw file LNCAP\_Silac\_23F10\_set1\_03  
 Method ITMS; CID Pepti... 152.16

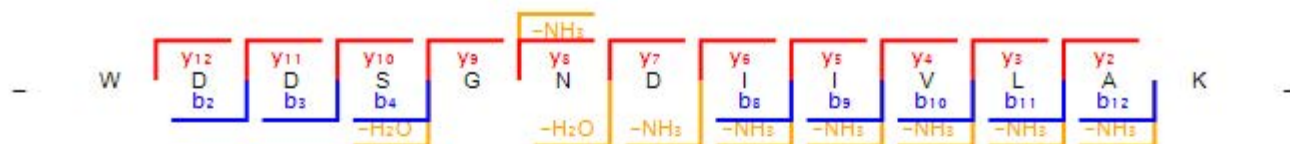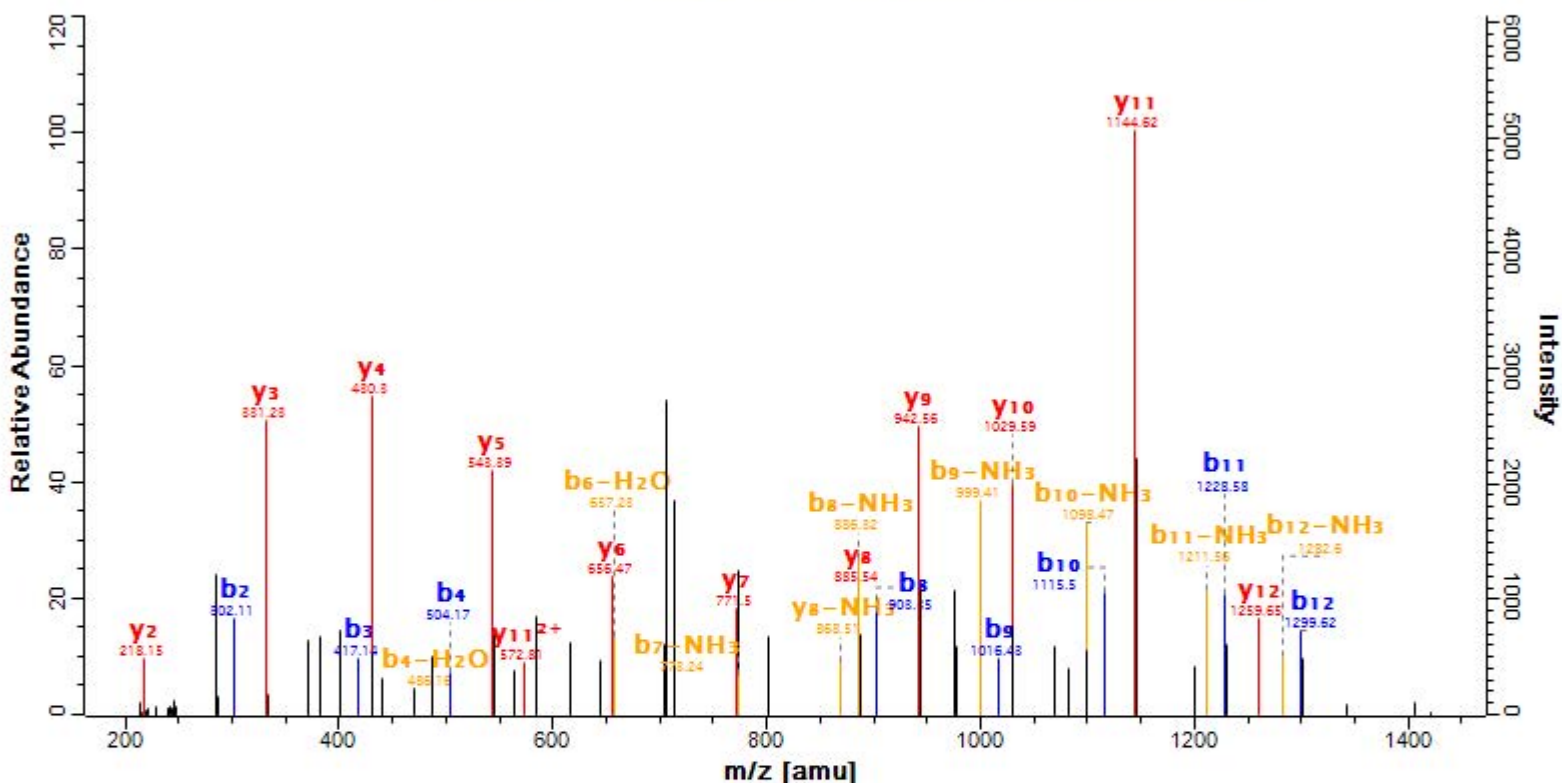

**precursor information**

|                   |                 |
|-------------------|-----------------|
| Mass:             | 1444.72022      |
| m/z:              | 723.36738       |
| Charge:           | 2+              |
| Retentiontime:    | 36.091545104980 |
| Score:            | 152.1628        |
| Mass Error [ppm]: | 0.28199         |
| PEP:              | 3.2198E-08      |
| Precursor Type:   | MULTI           |

**general information**

|                       |             |
|-----------------------|-------------|
| Annotation:           | 11 of 13    |
| AminoAcids Coverage:  | 85 %        |
| Intensity Coverage:   | 55 %        |
| Peak Coverage:        | 35 %        |
| Protein Localisation: | 705 ... 717 |

| b ion     |          |    |     |    | y ion    |           | y <sup>2+</sup> ion |           |
|-----------|----------|----|-----|----|----------|-----------|---------------------|-----------|
| Δ dalton  | mass     |    | seq |    | Δ dalton | mass      | Δ dalton            | mass      |
|           | 187.0866 | 1  | W   | 12 |          |           |                     |           |
| +0.062584 | 302.1135 | 2  | D   | 11 | 1259.648 | -0.19648  | 1259.648            |           |
| +0.087674 | 417.1405 | 3  | D   | 10 | 1144.621 | -0.03929  | 572.8141            | +0.142856 |
| +0.03117  | 504.1725 | 4  | S   | 9  | 1029.594 | -0.13112  | 1029.594            |           |
|           | 561.194  | 5  | G   | 8  | 942.5619 | +0.117341 | 942.5619            |           |
|           | 675.2369 | 6  | N   | 7  | 885.5404 | -0.00261  | 885.5404            |           |
|           | 790.2638 | 7  | D   | 6  | 771.4975 | +0.069672 | 771.4975            |           |
| +0.152525 | 903.3479 | 8  | I   | 5  | 656.4705 | -0.04725  | 656.4705            |           |
| -0.00344  | 1016.432 | 9  | I   | 4  | 543.3865 | -0.01213  | 543.3865            |           |
| +0.115709 | 1115.5   | 10 | V   | 3  | 430.3024 | +0.114169 | 430.3024            |           |
| -0.18271  | 1228.584 | 11 | L   | 2  | 331.234  | +0.071652 | 331.234             |           |
| +0.085962 | 1299.622 | 12 | A   | 1  | 218.1499 | +0.078994 | 218.1499            |           |
|           |          | 13 | K   | 0  | 147.1128 |           | 147.1128            |           |

Scan number 6810 Raw file LNCAP\_Silac\_23F10\_set1\_03  
 Method ITMS; CID Pepti... 162.88

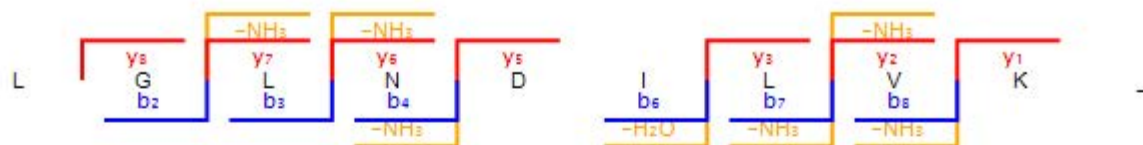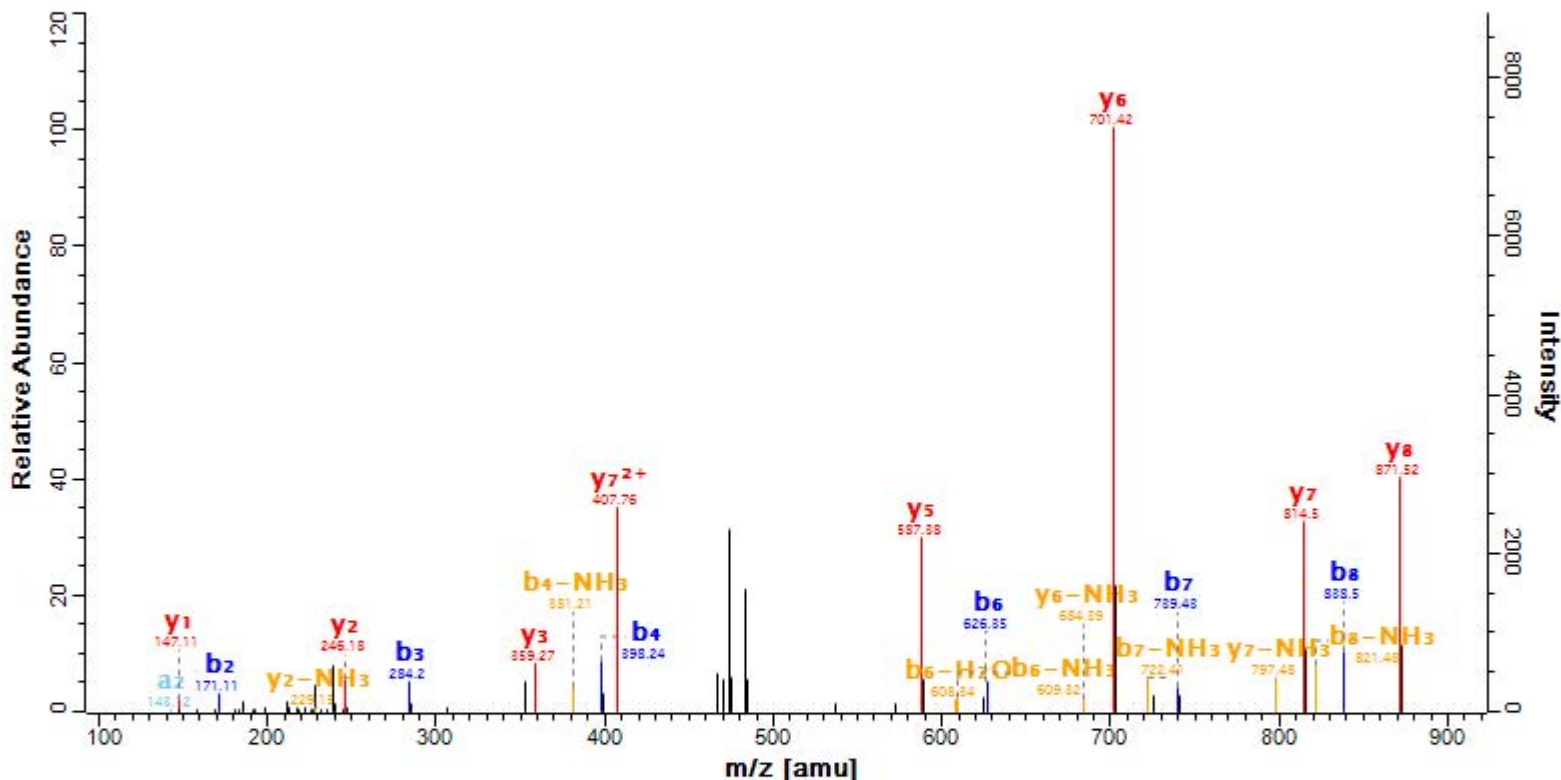

#### precursor information

|                       |                 |
|-----------------------|-----------------|
| Mass:                 | 983.60124       |
| $m/z$ :               | 492.80789       |
| Charge:               | 2+              |
| Retention time:       | 38.328197479248 |
| Score:                | 162.8769        |
| Mass Error [ppm]:     | -0.30107        |
| PEP:                  | 0.00025611      |
| Precursor Type:       | MULTI           |
| Annotation:           | 8 of 9          |
| AminoAcids Coverage:  | 89 %            |
| Intensity Coverage:   | 65 %            |
| Peak Coverage:        | 31 %            |
| Protein Localisation: | 613 ... 621     |

| a ion           |        | b ion           |        | seq |   |   | y ion           |         | $y^{2+}$ ion    |         |
|-----------------|--------|-----------------|--------|-----|---|---|-----------------|---------|-----------------|---------|
| $\Delta$ dalton | mass   | $\Delta$ dalton | mass   |     |   |   | $\Delta$ dalton | mass    | $\Delta$ dalton | mass    |
|                 | 86.096 |                 | 114.09 | 1   | L | 8 |                 |         |                 |         |
| -0.103          | 143.12 | +0.0192         | 171.11 | 2   | G | 7 | 871.52          | -0.012  | 871.52          |         |
|                 | 256.2  | -0.07           | 284.2  | 3   | L | 6 | 814.5           | +0.0396 | 407.76          | +0.2023 |
|                 | 370.24 | +0.0798         | 398.24 | 4   | N | 5 | 701.42          | +0.0762 | 701.42          |         |
|                 | 485.27 |                 | 513.27 | 5   | D | 4 | 587.38          | +0.0226 | 587.38          |         |
|                 | 598.36 | +0.138          | 626.35 | 6   | I | 3 | 472.35          |         | 472.35          |         |
|                 | 711.44 | +0.1185         | 739.43 | 7   | L | 2 | 359.27          | +0.0643 | 359.27          |         |
|                 | 810.51 | +0.0073         | 838.5  | 8   | V | 1 | 246.18          | +0.0905 | 246.18          |         |
|                 |        |                 |        | 9   | K | 0 | 147.11          | +0.0341 | 147.11          |         |

Scan number 696 Raw file LNCAP\_Silac\_23F10\_set1\_03  
 Method ITMS; CID Pepti... 152.54

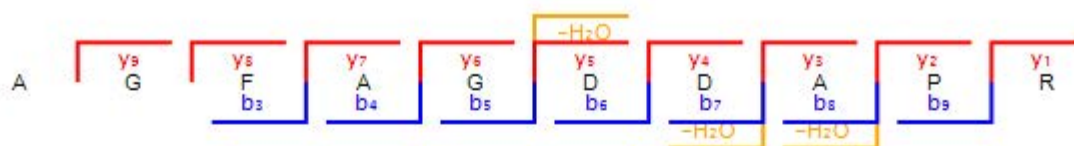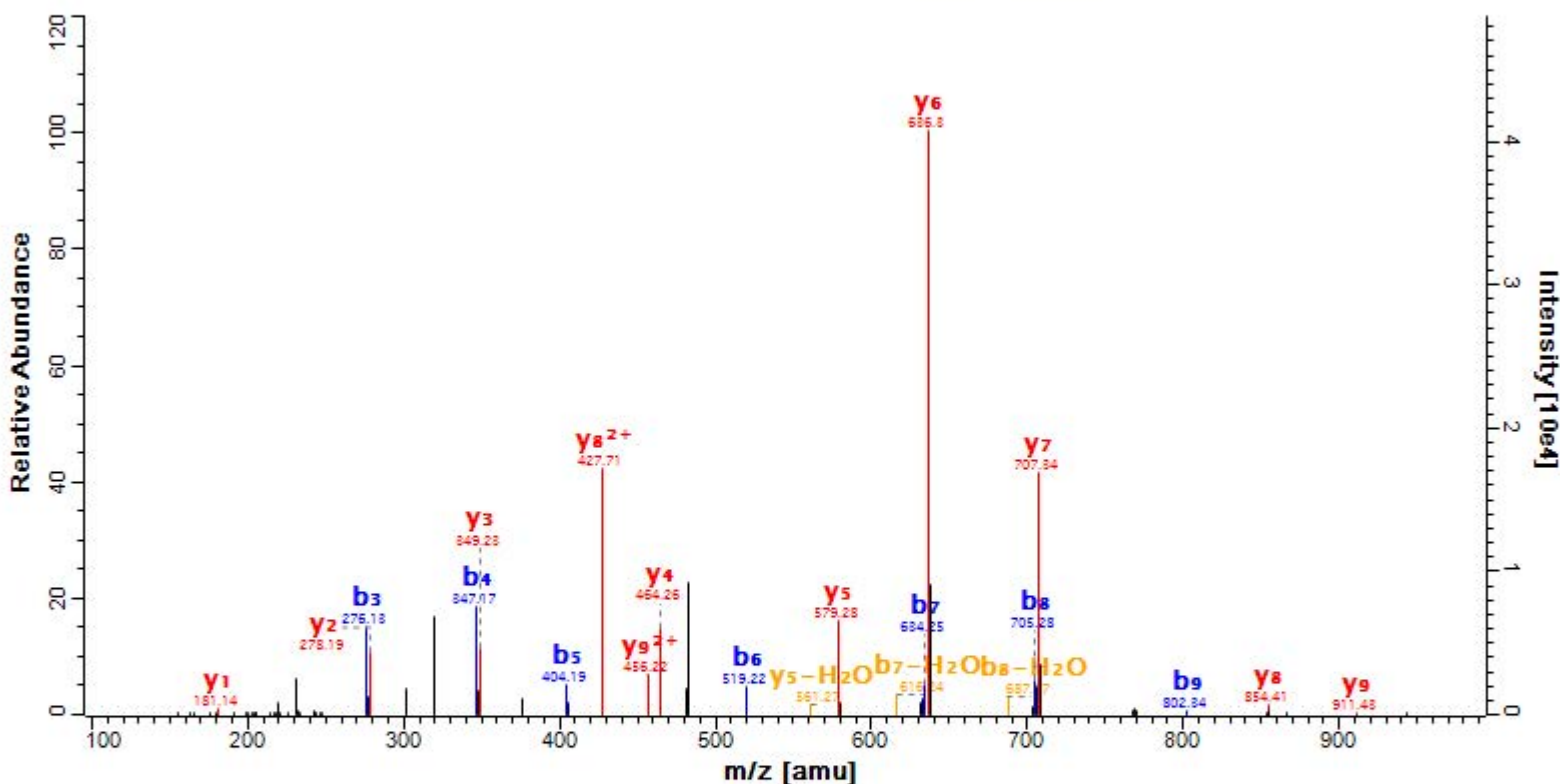

#### precursor information

|                   |                 |
|-------------------|-----------------|
| Mass:             | 975.44093       |
| m/z:              | 488.72774       |
| Charge:           | 2+              |
| Retentiontime:    | 9.2692966461181 |
| Score:            | 152.5395        |
| Mass Error [ppm]: | -0.079382       |
| PEP:              | 0.00013938      |
| Precursor Type:   | MULTI           |

|                       |           |
|-----------------------|-----------|
| Annotation:           | 9 of 10   |
| AminoAcids Coverage:  | 90 %      |
| Intensity Coverage:   | 71 %      |
| Peak Coverage:        | 21 %      |
| Protein Localisation: | 19 ... 28 |

| b ion     |          |    |     |   | y ion    |           | y <sup>2+</sup> ion |           |
|-----------|----------|----|-----|---|----------|-----------|---------------------|-----------|
| Δ dalton  | mass     |    | seq |   | Δ dalton | mass      | Δ dalton            | mass      |
|           | 72.04439 | 1  | A   | 9 |          |           |                     |           |
|           | 129.0659 | 2  | G   | 8 | 911.4313 | -0.22335  | 456.2193            | +0.116191 |
| -0.09182  | 276.1343 | 3  | F   | 7 | 854.4098 | +0.110183 | 427.7086            | +0.204194 |
| -0.05395  | 347.1714 | 4  | A   | 6 | 707.3414 | +0.015816 | 707.3414            |           |
| -0.03577  | 404.1928 | 5  | G   | 5 | 636.3043 | -0.11589  | 636.3043            |           |
| +0.00183  | 519.2198 | 6  | D   | 4 | 579.2828 | -0.02821  | 579.2828            |           |
| +0.050754 | 634.2467 | 7  | D   | 3 | 464.2559 | +0.089038 | 464.2559            |           |
| +0.044219 | 705.2838 | 8  | A   | 2 | 349.229  | +0.13829  | 349.229             |           |
| -0.14612  | 802.3366 | 9  | P   | 1 | 278.1918 | -0.02095  | 278.1918            |           |
|           |          | 10 | R   | 0 | 181.1391 | +0.133212 | 181.1391            |           |



Scan number 7334 Raw file LNCAP\_Silac\_23F10\_set1\_03  
 Method ITMS; CID Pepti... 302.44

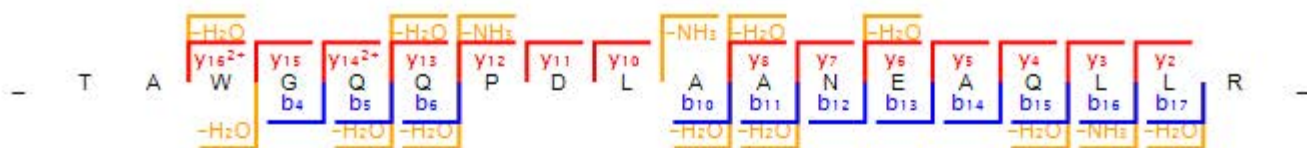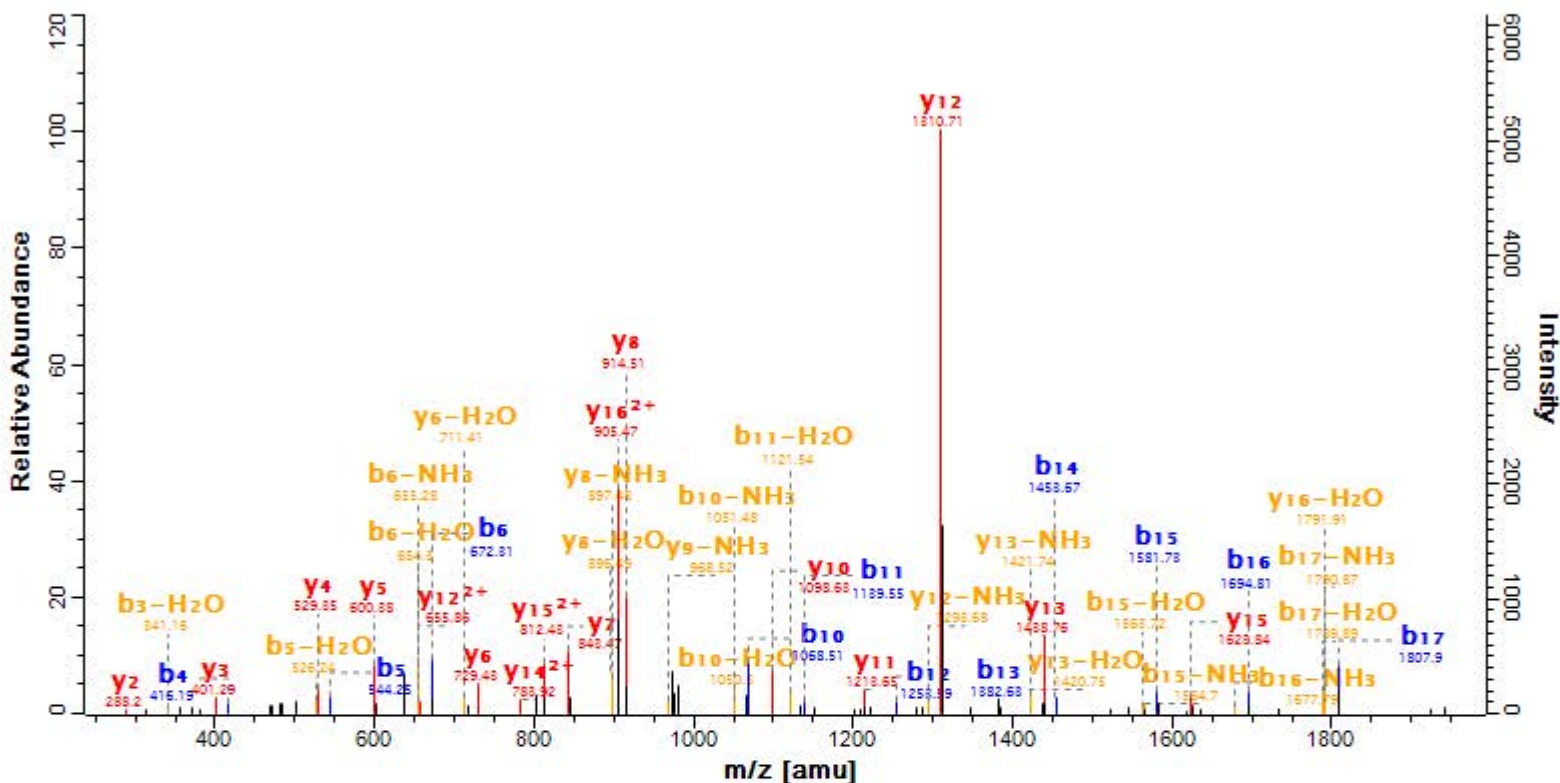

precursor information

|                   |                 |
|-------------------|-----------------|
| Mass:             | 1981.00168      |
| m/z:              | 991.50811       |
| Charge:           | 2+              |
| Retentiontime:    | 40.896236419677 |
| Score:            | 302.4373        |
| Mass Error [ppm]: | -0.031595       |
| PEP:              | 2.0954E-110     |
| Precursor Type:   | MULTI           |

| b ion     |          |    |     |    | y ion    |           | y <sup>2+</sup> ion |           |
|-----------|----------|----|-----|----|----------|-----------|---------------------|-----------|
| Δ dalton  | mass     |    | seq |    | Δ dalton | mass      | Δ dalton            | mass      |
|           | 102.055  | 1  | T   | 17 |          |           |                     |           |
|           | 173.0921 | 2  | A   | 16 | 1880.961 |           | 1880.961            |           |
|           | 359.1714 | 3  | W   | 15 | 1809.924 |           | 905.4657            | +0.065134 |
| +0.158168 | 416.1928 | 4  | G   | 14 | 1623.845 | -0.03326  | 812.4261            | +0.035455 |
| +0.15733  | 544.2514 | 5  | Q   | 13 | 1566.823 |           | 783.9154            | -0.14168  |
| -0.0011   | 672.31   | 6  | Q   | 12 | 1438.765 | +0.026514 | 1438.765            |           |
|           | 769.3628 | 7  | P   | 11 | 1310.706 | -0.00085  | 655.8568            | +0.499967 |
|           | 884.3897 | 8  | D   | 10 | 1213.654 | -0.06612  | 1213.654            |           |
|           | 997.4738 | 9  | L   | 9  | 1098.627 | +0.004276 | 1098.627            |           |
| -0.01748  | 1068.511 | 10 | A   | 8  | 985.5425 |           | 985.5425            |           |
| +0.353002 | 1139.548 | 11 | A   | 7  | 914.5054 | -0.02103  | 914.5054            |           |
| -0.24242  | 1253.591 | 12 | N   | 6  | 843.4683 | +0.071503 | 843.4683            |           |
| -0.0499   | 1382.634 | 13 | E   | 5  | 729.4254 | -0.00575  | 729.4254            |           |
| +0.202658 | 1453.671 | 14 | A   | 4  | 600.3828 | +0.060344 | 600.3828            |           |
| -0.2236   | 1581.729 | 15 | Q   | 3  | 529.3457 | +0.077316 | 529.3457            |           |
| -0.09929  | 1694.813 | 16 | L   | 2  | 401.2871 | +0.226164 | 401.2871            |           |
| -0.15308  | 1807.897 | 17 | L   | 1  | 288.203  | -0.03059  | 288.203             |           |
|           |          | 18 | R   | 0  | 175.119  |           | 175.119             |           |

general information

|                       |             |
|-----------------------|-------------|
| Annotation:           | 15 of 18    |
| AminoAcids Coverage:  | 83 %        |
| Intensity Coverage:   | 70 %        |
| Peak Coverage:        | 46 %        |
| Protein Localisation: | 253 ... 270 |

Scan number 7398 Raw file LNCAP\_Silac\_23F10\_set1\_03  
 Method ITMS; CID Pepti... 69.59

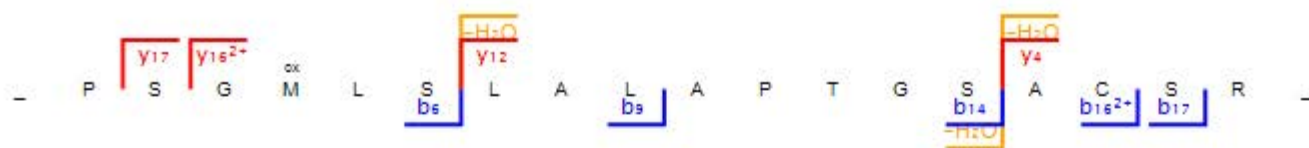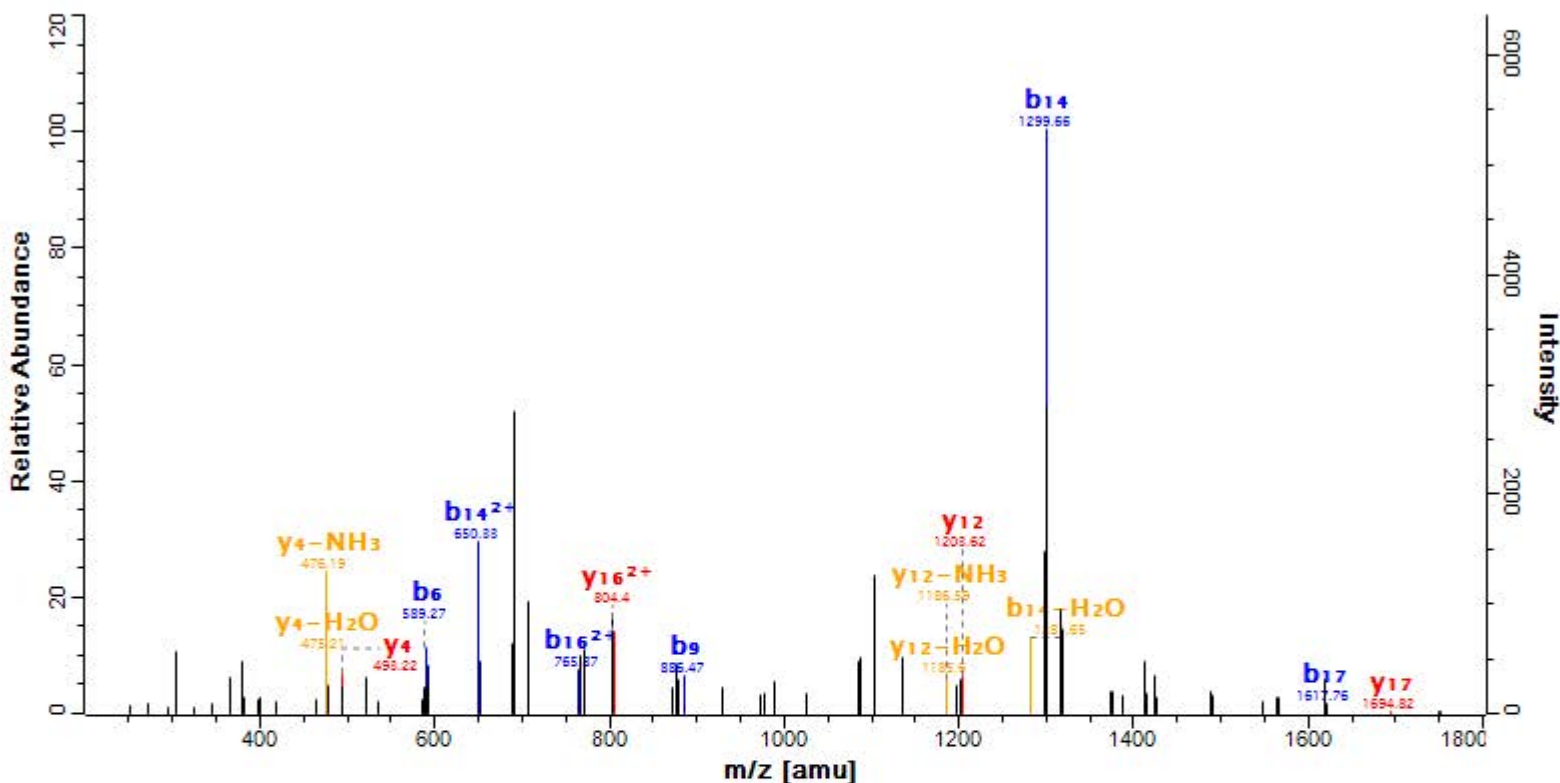

#### precursor information

|                   |                 |
|-------------------|-----------------|
| Mass:             | 1790.86688      |
| m/z:              | 896.44071       |
| Charge:           | 2+              |
| Retentiontime:    | 41.221424102783 |
| Score:            | 69.59393        |
| Mass Error [ppm]: | 0.7659          |
| PEP:              | 0.001561        |
| Precursor Type:   | MULTI           |

| b <sup>2+</sup> ion |        | b ion    |        | seq |   |    | y ion    |         | y <sup>2+</sup> ion |         |
|---------------------|--------|----------|--------|-----|---|----|----------|---------|---------------------|---------|
| Δ dalton            | mass   | Δ dalton | mass   |     |   |    | Δ dalton | mass    | Δ dalton            | mass    |
|                     | 98.06  |          | 98.06  | 1   | P | 17 |          |         |                     |         |
|                     | 185.09 |          | 185.09 | 2   | S | 16 | 1694.8   | +0.1144 | 1694.8              |         |
|                     | 242.11 |          | 242.11 | 3   | G | 15 | 1607.8   |         | 804.4               | +0.2555 |
|                     | 389.15 |          | 389.15 | 4   | M | 14 | 1550.8   |         | 1550.8              |         |
|                     | 502.23 |          | 502.23 | 5   | L | 13 | 1403.7   |         | 1403.7              |         |
|                     | 589.27 | +0.1554  | 589.27 | 6   | S | 12 | 1290.6   |         | 1290.6              |         |
|                     | 702.35 |          | 702.35 | 7   | L | 11 | 1203.6   | -0.067  | 1203.6              |         |
|                     | 773.39 |          | 773.39 | 8   | A | 10 | 1090.5   |         | 1090.5              |         |
|                     | 886.47 | -0.024   | 886.47 | 9   | L | 9  | 1019.5   |         | 1019.5              |         |
|                     | 957.51 |          | 957.51 | 10  | A | 8  | 906.41   |         | 906.41              |         |
|                     | 1054.6 |          | 1054.6 | 11  | P | 7  | 835.37   |         | 835.37              |         |
|                     | 1155.6 |          | 1155.6 | 12  | T | 6  | 738.32   |         | 738.32              |         |
|                     | 1212.6 |          | 1212.6 | 13  | G | 5  | 637.27   |         | 637.27              |         |
| -0.161              | 650.33 | +0.0508  | 1299.7 | 14  | S | 4  | 580.25   |         | 580.25              |         |
|                     | 1370.7 |          | 1370.7 | 15  | A | 3  | 493.22   | +0.0512 | 493.22              |         |
| -0.489              | 765.87 |          | 1530.7 | 16  | C | 2  | 422.18   |         | 422.18              |         |
|                     | 1617.8 | +0.1591  | 1617.8 | 17  | S | 1  | 262.15   |         | 262.15              |         |
|                     |        |          |        | 18  | R | 0  | 175.12   |         | 175.12              |         |

#### general information

|                       |          |
|-----------------------|----------|
| Annotation:           | 9 of 18  |
| AminoAcids Coverage:  | 50 %     |
| Intensity Coverage:   | 30 %     |
| Peak Coverage:        | 17 %     |
| Protein Localisation: | 2 ... 19 |

Scan number 7694 Raw file LNCAP\_Silac\_23F10\_set1\_03  
 Method ITMS; CID Pepti... 222.6

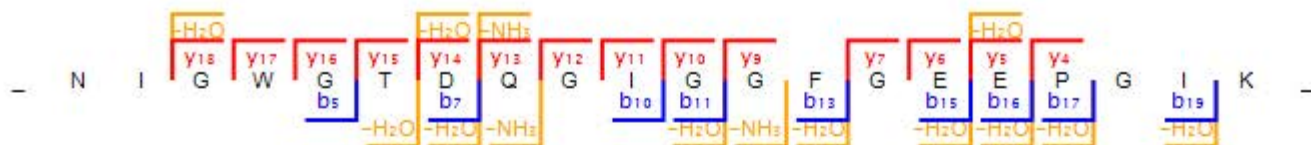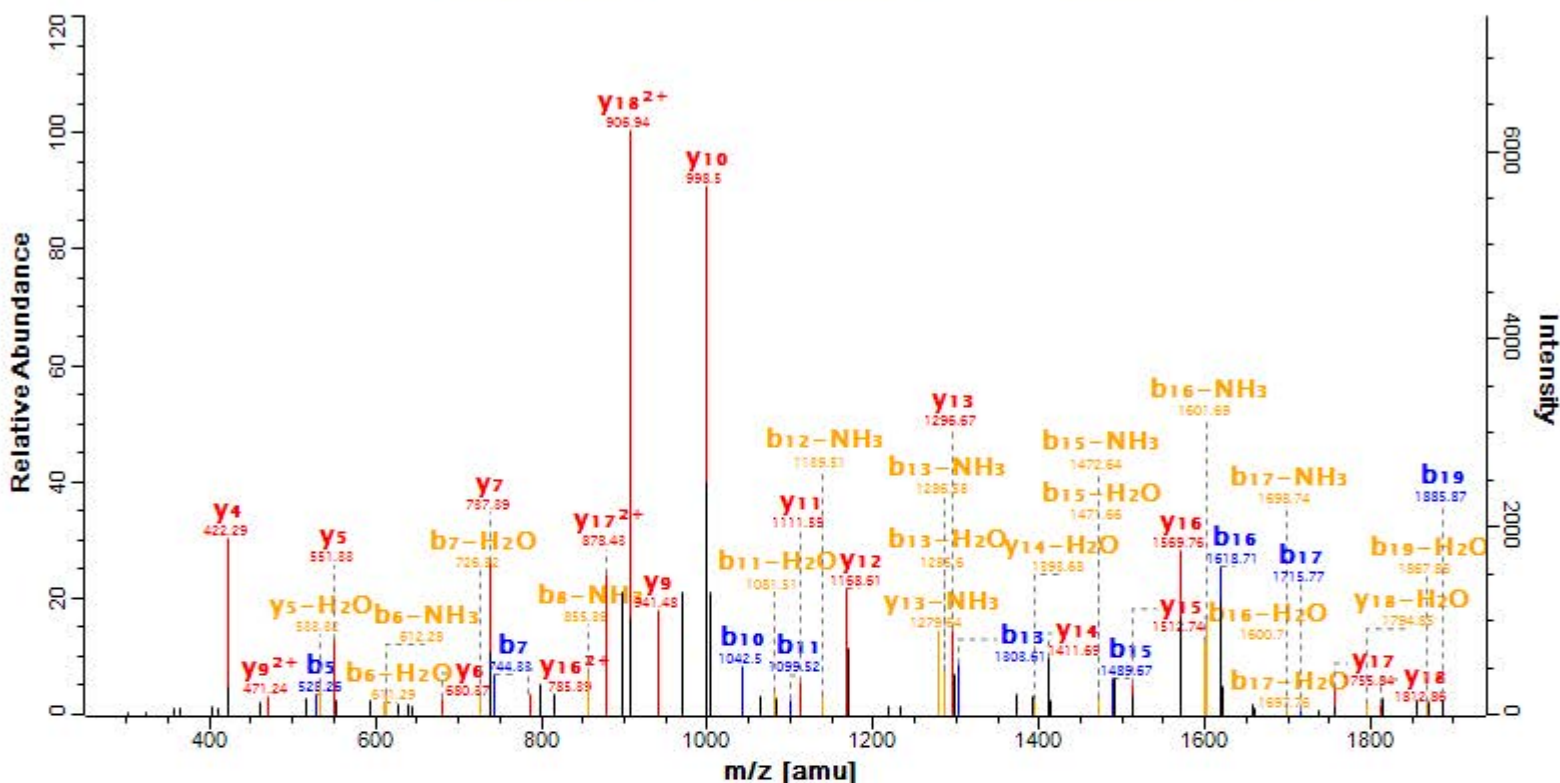

**precursor information**

|                   |                 |
|-------------------|-----------------|
| Mass:             | 2030.9685       |
| m/z:              | 1016.49153      |
| Charge:           | 2+              |
| Retentiontime:    | 42.725490570068 |
| Score:            | 222.5985        |
| Mass Error [ppm]: | -0.62324        |
| PEP:              | 4.3349E-66      |
| Precursor Type:   | MULTI           |

**general information**

|                       |           |
|-----------------------|-----------|
| Annotation:           | 17 of 20  |
| AminoAcids Coverage:  | 85 %      |
| Intensity Coverage:   | 65 %      |
| Peak Coverage:        | 47 %      |
| Protein Localisation: | 30 ... 49 |

| b ion     |          |    |     |    | y ion    |           | y <sup>2+</sup> ion |           |
|-----------|----------|----|-----|----|----------|-----------|---------------------|-----------|
| Δ dalton  | mass     |    | seq |    | Δ dalton | mass      | Δ dalton            | mass      |
|           | 115.0502 | 1  | N   | 19 |          |           |                     |           |
|           | 228.1343 | 2  | I   | 18 | 1925.948 |           | 1925.948            |           |
|           | 285.1557 | 3  | G   | 17 | 1812.864 | -0.16772  | 906.9358            | +0.262477 |
|           | 471.235  | 4  | W   | 16 | 1755.843 | +0.012069 | 878.425             | +0.313981 |
| +0.045616 | 528.2565 | 5  | G   | 15 | 1569.763 | -0.04363  | 785.3854            | +0.143921 |
|           | 629.3042 | 6  | T   | 14 | 1512.742 | -0.11225  | 1512.742            |           |
| +0.019822 | 744.3311 | 7  | D   | 13 | 1411.694 | +0.032106 | 1411.694            |           |
|           | 872.3897 | 8  | Q   | 12 | 1296.667 | -0.00418  | 1296.667            |           |
|           | 929.4112 | 9  | G   | 11 | 1168.609 | +0.017651 | 1168.609            |           |
| +0.110966 | 1042.495 | 10 | I   | 10 | 1111.587 | +0.016898 | 1111.587            |           |
| +0.210352 | 1099.517 | 11 | G   | 9  | 998.5033 | -0.05529  | 998.5033            |           |
|           | 1156.538 | 12 | G   | 8  | 941.4818 | +0.038808 | 471.2445            | +0.013141 |
| +0.110098 | 1303.607 | 13 | F   | 7  | 884.4604 |           | 884.4604            |           |
|           | 1360.628 | 14 | G   | 6  | 737.3919 | +0.033471 | 737.3919            |           |
| -0.21397  | 1489.671 | 15 | E   | 5  | 680.3705 | +0.223391 | 680.3705            |           |
| -0.11069  | 1618.713 | 16 | E   | 4  | 551.3279 | -0.0456   | 551.3279            |           |
| -0.06055  | 1715.766 | 17 | P   | 3  | 422.2853 | +0.050582 | 422.2853            |           |
|           | 1772.787 | 18 | G   | 2  | 325.2325 |           | 325.2325            |           |
| -0.11749  | 1885.872 | 19 | I   | 1  | 268.2111 |           | 268.2111            |           |
|           |          | 20 | K   | 0  | 155.127  |           | 155.127             |           |

Scan number 7864 Raw file LNCAP\_Silac\_23F10\_set1\_03  
 Method ITMS; CID Peptide 409.19

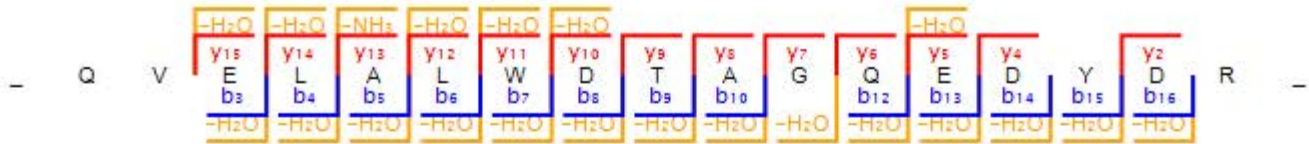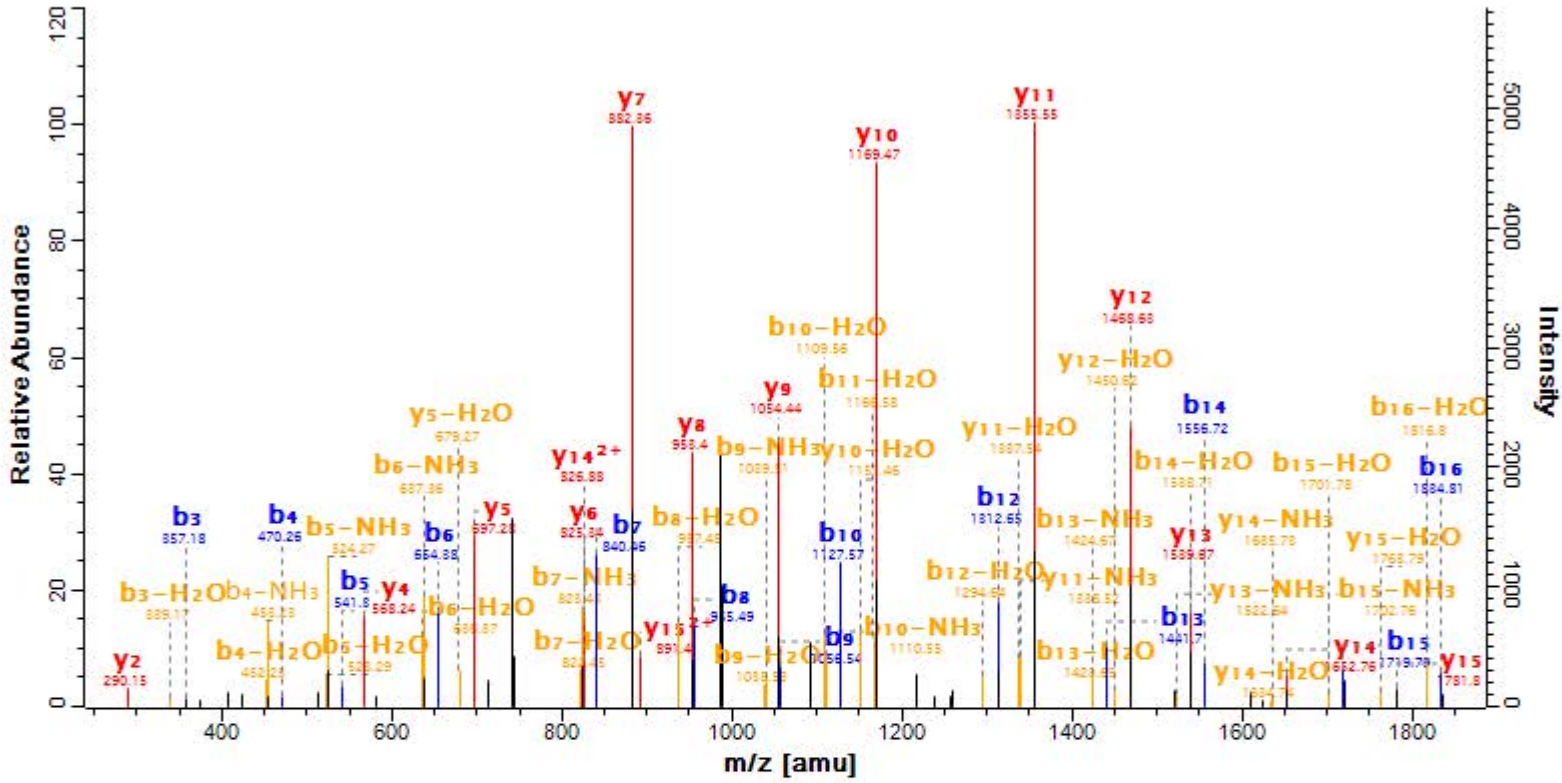

precursor information

|                   |                 |
|-------------------|-----------------|
| Mass:             | 2007.91724      |
| m/z:              | 1004.96589      |
| Charge:           | 2+              |
| Retentiontime:    | 43.588634490966 |
| Score:            | 409.1888        |
| Mass Error [ppm]: | -0.080883       |
| PEP:              | 1.2009E-221     |
| Precursor Type:   | MULTI           |

general information

|                       |           |
|-----------------------|-----------|
| Annotation:           | 14 of 17  |
| AminoAcids Coverage:  | 82 %      |
| Intensity Coverage:   | 74 %      |
| Peak Coverage:        | 62 %      |
| Protein Localisation: | 52 ... 68 |

| b ion     |          |     |   | y ion    |          | y <sup>2+</sup> ion |          |
|-----------|----------|-----|---|----------|----------|---------------------|----------|
| Δ dalton  | mass     | seq |   | Δ dalton | mass     | Δ dalton            | mass     |
|           | 129.0659 | 1   | Q | 16       |          |                     |          |
|           | 228.1343 | 2   | V | 15       | 1880.866 | 1880.866            |          |
| +0.207508 | 357.1769 | 3   | E | 14       | 1781.798 | -0.17476            | 891.4025 |
| +0.023407 | 470.2609 | 4   | L | 13       | 1652.755 | -0.07076            | 826.8812 |
| +0.01849  | 541.298  | 5   | A | 12       | 1539.671 | -0.04224            | 1539.671 |
| -0.01943  | 654.3821 | 6   | L | 11       | 1468.634 | -0.10205            | 1468.634 |
| +0.061289 | 840.4614 | 7   | W | 10       | 1355.55  | -0.04143            | 1355.55  |
| -0.01302  | 955.4884 | 8   | D | 9        | 1169.471 | +0.010054           | 1169.471 |
| -0.10342  | 1056.536 | 9   | T | 8        | 1054.444 | +0.06312            | 1054.444 |
| -0.05167  | 1127.573 | 10  | A | 7        | 953.3959 | +0.069051           | 953.3959 |
|           | 1184.595 | 11  | G | 6        | 882.3588 | +0.004236           | 882.3588 |
| -0.03857  | 1312.653 | 12  | Q | 5        | 825.3373 | +0.007389           | 825.3373 |
| +0.009659 | 1441.696 | 13  | E | 4        | 697.2788 | +0.104785           | 697.2788 |
| +0.147755 | 1556.723 | 14  | D | 3        | 568.2362 | +0.094705           | 568.2362 |
| +0.031936 | 1719.786 | 15  | Y | 2        | 453.2092 |                     | 453.2092 |
| -0.41774  | 1834.813 | 16  | D | 1        | 290.1459 | +0.063242           | 290.1459 |
|           |          | 17  | R | 0        | 175.119  |                     | 175.119  |

Scan number 7985 Raw file LNCAP\_Silac\_23F10\_set1\_03  
 Method ITMS; CID Pepti... 51.25

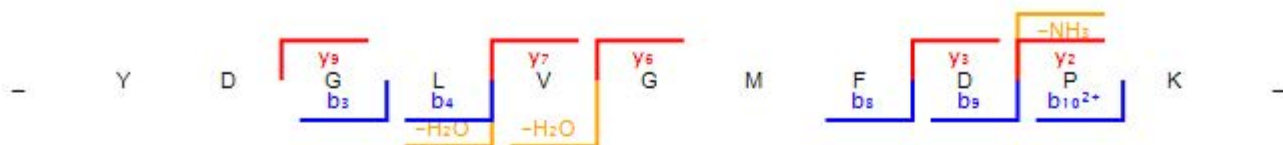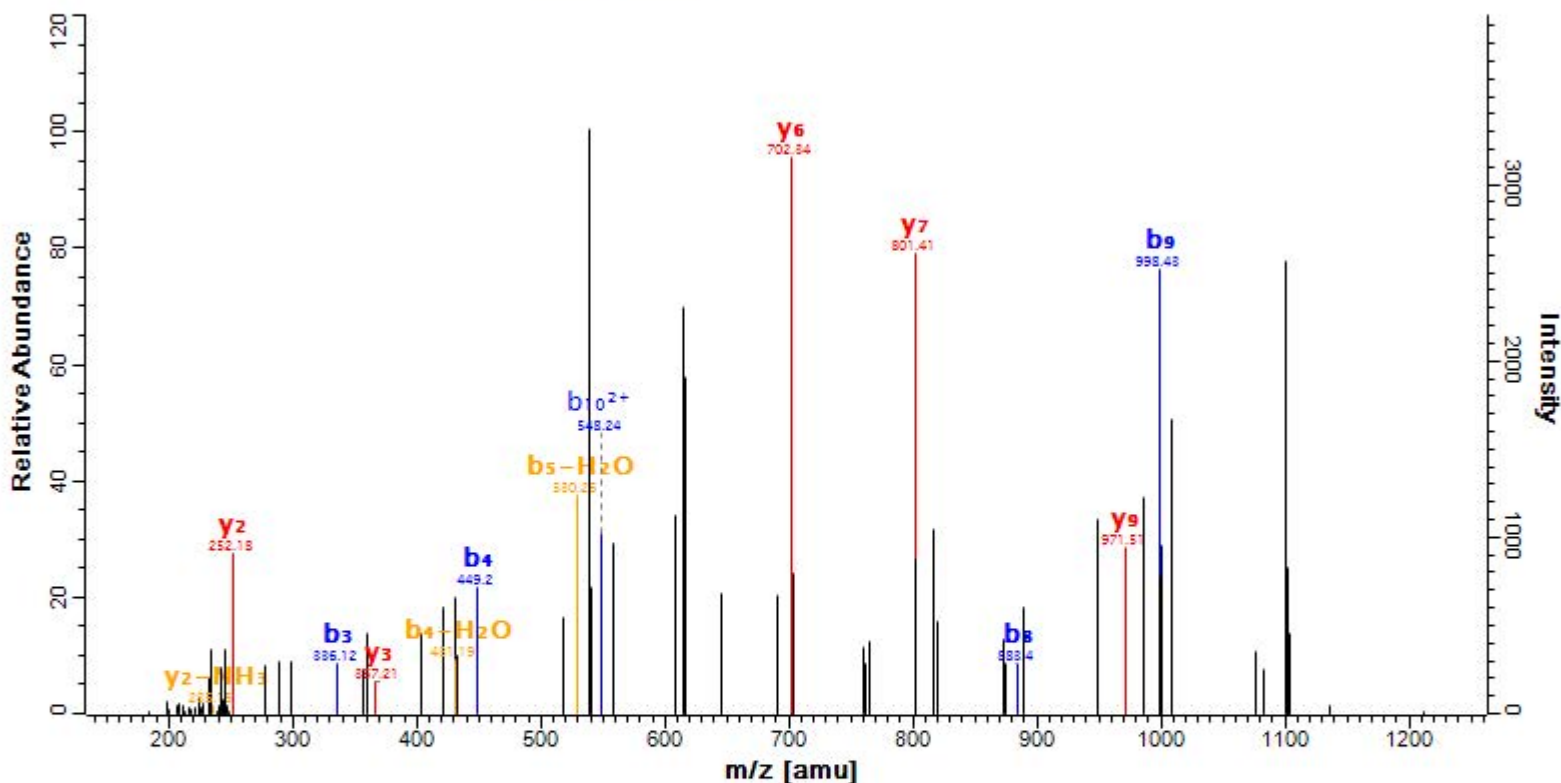

#### precursor information

|                   |                 |
|-------------------|-----------------|
| Mass:             | 1240.58011      |
| m/z:              | 621.29733       |
| Charge:           | 2+              |
| Retentiontime:    | 44.214679718017 |
| Score:            | 51.25192        |
| Mass Error [ppm]: | 0.24415         |
| PEP:              | 0.02987         |
| Precursor Type:   | MULTI           |

#### general information

|                       |             |
|-----------------------|-------------|
| Annotation:           | 7 of 11     |
| AminoAcids Coverage:  | 64 %        |
| Intensity Coverage:   | 28 %        |
| Peak Coverage:        | 15 %        |
| Protein Localisation: | 363 ... 373 |

| b <sup>2+</sup> ion |          | b ion     |          |     | y ion |          |                    |
|---------------------|----------|-----------|----------|-----|-------|----------|--------------------|
| Δ dalton            | mass     | Δ dalton  | mass     | seq |       | Δ dalton | mass               |
|                     | 164.0706 |           | 164.0706 | 1   | Y     | 10       |                    |
|                     | 279.0975 |           | 279.0975 | 2   | D     | 9        | 1086.538           |
|                     | 336.119  | +0.177924 | 336.119  | 3   | G     | 8        | 971.511 +0.0134    |
|                     | 449.2031 | +0.055347 | 449.2031 | 4   | L     | 7        | 914.4896           |
|                     | 548.2715 |           | 548.2715 | 5   | V     | 6        | 801.4055 +0.056611 |
|                     | 605.293  |           | 605.293  | 6   | G     | 5        | 702.3371 +0.109034 |
|                     | 736.3334 |           | 736.3334 | 7   | M     | 4        | 645.3156           |
|                     | 883.4019 | +0.43848  | 883.4019 | 8   | F     | 3        | 514.2751           |
|                     | 998.4288 | -0.12429  | 998.4288 | 9   | D     | 2        | 367.2067 -0.0189   |
| -0.03134            | 548.2444 |           | 1095.482 | 10  | P     | 1        | 252.1798 +0.103574 |
|                     |          |           |          | 11  | K     | 0        | 155.127            |

Scan number 8054 Raw file LNCAP\_Silac\_23F10\_set1\_03  
 Method ITMS: CID Pepti... 151.26

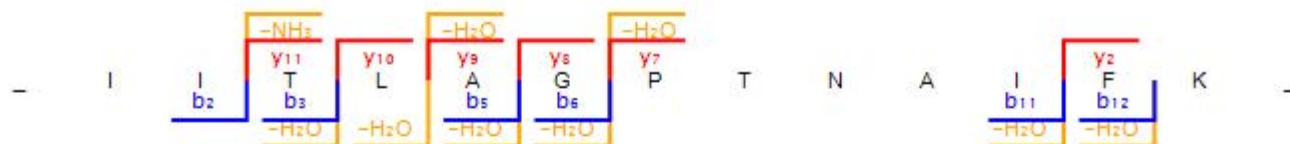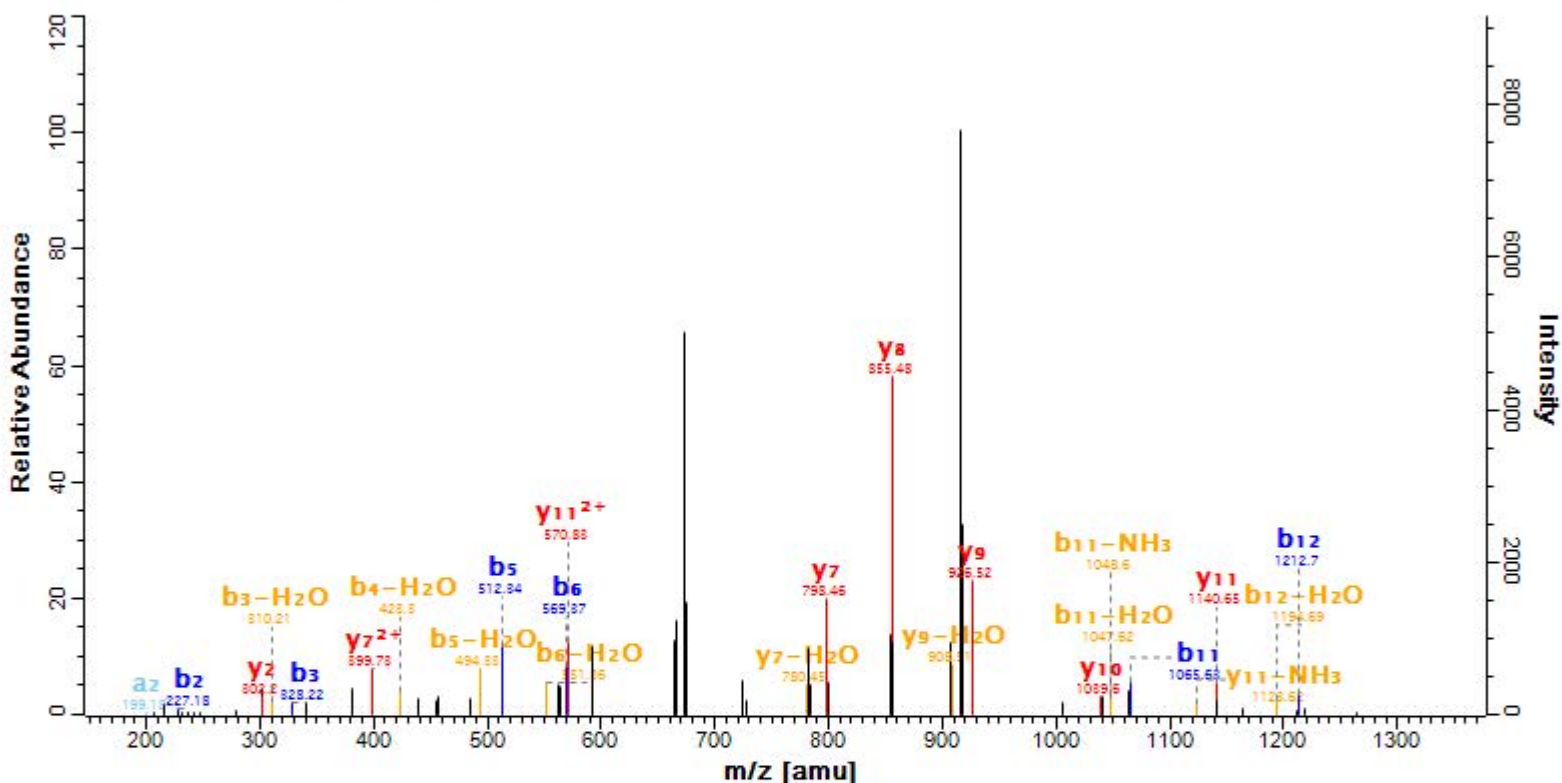

**precursor information**

|                   |                 |
|-------------------|-----------------|
| Mass:             | 1357.79712      |
| m/z:              | 679.90583       |
| Charge:           | 2+              |
| Retentiontime:    | 44.571655273437 |
| Score:            | 151.2568        |
| Mass Error [ppm]: | 0.13042         |
| PEP:              | 6.1813E-08      |
| Precursor Type:   | MULTI           |

**general information**

|                       |           |
|-----------------------|-----------|
| Annotation:           | 8 of 13   |
| AminoAcids Coverage:  | 62 %      |
| Intensity Coverage:   | 35 %      |
| Peak Coverage:        | 31 %      |
| Protein Localisation: | 58 ... 70 |

| a ion    |        | b ion    |        | seq |   |    | y ion    |         | y <sup>2+</sup> ion |         |
|----------|--------|----------|--------|-----|---|----|----------|---------|---------------------|---------|
| Δ dalton | mass   | Δ dalton | mass   |     |   |    | Δ dalton | mass    | Δ dalton            | mass    |
|          | 86.096 |          | 114.09 | 1   | I | 12 |          |         |                     |         |
| -0.044   | 199.18 | -0.013   | 227.18 | 2   | I | 11 | 1253.7   |         |                     | 1253.7  |
|          | 300.23 | +0.0884  | 328.22 | 3   | T | 10 | 1140.7   | +0.052  | 570.83              | +0.0432 |
|          | 413.31 |          | 441.31 | 4   | L | 9  | 1039.6   | +0.0704 | 1039.6              |         |
|          | 484.35 | +0.0454  | 512.34 | 5   | A | 8  | 926.52   | -0.004  | 926.52              |         |
|          | 541.37 | -0.093   | 569.37 | 6   | G | 7  | 855.48   | +0.0438 | 855.48              |         |
|          | 638.42 |          | 666.42 | 7   | P | 6  | 798.46   | +0.0265 | 399.73              | -0.401  |
|          | 739.47 |          | 767.47 | 8   | T | 5  | 701.41   |         | 701.41              |         |
|          | 853.51 |          | 881.51 | 9   | N | 4  | 600.36   |         | 600.36              |         |
|          | 924.55 |          | 952.55 | 10  | A | 3  | 486.32   |         | 486.32              |         |
|          | 1037.6 | -0.038   | 1065.6 | 11  | I | 2  | 415.28   |         | 415.28              |         |
|          | 1184.7 | -0.101   | 1212.7 | 12  | F | 1  | 302.2    | +0.1356 | 302.2               |         |
|          |        |          |        | 13  | K | 0  | 155.13   |         | 155.13              |         |

Scan number 8190 Raw file LNCAP\_Silac\_23F10\_set1\_03  
 Method ITMS; CID Pepti... 95.43

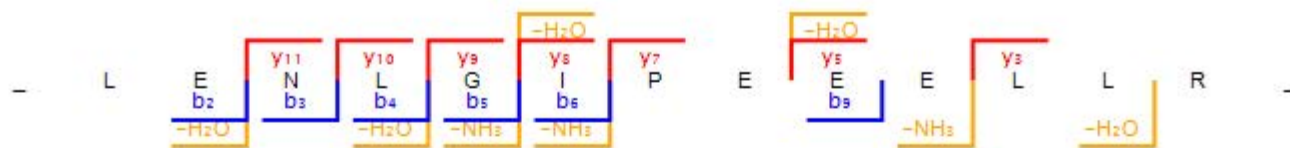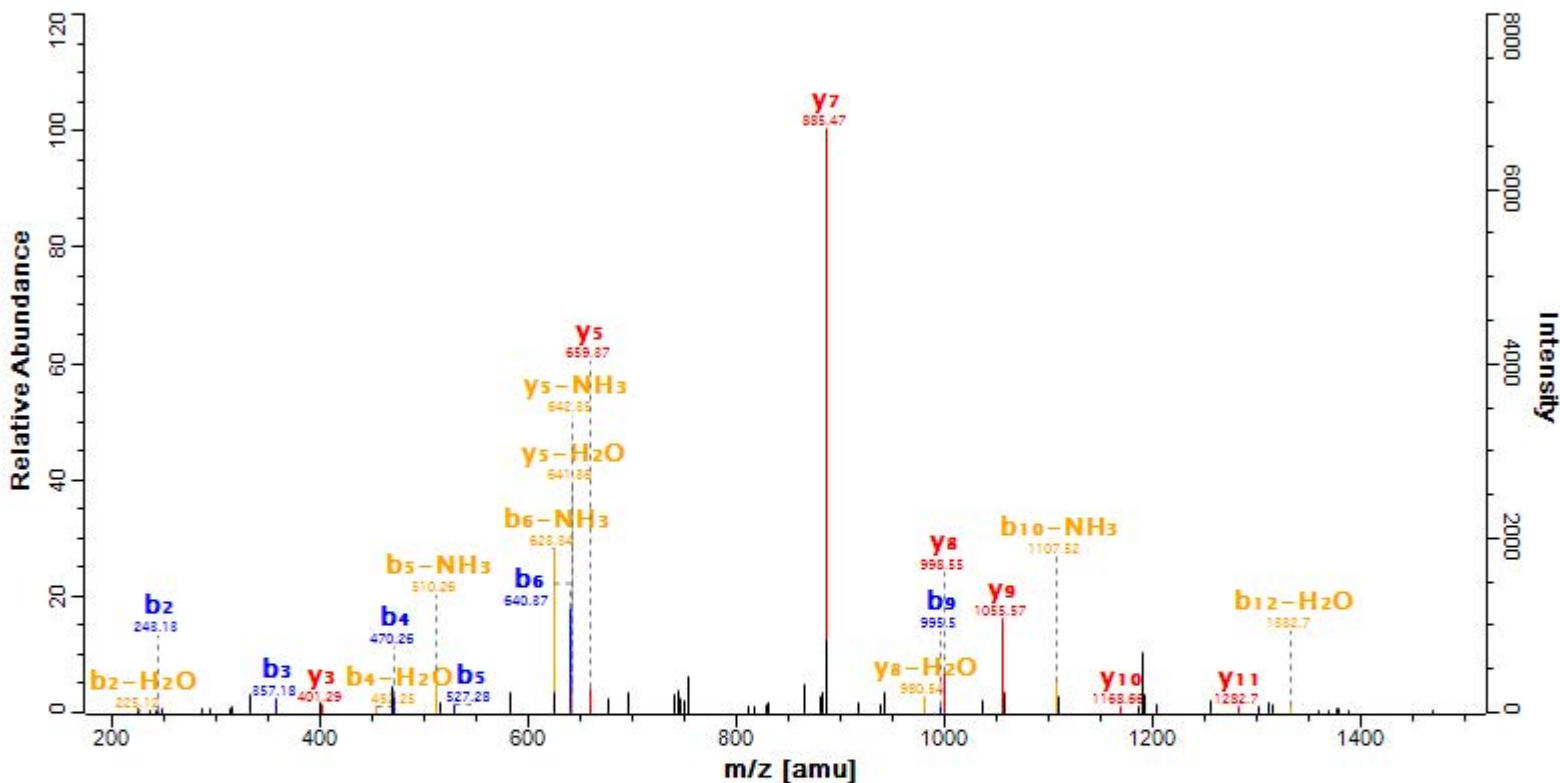

#### precursor information

|                   |                 |
|-------------------|-----------------|
| Mass:             | 1523.81955      |
| m/z:              | 762.91705       |
| Charge:           | 2+              |
| Retentiontime:    | 45.264705657959 |
| Score:            | 95.42811        |
| Mass Error [ppm]: | 0.01662         |
| PEP:              | 0.00016345      |
| Precursor Type:   | MULTI           |

#### general information

|                       |             |
|-----------------------|-------------|
| Annotation:           | 10 of 13    |
| AminoAcids Coverage:  | 77 %        |
| Intensity Coverage:   | 62 %        |
| Peak Coverage:        | 28 %        |
| Protein Localisation: | 108 ... 120 |

|            |          | b ion         |     |   | y ion    |               |            |
|------------|----------|---------------|-----|---|----------|---------------|------------|
|            | Δ dalton | mass          | seq |   | Δ dalton | mass          |            |
|            |          | 114.091340447 | 1   | L | 12       |               |            |
| +0.0183949 |          | 243.133933543 | 2   | E | 11       | 1411.74273551 |            |
| +0.10268   |          | 357.17686099  | 3   | N | 10       | 1282.70014241 | -0.0611043 |
| +0.0613407 |          | 470.260924971 | 4   | L | 9        | 1168.65721497 | +0.1811639 |
| +0.0564785 |          | 527.282388694 | 5   | G | 8        | 1055.57315099 | -0.0045475 |
| +0.2099023 |          | 640.366452675 | 6   | I | 7        | 998.551687263 | +0.0293064 |
|            |          | 737.419216527 | 7   | P | 6        | 885.467623282 | +0.0509314 |
|            |          | 866.461809623 | 8   | E | 5        | 788.41485943  |            |
| +0.1158976 |          | 995.504402719 | 9   | E | 4        | 659.372266334 | -0.0223518 |
|            |          | 1124.54699582 | 10  | E | 3        | 530.329673238 |            |
|            |          | 1237.6310598  | 11  | L | 2        | 401.287080142 | +0.1460864 |
|            |          | 1350.71512378 | 12  | L | 1        | 288.203016161 |            |
|            |          |               | 13  | R | 0        | 175.118952181 |            |

Scan number 8348 Raw file LNCAP\_Silac\_23F10\_set1\_03  
 Method ITMS: CID Peptide 114.31

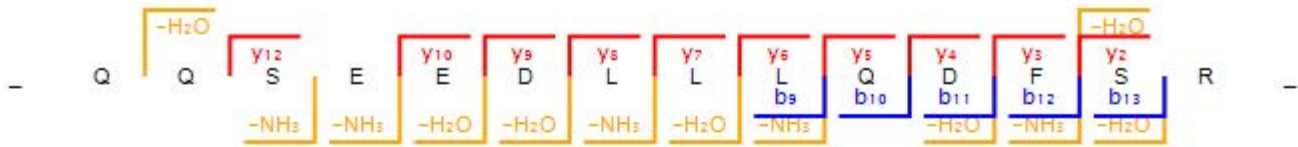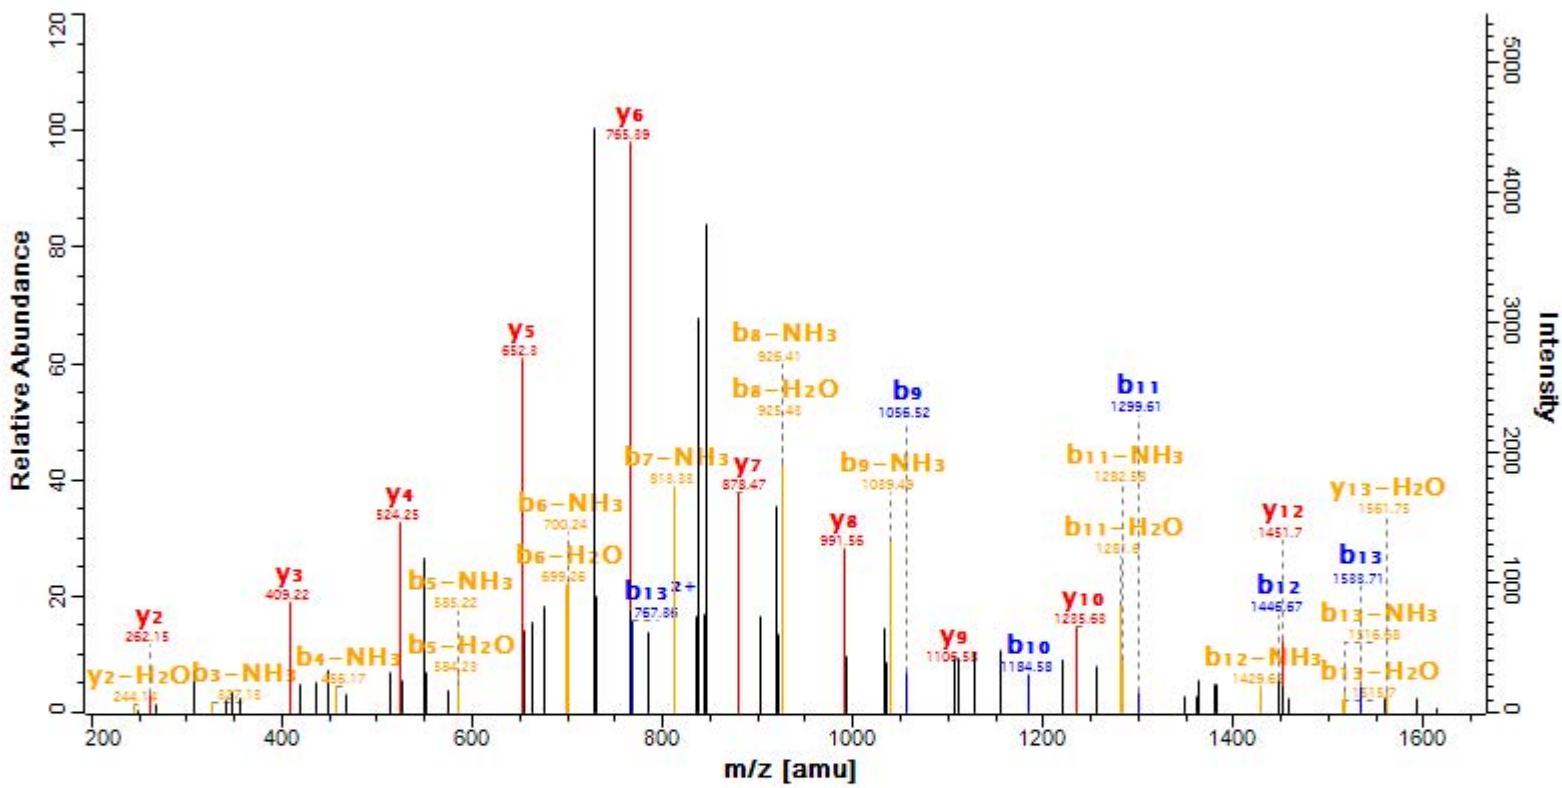

precursor information

|                   |                 |
|-------------------|-----------------|
| Mass:             | 1706.81162      |
| m/z:              | 854.41309       |
| Charge:           | 2+              |
| Retentiontime:    | 46.081710815429 |
| Score:            | 114.3098        |
| Mass Error [ppm]: | 0.28159         |
| PEP:              | 0.00021926      |
| Precursor Type:   | ISO             |

general information

|                       |          |
|-----------------------|----------|
| Annotation:           | 12 of 14 |
| AminoAcids Coverage:  | 86 %     |
| Intensity Coverage:   | 46 %     |
| Peak Coverage:        | 39 %     |
| Protein Localisation: | 9 ... 22 |

| b <sup>2+</sup> ion |          | b ion    |          |     | y ion    |      |          |
|---------------------|----------|----------|----------|-----|----------|------|----------|
| Δ dalton            | mass     | Δ dalton | mass     | seq | Δ dalton | mass |          |
|                     | 129.0659 |          | 129.0659 | 1   | Q        | 13   |          |
|                     | 257.1244 |          | 257.1244 | 2   | Q        | 12   | 1579.76  |
|                     | 344.1565 |          | 344.1565 | 3   | S        | 11   | 1451.701 |
|                     | 473.1991 |          | 473.1991 | 4   | E        | 10   | 1364.669 |
|                     | 602.2416 |          | 602.2416 | 5   | E        | 9    | 1235.627 |
|                     | 717.2686 |          | 717.2686 | 6   | D        | 8    | 1106.584 |
|                     | 830.3527 |          | 830.3527 | 7   | L        | 7    | 991.5571 |
|                     | 943.4367 |          | 943.4367 | 8   | L        | 6    | 878.473  |
|                     | 1056.521 | -0.03763 | 1056.521 | 9   | L        | 5    | 765.389  |
|                     | 1184.579 | -0.07203 | 1184.579 | 10  | Q        | 4    | 652.3049 |
|                     | 1299.606 | -0.09641 | 1299.606 | 11  | D        | 3    | 524.2463 |
|                     | 1446.675 | -0.12479 | 1446.675 | 12  | F        | 2    | 409.2194 |
| +0.175338           | 767.357  | -0.21053 | 1533.707 | 13  | S        | 1    | 262.151  |
|                     |          |          |          | 14  | R        | 0    | 175.119  |



Scan number 8388 Raw file LNCAP\_Silac\_23F10\_set1\_03  
 Method ITMS: CID Pepti... 190.86

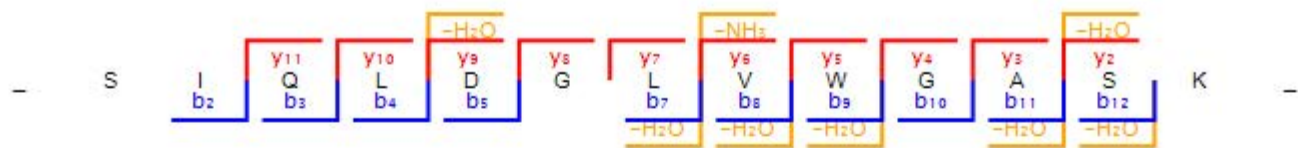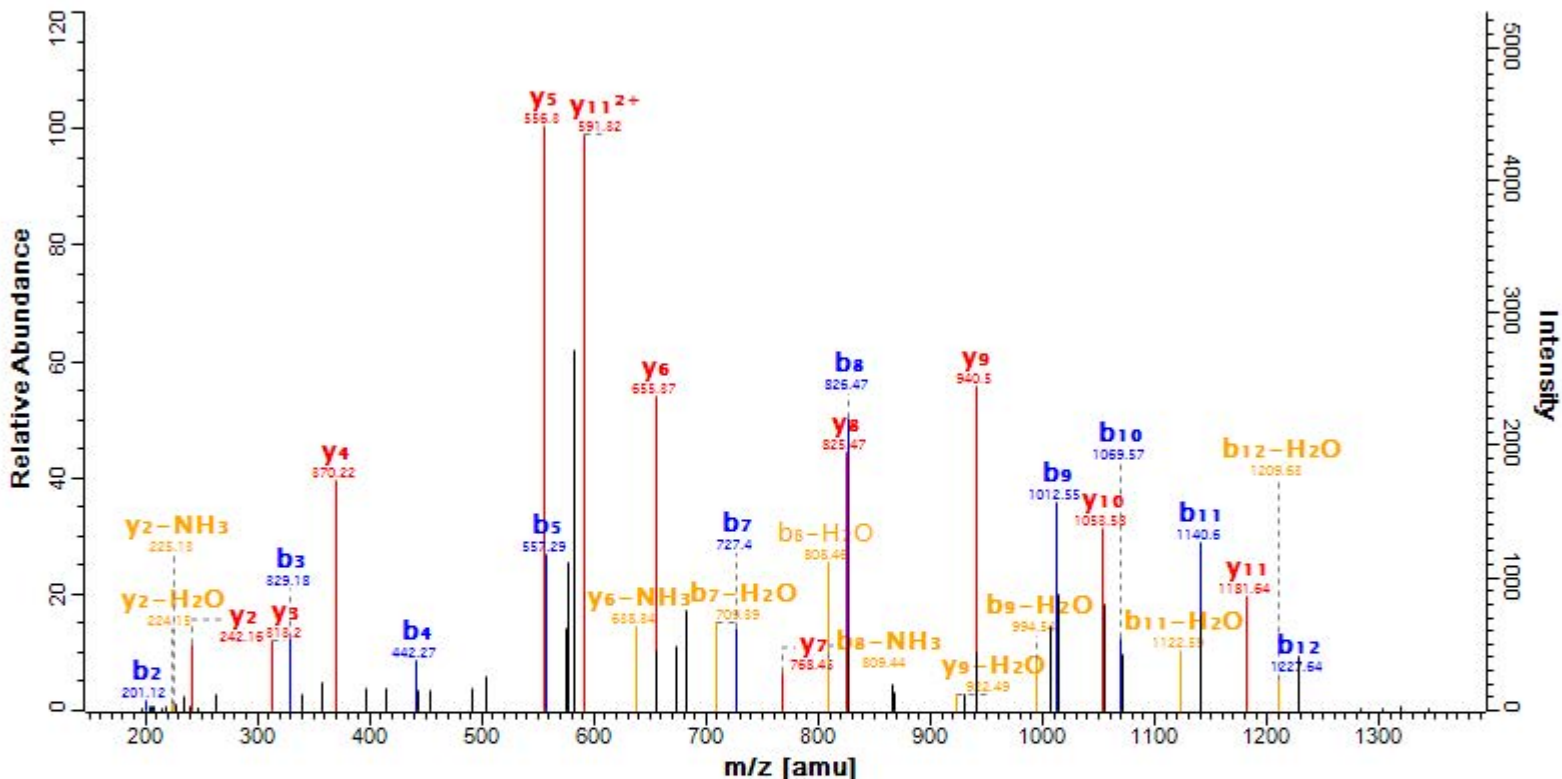

**precursor information**

|                   |                 |
|-------------------|-----------------|
| Mass:             | 1372.73467      |
| m/z:              | 687.37461       |
| Charge:           | 2+              |
| Retentiontime:    | 46.286186218261 |
| Score:            | 190.8578        |
| Mass Error [ppm]: | -0.28769        |
| PEP:              | 8.9051E-17      |
| Precursor Type:   | MULTI           |

**general information**

|                       |             |
|-----------------------|-------------|
| Annotation:           | 11 of 13    |
| AminoAcids Coverage:  | 85 %        |
| Intensity Coverage:   | 71 %        |
| Peak Coverage:        | 39 %        |
| Protein Localisation: | 220 ... 232 |

| b ion     |          |    |     |    | y ion    |           | y <sup>2+</sup> ion |           |
|-----------|----------|----|-----|----|----------|-----------|---------------------|-----------|
| Δ dalton  | mass     |    | seq |    | Δ dalton | mass      | Δ dalton            | mass      |
|           | 88.0393  | 1  | S   | 12 |          |           |                     |           |
| +0.063963 | 201.1234 | 2  | I   | 11 | 1294.725 |           | 1294.725            |           |
| +0.044982 | 329.1819 | 3  | Q   | 10 | 1181.64  | -0.11591  | 591.3239            | +0.167532 |
| +0.100262 | 442.266  | 4  | L   | 9  | 1053.582 | -0.02425  | 1053.582            |           |
| +0.153031 | 557.293  | 5  | D   | 8  | 940.4978 | -0.05304  | 940.4978            |           |
|           | 614.3144 | 6  | G   | 7  | 825.4709 | +0.010948 | 825.4709            |           |
| -0.01329  | 727.3985 | 7  | L   | 6  | 768.4494 | +0.025088 | 768.4494            |           |
| +0.004235 | 826.4669 | 8  | V   | 5  | 655.3653 | +0.024007 | 655.3653            |           |
| -0.0835   | 1012.546 | 9  | W   | 4  | 556.2969 | +0.08351  | 556.2969            |           |
| -0.07609  | 1069.568 | 10 | G   | 3  | 370.2176 | +0.212445 | 370.2176            |           |
| -0.09026  | 1140.605 | 11 | A   | 2  | 313.1961 | +0.111411 | 313.1961            |           |
| -0.19455  | 1227.637 | 12 | S   | 1  | 242.159  | -0.05758  | 242.159             |           |
|           |          | 13 | K   | 0  | 155.127  |           | 155.127             |           |

Scan number 8438 Raw file LNCAP\_Silac\_23F10\_set1\_03  
 Method ITMS: CID Peptide 102.29

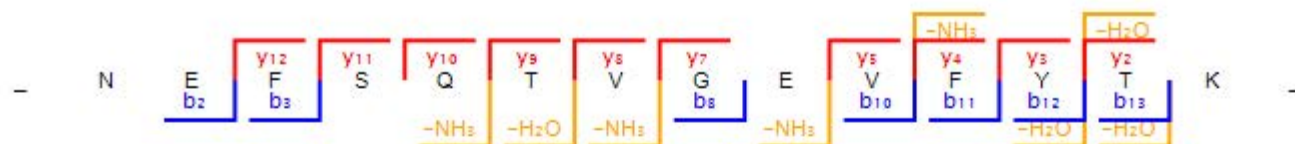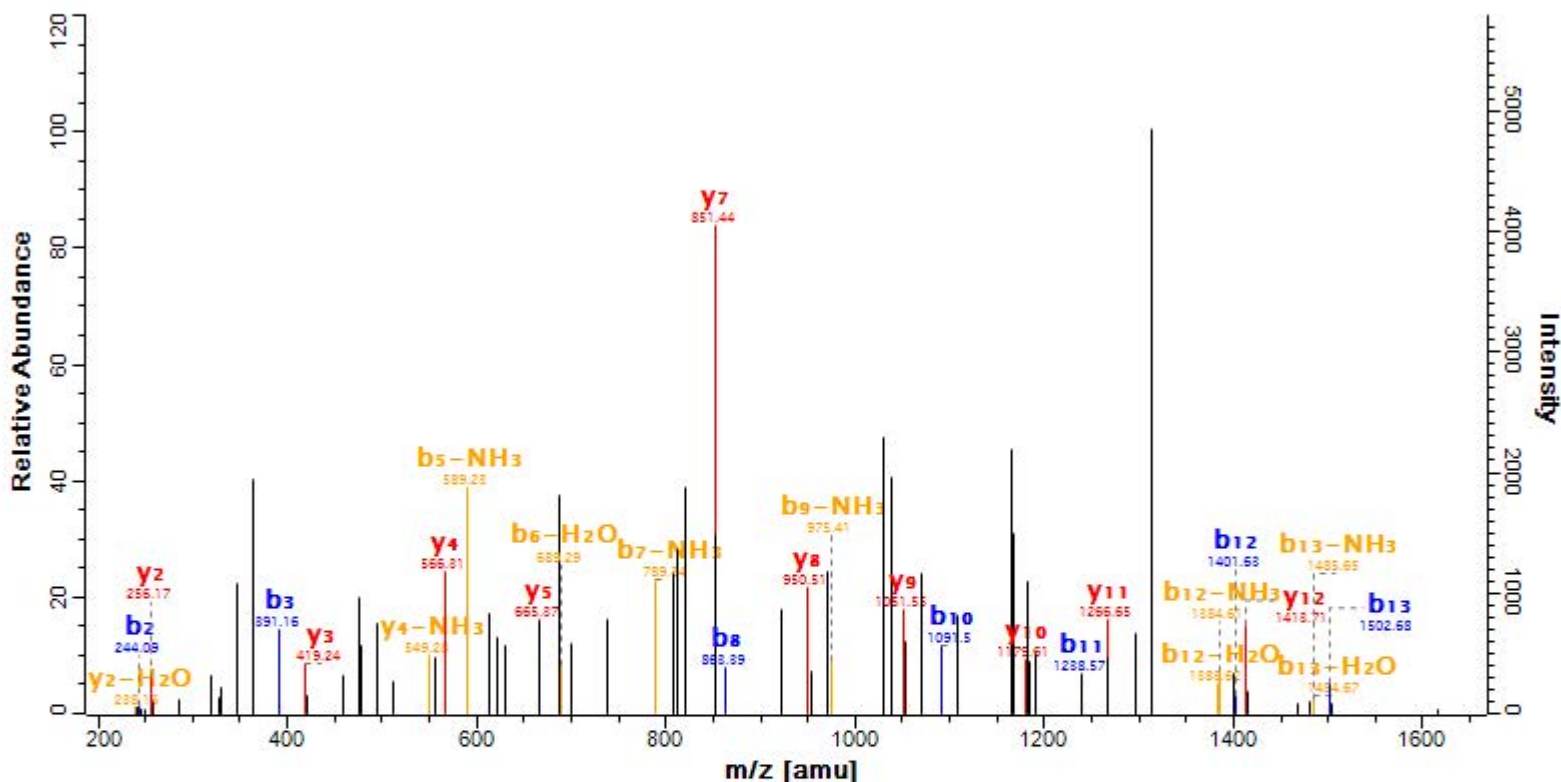

#### precursor information

|                   |                 |
|-------------------|-----------------|
| Mass:             | 1657.76602      |
| m/z:              | 829.89029       |
| Charge:           | 2+              |
| Retentiontime:    | 46.537906646728 |
| Score:            | 102.2941        |
| Mass Error [ppm]: | 0.093196        |
| PEP:              | 9.2655E-05      |
| Precursor Type:   | MULTI           |

#### general information

|                       |             |
|-----------------------|-------------|
| Annotation:           | 12 of 14    |
| AminoAcids Coverage:  | 86 %        |
| Intensity Coverage:   | 29 %        |
| Peak Coverage:        | 31 %        |
| Protein Localisation: | 130 ... 143 |

| b ion      |               |     |   |          | y ion         |            |
|------------|---------------|-----|---|----------|---------------|------------|
| Δ dalton   | mass          | seq |   | Δ dalton | mass          |            |
|            | 115.050203914 | 1   | N | 13       |               |            |
| +0.0573342 | 244.09279701  | 2   | E | 12       | 1542.75659997 |            |
| +0.1066113 | 391.161210926 | 3   | F | 11       | 1413.71400688 | -0.1457696 |
|            | 478.193239336 | 4   | S | 10       | 1266.64559296 | +0.0141971 |
|            | 606.251816848 | 5   | Q | 9        | 1179.61356455 | +0.217246  |
|            | 707.299495322 | 6   | T | 8        | 1051.55498704 | -0.0127507 |
|            | 806.367909238 | 7   | V | 7        | 950.507308565 | +0.1328282 |
| -0.3065483 | 863.389372961 | 8   | G | 6        | 851.438894648 | +0.0532318 |
|            | 992.431966058 | 9   | E | 5        | 794.417430925 |            |
| -0.2470841 | 1091.50037997 | 10  | V | 4        | 665.374837829 | +0.0069371 |
| -0.0243603 | 1238.56879389 | 11  | F | 3        | 566.306423912 | +0.1522553 |
| +0.2808414 | 1401.63212243 | 12  | Y | 2        | 419.238009996 | +0.0576443 |
| -0.1757726 | 1502.6798009  | 13  | T | 1        | 256.174681458 | +0.0884716 |
|            |               | 14  | K | 0        | 155.127002984 |            |

Scan number 8456 Raw file LNCAP\_Silac\_23F10\_set1\_03  
 Method ITMS: CID Pepti... 195.79

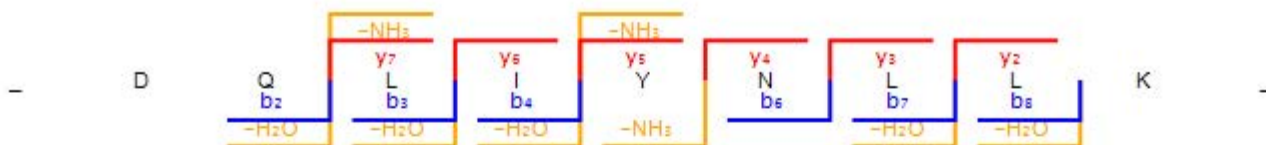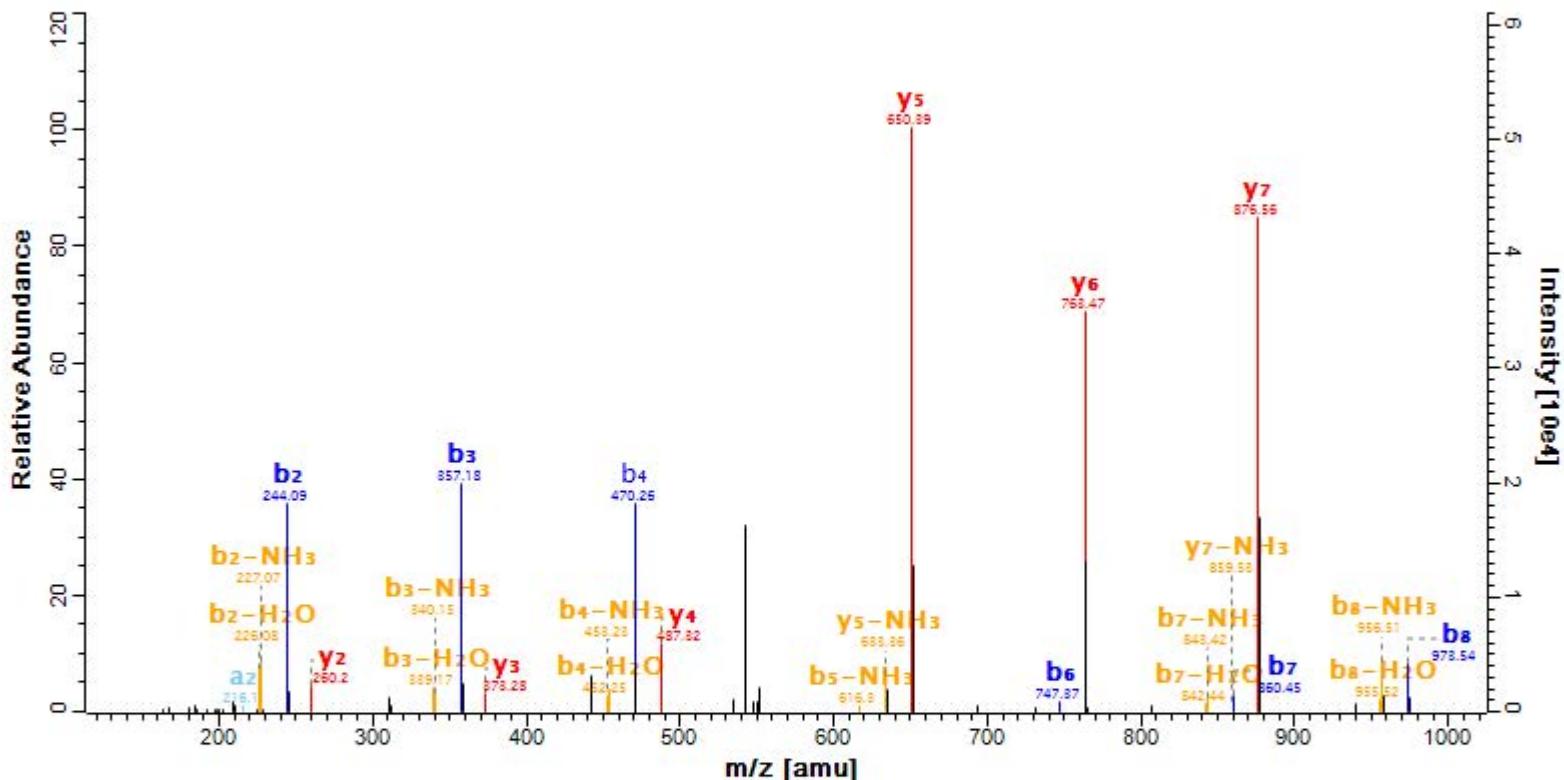

#### precursor information

|                       |                 |
|-----------------------|-----------------|
| Mass:                 | 1118.63336      |
| m/z:                  | 560.32395       |
| Charge:               | 2+              |
| Retentiontime:        | 46.628013610839 |
| Score:                | 195.7864        |
| Mass Error [ppm]:     | -0.18282        |
| PEP:                  | 1.8085E-08      |
| Precursor Type:       | MULTI           |
| Annotation:           | 7 of 9          |
| AminoAcids Coverage:  | 78 %            |
| Intensity Coverage:   | 72 %            |
| Peak Coverage:        | 35 %            |
| Protein Localisation: | 35 ... 43       |

| a ion     |          | b ion     |          | y ion |          |      |          |           |
|-----------|----------|-----------|----------|-------|----------|------|----------|-----------|
| Δ dalton  | mass     | Δ dalton  | mass     | seq   | Δ dalton | mass |          |           |
|           | 88.0393  |           | 116.0342 | 1     | D        | 8    |          |           |
| +0.087298 | 216.0979 | -0.00773  | 244.0928 | 2     | Q        | 7    | 1004.614 |           |
|           | 329.1819 | +0.049946 | 357.1769 | 3     | L        | 6    | 876.5553 | +0.031171 |
|           | 442.266  | -0.00372  | 470.2609 | 4     | I        | 5    | 763.4713 | +0.021851 |
|           | 605.3293 |           | 633.3243 | 5     | Y        | 4    | 650.3872 | +0.033893 |
|           | 719.3723 | +0.084967 | 747.3672 | 6     | N        | 3    | 487.3239 | +0.010857 |
|           | 832.4563 | +0.155933 | 860.4512 | 7     | L        | 2    | 373.2809 | +0.137464 |
|           | 945.5404 | -0.00424  | 973.5353 | 8     | L        | 1    | 260.1969 | -0.00888  |
|           |          |           |          | 9     | K        | 0    | 147.1128 |           |

Scan number 850 Raw file LNCAP\_Silac\_23F10\_set1\_03  
 Method ITMS; CID Pepti... 150.35

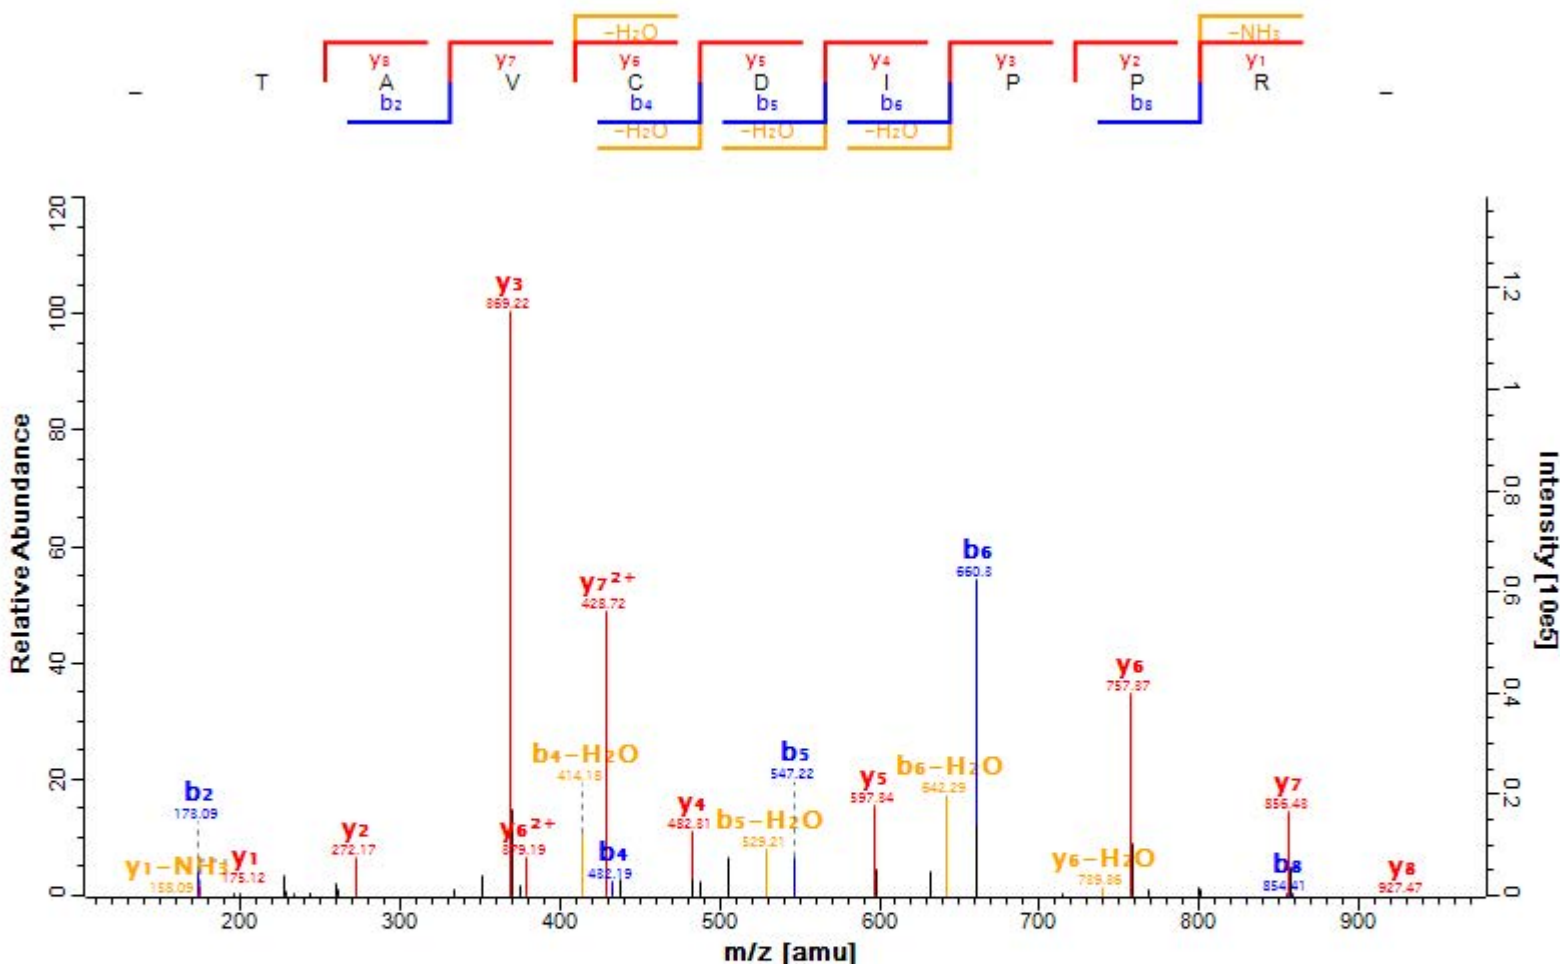

#### precursor information

|                       |                 |
|-----------------------|-----------------|
| Mass:                 | 1027.51232      |
| m/z:                  | 514.76344       |
| Charge:               | 2+              |
| Retentiontime:        | 10.078896522522 |
| Score:                | 150.3508        |
| Mass Error [ppm]:     | 0.24739         |
| PEP:                  | 0.00075306      |
| Precursor Type:       | MULTI           |
| Annotation:           | 8 of 9          |
| AminoAcids Coverage:  | 89 %            |
| Intensity Coverage:   | 80 %            |
| Peak Coverage:        | 29 %            |
| Protein Localisation: | 351 ... 359     |

| b ion     |          | seq |   |   | y ion    |           | y <sup>2+</sup> ion |           |
|-----------|----------|-----|---|---|----------|-----------|---------------------|-----------|
| Δ dalton  | mass     |     |   |   | Δ dalton | mass      | Δ dalton            | mass      |
|           | 102.055  | 1   | T | 8 |          |           |                     |           |
| -0.0083   | 173.0921 | 2   | A | 7 | 927.4717 | -0.11735  | 927.4717            |           |
|           | 272.1605 | 3   | V | 6 | 856.4345 | +0.018576 | 428.7209            | +0.195652 |
| -0.00522  | 432.1911 | 4   | C | 5 | 757.3661 | +0.052627 | 379.1867            | +0.16272  |
| +0.085576 | 547.2181 | 5   | D | 4 | 597.3355 | +0.045067 | 597.3355            |           |
| -0.03993  | 660.3021 | 6   | I | 3 | 482.3085 | +0.0313   | 482.3085            |           |
|           | 757.3549 | 7   | P | 2 | 369.2245 | -0.01354  | 369.2245            |           |
| +0.091663 | 854.4077 | 8   | P | 1 | 272.1717 | +0.073645 | 272.1717            |           |
|           |          | 9   | R | 0 | 175.119  | -0.06655  | 175.119             |           |

Scan number 8631 Raw file LNCAP\_Silac\_23F10\_set1\_03  
 Method ITMS: CID Pepti... 127.56

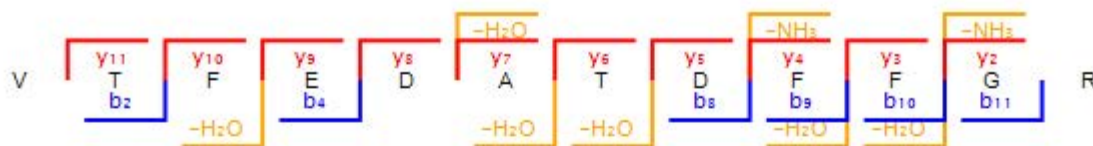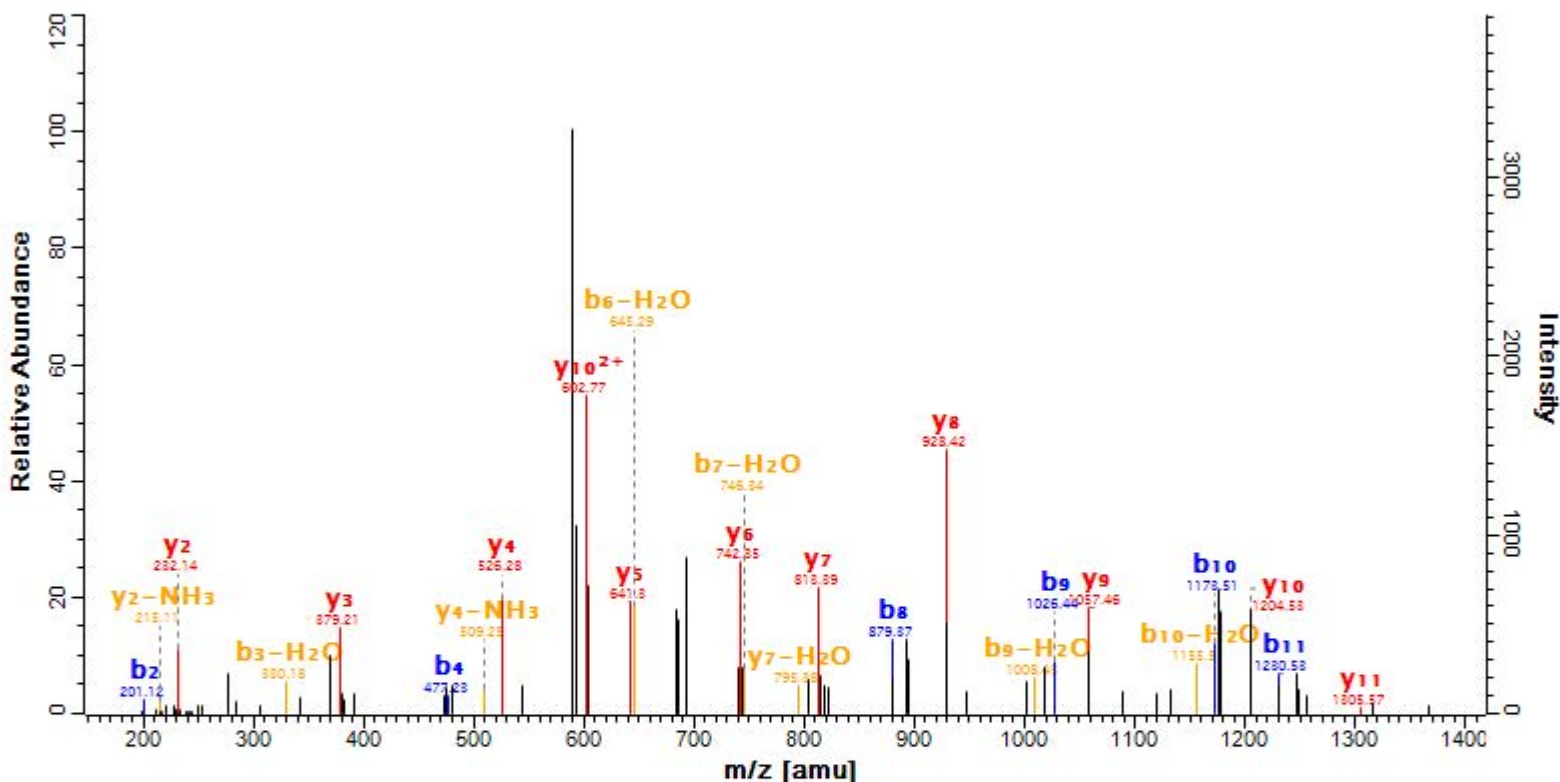

#### precursor information

|                   |                 |
|-------------------|-----------------|
| Mass:             | 1403.63593      |
| m/z:              | 702.82524       |
| Charge:           | 2+              |
| Retentiontime:    | 47.526725769043 |
| Score:            | 127.5587        |
| Mass Error [ppm]: | 0.13215         |
| PEP:              | 2.2765E-05      |
| Precursor Type:   | MULTI           |

#### general information

|                       |             |
|-----------------------|-------------|
| Annotation:           | 10 of 12    |
| AminoAcids Coverage:  | 83 %        |
| Intensity Coverage:   | 40 %        |
| Peak Coverage:        | 27 %        |
| Protein Localisation: | 117 ... 128 |

| b ion     |          |    |     |    | y ion    |           | y <sup>2+</sup> ion |          |
|-----------|----------|----|-----|----|----------|-----------|---------------------|----------|
| Δ dalton  | mass     |    | seq |    | Δ dalton | mass      | Δ dalton            | mass     |
|           | 100.0757 | 1  | V   | 11 |          |           |                     |          |
| +0.023634 | 201.1234 | 2  | T   | 10 | 1305.575 | +0.280495 | 1305.575            |          |
|           | 348.1918 | 3  | F   | 9  | 1204.527 | +0.023364 | 602.7671            | -0.03511 |
| +0.007567 | 477.2344 | 4  | E   | 8  | 1057.459 | +0.075054 | 1057.459            |          |
|           | 592.2613 | 5  | D   | 7  | 928.4159 | +0.082064 | 928.4159            |          |
|           | 663.2984 | 6  | A   | 6  | 813.389  | +0.075499 | 813.389             |          |
|           | 764.3461 | 7  | T   | 5  | 742.3519 | +0.135256 | 742.3519            |          |
| -0.10944  | 879.3731 | 8  | D   | 4  | 641.3042 | +0.09065  | 641.3042            |          |
| +0.061217 | 1026.441 | 9  | F   | 3  | 526.2772 | +0.153176 | 526.2772            |          |
| -0.03564  | 1173.51  | 10 | F   | 2  | 379.2088 | +0.01224  | 379.2088            |          |
| -0.03635  | 1230.531 | 11 | G   | 1  | 232.1404 | +0.110515 | 232.1404            |          |
|           |          | 12 | R   | 0  | 175.119  |           | 175.119             |          |

Scan number 8717 Raw file LNCAP\_Silac\_23F10\_set1\_03  
 Method ITMS; CID Pepti... 167.2

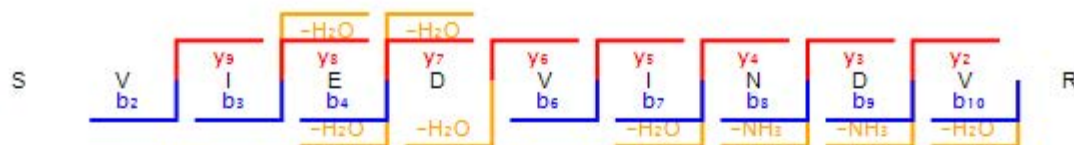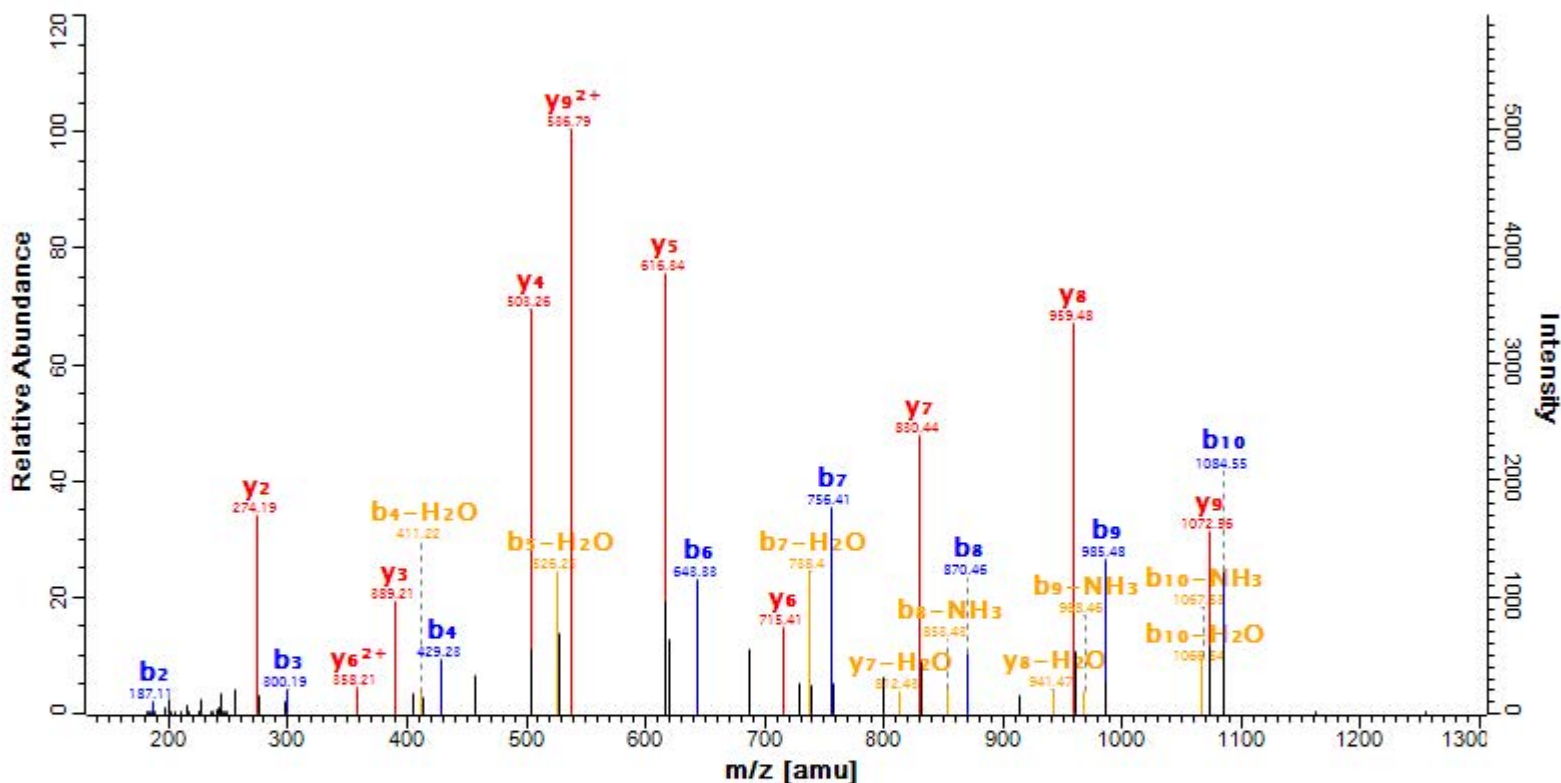

#### precursor information

|                   |                 |
|-------------------|-----------------|
| Mass:             | 1257.65671      |
| m/z:              | 629.83563       |
| Charge:           | 2+              |
| Retentiontime:    | 47.971923828125 |
| Score:            | 167.1986        |
| Mass Error [ppm]: | 0.18226         |
| PEP:              | 2.1342E-07      |
| Precursor Type:   | MULTI           |

#### general information

|                       |           |
|-----------------------|-----------|
| Annotation:           | 9 of 11   |
| AminoAcids Coverage:  | 82 %      |
| Intensity Coverage:   | 78 %      |
| Peak Coverage:        | 34 %      |
| Protein Localisation: | 16 ... 26 |

| b ion     |          |    |     |    | y ion    |           |          | y <sup>2+</sup> ion |  |
|-----------|----------|----|-----|----|----------|-----------|----------|---------------------|--|
| Δ dalton  | mass     |    | seq |    | Δ dalton | mass      | Δ dalton | mass                |  |
|           | 88.0393  | 1  | S   | 10 |          |           |          |                     |  |
| +0.04873  | 187.1077 | 2  | V   | 9  | 1171.632 |           | 1171.632 |                     |  |
| -0.07295  | 300.1918 | 3  | I   | 8  | 1072.563 | -0.03292  | 536.7853 | +0.161665           |  |
| +0.130614 | 429.2344 | 4  | E   | 7  | 959.4793 | +0.04498  | 959.4793 |                     |  |
|           | 544.2613 | 5  | D   | 6  | 830.4367 | +0.054004 | 830.4367 |                     |  |
| -0.10177  | 643.3297 | 6  | V   | 5  | 715.4097 | +0.106216 | 358.2085 | -0.04309            |  |
| -0.04075  | 756.4138 | 7  | I   | 4  | 616.3413 | +0.023446 | 616.3413 |                     |  |
| +0.072573 | 870.4567 | 8  | N   | 3  | 503.2572 | +0.071194 | 503.2572 |                     |  |
| -0.06722  | 985.4837 | 9  | D   | 2  | 389.2143 | +0.091355 | 389.2143 |                     |  |
| -0.04476  | 1084.552 | 10 | V   | 1  | 274.1874 | +0.047863 | 274.1874 |                     |  |
|           |          | 11 | R   | 0  | 175.119  |           | 175.119  |                     |  |

Scan number 8792 Raw file LNCAP\_Silac\_23F10\_set1\_03  
 Method ITMS; CID Pepti... 119.88

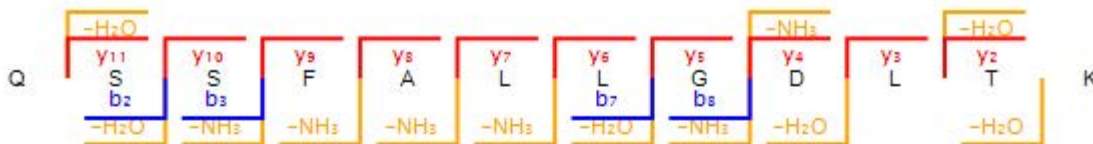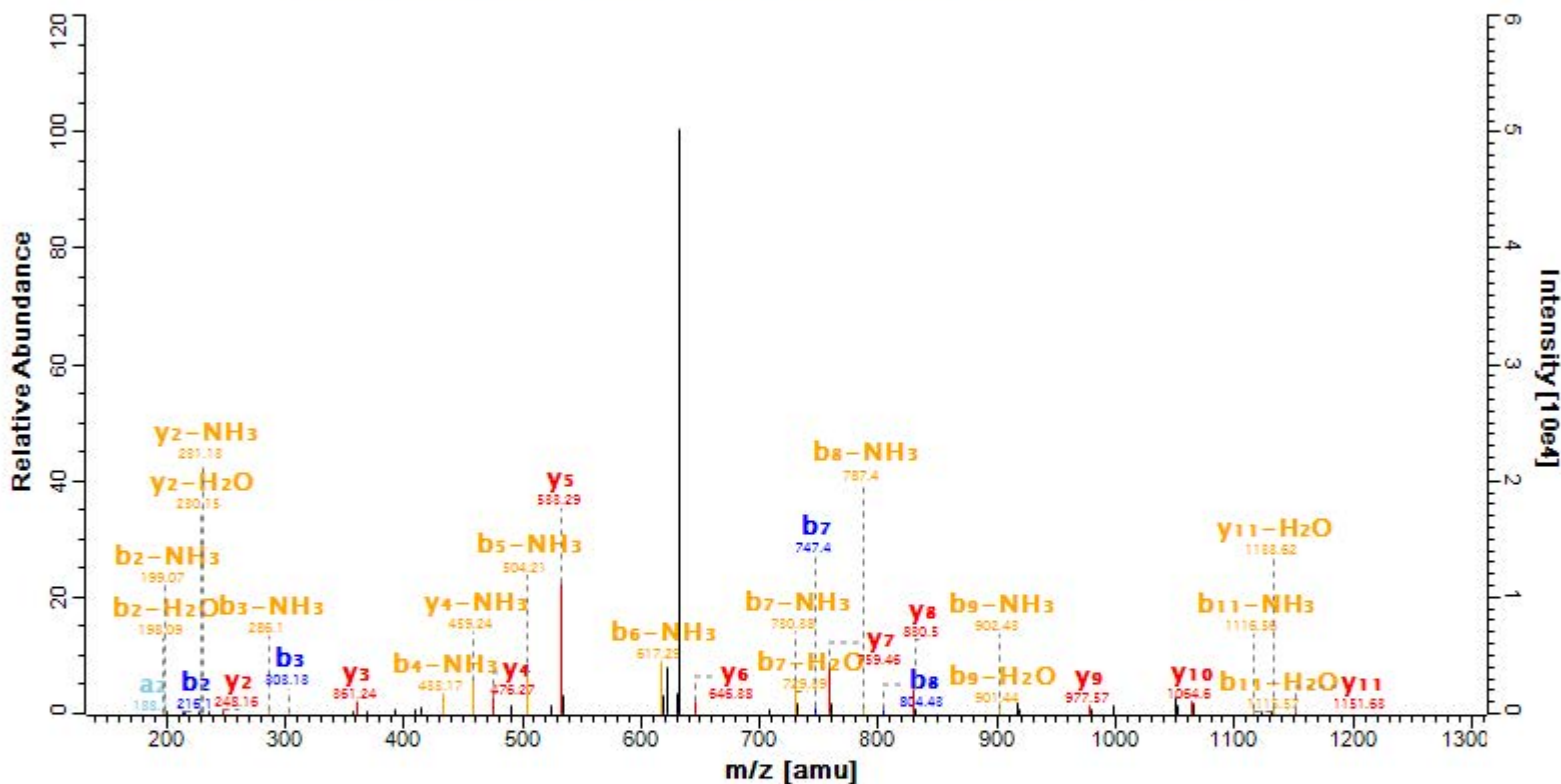

#### precursor information

|                   |                 |
|-------------------|-----------------|
| Mass:             | 1278.68249      |
| m/z:              | 640.34852       |
| Charge:           | 2+              |
| Retentiontime:    | 48.364490509033 |
| Score:            | 119.8804        |
| Mass Error [ppm]: | 0.40524         |
| PEP:              | 1.9922E-05      |
| Precursor Type:   | MULTI           |

#### general information

|                       |             |
|-----------------------|-------------|
| Annotation:           | 10 of 12    |
| AminoAcids Coverage:  | 83 %        |
| Intensity Coverage:   | 38 %        |
| Peak Coverage:        | 35 %        |
| Protein Localisation: | 693 ... 704 |

| a ion     |          | b ion     |          |     |   | y ion    |                    |
|-----------|----------|-----------|----------|-----|---|----------|--------------------|
| Δ dalton  | mass     | Δ dalton  | mass     | seq |   | Δ dalton | mass               |
|           | 101.0709 |           | 129.0659 | 1   | Q | 11       |                    |
| +0.100218 | 188.103  | +0.049701 | 216.0979 | 2   | S | 10       | 1151.631 +0.115306 |
|           | 275.135  | +0.014926 | 303.1299 | 3   | S | 9        | 1064.599 +0.147212 |
|           | 422.2034 |           | 450.1983 | 4   | F | 8        | 977.5666 +0.039897 |
|           | 493.2405 |           | 521.2354 | 5   | A | 7        | 830.4982 -0.13217  |
|           | 606.3246 |           | 634.3195 | 6   | L | 6        | 759.4611 +0.004434 |
|           | 719.4087 | -0.01599  | 747.4036 | 7   | L | 5        | 646.377 +0.101987  |
|           | 776.4301 | +0.175495 | 804.425  | 8   | G | 4        | 533.293 -0.00621   |
|           | 891.4571 |           | 919.452  | 9   | D | 3        | 476.2715 +0.003779 |
|           | 1004.541 |           | 1032.536 | 10  | L | 2        | 361.2445 +0.072043 |
|           | 1105.589 |           | 1133.584 | 11  | T | 1        | 248.1605 -0.01079  |
|           |          |           |          | 12  | K | 0        | 147.1128           |

Scan number 8991 Raw file LNCAP\_Silac\_23F10\_set1\_03  
 Method ITMS; CID Pepti... 143

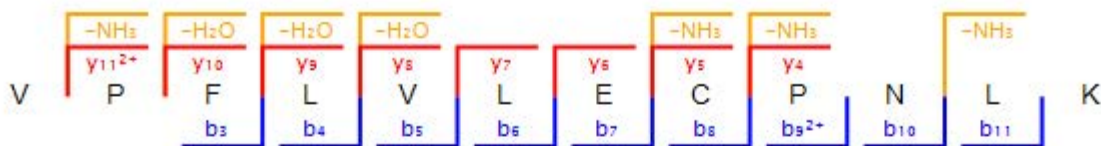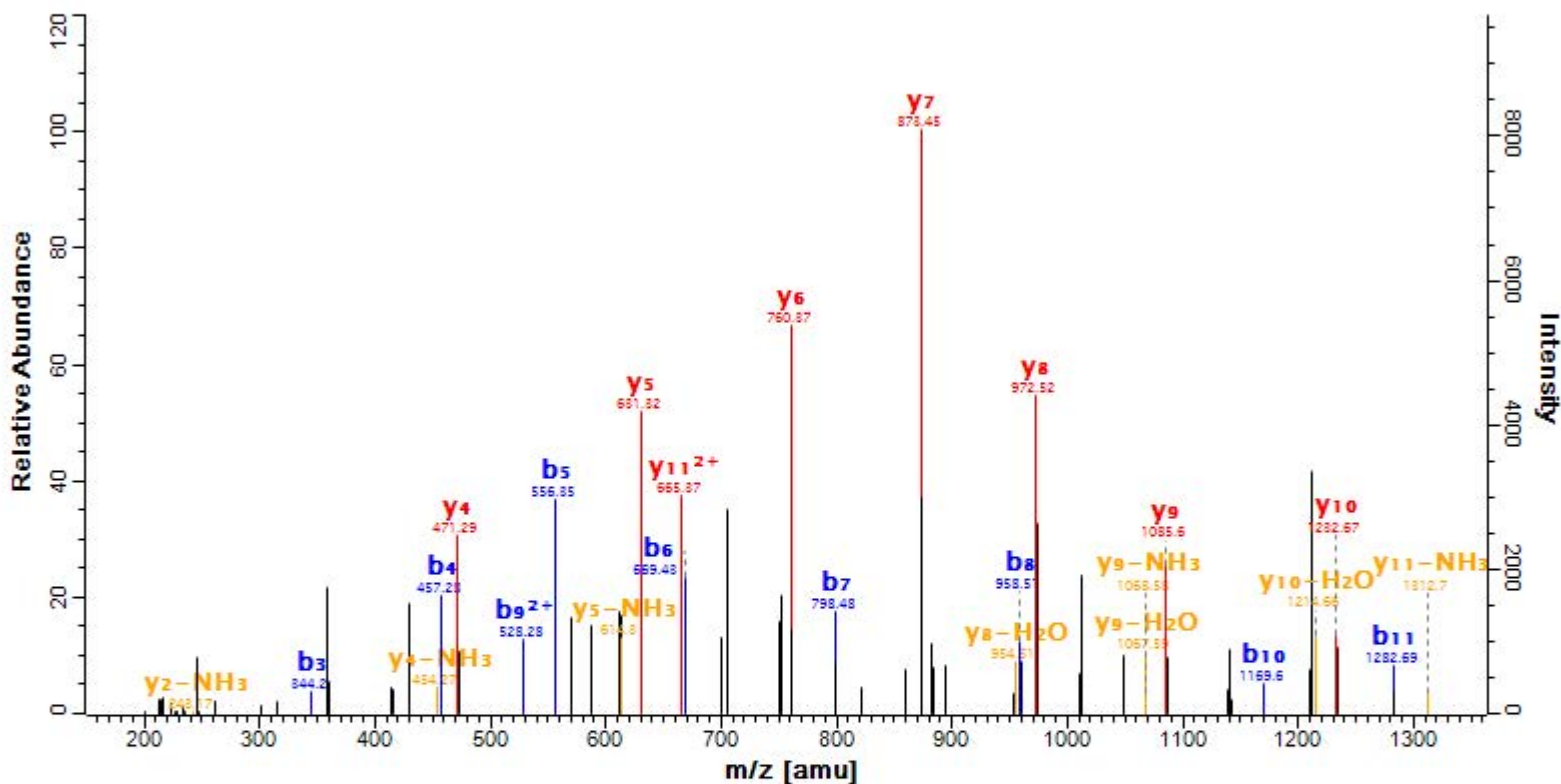

#### precursor information

|                   |                 |
|-------------------|-----------------|
| Mass:             | 1427.78451      |
| m/z:              | 714.89953       |
| Charge:           | 2+              |
| Retentiontime:    | 49.377838134765 |
| Score:            | 142.9956        |
| Mass Error [ppm]: | -0.1051         |
| PEP:              | 1.4037E-05      |
| Precursor Type:   | MULTI           |

#### general information

|                       |          |
|-----------------------|----------|
| Annotation:           | 10 of 12 |
| AminoAcids Coverage:  | 83 %     |
| Intensity Coverage:   | 51 %     |
| Peak Coverage:        | 30 %     |
| Protein Localisation: | 7 ... 18 |

| b <sup>2+</sup> ion |        | b ion    |        |     | y ion |          | y <sup>2+</sup> ion |          |                |
|---------------------|--------|----------|--------|-----|-------|----------|---------------------|----------|----------------|
| Δ dalton            | mass   | Δ dalton | mass   | seq |       | Δ dalton | mass                | Δ dalton | mass           |
|                     | 100.08 |          | 100.08 | 1   | V     | 11       |                     |          |                |
|                     | 197.13 |          | 197.13 | 2   | P     | 10       | 1329.7              |          | 665.37 +0.3543 |
|                     | 344.2  | +0.0223  | 344.2  | 3   | F     | 9        | 1232.7              | -0.107   | 1232.7         |
|                     | 457.28 | +0.1535  | 457.28 | 4   | L     | 8        | 1085.6              | -0.055   | 1085.6         |
|                     | 556.35 | +0.0306  | 556.35 | 5   | V     | 7        | 972.52              | -0.007   | 972.52         |
|                     | 669.43 | +0.0069  | 669.43 | 6   | L     | 6        | 873.45              | +0.0337  | 873.45         |
|                     | 798.48 | +0.0003  | 798.48 | 7   | E     | 5        | 760.37              | +0.0497  | 760.37         |
|                     | 958.51 | -0.037   | 958.51 | 8   | C     | 4        | 631.32              | -0.001   | 631.32         |
| -0.017              | 528.28 |          | 1055.6 | 9   | P     | 3        | 471.29              | +0.045   | 471.29         |
|                     | 1169.6 | -0.204   | 1169.6 | 10  | N     | 2        | 374.24              |          | 374.24         |
|                     | 1282.7 | -0.094   | 1282.7 | 11  | L     | 1        | 260.2               |          | 260.2          |
|                     |        |          |        | 12  | K     | 0        | 147.11              |          | 147.11         |



Scan number 900 Raw file LNCAP\_Silac\_23F10\_set1\_03  
 Method ITMS: CID Pepti... 77.68

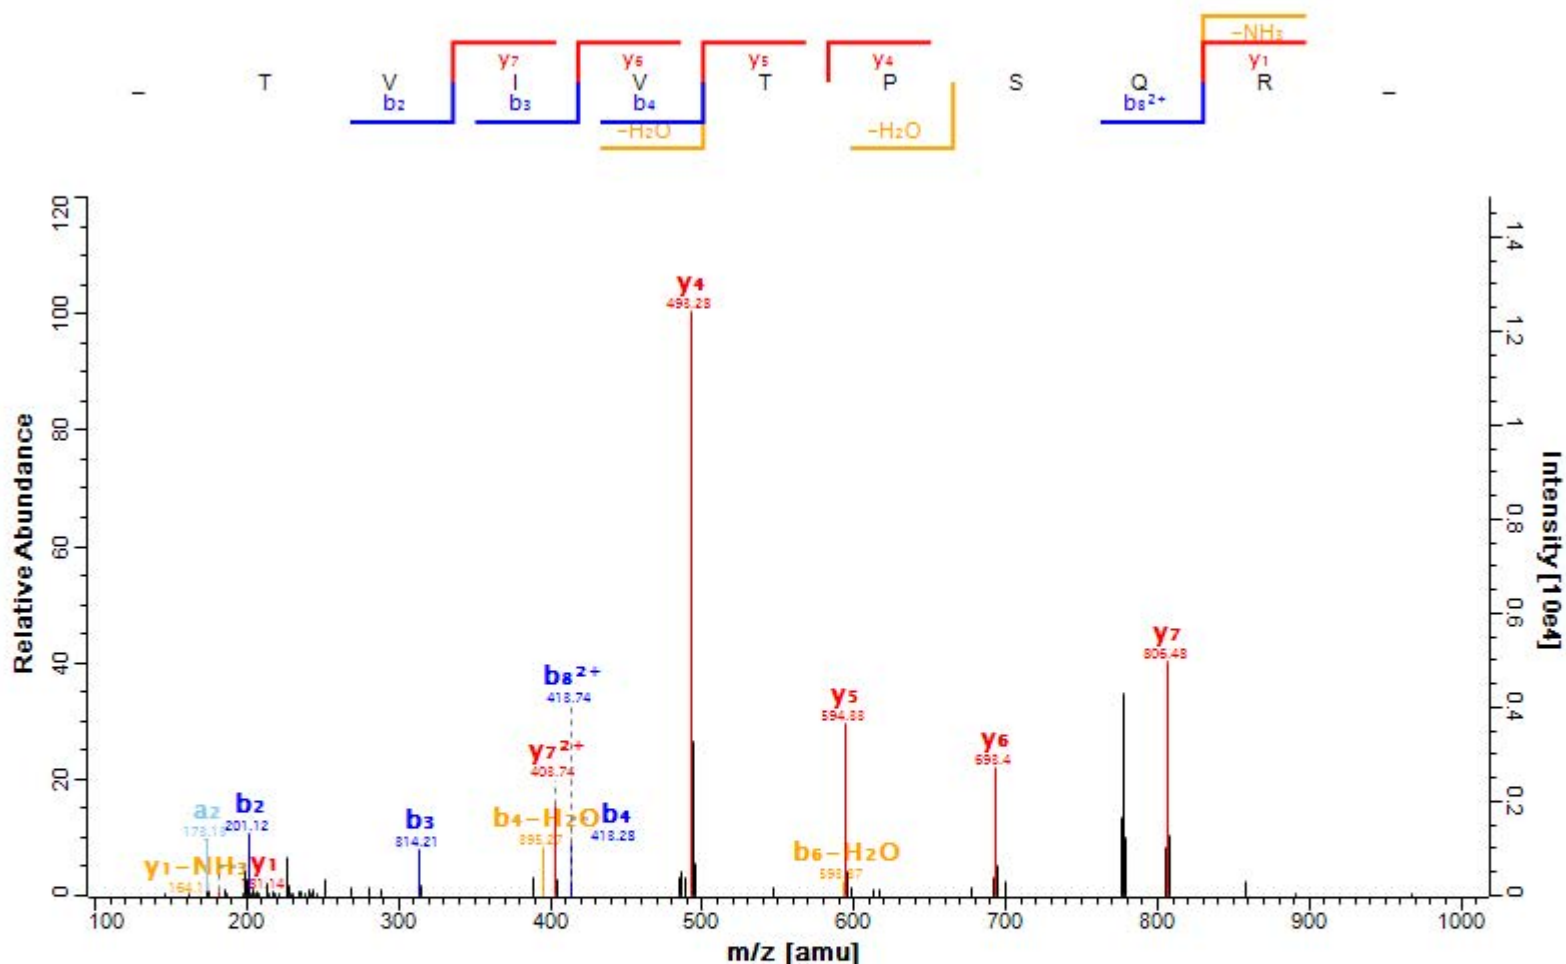

#### precursor information

|                       |                 |
|-----------------------|-----------------|
| Mass:                 | 999.57125       |
| m/z:                  | 500.7929        |
| Charge:               | 2+              |
| Retention time:       | 10.329681396484 |
| Score:                | 77.67735        |
| Mass Error [ppm]:     | -0.047138       |
| PEP:                  | 0.010784        |
| Precursor Type:       | MULTI           |
| Annotation:           | 7 of 9          |
| AminoAcids Coverage:  | 78 %            |
| Intensity Coverage:   | 58 %            |
| Peak Coverage:        | 16 %            |
| Protein Localisation: | 109 ... 117     |

| a ion         |               | b <sup>2+</sup> ion |               | b ion |     | y ion         |               | y <sup>2+</sup> ion |               |
|---------------|---------------|---------------------|---------------|-------|-----|---------------|---------------|---------------------|---------------|
| Δ dalton mass | Δ dalton mass | Δ dalton mass       | Δ dalton mass | seq   | seq | Δ dalton mass | Δ dalton mass | Δ dalton mass       | Δ dalton mass |
| 74.06         | 102.1         | 102.1               | 102.1         | 1     | T   | 8             |               |                     |               |
| +0.037 73.1   | 201.1         | -0.02 201.1         | 201.1         | 2     | V   | 7             | 905.6         | 905.6               |               |
| 286.2         | 314.2         | -0.01 314.2         | 314.2         | 3     | I   | 6             | 806.5         | +0.054 403.7        | +0.03         |
| 385.3         | 413.3         | -0.05 413.3         | 413.3         | 4     | V   | 5             | 693.4         | +0.03 693.4         |               |
| 486.3         | 514.3         | 514.3               | 514.3         | 5     | T   | 4             | 594.3         | +0.043 594.3        |               |
| 583.4         | 611.4         | 611.4               | 611.4         | 6     | P   | 3             | 493.3         | +0.134 493.3        |               |
| 670.4         | 698.4         | 698.4               | 698.4         | 7     | S   | 2             | 396.2         | 396.2               |               |
| 798.5         | +0.48 413.7   | 826.5               | 826.5         | 8     | Q   | 1             | 309.2         | 309.2               |               |
|               |               |                     |               | 9     | R   | 0             | 181.1         | +0.064 181.1        |               |

Scan number 9871 Raw file LNCAP\_Silac\_23F10\_set1\_03  
 Method ITMS: CID Peptide 151.07

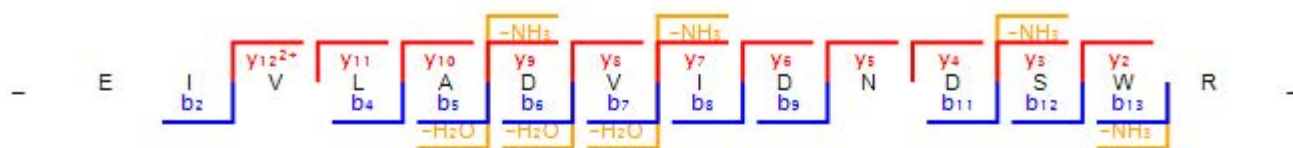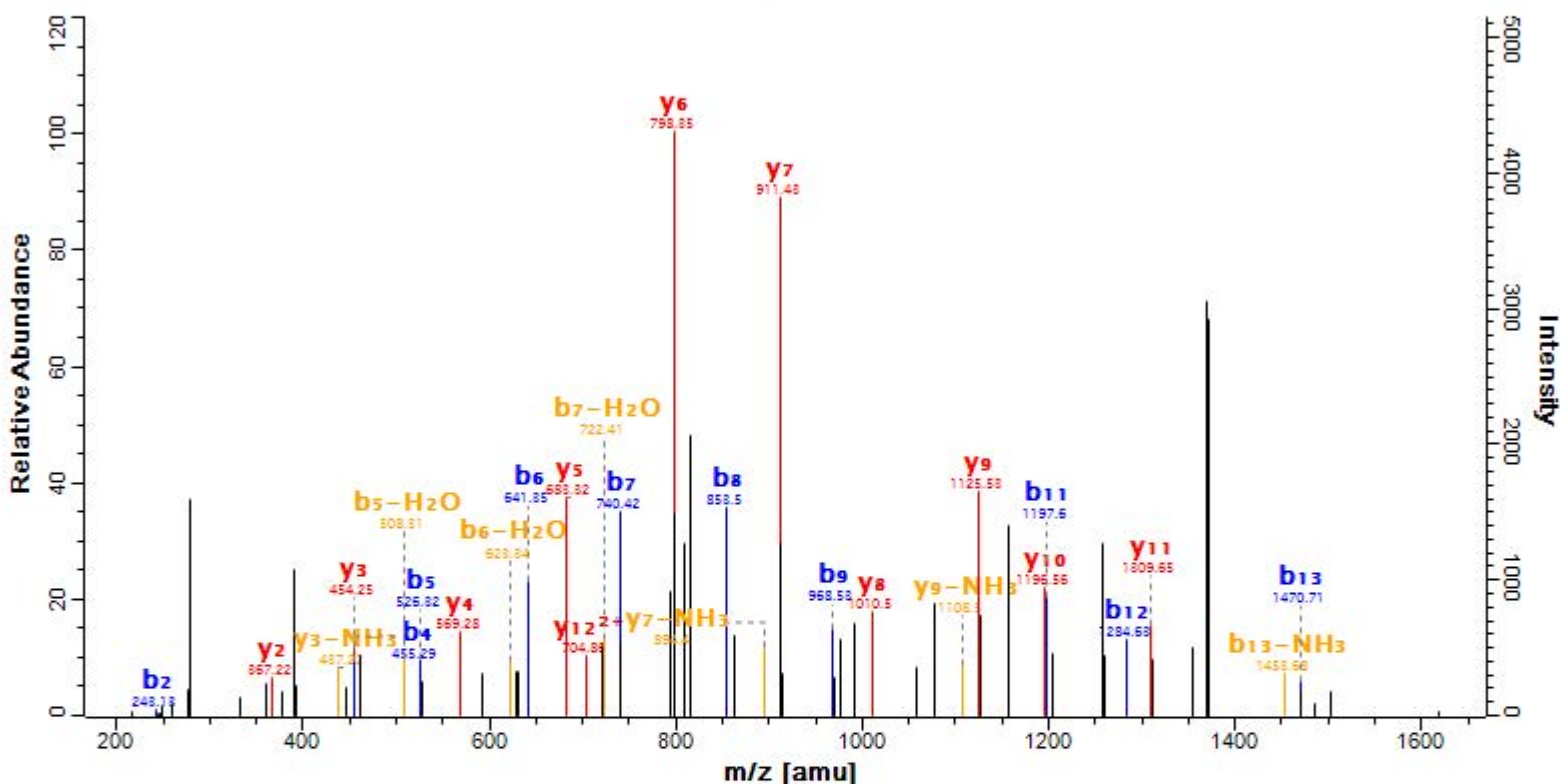

**precursor information**

|                   |                 |
|-------------------|-----------------|
| Mass:             | 1643.81542      |
| m/z:              | 822.91499       |
| Charge:           | 2+              |
| Retentiontime:    | 54.144031524658 |
| Score:            | 151.0698        |
| Mass Error [ppm]: | -0.048414       |
| PEP:              | 6.9829E-10      |
| Precursor Type:   | MULTI           |

| b ion     |          |    |     |    | y ion    |           | y <sup>2+</sup> ion |          |
|-----------|----------|----|-----|----|----------|-----------|---------------------|----------|
| Δ dalton  | mass     |    | seq |    | Δ dalton | mass      | Δ dalton            | mass     |
|           | 130.0499 | 1  | E   | 13 |          |           |                     |          |
| +0.07618  | 243.1339 | 2  | I   | 12 | 1521.8   |           | 1521.8              |          |
|           | 342.2023 | 3  | V   | 11 | 1408.716 |           | 704.8618            | -0.07709 |
| +0.113247 | 455.2864 | 4  | L   | 10 | 1309.648 | +0.011711 | 1309.648            |          |
| -0.15391  | 526.3235 | 5  | A   | 9  | 1196.564 | +0.001415 | 1196.564            |          |
| +0.019893 | 641.3505 | 6  | D   | 8  | 1125.527 | +0.062454 | 1125.527            |          |
| +0.068484 | 740.4189 | 7  | V   | 7  | 1010.5   | -0.07326  | 1010.5              |          |
| -0.06636  | 853.5029 | 8  | I   | 6  | 911.4313 | -0.00521  | 911.4313            |          |
| -0.12956  | 968.5299 | 9  | D   | 5  | 798.3472 | +0.029351 | 798.3472            |          |
|           | 1082.573 | 10 | N   | 4  | 683.3203 | +0.047566 | 683.3203            |          |
| -0.04397  | 1197.6   | 11 | D   | 3  | 569.2774 | +0.120645 | 569.2774            |          |
| -0.20564  | 1284.632 | 12 | S   | 2  | 454.2504 | +0.148564 | 454.2504            |          |
| +0.005818 | 1470.711 | 13 | W   | 1  | 367.2184 | +0.146047 | 367.2184            |          |
|           |          | 14 | R   | 0  | 181.1391 |           | 181.1391            |          |

**general information**

|                       |             |
|-----------------------|-------------|
| Annotation:           | 12 of 14    |
| AminoAcids Coverage:  | 86 %        |
| Intensity Coverage:   | 43 %        |
| Peak Coverage:        | 33 %        |
| Protein Localisation: | 228 ... 241 |

Scan number 10157 Raw file LNCAP\_Silac\_23F10\_set1\_04  
 Method ITMS; CID Pepti... 141.58

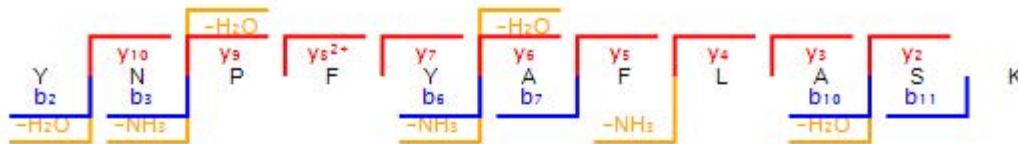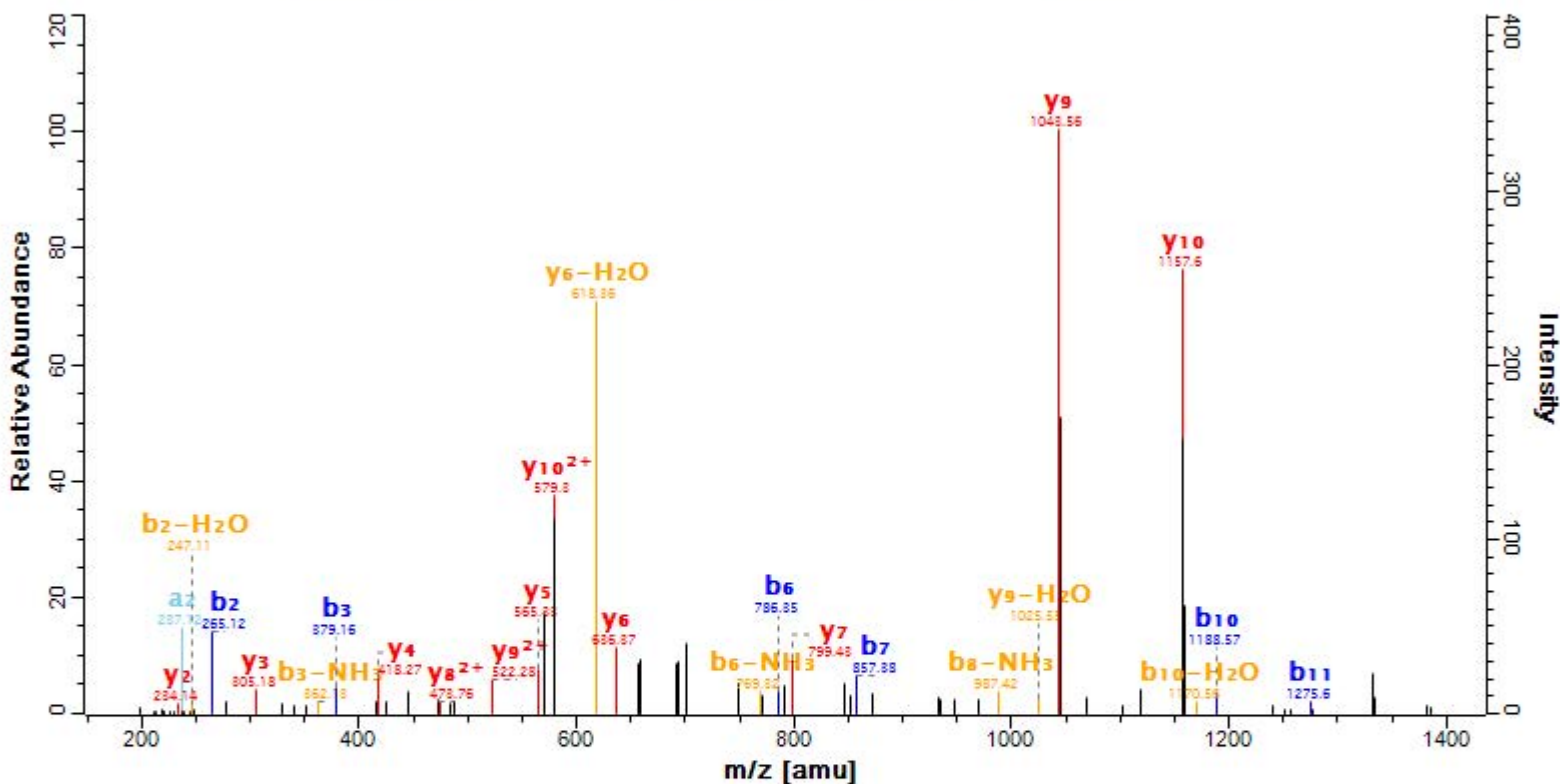

#### precursor information

|                   |                 |
|-------------------|-----------------|
| Mass:             | 1420.70262      |
| m/z:              | 711.35859       |
| Charge:           | 2+              |
| Retentiontime:    | 62.981800079345 |
| Score:            | 141.5814        |
| Mass Error [ppm]: | -0.054749       |
| PEP:              | 1.623E-05       |
| Precursor Type:   | MULTI           |

#### general information

|                       |             |
|-----------------------|-------------|
| Annotation:           | 10 of 12    |
| AminoAcids Coverage:  | 83 %        |
| Intensity Coverage:   | 55 %        |
| Peak Coverage:        | 30 %        |
| Protein Localisation: | 702 ... 713 |

| a ion    |        | b ion    |        | seq |   |    | y ion    |         | y <sup>2+</sup> ion |         |
|----------|--------|----------|--------|-----|---|----|----------|---------|---------------------|---------|
| Δ dalton | mass   | Δ dalton | mass   |     |   |    | Δ dalton | mass    | Δ dalton            | mass    |
|          | 74.06  |          | 102.05 | 1   | T | 11 |          |         |                     |         |
| -0.005   | 237.12 | +0.0682  | 265.12 | 2   | Y | 10 | 1320.7   |         | 1320.7              |         |
|          | 351.17 | +0.1045  | 379.16 | 3   | N | 9  | 1157.6   | -0.019  | 579.3               | +0.0243 |
|          | 448.22 |          | 476.21 | 4   | P | 8  | 1043.6   | -0.007  | 522.28              | +0.379  |
|          | 595.29 |          | 623.28 | 5   | F | 7  | 946.5    |         | 473.76              | +0.2115 |
|          | 758.35 | +0.0093  | 786.35 | 6   | Y | 6  | 799.43   | +0.1453 | 799.43              |         |
|          | 829.39 | -0.101   | 857.38 | 7   | A | 5  | 636.37   | +0.0497 | 636.37              |         |
|          | 976.46 |          | 1004.5 | 8   | F | 4  | 565.33   | +0.0614 | 565.33              |         |
|          | 1089.5 |          | 1117.5 | 9   | L | 3  | 418.27   | +0.0832 | 418.27              |         |
|          | 1160.6 | +0.0287  | 1188.6 | 10  | A | 2  | 305.18   | +0.1035 | 305.18              |         |
|          | 1247.6 | +0.2134  | 1275.6 | 11  | S | 1  | 234.14   | +0.0119 | 234.14              |         |
|          |        |          |        | 12  | K | 0  | 147.11   |         | 147.11              |         |

Scan number 1196 Raw file LNCAP\_Silac\_23F10\_set1\_04  
 Method ITMS; CID Pepti... 100.02

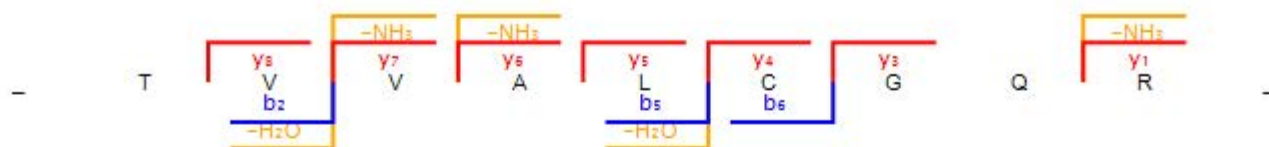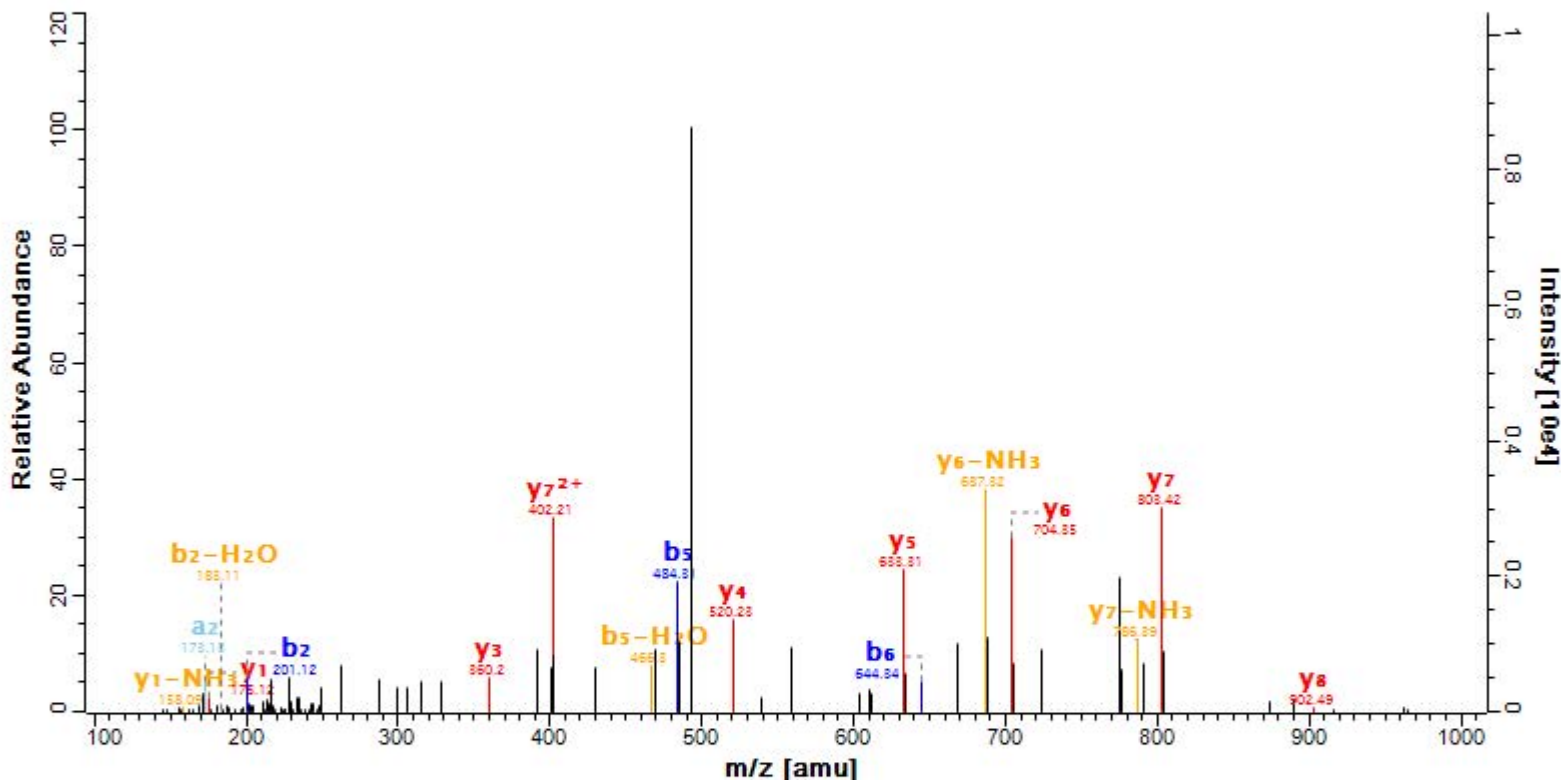

#### precursor information

|                       |                 |
|-----------------------|-----------------|
| Mass:                 | 1002.52841      |
| m/z:                  | 502.27148       |
| Charge:               | 2+              |
| Retentiontime:        | 11.632506370544 |
| Score:                | 100.0171        |
| Mass Error [ppm]:     | 0.35598         |
| PEP:                  | 0.0034806       |
| Precursor Type:       | MULTI           |
| Annotation:           | 7 of 9          |
| AminoAcids Coverage:  | 78 %            |
| Intensity Coverage:   | 37 %            |
| Peak Coverage:        | 16 %            |
| Protein Localisation: | 187 ... 195     |

| a ion    |        | b ion    |        |   |     |   | y ion    |         | y <sup>2+</sup> ion |        |
|----------|--------|----------|--------|---|-----|---|----------|---------|---------------------|--------|
| Δ dalton | mass   | Δ dalton | mass   |   | seq |   | Δ dalton | mass    | Δ dalton            | mass   |
|          | 74.06  |          | 102.05 | 1 | T   | 8 |          |         |                     |        |
| -0.033   | 173.13 | +0.0491  | 201.12 | 2 | V   | 7 | 902.49   | +0.1407 | 902.49              |        |
|          | 272.2  |          | 300.19 | 3 | V   | 6 | 803.42   | +0.0344 | 402.21              | -0.113 |
|          | 343.23 |          | 371.23 | 4 | A   | 5 | 704.35   | +0.0292 | 704.35              |        |
|          | 456.32 | -0.081   | 484.31 | 5 | L   | 4 | 633.31   | +0.0832 | 633.31              |        |
|          | 616.35 | +0.165   | 644.34 | 6 | C   | 3 | 520.23   | +0.1121 | 520.23              |        |
|          | 673.37 |          | 701.37 | 7 | G   | 2 | 360.2    | -0.01   | 360.2               |        |
|          | 801.43 |          | 829.42 | 8 | Q   | 1 | 303.18   |         | 303.18              |        |
|          |        |          |        | 9 | R   | 0 | 175.12   | +0.1168 | 175.12              |        |

Scan number 1446 Raw file LNCAP\_Silac\_23F10\_set1\_04  
 Method ITMS: CID Pepti... 104.21

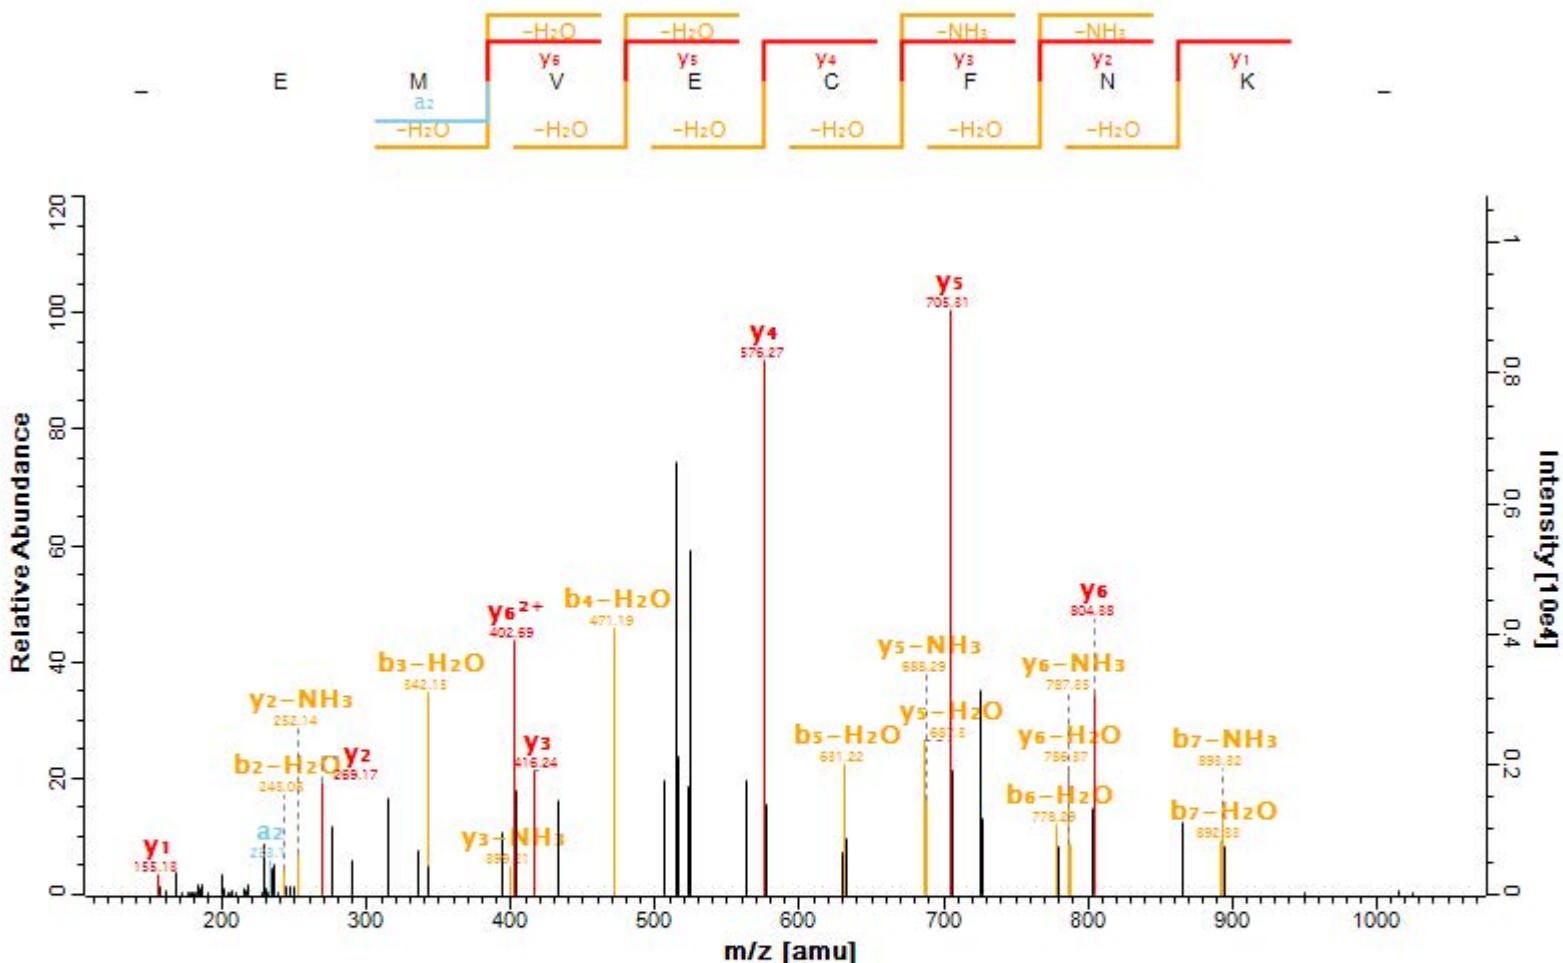

#### precursor information

|                       |                 |
|-----------------------|-----------------|
| Mass:                 | 1055.4417       |
| m/z:                  | 528.72812       |
| Charge:               | 2+              |
| Retention time:       | 12.907389640808 |
| Score:                | 104.2088        |
| Mass Error [ppm]:     | 0.088924        |
| g PEP:                | 0.0079771       |
| Annotation:           | 7 of 8          |
| AminoAcids Coverage:  | 88 %            |
| Intensity Coverage:   | 51 %            |
| Peak Coverage:        | 23 %            |
| Protein Localisation: | 88 ... 95       |

| a ion    |        | b ion    |      | seq |   |   | y ion    |         | y <sup>2+</sup> ion |        |
|----------|--------|----------|------|-----|---|---|----------|---------|---------------------|--------|
| Δ dalton | mass   | Δ dalton | mass |     |   |   | Δ dalton | mass    | Δ dalton            | mass   |
|          | 102.05 | 130.05   |      | 1   | E | 7 |          |         |                     |        |
| +0.1395  | 233.1  | 261.09   |      | 2   | M | 6 | 935.42   |         | 935.42              |        |
|          | 332.16 | 360.16   |      | 3   | V | 5 | 804.38   | +0.0128 | 402.69              | -0.073 |
|          | 461.21 | 489.2    |      | 4   | E | 4 | 705.31   | +0.0727 | 705.31              |        |
|          | 621.24 | 649.23   |      | 5   | C | 3 | 576.27   | +0.099  | 576.27              |        |
|          | 768.31 | 796.3    |      | 6   | F | 2 | 416.24   | +0.0405 | 416.24              |        |
|          | 882.35 | 910.34   |      | 7   | N | 1 | 269.17   | -0.006  | 269.17              |        |
|          |        |          |      | 8   | K | 0 | 155.13   | -0.026  | 155.13              |        |

Scan number 1706 Raw file LNCAP\_Silac\_23F10\_set1\_04  
 Method ITMS: CID Pepti... 106.4

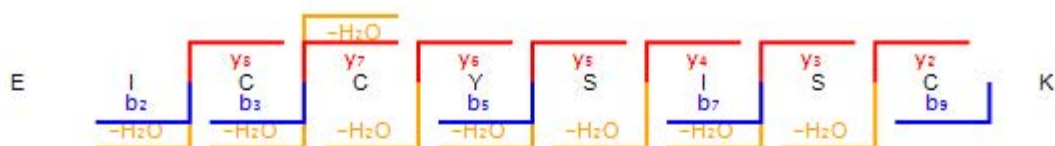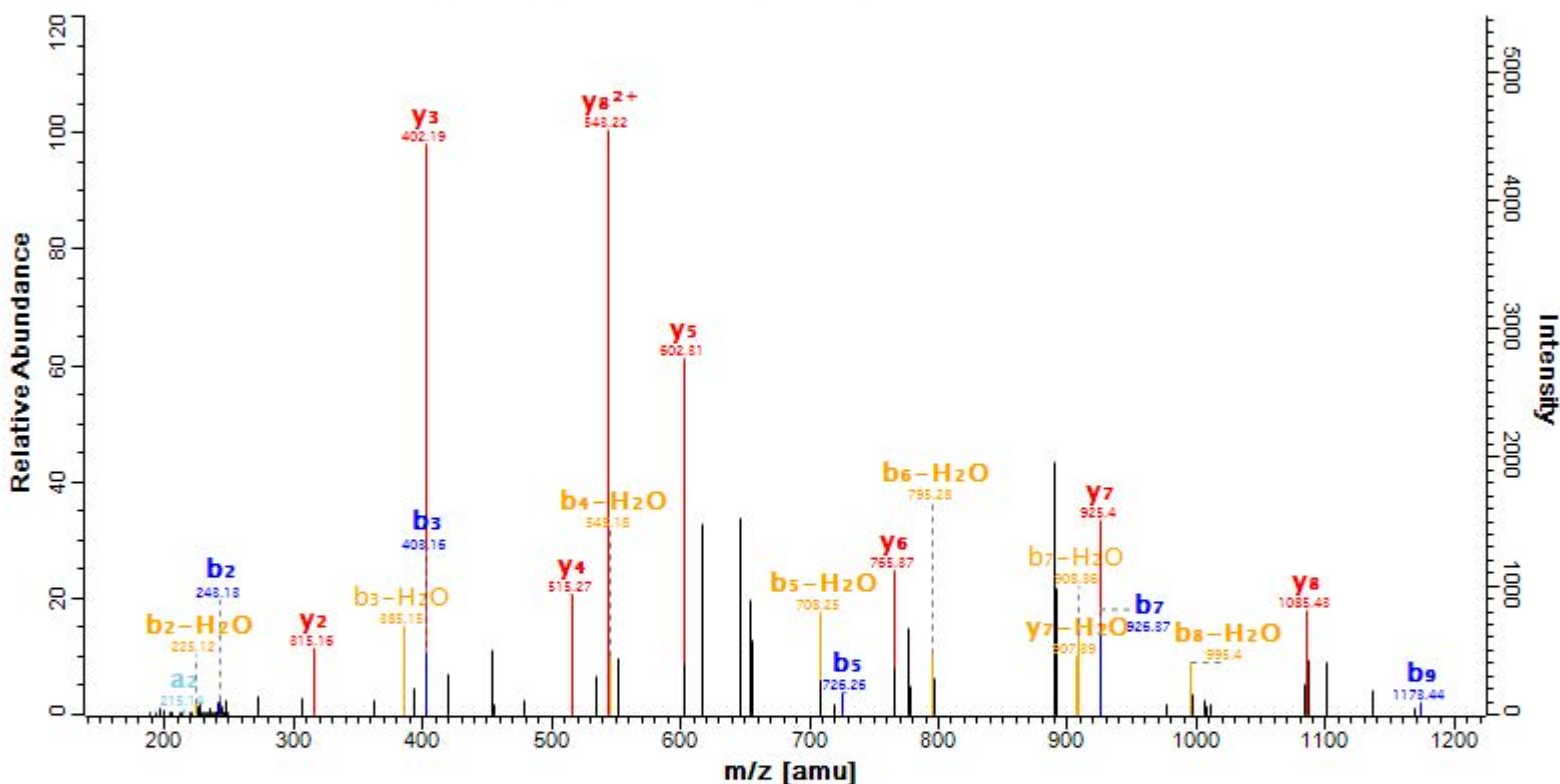

#### precursor information

|                   |                 |
|-------------------|-----------------|
| Mass:             | 1318.53555      |
| m/z:              | 660.27505       |
| Charge:           | 2+              |
| Retentiontime:    | 14.241076469421 |
| Score:            | 106.3996        |
| Mass Error [ppm]: | -0.020198       |
| PEP:              | 0.00060075      |
| Precursor Type:   | MULTI           |

|                       |             |
|-----------------------|-------------|
| Annotation:           | 8 of 10     |
| AminoAcids Coverage:  | 80 %        |
| Intensity Coverage:   | 59 %        |
| Peak Coverage:        | 24 %        |
| Protein Localisation: | 208 ... 217 |

| a ion    |        | b ion    |        |    |     |   | y ion    |         | y <sup>2+</sup> ion |         |
|----------|--------|----------|--------|----|-----|---|----------|---------|---------------------|---------|
| Δ dalton | mass   | Δ dalton | mass   |    | seq |   | Δ dalton | mass    | Δ dalton            | mass    |
|          | 102.05 |          | 130.05 | 1  | E   | 9 |          |         |                     |         |
| +0.0799  | 215.14 | +0.0771  | 243.13 | 2  | I   | 8 | 1198.5   |         | 1198.5              |         |
|          | 375.17 | +0.1662  | 403.16 | 3  | C   | 7 | 1085.4   | -0.21   | 543.22              | +0.1838 |
|          | 535.2  |          | 563.2  | 4  | C   | 6 | 925.4    | +0.0605 | 925.4               |         |
|          | 698.26 | -0.167   | 726.26 | 5  | Y   | 5 | 765.37   | +0.0404 | 765.37              |         |
|          | 785.3  |          | 813.29 | 6  | S   | 4 | 602.31   | +0.0036 | 602.31              |         |
|          | 898.38 | +0       | 926.37 | 7  | I   | 3 | 515.27   | +0.0121 | 515.27              |         |
|          | 985.41 |          | 1013.4 | 8  | S   | 2 | 402.19   | +0.0138 | 402.19              |         |
|          | 1145.4 | +0.0297  | 1173.4 | 9  | C   | 1 | 315.16   | +0.0326 | 315.16              |         |
|          |        |          |        | 10 | K   | 0 | 155.13   |         | 155.13              |         |

Scan number 1906 Raw file LNCAP\_Silac\_23F10\_set1\_04  
 Method ITMS: CID Pepti... 140.14

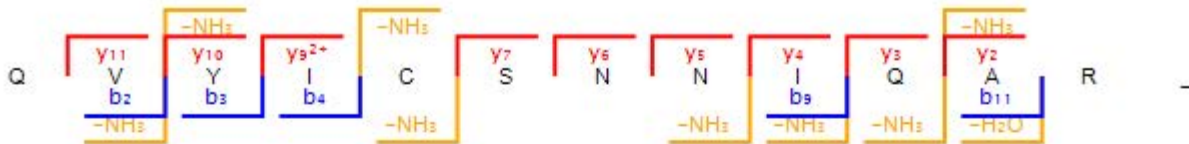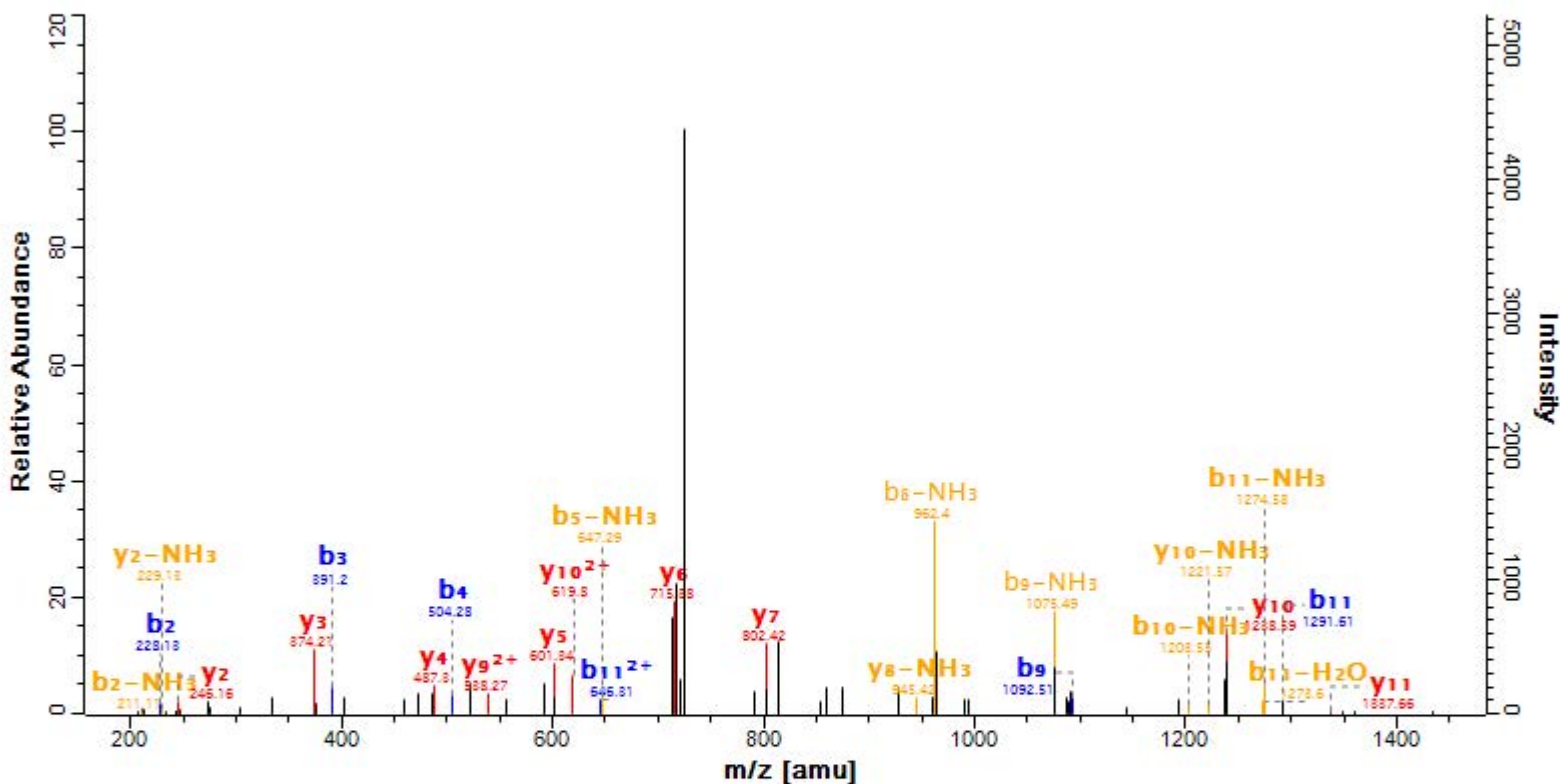

#### precursor information

|                   |                 |
|-------------------|-----------------|
| Mass:             | 1464.71425      |
| m/z:              | 733.3644        |
| Charge:           | 2+              |
| Retentiontime:    | 15.247585296630 |
| Score:            | 140.1416        |
| Mass Error [ppm]: | -0.06309        |
| PEP:              | 1.8463E-05      |
| Precursor Type:   | MULTI           |

#### general information

|                       |             |
|-----------------------|-------------|
| Annotation:           | 10 of 12    |
| AminoAcids Coverage:  | 83 %        |
| Intensity Coverage:   | 34 %        |
| Peak Coverage:        | 28 %        |
| Protein Localisation: | 164 ... 175 |

| b <sup>2+</sup> ion |        | b ion    |        | seq |   |    | y ion    |         | y <sup>2+</sup> ion |         |
|---------------------|--------|----------|--------|-----|---|----|----------|---------|---------------------|---------|
| Δ dalton            | mass   | Δ dalton | mass   |     |   |    | Δ dalton | mass    | Δ dalton            | mass    |
|                     | 129.07 |          | 129.07 | 1   | Q | 11 |          |         |                     |         |
|                     | 228.13 | -0.006   | 228.13 | 2   | V | 10 | 1337.7   | -0.073  | 1337.7              |         |
|                     | 391.2  | +0.1235  | 391.2  | 3   | Y | 9  | 1238.6   | -0.026  | 619.8               | -0.08   |
|                     | 504.28 | +0.1091  | 504.28 | 4   | I | 8  | 1075.5   |         | 538.27              | +0.1208 |
|                     | 664.31 |          | 664.31 | 5   | C | 7  | 962.45   |         | 962.45              |         |
|                     | 751.34 |          | 751.34 | 6   | S | 6  | 802.42   | +0.0852 | 802.42              |         |
|                     | 865.39 |          | 865.39 | 7   | N | 5  | 715.38   | +0.1626 | 715.38              |         |
|                     | 979.43 |          | 979.43 | 8   | N | 4  | 601.34   | -0.137  | 601.34              |         |
|                     | 1092.5 | -0.183   | 1092.5 | 9   | I | 3  | 487.3    | +0.1591 | 487.3               |         |
|                     | 1220.6 |          | 1220.6 | 10  | Q | 2  | 374.21   | +0.0702 | 374.21              |         |
| -0.024              | 646.31 | -0.207   | 1291.6 | 11  | A | 1  | 246.16   | -0.04   | 246.16              |         |
|                     |        |          |        | 12  | R | 0  | 175.12   |         | 175.12              |         |

Scan number 1954 Raw file LNCAP\_Silac\_23F10\_set1\_04  
 Method ITMS; CID Pepti... 87.67

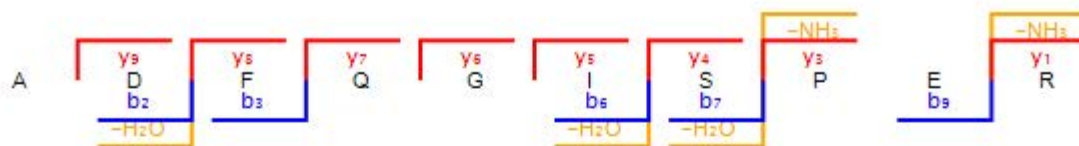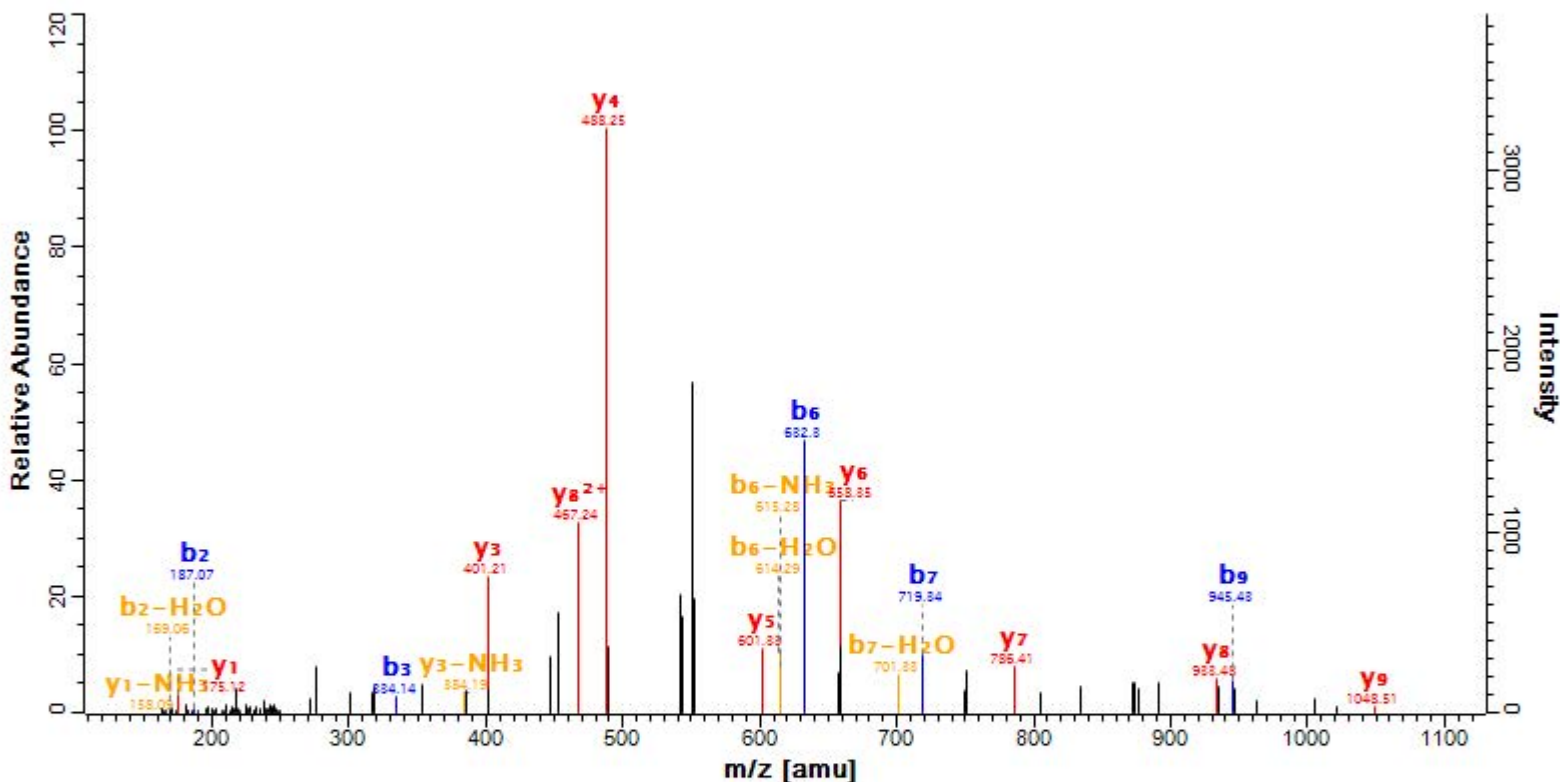

#### precursor information

|                   |                 |
|-------------------|-----------------|
| Mass:             | 1118.5378       |
| m/z:              | 560.27617       |
| Charge:           | 2+              |
| Retentiontime:    | 15.489377021789 |
| Score:            | 87.66729        |
| Mass Error [ppm]: | 1.9296          |
| PEP:              | 0.0024833       |
| Precursor Type:   | MULTI           |

g

|                       |           |
|-----------------------|-----------|
| Annotation:           | 9 of 10   |
| AminoAcids Coverage:  | 90 %      |
| Intensity Coverage:   | 46 %      |
| Peak Coverage:        | 19 %      |
| Protein Localisation: | 83 ... 92 |

| b ion     |          |     |   | y ion    |          | y <sup>2+</sup> ion |          |           |
|-----------|----------|-----|---|----------|----------|---------------------|----------|-----------|
| Δ dalton  | mass     | seq |   | Δ dalton | mass     | Δ dalton            | mass     |           |
|           | 72.04439 | 1   | A | 9        |          |                     |          |           |
| +0.195619 | 187.0713 | 2   | D | 8        | 1048.506 | +0.325011           | 1048.506 |           |
| +0.123009 | 334.1397 | 3   | F | 7        | 933.4789 | -0.03556            | 467.2431 | +0.242773 |
|           | 462.1983 | 4   | Q | 6        | 786.4104 | +0.123798           | 786.4104 |           |
|           | 519.2198 | 5   | G | 5        | 658.3519 | +0.119937           | 658.3519 |           |
| -0.02425  | 632.3039 | 6   | I | 4        | 601.3304 | +0.05235            | 601.3304 |           |
| +0.116329 | 719.3359 | 7   | S | 3        | 488.2463 | +0.014344           | 488.2463 |           |
|           | 816.3886 | 8   | P | 2        | 401.2143 | +0.064927           | 401.2143 |           |
| -0.0967   | 945.4312 | 9   | E | 1        | 304.1615 |                     | 304.1615 |           |
|           |          | 10  | R | 0        | 175.119  | +0.05248            | 175.119  |           |



Scan number 2295 Raw file LNCAP\_Silac\_23F10\_set1\_04  
 Method ITMS; CID Peptide 242.91

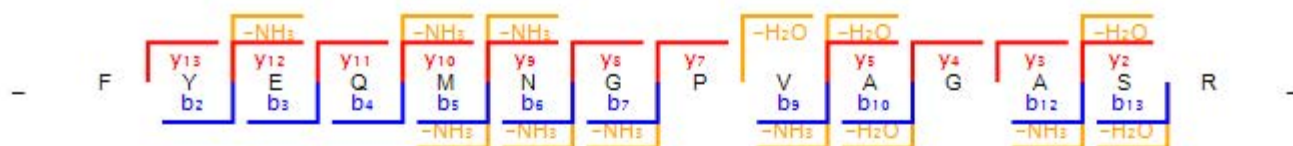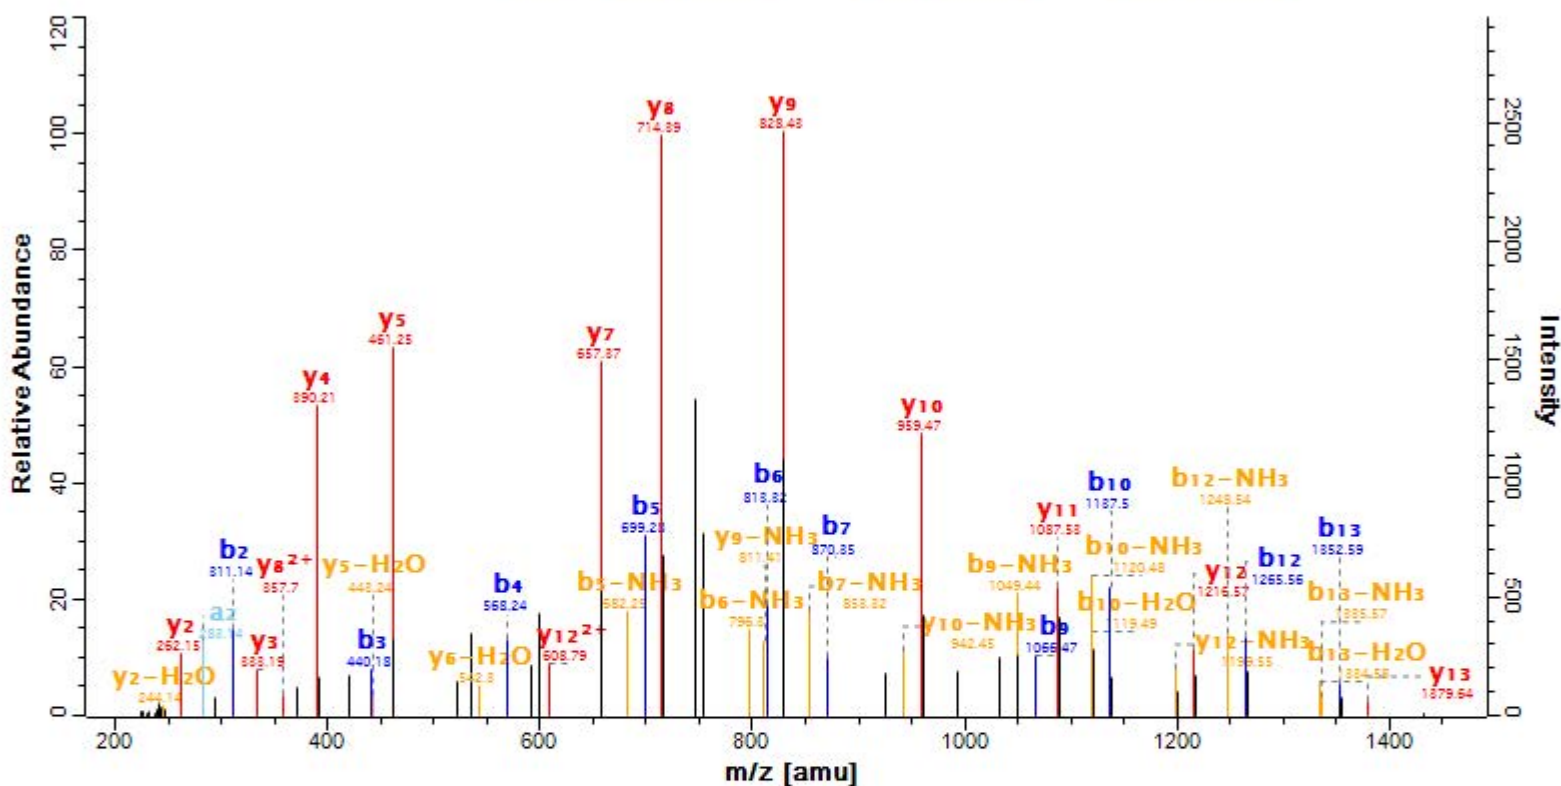

#### precursor information

|                   |                 |
|-------------------|-----------------|
| Mass:             | 1525.69932      |
| m/z:              | 763.85693       |
| Charge:           | 2+              |
| Retentiontime:    | 17.233478546142 |
| Score:            | 242.9063        |
| Mass Error [ppm]: | 0.62571         |
| PEP:              | 1.4136E-41      |
| Precursor Type:   | MULTI           |

#### general information

|                       |           |
|-----------------------|-----------|
| Annotation:           | 12 of 14  |
| AminoAcids Coverage:  | 86 %      |
| Intensity Coverage:   | 67 %      |
| Peak Coverage:        | 46 %      |
| Protein Localisation: | 25 ... 38 |

| a ion    |        | b ion    |        | seq |   |    | y ion    |         | y <sup>2+</sup> ion |         |
|----------|--------|----------|--------|-----|---|----|----------|---------|---------------------|---------|
| Δ dalton | mass   | Δ dalton | mass   |     |   |    | Δ dalton | mass    | Δ dalton            | mass    |
|          | 120.08 |          | 148.08 | 1   | F | 13 |          |         |                     |         |
| -0.008   | 283.14 | +0.0982  | 311.14 | 2   | Y | 12 | 1379.6   | +0.3761 | 1379.6              |         |
|          | 412.19 | +0.17    | 440.18 | 3   | E | 11 | 1216.6   | -0.053  | 608.79              | +0.0568 |
|          | 540.25 | +0.1257  | 568.24 | 4   | Q | 10 | 1087.5   | +0.0748 | 1087.5              |         |
|          | 671.29 | -0.025   | 699.28 | 5   | M | 9  | 959.47   | -0.015  | 959.47              |         |
|          | 785.33 | +0.0345  | 813.32 | 6   | N | 8  | 828.43   | +0.0098 | 828.43              |         |
|          | 842.35 | -0.042   | 870.35 | 7   | G | 7  | 714.39   | +0.0379 | 357.7               | -0.406  |
|          | 939.4  |          | 967.4  | 8   | P | 6  | 657.37   | +0.1013 | 657.37              |         |
|          | 1038.5 | +0.0411  | 1066.5 | 9   | V | 5  | 560.32   |         | 560.32              |         |
|          | 1109.5 | -0.038   | 1137.5 | 10  | A | 4  | 461.25   | +0.0769 | 461.25              |         |
|          | 1166.5 |          | 1194.5 | 11  | C | 3  | 390.21   | +0.0212 | 390.21              |         |
|          | 1237.6 | -0.089   | 1265.6 | 12  | A | 2  | 333.19   | +0.0692 | 333.19              |         |
|          | 1324.6 | +0.0707  | 1352.6 | 13  | S | 1  | 262.15   | +0.0748 | 262.15              |         |
|          |        |          |        | 14  | R | 0  | 175.12   |         | 175.12              |         |

Scan number 2315 Raw file LNCAP\_Silac\_23F10\_set1\_04  
 Method ITMS: CID Pepti... 121.29

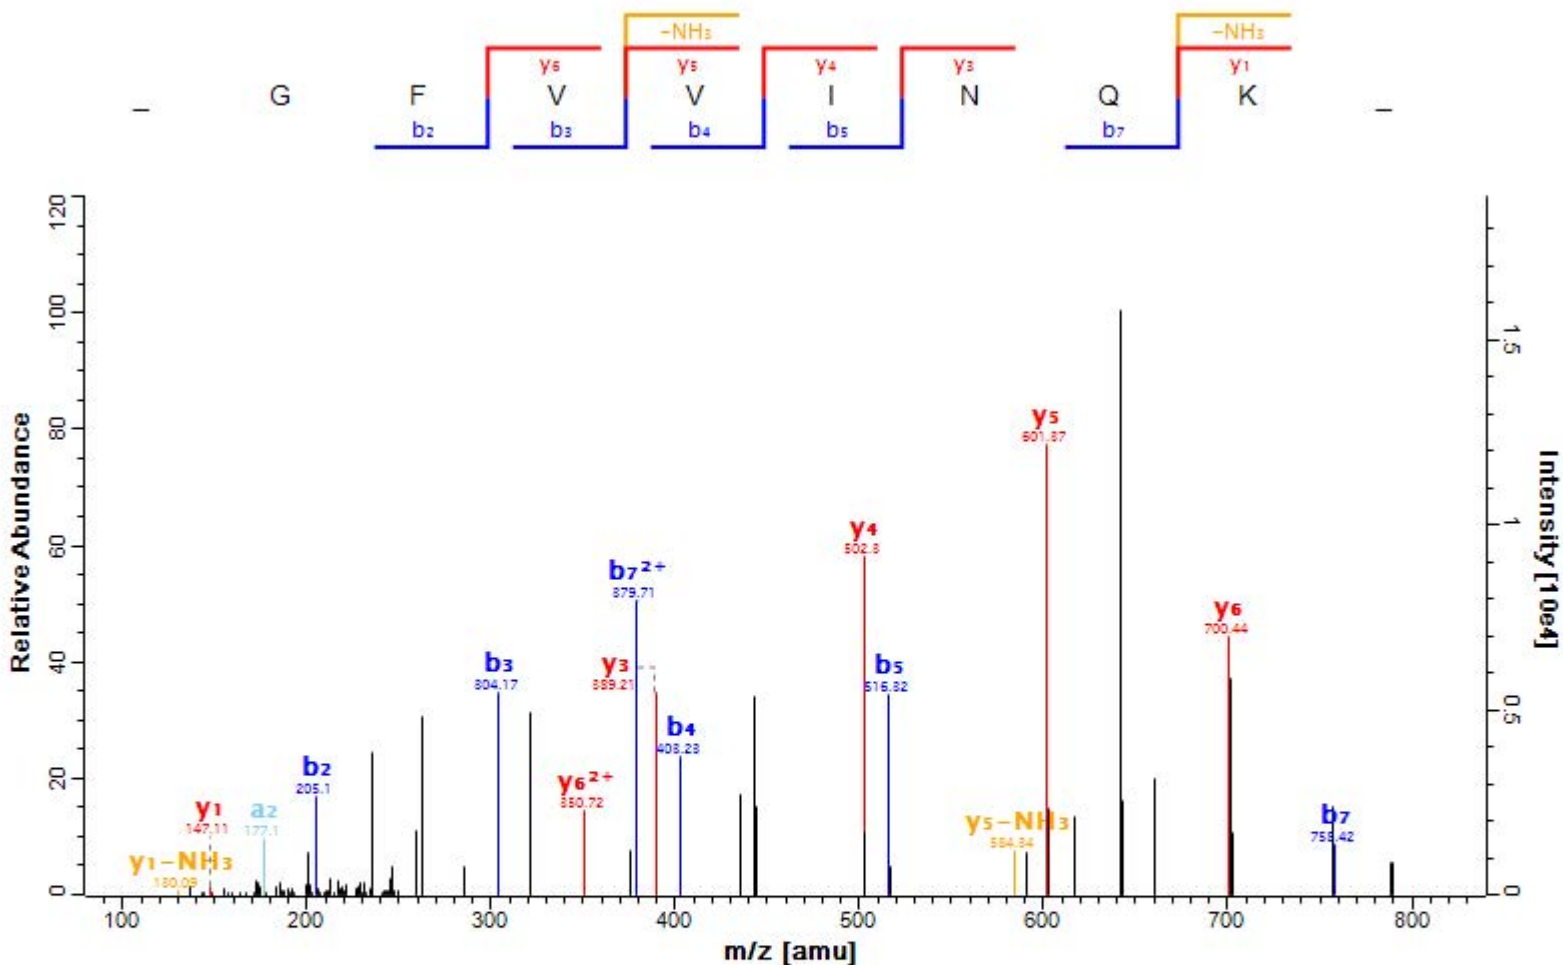

#### precursor information

|                       |                 |
|-----------------------|-----------------|
| Mass:                 | 903.51757       |
| m/z:                  | 452.76606       |
| Charge:               | 2+              |
| Retentiontime:        | 17.332700729370 |
| Score:                | 121.2923        |
| Mass Error [ppm]:     | -0.25542        |
| g PEP:                | 0.0012395       |
| Annotation:           | 7 of 8          |
| AminoAcids Coverag    | 88 %            |
| Intensity Coverage:   | 44 %            |
| Peak Coverage:        | 15 %            |
| Protein Localisation: | 288 ... 295     |

|       | a ion         | b <sup>2+</sup> ion | b ion         |     |   | y ion         | y <sup>2+</sup> ion     |
|-------|---------------|---------------------|---------------|-----|---|---------------|-------------------------|
|       | Δ dalton mass | Δ dalton mass       | Δ dalton mass | seq |   | Δ dalton mass | Δ dalton mass           |
|       | 30.03         | 58.03               | 58.03         | 1   | G | 7             |                         |
| +0.02 | 177.1         | 205.1               | -0.11 205.1   | 2   | F | 6             | 847.5 847.5             |
|       | 276.2         | 304.2               | -0.01 304.2   | 3   | V | 5             | 700.4 -0.02 350.7 +0.07 |
|       | 375.2         | 403.2               | -0.08 403.2   | 4   | V | 4             | 601.4 +0.04 601.4       |
|       | 488.3         | 516.3               | -0.04 516.3   | 5   | I | 3             | 502.3 +0.04 502.3       |
|       | 602.4         | 630.4               | 630.4         | 6   | N | 2             | 389.2 +0.09 389.2       |
|       | 730.4         | -0.32 379.7         | +0.13 758.4   | 7   | Q | 1             | 275.2 275.2             |
|       |               |                     |               | 8   | K | 0             | 147.1 -0.1 147.1        |

Scan number 2539 Raw file LNCAP\_Silac\_23F10\_set1\_04  
 Method ITMS: CID Pepti... 261.75

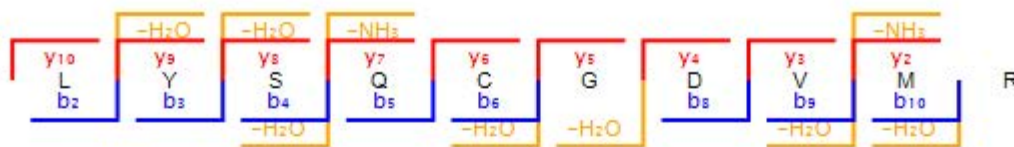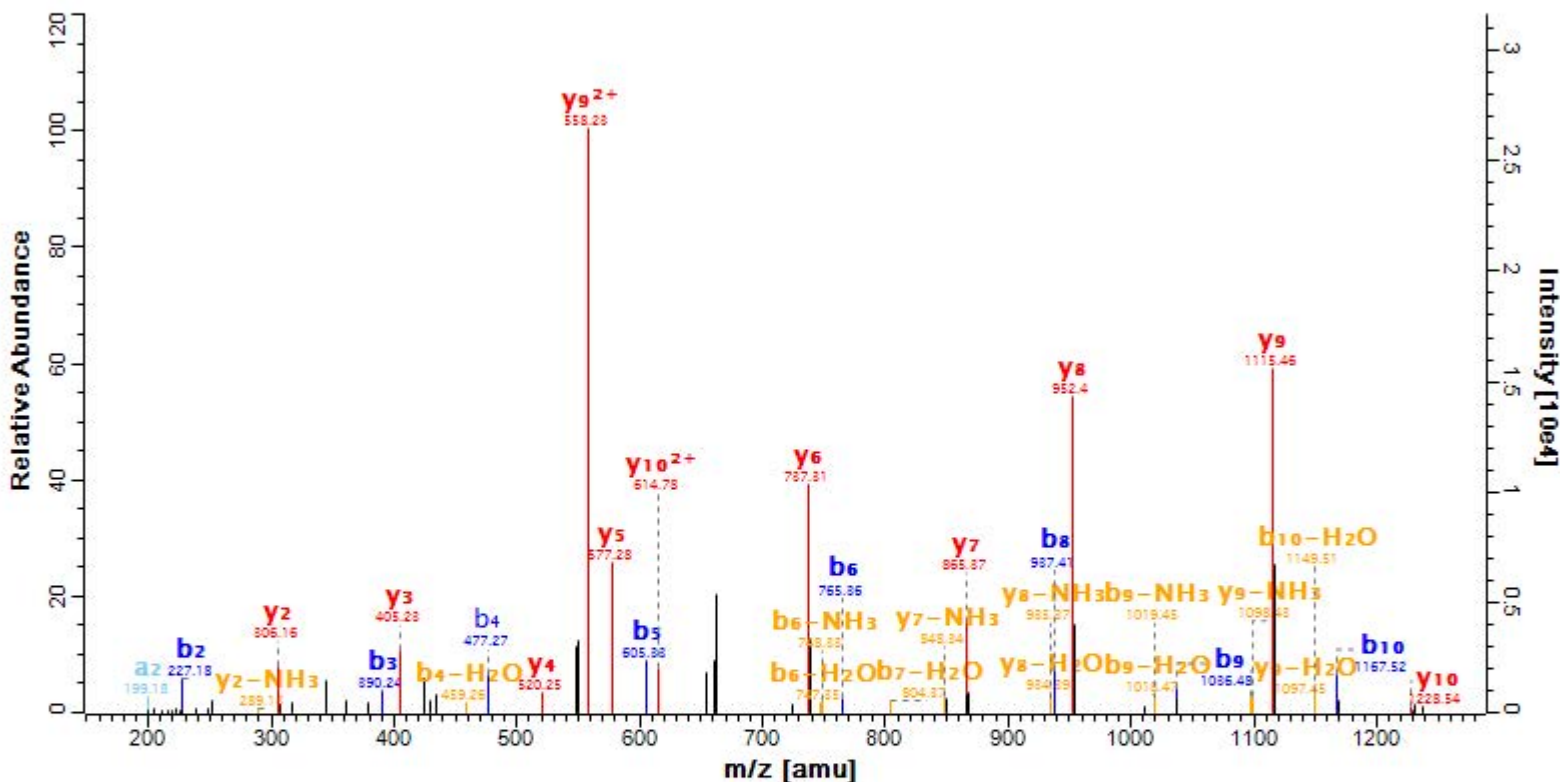

#### precursor information

|                   |                 |
|-------------------|-----------------|
| Mass:             | 1340.62135      |
| m/z:              | 671.31795       |
| Charge:           | 2+              |
| Retentiontime:    | 18.446458816528 |
| Score:            | 261.7532        |
| Mass Error [ppm]: | -0.25462        |
| PEP:              | 6.423E-39       |
| Precursor Type:   | MULTI           |

#### general information

|                       |             |
|-----------------------|-------------|
| Annotation:           | 9 of 11     |
| AminoAcids Coverage:  | 82 %        |
| Intensity Coverage:   | 70 %        |
| Peak Coverage:        | 41 %        |
| Protein Localisation: | 120 ... 130 |

| a ion    |        | b ion    |        |    |     |          | y ion  |          | y <sup>2+</sup> ion |  |
|----------|--------|----------|--------|----|-----|----------|--------|----------|---------------------|--|
| Δ dalton | mass   | Δ dalton | mass   |    | seq | Δ dalton | mass   | Δ dalton | mass                |  |
|          | 86.096 |          | 114.09 | 1  | L   | 10       |        |          |                     |  |
| +0.0903  | 199.18 | -0.099   | 227.18 | 2  | L   | 9        | 1228.5 | +0.1159  | 614.78              |  |
|          | 362.24 | +0.0066  | 390.24 | 3  | Y   | 8        | 1115.5 | +0.0094  | 558.23              |  |
|          | 449.28 | -0.121   | 477.27 | 4  | S   | 7        | 952.4  | -0.017   | 952.4               |  |
|          | 577.33 | +0.0969  | 605.33 | 5  | Q   | 6        | 865.37 | +0.0102  | 865.37              |  |
|          | 737.37 | +0.0413  | 765.36 | 6  | C   | 5        | 737.31 | +0.0426  | 737.31              |  |
|          | 794.39 |          | 822.38 | 7  | G   | 4        | 577.28 | +0.0663  | 577.28              |  |
|          | 909.41 | -0.09    | 937.41 | 8  | D   | 3        | 520.25 | +0.2376  | 520.25              |  |
|          | 1008.5 | +0.0416  | 1036.5 | 9  | V   | 2        | 405.23 | +0.0897  | 405.23              |  |
|          | 1139.5 | +0.0293  | 1167.5 | 10 | M   | 1        | 306.16 | +0.0546  | 306.16              |  |
|          |        |          |        | 11 | R   | 0        | 175.12 |          | 175.12              |  |

Scan number 2562 Raw file LNCAP\_Silac\_23F10\_set1\_04  
 Method ITMS: CID Pepti... 96.89

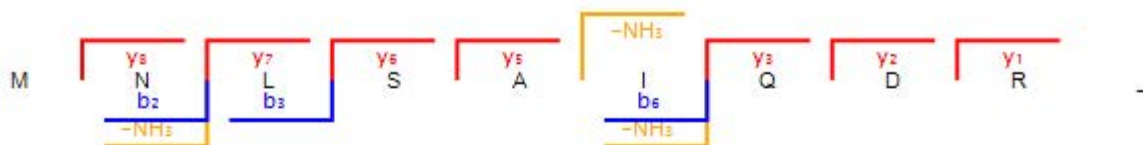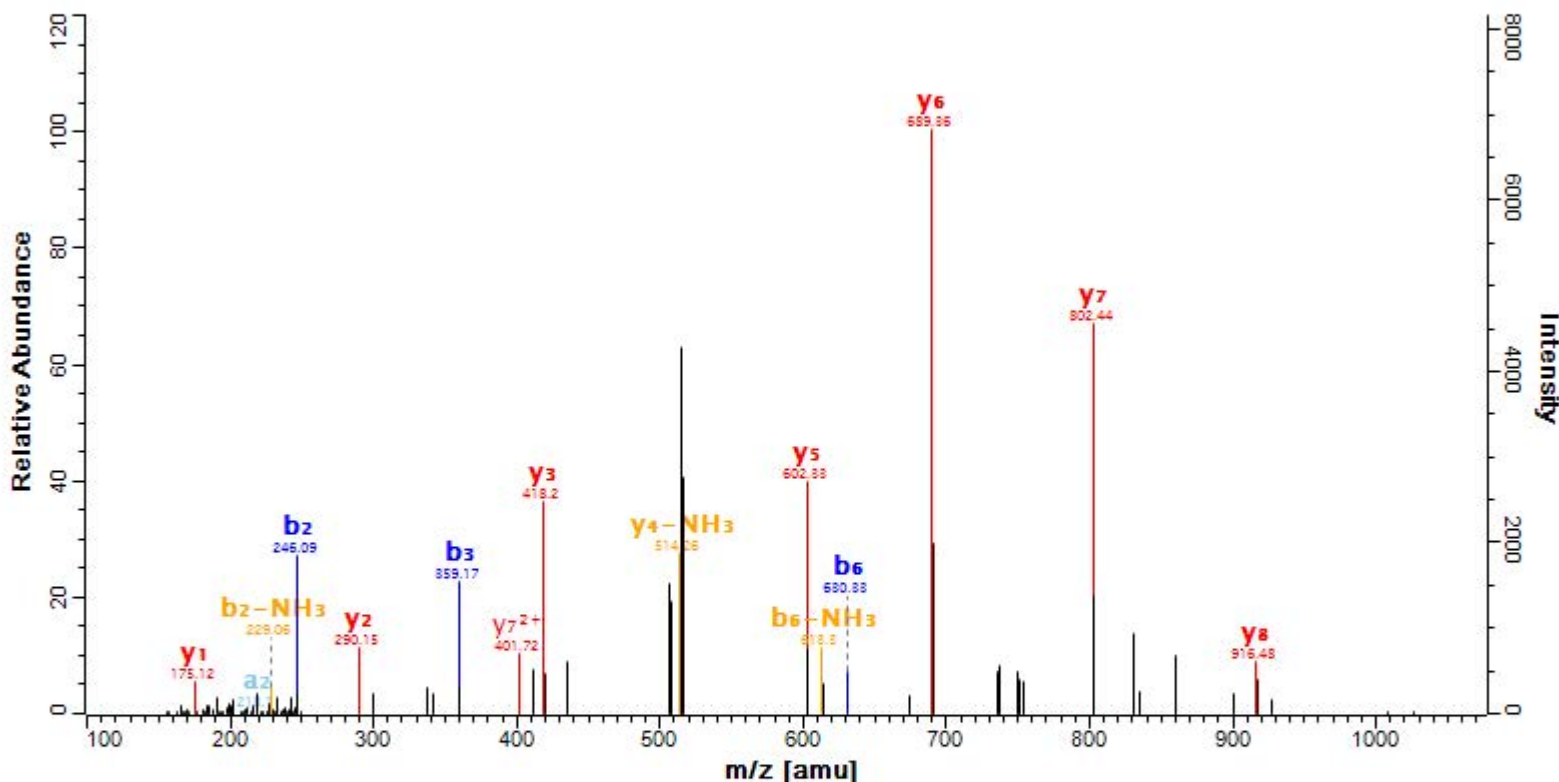

#### precursor information

|                       |                 |
|-----------------------|-----------------|
| Mass:                 | 1046.51795      |
| m/z:                  | 524.26625       |
| Charge:               | 2+              |
| Retentiontime:        | 18.559080123901 |
| Score:                | 96.88979        |
| Mass Error [ppm]:     | 0.07247         |
| PEP:                  | 0.0063118       |
| Precursor Type:       | ISO             |
| Annotation:           | 8 of 9          |
| AminoAcids Coverage:  | 89 %            |
| Intensity Coverage:   | 50 %            |
| Peak Coverage:        | 15 %            |
| Protein Localisation: | 199 ... 207     |

| a ion    |        | b ion    |        |   |     |          | y ion  |          | y <sup>2+</sup> ion |  |
|----------|--------|----------|--------|---|-----|----------|--------|----------|---------------------|--|
| Δ dalton | mass   | Δ dalton | mass   |   | seq | Δ dalton | mass   | Δ dalton | mass                |  |
|          | 104.05 |          | 132.05 | 1 | M   | 8        |        |          |                     |  |
| +0.3904  | 218.1  | -0.019   | 246.09 | 2 | N   | 7        | 916.48 | +0.0539  | 916.48              |  |
|          | 331.18 | +0.0829  | 359.17 | 3 | L   | 6        | 802.44 | +0.0489  | 401.72              |  |
|          | 418.21 |          | 446.21 | 4 | S   | 5        | 689.36 | +0.0636  | 689.36              |  |
|          | 489.25 |          | 517.24 | 5 | A   | 4        | 602.33 | +0.0489  | 602.33              |  |
|          | 602.33 | -0.007   | 630.33 | 6 | I   | 3        | 531.29 |          | 531.29              |  |
|          | 730.39 |          | 758.39 | 7 | Q   | 2        | 418.2  | +0.0693  | 418.2               |  |
|          | 845.42 |          | 873.41 | 8 | D   | 1        | 290.15 | +0.0705  | 290.15              |  |
|          |        |          |        | 9 | R   | 0        | 175.12 | +0.095   | 175.12              |  |

Scan number 2816 Raw file LNCAP\_Silac\_23F10\_set1\_04  
 Method ITMS; CID Pepti... 91.63

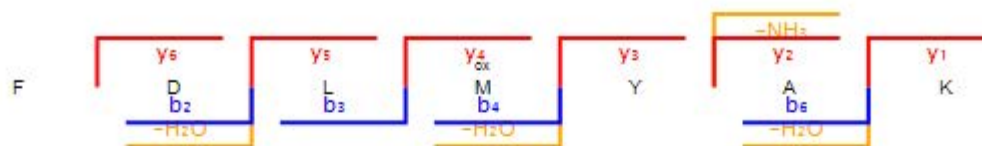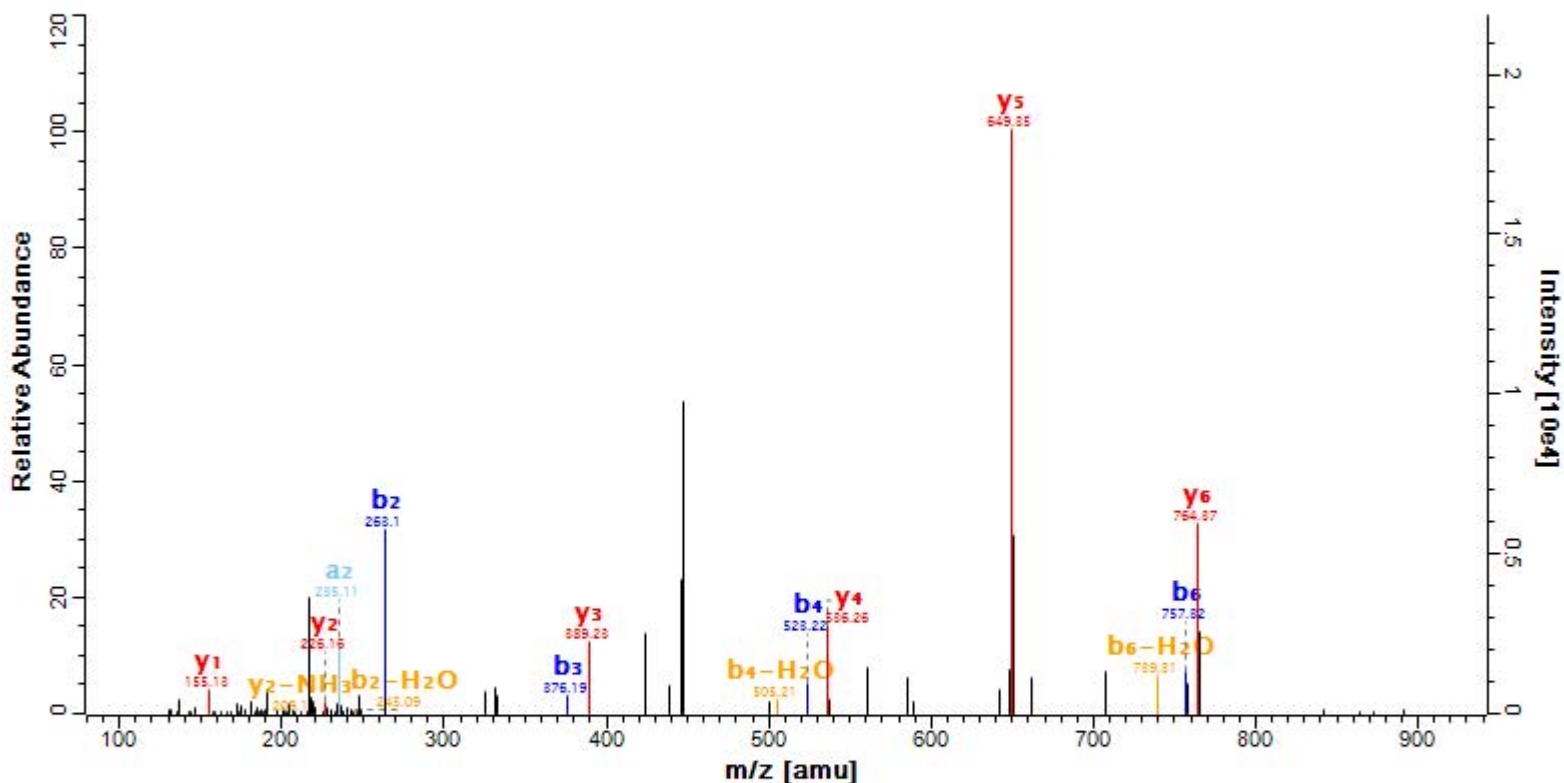

#### precursor information

|                      |                 |
|----------------------|-----------------|
| Mass:                | 902.4207        |
| m/z:                 | 452.21763       |
| Charge:              | 2+              |
| Retentiontime:       | 19.823886871337 |
| Score:               | 91.6263         |
| Mass Error [ppm]:    | -0.10075        |
| Annotation:          | 6 of 7          |
| AminoAcids Coverage: | 86 %            |
| Intensity Coverage:  | 45 %            |
| Peak Coverage:       | 14 %            |

| a ion     |          | b ion     |          |     |   | y ion    |           |
|-----------|----------|-----------|----------|-----|---|----------|-----------|
| Δ dalton  | mass     | Δ dalton  | mass     | seq |   | Δ dalton | mass      |
|           | 120.0808 |           | 148.0757 | 1   | F |          |           |
| +0.061669 | 235.1077 | -0.04779  | 263.1026 | 2   | D | 764.3739 | +0.021778 |
|           | 348.1918 | -0.02218  | 376.1867 | 3   | L | 649.3469 | +0.051468 |
|           | 495.2272 | +0.033274 | 523.2221 | 4   | M | 536.2628 | +0.12833  |
|           | 658.2905 |           | 686.2854 | 5   | Y | 389.2274 | +0.014681 |
|           | 729.3276 | +0.006868 | 757.3225 | 6   | A | 226.1641 | +0.098411 |
|           |          |           |          | 7   | K | 155.127  | +0.015789 |

Scan number 2829 Raw file LNCAP\_Silac\_23F10\_set1\_04  
 Method ITMS: CID Pepti... 207.29

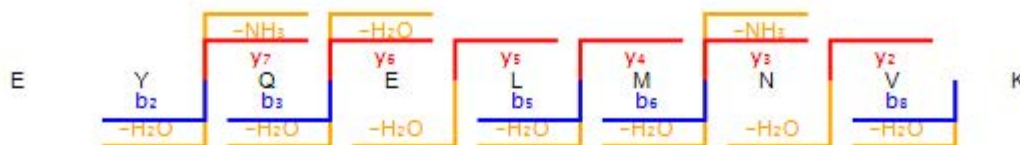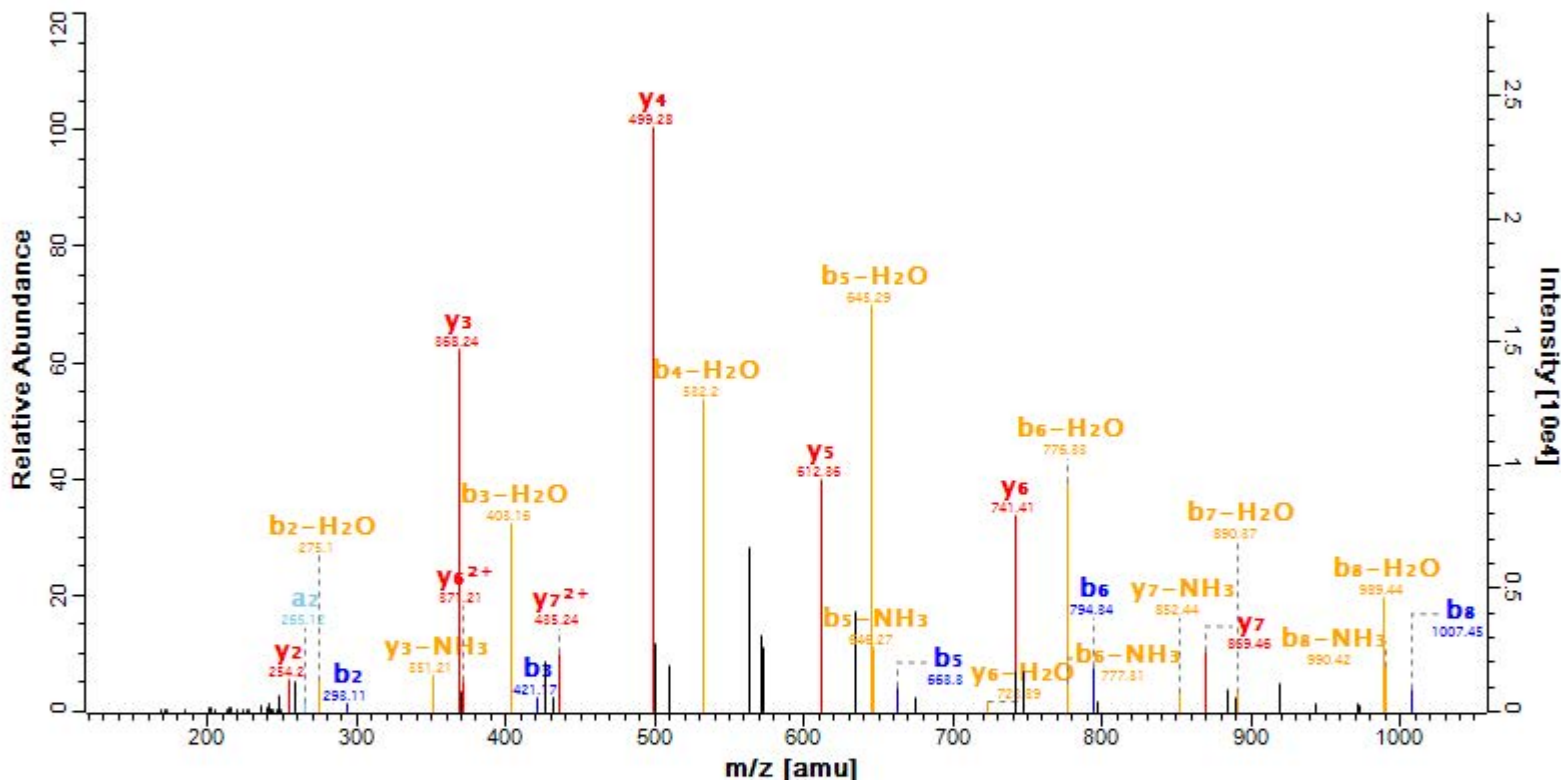

#### precursor information

|                       |                 |
|-----------------------|-----------------|
| Mass:                 | 1152.54844      |
| m/z:                  | 577.2815        |
| Charge:               | 2+              |
| Retention time:       | 19.891582489013 |
| Score:                | 207.2877        |
| Mass Error [ppm]:     | -0.061339       |
| PEP:                  | 1.0455E-12      |
| Precursor Type:       | MULTI           |
| Annotation:           | 7 of 9          |
| AminoAcids Coverage:  | 78 %            |
| Intensity Coverage:   | 78 %            |
| Peak Coverage:        | 33 %            |
| Protein Localisation: | 373 ... 381     |

| a ion    |        | b ion    |        | seq      |      |          | y ion  |          | y <sup>2+</sup> ion |  |
|----------|--------|----------|--------|----------|------|----------|--------|----------|---------------------|--|
| Δ dalton | mass   | Δ dalton | mass   | Δ dalton | mass | Δ dalton | mass   | Δ dalton | mass                |  |
|          | 102.05 |          | 130.05 | 1        | E    | 8        |        |          |                     |  |
| -0.043   | 265.12 | +0.1064  | 293.11 | 2        | Y    | 7        | 1032.5 |          | 1032.5              |  |
|          | 393.18 | -0.012   | 421.17 | 3        | Q    | 6        | 869.46 | +0.0034  | 435.24              |  |
|          | 522.22 |          | 550.21 | 4        | E    | 5        | 741.41 | +0.0627  | 371.21              |  |
|          | 635.3  | +0.1021  | 663.3  | 5        | L    | 4        | 612.36 | +0.0235  | 612.36              |  |
|          | 766.34 | +0.0101  | 794.34 | 6        | M    | 3        | 499.28 | +0.0143  | 499.28              |  |
|          | 880.39 |          | 908.38 | 7        | N    | 2        | 368.24 | +0.0518  | 368.24              |  |
|          | 979.46 | +0.0721  | 1007.5 | 8        | V    | 1        | 254.2  | +0.0125  | 254.2               |  |
|          |        |          |        | 9        | K    | 0        | 155.13 |          | 155.13              |  |

Scan number 3199 Raw file LNCAP\_Silac\_23F10\_set1\_04  
 Method ITMS; CID Pepti... 186.76

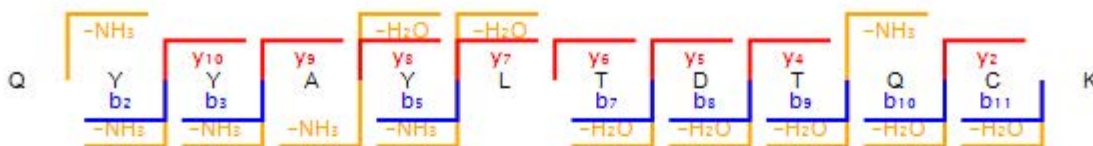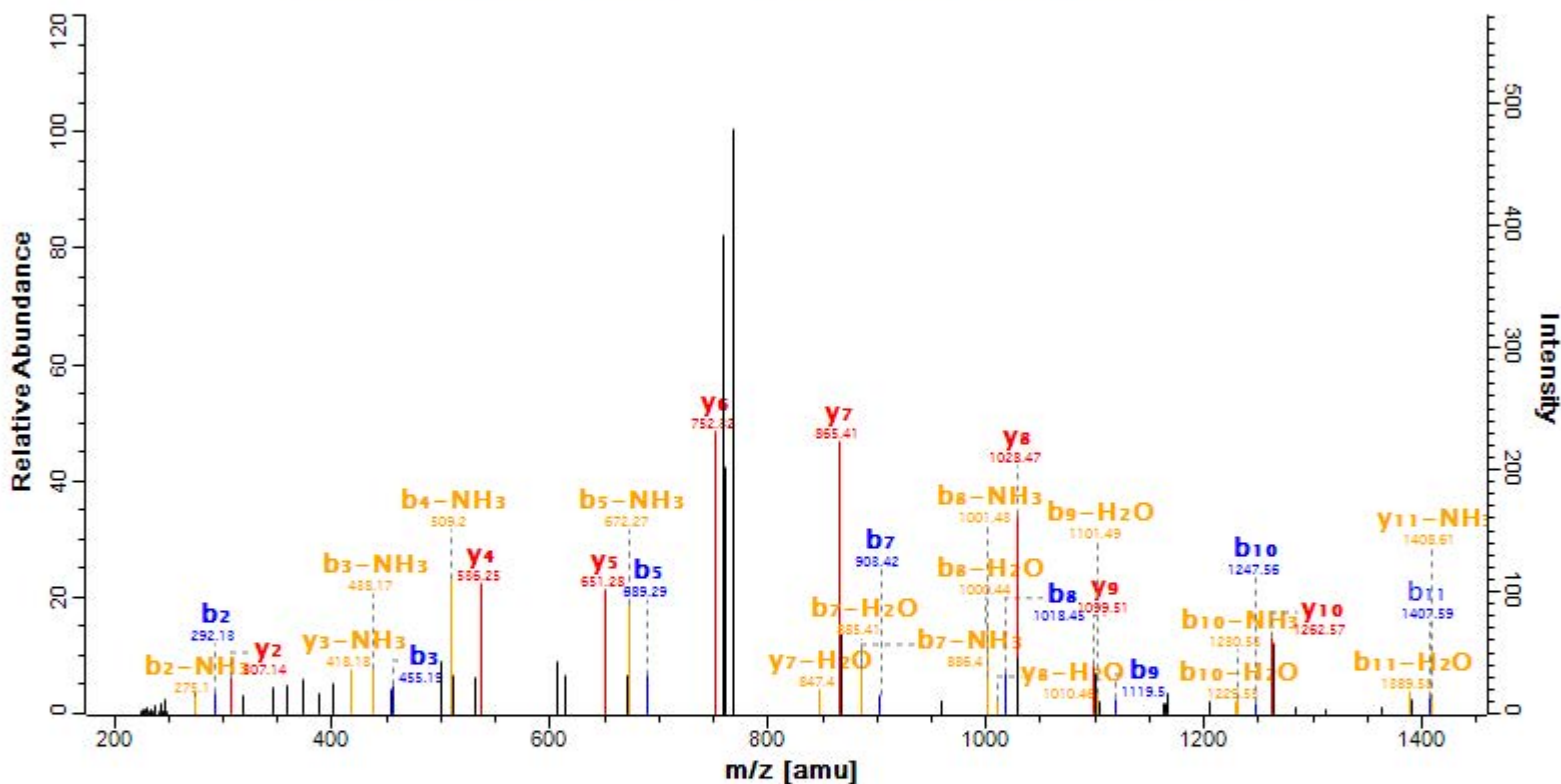

#### precursor information

|                   |                 |
|-------------------|-----------------|
| Mass:             | 1552.68506      |
| m/z:              | 777.34981       |
| Charge:           | 2+              |
| Retentiontime:    | 21.731882095336 |
| Score:            | 186.7626        |
| Mass Error [ppm]: | -1.1144         |
| PEP:              | 3.3002E-14      |
| Precursor Type:   | MULTI           |

#### general information

|                       |             |
|-----------------------|-------------|
| Annotation:           | 10 of 12    |
| AminoAcids Coverage:  | 83 %        |
| Intensity Coverage:   | 44 %        |
| Peak Coverage:        | 37 %        |
| Protein Localisation: | 337 ... 348 |

| b ion      |               |    |     |    |               | y ion      |  |
|------------|---------------|----|-----|----|---------------|------------|--|
| Δ dalton   | mass          |    | seq |    | Δ dalton      | mass       |  |
|            | 129.065853978 | 1  | Q   | 11 |               |            |  |
| +0.0332931 | 292.129182516 | 2  | Y   | 10 | 1425.63549325 |            |  |
| +0.0639587 | 455.192511055 | 3  | Y   | 9  | 1262.57216471 | +0.0649203 |  |
|            | 526.229624842 | 4  | A   | 8  | 1099.50883617 | +0.0124041 |  |
| +0.0042268 | 689.292953381 | 5  | Y   | 7  | 1028.47172238 | -0.0190857 |  |
|            | 802.377017361 | 6  | L   | 6  | 865.408393844 | -0.0117874 |  |
| -0.2969493 | 903.424695835 | 7  | T   | 5  | 752.324329864 | +0.048778  |  |
| +0.2671722 | 1018.45163887 | 8  | D   | 4  | 651.27665139  | +0.0188198 |  |
| -0.0764658 | 1119.49931734 | 9  | T   | 3  | 536.249708358 | +0.0195177 |  |
| -0.0600921 | 1247.55789485 | 10 | Q   | 2  | 435.202029883 |            |  |
| +0.0159491 | 1407.58854305 | 11 | C   | 1  | 307.143452372 | +0.0837205 |  |
|            |               | 12 | K   | 0  | 147.112804171 |            |  |

Scan number 3408 Raw file LNCAP\_Silac\_23F10\_set1\_04  
 Method ITMS; CID Pepti... 111.95

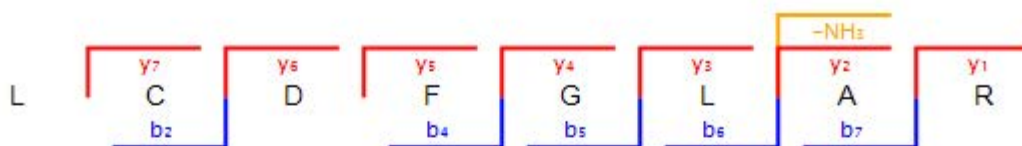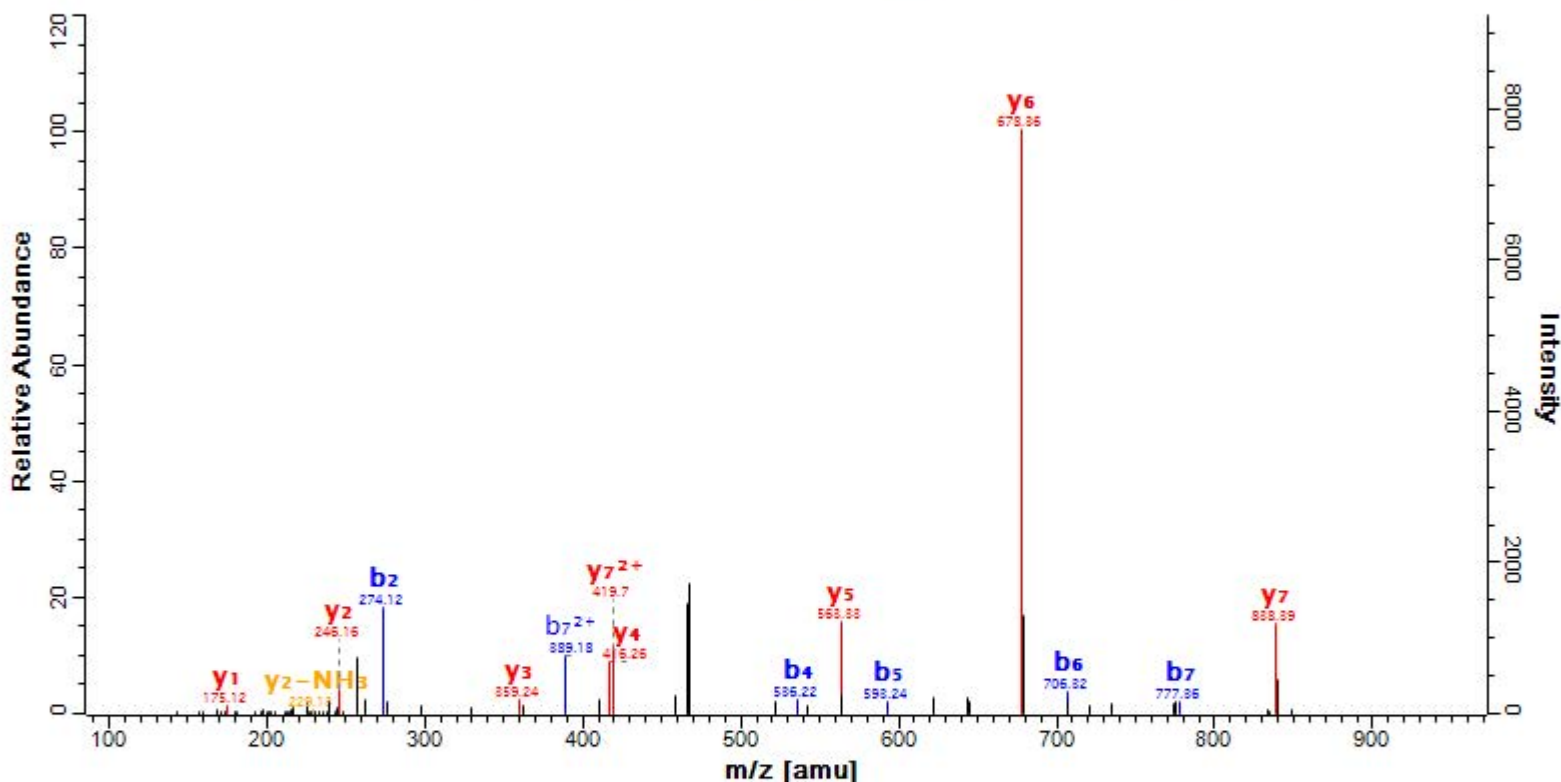

#### precursor information

|                       |                 |
|-----------------------|-----------------|
| Mass:                 | 950.46492       |
| m/z:                  | 476.23974       |
| Charge:               | 2+              |
| Retentiontime:        | 22.825452804565 |
| Score:                | 111.9471        |
| Mass Error [ppm]:     | 0.56099         |
| g PEP:                | 0.0046044       |
| Annotation:           | 7 of 8          |
| AminoAcids Coverag    | 88 %            |
| Intensity Coverage:   | 60 %            |
| Peak Coverage:        | 14 %            |
| Protein Localisation: | 153 ... 160     |

| b <sup>2+</sup> ion |        | b ion    |        |   |     |          | y ion  |          | y <sup>2+</sup> ion |        |
|---------------------|--------|----------|--------|---|-----|----------|--------|----------|---------------------|--------|
| Δ dalton            | mass   | Δ dalton | mass   |   | seq | Δ dalton | mass   | Δ dalton | mass                |        |
|                     | 114.09 |          | 114.09 | 1 | L   | 7        |        |          |                     |        |
|                     | 274.12 | -0.028   | 274.12 | 2 | C   | 6        | 838.39 | +0.0245  | 419.7               | -0.015 |
|                     | 389.15 |          | 389.15 | 3 | D   | 5        | 678.36 | +0.0232  | 678.36              |        |
|                     | 536.22 | +0.0718  | 536.22 | 4 | F   | 4        | 563.33 | +0.0615  | 563.33              |        |
|                     | 593.24 | +0.099   | 593.24 | 5 | G   | 3        | 416.26 | +0.0839  | 416.26              |        |
|                     | 706.32 | +0.1813  | 706.32 | 6 | L   | 2        | 359.24 | +0.1074  | 359.24              |        |
| -0.015              | 389.18 | -0.004   | 777.36 | 7 | A   | 1        | 246.16 | +0.0094  | 246.16              |        |
|                     |        |          |        | 8 | R   | 0        | 175.12 | +0.0501  | 175.12              |        |



Scan number 3853 Raw file LNCAP\_Silac\_23F10\_set1\_04  
 Method ITMS: CID Pepti... 174.77

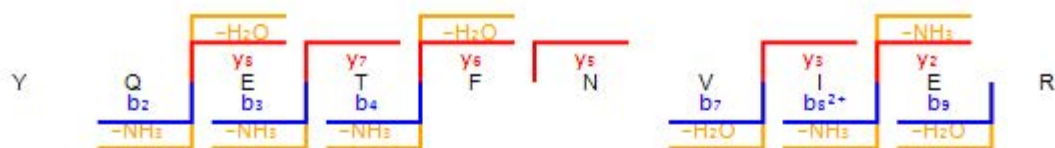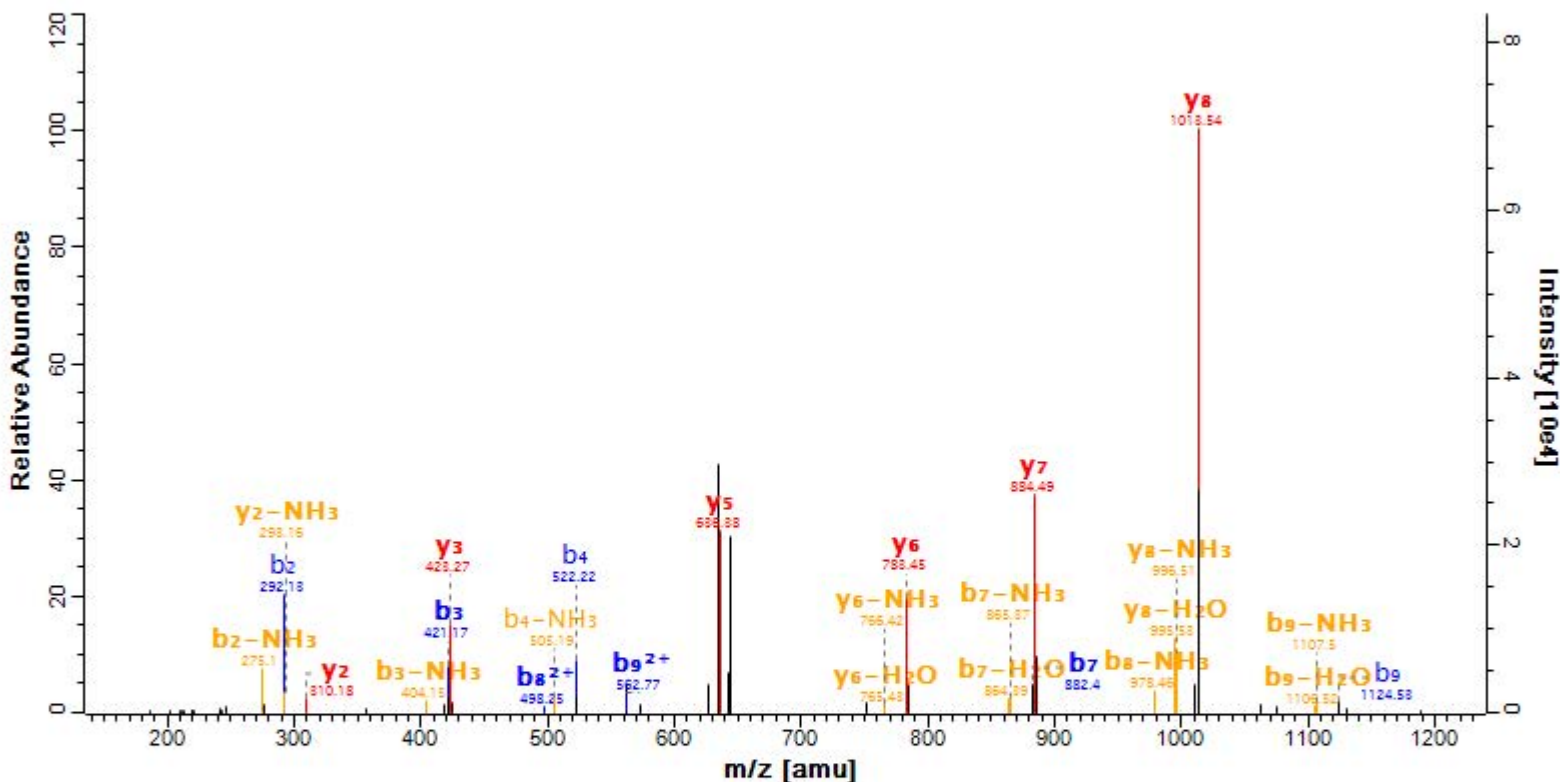

#### precursor information

|                   |                 |
|-------------------|-----------------|
| Mass:             | 1297.62999      |
| m/z:              | 649.82227       |
| Charge:           | 2+              |
| Retentiontime:    | 25.002014160156 |
| Score:            | 174.7679        |
| Mass Error [ppm]: | -0.20838        |
| PEP:              | 6.9005E-06      |
| Precursor Type:   | MULTI           |

|                       |             |
|-----------------------|-------------|
| Annotation:           | 8 of 10     |
| AminoAcids Coverage:  | 80 %        |
| Intensity Coverage:   | 62 %        |
| Peak Coverage:        | 36 %        |
| Protein Localisation: | 149 ... 158 |

| b <sup>2+</sup> ion |          | b ion     |          |     | y ion    |      |          |
|---------------------|----------|-----------|----------|-----|----------|------|----------|
| Δ dalton            | mass     | Δ dalton  | mass     | seq | Δ dalton | mass |          |
|                     | 164.0706 |           | 164.0706 | 1   | Y        | 9    |          |
|                     | 292.1292 | -0.03012  | 292.1292 | 2   | Q        | 8    | 1141.594 |
|                     | 421.1718 | +0.070839 | 421.1718 | 3   | E        | 7    | 1013.536 |
|                     | 522.2195 | +0.032743 | 522.2195 | 4   | T        | 6    | 884.4932 |
|                     | 669.2879 |           | 669.2879 | 5   | F        | 5    | 783.4455 |
|                     | 783.3308 |           | 783.3308 | 6   | N        | 4    | 636.3771 |
|                     | 882.3992 | -0.04563  | 882.3992 | 7   | V        | 3    | 522.3342 |
| -0.28122            | 498.2453 |           | 995.4833 | 8   | I        | 2    | 423.2657 |
| +0.340423           | 562.7666 | -0.40087  | 1124.526 | 9   | E        | 1    | 310.1817 |
|                     |          |           |          | 10  | R        | 0    | 181.1391 |

Scan number 3982 Raw file LNCAP\_Silac\_23F10\_set1\_04  
 Method ITMS: CID Pepti... 84.57

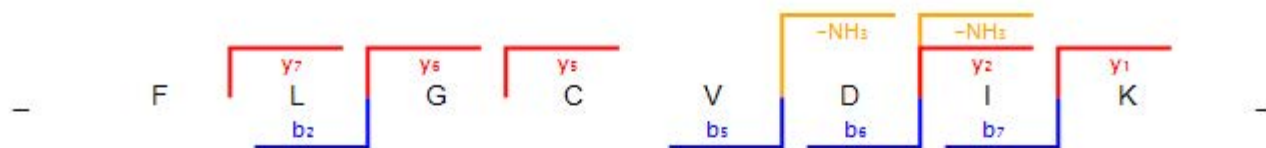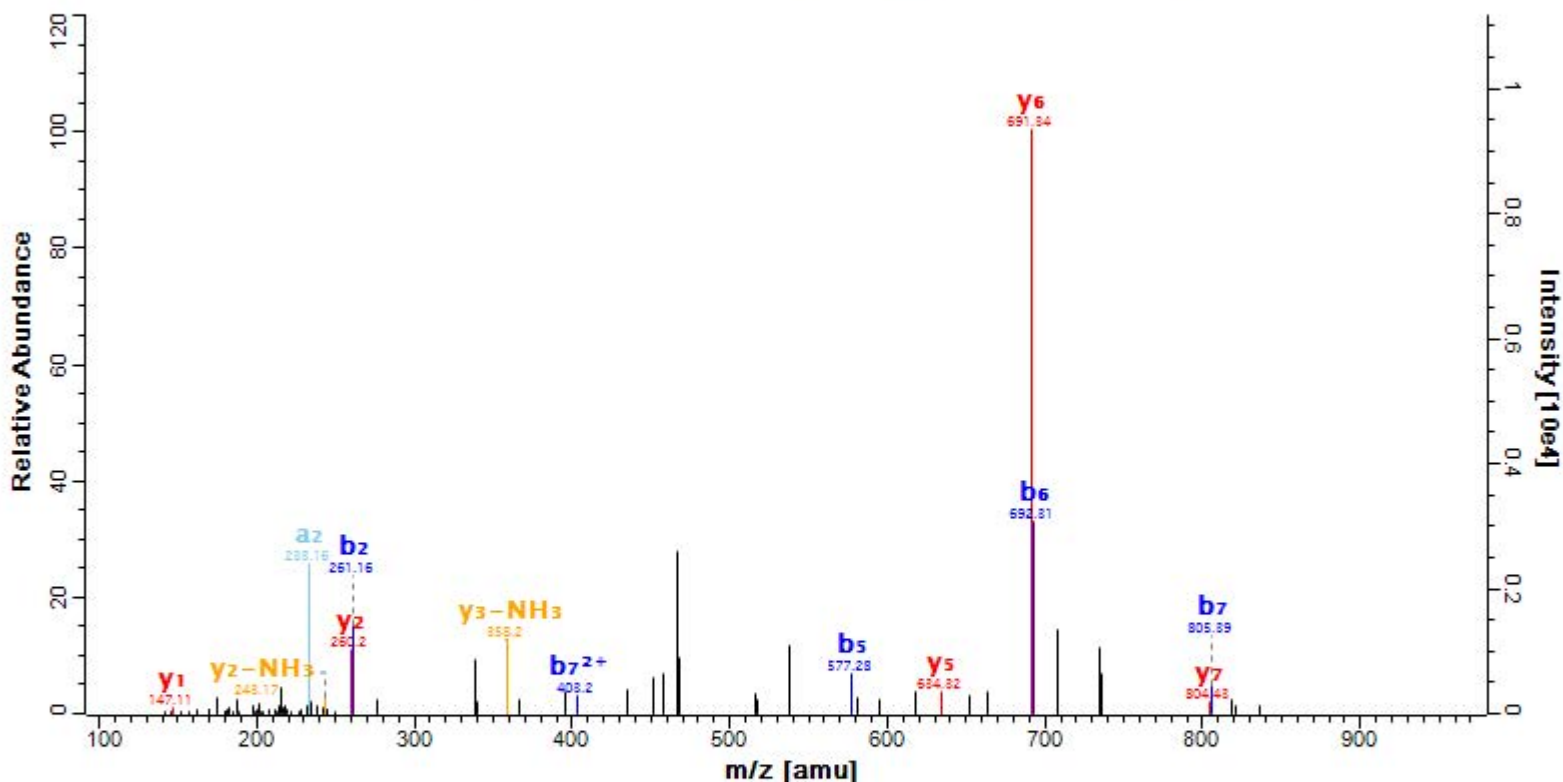

precursor information

|                       |                 |
|-----------------------|-----------------|
| Mass:                 | 950.4894        |
| m/z:                  | 476.25198       |
| Charge:               | 2+              |
| Retentiontime:        | 25.623498916626 |
| Score:                | 84.56776        |
| Mass Error [ppm]:     | -0.14226        |
| g PEP:                | 0.017433        |
| Annotation:           | 7 of 8          |
| AminoAcids Coverag    | 88 %            |
| Intensity Coverage:   | 52 %            |
| Peak Coverage:        | 13 %            |
| Protein Localisation: | 179 ... 186     |

| a ion    |        | b <sup>2+</sup> ion |         | b ion    |        | y ion |   |          |                |               |
|----------|--------|---------------------|---------|----------|--------|-------|---|----------|----------------|---------------|
| Δ dalton | mass   | Δ dalton            | mass    | Δ dalton | mass   | seq   |   | Δ dalton | mass           |               |
|          | 120.08 | 148.08              |         | 148.08   |        | 1     | F | 7        |                |               |
| +0.0576  | 233.16 | 261.16              |         | 261.16   |        | 2     | L | 6        | 804.43 +0.0276 |               |
|          | 290.19 | 318.18              |         | 318.18   |        | 3     | G | 5        | 691.34 +0.0052 |               |
|          | 450.22 | 478.21              |         | 478.21   |        | 4     | C | 4        | 634.32 +0.0031 |               |
|          | 549.29 | 577.28              | -0.007  | 577.28   |        | 5     | V | 3        | 474.29         |               |
|          | 664.31 | 692.31              | +0.0176 | 692.31   |        | 6     | D | 2        | 375.22         |               |
|          | 777.4  | +0.1609             | 403.2   | +0.0572  | 805.39 |       | 7 | I        | 1              | 260.2 +0.0013 |
|          |        |                     |         |          |        | 8     | K | 0        | 147.11 -0.006  |               |

Scan number 4004 Raw file LNCAP\_Silac\_23F10\_set1\_04  
 Method ITMS; CID Pepti... 176.6

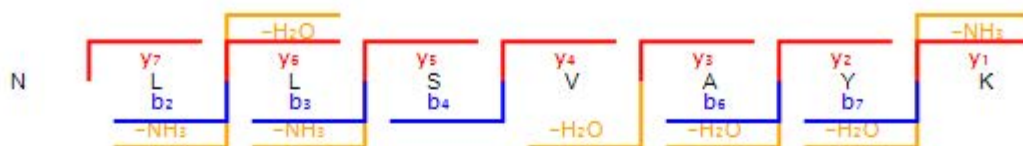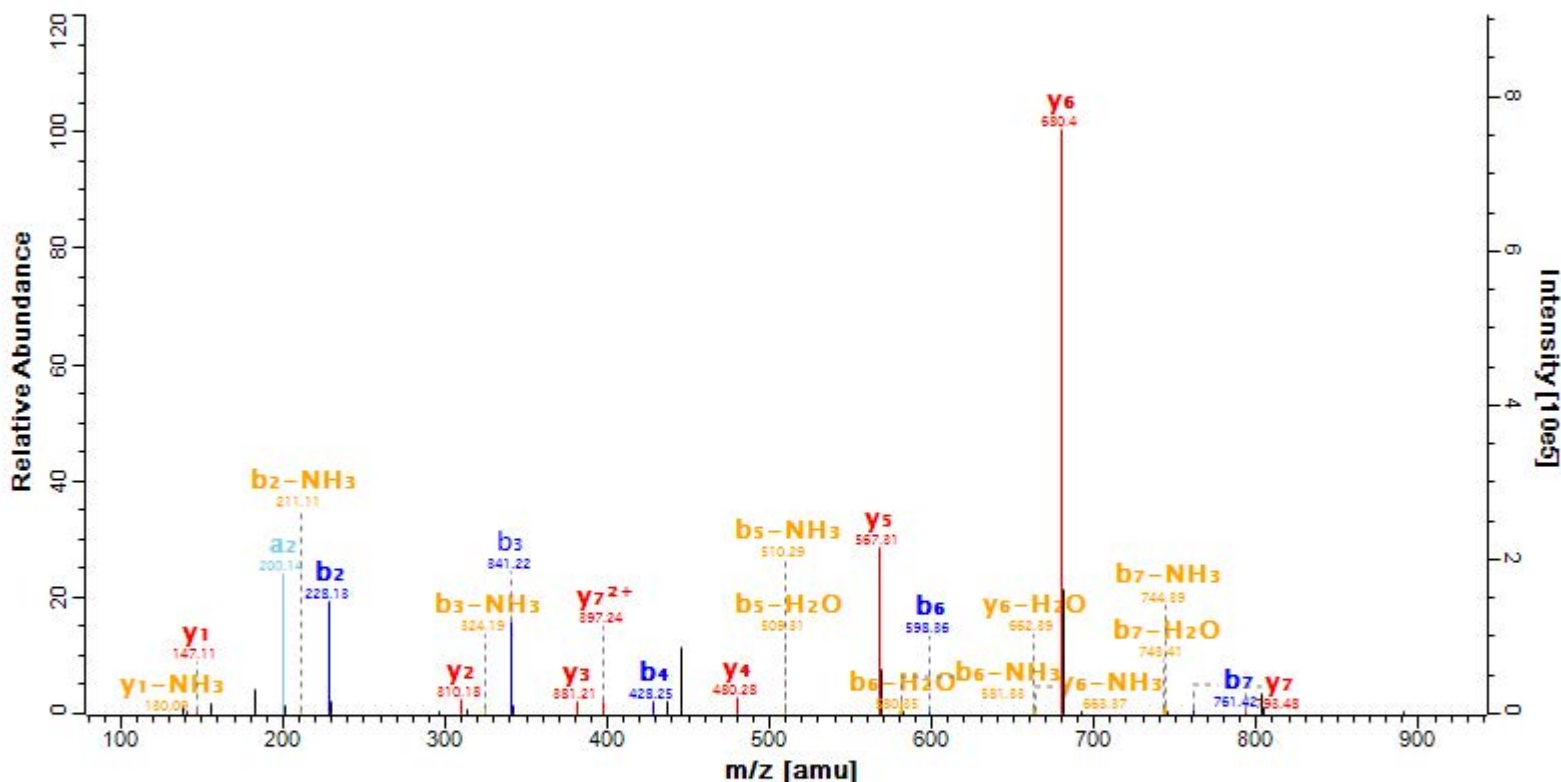

#### precursor information

|                       |                 |
|-----------------------|-----------------|
| Mass:                 | 906.5174        |
| m/z:                  | 454.26598       |
| Charge:               | 2+              |
| Retentiontime:        | 25.735765457153 |
| Score:                | 176.6039        |
| Mass Error [ppm]:     | -0.069783       |
| g PEP:                | 2.2022E-06      |
| Annotation:           | 7 of 8          |
| AminoAcids Coverage:  | 88 %            |
| Intensity Coverage:   | 75 %            |
| Peak Coverage:        | 47 %            |
| Protein Localisation: | 43 ... 50       |

| a ion    |        | b ion    |        | seq |   |   | y ion    |         | y <sup>2+</sup> ion |        |
|----------|--------|----------|--------|-----|---|---|----------|---------|---------------------|--------|
| Δ dalton | mass   | Δ dalton | mass   |     |   |   | Δ dalton | mass    | Δ dalton            | mass   |
|          | 87.055 |          | 115.05 | 1   | N | 7 |          |         |                     |        |
| +0.0372  | 200.14 | -0.074   | 228.13 | 2   | L | 6 | 793.48   | -0.005  | 397.24              | +0.181 |
|          | 313.22 | -0.049   | 341.22 | 3   | L | 5 | 680.4    | +0.0414 | 680.4               |        |
|          | 400.26 | +0.0556  | 428.25 | 4   | S | 4 | 567.31   | +0.031  | 567.31              |        |
|          | 499.32 |          | 527.32 | 5   | V | 3 | 480.28   | +0.0762 | 480.28              |        |
|          | 570.36 | +0.0283  | 598.36 | 6   | A | 2 | 381.21   | +0.0314 | 381.21              |        |
|          | 733.42 | +0.2758  | 761.42 | 7   | Y | 1 | 310.18   | +0.1129 | 310.18              |        |
|          |        |          |        | 8   | K | 0 | 147.11   | +0.0771 | 147.11              |        |

Scan number 402 Raw file LNCAP\_Silac\_23F10\_set1\_04  
 Method ITMS; CID Peptide 39.51

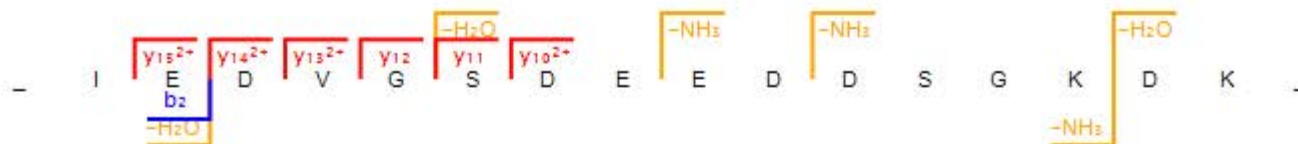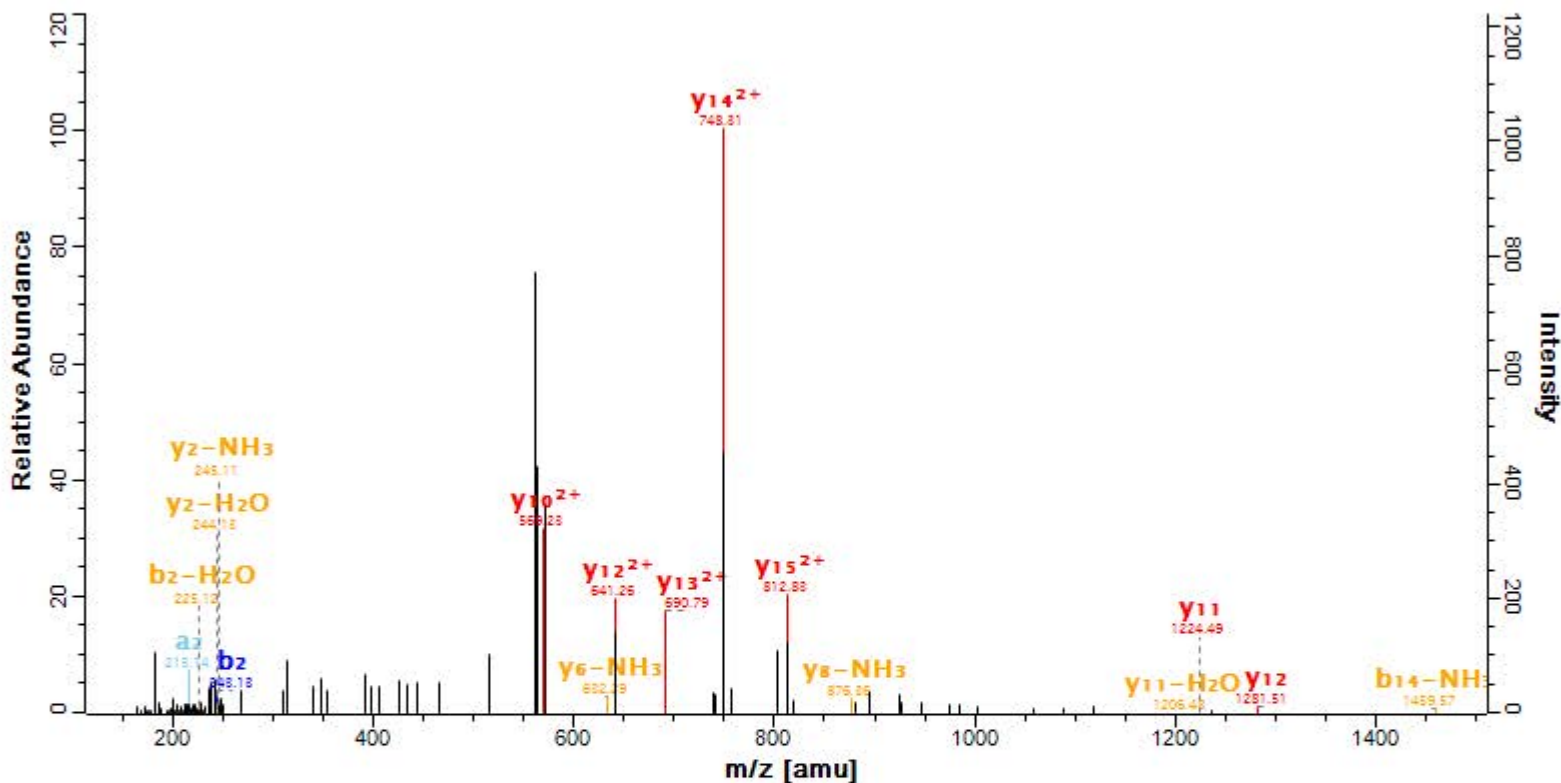

#### precursor information

|                   |                 |
|-------------------|-----------------|
| Mass:             | 1736.72133      |
| m/z:              | 579.91439       |
| Charge:           | 3+              |
| Retentiontime:    | 7.2645649909973 |
| Score:            | 39.509          |
| Mass Error [ppm]: | -0.64426        |
| PEP:              | 0.032174        |
| Precursor Type:   | MULTI           |

#### general information

|                       |             |
|-----------------------|-------------|
| Annotation:           | 10 of 16    |
| AminoAcids Coverage:  | 62 %        |
| Intensity Coverage:   | 31 %        |
| Peak Coverage:        | 13 %        |
| Protein Localisation: | 250 ... 265 |

| a ion    |        | b ion    |        | seq |   |    | y ion    |         | y <sup>2+</sup> ion |         |
|----------|--------|----------|--------|-----|---|----|----------|---------|---------------------|---------|
| Δ dalton | mass   | Δ dalton | mass   |     |   |    | Δ dalton | mass    | Δ dalton            | mass    |
|          | 86.096 |          | 114.09 | 1   | I | 15 |          |         |                     |         |
| +0.1127  | 215.14 | +0.0468  | 243.13 | 2   | E | 14 | 1624.6   |         | 812.83              | -0.08   |
|          | 330.17 |          | 358.16 | 3   | D | 13 | 1495.6   |         | 748.31              | +0.0233 |
|          | 429.23 |          | 457.23 | 4   | V | 12 | 1380.6   |         | 690.79              | +0.3761 |
|          | 486.26 |          | 514.25 | 5   | G | 11 | 1281.5   | +0.1719 | 641.26              | +0.0285 |
|          | 573.29 |          | 601.28 | 6   | S | 10 | 1224.5   | +0.3935 | 1224.5              |         |
|          | 688.31 |          | 716.31 | 7   | D | 9  | 1137.5   |         | 569.23              | +0.4486 |
|          | 817.36 |          | 845.35 | 8   | E | 8  | 1022.4   |         | 1022.4              |         |
|          | 946.4  |          | 974.39 | 9   | E | 7  | 893.38   |         | 893.38              |         |
|          | 1061.4 |          | 1089.4 | 10  | D | 6  | 764.34   |         | 764.34              |         |
|          | 1176.5 |          | 1204.4 | 11  | D | 5  | 649.32   |         | 649.32              |         |
|          | 1263.5 |          | 1291.5 | 12  | S | 4  | 534.29   |         | 534.29              |         |
|          | 1320.5 |          | 1348.5 | 13  | G | 3  | 447.26   |         | 447.26              |         |
|          | 1448.6 |          | 1476.6 | 14  | K | 2  | 390.23   |         | 390.23              |         |
|          | 1563.6 |          | 1591.6 | 15  | D | 1  | 262.14   |         | 262.14              |         |
|          |        |          |        | 16  | K | 0  | 147.11   |         | 147.11              |         |

Scan number 4052 Raw file LNCAP\_Silac\_23F10\_set1\_04  
 Method ITMS: CID Pepti... 72.2

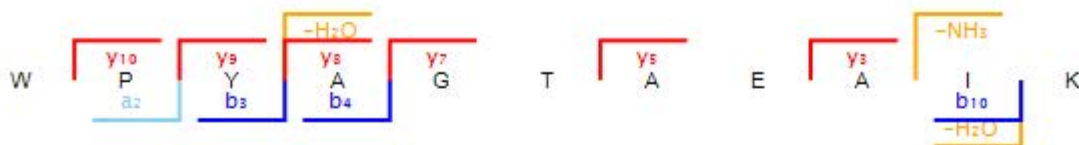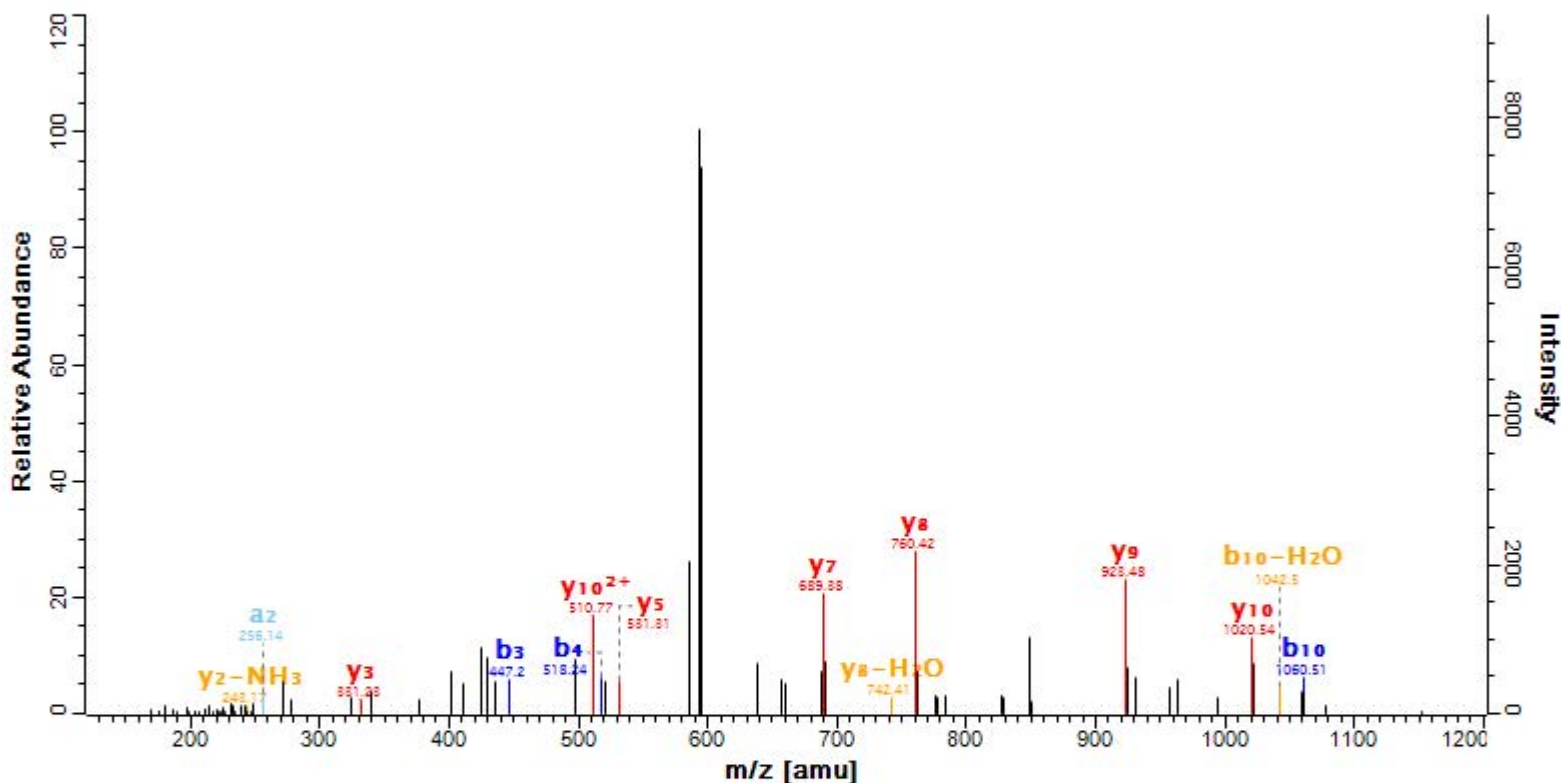

#### precursor information

|                   |                 |
|-------------------|-----------------|
| Mass:             | 1205.60766      |
| m/z:              | 603.81111       |
| Charge:           | 2+              |
| Retentiontime:    | 25.972467422485 |
| Score:            | 72.20042        |
| Mass Error [ppm]: | -0.34535        |
| PEP:              | 0.0052933       |
| Precursor Type:   | MULTI           |

#### general information

|                       |             |
|-----------------------|-------------|
| Annotation:           | 7 of 11     |
| AminoAcids Coverage:  | 64 %        |
| Intensity Coverage:   | 23 %        |
| Peak Coverage:        | 15 %        |
| Protein Localisation: | 204 ... 214 |

| a ion    |        | b ion    |        |    |     |          | y ion  |          | y <sup>2+</sup> ion |         |
|----------|--------|----------|--------|----|-----|----------|--------|----------|---------------------|---------|
| Δ dalton | mass   | Δ dalton | mass   |    | seq | Δ dalton | mass   | Δ dalton | mass                |         |
|          | 159.09 |          | 187.09 | 1  | W   | 10       |        |          |                     |         |
| -0.019   | 256.14 |          | 284.14 | 2  | P   | 9        | 1020.5 | -0.057   | 510.77              | +0.1427 |
|          | 419.21 | +0.0164  | 447.2  | 3  | Y   | 8        | 923.48 | +0.0114  | 923.48              |         |
|          | 490.24 | +0.1446  | 518.24 | 4  | A   | 7        | 760.42 | +0.0649  | 760.42              |         |
|          | 547.27 |          | 575.26 | 5  | G   | 6        | 689.38 | +0.0777  | 689.38              |         |
|          | 648.31 |          | 676.31 | 6  | T   | 5        | 632.36 |          | 632.36              |         |
|          | 719.35 |          | 747.35 | 7  | A   | 4        | 531.31 | +0.0515  | 531.31              |         |
|          | 848.39 |          | 876.39 | 8  | E   | 3        | 460.28 |          | 460.28              |         |
|          | 919.43 |          | 947.43 | 9  | A   | 2        | 331.23 | +0.1187  | 331.23              |         |
|          | 1032.5 | +0.1574  | 1060.5 | 10 | I   | 1        | 260.2  |          | 260.2               |         |
|          |        |          |        | 11 | K   | 0        | 147.11 |          | 147.11              |         |

Scan number 4110 Raw file LNCAP\_Silac\_23F10\_set1\_04  
 Method ITMS: CID Pepti... 224.66

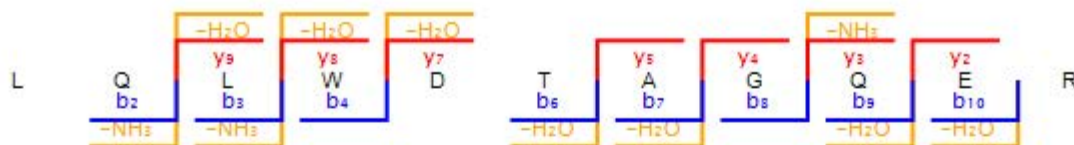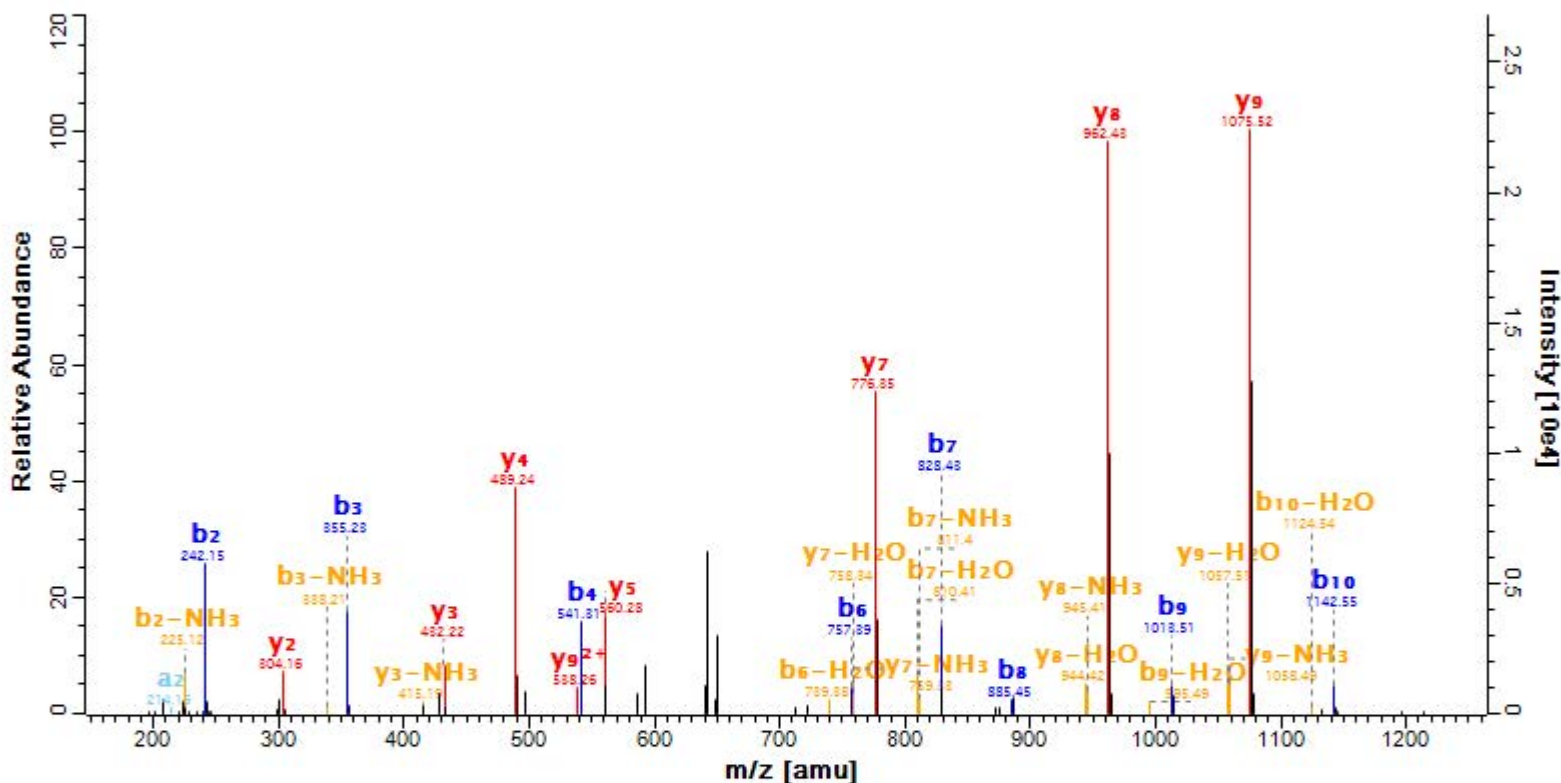

#### precursor information

|                   |                 |
|-------------------|-----------------|
| Mass:             | 1315.65181      |
| m/z:              | 658.83318       |
| Charge:           | 2+              |
| Retentiontime:    | 26.265371322631 |
| Score:            | 224.6584        |
| Mass Error [ppm]: | -0.19331        |
| PEP:              | 2.9859E-21      |
| Precursor Type:   | MULTI           |

#### general information

|                       |           |
|-----------------------|-----------|
| Annotation:           | 9 of 11   |
| AminoAcids Coverage:  | 82 %      |
| Intensity Coverage:   | 66 %      |
| Peak Coverage:        | 39 %      |
| Protein Localisation: | 64 ... 74 |

| a ion    |        | b ion    |        |    |     |          | y ion  |          | y <sup>2+</sup> ion |  |
|----------|--------|----------|--------|----|-----|----------|--------|----------|---------------------|--|
| Δ dalton | mass   | Δ dalton | mass   |    | seq | Δ dalton | mass   | Δ dalton | mass                |  |
|          | 86.096 |          | 114.09 | 1  | L   | 10       |        |          |                     |  |
| +0.1797  | 214.16 | -0.033   | 242.15 | 2  | Q   | 9        | 1203.6 |          | 1203.6              |  |
|          | 327.24 | +0.1098  | 355.23 | 3  | L   | 8        | 1075.5 | +0.0268  | 538.26              |  |
|          | 513.32 | +0.0809  | 541.31 | 4  | W   | 7        | 962.43 | +0.0325  | 962.43              |  |
|          | 628.35 |          | 656.34 | 5  | D   | 6        | 776.35 | +0.0327  | 776.35              |  |
|          | 729.39 | -0.055   | 757.39 | 6  | T   | 5        | 661.33 |          | 661.33              |  |
|          | 800.43 | +0.0155  | 828.43 | 7  | A   | 4        | 560.28 | +0.0586  | 560.28              |  |
|          | 857.45 | -0.152   | 885.45 | 8  | G   | 3        | 489.24 | +0.0371  | 489.24              |  |
|          | 985.51 | -0.137   | 1013.5 | 9  | Q   | 2        | 432.22 | +0.0919  | 432.22              |  |
|          | 1114.6 | -0.116   | 1142.5 | 10 | E   | 1        | 304.16 | +0.1007  | 304.16              |  |
|          |        |          |        | 11 | R   | 0        | 175.12 |          | 175.12              |  |

Scan number 4425 Raw file LNCAP\_Silac\_23F10\_set1\_04  
 Method ITMS: CID Pepti... 151.22

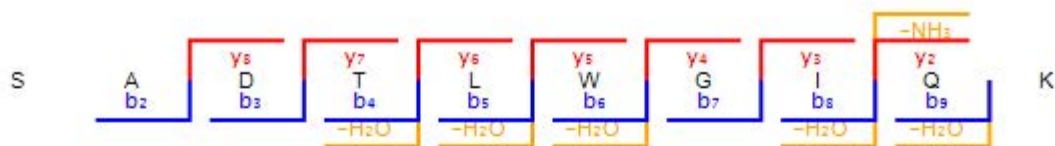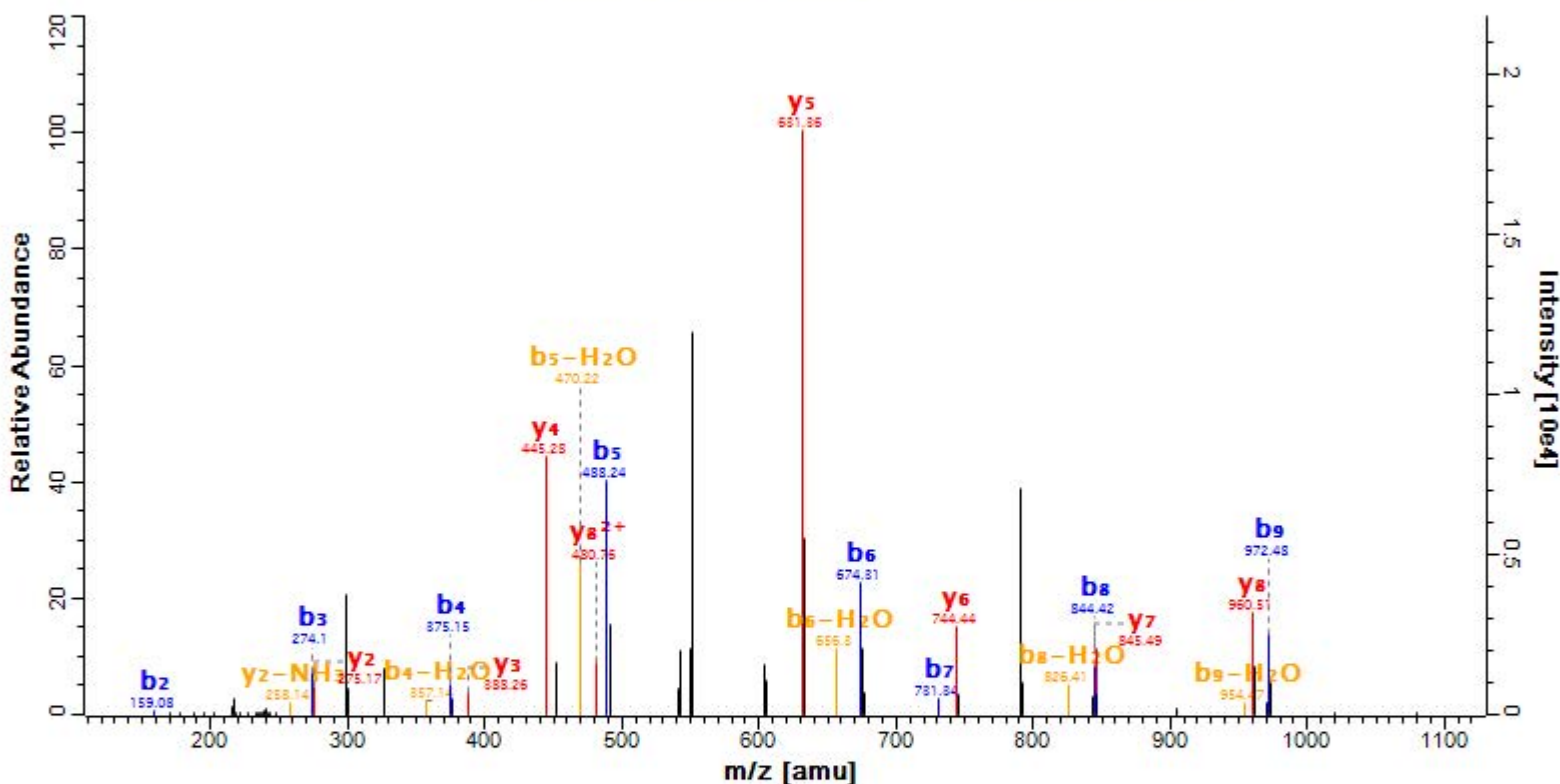

#### precursor information

|                   |                 |
|-------------------|-----------------|
| Mass:             | 1117.57686      |
| m/z:              | 559.7957        |
| Charge:           | 2+              |
| Retentiontime:    | 27.856187820434 |
| Score:            | 151.2159        |
| Mass Error [ppm]: | 0.074509        |
| PEP:              | 1.1767E-09      |
| Precursor Type:   | ISO             |

|                       |             |
|-----------------------|-------------|
| Annotation:           | 8 of 10     |
| AminoAcids Coverag    | 80 %        |
| Intensity Coverage:   | 52 %        |
| Peak Coverage:        | 27 %        |
| Protein Localisation: | 348 ... 357 |

| b ion     |          |    |     |   | y ion    |           | y <sup>2+</sup> ion |           |
|-----------|----------|----|-----|---|----------|-----------|---------------------|-----------|
| Δ dalton  | mass     |    | seq |   | Δ dalton | mass      | Δ dalton            | mass      |
|           | 88.0393  | 1  | S   | 9 |          |           |                     |           |
| -0.10614  | 159.0764 | 2  | A   | 8 | 1031.552 |           | 1031.552            |           |
| +0.072786 | 274.1034 | 3  | D   | 7 | 960.5149 | -0.03084  | 480.7611            | +0.060929 |
| +0.037375 | 375.151  | 4  | T   | 6 | 845.488  | +0.094127 | 845.488             |           |
| -0.01892  | 488.2351 | 5  | L   | 5 | 744.4403 | +0.043051 | 744.4403            |           |
| +0.036596 | 674.3144 | 6  | W   | 4 | 631.3562 | +0.007059 | 631.3562            |           |
| +0.082149 | 731.3359 | 7  | G   | 3 | 445.2769 | +0.044624 | 445.2769            |           |
| -0.00051  | 844.4199 | 8  | I   | 2 | 388.2554 | +0.075426 | 388.2554            |           |
| -0.10621  | 972.4785 | 9  | Q   | 1 | 275.1714 | +0.081548 | 275.1714            |           |
|           |          | 10 | K   | 0 | 147.1128 |           | 147.1128            |           |

Scan number 4503 Raw file LNCAP\_Silac\_23F10\_set1\_04  
 Method ITMS: CID Pepti... 104.2

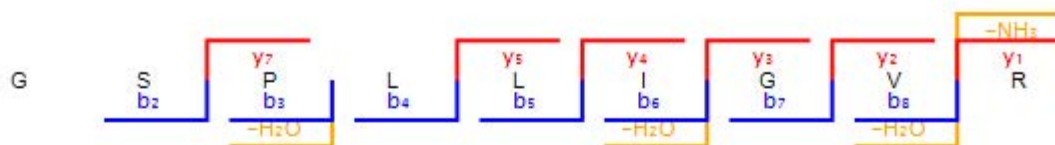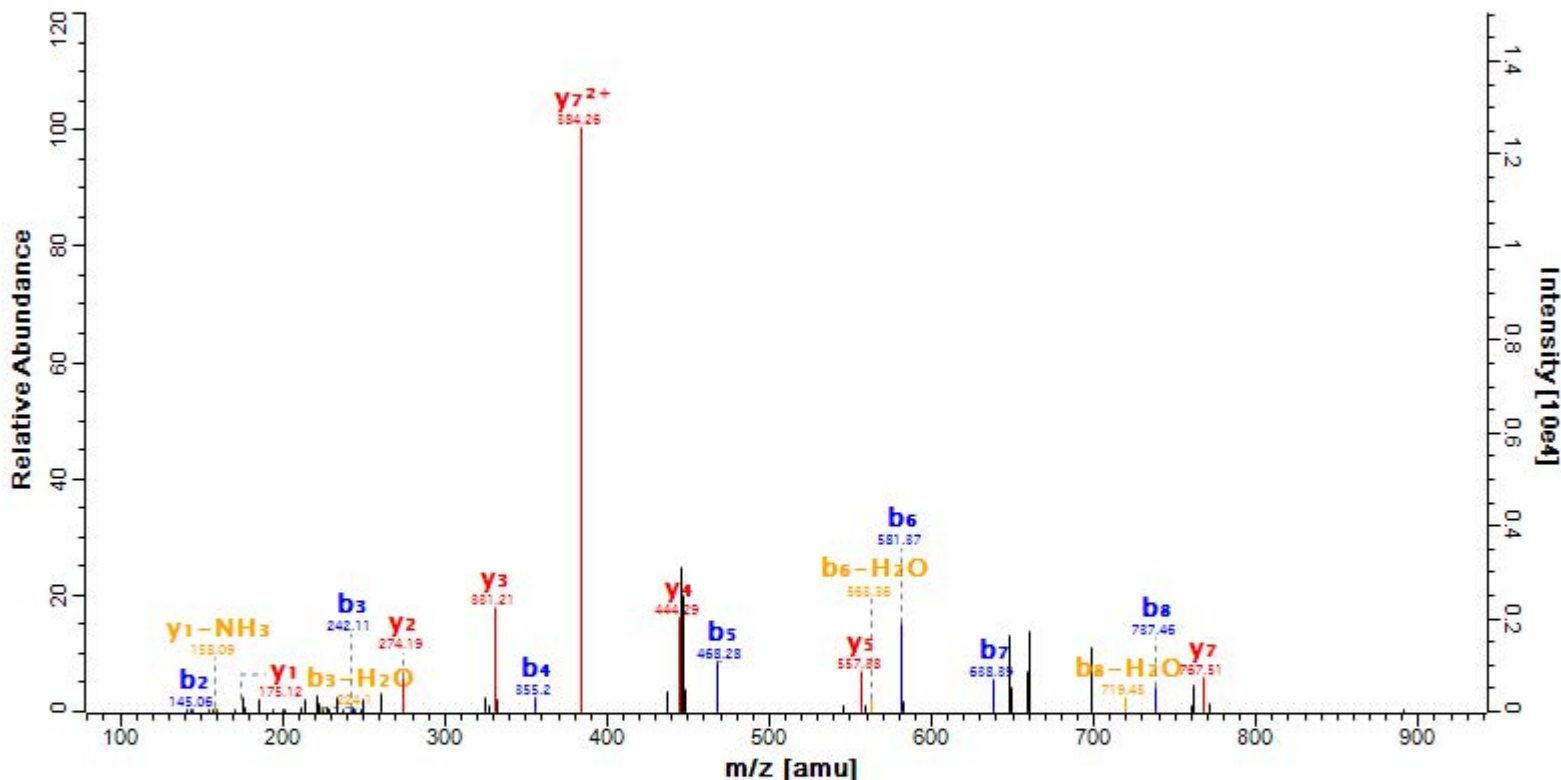

#### precursor information

|                       |                 |
|-----------------------|-----------------|
| Mass:                 | 910.55977       |
| m/z:                  | 456.28716       |
| Charge:               | 2+              |
| Retentiontime:        | 28.232866287231 |
| Score:                | 104.2004        |
| Mass Error [ppm]:     | -0.25715        |
| PEP:                  | 0.0028135       |
| Precursor Type:       | MULTI           |
| Annotation:           | 8 of 9          |
| AminoAcids Coverage:  | 89 %            |
| Intensity Coverage:   | 57 %            |
| Peak Coverage:        | 19 %            |
| Protein Localisation: | 204 ... 212     |

| b ion           |          | seq |   |   | y ion           |           | $y^{2+}$ ion    |           |
|-----------------|----------|-----|---|---|-----------------|-----------|-----------------|-----------|
| $\Delta$ dalton | mass     |     |   |   | $\Delta$ dalton | mass      | $\Delta$ dalton | mass      |
|                 | 58.02874 | 1   | G | 8 |                 |           |                 |           |
| +0.040031       | 145.0608 | 2   | S | 7 | 854.5458        |           | 854.5458        |           |
| -0.09055        | 242.1135 | 3   | P | 6 | 767.5138        | +0.090462 | 384.2605        | +0.081174 |
| +0.057103       | 355.1976 | 4   | L | 5 | 670.461         |           | 670.461         |           |
| -0.0005         | 468.2817 | 5   | L | 4 | 557.377         | +0.032466 | 557.377         |           |
| +0.016295       | 581.3657 | 6   | I | 3 | 444.2929        | +0.079299 | 444.2929        |           |
| -0.02232        | 638.3872 | 7   | G | 2 | 331.2088        | +0.041781 | 331.2088        |           |
| +0.127101       | 737.4556 | 8   | V | 1 | 274.1874        | +0.122326 | 274.1874        |           |
|                 |          | 9   | R | 0 | 175.119         | +0.060247 | 175.119         |           |



Scan number 4622 Raw file LNCAP\_Silac\_23F10\_set1\_04  
 Method ITMS; CID Pepti... 135.71

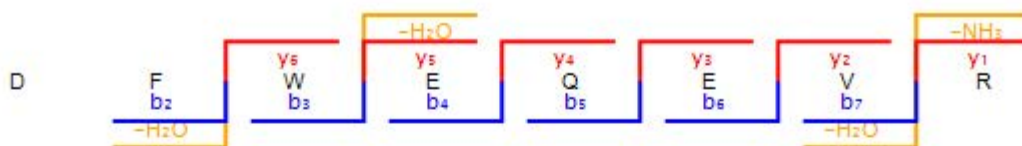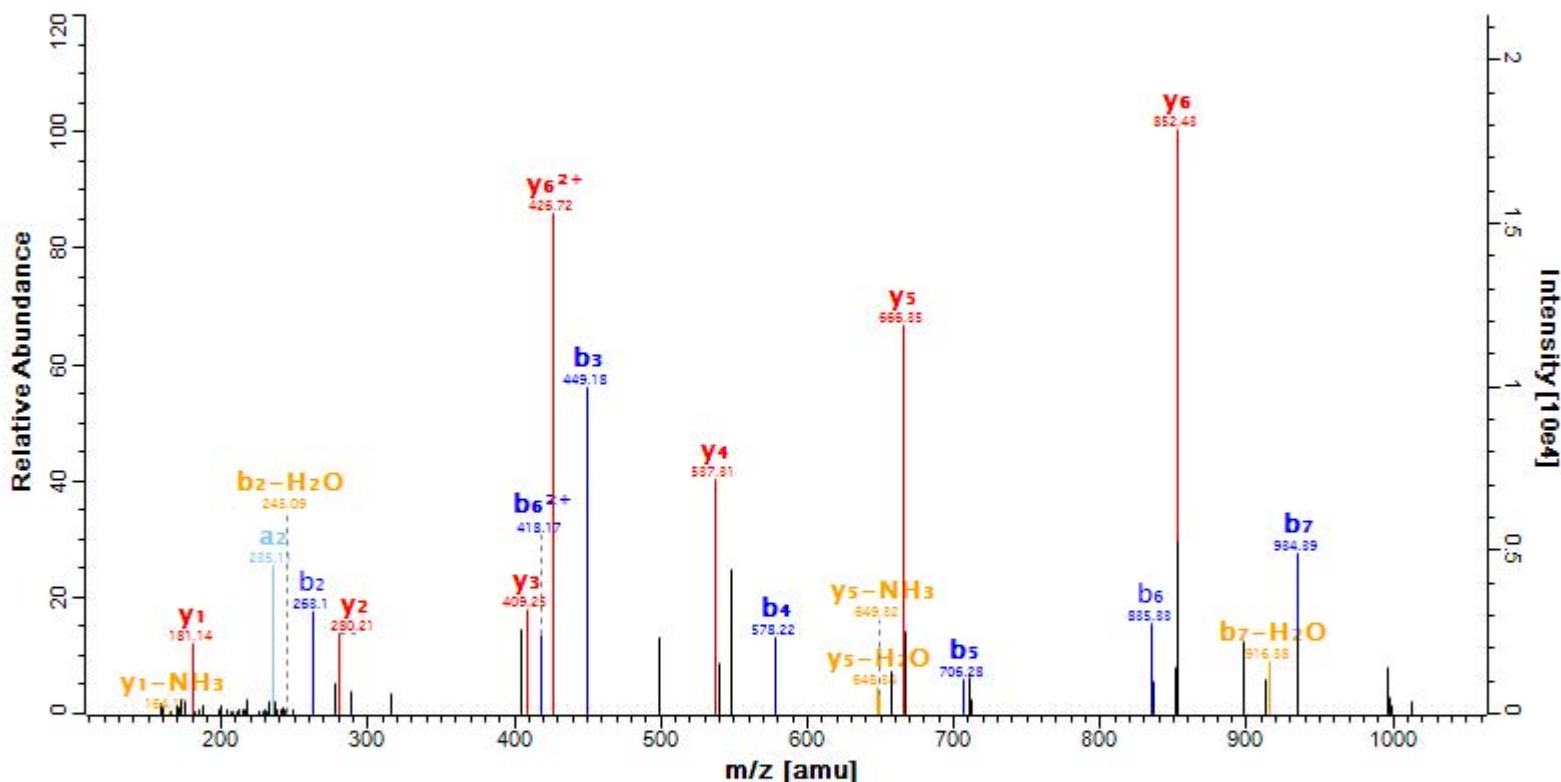

#### precursor information

|                       |                 |
|-----------------------|-----------------|
| Mass:                 | 1107.49833      |
| m/z:                  | 554.75644       |
| Charge:               | 2+              |
| Retentiontime:        | 28.840454101562 |
| Score:                | 135.7114        |
| Mass Error [ppm]:     | -0.1752         |
| g PEP:                | 0.00015208      |
| Annotation:           | 7 of 8          |
| AminoAcids Coverage:  | 88 %            |
| Intensity Coverage:   | 67 %            |
| Peak Coverage:        | 22 %            |
| Protein Localisation: | 601 ... 608     |

| a ion         |               | b <sup>2+</sup> ion |               | b ion  |               | y ion         |       | y <sup>2+</sup> ion |       |       |
|---------------|---------------|---------------------|---------------|--------|---------------|---------------|-------|---------------------|-------|-------|
| Δ dalton mass | Δ dalton mass | Δ dalton mass       | Δ dalton mass | seq    | Δ dalton mass | Δ dalton mass |       |                     |       |       |
| 88.04         | 116           | 116                 | 116           | 1      | D             | 7             |       |                     |       |       |
| +0.007235.1   | 263.1         | -0.03               | 263.1         | 2      | F             | 6             | 999.5 | 999.5               |       |       |
| 421.2         | 449.2         | -0.03               | 449.2         | 3      | W             | 5             | 852.4 | +0.02               | 426.7 |       |
| 550.2         | 578.2         | +0.09               | 578.2         | 4      | E             | 4             | 666.4 | -0.01               | 666.4 |       |
| 678.3         | 706.3         | -0.01               | 706.3         | 5      | Q             | 3             | 537.3 | +0.09               | 537.3 |       |
| 807.3         | +0.05         | 5418.2              | +0.02         | 6835.3 | 6             | E             | 2     | 409.3               | -0.04 | 409.3 |
| 906.4         | 934.4         | -0.02               | 934.4         | 7      | V             | 1             | 280.2 | +0.08               | 280.2 |       |
|               |               |                     |               | 8      | R             | 0             | 181.1 | +0.07               | 181.1 |       |

Scan number 4847 Raw file LNCAP\_Silac\_23F10\_set1\_04  
 Method ITMS: CID Pepti... 124.23

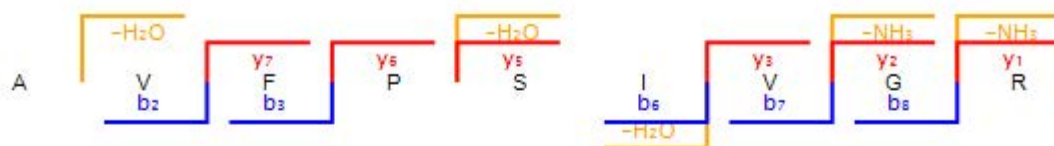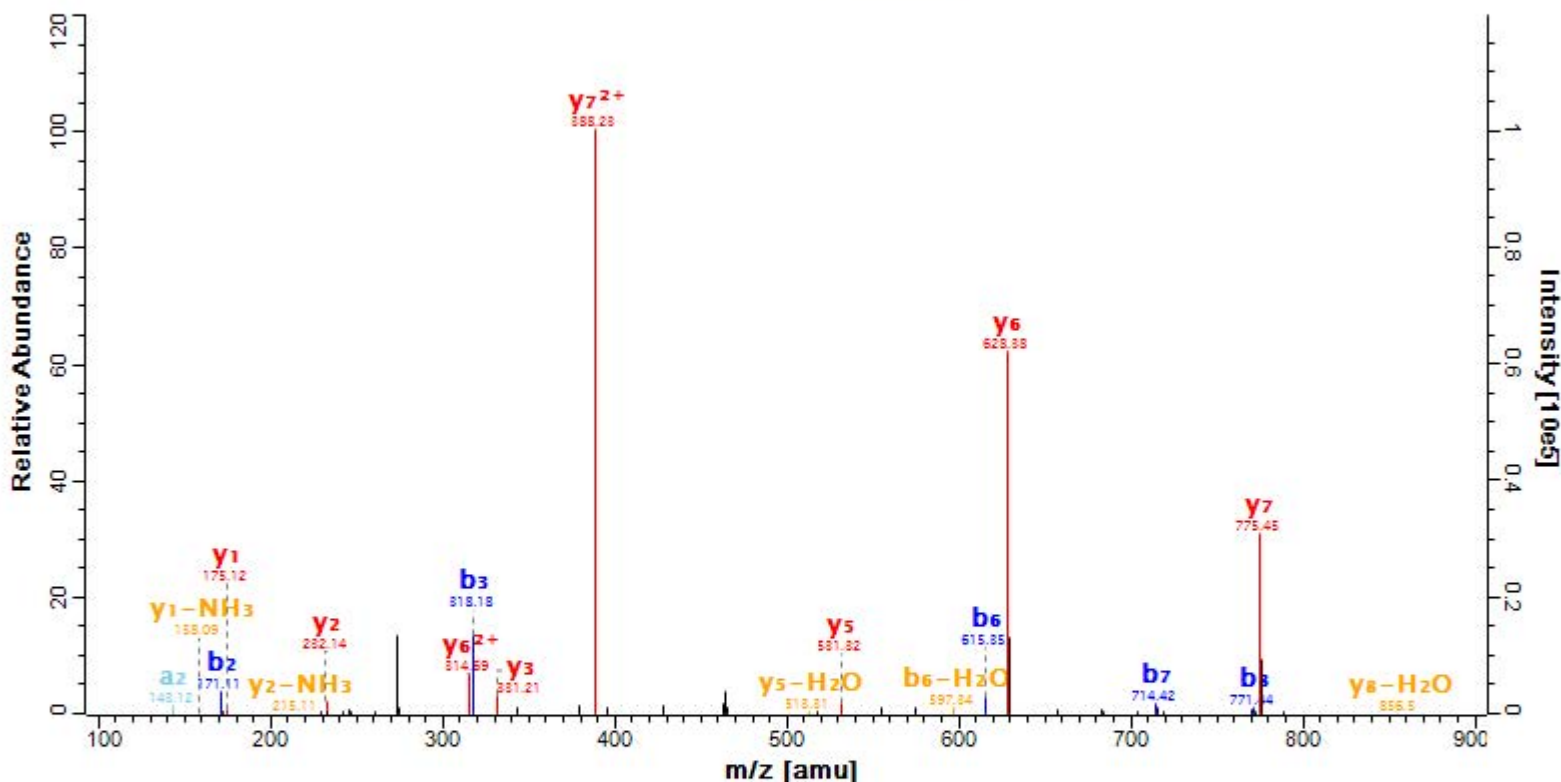

#### precursor information

|                       |                 |
|-----------------------|-----------------|
| Mass:                 | 944.5443        |
| m/z:                  | 473.27943       |
| Charge:               | 2+              |
| Retentiontime:        | 29.979841232299 |
| Score:                | 124.2303        |
| Mass Error [ppm]:     | -0.050586       |
| PEP:                  | 0.0012377       |
| Precursor Type:       | MULTI           |
| Annotation:           | 8 of 9          |
| AminoAcids Coverage:  | 89 %            |
| Intensity Coverage:   | 80 %            |
| Peak Coverage:        | 26 %            |
| Protein Localisation: | 29 ... 37       |

| a ion    |        | b ion    |        |   |     |          | y ion  |          | y <sup>2+</sup> ion |  |
|----------|--------|----------|--------|---|-----|----------|--------|----------|---------------------|--|
| Δ dalton | mass   | Δ dalton | mass   |   | seq | Δ dalton | mass   | Δ dalton | mass                |  |
|          | 44.049 |          | 72.044 | 1 | A   | 8        |        |          |                     |  |
| +0.0275  | 143.12 | +0.0154  | 171.11 | 2 | V   | 7        | 874.51 |          | 874.51              |  |
|          | 290.19 | +0.0279  | 318.18 | 3 | F   | 6        | 775.45 | +0.0252  | 388.23              |  |
|          | 387.24 |          | 415.23 | 4 | P   | 5        | 628.38 | +0.0522  | 314.69              |  |
|          | 474.27 |          | 502.27 | 5 | S   | 4        | 531.32 | +0.0569  | 531.32              |  |
|          | 587.36 | +0.0148  | 615.35 | 6 | I   | 3        | 444.29 |          | 444.29              |  |
|          | 686.42 | +0.0506  | 714.42 | 7 | V   | 2        | 331.21 | +0.1203  | 331.21              |  |
|          | 743.45 | +0       | 771.44 | 8 | G   | 1        | 232.14 | +0.0686  | 232.14              |  |
|          |        |          |        | 9 | R   | 0        | 175.12 | -0.014   | 175.12              |  |

Scan number 5355 Raw file LNCAP\_Silac\_23F10\_set1\_04  
 Method ITMS; CID Pepti... 68.28

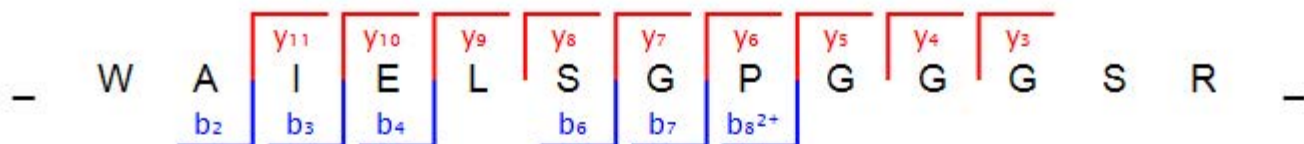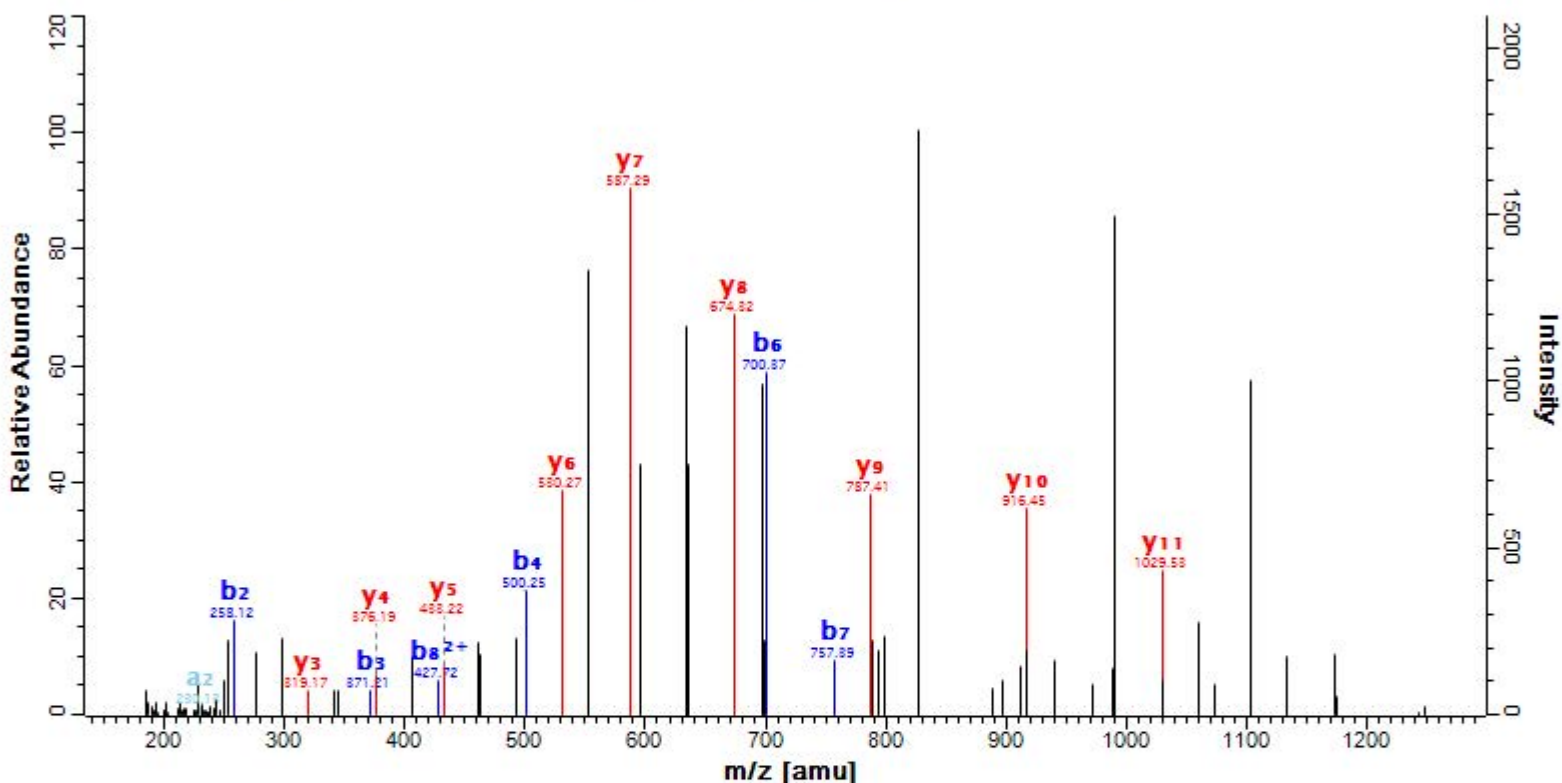

**precursor information**

|                   |                 |
|-------------------|-----------------|
| Mass:             | 1285.64173      |
| m/z:              | 643.82814       |
| Charge:           | 2+              |
| Retentiontime:    | 32.552024841308 |
| Score:            | 68.27738        |
| Mass Error [ppm]: | 0.17866         |
| PEP:              | 0.0034133       |
| Precursor Type:   | MULTI           |

**general information**

|                       |           |
|-----------------------|-----------|
| Annotation:           | 10 of 13  |
| AminoAcids Coverage:  | 77 %      |
| Intensity Coverage:   | 31 %      |
| Peak Coverage:        | 18 %      |
| Protein Localisation: | 17 ... 29 |

| a ion    |        | b <sup>2+</sup> ion |        | b ion    |        | y ion |   |          |                |
|----------|--------|---------------------|--------|----------|--------|-------|---|----------|----------------|
| Δ dalton | mass   | Δ dalton            | mass   | Δ dalton | mass   | seq   |   | Δ dalton | mass           |
|          | 159.09 |                     | 187.09 |          | 187.09 | 1     | W | 12       |                |
| -0.019   | 230.13 |                     | 258.12 | +0.0455  | 258.12 | 2     | A | 11       | 1100.6         |
|          | 343.21 |                     | 371.21 | +0.0557  | 371.21 | 3     | I | 10       | 1029.5 +0.0376 |
|          | 472.26 |                     | 500.25 | +0.0147  | 500.25 | 4     | E | 9        | 916.45 -0.01   |
|          | 585.34 |                     | 613.33 |          | 613.33 | 5     | L | 8        | 787.41 +0.0644 |
|          | 672.37 |                     | 700.37 | +0.0866  | 700.37 | 6     | S | 7        | 674.32 +0.1044 |
|          | 729.39 |                     | 757.39 | -0.071   | 757.39 | 7     | G | 6        | 587.29 +0.0338 |
|          | 826.45 | -0.491              | 427.72 |          | 854.44 | 8     | P | 5        | 530.27 +0.1693 |
|          | 883.47 |                     | 911.46 |          | 911.46 | 9     | G | 4        | 433.22 -0.056  |
|          | 940.49 |                     | 968.48 |          | 968.48 | 10    | G | 3        | 376.19 +0.1167 |
|          | 997.51 |                     | 1025.5 |          | 1025.5 | 11    | G | 2        | 319.17 +0.1453 |
|          | 1084.5 |                     | 1112.5 |          | 1112.5 | 12    | S | 1        | 262.15         |
|          |        |                     |        |          |        | 13    | R | 0        | 175.12         |

Scan number 548 Raw file LNCAP\_Silac\_23F10\_set1\_04  
 Method ITMS; CID Pepti... 97.43

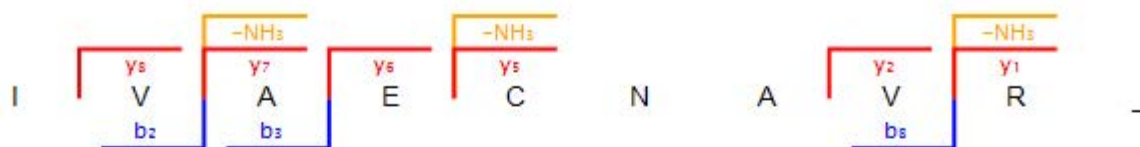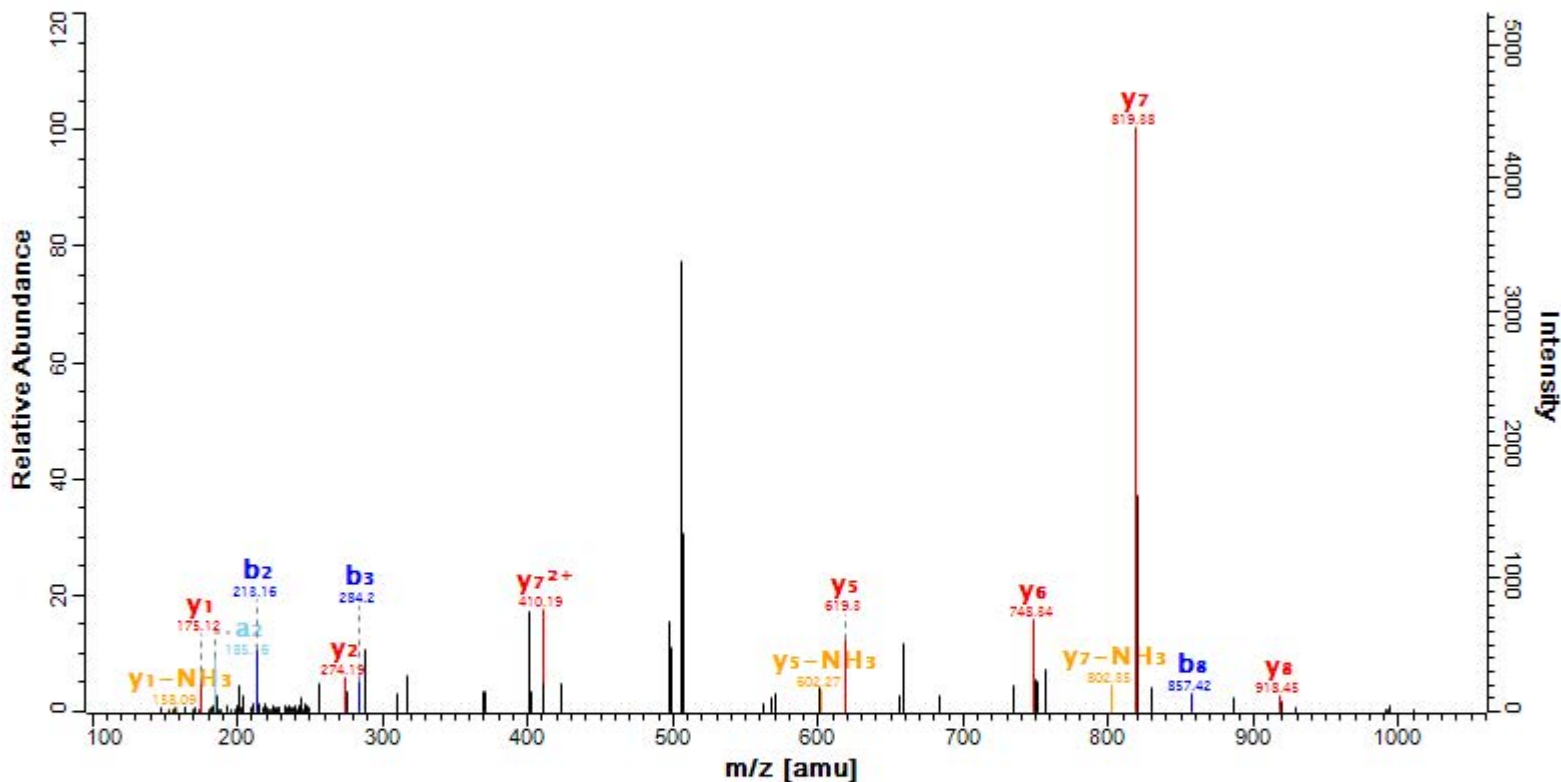

#### precursor information

|                       |                 |
|-----------------------|-----------------|
| Mass:                 | 1030.52303      |
| m/z:                  | 516.26879       |
| Charge:               | 2+              |
| Retention time:       | 8.1562929153442 |
| Score:                | 97.43056        |
| Mass Error [ppm]:     | 0.063135        |
| PEP:                  | 0.0039453       |
| Precursor Type:       | MULTI           |
| Annotation:           | 6 of 9          |
| AminoAcids Coverage:  | 67 %            |
| Intensity Coverage:   | 34 %            |
| Peak Coverage:        | 12 %            |
| Protein Localisation: | 333 ... 341     |

| a ion    |        | b ion    |        | seq |   |   | y ion    |         | y <sup>2+</sup> ion |        |
|----------|--------|----------|--------|-----|---|---|----------|---------|---------------------|--------|
| Δ dalton | mass   | Δ dalton | mass   |     |   |   | Δ dalton | mass    | Δ dalton            | mass   |
|          | 86.096 |          | 114.09 | 1   | I | 8 |          |         |                     |        |
| +0.0248  | 185.16 | -0.041   | 213.16 | 2   | V | 7 | 918.45   | +0.0118 | 918.45              |        |
|          | 256.2  | -0.094   | 284.2  | 3   | A | 6 | 819.38   | +0.0053 | 410.19              | +0.004 |
|          | 385.24 |          | 413.24 | 4   | E | 5 | 748.34   | +0.0278 | 748.34              |        |
|          | 545.28 |          | 573.27 | 5   | C | 4 | 619.3    | +0.0693 | 619.3               |        |
|          | 659.32 |          | 687.31 | 6   | N | 3 | 459.27   |         | 459.27              |        |
|          | 730.36 |          | 758.35 | 7   | A | 2 | 345.22   |         | 345.22              |        |
|          | 829.42 | -0.097   | 857.42 | 8   | V | 1 | 274.19   | -0.004  | 274.19              |        |
|          |        |          |        | 9   | R | 0 | 175.12   | +0.0633 | 175.12              |        |



Scan number 5682 Raw file LNCAP\_Silac\_23F10\_set1\_04  
 Method ITMS: CID Pepti... 130.01

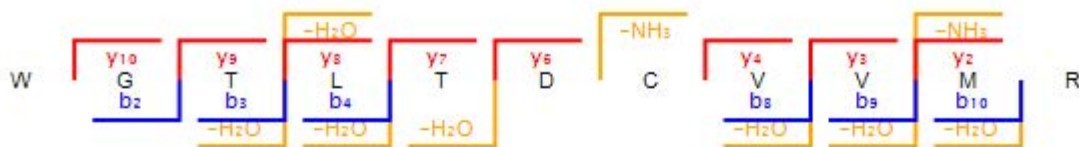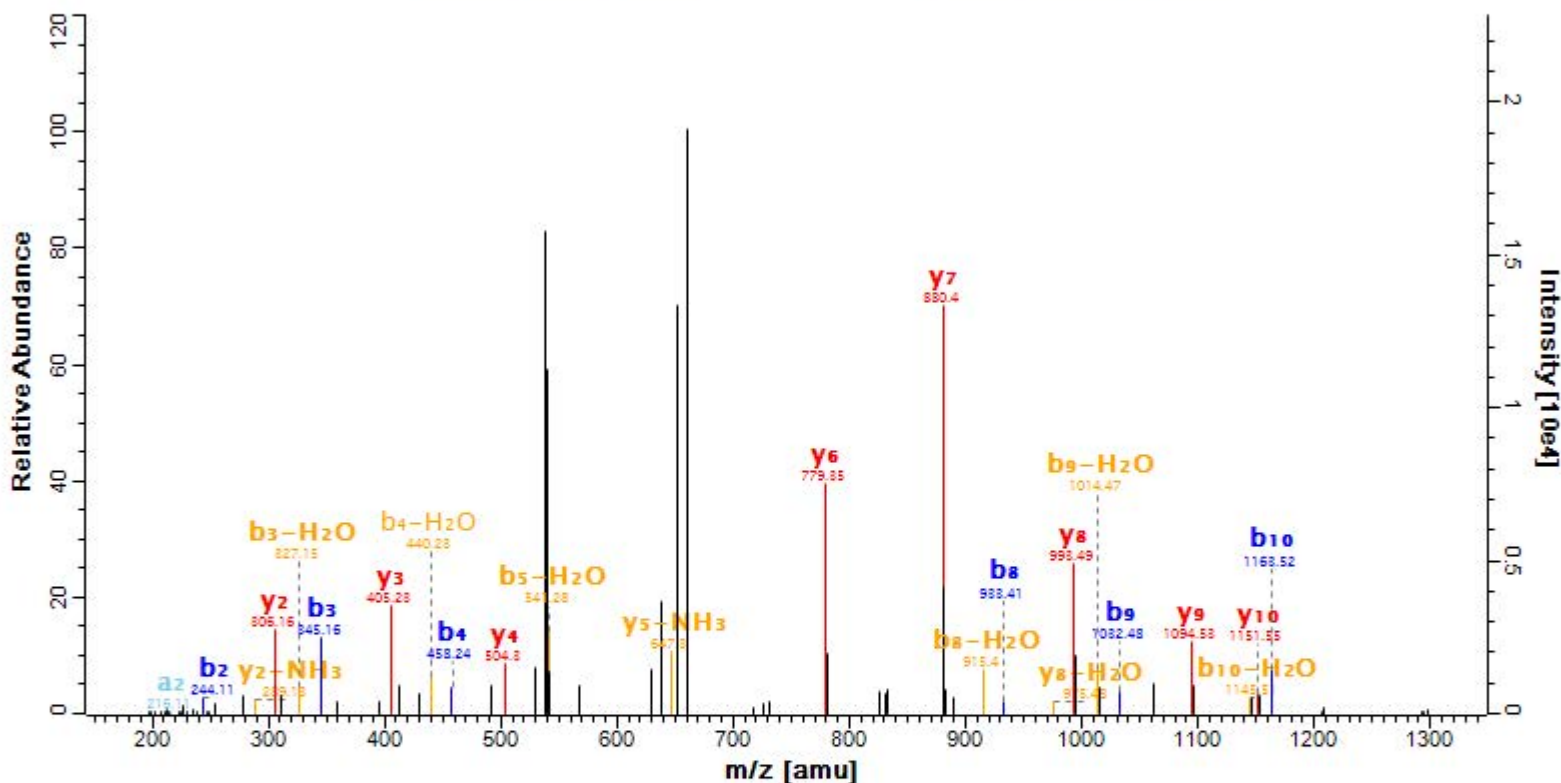

#### precursor information

|                   |                 |
|-------------------|-----------------|
| Mass:             | 1336.62668      |
| m/z:              | 669.32062       |
| Charge:           | 2+              |
| Retentiontime:    | 34.231834411621 |
| Score:            | 130.006         |
| Mass Error [ppm]: | -0.071051       |
| PEP:              | 0.00018614      |
| Precursor Type:   | MULTI           |

#### general information

|                       |           |
|-----------------------|-----------|
| Annotation:           | 9 of 11   |
| AminoAcids Coverage:  | 82 %      |
| Intensity Coverage:   | 35 %      |
| Peak Coverage:        | 26 %      |
| Protein Localisation: | 58 ... 68 |

|           | a ion           |          | b ion           |          |     | y ion           |      |                    |
|-----------|-----------------|----------|-----------------|----------|-----|-----------------|------|--------------------|
|           | $\Delta$ dalton | mass     | $\Delta$ dalton | mass     | seq | $\Delta$ dalton | mass |                    |
|           |                 | 159.0917 |                 | 187.0866 | 1   | W               | 10   |                    |
| +0.146475 | 216.1131        |          | -0.07908        | 244.1081 | 2   | G               | 9    | 1151.555 +0.005318 |
|           | 317.1608        |          | +0.097747       | 345.1557 | 3   | T               | 8    | 1094.533 +0.060229 |
|           | 430.2449        |          | -0.00298        | 458.2398 | 4   | L               | 7    | 993.4856 -0.00708  |
|           | 531.2926        |          |                 | 559.2875 | 5   | T               | 6    | 880.4015 +0.038956 |
|           | 646.3195        |          |                 | 674.3144 | 6   | D               | 5    | 779.3539 +0.047694 |
|           | 806.3502        |          |                 | 834.3451 | 7   | C               | 4    | 664.3269           |
|           | 905.4186        |          | +0.018955       | 933.4135 | 8   | V               | 3    | 504.2963 +0.146912 |
|           | 1004.487        |          | -0.05391        | 1032.482 | 9   | V               | 2    | 405.2279 +0.013238 |
|           | 1135.527        |          | -0.07682        | 1163.522 | 10  | M               | 1    | 306.1594 +0.025561 |
|           |                 |          |                 |          | 11  | R               | 0    | 175.119            |

Scan number 5942 Raw file LNCAP\_Silac\_23F10\_set1\_04  
 Method ITMS; CID Pepti... 285.54

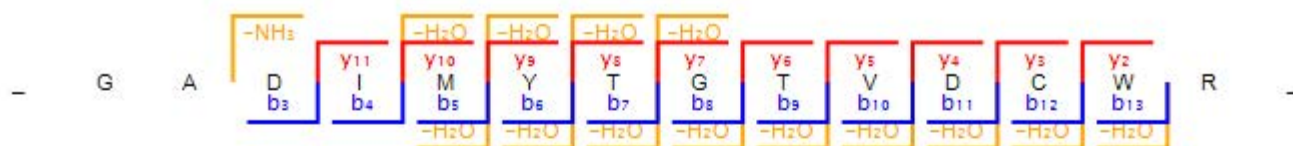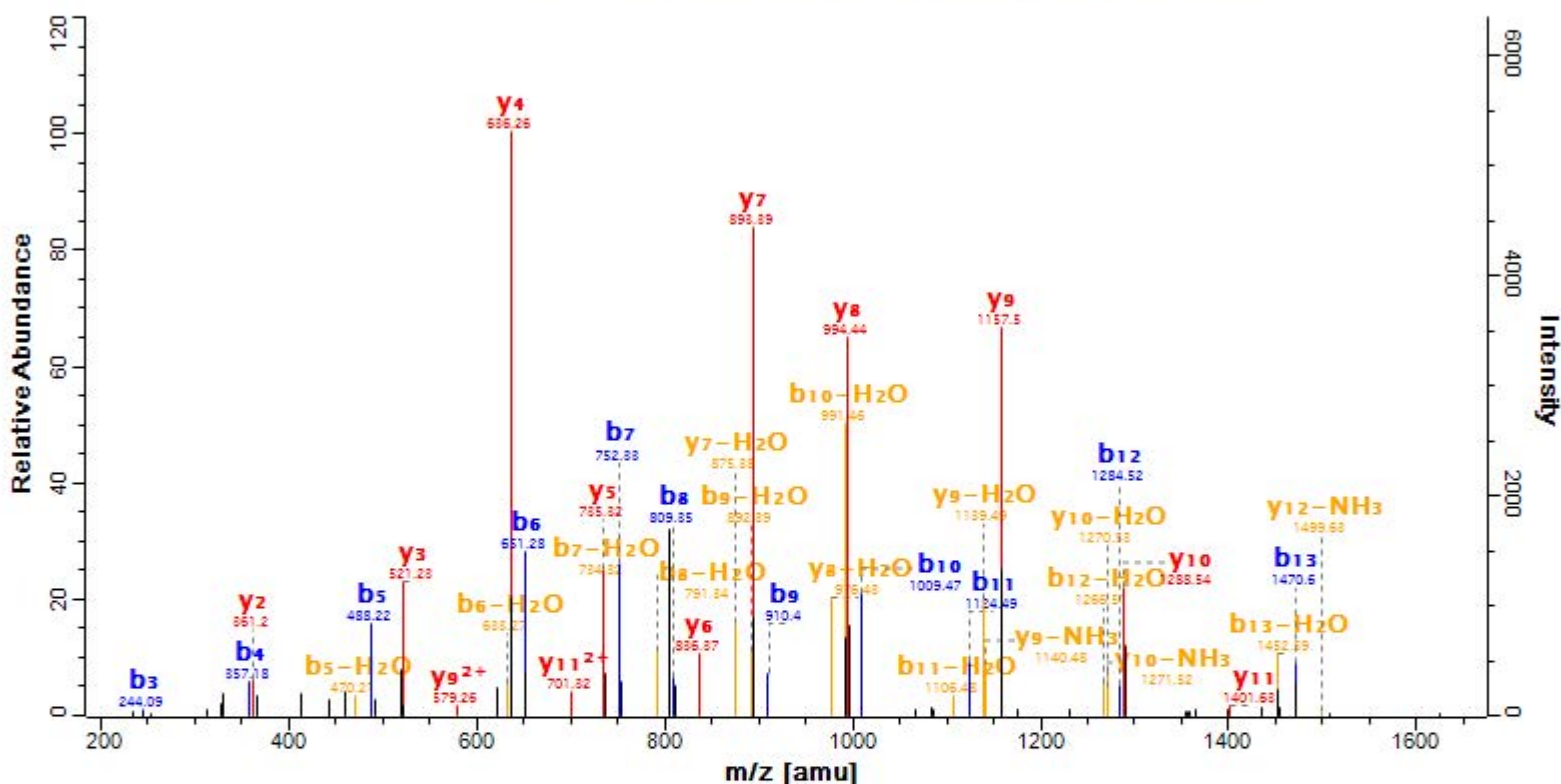

#### precursor information

|                   |                 |
|-------------------|-----------------|
| Mass:             | 1643.70696      |
| m/z:              | 822.86076       |
| Charge:           | 2+              |
| Retentiontime:    | 35.564388275146 |
| Score:            | 285.5385        |
| Mass Error [ppm]: | -0.15464        |
| PEP:              | 1.1949E-73      |
| Precursor Type:   | MULTI           |

| b ion     |          |    |     |    | y ion    |           | y <sup>2+</sup> ion |           |
|-----------|----------|----|-----|----|----------|-----------|---------------------|-----------|
| Δ dalton  | mass     |    | seq |    | Δ dalton | mass      | Δ dalton            | mass      |
|           | 58.02874 | 1  | G   | 13 |          |           |                     |           |
|           | 129.0659 | 2  | A   | 12 | 1587.693 |           | 1587.693            |           |
| +0.048789 | 244.0928 | 3  | D   | 11 | 1516.656 |           | 1516.656            |           |
| +0.001362 | 357.1769 | 4  | I   | 10 | 1401.629 | -0.2226   | 701.3181            | +0.049004 |
| +0.04773  | 488.2173 | 5  | M   | 9  | 1288.545 | -0.04796  | 1288.545            |           |
| -0.0532   | 651.2807 | 6  | Y   | 8  | 1157.504 | -0.03189  | 579.2558            | +0.260082 |
| -0.0385   | 752.3284 | 7  | T   | 7  | 994.4411 | +0.038951 | 994.4411            |           |
| +0.068885 | 809.3498 | 8  | G   | 6  | 893.3934 | +0.045125 | 893.3934            |           |
| -0.02054  | 910.3975 | 9  | T   | 5  | 836.3719 | +0.037292 | 836.3719            |           |
| -0.07357  | 1009.466 | 10 | V   | 4  | 735.3243 | +0.10322  | 735.3243            |           |
| -0.065    | 1124.493 | 11 | D   | 3  | 636.2559 | -0.01007  | 636.2559            |           |
| -0.17743  | 1284.523 | 12 | C   | 2  | 521.2289 | +0.086394 | 521.2289            |           |
| -0.14896  | 1470.603 | 13 | W   | 1  | 361.1983 | +0.046303 | 361.1983            |           |
|           |          | 14 | R   | 0  | 175.119  |           | 175.119             |           |

#### general information

|                       |             |
|-----------------------|-------------|
| Annotation:           | 11 of 14    |
| AminoAcids Coverage:  | 79 %        |
| Intensity Coverage:   | 77 %        |
| Peak Coverage:        | 48 %        |
| Protein Localisation: | 246 ... 259 |

Scan number 6234 Raw file LNCAP\_Silac\_23F10\_set1\_04  
 Method ITMS: CID Pepti... 107.17

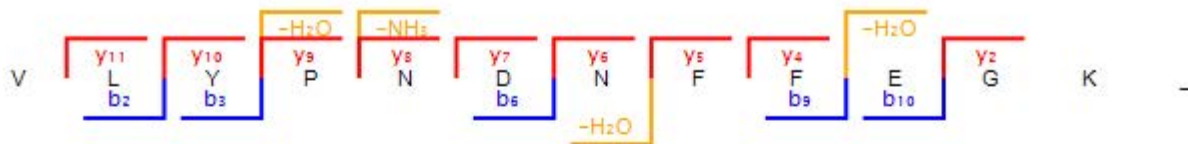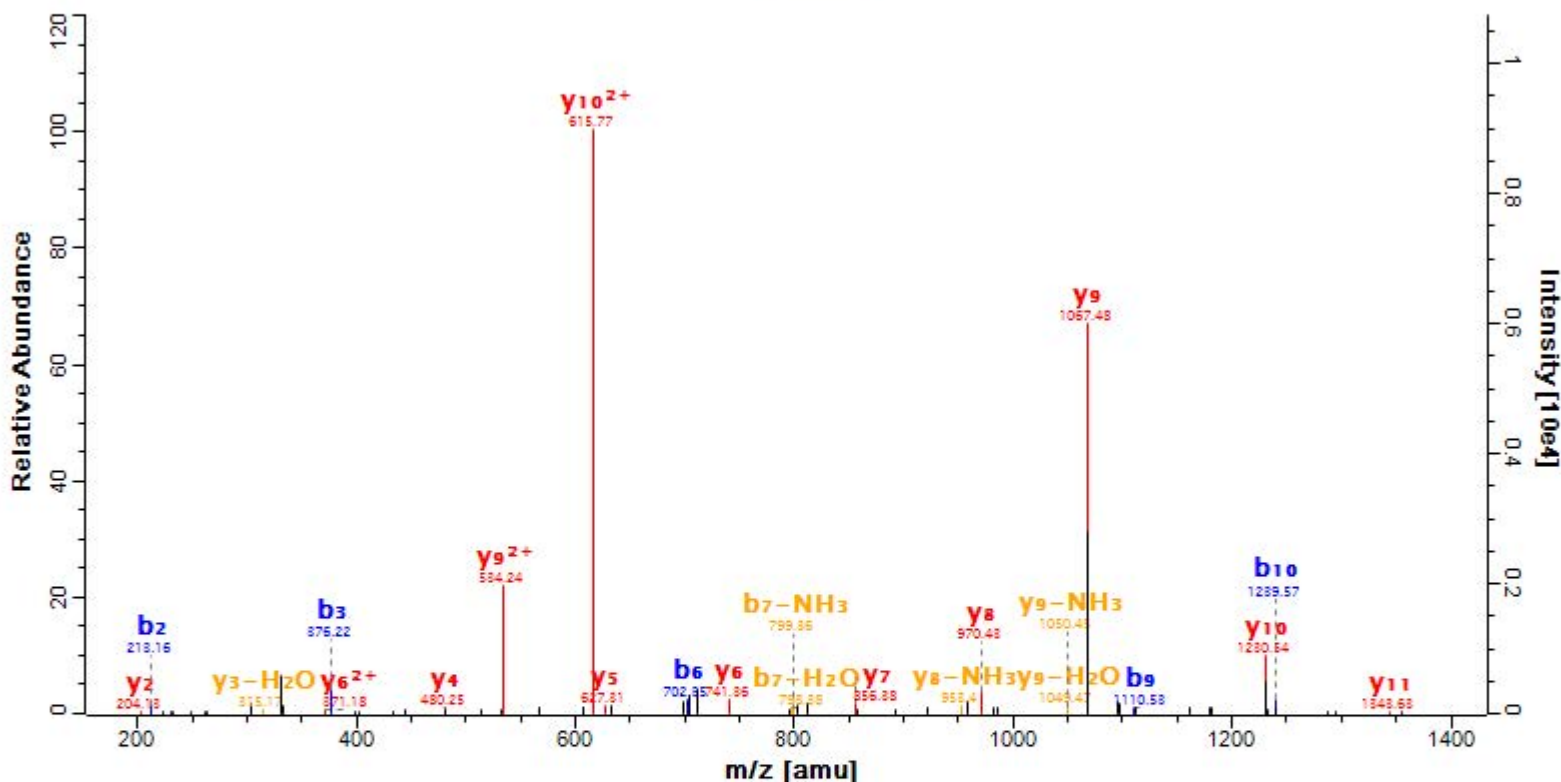

#### precursor information

|                   |                 |
|-------------------|-----------------|
| Mass:             | 1441.6877       |
| m/z:              | 721.85113       |
| Charge:           | 2+              |
| Retentiontime:    | 37.141674041748 |
| Score:            | 107.1657        |
| Mass Error [ppm]: | -0.057369       |
| PEP:              | 6.1321E-05      |
| Precursor Type:   | MULTI           |

#### general information

|                       |             |
|-----------------------|-------------|
| Annotation:           | 10 of 12    |
| AminoAcids Coverage:  | 83 %        |
| Intensity Coverage:   | 72 %        |
| Peak Coverage:        | 28 %        |
| Protein Localisation: | 279 ... 290 |

| b ion     |          |    |     |    | y ion    |           | y <sup>2+</sup> ion |           |
|-----------|----------|----|-----|----|----------|-----------|---------------------|-----------|
| Δ dalton  | mass     |    | seq |    | Δ dalton | mass      | Δ dalton            | mass      |
|           | 100.0757 | 1  | V   | 11 |          |           |                     |           |
| -0.09143  | 213.1598 | 2  | L   | 10 | 1343.627 | -0.10455  | 1343.627            |           |
| +0.060303 | 376.2231 | 3  | Y   | 9  | 1230.543 | +0.055443 | 615.7749            | +0.212621 |
|           | 473.2758 | 4  | P   | 8  | 1067.479 | -0.03321  | 534.2433            | +0.283165 |
|           | 587.3188 | 5  | N   | 7  | 970.4265 | +0.065151 | 970.4265            |           |
| +0.204148 | 702.3457 | 6  | D   | 6  | 856.3836 | +0.158189 | 856.3836            |           |
|           | 816.3886 | 7  | N   | 5  | 741.3566 | +0.122143 | 371.1819            | +0.163513 |
|           | 963.4571 | 8  | F   | 4  | 627.3137 | +0.149202 | 627.3137            |           |
| -0.11361  | 1110.525 | 9  | F   | 3  | 480.2453 | +0.302943 | 480.2453            |           |
| -0.10212  | 1239.568 | 10 | E   | 2  | 333.1769 |           | 333.1769            |           |
|           | 1296.59  | 11 | G   | 1  | 204.1343 | -0.16332  | 204.1343            |           |
|           |          | 12 | K   | 0  | 147.1128 |           | 147.1128            |           |



Scan number 6281 Raw file LNCAP\_Silac\_23F10\_set1\_04  
 Method ITMS; CID Peptide 209.19

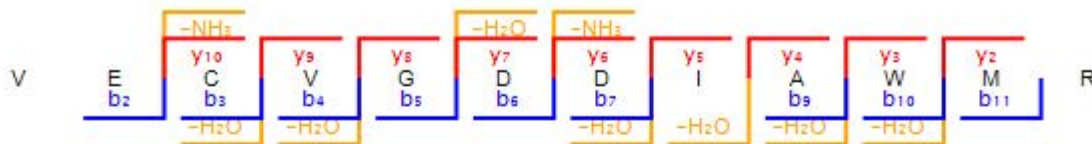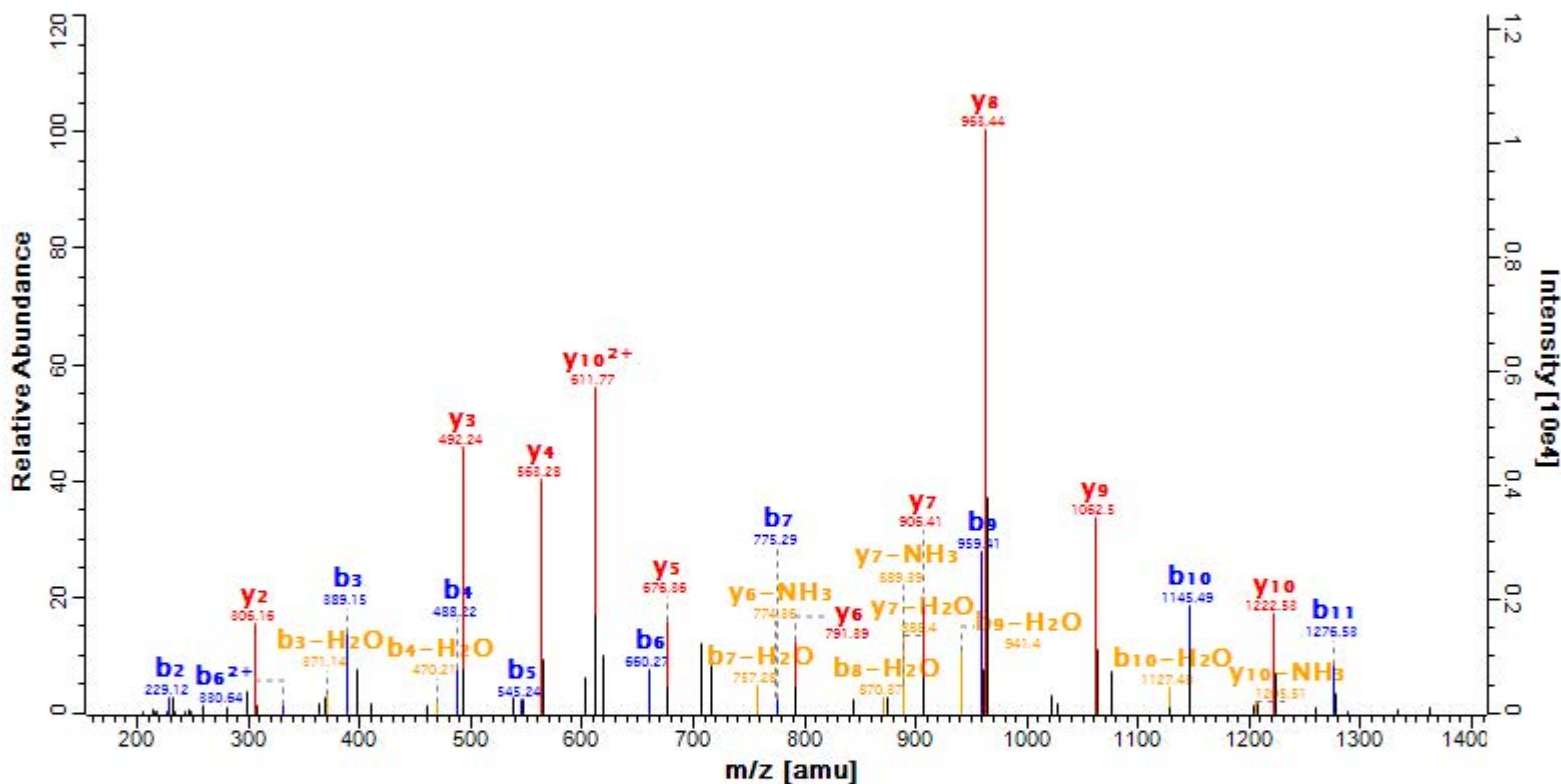

#### precursor information

|                   |                 |
|-------------------|-----------------|
| Mass:             | 1449.63813      |
| m/z:              | 725.82634       |
| Charge:           | 2+              |
| Retentiontime:    | 37.392364501953 |
| Score:            | 209.1883        |
| Mass Error [ppm]: | 0.043961        |
| PEP:              | 1.0497E-18      |
| Precursor Type:   | MULTI           |

#### general information

|                       |             |
|-----------------------|-------------|
| Annotation:           | 10 of 12    |
| AminoAcids Coverage:  | 83 %        |
| Intensity Coverage:   | 69 %        |
| Peak Coverage:        | 34 %        |
| Protein Localisation: | 323 ... 334 |

| b <sup>2+</sup> ion |        | b ion    |        | seq |   |    | y ion    |         | y <sup>2+</sup> ion |         |
|---------------------|--------|----------|--------|-----|---|----|----------|---------|---------------------|---------|
| Δ dalton            | mass   | Δ dalton | mass   |     |   |    | Δ dalton | mass    | Δ dalton            | mass    |
|                     | 100.08 |          | 100.08 | 1   | V | 11 |          |         |                     |         |
|                     | 229.12 | -0.111   | 229.12 | 2   | E | 10 | 1351.6   |         | 1351.6              |         |
|                     | 389.15 | -0.02    | 389.15 | 3   | C | 9  | 1222.5   | +0.0268 | 611.77              | +0.0757 |
|                     | 488.22 | +0.0038  | 488.22 | 4   | V | 8  | 1062.5   | +0.0036 | 1062.5              |         |
|                     | 545.24 | +0.268   | 545.24 | 5   | G | 7  | 963.44   | -0.001  | 963.44              |         |
| +0.4688             | 630.64 | -0.06    | 660.27 | 6   | D | 6  | 906.41   | -0.02   | 906.41              |         |
|                     | 775.29 | +0.1964  | 775.29 | 7   | D | 5  | 791.39   | +0.0224 | 791.39              |         |
|                     | 888.38 |          | 888.38 | 8   | I | 4  | 676.36   | +0.0035 | 676.36              |         |
|                     | 959.41 | -0.064   | 959.41 | 9   | A | 3  | 563.28   | +0.0743 | 563.28              |         |
|                     | 1145.5 | -0.03    | 1145.5 | 10  | W | 2  | 492.24   | +0.0521 | 492.24              |         |
|                     | 1276.5 | -0.043   | 1276.5 | 11  | M | 1  | 306.16   | +0.0519 | 306.16              |         |
|                     |        |          |        | 12  | R | 0  | 175.12   |         | 175.12              |         |

Scan number 6617 Raw file LNCAP\_Silac\_23F10\_set1\_04  
 Method ITMS: CID Pepti... 104.43

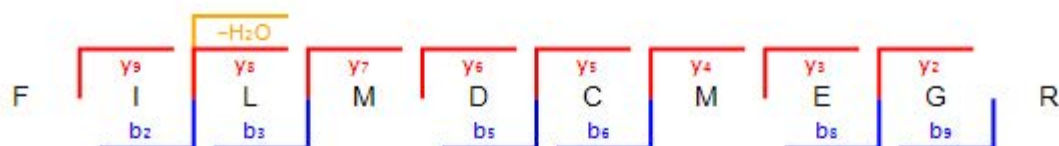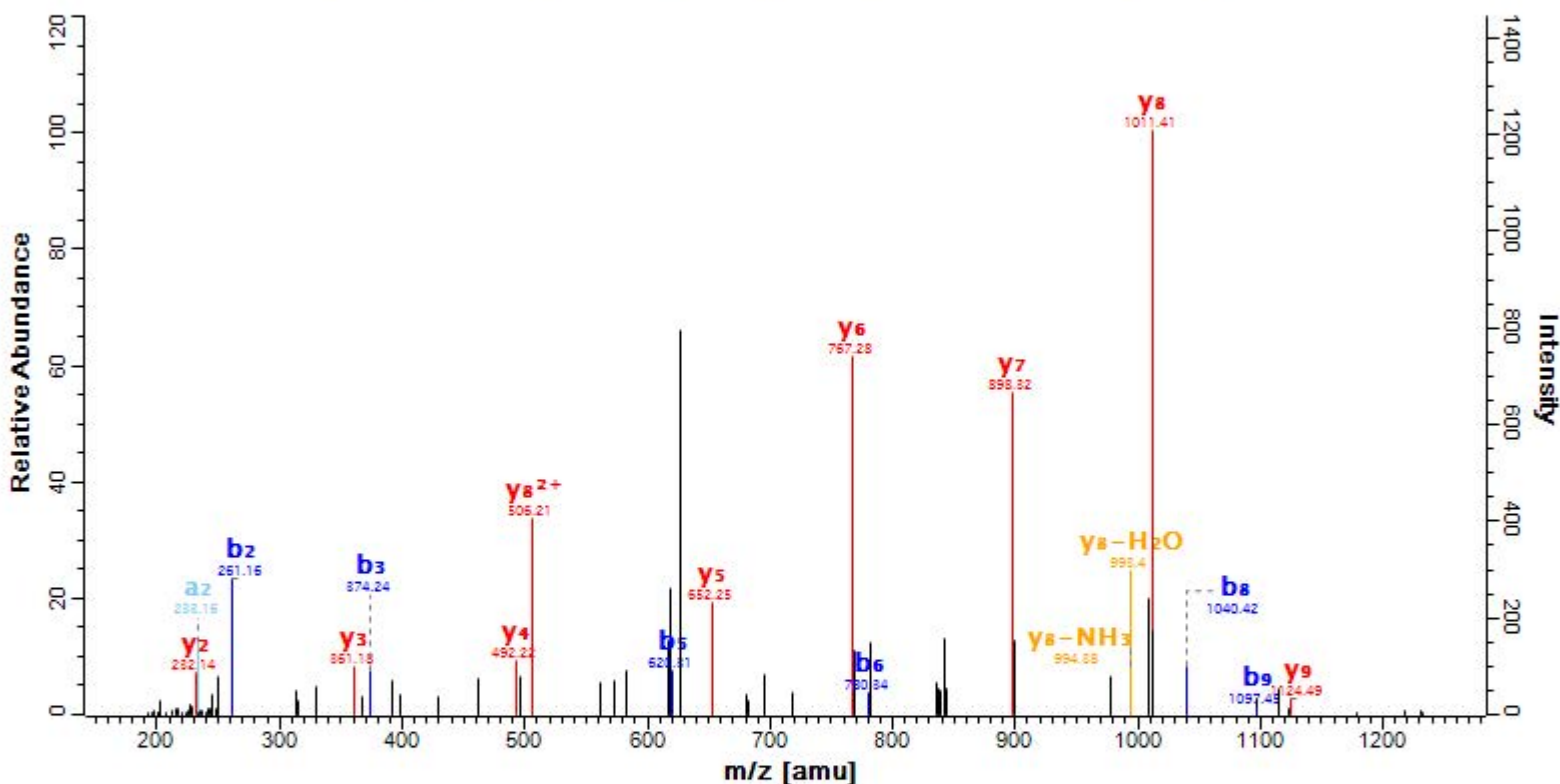

#### precursor information

|                   |                 |
|-------------------|-----------------|
| Mass:             | 1270.55094      |
| m/z:              | 636.28275       |
| Charge:           | 2+              |
| Retentiontime:    | 39.169952392578 |
| Score:            | 104.434         |
| Mass Error [ppm]: | 0.084205        |
| PEP:              | 0.00064892      |
| Precursor Type:   | MULTI           |

|                       |           |
|-----------------------|-----------|
| Annotation:           | 8 of 10   |
| AminoAcids Coverage:  | 80 %      |
| Intensity Coverage:   | 52 %      |
| Peak Coverage:        | 21 %      |
| Protein Localisation: | 71 ... 80 |

| a ion    |        | b ion    |        |    |     |   | y ion    |         | y <sup>2+</sup> ion |        |
|----------|--------|----------|--------|----|-----|---|----------|---------|---------------------|--------|
| Δ dalton | mass   | Δ dalton | mass   |    | seq |   | Δ dalton | mass    | Δ dalton            | mass   |
|          | 120.08 |          | 148.08 | 1  | F   | 9 |          |         |                     |        |
| -0.013   | 233.16 | -0.06    | 261.16 | 2  | I   | 8 | 1124.5   | +0.1137 | 1124.5              |        |
|          | 346.25 | +0.1228  | 374.24 | 3  | L   | 7 | 1011.4   | -0.038  | 506.21              | -0.038 |
|          | 477.29 |          | 505.28 | 4  | M   | 6 | 898.32   | +0.1042 | 898.32              |        |
|          | 592.32 | +0.0669  | 620.31 | 5  | D   | 5 | 767.28   | +0.0427 | 767.28              |        |
|          | 752.35 | +0.2493  | 780.34 | 6  | C   | 4 | 652.25   | +0.0917 | 652.25              |        |
|          | 883.39 |          | 911.38 | 7  | M   | 3 | 492.22   | +0.18   | 492.22              |        |
|          | 1012.4 | -0.065   | 1040.4 | 8  | E   | 2 | 361.18   | +0.0935 | 361.18              |        |
|          | 1069.5 | -0.016   | 1097.4 | 9  | G   | 1 | 232.14   | -0.049  | 232.14              |        |
|          |        |          |        | 10 | R   | 0 | 175.12   |         | 175.12              |        |

Scan number 6808 Raw file LNCAP\_Silac\_23F10\_set1\_04  
 Method ITMS; CID Pepti... 177.57

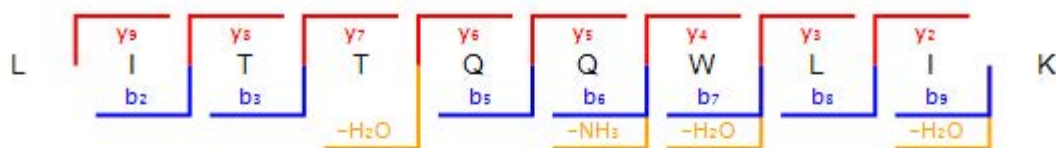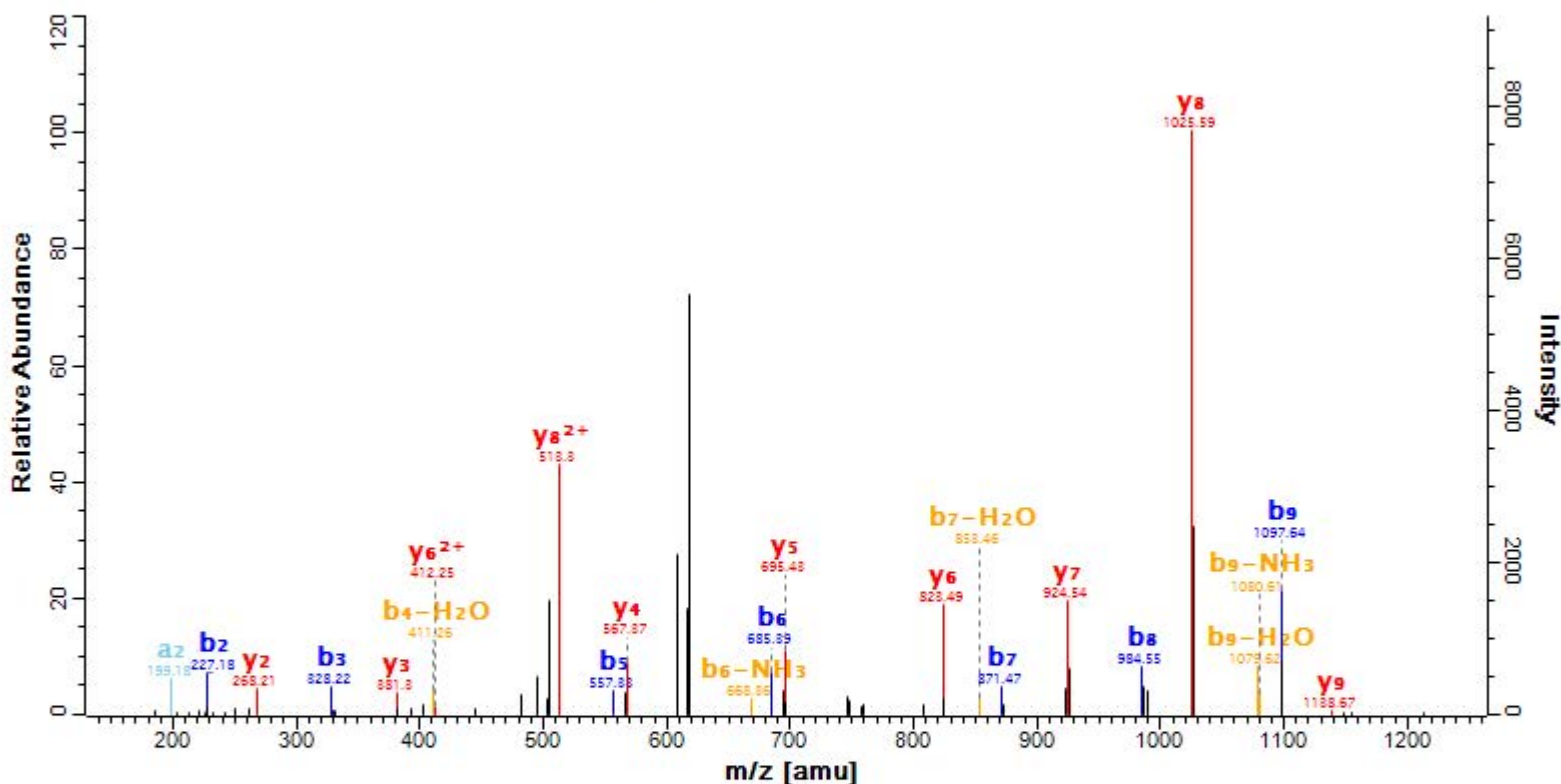

precursor information

|                   |                 |
|-------------------|-----------------|
| Mass:             | 1242.73337      |
| m/z:              | 622.37396       |
| Charge:           | 2+              |
| Retentiontime:    | 40.209106445312 |
| Score:            | 177.5723        |
| Mass Error [ppm]: | -0.19147        |
| PEP:              | 4.7987E-06      |
| Precursor Type:   | MULTI           |

|                       |           |
|-----------------------|-----------|
| Annotation:           | 8 of 10   |
| AminoAcids Coverage:  | 80 %      |
| Intensity Coverage:   | 51 %      |
| Peak Coverage:        | 28 %      |
| Protein Localisation: | 42 ... 51 |

| a ion    |        | b ion    |        |    |     |   | y ion    |         | y <sup>2+</sup> ion |         |
|----------|--------|----------|--------|----|-----|---|----------|---------|---------------------|---------|
| Δ dalton | mass   | Δ dalton | mass   |    | seq |   | Δ dalton | mass    | Δ dalton            | mass    |
|          | 86.096 |          | 114.09 | 1  | L   | 9 |          |         |                     |         |
| +0.0192  | 199.18 | +0.0358  | 227.18 | 2  | I   | 8 | 1138.7   | +0.3907 | 1138.7              |         |
|          | 300.23 | +0.2121  | 328.22 | 3  | T   | 7 | 1025.6   | +0.0344 | 513.3               | +0.1608 |
|          | 401.28 |          | 429.27 | 4  | T   | 6 | 924.54   | +0.0903 | 924.54              |         |
|          | 529.33 | +0.0225  | 557.33 | 5  | Q   | 5 | 823.49   | +0.0954 | 412.25              | +0.3363 |
|          | 657.39 | +0.1124  | 685.39 | 6  | Q   | 4 | 695.43   | +0.246  | 695.43              |         |
|          | 843.47 | +0.0118  | 871.47 | 7  | W   | 3 | 567.37   | +0.0461 | 567.37              |         |
|          | 956.56 | -0.032   | 984.55 | 8  | L   | 2 | 381.3    | +0.0562 | 381.3               |         |
|          | 1069.6 | +0.0038  | 1097.6 | 9  | I   | 1 | 268.21   | +0.1016 | 268.21              |         |
|          |        |          |        | 10 | K   | 0 | 155.13   |         | 155.13              |         |

Scan number 6928 Raw file LNCAP\_Silac\_23F10\_set1\_04  
 Method ITMS; CID Pepti... 56.09

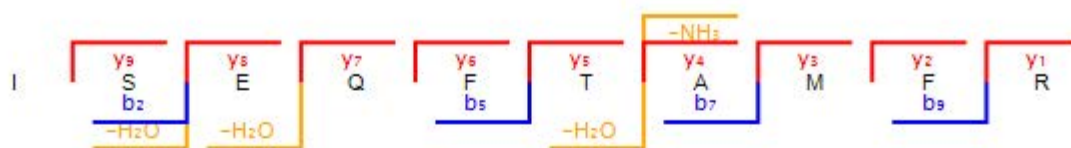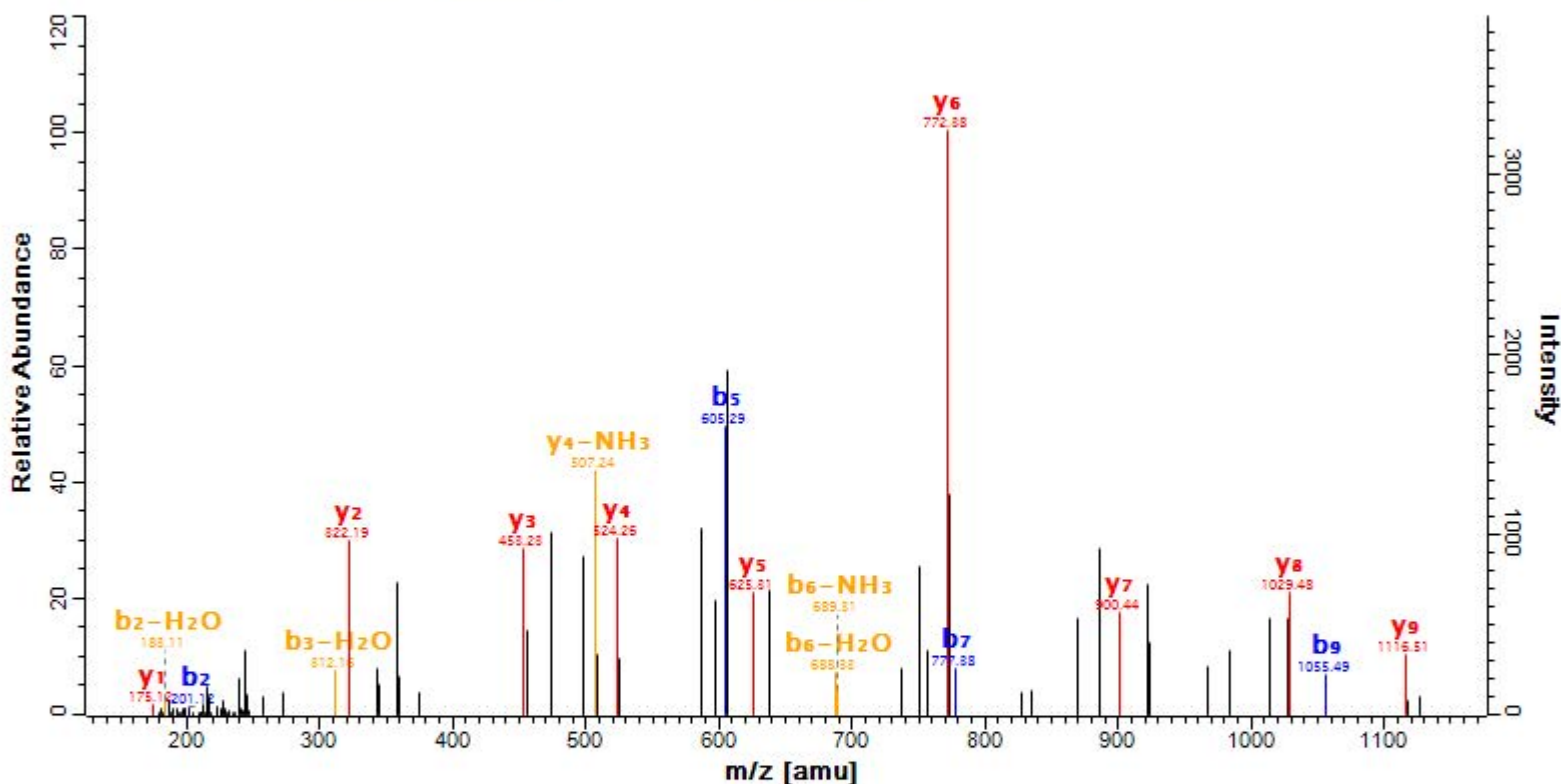

#### precursor information

|                   |                 |
|-------------------|-----------------|
| Mass:             | 1228.59149      |
| m/z:              | 615.30302       |
| Charge:           | 2+              |
| Retentiontime:    | 40.864376068115 |
| Score:            | 56.08672        |
| Mass Error [ppm]: | 0.36417         |
| PEP:              | 0.0258          |
| Precursor Type:   | MULTI           |

|                       |             |
|-----------------------|-------------|
| Annotation:           | 9 of 10     |
| AminoAcids Coverage:  | 90 %        |
| Intensity Coverage:   | 39 %        |
| Peak Coverage:        | 19 %        |
| Protein Localisation: | 381 ... 390 |

| b ion      |               |     |   | y ion    |                          |
|------------|---------------|-----|---|----------|--------------------------|
| Δ dalton   | mass          | seq |   | Δ dalton | mass                     |
|            | 114.091340447 | 1   | I | 9        |                          |
| +0.2853836 | 201.123368857 | 2   | S | 8        | 1116.5142559 +0.1256367  |
|            | 330.165961953 | 3   | E | 7        | 1029.48222749 +0.195751  |
|            | 458.224539464 | 4   | Q | 6        | 900.439634393 +0.1248187 |
| +0.1291047 | 605.292953381 | 5   | F | 5        | 772.381056882 +0.0115823 |
|            | 706.340631855 | 6   | T | 4        | 625.312642965 +0.1301061 |
| +0.1422129 | 777.377745643 | 7   | A | 3        | 524.264964491 +0.0229383 |
|            | 908.418230249 | 8   | M | 2        | 453.227850703 +0.0472347 |
| -0.114818  | 1055.48664416 | 9   | F | 1        | 322.187366097 +0.0500301 |
|            |               | 10  | R | 0        | 175.118952181 +0.0355125 |

Scan number 7310 Raw file LNCAP\_Silac\_23F10\_set1\_04  
 Method ITMS; CID Pepti... 132.74

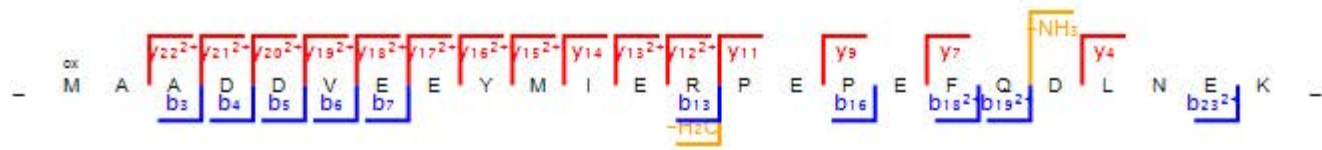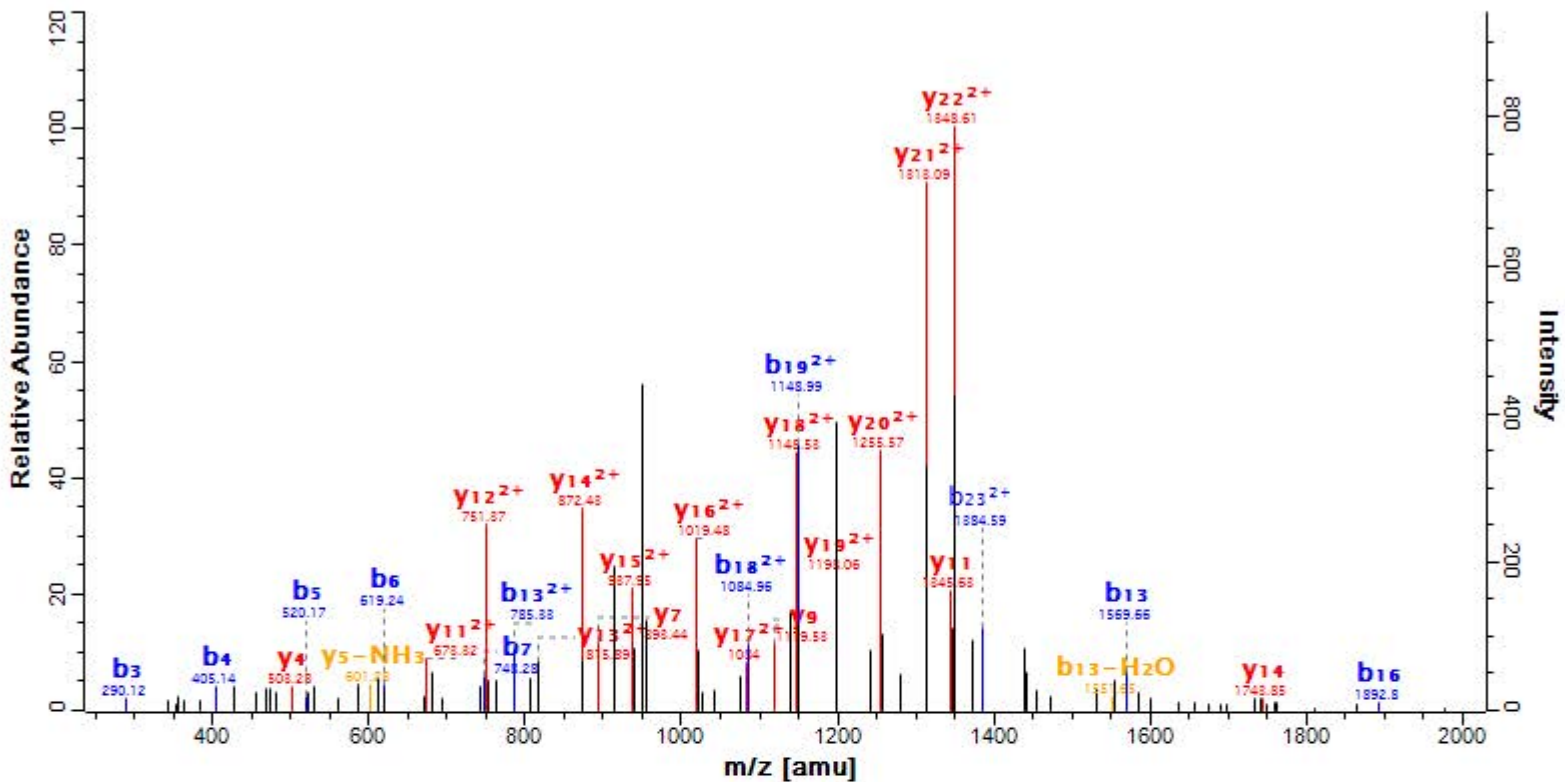

precursor information

|                   |                 |
|-------------------|-----------------|
| Mass:             | 2913.26899      |
| m/z:              | 972.09694       |
| Charge:           | 3+              |
| Retentiontime:    | 42.965671539306 |
| Score:            | 132.735         |
| Mass Error [ppm]: | 0.18242         |
| PEP:              | 7.5782E-16      |
| Precursor Type:   | MULTI           |

| b <sup>2+</sup> ion |        | b ion    |        | seq |   |    | y ion    |         | y <sup>2+</sup> ion |         |
|---------------------|--------|----------|--------|-----|---|----|----------|---------|---------------------|---------|
| Δ dalton            | mass   | Δ dalton | mass   |     |   |    | Δ dalton | mass    | Δ dalton            | mass    |
|                     | 148.04 |          | 148.04 | 1   | M | 23 |          |         |                     |         |
|                     | 219.08 |          | 219.08 | 2   | A | 22 | 2767.2   |         | 2767.2              |         |
|                     | 290.12 | -0.17    | 290.12 | 3   | A | 21 | 2696.2   |         | 1348.6              | +0.2182 |
|                     | 405.14 | +0.1853  | 405.14 | 4   | D | 20 | 2625.2   |         | 1313.1              | +0.2882 |
|                     | 520.17 | -0.078   | 520.17 | 5   | D | 19 | 2510.1   |         | 1255.6              | +0.1912 |
|                     | 619.24 | +0.193   | 619.24 | 6   | V | 18 | 2395.1   |         | 1198.1              | -0.009  |
|                     | 748.28 | -0.194   | 748.28 | 7   | E | 17 | 2296     |         | 1148.5              | -0.062  |
|                     | 877.32 |          | 877.32 | 8   | E | 16 | 2167     |         | 1084                | +0.0197 |
|                     | 1040.4 |          | 1040.4 | 9   | Y | 15 | 2038     |         | 1019.5              | +0.4135 |
|                     | 1171.4 |          | 1171.4 | 10  | M | 14 | 1874.9   |         | 937.95              | +0.1908 |
|                     | 1284.5 |          | 1284.5 | 11  | I | 13 | 1743.9   | +0.0269 | 872.43              | +0.2682 |
|                     | 1413.6 |          | 1413.6 | 12  | E | 12 | 1630.8   |         | 815.89              | -0.08   |
| +0.0529             | 785.33 | +0.0509  | 1569.7 | 13  | R | 11 | 1501.7   |         | 751.37              | +0.1888 |
|                     | 1666.7 |          | 1666.7 | 14  | P | 10 | 1345.6   | +0.0339 | 673.32              | +0.2214 |
|                     | 1795.8 |          | 1795.8 | 15  | E | 9  | 1248.6   |         | 1248.6              |         |
|                     | 1892.8 | -0.398   | 1892.8 | 16  | P | 8  | 1119.5   | -0.004  | 1119.5              |         |
|                     | 2021.8 |          | 2021.8 | 17  | E | 7  | 1022.5   |         | 1022.5              |         |
| -0.167              | 1085   |          | 2168.9 | 18  | F | 6  | 893.44   | +0.2486 | 893.44              |         |
| +0.2526             | 1149   |          | 2297   | 19  | Q | 5  | 746.37   |         | 746.37              |         |
|                     | 2412   |          | 2412   | 20  | D | 4  | 618.31   |         | 618.31              |         |
|                     | 2525.1 |          | 2525.1 | 21  | L | 3  | 503.28   | -0.039  | 503.28              |         |
|                     | 2639.1 |          | 2639.1 | 22  | N | 2  | 390.2    |         | 390.2               |         |
| -0.18               | 1384.6 |          | 2768.2 | 23  | E | 1  | 276.16   |         | 276.16              |         |
|                     |        |          |        | 24  | K | 0  | 147.11   |         | 147.11              |         |

general information

|                       |            |
|-----------------------|------------|
| Annotation:           | 19 of 24   |
| AminoAcids Coverage:  | 79 %       |
| Intensity Coverage:   | 54 %       |
| Peak Coverage:        | 31 %       |
| Protein Localisation: | 83 ... 106 |

Scan number 7535 Raw file LNCAP\_Silac\_23F10\_set1\_04  
 Method ITMS; CID Pepti... 130.41

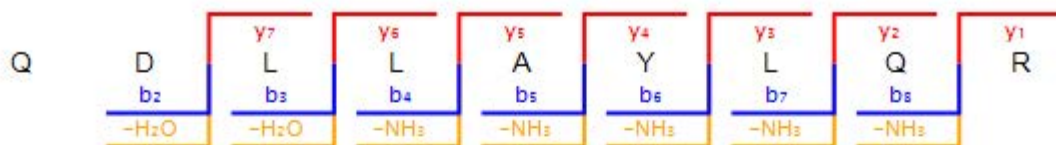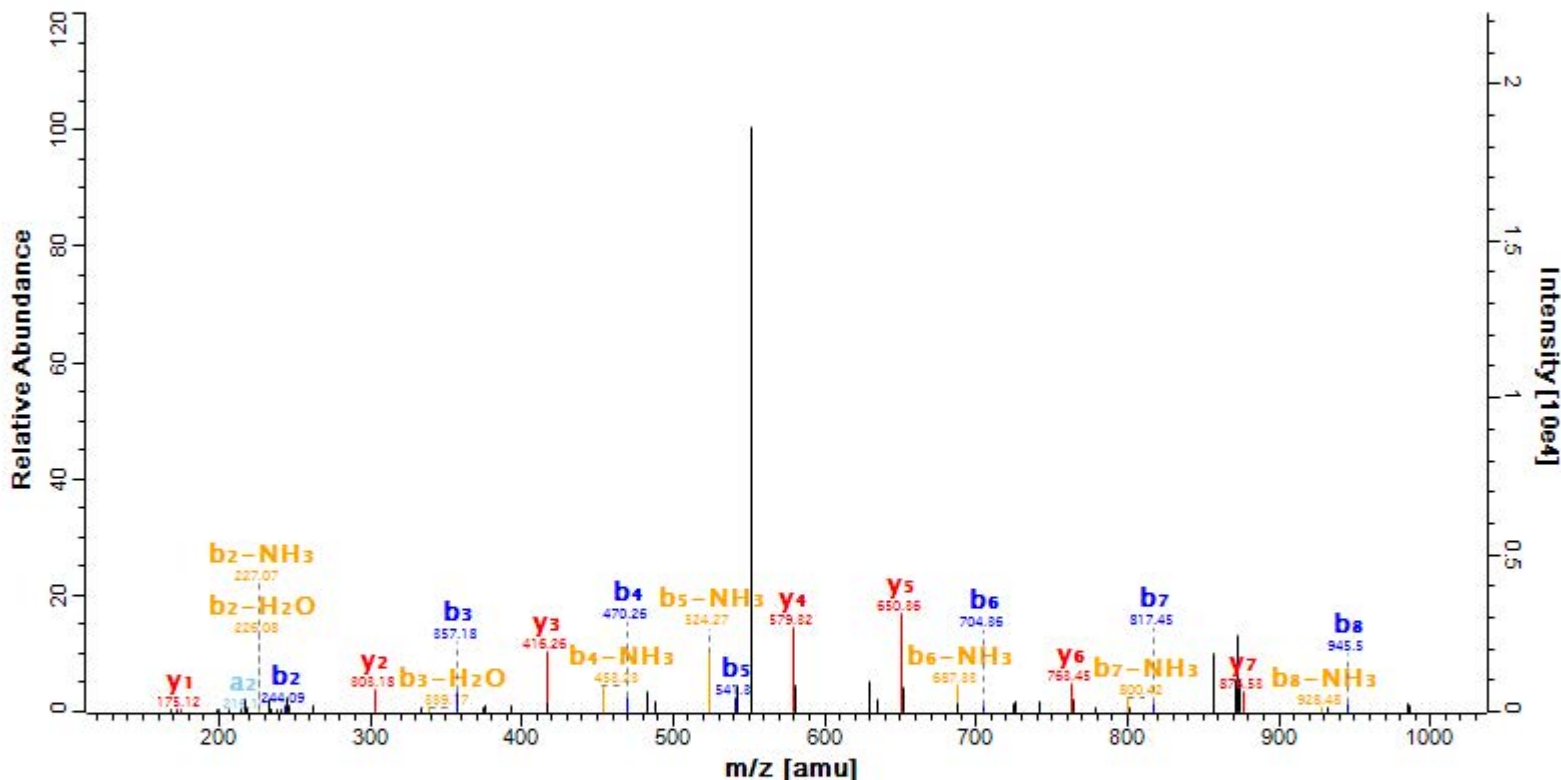

#### precursor information

|                       |                 |
|-----------------------|-----------------|
| Mass:                 | 1118.60839      |
| m/z:                  | 560.31147       |
| Charge:               | 2+              |
| Retentiontime:        | 44.268863677978 |
| Score:                | 130.4124        |
| Mass Error [ppm]:     | -0.019083       |
| PEP:                  | 0.001119        |
| Precursor Type:       | MULTI           |
| Annotation:           | 8 of 9          |
| AminoAcids Coverage:  | 89 %            |
| Intensity Coverage:   | 32 %            |
| Peak Coverage:        | 25 %            |
| Protein Localisation: | 774 ... 782     |

| a ion     |          | b ion     |          | y ion |          |            |           |
|-----------|----------|-----------|----------|-------|----------|------------|-----------|
| Δ dalton  | mass     | Δ dalton  | mass     | seq   | Δ dalton | mass       |           |
|           | 101.0709 |           | 129.0659 | 1     | Q        | 8          |           |
| +0.175494 | 216.0979 | +0.047782 | 244.0928 | 2     | D        | 7 991.5571 |           |
|           | 329.1819 | +0.059833 | 357.1769 | 3     | L        | 6 876.5302 | +0.059436 |
|           | 442.266  | -0.00861  | 470.2609 | 4     | L        | 5 763.4461 | +0.044073 |
|           | 513.3031 | -0.14612  | 541.298  | 5     | A        | 4 650.362  | +0.06344  |
|           | 676.3665 | +0.029136 | 704.3614 | 6     | Y        | 3 579.3249 | +0.019255 |
|           | 789.4505 | +0.287296 | 817.4454 | 7     | L        | 2 416.2616 | +0.099368 |
|           | 917.5091 | -0.12388  | 945.504  | 8     | Q        | 1 303.1775 | +0.053    |
|           |          |           |          | 9     | R        | 0 175.119  | -0.06481  |

Scan number 7672 Raw file LNCAP\_Silac\_23F10\_set1\_04  
 Method ITMS; CID Pepti... 92.19

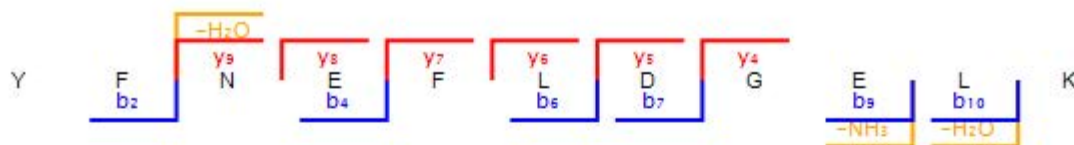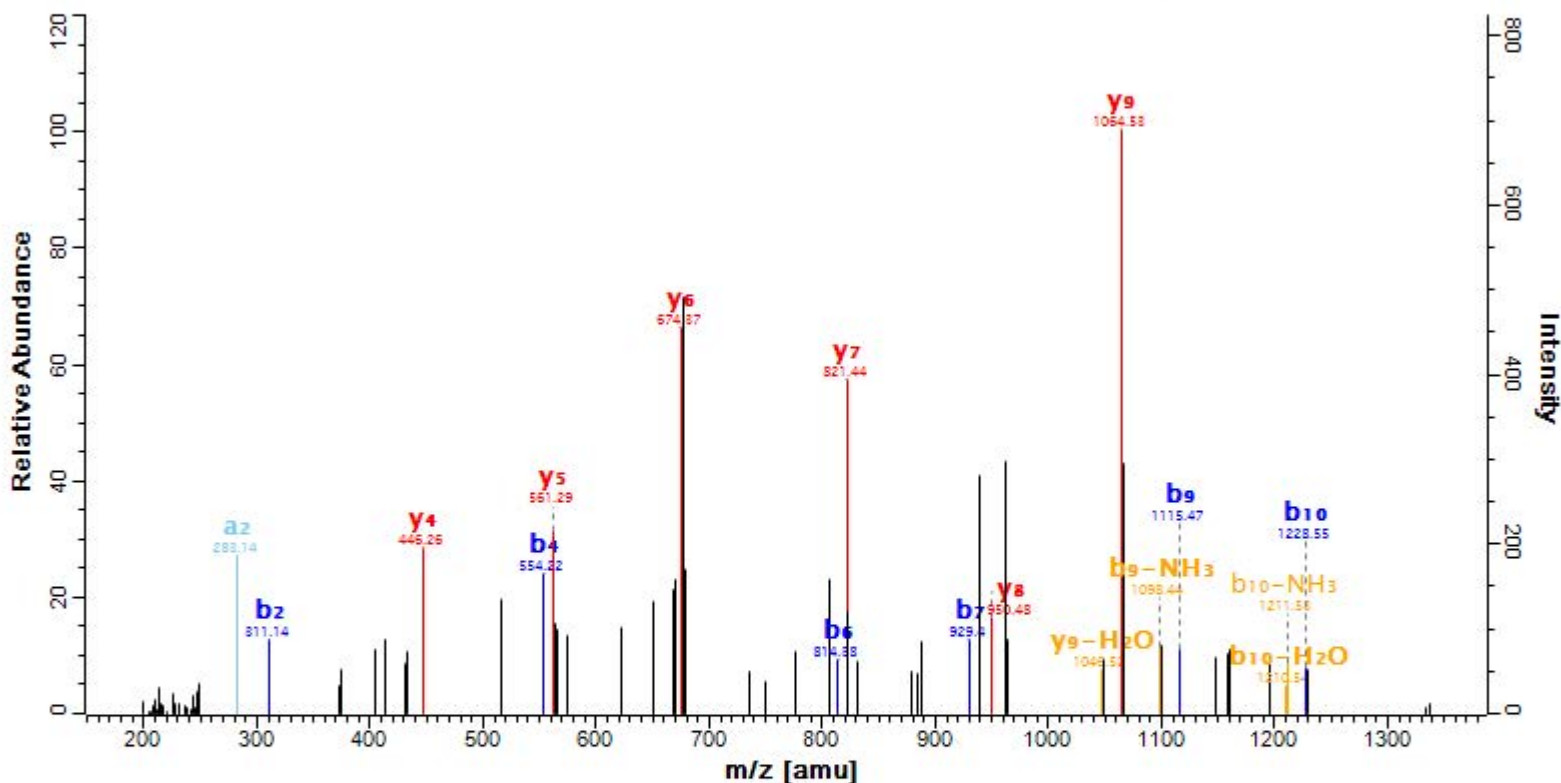

#### precursor information

|                   |                 |
|-------------------|-----------------|
| Mass:             | 1373.65072      |
| m/z:              | 687.83264       |
| Charge:           | 2+              |
| Retentiontime:    | 45.082679748535 |
| Score:            | 92.18982        |
| Mass Error [ppm]: | 0.28043         |
| PEP:              | 0.0015541       |
| Precursor Type:   | MULTI           |

#### general information

|                       |             |
|-----------------------|-------------|
| Annotation:           | 9 of 11     |
| AminoAcids Coverage:  | 82 %        |
| Intensity Coverage:   | 40 %        |
| Peak Coverage:        | 21 %        |
| Protein Localisation: | 136 ... 146 |

| a ion           |          | b ion           |          |        | y ion           |           |
|-----------------|----------|-----------------|----------|--------|-----------------|-----------|
| $\Delta$ dalton | mass     | $\Delta$ dalton | mass     | seq    | $\Delta$ dalton | mass      |
|                 | 136.0757 | 164.0706        |          | 1 Y 10 |                 |           |
| +0.18927        | 283.1441 | +0.088276       | 311.139  | 2 F 9  | 1211.594        |           |
|                 | 397.187  |                 | 425.1819 | 3 N 8  | 1064.526        | +0.035169 |
|                 | 526.2296 | -0.08623        | 554.2245 | 4 E 7  | 950.4829        | +0.060091 |
|                 | 673.298  |                 | 701.293  | 5 F 6  | 821.4403        | +0.034569 |
|                 | 786.3821 | -0.08899        | 814.377  | 6 L 5  | 674.3719        | +0.164628 |
|                 | 901.409  | +0.22342        | 929.404  | 7 D 4  | 561.2879        | +0.150181 |
|                 | 958.4305 |                 | 986.4254 | 8 G 3  | 446.2609        | +0.144715 |
|                 | 1087.473 | -0.04358        | 1115.468 | 9 E 2  | 389.2395        |           |
|                 | 1200.557 | -0.27535        | 1228.552 | 10 L 1 | 260.1969        |           |
|                 |          |                 |          | 11 K 0 | 147.1128        |           |

Scan number 8157 Raw file LNCAP\_Silac\_23F10\_set1\_04  
 Method ITMS: CID Pepti... 182.65

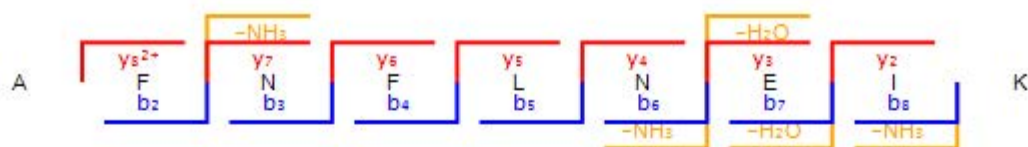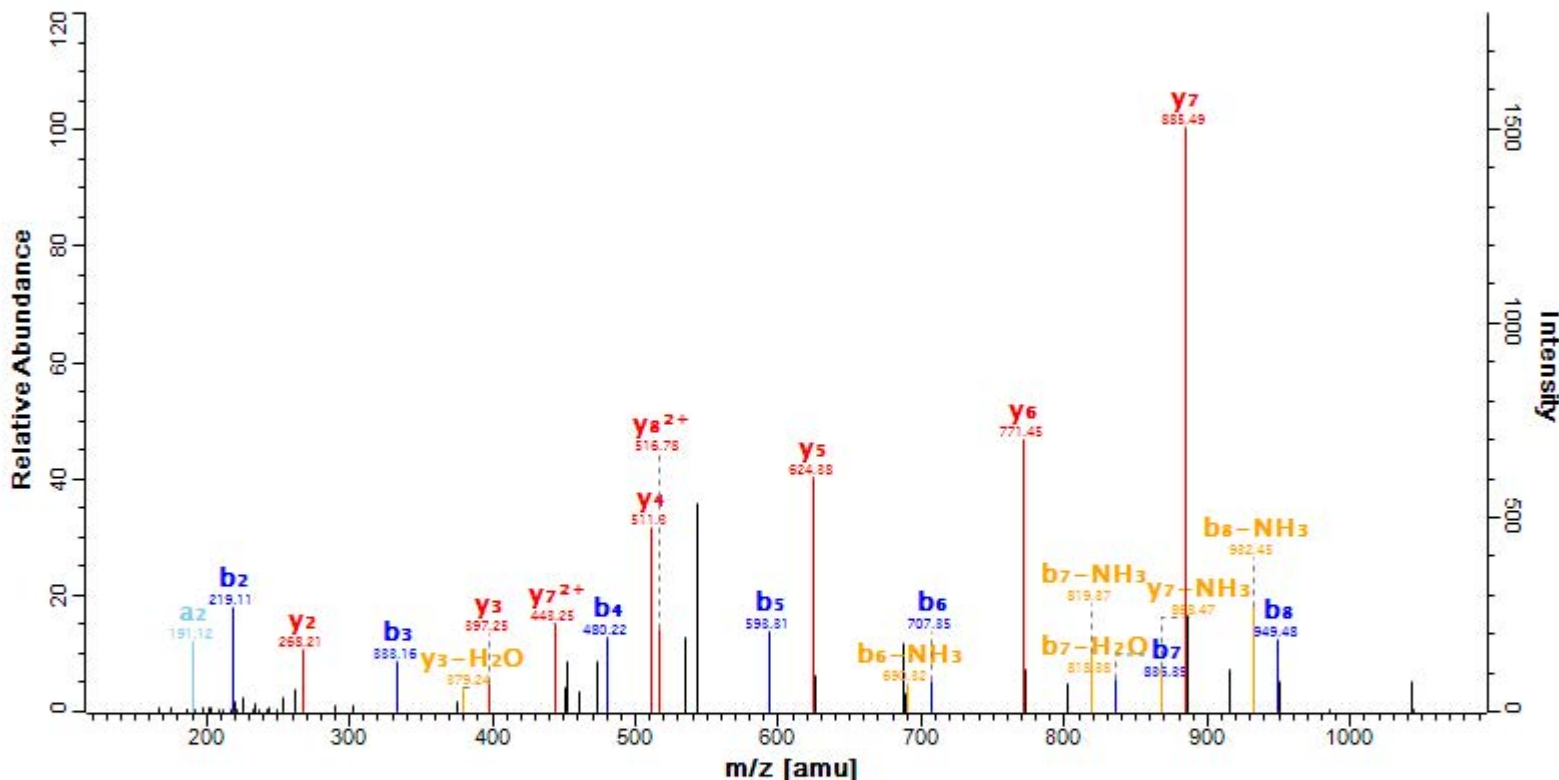

#### precursor information

|                       |                 |
|-----------------------|-----------------|
| Mass:                 | 1094.57604      |
| m/z:                  | 548.2953        |
| Charge:               | 2+              |
| Retentiontime:        | 47.896610260009 |
| Score:                | 182.6465        |
| Mass Error [ppm]:     | -0.0056447      |
| PEP:                  | 4.01E-06        |
| Precursor Type:       | MULTI           |
| Annotation:           | 7 of 9          |
| AminoAcids Coverage:  | 78 %            |
| Intensity Coverage:   | 68 %            |
| Peak Coverage:        | 29 %            |
| Protein Localisation: | 75 ... 83       |

| a ion    |        | b ion    |        | seq |   |   | y ion    |         | y <sup>2+</sup> ion |         |
|----------|--------|----------|--------|-----|---|---|----------|---------|---------------------|---------|
| Δ dalton | mass   | Δ dalton | mass   |     |   |   | Δ dalton | mass    | Δ dalton            | mass    |
|          | 44.049 |          | 72.044 | 1   | A | 8 |          |         |                     |         |
| +0.0172  | 191.12 | +0.0051  | 219.11 | 2   | F | 7 | 1032.6   |         | 516.78              | -0.061  |
|          | 305.16 | +0.1602  | 333.16 | 3   | N | 6 | 885.49   | +0.0366 | 443.25              | +0.0745 |
|          | 452.23 | -0.148   | 480.22 | 4   | F | 5 | 771.45   | -0.011  | 771.45              |         |
|          | 565.31 | -0.086   | 593.31 | 5   | L | 4 | 624.38   | +0.0947 | 624.38              |         |
|          | 679.36 | +0.2113  | 707.35 | 6   | N | 3 | 511.3    | +0.0639 | 511.3               |         |
|          | 808.4  | -0.092   | 836.39 | 7   | E | 2 | 397.25   | +0.0497 | 397.25              |         |
|          | 921.48 | -0.022   | 949.48 | 8   | I | 1 | 268.21   | +0.0549 | 268.21              |         |
|          |        |          |        | 9   | K | 0 | 155.13   |         | 155.13              |         |



Scan number 829 Raw file LNCAP\_Silac\_23F10\_set1\_04  
 Method ITMS: CID Pepti... 153.97

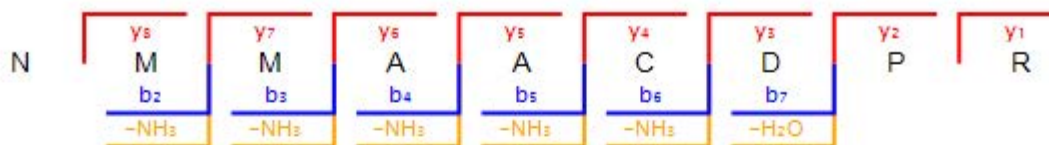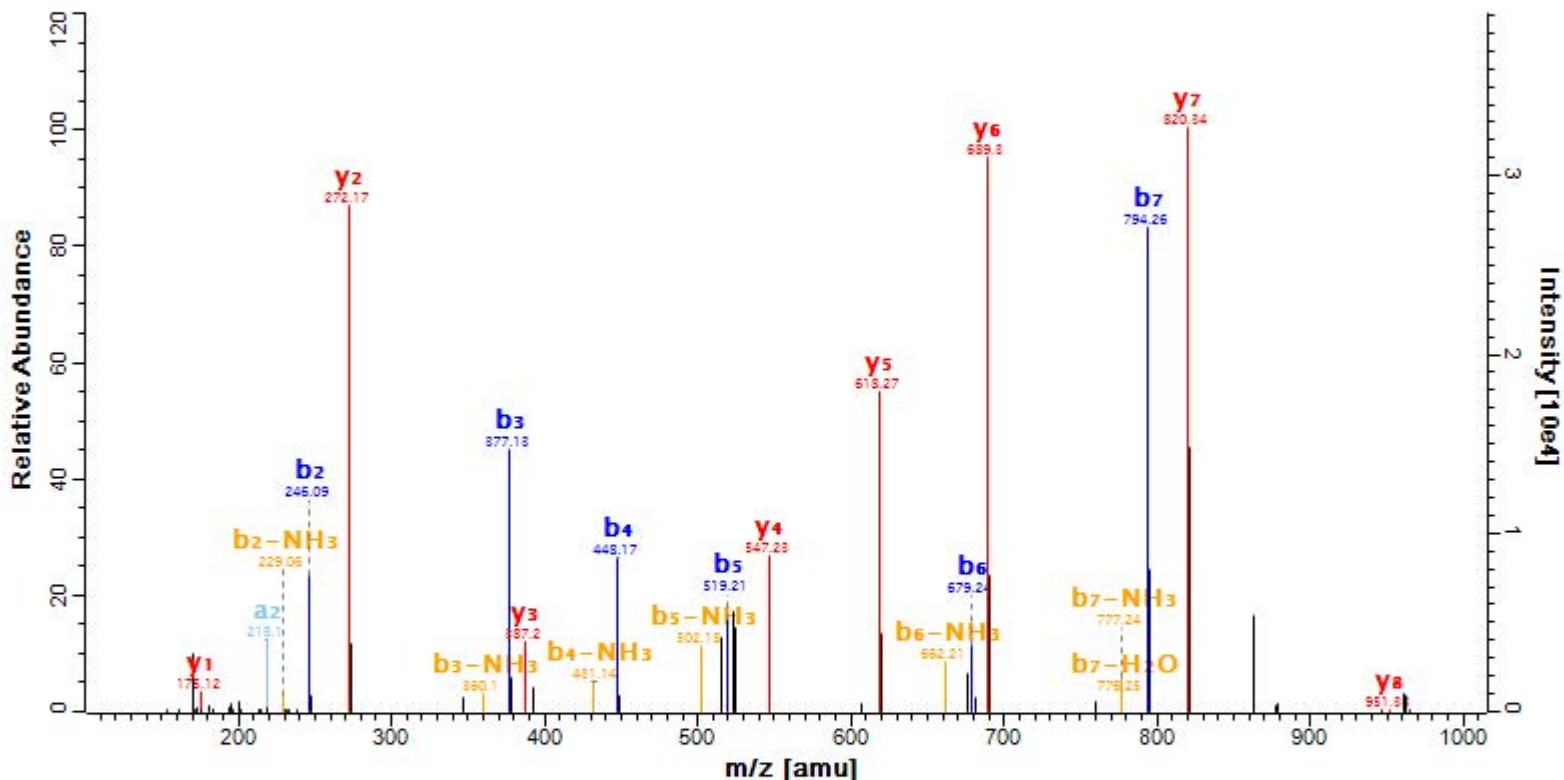

#### precursor information

|                       |                 |
|-----------------------|-----------------|
| Mass:                 | 1064.41947      |
| m/z:                  | 533.21701       |
| Charge:               | 2+              |
| Retentiontime:        | 9.6935062408447 |
| Score:                | 153.9702        |
| Mass Error [ppm]:     | -0.64502        |
| PEP:                  | 0.00063145      |
| Precursor Type:       | MULTI           |
| Annotation:           | 8 of 9          |
| AminoAcids Coverage:  | 89 %            |
| Intensity Coverage:   | 72 %            |
| Peak Coverage:        | 28 %            |
| Protein Localisation: | 298 ... 306     |

| a ion     |          | b ion     |          | seq |   | y ion    |                    |
|-----------|----------|-----------|----------|-----|---|----------|--------------------|
| Δ dalton  | mass     | Δ dalton  | mass     |     |   | Δ dalton | mass               |
|           | 87.05529 |           | 115.0502 | 1   | N | 8        |                    |
| +0.072531 | 218.0958 | -0.00582  | 246.0907 | 2   | M | 7        | 951.3845 +0.223711 |
|           | 349.1363 | +0.034781 | 377.1312 | 3   | M | 6        | 820.344 +0.013341  |
|           | 420.1734 | -0.0428   | 448.1683 | 4   | A | 5        | 689.3035 +0.049309 |
|           | 491.2105 | +0.063337 | 519.2054 | 5   | A | 4        | 618.2664 -0.01184  |
|           | 651.2411 | -0.03445  | 679.236  | 6   | C | 3        | 547.2293 -0.00818  |
|           | 766.2681 | -0.01641  | 794.263  | 7   | D | 2        | 387.1987 +0.105174 |
|           | 863.3208 |           | 891.3158 | 8   | P | 1        | 272.1717 -0.0082   |
|           |          |           |          | 9   | R | 0        | 175.119 -0.06234   |

Scan number 882 Raw file LNCAP\_Silac\_23F10\_set1\_04  
 Method ITMS: CID Pepti... 157.78

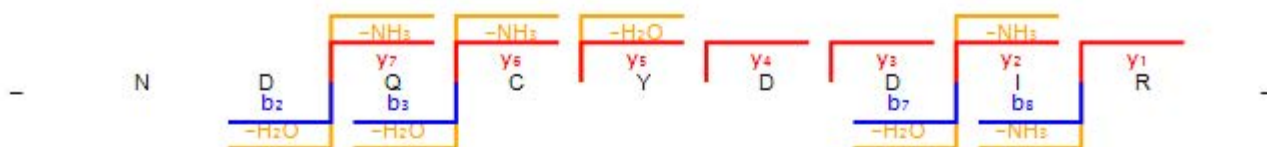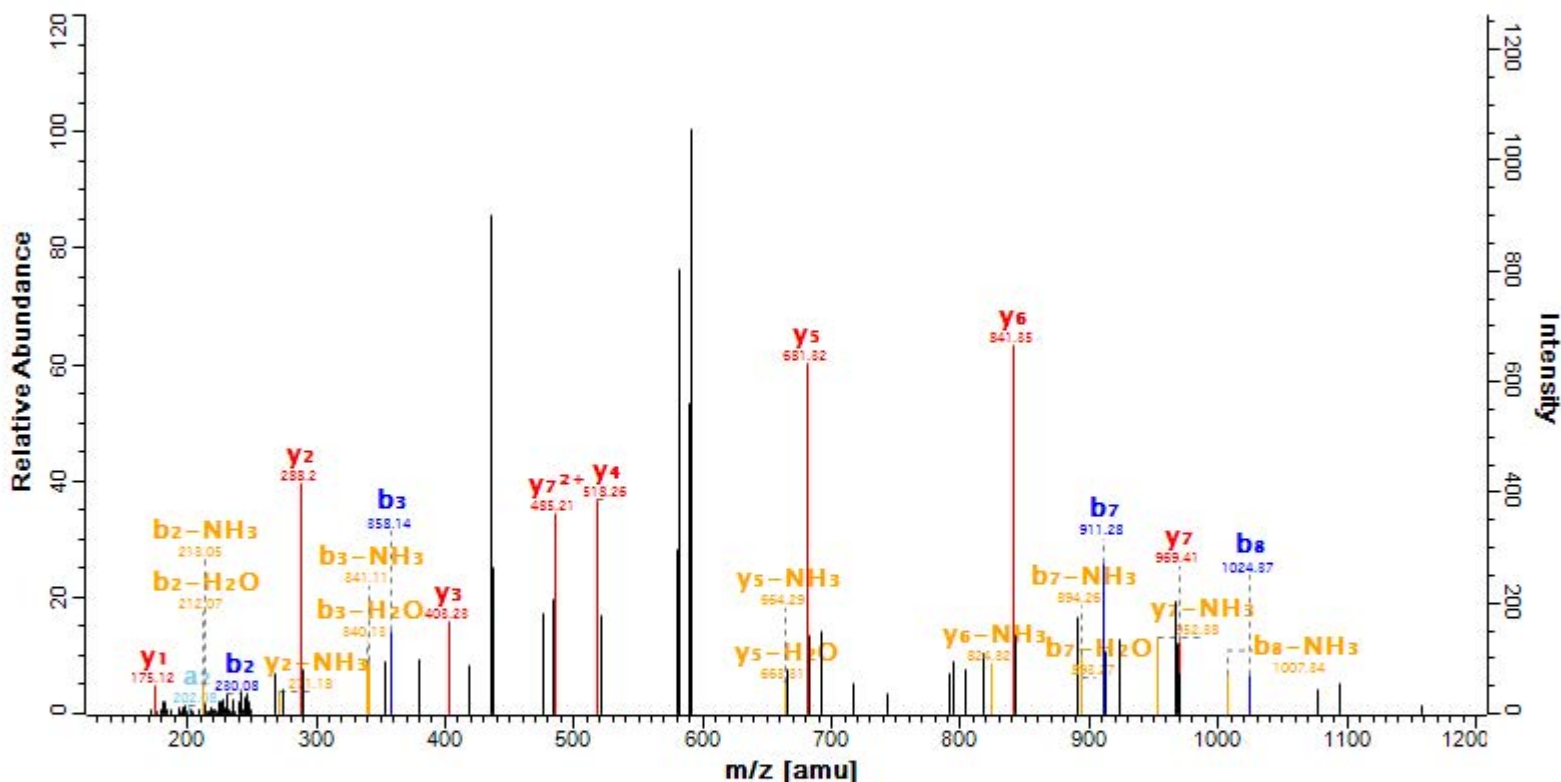

#### precursor information

|                       |                 |
|-----------------------|-----------------|
| Mass:                 | 1197.47184      |
| $m/z$ :               | 599.7432        |
| Charge:               | 2+              |
| Retentiontime:        | 9.9749898910522 |
| Score:                | 157.7773        |
| Mass Error [ppm]:     | -0.17428        |
| PEP:                  | 6.4928E-11      |
| Precursor Type:       | ISO             |
| Annotation:           | 8 of 9          |
| AminoAcids Coverage:  | 89 %            |
| Intensity Coverage:   | 34 %            |
| Peak Coverage:        | 22 %            |
| Protein Localisation: | 73 ... 81       |

| a ion           |        | b ion           |        | seq |   |   | y ion           |         | y <sup>2+</sup> ion |        |
|-----------------|--------|-----------------|--------|-----|---|---|-----------------|---------|---------------------|--------|
| $\Delta$ dalton | mass   | $\Delta$ dalton | mass   |     |   |   | $\Delta$ dalton | mass    | $\Delta$ dalton     | mass   |
|                 | 87.055 |                 | 115.05 | 1   | N | 8 |                 |         |                     |        |
| -0.065          | 202.08 | +0.1348         | 230.08 | 2   | D | 7 | 1084.4          |         | 1084.4              |        |
|                 | 330.14 | +0.0657         | 358.14 | 3   | Q | 6 | 969.41          | +0.104  | 485.21              | +0.183 |
|                 | 490.17 |                 | 518.17 | 4   | C | 5 | 841.35          | +0.0068 | 841.35              |        |
|                 | 653.23 |                 | 681.23 | 5   | Y | 4 | 681.32          | -0.005  | 681.32              |        |
|                 | 768.26 |                 | 796.26 | 6   | D | 3 | 518.26          | +0.0515 | 518.26              |        |
|                 | 883.29 | -0.001          | 911.28 | 7   | D | 2 | 403.23          | +0.0692 | 403.23              |        |
|                 | 996.37 | -0.14           | 1024.4 | 8   | I | 1 | 288.2           | +0.0613 | 288.2               |        |
|                 |        |                 |        | 9   | R | 0 | 175.12          | -0.115  | 175.12              |        |

Scan number 8991 Raw file LNCAP\_Silac\_23F10\_set1\_04  
 Method ITMS: CID Pepti... 95.4

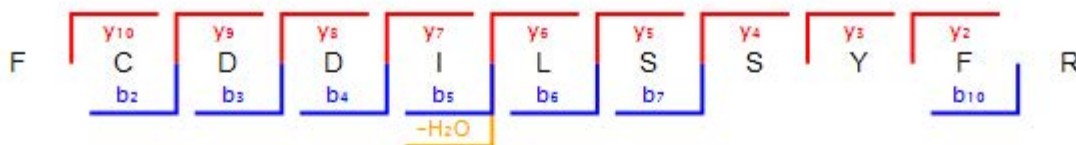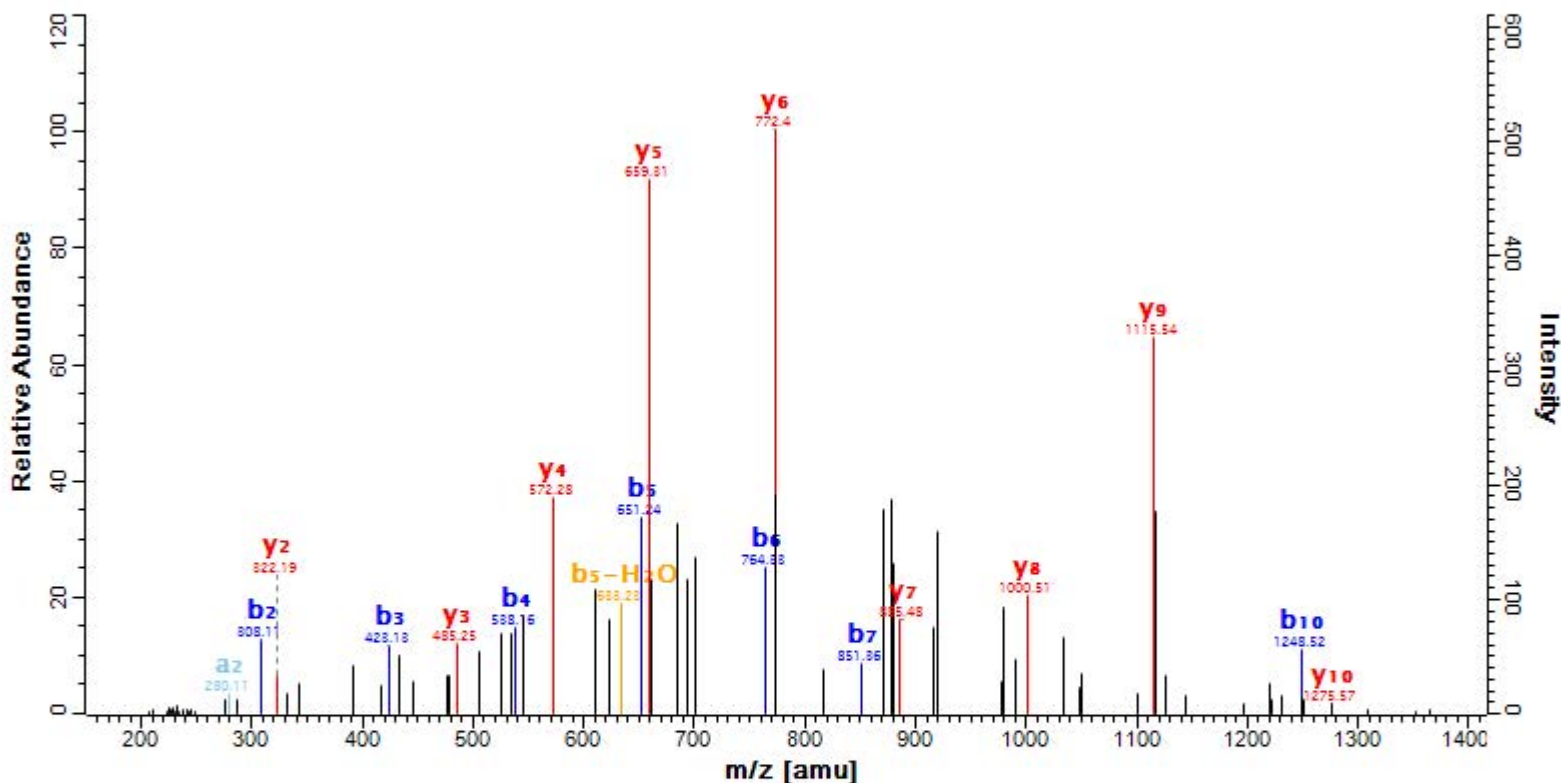

#### precursor information

|                   |                 |
|-------------------|-----------------|
| Mass:             | 1421.62921      |
| m/z:              | 711.82188       |
| Charge:           | 2+              |
| Retentiontime:    | 53.190444946289 |
| Score:            | 95.40089        |
| Mass Error [ppm]: | 0.46353         |
| PEP:              | 0.0011977       |
| Precursor Type:   | MULTI           |

#### general information

|                       |             |
|-----------------------|-------------|
| Annotation:           | 9 of 11     |
| AminoAcids Coverage:  | 82 %        |
| Intensity Coverage:   | 46 %        |
| Peak Coverage:        | 22 %        |
| Protein Localisation: | 232 ... 242 |

| a ion    |          | b ion     |          |     | y ion    |      |
|----------|----------|-----------|----------|-----|----------|------|
| Δ dalton | mass     | Δ dalton  | mass     | seq | Δ dalton | mass |
|          | 120.0808 |           | 148.0757 | 1   | F        | 10   |
| +0.09457 | 280.1114 | +0.022324 | 308.1063 | 2   | C        | 9    |
|          | 395.1384 | +0.121784 | 423.1333 | 3   | D        | 8    |
|          | 510.1653 | +0.196587 | 538.1602 | 4   | D        | 7    |
|          | 623.2494 | -0.03744  | 651.2443 | 5   | I        | 6    |
|          | 736.3334 | -0.00737  | 764.3284 | 6   | L        | 5    |
|          | 823.3655 | +0.113801 | 851.3604 | 7   | S        | 4    |
|          | 910.3975 |           | 938.3924 | 8   | S        | 3    |
|          | 1073.461 |           | 1101.456 | 9   | Y        | 2    |
|          | 1220.529 | -0.13304  | 1248.524 | 10  | F        | 1    |
|          |          |           |          | 11  | R        | 0    |

Scan number 9005 Raw file LNCAP\_Silac\_23F10\_set1\_04  
 Method ITMS; CID Pepti... 136.96

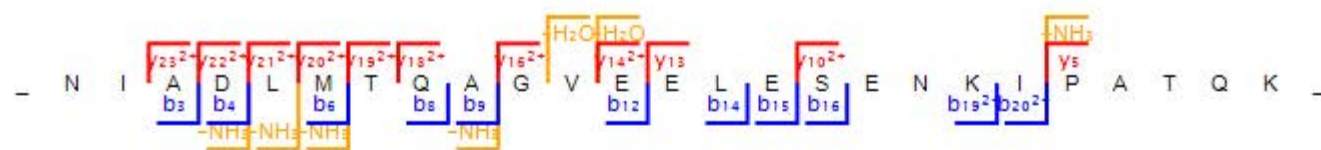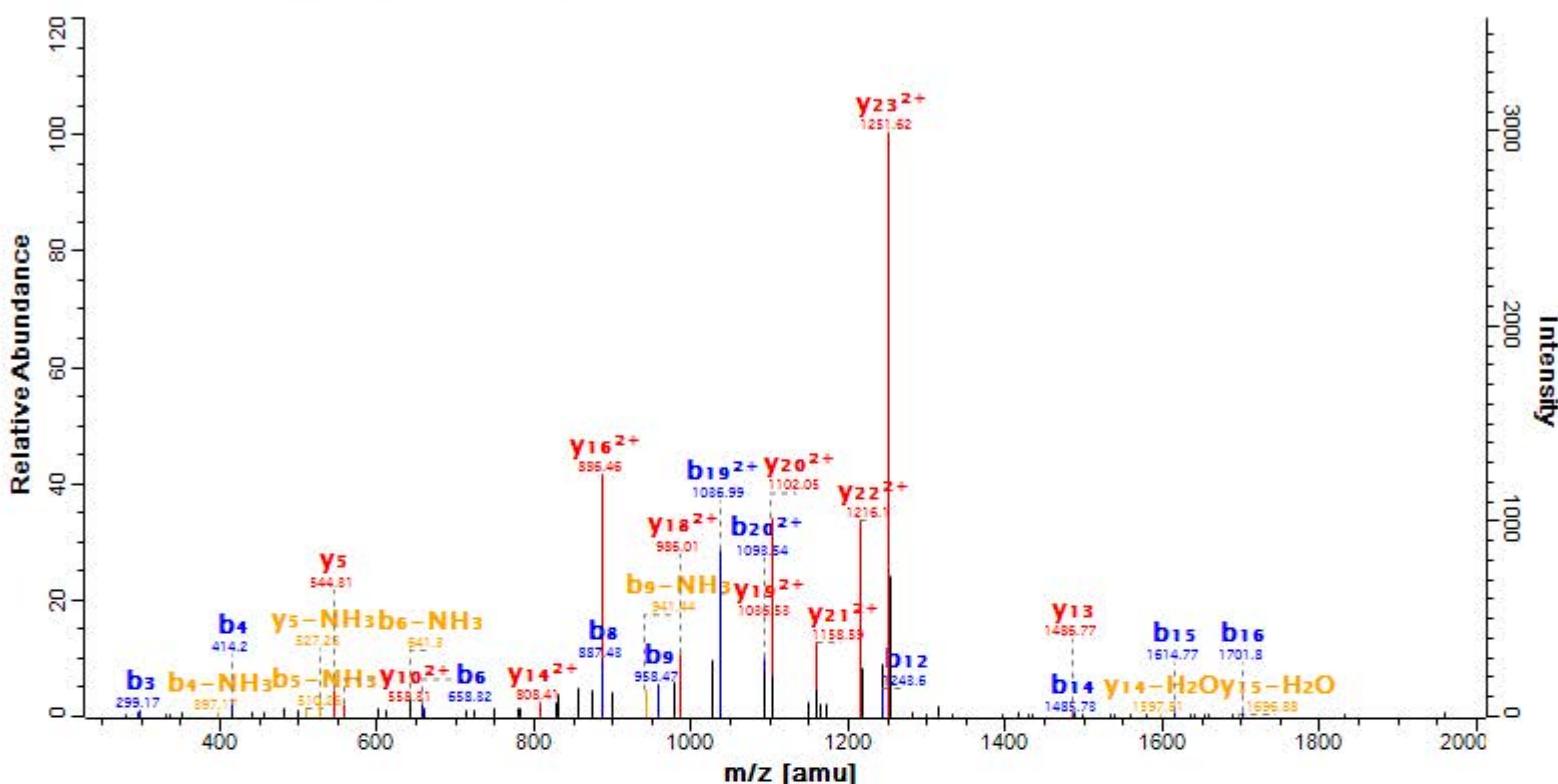

#### precursor information

|                   |                 |
|-------------------|-----------------|
| Mass:             | 2728.36045      |
| m/z:              | 910.46076       |
| Charge:           | 3+              |
| Retentiontime:    | 53.296188354492 |
| Score:            | 136.9649        |
| Mass Error [ppm]: | 0.56013         |
| PEP:              | 5.0752E-23      |
| Precursor Type:   | MULTI           |

| b <sup>2+</sup> ion |        | b ion    |        | seq      |      |          | y ion  |          | y <sup>2+</sup> ion |  |
|---------------------|--------|----------|--------|----------|------|----------|--------|----------|---------------------|--|
| Δ dalton            | mass   | Δ dalton | mass   | Δ dalton | mass | Δ dalton | mass   | Δ dalton | mass                |  |
|                     | 115.05 |          | 115.05 | 1        | N    | 24       |        |          |                     |  |
|                     | 228.13 |          | 228.13 | 2        | I    | 23       | 2615.3 |          | 2615.3              |  |
|                     | 299.17 | +0.1492  | 299.17 | 3        | A    | 22       | 2502.2 |          | 1251.6 +0.3877      |  |
|                     | 414.2  | +0.089   | 414.2  | 4        | D    | 21       | 2431.2 |          | 1216.1 +0.3077      |  |
|                     | 527.28 |          | 527.28 | 5        | L    | 20       | 2316.2 |          | 1158.6 +0.3283      |  |
|                     | 658.32 | +0.0927  | 658.32 | 6        | M    | 19       | 2203.1 |          | 1102 +0.3505        |  |
|                     | 759.37 |          | 759.37 | 7        | T    | 18       | 2072.1 |          | 1036.5 -0.054       |  |
|                     | 887.43 | +0.1665  | 887.43 | 8        | Q    | 17       | 1971   |          | 986.01 +0.312       |  |
|                     | 958.47 | +0.0392  | 958.47 | 9        | A    | 16       | 1842.9 |          | 1842.9              |  |
|                     | 1015.5 |          | 1015.5 | 10       | G    | 15       | 1771.9 |          | 886.46 +0.3331      |  |
|                     | 1114.6 |          | 1114.6 | 11       | V    | 14       | 1714.9 |          | 1714.9              |  |
|                     | 1243.6 | +0.267   | 1243.6 | 12       | E    | 13       | 1615.8 |          | 808.41 +0.2765      |  |
|                     | 1372.6 |          | 1372.6 | 13       | E    | 12       | 1486.8 | -0.448   | 1486.8              |  |
|                     | 1485.7 | -0.178   | 1485.7 | 14       | L    | 11       | 1357.7 |          | 1357.7              |  |
|                     | 1614.8 | +0.2469  | 1614.8 | 15       | E    | 10       | 1244.6 |          | 1244.6              |  |
|                     | 1701.8 | -0.316   | 1701.8 | 16       | S    | 9        | 1115.6 |          | 558.31 +0.2567      |  |
|                     | 1830.8 |          | 1830.8 | 17       | E    | 8        | 1028.6 |          | 1028.6              |  |
|                     | 1944.9 |          | 1944.9 | 18       | N    | 7        | 899.53 |          | 899.53              |  |
| +0.2016             | 1037   |          | 2073   | 19       | K    | 6        | 785.49 |          | 785.49              |  |
| -0.163              | 1093.5 |          | 2186.1 | 20       | I    | 5        | 657.39 |          | 657.39              |  |
|                     | 2283.1 |          | 2283.1 | 21       | P    | 4        | 544.31 | -0.022   | 544.31              |  |
|                     | 2354.2 |          | 2354.2 | 22       | A    | 3        | 447.26 |          | 447.26              |  |
|                     | 2455.2 |          | 2455.2 | 23       | T    | 2        | 376.22 |          | 376.22              |  |
|                     | 2583.3 |          | 2583.3 | 24       | Q    | 1        | 275.17 |          | 275.17              |  |
|                     |        |          |        | 25       | K    | 0        | 147.11 |          | 147.11              |  |

#### general information

|                       |           |
|-----------------------|-----------|
| Annotation:           | 17 of 25  |
| AminoAcids Coverage:  | 68 %      |
| Intensity Coverage:   | 72 %      |
| Peak Coverage:        | 33 %      |
| Protein Localisation: | 51 ... 75 |

Scan number 9107 Raw file LNCAP\_Silac\_23F10\_set1\_04  
 Method ITMS; CID Pepti... 188.24

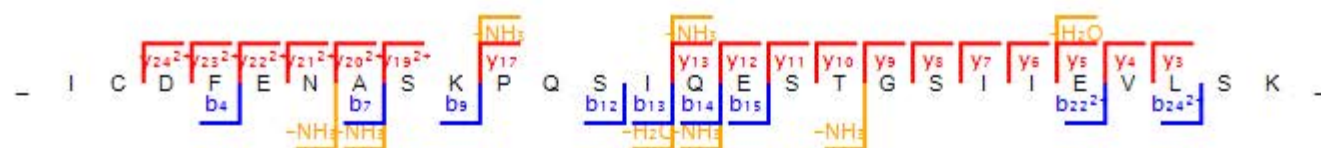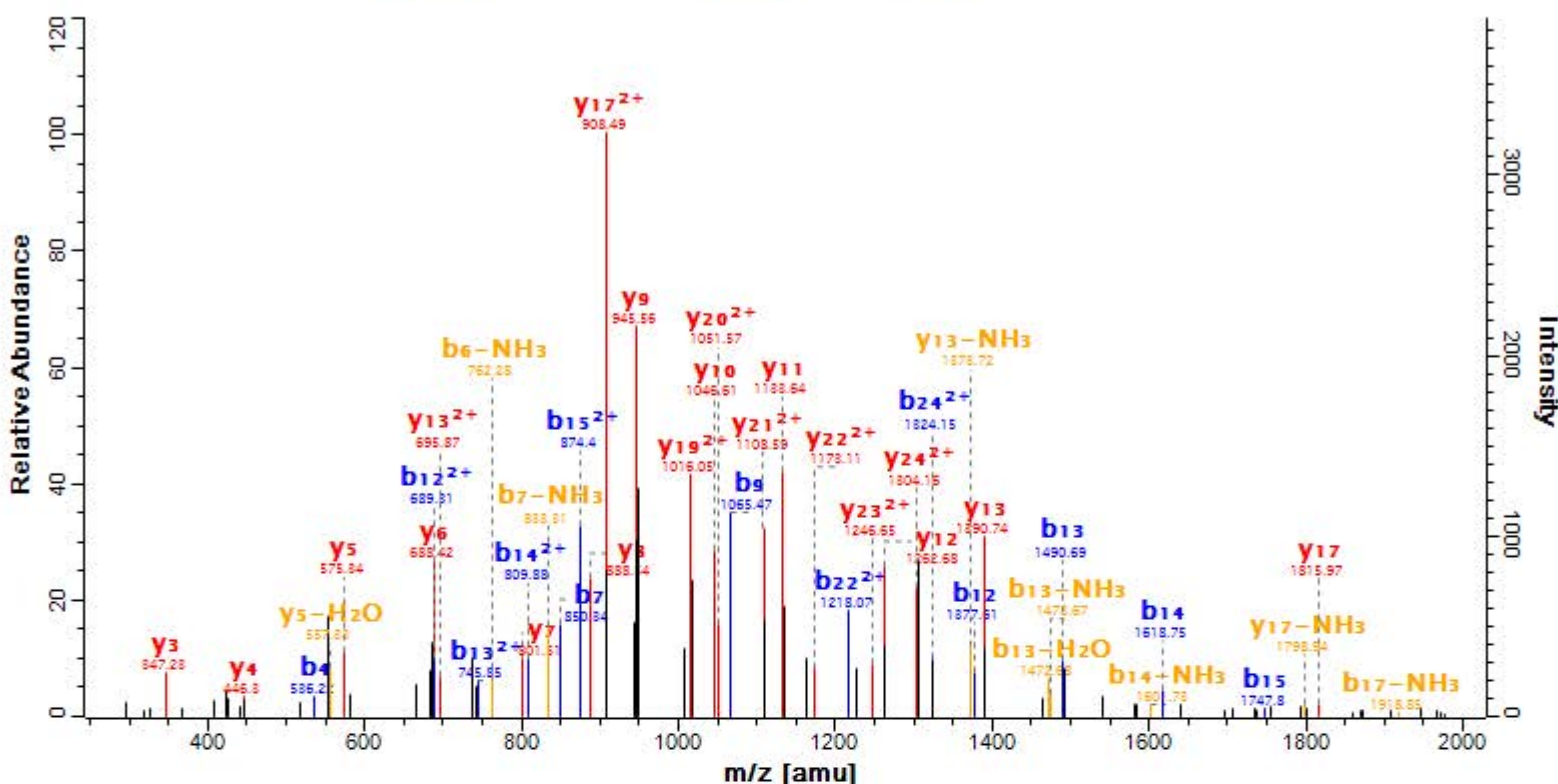

precursor information

|                   |                 |
|-------------------|-----------------|
| Mass:             | 2879.42161      |
| m/z:              | 960.81448       |
| Charge:           | 3+              |
| Retentiontime:    | 54.062812805175 |
| Score:            | 188.2372        |
| Mass Error [ppm]: | -0.22404        |
| PEP:              | 8.4492E-55      |
| Precursor Type:   | MULTI           |

| b <sup>2+</sup> ion |        | b ion    |        | seq |   |    | y ion    |         | y <sup>2+</sup> ion |         |
|---------------------|--------|----------|--------|-----|---|----|----------|---------|---------------------|---------|
| Δ dalton            | mass   | Δ dalton | mass   |     |   |    | Δ dalton | mass    | Δ dalton            | mass    |
|                     | 114.09 |          | 114.09 | 1   | I | 25 |          |         |                     |         |
|                     | 274.12 |          | 274.12 | 2   | C | 24 | 2767.3   |         | 2767.3              |         |
|                     | 389.15 |          | 389.15 | 3   | D | 23 | 2607.3   |         | 1304.2              | +0.1145 |
|                     | 536.22 | +0.1188  | 536.22 | 4   | F | 22 | 2492.3   |         | 1246.6              | +0.1847 |
|                     | 665.26 |          | 665.26 | 5   | E | 21 | 2345.2   |         | 1173.1              | +0.0523 |
|                     | 779.3  |          | 779.3  | 6   | N | 20 | 2216.2   |         | 1108.6              | +0.3087 |
|                     | 850.34 | -0.122   | 850.34 | 7   | A | 19 | 2102.1   |         | 1051.6              | +0.3677 |
|                     | 937.37 |          | 937.37 | 8   | S | 18 | 2031.1   |         | 1016.1              | +0.0537 |
|                     | 1065.5 | -0.01    | 1065.5 | 9   | K | 17 | 1944.1   |         | 1944.1              |         |
|                     | 1162.5 |          | 1162.5 | 10  | P | 16 | 1816     | +0.0166 | 908.49              | +0.2524 |
|                     | 1290.6 |          | 1290.6 | 11  | Q | 15 | 1718.9   |         | 1718.9              |         |
| +0.2376             | 689.31 | -0.075   | 1377.6 | 12  | S | 14 | 1590.9   |         | 1590.9              |         |
| -0.205              | 745.85 | -0.027   | 1490.7 | 13  | I | 13 | 1503.8   |         | 1503.8              |         |
| +0.1607             | 809.88 | -0.422   | 1618.8 | 14  | Q | 12 | 1390.7   | -0.093  | 695.87              | +0.2638 |
| +0.2816             | 874.4  | +0.3527  | 1747.8 | 15  | E | 11 | 1262.7   | -0.105  | 1262.7              |         |
|                     | 1834.8 |          | 1834.8 | 16  | S | 10 | 1133.6   | +0.0106 | 1133.6              |         |
|                     | 1935.9 |          | 1935.9 | 17  | T | 9  | 1046.6   | +0.0521 | 1046.6              |         |
|                     | 1992.9 |          | 1992.9 | 18  | G | 8  | 945.56   | -0.07   | 945.56              |         |
|                     | 2079.9 |          | 2079.9 | 19  | S | 7  | 888.54   | +0.1249 | 888.54              |         |
|                     | 2193   |          | 2193   | 20  | I | 6  | 801.51   | +0.3709 | 801.51              |         |
|                     | 2306.1 |          | 2306.1 | 21  | I | 5  | 688.42   | +0.0719 | 688.42              |         |
| +0.1928             | 1218.1 |          | 2435.1 | 22  | E | 4  | 575.34   | -0.071  | 575.34              |         |
|                     | 2534.2 |          | 2534.2 | 23  | V | 3  | 446.3    | +0.008  | 446.3               |         |
| +0.1283             | 1324.1 |          | 2647.3 | 24  | L | 2  | 347.23   | +0.0497 | 347.23              |         |
|                     | 2734.3 |          | 2734.3 | 25  | S | 1  | 234.14   |         | 234.14              |         |
|                     |        |          |        | 26  | K | 0  | 147.11   |         | 147.11              |         |

general information

|                       |             |
|-----------------------|-------------|
| Annotation:           | 21 of 26    |
| AminoAcids Coverage:  | 81 %        |
| Intensity Coverage:   | 65 %        |
| Peak Coverage:        | 43 %        |
| Protein Localisation: | 276 ... 301 |

Scan number 9362 Raw file LNCAP\_Silac\_23F10\_set1\_04  
 Method ITMS; CID Pepti... 182.22

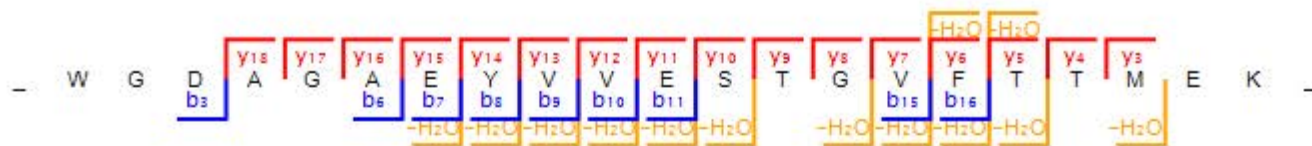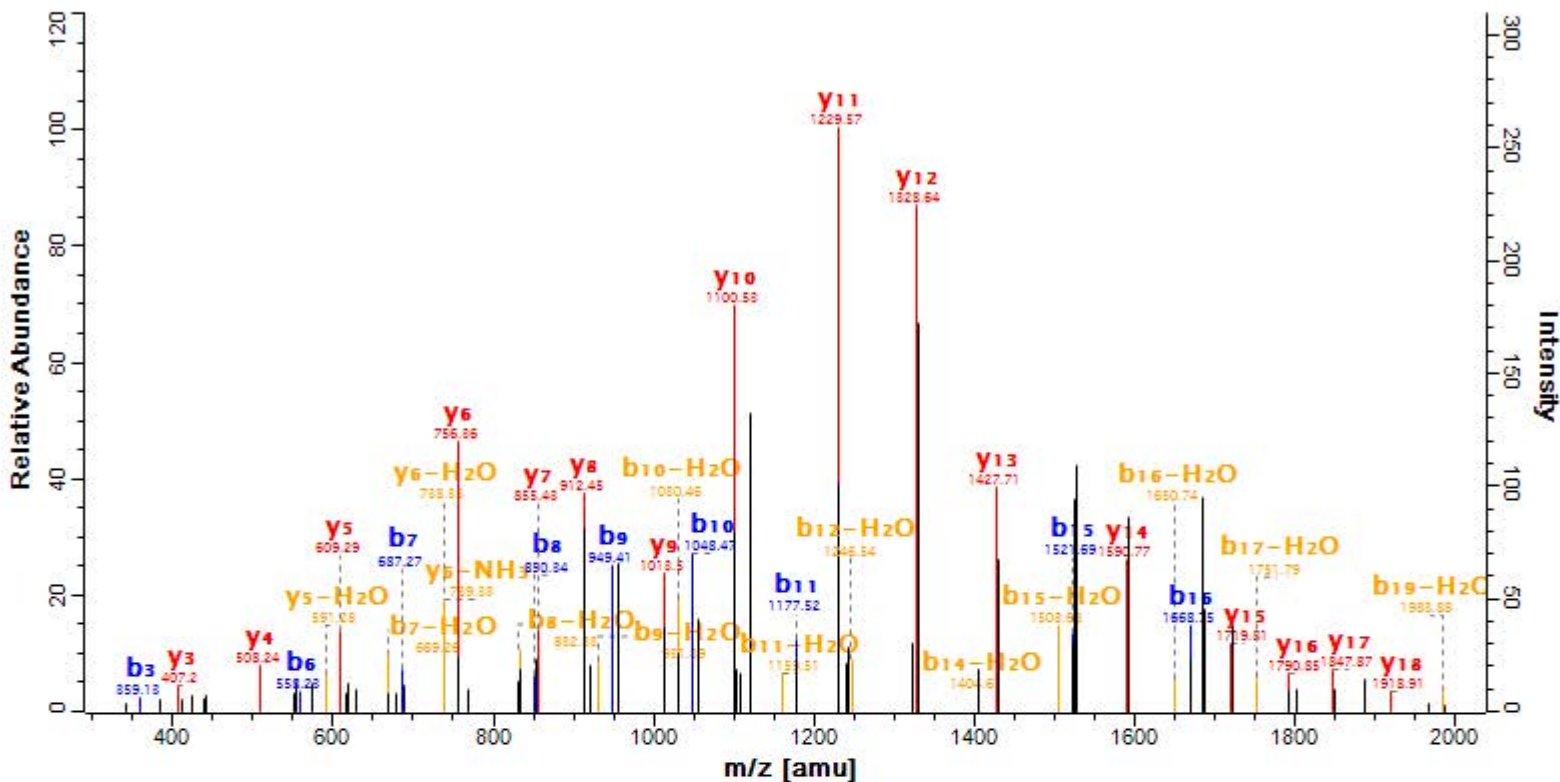

precursor information

|                   |                 |
|-------------------|-----------------|
| Mass:             | 2276.03037      |
| m/z:              | 1139.02246      |
| Charge:           | 2+              |
| Retentiontime:    | 55.974071502685 |
| Score:            | 182.2159        |
| Mass Error [ppm]: | -0.15052        |
| PEP:              | 2.442E-28       |
| Precursor Type:   | ISO             |

general information

|                       |            |
|-----------------------|------------|
| Annotation:           | 17 of 21   |
| AminoAcids Coverag    | 81 %       |
| Intensity Coverage:   | 49 %       |
| Peak Coverage:        | 38 %       |
| Protein Localisation: | 87 ... 107 |

| b ion      |               |     |   | y ion    |               |            |
|------------|---------------|-----|---|----------|---------------|------------|
| Δ dalton   | mass          | seq |   | Δ dalton | mass          |            |
|            | 187.08658942  | 1   | W | 20       |               |            |
|            | 244.108053144 | 2   | G | 19       | 2090.95867788 |            |
| +0.1418288 | 359.134996176 | 3   | D | 18       | 2033.93721416 |            |
|            | 430.172109963 | 4   | A | 17       | 1918.91027112 | +0.1189037 |
|            | 487.193573687 | 5   | G | 16       | 1847.87315734 | -0.1608771 |
| +0.0182139 | 558.230687475 | 6   | A | 15       | 1790.85169361 | -0.190927  |
| +0.0638776 | 687.273280571 | 7   | E | 14       | 1719.81457982 | -0.0564011 |
| +0.0740354 | 850.336609109 | 8   | Y | 13       | 1590.77198673 | -0.0141742 |
| -0.1259703 | 949.405023026 | 9   | V | 12       | 1427.70865819 | +0.0026455 |
| +0.043775  | 1048.47343694 | 10  | V | 11       | 1328.64024427 | +0.0117333 |
| +0.0996926 | 1177.51603004 | 11  | E | 10       | 1229.57183036 | +0.0231403 |
|            | 1264.54805845 | 12  | S | 9        | 1100.52923726 | -0.0277724 |
|            | 1365.59573692 | 13  | T | 8        | 1013.49720885 | -0.0006268 |
|            | 1422.61720065 | 14  | G | 7        | 912.449530377 | -0.0670841 |
| -0.1787786 | 1521.68561456 | 15  | V | 6        | 855.428066654 | +0.0658298 |
| -0.1979982 | 1668.75402848 | 16  | F | 5        | 756.359652737 | +0.0259063 |
|            | 1769.80170695 | 17  | T | 4        | 609.291238821 | +0.0338344 |
|            | 1870.84938543 | 18  | T | 3        | 508.243560347 | +0.1348576 |
|            | 2001.88987003 | 19  | M | 2        | 407.195881873 | +0.2130537 |
|            | 2130.93246313 | 20  | E | 1        | 276.155397267 |            |
|            |               | 21  | K | 0        | 147.112804171 |            |

Scan number 9370 Raw file LNCAP\_Silac\_23F10\_set1\_04  
 Method ITMS; CID Pepti... 90.66

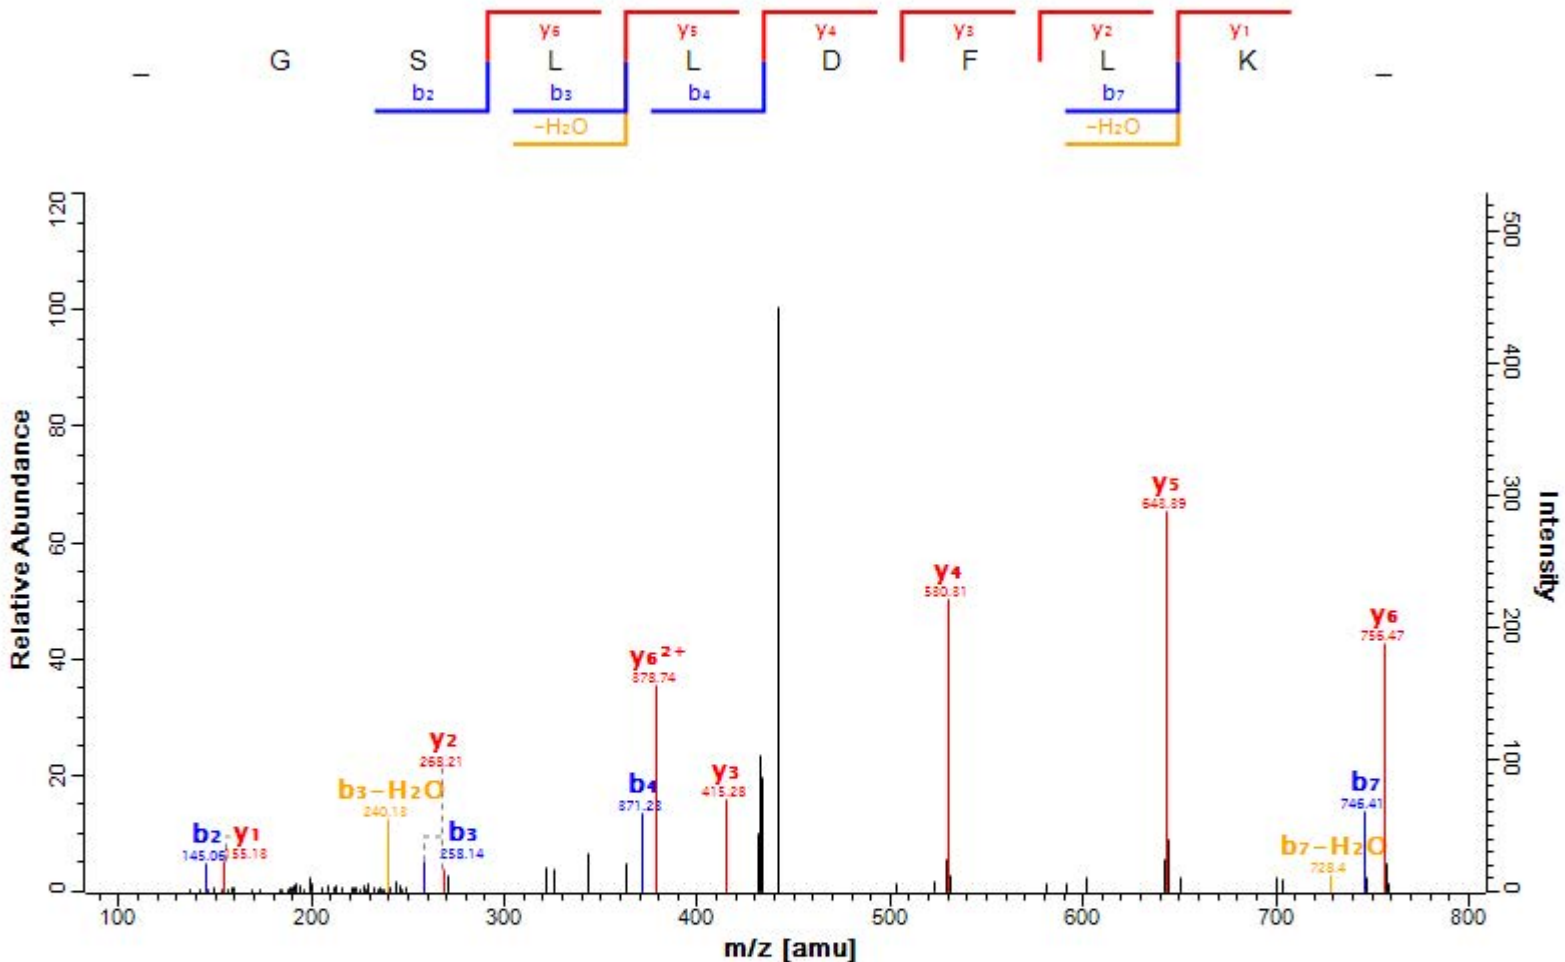

precursor information

|                       |                 |
|-----------------------|-----------------|
| Mass:                 | 899.52          |
| m/z:                  | 450.76728       |
| Charge:               | 2+              |
| Retentiontime:        | 56.042755126953 |
| Score:                | 90.65661        |
| Mass Error [ppm]:     | -0.85573        |
| g PEP:                | 0.016489        |
| Annotation:           | 7 of 8          |
| AminoAcids Coverag    | 88 %            |
| Intensity Coverage:   | 50 %            |
| Peak Coverage:        | 14 %            |
| Protein Localisation: | 353 ... 360     |

| b ion     |          |   |     |   | y ion    |           | y <sup>2+</sup> ion |          |
|-----------|----------|---|-----|---|----------|-----------|---------------------|----------|
| Δ dalton  | mass     |   | seq |   | Δ dalton | mass      | Δ dalton            | mass     |
|           | 58.02874 | 1 | G   | 7 |          |           |                     |          |
| +0.006446 | 145.0608 | 2 | S   | 6 | 843.5066 |           | 843.5066            |          |
| -0.03216  | 258.1448 | 3 | L   | 5 | 756.4746 | -0.01154  | 378.7409            | -0.00974 |
| +0.03682  | 371.2289 | 4 | L   | 4 | 643.3905 | +0.014847 | 643.3905            |          |
|           | 486.2558 | 5 | D   | 3 | 530.3064 | +0.134677 | 530.3064            |          |
|           | 633.3243 | 6 | F   | 2 | 415.2795 | +0.066833 | 415.2795            |          |
| +0.004952 | 746.4083 | 7 | L   | 1 | 268.2111 | +0.162773 | 268.2111            |          |
|           |          | 8 | K   | 0 | 155.127  | -0.05071  | 155.127             |          |

Scan number 9641 Raw file LNCAP\_Silac\_23F10\_set1\_04  
 Method ITMS; CID Pepti... 60.16

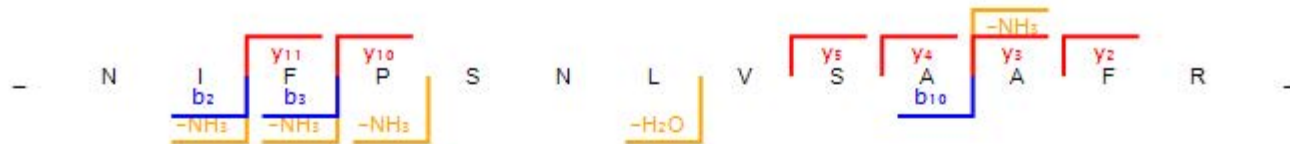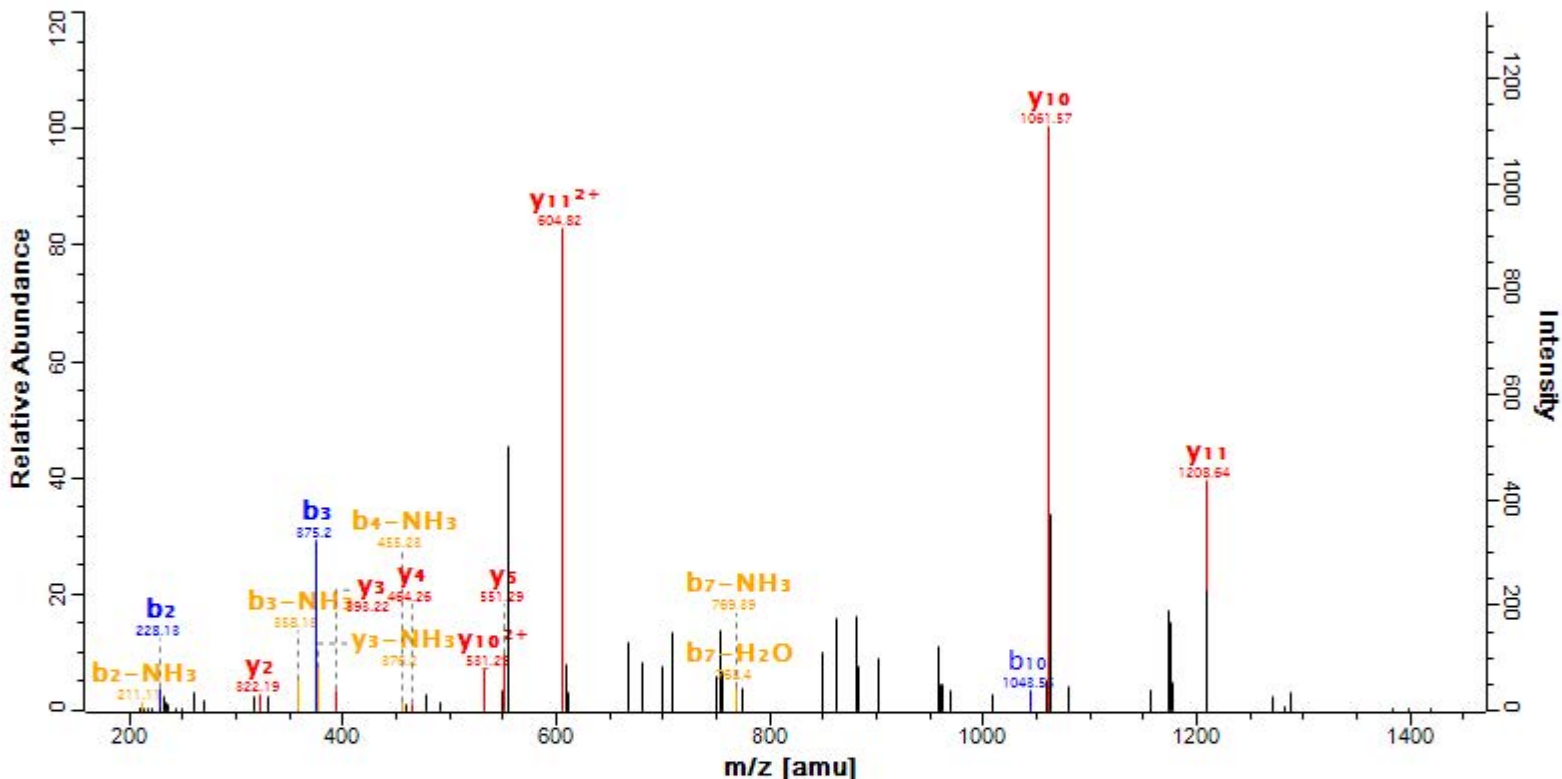

**precursor information**

|                   |                 |
|-------------------|-----------------|
| Mass:             | 1434.76242      |
| m/z:              | 718.38849       |
| Charge:           | 2+              |
| Retentiontime:    | 58.281513214111 |
| Score:            | 60.16146        |
| Mass Error [ppm]: | 0.32748         |
| PEP:              | 0.0084407       |
| Precursor Type:   | MULTI           |

**general information**

|                       |             |
|-----------------------|-------------|
| Annotation:           | 8 of 13     |
| AminoAcids Coverage:  | 62 %        |
| Intensity Coverage:   | 44 %        |
| Peak Coverage:        | 19 %        |
| Protein Localisation: | 190 ... 202 |

| b ion     |          |    |     |    | y ion    |           | y <sup>2+</sup> ion |           |
|-----------|----------|----|-----|----|----------|-----------|---------------------|-----------|
| Δ dalton  | mass     |    | seq |    | Δ dalton | mass      | Δ dalton            | mass      |
|           | 115.0502 | 1  | N   | 12 |          |           |                     |           |
| -0.2174   | 228.1343 | 2  | I   | 11 | 1321.726 |           | 1321.726            |           |
| +0.046036 | 375.2027 | 3  | F   | 10 | 1208.642 | -0.03823  | 604.8248            | +0.225721 |
|           | 472.2554 | 4  | P   | 9  | 1061.574 | +0.032381 | 531.2905            | +0.257609 |
|           | 559.2875 | 5  | S   | 8  | 964.5211 |           | 964.5211            |           |
|           | 673.3304 | 6  | N   | 7  | 877.489  |           | 877.489             |           |
|           | 786.4145 | 7  | L   | 6  | 763.4461 |           | 763.4461            |           |
|           | 885.4829 | 8  | V   | 5  | 650.362  |           | 650.362             |           |
|           | 972.5149 | 9  | S   | 4  | 551.2936 | +0.044024 | 551.2936            |           |
| -0.00637  | 1043.552 | 10 | A   | 3  | 464.2616 | +0.143924 | 464.2616            |           |
|           | 1114.589 | 11 | A   | 2  | 393.2245 | -0.03198  | 393.2245            |           |
|           | 1261.658 | 12 | F   | 1  | 322.1874 | +0.204754 | 322.1874            |           |
|           |          | 13 | R   | 0  | 175.119  |           | 175.119             |           |



Scan number 9867 Raw file LNCAP\_Silac\_23F10\_set1\_04  
 Method ITMS; CID Pepti... 186.11

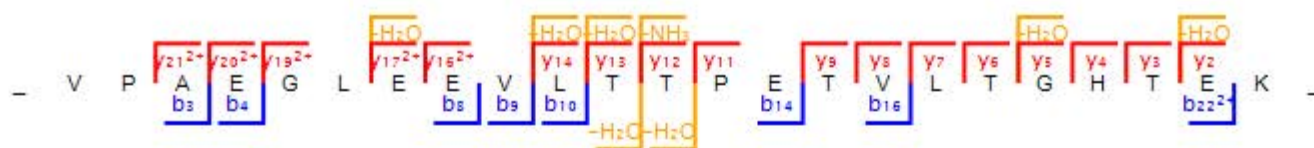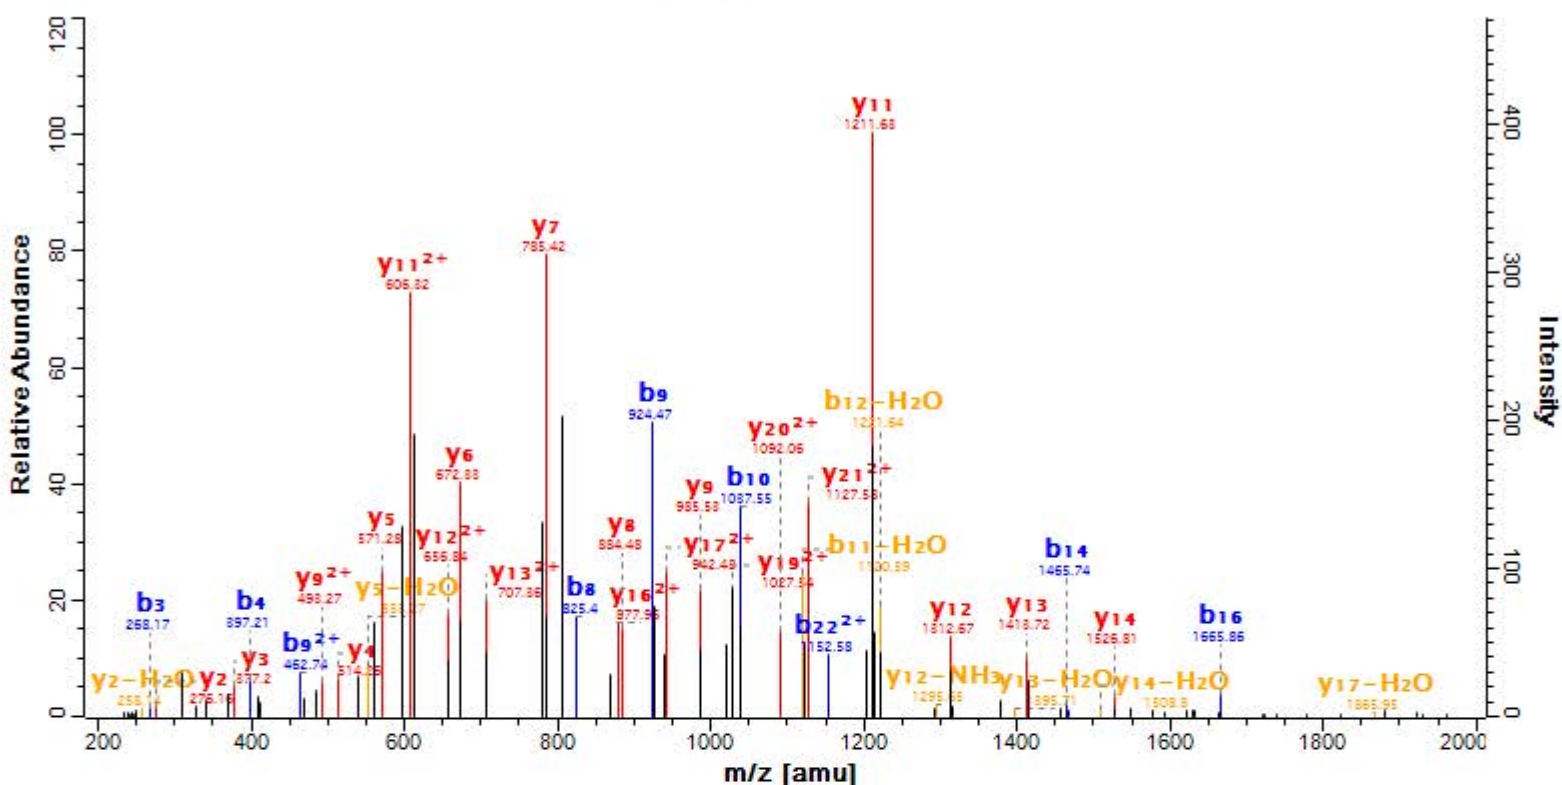

precursor information

|                   |                 |
|-------------------|-----------------|
| Mass:             | 2449.25941      |
| m/z:              | 817.42708       |
| Charge:           | 3+              |
| Retentiontime:    | 60.231098175048 |
| Score:            | 186.1136        |
| Mass Error [ppm]: | 0.24808         |
| PEP:              | 3.9849E-49      |
| Precursor Type:   | MULTI           |

general information

|                       |             |
|-----------------------|-------------|
| Annotation:           | 19 of 23    |
| AminoAcids Coverage:  | 83 %        |
| Intensity Coverage:   | 56 %        |
| Peak Coverage:        | 36 %        |
| Protein Localisation: | 574 ... 596 |

| b <sup>2+</sup> ion |        | b ion    |        | seq |   |    | y ion    |         | y <sup>2+</sup> ion |         |
|---------------------|--------|----------|--------|-----|---|----|----------|---------|---------------------|---------|
| Δ dalton            | mass   | Δ dalton | mass   |     |   |    | Δ dalton | mass    | Δ dalton            | mass    |
|                     | 100.08 |          | 100.08 | 1   | V | 22 |          |         |                     |         |
|                     | 197.13 |          | 197.13 | 2   | P | 21 | 2351.2   |         | 2351.2              |         |
|                     | 268.17 | -0.036   | 268.17 | 3   | A | 20 | 2254.1   |         | 1127.6              | +0.3359 |
|                     | 397.21 | +0.0711  | 397.21 | 4   | E | 19 | 2183.1   |         | 1092.1              | +0.265  |
|                     | 454.23 |          | 454.23 | 5   | G | 18 | 2054.1   |         | 1027.5              | -0.056  |
|                     | 567.31 |          | 567.31 | 6   | L | 17 | 1997     |         | 1997                |         |
|                     | 696.36 |          | 696.36 | 7   | E | 16 | 1884     |         | 942.48              | +0.2091 |
|                     | 825.4  | +0.05    | 825.4  | 8   | E | 15 | 1754.9   |         | 877.96              | +0.4681 |
| +0.2455             | 462.74 | +0.0147  | 924.47 | 9   | V | 14 | 1625.9   |         | 1625.9              |         |
|                     | 1037.6 | +0.0232  | 1037.6 | 10  | L | 13 | 1526.8   | +0.0942 | 1526.8              |         |
|                     | 1138.6 |          | 1138.6 | 11  | T | 12 | 1413.7   | -0.123  | 707.36              | -0.004  |
|                     | 1239.6 |          | 1239.6 | 12  | T | 11 | 1312.7   | -0.061  | 656.84              | -0.031  |
|                     | 1336.7 |          | 1336.7 | 13  | P | 10 | 1211.6   | -0.011  | 606.32              | +0.2567 |
|                     | 1465.7 | +0.3479  | 1465.7 | 14  | E | 9  | 1114.6   |         | 1114.6              |         |
|                     | 1566.8 |          | 1566.8 | 15  | T | 8  | 985.53   | -0.009  | 493.27              | +0.2271 |
|                     | 1665.9 | -0.318   | 1665.9 | 16  | V | 7  | 884.48   | +0.0694 | 884.48              |         |
|                     | 1778.9 |          | 1778.9 | 17  | L | 6  | 785.42   | -0.093  | 785.42              |         |
|                     | 1880   |          | 1880   | 18  | T | 5  | 672.33   | +0.0707 | 672.33              |         |
|                     | 1937   |          | 1937   | 19  | G | 4  | 571.28   | +0.0189 | 571.28              |         |
|                     | 2074.1 |          | 2074.1 | 20  | H | 3  | 514.26   | +0.1618 | 514.26              |         |
|                     | 2175.1 |          | 2175.1 | 21  | T | 2  | 377.2    | -0.106  | 377.2               |         |
| +0.4573             | 1152.6 |          | 2304.2 | 22  | E | 1  | 276.16   | +0.0577 | 276.16              |         |
|                     |        |          |        | 23  | K | 0  | 147.11   |         | 147.11              |         |

Scan number 1190 Raw file LNCAP\_Silac\_23F10\_set1\_05  
 Method ITMS; CID Pepti... 208.39

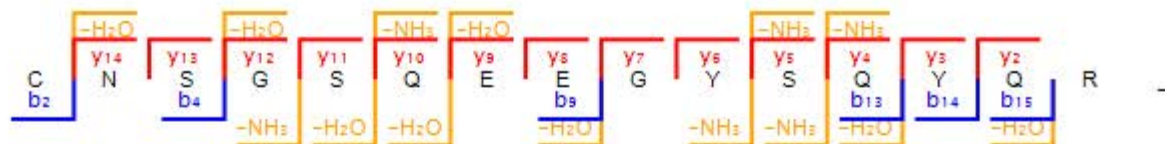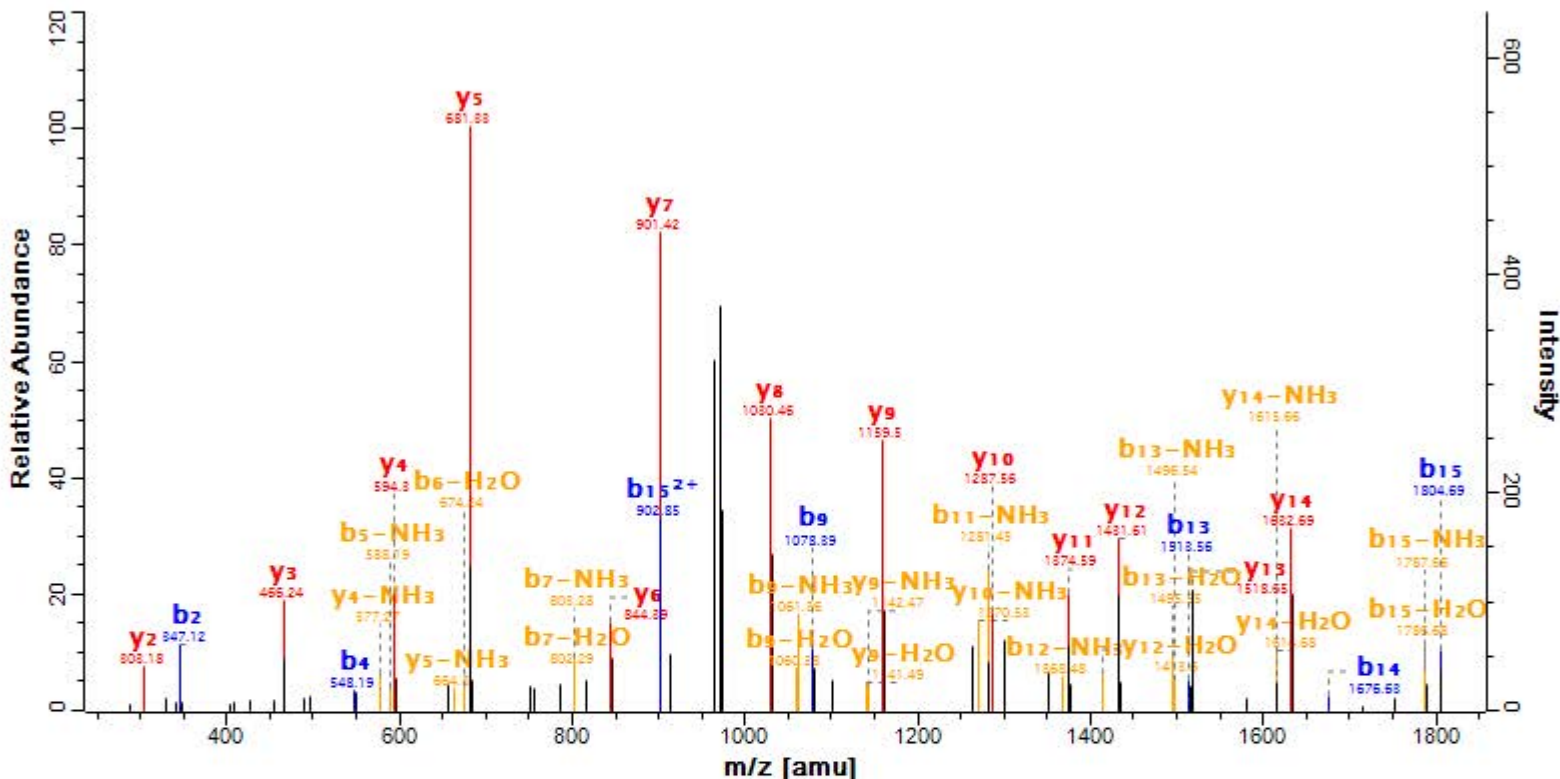

#### precursor information

|                   |                 |
|-------------------|-----------------|
| Mass:             | 1977.79068      |
| m/z:              | 989.90262       |
| Charge:           | 2+              |
| Retentiontime:    | 12.778661727905 |
| Score:            | 208.3862        |
| Mass Error [ppm]: | -0.24043        |
| PEP:              | 3.1117E-33      |
| Precursor Type:   | MULTI           |

#### general information

|                       |           |
|-----------------------|-----------|
| Annotation:           | 14 of 16  |
| AminoAcids Coverag    | 88 %      |
| Intensity Coverage:   | 58 %      |
| Peak Coverage:        | 44 %      |
| Protein Localisation: | 37 ... 52 |

| b <sup>2+</sup> ion |          | b ion     |          |     |   |          | y ion    |           |
|---------------------|----------|-----------|----------|-----|---|----------|----------|-----------|
| Δ dalton            | mass     | Δ dalton  | mass     | seq |   | Δ dalton | mass     |           |
|                     | 187.0866 |           | 187.0866 | 1   | W | 15       |          |           |
|                     | 347.1172 | -0.02034  | 347.1172 | 2   | C | 14       | 1792.719 |           |
|                     | 461.1602 |           | 461.1602 | 3   | N | 13       | 1632.688 | -0.17943  |
|                     | 548.1922 | +0.165534 | 548.1922 | 4   | S | 12       | 1518.646 | -0.08121  |
|                     | 605.2137 |           | 605.2137 | 5   | G | 11       | 1431.614 | -0.07091  |
|                     | 692.2457 |           | 692.2457 | 6   | S | 10       | 1374.592 | +0.013909 |
|                     | 820.3043 |           | 820.3043 | 7   | Q | 9        | 1287.56  | +0.048012 |
|                     | 949.3469 |           | 949.3469 | 8   | E | 8        | 1159.501 | +0.005882 |
|                     | 1078.389 | -0.07927  | 1078.389 | 9   | E | 7        | 1030.459 | +0.063733 |
|                     | 1135.411 |           | 1135.411 | 10  | G | 6        | 901.4163 | -0.01696  |
|                     | 1298.474 |           | 1298.474 | 11  | Y | 5        | 844.3948 | +0.087629 |
|                     | 1385.506 |           | 1385.506 | 12  | S | 4        | 681.3315 | +0.073504 |
|                     | 1513.565 | -0.16177  | 1513.565 | 13  | Q | 3        | 594.2994 | +0.089602 |
|                     | 1676.628 | -0.3916   | 1676.628 | 14  | Y | 2        | 466.2409 | +0.100725 |
| -0.41428            | 902.847  | -0.18443  | 1804.687 | 15  | Q | 1        | 303.1775 | +0.153525 |
|                     |          |           |          | 16  | R | 0        | 175.119  |           |

Scan number 1404 Raw file LNCAP\_Silac\_23F10\_set1\_05  
 Method ITMS; CID Pepti... 190.53

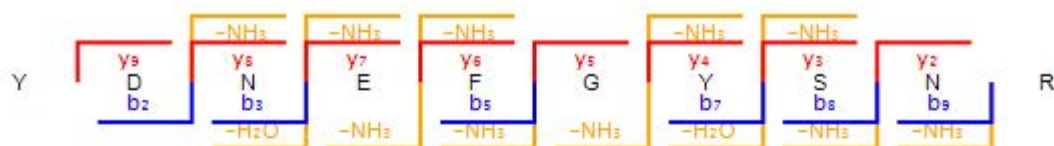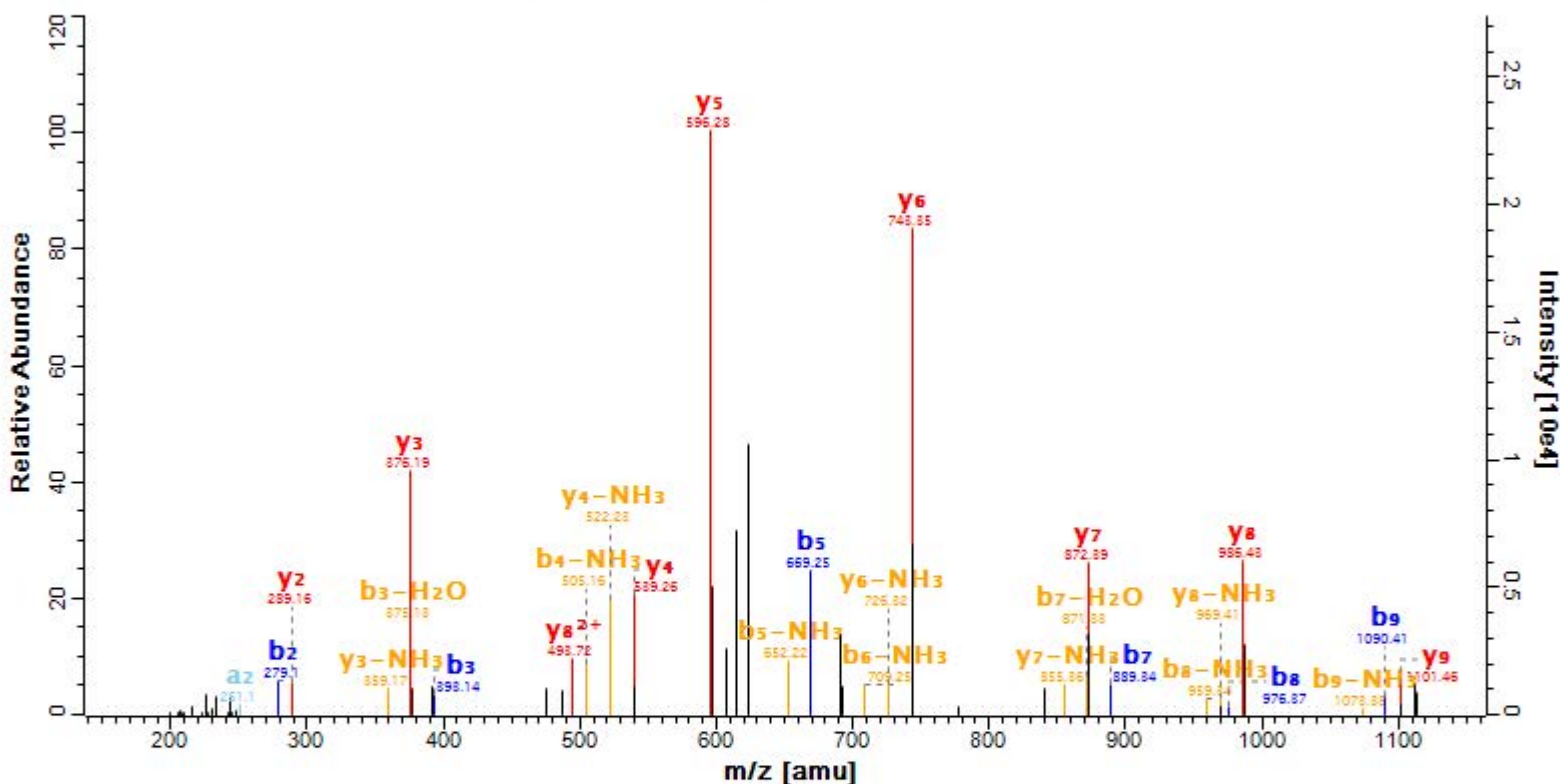

### precursor information

|                   |                 |
|-------------------|-----------------|
| Mass:             | 1263.51564      |
| m/z:              | 632.7651        |
| Charge:           | 2+              |
| Retentiontime:    | 14.104748725891 |
| Score:            | 190.531         |
| Mass Error [ppm]: | 0.0094832       |
| PEP:              | 1.2029E-08      |
| Precursor Type:   | MULTI           |

|                       |             |
|-----------------------|-------------|
| Annotation:           | 8 of 10     |
| AminoAcids Coverage:  | 80 %        |
| Intensity Coverage:   | 64 %        |
| Peak Coverage:        | 39 %        |
| Protein Localisation: | 140 ... 149 |

| a ion    |        | b ion    |        |    |     |   | y ion    |         | y <sup>2+</sup> ion |         |
|----------|--------|----------|--------|----|-----|---|----------|---------|---------------------|---------|
| Δ dalton | mass   | Δ dalton | mass   |    | seq |   | Δ dalton | mass    | Δ dalton            | mass    |
|          | 136.08 |          | 164.07 | 1  | Y   | 9 |          |         |                     |         |
| -0.039   | 251.1  | +0.0963  | 279.1  | 2  | D   | 8 | 1101.5   | -0.094  | 1101.5              |         |
|          | 365.15 | +0.0604  | 393.14 | 3  | N   | 7 | 986.43   | -0.023  | 493.72              | +0.3478 |
|          | 494.19 |          | 522.18 | 4  | E   | 6 | 872.39   | -0.015  | 872.39              |         |
|          | 641.26 | -0.018   | 669.25 | 5  | F   | 5 | 743.35   | +0.0245 | 743.35              |         |
|          | 698.28 |          | 726.27 | 6  | G   | 4 | 596.28   | +0.0507 | 596.28              |         |
|          | 861.34 | -0.071   | 889.34 | 7  | Y   | 3 | 539.26   | +0.0586 | 539.26              |         |
|          | 948.37 | +0.0589  | 976.37 | 8  | S   | 2 | 376.19   | +0.0643 | 376.19              |         |
|          | 1062.4 | -0.015   | 1090.4 | 9  | N   | 1 | 289.16   | +0.0903 | 289.16              |         |
|          |        |          |        | 10 | R   | 0 | 175.12   |         | 175.12              |         |

Scan number 1825 Raw file LNCAP\_Silac\_23F10\_set1\_05  
 Method ITMS; CID Pepti... 117.89

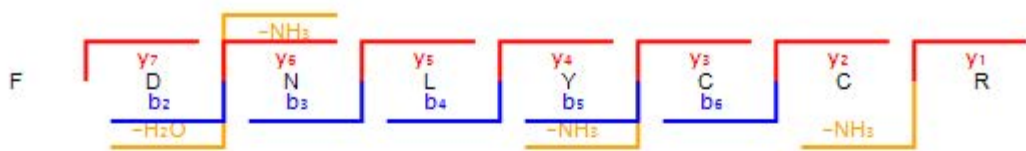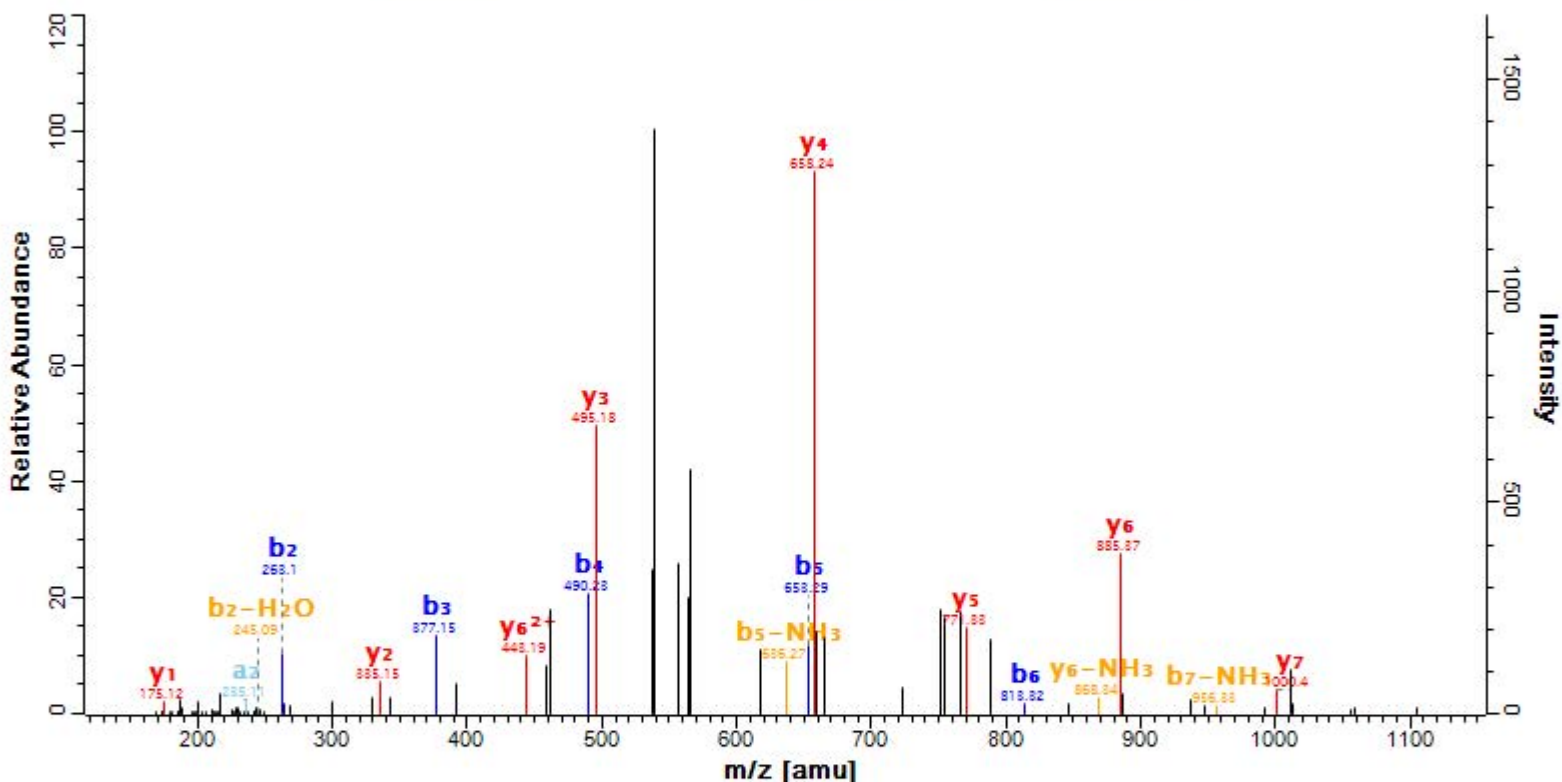

precursor information

|                       |                 |
|-----------------------|-----------------|
| Mass:                 | 1146.45878      |
| m/z:                  | 574.23667       |
| Charge:               | 2+              |
| Retentiontime:        | 16.636901855468 |
| Score:                | 117.8897        |
| Mass Error [ppm]:     | 0.11565         |
| g PEP:                | 0.0020144       |
| Annotation:           | 7 of 8          |
| AminoAcids Coverage:  | 88 %            |
| Intensity Coverage:   | 39 %            |
| Peak Coverage:        | 19 %            |
| Protein Localisation: | 368 ... 375     |

| a ion    |        | b ion    |        |     |   |          | y ion  |          | y <sup>2+</sup> ion |  |
|----------|--------|----------|--------|-----|---|----------|--------|----------|---------------------|--|
| Δ dalton | mass   | Δ dalton | mass   | seq |   | Δ dalton | mass   | Δ dalton | mass                |  |
|          | 120.08 |          | 148.08 | 1   | F | 7        |        |          |                     |  |
| +0.0111  | 235.11 | -0.026   | 263.1  | 2   | D | 6        | 1000.4 | +0.12    | 1000.4              |  |
|          | 349.15 | +0.0875  | 377.15 | 3   | N | 5        | 885.37 | +0.0329  | 443.19              |  |
|          | 462.23 | -0.013   | 490.23 | 4   | L | 4        | 771.33 | +0.0554  | 771.33              |  |
|          | 625.3  | +0.0551  | 653.29 | 5   | Y | 3        | 658.24 | +0.0563  | 658.24              |  |
|          | 785.33 | -0.005   | 813.32 | 6   | C | 2        | 495.18 | +0.1479  | 495.18              |  |
|          | 945.36 |          | 973.35 | 7   | C | 1        | 335.15 | +0.0292  | 335.15              |  |
|          |        |          |        | 8   | R | 0        | 175.12 | +0.0905  | 175.12              |  |

Scan number 1833 Raw file LNCAP\_Silac\_23F10\_set1\_05  
 Method ITMS: CID Pepti... 164.33

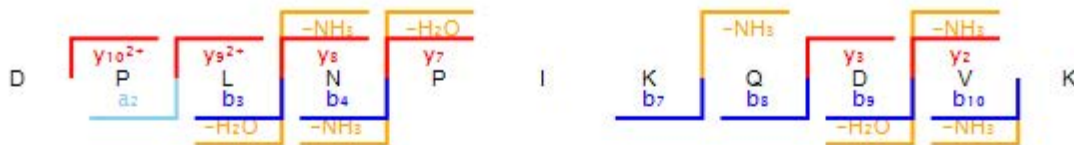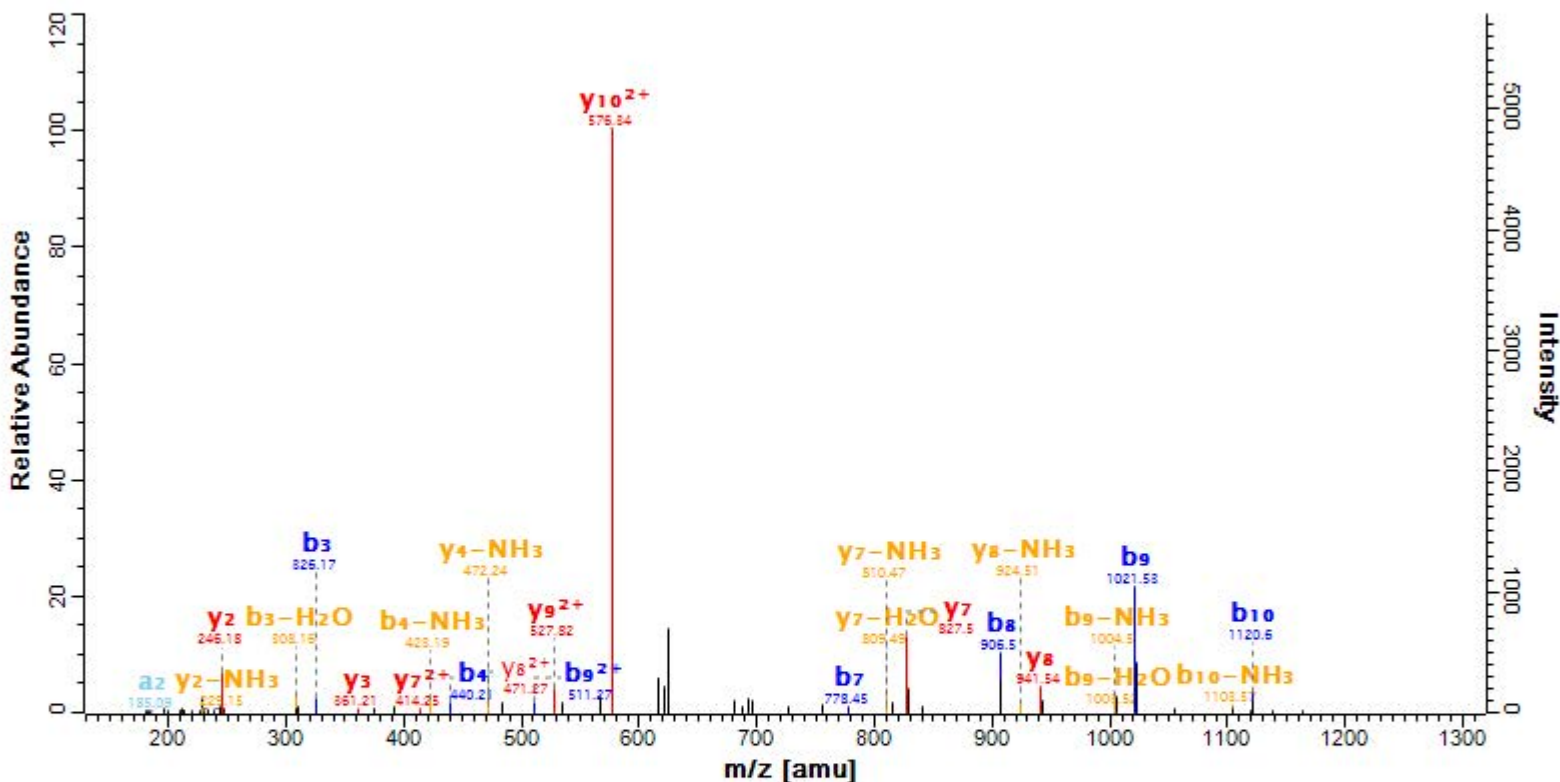

#### precursor information

|                   |                 |
|-------------------|-----------------|
| Mass:             | 1265.69775      |
| m/z:              | 633.85615       |
| Charge:           | 2+              |
| Retentiontime:    | 16.681453704834 |
| Score:            | 164.3349        |
| Mass Error [ppm]: | -0.15779        |
| PEP:              | 7.229E-07       |
| Precursor Type:   | MULTI           |

#### general information

|                       |           |
|-----------------------|-----------|
| Annotation:           | 8 of 11   |
| AminoAcids Coverage:  | 73 %      |
| Intensity Coverage:   | 66 %      |
| Peak Coverage:        | 25 %      |
| Protein Localisation: | 64 ... 74 |

|        | a ion         | b <sup>2+</sup> ion | b ion         |     |   | y ion         | y <sup>2+</sup> ion |
|--------|---------------|---------------------|---------------|-----|---|---------------|---------------------|
|        | Δ dalton mass | Δ dalton mass       | Δ dalton mass | seq |   | Δ dalton mass | Δ dalton mass       |
|        | 88.04         | 116                 | 116           | 1   | D | 10            |                     |
| +0.266 | 85.1          | 213.1               | 213.1         | 2   | P | 9             | 1152                |
|        | 298.2         | 326.2               | +0.1 326.2    | 3   | L | 8             | 1055                |
|        | 412.2         | 440.2               | +0.07 440.2   | 4   | N | 7             | 941.5               |
|        | 509.3         | 537.3               | 537.3         | 5   | P | 6             | 827.5               |
|        | 622.4         | 650.4               | 650.4         | 6   | I | 5             | 730.4               |
|        | 750.5         | 778.4               | -0.05 778.4   | 7   | K | 4             | 617.4               |
|        | 878.5         | 906.5               | -0.01 906.5   | 8   | Q | 3             | 489.3               |
|        | 993.5         | +0.229 111.3        | -0.04 1022    | 9   | D | 2             | 361.2               |
|        | 1093          | 1121                | +0.044 1121   | 10  | V | 1             | 246.2               |
|        |               |                     |               | 11  | K | 0             | 147.1               |

Scan number 1887 Raw file LNCAP\_Silac\_23F10\_set1\_05  
 Method ITMS; CID Peptide L128.69

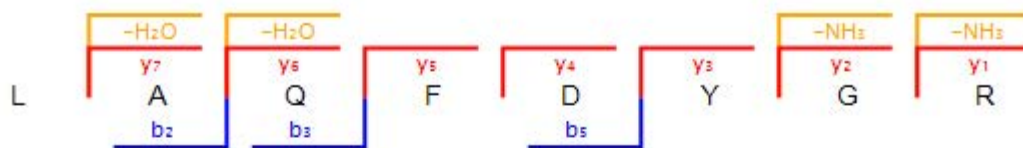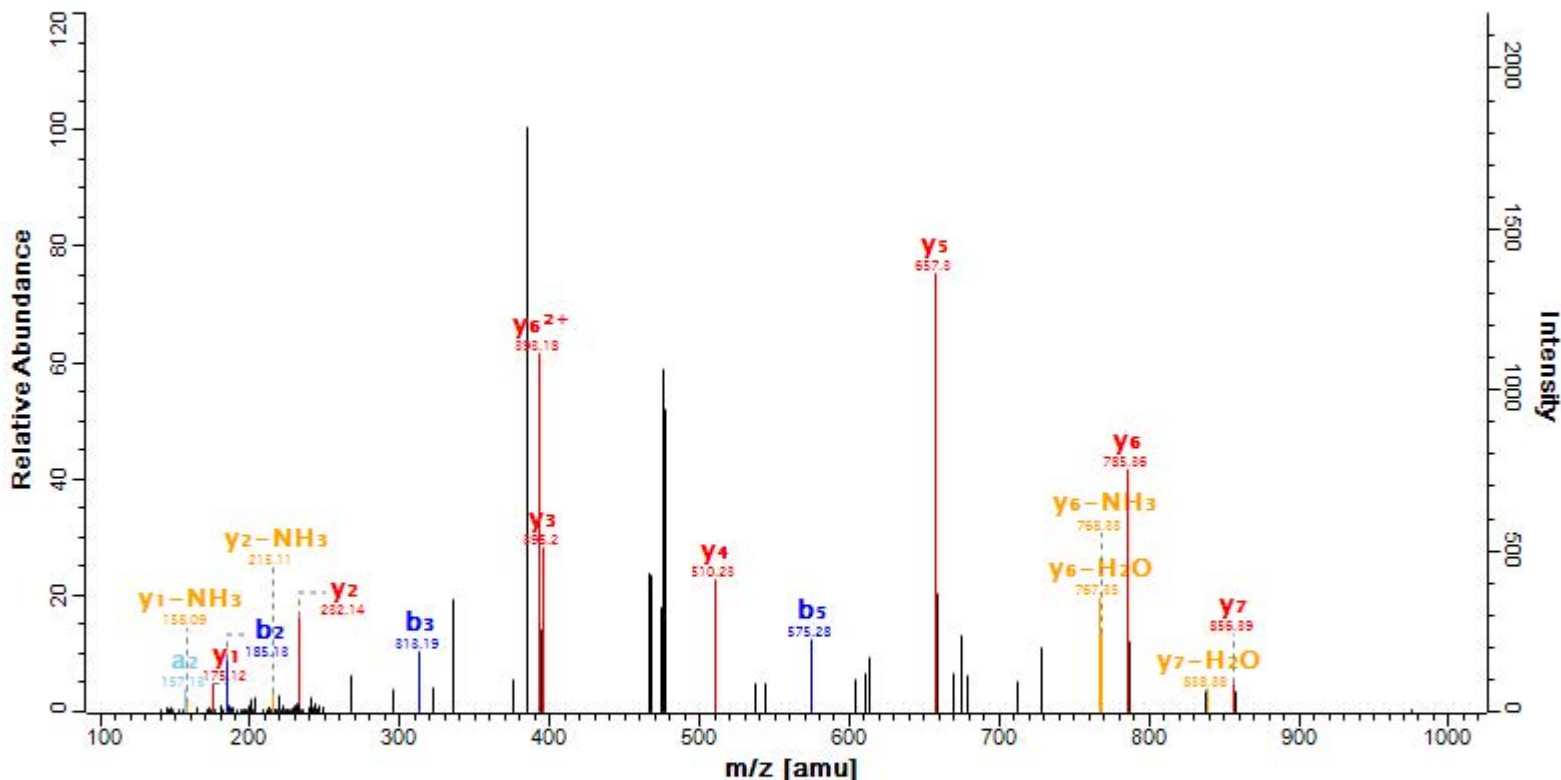

#### precursor information

|                       |                 |
|-----------------------|-----------------|
| Mass:                 | 968.47176       |
| m/z:                  | 485.24316       |
| Charge:               | 2+              |
| Retentiontime:        | 17.004087448120 |
| Score:                | 128.6864        |
| Mass Error [ppm]:     | 0.18961         |
| g PEP:                | 0.00067315      |
| Annotation:           | 7 of 8          |
| AminoAcids Coverage:  | 88 %            |
| Intensity Coverage:   | 41 %            |
| Peak Coverage:        | 14 %            |
| Protein Localisation: | 506 ... 513     |

| a ion    |        | b ion    |        |   |     |          | y ion  |          | y <sup>2+</sup> ion |  |
|----------|--------|----------|--------|---|-----|----------|--------|----------|---------------------|--|
| Δ dalton | mass   | Δ dalton | mass   |   | seq | Δ dalton | mass   | Δ dalton | mass                |  |
|          | 86.096 |          | 114.09 | 1 | L   | 7        |        |          |                     |  |
| +0.0809  | 157.13 | -0.152   | 185.13 | 2 | A   | 6        | 856.39 | +0.1247  | 856.39              |  |
|          | 285.19 | +0.1119  | 313.19 | 3 | Q   | 5        | 785.36 | +0.0376  | 393.18              |  |
|          | 432.26 |          | 460.26 | 4 | F   | 4        | 657.3  | +0.0425  | 657.3               |  |
|          | 547.29 | -0.014   | 575.28 | 5 | D   | 3        | 510.23 | +0.1024  | 510.23              |  |
|          | 710.35 |          | 738.35 | 6 | Y   | 2        | 395.2  | +0.0608  | 395.2               |  |
|          | 767.37 |          | 795.37 | 7 | G   | 1        | 232.14 | +0.067   | 232.14              |  |
|          |        |          |        | 8 | R   | 0        | 175.12 | +0.0427  | 175.12              |  |

Scan number 1890 Raw file LNCAP\_Silac\_23F10\_set1\_05  
 Method ITMS; CID Peptide 107.57

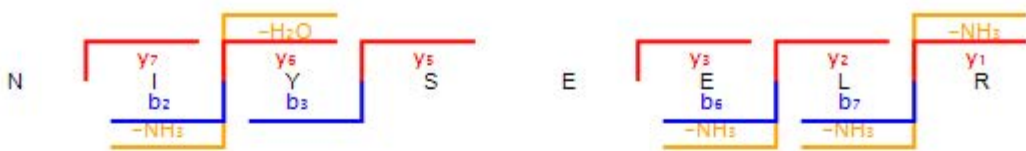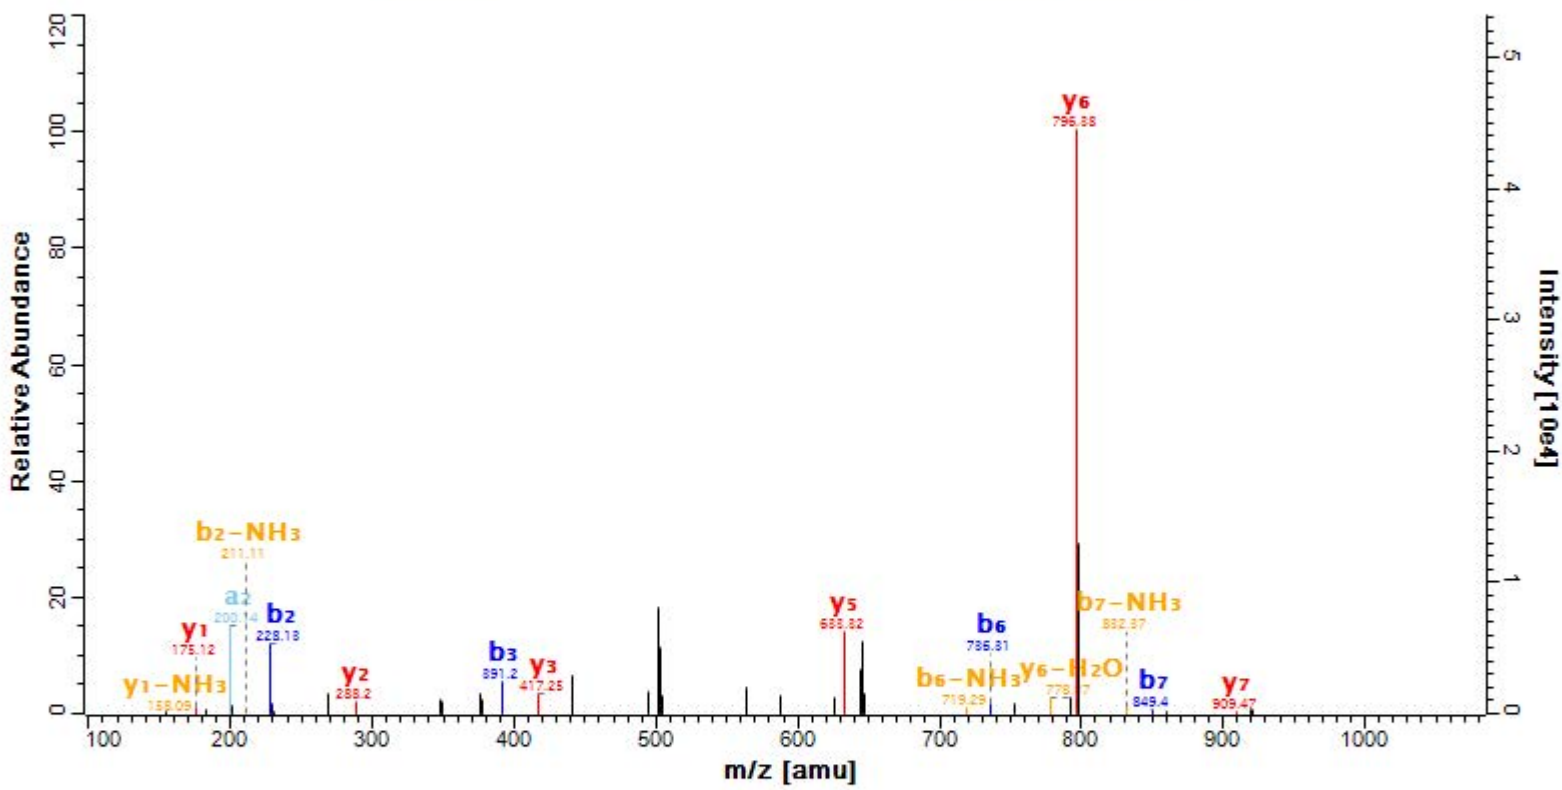

precursor information

|                       |                 |
|-----------------------|-----------------|
| Mass:                 | 1022.50331      |
| m/z:                  | 512.25893       |
| Charge:               | 2+              |
| Retentiontime:        | 17.020704269409 |
| Score:                | 107.5744        |
| Mass Error [ppm]:     | 0.037829        |
| g PEP:                | 0.0065102       |
| Annotation:           | 6 of 8          |
| AminoAcids Coverage:  | 75 %            |
| Intensity Coverage:   | 53 %            |
| Peak Coverage:        | 19 %            |
| Protein Localisation: | 209 ... 216     |

| a ion           |          | b ion           |          |   |     | y ion           |                    |
|-----------------|----------|-----------------|----------|---|-----|-----------------|--------------------|
| $\Delta$ dalton | mass     | $\Delta$ dalton | mass     |   | seq | $\Delta$ dalton | mass               |
|                 | 87.05529 |                 | 115.0502 | 1 | N   | 7               |                    |
| -0.06181        | 200.1394 | -0.06231        | 228.1343 | 2 | I   | 6               | 909.4676 +0.227933 |
|                 | 363.2027 | -0.06124        | 391.1976 | 3 | Y   | 5               | 796.3836 +0.035691 |
|                 | 450.2347 |                 | 478.2296 | 4 | S   | 4               | 633.3202 +0.089742 |
|                 | 579.2773 |                 | 607.2722 | 5 | E   | 3               | 546.2882           |
|                 | 708.3199 | -0.0689         | 736.3148 | 6 | E   | 2               | 417.2456 +0.021969 |
|                 | 821.404  | +0.202626       | 849.3989 | 7 | L   | 1               | 288.203 +0.095324  |
|                 |          |                 |          | 8 | R   | 0               | 175.119 -0.02813   |

Scan number 2247 Raw file LNCAP\_Silac\_23F10\_set1\_05  
 Method ITMS; CID Peptide 70.49

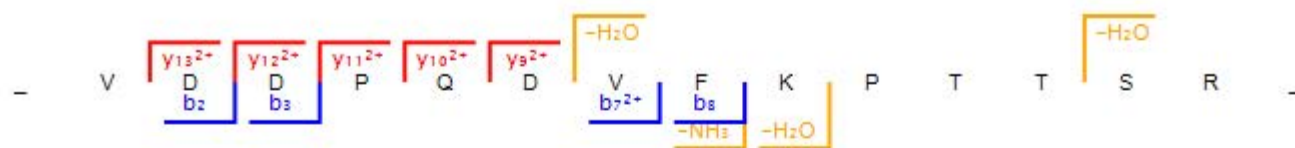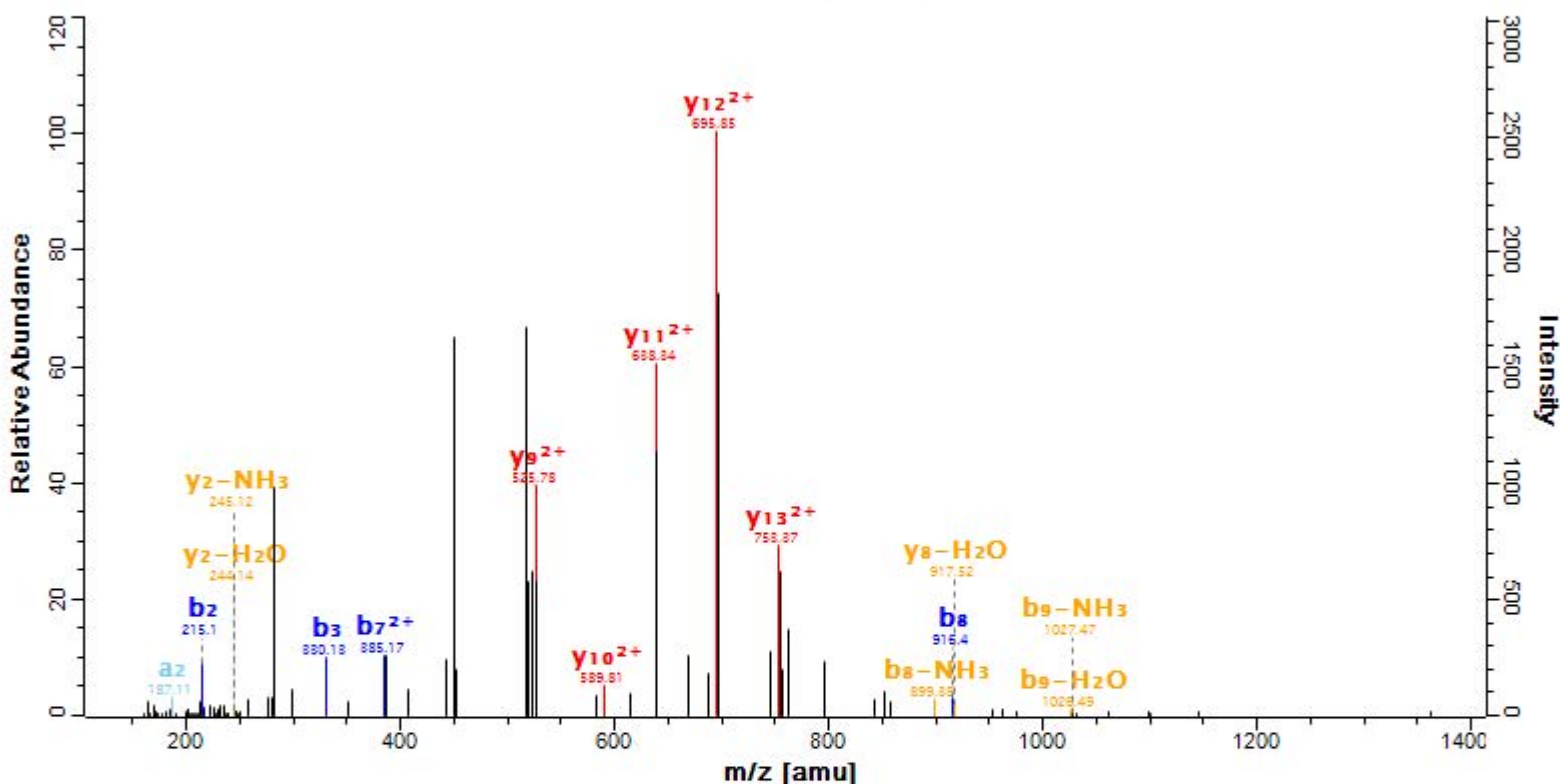

#### precursor information

|                   |                 |
|-------------------|-----------------|
| Mass:             | 1603.78399      |
| m/z:              | 535.60194       |
| Charge:           | 3+              |
| Retentiontime:    | 19.133209228515 |
| Score:            | 70.48843        |
| Mass Error [ppm]: | -0.1325         |
| PEP:              | 0.001648        |
| Precursor Type:   | MULTI           |

|        | a ion         | b <sup>2+</sup> ion | b ion         |    |     |    | y ion         | y <sup>2+</sup> ion |
|--------|---------------|---------------------|---------------|----|-----|----|---------------|---------------------|
|        | Δ dalton mass | Δ dalton mass       | Δ dalton mass |    | seq |    | Δ dalton mass | Δ dalton mass       |
|        | 72.08         | 100.1               | 100.1         | 1  | V   | 13 |               |                     |
| +0.082 | 87.1          | 215.1               | -0.1          | 2  | D   | 12 | 1506          | 753.4 +0.046        |
|        | 302.1         | 330.1               | +0.068        | 3  | D   | 11 | 1391          | 695.9 -0.03         |
|        | 399.2         | 427.2               |               | 4  | P   | 10 | 1276          | 638.3 +0.146        |
|        | 527.2         | 555.2               |               | 5  | Q   | 9  | 1179          | 589.8 +0.083        |
|        | 642.3         | 670.3               |               | 6  | D   | 8  | 1051          | 525.8 +0.319        |
|        | 741.3         | +0.456              |               | 7  | V   | 7  | 935.5         | 935.5               |
|        | 888.4         | 916.4               | -0.02         | 8  | F   | 6  | 836.5         | 836.5               |
|        | 1017          | 1044                |               | 9  | K   | 5  | 689.4         | 689.4               |
|        | 1114          | 1142                |               | 10 | P   | 4  | 561.3         | 561.3               |
|        | 1215          | 1243                |               | 11 | T   | 3  | 464.2         | 464.2               |
|        | 1316          | 1344                |               | 12 | T   | 2  | 363.2         | 363.2               |
|        | 1403          | 1431                |               | 13 | S   | 1  | 262.2         | 262.2               |
|        |               |                     |               | 14 | R   | 0  | 175.1         | 175.1               |

#### general information

|                       |             |
|-----------------------|-------------|
| Annotation:           | 9 of 14     |
| AminoAcids Coverage:  | 64 %        |
| Intensity Coverage:   | 33 %        |
| Peak Coverage:        | 14 %        |
| Protein Localisation: | 521 ... 534 |



Scan number 2856 Raw file LNCAP\_Silac\_23F10\_set1\_05  
 Method ITMS; CID Pepti... 320.23

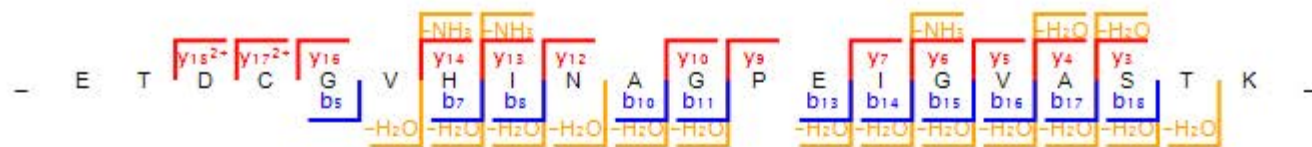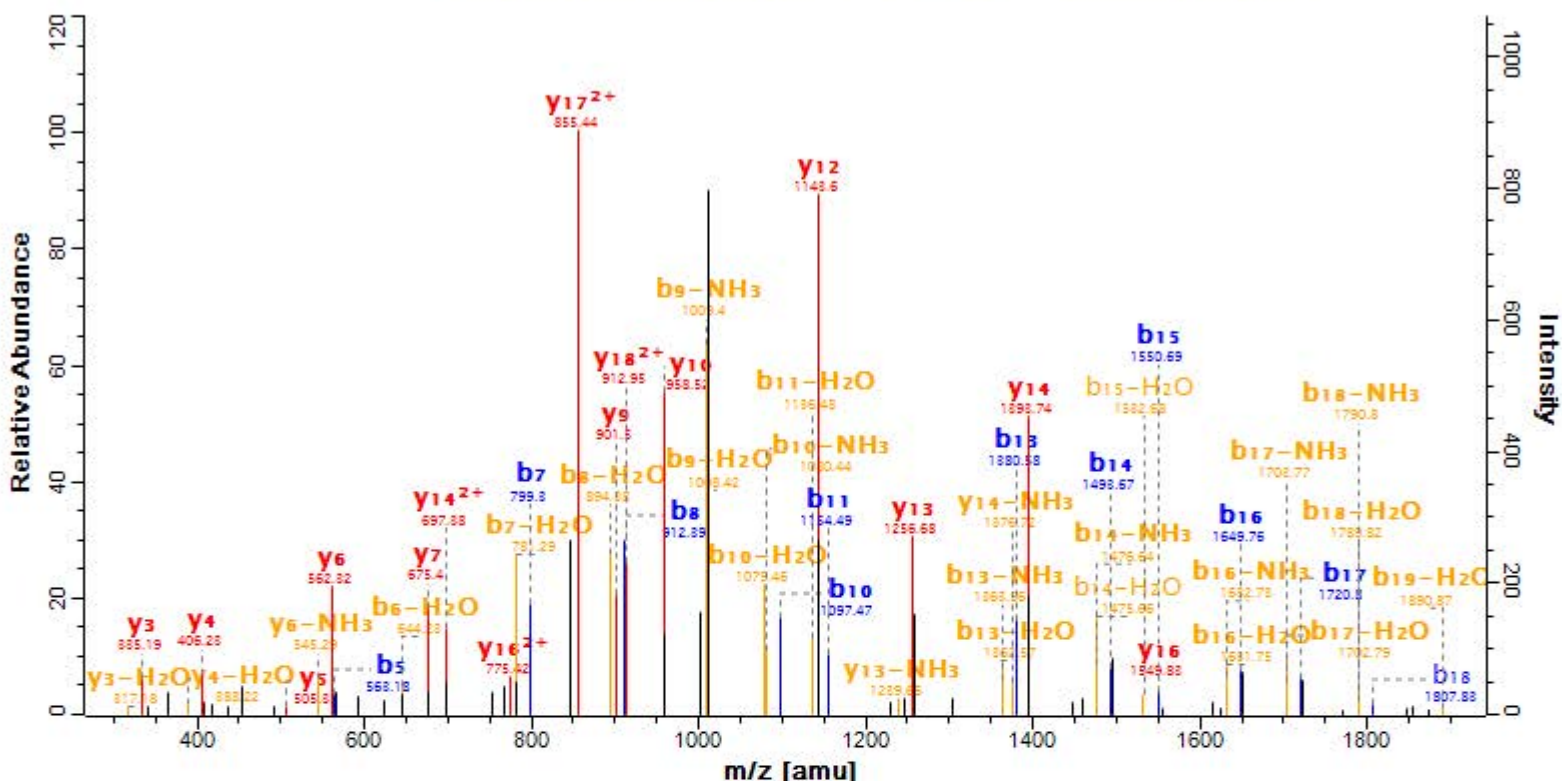

precursor information

|                   |                 |
|-------------------|-----------------|
| Mass:             | 2053.97445      |
| m/z:              | 1027.9945       |
| Charge:           | 2+              |
| Retentiontime:    | 22.603683471679 |
| Score:            | 320.2345        |
| Mass Error [ppm]: | 0.28311         |
| PEP:              | 1.419E-142      |
| Precursor Type:   | MULTI           |

general information

|                       |             |
|-----------------------|-------------|
| Annotation:           | 17 of 20    |
| AminoAcids Coverage:  | 85 %        |
| Intensity Coverage:   | 73 %        |
| Peak Coverage:        | 55 %        |
| Protein Localisation: | 475 ... 494 |

| b ion     |          |    |     |    | y ion    |           | y <sup>2+</sup> ion |           |
|-----------|----------|----|-----|----|----------|-----------|---------------------|-----------|
| Δ dalton  | mass     |    | seq |    | Δ dalton | mass      | Δ dalton            | mass      |
|           | 130.0499 | 1  | E   | 19 |          |           |                     |           |
|           | 231.0975 | 2  | T   | 18 | 1925.939 |           | 1925.939            |           |
|           | 346.1245 | 3  | D   | 17 | 1824.891 |           | 912.9491            | +0.290061 |
|           | 506.1551 | 4  | C   | 16 | 1709.864 |           | 855.4356            | +0.288762 |
| +0.23868  | 563.1766 | 5  | G   | 15 | 1549.833 | -0.12149  | 775.4203            | -0.0805   |
|           | 662.245  | 6  | V   | 14 | 1492.812 |           | 1492.812            |           |
| +0.16299  | 799.3039 | 7  | H   | 13 | 1393.743 | -0.01037  | 697.3753            | +0.059657 |
| -0.04876  | 912.388  | 8  | I   | 12 | 1256.684 | +0.062456 | 1256.684            |           |
|           | 1026.431 | 9  | N   | 11 | 1143.6   | +0.040685 | 1143.6              |           |
| -0.00954  | 1097.468 | 10 | A   | 10 | 1029.558 |           | 1029.558            |           |
| +0.081791 | 1154.489 | 11 | G   | 9  | 958.5204 | -0.00403  | 958.5204            |           |
|           | 1251.542 | 12 | P   | 8  | 901.4989 | +0.050149 | 901.4989            |           |
| -0.08461  | 1380.585 | 13 | E   | 7  | 804.4462 |           | 804.4462            |           |
| -0.01413  | 1493.669 | 14 | I   | 6  | 675.4036 | +0.214353 | 675.4036            |           |
| +0.081102 | 1550.69  | 15 | G   | 5  | 562.3195 | +0.072099 | 562.3195            |           |
| +0.044182 | 1649.759 | 16 | V   | 4  | 505.298  | +0.360714 | 505.298             |           |
| -0.1111   | 1720.796 | 17 | A   | 3  | 406.2296 | +0.088002 | 406.2296            |           |
| -0.08551  | 1807.828 | 18 | S   | 2  | 335.1925 | +0.052576 | 335.1925            |           |
|           | 1908.876 | 19 | T   | 1  | 248.1605 |           | 248.1605            |           |
|           |          | 20 | K   | 0  | 147.1128 |           | 147.1128            |           |

Scan number 2989 Raw file LNCAP\_Silac\_23F10\_set1\_05  
 Method ITMS; CID Pepti... 154.49

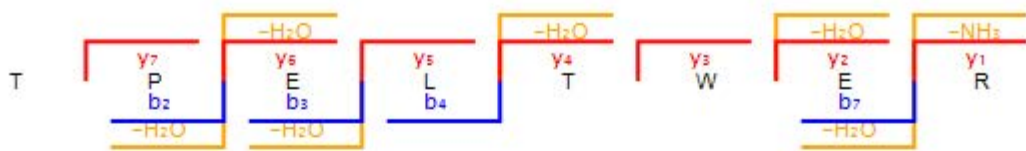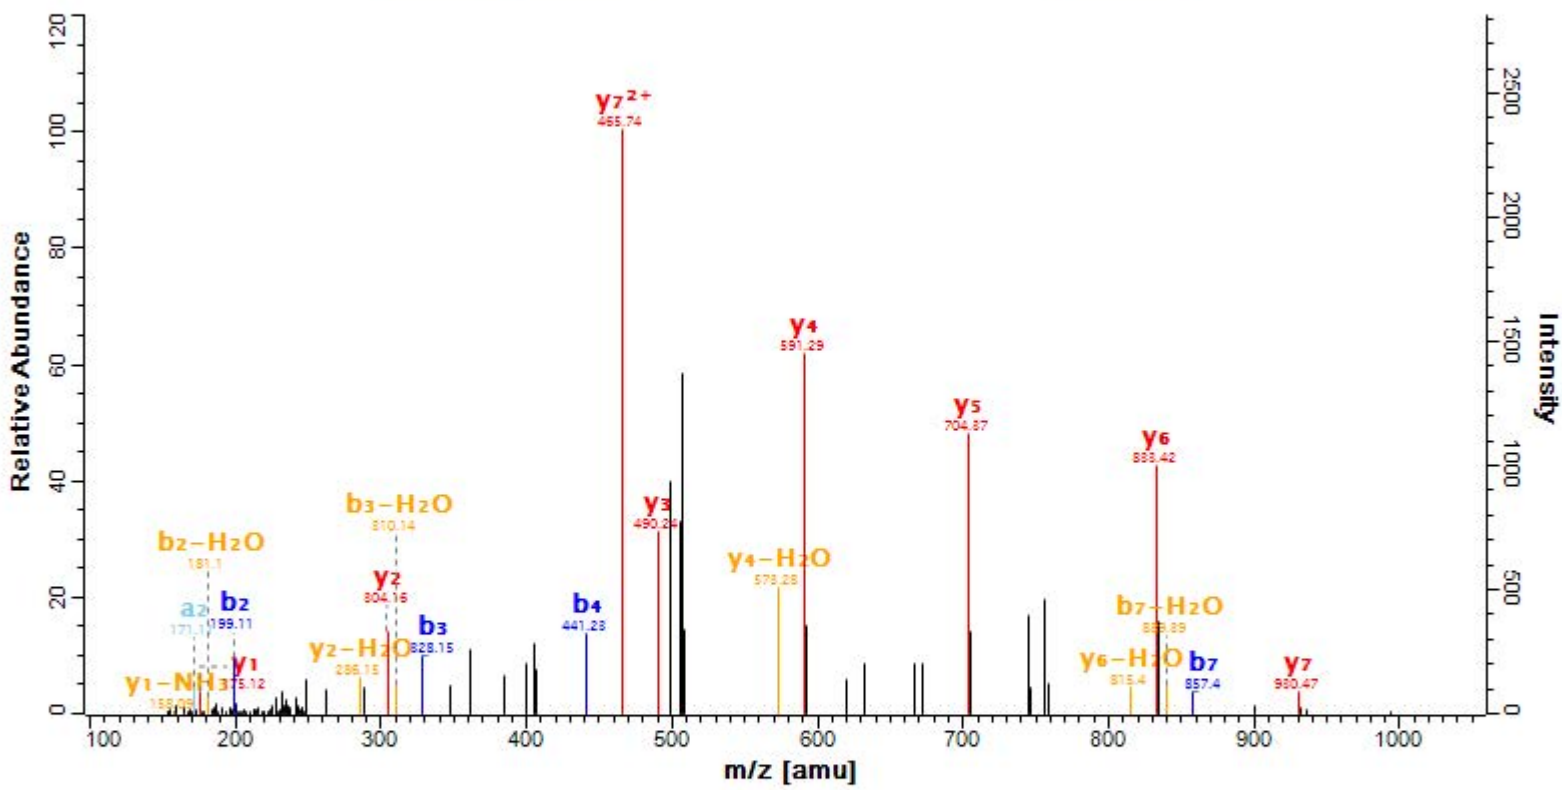

precursor information

|                       |                 |
|-----------------------|-----------------|
| Mass:                 | 1030.50748      |
| m/z:                  | 516.26102       |
| Charge:               | 2+              |
| Retentiontime:        | 23.348344802856 |
| Score:                | 154.4888        |
| Mass Error [ppm]:     | -0.85617        |
| g PEP:                | 7.8078E-05      |
| Annotation:           | 7 of 8          |
| AminoAcids Coverage:  | 88 %            |
| Intensity Coverage:   | 50 %            |
| Peak Coverage:        | 17 %            |
| Protein Localisation: | 492 ... 499     |

| a ion    |        | b ion    |        |   |     |          | y ion  |          | y <sup>2+</sup> ion |         |
|----------|--------|----------|--------|---|-----|----------|--------|----------|---------------------|---------|
| Δ dalton | mass   | Δ dalton | mass   |   | seq | Δ dalton | mass   | Δ dalton | mass                |         |
|          | 74.06  |          | 102.05 | 1 | T   | 7        |        |          |                     |         |
| -0.035   | 171.11 | +0.1191  | 199.11 | 2 | P   | 6        | 930.47 | +0.0936  | 465.74              | +0.2443 |
|          | 300.16 | +0.1211  | 328.15 | 3 | E   | 5        | 833.42 | +0.0334  | 833.42              |         |
|          | 413.24 | +0.0544  | 441.23 | 4 | L   | 4        | 704.37 | +0.0257  | 704.37              |         |
|          | 514.29 |          | 542.28 | 5 | T   | 3        | 591.29 | +0.0636  | 591.29              |         |
|          | 700.37 |          | 728.36 | 6 | W   | 2        | 490.24 | -0.032   | 490.24              |         |
|          | 829.41 | +0.0743  | 857.4  | 7 | E   | 1        | 304.16 | +0.0949  | 304.16              |         |
|          |        |          |        | 8 | R   | 0        | 175.12 | +0.035   | 175.12              |         |

Scan number 3080 Raw file LNCAP\_Silac\_23F10\_set1\_05  
 Method ITMS; CID Pepti... 105.2

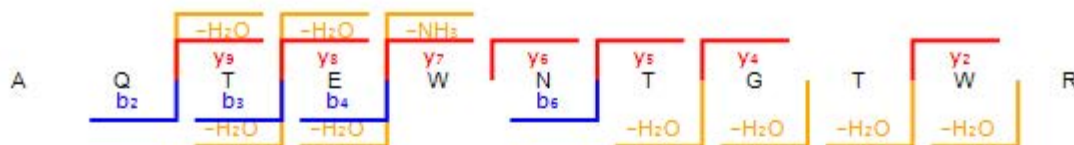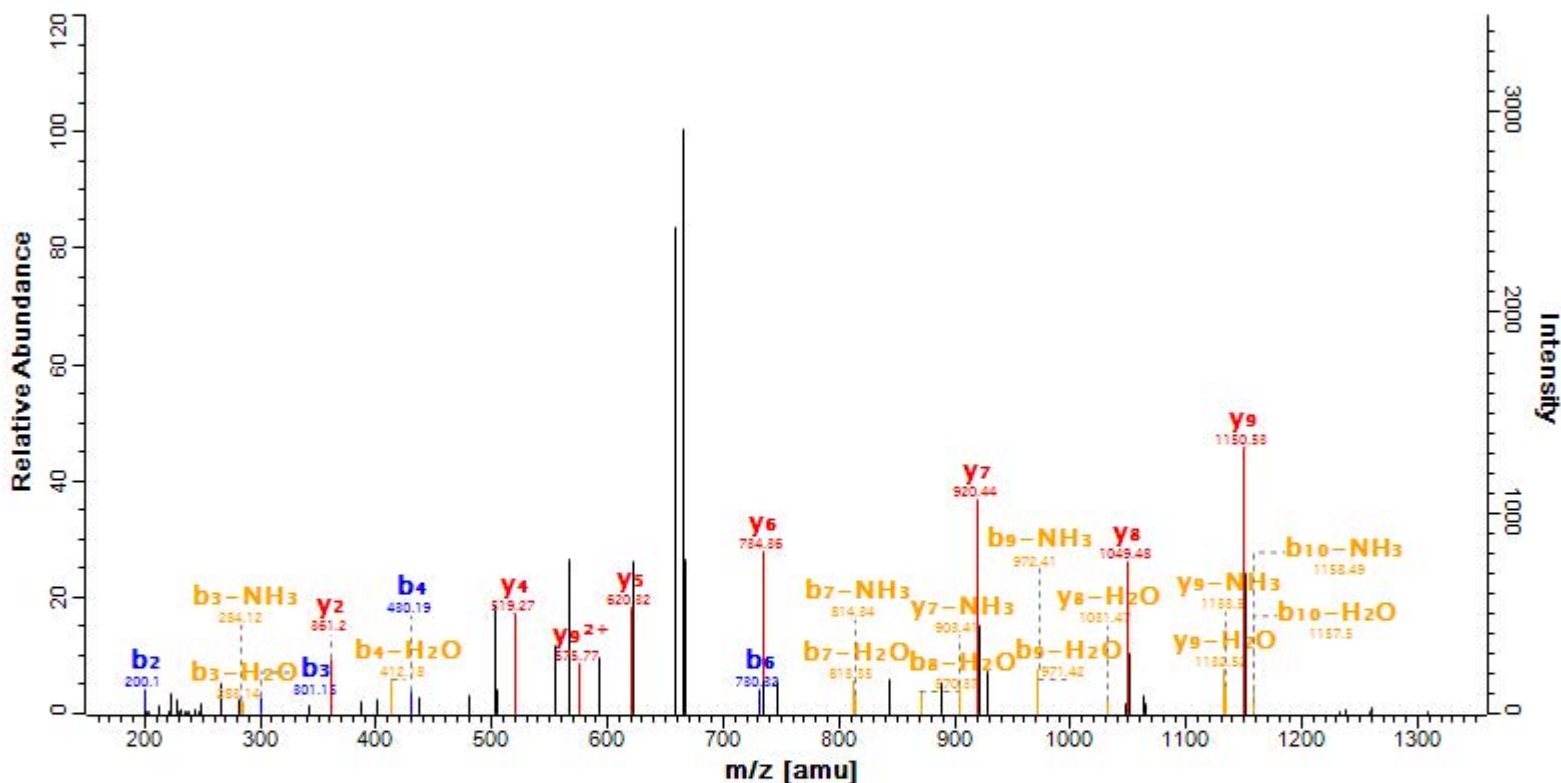

#### precursor information

|                   |                 |
|-------------------|-----------------|
| Mass:             | 1348.61594      |
| m/z:              | 675.31525       |
| Charge:           | 2+              |
| Retentiontime:    | 23.851999282836 |
| Score:            | 105.2036        |
| Mass Error [ppm]: | -0.051622       |
| PEP:              | 0.001502        |
| Precursor Type:   | ISO             |

#### general information

|                       |             |
|-----------------------|-------------|
| Annotation:           | 9 of 11     |
| AminoAcids Coverage:  | 82 %        |
| Intensity Coverage:   | 37 %        |
| Peak Coverage:        | 31 %        |
| Protein Localisation: | 196 ... 206 |

| b ion     |          |    |     |    | y ion    |           | y <sup>2+</sup> ion |           |
|-----------|----------|----|-----|----|----------|-----------|---------------------|-----------|
| Δ dalton  | mass     |    | seq |    | Δ dalton | mass      | Δ dalton            | mass      |
|           | 72.04439 | 1  | A   | 10 |          |           |                     |           |
| +0.044188 | 200.103  | 2  | Q   | 9  | 1278.586 |           | 1278.586            |           |
| +0.133472 | 301.1506 | 3  | T   | 8  | 1150.528 | -0.02735  | 575.7674            | +0.259846 |
| +0.209043 | 430.1932 | 4  | E   | 7  | 1049.48  | +0.029724 | 1049.48             |           |
|           | 616.2726 | 5  | W   | 6  | 920.4373 | -0.04157  | 920.4373            |           |
| +0.186962 | 730.3155 | 6  | N   | 5  | 734.358  | +0.024128 | 734.358             |           |
|           | 831.3632 | 7  | T   | 4  | 620.3151 | +0.185525 | 620.3151            |           |
|           | 888.3846 | 8  | G   | 3  | 519.2674 | +0.111743 | 519.2674            |           |
|           | 989.4323 | 9  | T   | 2  | 462.2459 |           | 462.2459            |           |
|           | 1175.512 | 10 | W   | 1  | 361.1983 | +0.080055 | 361.1983            |           |
|           |          | 11 | R   | 0  | 175.119  |           | 175.119             |           |

Scan number 3130 Raw file LNCAP\_Silac\_23F10\_set1\_05  
 Method ITMS: CID Pepti... 177.57

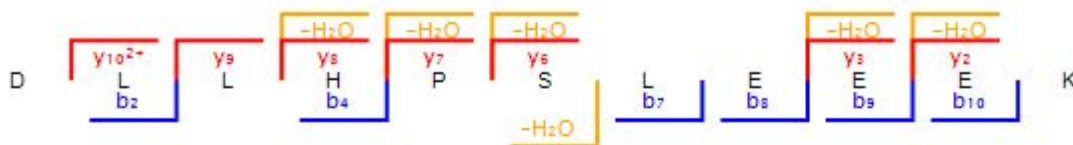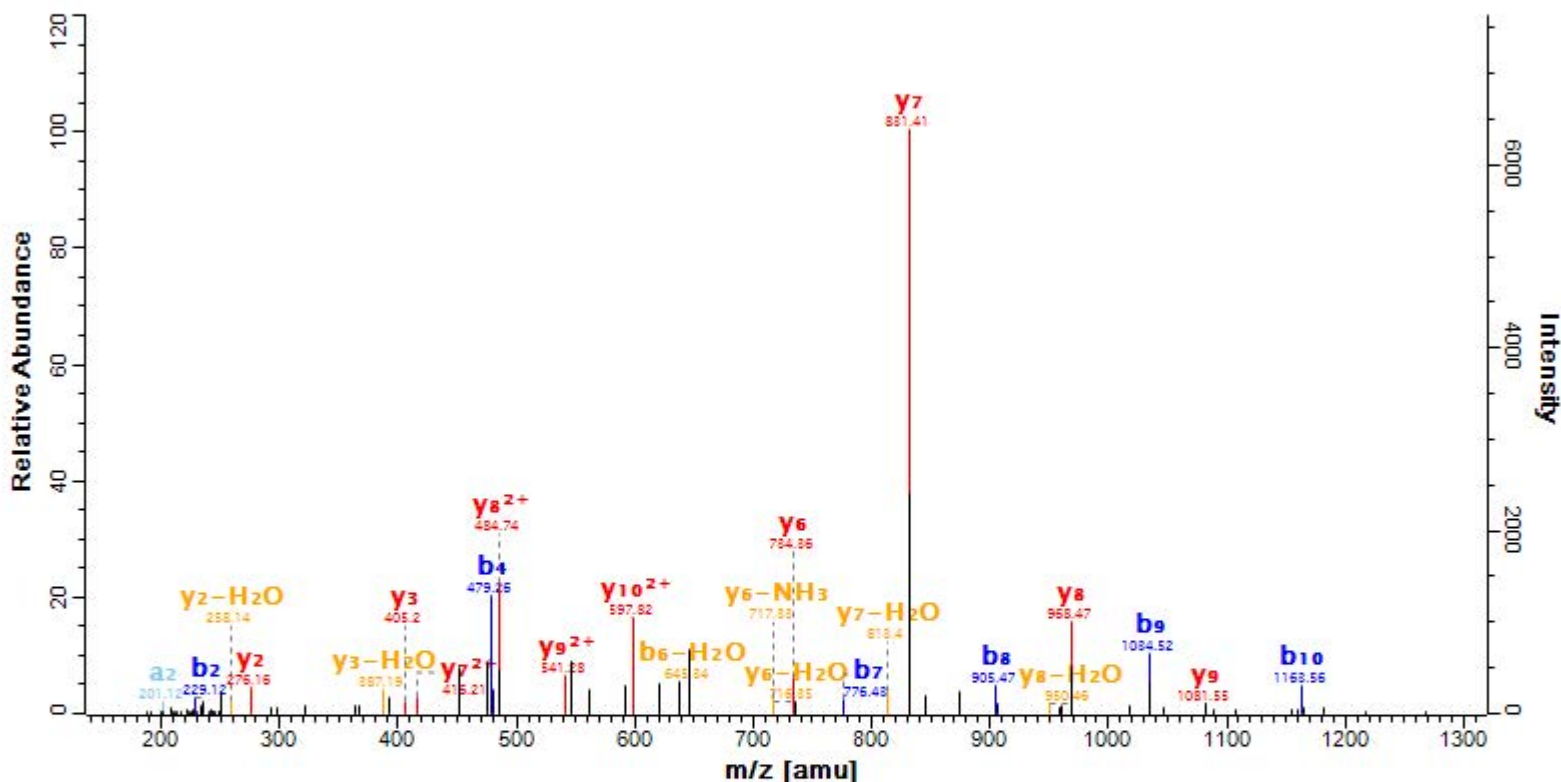

#### precursor information

|                   |                 |
|-------------------|-----------------|
| Mass:             | 1308.65602      |
| m/z:              | 655.33529       |
| Charge:           | 2+              |
| Retentiontime:    | 24.140178680419 |
| Score:            | 177.5723        |
| Mass Error [ppm]: | -0.093104       |
| PEP:              | 2.9479E-08      |
| Precursor Type:   | MULTI           |

#### general information

|                       |          |
|-----------------------|----------|
| Annotation:           | 9 of 11  |
| AminoAcids Coverage:  | 82 %     |
| Intensity Coverage:   | 60 %     |
| Peak Coverage:        | 25 %     |
| Protein Localisation: | 6 ... 16 |

| a ion    |        | b ion    |        |    |     |          | y ion  |          | y <sup>2+</sup> ion |         |
|----------|--------|----------|--------|----|-----|----------|--------|----------|---------------------|---------|
| Δ dalton | mass   | Δ dalton | mass   |    | seq | Δ dalton | mass   | Δ dalton | mass                |         |
|          | 88.039 |          | 116.03 | 1  | D   | 10       |        |          |                     |         |
| +0.1241  | 201.12 | -0.049   | 229.12 | 2  | L   | 9        | 1194.6 |          | 597.82              | +0.2447 |
|          | 314.21 |          | 342.2  | 3  | L   | 8        | 1081.6 | -0.009   | 541.28              | +0.157  |
|          | 451.27 | +0.0345  | 479.26 | 4  | H   | 7        | 968.47 | +0.0129  | 484.74              | +0.1072 |
|          | 548.32 |          | 576.31 | 5  | P   | 6        | 831.41 | +0.0276  | 416.21              | +0.2738 |
|          | 635.35 |          | 663.35 | 6  | S   | 5        | 734.36 | +0.0212  | 734.36              |         |
|          | 748.44 | +0.063   | 776.43 | 7  | L   | 4        | 647.32 |          | 647.32              |         |
|          | 877.48 | +0.0368  | 905.47 | 8  | E   | 3        | 534.24 |          | 534.24              |         |
|          | 1006.5 | -0.046   | 1034.5 | 9  | E   | 2        | 405.2  | +0.0991  | 405.2               |         |
|          | 1135.6 | +0.0255  | 1163.6 | 10 | E   | 1        | 276.16 | -0.015   | 276.16              |         |
|          |        |          |        | 11 | K   | 0        | 147.11 |          | 147.11              |         |

Scan number 3352 Raw file LNCAP\_Silac\_23F10\_set1\_05  
 Method ITMS; CID Pepti... 123.72

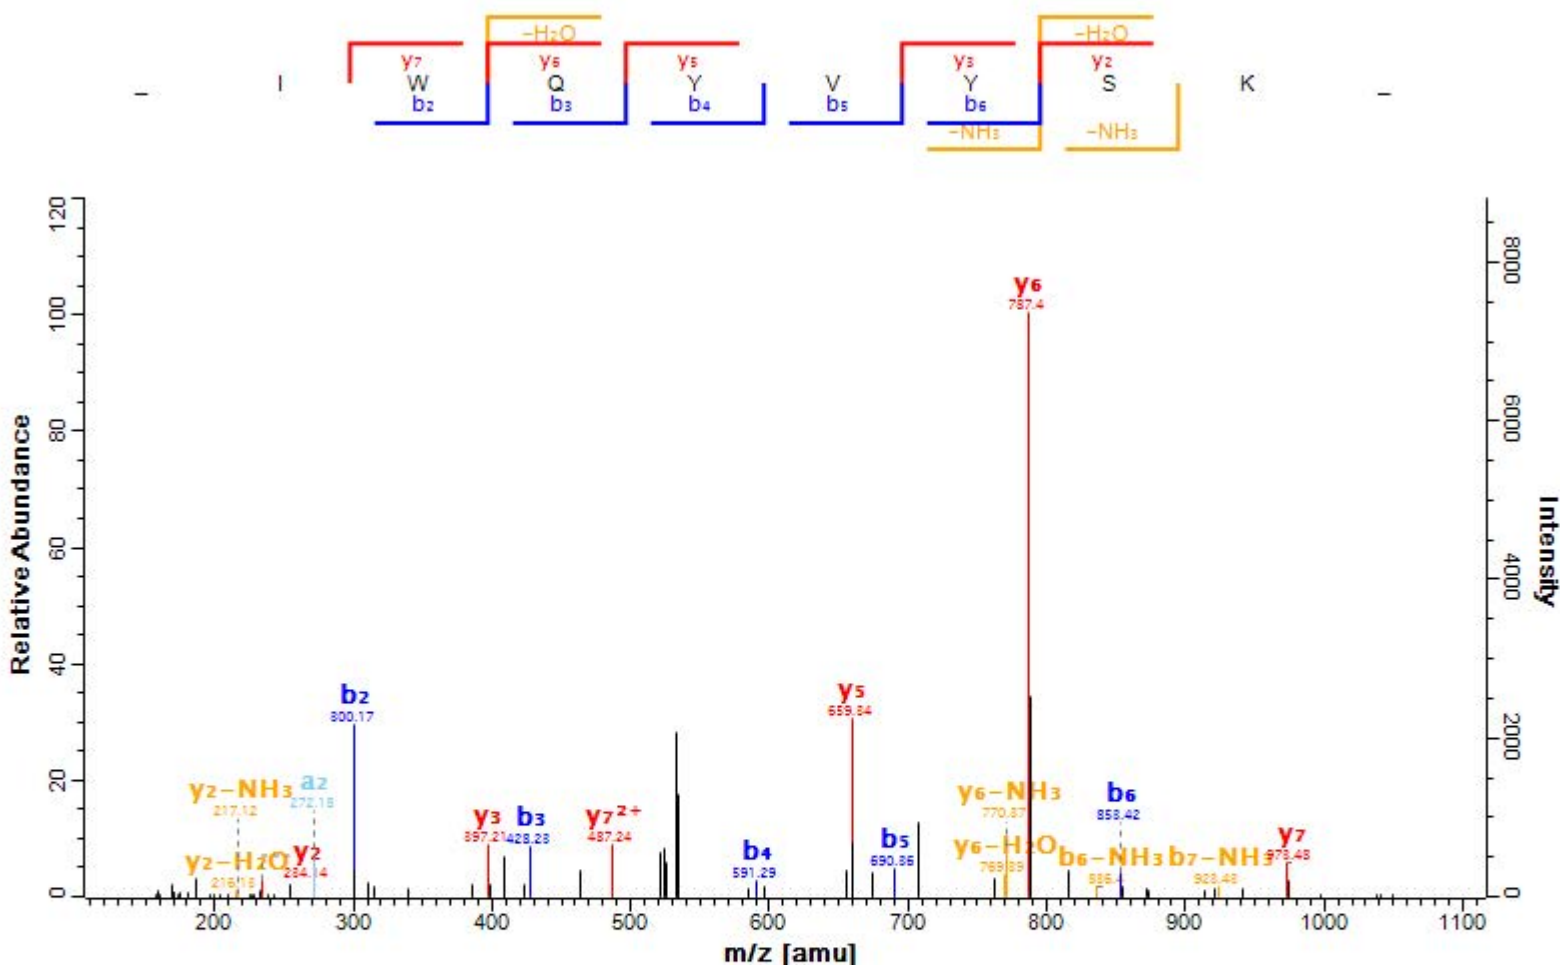

#### precursor information

|                       |                 |
|-----------------------|-----------------|
| Mass:                 | 1085.55452      |
| m/z:                  | 543.78454       |
| Charge:               | 2+              |
| Retentiontime:        | 25.317432403564 |
| Score:                | 123.7204        |
| Mass Error [ppm]:     | -0.053665       |
| g PEP:                | 0.0010535       |
| Annotation:           | 6 of 8          |
| AminoAcids Coverage:  | 75 %            |
| Intensity Coverage:   | 53 %            |
| Peak Coverage:        | 19 %            |
| Protein Localisation: | 89 ... 96       |

| a ion    |        | b ion    |        |   |     |   | y ion    |         | y <sup>2+</sup> ion |        |
|----------|--------|----------|--------|---|-----|---|----------|---------|---------------------|--------|
| Δ dalton | mass   | Δ dalton | mass   |   | seq |   | Δ dalton | mass    | Δ dalton            | mass   |
|          | 86.096 |          | 114.09 | 1 | I   | 7 |          |         |                     |        |
| +0.0852  | 272.18 | -0.015   | 300.17 | 2 | W   | 6 | 973.48   | +0.0173 | 487.24              | -0.025 |
|          | 400.23 | +0.0059  | 428.23 | 3 | Q   | 5 | 787.4    | +0.0515 | 787.4               |        |
|          | 563.3  | +0       | 591.29 | 4 | Y   | 4 | 659.34   | +0.0285 | 659.34              |        |
|          | 662.37 | -0.113   | 690.36 | 5 | V   | 3 | 496.28   |         | 496.28              |        |
|          | 825.43 | -0.033   | 853.42 | 6 | Y   | 2 | 397.21   | +0.1111 | 397.21              |        |
|          | 912.46 |          | 940.46 | 7 | S   | 1 | 234.14   | +0.1927 | 234.14              |        |
|          |        |          |        | 8 | K   | 0 | 147.11   |         | 147.11              |        |

Scan number 3696 Raw file LNCAP\_Silac\_23F10\_set1\_05  
 Method ITMS: CID Pepti... 102.52

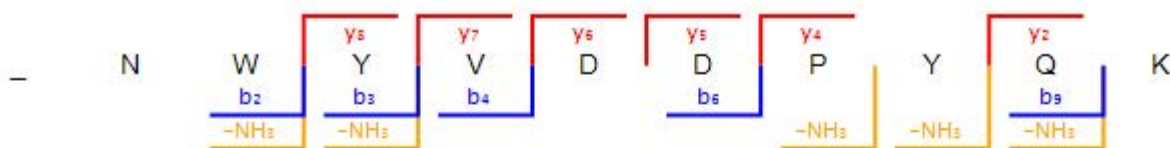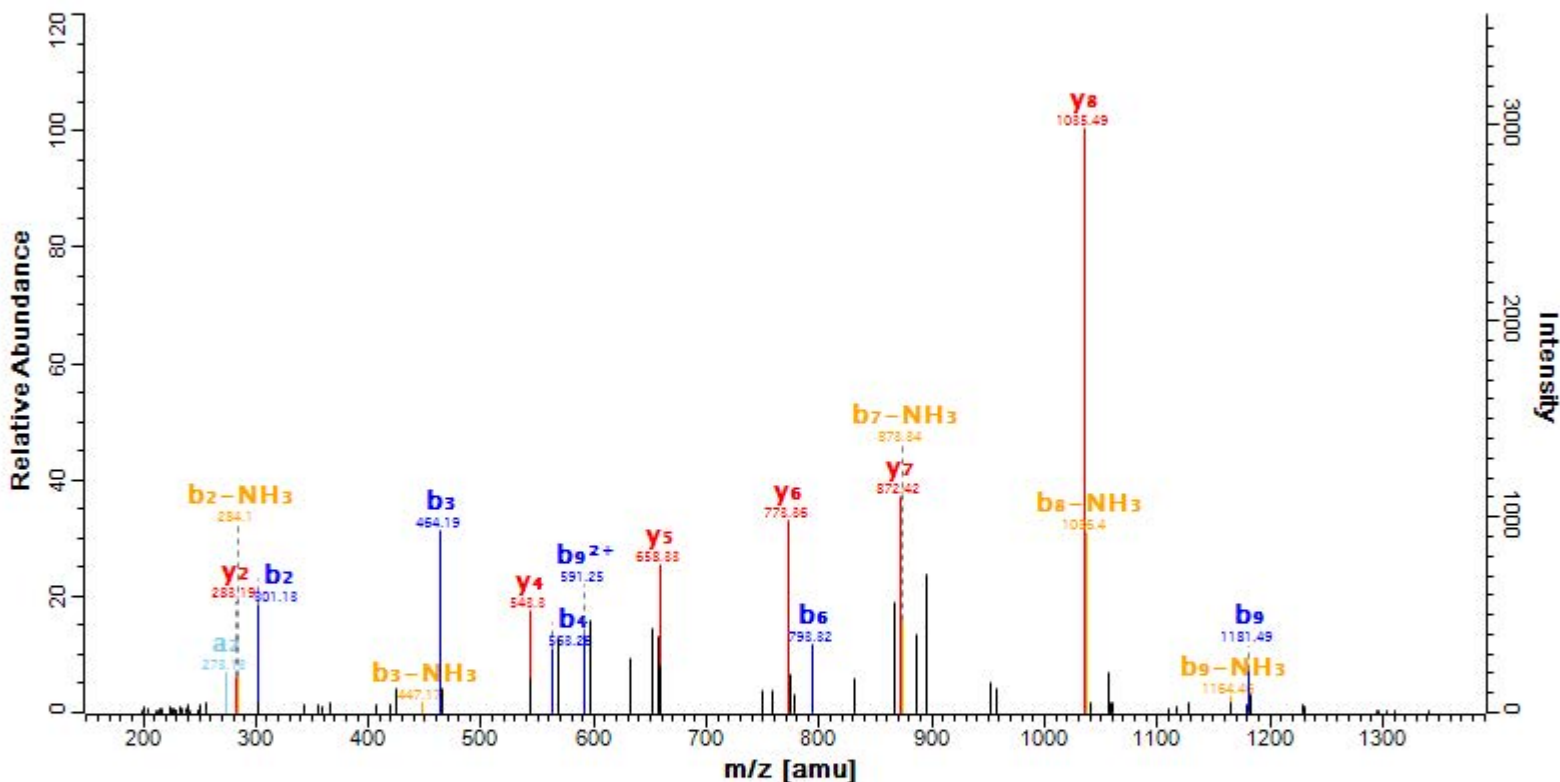

#### precursor information

|                   |                 |
|-------------------|-----------------|
| Mass:             | 1326.58782      |
| m/z:              | 664.30119       |
| Charge:           | 2+              |
| Retentiontime:    | 27.186162948608 |
| Score:            | 102.5236        |
| Mass Error [ppm]: | -0.1842         |
| PEP:              | 0.00075462      |
| Precursor Type:   | MULTI           |

|                       |             |
|-----------------------|-------------|
| Annotation:           | 8 of 10     |
| AminoAcids Coverage:  | 80 %        |
| Intensity Coverage:   | 60 %        |
| Peak Coverage:        | 19 %        |
| Protein Localisation: | 170 ... 179 |

| a ion    |        | b <sup>2+</sup> ion |        | b ion    |        | y ion |   |          |                |
|----------|--------|---------------------|--------|----------|--------|-------|---|----------|----------------|
| Δ dalton | mass   | Δ dalton            | mass   | Δ dalton | mass   | seq   |   | Δ dalton | mass           |
|          | 87.055 |                     | 115.05 |          | 115.05 | 1     | N | 9        |                |
| -0.008   | 273.13 |                     | 301.13 | +0.0495  | 301.13 | 2     | W | 8        | 1221.6         |
|          | 436.2  |                     | 464.19 | +0.088   | 464.19 | 3     | Y | 7        | 1035.5 -0.029  |
|          | 535.27 |                     | 563.26 | -0.007   | 563.26 | 4     | V | 6        | 872.42 +0.0543 |
|          | 650.29 |                     | 678.29 |          | 678.29 | 5     | D | 5        | 773.36 +0.0227 |
|          | 765.32 |                     | 793.32 | +0.0864  | 793.32 | 6     | D | 4        | 658.33 +0.0544 |
|          | 862.37 |                     | 890.37 |          | 890.37 | 7     | P | 3        | 543.3 +0.172   |
|          | 1025.4 |                     | 1053.4 |          | 1053.4 | 8     | Y | 2        | 446.25         |
|          | 1153.5 | +0.2814             | 591.25 | -0.043   | 1181.5 | 9     | Q | 1        | 283.19 +0.0107 |
|          |        |                     |        |          |        | 10    | K | 0        | 155.13         |

Scan number 4023 Raw file LNCAP\_Silac\_23F10\_set1\_05  
 Method ITMS; CID Pepti... 130.75

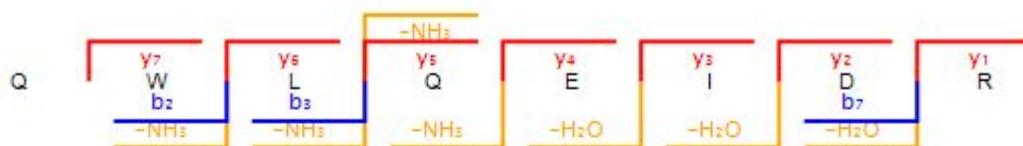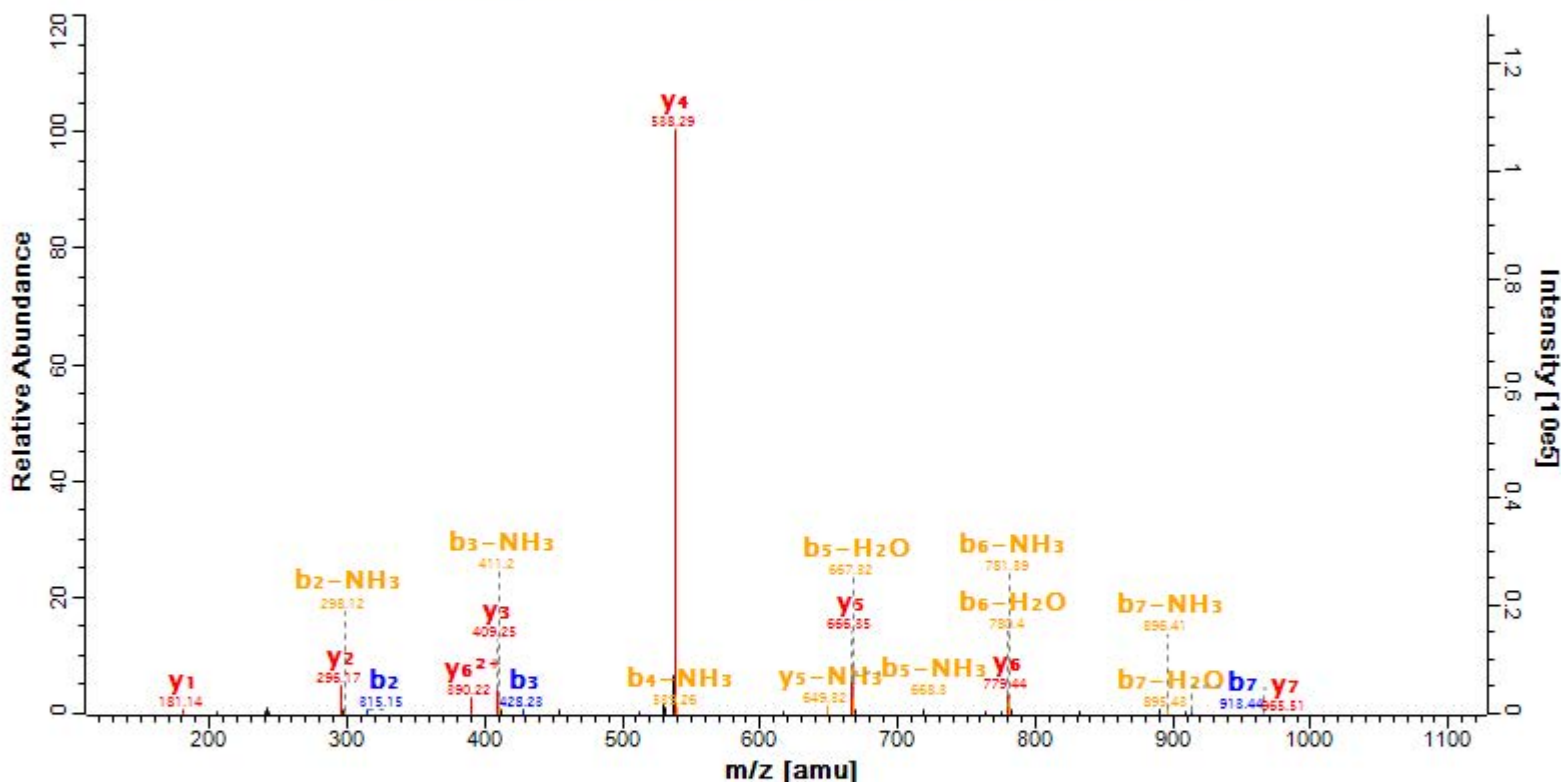

#### precursor information

|                       |                 |
|-----------------------|-----------------|
| Mass:                 | 1086.54559      |
| m/z:                  | 544.28007       |
| Charge:               | 2+              |
| Retentiontime:        | 28.991270065307 |
| Score:                | 130.7477        |
| Mass Error [ppm]:     | -0.20271        |
| g PEP:                | 0.00051527      |
| Annotation:           | 7 of 8          |
| AminoAcids Coverage:  | 88 %            |
| Intensity Coverage:   | 86 %            |
| Peak Coverage:        | 28 %            |
| Protein Localisation: | 101 ... 108     |

| b ion     |          |   |     |   | y ion    |           | y <sup>2+</sup> ion |           |
|-----------|----------|---|-----|---|----------|-----------|---------------------|-----------|
| Δ dalton  | mass     |   | seq |   | Δ dalton | mass      | Δ dalton            | mass      |
|           | 129.0659 | 1 | Q   | 7 |          |           |                     |           |
| +0.098363 | 315.1452 | 2 | W   | 6 | 965.5146 | -0.1779   | 965.5146            |           |
| -0.04021  | 428.2292 | 3 | L   | 5 | 779.4353 | +0.05424  | 390.2213            | +0.015151 |
|           | 556.2878 | 4 | Q   | 4 | 666.3513 | +0.052733 | 666.3513            |           |
|           | 685.3304 | 5 | E   | 3 | 538.2927 | +0.165876 | 538.2927            |           |
|           | 798.4145 | 6 | I   | 2 | 409.2501 | +0.090183 | 409.2501            |           |
| -0.01972  | 913.4414 | 7 | D   | 1 | 296.166  | +0.064475 | 296.166             |           |
|           |          | 8 | R   | 0 | 181.1391 | +0.077746 | 181.1391            |           |

Scan number 4258 Raw file LNCAP\_Silac\_23F10\_set1\_05  
 Method ITMS; CID Pepti... 371.31

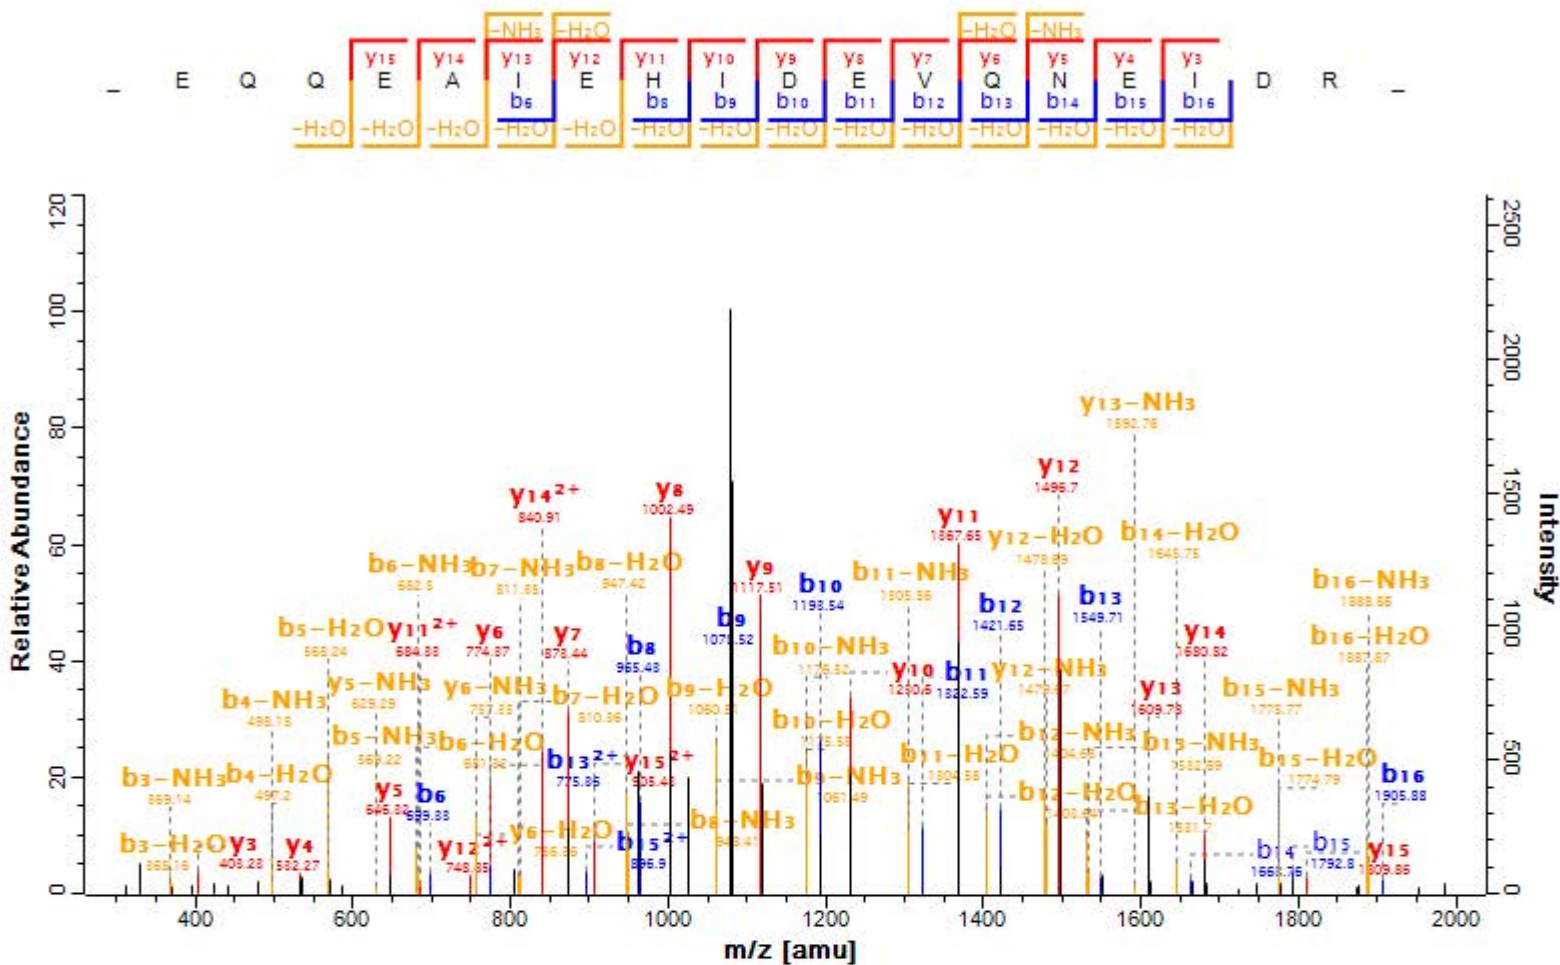

precursor information

|                   |                 |
|-------------------|-----------------|
| Mass:             | 2194.01424      |
| m/z:              | 1098.01439      |
| Charge:           | 2+              |
| Retentiontime:    | 30.273803710937 |
| Score:            | 371.3114        |
| Mass Error [ppm]: | 0.18989         |
| PEP:              | 1.5001E-178     |
| Precursor Type:   | MULTI           |

general information

|                       |           |
|-----------------------|-----------|
| Annotation:           | 14 of 18  |
| AminoAcids Coverage:  | 78 %      |
| Intensity Coverage:   | 63 %      |
| Peak Coverage:        | 58 %      |
| Protein Localisation: | 27 ... 44 |

| b <sup>2+</sup> ion |        | b ion    |        | seq |   |    | y ion    |         | y <sup>2+</sup> ion |         |
|---------------------|--------|----------|--------|-----|---|----|----------|---------|---------------------|---------|
| Δ dalton            | mass   | Δ dalton | mass   |     |   |    | Δ dalton | mass    | Δ dalton            | mass    |
|                     | 130.05 |          | 130.05 | 1   | E | 17 |          |         |                     |         |
|                     | 258.11 |          | 258.11 | 2   | Q | 16 | 2066     |         | 2066                |         |
|                     | 386.17 |          | 386.17 | 3   | Q | 15 | 1937.9   |         | 1937.9              |         |
|                     | 515.21 |          | 515.21 | 4   | E | 14 | 1809.9   | -0.055  | 905.43              | +0.188  |
|                     | 586.25 |          | 586.25 | 5   | A | 13 | 1680.8   | -0.003  | 840.91              | +0.2631 |
|                     | 699.33 | +0.1541  | 699.33 | 6   | I | 12 | 1609.8   | -0.008  | 1609.8              |         |
|                     | 828.37 |          | 828.37 | 7   | E | 11 | 1496.7   | -0.046  | 748.85              | +0.144  |
|                     | 965.43 | +0.0446  | 965.43 | 8   | H | 10 | 1367.7   | -0.013  | 684.33              | -0.016  |
|                     | 1078.5 | +0.047   | 1078.5 | 9   | I | 9  | 1230.6   | -0.007  | 1230.6              |         |
|                     | 1193.5 | -0.01    | 1193.5 | 10  | D | 8  | 1117.5   | -0.011  | 1117.5              |         |
|                     | 1322.6 | +0.0718  | 1322.6 | 11  | E | 7  | 1002.5   | +0.0022 | 1002.5              |         |
|                     | 1421.7 | -0.013   | 1421.7 | 12  | V | 6  | 873.44   | +0.0338 | 873.44              |         |
| +0.115              | 775.36 | +0.1901  | 1549.7 | 13  | Q | 5  | 774.37   | +0.039  | 774.37              |         |
|                     | 1663.8 | -0.115   | 1663.8 | 14  | N | 4  | 646.32   | +0.1708 | 646.32              |         |
| -0.146              | 896.9  | -0.056   | 1792.8 | 15  | E | 3  | 532.27   | +0.1748 | 532.27              |         |
|                     | 1905.9 | +0.0857  | 1905.9 | 16  | I | 2  | 403.23   | -0.063  | 403.23              |         |
|                     | 2020.9 |          | 2020.9 | 17  | D | 1  | 290.15   |         | 290.15              |         |
|                     |        |          |        | 18  | R | 0  | 175.12   |         | 175.12              |         |



Scan number 4294 Raw file LNCAP\_Silac\_23F10\_set1\_05  
 Method ITMS; CID Pepti... 186.77

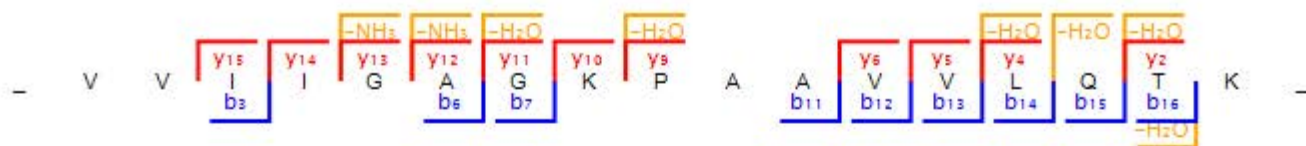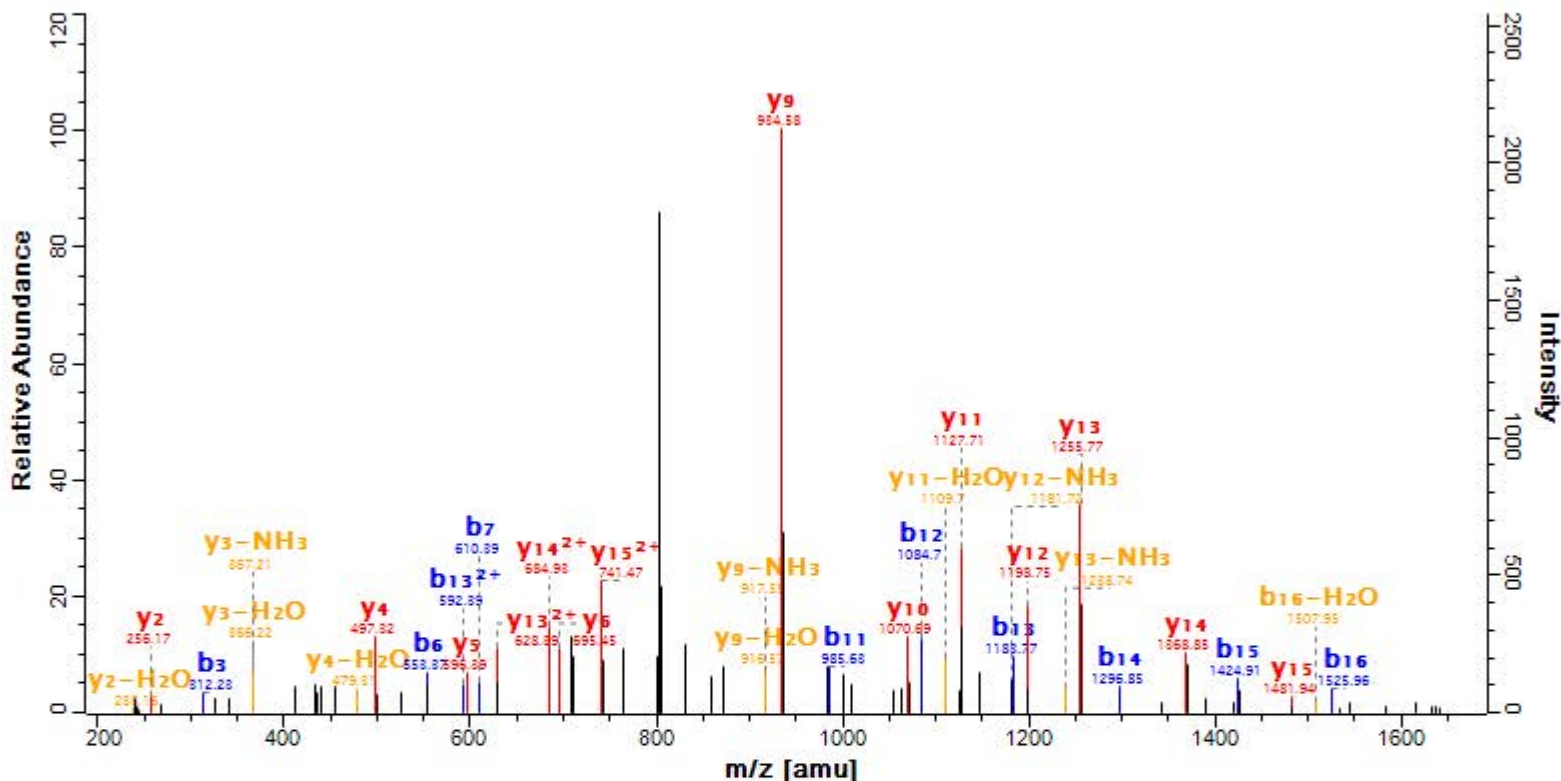

#### precursor information

|                   |                 |
|-------------------|-----------------|
| Mass:             | 1663.04012      |
| m/z:              | 832.52733       |
| Charge:           | 2+              |
| Retentiontime:    | 30.465564727783 |
| Score:            | 186.7722        |
| Mass Error [ppm]: | 0.29075         |
| PEP:              | 7.3096E-34      |
| Precursor Type:   | MULTI           |

#### general information

|                       |             |
|-----------------------|-------------|
| Annotation:           | 13 of 17    |
| AminoAcids Coverage:  | 76 %        |
| Intensity Coverage:   | 51 %        |
| Peak Coverage:        | 37 %        |
| Protein Localisation: | 943 ... 959 |

| b <sup>2+</sup> ion |        | b ion    |        |     |   |          | y ion  |          | y <sup>2+</sup> ion |         |
|---------------------|--------|----------|--------|-----|---|----------|--------|----------|---------------------|---------|
| Δ dalton            | mass   | Δ dalton | mass   | seq |   | Δ dalton | mass   | Δ dalton | mass                |         |
|                     | 100.08 |          | 100.08 | 1   | V | 16       |        |          |                     |         |
|                     | 199.14 |          | 199.14 | 2   | V | 15       | 1581   |          | 1581                |         |
|                     | 312.23 | +0.0684  | 312.23 | 3   | I | 14       | 1481.9 | +0.0394  | 741.47              | +0.0421 |
|                     | 425.31 |          | 425.31 | 4   | I | 13       | 1368.9 | -0.061   | 684.93              | +0.3324 |
|                     | 482.33 |          | 482.33 | 5   | G | 12       | 1255.8 | -0.093   | 628.39              | +0.0618 |
|                     | 553.37 | +0.0734  | 553.37 | 6   | A | 11       | 1198.7 | -0.091   | 1198.7              |         |
|                     | 610.39 | +0.108   | 610.39 | 7   | G | 10       | 1127.7 | +0.0333  | 1127.7              |         |
|                     | 746.5  |          | 746.5  | 8   | K | 9        | 1070.7 | +0.0831  | 1070.7              |         |
|                     | 843.55 |          | 843.55 | 9   | P | 8        | 934.58 | +0       | 934.58              |         |
|                     | 914.59 |          | 914.59 | 10  | A | 7        | 837.53 |          | 837.53              |         |
|                     | 985.63 | +0.0024  | 985.63 | 11  | A | 6        | 766.49 |          | 766.49              |         |
|                     | 1084.7 | -0.014   | 1084.7 | 12  | V | 5        | 695.45 | +0.1636  | 695.45              |         |
| -0.006              | 592.39 | -0.076   | 1183.8 | 13  | V | 4        | 596.39 | +0.1954  | 596.39              |         |
|                     | 1296.8 | +0.0603  | 1296.8 | 14  | L | 3        | 497.32 | +0.0896  | 497.32              |         |
|                     | 1424.9 | +0.1835  | 1424.9 | 15  | Q | 2        | 384.23 |          | 384.23              |         |
|                     | 1526   | +0.1075  | 1526   | 16  | T | 1        | 256.17 | +0.0405  | 256.17              |         |
|                     |        |          |        | 17  | K | 0        | 155.13 |          | 155.13              |         |

Scan number 4773 Raw file LNCAP\_Silac\_23F10\_set1\_05  
 Method ITMS; CID Pepti... 82.26

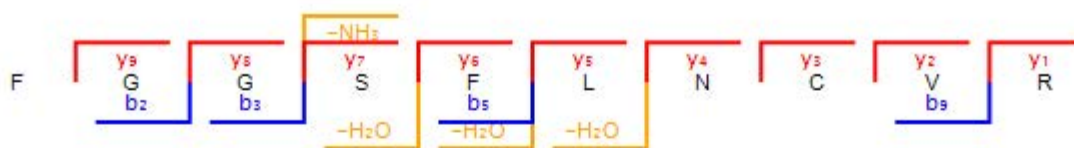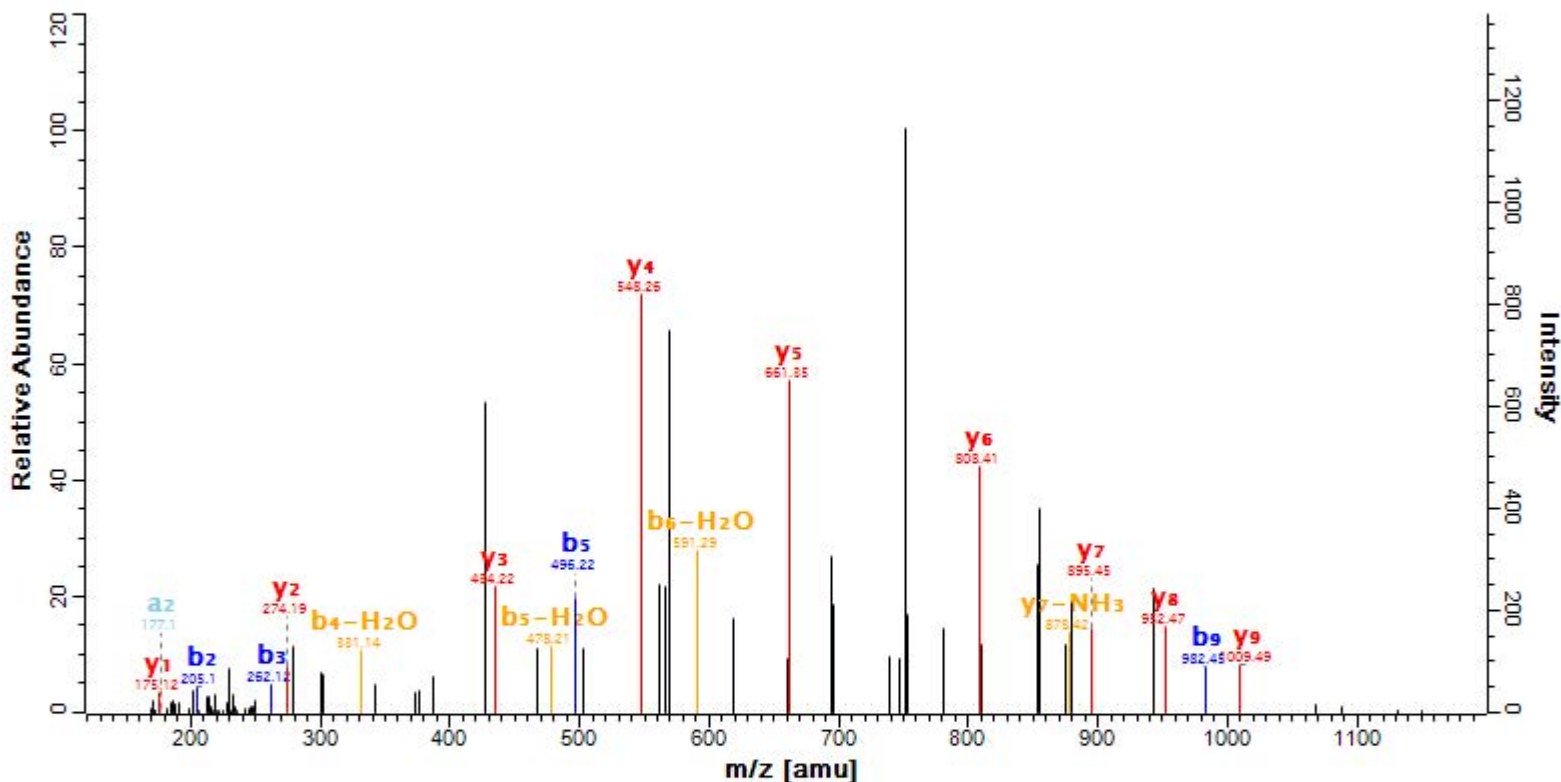

#### precursor information

|                   |                 |
|-------------------|-----------------|
| Mass:             | 1155.54984      |
| m/z:              | 578.7822        |
| Charge:           | 2+              |
| Retentiontime:    | 33.146770477294 |
| Score:            | 82.26067        |
| Mass Error [ppm]: | 0.28479         |
| PEP:              | 0.0046008       |
| Precursor Type:   | MULTI           |

|                       |             |
|-----------------------|-------------|
| Annotation:           | 9 of 10     |
| AminoAcids Coverage:  | 90 %        |
| Intensity Coverage:   | 34 %        |
| Peak Coverage:        | 19 %        |
| Protein Localisation: | 163 ... 172 |

| a ion           |          | b ion           |          | y ion |                 |      |          |           |
|-----------------|----------|-----------------|----------|-------|-----------------|------|----------|-----------|
| $\Delta$ dalton | mass     | $\Delta$ dalton | mass     | seq   | $\Delta$ dalton | mass |          |           |
|                 | 120.0808 |                 | 148.0757 | 1     | F               | 9    |          |           |
| +0.131785       | 177.1022 | +0.03221        | 205.0972 | 2     | G               | 8    | 1009.488 | +0.054776 |
|                 | 234.1237 | +0.036961       | 262.1186 | 3     | G               | 7    | 952.4669 | +0.1623   |
|                 | 321.1557 |                 | 349.1506 | 4     | S               | 6    | 895.4454 | +0.073656 |
|                 | 468.2241 | +0.382441       | 496.2191 | 5     | F               | 5    | 808.4134 | -0.00168  |
|                 | 581.3082 |                 | 609.3031 | 6     | L               | 4    | 661.345  | +0.117214 |
|                 | 695.3511 |                 | 723.3461 | 7     | N               | 3    | 548.2609 | +0.070662 |
|                 | 855.3818 |                 | 883.3767 | 8     | C               | 2    | 434.218  | +0.039127 |
|                 | 954.4502 | +0.109513       | 982.4451 | 9     | V               | 1    | 274.1874 | +0.08186  |
|                 |          |                 |          | 10    | R               | 0    | 175.119  | +0.058752 |

Scan number 5230 Raw file LNCAP\_Silac\_23F10\_set1\_05  
 Method ITMS: CID Pepti... 99.82

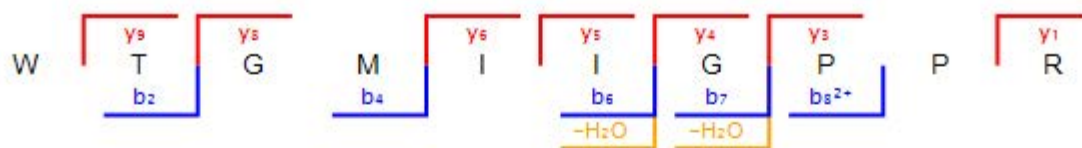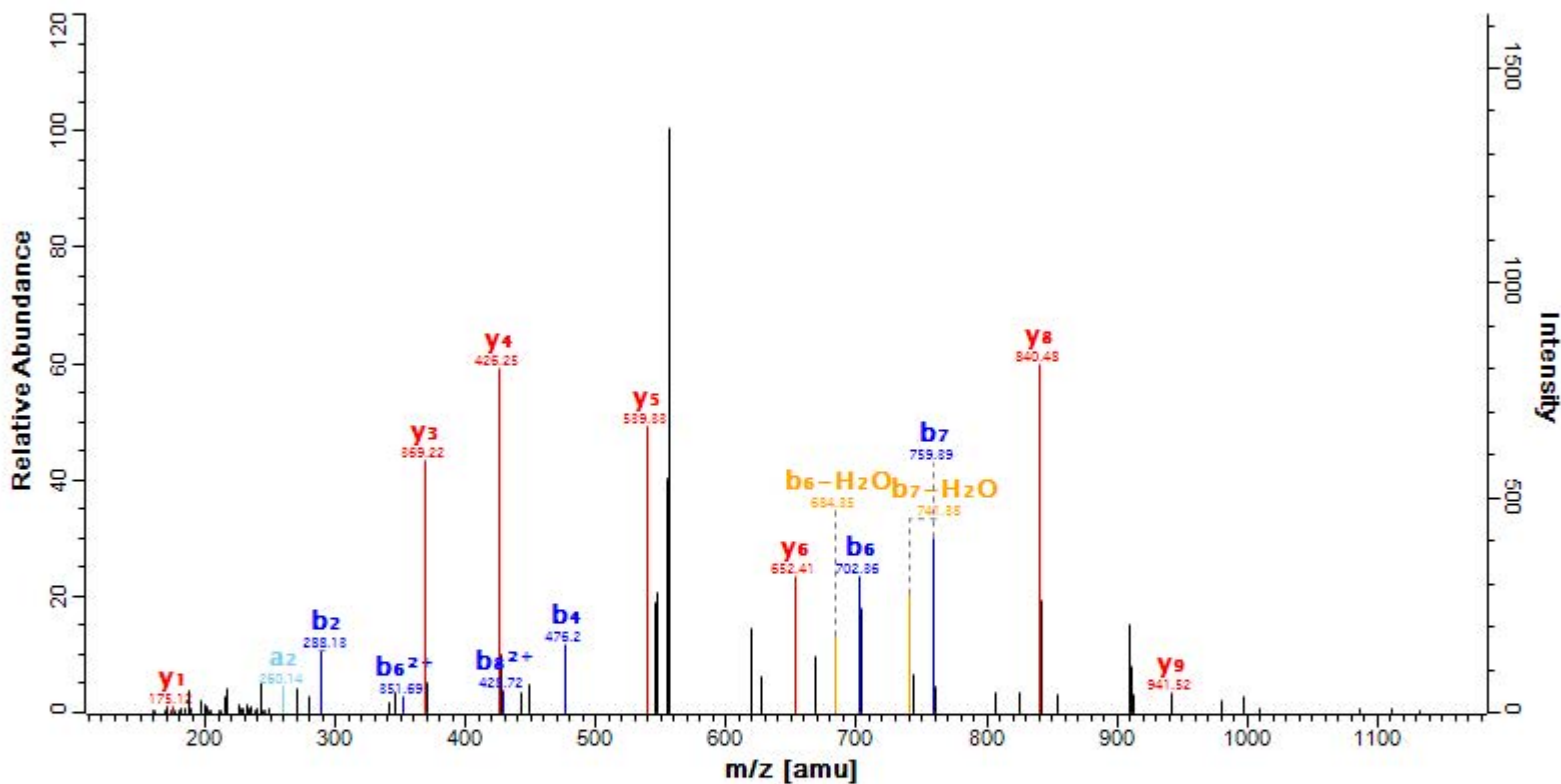

### precursor information

|                   |                 |
|-------------------|-----------------|
| Mass:             | 1126.59563      |
| m/z:              | 564.30509       |
| Charge:           | 2+              |
| Retentiontime:    | 35.646301269531 |
| Score:            | 99.81501        |
| Mass Error [ppm]: | -0.093788       |
| PEP:              | 0.0033853       |
| Precursor Type:   | ISO             |

|                       |           |
|-----------------------|-----------|
| Annotation:           | 8 of 10   |
| AminoAcids Coverage:  | 80 %      |
| Intensity Coverage:   | 46 %      |
| Peak Coverage:        | 17 %      |
| Protein Localisation: | 46 ... 55 |

| a ion    |        | b <sup>2+</sup> ion |        | b ion    |        | y ion |   |          |                |
|----------|--------|---------------------|--------|----------|--------|-------|---|----------|----------------|
| Δ dalton | mass   | Δ dalton            | mass   | Δ dalton | mass   | seq   |   | Δ dalton | mass           |
|          | 159.09 |                     | 187.09 |          | 187.09 | 1     | W | 9        |                |
| +0.0564  | 260.14 |                     | 288.13 | +0.0471  | 288.13 | 2     | T | 8        | 941.52 +0.0063 |
|          | 317.16 |                     | 345.16 |          | 345.16 | 3     | G | 7        | 840.48 -0.029  |
|          | 448.2  |                     | 476.2  | -0.029   | 476.2  | 4     | M | 6        | 783.45         |
|          | 561.29 |                     | 589.28 |          | 589.28 | 5     | I | 5        | 652.41 +0.081  |
|          | 674.37 | -0.38               | 351.69 | -0.069   | 702.36 | 6     | I | 4        | 539.33 +0.0962 |
|          | 731.39 |                     | 759.39 | -0.117   | 759.39 | 7     | G | 3        | 426.25 +0.0382 |
|          | 828.44 | -0.126              | 428.72 |          | 856.44 | 8     | P | 2        | 369.22 -0.005  |
|          | 925.5  |                     | 953.49 |          | 953.49 | 9     | P | 1        | 272.17         |
|          |        |                     |        |          |        | 10    | R | 0        | 175.12 -0.015  |

Scan number 5470 Raw file LNCAP\_Silac\_23F10\_set1\_05  
 Method ITMS; CID Pepti... 62.81

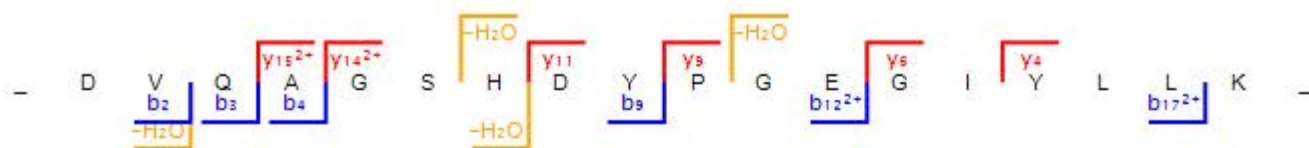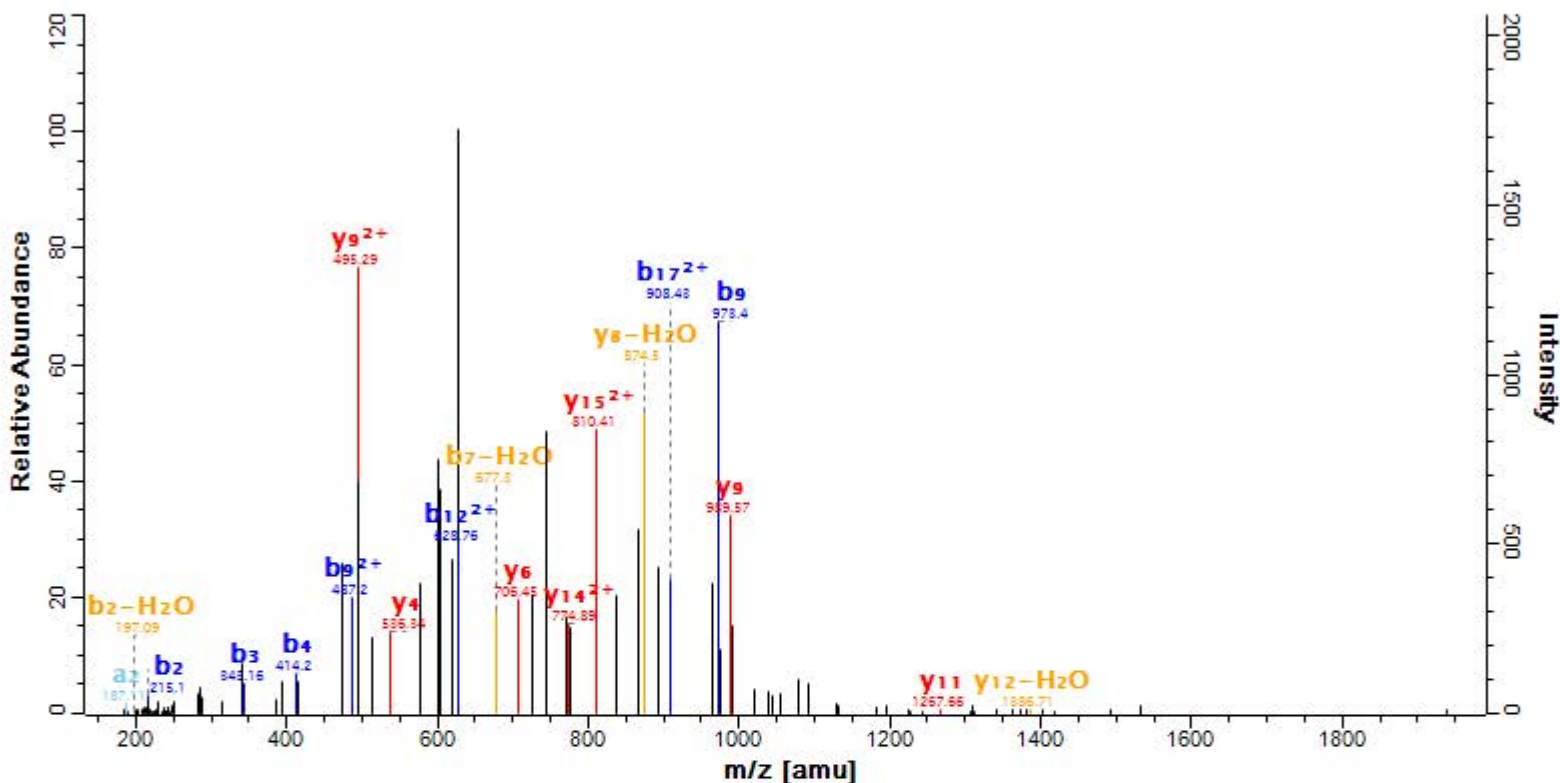

precursor information

|                   |                 |
|-------------------|-----------------|
| Mass:             | 1960.9543       |
| m/z:              | 654.65871       |
| Charge:           | 3+              |
| Retentiontime:    | 36.998897552490 |
| Score:            | 62.81318        |
| Mass Error [ppm]: | 0.6348          |
| PEP:              | 0.0015497       |
| Precursor Type:   | MULTI           |

|       | a ion         | b <sup>2+</sup> ion | b ion         |       |    |               | y ion         | y <sup>2+</sup> ion |       |
|-------|---------------|---------------------|---------------|-------|----|---------------|---------------|---------------------|-------|
|       | Δ dalton mass | Δ dalton mass       | Δ dalton mass | seq   |    | Δ dalton mass | Δ dalton mass |                     |       |
|       | 88.04         | 116                 | 116           | 1     | D  | 17            |               |                     |       |
| -0.15 | 187.1         | 215.1               | -0.09         | 2     | V  | 16            | 1847          | 1847                |       |
|       | 315.2         | 343.2               | +0.12         | 3     | Q  | 15            | 1748          | 1748                |       |
|       | 386.2         | 414.2               | -0.22         | 4     | A  | 14            | 1620          | 810.4 +0.19         |       |
|       | 443.2         | 471.2               |               | 5     | G  | 13            | 1549          | 774.9 -0.08         |       |
|       | 530.3         | 558.3               |               | 6     | S  | 12            | 1492          | 1492                |       |
|       | 667.3         | 695.3               |               | 7     | H  | 11            | 1405          | 1405                |       |
|       | 782.3         | 810.3               |               | 8     | D  | 10            | 1268          | 1268 +0.34          |       |
|       | 945.4         | +0.03               | 1487.2        | +0.04 | 6  | 9             | 1153          | 1153                |       |
|       | 1042          | 1070                |               | 10    | P  | 8             | 989.6 +0.00   | 495.3 +0.08         |       |
|       | 1099          | 1127                |               | 11    | G  | 7             | 892.5         | 892.5               |       |
|       | 1229          | +0.22               | 628.8         |       | 12 | E             | 6             | 835.5               | 835.5 |
|       | 1286          | 1314                |               | 13    | G  | 5             | 706.4 +0.06   | 706.4               |       |
|       | 1399          | 1427                |               | 14    | I  | 4             | 649.4         | 649.4               |       |
|       | 1562          | 1590                |               | 15    | Y  | 3             | 536.3 +0.13   | 536.3               |       |
|       | 1675          | 1703                |               | 16    | L  | 2             | 373.3         | 373.3               |       |
|       | 1788          | +0.17               | 1908.4        |       | 17 | L             | 1             | 260.2               | 260.2 |
|       |               |                     |               | 18    | K  | 0             | 147.1         | 147.1               |       |

general information

|                       |             |
|-----------------------|-------------|
| Annotation:           | 13 of 18    |
| AminoAcids Coverage:  | 72 %        |
| Intensity Coverage:   | 39 %        |
| Peak Coverage:        | 18 %        |
| Protein Localisation: | 389 ... 406 |

Scan number 5737 Raw file LNCAP\_Silac\_23F10\_set1\_05  
 Method ITMS: CID Peptide 135.79

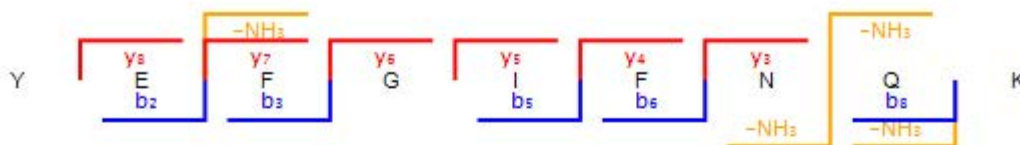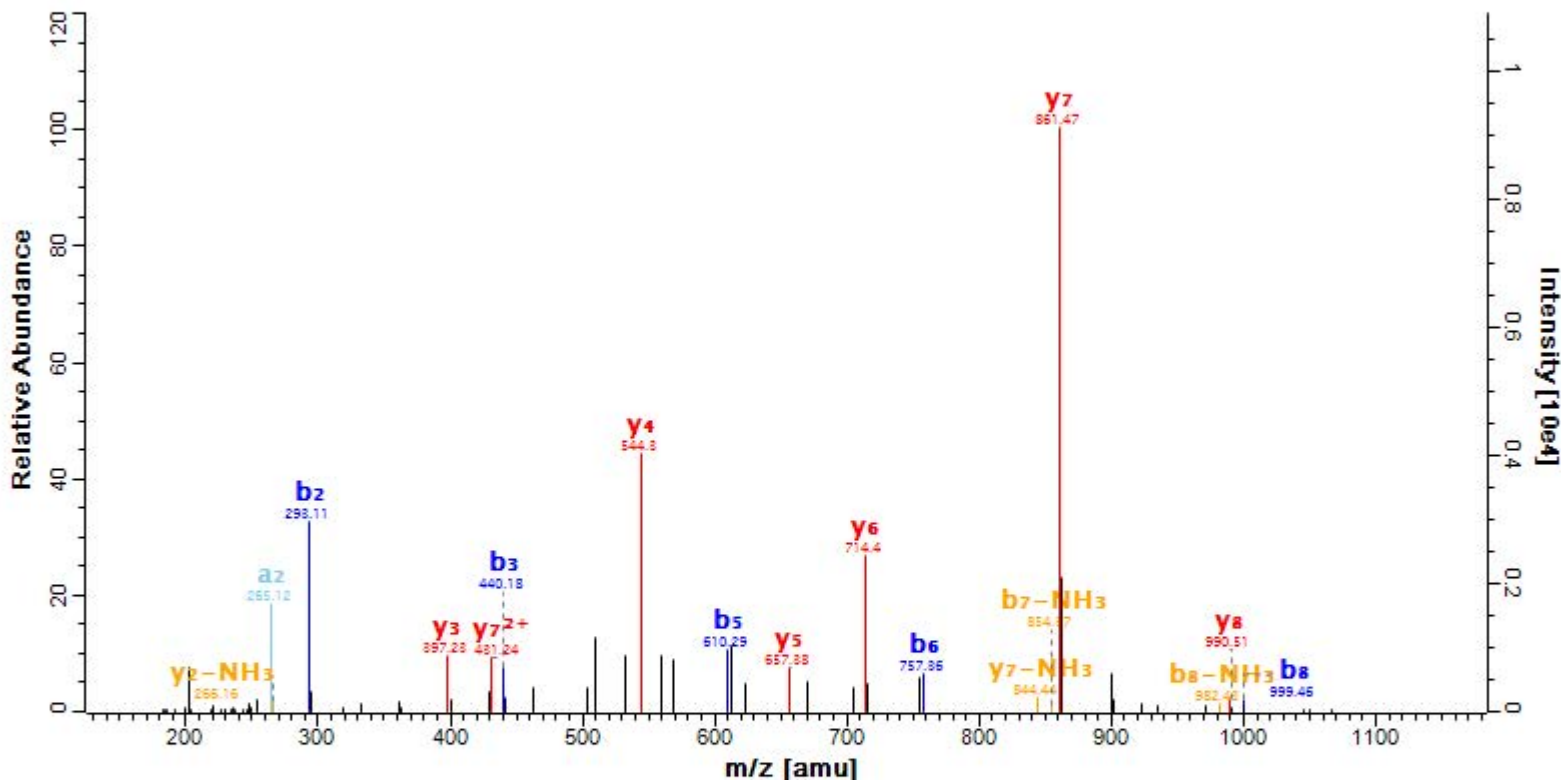

#### precursor information

|                       |                 |
|-----------------------|-----------------|
| Mass:                 | 1144.55513      |
| m/z:                  | 573.28484       |
| Charge:               | 2+              |
| Retention time:       | 38.502571105957 |
| Score:                | 135.7909        |
| Mass Error [ppm]:     | -0.15451        |
| PEP:                  | 0.001016        |
| Precursor Type:       | MULTI           |
| Annotation:           | 7 of 9          |
| AminoAcids Coverage:  | 78 %            |
| Intensity Coverage:   | 64 %            |
| Peak Coverage:        | 19 %            |
| Protein Localisation: | 162 ... 170     |

| a ion    |        | b ion    |        | seq |   |   | y ion    |         | y <sup>2+</sup> ion |         |
|----------|--------|----------|--------|-----|---|---|----------|---------|---------------------|---------|
| Δ dalton | mass   | Δ dalton | mass   |     |   |   | Δ dalton | mass    | Δ dalton            | mass    |
|          | 136.08 |          | 164.07 | 1   | Y | 8 |          |         |                     |         |
| -0.026   | 265.12 | -0.008   | 293.11 | 2   | E | 7 | 990.51   | -0.414  | 990.51              |         |
|          | 412.19 | +0.0554  | 440.18 | 3   | F | 6 | 861.47   | -0.02   | 431.24              | +0.1312 |
|          | 469.21 |          | 497.2  | 4   | G | 5 | 714.4    | +0.0178 | 714.4               |         |
|          | 582.29 | -0.037   | 610.29 | 5   | I | 4 | 657.38   | -0.116  | 657.38              |         |
|          | 729.36 | -0.057   | 757.36 | 6   | F | 3 | 544.3    | +0.0216 | 544.3               |         |
|          | 843.4  |          | 871.4  | 7   | N | 2 | 397.23   | +0.007  | 397.23              |         |
|          | 971.46 | -0.011   | 999.46 | 8   | Q | 1 | 283.19   |         | 283.19              |         |
|          |        |          |        | 9   | K | 0 | 155.13   |         | 155.13              |         |

Scan number 5812 Raw file LNCAP\_Silac\_23F10\_set1\_05  
 Method ITMS; CID Pepti... 158.11

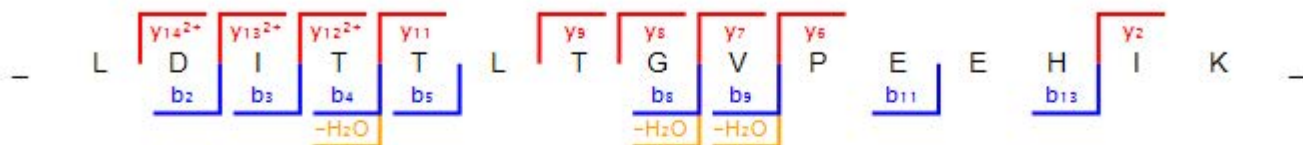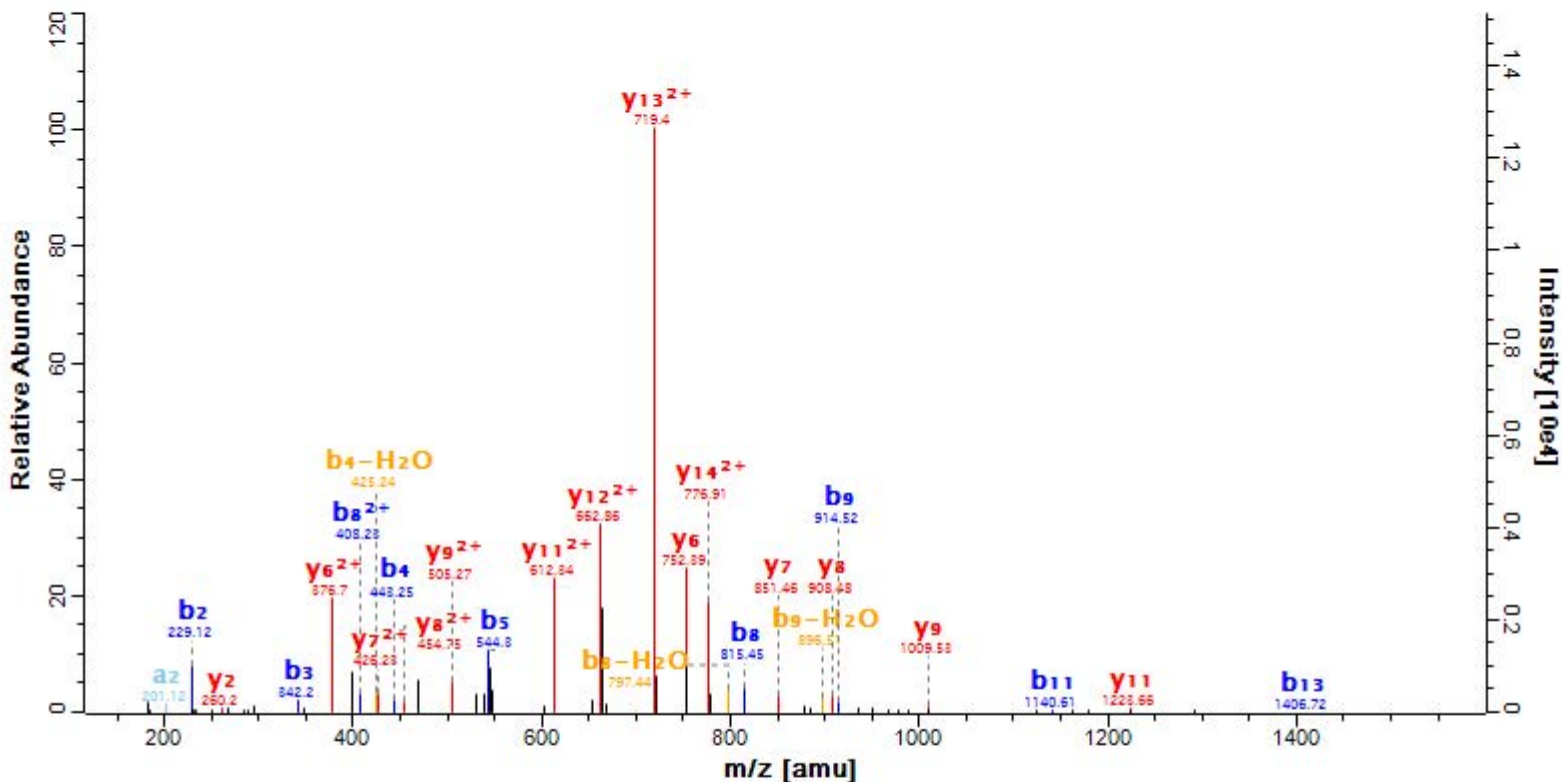

precursor information

|                   |                 |
|-------------------|-----------------|
| Mass:             | 1664.89913      |
| m/z:              | 555.97365       |
| Charge:           | 3+              |
| Retentiontime:    | 38.911548614502 |
| Score:            | 158.1111        |
| Mass Error [ppm]: | 0.37714         |
| PEP:              | 3.4384E-14      |
| Precursor Type:   | MULTI           |

general information

|                       |           |
|-----------------------|-----------|
| Annotation:           | 11 of 15  |
| AminoAcids Coverage:  | 73 %      |
| Intensity Coverage:   | 76 %      |
| Peak Coverage:        | 31 %      |
| Protein Localisation: | 59 ... 73 |

| a ion         | b <sup>2+</sup> ion | b ion         | seq | y ion         | y <sup>2+</sup> ion |
|---------------|---------------------|---------------|-----|---------------|---------------------|
| Δ dalton mass | Δ dalton mass       | Δ dalton mass |     | Δ dalton mass | Δ dalton mass       |
| 86.1          | 114.1               | 114.1         | 1   |               |                     |
| +0.097201.1   | 229.1               | -0.01 229.1   | 2   | 1553          | 776.9 +0.271        |
| 314.2         | 342.2               | +0.016342.2   | 3   | 1438          | 719.4 +0.239        |
| 415.3         | 443.3               | +0.013443.3   | 4   | 1325          | 662.9 +0.079        |
| 516.3         | 544.3               | -0.1 544.3    | 5   | 1224          | -0.07 612.3 +0.211  |
| 629.4         | 657.4               | 657.4         | 6   | 1123          | 1123                |
| 730.4         | 758.4               | 758.4         | 7   | 1010          | +0.02 505.3 +0.049  |
| 787.5         | -0.16 408.2         | -0.04 815.5   | 8   | 908.5         | +0.229454.7 -0.06   |
| 886.5         | 914.5               | -0.13 914.5   | 9   | 851.5         | -0.03 426.2 +0      |
| 983.6         | 1012                | 1012          | 10  | 752.4         | -0.05 376.7 +0.176  |
| 1113          | 1141                | +0.0451141    | 11  | 655.3         | 655.3               |
| 1242          | 1270                | 1270          | 12  | 526.3         | 526.3               |
| 1379          | 1407                | +0.1811407    | 13  | 397.3         | 397.3               |
| 1492          | 1520                | 1520          | 14  | 260.2         | +0.417260.2         |
|               |                     |               | 15  | 147.1         | 147.1               |

Scan number 5988 Raw file LNCAP\_Silac\_23F10\_set1\_05  
 Method ITMS; CID Pepti... 232.29

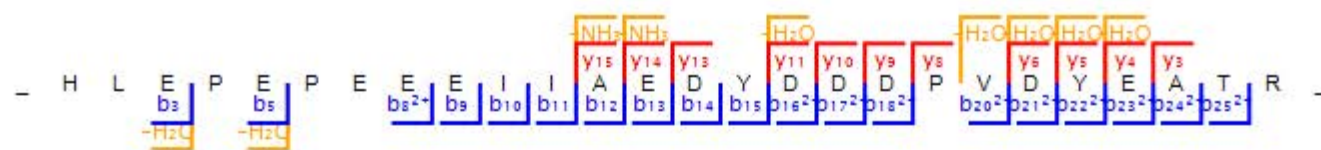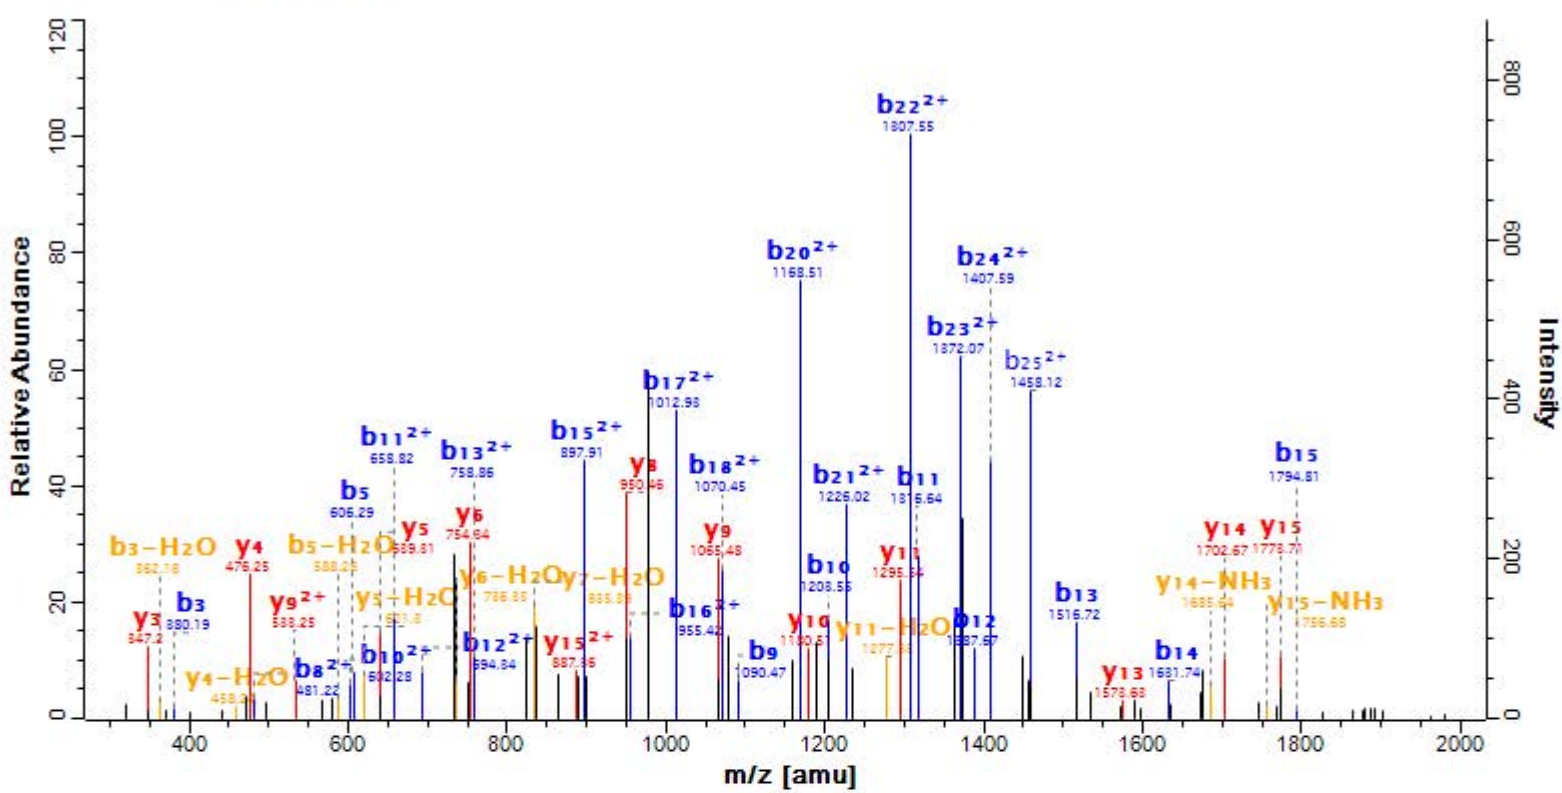

precursor information

|                   |                 |
|-------------------|-----------------|
| Mass:             | 3088.33105      |
| m/z:              | 1030.45096      |
| Charge:           | 3+              |
| Retentiontime:    | 39.923168182373 |
| Score:            | 232.2893        |
| Mass Error [ppm]: | 0.044294        |
| PEP:              | 1.9191E-83      |
| Precursor Type:   | MULTI           |

general information

|                       |           |
|-----------------------|-----------|
| Annotation:           | 20 of 26  |
| AminoAcids Coverage:  | 77 %      |
| Intensity Coverage:   | 68 %      |
| Peak Coverage:        | 46 %      |
| Protein Localisation: | 19 ... 44 |

| b <sup>2+</sup> ion |        | b ion    |        | seq |   |    | y ion    |         | y <sup>2+</sup> ion |         |
|---------------------|--------|----------|--------|-----|---|----|----------|---------|---------------------|---------|
| Δ dalton            | mass   | Δ dalton | mass   |     |   |    | Δ dalton | mass    | Δ dalton            | mass    |
|                     | 138.07 |          | 138.07 | 1   | H | 25 |          |         |                     |         |
|                     | 251.15 |          | 251.15 | 2   | L | 24 | 2952.3   |         | 2952.3              |         |
|                     | 380.19 | +0.2443  | 380.19 | 3   | E | 23 | 2839.2   |         | 2839.2              |         |
|                     | 477.25 |          | 477.25 | 4   | P | 22 | 2710.2   |         | 2710.2              |         |
|                     | 606.29 | +0.16    | 606.29 | 5   | E | 21 | 2613.1   |         | 2613.1              |         |
|                     | 703.34 |          | 703.34 | 6   | P | 20 | 2484.1   |         | 2484.1              |         |
|                     | 832.38 |          | 832.38 | 7   | E | 19 | 2387     |         | 2387                |         |
| +0.036              | 481.22 |          | 961.43 | 8   | E | 18 | 2258     |         | 2258                |         |
|                     | 1090.5 | +0.1119  | 1090.5 | 9   | E | 17 | 2128.9   |         | 2128.9              |         |
| +0.2164             | 602.28 | -0.024   | 1203.6 | 10  | I | 16 | 1999.9   |         | 1999.9              |         |
| +0.2496             | 658.82 | +0.023   | 1316.6 | 11  | I | 15 | 1886.8   |         | 1886.8              |         |
| +0.0699             | 694.34 | +0.0578  | 1387.7 | 12  | A | 14 | 1773.7   | -0.096  | 887.36              | +0.0645 |
| +0.3315             | 758.86 | -0.038   | 1516.7 | 13  | E | 13 | 1702.7   | +0.0681 | 1702.7              |         |
|                     | 1631.7 | +0.125   | 1631.7 | 14  | D | 12 | 1573.6   | +0.1376 | 1573.6              |         |
| +0.1913             | 897.91 | -0.242   | 1794.8 | 15  | Y | 11 | 1458.6   |         | 1458.6              |         |
| +0.0316             | 955.42 |          | 1909.8 | 16  | D | 10 | 1295.5   | +0.0875 | 1295.5              |         |
| +0.0936             | 1012.9 |          | 2024.9 | 17  | D | 9  | 1180.5   | +0.0925 | 1180.5              |         |
| +0.1807             | 1070.4 |          | 2139.9 | 18  | D | 8  | 1065.5   | +0.0426 | 533.25              | +0.3101 |
|                     | 2236.9 |          | 2236.9 | 19  | P | 7  | 950.46   | -0.025  | 950.46              |         |
| +0.3052             | 1168.5 |          | 2336   | 20  | V | 6  | 853.41   |         | 853.41              |         |
| +0.1955             | 1226   |          | 2451   | 21  | D | 5  | 754.34   | +0.1107 | 754.34              |         |
| +0.1505             | 1307.6 |          | 2614.1 | 22  | Y | 4  | 639.31   | +0.1471 | 639.31              |         |
| -0.045              | 1372.1 |          | 2743.1 | 23  | E | 3  | 476.25   | +0.0706 | 476.25              |         |
| +0.15               | 1407.6 |          | 2814.2 | 24  | A | 2  | 347.2    | +0.1028 | 347.2               |         |
| +0.2135             | 1458.1 |          | 2915.2 | 25  | T | 1  | 276.17   |         | 276.17              |         |
|                     |        |          |        | 26  | R | 0  | 175.12   |         | 175.12              |         |

Scan number 6158 Raw file LNCAP\_Silac\_23F10\_set1\_05  
 Method ITMS; CID Pepti... 69.4

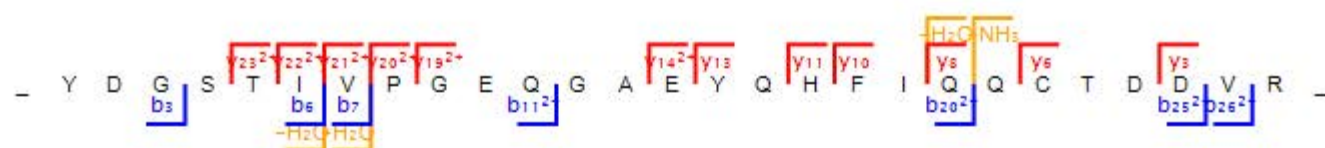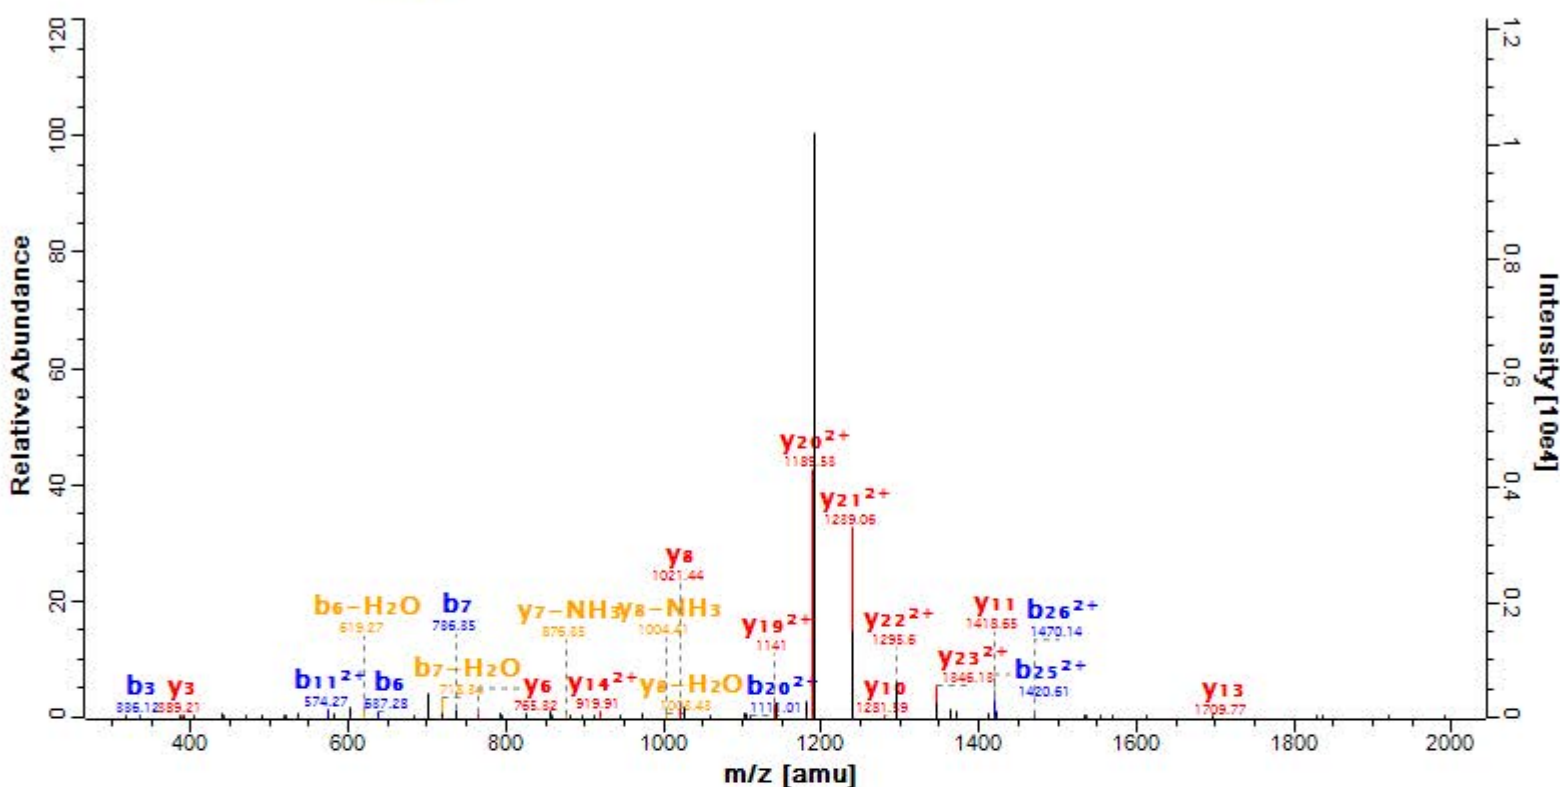

#### precursor information

|                   |                 |
|-------------------|-----------------|
| Mass:             | 3112.38213      |
| m/z:              | 1038.46799      |
| Charge:           | 3+              |
| Retentiontime:    | 40.917778015136 |
| Score:            | 69.3985         |
| Mass Error [ppm]: | -0.35834        |
| PEP:              | 6.6074E-06      |
| Precursor Type:   | MULTI           |

| b <sup>2+</sup> ion |        | b ion    |        | seq |   |    | y ion    |         | y <sup>2+</sup> ion |         |
|---------------------|--------|----------|--------|-----|---|----|----------|---------|---------------------|---------|
| Δ dalton            | mass   | Δ dalton | mass   |     |   |    | Δ dalton | mass    | Δ dalton            | mass    |
|                     | 164.07 |          | 164.07 | 1   | Y | 26 |          |         |                     |         |
|                     | 279.1  |          | 279.1  | 2   | D | 25 | 2950.3   |         | 2950.3              |         |
|                     | 336.12 | +0.0426  | 336.12 | 3   | G | 24 | 2835.3   |         | 2835.3              |         |
|                     | 423.15 |          | 423.15 | 4   | S | 23 | 2778.3   |         | 2778.3              |         |
|                     | 524.2  |          | 524.2  | 5   | T | 22 | 2691.2   |         | 1346.1              | +0.3455 |
|                     | 637.28 | -0.046   | 637.28 | 6   | I | 21 | 2590.2   |         | 1295.6              | +0.1224 |
|                     | 736.35 | -0.064   | 736.35 | 7   | V | 20 | 2477.1   |         | 1239.1              | +0.3435 |
|                     | 833.4  |          | 833.4  | 8   | P | 19 | 2378     |         | 1189.5              | +0.0378 |
|                     | 890.43 |          | 890.43 | 9   | G | 18 | 2281     |         | 1141                | +0.3007 |
|                     | 1019.5 |          | 1019.5 | 10  | E | 17 | 2224     |         | 2224                |         |
| +0.2262             | 574.27 |          | 1147.5 | 11  | Q | 16 | 2094.9   |         | 2094.9              |         |
|                     | 1204.5 |          | 1204.5 | 12  | G | 15 | 1966.9   |         | 1966.9              |         |
|                     | 1275.6 |          | 1275.6 | 13  | A | 14 | 1909.8   |         | 1909.8              |         |
|                     | 1404.6 |          | 1404.6 | 14  | E | 13 | 1838.8   |         | 919.91              | -0.146  |
|                     | 1567.7 |          | 1567.7 | 15  | Y | 12 | 1709.8   | -0.023  | 1709.8              |         |
|                     | 1695.7 |          | 1695.7 | 16  | Q | 11 | 1546.7   |         | 1546.7              |         |
|                     | 1832.8 |          | 1832.8 | 17  | H | 10 | 1418.6   | +0.4739 | 1418.6              |         |
|                     | 1979.9 |          | 1979.9 | 18  | F | 9  | 1281.6   | -0.117  | 1281.6              |         |
|                     | 2093   |          | 2093   | 19  | I | 8  | 1134.5   |         | 1134.5              |         |
| +0.0372             | 1111   |          | 2221   | 20  | Q | 7  | 1021.4   | -0.053  | 1021.4              |         |
|                     | 2349.1 |          | 2349.1 | 21  | Q | 6  | 893.38   |         | 893.38              |         |
|                     | 2509.1 |          | 2509.1 | 22  | C | 5  | 765.32   | -0.067  | 765.32              |         |
|                     | 2610.2 |          | 2610.2 | 23  | T | 4  | 605.29   |         | 605.29              |         |
|                     | 2725.2 |          | 2725.2 | 24  | D | 3  | 504.24   |         | 504.24              |         |
| +0.2951             | 1420.6 |          | 2840.2 | 25  | D | 2  | 389.21   | +0.4819 | 389.21              |         |
| -0.026              | 1470.1 |          | 2939.3 | 26  | V | 1  | 274.19   |         | 274.19              |         |
|                     |        |          |        | 27  | R | 0  | 175.12   |         | 175.12              |         |

#### general information

|                       |           |
|-----------------------|-----------|
| Annotation:           | 16 of 27  |
| AminoAcids Coverage:  | 59 %      |
| Intensity Coverage:   | 38 %      |
| Peak Coverage:        | 24 %      |
| Protein Localisation: | 31 ... 57 |



Scan number 6174 Raw file LNCAP\_Silac\_23F10\_set1\_05  
 Method ITMS; CID Pepti... 135.99

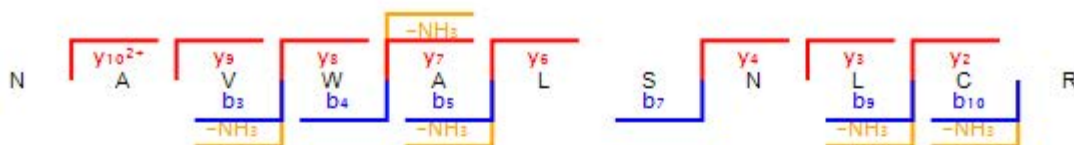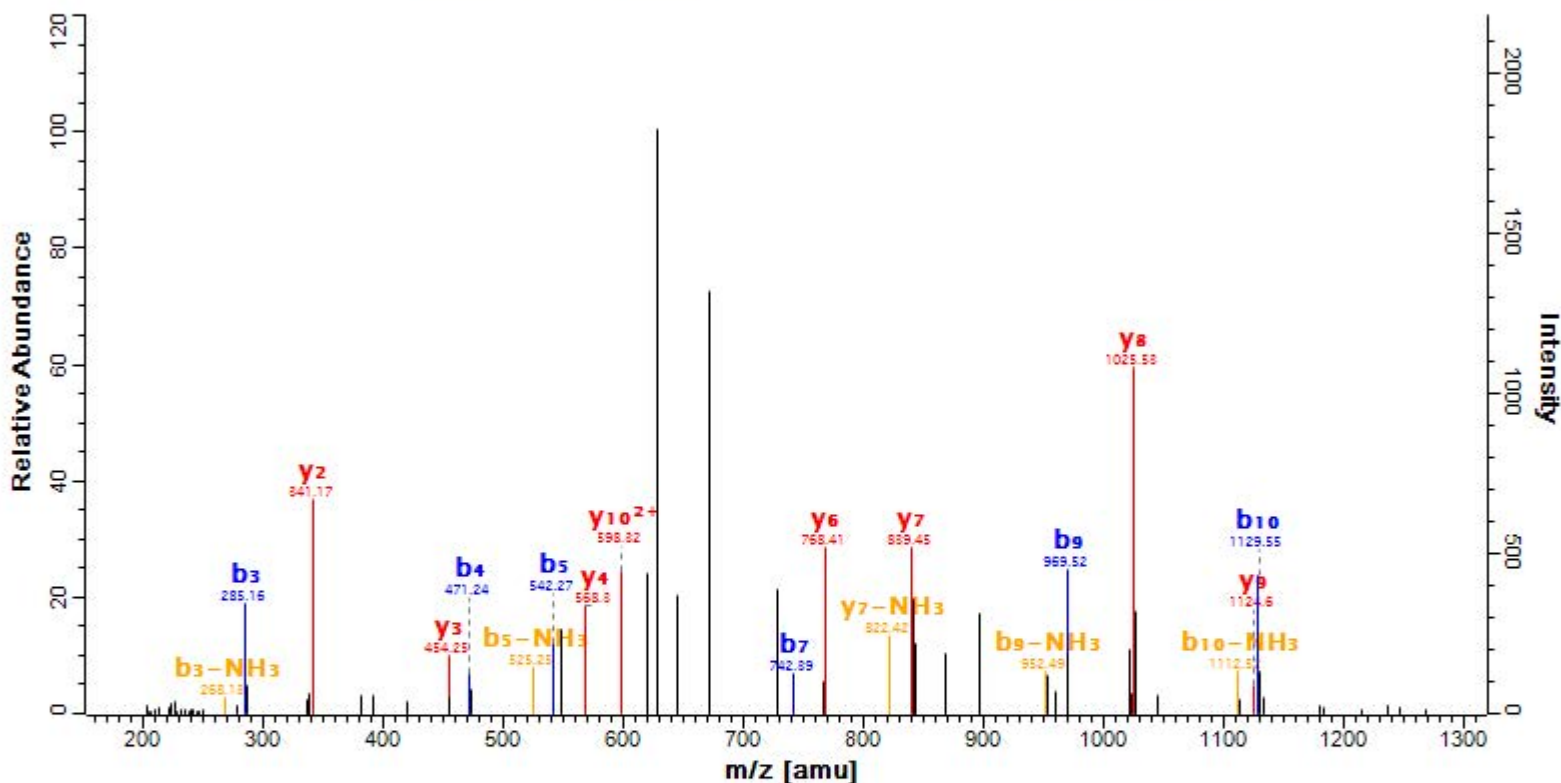

#### precursor information

|                   |                 |
|-------------------|-----------------|
| Mass:             | 1302.65077      |
| m/z:              | 652.33266       |
| Charge:           | 2+              |
| Retentiontime:    | 41.013126373291 |
| Score:            | 135.9866        |
| Mass Error [ppm]: | 0.36391         |
| PEP:              | 0.00017585      |
| Precursor Type:   | MULTI           |

#### general information

|                       |             |
|-----------------------|-------------|
| Annotation:           | 9 of 11     |
| AminoAcids Coverage:  | 82 %        |
| Intensity Coverage:   | 40 %        |
| Peak Coverage:        | 23 %        |
| Protein Localisation: | 231 ... 241 |

| b ion     |          |    |     |    | y ion    |           | y <sup>2+</sup> ion |          |
|-----------|----------|----|-----|----|----------|-----------|---------------------|----------|
| Δ dalton  | mass     |    | seq |    | Δ dalton | mass      | Δ dalton            | mass     |
|           | 115.0502 | 1  | N   | 10 |          |           |                     |          |
|           | 186.0873 | 2  | A   | 9  | 1195.635 |           | 598.321             | -0.06937 |
| -0.04501  | 285.1557 | 3  | V   | 8  | 1124.598 | +0.002688 | 1124.598            |          |
| +0.072328 | 471.235  | 4  | W   | 7  | 1025.529 | -0.03986  | 1025.529            |          |
| +0.113584 | 542.2722 | 5  | A   | 6  | 839.4499 | +0.063073 | 839.4499            |          |
|           | 655.3562 | 6  | L   | 5  | 768.4128 | +0.038237 | 768.4128            |          |
| -0.04517  | 742.3883 | 7  | S   | 4  | 655.3287 |           | 655.3287            |          |
|           | 856.4312 | 8  | N   | 3  | 568.2967 | -0.0889   | 568.2967            |          |
| -0.08922  | 969.5152 | 9  | L   | 2  | 454.2538 | +0.175894 | 454.2538            |          |
| -0.05224  | 1129.546 | 10 | C   | 1  | 341.1697 | -0.075    | 341.1697            |          |
|           |          | 11 | R   | 0  | 181.1391 |           | 181.1391            |          |

Scan number 6907 Raw file LNCAP\_Silac\_23F10\_set1\_05  
 Method ITMS; CID Pepti... 98.21

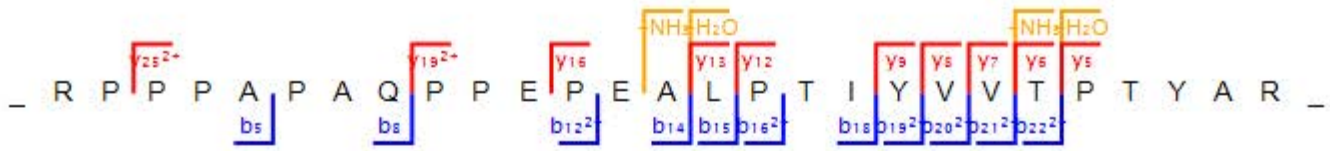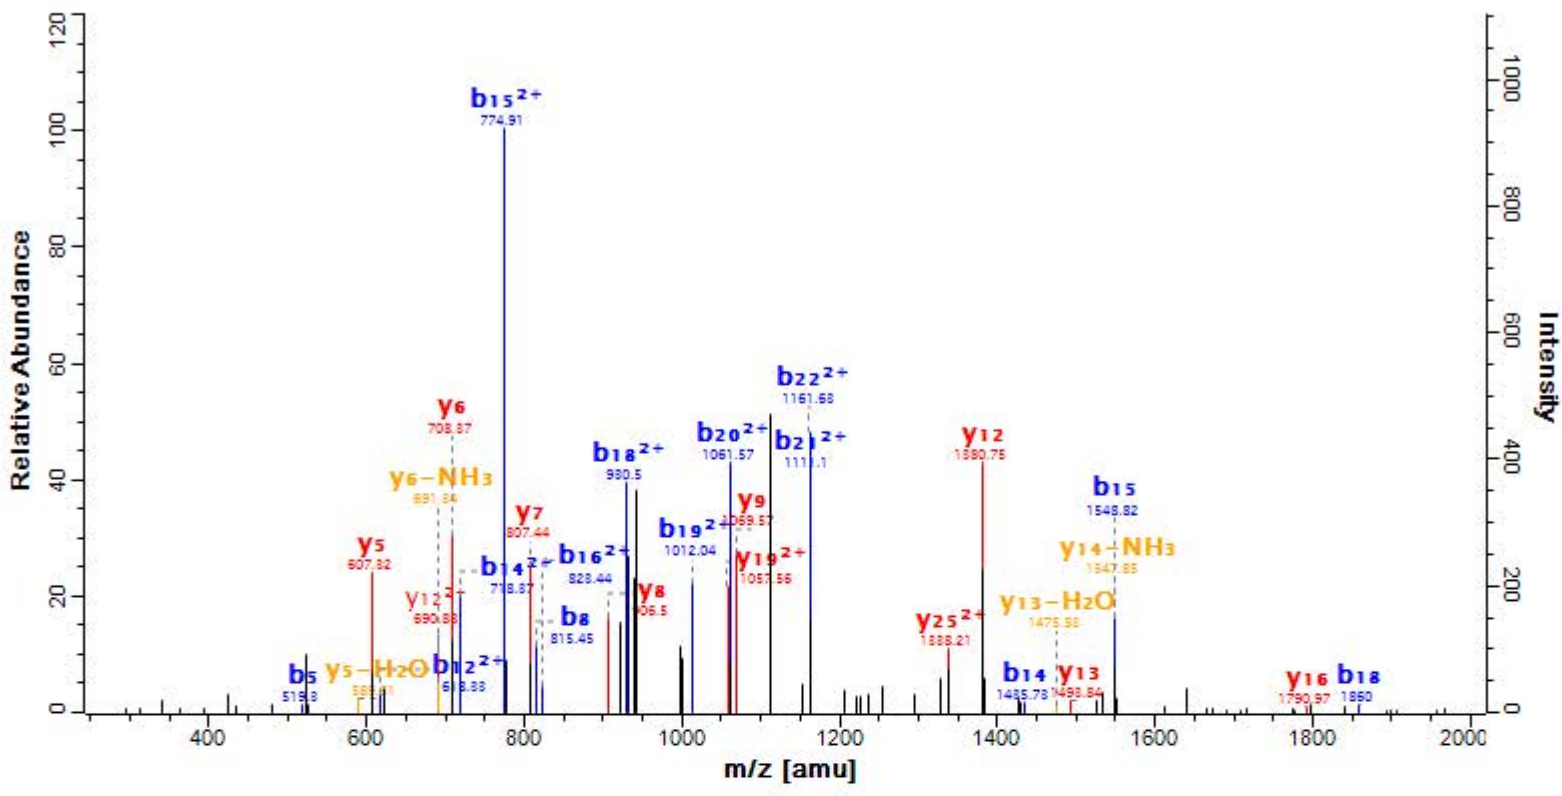

precursor information

|                   |                 |
|-------------------|-----------------|
| Mass:             | 2927.55511      |
| m/z:              | 976.85898       |
| Charge:           | 3+              |
| Retentiontime:    | 45.365871429443 |
| Score:            | 98.21014        |
| Mass Error [ppm]: | 0.19864         |
| PEP:              | 1.3009E-10      |
| Precursor Type:   | MULTI           |

| b <sup>2+</sup> ion |        | b ion    |        | seq |   |    | y ion    |         | y <sup>2+</sup> ion |         |
|---------------------|--------|----------|--------|-----|---|----|----------|---------|---------------------|---------|
| Δ dalton            | mass   | Δ dalton | mass   |     |   |    | Δ dalton | mass    | Δ dalton            | mass    |
|                     | 157.11 |          | 157.11 | 1   | R | 26 |          |         |                     |         |
|                     | 254.16 |          | 254.16 | 2   | P | 25 | 2772.5   |         | 2772.5              |         |
|                     | 351.21 |          | 351.21 | 3   | P | 24 | 2675.4   |         | 1338.2              | +0.227  |
|                     | 448.27 |          | 448.27 | 4   | P | 23 | 2578.4   |         | 2578.4              |         |
|                     | 519.3  | +0.2206  | 519.3  | 5   | A | 22 | 2481.3   |         | 2481.3              |         |
|                     | 616.36 |          | 616.36 | 6   | P | 21 | 2410.3   |         | 2410.3              |         |
|                     | 687.39 |          | 687.39 | 7   | A | 20 | 2313.2   |         | 2313.2              |         |
|                     | 815.45 | +0.0861  | 815.45 | 8   | Q | 19 | 2242.2   |         | 2242.2              |         |
|                     | 912.51 |          | 912.51 | 9   | P | 18 | 2114.1   |         | 1057.6              | +0.3367 |
|                     | 1009.6 |          | 1009.6 | 10  | P | 17 | 2017.1   |         | 2017.1              |         |
|                     | 1138.6 |          | 1138.6 | 11  | E | 16 | 1920     |         | 1920                |         |
| -0.207              | 618.33 |          | 1235.7 | 12  | P | 15 | 1791     | +0.3984 | 1791                |         |
|                     | 1364.7 |          | 1364.7 | 13  | E | 14 | 1693.9   |         | 1693.9              |         |
| +0.2506             | 718.37 | -0.059   | 1435.7 | 14  | A | 13 | 1564.9   |         | 1564.9              |         |
| +0.2638             | 774.91 | +0.0345  | 1548.8 | 15  | L | 12 | 1493.8   | +0.0789 | 1493.8              |         |
| +0.0793             | 823.44 |          | 1645.9 | 16  | P | 11 | 1380.8   | -0.053  | 690.88              | -0.099  |
|                     | 1746.9 |          | 1746.9 | 17  | T | 10 | 1283.7   |         | 1283.7              |         |
| +0.0248             | 930.5  | -0.488   | 1860   | 18  | I | 9  | 1182.7   |         | 1182.7              |         |
| +0.2601             | 1012   |          | 2023.1 | 19  | Y | 8  | 1069.6   | -0.032  | 1069.6              |         |
| +0.3298             | 1061.6 |          | 2122.1 | 20  | V | 7  | 906.5    | -0.109  | 906.5               |         |
| -0.075              | 1111.1 |          | 2221.2 | 21  | V | 6  | 807.44   | +0.0427 | 807.44              |         |
| +0.2565             | 1161.6 |          | 2322.2 | 22  | T | 5  | 708.37   | +0.0154 | 708.37              |         |
|                     | 2419.3 |          | 2419.3 | 23  | P | 4  | 607.32   | +0.1301 | 607.32              |         |
|                     | 2520.3 |          | 2520.3 | 24  | T | 3  | 510.27   |         | 510.27              |         |
|                     | 2683.4 |          | 2683.4 | 25  | Y | 2  | 409.22   |         | 409.22              |         |
|                     | 2754.5 |          | 2754.5 | 26  | A | 1  | 246.16   |         | 246.16              |         |
|                     |        |          |        | 27  | R | 0  | 175.12   |         | 175.12              |         |

general information

|                       |           |
|-----------------------|-----------|
| Annotation:           | 14 of 27  |
| AminoAcids Coverage:  | 52 %      |
| Intensity Coverage:   | 60 %      |
| Peak Coverage:        | 31 %      |
| Protein Localisation: | 70 ... 96 |

Scan number 7290 Raw file LNCAP\_Silac\_23F10\_set1\_05  
 Method ITMS; CID Pepti... 216.3

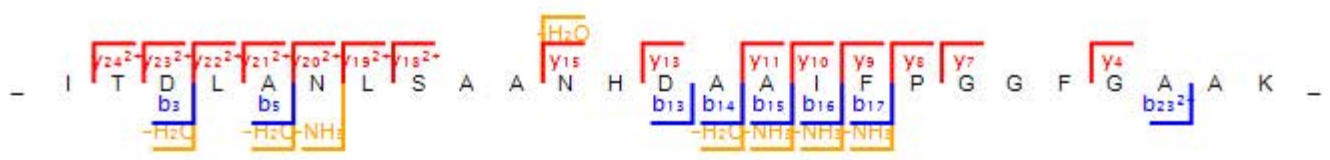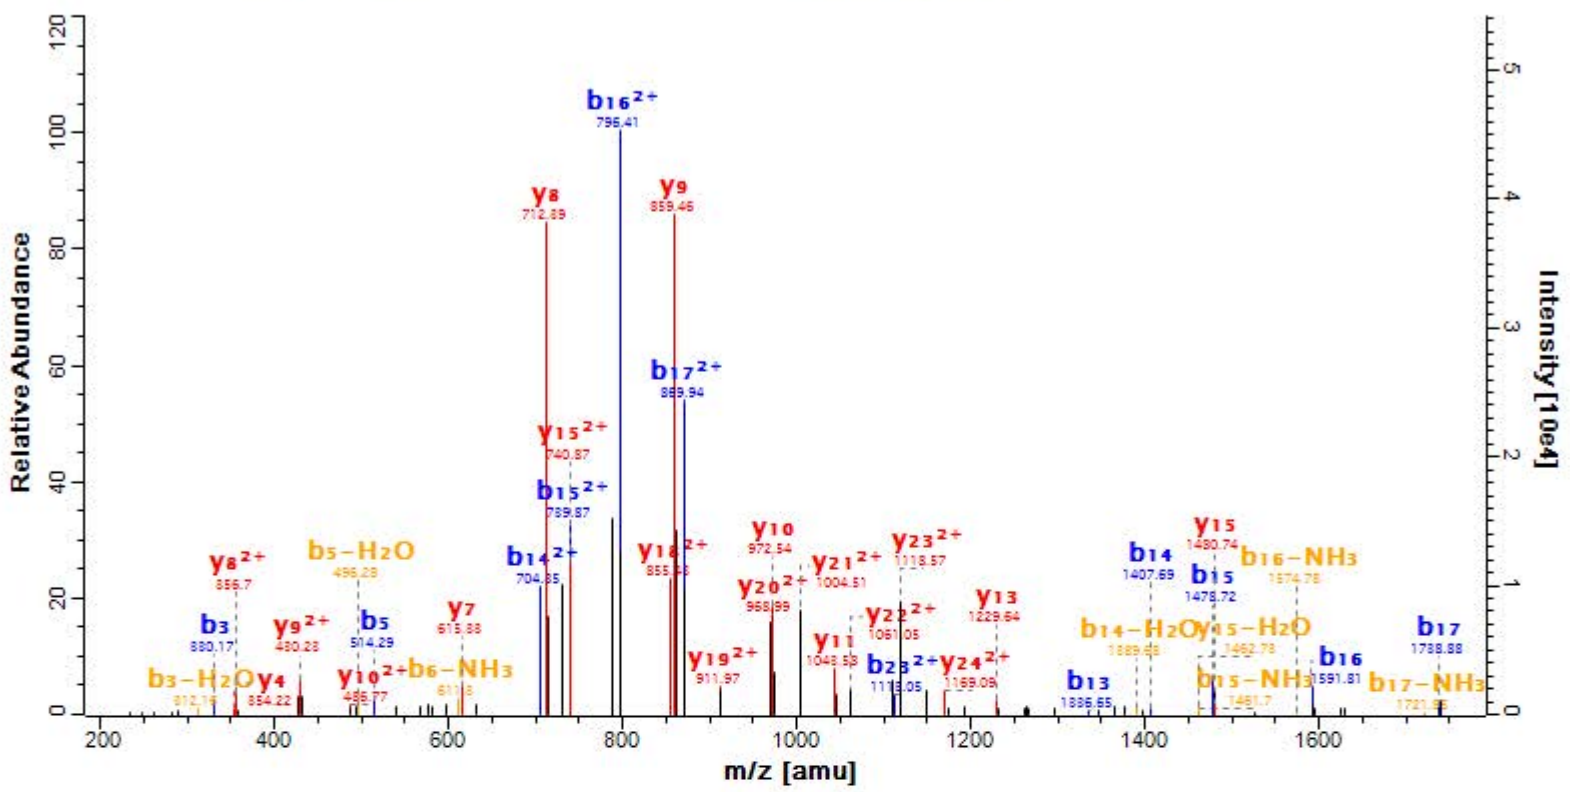

precursor information

|                   |                 |
|-------------------|-----------------|
| Mass:             | 2441.23377      |
| m/z:              | 814.75187       |
| Charge:           | 3+              |
| Retentiontime:    | 47.678062438964 |
| Score:            | 216.304         |
| Mass Error [ppm]: | -0.060577       |
| PEP:              | 5.3119E-78      |
| Precursor Type:   | MULTI           |

general information

|                       |             |
|-----------------------|-------------|
| Annotation:           | 18 of 25    |
| AminoAcids Coverage:  | 72 %        |
| Intensity Coverage:   | 64 %        |
| Peak Coverage:        | 40 %        |
| Protein Localisation: | 117 ... 141 |

| b <sup>2+</sup> ion |        | b ion    |        | seq |   |    | y ion    |         | y <sup>2+</sup> ion |         |
|---------------------|--------|----------|--------|-----|---|----|----------|---------|---------------------|---------|
| Δ dalton            | mass   | Δ dalton | mass   |     |   |    | Δ dalton | mass    | Δ dalton            | mass    |
|                     | 114.09 |          | 114.09 | 1   | I | 24 |          |         |                     |         |
|                     | 215.14 |          | 215.14 | 2   | T | 23 | 2337.2   |         | 1169.1              | +0.0557 |
|                     | 330.17 | +0.1305  | 330.17 | 3   | D | 22 | 2236.1   |         | 1118.6              | -0.027  |
|                     | 443.25 |          | 443.25 | 4   | L | 21 | 2121.1   |         | 1061.1              | -0.192  |
|                     | 514.29 | -0.116   | 514.29 | 5   | A | 20 | 2008     |         | 1004.5              | -0.091  |
|                     | 628.33 |          | 628.33 | 6   | N | 19 | 1937     |         | 968.99              | +0.0286 |
|                     | 741.41 |          | 741.41 | 7   | L | 18 | 1822.9   |         | 911.97              | -0.163  |
|                     | 828.45 |          | 828.45 | 8   | S | 17 | 1709.8   |         | 855.43              | +0.2994 |
|                     | 899.48 |          | 899.48 | 9   | A | 16 | 1622.8   |         | 1622.8              |         |
|                     | 970.52 |          | 970.52 | 10  | A | 15 | 1551.8   |         | 1551.8              |         |
|                     | 1084.6 |          | 1084.6 | 11  | N | 14 | 1480.7   | -0.041  | 740.87              | -0.197  |
|                     | 1221.6 |          | 1221.6 | 12  | H | 13 | 1366.7   |         | 1366.7              |         |
|                     | 1336.6 | -0.138   | 1336.6 | 13  | D | 12 | 1229.6   | -0.254  | 1229.6              |         |
| +0.1213             | 704.35 | +0.006   | 1407.7 | 14  | A | 11 | 1114.6   |         | 1114.6              |         |
| +0.002              | 739.87 | +0.1923  | 1478.7 | 15  | A | 10 | 1043.6   | +0.0423 | 1043.6              |         |
| +0.2599             | 796.41 | +0.2099  | 1591.8 | 16  | I | 9  | 972.54   | +0.0545 | 486.77              | -0.061  |
| +0.2533             | 869.94 | -0.313   | 1738.9 | 17  | F | 8  | 859.46   | -0.043  | 430.23              | +0.1127 |
|                     | 1835.9 |          | 1835.9 | 18  | P | 7  | 712.39   | +0.0715 | 356.7               | +0.1392 |
|                     | 1893   |          | 1893   | 19  | G | 6  | 615.33   | +0.1514 | 615.33              |         |
|                     | 1950   |          | 1950   | 20  | G | 5  | 558.31   |         | 558.31              |         |
|                     | 2097   |          | 2097   | 21  | F | 4  | 501.29   |         | 501.29              |         |
|                     | 2154.1 |          | 2154.1 | 22  | G | 3  | 354.22   | +0.2591 | 354.22              |         |
| +0.3173             | 1113.1 |          | 2225.1 | 23  | A | 2  | 297.2    |         | 297.2               |         |
|                     | 2296.1 |          | 2296.1 | 24  | A | 1  | 226.16   |         | 226.16              |         |
|                     |        |          |        | 25  | K | 0  | 155.13   |         | 155.13              |         |

Scan number 7357 Raw file LNCAP\_Silac\_23F10\_set1\_05  
 Method ITMS; CID Peptide 119.87

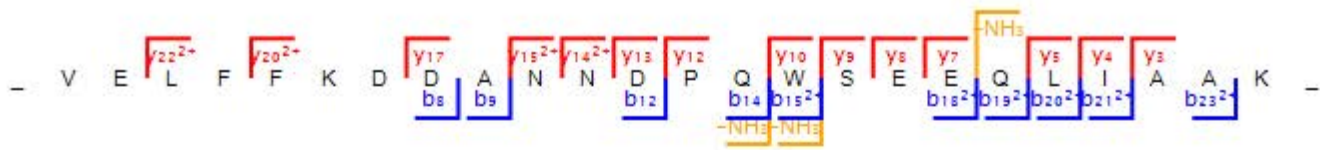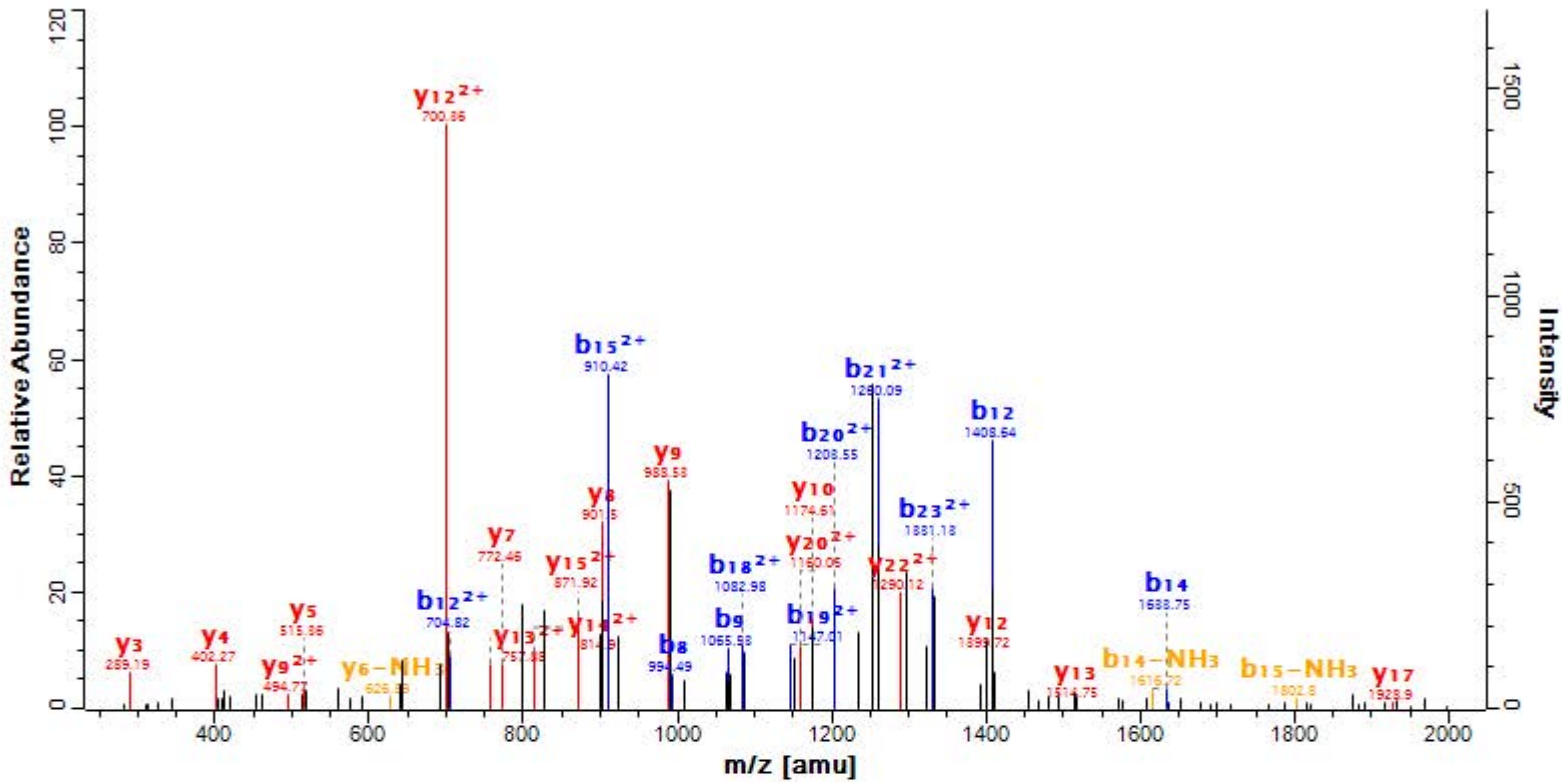

precursor information

|                   |                 |
|-------------------|-----------------|
| Mass:             | 2806.34488      |
| m/z:              | 936.45557       |
| Charge:           | 3+              |
| Retentiontime:    | 48.095981597900 |
| Score:            | 119.8729        |
| Mass Error [ppm]: | -0.039114       |
| PEP:              | 1.503E-15       |
| Precursor Type:   | MULTI           |

general information

|                       |             |
|-----------------------|-------------|
| Annotation:           | 18 of 24    |
| AminoAcids Coverage:  | 75 %        |
| Intensity Coverage:   | 53 %        |
| Peak Coverage:        | 30 %        |
| Protein Localisation: | 152 ... 175 |

| b <sup>2+</sup> ion |        | b ion    |        | seq |   |    | y ion    |         | y <sup>2+</sup> ion |         |
|---------------------|--------|----------|--------|-----|---|----|----------|---------|---------------------|---------|
| Δ dalton            | mass   | Δ dalton | mass   |     |   |    | Δ dalton | mass    | Δ dalton            | mass    |
|                     | 100.08 |          | 100.08 | 1   | V | 23 |          |         |                     |         |
|                     | 229.12 |          | 229.12 | 2   | E | 22 | 2708.3   |         | 2708.3              |         |
|                     | 342.2  |          | 342.2  | 3   | L | 21 | 2579.2   |         | 1290.1              | +0.2595 |
|                     | 489.27 |          | 489.27 | 4   | F | 20 | 2466.2   |         | 2466.2              |         |
|                     | 636.34 |          | 636.34 | 5   | F | 19 | 2319.1   |         | 1160                | +0.471  |
|                     | 764.43 |          | 764.43 | 6   | K | 18 | 2172     |         | 2172                |         |
|                     | 879.46 |          | 879.46 | 7   | D | 17 | 2043.9   |         | 2043.9              |         |
|                     | 994.49 | +0.1065  | 994.49 | 8   | D | 16 | 1928.9   | -0.341  | 1928.9              |         |
|                     | 1065.5 | -0.051   | 1065.5 | 9   | A | 15 | 1813.9   |         | 1813.9              |         |
|                     | 1179.6 |          | 1179.6 | 10  | N | 14 | 1742.8   |         | 871.92              | +0.2855 |
|                     | 1293.6 |          | 1293.6 | 11  | N | 13 | 1628.8   |         | 814.9               | -0.048  |
| +0.1889             | 704.82 | +0.0289  | 1408.6 | 12  | D | 12 | 1514.7   | -0.115  | 757.88              | +0.0224 |
|                     | 1505.7 |          | 1505.7 | 13  | P | 11 | 1399.7   | -0.116  | 700.36              | +0.3362 |
|                     | 1633.7 | -0.041   | 1633.7 | 14  | Q | 10 | 1302.7   |         | 1302.7              |         |
| +0.3716             | 910.42 |          | 1819.8 | 15  | W | 9  | 1174.6   | -0.043  | 1174.6              |         |
|                     | 1906.9 |          | 1906.9 | 16  | S | 8  | 988.53   | -0.033  | 494.77              | +0.4181 |
|                     | 2035.9 |          | 2035.9 | 17  | E | 7  | 901.5    | +0.1264 | 901.5               |         |
| +0.232              | 1083   |          | 2164.9 | 18  | E | 6  | 772.46   | +0.1902 | 772.46              |         |
| +0.3662             | 1147   |          | 2293   | 19  | Q | 5  | 643.41   |         | 643.41              |         |
| +0.3076             | 1203.5 |          | 2406.1 | 20  | L | 4  | 515.36   | +0.3    | 515.36              |         |
| +0.4238             | 1260.1 |          | 2519.2 | 21  | I | 3  | 402.27   | -0.053  | 402.27              |         |
|                     | 2590.2 |          | 2590.2 | 22  | A | 2  | 289.19   | +0.069  | 289.19              |         |
| +0.1955             | 1331.1 |          | 2661.2 | 23  | A | 1  | 218.15   |         | 218.15              |         |
|                     |        |          |        | 24  | K | 0  | 147.11   |         | 147.11              |         |

Scan number 7378 Raw file LNCAP\_Silac\_23F10\_set1\_05  
 Method ITMS; CID Peptide 169.04

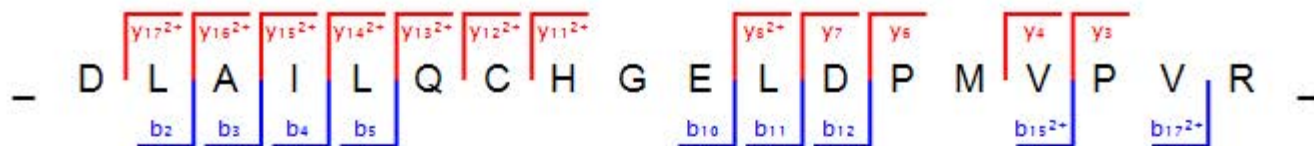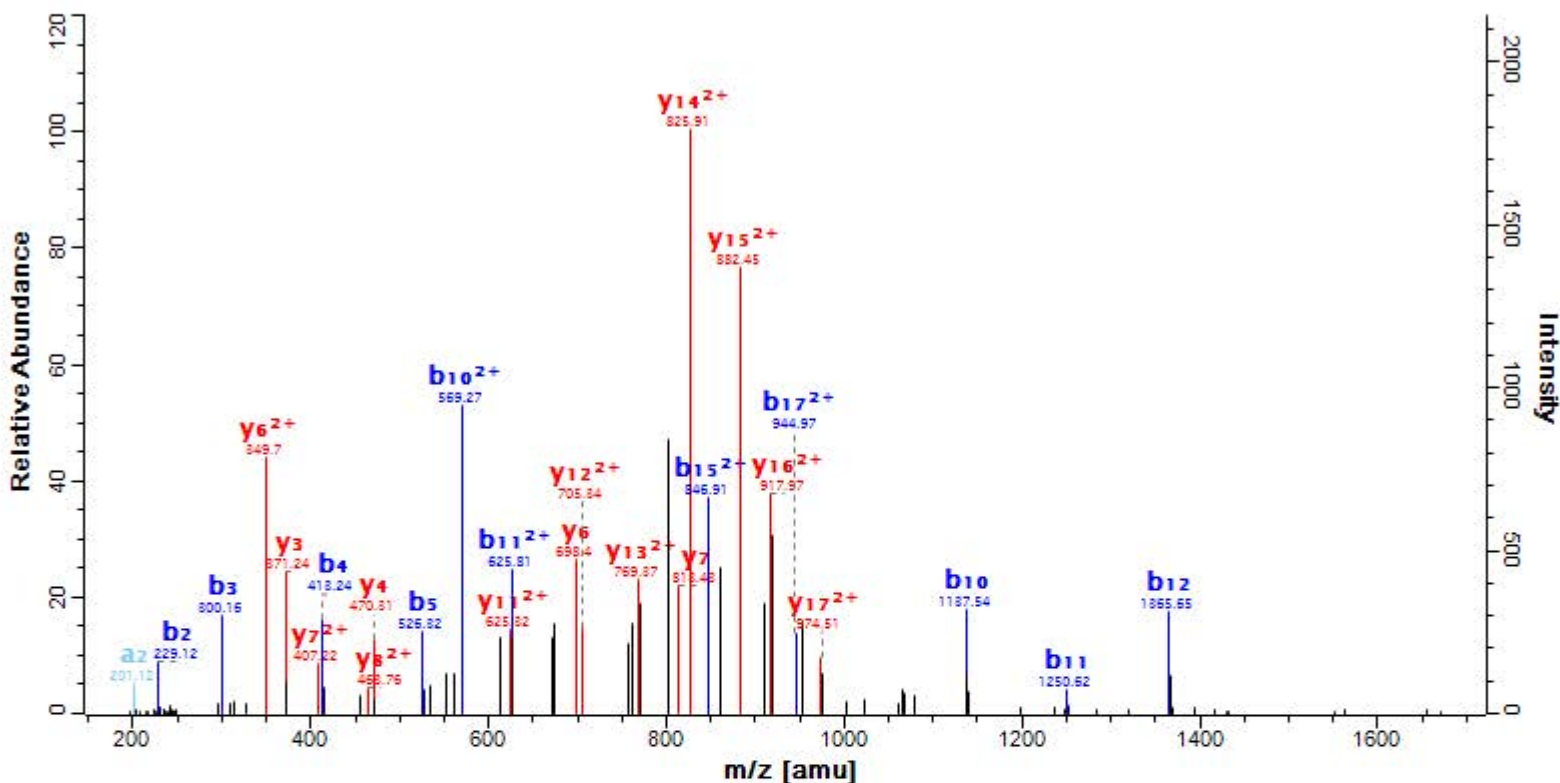

precursor information

|                   |                 |
|-------------------|-----------------|
| Mass:             | 2062.03364      |
| m/z:              | 688.35182       |
| Charge:           | 3+              |
| Retentiontime:    | 48.223369598388 |
| Score:            | 169.0407        |
| Mass Error [ppm]: | -0.15668        |
| PEP:              | 3.2221E-30      |
| Precursor Type:   | MULTI           |

| a ion         | b <sup>2+</sup> ion | b ion         |     |   | y ion         | y <sup>2+</sup> ion |             |       |
|---------------|---------------------|---------------|-----|---|---------------|---------------------|-------------|-------|
| Δ dalton mass | Δ dalton mass       | Δ dalton mass | seq |   | Δ dalton mass | Δ dalton mass       |             |       |
| 88.04         | 116                 | 116           | 1   | D | 17            |                     |             |       |
| +0.084201.1   | 229.1               | +0.07229.1    | 2   | L | 16            | 1948                | 974.5       | -0.39 |
| 272.2         | 300.2               | +0.048300.2   | 3   | A | 15            | 1835                | 918         | +0.07 |
| 385.2         | 413.2               | -0.05413.2    | 4   | I | 14            | 1764                | 882.5       | +0.31 |
| 498.3         | 526.3               | -0.1526.3     | 5   | L | 13            | 1651                | 825.9       | +0.31 |
| 626.4         | 654.4               | 654.4         | 6   | Q | 12            | 1538                | 769.4       | +0.01 |
| 786.4         | 814.4               | 814.4         | 7   | C | 11            | 1410                | 705.3       | +0.14 |
| 923.5         | 951.5               | 951.5         | 8   | H | 10            | 1250                | 625.3       | -0.48 |
| 980.5         | 1008                | 1008          | 9   | G | 9             | 1113                | 1113        |       |
| 1110          | +0.217569.3         | +0.0151138    | 10  | E | 8             | 1056                | 1056        |       |
| 1223          | -0.01625.8          | +0.2331251    | 11  | L | 7             | 926.5               | 463.8       | +0.11 |
| 1338          | 1366                | -0.051366     | 12  | D | 6             | 813.4               | +0.092407.2 | +0.11 |
| 1435          | 1463                | 1463          | 13  | P | 5             | 698.4               | +0.076349.7 | +0.17 |
| 1566          | 1594                | 1594          | 14  | M | 4             | 601.3               | 601.3       |       |
| 1665          | +0.28846.9          | 1693          | 15  | V | 3             | 470.3               | +0.091470.3 |       |
| 1762          | 1790                | 1790          | 16  | P | 2             | 371.2               | +0.058371.2 |       |
| 1861          | +0.41945            | 1889          | 17  | V | 1             | 274.2               | 274.2       |       |
|               |                     |               | 18  | R | 0             | 175.1               | 175.1       |       |

general information

|                       |             |
|-----------------------|-------------|
| Annotation:           | 14 of 18    |
| AminoAcids Coverage:  | 78 %        |
| Intensity Coverage:   | 64 %        |
| Peak Coverage:        | 25 %        |
| Protein Localisation: | 165 ... 182 |

Scan number 7418 Raw file LNCAP\_Silac\_23F10\_set1\_05  
 Method ITMS; CID Pepti... 145.52

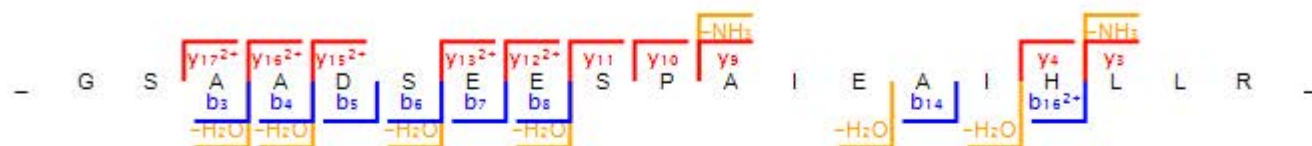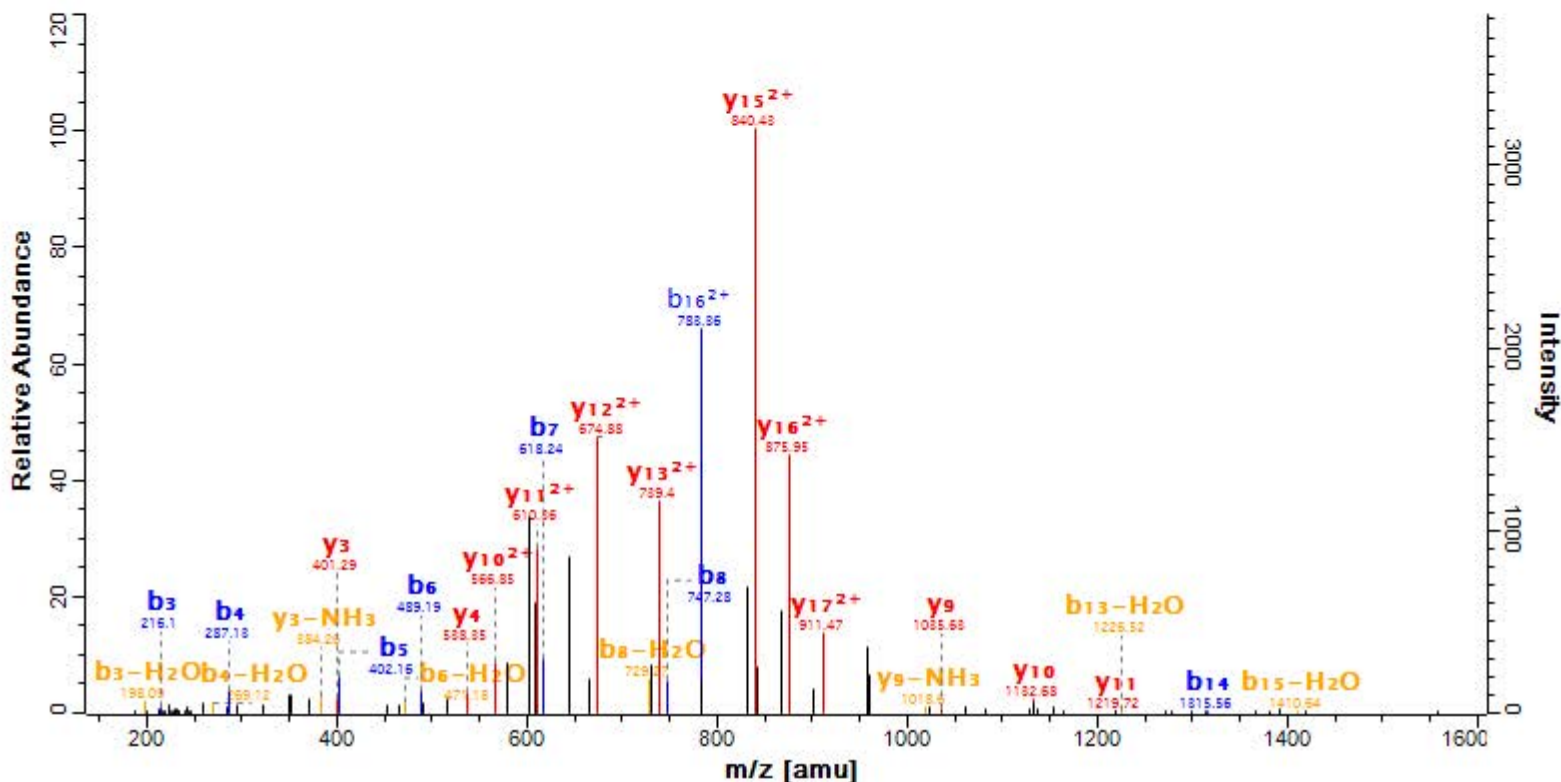

#### precursor information

|                   |                 |
|-------------------|-----------------|
| Mass:             | 1964.97948      |
| m/z:              | 656.00044       |
| Charge:           | 3+              |
| Retentiontime:    | 48.475803375244 |
| Score:            | 145.5203        |
| Mass Error [ppm]: | -0.43377        |
| PEP:              | 5.0555E-19      |
| Precursor Type:   | MULTI           |

| b <sup>2+</sup> ion |        | b ion    |        | seq |   |    | y ion    |         | y <sup>2+</sup> ion |         |
|---------------------|--------|----------|--------|-----|---|----|----------|---------|---------------------|---------|
| Δ dalton            | mass   | Δ dalton | mass   |     |   |    | Δ dalton | mass    | Δ dalton            | mass    |
|                     | 58.029 |          | 58.029 | 1   | G | 18 |          |         |                     |         |
|                     | 145.06 |          | 145.06 | 2   | S | 17 | 1909     |         | 1909                |         |
|                     | 216.1  | +0.088   | 216.1  | 3   | A | 16 | 1821.9   |         | 911.47              | +0.3737 |
|                     | 287.13 | +0.018   | 287.13 | 4   | A | 15 | 1750.9   |         | 875.95              | +0.196  |
|                     | 402.16 | -0.021   | 402.16 | 5   | D | 14 | 1679.9   |         | 840.43              | +0.2351 |
|                     | 489.19 | +0.0686  | 489.19 | 6   | S | 13 | 1564.8   |         | 1564.8              |         |
|                     | 618.24 | +0.1165  | 618.24 | 7   | E | 12 | 1477.8   |         | 739.4               | +0.3028 |
|                     | 747.28 | +0.0023  | 747.28 | 8   | E | 11 | 1348.8   |         | 674.88              | +0.3031 |
|                     | 834.31 |          | 834.31 | 9   | S | 10 | 1219.7   | +0.1528 | 610.36              | +0.2566 |
|                     | 931.36 |          | 931.36 | 10  | P | 9  | 1132.7   | +0.0233 | 566.85              | +0.0746 |
|                     | 1002.4 |          | 1002.4 | 11  | A | 8  | 1035.6   | -0.087  | 1035.6              |         |
|                     | 1115.5 |          | 1115.5 | 12  | I | 7  | 964.59   |         | 964.59              |         |
|                     | 1244.5 |          | 1244.5 | 13  | E | 6  | 851.51   |         | 851.51              |         |
|                     | 1315.6 | +0.1531  | 1315.6 | 14  | A | 5  | 722.47   |         | 722.47              |         |
|                     | 1428.6 |          | 1428.6 | 15  | I | 4  | 651.43   |         | 651.43              |         |
| -0.181              | 783.36 |          | 1565.7 | 16  | H | 3  | 538.35   | +0.0536 | 538.35              |         |
|                     | 1678.8 |          | 1678.8 | 17  | L | 2  | 401.29   | +0.068  | 401.29              |         |
|                     | 1791.9 |          | 1791.9 | 18  | L | 1  | 288.2    |         | 288.2               |         |
|                     |        |          |        | 19  | R | 0  | 175.12   |         | 175.12              |         |

#### general information

|                       |             |
|-----------------------|-------------|
| Annotation:           | 14 of 19    |
| AminoAcids Coverage:  | 74 %        |
| Intensity Coverage:   | 64 %        |
| Peak Coverage:        | 27 %        |
| Protein Localisation: | 120 ... 138 |

Scan number 742 Raw file LNCAP\_Silac\_23F10\_set1\_05  
 Method ITMS; CID Pepti... 109.11

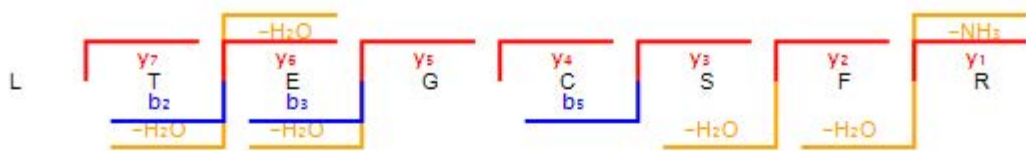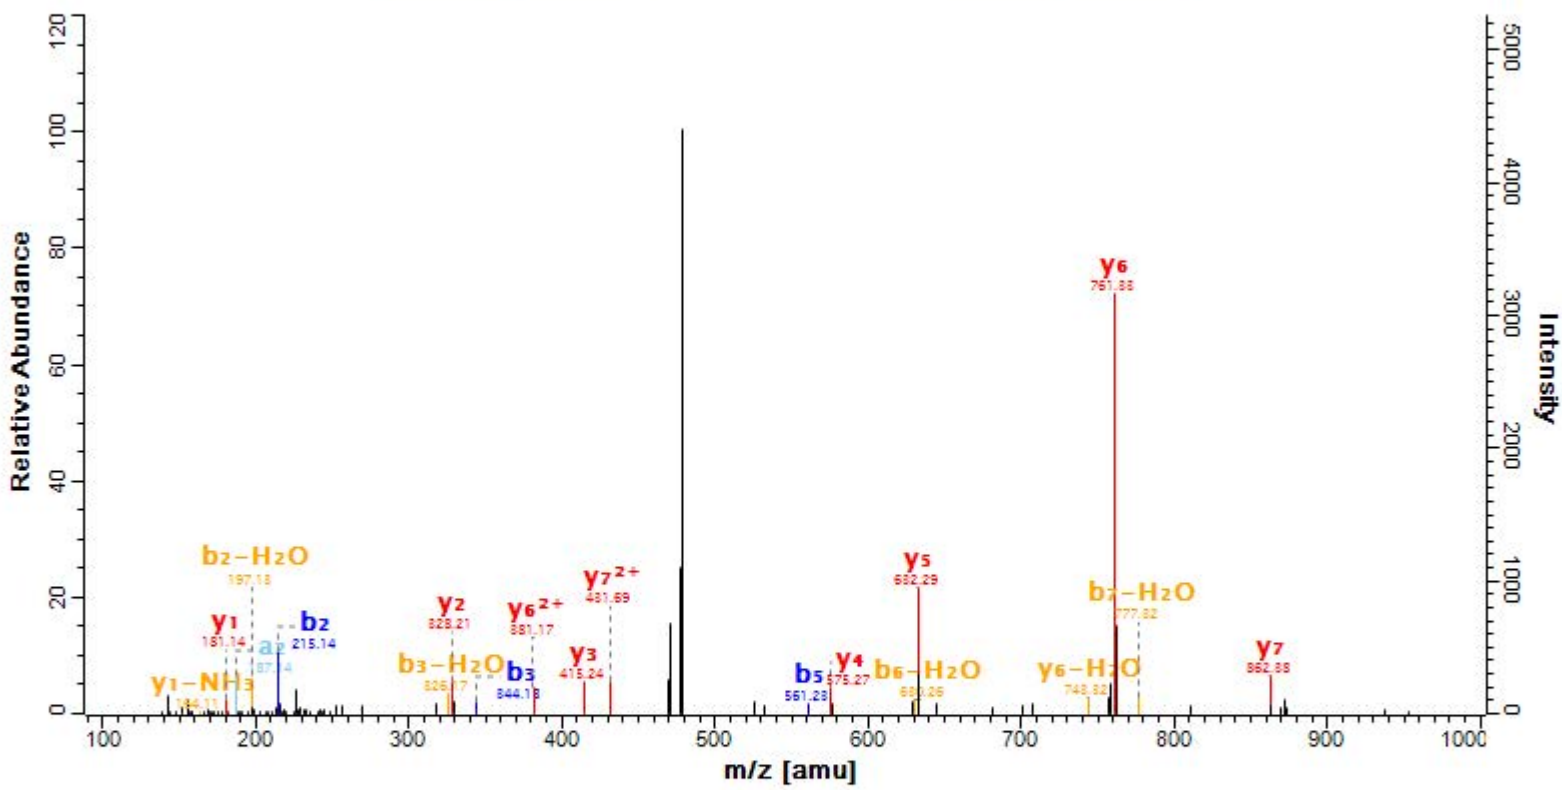

precursor information

|                       |                 |
|-----------------------|-----------------|
| Mass:                 | 968.43872       |
| m/z:                  | 485.22664       |
| Charge:               | 2+              |
| Retentiontime:        | 9.9795436859130 |
| Score:                | 109.1098        |
| Mass Error [ppm]:     | 0.15586         |
| g PEP:                | 0.005841        |
| Annotation:           | 7 of 8          |
| AminoAcids Coverage:  | 88 %            |
| Intensity Coverage:   | 41 %            |
| Peak Coverage:        | 16 %            |
| Protein Localisation: | 73 ... 80       |

| a ion    |        | b ion    |        |   |     |          | y ion  |          | y <sup>2+</sup> ion |        |
|----------|--------|----------|--------|---|-----|----------|--------|----------|---------------------|--------|
| Δ dalton | mass   | Δ dalton | mass   |   | seq | Δ dalton | mass   | Δ dalton | mass                |        |
|          | 86.096 |          | 114.09 | 1 | L   |          |        |          |                     |        |
| +0.055   | 187.14 | -0.01    | 215.14 | 2 | T   | 6        | 862.38 | +0.031   | 431.69              | -0.108 |
|          | 316.19 | -0.102   | 344.18 | 3 | E   | 5        | 761.33 | -0.043   | 381.17              | +0.261 |
|          | 373.21 |          | 401.2  | 4 | G   | 4        | 632.29 | +0.0218  | 632.29              |        |
|          | 533.24 | +0.1616  | 561.23 | 5 | C   | 3        | 575.27 | +0.1032  | 575.27              |        |
|          | 620.27 |          | 648.27 | 6 | S   | 2        | 415.24 | +0.0209  | 415.24              |        |
|          | 767.34 |          | 795.33 | 7 | F   | 1        | 328.21 | +0.0909  | 328.21              |        |
|          |        |          |        | 8 | R   | 0        | 181.14 | +0.0356  | 181.14              |        |

Scan number 7762 Raw file LNCAP\_Silac\_23F10\_set1\_05  
 Method ITMS; CID Pepti... 153.36

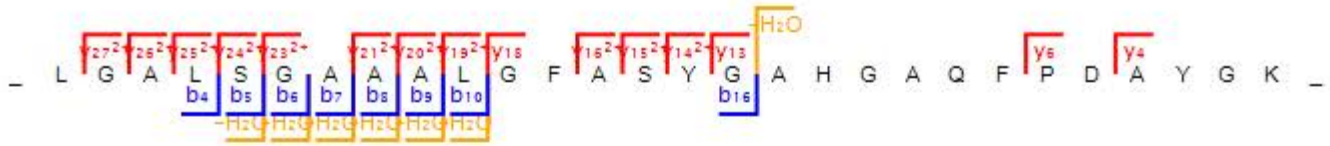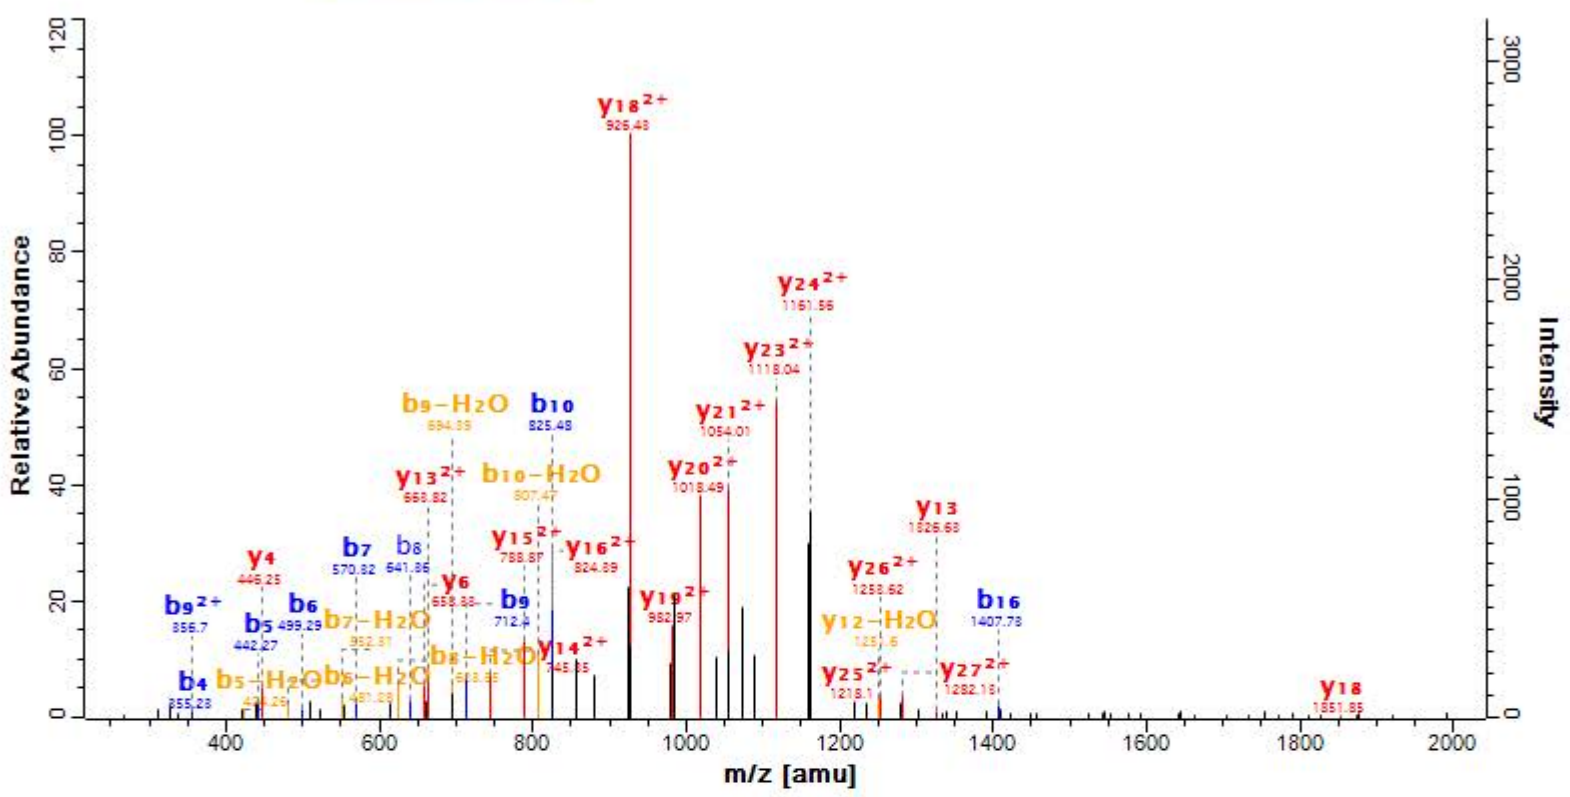

precursor information

|                   |                 |
|-------------------|-----------------|
| Mass:             | 2667.30799      |
| m/z:              | 890.10994       |
| Charge:           | 3+              |
| Retentiontime:    | 50.614284515380 |
| Score:            | 153.3561        |
| Mass Error [ppm]: | -0.058962       |
| PEP:              | 6.2245E-36      |
| Precursor Type:   | MULTI           |

| b <sup>2+</sup> ion |        | b ion    |        | seq |   |    | y ion    |         | y <sup>2+</sup> ion |         |
|---------------------|--------|----------|--------|-----|---|----|----------|---------|---------------------|---------|
| Δ dalton            | mass   | Δ dalton | mass   |     |   |    | Δ dalton | mass    | Δ dalton            | mass    |
|                     | 114.09 |          | 114.09 | 1   | L | 27 |          |         |                     |         |
|                     | 171.11 |          | 171.11 | 2   | G | 26 | 2563.2   |         | 1282.1              | +0.2846 |
|                     | 242.15 |          | 242.15 | 3   | A | 25 | 2506.2   |         | 1253.6              | +0.3376 |
|                     | 355.23 | -0.11    | 355.23 | 4   | L | 24 | 2435.2   |         | 1218.1              | +0.1886 |
|                     | 442.27 | -0.024   | 442.27 | 5   | S | 23 | 2322.1   |         | 1161.6              | -0.091  |
|                     | 499.29 | +0.1318  | 499.29 | 6   | G | 22 | 2235.1   |         | 1118                | +0.3343 |
|                     | 570.32 | -0.039   | 570.32 | 7   | A | 21 | 2178     |         | 2178                |         |
|                     | 641.36 | +0.1144  | 641.36 | 8   | A | 20 | 2107     |         | 1054                | +0.2832 |
| -0.285              | 356.7  | +0.006   | 712.4  | 9   | A | 19 | 2036     |         | 1018.5              | +0.3103 |
|                     | 825.48 | +0.1772  | 825.48 | 10  | L | 18 | 1964.9   |         | 982.97              | -0.014  |
|                     | 882.5  |          | 882.5  | 11  | G | 17 | 1851.9   | -0.016  | 926.43              | +0.2871 |
|                     | 1029.6 |          | 1029.6 | 12  | F | 16 | 1794.8   |         | 1794.8              |         |
|                     | 1100.6 |          | 1100.6 | 13  | A | 15 | 1647.8   |         | 824.39              | +0.249  |
|                     | 1187.6 |          | 1187.6 | 14  | S | 14 | 1576.7   |         | 788.87              | +0.3296 |
|                     | 1350.7 |          | 1350.7 | 15  | Y | 13 | 1489.7   |         | 745.35              | +0.1184 |
|                     | 1407.7 | -0.104   | 1407.7 | 16  | G | 12 | 1326.6   | -0.169  | 663.82              | +0.2429 |
|                     | 1478.8 |          | 1478.8 | 17  | A | 11 | 1269.6   |         | 1269.6              |         |
|                     | 1615.8 |          | 1615.8 | 18  | H | 10 | 1198.6   |         | 1198.6              |         |
|                     | 1672.8 |          | 1672.8 | 19  | G | 9  | 1061.5   |         | 1061.5              |         |
|                     | 1743.9 |          | 1743.9 | 20  | A | 8  | 1004.5   |         | 1004.5              |         |
|                     | 1871.9 |          | 1871.9 | 21  | Q | 7  | 933.46   |         | 933.46              |         |
|                     | 2019   |          | 2019   | 22  | F | 6  | 805.4    |         | 805.4               |         |
|                     | 2116.1 |          | 2116.1 | 23  | P | 5  | 658.33   | +0.166  | 658.33              |         |
|                     | 2231.1 |          | 2231.1 | 24  | D | 4  | 561.28   |         | 561.28              |         |
|                     | 2302.1 |          | 2302.1 | 25  | A | 3  | 446.25   | +0.1863 | 446.25              |         |
|                     | 2465.2 |          | 2465.2 | 26  | Y | 2  | 375.21   |         | 375.21              |         |
|                     | 2522.2 |          | 2522.2 | 27  | G | 1  | 212.15   |         | 212.15              |         |
|                     |        |          |        | 28  | K | 0  | 155.13   |         | 155.13              |         |

general information

|                       |           |
|-----------------------|-----------|
| Annotation:           | 17 of 28  |
| AminoAcids Coverage:  | 61 %      |
| Intensity Coverage:   | 56 %      |
| Peak Coverage:        | 32 %      |
| Protein Localisation: | 11 ... 38 |



Scan number 7949 Raw file LNCAP\_Silac\_23F10\_set1\_05  
 Method ITMS: CID Pepti... 109.44

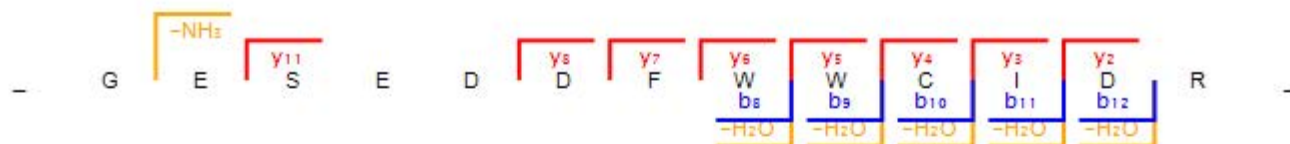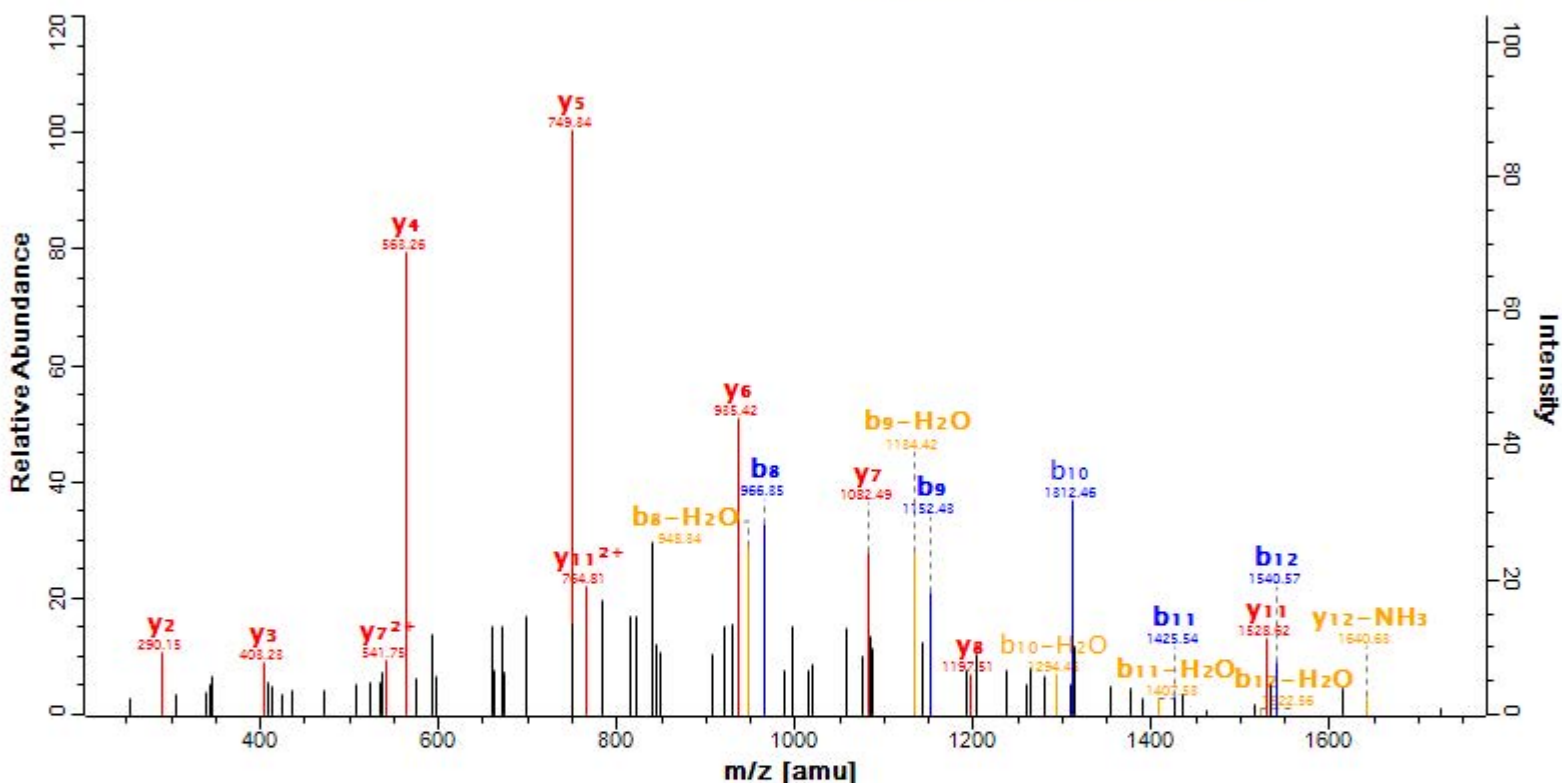

precursor information

|                   |                 |
|-------------------|-----------------|
| Mass:             | 1713.6734       |
| m/z:              | 857.84397       |
| Charge:           | 2+              |
| Retentiontime:    | 51.859317779541 |
| Score:            | 109.4421        |
| Mass Error [ppm]: | 0.26874         |
| PEP:              | 7.3304E-06      |
| Precursor Type:   | MULTI           |

general information

|                       |             |
|-----------------------|-------------|
| Annotation:           | 11 of 13    |
| AminoAcids Coverage:  | 85 %        |
| Intensity Coverage:   | 47 %        |
| Peak Coverage:        | 25 %        |
| Protein Localisation: | 283 ... 295 |

| b ion     |          |     |   | y ion    |          | y <sup>2+</sup> ion |          |
|-----------|----------|-----|---|----------|----------|---------------------|----------|
| Δ dalton  | mass     | seq |   | Δ dalton | mass     | Δ dalton            | mass     |
|           | 58.02874 | 1   | G | 12       |          |                     |          |
|           | 187.0713 | 2   | E | 11       | 1657.659 | 1657.659            |          |
|           | 274.1034 | 3   | S | 10       | 1528.616 | -0.00751            | 764.8117 |
|           | 403.146  | 4   | E | 9        | 1441.584 |                     | 1441.584 |
|           | 518.1729 | 5   | D | 8        | 1312.542 |                     | 1312.542 |
|           | 633.1998 | 6   | D | 7        | 1197.515 | +0.18646            | 1197.515 |
|           | 780.2683 | 7   | F | 6        | 1082.488 | +0.102929           | 541.7475 |
| +0.003568 | 966.3476 | 8   | W | 5        | 935.4192 | +0.185808           | 935.4192 |
| -0.04175  | 1152.427 | 9   | W | 4        | 749.3399 | +0.076156           | 749.3399 |
| -0.07582  | 1312.458 | 10  | C | 3        | 563.2606 | +0.073621           | 563.2606 |
| +0.096225 | 1425.542 | 11  | I | 2        | 403.23   | +0.19808            | 403.23   |
| +0.089911 | 1540.569 | 12  | D | 1        | 290.1459 | +0.193033           | 290.1459 |
|           |          | 13  | R | 0        | 175.119  |                     | 175.119  |

Scan number 7968 Raw file LNCAP\_Silac\_23F10\_set1\_05  
 Method ITMS; CID Pepti... 79.65

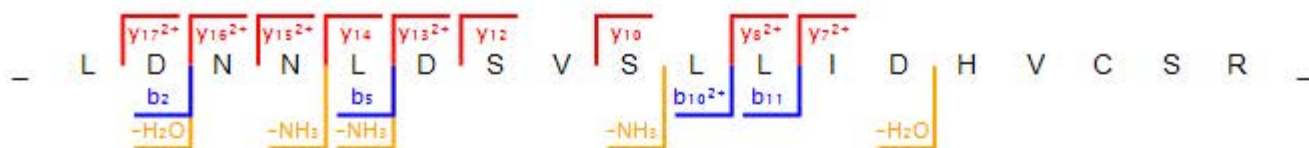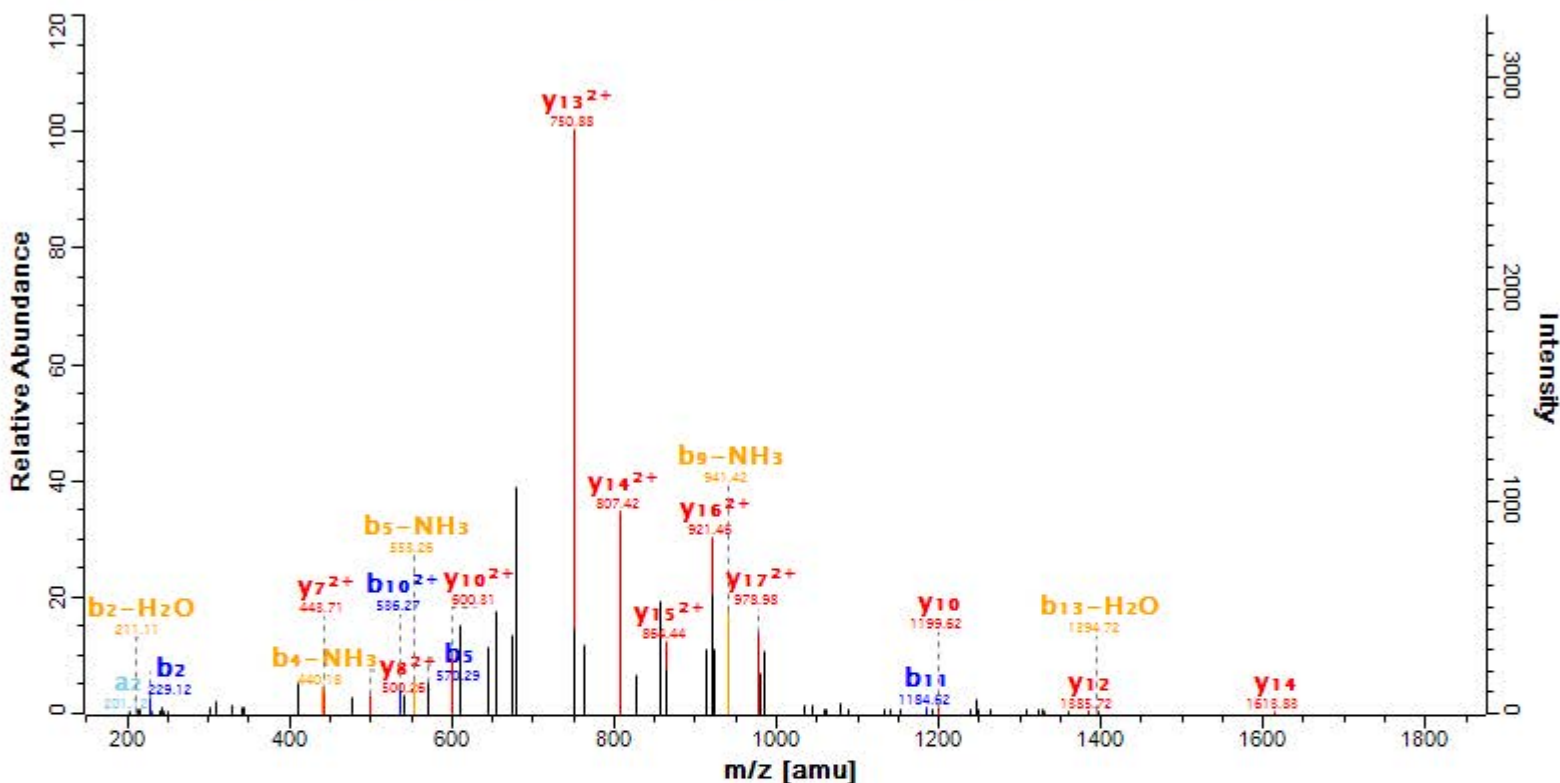

precursor information

|                   |                 |
|-------------------|-----------------|
| Mass:             | 2069.02125      |
| m/z:              | 690.68102       |
| Charge:           | 3+              |
| Retentiontime:    | 51.998573303222 |
| Score:            | 79.65154        |
| Mass Error [ppm]: | 0.044615        |
| PEP:              | 0.00018012      |
| Precursor Type:   | MULTI           |

general information

|                       |             |
|-----------------------|-------------|
| Annotation:           | 11 of 18    |
| AminoAcids Coverage:  | 61 %        |
| Intensity Coverage:   | 45 %        |
| Peak Coverage:        | 22 %        |
| Protein Localisation: | 323 ... 340 |

| a ion         | b <sup>2+</sup> ion | b ion         |    | seq |    | y ion         | y <sup>2+</sup> ion |
|---------------|---------------------|---------------|----|-----|----|---------------|---------------------|
| Δ dalton mass | Δ dalton mass       | Δ dalton mass |    |     |    | Δ dalton mass | Δ dalton mass       |
| 86.1          | 114.1               | 114.1         | 1  | L   | 17 |               |                     |
| +0.114201.1   | 229.1               | +0.025229.1   | 2  | D   | 16 | 1957          | 979                 |
| 315.2         | 343.2               | 343.2         | 3  | N   | 15 | 1842          | 921.5               |
| 429.2         | 457.2               | 457.2         | 4  | N   | 14 | 1728          | 864.4               |
| 542.3         | 570.3               | +0.061570.3   | 5  | L   | 13 | 1614          | -0.21 807.4         |
| 657.3         | 685.3               | 685.3         | 6  | D   | 12 | 1501          | 750.9               |
| 744.4         | 772.3               | 772.3         | 7  | S   | 11 | 1386          | +0.3051386          |
| 843.4         | 871.4               | 871.4         | 8  | V   | 10 | 1299          | 1299                |
| 930.5         | 958.4               | 958.4         | 9  | S   | 9  | 1200          | -0.02 600.3         |
| 1044          | +0.085536.3         | 1072          | 10 | L   | 8  | 1113          | 1113                |
| 1157          | 1185                | +0.0481185    | 11 | L   | 7  | 999.5         | 500.3               |
| 1270          | 1298                | 1298          | 12 | I   | 6  | 886.4         | -0.14 443.7         |
| 1385          | 1413                | 1413          | 13 | D   | 5  | 773.3         | 773.3               |
| 1522          | 1550                | 1550          | 14 | H   | 4  | 658.3         | 658.3               |
| 1621          | 1649                | 1649          | 15 | V   | 3  | 521.3         | 521.3               |
| 1781          | 1809                | 1809          | 16 | C   | 2  | 422.2         | 422.2               |
| 1868          | 1896                | 1896          | 17 | S   | 1  | 262.2         | 262.2               |
|               |                     |               | 18 | R   | 0  | 175.1         | 175.1               |

Scan number 8337 Raw file LNCAP\_Silac\_23F10\_set1\_05  
 Method ITMS; CID Pepti... 183.6

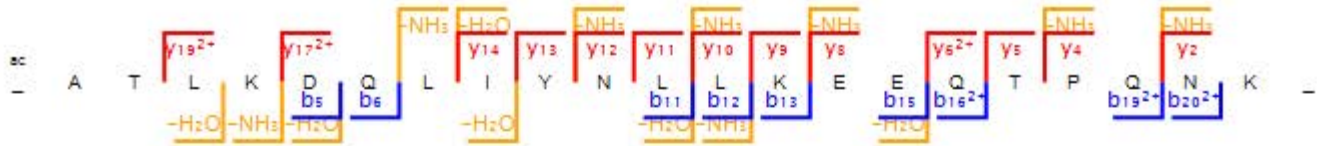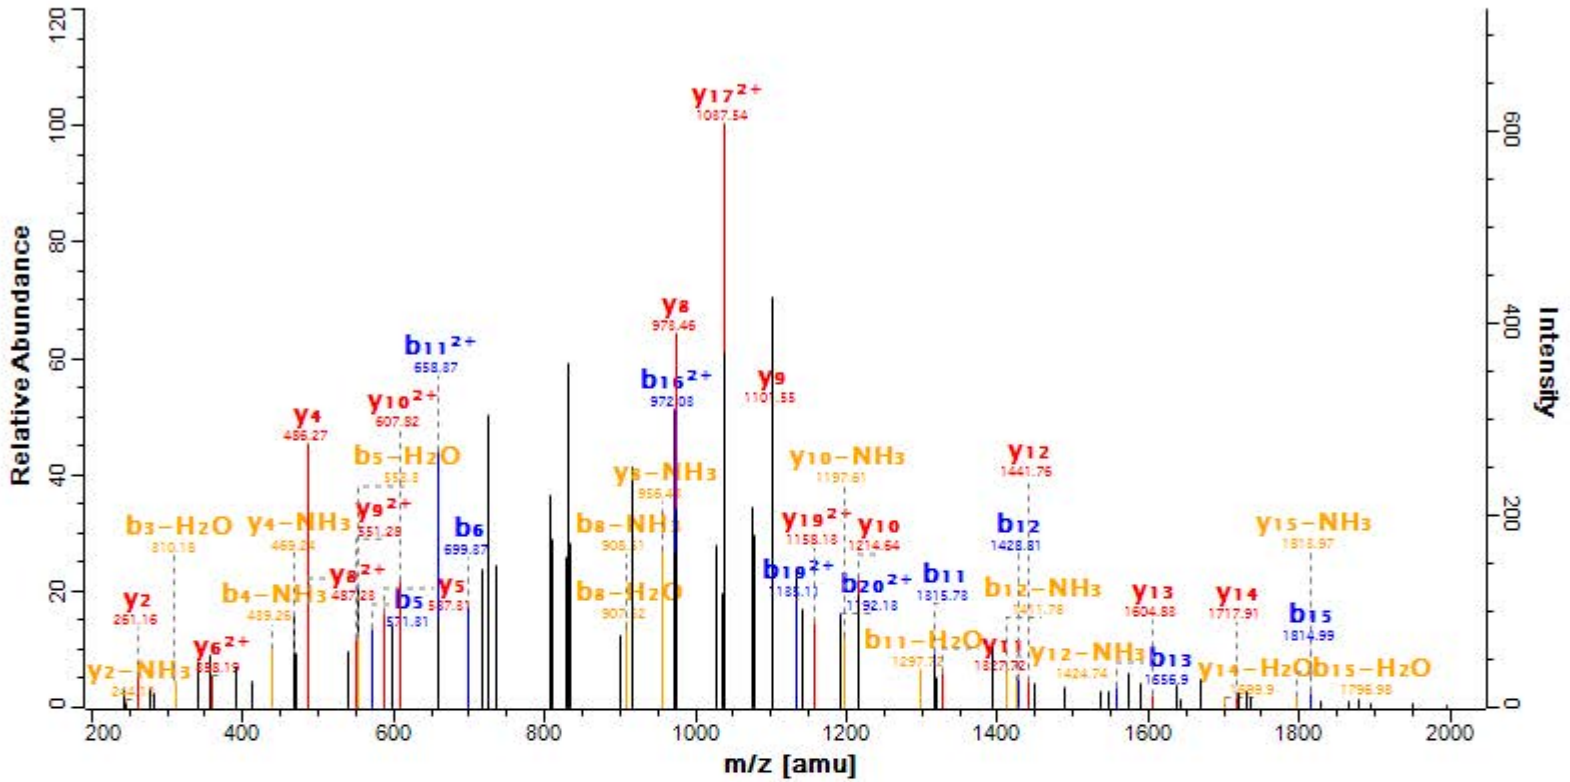

precursor information

|                   |                 |
|-------------------|-----------------|
| Mass:             | 2528.34952      |
| m/z:              | 843.79045       |
| Charge:           | 3+              |
| Retentiontime:    | 54.765014648437 |
| Score:            | 183.5978        |
| Mass Error [ppm]: | 0.35805         |
| PEP:              | 9.4661E-38      |
| Precursor Type:   | MULTI           |

general information

|                       |          |
|-----------------------|----------|
| Annotation:           | 18 of 21 |
| AminoAcids Coverag    | 86 %     |
| Intensity Coverage:   | 42 %     |
| Peak Coverage:        | 39 %     |
| Protein Localisation: | 2 ... 22 |

| b <sup>2+</sup> ion |        | b ion    |        | seq |   |    | y ion    |         | y <sup>2+</sup> ion |         |
|---------------------|--------|----------|--------|-----|---|----|----------|---------|---------------------|---------|
| Δ dalton            | mass   | Δ dalton | mass   |     |   |    | Δ dalton | mass    | Δ dalton            | mass    |
|                     | 114.05 | 114.05   |        | 1   | A | 20 |          |         |                     |         |
|                     | 215.1  | 215.1    |        | 2   | T | 19 | 2416.3   |         | 2416.3              |         |
|                     | 328.19 | 328.19   |        | 3   | L | 18 | 2315.3   |         | 1158.1              | +0.4296 |
|                     | 456.28 | 456.28   |        | 4   | K | 17 | 2202.2   |         | 2202.2              |         |
|                     | 571.31 | +0.2891  | 571.31 | 5   | D | 16 | 2074.1   |         | 1037.5              | +0.3365 |
|                     | 699.37 | +0.288   | 699.37 | 6   | Q | 15 | 1959.1   |         | 1959.1              |         |
|                     | 812.45 |          | 812.45 | 7   | L | 14 | 1831     |         | 1831                |         |
|                     | 925.54 |          | 925.54 | 8   | I | 13 | 1717.9   | +0.0576 | 1717.9              |         |
|                     | 1088.6 |          | 1088.6 | 9   | Y | 12 | 1604.8   | +0.3837 | 1604.8              |         |
|                     | 1202.6 |          | 1202.6 | 10  | N | 11 | 1441.8   | -0.054  | 1441.8              |         |
| +0.2588             | 658.37 | +0.0755  | 1315.7 | 11  | L | 10 | 1327.7   | +0.0266 | 1327.7              |         |
|                     | 1428.8 | -0.086   | 1428.8 | 12  | L | 9  | 1214.6   | -0.03   | 607.82              | +0.2502 |
|                     | 1556.9 | -0.174   | 1556.9 | 13  | K | 8  | 1101.6   | -0.033  | 551.28              | +0.0093 |
|                     | 1685.9 |          | 1685.9 | 14  | E | 7  | 973.46   | +0.0242 | 487.23              | +0.292  |
|                     | 1815   | +0.2788  | 1815   | 15  | E | 6  | 844.42   |         | 844.42              |         |
| -0.279              | 972.03 |          | 1943   | 16  | Q | 5  | 715.37   |         | 358.19              | +0.0106 |
|                     | 2044.1 |          | 2044.1 | 17  | T | 4  | 587.31   | +0.0559 | 587.31              |         |
|                     | 2141.1 |          | 2141.1 | 18  | P | 3  | 486.27   | +0.0653 | 486.27              |         |
| -0.229              | 1135.1 |          | 2269.2 | 19  | Q | 2  | 389.21   |         | 389.21              |         |
| +0.3994             | 1192.1 |          | 2383.3 | 20  | N | 1  | 261.16   | +0.1216 | 261.16              |         |
|                     |        |          |        | 21  | K | 0  | 147.11   |         | 147.11              |         |

Scan number 8517 Raw file LNCAP\_Silac\_23F10\_set1\_05  
 Method ITMS; CID Pepti... 151.17

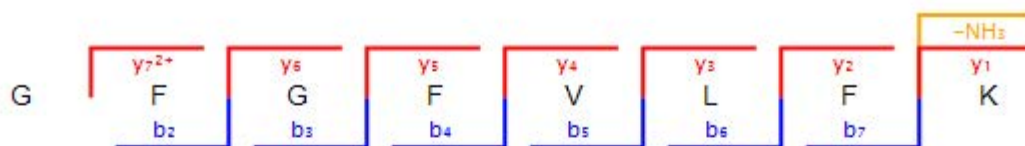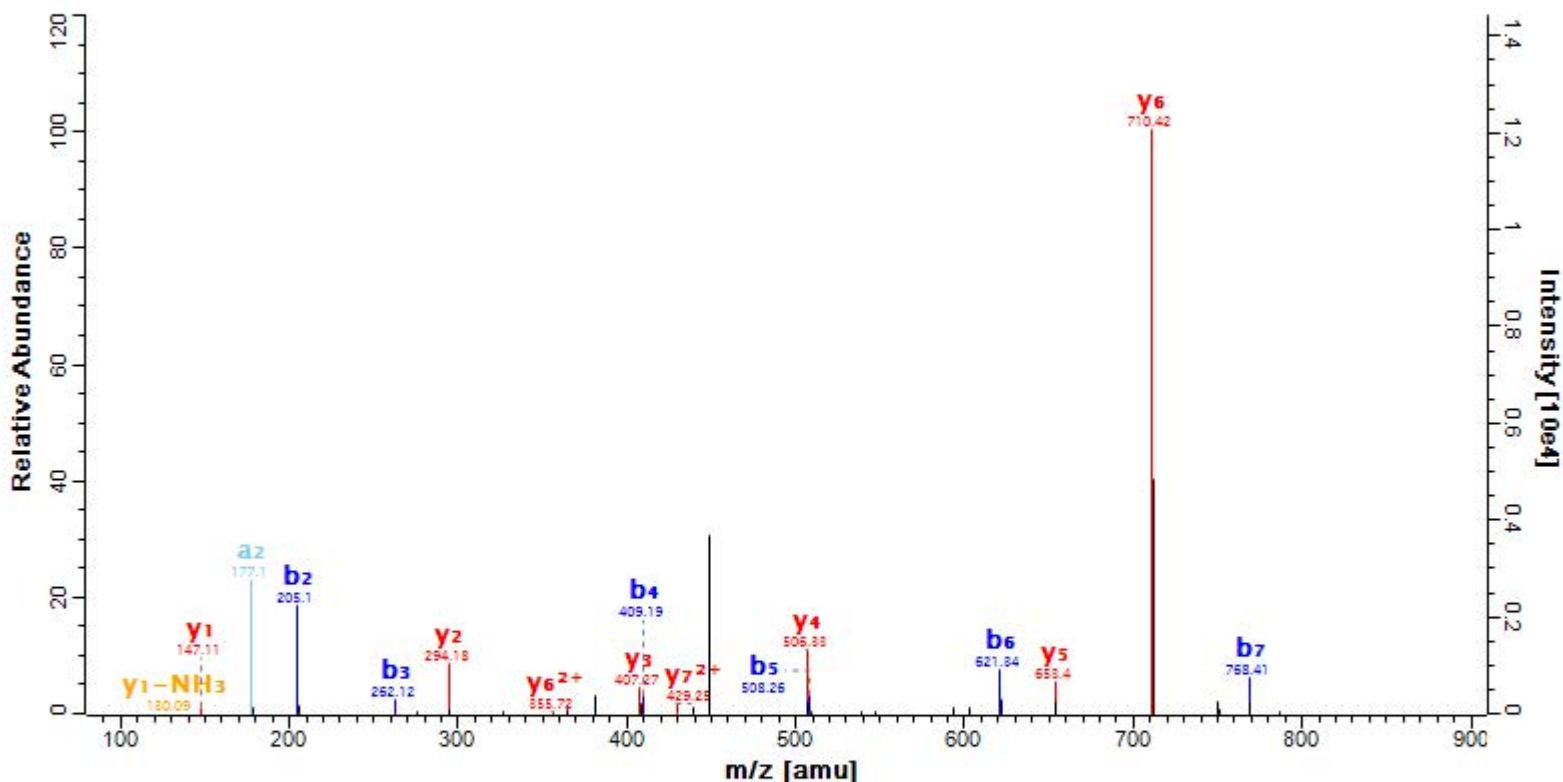

#### precursor information

|                       |                 |
|-----------------------|-----------------|
| Mass:                 | 913.50601       |
| m/z:                  | 457.76028       |
| Charge:               | 2+              |
| Retentiontime:        | 56.121829986572 |
| Score:                | 151.1728        |
| Mass Error [ppm]:     | -0.18311        |
| g PEP:                | 9.5483E-05      |
| Annotation:           | 7 of 8          |
| AminoAcids Coverage:  | 88 %            |
| Intensity Coverage:   | 67 %            |
| Peak Coverage:        | 29 %            |
| Protein Localisation: | 120 ... 127     |

| a ion    |        | b ion    |        |   |     |          | y ion  |          | y <sup>2+</sup> ion |  |
|----------|--------|----------|--------|---|-----|----------|--------|----------|---------------------|--|
| Δ dalton | mass   | Δ dalton | mass   |   | seq | Δ dalton | mass   | Δ dalton | mass                |  |
|          | 30.034 |          | 58.029 | 1 | G   |          |        |          |                     |  |
| -0.037   | 177.1  | +0.0217  | 205.1  | 2 | F   | 6        | 857.49 |          | 429.25              |  |
|          | 234.12 | +0.1203  | 262.12 | 3 | G   | 5        | 710.42 | +0.0354  | 355.72              |  |
|          | 381.19 | -0.02    | 409.19 | 4 | F   | 4        | 653.4  | +0.0047  | 653.4               |  |
|          | 480.26 | +0.1499  | 508.26 | 5 | V   | 3        | 506.33 | +0.0538  | 506.33              |  |
|          | 593.34 | +0.012   | 621.34 | 6 | L   | 2        | 407.27 | +0.1521  | 407.27              |  |
|          | 740.41 | -0.018   | 768.41 | 7 | F   | 1        | 294.18 | +0.0331  | 294.18              |  |
|          |        |          |        | 8 | K   | 0        | 147.11 | +0.0352  | 147.11              |  |

Scan number 8700 Raw file LNCAP\_Silac\_23F10\_set1\_05  
 Method ITMS; CID Pepti... 166.77

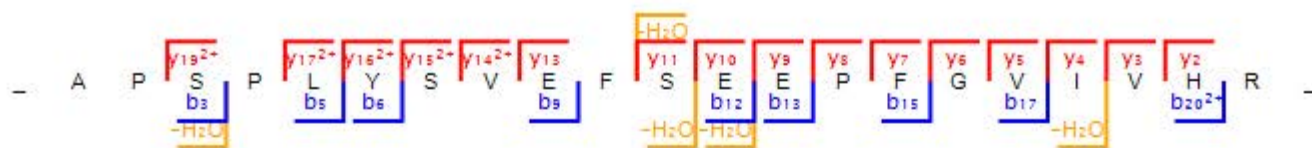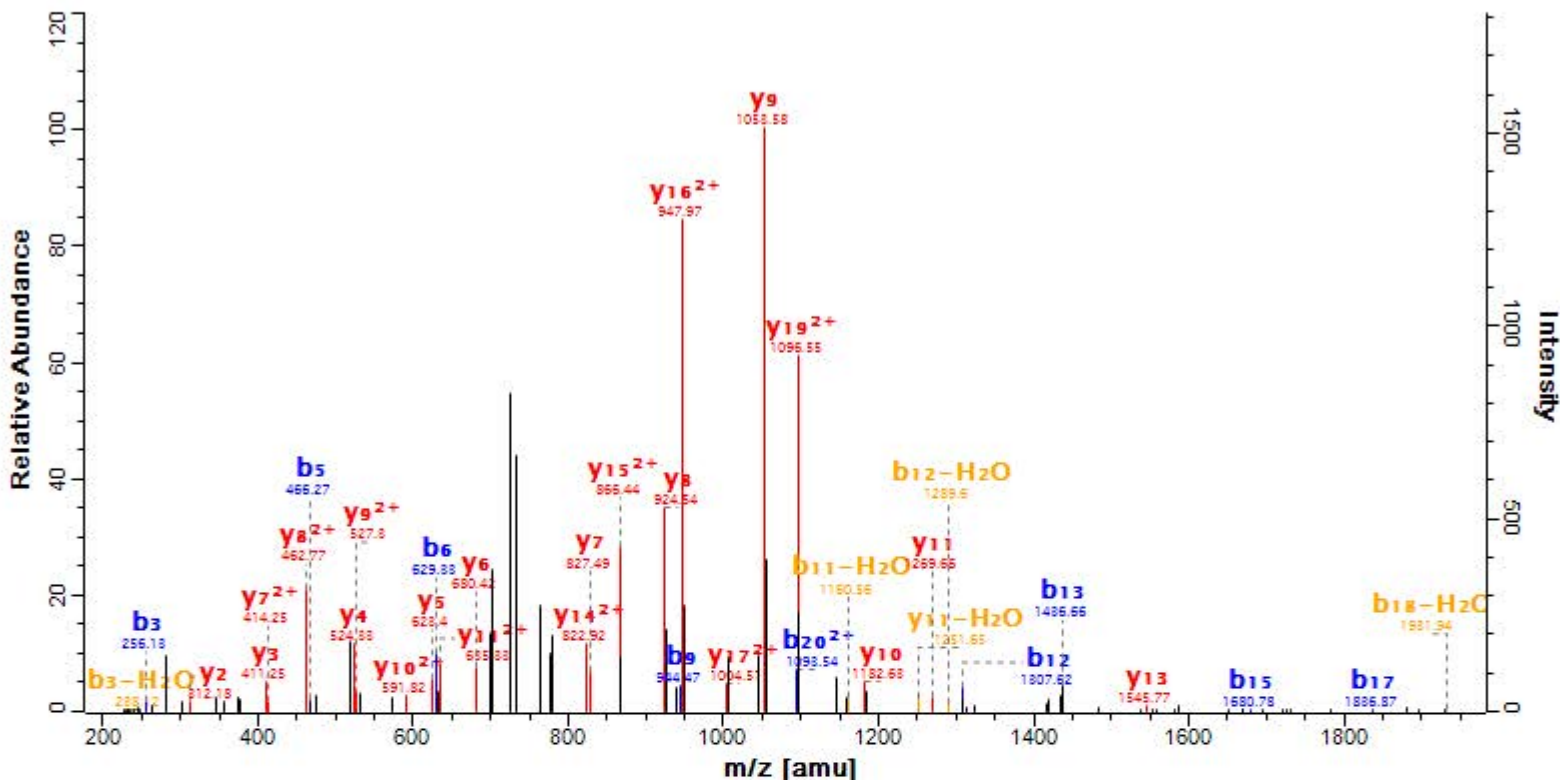

precursor information

|                   |                 |
|-------------------|-----------------|
| Mass:             | 2359.18534      |
| m/z:              | 787.40239       |
| Charge:           | 3+              |
| Retentiontime:    | 57.596488952636 |
| Score:            | 166.7736        |
| Mass Error [ppm]: | 0.2079          |
| PEP:              | 3.6002E-28      |
| Precursor Type:   | MULTI           |

| b <sup>2+</sup> ion |        | b ion    |        | seq |   |    | y ion    |         | y <sup>2+</sup> ion |         |
|---------------------|--------|----------|--------|-----|---|----|----------|---------|---------------------|---------|
| Δ dalton            | mass   | Δ dalton | mass   |     |   |    | Δ dalton | mass    | Δ dalton            | mass    |
|                     | 72.044 |          | 72.044 | 1   | A | 20 |          |         |                     |         |
|                     | 169.1  |          | 169.1  | 2   | P | 19 | 2289.2   |         | 2289.2              |         |
|                     | 256.13 | +0.0204  | 256.13 | 3   | S | 18 | 2192.1   |         | 1096.6              | +0.4267 |
|                     | 353.18 |          | 353.18 | 4   | P | 17 | 2105.1   |         | 2105.1              |         |
|                     | 466.27 | -0.096   | 466.27 | 5   | L | 16 | 2008     |         | 1004.5              | -0.011  |
|                     | 629.33 | +0.0547  | 629.33 | 6   | Y | 15 | 1894.9   |         | 947.97              | +0.2314 |
|                     | 716.36 |          | 716.36 | 7   | S | 14 | 1731.9   |         | 866.44              | +0.28   |
|                     | 815.43 |          | 815.43 | 8   | V | 13 | 1644.8   |         | 822.92              | +0.2915 |
|                     | 944.47 | +0.0962  | 944.47 | 9   | E | 12 | 1545.8   | -0.112  | 1545.8              |         |
|                     | 1091.5 |          | 1091.5 | 10  | F | 11 | 1416.7   |         | 1416.7              |         |
|                     | 1178.6 |          | 1178.6 | 11  | S | 10 | 1269.7   | +0.1497 | 635.33              | +0.1917 |
|                     | 1307.6 | +0.1623  | 1307.6 | 12  | E | 9  | 1182.6   | +0.0415 | 591.82              | +0.1348 |
|                     | 1436.7 | -0.144   | 1436.7 | 13  | E | 8  | 1053.6   | -0.207  | 527.3               | +0.1901 |
|                     | 1533.7 |          | 1533.7 | 14  | P | 7  | 924.54   | +0.1274 | 462.77              | +0.2369 |
|                     | 1680.8 | +0.1459  | 1680.8 | 15  | F | 6  | 827.49   | +0.1253 | 414.25              | +0.0272 |
|                     | 1737.8 |          | 1737.8 | 16  | G | 5  | 680.42   | +0.1196 | 680.42              |         |
|                     | 1836.9 | +0.0488  | 1836.9 | 17  | V | 4  | 623.4    | +0.1079 | 623.4               |         |
|                     | 1950   |          | 1950   | 18  | I | 3  | 524.33   | +0.0915 | 524.33              |         |
|                     | 2049   |          | 2049   | 19  | V | 2  | 411.25   | +0.1331 | 411.25              |         |
| +0.346              | 1093.5 |          | 2186.1 | 20  | H | 1  | 312.18   | +0.2167 | 312.18              |         |
|                     |        |          |        | 21  | R | 0  | 175.12   |         | 175.12              |         |

general information

|                       |             |
|-----------------------|-------------|
| Annotation:           | 17 of 21    |
| AminoAcids Coverag    | 81 %        |
| Intensity Coverage:   | 53 %        |
| Peak Coverage:        | 32 %        |
| Protein Localisation: | 204 ... 224 |

Scan number 8808 Raw file LNCAP\_Silac\_23F10\_set1\_05  
 Method ITMS; CID Pepti... 70.41

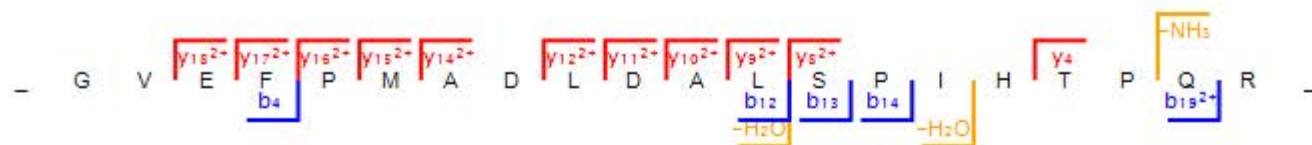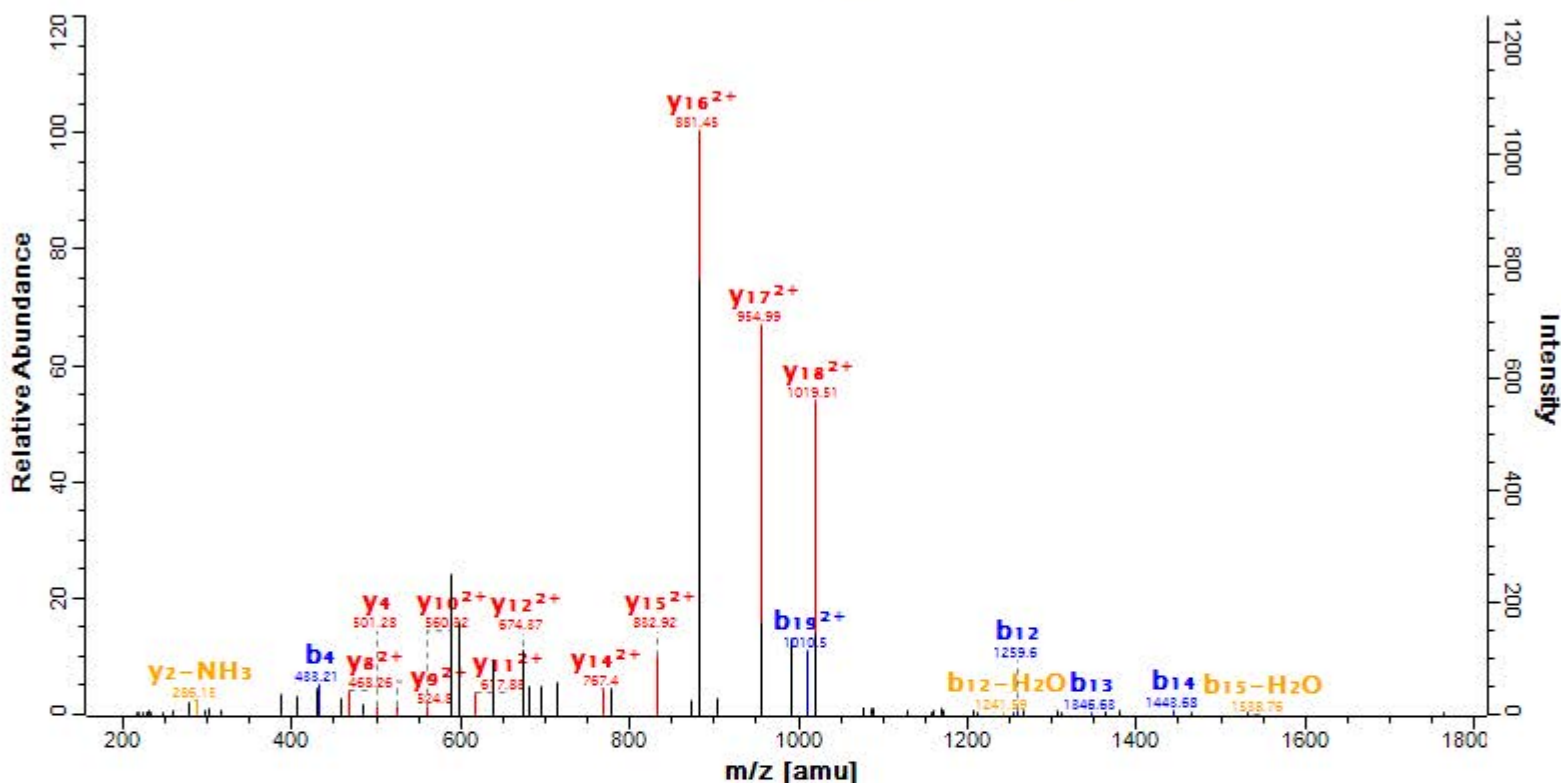

precursor information

|                   |                 |
|-------------------|-----------------|
| Mass:             | 2193.08754      |
| m/z:              | 732.03646       |
| Charge:           | 3+              |
| Retentiontime:    | 58.521709442138 |
| Score:            | 70.41049        |
| Mass Error [ppm]: | -0.59229        |
| PEP:              | 0.00030086      |
| Precursor Type:   | MULTI           |

| b <sup>2+</sup> ion |        | b ion    |        | seq |   |    | y ion    |         | y <sup>2+</sup> ion |         |
|---------------------|--------|----------|--------|-----|---|----|----------|---------|---------------------|---------|
| Δ dalton            | mass   | Δ dalton | mass   |     |   |    | Δ dalton | mass    | Δ dalton            | mass    |
|                     | 58.029 |          | 58.029 | 1   | G | 19 |          |         |                     |         |
|                     | 157.1  |          | 157.1  | 2   | V | 18 | 2137.1   |         | 2137.1              |         |
|                     | 286.14 |          | 286.14 | 3   | E | 17 | 2038     |         | 1019.5              | +0.2989 |
|                     | 433.21 | -0.017   | 433.21 | 4   | F | 16 | 1909     |         | 954.99              | +0.3304 |
|                     | 530.26 |          | 530.26 | 5   | P | 15 | 1761.9   |         | 881.45              | +0.1106 |
|                     | 661.3  |          | 661.3  | 6   | M | 14 | 1664.8   |         | 832.92              | +0.2736 |
|                     | 732.34 |          | 732.34 | 7   | A | 13 | 1533.8   |         | 767.4               | +0.2966 |
|                     | 847.37 |          | 847.37 | 8   | D | 12 | 1462.8   |         | 1462.8              |         |
|                     | 960.45 |          | 960.45 | 9   | L | 11 | 1347.7   |         | 674.37              | -0.269  |
|                     | 1075.5 |          | 1075.5 | 10  | D | 10 | 1234.7   |         | 617.83              | +0.132  |
|                     | 1146.5 |          | 1146.5 | 11  | A | 9  | 1119.6   |         | 560.32              | +0.0414 |
|                     | 1259.6 | -0.138   | 1259.6 | 12  | L | 8  | 1048.6   |         | 524.8               | +0.069  |
|                     | 1346.6 | +0.2081  | 1346.6 | 13  | S | 7  | 935.51   |         | 468.26              | +0.3037 |
|                     | 1443.7 | +0.1509  | 1443.7 | 14  | P | 6  | 848.47   |         | 848.47              |         |
|                     | 1556.8 |          | 1556.8 | 15  | I | 5  | 751.42   |         | 751.42              |         |
|                     | 1693.8 |          | 1693.8 | 16  | H | 4  | 638.34   |         | 638.34              |         |
|                     | 1794.9 |          | 1794.9 | 17  | T | 3  | 501.28   | +0.1366 | 501.28              |         |
|                     | 1891.9 |          | 1891.9 | 18  | P | 2  | 400.23   |         | 400.23              |         |
| +0.4501             | 1010.5 |          | 2020   | 19  | Q | 1  | 303.18   |         | 303.18              |         |
|                     |        |          |        | 20  | R | 0  | 175.12   |         | 175.12              |         |

general information

|                       |             |
|-----------------------|-------------|
| Annotation:           | 14 of 20    |
| AminoAcids Coverag    | 70 %        |
| Intensity Coverage:   | 53 %        |
| Peak Coverage:        | 23 %        |
| Protein Localisation: | 148 ... 167 |

Scan number 8911 Raw file LNCAP\_Silac\_23F10\_set1\_05  
 Method ITMS; CID Pepti... 71.7

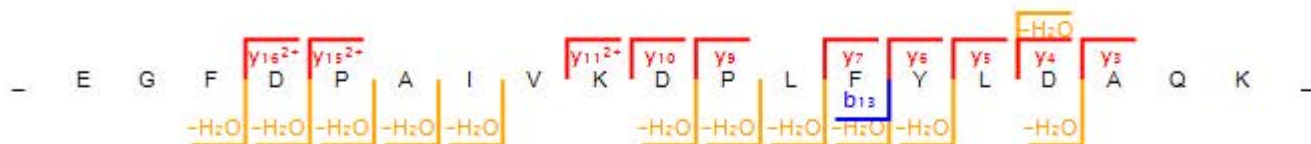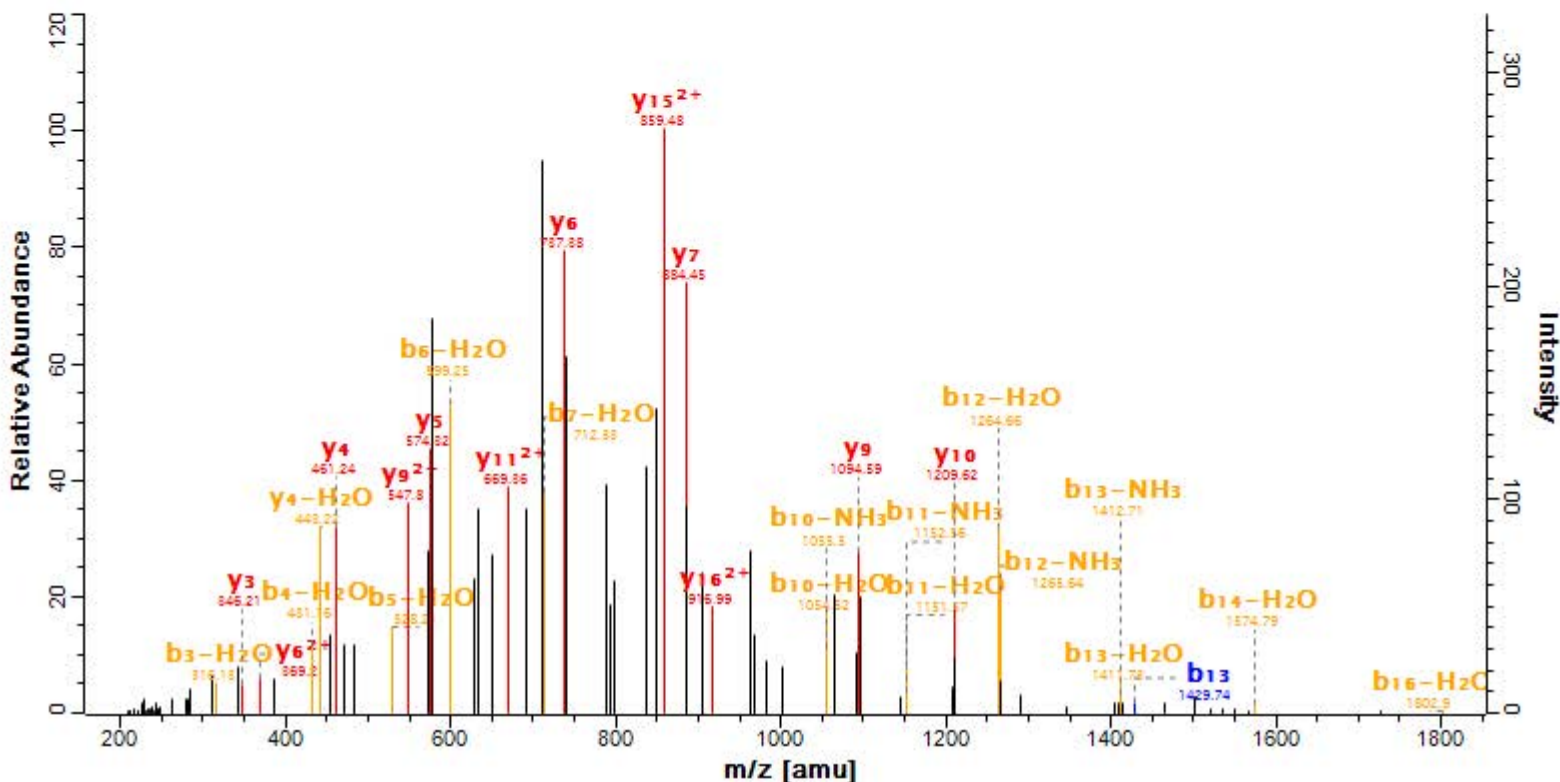

precursor information

|                   |                 |
|-------------------|-----------------|
| Mass:             | 2165.10541      |
| m/z:              | 722.70908       |
| Charge:           | 3+              |
| Retentiontime:    | 59.367465972900 |
| Score:            | 71.69701        |
| Mass Error [ppm]: | 0.43189         |
| PEP:              | 0.00021836      |
| Precursor Type:   | MULTI           |

general information

|                       |             |
|-----------------------|-------------|
| Annotation:           | 14 of 19    |
| AminoAcids Coverage:  | 74 %        |
| Intensity Coverage:   | 45 %        |
| Peak Coverage:        | 28 %        |
| Protein Localisation: | 604 ... 622 |

| b ion    |          |     |   | y ion    |          | y <sup>2+</sup> ion |           |
|----------|----------|-----|---|----------|----------|---------------------|-----------|
| Δ dalton | mass     | seq |   | Δ dalton | mass     | Δ dalton            | mass      |
|          | 130.0499 | 1   | E | 18       |          |                     |           |
|          | 187.0713 | 2   | G | 17       | 2037.069 | 2037.069            |           |
|          | 334.1397 | 3   | F | 16       | 1980.048 | 1980.048            |           |
|          | 449.1667 | 4   | D | 15       | 1832.979 | 916.9933            | +0.248483 |
|          | 546.2195 | 5   | P | 14       | 1717.952 | 859.4798            | +0.264274 |
|          | 617.2566 | 6   | A | 13       | 1620.9   | 1620.9              |           |
|          | 730.3406 | 7   | I | 12       | 1549.862 | 1549.862            |           |
|          | 829.409  | 8   | V | 11       | 1436.778 | 1436.778            |           |
|          | 957.504  | 9   | K | 10       | 1337.71  | 669.3586            | +0.265884 |
|          | 1072.531 | 10  | D | 9        | 1209.615 | +0.031102 1209.615  |           |
|          | 1169.584 | 11  | P | 8        | 1094.588 | -0.16449 547.7977   | +0.236871 |
|          | 1282.668 | 12  | L | 7        | 997.5353 | 997.5353            |           |
| -0.00109 | 1429.736 | 13  | F | 6        | 884.4512 | +0.029956 884.4512  |           |
|          | 1592.8   | 14  | Y | 5        | 737.3828 | +0.052106 369.1951  | +0.103469 |
|          | 1705.884 | 15  | L | 4        | 574.3195 | +0.010515 574.3195  |           |
|          | 1820.911 | 16  | D | 3        | 461.2354 | +9.62E-05 461.2354  |           |
|          | 1891.948 | 17  | A | 2        | 346.2085 | +0.085877 346.2085  |           |
|          | 2020.006 | 18  | Q | 1        | 275.1714 | 275.1714            |           |
|          |          | 19  | K | 0        | 147.1128 | 147.1128            |           |

Scan number 8950 Raw file LNCAP\_Silac\_23F10\_set1\_05  
 Method ITMS: CID Pepti... 95.42

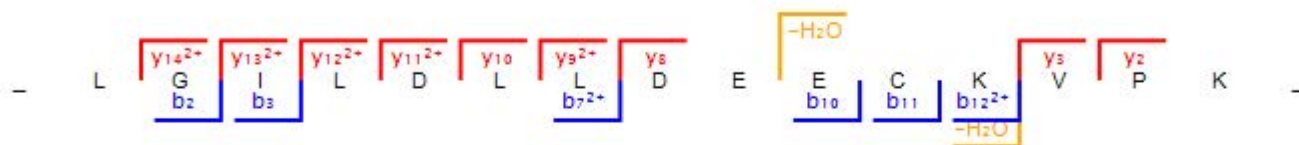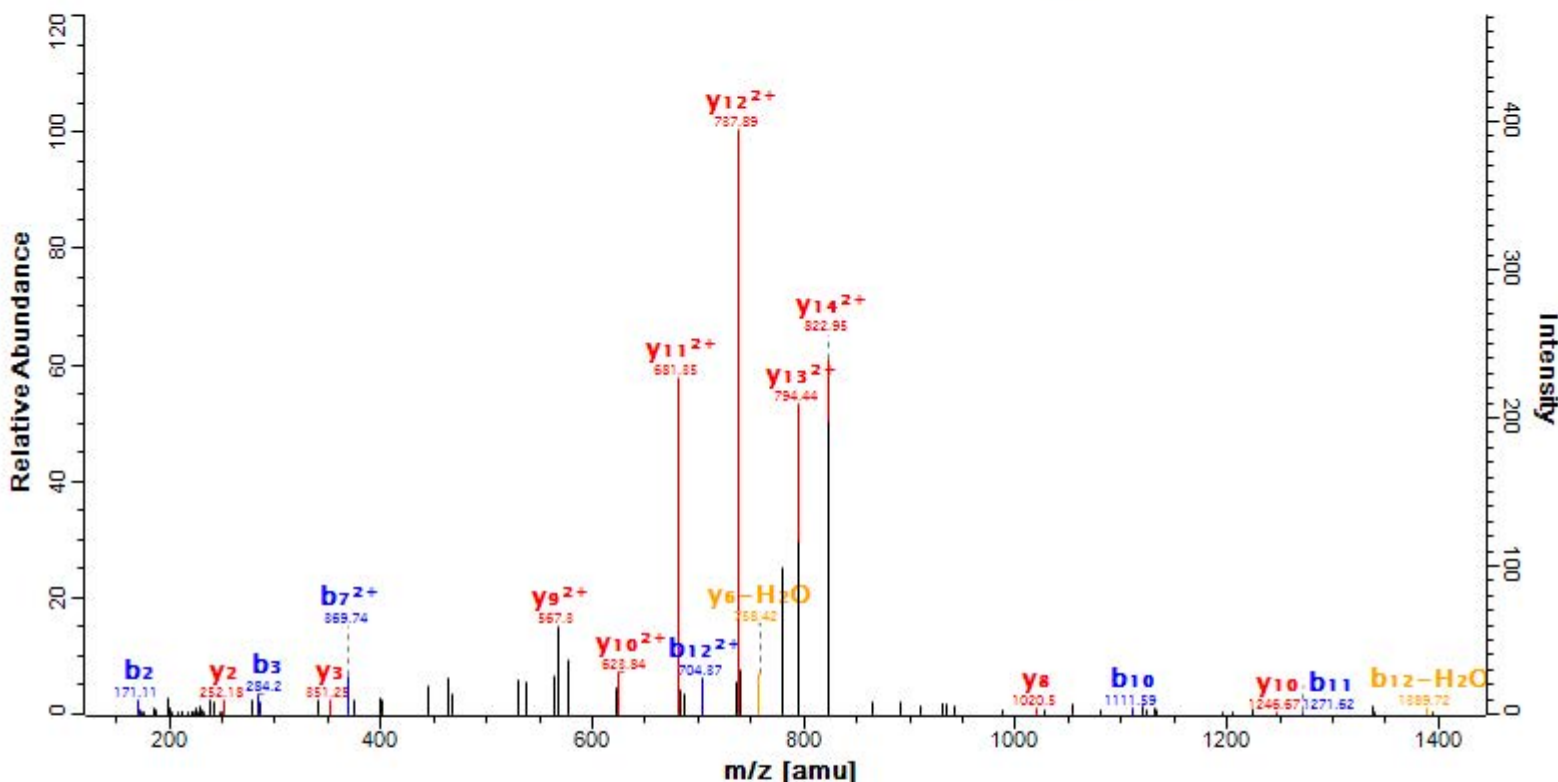

precursor information

|                   |                 |
|-------------------|-----------------|
| Mass:             | 1740.93417      |
| m/z:              | 581.31867       |
| Charge:           | 3+              |
| Retentiontime:    | 59.703971862793 |
| Score:            | 95.41728        |
| Mass Error [ppm]: | 0.56815         |
| PEP:              | 7.6055E-05      |
| Precursor Type:   | MULTI           |

general information

|                       |             |
|-----------------------|-------------|
| Annotation:           | 12 of 15    |
| AminoAcids Coverag    | 80 %        |
| Intensity Coverage:   | 57 %        |
| Peak Coverage:        | 19 %        |
| Protein Localisation: | 504 ... 518 |

| b <sup>2+</sup> ion |        | b ion    |        | seq |   |    | y ion    |         | y <sup>2+</sup> ion |         |
|---------------------|--------|----------|--------|-----|---|----|----------|---------|---------------------|---------|
| Δ dalton            | mass   | Δ dalton | mass   |     |   |    | Δ dalton | mass    | Δ dalton            | mass    |
|                     | 114.09 |          | 114.09 | 1   | L | 14 |          |         |                     |         |
|                     | 171.11 | +0.1424  | 171.11 | 2   | G | 13 | 1644.9   |         | 822.95              | -0.017  |
|                     | 284.2  | +0.0343  | 284.2  | 3   | I | 12 | 1587.9   |         | 794.44              | +0.1445 |
|                     | 397.28 |          | 397.28 | 4   | L | 11 | 1474.8   |         | 737.89              | +0.1185 |
|                     | 512.31 |          | 512.31 | 5   | D | 10 | 1361.7   |         | 681.35              | +0.1133 |
|                     | 625.39 |          | 625.39 | 6   | L | 9  | 1246.7   | +0.2074 | 623.84              | +0.0378 |
| -0.448              | 369.74 |          | 738.48 | 7   | L | 8  | 1133.6   |         | 567.3               | +0.0116 |
|                     | 853.5  |          | 853.5  | 8   | D | 7  | 1020.5   | -0.408  | 1020.5              |         |
|                     | 982.55 |          | 982.55 | 9   | E | 6  | 905.47   |         | 905.47              |         |
|                     | 1111.6 | +0.0299  | 1111.6 | 10  | E | 5  | 776.43   |         | 776.43              |         |
|                     | 1271.6 | -0.174   | 1271.6 | 11  | C | 4  | 647.39   |         | 647.39              |         |
| -0.115              | 704.37 |          | 1407.7 | 12  | K | 3  | 487.36   |         | 487.36              |         |
|                     | 1506.8 |          | 1506.8 | 13  | V | 2  | 351.25   | +0.1109 | 351.25              |         |
|                     | 1603.8 |          | 1603.8 | 14  | P | 1  | 252.18   | +0.0103 | 252.18              |         |
|                     |        |          |        | 15  | K | 0  | 155.13   |         | 155.13              |         |



Scan number 9265 Raw file LNCAP\_Silac\_23F10\_set1\_05  
 Method ITMS; CID Pepti... 72.99

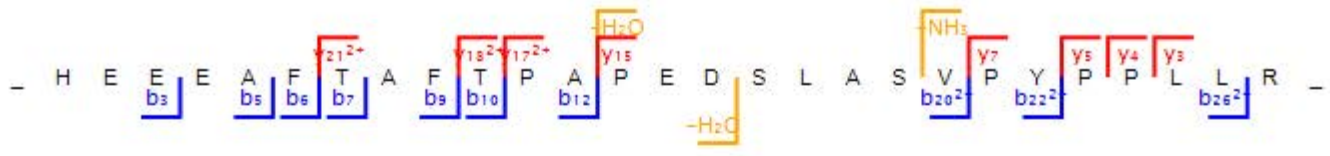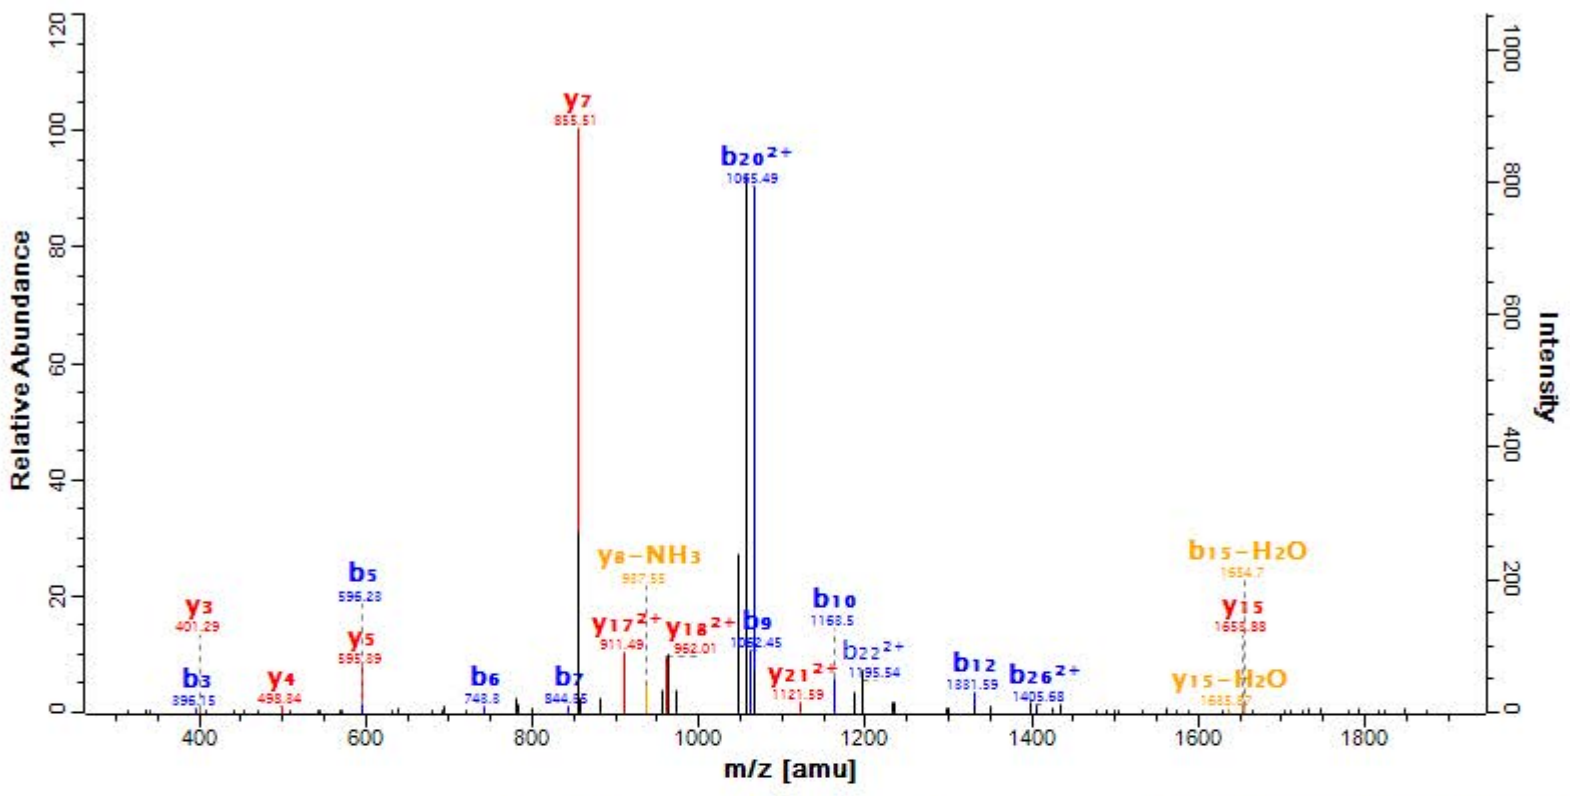

precursor information

|                   |                 |
|-------------------|-----------------|
| Mass:             | 2983.46074      |
| m/z:              | 995.49419       |
| Charge:           | 3+              |
| Retentiontime:    | 62.558944702148 |
| Score:            | 72.98977        |
| Mass Error [ppm]: | 0.13076         |
| PEP:              | 5.1913E-08      |
| Precursor Type:   | MULTI           |

| b <sup>2+</sup> ion |        | b ion    |        |    |     |          | y ion  |          | y <sup>2+</sup> ion |  |
|---------------------|--------|----------|--------|----|-----|----------|--------|----------|---------------------|--|
| Δ dalton            | mass   | Δ dalton | mass   |    | seq | Δ dalton | mass   | Δ dalton | mass                |  |
|                     | 138.07 |          | 138.07 | 1  | H   | 26       |        |          |                     |  |
|                     | 267.11 |          | 267.11 | 2  | E   | 25       | 2847.4 |          | 2847.4              |  |
|                     | 396.15 | +0.1145  | 396.15 | 3  | E   | 24       | 2718.4 |          | 2718.4              |  |
|                     | 525.19 |          | 525.19 | 4  | E   | 23       | 2589.3 |          | 2589.3              |  |
|                     | 596.23 | +0.2719  | 596.23 | 5  | A   | 22       | 2460.3 |          | 2460.3              |  |
|                     | 743.3  | +0.2133  | 743.3  | 6  | F   | 21       | 2389.2 |          | 2389.2              |  |
|                     | 844.35 | -0.001   | 844.35 | 7  | T   | 20       | 2242.2 |          | 1121.6 +0.1667      |  |
|                     | 915.38 |          | 915.38 | 8  | A   | 19       | 2141.1 |          | 2141.1              |  |
|                     | 1062.5 | -0.018   | 1062.5 | 9  | F   | 18       | 2070.1 |          | 2070.1              |  |
|                     | 1163.5 | -0.159   | 1163.5 | 10 | T   | 17       | 1923   |          | 962.01 +0.08        |  |
|                     | 1260.6 |          | 1260.6 | 11 | P   | 16       | 1822   |          | 911.49 +0.2604      |  |
|                     | 1331.6 | -0.045   | 1331.6 | 12 | A   | 15       | 1724.9 |          | 1724.9              |  |
|                     | 1428.6 |          | 1428.6 | 13 | P   | 14       | 1653.9 | -0.071   | 1653.9              |  |
|                     | 1557.7 |          | 1557.7 | 14 | E   | 13       | 1556.8 |          | 1556.8              |  |
|                     | 1672.7 |          | 1672.7 | 15 | D   | 12       | 1427.8 |          | 1427.8              |  |
|                     | 1759.7 |          | 1759.7 | 16 | S   | 11       | 1312.8 |          | 1312.8              |  |
|                     | 1872.8 |          | 1872.8 | 17 | L   | 10       | 1225.7 |          | 1225.7              |  |
|                     | 1943.9 |          | 1943.9 | 18 | A   | 9        | 1112.6 |          | 1112.6              |  |
|                     | 2030.9 |          | 2030.9 | 19 | S   | 8        | 1041.6 |          | 1041.6              |  |
| +0.294              | 1065.5 |          | 2130   | 20 | V   | 7        | 954.58 |          | 954.58              |  |
|                     | 2227   |          | 2227   | 21 | P   | 6        | 855.51 | +0.0847  | 855.51              |  |
| -0.026              | 1195.5 |          | 2390.1 | 22 | Y   | 5        | 758.46 |          | 758.46              |  |
|                     | 2487.1 |          | 2487.1 | 23 | P   | 4        | 595.39 | +0.0859  | 595.39              |  |
|                     | 2584.2 |          | 2584.2 | 24 | P   | 3        | 498.34 | +0.3257  | 498.34              |  |
|                     | 2697.3 |          | 2697.3 | 25 | L   | 2        | 401.29 | -0.05    | 401.29              |  |
| +0.3864             | 1405.7 |          | 2810.4 | 26 | L   | 1        | 288.2  |          | 288.2               |  |
|                     |        |          |        | 27 | R   | 0        | 175.12 |          | 175.12              |  |

general information

|                       |             |
|-----------------------|-------------|
| Annotation:           | 18 of 27    |
| AminoAcids Coverage:  | 67 %        |
| Intensity Coverage:   | 52 %        |
| Peak Coverage:        | 23 %        |
| Protein Localisation: | 152 ... 178 |

Scan number 9342 Raw file LNCAP\_Silac\_23F10\_set1\_05  
 Method ITMS; CID Pepti... 107.32

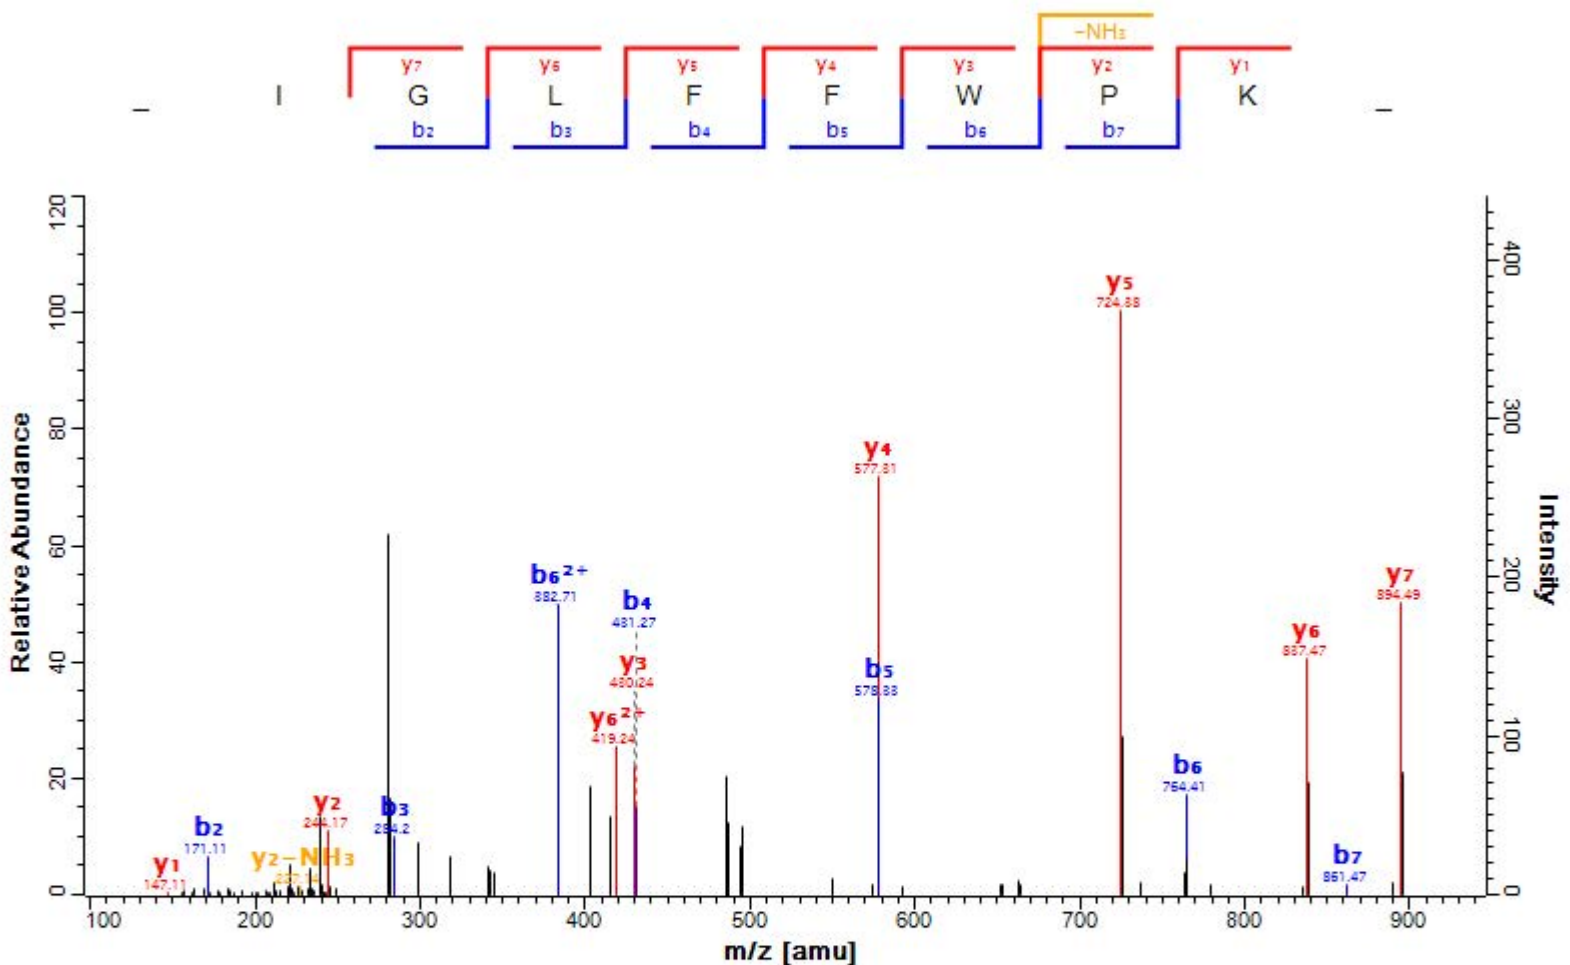

#### precursor information

|                       |                 |
|-----------------------|-----------------|
| Mass:                 | 1006.56372      |
| m/z:                  | 504.28914       |
| Charge:               | 2+              |
| Retentiontime:        | 63.286647796630 |
| Score:                | 107.3173        |
| Mass Error [ppm]:     | -0.30396        |
| g PEP:                | 0.0066223       |
| Annotation:           | 7 of 8          |
| AminoAcids Coverag    | 88 %            |
| Intensity Coverage:   | 56 %            |
| Peak Coverage:        | 18 %            |
| Protein Localisation: | 263 ... 270     |

| b <sup>2+</sup> ion |        | b ion    |        |   |     |          | y ion  |          | y <sup>2+</sup> ion |  |
|---------------------|--------|----------|--------|---|-----|----------|--------|----------|---------------------|--|
| Δ dalton            | mass   | Δ dalton | mass   |   | seq | Δ dalton | mass   | Δ dalton | mass                |  |
|                     | 114.09 |          | 114.09 | 1 | I   | 7        |        |          |                     |  |
|                     | 171.11 | +0.1087  | 171.11 | 2 | G   | 6        | 894.49 | +0.0357  | 894.49              |  |
|                     | 284.2  | +0.0672  | 284.2  | 3 | L   | 5        | 837.47 | +0.0443  | 419.24              |  |
|                     | 431.27 | +0.1317  | 431.27 | 4 | F   | 4        | 724.38 | -0.012   | 724.38              |  |
|                     | 578.33 | +0.0032  | 578.33 | 5 | F   | 3        | 577.31 | +0.0674  | 577.31              |  |
| +0.4594             | 382.71 | +0.0432  | 764.41 | 6 | W   | 2        | 430.24 | +0.1365  | 430.24              |  |
|                     | 861.47 | -0.028   | 861.47 | 7 | P   | 1        | 244.17 | +0.0912  | 244.17              |  |
|                     |        |          |        | 8 | K   | 0        | 147.11 | +0.2817  | 147.11              |  |

Scan number 1095 Raw file LNCAP\_Silac\_23F10\_set1\_06  
 Method ITMS: CID Pepti... 316.05

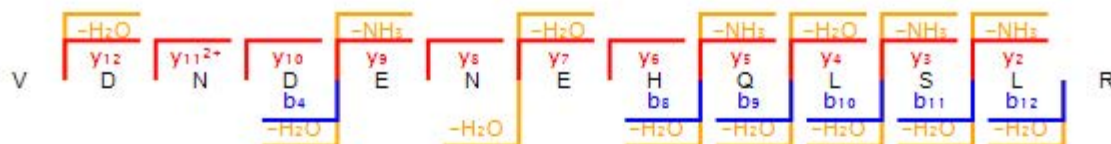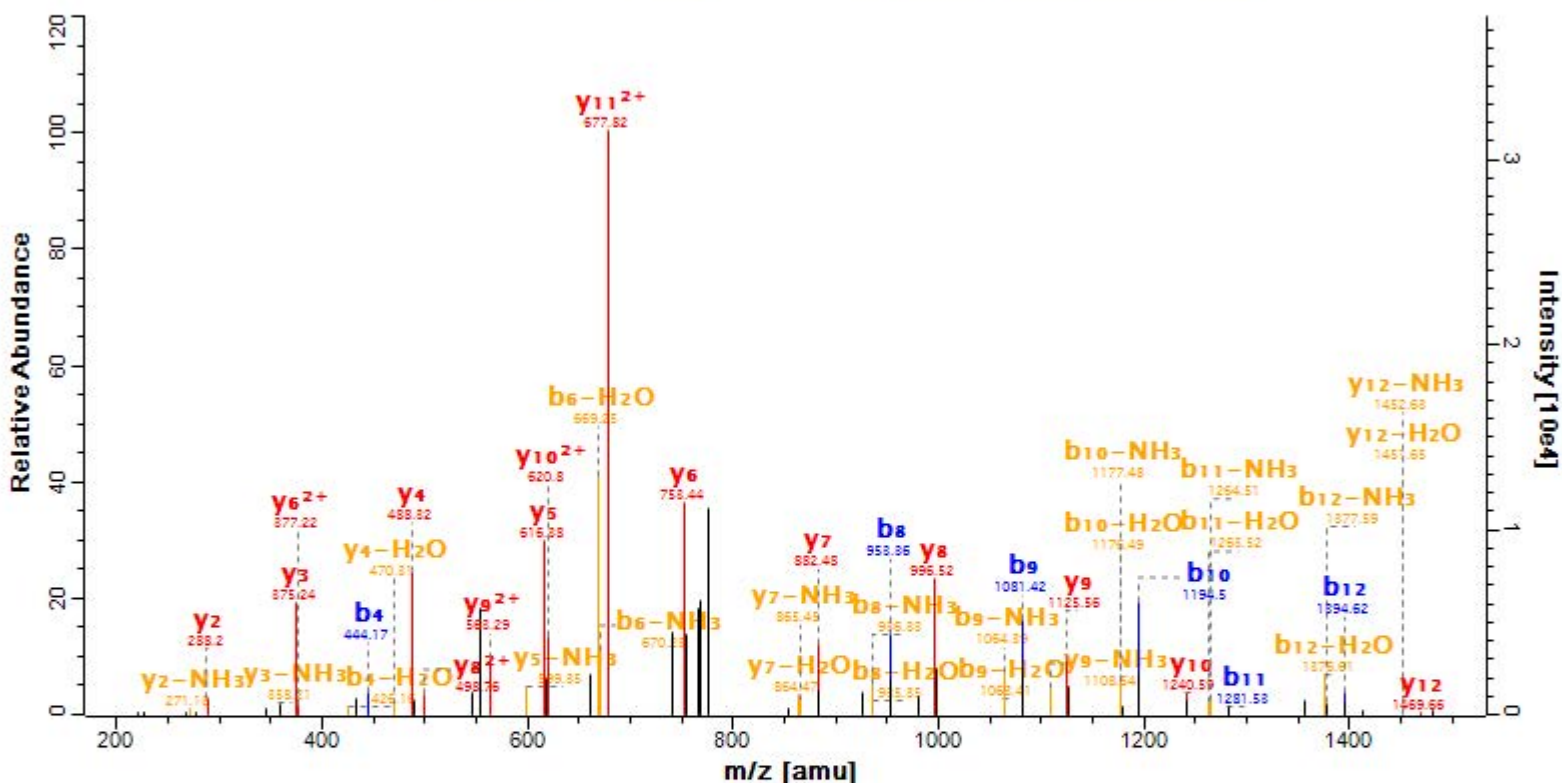

precursor information

|                   |                 |
|-------------------|-----------------|
| Mass:             | 1567.72264      |
| m/z:              | 784.8686        |
| Charge:           | 2+              |
| Retentiontime:    | 11.892523765564 |
| Score:            | 316.0464        |
| Mass Error [ppm]: | -0.015242       |
| PEP:              | 3.4505E-96      |
| Precursor Type:   | MULTI           |

general information

|                       |           |
|-----------------------|-----------|
| Annotation:           | 11 of 13  |
| AminoAcids Coverage:  | 85 %      |
| Intensity Coverage:   | 69 %      |
| Peak Coverage:        | 49 %      |
| Protein Localisation: | 33 ... 45 |

| b ion     |          |    |     |    | y ion    |           | y <sup>2+</sup> ion |           |
|-----------|----------|----|-----|----|----------|-----------|---------------------|-----------|
| Δ dalton  | mass     |    | seq |    | Δ dalton | mass      | Δ dalton            | mass      |
|           | 100.0757 | 1  | V   | 12 |          |           |                     |           |
|           | 215.1026 | 2  | D   | 11 | 1469.662 | -0.20034  | 1469.662            |           |
|           | 329.1456 | 3  | N   | 10 | 1354.635 |           | 677.8209            | +0.256158 |
| +0.127362 | 444.1725 | 4  | D   | 9  | 1240.592 | +0.154317 | 620.7995            | +0.205661 |
|           | 573.2151 | 5  | E   | 8  | 1125.565 | -0.03004  | 563.286             | +0.236589 |
|           | 687.258  | 6  | N   | 7  | 996.5221 | +0.077308 | 498.7647            | +0.220654 |
|           | 816.3006 | 7  | E   | 6  | 882.4792 | -0.02448  | 882.4792            |           |
| -0.06345  | 953.3595 | 8  | H   | 5  | 753.4366 | +0.009325 | 377.2219            | +0.379442 |
| -0.03005  | 1081.418 | 9  | Q   | 4  | 616.3777 | +0.082702 | 616.3777            |           |
| -0.10764  | 1194.502 | 10 | L   | 3  | 488.3191 | +0.059126 | 488.3191            |           |
| +0.079448 | 1281.534 | 11 | S   | 2  | 375.235  | +0.039614 | 375.235             |           |
| -0.03416  | 1394.618 | 12 | L   | 1  | 288.203  | +0.030016 | 288.203             |           |
|           |          | 13 | R   | 0  | 175.119  |           | 175.119             |           |

Scan number 1497 Raw file LNCAP\_Silac\_23F10\_set1\_06  
 Method ITMS; CID Pepti... 93.23

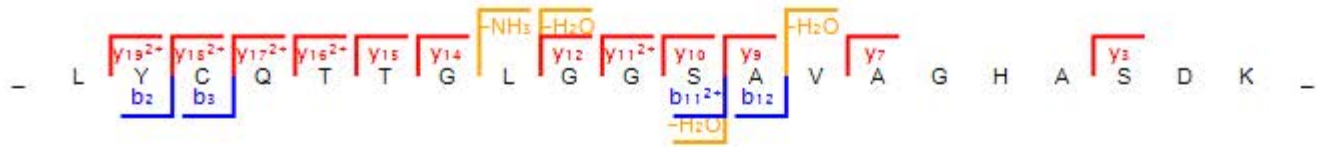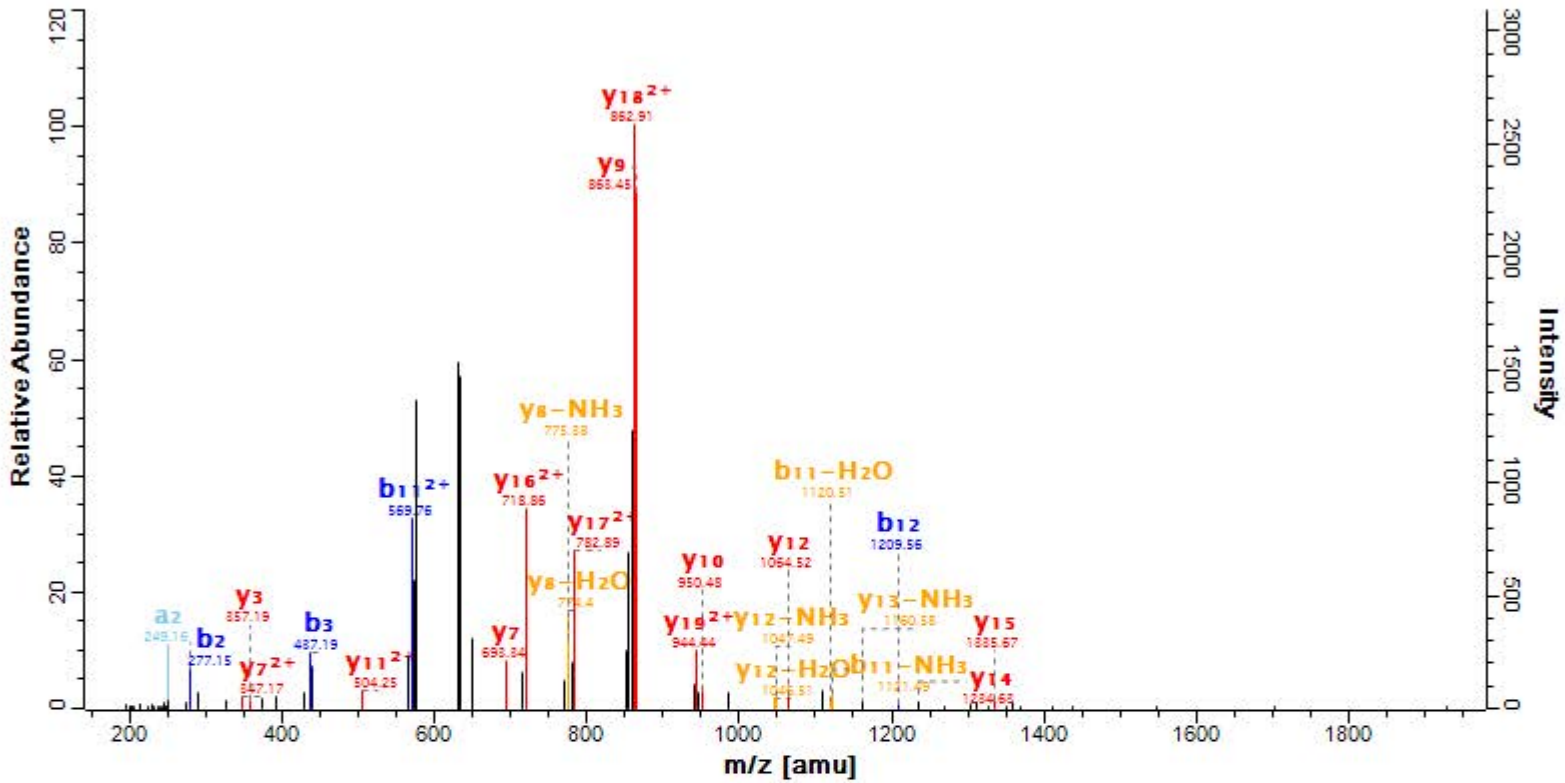

**precursor information**

|                   |                 |
|-------------------|-----------------|
| Mass:             | 1991.93706      |
| m/z:              | 664.9863        |
| Charge:           | 3+              |
| Retention time:   | 14.320529937744 |
| Score:            | 93.22573        |
| Mass Error [ppm]: | -0.013336       |
| PEP:              | 4.8377E-06      |
| Precursor Type:   | MULTI           |

**general information**

|                       |             |
|-----------------------|-------------|
| Annotation:           | 15 of 20    |
| AminoAcids Coverage:  | 75 %        |
| Intensity Coverage:   | 48 %        |
| Peak Coverage:        | 25 %        |
| Protein Localisation: | 119 ... 138 |

|       | a ion         | b <sup>2+</sup> ion | b ion         |     |   |               | y ion         | y <sup>2+</sup> ion |
|-------|---------------|---------------------|---------------|-----|---|---------------|---------------|---------------------|
|       | Δ dalton mass | Δ dalton mass       | Δ dalton mass | seq |   | Δ dalton mass | Δ dalton mass |                     |
|       | 86.1          | 114.1               | 114.1         | 1   | L | 19            |               |                     |
| -0.02 | 249.2         | 277.2               | +0.08 277.2   | 2   | Y | 18            | 1888          | 944.4 +0.34         |
|       | 409.2         | 437.2               | -0.12 437.2   | 3   | C | 17            | 1725          | 862.9 +0.00         |
|       | 537.2         | 565.2               | 565.2         | 4   | Q | 16            | 1565          | 782.9 +0.33         |
|       | 638.3         | 666.3               | 666.3         | 5   | T | 15            | 1437          | 718.9 +0.25         |
|       | 739.3         | 767.3               | 767.3         | 6   | T | 14            | 1336          | -0.06 1336          |
|       | 796.4         | 824.4               | 824.4         | 7   | G | 13            | 1235          | +0.078 1235         |
|       | 909.4         | 937.4               | 937.4         | 8   | L | 12            | 1178          | 1178                |
|       | 966.5         | 994.5               | 994.5         | 9   | G | 11            | 1065          | +0.085 1065         |
|       | 1023          | 1051                | 1051          | 10  | G | 10            | 1007          | 504.3 -0.09         |
|       | 1111          | +0.173 569.8        | 1139          | 11  | S | 9             | 950.5         | -0.1 950.5          |
|       | 1182          | 1210                | +0.123 1210   | 12  | A | 8             | 863.4         | +0.138 863.4        |
|       | 1281          | 1309                | 1309          | 13  | V | 7             | 792.4         | 792.4               |
|       | 1352          | 1380                | 1380          | 14  | A | 6             | 693.3         | +0.042 347.2 +0.39  |
|       | 1409          | 1437                | 1437          | 15  | G | 5             | 622.3         | 622.3               |
|       | 1546          | 1574                | 1574          | 16  | H | 4             | 565.3         | 565.3               |
|       | 1617          | 1645                | 1645          | 17  | A | 3             | 428.2         | 428.2               |
|       | 1704          | 1732                | 1732          | 18  | S | 2             | 357.2         | +0.20 357.2         |
|       | 1819          | 1847                | 1847          | 19  | D | 1             | 270.2         | 270.2               |
|       |               |                     |               | 20  | K | 0             | 155.1         | 155.1               |

Scan number 1564 Raw file LNCAP\_Silac\_23F10\_set1\_06  
 Method ITMS; CID Pepti... 58.82

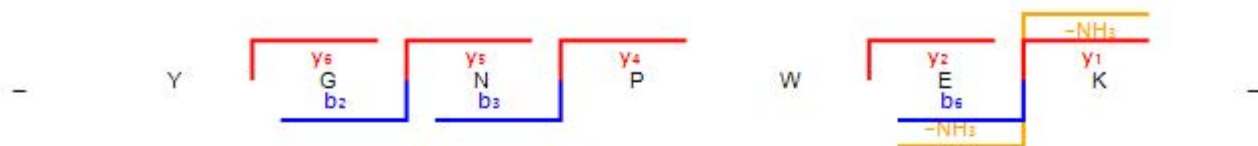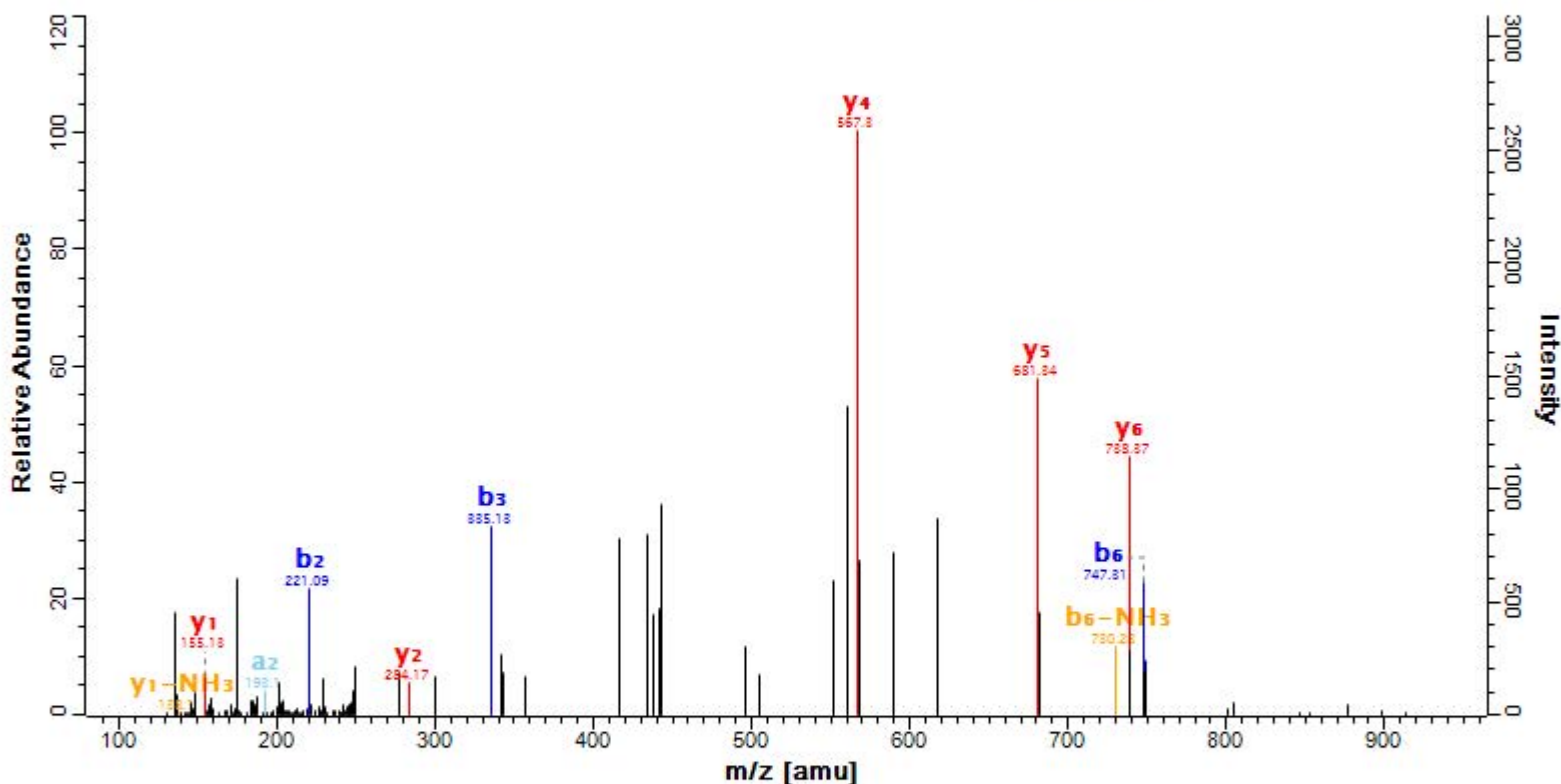

#### precursor information

|                     |                 |
|---------------------|-----------------|
| Mass:               | 900.42254       |
| m/z:                | 451.21855       |
| Charge:             | 2+              |
| Retentiontime:      | 14.730946540832 |
| Score:              | 58.815          |
| g Mass Error [ppm]: | 0.47014         |
| Annotation:         | 5 of 7          |
| AminoAcids Coverag  | 71 %            |
| Intensity Coverage: | 35 %            |
| Peak Coverage:      | 9 %             |

| a ion    |          | b ion     |          |   |     | y ion    |                    |
|----------|----------|-----------|----------|---|-----|----------|--------------------|
| Δ dalton | mass     | Δ dalton  | mass     |   | seq | Δ dalton | mass               |
|          | 136.0757 |           | 164.0706 | 1 | Y   | 6        |                    |
| -0.00751 | 193.0972 | -0.01513  | 221.0921 | 2 | G   | 5        | 738.3661 +0.00094  |
|          | 307.1401 | -0.04888  | 335.135  | 3 | N   | 4        | 681.3446 -0.02276  |
|          | 404.1928 |           | 432.1878 | 4 | P   | 3        | 567.3017 +0.06228  |
|          | 590.2722 |           | 618.2671 | 5 | W   | 2        | 470.2489           |
|          | 719.3148 | +0.034389 | 747.3097 | 6 | E   | 1        | 284.1696 +0.053548 |
|          |          |           |          | 7 | K   | 0        | 155.127 +0.029552  |

Scan number 2574 Raw file LNCAP\_Silac\_23F10\_set1\_06  
 Method ITMS; CID Pepti... 239.87

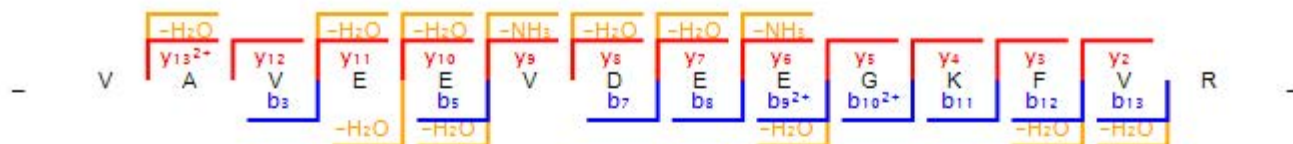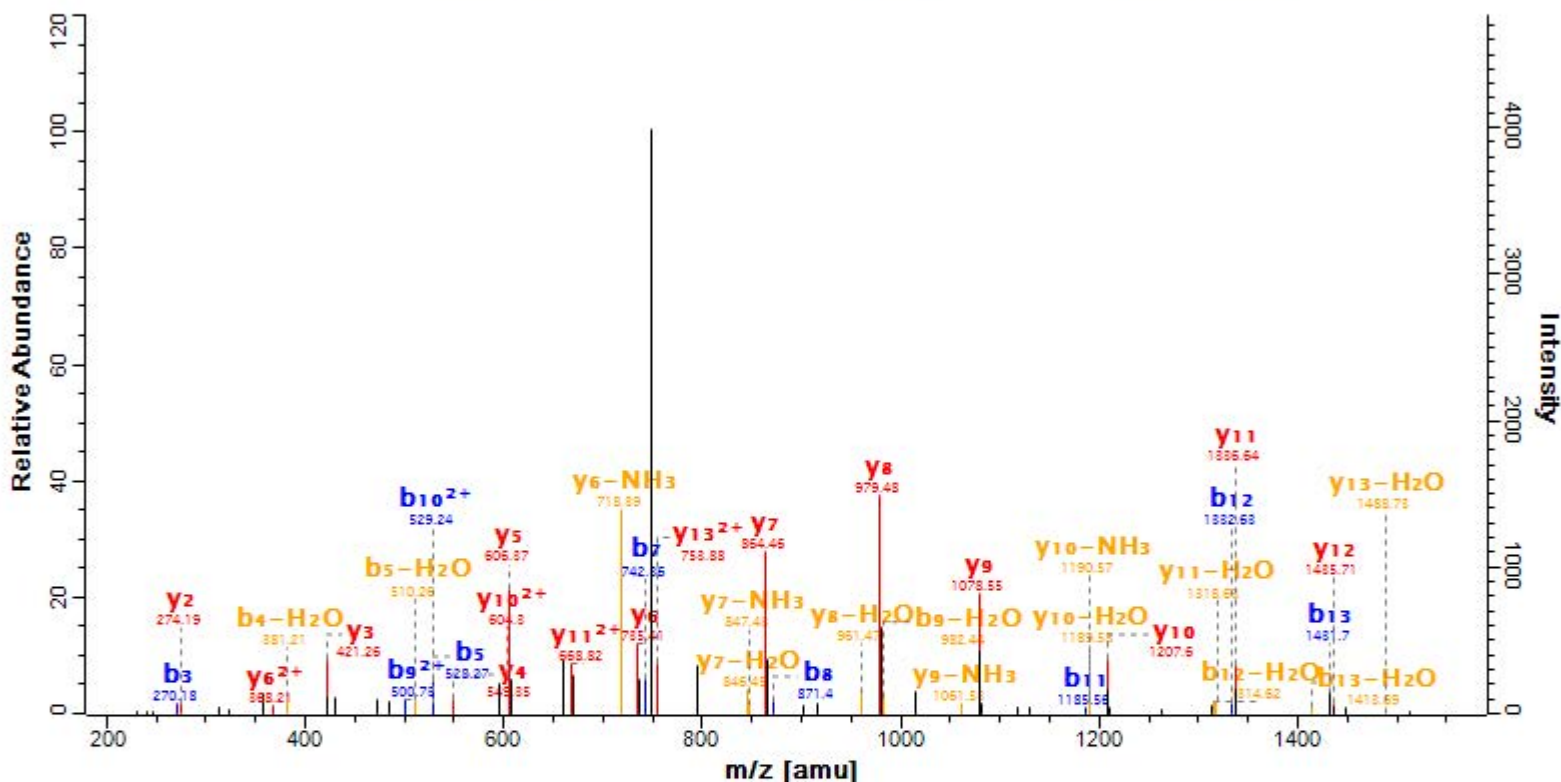

#### precursor information

|                   |                 |
|-------------------|-----------------|
| Mass:             | 1604.80489      |
| m/z:              | 803.40972       |
| Charge:           | 2+              |
| Retentiontime:    | 20.697832107543 |
| Score:            | 239.8703        |
| Mass Error [ppm]: | 0.18088         |
| PEP:              | 1.7735E-41      |
| Precursor Type:   | MULTI           |

#### general information

|                       |             |
|-----------------------|-------------|
| Annotation:           | 12 of 14    |
| AminoAcids Coverage:  | 86 %        |
| Intensity Coverage:   | 53 %        |
| Peak Coverage:        | 48 %        |
| Protein Localisation: | 440 ... 453 |

| b <sup>2+</sup> ion |        | b ion    |        | seq |   |    | y ion    |         | y <sup>2+</sup> ion |         |
|---------------------|--------|----------|--------|-----|---|----|----------|---------|---------------------|---------|
| Δ dalton            | mass   | Δ dalton | mass   |     |   |    | Δ dalton | mass    | Δ dalton            | mass    |
|                     | 100.08 |          | 100.08 | 1   | V | 13 |          |         |                     |         |
|                     | 171.11 |          | 171.11 | 2   | A | 12 | 1506.7   |         | 753.88              | +0.22   |
|                     | 270.18 | -0.044   | 270.18 | 3   | V | 11 | 1435.7   | +0.3007 | 1435.7              |         |
|                     | 399.22 |          | 399.22 | 4   | E | 10 | 1336.6   | -0.031  | 668.82              | -0.006  |
|                     | 528.27 | -0.116   | 528.27 | 5   | E | 9  | 1207.6   | -0.001  | 604.3               | +0.3357 |
|                     | 627.33 |          | 627.33 | 6   | V | 8  | 1078.6   | +0.0909 | 1078.6              |         |
|                     | 742.36 | -0.055   | 742.36 | 7   | D | 7  | 979.48   | +0.03   | 979.48              |         |
|                     | 871.4  | -0.334   | 871.4  | 8   | E | 6  | 864.46   | +0.0096 | 864.46              |         |
| -0.351              | 500.73 |          | 1000.4 | 9   | E | 5  | 735.41   | +0.0629 | 368.21              | +0.1434 |
| +0.0478             | 529.24 |          | 1057.5 | 10  | G | 4  | 606.37   | +0.0356 | 606.37              |         |
|                     | 1185.6 | +0.4267  | 1185.6 | 11  | K | 3  | 549.35   | +0.1026 | 549.35              |         |
|                     | 1332.6 | -0.049   | 1332.6 | 12  | F | 2  | 421.26   | +0.0324 | 421.26              |         |
|                     | 1431.7 | -0.089   | 1431.7 | 13  | V | 1  | 274.19   | -0.076  | 274.19              |         |
|                     |        |          |        | 14  | R | 0  | 175.12   |         | 175.12              |         |

Scan number 2632 Raw file LNCAP\_Silac\_23F10\_set1\_06  
 Method ITMS; CID Pepti... 218.6

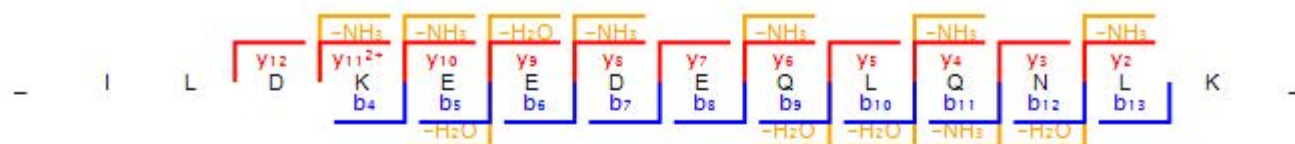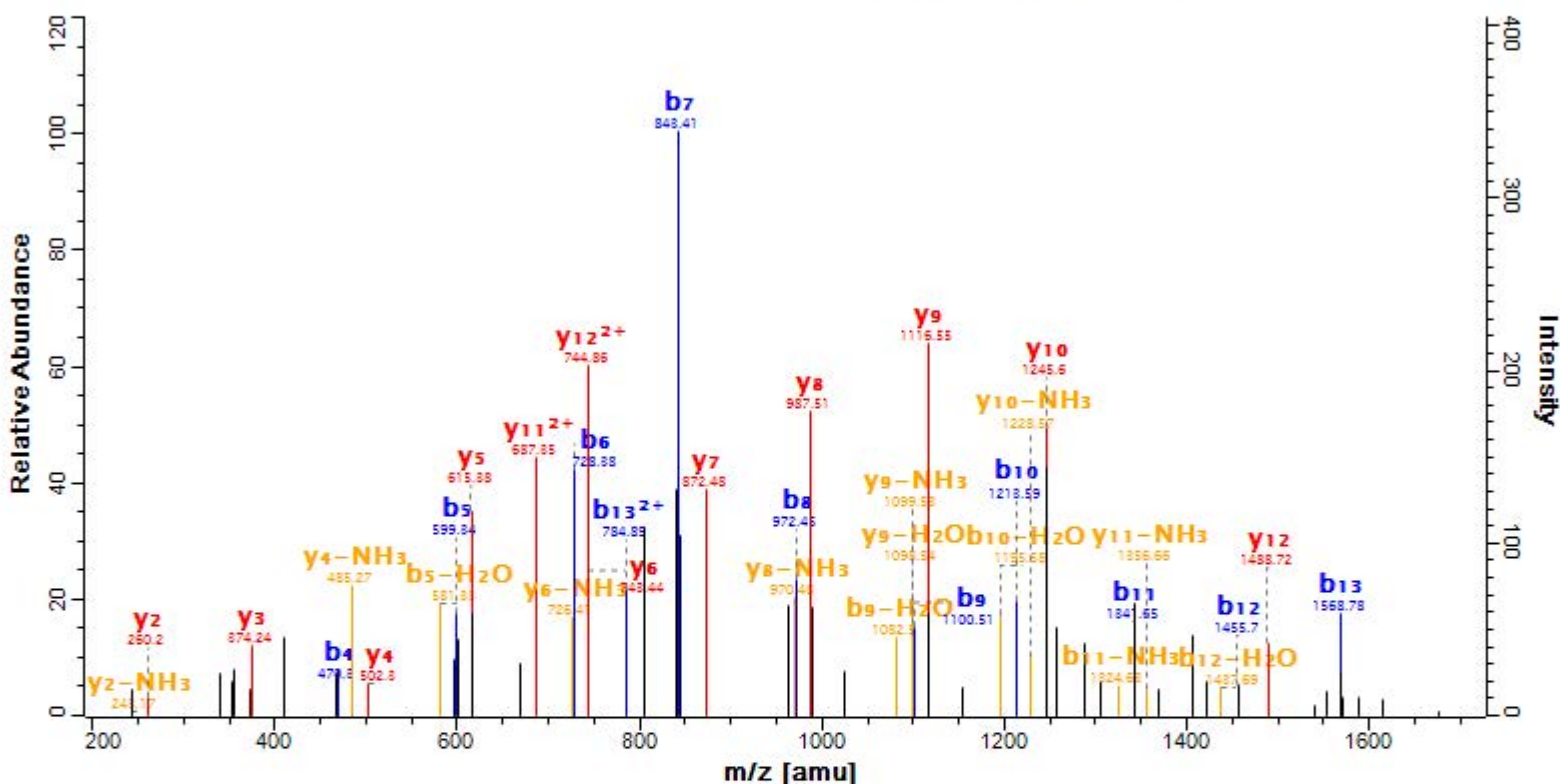

#### precursor information

|                   |                 |
|-------------------|-----------------|
| Mass:             | 1713.87903      |
| m/z:              | 857.94679       |
| Charge:           | 2+              |
| Retentiontime:    | 21.035404205322 |
| Score:            | 218.5986        |
| Mass Error [ppm]: | 0.3151          |
| PEP:              | 3.5038E-33      |
| Precursor Type:   | MULTI           |

| b <sup>2+</sup> ion |         | b ion    |         | seq |   |    | y ion    |         | y <sup>2+</sup> ion |         |
|---------------------|---------|----------|---------|-----|---|----|----------|---------|---------------------|---------|
| Δ dalton            | mass    | Δ dalton | mass    |     |   |    | Δ dalton | mass    | Δ dalton            | mass    |
|                     | 114.09  |          | 114.09  | 1   | I | 13 |          |         |                     |         |
|                     | 227.18  |          | 227.18  | 2   | L | 12 | 1601.8   |         | 1601.8              |         |
|                     | 342.2   |          | 342.2   | 3   | D | 11 | 1488.7   | +0.0822 | 744.86              | -0.139  |
|                     | 470.3   | +0.0794  | 470.3   | 4   | K | 10 | 1373.7   |         | 687.35              | +0.2401 |
|                     | 599.34  | +0.1321  | 599.34  | 5   | E | 9  | 1245.6   | -0.114  | 1245.6              |         |
|                     | 728.38  | +0.1383  | 728.38  | 6   | E | 8  | 1116.6   | +0.0704 | 1116.6              |         |
|                     | 843.41  | +0.0417  | 843.41  | 7   | D | 7  | 987.51   | +0.0734 | 987.51              |         |
|                     | 972.45  | +0.1096  | 972.45  | 8   | E | 6  | 872.48   | +0.146  | 872.48              |         |
|                     | 1100.5  | -0.052   | 1100.5  | 9   | Q | 5  | 743.44   | +0.015  | 743.44              |         |
|                     | 1213.6  | +0.0623  | 1213.6  | 10  | L | 4  | 615.38   | +0.0969 | 615.38              |         |
|                     | 1341.7  | +0.194   | 1341.7  | 11  | Q | 3  | 502.3    | +0.0319 | 502.3               |         |
|                     | 1455.7  | +0.3315  | 1455.7  | 12  | N | 2  | 374.24   | +0.1961 | 374.24              |         |
|                     | +0.1015 | 784.89   | +0.2975 | 13  | L | 1  | 260.2    | +0.1124 | 260.2               |         |
|                     |         |          |         | 14  | K | 0  | 147.11   |         | 147.11              |         |

#### general information

|                       |             |
|-----------------------|-------------|
| Annotation:           | 11 of 14    |
| AminoAcids Coverage:  | 79 %        |
| Intensity Coverage:   | 63 %        |
| Peak Coverage:        | 47 %        |
| Protein Localisation: | 204 ... 217 |

Scan number 3157 Raw file LNCAP\_Silac\_23F10\_set1\_06  
 Method ITMS; CID Pepti... 127.4

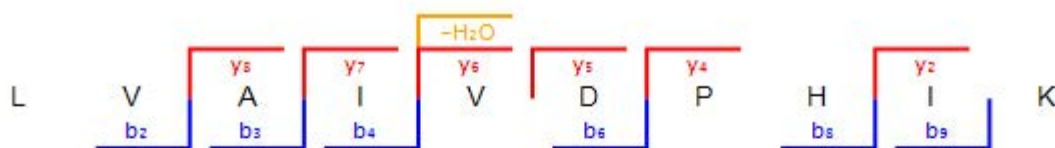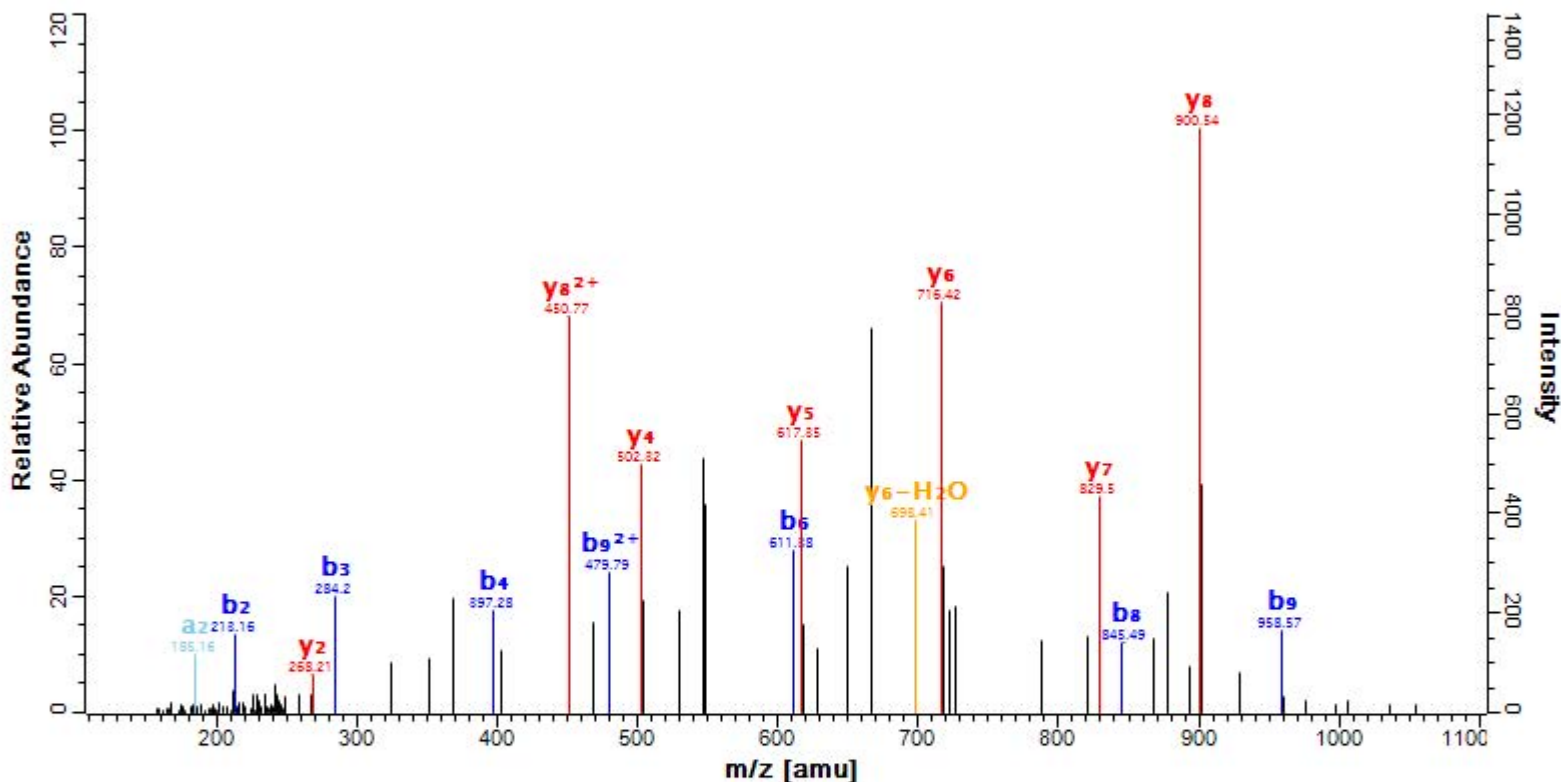

precursor information

|                   |                 |
|-------------------|-----------------|
| Mass:             | 1103.67034      |
| m/z:              | 552.84245       |
| Charge:           | 2+              |
| Retentiontime:    | 24.012029647827 |
| Score:            | 127.3975        |
| Mass Error [ppm]: | 0.056709        |
| PEP:              | 0.00025448      |

**g** Precursor Type: MULTI

|                       |             |
|-----------------------|-------------|
| Annotation:           | 8 of 10     |
| AminoAcids Coverage:  | 80 %        |
| Intensity Coverage:   | 47 %        |
| Peak Coverage:        | 15 %        |
| Protein Localisation: | 514 ... 523 |

|       | a ion         | b <sup>2+</sup> ion | b ion         |     |   | y ion         | y <sup>2+</sup> ion |
|-------|---------------|---------------------|---------------|-----|---|---------------|---------------------|
|       | Δ dalton mass | Δ dalton mass       | Δ dalton mass | seq |   | Δ dalton mass | Δ dalton mass       |
|       | 86.1          | 114.1               | 114.1         | 1   | L |               |                     |
| -0.03 | 185.2         | 213.2               | +0.037213.2   | 2   | V | 8 999.6       | 999.6               |
|       | 256.2         | 284.2               | -0.02 284.2   | 3   | A | 7 900.5       | -0.1 450.8 +0.19    |
|       | 369.3         | 397.3               | +0.052397.3   | 4   | I | 6 829.5       | +0.064829.5         |
|       | 468.4         | 496.3               | 496.3         | 5   | V | 5 716.4       | +0.054716.4         |
|       | 583.4         | 611.4               | -0.17 611.4   | 6   | D | 4 617.3       | -0.02 617.3         |
|       | 680.4         | 708.4               | 708.4         | 7   | P | 3 502.3       | +0.085502.3         |
|       | 817.5         | 845.5               | +0.061845.5   | 8   | H | 2 405.3       | 405.3               |
|       | 930.6         | -0.32 479.8         | +0.017958.6   | 9   | I | 1 268.2       | +0.127268.2         |
|       |               |                     |               | 10  | K | 0 155.1       | 155.1               |



Scan number 3223 Raw file LNCAP\_Silac\_23F10\_set1\_06  
 Method ITMS; CID Pepti... 196.67

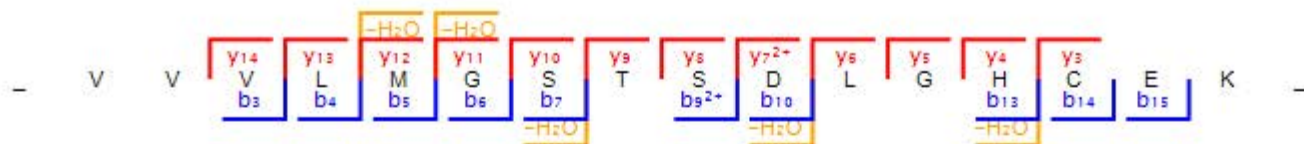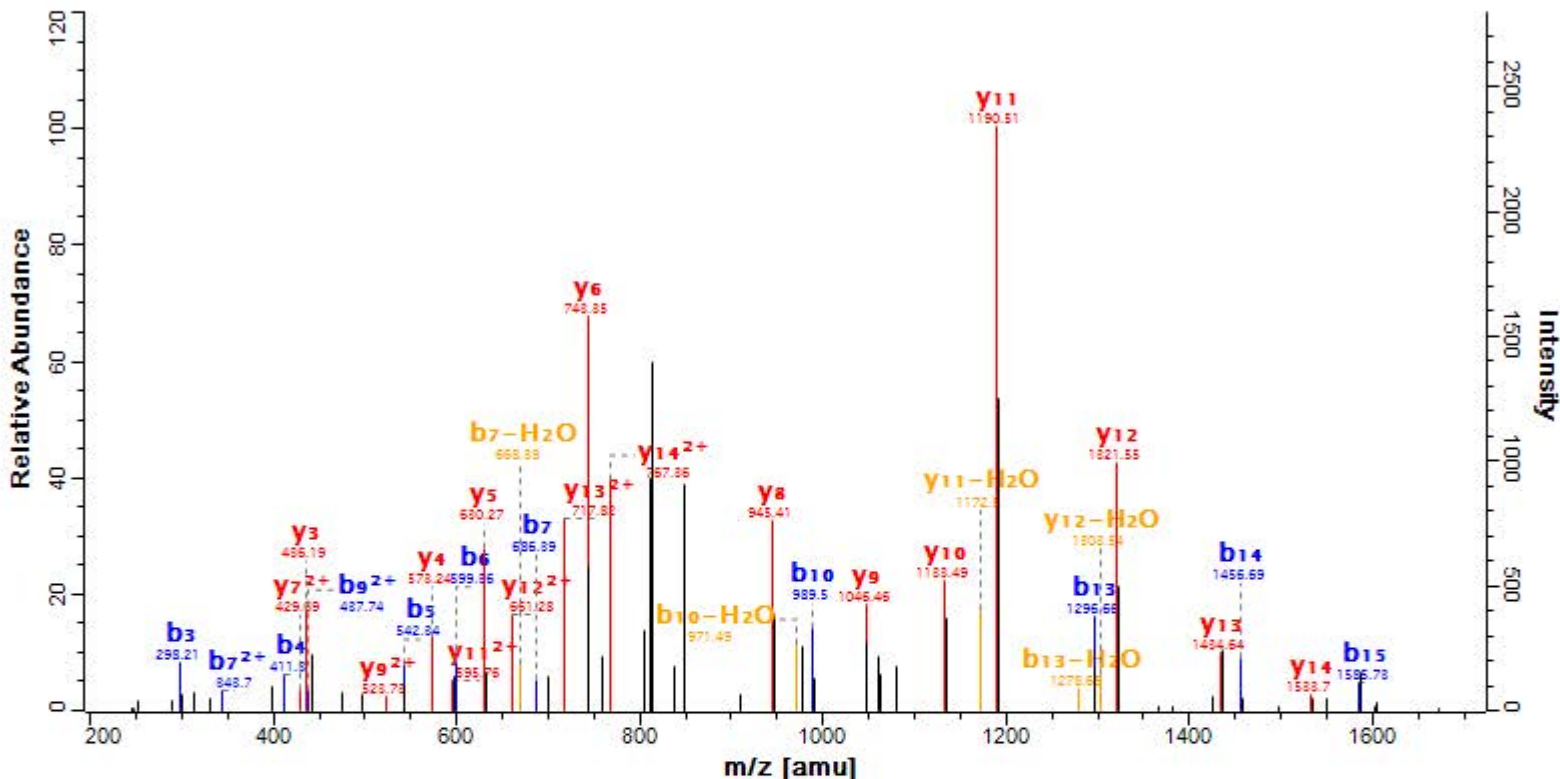

#### precursor information

|                   |                 |
|-------------------|-----------------|
| Mass:             | 1730.83292      |
| m/z:              | 866.42374       |
| Charge:           | 2+              |
| Retentiontime:    | 24.379335403442 |
| Score:            | 196.6749        |
| Mass Error [ppm]: | -0.12777        |
| PEP:              | 2.1859E-27      |
| Precursor Type:   | MULTI           |

#### general information

|                       |             |
|-----------------------|-------------|
| Annotation:           | 13 of 16    |
| AminoAcids Coverage:  | 81 %        |
| Intensity Coverage:   | 55 %        |
| Peak Coverage:        | 39 %        |
| Protein Localisation: | 294 ... 309 |

| b <sup>2+</sup> ion |        | b ion    |        | seq |   |    | y ion    |         | y <sup>2+</sup> ion |         |
|---------------------|--------|----------|--------|-----|---|----|----------|---------|---------------------|---------|
| Δ dalton            | mass   | Δ dalton | mass   |     |   |    | Δ dalton | mass    | Δ dalton            | mass    |
|                     | 100.08 |          | 100.08 | 1   | V | 15 |          |         |                     |         |
|                     | 199.14 |          | 199.14 | 2   | V | 14 | 1632.8   |         | 1632.8              |         |
|                     | 298.21 | +0.0378  | 298.21 | 3   | V | 13 | 1533.7   | -0.06   | 767.36              | +0.2665 |
|                     | 411.3  | +0.0593  | 411.3  | 4   | L | 12 | 1434.6   | -0.007  | 717.82              | +0.1882 |
|                     | 542.34 | -0.029   | 542.34 | 5   | M | 11 | 1321.6   | -0.004  | 661.28              | +0.2041 |
|                     | 599.36 | -0.079   | 599.36 | 6   | G | 10 | 1190.5   | -0.015  | 595.76              | -0.487  |
| +0.4917             | 743.7  | -0.154   | 686.39 | 7   | S | 9  | 1133.5   | +0.0938 | 1133.5              |         |
|                     | 787.44 |          | 787.44 | 8   | T | 8  | 1046.5   | -0.014  | 523.73              | -0.289  |
| -0.384              | 437.74 |          | 874.47 | 9   | S | 7  | 945.41   | +0.0309 | 945.41              |         |
|                     | 989.5  | -0.077   | 989.5  | 10  | D | 6  | 858.38   |         | 429.69              | -0.307  |
|                     | 1102.6 |          | 1102.6 | 11  | L | 5  | 743.35   | +0.0365 | 743.35              |         |
|                     | 1159.6 |          | 1159.6 | 12  | G | 4  | 630.27   | +0.0687 | 630.27              |         |
|                     | 1296.7 | -0.065   | 1296.7 | 13  | H | 3  | 573.24   | +0.1037 | 573.24              |         |
|                     | 1456.7 | -0.088   | 1456.7 | 14  | C | 2  | 436.19   | -0.015  | 436.19              |         |
|                     | 1585.7 | -0.234   | 1585.7 | 15  | E | 1  | 276.16   |         | 276.16              |         |
|                     |        |          |        | 16  | K | 0  | 147.11   |         | 147.11              |         |

Scan number 3410 Raw file LNCAP\_Silac\_23F10\_set1\_06  
 Method ITMS; CID Pepti... 44.61

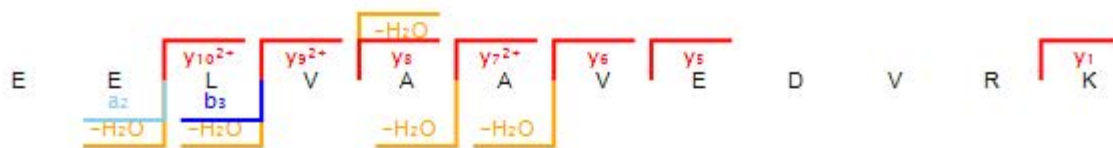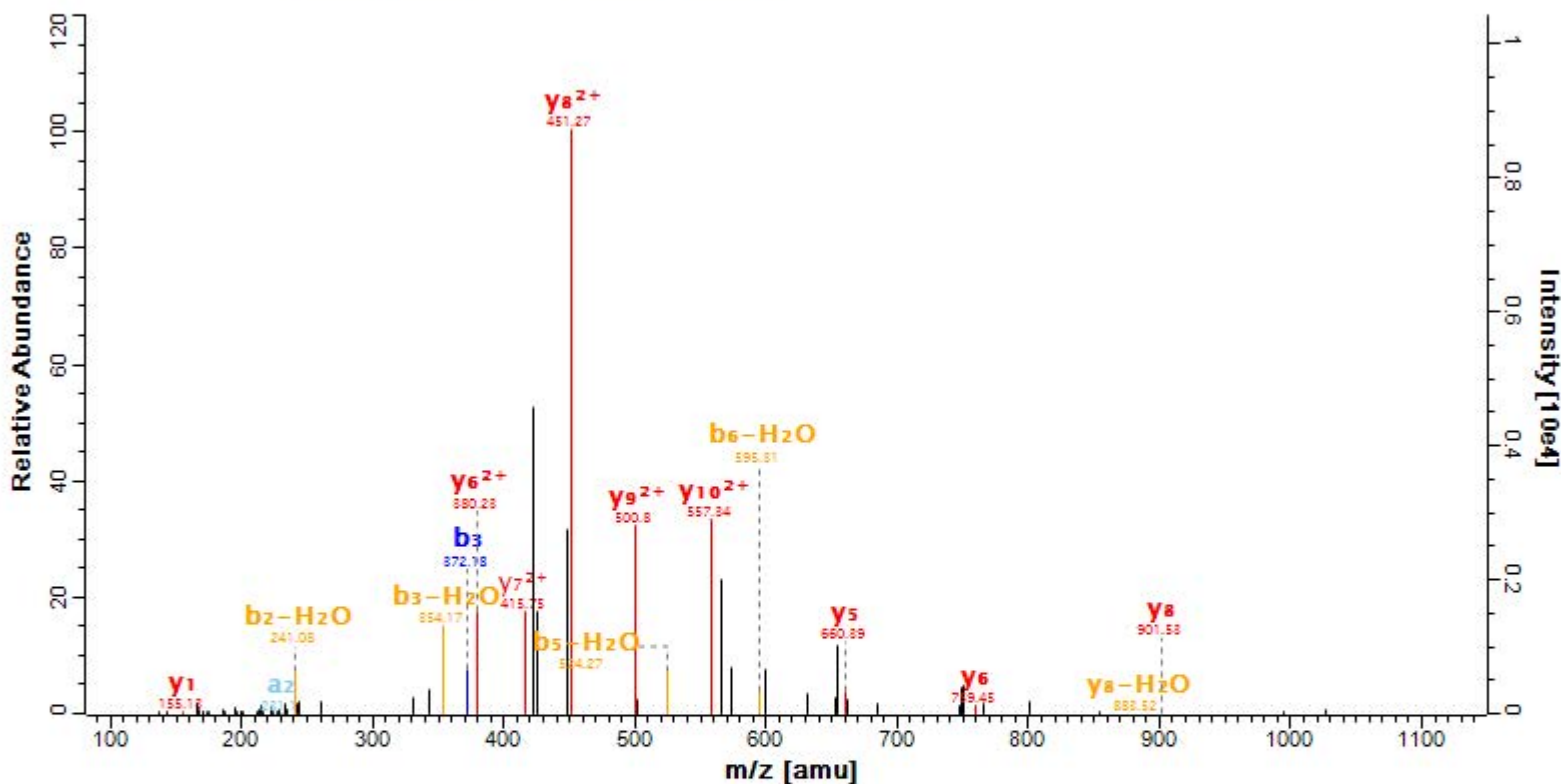

#### precursor information

|                   |                 |
|-------------------|-----------------|
| Mass:             | 1356.72483      |
| m/z:              | 453.24889       |
| Charge:           | 3+              |
| Retentiontime:    | 25.431894302368 |
| Score:            | 44.61188        |
| Mass Error [ppm]: | -0.045812       |
| PEP:              | 0.025221        |
| Precursor Type:   | MULTI           |

#### general information

|                       |           |
|-----------------------|-----------|
| Annotation:           | 9 of 12   |
| AminoAcids Coverage:  | 75 %      |
| Intensity Coverage:   | 52 %      |
| Peak Coverage:        | 19 %      |
| Protein Localisation: | 88 ... 99 |

| a ion    |        | b ion    |        | seq |   |    | y ion    |         | y <sup>2+</sup> ion |         |
|----------|--------|----------|--------|-----|---|----|----------|---------|---------------------|---------|
| Δ dalton | mass   | Δ dalton | mass   |     |   |    | Δ dalton | mass    | Δ dalton            | mass    |
|          | 102.05 |          | 130.05 | 1   | E | 11 |          |         |                     |         |
| -0.333   | 231.1  |          | 259.09 | 2   | E | 10 | 1242.7   |         | 1242.7              |         |
|          | 344.18 | -0.298   | 372.18 | 3   | L | 9  | 1113.7   |         | 557.34              | +0.1403 |
|          | 443.25 |          | 471.24 | 4   | V | 8  | 1000.6   |         | 500.8               | -0.019  |
|          | 514.29 |          | 542.28 | 5   | A | 7  | 901.53   | +0.1342 | 451.27              | -0.026  |
|          | 585.32 |          | 613.32 | 6   | A | 6  | 830.49   |         | 415.75              | +0.1353 |
|          | 684.39 |          | 712.39 | 7   | V | 5  | 759.45   | +0.0555 | 380.23              | +0.0162 |
|          | 813.44 |          | 841.43 | 8   | E | 4  | 660.39   | +0.0238 | 660.39              |         |
|          | 928.46 |          | 956.46 | 9   | D | 3  | 531.34   |         | 531.34              |         |
|          | 1027.5 |          | 1055.5 | 10  | V | 2  | 416.32   |         | 416.32              |         |
|          | 1189.7 |          | 1217.6 | 11  | R | 1  | 317.25   |         | 317.25              |         |
|          |        |          |        | 12  | K | 0  | 155.13   | +0.0143 | 155.13              |         |

Scan number 3696 Raw file LNCAP\_Silac\_23F10\_set1\_06  
 Method ITMS; CID Pepti... 112.84

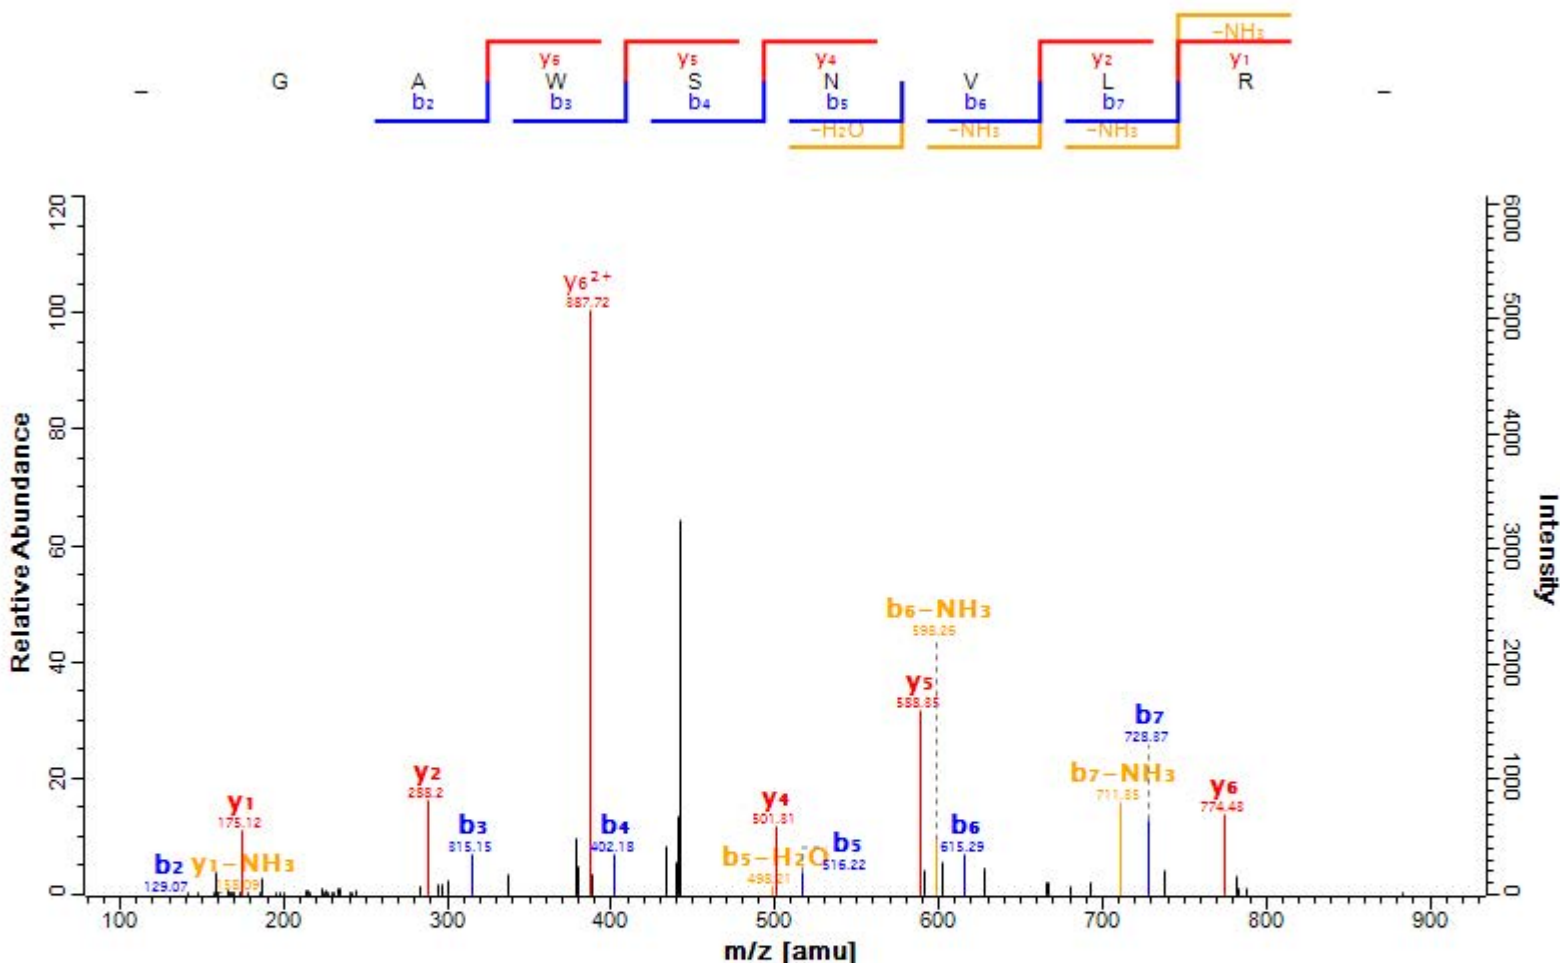

precursor information

|                       |                 |
|-----------------------|-----------------|
| Mass:                 | 901.47705       |
| m/z:                  | 451.7458        |
| Charge:               | 2+              |
| Retentiontime:        | 27.039142608642 |
| Score:                | 112.8419        |
| Mass Error [ppm]:     | 0.05334         |
| g PEP:                | 0.0011124       |
| Annotation:           | 7 of 8          |
| AminoAcids Coverage:  | 88 %            |
| Intensity Coverage:   | 59 %            |
| Peak Coverage:        | 15 %            |
| Protein Localisation: | 273 ... 280     |

| b ion     |          |   |     | y ion    |          | y <sup>2+</sup> ion |          |
|-----------|----------|---|-----|----------|----------|---------------------|----------|
| Δ dalton  | mass     |   | seq | Δ dalton | mass     | Δ dalton            | mass     |
|           | 58.02874 | 1 | G   |          |          |                     |          |
| +0.170871 | 129.0659 | 2 | A   | 6        | 845.4628 |                     | 845.4628 |
| +0.065435 | 315.1452 | 3 | W   | 5        | 774.4257 | +0.076804           | 387.7165 |
| +0.081472 | 402.1772 | 4 | S   | 4        | 588.3464 | +0.059071           | 588.3464 |
| +0.057221 | 516.2201 | 5 | N   | 3        | 501.3144 | +0.027104           | 501.3144 |
| -0.03671  | 615.2885 | 6 | V   | 2        | 387.2714 |                     | 387.2714 |
| -0.00822  | 728.3726 | 7 | L   | 1        | 288.203  | +0.104998           | 288.203  |
|           |          | 8 | R   | 0        | 175.119  | -0.01602            | 175.119  |

Scan number 373 Raw file LNCAP\_Silac\_23F10\_set1\_06  
 Method ITMS: CID Pepti... 236.32

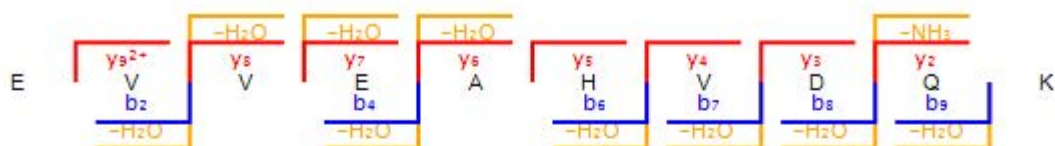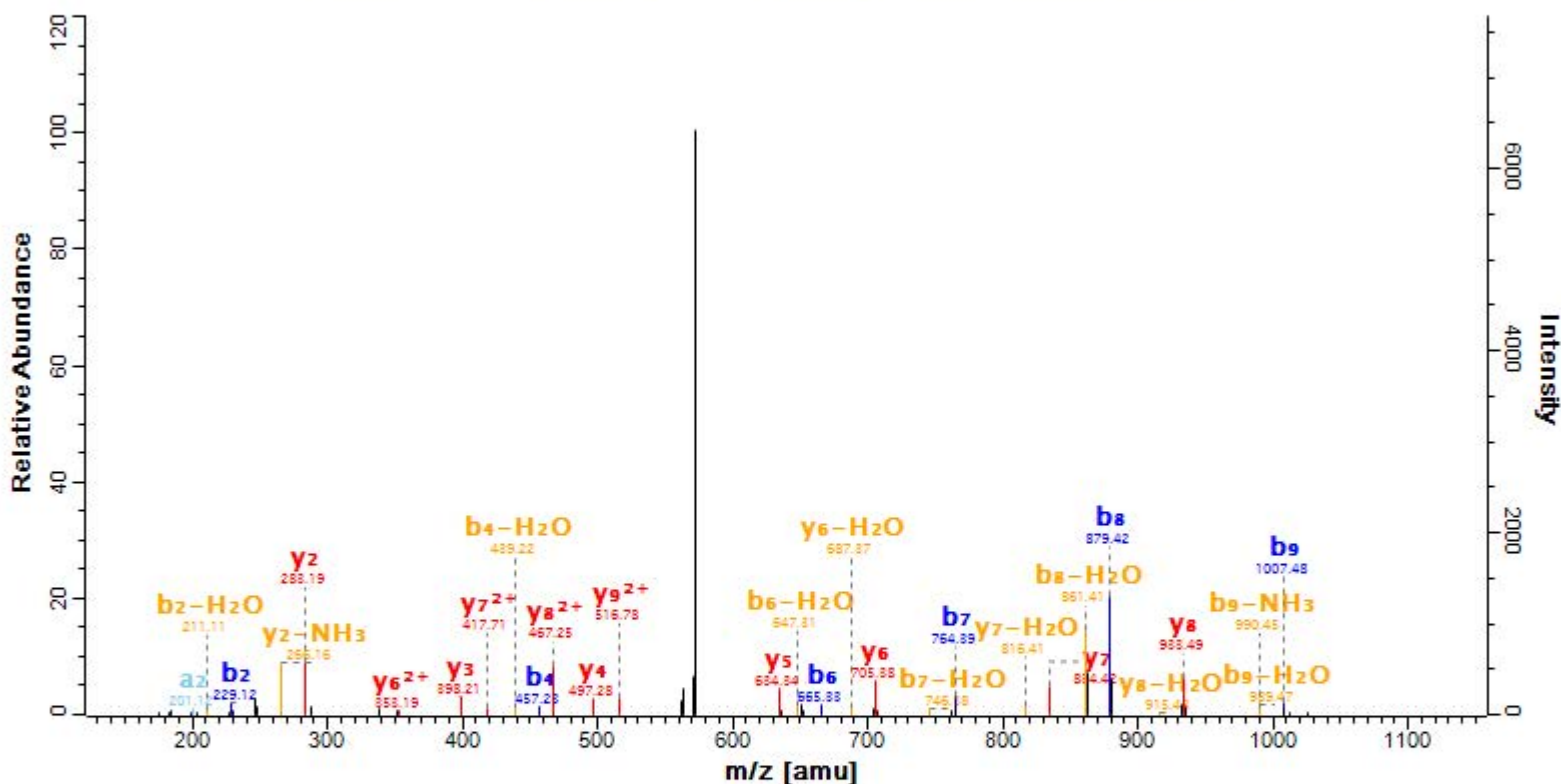

#### precursor information

|                   |                 |
|-------------------|-----------------|
| Mass:             | 1152.57727      |
| m/z:              | 577.29591       |
| Charge:           | 2+              |
| Retentiontime:    | 7.1489267349243 |
| Score:            | 236.3153        |
| Mass Error [ppm]: | -0.19743        |
| PEP:              | 3.4933E-27      |
| Precursor Type:   | MULTI           |

|                       |             |
|-----------------------|-------------|
| Annotation:           | 8 of 10     |
| AminoAcids Coverage:  | 80 %        |
| Intensity Coverage:   | 42 %        |
| Peak Coverage:        | 31 %        |
| Protein Localisation: | 224 ... 233 |

| a ion    |        | b ion    |        |    |     |   | y ion    |         | y <sup>2+</sup> ion |         |
|----------|--------|----------|--------|----|-----|---|----------|---------|---------------------|---------|
| Δ dalton | mass   | Δ dalton | mass   |    | seq |   | Δ dalton | mass    | Δ dalton            | mass    |
|          | 102.05 |          | 130.05 | 1  | E   | 9 |          |         |                     |         |
| +0.0501  | 201.12 | +0.032   | 229.12 | 2  | V   | 8 | 1032.6   |         | 516.78              | +0.0211 |
|          | 300.19 |          | 328.19 | 3  | V   | 7 | 933.49   | +0.0106 | 467.25              | +0.1879 |
|          | 429.23 | +0.3266  | 457.23 | 4  | E   | 6 | 834.42   | +0.0414 | 417.71              | +0.0333 |
|          | 500.27 |          | 528.27 | 5  | A   | 5 | 705.38   | +0.091  | 353.19              | +0.3714 |
|          | 637.33 | +0.0467  | 665.33 | 6  | H   | 4 | 634.34   | +0.1487 | 634.34              |         |
|          | 736.4  | +0.192   | 764.39 | 7  | V   | 3 | 497.28   | +0.0122 | 497.28              |         |
|          | 851.43 | +0.0039  | 879.42 | 8  | D   | 2 | 398.21   | +0.1911 | 398.21              |         |
|          | 979.48 | +0.0618  | 1007.5 | 9  | Q   | 1 | 283.19   | +0.0585 | 283.19              |         |
|          |        |          |        | 10 | K   | 0 | 155.13   |         | 155.13              |         |

Scan number 381 Raw file LNCAP\_Silac\_23F10\_set1\_06  
 Method ITMS; CID Pepti... 146.3

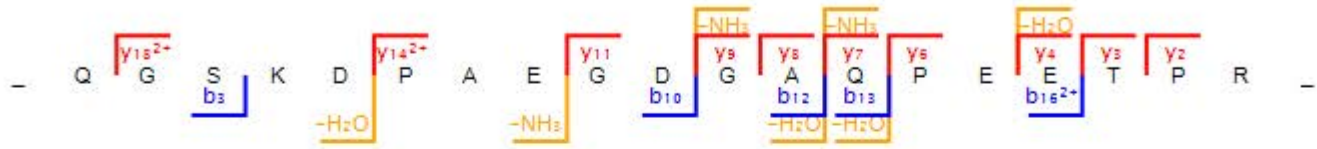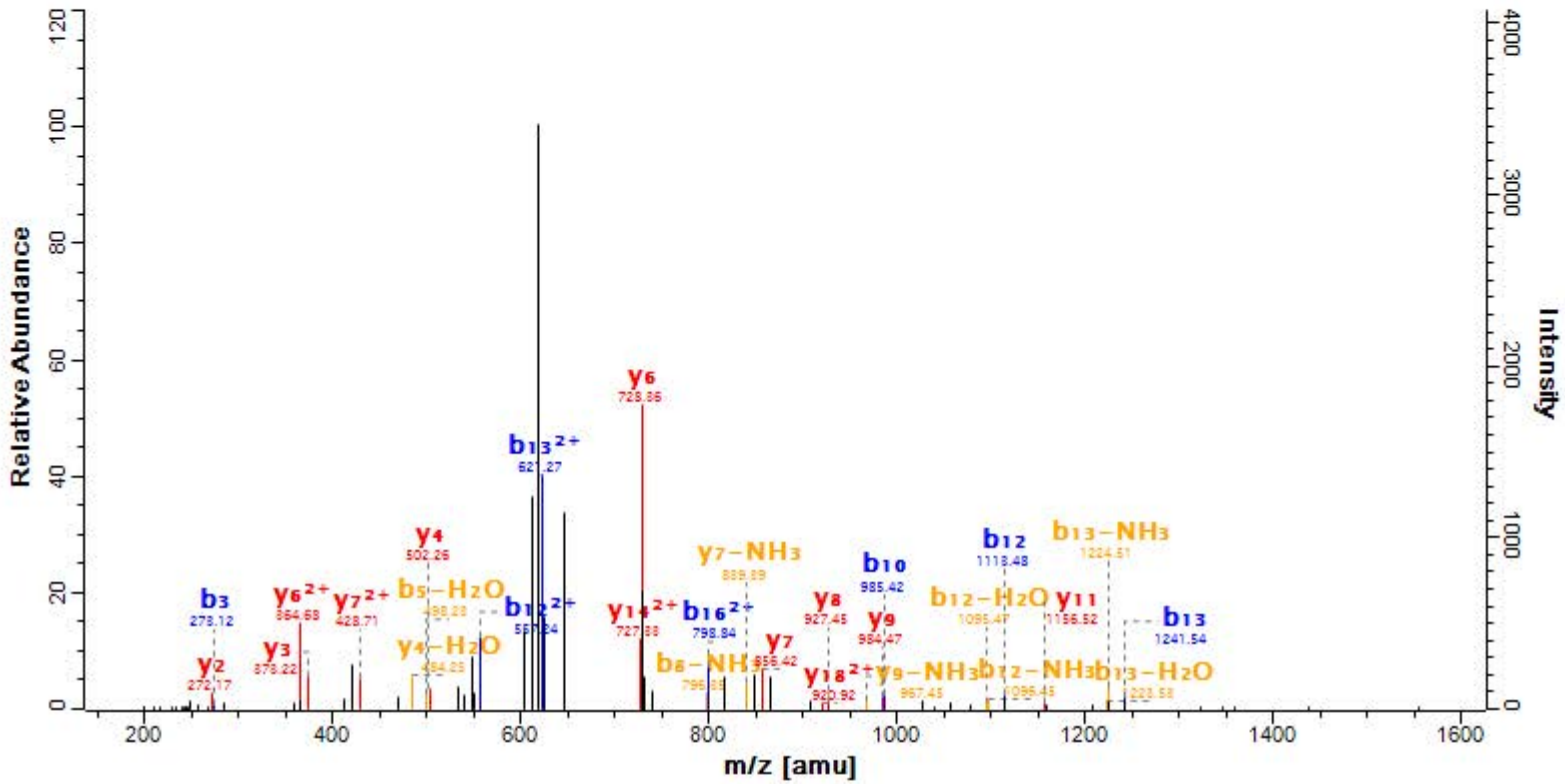

precursor information

|                   |                 |
|-------------------|-----------------|
| Mass:             | 1967.88305      |
| m/z:              | 656.96829       |
| Charge:           | 3+              |
| Retentiontime:    | 7.2028932571411 |
| Score:            | 146.2959        |
| Mass Error [ppm]: | 0.49396         |
| PEP:              | 3.6066E-19      |
| Precursor Type:   | MULTI           |

general information

|                       |             |
|-----------------------|-------------|
| Annotation:           | 14 of 19    |
| AminoAcids Coverage:  | 74 %        |
| Intensity Coverage:   | 40 %        |
| Peak Coverage:        | 28 %        |
| Protein Localisation: | 210 ... 228 |

| b <sup>2+</sup> ion |        | b ion    |        | seq |   |    | y ion    |         | y <sup>2+</sup> ion |         |
|---------------------|--------|----------|--------|-----|---|----|----------|---------|---------------------|---------|
| Δ dalton            | mass   | Δ dalton | mass   |     |   |    | Δ dalton | mass    | Δ dalton            | mass    |
|                     | 129.07 |          | 129.07 | 1   | Q | 18 |          |         |                     |         |
|                     | 186.09 |          | 186.09 | 2   | G | 17 | 1840.8   |         | 920.92              | -0.068  |
|                     | 273.12 | +0.3189  | 273.12 | 3   | S | 16 | 1783.8   |         | 1783.8              |         |
|                     | 401.21 |          | 401.21 | 4   | K | 15 | 1696.8   |         | 1696.8              |         |
|                     | 516.24 |          | 516.24 | 5   | D | 14 | 1568.7   |         | 1568.7              |         |
|                     | 613.29 |          | 613.29 | 6   | P | 13 | 1453.7   |         | 727.33              | +0.4359 |
|                     | 684.33 |          | 684.33 | 7   | A | 12 | 1356.6   |         | 1356.6              |         |
|                     | 813.37 |          | 813.37 | 8   | E | 11 | 1285.6   |         | 1285.6              |         |
|                     | 870.4  |          | 870.4  | 9   | G | 10 | 1156.5   | +0.2223 | 1156.5              |         |
|                     | 985.42 | +0.178   | 985.42 | 10  | D | 9  | 1099.5   |         | 1099.5              |         |
|                     | 1042.4 |          | 1042.4 | 11  | G | 8  | 984.47   | +0.0109 | 984.47              |         |
| +0.1082             | 557.24 | +0.0548  | 1113.5 | 12  | A | 7  | 927.45   | +0.0546 | 927.45              |         |
| +0.2019             | 621.27 | +0.054   | 1241.5 | 13  | Q | 6  | 856.42   | +0.0753 | 428.71              | +0.3608 |
|                     | 1338.6 |          | 1338.6 | 14  | P | 5  | 728.36   | +0.0737 | 364.68              | +0.2042 |
|                     | 1467.6 |          | 1467.6 | 15  | E | 4  | 631.3    |         | 631.3               |         |
| +0.1407             | 798.84 |          | 1596.7 | 16  | E | 3  | 502.26   | +0.1015 | 502.26              |         |
|                     | 1697.7 |          | 1697.7 | 17  | T | 2  | 373.22   | +0.0955 | 373.22              |         |
|                     | 1794.8 |          | 1794.8 | 18  | P | 1  | 272.17   | +0.0656 | 272.17              |         |
|                     |        |          |        | 19  | R | 0  | 175.12   |         | 175.12              |         |

Scan number 4091 Raw file LNCAP\_Silac\_23F10\_set1\_06  
 Method ITMS: CID Pepti... 132.79

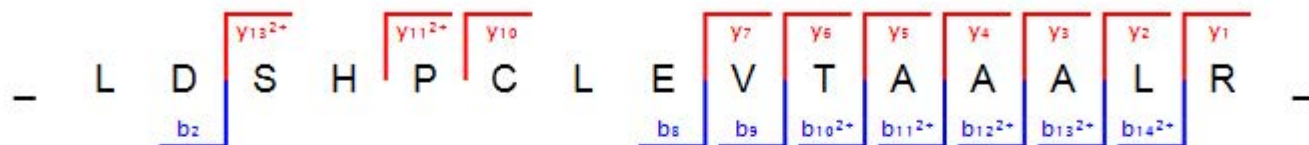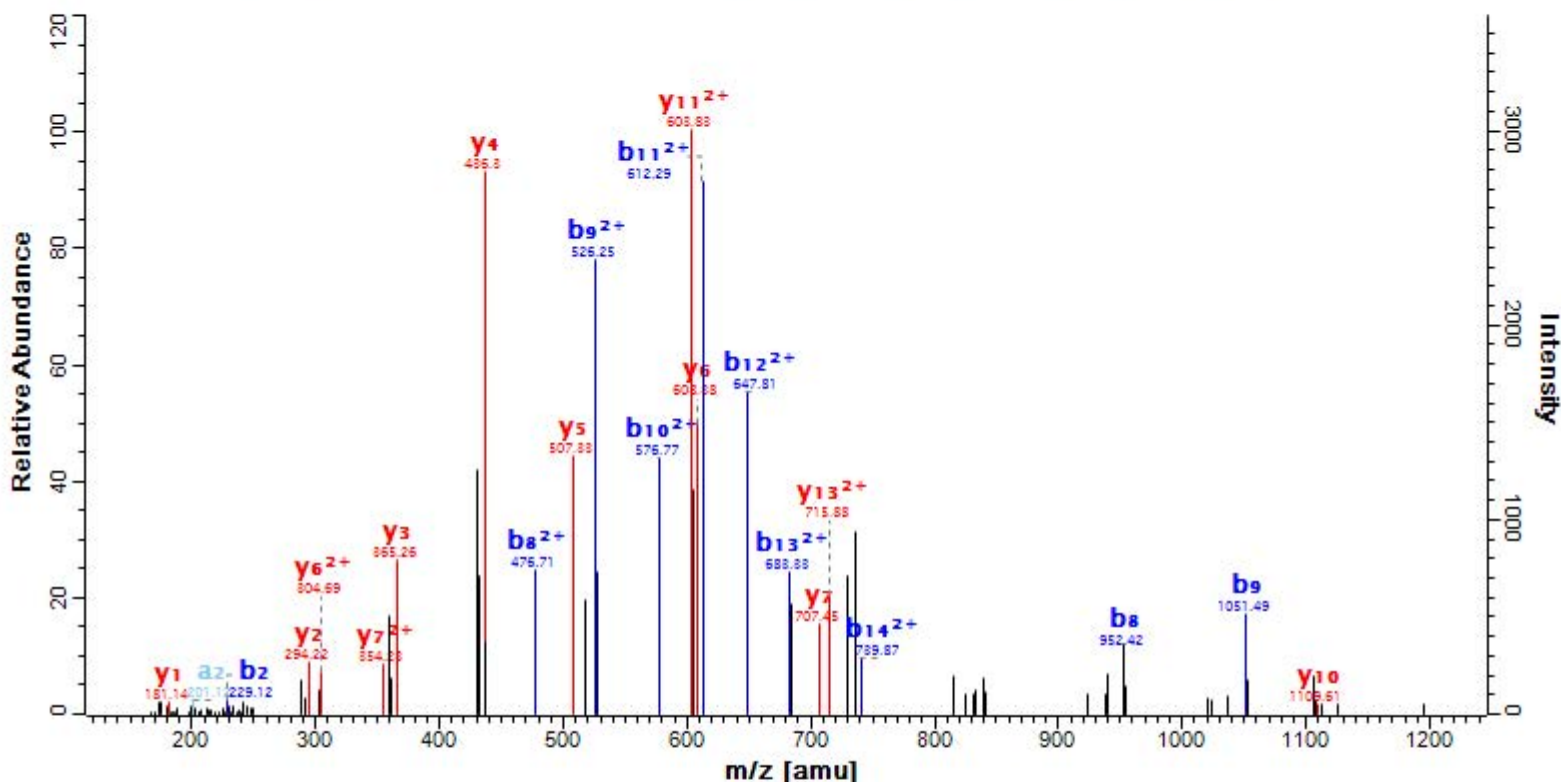

**precursor information**

|                   |                 |
|-------------------|-----------------|
| Mass:             | 1651.83535      |
| m/z:              | 551.61906       |
| Charge:           | 3+              |
| Retentiontime:    | 29.285007476806 |
| Score:            | 132.7903        |
| Mass Error [ppm]: | 0.095453        |
| PEP:              | 5.7481E-10      |
| Precursor Type:   | MULTI           |

| a ion         | b <sup>2+</sup> ion | b ion         |     |   | y ion         | y <sup>2+</sup> ion |
|---------------|---------------------|---------------|-----|---|---------------|---------------------|
| Δ dalton mass | Δ dalton mass       | Δ dalton mass | seq |   | Δ dalton mass | Δ dalton mass       |
| 86.1          | 114.1               | 114.1         | 1   | L | 14            |                     |
| +0.15201.1    | 229.1               | +0.036229.1   | 2   | D | 13            | 1546                |
| 288.2         | 316.2               | 316.2         | 3   | S | 12            | 1431                |
| 425.2         | 453.2               | 453.2         | 4   | H | 11            | 1344                |
| 522.3         | 550.3               | 550.3         | 5   | P | 10            | 1207                |
| 682.3         | 710.3               | 710.3         | 6   | C | 9             | 1110                |
| 795.4         | 823.4               | 823.4         | 7   | L | 8             | 949.6               |
| 924.4         | +0.234476.7         | +0.082952.4   | 8   | E | 7             | 836.5               |
| 1023          | +0.242526.2         | +0.0491051    | 9   | V | 6             | 707.5               |
| 1125          | +0.257576.8         | 1153          | 10  | T | 5             | 608.4               |
| 1196          | +0.22               | 612.3         | 11  | A | 4             | 507.3               |
| 1267          | +0.264647.8         | 1295          | 12  | A | 3             | 436.3               |
| 1338          | +0.146683.3         | 1366          | 13  | A | 2             | 365.3               |
| 1451          | +0.293739.9         | 1479          | 14  | L | 1             | 294.2               |
|               |                     |               | 15  | R | 0             | 181.1               |

**general information**

|                       |            |
|-----------------------|------------|
| Annotation:           | 12 of 15   |
| AminoAcids Coverage:  | 80 %       |
| Intensity Coverage:   | 65 %       |
| Peak Coverage:        | 23 %       |
| Protein Localisation: | 88 ... 102 |

Scan number 451 Raw file LNCAP\_Silac\_23F10\_set1\_06  
 Method ITMS; CID Pepti... 126.71

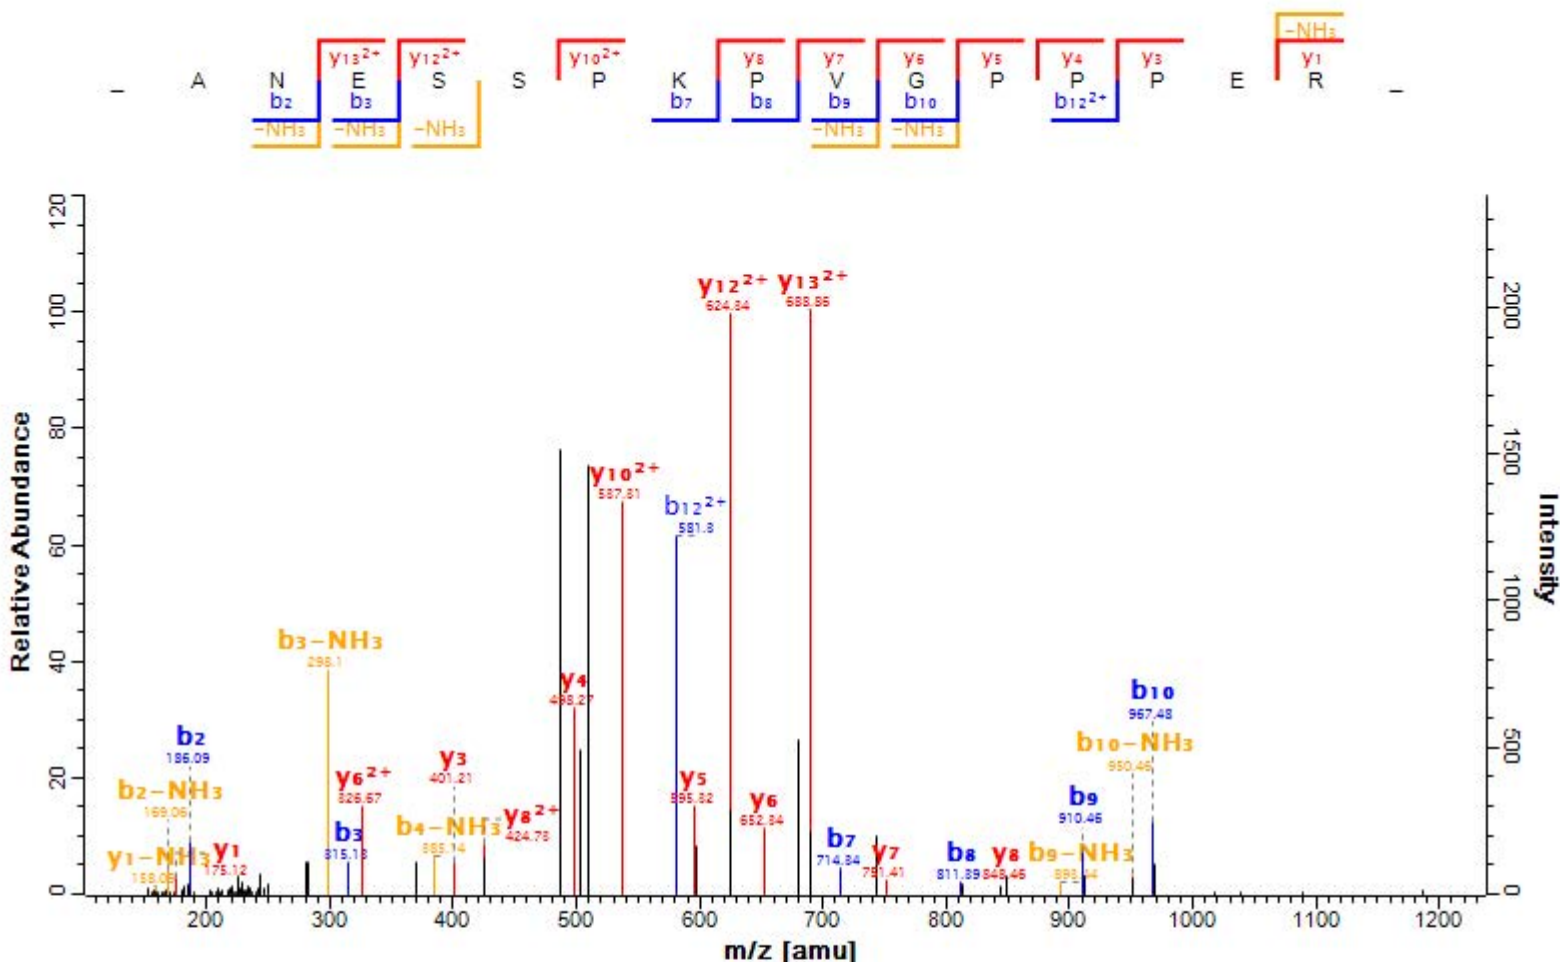

#### precursor information

|                   |                 |
|-------------------|-----------------|
| Mass:             | 1560.78948      |
| m/z:              | 521.27044       |
| Charge:           | 3+              |
| Retentiontime:    | 7.6911034584045 |
| Score:            | 126.7053        |
| Mass Error [ppm]: | -0.086911       |
| PEP:              | 1.5313E-09      |
| Precursor Type:   | MULTI           |

#### general information

|                       |             |
|-----------------------|-------------|
| Annotation:           | 13 of 15    |
| AminoAcids Coverage:  | 87 %        |
| Intensity Coverage:   | 60 %        |
| Peak Coverage:        | 23 %        |
| Protein Localisation: | 156 ... 170 |

| b <sup>2+</sup> ion |        | b ion    |        | seq |   |    | y ion    |         | y <sup>2+</sup> ion |         |
|---------------------|--------|----------|--------|-----|---|----|----------|---------|---------------------|---------|
| Δ dalton            | mass   | Δ dalton | mass   |     |   |    | Δ dalton | mass    | Δ dalton            | mass    |
|                     | 72.044 |          | 72.044 | 1   | A | 14 |          |         |                     |         |
|                     | 186.09 | +0.0191  | 186.09 | 2   | N | 13 | 1490.8   |         | 1490.8              |         |
|                     | 315.13 | +0.031   | 315.13 | 3   | E | 12 | 1376.7   |         | 688.86              | +0.3151 |
|                     | 402.16 |          | 402.16 | 4   | S | 11 | 1247.7   |         | 624.34              | +0.3127 |
|                     | 489.19 |          | 489.19 | 5   | S | 10 | 1160.6   |         | 1160.6              |         |
|                     | 586.25 |          | 586.25 | 6   | P | 9  | 1073.6   |         | 537.31              | +0.2704 |
|                     | 714.34 | -0.043   | 714.34 | 7   | K | 8  | 976.56   |         | 976.56              |         |
|                     | 811.39 | +0.3544  | 811.39 | 8   | P | 7  | 848.46   | +0.0902 | 424.73              | -0.027  |
|                     | 910.46 | +0.1441  | 910.46 | 9   | V | 6  | 751.41   | +0.3963 | 751.41              |         |
|                     | 967.48 | +0.0371  | 967.48 | 10  | G | 5  | 652.34   | -0.043  | 326.67              | +0.0893 |
|                     | 1064.5 |          | 1064.5 | 11  | P | 4  | 595.32   | +0.086  | 595.32              |         |
| -0.189              | 581.3  |          | 1161.6 | 12  | P | 3  | 498.27   | -0.024  | 498.27              |         |
|                     | 1258.6 |          | 1258.6 | 13  | P | 2  | 401.21   | +0.0406 | 401.21              |         |
|                     | 1387.7 |          | 1387.7 | 14  | E | 1  | 304.16   |         | 304.16              |         |
|                     |        |          |        | 15  | R | 0  | 175.12   | -0.041  | 175.12              |         |

Scan number 4540 Raw file LNCAP\_Silac\_23F10\_set1\_06  
 Method ITMS; CID Pepti... 122.49

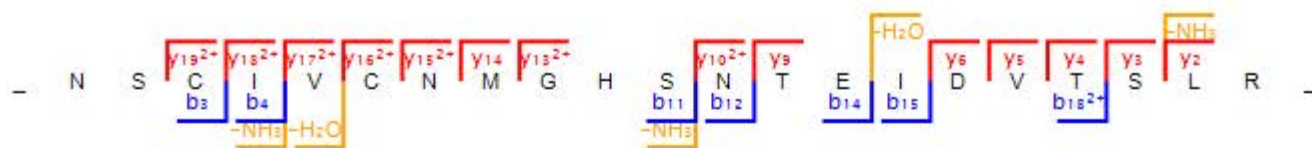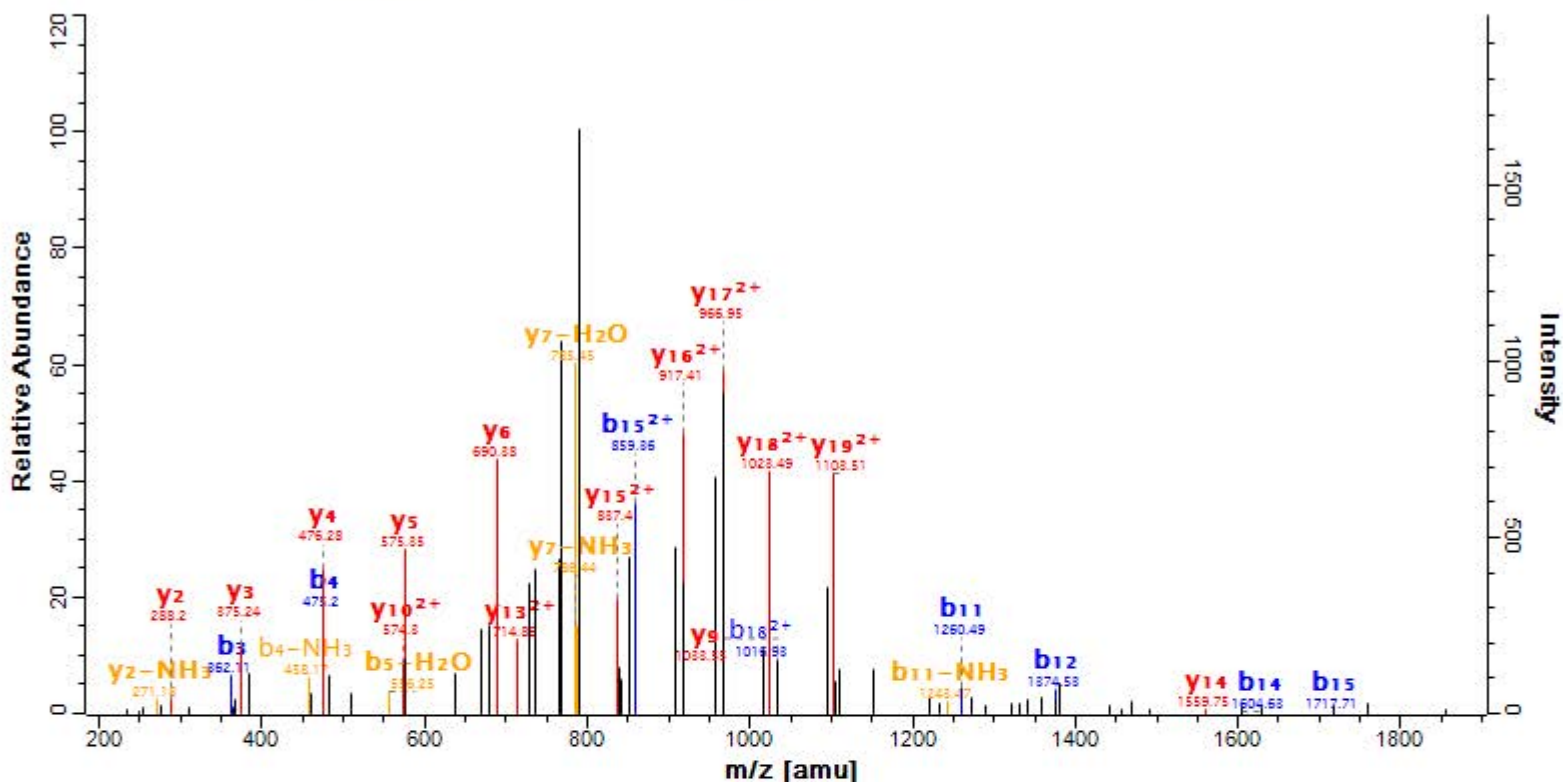

precursor information

|                   |                |
|-------------------|----------------|
| Mass:             | 2406.07259     |
| m/z:              | 803.03147      |
| Charge:           | 3+             |
| Retentiontime:    | 31.77880859375 |
| Score:            | 122.4872       |
| Mass Error [ppm]: | -0.0079439     |
| PEP:              | 2.73E-13       |
| Precursor Type:   | MULTI          |

| b <sup>2+</sup> ion |         | b ion    |        | seq |   |    | y ion    |         | y <sup>2+</sup> ion |         |
|---------------------|---------|----------|--------|-----|---|----|----------|---------|---------------------|---------|
| Δ dalton            | mass    | Δ dalton | mass   |     |   |    | Δ dalton | mass    | Δ dalton            | mass    |
|                     | 115.05  |          | 115.05 | 1   | N | 20 |          |         |                     |         |
|                     | 202.08  |          | 202.08 | 2   | S | 19 | 2293     |         | 2293                |         |
|                     | 362.11  | +0.1306  | 362.11 | 3   | C | 18 | 2206     |         | 1103.5              | +0.2407 |
|                     | 475.2   | +0.0579  | 475.2  | 4   | I | 17 | 2046     |         | 1023.5              | +0.2106 |
|                     | 574.27  |          | 574.27 | 5   | V | 16 | 1932.9   |         | 966.95              | -0.082  |
|                     | 734.3   |          | 734.3  | 6   | C | 15 | 1833.8   |         | 917.41              | -0.018  |
|                     | 848.34  |          | 848.34 | 7   | N | 14 | 1673.8   |         | 837.4               | -0.069  |
|                     | 979.38  |          | 979.38 | 8   | M | 13 | 1559.7   | +0.0712 | 1559.7              |         |
|                     | 1036.4  |          | 1036.4 | 9   | G | 12 | 1428.7   |         | 714.86              | +0.2534 |
|                     | 1173.5  |          | 1173.5 | 10  | H | 11 | 1371.7   |         | 1371.7              |         |
|                     | 1260.5  | +0.4165  | 1260.5 | 11  | S | 10 | 1234.6   |         | 1234.6              |         |
|                     | 1374.5  | +0.2105  | 1374.5 | 12  | N | 9  | 1147.6   |         | 574.3               | +0.0626 |
|                     | 1475.6  |          | 1475.6 | 13  | T | 8  | 1033.6   | +0.0239 | 1033.6              |         |
|                     | 1604.6  | -0.076   | 1604.6 | 14  | E | 7  | 932.5    |         | 932.5               |         |
| +0.2613             | 1859.36 | -0.168   | 1717.7 | 15  | I | 6  | 803.46   |         | 803.46              |         |
|                     | 1832.7  |          | 1832.7 | 16  | D | 5  | 690.38   | +0.0949 | 690.38              |         |
|                     | 1931.8  |          | 1931.8 | 17  | V | 4  | 575.35   | +0.0436 | 575.35              |         |
| -0.011              | 2032.9  |          | 2032.9 | 18  | T | 3  | 476.28   | +0.1565 | 476.28              |         |
|                     | 2119.9  |          | 2119.9 | 19  | S | 2  | 375.24   | -0.058  | 375.24              |         |
|                     | 2233    |          | 2233   | 20  | L | 1  | 288.2    | +0.0392 | 288.2               |         |
|                     |         |          |        | 21  | R | 0  | 175.12   |         | 175.12              |         |

general information

|                       |             |
|-----------------------|-------------|
| Annotation:           | 17 of 21    |
| AminoAcids Coverag    | 81 %        |
| Intensity Coverage:   | 46 %        |
| Peak Coverage:        | 33 %        |
| Protein Localisation: | 390 ... 410 |



Scan number 4936 Raw file LNCAP\_Silac\_23F10\_set1\_06  
 Method ITMS: CID Pepti... 58.17

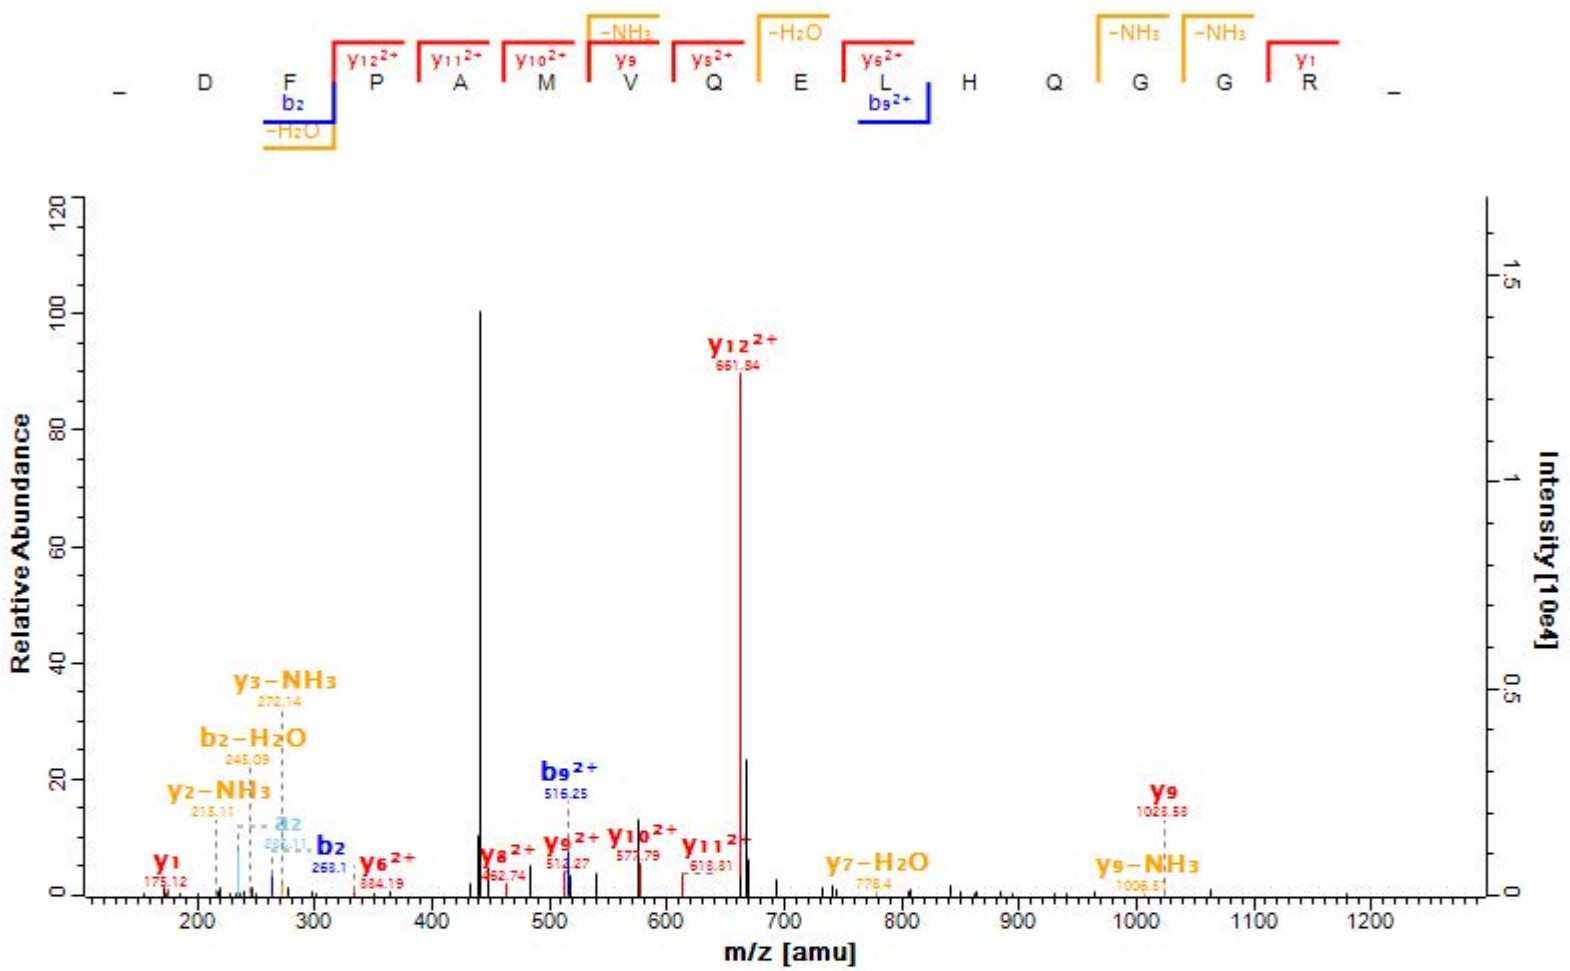

**precursor information**

|                   |                 |
|-------------------|-----------------|
| Mass:             | 1583.75126      |
| m/z:              | 528.92436       |
| Charge:           | 3+              |
| Retentiontime:    | 33.976543426513 |
| Score:            | 58.17212        |
| Mass Error [ppm]: | -0.12411        |
| PEP:              | 0.0087523       |
| Precursor Type:   | MULTI           |

**general information**

|                       |             |
|-----------------------|-------------|
| Annotation:           | 11 of 14    |
| AminoAcids Coverage:  | 79 %        |
| Intensity Coverage:   | 38 %        |
| Peak Coverage:        | 17 %        |
| Protein Localisation: | 423 ... 436 |

| a ion         |               | b <sup>2+</sup> ion |               | b ion |               | y ion         |       | y <sup>2+</sup> ion |        |
|---------------|---------------|---------------------|---------------|-------|---------------|---------------|-------|---------------------|--------|
| Δ dalton mass | Δ dalton mass | Δ dalton mass       | Δ dalton mass | seq   | Δ dalton mass | Δ dalton mass |       |                     |        |
|               | 88.04         | 116                 |               | 1     | D             | 13            |       |                     |        |
| -0.06         | 235.1         | 263.1               | +0.024        | 2     | F             | 12            | 1470  | 1470                |        |
|               | 332.2         | 360.2               |               | 3     | P             | 11            | 1323  | 661.8               | +0.24% |
|               | 403.2         | 431.2               |               | 4     | A             | 10            | 1226  | 613.3               | +0.16% |
|               | 534.2         | 562.2               |               | 5     | M             | 9             | 1155  | 577.8               | +0.24% |
|               | 633.3         | 661.3               |               | 6     | V             | 8             | 1024  | 512.3               | +0.07% |
|               | 761.4         | 789.4               |               | 7     | Q             | 7             | 924.5 | 462.7               | +0.26% |
|               | 890.4         | 918.4               |               | 8     | E             | 6             | 796.4 | 796.4               |        |
|               | 1003          | -0.23               | 516.2         | 9     | L             | 5             | 667.4 | 334.2               | +0.08% |
|               | 1141          |                     | 1169          | 10    | H             | 4             | 554.3 | 554.3               |        |
|               | 1269          |                     | 1297          | 11    | Q             | 3             | 417.2 | 417.2               |        |
|               | 1326          |                     | 1354          | 12    | G             | 2             | 289.2 | 289.2               |        |
|               | 1383          |                     | 1411          | 13    | G             | 1             | 232.1 | 232.1               |        |
|               |               |                     |               | 14    | R             | 0             | 175.1 | +0.01               | 175.1  |

Scan number 5217 Raw file LNCAP\_Silac\_23F10\_set1\_06  
 Method ITMS; CID Pepti... 47.53

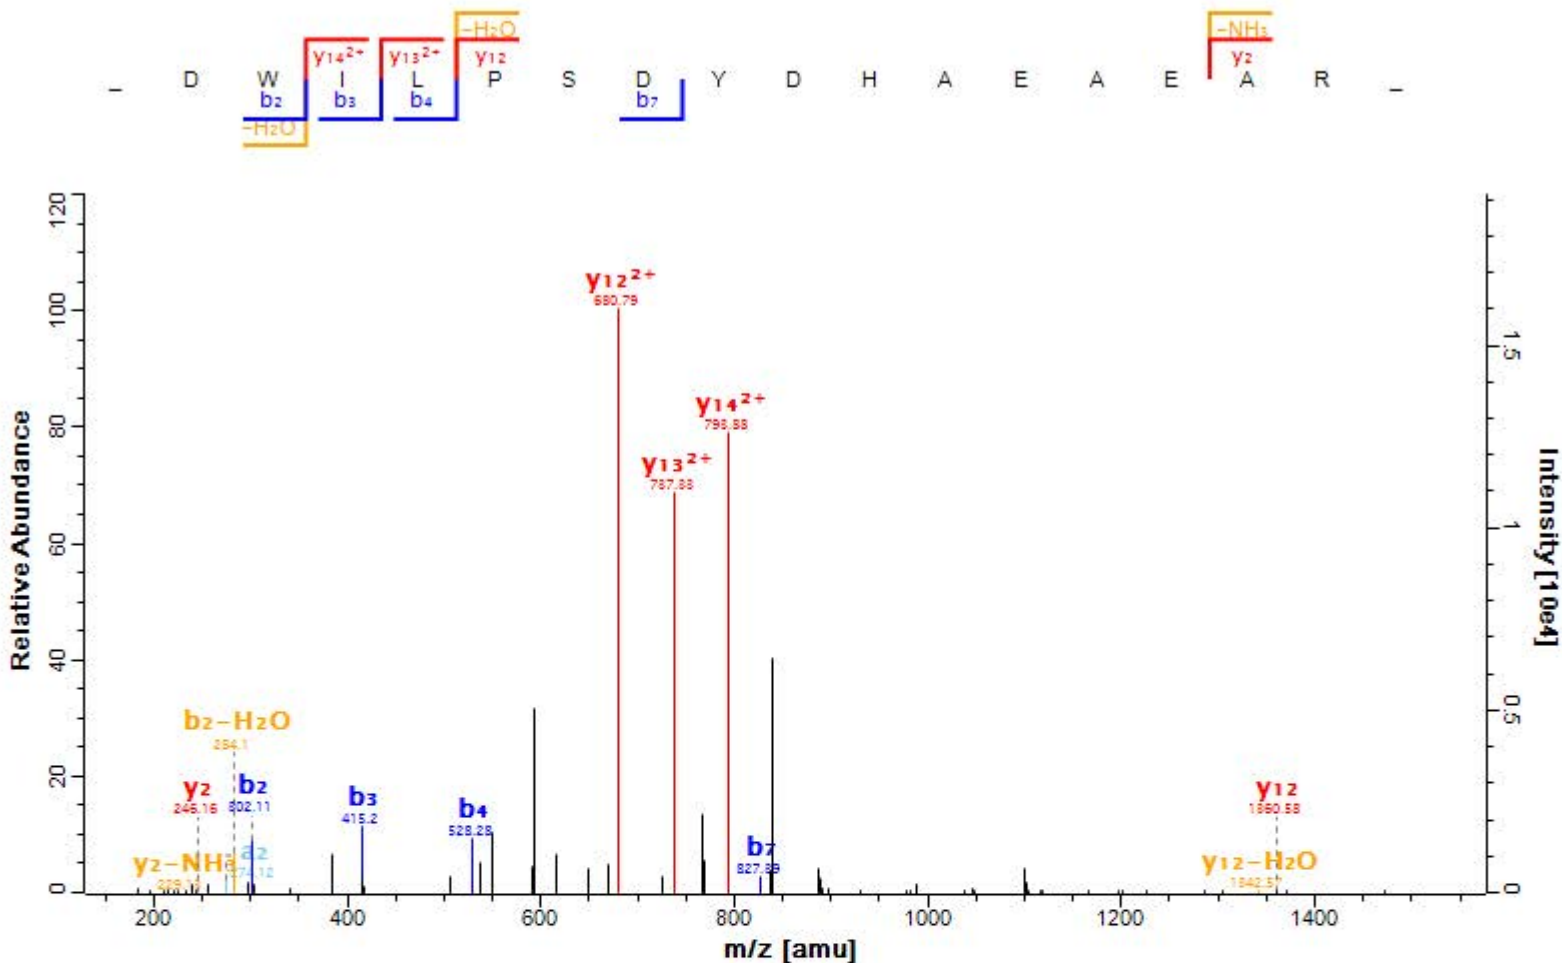

**precursor information**

|                   |                 |
|-------------------|-----------------|
| Mass:             | 1886.84417      |
| m/z:              | 629.95533       |
| Charge:           | 3+              |
| Retentiontime:    | 35.543952941894 |
| Score:            | 47.53175        |
| Mass Error [ppm]: | 0.35204         |
| PEP:              | 0.020874        |
| Precursor Type:   | MULTI           |

**general information**

|                       |             |
|-----------------------|-------------|
| Annotation:           | 6 of 16     |
| AminoAcids Coverage:  | 38 %        |
| Intensity Coverage:   | 57 %        |
| Peak Coverage:        | 14 %        |
| Protein Localisation: | 264 ... 279 |

| a ion    |        | b ion    |        |    |     |    | y ion    |         | y <sup>2+</sup> ion |         |
|----------|--------|----------|--------|----|-----|----|----------|---------|---------------------|---------|
| Δ dalton | mass   | Δ dalton | mass   |    | seq |    | Δ dalton | mass    | Δ dalton            | mass    |
|          | 88.039 | 116.03   |        | 1  | D   | 15 |          |         |                     |         |
| +0.0862  | 274.12 | +0.0238  | 302.11 | 2  | W   | 14 | 1772.8   |         | 1772.8              |         |
|          | 387.2  | -0.035   | 415.2  | 3  | I   | 13 | 1586.7   |         | 793.88              | +0.2253 |
|          | 500.29 | +0.0318  | 528.28 | 4  | L   | 12 | 1473.7   |         | 737.33              | +0.2509 |
|          | 597.34 |          | 625.33 | 5  | P   | 11 | 1360.6   | +0.2833 | 680.79              | +0.2343 |
|          | 684.37 |          | 712.37 | 6  | S   | 10 | 1263.5   |         | 1263.5              |         |
|          | 799.4  | +0.2724  | 827.39 | 7  | D   | 9  | 1176.5   |         | 1176.5              |         |
|          | 962.46 |          | 990.46 | 8  | Y   | 8  | 1061.5   |         | 1061.5              |         |
|          | 1077.5 |          | 1105.5 | 9  | D   | 7  | 898.4    |         | 898.4               |         |
|          | 1214.5 |          | 1242.5 | 10 | H   | 6  | 783.37   |         | 783.37              |         |
|          | 1285.6 |          | 1313.6 | 11 | A   | 5  | 646.32   |         | 646.32              |         |
|          | 1414.6 |          | 1442.6 | 12 | E   | 4  | 575.28   |         | 575.28              |         |
|          | 1485.7 |          | 1513.7 | 13 | A   | 3  | 446.24   |         | 446.24              |         |
|          | 1614.7 |          | 1642.7 | 14 | E   | 2  | 375.2    |         | 375.2               |         |
|          | 1685.7 |          | 1713.7 | 15 | A   | 1  | 246.16   | -0.075  | 246.16              |         |
|          |        |          |        | 16 | R   | 0  | 175.12   |         | 175.12              |         |

Scan number 6054 Raw file LNCAP\_Silac\_23F10\_set1\_06  
 Method ITMS: CID Pepti... 185.95

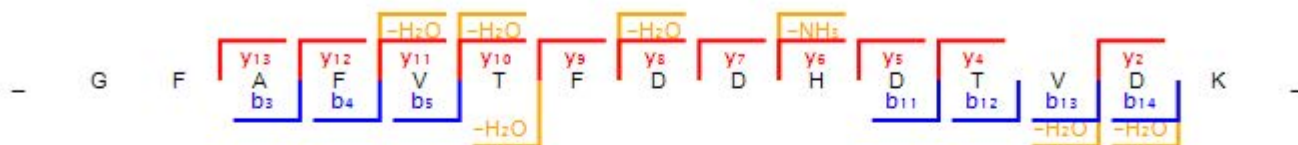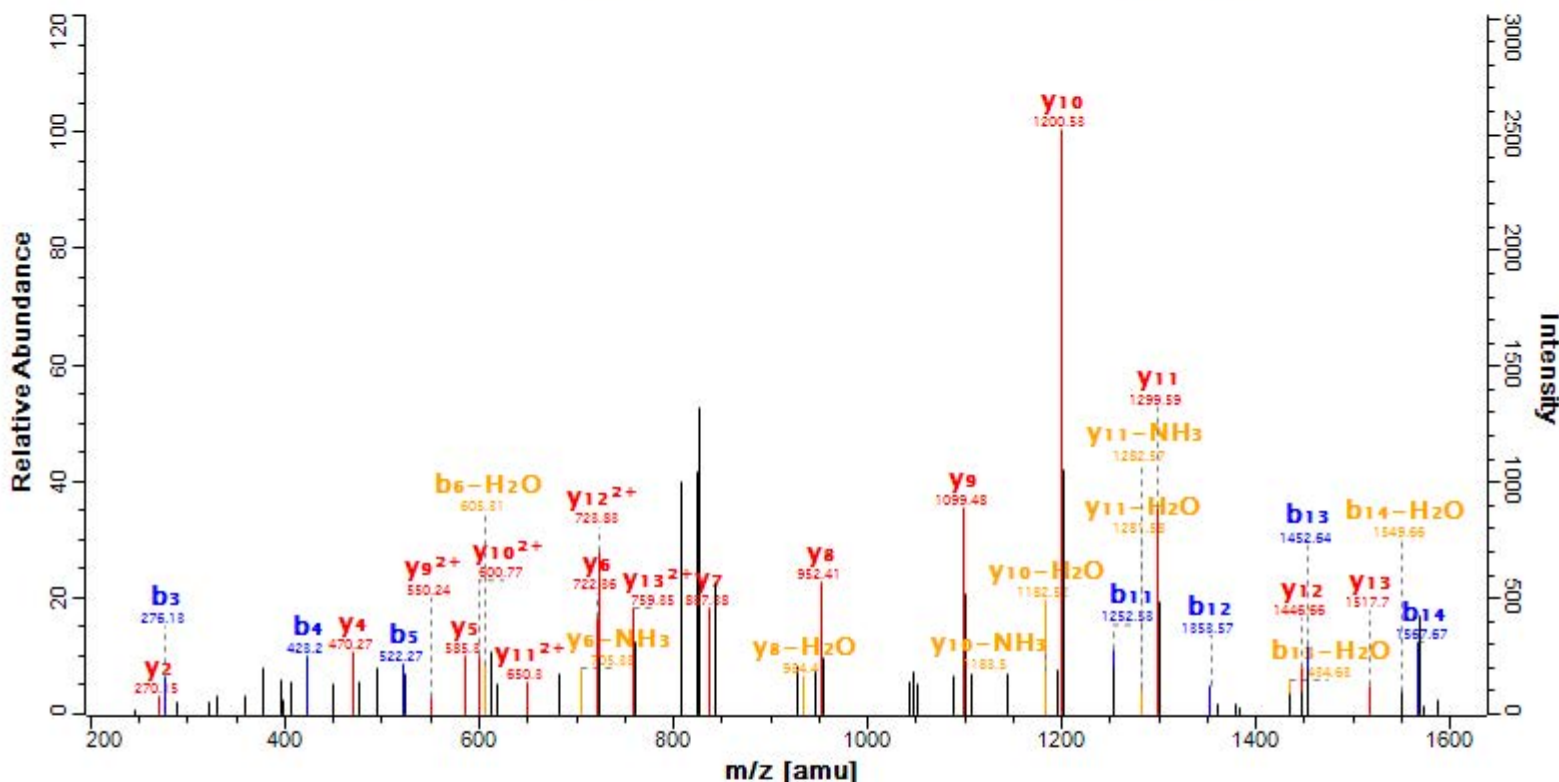

#### precursor information

|                   |                 |
|-------------------|-----------------|
| Mass:             | 1712.76784      |
| m/z:              | 857.3912        |
| Charge:           | 2+              |
| Retentiontime:    | 40.396518707275 |
| Score:            | 185.9465        |
| Mass Error [ppm]: | -0.21865        |
| PEP:              | 1.2975E-21      |
| Precursor Type:   | MULTI           |

#### general information

|                       |             |
|-----------------------|-------------|
| Annotation:           | 12 of 15    |
| AminoAcids Coverage:  | 80 %        |
| Intensity Coverage:   | 47 %        |
| Peak Coverage:        | 39 %        |
| Protein Localisation: | 168 ... 182 |

| b ion     |          |     |   | y ion    |          |           | y <sup>2+</sup> ion |           |
|-----------|----------|-----|---|----------|----------|-----------|---------------------|-----------|
| Δ dalton  | mass     | seq |   | Δ dalton | mass     | Δ dalton  | mass                |           |
|           | 58.02874 | 1   | G | 14       |          |           |                     |           |
|           | 205.0972 | 2   | F | 13       | 1664.768 | 1664.768  |                     |           |
| -0.02892  | 276.1343 | 3   | A | 12       | 1517.7   | +0.339982 | 759.3535            | +0.103975 |
| +0.103471 | 423.2027 | 4   | F | 11       | 1446.663 | +0.052144 | 723.835             | +0.024448 |
| -0.0626   | 522.2711 | 5   | V | 10       | 1299.594 | -0.06462  | 650.3008            | +0.138367 |
|           | 623.3188 | 6   | T | 9        | 1200.526 | -0.01342  | 600.7666            | +0.100369 |
|           | 770.3872 | 7   | F | 8        | 1099.478 | +0.039141 | 550.2427            | +0.109865 |
|           | 885.4141 | 8   | D | 7        | 952.4098 | -0.05266  | 952.4098            |           |
|           | 1000.441 | 9   | D | 6        | 837.3828 | +0.054969 | 837.3828            |           |
|           | 1137.5   | 10  | H | 5        | 722.3559 | +0.168094 | 722.3559            |           |
| +0.100024 | 1252.527 | 11  | D | 4        | 585.297  | +0.157059 | 585.297             |           |
| -0.26516  | 1353.575 | 12  | T | 3        | 470.27   | +0.092632 | 470.27              |           |
| -0.11482  | 1452.643 | 13  | V | 2        | 369.2224 |           | 369.2224            |           |
| -0.04118  | 1567.67  | 14  | D | 1        | 270.1539 | +0.132889 | 270.1539            |           |
|           |          | 15  | K | 0        | 155.127  |           | 155.127             |           |

Scan number 614 Raw file LNCAP\_Silac\_23F10\_set1\_06  
 Method ITMS; CID Peptide 136.83

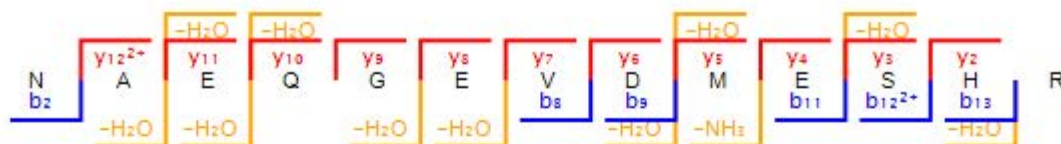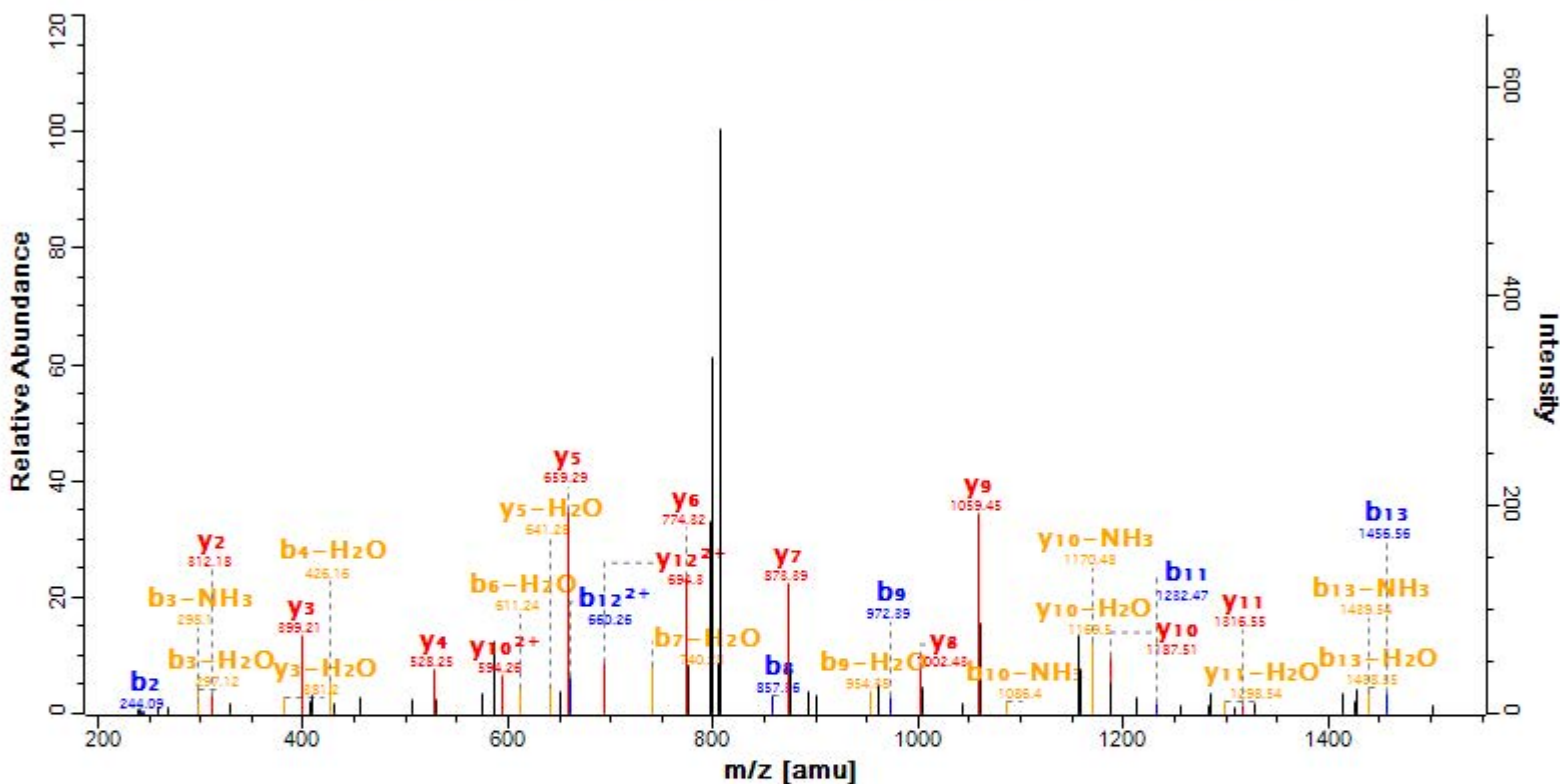

#### precursor information

|                   |                 |
|-------------------|-----------------|
| Mass:             | 1629.66941      |
| m/z:              | 815.84198       |
| Charge:           | 2+              |
| Retentiontime:    | 8.8113946914672 |
| Score:            | 136.8258        |
| Mass Error [ppm]: | 0.30822         |
| PEP:              | 8.5359E-09      |
| Precursor Type:   | MULTI           |

#### general information

|                       |             |
|-----------------------|-------------|
| Annotation:           | 12 of 14    |
| AminoAcids Coverage:  | 86 %        |
| Intensity Coverage:   | 42 %        |
| Peak Coverage:        | 42 %        |
| Protein Localisation: | 157 ... 170 |

| b <sup>2+</sup> ion |        | b ion    |        | seq |   |    | y ion    |         | y <sup>2+</sup> ion |         |
|---------------------|--------|----------|--------|-----|---|----|----------|---------|---------------------|---------|
| Δ dalton            | mass   | Δ dalton | mass   |     |   |    | Δ dalton | mass    | Δ dalton            | mass    |
|                     | 130.05 |          | 130.05 | 1   | E | 13 |          |         |                     |         |
|                     | 244.09 | +0.1471  | 244.09 | 2   | N | 12 | 1501.6   |         | 1501.6              |         |
|                     | 315.13 |          | 315.13 | 3   | A | 11 | 1387.6   |         | 694.3               | +0.11   |
|                     | 444.17 |          | 444.17 | 4   | E | 10 | 1316.6   | +0.0432 | 1316.6              |         |
|                     | 572.23 |          | 572.23 | 5   | Q | 9  | 1187.5   | -0.043  | 594.26              | +0.0304 |
|                     | 629.25 |          | 629.25 | 6   | G | 8  | 1059.5   | -0.02   | 1059.5              |         |
|                     | 758.3  |          | 758.3  | 7   | E | 7  | 1002.4   | -0.002  | 1002.4              |         |
|                     | 857.36 | +0.0771  | 857.36 | 8   | V | 6  | 873.39   | +0.0149 | 873.39              |         |
|                     | 972.39 | -0.195   | 972.39 | 9   | D | 5  | 774.32   | -3E-05  | 774.32              |         |
|                     | 1103.4 |          | 1103.4 | 10  | M | 4  | 659.29   | -0.076  | 659.29              |         |
|                     | 1232.5 | -0.292   | 1232.5 | 11  | E | 3  | 528.25   | +0.07   | 528.25              |         |
| +0.0085             | 660.26 |          | 1319.5 | 12  | S | 2  | 399.21   | +0.0281 | 399.21              |         |
|                     | 1456.6 | +0.1287  | 1456.6 | 13  | H | 1  | 312.18   | -0.012  | 312.18              |         |
|                     |        |          |        | 14  | R | 0  | 175.12   |         | 175.12              |         |

Scan number 6211 Raw file LNCAP\_Silac\_23F10\_set1\_06  
 Method ITMS; CID Pepti... 114.7

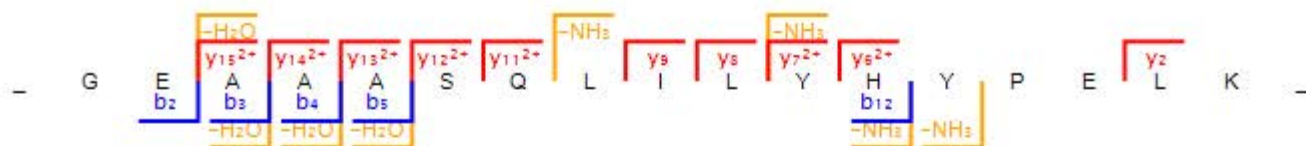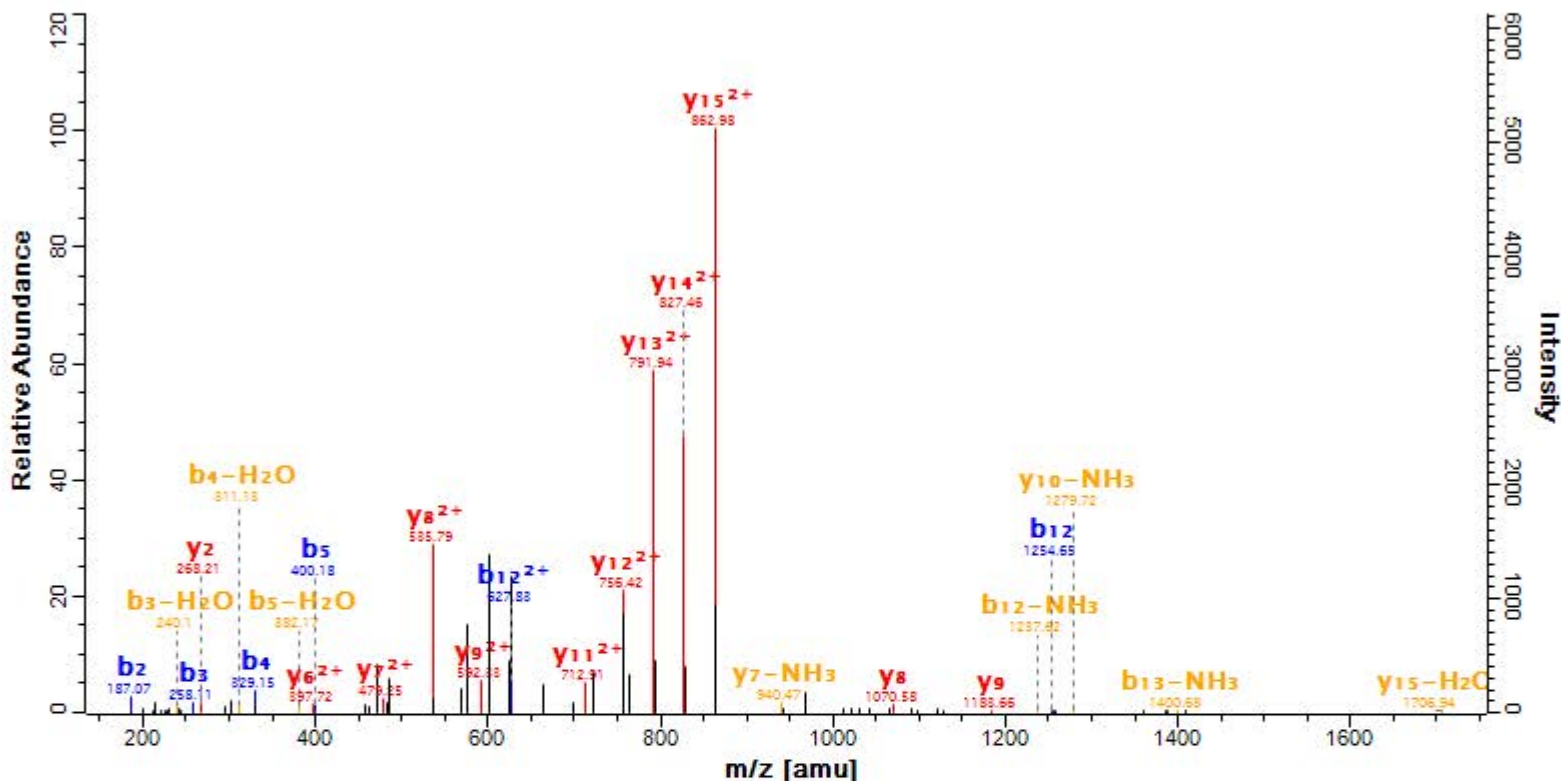

#### precursor information

|                   |                 |
|-------------------|-----------------|
| Mass:             | 1901.98895      |
| m/z:              | 635.00359       |
| Charge:           | 3+              |
| Retentiontime:    | 41.302028656005 |
| Score:            | 114.7048        |
| Mass Error [ppm]: | 0.12431         |
| PEP:              | 8.5072E-09      |
| Precursor Type:   | MULTI           |

#### general information

|                       |             |
|-----------------------|-------------|
| Annotation:           | 13 of 17    |
| AminoAcids Coverage:  | 76 %        |
| Intensity Coverage:   | 59 %        |
| Peak Coverage:        | 28 %        |
| Protein Localisation: | 231 ... 247 |

| b <sup>2+</sup> ion |        | b ion    |        | seq |   |    | y ion    |         | y <sup>2+</sup> ion |         |
|---------------------|--------|----------|--------|-----|---|----|----------|---------|---------------------|---------|
| Δ dalton            | mass   | Δ dalton | mass   |     |   |    | Δ dalton | mass    | Δ dalton            | mass    |
|                     | 58.029 |          | 58.029 | 1   | G | 16 |          |         |                     |         |
|                     | 187.07 | -0.028   | 187.07 | 2   | E | 15 | 1854     |         | 1854                |         |
|                     | 258.11 | +0.0177  | 258.11 | 3   | A | 14 | 1724.9   |         | 862.98              | +0.2713 |
|                     | 329.15 | +0.0526  | 329.15 | 4   | A | 13 | 1653.9   |         | 827.46              | +0.302  |
|                     | 400.18 | +0.2982  | 400.18 | 5   | A | 12 | 1582.9   |         | 791.94              | +0.2022 |
|                     | 487.21 |          | 487.21 | 6   | S | 11 | 1511.8   |         | 756.42              | -0.018  |
|                     | 615.27 |          | 615.27 | 7   | Q | 10 | 1424.8   |         | 712.91              | +0.2547 |
|                     | 728.36 |          | 728.36 | 8   | L | 9  | 1296.7   |         | 1296.7              |         |
|                     | 841.44 |          | 841.44 | 9   | I | 8  | 1183.7   | +0.3437 | 592.33              | +0.201  |
|                     | 954.53 |          | 954.53 | 10  | L | 7  | 1070.6   | -0.125  | 535.79              | +0.2304 |
|                     | 1117.6 |          | 1117.6 | 11  | Y | 6  | 957.49   |         | 479.25              | +0.4885 |
| -0.109              | 627.83 | -0.011   | 1254.6 | 12  | H | 5  | 794.43   |         | 397.72              | +0.1407 |
|                     | 1417.7 |          | 1417.7 | 13  | Y | 4  | 657.37   |         | 657.37              |         |
|                     | 1514.8 |          | 1514.8 | 14  | P | 3  | 494.31   |         | 494.31              |         |
|                     | 1643.8 |          | 1643.8 | 15  | E | 2  | 397.25   |         | 397.25              |         |
|                     | 1756.9 |          | 1756.9 | 16  | L | 1  | 268.21   | -0.08   | 268.21              |         |
|                     |        |          |        | 17  | K | 0  | 155.13   |         | 155.13              |         |

Scan number 6373 Raw file LNCAP\_Silac\_23F10\_set1\_06  
 Method ITMS: CID Peptide LNCAP\_Silac\_23F10\_set1\_06

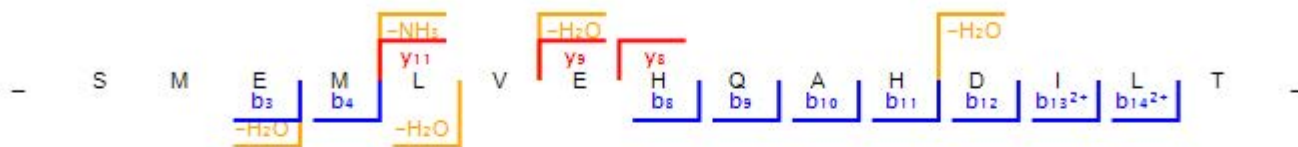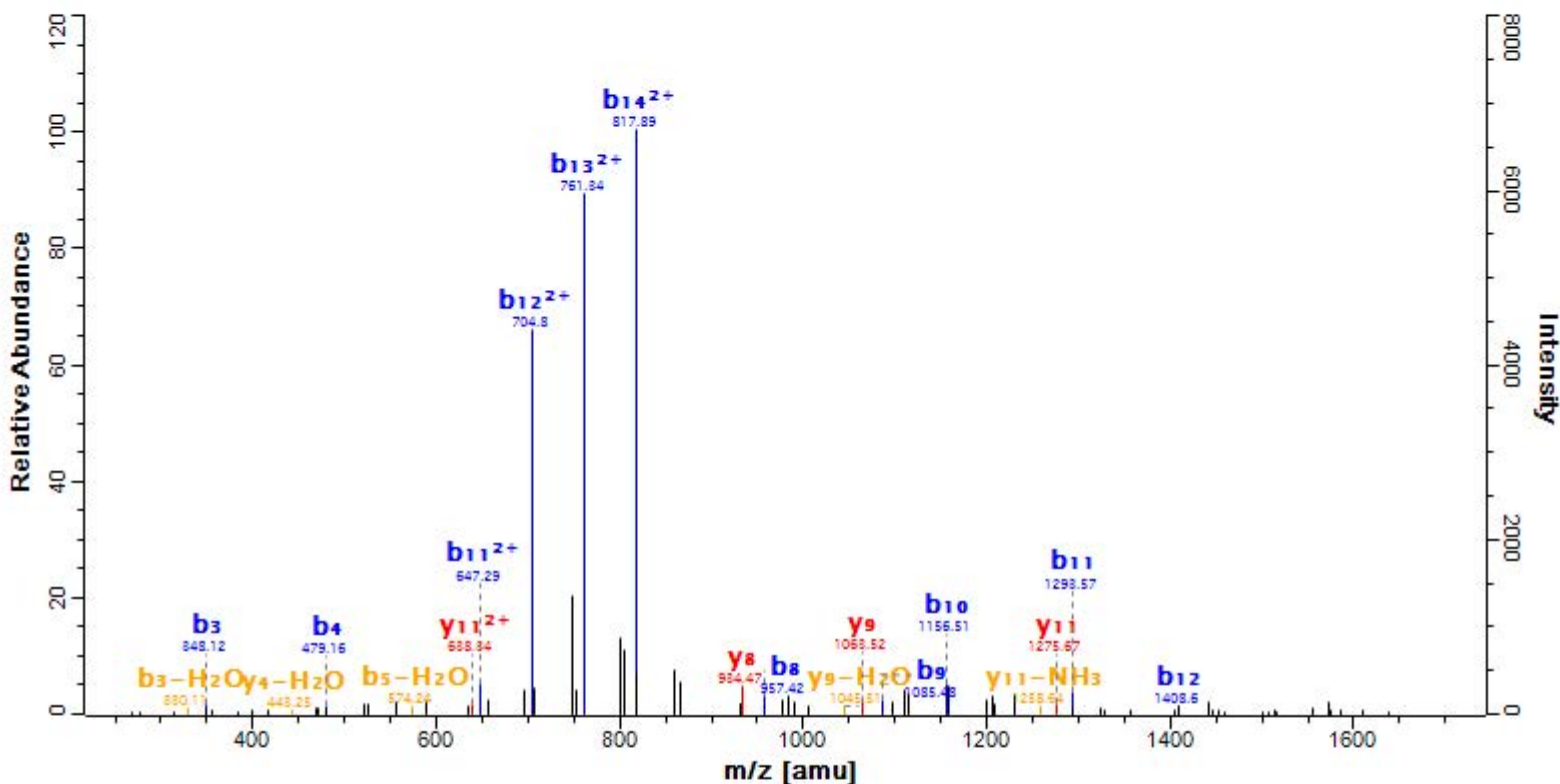

#### precursor information

|                   |                 |
|-------------------|-----------------|
| Mass:             | 1752.81657      |
| m/z:              | 877.41556       |
| Charge:           | 2+              |
| Retentiontime:    | 42.236885070800 |
| Score:            | 105.0287        |
| Mass Error [ppm]: | -0.5242         |
| PEP:              | 0.00013851      |
| Precursor Type:   | ISO             |

#### general information

|                       |             |
|-----------------------|-------------|
| Annotation:           | 11 of 15    |
| AminoAcids Coverage:  | 73 %        |
| Intensity Coverage:   | 66 %        |
| Peak Coverage:        | 24 %        |
| Protein Localisation: | 363 ... 377 |

| b <sup>2+</sup> ion |        | b ion    |        | seq |   |    | y ion    |         | y <sup>2+</sup> ion |         |
|---------------------|--------|----------|--------|-----|---|----|----------|---------|---------------------|---------|
| Δ dalton            | mass   | Δ dalton | mass   |     |   |    | Δ dalton | mass    | Δ dalton            | mass    |
|                     | 88.039 |          | 88.039 | 1   | S | 14 |          |         |                     |         |
|                     | 219.08 |          | 219.08 | 2   | M | 13 | 1666.8   |         | 1666.8              |         |
|                     | 348.12 | -0.021   | 348.12 | 3   | E | 12 | 1535.8   |         | 1535.8              |         |
|                     | 479.16 | -0.012   | 479.16 | 4   | M | 11 | 1406.7   |         | 1406.7              |         |
|                     | 592.25 |          | 592.25 | 5   | L | 10 | 1275.7   | +0.1503 | 638.34              | +0.4644 |
|                     | 691.32 |          | 691.32 | 6   | V | 9  | 1162.6   |         | 1162.6              |         |
|                     | 820.36 |          | 820.36 | 7   | E | 8  | 1063.5   | +0.4134 | 1063.5              |         |
|                     | 957.42 | -0.022   | 957.42 | 8   | H | 7  | 934.47   | -0.186  | 934.47              |         |
|                     | 1085.5 | +0.0898  | 1085.5 | 9   | Q | 6  | 797.42   |         | 797.42              |         |
|                     | 1156.5 | +0.1632  | 1156.5 | 10  | A | 5  | 669.36   |         | 669.36              |         |
| +0.0173             | 647.29 | -0.019   | 1293.6 | 11  | H | 4  | 598.32   |         | 598.32              |         |
| +0.2805             | 704.8  | -0.119   | 1408.6 | 12  | D | 3  | 461.26   |         | 461.26              |         |
| +0.2727             | 761.34 |          | 1521.7 | 13  | I | 2  | 346.23   |         | 346.23              |         |
| +0.2482             | 817.89 |          | 1634.8 | 14  | L | 1  | 233.15   |         | 233.15              |         |
|                     |        |          |        | 15  | T | 0  | 120.07   |         | 120.07              |         |

Scan number 6666 Raw file LNCAP\_Silac\_23F10\_set1\_06  
 Method ITMS; CID Pepti... 82.88

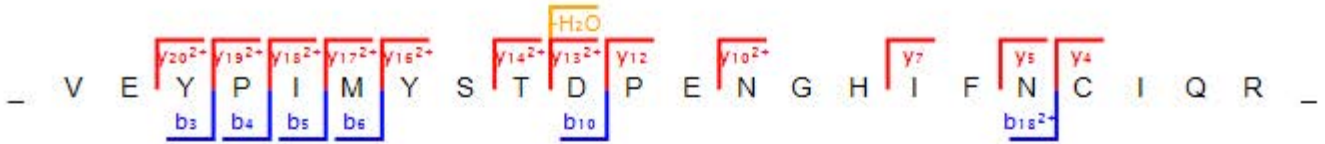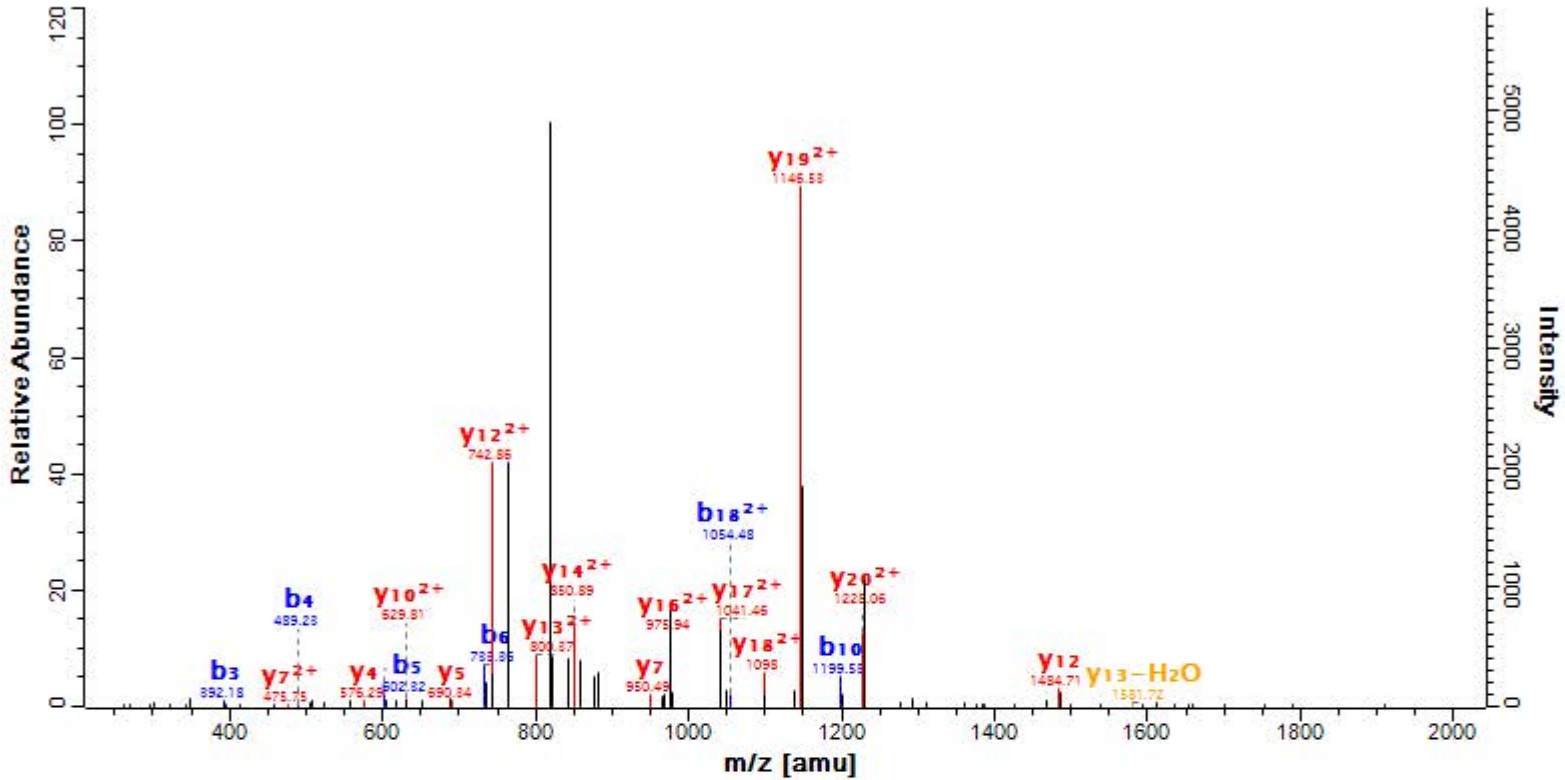

**precursor information**

|                   |                 |
|-------------------|-----------------|
| Mass:             | 2682.2209       |
| m/z:              | 895.08091       |
| Charge:           | 3+              |
| Retentiontime:    | 43.964550018310 |
| Score:            | 82.8772         |
| Mass Error [ppm]: | 0.089207        |
| PEP:              | 0.00012651      |
| Precursor Type:   | MULTI           |

| b <sup>2+</sup> ion |        | b ion    |        | seq |   |    | y ion    |         | y <sup>2+</sup> ion |         |
|---------------------|--------|----------|--------|-----|---|----|----------|---------|---------------------|---------|
| Δ dalton            | mass   | Δ dalton | mass   |     |   |    | Δ dalton | mass    | Δ dalton            | mass    |
|                     | 100.08 |          | 100.08 | 1   | V | 21 |          |         |                     |         |
|                     | 229.12 |          | 229.12 | 2   | E | 20 | 2584.2   |         | 2584.2              |         |
|                     | 392.18 | +0.022   | 392.18 | 3   | Y | 19 | 2455.1   |         | 1228.1              | -0.017  |
|                     | 489.23 | +0.1395  | 489.23 | 4   | P | 18 | 2292.1   |         | 1146.5              | +0.2918 |
|                     | 602.32 | +0.1583  | 602.32 | 5   | I | 17 | 2195     |         | 1098                | +0.4441 |
|                     | 733.36 | +0.069   | 733.36 | 6   | M | 16 | 2081.9   |         | 1041.5              | +0.093  |
|                     | 896.42 |          | 896.42 | 7   | Y | 15 | 1950.9   |         | 975.94              | +0.003  |
|                     | 983.45 |          | 983.45 | 8   | S | 14 | 1787.8   |         | 1787.8              |         |
|                     | 1084.5 |          | 1084.5 | 9   | T | 13 | 1700.8   |         | 850.89              | +0.3265 |
|                     | 1199.5 | -0.204   | 1199.5 | 10  | D | 12 | 1599.7   |         | 800.37              | +0.1578 |
|                     | 1296.6 |          | 1296.6 | 11  | P | 11 | 1484.7   | +0.0846 | 742.86              | +0.2801 |
|                     | 1425.6 |          | 1425.6 | 12  | E | 10 | 1387.7   |         | 1387.7              |         |
|                     | 1539.7 |          | 1539.7 | 13  | N | 9  | 1258.6   |         | 629.81              | +0.4655 |
|                     | 1596.7 |          | 1596.7 | 14  | G | 8  | 1144.6   |         | 1144.6              |         |
|                     | 1733.7 |          | 1733.7 | 15  | H | 7  | 1087.5   |         | 1087.5              |         |
|                     | 1846.8 |          | 1846.8 | 16  | I | 6  | 950.49   | -0.086  | 475.75              | -0.418  |
|                     | 1993.9 |          | 1993.9 | 17  | F | 5  | 837.4    |         | 837.4               |         |
| -0.431              | 1054.5 |          | 2107.9 | 18  | N | 4  | 690.34   | +0.3391 | 690.34              |         |
|                     | 2268   |          | 2268   | 19  | C | 3  | 576.29   | -0.113  | 576.29              |         |
|                     | 2381.1 |          | 2381.1 | 20  | I | 2  | 416.26   |         | 416.26              |         |
|                     | 2509.1 |          | 2509.1 | 21  | Q | 1  | 303.18   |         | 303.18              |         |
|                     |        |          |        | 22  | R | 0  | 175.12   |         | 175.12              |         |

**general information**

|                       |           |
|-----------------------|-----------|
| Annotation:           | 12 of 22  |
| AminoAcids Coverage:  | 55 %      |
| Intensity Coverage:   | 41 %      |
| Peak Coverage:        | 23 %      |
| Protein Localisation: | 52 ... 73 |

Scan number 669 Raw file LNCAP\_Silac\_23F10\_set1\_06  
 Method ITMS; CID Pepti... 209.79

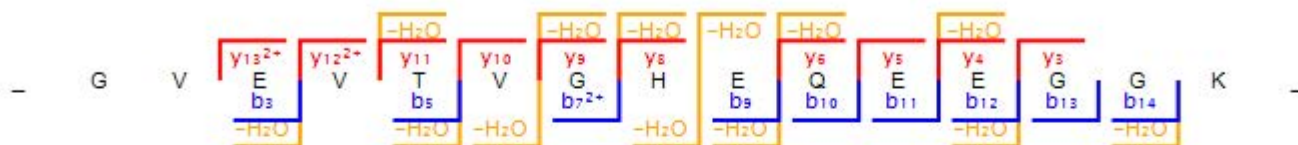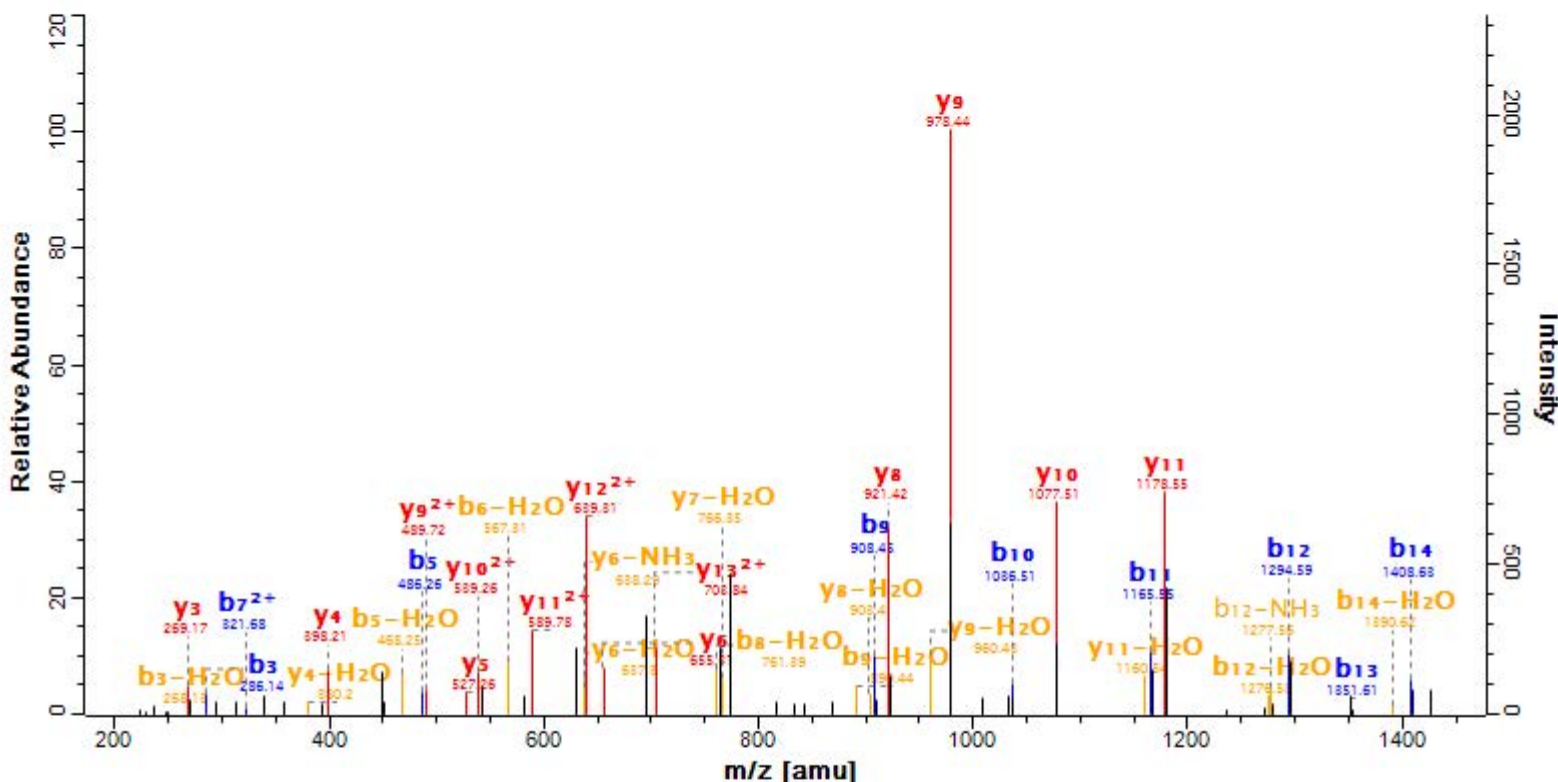

#### precursor information

|                   |                 |
|-------------------|-----------------|
| Mass:             | 1553.73176      |
| m/z:              | 777.87316       |
| Charge:           | 2+              |
| Retentiontime:    | 9.1711034774780 |
| Score:            | 209.7945        |
| Mass Error [ppm]: | -0.25615        |
| PEP:              | 2.2523E-28      |
| Precursor Type:   | MULTI           |

#### general information

|                       |             |
|-----------------------|-------------|
| Annotation:           | 12 of 15    |
| AminoAcids Coverage:  | 80 %        |
| Intensity Coverage:   | 65 %        |
| Peak Coverage:        | 45 %        |
| Protein Localisation: | 189 ... 203 |

| b <sup>2+</sup> ion |        | b ion    |        | seq |   |    | y ion    |         | y <sup>2+</sup> ion |         |
|---------------------|--------|----------|--------|-----|---|----|----------|---------|---------------------|---------|
| Δ dalton            | mass   | Δ dalton | mass   |     |   |    | Δ dalton | mass    | Δ dalton            | mass    |
|                     | 58.029 |          | 58.029 | 1   | G | 14 |          |         |                     |         |
|                     | 157.1  |          | 157.1  | 2   | V | 13 | 1505.7   |         | 1505.7              |         |
|                     | 286.14 | -0.048   | 286.14 | 3   | E | 12 | 1406.7   |         | 703.84              | +0.1792 |
|                     | 385.21 |          | 385.21 | 4   | V | 11 | 1277.6   |         | 639.31              | +0.1495 |
|                     | 486.26 | +0.2428  | 486.26 | 5   | T | 10 | 1178.6   | -0.006  | 589.78              | +0.2212 |
|                     | 585.32 |          | 585.32 | 6   | V | 9  | 1077.5   | -0.075  | 539.26              | +0.0845 |
| +0.404              | 321.68 |          | 642.35 | 7   | G | 8  | 978.44   | -0.034  | 489.72              | +0.0278 |
|                     | 779.4  |          | 779.4  | 8   | H | 7  | 921.42   | -0.021  | 921.42              |         |
|                     | 908.45 | +0.0608  | 908.45 | 9   | E | 6  | 784.36   |         | 784.36              |         |
|                     | 1036.5 | +0.0091  | 1036.5 | 10  | Q | 5  | 655.31   | +0.1646 | 655.31              |         |
|                     | 1165.5 | -0.067   | 1165.5 | 11  | E | 4  | 527.26   | +0.0734 | 527.26              |         |
|                     | 1294.6 | -0.021   | 1294.6 | 12  | E | 3  | 398.21   | +0.1365 | 398.21              |         |
|                     | 1351.6 | -0.037   | 1351.6 | 13  | G | 2  | 269.17   | +0.0859 | 269.17              |         |
|                     | 1408.6 | -0.06    | 1408.6 | 14  | G | 1  | 212.15   |         | 212.15              |         |
|                     |        |          |        | 15  | K | 0  | 155.13   |         | 155.13              |         |



Scan number 6908 Raw file LNCAP\_Silac\_23F10\_set1\_06  
 Method ITMS; CID Pepti... 96.06

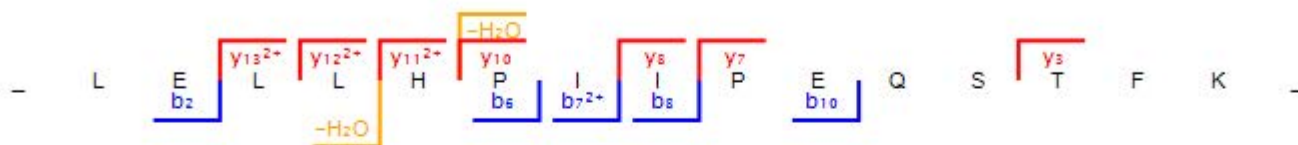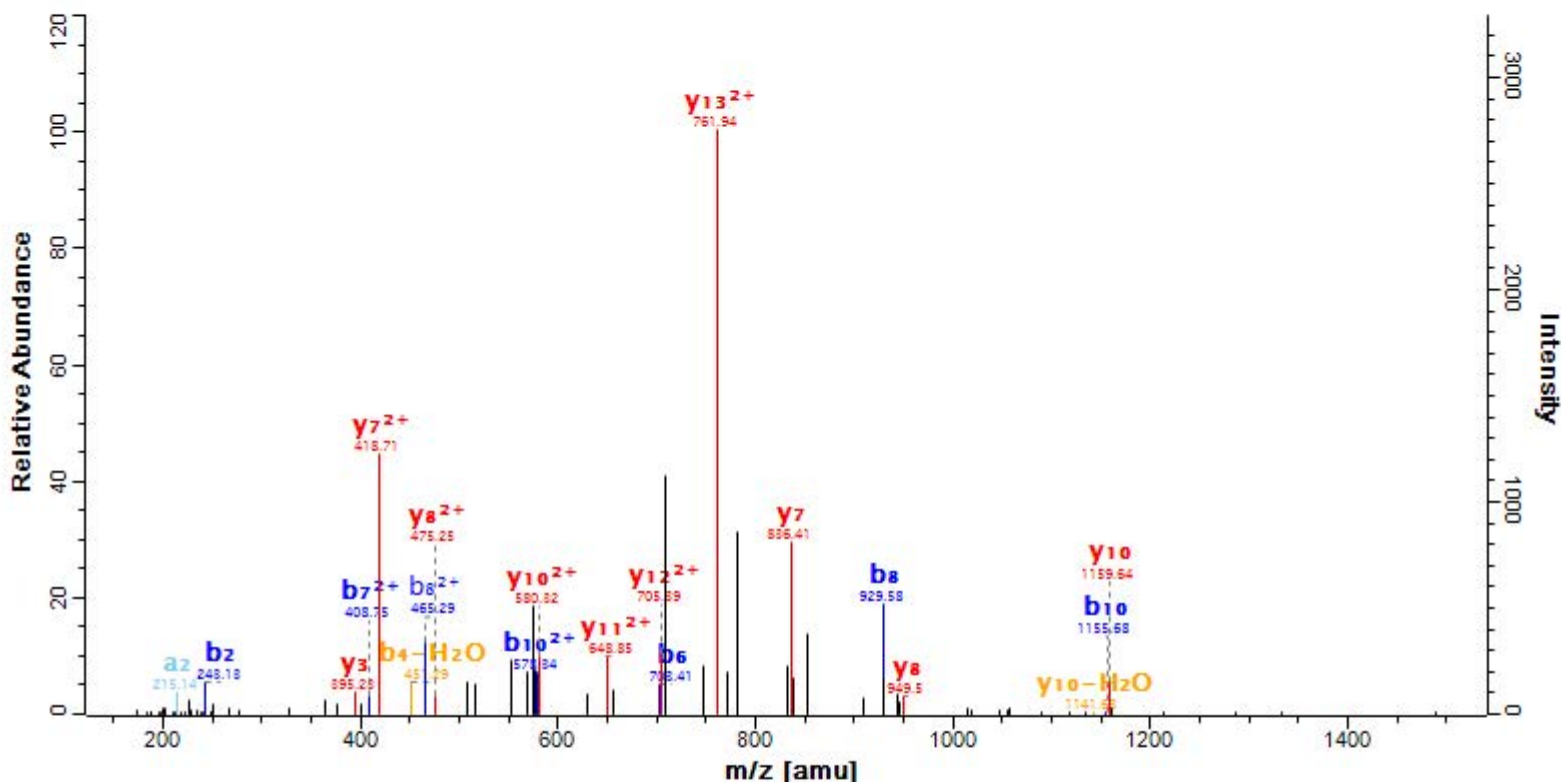

precursor information

|                   |                 |
|-------------------|-----------------|
| Mass:             | 1763.98259      |
| m/z:              | 589.00147       |
| Charge:           | 3+              |
| Retentiontime:    | 45.433322906494 |
| Score:            | 96.0589         |
| Mass Error [ppm]: | 0.23784         |
| PEP:              | 8.5743E-05      |
| Precursor Type:   | MULTI           |

general information

|                       |             |
|-----------------------|-------------|
| Annotation:           | 11 of 15    |
| AminoAcids Coverage:  | 73 %        |
| Intensity Coverage:   | 54 %        |
| Peak Coverage:        | 21 %        |
| Protein Localisation: | 222 ... 236 |

|    | a ion         | b <sup>2+</sup> ion | b ion         |     |   | y ion         | y <sup>2+</sup> ion |                   |
|----|---------------|---------------------|---------------|-----|---|---------------|---------------------|-------------------|
|    | Δ dalton mass | Δ dalton mass       | Δ dalton mass | seq |   | Δ dalton mass | Δ dalton mass       |                   |
|    | 86.1          | 114.1               | 114.1         | 1   | L | 14            |                     |                   |
| +0 | 215.1         | 243.1               | +0.077243.1   | 2   | E | 13            | 1652                | 1652              |
|    | 328.2         | 356.2               | 356.2         | 3   | L | 12            | 1523                | 761.9 +0.25       |
|    | 441.3         | 469.3               | 469.3         | 4   | L | 11            | 1410                | 705.4 +0.26       |
|    | 578.4         | 606.4               | 606.4         | 5   | H | 10            | 1297                | 648.9 +0.26       |
|    | 675.4         | 703.4               | -0.2 703.4    | 6   | P | 9             | 1160                | +0.072580.3 -0.15 |
|    | 788.5         | +0.116408.8         | 816.5         | 7   | I | 8             | 1063                | 1063              |
|    | 901.6         | +0.221465.3         | +0.007929.6   | 8   | I | 7             | 949.5               | +0.101475.3 -0.04 |
|    | 998.6         | 1027                | 1027          | 9   | P | 6             | 836.4               | +0.056418.7 +0.14 |
|    | 1128          | +0.493578.3         | -0.22 1156    | 10  | E | 5             | 739.4               | 739.4             |
|    | 1256          | 1284                | 1284          | 11  | Q | 4             | 610.3               | 610.3             |
|    | 1343          | 1371                | 1371          | 12  | S | 3             | 482.3               | 482.3             |
|    | 1444          | 1472                | 1472          | 13  | T | 2             | 395.2               | -0.27 395.2       |
|    | 1591          | 1619                | 1619          | 14  | F | 1             | 294.2               | 294.2             |
|    |               |                     |               | 15  | K | 0             | 147.1               | 147.1             |

Scan number 702 Raw file LNCAP\_Silac\_23F10\_set1\_06  
 Method ITMS; CID Pepti... 111.86

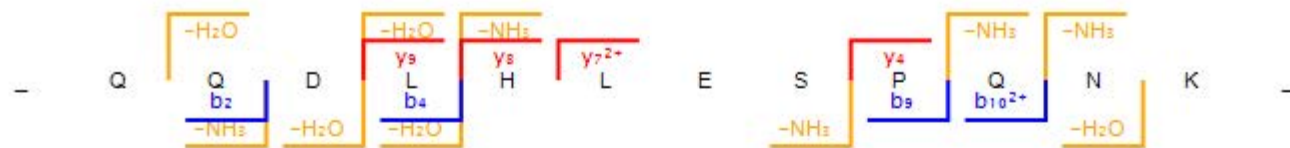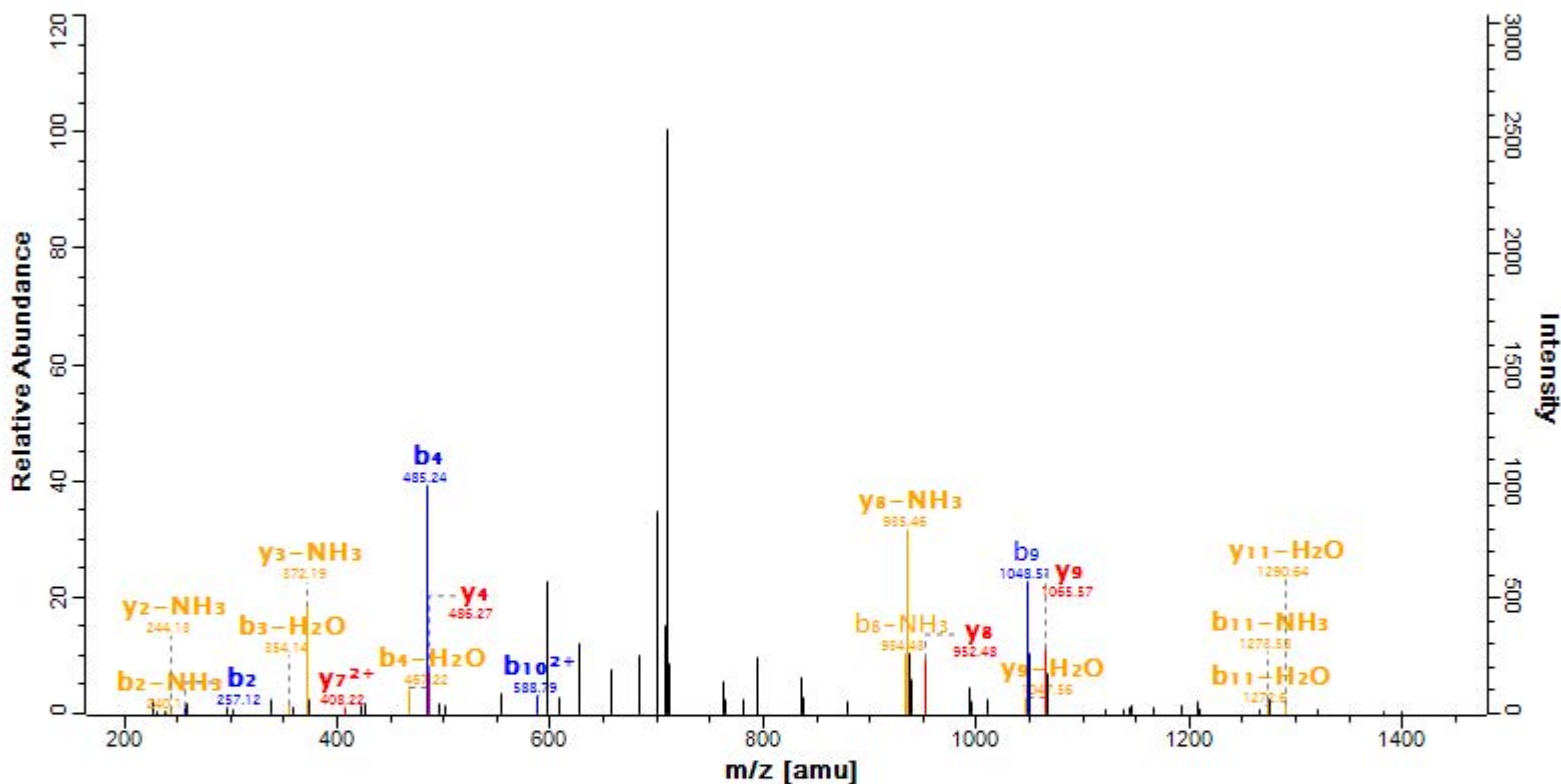

#### precursor information

|                   |                 |
|-------------------|-----------------|
| Mass:             | 1435.70619      |
| m/z:              | 718.86037       |
| Charge:           | 2+              |
| Retentiontime:    | 9.3844833374023 |
| Score:            | 111.8553        |
| Mass Error [ppm]: | 0.43863         |
| PEP:              | 4.5269E-05      |
| Precursor Type:   | MULTI           |

#### general information

|                       |            |
|-----------------------|------------|
| Annotation:           | 9 of 12    |
| AminoAcids Coverage:  | 75 %       |
| Intensity Coverage:   | 34 %       |
| Peak Coverage:        | 22 %       |
| Protein Localisation: | 95 ... 106 |

| b <sup>2+</sup> ion |        | b ion    |        | seq |   |    | y ion    |        | y <sup>2+</sup> ion |         |
|---------------------|--------|----------|--------|-----|---|----|----------|--------|---------------------|---------|
| Δ dalton            | mass   | Δ dalton | mass   |     |   |    | Δ dalton | mass   | Δ dalton            | mass    |
|                     | 129.07 |          | 129.07 | 1   | Q | 11 |          |        |                     |         |
|                     | 257.12 | +0.1225  | 257.12 | 2   | Q | 10 | 1308.7   |        | 1308.7              |         |
|                     | 372.15 |          | 372.15 | 3   | D | 9  | 1180.6   |        | 1180.6              |         |
|                     | 485.24 | +0.0984  | 485.24 | 4   | L | 8  | 1065.6   | -0.144 | 1065.6              |         |
|                     | 622.29 |          | 622.29 | 5   | H | 7  | 952.48   | -0.051 | 952.48              |         |
|                     | 735.38 |          | 735.38 | 6   | L | 6  | 815.43   |        | 408.22              | +0.1515 |
|                     | 864.42 |          | 864.42 | 7   | E | 5  | 702.34   |        | 702.34              |         |
|                     | 951.45 |          | 951.45 | 8   | S | 4  | 573.3    |        | 573.3               |         |
|                     | 1048.5 | -0.097   | 1048.5 | 9   | P | 3  | 486.27   | +0.074 | 486.27              |         |
| -0.174              | 588.79 |          | 1176.6 | 10  | Q | 2  | 389.21   |        | 389.21              |         |
|                     | 1290.6 |          | 1290.6 | 11  | N | 1  | 261.16   |        | 261.16              |         |
|                     |        |          |        | 12  | K | 0  | 147.11   |        | 147.11              |         |

Scan number 7169 Raw file LNCAP\_Silac\_23F10\_set1\_06  
 Method ITMS; CID Pepti... 178.14

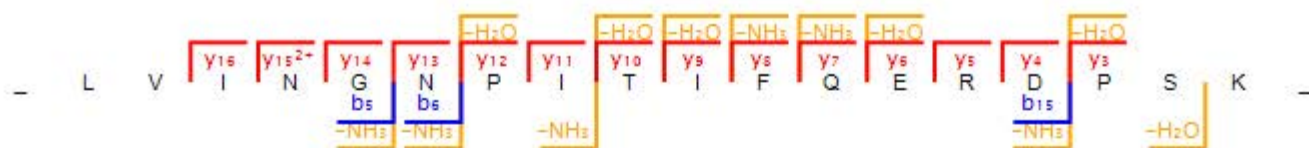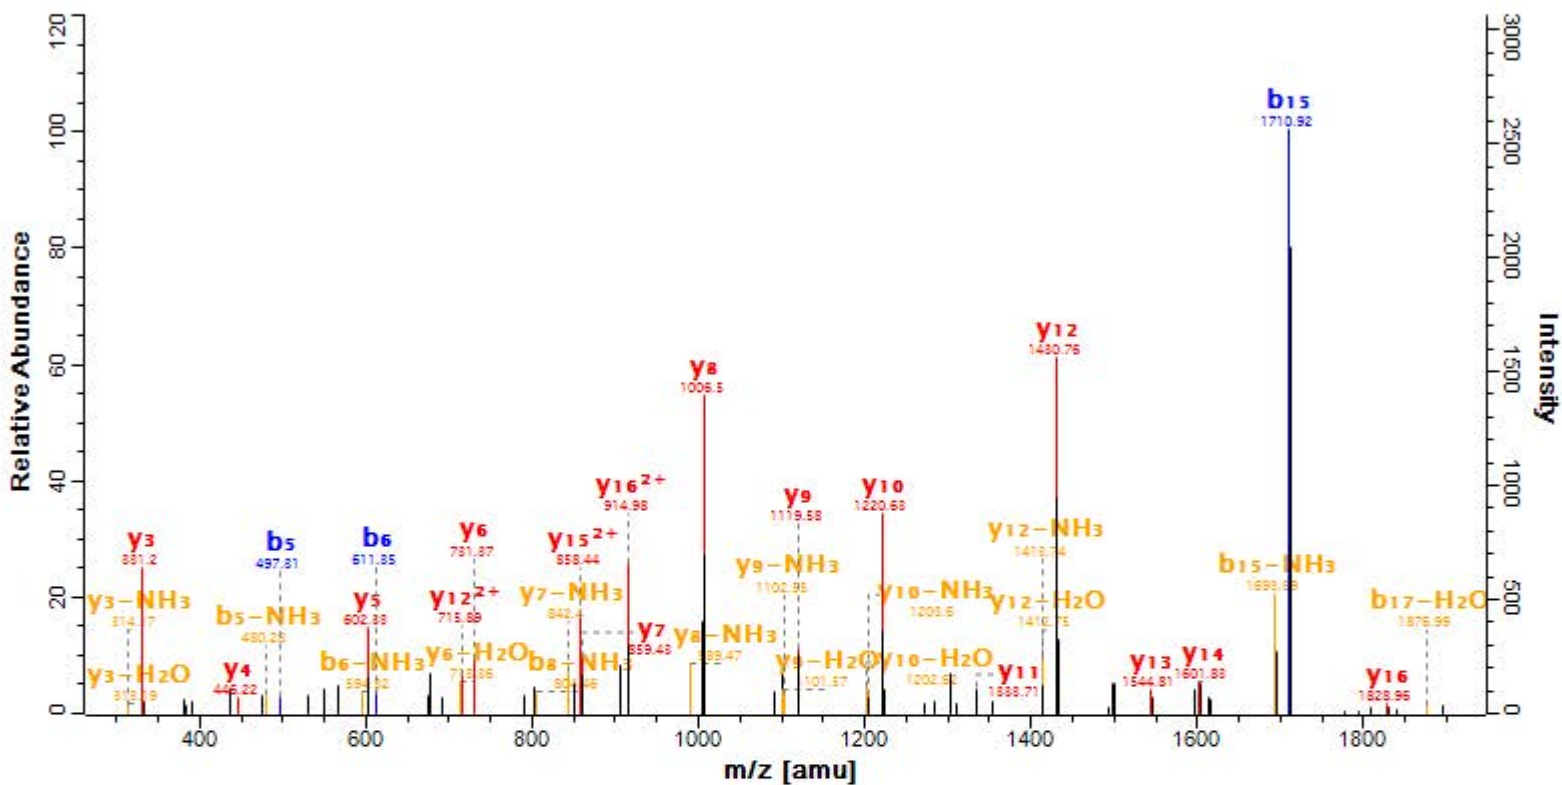

precursor information

|                   |                 |
|-------------------|-----------------|
| Mass:             | 2040.10014      |
| m/z:              | 1021.05735      |
| Charge:           | 2+              |
| Retentiontime:    | 46.990718841552 |
| Score:            | 178.1361        |
| Mass Error [ppm]: | -0.12203        |
| PEP:              | 1.0265E-30      |
| Precursor Type:   | MULTI           |

general information

|                       |           |
|-----------------------|-----------|
| Annotation:           | 15 of 18  |
| AminoAcids Coverage:  | 83 %      |
| Intensity Coverage:   | 52 %      |
| Peak Coverage:        | 37 %      |
| Protein Localisation: | 67 ... 84 |

| b ion     |          |    |     |    | y ion    |           |          | y <sup>2+</sup> ion |  |
|-----------|----------|----|-----|----|----------|-----------|----------|---------------------|--|
| Δ dalton  | mass     |    | seq |    | Δ dalton | mass      | Δ dalton | mass                |  |
|           | 114.0913 | 1  | L   | 17 |          |           |          |                     |  |
|           | 213.1598 | 2  | V   | 16 | 1928.024 |           | 1928.024 |                     |  |
|           | 326.2438 | 3  | I   | 15 | 1828.955 | -0.22484  | 914.9812 | +0.193084           |  |
|           | 440.2867 | 4  | N   | 14 | 1715.871 |           | 858.4392 | +0.294442           |  |
| +0.181109 | 497.3082 | 5  | G   | 13 | 1601.828 | +0.049001 | 1601.828 |                     |  |
| +0.104368 | 611.3511 | 6  | N   | 12 | 1544.807 | +0.008575 | 1544.807 |                     |  |
|           | 708.4039 | 7  | P   | 11 | 1430.764 | +0.007313 | 715.8855 | +0.045306           |  |
|           | 821.488  | 8  | I   | 10 | 1333.711 | -0.00877  | 1333.711 |                     |  |
|           | 922.5356 | 9  | T   | 9  | 1220.627 | -0.027    | 1220.627 |                     |  |
|           | 1035.62  | 10 | I   | 8  | 1119.579 | +0.158738 | 1119.579 |                     |  |
|           | 1182.688 | 11 | F   | 7  | 1006.495 | -0.02282  | 1006.495 |                     |  |
|           | 1310.747 | 12 | Q   | 6  | 859.4268 | +0.073423 | 859.4268 |                     |  |
|           | 1439.789 | 13 | E   | 5  | 731.3682 | +0.066998 | 731.3682 |                     |  |
|           | 1595.89  | 14 | R   | 4  | 602.3257 | -0.05771  | 602.3257 |                     |  |
| +0.027356 | 1710.917 | 15 | D   | 3  | 446.2245 | +0.102487 | 446.2245 |                     |  |
|           | 1807.97  | 16 | P   | 2  | 331.1976 | +0.035558 | 331.1976 |                     |  |
|           | 1895.002 | 17 | S   | 1  | 234.1448 |           | 234.1448 |                     |  |
|           |          | 18 | K   | 0  | 147.1128 |           | 147.1128 |                     |  |

Scan number 7650 Raw file LNCAP\_Silac\_23F10\_set1\_06  
 Method ITMS; CID Pepti... 73.88

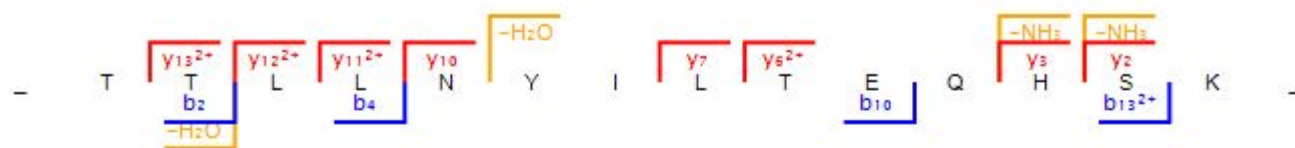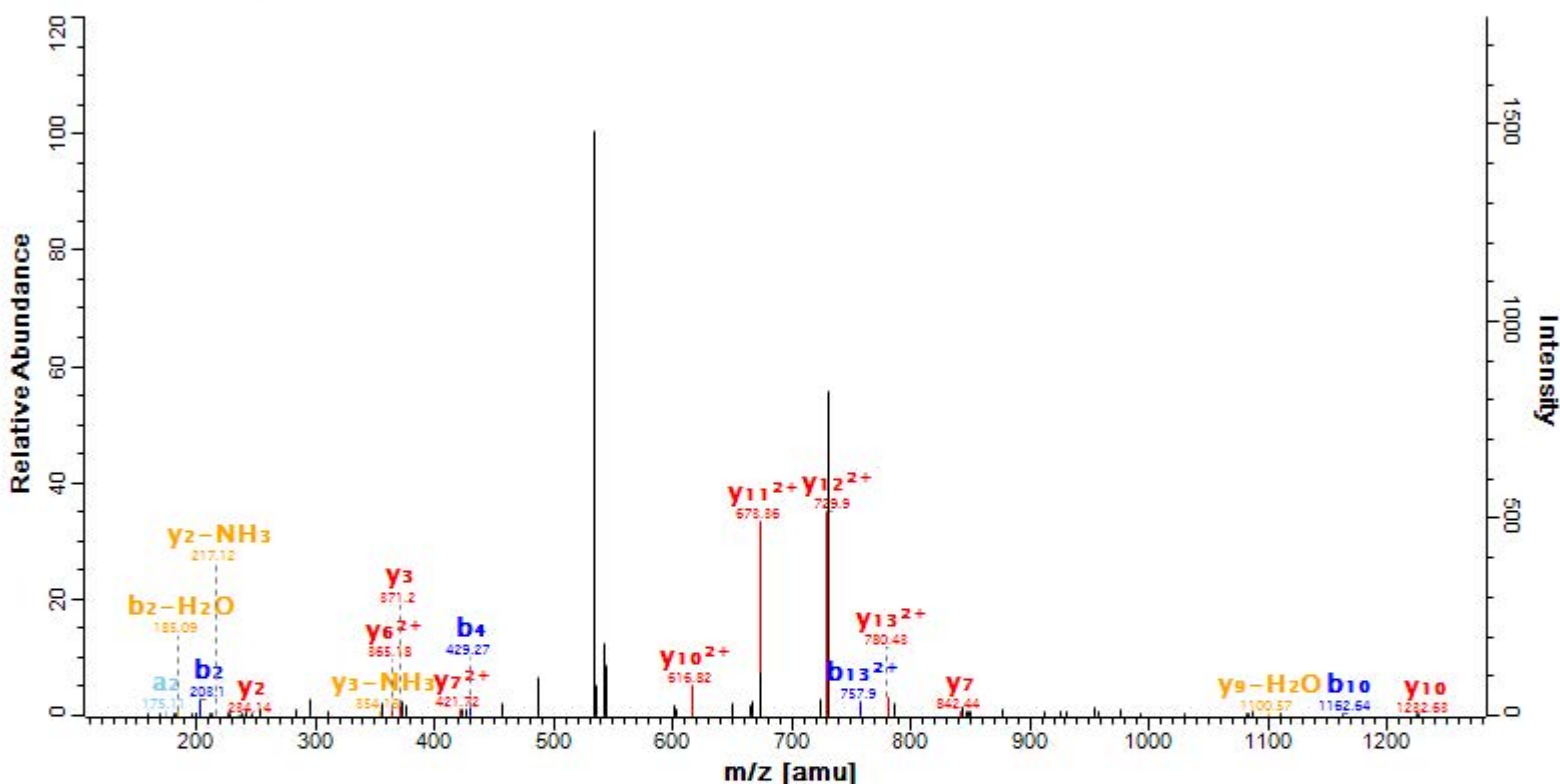

**precursor information**

|                   |                 |
|-------------------|-----------------|
| Mass:             | 1659.88371      |
| m/z:              | 554.30185       |
| Charge:           | 3+              |
| Retentiontime:    | 50.029216766357 |
| Score:            | 73.88116        |
| Mass Error [ppm]: | 0.31461         |
| PEP:              | 0.0015503       |
| Precursor Type:   | MULTI           |

|       | a ion         | b <sup>2+</sup> ion | b ion         |    |     |    | y ion         | y <sup>2+</sup> ion |
|-------|---------------|---------------------|---------------|----|-----|----|---------------|---------------------|
|       | Δ dalton mass | Δ dalton mass       | Δ dalton mass |    | seq |    | Δ dalton mass | Δ dalton mass       |
|       | 74.06         | 102.1               | 102.1         | 1  | T   | 13 |               |                     |
| -0.05 | 175.1         | 203.1               | +0.028        | 2  | T   | 12 | 1560          | 780.4 +0.409        |
|       | 288.2         | 316.2               |               | 3  | L   | 11 | 1459          | 729.9 -0.01         |
|       | 401.3         | 429.3               | -0.01         | 4  | L   | 10 | 1346          | 673.4 +0.28         |
|       | 515.3         | 543.3               |               | 5  | N   | 9  | 1233          | -0.4 616.8 +0.29    |
|       | 678.4         | 706.4               |               | 6  | Y   | 8  | 1119          | 1119                |
|       | 791.5         | 819.5               |               | 7  | I   | 7  | 955.5         | 955.5               |
|       | 904.6         | 932.5               |               | 8  | L   | 6  | 842.4 -0.18   | 421.7 +0.18         |
|       | 1006          | 1034                |               | 9  | T   | 5  | 729.4         | 365.2 -0.14         |
|       | 1135          | 1163                | -0.45         | 10 | E   | 4  | 628.3         | 628.3               |
|       | 1263          | 1291                |               | 11 | Q   | 3  | 499.3         | 499.3               |
|       | 1400          | 1428                |               | 12 | H   | 2  | 371.2 +0.086  | 371.2               |
|       | 1487          | -0.21 757.9         |               | 13 | S   | 1  | 234.1 +0.122  | 234.1               |
|       |               |                     |               | 14 | K   | 0  | 147.1         | 147.1               |

**general information**

|                       |           |
|-----------------------|-----------|
| Annotation:           | 10 of 14  |
| AminoAcids Coverage:  | 71 %      |
| Intensity Coverage:   | 26 %      |
| Peak Coverage:        | 19 %      |
| Protein Localisation: | 56 ... 69 |

Scan number 791 Raw file LNCAP\_Silac\_23F10\_set1\_06  
 Method ITMS: CID Pepti... 68.68

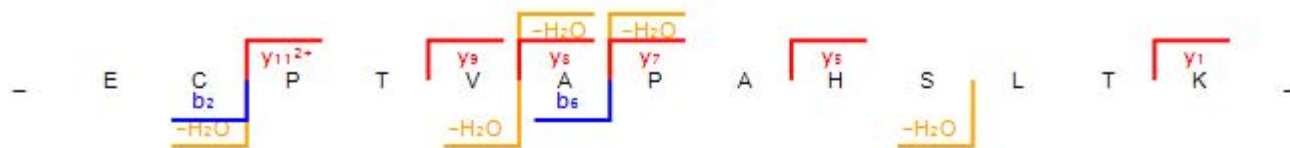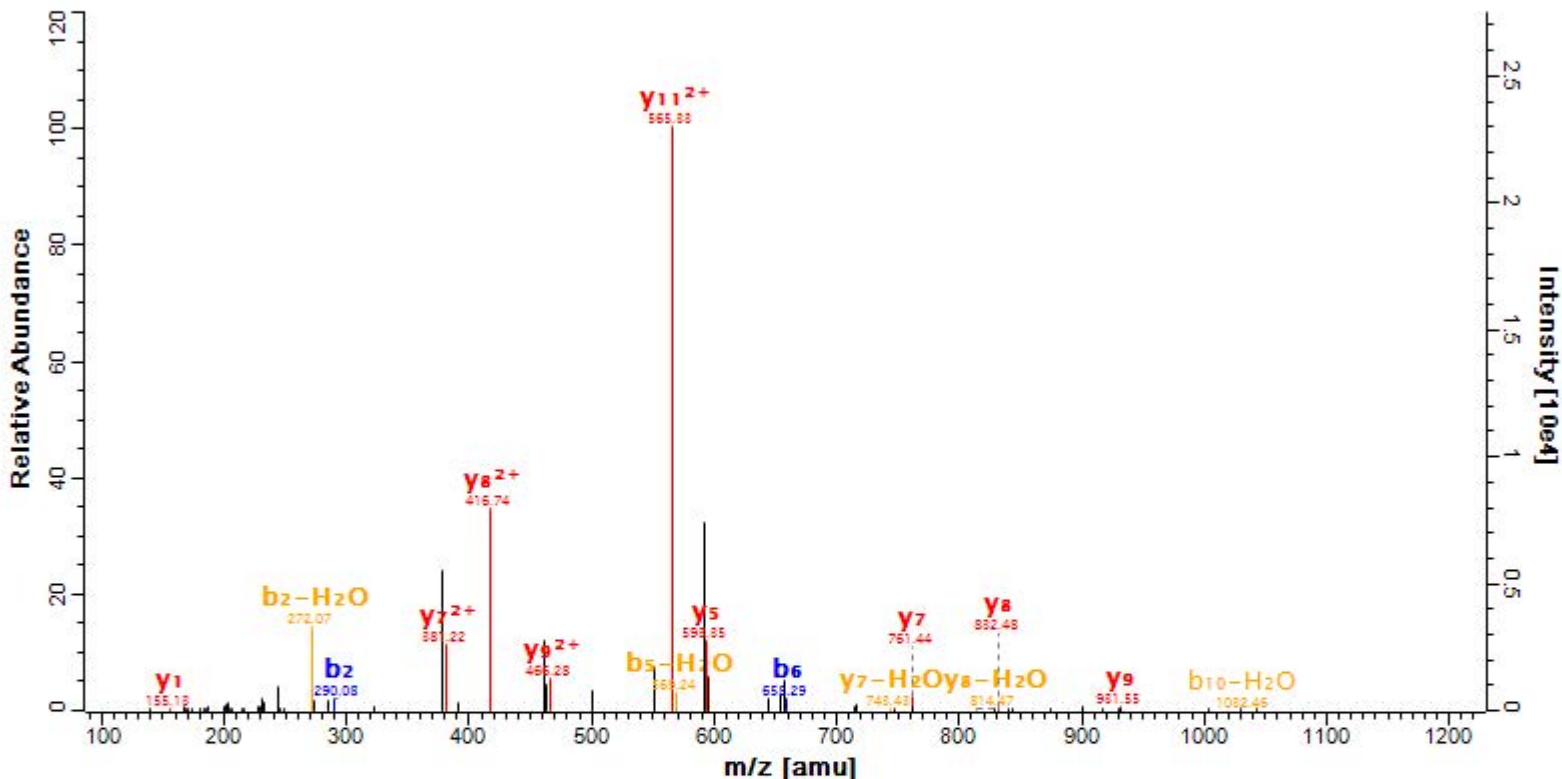

**precursor information**

|                   |                 |
|-------------------|-----------------|
| Mass:             | 1409.69652      |
| m/z:              | 470.90612       |
| Charge:           | 3+              |
| Retentiontime:    | 9.9633903503418 |
| Score:            | 68.67566        |
| Mass Error [ppm]: | -0.54812        |
| PEP:              | 0.0031665       |
| Precursor Type:   | MULTI           |

**general information**

|                       |             |
|-----------------------|-------------|
| Annotation:           | 9 of 13     |
| AminoAcids Coverage:  | 69 %        |
| Intensity Coverage:   | 58 %        |
| Peak Coverage:        | 16 %        |
| Protein Localisation: | 576 ... 588 |

| b ion      |          |    |     |    | y ion    |           | y <sup>2+</sup> ion |           |
|------------|----------|----|-----|----|----------|-----------|---------------------|-----------|
| Δ dalton   | mass     |    | seq |    | Δ dalton | mass      | Δ dalton            | mass      |
|            | 130.0499 | 1  | E   | 12 |          |           |                     |           |
| +0.1111072 | 290.0805 | 2  | C   | 11 | 1289.676 |           | 1289.676            |           |
|            | 387.1333 | 3  | P   | 10 | 1129.646 |           | 565.3264            | +0.135326 |
|            | 488.181  | 4  | T   | 9  | 1032.593 |           | 1032.593            |           |
|            | 587.2494 | 5  | V   | 8  | 931.5451 | -0.25017  | 466.2762            | +0.135376 |
| +0.060497  | 658.2865 | 6  | A   | 7  | 832.4767 | +0.108467 | 416.742             | +0.171689 |
|            | 755.3393 | 7  | P   | 6  | 761.4396 | -0.03545  | 381.2234            | +0.046935 |
|            | 826.3764 | 8  | A   | 5  | 664.3868 |           | 664.3868            |           |
|            | 963.4353 | 9  | H   | 4  | 593.3497 | +0.134994 | 593.3497            |           |
|            | 1050.467 | 10 | S   | 3  | 456.2908 |           | 456.2908            |           |
|            | 1163.551 | 11 | L   | 2  | 369.2587 |           | 369.2587            |           |
|            | 1264.599 | 12 | T   | 1  | 256.1747 |           | 256.1747            |           |
|            |          | 13 | K   | 0  | 155.127  | -0.05741  | 155.127             |           |

Scan number 8502 Raw file LNCAP\_Silac\_23F10\_set1\_06  
 Method ITMS; CID Pepti... 113.54

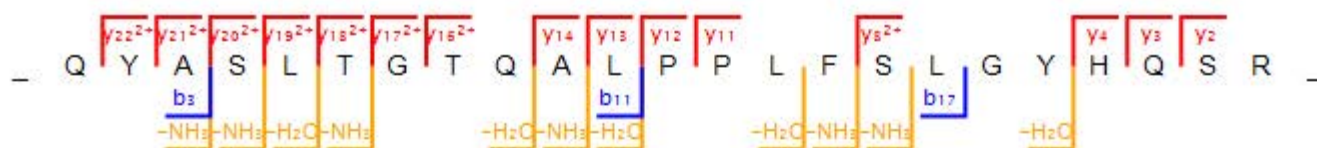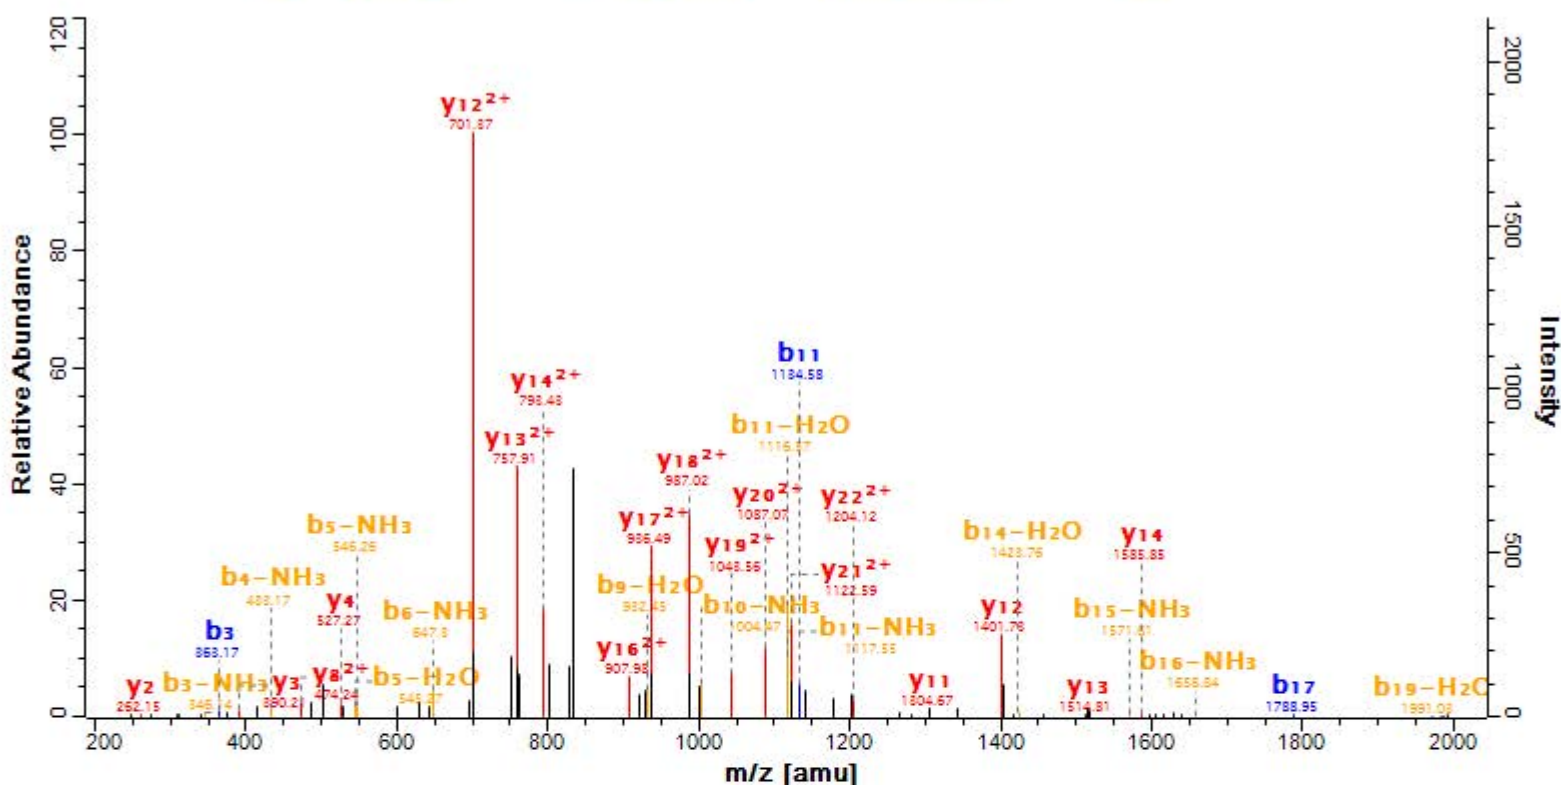

precursor information

|                   |                 |
|-------------------|-----------------|
| Mass:             | 2534.29181      |
| m/z:              | 845.77121       |
| Charge:           | 3+              |
| Retentiontime:    | 56.445568084716 |
| Score:            | 113.5422        |
| Mass Error [ppm]: | 0.014141        |
| PEP:              | 2.3685E-10      |
| Precursor Type:   | MULTI           |

general information

|                       |             |
|-----------------------|-------------|
| Annotation:           | 20 of 23    |
| AminoAcids Coverage:  | 87 %        |
| Intensity Coverage:   | 63 %        |
| Peak Coverage:        | 37 %        |
| Protein Localisation: | 429 ... 451 |

| b ion     |          |    |     | y ion    |          | y <sup>2+</sup> ion |           |
|-----------|----------|----|-----|----------|----------|---------------------|-----------|
| Δ dalton  | mass     |    | seq | Δ dalton | mass     | Δ dalton            | mass      |
|           | 129.0659 | 1  | Q   | 22       |          |                     |           |
|           | 292.1292 | 2  | Y   | 21       | 2407.24  | 1204.124            | +0.276273 |
| +0.195154 | 363.1663 | 3  | A   | 20       | 2244.177 | 1122.592            | +0.190139 |
|           | 450.1983 | 4  | S   | 19       | 2173.14  | 1087.074            | +0.207597 |
|           | 563.2824 | 5  | L   | 18       | 2086.108 | 1043.558            | +0.302469 |
|           | 664.3301 | 6  | T   | 17       | 1973.024 | 987.0156            | +0.251239 |
|           | 721.3515 | 7  | G   | 16       | 1871.976 | 936.4918            | +0.261651 |
|           | 822.3992 | 8  | T   | 15       | 1814.955 | 907.981             | +0.469954 |
|           | 950.4578 | 9  | Q   | 14       | 1713.907 | 1713.907            |           |
|           | 1021.495 | 10 | A   | 13       | 1585.849 | +0.130588 793.4279  | +0.199473 |
| -0.03111  | 1134.579 | 11 | L   | 12       | 1514.811 | -0.18911 757.9094   | +0.311536 |
|           | 1231.632 | 12 | P   | 11       | 1401.727 | +0.035579 701.3673  | +0.268851 |
|           | 1328.684 | 13 | P   | 10       | 1304.675 | +0.02743 1304.675   |           |
|           | 1441.769 | 14 | L   | 9        | 1207.622 | 1207.622            |           |
|           | 1588.837 | 15 | F   | 8        | 1094.538 | 1094.538            |           |
|           | 1675.869 | 16 | S   | 7        | 947.4694 | 474.2383            | +0.103237 |
| -0.39435  | 1788.953 | 17 | L   | 6        | 860.4373 | 860.4373            |           |
|           | 1845.975 | 18 | G   | 5        | 747.3533 | 747.3533            |           |
|           | 2009.038 | 19 | Y   | 4        | 690.3318 | 690.3318            |           |
|           | 2146.097 | 20 | H   | 3        | 527.2685 | -0.00803 527.2685   |           |
|           | 2274.155 | 21 | Q   | 2        | 390.2096 | +0.05152 390.2096   |           |
|           | 2361.187 | 22 | S   | 1        | 262.151  | +0.020528 262.151   |           |
|           |          | 23 | R   | 0        | 175.119  | 175.119             |           |

Scan number 8577 Raw file LNCAP\_Silac\_23F10\_set1\_06  
 Method ITMS; CID Pepti... 125.97

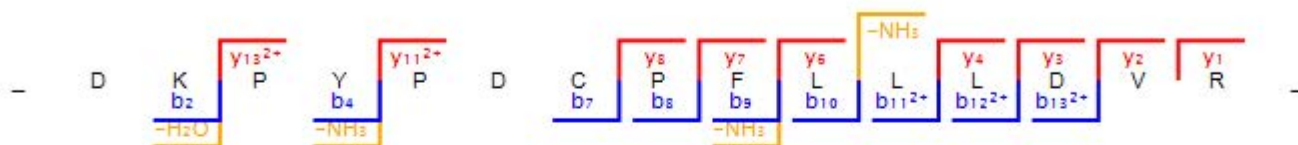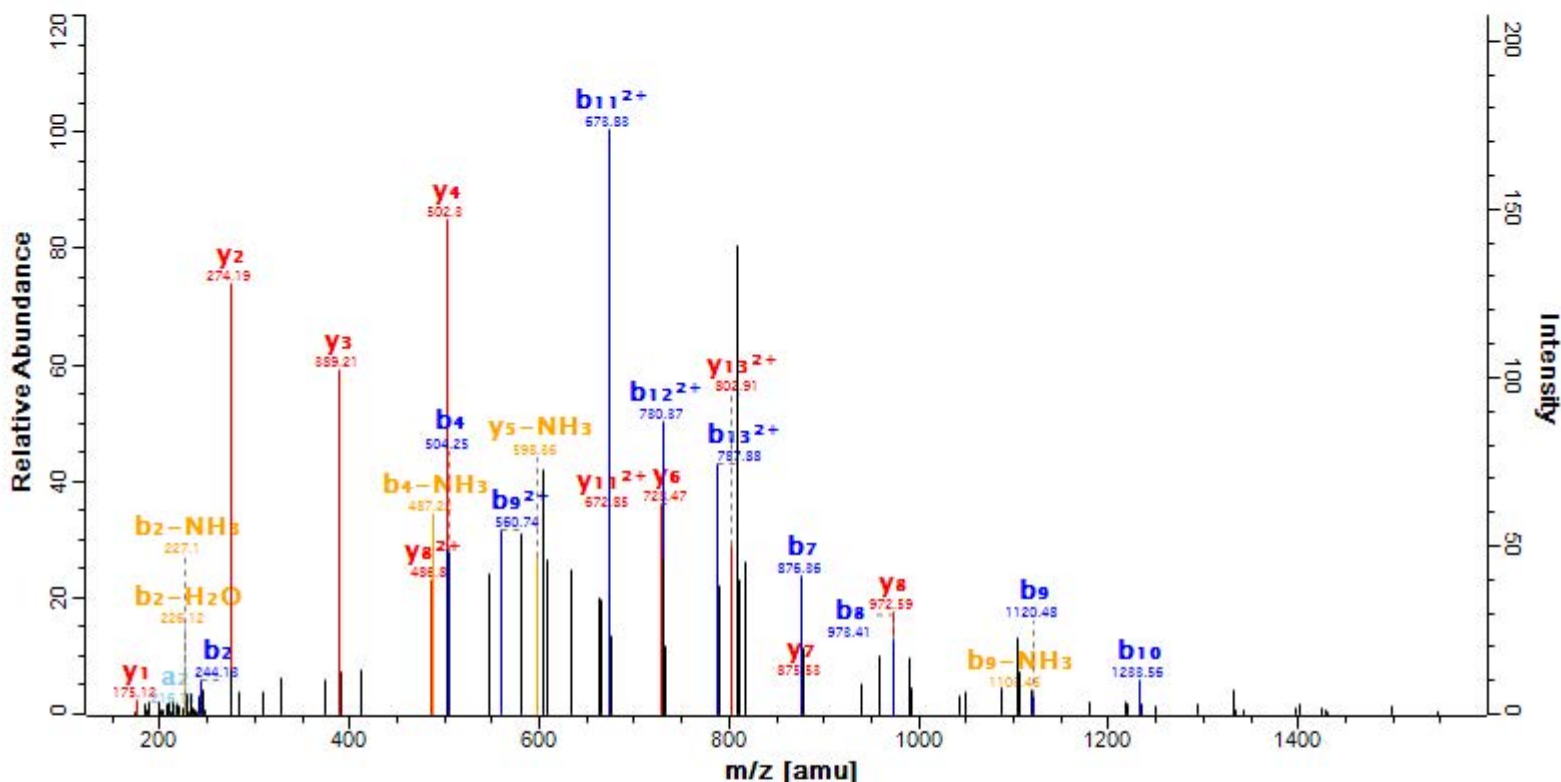

precursor information

|                   |                 |
|-------------------|-----------------|
| Mass:             | 1846.93037      |
| m/z:              | 616.65073       |
| Charge:           | 3+              |
| Retentiontime:    | 57.130912780761 |
| Score:            | 125.9748        |
| Mass Error [ppm]: | 0.87495         |
| PEP:              | 1.6587E-09      |
| Precursor Type:   | MULTI           |

general information

|                       |             |
|-----------------------|-------------|
| Annotation:           | 13 of 15    |
| AminoAcids Coverage:  | 87 %        |
| Intensity Coverage:   | 54 %        |
| Peak Coverage:        | 24 %        |
| Protein Localisation: | 165 ... 179 |

| a ion         |               | b <sup>2+</sup> ion |               | b ion  |               | y ion         |               | y <sup>2+</sup> ion |               |        |    |
|---------------|---------------|---------------------|---------------|--------|---------------|---------------|---------------|---------------------|---------------|--------|----|
| Δ dalton mass | Δ dalton mass | Δ dalton mass       | Δ dalton mass | seq    | Δ dalton mass | Δ dalton mass | Δ dalton mass | Δ dalton mass       | Δ dalton mass |        |    |
| 88.04         |               | 116                 |               | 116    | 1             | D             | 14            |                     |               |        |    |
| +0.114        | 16.1          | 244.1               |               | +0.007 | 244.1         | 2             | K             | 13                  | 1733          | 1733   |    |
| 313.2         |               | 341.2               |               | 341.2  | 3             | P             | 12            | 1605                | 802.9         | +0.311 |    |
| 476.3         |               | 504.2               | +0.187        | 504.2  | 4             | Y             | 11            | 1508                | 1508          |        |    |
| 573.3         |               | 601.3               |               | 601.3  | 5             | P             | 10            | 1345                | 672.9         | +0.387 |    |
| 688.3         |               | 716.3               |               | 716.3  | 6             | D             | 9             | 1248                | 1248          |        |    |
| 848.4         |               | 876.4               | +0.047        | 876.4  | 7             | C             | 8             | 1133                | 1133          |        |    |
| 945.4         |               | 973.4               | +0.404        | 973.4  | 8             | P             | 7             | 972.6               | -0.19         | 486.8  | +0 |
| 1092          | -0.11         | 560.7               | +0.208        | 1120   | 9             | F             | 6             | 875.5               | +0.09         | 5875.5 |    |
| 1206          |               | 1234                | -0.17         | 1234   | 10            | L             | 5             | 728.5               | +0.106        | 728.5  |    |
| 1319          | +0.242        | 673.8               |               | 1347   | 11            | L             | 4             | 615.4               |               | 615.4  |    |
| 1432          | +0.089        | 730.4               |               | 1460   | 12            | L             | 3             | 502.3               | +0.014        | 502.3  |    |
| 1547          | +0.046        | 787.9               |               | 1575   | 13            | D             | 2             | 389.2               | +0.01         | 389.2  |    |
| 1646          |               | 1674                |               | 1674   | 14            | V             | 1             | 274.2               | -0.01         | 274.2  |    |
|               |               |                     |               |        | 15            | R             | 0             | 175.1               | -0.09         | 175.1  |    |

Scan number 8903 Raw file LNCAP\_Silac\_23F10\_set1\_06  
 Method ITMS; CID Pepti... 56.12

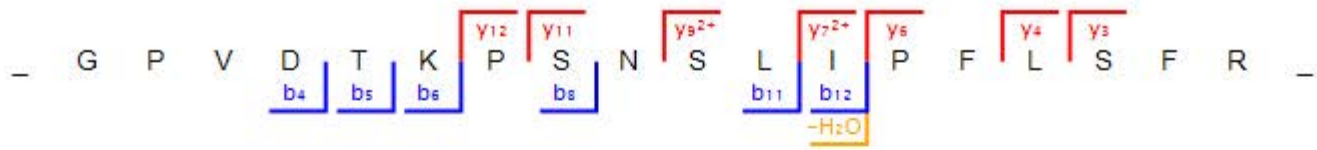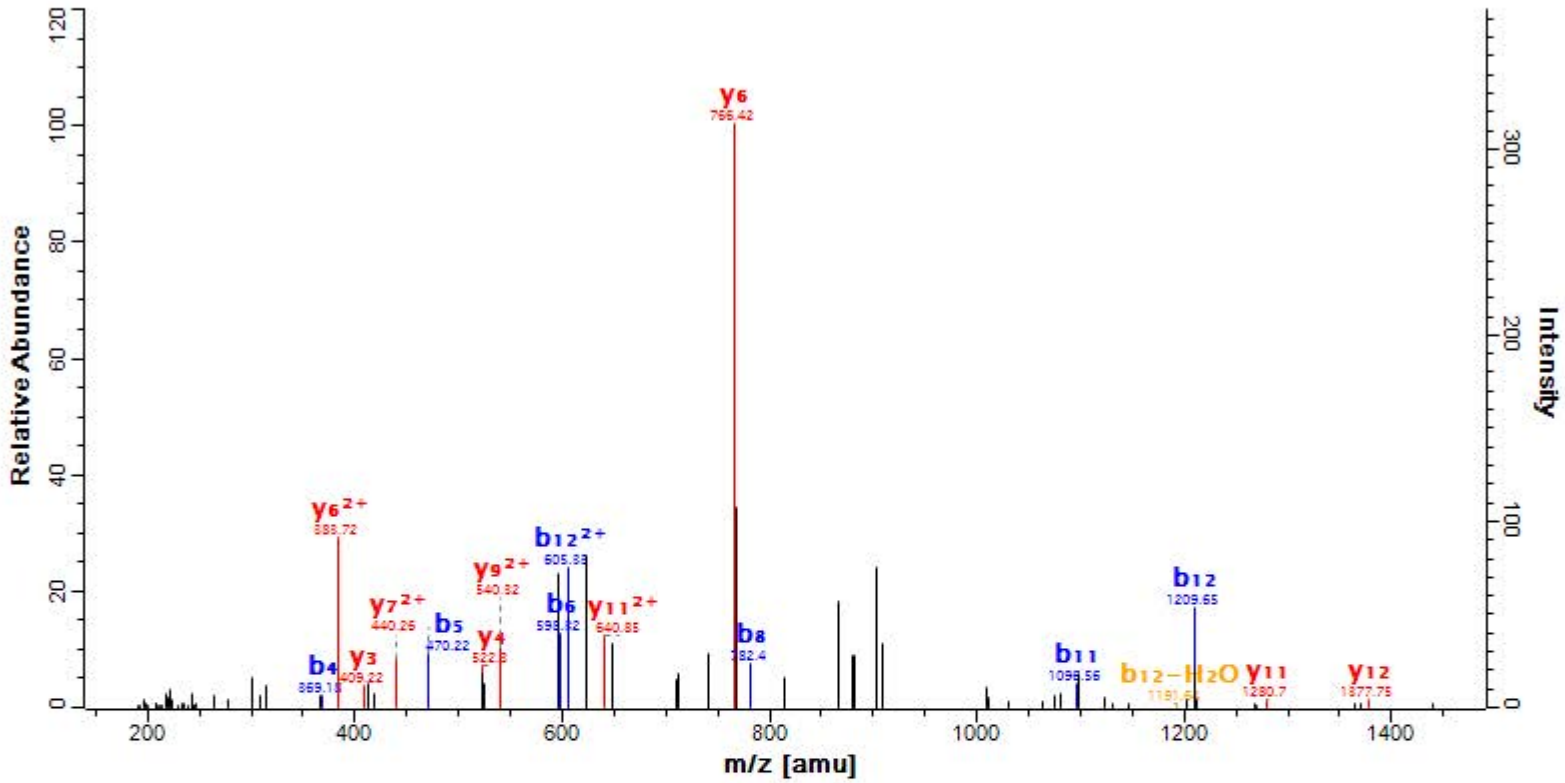

precursor information

|                   |                 |
|-------------------|-----------------|
| Mass:             | 1974.05839      |
| m/z:              | 659.02674       |
| Charge:           | 3+              |
| Retentiontime:    | 60.100646972656 |
| Score:            | 56.12079        |
| Mass Error [ppm]: | 0.47058         |
| PEP:              | 0.0020769       |
| Precursor Type:   | MULTI           |

general information

|                       |             |
|-----------------------|-------------|
| Annotation:           | 11 of 18    |
| AminoAcids Coverage:  | 61 %        |
| Intensity Coverage:   | 44 %        |
| Peak Coverage:        | 20 %        |
| Protein Localisation: | 802 ... 819 |

| b <sup>2+</sup> ion |        | b ion    |        | seq |   |    | y ion    |         | y <sup>2+</sup> ion |         |
|---------------------|--------|----------|--------|-----|---|----|----------|---------|---------------------|---------|
| Δ dalton            | mass   | Δ dalton | mass   |     |   |    | Δ dalton | mass    | Δ dalton            | mass    |
|                     | 58.029 |          | 58.029 | 1   | G | 17 |          |         |                     |         |
|                     | 155.08 |          | 155.08 | 2   | P | 16 | 1918     |         | 1918                |         |
|                     | 254.15 |          | 254.15 | 3   | V | 15 | 1821     |         | 1821                |         |
|                     | 369.18 | +0.1723  | 369.18 | 4   | D | 14 | 1721.9   |         | 1721.9              |         |
|                     | 470.22 | +0.0905  | 470.22 | 5   | T | 13 | 1606.9   |         | 1606.9              |         |
|                     | 598.32 | +0.0898  | 598.32 | 6   | K | 12 | 1505.8   |         | 1505.8              |         |
|                     | 695.37 |          | 695.37 | 7   | P | 11 | 1377.8   | -0.102  | 1377.8              |         |
|                     | 782.4  | +0.0358  | 782.4  | 8   | S | 10 | 1280.7   | -0.2    | 640.85              | -0.411  |
|                     | 896.45 |          | 896.45 | 9   | N | 9  | 1193.7   |         | 1193.7              |         |
|                     | 983.48 |          | 983.48 | 10  | S | 8  | 1079.6   |         | 540.32              | -0.386  |
|                     | 1096.6 | -0.002   | 1096.6 | 11  | L | 7  | 992.59   |         | 992.59              |         |
| +0.1034             | 605.33 | -0.122   | 1209.6 | 12  | I | 6  | 879.51   |         | 440.26              | +0.4686 |
|                     | 1306.7 |          | 1306.7 | 13  | P | 5  | 766.42   | +0.0073 | 383.72              | +0.1543 |
|                     | 1453.8 |          | 1453.8 | 14  | F | 4  | 669.37   |         | 669.37              |         |
|                     | 1566.9 |          | 1566.9 | 15  | L | 3  | 522.3    | -0.058  | 522.3               |         |
|                     | 1653.9 |          | 1653.9 | 16  | S | 2  | 409.22   | +0.052  | 409.22              |         |
|                     | 1801   |          | 1801   | 17  | F | 1  | 322.19   |         | 322.19              |         |
|                     |        |          |        | 18  | R | 0  | 175.12   |         | 175.12              |         |



Scan number 9002 Raw file LNCAP\_Silac\_23F10\_set1\_06  
 Method ITMS; CID Pepti... 128.31

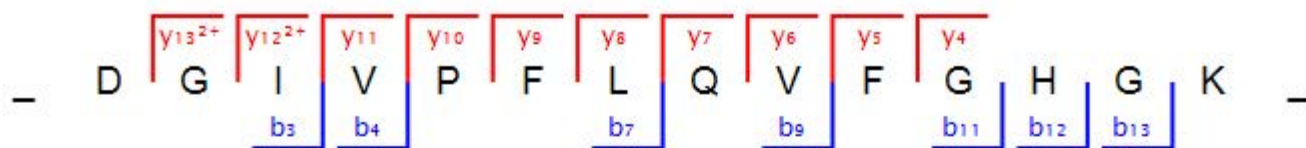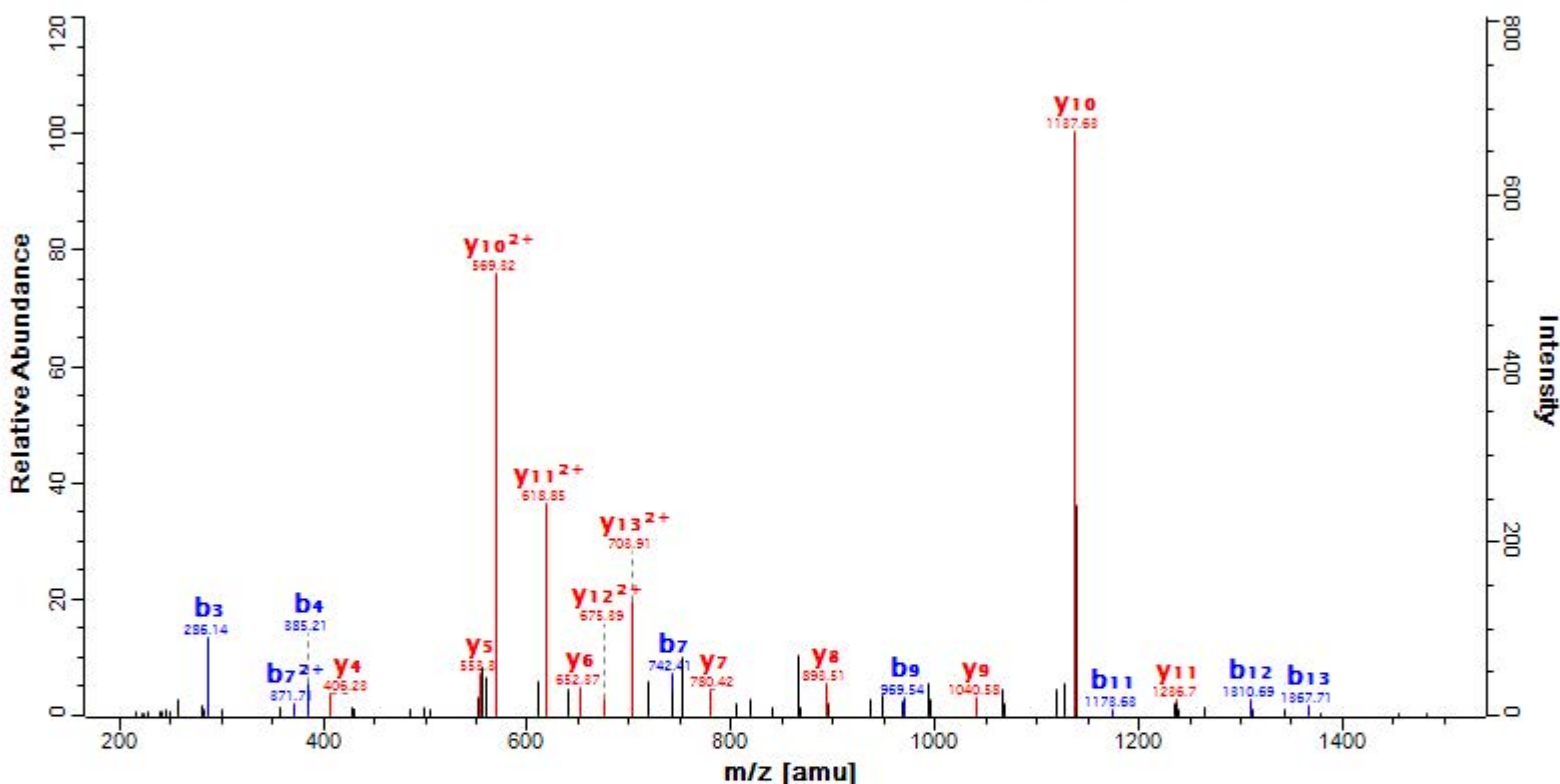

precursor information

|                   |                 |
|-------------------|-----------------|
| Mass:             | 1512.8091       |
| m/z:              | 757.41183       |
| Charge:           | 2+              |
| Retentiontime:    | 61.033432006835 |
| Score:            | 128.3128        |
| Mass Error [ppm]: | 0.13558         |
| PEP:              | 1.0563E-08      |
| Precursor Type:   | MULTI           |

| b <sup>2+</sup> ion |        | b ion    |        | seq |   |    | y ion    |         | y <sup>2+</sup> ion |         |
|---------------------|--------|----------|--------|-----|---|----|----------|---------|---------------------|---------|
| Δ dalton            | mass   | Δ dalton | mass   |     |   |    | Δ dalton | mass    | Δ dalton            | mass    |
|                     | 116.03 |          | 116.03 | 1   | D | 13 |          |         |                     |         |
|                     | 173.06 |          | 173.06 | 2   | G | 12 | 1406.8   |         | 703.91              | +0.1869 |
|                     | 286.14 | -0.019   | 286.14 | 3   | I | 11 | 1349.8   |         | 675.39              | +0.2466 |
|                     | 385.21 | +0.1465  | 385.21 | 4   | V | 10 | 1236.7   | -0.148  | 618.85              | +0.1902 |
|                     | 482.26 |          | 482.26 | 5   | P | 9  | 1137.6   | +0.0783 | 569.32              | +0.1752 |
|                     | 629.33 |          | 629.33 | 6   | F | 8  | 1040.6   | +0.1921 | 1040.6              |         |
| -0.415              | 371.71 | -0.001   | 742.41 | 7   | L | 7  | 893.51   | +0.1843 | 893.51              |         |
|                     | 870.47 |          | 870.47 | 8   | Q | 6  | 780.42   | -0.334  | 780.42              |         |
|                     | 969.54 | -0.103   | 969.54 | 9   | V | 5  | 652.37   | -0.033  | 652.37              |         |
|                     | 1116.6 |          | 1116.6 | 10  | F | 4  | 553.3    | +0.1588 | 553.3               |         |
|                     | 1173.6 | -0.075   | 1173.6 | 11  | G | 3  | 406.23   | +0.1445 | 406.23              |         |
|                     | 1310.7 | -0.033   | 1310.7 | 12  | H | 2  | 349.21   |         | 349.21              |         |
|                     | 1367.7 | -0.021   | 1367.7 | 13  | G | 1  | 212.15   |         | 212.15              |         |
|                     |        |          |        | 14  | K | 0  | 155.13   |         | 155.13              |         |

general information

|                       |             |
|-----------------------|-------------|
| Annotation:           | 12 of 14    |
| AminoAcids Coverage:  | 86 %        |
| Intensity Coverage:   | 61 %        |
| Peak Coverage:        | 24 %        |
| Protein Localisation: | 536 ... 549 |

Scan number 9097 Raw file LNCAP\_Silac\_23F10\_set1\_06  
 Method ITMS; CID Pepti... 153.36

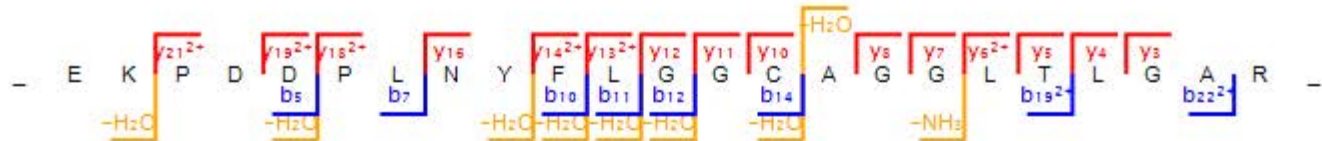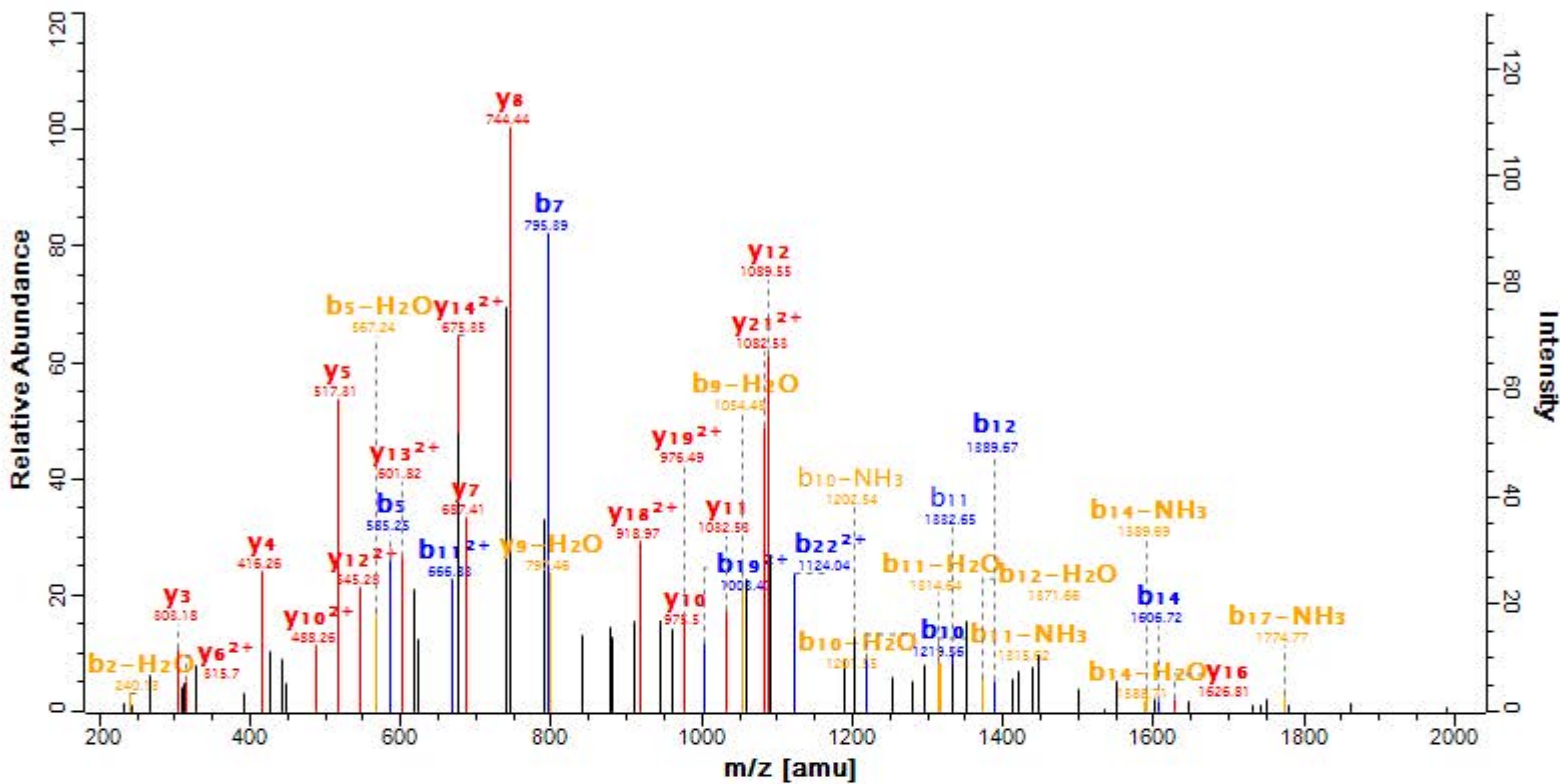

precursor information

|                   |                 |
|-------------------|-----------------|
| Mass:             | 2420.17969      |
| m/z:              | 807.73384       |
| Charge:           | 3+              |
| Retentiontime:    | 61.977073669433 |
| Score:            | 153.3647        |
| Mass Error [ppm]: | 0.10006         |
| PEP:              | 7.3633E-29      |
| Precursor Type:   | MULTI           |

general information

|                       |            |
|-----------------------|------------|
| Annotation:           | 20 of 23   |
| AminoAcids Coverage:  | 87 %       |
| Intensity Coverage:   | 59 %       |
| Peak Coverage:        | 43 %       |
| Protein Localisation: | 82 ... 104 |

| b <sup>2+</sup> ion |        | b ion    |        | seq |   | y ion    |        | y <sup>2+</sup> ion |                |
|---------------------|--------|----------|--------|-----|---|----------|--------|---------------------|----------------|
| Δ dalton            | mass   | Δ dalton | mass   |     |   | Δ dalton | mass   | Δ dalton            | mass           |
|                     | 130.05 |          | 130.05 | 1   | E | 22       |        |                     |                |
|                     | 258.14 |          | 258.14 | 2   | K | 21       | 2292.1 |                     | 2292.1         |
|                     | 355.2  |          | 355.2  | 3   | P | 20       | 2164   |                     | 1082.5 +0.1573 |
|                     | 470.22 |          | 470.22 | 4   | D | 19       | 2067   |                     | 2067           |
|                     | 585.25 | +0.2392  | 585.25 | 5   | D | 18       | 1952   |                     | 976.49 +0.2323 |
|                     | 682.3  |          | 682.3  | 6   | P | 17       | 1836.9 |                     | 918.97 +0.3352 |
|                     | 795.39 | +0.1336  | 795.39 | 7   | L | 16       | 1739.9 |                     | 1739.9         |
|                     | 909.43 |          | 909.43 | 8   | N | 15       | 1626.8 | +0.1112             | 1626.8         |
|                     | 1072.5 |          | 1072.5 | 9   | Y | 14       | 1512.8 |                     | 1512.8         |
|                     | 1219.6 | +0.072   | 1219.6 | 10  | F | 13       | 1349.7 |                     | 675.35 -0.142  |
| +0.2977             | 666.83 | -0.106   | 1332.6 | 11  | L | 12       | 1202.6 |                     | 601.82 -0.113  |
|                     | 1389.7 | +0.3732  | 1389.7 | 12  | G | 11       | 1089.5 | +0.061              | 545.28 +0.1835 |
|                     | 1446.7 |          | 1446.7 | 13  | G | 10       | 1032.5 | +0.006              | 1032.5         |
|                     | 1606.7 | +0.0286  | 1606.7 | 14  | C | 9        | 975.5  | +0.1097             | 488.26 +0.1528 |
|                     | 1677.8 |          | 1677.8 | 15  | A | 8        | 815.47 |                     | 815.47         |
|                     | 1734.8 |          | 1734.8 | 16  | G | 7        | 744.44 | +0.0029             | 744.44         |
|                     | 1791.8 |          | 1791.8 | 17  | G | 6        | 687.41 | +0.0534             | 687.41         |
|                     | 1904.9 |          | 1904.9 | 18  | L | 5        | 630.39 |                     | 315.7 +0.3078  |
| +0.1607             | 1003.5 |          | 2005.9 | 19  | T | 4        | 517.31 | +0.0602             | 517.31         |
|                     | 2119   |          | 2119   | 20  | L | 3        | 416.26 | +0.0538             | 416.26         |
|                     | 2176   |          | 2176   | 21  | G | 2        | 303.18 | +0.1406             | 303.18         |
| +0.0129             | 1124   |          | 2247.1 | 22  | A | 1        | 246.16 |                     | 246.16         |
|                     |        |          |        | 23  | R | 0        | 175.12 |                     | 175.12         |

Scan number 1540 Raw file LNCAP\_Silac\_23F10\_set1\_07  
 Method ITMS: CID Pepti... 46.7

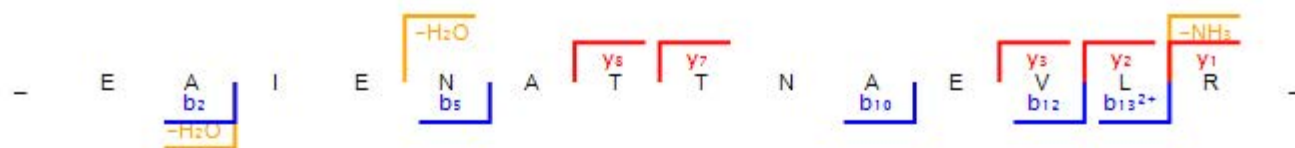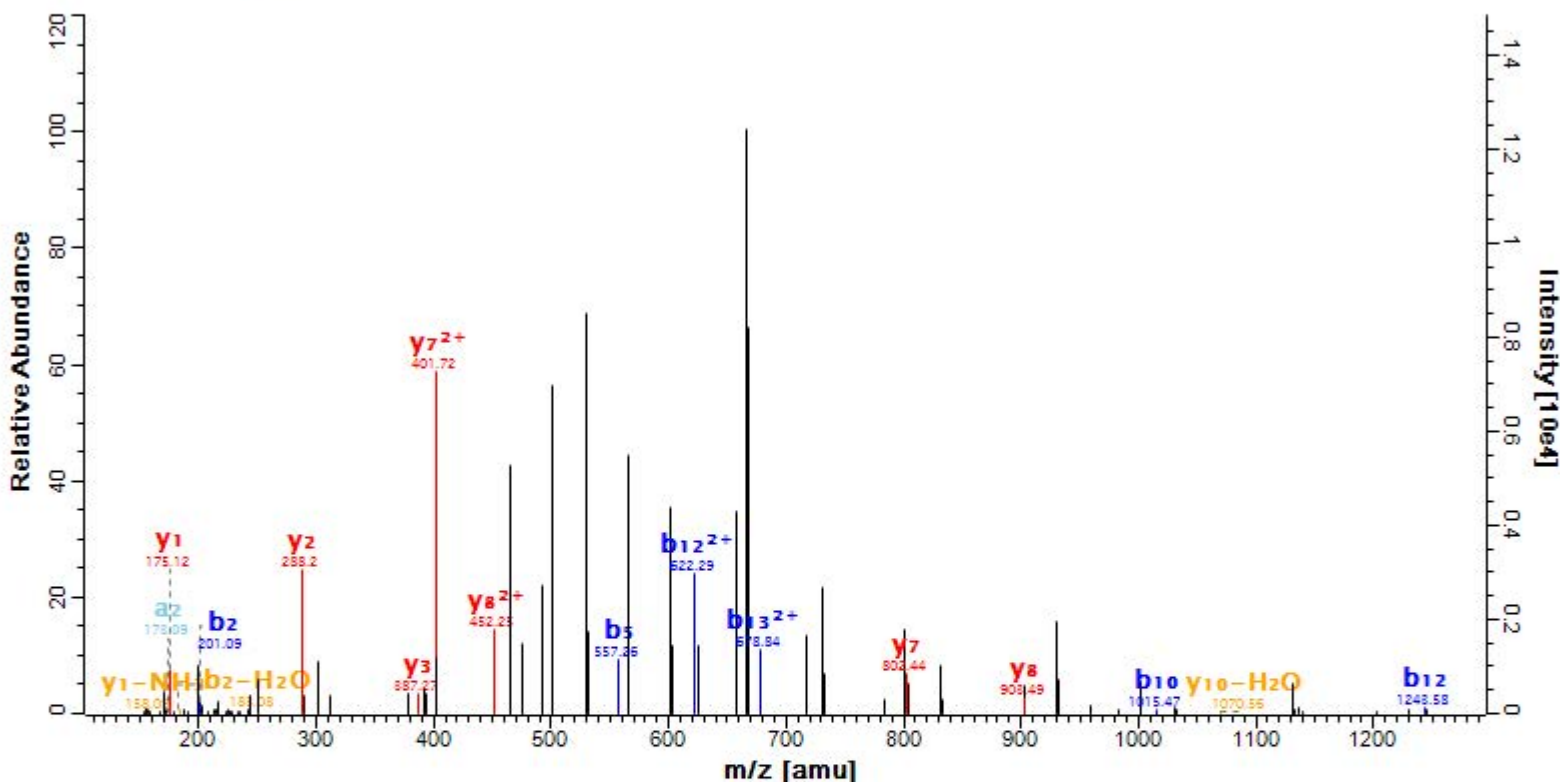

#### precursor information

|                   |                 |
|-------------------|-----------------|
| Mass:             | 1529.76791      |
| m/z:              | 510.92991       |
| Charge:           | 3+              |
| Retentiontime:    | 14.699999809265 |
| Score:            | 46.70438        |
| Mass Error [ppm]: | -0.42046        |
| PEP:              | 0.034806        |
| Precursor Type:   | MULTI           |

#### general information

|                       |            |
|-----------------------|------------|
| Annotation:           | 8 of 14    |
| AminoAcids Coverage:  | 57 %       |
| Intensity Coverage:   | 19 %       |
| Peak Coverage:        | 17 %       |
| Protein Localisation: | 91 ... 104 |

|        | a ion         | b <sup>2+</sup> ion | b ion         |        |      |    | y ion         | y <sup>2+</sup> ion |        |        |       |  |
|--------|---------------|---------------------|---------------|--------|------|----|---------------|---------------------|--------|--------|-------|--|
|        | Δ dalton mass | Δ dalton mass       | Δ dalton mass |        | seq  |    | Δ dalton mass | Δ dalton mass       |        |        |       |  |
|        | 102.1         | 130                 | 130           | 1      | E    | 13 |               |                     |        |        |       |  |
| +0.012 | 73.1          | 201.1               | +0.042        | 201.1  | 2    | A  | 12            | 1402                | 1402   |        |       |  |
|        | 286.2         | 314.2               |               | 314.2  | 3    | I  | 11            | 1331                | 1331   |        |       |  |
|        | 415.2         | 443.2               |               | 443.2  | 4    | E  | 10            | 1218                | 1218   |        |       |  |
|        | 529.3         | 557.3               | -0.32         | 557.3  | 5    | N  | 9             | 1089                | 1089   |        |       |  |
|        | 600.3         | 628.3               |               | 628.3  | 6    | A  | 8             | 974.5               | 974.5  |        |       |  |
|        | 701.3         | 729.3               |               | 729.3  | 7    | T  | 7             | 903.5               | -0.2   | 452.2  | -0.43 |  |
|        | 802.4         | 830.4               |               | 830.4  | 8    | T  | 6             | 802.4               | +0.03  | 401.7  | -0.35 |  |
|        | 916.4         | 944.4               |               | 944.4  | 9    | N  | 5             | 701.4               |        | 701.4  |       |  |
|        | 987.5         | 1015                | +0.126        | 1015   | 10   | A  | 4             | 587.4               |        | 587.4  |       |  |
|        | 1117          | 1145                |               | 1145   | 11   | E  | 3             | 516.3               |        | 516.3  |       |  |
|        | 1216          | +0.212              | 622.3         | +0.328 | 1244 | 12 | V             | 2                   | 387.3  | -0.02  | 387.3 |  |
|        | 1329          | +0.064              | 678.8         |        | 1357 | 13 | L             | 1                   | 288.2  | +0.105 | 288.2 |  |
|        |               |                     |               |        | 14   | R  | 0             | 175.1               | +0.064 | 175.1  |       |  |

Scan number 1603 Raw file LNCAP\_Silac\_23F10\_set1\_07  
 Method ITMS; CID Pepti... 124.12

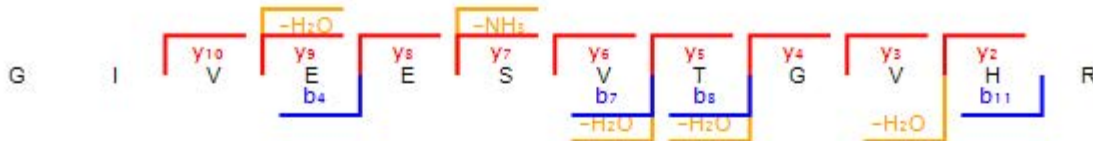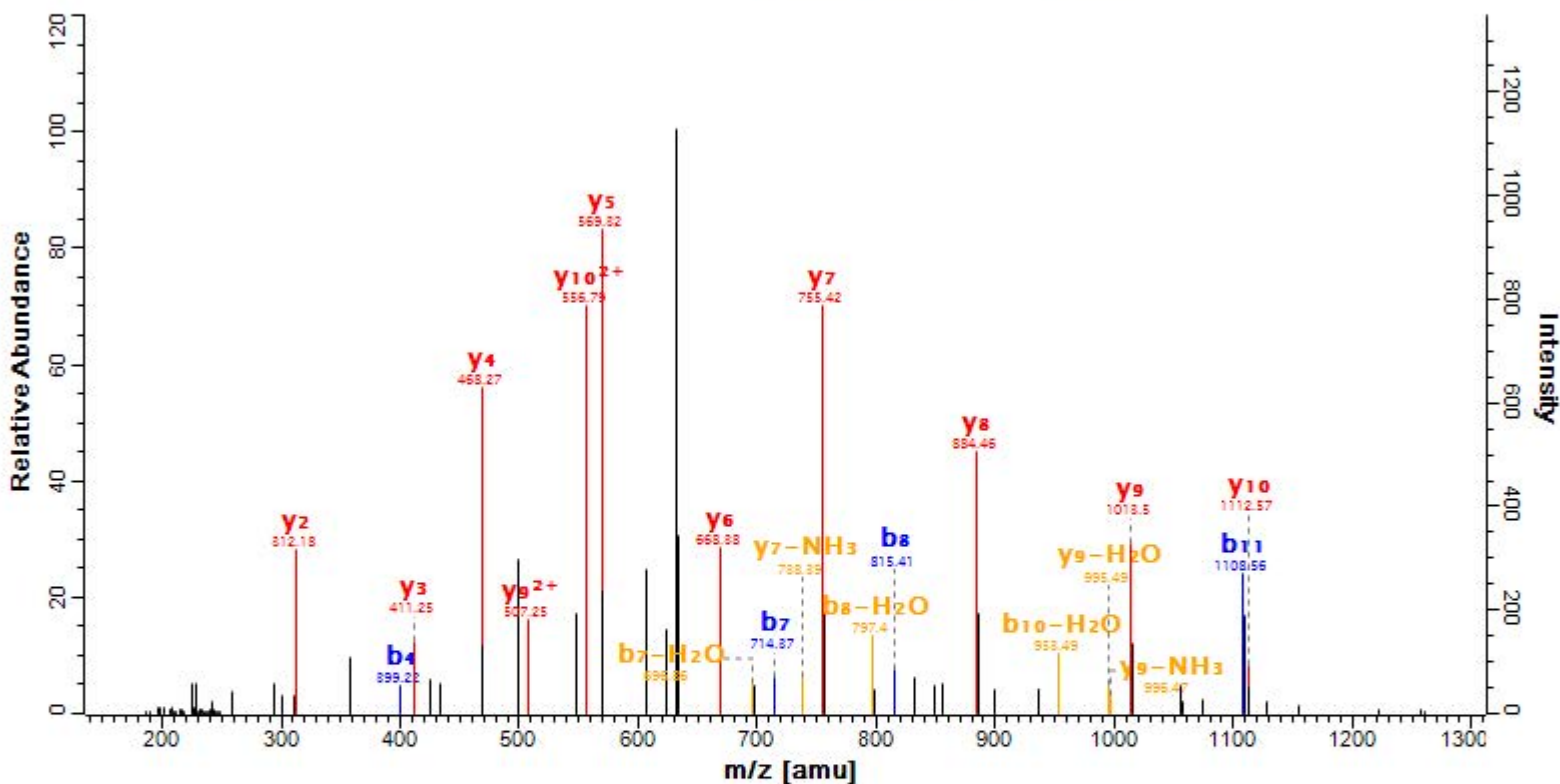

#### precursor information

|                   |                 |
|-------------------|-----------------|
| Mass:             | 1281.66775      |
| m/z:              | 641.84115       |
| Charge:           | 2+              |
| Retentiontime:    | 15.078287124633 |
| Score:            | 124.1237        |
| Mass Error [ppm]: | 0.030955        |
| PEP:              | 2.1493E-05      |
| Precursor Type:   | MULTI           |

#### general information

|                       |             |
|-----------------------|-------------|
| Annotation:           | 9 of 12     |
| AminoAcids Coverage:  | 75 %        |
| Intensity Coverage:   | 54 %        |
| Peak Coverage:        | 22 %        |
| Protein Localisation: | 331 ... 342 |

| b ion     |          |     |   | y ion    |           | y <sup>2+</sup> ion |           |
|-----------|----------|-----|---|----------|-----------|---------------------|-----------|
| Δ dalton  | mass     | seq |   | Δ dalton | mass      | Δ dalton            | mass      |
|           | 58.02874 | 1   | G |          |           |                     |           |
|           | 171.1128 | 2   | I | 1225.654 |           | 1225.654            |           |
|           | 270.1812 | 3   | V | 1112.569 | +0.069209 | 556.7884            | +0.189047 |
| +0.043157 | 399.2238 | 4   | E | 1013.501 | +0.080555 | 507.2542            | +0.040881 |
|           | 528.2664 | 5   | E | 884.4585 | +0.02891  | 884.4585            |           |
|           | 615.2984 | 6   | S | 755.4159 | +0.051117 | 755.4159            |           |
| +0.042699 | 714.3668 | 7   | V | 668.3838 | +0.091752 | 668.3838            |           |
| -0.18064  | 815.4145 | 8   | T | 569.3154 | +0.000498 | 569.3154            |           |
|           | 872.436  | 9   | G | 468.2677 | +0.0378   | 468.2677            |           |
|           | 971.5044 | 10  | V | 411.2463 | +0.173095 | 411.2463            |           |
| -0.02096  | 1108.563 | 11  | H | 312.1779 | +0.024406 | 312.1779            |           |
|           |          | 12  | R | 175.119  |           | 175.119             |           |

Scan number 1861 Raw file LNCAP\_Silac\_23F10\_set1\_07  
 Method ITMS; CID Pepti... 190.41

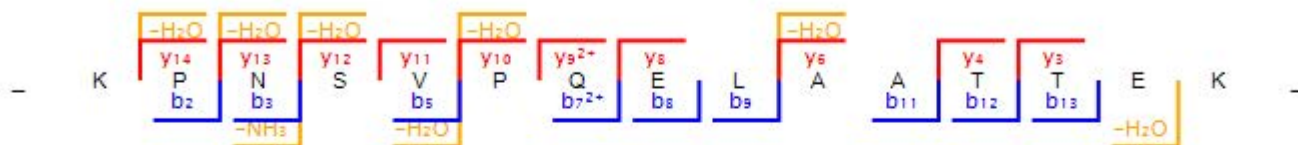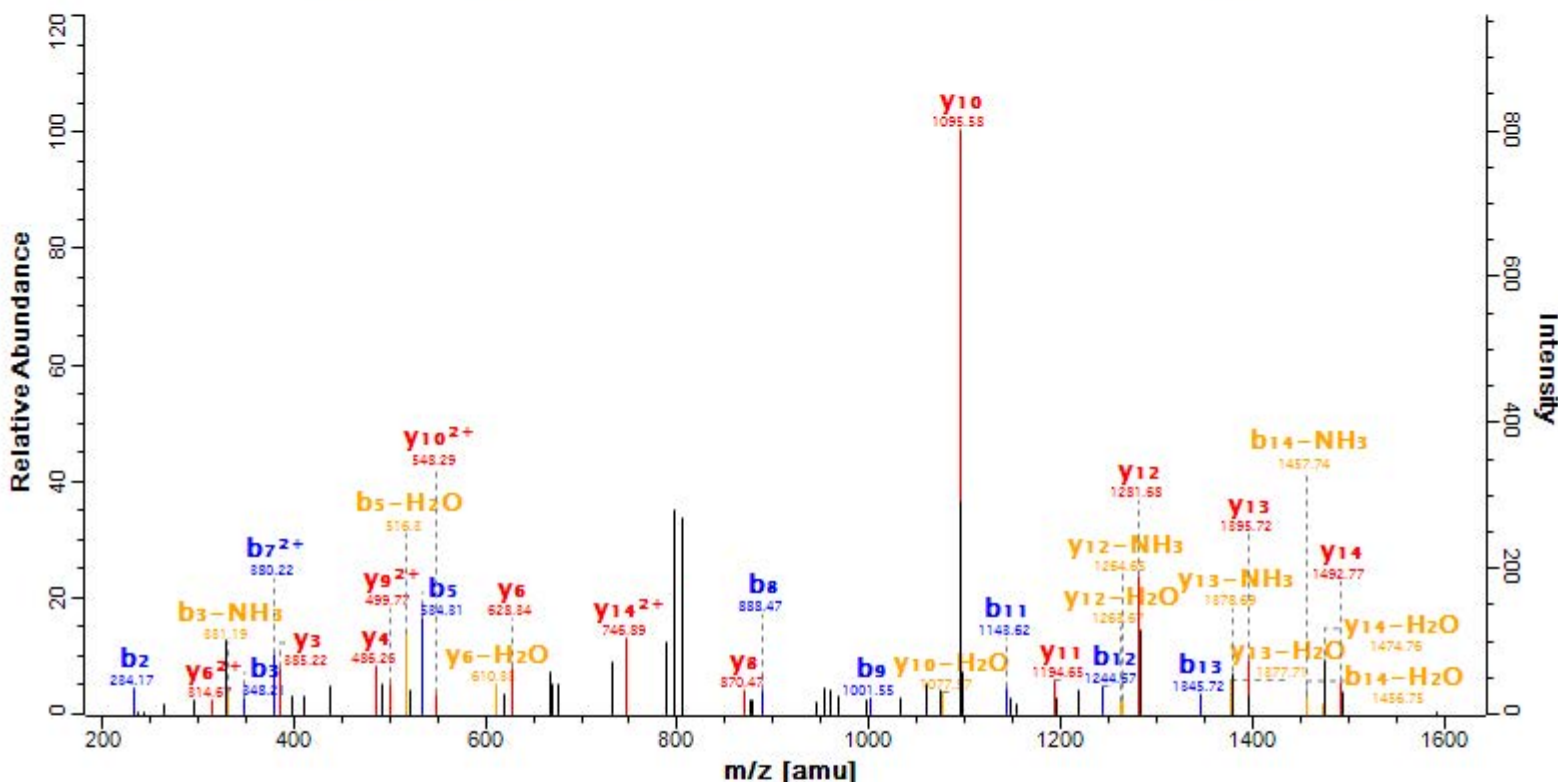

precursor information

|                   |                 |
|-------------------|-----------------|
| Mass:             | 1611.84664      |
| m/z:              | 806.9306        |
| Charge:           | 2+              |
| Retentiontime:    | 16.640384674072 |
| Score:            | 190.407         |
| Mass Error [ppm]: | -0.099444       |
| PEP:              | 4.5597E-22      |
| Precursor Type:   | MULTI           |

general information

|                       |             |
|-----------------------|-------------|
| Annotation:           | 13 of 15    |
| AminoAcids Coverage:  | 87 %        |
| Intensity Coverage:   | 48 %        |
| Peak Coverage:        | 43 %        |
| Protein Localisation: | 618 ... 632 |

| b <sup>2+</sup> ion |        | b ion    |        | seq |   |    | y ion    |         | y <sup>2+</sup> ion |         |
|---------------------|--------|----------|--------|-----|---|----|----------|---------|---------------------|---------|
| Δ dalton            | mass   | Δ dalton | mass   |     |   |    | Δ dalton | mass    | Δ dalton            | mass    |
|                     | 137.12 |          | 137.12 | 1   | K | 14 |          |         |                     |         |
|                     | 234.17 | +0.0525  | 234.17 | 2   | P | 13 | 1492.8   | -0.231  | 746.89              | +0.2622 |
|                     | 348.21 | +0.0691  | 348.21 | 3   | N | 12 | 1395.7   | -0.24   | 1395.7              |         |
|                     | 435.24 |          | 435.24 | 4   | S | 11 | 1281.7   | +0.0542 | 1281.7              |         |
|                     | 534.31 | -0.131   | 534.31 | 5   | V | 10 | 1194.6   | -0.036  | 1194.6              |         |
|                     | 631.37 |          | 631.37 | 6   | P | 9  | 1095.6   | +0.0331 | 548.29              | +0.1585 |
| +0.049              | 380.22 |          | 759.42 | 7   | Q | 8  | 998.52   |         | 499.77              | -0.251  |
|                     | 888.47 | -0.038   | 888.47 | 8   | E | 7  | 870.47   | +0.0881 | 870.47              |         |
|                     | 1001.6 | -0.115   | 1001.6 | 9   | L | 6  | 741.42   |         | 741.42              |         |
|                     | 1072.6 |          | 1072.6 | 10  | A | 5  | 628.34   | +0.1322 | 314.67              | -0.317  |
|                     | 1143.6 | -0.103   | 1143.6 | 11  | A | 4  | 557.3    |         | 557.3               |         |
|                     | 1244.7 | +0.0081  | 1244.7 | 12  | T | 3  | 486.26   | +0.0897 | 486.26              |         |
|                     | 1345.7 | -0.053   | 1345.7 | 13  | T | 2  | 385.22   | +0.1314 | 385.22              |         |
|                     | 1474.8 |          | 1474.8 | 14  | E | 1  | 284.17   |         | 284.17              |         |
|                     |        |          |        | 15  | K | 0  | 155.13   |         | 155.13              |         |

Scan number 2476 Raw file LNCAP\_Silac\_23F10\_set1\_07  
 Method ITMS; CID Pepti... 248.97

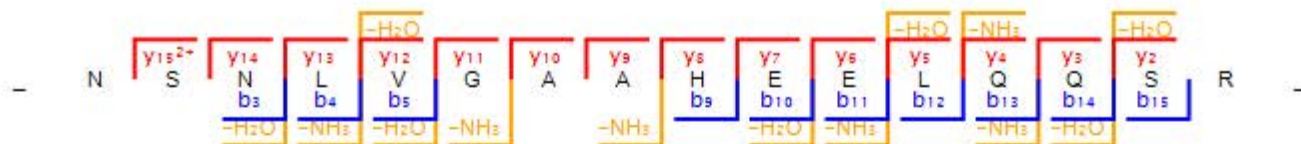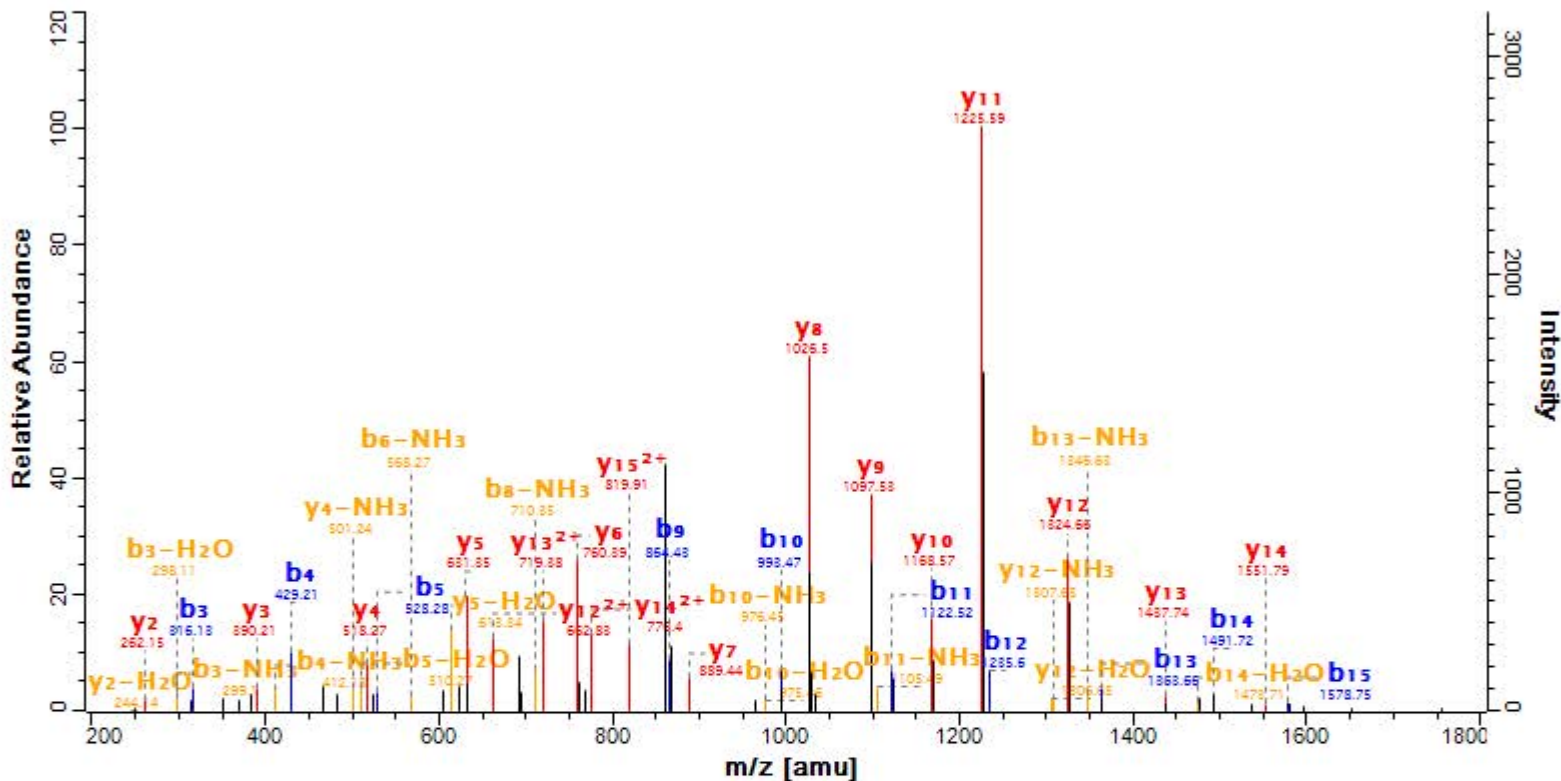

precursor information

|                   |                 |
|-------------------|-----------------|
| Mass:             | 1751.85483      |
| m/z:              | 876.93469       |
| Charge:           | 2+              |
| Retentiontime:    | 20.520244598388 |
| Score:            | 248.9714        |
| Mass Error [ppm]: | -0.13906        |
| PEP:              | 4.6904E-62      |
| Precursor Type:   | MULTI           |

general information

|                       |             |
|-----------------------|-------------|
| Annotation:           | 14 of 16    |
| AminoAcids Coverage:  | 88 %        |
| Intensity Coverage:   | 61 %        |
| Peak Coverage:        | 50 %        |
| Protein Localisation: | 281 ... 296 |

| b ion     |          |    |     |    | y ion    |           | y <sup>2+</sup> ion |           |
|-----------|----------|----|-----|----|----------|-----------|---------------------|-----------|
| Δ dalton  | mass     |    | seq |    | Δ dalton | mass      | Δ dalton            | mass      |
|           | 115.0502 | 1  | N   | 15 |          |           |                     |           |
|           | 202.0822 | 2  | S   | 14 | 1638.819 |           | 819.9133            | +0.269573 |
| +0.070153 | 316.1252 | 3  | N   | 13 | 1551.787 | +0.066488 | 776.3973            | +0.212101 |
| +0.049382 | 429.2092 | 4  | L   | 12 | 1437.744 | +0.110269 | 719.3759            | +0.223433 |
| -0.05315  | 528.2776 | 5  | V   | 11 | 1324.66  | -0.01221  | 662.8338            | +0.221092 |
|           | 585.2991 | 6  | G   | 10 | 1225.592 | -0.04096  | 1225.592            |           |
|           | 656.3362 | 7  | A   | 9  | 1168.571 | +0.011628 | 1168.571            |           |
|           | 727.3733 | 8  | A   | 8  | 1097.533 | +0.00028  | 1097.533            |           |
| +0.1291   | 864.4322 | 9  | H   | 7  | 1026.496 | +0.015665 | 1026.496            |           |
| +0.137776 | 993.4748 | 10 | E   | 6  | 889.4374 | +0.183342 | 889.4374            |           |
| -0.077    | 1122.517 | 11 | E   | 5  | 760.3948 | +0.068769 | 760.3948            |           |
| +0.009105 | 1235.601 | 12 | L   | 4  | 631.3522 | +0.042881 | 631.3522            |           |
| -0.08219  | 1363.66  | 13 | Q   | 3  | 518.2681 | +0.039909 | 518.2681            |           |
| -0.02419  | 1491.719 | 14 | Q   | 2  | 390.2096 | +0.112006 | 390.2096            |           |
| -0.32209  | 1578.751 | 15 | S   | 1  | 262.151  | +0.019124 | 262.151             |           |
|           |          | 16 | R   | 0  | 175.119  |           | 175.119             |           |

Scan number 2730 Raw file LNCAP\_Silac\_23F10\_set1\_07  
 Method ITMS: CID Pepti... 149.49

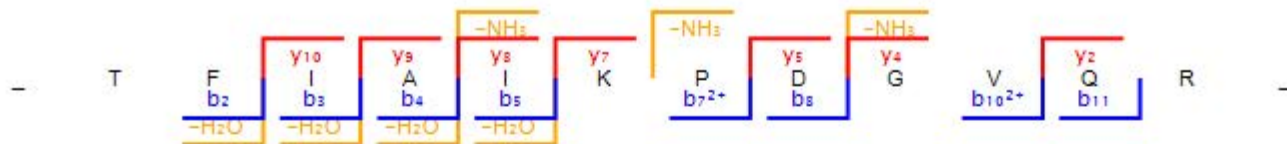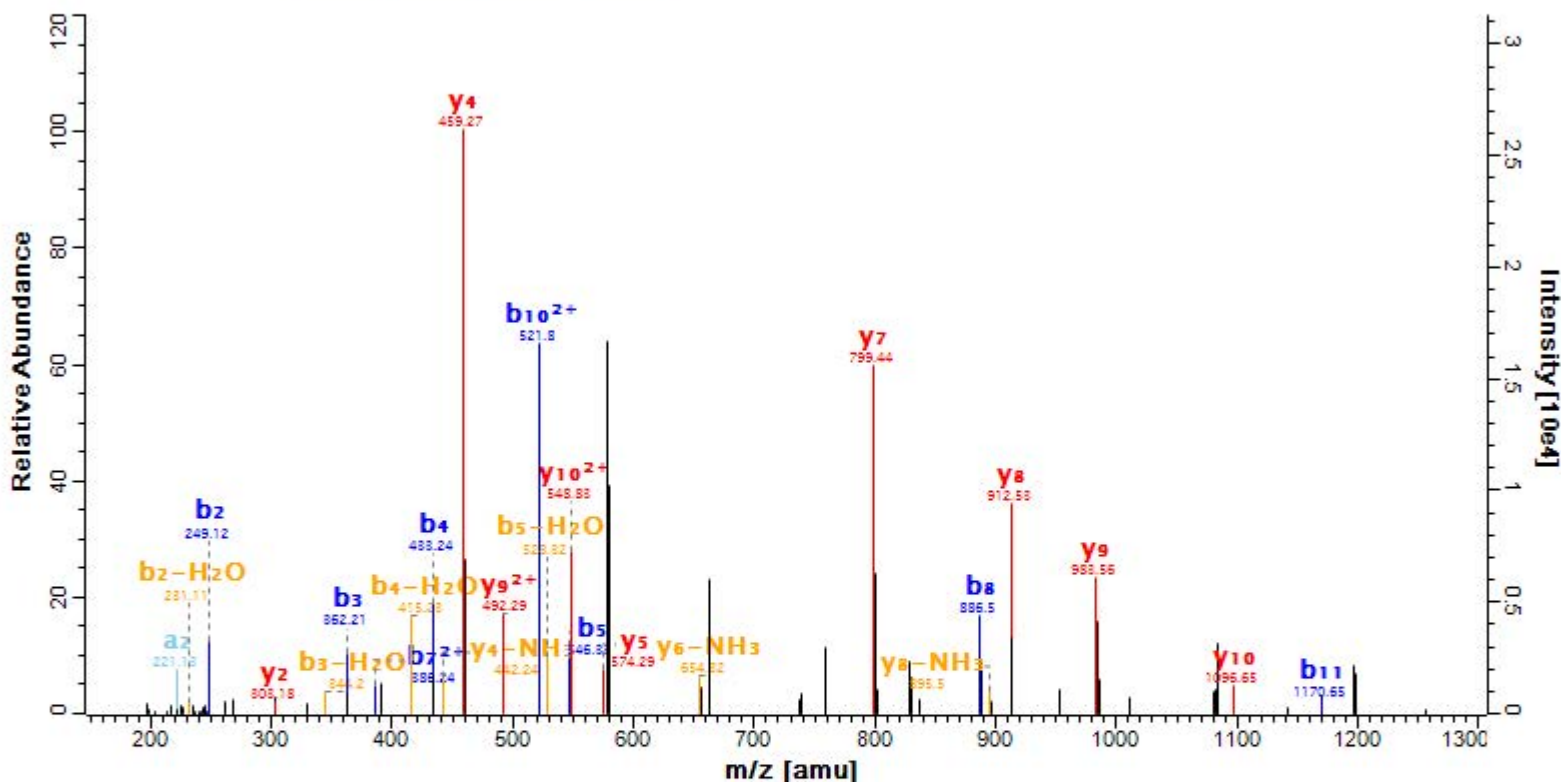

#### precursor information

|                   |                 |
|-------------------|-----------------|
| Mass:             | 1343.75584      |
| m/z:              | 672.8852        |
| Charge:           | 2+              |
| Retentiontime:    | 22.051055908203 |
| Score:            | 149.4918        |
| Mass Error [ppm]: | -0.21891        |
| PEP:              | 3.2369E-06      |
| Precursor Type:   | MULTI           |

#### general information

|                       |                       |
|-----------------------|-----------------------|
| Annotation:           | 10 of 12              |
| AminoAcids Coverage:  | 83 %                  |
| Intensity Coverage:   | 55 %                  |
| Peak Coverage:        | 30 %                  |
| Protein Localisation: | 32 ... 43; 147 ... 15 |

|       | a ion         | b <sup>2+</sup> ion | b ion         |     |   | y ion         | y <sup>2+</sup> ion      |
|-------|---------------|---------------------|---------------|-----|---|---------------|--------------------------|
|       | Δ dalton mass | Δ dalton mass       | Δ dalton mass | seq |   | Δ dalton mass | Δ dalton mass            |
|       | 74.06         | 102.1               | 102.1         | 1   | T | 11            |                          |
| +0.08 | 1221.1        | 249.1               | -0.03 249.1   | 2   | F | 10            | 1244 1244                |
|       | 334.2         | 362.2               | +0.08 362.2   | 3   | I | 9             | 1097 +0.05 2548.8 +0.20  |
|       | 405.2         | 433.2               | +0.01 433.2   | 4   | A | 8             | 983.6 +0.02 6492.3 +0.36 |
|       | 518.3         | 546.3               | -0.02 546.3   | 5   | I | 7             | 912.5 +0 912.5           |
|       | 646.4         | 674.4               | 674.4         | 6   | K | 6             | 799.4 +0.03 1799.4       |
|       | 743.5         | +0.10 1386.2        | 771.5         | 7   | P | 5             | 671.3 671.3              |
|       | 858.5         | 886.5               | +0.06 4886.5  | 8   | D | 4             | 574.3 +0.09 1574.3       |
|       | 915.5         | 943.5               | 943.5         | 9   | G | 3             | 459.3 +0.03 9459.3       |
|       | 1015          | -0.27 521.8         | 1043          | 10  | V | 2             | 402.2 402.2              |
|       | 1143          | 1171                | +0.08 31171   | 11  | Q | 1             | 303.2 +0.01 2303.2       |
|       |               |                     |               | 12  | R | 0             | 175.1 175.1              |

Scan number 2789 Raw file LNCAP\_Silac\_23F10\_set1\_07  
 Method ITMS; CID Pepti... 125.25

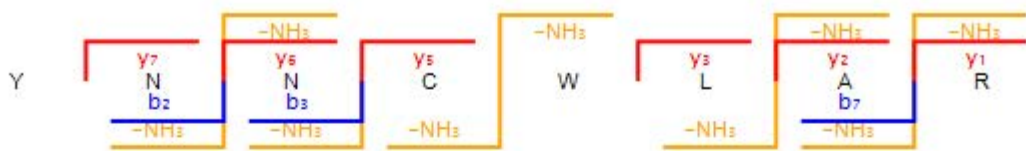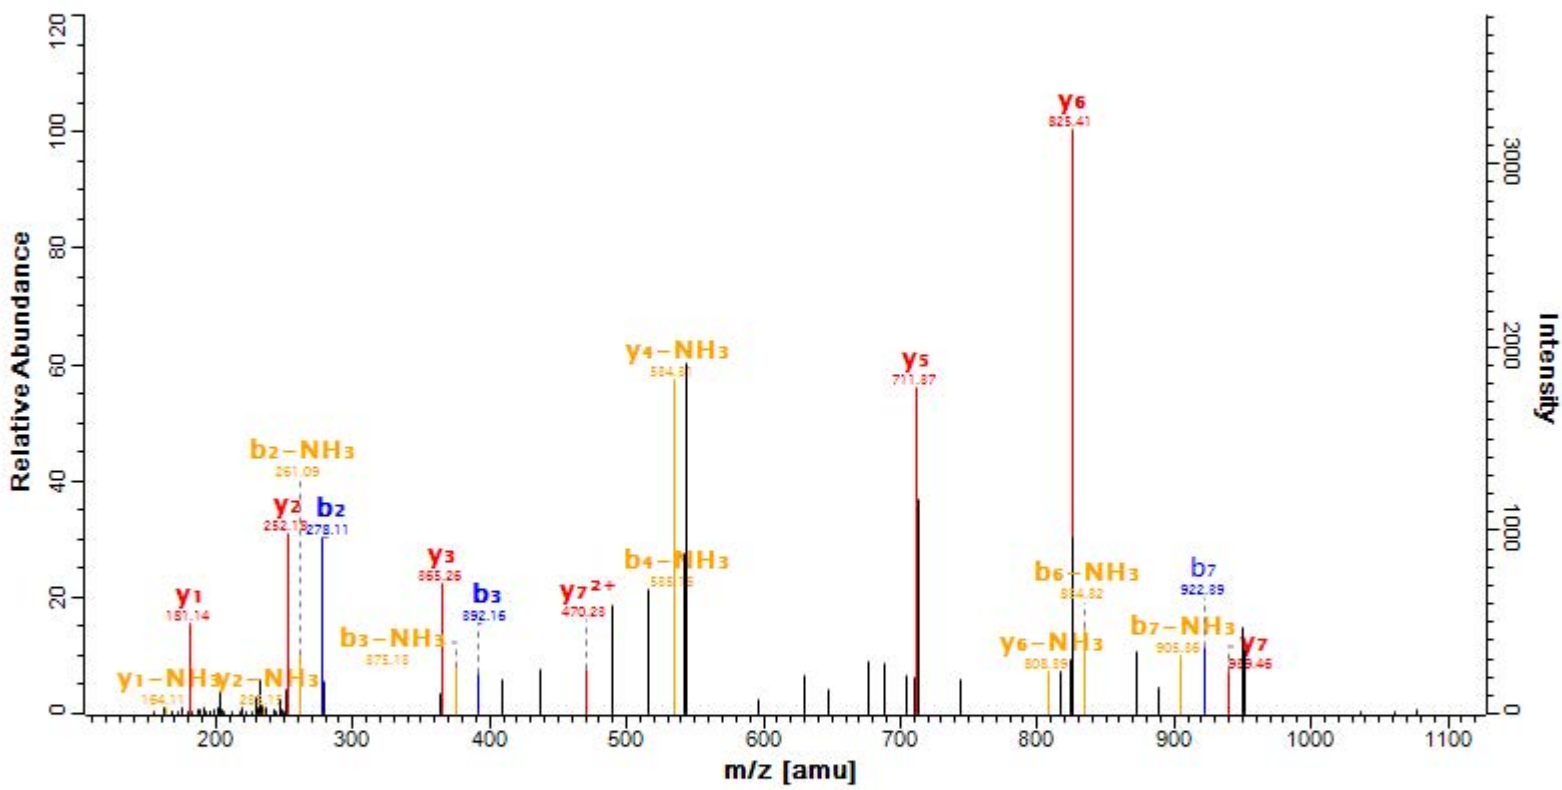

precursor information

|                       |                 |
|-----------------------|-----------------|
| Mass:                 | 1095.4925       |
| m/z:                  | 548.75353       |
| Charge:               | 2+              |
| Retentiontime:        | 22.419992446899 |
| Score:                | 125.2523        |
| Mass Error [ppm]:     | 0.45848         |
| g PEP:                | 0.00093619      |
| Annotation:           | 7 of 8          |
| AminoAcids Coverage:  | 88 %            |
| Intensity Coverage:   | 54 %            |
| Peak Coverage:        | 22 %            |
| Protein Localisation: | 89 ... 96       |

| b ion    |          |   |     |   | y ion    |           | y <sup>2+</sup> ion |           |
|----------|----------|---|-----|---|----------|-----------|---------------------|-----------|
| Δ dalton | mass     |   | seq |   | Δ dalton | mass      | Δ dalton            | mass      |
|          | 164.0706 | 1 | Y   | 7 |          |           |                     |           |
| +0.08178 | 278.1135 | 2 | N   | 6 | 939.4561 | +0.159648 | 470.2317            | +0.010939 |
| -0.00357 | 392.1565 | 3 | N   | 5 | 825.4131 | +0.080016 | 825.4131            |           |
|          | 552.1871 | 4 | C   | 4 | 711.3702 | +0.258869 | 711.3702            |           |
|          | 738.2664 | 5 | W   | 3 | 551.3396 |           | 551.3396            |           |
|          | 851.3505 | 6 | L   | 2 | 365.2603 | +0.163264 | 365.2603            |           |
| -0.00967 | 922.3876 | 7 | A   | 1 | 252.1762 | +0.116774 | 252.1762            |           |
|          |          | 8 | R   | 0 | 181.1391 | +0.01427  | 181.1391            |           |



Scan number 3028 Raw file LNCAP\_Silac\_23F10\_set1\_Q\_07  
 Method ITMS; CID Pepti... 126.48

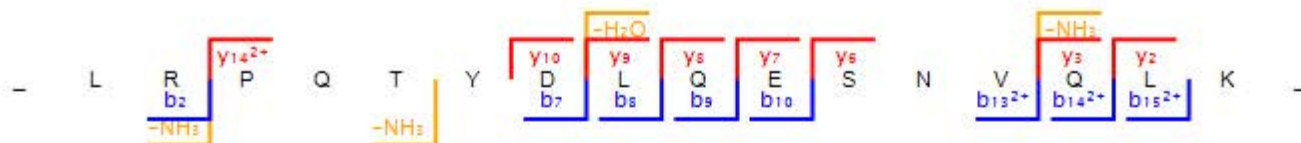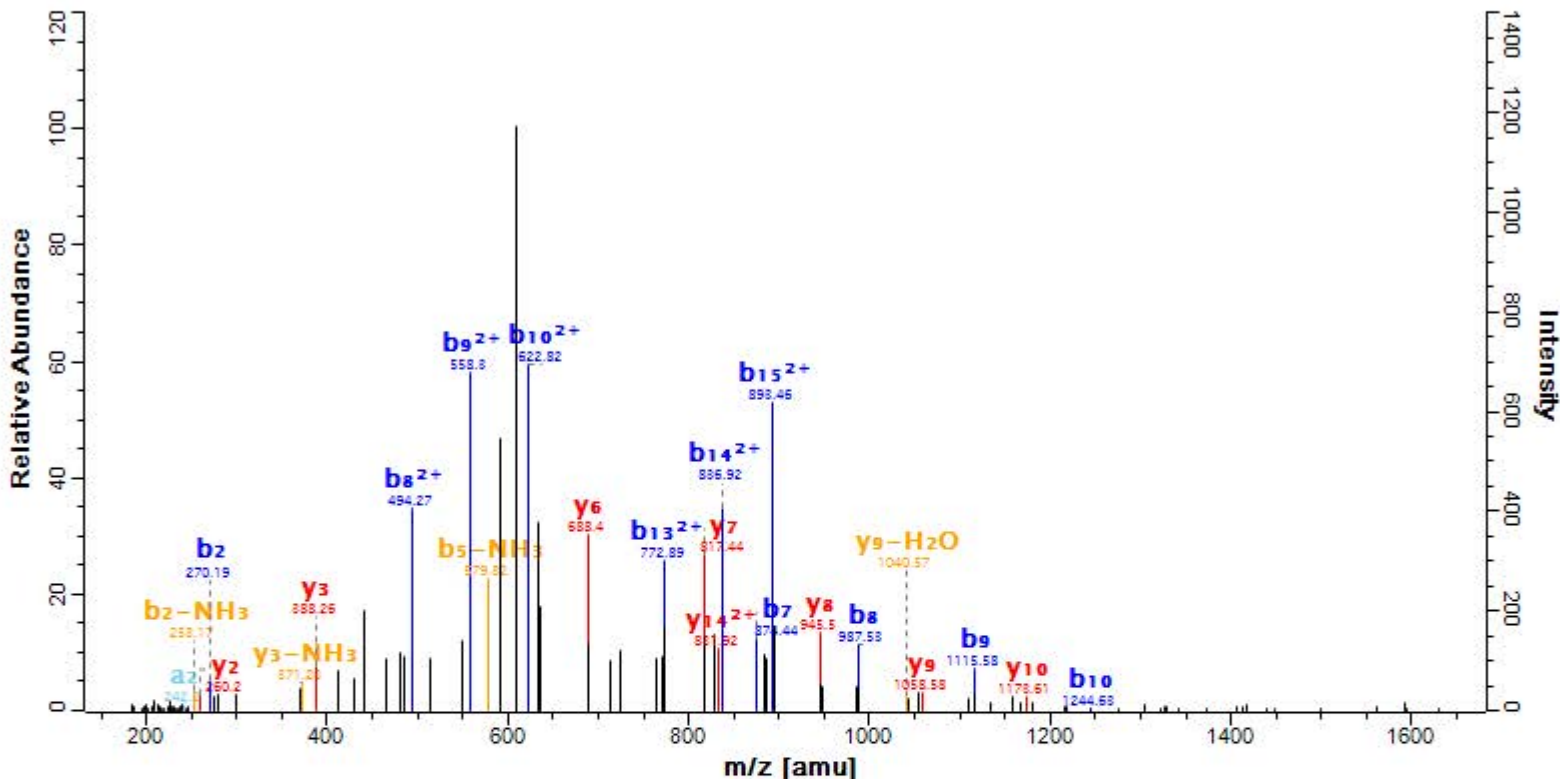

#### precursor information

|                   |                 |
|-------------------|-----------------|
| Mass:             | 1931.0104       |
| m/z:              | 644.67741       |
| Charge:           | 3+              |
| Retentiontime:    | 23.853332519531 |
| Score:            | 126.4845        |
| Mass Error [ppm]: | -0.43303        |
| PEP:              | 4.161E-10       |
| Precursor Type:   | MULTI           |

#### general information

|                       |           |
|-----------------------|-----------|
| Annotation:           | 11 of 16  |
| AminoAcids Coverage:  | 69 %      |
| Intensity Coverage:   | 46 %      |
| Peak Coverage:        | 21 %      |
| Protein Localisation: | 83 ... 98 |

| a ion       | b <sup>2+</sup> ion | b ion       |    | seq | y ion | y <sup>2+</sup> ion |
|-------------|---------------------|-------------|----|-----|-------|---------------------|
| 86.1        | 114.1               | 114.1       | 1  | L   | 15    |                     |
| +0.358242.2 | 270.2               | +0.039270.2 | 2  | R   | 14    | 1819                |
| 339.3       | 367.2               | 367.2       | 3  | P   | 13    | 1663                |
| 467.3       | 495.3               | 495.3       | 4  | Q   | 12    | 1566                |
| 568.4       | 596.4               | 596.4       | 5  | T   | 11    | 1438                |
| 731.4       | 759.4               | 759.4       | 6  | Y   | 10    | 1337                |
| 846.4       | 874.4               | +0.064874.4 | 7  | D   | 9     | 1174                |
| 959.5       | +0.207494.3         | +0.029987.5 | 8  | L   | 8     | 1059                |
| 1088        | +0.252558.3         | -0.03       | 9  | Q   | 7     | 945.5               |
| 1217        | +0.304622.8         | +0.0381245  | 10 | E   | 6     | 817.4               |
| 1304        | 1332                | 1332        | 11 | S   | 5     | 688.4               |
| 1418        | 1446                | 1446        | 12 | N   | 4     | 601.4               |
| 1517        | +0.007772.9         | 1545        | 13 | V   | 3     | 487.3               |
| 1645        | +0.326836.9         | 1673        | 14 | Q   | 2     | 388.3               |
| 1758        | +0.213893.5         | 1786        | 15 | L   | 1     | 260.2               |
|             |                     |             | 16 | K   | 0     | 147.1               |

Scan number 3032 Raw file LNCAP\_Silac\_23F10\_set1\_07  
 Method ITMS; CID Pepti... 199.03

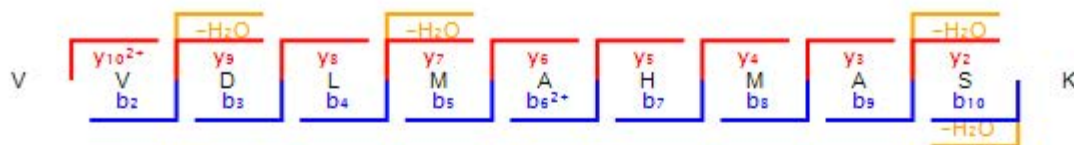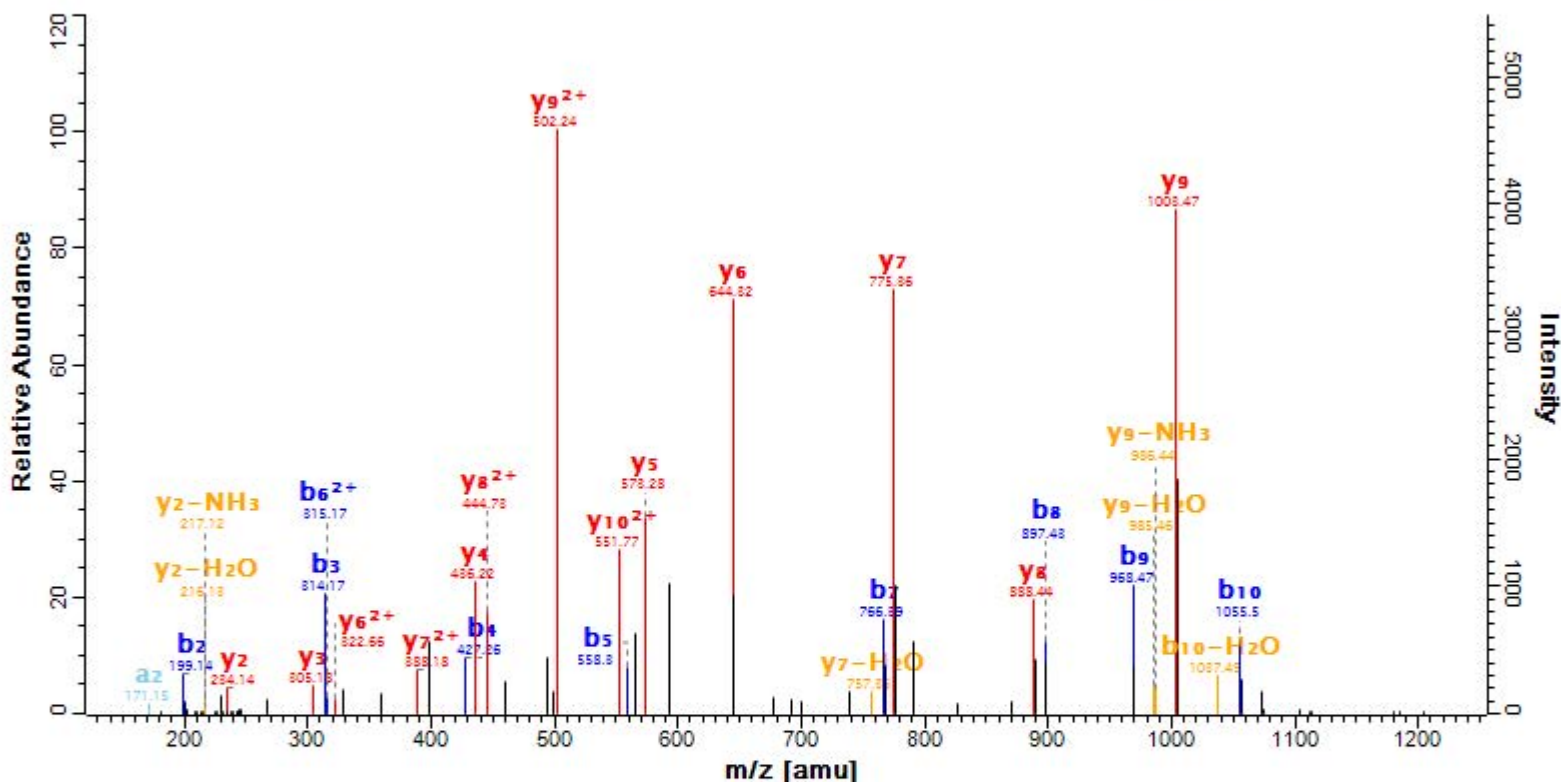

#### precursor information

|                   |                 |
|-------------------|-----------------|
| Mass:             | 1200.59947      |
| m/z:              | 601.30701       |
| Charge:           | 2+              |
| Retentiontime:    | 23.880197525024 |
| Score:            | 199.0296        |
| Mass Error [ppm]: | -0.021146       |
| PEP:              | 1.1559E-11      |
| Precursor Type:   | MULTI           |

#### general information

|                       |             |
|-----------------------|-------------|
| Annotation:           | 9 of 11     |
| AminoAcids Coverage:  | 82 %        |
| Intensity Coverage:   | 70 %        |
| Peak Coverage:        | 31 %        |
| Protein Localisation: | 324 ... 334 |

|        | a ion         | b <sup>2+</sup> ion | b ion         |       |     |    | y ion         | y <sup>2+</sup> ion |        |       |       |
|--------|---------------|---------------------|---------------|-------|-----|----|---------------|---------------------|--------|-------|-------|
|        | Δ dalton mass | Δ dalton mass       | Δ dalton mass |       | seq |    | Δ dalton mass | Δ dalton mass       |        |       |       |
|        | 72.08         | 100.1               | 100.1         | 1     | V   | 10 |               |                     |        |       |       |
| +0.018 | 71.1          | 199.1               | +0.026        | 199.1 | 2   | V  | 9             | 1103                | 551.8  | +0.18 |       |
|        | 286.2         | 314.2               | +0.052        | 314.2 | 3   | D  | 8             | 1003                | +0.032 | 502.2 | +0.21 |
|        | 399.3         | 427.3               | +0.03         | 427.3 | 4   | L  | 7             | 888.4               | -0.01  | 444.7 | +0.28 |
|        | 530.3         | 558.3               | +0.078        | 558.3 | 5   | M  | 6             | 775.4               | +0.029 | 888.2 | +0.16 |
|        | 601.3         | +0.002              | 315.2         | 629.3 | 6   | A  | 5             | 644.3               | +0.029 | 822.7 | -0.14 |
|        | 738.4         | 766.4               | +0.016        | 766.4 | 7   | H  | 4             | 573.3               | +0.044 | 573.3 |       |
|        | 869.4         | 897.4               | +0.005        | 897.4 | 8   | M  | 3             | 436.2               | +0.05  | 436.2 |       |
|        | 940.5         | 968.5               | +0.097        | 968.5 | 9   | A  | 2             | 305.2               | +0.029 | 305.2 |       |
|        | 1028          | 1056                | -0.01         | 1056  | 10  | S  | 1             | 234.1               | +0.082 | 234.1 |       |
|        |               |                     |               |       | 11  | K  | 0             | 147.1               |        | 147.1 |       |

Scan number 3116 Raw file LNCAP\_Silac\_23F10\_set1\_07  
 Method ITMS; CID Peptide 146.5

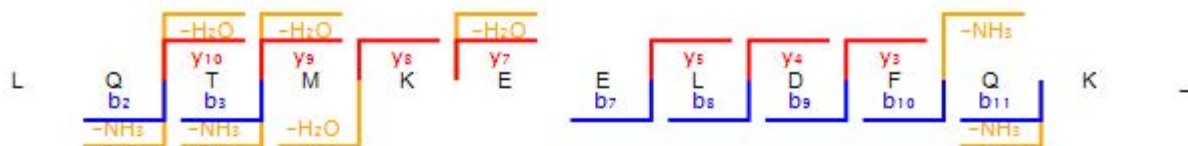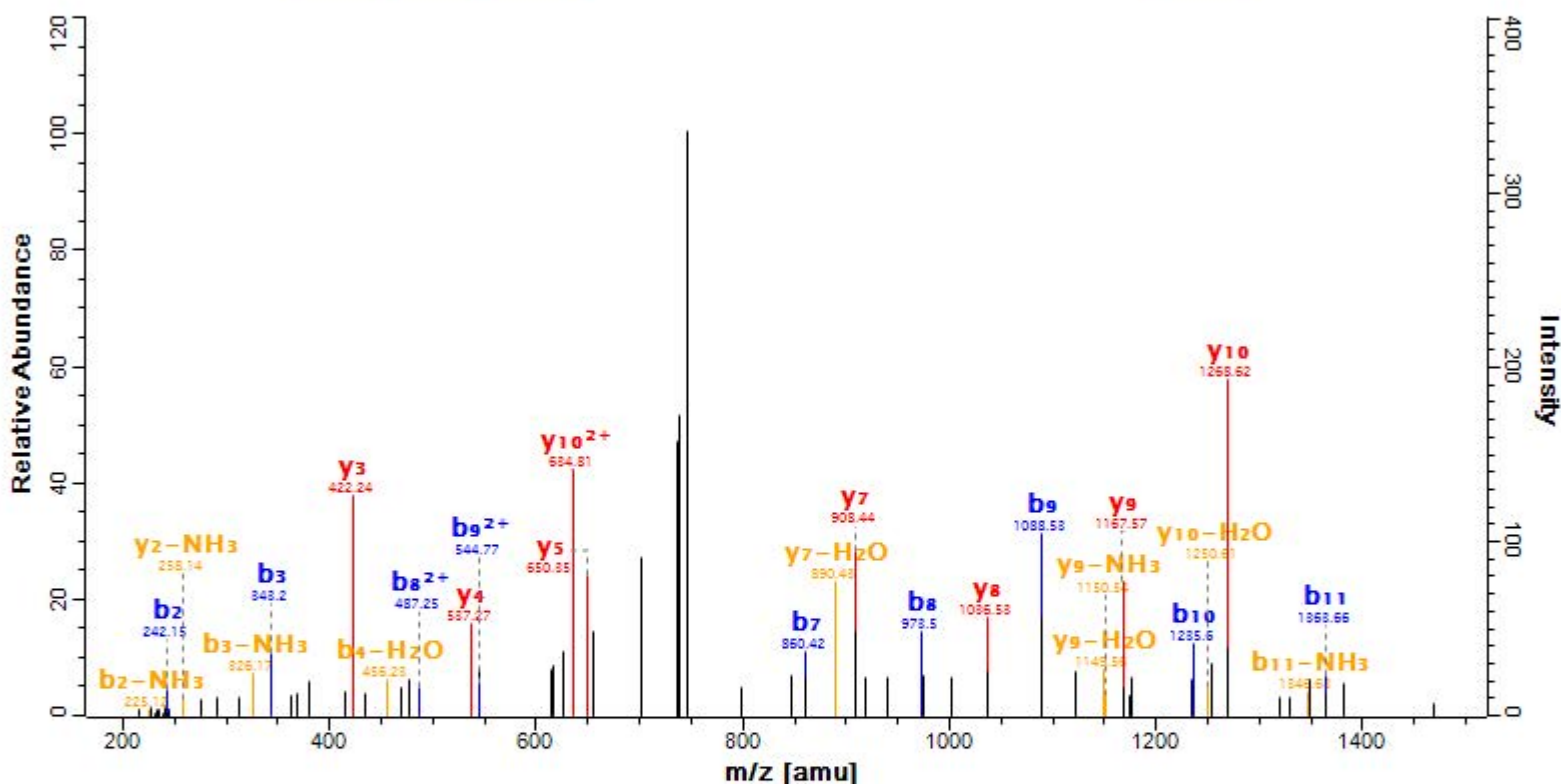

#### precursor information

|                   |                 |
|-------------------|-----------------|
| Mass:             | 1508.7549       |
| m/z:              | 755.38473       |
| Charge:           | 2+              |
| Retention time:   | 24.370817184448 |
| Score:            | 146.5019        |
| Mass Error [ppm]: | 0.27971         |
| PEP:              | 5.4245E-07      |
| Precursor Type:   | ISO             |

#### general information

|                       |             |
|-----------------------|-------------|
| Annotation:           | 10 of 12    |
| AminoAcids Coverage:  | 83 %        |
| Intensity Coverage:   | 42 %        |
| Peak Coverage:        | 31 %        |
| Protein Localisation: | 197 ... 208 |

| b <sup>2+</sup> ion |        | b ion    |        | seq |   |    | y ion    |         | y <sup>2+</sup> ion |         |
|---------------------|--------|----------|--------|-----|---|----|----------|---------|---------------------|---------|
| Δ dalton            | mass   | Δ dalton | mass   |     |   |    | Δ dalton | mass    | Δ dalton            | mass    |
|                     | 114.09 |          | 114.09 | 1   | L | 11 |          |         |                     |         |
|                     | 242.15 | +0.0118  | 242.15 | 2   | Q | 10 | 1396.7   |         | 1396.7              |         |
|                     | 343.2  | -0.023   | 343.2  | 3   | T | 9  | 1268.6   | -0.047  | 634.81              | +0.2259 |
|                     | 474.24 |          | 474.24 | 4   | M | 8  | 1167.6   | +0.0582 | 1167.6              |         |
|                     | 602.33 |          | 602.33 | 5   | K | 7  | 1036.5   | +0.1443 | 1036.5              |         |
|                     | 731.38 |          | 731.38 | 6   | E | 6  | 908.44   | -0.045  | 908.44              |         |
|                     | 860.42 | -0.289   | 860.42 | 7   | E | 5  | 779.39   |         | 779.39              |         |
| +0.3325             | 487.25 | -0.066   | 973.5  | 8   | L | 4  | 650.35   | +0.0036 | 650.35              |         |
| +0.3568             | 544.77 | +0.0607  | 1088.5 | 9   | D | 3  | 537.27   | +0.1393 | 537.27              |         |
|                     | 1235.6 | +0.0501  | 1235.6 | 10  | F | 2  | 422.24   | +0.097  | 422.24              |         |
|                     | 1363.7 | +0.0099  | 1363.7 | 11  | Q | 1  | 275.17   |         | 275.17              |         |
|                     |        |          |        | 12  | K | 0  | 147.11   |         | 147.11              |         |

Scan number 3194 Raw file LNCAP\_Silac\_23F10\_set1\_07  
 Method ITMS; CID Pepti... 91.09

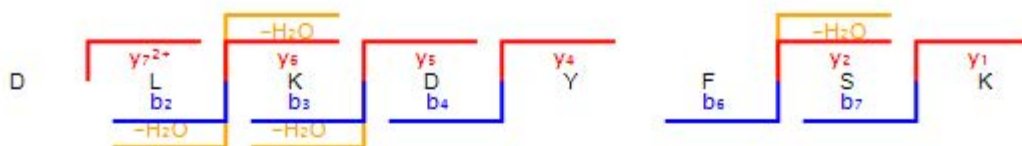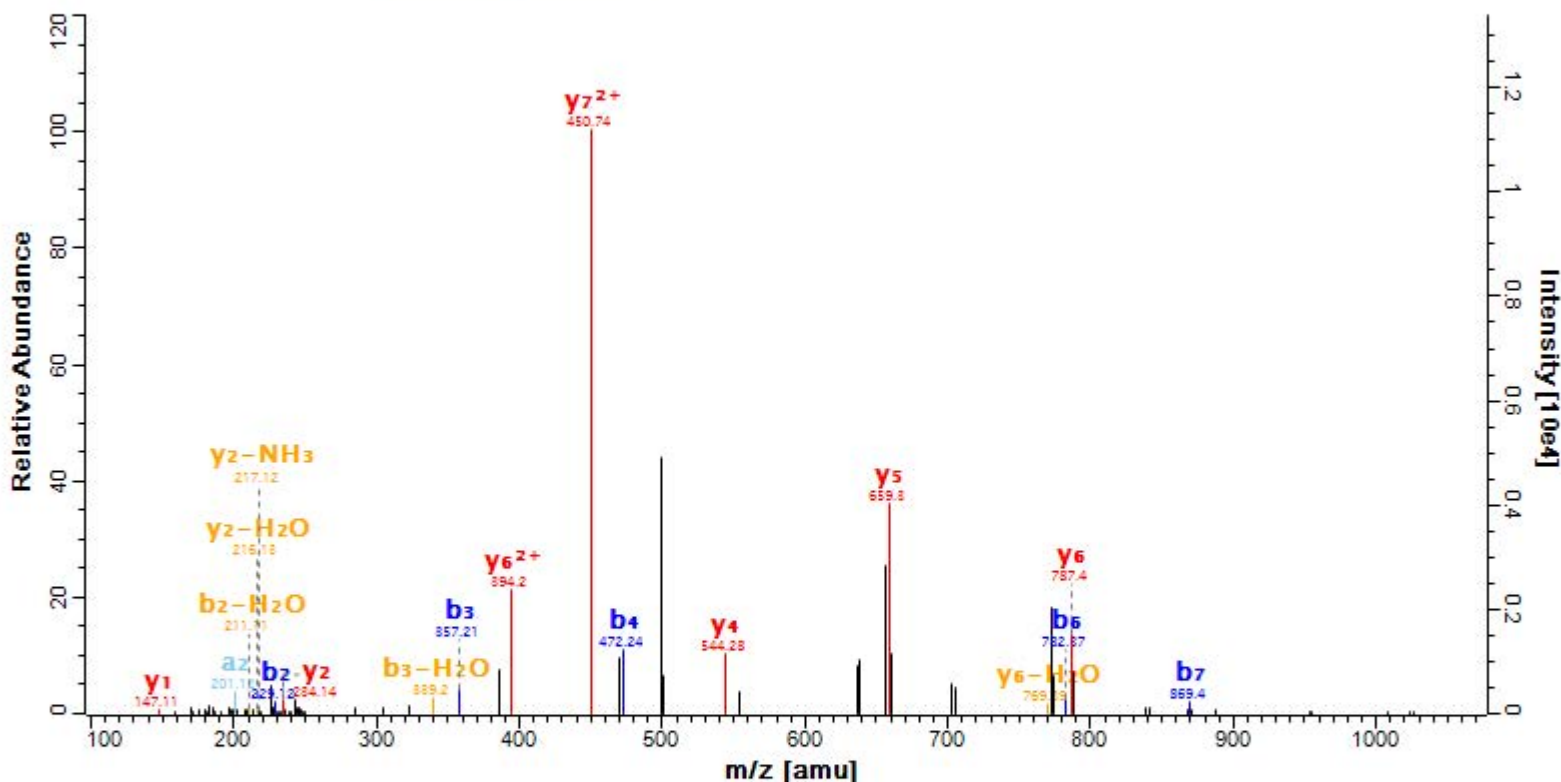

#### precursor information

|                       |                 |
|-----------------------|-----------------|
| Mass:                 | 1014.50239      |
| m/z:                  | 508.25847       |
| Charge:               | 2+              |
| Retentiontime:        | 24.810007095336 |
| Score:                | 91.08722        |
| Mass Error [ppm]:     | 0.17264         |
| g PEP:                | 0.011389        |
| Annotation:           | 7 of 8          |
| AminoAcids Coverage:  | 88 %            |
| Intensity Coverage:   | 50 %            |
| Peak Coverage:        | 16 %            |
| Protein Localisation: | 93 ... 100      |

| a ion    |        | b ion    |        |     |   |          | y ion  |          | y <sup>2+</sup> ion |  |
|----------|--------|----------|--------|-----|---|----------|--------|----------|---------------------|--|
| Δ dalton | mass   | Δ dalton | mass   | seq |   | Δ dalton | mass   | Δ dalton | mass                |  |
|          | 88.039 |          | 116.03 | 1   | D | 7        |        |          |                     |  |
| +0.0188  | 201.12 | -0.03    | 229.12 | 2   | L | 6        | 900.48 |          | 450.74              |  |
|          | 329.22 | +0.0828  | 357.21 | 3   | K | 5        | 787.4  | -0.007   | 394.2               |  |
|          | 444.25 | +0.2045  | 472.24 | 4   | D | 4        | 659.3  | +0.0754  | 659.3               |  |
|          | 607.31 |          | 635.3  | 5   | Y | 3        | 544.28 | +0.0058  | 544.28              |  |
|          | 754.38 | -0.038   | 782.37 | 6   | F | 2        | 381.21 |          | 381.21              |  |
|          | 841.41 | +0.0141  | 869.4  | 7   | S | 1        | 234.14 | +0.0274  | 234.14              |  |
|          |        |          |        | 8   | K | 0        | 147.11 | -0.02    | 147.11              |  |

Scan number 3272 Raw file LNCAP\_Silac\_23F10\_set1\_07  
 Method ITMS; CID Pepti... 176.05

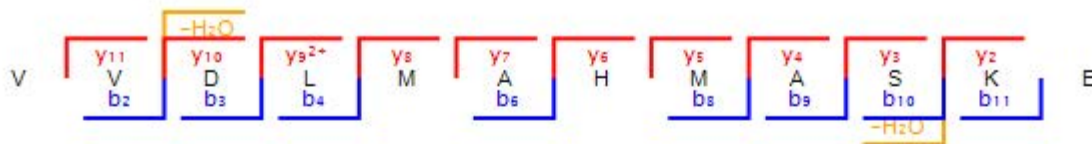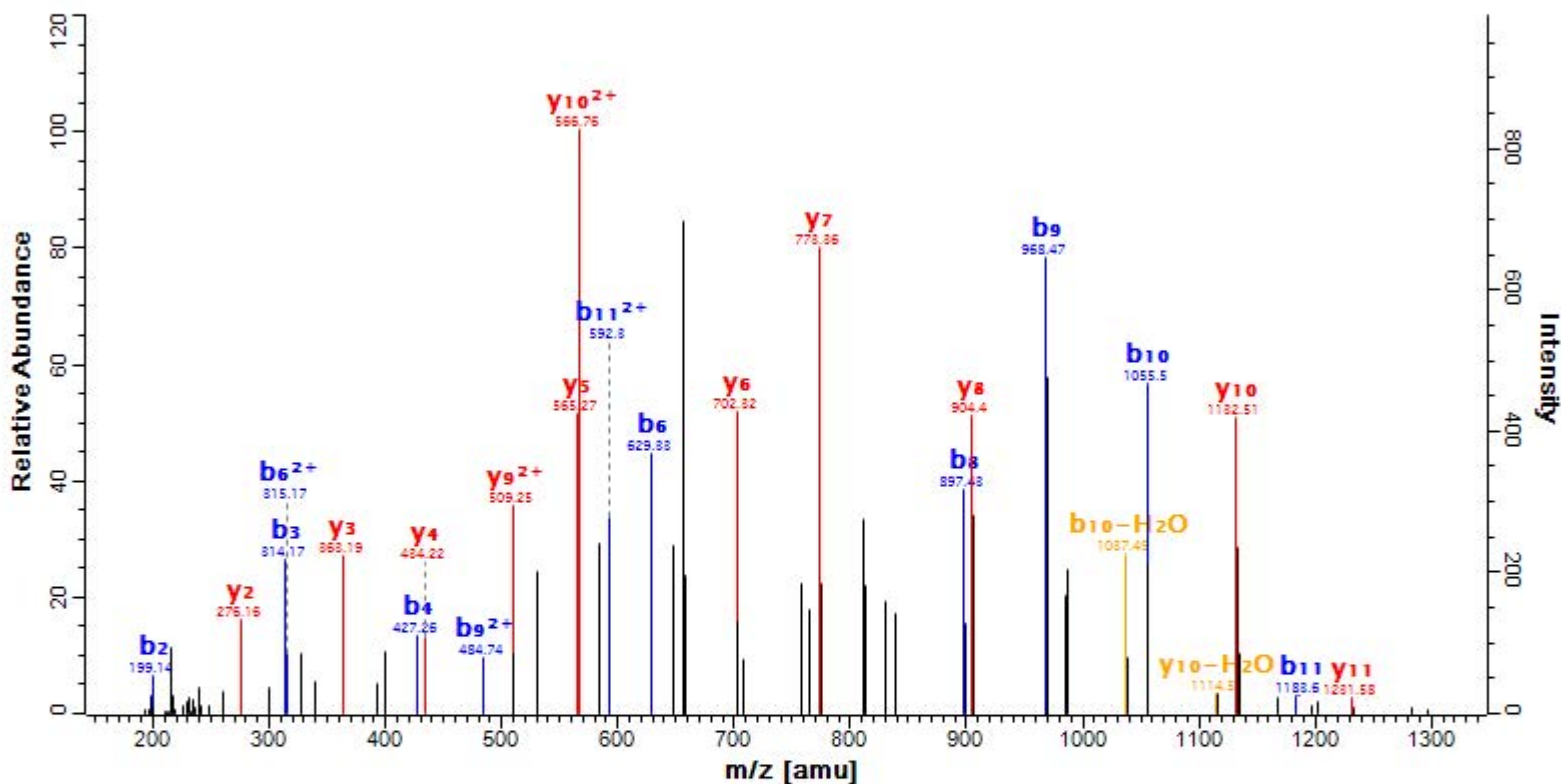

#### precursor information

|                   |                 |
|-------------------|-----------------|
| Mass:             | 1329.64205      |
| m/z:              | 665.8283        |
| Charge:           | 2+              |
| Retentiontime:    | 25.285238265991 |
| Score:            | 176.051         |
| Mass Error [ppm]: | -0.032626       |
| PEP:              | 7.4086E-11      |
| Precursor Type:   | MULTI           |

#### general information

|                       |             |
|-----------------------|-------------|
| Annotation:           | 10 of 12    |
| AminoAcids Coverage:  | 83 %        |
| Intensity Coverage:   | 51 %        |
| Peak Coverage:        | 28 %        |
| Protein Localisation: | 324 ... 335 |

| b <sup>2+</sup> ion |        | b ion    |        | seq |   |    | y ion    |         | y <sup>2+</sup> ion |         |
|---------------------|--------|----------|--------|-----|---|----|----------|---------|---------------------|---------|
| Δ dalton            | mass   | Δ dalton | mass   |     |   |    | Δ dalton | mass    | Δ dalton            | mass    |
|                     | 100.08 |          | 100.08 | 1   | V | 11 |          |         |                     |         |
|                     | 199.14 | +0.0476  | 199.14 | 2   | V | 10 | 1231.6   | +0.2262 | 1231.6              |         |
|                     | 314.17 | +0.0833  | 314.17 | 3   | D | 9  | 1132.5   | +0.0022 | 566.76              | +0.2298 |
|                     | 427.26 | +0.0252  | 427.26 | 4   | L | 8  | 1017.5   |         | 509.25              | +0.1429 |
|                     | 558.3  |          | 558.3  | 5   | M | 7  | 904.4    | +0.0145 | 904.4               |         |
| +0.161              | 315.17 | +0.1019  | 629.33 | 6   | A | 6  | 773.36   | -0.046  | 773.36              |         |
|                     | 766.39 |          | 766.39 | 7   | H | 5  | 702.32   | +0.1403 | 702.32              |         |
|                     | 897.43 | -0.057   | 897.43 | 8   | M | 4  | 565.27   | -0.001  | 565.27              |         |
| -0.432              | 484.74 | +0.0003  | 968.47 | 9   | A | 3  | 434.22   | -0.03   | 434.22              |         |
|                     | 1055.5 | -0.017   | 1055.5 | 10  | S | 2  | 363.19   | +0.1138 | 363.19              |         |
| +0.1904             | 592.3  | +0.1474  | 1183.6 | 11  | K | 1  | 276.16   | -0.05   | 276.16              |         |
|                     |        |          |        | 12  | F | 0  | 148.06   |         | 148.06              |         |

Scan number 3360 Raw file LNCAP\_Silac\_23F10\_set1\_07  
 Method ITMS: CID Pepti... 75.46

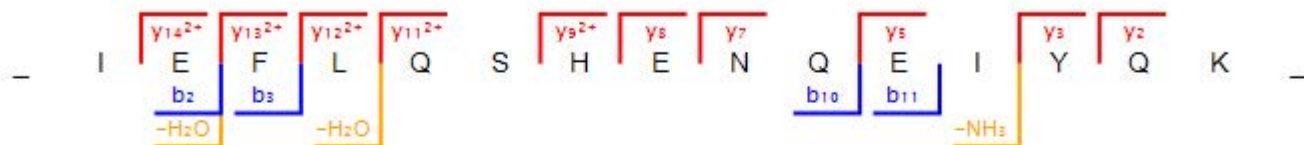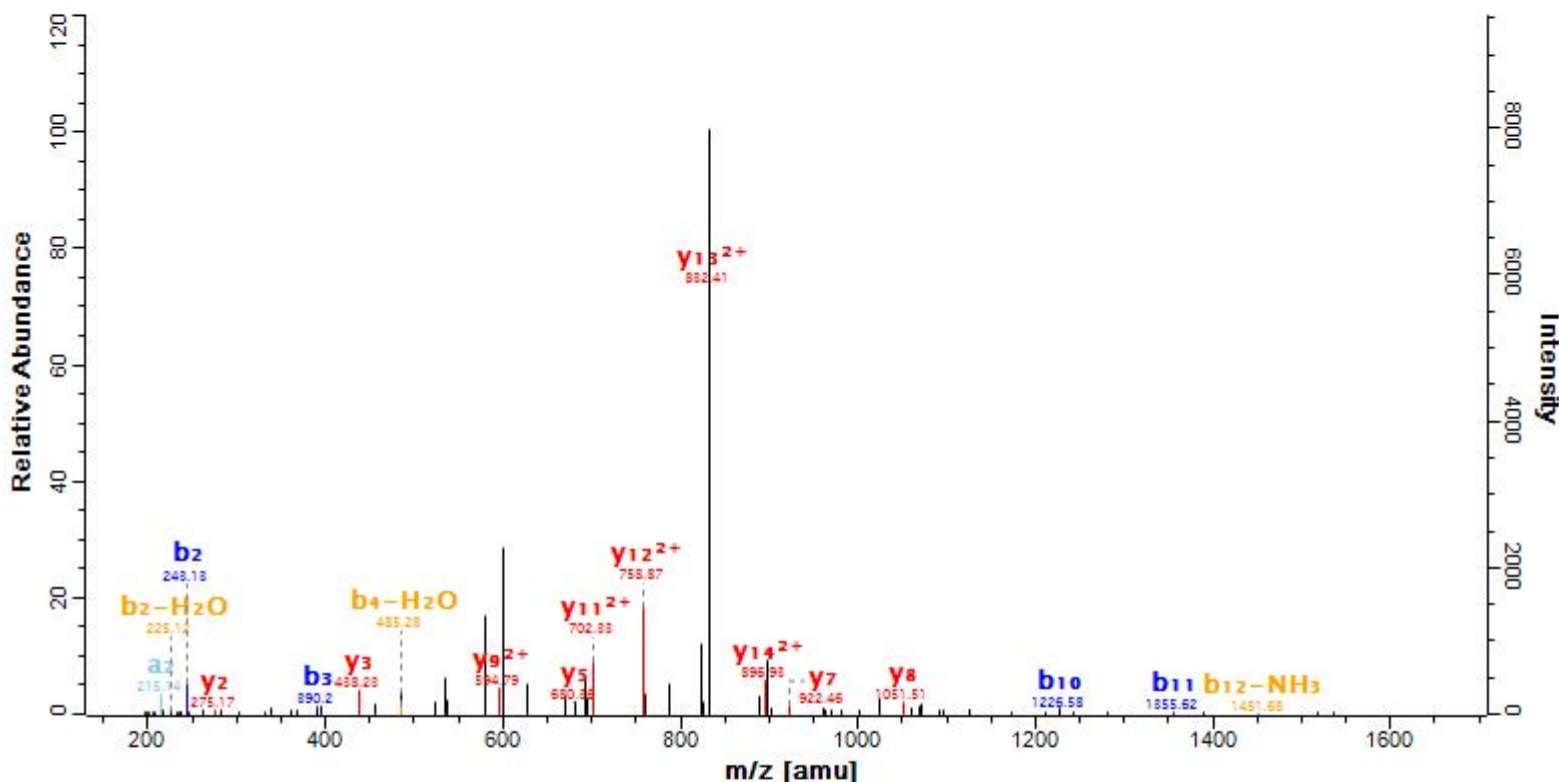

#### precursor information

|                   |                 |
|-------------------|-----------------|
| Mass:             | 1904.92692      |
| m/z:              | 635.98292       |
| Charge:           | 3+              |
| Retentiontime:    | 25.823421478271 |
| Score:            | 75.46223        |
| Mass Error [ppm]: | 0.042638        |
| PEP:              | 0.00080469      |
| Precursor Type:   | MULTI           |

| a ion    |        | b ion    |        | seq |   |    | y ion    |         | y <sup>2+</sup> ion |         |
|----------|--------|----------|--------|-----|---|----|----------|---------|---------------------|---------|
| Δ dalton | mass   | Δ dalton | mass   |     |   |    | Δ dalton | mass    | Δ dalton            | mass    |
|          | 86.096 |          | 114.09 | 1   | I | 14 |          |         |                     |         |
| +0.0103  | 215.14 | -0.024   | 243.13 | 2   | E | 13 | 1792.9   |         | 896.93              | -0.068  |
|          | 362.21 | -0.005   | 390.2  | 3   | F | 12 | 1663.8   |         | 832.41              | +0.0751 |
|          | 475.29 |          | 503.29 | 4   | L | 11 | 1516.7   |         | 758.87              | +0.3355 |
|          | 603.35 |          | 631.34 | 5   | Q | 10 | 1403.7   |         | 702.33              | +0.288  |
|          | 690.38 |          | 718.38 | 6   | S | 9  | 1275.6   |         | 1275.6              |         |
|          | 827.44 |          | 855.44 | 7   | H | 8  | 1188.6   |         | 594.79              | +0.0475 |
|          | 956.48 |          | 984.48 | 8   | E | 7  | 1051.5   | +0.0664 | 1051.5              |         |
|          | 1070.5 |          | 1098.5 | 9   | N | 6  | 922.46   | -0.033  | 922.46              |         |
|          | 1198.6 | -0.055   | 1226.6 | 10  | Q | 5  | 808.42   |         | 808.42              |         |
|          | 1327.6 | -0.055   | 1355.6 | 11  | E | 4  | 680.36   | +0.1694 | 680.36              |         |
|          | 1440.7 |          | 1468.7 | 12  | I | 3  | 551.32   |         | 551.32              |         |
|          | 1603.8 |          | 1631.8 | 13  | Y | 2  | 438.23   | +0.0671 | 438.23              |         |
|          | 1731.8 |          | 1759.8 | 14  | Q | 1  | 275.17   | +0.0703 | 275.17              |         |
|          |        |          |        | 15  | K | 0  | 147.11   |         | 147.11              |         |

#### general information

|                       |             |
|-----------------------|-------------|
| Annotation:           | 12 of 15    |
| AminoAcids Coverage:  | 80 %        |
| Intensity Coverage:   | 32 %        |
| Peak Coverage:        | 17 %        |
| Protein Localisation: | 481 ... 495 |

Scan number 3640 Raw file LNCAP\_Silac\_23F10\_set1\_07  
 Method ITMS; CID Pepti... 232.37

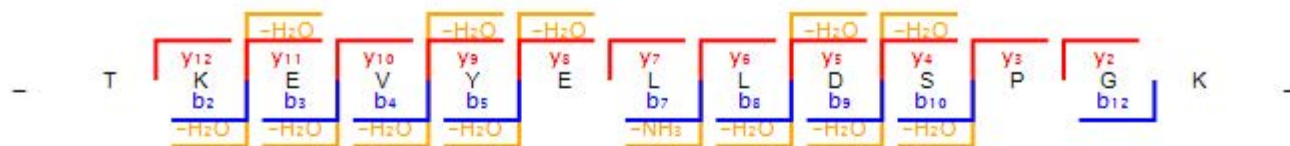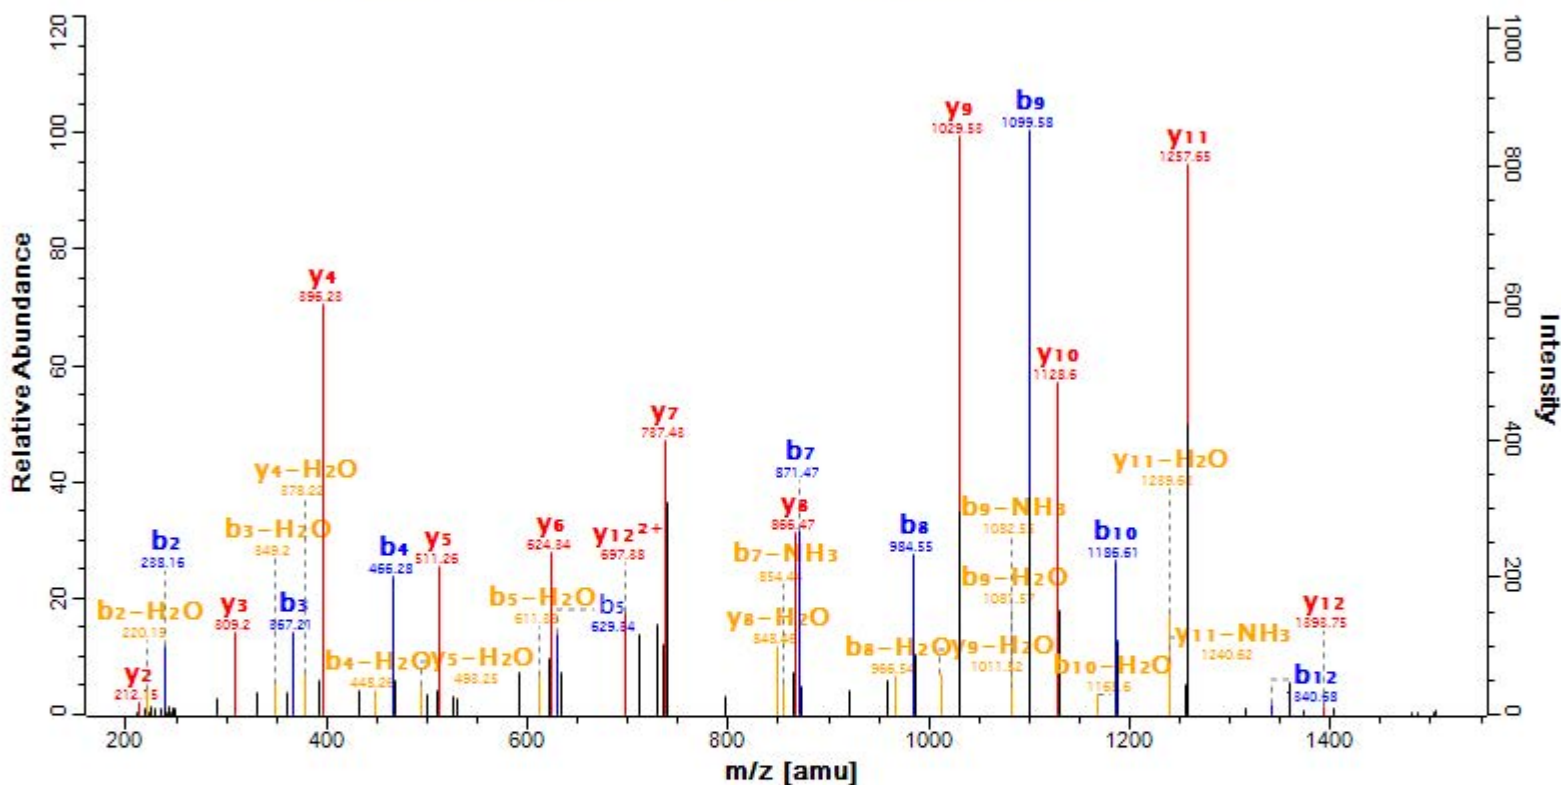

#### precursor information

|                   |                 |
|-------------------|-----------------|
| Mass:             | 1477.76662      |
| m/z:              | 739.89059       |
| Charge:           | 2+              |
| Retentiontime:    | 27.454473495483 |
| Score:            | 232.3726        |
| Mass Error [ppm]: | 0.13091         |
| PEP:              | 6.4399E-31      |
| Precursor Type:   | MULTI           |

#### general information

|                       |           |
|-----------------------|-----------|
| Annotation:           | 11 of 13  |
| AminoAcids Coverage:  | 85 %      |
| Intensity Coverage:   | 70 %      |
| Peak Coverage:        | 40 %      |
| Protein Localisation: | 44 ... 56 |

| b ion     |          |    |     |    | y ion    |           | y <sup>2+</sup> ion |           |
|-----------|----------|----|-----|----|----------|-----------|---------------------|-----------|
| Δ dalton  | mass     |    | seq |    | Δ dalton | mass      | Δ dalton            | mass      |
|           | 102.055  | 1  | T   | 12 |          |           |                     |           |
| +0.058234 | 238.1641 | 2  | K   | 11 | 1393.754 | -0.31765  | 697.3808            | +0.034374 |
| +0.084977 | 367.2067 | 3  | E   | 10 | 1257.645 | -0.00952  | 1257.645            |           |
| +0.059898 | 466.2751 | 4  | V   | 9  | 1128.603 | -0.05579  | 1128.603            |           |
| +0.064075 | 629.3385 | 5  | Y   | 8  | 1029.534 | -0.01521  | 1029.534            |           |
|           | 758.381  | 6  | E   | 7  | 866.4709 | +0.116174 | 866.4709            |           |
| +0.029153 | 871.4651 | 7  | L   | 6  | 737.4283 | +0.147842 | 737.4283            |           |
| +0.008261 | 984.5492 | 8  | L   | 5  | 624.3443 | -0.03427  | 624.3443            |           |
| -0.03107  | 1099.576 | 9  | D   | 4  | 511.2602 | +0.151846 | 511.2602            |           |
| -0.06493  | 1186.608 | 10 | S   | 3  | 396.2333 | -0.04063  | 396.2333            |           |
|           | 1283.661 | 11 | P   | 2  | 309.2012 | +0.025576 | 309.2012            |           |
| -0.00622  | 1340.682 | 12 | G   | 1  | 212.1485 | -0.01156  | 212.1485            |           |
|           |          | 13 | K   | 0  | 155.127  |           | 155.127             |           |

Scan number 4265 Raw file LNCAP\_Silac\_23F10\_set1\_07  
 Method ITMS; CID Pepti... 118.51

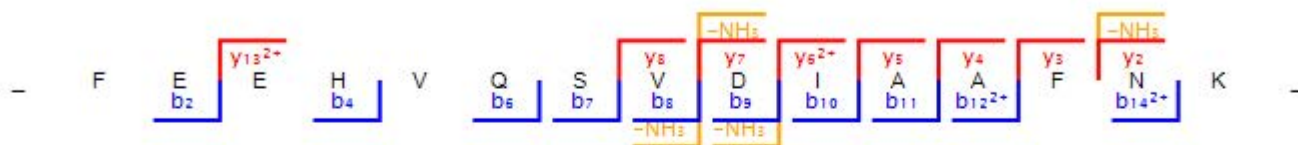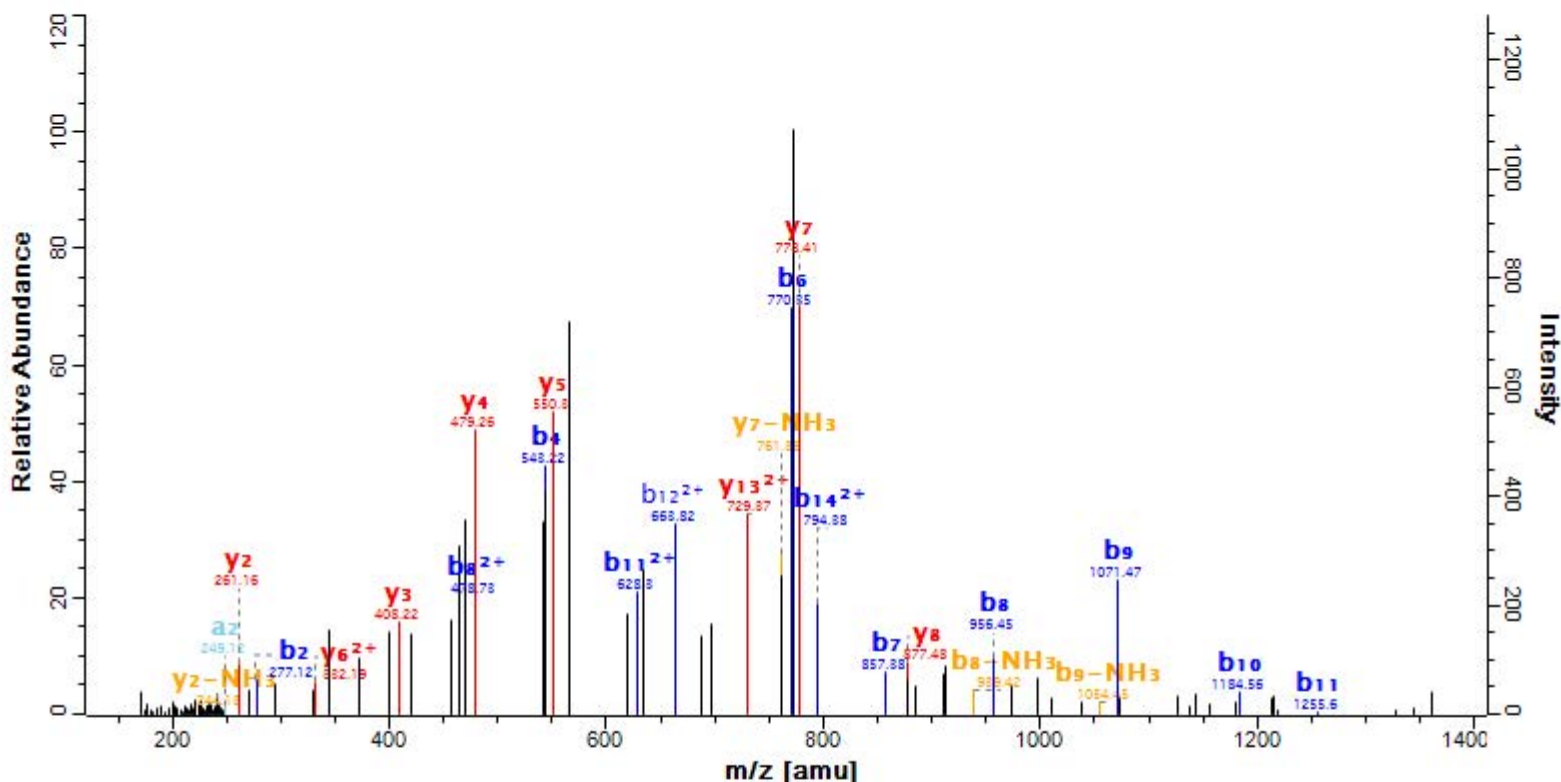

#### precursor information

|                   |                 |
|-------------------|-----------------|
| Mass:             | 1732.8418       |
| m/z:              | 578.62121       |
| Charge:           | 3+              |
| Retentiontime:    | 31.162668228149 |
| Score:            | 118.5074        |
| Mass Error [ppm]: | -0.14442        |
| PEP:              | 2.2605E-07      |
| Precursor Type:   | MULTI           |

|       | a ion         | b <sup>2+</sup> ion | b ion         |       |    | y ion         | y <sup>2+</sup> ion |       |
|-------|---------------|---------------------|---------------|-------|----|---------------|---------------------|-------|
|       | Δ dalton mass | Δ dalton mass       | Δ dalton mass | seq   |    | Δ dalton mass | Δ dalton mass       |       |
|       | 120.1         | 148.1               | 148.1         | 1     | F  | 14            |                     |       |
| -0.31 | 249.1         | 277.1               | +0.083277.1   | 2     | E  | 13            | 1587                |       |
|       | 378.2         | 406.2               | 406.2         | 3     | E  | 12            | 1458                |       |
|       | 515.2         | 543.2               | -0.19         | 543.2 | 4  | H             | 11                  | 1329  |
|       | 614.3         | 642.3               | 642.3         | 5     | V  | 10            | 1192                |       |
|       | 742.4         | 770.3               | +0.46         | 770.3 | 6  | Q             | 9                   | 1093  |
|       | 829.4         | 857.4               | +0.264        | 857.4 | 7  | S             | 8                   | 964.5 |
|       | 928.5         | +0.002478.7         | +0.0599       | 956.4 | 8  | V             | 7                   | 877.5 |
|       | 1043          | 1071                | -0.08         | 1071  | 9  | D             | 6                   | 778.4 |
|       | 1157          | 1185                | +0.0081       | 1185  | 10 | I             | 5                   | 663.4 |
|       | 1228          | +0.103628.3         | +0.2061       | 1256  | 11 | A             | 4                   | 550.3 |
|       | 1299          | -0.1                | 663.8         | 1327  | 12 | A             | 3                   | 479.3 |
|       | 1446          | 1474                | 1474          | 1474  | 13 | F             | 2                   | 408.2 |
|       | 1560          | +0.488794.4         | 1588          | 1588  | 14 | N             | 1                   | 261.2 |
|       |               |                     |               |       | 15 | K             | 0                   | 147.1 |

#### general information

|                       |             |
|-----------------------|-------------|
| Annotation:           | 12 of 15    |
| AminoAcids Coverage:  | 80 %        |
| Intensity Coverage:   | 45 %        |
| Peak Coverage:        | 23 %        |
| Protein Localisation: | 266 ... 280 |



Scan number 4508 Raw file LNCAP\_Silac\_23F10\_set1\_07  
 Method ITMS: CID Pepti... 110.51

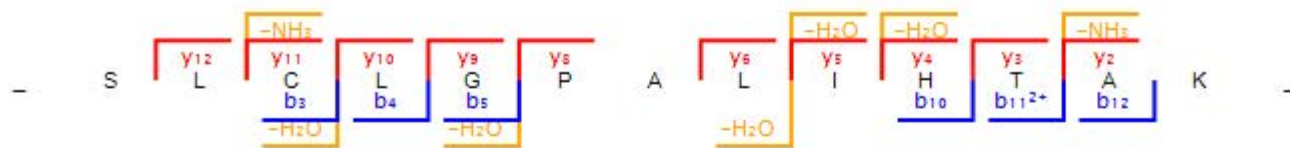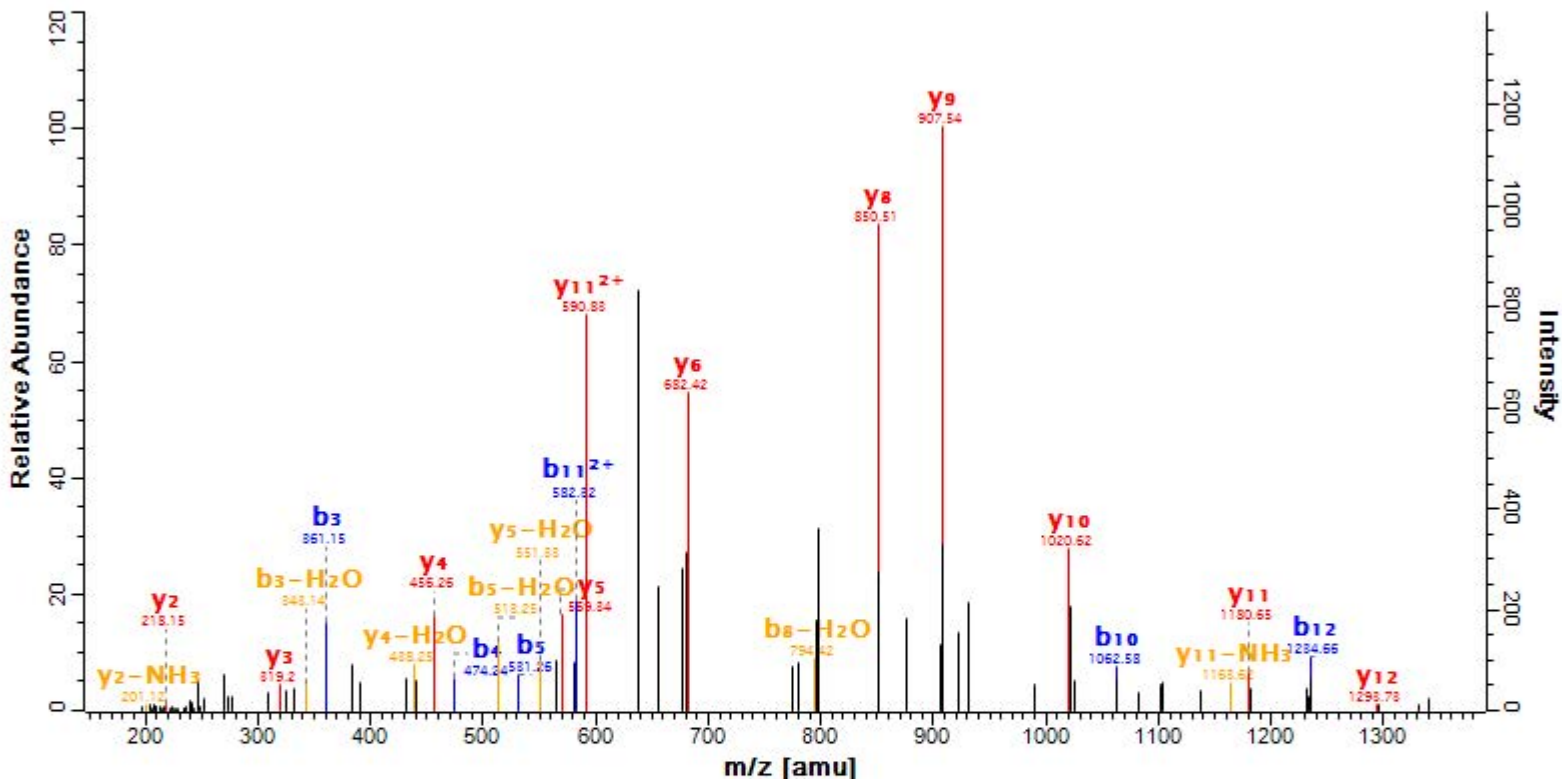

**precursor information**

|                   |                 |
|-------------------|-----------------|
| Mass:             | 1379.75915      |
| m/z:              | 690.88685       |
| Charge:           | 2+              |
| Retentiontime:    | 32.617378234863 |
| Score:            | 110.5098        |
| Mass Error [ppm]: | -0.25566        |
| PEP:              | 6.6356E-06      |
| Precursor Type:   | MULTI           |

**general information**

|                       |             |
|-----------------------|-------------|
| Annotation:           | 10 of 13    |
| AminoAcids Coverage:  | 77 %        |
| Intensity Coverage:   | 50 %        |
| Peak Coverage:        | 26 %        |
| Protein Localisation: | 105 ... 117 |

| b <sup>2+</sup> ion |        | b ion    |        |     |   |          | y ion  |          | y <sup>2+</sup> ion |         |
|---------------------|--------|----------|--------|-----|---|----------|--------|----------|---------------------|---------|
| Δ dalton            | mass   | Δ dalton | mass   | seq |   | Δ dalton | mass   | Δ dalton | mass                |         |
|                     | 88.039 |          | 88.039 | 1   | S | 12       |        |          |                     |         |
|                     | 201.12 |          | 201.12 | 2   | L | 11       | 1293.7 | +0.2146  | 1293.7              |         |
|                     | 361.15 | +0.0665  | 361.15 | 3   | C | 10       | 1180.7 | -0.074   | 590.83              | +0.1608 |
|                     | 474.24 | +0.0466  | 474.24 | 4   | L | 9        | 1020.6 | -0.041   | 1020.6              |         |
|                     | 531.26 | -0.091   | 531.26 | 5   | G | 8        | 907.54 | +0.0858  | 907.54              |         |
|                     | 628.31 |          | 628.31 | 6   | P | 7        | 850.51 | +0.0394  | 850.51              |         |
|                     | 699.35 |          | 699.35 | 7   | A | 6        | 753.46 |          | 753.46              |         |
|                     | 812.43 |          | 812.43 | 8   | L | 5        | 682.42 | -0.257   | 682.42              |         |
|                     | 925.52 |          | 925.52 | 9   | I | 4        | 569.34 | +0.0917  | 569.34              |         |
|                     | 1062.6 | -0.078   | 1062.6 | 10  | H | 3        | 456.26 | +0.1807  | 456.26              |         |
| +0.1454             | 582.32 |          | 1163.6 | 11  | T | 2        | 319.2  | +0.0888  | 319.2               |         |
|                     | 1234.7 | -0.156   | 1234.7 | 12  | A | 1        | 218.15 | +0.2527  | 218.15              |         |
|                     |        |          |        | 13  | K | 0        | 147.11 |          | 147.11              |         |

Scan number 472 Raw file LNCAP\_Silac\_23F10\_set1\_07  
 Method ITMS; CID Peptide 280.97

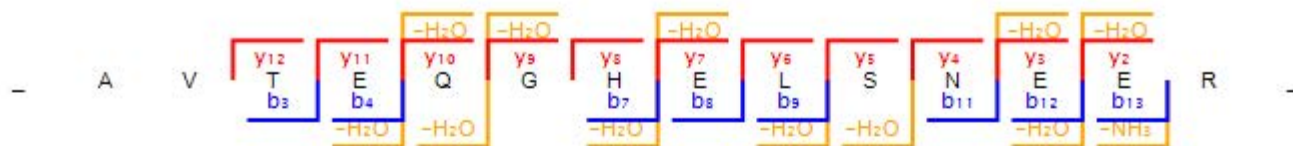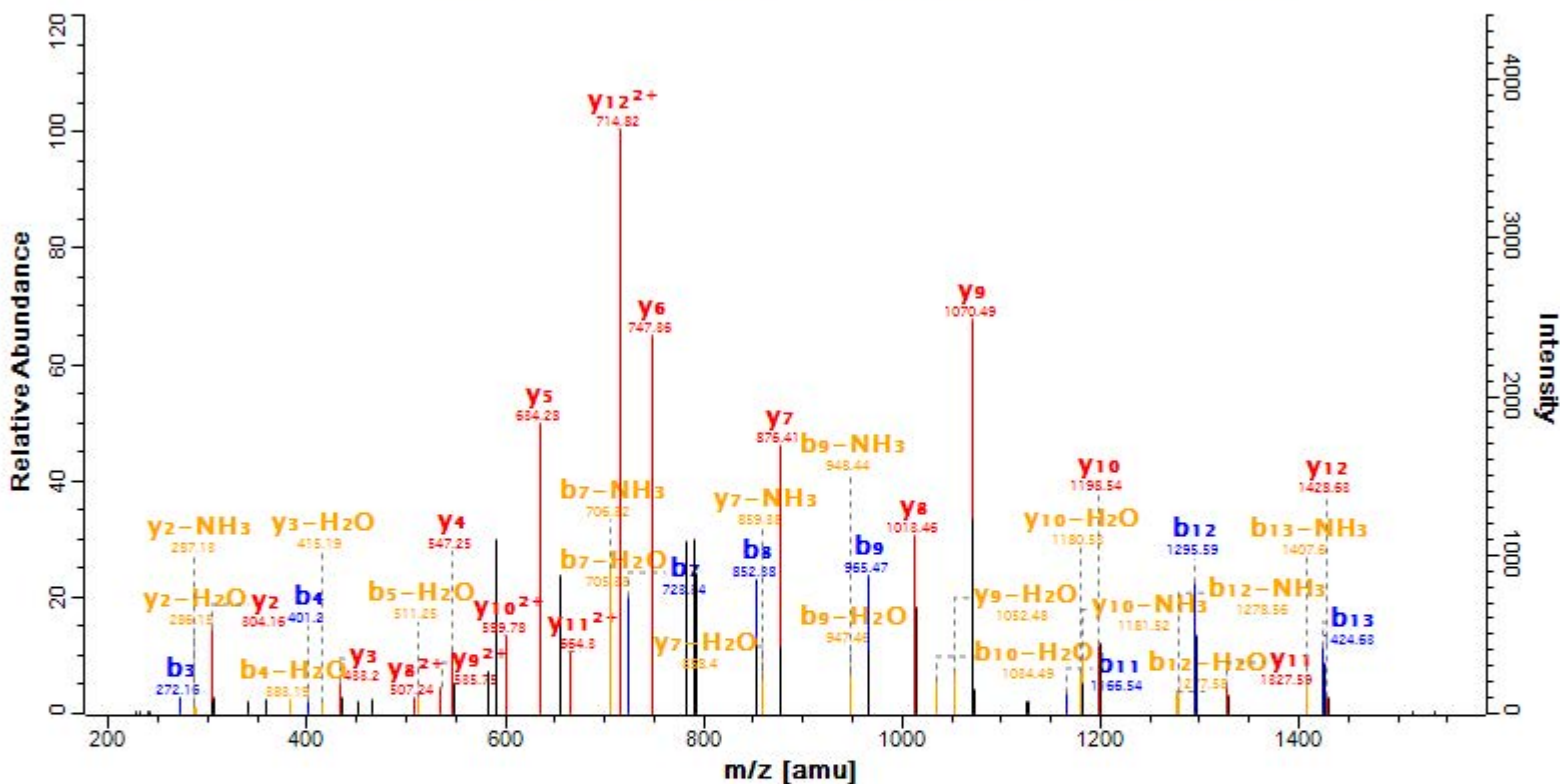

#### precursor information

|                   |                 |
|-------------------|-----------------|
| Mass:             | 1597.73243      |
| m/z:              | 799.87349       |
| Charge:           | 2+              |
| Retentiontime:    | 7.7822284698486 |
| Score:            | 280.9665        |
| Mass Error [ppm]: | -0.49754        |
| PEP:              | 1.6697E-73      |
| Precursor Type:   | MULTI           |

#### general information

|                       |           |
|-----------------------|-----------|
| Annotation:           | 11 of 14  |
| AminoAcids Coverage:  | 79 %      |
| Intensity Coverage:   | 66 %      |
| Peak Coverage:        | 52 %      |
| Protein Localisation: | 30 ... 43 |

| b ion     |          |     |   | y ion    |          | y <sup>2+</sup> ion |          |           |
|-----------|----------|-----|---|----------|----------|---------------------|----------|-----------|
| Δ dalton  | mass     | seq |   | Δ dalton | mass     | Δ dalton            | mass     |           |
|           | 72.04439 | 1   | A | 13       |          |                     |          |           |
|           | 171.1128 | 2   | V | 12       | 1527.703 | 1527.703            |          |           |
| +0.107004 | 272.1605 | 3   | T | 11       | 1428.635 | -0.07931            | 714.8211 | +0.249552 |
| +0.04845  | 401.2031 | 4   | E | 10       | 1327.587 | -0.00295            | 664.2973 | +0.188553 |
|           | 529.2617 | 5   | Q | 9        | 1198.545 | -0.00271            | 599.776  | +0.228648 |
|           | 586.2831 | 6   | G | 8        | 1070.486 | -0.01396            | 535.7467 | -0.4834   |
| +0.09248  | 723.342  | 7   | H | 7        | 1013.465 | -0.03595            | 507.236  | +0.107658 |
| -0.0203   | 852.3846 | 8   | E | 6        | 876.4058 | +0.090648           | 876.4058 |           |
| +0.018436 | 965.4687 | 9   | L | 5        | 747.3632 | +0.024293           | 747.3632 |           |
|           | 1052.501 | 10  | S | 4        | 634.2791 | +0.061848           | 634.2791 |           |
| +0.064757 | 1166.544 | 11  | N | 3        | 547.2471 | +0.036565           | 547.2471 |           |
| -0.02068  | 1295.586 | 12  | E | 2        | 433.2041 | +0.043298           | 433.2041 |           |
| -0.06816  | 1424.629 | 13  | E | 1        | 304.1615 | +0.111679           | 304.1615 |           |
|           |          | 14  | R | 0        | 175.119  |                     | 175.119  |           |

Scan number 489 Raw file LNCAP\_Silac\_23F10\_set1\_07  
 Method ITMS; CID Peptide 129.82

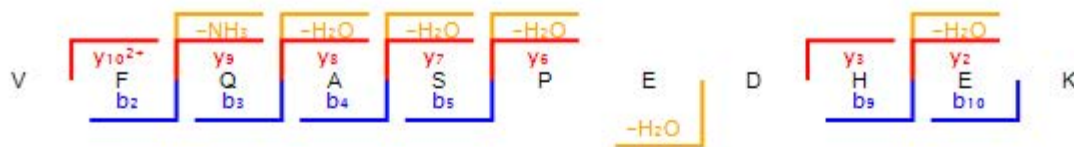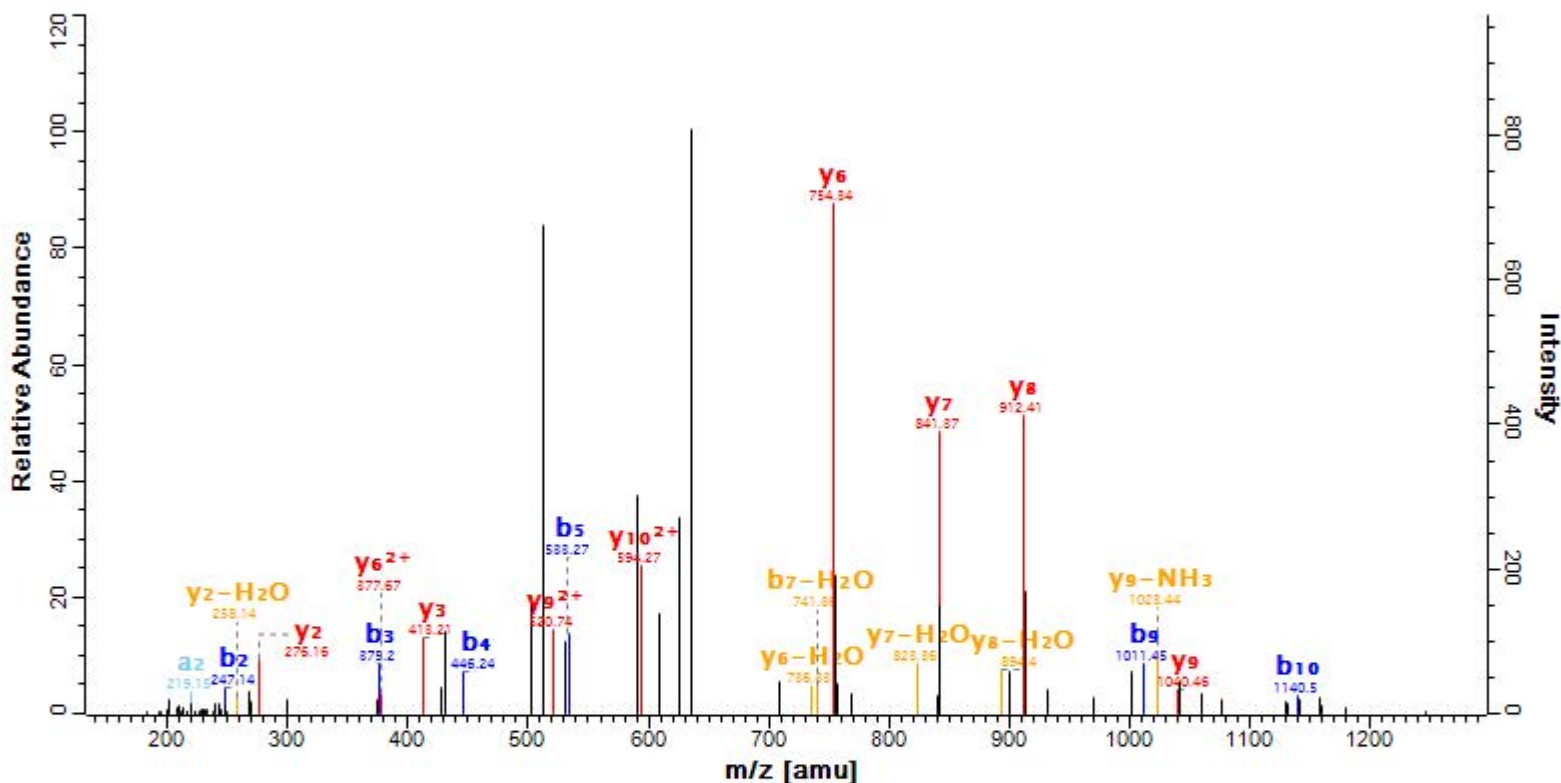

#### precursor information

|                   |                 |
|-------------------|-----------------|
| Mass:             | 1285.59405      |
| m/z:              | 643.8043        |
| Charge:           | 2+              |
| Retentiontime:    | 7.8962616920471 |
| Score:            | 129.8187        |
| Mass Error [ppm]: | 0.13213         |
| PEP:              | 0.0001863       |
| Precursor Type:   | MULTI           |

#### general information

|                       |           |
|-----------------------|-----------|
| Annotation:           | 8 of 11   |
| AminoAcids Coverage:  | 73 %      |
| Intensity Coverage:   | 40 %      |
| Peak Coverage:        | 25 %      |
| Protein Localisation: | 75 ... 85 |

| a ion    |        | b ion    |        |    |     |          | y ion  |          | y <sup>2+</sup> ion |  |
|----------|--------|----------|--------|----|-----|----------|--------|----------|---------------------|--|
| Δ dalton | mass   | Δ dalton | mass   |    | seq | Δ dalton | mass   | Δ dalton | mass                |  |
|          | 72.081 |          | 100.08 | 1  | V   | 10       |        |          |                     |  |
| +0.0375  | 219.15 | -0.047   | 247.14 | 2  | F   | 9        | 1187.5 |          | 594.27 +0.1436      |  |
|          | 347.21 | +0.1767  | 375.2  | 3  | Q   | 8        | 1040.5 | -0.001   | 520.74 +0.2561      |  |
|          | 418.24 | +0.0236  | 446.24 | 4  | A   | 7        | 912.41 | -0.065   | 912.41              |  |
|          | 505.28 | +0.1226  | 533.27 | 5  | S   | 6        | 841.37 | +0.0178  | 841.37              |  |
|          | 602.33 |          | 630.32 | 6  | P   | 5        | 754.34 | +0.0315  | 377.67 +0.1887      |  |
|          | 731.37 |          | 759.37 | 7  | E   | 4        | 657.28 |          | 657.28              |  |
|          | 846.4  |          | 874.39 | 8  | D   | 3        | 528.24 |          | 528.24              |  |
|          | 983.46 | +0.0868  | 1011.5 | 9  | H   | 2        | 413.21 | +0.0126  | 413.21              |  |
|          | 1112.5 | +0.1222  | 1140.5 | 10 | E   | 1        | 276.16 | +0.1745  | 276.16              |  |
|          |        |          |        | 11 | K   | 0        | 147.11 |          | 147.11              |  |

Scan number 5772 Raw file LNCAP\_Silac\_23F10\_set1\_07  
 Method ITMS; CID Peptide 75.38

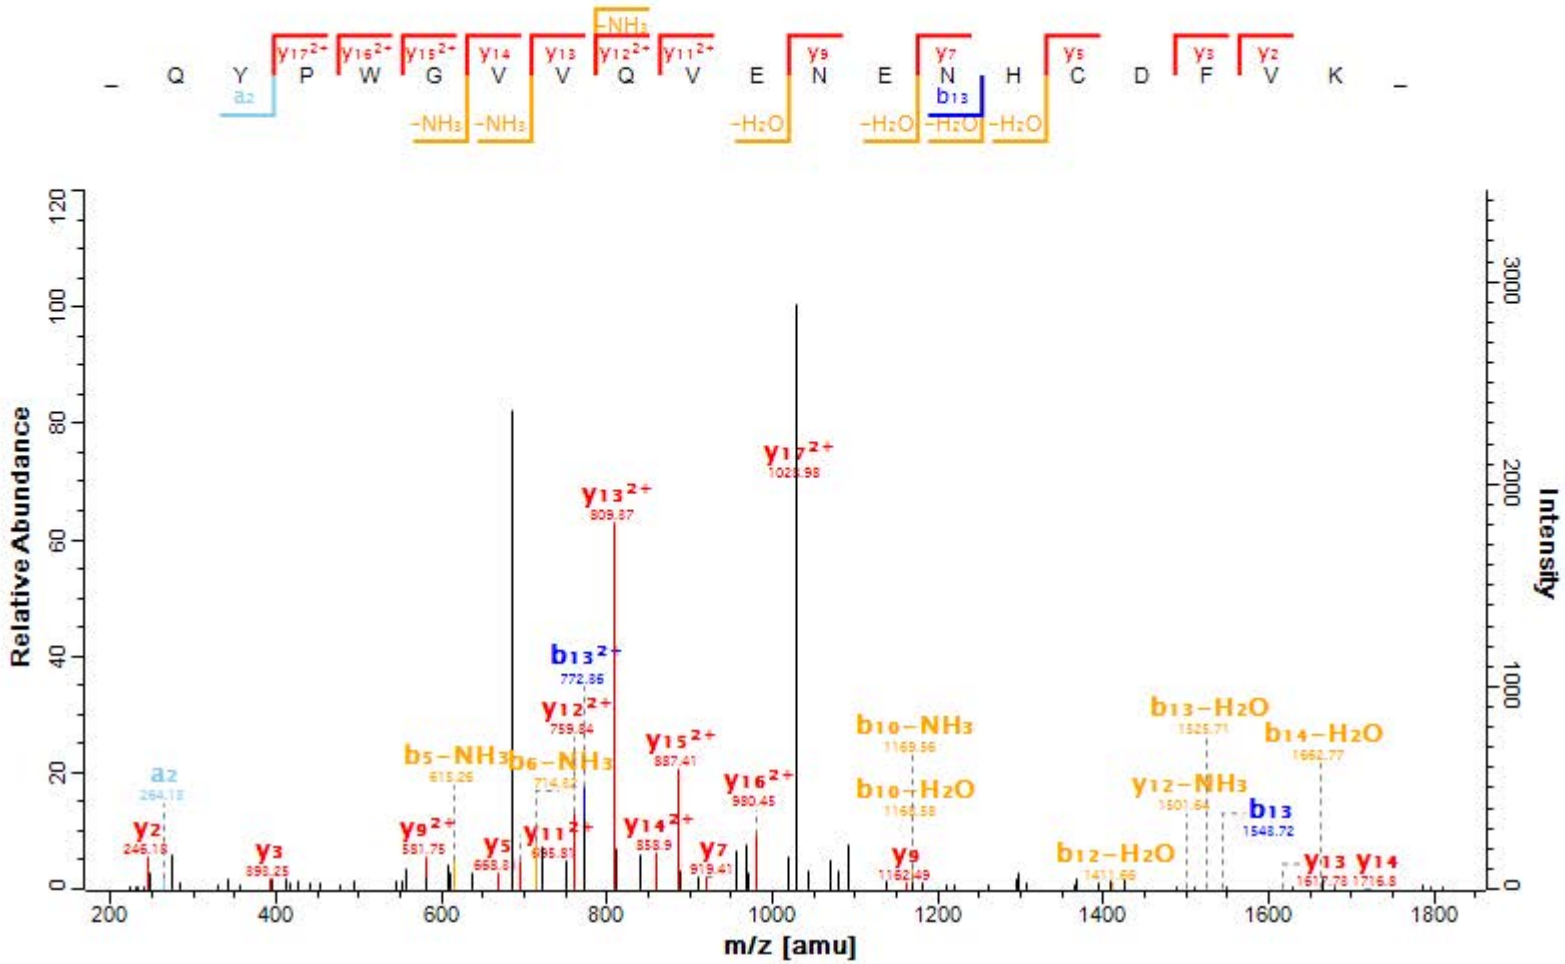

precursor information

|                   |                 |
|-------------------|-----------------|
| Mass:             | 2347.06959      |
| m/z:              | 783.36381       |
| Charge:           | 3+              |
| Retentiontime:    | 40.405113220214 |
| Score:            | 75.37602        |
| Mass Error [ppm]: | 0.18188         |
| PEP:              | 0.00020807      |
| Precursor Type:   | MULTI           |

general information

|                       |             |
|-----------------------|-------------|
| Annotation:           | 16 of 19    |
| AminoAcids Coverage:  | 84 %        |
| Intensity Coverage:   | 42 %        |
| Peak Coverage:        | 25 %        |
| Protein Localisation: | 264 ... 282 |

|        | a ion         | b <sup>2+</sup> ion | b ion         |    |     |    | y ion         | y <sup>2+</sup> ion |
|--------|---------------|---------------------|---------------|----|-----|----|---------------|---------------------|
|        | Δ dalton mass | Δ dalton mass       | Δ dalton mass |    | seq |    | Δ dalton mass | Δ dalton mass       |
|        | 101.1         | 129.1               | 129.1         | 1  | Q   | 18 |               |                     |
| +0.063 | 264.1         | 292.1               | 292.1         | 2  | Y   | 17 | 2220          | 2220                |
|        | 361.2         | 389.2               | 389.2         | 3  | P   | 16 | 2057          | 1029 +0.01!         |
|        | 547.3         | 575.3               | 575.3         | 4  | W   | 15 | 1960          | 980.5 +0.27         |
|        | 604.3         | 632.3               | 632.3         | 5  | G   | 14 | 1774          | 887.4 +0.17!        |
|        | 703.4         | 731.4               | 731.4         | 6  | V   | 13 | 1717          | 858.9 +0.25!        |
|        | 802.4         | 830.4               | 830.4         | 7  | V   | 12 | 1618          | 809.4 +0.29!        |
|        | 930.5         | 958.5               | 958.5         | 8  | Q   | 11 | 1519          | 759.8 +0.31         |
|        | 1030          | 1058                | 1058          | 9  | V   | 10 | 1391          | 695.8 +0.32!        |
|        | 1159          | 1187                | 1187          | 10 | E   | 9  | 1292          | 1292                |
|        | 1273          | 1301                | 1301          | 11 | N   | 8  | 1162          | 581.8 +0.06!        |
|        | 1402          | 1430                | 1430          | 12 | E   | 7  | 1048          | 1048                |
|        | 1516          | -0.48 772.4         | -0.23 1544    | 13 | N   | 6  | 919.4         | 919.4 +0.08!        |
|        | 1653          | 1681                | 1681          | 14 | H   | 5  | 805.4         | 805.4               |
|        | 1813          | 1841                | 1841          | 15 | C   | 4  | 668.3         | 668.3 +0.01!        |
|        | 1928          | 1956                | 1956          | 16 | D   | 3  | 508.3         | 508.3               |
|        | 2075          | 2103                | 2103          | 17 | F   | 2  | 393.2         | 393.2 +0.11!        |
|        | 2174          | 2202                | 2202          | 18 | V   | 1  | 246.2         | 246.2 +0.03!        |
|        |               |                     |               | 19 | K   | 0  | 147.1         | 147.1               |

Scan number 592 Raw file LNCAP\_Silac\_23F10\_set1\_07  
 Method ITMS; CID Pepti... 84.17

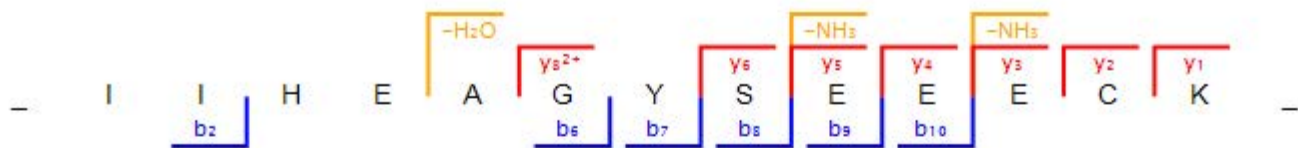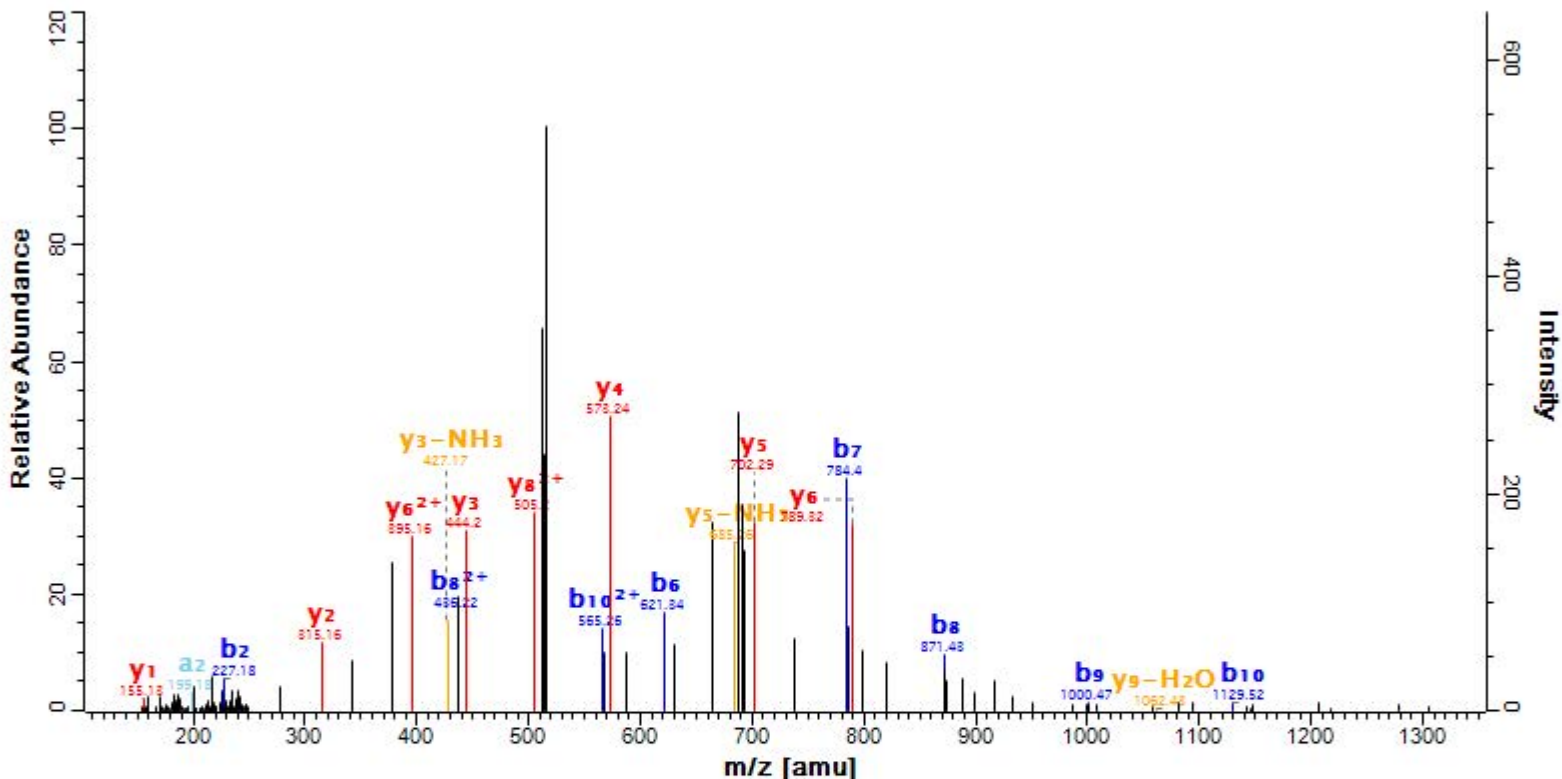

precursor information

|                   |                 |
|-------------------|-----------------|
| Mass:             | 1563.6877       |
| m/z:              | 522.23651       |
| Charge:           | 3+              |
| Retentiontime:    | 8.5592069625854 |
| Score:            | 84.16871        |
| Mass Error [ppm]: | 0.114           |
| PEP:              | 0.00059075      |
| Precursor Type:   | MULTI           |

general information

|                       |           |
|-----------------------|-----------|
| Annotation:           | 10 of 13  |
| AminoAcids Coverage:  | 77 %      |
| Intensity Coverage:   | 34 %      |
| Peak Coverage:        | 14 %      |
| Protein Localisation: | 55 ... 67 |

| a ion         | b <sup>2+</sup> ion | b ion         |    |     | y ion         | y <sup>2+</sup> ion |
|---------------|---------------------|---------------|----|-----|---------------|---------------------|
| Δ dalton mass | Δ dalton mass       | Δ dalton mass |    | seq | Δ dalton mass | Δ dalton mass       |
| 86.1          | 114.1               | 114.1         | 1  | I   | 12            |                     |
| +0.009 99.2   | 227.2               | -0.03 227.2   | 2  | I   | 11            | 1460                |
| 336.2         | 364.2               | 364.2         | 3  | H   | 10            | 1347                |
| 465.3         | 493.3               | 493.3         | 4  | E   | 9             | 1209                |
| 536.3         | 564.3               | 564.3         | 5  | A   | 8             | 1080                |
| 593.3         | 621.3               | -0.25 621.3   | 6  | G   | 7             | 1009                |
| 756.4         | 784.4               | -0.07 784.4   | 7  | Y   | 6             | 952.4               |
| 843.4         | +0.21 1436.2        | +0.09 8871.4  | 8  | S   | 5             | 789.3               |
| 972.5         | 1000                | -0.1 1000     | 9  | E   | 4             | 702.3               |
| 1102          | +0.19 1565.3        | -0.24 1130    | 10 | E   | 3             | 573.2               |
| 1231          | 1259                | 1259          | 11 | E   | 2             | 444.2               |
| 1391          | 1419                | 1419          | 12 | C   | 1             | 315.2               |
|               |                     |               | 13 | K   | 0             | 155.1               |

Scan number 593 Raw file LNCAP\_Silac\_23F10\_set1\_07  
 Method ITMS; CID Pepti... 86.83

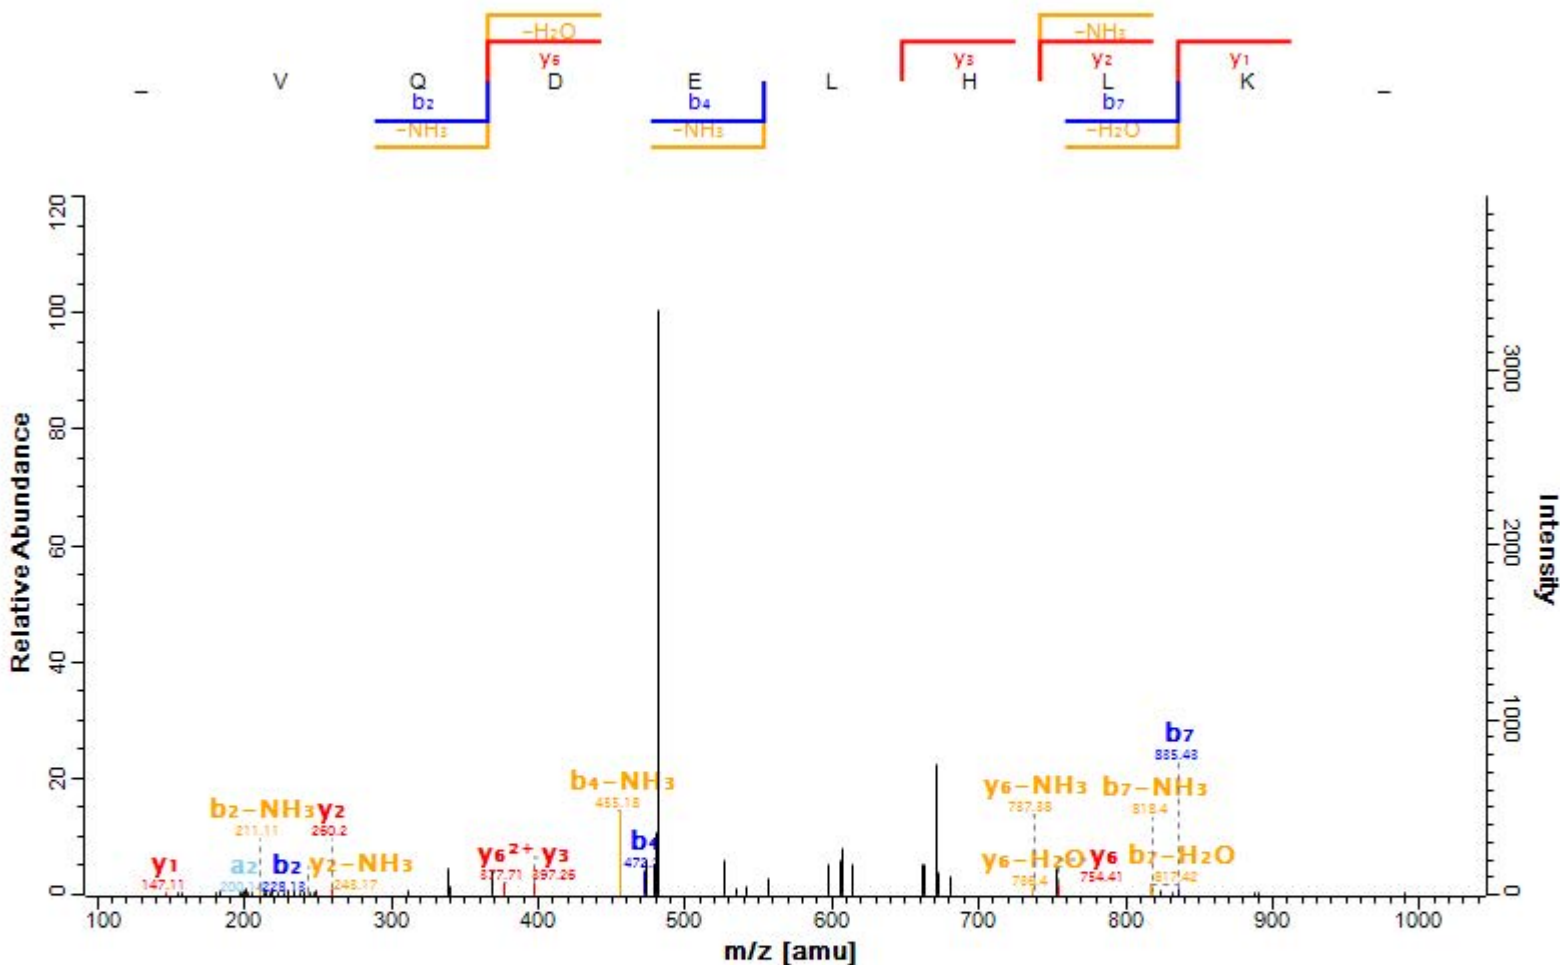

#### precursor information

|                       |                 |
|-----------------------|-----------------|
| Mass:                 | 980.52874       |
| m/z:                  | 491.27165       |
| Charge:               | 2+              |
| Retentiontime:        | 8.5685920715332 |
| Score:                | 86.83283        |
| Mass Error [ppm]:     | -0.36355        |
| g PEP:                | 0.015916        |
| Annotation:           | 6 of 8          |
| AminoAcids Coverage:  | 75 %            |
| Intensity Coverage:   | 12 %            |
| Peak Coverage:        | 14 %            |
| Protein Localisation: | 2100 ... 2107   |

| a ion    |        | b ion    |        |   |     |          | y ion  |          | y <sup>2+</sup> ion |  |
|----------|--------|----------|--------|---|-----|----------|--------|----------|---------------------|--|
| Δ dalton | mass   | Δ dalton | mass   |   | seq | Δ dalton | mass   | Δ dalton | mass                |  |
|          | 72.081 |          | 100.08 | 1 | V   | 7        |        |          |                     |  |
| +0.0611  | 200.14 | -0.022   | 228.13 | 2 | Q   | 6        | 882.47 |          | 882.47              |  |
|          | 315.17 |          | 343.16 | 3 | D   | 5        | 754.41 | +0.0919  | 377.71              |  |
|          | 444.21 | +0.0611  | 472.2  | 4 | E   | 4        | 639.38 |          | 639.38              |  |
|          | 557.29 |          | 585.29 | 5 | L   | 3        | 510.34 |          | 510.34              |  |
|          | 694.35 |          | 722.35 | 6 | H   | 2        | 397.26 | -0.273   | 397.26              |  |
|          | 807.44 | +0.0709  | 835.43 | 7 | L   | 1        | 260.2  | +0.1018  | 260.2               |  |
|          |        |          |        | 8 | K   | 0        | 147.11 | +0.1036  | 147.11              |  |

Scan number 5999 Raw file LNCAP\_Silac\_23F10\_set1\_07  
 Method ITMS; CID Pepti... 190.11

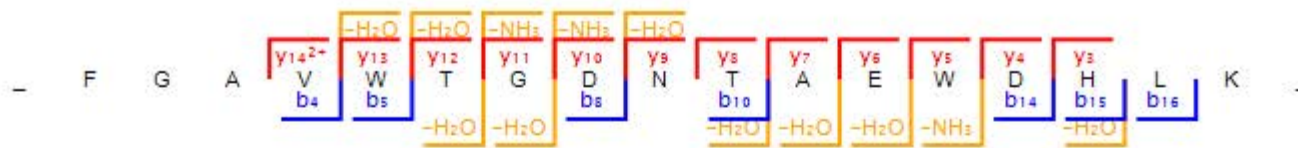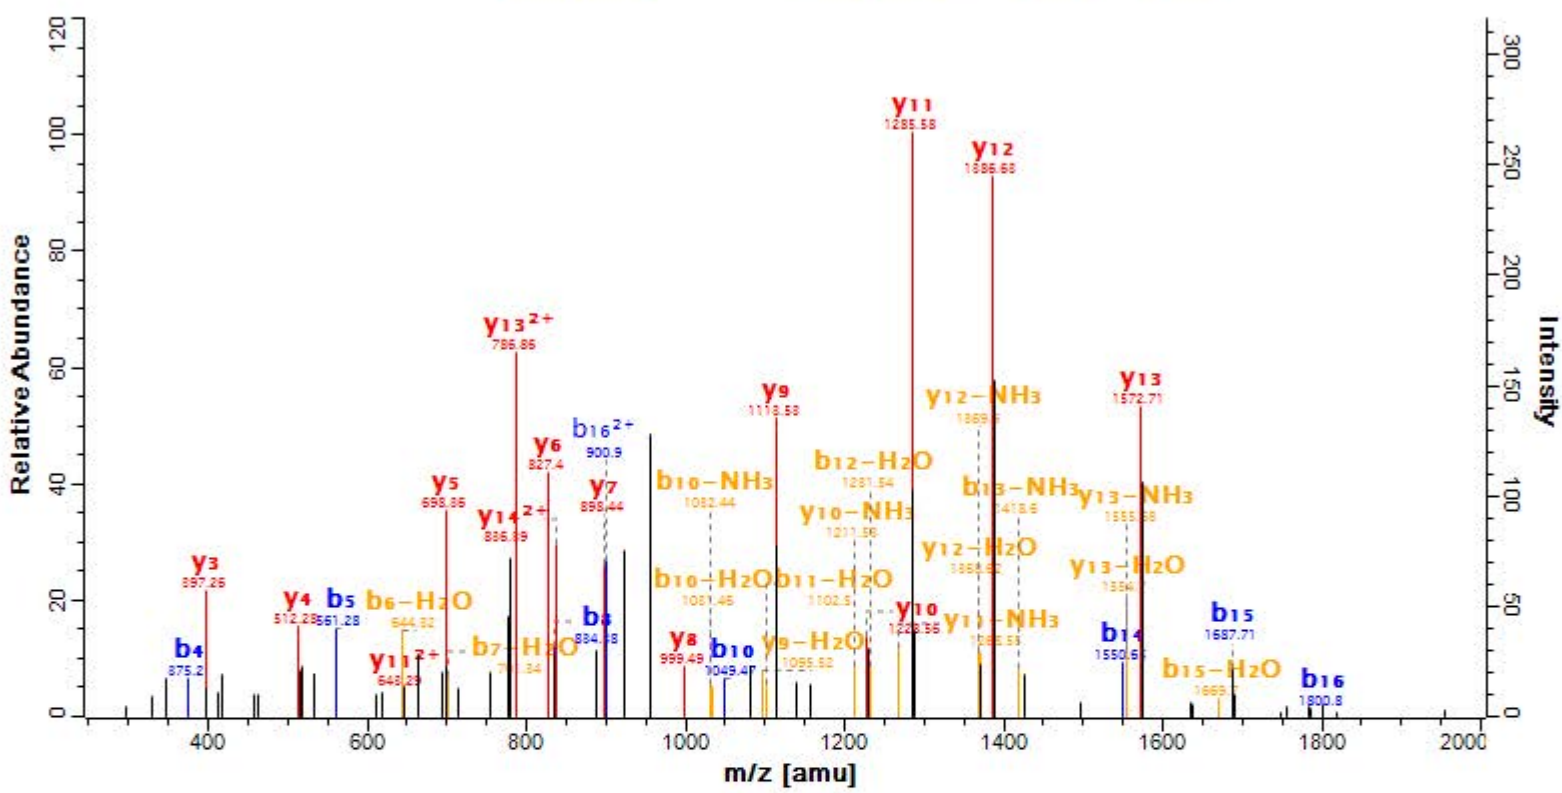

**precursor information**

|                   |                 |
|-------------------|-----------------|
| Mass:             | 1945.89749      |
| m/z:              | 973.95602       |
| Charge:           | 2+              |
| Retentiontime:    | 41.896690368652 |
| Score:            | 190.1081        |
| Mass Error [ppm]: | 0.82819         |
| PEP:              | 6.7079E-34      |
| Precursor Type:   | MULTI           |

**general information**

|                       |             |
|-----------------------|-------------|
| Annotation:           | 14 of 17    |
| AminoAcids Coverage:  | 82 %        |
| Intensity Coverage:   | 57 %        |
| Peak Coverage:        | 41 %        |
| Protein Localisation: | 662 ... 678 |

| b <sup>2+</sup> ion |        | b ion    |        | seq |   |    | y ion    |         | y <sup>2+</sup> ion |         |
|---------------------|--------|----------|--------|-----|---|----|----------|---------|---------------------|---------|
| Δ dalton            | mass   | Δ dalton | mass   |     |   |    | Δ dalton | mass    | Δ dalton            | mass    |
|                     | 148.08 |          | 148.08 | 1   | F | 16 |          |         |                     |         |
|                     | 205.1  |          | 205.1  | 2   | G | 15 | 1799.8   |         | 1799.8              |         |
|                     | 276.13 |          | 276.13 | 3   | A | 14 | 1742.8   |         | 1742.8              |         |
|                     | 375.2  | +0.1115  | 375.2  | 4   | V | 13 | 1671.8   |         | 836.39              | +0.2076 |
|                     | 561.28 | +0.096   | 561.28 | 5   | W | 12 | 1572.7   | -0.04   | 786.86              | +0.3021 |
|                     | 662.33 |          | 662.33 | 6   | T | 11 | 1386.6   | +0.0018 | 1386.6              |         |
|                     | 719.35 |          | 719.35 | 7   | G | 10 | 1285.6   | +0.0018 | 8643.29             | -0.103  |
|                     | 834.38 | +0.0841  | 834.38 | 8   | D | 9  | 1228.6   | +0.0913 | 1228.6              |         |
|                     | 948.42 |          | 948.42 | 9   | N | 8  | 1113.5   | +0.0502 | 1113.5              |         |
|                     | 1049.5 | -0.064   | 1049.5 | 10  | T | 7  | 999.49   | +0.0181 | 999.49              |         |
|                     | 1120.5 |          | 1120.5 | 11  | A | 6  | 898.44   | -0.005  | 898.44              |         |
|                     | 1249.5 |          | 1249.5 | 12  | E | 5  | 827.4    | +0.1541 | 827.4               |         |
|                     | 1435.6 |          | 1435.6 | 13  | W | 4  | 698.36   | +0.1711 | 698.36              |         |
|                     | 1550.7 | -0.137   | 1550.7 | 14  | D | 3  | 512.28   | +0.0625 | 512.28              |         |
|                     | 1687.7 | +0.0761  | 1687.7 | 15  | H | 2  | 397.26   | +0.0943 | 397.26              |         |
| -0.135              | 900.9  | -0.041   | 1800.8 | 16  | L | 1  | 260.2    |         | 260.2               |         |
|                     |        |          |        | 17  | K | 0  | 147.11   |         | 147.11              |         |

Scan number 6219 Raw file LNCAP\_Silac\_23F10\_set1\_07  
 Method ITMS; CID Peptide 177.63

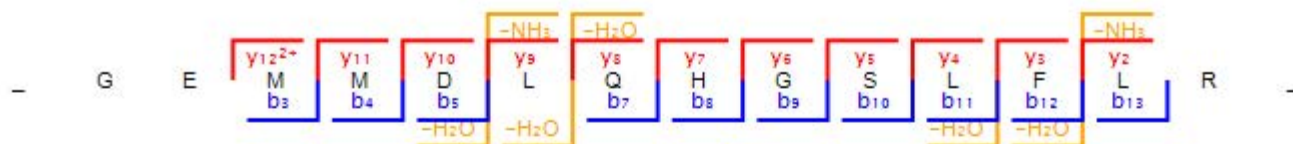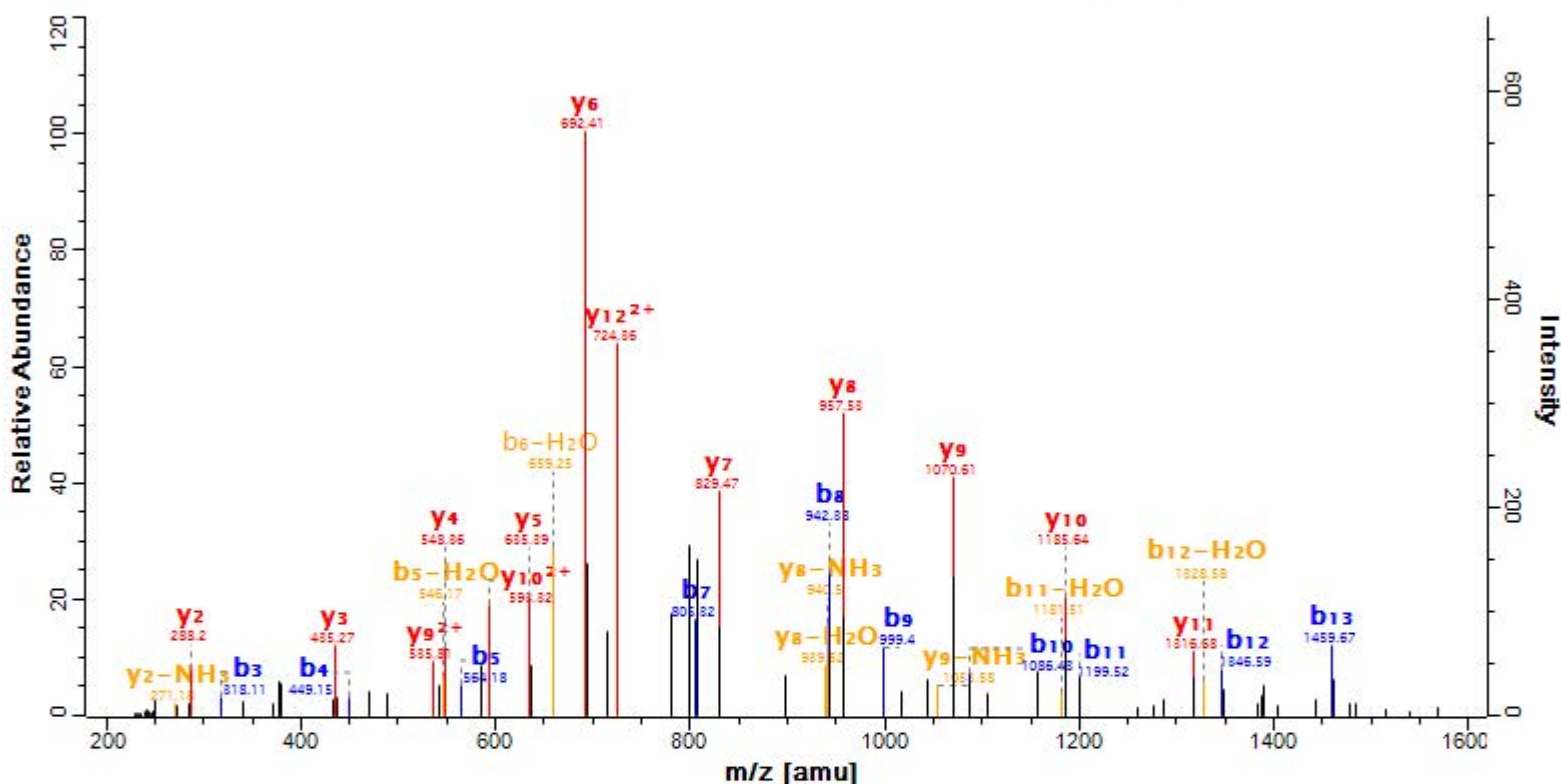

#### precursor information

|                   |                 |
|-------------------|-----------------|
| Mass:             | 1632.77521      |
| m/z:              | 817.39488       |
| Charge:           | 2+              |
| Retentiontime:    | 43.407123565673 |
| Score:            | 177.6334        |
| Mass Error [ppm]: | -0.010978       |
| PEP:              | 1.1086E-13      |
| Precursor Type:   | MULTI           |

| b ion     |          |     |   | y ion    |          | y <sup>2+</sup> ion |                    |
|-----------|----------|-----|---|----------|----------|---------------------|--------------------|
| Δ dalton  | mass     | seq |   | Δ dalton | mass     | Δ dalton            | mass               |
|           | 58.02874 | 1   | G | 13       |          |                     |                    |
|           | 187.0713 | 2   | E | 12       | 1576.761 |                     | 1576.761           |
| -0.01465  | 318.1118 | 3   | M | 11       | 1447.718 |                     | 724.3629 +0.298879 |
| +0.027751 | 449.1523 | 4   | M | 10       | 1316.678 | +0.195202           | 1316.678           |
| -0.02416  | 564.1792 | 5   | D | 9        | 1185.637 | +0.128875           | 593.3224 +0.368233 |
|           | 677.2633 | 6   | L | 8        | 1070.611 | +0.0003             | 535.8089 +0.216483 |
| -0.02349  | 805.3219 | 7   | Q | 7        | 957.5265 | +0.018263           | 957.5265           |
| +0.000854 | 942.3808 | 8   | H | 6        | 829.4679 | +0.010312           | 829.4679           |
| +0.371968 | 999.4023 | 9   | G | 5        | 692.409  | +0.023204           | 692.409            |
| -0.10153  | 1086.434 | 10  | S | 4        | 635.3875 | -0.07844            | 635.3875           |
| -0.11894  | 1199.518 | 11  | L | 3        | 548.3555 | +0.103063           | 548.3555           |
| -0.2302   | 1346.587 | 12  | F | 2        | 435.2714 | +0.043694           | 435.2714           |
| -0.05474  | 1459.671 | 13  | L | 1        | 288.203  | +0.004656           | 288.203            |
|           |          | 14  | R | 0        | 175.119  |                     | 175.119            |

#### general information

|                       |            |
|-----------------------|------------|
| Annotation:           | 11 of 14   |
| AminoAcids Coverage:  | 79 %       |
| Intensity Coverage:   | 62 %       |
| Peak Coverage:        | 34 %       |
| Protein Localisation: | 89 ... 102 |



Scan number 6252 Raw file LNCAP\_Silac\_23F10\_set1\_07  
 Method ITMS; CID Pepti... 99.57

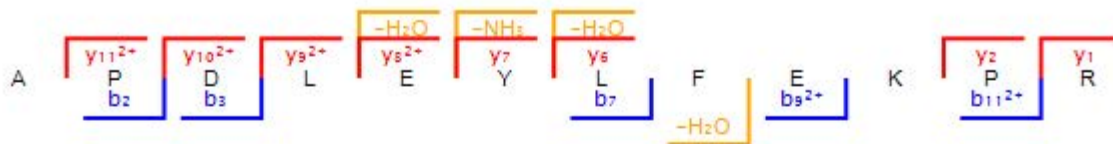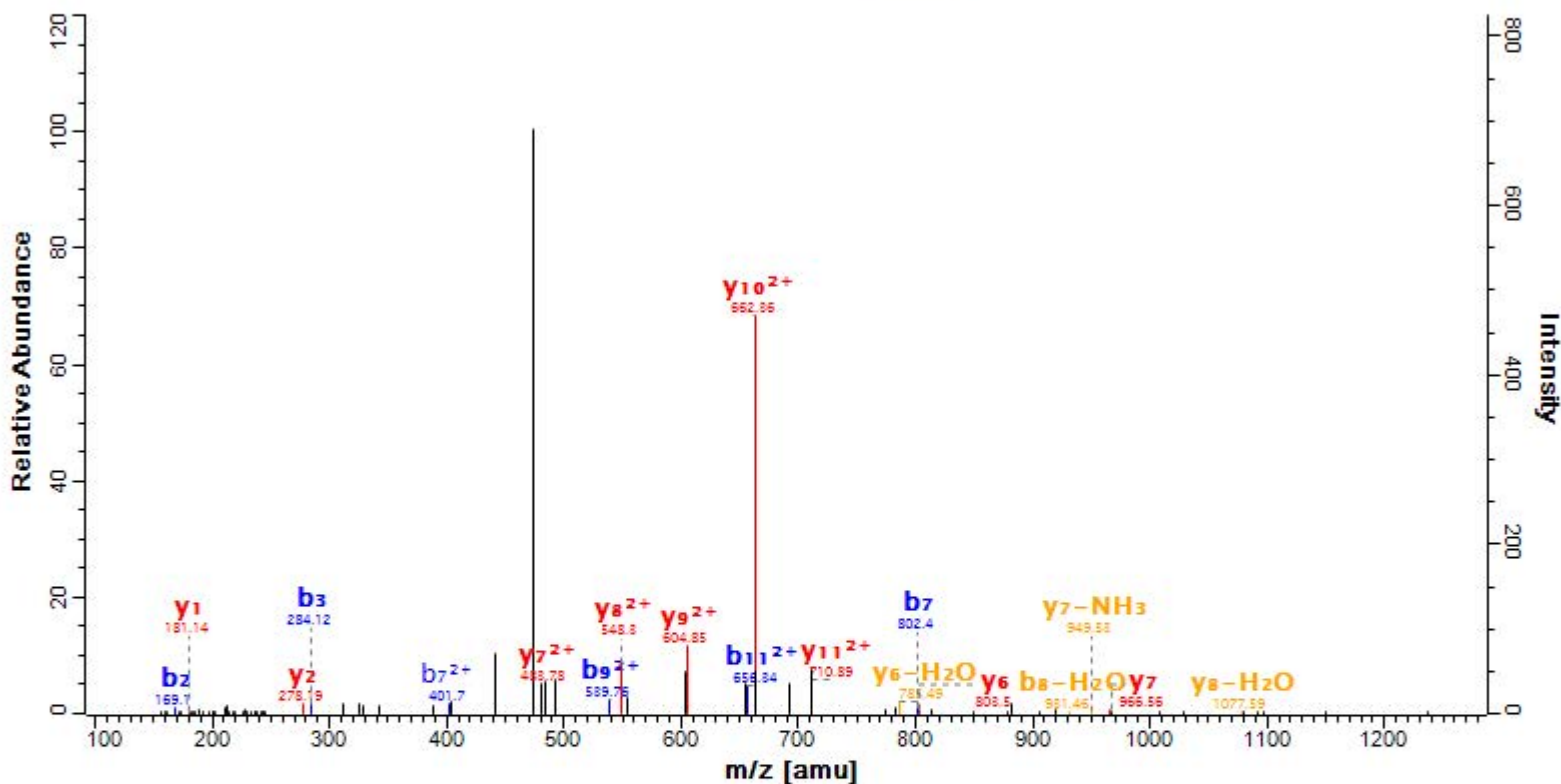

#### precursor information

|                   |                 |
|-------------------|-----------------|
| Mass:             | 1494.81219      |
| m/z:              | 499.27801       |
| Charge:           | 3+              |
| Retentiontime:    | 43.644962310791 |
| Score:            | 99.56806        |
| Mass Error [ppm]: | -0.42974        |
| PEP:              | 0.00048726      |
| Precursor Type:   | ISO             |

#### general information

|                       |             |
|-----------------------|-------------|
| Annotation:           | 10 of 12    |
| AminoAcids Coverage:  | 83 %        |
| Intensity Coverage:   | 38 %        |
| Peak Coverage:        | 18 %        |
| Protein Localisation: | 155 ... 166 |

| b <sup>2+</sup> ion |        | b ion    |        | seq |   |    | y ion    |        | y <sup>2+</sup> ion |         |
|---------------------|--------|----------|--------|-----|---|----|----------|--------|---------------------|---------|
| Δ dalton            | mass   | Δ dalton | mass   |     |   |    | Δ dalton | mass   | Δ dalton            | mass    |
|                     | 72.044 |          | 72.044 | 1   | A | 11 |          |        |                     |         |
|                     | 169.1  | +0.0905  | 169.1  | 2   | P | 10 | 1420.8   |        | 710.89              | -0.006  |
|                     | 284.12 | +0.0343  | 284.12 | 3   | D | 9  | 1323.7   |        | 662.36              | +0.2183 |
|                     | 397.21 |          | 397.21 | 4   | L | 8  | 1208.7   |        | 604.85              | +0.2891 |
|                     | 526.25 |          | 526.25 | 5   | E | 7  | 1095.6   |        | 548.3               | +0.308  |
|                     | 689.31 |          | 689.31 | 6   | Y | 6  | 966.56   | -0.13  | 483.78              | -0.123  |
| +0.268              | 401.7  | -0.012   | 802.4  | 7   | L | 5  | 803.5    | -0.219 | 803.5               |         |
|                     | 949.47 |          | 949.47 | 8   | F | 4  | 690.41   |        | 690.41              |         |
| -0.418              | 539.76 |          | 1078.5 | 9   | E | 3  | 543.34   |        | 543.34              |         |
|                     | 1214.6 |          | 1214.6 | 10  | K | 2  | 414.3    |        | 414.3               |         |
| -0.266              | 656.34 |          | 1311.7 | 11  | P | 1  | 278.19   | -0.392 | 278.19              |         |
|                     |        |          |        | 12  | R | 0  | 181.14   | -0.118 | 181.14              |         |

Scan number 6771 Raw file LNCAP\_Silac\_23F10\_set1\_07  
 Method ITMS; CID Peptide LNCAP\_Silac\_23F10\_set1\_07

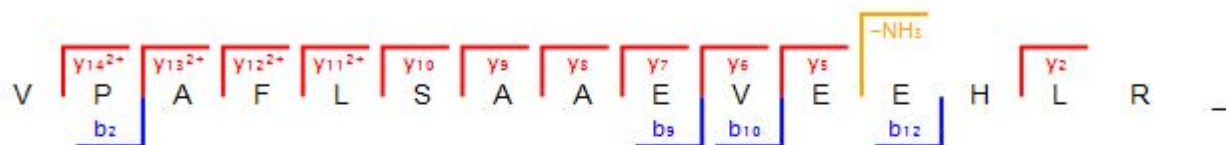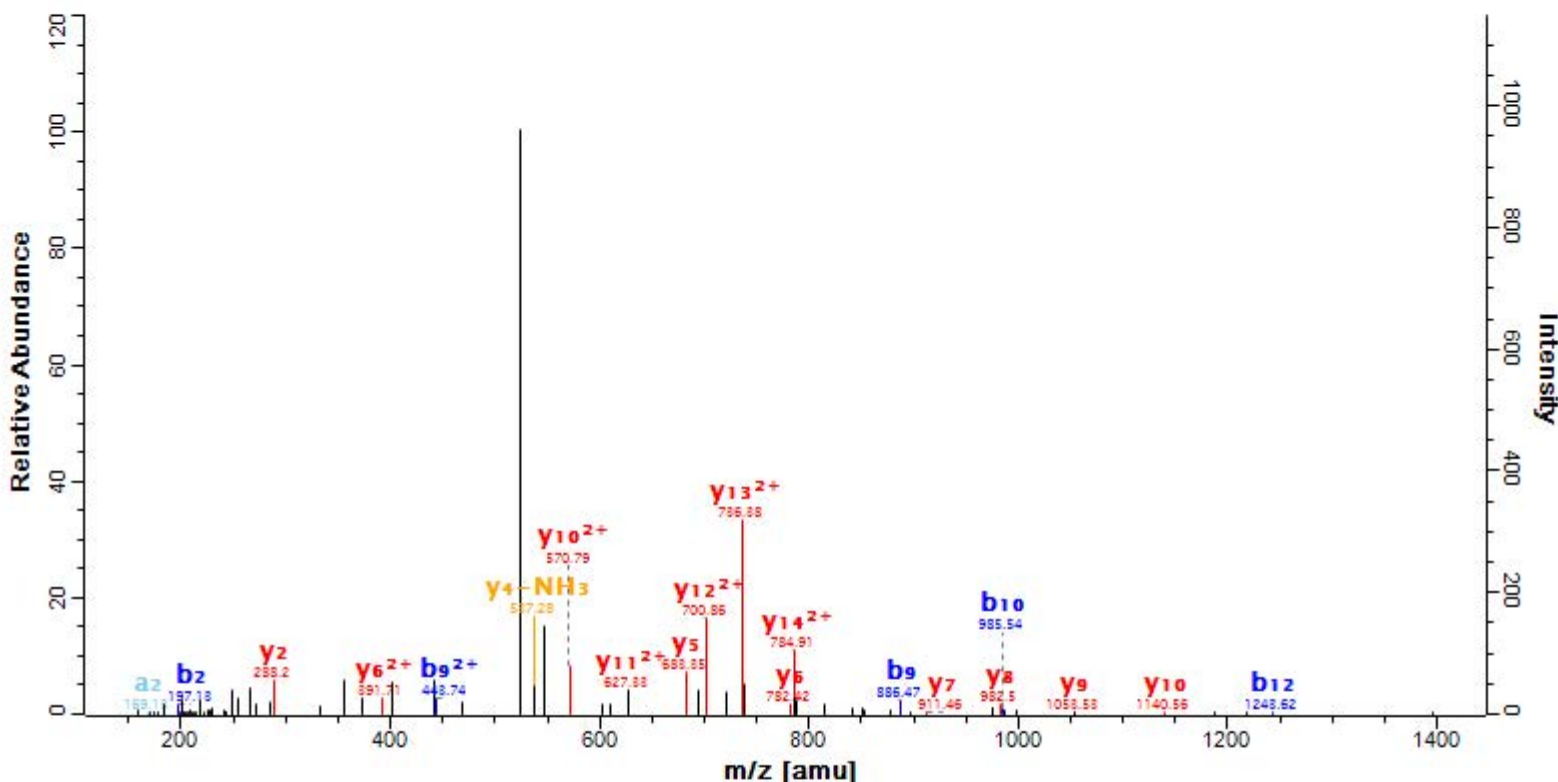

#### precursor information

|                   |                 |
|-------------------|-----------------|
| Mass:             | 1666.86865      |
| m/z:              | 556.63016       |
| Charge:           | 3+              |
| Retentiontime:    | 47.334087371826 |
| Score:            | 96.46406        |
| Mass Error [ppm]: | 0.4657          |
| PEP:              | 0.0016412       |
| Precursor Type:   | ISO             |

#### general information

|                       |          |
|-----------------------|----------|
| Annotation:           | 12 of 15 |
| AminoAcids Coverage:  | 80 %     |
| Intensity Coverage:   | 35 %     |
| Peak Coverage:        | 20 %     |
| Protein Localisation: | 4 ... 18 |

|        | a ion         | b <sup>2+</sup> ion | b ion         |     |   |    | y ion         | y <sup>2+</sup> ion |
|--------|---------------|---------------------|---------------|-----|---|----|---------------|---------------------|
|        | Δ dalton mass | Δ dalton mass       | Δ dalton mass | seq |   |    | Δ dalton mass | Δ dalton mass       |
|        | 72.08         | 100.1               | 100.1         | 1   | V | 14 |               |                     |
| +0.035 | 69.1          | 197.1               | -0.11         | 2   | P | 13 | 1569          | 784.9 +0.316        |
|        | 240.2         | 268.2               | 268.2         | 3   | A | 12 | 1472          | 736.4 +0.281        |
|        | 387.2         | 415.2               | 415.2         | 4   | F | 11 | 1401          | 700.9 +0.316        |
|        | 500.3         | 528.3               | 528.3         | 5   | L | 10 | 1254          | 627.3 +0.021        |
|        | 587.4         | 615.4               | 615.4         | 6   | S | 9  | 1141          | +0.078 570.8 +0.241 |
|        | 658.4         | 686.4               | 686.4         | 7   | A | 8  | 1054          | -0.22 1054          |
|        | 729.4         | 757.4               | 757.4         | 8   | A | 7  | 982.5         | +0.34 982.5         |
|        | 858.5         | -0.34 443.7         | +0.144 886.5  | 9   | E | 6  | 911.5         | +0.079 911.5        |
|        | 957.5         | 985.5               | -0.33 985.5   | 10  | V | 5  | 782.4         | +0.139 991.7 -0.04  |
|        | 1087          | 1115                | 1115          | 11  | E | 4  | 683.3         | +0.036 683.3        |
|        | 1216          | 1244                | -0.12 1244    | 12  | E | 3  | 554.3         | 554.3               |
|        | 1353          | 1381                | 1381          | 13  | H | 2  | 425.3         | 425.3               |
|        | 1466          | 1494                | 1494          | 14  | L | 1  | 288.2         | +0.017 288.2        |
|        |               |                     |               | 15  | R | 0  | 175.1         | 175.1               |

Scan number 6867 Raw file LNCAP\_Silac\_23F10\_set1\_07  
 Method ITMS: CID Pepti... 91.96

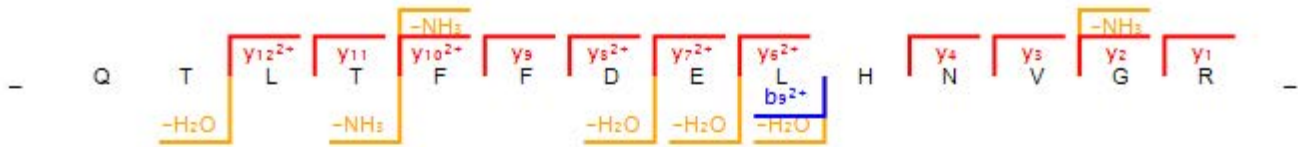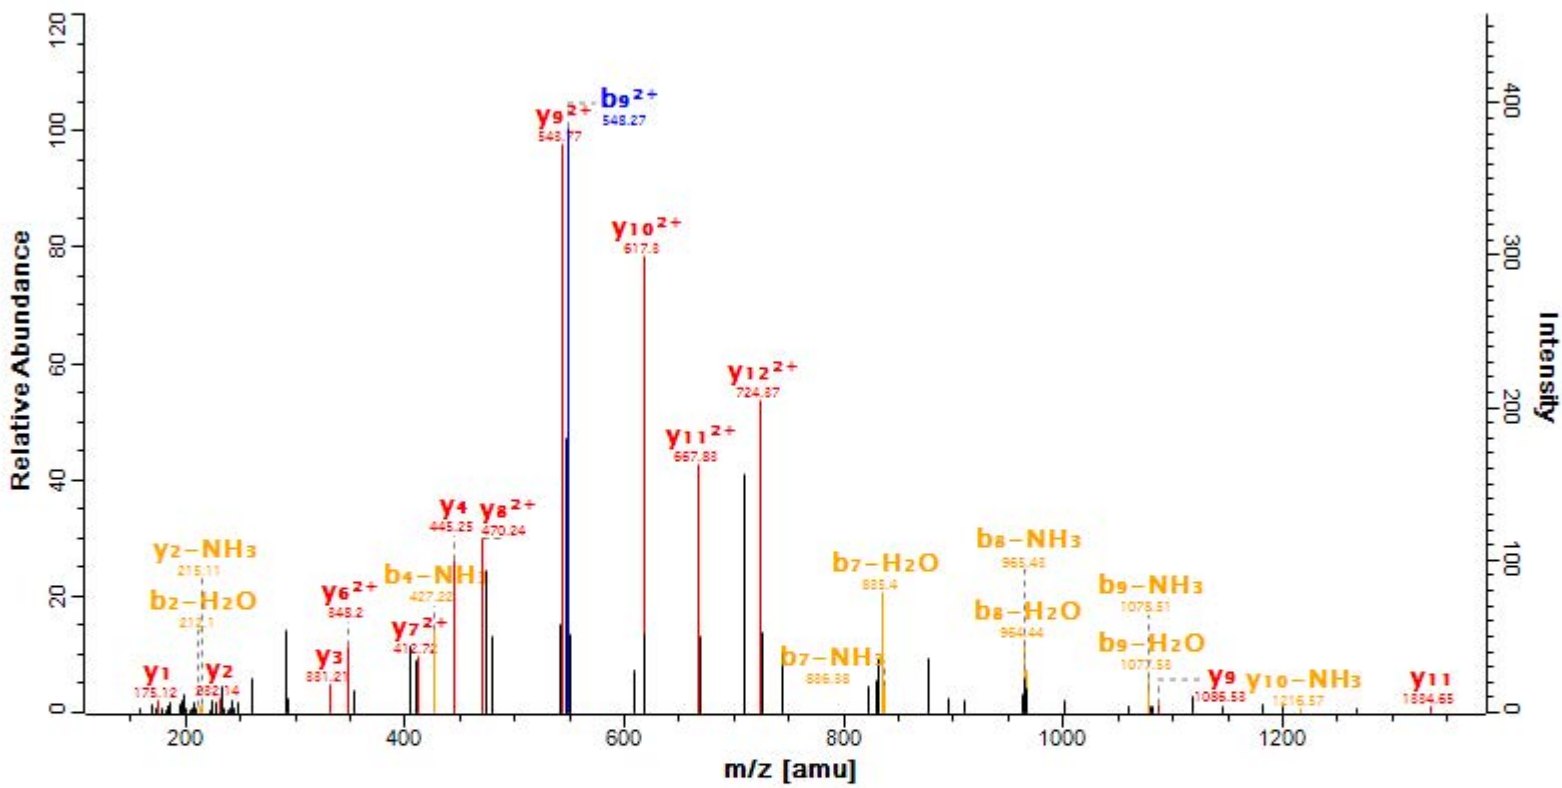

precursor information

|                   |                 |
|-------------------|-----------------|
| Mass:             | 1675.83251      |
| m/z:              | 559.61811       |
| Charge:           | 3+              |
| Retentiontime:    | 48.053188323974 |
| Score:            | 91.96123        |
| Mass Error [ppm]: | 0.4142          |
| PEP:              | 0.00027225      |
| Precursor Type:   | MULTI           |

general information

|                       |             |
|-----------------------|-------------|
| Annotation:           | 12 of 14    |
| AminoAcids Coverage:  | 86 %        |
| Intensity Coverage:   | 57 %        |
| Peak Coverage:        | 25 %        |
| Protein Localisation: | 154 ... 167 |

| b <sup>2+</sup> ion |        | b ion    |        |    |     |    | y ion    |         | y <sup>2+</sup> ion |         |
|---------------------|--------|----------|--------|----|-----|----|----------|---------|---------------------|---------|
| Δ dalton            | mass   | Δ dalton | mass   |    | seq |    | Δ dalton | mass    | Δ dalton            | mass    |
|                     | 129.07 |          | 129.07 | 1  | Q   | 13 |          |         |                     |         |
|                     | 230.11 |          | 230.11 | 2  | T   | 12 | 1548.8   |         | 1548.8              |         |
|                     | 343.2  |          | 343.2  | 3  | L   | 11 | 1447.7   |         | 724.37              | +0.3287 |
|                     | 444.25 |          | 444.25 | 4  | T   | 10 | 1334.6   | -0.218  | 667.83              | +0.1765 |
|                     | 591.31 |          | 591.31 | 5  | F   | 9  | 1233.6   |         | 617.3               | +0.2802 |
|                     | 738.38 |          | 738.38 | 6  | F   | 8  | 1086.5   | +0.0391 | 543.77              | +0.1958 |
|                     | 853.41 |          | 853.41 | 7  | D   | 7  | 939.46   |         | 470.24              | -0.143  |
|                     | 982.45 |          | 982.45 | 8  | E   | 6  | 824.44   |         | 412.72              | +0.0137 |
| +0.087              | 548.27 |          | 1095.5 | 9  | L   | 5  | 695.39   |         | 348.2               | +0.0034 |
|                     | 1232.6 |          | 1232.6 | 10 | H   | 4  | 582.31   |         | 582.31              |         |
|                     | 1346.6 |          | 1346.6 | 11 | N   | 3  | 445.25   | +0.0695 | 445.25              |         |
|                     | 1445.7 |          | 1445.7 | 12 | V   | 2  | 331.21   | -0.156  | 331.21              |         |
|                     | 1502.7 |          | 1502.7 | 13 | G   | 1  | 232.14   | +0.0263 | 232.14              |         |
|                     |        |          |        | 14 | R   | 0  | 175.12   | -0.035  | 175.12              |         |

Scan number 7629 Raw file LNCAP\_Silac\_23F10\_set1\_07  
 Method ITMS; CID Pepti... 60.2

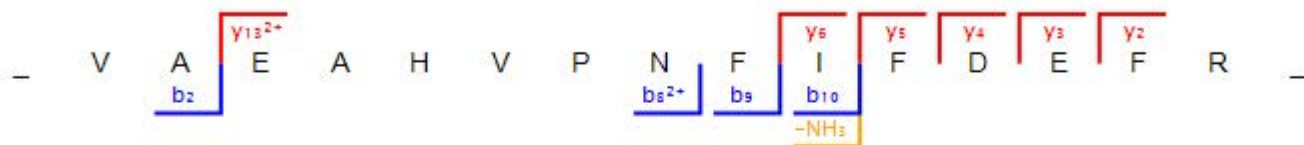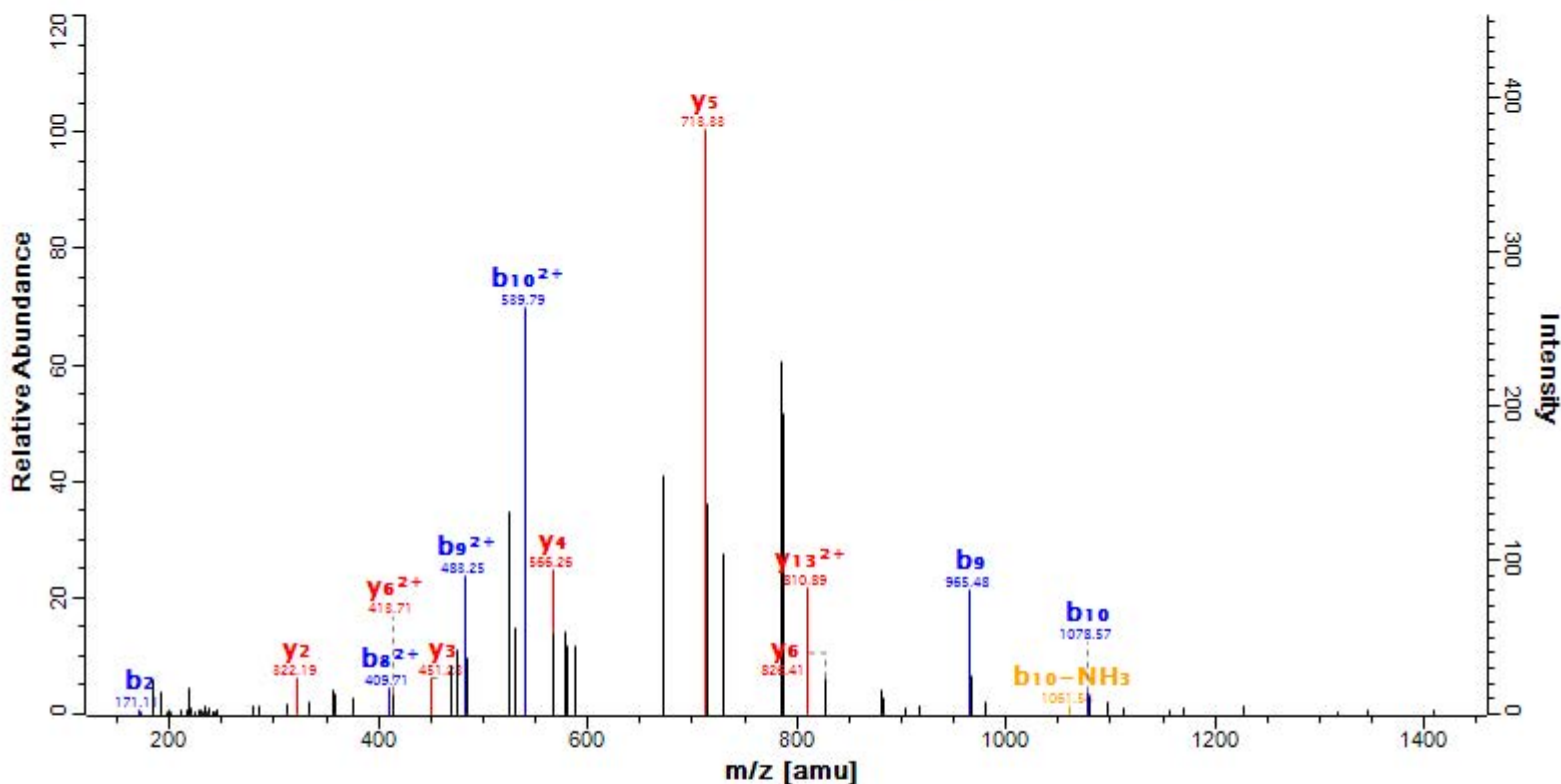

#### precursor information

|                   |                 |
|-------------------|-----------------|
| Mass:             | 1789.87729      |
| m/z:              | 597.63304       |
| Charge:           | 3+              |
| Retentiontime:    | 54.726119995117 |
| Score:            | 60.19625        |
| Mass Error [ppm]: | -0.82866        |
| PEP:              | 0.0048539       |
| Precursor Type:   | MULTI           |

#### general information

|                       |               |
|-----------------------|---------------|
| Annotation:           | 9 of 15       |
| AminoAcids Coverag    | 60 %          |
| Intensity Coverage:   | 38 %          |
| Peak Coverage:        | 16 %          |
| Protein Localisation: | 1147 ... 1161 |

| b <sup>2+</sup> ion |        | b ion    |        | seq |   |    | y ion    |         | y <sup>2+</sup> ion |         |
|---------------------|--------|----------|--------|-----|---|----|----------|---------|---------------------|---------|
| Δ dalton            | mass   | Δ dalton | mass   |     |   |    | Δ dalton | mass    | Δ dalton            | mass    |
|                     | 100.08 |          | 100.08 | 1   | V | 14 |          |         |                     |         |
|                     | 171.11 | +0.176   | 171.11 | 2   | A | 13 | 1691.8   |         | 1691.8              |         |
|                     | 300.16 |          | 300.16 | 3   | E | 12 | 1620.8   |         | 810.89              | +0.1464 |
|                     | 371.19 |          | 371.19 | 4   | A | 11 | 1491.7   |         | 1491.7              |         |
|                     | 508.25 |          | 508.25 | 5   | H | 10 | 1420.7   |         | 1420.7              |         |
|                     | 607.32 |          | 607.32 | 6   | V | 9  | 1283.6   |         | 1283.6              |         |
|                     | 704.37 |          | 704.37 | 7   | P | 8  | 1184.6   |         | 1184.6              |         |
| +0.0156             | 409.71 |          | 818.42 | 8   | N | 7  | 1087.5   |         | 1087.5              |         |
| -0.05               | 483.25 | -0.038   | 965.48 | 9   | F | 6  | 973.48   |         | 973.48              |         |
| +0.2003             | 539.79 | -0.012   | 1078.6 | 10  | I | 5  | 826.41   | +0.0859 | 413.71              | +0.15   |
|                     | 1225.6 |          | 1225.6 | 11  | F | 4  | 713.33   | +0.0508 | 713.33              |         |
|                     | 1340.7 |          | 1340.7 | 12  | D | 3  | 566.26   | -0.053  | 566.26              |         |
|                     | 1469.7 |          | 1469.7 | 13  | E | 2  | 451.23   | +0.0627 | 451.23              |         |
|                     | 1616.8 |          | 1616.8 | 14  | F | 1  | 322.19   | +0.0777 | 322.19              |         |
|                     |        |          |        | 15  | R | 0  | 175.12   |         | 175.12              |         |

Scan number 7773 Raw file LNCAP\_Silac\_23F10\_set1\_07  
 Method ITMS; CID Pepti... 148.32

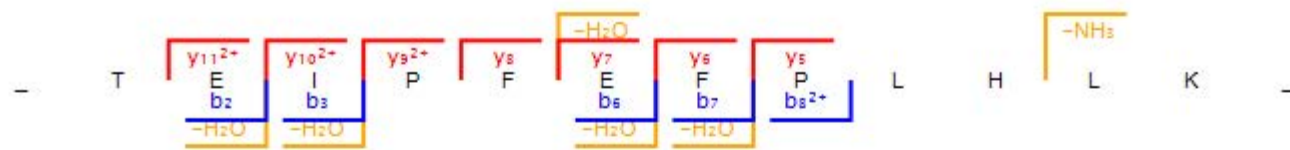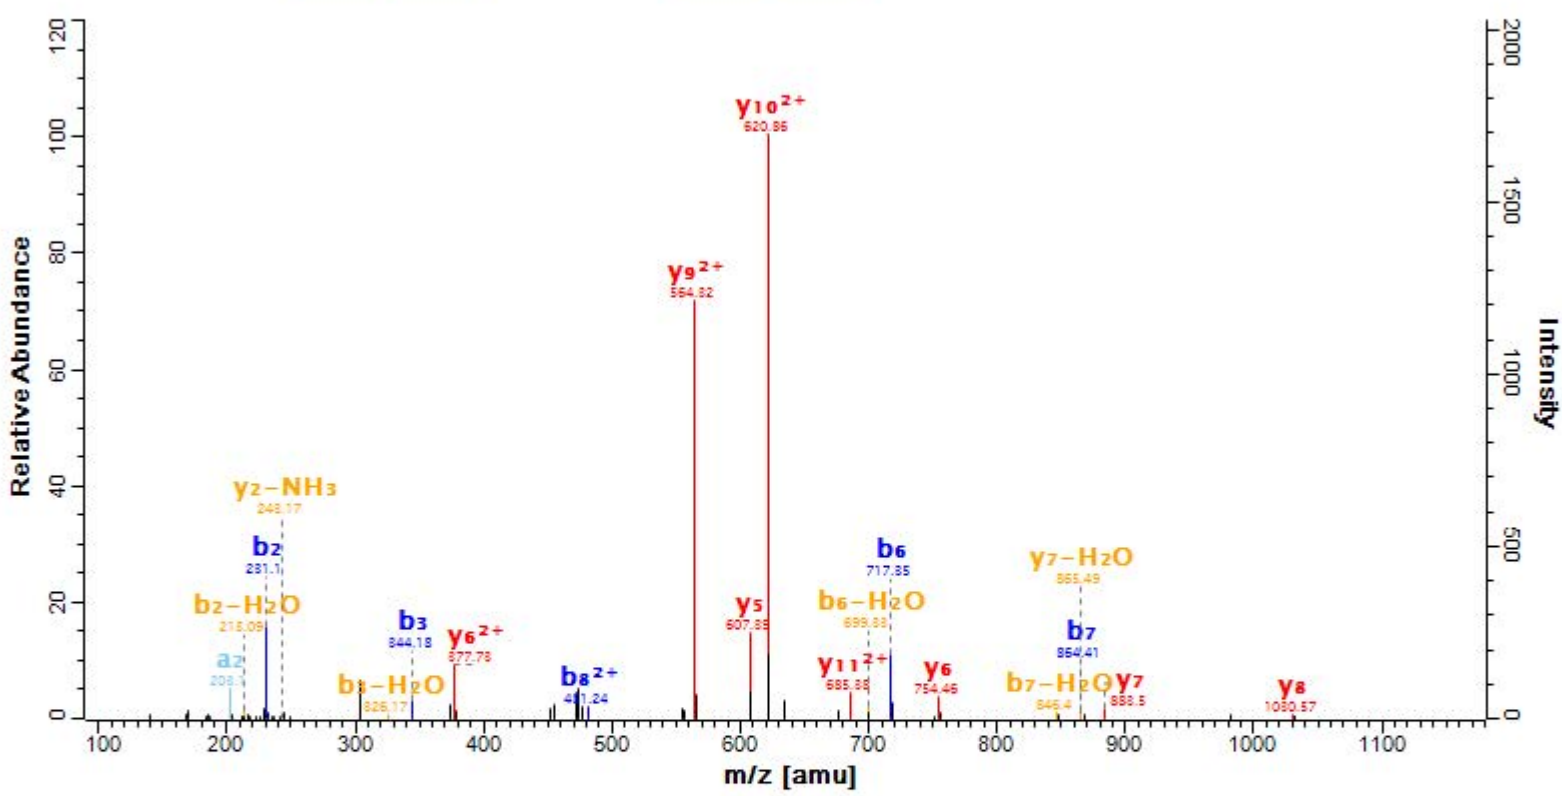

**precursor information**

|                   |                 |
|-------------------|-----------------|
| Mass:             | 1469.79161      |
| m/z:              | 490.93781       |
| Charge:           | 3+              |
| Retentiontime:    | 56.177425384521 |
| Score:            | 148.321         |
| Mass Error [ppm]: | -0.16217        |
| PEP:              | 5.7776E-06      |
| Precursor Type:   | MULTI           |

**general information**

|                       |            |
|-----------------------|------------|
| Annotation:           | 8 of 12    |
| AminoAcids Coverage:  | 67 %       |
| Intensity Coverage:   | 77 %       |
| Peak Coverage:        | 18 %       |
| Protein Localisation: | 89 ... 100 |

|       | a ion         | b <sup>2+</sup> ion | b ion         |       |     |    | y ion         | y <sup>2+</sup> ion |        |       |       |
|-------|---------------|---------------------|---------------|-------|-----|----|---------------|---------------------|--------|-------|-------|
|       | Δ dalton mass | Δ dalton mass       | Δ dalton mass |       | seq |    | Δ dalton mass | Δ dalton mass       |        |       |       |
|       | 74.06         | 102.1               | 102.1         | 1     | T   | 11 |               |                     |        |       |       |
| +0.03 | 203.1         | 231.1               | -0.04         | 231.1 | 2   | E  | 10            | 1370                | 685.4  | +0.26 |       |
|       | 316.2         | 344.2               | +0.025        | 344.2 | 3   | I  | 9             | 1241                | 620.9  | +0.28 |       |
|       | 413.2         | 441.2               |               | 441.2 | 4   | P  | 8             | 1128                | 564.3  | +0.26 |       |
|       | 560.3         | 588.3               |               | 588.3 | 5   | F  | 7             | 1031                | -0.18  | 1031  |       |
|       | 689.4         | 717.3               | +0.07         | 717.3 | 6   | E  | 6             | 883.5               | +0.15  | 883.5 |       |
|       | 836.4         | 864.4               | -0.01         | 864.4 | 7   | F  | 5             | 754.5               | +0.01  | 737.7 | +0.02 |
|       | 933.5         | +0.21               | 6481.2        | 961.5 | 8   | P  | 4             | 607.4               | +0.065 | 607.4 |       |
|       | 1047          | 1075                |               | 1075  | 9   | L  | 3             | 510.3               |        | 510.3 |       |
|       | 1184          | 1212                |               | 1212  | 10  | H  | 2             | 397.3               |        | 397.3 |       |
|       | 1297          | 1325                |               | 1325  | 11  | L  | 1             | 260.2               |        | 260.2 |       |
|       |               |                     |               |       | 12  | K  | 0             | 147.1               |        | 147.1 |       |

Scan number 8373 Raw file LNCAP\_Silac\_23F10\_set1\_07  
 Method ITMS; CID Peptide 237.46

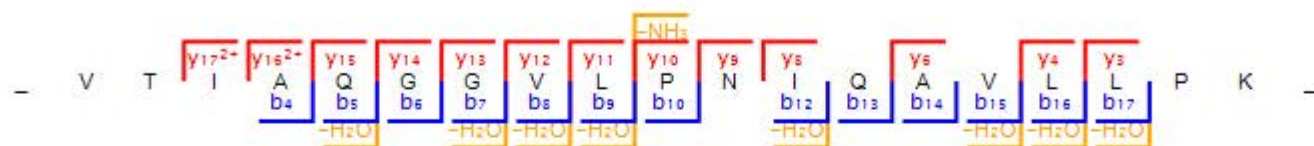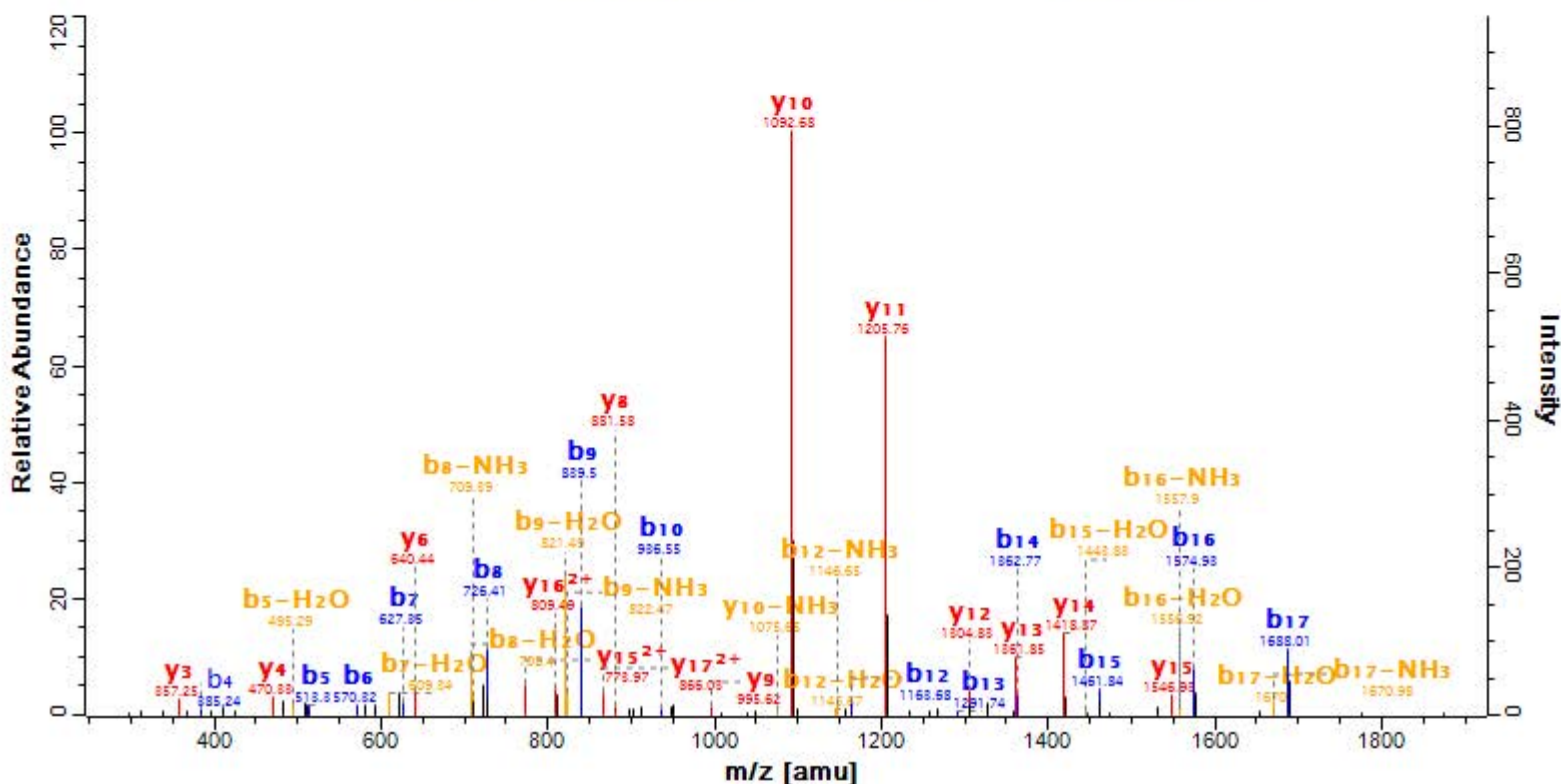

precursor information

|                   |                 |
|-------------------|-----------------|
| Mass:             | 1930.16157      |
| m/z:              | 966.08806       |
| Charge:           | 2+              |
| Retentiontime:    | 62.929134368896 |
| Score:            | 237.4612        |
| Mass Error [ppm]: | 0.020742        |
| PEP:              | 1.7643E-65      |
| Precursor Type:   | MULTI           |

general information

|                       |             |
|-----------------------|-------------|
| Annotation:           | 15 of 19    |
| AminoAcids Coverage:  | 79 %        |
| Intensity Coverage:   | 75 %        |
| Peak Coverage:        | 47 %        |
| Protein Localisation: | 101 ... 119 |

| b ion     |          |    |     |    | y ion    |           | y <sup>2+</sup> ion |           |
|-----------|----------|----|-----|----|----------|-----------|---------------------|-----------|
| Δ dalton  | mass     |    | seq |    | Δ dalton | mass      | Δ dalton            | mass      |
|           | 100.0757 | 1  | V   | 18 |          |           |                     |           |
|           | 201.1234 | 2  | T   | 17 | 1832.1   |           | 1832.1              |           |
|           | 314.2074 | 3  | I   | 16 | 1731.053 |           | 866.03              | +0.212862 |
| -0.10014  | 385.2445 | 4  | A   | 15 | 1617.969 |           | 809.488             | +0.226513 |
| +0.037818 | 513.3031 | 5  | Q   | 14 | 1546.932 | +0.037577 | 773.9694            | +0.124281 |
| +0.151975 | 570.3246 | 6  | G   | 13 | 1418.873 | -0.12845  | 1418.873            |           |
| +0.093707 | 627.3461 | 7  | G   | 12 | 1361.851 | -0.1026   | 1361.851            |           |
| -0.01084  | 726.4145 | 8  | V   | 11 | 1304.83  | -0.13814  | 1304.83             |           |
| -0.03869  | 839.4985 | 9  | L   | 10 | 1205.762 | -0.08755  | 1205.762            |           |
| +0.018836 | 936.5513 | 10 | P   | 9  | 1092.678 | -0.06379  | 1092.678            |           |
|           | 1050.594 | 11 | N   | 8  | 995.6248 | +0.337671 | 995.6248            |           |
| -0.32672  | 1163.678 | 12 | I   | 7  | 881.5819 | -0.07851  | 881.5819            |           |
| -0.04851  | 1291.737 | 13 | Q   | 6  | 768.4978 |           | 768.4978            |           |
| -0.01506  | 1362.774 | 14 | A   | 5  | 640.4392 | -0.00685  | 640.4392            |           |
| -0.11314  | 1461.842 | 15 | V   | 4  | 569.4021 |           | 569.4021            |           |
| -0.30231  | 1574.926 | 16 | L   | 3  | 470.3337 | -0.07961  | 470.3337            |           |
| -0.22915  | 1688.011 | 17 | L   | 2  | 357.2496 | +0.117617 | 357.2496            |           |
|           | 1785.063 | 18 | P   | 1  | 244.1656 |           | 244.1656            |           |
|           |          | 19 | K   | 0  | 147.1128 |           | 147.1128            |           |

Scan number 1114 Raw file LNCAP\_Silac\_23F10\_set1\_08  
 Method ITMS: CID Pepti... 36.38

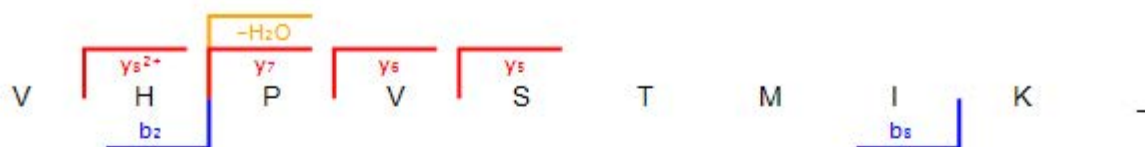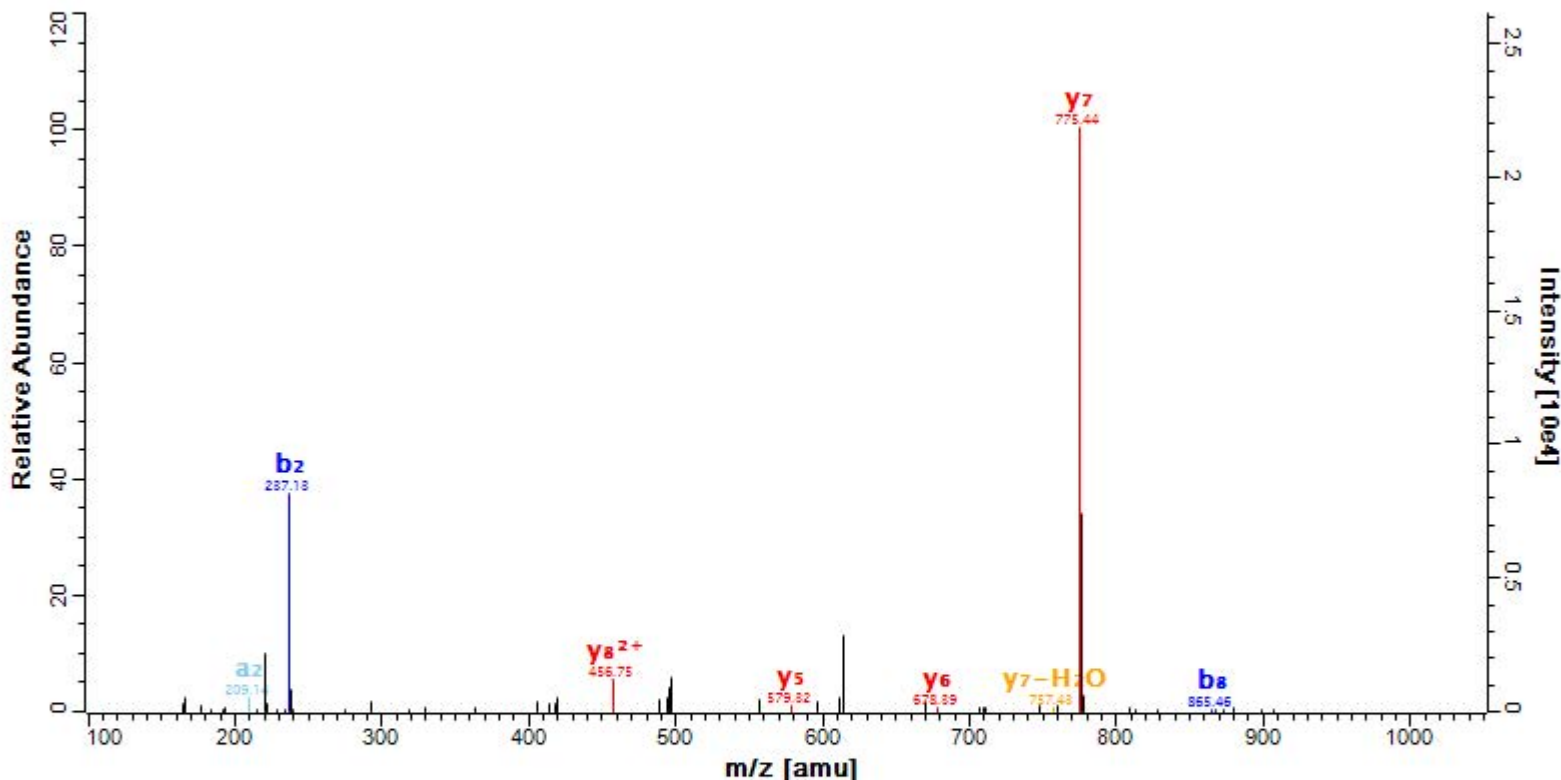

#### precursor information

|                       |                 |
|-----------------------|-----------------|
| Mass:                 | 1010.55862      |
| m/z:                  | 506.28659       |
| Charge:               | 2+              |
| Retentiontime:        | 11.468678474426 |
| Score:                | 36.38147        |
| Mass Error [ppm]:     | 0.33168         |
| PEP:                  | 0.11773         |
| Precursor Type:       | MULTI           |
| Annotation:           | 5 of 9          |
| AminoAcids Coverage:  | 56 %            |
| Intensity Coverage:   | 55 %            |
| Peak Coverage:        | 10 %            |
| Protein Localisation: | 299 ... 307     |

| a ion    |        | b ion    |        |   |     |          | y ion  |          | y <sup>2+</sup> ion |  |
|----------|--------|----------|--------|---|-----|----------|--------|----------|---------------------|--|
| Δ dalton | mass   | Δ dalton | mass   |   | seq | Δ dalton | mass   | Δ dalton | mass                |  |
|          | 72.081 |          | 100.08 | 1 | V   | 8        |        |          |                     |  |
| -0.019   | 209.14 | -0.002   | 237.13 | 2 | H   | 7        | 912.5  |          | 456.75              |  |
|          | 306.19 |          | 334.19 | 3 | P   | 6        | 775.44 | +0.0284  | 775.44              |  |
|          | 405.26 |          | 433.26 | 4 | V   | 5        | 678.39 | +0.0249  | 678.39              |  |
|          | 492.29 |          | 520.29 | 5 | S   | 4        | 579.32 | +0.0324  | 579.32              |  |
|          | 593.34 |          | 621.34 | 6 | T   | 3        | 492.29 |          | 492.29              |  |
|          | 724.38 |          | 752.38 | 7 | M   | 2        | 391.24 |          | 391.24              |  |
|          | 837.47 | -0.145   | 865.46 | 8 | I   | 1        | 260.2  |          | 260.2               |  |
|          |        |          |        | 9 | K   | 0        | 147.11 |          | 147.11              |  |

Scan number 1297 Raw file LNCAP\_Silac\_23F10\_set1\_08  
 Method ITMS; CID Pepti... 84.48

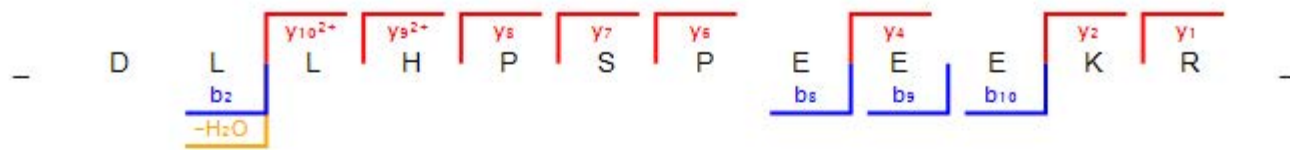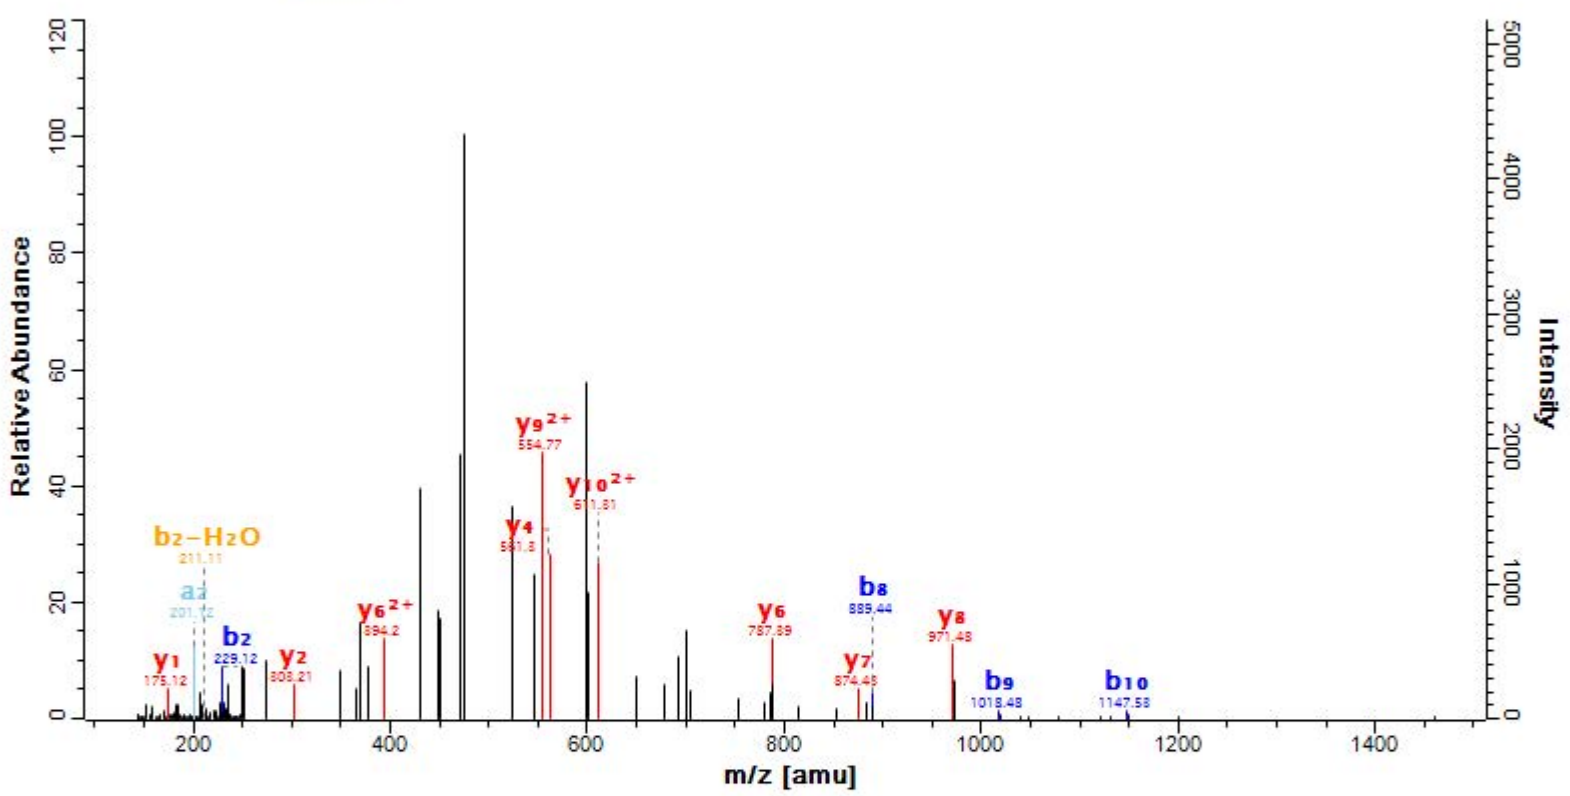

**precursor information**

|                   |                 |
|-------------------|-----------------|
| Mass:             | 1448.72572      |
| m/z:              | 483.91585       |
| Charge:           | 3+              |
| Retentiontime:    | 12.600693702697 |
| Score:            | 84.4793         |
| Mass Error [ppm]: | -0.16422        |
| PEP:              | 0.00081668      |
| Precursor Type:   | MULTI           |

**general information**

|                       |          |
|-----------------------|----------|
| Annotation:           | 11 of 12 |
| AminoAcids Coverage:  | 92 %     |
| Intensity Coverage:   | 23 %     |
| Peak Coverage:        | 12 %     |
| Protein Localisation: | 6 ... 17 |

| a ion    |        | b ion    |        | seq |   |    | y ion    |         | y <sup>2+</sup> ion |         |
|----------|--------|----------|--------|-----|---|----|----------|---------|---------------------|---------|
| Δ dalton | mass   | Δ dalton | mass   |     |   |    | Δ dalton | mass    | Δ dalton            | mass    |
|          | 88.039 |          | 116.03 | 1   | D | 11 |          |         |                     |         |
| -0.032   | 201.12 | -0.034   | 229.12 | 2   | L | 10 | 1334.7   |         | 1334.7              |         |
|          | 314.21 |          | 342.2  | 3   | L | 9  | 1221.6   |         | 611.31              | +0.2023 |
|          | 451.27 |          | 479.26 | 4   | H | 8  | 1108.5   |         | 554.77              | +0.2405 |
|          | 548.32 |          | 576.31 | 5   | P | 7  | 971.48   | +0.0876 | 971.48              |         |
|          | 635.35 |          | 663.35 | 6   | S | 6  | 874.43   | +0.0571 | 874.43              |         |
|          | 732.4  |          | 760.4  | 7   | P | 5  | 787.39   | +0.0327 | 394.2               | +0.2231 |
|          | 861.45 | +0.1982  | 889.44 | 8   | E | 4  | 690.34   |         | 690.34              |         |
|          | 990.49 | -0.174   | 1018.5 | 9   | E | 3  | 561.3    | +0.4364 | 561.3               |         |
|          | 1119.5 | -0.023   | 1147.5 | 10  | E | 2  | 432.26   |         | 432.26              |         |
|          | 1247.6 |          | 1275.6 | 11  | K | 1  | 303.21   | +0.0294 | 303.21              |         |
|          |        |          |        | 12  | R | 0  | 175.12   | +0.018  | 175.12              |         |



Scan number 1552 Raw file LNCAP\_Silac\_23F10\_set1\_08  
 Method ITMS: CID Pepti... 105.03

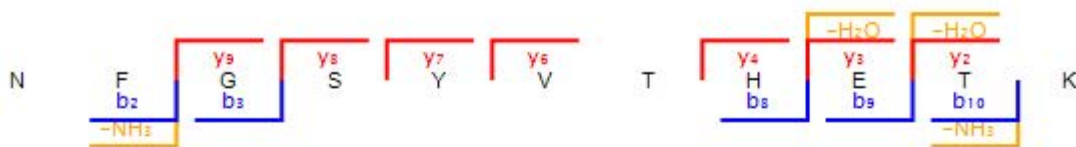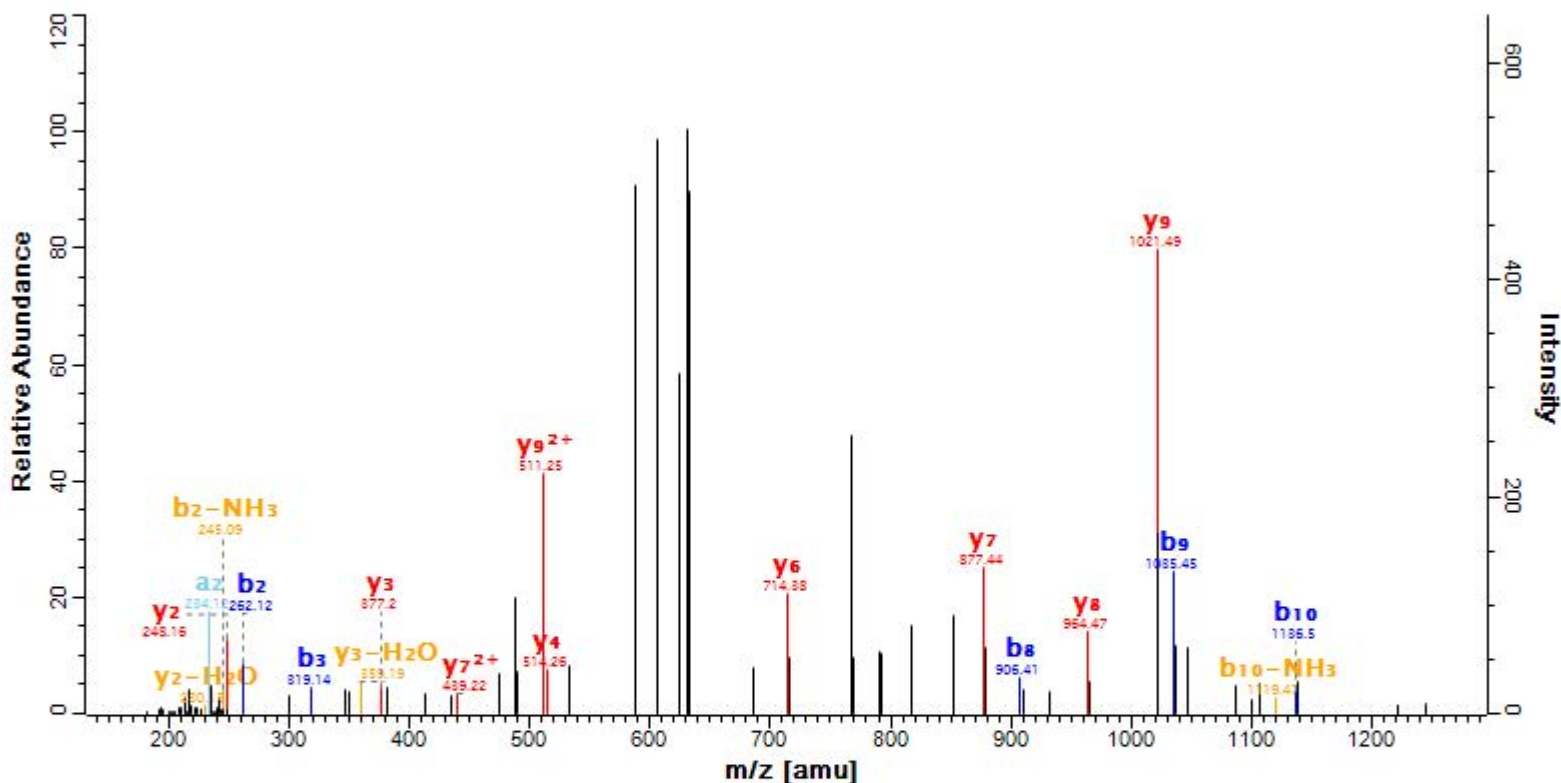

#### precursor information

|                   |                 |
|-------------------|-----------------|
| Mass:             | 1281.59884      |
| m/z:              | 641.80669       |
| Charge:           | 2+              |
| Retentiontime:    | 14.130715370178 |
| Score:            | 105.0319        |
| Mass Error [ppm]: | -0.10173        |
| PEP:              | 0.00031962      |
| Precursor Type:   | MULTI           |

#### general information

|                       |           |
|-----------------------|-----------|
| Annotation:           | 8 of 11   |
| AminoAcids Coverage:  | 73 %      |
| Intensity Coverage:   | 25 %      |
| Peak Coverage:        | 22 %      |
| Protein Localisation: | 61 ... 71 |

| a ion    |        | b ion    |        |    |     |          | y ion  |          | y <sup>2+</sup> ion |         |
|----------|--------|----------|--------|----|-----|----------|--------|----------|---------------------|---------|
| Δ dalton | mass   | Δ dalton | mass   |    | seq | Δ dalton | mass   | Δ dalton | mass                |         |
|          | 87.055 |          | 115.05 | 1  | N   | 10       |        |          |                     |         |
| +0.0671  | 234.12 | -0.027   | 262.12 | 2  | F   | 9        | 1168.6 |          | 1168.6              |         |
|          | 291.15 | +0.0859  | 319.14 | 3  | G   | 8        | 1021.5 | -0.017   | 511.25              | +0.1945 |
|          | 378.18 |          | 406.17 | 4  | S   | 7        | 964.47 | +0.1002  | 964.47              |         |
|          | 541.24 |          | 569.24 | 5  | Y   | 6        | 877.44 | +0.1053  | 439.22              | +0.0991 |
|          | 640.31 |          | 668.3  | 6  | V   | 5        | 714.38 | +0.0846  | 714.38              |         |
|          | 741.36 |          | 769.35 | 7  | T   | 4        | 615.31 |          | 615.31              |         |
|          | 878.42 | +0.1511  | 906.41 | 8  | H   | 3        | 514.26 | +0.2128  | 514.26              |         |
|          | 1007.5 | +0.1209  | 1035.5 | 9  | E   | 2        | 377.2  | +0.138   | 377.2               |         |
|          | 1108.5 | +0.1748  | 1136.5 | 10 | T   | 1        | 248.16 | +0.0937  | 248.16              |         |
|          |        |          |        | 11 | K   | 0        | 147.11 |          | 147.11              |         |

Scan number 1820 Raw file LNCAP\_Silac\_23F10\_set1\_08  
 Method ITMS: CID Pepti... 69.03

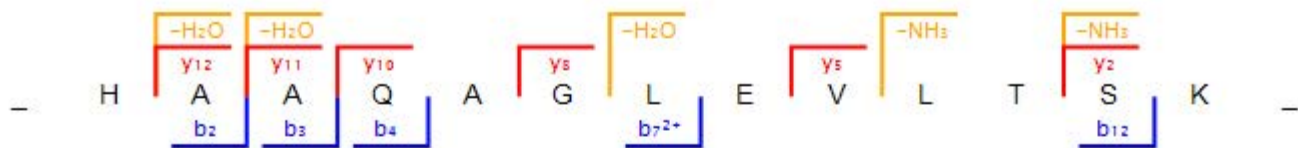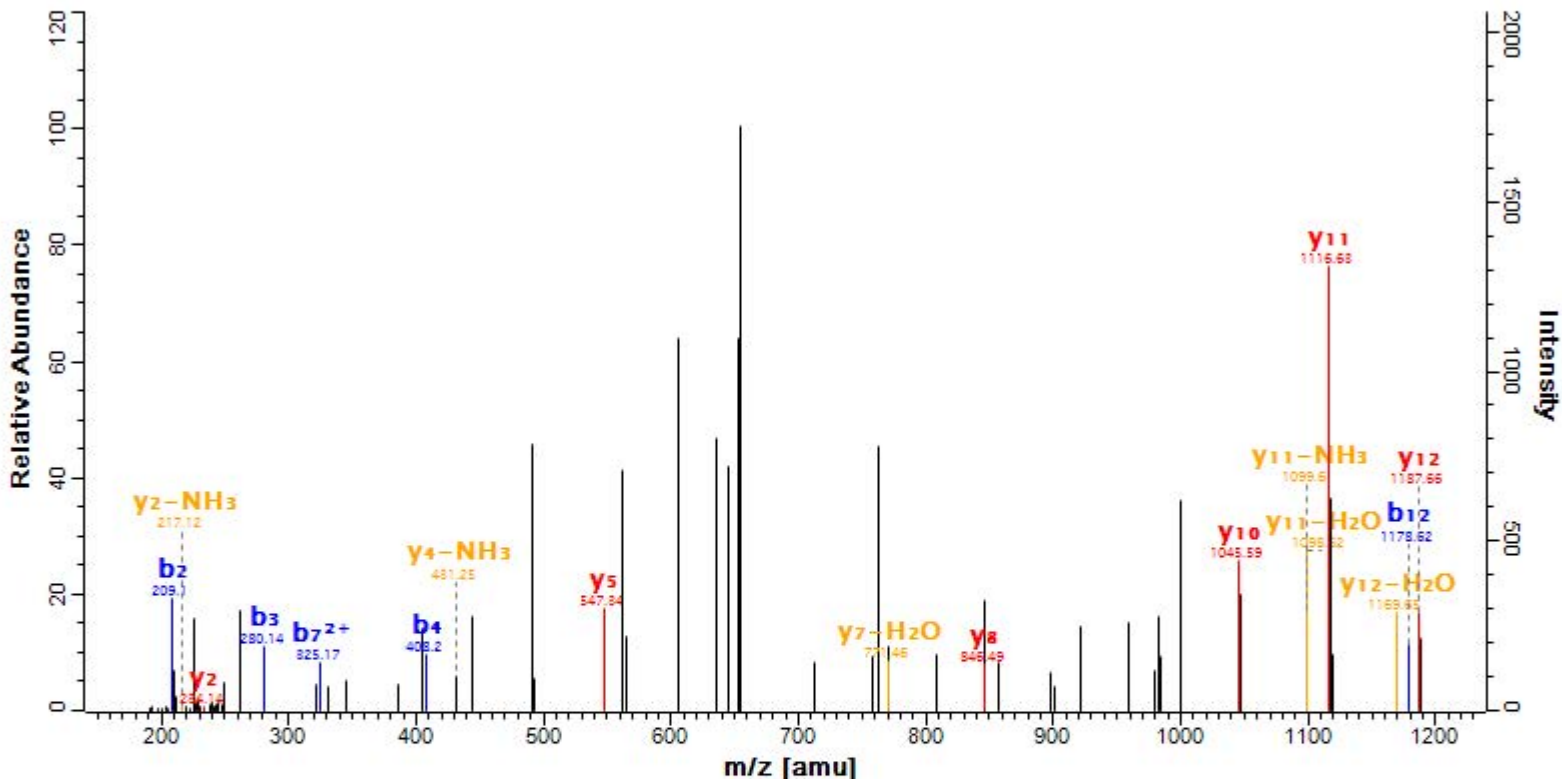

**precursor information**

|                   |                 |
|-------------------|-----------------|
| Mass:             | 1323.71356      |
| m/z:              | 662.86406       |
| Charge:           | 2+              |
| Retentiontime:    | 15.680751800537 |
| Score:            | 69.03009        |
| Mass Error [ppm]: | -0.83505        |
| PEP:              | 0.002947        |
| Precursor Type:   | MULTI           |

**general information**

|                       |          |
|-----------------------|----------|
| Annotation:           | 8 of 13  |
| AminoAcids Coverage:  | 62 %     |
| Intensity Coverage:   | 22 %     |
| Peak Coverage:        | 20 %     |
| Protein Localisation: | 5 ... 17 |

| b <sup>2+</sup> ion |          | b ion     |          |    |     | y ion    |                    |
|---------------------|----------|-----------|----------|----|-----|----------|--------------------|
| Δ dalton            | mass     | Δ dalton  | mass     |    | seq | Δ dalton | mass               |
|                     | 138.0662 |           | 138.0662 | 1  | H   | 12       |                    |
|                     | 209.1033 | +0.056976 | 209.1033 | 2  | A   | 11       | 1187.663 -0.0213   |
|                     | 280.1404 | +0.121608 | 280.1404 | 3  | A   | 10       | 1116.626 -0.10272  |
|                     | 408.199  | +0.002301 | 408.199  | 4  | Q   | 9        | 1045.589 -0.05511  |
|                     | 479.2361 |           | 479.2361 | 5  | A   | 8        | 917.5302           |
|                     | 536.2576 |           | 536.2576 | 6  | G   | 7        | 846.4931 -0.00367  |
| +0.019331           | 325.1745 |           | 649.3416 | 7  | L   | 6        | 789.4716           |
|                     | 778.3842 |           | 778.3842 | 8  | E   | 5        | 676.3876           |
|                     | 877.4526 |           | 877.4526 | 9  | V   | 4        | 547.345 -0.03072   |
|                     | 990.5367 |           | 990.5367 | 10 | L   | 3        | 448.2766           |
|                     | 1091.584 |           | 1091.584 | 11 | T   | 2        | 335.1925           |
|                     | 1178.616 | -0.08419  | 1178.616 | 12 | S   | 1        | 234.1448 +0.023518 |
|                     |          |           |          | 13 | K   | 0        | 147.1128           |

Scan number 2133 Raw file LNCAP\_Silac\_23F10\_set1\_08  
 Method ITMS; CID Peptide 69.36

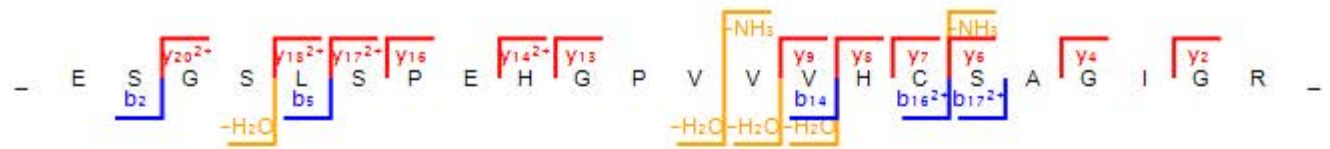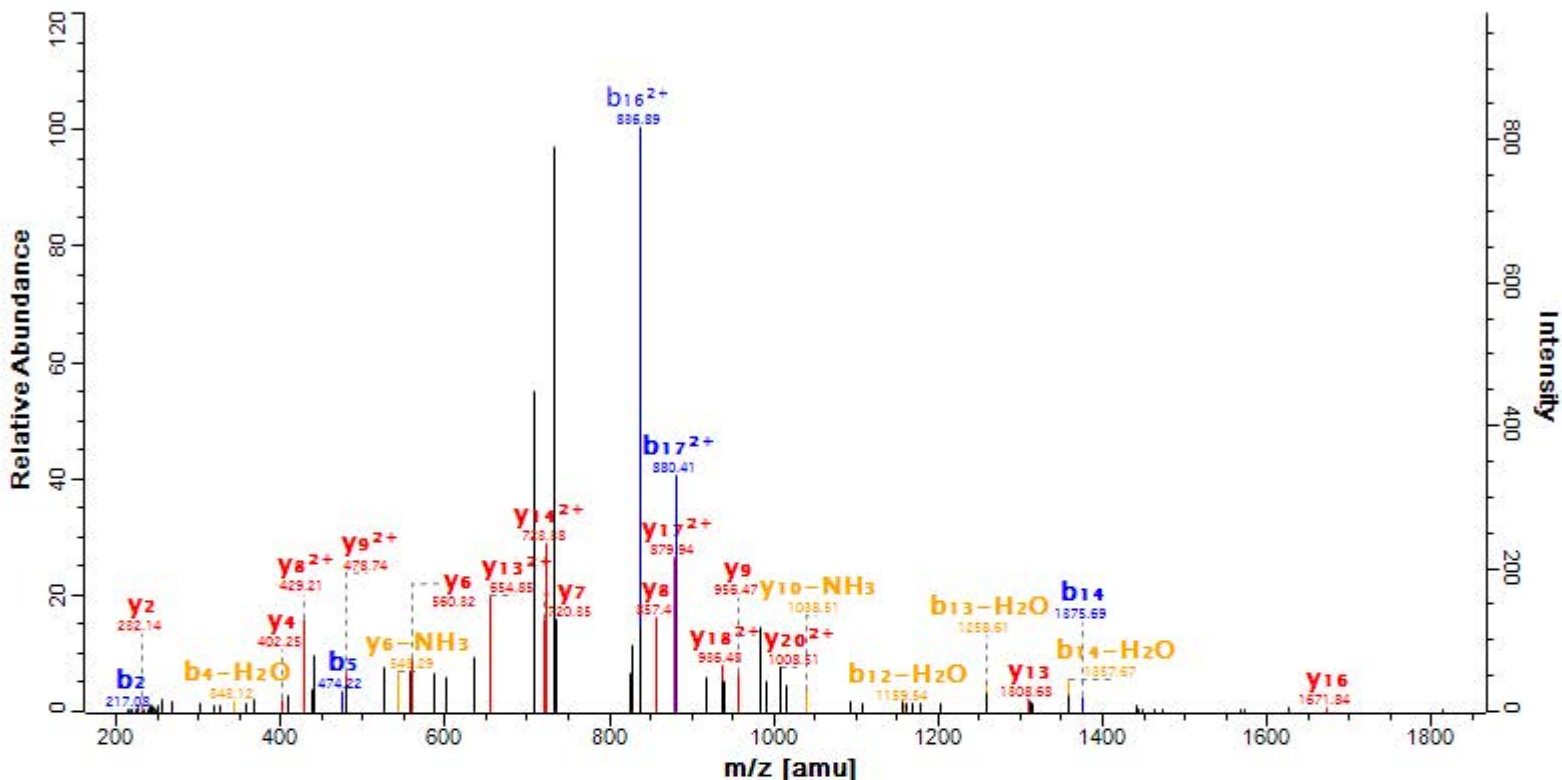

**precursor information**

|                   |                 |
|-------------------|-----------------|
| Mass:             | 2231.0751       |
| m/z:              | 744.69898       |
| Charge:           | 3+              |
| Retentiontime:    | 17.502246856689 |
| Score:            | 69.36105        |
| Mass Error [ppm]: | -0.093832       |
| PEP:              | 0.00341         |
| Precursor Type:   | ISO             |

**general information**

|                       |             |
|-----------------------|-------------|
| Annotation:           | 16 of 22    |
| AminoAcids Coverage:  | 73 %        |
| Intensity Coverage:   | 48 %        |
| Peak Coverage:        | 28 %        |
| Protein Localisation: | 200 ... 221 |

| b <sup>2+</sup> ion |        | b ion    |        | seq |   |    | y ion    |         | y <sup>2+</sup> ion |         |
|---------------------|--------|----------|--------|-----|---|----|----------|---------|---------------------|---------|
| Δ dalton            | mass   | Δ dalton | mass   |     |   |    | Δ dalton | mass    | Δ dalton            | mass    |
|                     | 130.05 |          | 130.05 | 1   | E | 21 |          |         |                     |         |
|                     | 217.08 | -0.085   | 217.08 | 2   | S | 20 | 2103     |         | 2103                |         |
|                     | 274.1  |          | 274.1  | 3   | G | 19 | 2016     |         | 1008.5              | -0.124  |
|                     | 361.14 |          | 361.14 | 4   | S | 18 | 1959     |         | 1959                |         |
|                     | 474.22 | +0.1878  | 474.22 | 5   | L | 17 | 1872     |         | 936.48              | +0.2798 |
|                     | 561.25 |          | 561.25 | 6   | S | 16 | 1758.9   |         | 879.94              | -0.012  |
|                     | 658.3  |          | 658.3  | 7   | P | 15 | 1671.8   | +0.3546 | 1671.8              |         |
|                     | 787.35 |          | 787.35 | 8   | E | 14 | 1574.8   |         | 1574.8              |         |
|                     | 924.41 |          | 924.41 | 9   | H | 13 | 1445.7   |         | 723.38              | +0.376  |
|                     | 981.43 |          | 981.43 | 10  | G | 12 | 1308.7   | +0.0898 | 654.85              | +0.1745 |
|                     | 1078.5 |          | 1078.5 | 11  | P | 11 | 1251.7   |         | 1251.7              |         |
|                     | 1177.5 |          | 1177.5 | 12  | V | 10 | 1154.6   |         | 1154.6              |         |
|                     | 1276.6 |          | 1276.6 | 13  | V | 9  | 1055.5   |         | 1055.5              |         |
|                     | 1375.7 | -0.138   | 1375.7 | 14  | V | 8  | 956.47   | +0.0904 | 478.74              | -0.055  |
|                     | 1512.7 |          | 1512.7 | 15  | H | 7  | 857.4    | -0.054  | 429.21              | +0.0973 |
| -0.174              | 836.89 |          | 1672.8 | 16  | C | 6  | 720.35   | +0.0703 | 720.35              |         |
| +0.1479             | 880.41 |          | 1759.8 | 17  | S | 5  | 560.32   | +0.0169 | 560.32              |         |
|                     | 1830.8 |          | 1830.8 | 18  | A | 4  | 473.28   |         | 473.28              |         |
|                     | 1887.9 |          | 1887.9 | 19  | G | 3  | 402.25   | +0.217  | 402.25              |         |
|                     | 2000.9 |          | 2000.9 | 20  | I | 2  | 345.22   |         | 345.22              |         |
|                     | 2058   |          | 2058   | 21  | G | 1  | 232.14   | -0.146  | 232.14              |         |
|                     |        |          |        | 22  | R | 0  | 175.12   |         | 175.12              |         |

Scan number 3841 Raw file LNCAP\_Silac\_23F10\_set1\_08  
 Method ITMS: CID Pepti... 65.56

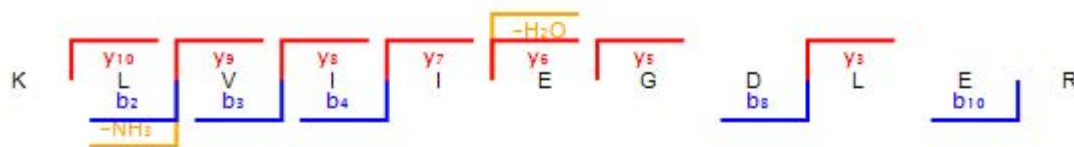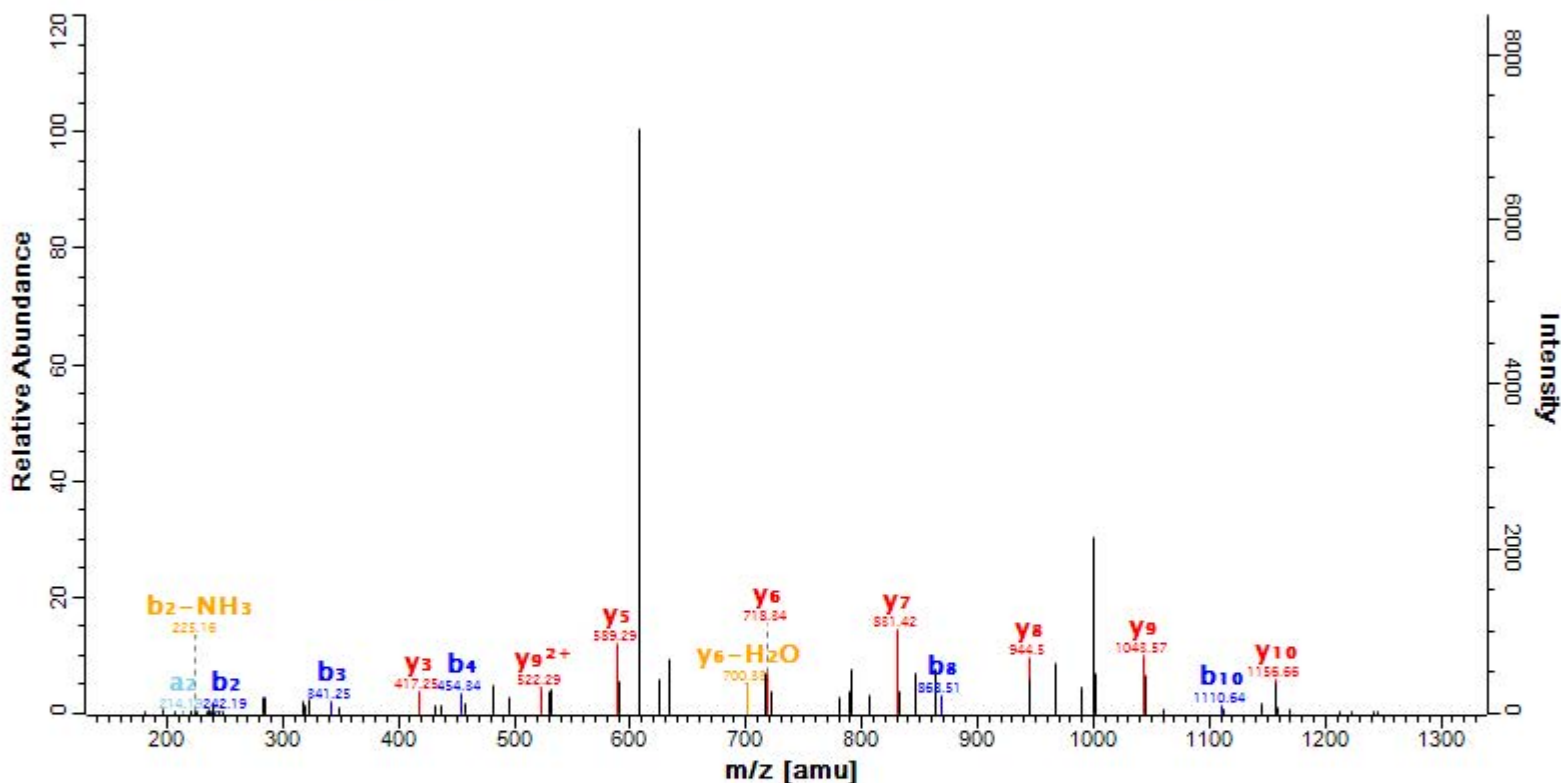

#### precursor information

|                   |                 |
|-------------------|-----------------|
| Mass:             | 1283.74467      |
| m/z:              | 642.87961       |
| Charge:           | 2+              |
| Retentiontime:    | 27.423612594604 |
| Score:            | 65.56252        |
| Mass Error [ppm]: | -0.18147        |
| PEP:              | 0.0049983       |
| Precursor Type:   | MULTI           |

#### general information

|                       |             |
|-----------------------|-------------|
| Annotation:           | 9 of 11     |
| AminoAcids Coverage:  | 82 %        |
| Intensity Coverage:   | 22 %        |
| Peak Coverage:        | 18 %        |
| Protein Localisation: | 132 ... 142 |

| a ion    |        | b ion    |        |    |     |          | y ion  |          | y <sup>2+</sup> ion |  |
|----------|--------|----------|--------|----|-----|----------|--------|----------|---------------------|--|
| Δ dalton | mass   | Δ dalton | mass   |    | seq | Δ dalton | mass   | Δ dalton | mass                |  |
|          | 101.11 |          | 129.1  | 1  | K   | 10       |        |          |                     |  |
| +0.1568  | 214.19 | -0.1     | 242.19 | 2  | L   | 9        | 1156.7 | -0.01    | 1156.7              |  |
|          | 313.26 | +0.0067  | 341.25 | 3  | V   | 8        | 1043.6 | +0.0258  | 522.29              |  |
|          | 426.34 | +0.025   | 454.34 | 4  | I   | 7        | 944.5  | +0.0426  | 944.5               |  |
|          | 539.43 |          | 567.42 | 5  | I   | 6        | 831.42 | +0.0653  | 831.42              |  |
|          | 668.47 |          | 696.47 | 6  | E   | 5        | 718.34 | +0.0789  | 718.34              |  |
|          | 725.49 |          | 753.49 | 7  | G   | 4        | 589.29 | +0.0134  | 589.29              |  |
|          | 840.52 | +0.1824  | 868.51 | 8  | D   | 3        | 532.27 |          | 532.27              |  |
|          | 953.6  |          | 981.6  | 9  | L   | 2        | 417.25 | +0.0274  | 417.25              |  |
|          | 1082.6 | +0.0713  | 1110.6 | 10 | E   | 1        | 304.16 |          | 304.16              |  |
|          |        |          |        | 11 | R   | 0        | 175.12 |          | 175.12              |  |

Scan number 4132 Raw file LNCAP\_Silac\_23F10\_set1\_08  
 Method ITMS; CID Pepti... 151.89

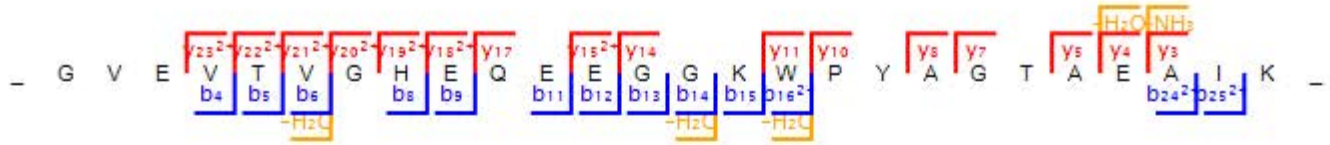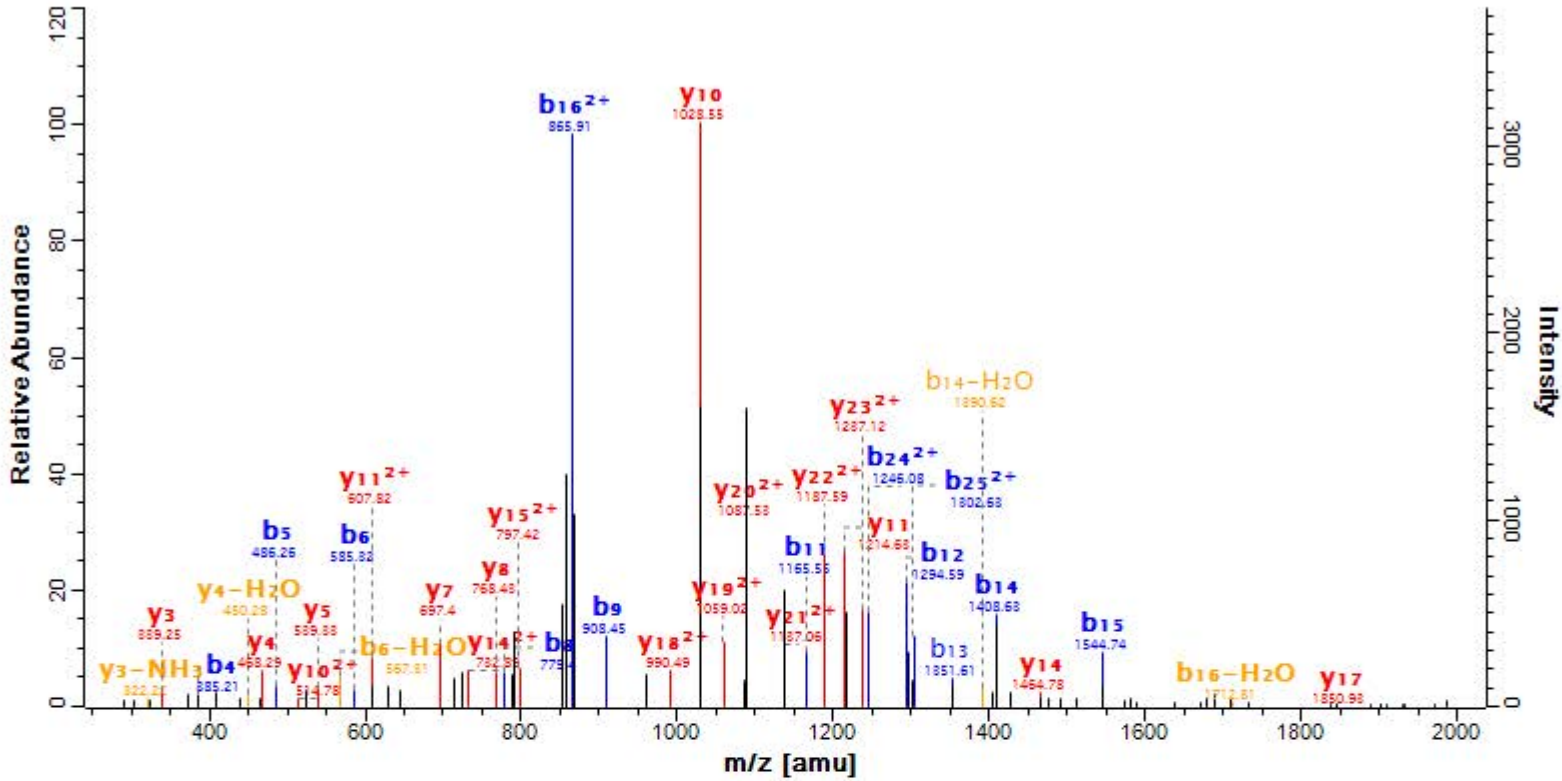

precursor information

|                   |                 |
|-------------------|-----------------|
| Mass:             | 2741.32961      |
| m/z:              | 914.78381       |
| Charge:           | 3+              |
| Retentiontime:    | 29.094875335693 |
| Score:            | 151.886         |
| Mass Error [ppm]: | -0.021266       |
| PEP:              | 1.1303E-32      |
| Precursor Type:   | MULTI           |

general information

|                       |             |
|-----------------------|-------------|
| Annotation:           | 21 of 26    |
| AminoAcids Coverage:  | 81 %        |
| Intensity Coverage:   | 55 %        |
| Peak Coverage:        | 37 %        |
| Protein Localisation: | 189 ... 214 |

| b <sup>2+</sup> ion |        | b ion    |        | seq |   |    | y ion    |         | y <sup>2+</sup> ion |         |
|---------------------|--------|----------|--------|-----|---|----|----------|---------|---------------------|---------|
| Δ dalton            | mass   | Δ dalton | mass   |     |   |    | Δ dalton | mass    | Δ dalton            | mass    |
|                     | 58.029 |          | 58.029 | 1   | G | 25 |          |         |                     |         |
|                     | 157.1  |          | 157.1  | 2   | V | 24 | 2701.3   |         | 2701.3              |         |
|                     | 286.14 |          | 286.14 | 3   | E | 23 | 2602.3   |         | 2602.3              |         |
|                     | 385.21 | +0.0209  | 385.21 | 4   | V | 22 | 2473.2   |         | 1237.1              | +0.1075 |
|                     | 486.26 | +0.2356  | 486.26 | 5   | T | 21 | 2374.2   |         | 1187.6              | +0.2528 |
|                     | 585.32 | +0.1414  | 585.32 | 6   | V | 20 | 2273.1   |         | 1137.1              | +0.0766 |
|                     | 642.35 |          | 642.35 | 7   | G | 19 | 2174     |         | 1087.5              | -0.077  |
|                     | 779.4  | -0.039   | 779.4  | 8   | H | 18 | 2117     |         | 1059                | +0.1055 |
|                     | 908.45 | +0.1326  | 908.45 | 9   | E | 17 | 1980     |         | 990.49              | -0.089  |
|                     | 1036.5 |          | 1036.5 | 10  | Q | 16 | 1850.9   | +0.1148 | 1850.9              |         |
|                     | 1165.5 | -0.051   | 1165.5 | 11  | E | 15 | 1722.9   |         | 1722.9              |         |
|                     | 1294.6 | +0.0207  | 1294.6 | 12  | E | 14 | 1593.8   |         | 797.42              | +0.1925 |
|                     | 1351.6 | -0.023   | 1351.6 | 13  | G | 13 | 1464.8   | -0.063  | 732.89              | +0.0745 |
|                     | 1408.6 | -0.158   | 1408.6 | 14  | G | 12 | 1407.8   |         | 1407.8              |         |
|                     | 1544.7 | -0.133   | 1544.7 | 15  | K | 11 | 1350.7   |         | 1350.7              |         |
| +0.2828             | 865.91 |          | 1730.8 | 16  | W | 10 | 1214.6   | -0.086  | 607.82              | +0.0073 |
|                     | 1827.9 |          | 1827.9 | 17  | P | 9  | 1028.6   | -0.023  | 514.78              | +0.1327 |
|                     | 1990.9 |          | 1990.9 | 18  | Y | 8  | 931.5    |         | 931.5               |         |
|                     | 2062   |          | 2062   | 19  | A | 7  | 768.43   | -0.141  | 768.43              |         |
|                     | 2119   |          | 2119   | 20  | G | 6  | 697.4    | +0.0154 | 697.4               |         |
|                     | 2220   |          | 2220   | 21  | T | 5  | 640.38   |         | 640.38              |         |
|                     | 2291.1 |          | 2291.1 | 22  | A | 4  | 539.33   | +0.071  | 539.33              |         |
|                     | 2420.1 |          | 2420.1 | 23  | E | 3  | 468.29   | -0.018  | 468.29              |         |
| +0.1888             | 1246.1 |          | 2491.2 | 24  | A | 2  | 339.25   | +0.1521 | 339.25              |         |
| +0.2719             | 1302.6 |          | 2604.2 | 25  | I | 1  | 268.21   |         | 268.21              |         |
|                     |        |          |        | 26  | K | 0  | 155.13   |         | 155.13              |         |

Scan number 4209 Raw file LNCAP\_Silac\_23F10\_set1\_08  
 Method ITMS; CID Pepti... 87.18

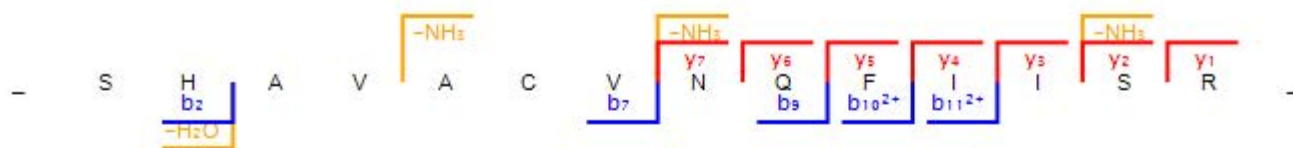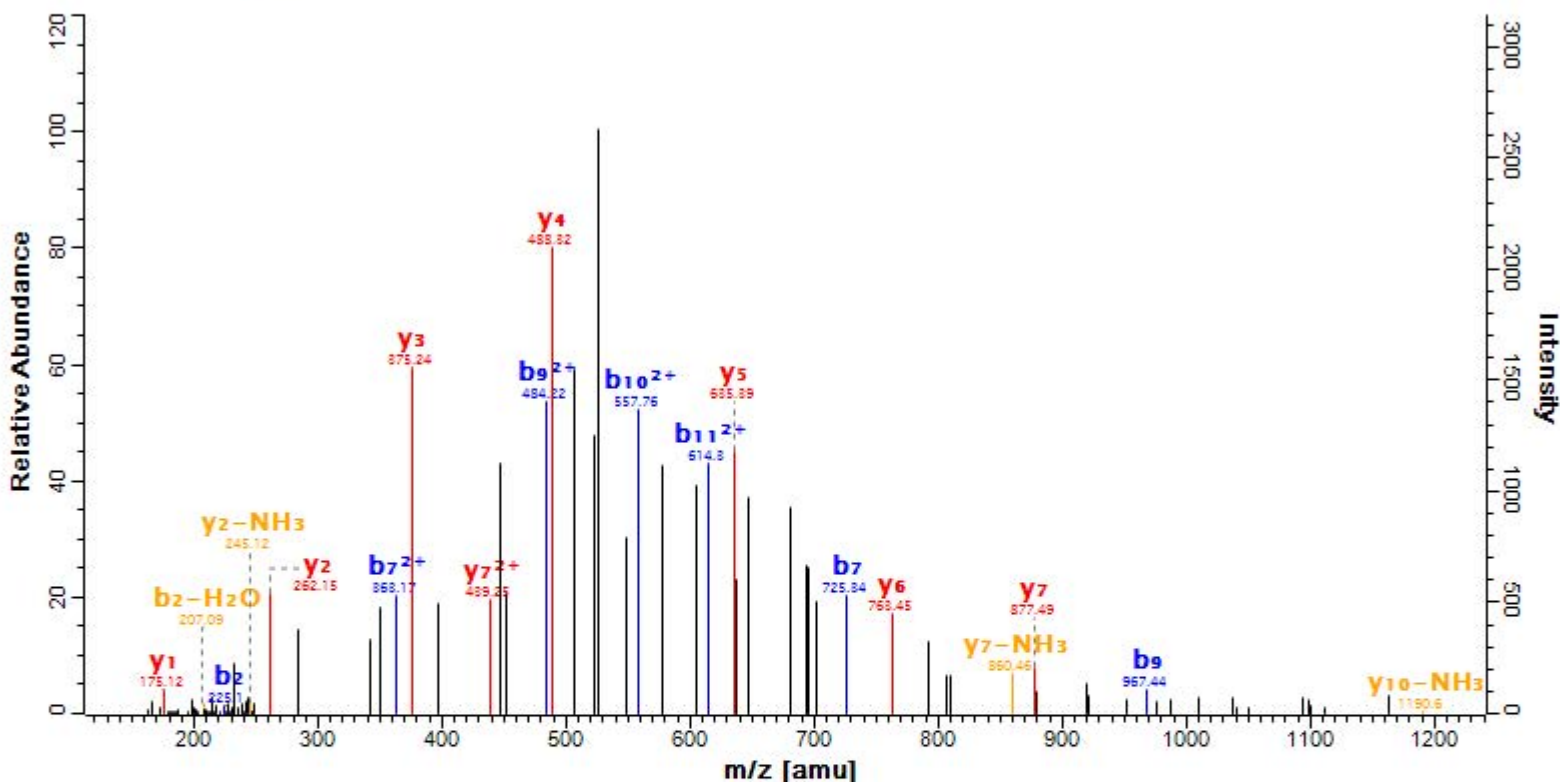

precursor information

|                   |                 |
|-------------------|-----------------|
| Mass:             | 1600.81437      |
| m/z:              | 534.61207       |
| Charge:           | 3+              |
| Retentiontime:    | 29.522485733032 |
| Score:            | 87.17953        |
| Mass Error [ppm]: | -0.016412       |
| PEP:              | 0.005156        |
| Precursor Type:   | ISO             |

| b <sup>2+</sup> ion |        | b ion    |        | seq |   |    | y ion    |         | y <sup>2+</sup> ion |         |
|---------------------|--------|----------|--------|-----|---|----|----------|---------|---------------------|---------|
| Δ dalton            | mass   | Δ dalton | mass   |     |   |    | Δ dalton | mass    | Δ dalton            | mass    |
|                     | 88.039 |          | 88.039 | 1   | S | 13 |          |         |                     |         |
|                     | 225.1  | -0.058   | 225.1  | 2   | H | 12 | 1514.8   |         | 1514.8              |         |
|                     | 296.14 |          | 296.14 | 3   | A | 11 | 1377.7   |         | 1377.7              |         |
|                     | 395.2  |          | 395.2  | 4   | V | 10 | 1306.7   |         | 1306.7              |         |
|                     | 466.24 |          | 466.24 | 5   | A | 9  | 1207.6   |         | 1207.6              |         |
|                     | 626.27 |          | 626.27 | 6   | C | 8  | 1136.6   |         | 1136.6              |         |
| +0.1147             | 363.17 | +0.0988  | 725.34 | 7   | V | 7  | 976.56   |         | 976.56              |         |
|                     | 839.38 |          | 839.38 | 8   | N | 6  | 877.49   | +0.1726 | 439.25              | +0.0974 |
| +0.1676             | 484.22 | +0.1191  | 967.44 | 9   | Q | 5  | 763.45   | +0.0629 | 763.45              |         |
| +0.175              | 557.76 |          | 1114.5 | 10  | F | 4  | 635.39   | -0.026  | 635.39              |         |
| +0.1784             | 614.3  |          | 1227.6 | 11  | I | 3  | 488.32   | +0.1208 | 488.32              |         |
|                     | 1340.7 |          | 1340.7 | 12  | I | 2  | 375.24   | +0.0565 | 375.24              |         |
|                     | 1427.7 |          | 1427.7 | 13  | S | 1  | 262.15   | -0.003  | 262.15              |         |
|                     |        |          |        | 14  | R | 0  | 175.12   | +0.031  | 175.12              |         |

general information

|                       |             |
|-----------------------|-------------|
| Annotation:           | 10 of 14    |
| AminoAcids Coverage:  | 71 %        |
| Intensity Coverage:   | 39 %        |
| Peak Coverage:        | 19 %        |
| Protein Localisation: | 200 ... 213 |

Scan number 4332 Raw file LNCAP\_Silac\_23F10\_set1\_08  
 Method ITMS; CID Pepti... 78.71

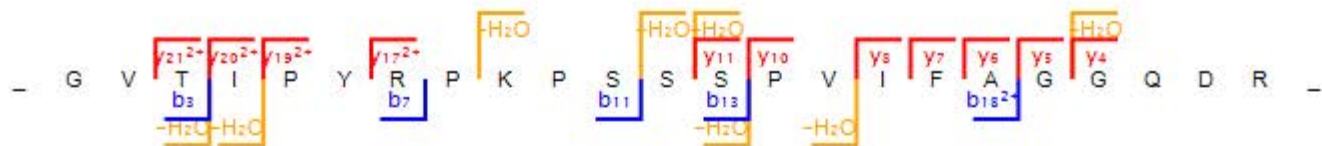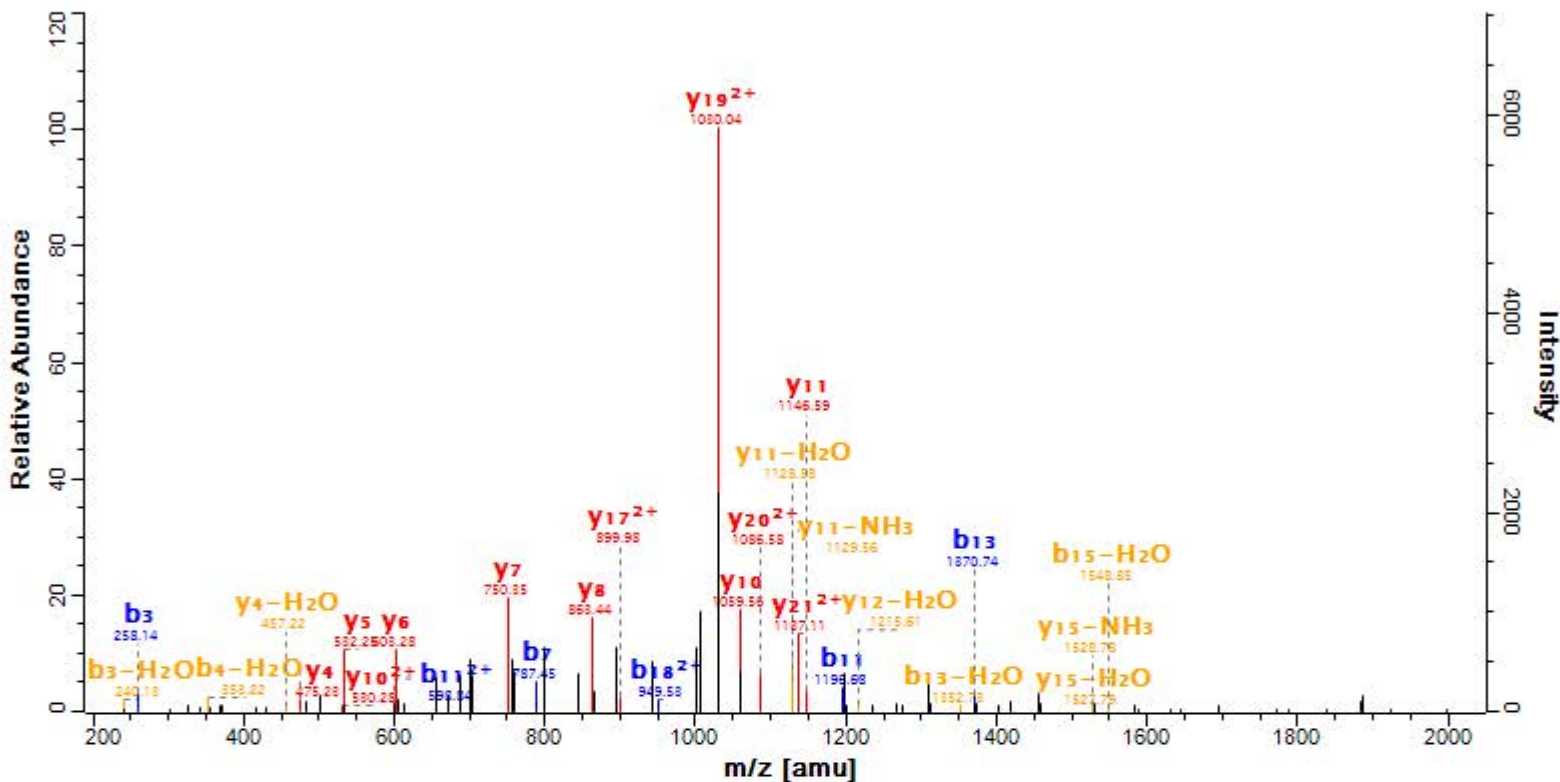

precursor information

|                   |                 |
|-------------------|-----------------|
| Mass:             | 2428.28768      |
| m/z:              | 810.4365        |
| Charge:           | 3+              |
| Retentiontime:    | 30.221952438354 |
| Score:            | 78.70789        |
| Mass Error [ppm]: | 0.57241         |
| PEP:              | 0.004811        |
| Precursor Type:   | ISO             |

| b <sup>2+</sup> ion |        | b ion    |        | seq |   | y ion    |        | y <sup>2+</sup> ion |        |
|---------------------|--------|----------|--------|-----|---|----------|--------|---------------------|--------|
| Δ dalton            | mass   | Δ dalton | mass   |     |   | Δ dalton | mass   | Δ dalton            | mass   |
|                     | 58.029 |          | 58.029 | 1   | G | 22       |        |                     |        |
|                     | 157.1  |          | 157.1  | 2   | V | 21       | 2372.3 |                     | 2372.3 |
|                     | 258.14 | +0.1104  | 258.14 | 3   | T | 20       | 2273.2 |                     | 1137.1 |
|                     | 371.23 |          | 371.23 | 4   | I | 19       | 2172.2 |                     | 1086.6 |
|                     | 468.28 |          | 468.28 | 5   | P | 18       | 2059.1 |                     | 1030   |
|                     | 631.34 |          | 631.34 | 6   | Y | 17       | 1962   |                     | 1962   |
|                     | 787.45 | -0.187   | 787.45 | 7   | R | 16       | 1799   |                     | 899.98 |
|                     | 884.5  |          | 884.5  | 8   | P | 15       | 1642.9 |                     | 1642.9 |
|                     | 1012.6 |          | 1012.6 | 9   | K | 14       | 1545.8 |                     | 1545.8 |
|                     | 1109.6 |          | 1109.6 | 10  | P | 13       | 1417.7 |                     | 1417.7 |
| -0.125              | 598.84 | -0.073   | 1196.7 | 11  | S | 12       | 1320.7 |                     | 1320.7 |
|                     | 1283.7 |          | 1283.7 | 12  | S | 11       | 1233.6 |                     | 1233.6 |
|                     | 1370.7 | -0.147   | 1370.7 | 13  | S | 10       | 1146.6 | -0.196              | 1146.6 |
|                     | 1467.8 |          | 1467.8 | 14  | P | 9        | 1059.6 | +0.0678             | 530.28 |
|                     | 1566.9 |          | 1566.9 | 15  | V | 8        | 962.51 |                     | 962.51 |
|                     | 1679.9 |          | 1679.9 | 16  | I | 7        | 863.44 | +0.1016             | 863.44 |
|                     | 1827   |          | 1827   | 17  | F | 6        | 750.35 | -0.006              | 750.35 |
| +0.3085             | 949.53 |          | 1898.1 | 18  | A | 5        | 603.28 | +0.0938             | 603.28 |
|                     | 1955.1 |          | 1955.1 | 19  | G | 4        | 532.25 | +0.073              | 532.25 |
|                     | 2012.1 |          | 2012.1 | 20  | G | 3        | 475.23 | +0.0625             | 475.23 |
|                     | 2140.2 |          | 2140.2 | 21  | Q | 2        | 418.2  |                     | 418.2  |
|                     | 2255.2 |          | 2255.2 | 22  | D | 1        | 290.15 |                     | 290.15 |
|                     |        |          |        | 23  | R | 0        | 175.12 |                     | 175.12 |

general information

|                       |             |
|-----------------------|-------------|
| Annotation:           | 16 of 23    |
| AminoAcids Coverage:  | 70 %        |
| Intensity Coverage:   | 51 %        |
| Peak Coverage:        | 28 %        |
| Protein Localisation: | 177 ... 199 |

Scan number 485 Raw file LNCAP\_Silac\_23F10\_set1\_08  
 Method ITMS; CID Pepti... 57.8

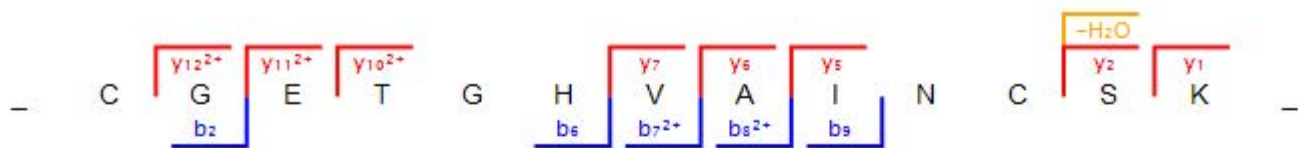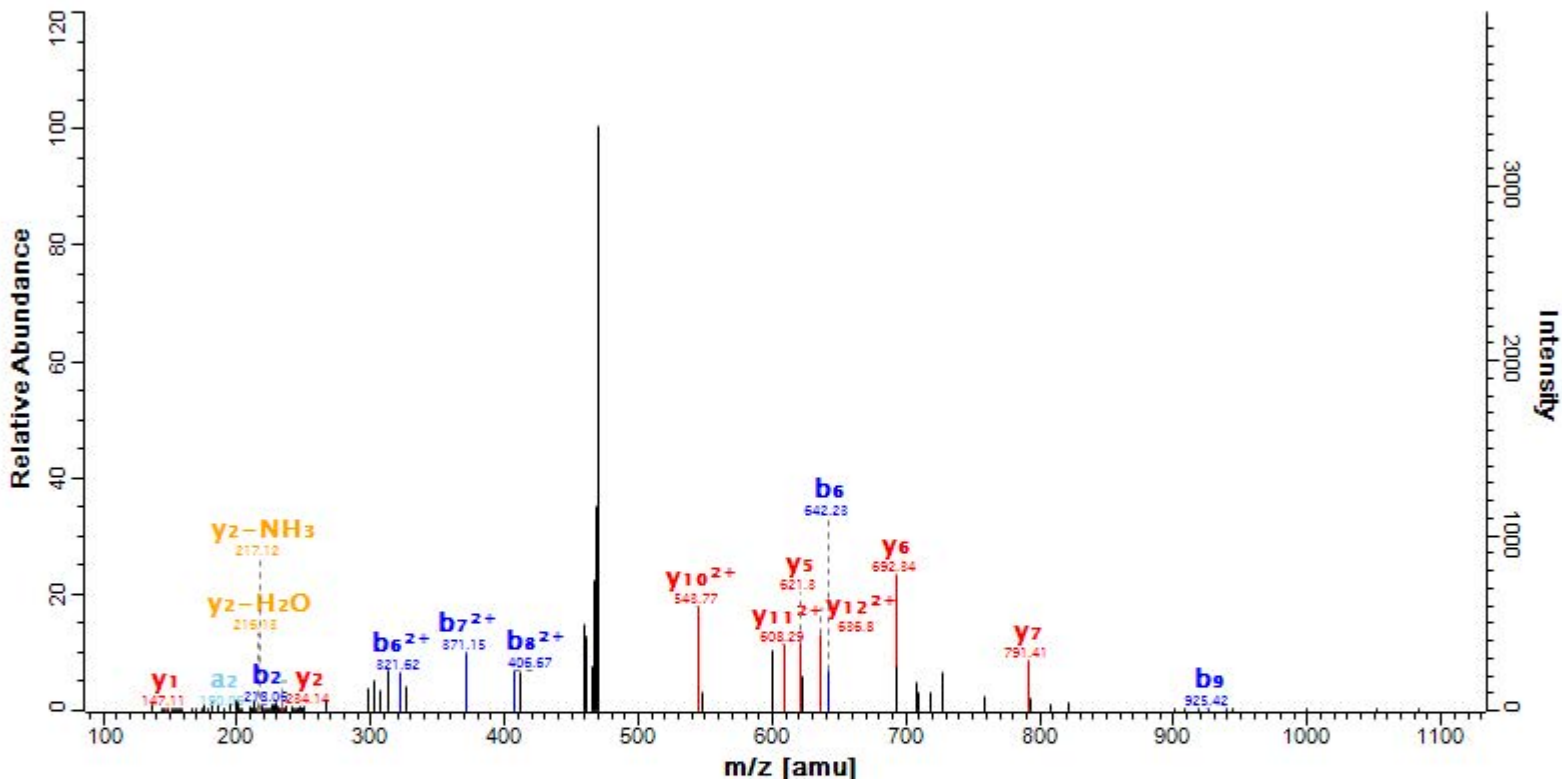

precursor information

|                   |                 |
|-------------------|-----------------|
| Mass:             | 1431.62497      |
| m/z:              | 478.2156        |
| Charge:           | 3+              |
| Retention time:   | 7.7014017105102 |
| Score:            | 57.80165        |
| Mass Error [ppm]: | 1.0418          |
| PEP:              | 0.0099025       |
| Precursor Type:   | MULTI           |

general information

|                       |             |
|-----------------------|-------------|
| Annotation:           | 9 of 13     |
| AminoAcids Coverage:  | 69 %        |
| Intensity Coverage:   | 28 %        |
| Peak Coverage:        | 13 %        |
| Protein Localisation: | 140 ... 152 |

|       | a ion         | b <sup>2+</sup> ion | b ion         |     |   | y ion         | y <sup>2+</sup> ion |              |        |
|-------|---------------|---------------------|---------------|-----|---|---------------|---------------------|--------------|--------|
|       | Δ dalton mass | Δ dalton mass       | Δ dalton mass | seq |   | Δ dalton mass | Δ dalton mass       |              |        |
|       | 133           | 161                 | 161           | 1   | C | 12            |                     |              |        |
| +0.26 | 190.1         | 218.1               | +0.12 218.1   | 2   | G | 11            | 1273                | 636.8        | +0.019 |
|       | 319.1         | 347.1               | 347.1         | 3   | E | 10            | 1216                | 608.3        | +0.164 |
|       | 420.2         | 448.1               | 448.1         | 4   | T | 9             | 1087                | 543.8        | +0.349 |
|       | 477.2         | 505.2               | 505.2         | 5   | G | 8             | 985.5               | 985.5        |        |
|       | 614.2         | -0.02 321.6         | +0.046 642.2  | 6   | H | 7             | 928.5               | 928.5        |        |
|       | 713.3         | +0.014 371.2        | 741.3         | 7   | V | 6             | 791.4               | +0.055 791.4 |        |
|       | 784.3         | +0.12 406.7         | 812.3         | 8   | A | 5             | 692.3               | +0.048 692.3 |        |
|       | 897.4         | 925.4               | +0.155 925.4  | 9   | I | 4             | 621.3               | +0.024 621.3 |        |
|       | 1011          | 1039                | 1039          | 10  | N | 3             | 508.2               | 508.2        |        |
|       | 1171          | 1199                | 1199          | 11  | C | 2             | 394.2               | 394.2        |        |
|       | 1259          | 1287                | 1287          | 12  | S | 1             | 234.1               | +0.092 234.1 |        |
|       |               |                     |               | 13  | K | 0             | 147.1               | +0.055 147.1 |        |



Scan number 5281 Raw file LNCAP\_Silac\_23F10\_set1\_08  
 Method ITMS; CID Pepti... 45.4

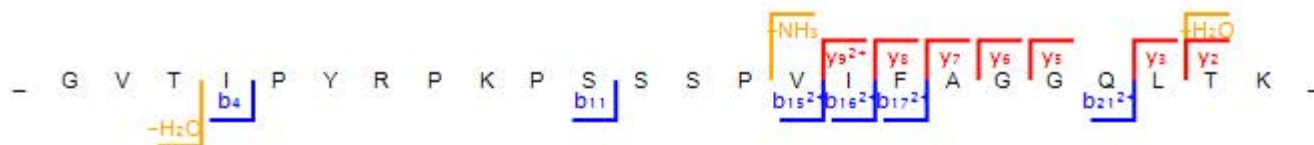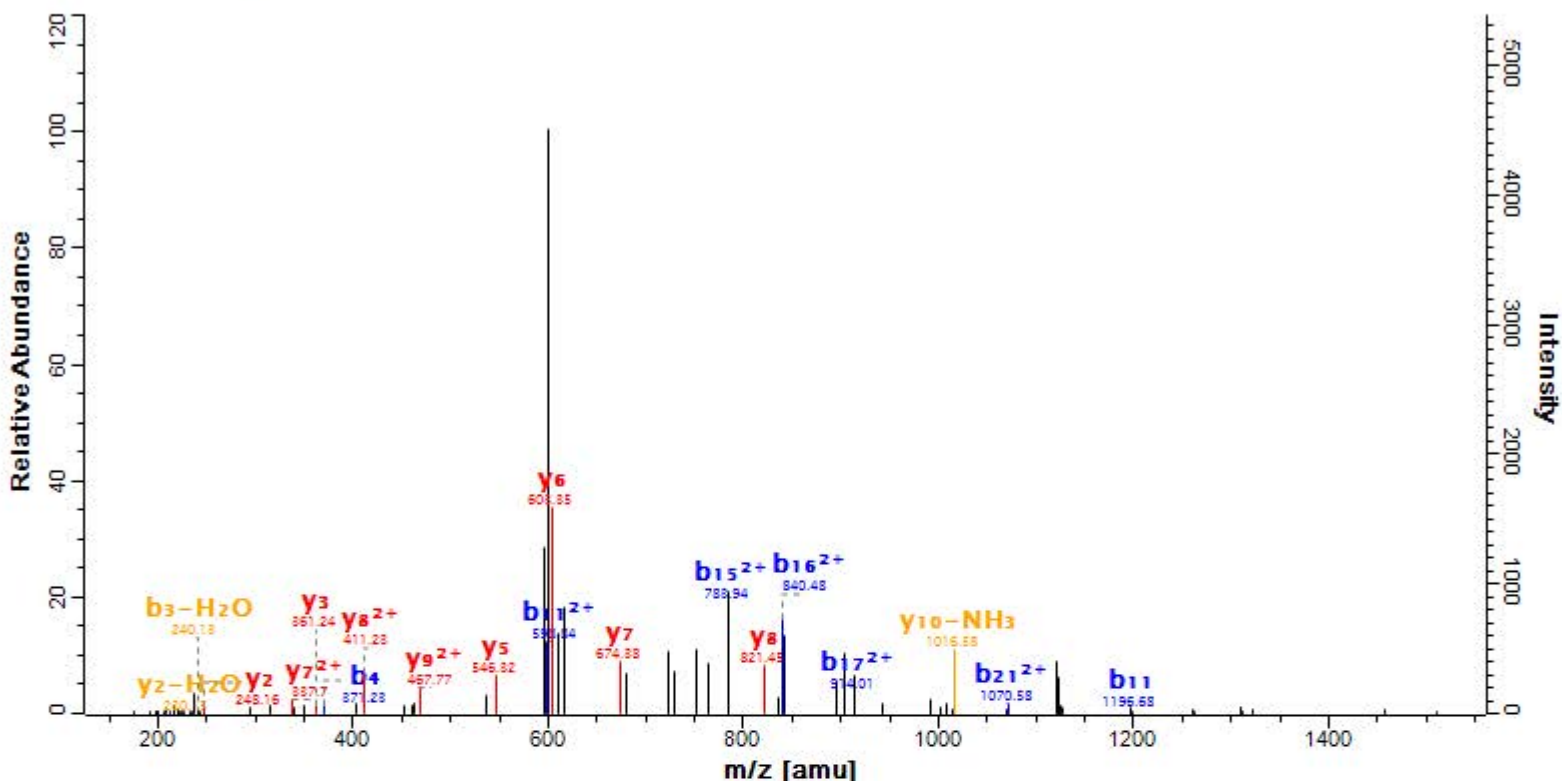

**precursor information**

|                   |                 |
|-------------------|-----------------|
| Mass:             | 2499.38481      |
| m/z:              | 625.85348       |
| Charge:           | 4+              |
| Retentiontime:    | 35.764331817627 |
| Score:            | 45.39541        |
| Mass Error [ppm]: | -0.055613       |
| PEP:              | 0.0059418       |
| Precursor Type:   | MULTI           |

**general information**

|                       |             |
|-----------------------|-------------|
| Annotation:           | 13 of 24    |
| AminoAcids Coverage:  | 54 %        |
| Intensity Coverage:   | 30 %        |
| Peak Coverage:        | 17 %        |
| Protein Localisation: | 139 ... 162 |

| b <sup>2+</sup> ion |        | b ion    |        | seq |   |    | y ion    |         | y <sup>2+</sup> ion |         |
|---------------------|--------|----------|--------|-----|---|----|----------|---------|---------------------|---------|
| Δ dalton            | mass   | Δ dalton | mass   |     |   |    | Δ dalton | mass    | Δ dalton            | mass    |
|                     | 58.029 |          | 58.029 | 1   | G | 23 |          |         |                     |         |
|                     | 157.1  |          | 157.1  | 2   | V | 22 | 2443.4   |         | 2443.4              |         |
|                     | 258.14 |          | 258.14 | 3   | T | 21 | 2344.3   |         | 2344.3              |         |
|                     | 371.23 | +0.1331  | 371.23 | 4   | I | 20 | 2243.3   |         | 2243.3              |         |
|                     | 468.28 |          | 468.28 | 5   | P | 19 | 2130.2   |         | 2130.2              |         |
|                     | 631.34 |          | 631.34 | 6   | Y | 18 | 2033.1   |         | 2033.1              |         |
|                     | 787.45 |          | 787.45 | 7   | R | 17 | 1870.1   |         | 1870.1              |         |
|                     | 884.5  |          | 884.5  | 8   | P | 16 | 1714     |         | 1714                |         |
|                     | 1012.6 |          | 1012.6 | 9   | K | 15 | 1616.9   |         | 1616.9              |         |
|                     | 1109.6 |          | 1109.6 | 10  | P | 14 | 1488.8   |         | 1488.8              |         |
| -0.027              | 598.84 | -0.059   | 1196.7 | 11  | S | 13 | 1391.8   |         | 1391.8              |         |
|                     | 1283.7 |          | 1283.7 | 12  | S | 12 | 1304.7   |         | 1304.7              |         |
|                     | 1370.7 |          | 1370.7 | 13  | S | 11 | 1217.7   |         | 1217.7              |         |
|                     | 1467.8 |          | 1467.8 | 14  | P | 10 | 1130.7   |         | 1130.7              |         |
| +0.029              | 783.94 |          | 1566.9 | 15  | V | 9  | 1033.6   |         | 1033.6              |         |
| -0.053              | 840.48 |          | 1679.9 | 16  | I | 8  | 934.54   |         | 467.77              | +0.1037 |
| +0.0508             | 914.01 |          | 1827   | 17  | F | 7  | 821.45   | +0.1322 | 411.23              | +0.14   |
|                     | 1898.1 |          | 1898.1 | 18  | A | 6  | 674.38   | +0.0927 | 337.7               | +0.3456 |
|                     | 1955.1 |          | 1955.1 | 19  | G | 5  | 603.35   | +0.0297 | 603.35              |         |
|                     | 2012.1 |          | 2012.1 | 20  | G | 4  | 546.32   | +0.004  | 546.32              |         |
| +0.2883             | 1070.6 |          | 2140.2 | 21  | Q | 3  | 489.3    |         | 489.3               |         |
|                     | 2253.2 |          | 2253.2 | 22  | L | 2  | 361.24   | -0.013  | 361.24              |         |
|                     | 2354.3 |          | 2354.3 | 23  | T | 1  | 248.16   | +0.0737 | 248.16              |         |
|                     |        |          |        | 24  | K | 0  | 147.11   |         | 147.11              |         |

Scan number 553 Raw file LNCAP\_Silac\_23F10\_set1\_08  
 Method ITMS: CID Pepti... 59.91

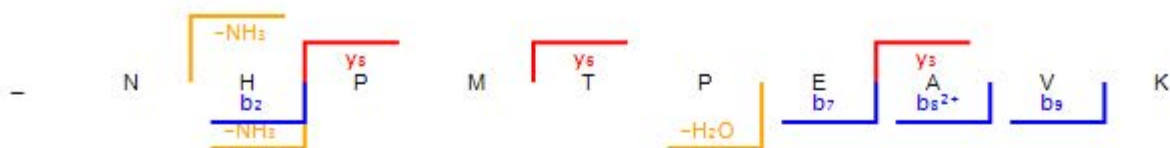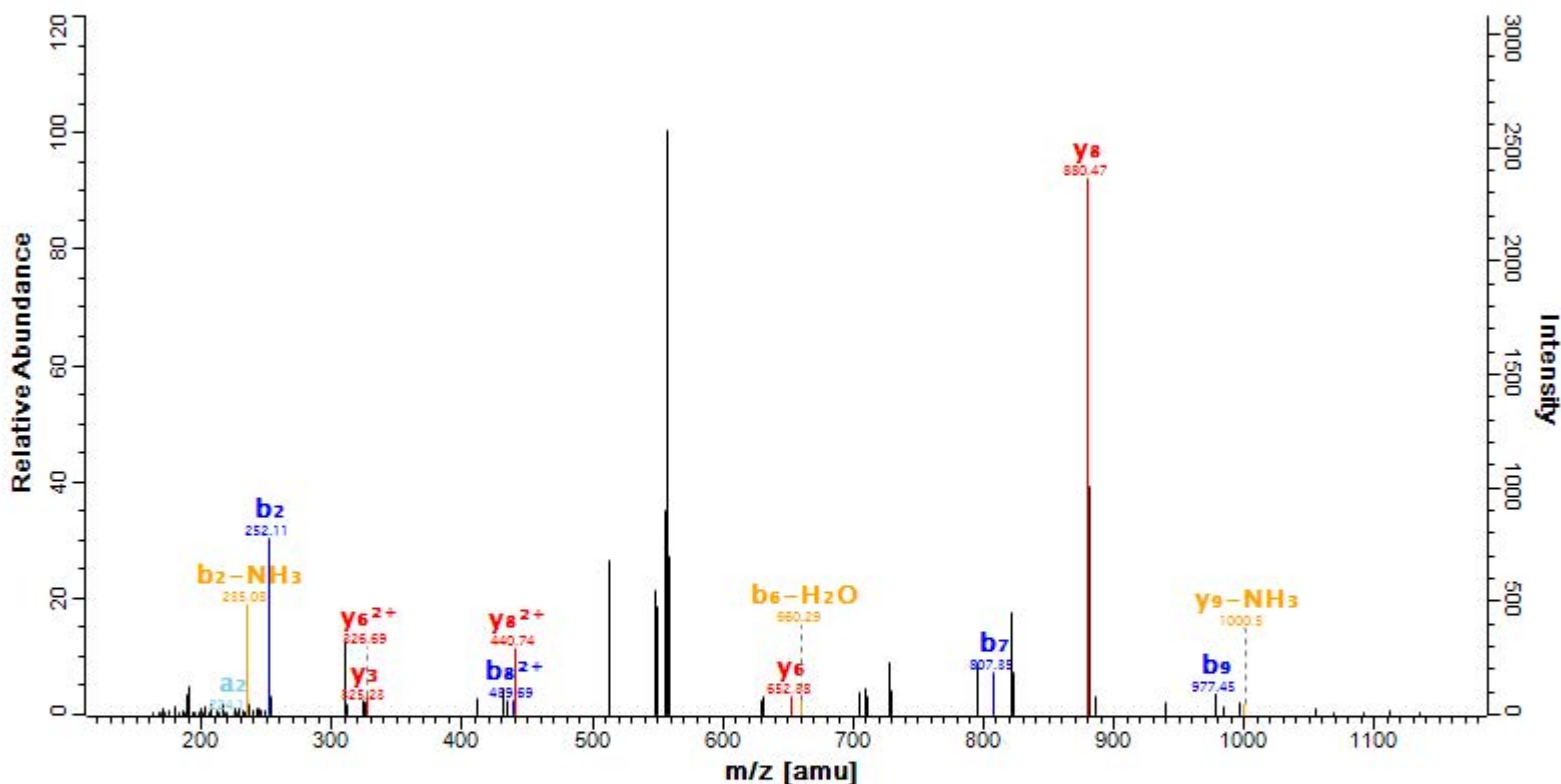

#### precursor information

|                   |                 |
|-------------------|-----------------|
| Mass:             | 1122.54899      |
| m/z:              | 562.28177       |
| Charge:           | 2+              |
| Retentiontime:    | 8.0938034057617 |
| Score:            | 59.90757        |
| Mass Error [ppm]: | -0.16651        |
| PEP:              | 0.021583        |
| Precursor Type:   | MULTI           |

|                       |             |
|-----------------------|-------------|
| Annotation:           | 7 of 10     |
| AminoAcids Coverage:  | 70 %        |
| Intensity Coverage:   | 30 %        |
| Peak Coverage:        | 13 %        |
| Protein Localisation: | 261 ... 270 |

| a ion         | b <sup>2+</sup> ion | b ion         |     |   | y ion         | y <sup>2+</sup> ion |             |
|---------------|---------------------|---------------|-----|---|---------------|---------------------|-------------|
| Δ dalton mass | Δ dalton mass       | Δ dalton mass | seq |   | Δ dalton mass | Δ dalton mass       |             |
| 87.06         | 115.1               | 115.1         | 1   | N | 9             |                     |             |
| +0.195224.1   | 252.1               | +0.051252.1   | 2   | H | 8             | 1018                | 1018        |
| 321.2         | 349.2               | 349.2         | 3   | P | 7             | 880.5               | +0.015440.7 |
| 452.2         | 480.2               | 480.2         | 4   | M | 6             | 783.4               | 783.4       |
| 553.3         | 581.3               | 581.3         | 5   | T | 5             | 652.4               | +0.127326.7 |
| 650.3         | 678.3               | 678.3         | 6   | P | 4             | 551.3               | 551.3       |
| 779.4         | 807.3               | -0.19807.3    | 7   | E | 3             | 454.3               | 454.3       |
| 850.4         | -0.19439.7          | 878.4         | 8   | A | 2             | 325.2               | +0.082325.2 |
| 949.5         | 977.5               | +0.185977.5   | 9   | V | 1             | 254.2               | 254.2       |
|               |                     |               | 10  | K | 0             | 155.1               | 155.1       |

Scan number 5821 Raw file LNCAP\_Silac\_23F10\_set1\_08  
 Method ITMS; CID Pepti... 78.94

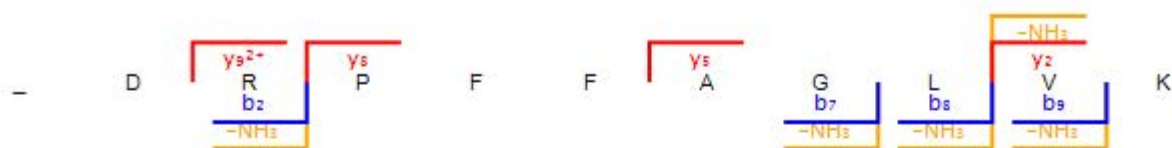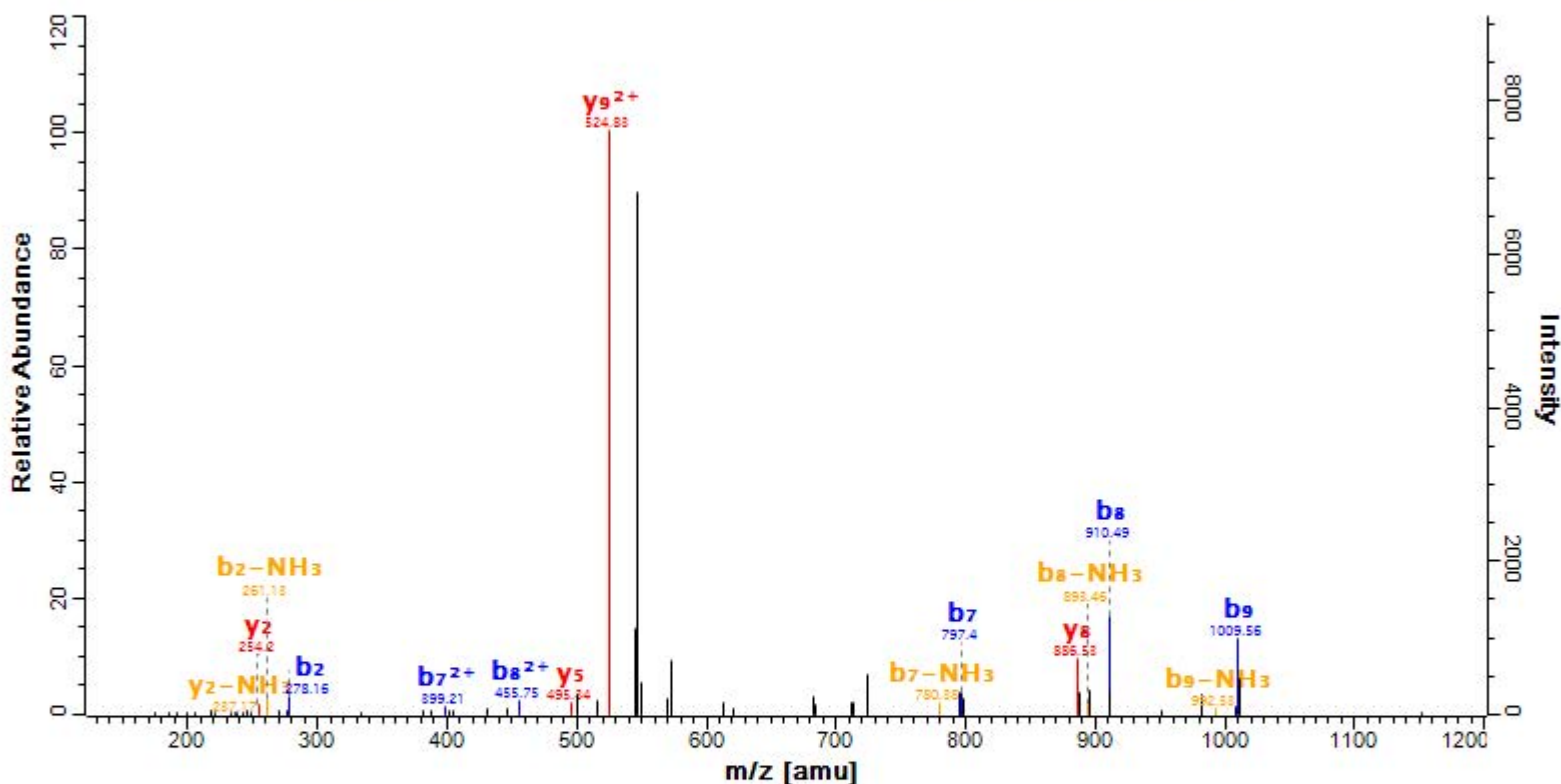

#### precursor information

|                   |                 |
|-------------------|-----------------|
| Mass:             | 1148.63454      |
| m/z:              | 575.32455       |
| Charge:           | 2+              |
| Retentiontime:    | 39.054485321044 |
| Score:            | 78.93885        |
| Mass Error [ppm]: | 0.26727         |
| PEP:              | 0.0049259       |
| Precursor Type:   | MULTI           |

|                       |           |
|-----------------------|-----------|
| Annotation:           | 6 of 10   |
| AminoAcids Coverage:  | 60 %      |
| Intensity Coverage:   | 45 %      |
| Peak Coverage:        | 17 %      |
| Protein Localisation: | 82 ... 91 |

| b <sup>2+</sup> ion |        | b ion    |        |    |     |   | y ion    |         | y <sup>2+</sup> ion |         |
|---------------------|--------|----------|--------|----|-----|---|----------|---------|---------------------|---------|
| Δ dalton            | mass   | Δ dalton | mass   |    | seq |   | Δ dalton | mass    | Δ dalton            | mass    |
|                     | 116.03 |          | 116.03 | 1  | D   | 9 |          |         |                     |         |
|                     | 278.16 | +0.0945  | 278.16 | 2  | R   | 8 | 1048.6   |         | 524.83              | +0.1913 |
|                     | 375.21 |          | 375.21 | 3  | P   | 7 | 886.53   | -0.079  | 886.53              |         |
|                     | 522.28 |          | 522.28 | 4  | F   | 6 | 789.47   |         | 789.47              |         |
|                     | 669.35 |          | 669.35 | 5  | F   | 5 | 642.41   |         | 642.41              |         |
|                     | 740.38 |          | 740.38 | 6  | A   | 4 | 495.34   | +0.0646 | 495.34              |         |
| +0.0304             | 399.21 | -0.046   | 797.4  | 7  | G   | 3 | 424.3    |         | 424.3               |         |
| +0.1025             | 455.75 | -0.064   | 910.49 | 8  | L   | 2 | 367.28   |         | 367.28              |         |
|                     | 1009.6 | -0.015   | 1009.6 | 9  | V   | 1 | 254.2    | +0.103  | 254.2               |         |
|                     |        |          |        | 10 | K   | 0 | 155.13   |         | 155.13              |         |

Scan number 6841 Raw file LNCAP\_Silac\_23F10\_set1\_08  
 Method ITMS; CID Pepti... 102.97

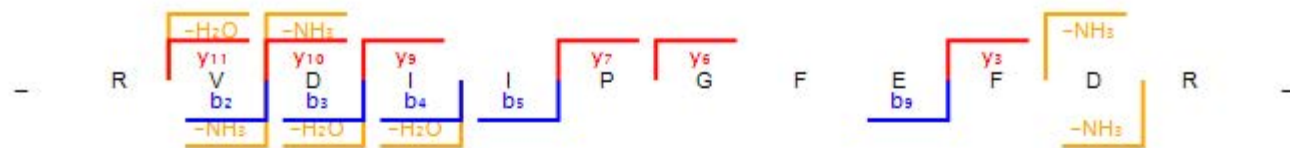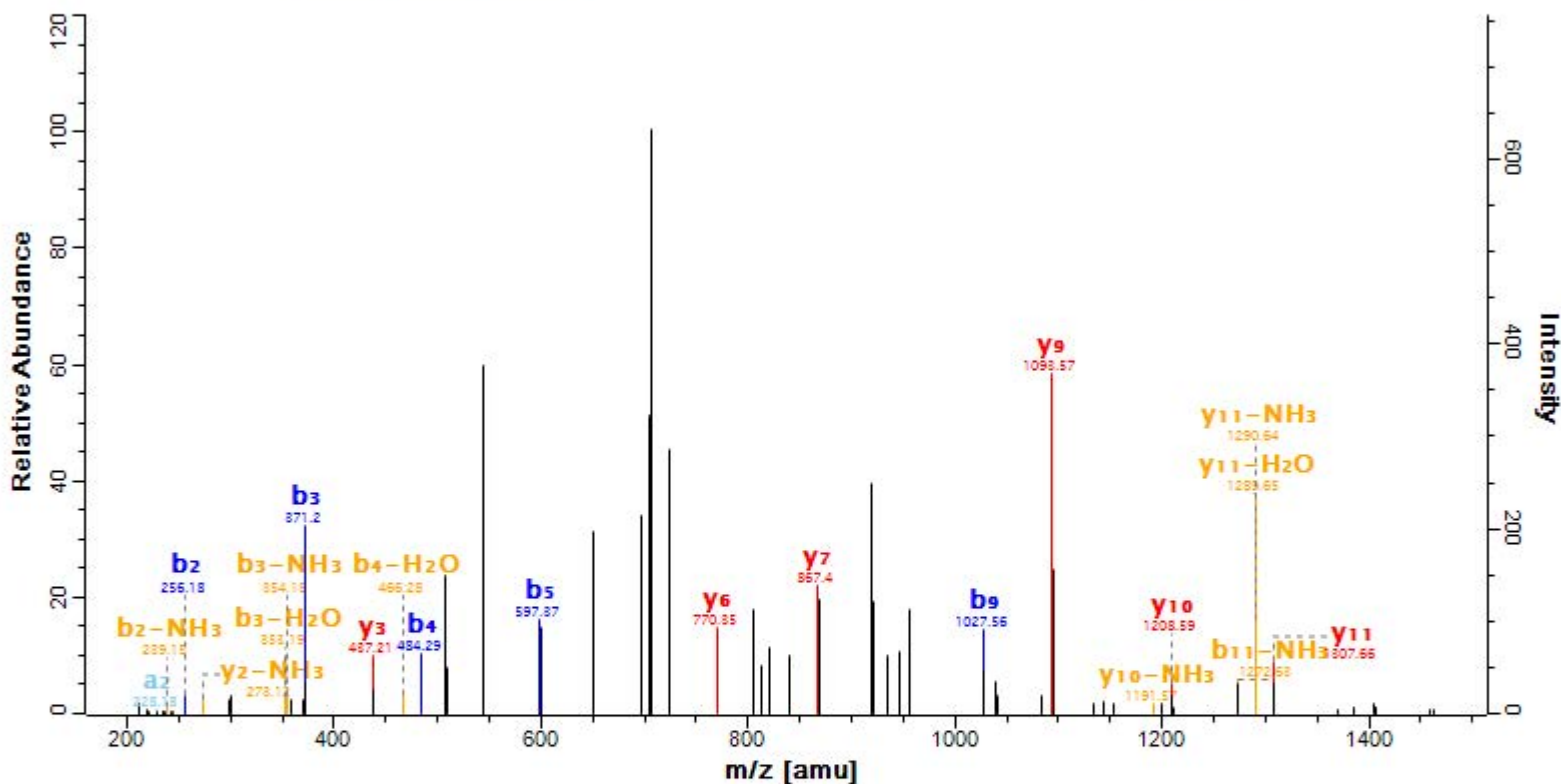

#### precursor information

|                   |                 |
|-------------------|-----------------|
| Mass:             | 1462.75602      |
| m/z:              | 732.38528       |
| Charge:           | 2+              |
| Retentiontime:    | 45.830718994140 |
| Score:            | 102.9703        |
| Mass Error [ppm]: | -0.57888        |
| PEP:              | 0.006977        |
| Precursor Type:   | ISO             |

#### general information

|                       |             |
|-----------------------|-------------|
| Annotation:           | 9 of 12     |
| AminoAcids Coverage:  | 75 %        |
| Intensity Coverage:   | 27 %        |
| Peak Coverage:        | 25 %        |
| Protein Localisation: | 478 ... 489 |

| a ion    |          | b ion     |          |     | y ion |          |                    |
|----------|----------|-----------|----------|-----|-------|----------|--------------------|
| Δ dalton | mass     | Δ dalton  | mass     | seq |       | Δ dalton | mass               |
|          | 129.1135 |           | 157.1084 | 1   | R     | 11       |                    |
| -0.08418 | 228.1819 | -0.02559  | 256.1768 | 2   | V     | 10       | 1307.663 +0.040096 |
|          | 343.2088 | +0.043936 | 371.2037 | 3   | D     | 9        | 1208.595 +0.10851  |
|          | 456.2929 | +0.287814 | 484.2878 | 4   | I     | 8        | 1093.568 +0.09102  |
|          | 569.377  | +0.068496 | 597.3719 | 5   | I     | 7        | 980.4836           |
|          | 666.4297 |           | 694.4246 | 6   | P     | 6        | 867.3995 -0.02607  |
|          | 723.4512 |           | 751.4461 | 7   | G     | 5        | 770.3468 -0.25987  |
|          | 870.5196 |           | 898.5145 | 8   | F     | 4        | 713.3253           |
|          | 999.5622 | -0.06114  | 1027.557 | 9   | E     | 3        | 566.2569           |
|          | 1146.631 |           | 1174.626 | 10  | F     | 2        | 437.2143 +0.052292 |
|          | 1261.658 |           | 1289.652 | 11  | D     | 1        | 290.1459           |
|          |          |           |          | 12  | R     | 0        | 175.119            |

Scan number 7056 Raw file LNCAP\_Silac\_23F10\_set1\_08  
 Method ITMS; CID Peptide 113.22

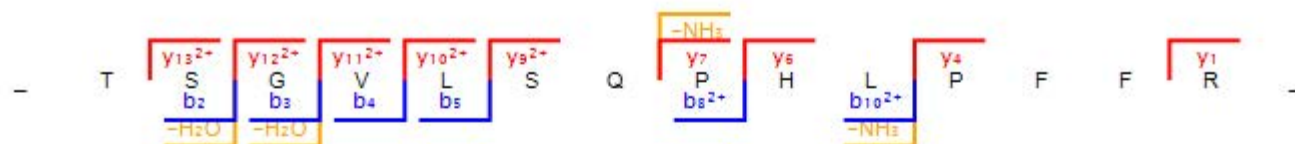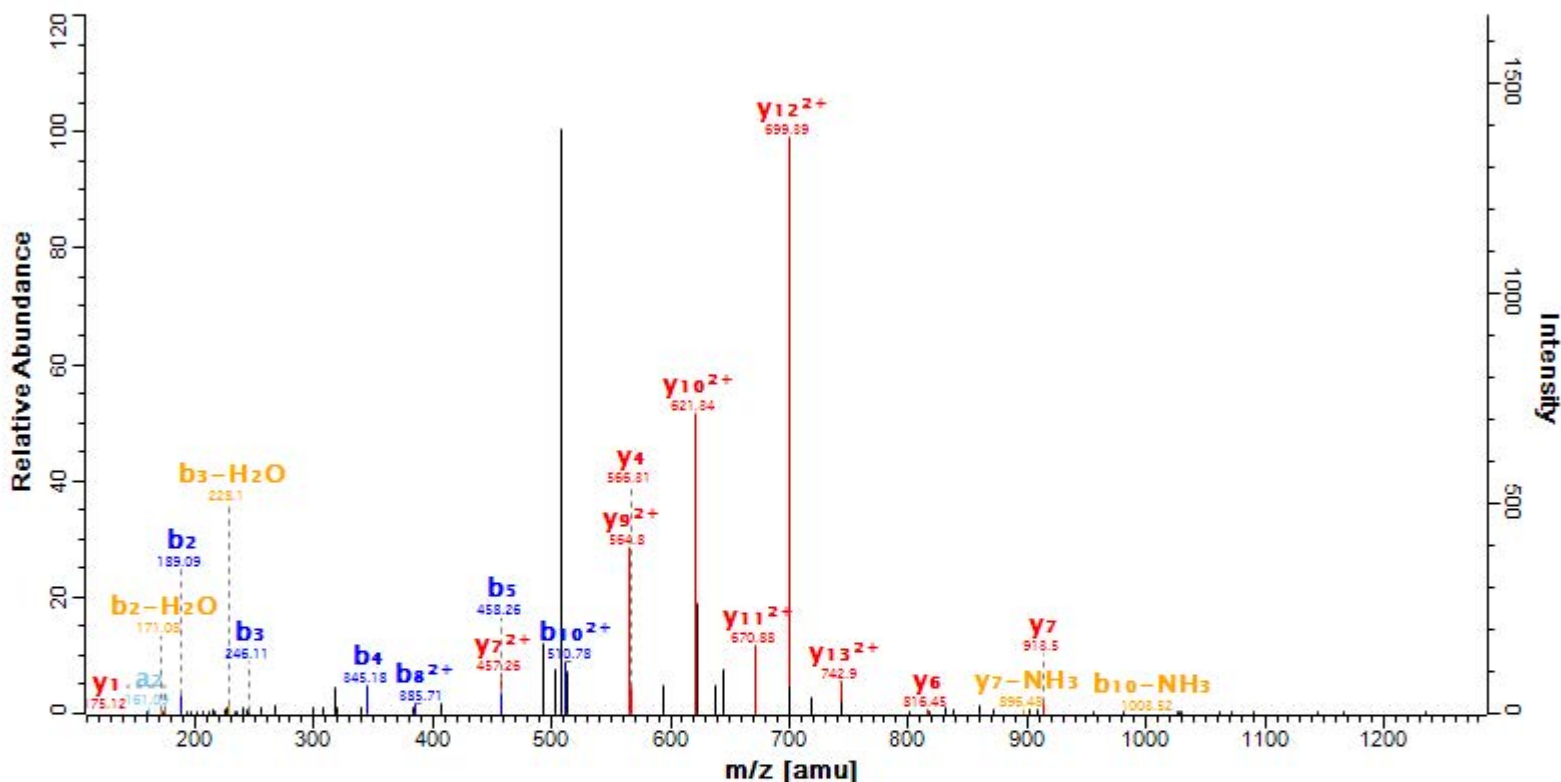

precursor information

|                   |                 |
|-------------------|-----------------|
| Mass:             | 1584.84233      |
| m/z:              | 529.28805       |
| Charge:           | 3+              |
| Retentiontime:    | 47.326187133789 |
| Score:            | 113.2243        |
| Mass Error [ppm]: | 0.67453         |
| PEP:              | 0.00024115      |
| Precursor Type:   | ISO             |

|        | a ion         | b <sup>2+</sup> ion | b ion         |       |     |    | y ion         | y <sup>2+</sup> ion |        |       |       |
|--------|---------------|---------------------|---------------|-------|-----|----|---------------|---------------------|--------|-------|-------|
|        | Δ dalton mass | Δ dalton mass       | Δ dalton mass |       | seq |    | Δ dalton mass | Δ dalton mass       |        |       |       |
|        | 74.06         | 102.1               | 102.1         | 1     | T   | 13 |               |                     |        |       |       |
| +0.088 | 61.1          | 189.1               | +0.043        | 189.1 | 2   | S  | 12            | 1485                | 742.9  | +0.24 |       |
|        | 218.1         | 246.1               | +0.073        | 246.1 | 3   | G  | 11            | 1398                | 699.4  | +0.24 |       |
|        | 317.2         | 345.2               | +0.058        | 345.2 | 4   | V  | 10            | 1341                | 670.9  | -0.14 |       |
|        | 430.3         | 458.3               | +0.078        | 458.3 | 5   | L  | 9             | 1242                | 621.3  | +0.10 |       |
|        | 517.3         | 545.3               |               | 545.3 | 6   | S  | 8             | 1129                | 564.8  | +0.16 |       |
|        | 645.4         | 673.4               |               | 673.4 | 7   | Q  | 7             | 1042                | 1042   |       |       |
|        | 742.4         | -0.48               | 385.7         | 770.4 | 8   | P  | 6             | 913.5               | -0.02  | 457.3 | +0.22 |
|        | 879.5         |                     | 907.5         | 907.5 | 9   | H  | 5             | 816.5               | +0.104 | 816.5 |       |
|        | 992.6         | +0.43               | 3510.8        | 1021  | 10  | L  | 4             | 679.4               |        | 679.4 |       |
|        | 1090          |                     | 1118          | 1118  | 11  | P  | 3             | 566.3               | +0.21  | 566.3 |       |
|        | 1237          |                     | 1265          | 1265  | 12  | F  | 2             | 469.3               |        | 469.3 |       |
|        | 1384          |                     | 1412          | 1412  | 13  | F  | 1             | 322.2               |        | 322.2 |       |
|        |               |                     |               |       | 14  | R  | 0             | 175.1               | +0.129 | 175.1 |       |

general information

|                       |             |
|-----------------------|-------------|
| Annotation:           | 10 of 14    |
| AminoAcids Coverage:  | 71 %        |
| Intensity Coverage:   | 54 %        |
| Peak Coverage:        | 24 %        |
| Protein Localisation: | 449 ... 462 |

Scan number 7176 Raw file LNCAP\_Silac\_23F10\_set1\_08  
 Method ITMS; CID Pepti... 130.01

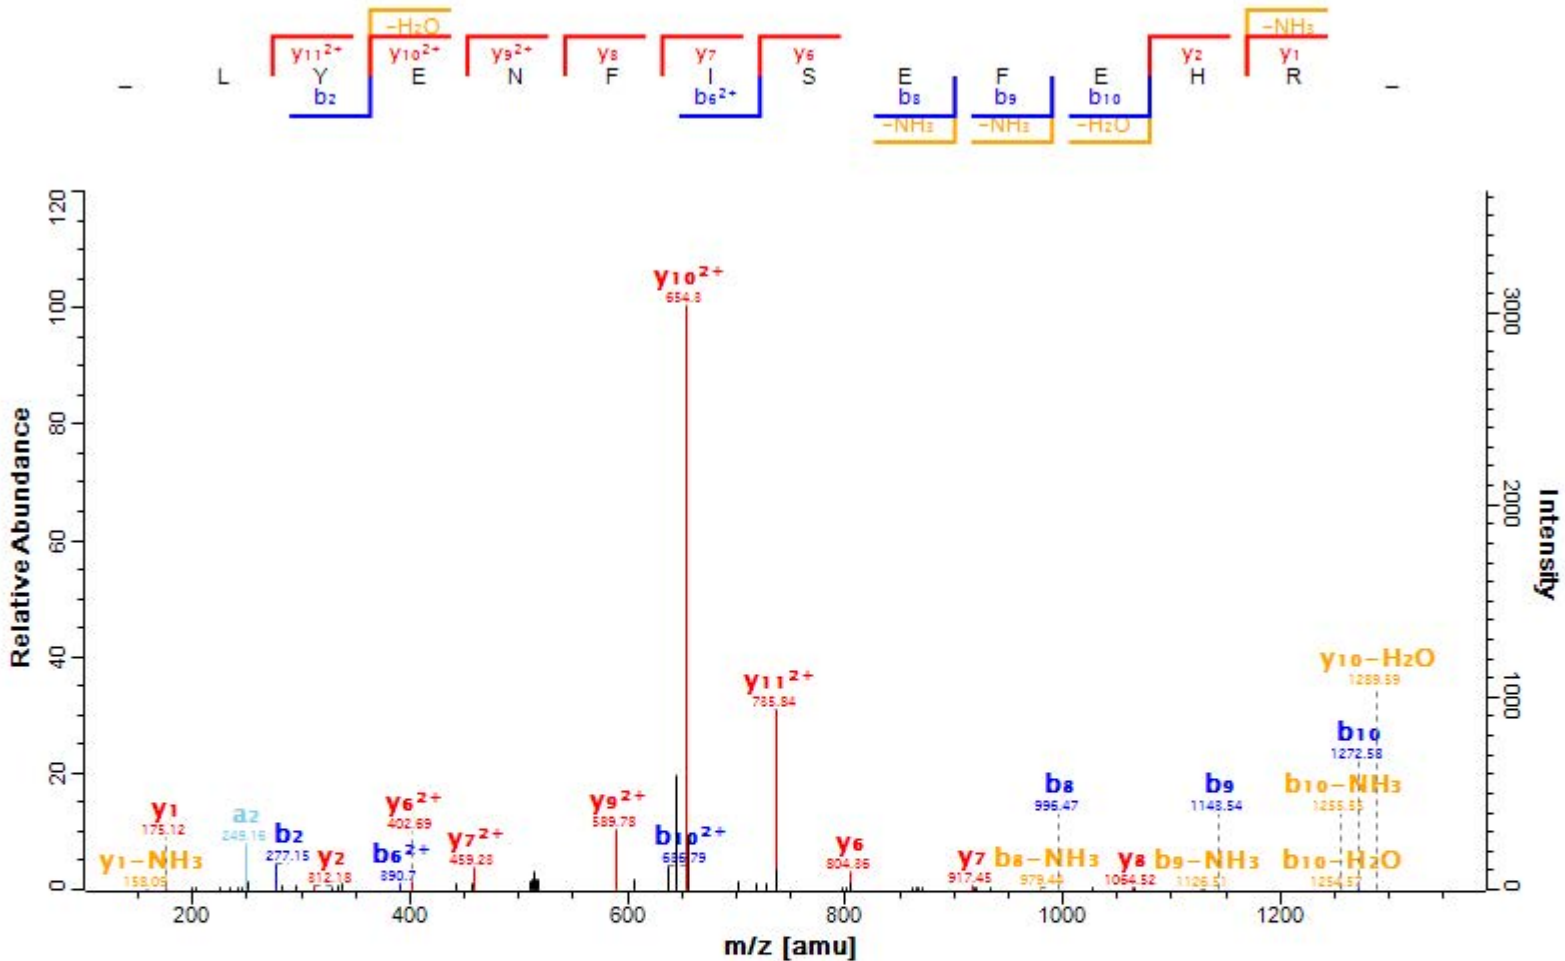

precursor information

|                   |                 |
|-------------------|-----------------|
| Mass:             | 1582.74184      |
| m/z:              | 528.58789       |
| Charge:           | 3+              |
| Retentiontime:    | 48.163635253906 |
| Score:            | 130.006         |
| Mass Error [ppm]: | 0.14598         |
| PEP:              | 2.3671E-05      |
| Precursor Type:   | MULTI           |

general information

|                       |           |
|-----------------------|-----------|
| Annotation:           | 11 of 12  |
| AminoAcids Coverage:  | 92 %      |
| Intensity Coverage:   | 72 %      |
| Peak Coverage:        | 20 %      |
| Protein Localisation: | 59 ... 70 |

| a ion         |               | b <sup>2+</sup> ion |               | b ion |               |               |        |       | y ion  |        | y <sup>2+</sup> ion |  |
|---------------|---------------|---------------------|---------------|-------|---------------|---------------|--------|-------|--------|--------|---------------------|--|
| Δ dalton mass | Δ dalton mass | Δ dalton mass       | Δ dalton mass | seq   | Δ dalton mass | Δ dalton mass |        |       |        |        |                     |  |
| 86.1          | 114.1         | 114.1               | 1             | L     | 11            |               |        |       |        |        |                     |  |
| +0.07 249.2   | 277.2         | -0.05 277.2         | 2             | Y     | 10            | 1471          |        |       | 735.8  | +0.281 |                     |  |
| 378.2         | 406.2         | 406.2               | 3             | E     | 9             | 1308          |        |       | 654.3  | +0.227 |                     |  |
| 492.2         | 520.2         | 520.2               | 4             | N     | 8             | 1179          |        |       | 589.8  | +0.293 |                     |  |
| 639.3         | 667.3         | 667.3               | 5             | F     | 7             | 1065          | +0.263 | 1065  |        |        |                     |  |
| 752.4         | +0.44 839.7   | 780.4               | 6             | I     | 6             | 917.4         | +0.01  | 459.2 | +0.169 |        |                     |  |
| 839.4         | 867.4         | 867.4               | 7             | S     | 5             | 804.4         | -0.03  | 402.7 | +0.061 |        |                     |  |
| 968.5         | 996.5         | +0.01 896.5         | 8             | E     | 4             | 717.3         |        | 717.3 |        |        |                     |  |
| 1116          | 1144          | +0.064 1144         | 9             | F     | 3             | 588.3         |        | 588.3 |        |        |                     |  |
| 1245          | +0.01 1636.8  | +0.075 1273         | 10            | E     | 2             | 441.2         |        | 441.2 |        |        |                     |  |
| 1382          | 1410          | 1410                | 11            | H     | 1             | 312.2         | +0.098 | 312.2 |        |        |                     |  |
|               |               |                     | 12            | R     | 0             | 175.1         | +0.085 | 175.1 |        |        |                     |  |

Scan number 7417 Raw file LNCAP\_Silac\_23F10\_set1\_08  
 Method ITMS; CID Pepti... 88.28

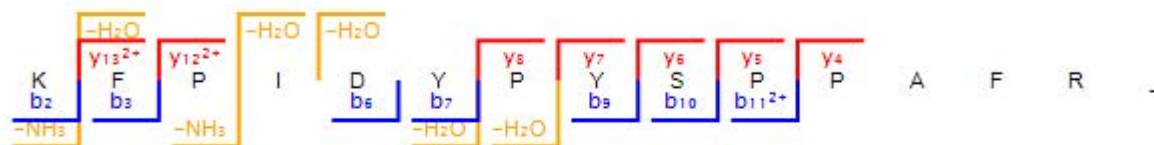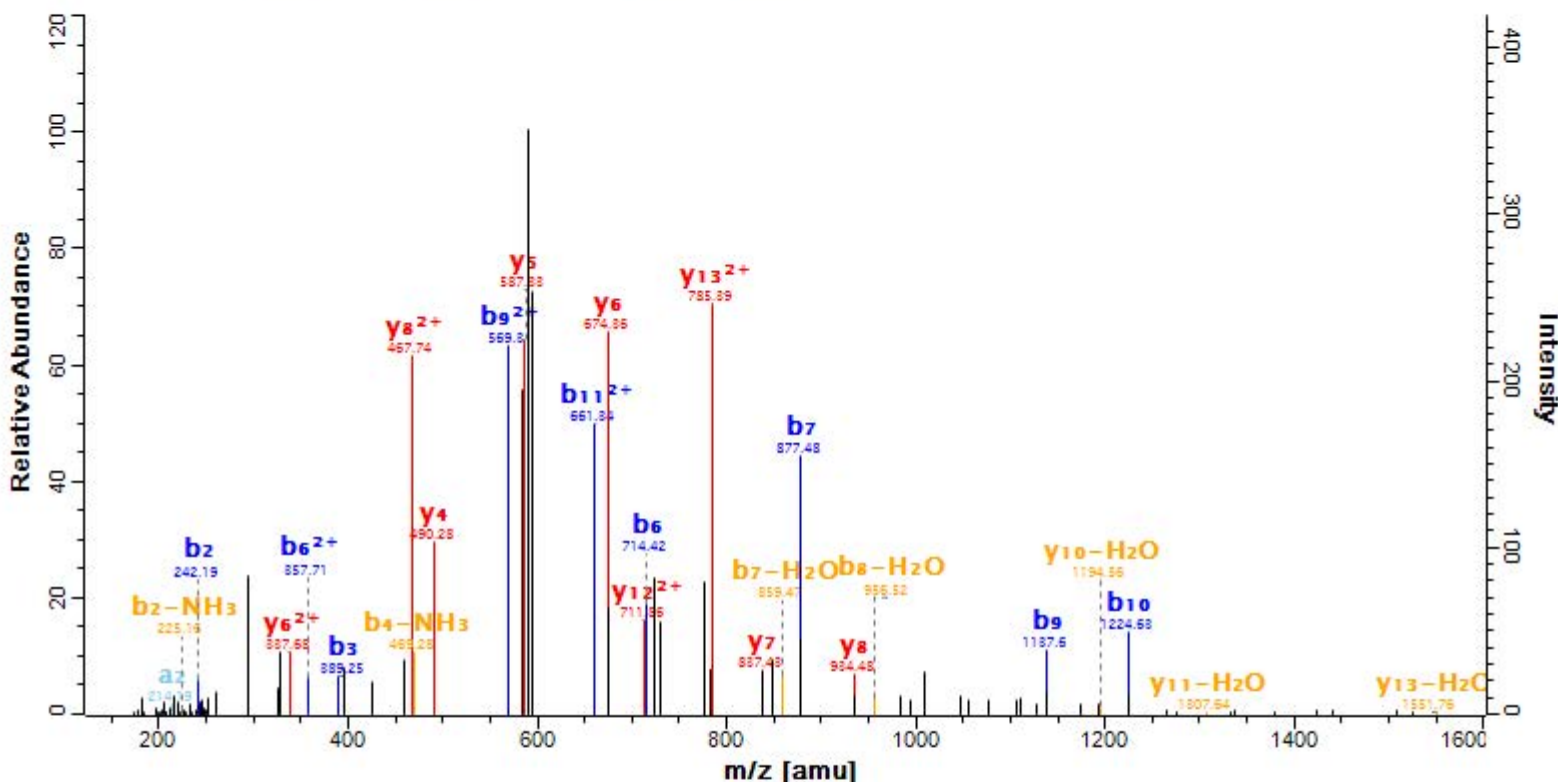

#### precursor information

|                   |                 |
|-------------------|-----------------|
| Mass:             | 1809.94533      |
| m/z:              | 604.32239       |
| Charge:           | 3+              |
| Retentiontime:    | 50.101516723632 |
| Score:            | 88.28183        |
| Mass Error [ppm]: | -0.032006       |
| PEP:              | 0.00014278      |
| Precursor Type:   | MULTI           |

#### general information

|                       |           |
|-----------------------|-----------|
| Annotation:           | 11 of 15  |
| AminoAcids Coverage:  | 73 %      |
| Intensity Coverage:   | 49 %      |
| Peak Coverage:        | 24 %      |
| Protein Localisation: | 62 ... 76 |

| a ion         |               | b <sup>2+</sup> ion |               | b ion       |               | y ion         |    |       | y <sup>2+</sup> ion |             |
|---------------|---------------|---------------------|---------------|-------------|---------------|---------------|----|-------|---------------------|-------------|
| Δ dalton mass | Δ dalton mass | Δ dalton mass       | Δ dalton mass | seq         | Δ dalton mass | Δ dalton mass |    |       |                     |             |
| 86.1          |               | 114.1               |               | 114.1       | 1             | L             | 14 |       |                     |             |
| +0.05 214.2   |               | 242.2               |               | -0.03 242.2 | 2             | K             | 13 | 1698  |                     | 1698        |
| 361.3         |               | 389.3               |               | +0.09 389.3 | 3             | F             | 12 | 1570  |                     | 785.4 +0.26 |
| 458.3         |               | 486.3               |               | 486.3       | 4             | P             | 11 | 1423  |                     | 711.9 +0.32 |
| 571.4         |               | 599.4               |               | 599.4       | 5             | I             | 10 | 1326  |                     | 1326        |
| 686.4         | -0.48         | 357.7               |               | -0.16 714.4 | 6             | D             | 9  | 1213  |                     | 1213        |
| 849.5         |               | 877.5               |               | +0.04 877.5 | 7             | Y             | 8  | 1098  |                     | 1098        |
| 946.5         |               | 974.5               |               | 974.5       | 8             | P             | 7  | 934.5 | -0.1                | 467.7 +0.14 |
| 1110          | +0.15         | 569.3               |               | +0.00 8138  | 9             | Y             | 6  | 837.4 | +0.07               | 837.4       |
| 1197          |               | 1225                |               | +0.05 1225  | 10            | S             | 5  | 674.4 | +0.04               | 437.7 +0.20 |
| 1294          | -0.2          | 661.3               |               | 1322        | 11            | P             | 4  | 587.3 | -0.04               | 587.3       |
| 1391          |               | 1419                |               | 1419        | 12            | P             | 3  | 490.3 | +0.11               | 490.3       |
| 1462          |               | 1490                |               | 1490        | 13            | A             | 2  | 393.2 |                     | 393.2       |
| 1609          |               | 1637                |               | 1637        | 14            | F             | 1  | 322.2 |                     | 322.2       |
|               |               |                     |               |             | 15            | R             | 0  | 175.1 |                     | 175.1       |

Scan number 7814 Raw file LNCAP\_Silac\_23F10\_set1\_08  
 Method ITMS: CID Peptide 83.53

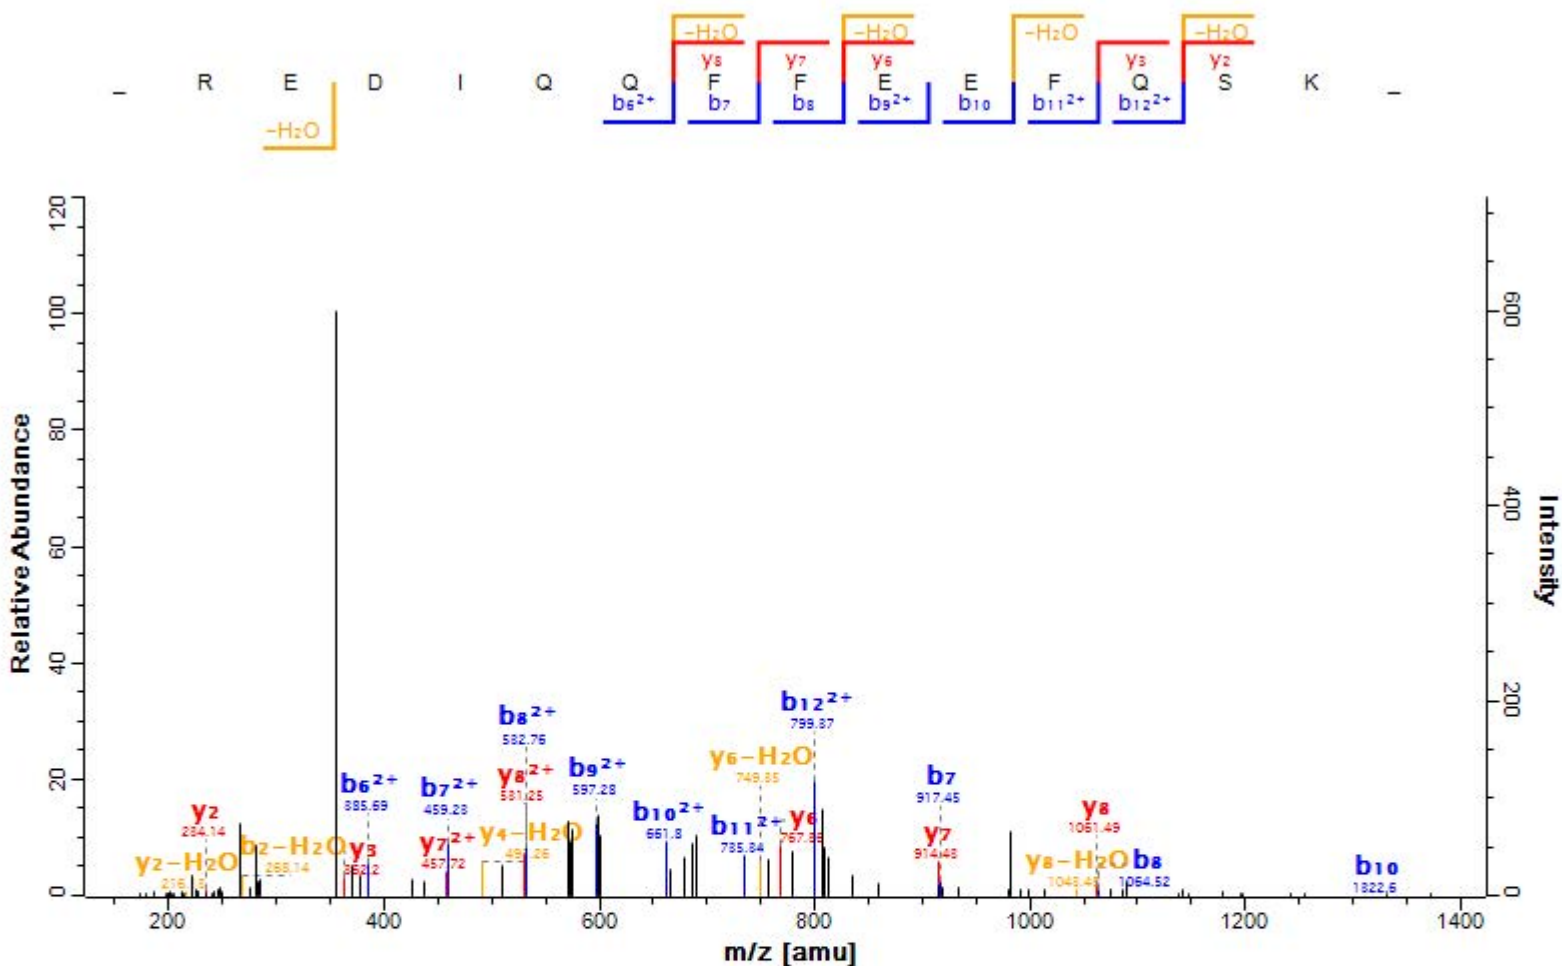

precursor information

|                   |                 |
|-------------------|-----------------|
| Mass:             | 1829.85846      |
| m/z:              | 610.9601        |
| Charge:           | 3+              |
| Retentiontime:    | 53.631870269775 |
| Score:            | 83.53048        |
| Mass Error [ppm]: | 0.020255        |
| PEP:              | 0.00035714      |
| Precursor Type:   | MULTI           |

general information

|                       |             |
|-----------------------|-------------|
| Annotation:           | 9 of 14     |
| AminoAcids Coverage:  | 64 %        |
| Intensity Coverage:   | 26 %        |
| Peak Coverage:        | 20 %        |
| Protein Localisation: | 399 ... 412 |

| b <sup>2+</sup> ion |        | b ion    |        |    |     |    | y ion    |         | y <sup>2+</sup> ion |         |
|---------------------|--------|----------|--------|----|-----|----|----------|---------|---------------------|---------|
| Δ dalton            | mass   | Δ dalton | mass   |    | seq |    | Δ dalton | mass    | Δ dalton            | mass    |
|                     | 157.11 |          | 157.11 | 1  | R   | 13 |          |         |                     |         |
|                     | 286.15 |          | 286.15 | 2  | E   | 12 | 1674.8   |         | 1674.8              |         |
|                     | 401.18 |          | 401.18 | 3  | D   | 11 | 1545.7   |         | 1545.7              |         |
|                     | 514.26 |          | 514.26 | 4  | I   | 10 | 1430.7   |         | 1430.7              |         |
|                     | 642.32 |          | 642.32 | 5  | Q   | 9  | 1317.6   |         | 1317.6              |         |
| +0.2185             | 385.69 |          | 770.38 | 6  | Q   | 8  | 1189.6   |         | 1189.6              |         |
| +0.1732             | 459.23 | +0       | 917.45 | 7  | F   | 7  | 1061.5   | +0.0877 | 531.25              | -0.136  |
| +0.0747             | 532.76 | -0.221   | 1064.5 | 8  | F   | 6  | 914.43   | -0.044  | 457.72              | +0.1935 |
| -0.068              | 597.28 |          | 1193.6 | 9  | E   | 5  | 767.36   | +0.0528 | 767.36              |         |
| -0.015              | 661.8  | +0.0711  | 1322.6 | 10 | E   | 4  | 638.31   |         | 638.31              |         |
| +0.1868             | 735.34 |          | 1469.7 | 11 | F   | 3  | 509.27   |         | 509.27              |         |
| +0.2218             | 799.37 |          | 1597.7 | 12 | Q   | 2  | 362.2    | -0.129  | 362.2               |         |
|                     | 1684.8 |          | 1684.8 | 13 | S   | 1  | 234.14   | -0.013  | 234.14              |         |
|                     |        |          |        | 14 | K   | 0  | 147.11   |         | 147.11              |         |



Scan number 7844 Raw file LNCAP\_Silac\_23F10\_set1\_08  
 Method ITMS; CID Pepti... 128.74

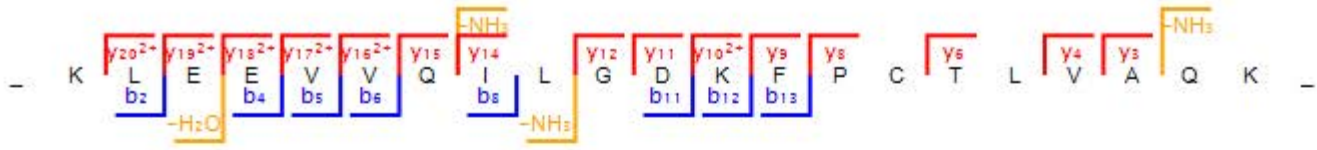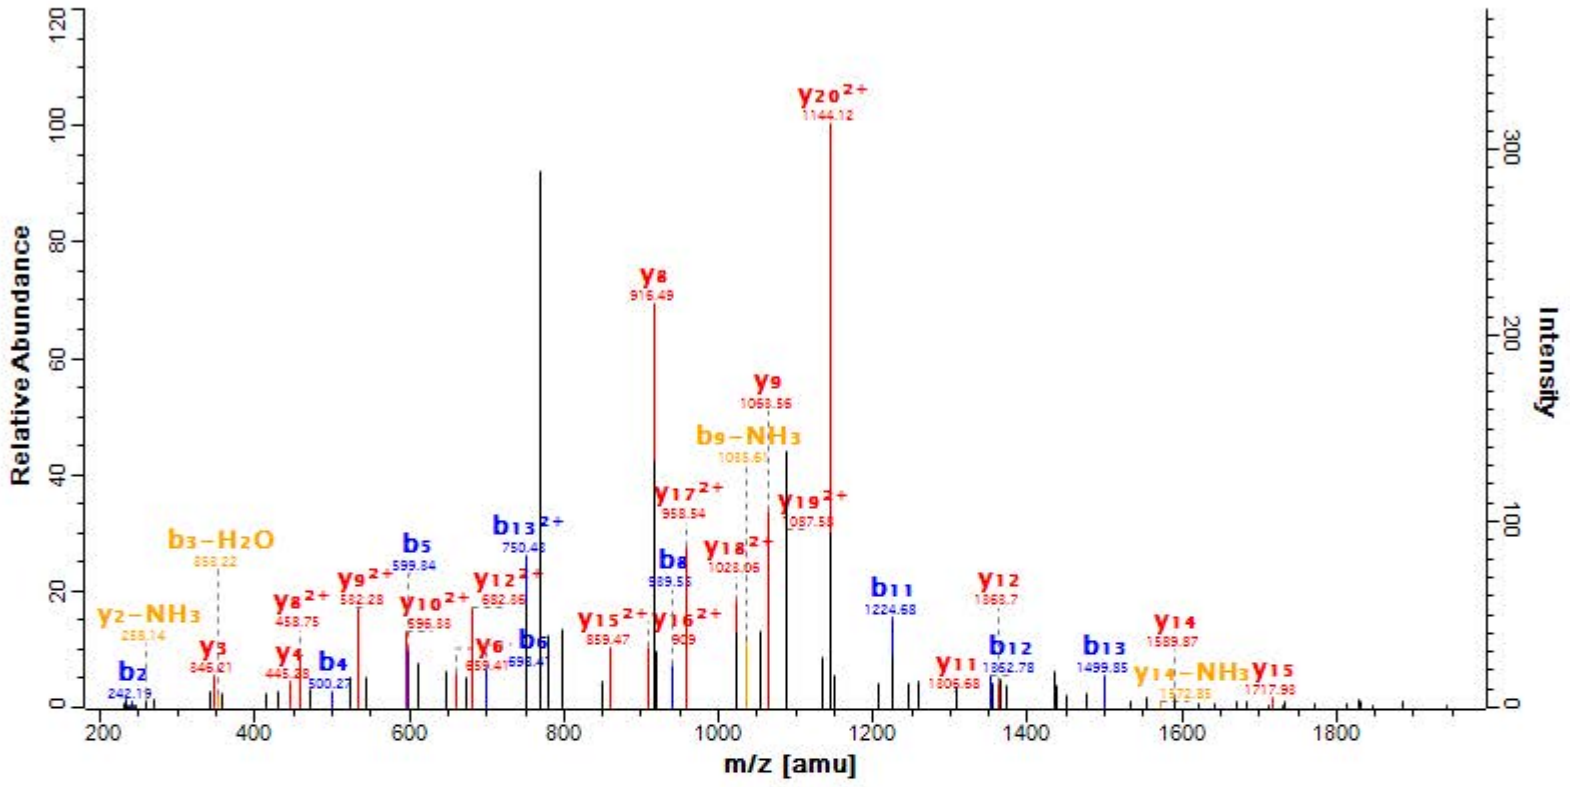

precursor information

|                   |                 |
|-------------------|-----------------|
| Mass:             | 2414.32232      |
| m/z:              | 805.78138       |
| Charge:           | 3+              |
| Retentiontime:    | 53.915332794189 |
| Score:            | 128.743         |
| Mass Error [ppm]: | -0.82871        |
| PEP:              | 1.1473E-13      |
| Precursor Type:   | MULTI           |

general information

|                       |           |
|-----------------------|-----------|
| Annotation:           | 17 of 21  |
| AminoAcids Coverage:  | 81 %      |
| Intensity Coverage:   | 52 %      |
| Peak Coverage:        | 32 %      |
| Protein Localisation: | 19 ... 39 |

| b <sup>2+</sup> ion |               | b ion    |        | seq |   |    | y ion    |         | y <sup>2+</sup> ion |         |
|---------------------|---------------|----------|--------|-----|---|----|----------|---------|---------------------|---------|
| Δ dalton            | mass          | Δ dalton | mass   |     |   |    | Δ dalton | mass    | Δ dalton            | mass    |
|                     | 129.1         |          | 129.1  | 1   | K | 20 |          |         |                     |         |
|                     | 242.19        | +0.0444  | 242.19 | 2   | L | 19 | 2287.2   |         | 1144.1              | +0.2275 |
|                     | 371.23        |          | 371.23 | 3   | E | 18 | 2174.2   |         | 1087.6              | -0.15   |
|                     | 500.27        | +0.0746  | 500.27 | 4   | E | 17 | 2045.1   |         | 1023.1              | +0.2768 |
|                     | 599.34        | +0.0781  | 599.34 | 5   | V | 16 | 1916.1   |         | 958.54              | +0.4517 |
|                     | 698.41        | -0.072   | 698.41 | 6   | V | 15 | 1817     |         | 909                 | +0.4351 |
|                     | 826.47        |          | 826.47 | 7   | Q | 14 | 1717.9   | -0.152  | 859.47              | +0.2144 |
|                     | 939.55        | +0.0034  | 939.55 | 8   | I | 13 | 1589.9   | +0.1194 | 1589.9              |         |
|                     | 1052.6        |          | 1052.6 | 9   | L | 12 | 1476.8   |         | 1476.8              |         |
|                     | 1109.7        |          | 1109.7 | 10  | G | 11 | 1363.7   | +0.0053 | 682.36              | +0.1938 |
|                     | 1224.7        | +0.0367  | 1224.7 | 11  | D | 10 | 1306.7   | +0.186  | 1306.7              |         |
|                     | 1352.8        | -0.23    | 1352.8 | 12  | K | 9  | 1191.7   |         | 596.33              | +0.0697 |
|                     | +0.2018750.43 | +0.2274  | 1499.8 | 13  | F | 8  | 1063.6   | +0.0113 | 532.28              | +0.3426 |
|                     | 1596.9        |          | 1596.9 | 14  | P | 7  | 916.49   | -0.02   | 458.75              | +0.3612 |
|                     | 1756.9        |          | 1756.9 | 15  | C | 6  | 819.44   |         | 819.44              |         |
|                     | 1858          |          | 1858   | 16  | T | 5  | 659.41   | +0.0661 | 659.41              |         |
|                     | 1971.1        |          | 1971.1 | 17  | L | 4  | 558.36   |         | 558.36              |         |
|                     | 2070.1        |          | 2070.1 | 18  | V | 3  | 445.28   | +0.0704 | 445.28              |         |
|                     | 2141.2        |          | 2141.2 | 19  | A | 2  | 346.21   | +0.0182 | 346.21              |         |
|                     | 2269.2        |          | 2269.2 | 20  | Q | 1  | 275.17   |         | 275.17              |         |
|                     |               |          |        | 21  | K | 0  | 147.11   |         | 147.11              |         |

Scan number 8012 Raw file LNCAP\_Silac\_23F10\_set1\_08  
 Method ITMS; CID Pepti... 107.41

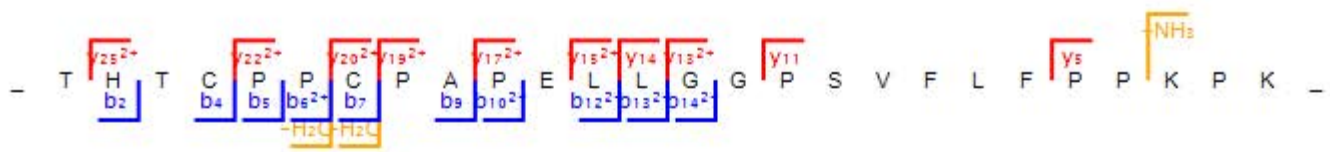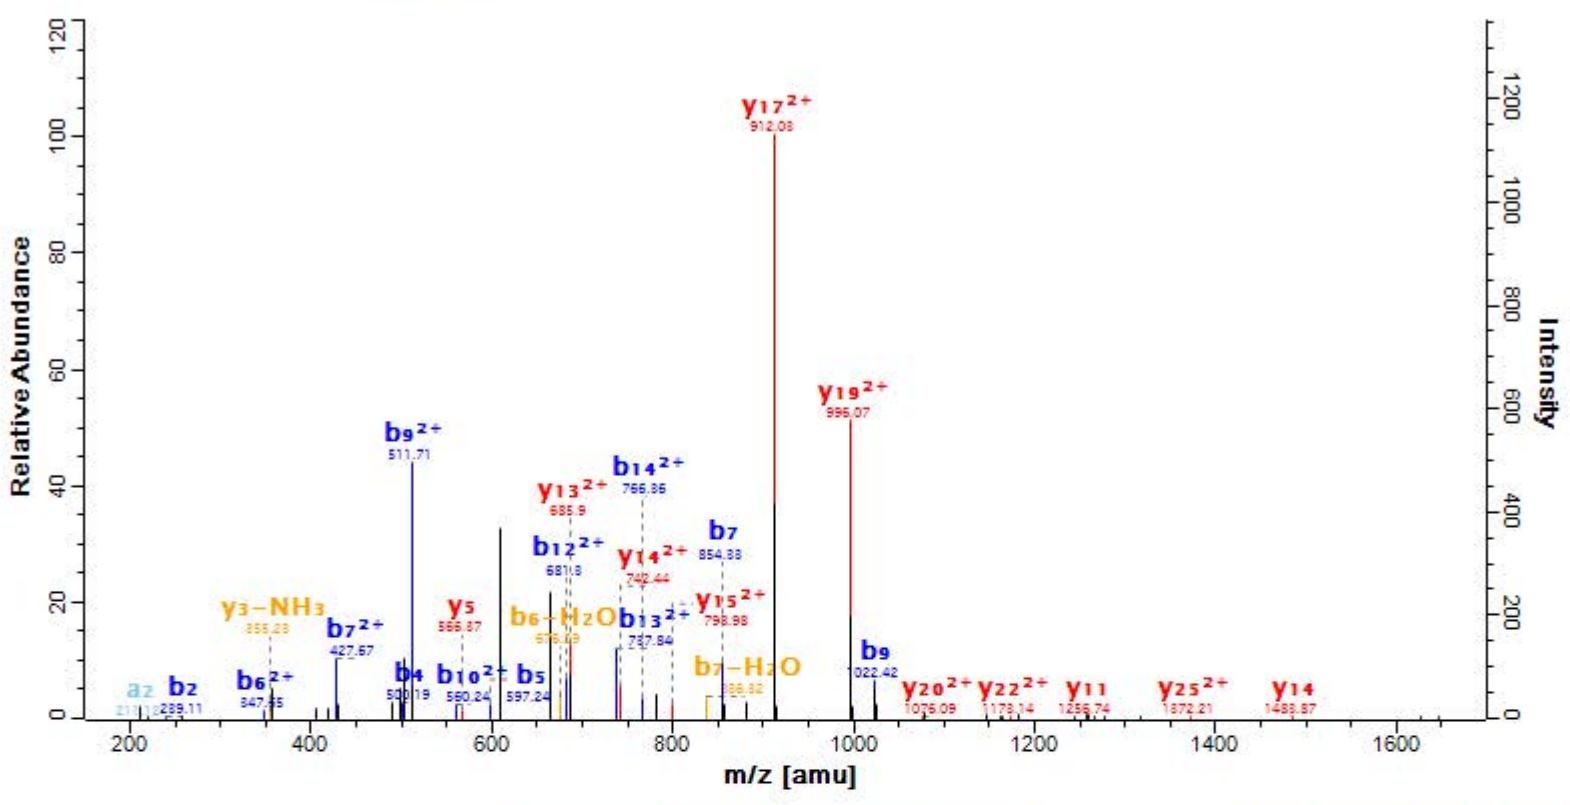

precursor information

|                   |                 |
|-------------------|-----------------|
| Mass:             | 2843.45161      |
| m/z:              | 711.87018       |
| Charge:           | 4+              |
| Retentiontime:    | 55.369087219238 |
| Score:            | 107.4089        |
| Mass Error [ppm]: | 0.47498         |
| PEP:              | 4.1411E-11      |
| Precursor Type:   | ISO             |

|       | a ion         | b <sup>2+</sup> ion | b ion         |    |     |    | y ion         | y <sup>2+</sup> ion |
|-------|---------------|---------------------|---------------|----|-----|----|---------------|---------------------|
|       | Δ dalton mass | Δ dalton mass       | Δ dalton mass |    | seq |    | Δ dalton mass | Δ dalton mass       |
|       | 74.06         | 102.1               | 102.1         | 1  | T   | 25 |               |                     |
| -0.07 | 211.1         | 239.1               | +0.008239.1   | 2  | H   | 24 | 2743          | 1372 +0.46          |
|       | 312.2         | 340.2               | 340.2         | 3  | T   | 23 | 2606          | 2606                |
|       | 472.2         | 500.2               | -0.03 500.2   | 4  | C   | 22 | 2505          | 2505                |
|       | 569.3         | 597.2               | +0.055597.2   | 5  | P   | 21 | 2345          | 1173 +0.10          |
|       | 666.3         | -0.01 347.7         | 694.3         | 6  | P   | 20 | 2248          | 2248                |
|       | 826.3         | +0.227427.7         | +0.084854.3   | 7  | C   | 19 | 2151          | 1076 +0.24          |
|       | 923.4         | 951.4               | 951.4         | 8  | P   | 18 | 1991          | 996.1 +0.2          |
|       | 994.4         | +0.225511.7         | -0.02 1022    | 9  | A   | 17 | 1894          | 1894                |
|       | 1091          | +0.182560.2         | 1119          | 10 | P   | 16 | 1823          | 912 +0.25           |
|       | 1221          | 1249                | 1249          | 11 | E   | 15 | 1726          | 1726                |
|       | 1334          | +0.233681.3         | 1362          | 12 | L   | 14 | 1597          | 799 +0.39           |
|       | 1447          | +0.31 737.8         | 1475          | 13 | L   | 13 | 1484          | +0.408742.4 +0.30   |
|       | 1504          | +0.17 766.4         | 1532          | 14 | G   | 12 | 1371          | 685.9 -0.18         |
|       | 1561          | 1589                | 1589          | 15 | G   | 11 | 1314          | 1314                |
|       | 1658          | 1686                | 1686          | 16 | P   | 10 | 1257          | -0.05 1257          |
|       | 1745          | 1773                | 1773          | 17 | S   | 9  | 1160          | 1160                |
|       | 1844          | 1872                | 1872          | 18 | V   | 8  | 1073          | 1073                |
|       | 1991          | 2019                | 2019          | 19 | F   | 7  | 973.6         | 973.6               |
|       | 2104          | 2132                | 2132          | 20 | L   | 6  | 826.5         | 826.5               |
|       | 2251          | 2279                | 2279          | 21 | F   | 5  | 713.4         | 713.4               |
|       | 2348          | 2376                | 2376          | 22 | P   | 4  | 566.4         | -0.04 566.4         |
|       | 2445          | 2473                | 2473          | 23 | P   | 3  | 469.3         | 469.3               |
|       | 2573          | 2601                | 2601          | 24 | K   | 2  | 372.3         | 372.3               |
|       | 2670          | 2698                | 2698          | 25 | P   | 1  | 244.2         | 244.2               |
|       |               |                     |               | 26 | K   | 0  | 147.1         | 147.1               |

general information

|                       |             |
|-----------------------|-------------|
| Annotation:           | 14 of 26    |
| AminoAcids Coverage:  | 54 %        |
| Intensity Coverage:   | 60 %        |
| Peak Coverage:        | 36 %        |
| Protein Localisation: | 258 ... 283 |

Scan number 8141 Raw file LNCAP\_Silac\_23F10\_set1\_08  
 Method ITMS; CID Pepti... 59.34

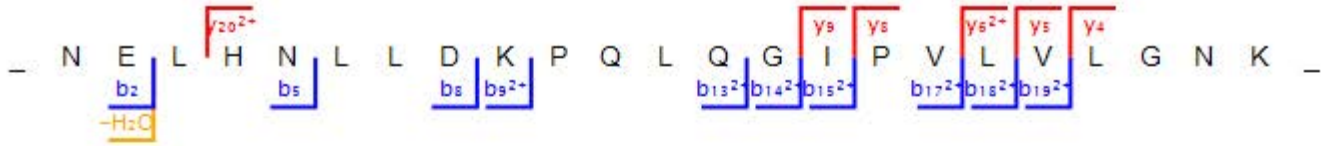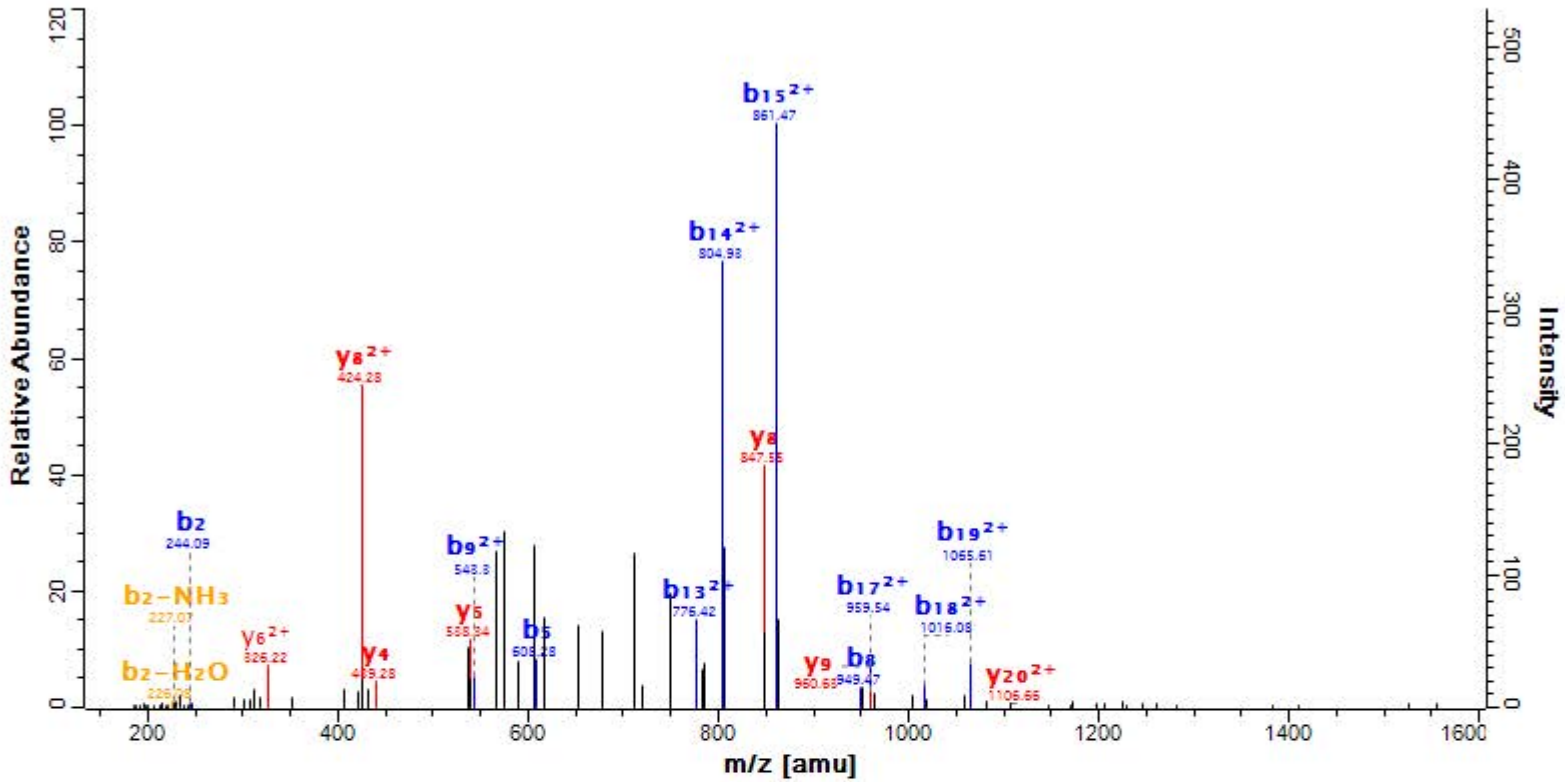

precursor information

|                   |                 |
|-------------------|-----------------|
| Mass:             | 2551.449        |
| m/z:              | 638.86953       |
| Charge:           | 4+              |
| Retentiontime:    | 56.667030334472 |
| Score:            | 59.34237        |
| Mass Error [ppm]: | 0.15155         |
| PEP:              | 0.00033155      |
| Precursor Type:   | MULTI           |

general information

|                       |             |
|-----------------------|-------------|
| Annotation:           | 14 of 23    |
| AminoAcids Coverage:  | 61 %        |
| Intensity Coverage:   | 52 %        |
| Peak Coverage:        | 21 %        |
| Protein Localisation: | 161 ... 183 |

| b <sup>2+</sup> ion |        | b ion    |        | seq |   |    | y ion    |         | y <sup>2+</sup> ion |         |
|---------------------|--------|----------|--------|-----|---|----|----------|---------|---------------------|---------|
| Δ dalton            | mass   | Δ dalton | mass   |     |   |    | Δ dalton | mass    | Δ dalton            | mass    |
|                     | 115.05 |          | 115.05 | 1   | N | 22 |          |         |                     |         |
|                     | 244.09 | -0.05    | 244.09 | 2   | E | 21 | 2454.4   |         | 2454.4              |         |
|                     | 357.18 |          | 357.18 | 3   | L | 20 | 2325.4   |         | 2325.4              |         |
|                     | 494.24 |          | 494.24 | 4   | H | 19 | 2212.3   |         | 1106.7              | -0.128  |
|                     | 608.28 | -0.063   | 608.28 | 5   | N | 18 | 2075.3   |         | 2075.3              |         |
|                     | 721.36 |          | 721.36 | 6   | L | 17 | 1961.2   |         | 1961.2              |         |
|                     | 834.45 |          | 834.45 | 7   | L | 16 | 1848.1   |         | 1848.1              |         |
|                     | 949.47 | -0.097   | 949.47 | 8   | D | 15 | 1735     |         | 1735                |         |
| +0.07               | 543.3  |          | 1085.6 | 9   | K | 14 | 1620     |         | 1620                |         |
|                     | 1182.6 |          | 1182.6 | 10  | P | 13 | 1483.9   |         | 1483.9              |         |
|                     | 1310.7 |          | 1310.7 | 11  | Q | 12 | 1386.9   |         | 1386.9              |         |
|                     | 1423.8 |          | 1423.8 | 12  | L | 11 | 1258.8   |         | 1258.8              |         |
| +0.3637776          | 42     |          | 1551.8 | 13  | Q | 10 | 1145.7   |         | 1145.7              |         |
| +0.1739804          | 93     |          | 1608.9 | 14  | G | 9  | 1017.7   |         | 1017.7              |         |
| +0.3137861          | 47     |          | 1721.9 | 15  | I | 8  | 960.63   | -0.031  | 960.63              |         |
|                     | 1819   |          | 1819   | 16  | P | 7  | 847.55   | -0.015  | 424.28              | +0.1334 |
| +0.2856959          | 54     |          | 1918.1 | 17  | V | 6  | 750.5    |         | 750.5               |         |
| +0.25681016         | 1      |          | 2031.1 | 18  | L | 5  | 651.43   |         | 326.22              | +0.0845 |
| +0.34741065         | 6      |          | 2130.2 | 19  | V | 4  | 538.34   | -0.299  | 538.34              |         |
|                     | 2243.3 |          | 2243.3 | 20  | L | 3  | 439.28   | +0.0962 | 439.28              |         |
|                     | 2300.3 |          | 2300.3 | 21  | G | 2  | 326.19   |         | 326.19              |         |
|                     | 2414.4 |          | 2414.4 | 22  | N | 1  | 269.17   |         | 269.17              |         |
|                     |        |          |        | 23  | K | 0  | 155.13   |         | 155.13              |         |

Scan number 8172 Raw file LNCAP\_Silac\_23F10\_set1\_08  
 Method ITMS; CID Peptide 238.07

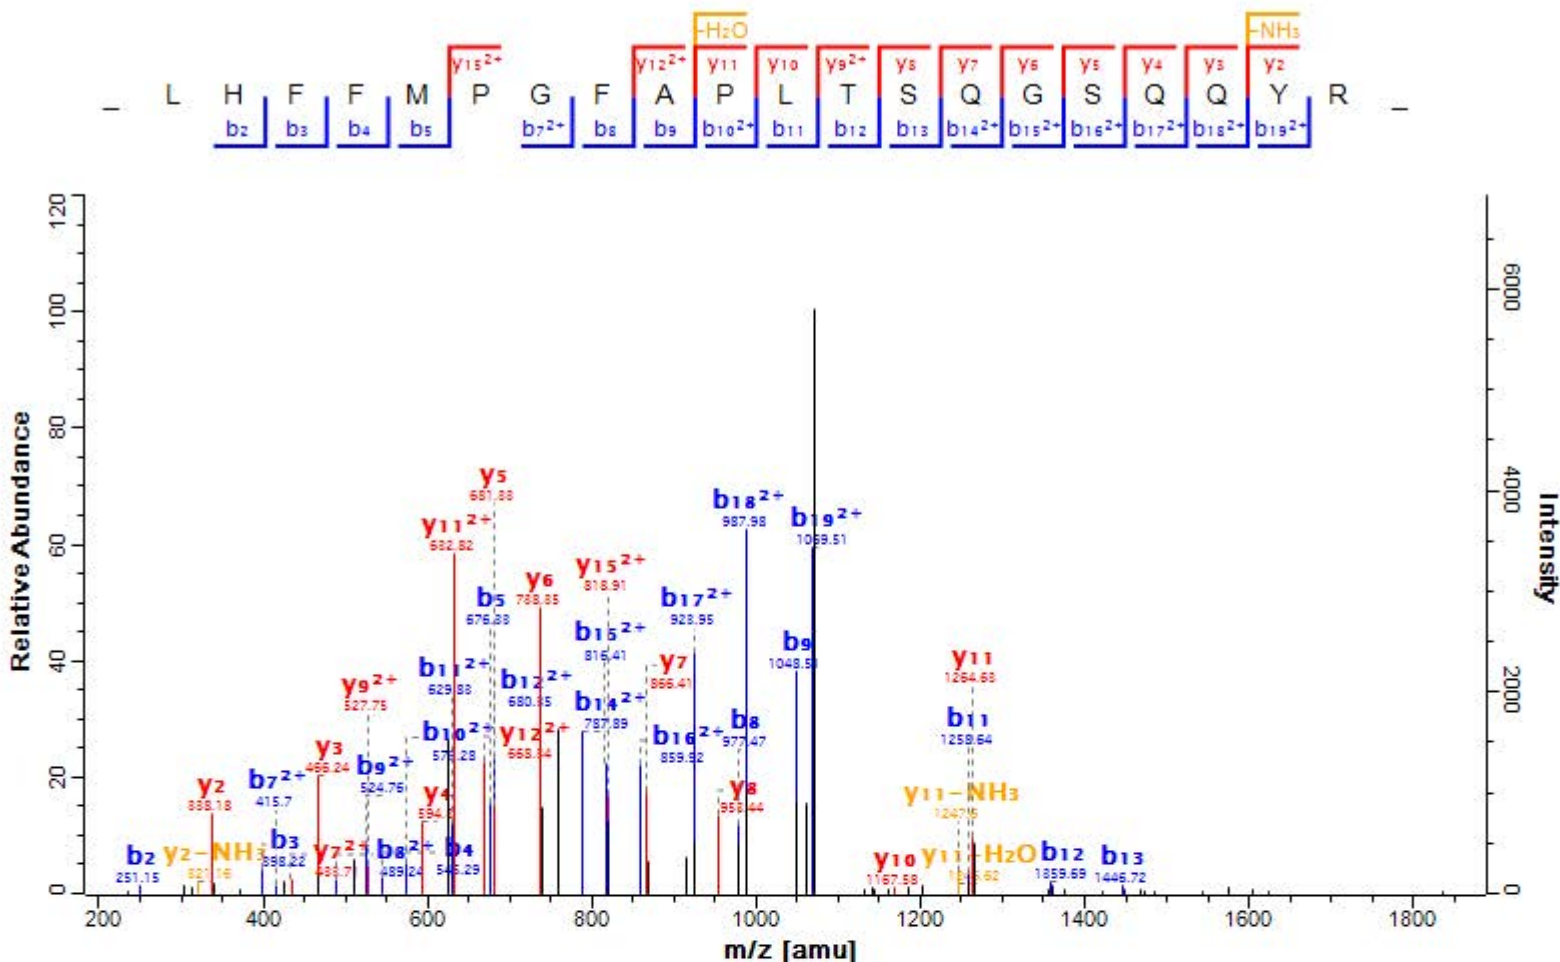

#### precursor information

|                   |                 |
|-------------------|-----------------|
| Mass:             | 2311.12002      |
| m/z:              | 771.38062       |
| Charge:           | 3+              |
| Retentiontime:    | 57.002693176269 |
| Score:            | 238.0663        |
| Mass Error [ppm]: | -0.33963        |
| PEP:              | 3.8747E-75      |
| Precursor Type:   | MULTI           |

| b <sup>2+</sup> ion |        | b ion    |        |    |     |    | y ion    |         | y <sup>2+</sup> ion |         |
|---------------------|--------|----------|--------|----|-----|----|----------|---------|---------------------|---------|
| Δ dalton            | mass   | Δ dalton | mass   |    | seq |    | Δ dalton | mass    | Δ dalton            | mass    |
|                     | 114.09 |          | 114.09 | 1  | L   | 19 |          |         |                     |         |
|                     | 251.15 | +0.0265  | 251.15 | 2  | H   | 18 | 2199     |         | 2199                |         |
|                     | 398.22 | +0.1087  | 398.22 | 3  | F   | 17 | 2062     |         | 2062                |         |
|                     | 545.29 | -0.29    | 545.29 | 4  | F   | 16 | 1914.9   |         | 1914.9              |         |
|                     | 676.33 | +0.0009  | 676.33 | 5  | M   | 15 | 1767.8   |         | 1767.8              |         |
|                     | 773.38 |          | 773.38 | 6  | P   | 14 | 1636.8   |         | 818.91              | +0.0518 |
| +0.1557             | 7415.7 |          | 830.4  | 7  | G   | 13 | 1539.8   |         | 1539.8              |         |
| +0.3523             | 489.24 | -0.082   | 977.47 | 8  | F   | 12 | 1482.7   |         | 1482.7              |         |
| +0.0984             | 524.76 | +0.0053  | 1048.5 | 9  | A   | 11 | 1335.7   |         | 668.34              | +0.2937 |
| +0.0997             | 573.28 |          | 1145.6 | 10 | P   | 10 | 1264.6   | -0.029  | 632.82              | +0.2556 |
| +0.2547             | 629.83 | +0.0009  | 1258.6 | 11 | L   | 9  | 1167.6   | -0.006  | 1167.6              |         |
| +0.1827             | 680.35 | +0.0471  | 1359.7 | 12 | T   | 8  | 1054.5   |         | 527.75              | -0.11   |
|                     | 1446.7 | +0.3111  | 1446.7 | 13 | S   | 7  | 953.44   | +0.1351 | 953.44              |         |
| +0.2228             | 787.89 |          | 1574.8 | 14 | Q   | 6  | 866.41   | +0.0489 | 433.71              | +0.2279 |
| +0.1212             | 816.41 |          | 1631.8 | 15 | G   | 5  | 738.35   | +0.0384 | 738.35              |         |
| +0.2154             | 859.92 |          | 1718.8 | 16 | S   | 4  | 681.33   | +0.0728 | 681.33              |         |
| +0.2652             | 923.95 |          | 1846.9 | 17 | Q   | 3  | 594.3    | +0.0276 | 594.3               |         |
| +0.2468             | 987.98 |          | 1975   | 18 | Q   | 2  | 466.24   | +0.1305 | 466.24              |         |
| -0.015              | 1069.5 |          | 2138   | 19 | Y   | 1  | 338.18   | +0.1193 | 338.18              |         |
|                     |        |          |        | 20 | R   | 0  | 175.12   |         | 175.12              |         |

#### general information

|                       |             |
|-----------------------|-------------|
| Annotation:           | 18 of 20    |
| AminoAcids Coverage:  | 90 %        |
| Intensity Coverage:   | 66 %        |
| Peak Coverage:        | 45 %        |
| Protein Localisation: | 263 ... 282 |

Scan number 8288 Raw file LNCAP\_Silac\_23F10\_set1\_08  
 Method ITMS; CID Pepti... 266.28

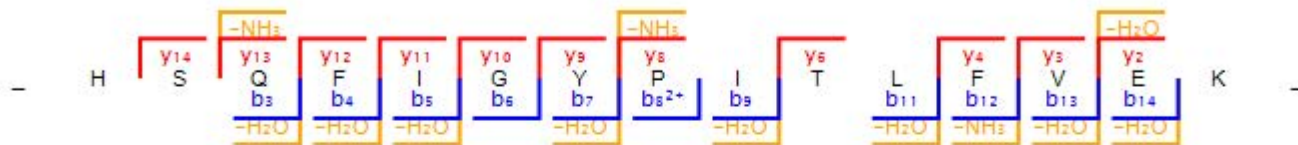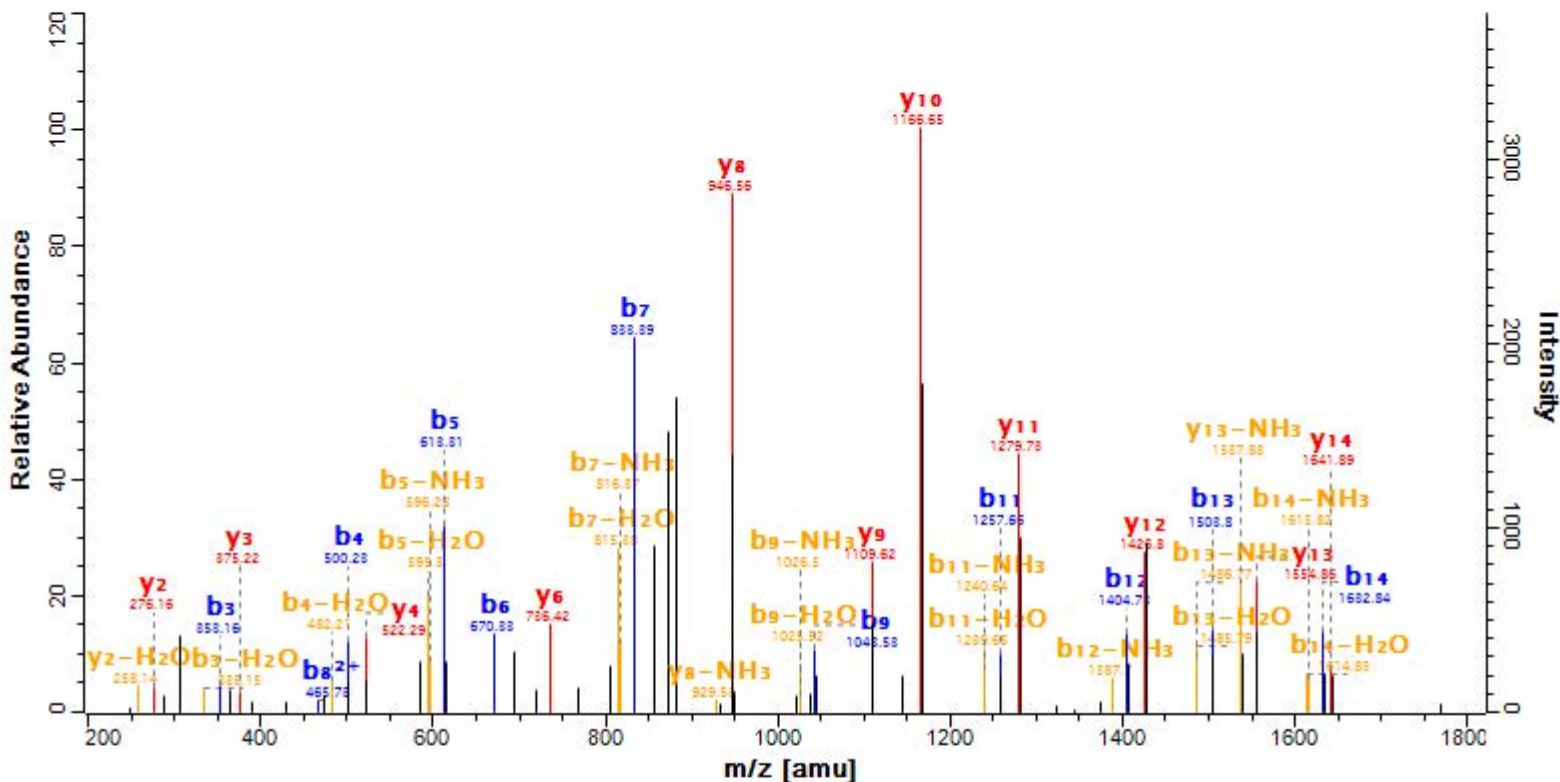

precursor information

|                   |                 |
|-------------------|-----------------|
| Mass:             | 1777.93996      |
| m/z:              | 889.97725       |
| Charge:           | 2+              |
| Retentiontime:    | 58.097808837890 |
| Score:            | 266.2825        |
| Mass Error [ppm]: | -0.1974         |
| PEP:              | 6.6108E-68      |
| Precursor Type:   | MULTI           |

general information

|                       |             |
|-----------------------|-------------|
| Annotation:           | 13 of 15    |
| AminoAcids Coverage:  | 87 %        |
| Intensity Coverage:   | 57 %        |
| Peak Coverage:        | 48 %        |
| Protein Localisation: | 332 ... 346 |

| b <sup>2+</sup> ion |          | b ion     |          | y ion |          |      |          |
|---------------------|----------|-----------|----------|-------|----------|------|----------|
| Δ dalton            | mass     | Δ dalton  | mass     | seq   | Δ dalton | mass |          |
|                     | 138.0662 |           | 138.0662 | 1     | H        | 14   |          |
|                     | 225.0982 |           | 225.0982 | 2     | S        | 13   | 1641.889 |
|                     | 353.1568 | +0.097844 | 353.1568 | 3     | Q        | 12   | 1554.857 |
|                     | 500.2252 | +0.064404 | 500.2252 | 4     | F        | 11   | 1426.798 |
|                     | 613.3093 | +0.016717 | 613.3093 | 5     | I        | 10   | 1279.73  |
|                     | 670.3307 | +0.026991 | 670.3307 | 6     | G        | 9    | 1166.646 |
|                     | 833.3941 | +0.027994 | 833.3941 | 7     | Y        | 8    | 1109.624 |
| +0.002562           | 465.7271 |           | 930.4468 | 8     | P        | 7    | 946.568  |
|                     | 1043.531 | -0.06947  | 1043.531 | 9     | I        | 6    | 849.508  |
|                     | 1144.579 |           | 1144.579 | 10    | T        | 5    | 736.424  |
|                     | 1257.663 | +0.018151 | 1257.663 | 11    | L        | 4    | 635.3763 |
|                     | 1404.731 | -0.02768  | 1404.731 | 12    | F        | 3    | 522.2922 |
|                     | 1503.799 | -0.10354  | 1503.799 | 13    | V        | 2    | 375.2238 |
|                     | 1632.842 | -0.1537   | 1632.842 | 14    | E        | 1    | 276.1554 |
|                     |          |           |          | 15    | K        | 0    | 147.1128 |

Scan number 867 Raw file LNCAP\_Silac\_23F10\_set1\_08  
 Method ITMS: CID Pepti... 40.1

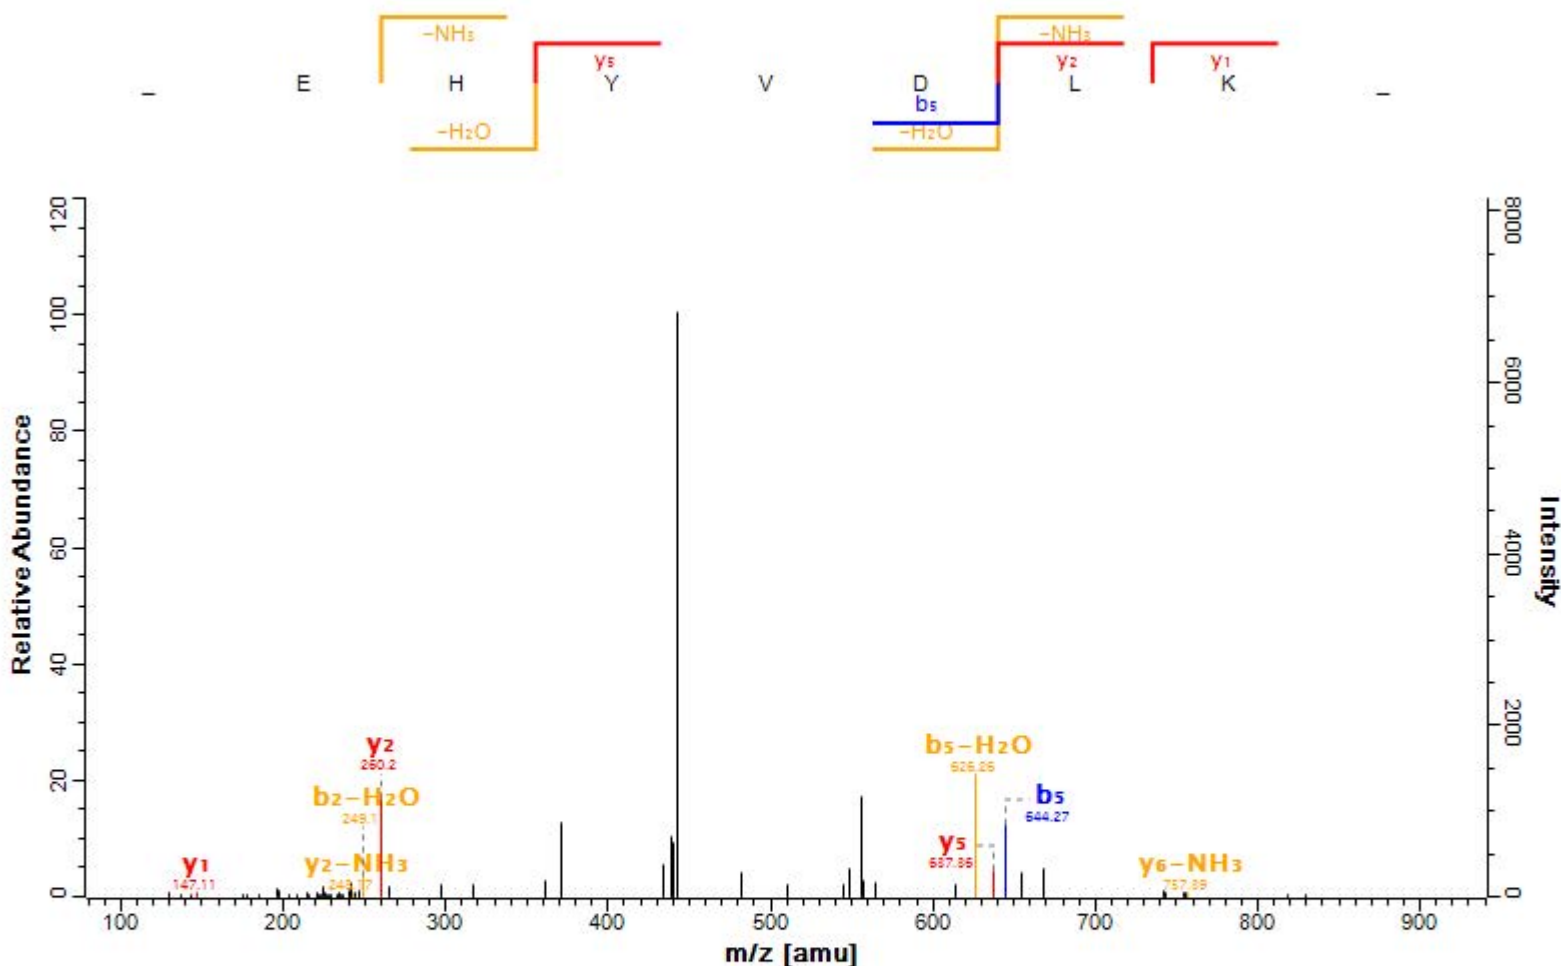

#### precursor information

|                     |                 |
|---------------------|-----------------|
| Mass:               | 902.44957       |
| m/z:                | 452.23206       |
| Charge:             | 2+              |
| Retentiontime:      | 10.006429672241 |
| Score:              | 40.1031         |
| g Mass Error [ppm]: | -0.23134        |
| Annotation:         | 5 of 7          |
| AminoAcids Coverag  | 71 %            |
| Intensity Coverage: | 21 %            |
| Peak Coverage:      | 7 %             |

| b ion      |               |     |   | y ion    |                          |
|------------|---------------|-----|---|----------|--------------------------|
| Δ dalton   | mass          | seq |   | Δ dalton | mass                     |
|            | 130.049869563 | 1   | E | 6        |                          |
|            | 267.108781425 | 2   | H | 5        | 774.4144655              |
|            | 430.172109963 | 3   | Y | 4        | 637.355553638 +0.0221319 |
|            | 529.24052388  | 4   | V | 3        | 474.292225099            |
| +0.0432631 | 644.267466912 | 5   | D | 2        | 375.223811183            |
|            | 757.351530892 | 6   | L | 1        | 260.196868151 -0.0193779 |
|            |               | 7   | K | 0        | 147.112804171 +0.0091288 |

Scan number 934 Raw file LNCAP\_Silac\_23F10\_set1\_08  
 Method ITMS: CID Pepti... 141.88

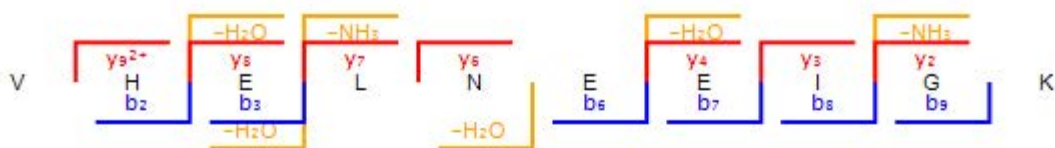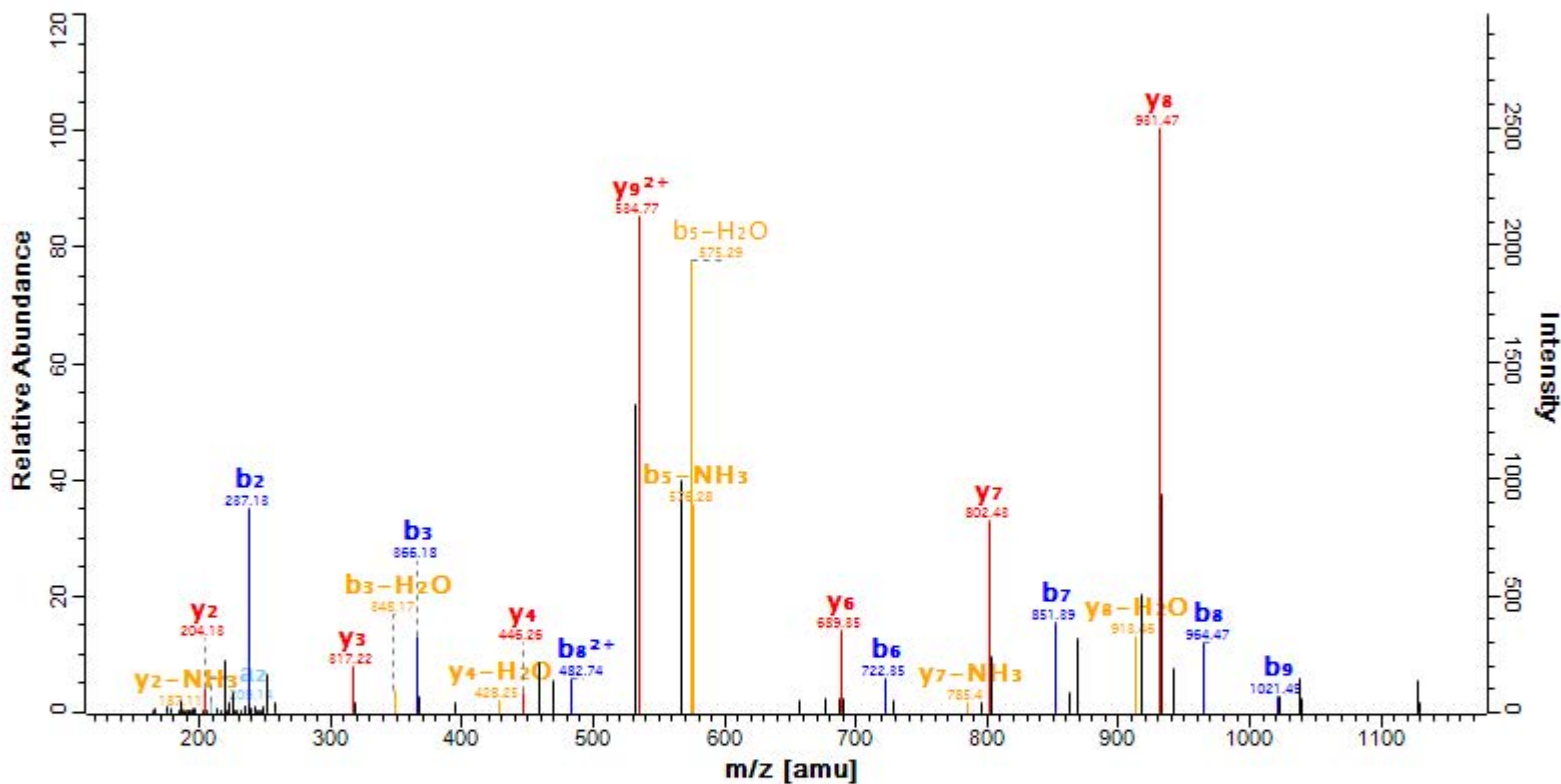

precursor information

|                   |                 |
|-------------------|-----------------|
| Mass:             | 1166.59354      |
| m/z:              | 584.30404       |
| Charge:           | 2+              |
| Retentiontime:    | 10.395719528198 |
| Score:            | 141.8786        |
| Mass Error [ppm]: | 0.3298          |
| PEP:              | 0.00019399      |
| Precursor Type:   | MULTI           |

|                       |             |
|-----------------------|-------------|
| Annotation:           | 8 of 10     |
| AminoAcids Coverage:  | 80 %        |
| Intensity Coverage:   | 61 %        |
| Peak Coverage:        | 22 %        |
| Protein Localisation: | 192 ... 201 |

| a ion         | b <sup>2+</sup> ion | b ion         |     |   | y ion         | y <sup>2+</sup> ion |             |       |
|---------------|---------------------|---------------|-----|---|---------------|---------------------|-------------|-------|
| Δ dalton mass | Δ dalton mass       | Δ dalton mass | seq |   | Δ dalton mass | Δ dalton mass       |             |       |
| 72.08         | 100.1               | 100.1         | 1   | V | 9             |                     |             |       |
| +0.066209.1   | 237.1               | +0.074237.1   | 2   | H | 8             | 1069                | 534.8       | +0.24 |
| 338.2         | 366.2               | +0.068366.2   | 3   | E | 7             | 931.5               | +0.004931.5 |       |
| 451.3         | 479.3               | 479.3         | 4   | L | 6             | 802.4               | +0.022802.4 |       |
| 565.3         | 593.3               | 593.3         | 5   | N | 5             | 689.3               | +0.129689.3 |       |
| 694.4         | 722.3               | +0.059722.3   | 6   | E | 4             | 575.3               | 575.3       |       |
| 823.4         | 851.4               | -0.01 851.4   | 7   | E | 3             | 446.3               | +0.124446.3 |       |
| 936.5         | -0.14 482.7         | -0.06 964.5   | 8   | I | 2             | 317.2               | -0.01 317.2 |       |
| 993.5         | 1021                | +0.0661021    | 9   | G | 1             | 204.1               | +0.075204.1 |       |
|               |                     |               | 10  | K | 0             | 147.1               | 147.1       |       |

Scan number 1502 Raw file LNCAP\_Silac\_23F10\_set1\_09  
 Method ITMS: CID Pepti... 101.97

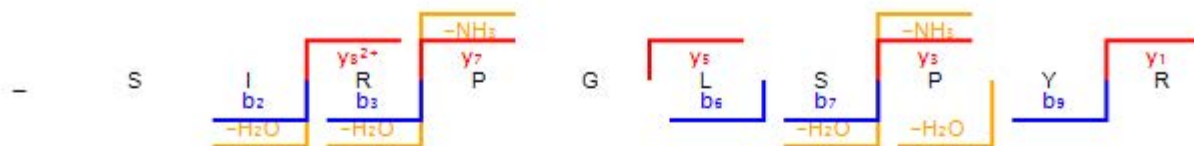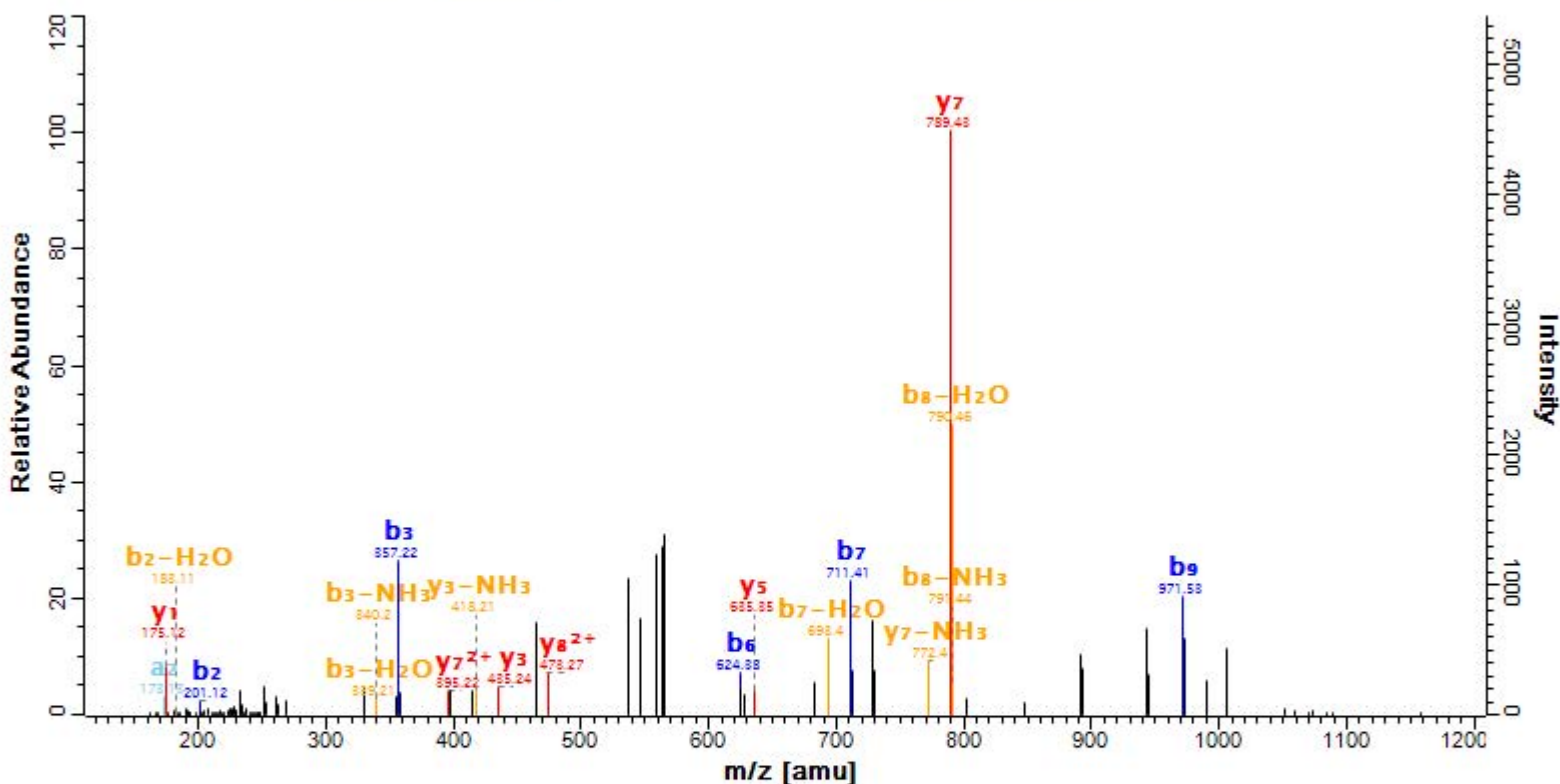

**precursor information**

|                   |                 |
|-------------------|-----------------|
| Mass:             | 1144.63553      |
| m/z:              | 573.32504       |
| Charge:           | 2+              |
| Retentiontime:    | 13.566512107849 |
| Score:            | 101.9741        |
| Mass Error [ppm]: | 0.20649         |
| PEP:              | 0.0051846       |
| Precursor Type:   | ISO             |

|                       |             |
|-----------------------|-------------|
| Annotation:           | 8 of 10     |
| AminoAcids Coverage:  | 80 %        |
| Intensity Coverage:   | 45 %        |
| Peak Coverage:        | 18 %        |
| Protein Localisation: | 103 ... 112 |

| a ion    |        | b ion    |        |    |     |   | y ion    |         | y <sup>2+</sup> ion |         |
|----------|--------|----------|--------|----|-----|---|----------|---------|---------------------|---------|
| Δ dalton | mass   | Δ dalton | mass   |    | seq |   | Δ dalton | mass    | Δ dalton            | mass    |
|          | 60.044 |          | 88.039 | 1  | S   | 9 |          |         |                     |         |
| +0.0055  | 173.13 | +0.034   | 201.12 | 2  | I   | 8 | 1058.6   |         | 1058.6              |         |
|          | 329.23 | +0.0412  | 357.22 | 3  | R   | 7 | 945.53   |         | 473.27              | +0.3187 |
|          | 426.28 |          | 454.28 | 4  | P   | 6 | 789.43   | +0.0365 | 395.22              | +0.2166 |
|          | 483.3  |          | 511.3  | 5  | G   | 5 | 692.37   |         | 692.37              |         |
|          | 596.39 | +0.0238  | 624.38 | 6  | L   | 4 | 635.35   | +0.0864 | 635.35              |         |
|          | 683.42 | -0.023   | 711.41 | 7  | S   | 3 | 522.27   |         | 522.27              |         |
|          | 780.47 |          | 808.47 | 8  | P   | 2 | 435.24   | +0.1693 | 435.24              |         |
|          | 943.54 | +0.0265  | 971.53 | 9  | Y   | 1 | 338.18   |         | 338.18              |         |
|          |        |          |        | 10 | R   | 0 | 175.12   | +0.0402 | 175.12              |         |



Scan number 1660 Raw file LNCAP\_Silac\_23F10\_set1\_09  
 Method ITMS: CID Pepti... 182.64

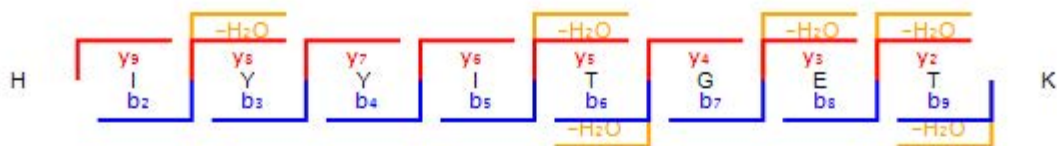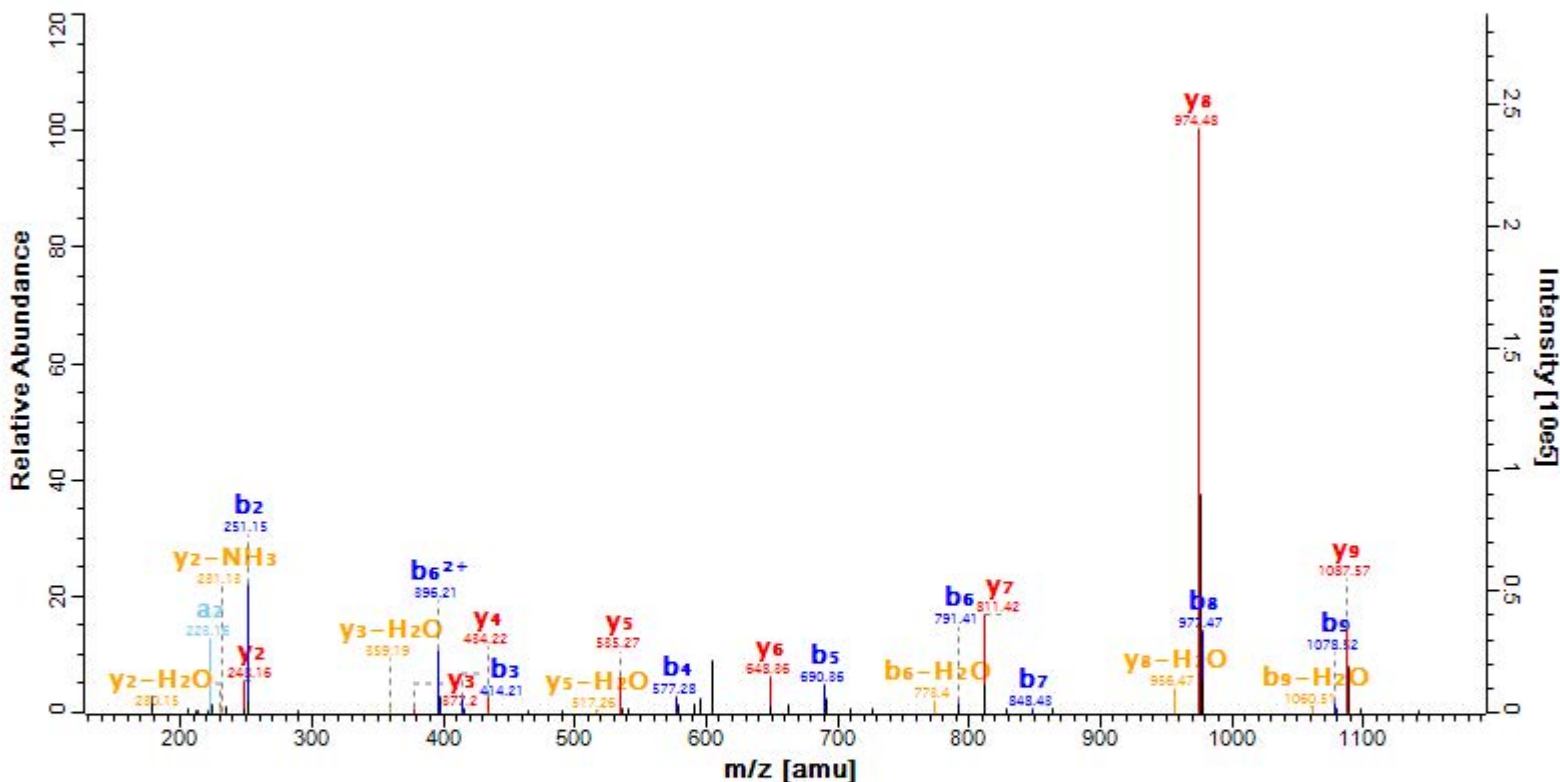

#### precursor information

|                   |                 |
|-------------------|-----------------|
| Mass:             | 1223.61852      |
| m/z:              | 612.81654       |
| Charge:           | 2+              |
| Retentiontime:    | 14.455381393432 |
| Score:            | 182.6384        |
| Mass Error [ppm]: | -0.092898       |
| PEP:              | 1.0019E-06      |

#### g Precursor Type: MULTI

|                       |             |
|-----------------------|-------------|
| Annotation:           | 8 of 10     |
| AminoAcids Coverage:  | 80 %        |
| Intensity Coverage:   | 70 %        |
| Peak Coverage:        | 36 %        |
| Protein Localisation: | 612 ... 621 |

| a ion    |        | b <sup>2+</sup> ion |        | b ion    |        | y ion |   |          |        |
|----------|--------|---------------------|--------|----------|--------|-------|---|----------|--------|
| Δ dalton | mass   | Δ dalton            | mass   | Δ dalton | mass   | seq   |   | Δ dalton | mass   |
|          | 110.07 |                     | 138.07 |          | 138.07 | 1     | H | 9        |        |
| -0.028   | 223.16 |                     | 251.15 | -0.023   | 251.15 | 2     | I | 8        | 1087.6 |
|          | 386.22 |                     | 414.21 | +0.0826  | 414.21 | 3     | Y | 7        | 974.48 |
|          | 549.28 |                     | 577.28 | +0.1244  | 577.28 | 4     | Y | 6        | 811.42 |
|          | 662.37 |                     | 690.36 | -0.084   | 690.36 | 5     | I | 5        | 648.36 |
|          | 763.41 | +0.0123             | 396.21 | -0.052   | 791.41 | 6     | T | 4        | 535.27 |
|          | 820.44 |                     | 848.43 | +0.1961  | 848.43 | 7     | G | 3        | 434.22 |
|          | 949.48 |                     | 977.47 | +0.0062  | 977.47 | 8     | E | 2        | 377.2  |
|          | 1050.5 |                     | 1078.5 | -0.025   | 1078.5 | 9     | T | 1        | 248.16 |
|          |        |                     |        |          |        | 10    | K | 0        | 147.11 |

Scan number 1739 Raw file LNCAP\_Silac\_23F10\_set1\_09  
 Method ITMS; CID Pepti... 136.93

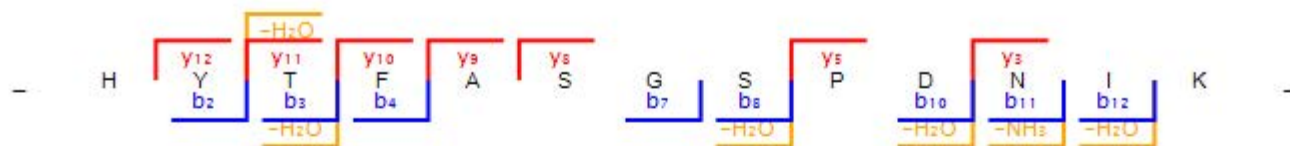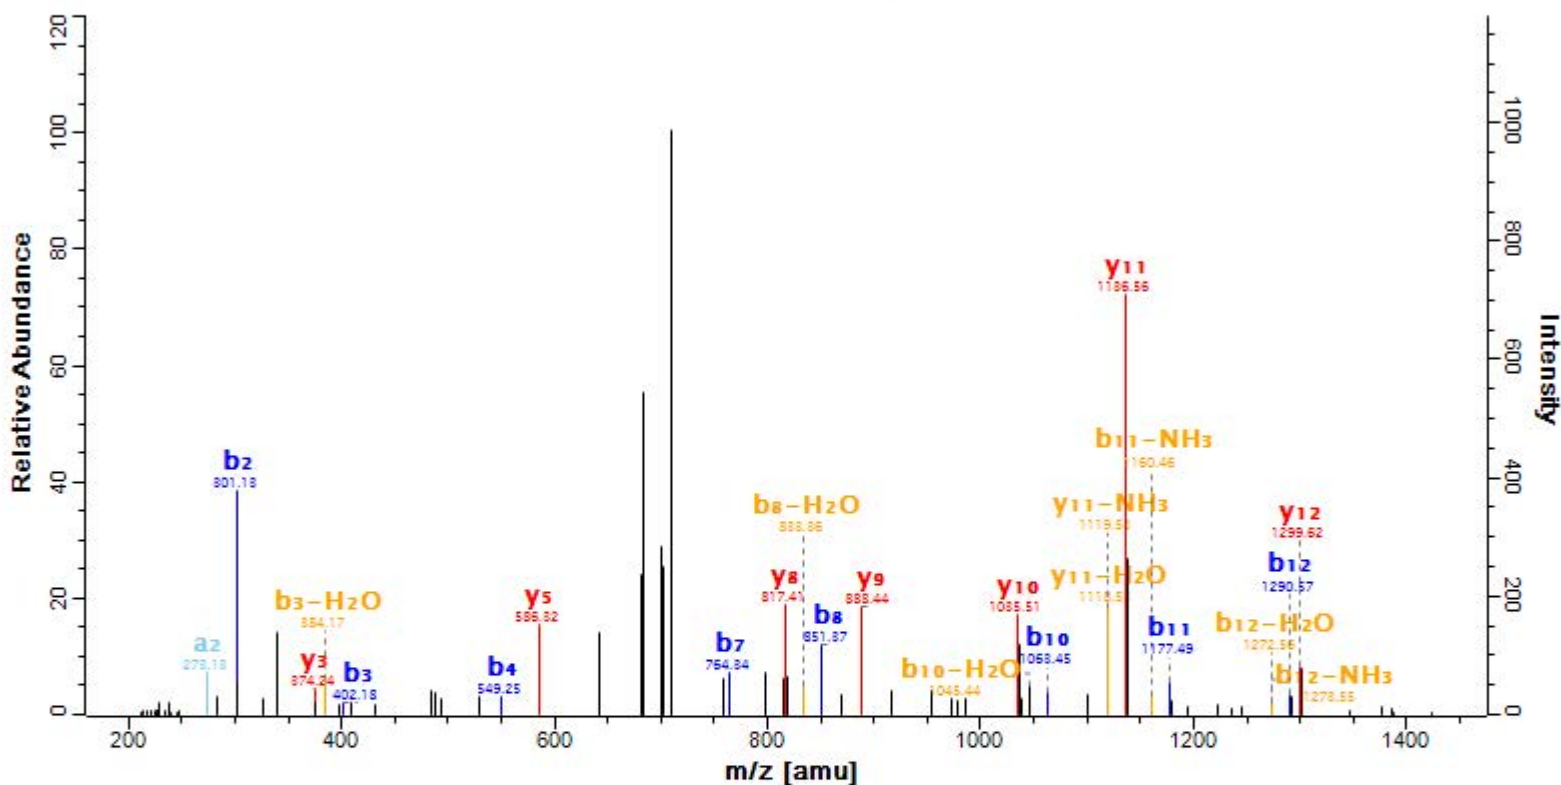

#### precursor information

|                   |                 |
|-------------------|-----------------|
| Mass:             | 1435.67321      |
| m/z:              | 718.84388       |
| Charge:           | 2+              |
| Retentiontime:    | 14.917583465576 |
| Score:            | 136.9324        |
| Mass Error [ppm]: | 0.0087744       |
| PEP:              | 1.143E-06       |
| Precursor Type:   | MULTI           |

#### general information

|                       |             |
|-----------------------|-------------|
| Annotation:           | 11 of 13    |
| AminoAcids Coverage:  | 85 %        |
| Intensity Coverage:   | 39 %        |
| Peak Coverage:        | 28 %        |
| Protein Localisation: | 384 ... 396 |

| a ion           |          | b ion           |          |     |   | y ion           |                    |
|-----------------|----------|-----------------|----------|-----|---|-----------------|--------------------|
| $\Delta$ dalton | mass     | $\Delta$ dalton | mass     | seq |   | $\Delta$ dalton | mass               |
|                 | 110.0713 |                 | 138.0662 | 1   | H | 12              |                    |
| +0.124675       | 273.1346 | +0.035431       | 301.1295 | 2   | Y | 11              | 1299.622 +0.067041 |
|                 | 374.1823 | -0.08906        | 402.1772 | 3   | T | 10              | 1136.558 +0.037718 |
|                 | 521.2507 | +0.048092       | 549.2456 | 4   | F | 9               | 1035.511 +0.013863 |
|                 | 592.2878 |                 | 620.2827 | 5   | A | 8               | 888.4421 +0.000917 |
|                 | 679.3198 |                 | 707.3148 | 6   | S | 7               | 817.405 +0.000556  |
|                 | 736.3413 | +0.048367       | 764.3362 | 7   | G | 6               | 730.373            |
|                 | 823.3733 | +0.096173       | 851.3682 | 8   | S | 5               | 673.3515           |
|                 | 920.4261 |                 | 948.421  | 9   | P | 4               | 586.3195 +0.072648 |
|                 | 1035.453 | -0.08052        | 1063.448 | 10  | D | 3               | 489.2667           |
|                 | 1149.496 | +0.126554       | 1177.491 | 11  | N | 2               | 374.2398 +0.224743 |
|                 | 1262.58  | -0.03942        | 1290.575 | 12  | I | 1               | 260.1969           |
|                 |          |                 |          | 13  | K | 0               | 147.1128           |

Scan number 2393 Raw file LNCAP\_Silac\_23F10\_set1\_09  
 Method ITMS; CID Pepti... 170.61

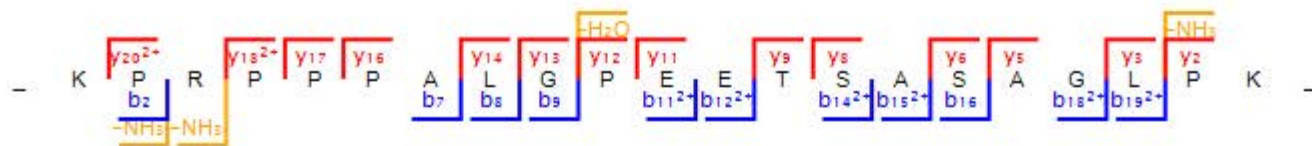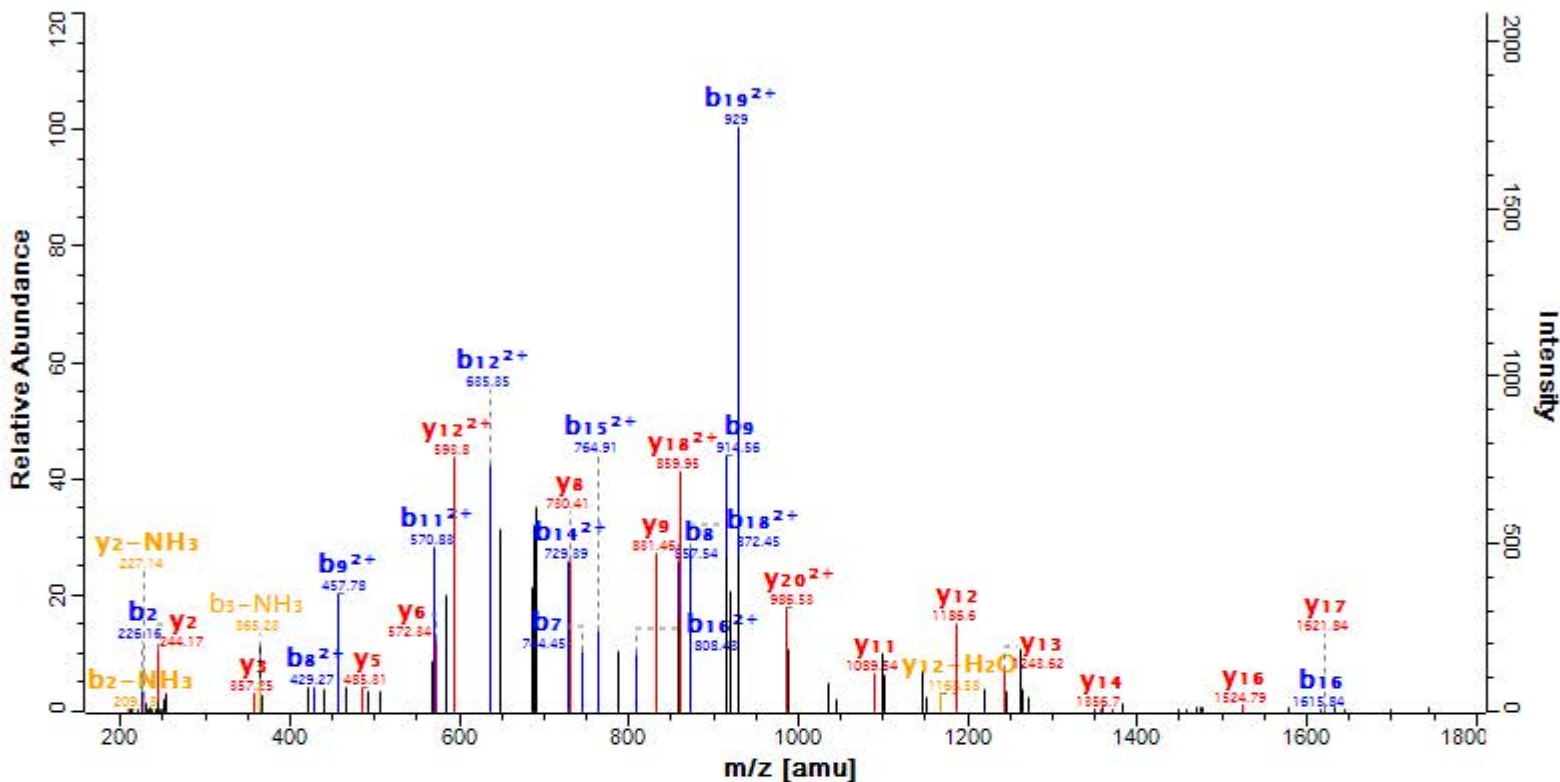

#### precursor information

|                   |                 |
|-------------------|-----------------|
| Mass:             | 2099.13685      |
| m/z:              | 700.71956       |
| Charge:           | 3+              |
| Retentiontime:    | 18.694150924682 |
| Score:            | 170.608         |
| Mass Error [ppm]: | -0.30918        |
| PEP:              | 1.2744E-36      |
| Precursor Type:   | MULTI           |

| b <sup>2+</sup> ion |        | b ion    |        | seq |   |    | y ion    |         | y <sup>2+</sup> ion |         |
|---------------------|--------|----------|--------|-----|---|----|----------|---------|---------------------|---------|
| Δ dalton            | mass   | Δ dalton | mass   |     |   |    | Δ dalton | mass    | Δ dalton            | mass    |
|                     | 129.1  |          | 129.1  | 1   | K | 20 |          |         |                     |         |
|                     | 226.16 | +0.1007  | 226.16 | 2   | P | 19 | 1972     |         | 986.53              | +0.0247 |
|                     | 382.26 |          | 382.26 | 3   | R | 18 | 1875     |         | 1875                |         |
|                     | 479.31 |          | 479.31 | 4   | P | 17 | 1718.9   |         | 859.95              | +0.3488 |
|                     | 576.36 |          | 576.36 | 5   | P | 16 | 1621.8   | +0.1438 | 1621.8              |         |
|                     | 673.41 |          | 673.41 | 6   | P | 15 | 1524.8   | +0.1147 | 1524.8              |         |
|                     | 744.45 | +0.0213  | 744.45 | 7   | A | 14 | 1427.7   |         | 1427.7              |         |
| +0.094              | 429.27 | +0.0037  | 857.54 | 8   | L | 13 | 1356.7   | -0.04   | 1356.7              |         |
| +0.244              | 457.78 | -0.061   | 914.56 | 9   | G | 12 | 1243.6   | -0.042  | 1243.6              |         |
|                     | 1011.6 |          | 1011.6 | 10  | P | 11 | 1186.6   | +0.0326 | 593.8               | +0.2175 |
| +0.2244             | 570.83 |          | 1140.7 | 11  | E | 10 | 1089.5   | +0.2602 | 1089.5              |         |
| +0.1813             | 635.35 |          | 1269.7 | 12  | E | 9  | 960.5    |         | 960.5               |         |
|                     | 1370.7 |          | 1370.7 | 13  | T | 8  | 831.46   | +0.0594 | 831.46              |         |
| +0.2662             | 729.39 |          | 1457.8 | 14  | S | 7  | 730.41   | +0.045  | 730.41              |         |
| +0.1135             | 764.91 |          | 1528.8 | 15  | A | 6  | 643.38   |         | 643.38              |         |
| +0.2594             | 808.43 | -0.137   | 1615.8 | 16  | S | 5  | 572.34   | -0.045  | 572.34              |         |
|                     | 1686.9 |          | 1686.9 | 17  | A | 4  | 485.31   | +0.0614 | 485.31              |         |
| +0.3085             | 872.45 |          | 1743.9 | 18  | G | 3  | 414.27   |         | 414.27              |         |
| +0.2973             | 929    |          | 1857   | 19  | L | 2  | 357.25   | +0.0348 | 357.25              |         |
|                     | 1954   |          | 1954   | 20  | P | 1  | 244.17   | -0.014  | 244.17              |         |
|                     |        |          |        | 21  | K | 0  | 147.11   |         | 147.11              |         |

#### general information

|                       |           |
|-----------------------|-----------|
| Annotation:           | 19 of 21  |
| AminoAcids Coverag    | 90 %      |
| Intensity Coverage:   | 61 %      |
| Peak Coverage:        | 33 %      |
| Protein Localisation: | 15 ... 35 |

Scan number 2903 Raw file LNCAP\_Silac\_23F10\_set1\_09  
 Method ITMS; CID Pepti... 192.32

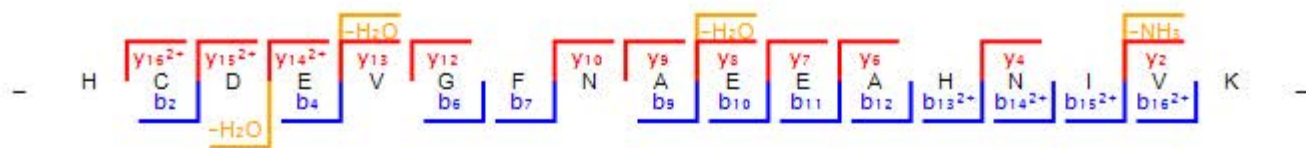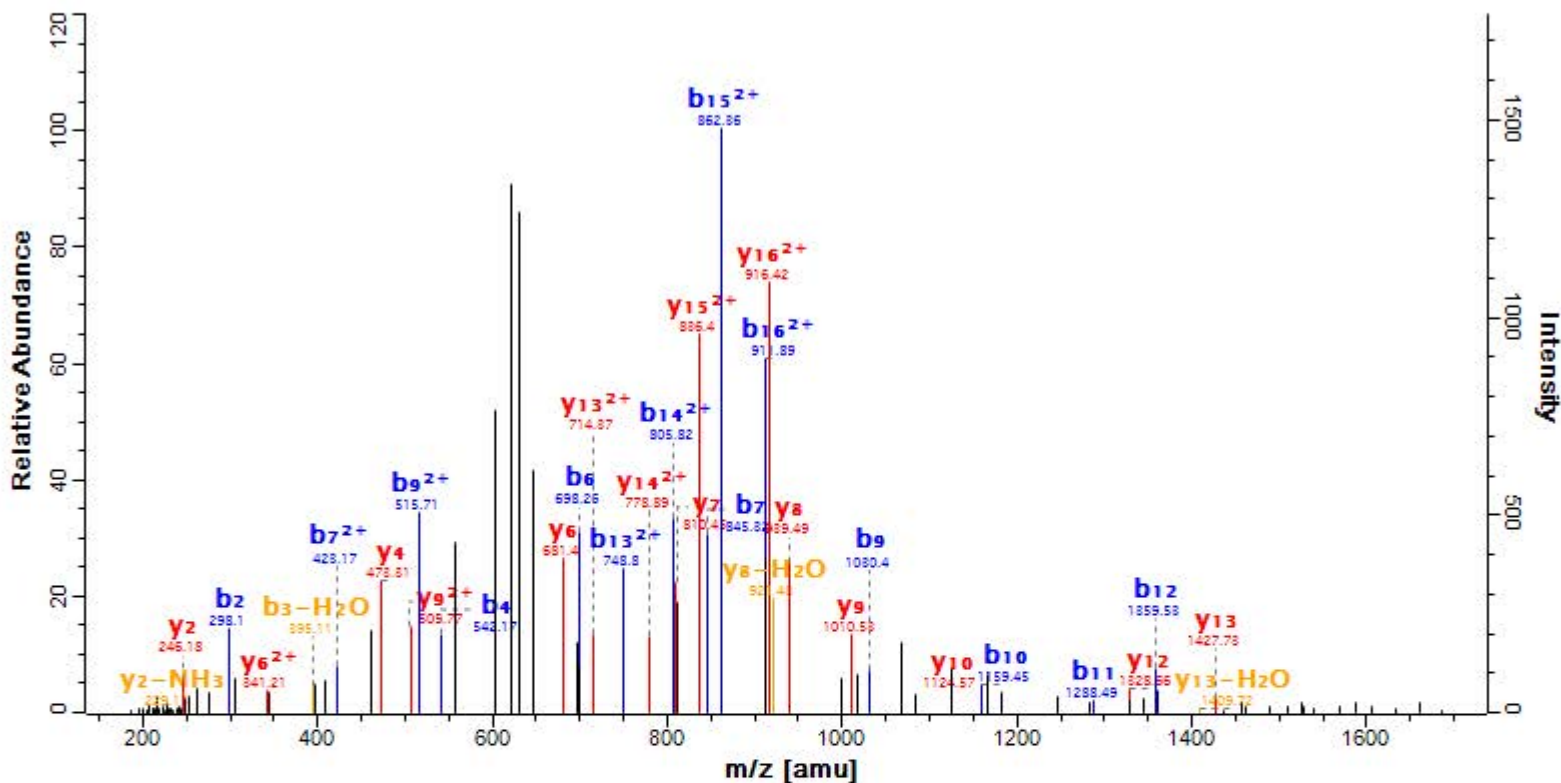

**precursor information**

|                   |                 |
|-------------------|-----------------|
| Mass:             | 1967.87906      |
| m/z:              | 656.96696       |
| Charge:           | 3+              |
| Retentiontime:    | 21.679357528686 |
| Score:            | 192.3154        |
| Mass Error [ppm]: | -0.26043        |
| PEP:              | 5.2268E-34      |
| Precursor Type:   | MULTI           |

| b <sup>2+</sup> ion |         | b ion    |        |    |     |    | y ion    |         | y <sup>2+</sup> ion |         |
|---------------------|---------|----------|--------|----|-----|----|----------|---------|---------------------|---------|
| Δ dalton            | mass    | Δ dalton | mass   |    | seq |    | Δ dalton | mass    | Δ dalton            | mass    |
|                     | 138.07  |          | 138.07 | 1  | H   | 16 |          |         |                     |         |
|                     | 298.1   | +0.02    | 298.1  | 2  | C   | 15 | 1831.8   |         | 916.42              | +0.4227 |
|                     | 413.12  |          | 413.12 | 3  | D   | 14 | 1671.8   |         | 836.4               | +0.3854 |
|                     | 542.17  | +0.1289  | 542.17 | 4  | E   | 13 | 1556.8   |         | 778.89              | +0.2394 |
|                     | 641.23  |          | 641.23 | 5  | V   | 12 | 1427.7   | -0.089  | 714.37              | +0.1549 |
|                     | 698.26  | +0.0288  | 698.26 | 6  | G   | 11 | 1328.7   | +0.0157 | 1328.7              |         |
| +0.2627             | 742.17  | -0.001   | 845.32 | 7  | F   | 10 | 1271.6   |         | 1271.6              |         |
|                     | 959.37  |          | 959.37 | 8  | N   | 9  | 1124.6   | +0.1381 | 1124.6              |         |
| +0.2487             | 1015.71 | +0.0357  | 1030.4 | 9  | A   | 8  | 1010.5   | +0.4525 | 505.77              | +0.2746 |
|                     | 1159.4  | +0.0184  | 1159.4 | 10 | E   | 7  | 939.49   | -0.071  | 939.49              |         |
|                     | 1288.5  | -0.15    | 1288.5 | 11 | E   | 6  | 810.45   | -0.13   | 810.45              |         |
|                     | 1359.5  | -0.026   | 1359.5 | 12 | A   | 5  | 681.4    | +0.0747 | 341.21              | +0.2718 |
| +0.3355             | 148.8   |          | 1496.6 | 13 | H   | 4  | 610.37   |         | 610.37              |         |
| +0.1443             | 305.82  |          | 1610.6 | 14 | N   | 3  | 473.31   | +0.1188 | 473.31              |         |
| +0.2828             | 862.36  |          | 1723.7 | 15 | I   | 2  | 359.27   |         | 359.27              |         |
| +0.2446             | 911.89  |          | 1822.8 | 16 | V   | 1  | 246.18   | -0.141  | 246.18              |         |
|                     |         |          |        | 17 | K   | 0  | 147.11   |         | 147.11              |         |

**general information**

|                       |          |
|-----------------------|----------|
| Annotation:           | 15 of 17 |
| AminoAcids Coverage:  | 88 %     |
| Intensity Coverage:   | 52 %     |
| Peak Coverage:        | 31 %     |
| Protein Localisation: | 7 ... 23 |

Scan number 3053 Raw file LNCAP\_Silac\_23F10\_set1\_09  
 Method ITMS; CID Pepti... 91.31

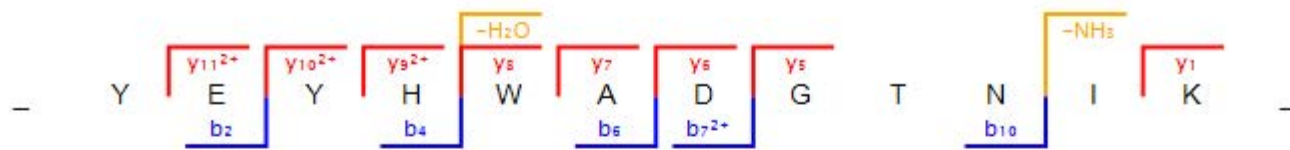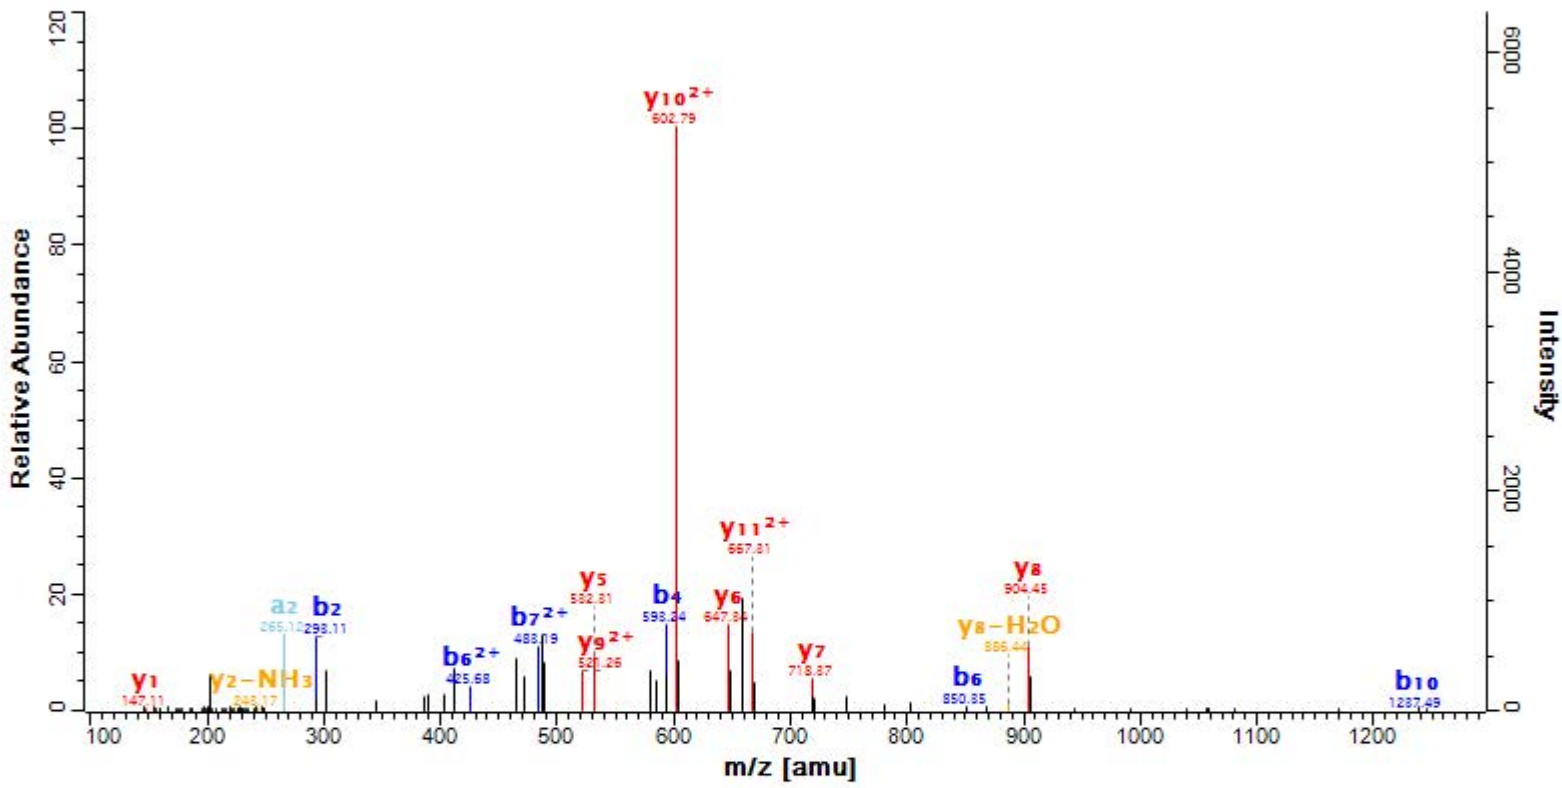

**precursor information**

|                   |                 |
|-------------------|-----------------|
| Mass:             | 1495.67312      |
| m/z:              | 499.56498       |
| Charge:           | 3+              |
| Retentiontime:    | 22.589340209960 |
| Score:            | 91.31331        |
| Mass Error [ppm]: | -0.048146       |
| PEP:              | 0.00083906      |
| Precursor Type:   | MULTI           |

**general information**

|                       |            |
|-----------------------|------------|
| Annotation:           | 10 of 12   |
| AminoAcids Coverage:  | 83 %       |
| Intensity Coverage:   | 57 %       |
| Peak Coverage:        | 13 %       |
| Protein Localisation: | 98 ... 109 |

| a ion         | b <sup>2+</sup> ion | b ion         |     |   | y ion         | y <sup>2+</sup> ion |
|---------------|---------------------|---------------|-----|---|---------------|---------------------|
| Δ dalton mass | Δ dalton mass       | Δ dalton mass | seq |   | Δ dalton mass | Δ dalton mass       |
| 136.1         | 164.1               | 164.1         | 1   | Y | 11            |                     |
| +0.048265.1   | 293.1               | +0.034293.1   | 2   | E | 10            | 1334                |
| 428.2         | 456.2               | 456.2         | 3   | Y | 9             | 1205                |
| 565.2         | 593.2               | +0.438593.2   | 4   | H | 8             | 1042                |
| 751.3         | 779.3               | 779.3         | 5   | W | 7             | 904.5               |
| 822.4         | +0.115425.7         | +0.14850.4    | 6   | A | 6             | 718.4               |
| 937.4         | +0                  | 483.2         | 7   | D | 5             | 647.3               |
| 994.4         | 1022                | 1022          | 8   | G | 4             | 532.3               |
| 1095          | 1123                | 1123          | 9   | T | 3             | 475.3               |
| 1209          | 1237                | +0.3981237    | 10  | N | 2             | 374.2               |
| 1323          | 1351                | 1351          | 11  | I | 1             | 260.2               |
|               |                     |               | 12  | K | 0             | 147.1               |

Scan number 3153 Raw file LNCAP\_Silac\_23F10\_set1\_09  
 Method ITMS: CID Pepti... 116.05

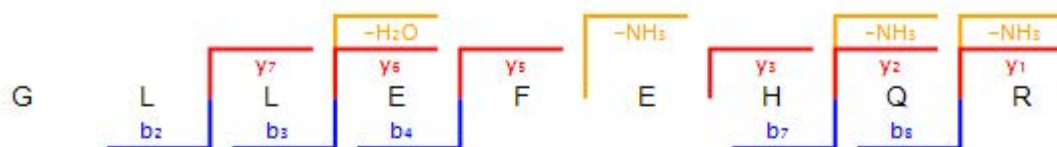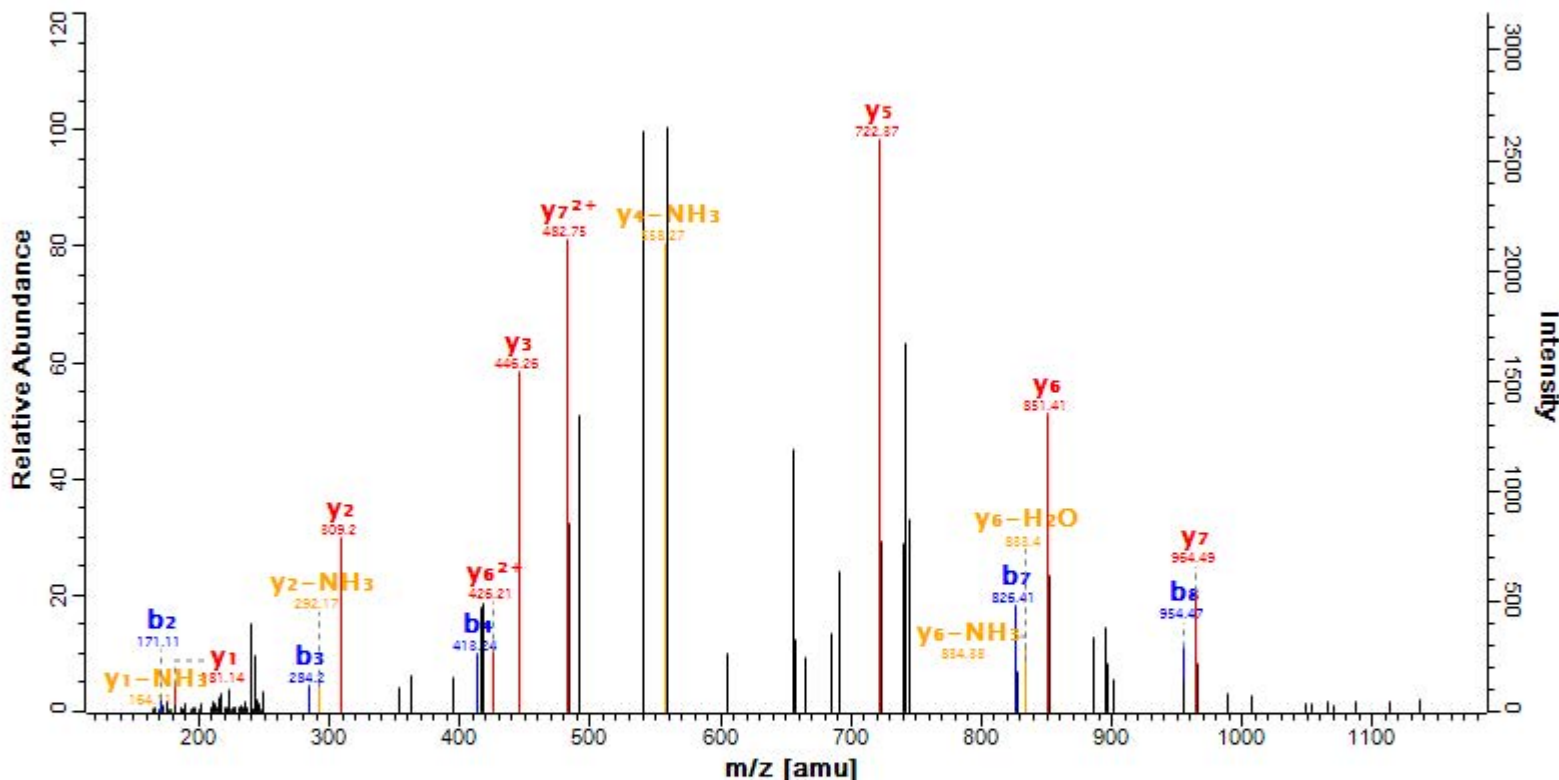

#### precursor information

|                       |                 |
|-----------------------|-----------------|
| Mass:                 | 1127.5723       |
| m/z:                  | 564.79342       |
| Charge:               | 2+              |
| Retentiontime:        | 23.226873397827 |
| Score:                | 116.0506        |
| Mass Error [ppm]:     | -0.054077       |
| PEP:                  | 0.0016525       |
| Precursor Type:       | MULTI           |
| Annotation:           | 8 of 9          |
| AminoAcids Coverage:  | 89 %            |
| Intensity Coverage:   | 37 %            |
| Peak Coverage:        | 17 %            |
| Protein Localisation: | 225 ... 233     |

| b ion     |          | seq |   |   | y ion    |           | y <sup>2+</sup> ion |           |
|-----------|----------|-----|---|---|----------|-----------|---------------------|-----------|
| Δ dalton  | mass     |     |   |   | Δ dalton | mass      | Δ dalton            | mass      |
|           | 58.02874 | 1   | G | 8 |          |           |                     |           |
| -0.00793  | 171.1128 | 2   | L | 7 | 1077.578 |           | 1077.578            |           |
| +0.190766 | 284.1969 | 3   | L | 6 | 964.4942 | +0.023832 | 482.7508            | +0.026832 |
| +0.108195 | 413.2395 | 4   | E | 5 | 851.4102 | +0.064439 | 426.2087            | +0.096269 |
|           | 560.3079 | 5   | F | 4 | 722.3676 | +0.078162 | 722.3676            |           |
|           | 689.3505 | 6   | E | 3 | 575.2992 |           | 575.2992            |           |
| +0.042585 | 826.4094 | 7   | H | 2 | 446.2566 | -0.01859  | 446.2566            |           |
| +0.003905 | 954.468  | 8   | Q | 1 | 309.1977 | +0.011173 | 309.1977            |           |
|           |          | 9   | R | 0 | 181.1391 | +0.014117 | 181.1391            |           |

Scan number 3170 Raw file LNCAP\_Silac\_23F10\_set1\_09  
 Method ITMS; CID Pepti... 65.23

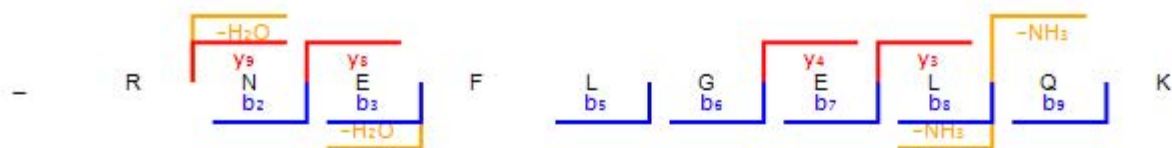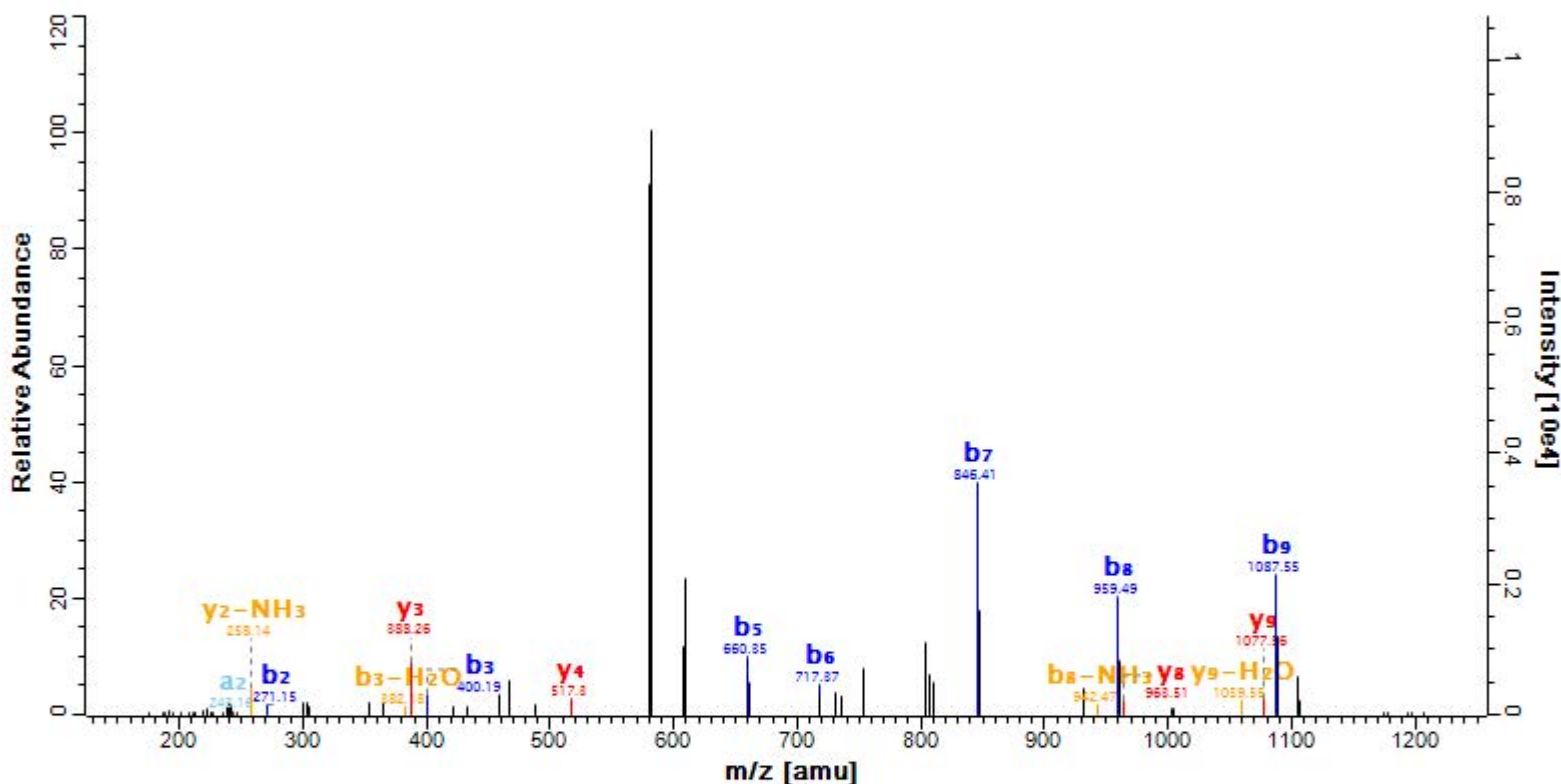

#### precursor information

|                   |                 |
|-------------------|-----------------|
| Mass:             | 1232.6516       |
| m/z:              | 617.33308       |
| Charge:           | 2+              |
| Retentiontime:    | 23.324785232543 |
| Score:            | 65.23174        |
| Mass Error [ppm]: | 0.21398         |
| PEP:              | 0.0080588       |
| Precursor Type:   | MULTI           |

|                       |             |
|-----------------------|-------------|
| Annotation:           | 7 of 10     |
| AminoAcids Coverage:  | 70 %        |
| Intensity Coverage:   | 24 %        |
| Peak Coverage:        | 16 %        |
| Protein Localisation: | 337 ... 346 |

| a ion           |          | b ion           |          | y ion |                 |      |                    |
|-----------------|----------|-----------------|----------|-------|-----------------|------|--------------------|
| $\Delta$ dalton | mass     | $\Delta$ dalton | mass     | seq   | $\Delta$ dalton | mass |                    |
|                 | 129.1135 |                 | 157.1084 | 1     | R               | 9    |                    |
| +0.01639        | 243.1564 | +0.034323       | 271.1513 | 2     | N               | 8    | 1077.558 +0.039301 |
|                 | 372.199  | +0.05127        | 400.1939 | 3     | E               | 7    | 963.5146 +0.16017  |
|                 | 519.2674 |                 | 547.2623 | 4     | F               | 6    | 834.472            |
|                 | 632.3515 | +0.093739       | 660.3464 | 5     | L               | 5    | 687.4036           |
|                 | 689.3729 | +0.014414       | 717.3678 | 6     | G               | 4    | 574.3195           |
|                 | 818.4155 | +0.014179       | 846.4104 | 7     | E               | 3    | 517.298 -0.00037   |
|                 | 931.4996 | +0.00824        | 959.4945 | 8     | L               | 2    | 388.2554 +0.097643 |
|                 | 1059.558 | +0.066423       | 1087.553 | 9     | Q               | 1    | 275.1714           |
|                 |          |                 |          | 10    | K               | 0    | 147.1128           |

Scan number 3364 Raw file LNCAP\_Silac\_23F10\_set1\_09  
 Method ITMS: CID Peptide 141.85

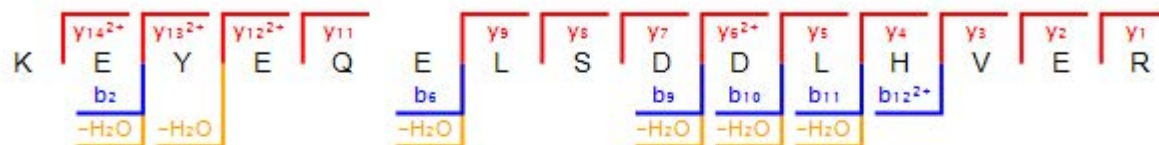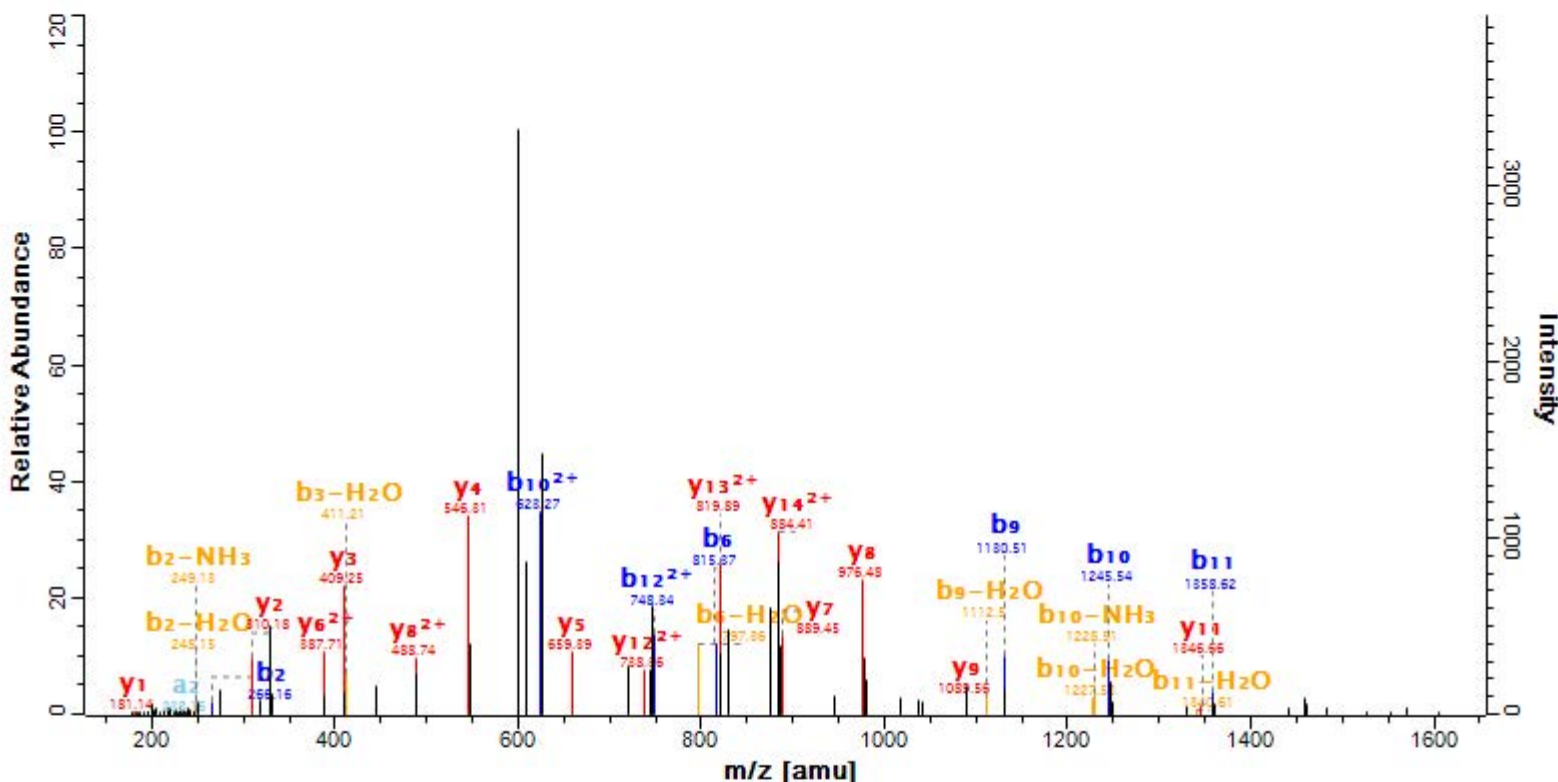

#### precursor information

|                   |                 |
|-------------------|-----------------|
| Mass:             | 1888.8801       |
| m/z:              | 630.63398       |
| Charge:           | 3+              |
| Retentiontime:    | 24.419530868530 |
| Score:            | 141.8514        |
| Mass Error [ppm]: | -0.096372       |
| PEP:              | 2.8628E-13      |
| Precursor Type:   | MULTI           |

#### general information

|                       |             |
|-----------------------|-------------|
| Annotation:           | 14 of 15    |
| AminoAcids Coverage:  | 93 %        |
| Intensity Coverage:   | 41 %        |
| Peak Coverage:        | 27 %        |
| Protein Localisation: | 140 ... 154 |

| a ion         | b <sup>2+</sup> ion | b ion         |      |    | y ion         | y <sup>2+</sup> ion |        |        |       |       |
|---------------|---------------------|---------------|------|----|---------------|---------------------|--------|--------|-------|-------|
| Δ dalton mass | Δ dalton mass       | Δ dalton mass | seq  |    | Δ dalton mass | Δ dalton mass       |        |        |       |       |
| 109.1         | 137.1               | 137.1         | 1    | K  | 14            |                     |        |        |       |       |
| +0.21238.2    | 266.2               | +0.109266.2   | 2    | E  | 13            | 1768                | 884.4  | -0.11  |       |       |
| 401.2         | 429.2               | 429.2         | 3    | Y  | 12            | 1639                | 819.9  | +0.30  |       |       |
| 530.3         | 558.3               | 558.3         | 4    | E  | 11            | 1476                | 738.4  | +0.10  |       |       |
| 658.3         | 686.3               | 686.3         | 5    | Q  | 10            | 1347                | -0.37  | 1347   |       |       |
| 787.4         | 815.4               | +0.178815.4   | 6    | E  | 9             | 1219                |        | 1219   |       |       |
| 900.5         | 928.5               | 928.5         | 7    | L  | 8             | 1090                | +0.03  | 1090   |       |       |
| 987.5         | 1015                | 1015          | 8    | S  | 7             | 976.5               | +0.034 | 888.7  | -0.01 |       |
| 1103          | 1131                | -0.02         | 1131 | 9  | D             | 6                   | 889.4  | +0.039 | 889.4 |       |
| 1218          | +0.195623.3         | -0.16         | 1246 | 10 | D             | 5                   | 774.4  |        | 387.7 | -0.04 |
| 1331          | 1359                | -0.04         | 1359 | 11 | L             | 4                   | 659.4  | +0.242 | 659.4 |       |
| 1468          | +0.179748.3         |               | 1496 | 12 | H             | 3                   | 546.3  | +0.023 | 546.3 |       |
| 1567          | 1595                |               | 1595 | 13 | V             | 2                   | 409.3  | -0.01  | 409.3 |       |
| 1696          | 1724                |               | 1724 | 14 | E             | 1                   | 310.2  | +0.128 | 310.2 |       |
|               |                     |               |      | 15 | R             | 0                   | 181.1  | -0.01  | 181.1 |       |



Scan number 3373 Raw file LNCAP\_Silac\_23F10\_set1\_09  
 Method ITMS; CID Pepti... 168.22

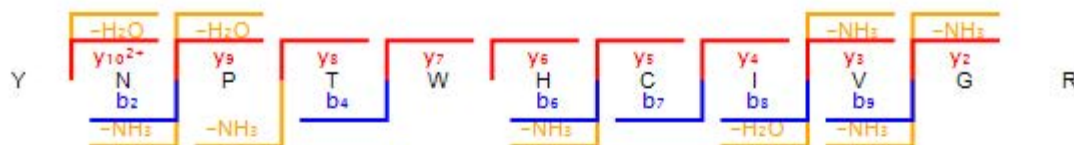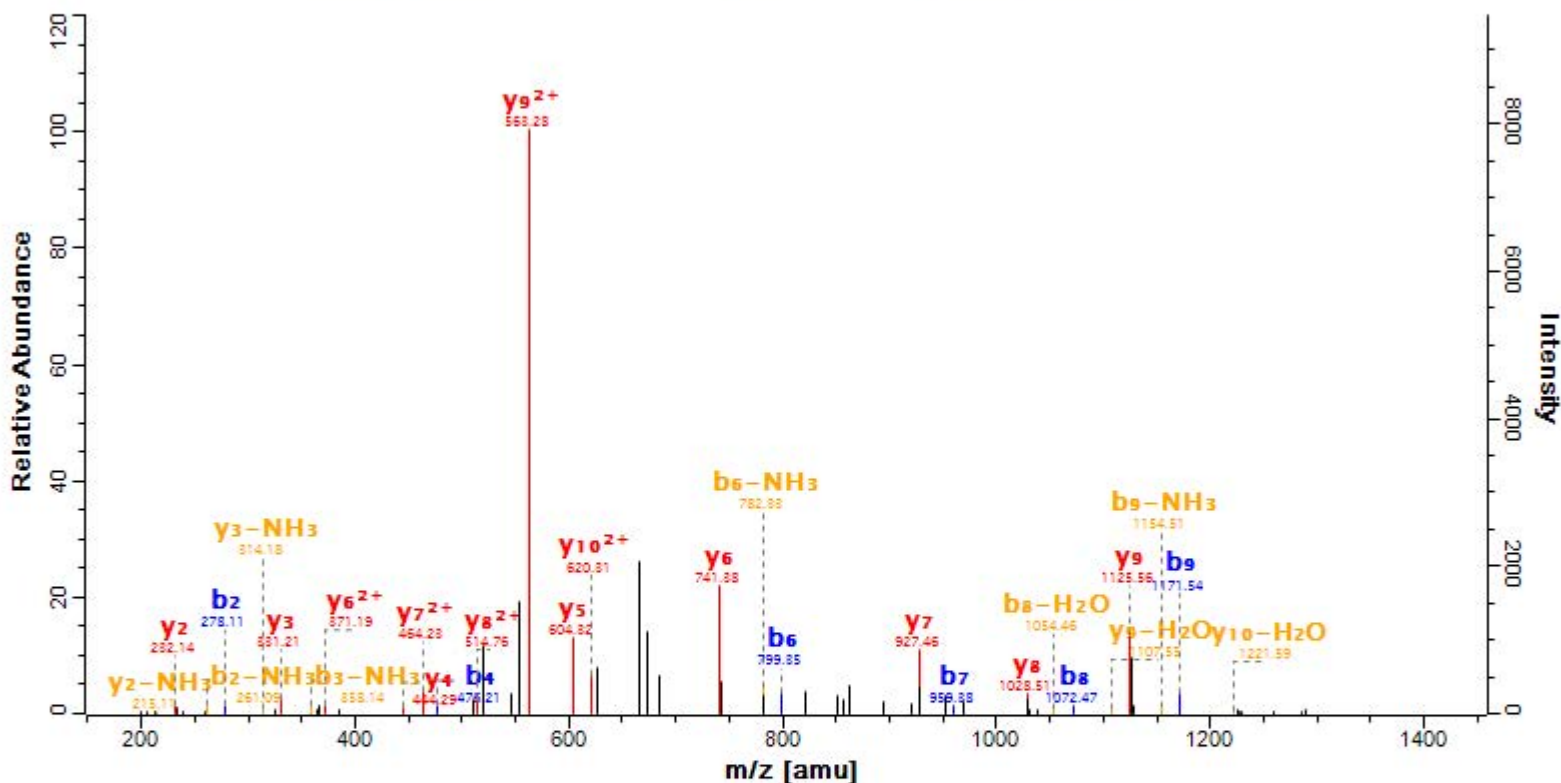

#### precursor information

|                   |                 |
|-------------------|-----------------|
| Mass:             | 1401.66143      |
| m/z:              | 701.83799       |
| Charge:           | 2+              |
| Retentiontime:    | 24.467107772827 |
| Score:            | 168.2202        |
| Mass Error [ppm]: | 0.1733          |
| PEP:              | 7.2464E-08      |
| Precursor Type:   | MULTI           |

#### general information

|                       |           |
|-----------------------|-----------|
| Annotation:           | 9 of 11   |
| AminoAcids Coverage:  | 82 %      |
| Intensity Coverage:   | 53 %      |
| Peak Coverage:        | 31 %      |
| Protein Localisation: | 50 ... 60 |

| b ion     |          |    |     |    | y ion    |           | y <sup>2+</sup> ion |           |
|-----------|----------|----|-----|----|----------|-----------|---------------------|-----------|
| Δ dalton  | mass     |    | seq |    | Δ dalton | mass      | Δ dalton            | mass      |
|           | 164.0706 | 1  | Y   | 10 |          |           |                     |           |
| +0.077355 | 278.1135 | 2  | N   | 9  | 1239.605 |           | 620.3062            | +0.176765 |
|           | 375.1663 | 3  | P   | 8  | 1125.562 | +0.030808 | 563.2847            | +0.219102 |
| +0.150222 | 476.214  | 4  | T   | 7  | 1028.509 | +0.201736 | 514.7584            | +0.344727 |
|           | 662.2933 | 5  | W   | 6  | 927.4618 | -0.03141  | 464.2345            | +0.208472 |
| +0.009861 | 799.3522 | 6  | H   | 5  | 741.3825 | +0.093315 | 371.1949            | +0.016744 |
| +0.009547 | 959.3828 | 7  | C   | 4  | 604.3235 | -0.02288  | 604.3235            |           |
| -0.02514  | 1072.467 | 8  | I   | 3  | 444.2929 | +0.184767 | 444.2929            |           |
| +0.112379 | 1171.535 | 9  | V   | 2  | 331.2088 | +0.160006 | 331.2088            |           |
|           | 1228.557 | 10 | G   | 1  | 232.1404 | +0.034969 | 232.1404            |           |
|           |          | 11 | R   | 0  | 175.119  |           | 175.119             |           |

Scan number 350 Raw file LNCAP\_Silac\_23F10\_set1\_09  
 Method ITMS; CID Pepti... 110.38

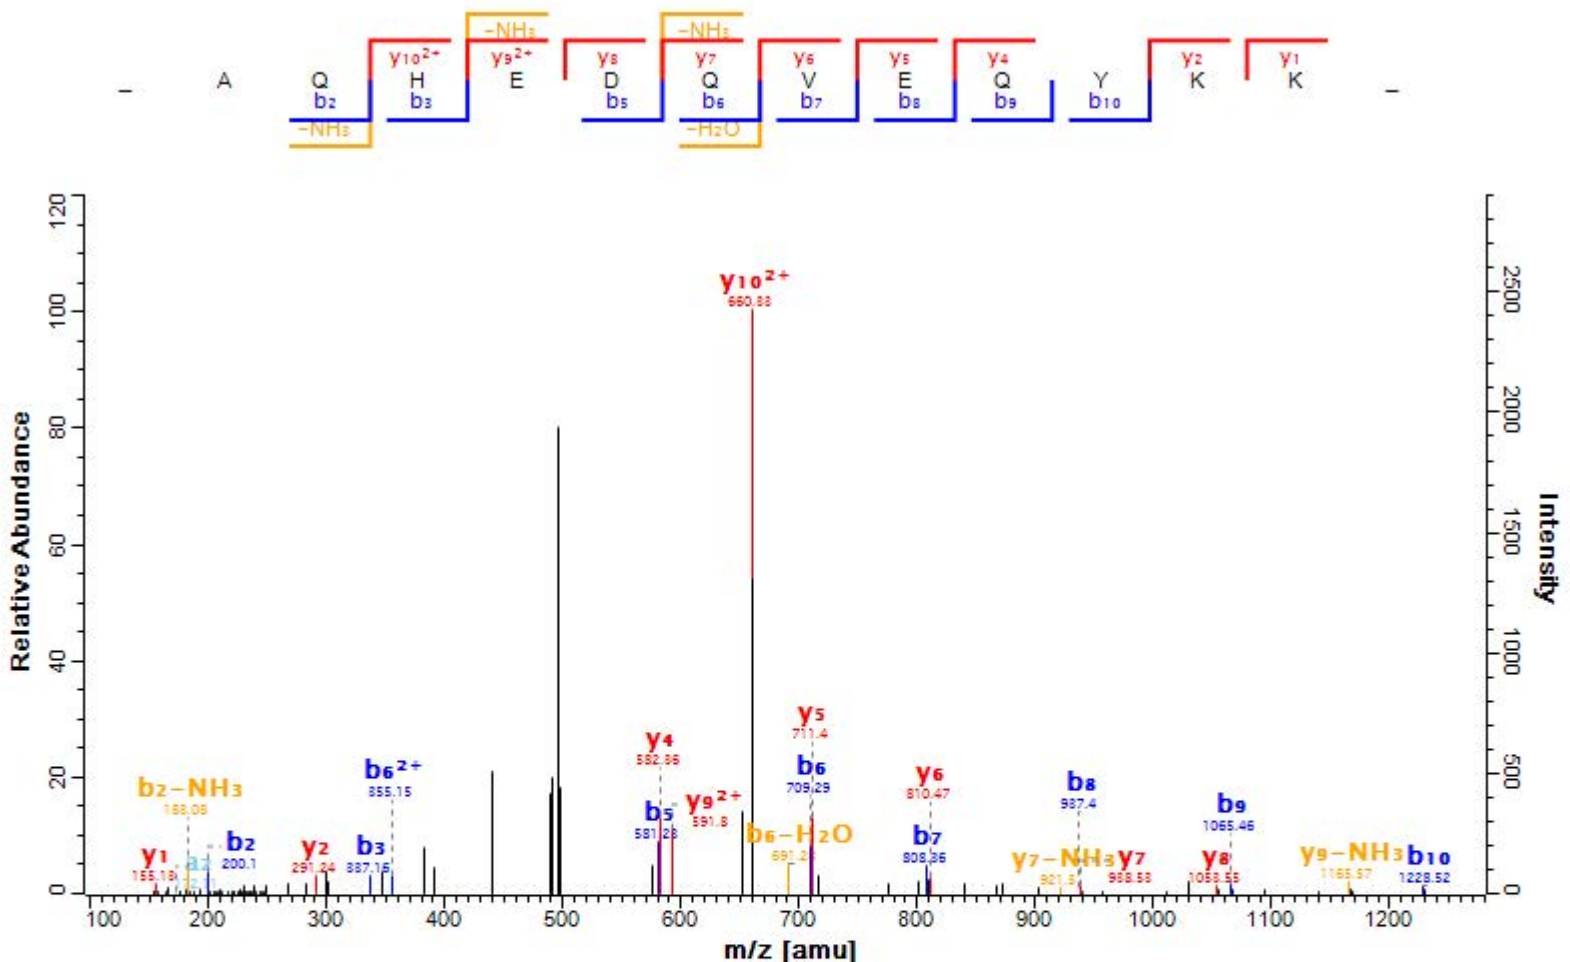

precursor information

|                   |                 |
|-------------------|-----------------|
| Mass:             | 1501.71596      |
| m/z:              | 501.57926       |
| Charge:           | 3+              |
| Retentiontime:    | 6.8400282859802 |
| Score:            | 110.3793        |
| Mass Error [ppm]: | -0.10315        |
| PEP:              | 2.5818E-05      |
| Precursor Type:   | MULTI           |

general information

|                       |             |
|-----------------------|-------------|
| Annotation:           | 11 of 12    |
| AminoAcids Coverage:  | 92 %        |
| Intensity Coverage:   | 38 %        |
| Peak Coverage:        | 17 %        |
| Protein Localisation: | 250 ... 261 |

| a ion         | b <sup>2+</sup> ion | b ion         |    |     | y ion         | y <sup>2+</sup> ion |
|---------------|---------------------|---------------|----|-----|---------------|---------------------|
| Δ dalton mass | Δ dalton mass       | Δ dalton mass |    | seq | Δ dalton mass | Δ dalton mass       |
| 44.05         | 72.04               | 72.04         | 1  | A   | 11            |                     |
| +0.302 72.1   | 200.1               | +0.049 200.1  | 2  | Q   | 10            | 1448 1448           |
| 309.2         | 337.2               | +0.073 337.2  | 3  | H   | 9             | 1320 660.3 -0.01    |
| 438.2         | 466.2               | 466.2         | 4  | E   | 8             | 1183 591.8 +0.206   |
| 553.2         | 581.2               | -0.03 581.2   | 5  | D   | 7             | 1054 +0.105 1054    |
| 681.3         | +0.123 355.1        | +0.149 709.3  | 6  | Q   | 6             | 938.5 +0.049 938.5  |
| 780.4         | 808.4               | -0.02 808.4   | 7  | V   | 5             | 810.5 +0.058 810.5  |
| 909.4         | 937.4               | +0.113 937.4  | 8  | E   | 4             | 711.4 +0.03 711.4   |
| 1037          | 1065                | +0.151 1065   | 9  | Q   | 3             | 582.4 +0.21 582.4   |
| 1201          | 1229                | +0.136 1229   | 10 | Y   | 2             | 454.3 454.3         |
| 1337          | 1365                | 1365          | 11 | K   | 1             | 291.2 +0.373 291.2  |
|               |                     |               | 12 | K   | 0             | 155.1 +0.026 155.1  |

Scan number 5643 Raw file LNCAP\_Silac\_23F10\_set1\_09  
 Method ITMS; CID Pepti... 52.58

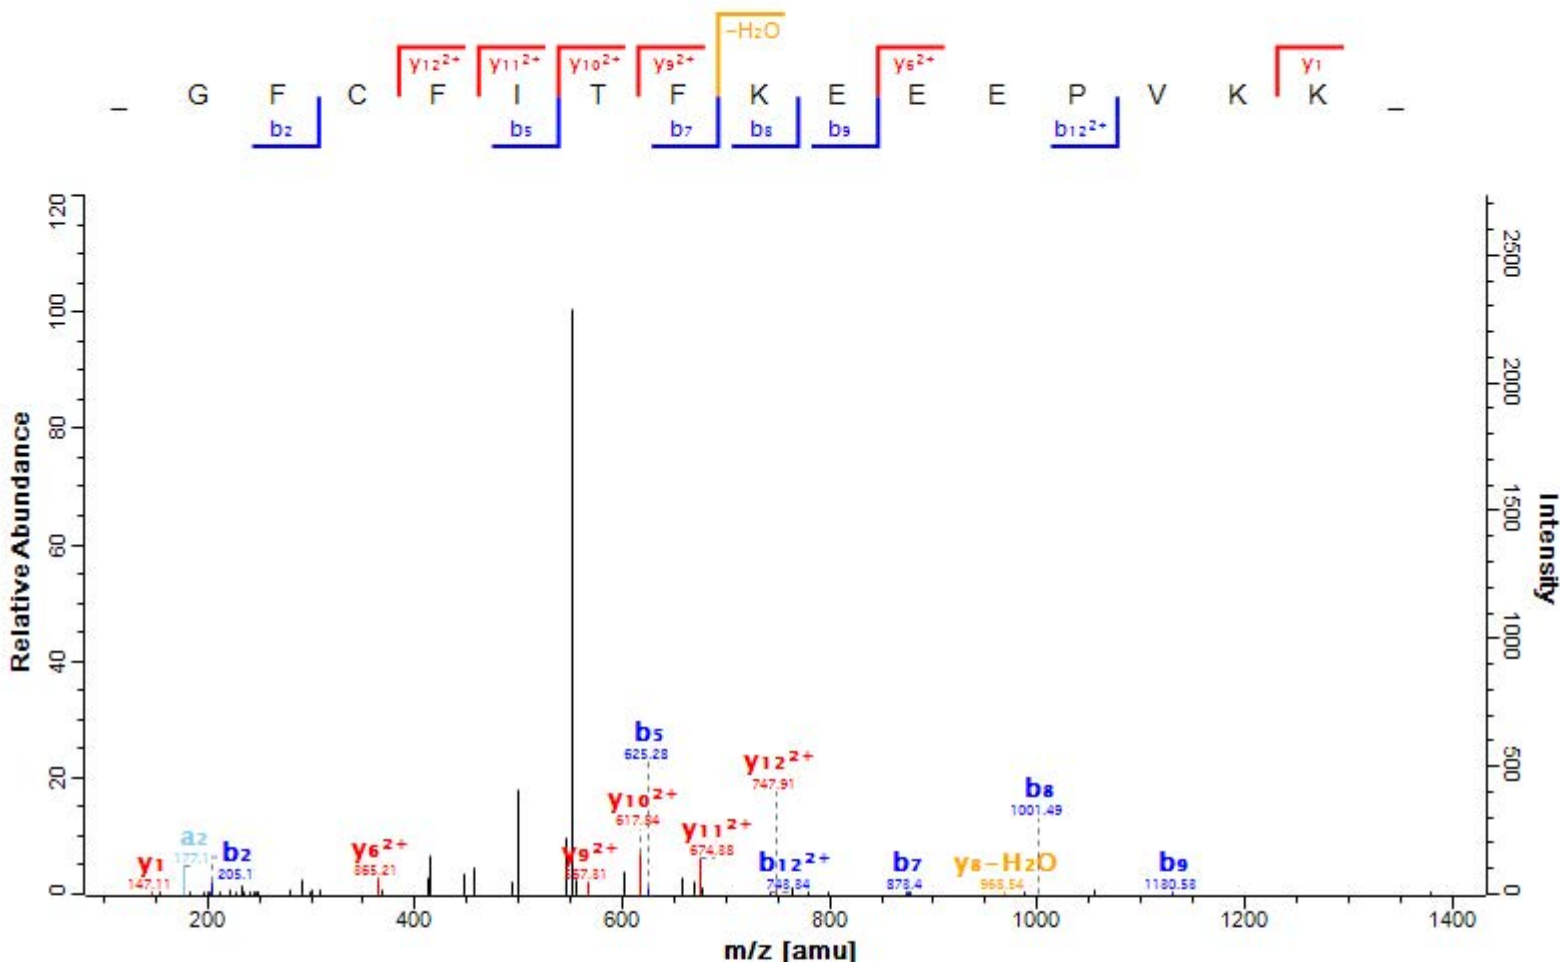

#### precursor information

|                   |                 |
|-------------------|-----------------|
| Mass:             | 1857.93358      |
| m/z:              | 465.49067       |
| Charge:           | 4+              |
| Retentiontime:    | 38.212001800537 |
| Score:            | 52.57584        |
| Mass Error [ppm]: | 0.040108        |
| PEP:              | 0.0098234       |
| Precursor Type:   | MULTI           |

#### general information

|                       |             |
|-----------------------|-------------|
| Annotation:           | 11 of 15    |
| AminoAcids Coverag    | 73 %        |
| Intensity Coverage:   | 14 %        |
| Peak Coverage:        | 15 %        |
| Protein Localisation: | 205 ... 219 |

| a ion         |               | b <sup>2+</sup> ion |               | b ion  |       |               |               | y ion |       | y <sup>2+</sup> ion |       |       |
|---------------|---------------|---------------------|---------------|--------|-------|---------------|---------------|-------|-------|---------------------|-------|-------|
| Δ dalton mass | Δ dalton mass | Δ dalton mass       | Δ dalton mass | seq    |       | Δ dalton mass | Δ dalton mass |       |       |                     |       |       |
| 30.03         |               | 58.03               |               | 58.03  | 1     | G             | 14            |       |       |                     |       |       |
| +0.074        | 77.1          | 205.1               |               | +0.012 | 205.1 | 2             | F             | 13    | 1802  |                     | 1802  |       |
|               | 337.1         | 365.1               |               |        | 365.1 | 3             | C             | 12    | 1655  |                     | 1655  |       |
|               | 484.2         | 512.2               |               |        | 512.2 | 4             | F             | 11    | 1495  |                     | 747.9 | -0.05 |
|               | 597.3         | 625.3               | +0.235        | 625.3  | 5     | I             | 10            | 1348  |       | 674.4               | +0.32 |       |
|               | 698.3         | 726.3               |               |        | 726.3 | 6             | T             | 9     | 1235  |                     | 617.8 | +0.22 |
|               | 845.4         | 873.4               | +0.056        | 873.4  | 7     | F             | 8             | 1134  |       | 567.3               | -0.19 |       |
|               | 973.5         | 1001                | +0.202        | 1001   | 8     | K             | 7             | 986.6 |       | 986.6               |       |       |
|               | 1103          | 1131                | +0.126        | 1131   | 9     | E             | 6             | 858.5 |       | 858.5               |       |       |
|               | 1232          | 1260                |               |        | 1260  | 10            | E             | 5     | 729.4 |                     | 365.2 | +0.03 |
|               | 1361          | 1389                |               |        | 1389  | 11            | E             | 4     | 600.4 |                     | 600.4 |       |
|               | 1458          | -0.01               | 743.3         |        | 1486  | 12            | P             | 3     | 471.3 |                     | 471.3 |       |
|               | 1557          |                     | 1585          |        | 1585  | 13            | V             | 2     | 374.3 |                     | 374.3 |       |
|               | 1685          |                     | 1713          |        | 1713  | 14            | K             | 1     | 275.2 |                     | 275.2 |       |
|               |               |                     |               |        |       | 15            | K             | 0     | 147.1 | -0.05               | 147.1 |       |

Scan number 5921 Raw file LNCAP\_Silac\_23F10\_set1\_09  
 Method ITMS: CID Pepti... 86.94

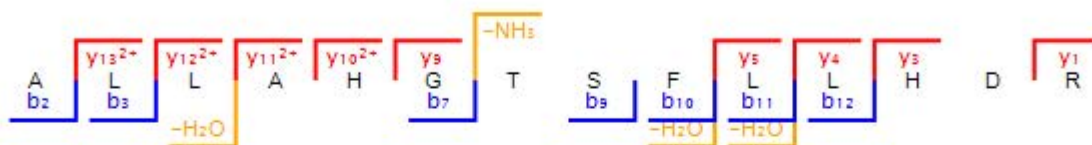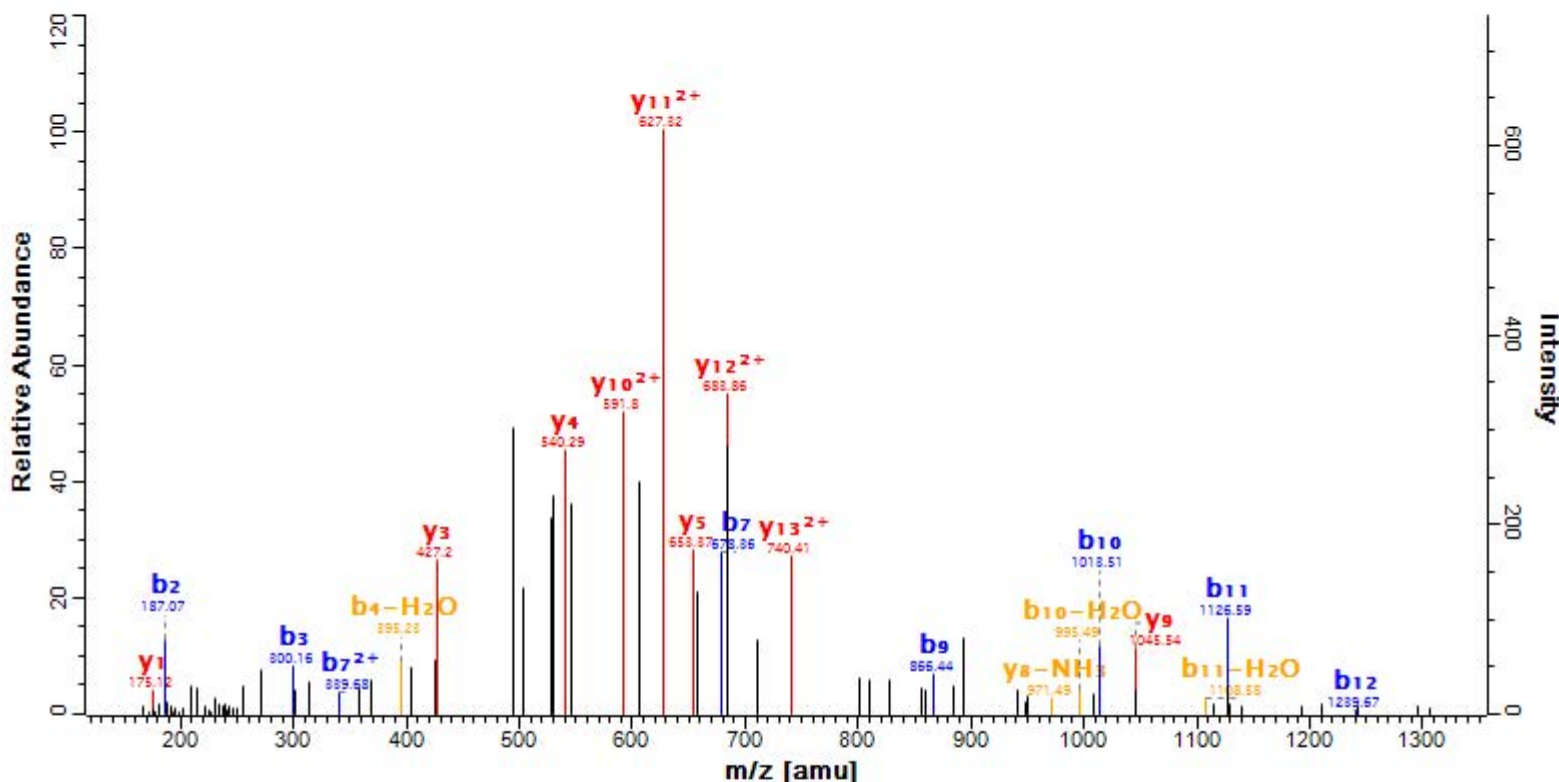

#### precursor information

|                   |                 |
|-------------------|-----------------|
| Mass:             | 1664.86341      |
| m/z:              | 555.96175       |
| Charge:           | 3+              |
| Retentiontime:    | 39.969516754150 |
| Score:            | 86.94421        |
| Mass Error [ppm]: | -0.025824       |
| PEP:              | 0.00019272      |
| Precursor Type:   | MULTI           |

#### general information

|                       |               |
|-----------------------|---------------|
| Annotation:           | 13 of 15      |
| AminoAcids Coverage:  | 87 %          |
| Intensity Coverage:   | 48 %          |
| Peak Coverage:        | 23 %          |
| Protein Localisation: | 1081 ... 1095 |

| b <sup>2+</sup> ion |        | b ion    |        | seq |   |    | y ion    |         | y <sup>2+</sup> ion |         |
|---------------------|--------|----------|--------|-----|---|----|----------|---------|---------------------|---------|
| Δ dalton            | mass   | Δ dalton | mass   |     |   |    | Δ dalton | mass    | Δ dalton            | mass    |
|                     | 116.03 |          | 116.03 | 1   | D | 14 |          |         |                     |         |
|                     | 187.07 | -0.098   | 187.07 | 2   | A | 13 | 1550.8   |         | 1550.8              |         |
|                     | 300.16 | -0.038   | 300.16 | 3   | L | 12 | 1479.8   |         | 740.41              | +0.0842 |
|                     | 413.24 |          | 413.24 | 4   | L | 11 | 1366.7   |         | 683.86              | +0.088  |
|                     | 484.28 |          | 484.28 | 5   | A | 10 | 1253.6   |         | 627.32              | +0.2094 |
|                     | 621.34 |          | 621.34 | 6   | H | 9  | 1182.6   |         | 591.8               | +0.2026 |
| -0.067              | 339.68 | +0.3804  | 678.36 | 7   | G | 8  | 1045.5   | -0.052  | 1045.5              |         |
|                     | 779.4  |          | 779.4  | 8   | T | 7  | 988.52   |         | 988.52              |         |
|                     | 866.44 | -0.008   | 866.44 | 9   | S | 6  | 887.47   |         | 887.47              |         |
|                     | 1013.5 | +0.1772  | 1013.5 | 10  | F | 5  | 800.44   |         | 800.44              |         |
|                     | 1126.6 | -0.049   | 1126.6 | 11  | L | 4  | 653.37   | +0.062  | 653.37              |         |
|                     | 1239.7 | +0.3812  | 1239.7 | 12  | L | 3  | 540.29   | +0.0054 | 540.29              |         |
|                     | 1376.7 |          | 1376.7 | 13  | H | 2  | 427.2    | +0.1466 | 427.2               |         |
|                     | 1491.8 |          | 1491.8 | 14  | D | 1  | 290.15   |         | 290.15              |         |
|                     |        |          |        | 15  | R | 0  | 175.12   | +0.0083 | 175.12              |         |

Scan number 6038 Raw file LNCAP\_Silac\_23F10\_set1\_09  
 Method ITMS: CID Pepti... 44.58

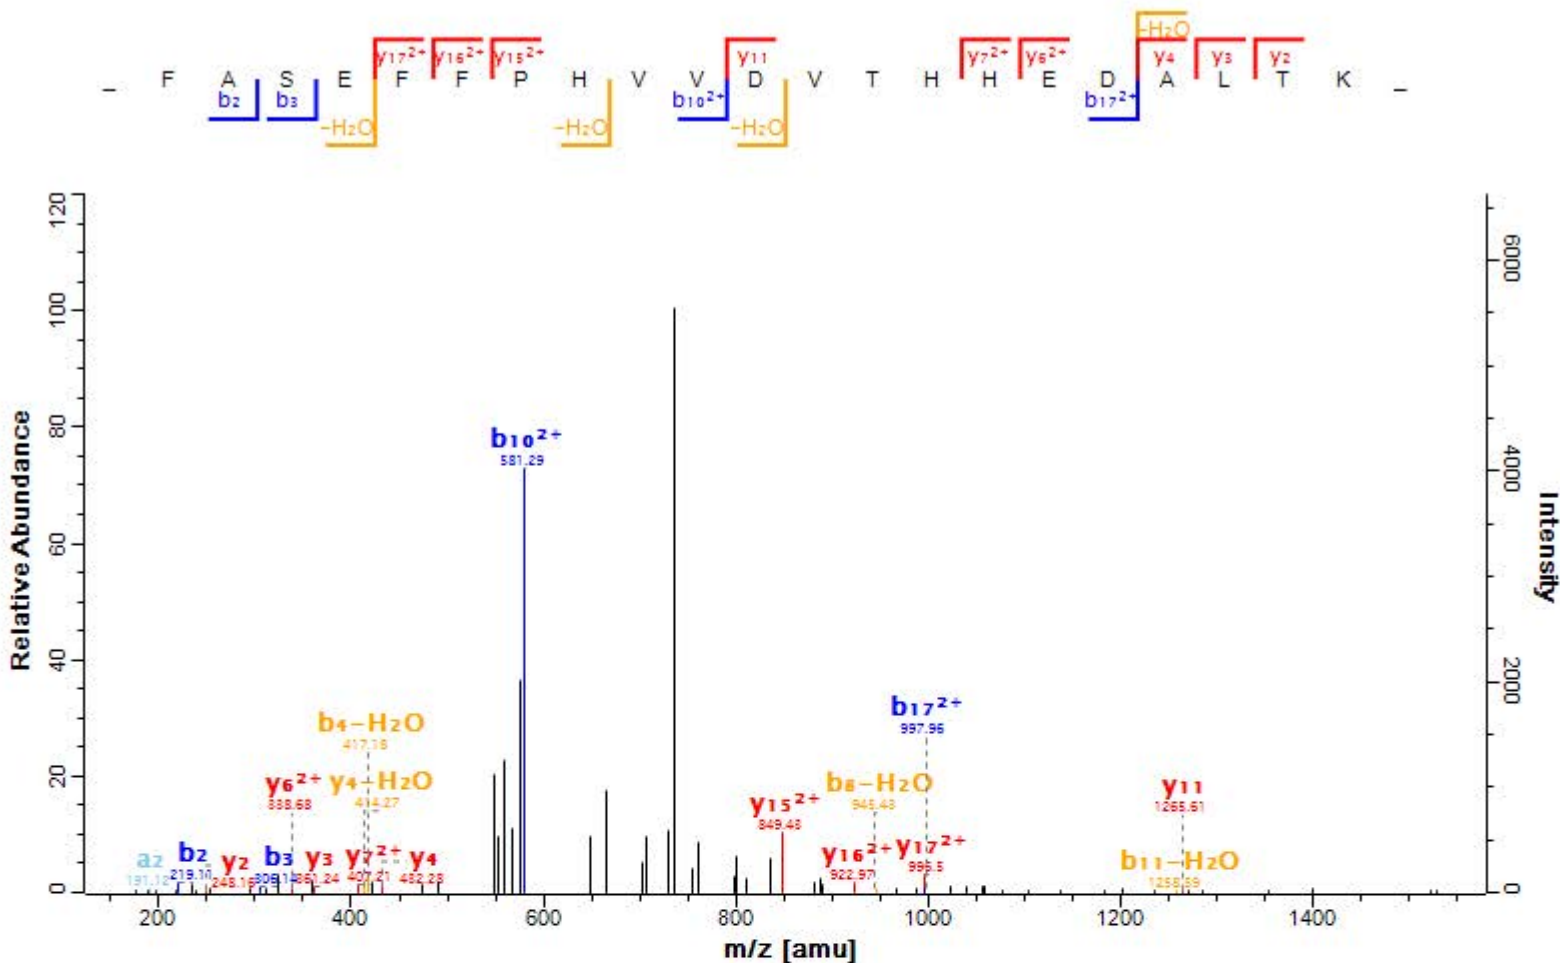

precursor information

|                   |                 |
|-------------------|-----------------|
| Mass:             | 2425.1697       |
| m/z:              | 607.2997        |
| Charge:           | 4+              |
| Retentiontime:    | 40.699810028076 |
| Score:            | 44.57743        |
| Mass Error [ppm]: | -0.23257        |
| PEP:              | 0.011809        |
| Precursor Type:   | MULTI           |

|       | a ion         | b <sup>2+</sup> ion | b ion         |     |   | y ion         | y <sup>2+</sup> ion |
|-------|---------------|---------------------|---------------|-----|---|---------------|---------------------|
|       | Δ dalton mass | Δ dalton mass       | Δ dalton mass | seq |   | Δ dalton mass | Δ dalton mass       |
|       | 120.1         | 148.1               | 148.1         | 1   | F | 20            |                     |
| -0.06 | 191.1         | 219.1               | +0.088        | 2   | A | 19            | 2279                |
|       | 278.1         | 306.1               | +0.09         | 3   | S | 18            | 2208                |
|       | 407.2         | 435.2               |               | 4   | E | 17            | 2121                |
|       | 554.3         | 582.3               |               | 5   | F | 16            | 1992                |
|       | 701.3         | 729.3               |               | 6   | F | 15            | 1845                |
|       | 798.4         | 826.4               |               | 7   | P | 14            | 1698                |
|       | 935.4         | 963.4               |               | 8   | H | 13            | 1601                |
|       | 1035          | 1063                |               | 9   | V | 12            | 1464                |
|       | 1134          | -0.4                | 581.3         | 10  | V | 11            | 1365                |
|       | 1249          |                     | 1277          | 11  | D | 10            | 1266                |
|       | 1348          |                     | 1376          | 12  | V | 9             | 1151                |
|       | 1449          |                     | 1477          | 13  | T | 8             | 1052                |
|       | 1586          |                     | 1614          | 14  | H | 7             | 950.5               |
|       | 1723          |                     | 1751          | 15  | H | 6             | 813.4               |
|       | 1852          |                     | 1880          | 16  | E | 5             | 676.4               |
|       | 1967          | -0.4                | 998           | 17  | D | 4             | 547.3               |
|       | 2038          |                     | 2066          | 18  | A | 3             | 432.3               |
|       | 2151          |                     | 2179          | 19  | L | 2             | 361.2               |
|       | 2252          |                     | 2280          | 20  | T | 1             | 248.2               |
|       |               |                     |               | 21  | K | 0             | 147.1               |

general information

|                       |           |
|-----------------------|-----------|
| Annotation:           | 15 of 21  |
| AminoAcids Coverag    | 71 %      |
| Intensity Coverage:   | 24 %      |
| Peak Coverage:        | 19 %      |
| Protein Localisation: | 65 ... 85 |

Scan number 6440 Raw file LNCAP\_Silac\_23F10\_set1\_09  
 Method ITMS; CID Pepti... 100.02

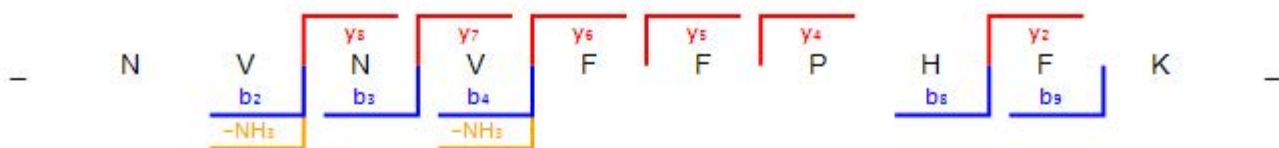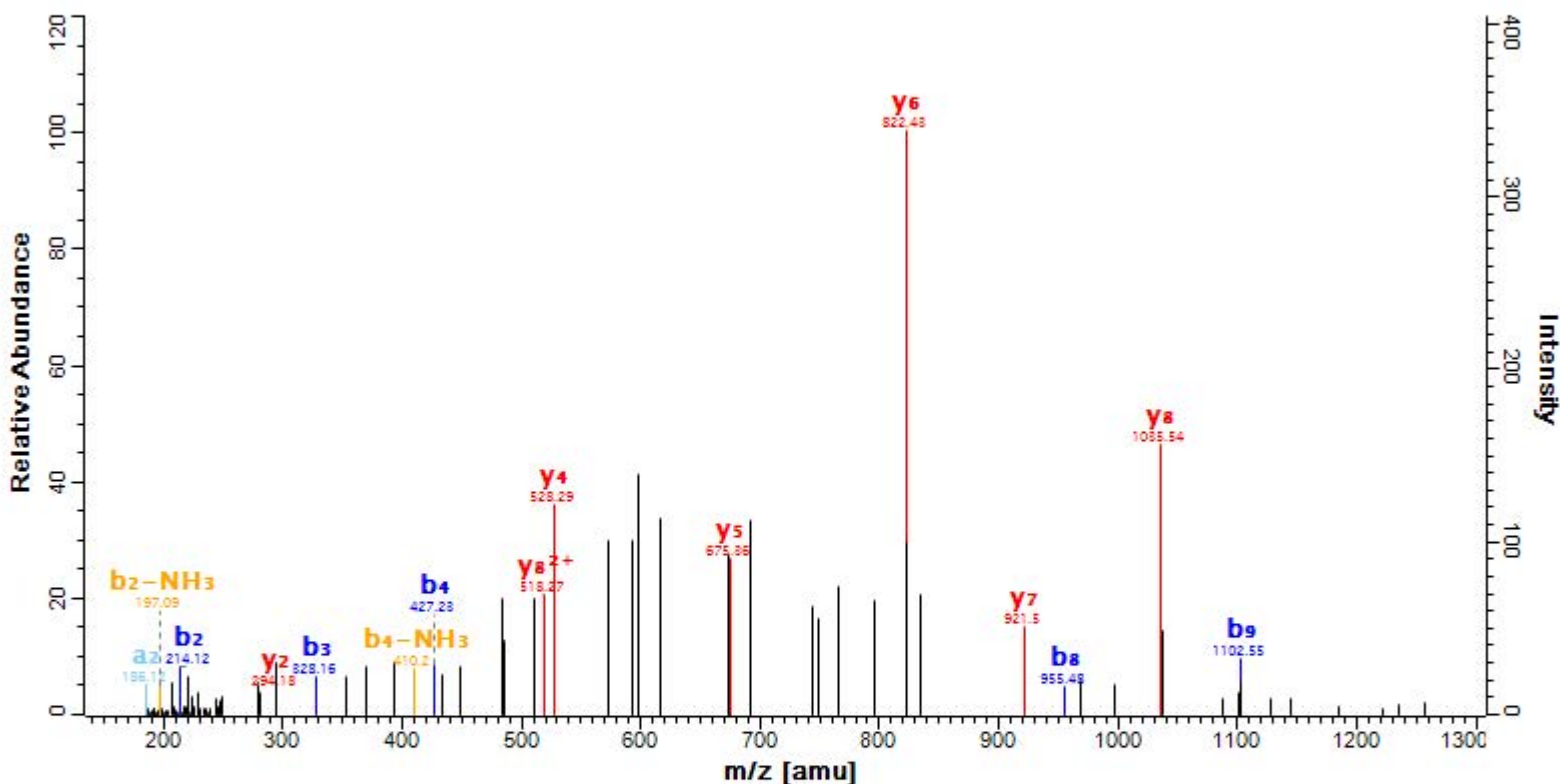

### precursor information

|                   |                 |
|-------------------|-----------------|
| Mass:             | 1247.64573      |
| m/z:              | 624.83014       |
| Charge:           | 2+              |
| Retentiontime:    | 43.407024383544 |
| Score:            | 100.017         |
| Mass Error [ppm]: | 0.47952         |
| PEP:              | 0.0032869       |
| Precursor Type:   | ISO             |

|                       |           |
|-----------------------|-----------|
| Annotation:           | 8 of 10   |
| AminoAcids Coverage:  | 80 %      |
| Intensity Coverage:   | 33 %      |
| Peak Coverage:        | 16 %      |
| Protein Localisation: | 27 ... 36 |

| a ion    |        | b ion    |        |    |     |   | y ion    |         | y <sup>2+</sup> ion |         |
|----------|--------|----------|--------|----|-----|---|----------|---------|---------------------|---------|
| Δ dalton | mass   | Δ dalton | mass   |    | seq |   | Δ dalton | mass    | Δ dalton            | mass    |
|          | 87.055 |          | 115.05 | 1  | N   | 9 |          |         |                     |         |
| -0.094   | 186.12 | -0.016   | 214.12 | 2  | V   | 8 | 1134.6   |         | 1134.6              |         |
|          | 300.17 | +0.0921  | 328.16 | 3  | N   | 7 | 1035.5   | -0.033  | 518.27              | +0.0947 |
|          | 399.24 | +0.0575  | 427.23 | 4  | V   | 6 | 921.5    | -0.029  | 921.5               |         |
|          | 546.3  |          | 574.3  | 5  | F   | 5 | 822.43   | -0.181  | 822.43              |         |
|          | 693.37 |          | 721.37 | 6  | F   | 4 | 675.36   | +0.1468 | 675.36              |         |
|          | 790.42 |          | 818.42 | 7  | P   | 3 | 528.29   | +0.0732 | 528.29              |         |
|          | 927.48 | +0.0066  | 955.48 | 8  | H   | 2 | 431.24   |         | 431.24              |         |
|          | 1074.6 | +0.0767  | 1102.5 | 9  | F   | 1 | 294.18   | +0.1163 | 294.18              |         |
|          |        |          |        | 10 | K   | 0 | 147.11   |         | 147.11              |         |

Scan number 6772 Raw file LNCAP\_Silac\_23F10\_set1\_09  
 Method ITMS; CID Peptide LNCAP\_Silac\_23F10\_set1\_09

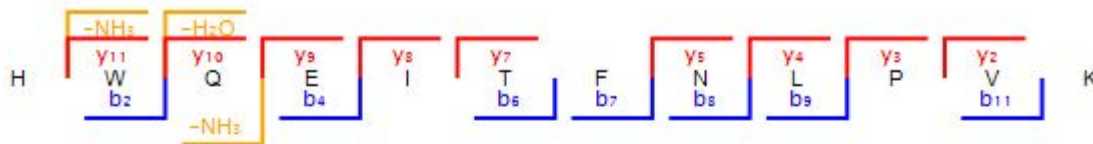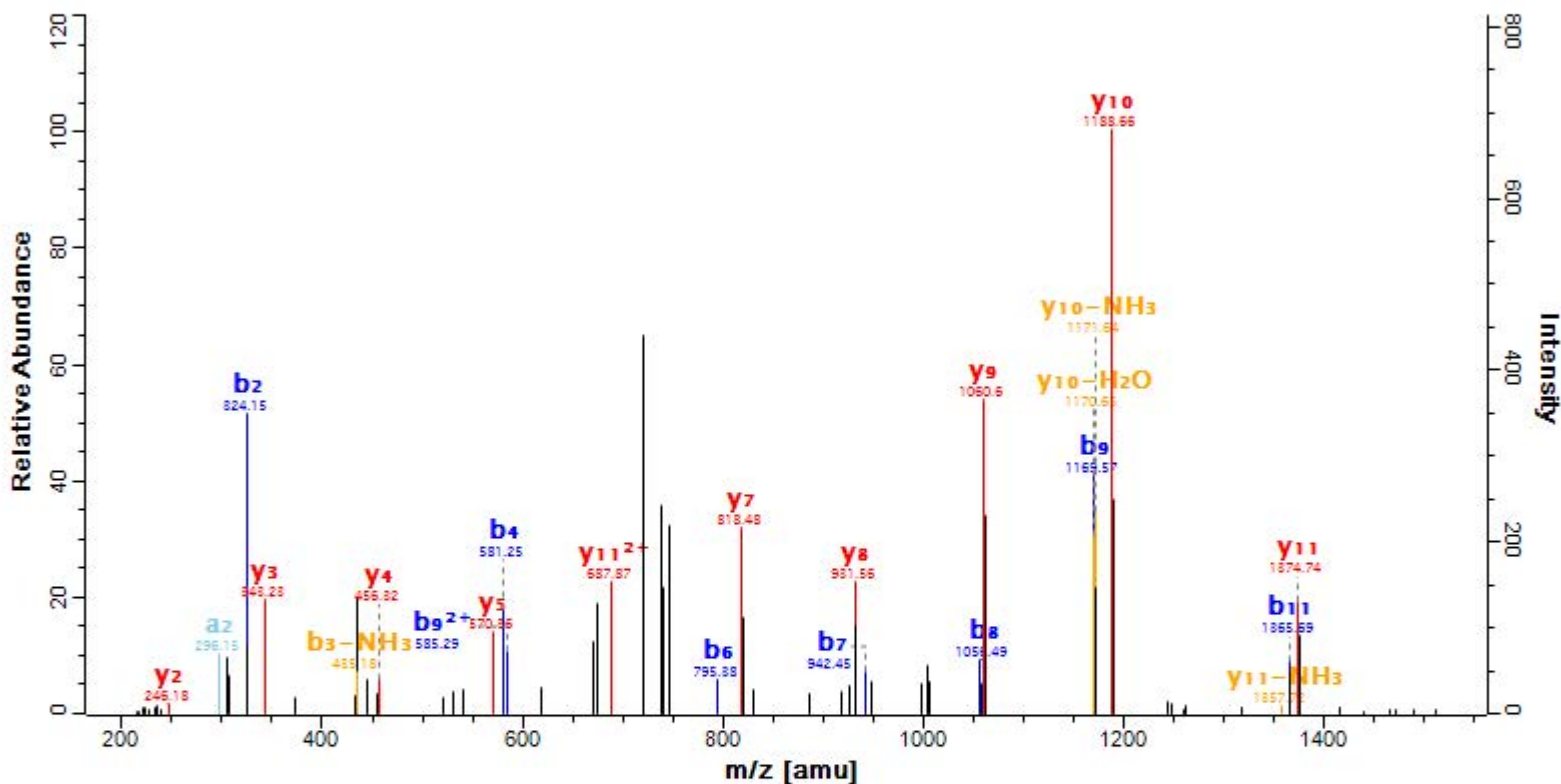

#### precursor information

|                   |                 |
|-------------------|-----------------|
| Mass:             | 1510.79366      |
| m/z:              | 756.40411       |
| Charge:           | 2+              |
| Retentiontime:    | 45.949180603027 |
| Score:            | 130.0985        |
| Mass Error [ppm]: | 0.27451         |
| PEP:              | 2.3705E-05      |
| Precursor Type:   | MULTI           |

#### general information

|                       |           |
|-----------------------|-----------|
| Annotation:           | 10 of 12  |
| AminoAcids Coverage:  | 83 %      |
| Intensity Coverage:   | 51 %      |
| Peak Coverage:        | 28 %      |
| Protein Localisation: | 43 ... 54 |

| a ion         |               | b <sup>2+</sup> ion |               | b ion  |               | y ion         |               | y <sup>2+</sup> ion |  |
|---------------|---------------|---------------------|---------------|--------|---------------|---------------|---------------|---------------------|--|
| Δ dalton mass | Δ dalton mass | Δ dalton mass       | Δ dalton mass | seq    | Δ dalton mass | Δ dalton mass | Δ dalton mass | Δ dalton mass       |  |
| 110.1         | 138.1         | 138.1               | 138.1         | 1 H 11 |               |               |               |                     |  |
| +0.145296.2   | 324.1         | +0.032324.1         | 2 W 10        | 1375   | -0.21         | 687.9         | +0.286        |                     |  |
| 424.2         | 452.2         | 452.2               | 3 Q 9         | 1189   | -0.07         | 1189          |               |                     |  |
| 553.3         | 581.2         | +0.03 581.2         | 4 E 8         | 1061   | -0.02         | 1061          |               |                     |  |
| 666.3         | 694.3         | 694.3               | 5 I 7         | 931.6  | -0.08         | 931.6         |               |                     |  |
| 767.4         | 795.4         | +0.06 795.4         | 6 T 6         | 818.5  | -0.03         | 818.5         |               |                     |  |
| 914.5         | 942.4         | -0.16 942.4         | 7 F 5         | 717.4  |               | 717.4         |               |                     |  |
| 1028          | 1056          | -0.39 1056          | 8 N 4         | 570.4  | +0.10         | 570.4         |               |                     |  |
| 1142          | +0.436585.3   | +0.0711170          | 9 L 3         | 456.3  | +0.196        | 456.3         |               |                     |  |
| 1239          | 1267          | 1267                | 10 P 2        | 343.2  | +0.012        | 343.2         |               |                     |  |
| 1338          | 1366          | -0.09 1366          | 11 V 1        | 246.2  | +0.062        | 246.2         |               |                     |  |
|               |               |                     | 12 K 0        | 147.1  |               | 147.1         |               |                     |  |

Scan number 6780 Raw file LNCAP\_Silac\_23F10\_set1\_09  
 Method ITMS; CID Peptide 176.23

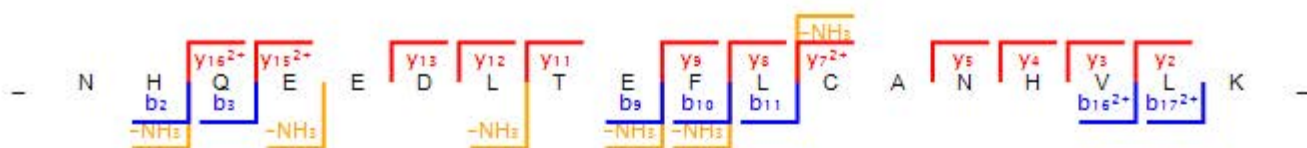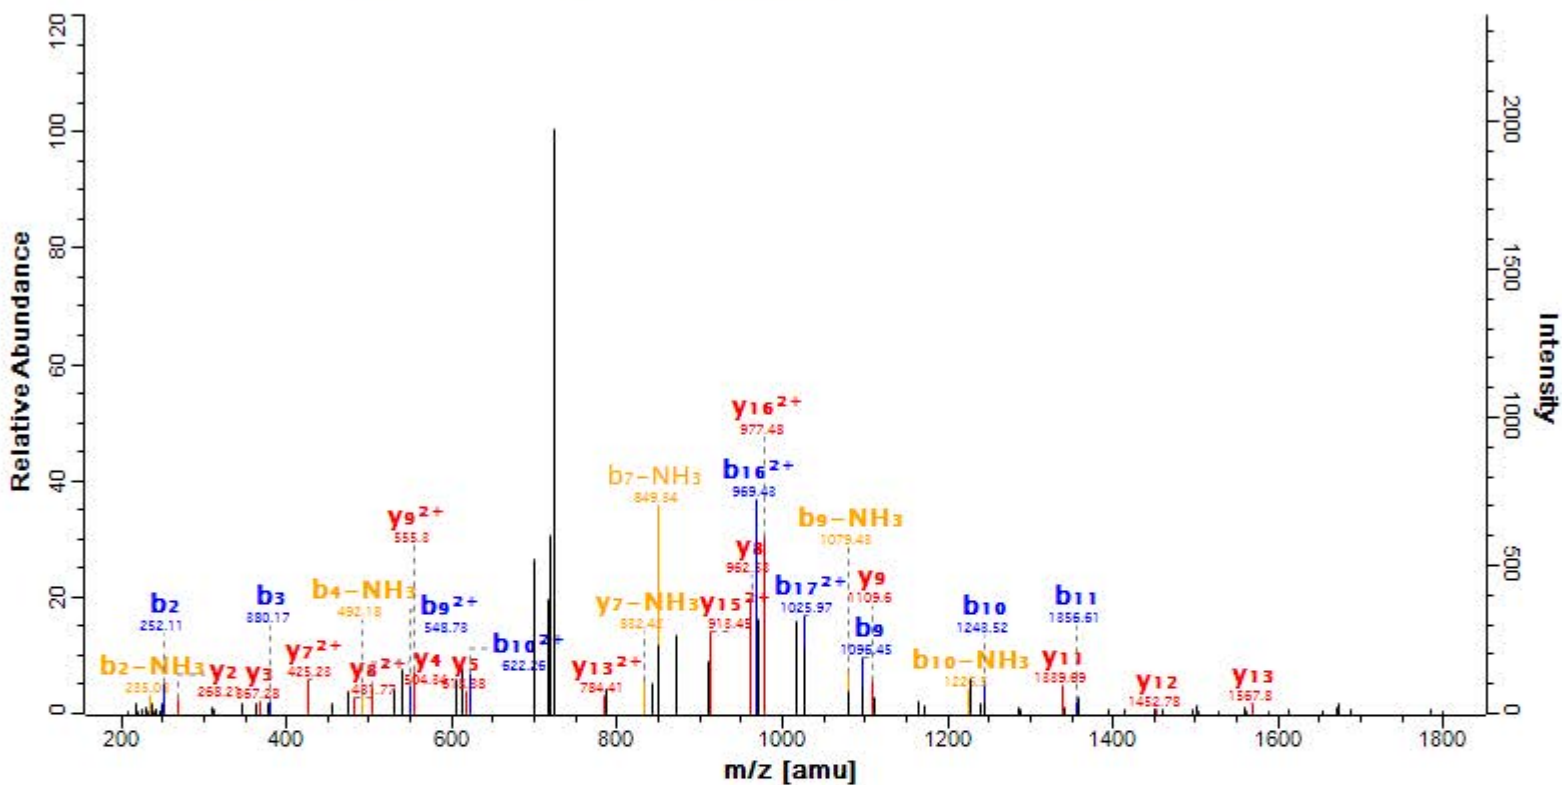

**precursor information**

|                   |                 |
|-------------------|-----------------|
| Mass:             | 2196.02695      |
| m/z:              | 733.01626       |
| Charge:           | 3+              |
| Retentiontime:    | 46.009471893310 |
| Score:            | 176.2345        |
| Mass Error [ppm]: | -0.0054938      |
| PEP:              | 1.6673E-30      |
| Precursor Type:   | MULTI           |

**general information**

|                       |             |
|-----------------------|-------------|
| Annotation:           | 15 of 18    |
| AminoAcids Coverage:  | 83 %        |
| Intensity Coverage:   | 36 %        |
| Peak Coverage:        | 27 %        |
| Protein Localisation: | 183 ... 200 |

| b <sup>2+</sup> ion |        | b ion    |        | seq |   |    | y ion    |         | y <sup>2+</sup> ion |         |
|---------------------|--------|----------|--------|-----|---|----|----------|---------|---------------------|---------|
| Δ dalton            | mass   | Δ dalton | mass   |     |   |    | Δ dalton | mass    | Δ dalton            | mass    |
|                     | 115.05 |          | 115.05 | 1   | N | 17 |          |         |                     |         |
|                     | 252.11 | +0.0554  | 252.11 | 2   | H | 16 | 2091     |         | 2091                |         |
|                     | 380.17 | +0.1136  | 380.17 | 3   | Q | 15 | 1953.9   |         | 977.48              | +0.2919 |
|                     | 509.21 |          | 509.21 | 4   | E | 14 | 1825.9   |         | 913.45              | +0.0092 |
|                     | 638.25 |          | 638.25 | 5   | E | 13 | 1696.8   |         | 1696.8              |         |
|                     | 753.28 |          | 753.28 | 6   | D | 12 | 1567.8   | +0.3789 | 784.41              | +0.148  |
|                     | 866.36 |          | 866.36 | 7   | L | 11 | 1452.8   | -0.139  | 1452.8              |         |
|                     | 967.41 |          | 967.41 | 8   | T | 10 | 1339.7   | +0.0446 | 1339.7              |         |
| -0.027              | 548.73 | -0.033   | 1096.5 | 9   | E | 9  | 1238.6   |         | 1238.6              |         |
| -0.063              | 622.26 | -0.138   | 1243.5 | 10  | F | 8  | 1109.6   | -0.123  | 555.3               | +0.0659 |
|                     | 1356.6 | +0.0524  | 1356.6 | 11  | L | 7  | 962.53   | -0.131  | 481.77              | +0.133  |
|                     | 1516.6 |          | 1516.6 | 12  | C | 6  | 849.45   |         | 425.23              | +0.1533 |
|                     | 1587.7 |          | 1587.7 | 13  | A | 5  | 689.42   |         | 689.42              |         |
|                     | 1701.7 |          | 1701.7 | 14  | N | 4  | 618.38   | +0.2423 | 3618.38             |         |
|                     | 1838.8 |          | 1838.8 | 15  | H | 3  | 504.34   | +0.0298 | 504.34              |         |
| +0.116              | 969.43 |          | 1937.8 | 16  | V | 2  | 367.28   | +0.2003 | 367.28              |         |
| +0.492              | 1026   |          | 2050.9 | 17  | L | 1  | 268.21   | +0.1344 | 268.21              |         |
|                     |        |          |        | 18  | K | 0  | 155.13   |         | 155.13              |         |



Scan number 7501 Raw file LNCAP\_Silac\_23F10\_set1\_09  
 Method ITMS; CID Pepti... 69.28

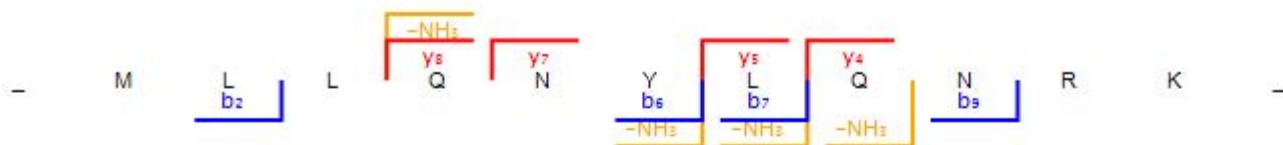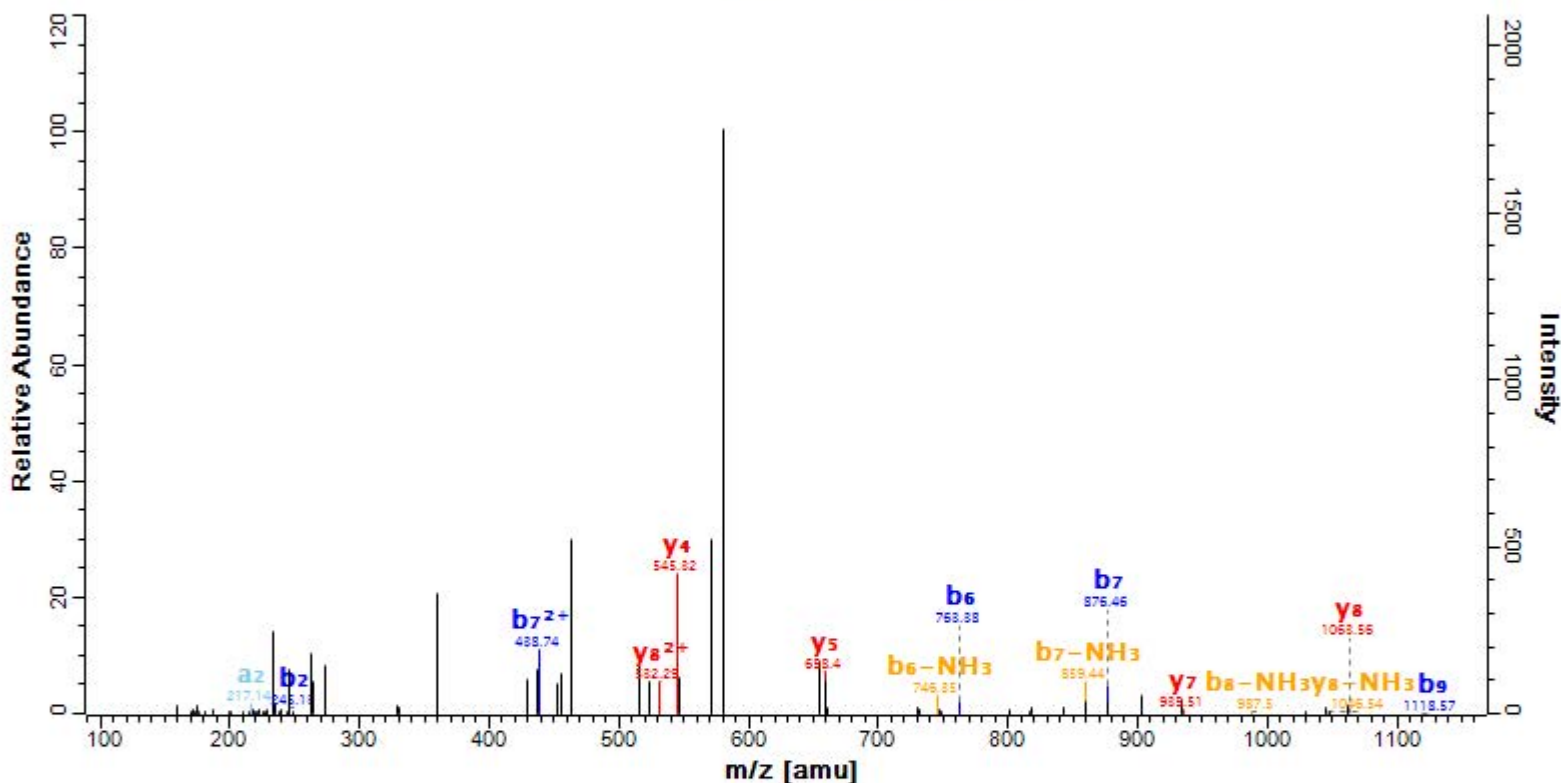

#### precursor information

|                   |                 |
|-------------------|-----------------|
| Mass:             | 1419.76596      |
| m/z:              | 474.2626        |
| Charge:           | 3+              |
| Retentiontime:    | 52.186298370361 |
| Score:            | 69.2755         |
| Mass Error [ppm]: | 0.21313         |
| PEP:              | 0.0034996       |
| Precursor Type:   | MULTI           |

#### general information

|                       |               |
|-----------------------|---------------|
| Annotation:           | 7 of 11       |
| AminoAcids Coverage:  | 64 %          |
| Intensity Coverage:   | 17 %          |
| Peak Coverage:        | 13 %          |
| Protein Localisation: | 1689 ... 1699 |

|        | a ion         | b <sup>2+</sup> ion | b ion         |    |     |    | y ion         | y <sup>2+</sup> ion |
|--------|---------------|---------------------|---------------|----|-----|----|---------------|---------------------|
|        | Δ dalton mass | Δ dalton mass       | Δ dalton mass |    | seq |    | Δ dalton mass | Δ dalton mass       |
|        | 104.1         | 132                 | 132           | 1  | M   | 10 |               |                     |
| +0.035 | 217.1         | 245.1               | -0.06 245.1   | 2  | L   | 9  | 1290          | 1290                |
|        | 330.2         | 358.2               | 358.2         | 3  | L   | 8  | 1177          | 1177                |
|        | 458.3         | 486.3               | 486.3         | 4  | Q   | 7  | 1064          | +0.274 532.3 -0.41  |
|        | 572.3         | 600.3               | 600.3         | 5  | N   | 6  | 935.5         | +0.224 935.5        |
|        | 735.4         | 763.4               | -0.05 763.4   | 6  | Y   | 5  | 821.5         | 821.5               |
|        | 848.5         | +0.035 438.7        | +0.079 876.5  | 7  | L   | 4  | 658.4         | +0.39 658.4         |
|        | 976.5         | 1005                | 1005          | 8  | Q   | 3  | 545.3         | +0.076 545.3        |
|        | 1091          | 1119                | +0.05 1119    | 9  | N   | 2  | 417.3         | 417.3               |
|        | 1247          | 1275                | 1275          | 10 | R   | 1  | 303.2         | 303.2               |
|        |               |                     |               | 11 | K   | 0  | 147.1         | 147.1               |

Scan number 7635 Raw file LNCAP\_Silac\_23F10\_set1\_09  
 Method ITMS: CID Pepti... 101.97

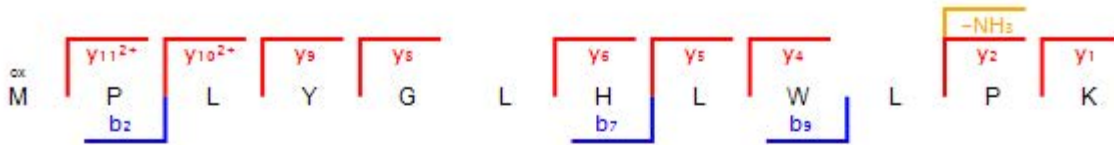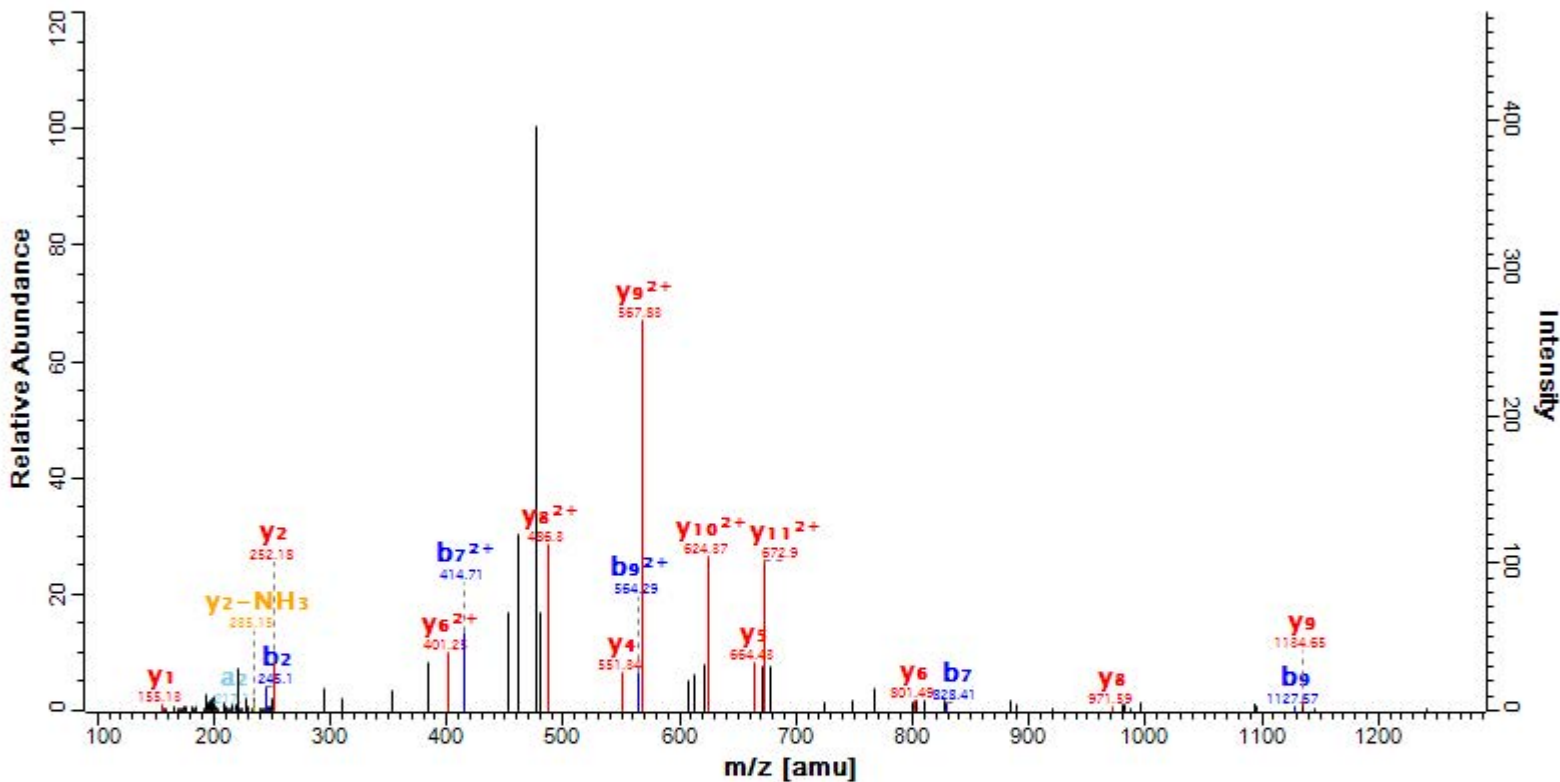

precursor information

|                   |                 |
|-------------------|-----------------|
| Mass:             | 1482.80578      |
| m/z:              | 495.27587       |
| Charge:           | 3+              |
| Retentiontime:    | 53.506061553955 |
| Score:            | 101.9741        |
| Mass Error [ppm]: | 0.037324        |
| PEP:              | 0.00043533      |
| Precursor Type:   | MULTI           |

general information

|                       |             |
|-----------------------|-------------|
| Annotation:           | 9 of 12     |
| AminoAcids Coverage:  | 75 %        |
| Intensity Coverage:   | 41 %        |
| Peak Coverage:        | 18 %        |
| Protein Localisation: | 207 ... 218 |

| a ion         |                    | b <sup>2+</sup> ion |               | b ion |               | y ion         |               | y <sup>2+</sup> ion |  |
|---------------|--------------------|---------------------|---------------|-------|---------------|---------------|---------------|---------------------|--|
| Δ dalton mass | Δ dalton mass      | Δ dalton mass       | Δ dalton mass | seq   | Δ dalton mass | Δ dalton mass | Δ dalton mass | Δ dalton mass       |  |
| 120           | 148                | 148                 | 148           | 1     | M             | 11            |               |                     |  |
| -0.05 217.1   | 245.1              | +0.075245.1         | 245.1         | 2     | P             | 10            | 1345          | 672.9 +0.171        |  |
| 330.2         | 358.2              | 358.2               | 358.2         | 3     | L             | 9             | 1248          | 624.4 +0.142        |  |
| 493.2         | 521.2              | 521.2               | 521.2         | 4     | Y             | 8             | 1135 +0.03    | 3567.8 +0.221       |  |
| 550.3         | 578.3              | 578.3               | 578.3         | 5     | G             | 7             | 971.6 +0.193  | 486.3 +0.246        |  |
| 663.4         | 691.3              | 691.3               | 691.3         | 6     | L             | 6             | 914.6         | 914.6               |  |
| 800.4 +0.01   | 4414.7 +0.293828.4 | 3828.4              | 3828.4        | 7     | H             | 5             | 801.5 +0.125  | 401.2 -0.03         |  |
| 913.5         | 941.5              | 941.5               | 941.5         | 8     | L             | 4             | 664.4 +0.089  | 664.4               |  |
| 1100 +0.40    | 4564.3 +0.26       | 1128                | 1128          | 9     | W             | 3             | 551.3 +0.085  | 551.3               |  |
| 1213          | 1241               | 1241                | 1241          | 10    | L             | 2             | 365.3         | 365.3               |  |
| 1310          | 1338               | 1338                | 1338          | 11    | P             | 1             | 252.2 -0.21   | 252.2               |  |
|               |                    |                     |               | 12    | K             | 0             | 155.1 -0.09   | 155.1               |  |

Scan number 887 Raw file LNCAP\_Silac\_23F10\_set1\_09  
 Method ITMS; CID Pepti... 85.29

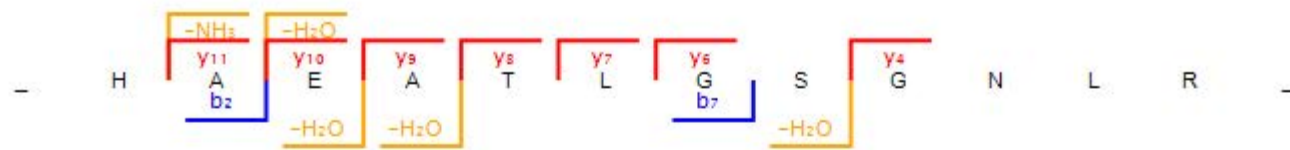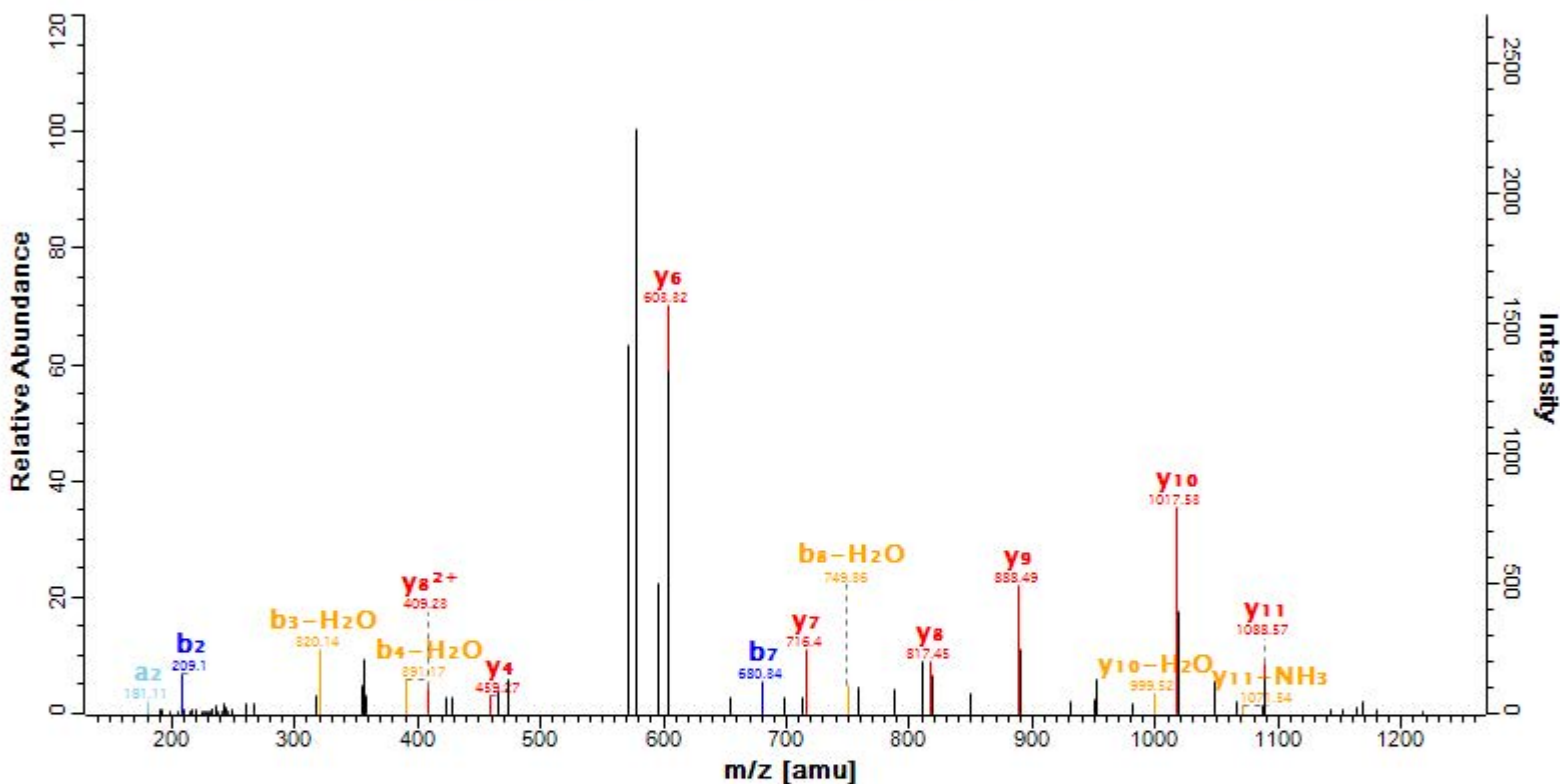

#### precursor information

|                   |                 |
|-------------------|-----------------|
| Mass:             | 1224.61974      |
| m/z:              | 613.31714       |
| Charge:           | 2+              |
| Retentiontime:    | 9.9391212463378 |
| Score:            | 85.28841        |
| Mass Error [ppm]: | -1.1128         |
| PEP:              | 0.012313        |
| Precursor Type:   | ISO             |

#### general information

|                       |           |
|-----------------------|-----------|
| Annotation:           | 8 of 12   |
| AminoAcids Coverage:  | 67 %      |
| Intensity Coverage:   | 33 %      |
| Peak Coverage:        | 17 %      |
| Protein Localisation: | 36 ... 47 |

| a ion    |        | b ion    |        | seq |   |    | y ion    |         | y <sup>2+</sup> ion |         |
|----------|--------|----------|--------|-----|---|----|----------|---------|---------------------|---------|
| Δ dalton | mass   | Δ dalton | mass   |     |   |    | Δ dalton | mass    | Δ dalton            | mass    |
|          | 110.07 |          | 138.07 | 1   | H | 11 |          |         |                     |         |
| +0.043   | 181.11 | +0.096   | 209.1  | 2   | A | 10 | 1088.6   | +0.0021 | 1088.6              |         |
|          | 310.15 |          | 338.15 | 3   | E | 9  | 1017.5   | -0.012  | 1017.5              |         |
|          | 381.19 |          | 409.18 | 4   | A | 8  | 888.49   | +0.0088 | 888.49              |         |
|          | 482.24 |          | 510.23 | 5   | T | 7  | 817.45   | +0.0737 | 409.23              | +0.0628 |
|          | 595.32 |          | 623.31 | 6   | L | 6  | 716.4    | +0.0602 | 716.4               |         |
|          | 652.34 | +0.0932  | 680.34 | 7   | G | 5  | 603.32   | +0.2267 | 603.32              |         |
|          | 739.37 |          | 767.37 | 8   | S | 4  | 546.3    |         | 546.3               |         |
|          | 796.39 |          | 824.39 | 9   | G | 3  | 459.27   | +0.1153 | 459.27              |         |
|          | 910.44 |          | 938.43 | 10  | N | 2  | 402.25   |         | 402.25              |         |
|          | 1023.5 |          | 1051.5 | 11  | L | 1  | 288.2    |         | 288.2               |         |
|          |        |          |        | 12  | R | 0  | 175.12   |         | 175.12              |         |

Scan number 977 Raw file LNCAP\_Silac\_23F10\_set1\_09  
 Method ITMS: CID Pepti... 169.37

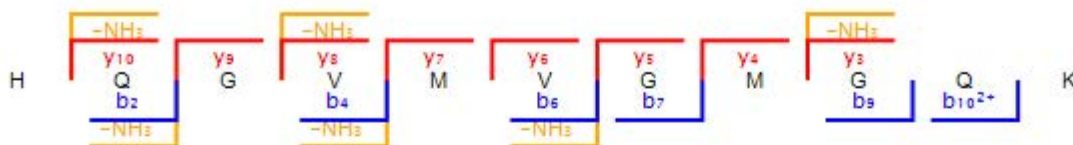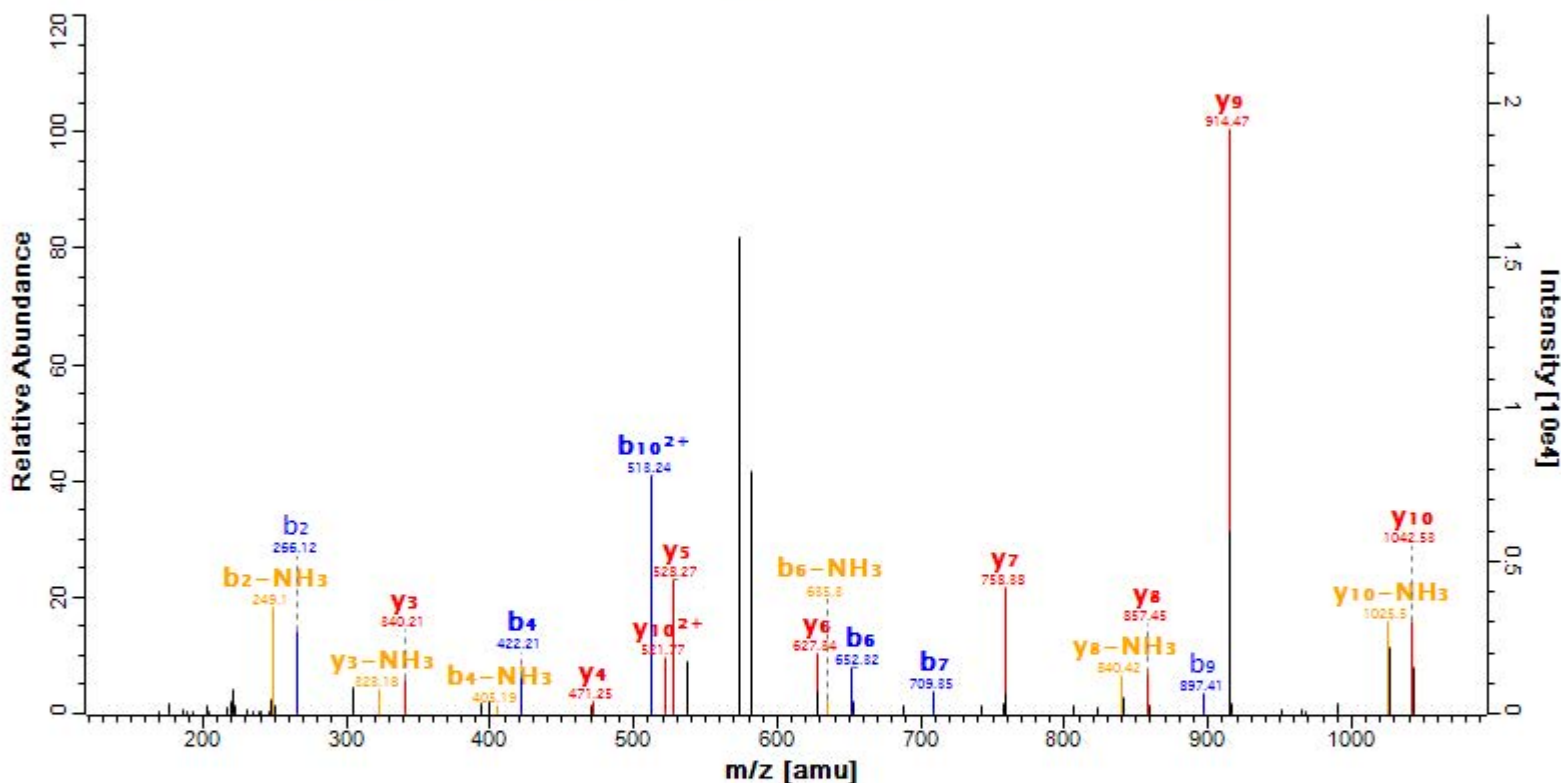

#### precursor information

|                   |                 |
|-------------------|-----------------|
| Mass:             | 1170.56323      |
| m/z:              | 586.28889       |
| Charge:           | 2+              |
| Retentiontime:    | 10.437109947204 |
| Score:            | 169.374         |
| Mass Error [ppm]: | -0.46786        |
| PEP:              | 6.7161E-08      |
| Precursor Type:   | MULTI           |

#### general information

|                       |           |
|-----------------------|-----------|
| Annotation:           | 9 of 11   |
| AminoAcids Coverage:  | 82 %      |
| Intensity Coverage:   | 56 %      |
| Peak Coverage:        | 29 %      |
| Protein Localisation: | 40 ... 50 |

| b <sup>2+</sup> ion |        | b ion    |        |    |     |          | y ion  |          | y <sup>2+</sup> ion |         |
|---------------------|--------|----------|--------|----|-----|----------|--------|----------|---------------------|---------|
| Δ dalton            | mass   | Δ dalton | mass   |    | seq | Δ dalton | mass   | Δ dalton | mass                |         |
|                     | 138.07 |          | 138.07 | 1  | H   | 10       |        |          |                     |         |
|                     | 266.12 | -0.072   | 266.12 | 2  | Q   | 9        | 1042.5 | -0.041   | 521.77              | +0.1447 |
|                     | 323.15 |          | 323.15 | 3  | G   | 8        | 914.47 | -0.042   | 914.47              |         |
|                     | 422.21 | -0.022   | 422.21 | 4  | V   | 7        | 857.45 | -0.06    | 857.45              |         |
|                     | 553.26 |          | 553.26 | 5  | M   | 6        | 758.38 | +0.105   | 758.38              |         |
|                     | 652.32 | +0.0416  | 652.32 | 6  | V   | 5        | 627.34 | +0.0164  | 627.34              |         |
|                     | 709.35 | -0.053   | 709.35 | 7  | G   | 4        | 528.27 | -0.026   | 528.27              |         |
|                     | 840.39 |          | 840.39 | 8  | M   | 3        | 471.25 | +0.0816  | 471.25              |         |
|                     | 897.41 | -0.088   | 897.41 | 9  | G   | 2        | 340.21 | +0.0623  | 340.21              |         |
| -0.301              | 513.24 |          | 1025.5 | 10 | Q   | 1        | 283.19 |          | 283.19              |         |
|                     |        |          |        | 11 | K   | 0        | 155.13 |          | 155.13              |         |

Scan number 1433 Raw file LNCAP\_Silac\_23F10\_set1\_10  
 Method ITMS; CID Pepti... 60.91

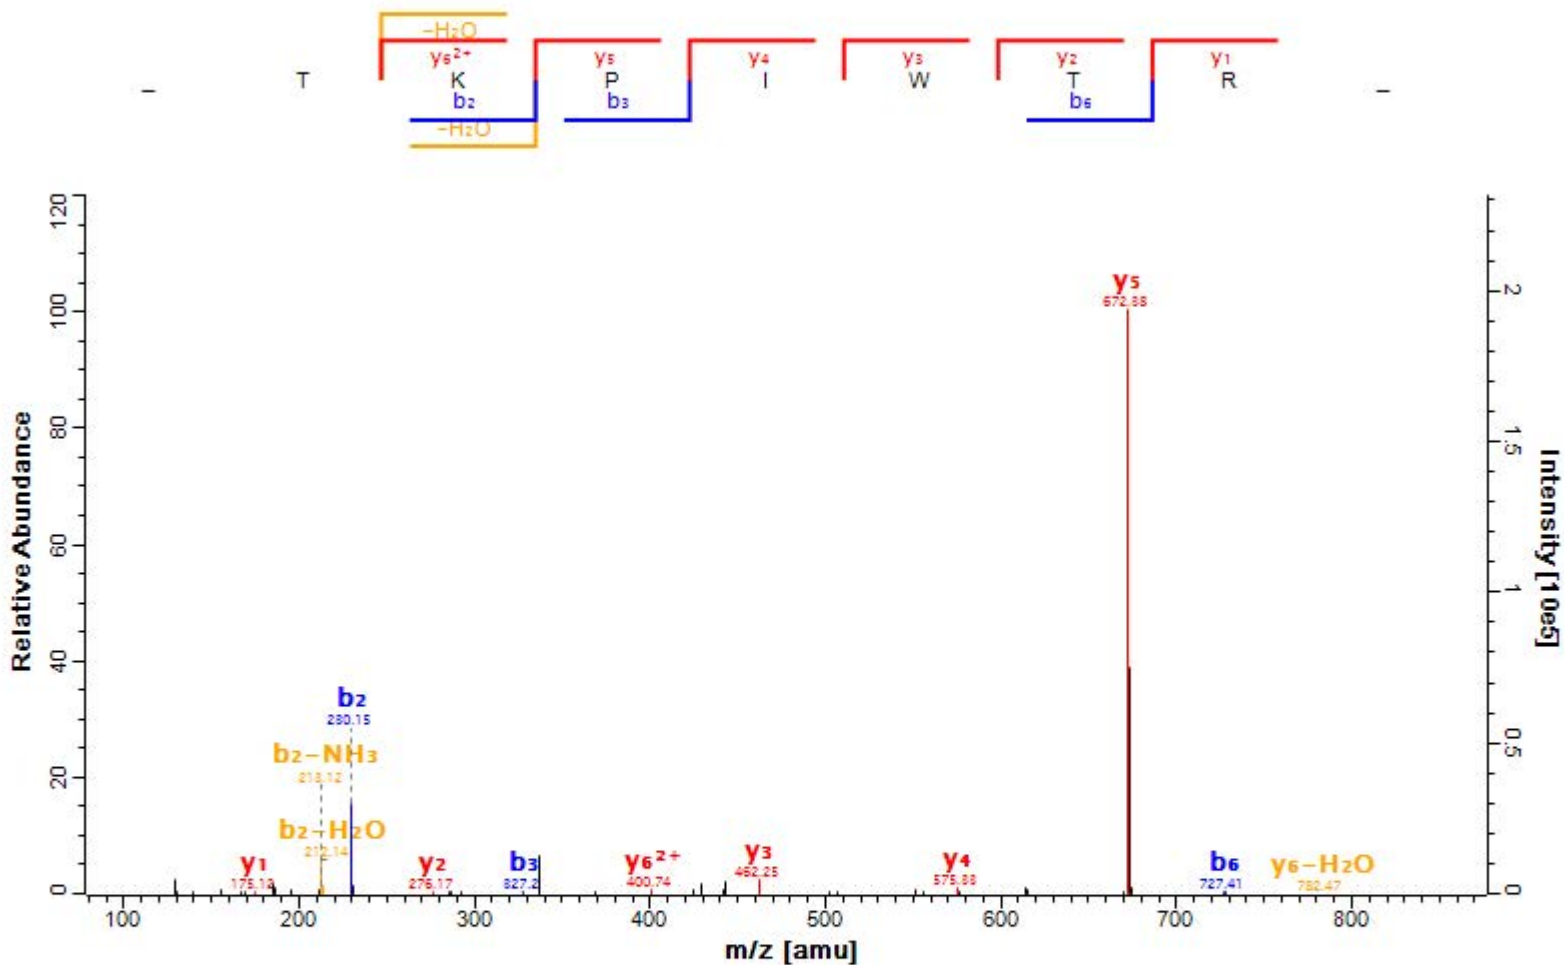

#### precursor information

|                      |                 |
|----------------------|-----------------|
| Mass:                | 900.51808       |
| m/z:                 | 451.26631       |
| Charge:              | 2+              |
| Retentiontime:       | 13.304472923278 |
| Score:               | 60.91026        |
| g Mass Error [ppm]:  | -0.067028       |
| Annotation:          | 6 of 7          |
| AminoAcids Coverage: | 86 %            |
| Intensity Coverage:  | 65 %            |
| Peak Coverage:       | 18 %            |

| b ion     |          |   |     |   | y ion    |           | y <sup>2+</sup> ion |           |
|-----------|----------|---|-----|---|----------|-----------|---------------------|-----------|
| Δ dalton  | mass     |   | seq |   | Δ dalton | mass      | Δ dalton            | mass      |
|           | 102.055  | 1 | T   | 6 |          |           |                     |           |
| -0.01975  | 230.1499 | 2 | K   | 5 | 800.4777 |           | 400.7425            | +0.042681 |
| +0.152695 | 327.2027 | 3 | P   | 4 | 672.3828 | -0.03371  | 672.3828            |           |
|           | 440.2867 | 4 | I   | 3 | 575.33   | +0.008799 | 575.33              |           |
|           | 626.3661 | 5 | W   | 2 | 462.2459 | +0.107664 | 462.2459            |           |
| -0.16819  | 727.4137 | 6 | T   | 1 | 276.1666 | +0.025874 | 276.1666            |           |
|           |          | 7 | R   | 0 | 175.119  | +0.093221 | 175.119             |           |

Scan number 1707 Raw file LNCAP\_Silac\_23F10\_set1\_10  
 Method ITMS; CID Peptide L25.74

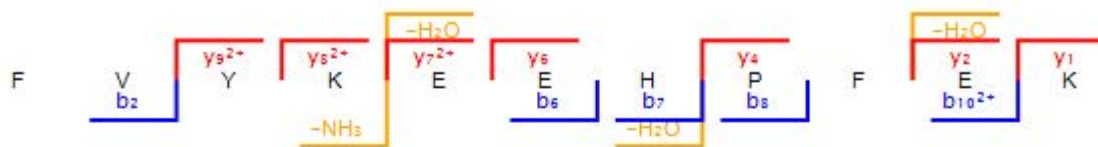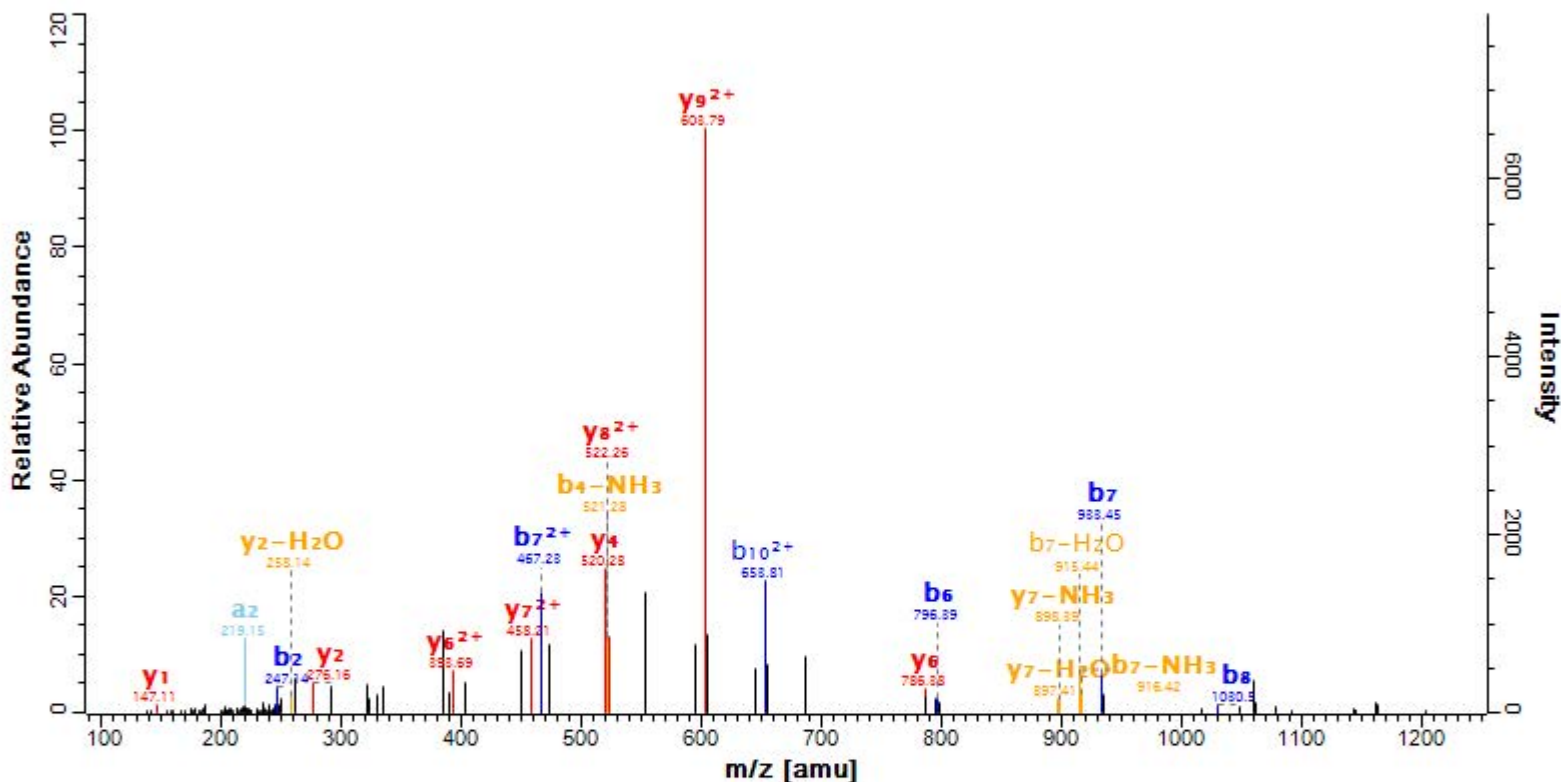

#### precursor information

|                   |                 |
|-------------------|-----------------|
| Mass:             | 1451.70881      |
| m/z:              | 484.91021       |
| Charge:           | 3+              |
| Retentiontime:    | 14.980576515197 |
| Score:            | 125.7365        |
| Mass Error [ppm]: | 0.20155         |
| PEP:              | 0.00015508      |
| Precursor Type:   | MULTI           |

#### general information

|                       |          |
|-----------------------|----------|
| Annotation:           | 9 of 11  |
| AminoAcids Coverage:  | 82 %     |
| Intensity Coverage:   | 56 %     |
| Peak Coverage:        | 16 %     |
| Protein Localisation: | 3 ... 13 |

|       | a ion         | b <sup>2+</sup> ion | b ion         |     |   |               | y ion         | y <sup>2+</sup> ion |
|-------|---------------|---------------------|---------------|-----|---|---------------|---------------|---------------------|
|       | Δ dalton mass | Δ dalton mass       | Δ dalton mass | seq |   | Δ dalton mass | Δ dalton mass |                     |
|       | 120.1         | 148.1               | 148.1         | 1   | F | 10            |               |                     |
| -0.04 | 219.1         | 247.1               | +0.07 247.1   | 2   | V | 9             | 1306          | 1306                |
|       | 382.2         | 410.2               | 410.2         | 3   | Y | 8             | 1207          | 603.8 +0.241        |
|       | 510.3         | 538.3               | 538.3         | 4   | K | 7             | 1044          | 522.3 +0.296        |
|       | 639.4         | 667.3               | 667.3         | 5   | E | 6             | 915.4         | 458.2 -0.27         |
|       | 768.4         | 796.4               | +0.168 796.4  | 6   | E | 5             | 786.4 -0.04   | 393.7 -0.04         |
|       | 905.5         | +0.14 1467.2        | +0.064 1493.4 | 7   | H | 4             | 657.3         | 657.3               |
|       | 1003          | 1030                | +0.224 1030   | 8   | P | 3             | 520.3 -0.04   | 520.3               |
|       | 1150          | 1178                | 1178          | 9   | F | 2             | 423.2         | 423.2               |
|       | 1279          | -0.13 653.8         | 1307          | 10  | E | 1             | 276.2 +0.14   | 276.2               |
|       |               |                     |               | 11  | K | 0             | 147.1 -0.08   | 147.1               |

Scan number 2093 Raw file LNCAP\_Silac\_23F10\_set1\_10  
 Method ITMS; CID Pepti... 114.27

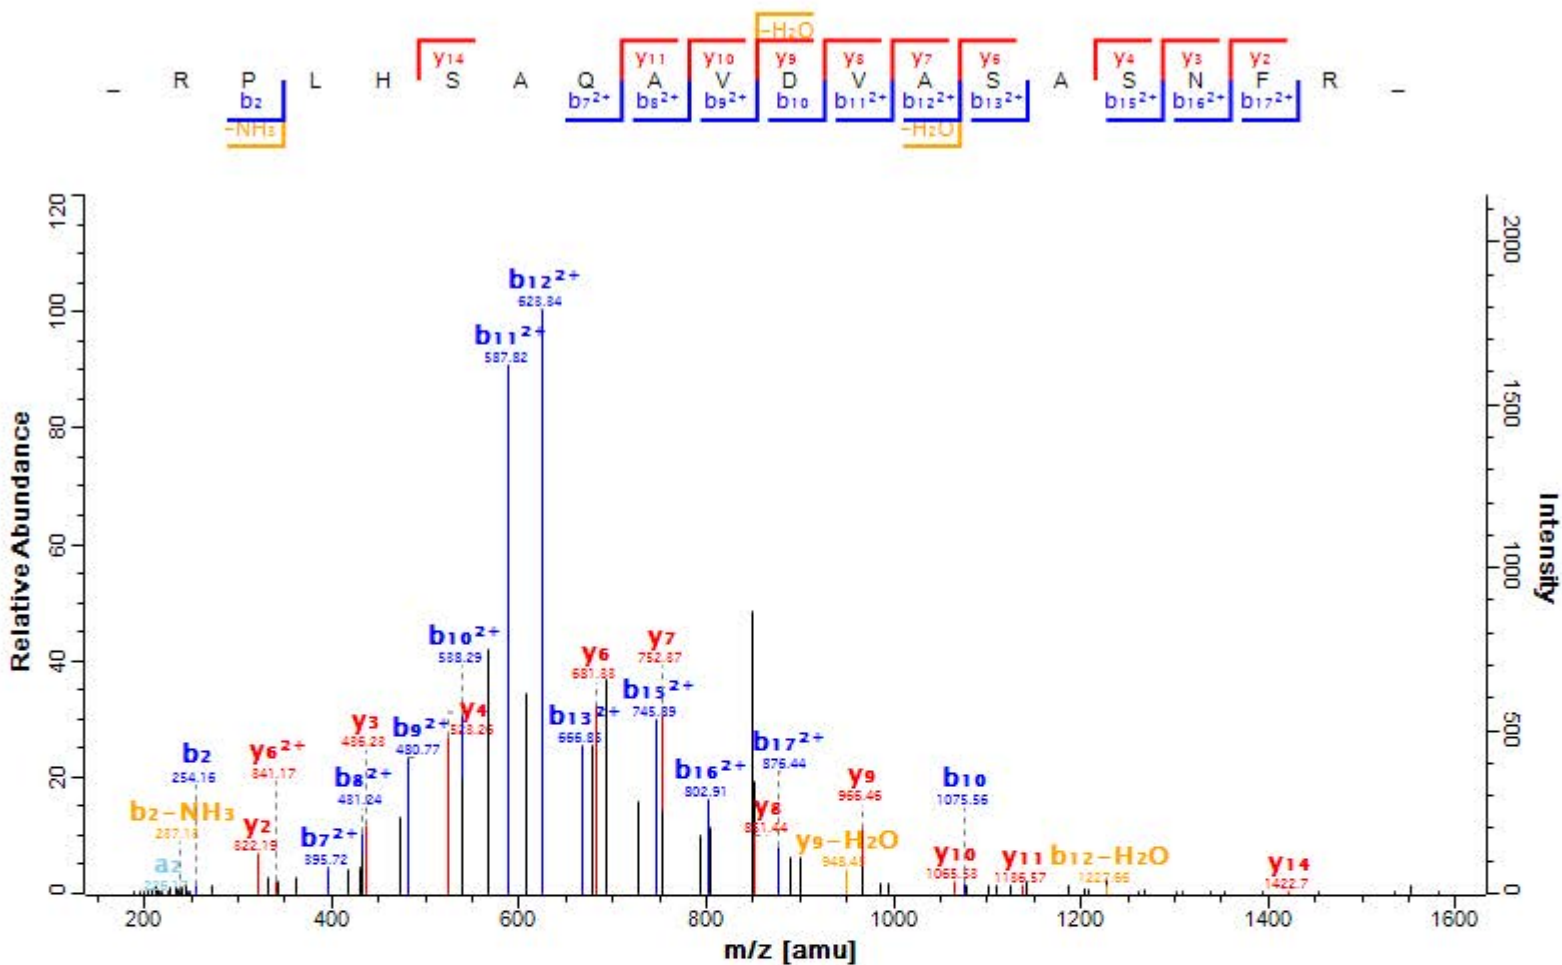

precursor information

|                   |                 |
|-------------------|-----------------|
| Mass:             | 1924.98748      |
| m/z:              | 642.66977       |
| Charge:           | 3+              |
| Retentiontime:    | 17.430215835571 |
| Score:            | 114.2746        |
| Mass Error [ppm]: | 0.37463         |
| PEP:              | 0.00012851      |
| Precursor Type:   | ISO             |

general information

|                       |           |
|-----------------------|-----------|
| Annotation:           | 12 of 18  |
| AminoAcids Coverage:  | 67 %      |
| Intensity Coverage:   | 55 %      |
| Peak Coverage:        | 28 %      |
| Protein Localisation: | 15 ... 32 |

|       | a ion         | b <sup>2+</sup> ion | b ion         |     |   | y ion         | y <sup>2+</sup> ion |
|-------|---------------|---------------------|---------------|-----|---|---------------|---------------------|
|       | Δ dalton mass | Δ dalton mass       | Δ dalton mass | seq |   | Δ dalton mass | Δ dalton mass       |
|       | 129.1         | 157.1               | 157.1         | 1   | R | 17            |                     |
| -0.16 | 226.2         | 254.2               | +0.148254.2   | 2   | P | 16            | 1770                |
|       | 339.3         | 367.2               | 367.2         | 3   | L | 15            | 1673                |
|       | 476.3         | 504.3               | 504.3         | 4   | H | 14            | 1560                |
|       | 563.3         | 591.3               | 591.3         | 5   | S | 13            | 1423                |
|       | 634.4         | 662.4               | 662.4         | 6   | A | 12            | 1336                |
|       | 762.4         | -0.06 395.7         | 790.4         | 7   | Q | 11            | 1265                |
|       | 833.5         | +0.054431.2         | 861.5         | 8   | A | 10            | 1137                |
|       | 932.5         | +0.253480.8         | 960.5         | 9   | V | 9             | 1066                |
|       | 1048          | +0.027538.3         | -0.06 1076    | 10  | D | 8             | 966.5               |
|       | 1147          | +0.268587.8         | 1175          | 11  | V | 7             | 851.4               |
|       | 1218          | +0.26 623.3         | 1246          | 12  | A | 6             | 752.4               |
|       | 1305          | -0.03 666.9         | 1333          | 13  | S | 5             | 681.3               |
|       | 1376          |                     | 1404          | 14  | A | 4             | 594.3               |
|       | 1463          | +0.259745.9         | 1491          | 15  | S | 3             | 523.3               |
|       | 1577          | +0.039802.9         | 1605          | 16  | N | 2             | 436.2               |
|       | 1724          | +0.203876.4         | 1752          | 17  | F | 1             | 322.2               |
|       |               |                     |               | 18  | R | 0             | 175.1               |

Scan number 2342 Raw file LNCAP\_Silac\_23F10\_set1\_10  
 Method ITMS; CID Pepti... 38.24

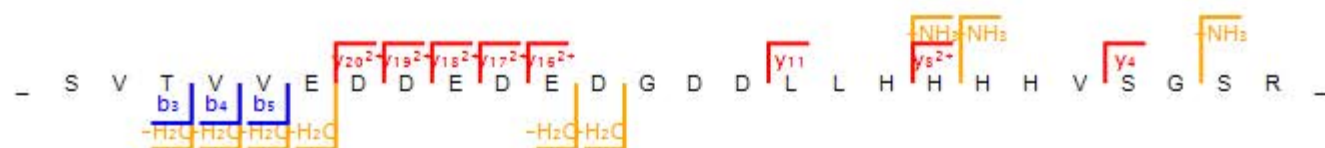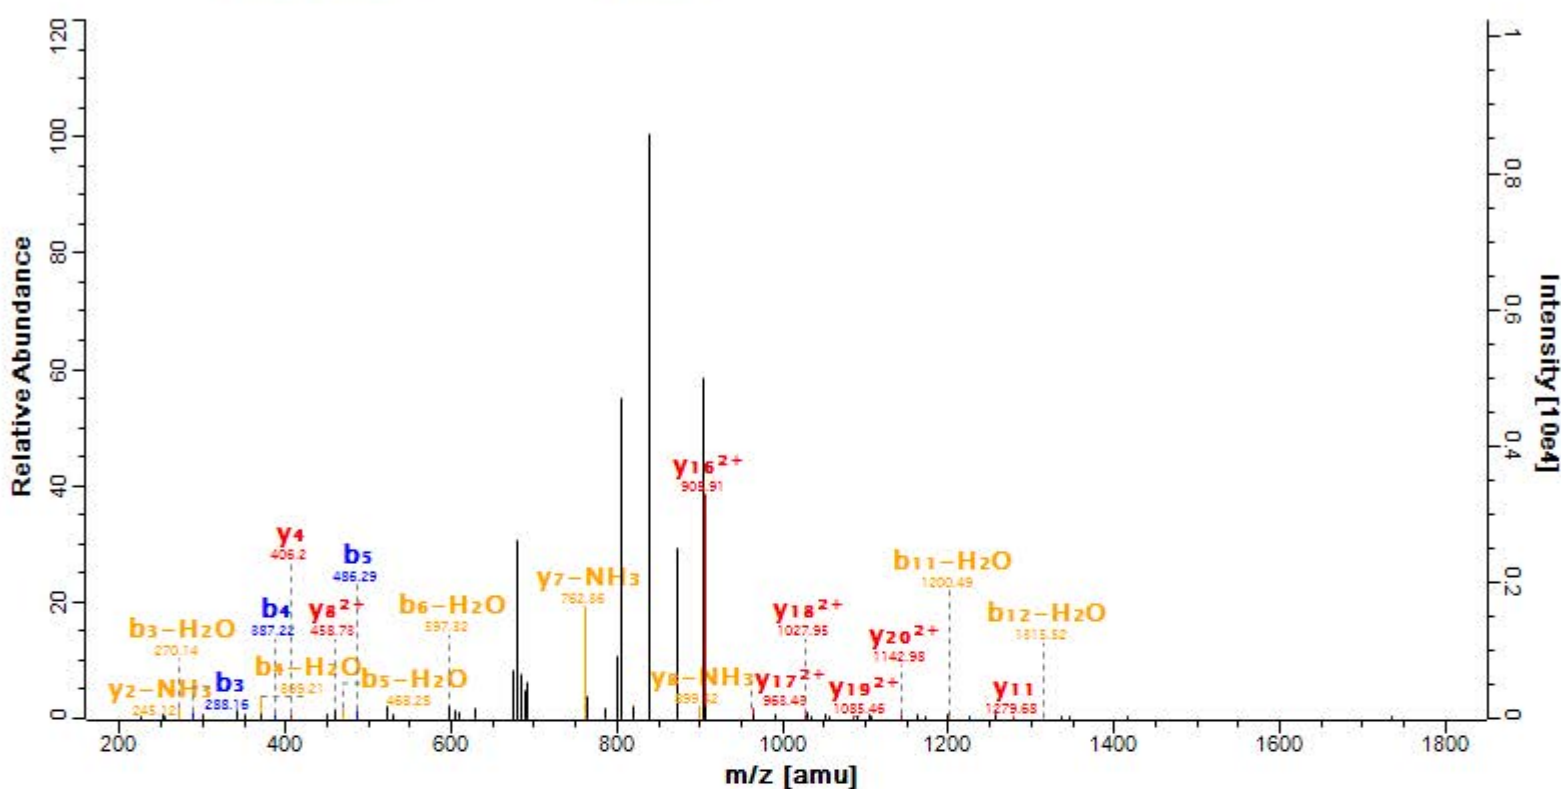

#### precursor information

|                   |                 |
|-------------------|-----------------|
| Mass:             | 2898.26638      |
| m/z:              | 725.57387       |
| Charge:           | 4+              |
| Retentiontime:    | 19.008152008056 |
| Score:            | 38.23733        |
| Mass Error [ppm]: | 0.39395         |
| PEP:              | 0.012984        |
| Precursor Type:   | MULTI           |

| b ion     |          |    |     |    | y ion    |           | y <sup>2+</sup> ion |           |
|-----------|----------|----|-----|----|----------|-----------|---------------------|-----------|
| Δ dalton  | mass     |    | seq |    | Δ dalton | mass      | Δ dalton            | mass      |
|           | 88.0393  | 1  | S   | 25 |          |           |                     |           |
|           | 187.1077 | 2  | V   | 24 | 2812.24  |           | 2812.24             |           |
| +0.024656 | 288.1554 | 3  | T   | 23 | 2713.172 |           | 2713.172            |           |
| +0.024602 | 387.2238 | 4  | V   | 22 | 2612.124 |           | 2612.124            |           |
| -0.01915  | 486.2922 | 5  | V   | 21 | 2513.056 |           | 2513.056            |           |
|           | 615.3348 | 6  | E   | 20 | 2413.988 |           | 2413.988            |           |
|           | 730.3618 | 7  | D   | 19 | 2284.945 |           | 1142.976            | +0.417187 |
|           | 845.3887 | 8  | D   | 18 | 2169.918 |           | 1085.463            | -0.13514  |
|           | 974.4313 | 9  | E   | 17 | 2054.891 |           | 1027.949            | +0.075234 |
|           | 1089.458 | 10 | D   | 16 | 1925.848 |           | 963.4279            | +0.27695  |
|           | 1218.501 | 11 | E   | 15 | 1810.822 |           | 905.9144            | -0.02843  |
|           | 1333.528 | 12 | D   | 14 | 1681.779 |           | 1681.779            |           |
|           | 1390.549 | 13 | G   | 13 | 1566.752 |           | 1566.752            |           |
|           | 1505.576 | 14 | D   | 12 | 1509.731 |           | 1509.731            |           |
|           | 1620.603 | 15 | D   | 11 | 1394.704 |           | 1394.704            |           |
|           | 1733.687 | 16 | L   | 10 | 1279.677 | -0.09024  | 1279.677            |           |
|           | 1846.771 | 17 | L   | 9  | 1166.593 |           | 1166.593            |           |
|           | 1983.83  | 18 | H   | 8  | 1053.509 |           | 1053.509            |           |
|           | 2120.889 | 19 | H   | 7  | 916.4496 |           | 458.7284            | -0.08294  |
|           | 2257.948 | 20 | H   | 6  | 779.3907 |           | 779.3907            |           |
|           | 2395.007 | 21 | H   | 5  | 642.3318 |           | 642.3318            |           |
|           | 2494.075 | 22 | V   | 4  | 505.2729 |           | 505.2729            |           |
|           | 2581.107 | 23 | S   | 3  | 406.2045 | +0.188472 | 406.2045            |           |
|           | 2638.129 | 24 | G   | 2  | 319.1724 |           | 319.1724            |           |
|           | 2725.161 | 25 | S   | 1  | 262.151  |           | 262.151             |           |
|           |          | 26 | R   | 0  | 175.119  |           | 175.119             |           |

#### general information

|                       |             |
|-----------------------|-------------|
| Annotation:           | 15 of 26    |
| AminoAcids Coverage:  | 58 %        |
| Intensity Coverage:   | 18 %        |
| Peak Coverage:        | 23 %        |
| Protein Localisation: | 546 ... 571 |



Scan number 3352 Raw file LNCAP\_Silac\_23F10\_set1\_10  
 Method ITMS: CID Pepti... 169.52

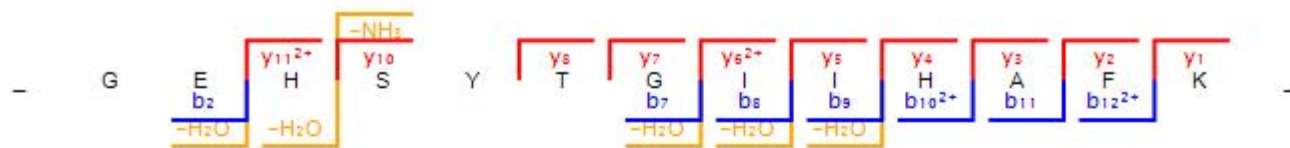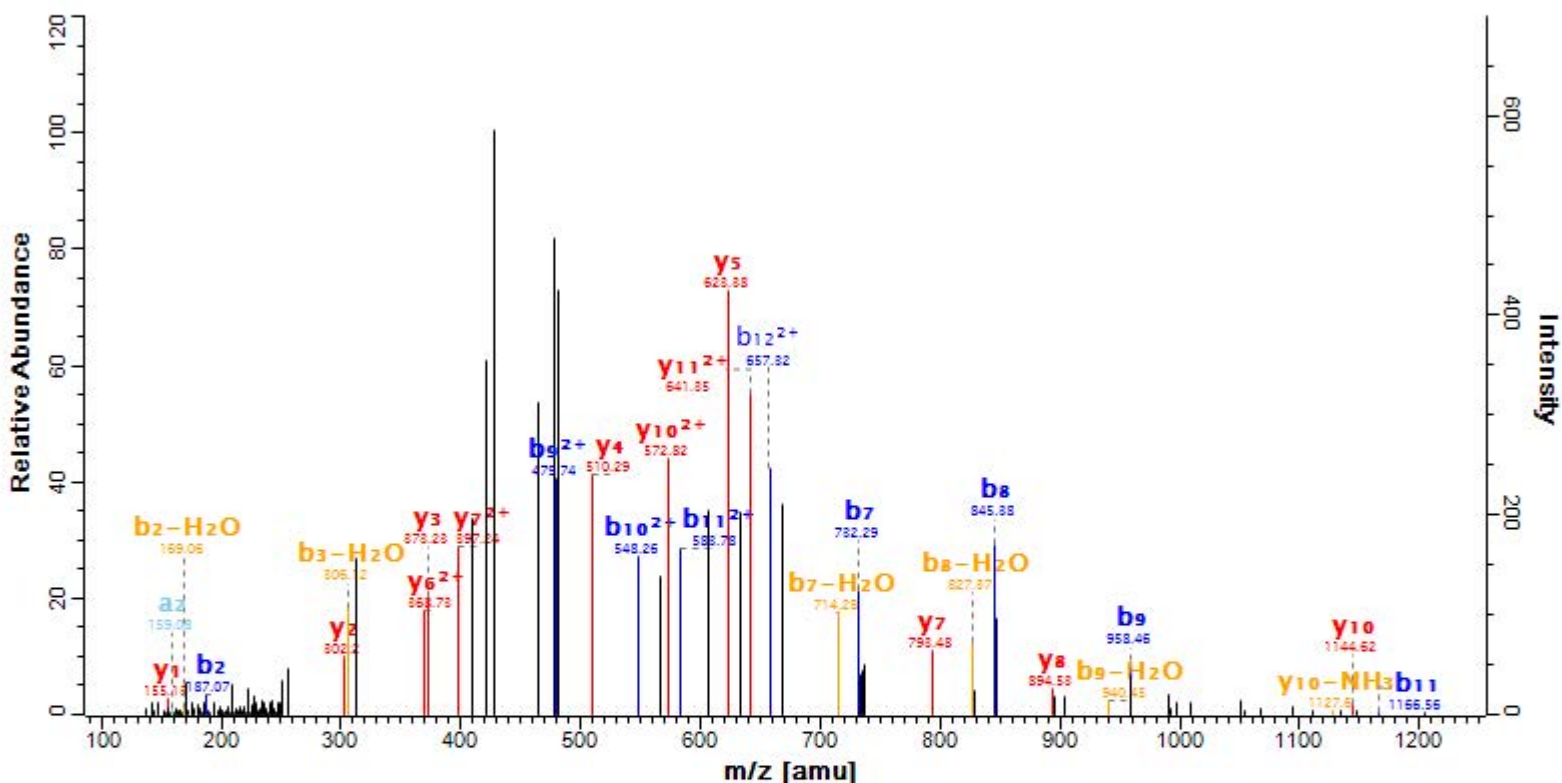

precursor information

|                   |                 |
|-------------------|-----------------|
| Mass:             | 1458.72559      |
| m/z:              | 487.24914       |
| Charge:           | 3+              |
| Retentiontime:    | 25.695215225219 |
| Score:            | 169.5183        |
| Mass Error [ppm]: | 0.019572        |
| PEP:              | 1.4335E-11      |
| Precursor Type:   | MULTI           |

general information

|                       |             |
|-----------------------|-------------|
| Annotation:           | 11 of 13    |
| AminoAcids Coverage:  | 85 %        |
| Intensity Coverage:   | 43 %        |
| Peak Coverage:        | 21 %        |
| Protein Localisation: | 164 ... 176 |

| a ion         |               | b <sup>2+</sup> ion |               | b ion |               | y ion         |               | y <sup>2+</sup> ion |  |
|---------------|---------------|---------------------|---------------|-------|---------------|---------------|---------------|---------------------|--|
| Δ dalton mass | Δ dalton mass | Δ dalton mass       | Δ dalton mass | seq   | Δ dalton mass | Δ dalton mass | Δ dalton mass | Δ dalton mass       |  |
| 30.03         | 58.03         | 58.03               | 58.03         | 1     | G             | 12            |               |                     |  |
| +0.057 59.1   | 187.1         | +0.072 187.1        | 187.1         | 2     | E             | 11            | 1411          | 1411                |  |
| 296.1         | 324.1         | 324.1               | 324.1         | 3     | H             | 10            | 1282          | 641.3 +0.141        |  |
| 383.2         | 411.2         | 411.2               | 411.2         | 4     | S             | 9             | 1145 +0.005   | 572.8 +0.171        |  |
| 546.2         | 574.2         | 574.2               | 574.2         | 5     | Y             | 8             | 1058          | 1058                |  |
| 647.3         | 675.3         | 675.3               | 675.3         | 6     | T             | 7             | 894.5 -0.07   | 894.5               |  |
| 704.3         | 732.3         | +0.081 732.3        | 732.3         | 7     | G             | 6             | 793.5 -0.02   | 397.2 -0.14         |  |
| 817.4         | 845.4         | -0.03 845.4         | 845.4         | 8     | I             | 5             | 736.5         | 368.7 +0.12         |  |
| 930.5         | -0.2 479.7    | +0.032 479.7        | 479.7         | 9     | I             | 4             | 623.4 -0.01   | 623.4               |  |
| 1068          | +0.126 548.3  | 548.3               | 1096          | 10    | H             | 3             | 510.3 +0.068  | 510.3               |  |
| 1139          | +0.235 583.8  | +0.197 583.8        | 583.8         | 11    | A             | 2             | 373.2 +0.063  | 373.2               |  |
| 1286          | +0.269 557.3  | 557.3               | 1314          | 12    | F             | 1             | 302.2 -0.08   | 302.2               |  |
|               |               |                     |               | 13    | K             | 0             | 155.1 +0.025  | 155.1               |  |

Scan number 3661 Raw file LNCAP\_Silac\_23F10\_set1\_10  
 Method ITMS; CID Pepti... 67.12

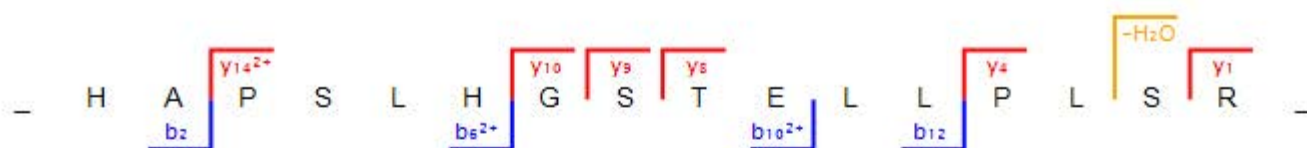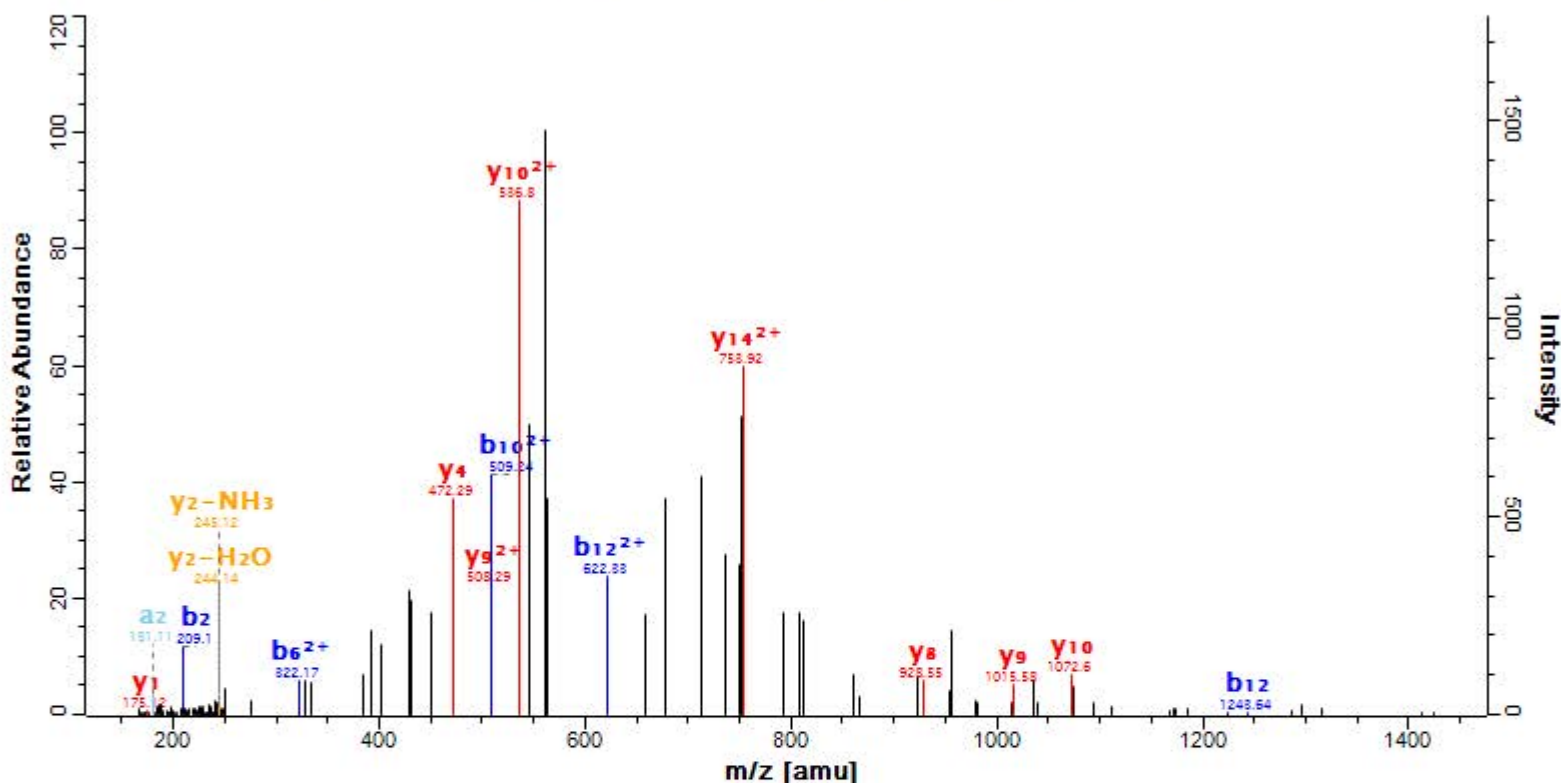

#### precursor information

|                   |                 |
|-------------------|-----------------|
| Mass:             | 1713.9165       |
| m/z:              | 572.31278       |
| Charge:           | 3+              |
| Retentiontime:    | 27.703966140747 |
| Score:            | 67.11539        |
| Mass Error [ppm]: | 0.16258         |
| PEP:              | 0.0013472       |
| Precursor Type:   | MULTI           |

#### general information

|                       |             |
|-----------------------|-------------|
| Annotation:           | 11 of 16    |
| AminoAcids Coverage:  | 69 %        |
| Intensity Coverage:   | 29 %        |
| Peak Coverage:        | 14 %        |
| Protein Localisation: | 186 ... 201 |

| a ion         |               | b <sup>2+</sup> ion |               | b ion |               |               |        |        | y ion |       | y <sup>2+</sup> ion |  |
|---------------|---------------|---------------------|---------------|-------|---------------|---------------|--------|--------|-------|-------|---------------------|--|
| Δ dalton mass | Δ dalton mass | Δ dalton mass       | Δ dalton mass | seq   | Δ dalton mass | Δ dalton mass |        |        |       |       |                     |  |
| 110.1         | 138.1         | 138.1               | 1             | H     | 15            |               |        |        |       |       |                     |  |
| +0.039 81.1   | 209.1         | +0.038 209.1        | 2             | A     | 14            | 1578          |        |        |       | 1578  |                     |  |
| 278.2         | 306.2         | 306.2               | 3             | P     | 13            | 1507          |        |        |       | 753.9 | +0.21               |  |
| 365.2         | 393.2         | 393.2               | 4             | S     | 12            | 1410          |        |        |       | 1410  |                     |  |
| 478.3         | 506.3         | 506.3               | 5             | L     | 11            | 1323          |        |        |       | 1323  |                     |  |
| 615.3         | -0.03 322.2   | 643.3               | 6             | H     | 10            | 1210          |        |        |       | 1210  |                     |  |
| 672.4         | 700.4         | 700.4               | 7             | G     | 9             | 1073          | +0.13  | 1536.8 | -0.03 |       |                     |  |
| 759.4         | 787.4         | 787.4               | 8             | S     | 8             | 1016          | +0.03  | 5508.3 | -0.16 |       |                     |  |
| 860.4         | 888.4         | 888.4               | 9             | T     | 7             | 928.5         | +0.00  | 2928.5 |       |       |                     |  |
| 989.5         | +0.06 509.2   | 1017                | 10            | E     | 6             | 827.5         |        | 827.5  |       |       |                     |  |
| 1103          | 1131          | 1131                | 11            | L     | 5             | 698.5         |        | 698.5  |       |       |                     |  |
| 1216          | +0.206 622.3  | +0.142 1244         | 12            | L     | 4             | 585.4         |        | 585.4  |       |       |                     |  |
| 1313          | 1341          | 1341                | 13            | P     | 3             | 472.3         | +0.119 | 472.3  |       |       |                     |  |
| 1426          | 1454          | 1454                | 14            | L     | 2             | 375.2         |        | 375.2  |       |       |                     |  |
| 1513          | 1541          | 1541                | 15            | S     | 1             | 262.2         |        | 262.2  |       |       |                     |  |
|               |               |                     | 16            | R     | 0             | 175.1         | +0.027 | 175.1  |       |       |                     |  |

Scan number 4037 Raw file LNCAP\_Silac\_23F10\_set1\_10  
 Method ITMS; CID Pepti... 167.61

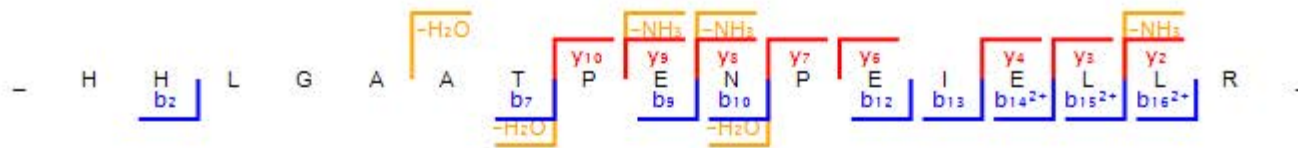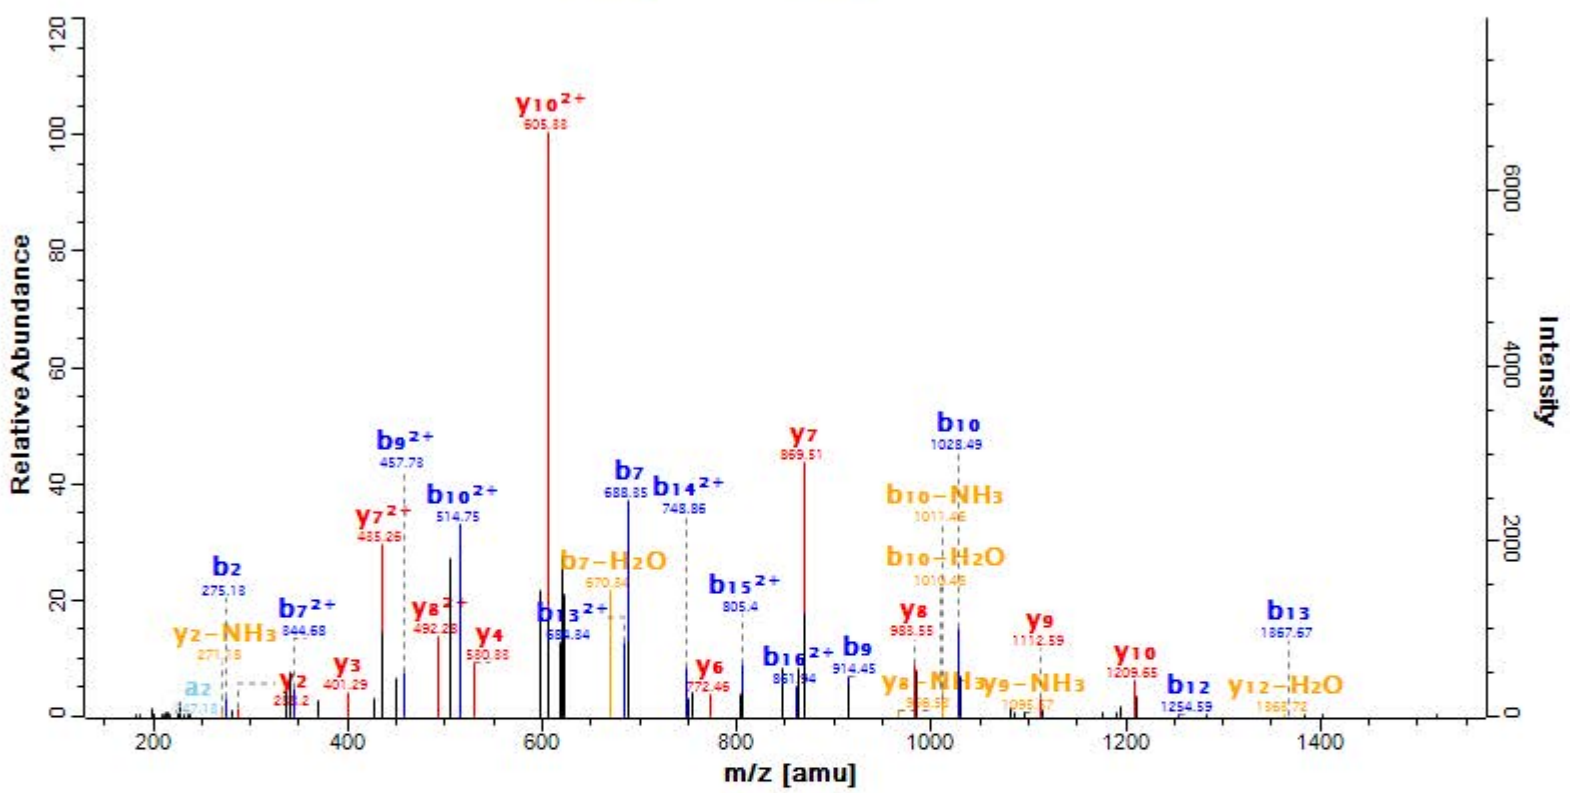

**precursor information**

|                   |                 |
|-------------------|-----------------|
| Mass:             | 1895.98547      |
| m/z:              | 633.00243       |
| Charge:           | 3+              |
| Retentiontime:    | 30.294494628906 |
| Score:            | 167.6136        |
| Mass Error [ppm]: | 0.060299        |
| PEP:              | 5.1402E-16      |
| Precursor Type:   | ISO             |

**general information**

|                       |           |
|-----------------------|-----------|
| Annotation:           | 12 of 17  |
| AminoAcids Coverage:  | 71 %      |
| Intensity Coverage:   | 59 %      |
| Peak Coverage:        | 32 %      |
| Protein Localisation: | 50 ... 66 |

|       | a ion         | b <sup>2+</sup> ion | b ion         |    |     |    | y ion         | y <sup>2+</sup> ion |
|-------|---------------|---------------------|---------------|----|-----|----|---------------|---------------------|
|       | Δ dalton mass | Δ dalton mass       | Δ dalton mass |    | seq |    | Δ dalton mass | Δ dalton mass       |
|       | 110.1         | 138.1               | 138.1         | 1  | H   | 16 |               |                     |
| -0.13 | 247.1         | 275.1               | +0.038        | 2  | H   | 15 | 1760          | 1760                |
|       | 360.2         | 388.2               | 388.2         | 3  | L   | 14 | 1623          | 1623                |
|       | 417.2         | 445.2               | 445.2         | 4  | G   | 13 | 1510          | 1510                |
|       | 488.3         | 516.3               | 516.3         | 5  | A   | 12 | 1453          | 1453                |
|       | 559.3         | 587.3               | 587.3         | 6  | A   | 11 | 1382          | 1382                |
|       | 660.4         | +0.124344.7         | +0.062688.4   | 7  | T   | 10 | 1311          | 1311                |
|       | 757.4         | 785.4               | 785.4         | 8  | P   | 9  | 1210          | -0.12 605.3 +0.28   |
|       | 886.5         | +0.207457.7         | +0.029914.4   | 9  | E   | 8  | 1113          | -0.06 1113          |
|       | 1000          | +0.292514.7         | -0.03 1028    | 10 | N   | 7  | 983.6         | +0.012492.3 +0.13   |
|       | 1098          | 1126                | 1126          | 11 | P   | 6  | 869.5         | +0.018435.3 +0.07   |
|       | 1227          | 1255                | +0.2281255    | 12 | E   | 5  | 772.5         | -0.01 772.5         |
|       | 1340          | +0.347684.3         | +0.4491368    | 13 | I   | 4  | 643.4         | 643.4               |
|       | 1469          | +0.195748.9         | 1497          | 14 | E   | 3  | 530.3         | +0.023530.3         |
|       | 1582          | +0.19 805.4         | 1610          | 15 | L   | 2  | 401.3         | +0.088401.3         |
|       | 1695          | +0.127861.9         | 1723          | 16 | L   | 1  | 288.2         | +0.05 288.2         |
|       |               |                     |               | 17 | R   | 0  | 175.1         | 175.1               |

Scan number 4281 Raw file LNCAP\_Silac\_23F10\_set1\_10  
 Method ITMS; CID Pepti... 65.23

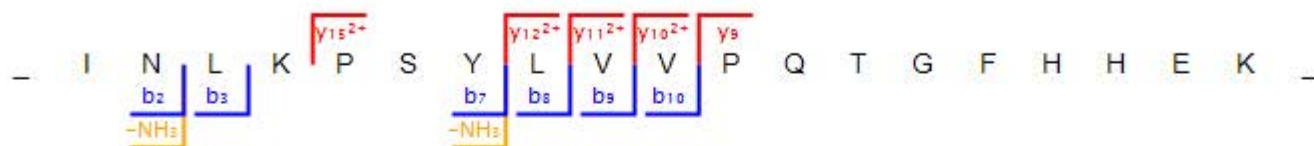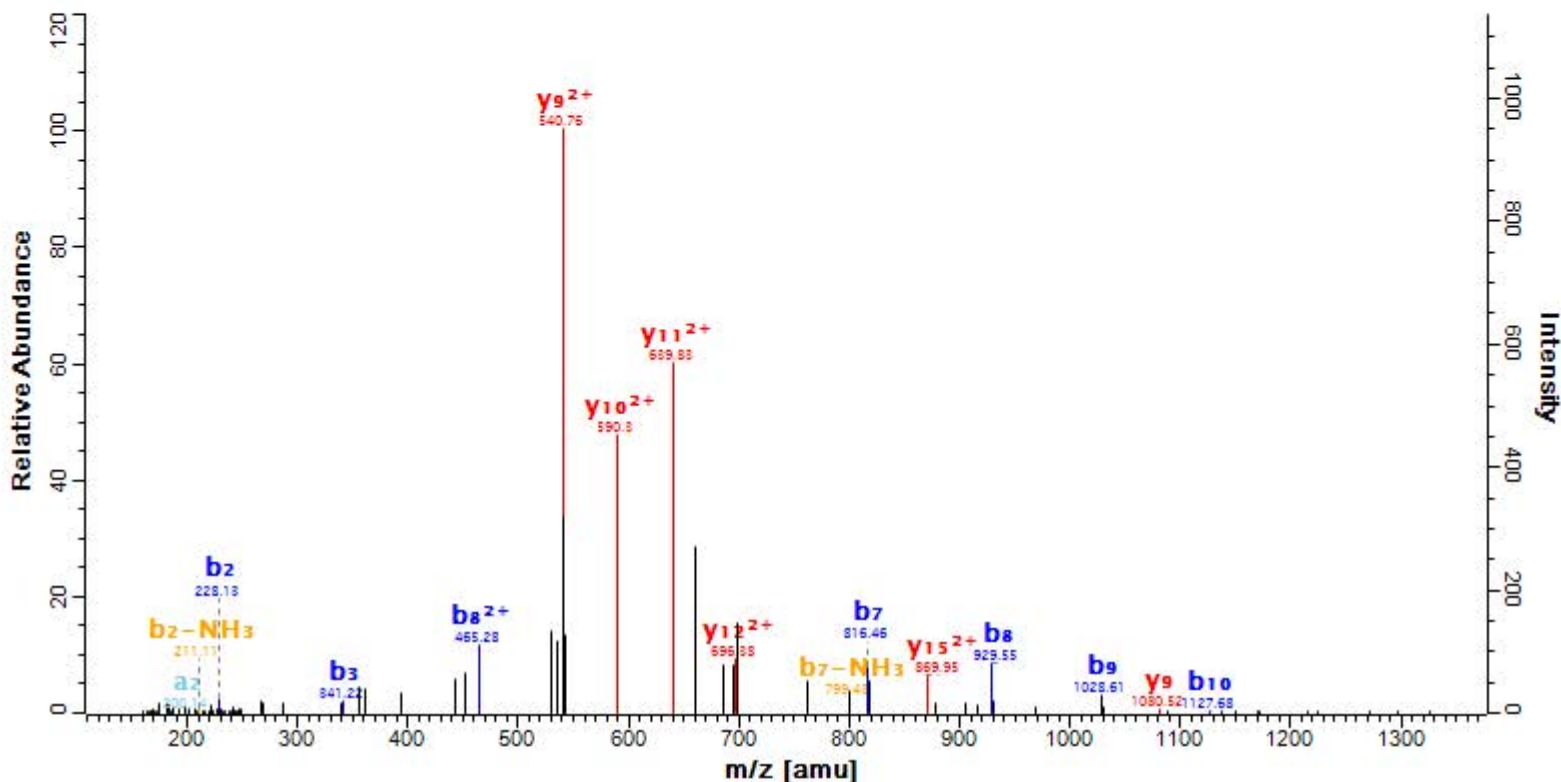

#### precursor information

|                   |                 |
|-------------------|-----------------|
| Mass:             | 2206.19105      |
| m/z:              | 552.55504       |
| Charge:           | 4+              |
| Retentiontime:    | 31.968227386474 |
| Score:            | 65.22546        |
| Mass Error [ppm]: | 0.53469         |
| PEP:              | 0.00082742      |
| Precursor Type:   | MULTI           |

|       | a ion         | b <sup>2+</sup> ion | b ion         |    |     |    | y ion         | y <sup>2+</sup> ion |
|-------|---------------|---------------------|---------------|----|-----|----|---------------|---------------------|
|       | Δ dalton mass | Δ dalton mass       | Δ dalton mass |    | seq |    | Δ dalton mass | Δ dalton mass       |
|       | 86.1          | 114.1               | 114.1         | 1  | I   | 18 |               |                     |
| -0.07 | 200.1         | 228.1               | +0.06 228.1   | 2  | N   | 17 | 2094          | 2094                |
|       | 313.2         | 341.2               | +0.14 341.2   | 3  | L   | 16 | 1980          | 1980                |
|       | 441.3         | 469.3               | 469.3         | 4  | K   | 15 | 1867          | 1867                |
|       | 538.4         | 566.4               | 566.4         | 5  | P   | 14 | 1739          | 869.9 +0.191        |
|       | 625.4         | 653.4               | 653.4         | 6  | S   | 13 | 1642          | 1642                |
|       | 788.5         | 816.5               | -0.02 816.5   | 7  | Y   | 12 | 1555          | 1555                |
|       | 901.6         | +0.02 465.3         | +0.01 829.5   | 8  | L   | 11 | 1392          | 696.4 -0.08         |
|       | 1001          | 1029                | -0.06 1029    | 9  | V   | 10 | 1279          | 639.8 +0.31         |
|       | 1100          | 1128                | -0.22 1128    | 10 | V   | 9  | 1180          | 590.3 +0.21         |
|       | 1197          | 1225                | 1225          | 11 | P   | 8  | 1081          | +0.35 540.8 +0.03   |
|       | 1325          | 1353                | 1353          | 12 | Q   | 7  | 983.5         | 983.5               |
|       | 1426          | 1454                | 1454          | 13 | T   | 6  | 855.4         | 855.4               |
|       | 1483          | 1511                | 1511          | 14 | G   | 5  | 754.4         | 754.4               |
|       | 1630          | 1658                | 1658          | 15 | F   | 4  | 697.3         | 697.3               |
|       | 1767          | 1795                | 1795          | 16 | H   | 3  | 550.3         | 550.3               |
|       | 1904          | 1932                | 1932          | 17 | H   | 2  | 413.2         | 413.2               |
|       | 2033          | 2061                | 2061          | 18 | E   | 1  | 276.2         | 276.2               |
|       |               |                     |               | 19 | K   | 0  | 147.1         | 147.1               |

#### general information

|                       |             |
|-----------------------|-------------|
| Annotation:           | 8 of 19     |
| AminoAcids Coverage:  | 42 %        |
| Intensity Coverage:   | 54 %        |
| Peak Coverage:        | 13 %        |
| Protein Localisation: | 692 ... 710 |

Scan number 4430 Raw file LNCAP\_Silac\_23F10\_set1\_10  
 Method ITMS; CID Pepti... 95.85

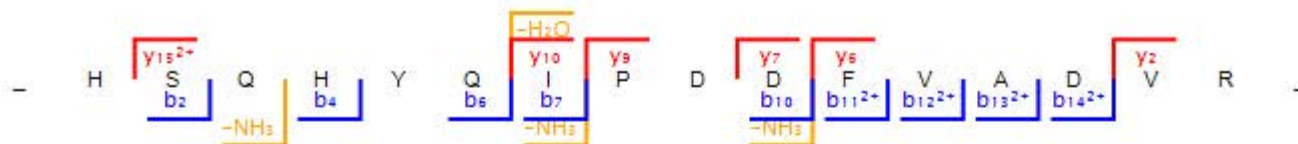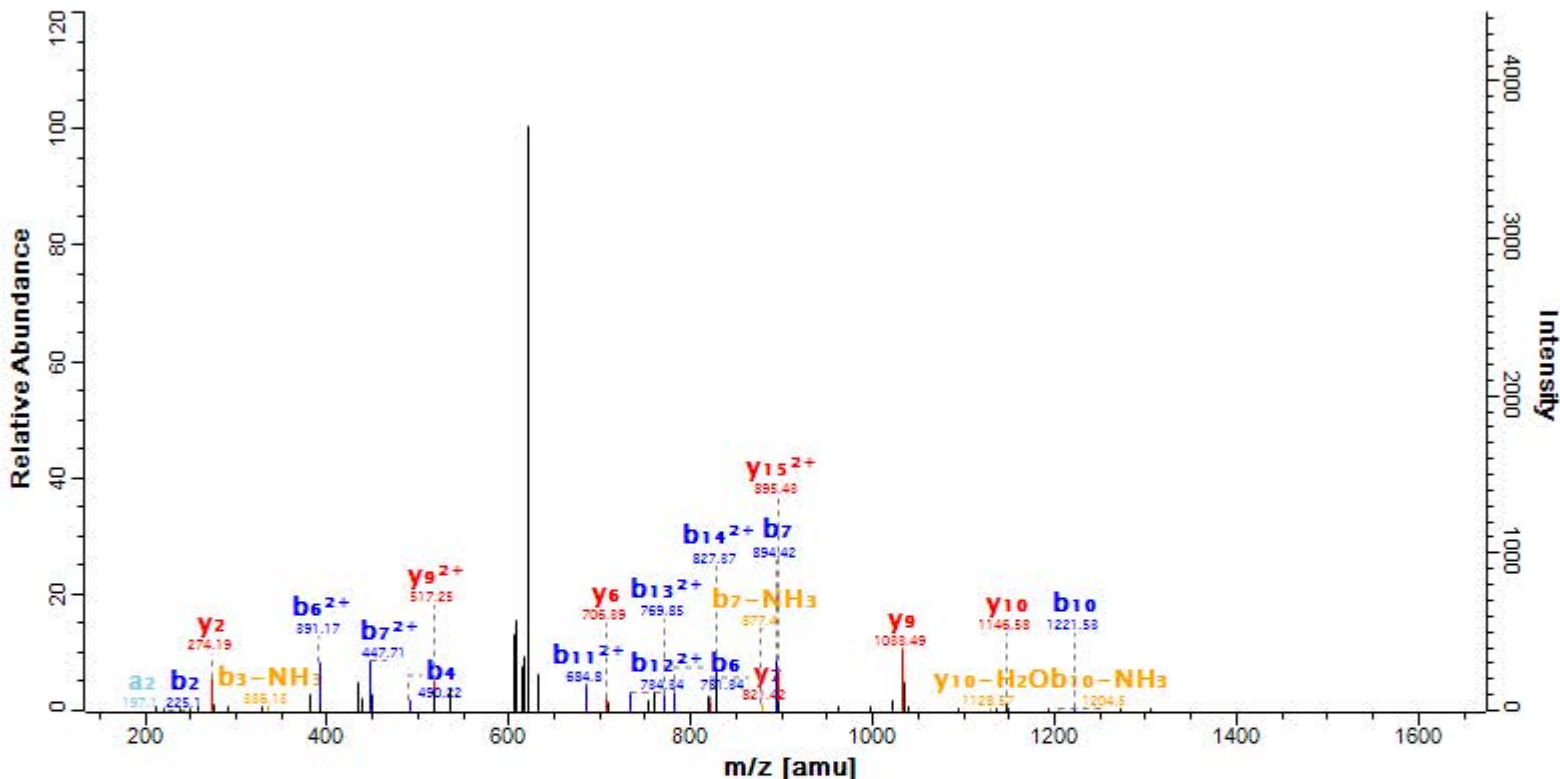

#### precursor information

|                   |                 |
|-------------------|-----------------|
| Mass:             | 1925.9028       |
| m/z:              | 642.97488       |
| Charge:           | 3+              |
| Retentiontime:    | 33.062602996826 |
| Score:            | 95.85367        |
| Mass Error [ppm]: | 0.40155         |
| PEP:              | 2.2628E-05      |
| Precursor Type:   | MULTI           |

#### general information

|                       |               |
|-----------------------|---------------|
| Annotation:           | 12 of 16      |
| AminoAcids Coverag    | 75 %          |
| Intensity Coverage:   | 28 %          |
| Peak Coverage:        | 26 %          |
| Protein Localisation: | 1014 ... 1029 |

|        | a ion         | b <sup>2+</sup> ion | b ion         |     |   |               | y ion         | y <sup>2+</sup> ion     |
|--------|---------------|---------------------|---------------|-----|---|---------------|---------------|-------------------------|
|        | Δ dalton mass | Δ dalton mass       | Δ dalton mass | seq |   | Δ dalton mass | Δ dalton mass |                         |
|        | 110.1         | 138.1               | 138.1         | 1   | H | 15            |               |                         |
| +0.486 | 97.1          | 225.1               | +0.25 225.1   | 2   | S | 14            | 1790          | 895.4 -0.08             |
|        | 325.2         | 353.2               | 353.2         | 3   | Q | 13            | 1703          | 1703                    |
|        | 462.2         | 490.2               | +0.21 490.2   | 4   | H | 12            | 1575          | 1575                    |
|        | 625.3         | 653.3               | 653.3         | 5   | Y | 11            | 1438          | 1438                    |
|        | 753.3         | +0.26 891.2         | -0.09 781.3   | 6   | Q | 10            | 1275          | 1275                    |
|        | 866.4         | +0.22 1447.7        | -0.06 894.4   | 7   | I | 9             | 1147          | +0.04 1147              |
|        | 963.5         | 991.5               | 991.5         | 8   | P | 8             | 1033          | -0.03 517.3 +0.03 517.3 |
|        | 1079          | 1107                | 1107          | 9   | D | 7             | 936.4         | 936.4                   |
|        | 1194          | 1222                | +0.08 51 222  | 10  | D | 6             | 821.4         | -0.09 821.4             |
|        | 1341          | +0.32 66 84.8       | 1369          | 11  | F | 5             | 706.4         | +0.04 706.4             |
|        | 1440          | +0.01 97 34.3       | 1468          | 12  | V | 4             | 559.3         | 559.3                   |
|        | 1511          | +0.24 57 69.9       | 1539          | 13  | A | 3             | 460.3         | 460.3                   |
|        | 1626          | -0.01 82 7.4        | 1654          | 14  | D | 2             | 389.2         | 389.2                   |
|        | 1725          | 1753                | 1753          | 15  | V | 1             | 274.2         | +0.12 274.2             |
|        |               |                     |               | 16  | R | 0             | 175.1         | 175.1                   |

Scan number 451 Raw file LNCAP\_Silac\_23F10\_set1\_10  
 Method ITMS; CID Pepti... 201

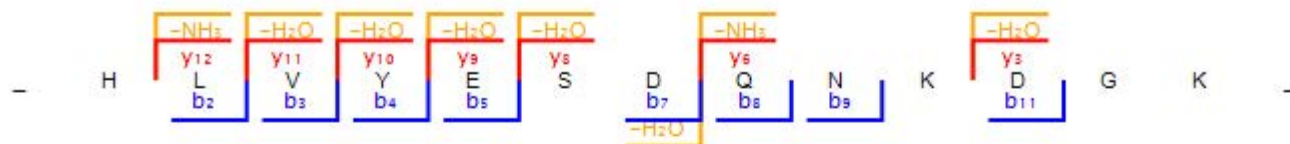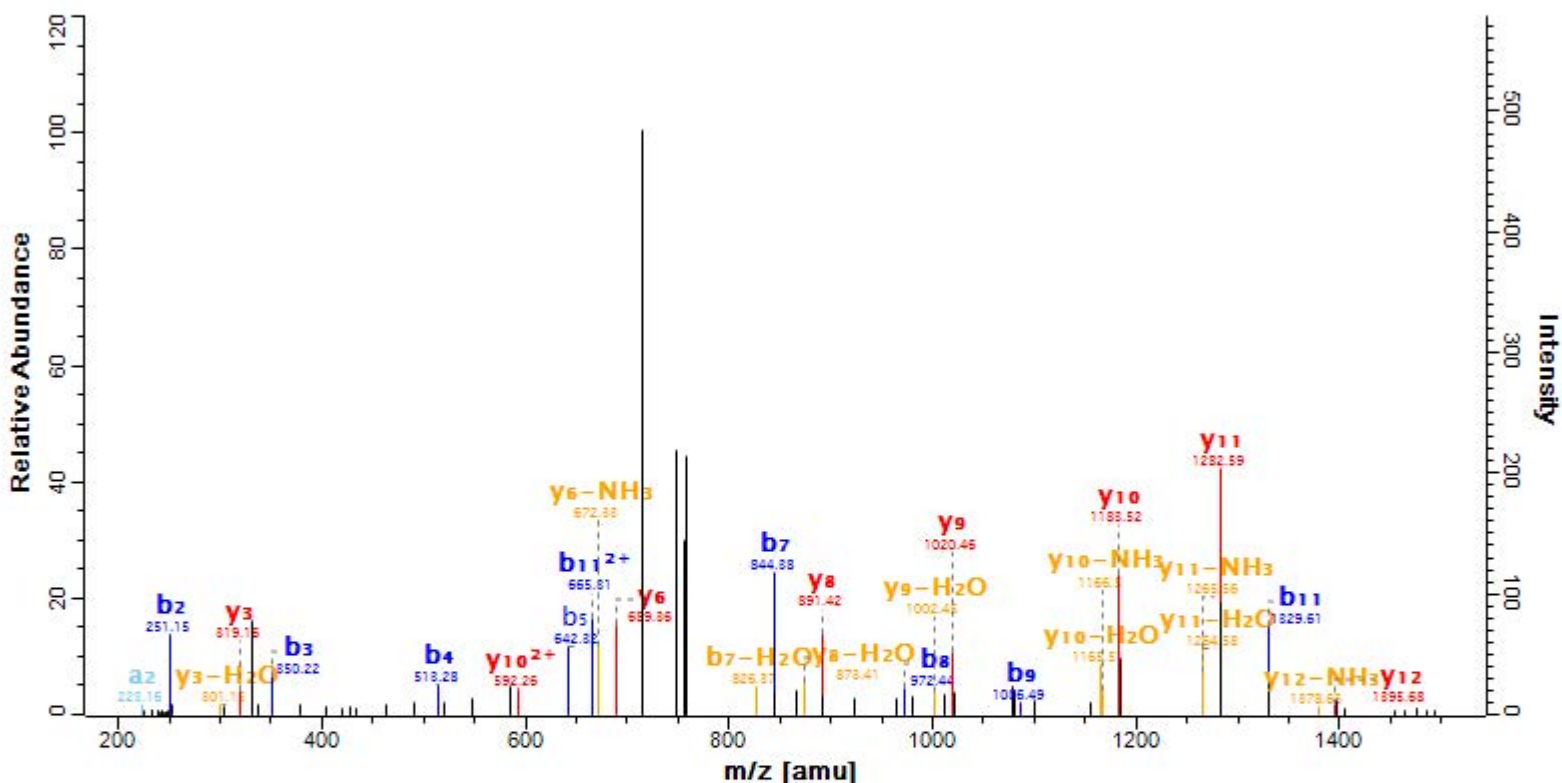

precursor information

|                   |                 |
|-------------------|-----------------|
| Mass:             | 1531.72795      |
| m/z:              | 766.87125       |
| Charge:           | 2+              |
| Retentiontime:    | 7.2295351028442 |
| Score:            | 200.9994        |
| Mass Error [ppm]: | 0.82575         |
| PEP:              | 1.4003E-22      |
| Precursor Type:   | MULTI           |

general information

|                       |             |
|-----------------------|-------------|
| Annotation:           | 9 of 13     |
| AminoAcids Coverag    | 69 %        |
| Intensity Coverage:   | 43 %        |
| Peak Coverage:        | 33 %        |
| Protein Localisation: | 280 ... 292 |

| a ion         | b <sup>2+</sup> ion | b ion         |    |     |    | y ion         | y <sup>2+</sup> ion |
|---------------|---------------------|---------------|----|-----|----|---------------|---------------------|
| Δ dalton mass | Δ dalton mass       | Δ dalton mass |    | seq |    | Δ dalton mass | Δ dalton mass       |
| 110.1         | 138.1               | 138.1         | 1  | H   | 12 |               |                     |
| -0.03 223.2   | 251.2               | +0.019251.2   | 2  | L   | 11 | 1396          | -0.32 1396          |
| 322.2         | 350.2               | +0.065350.2   | 3  | V   | 10 | 1283          | -0.07 1283          |
| 485.3         | 513.3               | +0.102513.3   | 4  | Y   | 9  | 1184          | -0.05 592.3 -0.06   |
| 614.3         | 642.3               | -0.08 642.3   | 5  | E   | 8  | 1020          | -0.02 1020          |
| 701.4         | 729.4               | 729.4         | 6  | S   | 7  | 891.4         | +0.184891.4         |
| 816.4         | 844.4               | +0.058844.4   | 7  | D   | 6  | 804.4         | 804.4               |
| 944.4         | 972.4               | -0.12 972.4   | 8  | Q   | 5  | 689.4         | +0.044689.4         |
| 1058          | 1086                | -0.21 1086    | 9  | N   | 4  | 561.3         | 561.3               |
| 1187          | 1215                | 1215          | 10 | K   | 3  | 447.3         | 447.3               |
| 1302          | +0.326665.3         | -0.09 1330    | 11 | D   | 2  | 319.2         | +0.134319.2         |
| 1359          | 1387                | 1387          | 12 | G   | 1  | 204.1         | 204.1               |
|               |                     |               | 13 | K   | 0  | 147.1         | 147.1               |

Scan number 4580 Raw file LNCAP\_Silac\_23F10\_set1\_10  
 Method ITMS: CID Pepti... 56.57

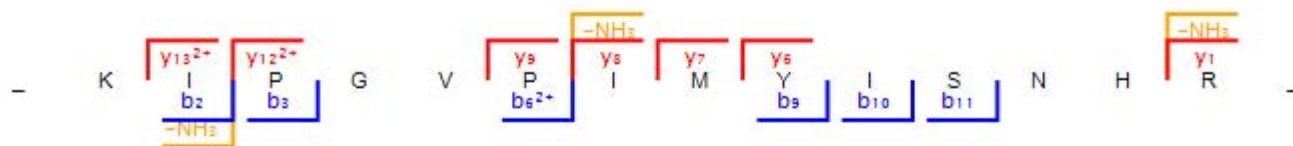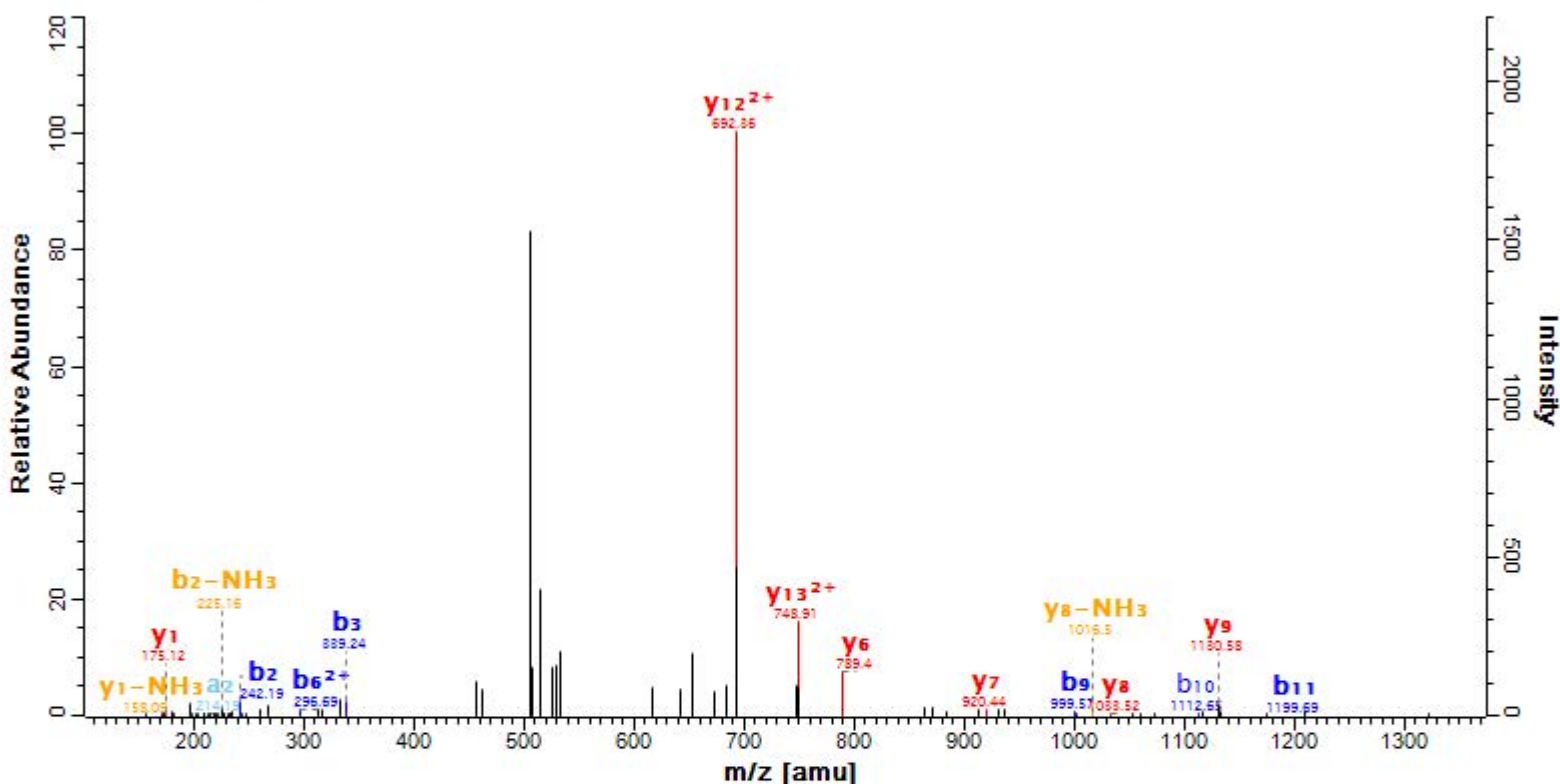

#### precursor information

|                   |                 |
|-------------------|-----------------|
| Mass:             | 1623.89148      |
| m/z:              | 542.30444       |
| Charge:           | 3+              |
| Retentiontime:    | 34.179206848144 |
| Score:            | 56.56912        |
| Mass Error [ppm]: | -0.26972        |
| PEP:              | 0.0049401       |
| Precursor Type:   | MULTI           |

|       | a ion         | b <sup>2+</sup> ion | b ion         |     |   |               | y ion         | y <sup>2+</sup> ion |
|-------|---------------|---------------------|---------------|-----|---|---------------|---------------|---------------------|
|       | Δ dalton mass | Δ dalton mass       | Δ dalton mass | seq |   | Δ dalton mass | Δ dalton mass |                     |
|       | 101.1         | 129.1               | 129.1         | 1   | K | 13            |               |                     |
| -0.07 | 214.2         | 242.2               | +0.081242.2   | 2   | I | 12            | 1497          | 748.9 +0.246        |
|       | 311.2         | 339.2               | +0.073339.2   | 3   | P | 11            | 1384          | 692.4 +0.269        |
|       | 368.3         | 396.3               | 396.3         | 4   | G | 10            | 1287          | 1287                |
|       | 467.3         | 495.3               | 495.3         | 5   | V | 9             | 1230          | 1230                |
|       | 564.4         | -0.31 296.7         | 592.4         | 6   | P | 8             | 1131          | +0.1851131          |
|       | 677.5         | 705.5               | 705.5         | 7   | I | 7             | 1034          | +0.2791034          |
|       | 808.5         | 836.5               | 836.5         | 8   | M | 6             | 920.4         | +0.145920.4         |
|       | 971.6         | 999.6               | -0.1 999.6    | 9   | Y | 5             | 789.4         | +0.014789.4         |
|       | 1085          | 1113                | +0.0451113    | 10  | I | 4             | 626.3         | 626.3               |
|       | 1172          | 1200                | +0.2271200    | 11  | S | 3             | 513.3         | 513.3               |
|       | 1286          | 1314                | 1314          | 12  | N | 2             | 426.2         | 426.2               |
|       | 1423          | 1451                | 1451          | 13  | H | 1             | 312.2         | 312.2               |
|       |               |                     |               | 14  | R | 0             | 175.1         | +0.026175.1         |

#### general information

|                       |             |
|-----------------------|-------------|
| Annotation:           | 9 of 14     |
| AminoAcids Coverage:  | 64 %        |
| Intensity Coverage:   | 35 %        |
| Peak Coverage:        | 17 %        |
| Protein Localisation: | 170 ... 183 |

Scan number 4645 Raw file LNCAP\_Silac\_23F10\_set1\_10  
 Method ITMS: CID Pepti... 173.25

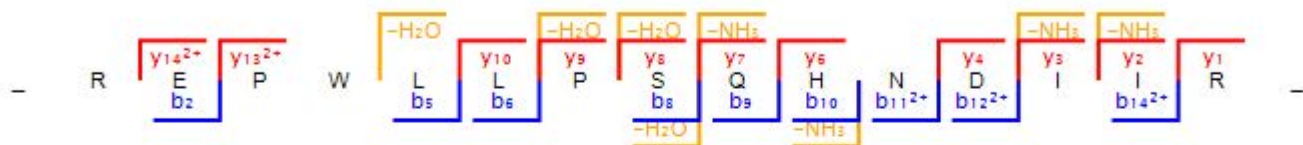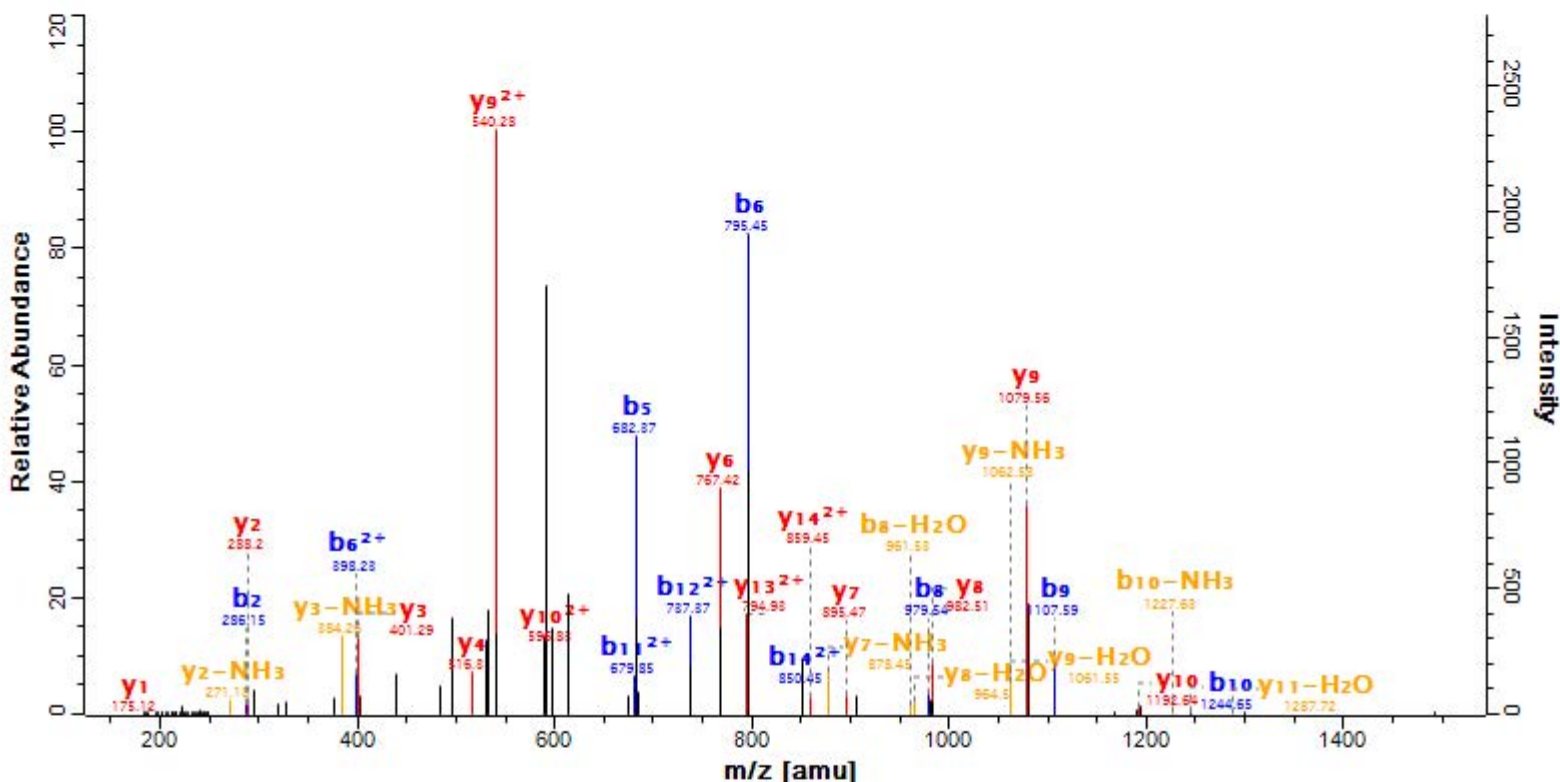

#### precursor information

|                   |                 |
|-------------------|-----------------|
| Mass:             | 1872.99627      |
| m/z:              | 625.33936       |
| Charge:           | 3+              |
| Retentiontime:    | 34.666954040527 |
| Score:            | 173.2541        |
| Mass Error [ppm]: | 0.21395         |
| PEP:              | 4.5378E-13      |
| Precursor Type:   | ISO             |

#### general information

|                       |             |
|-----------------------|-------------|
| Annotation:           | 13 of 15    |
| AminoAcids Coverage:  | 87 %        |
| Intensity Coverage:   | 55 %        |
| Peak Coverage:        | 25 %        |
| Protein Localisation: | 735 ... 749 |

| b <sup>2+</sup> ion |        | b ion    |        | seq |   |    | y ion    |         | y <sup>2+</sup> ion |         |
|---------------------|--------|----------|--------|-----|---|----|----------|---------|---------------------|---------|
| Δ dalton            | mass   | Δ dalton | mass   |     |   |    | Δ dalton | mass    | Δ dalton            | mass    |
|                     | 157.11 |          | 157.11 | 1   | R | 14 |          |         |                     |         |
|                     | 286.15 | +0.0893  | 286.15 | 2   | E | 13 | 1717.9   |         | 859.45              | +0.3395 |
|                     | 383.2  |          | 383.2  | 3   | P | 12 | 1588.9   |         | 794.93              | -0.069  |
|                     | 569.28 |          | 569.28 | 4   | W | 11 | 1491.8   |         | 1491.8              |         |
|                     | 682.37 | +0.0218  | 682.37 | 5   | L | 10 | 1305.7   |         | 1305.7              |         |
| +0.1855             | 398.23 | +0.0752  | 795.45 | 6   | L | 9  | 1192.6   | -0.001  | 596.83              | +0.0371 |
|                     | 892.5  |          | 892.5  | 7   | P | 8  | 1079.6   | -0.029  | 540.28              | +0.2741 |
|                     | 979.54 | +0.0034  | 979.54 | 8   | S | 7  | 982.51   | +0.007  | 982.51              |         |
|                     | 1107.6 | +0.0306  | 1107.6 | 9   | Q | 6  | 895.47   | +0.0317 | 895.47              |         |
|                     | 1244.7 | +0.0517  | 1244.7 | 10  | H | 5  | 767.42   | +0      | 767.42              |         |
| +0.3058             | 679.85 |          | 1358.7 | 11  | N | 4  | 630.36   |         | 630.36              |         |
| +0.158              | 737.37 |          | 1473.7 | 12  | D | 3  | 516.31   | +0.0218 | 516.31              |         |
|                     | 1586.8 |          | 1586.8 | 13  | I | 2  | 401.29   | +0.058  | 401.29              |         |
| +0.0356             | 850.45 |          | 1699.9 | 14  | I | 1  | 288.2    | +0.0351 | 288.2               |         |
|                     |        |          |        | 15  | R | 0  | 175.12   | +0.2303 | 175.12              |         |



Scan number 4791 Raw file LNCAP\_Silac\_23F10\_set1\_10  
 Method ITMS; CID Pepti... 201.02

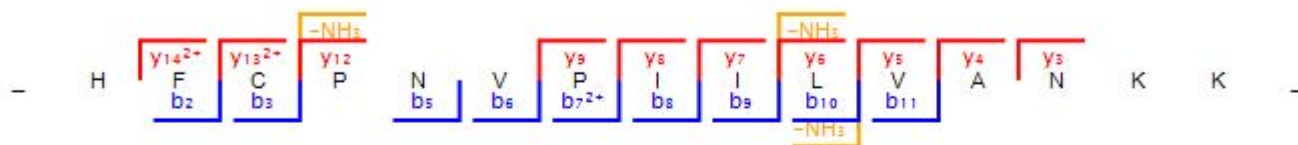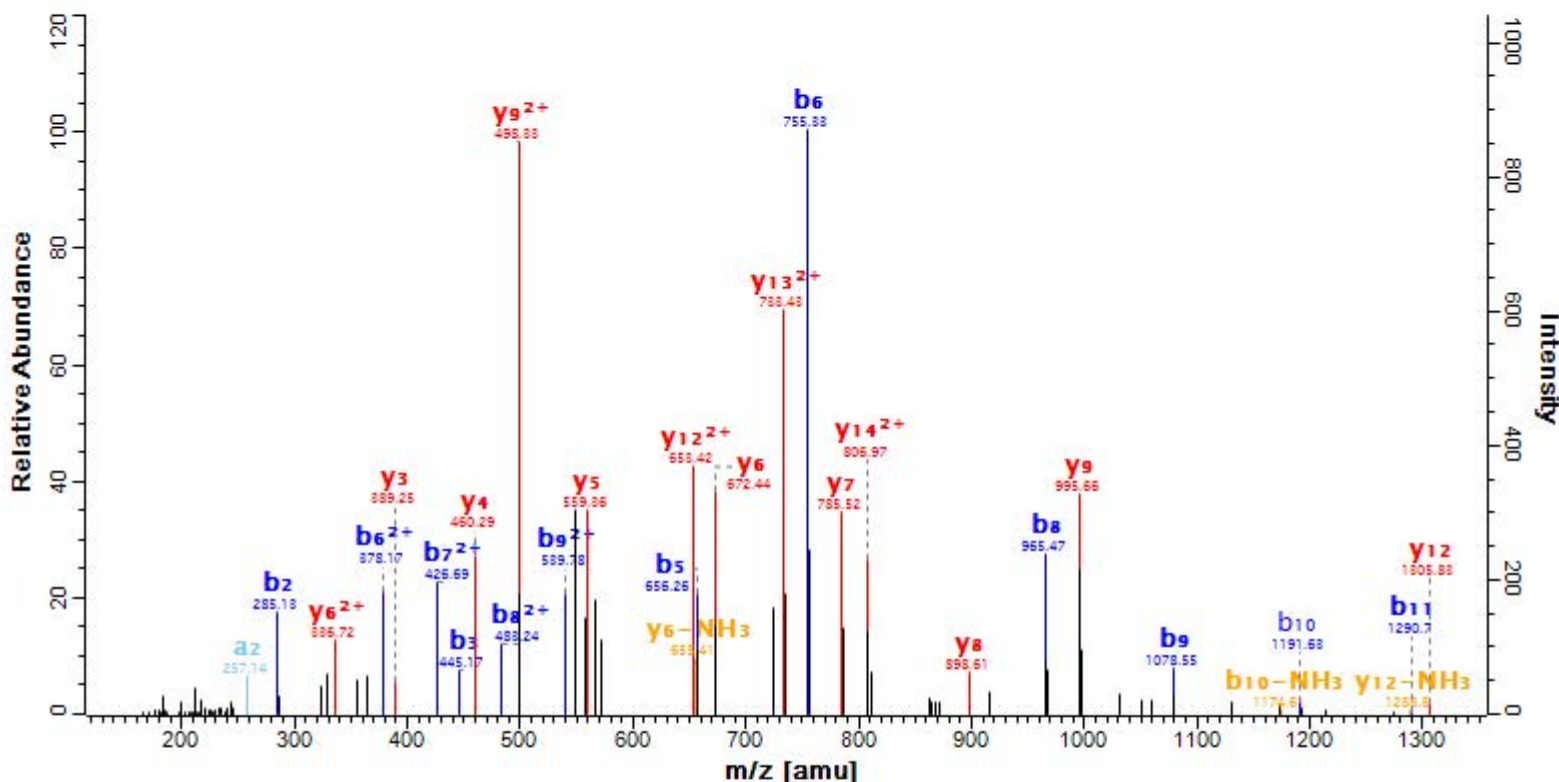

precursor information

|                   |                 |
|-------------------|-----------------|
| Mass:             | 1748.97598      |
| m/z:              | 583.99927       |
| Charge:           | 3+              |
| Retentiontime:    | 35.756828308105 |
| Score:            | 201.0235        |
| Mass Error [ppm]: | 0.0015999       |
| PEP:              | 2.7228E-28      |
| Precursor Type:   | MULTI           |

| a ion         | b <sup>2+</sup> ion | b ion         | seq |   |    | y ion         | y <sup>2+</sup> ion |
|---------------|---------------------|---------------|-----|---|----|---------------|---------------------|
| Δ dalton mass | Δ dalton mass       | Δ dalton mass |     |   |    | Δ dalton mass | Δ dalton mass       |
| 110.1         | 138.1               | 138.1         | 1   | H | 14 |               |                     |
| -0.02 257.1   | 285.1               | +0 285.1      | 2   | F | 13 | 1613          | 807 +0.13           |
| 417.2         | 445.2               | +0.15 445.2   | 3   | C | 12 | 1466          | 733.4 +0.24         |
| 514.2         | 542.2               | 542.2         | 4   | P | 11 | 1306          | +0.104 653.4 +0.28  |
| 628.3         | 656.3               | +0.20 656.3   | 5   | N | 10 | 1209          | 1209                |
| 727.3         | +0.12 3378.2        | +0.01 6755.3  | 6   | V | 9  | 1095          | 1095                |
| 824.4         | +0.29 426.7         | 852.4         | 7   | P | 8  | 995.7         | -0.04 498.3 +0.24   |
| 937.5         | +0.25 7483.2        | +0.04 1965.5  | 8   | I | 7  | 898.6         | +0.17 3898.6        |
| 1051          | +0.18 539.8         | +0.02 91079   | 9   | I | 6  | 785.5         | +0.04 7785.5        |
| 1164          | 1192                | +0.03 51192   | 10  | L | 5  | 672.4         | -0.07 336.7 -0.5    |
| 1263          | 1291                | +0.30 91291   | 11  | V | 4  | 559.4         | +0.04 559.4         |
| 1334          | 1362                | 1362          | 12  | A | 3  | 460.3         | +0.01 3460.3        |
| 1448          | 1476                | 1476          | 13  | N | 2  | 389.3         | +0.02 4389.3        |
| 1576          | 1604                | 1604          | 14  | K | 1  | 275.2         | 275.2               |
|               |                     |               | 15  | K | 0  | 147.1         | 147.1               |

general information

|                       |             |
|-----------------------|-------------|
| Annotation:           | 12 of 15    |
| AminoAcids Coverage:  | 80 %        |
| Intensity Coverage:   | 65 %        |
| Peak Coverage:        | 29 %        |
| Protein Localisation: | 105 ... 119 |

Scan number 489 Raw file LNCAP\_Silac\_23F10\_set1\_10  
 Method ITMS; CID Pepti... 82.54

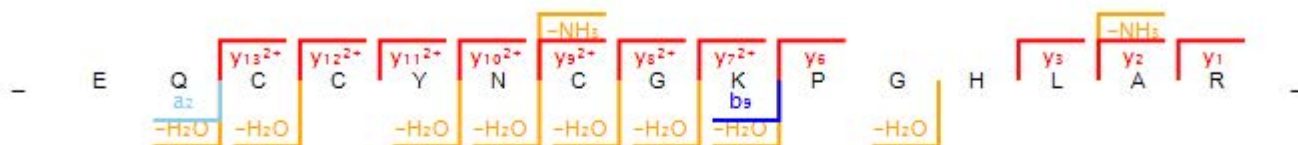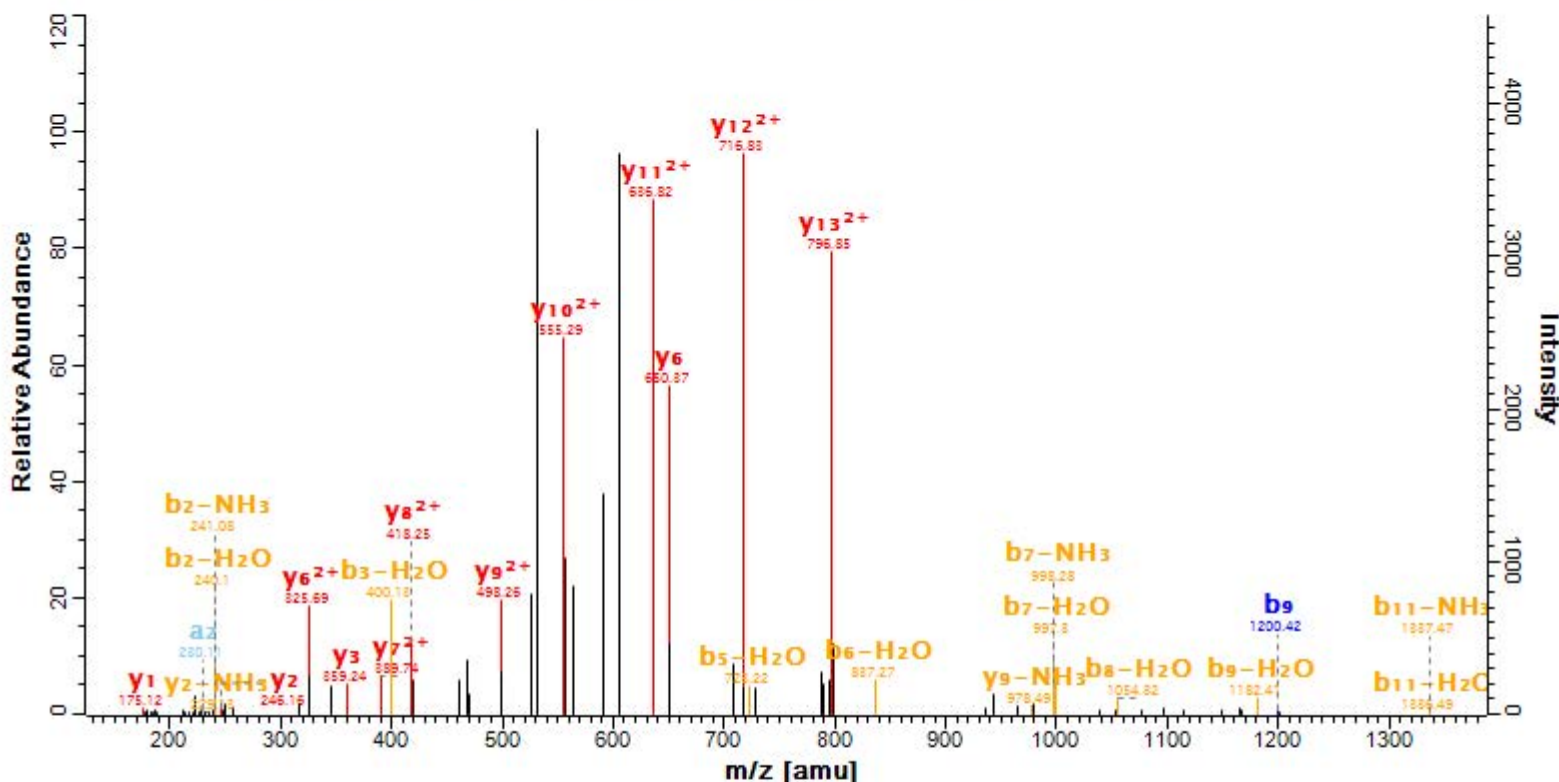

#### precursor information

|                   |                 |
|-------------------|-----------------|
| Mass:             | 1848.78164      |
| m/z:              | 617.26782       |
| Charge:           | 3+              |
| Retentiontime:    | 7.4438414573669 |
| Score:            | 82.54314        |
| Mass Error [ppm]: | -0.082919       |
| PEP:              | 0.00034911      |
| Precursor Type:   | MULTI           |

| a ion    |        | b ion          |      | seq |   |    | y ion    |         | y <sup>2+</sup> ion |         |
|----------|--------|----------------|------|-----|---|----|----------|---------|---------------------|---------|
| Δ dalton | mass   | Δ dalton       | mass |     |   |    | Δ dalton | mass    | Δ dalton            | mass    |
|          | 102.05 | 130.05         |      | 1   | E | 14 |          |         |                     |         |
| +0.064   | 230.11 | 258.11         |      | 2   | Q | 13 | 1720.7   |         | 1720.7              |         |
|          | 390.14 | 418.14         |      | 3   | C | 12 | 1592.7   |         | 796.85              | +0.2509 |
|          | 550.17 | 578.17         |      | 4   | C | 11 | 1432.7   |         | 716.83              | +0.2765 |
|          | 713.24 | 741.23         |      | 5   | Y | 10 | 1272.6   |         | 636.82              | +0.2641 |
|          | 827.28 | 855.28         |      | 6   | N | 9  | 1109.6   |         | 555.29              | +0.0497 |
|          | 987.31 | 1015.3         |      | 7   | C | 8  | 995.52   |         | 498.26              | +0.0484 |
|          | 1044.3 | 1072.3         |      | 8   | G | 7  | 835.49   |         | 418.25              | +0.0437 |
|          | 1172.4 | +0.0913 1200.4 |      | 9   | K | 6  | 778.47   |         | 389.74              | +0.2363 |
|          | 1269.5 | 1297.5         |      | 10  | P | 5  | 650.37   | +0.0122 | 325.69              | -0.021  |
|          | 1326.5 | 1354.5         |      | 11  | G | 4  | 553.32   |         | 553.32              |         |
|          | 1463.6 | 1491.6         |      | 12  | H | 3  | 496.3    |         | 496.3               |         |
|          | 1576.6 | 1604.6         |      | 13  | L | 2  | 359.24   | +0.0999 | 359.24              |         |
|          | 1647.7 | 1675.7         |      | 14  | A | 1  | 246.16   | +0.085  | 246.16              |         |
|          |        |                |      | 15  | R | 0  | 175.12   | +0.1137 | 175.12              |         |

#### general information

|                       |            |
|-----------------------|------------|
| Annotation:           | 13 of 15   |
| AminoAcids Coverage:  | 87 %       |
| Intensity Coverage:   | 53 %       |
| Peak Coverage:        | 28 %       |
| Protein Localisation: | 95 ... 109 |

Scan number 5097 Raw file LNCAP\_Silac\_23F10\_set1\_10  
 Method ITMS; CID Pepti... 144.29

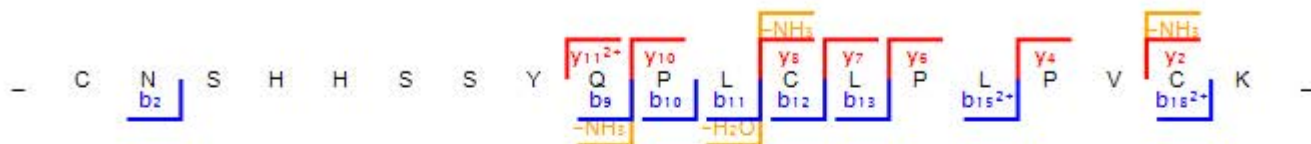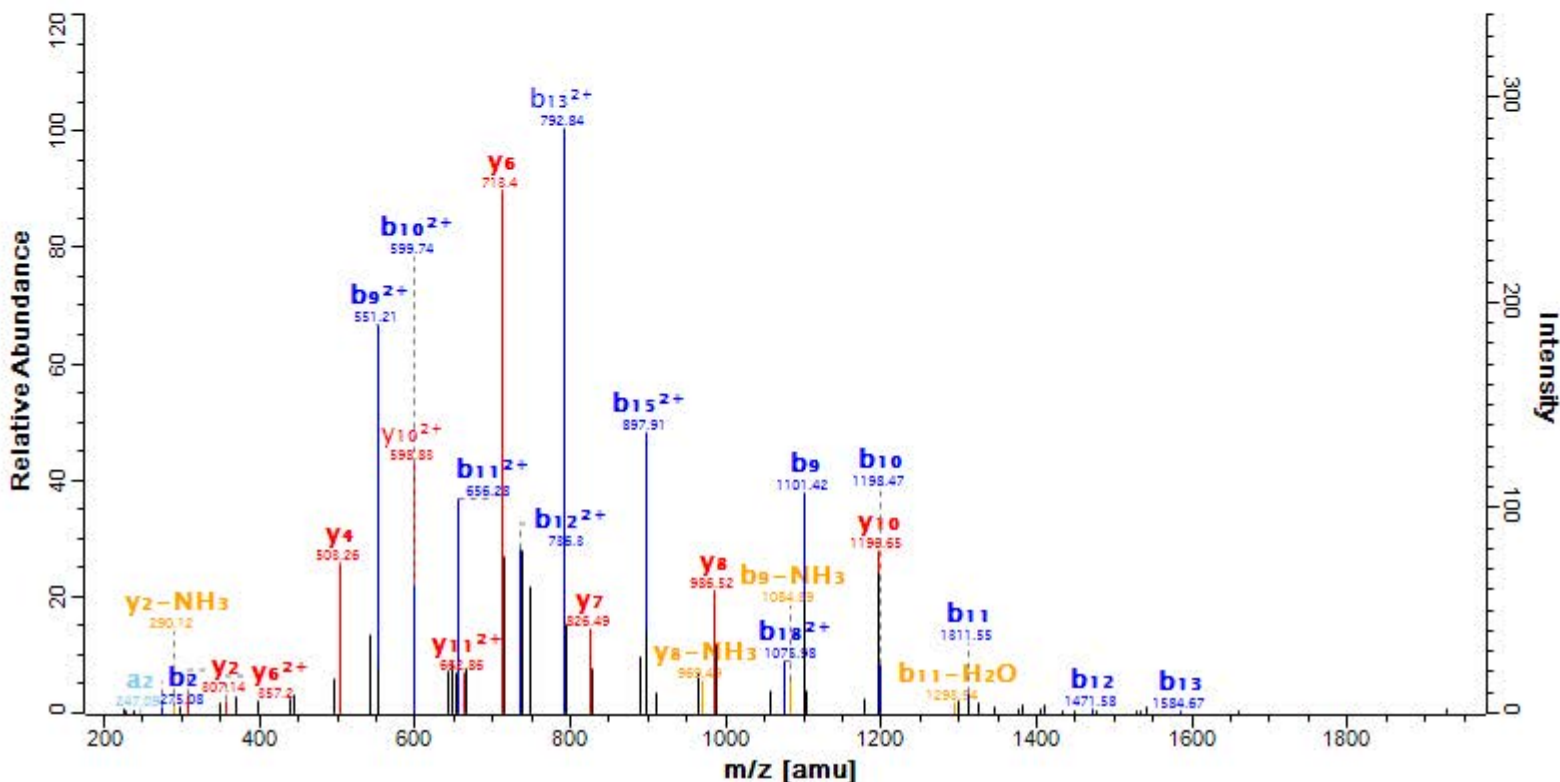

**precursor information**

|                   |                 |
|-------------------|-----------------|
| Mass:             | 2296.05481      |
| m/z:              | 766.35888       |
| Charge:           | 3+              |
| Retentiontime:    | 38.262657165527 |
| Score:            | 144.2888        |
| Mass Error [ppm]: | -0.13255        |
| PEP:              | 6.0737E-19      |
| Precursor Type:   | MULTI           |

**general information**

|                       |             |
|-----------------------|-------------|
| Annotation:           | 11 of 19    |
| AminoAcids Coverage:  | 58 %        |
| Intensity Coverage:   | 67 %        |
| Peak Coverage:        | 33 %        |
| Protein Localisation: | 503 ... 521 |

| a ion         | b <sup>2+</sup> ion | b ion         |     |   |               | y ion         | y <sup>2+</sup> ion |
|---------------|---------------------|---------------|-----|---|---------------|---------------|---------------------|
| Δ dalton mass | Δ dalton mass       | Δ dalton mass | seq |   | Δ dalton mass | Δ dalton mass |                     |
| 133           | 161                 | 161           | 1   | C | 18            |               |                     |
| +0.107247.1   | 275.1               | +0.037275.1   | 2   | N | 17            | 2137          | 2137                |
| 334.1         | 362.1               | 362.1         | 3   | S | 16            | 2023          | 2023                |
| 471.2         | 499.2               | 499.2         | 4   | H | 15            | 1936          | 1936                |
| 608.2         | 636.2               | 636.2         | 5   | H | 14            | 1799          | 1799                |
| 695.3         | 723.3               | 723.3         | 6   | S | 13            | 1662          | 1662                |
| 782.3         | 810.3               | 810.3         | 7   | S | 12            | 1575          | 1575                |
| 945.4         | 973.4               | 973.4         | 8   | Y | 11            | 1488          | 1488                |
| 1073          | +0.253551.2         | -0.05 1101    | 9   | Q | 10            | 1325          | 662.9 +0.339        |
| 1170          | +0.425599.7         | +0.0981198    | 10  | P | 9             | 1197          | -0.01 598.8 +0.184  |
| 1284          | +0.322656.3         | +0.2511312    | 11  | L | 8             | 1100          | 1100                |
| 1444          | -0.04 736.3         | +0.02 1472    | 12  | C | 7             | 986.5         | -0.04 986.5         |
| 1557          | +0.189792.8         | +0.4211585    | 13  | L | 6             | 826.5         | -0.02 826.5         |
| 1654          | 1682                | 1682          | 14  | P | 5             | 713.4         | -0.06 357.2 +0.051  |
| 1767          | +0.104897.9         | 1795          | 15  | L | 4             | 616.3         | 616.3               |
| 1864          | 1892                | 1892          | 16  | P | 3             | 503.3         | +0.074503.3         |
| 1963          | 1991                | 1991          | 17  | V | 2             | 406.2         | 406.2               |
| 2123          | -0.01 1076          | 2151          | 18  | C | 1             | 307.1         | +0.007307.1         |
|               |                     |               | 19  | K | 0             | 147.1         | 147.1               |

Scan number 5530 Raw file LNCAP\_Silac\_23F10\_set1\_10  
 Method ITMS; CID Peptide 49.59

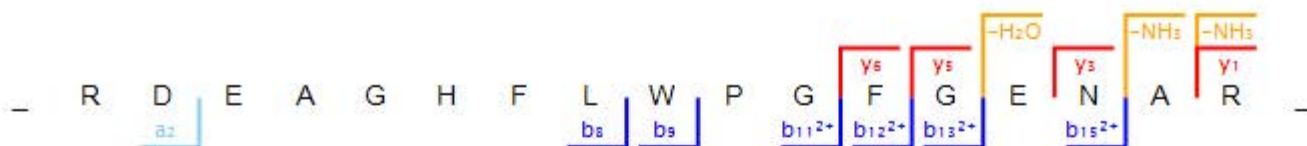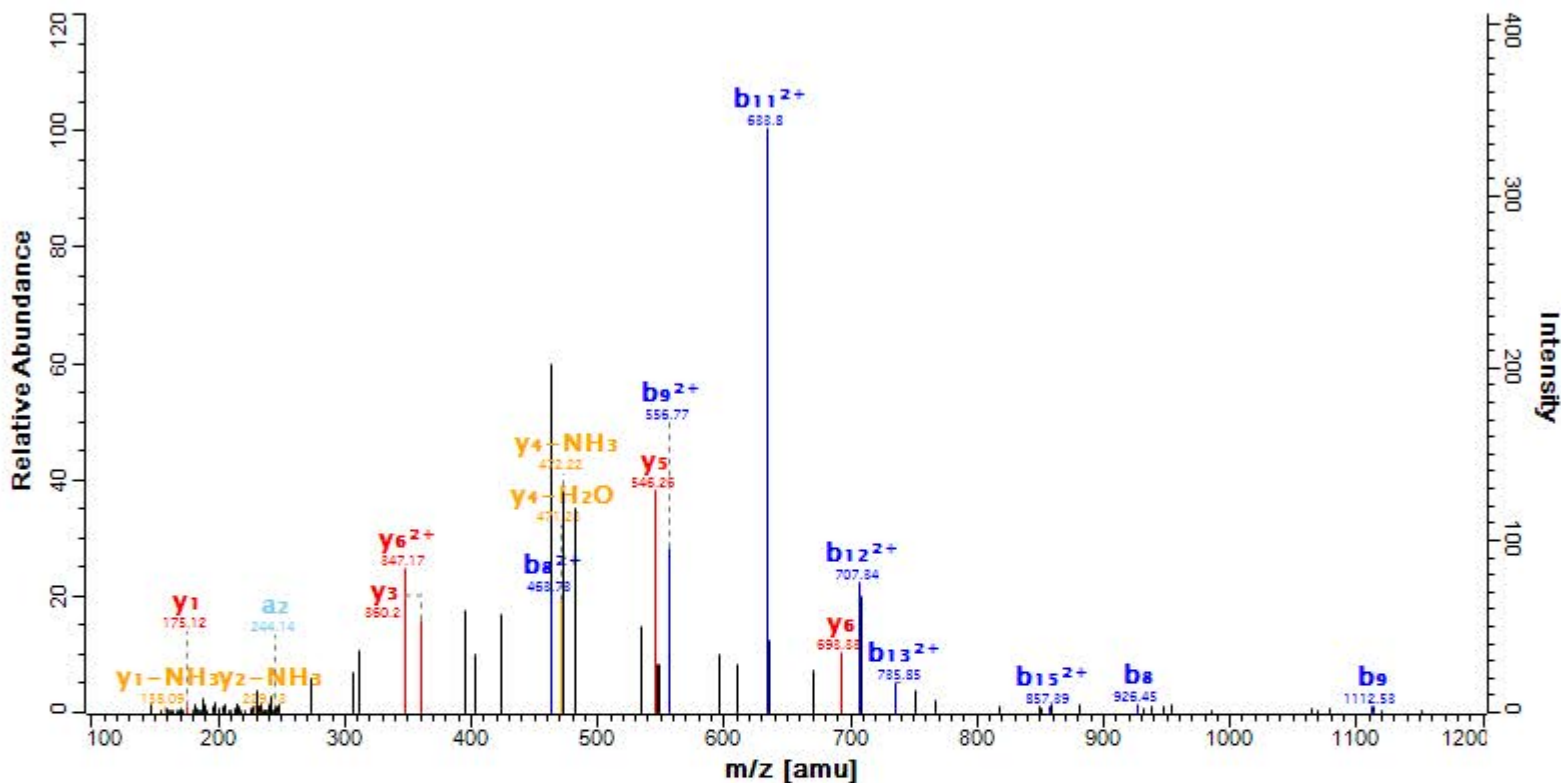

precursor information

|                   |                 |
|-------------------|-----------------|
| Mass:             | 1957.91728      |
| m/z:              | 490.4866        |
| Charge:           | 4+              |
| Retentiontime:    | 42.120121002197 |
| Score:            | 49.59457        |
| Mass Error [ppm]: | -0.54336        |
| PEP:              | 0.0076928       |
| Precursor Type:   | MULTI           |

general information

|                       |             |
|-----------------------|-------------|
| Annotation:           | 11 of 17    |
| AminoAcids Coverage:  | 65 %        |
| Intensity Coverage:   | 48 %        |
| Peak Coverage:        | 16 %        |
| Protein Localisation: | 537 ... 553 |

|        | a ion         | b <sup>2+</sup> ion | b ion         |    |     |    | y ion         | y <sup>2+</sup> ion |
|--------|---------------|---------------------|---------------|----|-----|----|---------------|---------------------|
|        | Δ dalton mass | Δ dalton mass       | Δ dalton mass |    | seq |    | Δ dalton mass | Δ dalton mass       |
|        | 129.1         | 157.1               | 157.1         | 1  | R   | 16 |               |                     |
| +0.109 | 244.1         | 272.1               | 272.1         | 2  | D   | 15 | 1803          | 1803                |
|        | 373.2         | 401.2               | 401.2         | 3  | E   | 14 | 1688          | 1688                |
|        | 444.2         | 472.2               | 472.2         | 4  | A   | 13 | 1559          | 1559                |
|        | 501.2         | 529.2               | 529.2         | 5  | G   | 12 | 1488          | 1488                |
|        | 638.3         | 666.3               | 666.3         | 6  | H   | 11 | 1431          | 1431                |
|        | 785.4         | 813.4               | 813.4         | 7  | F   | 10 | 1294          | 1294                |
|        | 898.5         | +0.073463.7         | -0.06 926.4   | 8  | L   | 9  | 1147          | 1147                |
|        | 1085          | +0.16 556.8         | -0.2 1113     | 9  | W   | 8  | 1033          | 1033                |
|        | 1182          | 1210                | 1210          | 10 | P   | 7  | 847.4         | 847.4               |
|        | 1239          | +0.2 633.8          | 1267          | 11 | G   | 6  | 750.4         | 750.4               |
|        | 1386          | -0.01 707.3         | 1414          | 12 | F   | 5  | 693.3         | +0.201347.2         |
|        | 1443          | +0.092735.8         | 1471          | 13 | G   | 4  | 546.3         | +0.004546.3         |
|        | 1572          | 1600                | 1600          | 14 | E   | 3  | 489.2         | 489.2               |
|        | 1686          | +0.471857.4         | 1714          | 15 | N   | 2  | 360.2         | +0.108360.2         |
|        | 1757          | 1785                | 1785          | 16 | A   | 1  | 246.2         | 246.2               |
|        |               |                     |               | 17 | R   | 0  | 175.1         | +0.1 175.1          |

Scan number 5597 Raw file LNCAP\_Silac\_23F10\_set1\_10  
 Method ITMS; CID Pepti... 73.3

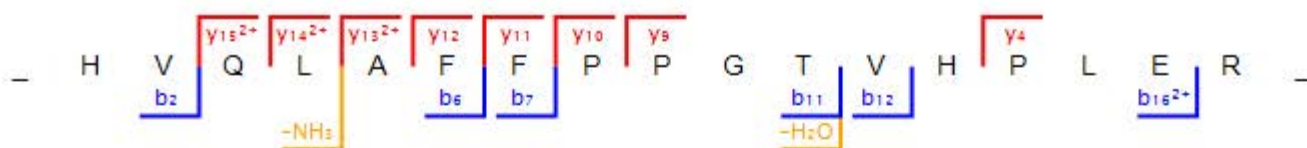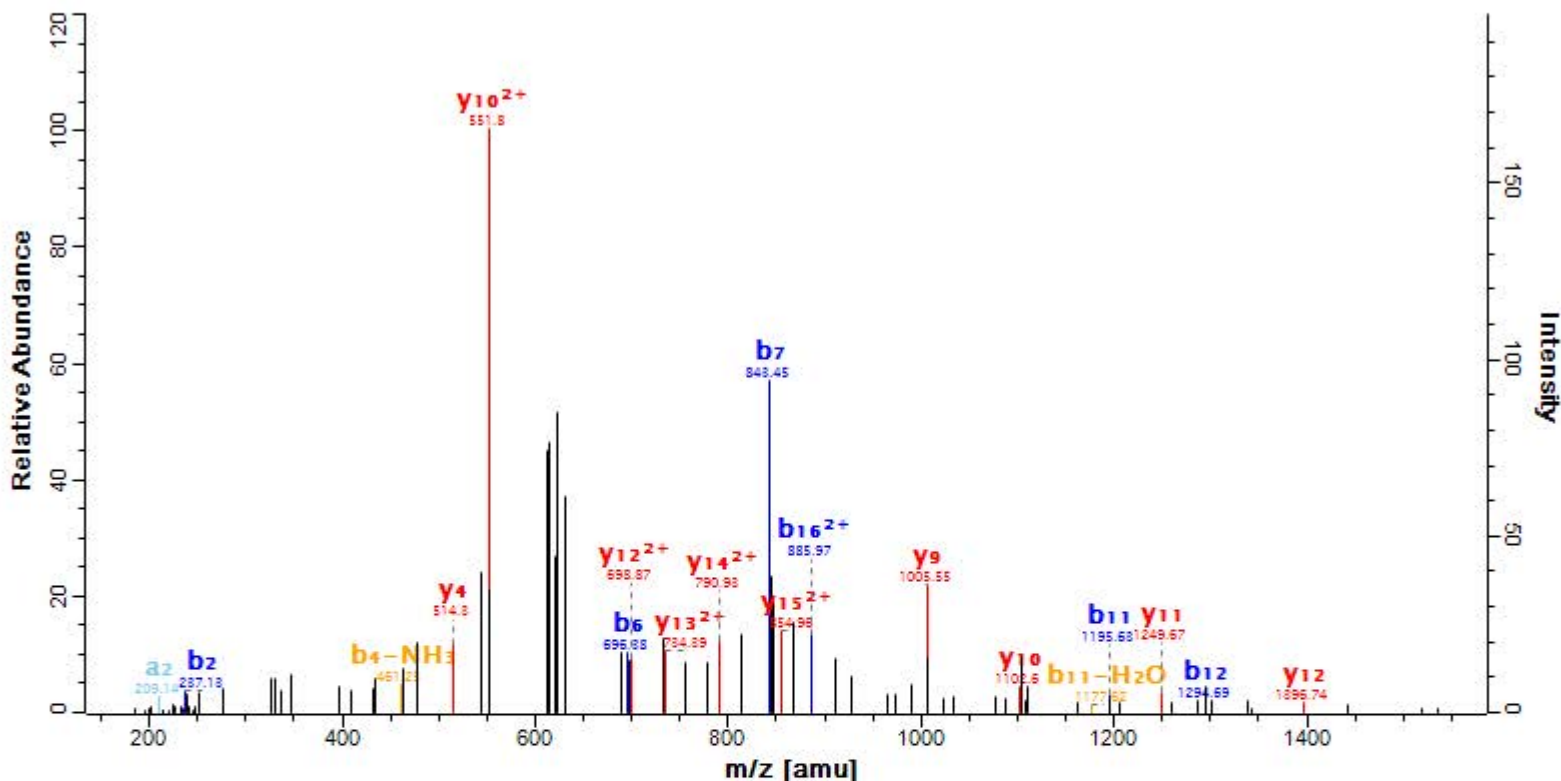

precursor information

|                   |                 |
|-------------------|-----------------|
| Mass:             | 1944.03733      |
| m/z:              | 649.01972       |
| Charge:           | 3+              |
| Retentiontime:    | 42.801227569580 |
| Score:            | 73.29602        |
| Mass Error [ppm]: | 0.16775         |
| PEP:              | 0.00018187      |
| Precursor Type:   | MULTI           |

|       | a ion         | b <sup>2+</sup> ion | b ion         |     |   |               | y ion         | y <sup>2+</sup> ion |
|-------|---------------|---------------------|---------------|-----|---|---------------|---------------|---------------------|
|       | Δ dalton mass | Δ dalton mass       | Δ dalton mass | seq |   | Δ dalton mass | Δ dalton mass |                     |
|       | 110.1         | 138.1               | 138.1         | 1   | H | 16            |               |                     |
| -0.02 | 209.1         | 237.1               | +0.108237.1   | 2   | V | 15            | 1808          | 1808                |
|       | 337.2         | 365.2               | 365.2         | 3   | Q | 14            | 1709          | 855 +0.234          |
|       | 450.3         | 478.3               | 478.3         | 4   | L | 13            | 1581          | 790.9 +0.344        |
|       | 521.3         | 549.3               | 549.3         | 5   | A | 12            | 1468          | 734.4 +0.279        |
|       | 668.4         | 696.4               | +0.08696.4    | 6   | F | 11            | 1397          | +0.225698.9 +0.103  |
|       | 815.5         | 843.5               | -0.04843.5    | 7   | F | 10            | 1250          | +0.0511250          |
|       | 912.5         | 940.5               | 940.5         | 8   | P | 9             | 1103          | -0.13551.8 +0.175   |
|       | 1010          | 1038                | 1038          | 9   | P | 8             | 1006          | +0.2271006          |
|       | 1067          | 1095                | 1095          | 10  | G | 7             | 908.5         | 908.5               |
|       | 1168          | 1196                | +0.1371196    | 11  | T | 6             | 851.5         | 851.5               |
|       | 1267          | 1295                | +0.0211295    | 12  | V | 5             | 750.4         | 750.4               |
|       | 1404          | 1432                | 1432          | 13  | H | 4             | 651.4         | 651.4               |
|       | 1501          | 1529                | 1529          | 14  | P | 3             | 514.3         | +0.033514.3         |
|       | 1614          | 1642                | 1642          | 15  | L | 2             | 417.2         | 417.2               |
|       | 1743          | +0.294886           | 1771          | 16  | E | 1             | 304.2         | 304.2               |
|       |               |                     |               | 17  | R | 0             | 175.1         | 175.1               |

general information

|                       |             |
|-----------------------|-------------|
| Annotation:           | 12 of 17    |
| AminoAcids Coverage:  | 71 %        |
| Intensity Coverage:   | 33 %        |
| Peak Coverage:        | 21 %        |
| Protein Localisation: | 311 ... 327 |

Scan number 5666 Raw file LNCAP\_Silac\_23F10\_set1\_10  
 Method ITMS; CID Pepti... 106.6

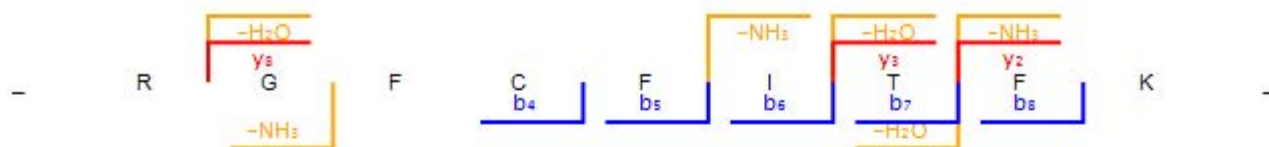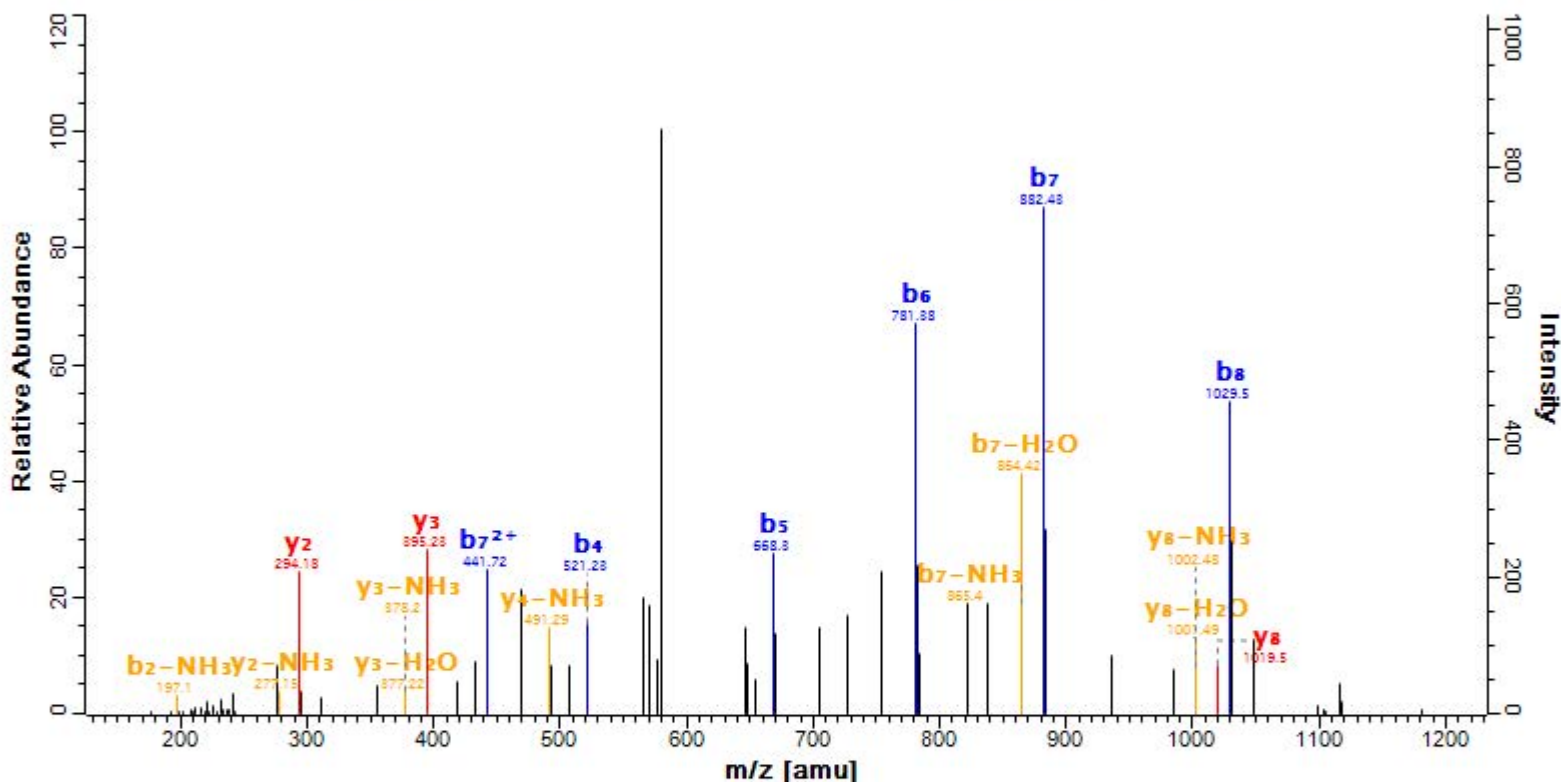

#### precursor information

|                       |                 |
|-----------------------|-----------------|
| Mass:                 | 1174.59553      |
| m/z:                  | 588.30504       |
| Charge:               | 2+              |
| Retentiontime:        | 43.484272003173 |
| Score:                | 106.5993        |
| Mass Error [ppm]:     | -0.17669        |
| PEP:                  | 0.0013229       |
| Precursor Type:       | MULTI           |
| Annotation:           | 6 of 9          |
| AminoAcids Coverage:  | 67 %            |
| Intensity Coverage:   | 45 %            |
| Peak Coverage:        | 24 %            |
| Protein Localisation: | 204 ... 212     |

| b <sup>2+</sup> ion |          | b ion     |          |     | y ion    |      |                    |
|---------------------|----------|-----------|----------|-----|----------|------|--------------------|
| Δ dalton            | mass     | Δ dalton  | mass     | seq | Δ dalton | mass |                    |
|                     | 157.1084 |           | 157.1084 | 1   | R        | 8    |                    |
|                     | 214.1299 |           | 214.1299 | 2   | G        | 7    | 1019.502 -0.00385  |
|                     | 361.1983 |           | 361.1983 | 3   | F        | 6    | 962.4804           |
|                     | 521.2289 | -0.08609  | 521.2289 | 4   | C        | 5    | 815.412            |
|                     | 668.2973 | -0.09939  | 668.2973 | 5   | F        | 4    | 655.3814           |
|                     | 781.3814 | +0.098528 | 781.3814 | 6   | I        | 3    | 508.313            |
| +0.027493           | 441.7182 | -0.05608  | 882.4291 | 7   | T        | 2    | 395.2289 +0.090134 |
|                     | 1029.497 | +0.052687 | 1029.497 | 8   | F        | 1    | 294.1812 +0.116817 |
|                     |          |           |          | 9   | K        | 0    | 147.1128           |

Scan number 5924 Raw file LNCAP\_Silac\_23F10\_set1\_10  
 Method ITMS; CID Pepti... 36.45

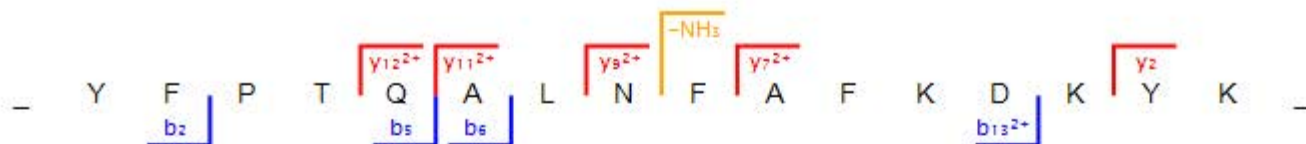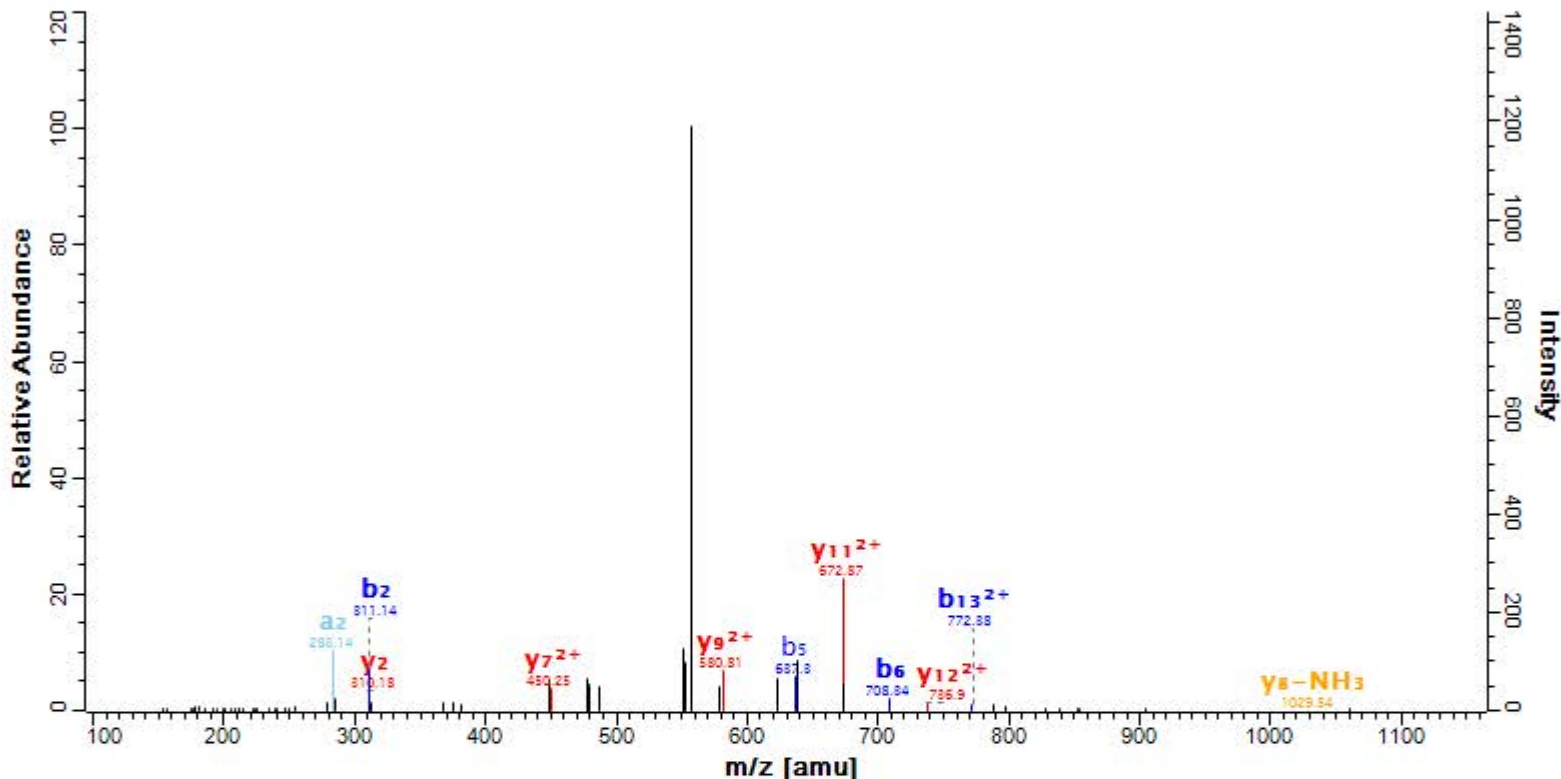

#### precursor information

|                   |                 |
|-------------------|-----------------|
| Mass:             | 1980.01362      |
| m/z:              | 496.01068       |
| Charge:           | 4+              |
| Retentiontime:    | 46.122642517089 |
| Score:            | 36.44535        |
| Mass Error [ppm]: | -0.46028        |
| PEP:              | 0.0512          |
| Precursor Type:   | MULTI           |

#### general information

|                       |           |
|-----------------------|-----------|
| Annotation:           | 9 of 16   |
| AminoAcids Coverag    | 56 %      |
| Intensity Coverage:   | 25 %      |
| Peak Coverage:        | 10 %      |
| Protein Localisation: | 81 ... 96 |

|       | a ion         | b <sup>2+</sup> ion | b ion         |    |     |    | y ion         | y <sup>2+</sup> ion |
|-------|---------------|---------------------|---------------|----|-----|----|---------------|---------------------|
|       | Δ dalton mass | Δ dalton mass       | Δ dalton mass |    | seq |    | Δ dalton mass | Δ dalton mass       |
|       | 136.1         | 164.1               | 164.1         | 1  | Y   | 15 |               |                     |
| -0.01 | 283.1         | 311.1               | +0.057311.1   | 2  | F   | 14 | 1818          | 1818                |
|       | 380.2         | 408.2               | 408.2         | 3  | P   | 13 | 1671          | 1671                |
|       | 481.2         | 509.2               | 509.2         | 4  | T   | 12 | 1574          | 1574                |
|       | 609.3         | 637.3               | -0.02 637.3   | 5  | Q   | 11 | 1473          | 736.9 +0.261        |
|       | 680.3         | 708.3               | +0.027708.3   | 6  | A   | 10 | 1345          | 672.9 +0.23         |
|       | 793.4         | 821.4               | 821.4         | 7  | L   | 9  | 1274          | 1274                |
|       | 907.5         | 935.5               | 935.5         | 8  | N   | 8  | 1161          | 580.8 +0.26         |
|       | 1055          | 1083                | 1083          | 9  | F   | 7  | 1047          | 1047                |
|       | 1126          | 1154                | 1154          | 10 | A   | 6  | 899.5         | 450.3 -0.3          |
|       | 1273          | 1301                | 1301          | 11 | F   | 5  | 828.5         | 828.5               |
|       | 1401          | 1429                | 1429          | 12 | K   | 4  | 681.4         | 681.4               |
|       | 1516          | -0.23 772.4         | 1544          | 13 | D   | 3  | 553.3         | 553.3               |
|       | 1644          | 1672                | 1672          | 14 | K   | 2  | 438.3         | 438.3               |
|       | 1807          | 1835                | 1835          | 15 | Y   | 1  | 310.2 +0.08   | 310.2               |
|       |               |                     |               | 16 | K   | 0  | 147.1         | 147.1               |

Scan number 5966 Raw file LNCAP\_Silac\_23F10\_set1\_10  
 Method ITMS; CID Pepti... 178.84

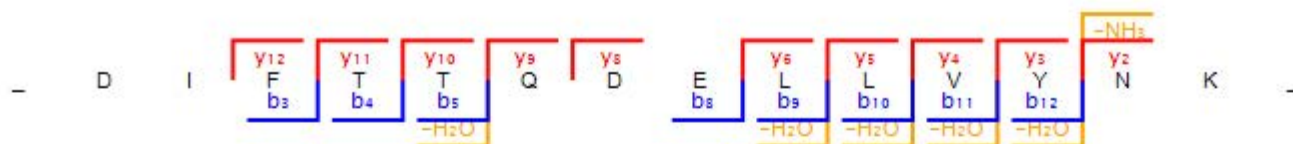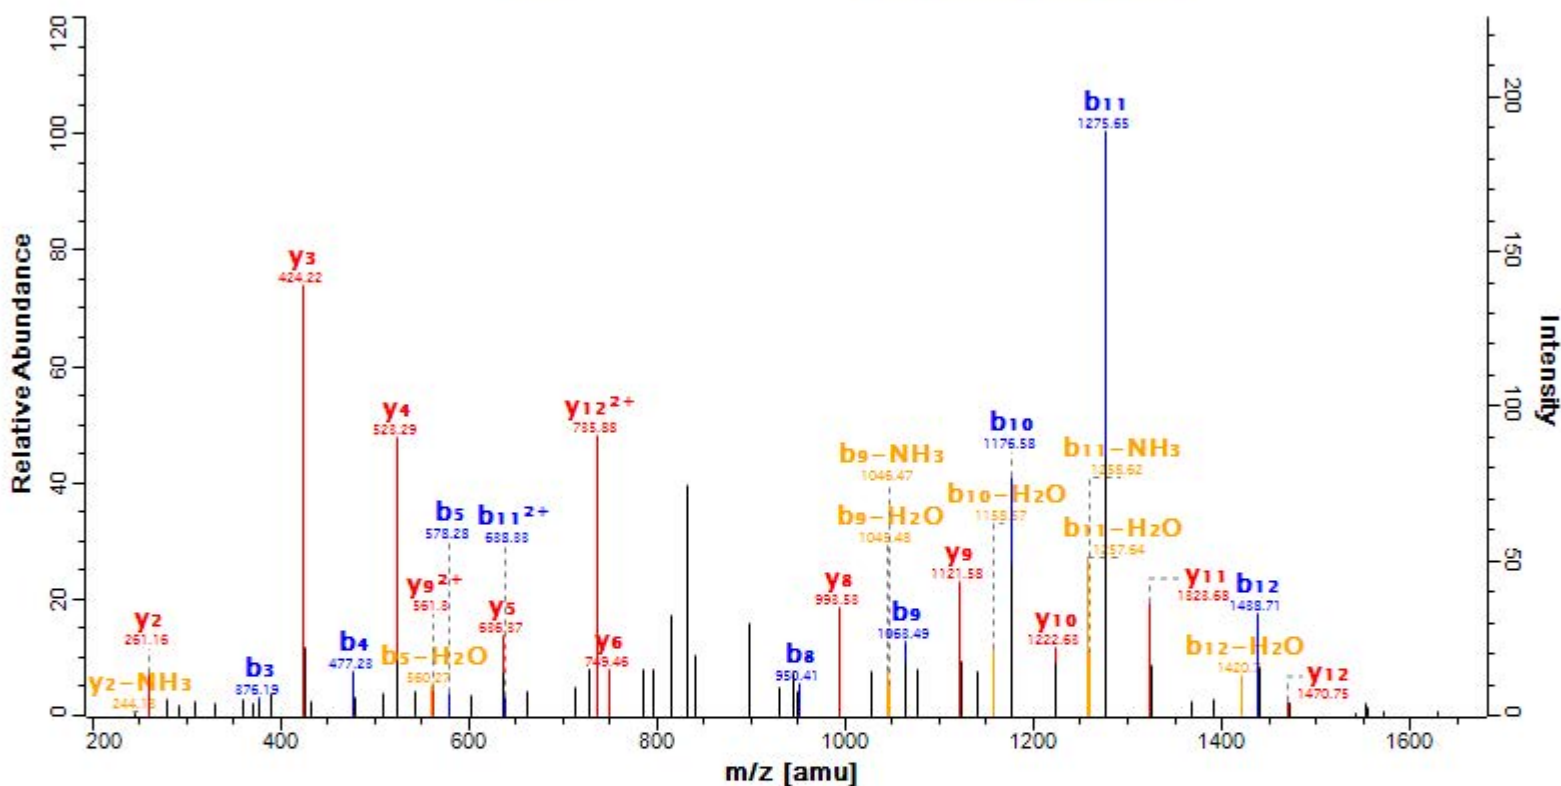

#### precursor information

|                   |                 |
|-------------------|-----------------|
| Mass:             | 1697.85132      |
| m/z:              | 849.93294       |
| Charge:           | 2+              |
| Retentiontime:    | 46.572704315185 |
| Score:            | 178.8359        |
| Mass Error [ppm]: | 0.059369        |
| PEP:              | 4.1643E-18      |
| Precursor Type:   | ISO             |

#### general information

|                       |             |
|-----------------------|-------------|
| Annotation:           | 11 of 14    |
| AminoAcids Coverage:  | 79 %        |
| Intensity Coverage:   | 58 %        |
| Peak Coverage:        | 34 %        |
| Protein Localisation: | 252 ... 265 |

| b <sup>2+</sup> ion |        | b ion    |        | seq |   |    | y ion    |         | y <sup>2+</sup> ion |         |
|---------------------|--------|----------|--------|-----|---|----|----------|---------|---------------------|---------|
| Δ dalton            | mass   | Δ dalton | mass   |     |   |    | Δ dalton | mass    | Δ dalton            | mass    |
|                     | 116.03 |          | 116.03 | 1   | D | 13 |          |         |                     |         |
|                     | 229.12 |          | 229.12 | 2   | I | 12 | 1583.8   |         | 1583.8              |         |
|                     | 376.19 | +0.0584  | 376.19 | 3   | F | 11 | 1470.7   | -0.139  | 735.88              | +0.2115 |
|                     | 477.23 | +0.067   | 477.23 | 4   | T | 10 | 1323.7   | -0.031  | 1323.7              |         |
|                     | 578.28 | +0.141   | 578.28 | 5   | T | 9  | 1222.6   | +0.1279 | 1222.6              |         |
|                     | 706.34 |          | 706.34 | 6   | Q | 8  | 1121.6   | +0.0415 | 561.3               | -0.026  |
|                     | 821.37 |          | 821.37 | 7   | D | 7  | 993.53   | +0.1585 | 993.53              |         |
|                     | 950.41 | -0.02    | 950.41 | 8   | E | 6  | 878.5    |         | 878.5               |         |
|                     | 1063.5 | -0.032   | 1063.5 | 9   | L | 5  | 749.46   | +0.0615 | 749.46              |         |
|                     | 1176.6 | -0.064   | 1176.6 | 10  | L | 4  | 636.37   | -0.065  | 636.37              |         |
| +0.359              | 638.33 | -0.088   | 1275.6 | 11  | V | 3  | 523.29   | +0.1155 | 523.29              |         |
|                     | 1438.7 | +0.0044  | 1438.7 | 12  | Y | 2  | 424.22   | +0.0117 | 424.22              |         |
|                     | 1552.8 |          | 1552.8 | 13  | N | 1  | 261.16   | +0.1154 | 261.16              |         |
|                     |        |          |        | 14  | K | 0  | 147.11   |         | 147.11              |         |



Scan number 5973 Raw file LNCAP\_Silac\_23F10\_set1\_10  
 Method ITMS; CID Pepti... 51.93

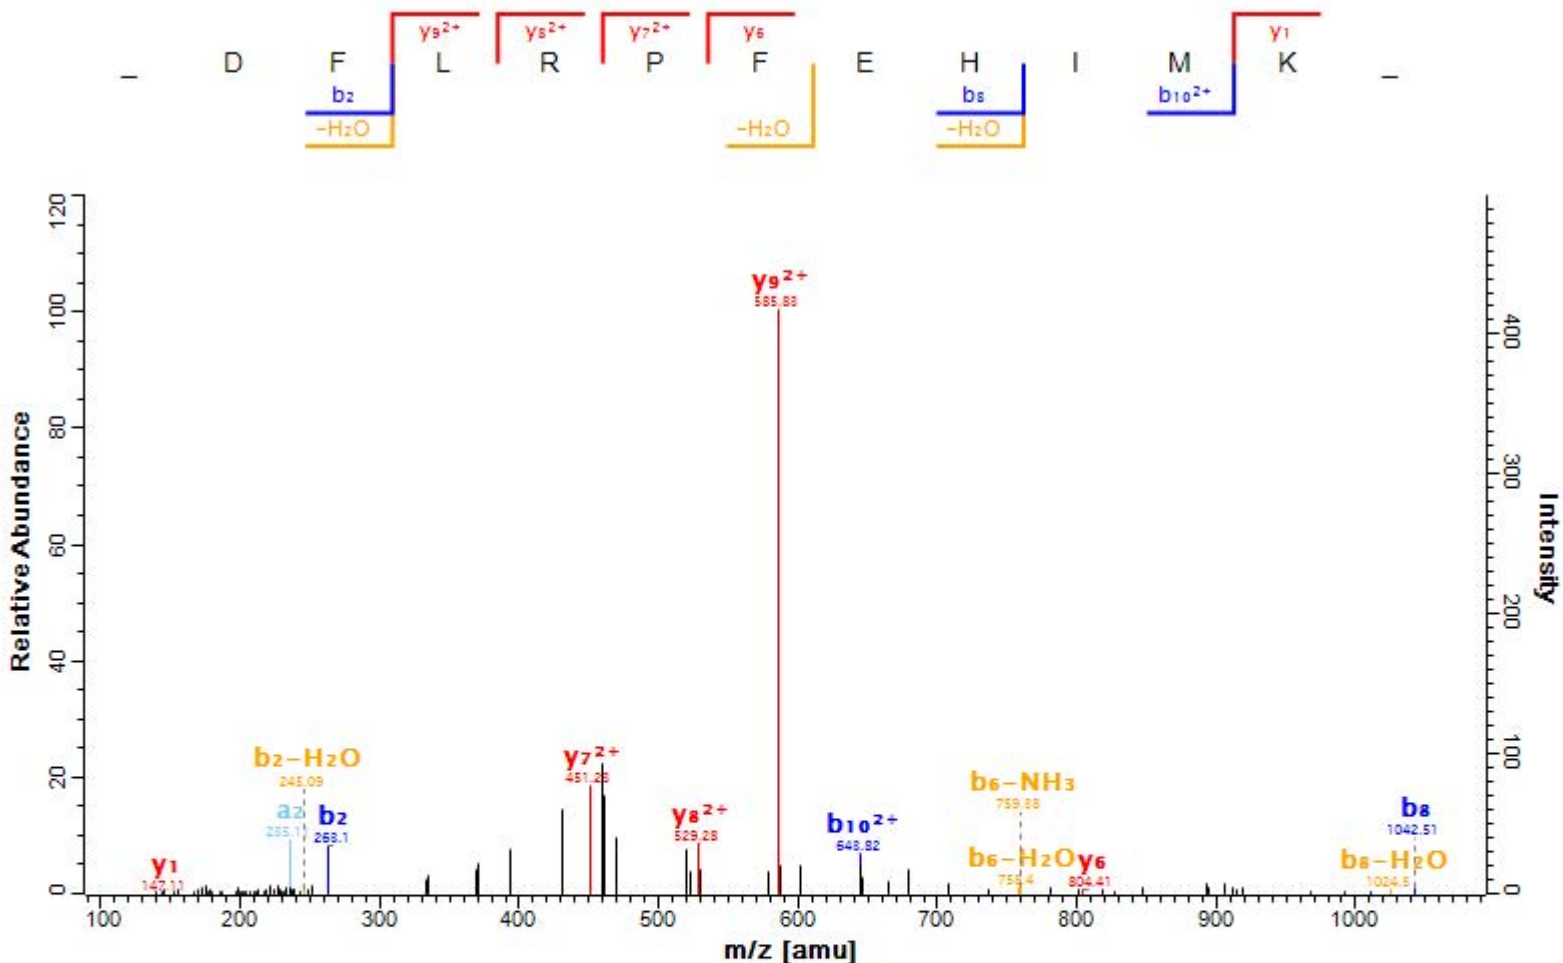

#### precursor information

|                   |                 |
|-------------------|-----------------|
| Mass:             | 1431.73269      |
| m/z:              | 478.25151       |
| Charge:           | 3+              |
| Retentiontime:    | 46.643508911132 |
| Score:            | 51.92667        |
| Mass Error [ppm]: | -0.42101        |
| PEP:              | 0.022551        |
| Precursor Type:   | MULTI           |

#### general information

|                       |               |
|-----------------------|---------------|
| Annotation:           | 8 of 11       |
| AminoAcids Coverage:  | 73 %          |
| Intensity Coverage:   | 45 %          |
| Peak Coverage:        | 12 %          |
| Protein Localisation: | 1182 ... 1192 |

|        | a ion         | b <sup>2+</sup> ion | b ion         |       |   | y ion         | y <sup>2+</sup> ion |       |        |
|--------|---------------|---------------------|---------------|-------|---|---------------|---------------------|-------|--------|
|        | Δ dalton mass | Δ dalton mass       | Δ dalton mass | seq   |   | Δ dalton mass | Δ dalton mass       |       |        |
|        | 88.04         | 116                 | 116           | 1     | D | 10            |                     |       |        |
| +0.046 | 235.1         | 263.1               | +0.045        | 263.1 | 2 | F             | 9                   | 1318  | 1318   |
|        | 348.2         | 376.2               | 376.2         | 3     | L | 8             | 1171                | 585.8 | +0.28; |
|        | 504.3         | 532.3               | 532.3         | 4     | R | 7             | 1058                | 529.3 | -0.1   |
|        | 601.3         | 629.3               | 629.3         | 5     | P | 6             | 901.5               | 451.2 | -0.02  |
|        | 748.4         | 776.4               | 776.4         | 6     | F | 5             | 804.4               | -0.37 | 804.4  |
|        | 877.5         | 905.5               | 905.5         | 7     | E | 4             | 657.3               | 657.3 |        |
|        | 1015          | 1043                | +0.141        | 1043  | 8 | H             | 3                   | 528.3 | 528.3  |
|        | 1128          | 1156                | 1156          | 9     | I | 2             | 391.2               | 391.2 |        |
|        | 1259          | +0.343              | 1287          | 10    | M | 1             | 278.2               | 278.2 |        |
|        |               |                     |               | 11    | K | 0             | 147.1               | -0.06 | 147.1  |

Scan number 630 Raw file LNCAP\_Silac\_23F10\_set1\_10  
 Method ITMS; CID Pepti... 88.56

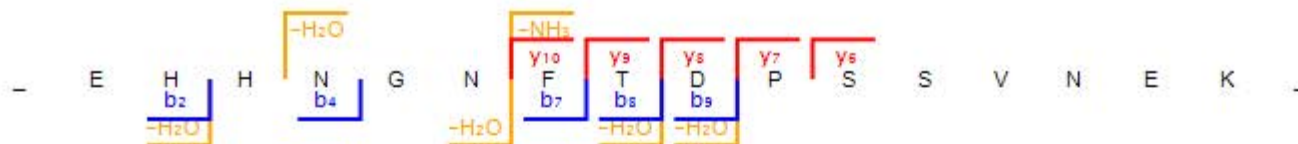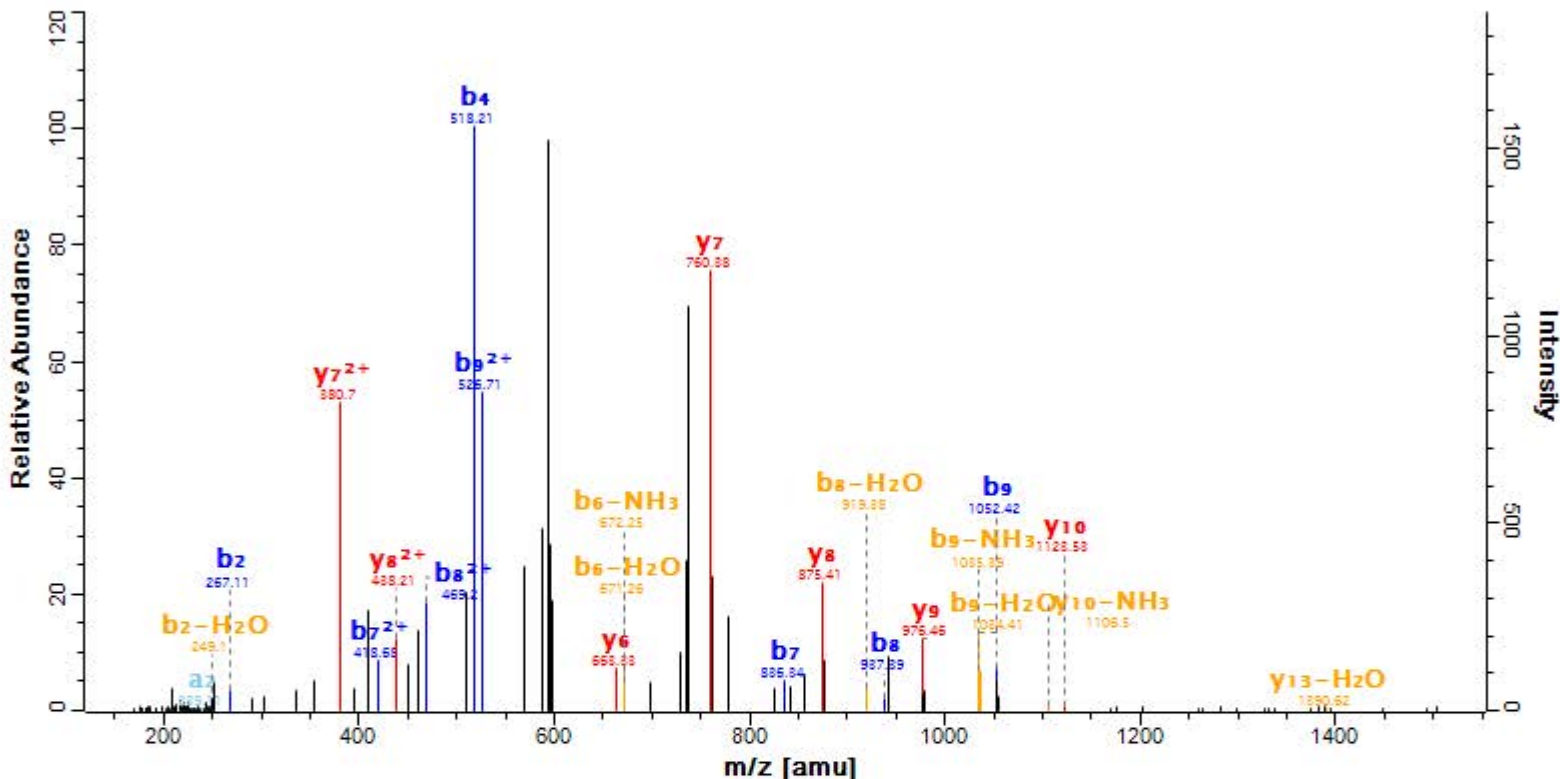

#### precursor information

|                   |                 |
|-------------------|-----------------|
| Mass:             | 1810.78759      |
| m/z:              | 604.60314       |
| Charge:           | 3+              |
| Retentiontime:    | 8.3005332946777 |
| Score:            | 88.56142        |
| Mass Error [ppm]: | 0.2938          |
| PEP:              | 4.4302E-05      |
| Precursor Type:   | MULTI           |

#### general information

|                       |           |
|-----------------------|-----------|
| Annotation:           | 8 of 16   |
| AminoAcids Coverage:  | 50 %      |
| Intensity Coverage:   | 44 %      |
| Peak Coverage:        | 20 %      |
| Protein Localisation: | 18 ... 33 |

|       | a ion | b <sup>2+</sup> ion | b ion        |    |   |    | y ion | y <sup>2+</sup> ion |
|-------|-------|---------------------|--------------|----|---|----|-------|---------------------|
|       | 102.1 | 130                 | 130          | 1  | E | 15 |       |                     |
| -0.07 | 239.1 | 267.1               | +0.02 267.1  | 2  | H | 14 | 1683  | 1683                |
|       | 376.2 | 404.2               | 404.2        | 3  | H | 13 | 1546  | 1546                |
|       | 490.2 | 518.2               | -0.34 518.2  | 4  | N | 12 | 1409  | 1409                |
|       | 547.2 | 575.2               | 575.2        | 5  | G | 11 | 1295  | 1295                |
|       | 661.3 | 689.3               | 689.3        | 6  | N | 10 | 1238  | 1238                |
|       | 808.3 | +0.29 6418.7        | +0.21 9836.3 | 7  | F | 9  | 1124  | -0.11 1124          |
|       | 909.4 | +0.01 6469.2        | +0.02 3937.4 | 8  | T | 8  | 976.5 | +0.05 976.5         |
|       | 1024  | +0.27 2526.7        | +0.07 81052  | 9  | D | 7  | 875.4 | +0.03 7438.2 -0.03  |
|       | 1121  | 1149                | 1149         | 10 | P | 6  | 760.4 | +0.05 4380.7 +0.16  |
|       | 1209  | 1237                | 1237         | 11 | S | 5  | 663.3 | +0.05 3663.3        |
|       | 1296  | 1324                | 1324         | 12 | S | 4  | 576.3 | 576.3               |
|       | 1395  | 1423                | 1423         | 13 | V | 3  | 489.3 | 489.3               |
|       | 1509  | 1537                | 1537         | 14 | N | 2  | 390.2 | 390.2               |
|       | 1638  | 1666                | 1666         | 15 | E | 1  | 276.2 | 276.2               |
|       |       |                     |              | 16 | K | 0  | 147.1 | 147.1               |

Scan number 6450 Raw file LNCAP\_Silac\_23F10\_set1\_10  
 Method ITMS: CID Pepti... 86.38

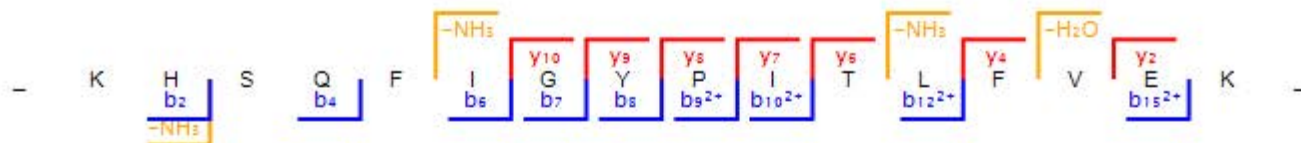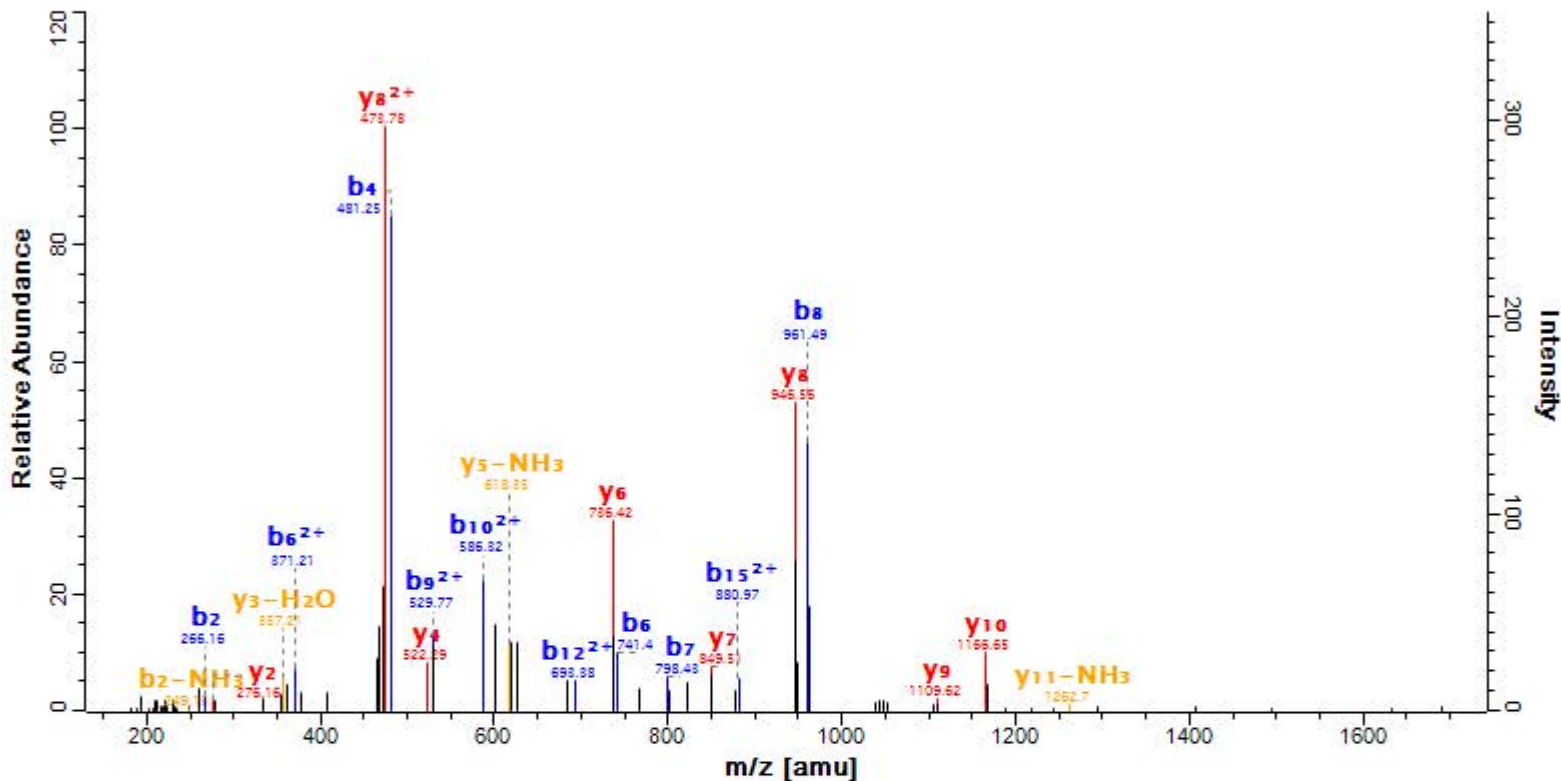

#### precursor information

|                   |                 |
|-------------------|-----------------|
| Mass:             | 1906.03512      |
| m/z:              | 636.35232       |
| Charge:           | 3+              |
| Retentiontime:    | 52.618999481201 |
| Score:            | 86.37751        |
| Mass Error [ppm]: | -0.078655       |
| PEP:              | 3.2995E-05      |
| Precursor Type:   | MULTI           |

#### general information

|                       |             |
|-----------------------|-------------|
| Annotation:           | 12 of 16    |
| AminoAcids Coverage:  | 75 %        |
| Intensity Coverage:   | 62 %        |
| Peak Coverage:        | 24 %        |
| Protein Localisation: | 331 ... 346 |

| b <sup>2+</sup> ion |        | b ion    |        | seq |   |    | y ion    |         | y <sup>2+</sup> ion |         |
|---------------------|--------|----------|--------|-----|---|----|----------|---------|---------------------|---------|
| Δ dalton            | mass   | Δ dalton | mass   |     |   |    | Δ dalton | mass    | Δ dalton            | mass    |
|                     | 129.1  |          | 129.1  | 1   | K | 15 |          |         |                     |         |
|                     | 266.16 | +0.1212  | 266.16 | 2   | H | 14 | 1778.9   |         | 1778.9              |         |
|                     | 353.19 |          | 353.19 | 3   | S | 13 | 1641.9   |         | 1641.9              |         |
|                     | 481.25 | +0.159   | 481.25 | 4   | Q | 12 | 1554.9   |         | 1554.9              |         |
|                     | 628.32 |          | 628.32 | 5   | F | 11 | 1426.8   |         | 1426.8              |         |
| +0.1861             | 371.21 | -0.074   | 741.4  | 6   | I | 10 | 1279.7   |         | 1279.7              |         |
|                     | 798.43 | +0.2038  | 798.43 | 7   | G | 9  | 1166.6   | -0.086  | 1166.6              |         |
|                     | 961.49 | -0.018   | 961.49 | 8   | Y | 8  | 1109.6   | +0.1587 | 1109.6              |         |
| -0.107              | 529.77 |          | 1058.5 | 9   | P | 7  | 946.56   | -0.025  | 473.78              | +0.1565 |
| +0.2639             | 586.32 |          | 1171.6 | 10  | I | 6  | 849.51   | -0.431  | 849.51              |         |
|                     | 1272.7 |          | 1272.7 | 11  | T | 5  | 736.42   | +0.0166 | 736.42              |         |
| +0.0526             | 693.38 |          | 1385.8 | 12  | L | 4  | 635.38   |         | 635.38              |         |
|                     | 1532.8 |          | 1532.8 | 13  | F | 3  | 522.29   | -0.178  | 522.29              |         |
|                     | 1631.9 |          | 1631.9 | 14  | V | 2  | 375.22   |         | 375.22              |         |
| +0.2382             | 880.97 |          | 1760.9 | 15  | E | 1  | 276.16   | -0.029  | 276.16              |         |
|                     |        |          |        | 16  | K | 0  | 147.11   |         | 147.11              |         |

Scan number 6850 Raw file LNCAP\_Silac\_23F10\_set1\_10  
 Method ITMS; CID Pepti... 30.95

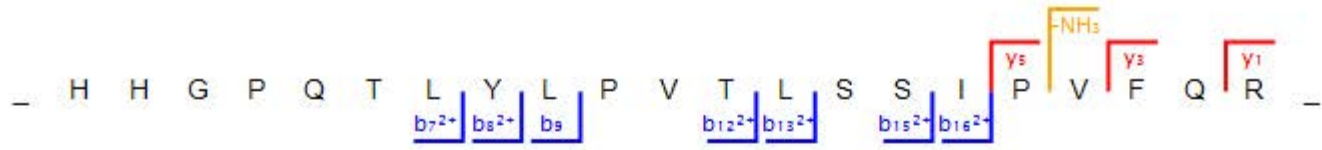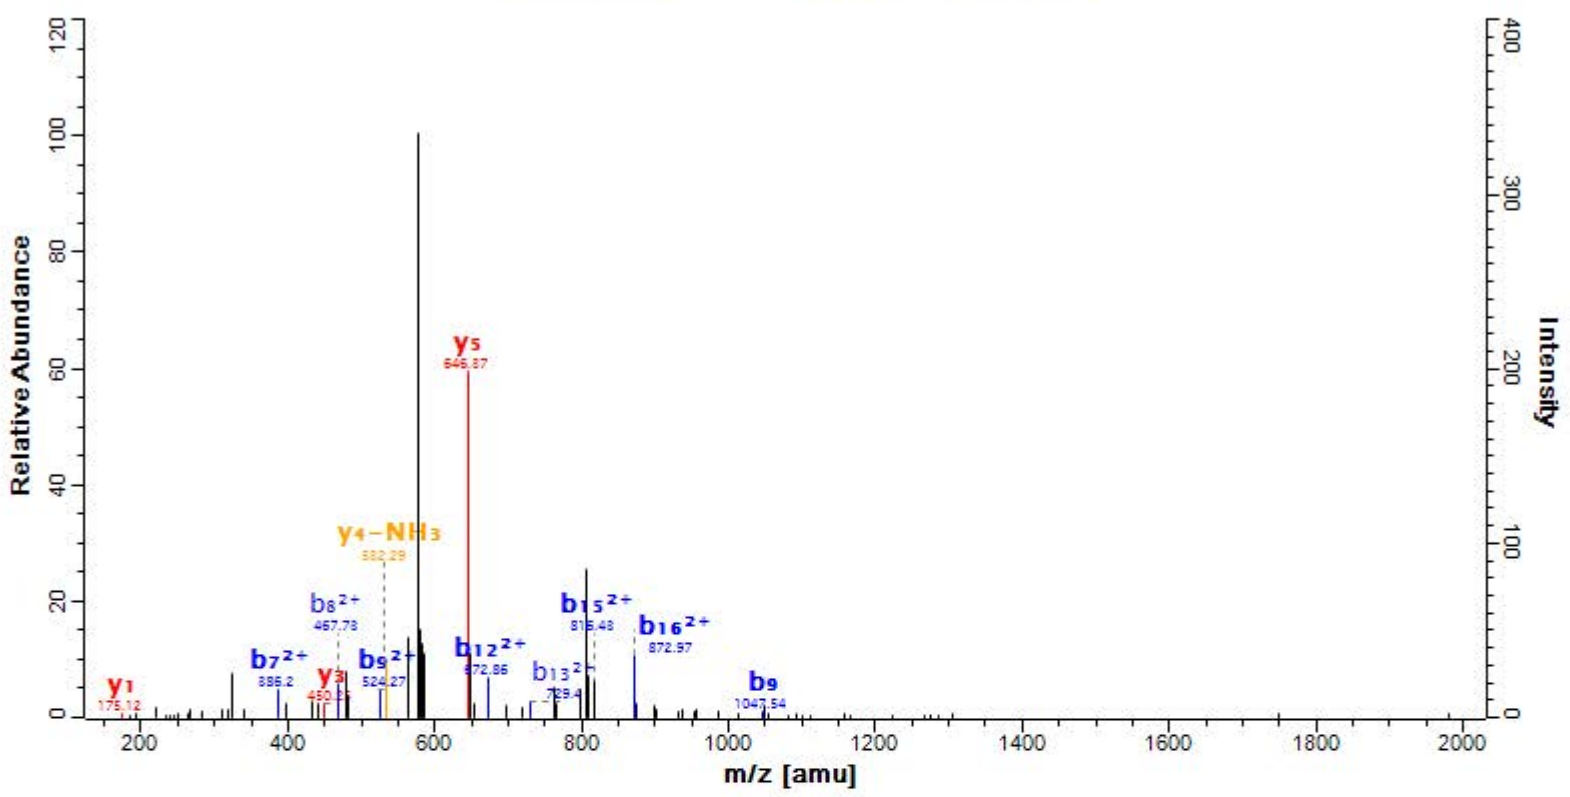

**precursor information**

|                   |                 |
|-------------------|-----------------|
| Mass:             | 2389.29093      |
| m/z:              | 598.33001       |
| Charge:           | 4+              |
| Retentiontime:    | 59.439029693603 |
| Score:            | 30.94517        |
| Mass Error [ppm]: | 0.11711         |
| PEP:              | 0.085984        |
| Precursor Type:   | MULTI           |

| b <sup>2+</sup> ion |          | b ion    |          |     |   | y ion    |          |           |
|---------------------|----------|----------|----------|-----|---|----------|----------|-----------|
| Δ dalton            | mass     | Δ dalton | mass     | seq |   | Δ dalton | mass     |           |
|                     | 138.0662 |          | 138.0662 | 1   | H | 20       |          |           |
|                     | 275.1251 |          | 275.1251 | 2   | H | 19       | 2253.239 |           |
|                     | 332.1466 |          | 332.1466 | 3   | G | 18       | 2116.18  |           |
|                     | 429.1993 |          | 429.1993 | 4   | P | 17       | 2059.159 |           |
|                     | 557.2579 |          | 557.2579 | 5   | Q | 16       | 1962.106 |           |
|                     | 658.3056 |          | 658.3056 | 6   | T | 15       | 1834.047 |           |
| +0.066003           | 386.1985 |          | 771.3896 | 7   | L | 14       | 1733     |           |
| -0.08645            | 467.7301 |          | 934.453  | 8   | Y | 13       | 1619.916 |           |
| +0.245603           | 524.2722 | -0.03081 | 1047.537 | 9   | L | 12       | 1456.852 |           |
|                     | 1144.59  |          | 1144.59  | 10  | P | 11       | 1343.768 |           |
|                     | 1243.658 |          | 1243.658 | 11  | V | 10       | 1246.715 |           |
| +0.155376           | 672.8566 |          | 1344.706 | 12  | T | 9        | 1147.647 |           |
| -0.01513            | 729.3986 |          | 1457.79  | 13  | L | 8        | 1046.599 |           |
|                     | 1544.822 |          | 1544.822 | 14  | S | 7        | 933.5152 |           |
| +0.038469           | 816.4306 |          | 1631.854 | 15  | S | 6        | 846.4832 |           |
| +0.13694            | 872.9727 |          | 1744.938 | 16  | I | 5        | 759.4512 |           |
|                     | 1841.991 |          | 1841.991 | 17  | P | 4        | 646.3671 | -0.00048  |
|                     | 1941.059 |          | 1941.059 | 18  | V | 3        | 549.3144 |           |
|                     | 2088.128 |          | 2088.128 | 19  | F | 2        | 450.2459 | +0.128202 |
|                     | 2216.186 |          | 2216.186 | 20  | Q | 1        | 303.1775 |           |
|                     |          |          |          | 21  | R | 0        | 175.119  | -0.0577   |

**general information**

|                       |             |
|-----------------------|-------------|
| Annotation:           | 12 of 21    |
| AminoAcids Coverag    | 57 %        |
| Intensity Coverage:   | 28 %        |
| Peak Coverage:        | 16 %        |
| Protein Localisation: | 836 ... 856 |

Scan number 781 Raw file LNCAP\_Silac\_23F10\_set1\_10  
 Method ITMS; CID Pepti... 87.5

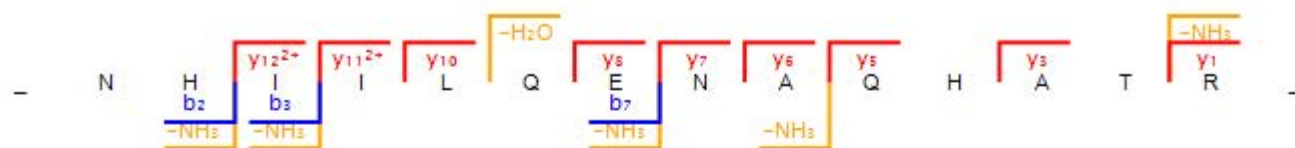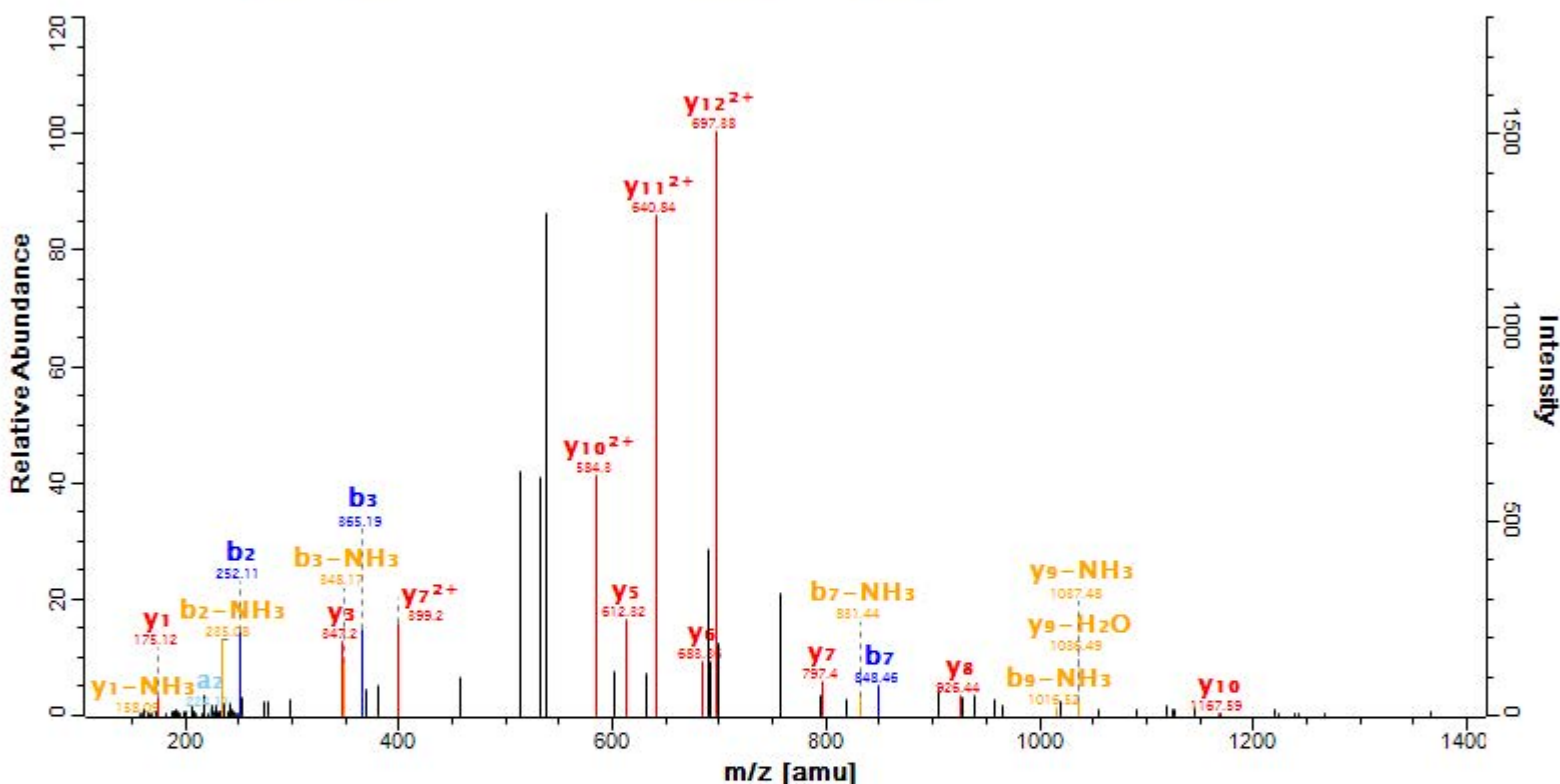

#### precursor information

|                   |                 |
|-------------------|-----------------|
| Mass:             | 1643.84887      |
| m/z:              | 548.9569        |
| Charge:           | 3+              |
| Retentiontime:    | 9.2389698028564 |
| Score:            | 87.4985         |
| Mass Error [ppm]: | -0.20049        |
| PEP:              | 0.00037677      |
| Precursor Type:   | MULTI           |

| a ion    |        | b ion    |        |    |     |    | y ion    |         | y <sup>2+</sup> ion |         |
|----------|--------|----------|--------|----|-----|----|----------|---------|---------------------|---------|
| Δ dalton | mass   | Δ dalton | mass   |    | seq |    | Δ dalton | mass    | Δ dalton            | mass    |
|          | 87.055 |          | 115.05 | 1  | N   | 13 |          |         |                     |         |
| +0.0816  | 224.11 | -0.004   | 252.11 | 2  | H   | 12 | 1530.8   |         | 1530.8              |         |
|          | 337.2  | +0.1459  | 365.19 | 3  | I   | 11 | 1393.8   |         | 697.38              | +0.2325 |
|          | 450.28 |          | 478.28 | 4  | I   | 10 | 1280.7   |         | 640.84              | +0.2726 |
|          | 563.37 |          | 591.36 | 5  | L   | 9  | 1167.6   | -0.449  | 584.3               | +0.2915 |
|          | 691.42 |          | 719.42 | 6  | Q   | 8  | 1054.5   |         | 1054.5              |         |
|          | 820.47 | +0.1361  | 848.46 | 7  | E   | 7  | 926.44   | +0.1804 | 926.44              |         |
|          | 934.51 |          | 962.51 | 8  | N   | 6  | 797.4    | +0.1839 | 399.2               | +0.0662 |
|          | 1005.5 |          | 1033.5 | 9  | A   | 5  | 683.36   | +0.1042 | 683.36              |         |
|          | 1133.6 |          | 1161.6 | 10 | Q   | 4  | 612.32   | +0.0448 | 612.32              |         |
|          | 1270.7 |          | 1298.7 | 11 | H   | 3  | 484.26   |         | 484.26              |         |
|          | 1341.7 |          | 1369.7 | 12 | A   | 2  | 347.2    | +0.1487 | 347.2               |         |
|          | 1442.7 |          | 1470.7 | 13 | T   | 1  | 276.17   |         | 276.17              |         |
|          |        |          |        | 14 | R   | 0  | 175.12   | +0.1494 | 175.12              |         |

#### general information

|                       |             |
|-----------------------|-------------|
| Annotation:           | 11 of 14    |
| AminoAcids Coverage:  | 79 %        |
| Intensity Coverage:   | 46 %        |
| Peak Coverage:        | 19 %        |
| Protein Localisation: | 209 ... 222 |

Scan number 818 Raw file LNCAP\_Silac\_23F10\_set1\_10  
 Method ITMS: CID Pepti... 86.91

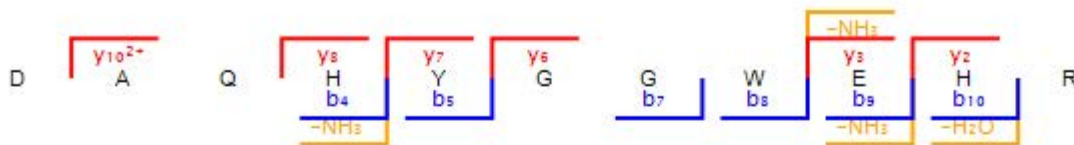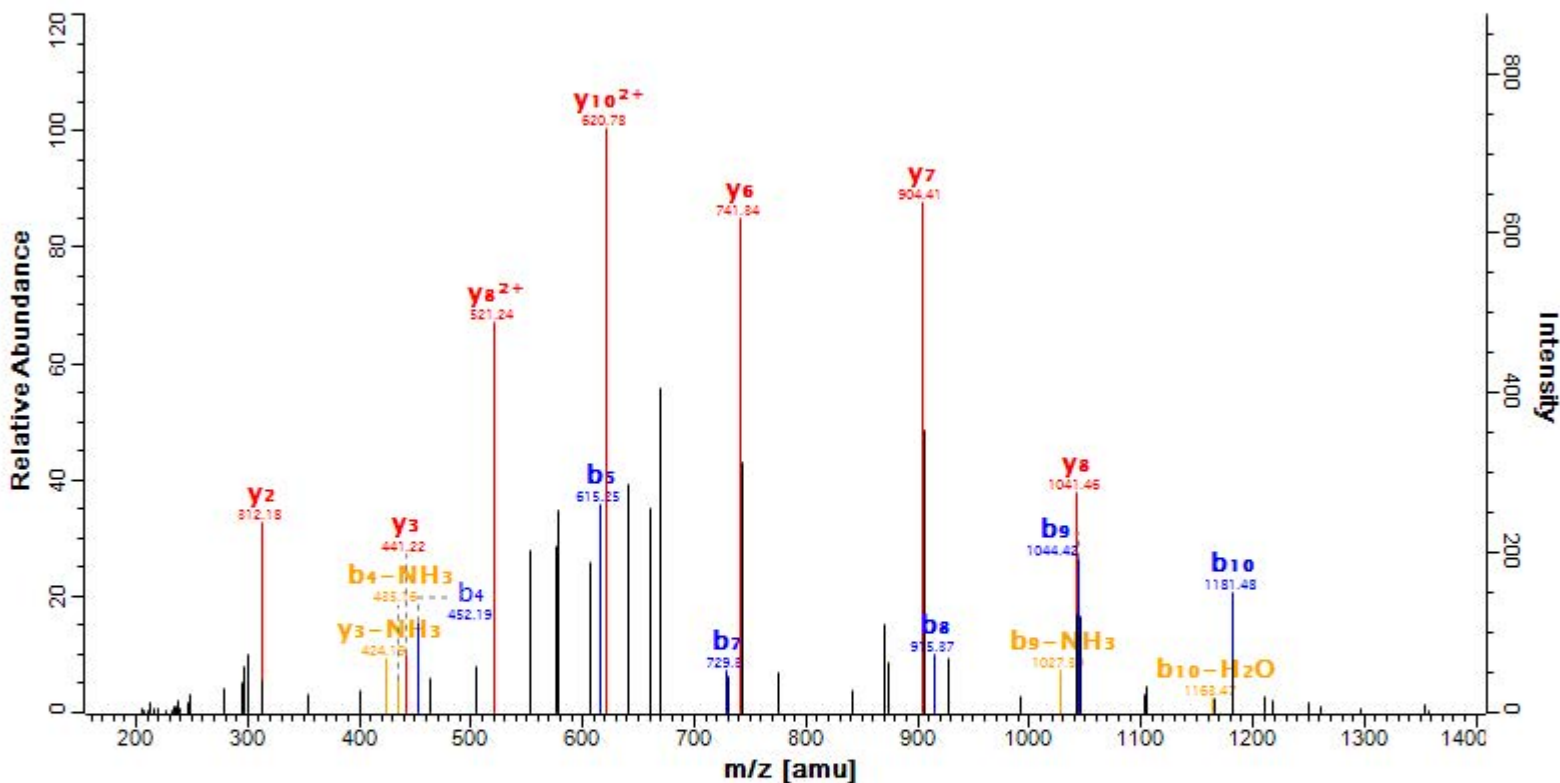

#### precursor information

|                   |                 |
|-------------------|-----------------|
| Mass:             | 1354.58044      |
| m/z:              | 678.2975        |
| Charge:           | 2+              |
| Retentiontime:    | 9.4535512924194 |
| Score:            | 86.91063        |
| Mass Error [ppm]: | 0.10674         |
| PEP:              | 0.0021501       |
| Precursor Type:   | MULTI           |

#### general information

|                       |             |
|-----------------------|-------------|
| Annotation:           | 8 of 11     |
| AminoAcids Coverage:  | 73 %        |
| Intensity Coverage:   | 49 %        |
| Peak Coverage:        | 22 %        |
| Protein Localisation: | 610 ... 620 |

| b ion     |          |     |   | y ion    |          | y <sup>2+</sup> ion |           |           |
|-----------|----------|-----|---|----------|----------|---------------------|-----------|-----------|
| Δ dalton  | mass     | seq |   | Δ dalton | mass     | Δ dalton            | mass      |           |
|           | 116.0342 | 1   | D | 10       |          |                     |           |           |
|           | 187.0713 | 2   | A | 9        | 1240.561 | 620.784             | +0.182783 |           |
|           | 315.1299 | 3   | Q | 8        | 1169.524 | 1169.524            |           |           |
| +0.087178 | 452.1888 | 4   | H | 7        | 1041.465 | +0.038968           | 521.2361  | +0.174354 |
| -0.04103  | 615.2522 | 5   | Y | 6        | 904.406  | +0.052226           | 904.406   |           |
|           | 672.2736 | 6   | G | 5        | 741.3427 | +0.030105           | 741.3427  |           |
| +0.062526 | 729.2951 | 7   | G | 4        | 684.3212 |                     | 684.3212  |           |
| +0.108335 | 915.3744 | 8   | W | 3        | 627.2998 |                     | 627.2998  |           |
| +0.120613 | 1044.417 | 9   | E | 2        | 441.2205 | +0.1261             | 441.2205  |           |
| -0.06501  | 1181.476 | 10  | H | 1        | 312.1779 | +0.047112           | 312.1779  |           |
|           |          | 11  | R | 0        | 175.119  |                     | 175.119   |           |

Scan number 3138 Raw file LNCAP\_Silac\_23F10\_set1\_11  
 Method ITMS: CID Pepti... 131.96

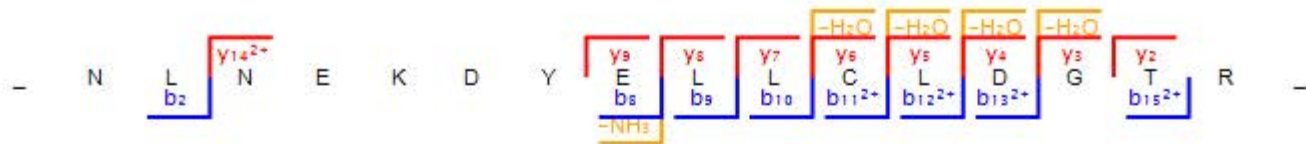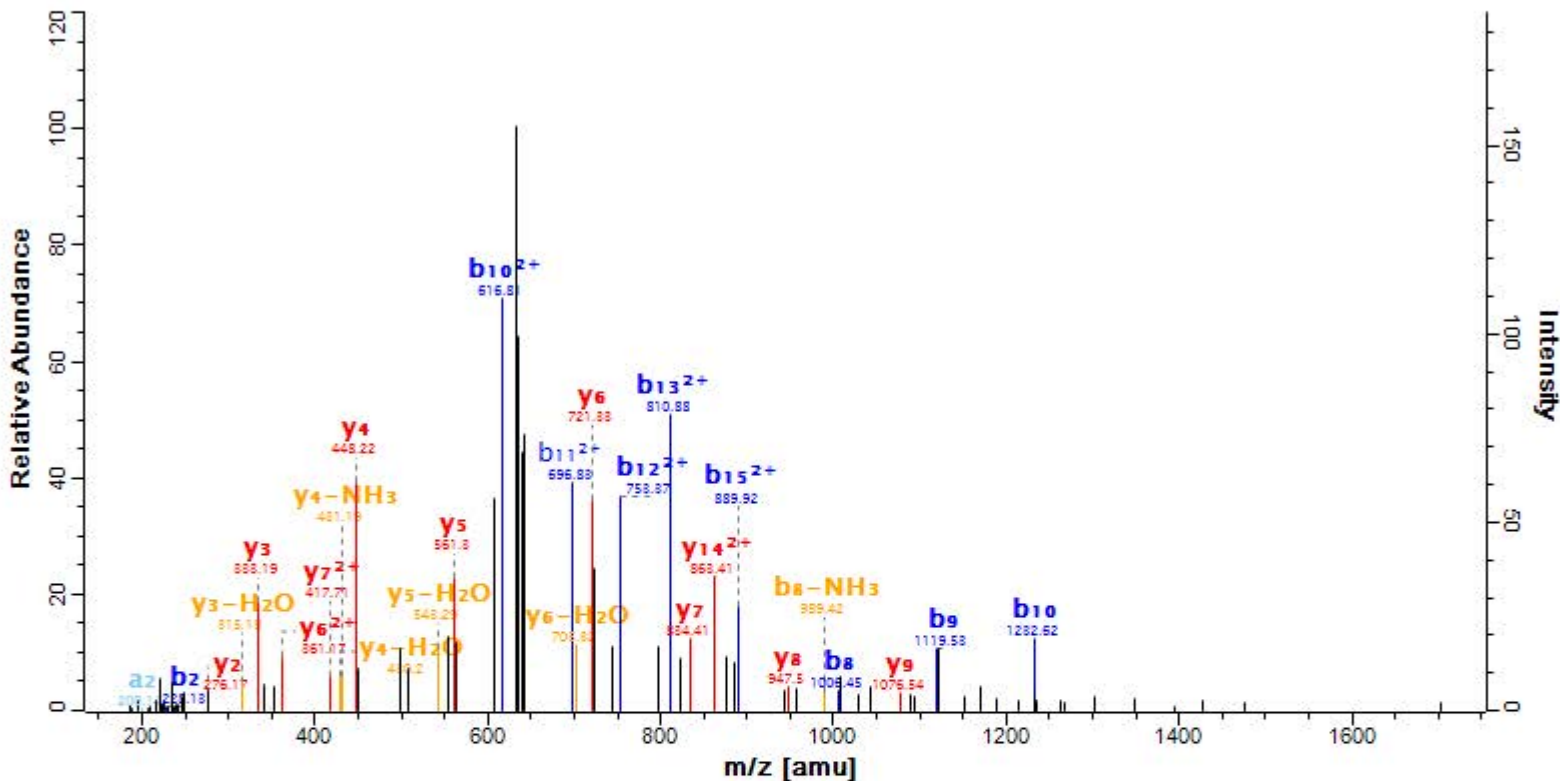

precursor information

|                   |                 |
|-------------------|-----------------|
| Mass:             | 1951.93151      |
| m/z:              | 651.65111       |
| Charge:           | 3+              |
| Retentiontime:    | 37.447799682617 |
| Score:            | 131.958         |
| Mass Error [ppm]: | 0.29258         |
| PEP:              | 2.2364E-07      |
| Precursor Type:   | ISO             |

general information

|                       |             |
|-----------------------|-------------|
| Annotation:           | 11 of 16    |
| AminoAcids Coverage:  | 69 %        |
| Intensity Coverage:   | 47 %        |
| Peak Coverage:        | 30 %        |
| Protein Localisation: | 572 ... 587 |

|      | a ion         | b <sup>2+</sup> ion | b ion         |     |   |               | y ion         | y <sup>2+</sup> ion |
|------|---------------|---------------------|---------------|-----|---|---------------|---------------|---------------------|
|      | Δ dalton mass | Δ dalton mass       | Δ dalton mass | seq |   | Δ dalton mass | Δ dalton mass |                     |
|      | 87.06         | 115.1               | 115.1         | 1   | N | 15            |               |                     |
| +0.1 | 200.1         | 228.1               | +0.216228.1   | 2   | L | 14            | 1839          | 1839                |
|      | 314.2         | 342.2               | 342.2         | 3   | N | 13            | 1726          | 863.4 -0.23         |
|      | 443.2         | 471.2               | 471.2         | 4   | E | 12            | 1612          | 1612                |
|      | 571.3         | 599.3               | 599.3         | 5   | K | 11            | 1483          | 1483                |
|      | 686.3         | 714.3               | 714.3         | 6   | D | 10            | 1355          | 1355                |
|      | 849.4         | 877.4               | 877.4         | 7   | Y | 9             | 1240          | 1240                |
|      | 978.5         | 1006                | -0.081006     | 8   | E | 8             | 1077          | +0.2651077          |
|      | 1092          | 1120                | +01120        | 9   | L | 7             | 947.5         | +0947.5             |
|      | 1205          | +0.202616.8         | -0.121233     | 10  | L | 6             | 834.4         | +0.017417.7 +0.15;  |
|      | 1365          | +0.225696.8         | 1393          | 11  | C | 5             | 721.3         | -0.04361.2 +0.46;   |
|      | 1478          | +0.172753.4         | 1506          | 12  | L | 4             | 561.3         | -0.05561.3          |
|      | 1593          | +0.356810.9         | 1621          | 13  | D | 3             | 448.2         | +0.106448.2         |
|      | 1650          | 1678                | 1678          | 14  | G | 2             | 333.2         | +0.08633.2          |
|      | 1751          | +0.38889.9          | 1779          | 15  | T | 1             | 276.2         | +0.047276.2         |
|      |               |                     |               | 16  | R | 0             | 175.1         | 175.1               |

Scan number 1985 Raw file LNCAP\_Silac\_23F10\_set1\_12  
 Method ITMS: CID Pepti... 54.07

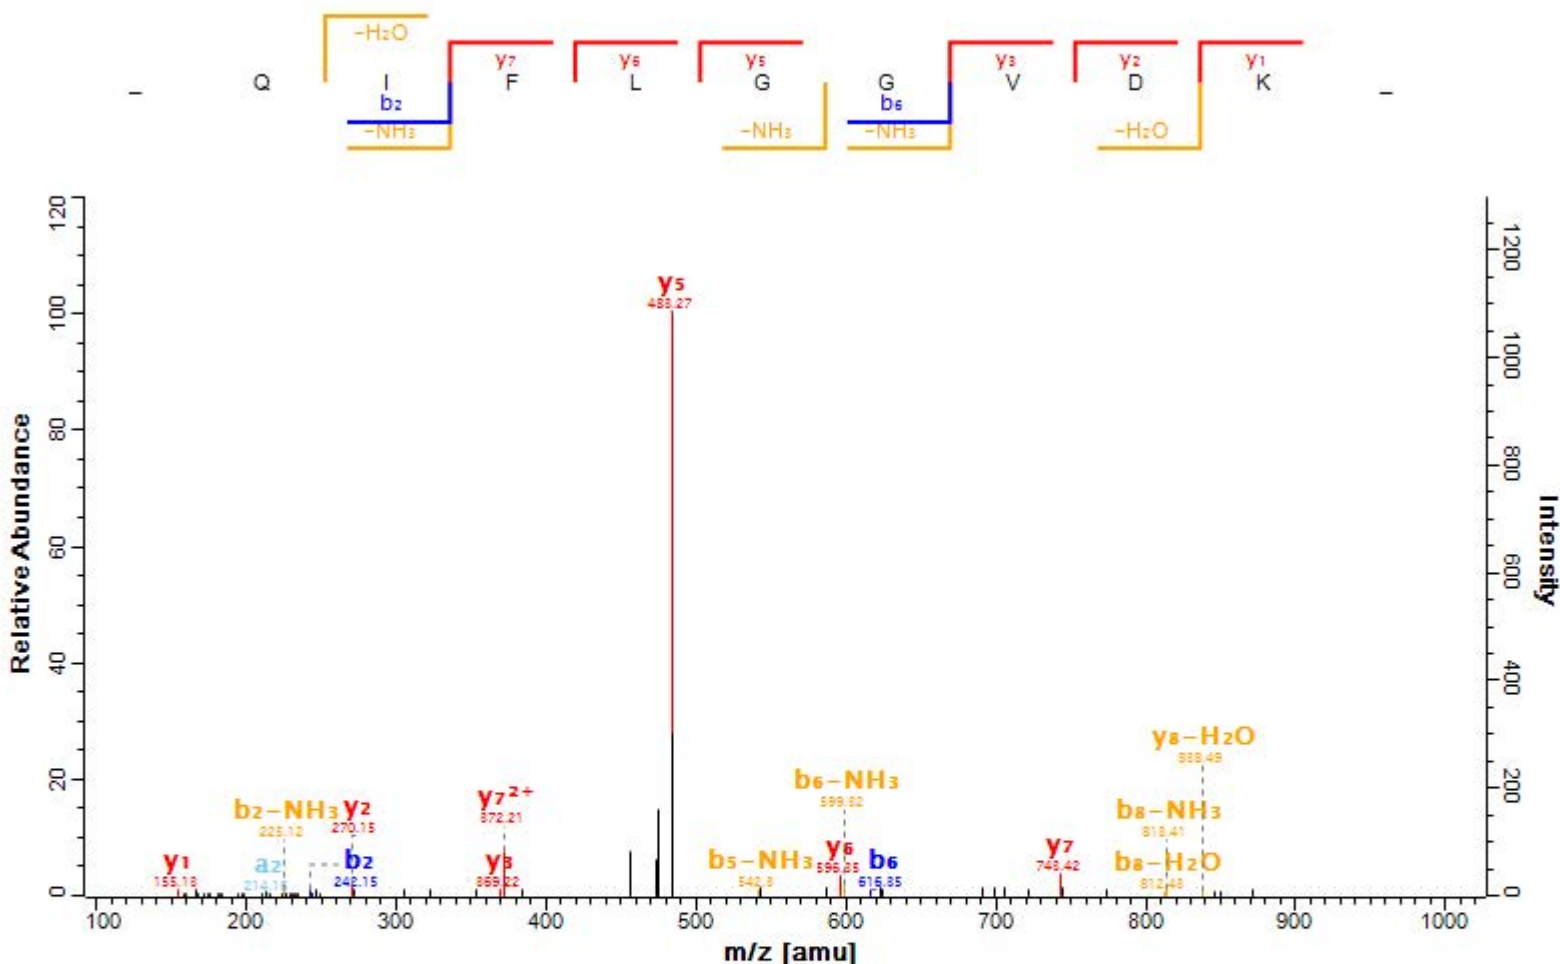

#### precursor information

|                       |                 |
|-----------------------|-----------------|
| Mass:                 | 975.53889       |
| m/z:                  | 488.77672       |
| Charge:               | 2+              |
| Retentiontime:        | 25.164915084838 |
| Score:                | 54.06599        |
| Mass Error [ppm]:     | -0.045968       |
| PEP:                  | 0.035479        |
| Precursor Type:       | MULTI           |
| Annotation:           | 8 of 9          |
| AminoAcids Coverage:  | 89 %            |
| Intensity Coverage:   | 56 %            |
| Peak Coverage:        | 16 %            |
| Protein Localisation: | 97 ... 105      |

| a ion    |        | b ion    |        |   |     |   | y ion    |         | y <sup>2+</sup> ion |        |
|----------|--------|----------|--------|---|-----|---|----------|---------|---------------------|--------|
| Δ dalton | mass   | Δ dalton | mass   |   | seq |   | Δ dalton | mass    | Δ dalton            | mass   |
|          | 101.07 |          | 129.07 | 1 | Q   | 8 |          |         |                     |        |
| +0.0826  | 214.16 | +0.0172  | 242.15 | 2 | I   | 7 | 856.5    |         | 856.5               |        |
|          | 361.22 |          | 389.22 | 3 | F   | 6 | 743.42   | +0.0266 | 372.21              | +0.032 |
|          | 474.31 |          | 502.3  | 4 | L   | 5 | 596.35   | +0.0657 | 596.35              |        |
|          | 531.33 |          | 559.32 | 5 | G   | 4 | 483.27   | +0.4443 | 483.27              |        |
|          | 588.35 | -0.146   | 616.35 | 6 | G   | 3 | 426.24   |         | 426.24              |        |
|          | 687.42 |          | 715.41 | 7 | V   | 2 | 369.22   | +0.1927 | 369.22              |        |
|          | 802.45 |          | 830.44 | 8 | D   | 1 | 270.15   | +0.0944 | 270.15              |        |
|          |        |          |        | 9 | K   | 0 | 155.13   | +0.0107 | 155.13              |        |



Scan number 1963 Raw file LNCAP\_Silac\_23F10\_set1\_13  
 Method ITMS; CID Pepti... 68.54

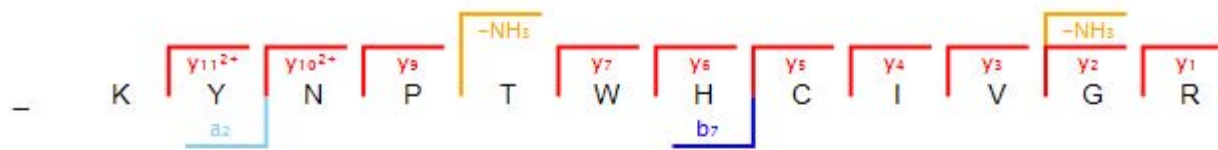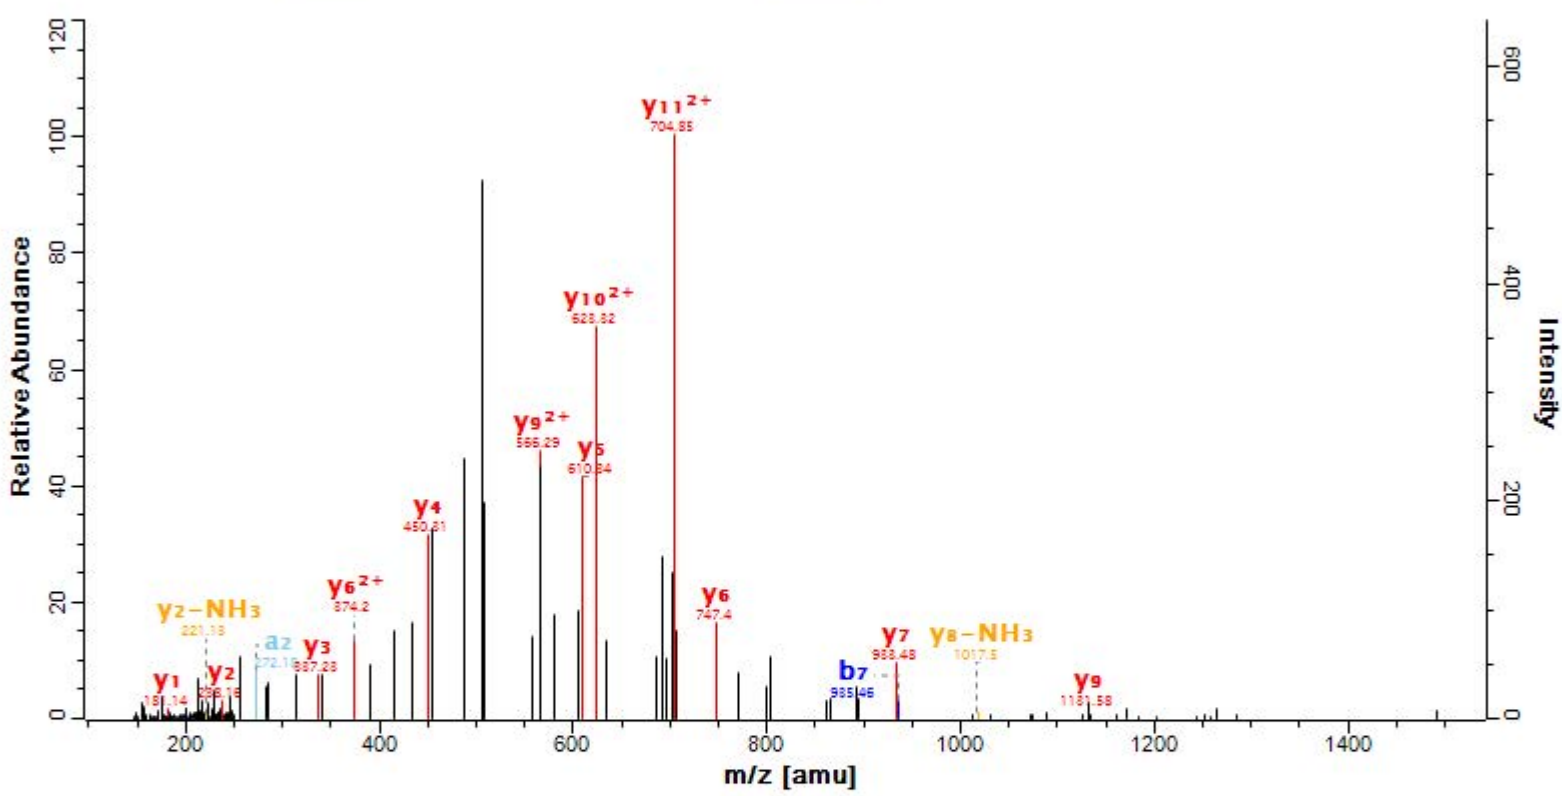

precursor information

|                   |                 |
|-------------------|-----------------|
| Mass:             | 0               |
| m/z:              | 515.60416       |
| Charge:           | 0+              |
| Retentiontime:    | 20.875455856323 |
| Score:            | 68.53571        |
| Mass Error [ppm]: | 0.11357         |
| PEP:              | 0.062695        |
| Precursor Type:   | PEAK            |

general information

|                       |           |
|-----------------------|-----------|
| Annotation:           | 11 of 12  |
| AminoAcids Coverage:  | 92 %      |
| Intensity Coverage:   | 33 %      |
| Peak Coverage:        | 11 %      |
| Protein Localisation: | 49 ... 60 |

| a ion    |        | b ion    |        | seq |   |    | y ion    |         | y <sup>2+</sup> ion |         |
|----------|--------|----------|--------|-----|---|----|----------|---------|---------------------|---------|
| Δ dalton | mass   | Δ dalton | mass   |     |   |    | Δ dalton | mass    | Δ dalton            | mass    |
|          | 109.12 |          | 137.12 | 1   | K | 11 |          |         |                     |         |
| +0.024   | 272.18 |          | 300.18 | 2   | Y | 10 | 1408.7   |         | 704.85              | +0.1435 |
|          | 386.23 |          | 414.22 | 3   | N | 9  | 1245.6   |         | 623.32              | +0.1635 |
|          | 483.28 |          | 511.28 | 4   | P | 8  | 1131.6   | -0.065  | 566.29              | -0.03   |
|          | 584.33 |          | 612.32 | 5   | T | 7  | 1034.5   |         | 1034.5              |         |
|          | 770.41 |          | 798.4  | 6   | W | 6  | 933.48   | -0.033  | 933.48              |         |
|          | 907.47 | +0.0636  | 935.46 | 7   | H | 5  | 747.4    | -0.02   | 374.2               | +0.1527 |
|          | 1067.5 |          | 1095.5 | 8   | C | 4  | 610.34   | +0.0609 | 610.34              |         |
|          | 1180.6 |          | 1208.6 | 9   | I | 3  | 450.31   | +0.1772 | 450.31              |         |
|          | 1279.6 |          | 1307.6 | 10  | V | 2  | 337.23   | +0.0582 | 337.23              |         |
|          | 1336.7 |          | 1364.7 | 11  | G | 1  | 238.16   | +0.0969 | 238.16              |         |
|          |        |          |        | 12  | R | 0  | 181.14   | +0.1145 | 181.14              |         |

Scan number 413 Raw file LNCAP\_Silac\_23F10\_set1\_13  
 Method ITMS: CID Pepti... 106.6

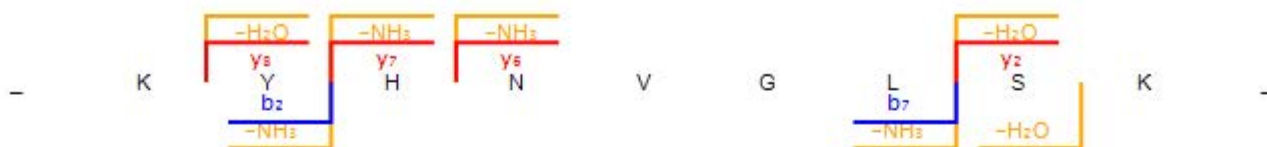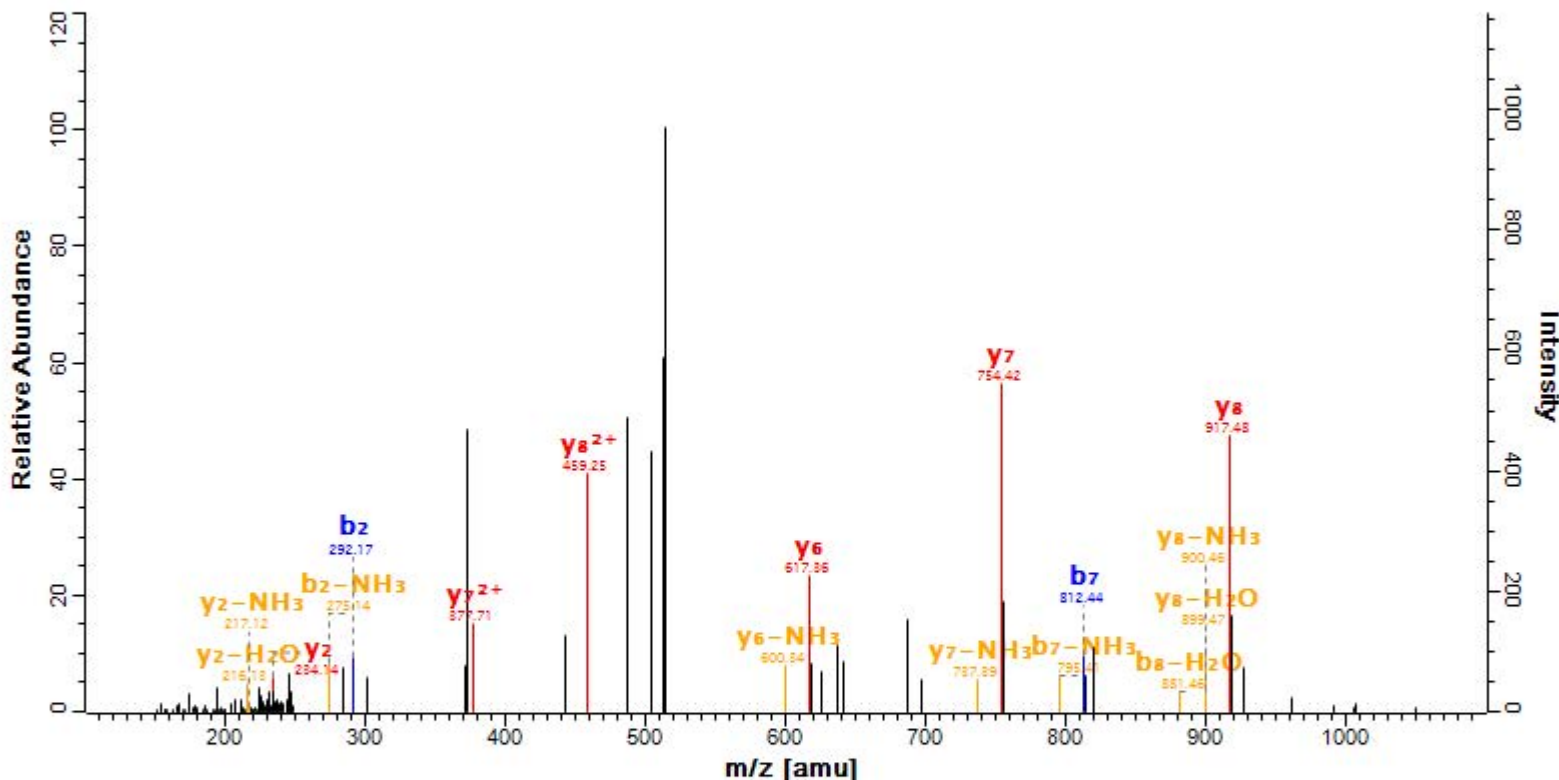

#### precursor information

|                       |                 |
|-----------------------|-----------------|
| Mass:                 | 1044.57169      |
| m/z:                  | 523.29312       |
| Charge:               | 2+              |
| Retention time:       | 7.2419099807739 |
| Score:                | 106.5993        |
| Mass Error [ppm]:     | 0.0623          |
| PEP:                  | 0.0013229       |
| Precursor Type:       | MULTI           |
| Annotation:           | 5 of 9          |
| AminoAcids Coverage:  | 56 %            |
| Intensity Coverage:   | 29 %            |
| Peak Coverage:        | 15 %            |
| Protein Localisation: | 224 ... 232     |

| b ion     |          |     |   | y ion    |          | y <sup>2+</sup> ion |          |
|-----------|----------|-----|---|----------|----------|---------------------|----------|
| Δ dalton  | mass     | seq |   | Δ dalton | mass     | Δ dalton            | mass     |
|           | 129.1022 | 1   | K | 8        |          |                     |          |
| +0.08962  | 292.1656 | 2   | Y | 7        | 917.4839 | -0.0426             | 459.2456 |
|           | 429.2245 | 3   | H | 6        | 754.4206 | +0.023295           | 377.7139 |
|           | 543.2674 | 4   | N | 5        | 617.3617 | -0.05427            | 617.3617 |
|           | 642.3358 | 5   | V | 4        | 503.3188 |                     | 503.3188 |
|           | 699.3573 | 6   | G | 3        | 404.2504 |                     | 404.2504 |
| +0.055416 | 812.4413 | 7   | L | 2        | 347.2289 |                     | 347.2289 |
|           | 899.4734 | 8   | S | 1        | 234.1448 | +0.09087            | 234.1448 |
|           |          | 9   | K | 0        | 147.1128 |                     | 147.1128 |

Scan number 4249 Raw file LNCAP\_Silac\_23F10\_set1\_13  
 Method ITMS; CID Pepti... 54.41

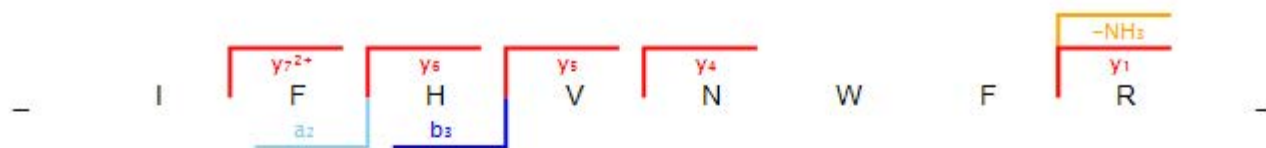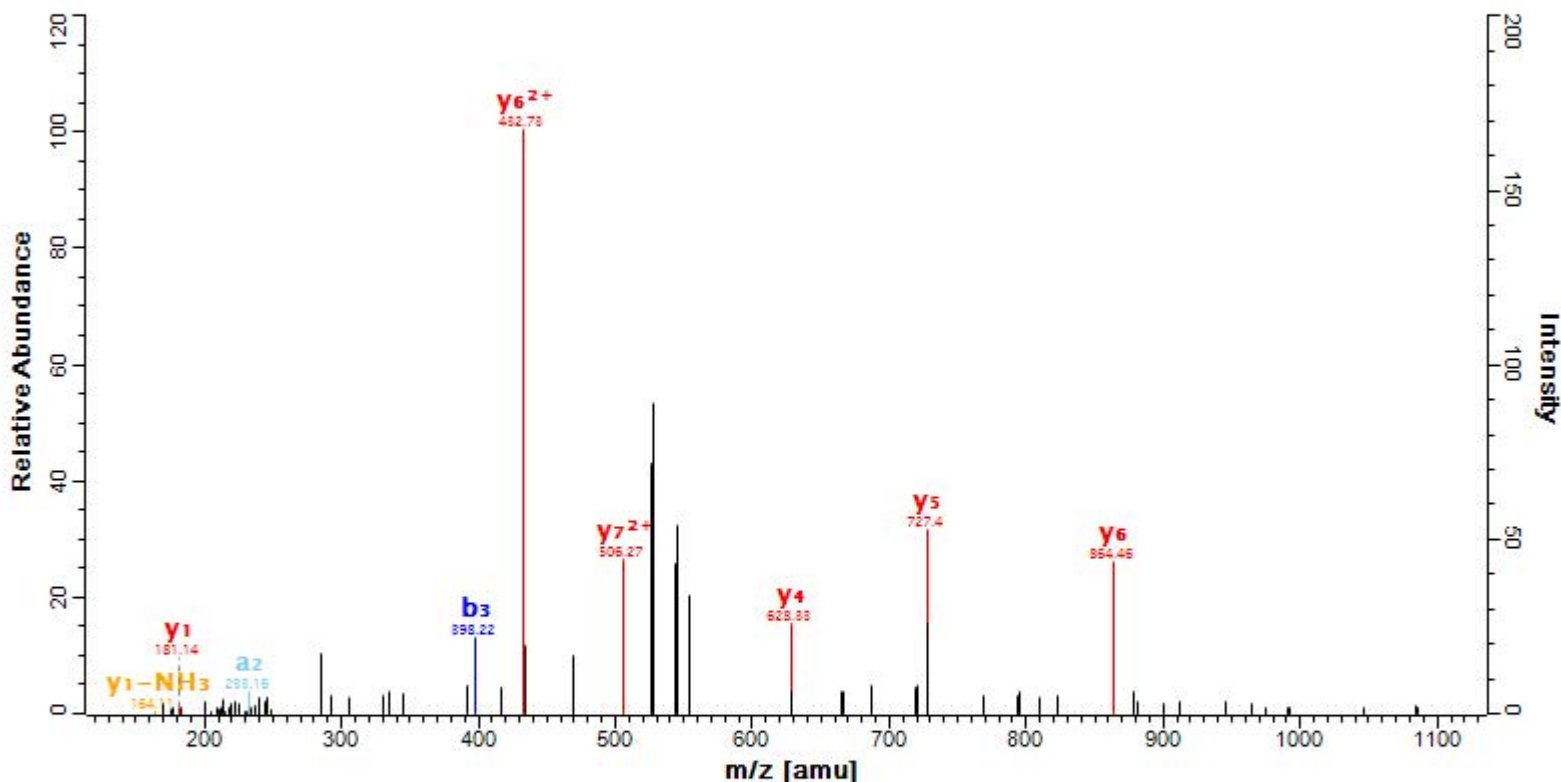

#### precursor information

|                       |                 |
|-----------------------|-----------------|
| Mass:                 | 1117.58224      |
| m/z:                  | 559.7984        |
| Charge:               | 2+              |
| Retentiontime:        | 43.933887481689 |
| Score:                | 54.40824        |
| Mass Error [ppm]:     | 0.096536        |
| g PEP:                | 0.044624        |
| Annotation:           | 5 of 8          |
| AminoAcids Coverage:  | 62 %            |
| Intensity Coverage:   | 39 %            |
| Peak Coverage:        | 12 %            |
| Protein Localisation: | 529 ... 536     |

| a ion    |        | b ion    |        |   |     |   | y ion    |         | y <sup>2+</sup> ion |         |
|----------|--------|----------|--------|---|-----|---|----------|---------|---------------------|---------|
| Δ dalton | mass   | Δ dalton | mass   |   | seq |   | Δ dalton | mass    | Δ dalton            | mass    |
|          | 86.096 |          | 114.09 | 1 | I   | 7 |          |         |                     |         |
| -0.001   | 233.16 |          | 261.16 | 2 | F   | 6 | 1011.5   |         | 506.27              | +0.2582 |
|          | 370.22 | +0.0106  | 398.22 | 3 | H   | 5 | 864.46   | -0.089  | 432.73              | +0.0933 |
|          | 469.29 |          | 497.29 | 4 | V   | 4 | 727.4    | -0.022  | 727.4               |         |
|          | 583.34 |          | 611.33 | 5 | N   | 3 | 628.33   | +0.0407 | 628.33              |         |
|          | 769.41 |          | 797.41 | 6 | W   | 2 | 514.29   |         | 514.29              |         |
|          | 916.48 |          | 944.48 | 7 | F   | 1 | 328.21   |         | 328.21              |         |
|          |        |          |        | 8 | R   | 0 | 181.14   | -0.1    | 181.14              |         |

Scan number 484 Raw file LNCAP\_Silac\_23F10\_set1\_13  
 Method ITMS: CID Pepti... 80.32

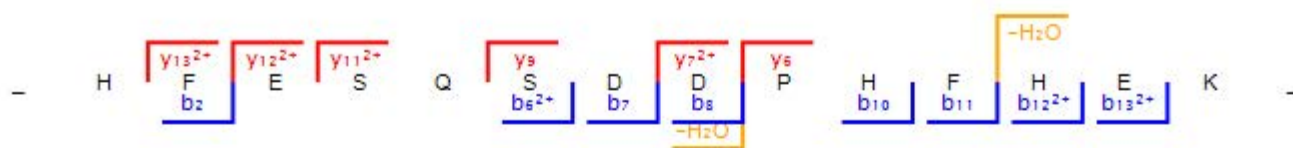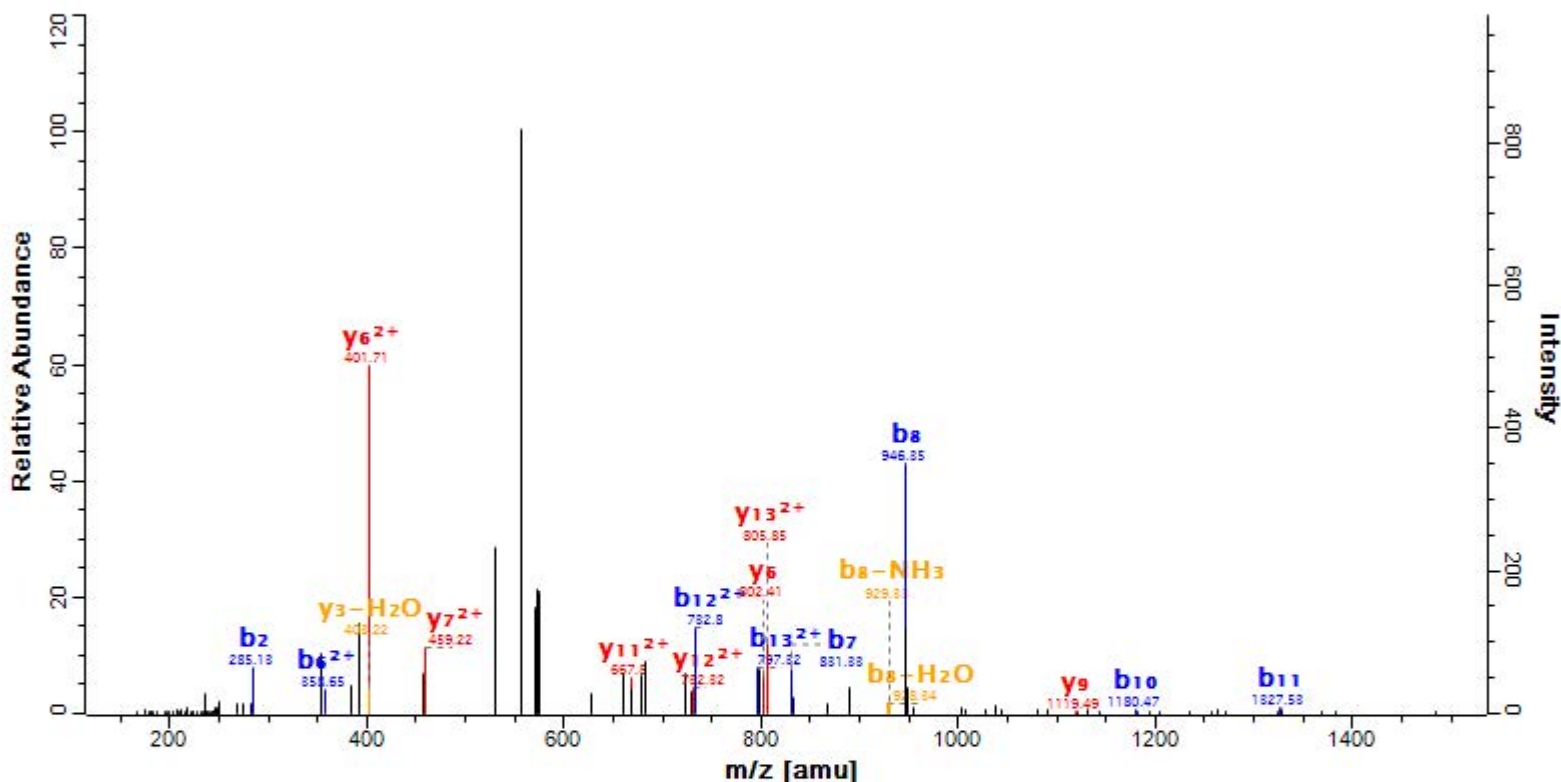

#### precursor information

|                   |                 |
|-------------------|-----------------|
| Mass:             | 1746.74762      |
| m/z:              | 583.25648       |
| Charge:           | 3+              |
| Retentiontime:    | 7.7439532279968 |
| Score:            | 80.31847        |
| Mass Error [ppm]: | -0.082115       |
| PEP:              | 0.014943        |
| Precursor Type:   | ISO             |

#### general information

|                       |             |
|-----------------------|-------------|
| Annotation:           | 11 of 14    |
| AminoAcids Coverage:  | 79 %        |
| Intensity Coverage:   | 35 %        |
| Peak Coverage:        | 14 %        |
| Protein Localisation: | 305 ... 318 |

| b <sup>2+</sup> ion |        | b ion    |        | seq |   |    | y ion    |        | y <sup>2+</sup> ion |         |
|---------------------|--------|----------|--------|-----|---|----|----------|--------|---------------------|---------|
| Δ dalton            | mass   | Δ dalton | mass   |     |   |    | Δ dalton | mass   | Δ dalton            | mass    |
|                     | 138.07 |          | 138.07 | 1   | H | 13 |          |        |                     |         |
|                     | 285.13 | +0.0806  | 285.13 | 2   | F | 12 | 1610.7   |        | 805.85              | +0.254  |
|                     | 414.18 |          | 414.18 | 3   | E | 11 | 1463.6   |        | 732.32              | -0.186  |
|                     | 501.21 |          | 501.21 | 4   | S | 10 | 1334.6   |        | 667.8               | -0.075  |
|                     | 629.27 |          | 629.27 | 5   | Q | 9  | 1247.6   |        | 1247.6              |         |
| -0.459              | 358.65 |          | 716.3  | 6   | S | 8  | 1119.5   | -0.034 | 1119.5              |         |
|                     | 831.33 | +0.153   | 831.33 | 7   | D | 7  | 1032.5   |        | 1032.5              |         |
|                     | 946.35 | -0.077   | 946.35 | 8   | D | 6  | 917.44   |        | 459.22              | +0.3158 |
|                     | 1043.4 |          | 1043.4 | 9   | P | 5  | 802.41   | +0.058 | 401.71              | +0.1054 |
|                     | 1180.5 | +0.0008  | 1180.5 | 10  | H | 4  | 705.36   |        | 705.36              |         |
|                     | 1327.5 | -0.233   | 1327.5 | 11  | F | 3  | 568.3    |        | 568.3               |         |
| +0.1732             | 732.8  |          | 1464.6 | 12  | H | 2  | 421.23   |        | 421.23              |         |
| -0.184              | 797.32 |          | 1593.6 | 13  | E | 1  | 284.17   |        | 284.17              |         |
|                     |        |          |        | 14  | K | 0  | 155.13   |        | 155.13              |         |

Scan number 802 Raw file LNCAP\_Silac\_23F10\_set1\_13  
 Method ITMS: CID Pepti... 101.93

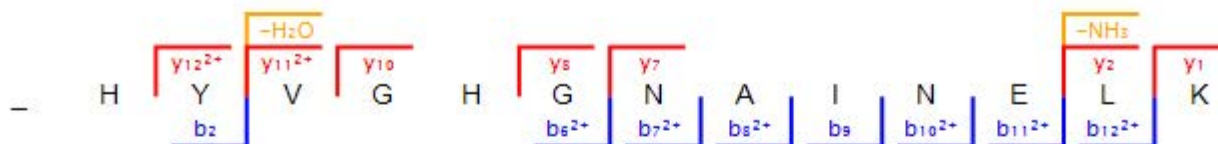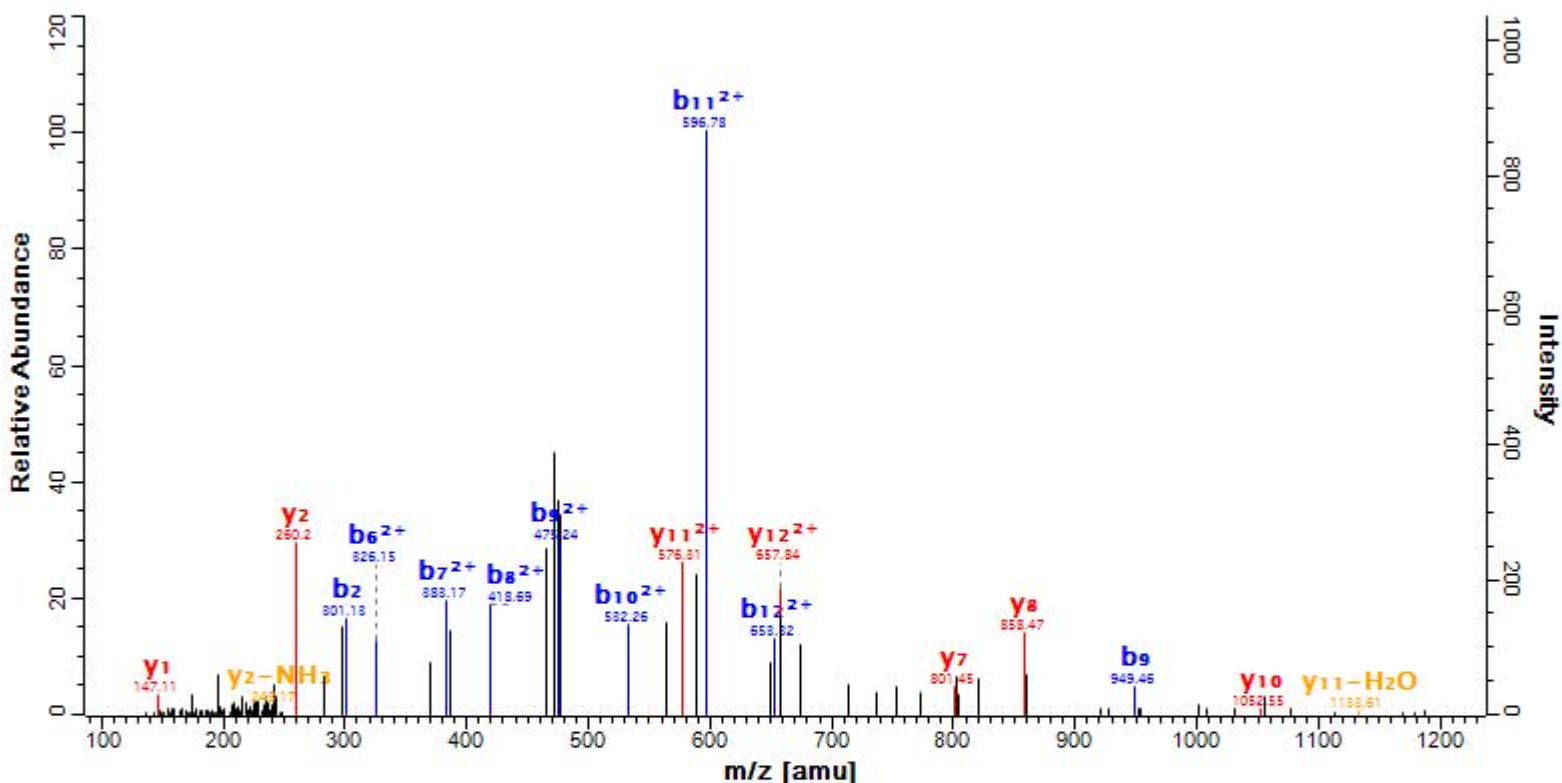

precursor information

|                   |                 |
|-------------------|-----------------|
| Mass:             | 0               |
| m/z:              | 484.58452       |
| Charge:           | 0+              |
| Retentiontime:    | 10.360164642334 |
| Score:            | 101.9286        |
| Mass Error [ppm]: | 0.022073        |
| PEP:              | 0.0022053       |
| Precursor Type:   | PEAK            |

general information

|                       |             |
|-----------------------|-------------|
| Annotation:           | 11 of 13    |
| AminoAcids Coverage:  | 85 %        |
| Intensity Coverage:   | 43 %        |
| Peak Coverage:        | 14 %        |
| Protein Localisation: | 185 ... 197 |

| b <sup>2+</sup> ion |        | b ion    |        |    |     |    | y ion    |         | y <sup>2+</sup> ion |         |
|---------------------|--------|----------|--------|----|-----|----|----------|---------|---------------------|---------|
| Δ dalton            | mass   | Δ dalton | mass   |    | seq |    | Δ dalton | mass    | Δ dalton            | mass    |
|                     | 138.07 |          | 138.07 | 1  | H   | 12 |          |         |                     |         |
|                     | 301.13 | -0.067   | 301.13 | 2  | Y   | 11 | 1314.7   |         | 657.84              | -0.008  |
|                     | 400.2  |          | 400.2  | 3  | V   | 10 | 1151.6   |         | 576.31              | +0.2297 |
|                     | 457.22 |          | 457.22 | 4  | G   | 9  | 1052.5   | -0.008  | 1052.5              |         |
|                     | 594.28 |          | 594.28 | 5  | H   | 8  | 995.53   |         | 995.53              |         |
| +0.2403             | 326.15 |          | 651.3  | 6  | G   | 7  | 858.47   | +0.1346 | 858.47              |         |
| +0.1812             | 383.17 |          | 765.34 | 7  | N   | 6  | 801.45   | -0.117  | 801.45              |         |
| +0.2282             | 418.69 |          | 836.38 | 8  | A   | 5  | 687.4    |         | 687.4               |         |
| +0.3367             | 475.24 | -0.071   | 949.46 | 9  | I   | 4  | 616.37   |         | 616.37              |         |
| -0.075              | 532.26 |          | 1063.5 | 10 | N   | 3  | 503.28   |         | 503.28              |         |
| +0.2377             | 596.78 |          | 1192.5 | 11 | E   | 2  | 389.24   |         | 389.24              |         |
| +0.3066             | 653.32 |          | 1305.6 | 12 | L   | 1  | 260.2    | +0.039  | 260.2               |         |
|                     |        |          |        | 13 | K   | 0  | 147.11   | +0.0875 | 147.11              |         |

Scan number 2027 Raw file LNCAP\_Silac\_23F10\_set1\_14  
 Method ITMS; CID Peptide 128.68

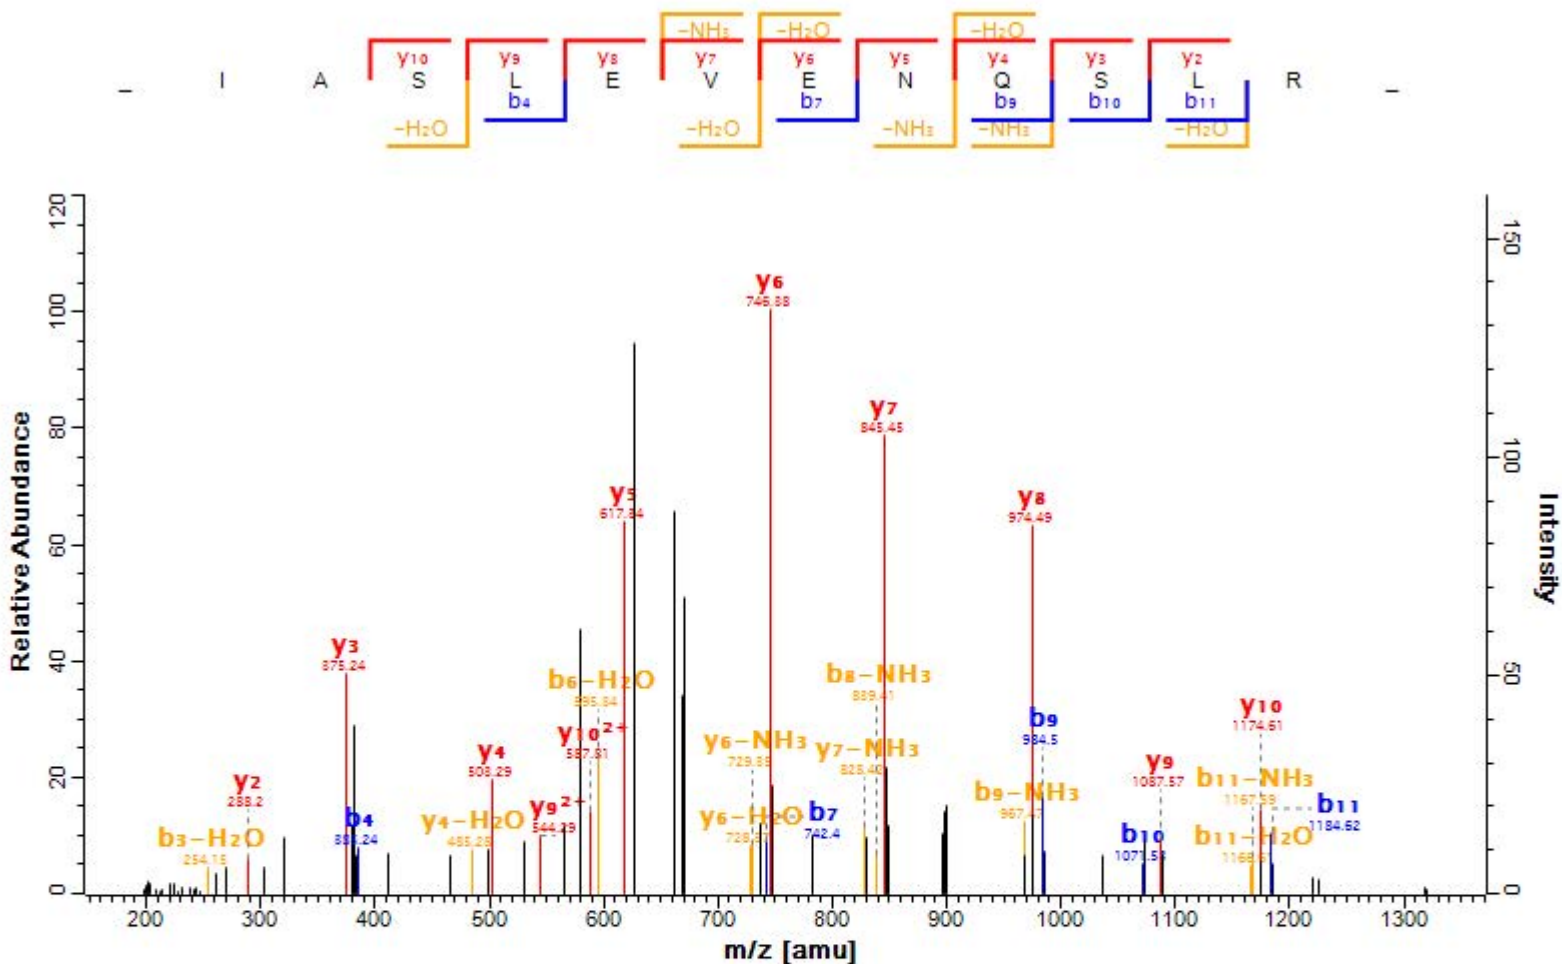

#### precursor information

|                   |                 |
|-------------------|-----------------|
| Mass:             | 1357.71929      |
| m/z:              | 679.86692       |
| Charge:           | 2+              |
| Retentiontime:    | 23.433917999267 |
| Score:            | 128.6753        |
| Mass Error [ppm]: | -0.62485        |
| PEP:              | 2.3178E-05      |
| Precursor Type:   | MULTI           |

#### general information

|                       |           |
|-----------------------|-----------|
| Annotation:           | 9 of 12   |
| AminoAcids Coverage:  | 75 %      |
| Intensity Coverage:   | 46 %      |
| Peak Coverage:        | 32 %      |
| Protein Localisation: | 84 ... 95 |

| b ion     |          |    |     |    | y ion    |           | y <sup>2+</sup> ion |          |
|-----------|----------|----|-----|----|----------|-----------|---------------------|----------|
| Δ dalton  | mass     |    | seq |    | Δ dalton | mass      | Δ dalton            | mass     |
|           | 114.0913 | 1  | I   | 11 |          |           |                     |          |
|           | 185.1285 | 2  | A   | 10 | 1245.643 |           | 1245.643            |          |
|           | 272.1605 | 3  | S   | 9  | 1174.606 | -0.0026   | 587.8068            | -0.13263 |
| +0.132223 | 385.2445 | 4  | L   | 8  | 1087.574 | -0.04516  | 544.2907            | -0.13639 |
|           | 514.2871 | 5  | E   | 7  | 974.4901 | -0.00571  | 974.4901            |          |
|           | 613.3556 | 6  | V   | 6  | 845.4476 | +0.046462 | 845.4476            |          |
| +0.144761 | 742.3981 | 7  | E   | 5  | 746.3791 | +0.006233 | 746.3791            |          |
|           | 856.4411 | 8  | N   | 4  | 617.3365 | +0.141234 | 617.3365            |          |
| +0.172223 | 984.4997 | 9  | Q   | 3  | 503.2936 | +0.06795  | 503.2936            |          |
| +0.334043 | 1071.532 | 10 | S   | 2  | 375.235  | +0.13489  | 375.235             |          |
| -0.30715  | 1184.616 | 11 | L   | 1  | 288.203  | -0.01234  | 288.203             |          |
|           |          | 12 | R   | 0  | 175.119  |           | 175.119             |          |

Scan number 2129 Raw file LNCAP\_Silac\_23F10\_set1\_14  
 Method ITMS: CID Peptide 175.93

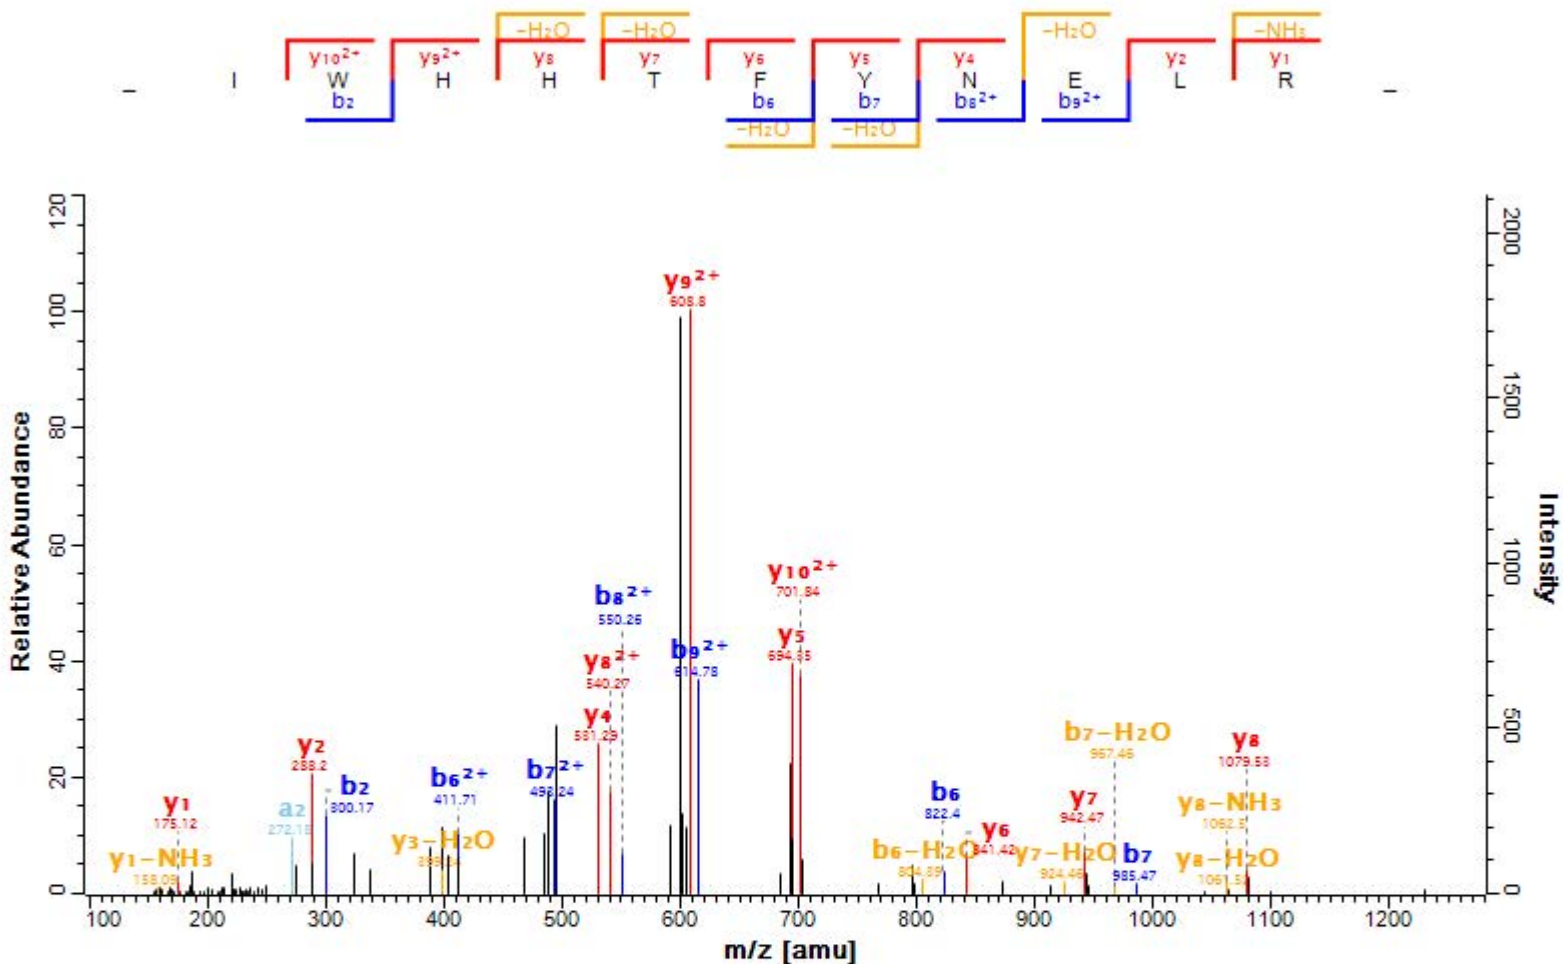

#### precursor information

|                   |                 |
|-------------------|-----------------|
| Mass:             | 1514.74188      |
| m/z:              | 505.92124       |
| Charge:           | 3+              |
| Retentiontime:    | 24.452590942382 |
| Score:            | 175.9339        |
| Mass Error [ppm]: | -0.00031296     |
| PEP:              | 3.7009E-08      |
| Precursor Type:   | MULTI           |

#### general information

|                       |           |
|-----------------------|-----------|
| Annotation:           | 10 of 11  |
| AminoAcids Coverage:  | 91 %      |
| Intensity Coverage:   | 50 %      |
| Peak Coverage:        | 23 %      |
| Protein Localisation: | 85 ... 95 |

|       | a ion         | b <sup>2+</sup> ion | b ion         |     |   |    | y ion         | y <sup>2+</sup> ion |
|-------|---------------|---------------------|---------------|-----|---|----|---------------|---------------------|
|       | Δ dalton mass | Δ dalton mass       | Δ dalton mass | seq |   |    | Δ dalton mass | Δ dalton mass       |
|       | 86.1          | 114.1               | 114.1         | 1   | I | 10 |               |                     |
| -0.09 | 272.2         | 300.2               | +0.086300.2   | 2   | W | 9  | 1403          | 701.8 +0.26%        |
|       | 409.2         | 437.2               | 437.2         | 3   | H | 8  | 1217          | 608.8 +0.21%        |
|       | 546.3         | 574.3               | 574.3         | 4   | H | 7  | 1080          | -0.02 540.3 +0.24%  |
|       | 647.3         | 675.3               | 675.3         | 5   | T | 6  | 942.5         | -0.03 942.5         |
|       | 794.4         | -0.01 411.7         | +0.249822.4   | 6   | F | 5  | 841.4         | +0.143841.4         |
|       | 957.5         | +0.316493.2         | +0.041985.5   | 7   | Y | 4  | 694.4         | -0.1 694.4          |
|       | 1072          | +0.217550.3         | 1100          | 8   | N | 3  | 531.3         | +0.028531.3         |
|       | 1201          | +0.292614.8         | 1229          | 9   | E | 2  | 417.2         | 417.2               |
|       | 1314          | 1342                | 1342          | 10  | L | 1  | 288.2         | +0.118288.2         |
|       |               |                     |               | 11  | R | 0  | 175.1         | +0.139175.1         |

Scan number 280 Raw file LNCAP\_Silac\_23F10\_set1\_14  
 Method ITMS: CID Peptide 53.83

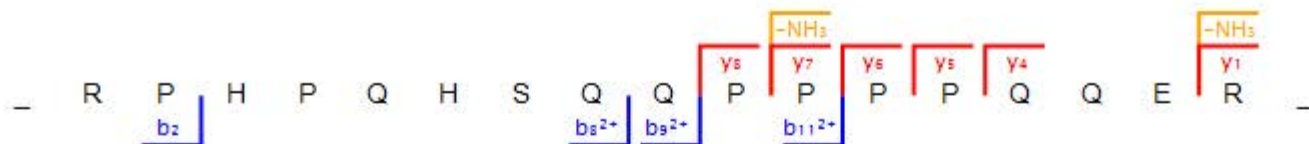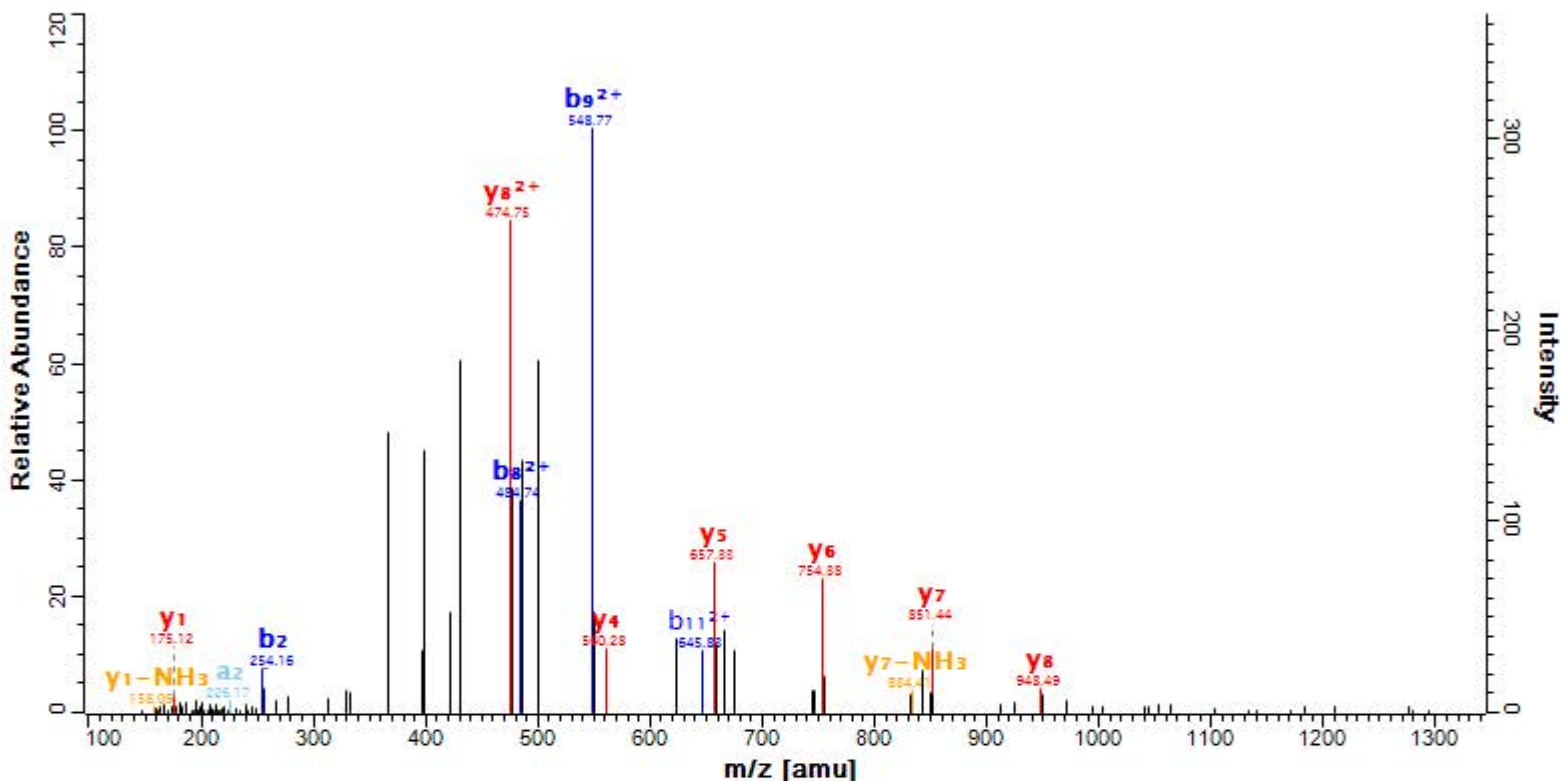

precursor information

|                   |                 |
|-------------------|-----------------|
| Mass:             | 2043.01488      |
| m/z:              | 511.761         |
| Charge:           | 4+              |
| Retentiontime:    | 6.2474799156189 |
| Score:            | 53.82846        |
| Mass Error [ppm]: | 0.08447         |
| PEP:              | 0.0027348       |
| Precursor Type:   | MULTI           |

general information

|                       |             |
|-----------------------|-------------|
| Annotation:           | 10 of 17    |
| AminoAcids Coverage:  | 59 %        |
| Intensity Coverage:   | 39 %        |
| Peak Coverage:        | 13 %        |
| Protein Localisation: | 530 ... 546 |

|        | a ion         | b <sup>2+</sup> ion | b ion         |       |     |    | y ion         | y <sup>2+</sup> ion |
|--------|---------------|---------------------|---------------|-------|-----|----|---------------|---------------------|
|        | Δ dalton mass | Δ dalton mass       | Δ dalton mass |       | seq |    | Δ dalton mass | Δ dalton mass       |
|        | 129.1         | 157.1               | 157.1         | 1     | R   | 16 |               |                     |
| +0.048 | 226.2         | 254.2               | -0.05         | 254.2 | 2   | P  | 15            | 1888                |
|        | 363.2         | 391.2               |               | 391.2 | 3   | H  | 14            | 1791                |
|        | 460.3         | 488.3               |               | 488.3 | 4   | P  | 13            | 1654                |
|        | 588.3         | 616.3               |               | 616.3 | 5   | Q  | 12            | 1557                |
|        | 725.4         | 753.4               |               | 753.4 | 6   | H  | 11            | 1429                |
|        | 812.4         | 840.4               |               | 840.4 | 7   | S  | 10            | 1292                |
|        | 940.5         | -0.18               | 484.7         | 968.5 | 8   | Q  | 9             | 1205                |
|        | 1069          | +0.21               | 9548.8        | 1097  | 9   | Q  | 8             | 1077                |
|        | 1166          |                     | 1194          | 1194  | 10  | P  | 7             | 948.5               |
|        | 1263          | +0.05               | 645.8         | 1291  | 11  | P  | 6             | 851.4               |
|        | 1360          |                     | 1388          | 1388  | 12  | P  | 5             | 754.4               |
|        | 1457          |                     | 1485          | 1485  | 13  | P  | 4             | 657.3               |
|        | 1585          |                     | 1613          | 1613  | 14  | Q  | 3             | 560.3               |
|        | 1713          |                     | 1741          | 1741  | 15  | Q  | 2             | 432.2               |
|        | 1842          |                     | 1870          | 1870  | 16  | E  | 1             | 304.2               |
|        |               |                     |               |       | 17  | R  | 0             | 175.1               |



Scan number 2995 Raw file LNCAP\_Silac\_23F10\_set1\_14  
 Method ITMS; CID Pepti... 247.88

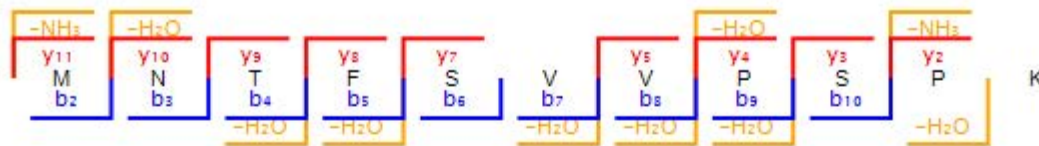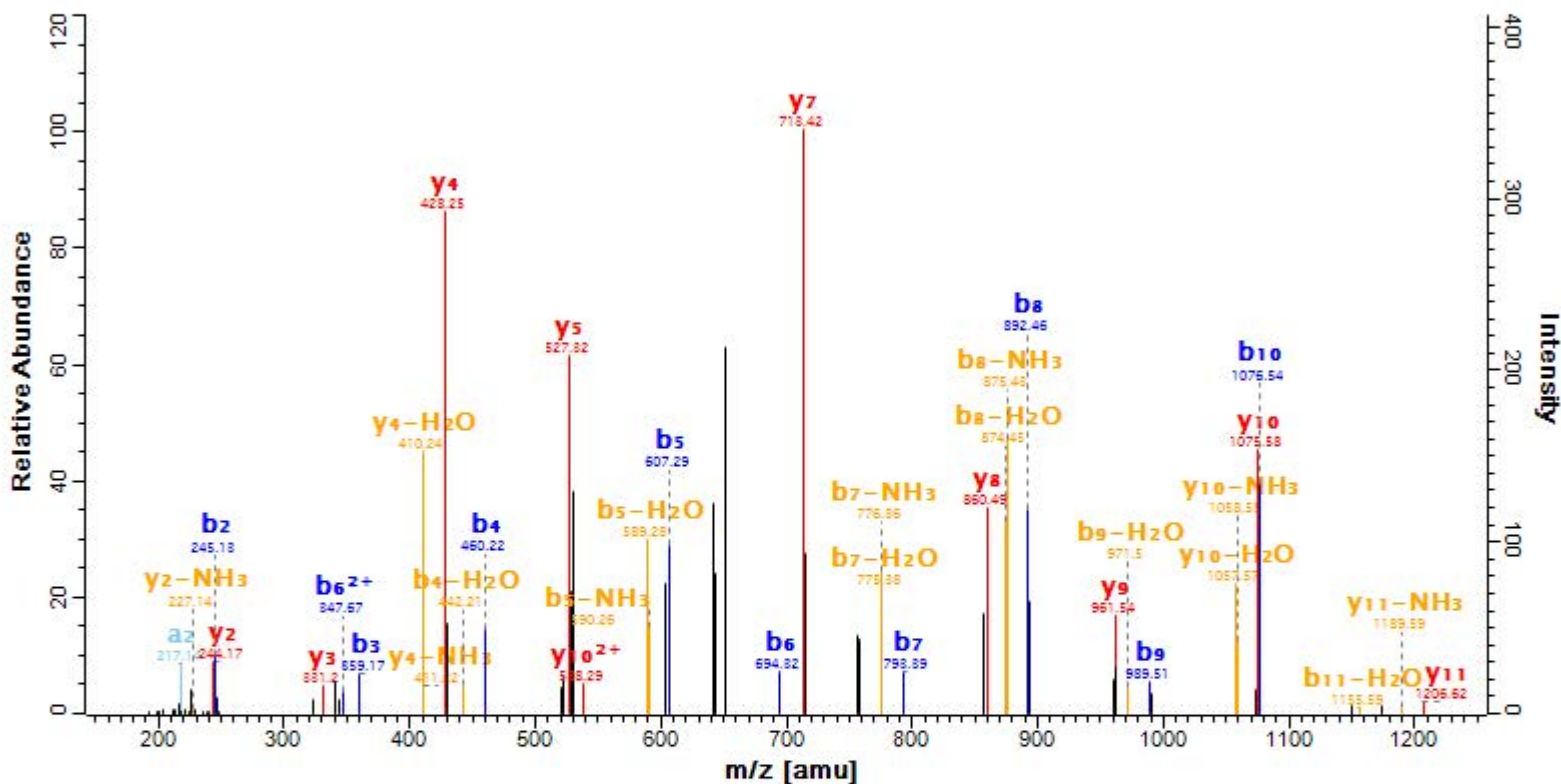

#### precursor information

|                   |                 |
|-------------------|-----------------|
| Mass:             | 1318.69573      |
| m/z:              | 660.35514       |
| Charge:           | 2+              |
| Retentiontime:    | 33.213119506835 |
| Score:            | 247.8791        |
| Mass Error [ppm]: | 0.16542         |
| PEP:              | 3.025E-33       |
| Precursor Type:   | MULTI           |

#### general information

|                       |             |
|-----------------------|-------------|
| Annotation:           | 10 of 12    |
| AminoAcids Coverage:  | 83 %        |
| Intensity Coverage:   | 68 %        |
| Peak Coverage:        | 44 %        |
| Protein Localisation: | 163 ... 174 |

| a ion         |               | b <sup>2+</sup> ion |               | b ion         |     | seq           |               | y ion         |               | y <sup>2+</sup> ion |               |
|---------------|---------------|---------------------|---------------|---------------|-----|---------------|---------------|---------------|---------------|---------------------|---------------|
| Δ dalton mass | Δ dalton mass | Δ dalton mass       | Δ dalton mass | Δ dalton mass | seq | Δ dalton mass | Δ dalton mass | Δ dalton mass | Δ dalton mass | Δ dalton mass       | Δ dalton mass |
| 86.1          | 114.1         |                     | 114.1         | 1             | I   | 11            |               |               |               |                     |               |
| +0.058217.1   | 245.1         | +0.016245.1         | 2             | M             | 10  | 1207          | +0.23         | 1207          |               |                     |               |
| 331.2         | 359.2         | -0.01               | 359.2         | 3             | N   | 9             | 1076          | -0.03         | 538.3         | +0.069              |               |
| 432.2         | 460.2         | +0.071460.2         | 4             | T             | 8   | 961.5         | +0.012961.5   |               |               |                     |               |
| 579.3         | 607.3         | +0.121607.3         | 5             | F             | 7   | 860.5         | -0.04         | 860.5         |               |                     |               |
| 666.3         | -0.19         | 347.7               | -0.3          | 694.3         | 6   | S             | 6             | 713.4         | +0.037713.4   |                     |               |
| 765.4         |               | 793.4               | -0.11         | 793.4         | 7   | V             | 5             | 626.4         |               | 626.4               |               |
| 864.5         |               | 892.5               | -0.08         | 892.5         | 8   | V             | 4             | 527.3         | +0.014527.3   |                     |               |
| 961.5         |               | 989.5               | +0.019989.5   | 9             | P   | 3             | 428.3         | +0.019428.3   |               |                     |               |
| 1049          |               | 1077                | -0.02         | 1077          | 10  | S             | 2             | 331.2         | -0.02         | 331.2               |               |
| 1146          |               | 1174                |               | 1174          | 11  | P             | 1             | 244.2         | +0.085244.2   |                     |               |
|               |               |                     |               |               | 12  | K             | 0             | 147.1         |               | 147.1               |               |

Scan number 325 Raw file LNCAP\_Silac\_23F10\_set1\_14  
 Method ITMS; CID Pepti... 79.82

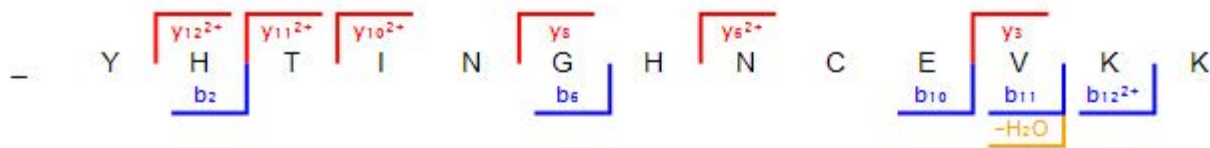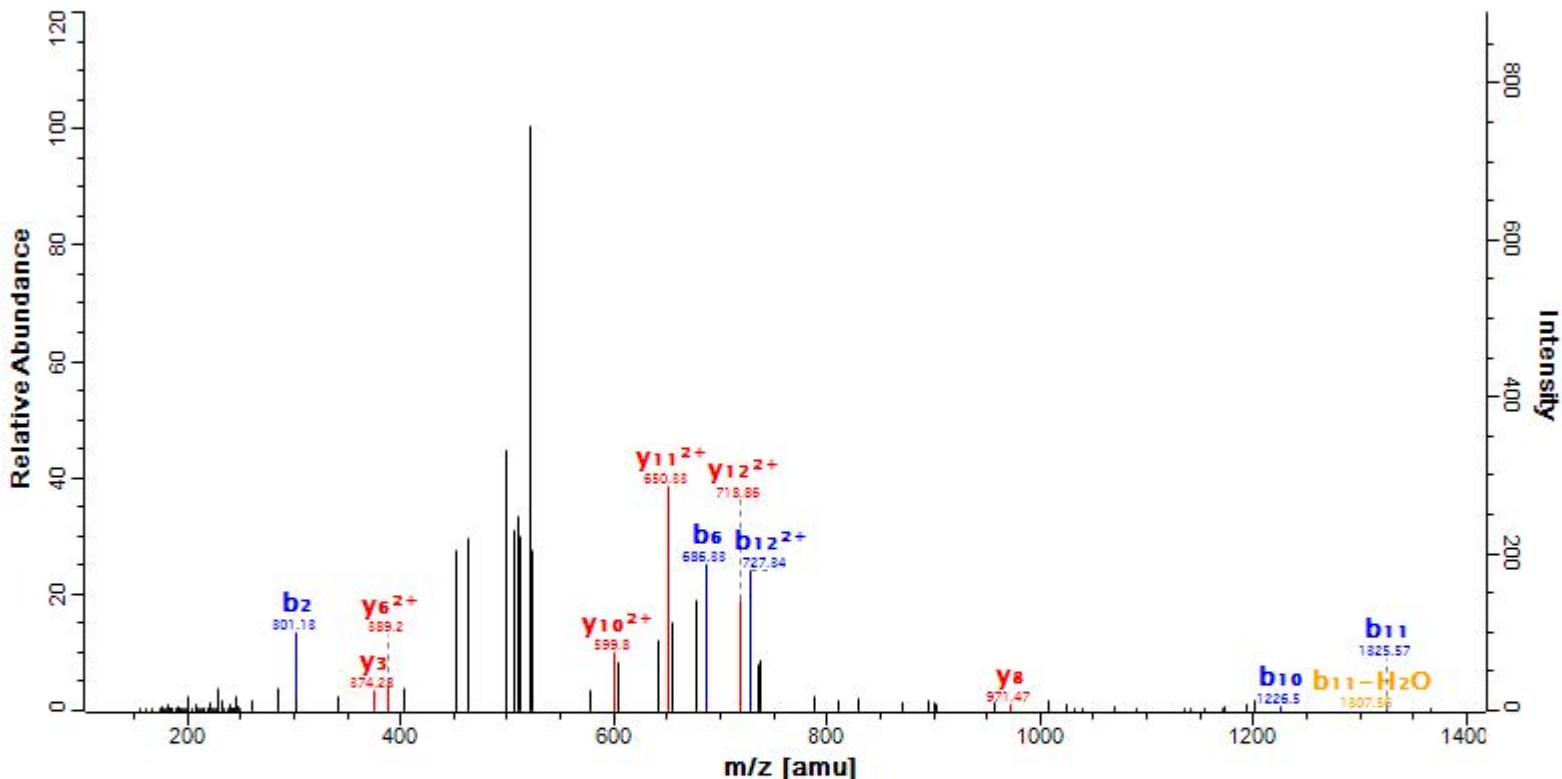

**precursor information**

|                   |                 |
|-------------------|-----------------|
| Mass:             | 1598.76286      |
| m/z:              | 533.92823       |
| Charge:           | 3+              |
| Retentiontime:    | 6.6594848632812 |
| Score:            | 79.8202         |
| Mass Error [ppm]: | 0.31107         |
| PEP:              | 0.00050883      |
| Precursor Type:   | MULTI           |

**general information**

|                       |             |
|-----------------------|-------------|
| Annotation:           | 8 of 13     |
| AminoAcids Coverage:  | 62 %        |
| Intensity Coverage:   | 23 %        |
| Peak Coverage:        | 10 %        |
| Protein Localisation: | 188 ... 200 |

| b <sup>2+</sup> ion |        | b ion    |        |    |     |    | y ion    |         | y <sup>2+</sup> ion |         |
|---------------------|--------|----------|--------|----|-----|----|----------|---------|---------------------|---------|
| Δ dalton            | mass   | Δ dalton | mass   |    | seq |    | Δ dalton | mass    | Δ dalton            | mass    |
|                     | 164.07 |          | 164.07 | 1  | Y   | 12 |          |         |                     |         |
|                     | 301.13 | +0.0324  | 301.13 | 2  | H   | 11 | 1436.7   |         | 718.86              | -0.14   |
|                     | 402.18 |          | 402.18 | 3  | T   | 10 | 1299.6   |         | 650.33              | +0.248  |
|                     | 515.26 |          | 515.26 | 4  | I   | 9  | 1198.6   |         | 599.8               | +0.2012 |
|                     | 629.3  |          | 629.3  | 5  | N   | 8  | 1085.5   |         | 1085.5              |         |
|                     | 686.33 | +0.4843  | 686.33 | 6  | G   | 7  | 971.47   | +0.2425 | 971.47              |         |
|                     | 823.38 |          | 823.38 | 7  | H   | 6  | 914.45   |         | 914.45              |         |
|                     | 937.43 |          | 937.43 | 8  | N   | 5  | 777.39   |         | 389.2               | -0.006  |
|                     | 1097.5 |          | 1097.5 | 9  | C   | 4  | 663.35   |         | 663.35              |         |
|                     | 1226.5 | -0.036   | 1226.5 | 10 | E   | 3  | 503.32   |         | 503.32              |         |
|                     | 1325.6 | +0.3504  | 1325.6 | 11 | V   | 2  | 374.28   | +0.0287 | 374.28              |         |
|                     | 727.34 |          | 1453.7 | 12 | K   | 1  | 275.21   |         | 275.21              |         |
|                     |        |          |        | 13 | K   | 0  | 147.11   |         | 147.11              |         |

Scan number 670 Raw file LNCAP\_Silac\_23F10\_set1\_14  
 Method ITMS: CID Pepti... 116.52

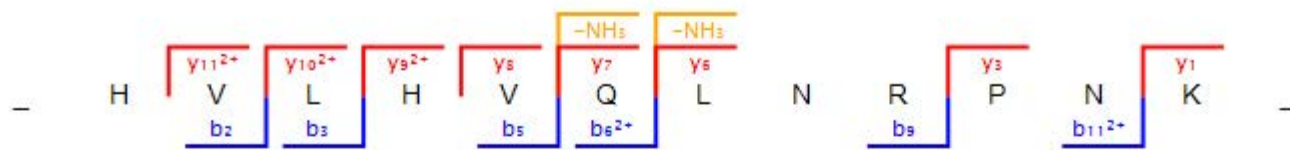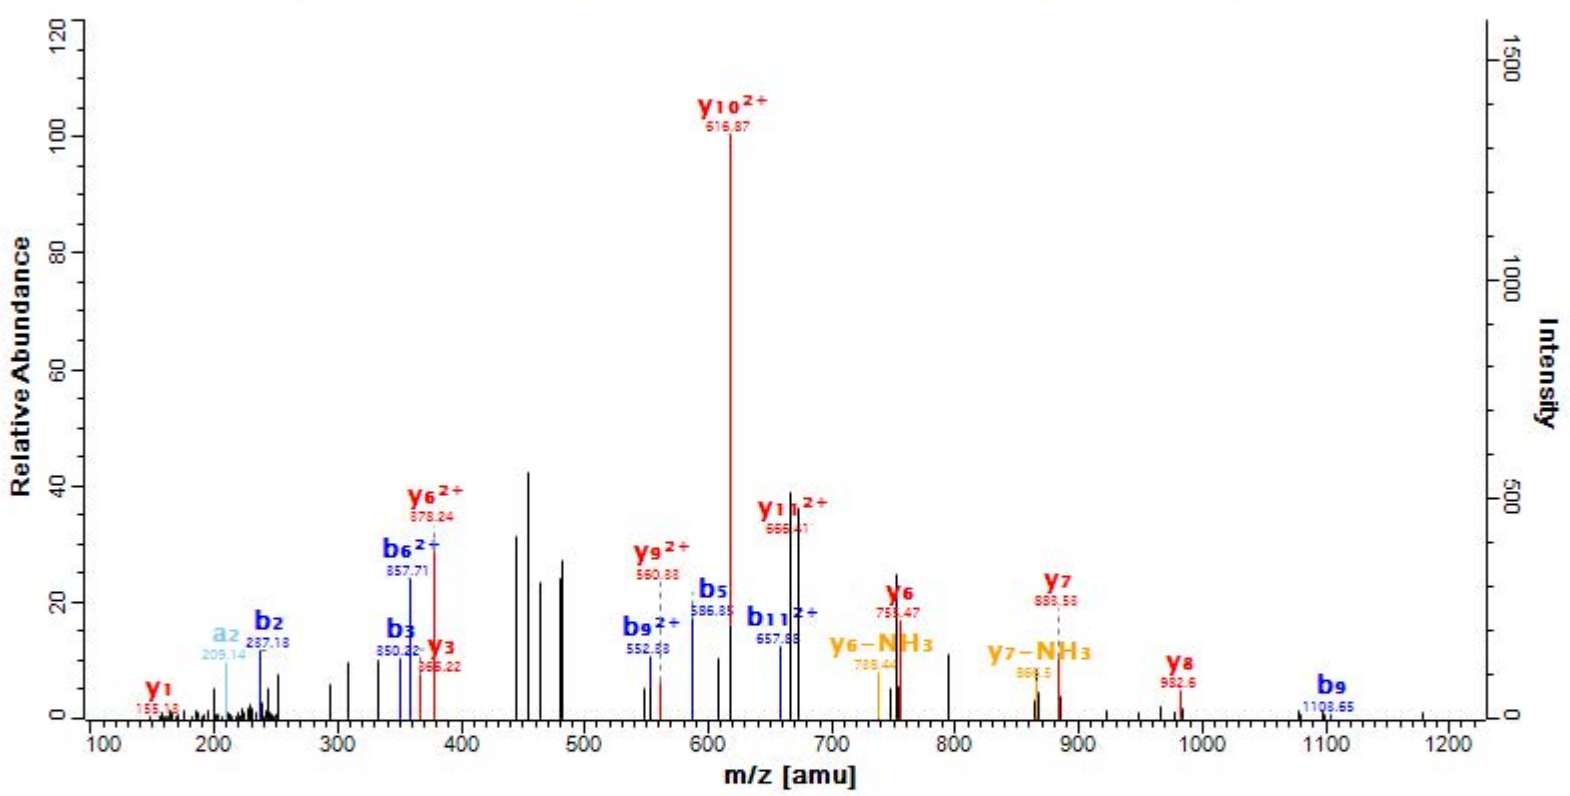

**precursor information**

|                   |                 |
|-------------------|-----------------|
| Mass:             | 1453.82619      |
| m/z:              | 485.61601       |
| Charge:           | 3+              |
| Retentiontime:    | 9.8876628875732 |
| Score:            | 116.5176        |
| Mass Error [ppm]: | -0.2884         |
| PEP:              | 2.3949E-05      |
| Precursor Type:   | MULTI           |

**general information**

|                       |           |
|-----------------------|-----------|
| Annotation:           | 10 of 12  |
| AminoAcids Coverage:  | 83 %      |
| Intensity Coverage:   | 41 %      |
| Peak Coverage:        | 16 %      |
| Protein Localisation: | 66 ... 77 |

| a ion         | b <sup>2+</sup> ion | b ion         |    |     |    | y ion         | y <sup>2+</sup> ion |
|---------------|---------------------|---------------|----|-----|----|---------------|---------------------|
| Δ dalton mass | Δ dalton mass       | Δ dalton mass |    | seq |    | Δ dalton mass | Δ dalton mass       |
| 110.1         | 138.1               | 138.1         | 1  | H   | 11 |               |                     |
| +0.028209.1   | 237.1               | +0.097237.1   | 2  | V   | 10 | 1332          | 666.4 -0.05         |
| 322.2         | 350.2               | +0.006350.2   | 3  | L   | 9  | 1233          | 616.9 +0.17         |
| 459.3         | 487.3               | 487.3         | 4  | H   | 8  | 1120          | 560.3 +0.11         |
| 558.4         | 586.3               | -0.02 586.3   | 5  | V   | 7  | 982.6         | -0.04 982.6         |
| 686.4         | +0.298357.7         | 714.4         | 6  | Q   | 6  | 883.5         | -0.01 883.5         |
| 799.5         | 827.5               | 827.5         | 7  | L   | 5  | 755.5         | +0.069378.2 +0.00   |
| 913.5         | 941.5               | 941.5         | 8  | N   | 4  | 642.4         | 642.4               |
| 1076          | -0.08 552.3         | -0.14 1104    | 9  | R   | 3  | 528.3         | 528.3               |
| 1173          | 1201                | 1201          | 10 | P   | 2  | 366.2         | -0.12 366.2         |
| 1287          | -0.01 657.9         | 1315          | 11 | N   | 1  | 269.2         | 269.2               |
|               |                     |               | 12 | K   | 0  | 155.1         | +0.104155.1         |

Scan number 1060 Raw file LNCAP\_Silac\_23F10\_set2\_01  
 Method ITMS; CID Pepti... 86.29

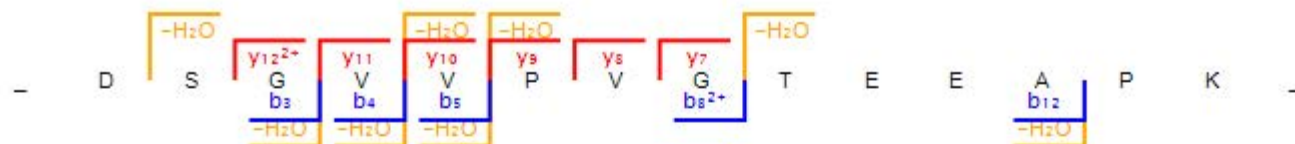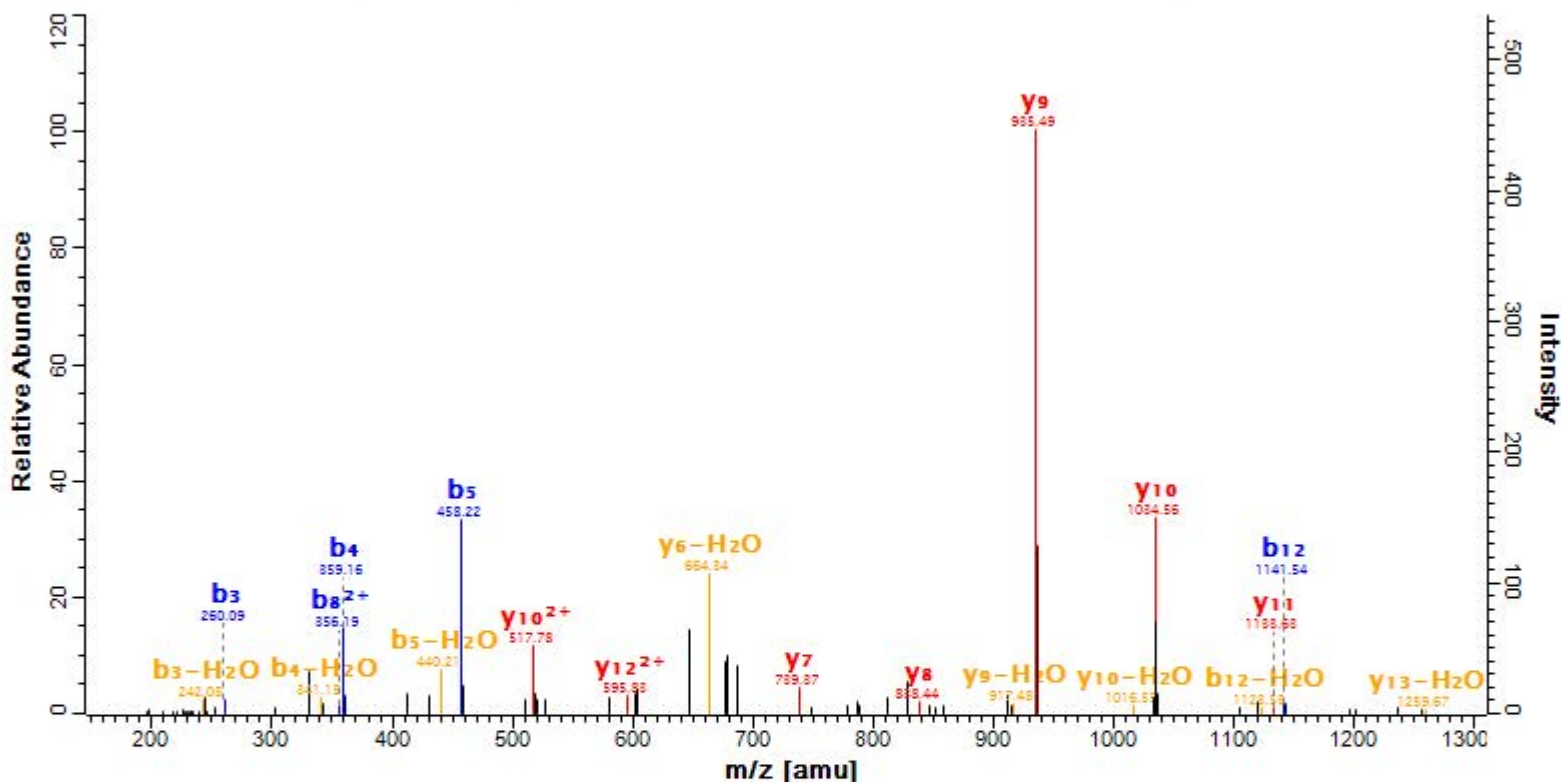

#### precursor information

|                   |                 |
|-------------------|-----------------|
| Mass:             | 1383.6876       |
| m/z:              | 692.85107       |
| Charge:           | 2+              |
| Retentiontime:    | 14.606249809265 |
| Score:            | 86.2877         |
| Mass Error [ppm]: | -0.41564        |
| PEP:              | 0.00045202      |
| Precursor Type:   | MULTI           |

| b <sup>2+</sup> ion |        | b ion    |        | seq |   |    | y ion    |         | y <sup>2+</sup> ion |         |
|---------------------|--------|----------|--------|-----|---|----|----------|---------|---------------------|---------|
| Δ dalton            | mass   | Δ dalton | mass   |     |   |    | Δ dalton | mass    | Δ dalton            | mass    |
|                     | 116.03 |          | 116.03 | 1   | D | 13 |          |         |                     |         |
|                     | 203.07 |          | 203.07 | 2   | S | 12 | 1277.7   |         | 1277.7              |         |
|                     | 260.09 | +0.0784  | 260.09 | 3   | G | 11 | 1190.7   |         | 595.83              | -0.188  |
|                     | 359.16 | -0.032   | 359.16 | 4   | V | 10 | 1133.6   | +0.0358 | 1133.6              |         |
|                     | 458.22 | -0.002   | 458.22 | 5   | V | 9  | 1034.6   | -0.033  | 517.78              | +0.0185 |
|                     | 555.28 |          | 555.28 | 6   | P | 8  | 935.49   | +0.0033 | 935.49              |         |
|                     | 654.35 |          | 654.35 | 7   | V | 7  | 838.44   | +0.0736 | 838.44              |         |
| +0.0521             | 356.19 |          | 711.37 | 8   | G | 6  | 739.37   | -0.09   | 739.37              |         |
|                     | 812.41 |          | 812.41 | 9   | T | 5  | 682.35   |         | 682.35              |         |
|                     | 941.46 |          | 941.46 | 10  | E | 4  | 581.3    |         | 581.3               |         |
|                     | 1070.5 |          | 1070.5 | 11  | E | 3  | 452.26   |         | 452.26              |         |
|                     | 1141.5 | -0.164   | 1141.5 | 12  | A | 2  | 323.22   |         | 323.22              |         |
|                     | 1238.6 |          | 1238.6 | 13  | P | 1  | 252.18   |         | 252.18              |         |
|                     |        |          |        | 14  | K | 0  | 155.13   |         | 155.13              |         |

#### general information

|                       |           |
|-----------------------|-----------|
| Annotation:           | 9 of 14   |
| AminoAcids Coverage:  | 64 %      |
| Intensity Coverage:   | 56 %      |
| Peak Coverage:        | 24 %      |
| Protein Localisation: | 14 ... 27 |

Scan number 1188 Raw file LNCAP\_Silac\_23F10\_set2\_01  
 Method ITMS; CID Pepti... 126.88

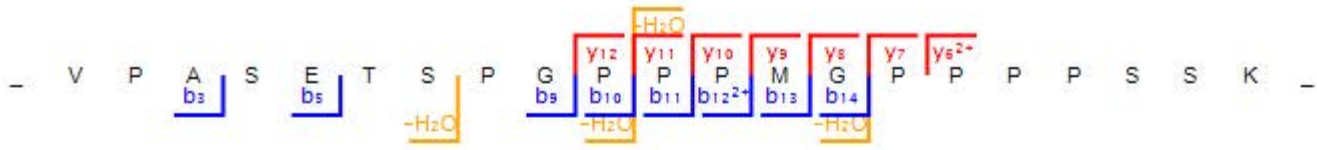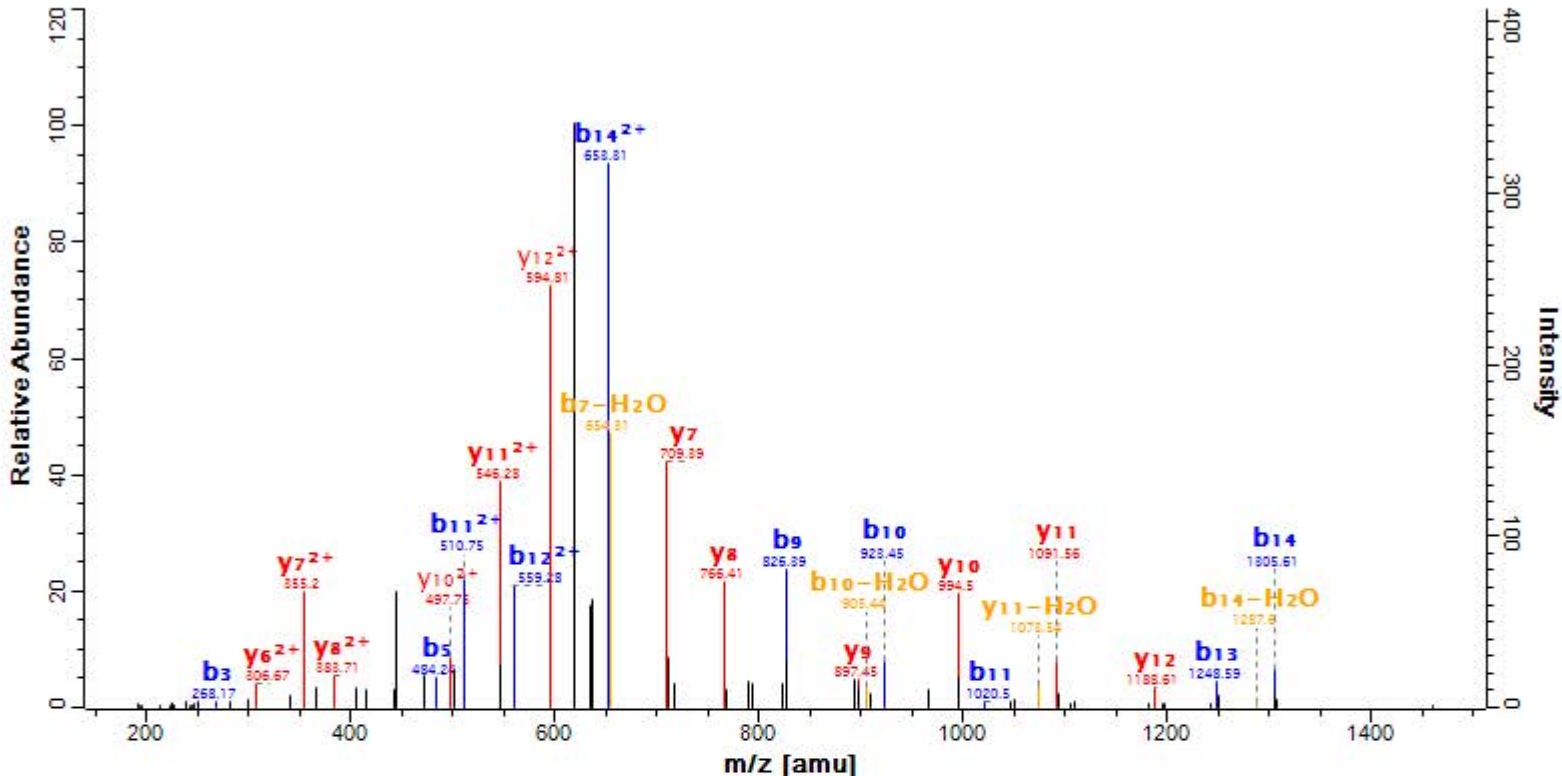

precursor information

|                   |                 |
|-------------------|-----------------|
| Mass:             | 2012.98813      |
| m/z:              | 672.00332       |
| Charge:           | 3+              |
| Retentiontime:    | 15.854846954345 |
| Score:            | 126.8845        |
| Mass Error [ppm]: | 0.19793         |
| PEP:              | 1.8059E-13      |
| Precursor Type:   | MULTI           |

general information

|                       |           |
|-----------------------|-----------|
| Annotation:           | 13 of 21  |
| AminoAcids Coverage:  | 62 %      |
| Intensity Coverage:   | 64 %      |
| Peak Coverage:        | 32 %      |
| Protein Localisation: | 63 ... 83 |

| b <sup>2+</sup> ion |        | b ion    |        | seq |   |    | y ion    |         | y <sup>2+</sup> ion |         |
|---------------------|--------|----------|--------|-----|---|----|----------|---------|---------------------|---------|
| Δ dalton            | mass   | Δ dalton | mass   |     |   |    | Δ dalton | mass    | Δ dalton            | mass    |
|                     | 100.08 |          | 100.08 | 1   | V | 20 |          |         |                     |         |
|                     | 197.13 |          | 197.13 | 2   | P | 19 | 1914.9   |         | 1914.9              |         |
|                     | 268.17 | -0.002   | 268.17 | 3   | A | 18 | 1817.9   |         | 1817.9              |         |
|                     | 355.2  |          | 355.2  | 4   | S | 17 | 1746.8   |         | 1746.8              |         |
|                     | 484.24 | +0.0611  | 484.24 | 5   | E | 16 | 1659.8   |         | 1659.8              |         |
|                     | 585.29 |          | 585.29 | 6   | T | 15 | 1530.8   |         | 1530.8              |         |
|                     | 672.32 |          | 672.32 | 7   | S | 14 | 1429.7   |         | 1429.7              |         |
|                     | 769.37 |          | 769.37 | 8   | P | 13 | 1342.7   |         | 1342.7              |         |
|                     | 826.39 | +0.0462  | 826.39 | 9   | G | 12 | 1245.6   |         | 1245.6              |         |
|                     | 923.45 | +0.056   | 923.45 | 10  | P | 11 | 1188.6   | -0.206  | 594.81              | +0.1914 |
| +0.28               | 510.75 | -0.061   | 1020.5 | 11  | P | 10 | 1091.6   | -0.11   | 546.28              | +0.1344 |
| +0.1456             | 559.28 |          | 1117.6 | 12  | P | 9  | 994.5    | +0.0178 | 497.75              | +0.0665 |
|                     | 1248.6 | -0.186   | 1248.6 | 13  | M | 8  | 897.45   | -0.08   | 897.45              |         |
| +0.0829             | 653.31 | -0.293   | 1305.6 | 14  | G | 7  | 766.41   | +0.0566 | 383.71              | +0.1911 |
|                     | 1402.7 |          | 1402.7 | 15  | P | 6  | 709.39   | -0.085  | 355.2               | +0.1043 |
|                     | 1499.7 |          | 1499.7 | 16  | P | 5  | 612.34   |         | 306.67              | -0.045  |
|                     | 1596.8 |          | 1596.8 | 17  | P | 4  | 515.28   |         | 515.28              |         |
|                     | 1693.8 |          | 1693.8 | 18  | P | 3  | 418.23   |         | 418.23              |         |
|                     | 1780.9 |          | 1780.9 | 19  | S | 2  | 321.18   |         | 321.18              |         |
|                     | 1867.9 |          | 1867.9 | 20  | S | 1  | 234.14   |         | 234.14              |         |
|                     |        |          |        | 21  | K | 0  | 147.11   |         | 147.11              |         |

Scan number 1503 Raw file LNCAP\_Silac\_23F10\_set2\_01  
 Method ITMS; CID Pepti... 158.91

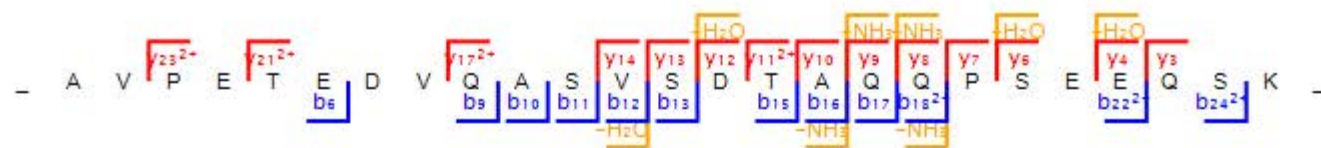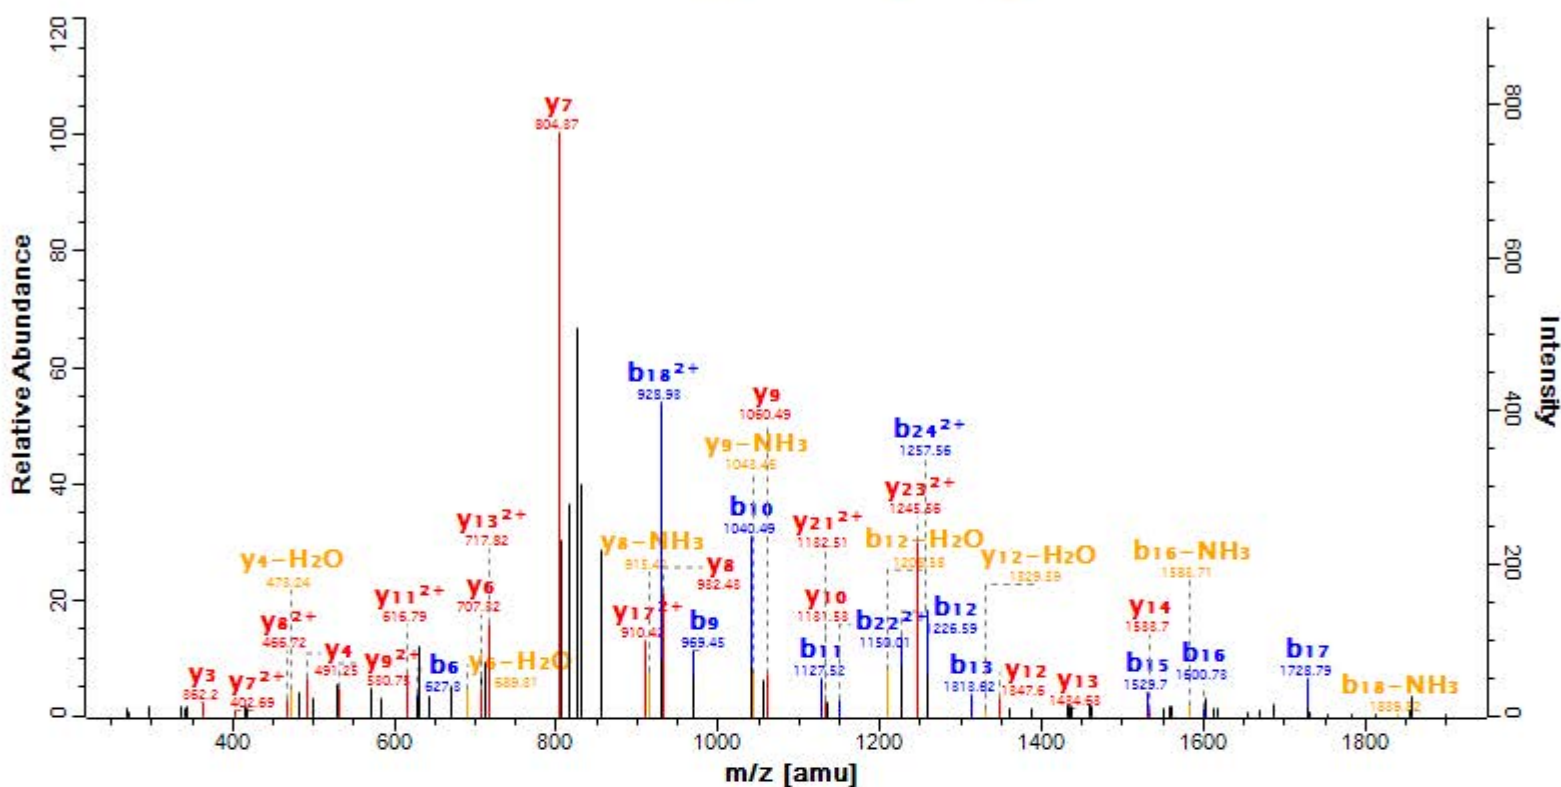

precursor information

|                   |                 |
|-------------------|-----------------|
| Mass:             | 2659.21002      |
| m/z:              | 887.41062       |
| Charge:           | 3+              |
| Retentiontime:    | 18.895931243896 |
| Score:            | 158.9069        |
| Mass Error [ppm]: | 0.1272          |
| PEP:              | 1.1484E-31      |
| Precursor Type:   | MULTI           |

| b <sup>2+</sup> ion |        | b ion    |        | seq |   |    | y ion    |         | y <sup>2+</sup> ion |         |
|---------------------|--------|----------|--------|-----|---|----|----------|---------|---------------------|---------|
| Δ dalton            | mass   | Δ dalton | mass   |     |   |    | Δ dalton | mass    | Δ dalton            | mass    |
|                     | 72.044 |          | 72.044 | 1   | A | 24 |          |         |                     |         |
|                     | 171.11 |          | 171.11 | 2   | V | 23 | 2589.2   |         | 2589.2              |         |
|                     | 268.17 |          | 268.17 | 3   | P | 22 | 2490.1   |         | 1245.6              | +0.2046 |
|                     | 397.21 |          | 397.21 | 4   | E | 21 | 2393.1   |         | 2393.1              |         |
|                     | 498.26 |          | 498.26 | 5   | T | 20 | 2264     |         | 1132.5              | +0.2405 |
|                     | 627.3  | -0.057   | 627.3  | 6   | E | 19 | 2163     |         | 2163                |         |
|                     | 742.33 |          | 742.33 | 7   | D | 18 | 2033.9   |         | 2033.9              |         |
|                     | 841.39 |          | 841.39 | 8   | V | 17 | 1918.9   |         | 1918.9              |         |
|                     | 969.45 | -0.004   | 969.45 | 9   | Q | 16 | 1819.8   |         | 910.42              | +0.3842 |
|                     | 1040.5 | -0.054   | 1040.5 | 10  | A | 15 | 1691.8   |         | 1691.8              |         |
|                     | 1127.5 | +0.0149  | 1127.5 | 11  | S | 14 | 1620.7   |         | 1620.7              |         |
|                     | 1226.6 | -0.147   | 1226.6 | 12  | V | 13 | 1533.7   | -0.014  | 1533.7              |         |
|                     | 1313.6 | -0.322   | 1313.6 | 13  | S | 12 | 1434.6   | -0.204  | 717.82              | +0.1395 |
|                     | 1428.6 |          | 1428.6 | 14  | D | 11 | 1347.6   | -0.051  | 1347.6              |         |
|                     | 1529.7 | +0.0931  | 1529.7 | 15  | T | 10 | 1232.6   |         | 616.79              | +0.1735 |
|                     | 1600.7 | -0.209   | 1600.7 | 16  | A | 9  | 1131.5   | +0.0698 | 1131.5              |         |
|                     | 1728.8 | -0.253   | 1728.8 | 17  | Q | 8  | 1060.5   | +0.2057 | 530.75              | -0.001  |
| +0.1117             | 928.93 |          | 1856.9 | 18  | Q | 7  | 932.43   | +0.1366 | 466.72              | +0.3147 |
|                     | 1953.9 |          | 1953.9 | 19  | P | 6  | 804.37   | +0.0023 | 402.69              | -0.138  |
|                     | 2040.9 |          | 2040.9 | 20  | S | 5  | 707.32   | +0.1175 | 707.32              |         |
|                     | 2170   |          | 2170   | 21  | E | 4  | 620.29   |         | 620.29              |         |
| -0.352              | 1150   |          | 2299   | 22  | E | 3  | 491.25   | +0.1675 | 491.25              |         |
|                     | 2427.1 |          | 2427.1 | 23  | Q | 2  | 362.2    | +0.0625 | 362.2               |         |
| +0.3714             | 1257.6 |          | 2514.1 | 24  | S | 1  | 234.14   |         | 234.14              |         |
|                     |        |          |        | 25  | K | 0  | 147.11   |         | 147.11              |         |

general information

|                       |             |
|-----------------------|-------------|
| Annotation:           | 18 of 25    |
| AminoAcids Coverage:  | 72 %        |
| Intensity Coverage:   | 54 %        |
| Peak Coverage:        | 40 %        |
| Protein Localisation: | 113 ... 137 |

Scan number 1553 Raw file LNCAP\_Silac\_23F10\_set2\_01  
 Method ITMS; CID Peptide 115.57

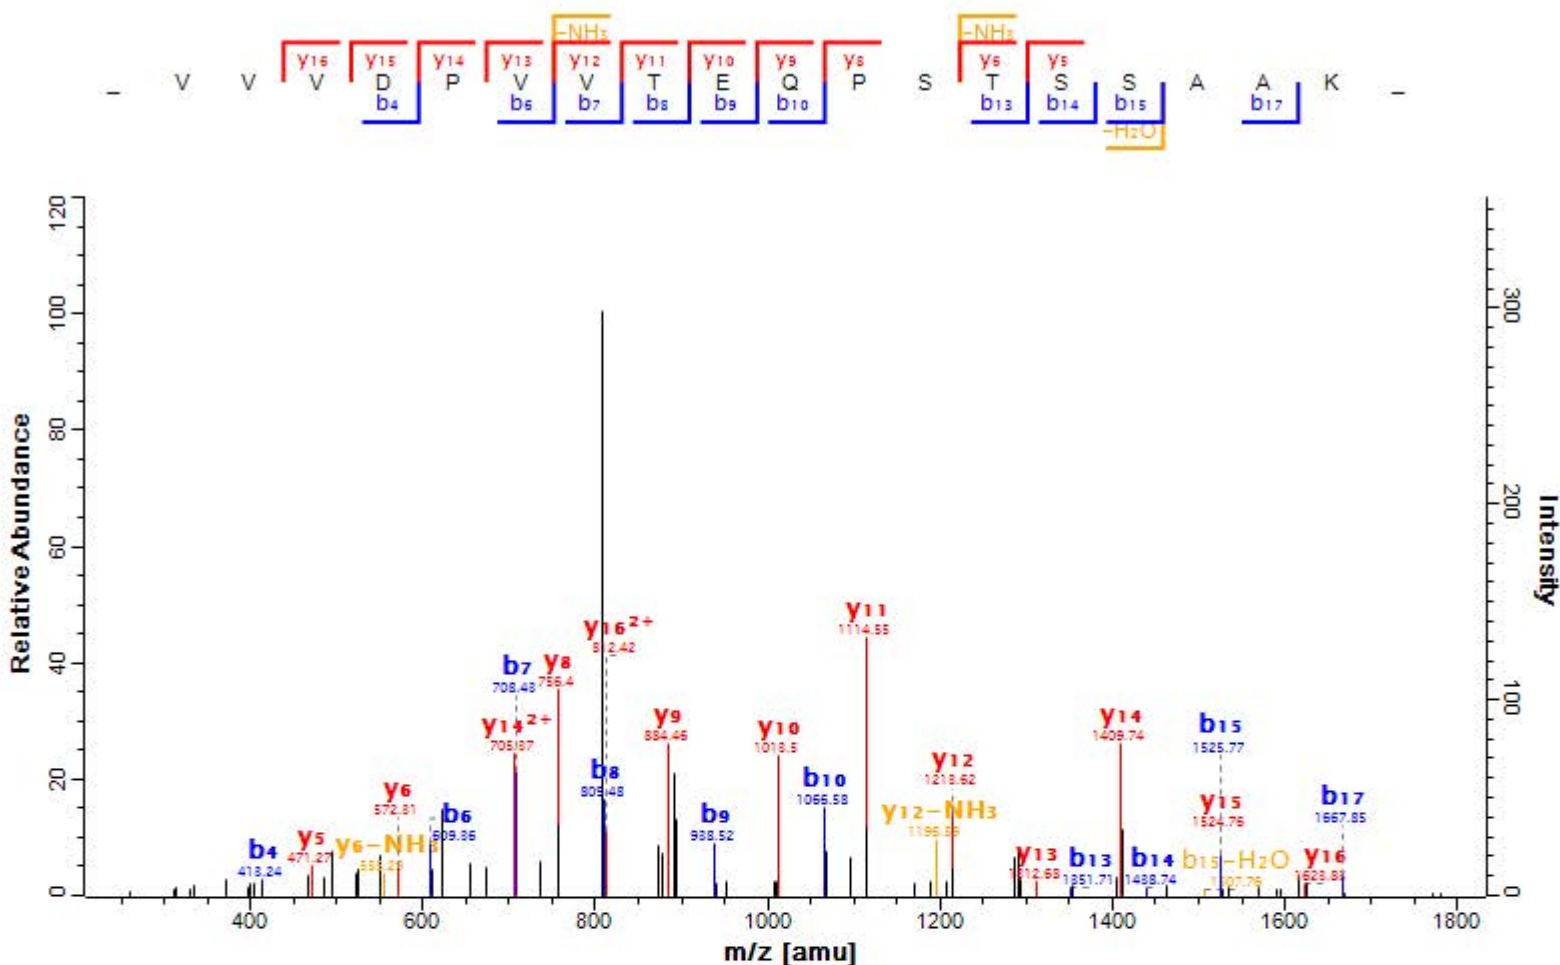

precursor information

|                   |                 |
|-------------------|-----------------|
| Mass:             | 1820.96043      |
| m/z:              | 911.48749       |
| Charge:           | 2+              |
| Retentiontime:    | 19.380704879760 |
| Score:            | 115.5695        |
| Mass Error [ppm]: | -0.36954        |
| PEP:              | 4.1119E-05      |
| Precursor Type:   | ISO             |

general information

|                       |               |
|-----------------------|---------------|
| Annotation:           | 13 of 18      |
| AminoAcids Coverage:  | 72 %          |
| Intensity Coverage:   | 44 %          |
| Peak Coverage:        | 29 %          |
| Protein Localisation: | 1511 ... 1528 |

| b ion     |          |     |   | y ion    |          |           | y <sup>2+</sup> ion |           |
|-----------|----------|-----|---|----------|----------|-----------|---------------------|-----------|
| Δ dalton  | mass     | seq |   | Δ dalton | mass     | Δ dalton  | mass                |           |
|           | 100.0757 | 1   | V | 17       |          |           |                     |           |
|           | 199.1441 | 2   | V | 16       | 1722.9   |           | 1722.9              |           |
|           | 298.2125 | 3   | V | 15       | 1623.832 | -0.08095  | 812.4194            | +0.054278 |
| -0.04152  | 413.2395 | 4   | D | 14       | 1524.763 | -0.24288  | 1524.763            |           |
|           | 510.2922 | 5   | P | 13       | 1409.736 | -0.11547  | 705.3717            | +0.298611 |
| +0.013262 | 609.3606 | 6   | V | 12       | 1312.683 | +0.063757 | 1312.683            |           |
| -0.02042  | 708.4291 | 7   | V | 11       | 1213.615 | -0.09927  | 1213.615            |           |
| +0.011611 | 809.4767 | 8   | T | 10       | 1114.547 | +0.062524 | 1114.547            |           |
| -0.22605  | 938.5193 | 9   | E | 9        | 1013.499 | -0.01217  | 1013.499            |           |
| -0.00625  | 1066.578 | 10  | Q | 8        | 884.4563 | -0.06919  | 884.4563            |           |
|           | 1163.631 | 11  | P | 7        | 756.3978 | +0.051949 | 756.3978            |           |
|           | 1250.663 | 12  | S | 6        | 659.345  |           | 659.345             |           |
| -0.27861  | 1351.71  | 13  | T | 5        | 572.313  | +0.036155 | 572.313             |           |
| +0.112701 | 1438.742 | 14  | S | 4        | 471.2653 | +0.255831 | 471.2653            |           |
| -0.18007  | 1525.774 | 15  | S | 3        | 384.2333 |           | 384.2333            |           |
|           | 1596.812 | 16  | A | 2        | 297.2012 |           | 297.2012            |           |
| +0.218604 | 1667.849 | 17  | A | 1        | 226.1641 |           | 226.1641            |           |
|           |          | 18  | K | 0        | 155.127  |           | 155.127             |           |

Scan number 1660 Raw file LNCAP\_Silac\_23F10\_set2\_01  
 Method ITMS; CID Pepti... 104.23

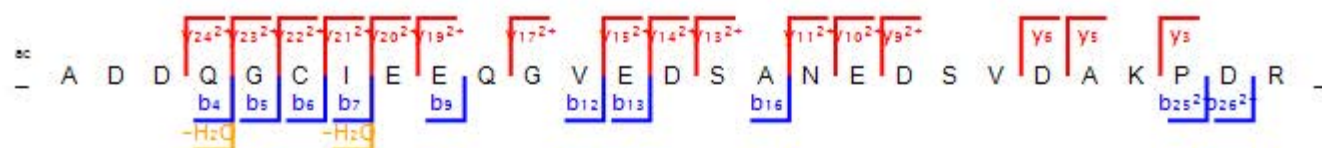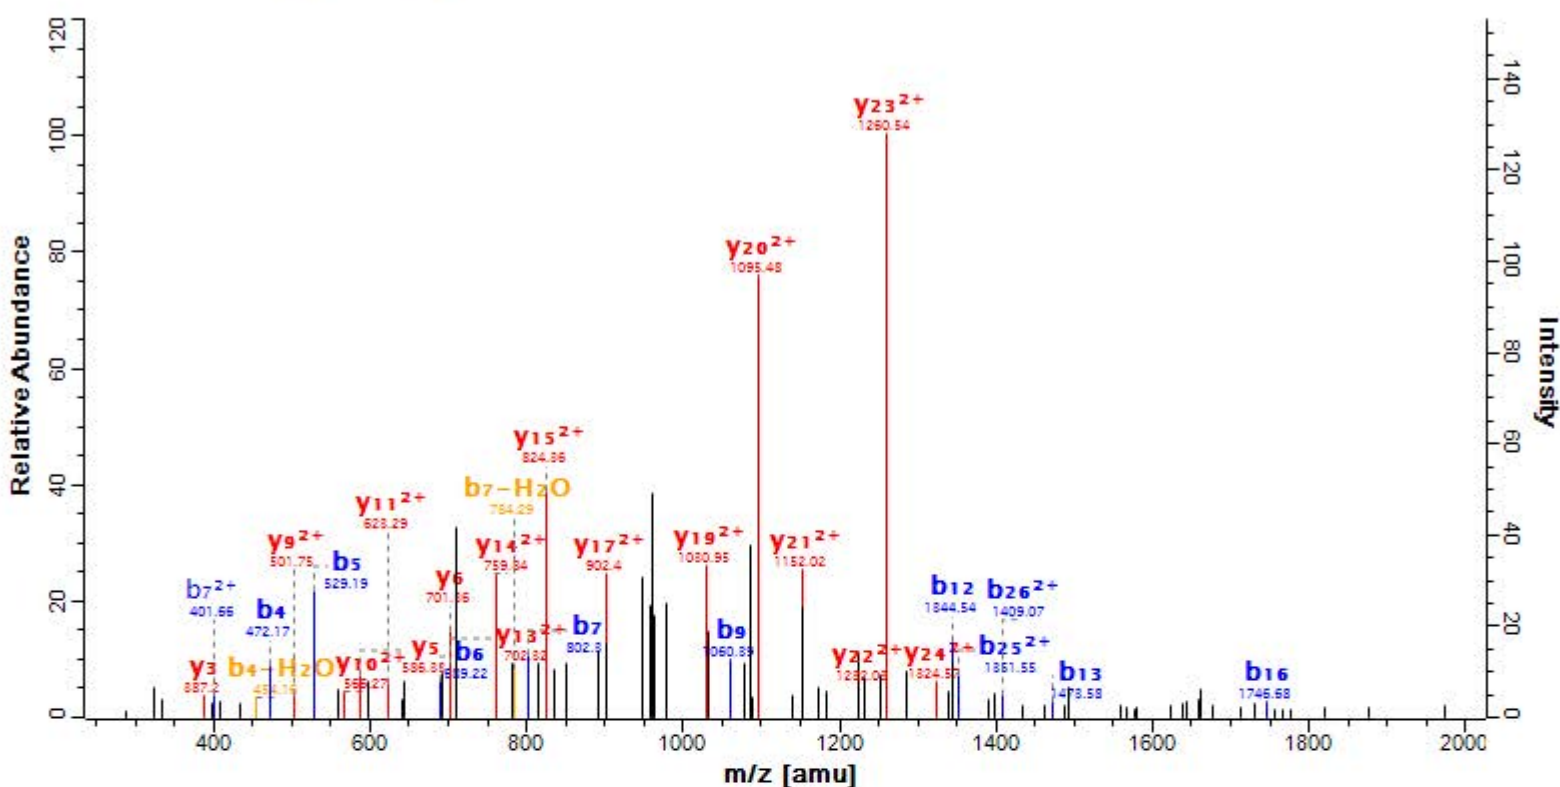

precursor information

|                   |                 |
|-------------------|-----------------|
| Mass:             | 2990.2318       |
| m/z:              | 997.75121       |
| Charge:           | 3+              |
| Retentiontime:    | 20.386337280273 |
| Score:            | 104.2329        |
| Mass Error [ppm]: | -0.048458       |
| PEP:              | 1.1638E-12      |
| Precursor Type:   | MULTI           |

| b <sup>2+</sup> ion |        | b ion    |        | seq |   |    | y ion    |         | y <sup>2+</sup> ion |         |
|---------------------|--------|----------|--------|-----|---|----|----------|---------|---------------------|---------|
| Δ dalton            | mass   | Δ dalton | mass   |     |   |    | Δ dalton | mass    | Δ dalton            | mass    |
|                     | 114.05 |          | 114.05 | 1   | A | 26 |          |         |                     |         |
|                     | 229.08 |          | 229.08 | 2   | D | 25 | 2878.2   |         | 2878.2              |         |
|                     | 344.11 |          | 344.11 | 3   | D | 24 | 2763.2   |         | 2763.2              |         |
|                     | 472.17 | -0.295   | 472.17 | 4   | Q | 23 | 2648.1   |         | 1324.6              | -0.249  |
|                     | 529.19 | +0.096   | 529.19 | 5   | G | 22 | 2520.1   |         | 1260.5              | +0.1997 |
|                     | 689.22 | +0.0663  | 689.22 | 6   | C | 21 | 2463.1   |         | 1232                | -0.102  |
| -0.445              | 401.66 | -0.059   | 802.3  | 7   | I | 20 | 2303     |         | 1152                | -0.171  |
|                     | 931.35 |          | 931.35 | 8   | E | 19 | 2189.9   |         | 1095.5              | +0.1083 |
|                     | 1060.4 | -0.185   | 1060.4 | 9   | E | 18 | 2060.9   |         | 1031                | -0.05   |
|                     | 1188.4 |          | 1188.4 | 10  | Q | 17 | 1931.9   |         | 1931.9              |         |
|                     | 1245.5 |          | 1245.5 | 11  | G | 16 | 1803.8   |         | 902.4               | +0.0292 |
|                     | 1344.5 | -0.337   | 1344.5 | 12  | V | 15 | 1746.8   |         | 1746.8              |         |
|                     | 1473.6 | -0.182   | 1473.6 | 13  | E | 14 | 1647.7   |         | 824.36              | +0.1901 |
|                     | 1588.6 |          | 1588.6 | 14  | D | 13 | 1518.7   |         | 759.84              | +0.3164 |
|                     | 1675.6 |          | 1675.6 | 15  | S | 12 | 1403.6   |         | 702.32              | +0.0571 |
|                     | 1746.7 | -0.426   | 1746.7 | 16  | A | 11 | 1316.6   |         | 1316.6              |         |
|                     | 1860.7 |          | 1860.7 | 17  | N | 10 | 1245.6   |         | 623.29              | +0.3479 |
|                     | 1989.8 |          | 1989.8 | 18  | E | 9  | 1131.5   |         | 566.27              | +0.1003 |
|                     | 2104.8 |          | 2104.8 | 19  | D | 8  | 1002.5   |         | 501.75              | +0.432  |
|                     | 2191.8 |          | 2191.8 | 20  | S | 7  | 887.46   |         | 887.46              |         |
|                     | 2290.9 |          | 2290.9 | 21  | V | 6  | 800.43   |         | 800.43              |         |
|                     | 2405.9 |          | 2405.9 | 22  | D | 5  | 701.36   | +0.0929 | 701.36              |         |
|                     | 2477   |          | 2477   | 23  | A | 4  | 586.33   | +0.0275 | 586.33              |         |
|                     | 2605   |          | 2605   | 24  | K | 3  | 515.29   |         | 515.29              |         |
| -0.148              | 1351.6 |          | 2702.1 | 25  | P | 2  | 387.2    | +0.1569 | 387.2               |         |
| +0.2057             | 1409.1 |          | 2817.1 | 26  | D | 1  | 290.15   |         | 290.15              |         |
|                     |        |          |        | 27  | R | 0  | 175.12   |         | 175.12              |         |

general information

|                       |           |
|-----------------------|-----------|
| Annotation:           | 20 of 27  |
| AminoAcids Coverage:  | 74 %      |
| Intensity Coverage:   | 50 %      |
| Peak Coverage:        | 31 %      |
| Protein Localisation: | 35 ... 61 |



Scan number 2239 Raw file LNCAP\_Silac\_23F10\_set2\_01  
 Method ITMS; CID Pepti... 131.56

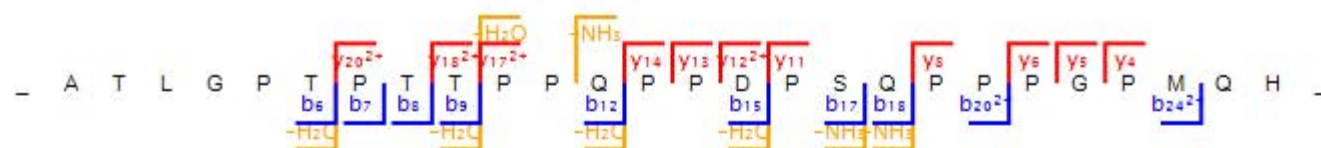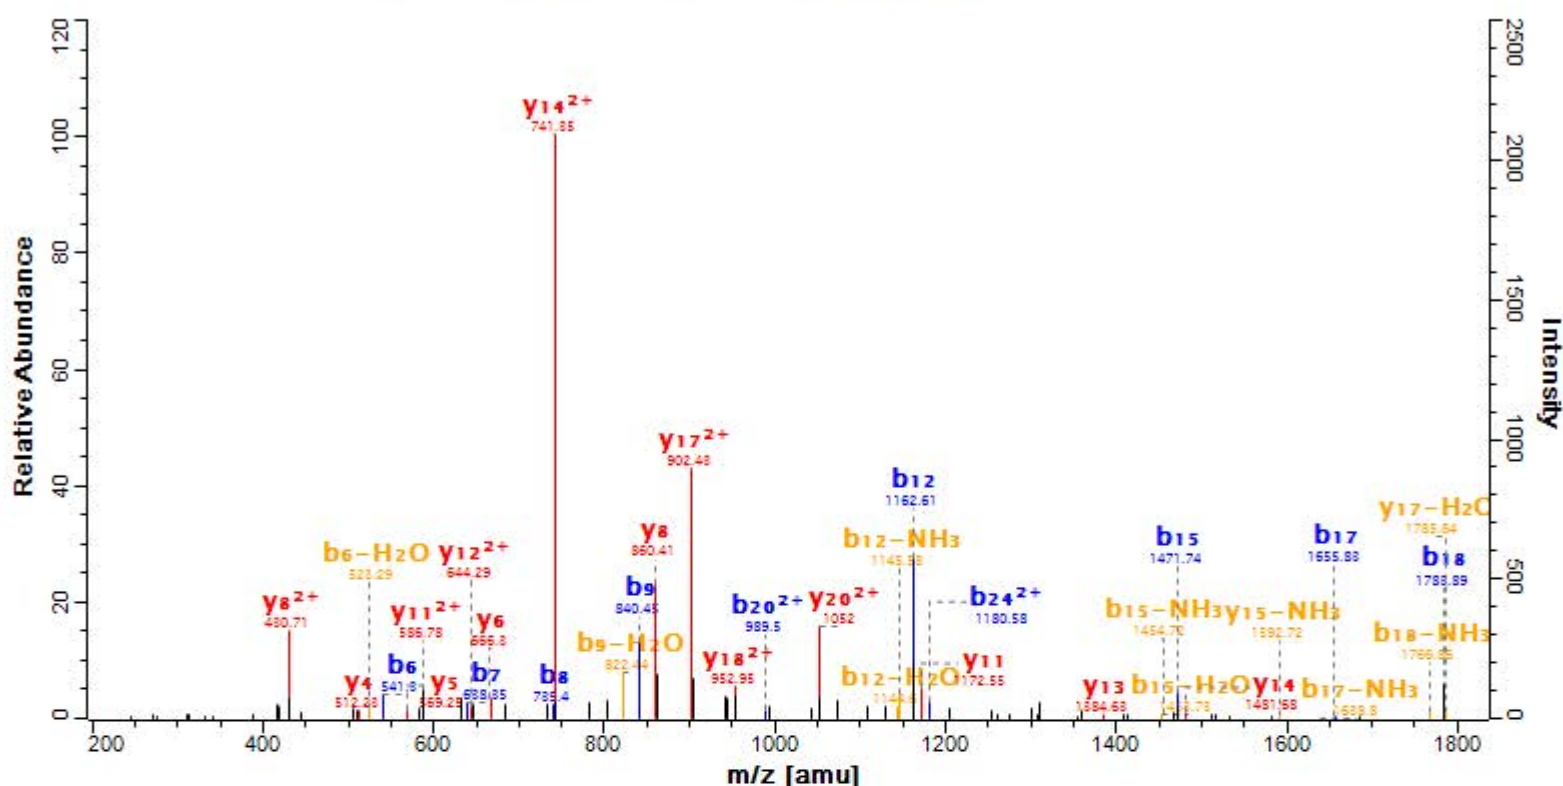

#### precursor information

|                   |                 |
|-------------------|-----------------|
| Mass:             | 2642.28033      |
| m/z:              | 881.76739       |
| Charge:           | 3+              |
| Retentiontime:    | 25.658084869384 |
| Score:            | 131.5595        |
| Mass Error [ppm]: | 0.16752         |
| PEP:              | 1.5075E-16      |
| Precursor Type:   | ISO             |

| b <sup>2+</sup> ion |        | b ion    |        | seq |   |    | y ion    |         | y <sup>2+</sup> ion |         |
|---------------------|--------|----------|--------|-----|---|----|----------|---------|---------------------|---------|
| Δ dalton            | mass   | Δ dalton | mass   |     |   |    | Δ dalton | mass    | Δ dalton            | mass    |
|                     | 72.044 |          | 72.044 | 1   | A | 25 |          |         |                     |         |
|                     | 173.09 |          | 173.09 | 2   | T | 24 | 2572.3   |         | 2572.3              |         |
|                     | 286.18 |          | 286.18 | 3   | L | 23 | 2471.2   |         | 2471.2              |         |
|                     | 343.2  |          | 343.2  | 4   | G | 22 | 2358.1   |         | 2358.1              |         |
|                     | 440.25 |          | 440.25 | 5   | P | 21 | 2301.1   |         | 2301.1              |         |
|                     | 541.3  | +0.0734  | 541.3  | 6   | T | 20 | 2204     |         | 2204                |         |
|                     | 638.35 | -0.037   | 638.35 | 7   | P | 19 | 2103     |         | 1052                | +0.3026 |
|                     | 739.4  | +0.0362  | 739.4  | 8   | T | 18 | 2005.9   |         | 2005.9              |         |
|                     | 840.45 | -0.046   | 840.45 | 9   | T | 17 | 1904.9   |         | 952.95              | -0.307  |
|                     | 937.5  |          | 937.5  | 10  | P | 16 | 1803.8   |         | 902.43              | +0.2487 |
|                     | 1034.6 |          | 1034.6 | 11  | P | 15 | 1706.8   |         | 1706.8              |         |
|                     | 1162.6 | -0.042   | 1162.6 | 12  | Q | 14 | 1609.7   |         | 1609.7              |         |
|                     | 1259.7 |          | 1259.7 | 13  | P | 13 | 1481.7   | -0.029  | 741.35              | +0.3178 |
|                     | 1356.7 |          | 1356.7 | 14  | P | 12 | 1384.6   | +0.0265 | 1384.6              |         |
|                     | 1471.7 | -0.144   | 1471.7 | 15  | D | 11 | 1287.6   |         | 644.29              | +0.2434 |
|                     | 1568.8 |          | 1568.8 | 16  | P | 10 | 1172.6   | +0.021  | 586.78              | -0.008  |
|                     | 1655.8 | +0.4613  | 1655.8 | 17  | S | 9  | 1075.5   |         | 1075.5              |         |
|                     | 1783.9 | -0.288   | 1783.9 | 18  | Q | 8  | 988.47   |         | 988.47              |         |
|                     | 1880.9 |          | 1880.9 | 19  | P | 7  | 860.41   | -0.089  | 430.71              | +0.0246 |
| +0.054              | 989.5  |          | 1978   | 20  | P | 6  | 763.36   |         | 763.36              |         |
|                     | 2075   |          | 2075   | 21  | P | 5  | 666.3    | +0.0637 | 666.3               |         |
|                     | 2132.1 |          | 2132.1 | 22  | G | 4  | 569.25   | +0.1843 | 569.25              |         |
|                     | 2229.1 |          | 2229.1 | 23  | P | 3  | 512.23   | +0.134  | 512.23              |         |
| -0.334              | 1180.6 |          | 2360.2 | 24  | M | 2  | 415.18   |         | 415.18              |         |
|                     | 2488.2 |          | 2488.2 | 25  | Q | 1  | 284.14   |         | 284.14              |         |
|                     |        |          |        | 26  | H | 0  | 156.08   |         | 156.08              |         |

#### general information

|                       |             |
|-----------------------|-------------|
| Annotation:           | 18 of 26    |
| AminoAcids Coverage:  | 69 %        |
| Intensity Coverage:   | 73 %        |
| Peak Coverage:        | 38 %        |
| Protein Localisation: | 101 ... 126 |

Scan number 2856 Raw file LNCAP\_Silac\_23F10\_set2\_01  
 Method ITMS; CID Pepti... 211.06

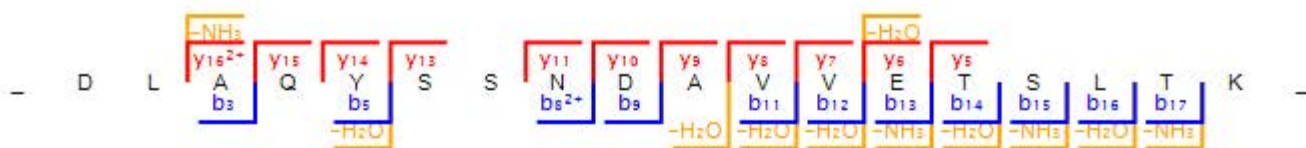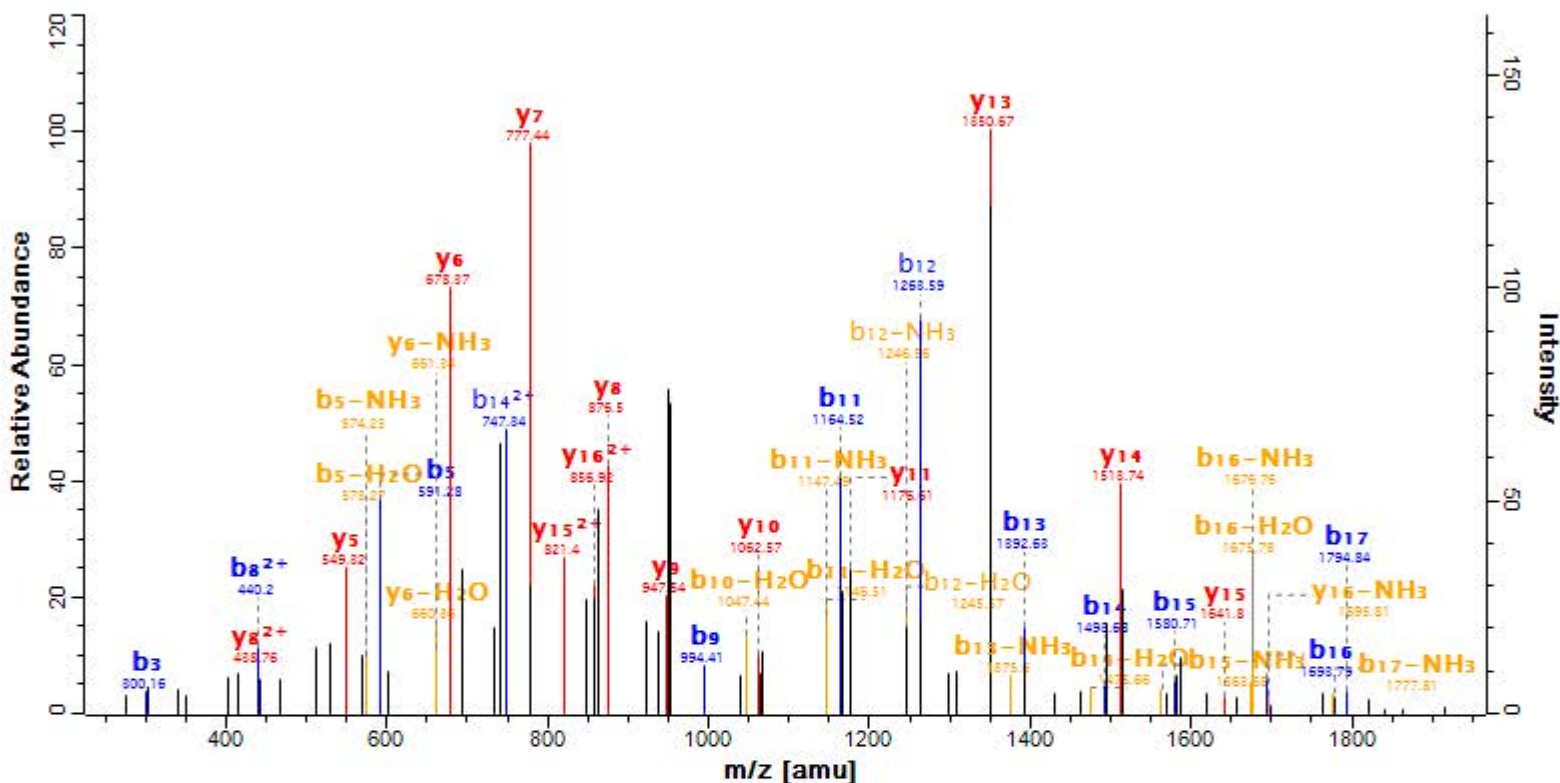

#### precursor information

|                   |                 |
|-------------------|-----------------|
| Mass:             | 1939.93883      |
| m/z:              | 970.97669       |
| Charge:           | 2+              |
| Retentiontime:    | 31.145492553710 |
| Score:            | 211.0629        |
| Mass Error [ppm]: | 0.70179         |
| PEP:              | 5.5671E-41      |
| Precursor Type:   | MULTI           |

| b <sup>2+</sup> ion |        | b ion           |        | seq |   |    | y ion           |         | y <sup>2+</sup> ion |         |
|---------------------|--------|-----------------|--------|-----|---|----|-----------------|---------|---------------------|---------|
| $\Delta$ dalton     | mass   | $\Delta$ dalton | mass   |     |   |    | $\Delta$ dalton | mass    | $\Delta$ dalton     | mass    |
|                     | 116.03 |                 | 116.03 | 1   | D | 17 |                 |         |                     |         |
|                     | 229.12 |                 | 229.12 | 2   | L | 16 | 1825.9          |         | 1825.9              |         |
|                     | 300.16 | -0.05           | 300.16 | 3   | A | 15 | 1712.8          |         | 856.92              | +0.0584 |
|                     | 428.21 |                 | 428.21 | 4   | Q | 14 | 1641.8          | +0.4043 | 821.4               | +0.0293 |
|                     | 591.28 | +0.0769         | 591.28 | 5   | Y | 13 | 1513.7          | +0.0184 | 1513.7              |         |
|                     | 678.31 |                 | 678.31 | 6   | S | 12 | 1350.7          | -0.081  | 1350.7              |         |
|                     | 765.34 |                 | 765.34 | 7   | S | 11 | 1263.6          |         | 1263.6              |         |
| -0.064              | 440.2  |                 | 879.38 | 8   | N | 10 | 1176.6          | +0.0461 | 1176.6              |         |
|                     | 994.41 | +0.1232         | 994.41 | 9   | D | 9  | 1062.6          | +0.1874 | 1062.6              |         |
|                     | 1065.4 |                 | 1065.4 | 10  | A | 8  | 947.54          | -0.06   | 947.54              |         |
|                     | 1164.5 | -0.067          | 1164.5 | 11  | V | 7  | 876.5           | -0.206  | 438.76              | +0.4233 |
|                     | 1263.6 | +0.0115         | 1263.6 | 12  | V | 6  | 777.44          | -0.068  | 777.44              |         |
|                     | 1392.6 | -0.038          | 1392.6 | 13  | E | 5  | 678.37          | -0.012  | 678.37              |         |
| +0.1257             | 747.34 | -0.047          | 1493.7 | 14  | T | 4  | 549.32          | +0.0514 | 549.32              |         |
|                     | 1580.7 | -0.08           | 1580.7 | 15  | S | 3  | 448.28          |         | 448.28              |         |
|                     | 1693.8 | -0.267          | 1693.8 | 16  | L | 2  | 361.24          |         | 361.24              |         |
|                     | 1794.8 | -0.017          | 1794.8 | 17  | T | 1  | 248.16          |         | 248.16              |         |
|                     |        |                 |        | 18  | K | 0  | 147.11          |         | 147.11              |         |

#### general information

|                       |           |
|-----------------------|-----------|
| Annotation:           | 15 of 18  |
| AminoAcids Coverage:  | 83 %      |
| Intensity Coverage:   | 54 %      |
| Peak Coverage:        | 43 %      |
| Protein Localisation: | 65 ... 82 |

Scan number 2885 Raw file LNCAP\_Silac\_23F10\_set2\_01  
Method ITMS; CID Peptide 174.2

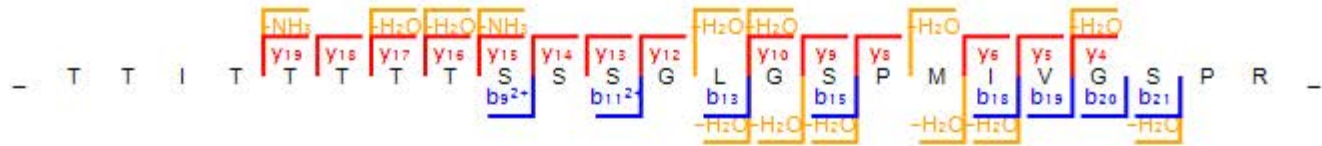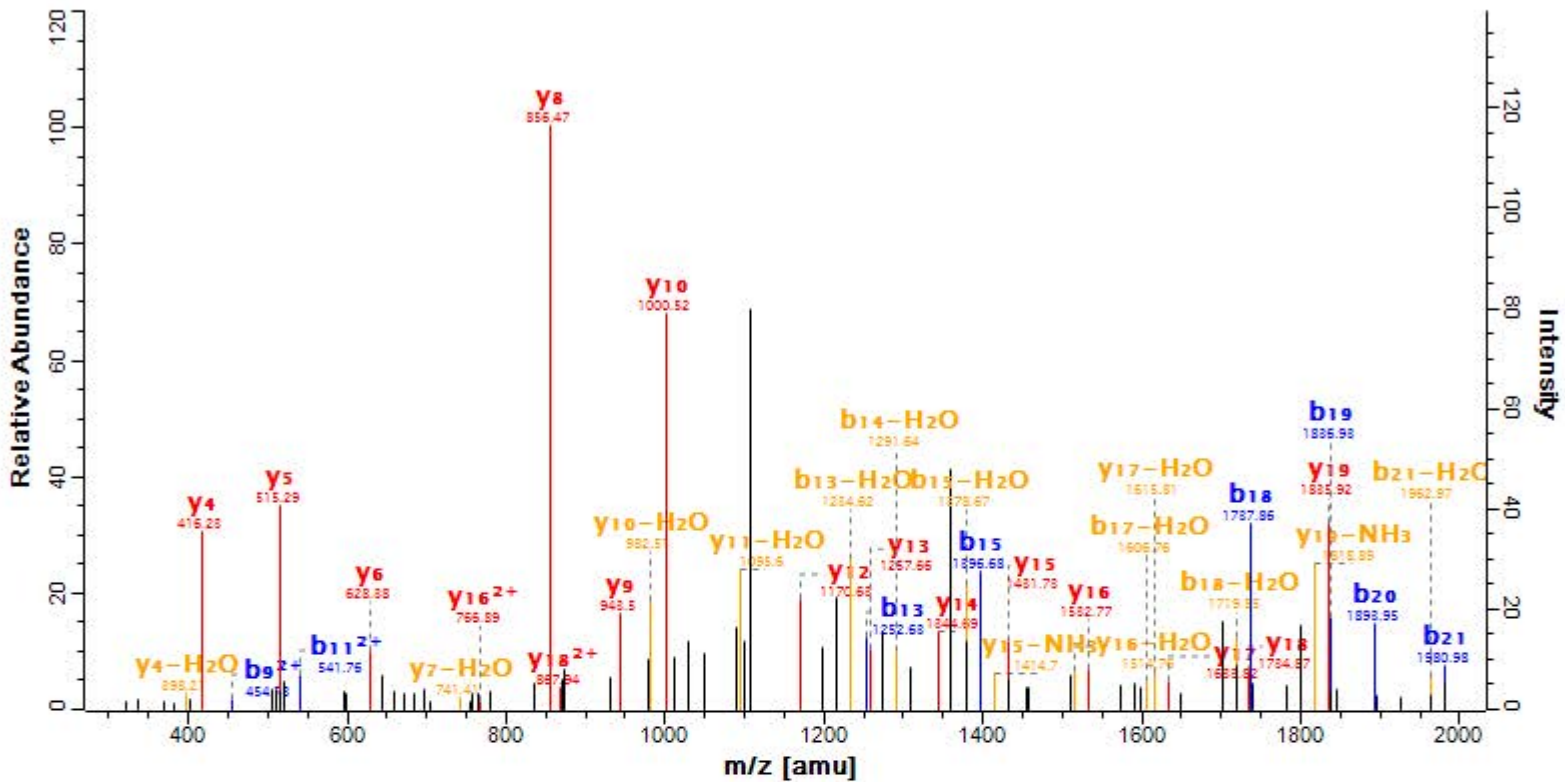

**precursor information**

|                   |                 |
|-------------------|-----------------|
| Mass:             | 2251.13651      |
| m/z:              | 1126.57553      |
| Charge:           | 2+              |
| Retentiontime:    | 31.406850814819 |
| Score:            | 174.2027        |
| Mass Error [ppm]: | -0.029536       |
| PEP:              | 3.0472E-38      |
| Precursor Type:   | MULTI           |

| b <sup>2+</sup> ion |        | b ion           |        |     |   |                 | y ion  |                 | y <sup>2+</sup> ion |         |
|---------------------|--------|-----------------|--------|-----|---|-----------------|--------|-----------------|---------------------|---------|
| $\Delta$ dalton     | mass   | $\Delta$ dalton | mass   | seq |   | $\Delta$ dalton | mass   | $\Delta$ dalton | mass                |         |
|                     | 102.05 |                 | 102.05 | 1   | T | 22              |        |                 |                     |         |
|                     | 203.1  |                 | 203.1  | 2   | T | 21              | 2151.1 |                 | 2151.1              |         |
|                     | 316.19 |                 | 316.19 | 3   | I | 20              | 2050   |                 | 2050                |         |
|                     | 417.23 |                 | 417.23 | 4   | T | 19              | 1937   |                 | 1937                |         |
|                     | 518.28 |                 | 518.28 | 5   | T | 18              | 1835.9 | +0.4717         | 1835.9              |         |
|                     | 619.33 |                 | 619.33 | 6   | T | 17              | 1734.9 | -0.125          | 867.94              | +0.2532 |
|                     | 720.38 |                 | 720.38 | 7   | T | 16              | 1633.8 | -0.437          | 1633.8              |         |
|                     | 821.43 |                 | 821.43 | 8   | T | 15              | 1532.8 | +0.0031         | 766.89              | +0.0121 |
| -0.332              | 454.73 |                 | 908.46 | 9   | S | 14              | 1431.7 | +0.1259         | 1431.7              |         |
|                     | 995.49 |                 | 995.49 | 10  | S | 13              | 1344.7 | +0.0412         | 1344.7              |         |
| +0.1334             | 541.76 |                 | 1082.5 | 11  | S | 12              | 1257.7 | -0.063          | 1257.7              |         |
|                     | 1139.5 |                 | 1139.5 | 12  | G | 11              | 1170.6 | +0.0418         | 1170.6              |         |
|                     | 1252.6 | -0.005          | 1252.6 | 13  | L | 10              | 1113.6 |                 | 1113.6              |         |
|                     | 1309.6 |                 | 1309.6 | 14  | G | 9               | 1000.5 | +0.0557         | 1000.5              |         |
|                     | 1396.7 | -0.245          | 1396.7 | 15  | S | 8               | 943.5  | +0.1864         | 943.5               |         |
|                     | 1493.7 |                 | 1493.7 | 16  | P | 7               | 856.47 | +0.0076         | 856.47              |         |
|                     | 1624.8 |                 | 1624.8 | 17  | M | 6               | 759.42 |                 | 759.42              |         |
|                     | 1737.9 | -0.322          | 1737.9 | 18  | I | 5               | 628.38 | +0.0788         | 628.38              |         |
|                     | 1836.9 | +0.2569         | 1836.9 | 19  | V | 4               | 515.29 | +0.1356         | 515.29              |         |
|                     | 1893.9 | -0.183          | 1893.9 | 20  | G | 3               | 416.23 | +0.0429         | 416.23              |         |
|                     | 1981   | -0.073          | 1981   | 21  | S | 2               | 359.2  |                 | 359.2               |         |
|                     | 2078   |                 | 2078   | 22  | P | 1               | 272.17 |                 | 272.17              |         |
|                     |        |                 |        | 23  | R | 0               | 175.12 |                 | 175.12              |         |

**general information**

|                       |          |
|-----------------------|----------|
| Annotation:           | 17 of 23 |
| AminoAcids Coverage:  | 74 %     |
| Intensity Coverage:   | 58 %     |
| Peak Coverage:        | 38 %     |
| Protein Localisation: | 8 ... 30 |

Scan number 3049 Raw file LNCAP\_Silac\_23F10\_set2\_01  
 Method ITMS; CID Peptide 174

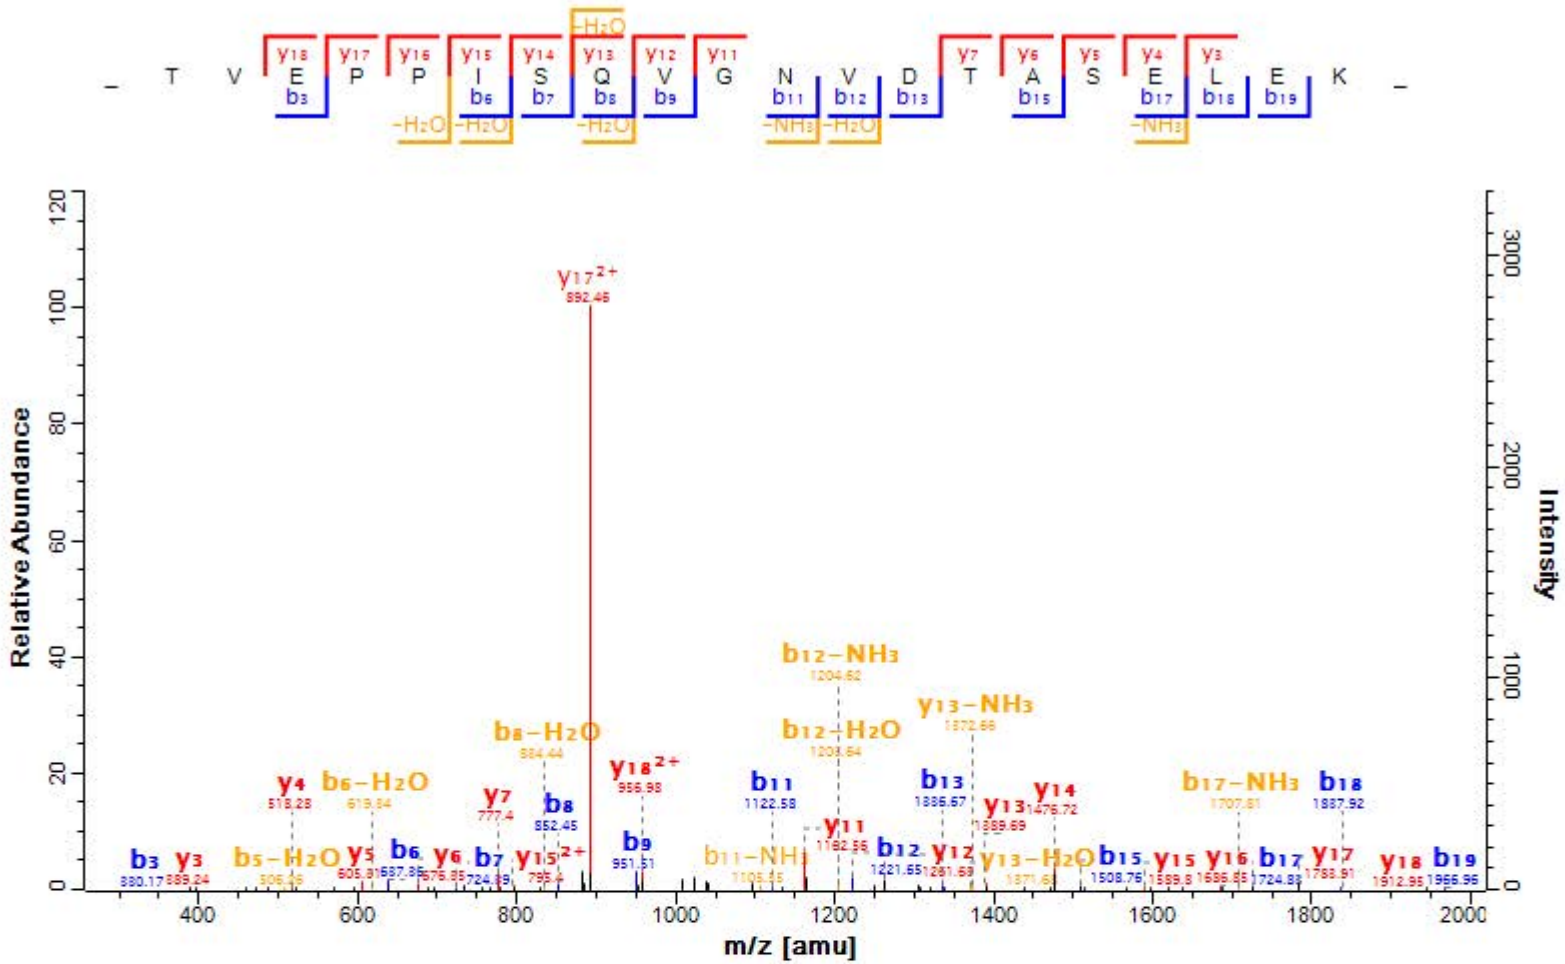

precursor information

|                   |                 |
|-------------------|-----------------|
| Mass:             | 2112.05911      |
| m/z:              | 1057.03683      |
| Charge:           | 2+              |
| Retentiontime:    | 32.881526947021 |
| Score:            | 174.0004        |
| Mass Error [ppm]: | 0.22292         |
| PEP:              | 3.328E-36       |
| Precursor Type:   | MULTI           |

general information

|                       |               |
|-----------------------|---------------|
| Annotation:           | 17 of 20      |
| AminoAcids Coverage:  | 85 %          |
| Intensity Coverage:   | 79 %          |
| Peak Coverage:        | 37 %          |
| Protein Localisation: | 1092 ... 1111 |

| b ion     |          |     |   |          | y ion    |           | y <sup>2+</sup> ion |           |
|-----------|----------|-----|---|----------|----------|-----------|---------------------|-----------|
| Δ dalton  | mass     | seq |   | Δ dalton | mass     | Δ dalton  | mass                |           |
|           | 102.055  | 1   | T | 19       |          |           |                     |           |
|           | 201.1234 | 2   | V | 18       | 2012.018 |           | 2012.018            |           |
| +0.368431 | 330.166  | 3   | E | 17       | 1912.95  | +0.384889 | 956.9786            | +0.060022 |
|           | 427.2187 | 4   | P | 16       | 1783.907 | -0.01148  | 892.4573            | +0.250996 |
|           | 524.2715 | 5   | P | 15       | 1686.854 | -0.10655  | 1686.854            |           |
| +0.038062 | 637.3556 | 6   | I | 14       | 1589.802 | -0.12263  | 795.4045            | +0.374683 |
| +0.137503 | 724.3876 | 7   | S | 13       | 1476.718 | -0.11547  | 1476.718            |           |
| +0.041878 | 852.4462 | 8   | Q | 12       | 1389.686 | +0.137872 | 1389.686            |           |
| +0.012282 | 951.5146 | 9   | V | 11       | 1261.627 | +0.002113 | 1261.627            |           |
|           | 1008.536 | 10  | G | 10       | 1162.559 | -0.02859  | 1162.559            |           |
| +0.296035 | 1122.579 | 11  | N | 9        | 1105.537 |           | 1105.537            |           |
| +0.018271 | 1221.647 | 12  | V | 8        | 991.4942 |           | 991.4942            |           |
| -0.08594  | 1336.674 | 13  | D | 7        | 892.4258 |           | 892.4258            |           |
|           | 1437.722 | 14  | T | 6        | 777.3989 | -0.00752  | 777.3989            |           |
| -0.13338  | 1508.759 | 15  | A | 5        | 676.3512 | -0.22217  | 676.3512            |           |
|           | 1595.791 | 16  | S | 4        | 605.3141 | +0.009159 | 605.3141            |           |
| +0.129766 | 1724.834 | 17  | E | 3        | 518.2821 | +0.075123 | 518.2821            |           |
| -0.18574  | 1837.918 | 18  | L | 2        | 389.2395 | +0.119548 | 389.2395            |           |
| -0.10663  | 1966.96  | 19  | E | 1        | 276.1554 |           | 276.1554            |           |
|           |          | 20  | K | 0        | 147.1128 |           | 147.1128            |           |

Scan number 4052 Raw file LNCAP\_Silac\_23F10\_set2\_01  
 Method ITMS; CID Pepti... 110.57

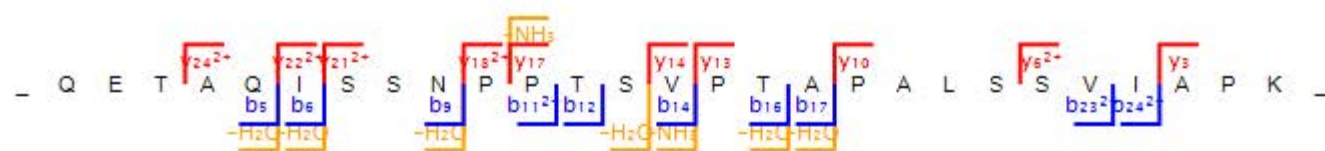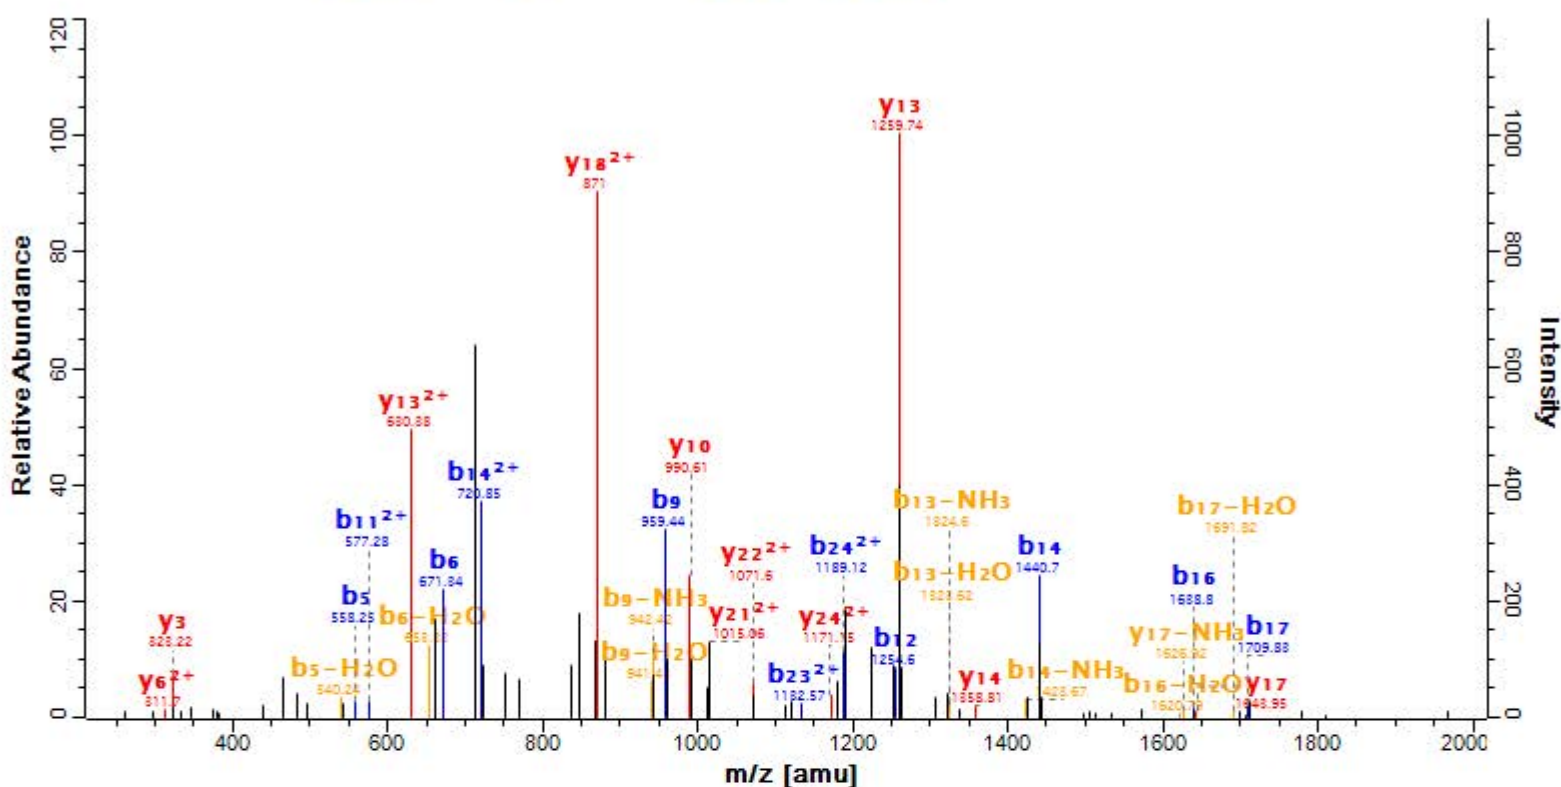

#### precursor information

|                   |                 |
|-------------------|-----------------|
| Mass:             | 2690.41349      |
| m/z:              | 897.81177       |
| Charge:           | 3+              |
| Retentiontime:    | 41.396366119384 |
| Score:            | 110.5715        |
| Mass Error [ppm]: | 0.30274         |
| PEP:              | 2.9206E-13      |
| Precursor Type:   | MULTI           |

| b <sup>2+</sup> ion |        | b ion    |        | seq |   |    | y ion    |         | y <sup>2+</sup> ion |         |
|---------------------|--------|----------|--------|-----|---|----|----------|---------|---------------------|---------|
| Δ dalton            | mass   | Δ dalton | mass   |     |   |    | Δ dalton | mass    | Δ dalton            | mass    |
|                     | 129.07 |          | 129.07 | 1   | Q | 26 |          |         |                     |         |
|                     | 258.11 |          | 258.11 | 2   | E | 25 | 2571.4   |         | 2571.4              |         |
|                     | 359.16 |          | 359.16 | 3   | T | 24 | 2442.3   |         | 2442.3              |         |
|                     | 430.19 |          | 430.19 | 4   | A | 23 | 2341.3   |         | 1171.1              | +0.2868 |
|                     | 558.25 | +0.1091  | 558.25 | 5   | Q | 22 | 2270.2   |         | 2270.2              |         |
|                     | 671.34 | +0.008   | 671.34 | 6   | I | 21 | 2142.2   |         | 1071.6              | -0.362  |
|                     | 758.37 |          | 758.37 | 7   | S | 20 | 2029.1   |         | 1015.1              | -0.117  |
|                     | 845.4  |          | 845.4  | 8   | S | 19 | 1942.1   |         | 1942.1              |         |
|                     | 959.44 | -0.022   | 959.44 | 9   | N | 18 | 1855     |         | 1855                |         |
|                     | 1056.5 |          | 1056.5 | 10  | P | 17 | 1741     |         | 871                 | +0.1871 |
| +0.0831             | 577.28 |          | 1153.5 | 11  | P | 16 | 1643.9   | -0.325  | 1643.9              |         |
|                     | 1254.6 | -0.003   | 1254.6 | 12  | T | 15 | 1546.9   |         | 1546.9              |         |
|                     | 1341.6 |          | 1341.6 | 13  | S | 14 | 1445.8   |         | 1445.8              |         |
| +0.0755             | 720.85 | -0.086   | 1440.7 | 14  | V | 13 | 1358.8   | +0.0423 | 1358.8              |         |
|                     | 1537.7 |          | 1537.7 | 15  | P | 12 | 1259.7   | -0.155  | 630.38              | +0.1626 |
|                     | 1638.8 | +0.071   | 1638.8 | 16  | T | 11 | 1162.7   |         | 1162.7              |         |
|                     | 1709.8 | +0.0721  | 1709.8 | 17  | A | 10 | 1061.6   |         | 1061.6              |         |
|                     | 1806.9 |          | 1806.9 | 18  | P | 9  | 990.61   | -0.153  | 990.61              |         |
|                     | 1877.9 |          | 1877.9 | 19  | A | 8  | 893.55   |         | 893.55              |         |
|                     | 1991   |          | 1991   | 20  | L | 7  | 822.52   |         | 822.52              |         |
|                     | 2078   |          | 2078   | 21  | S | 6  | 709.43   |         | 709.43              |         |
|                     | 2165.1 |          | 2165.1 | 22  | S | 5  | 622.4    |         | 311.7               | +0.4072 |
| +0.404              | 1132.6 |          | 2264.1 | 23  | V | 4  | 535.37   |         | 535.37              |         |
| -0.298              | 1189.1 |          | 2377.2 | 24  | I | 3  | 436.3    |         | 436.3               |         |
|                     | 2448.3 |          | 2448.3 | 25  | A | 2  | 323.22   | +0.0232 | 323.22              |         |
|                     | 2545.3 |          | 2545.3 | 26  | P | 1  | 252.18   |         | 252.18              |         |
|                     |        |          |        | 27  | K | 0  | 155.13   |         | 155.13              |         |

#### general information

|                       |             |
|-----------------------|-------------|
| Annotation:           | 18 of 27    |
| AminoAcids Coverage:  | 67 %        |
| Intensity Coverage:   | 53 %        |
| Peak Coverage:        | 34 %        |
| Protein Localisation: | 165 ... 191 |

Scan number 4420 Raw file LNCAP\_Silac\_23F10\_set2\_01  
 Method ITMS; CID Pepti... 136.02

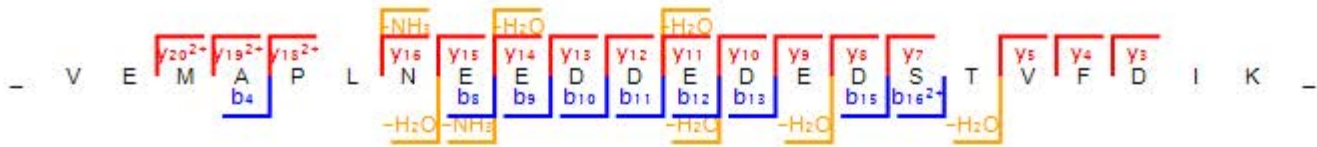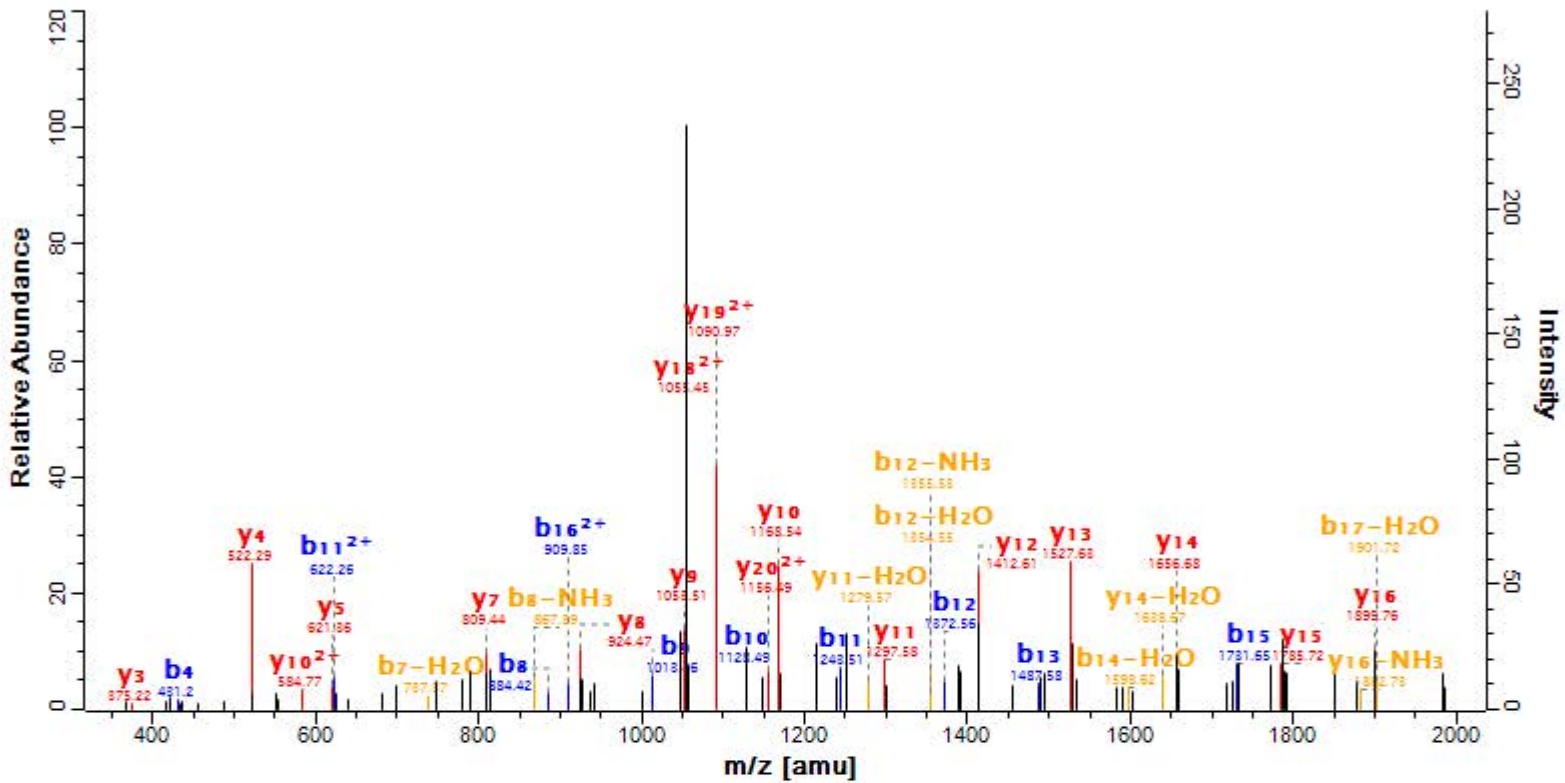

**precursor information**

|                   |                 |
|-------------------|-----------------|
| Mass:             | 2539.08043      |
| m/z:              | 1270.54749      |
| Charge:           | 2+              |
| Retentiontime:    | 44.489040374755 |
| Score:            | 136.0206        |
| Mass Error [ppm]: | 0.33522         |
| PEP:              | 1.4162E-20      |
| Precursor Type:   | MULTI           |

**general information**

|                       |             |
|-----------------------|-------------|
| Annotation:           | 17 of 22    |
| AminoAcids Coverage:  | 77 %        |
| Intensity Coverage:   | 45 %        |
| Peak Coverage:        | 36 %        |
| Protein Localisation: | 136 ... 157 |

| b <sup>2+</sup> ion |        | b ion    |        | seq |   |    | y ion    |         | y <sup>2+</sup> ion |         |
|---------------------|--------|----------|--------|-----|---|----|----------|---------|---------------------|---------|
| Δ dalton            | mass   | Δ dalton | mass   |     |   |    | Δ dalton | mass    | Δ dalton            | mass    |
|                     | 100.08 |          | 100.08 | 1   | V | 21 |          |         |                     |         |
|                     | 229.12 |          | 229.12 | 2   | E | 20 | 2441     |         | 2441                |         |
|                     | 360.16 |          | 360.16 | 3   | M | 19 | 2312     |         | 1156.5              | +0.4015 |
|                     | 431.2  | -0.036   | 431.2  | 4   | A | 18 | 2180.9   |         | 1091                | +0.2568 |
|                     | 528.25 |          | 528.25 | 5   | P | 17 | 2109.9   |         | 1055.5              | -0.019  |
|                     | 641.33 |          | 641.33 | 6   | L | 16 | 2012.8   |         | 2012.8              |         |
|                     | 755.38 |          | 755.38 | 7   | N | 15 | 1899.8   | +0.1066 | 1899.8              |         |
|                     | 884.42 | -0.016   | 884.42 | 8   | E | 14 | 1785.7   | -0.146  | 1785.7              |         |
|                     | 1013.5 | -0.032   | 1013.5 | 9   | E | 13 | 1656.7   | -0.237  | 1656.7              |         |
|                     | 1128.5 | -0.166   | 1128.5 | 10  | D | 12 | 1527.6   | -0.155  | 1527.6              |         |
| +0.2319             | 1243.5 | -0.014   | 1243.5 | 11  | D | 11 | 1412.6   | -0.013  | 1412.6              |         |
|                     | 1372.6 | -0.114   | 1372.6 | 12  | E | 10 | 1297.6   | +0.1901 | 1297.6              |         |
|                     | 1487.6 | -0.317   | 1487.6 | 13  | D | 9  | 1168.5   | +0.2569 | 584.77              | -0.229  |
|                     | 1616.6 |          | 1616.6 | 14  | E | 8  | 1053.5   | -0.023  | 1053.5              |         |
|                     | 1731.7 | -0.145   | 1731.7 | 15  | D | 7  | 924.47   | -0.125  | 924.47              |         |
| -0.334              | 1818.7 |          | 1818.7 | 16  | S | 6  | 809.44   | +0.0078 | 809.44              |         |
|                     | 1919.7 |          | 1919.7 | 17  | T | 5  | 722.41   |         | 722.41              |         |
|                     | 2018.8 |          | 2018.8 | 18  | V | 4  | 621.36   | +0.0575 | 621.36              |         |
|                     | 2165.9 |          | 2165.9 | 19  | F | 3  | 522.29   | +0.104  | 522.29              |         |
|                     | 2280.9 |          | 2280.9 | 20  | D | 2  | 375.22   | -0.002  | 375.22              |         |
|                     | 2394   |          | 2394   | 21  | I | 1  | 260.2    |         | 260.2               |         |
|                     |        |          |        | 22  | K | 0  | 147.11   |         | 147.11              |         |

Scan number 4554 Raw file LNCAP\_Silac\_23F10\_set2\_01  
 Method ITMS; CID Pepti... 263.31

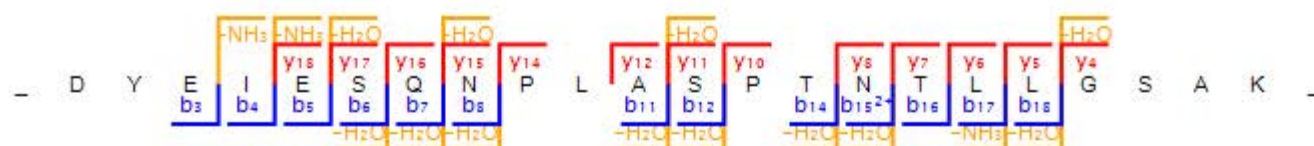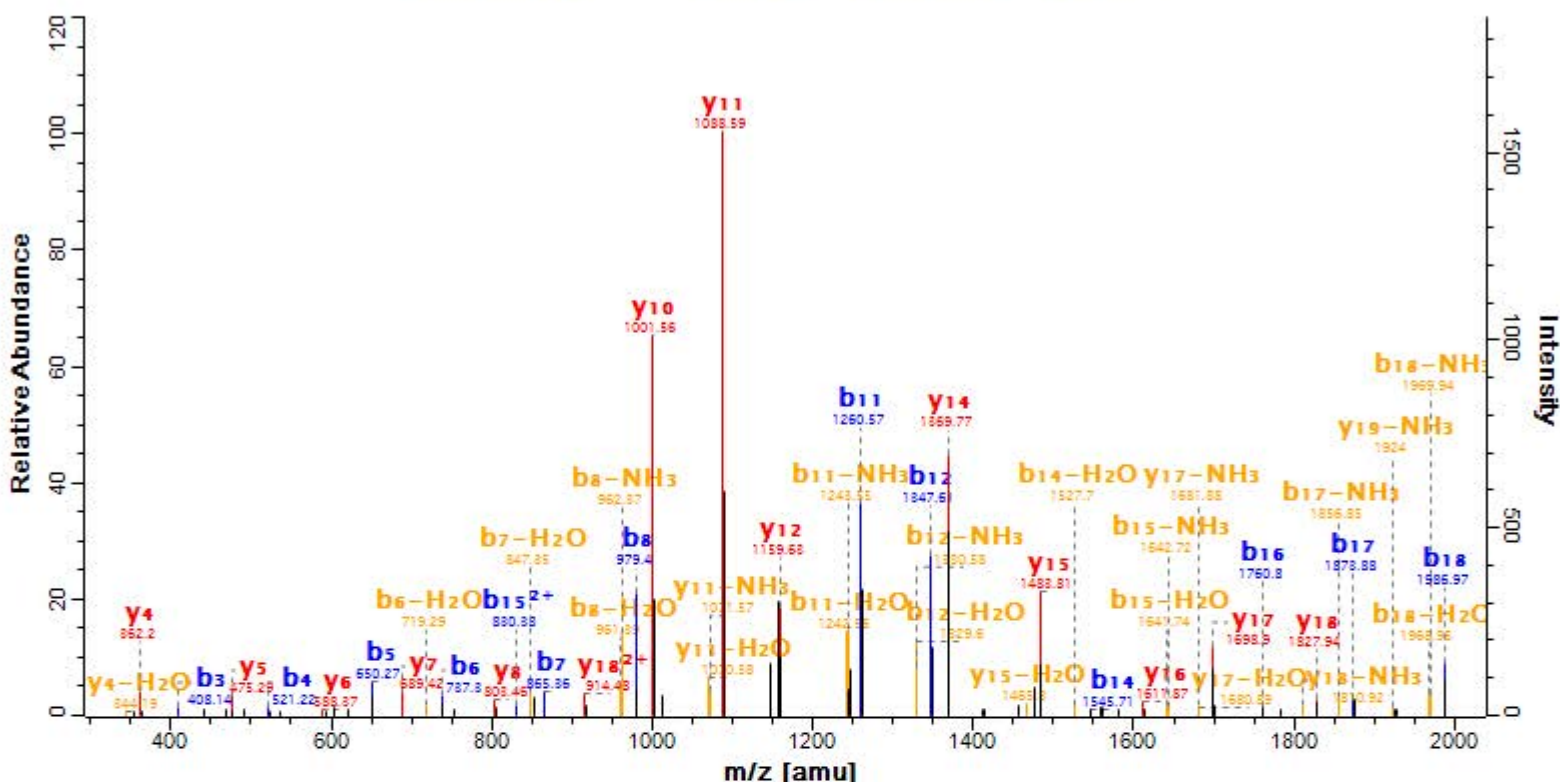

precursor information

|                   |                 |
|-------------------|-----------------|
| Mass:             | 2347.15461      |
| m/z:              | 1174.58458      |
| Charge:           | 2+              |
| Retentiontime:    | 45.622333526611 |
| Score:            | 263.3145        |
| Mass Error [ppm]: | 0.11688         |
| PEP:              | 3.4764E-98      |
| Precursor Type:   | MULTI           |

general information

|                       |             |
|-----------------------|-------------|
| Annotation:           | 16 of 22    |
| AminoAcids Coverage:  | 73 %        |
| Intensity Coverage:   | 66 %        |
| Peak Coverage:        | 49 %        |
| Protein Localisation: | 618 ... 639 |

| b <sup>2+</sup> ion |        | b ion    |        | seq |   |    | y ion    |         | y <sup>2+</sup> ion |         |
|---------------------|--------|----------|--------|-----|---|----|----------|---------|---------------------|---------|
| Δ dalton            | mass   | Δ dalton | mass   |     |   |    | Δ dalton | mass    | Δ dalton            | mass    |
|                     | 116.03 |          | 116.03 | 1   | D | 21 |          |         |                     |         |
|                     | 279.1  |          | 279.1  | 2   | Y | 20 | 2233.1   |         | 2233.1              |         |
|                     | 408.14 | +0.1962  | 408.14 | 3   | E | 19 | 2070.1   |         | 2070.1              |         |
|                     | 521.22 | -0.021   | 521.22 | 4   | I | 18 | 1941     |         | 1941                |         |
|                     | 650.27 | -0.062   | 650.27 | 5   | E | 17 | 1827.9   | -0.027  | 914.48              | +0.0981 |
|                     | 737.3  | -0.003   | 737.3  | 6   | S | 16 | 1698.9   | -0.202  | 1698.9              |         |
|                     | 865.36 | +0.0446  | 865.36 | 7   | Q | 15 | 1611.9   | +0.0388 | 1611.9              |         |
|                     | 979.4  | -0.028   | 979.4  | 8   | N | 14 | 1483.8   | -0.111  | 1483.8              |         |
|                     | 1076.5 |          | 1076.5 | 9   | P | 13 | 1369.8   | -0.058  | 1369.8              |         |
|                     | 1189.5 |          | 1189.5 | 10  | L | 12 | 1272.7   |         | 1272.7              |         |
|                     | 1260.6 | -0.165   | 1260.6 | 11  | A | 11 | 1159.6   | +0.0306 | 1159.6              |         |
|                     | 1347.6 | -0.133   | 1347.6 | 12  | S | 10 | 1088.6   | -0.044  | 1088.6              |         |
|                     | 1444.7 |          | 1444.7 | 13  | P | 9  | 1001.6   | -0.054  | 1001.6              |         |
|                     | 1545.7 | -0.396   | 1545.7 | 14  | T | 8  | 904.51   |         | 904.51              |         |
| +0.0117             | 830.38 |          | 1659.7 | 15  | N | 7  | 803.46   | -0.257  | 803.46              |         |
|                     | 1760.8 | -0.075   | 1760.8 | 16  | T | 6  | 689.42   | -0.08   | 689.42              |         |
|                     | 1873.9 | -0.193   | 1873.9 | 17  | L | 5  | 588.37   | +0.0806 | 588.37              |         |
|                     | 1987   | -0.062   | 1987   | 18  | L | 4  | 475.29   | +0.042  | 475.29              |         |
|                     | 2044   |          | 2044   | 19  | G | 3  | 362.2    | +0.1255 | 362.2               |         |
|                     | 2131   |          | 2131   | 20  | S | 2  | 305.18   |         | 305.18              |         |
|                     | 2202.1 |          | 2202.1 | 21  | A | 1  | 218.15   |         | 218.15              |         |
|                     |        |          |        | 22  | K | 0  | 147.11   |         | 147.11              |         |

Scan number 4598 Raw file LNCAP\_Silac\_23F10\_set2\_01  
 Method ITMS; CID Pepti... 148.15

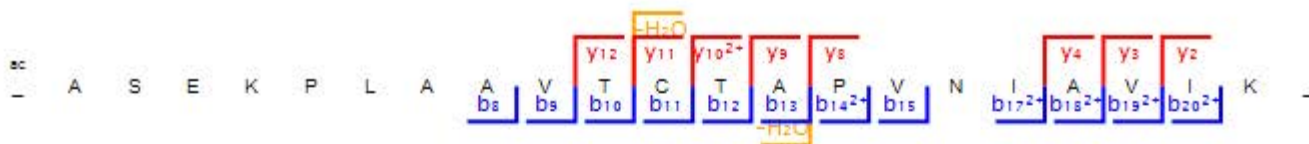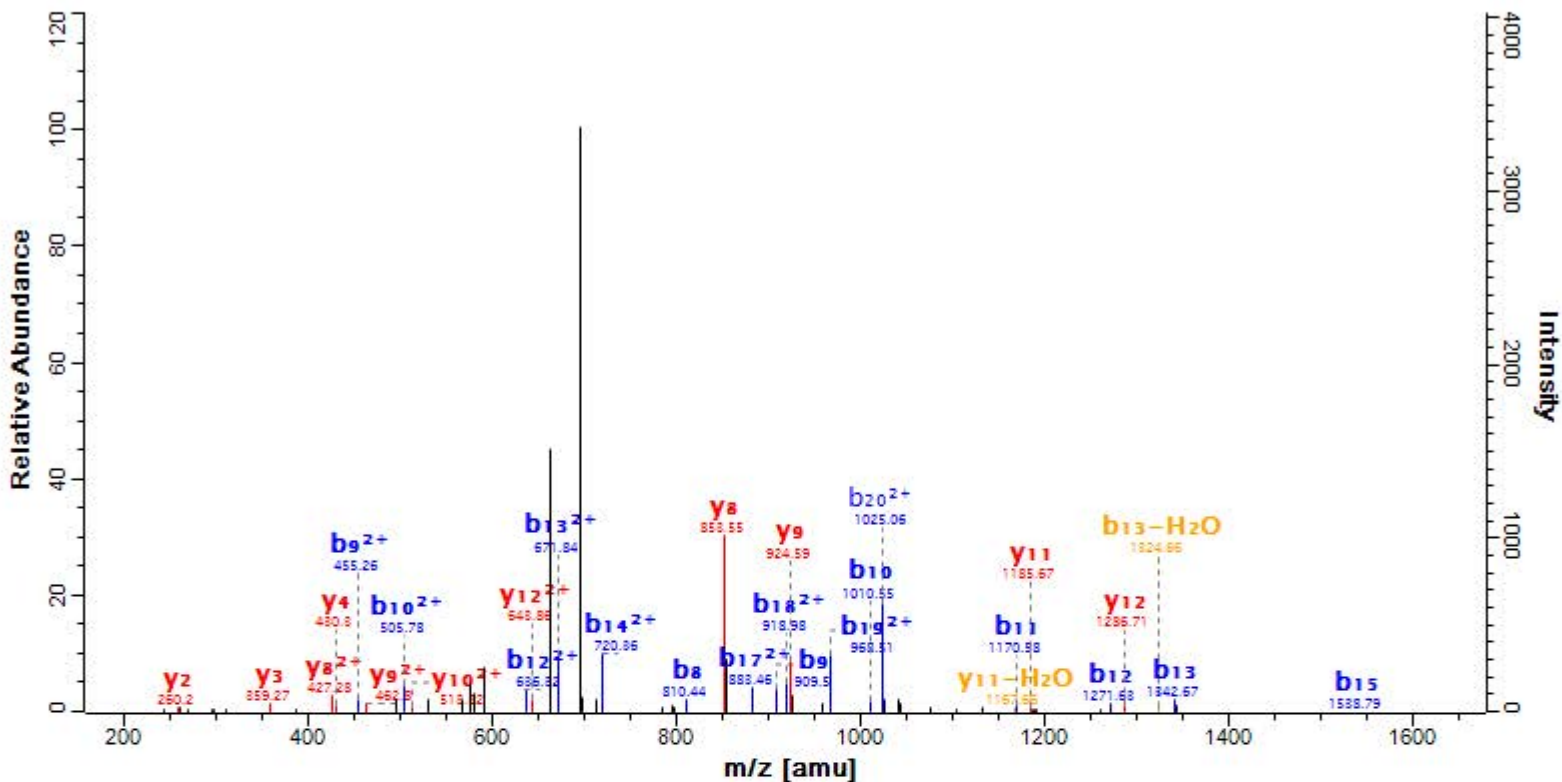

precursor information

|                   |                 |
|-------------------|-----------------|
| Mass:             | 2194.20274      |
| m/z:              | 732.40819       |
| Charge:           | 3+              |
| Retentiontime:    | 45.968639373779 |
| Score:            | 148.1532        |
| Mass Error [ppm]: | -0.18036        |
| PEP:              | 1.6817E-19      |
| Precursor Type:   | MULTI           |

| b <sup>2+</sup> ion |        | b ion    |        | seq |   |    | y ion    |         | y <sup>2+</sup> ion |         |
|---------------------|--------|----------|--------|-----|---|----|----------|---------|---------------------|---------|
| Δ dalton            | mass   | Δ dalton | mass   |     |   |    | Δ dalton | mass    | Δ dalton            | mass    |
|                     | 114.05 |          | 114.05 | 1   | A | 20 |          |         |                     |         |
|                     | 201.09 |          | 201.09 | 2   | S | 19 | 2082.2   |         | 2082.2              |         |
|                     | 330.13 |          | 330.13 | 3   | E | 18 | 1995.1   |         | 1995.1              |         |
|                     | 458.22 |          | 458.22 | 4   | K | 17 | 1866.1   |         | 1866.1              |         |
|                     | 555.28 |          | 555.28 | 5   | P | 16 | 1738     |         | 1738                |         |
|                     | 668.36 |          | 668.36 | 6   | L | 15 | 1640.9   |         | 1640.9              |         |
|                     | 739.4  |          | 739.4  | 7   | A | 14 | 1527.9   |         | 1527.9              |         |
|                     | 810.44 | +0.1832  | 810.44 | 8   | A | 13 | 1456.8   |         | 1456.8              |         |
| -0.106              | 455.26 | +0.0832  | 909.5  | 9   | V | 12 | 1385.8   |         | 1385.8              |         |
| +0.075              | 505.78 | -0.075   | 1010.6 | 10  | T | 11 | 1286.7   | +0.1282 | 643.86              | +0.0031 |
|                     | 1170.6 | -0.118   | 1170.6 | 11  | C | 10 | 1185.7   | +0.0173 | 1185.7              |         |
| +0.0524             | 636.32 | -0.152   | 1271.6 | 12  | T | 9  | 1025.6   |         | 513.32              | +0.1695 |
| +0.0158             | 671.84 | +0.0298  | 1342.7 | 13  | A | 8  | 924.59   | -0.009  | 462.8               | +0.0041 |
| +0.4628             | 720.36 |          | 1439.7 | 14  | P | 7  | 853.55   | +0      | 427.28              | +0.2015 |
|                     | 1538.8 | -0.013   | 1538.8 | 15  | V | 6  | 756.5    |         | 756.5               |         |
|                     | 1652.8 |          | 1652.8 | 16  | N | 5  | 657.43   |         | 657.43              |         |
| +0.1378             | 883.46 |          | 1765.9 | 17  | I | 4  | 543.39   |         | 543.39              |         |
| +0.2296             | 918.98 |          | 1837   | 18  | A | 3  | 430.3    | +0.1658 | 430.3               |         |
| +0.2875             | 968.51 |          | 1936   | 19  | V | 2  | 359.27   | +0.0216 | 359.27              |         |
| +0.2166             | 1025.1 |          | 2049.1 | 20  | I | 1  | 260.2    | +0.032  | 260.2               |         |
|                     |        |          |        | 21  | K | 0  | 147.11   |         | 147.11              |         |

general information

|                       |          |
|-----------------------|----------|
| Annotation:           | 12 of 21 |
| AminoAcids Coverag    | 57 %     |
| Intensity Coverage:   | 39 %     |
| Peak Coverage:        | 31 %     |
| Protein Localisation: | 2 ... 22 |



Scan number 4795 Raw file LNCAP\_Silac\_23F10\_set2\_01  
 Method ITMS; CID Pepti... 121.82

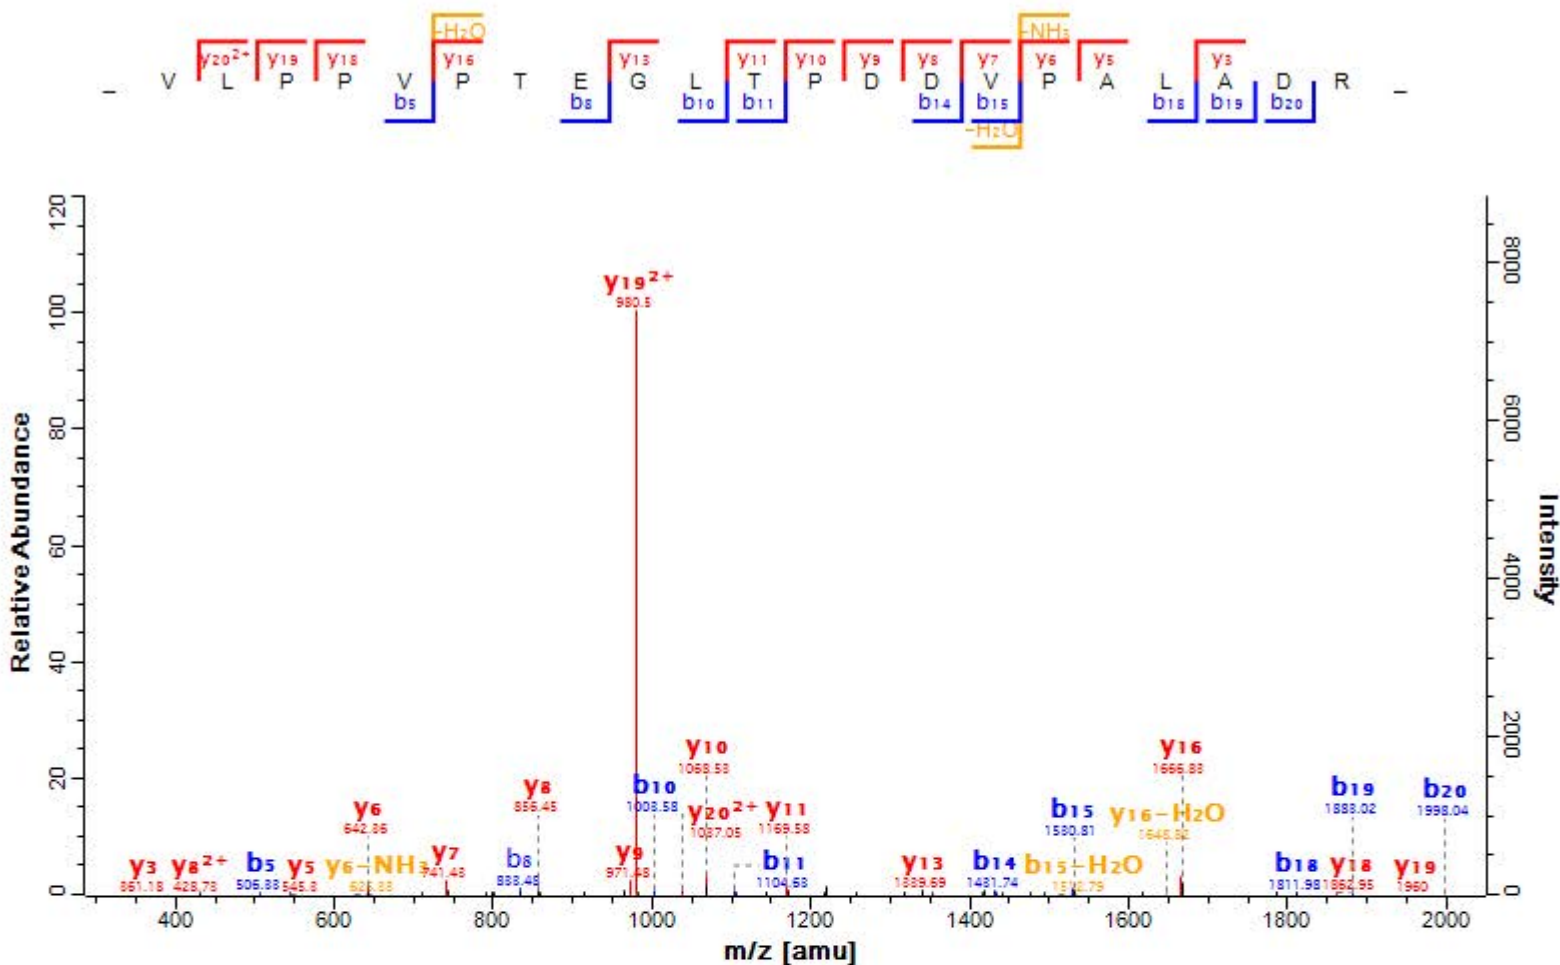

#### precursor information

|                   |                 |
|-------------------|-----------------|
| Mass:             | 2171.14741      |
| m/z:              | 1086.58098      |
| Charge:           | 2+              |
| Retentiontime:    | 47.478794097900 |
| Score:            | 121.8175        |
| Mass Error [ppm]: | 0.0028389       |
| PEP:              | 2.8707E-13      |
| Precursor Type:   | MULTI           |

#### general information

|                       |             |
|-----------------------|-------------|
| Annotation:           | 18 of 21    |
| AminoAcids Coverage:  | 86 %        |
| Intensity Coverage:   | 84 %        |
| Peak Coverage:        | 27 %        |
| Protein Localisation: | 233 ... 253 |

| b ion     |          |     |   | y ion    |          | y <sup>2+</sup> ion |           |           |
|-----------|----------|-----|---|----------|----------|---------------------|-----------|-----------|
| Δ dalton  | mass     | seq |   | Δ dalton | mass     | Δ dalton            | mass      |           |
|           | 100.0757 | 1   | V | 20       |          |                     |           |           |
|           | 213.1598 | 2   | L | 19       | 2073.086 | 1037.047            | +0.199447 |           |
|           | 310.2125 | 3   | P | 18       | 1960.002 | +0.005249           | 980.5047  | +0.308984 |
|           | 407.2653 | 4   | P | 17       | 1862.949 | -0.14047            | 1862.949  |           |
| +0.159956 | 506.3337 | 5   | V | 16       | 1765.897 |                     | 1765.897  |           |
|           | 603.3865 | 6   | P | 15       | 1666.828 | -0.10108            | 1666.828  |           |
|           | 704.4341 | 7   | T | 14       | 1569.775 |                     | 1569.775  |           |
| +0.198928 | 833.4767 | 8   | E | 13       | 1468.728 |                     | 1468.728  |           |
|           | 890.4982 | 9   | G | 12       | 1339.685 | +0.085043           | 1339.685  |           |
| +0.108171 | 1003.582 | 10  | L | 11       | 1282.664 |                     | 1282.664  |           |
| -0.10211  | 1104.63  | 11  | T | 10       | 1169.58  | -0.06443            | 1169.58   |           |
|           | 1201.683 | 12  | P | 9        | 1068.532 | -0.00223            | 1068.532  |           |
|           | 1316.71  | 13  | D | 8        | 971.4793 | +0.395749           | 971.4793  |           |
| -0.10121  | 1431.737 | 14  | D | 7        | 856.4523 | +0.118127           | 428.7298  | +0.333135 |
| -0.11311  | 1530.805 | 15  | V | 6        | 741.4254 | +0.066701           | 741.4254  |           |
|           | 1627.858 | 16  | P | 5        | 642.357  | +0.059309           | 642.357   |           |
|           | 1698.895 | 17  | A | 4        | 545.3042 | +0.233167           | 545.3042  |           |
| -0.10468  | 1811.979 | 18  | L | 3        | 474.2671 |                     | 474.2671  |           |
| -0.10846  | 1883.016 | 19  | A | 2        | 361.183  | +0.145543           | 361.183   |           |
| +0.459564 | 1998.043 | 20  | D | 1        | 290.1459 |                     | 290.1459  |           |
|           |          | 21  | R | 0        | 175.119  |                     | 175.119   |           |

Scan number 5446 Raw file LNCAP\_Silac\_23F10\_set2\_01  
 Method ITMS; CID Pepti... 62.62

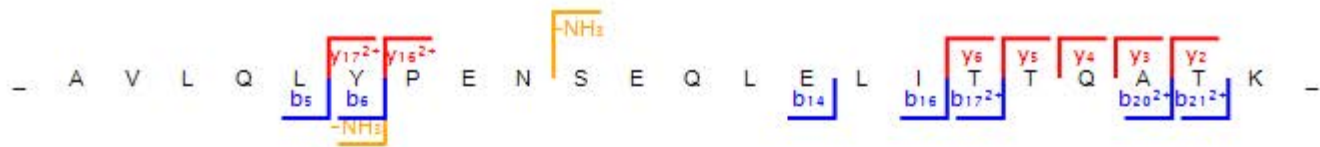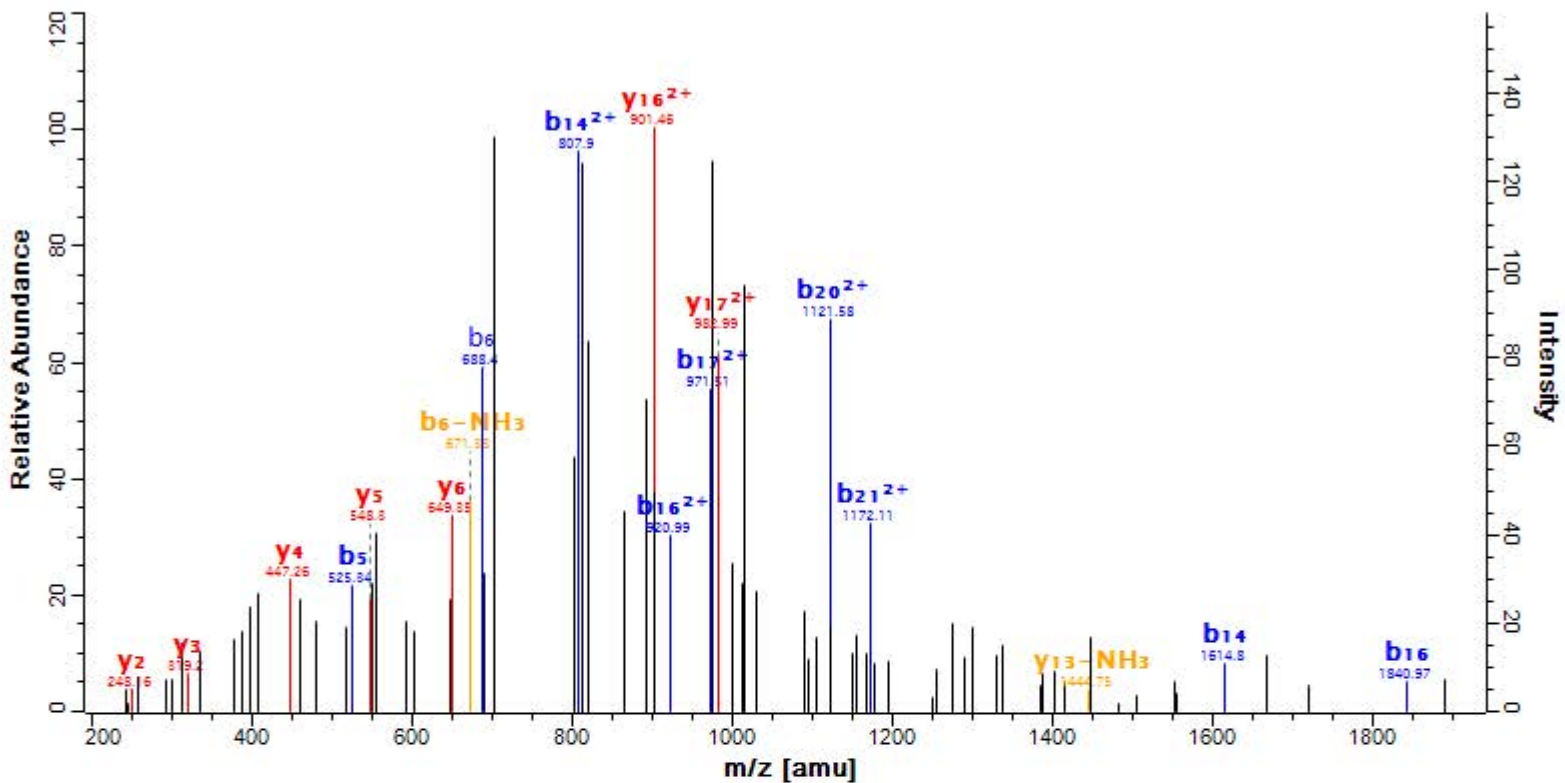

precursor information

|                   |                 |
|-------------------|-----------------|
| Mass:             | 2488.30652      |
| m/z:              | 830.44278       |
| Charge:           | 3+              |
| Retentiontime:    | 52.763751983642 |
| Score:            | 62.61666        |
| Mass Error [ppm]: | 0.17605         |
| PEP:              | 0.00092432      |
| Precursor Type:   | MULTI           |

| b <sup>2+</sup> ion |        | b ion    |        | seq |   |    | y ion    |         | y <sup>2+</sup> ion |         |
|---------------------|--------|----------|--------|-----|---|----|----------|---------|---------------------|---------|
| Δ dalton            | mass   | Δ dalton | mass   |     |   |    | Δ dalton | mass    | Δ dalton            | mass    |
|                     | 72.044 |          | 72.044 | 1   | A | 21 |          |         |                     |         |
|                     | 171.11 |          | 171.11 | 2   | V | 20 | 2418.3   |         | 2418.3              |         |
|                     | 284.2  |          | 284.2  | 3   | L | 19 | 2319.2   |         | 2319.2              |         |
|                     | 412.26 |          | 412.26 | 4   | Q | 18 | 2206.1   |         | 2206.1              |         |
|                     | 525.34 | +0.2354  | 525.34 | 5   | L | 17 | 2078.1   |         | 2078.1              |         |
|                     | 688.4  | -0.134   | 688.4  | 6   | Y | 16 | 1965     |         | 982.99              | +0.1923 |
|                     | 785.46 |          | 785.46 | 7   | P | 15 | 1801.9   |         | 901.46              | +0.0414 |
|                     | 914.5  |          | 914.5  | 8   | E | 14 | 1704.9   |         | 1704.9              |         |
|                     | 1028.5 |          | 1028.5 | 9   | N | 13 | 1575.8   |         | 1575.8              |         |
|                     | 1115.6 |          | 1115.6 | 10  | S | 12 | 1461.8   |         | 1461.8              |         |
|                     | 1244.6 |          | 1244.6 | 11  | E | 11 | 1374.7   |         | 1374.7              |         |
|                     | 1372.7 |          | 1372.7 | 12  | Q | 10 | 1245.7   |         | 1245.7              |         |
|                     | 1485.8 |          | 1485.8 | 13  | L | 9  | 1117.6   |         | 1117.6              |         |
| +0.1073             | 807.9  | +0.1354  | 1614.8 | 14  | E | 8  | 1004.6   |         | 1004.6              |         |
|                     | 1727.9 |          | 1727.9 | 15  | L | 7  | 875.52   |         | 875.52              |         |
| +0.4515             | 920.99 | -0.097   | 1841   | 16  | I | 6  | 762.44   |         | 762.44              |         |
| +0.3354             | 971.51 |          | 1942   | 17  | T | 5  | 649.35   | -0.059  | 649.35              |         |
|                     | 2043.1 |          | 2043.1 | 18  | T | 4  | 548.3    | -0.093  | 548.3               |         |
|                     | 2171.1 |          | 2171.1 | 19  | Q | 3  | 447.26   | +0.0267 | 447.26              |         |
| +0.0777             | 1121.6 |          | 2242.2 | 20  | A | 2  | 319.2    | -0.079  | 319.2               |         |
| +0.2095             | 1172.1 |          | 2343.2 | 21  | T | 1  | 248.16   | +0.2653 | 248.16              |         |
|                     |        |          |        | 22  | K | 0  | 147.11   |         | 147.11              |         |

general information

|                       |             |
|-----------------------|-------------|
| Annotation:           | 12 of 22    |
| AminoAcids Coverage:  | 55 %        |
| Intensity Coverage:   | 31 %        |
| Peak Coverage:        | 21 %        |
| Protein Localisation: | 159 ... 180 |

Scan number 5987 Raw file LNCAP\_Silac\_23F10\_set2\_01  
 Method ITMS; CID Pepti... 78.75

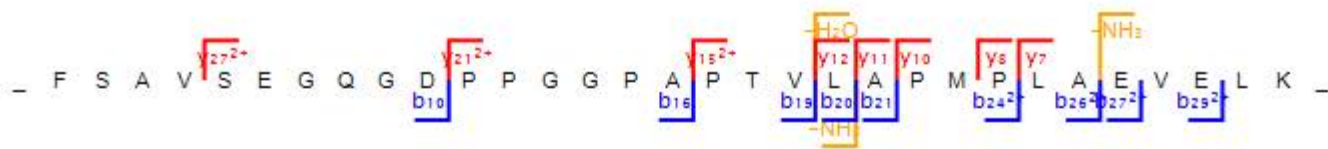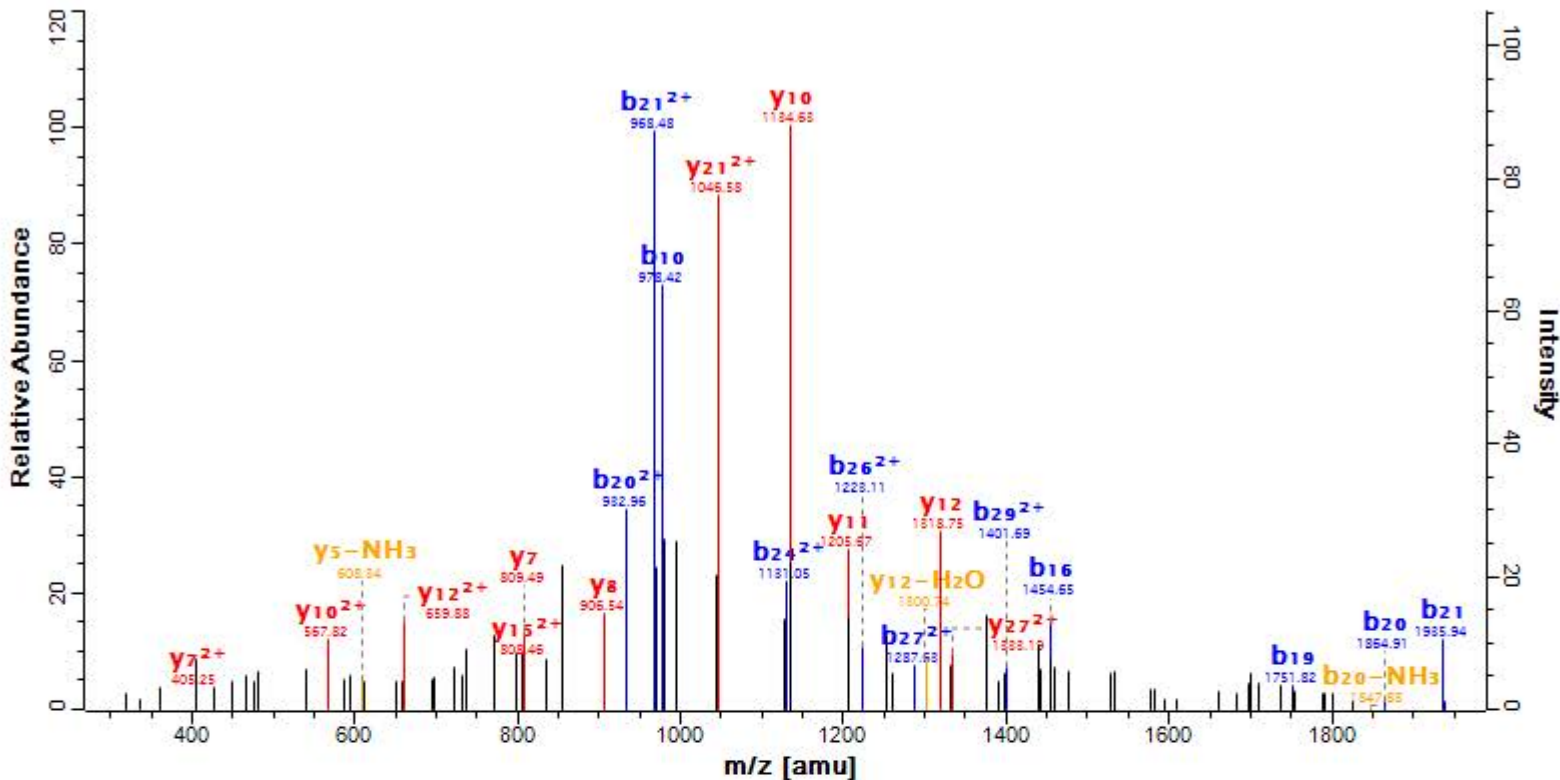

**precursor information**

|                   |                 |
|-------------------|-----------------|
| Mass:             | 3060.54831      |
| m/z:              | 1021.19005      |
| Charge:           | 3+              |
| Retentiontime:    | 57.557941436767 |
| Score:            | 78.75172        |
| Mass Error [ppm]: | 0.17003         |
| PEP:              | 3.1813E-10      |
| Precursor Type:   | MULTI           |

**general information**

|                       |             |
|-----------------------|-------------|
| Annotation:           | 16 of 31    |
| AminoAcids Coverag    | 52 %        |
| Intensity Coverage:   | 54 %        |
| Peak Coverage:        | 27 %        |
| Protein Localisation: | 165 ... 195 |

| b <sup>2+</sup> ion |        | b ion    |        | seq |   |    | y ion    |         | y <sup>2+</sup> ion |         |
|---------------------|--------|----------|--------|-----|---|----|----------|---------|---------------------|---------|
| Δ dalton            | mass   | Δ dalton | mass   |     |   |    | Δ dalton | mass    | Δ dalton            | mass    |
|                     | 148.08 |          | 148.08 | 1   | F | 30 |          |         |                     |         |
|                     | 235.11 |          | 235.11 | 2   | S | 29 | 2922.5   |         | 2922.5              |         |
|                     | 306.14 |          | 306.14 | 3   | A | 28 | 2835.5   |         | 2835.5              |         |
|                     | 405.21 |          | 405.21 | 4   | V | 27 | 2764.4   |         | 2764.4              |         |
|                     | 492.25 |          | 492.25 | 5   | S | 26 | 2665.4   |         | 1333.2              | -0.106  |
|                     | 621.29 |          | 621.29 | 6   | E | 25 | 2578.3   |         | 2578.3              |         |
|                     | 678.31 |          | 678.31 | 7   | G | 24 | 2449.3   |         | 2449.3              |         |
|                     | 806.37 |          | 806.37 | 8   | Q | 23 | 2392.3   |         | 2392.3              |         |
|                     | 863.39 |          | 863.39 | 9   | G | 22 | 2264.2   |         | 2264.2              |         |
|                     | 978.42 | -0.01    | 978.42 | 10  | D | 21 | 2207.2   |         | 2207.2              |         |
|                     | 1075.5 |          | 1075.5 | 11  | P | 20 | 2092.2   |         | 1046.6              | +0.1095 |
|                     | 1172.5 |          | 1172.5 | 12  | P | 19 | 1995.1   |         | 1995.1              |         |
|                     | 1229.5 |          | 1229.5 | 13  | G | 18 | 1898.1   |         | 1898.1              |         |
|                     | 1286.6 |          | 1286.6 | 14  | G | 17 | 1841     |         | 1841                |         |
|                     | 1383.6 |          | 1383.6 | 15  | P | 16 | 1784     |         | 1784                |         |
|                     | 1454.7 | +0.2024  | 1454.7 | 16  | A | 15 | 1687     |         | 1687                |         |
|                     | 1551.7 |          | 1551.7 | 17  | P | 14 | 1615.9   |         | 808.46              | -0.273  |
|                     | 1652.8 |          | 1652.8 | 18  | T | 13 | 1518.9   |         | 1518.9              |         |
|                     | 1751.8 | -0.363   | 1751.8 | 19  | V | 12 | 1417.8   |         | 1417.8              |         |
| +0.2939             | 932.96 | -0.082   | 1864.9 | 20  | L | 11 | 1318.8   | +0.0517 | 659.88              | +0.1795 |
| +0.1424             | 968.48 | -0.129   | 1935.9 | 21  | A | 10 | 1205.7   | +0.0449 | 1205.7              |         |
|                     | 2033   |          | 2033   | 22  | P | 9  | 1134.6   | +0.0112 | 567.82              | -0.044  |
|                     | 2164   |          | 2164   | 23  | M | 8  | 1037.6   |         | 1037.6              |         |
| -0.484              | 1131   |          | 2261.1 | 24  | P | 7  | 906.54   | +0.1945 | 906.54              |         |
|                     | 2374.2 |          | 2374.2 | 25  | L | 6  | 809.49   | -0.203  | 405.25              | +0.2385 |
| +0.2449             | 1223.1 |          | 2445.2 | 26  | A | 5  | 696.4    |         | 696.4               |         |
| +0.3804             | 1287.6 |          | 2574.3 | 27  | E | 4  | 625.36   |         | 625.36              |         |
|                     | 2673.3 |          | 2673.3 | 28  | V | 3  | 496.32   |         | 496.32              |         |
| -0.048              | 1401.7 |          | 2802.4 | 29  | E | 2  | 397.25   |         | 397.25              |         |
|                     | 2915.4 |          | 2915.4 | 30  | L | 1  | 268.21   |         | 268.21              |         |
|                     |        |          |        | 31  | K | 0  | 155.13   |         | 155.13              |         |

Scan number 5992 Raw file LNCAP\_Silac\_23F10\_set2\_01  
 Method ITMS; CID Peptide 87.64

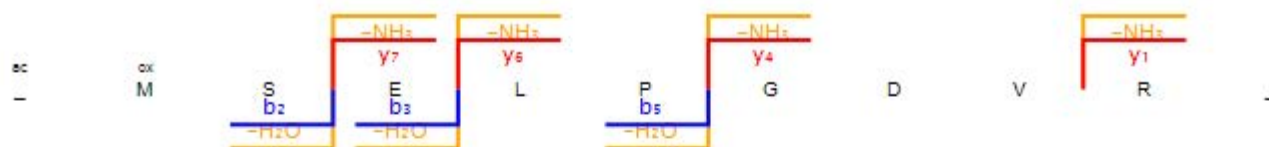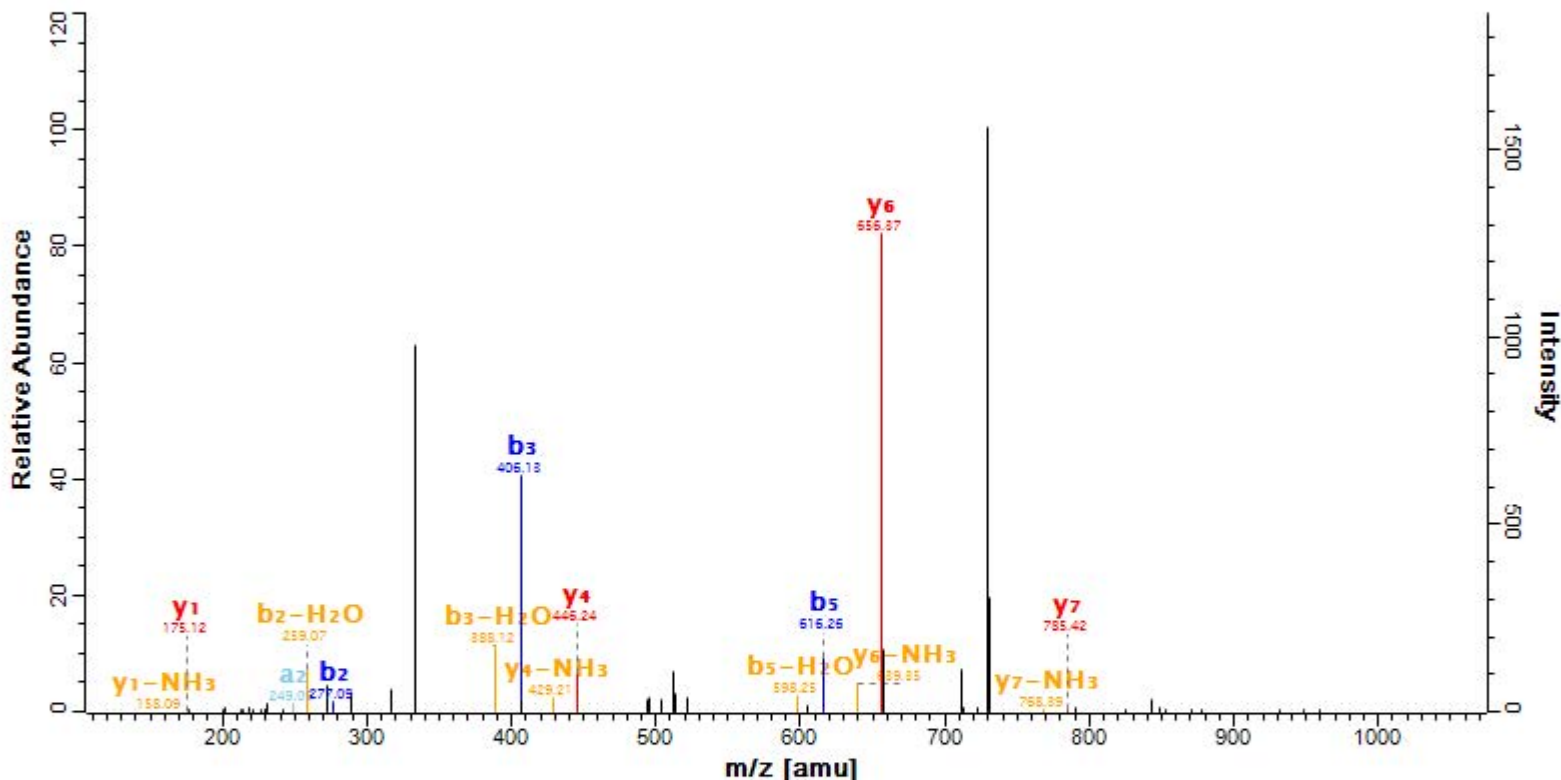

#### precursor information

|                       |                 |
|-----------------------|-----------------|
| Mass:                 | 1060.48636      |
| m/z:                  | 531.25046       |
| Charge:               | 2+              |
| Retentiontime:        | 57.604183197021 |
| Score:                | 87.6395         |
| Mass Error [ppm]:     | 0.42595         |
| PEP:                  | 0.0032525       |
| Precursor Type:       | ISO             |
| Annotation:           | 6 of 9          |
| AminoAcids Coverage:  | 67 %            |
| Intensity Coverage:   | 40 %            |
| Peak Coverage:        | 21 %            |
| Protein Localisation: | 1 ... 9         |

| a ion     |          | b ion     |          |   |     |   | y ion    |           |
|-----------|----------|-----------|----------|---|-----|---|----------|-----------|
| Δ dalton  | mass     | Δ dalton  | mass     |   | seq |   | Δ dalton | mass      |
|           | 162.0583 |           | 190.0532 | 1 | M   | 8 |          |           |
| +0.028329 | 249.0904 | -0.02314  | 277.0853 | 2 | S   | 7 | 872.4472 |           |
|           | 378.1329 | +0.028449 | 406.1279 | 3 | E   | 6 | 785.4152 | +0.083036 |
|           | 491.217  |           | 519.2119 | 4 | L   | 5 | 656.3726 | -0.01884  |
|           | 588.2698 | +0.145467 | 616.2647 | 5 | P   | 4 | 543.2885 |           |
|           | 645.2912 |           | 673.2862 | 6 | G   | 3 | 446.2358 | +0.002875 |
|           | 760.3182 |           | 788.3131 | 7 | D   | 2 | 389.2143 |           |
|           | 859.3866 |           | 887.3815 | 8 | V   | 1 | 274.1874 |           |
|           |          |           |          | 9 | R   | 0 | 175.119  | -0.09007  |

Scan number 6252 Raw file LNCAP\_Silac\_23F10\_set2\_01  
 Method ITMS; CID Pepti... 210.98

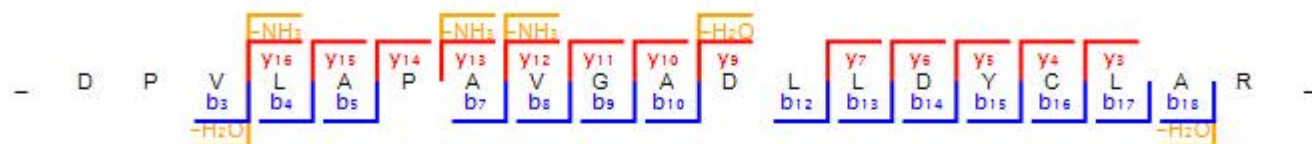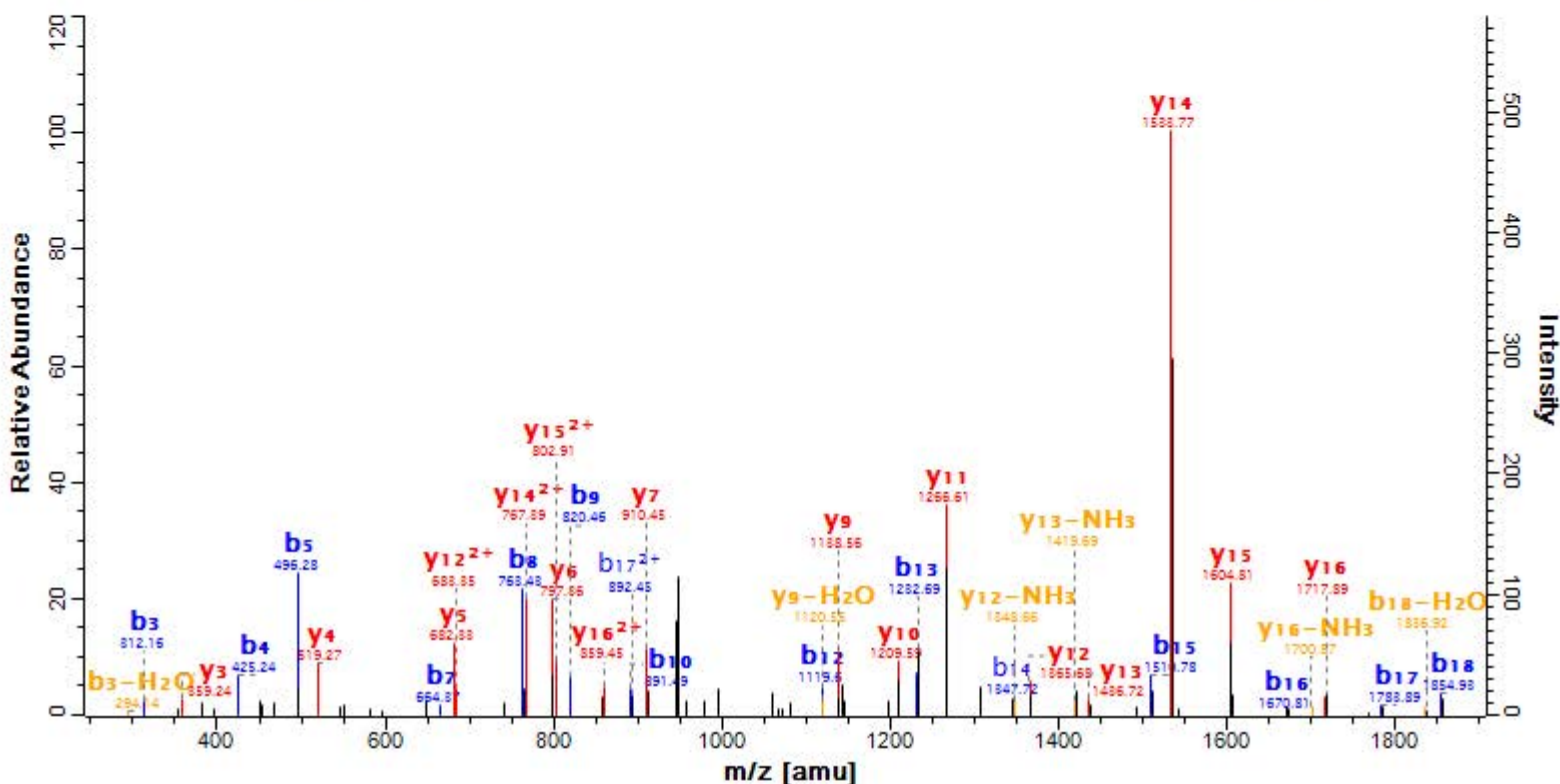

precursor information

|                   |                 |
|-------------------|-----------------|
| Mass:             | 2028.03368      |
| m/z:              | 1015.02412      |
| Charge:           | 2+              |
| Retentiontime:    | 60.061389923095 |
| Score:            | 210.9766        |
| Mass Error [ppm]: | -0.6569         |
| PEP:              | 5.0361E-49      |
| Precursor Type:   | MULTI           |

general information

|                       |               |
|-----------------------|---------------|
| Annotation:           | 16 of 19      |
| AminoAcids Coverage:  | 84 %          |
| Intensity Coverage:   | 57 %          |
| Peak Coverage:        | 39 %          |
| Protein Localisation: | 1207 ... 1225 |

| b <sup>2+</sup> ion |        | b ion    |        | seq |   |    | y ion    |         | y <sup>2+</sup> ion |         |
|---------------------|--------|----------|--------|-----|---|----|----------|---------|---------------------|---------|
| Δ dalton            | mass   | Δ dalton | mass   |     |   |    | Δ dalton | mass    | Δ dalton            | mass    |
|                     | 116.03 |          | 116.03 | 1   | D | 18 |          |         |                     |         |
|                     | 213.09 |          | 213.09 | 2   | P | 17 | 1914     |         | 1914                |         |
|                     | 312.16 | -0.029   | 312.16 | 3   | V | 16 | 1817     |         | 1817                |         |
|                     | 425.24 | +0.0573  | 425.24 | 4   | L | 15 | 1717.9   | -0.256  | 859.45              | -0.03   |
|                     | 496.28 | -0.037   | 496.28 | 5   | A | 14 | 1604.8   | -0.091  | 802.91              | +0.2345 |
|                     | 593.33 |          | 593.33 | 6   | P | 13 | 1533.8   | -0.081  | 767.39              | +0.2784 |
|                     | 664.37 | +0.0091  | 664.37 | 7   | A | 12 | 1436.7   | +0.0876 | 1436.7              |         |
|                     | 763.43 | -0.072   | 763.43 | 8   | V | 11 | 1365.7   | +0.0452 | 683.35              | +0.0117 |
|                     | 820.46 | -0.045   | 820.46 | 9   | G | 10 | 1266.6   | -0.028  | 1266.6              |         |
|                     | 891.49 | -0.079   | 891.49 | 10  | A | 9  | 1209.6   | -0.007  | 1209.6              |         |
|                     | 1006.5 |          | 1006.5 | 11  | D | 8  | 1138.6   | -0.093  | 1138.6              |         |
|                     | 1119.6 | -0.266   | 1119.6 | 12  | L | 7  | 1023.5   |         | 1023.5              |         |
|                     | 1232.7 | -0.445   | 1232.7 | 13  | L | 6  | 910.45   | -0.053  | 910.45              |         |
|                     | 1347.7 | +0.0671  | 1347.7 | 14  | D | 5  | 797.36   | +0.0075 | 797.36              |         |
|                     | 1510.8 | -0.182   | 1510.8 | 15  | Y | 4  | 682.33   | +0.0377 | 682.33              |         |
|                     | 1670.8 | +0.1394  | 1670.8 | 16  | C | 3  | 519.27   | +0.0943 | 519.27              |         |
| +0.2145             | 892.45 | -0.046   | 1783.9 | 17  | L | 2  | 359.24   | +0.1561 | 359.24              |         |
|                     | 1854.9 | -0.287   | 1854.9 | 18  | A | 1  | 246.16   |         | 246.16              |         |
|                     |        |          |        | 19  | R | 0  | 175.12   |         | 175.12              |         |

Scan number 6587 Raw file LNCAP\_Silac\_23F10\_set2\_01  
 Method ITMS; CID Pepti... 156.39

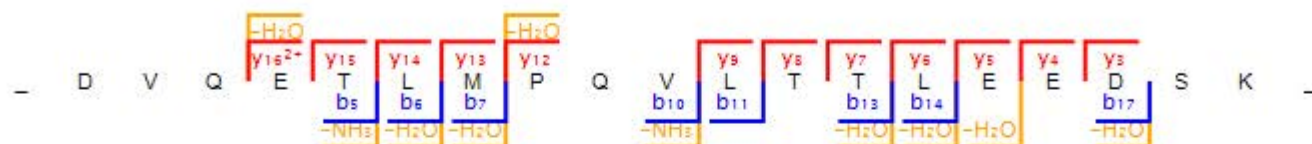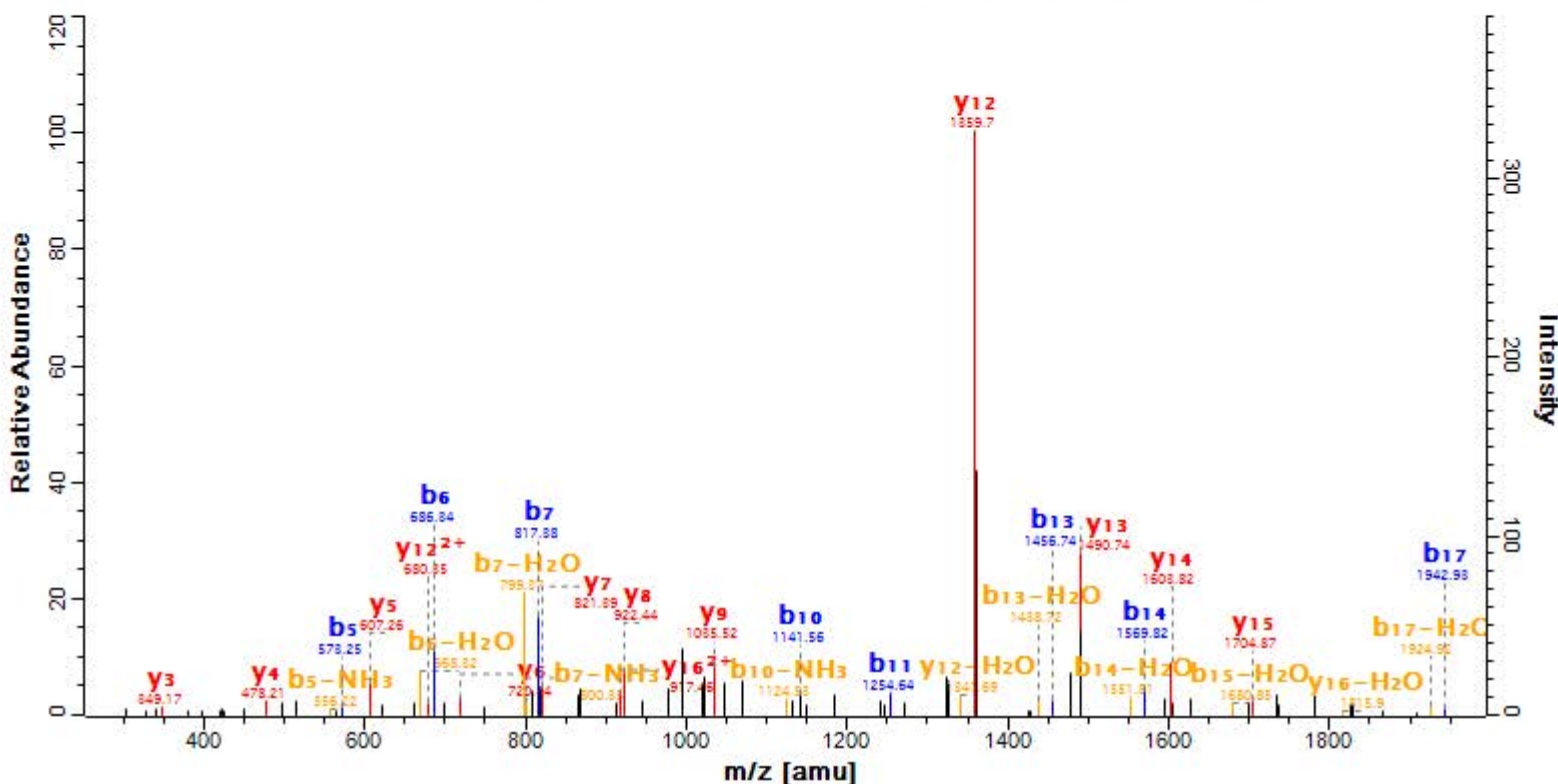

**precursor information**

|                   |                 |
|-------------------|-----------------|
| Mass:             | 2175.06144      |
| m/z:              | 1088.538        |
| Charge:           | 2+              |
| Retentiontime:    | 63.106166839599 |
| Score:            | 156.3896        |
| Mass Error [ppm]: | -0.11101        |
| PEP:              | 2.9907E-26      |
| Precursor Type:   | MULTI           |

**general information**

|                       |             |
|-----------------------|-------------|
| Annotation:           | 13 of 19    |
| AminoAcids Coverage:  | 68 %        |
| Intensity Coverage:   | 56 %        |
| Peak Coverage:        | 34 %        |
| Protein Localisation: | 697 ... 715 |

| b ion     |          |    |     | y ion    |          | y <sup>2+</sup> ion |          |          |
|-----------|----------|----|-----|----------|----------|---------------------|----------|----------|
| Δ dalton  | mass     |    | seq | Δ dalton | mass     | Δ dalton            | mass     |          |
|           | 116.0342 | 1  | D   | 18       |          |                     |          |          |
|           | 215.1026 | 2  | V   | 17       | 2061.042 | 2061.042            |          |          |
|           | 343.1612 | 3  | Q   | 16       | 1961.974 | 1961.974            |          |          |
|           | 472.2038 | 4  | E   | 15       | 1833.915 | 917.4611            | -0.02121 |          |
| +0.01634  | 573.2515 | 5  | T   | 14       | 1704.872 | -0.37695            | 1704.872 |          |
| +0.019068 | 686.3355 | 6  | L   | 13       | 1603.825 | -0.09062            | 1603.825 |          |
| -0.00274  | 817.376  | 7  | M   | 12       | 1490.741 | -0.14535            | 1490.741 |          |
|           | 914.4288 | 8  | P   | 11       | 1359.7   | -0.09168            | 680.3537 | -0.06315 |
|           | 1042.487 | 9  | Q   | 10       | 1262.647 |                     | 1262.647 |          |
| -0.1969   | 1141.556 | 10 | V   | 9        | 1134.589 |                     | 1134.589 |          |
| +0.015911 | 1254.64  | 11 | L   | 8        | 1035.52  | -0.01666            | 1035.52  |          |
|           | 1355.688 | 12 | T   | 7        | 922.4364 | +0.066791           | 922.4364 |          |
| -0.13047  | 1456.735 | 13 | T   | 6        | 821.3887 | +0.206755           | 821.3887 |          |
| -0.24029  | 1569.819 | 14 | L   | 5        | 720.341  | -0.01278            | 720.341  |          |
|           | 1698.862 | 15 | E   | 4        | 607.257  | +0.112301           | 607.257  |          |
|           | 1827.904 | 16 | E   | 3        | 478.2144 | +0.083666           | 478.2144 |          |
| +0.328731 | 1942.931 | 17 | D   | 2        | 349.1718 | +0.114723           | 349.1718 |          |
|           | 2029.963 | 18 | S   | 1        | 234.1448 |                     | 234.1448 |          |
|           |          | 19 | K   | 0        | 147.1128 |                     | 147.1128 |          |

Scan number 6664 Raw file LNCAP\_Silac\_23F10\_set2\_01  
 Method ITMS; CID Pepti... 133.74

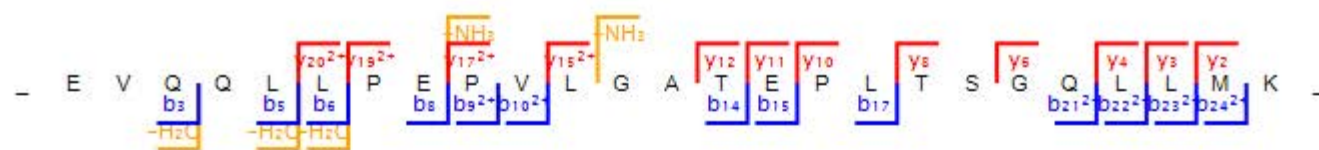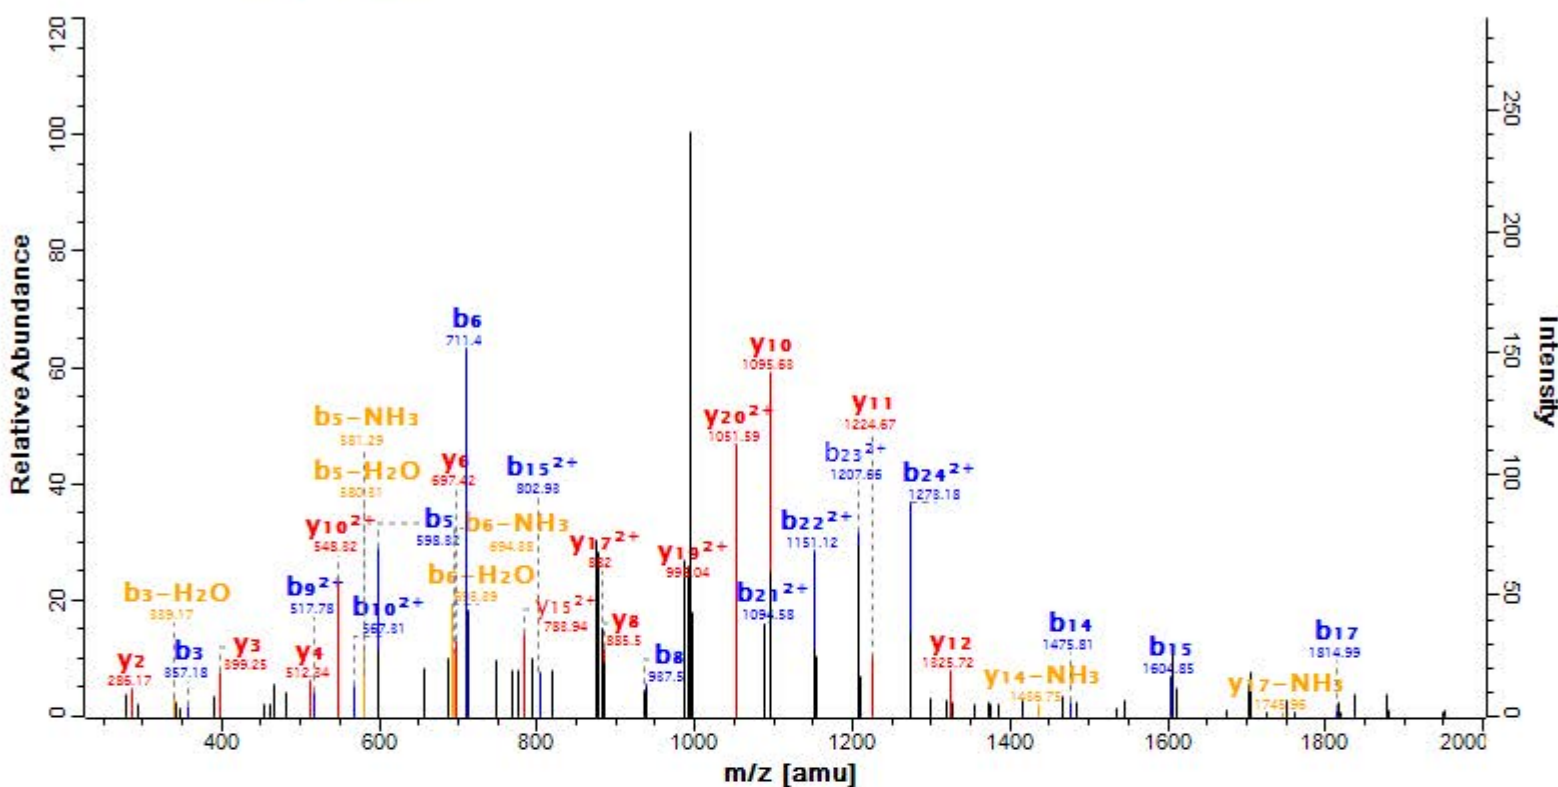

#### precursor information

|                   |                 |
|-------------------|-----------------|
| Mass:             | 2690.45597      |
| m/z:              | 897.82593       |
| Charge:           | 3+              |
| Retentiontime:    | 63.856506347656 |
| Score:            | 133.744         |
| Mass Error [ppm]: | -0.17917        |
| PEP:              | 5.4512E-17      |
| Precursor Type:   | MULTI           |

| b <sup>2+</sup> ion |         | b ion    |        | seq |   |    | y ion    |         | y <sup>2+</sup> ion |         |
|---------------------|---------|----------|--------|-----|---|----|----------|---------|---------------------|---------|
| Δ dalton            | mass    | Δ dalton | mass   |     |   |    | Δ dalton | mass    | Δ dalton            | mass    |
|                     | 130.05  |          | 130.05 | 1   | E | 24 |          |         |                     |         |
|                     | 229.12  |          | 229.12 | 2   | V | 23 | 2570.4   |         | 2570.4              |         |
|                     | 357.18  | +0.078   | 357.18 | 3   | Q | 22 | 2471.4   |         | 2471.4              |         |
|                     | 485.24  |          | 485.24 | 4   | Q | 21 | 2343.3   |         | 2343.3              |         |
|                     | 598.32  | +0.0216  | 598.32 | 5   | L | 20 | 2215.2   |         | 2215.2              |         |
|                     | 711.4   | -0.088   | 711.4  | 6   | L | 19 | 2102.2   |         | 1051.6              | +0.2414 |
|                     | 808.46  |          | 808.46 | 7   | P | 18 | 1989.1   |         | 995.04              | -0.315  |
|                     | 937.5   | +0.0108  | 937.5  | 8   | E | 17 | 1892     |         | 1892                |         |
| +0.4584             | 117.78  |          | 1034.6 | 9   | P | 16 | 1763     |         | 882                 | -0.121  |
| +0.0042             | 2567.31 |          | 1133.6 | 10  | V | 15 | 1665.9   |         | 1665.9              |         |
|                     | 1246.7  |          | 1246.7 | 11  | L | 14 | 1566.9   |         | 783.94              | +0.2417 |
|                     | 1303.7  |          | 1303.7 | 12  | G | 13 | 1453.8   |         | 1453.8              |         |
|                     | 1374.8  |          | 1374.8 | 13  | A | 12 | 1396.8   |         | 1396.8              |         |
|                     | 1475.8  | +0.1606  | 1475.8 | 14  | T | 11 | 1325.7   | -0.057  | 1325.7              |         |
| +0.2062             | 802.93  | +0.0623  | 1604.9 | 15  | E | 10 | 1224.7   | -0.159  | 1224.7              |         |
|                     | 1701.9  |          | 1701.9 | 16  | P | 9  | 1095.6   | +0.0062 | 548.32              | +0.2774 |
|                     | 1815    | -0.066   | 1815   | 17  | L | 8  | 998.58   |         | 998.58              |         |
|                     | 1916    |          | 1916   | 18  | T | 7  | 885.5    | +0.0388 | 885.5               |         |
|                     | 2003.1  |          | 2003.1 | 19  | S | 6  | 784.45   |         | 784.45              |         |
|                     | 2060.1  |          | 2060.1 | 20  | G | 5  | 697.42   | +0.1377 | 697.42              |         |
| +0.3857             | 1094.6  |          | 2188.1 | 21  | Q | 4  | 640.39   |         | 640.39              |         |
| +0.22               | 1151.1  |          | 2301.2 | 22  | L | 3  | 512.34   | -0.09   | 512.34              |         |
| +0.3347             | 1207.7  |          | 2414.3 | 23  | L | 2  | 399.25   | -0.014  | 399.25              |         |
| +0.4163             | 1273.2  |          | 2545.4 | 24  | M | 1  | 286.17   | +0.2143 | 286.17              |         |
|                     |         |          |        | 25  | K | 0  | 155.13   |         | 155.13              |         |

#### general information

|                       |             |
|-----------------------|-------------|
| Annotation:           | 20 of 25    |
| AminoAcids Coverage:  | 80 %        |
| Intensity Coverage:   | 46 %        |
| Peak Coverage:        | 31 %        |
| Protein Localisation: | 423 ... 447 |

Scan number 6676 Raw file LNCAP\_Silac\_23F10\_set2\_01  
 Method ITMS; CID Pepti... 99.41

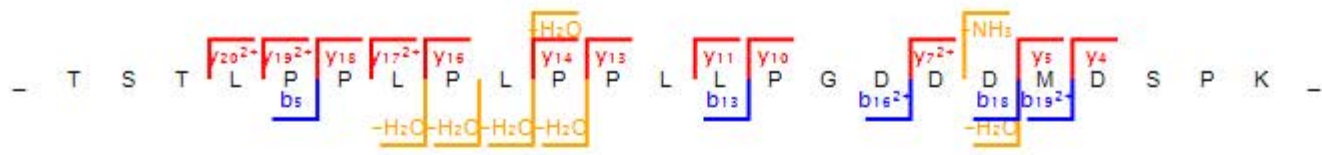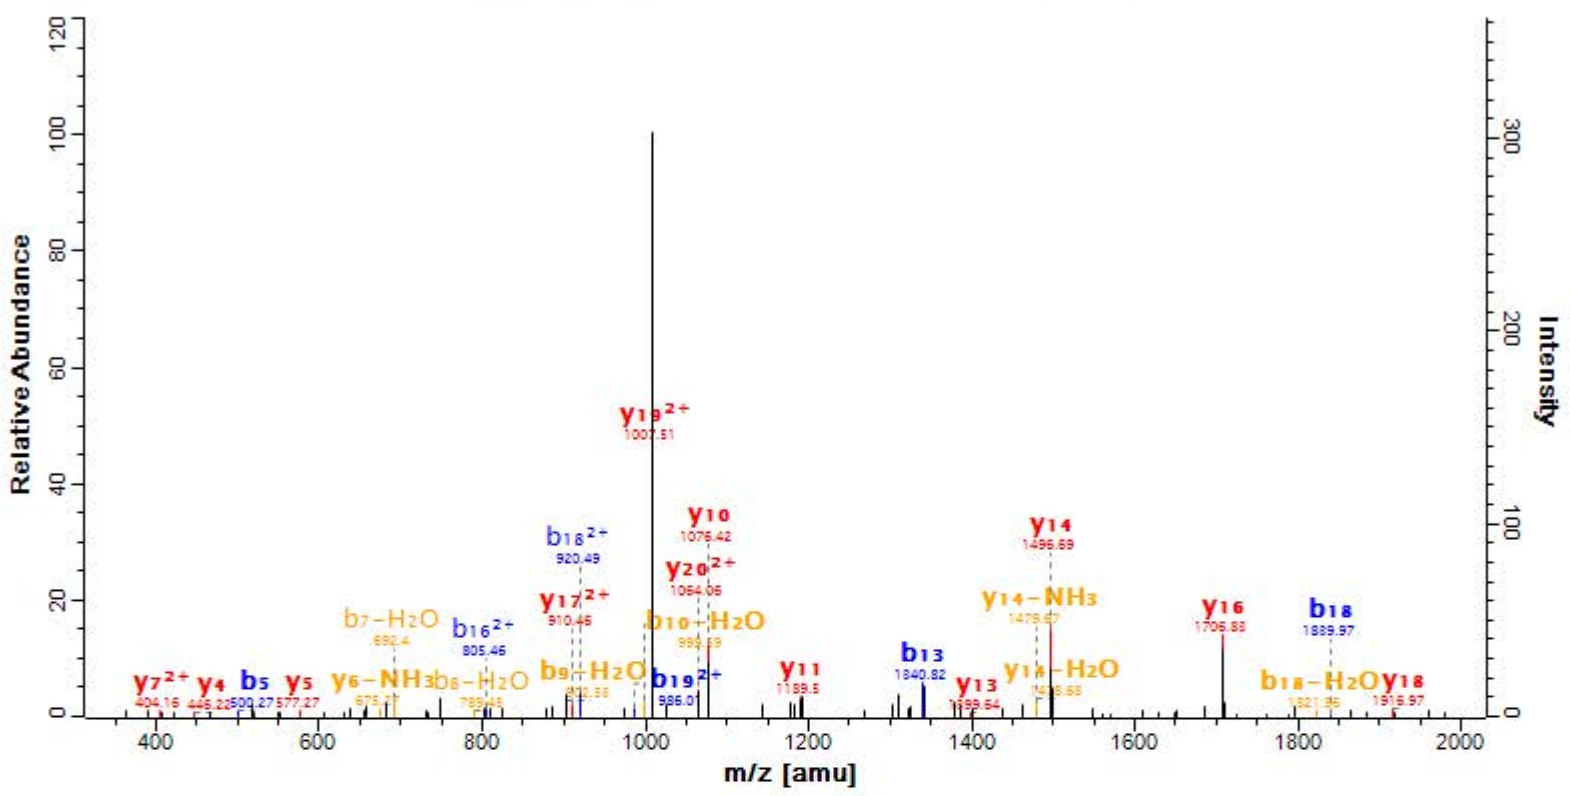

precursor information

|                   |                 |
|-------------------|-----------------|
| Mass:             | 2415.22341      |
| m/z:              | 1208.61898      |
| Charge:           | 2+              |
| Retentiontime:    | 63.976642608642 |
| Score:            | 99.4091         |
| Mass Error [ppm]: | -0.38191        |
| PEP:              | 5.25E-07        |
| Precursor Type:   | MULTI           |

general information

|                       |             |
|-----------------------|-------------|
| Annotation:           | 15 of 23    |
| AminoAcids Coverage:  | 65 %        |
| Intensity Coverage:   | 37 %        |
| Peak Coverage:        | 27 %        |
| Protein Localisation: | 624 ... 646 |

| b <sup>2+</sup> ion |         | b ion    |        | seq |   |    | y ion    |         | y <sup>2+</sup> ion |         |
|---------------------|---------|----------|--------|-----|---|----|----------|---------|---------------------|---------|
| Δ dalton            | mass    | Δ dalton | mass   |     |   |    | Δ dalton | mass    | Δ dalton            | mass    |
|                     | 102.05  |          | 102.05 | 1   | T | 22 |          |         |                     |         |
|                     | 189.09  |          | 189.09 | 2   | S | 21 | 2315.2   |         | 2315.2              |         |
|                     | 290.13  |          | 290.13 | 3   | T | 20 | 2228.2   |         | 2228.2              |         |
|                     | 403.22  |          | 403.22 | 4   | L | 19 | 2127.1   |         | 1064.1              | +0.318  |
|                     | 500.27  | +0.0565  | 500.27 | 5   | P | 18 | 2014     |         | 1007.5              | +0.0238 |
|                     | 597.32  |          | 597.32 | 6   | P | 17 | 1917     | -0.401  | 1917                |         |
|                     | 710.41  |          | 710.41 | 7   | L | 16 | 1819.9   |         | 910.46              | +0.1252 |
|                     | 807.46  |          | 807.46 | 8   | P | 15 | 1706.8   | -0.101  | 1706.8              |         |
|                     | 920.55  |          | 920.55 | 9   | L | 14 | 1609.8   |         | 1609.8              |         |
|                     | 1017.6  |          | 1017.6 | 10  | P | 13 | 1496.7   | -0.113  | 1496.7              |         |
|                     | 1114.7  |          | 1114.7 | 11  | P | 12 | 1399.6   | +0.0789 | 1399.6              |         |
|                     | 1227.7  |          | 1227.7 | 12  | L | 11 | 1302.6   |         | 1302.6              |         |
|                     | 1340.8  | -0.021   | 1340.8 | 13  | L | 10 | 1189.5   | +0.0537 | 1189.5              |         |
|                     | 1437.9  |          | 1437.9 | 14  | P | 9  | 1076.4   | +0.0203 | 1076.4              |         |
|                     | 1494.9  |          | 1494.9 | 15  | G | 8  | 979.37   |         | 979.37              |         |
| -0.023              | 805.46  |          | 1609.9 | 16  | D | 7  | 922.35   |         | 922.35              |         |
|                     | 1724.9  |          | 1724.9 | 17  | D | 6  | 807.32   |         | 404.16              | +0.0235 |
| -0.14               | 920.49  | +0.0425  | 1840   | 18  | D | 5  | 692.29   |         | 692.29              |         |
| +0.0239             | 9986.01 |          | 1971   | 19  | M | 4  | 577.27   | -0.011  | 577.27              |         |
|                     | 2086    |          | 2086   | 20  | D | 3  | 446.22   | -0.256  | 446.22              |         |
|                     | 2173.1  |          | 2173.1 | 21  | S | 2  | 331.2    |         | 331.2               |         |
|                     | 2270.1  |          | 2270.1 | 22  | P | 1  | 244.17   |         | 244.17              |         |
|                     |         |          |        | 23  | K | 0  | 147.11   |         | 147.11              |         |



Scan number 678 Raw file LNCAP\_Silac\_23F10\_set2\_01  
 Method ITMS: CID Pepti... 89.05

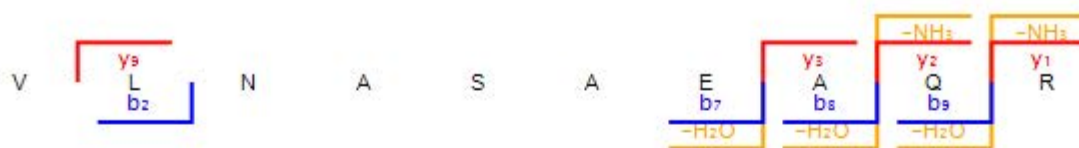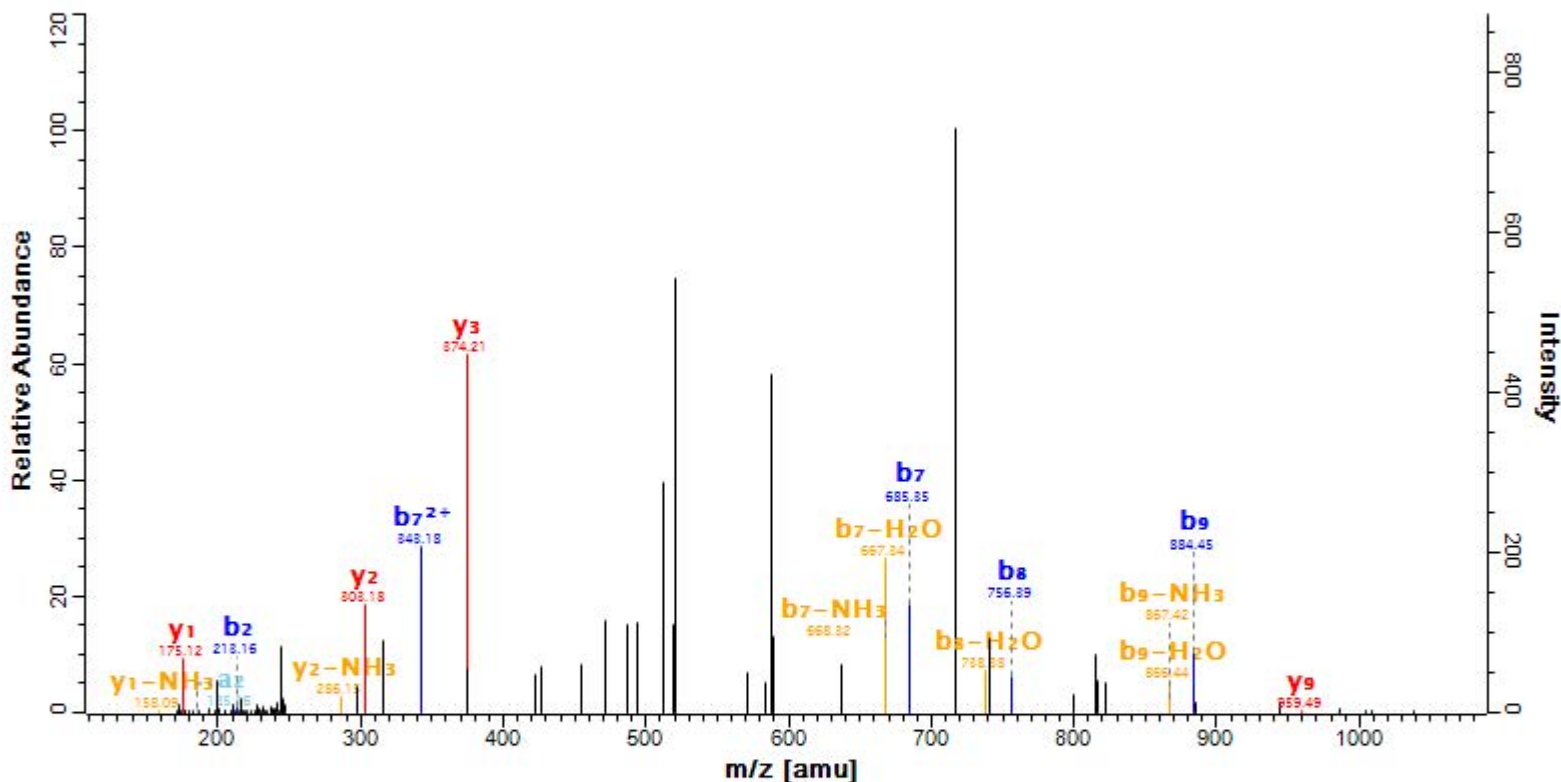

#### precursor information

|                   |                 |
|-------------------|-----------------|
| Mass:             | 1057.55136      |
| m/z:              | 529.78296       |
| Charge:           | 2+              |
| Retentiontime:    | 10.787036895752 |
| Score:            | 89.04736        |
| Mass Error [ppm]: | -0.24774        |
| PEP:              | 0.0023227       |
| Precursor Type:   | MULTI           |

|                       |             |
|-----------------------|-------------|
| Annotation:           | 5 of 10     |
| AminoAcids Coverage:  | 50 %        |
| Intensity Coverage:   | 28 %        |
| Peak Coverage:        | 17 %        |
| Protein Localisation: | 143 ... 152 |

| a ion    |        | b <sup>2+</sup> ion |        | b ion    |        | y ion |   |          |                |
|----------|--------|---------------------|--------|----------|--------|-------|---|----------|----------------|
| Δ dalton | mass   | Δ dalton            | mass   | Δ dalton | mass   | seq   |   | Δ dalton | mass           |
|          | 72.081 |                     | 100.08 |          | 100.08 | 1     | V | 9        |                |
| -0.074   | 185.16 |                     | 213.16 | -0.068   | 213.16 | 2     | L | 8        | 959.49 -0.089  |
|          | 299.21 |                     | 327.2  |          | 327.2  | 3     | N | 7        | 846.41         |
|          | 370.24 |                     | 398.24 |          | 398.24 | 4     | A | 6        | 732.36         |
|          | 457.28 |                     | 485.27 |          | 485.27 | 5     | S | 5        | 661.33         |
|          | 528.31 |                     | 556.31 |          | 556.31 | 6     | A | 4        | 574.29         |
|          | 657.36 | -0.059              | 343.18 | +0.0337  | 685.35 | 7     | E | 3        | 503.26         |
|          | 728.39 |                     | 756.39 | -0.135   | 756.39 | 8     | A | 2        | 374.21 +0.013  |
|          | 856.45 |                     | 884.45 | +0.0282  | 884.45 | 9     | Q | 1        | 303.18 +0.0042 |
|          |        |                     |        |          |        | 10    | R | 0        | 175.12 +0.0725 |

Scan number 7153 Raw file LNCAP\_Silac\_23F10\_set2\_01  
 Method ITMS; CID Pepti... 88.43

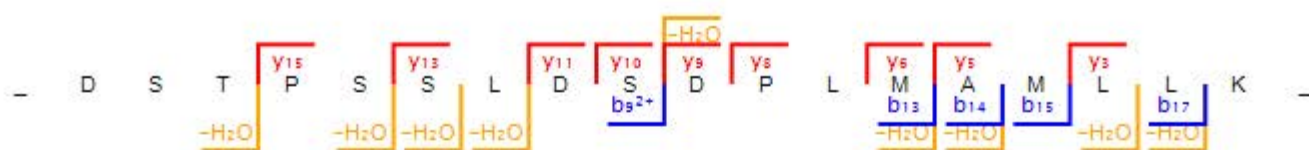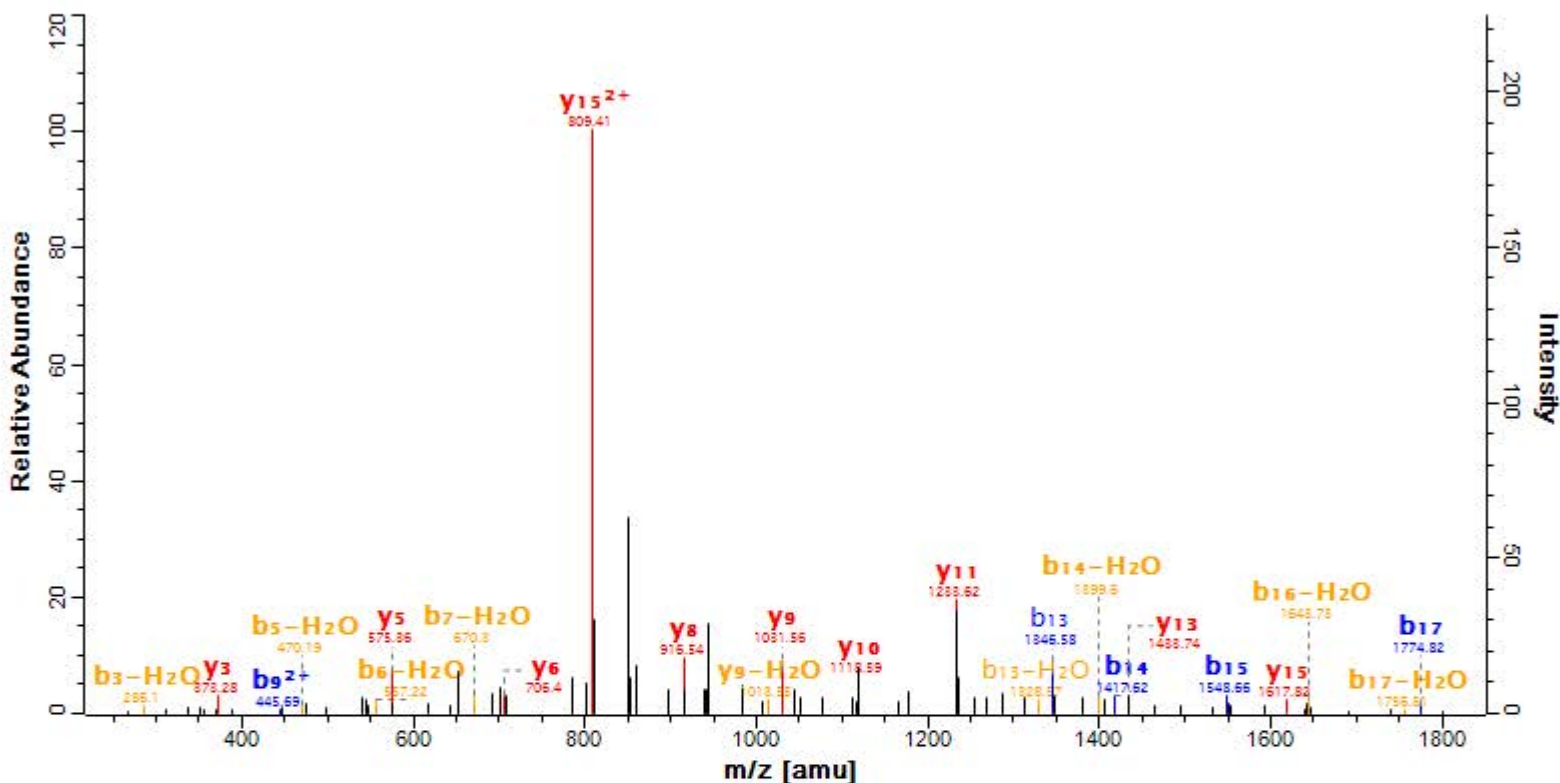

precursor information

|                   |                 |
|-------------------|-----------------|
| Mass:             | 1919.92244      |
| m/z:              | 960.9685        |
| Charge:           | 2+              |
| Retentiontime:    | 68.958259582519 |
| Score:            | 88.42699        |
| Mass Error [ppm]: | 0.22034         |
| PEP:              | 2.8848E-05      |
| Precursor Type:   | MULTI           |

general information

|                       |               |
|-----------------------|---------------|
| Annotation:           | 14 of 18      |
| AminoAcids Coverage:  | 78 %          |
| Intensity Coverage:   | 44 %          |
| Peak Coverage:        | 27 %          |
| Protein Localisation: | 1835 ... 1852 |

| b <sup>2+</sup> ion |        | b ion    |        | seq |   |    | y ion    |         | y <sup>2+</sup> ion |         |
|---------------------|--------|----------|--------|-----|---|----|----------|---------|---------------------|---------|
| Δ dalton            | mass   | Δ dalton | mass   |     |   |    | Δ dalton | mass    | Δ dalton            | mass    |
|                     | 116.03 | 116.03   |        | 1   | D | 17 |          |         |                     |         |
|                     | 203.07 | 203.07   |        | 2   | S | 16 | 1805.9   |         | 1805.9              |         |
|                     | 304.11 | 304.11   |        | 3   | T | 15 | 1718.9   |         | 1718.9              |         |
|                     | 401.17 | 401.17   |        | 4   | P | 14 | 1617.8   | +0.1097 | 809.41              | +0.2086 |
|                     | 488.2  | 488.2    |        | 5   | S | 13 | 1520.8   |         | 1520.8              |         |
|                     | 575.23 | 575.23   |        | 6   | S | 12 | 1433.7   | -0.39   | 1433.7              |         |
|                     | 688.31 | 688.31   |        | 7   | L | 11 | 1346.7   |         | 1346.7              |         |
|                     | 803.34 | 803.34   |        | 8   | D | 10 | 1233.6   | +0.1278 | 1233.6              |         |
| -0.176              | 445.69 | 890.37   |        | 9   | S | 9  | 1118.6   | +0.1764 | 1118.6              |         |
|                     | 1005.4 | 1005.4   |        | 10  | D | 8  | 1031.6   | +0.107  | 1031.6              |         |
|                     | 1102.5 | 1102.5   |        | 11  | P | 7  | 916.54   | +0.0211 | 916.54              |         |
|                     | 1215.5 | 1215.5   |        | 12  | L | 6  | 819.48   |         | 819.48              |         |
|                     | 1346.6 | +0.0142  | 1346.6 | 13  | M | 5  | 706.4    | +0.1894 | 706.4               |         |
|                     | 1417.6 | -0.001   | 1417.6 | 14  | A | 4  | 575.36   | +0.0486 | 575.36              |         |
|                     | 1548.7 | +0.0649  | 1548.7 | 15  | M | 3  | 504.32   |         | 504.32              |         |
|                     | 1661.7 |          | 1661.7 | 16  | L | 2  | 373.28   | +0.0697 | 373.28              |         |
|                     | 1774.8 | -0.123   | 1774.8 | 17  | L | 1  | 260.2    |         | 260.2               |         |
|                     |        |          |        | 18  | K | 0  | 147.11   |         | 147.11              |         |

Scan number 7337 Raw file LNCAP\_Silac\_23F10\_set2\_01  
 Method ITMS; CID Pepti... 86.62

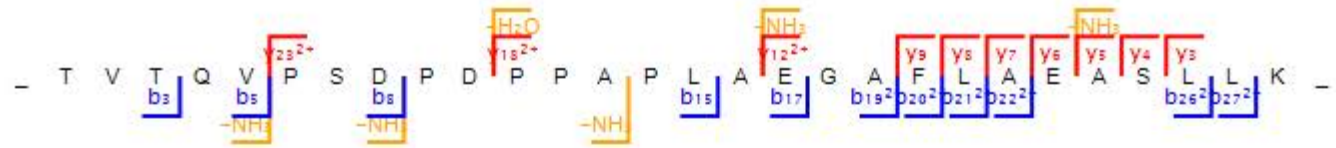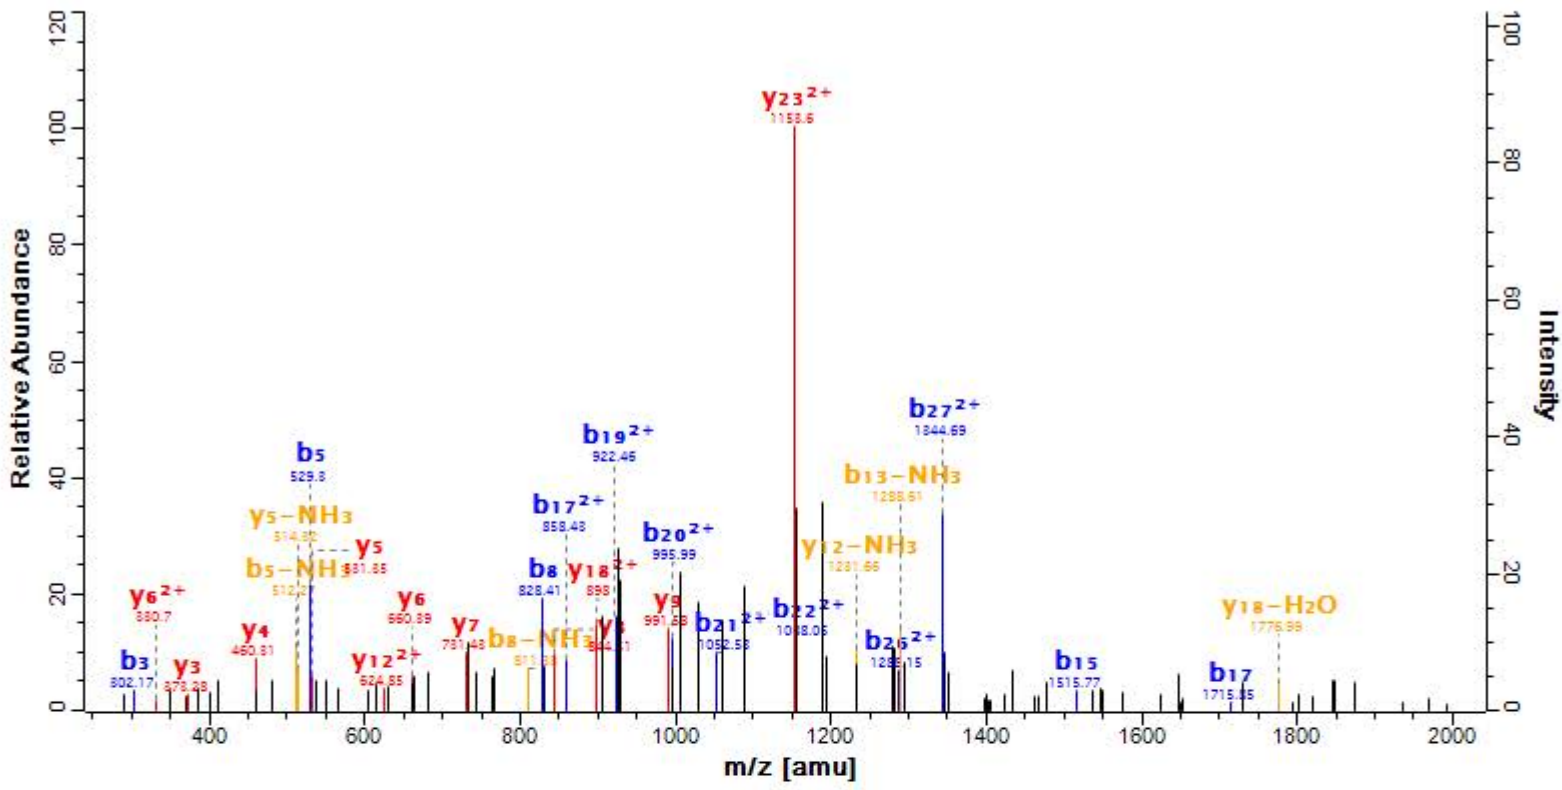

precursor information

|                   |                 |
|-------------------|-----------------|
| Mass:             | 2833.47582      |
| m/z:              | 945.49922       |
| Charge:           | 3+              |
| Retentiontime:    | 71.060409545898 |
| Score:            | 86.61732        |
| Mass Error [ppm]: | 0.30973         |
| PEP:              | 3.6757E-10      |
| Precursor Type:   | MULTI           |

general information

|                       |             |
|-----------------------|-------------|
| Annotation:           | 18 of 28    |
| AminoAcids Coverag    | 64 %        |
| Intensity Coverage:   | 41 %        |
| Peak Coverage:        | 28 %        |
| Protein Localisation: | 345 ... 372 |

| b <sup>2+</sup> ion |        | b ion    |        | seq |   |    | y ion    |         | y <sup>2+</sup> ion |         |
|---------------------|--------|----------|--------|-----|---|----|----------|---------|---------------------|---------|
| Δ dalton            | mass   | Δ dalton | mass   |     |   |    | Δ dalton | mass    | Δ dalton            | mass    |
|                     | 102.05 |          | 102.05 | 1   | T | 27 |          |         |                     |         |
|                     | 201.12 |          | 201.12 | 2   | V | 26 | 2733.4   |         | 2733.4              |         |
|                     | 302.17 | +0.2901  | 302.17 | 3   | T | 25 | 2634.4   |         | 2634.4              |         |
|                     | 430.23 |          | 430.23 | 4   | Q | 24 | 2533.3   |         | 2533.3              |         |
|                     | 529.3  | +0.0688  | 529.3  | 5   | V | 23 | 2405.3   |         | 2405.3              |         |
|                     | 626.35 |          | 626.35 | 6   | P | 22 | 2306.2   |         | 1153.6              | +0.0801 |
|                     | 713.38 |          | 713.38 | 7   | S | 21 | 2209.1   |         | 2209.1              |         |
|                     | 828.41 | +0       | 828.41 | 8   | D | 20 | 2122.1   |         | 2122.1              |         |
|                     | 925.46 |          | 925.46 | 9   | P | 19 | 2007.1   |         | 2007.1              |         |
|                     | 1040.5 |          | 1040.5 | 10  | D | 18 | 1910     |         | 1910                |         |
|                     | 1137.5 |          | 1137.5 | 11  | P | 17 | 1795     |         | 898                 | -0.146  |
|                     | 1234.6 |          | 1234.6 | 12  | P | 16 | 1697.9   |         | 1697.9              |         |
|                     | 1305.6 |          | 1305.6 | 13  | A | 15 | 1600.9   |         | 1600.9              |         |
|                     | 1402.7 |          | 1402.7 | 14  | P | 14 | 1529.9   |         | 1529.9              |         |
|                     | 1515.8 | +0.3183  | 1515.8 | 15  | L | 13 | 1432.8   |         | 1432.8              |         |
|                     | 1586.8 |          | 1586.8 | 16  | A | 12 | 1319.7   |         | 1319.7              |         |
| -0.136              | 858.43 | -0.412   | 1715.8 | 17  | E | 11 | 1248.7   |         | 624.85              | +0.3116 |
|                     | 1772.9 |          | 1772.9 | 18  | G | 10 | 1119.6   |         | 1119.6              |         |
| +0.1656             | 922.46 |          | 1843.9 | 19  | A | 9  | 1062.6   |         | 1062.6              |         |
| -0.112              | 995.99 |          | 1991   | 20  | F | 8  | 991.58   | +0.148  | 991.58              |         |
| +0.3909             | 1052.5 |          | 2104.1 | 21  | L | 7  | 844.51   | +0.0374 | 844.51              |         |
| +0.0405             | 1088.1 |          | 2175.1 | 22  | A | 6  | 731.43   | +0.0439 | 731.43              |         |
|                     | 2304.1 |          | 2304.1 | 23  | E | 5  | 660.39   | +0.1839 | 330.7               | -0.261  |
|                     | 2375.2 |          | 2375.2 | 24  | A | 4  | 531.35   | +0.0783 | 531.35              |         |
|                     | 2462.2 |          | 2462.2 | 25  | S | 3  | 460.31   | +0.0226 | 460.31              |         |
| -0.017              | 1288.1 |          | 2575.3 | 26  | L | 2  | 373.28   | -0.434  | 373.28              |         |
| -0.133              | 1344.7 |          | 2688.4 | 27  | L | 1  | 260.2    |         | 260.2               |         |
|                     |        |          |        | 28  | K | 0  | 147.11   |         | 147.11              |         |

Scan number 7475 Raw file LNCAP\_Silac\_23F10\_set2\_01  
 Method ITMS; CID Pepti... 68.29

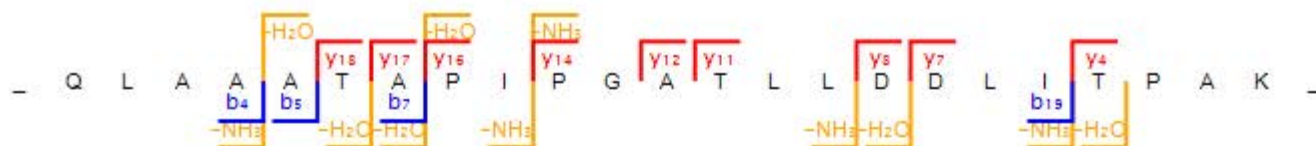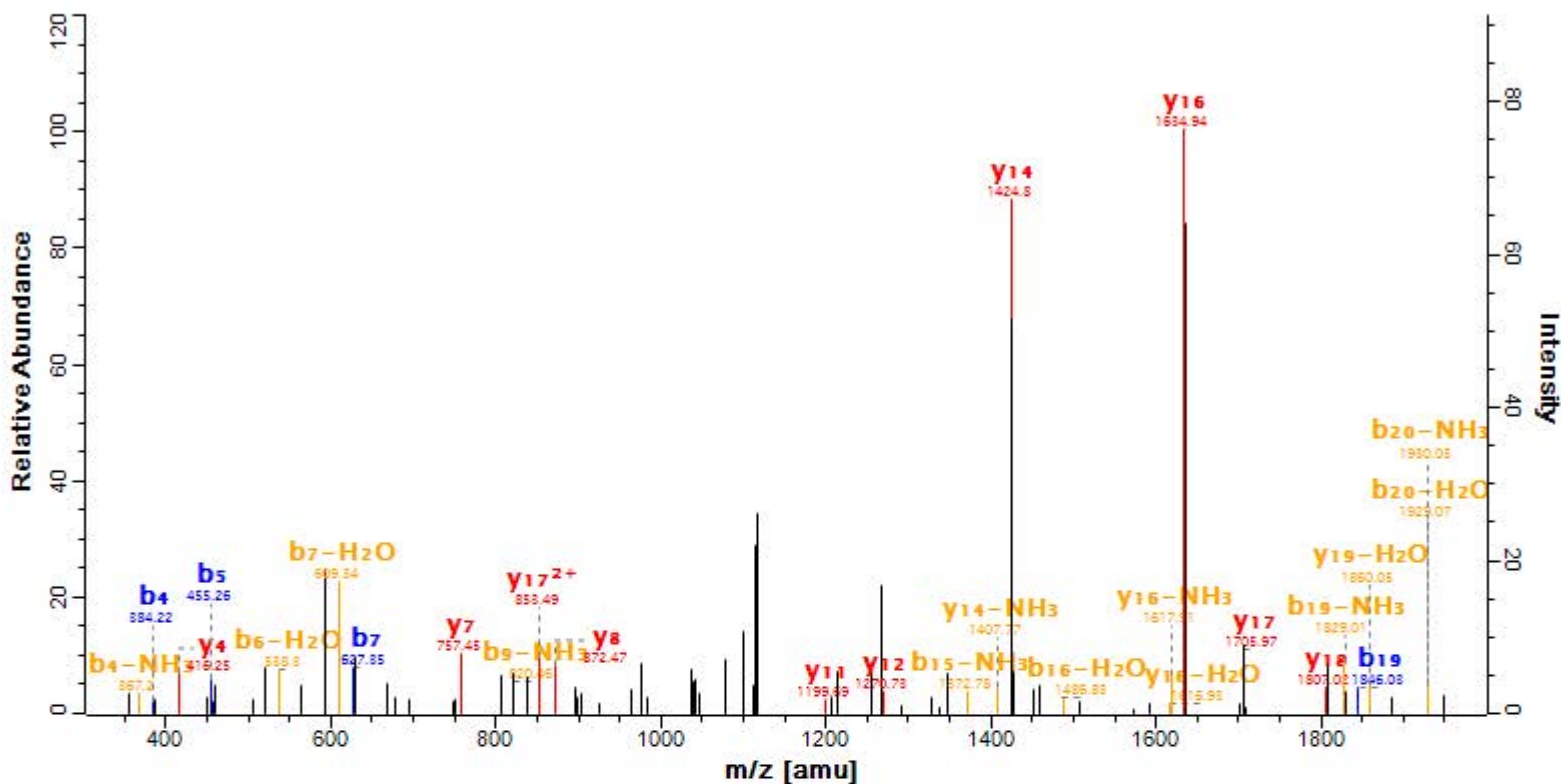

precursor information

|                   |                 |
|-------------------|-----------------|
| Mass:             | 2260.26831      |
| m/z:              | 1131.14143      |
| Charge:           | 2+              |
| Retentiontime:    | 72.691169738769 |
| Score:            | 68.29145        |
| Mass Error [ppm]: | 0.20424         |
| PEP:              | 0.00021451      |
| Precursor Type:   | MULTI           |

| b ion     |          |     |   | y ion    |          | y <sup>2+</sup> ion |          |
|-----------|----------|-----|---|----------|----------|---------------------|----------|
| Δ dalton  | mass     | seq |   | Δ dalton | mass     | Δ dalton            | mass     |
|           | 129.0659 | 1   | Q | 22       |          |                     |          |
|           | 242.1499 | 2   | L | 21       | 2133.217 |                     | 2133.217 |
|           | 313.187  | 3   | A | 20       | 2020.132 |                     | 2020.132 |
| -0.27108  | 384.2241 | 4   | A | 19       | 1949.095 |                     | 1949.095 |
| +0.026338 | 455.2613 | 5   | A | 18       | 1878.058 |                     | 1878.058 |
|           | 556.3089 | 6   | T | 17       | 1807.021 | -0.34939            | 1807.021 |
| -0.23094  | 627.3461 | 7   | A | 16       | 1705.973 | +0.024705           | 853.4904 |
|           | 724.3988 | 8   | P | 15       | 1634.936 | -0.1573             | 1634.936 |
|           | 837.4829 | 9   | I | 14       | 1537.884 |                     | 1537.884 |
|           | 934.5356 | 10  | P | 13       | 1424.8   | -0.01498            | 1424.8   |
|           | 991.5571 | 11  | G | 12       | 1327.747 |                     | 1327.747 |
|           | 1062.594 | 12  | A | 11       | 1270.725 | +0.098192           | 1270.725 |
|           | 1163.642 | 13  | T | 10       | 1199.688 | +0.354178           | 1199.688 |
|           | 1276.726 | 14  | L | 9        | 1098.641 |                     | 1098.641 |
|           | 1389.81  | 15  | L | 8        | 985.5564 |                     | 985.5564 |
|           | 1504.837 | 16  | D | 7        | 872.4724 | +0.449134           | 872.4724 |
|           | 1619.864 | 17  | D | 6        | 757.4454 | +0.03107            | 757.4454 |
|           | 1732.948 | 18  | L | 5        | 642.4185 |                     | 642.4185 |
| -0.19098  | 1846.032 | 19  | I | 4        | 529.3344 |                     | 529.3344 |
|           | 1947.08  | 20  | T | 3        | 416.2504 | +0.187994           | 416.2504 |
|           | 2044.132 | 21  | P | 2        | 315.2027 |                     | 315.2027 |
|           | 2115.17  | 22  | A | 1        | 218.1499 |                     | 218.1499 |
|           |          | 23  | K | 0        | 147.1128 |                     | 147.1128 |

general information

|                       |             |
|-----------------------|-------------|
| Annotation:           | 14 of 23    |
| AminoAcids Coverage:  | 61 %        |
| Intensity Coverage:   | 38 %        |
| Peak Coverage:        | 30 %        |
| Protein Localisation: | 130 ... 152 |

Scan number 7704 Raw file LNCAP\_Silac\_23F10\_set2\_01  
 Method ITMS; CID Pepti... 72.93

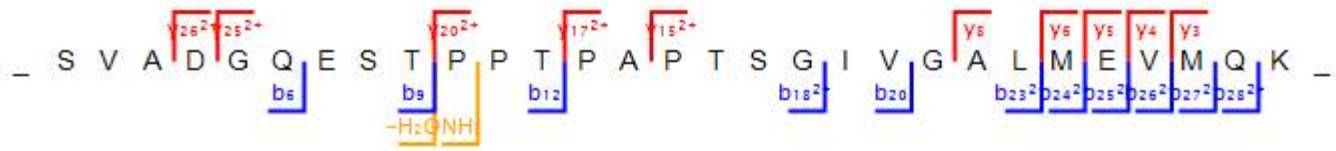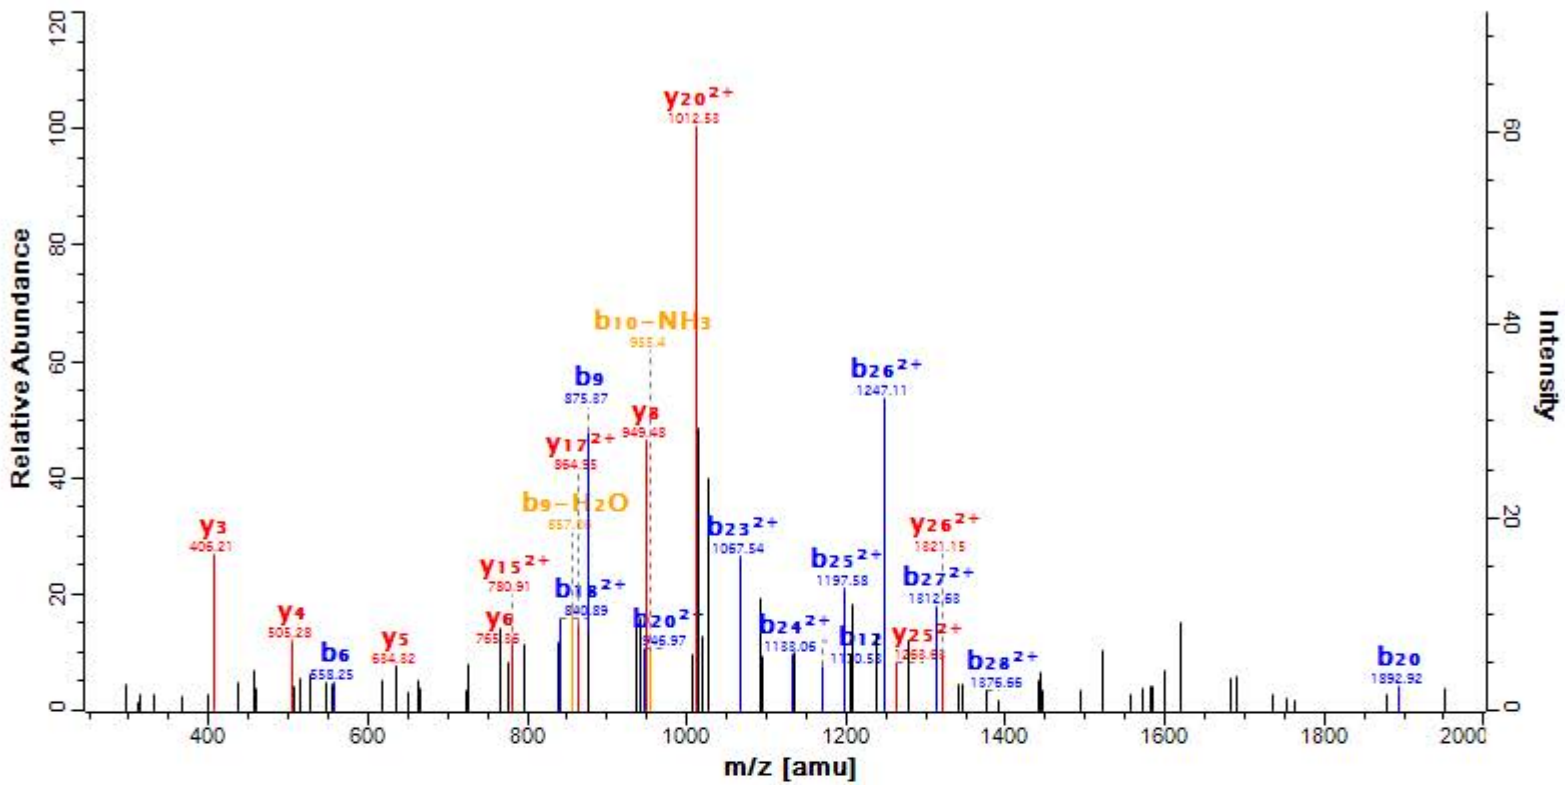

precursor information

|                   |                 |
|-------------------|-----------------|
| Mass:             | 2897.41488      |
| m/z:              | 966.81224       |
| Charge:           | 3+              |
| Retentiontime:    | 76.022361755371 |
| Score:            | 72.93469        |
| Mass Error [ppm]: | -0.063429       |
| PEP:              | 6.7434E-09      |
| Precursor Type:   | MULTI           |

general information

|                       |             |
|-----------------------|-------------|
| Annotation:           | 18 of 29    |
| AminoAcids Coverage:  | 62 %        |
| Intensity Coverage:   | 48 %        |
| Peak Coverage:        | 26 %        |
| Protein Localisation: | 449 ... 477 |

| b <sup>2+</sup> ion |        | b ion    |        | seq |   |    | y ion    |         | y <sup>2+</sup> ion |         |
|---------------------|--------|----------|--------|-----|---|----|----------|---------|---------------------|---------|
| Δ dalton            | mass   | Δ dalton | mass   |     |   |    | Δ dalton | mass    | Δ dalton            | mass    |
|                     | 88.039 |          | 88.039 | 1   | S | 28 |          |         |                     |         |
|                     | 187.11 |          | 187.11 | 2   | V | 27 | 2811.4   |         | 2811.4              |         |
|                     | 258.14 |          | 258.14 | 3   | A | 26 | 2712.3   |         | 2712.3              |         |
|                     | 373.17 |          | 373.17 | 4   | D | 25 | 2641.3   |         | 1321.1              | -0.099  |
|                     | 430.19 |          | 430.19 | 5   | G | 24 | 2526.3   |         | 1263.6              | -0.036  |
|                     | 558.25 | -0.237   | 558.25 | 6   | Q | 23 | 2469.2   |         | 2469.2              |         |
|                     | 687.29 |          | 687.29 | 7   | E | 22 | 2341.2   |         | 2341.2              |         |
|                     | 774.33 |          | 774.33 | 8   | S | 21 | 2212.1   |         | 2212.1              |         |
|                     | 875.37 | +0.0793  | 875.37 | 9   | T | 20 | 2125.1   |         | 2125.1              |         |
|                     | 972.43 |          | 972.43 | 10  | P | 19 | 2024.1   |         | 1012.5              | +0.2786 |
|                     | 1069.5 |          | 1069.5 | 11  | P | 18 | 1927     |         | 1927                |         |
|                     | 1170.5 | -0.27    | 1170.5 | 12  | T | 17 | 1829.9   |         | 1829.9              |         |
|                     | 1267.6 |          | 1267.6 | 13  | P | 16 | 1728.9   |         | 864.95              | +0.0265 |
|                     | 1338.6 |          | 1338.6 | 14  | A | 15 | 1631.8   |         | 1631.8              |         |
|                     | 1435.7 |          | 1435.7 | 15  | P | 14 | 1560.8   |         | 780.91              | +0.1317 |
|                     | 1536.7 |          | 1536.7 | 16  | T | 13 | 1463.8   |         | 1463.8              |         |
|                     | 1623.7 |          | 1623.7 | 17  | S | 12 | 1362.7   |         | 1362.7              |         |
| -0.272              | 840.89 |          | 1680.8 | 18  | G | 11 | 1275.7   |         | 1275.7              |         |
|                     | 1793.9 |          | 1793.9 | 19  | I | 10 | 1218.7   |         | 1218.7              |         |
| -0.087              | 946.97 | -0.174   | 1892.9 | 20  | V | 9  | 1105.6   |         | 1105.6              |         |
|                     | 1949.9 |          | 1949.9 | 21  | G | 8  | 1006.5   |         | 1006.5              |         |
|                     | 2021   |          | 2021   | 22  | A | 7  | 949.48   | -0.488  | 949.48              |         |
| -0.272              | 1067.5 |          | 2134.1 | 23  | L | 6  | 878.45   |         | 878.45              |         |
| -0.029              | 1133.1 |          | 2265.1 | 24  | M | 5  | 765.36   | -0.131  | 765.36              |         |
| -0.154              | 1197.6 |          | 2394.1 | 25  | E | 4  | 634.32   | +0.1384 | 634.32              |         |
| +0.2664             | 1247.1 |          | 2493.2 | 26  | V | 3  | 505.28   | +0.0368 | 505.28              |         |
| -0.148              | 1312.6 |          | 2624.3 | 27  | M | 2  | 406.21   | +0.1625 | 406.21              |         |
| -0.137              | 1376.7 |          | 2752.3 | 28  | Q | 1  | 275.17   |         | 275.17              |         |
|                     |        |          |        | 29  | K | 0  | 147.11   |         | 147.11              |         |

Scan number 10090 Raw file LNCAP\_Silac\_23F10\_set2\_02  
 Method ITMS; CID Pepti... 301.16

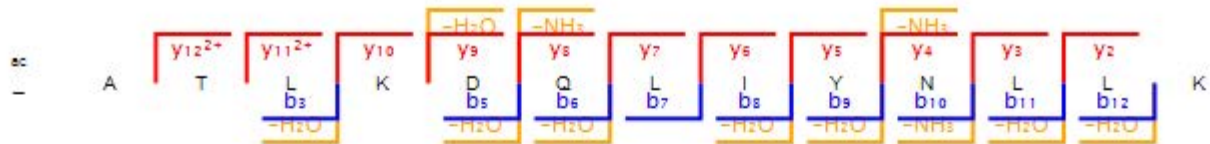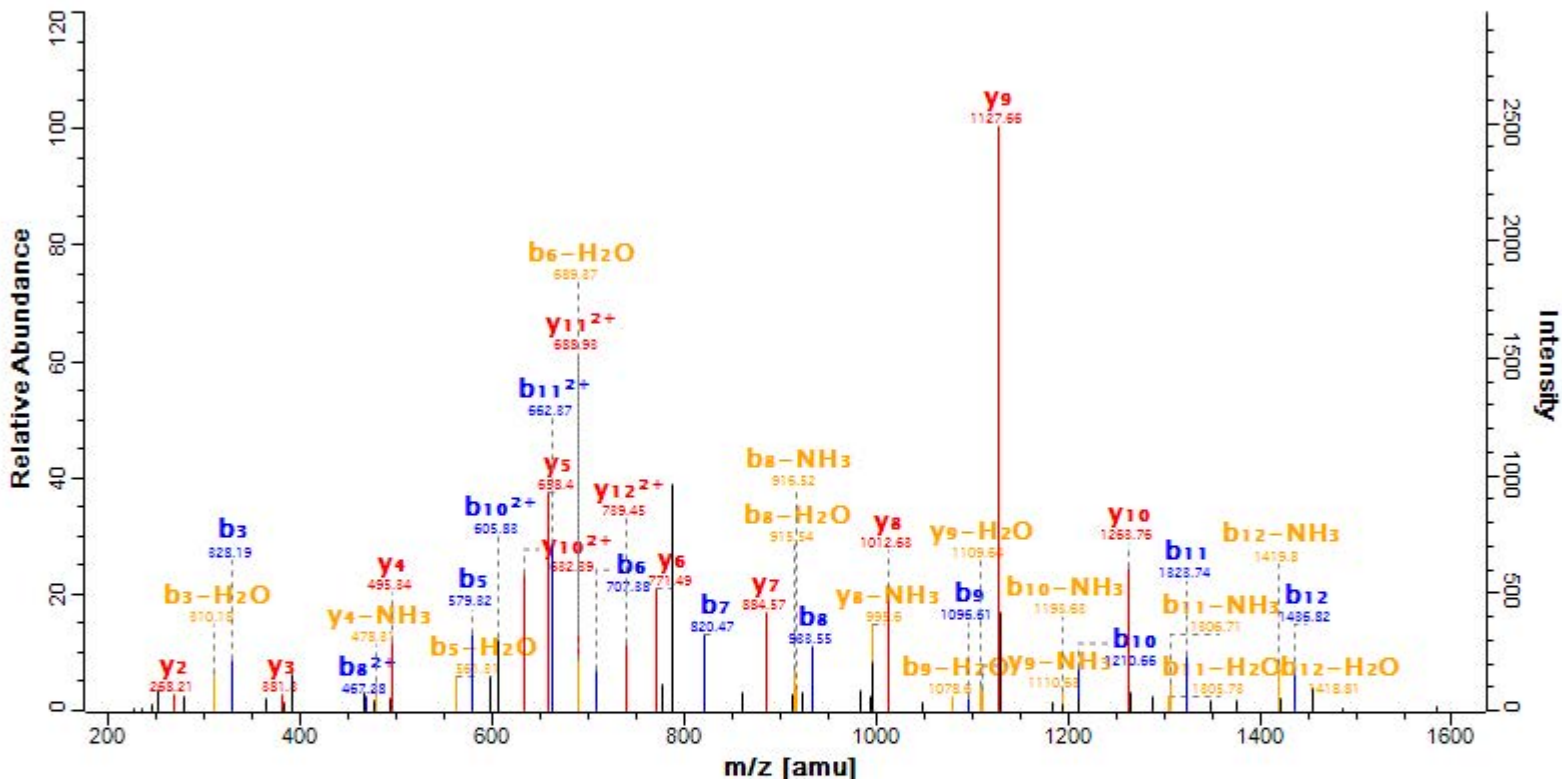

precursor information

|                   |                 |
|-------------------|-----------------|
| Mass:             | 1573.90788      |
| m/z:              | 787.96122       |
| Charge:           | 2+              |
| Retentiontime:    | 61.036674499511 |
| Score:            | 301.1577        |
| Mass Error [ppm]: | -0.041681       |
| PEP:              | 1.5322E-81      |
| Precursor Type:   | MULTI           |

general information

|                       |          |
|-----------------------|----------|
| Annotation:           | 11 of 13 |
| AminoAcids Coverage:  | 85 %     |
| Intensity Coverage:   | 75 %     |
| Peak Coverage:        | 50 %     |
| Protein Localisation: | 2 ... 14 |

| b <sup>2+</sup> ion |        | b ion    |        | seq |   |    | y ion    |         | y <sup>2+</sup> ion |         |
|---------------------|--------|----------|--------|-----|---|----|----------|---------|---------------------|---------|
| Δ dalton            | mass   | Δ dalton | mass   |     |   |    | Δ dalton | mass    | Δ dalton            | mass    |
|                     | 114.05 |          | 114.05 | 1   | A | 12 |          |         |                     |         |
|                     | 215.1  |          | 215.1  | 2   | T | 11 | 1477.9   |         | 739.45              | +0.1695 |
|                     | 328.19 | +0.082   | 328.19 | 3   | L | 10 | 1376.8   |         | 688.93              | -0.029  |
|                     | 464.3  |          | 464.3  | 4   | K | 9  | 1263.8   | +0.0147 | 632.39              | +0.133  |
|                     | 579.32 | +0.1391  | 579.32 | 5   | D | 8  | 1127.7   | -0.098  | 1127.7              |         |
|                     | 707.38 | -0.076   | 707.38 | 6   | Q | 7  | 1012.6   | -0.065  | 1012.6              |         |
|                     | 820.47 | +0.0347  | 820.47 | 7   | L | 6  | 884.57   | +0.0095 | 884.57              |         |
| +0.066              | 467.28 | -0.086   | 933.55 | 8   | I | 5  | 771.49   | +0.0118 | 771.49              |         |
|                     | 1096.6 | -0.249   | 1096.6 | 9   | Y | 4  | 658.4    | +0.1108 | 658.4               |         |
| +0.0791             | 605.83 | -0.147   | 1210.7 | 10  | N | 3  | 495.34   | +0.1074 | 495.34              |         |
| +0.0522             | 662.37 | -0.138   | 1323.7 | 11  | L | 2  | 381.3    | +0.1489 | 381.3               |         |
|                     | 1436.8 | -0.088   | 1436.8 | 12  | L | 1  | 268.21   | +0.0974 | 268.21              |         |
|                     |        |          |        | 13  | K | 0  | 155.13   |         | 155.13              |         |

Scan number 10471 Raw file LNCAP\_Silac\_23F10\_set2\_02  
 Method ITMS; CID Pepti... 101.89

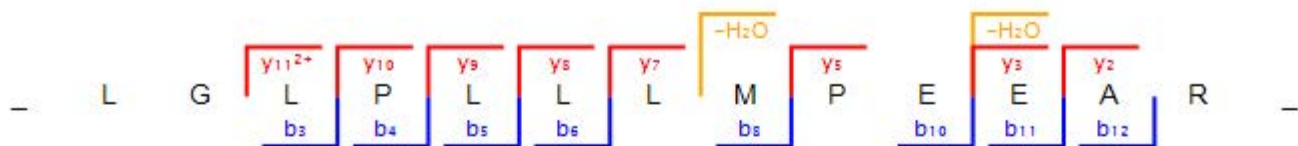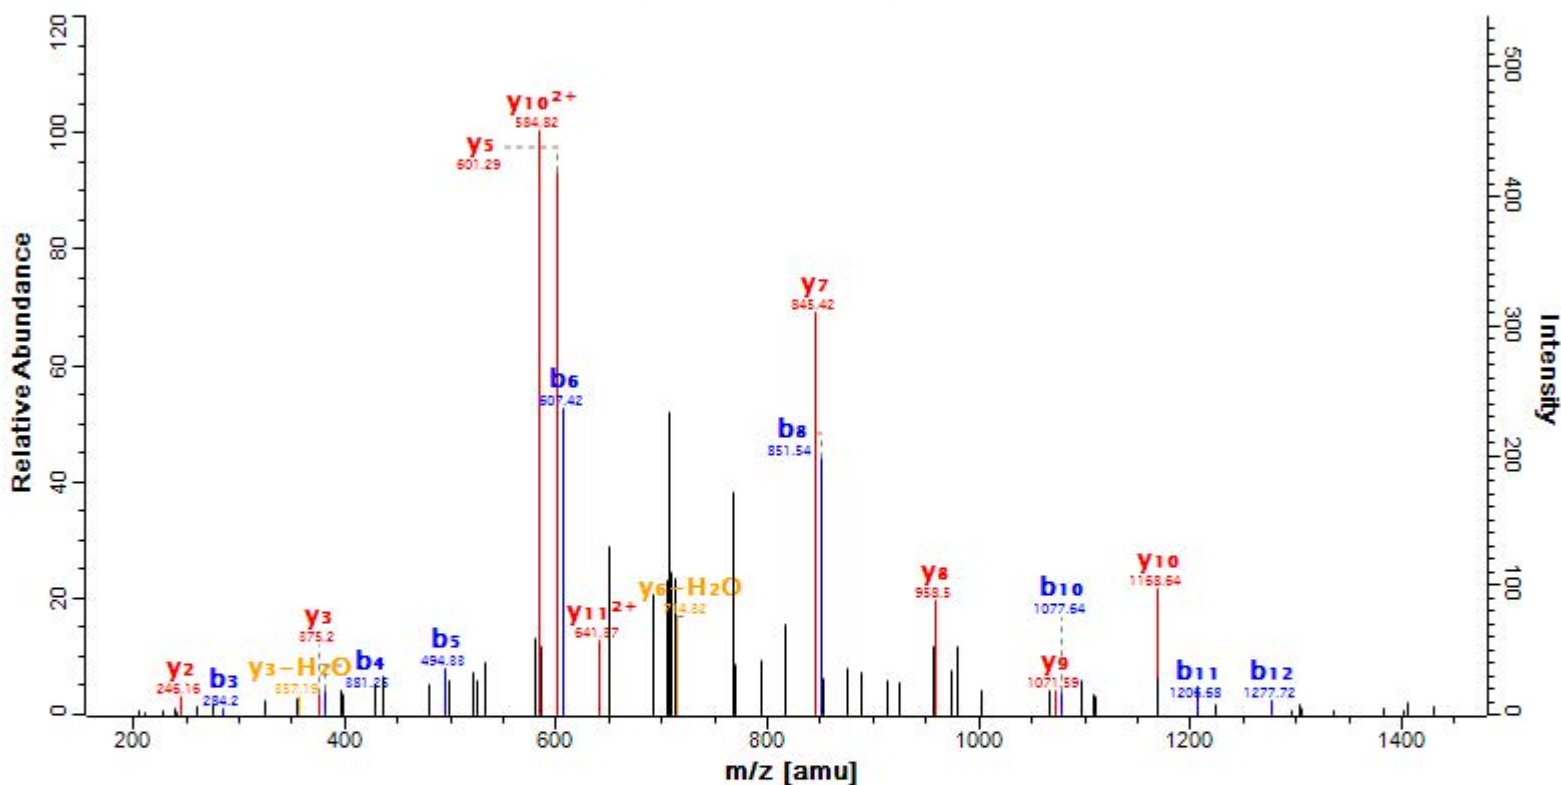

#### precursor information

|                   |                 |
|-------------------|-----------------|
| Mass:             | 1450.82207      |
| m/z:              | 726.41831       |
| Charge:           | 2+              |
| Retentiontime:    | 63.416202545166 |
| Score:            | 101.8882        |
| Mass Error [ppm]: | 0.20799         |
| PEP:              | 3.6499E-05      |
| Precursor Type:   | MULTI           |

#### general information

|                       |           |
|-----------------------|-----------|
| Annotation:           | 10 of 13  |
| AminoAcids Coverage:  | 77 %      |
| Intensity Coverage:   | 52 %      |
| Peak Coverage:        | 25 %      |
| Protein Localisation: | 46 ... 58 |

| b ion     |          |    |     |    | y ion    |           | y <sup>2+</sup> ion |           |
|-----------|----------|----|-----|----|----------|-----------|---------------------|-----------|
| Δ dalton  | mass     |    | seq |    | Δ dalton | mass      | Δ dalton            | mass      |
|           | 114.0913 | 1  | L   | 12 |          |           |                     |           |
|           | 171.1128 | 2  | G   | 11 | 1338.745 |           | 1338.745            |           |
| -0.00278  | 284.1969 | 3  | L   | 10 | 1281.724 |           | 641.3654            | +0.159382 |
| -0.09021  | 381.2496 | 4  | P   | 9  | 1168.639 | +0.043405 | 584.8234            | +0.056211 |
| +0.047896 | 494.3337 | 5  | L   | 8  | 1071.587 | +0.122048 | 1071.587            |           |
| -0.01914  | 607.4178 | 6  | L   | 7  | 958.5026 | -0.09858  | 958.5026            |           |
|           | 720.5018 | 7  | L   | 6  | 845.4186 | -0.04723  | 845.4186            |           |
| -0.04121  | 851.5423 | 8  | M   | 5  | 732.3345 |           | 732.3345            |           |
|           | 948.5951 | 9  | P   | 4  | 601.294  | +0.13323  | 601.294             |           |
| -0.06748  | 1077.638 | 10 | E   | 3  | 504.2413 |           | 504.2413            |           |
| +0.275918 | 1206.68  | 11 | E   | 2  | 375.1987 | +0.188121 | 375.1987            |           |
| -0.1036   | 1277.717 | 12 | A   | 1  | 246.1561 | -0.00857  | 246.1561            |           |
|           |          | 13 | R   | 0  | 175.119  |           | 175.119             |           |

Scan number 10896 Raw file LNCAP\_Silac\_23F10\_set2\_02  
 Method ITMS; CID Pepti... 126.09

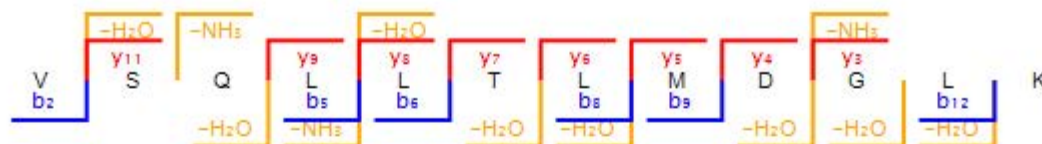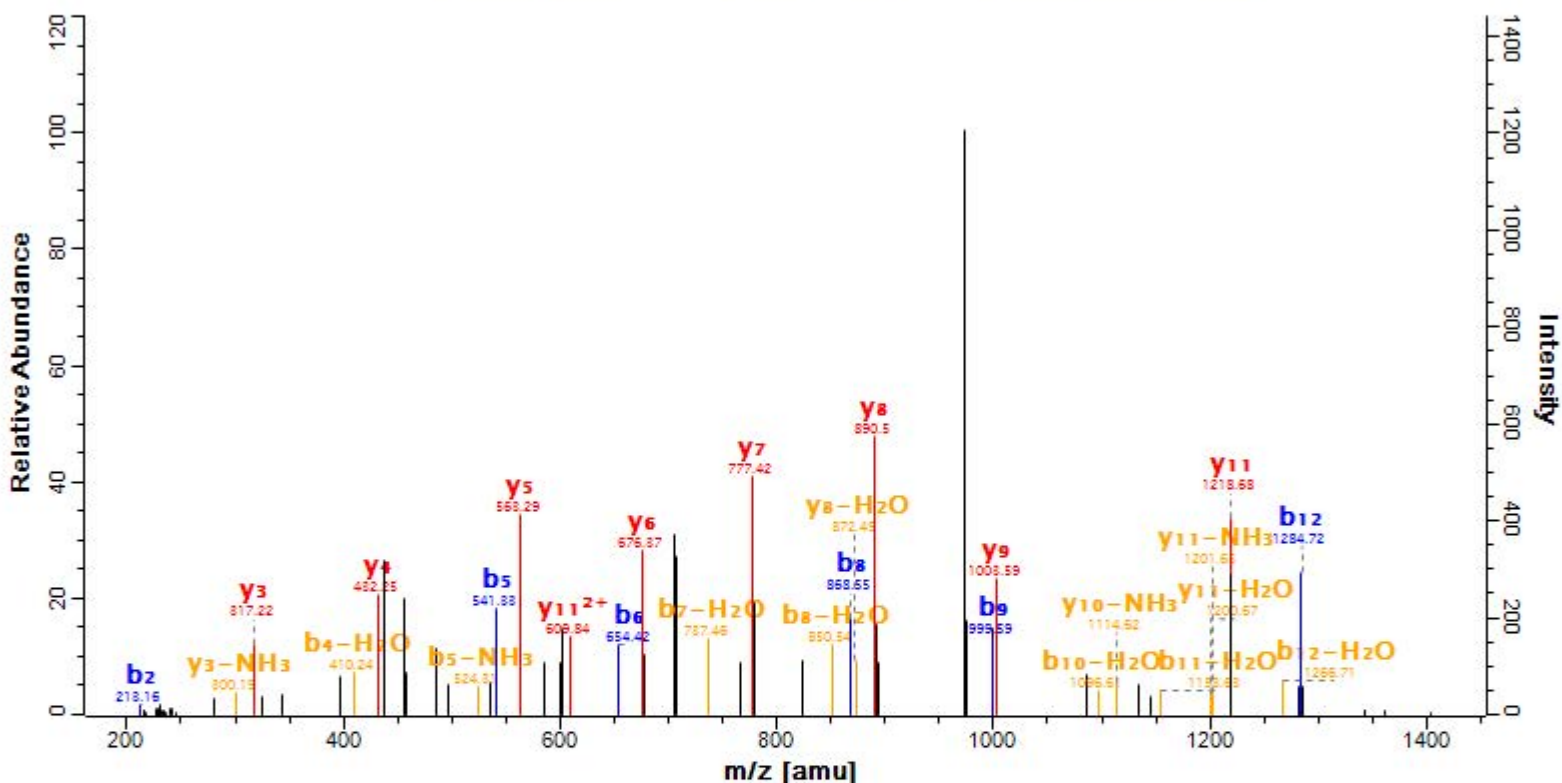

**precursor information**

|                   |                 |
|-------------------|-----------------|
| Mass:             | 1429.82148      |
| m/z:              | 715.91802       |
| Charge:           | 2+              |
| Retentiontime:    | 66.203140258789 |
| Score:            | 126.0862        |
| Mass Error [ppm]: | 0.032132        |
| PEP:              | 1.0487E-06      |
| Precursor Type:   | MULTI           |

**general information**

|                       |             |
|-----------------------|-------------|
| Annotation:           | 11 of 13    |
| AminoAcids Coverage:  | 85 %        |
| Intensity Coverage:   | 45 %        |
| Peak Coverage:        | 33 %        |
| Protein Localisation: | 324 ... 336 |

| b ion     |          |     |   | y ion    |          |           | y <sup>2+</sup> ion |  |
|-----------|----------|-----|---|----------|----------|-----------|---------------------|--|
| Δ dalton  | mass     | seq |   | Δ dalton | mass     | Δ dalton  | mass                |  |
|           | 114.0913 | 1   | I | 12       |          |           |                     |  |
| -0.11726  | 213.1598 | 2   | V | 11       | 1317.745 |           | 1317.745            |  |
|           | 300.1918 | 3   | S | 10       | 1218.676 | -0.00522  | 609.8418            |  |
|           | 428.2504 | 4   | Q | 9        | 1131.644 |           | 1131.644            |  |
| -0.09956  | 541.3344 | 5   | L | 8        | 1003.586 | +0.080203 | 1003.586            |  |
| +0.052337 | 654.4185 | 6   | L | 7        | 890.5016 | +0.008932 | 890.5016            |  |
|           | 755.4662 | 7   | T | 6        | 777.4175 | +0.067728 | 777.4175            |  |
| +0.037355 | 868.5502 | 8   | L | 5        | 676.3698 | +0.079273 | 676.3698            |  |
| +0.051802 | 999.5907 | 9   | M | 4        | 563.2858 | +0.140937 | 563.2858            |  |
|           | 1114.618 | 10  | D | 3        | 432.2453 | +0.076747 | 432.2453            |  |
|           | 1171.639 | 11  | G | 2        | 317.2183 | +0.066885 | 317.2183            |  |
| -0.23454  | 1284.723 | 12  | L | 1        | 260.1969 |           | 260.1969            |  |
|           |          | 13  | K | 0        | 147.1128 |           | 147.1128            |  |



Scan number 1092 Raw file LNCAP\_Silac\_23F10\_set2\_02  
 Method ITMS; CID Pepti... 169.93

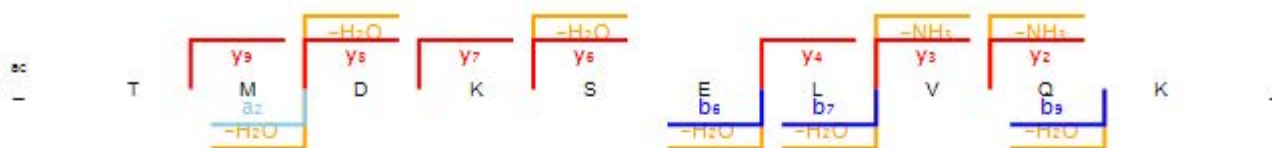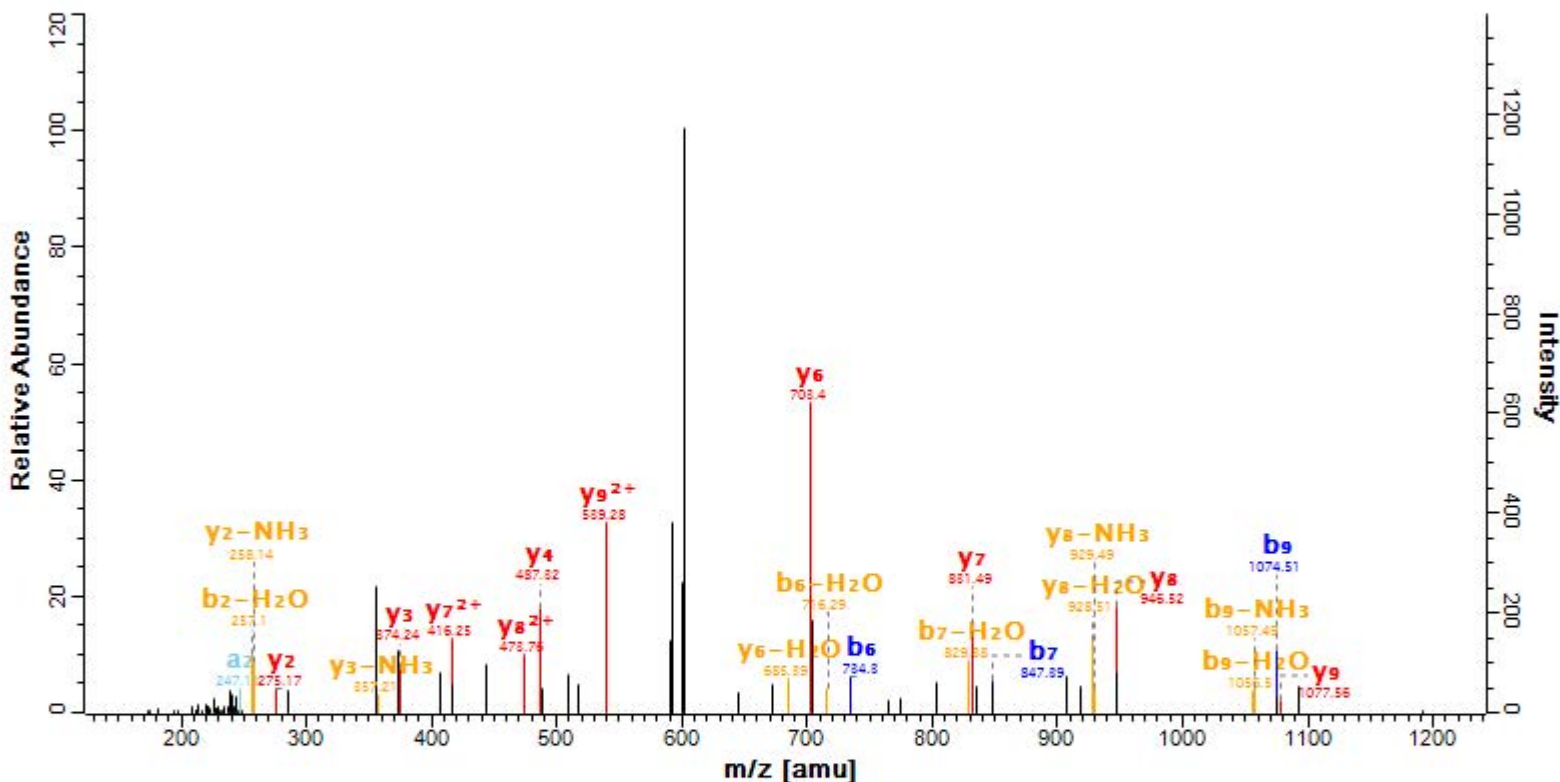

### precursor information

|                   |                 |
|-------------------|-----------------|
| Mass:             | 1219.61227      |
| m/z:              | 610.81341       |
| Charge:           | 2+              |
| Retentiontime:    | 12.752985000610 |
| Score:            | 169.9348        |
| Mass Error [ppm]: | 0.35356         |
| PEP:              | 2.4315E-05      |
| Precursor Type:   | MULTI           |

|                       |          |
|-----------------------|----------|
| Annotation:           | 8 of 10  |
| AminoAcids Coverage:  | 80 %     |
| Intensity Coverage:   | 43 %     |
| Peak Coverage:        | 27 %     |
| Protein Localisation: | 2 ... 11 |

| a ion    |        | b ion    |        |    |     |          | y ion  |          | y <sup>2+</sup> ion |         |
|----------|--------|----------|--------|----|-----|----------|--------|----------|---------------------|---------|
| Δ dalton | mass   | Δ dalton | mass   |    | seq | Δ dalton | mass   | Δ dalton | mass                |         |
|          | 116.07 |          | 144.07 | 1  | T   | 9        |        |          |                     |         |
| +0.0284  | 247.11 |          | 275.11 | 2  | M   | 8        | 1077.6 | +0.143   | 539.28              | +0.1022 |
|          | 362.14 |          | 390.13 | 3  | D   | 7        | 946.52 | -0.03    | 473.76              | +0.1191 |
|          | 490.23 |          | 518.23 | 4  | K   | 6        | 831.49 | -0.013   | 416.25              | +0.0503 |
|          | 577.27 |          | 605.26 | 5  | S   | 5        | 703.4  | -0.042   | 703.4               |         |
|          | 706.31 | +0.0827  | 734.3  | 6  | E   | 4        | 616.37 |          | 616.37              |         |
|          | 819.39 | +0.1313  | 847.39 | 7  | L   | 3        | 487.32 | +0.0121  | 487.32              |         |
|          | 918.46 |          | 946.46 | 8  | V   | 2        | 374.24 | +0.0363  | 374.24              |         |
|          | 1046.5 | +0.0748  | 1074.5 | 9  | Q   | 1        | 275.17 | +0.01    | 275.17              |         |
|          |        |          |        | 10 | K   | 0        | 147.11 |          | 147.11              |         |

Scan number 11116 Raw file LNCAP\_Silac\_23F10\_set2\_02  
 Method ITMS; CID Pepti... 87.55

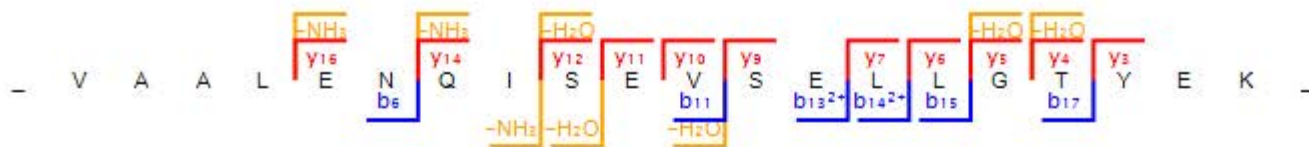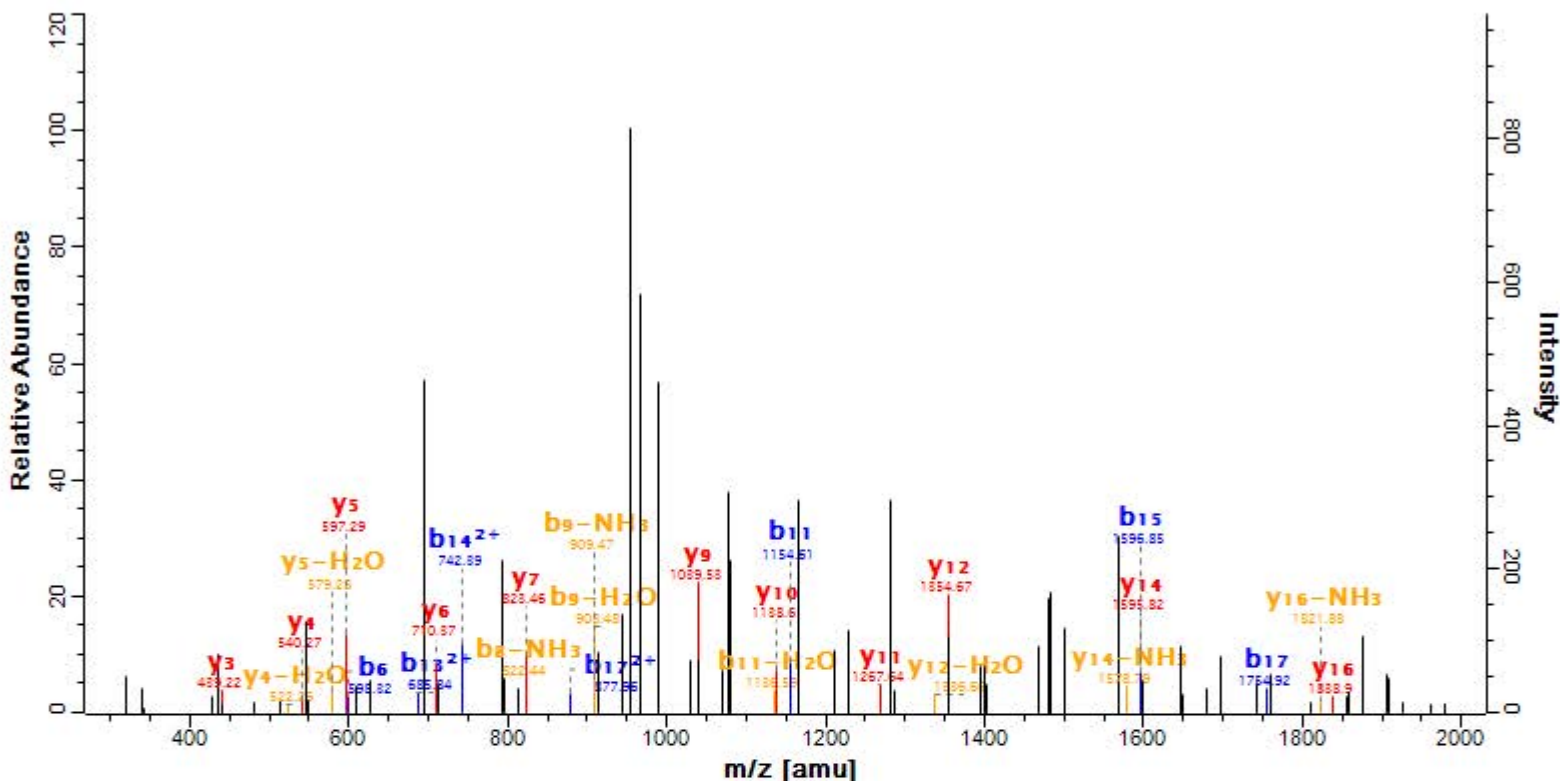

#### precursor information

|                   |                 |
|-------------------|-----------------|
| Mass:             | 2192.06158      |
| m/z:              | 1097.03807      |
| Charge:           | 2+              |
| Retentiontime:    | 67.691619873046 |
| Score:            | 87.5537         |
| Mass Error [ppm]: | -0.51705        |
| PEP:              | 0.00029903      |
| Precursor Type:   | MULTI           |

| b <sup>2+</sup> ion |          | b ion    |          |     | y ion    |      |          |           |
|---------------------|----------|----------|----------|-----|----------|------|----------|-----------|
| Δ dalton            | mass     | Δ dalton | mass     | seq | Δ dalton | mass |          |           |
|                     | 100.0757 |          | 100.0757 | 1   | V        | 19   |          |           |
|                     | 171.1128 |          | 171.1128 | 2   | A        | 18   | 2094.06  |           |
|                     | 242.1499 |          | 242.1499 | 3   | A        | 17   | 2023.023 |           |
|                     | 355.234  |          | 355.234  | 4   | L        | 16   | 1951.986 |           |
|                     | 484.2766 |          | 484.2766 | 5   | E        | 15   | 1838.902 | -0.12728  |
|                     | 598.3195 | -0.04814 | 598.3195 | 6   | N        | 14   | 1709.859 |           |
|                     | 726.3781 |          | 726.3781 | 7   | Q        | 13   | 1595.816 | +0.209829 |
|                     | 839.4621 |          | 839.4621 | 8   | I        | 12   | 1467.758 |           |
|                     | 926.4942 |          | 926.4942 | 9   | S        | 11   | 1354.674 | -0.04792  |
|                     | 1055.537 |          | 1055.537 | 10  | E        | 10   | 1267.642 | +0.056618 |
|                     | 1154.605 | -0.09419 | 1154.605 | 11  | V        | 9    | 1138.599 | -0.05875  |
|                     | 1241.637 |          | 1241.637 | 12  | S        | 8    | 1039.531 | +0.001609 |
| +0.450712           | 685.8435 |          | 1370.68  | 13  | E        | 7    | 952.4986 |           |
| -0.00947            | 742.3856 |          | 1483.764 | 14  | L        | 6    | 823.456  | +0.000303 |
|                     | 1596.848 | -0.08682 | 1596.848 | 15  | L        | 5    | 710.3719 | +0.146501 |
|                     | 1653.869 |          | 1653.869 | 16  | G        | 4    | 597.2879 | -0.0043   |
| +0.498031           | 877.9622 | -0.26778 | 1754.917 | 17  | T        | 3    | 540.2664 | +0.079848 |
|                     | 1917.98  |          | 1917.98  | 18  | Y        | 2    | 439.2187 | +0.077966 |
|                     | 2047.023 |          | 2047.023 | 19  | E        | 1    | 276.1554 |           |
|                     |          |          |          | 20  | K        | 0    | 147.1128 |           |

#### general information

|                       |             |
|-----------------------|-------------|
| Annotation:           | 14 of 20    |
| AminoAcids Coverage:  | 70 %        |
| Intensity Coverage:   | 16 %        |
| Peak Coverage:        | 26 %        |
| Protein Localisation: | 363 ... 382 |

Scan number 11251 Raw file LNCAP\_Silac\_23F10\_set2\_02  
 Method ITMS: CID Pepti... 77.78

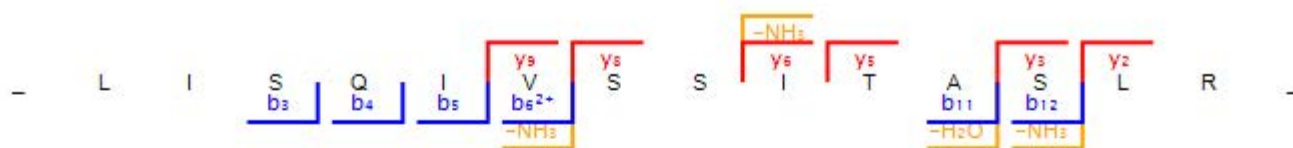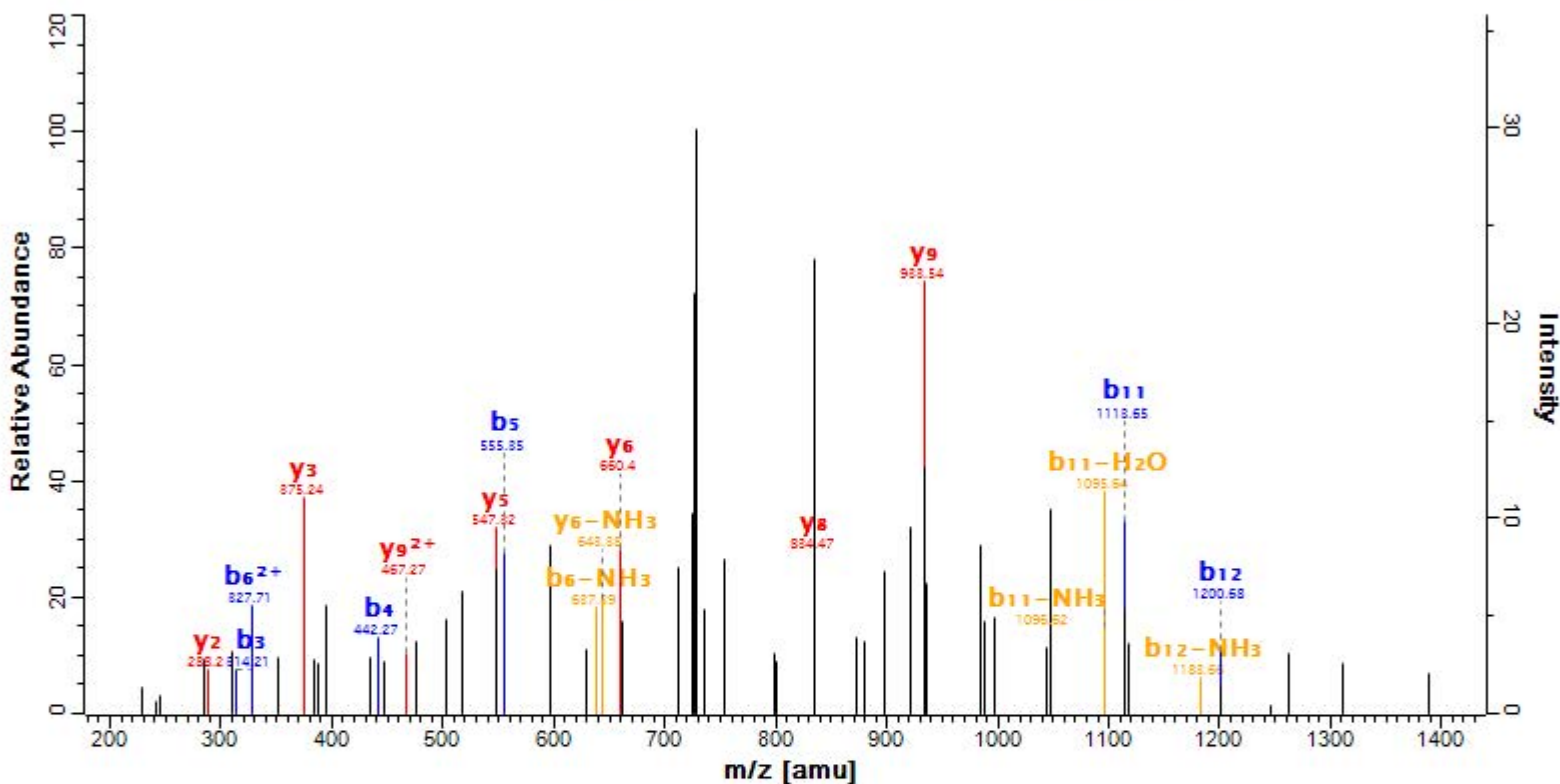

**precursor information**

|                   |                 |
|-------------------|-----------------|
| Mass:             | 1486.87178      |
| m/z:              | 744.44317       |
| Charge:           | 2+              |
| Retentiontime:    | 68.683578491210 |
| Score:            | 77.77563        |
| Mass Error [ppm]: | -0.076075       |
| PEP:              | 0.0012056       |
| Precursor Type:   | MULTI           |

| b <sup>2+</sup> ion |        | b ion    |        |    |     |          | y ion  |          | y <sup>2+</sup> ion |  |
|---------------------|--------|----------|--------|----|-----|----------|--------|----------|---------------------|--|
| Δ dalton            | mass   | Δ dalton | mass   |    | seq | Δ dalton | mass   | Δ dalton | mass                |  |
|                     | 114.09 |          | 114.09 | 1  | L   | 13       |        |          |                     |  |
|                     | 227.18 |          | 227.18 | 2  | I   | 12       | 1374.8 |          | 1374.8              |  |
|                     | 314.21 | +0.1748  | 314.21 | 3  | S   | 11       | 1261.7 |          | 1261.7              |  |
|                     | 442.27 | +0.2289  | 442.27 | 4  | Q   | 10       | 1174.7 |          | 1174.7              |  |
|                     | 555.35 | -0.083   | 555.35 | 5  | I   | 9        | 1046.6 |          | 1046.6              |  |
| +0.0801             | 327.71 |          | 654.42 | 6  | V   | 8        | 933.54 | +0.1838  | 467.27              |  |
|                     | 741.45 |          | 741.45 | 7  | S   | 7        | 834.47 | -0.003   | 834.47              |  |
|                     | 828.48 |          | 828.48 | 8  | S   | 6        | 747.44 |          | 747.44              |  |
|                     | 941.57 |          | 941.57 | 9  | I   | 5        | 660.4  | -0.135   | 660.4               |  |
|                     | 1042.6 |          | 1042.6 | 10 | T   | 4        | 547.32 | +0.0995  | 547.32              |  |
|                     | 1113.7 | -0.04    | 1113.7 | 11 | A   | 3        | 446.27 |          | 446.27              |  |
|                     | 1200.7 | +0.0971  | 1200.7 | 12 | S   | 2        | 375.24 | +0.1456  | 375.24              |  |
|                     | 1313.8 |          | 1313.8 | 13 | L   | 1        | 288.2  | -0.111   | 288.2               |  |
|                     |        |          |        | 14 | R   | 0        | 175.12 |          | 175.12              |  |

**general information**

|                       |             |
|-----------------------|-------------|
| Annotation:           | 10 of 14    |
| AminoAcids Coverage:  | 71 %        |
| Intensity Coverage:   | 31 %        |
| Peak Coverage:        | 28 %        |
| Protein Localisation: | 230 ... 243 |

Scan number 11698 Raw file LNCAP\_Silac\_23F10\_set2\_02  
 Method ITMS; CID Pepti... 158.45

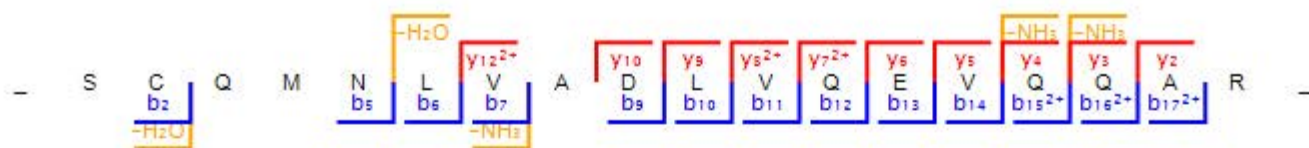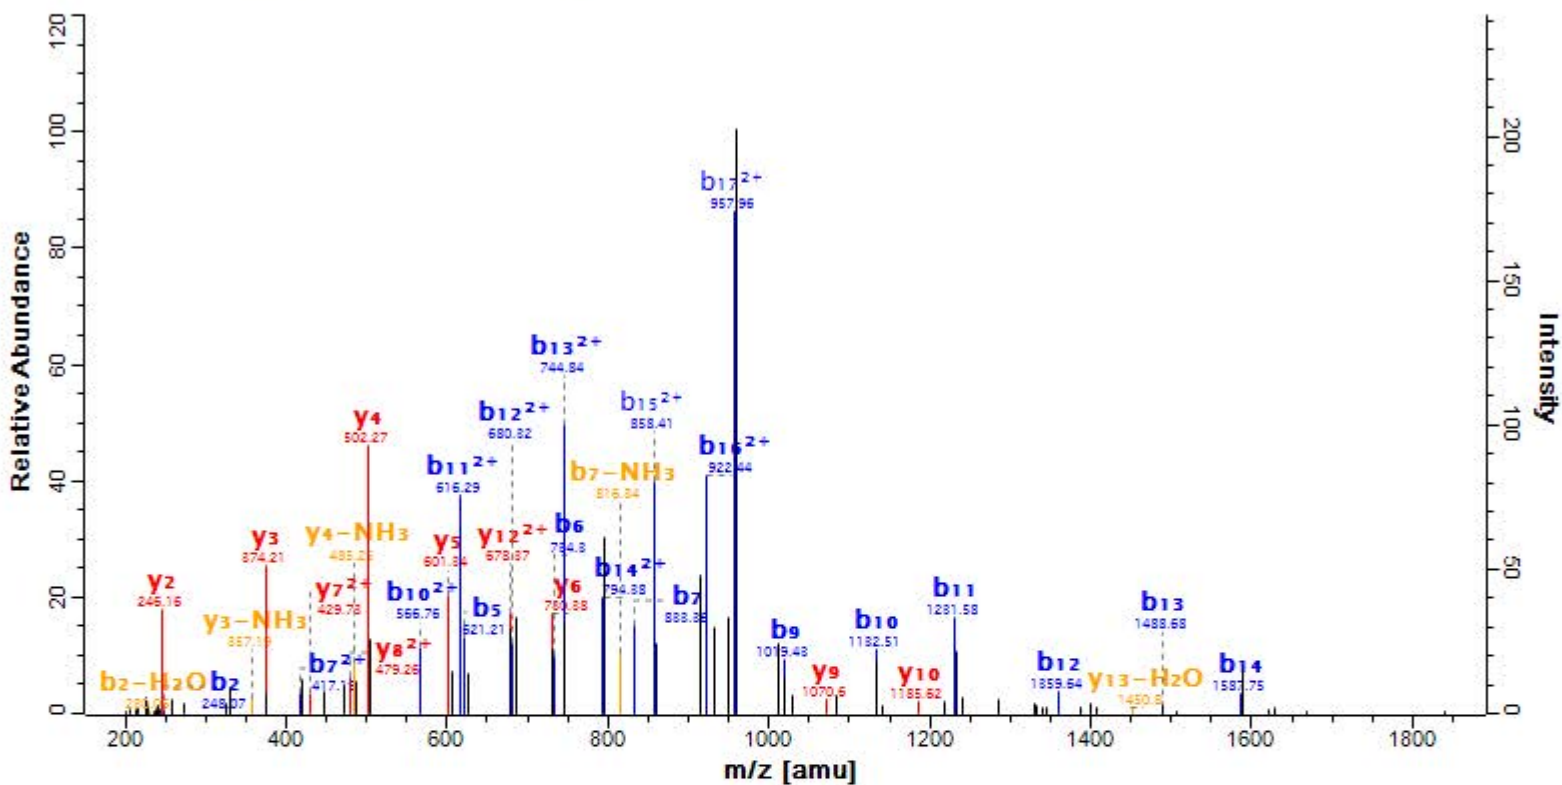

precursor information

|                   |                 |
|-------------------|-----------------|
| Mass:             | 2088.00822      |
| m/z:              | 697.01002       |
| Charge:           | 3+              |
| Retentiontime:    | 72.248626708984 |
| Score:            | 158.4521        |
| Mass Error [ppm]: | -0.47204        |
| PEP:              | 1.5002E-23      |
| Precursor Type:   | MULTI           |

general information

|                       |             |
|-----------------------|-------------|
| Annotation:           | 13 of 18    |
| AminoAcids Coverage:  | 72 %        |
| Intensity Coverage:   | 57 %        |
| Peak Coverage:        | 35 %        |
| Protein Localisation: | 167 ... 184 |

| b <sup>2+</sup> ion |        | b ion    |        | seq |   |    | y ion    |         | y <sup>2+</sup> ion |         |
|---------------------|--------|----------|--------|-----|---|----|----------|---------|---------------------|---------|
| Δ dalton            | mass   | Δ dalton | mass   |     |   |    | Δ dalton | mass    | Δ dalton            | mass    |
|                     | 88.039 |          | 88.039 | 1   | S | 17 |          |         |                     |         |
|                     | 248.07 | +0.2115  | 248.07 | 2   | C | 16 | 2002     |         | 2002                |         |
|                     | 376.13 |          | 376.13 | 3   | Q | 15 | 1842     |         | 1842                |         |
|                     | 507.17 |          | 507.17 | 4   | M | 14 | 1713.9   |         | 1713.9              |         |
|                     | 621.21 | -0.094   | 621.21 | 5   | N | 13 | 1582.9   |         | 1582.9              |         |
|                     | 734.3  | -0.102   | 734.3  | 6   | L | 12 | 1468.8   |         | 1468.8              |         |
| +0.4396             | 417.19 | -0.043   | 833.36 | 7   | V | 11 | 1355.7   |         | 678.37              | -0.295  |
|                     | 904.4  |          | 904.4  | 8   | A | 10 | 1256.7   |         | 1256.7              |         |
|                     | 1019.4 | -0.192   | 1019.4 | 9   | D | 9  | 1185.6   | +0.2649 | 1185.6              |         |
| +0.1083             | 566.76 | +0.0581  | 1132.5 | 10  | L | 8  | 1070.6   | -0.008  | 1070.6              |         |
| +0.2665             | 616.29 | -0.203   | 1231.6 | 11  | V | 7  | 957.51   |         | 479.26              | +0.2351 |
| +0.0772             | 680.32 | -0.054   | 1359.6 | 12  | Q | 6  | 858.44   |         | 429.73              | +0.3325 |
| +0.2083             | 744.84 | -0.474   | 1488.7 | 13  | E | 5  | 730.38   | +0.0633 | 730.38              |         |
| -0.121              | 794.38 | -0.165   | 1587.8 | 14  | V | 4  | 601.34   | +0.0887 | 601.34              |         |
| +0.0068             | 858.41 |          | 1715.8 | 15  | Q | 3  | 502.27   | +0.0555 | 502.27              |         |
| +0.353              | 922.44 |          | 1843.9 | 16  | Q | 2  | 374.21   | +0.0707 | 374.21              |         |
| -0.066              | 957.96 |          | 1914.9 | 17  | A | 1  | 246.16   | +0.0441 | 246.16              |         |
|                     |        |          |        | 18  | R | 0  | 175.12   |         | 175.12              |         |

Scan number 11745 Raw file LNCAP\_Silac\_23F10\_set2\_02  
 Method ITMS; CID Pepti... 188.41

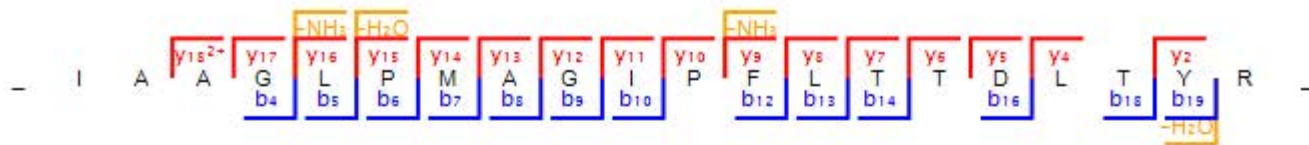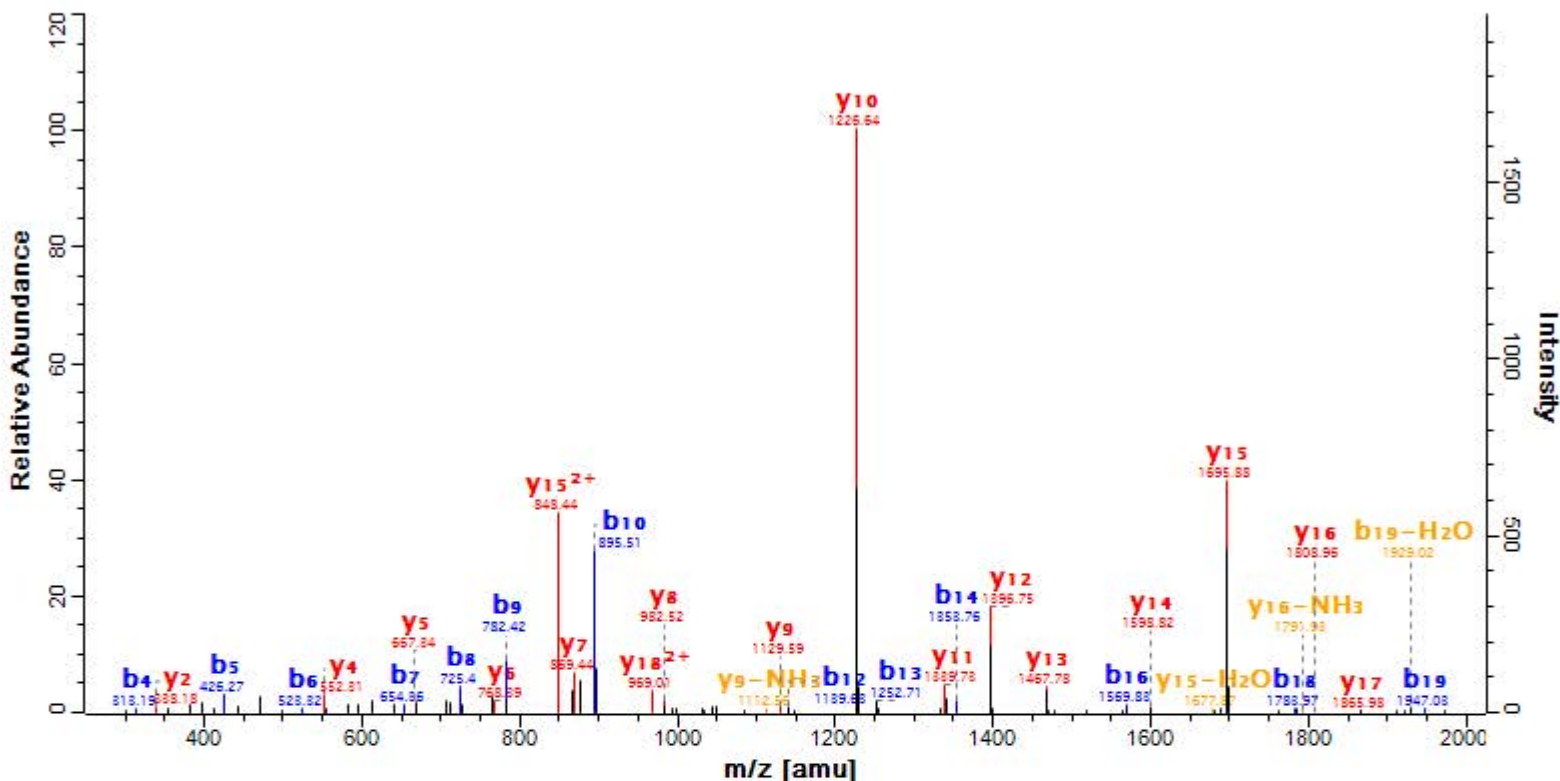

**precursor information**

|                   |                 |
|-------------------|-----------------|
| Mass:             | 2120.13302      |
| m/z:              | 1061.07379      |
| Charge:           | 2+              |
| Retentiontime:    | 72.686325073242 |
| Score:            | 188.4109        |
| Mass Error [ppm]: | -0.45932        |
| PEP:              | 2.2932E-47      |
| Precursor Type:   | MULTI           |

| b ion     |          |    |     |    | y ion    |           | y <sup>2+</sup> ion |           |
|-----------|----------|----|-----|----|----------|-----------|---------------------|-----------|
| Δ dalton  | mass     |    | seq |    | Δ dalton | mass      | Δ dalton            | mass      |
|           | 114.0913 | 1  | I   | 19 |          |           |                     |           |
|           | 185.1285 | 2  | A   | 18 | 2008.057 |           | 2008.057            |           |
|           | 256.1656 | 3  | A   | 17 | 1937.02  |           | 969.0137            | +0.365952 |
| +0.109324 | 313.187  | 4  | G   | 16 | 1865.983 | -0.10481  | 1865.983            |           |
| -0.04466  | 426.2711 | 5  | L   | 15 | 1808.962 | +0.155913 | 1808.962            |           |
| +0.142815 | 523.3239 | 6  | P   | 14 | 1695.877 | -0.06166  | 848.4424            | +0.302019 |
| +0.077611 | 654.3643 | 7  | M   | 13 | 1598.825 | +0.298234 | 1598.825            |           |
| +0.000397 | 725.4015 | 8  | A   | 12 | 1467.784 | -0.11392  | 1467.784            |           |
| -0.00215  | 782.4229 | 9  | G   | 11 | 1396.747 | -0.00478  | 1396.747            |           |
| -0.05716  | 895.507  | 10 | I   | 10 | 1339.726 | +0.041339 | 1339.726            |           |
|           | 992.5597 | 11 | P   | 9  | 1226.642 | -0.02413  | 1226.642            |           |
| -0.11278  | 1139.628 | 12 | F   | 8  | 1129.589 | -0.12774  | 1129.589            |           |
| -0.21882  | 1252.712 | 13 | L   | 7  | 982.5204 | -0.00183  | 982.5204            |           |
| -0.02736  | 1353.76  | 14 | T   | 6  | 869.4363 | +0.107256 | 869.4363            |           |
|           | 1454.808 | 15 | T   | 5  | 768.3886 | -0.00058  | 768.3886            |           |
| +0.016913 | 1569.835 | 16 | D   | 4  | 667.341  | +0.178565 | 667.341             |           |
|           | 1682.919 | 17 | L   | 3  | 552.314  | +0.012881 | 552.314             |           |
| -0.25765  | 1783.966 | 18 | T   | 2  | 439.23   |           | 439.23              |           |
| +0.044254 | 1947.03  | 19 | Y   | 1  | 338.1823 | +0.104249 | 338.1823            |           |
|           |          | 20 | R   | 0  | 175.119  |           | 175.119             |           |

**general information**

|                       |           |
|-----------------------|-----------|
| Annotation:           | 17 of 20  |
| AminoAcids Coverage:  | 85 %      |
| Intensity Coverage:   | 64 %      |
| Peak Coverage:        | 34 %      |
| Protein Localisation: | 65 ... 84 |

Scan number 11809 Raw file LNCAP\_Silac\_23F10\_set2\_02  
 Method ITMS; CID Pepti... 132.83

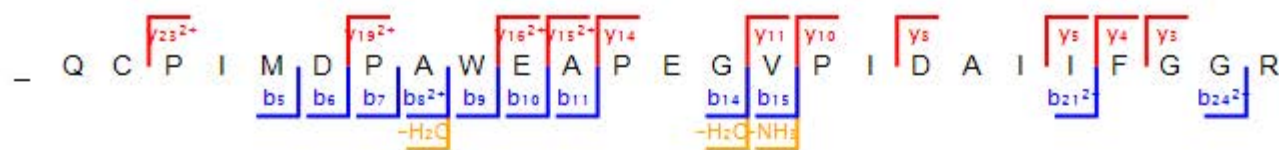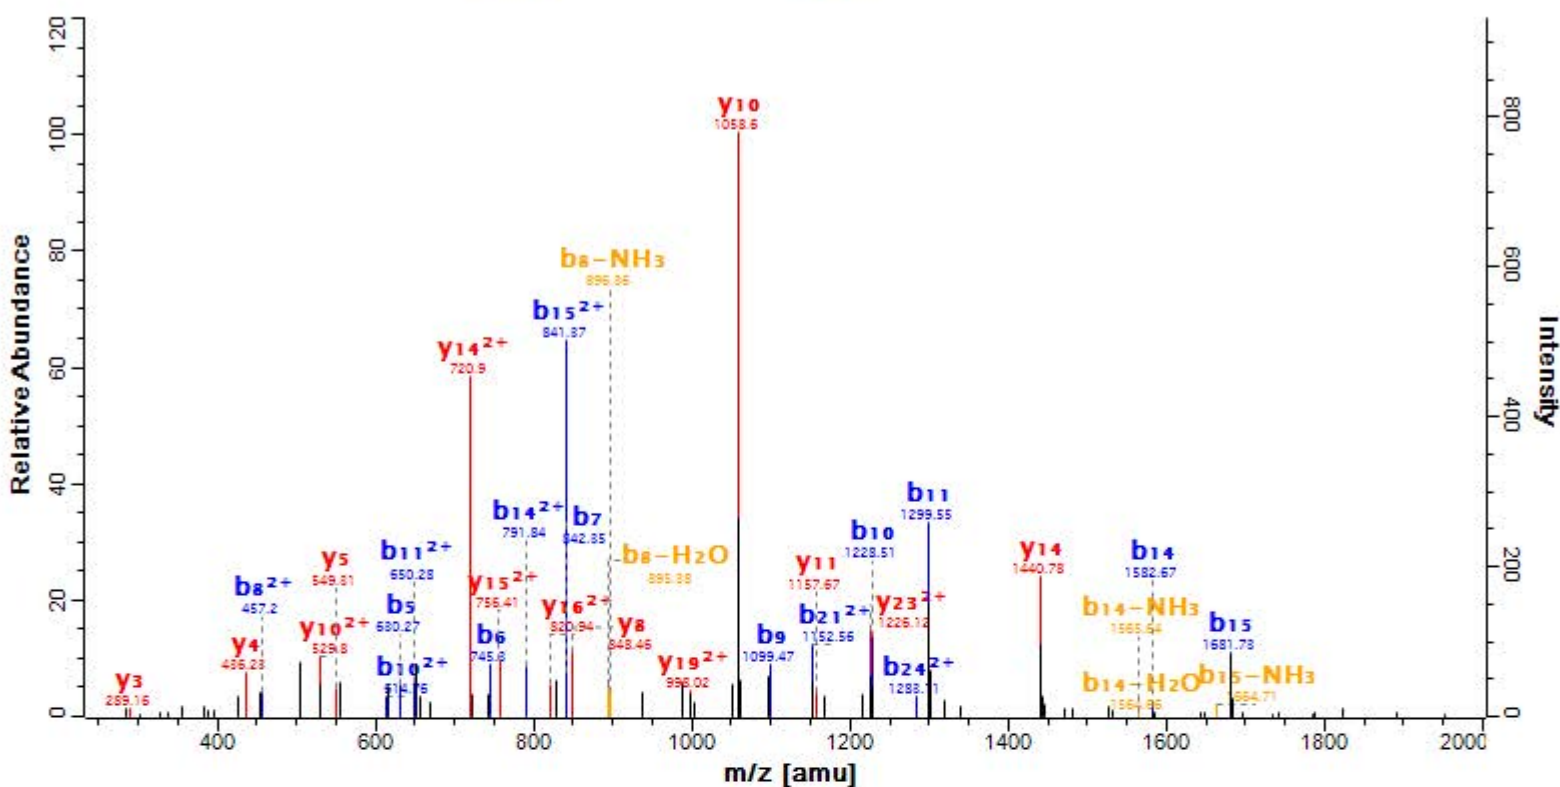

#### precursor information

|                   |                 |
|-------------------|-----------------|
| Mass:             | 2738.31924      |
| m/z:              | 913.78036       |
| Charge:           | 3+              |
| Retentiontime:    | 73.276000976562 |
| Score:            | 132.8275        |
| Mass Error [ppm]: | -0.14544        |
| PEP:              | 8.3323E-17      |
| Precursor Type:   | MULTI           |

| b <sup>2+</sup> ion |        | b ion    |        | seq |   | y ion    |        | y <sup>2+</sup> ion |                |
|---------------------|--------|----------|--------|-----|---|----------|--------|---------------------|----------------|
| Δ dalton            | mass   | Δ dalton | mass   |     |   | Δ dalton | mass   | Δ dalton            | mass           |
|                     | 129.07 |          | 129.07 | 1   | Q | 24       |        |                     |                |
|                     | 289.1  |          | 289.1  | 2   | C | 23       | 2611.3 |                     | 2611.3         |
|                     | 386.15 |          | 386.15 | 3   | P | 22       | 2451.2 |                     | 1226.1 +0.1152 |
|                     | 499.23 |          | 499.23 | 4   | I | 21       | 2354.2 |                     | 2354.2         |
|                     | 630.27 | +0.1281  | 630.27 | 5   | M | 20       | 2241.1 |                     | 2241.1         |
|                     | 745.3  | -0.047   | 745.3  | 6   | D | 19       | 2110.1 |                     | 2110.1         |
|                     | 842.35 | +0.1783  | 842.35 | 7   | P | 18       | 1995   |                     | 998.02 +0.1937 |
| +0.129              | 457.2  |          | 913.39 | 8   | A | 17       | 1898   |                     | 1898           |
|                     | 1099.5 | -0.108   | 1099.5 | 9   | W | 16       | 1826.9 |                     | 1826.9         |
| +0.0865             | 614.76 | -0.096   | 1228.5 | 10  | E | 15       | 1640.9 |                     | 820.94 +0.0813 |
| -0.193              | 650.28 | -0.077   | 1299.5 | 11  | A | 14       | 1511.8 |                     | 756.41 +0.268  |
|                     | 1396.6 |          | 1396.6 | 12  | P | 13       | 1440.8 | -0.027              | 720.9 +0.1682  |
|                     | 1525.6 |          | 1525.6 | 13  | E | 12       | 1343.7 |                     | 1343.7         |
| +0.0533             | 791.84 | +0.2873  | 1582.7 | 14  | G | 11       | 1214.7 |                     | 1214.7         |
| +0.228              | 841.37 | -0.231   | 1681.7 | 15  | V | 10       | 1157.7 | +0.0898             | 1157.7         |
|                     | 1778.8 |          | 1778.8 | 16  | P | 9        | 1058.6 | +0.0453             | 529.8 +0.0761  |
|                     | 1891.9 |          | 1891.9 | 17  | I | 8        | 961.55 |                     | 961.55         |
|                     | 2006.9 |          | 2006.9 | 18  | D | 7        | 848.46 | +0.0071             | 848.46         |
|                     | 2077.9 |          | 2077.9 | 19  | A | 6        | 733.44 |                     | 733.44         |
|                     | 2191   |          | 2191   | 20  | I | 5        | 662.4  |                     | 662.4          |
| +0.3753             | 1152.6 |          | 2304.1 | 21  | I | 4        | 549.31 | +0.0766             | 549.31         |
|                     | 2451.2 |          | 2451.2 | 22  | F | 3        | 436.23 | +0.0189             | 436.23         |
|                     | 2508.2 |          | 2508.2 | 23  | G | 2        | 289.16 | +0.0367             | 289.16         |
| +0.1403             | 1283.1 |          | 2565.2 | 24  | G | 1        | 232.14 |                     | 232.14         |
|                     |        |          |        | 25  | R | 0        | 175.12 |                     | 175.12         |

#### general information

|                       |             |
|-----------------------|-------------|
| Annotation:           | 18 of 25    |
| AminoAcids Coverage:  | 72 %        |
| Intensity Coverage:   | 64 %        |
| Peak Coverage:        | 35 %        |
| Protein Localisation: | 430 ... 454 |

Scan number 12263 Raw file LNCAP\_Silac\_23F10\_set2\_02  
 Method ITMS; CID Pepti... 98.58

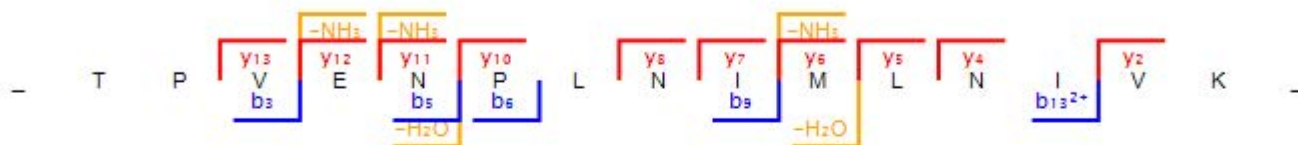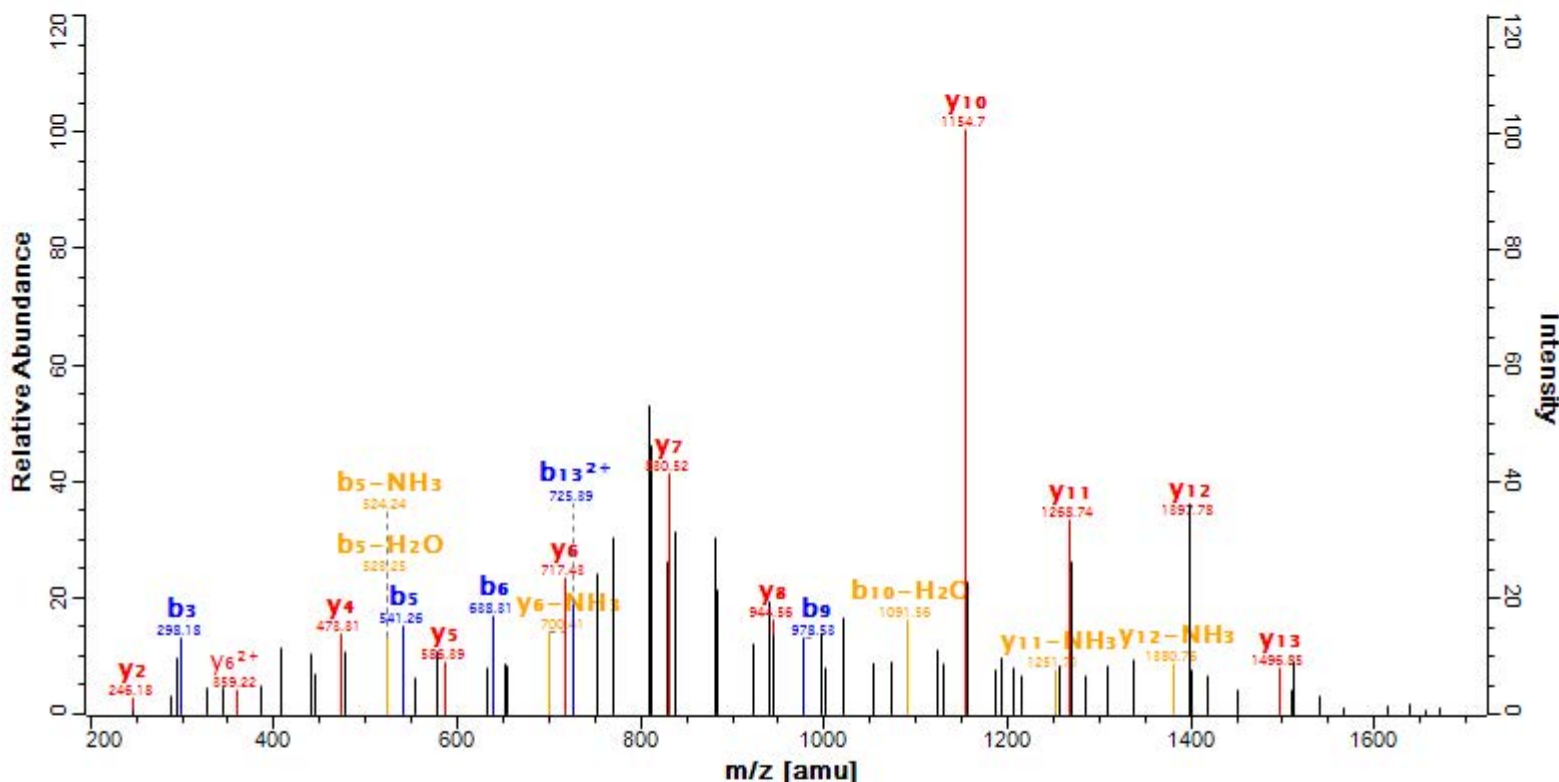

#### precursor information

|                   |                 |
|-------------------|-----------------|
| Mass:             | 1693.94474      |
| m/z:              | 847.97964       |
| Charge:           | 2+              |
| Retentiontime:    | 77.516677856445 |
| Score:            | 98.58204        |
| Mass Error [ppm]: | 0.62447         |
| PEP:              | 0.0012696       |
| Precursor Type:   | ISO             |

#### general information

|                       |               |
|-----------------------|---------------|
| Annotation:           | 11 of 15      |
| AminoAcids Coverage:  | 73 %          |
| Intensity Coverage:   | 38 %          |
| Peak Coverage:        | 27 %          |
| Protein Localisation: | 1497 ... 1511 |

| b <sup>2+</sup> ion |        | b ion    |        | seq |   |    | y ion    |         | y <sup>2+</sup> ion |         |
|---------------------|--------|----------|--------|-----|---|----|----------|---------|---------------------|---------|
| Δ dalton            | mass   | Δ dalton | mass   |     |   |    | Δ dalton | mass    | Δ dalton            | mass    |
|                     | 102.05 |          | 102.05 | 1   | T | 14 |          |         |                     |         |
|                     | 199.11 |          | 199.11 | 2   | P | 13 | 1593.9   |         | 1593.9              |         |
|                     | 298.18 | -0.041   | 298.18 | 3   | V | 12 | 1496.9   | -0.015  | 1496.9              |         |
|                     | 427.22 |          | 427.22 | 4   | E | 11 | 1397.8   | -0.201  | 1397.8              |         |
|                     | 541.26 | +0.252   | 541.26 | 5   | N | 10 | 1268.7   | -0.194  | 1268.7              |         |
|                     | 638.31 | +0.0886  | 638.31 | 6   | P | 9  | 1154.7   | +0.0571 | 1154.7              |         |
|                     | 751.4  |          | 751.4  | 7   | L | 8  | 1057.6   |         | 1057.6              |         |
|                     | 865.44 |          | 865.44 | 8   | N | 7  | 944.56   | -0.196  | 944.56              |         |
|                     | 978.53 | -0.014   | 978.53 | 9   | I | 6  | 830.52   | +0.1555 | 830.52              |         |
|                     | 1109.6 |          | 1109.6 | 10  | M | 5  | 717.43   | -0.052  | 359.22              | +0.0015 |
|                     | 1222.7 |          | 1222.7 | 11  | L | 4  | 586.39   | -0.106  | 586.39              |         |
|                     | 1336.7 |          | 1336.7 | 12  | N | 3  | 473.31   | -0.079  | 473.31              |         |
| +0.2859             | 725.39 |          | 1449.8 | 13  | I | 2  | 359.27   |         | 359.27              |         |
|                     | 1548.8 |          | 1548.8 | 14  | V | 1  | 246.18   | +0.0179 | 246.18              |         |
|                     |        |          |        | 15  | K | 0  | 147.11   |         | 147.11              |         |

Scan number 12270 Raw file LNCAP\_Silac\_23F10\_set2\_02  
 Method ITMS; CID Pepti... 113.01

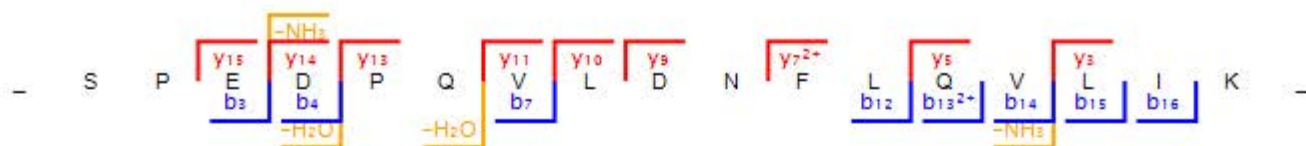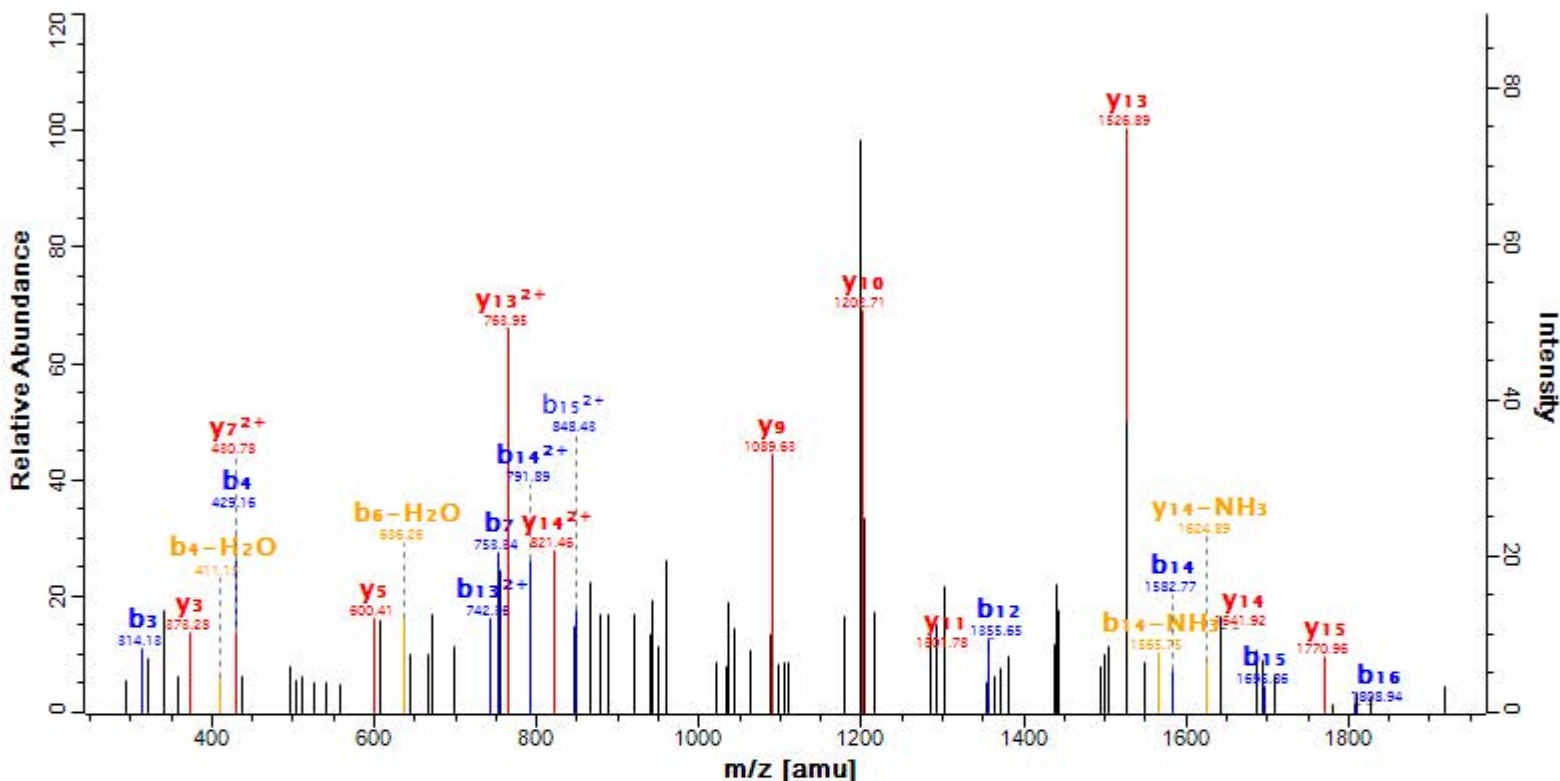

#### precursor information

|                   |                 |
|-------------------|-----------------|
| Mass:             | 1954.03967      |
| m/z:              | 978.02711       |
| Charge:           | 2+              |
| Retentiontime:    | 77.589752197265 |
| Score:            | 113.0145        |
| Mass Error [ppm]: | -0.75629        |
| PEP:              | 1.1619E-08      |
| Precursor Type:   | MULTI           |

| b <sup>2+</sup> ion |        | b ion    |        | seq |   |    | y ion    |         | y <sup>2+</sup> ion |         |
|---------------------|--------|----------|--------|-----|---|----|----------|---------|---------------------|---------|
| Δ dalton            | mass   | Δ dalton | mass   |     |   |    | Δ dalton | mass    | Δ dalton            | mass    |
|                     | 88.039 |          | 88.039 | 1   | S | 16 |          |         |                     |         |
|                     | 185.09 |          | 185.09 | 2   | P | 15 | 1868     |         | 1868                |         |
|                     | 314.13 | +0.0441  | 314.13 | 3   | E | 14 | 1771     | +0.257  | 1771                |         |
|                     | 429.16 | +0.1088  | 429.16 | 4   | D | 13 | 1641.9   | -0.313  | 821.46              | -0.263  |
|                     | 526.21 |          | 526.21 | 5   | P | 12 | 1526.9   | -0.176  | 763.95              | +0.2783 |
|                     | 654.27 |          | 654.27 | 6   | Q | 11 | 1429.8   |         | 1429.8              |         |
|                     | 753.34 | +0.0019  | 753.34 | 7   | V | 10 | 1301.8   | +0.3182 | 1301.8              |         |
|                     | 866.43 |          | 866.43 | 8   | L | 9  | 1202.7   | -0.008  | 1202.7              |         |
|                     | 981.45 |          | 981.45 | 9   | D | 8  | 1089.6   | +0.0825 | 1089.6              |         |
|                     | 1095.5 |          | 1095.5 | 10  | N | 7  | 974.6    |         | 974.6               |         |
|                     | 1242.6 |          | 1242.6 | 11  | F | 6  | 860.56   |         | 430.78              | -0.497  |
|                     | 1355.6 | +0.1596  | 1355.6 | 12  | L | 5  | 713.49   |         | 713.49              |         |
| +0.132              | 742.36 |          | 1483.7 | 13  | Q | 4  | 600.41   | -0.027  | 600.41              |         |
| -0.009              | 791.89 | +0.1742  | 1582.8 | 14  | V | 3  | 472.35   |         | 472.35              |         |
| +0.1114             | 848.43 | +0.1747  | 1695.9 | 15  | L | 2  | 373.28   | +0.0919 | 373.28              |         |
|                     | 1808.9 | +0.0949  | 1808.9 | 16  | I | 1  | 260.2    |         | 260.2               |         |
|                     |        |          |        | 17  | K | 0  | 147.11   |         | 147.11              |         |

#### general information

|                       |            |
|-----------------------|------------|
| Annotation:           | 13 of 17   |
| AminoAcids Coverage:  | 76 %       |
| Intensity Coverage:   | 38 %       |
| Peak Coverage:        | 26 %       |
| Protein Localisation: | 98 ... 114 |



Scan number 12412 Raw file LNCAP\_Silac\_23F10\_set2\_02  
 Method ITMS; CID Pepti... 75.55

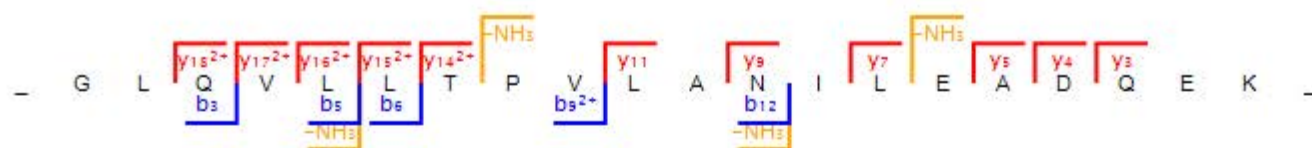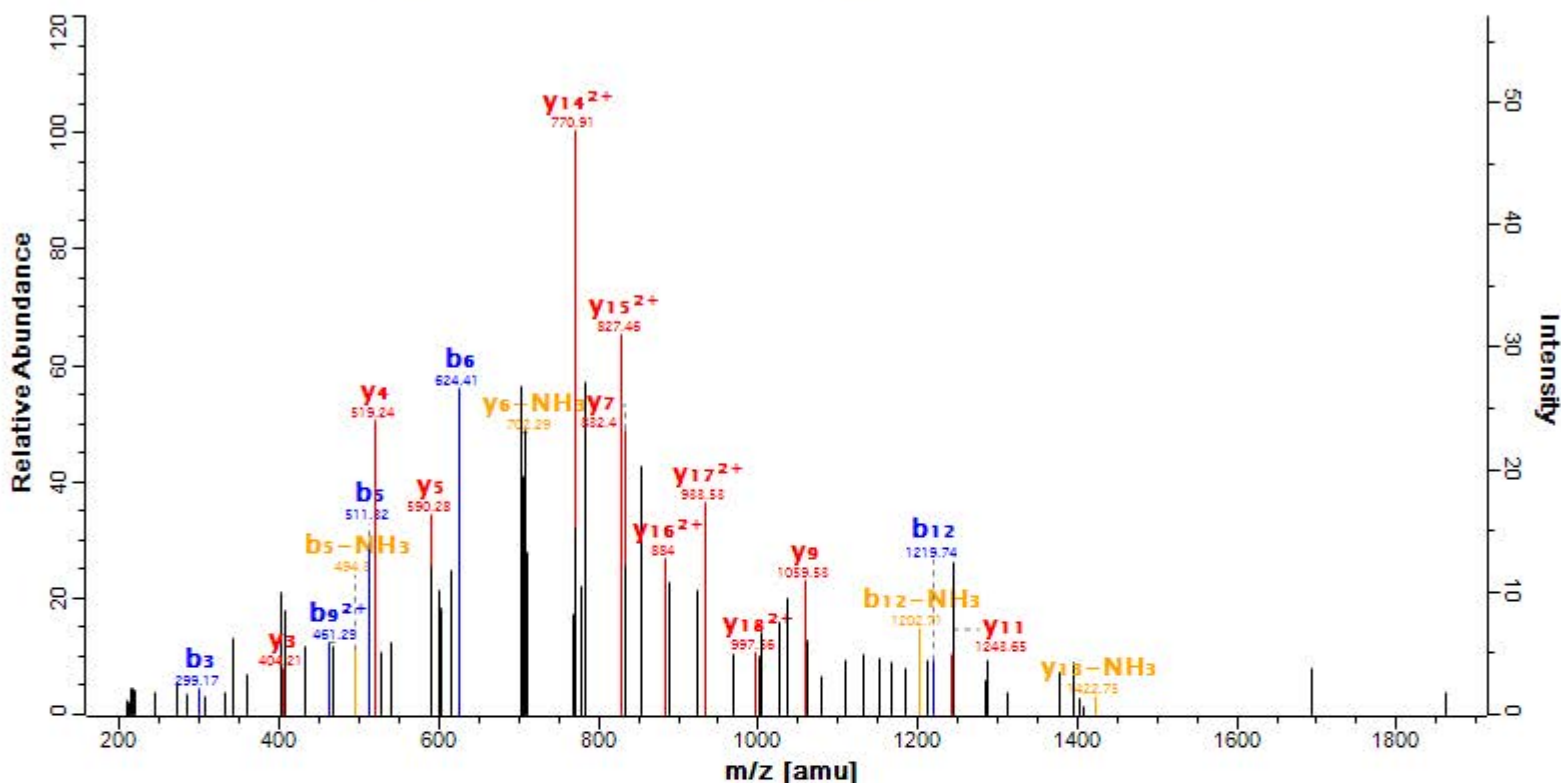

precursor information

|                   |                 |
|-------------------|-----------------|
| Mass:             | 2163.21615      |
| m/z:              | 722.07933       |
| Charge:           | 3+              |
| Retentiontime:    | 78.948104858398 |
| Score:            | 75.54819        |
| Mass Error [ppm]: | 0.49108         |
| PEP:              | 0.0001799       |
| Precursor Type:   | MULTI           |

| b <sup>2+</sup> ion |        | b ion    |        |    |     |    | y ion    |         | y <sup>2+</sup> ion |         |
|---------------------|--------|----------|--------|----|-----|----|----------|---------|---------------------|---------|
| Δ dalton            | mass   | Δ dalton | mass   |    | seq |    | Δ dalton | mass    | Δ dalton            | mass    |
|                     | 58.029 |          | 58.029 | 1  | G   | 19 |          |         |                     |         |
|                     | 171.11 |          | 171.11 | 2  | L   | 18 | 2107.2   |         | 2107.2              |         |
|                     | 299.17 | +0.0366  | 299.17 | 3  | Q   | 17 | 1994.1   |         | 997.56              | -0.119  |
|                     | 398.24 |          | 398.24 | 4  | V   | 16 | 1866.1   |         | 933.53              | +0.2864 |
|                     | 511.32 | +0.1547  | 511.32 | 5  | L   | 15 | 1767     |         | 884                 | -0.231  |
|                     | 624.41 | -0.086   | 624.41 | 6  | L   | 14 | 1653.9   |         | 827.46              | -0.086  |
|                     | 725.46 |          | 725.46 | 7  | T   | 13 | 1540.8   |         | 770.91              | -0.005  |
|                     | 822.51 |          | 822.51 | 8  | P   | 12 | 1439.8   |         | 1439.8              |         |
| +0.151              | 461.29 |          | 921.58 | 9  | V   | 11 | 1342.7   |         | 1342.7              |         |
|                     | 1034.7 |          | 1034.7 | 10 | L   | 10 | 1243.7   | -0.247  | 1243.7              |         |
|                     | 1105.7 |          | 1105.7 | 11 | A   | 9  | 1130.6   |         | 1130.6              |         |
|                     | 1219.7 | +0.2916  | 1219.7 | 12 | N   | 8  | 1059.5   | -0.114  | 1059.5              |         |
|                     | 1332.8 |          | 1332.8 | 13 | I   | 7  | 945.49   |         | 945.49              |         |
|                     | 1445.9 |          | 1445.9 | 14 | L   | 6  | 832.4    | +0.1408 | 832.4               |         |
|                     | 1575   |          | 1575   | 15 | E   | 5  | 719.32   |         | 719.32              |         |
|                     | 1646   |          | 1646   | 16 | A   | 4  | 590.28   | +0.0733 | 590.28              |         |
|                     | 1761   |          | 1761   | 17 | D   | 3  | 519.24   | +0.0337 | 519.24              |         |
|                     | 1889.1 |          | 1889.1 | 18 | Q   | 2  | 404.21   | +0.0517 | 404.21              |         |
|                     | 2018.1 |          | 2018.1 | 19 | E   | 1  | 276.16   |         | 276.16              |         |
|                     |        |          |        | 20 | K   | 0  | 147.11   |         | 147.11              |         |

general information

|                       |             |
|-----------------------|-------------|
| Annotation:           | 14 of 20    |
| AminoAcids Coverag    | 70 %        |
| Intensity Coverage:   | 39 %        |
| Peak Coverage:        | 24 %        |
| Protein Localisation: | 272 ... 291 |

Scan number 12512 Raw file LNCAP\_Silac\_23F10\_set2\_02  
 Method ITMS; CID Pepti... 227.46

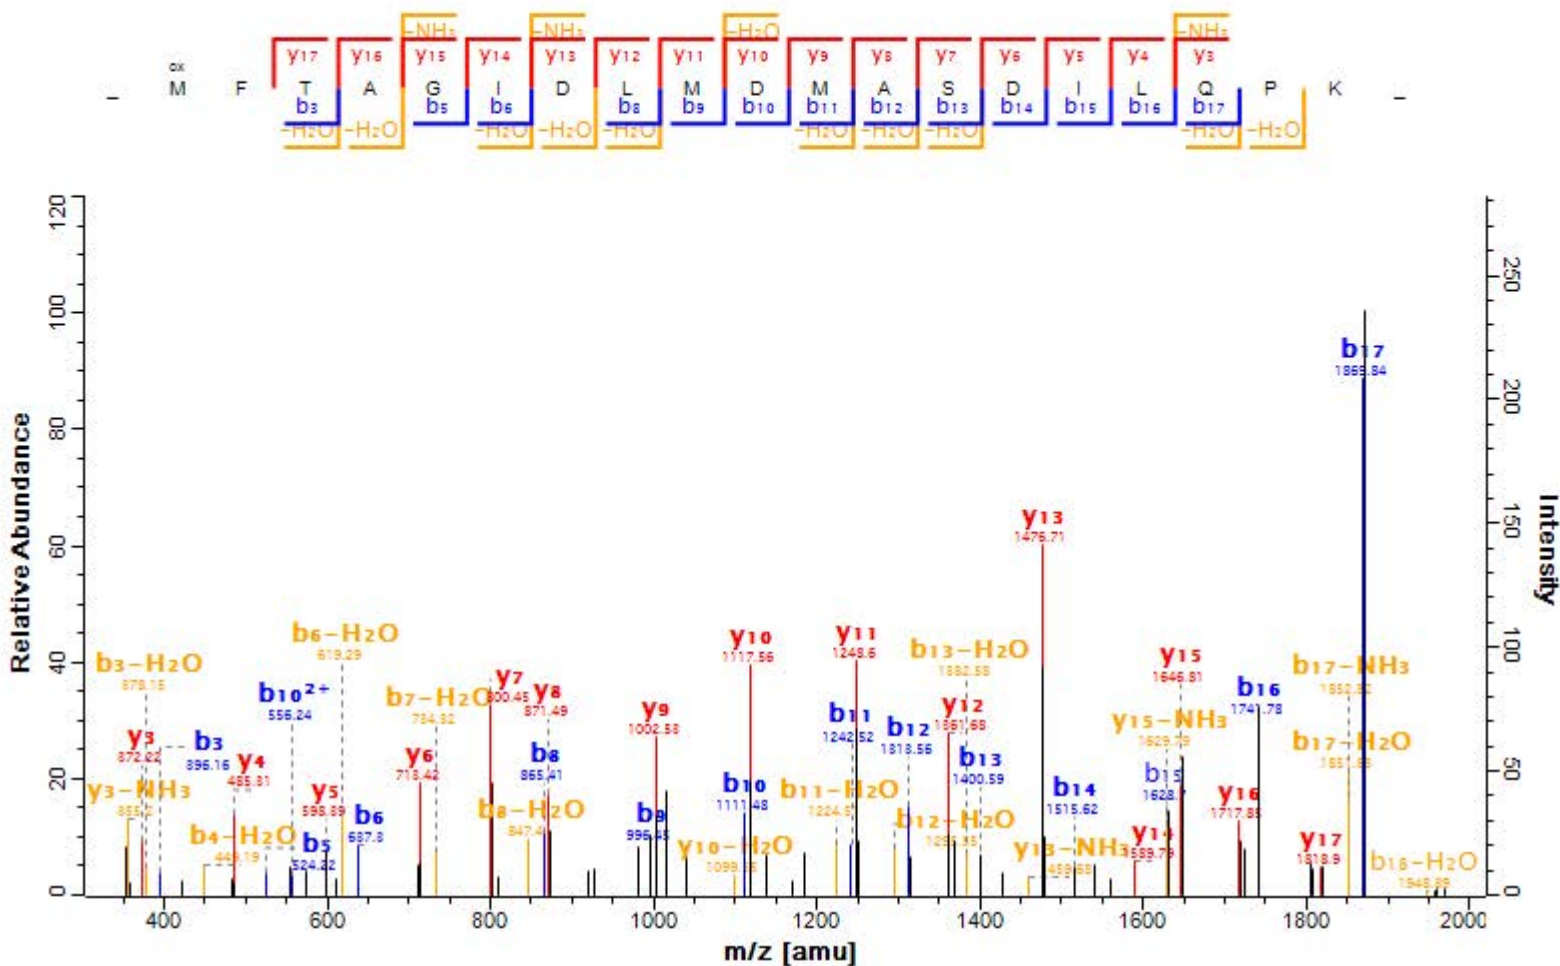

#### precursor information

|                   |                 |
|-------------------|-----------------|
| Mass:             | 2111.99352      |
| m/z:              | 1057.00404      |
| Charge:           | 2+              |
| Retentiontime:    | 80.002891540527 |
| Score:            | 227.4564        |
| Mass Error [ppm]: | -0.29223        |
| PEP:              | 4.1025E-56      |
| Precursor Type:   | MULTI           |

#### general information

|                       |             |
|-----------------------|-------------|
| Annotation:           | 17 of 19    |
| AminoAcids Coverage:  | 89 %        |
| Intensity Coverage:   | 53 %        |
| Peak Coverage:        | 45 %        |
| Protein Localisation: | 113 ... 131 |

| b <sup>2+</sup> ion |          | b ion     |          | y ion |          |      |          |
|---------------------|----------|-----------|----------|-------|----------|------|----------|
| Δ dalton            | mass     | Δ dalton  | mass     | seq   | Δ dalton | mass |          |
|                     | 148.0427 |           | 148.0427 | 1     | M        | 18   |          |
|                     | 295.1111 |           | 295.1111 | 2     | F        | 17   | 1965.966 |
|                     | 396.1588 | -0.04286  | 396.1588 | 3     | T        | 16   | 1818.898 |
|                     | 467.1959 |           | 467.1959 | 4     | A        | 15   | 1717.85  |
|                     | 524.2173 | +0.172547 | 524.2173 | 5     | G        | 14   | 1646.813 |
|                     | 637.3014 | +0.088361 | 637.3014 | 6     | I        | 13   | 1589.791 |
|                     | 752.3284 |           | 752.3284 | 7     | D        | 12   | 1476.707 |
|                     | 865.4124 | +0.016905 | 865.4124 | 8     | L        | 11   | 1361.68  |
|                     | 996.4529 | -0.10085  | 996.4529 | 9     | M        | 10   | 1248.596 |
| +0.20755            | 556.2436 | -0.11083  | 1111.48  | 10    | D        | 9    | 1117.556 |
|                     | 1242.52  | -0.15046  | 1242.52  | 11    | M        | 8    | 1002.529 |
|                     | 1313.557 | -0.16645  | 1313.557 | 12    | A        | 7    | 871.4884 |
|                     | 1400.589 | -0.11022  | 1400.589 | 13    | S        | 6    | 800.4512 |
|                     | 1515.616 | -0.07491  | 1515.616 | 14    | D        | 5    | 713.4192 |
|                     | 1628.7   | -0.34831  | 1628.7   | 15    | I        | 4    | 598.3923 |
|                     | 1741.785 | -0.25537  | 1741.785 | 16    | L        | 3    | 485.3082 |
|                     | 1869.843 | -0.17344  | 1869.843 | 17    | Q        | 2    | 372.2241 |
|                     | 1966.896 |           | 1966.896 | 18    | P        | 1    | 244.1656 |
|                     |          |           |          | 19    | K        | 0    | 147.1128 |

Scan number 1460 Raw file LNCAP\_Silac\_23F10\_set2\_02  
 Method ITMS; CID Pepti... 133.47

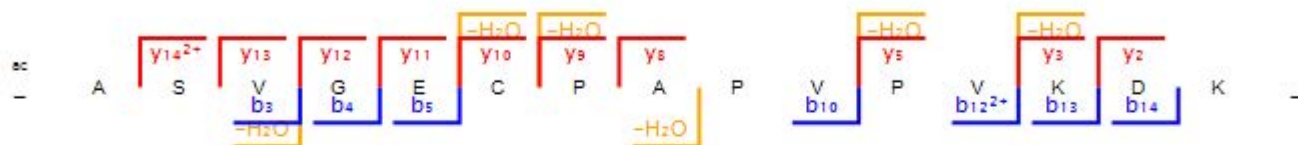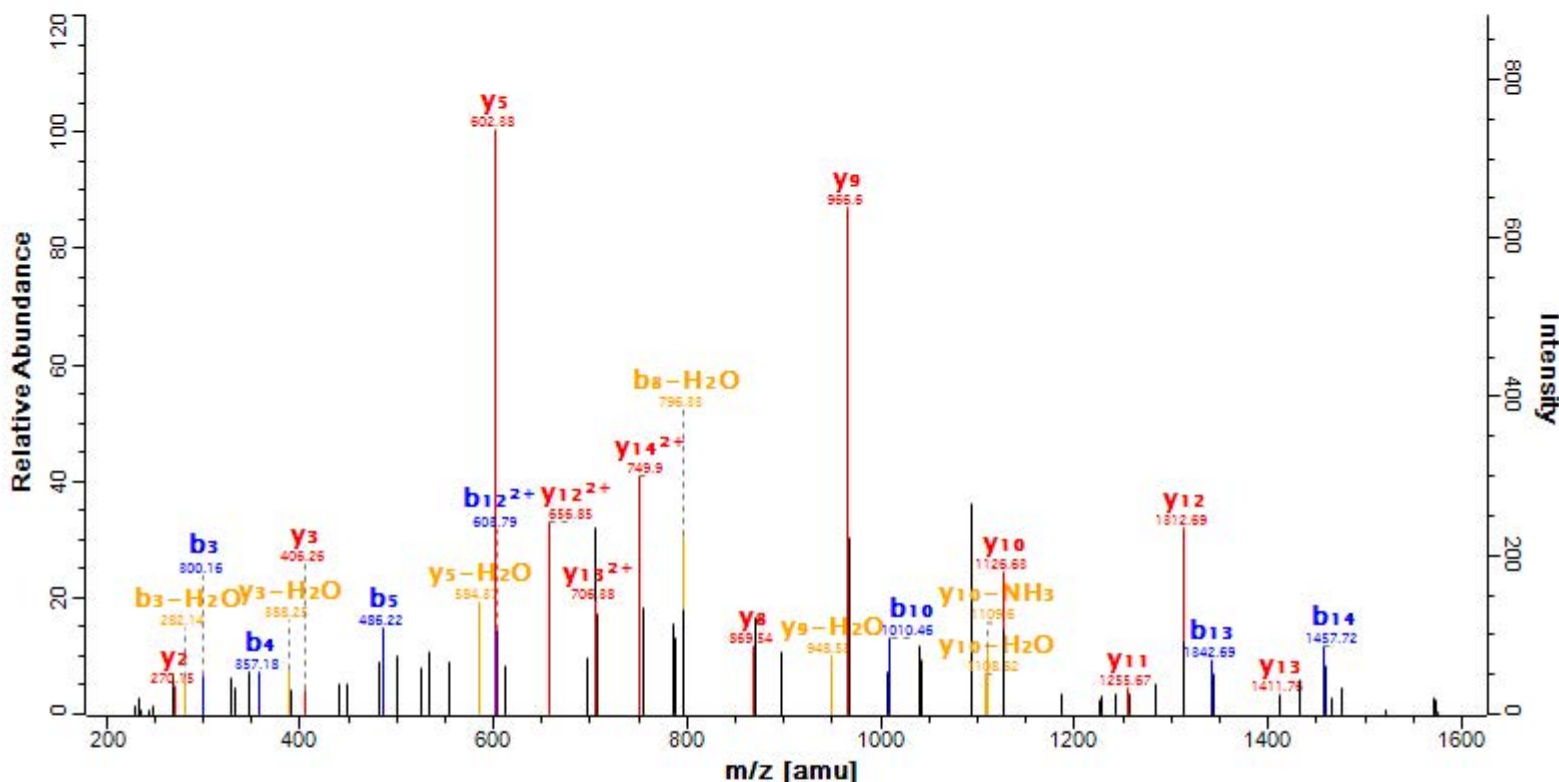

#### precursor information

|                   |                 |
|-------------------|-----------------|
| Mass:             | 1594.80215      |
| m/z:              | 798.40835       |
| Charge:           | 2+              |
| Retentiontime:    | 15.029078483581 |
| Score:            | 133.4698        |
| Mass Error [ppm]: | -0.21526        |
| PEP:              | 9.9295E-10      |
| Precursor Type:   | MULTI           |

#### general information

|                       |          |
|-----------------------|----------|
| Annotation:           | 12 of 15 |
| AminoAcids Coverage:  | 80 %     |
| Intensity Coverage:   | 51 %     |
| Peak Coverage:        | 31 %     |
| Protein Localisation: | 2 ... 16 |

| b <sup>2+</sup> ion |        | b ion    |        | seq |   |    | y ion    |         | y <sup>2+</sup> ion |         |
|---------------------|--------|----------|--------|-----|---|----|----------|---------|---------------------|---------|
| Δ dalton            | mass   | Δ dalton | mass   |     |   |    | Δ dalton | mass    | Δ dalton            | mass    |
|                     | 114.05 |          | 114.05 | 1   | A | 14 |          |         |                     |         |
|                     | 201.09 |          | 201.09 | 2   | S | 13 | 1498.8   |         | 749.9               | +0.1919 |
|                     | 300.16 | -0.065   | 300.16 | 3   | V | 12 | 1411.8   | +0.4657 | 706.38              | -0.208  |
|                     | 357.18 | +0.0768  | 357.18 | 4   | G | 11 | 1312.7   | +0.0784 | 656.85              | +0.0767 |
|                     | 486.22 | -0.018   | 486.22 | 5   | E | 10 | 1255.7   | -0.002  | 1255.7              |         |
|                     | 646.25 |          | 646.25 | 6   | C | 9  | 1126.6   | -0.17   | 1126.6              |         |
|                     | 743.3  |          | 743.3  | 7   | P | 8  | 966.6    | -0.076  | 966.6               |         |
|                     | 814.34 |          | 814.34 | 8   | A | 7  | 869.54   | -0.051  | 869.54              |         |
|                     | 911.39 |          | 911.39 | 9   | P | 6  | 798.51   |         | 798.51              |         |
|                     | 1010.5 | -0.382   | 1010.5 | 10  | V | 5  | 701.45   |         | 701.45              |         |
|                     | 1107.5 |          | 1107.5 | 11  | P | 4  | 602.38   | +0.0658 | 602.38              |         |
| -0.441              | 603.79 |          | 1206.6 | 12  | V | 3  | 505.33   |         | 505.33              |         |
|                     | 1342.7 | +0.0056  | 1342.7 | 13  | K | 2  | 406.26   | -0.229  | 406.26              |         |
|                     | 1457.7 | -0.093   | 1457.7 | 14  | D | 1  | 270.15   | +0.0533 | 270.15              |         |
|                     |        |          |        | 15  | K | 0  | 155.13   |         | 155.13              |         |

Scan number 1702 Raw file LNCAP\_Silac\_23F10\_set2\_02  
 Method ITMS: CID Pepti... 149.23

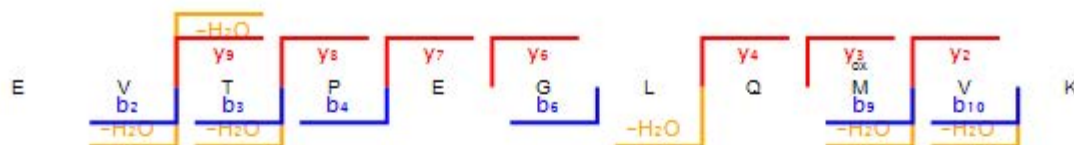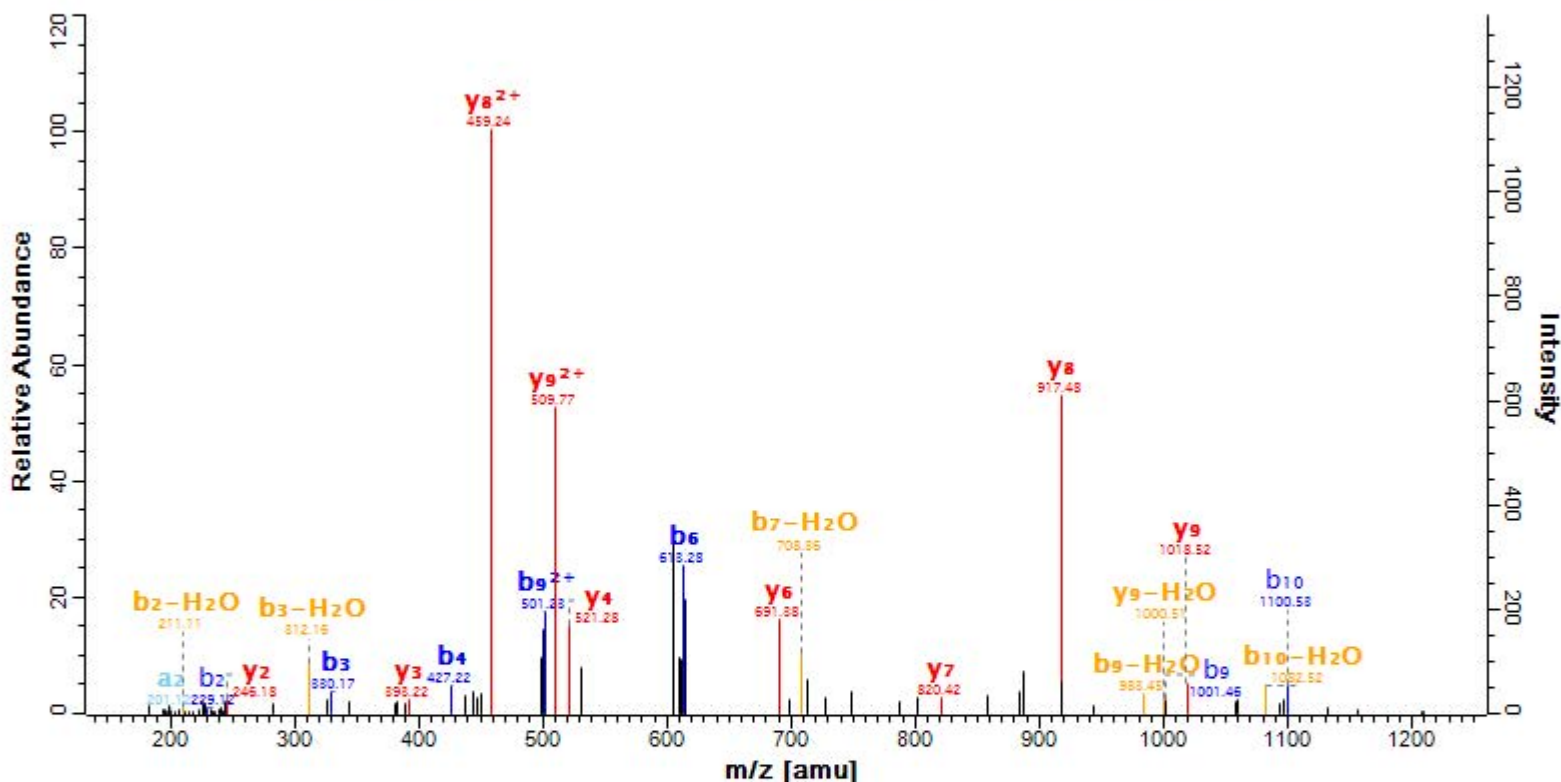

**precursor information**

|                   |                 |
|-------------------|-----------------|
| Mass:             | 1245.62707      |
| m/z:              | 623.82081       |
| Charge:           | 2+              |
| Retentiontime:    | 16.404220581054 |
| Score:            | 149.2311        |
| Mass Error [ppm]: | -0.33508        |
| PEP:              | 8.6858E-05      |
| Precursor Type:   | MULTI           |

**general information**

|                       |             |
|-----------------------|-------------|
| Annotation:           | 9 of 11     |
| AminoAcids Coverage:  | 82 %        |
| Intensity Coverage:   | 61 %        |
| Peak Coverage:        | 25 %        |
| Protein Localisation: | 262 ... 272 |

|       | a ion         | b <sup>2+</sup> ion | b ion         |     |   | y ion         | y <sup>2+</sup> ion    |
|-------|---------------|---------------------|---------------|-----|---|---------------|------------------------|
|       | Δ dalton mass | Δ dalton mass       | Δ dalton mass | seq |   | Δ dalton mass | Δ dalton mass          |
|       | 102.1         | 130                 | 130           | 1   | E | 10            |                        |
| -0.34 | 201.1         | 229.1               | +0 229.1      | 2   | V | 9             | 1118                   |
|       | 302.2         | 330.2               | +0.055330.2   | 3   | T | 8             | 1019 +0.125509.8 +0.03 |
|       | 399.2         | 427.2               | -0.08 427.2   | 4   | P | 7             | 917.5 +0 459.2 +0.074  |
|       | 528.3         | 556.3               | 556.3         | 5   | E | 6             | 820.4 +0.004820.4      |
|       | 585.3         | 613.3               | +0.288613.3   | 6   | G | 5             | 691.4 +0 691.4         |
|       | 698.4         | 726.4               | 726.4         | 7   | L | 4             | 634.4                  |
|       | 826.4         | 854.4               | 854.4         | 8   | Q | 3             | 521.3 +0.077521.3      |
|       | 973.5         | +0.177501.2         | +0.0151001    | 9   | M | 2             | 393.2 +0.062393.2      |
|       | 1073          | 1101                | -0.07 1101    | 10  | V | 1             | 246.2 -0.06 246.2      |
|       |               |                     |               | 11  | K | 0             | 147.1 147.1            |

Scan number 1972 Raw file LNCAP\_Silac\_23F10\_set2\_02  
 Method ITMS; CID Pepti... 130.72

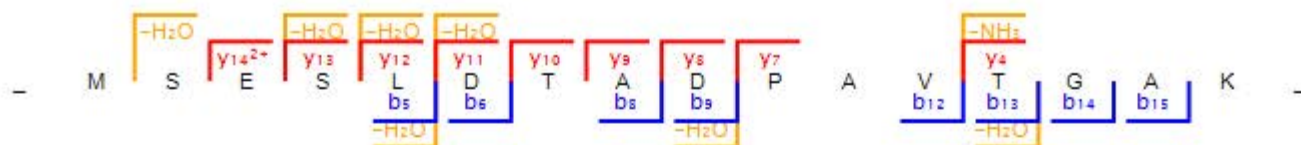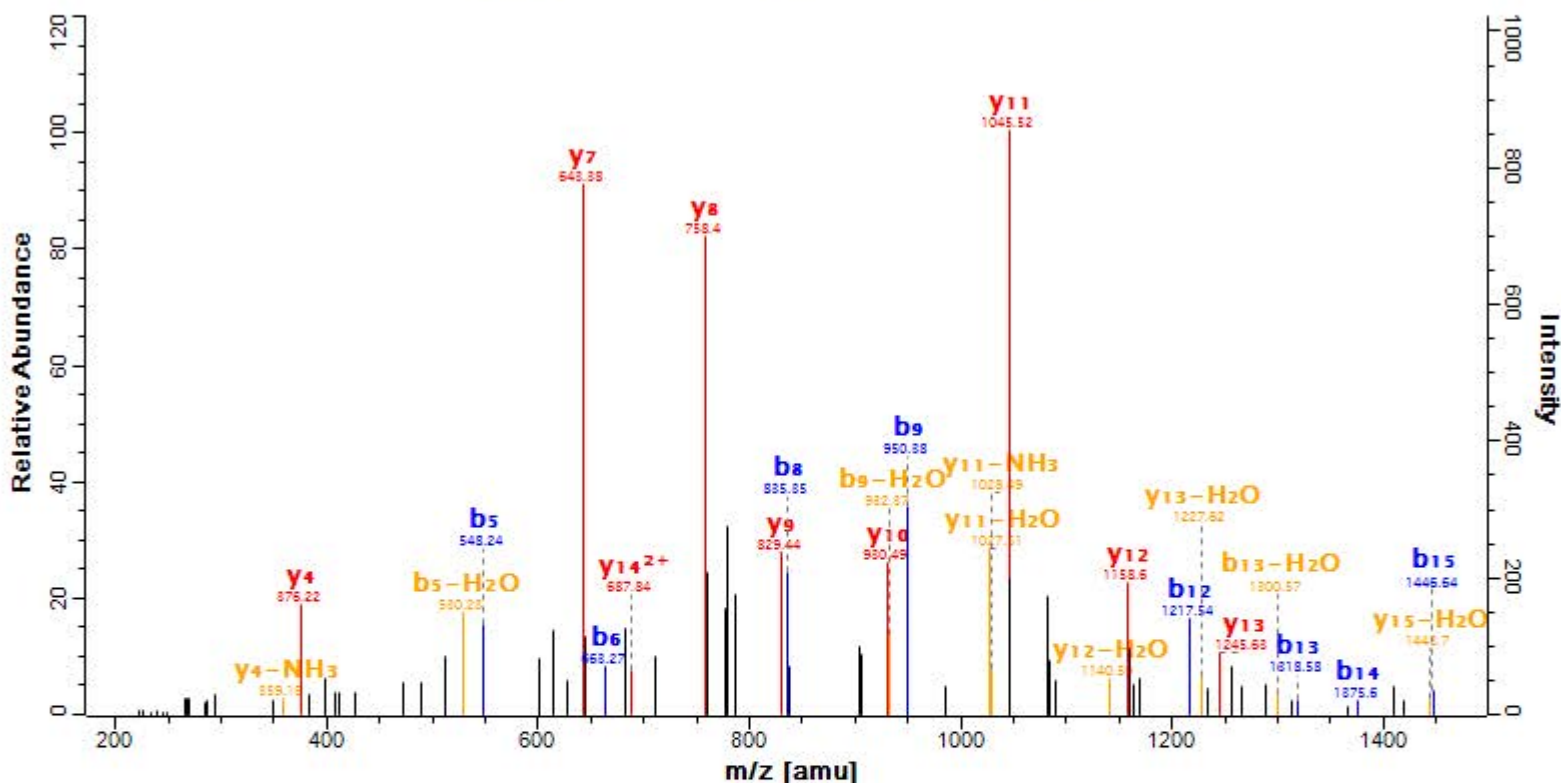

#### precursor information

|                   |                 |
|-------------------|-----------------|
| Mass:             | 1591.74034      |
| m/z:              | 796.87744       |
| Charge:           | 2+              |
| Retentiontime:    | 17.934617996215 |
| Score:            | 130.7175        |
| Mass Error [ppm]: | 0.24164         |
| PEP:              | 2.6958E-10      |
| Precursor Type:   | MULTI           |

#### general information

|                       |             |
|-----------------------|-------------|
| Annotation:           | 13 of 16    |
| AminoAcids Coverage:  | 81 %        |
| Intensity Coverage:   | 59 %        |
| Peak Coverage:        | 32 %        |
| Protein Localisation: | 259 ... 274 |

| b ion     |          |    |     |    | y ion    |           | y <sup>2+</sup> ion |          |
|-----------|----------|----|-----|----|----------|-----------|---------------------|----------|
| Δ dalton  | mass     |    | seq |    | Δ dalton | mass      | Δ dalton            | mass     |
|           | 132.0478 | 1  | M   | 15 |          |           |                     |          |
|           | 219.0798 | 2  | S   | 14 | 1461.707 |           | 1461.707            |          |
|           | 348.1224 | 3  | E   | 13 | 1374.675 |           | 687.841             | -0.13067 |
|           | 435.1544 | 4  | S   | 12 | 1245.632 | +0.125202 | 1245.632            |          |
| +0.014272 | 548.2385 | 5  | L   | 11 | 1158.6   | -0.05517  | 1158.6              |          |
| +0.178247 | 663.2654 | 6  | D   | 10 | 1045.516 | +0.012656 | 1045.516            |          |
|           | 764.3131 | 7  | T   | 9  | 930.4891 | +0.157886 | 930.4891            |          |
| +0.080515 | 835.3502 | 8  | A   | 8  | 829.4414 | +0.029966 | 829.4414            |          |
| -0.05806  | 950.3772 | 9  | D   | 7  | 758.4043 | +0.062441 | 758.4043            |          |
|           | 1047.43  | 10 | P   | 6  | 643.3774 | -0.05026  | 643.3774            |          |
|           | 1118.467 | 11 | A   | 5  | 546.3246 |           | 546.3246            |          |
| -0.101    | 1217.535 | 12 | V   | 4  | 475.2875 |           | 475.2875            |          |
| -0.0747   | 1318.583 | 13 | T   | 3  | 376.2191 | +0.118281 | 376.2191            |          |
| +0.103543 | 1375.605 | 14 | G   | 2  | 275.1714 |           | 275.1714            |          |
| +0.348289 | 1446.642 | 15 | A   | 1  | 218.1499 |           | 218.1499            |          |
|           |          | 16 | K   | 0  | 147.1128 |           | 147.1128            |          |

Scan number 2012 Raw file LNCAP\_Silac\_23F10\_set2\_02  
 Method ITMS; CID Pepti... 312.66

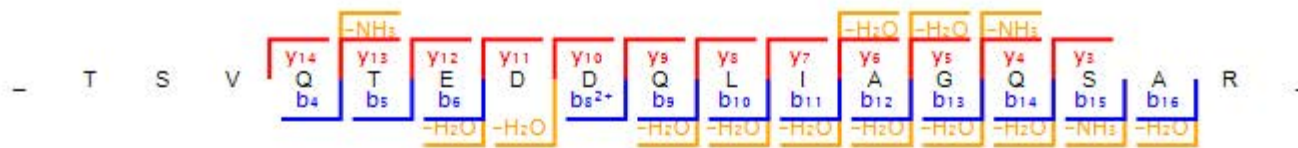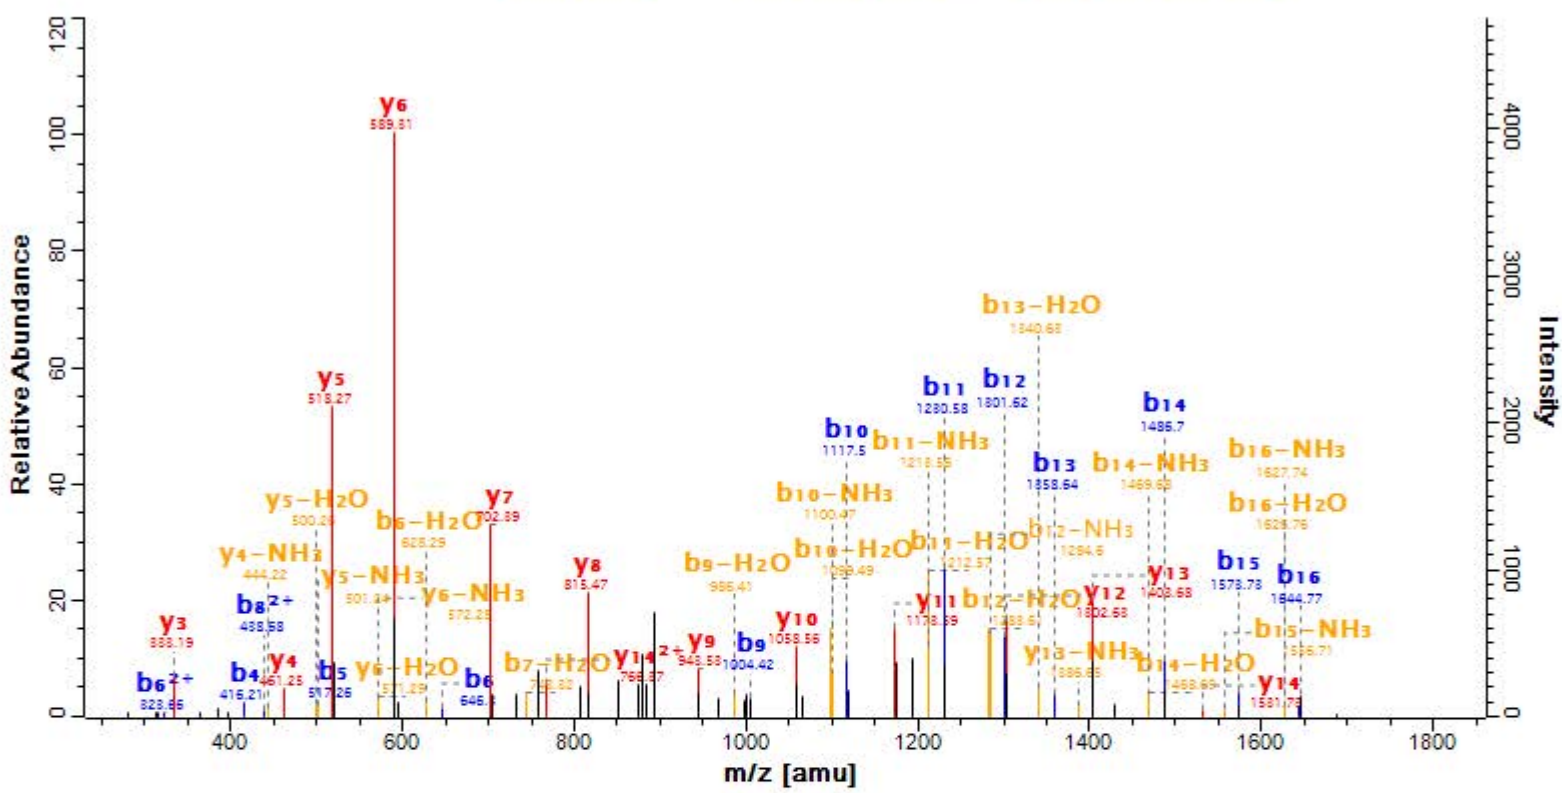

**precursor information**

|                   |                 |
|-------------------|-----------------|
| Mass:             | 1817.87509      |
| m/z:              | 909.94482       |
| Charge:           | 2+              |
| Retentiontime:    | 18.165054321289 |
| Score:            | 312.6553        |
| Mass Error [ppm]: | -0.24375        |
| PEP:              | 6.7109E-111     |
| Precursor Type:   | MULTI           |

**general information**

|                       |             |
|-----------------------|-------------|
| Annotation:           | 14 of 17    |
| AminoAcids Coverage:  | 82 %        |
| Intensity Coverage:   | 72 %        |
| Peak Coverage:        | 54 %        |
| Protein Localisation: | 654 ... 670 |

| b <sup>2+</sup> ion |        | b ion         |        | seq |   |    | y ion    |         | y <sup>2+</sup> ion |        |
|---------------------|--------|---------------|--------|-----|---|----|----------|---------|---------------------|--------|
| Δ dalton            | mass   | Δ dalton      | mass   |     |   |    | Δ dalton | mass    | Δ dalton            | mass   |
|                     | 102.05 | 102.05        |        | 1   | T | 16 |          |         |                     |        |
|                     | 189.09 | 189.09        |        | 2   | S | 15 | 1717.8   |         | 1717.8              |        |
|                     | 288.16 | 288.16        |        | 3   | V | 14 | 1630.8   |         | 1630.8              |        |
|                     | 416.21 | +0.0814416.21 |        | 4   | Q | 13 | 1531.7   | +0.0169 | 766.37              | -0.063 |
|                     | 517.26 | -0.012        | 517.26 | 5   | T | 12 | 1403.7   | -0.032  | 1403.7              |        |
| -0.356              | 323.66 | +0.1166       | 646.3  | 6   | E | 11 | 1302.6   | -0.126  | 1302.6              |        |
|                     | 761.33 |               | 761.33 | 7   | D | 10 | 1173.6   | -0.012  | 1173.6              |        |
| -0.288              | 438.68 |               | 876.36 | 8   | D | 9  | 1058.6   | +0.025  | 1058.6              |        |
|                     | 1004.4 | -0.019        | 1004.4 | 9   | Q | 8  | 943.53   | +0.0254 | 943.53              |        |
|                     | 1117.5 | +0.073        | 1117.5 | 10  | L | 7  | 815.47   | +0.141  | 815.47              |        |
|                     | 1230.6 | -0.031        | 1230.6 | 11  | I | 6  | 702.39   | +0.0758 | 702.39              |        |
|                     | 1301.6 | -0.054        | 1301.6 | 12  | A | 5  | 589.31   | +0.042  | 589.31              |        |
|                     | 1358.6 | -0.013        | 1358.6 | 13  | G | 4  | 518.27   | +0.0344 | 518.27              |        |
|                     | 1486.7 | -0.15         | 1486.7 | 14  | Q | 3  | 461.25   | -0.028  | 461.25              |        |
|                     | 1573.7 | -0.09         | 1573.7 | 15  | S | 2  | 333.19   | -0.012  | 333.19              |        |
|                     | 1644.8 | -0.101        | 1644.8 | 16  | A | 1  | 246.16   |         | 246.16              |        |
|                     |        |               |        | 17  | R | 0  | 175.12   |         | 175.12              |        |

Scan number 2052 Raw file LNCAP\_Silac\_23F10\_set2\_02  
 Method ITMS; CID Pepti... 143.97

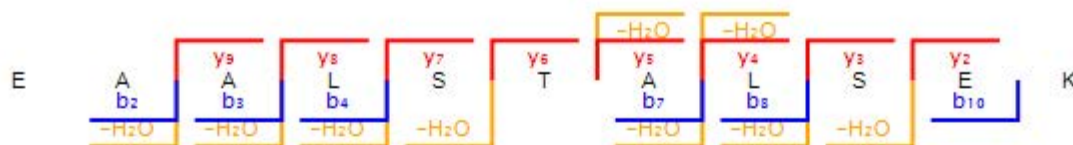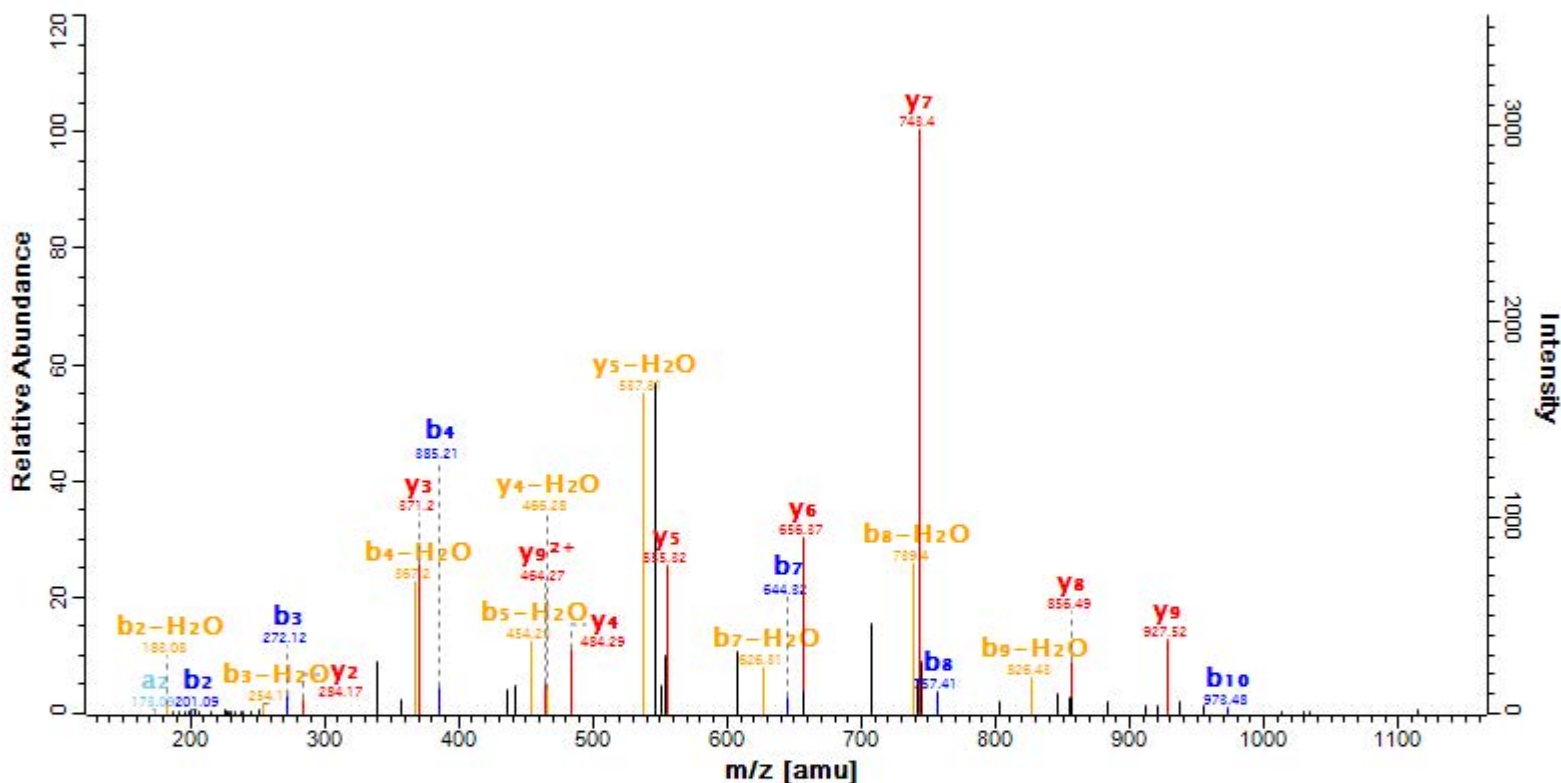

#### precursor information

|                   |                 |
|-------------------|-----------------|
| Mass:             | 1118.58249      |
| m/z:              | 560.29852       |
| Charge:           | 2+              |
| Retentiontime:    | 18.380527496337 |
| Score:            | 143.9743        |
| Mass Error [ppm]: | 0.5056          |
| PEP:              | 8.8058E-05      |
| Precursor Type:   | MULTI           |

#### general information

|                       |             |
|-----------------------|-------------|
| Annotation:           | 9 of 11     |
| AminoAcids Coverage:  | 82 %        |
| Intensity Coverage:   | 68 %        |
| Peak Coverage:        | 32 %        |
| Protein Localisation: | 145 ... 155 |

| a ion    |        | b ion    |        |    |     |          | y ion  |          | y <sup>2+</sup> ion |  |
|----------|--------|----------|--------|----|-----|----------|--------|----------|---------------------|--|
| Δ dalton | mass   | Δ dalton | mass   |    | seq | Δ dalton | mass   | Δ dalton | mass                |  |
|          | 102.05 |          | 130.05 | 1  | E   | 10       |        |          |                     |  |
| +0.103   | 173.09 | -0.071   | 201.09 | 2  | A   | 9        | 998.56 |          | 998.56              |  |
|          | 244.13 | -0.04    | 272.12 | 3  | A   | 8        | 927.52 | -0.059   | 464.27              |  |
|          | 357.21 | +0.0612  | 385.21 | 4  | L   | 7        | 856.49 | +0.0042  | 856.49              |  |
|          | 444.25 |          | 472.24 | 5  | S   | 6        | 743.4  | +0.0277  | 743.4               |  |
|          | 545.29 |          | 573.29 | 6  | T   | 5        | 656.37 | +0.1087  | 656.37              |  |
|          | 616.33 | +0.0675  | 644.32 | 7  | A   | 4        | 555.32 | +0.0418  | 555.32              |  |
|          | 729.41 | +0.0092  | 757.41 | 8  | L   | 3        | 484.29 | +0.154   | 484.29              |  |
|          | 816.45 |          | 844.44 | 9  | S   | 2        | 371.2  | +0.0152  | 371.2               |  |
|          | 945.49 | -0.328   | 973.48 | 10 | E   | 1        | 284.17 | +0.1214  | 284.17              |  |
|          |        |          |        | 11 | K   | 0        | 155.13 |          | 155.13              |  |

Scan number 2364 Raw file LNCAP\_Silac\_23F10\_set2\_02  
 Method ITMS: CID Pepti... 170.95

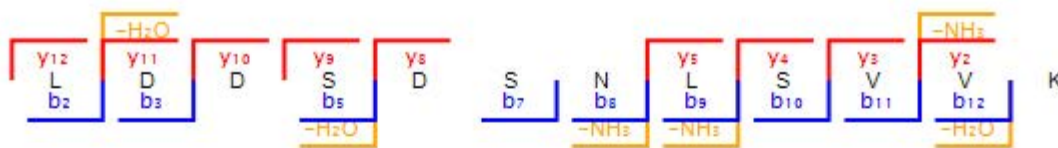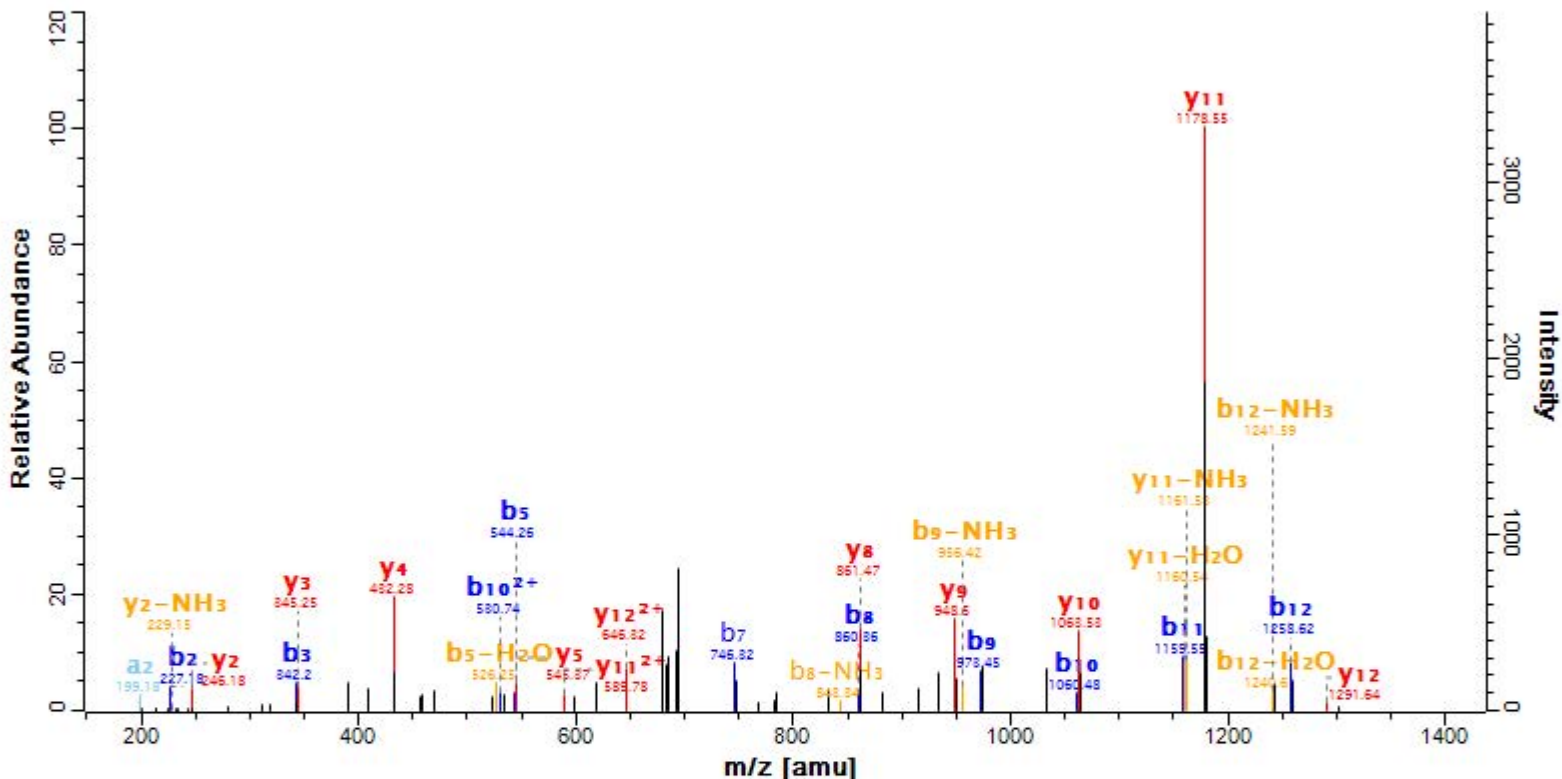

precursor information

|                   |                 |
|-------------------|-----------------|
| Mass:             | 1403.71461      |
| m/z:              | 702.86458       |
| Charge:           | 2+              |
| Retention time:   | 20.109699249267 |
| Score:            | 170.9496        |
| Mass Error [ppm]: | 0.15604         |
| PEP:              | 1.2913E-11      |
| Precursor Type:   | MULTI           |

general information

|                       |             |
|-----------------------|-------------|
| Annotation:           | 11 of 13    |
| AminoAcids Coverage:  | 85 %        |
| Intensity Coverage:   | 51 %        |
| Peak Coverage:        | 34 %        |
| Protein Localisation: | 722 ... 734 |

|       | a ion         | b <sup>2+</sup> ion | b ion         |       |    |    | y ion         | y <sup>2+</sup> ion |
|-------|---------------|---------------------|---------------|-------|----|----|---------------|---------------------|
|       | Δ dalton mass | Δ dalton mass       | Δ dalton mass | seq   |    |    | Δ dalton mass | Δ dalton mass       |
|       | 86.1          | 114.1               | 114.1         | 1     | I  | 12 |               |                     |
| -0.08 | 199.2         | 227.2               | +0.00         | 2     | L  | 11 | 1292          | +0.1395             |
|       | 314.2         | 342.2               | -0.06         | 3     | D  | 10 | 1179          | -0.02               |
|       | 429.2         | 457.2               |               | 4     | D  | 9  | 1064          | -0.05               |
|       | 516.3         | 544.3               | -0.23         | 5     | S  | 8  | 948.5         | +0.05               |
|       | 631.3         | 659.3               |               | 6     | D  | 7  | 861.5         | -0.06               |
|       | 718.3         | 746.3               | +0.033        | 7     | S  | 6  | 746.4         |                     |
|       | 832.4         | 860.4               | +0.277        | 8     | N  | 5  | 659.4         |                     |
|       | 945.5         | 973.4               | -0.1          | 9     | L  | 4  | 545.4         | -0.06               |
|       | 1032          | +0.388              | 530.7         | -0.09 | 10 | S  | 3             | 432.3               |
|       | 1132          |                     | 1160          | -0.14 | 11 | V  | 2             | 345.2               |
|       | 1231          |                     | 1259          | -0.12 | 12 | V  | 1             | 246.2               |
|       |               |                     |               |       | 13 | K  | 0             | 147.1               |



Scan number 2514 Raw file LNCAP\_Silac\_23F10\_set2\_02  
 Method ITMS; CID Pepti... 184.24

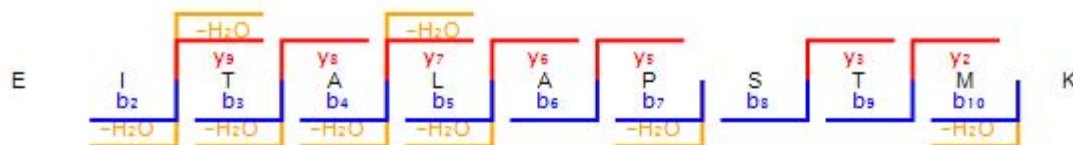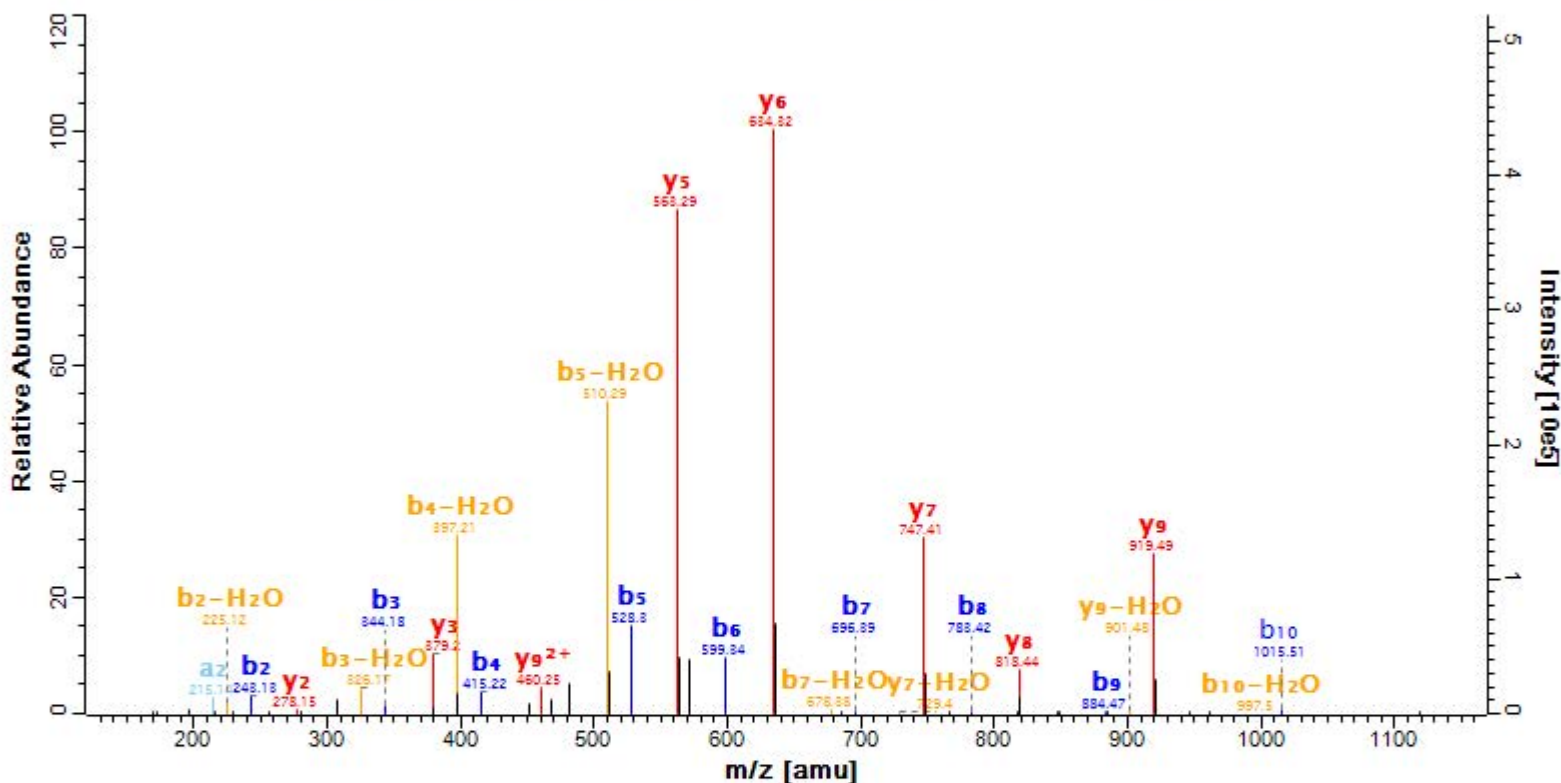

#### precursor information

|                   |                 |
|-------------------|-----------------|
| Mass:             | 1160.61107      |
| m/z:              | 581.31281       |
| Charge:           | 2+              |
| Retentiontime:    | 20.920673370361 |
| Score:            | 184.2389        |
| Mass Error [ppm]: | -0.031167       |
| PEP:              | 1.7045E-10      |
| Precursor Type:   | MULTI           |

#### general information

|                       |             |
|-----------------------|-------------|
| Annotation:           | 9 of 11     |
| AminoAcids Coverage:  | 82 %        |
| Intensity Coverage:   | 83 %        |
| Peak Coverage:        | 37 %        |
| Protein Localisation: | 316 ... 326 |

| a ion    |        | b ion    |        | seq |   |    | y ion    |         | y <sup>2+</sup> ion |        |
|----------|--------|----------|--------|-----|---|----|----------|---------|---------------------|--------|
| Δ dalton | mass   | Δ dalton | mass   |     |   |    | Δ dalton | mass    | Δ dalton            | mass   |
|          | 102.05 |          | 130.05 | 1   | E | 10 |          |         |                     |        |
| -0.059   | 215.14 | +0.0351  | 243.13 | 2   | I | 9  | 1032.6   |         |                     | 1032.6 |
|          | 316.19 | -0.014   | 344.18 | 3   | T | 8  | 919.49   | -0.041  |                     | 460.25 |
|          | 387.22 | +0.0161  | 415.22 | 4   | A | 7  | 818.44   | +0.0871 |                     | 818.44 |
|          | 500.31 | -0.108   | 528.3  | 5   | L | 6  | 747.41   | +0.0367 |                     | 747.41 |
|          | 571.34 | -0.057   | 599.34 | 6   | A | 5  | 634.32   | +0.0383 |                     | 634.32 |
|          | 668.4  | +0.0969  | 696.39 | 7   | P | 4  | 563.29   | +0.0708 |                     | 563.29 |
|          | 755.43 | +0.1939  | 783.42 | 8   | S | 3  | 466.23   |         |                     | 466.23 |
|          | 856.48 | -0.132   | 884.47 | 9   | T | 2  | 379.2    | +0.0379 |                     | 379.2  |
|          | 987.52 | -0.267   | 1015.5 | 10  | M | 1  | 278.15   | +0.088  |                     | 278.15 |
|          |        |          |        | 11  | K | 0  | 147.11   |         |                     | 147.11 |

Scan number 2632 Raw file LNCAP\_Silac\_23F10\_set2\_02  
 Method ITMS; CID Pepti... 206.97

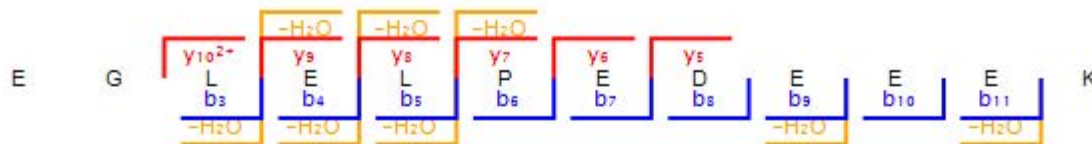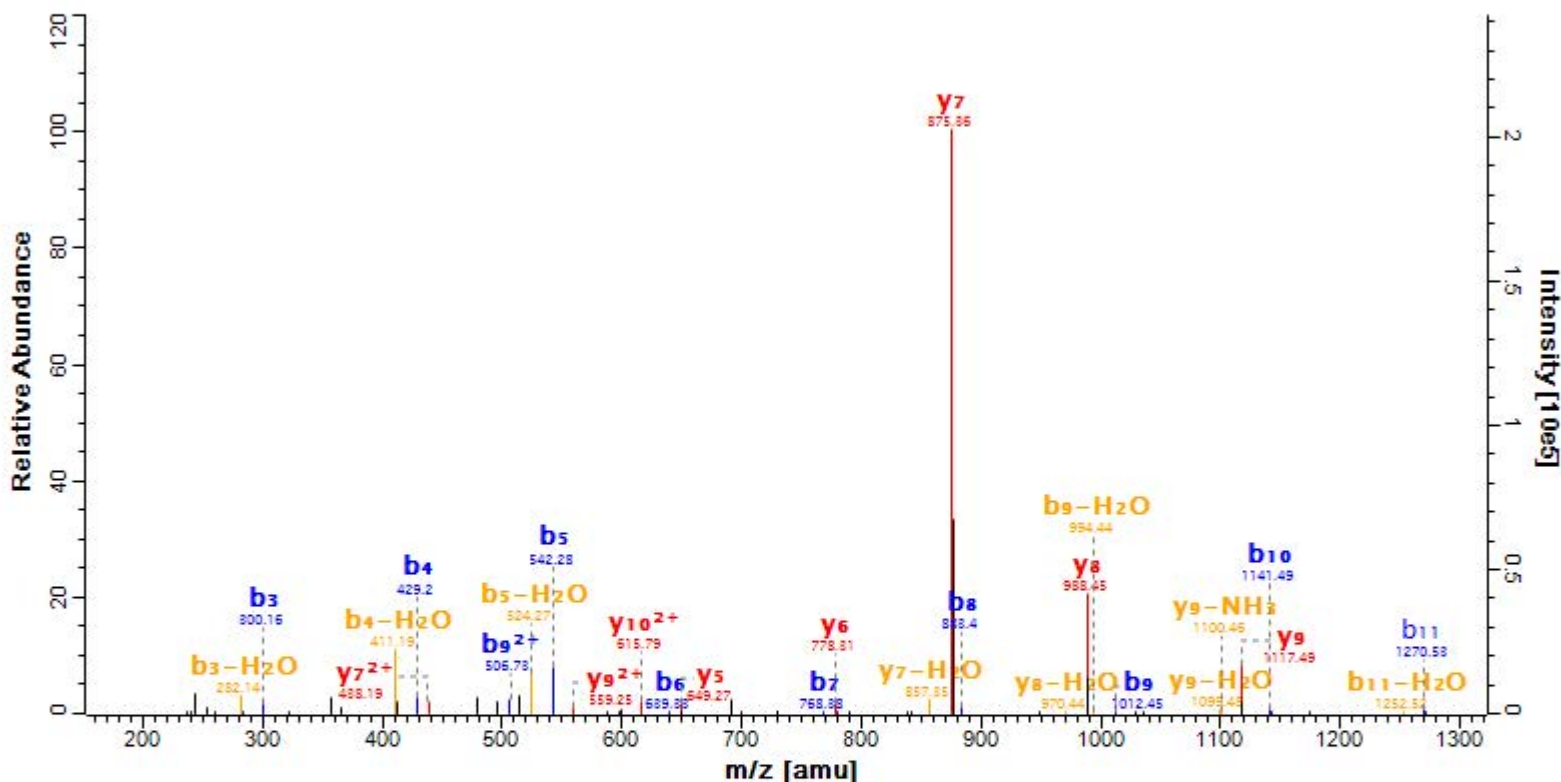

#### precursor information

|                   |                 |
|-------------------|-----------------|
| Mass:             | 1415.63035      |
| m/z:              | 708.82245       |
| Charge:           | 2+              |
| Retentiontime:    | 21.575054168701 |
| Score:            | 206.9699        |
| Mass Error [ppm]: | -0.027999       |
| PEP:              | 1.379E-18       |
| Precursor Type:   | MULTI           |

#### general information

|                       |             |
|-----------------------|-------------|
| Annotation:           | 10 of 12    |
| AminoAcids Coverage:  | 83 %        |
| Intensity Coverage:   | 72 %        |
| Peak Coverage:        | 40 %        |
| Protein Localisation: | 669 ... 680 |

| b <sup>2+</sup> ion |        | b ion    |        | seq |   |    | y ion    |         | y <sup>2+</sup> ion |         |
|---------------------|--------|----------|--------|-----|---|----|----------|---------|---------------------|---------|
| Δ dalton            | mass   | Δ dalton | mass   |     |   |    | Δ dalton | mass    | Δ dalton            | mass    |
|                     | 130.05 |          | 130.05 | 1   | E | 11 |          |         |                     |         |
|                     | 187.07 |          | 187.07 | 2   | G | 10 | 1287.6   |         | 1287.6              |         |
|                     | 300.16 | +0.0645  | 300.16 | 3   | L | 9  | 1230.6   |         | 615.79              | +0.2844 |
|                     | 429.2  | -0.041   | 429.2  | 4   | E | 8  | 1117.5   | -0.003  | 559.25              | +0.0287 |
|                     | 542.28 | -0.061   | 542.28 | 5   | L | 7  | 988.45   | -0.001  | 988.45              |         |
|                     | 639.33 | +0.1728  | 639.33 | 6   | P | 6  | 875.36   | +0.0177 | 438.19              | +0.152  |
|                     | 768.38 | +0.1413  | 768.38 | 7   | E | 5  | 778.31   | +0.1422 | 778.31              |         |
|                     | 883.4  | +0.0753  | 883.4  | 8   | D | 4  | 649.27   | +0.0812 | 649.27              |         |
| -0.387              | 506.73 | +0.0343  | 1012.4 | 9   | E | 3  | 534.24   |         | 534.24              |         |
|                     | 1141.5 | -0.189   | 1141.5 | 10  | E | 2  | 405.2    |         | 405.2               |         |
|                     | 1270.5 | -0.311   | 1270.5 | 11  | E | 1  | 276.16   |         | 276.16              |         |
|                     |        |          |        | 12  | K | 0  | 147.11   |         | 147.11              |         |

Scan number 2678 Raw file LNCAP\_Silac\_23F10\_set2\_02  
 Method ITMS; CID Pepti... 79.61

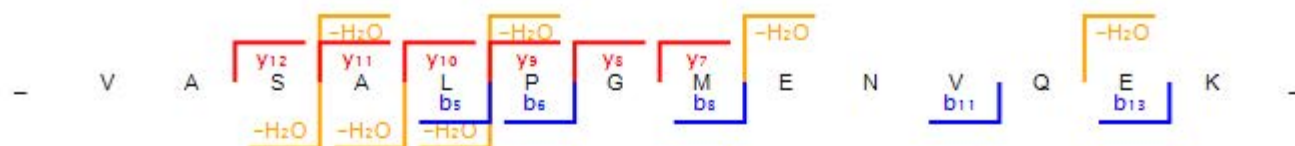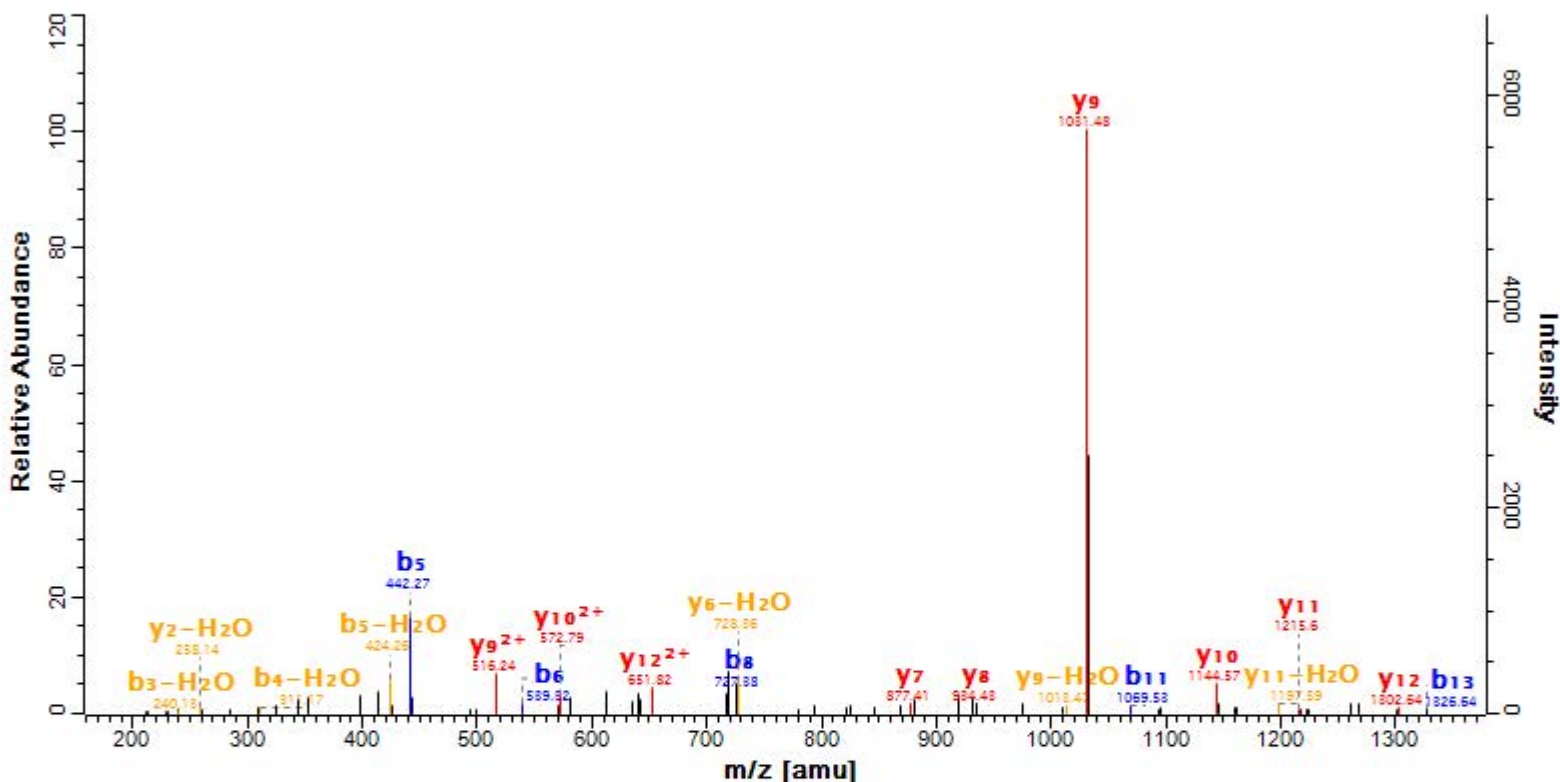

#### precursor information

|                   |                 |
|-------------------|-----------------|
| Mass:             | 1471.73418      |
| m/z:              | 736.87437       |
| Charge:           | 2+              |
| Retentiontime:    | 21.831764221191 |
| Score:            | 79.61386        |
| Mass Error [ppm]: | 0.068064        |
| PEP:              | 0.0010428       |
| Precursor Type:   | MULTI           |

| b ion     |          |     |   | y ion    |          | y <sup>2+</sup> ion |          |           |
|-----------|----------|-----|---|----------|----------|---------------------|----------|-----------|
| Δ dalton  | mass     | seq |   | Δ dalton | mass     | Δ dalton            | mass     |           |
|           | 100.0757 | 1   | V | 13       |          |                     |          |           |
|           | 171.1128 | 2   | A | 12       | 1373.673 |                     | 1373.673 |           |
|           | 258.1448 | 3   | S | 11       | 1302.636 | +0.072791           | 651.8216 | +0.245709 |
|           | 329.1819 | 4   | A | 10       | 1215.604 | +0.013999           | 1215.604 |           |
| -0.00588  | 442.266  | 5   | L | 9        | 1144.567 | -0.18375            | 572.787  | +0.372138 |
| +0.083447 | 539.3188 | 6   | P | 8        | 1031.483 | -0.03145            | 516.2449 | +0.067856 |
|           | 596.3402 | 7   | G | 7        | 934.4299 | +0.103162           | 934.4299 |           |
| -0.40593  | 727.3807 | 8   | M | 6        | 877.4084 | +0.024651           | 877.4084 |           |
|           | 856.4233 | 9   | E | 5        | 746.3679 |                     | 746.3679 |           |
|           | 970.4662 | 10  | N | 4        | 617.3253 |                     | 617.3253 |           |
| +0.104869 | 1069.535 | 11  | V | 3        | 503.2824 |                     | 503.2824 |           |
|           | 1197.593 | 12  | Q | 2        | 404.214  |                     | 404.214  |           |
| -0.16158  | 1326.636 | 13  | E | 1        | 276.1554 |                     | 276.1554 |           |
|           |          | 14  | K | 0        | 147.1128 |                     | 147.1128 |           |

#### general information

|                       |             |
|-----------------------|-------------|
| Annotation:           | 10 of 14    |
| AminoAcids Coverage:  | 71 %        |
| Intensity Coverage:   | 54 %        |
| Peak Coverage:        | 25 %        |
| Protein Localisation: | 170 ... 183 |

Scan number 339 Raw file LNCAP\_Silac\_23F10\_set2\_02  
 Method ITMS: CID Pepti... 244.72

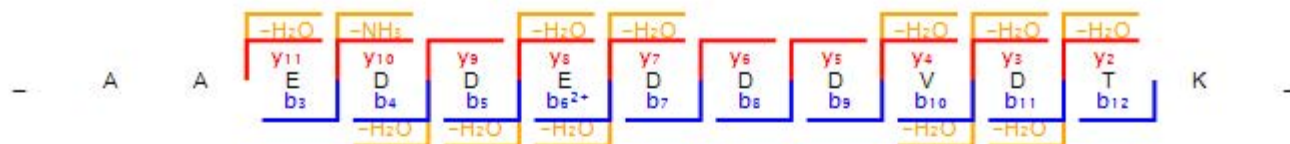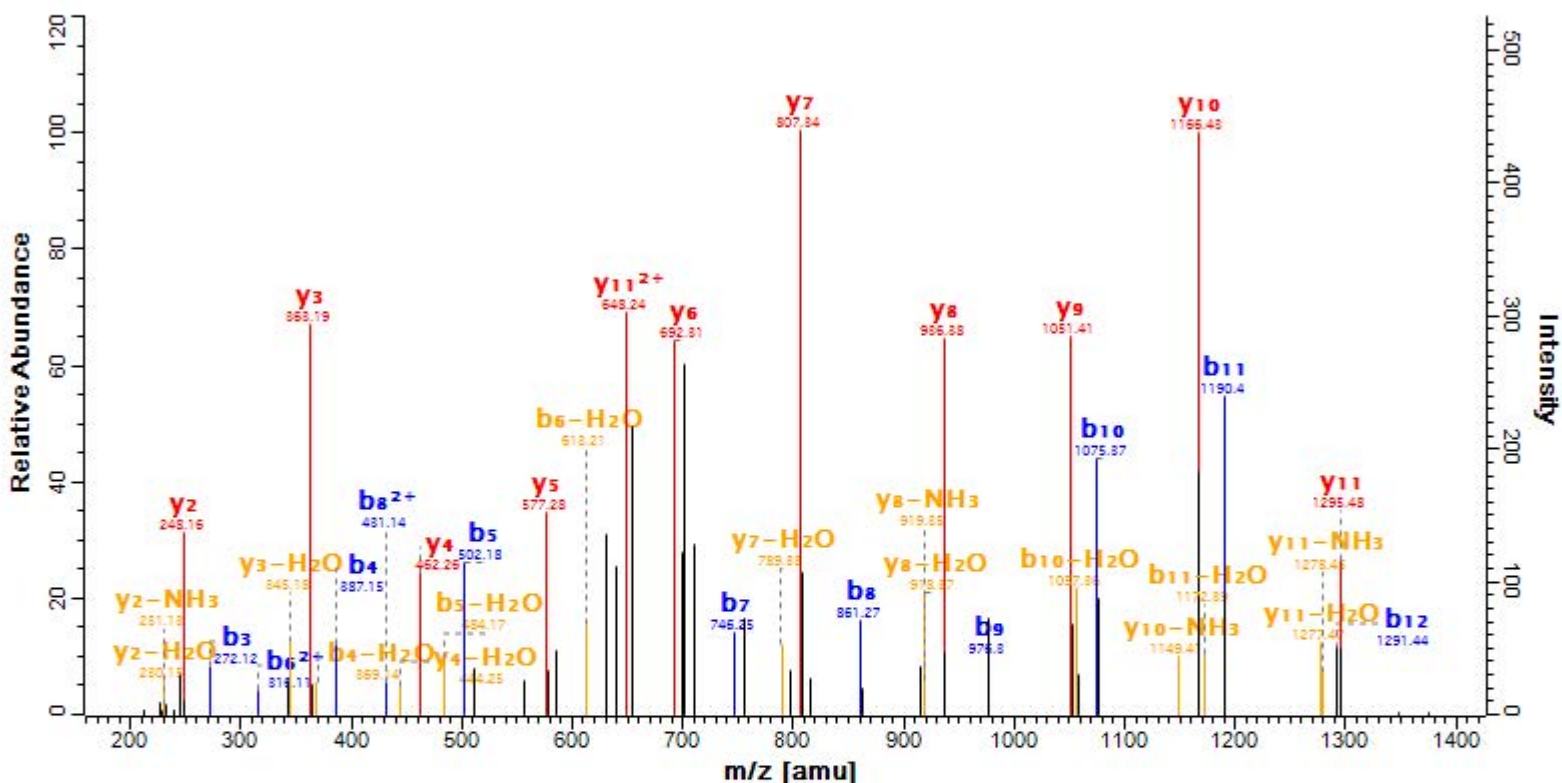

precursor information

|                   |                 |
|-------------------|-----------------|
| Mass:             | 1436.54282      |
| m/z:              | 719.27869       |
| Charge:           | 2+              |
| Retentiontime:    | 7.0077567100524 |
| Score:            | 244.7179        |
| Mass Error [ppm]: | 0.091398        |
| PEP:              | 2.4845E-36      |
| Precursor Type:   | MULTI           |

general information

|                       |            |
|-----------------------|------------|
| Annotation:           | 10 of 13   |
| AminoAcids Coverage:  | 77 %       |
| Intensity Coverage:   | 67 %       |
| Peak Coverage:        | 47 %       |
| Protein Localisation: | 91 ... 103 |

| b <sup>2+</sup> ion |        | b ion    |        |    |     |    | y ion    |         | y <sup>2+</sup> ion |         |
|---------------------|--------|----------|--------|----|-----|----|----------|---------|---------------------|---------|
| Δ dalton            | mass   | Δ dalton | mass   |    | seq |    | Δ dalton | mass    | Δ dalton            | mass    |
|                     | 72.044 |          | 72.044 | 1  | A   | 12 |          |         |                     |         |
|                     | 143.08 |          | 143.08 | 2  | A   | 11 | 1366.5   |         | 1366.5              |         |
|                     | 272.12 | +0.0611  | 272.12 | 3  | E   | 10 | 1295.5   | -0.06   | 648.24              | +0.2008 |
|                     | 387.15 | -0.045   | 387.15 | 4  | D   | 9  | 1166.4   | -0.064  | 1166.4              |         |
|                     | 502.18 | +0.0572  | 502.18 | 5  | D   | 8  | 1051.4   | -0.023  | 1051.4              |         |
| -0.095              | 316.11 |          | 631.22 | 6  | E   | 7  | 936.38   | -0.029  | 936.38              |         |
|                     | 746.25 | -0.014   | 746.25 | 7  | D   | 6  | 807.34   | +0.0273 | 807.34              |         |
| +0.149              | 431.14 | -0.127   | 861.27 | 8  | D   | 5  | 692.31   | +0.0287 | 692.31              |         |
|                     | 976.3  | +0.128   | 976.3  | 9  | D   | 4  | 577.28   | +0.0055 | 577.28              |         |
|                     | 1075.4 | -0.044   | 1075.4 | 10 | V   | 3  | 462.26   | -0.014  | 462.26              |         |
|                     | 1190.4 | -0.095   | 1190.4 | 11 | D   | 2  | 363.19   | +0.0398 | 363.19              |         |
|                     | 1291.4 | -0.11    | 1291.4 | 12 | T   | 1  | 248.16   | -0.027  | 248.16              |         |
|                     |        |          |        | 13 | K   | 0  | 147.11   |         | 147.11              |         |

Scan number 3868 Raw file LNCAP\_Silac\_23F10\_set2\_02  
 Method ITMS; CID Pepti... 72.42

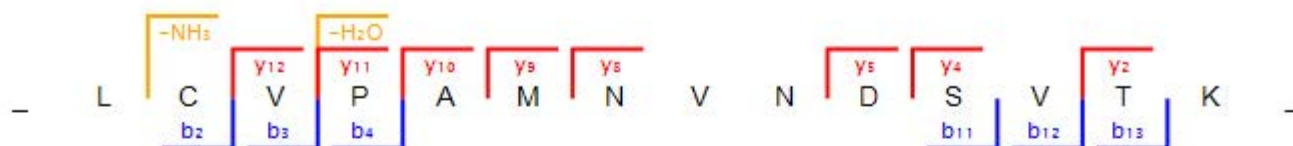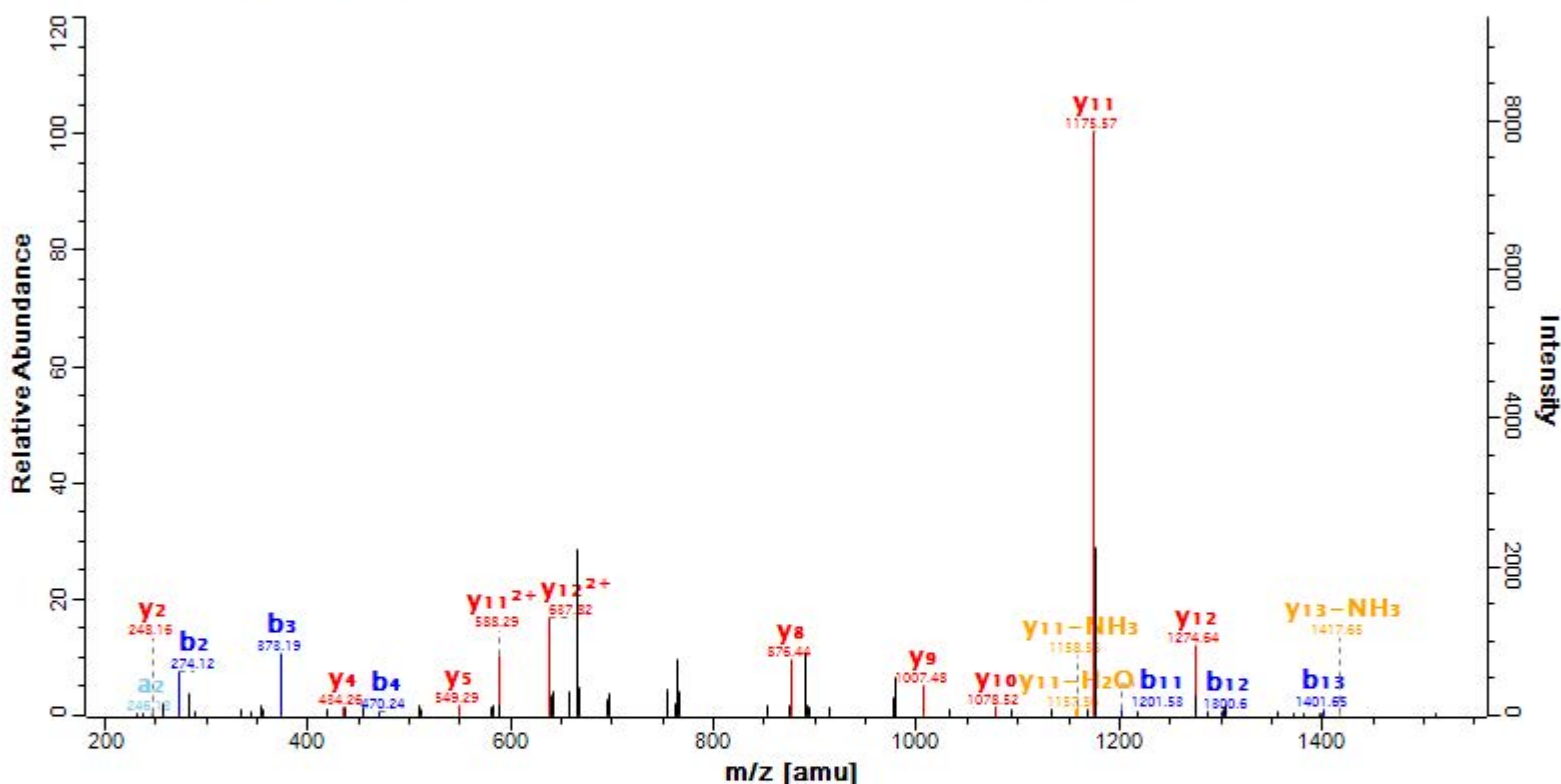

#### precursor information

|                   |                 |
|-------------------|-----------------|
| Mass:             | 1546.74818      |
| m/z:              | 774.38137       |
| Charge:           | 2+              |
| Retentiontime:    | 28.000347137451 |
| Score:            | 72.41717        |
| Mass Error [ppm]: | -0.10749        |
| PEP:              | 0.0016799       |
| Precursor Type:   | MULTI           |

#### general information

|                       |             |
|-----------------------|-------------|
| Annotation:           | 10 of 14    |
| AminoAcids Coverage:  | 71 %        |
| Intensity Coverage:   | 50 %        |
| Peak Coverage:        | 25 %        |
| Protein Localisation: | 352 ... 365 |

| a ion    |        | b ion    |        |    |     |          | y ion  |          | y <sup>2+</sup> ion |         |
|----------|--------|----------|--------|----|-----|----------|--------|----------|---------------------|---------|
| Δ dalton | mass   | Δ dalton | mass   |    | seq | Δ dalton | mass   | Δ dalton | mass                |         |
|          | 86.096 |          | 114.09 | 1  | L   | 13       |        |          |                     |         |
| -0.131   | 246.13 | +0.0349  | 274.12 | 2  | C   | 12       | 1434.7 |          | 1434.7              |         |
|          | 345.2  | -0.007   | 373.19 | 3  | V   | 11       | 1274.6 | -0.047   | 637.82              | +0.1785 |
|          | 442.25 | +0.1945  | 470.24 | 4  | P   | 10       | 1175.6 | -0.049   | 588.29              | +0.0028 |
|          | 513.29 |          | 541.28 | 5  | A   | 9        | 1078.5 | +0.1589  | 1078.5              |         |
|          | 644.33 |          | 672.32 | 6  | M   | 8        | 1007.5 | +0.0914  | 1007.5              |         |
|          | 758.37 |          | 786.36 | 7  | N   | 7        | 876.44 | +0.0782  | 876.44              |         |
|          | 857.44 |          | 885.43 | 8  | V   | 6        | 762.4  |          | 762.4               |         |
|          | 971.48 |          | 999.48 | 9  | N   | 5        | 663.33 |          | 663.33              |         |
|          | 1086.5 |          | 1114.5 | 10 | D   | 4        | 549.29 | +0.0325  | 549.29              |         |
|          | 1173.5 | -0.31    | 1201.5 | 11 | S   | 3        | 434.26 | +0.2768  | 434.26              |         |
|          | 1272.6 | +0.2676  | 1300.6 | 12 | V   | 2        | 347.23 |          | 347.23              |         |
|          | 1373.7 | +0.3914  | 1401.7 | 13 | T   | 1        | 248.16 | +0.1322  | 248.16              |         |
|          |        |          |        | 14 | K   | 0        | 147.11 |          | 147.11              |         |

Scan number 3999 Raw file LNCAP\_Silac\_23F10\_set2\_02  
 Method ITMS; CID Peptide 75.77

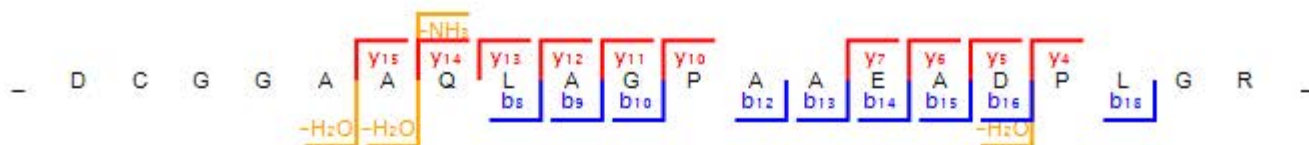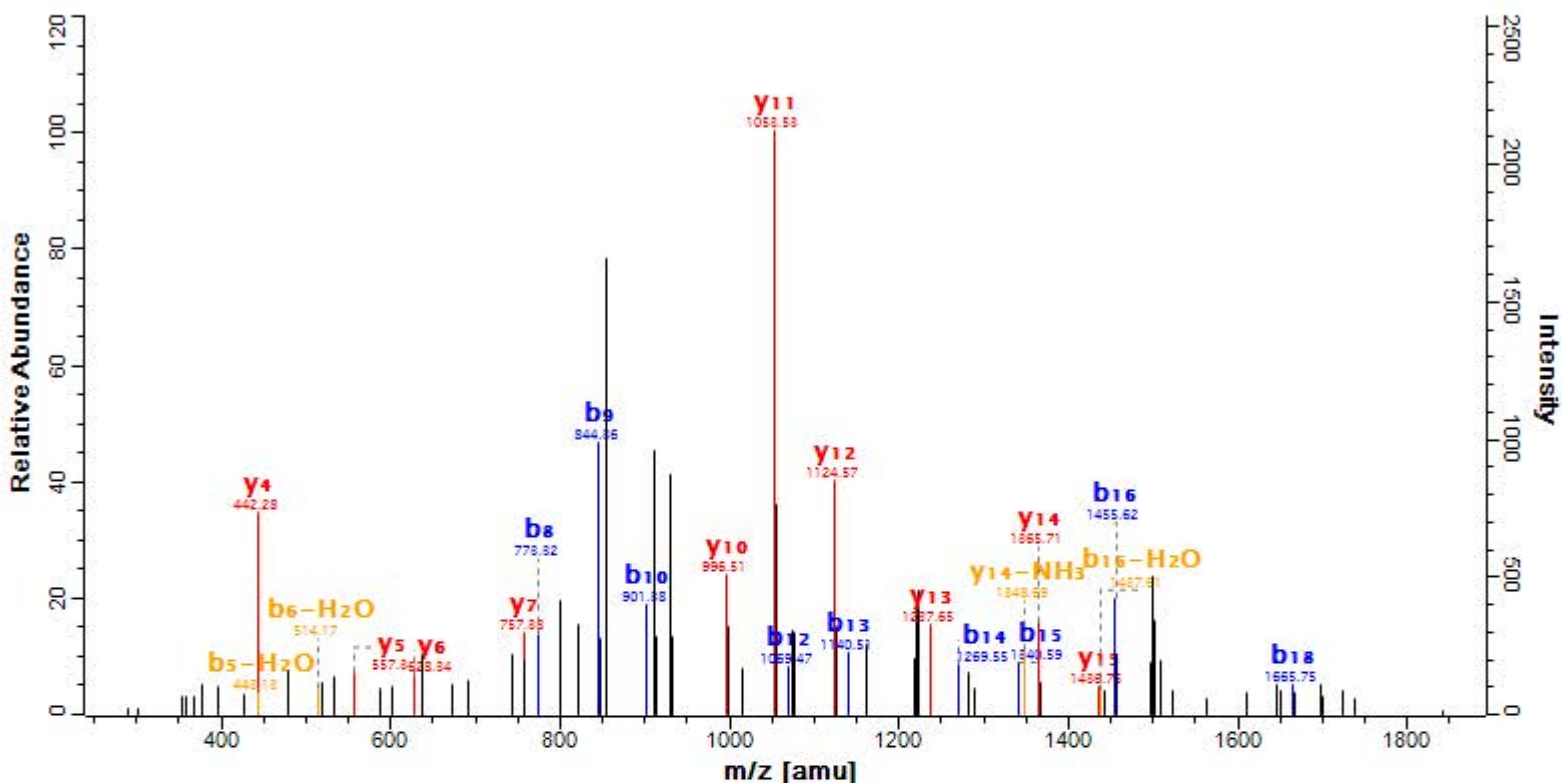

**precursor information**

|                   |                 |
|-------------------|-----------------|
| Mass:             | 1895.88149      |
| m/z:              | 948.94802       |
| Charge:           | 2+              |
| Retentiontime:    | 28.651065826416 |
| Score:            | 75.77346        |
| Mass Error [ppm]: | 1.0133          |
| PEP:              | 0.0043013       |
| Precursor Type:   | ISO             |

| b ion      |               |     |   | y ion    |               |            |
|------------|---------------|-----|---|----------|---------------|------------|
| Δ dalton   | mass          | seq |   | Δ dalton | mass          |            |
|            | 116.034219499 | 1   | D | 19       |               |            |
|            | 276.0648677   | 2   | C | 18       | 1781.85990731 |            |
|            | 333.086331424 | 3   | G | 17       | 1621.82925911 |            |
|            | 390.107795147 | 4   | G | 16       | 1564.80779538 |            |
|            | 461.144908935 | 5   | A | 15       | 1507.78633166 |            |
|            | 532.182022723 | 6   | A | 14       | 1436.74921787 | -0.0838126 |
|            | 660.240600234 | 7   | Q | 13       | 1365.71210408 | +0.0463188 |
| -0.1097594 | 773.324664215 | 8   | L | 12       | 1237.65352657 | -0.0754016 |
| -0.0117414 | 844.361778002 | 9   | A | 11       | 1124.56946259 | -0.0052536 |
| -0.0353413 | 901.383241726 | 10  | G | 10       | 1053.5323488  | +0.0042723 |
|            | 998.436005578 | 11  | P | 9        | 996.510885081 | +0.0616857 |
| +0.0005134 | 1069.47311937 | 12  | A | 8        | 899.458121229 |            |
| -0.0444128 | 1140.51023315 | 13  | A | 7        | 828.421007441 |            |
| +0.0492245 | 1269.55282625 | 14  | E | 6        | 757.383893653 | +0.0229667 |
| -0.1581773 | 1340.58994004 | 15  | A | 5        | 628.341300557 | +0.1278157 |
| -0.1561897 | 1455.61688307 | 16  | D | 4        | 557.304186769 | +0.2606326 |
|            | 1552.66964692 | 17  | P | 3        | 442.277243737 | +0.104287  |
| -0.066333  | 1665.7537109  | 18  | L | 2        | 345.224479885 |            |
|            | 1722.77517463 | 19  | G | 1        | 232.140415905 |            |
|            |               | 20  | R | 0        | 175.118952181 |            |

**general information**

|                       |          |
|-----------------------|----------|
| Annotation:           | 14 of 20 |
| AminoAcids Coverag    | 70 %     |
| Intensity Coverage:   | 38 %     |
| Peak Coverage:        | 27 %     |
| Protein Localisation: | 7 ... 26 |

Scan number 4131 Raw file LNCAP\_Silac\_23F10\_set2\_02  
 Method ITMS; CID Pepti... 124.68

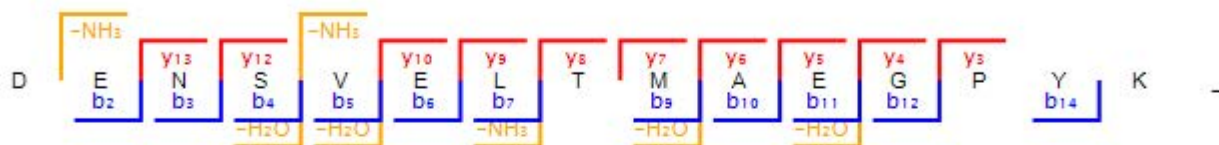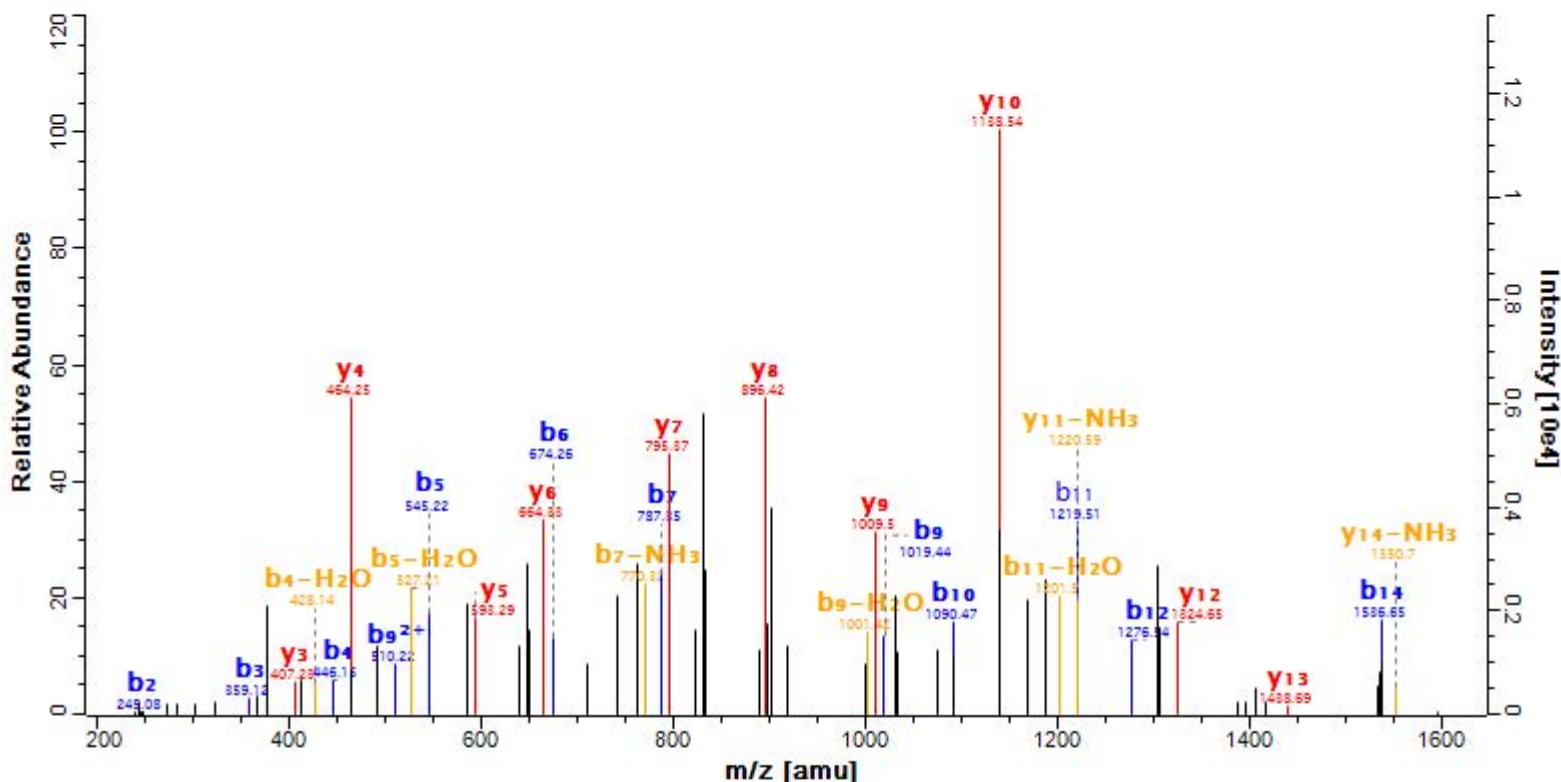

#### precursor information

|                   |                 |
|-------------------|-----------------|
| Mass:             | 1681.75072      |
| m/z:              | 841.88264       |
| Charge:           | 2+              |
| Retentiontime:    | 29.348617553710 |
| Score:            | 124.6754        |
| Mass Error [ppm]: | 0.12212         |
| PEP:              | 2.3076E-09      |
| Precursor Type:   | MULTI           |

#### general information

|                       |             |
|-----------------------|-------------|
| Annotation:           | 13 of 15    |
| AminoAcids Coverage:  | 87 %        |
| Intensity Coverage:   | 51 %        |
| Peak Coverage:        | 36 %        |
| Protein Localisation: | 185 ... 199 |

| b <sup>2+</sup> ion |          | b ion     |          |     |   | y ion    |          |
|---------------------|----------|-----------|----------|-----|---|----------|----------|
| Δ dalton            | mass     | Δ dalton  | mass     | seq |   | Δ dalton | mass     |
|                     | 116.0342 |           | 116.0342 | 1   | D | 14       |          |
|                     | 245.0768 | +0.018692 | 245.0768 | 2   | E | 13       | 1567.731 |
|                     | 359.1197 | +0.239696 | 359.1197 | 3   | N | 12       | 1438.688 |
|                     | 446.1518 | +0.036159 | 446.1518 | 4   | S | 11       | 1324.645 |
|                     | 545.2202 | -0.004    | 545.2202 | 5   | V | 10       | 1237.613 |
|                     | 674.2628 | +0.069866 | 674.2628 | 6   | E | 9        | 1138.545 |
|                     | 787.3468 | -0.01701  | 787.3468 | 7   | L | 8        | 1009.502 |
|                     | 888.3945 |           | 888.3945 | 8   | T | 7        | 896.4182 |
| -0.25727            | 510.2211 | -0.1186   | 1019.435 | 9   | M | 6        | 795.3706 |
|                     | 1090.472 | -0.05976  | 1090.472 | 10  | A | 5        | 664.3301 |
|                     | 1219.515 | -0.08551  | 1219.515 | 11  | E | 4        | 593.293  |
|                     | 1276.536 | -0.14762  | 1276.536 | 12  | G | 3        | 464.2504 |
|                     | 1373.589 |           | 1373.589 | 13  | P | 2        | 407.2289 |
|                     | 1536.652 | -0.09697  | 1536.652 | 14  | Y | 1        | 310.1761 |
|                     |          |           |          | 15  | K | 0        | 147.1128 |

Scan number 4227 Raw file LNCAP\_Silac\_23F10\_set2\_02  
 Method ITMS; CID Pepti... 72.89

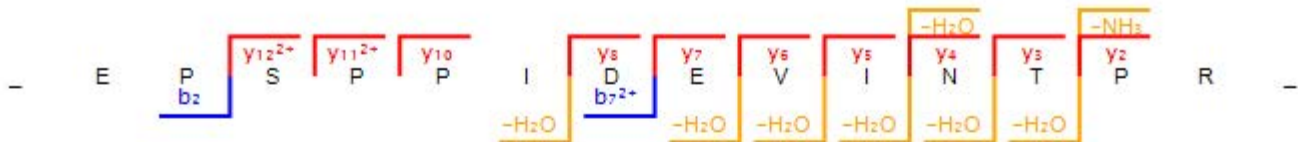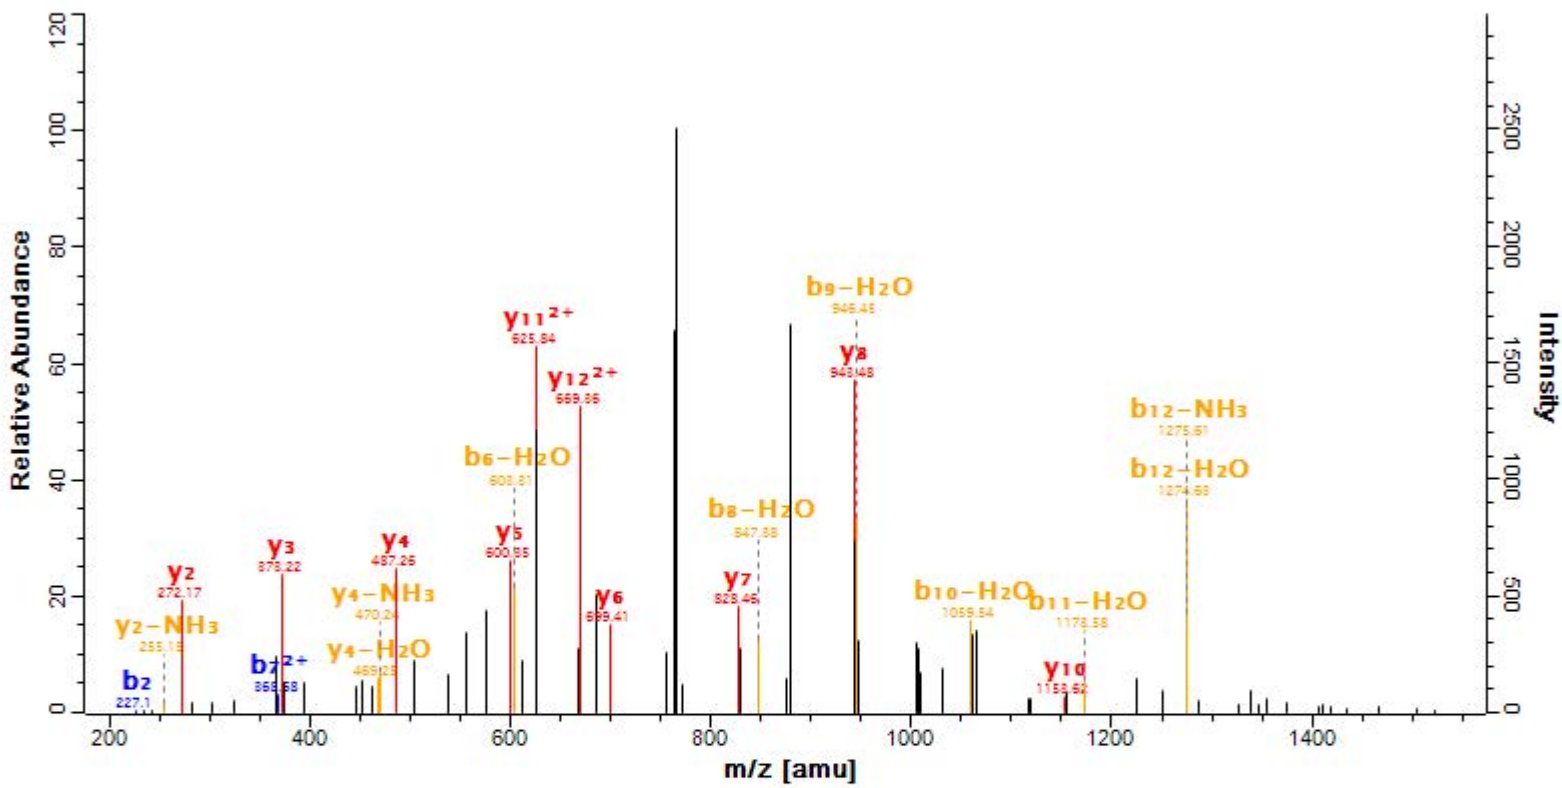

precursor information

|                   |                 |
|-------------------|-----------------|
| Mass:             | 1562.79362      |
| m/z:              | 782.40409       |
| Charge:           | 2+              |
| Retentiontime:    | 29.841358184814 |
| Score:            | 72.89124        |
| Mass Error [ppm]: | -0.26617        |
| PEP:              | 0.001638        |
| Precursor Type:   | MULTI           |

general information

|                       |             |
|-----------------------|-------------|
| Annotation:           | 12 of 14    |
| AminoAcids Coverage:  | 86 %        |
| Intensity Coverage:   | 43 %        |
| Peak Coverage:        | 28 %        |
| Protein Localisation: | 116 ... 129 |

| b <sup>2+</sup> ion |        | b ion    |        | seq |   |    | y ion    |         | y <sup>2+</sup> ion |         |
|---------------------|--------|----------|--------|-----|---|----|----------|---------|---------------------|---------|
| Δ dalton            | mass   | Δ dalton | mass   |     |   |    | Δ dalton | mass    | Δ dalton            | mass    |
|                     | 130.05 |          | 130.05 | 1   | E | 13 |          |         |                     |         |
|                     | 227.1  | -0.071   | 227.1  | 2   | P | 12 | 1434.8   |         | 1434.8              |         |
|                     | 314.13 |          | 314.13 | 3   | S | 11 | 1337.7   |         | 669.36              | +0.2323 |
|                     | 411.19 |          | 411.19 | 4   | P | 10 | 1250.7   |         | 625.84              | -0.061  |
|                     | 508.24 |          | 508.24 | 5   | P | 9  | 1153.6   | +0.1083 | 1153.6              |         |
|                     | 621.32 |          | 621.32 | 6   | I | 8  | 1056.6   |         | 1056.6              |         |
| -0.248              | 368.68 |          | 736.35 | 7   | D | 7  | 943.48   | -0.071  | 943.48              |         |
|                     | 865.39 |          | 865.39 | 8   | E | 6  | 828.46   | +0.0284 | 828.46              |         |
|                     | 964.46 |          | 964.46 | 9   | V | 5  | 699.41   | +0.1443 | 699.41              |         |
|                     | 1077.5 |          | 1077.5 | 10  | I | 4  | 600.35   | +0.0766 | 600.35              |         |
|                     | 1191.6 |          | 1191.6 | 11  | N | 3  | 487.26   | +0.1427 | 487.26              |         |
|                     | 1292.6 |          | 1292.6 | 12  | T | 2  | 373.22   | +0.0637 | 373.22              |         |
|                     | 1389.7 |          | 1389.7 | 13  | P | 1  | 272.17   | -0.035  | 272.17              |         |
|                     |        |          |        | 14  | R | 0  | 175.12   |         | 175.12              |         |



Scan number 4363 Raw file LNCAP\_Silac\_23F10\_set2\_02  
 Method ITMS; CID Pepti... 307.21

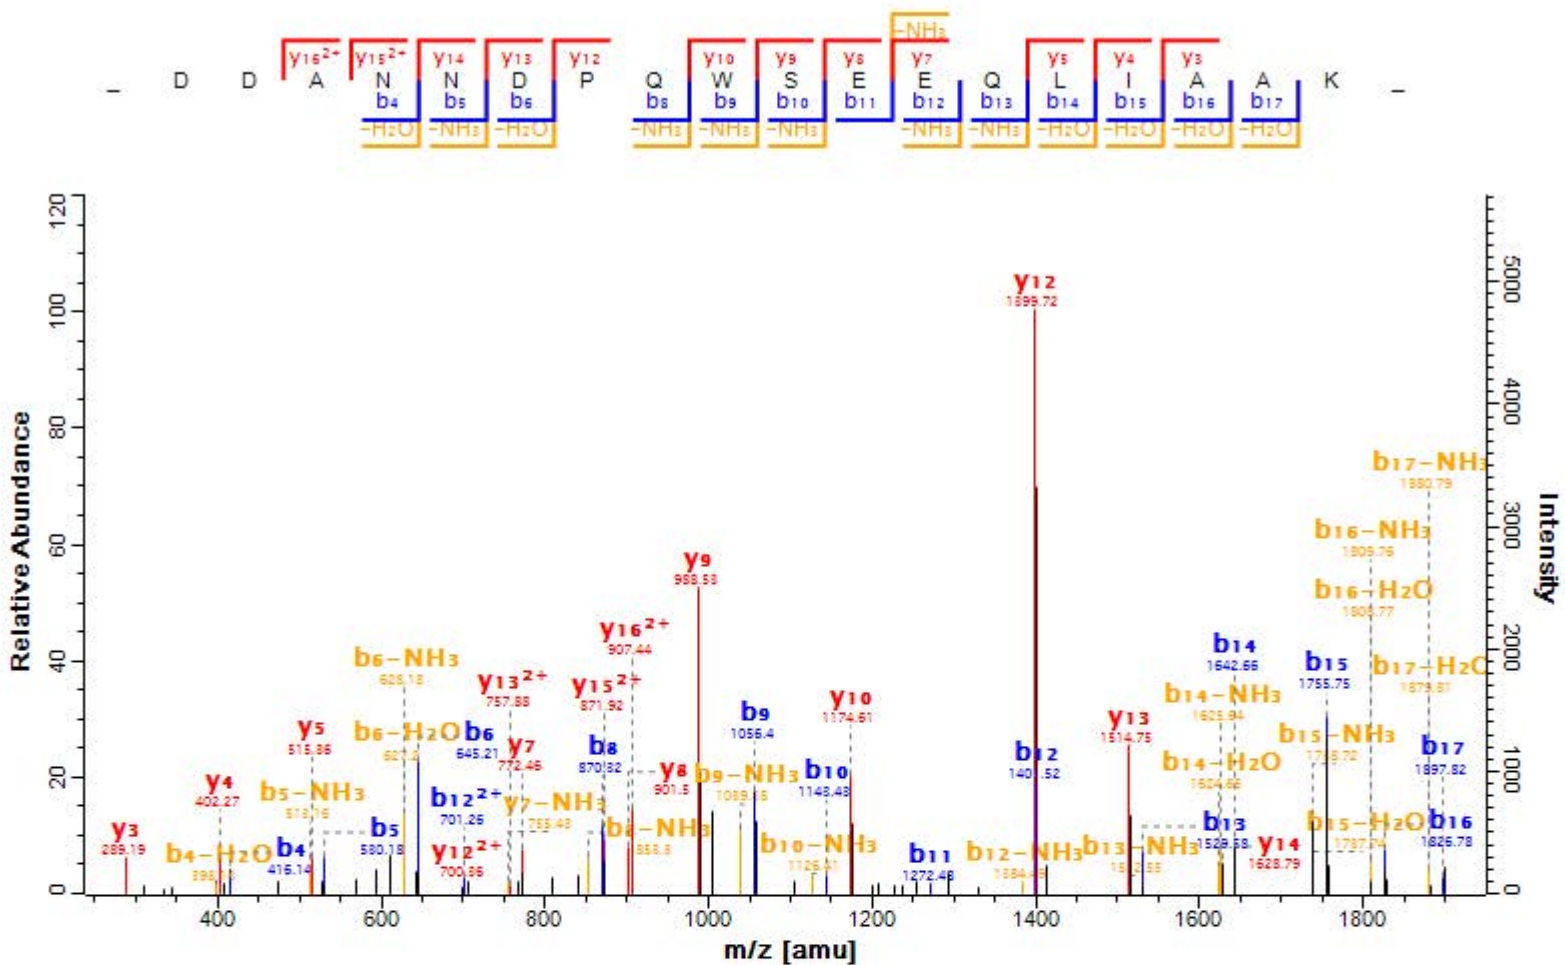

precursor information

|                   |                 |
|-------------------|-----------------|
| Mass:             | 2042.91799      |
| m/z:              | 1022.46627      |
| Charge:           | 2+              |
| Retentiontime:    | 30.547027587890 |
| Score:            | 307.205         |
| Mass Error [ppm]: | -0.065154       |
| PEP:              | 1.1673E-110     |
| Precursor Type:   | MULTI           |

general information

|                       |             |
|-----------------------|-------------|
| Annotation:           | 15 of 18    |
| AminoAcids Coverage:  | 83 %        |
| Intensity Coverage:   | 61 %        |
| Peak Coverage:        | 46 %        |
| Protein Localisation: | 158 ... 175 |

| b <sup>2+</sup> ion |        | b ion    |        | seq |   |    | y ion    |         | y <sup>2+</sup> ion |         |
|---------------------|--------|----------|--------|-----|---|----|----------|---------|---------------------|---------|
| Δ dalton            | mass   | Δ dalton | mass   |     |   |    | Δ dalton | mass    | Δ dalton            | mass    |
|                     | 116.03 |          | 116.03 | 1   | D | 17 |          |         |                     |         |
|                     | 231.06 |          | 231.06 | 2   | D | 16 | 1928.9   |         | 1928.9              |         |
|                     | 302.1  |          | 302.1  | 3   | A | 15 | 1813.9   |         | 907.44              | +0.2507 |
|                     | 416.14 | +0.0086  | 416.14 | 4   | N | 14 | 1742.8   |         | 871.92              | -0.25   |
|                     | 530.18 | +0.0435  | 530.18 | 5   | N | 13 | 1628.8   | -0.238  | 1628.8              |         |
|                     | 645.21 | +0.0642  | 645.21 | 6   | D | 12 | 1514.7   | -0.18   | 757.88              | +0.4788 |
|                     | 742.26 |          | 742.26 | 7   | P | 11 | 1399.7   | -0.099  | 700.36              | +0.0301 |
|                     | 870.32 | -0.008   | 870.32 | 8   | Q | 10 | 1302.7   |         | 1302.7              |         |
|                     | 1056.4 | -0.071   | 1056.4 | 9   | W | 9  | 1174.6   | -0.074  | 1174.6              |         |
|                     | 1143.4 | +0.0476  | 1143.4 | 10  | S | 8  | 988.53   | -0.086  | 988.53              |         |
|                     | 1272.5 | -0.025   | 1272.5 | 11  | E | 7  | 901.5    | -0.039  | 901.5               |         |
| -0.175              | 701.26 | +0.1332  | 1401.5 | 12  | E | 6  | 772.46   | +0.0625 | 772.46              |         |
|                     | 1529.6 | -0.115   | 1529.6 | 13  | Q | 5  | 643.41   |         | 643.41              |         |
|                     | 1642.7 | -0.163   | 1642.7 | 14  | L | 4  | 515.36   | -0.024  | 515.36              |         |
|                     | 1755.7 | -0.153   | 1755.7 | 15  | I | 3  | 402.27   | +0.1249 | 402.27              |         |
|                     | 1826.8 | -0.161   | 1826.8 | 16  | A | 2  | 289.19   | -0.03   | 289.19              |         |
|                     | 1897.8 | -0.114   | 1897.8 | 17  | A | 1  | 218.15   |         | 218.15              |         |
|                     |        |          |        | 18  | K | 0  | 147.11   |         | 147.11              |         |

Scan number 5025 Raw file LNCAP\_Silac\_23F10\_set2\_02  
 Method ITMS; CID Pepti... 151.04

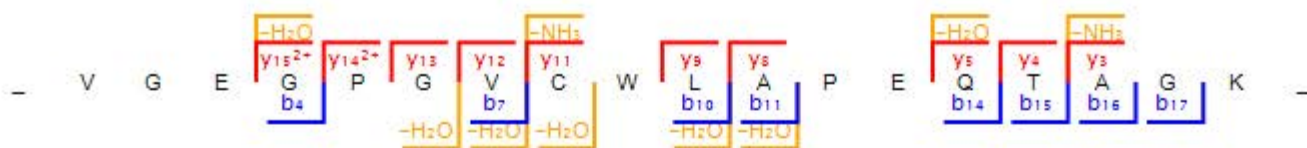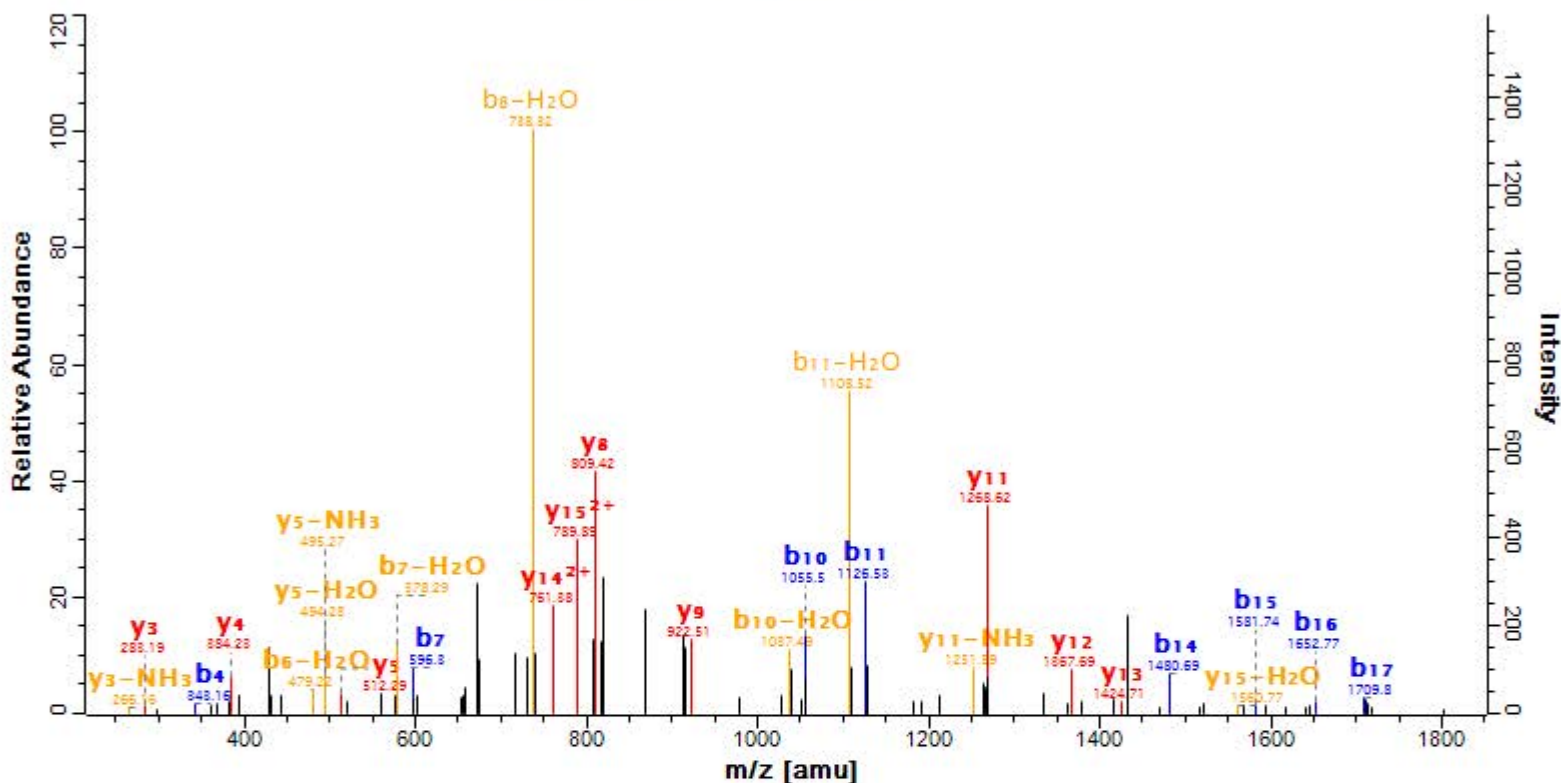

#### precursor information

|                   |                 |
|-------------------|-----------------|
| Mass:             | 1854.89343      |
| m/z:              | 928.45399       |
| Charge:           | 2+              |
| Retentiontime:    | 33.947914123535 |
| Score:            | 151.0435        |
| Mass Error [ppm]: | 0.00037632      |
| PEP:              | 1.4342E-18      |
| Precursor Type:   | MULTI           |

#### general information

|                       |             |
|-----------------------|-------------|
| Annotation:           | 13 of 18    |
| AminoAcids Coverage:  | 72 %        |
| Intensity Coverage:   | 55 %        |
| Peak Coverage:        | 30 %        |
| Protein Localisation: | 152 ... 169 |

| b ion     |          |     |   | y ion    |          | y <sup>2+</sup> ion |           |
|-----------|----------|-----|---|----------|----------|---------------------|-----------|
| Δ dalton  | mass     | seq |   | Δ dalton | mass     | Δ dalton            | mass      |
|           | 100.0757 | 1   | V | 17       |          |                     |           |
|           | 157.0972 | 2   | G | 16       | 1764.846 | 1764.846            |           |
|           | 286.1397 | 3   | E | 15       | 1707.825 | 1707.825            |           |
| +0.059492 | 343.1612 | 4   | G | 14       | 1578.782 | 789.8949            | +0.182169 |
|           | 440.214  | 5   | P | 13       | 1521.761 | 761.3841            | +0.080902 |
|           | 497.2354 | 6   | G | 12       | 1424.708 | +0.043865 1424.708  |           |
| +0.119671 | 596.3039 | 7   | V | 11       | 1367.687 | -0.07041 1367.687   |           |
|           | 756.3345 | 8   | C | 10       | 1268.618 | -0.00713 1268.618   |           |
|           | 942.4138 | 9   | W | 9        | 1108.588 | 1108.588            |           |
| -0.10078  | 1055.498 | 10  | L | 8        | 922.5084 | +0.079519 922.5084  |           |
| +0.068402 | 1126.535 | 11  | A | 7        | 809.4243 | +0.09498 809.4243   |           |
|           | 1223.588 | 12  | P | 6        | 738.3872 | 738.3872            |           |
|           | 1352.63  | 13  | E | 5        | 641.3344 | 641.3344            |           |
| +0.121499 | 1480.689 | 14  | Q | 4        | 512.2918 | +0.312351 512.2918  |           |
| +0.331999 | 1581.737 | 15  | T | 3        | 384.2333 | -0.06297 384.2333   |           |
| -0.41569  | 1652.774 | 16  | A | 2        | 283.1856 | +0.231839 283.1856  |           |
| -0.43935  | 1709.795 | 17  | G | 1        | 212.1485 | 212.1485            |           |
|           |          | 18  | K | 0        | 155.127  | 155.127             |           |

Scan number 5045 Raw file LNCAP\_Silac\_23F10\_set2\_02  
 Method ITMS; CID Pepti... 123.55

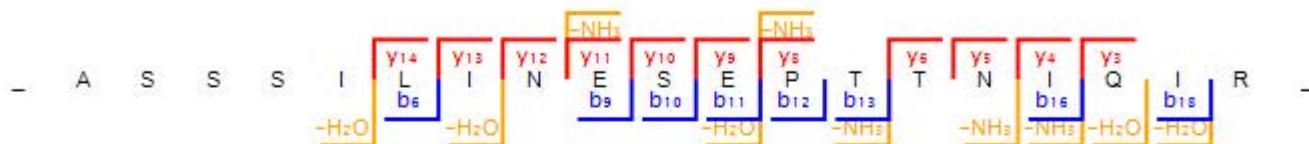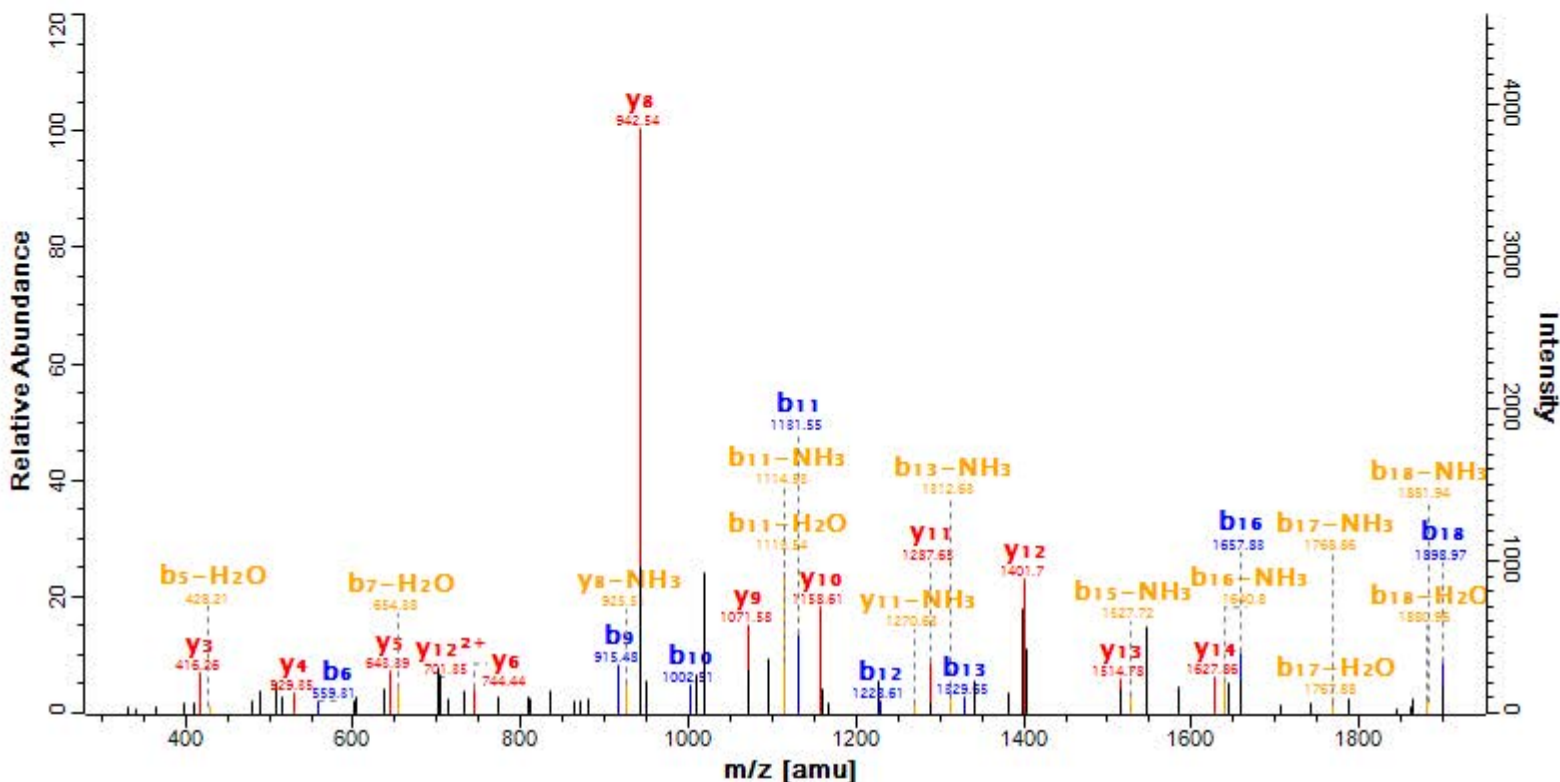

#### precursor information

|                   |                 |
|-------------------|-----------------|
| Mass:             | 2072.07488      |
| m/z:              | 1037.04472      |
| Charge:           | 2+              |
| Retentiontime:    | 34.053836822509 |
| Score:            | 123.5525        |
| Mass Error [ppm]: | -0.037794       |
| PEP:              | 1.298E-12       |
| Precursor Type:   | MULTI           |

#### general information

|                       |           |
|-----------------------|-----------|
| Annotation:           | 14 of 19  |
| AminoAcids Coverage:  | 74 %      |
| Intensity Coverage:   | 52 %      |
| Peak Coverage:        | 36 %      |
| Protein Localisation: | 56 ... 74 |

| b ion     |          |    |     | y ion    |          | y <sup>2+</sup> ion |          |          |
|-----------|----------|----|-----|----------|----------|---------------------|----------|----------|
| Δ dalton  | mass     |    | seq | Δ dalton | mass     | Δ dalton            | mass     |          |
|           | 72.04439 | 1  | A   | 18       |          |                     |          |          |
|           | 159.0764 | 2  | S   | 17       | 2002.045 | 2002.045            |          |          |
|           | 246.1084 | 3  | S   | 16       | 1915.013 | 1915.013            |          |          |
|           | 333.1405 | 4  | S   | 15       | 1827.981 | 1827.981            |          |          |
|           | 446.2245 | 5  | I   | 14       | 1740.949 | 1740.949            |          |          |
| +0.188223 | 559.3086 | 6  | L   | 13       | 1627.865 | +0.054946           | 1627.865 |          |
|           | 672.3927 | 7  | I   | 12       | 1514.781 | -0.0076             | 1514.781 |          |
|           | 786.4356 | 8  | N   | 11       | 1401.697 | -0.08698            | 701.3521 | +0.31786 |
| -0.11784  | 915.4782 | 9  | E   | 10       | 1287.654 | +0.093394           | 1287.654 |          |
| -0.01388  | 1002.51  | 10 | S   | 9        | 1158.611 | -0.07678            | 1158.611 |          |
| +0.030687 | 1131.553 | 11 | E   | 8        | 1071.579 | -0.13032            | 1071.579 |          |
| +0.094744 | 1228.606 | 12 | P   | 7        | 942.5367 | -0.04794            | 942.5367 |          |
| -0.13018  | 1329.653 | 13 | T   | 6        | 845.4839 |                     | 845.4839 |          |
|           | 1430.701 | 14 | T   | 5        | 744.4363 | +0.033036           | 744.4363 |          |
|           | 1544.744 | 15 | N   | 4        | 643.3886 | -0.05857            | 643.3886 |          |
| -0.11759  | 1657.828 | 16 | I   | 3        | 529.3457 | +0.006393           | 529.3457 |          |
|           | 1785.886 | 17 | Q   | 2        | 416.2616 | +0.137027           | 416.2616 |          |
| -0.15001  | 1898.971 | 18 | I   | 1        | 288.203  |                     | 288.203  |          |
|           |          | 19 | R   | 0        | 175.119  |                     | 175.119  |          |

Scan number 525 Raw file LNCAP\_Silac\_23F10\_set2\_02  
 Method ITMS; CID Pepti... 74.85

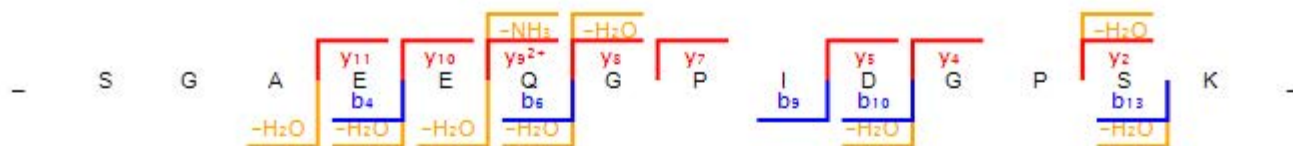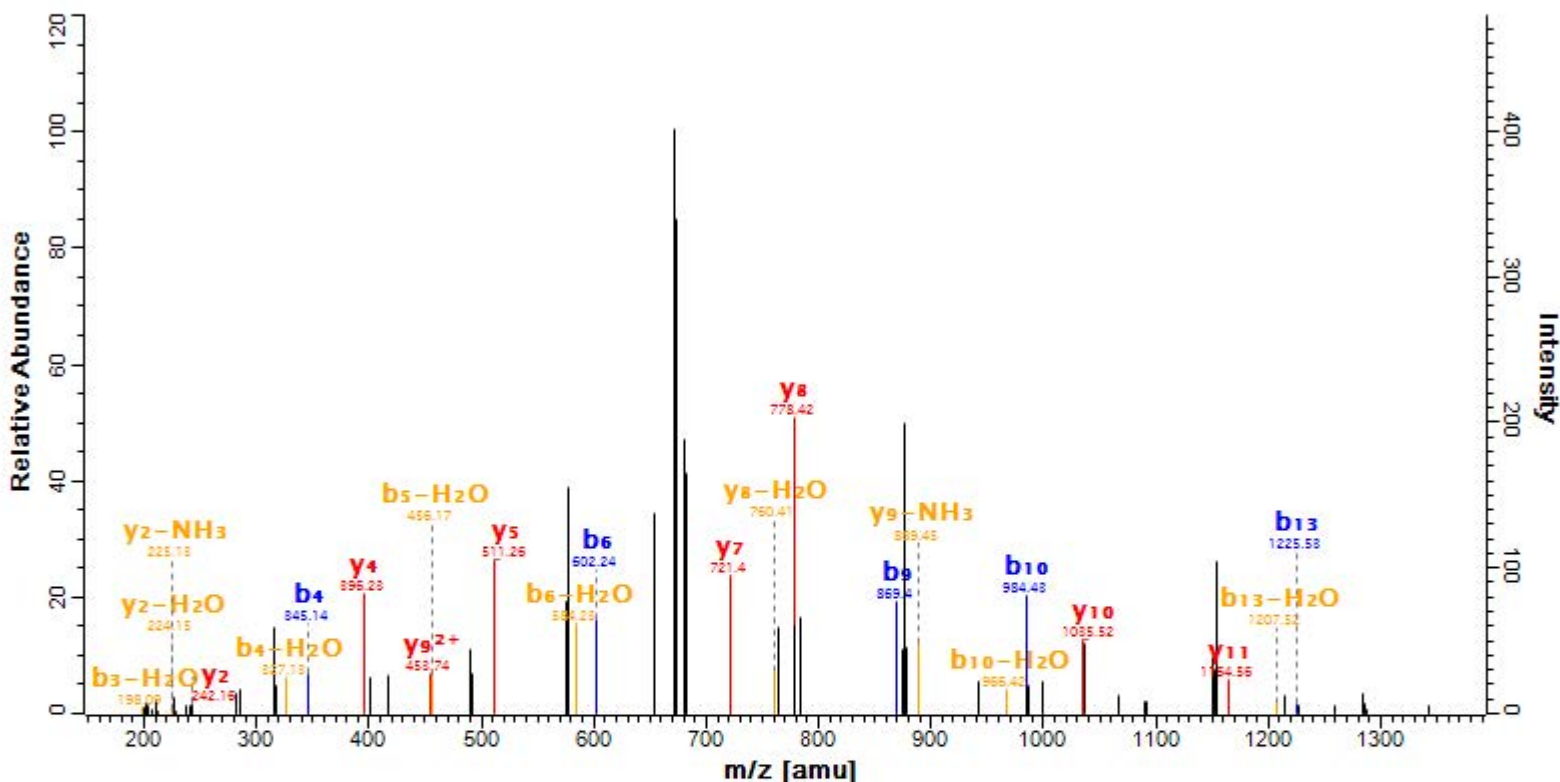

#### precursor information

|                   |                 |
|-------------------|-----------------|
| Mass:             | 1370.63022      |
| m/z:              | 686.32239       |
| Charge:           | 2+              |
| Retentiontime:    | 8.6645650863647 |
| Score:            | 74.85336        |
| Mass Error [ppm]: | -0.8491         |
| PEP:              | 0.0014643       |
| Precursor Type:   | MULTI           |

#### general information

|                       |             |
|-----------------------|-------------|
| Annotation:           | 10 of 14    |
| AminoAcids Coverage:  | 71 %        |
| Intensity Coverage:   | 26 %        |
| Peak Coverage:        | 28 %        |
| Protein Localisation: | 224 ... 237 |

| b ion     |          |     |   | y ion    |          | y <sup>2+</sup> ion |          |
|-----------|----------|-----|---|----------|----------|---------------------|----------|
| Δ dalton  | mass     | seq |   | Δ dalton | mass     | Δ dalton            | mass     |
|           | 88.0393  | 1   | S | 13       |          |                     |          |
|           | 145.0608 | 2   | G | 12       | 1292.621 |                     | 1292.621 |
|           | 216.0979 | 3   | A | 11       | 1235.599 |                     | 1235.599 |
| +0.025357 | 345.1405 | 4   | E | 10       | 1164.562 | +0.355711           | 1164.562 |
|           | 474.1831 | 5   | E | 9        | 1035.52  | +0.05785            | 1035.52  |
| +0.088249 | 602.2416 | 6   | Q | 8        | 906.4771 |                     | 453.7422 |
|           | 659.2631 | 7   | G | 7        | 778.4185 | -0.01133            | 778.4185 |
|           | 756.3159 | 8   | P | 6        | 721.397  | +0.036503           | 721.397  |
| +0.035121 | 869.3999 | 9   | I | 5        | 624.3443 |                     | 624.3443 |
| +0.026305 | 984.4269 | 10  | D | 4        | 511.2602 | +0.063101           | 511.2602 |
|           | 1041.448 | 11  | G | 3        | 396.2333 | -0.01512            | 396.2333 |
|           | 1138.501 | 12  | P | 2        | 339.2118 |                     | 339.2118 |
| -0.07037  | 1225.533 | 13  | S | 1        | 242.159  | +0.07191            | 242.159  |
|           |          | 14  | K | 0        | 155.127  |                     | 155.127  |

Scan number 5688 Raw file LNCAP\_Silac\_23F10\_set2\_02  
 Method ITMS; CID Peptide 230.71

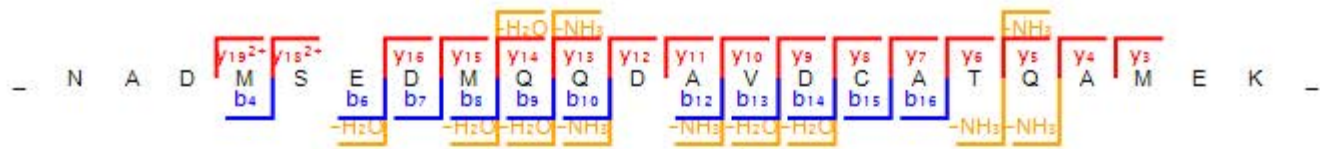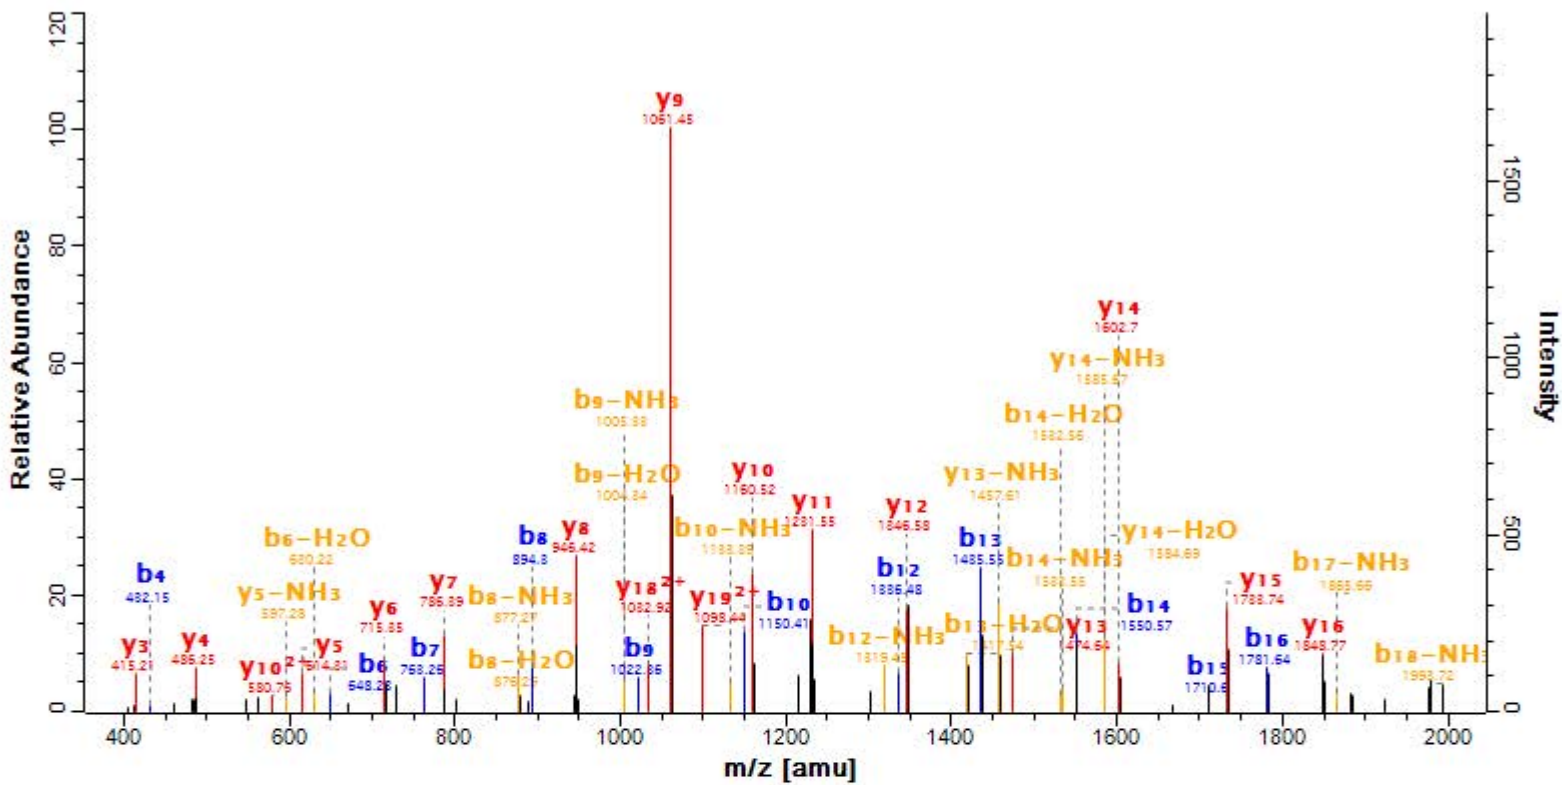

**precursor information**

|                   |                 |
|-------------------|-----------------|
| Mass:             | 2486.96582      |
| m/z:              | 1244.49019      |
| Charge:           | 2+              |
| Retentiontime:    | 37.376995086669 |
| Score:            | 230.7101        |
| Mass Error [ppm]: | -0.0020538      |
| PEP:              | 7.467E-76       |
| Precursor Type:   | MULTI           |

| b ion     |          |     |   | y ion    |          | y <sup>2+</sup> ion |                    |
|-----------|----------|-----|---|----------|----------|---------------------|--------------------|
| Δ dalton  | mass     | seq |   | Δ dalton | mass     | Δ dalton            | mass               |
|           | 115.0502 | 1   | N | 21       |          |                     |                    |
|           | 186.0873 | 2   | A | 20       | 2381.944 |                     | 2381.944           |
|           | 301.1143 | 3   | D | 19       | 2310.907 |                     | 2310.907           |
| -0.04671  | 432.1547 | 4   | M | 18       | 2195.88  |                     | 1098.444 +0.35137  |
|           | 519.1868 | 5   | S | 17       | 2064.84  |                     | 1032.924 +0.217682 |
| +0.167362 | 648.2294 | 6   | E | 16       | 1977.808 |                     | 1977.808           |
| +0.025978 | 763.2563 | 7   | D | 15       | 1848.765 | +0.044239           | 1848.765           |
| -0.00737  | 894.2968 | 8   | M | 14       | 1733.738 | -0.06236            | 1733.738           |
| -0.10049  | 1022.355 | 9   | Q | 13       | 1602.698 | -0.3024             | 1602.698           |
| +0.074698 | 1150.414 | 10  | Q | 12       | 1474.639 | -0.11101            | 1474.639           |
|           | 1265.441 | 11  | D | 11       | 1346.581 | +0.006166           | 1346.581           |
| -0.07859  | 1336.478 | 12  | A | 10       | 1231.554 | +0.039212           | 1231.554           |
| +0.081876 | 1435.546 | 13  | V | 9        | 1160.517 | +0.025057           | 580.7619 -0.42098  |
| -0.15771  | 1550.573 | 14  | D | 8        | 1061.448 | -0.11368            | 1061.448           |
| +0.017937 | 1710.604 | 15  | C | 7        | 946.4212 | +0.06597            | 946.4212           |
| -0.18812  | 1781.641 | 16  | A | 6        | 786.3906 | +0.032592           | 786.3906           |
|           | 1882.689 | 17  | T | 5        | 715.3535 | +0.104069           | 715.3535           |
|           | 2010.747 | 18  | Q | 4        | 614.3058 | -0.05187            | 614.3058           |
|           | 2081.784 | 19  | A | 3        | 486.2472 | +0.070921           | 486.2472           |
|           | 2212.825 | 20  | M | 2        | 415.2101 | +0.02048            | 415.2101           |
|           | 2341.868 | 21  | E | 1        | 284.1696 |                     | 284.1696           |
|           |          | 22  | K | 0        | 155.127  |                     | 155.127            |

**general information**

|                       |           |
|-----------------------|-----------|
| Annotation:           | 17 of 22  |
| AminoAcids Coverage:  | 77 %      |
| Intensity Coverage:   | 62 %      |
| Peak Coverage:        | 46 %      |
| Protein Localisation: | 10 ... 31 |

Scan number 5759 Raw file LNCAP\_Silac\_23F10\_set2\_02  
 Method ITMS; CID Pepti... 75.32

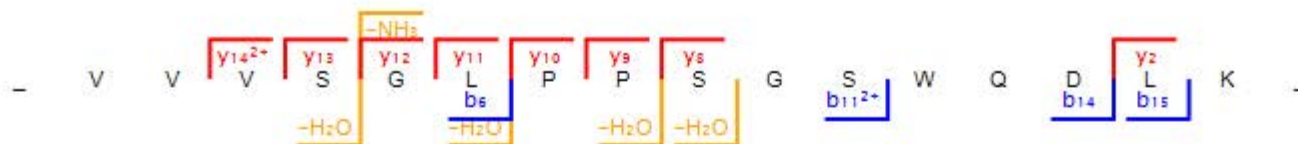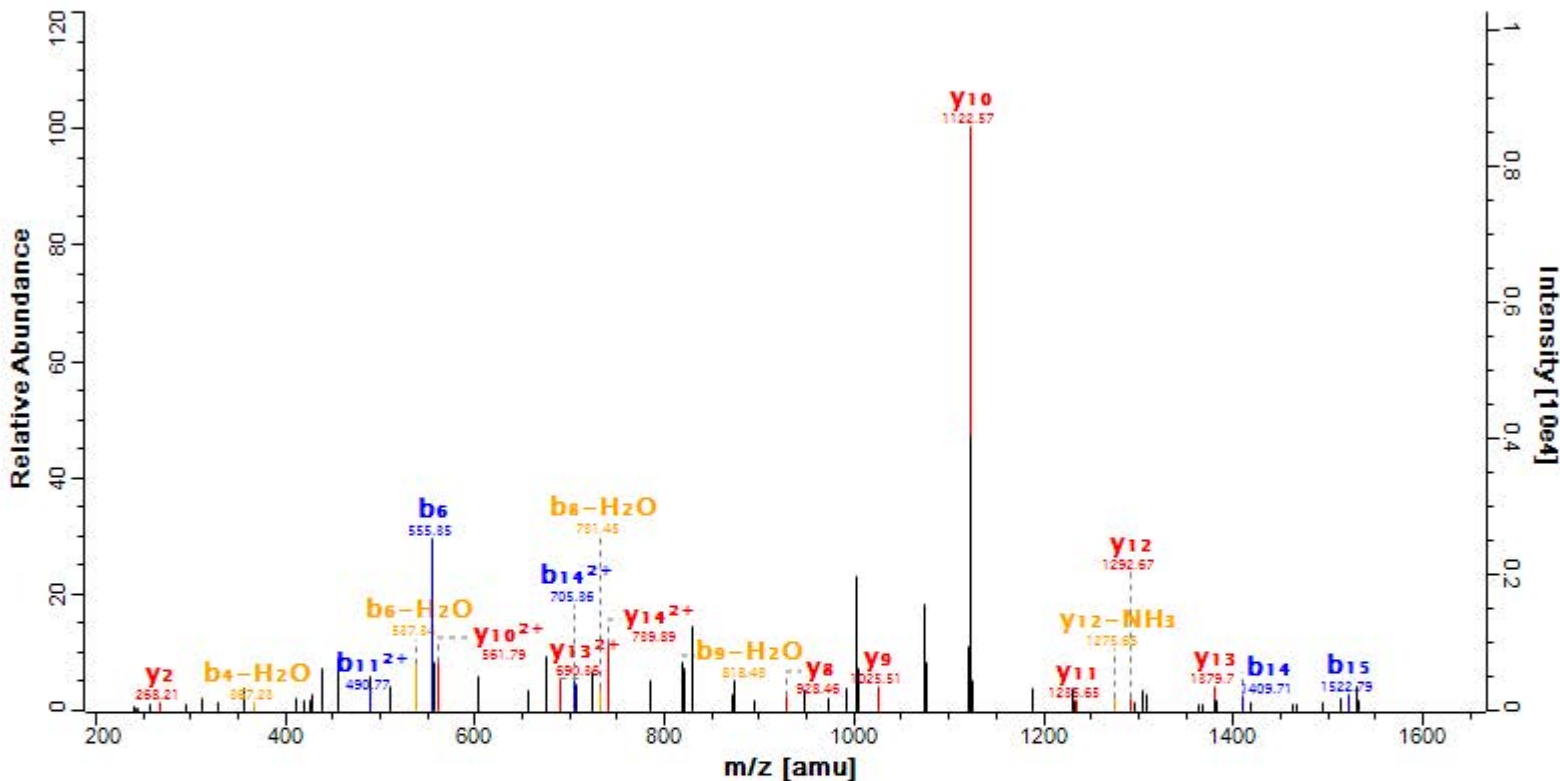

#### precursor information

|                   |                 |
|-------------------|-----------------|
| Mass:             | 1667.88863      |
| m/z:              | 834.95159       |
| Charge:           | 2+              |
| Retentiontime:    | 37.760238647460 |
| Score:            | 75.31638        |
| Mass Error [ppm]: | 0.2161          |
| PEP:              | 0.00033437      |
| Precursor Type:   | MULTI           |

#### general information

|                       |             |
|-----------------------|-------------|
| Annotation:           | 10 of 16    |
| AminoAcids Coverag    | 62 %        |
| Intensity Coverage:   | 39 %        |
| Peak Coverage:        | 24 %        |
| Protein Localisation: | 123 ... 138 |

| b <sup>2+</sup> ion |        | b ion    |        | seq |   |    | y ion    |         | y <sup>2+</sup> ion |         |
|---------------------|--------|----------|--------|-----|---|----|----------|---------|---------------------|---------|
| Δ dalton            | mass   | Δ dalton | mass   |     |   |    | Δ dalton | mass    | Δ dalton            | mass    |
|                     | 100.08 |          | 100.08 | 1   | V | 15 |          |         |                     |         |
|                     | 199.14 |          | 199.14 | 2   | V | 14 | 1577.8   |         | 1577.8              |         |
|                     | 298.21 |          | 298.21 | 3   | V | 13 | 1478.8   |         | 739.89              | +0.0796 |
|                     | 385.24 |          | 385.24 | 4   | S | 12 | 1379.7   | -0.145  | 690.36              | -0.247  |
|                     | 442.27 |          | 442.27 | 5   | G | 11 | 1292.7   | +0.0884 | 1292.7              |         |
|                     | 555.35 | -0.024   | 555.35 | 6   | L | 10 | 1235.7   | -0.035  | 1235.7              |         |
|                     | 652.4  |          | 652.4  | 7   | P | 9  | 1122.6   | -0.024  | 561.79              | +0.0314 |
|                     | 749.46 |          | 749.46 | 8   | P | 8  | 1025.5   | -0.111  | 1025.5              |         |
|                     | 836.49 |          | 836.49 | 9   | S | 7  | 928.46   | +0.3156 | 928.46              |         |
|                     | 893.51 |          | 893.51 | 10  | G | 6  | 841.43   |         | 841.43              |         |
| -0.386              | 490.77 |          | 980.54 | 11  | S | 5  | 784.41   |         | 784.41              |         |
|                     | 1166.6 |          | 1166.6 | 12  | W | 4  | 697.38   |         | 697.38              |         |
|                     | 1294.7 |          | 1294.7 | 13  | Q | 3  | 511.3    |         | 511.3               |         |
| -0.003              | 705.36 | +0.11131 | 1409.7 | 14  | D | 2  | 383.24   |         | 383.24              |         |
|                     | 1522.8 | +0.1022  | 1522.8 | 15  | L | 1  | 268.21   | +0.0499 | 268.21              |         |
|                     |        |          |        | 16  | K | 0  | 155.13   |         | 155.13              |         |

Scan number 5797 Raw file LNCAP\_Silac\_23F10\_set2\_02  
 Method ITMS; CID Peptide 265.12

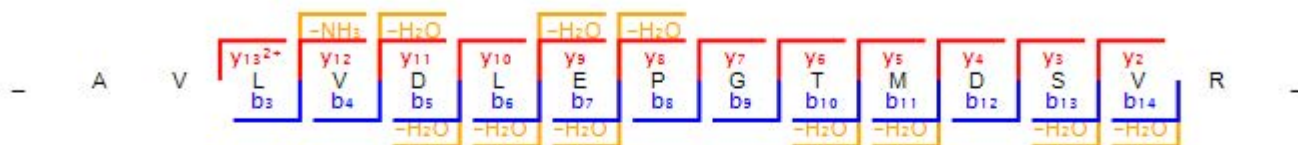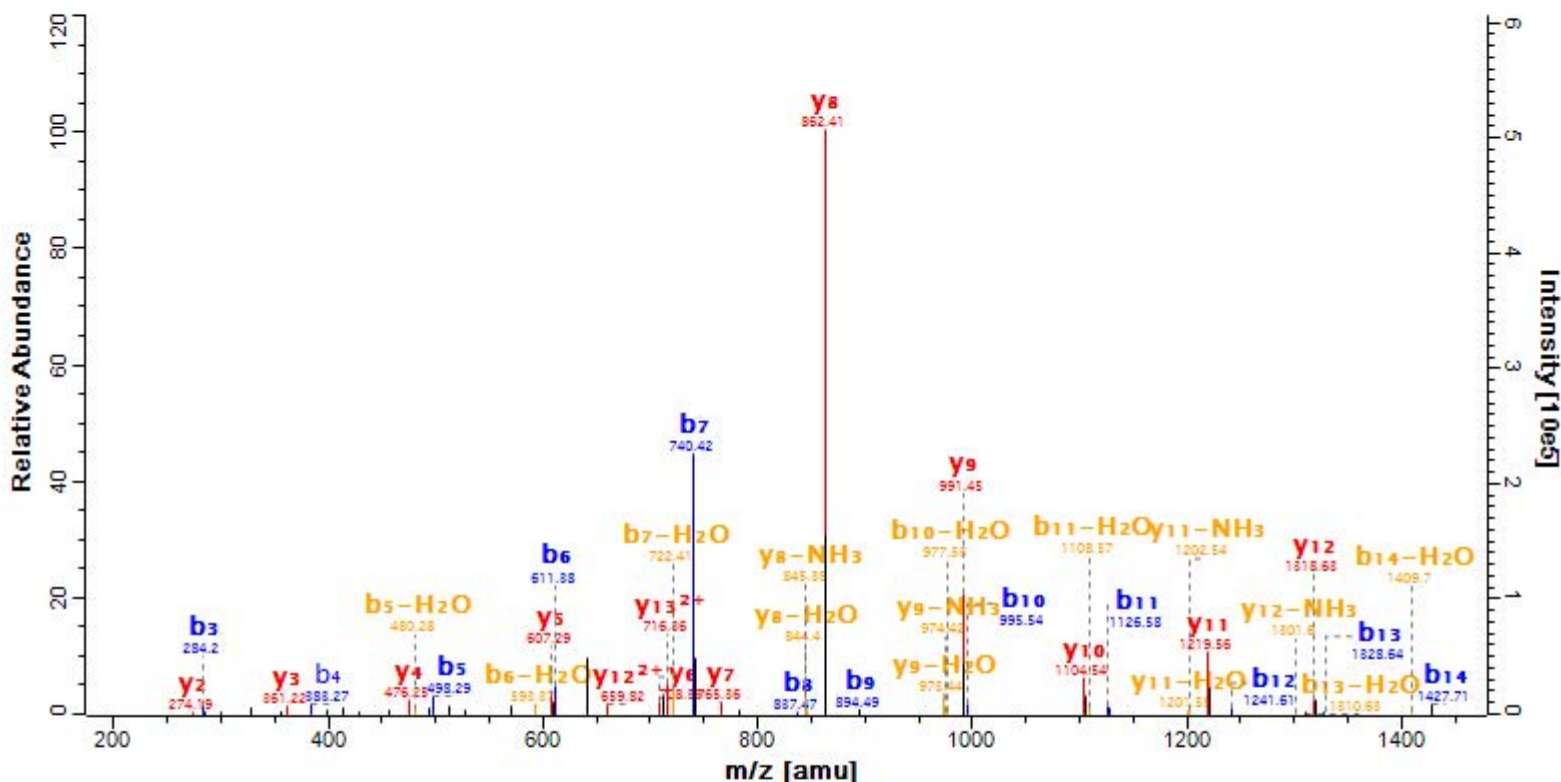

#### precursor information

|                   |                 |
|-------------------|-----------------|
| Mass:             | 1600.81297      |
| m/z:              | 801.41376       |
| Charge:           | 2+              |
| Retentiontime:    | 37.947242736816 |
| Score:            | 265.1235        |
| Mass Error [ppm]: | -0.054164       |
| PEP:              | 7.1354E-68      |
| Precursor Type:   | MULTI           |

#### general information

|                       |           |
|-----------------------|-----------|
| Annotation:           | 13 of 15  |
| AminoAcids Coverage:  | 87 %      |
| Intensity Coverage:   | 73 %      |
| Peak Coverage:        | 51 %      |
| Protein Localisation: | 63 ... 77 |

| b ion     |          |     |   |          | y ion    |           | y <sup>2+</sup> ion |           |
|-----------|----------|-----|---|----------|----------|-----------|---------------------|-----------|
| Δ dalton  | mass     | seq |   | Δ dalton | mass     | Δ dalton  | mass                |           |
|           | 72.04439 | 1   | A | 14       |          |           |                     |           |
|           | 171.1128 | 2   | V | 13       | 1530.783 | 1530.783  |                     |           |
| +0.011018 | 284.1969 | 3   | L | 12       | 1431.715 | 716.361   | +0.156537           |           |
| -0.00228  | 383.2653 | 4   | V | 11       | 1318.631 | -0.04908  | 659.819             | +0.169699 |
| +0.071605 | 498.2922 | 5   | D | 10       | 1219.562 | -0.01594  | 1219.562            |           |
| +0.172234 | 611.3763 | 6   | L | 9        | 1104.535 | -0.06139  | 1104.535            |           |
| -0.03399  | 740.4189 | 7   | E | 8        | 991.4513 | +0.041416 | 991.4513            |           |
| -0.12643  | 837.4716 | 8   | P | 7        | 862.4087 | +0.037866 | 862.4087            |           |
| +0.004144 | 894.4931 | 9   | G | 6        | 765.356  | +0.122429 | 765.356             |           |
| -0.02242  | 995.5408 | 10  | T | 5        | 708.3345 | +0.076083 | 708.3345            |           |
| -0.10276  | 1126.581 | 11  | M | 4        | 607.2868 | +0.115033 | 607.2868            |           |
| -0.1756   | 1241.608 | 12  | D | 3        | 476.2463 | +0.064698 | 476.2463            |           |
| -0.19139  | 1328.64  | 13  | S | 2        | 361.2194 | +0.123745 | 361.2194            |           |
| -0.07426  | 1427.709 | 14  | V | 1        | 274.1874 | +0.254071 | 274.1874            |           |
|           |          | 15  | R | 0        | 175.119  |           | 175.119             |           |

Scan number 588 Raw file LNCAP\_Silac\_23F10\_set2\_02  
 Method ITMS; CID Pepti... 299.93

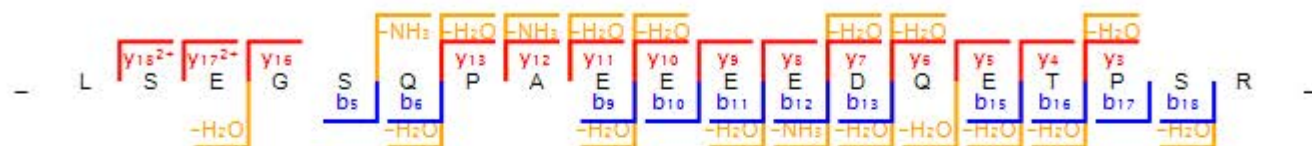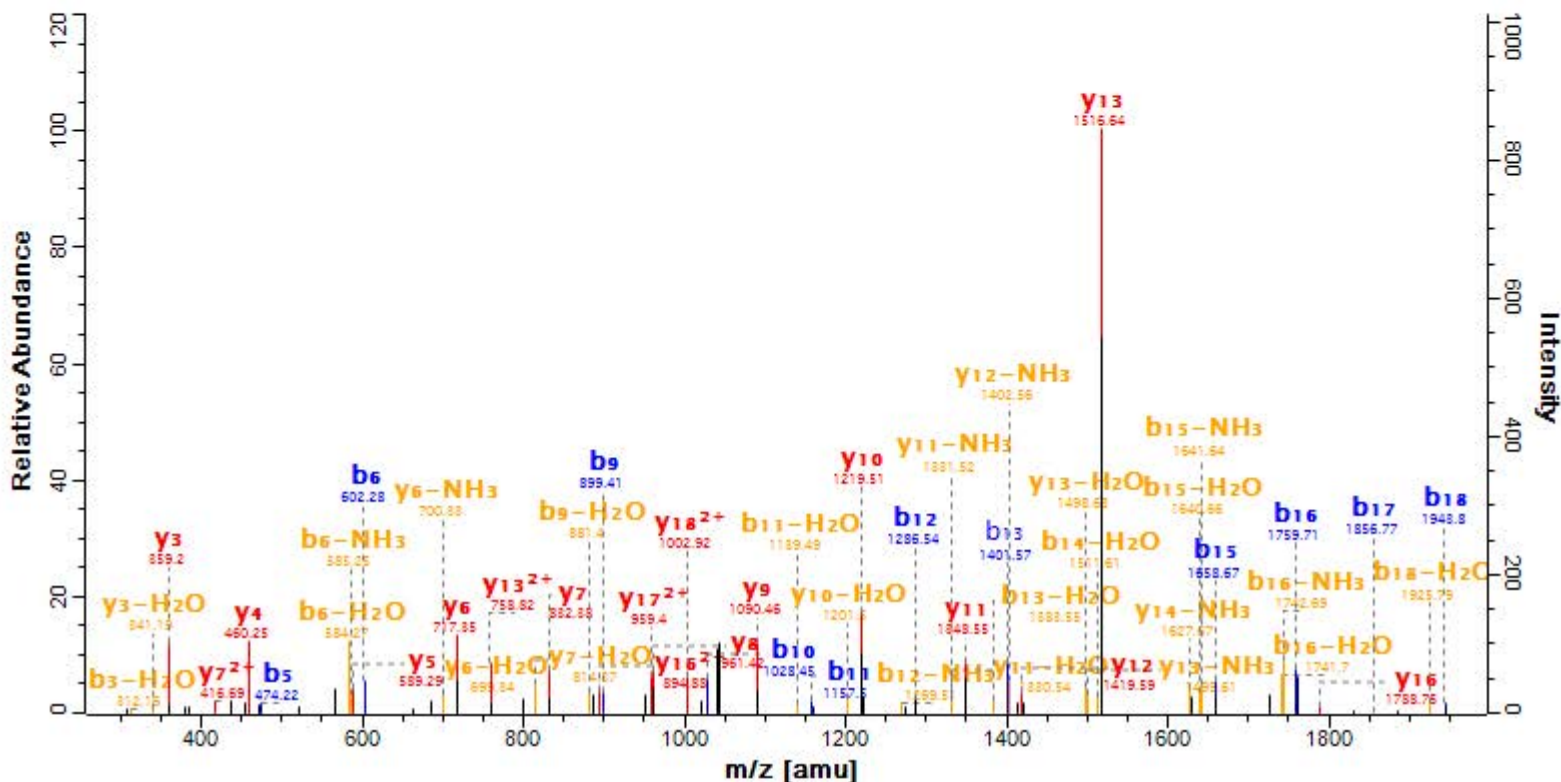

precursor information

|                   |                 |
|-------------------|-----------------|
| Mass:             | 2116.90308      |
| m/z:              | 1059.45882      |
| Charge:           | 2+              |
| Retentiontime:    | 9.1949701309204 |
| Score:            | 299.9317        |
| Mass Error [ppm]: | -0.087027       |
| PEP:              | 2.4157E-117     |
| Precursor Type:   | MULTI           |

general information

|                       |             |
|-----------------------|-------------|
| Annotation:           | 17 of 19    |
| AminoAcids Coverage:  | 89 %        |
| Intensity Coverage:   | 62 %        |
| Peak Coverage:        | 54 %        |
| Protein Localisation: | 141 ... 159 |

| b ion     |          |    |     |    | y ion    |           | y <sup>2+</sup> ion |           |
|-----------|----------|----|-----|----|----------|-----------|---------------------|-----------|
| Δ dalton  | mass     |    | seq |    | Δ dalton | mass      | Δ dalton            | mass      |
|           | 114.0913 | 1  | L   | 18 |          |           |                     |           |
|           | 201.1234 | 2  | S   | 17 | 2004.826 |           | 1002.917            | +0.021844 |
|           | 330.166  | 3  | E   | 16 | 1917.794 |           | 959.4009            | -0.05736  |
|           | 387.1874 | 4  | G   | 15 | 1788.752 | +0.317236 | 894.8796            | +0.353954 |
| +0.019987 | 474.2195 | 5  | S   | 14 | 1731.73  |           | 1731.73             |           |
| +0.123824 | 602.278  | 6  | Q   | 13 | 1644.698 |           | 1644.698            |           |
|           | 699.3308 | 7  | P   | 12 | 1516.64  | -0.04933  | 758.8235            | +0.174821 |
|           | 770.3679 | 8  | A   | 11 | 1419.587 | +0.032118 | 1419.587            |           |
| +0.107808 | 899.4105 | 9  | E   | 10 | 1348.55  | -0.00071  | 1348.55             |           |
| +0.079864 | 1028.453 | 10 | E   | 9  | 1219.507 | +0.056283 | 1219.507            |           |
| -0.03207  | 1157.496 | 11 | E   | 8  | 1090.465 | +0.002684 | 1090.465            |           |
| -0.04927  | 1286.538 | 12 | E   | 7  | 961.4221 | +0.139516 | 961.4221            |           |
| -0.1508   | 1401.565 | 13 | D   | 6  | 832.3795 | +0.070537 | 416.6934            | -0.45772  |
|           | 1529.624 | 14 | Q   | 5  | 717.3526 | +0.028815 | 717.3526            |           |
| -0.02833  | 1658.666 | 15 | E   | 4  | 589.294  | +0.086233 | 589.294             |           |
| -0.16354  | 1759.714 | 16 | T   | 3  | 460.2514 | +0.054302 | 460.2514            |           |
| -0.29186  | 1856.767 | 17 | P   | 2  | 359.2037 | +0.034049 | 359.2037            |           |
| +0.138756 | 1943.799 | 18 | S   | 1  | 262.151  |           | 262.151             |           |
|           |          | 19 | R   | 0  | 175.119  |           | 175.119             |           |



Scan number 625 Raw file LNCAP\_Silac\_23F10\_set2\_02  
 Method ITMS; CID Pepti... 226.24

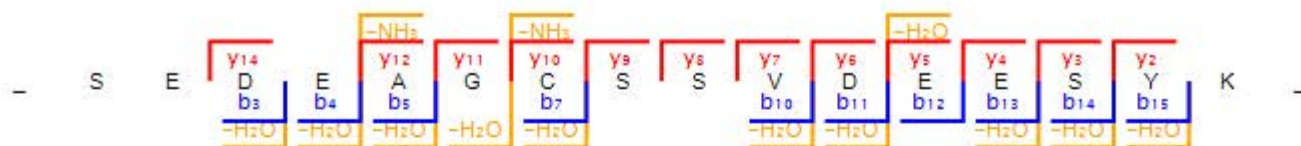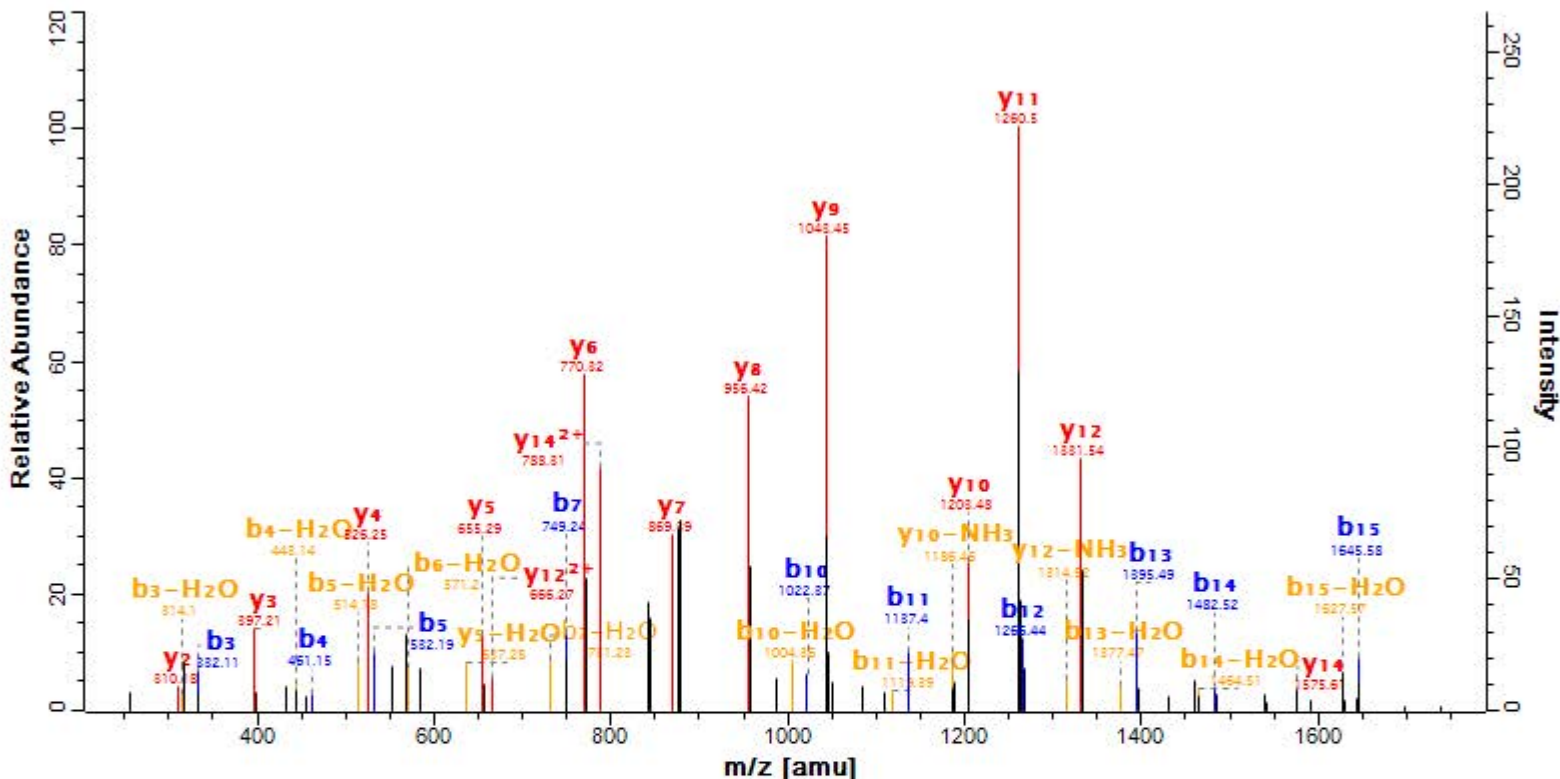

#### precursor information

|                   |                 |
|-------------------|-----------------|
| Mass:             | 1790.67856      |
| m/z:              | 896.34656       |
| Charge:           | 2+              |
| Retentiontime:    | 9.4921684265136 |
| Score:            | 226.2415        |
| Mass Error [ppm]: | -0.17222        |
| PEP:              | 2.8218E-41      |
| Precursor Type:   | MULTI           |

#### general information

|                       |             |
|-----------------------|-------------|
| Annotation:           | 13 of 16    |
| AminoAcids Coverage:  | 81 %        |
| Intensity Coverage:   | 57 %        |
| Peak Coverage:        | 43 %        |
| Protein Localisation: | 376 ... 391 |

| b ion     |          |    |     |    | y ion    |           | y <sup>2+</sup> ion |           |
|-----------|----------|----|-----|----|----------|-----------|---------------------|-----------|
| Δ dalton  | mass     |    | seq |    | Δ dalton | mass      | Δ dalton            | mass      |
|           | 88.0393  | 1  | S   | 15 |          |           |                     |           |
|           | 217.0819 | 2  | E   | 14 | 1704.654 |           | 1704.654            |           |
| +0.067856 | 332.1088 | 3  | D   | 13 | 1575.612 | -0.01521  | 788.3094            | +0.131701 |
| -0.01716  | 461.1514 | 4  | E   | 12 | 1460.585 |           | 1460.585            |           |
| +0.101674 | 532.1885 | 5  | A   | 11 | 1331.542 | -0.02563  | 666.2746            | -0.0878   |
|           | 589.21   | 6  | G   | 10 | 1260.505 | -0.01525  | 1260.505            |           |
| +0.198    | 749.2407 | 7  | C   | 9  | 1203.483 | +0.00829  | 1203.483            |           |
|           | 836.2727 | 8  | S   | 8  | 1043.453 | -0.00952  | 1043.453            |           |
|           | 923.3047 | 9  | S   | 7  | 956.4207 | +0.021223 | 956.4207            |           |
| -0.07656  | 1022.373 | 10 | V   | 6  | 869.3887 | -0.13278  | 869.3887            |           |
| -0.03252  | 1137.4   | 11 | D   | 5  | 770.3203 | -0.0341   | 770.3203            |           |
| -0.03874  | 1266.443 | 12 | E   | 4  | 655.2933 | +0.08678  | 655.2933            |           |
| -0.0845   | 1395.485 | 13 | E   | 3  | 526.2508 | +0.03782  | 526.2508            |           |
| -0.15584  | 1482.517 | 14 | S   | 2  | 397.2082 | +0.060333 | 397.2082            |           |
| -0.10857  | 1645.581 | 15 | Y   | 1  | 310.1761 | +0.130142 | 310.1761            |           |
|           |          | 16 | K   | 0  | 147.1128 |           | 147.1128            |           |

Scan number 631 Raw file LNCAP\_Silac\_23F10\_set2\_02  
 Method ITMS; CID Peptide 121.56

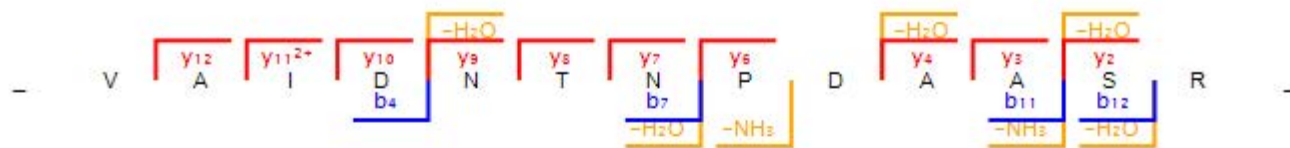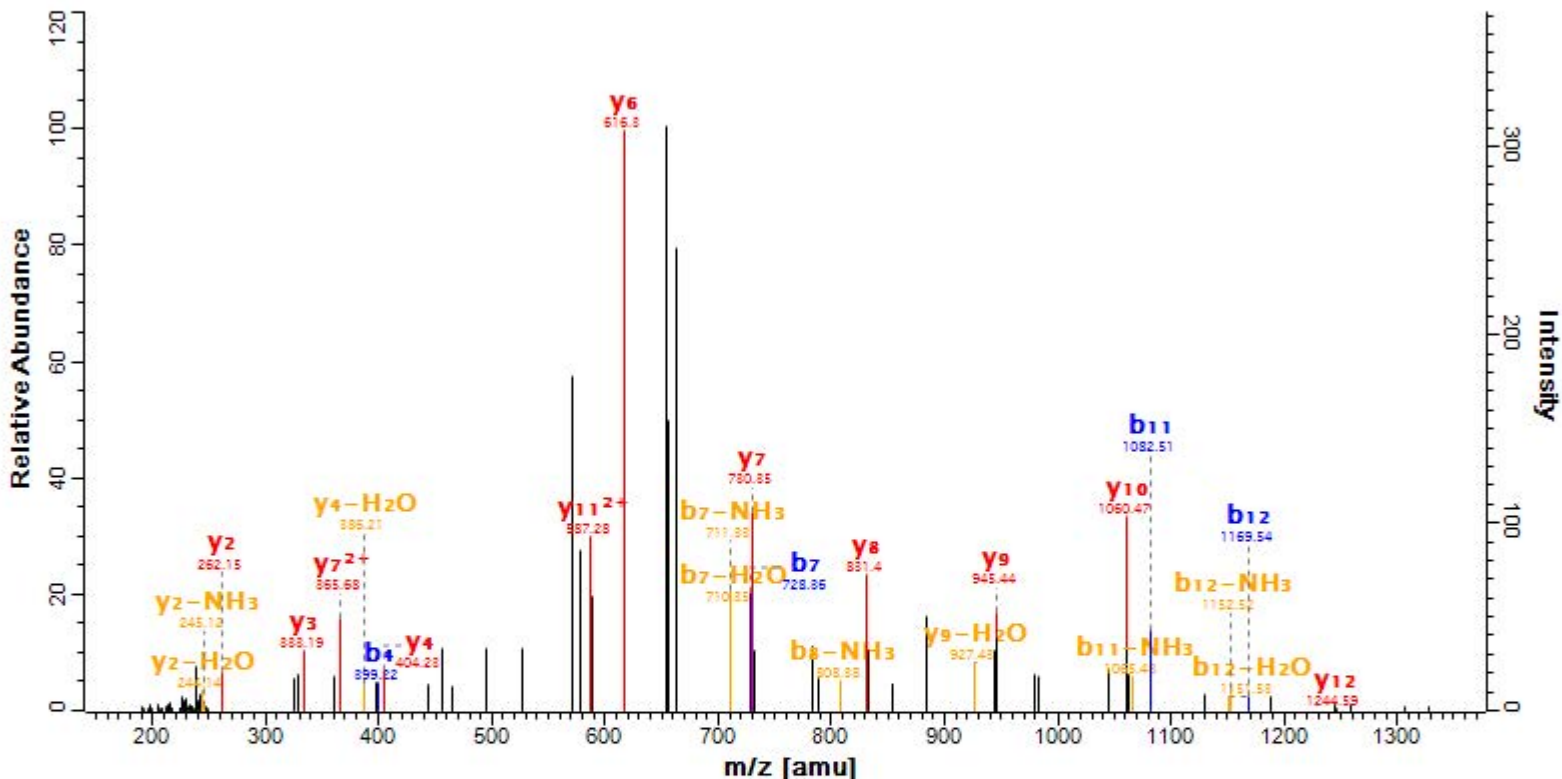

**precursor information**

|                   |                 |
|-------------------|-----------------|
| Mass:             | 0               |
| m/z:              | 672.33105       |
| Charge:           | 0+              |
| Retentiontime:    | 9.5422487258911 |
| Score:            | 121.5584        |
| Mass Error [ppm]: | -0.11904        |
| PEP:              | 3.441E-05       |
| Precursor Type:   | PEAK            |

**general information**

|                       |             |
|-----------------------|-------------|
| Annotation:           | 10 of 13    |
| AminoAcids Coverage:  | 77 %        |
| Intensity Coverage:   | 38 %        |
| Peak Coverage:        | 26 %        |
| Protein Localisation: | 419 ... 431 |

| b ion     |          |    |     |    | y ion    |           | y <sup>2+</sup> ion |          |
|-----------|----------|----|-----|----|----------|-----------|---------------------|----------|
| Δ dalton  | mass     |    | seq |    | Δ dalton | mass      | Δ dalton            | mass     |
|           | 100.0757 | 1  | V   | 12 |          |           |                     |          |
|           | 171.1128 | 2  | A   | 11 | 1244.587 | +0.163309 | 1244.587            |          |
|           | 284.1969 | 3  | I   | 10 | 1173.549 |           | 587.2784            | -0.06627 |
| +0.026982 | 399.2238 | 4  | D   | 9  | 1060.465 | +0.146669 | 1060.465            |          |
|           | 513.2667 | 5  | N   | 8  | 945.4384 | +0.01193  | 945.4384            |          |
|           | 614.3144 | 6  | T   | 7  | 831.3955 | +0.088793 | 831.3955            |          |
| -0.04222  | 728.3573 | 7  | N   | 6  | 730.3478 | +0.082455 | 365.6776            | -0.38764 |
|           | 825.4101 | 8  | P   | 5  | 616.3049 | -0.07548  | 616.3049            |          |
|           | 940.4371 | 9  | D   | 4  | 519.2522 |           | 519.2522            |          |
|           | 1011.474 | 10 | A   | 3  | 404.2252 | +0.113293 | 404.2252            |          |
| +0.004102 | 1082.511 | 11 | A   | 2  | 333.1881 | +0.072343 | 333.1881            |          |
| +0.149075 | 1169.543 | 12 | S   | 1  | 262.151  | +0.039724 | 262.151             |          |
|           |          | 13 | R   | 0  | 175.119  |           | 175.119             |          |

Scan number 664 Raw file LNCAP\_Silac\_23F10\_set2\_02  
 Method ITMS: CID Pepti... 135.02

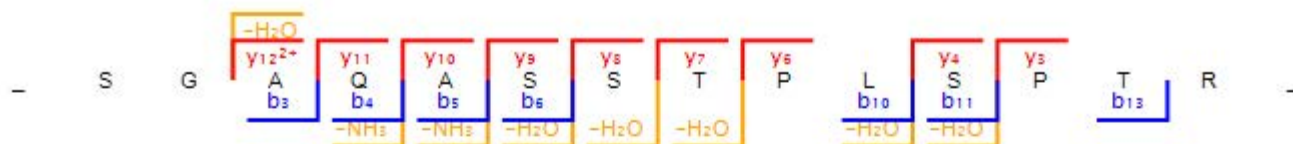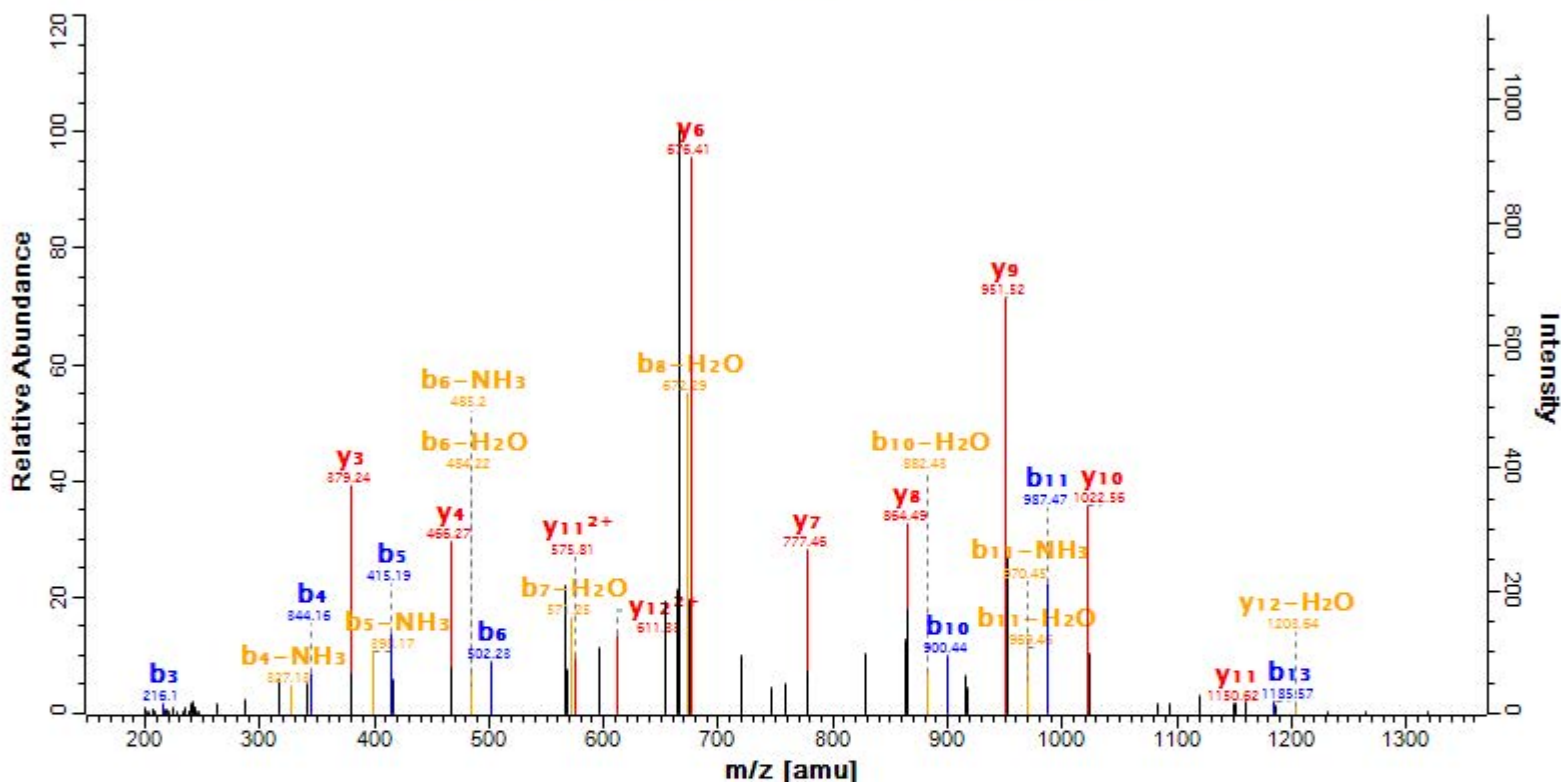

#### precursor information

|                   |                 |
|-------------------|-----------------|
| Mass:             | 1358.67943      |
| m/z:              | 680.34699       |
| Charge:           | 2+              |
| Retentiontime:    | 9.7836666107177 |
| Score:            | 135.0247        |
| Mass Error [ppm]: | 0.31353         |
| PEP:              | 9.3589E-09      |
| Precursor Type:   | MULTI           |

#### general information

|                       |           |
|-----------------------|-----------|
| Annotation:           | 11 of 14  |
| AminoAcids Coverage:  | 79 %      |
| Intensity Coverage:   | 58 %      |
| Peak Coverage:        | 31 %      |
| Protein Localisation: | 12 ... 25 |

| b ion     |          |     |   | y ion    |          | y <sup>2+</sup> ion |           |
|-----------|----------|-----|---|----------|----------|---------------------|-----------|
| Δ dalton  | mass     | seq |   | Δ dalton | mass     | Δ dalton            | mass      |
|           | 88.0393  | 1   | S | 13       |          |                     |           |
|           | 145.0608 | 2   | G | 12       | 1278.674 | 1278.674            |           |
| +0.033313 | 216.0979 | 3   | A | 11       | 1221.653 | 611.3301            | +0.206218 |
| +0.104465 | 344.1565 | 4   | Q | 10       | 1150.616 | 575.8115            | +0.122724 |
| +0.104278 | 415.1936 | 5   | A | 9        | 1022.557 | -0.01695            | 1022.557  |
| +0.017928 | 502.2256 | 6   | S | 8        | 951.5201 | -0.07022            | 951.5201  |
|           | 589.2576 | 7   | S | 7        | 864.4881 | +0.089245           | 864.4881  |
|           | 690.3053 | 8   | T | 6        | 777.4561 | +0.114376           | 777.4561  |
|           | 787.3581 | 9   | P | 5        | 676.4084 | -0.02819            | 676.4084  |
| +0.024599 | 900.4421 | 10  | L | 4        | 579.3556 |                     | 579.3556  |
| -0.00133  | 987.4742 | 11  | S | 3        | 466.2716 | -0.01325            | 466.2716  |
|           | 1084.527 | 12  | P | 2        | 379.2395 | +0.024392           | 379.2395  |
| -0.19155  | 1185.575 | 13  | T | 1        | 282.1868 |                     | 282.1868  |
|           |          | 14  | R | 0        | 181.1391 |                     | 181.1391  |

Scan number 7021 Raw file LNCAP\_Silac\_23F10\_set2\_02  
 Method ITMS; CID Pepti... 54.81

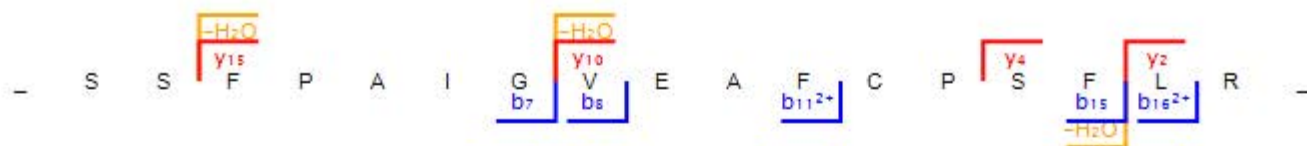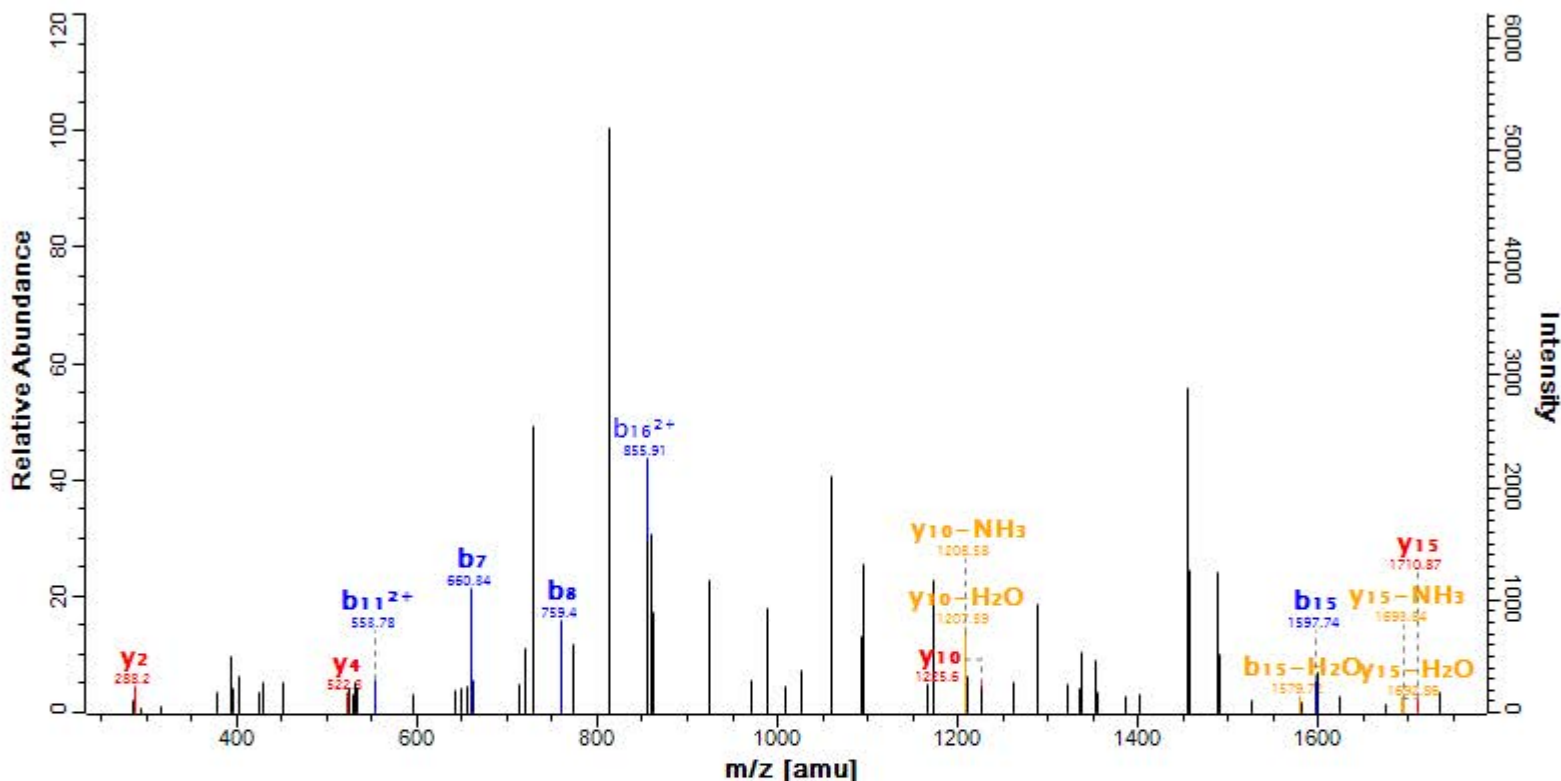

#### precursor information

|                   |                 |
|-------------------|-----------------|
| Mass:             | 1883.92403      |
| m/z:              | 942.96929       |
| Charge:           | 2+              |
| Retentiontime:    | 44.185081481933 |
| Score:            | 54.81177        |
| Mass Error [ppm]: | 0.013859        |
| PEP:              | 0.0033309       |
| Precursor Type:   | MULTI           |

#### general information

|                       |             |
|-----------------------|-------------|
| Annotation:           | 7 of 17     |
| AminoAcids Coverage:  | 41 %        |
| Intensity Coverage:   | 15 %        |
| Peak Coverage:        | 17 %        |
| Protein Localisation: | 188 ... 204 |

| b <sup>2+</sup> ion |          | b ion     |          |     | y ion    |      |                    |
|---------------------|----------|-----------|----------|-----|----------|------|--------------------|
| Δ dalton            | mass     | Δ dalton  | mass     | seq | Δ dalton | mass |                    |
|                     | 88.0393  |           | 88.0393  | 1   | S        | 16   |                    |
|                     | 175.0713 |           | 175.0713 | 2   | S        | 15   | 1797.899           |
|                     | 322.1397 |           | 322.1397 | 3   | F        | 14   | 1710.867 -0.00761  |
|                     | 419.1925 |           | 419.1925 | 4   | P        | 13   | 1563.799           |
|                     | 490.2296 |           | 490.2296 | 5   | A        | 12   | 1466.746           |
|                     | 603.3137 |           | 603.3137 | 6   | I        | 11   | 1395.709           |
|                     | 660.3352 | +0.065238 | 660.3352 | 7   | G        | 10   | 1282.625           |
|                     | 759.4036 | +0.03607  | 759.4036 | 8   | V        | 9    | 1225.603 +0.145496 |
|                     | 888.4462 |           | 888.4462 | 9   | E        | 8    | 1126.535           |
|                     | 959.4833 |           | 959.4833 | 10  | A        | 7    | 997.4924           |
| -0.40204            | 553.7795 |           | 1106.552 | 11  | F        | 6    | 926.4553           |
|                     | 1266.582 |           | 1266.582 | 12  | C        | 5    | 779.3869           |
|                     | 1363.635 |           | 1363.635 | 13  | P        | 4    | 619.3562           |
|                     | 1450.667 |           | 1450.667 | 14  | S        | 3    | 522.3035 +0.030587 |
|                     | 1597.736 | -0.07844  | 1597.736 | 15  | F        | 2    | 435.2714           |
| -0.00658            | 855.9134 |           | 1710.82  | 16  | L        | 1    | 288.203 -0.00105   |
|                     |          |           |          | 17  | R        | 0    | 175.119            |

Scan number 7177 Raw file LNCAP\_Silac\_23F10\_set2\_02  
 Method ITMS; CID Pepti... 232.5

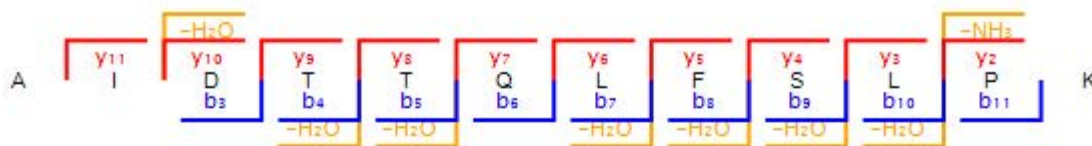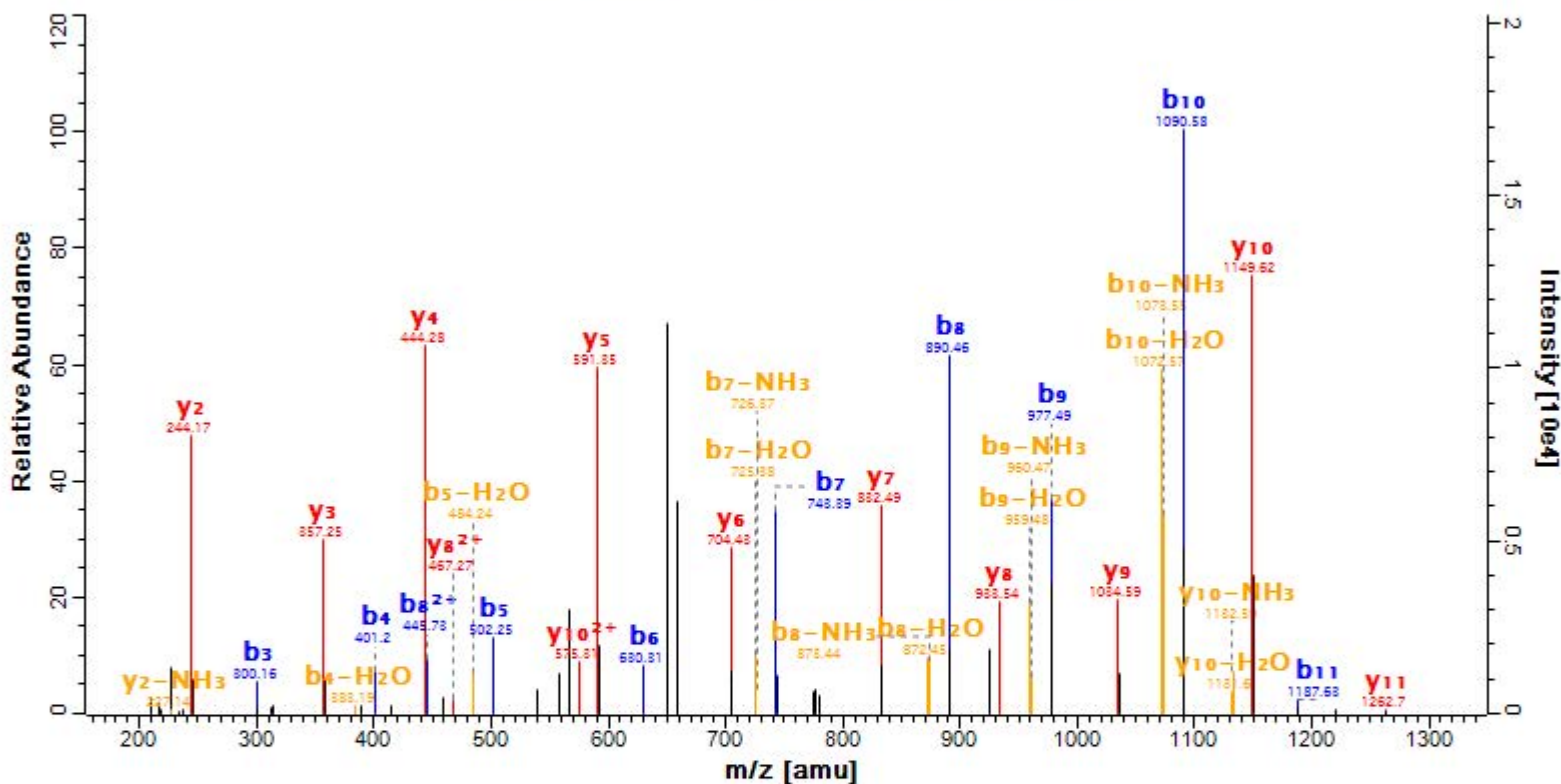

#### precursor information

|                   |                 |
|-------------------|-----------------|
| Mass:             | 1332.72896      |
| m/z:              | 667.37176       |
| Charge:           | 2+              |
| Retentiontime:    | 45.016525268554 |
| Score:            | 232.4968        |
| Mass Error [ppm]: | 0.034687        |
| PEP:              | 6.9891E-32      |
| Precursor Type:   | MULTI           |

#### general information

|                       |             |
|-----------------------|-------------|
| Annotation:           | 10 of 12    |
| AminoAcids Coverage:  | 83 %        |
| Intensity Coverage:   | 72 %        |
| Peak Coverage:        | 48 %        |
| Protein Localisation: | 589 ... 600 |

| b <sup>2+</sup> ion |        | b ion    |        | seq |   |    | y ion    |         | y <sup>2+</sup> ion |         |
|---------------------|--------|----------|--------|-----|---|----|----------|---------|---------------------|---------|
| Δ dalton            | mass   | Δ dalton | mass   |     |   |    | Δ dalton | mass    | Δ dalton            | mass    |
|                     | 72.044 |          | 72.044 | 1   | A | 11 |          |         |                     |         |
|                     | 185.13 |          | 185.13 | 2   | I | 10 | 1262.7   | +0.2739 | 1262.7              |         |
|                     | 300.16 | +0.0047  | 300.16 | 3   | D | 9  | 1149.6   | -0.065  | 575.31              | -0.041  |
|                     | 401.2  | +0.0176  | 401.2  | 4   | T | 8  | 1034.6   | -0.024  | 1034.6              |         |
|                     | 502.25 | +0.0514  | 502.25 | 5   | T | 7  | 933.54   | +0.0386 | 467.27              | +0.1317 |
|                     | 630.31 | +0.056   | 630.31 | 6   | Q | 6  | 832.49   | -0.035  | 832.49              |         |
|                     | 743.39 | -0.063   | 743.39 | 7   | L | 5  | 704.43   | +0.0093 | 704.43              |         |
| -0.271              | 445.73 | -0.043   | 890.46 | 8   | F | 4  | 591.35   | +0.0467 | 591.35              |         |
|                     | 977.49 | -0.008   | 977.49 | 9   | S | 3  | 444.28   | +0.0246 | 444.28              |         |
|                     | 1090.6 | -0.112   | 1090.6 | 10  | L | 2  | 357.25   | +0.0063 | 357.25              |         |
|                     | 1187.6 | +0.0617  | 1187.6 | 11  | P | 1  | 244.17   | -0.035  | 244.17              |         |
|                     |        |          |        | 12  | K | 0  | 147.11   |         | 147.11              |         |

Scan number 8134 Raw file LNCAP\_Silac\_23F10\_set2\_02  
 Method ITMS; CID Pepti... 103.41

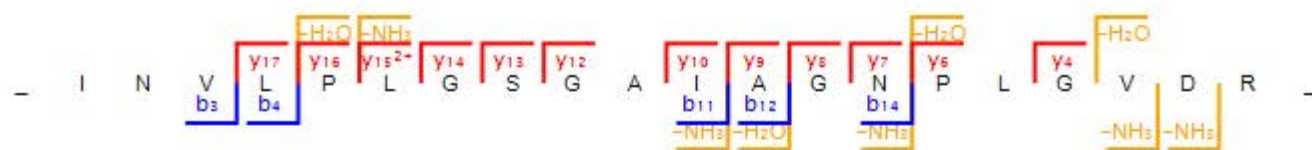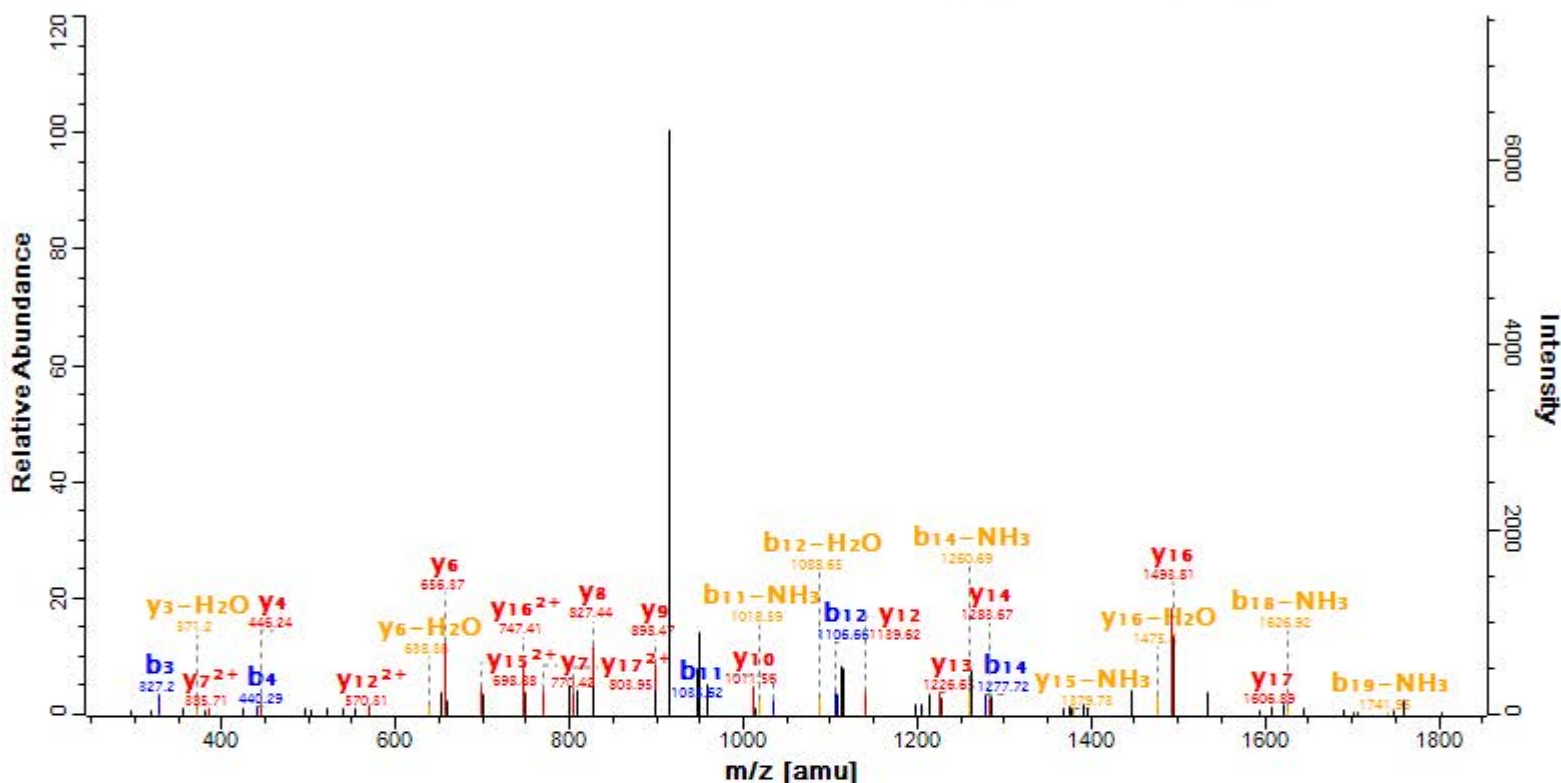

**precursor information**

|                   |                 |
|-------------------|-----------------|
| Mass:             | 1933.87574      |
| m/z:              | 967.94515       |
| Charge:           | 2+              |
| Retentiontime:    | 50.122222900390 |
| Score:            | 103.4126        |
| Mass Error [ppm]: | -0.55933        |
| PEP:              | 1.2753E-07      |
| Precursor Type:   | MULTI           |

**general information**

|                       |             |
|-----------------------|-------------|
| Annotation:           | 15 of 20    |
| AminoAcids Coverage:  | 75 %        |
| Intensity Coverage:   | 31 %        |
| Peak Coverage:        | 34 %        |
| Protein Localisation: | 194 ... 213 |

| b ion     |          |    |     |    | y ion    |           | y <sup>2+</sup> ion |           |
|-----------|----------|----|-----|----|----------|-----------|---------------------|-----------|
| Δ dalton  | mass     |    | seq |    | Δ dalton | mass      | Δ dalton            | mass      |
|           | 114.0913 | 1  | I   | 19 |          |           |                     |           |
|           | 228.1343 | 2  | N   | 18 | 1820.002 |           | 1820.002            |           |
| +0.064988 | 327.2027 | 3  | V   | 17 | 1705.96  |           | 1705.96             |           |
| +0.137815 | 440.2867 | 4  | L   | 16 | 1606.891 | -0.11598  | 803.9492            | +0.43428  |
|           | 537.3395 | 5  | P   | 15 | 1493.807 | -0.08356  | 747.4072            | +0.012018 |
|           | 650.4236 | 6  | L   | 14 | 1396.754 |           | 698.8808            | +0.424203 |
|           | 707.445  | 7  | G   | 13 | 1283.67  | +0.03667  | 1283.67             |           |
|           | 794.4771 | 8  | S   | 12 | 1226.649 | +0.105985 | 1226.649            |           |
|           | 851.4985 | 9  | G   | 11 | 1139.617 | +0.080763 | 570.312             | +0.279297 |
|           | 922.5356 | 10 | A   | 10 | 1082.595 |           | 1082.595            |           |
| -0.04964  | 1035.62  | 11 | I   | 9  | 1011.558 | +0.031369 | 1011.558            |           |
| -0.24422  | 1106.657 | 12 | A   | 8  | 898.4741 | -0.0377   | 898.4741            |           |
|           | 1163.678 | 13 | G   | 7  | 827.437  | +0.04012  | 827.437             |           |
| +0.02537  | 1277.721 | 14 | N   | 6  | 770.4155 | +0.108642 | 385.7114            | -0.31901  |
|           | 1374.774 | 15 | P   | 5  | 656.3726 | +0.114277 | 656.3726            |           |
|           | 1487.858 | 16 | L   | 4  | 559.3198 |           | 559.3198            |           |
|           | 1544.88  | 17 | G   | 3  | 446.2358 | +0.098456 | 446.2358            |           |
|           | 1643.948 | 18 | V   | 2  | 389.2143 |           | 389.2143            |           |
|           | 1758.975 | 19 | D   | 1  | 290.1459 |           | 290.1459            |           |
|           |          | 20 | R   | 0  | 175.119  |           | 175.119             |           |

Scan number 8262 Raw file LNCAP\_Silac\_23F10\_set2\_02  
 Method ITMS; CID Pepti... 197.17

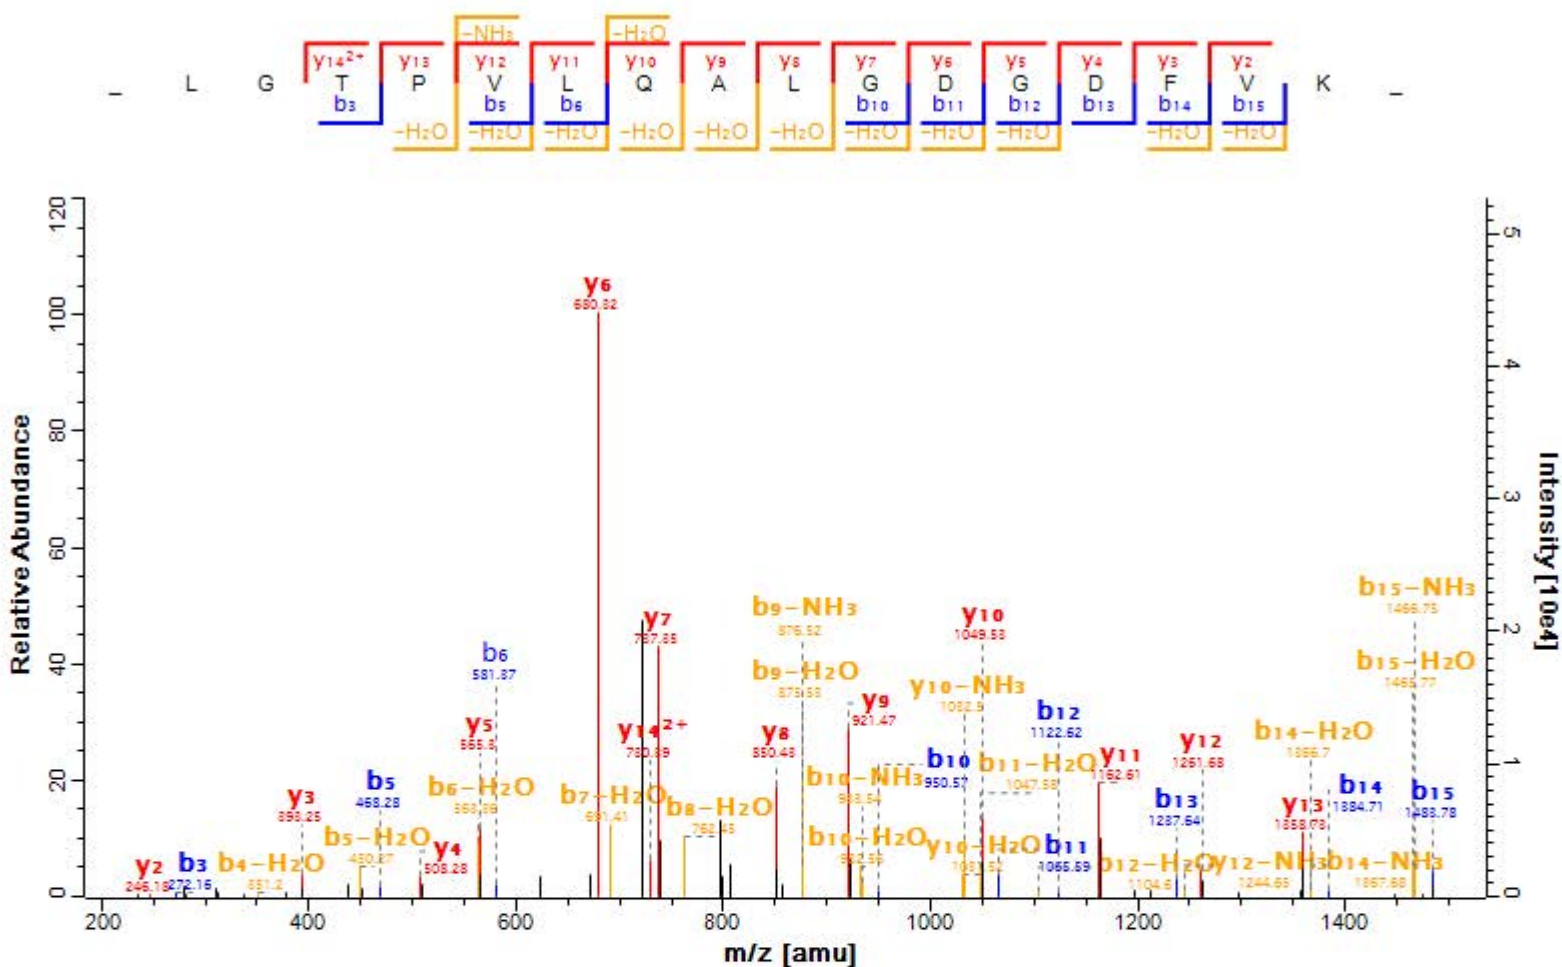

**precursor information**

|                   |                 |
|-------------------|-----------------|
| Mass:             | 1628.87719      |
| m/z:              | 815.44587       |
| Charge:           | 2+              |
| Retentiontime:    | 50.797710418701 |
| Score:            | 197.1731        |
| Mass Error [ppm]: | -0.11347        |
| PEP:              | 1.8684E-27      |
| Precursor Type:   | MULTI           |

**general information**

|                       |             |
|-----------------------|-------------|
| Annotation:           | 13 of 16    |
| AminoAcids Coverag    | 81 %        |
| Intensity Coverage:   | 72 %        |
| Peak Coverage:        | 51 %        |
| Protein Localisation: | 194 ... 209 |

| b ion     |          |    |     |    | y ion    |           | y <sup>2+</sup> ion |          |
|-----------|----------|----|-----|----|----------|-----------|---------------------|----------|
| Δ dalton  | mass     |    | seq |    | Δ dalton | mass      | Δ dalton            | mass     |
|           | 114.0913 | 1  | L   | 15 |          |           |                     |          |
|           | 171.1128 | 2  | G   | 14 | 1516.801 |           | 1516.801            |          |
| -0.19201  | 272.1605 | 3  | T   | 13 | 1459.779 |           | 730.3932            | -0.01991 |
|           | 369.2132 | 4  | P   | 12 | 1358.731 | -0.0133   | 1358.731            |          |
| +0.278215 | 468.2817 | 5  | V   | 11 | 1261.679 | -0.087    | 1261.679            |          |
| +0.188292 | 581.3657 | 6  | L   | 10 | 1162.61  | +0.045009 | 1162.61             |          |
|           | 709.4243 | 7  | Q   | 9  | 1049.526 | +0.097334 | 1049.526            |          |
|           | 780.4614 | 8  | A   | 8  | 921.4676 | +0.02725  | 921.4676            |          |
|           | 893.5455 | 9  | L   | 7  | 850.4305 | +0.049898 | 850.4305            |          |
| -0.00133  | 950.5669 | 10 | G   | 6  | 737.3464 | -0.00788  | 737.3464            |          |
| -0.09413  | 1065.594 | 11 | D   | 5  | 680.325  | -0.20395  | 680.325             |          |
| +0.109503 | 1122.615 | 12 | G   | 4  | 565.298  | +0.093746 | 565.298             |          |
| -0.09041  | 1237.642 | 13 | D   | 3  | 508.2766 | -0.02041  | 508.2766            |          |
| -0.33095  | 1384.711 | 14 | F   | 2  | 393.2496 | +0.017702 | 393.2496            |          |
| -0.11445  | 1483.779 | 15 | V   | 1  | 246.1812 | -0.116    | 246.1812            |          |
|           |          | 16 | K   | 0  | 147.1128 |           | 147.1128            |          |

Scan number 8404 Raw file LNCAP\_Silac\_23F10\_set2\_02  
 Method ITMS; CID Pepti... 70.49

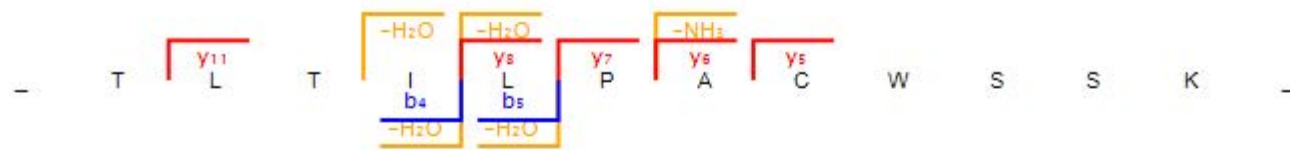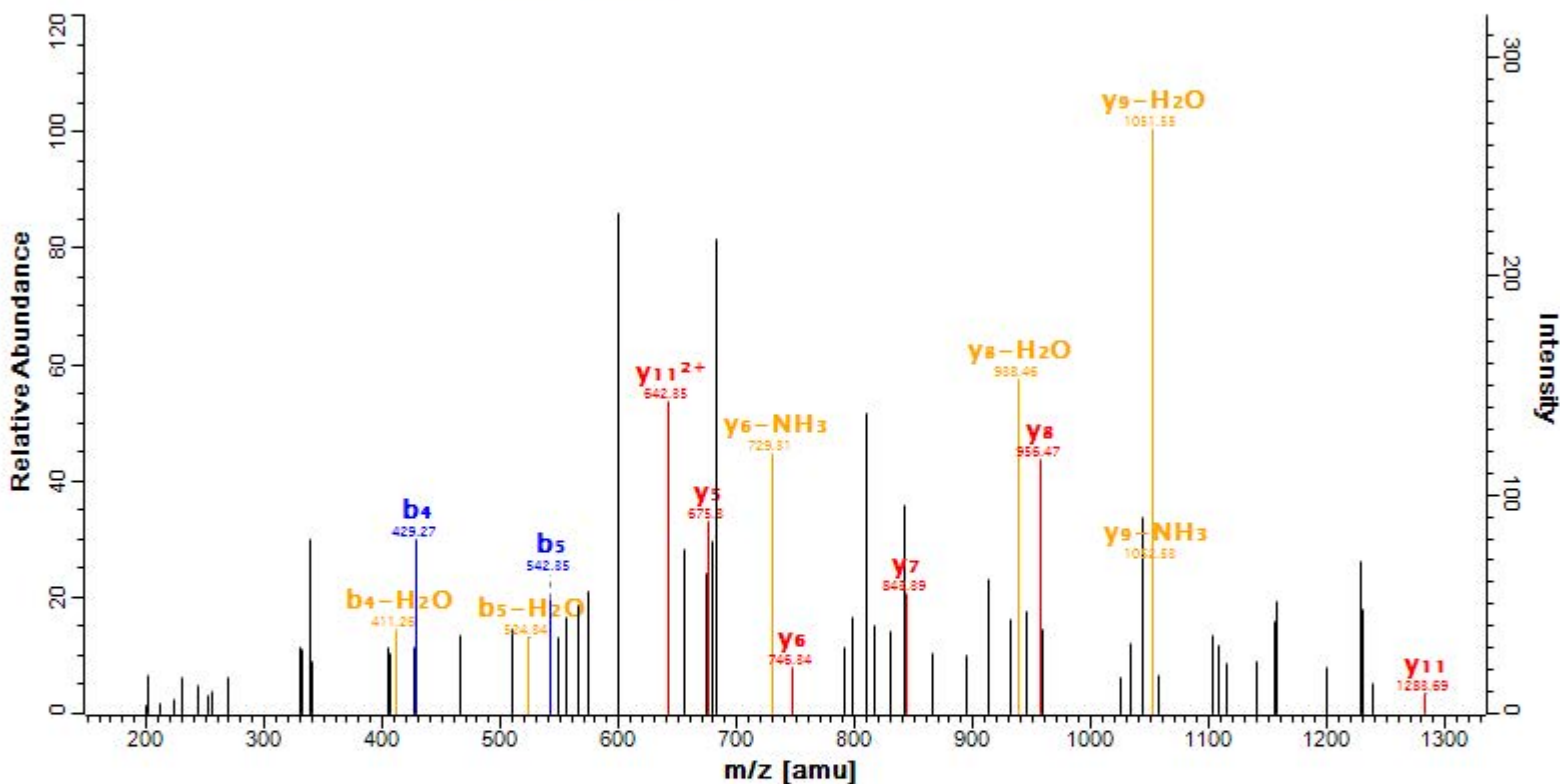

#### precursor information

|                   |                 |
|-------------------|-----------------|
| Mass:             | 1375.71722      |
| m/z:              | 688.86589       |
| Charge:           | 2+              |
| Retentiontime:    | 51.586090087890 |
| Score:            | 70.48843        |
| Mass Error [ppm]: | 0.17899         |
| PEP:              | 0.0043974       |
| Precursor Type:   | MULTI           |

#### general information

|                       |             |
|-----------------------|-------------|
| Annotation:           | 6 of 12     |
| AminoAcids Coverage:  | 50 %        |
| Intensity Coverage:   | 34 %        |
| Peak Coverage:        | 21 %        |
| Protein Localisation: | 328 ... 339 |

| b ion     |          |     |   | y ion    |          | y <sup>2+</sup> ion |          |           |
|-----------|----------|-----|---|----------|----------|---------------------|----------|-----------|
| Δ dalton  | mass     | seq |   | Δ dalton | mass     | Δ dalton            | mass     |           |
|           | 102.055  | 1   | T | 11       |          |                     |          |           |
|           | 215.139  | 2   | L | 10       | 1283.691 | -0.25095            | 642.349  | +0.249305 |
|           | 316.1867 | 3   | T | 9        | 1170.607 |                     | 1170.607 |           |
| -0.01124  | 429.2708 | 4   | I | 8        | 1069.559 |                     | 1069.559 |           |
| +0.246005 | 542.3548 | 5   | L | 7        | 956.475  | +0.089246           | 956.475  |           |
|           | 639.4076 | 6   | P | 6        | 843.3909 | +0.188874           | 843.3909 |           |
|           | 710.4447 | 7   | A | 5        | 746.3381 | +0.349792           | 746.3381 |           |
|           | 870.4754 | 8   | C | 4        | 675.301  | +0.096684           | 675.301  |           |
|           | 1056.555 | 9   | W | 3        | 515.2704 |                     | 515.2704 |           |
|           | 1143.587 | 10  | S | 2        | 329.1911 |                     | 329.1911 |           |
|           | 1230.619 | 11  | S | 1        | 242.159  |                     | 242.159  |           |
|           |          | 12  | K | 0        | 155.127  |                     | 155.127  |           |



Scan number 8428 Raw file LNCAP\_Silac\_23F10\_set2\_02  
 Method ITMS; CID Pepti... 88.56

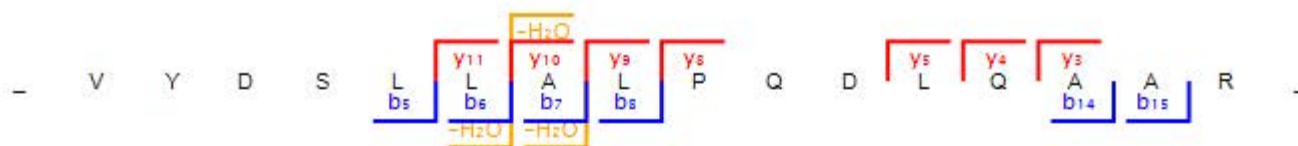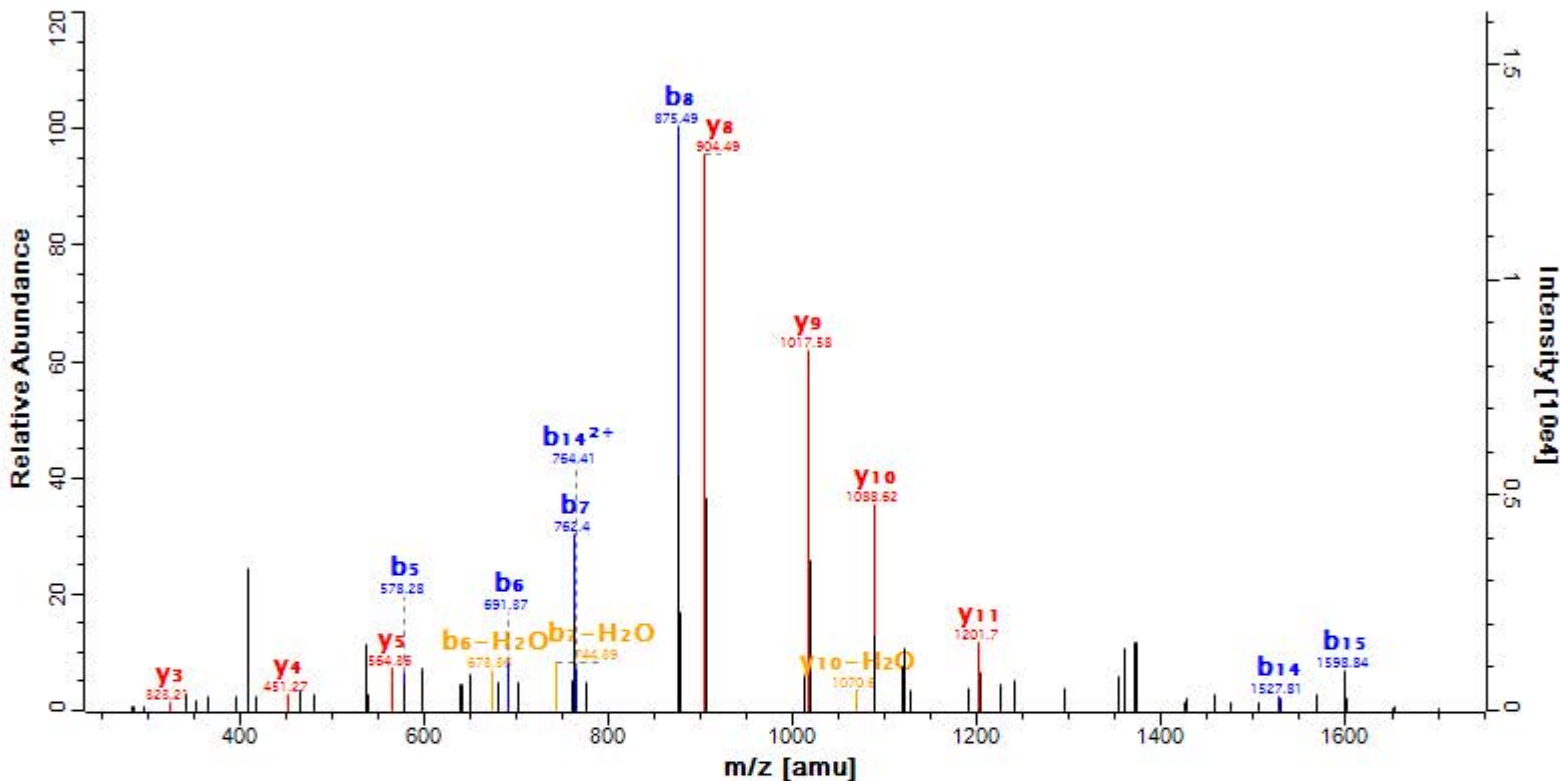

#### precursor information

|                   |                 |
|-------------------|-----------------|
| Mass:             | 1771.94589      |
| m/z:              | 886.98022       |
| Charge:           | 2+              |
| Retentiontime:    | 51.715183258056 |
| Score:            | 88.56142        |
| Mass Error [ppm]: | -0.54117        |
| PEP:              | 4.4302E-05      |
| Precursor Type:   | MULTI           |

#### general information

|                       |           |
|-----------------------|-----------|
| Annotation:           | 9 of 16   |
| AminoAcids Coverage:  | 56 %      |
| Intensity Coverage:   | 48 %      |
| Peak Coverage:        | 21 %      |
| Protein Localisation: | 65 ... 80 |

| b <sup>2+</sup> ion |          | b ion     |          |     |   |          | y ion    |           |
|---------------------|----------|-----------|----------|-----|---|----------|----------|-----------|
| Δ dalton            | mass     | Δ dalton  | mass     | seq |   | Δ dalton | mass     |           |
|                     | 100.0757 |           | 100.0757 | 1   | V | 15       |          |           |
|                     | 263.139  |           | 263.139  | 2   | Y | 14       | 1679.906 |           |
|                     | 378.166  |           | 378.166  | 3   | D | 13       | 1516.843 |           |
|                     | 465.198  |           | 465.198  | 4   | S | 12       | 1401.816 |           |
|                     | 578.2821 | -0.00587  | 578.2821 | 5   | L | 11       | 1314.784 |           |
|                     | 691.3661 | -0.08456  | 691.3661 | 6   | L | 10       | 1201.699 | -0.04262  |
|                     | 762.4032 | -0.08988  | 762.4032 | 7   | A | 9        | 1088.615 | -0.09686  |
|                     | 875.4873 | -0.05913  | 875.4873 | 8   | L | 8        | 1017.578 | -0.02843  |
|                     | 972.5401 |           | 972.5401 | 9   | P | 7        | 904.4942 | +0.073697 |
|                     | 1100.599 |           | 1100.599 | 10  | Q | 6        | 807.4415 |           |
|                     | 1215.626 |           | 1215.626 | 11  | D | 5        | 679.3829 |           |
|                     | 1328.71  |           | 1328.71  | 12  | L | 4        | 564.356  | +0.042853 |
|                     | 1456.768 |           | 1456.768 | 13  | Q | 3        | 451.2719 | +0.14419  |
| +0.122197           | 764.4063 | +0.055748 | 1527.805 | 14  | A | 2        | 323.2133 | +0.168588 |
|                     | 1598.842 | -0.22636  | 1598.842 | 15  | A | 1        | 252.1762 |           |
|                     |          |           |          | 16  | R | 0        | 181.1391 |           |

Scan number 8879 Raw file LNCAP\_Silac\_23F10\_set2\_02  
 Method ITMS; CID Pepti... 57.97

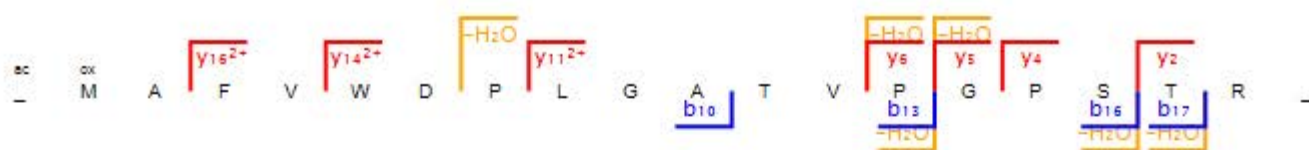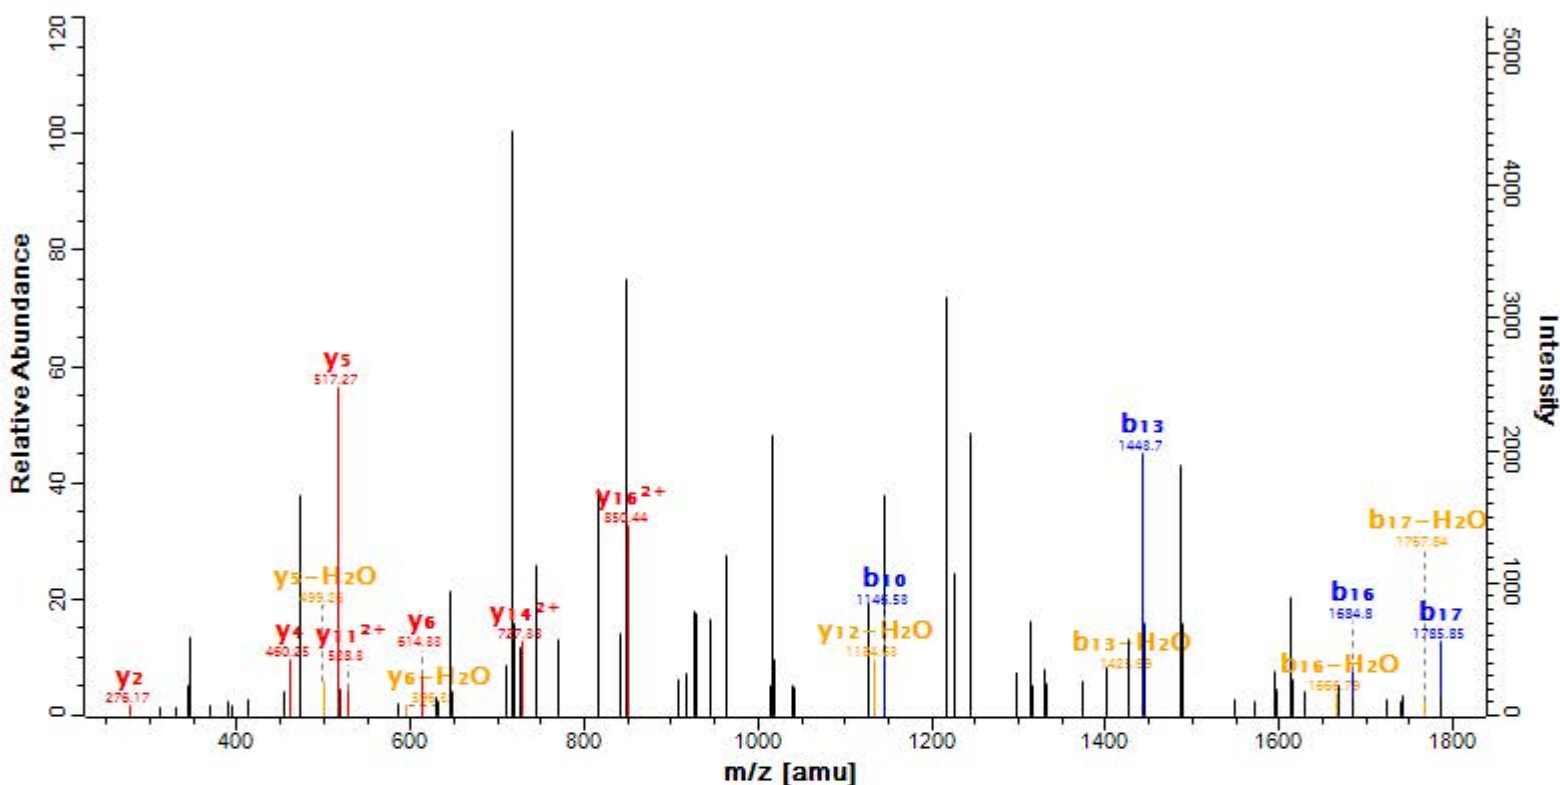

precursor information

|                   |                 |
|-------------------|-----------------|
| Mass:             | 1958.95611      |
| m/z:              | 980.48533       |
| Charge:           | 2+              |
| Retentiontime:    | 54.123409271240 |
| Score:            | 57.97267        |
| Mass Error [ppm]: | 0.040103        |
| PEP:              | 0.0090746       |
| Precursor Type:   | MULTI           |

general information

|                       |          |
|-----------------------|----------|
| Annotation:           | 10 of 18 |
| AminoAcids Coverage:  | 56 %     |
| Intensity Coverage:   | 17 %     |
| Peak Coverage:        | 18 %     |
| Protein Localisation: | 1 ... 18 |

| b ion     |          |     |   | y ion    |          | y <sup>2+</sup> ion |           |
|-----------|----------|-----|---|----------|----------|---------------------|-----------|
| Δ dalton  | mass     | seq |   | Δ dalton | mass     | Δ dalton            | mass      |
|           | 190.0532 | 1   | M | 17       |          |                     |           |
|           | 261.0904 | 2   | A | 16       | 1770.917 | 1770.917            |           |
|           | 408.1588 | 3   | F | 15       | 1699.88  | 850.4438            | -0.37045  |
|           | 507.2272 | 4   | V | 14       | 1552.812 | 1552.812            |           |
|           | 693.3065 | 5   | W | 13       | 1453.743 | 727.3753            | +0.005519 |
|           | 808.3334 | 6   | D | 12       | 1267.664 | 1267.664            |           |
|           | 905.3862 | 7   | P | 11       | 1152.637 | 1152.637            |           |
|           | 1018.47  | 8   | L | 10       | 1055.584 | 528.2958            | -0.35552  |
|           | 1075.492 | 9   | G | 9        | 942.5003 | 942.5003            |           |
| -0.07816  | 1146.529 | 10  | A | 8        | 885.4789 | 885.4789            |           |
|           | 1247.577 | 11  | T | 7        | 814.4417 | 814.4417            |           |
|           | 1346.645 | 12  | V | 6        | 713.3941 | 713.3941            |           |
| -0.11237  | 1443.698 | 13  | P | 5        | 614.3257 | -0.17972            | 614.3257  |
|           | 1500.719 | 14  | G | 4        | 517.2729 | +0.173524           | 517.2729  |
|           | 1597.772 | 15  | P | 3        | 460.2514 | +0.15678            | 460.2514  |
| -0.17712  | 1684.804 | 16  | S | 2        | 363.1987 |                     | 363.1987  |
| +0.038625 | 1785.852 | 17  | T | 1        | 276.1666 | +0.107478           | 276.1666  |
|           |          | 18  | R | 0        | 175.119  |                     | 175.119   |

Scan number 8905 Raw file LNCAP\_Silac\_23F10\_set2\_02  
 Method ITMS; CID Pepti... 207.53

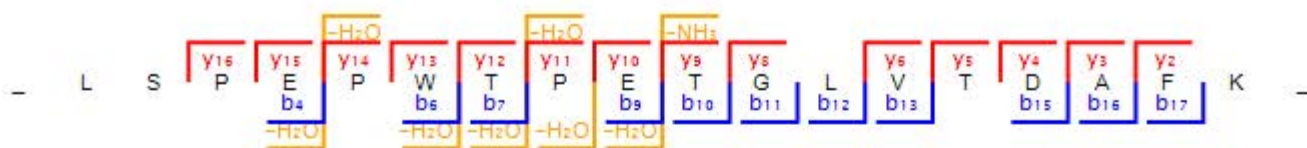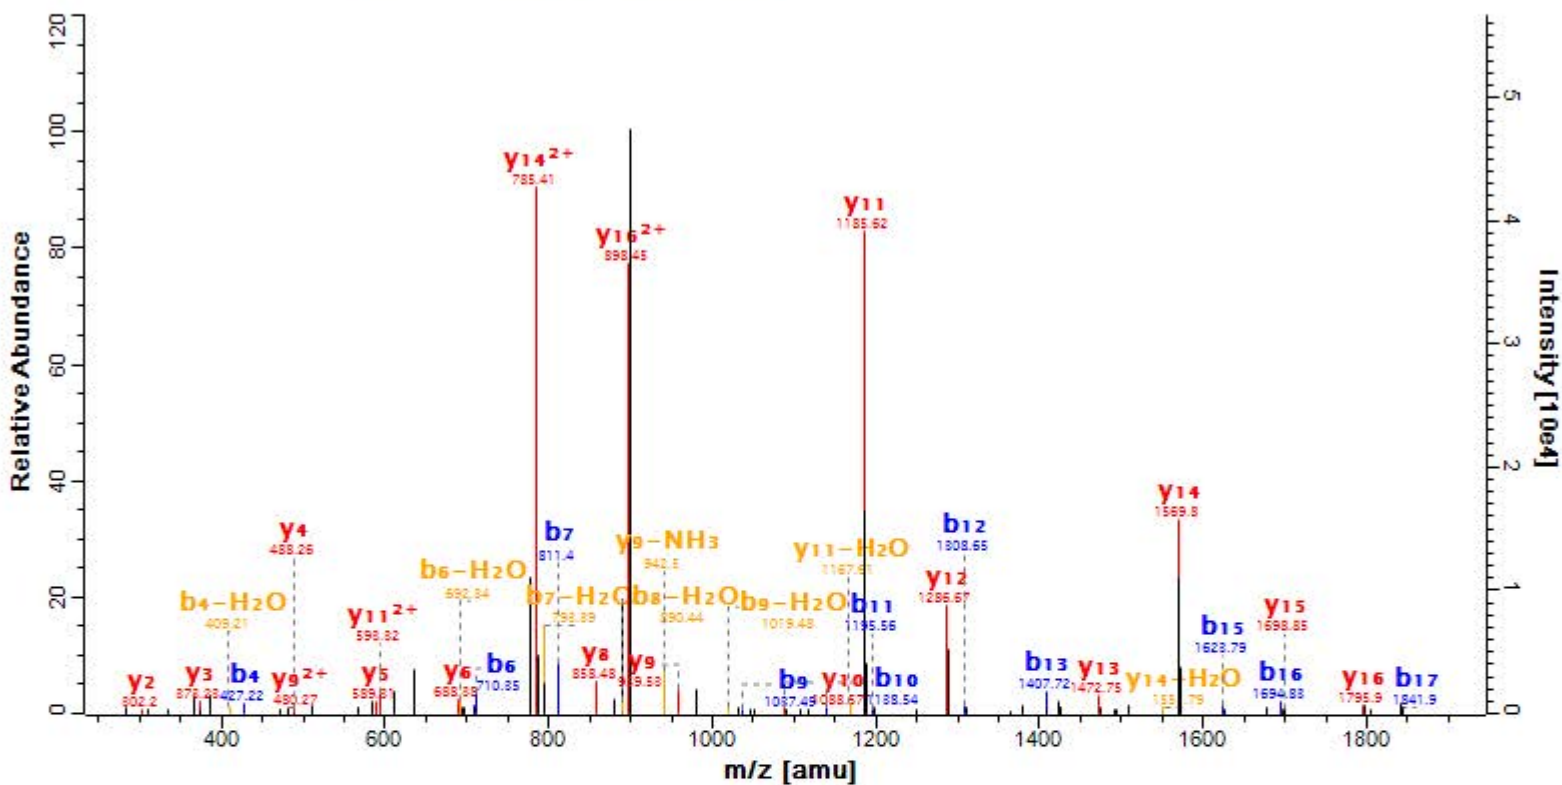

precursor information

|                   |                 |
|-------------------|-----------------|
| Mass:             | 1986.99361      |
| m/z:              | 994.50408       |
| Charge:           | 2+              |
| Retentiontime:    | 54.267658233642 |
| Score:            | 207.5324        |
| Mass Error [ppm]: | -0.1244         |
| PEP:              | 9.3477E-41      |
| Precursor Type:   | MULTI           |

general information

|                       |             |
|-----------------------|-------------|
| Annotation:           | 16 of 18    |
| AminoAcids Coverage:  | 89 %        |
| Intensity Coverage:   | 55 %        |
| Peak Coverage:        | 38 %        |
| Protein Localisation: | 682 ... 699 |

| b ion     |          |    |     |    | y ion    |           | y <sup>2+</sup> ion |           |
|-----------|----------|----|-----|----|----------|-----------|---------------------|-----------|
| Δ dalton  | mass     |    | seq |    | Δ dalton | mass      | Δ dalton            | mass      |
|           | 114.0913 | 1  | L   | 17 |          |           |                     |           |
|           | 201.1234 | 2  | S   | 16 | 1882.931 |           | 1882.931            |           |
|           | 298.1761 | 3  | P   | 15 | 1795.899 | -0.03022  | 898.4533            | -0.02626  |
| +0.166406 | 427.2187 | 4  | E   | 14 | 1698.846 | +0.000446 | 1698.846            |           |
|           | 524.2715 | 5  | P   | 13 | 1569.804 | -0.06963  | 785.4056            | +0.255186 |
| +0.016995 | 710.3508 | 6  | W   | 12 | 1472.751 | -0.15066  | 1472.751            |           |
| +0.007036 | 811.3985 | 7  | T   | 11 | 1286.672 | -0.0827   | 1286.672            |           |
|           | 908.4512 | 8  | P   | 10 | 1185.624 | -0.05357  | 593.3157            | +0.131929 |
| +0.047178 | 1037.494 | 9  | E   | 9  | 1088.571 | -0.1584   | 1088.571            |           |
| +0.186633 | 1138.542 | 10 | T   | 8  | 959.5288 | +0.057531 | 480.268             | +0.252422 |
| +0.192147 | 1195.563 | 11 | G   | 7  | 858.4811 | +0.018296 | 858.4811            |           |
| -0.16694  | 1308.647 | 12 | L   | 6  | 801.4596 |           | 801.4596            |           |
| +0.003048 | 1407.715 | 13 | V   | 5  | 688.3756 | -0.00545  | 688.3756            |           |
|           | 1508.763 | 14 | T   | 4  | 589.3072 | +0.084205 | 589.3072            |           |
| +0.034383 | 1623.79  | 15 | D   | 3  | 488.2595 | +0.312456 | 488.2595            |           |
| +0.050492 | 1694.827 | 16 | A   | 2  | 373.2325 | +0.041731 | 373.2325            |           |
| +0.134422 | 1841.896 | 17 | F   | 1  | 302.1954 | -0.07841  | 302.1954            |           |
|           |          | 18 | K   | 0  | 155.127  |           | 155.127             |           |

Scan number 9024 Raw file LNCAP\_Silac\_23F10\_set2\_02  
 Method ITMS; CID Pepti... 183.6

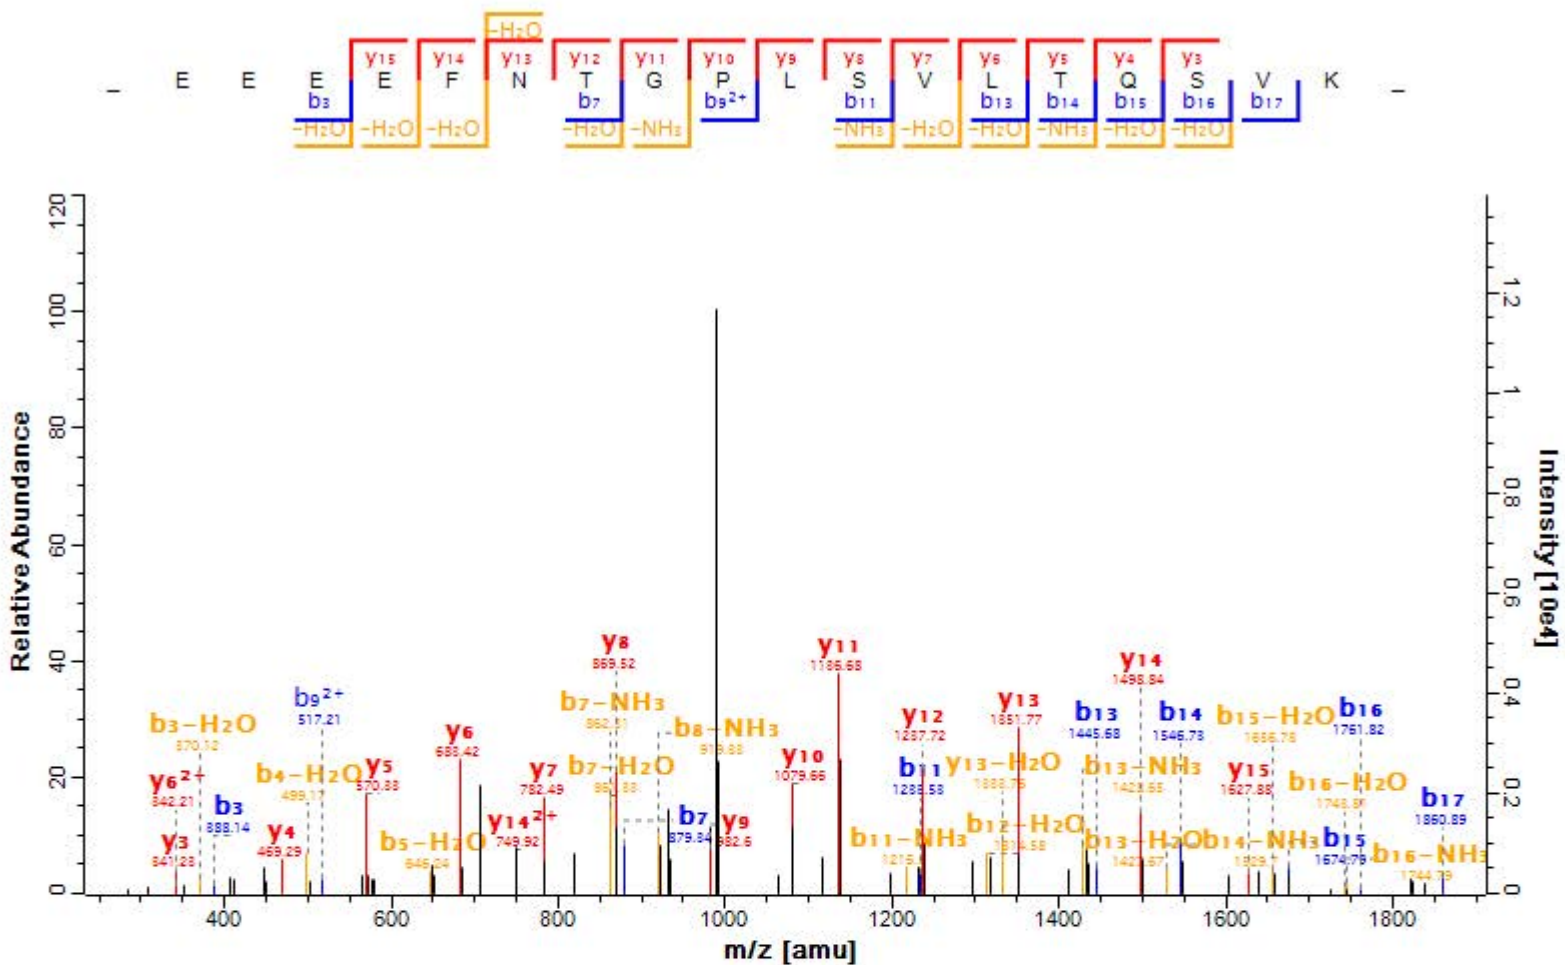

precursor information

|                   |                 |
|-------------------|-----------------|
| Mass:             | 2005.98463      |
| m/z:              | 1003.99959      |
| Charge:           | 2+              |
| Retentiontime:    | 54.930931091308 |
| Score:            | 183.5978        |
| Mass Error [ppm]: | 0.10662         |
| PEP:              | 7.5898E-32      |
| Precursor Type:   | MULTI           |

general information

|                       |           |
|-----------------------|-----------|
| Annotation:           | 15 of 18  |
| AminoAcids Coverage:  | 83 %      |
| Intensity Coverage:   | 46 %      |
| Peak Coverage:        | 41 %      |
| Protein Localisation: | 20 ... 37 |

| b <sup>2+</sup> ion |        | b ion    |        | seq |   |    | y ion    |         | y <sup>2+</sup> ion |         |
|---------------------|--------|----------|--------|-----|---|----|----------|---------|---------------------|---------|
| Δ dalton            | mass   | Δ dalton | mass   |     |   |    | Δ dalton | mass    | Δ dalton            | mass    |
|                     | 130.05 | 130.05   |        | 1   | E | 17 |          |         |                     |         |
|                     | 259.09 | 259.09   |        | 2   | E | 16 | 1886     |         | 1886                |         |
|                     | 388.14 | +0.1102  | 388.14 | 3   | E | 15 | 1756.9   |         | 1756.9              |         |
|                     | 517.18 |          | 517.18 | 4   | E | 14 | 1627.9   | -0.191  | 1627.9              |         |
|                     | 664.25 |          | 664.25 | 5   | F | 13 | 1498.8   | +0.0376 | 749.92              | -0.326  |
|                     | 778.29 |          | 778.29 | 6   | N | 12 | 1351.8   | -0.053  | 1351.8              |         |
|                     | 879.34 | +0.2781  | 879.34 | 7   | T | 11 | 1237.7   | -0.062  | 1237.7              |         |
|                     | 936.36 |          | 936.36 | 8   | G | 10 | 1136.7   | +0.0217 | 1136.7              |         |
| +0.1565             | 117.21 |          | 1033.4 | 9   | P | 9  | 1079.7   | +0.0039 | 1079.7              |         |
|                     | 1146.5 |          | 1146.5 | 10  | L | 8  | 982.6    | -0.013  | 982.6               |         |
|                     | 1233.5 | +0.2875  | 1233.5 | 11  | S | 7  | 869.52   | -0.006  | 869.52              |         |
|                     | 1332.6 |          | 1332.6 | 12  | V | 6  | 782.49   | -0.024  | 782.49              |         |
|                     | 1445.7 | +0.0094  | 1445.7 | 13  | L | 5  | 683.42   | +0.0451 | 342.21              | +0.2978 |
|                     | 1546.7 | +0.0636  | 1546.7 | 14  | T | 4  | 570.33   | +0.1221 | 570.33              |         |
|                     | 1674.8 | -0.292   | 1674.8 | 15  | Q | 3  | 469.29   | +0.099  | 469.29              |         |
|                     | 1761.8 | +0.1718  | 1761.8 | 16  | S | 2  | 341.23   | +0.0087 | 341.23              |         |
|                     | 1860.9 | -0.293   | 1860.9 | 17  | V | 1  | 254.2    |         | 254.2               |         |
|                     |        |          |        | 18  | K | 0  | 155.13   |         | 155.13              |         |

Scan number 9133 Raw file LNCAP\_Silac\_23F10\_set2\_02  
 Method ITMS; CID Pepti... 54.97

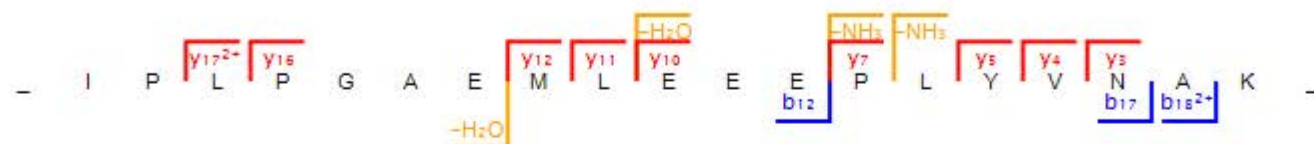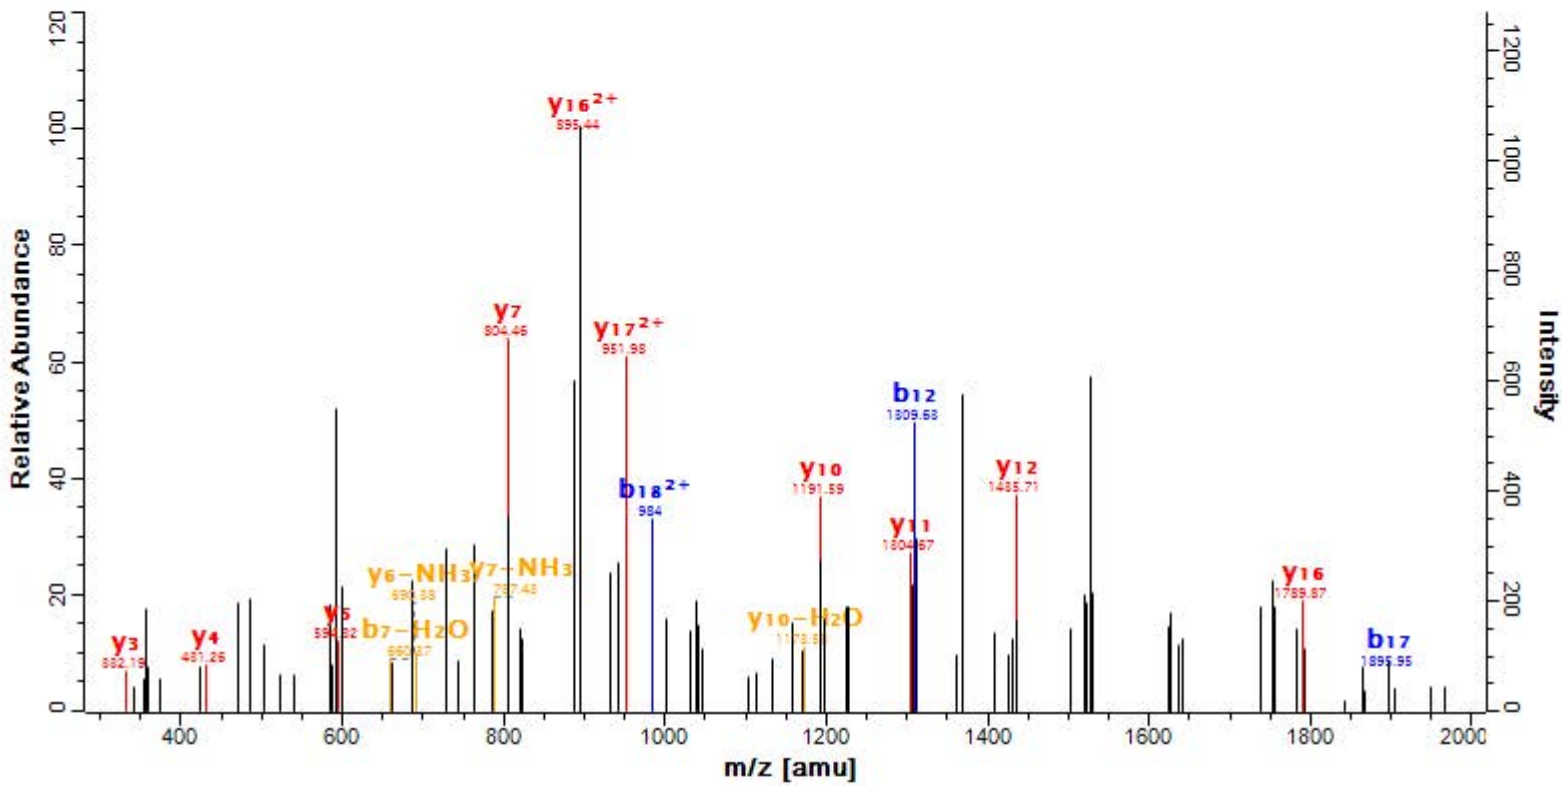

**precursor information**

|                   |                 |
|-------------------|-----------------|
| Mass:             | 2112.08253      |
| m/z:              | 1057.04854      |
| Charge:           | 2+              |
| Retentiontime:    | 55.549900054931 |
| Score:            | 54.97353        |
| Mass Error [ppm]: | 0.58439         |
| PEP:              | 0.0023463       |
| Precursor Type:   | MULTI           |

**general information**

|                       |             |
|-----------------------|-------------|
| Annotation:           | 13 of 19    |
| AminoAcids Coverage:  | 68 %        |
| Intensity Coverage:   | 26 %        |
| Peak Coverage:        | 17 %        |
| Protein Localisation: | 252 ... 270 |

| b <sup>2+</sup> ion |        | b ion    |        | seq |   |    | y ion    |         | y <sup>2+</sup> ion |         |
|---------------------|--------|----------|--------|-----|---|----|----------|---------|---------------------|---------|
| Δ dalton            | mass   | Δ dalton | mass   |     |   |    | Δ dalton | mass    | Δ dalton            | mass    |
|                     | 114.09 |          | 114.09 | 1   | I | 18 |          |         |                     |         |
|                     | 211.14 |          | 211.14 | 2   | P | 17 | 2000     |         | 2000                |         |
|                     | 324.23 |          | 324.23 | 3   | L | 16 | 1903     |         | 951.98              | +0.2567 |
|                     | 421.28 |          | 421.28 | 4   | P | 15 | 1789.9   | +0.194  | 895.44              | +0.0907 |
|                     | 478.3  |          | 478.3  | 5   | G | 14 | 1692.8   |         | 1692.8              |         |
|                     | 549.34 |          | 549.34 | 6   | A | 13 | 1635.8   |         | 1635.8              |         |
|                     | 678.38 |          | 678.38 | 7   | E | 12 | 1564.8   |         | 1564.8              |         |
|                     | 809.42 |          | 809.42 | 8   | M | 11 | 1435.7   | -0.027  | 1435.7              |         |
|                     | 922.51 |          | 922.51 | 9   | L | 10 | 1304.7   | -0.147  | 1304.7              |         |
|                     | 1051.5 |          | 1051.5 | 10  | E | 9  | 1191.6   | -0.066  | 1191.6              |         |
|                     | 1180.6 |          | 1180.6 | 11  | E | 8  | 1062.5   |         | 1062.5              |         |
|                     | 1309.6 | -0.104   | 1309.6 | 12  | E | 7  | 933.5    |         | 933.5               |         |
|                     | 1406.7 |          | 1406.7 | 13  | P | 6  | 804.46   | +0.1127 | 804.46              |         |
|                     | 1519.8 |          | 1519.8 | 14  | L | 5  | 707.41   |         | 707.41              |         |
|                     | 1682.8 |          | 1682.8 | 15  | Y | 4  | 594.32   | +0.0156 | 594.32              |         |
|                     | 1781.9 |          | 1781.9 | 16  | V | 3  | 431.26   | +0.1418 | 431.26              |         |
|                     | 1895.9 | +0.2644  | 1895.9 | 17  | N | 2  | 332.19   | +0.193  | 332.19              |         |
| +0.3086984          |        |          | 1967   | 18  | A | 1  | 218.15   |         | 218.15              |         |
|                     |        |          |        | 19  | K | 0  | 147.11   |         | 147.11              |         |

Scan number 9325 Raw file LNCAP\_Silac\_23F10\_set2\_02  
 Method ITMS; CID Pepti... 269.51

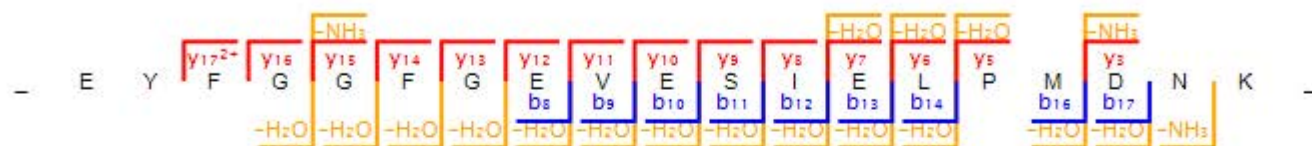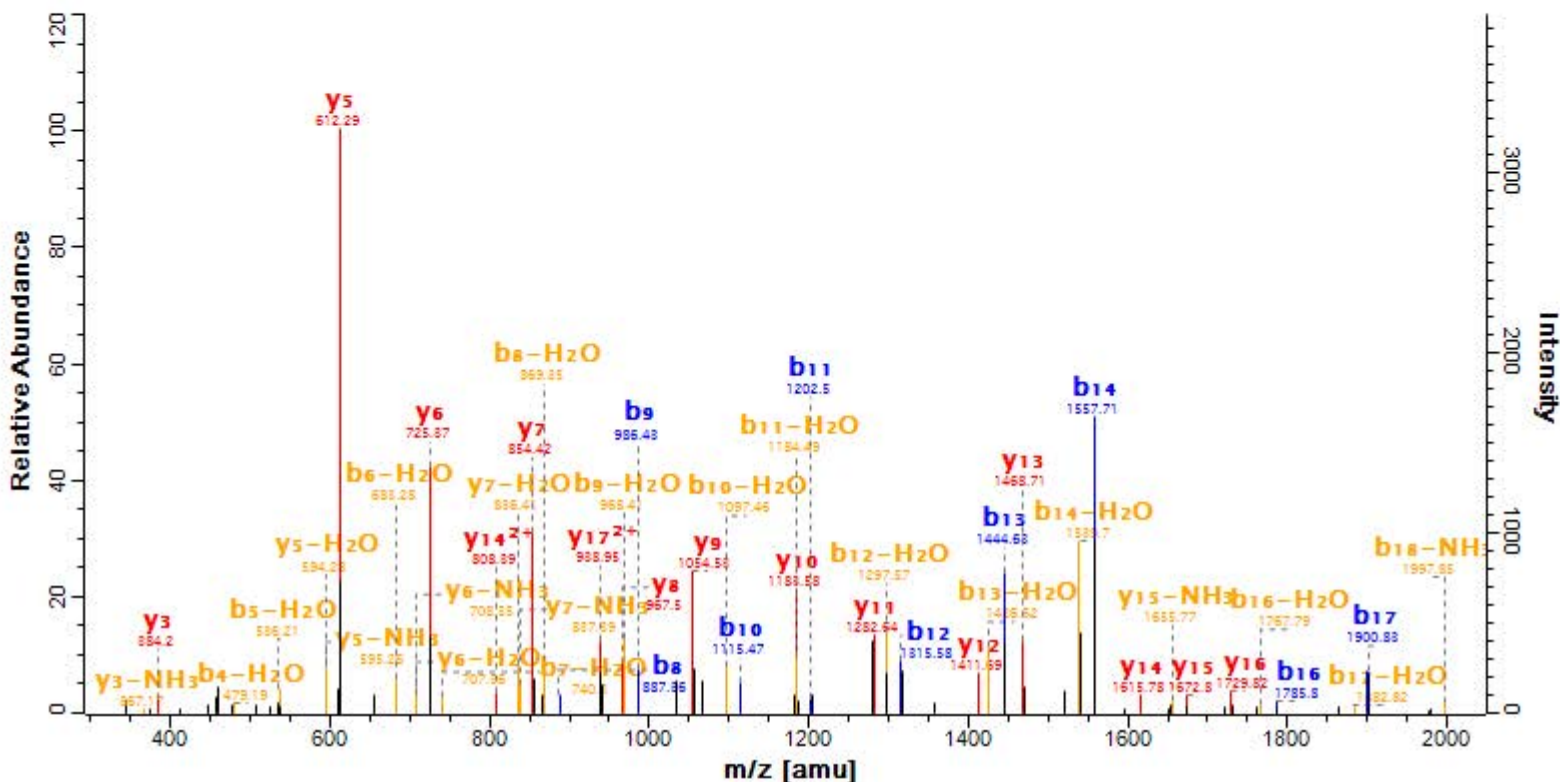

#### precursor information

|                   |                 |
|-------------------|-----------------|
| Mass:             | 2159.97207      |
| m/z:              | 1080.99331      |
| Charge:           | 2+              |
| Retentiontime:    | 56.667125701904 |
| Score:            | 269.5136        |
| Mass Error [ppm]: | -0.03195        |
| PEP:              | 3.0326E-89      |
| Precursor Type:   | MULTI           |

#### general information

|                       |             |
|-----------------------|-------------|
| Annotation:           | 16 of 19    |
| AminoAcids Coverage:  | 84 %        |
| Intensity Coverage:   | 71 %        |
| Peak Coverage:        | 47 %        |
| Protein Localisation: | 181 ... 199 |

| b ion     |          |    |     |    | y ion    |           | y <sup>2+</sup> ion |           |
|-----------|----------|----|-----|----|----------|-----------|---------------------|-----------|
| Δ dalton  | mass     |    | seq |    | Δ dalton | mass      | Δ dalton            | mass      |
|           | 130.0499 | 1  | E   | 18 |          |           |                     |           |
|           | 293.1132 | 2  | Y   | 17 | 2039.951 |           | 2039.951            |           |
|           | 440.1816 | 3  | F   | 16 | 1876.888 |           | 938.9475            | -0.00571  |
|           | 497.2031 | 4  | G   | 15 | 1729.819 | -0.26874  | 1729.819            |           |
|           | 554.2245 | 5  | G   | 14 | 1672.798 | -0.17001  | 1672.798            |           |
|           | 701.293  | 6  | F   | 13 | 1615.776 | +0.254413 | 808.3918            | +0.462191 |
|           | 758.3144 | 7  | G   | 12 | 1468.708 | -0.11357  | 1468.708            |           |
| +0.340377 | 887.357  | 8  | E   | 11 | 1411.686 | +0.047049 | 1411.686            |           |
| -0.12159  | 986.4254 | 9  | V   | 10 | 1282.644 | -0.05184  | 1282.644            |           |
| +0.212525 | 1115.468 | 10 | E   | 9  | 1183.575 | +0.076025 | 1183.575            |           |
| -0.15385  | 1202.5   | 11 | S   | 8  | 1054.533 | +0.032925 | 1054.533            |           |
| -0.12024  | 1315.584 | 12 | I   | 7  | 967.5008 | +0.071056 | 967.5008            |           |
| -0.16149  | 1444.627 | 13 | E   | 6  | 854.4168 | +0.029022 | 854.4168            |           |
| -0.12983  | 1557.711 | 14 | L   | 5  | 725.3742 | +0.000936 | 725.3742            |           |
|           | 1654.764 | 15 | P   | 4  | 612.2901 | -0.01791  | 612.2901            |           |
| -0.0246   | 1785.804 | 16 | M   | 3  | 515.2374 |           | 515.2374            |           |
| -0.11575  | 1900.831 | 17 | D   | 2  | 384.1969 | +0.07339  | 384.1969            |           |
|           | 2014.874 | 18 | N   | 1  | 269.1699 |           | 269.1699            |           |
|           |          | 19 | K   | 0  | 155.127  |           | 155.127             |           |

Scan number 9398 Raw file LNCAP\_Silac\_23F10\_set2\_02  
 Method ITMS: CID Pepti... 164.81

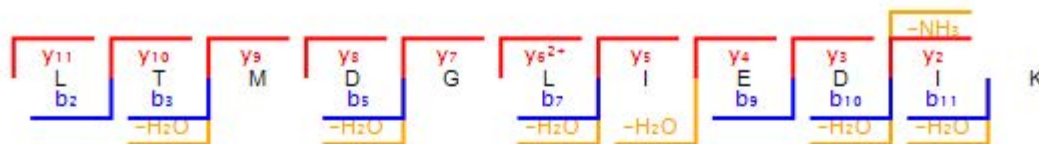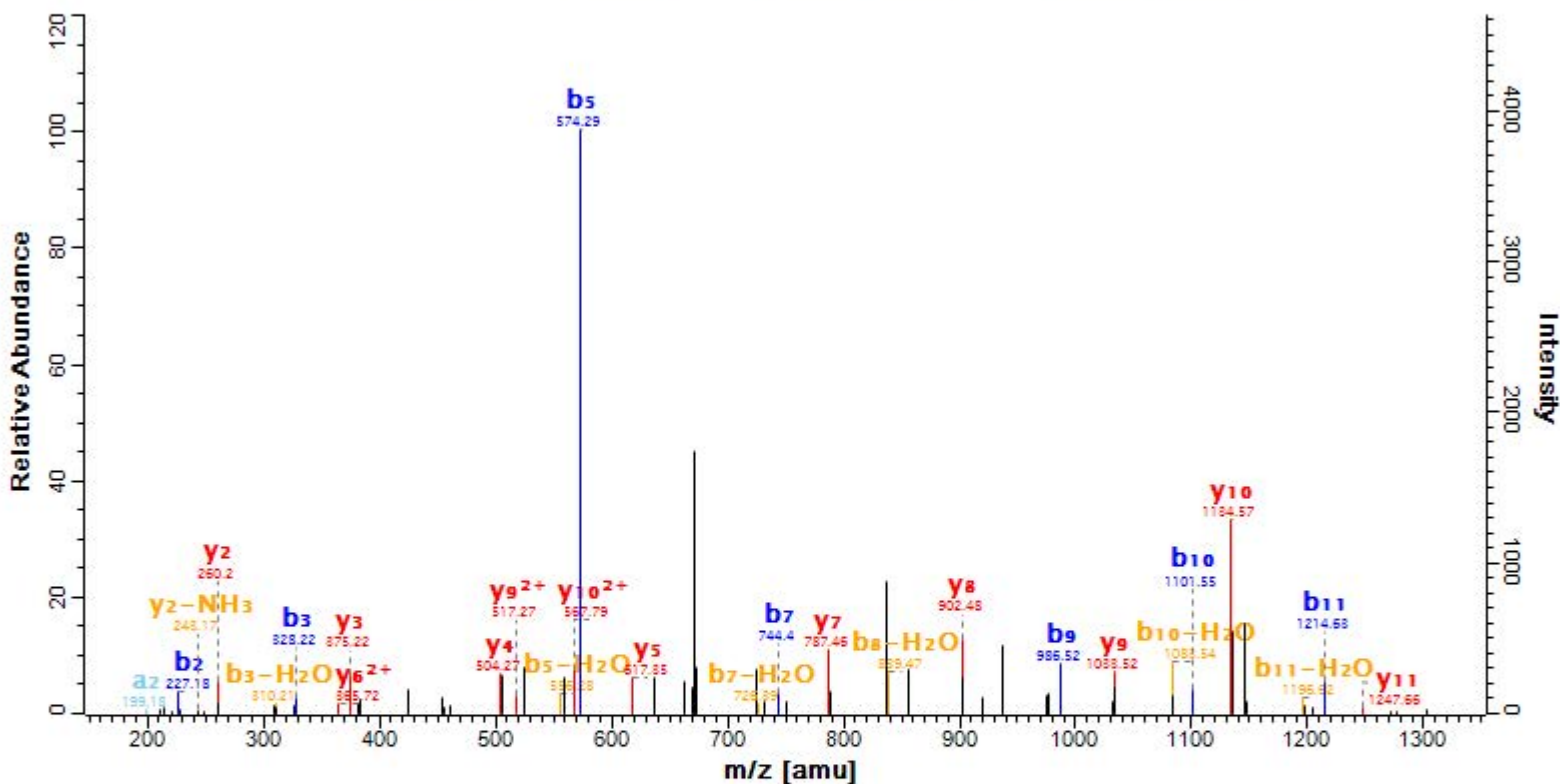

#### precursor information

|                   |                 |
|-------------------|-----------------|
| Mass:             | 1359.733        |
| m/z:              | 680.87377       |
| Charge:           | 2+              |
| Retentiontime:    | 57.068550109863 |
| Score:            | 164.8112        |
| Mass Error [ppm]: | 0.76669         |
| PEP:              | 1.1794E-07      |
| Precursor Type:   | MULTI           |

#### general information

|                       |           |
|-----------------------|-----------|
| Annotation:           | 10 of 12  |
| AminoAcids Coverage:  | 83 %      |
| Intensity Coverage:   | 52 %      |
| Peak Coverage:        | 31 %      |
| Protein Localisation: | 29 ... 40 |

| a ion    |        | b ion    |        | seq |   |    | y ion    |         | y <sup>2+</sup> ion |         |
|----------|--------|----------|--------|-----|---|----|----------|---------|---------------------|---------|
| Δ dalton | mass   | Δ dalton | mass   |     |   |    | Δ dalton | mass    | Δ dalton            | mass    |
|          | 86.096 |          | 114.09 | 1   | I | 11 |          |         |                     |         |
| +0.117   | 199.18 | -0.046   | 227.18 | 2   | L | 10 | 1247.7   | +0.2472 | 1247.7              |         |
|          | 300.23 | +0.1551  | 328.22 | 3   | T | 9  | 1134.6   | -0.054  | 567.79              | +0.0198 |
|          | 431.27 |          | 459.26 | 4   | M | 8  | 1033.5   | +0.044  | 517.27              | +0.0476 |
|          | 546.3  | -0.29    | 574.29 | 5   | D | 7  | 902.48   | -0.267  | 902.48              |         |
|          | 603.32 |          | 631.31 | 6   | G | 6  | 787.46   | -0.033  | 787.46              |         |
|          | 716.4  | -0.013   | 744.4  | 7   | L | 5  | 730.43   |         | 365.72              | -0.492  |
|          | 829.49 |          | 857.48 | 8   | I | 4  | 617.35   | +0.1423 | 617.35              |         |
|          | 958.53 | -0.052   | 986.52 | 9   | E | 3  | 504.27   | +0.0385 | 504.27              |         |
|          | 1073.6 | -0.218   | 1101.5 | 10  | D | 2  | 375.22   | -0.005  | 375.22              |         |
|          | 1186.6 | +0.0058  | 1214.6 | 11  | I | 1  | 260.2    | +0.007  | 260.2               |         |
|          |        |          |        | 12  | K | 0  | 147.11   |         | 147.11              |         |

Scan number 9715 Raw file LNCAP\_Silac\_23F10\_set2\_02  
 Method ITMS: CID Pepti... 147.56

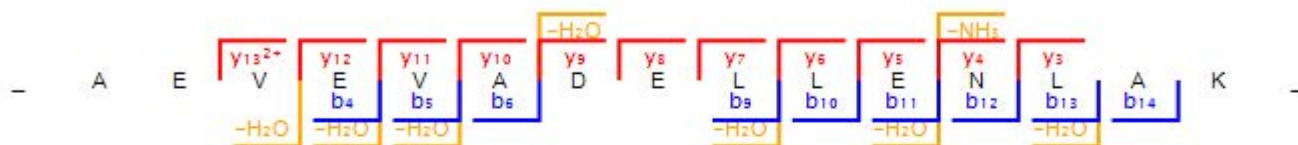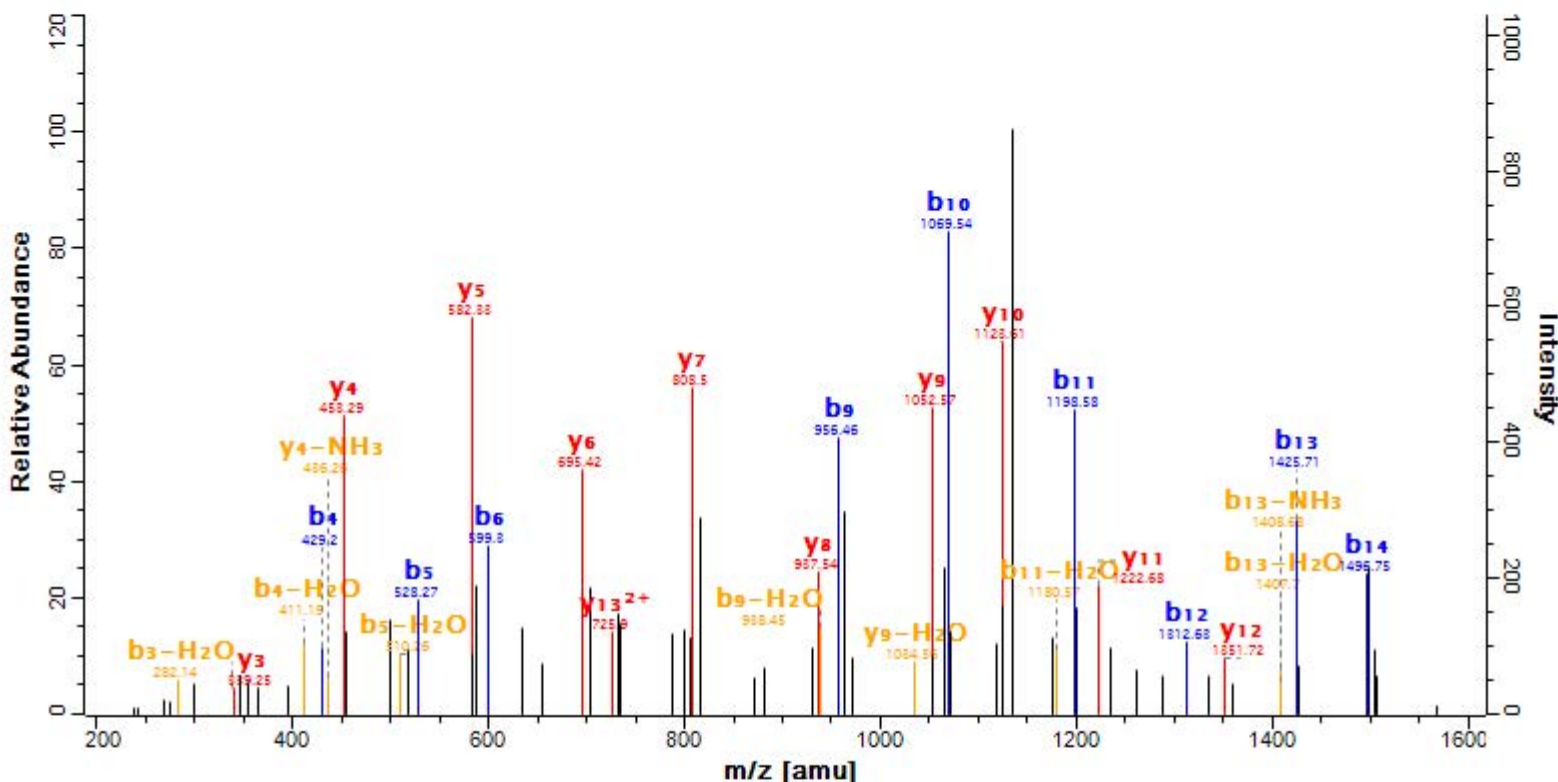

#### precursor information

|                   |                 |
|-------------------|-----------------|
| Mass:             | 1641.84689      |
| m/z:              | 821.93072       |
| Charge:           | 2+              |
| Retentiontime:    | 58.860866546630 |
| Score:            | 147.5608        |
| Mass Error [ppm]: | 0.45938         |
| PEP:              | 2.6582E-13      |
| Precursor Type:   | MULTI           |

#### general information

|                       |            |
|-----------------------|------------|
| Annotation:           | 12 of 15   |
| AminoAcids Coverage:  | 80 %       |
| Intensity Coverage:   | 55 %       |
| Peak Coverage:        | 38 %       |
| Protein Localisation: | 97 ... 111 |

| b ion     |          |     |   | y ion    |          |           | y <sup>2+</sup> ion |  |
|-----------|----------|-----|---|----------|----------|-----------|---------------------|--|
| Δ dalton  | mass     | seq |   | Δ dalton | mass     | Δ dalton  | mass                |  |
|           | 72.04439 | 1   | A | 14       |          |           |                     |  |
|           | 201.087  | 2   | E | 13       | 1579.83  | 1579.83   |                     |  |
|           | 300.1554 | 3   | V | 12       | 1450.788 | 725.8976  | +0.206721           |  |
| -0.05108  | 429.198  | 4   | E | 11       | 1351.719 | -0.18164  | 1351.719            |  |
| -0.06535  | 528.2664 | 5   | V | 10       | 1222.677 | -0.07985  | 1222.677            |  |
| +0.021555 | 599.3035 | 6   | A | 9        | 1123.608 | +0.124431 | 1123.608            |  |
|           | 714.3305 | 7   | D | 8        | 1052.571 | -0.03169  | 1052.571            |  |
|           | 843.3731 | 8   | E | 7        | 937.5444 | -0.24224  | 937.5444            |  |
| +0.008885 | 956.4571 | 9   | L | 6        | 808.5018 | +0.038271 | 808.5018            |  |
| -0.02482  | 1069.541 | 10  | L | 5        | 695.4178 | +0.133077 | 695.4178            |  |
| -0.17679  | 1198.584 | 11  | E | 4        | 582.3337 | +0.01133  | 582.3337            |  |
| -0.06994  | 1312.627 | 12  | N | 3        | 453.2911 | +0.126128 | 453.2911            |  |
| -0.07649  | 1425.711 | 13  | L | 2        | 339.2482 | +0.044941 | 339.2482            |  |
| -0.01351  | 1496.748 | 14  | A | 1        | 226.1641 |           | 226.1641            |  |
|           |          | 15  | K | 0        | 155.127  |           | 155.127             |  |



Scan number 10214 Raw file LNCAP\_Silac\_23F10\_set2\_03  
 Method ITMS; CID Pepti... 105.03

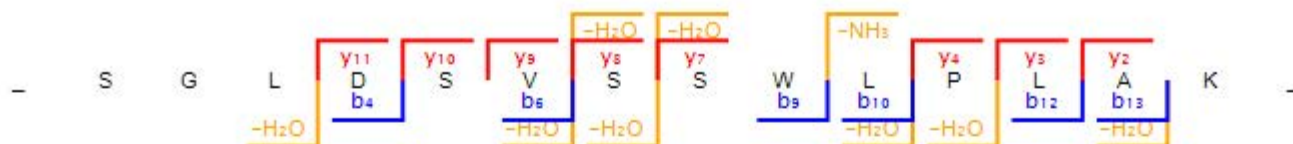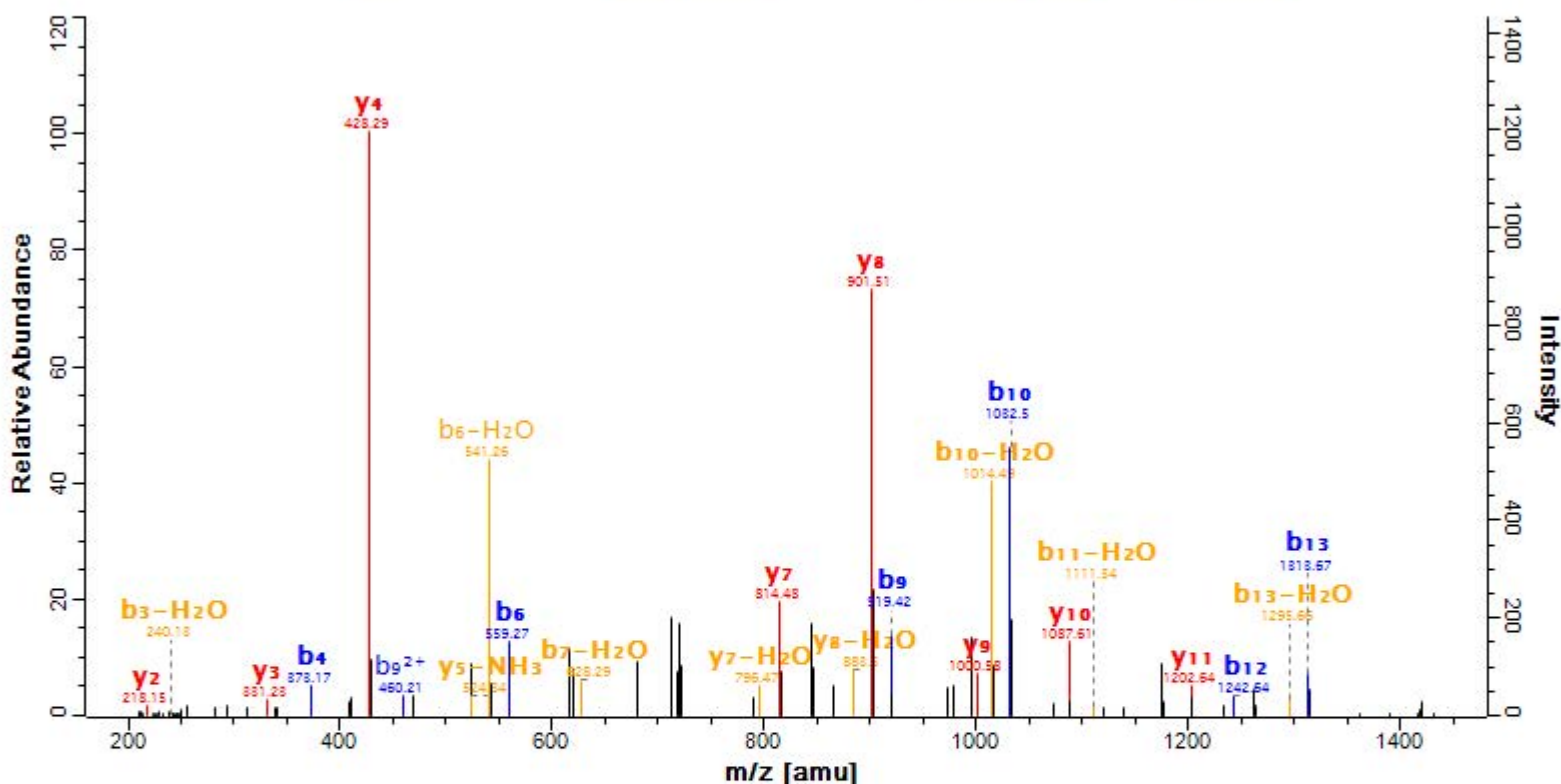

#### precursor information

|                   |                 |
|-------------------|-----------------|
| Mass:             | 1458.77201      |
| m/z:              | 730.39328       |
| Charge:           | 2+              |
| Retentiontime:    | 56.772109985351 |
| Score:            | 105.0287        |
| Mass Error [ppm]: | 0.11029         |
| PEP:              | 8.7167E-06      |
| Precursor Type:   | MULTI           |

#### general information

|                       |            |
|-----------------------|------------|
| Annotation:           | 11 of 14   |
| AminoAcids Coverage:  | 79 %       |
| Intensity Coverage:   | 59 %       |
| Peak Coverage:        | 24 %       |
| Protein Localisation: | 90 ... 103 |

| b <sup>2+</sup> ion |          | b ion     |          |     | y ion    |      |          |           |
|---------------------|----------|-----------|----------|-----|----------|------|----------|-----------|
| Δ dalton            | mass     | Δ dalton  | mass     | seq | Δ dalton | mass |          |           |
|                     | 88.0393  |           | 88.0393  | 1   | S        | 13   |          |           |
|                     | 145.0608 |           | 145.0608 | 2   | G        | 12   | 1372.747 |           |
|                     | 258.1448 |           | 258.1448 | 3   | L        | 11   | 1315.726 |           |
|                     | 373.1718 | -0.00753  | 373.1718 | 4   | D        | 10   | 1202.642 | -0.05819  |
|                     | 460.2038 |           | 460.2038 | 5   | S        | 9    | 1087.615 | -0.02624  |
|                     | 559.2722 | -0.06372  | 559.2722 | 6   | V        | 8    | 1000.583 | -0.00551  |
|                     | 646.3042 |           | 646.3042 | 7   | S        | 7    | 901.5142 | +0.02586  |
|                     | 733.3363 |           | 733.3363 | 8   | S        | 6    | 814.4822 | +0.005642 |
| +0.085992           | 460.2114 | -0.02075  | 919.4156 | 9   | W        | 5    | 727.4501 |           |
|                     | 1032.5   | -0.10292  | 1032.5   | 10  | L        | 4    | 541.3708 |           |
|                     | 1129.552 |           | 1129.552 | 11  | P        | 3    | 428.2867 | +0.0332   |
|                     | 1242.636 | +0.086787 | 1242.636 | 12  | L        | 2    | 331.234  | +0.220577 |
|                     | 1313.674 | -0.16139  | 1313.674 | 13  | A        | 1    | 218.1499 | +0.117431 |
|                     |          |           |          | 14  | K        | 0    | 147.1128 |           |

Scan number 10295 Raw file LNCAP\_Silac\_23F10\_set2\_03  
 Method ITMS; CID Pepti... 239.55

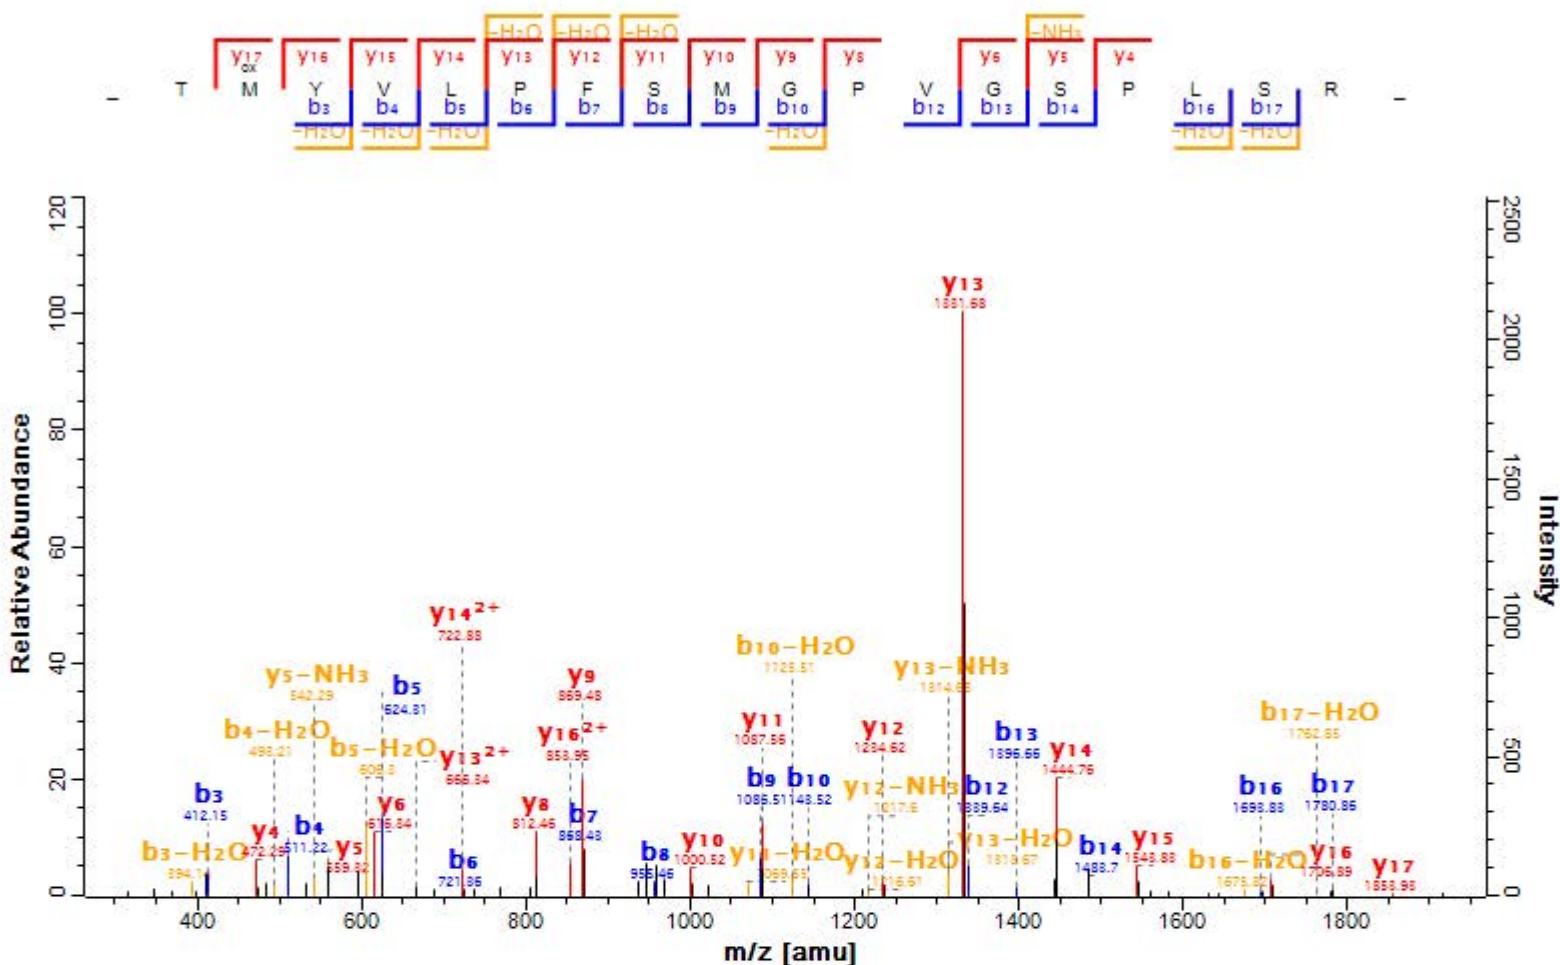

precursor information

|                   |                 |
|-------------------|-----------------|
| Mass:             | 1953.96988      |
| m/z:              | 977.99222       |
| Charge:           | 2+              |
| Retentiontime:    | 57.293136596679 |
| Score:            | 239.5532        |
| Mass Error [ppm]: | 0.32982         |
| PEP:              | 1.7118E-57      |
| Precursor Type:   | MULTI           |

general information

|                       |             |
|-----------------------|-------------|
| Annotation:           | 16 of 18    |
| AminoAcids Coverage:  | 89 %        |
| Intensity Coverage:   | 63 %        |
| Peak Coverage:        | 45 %        |
| Protein Localisation: | 156 ... 173 |

| b ion     |          |    |     |    | y ion    |           | y <sup>2+</sup> ion |           |
|-----------|----------|----|-----|----|----------|-----------|---------------------|-----------|
| Δ dalton  | mass     |    | seq |    | Δ dalton | mass      | Δ dalton            | mass      |
|           | 102.055  | 1  | T   | 17 |          |           |                     |           |
|           | 249.0904 | 2  | M   | 16 | 1853.929 | +0.187495 | 1853.929            |           |
| -0.0592   | 412.1537 | 3  | Y   | 15 | 1706.893 | +0.092767 | 853.9504            | +0.208761 |
| +0.016185 | 511.2221 | 4  | V   | 14 | 1543.83  | -0.01187  | 1543.83             |           |
| -0.00947  | 624.3062 | 5  | L   | 13 | 1444.762 | +0.040427 | 722.8845            | +0.178563 |
| +0.092431 | 721.3589 | 6  | P   | 12 | 1331.678 | -0.04641  | 666.3425            | +0.256056 |
| +0.002654 | 868.4273 | 7  | F   | 11 | 1234.625 | +0.161264 | 1234.625            |           |
| +0.105086 | 955.4594 | 8  | S   | 10 | 1087.556 | -0.04864  | 1087.556            |           |
| -0.22348  | 1086.5   | 9  | M   | 9  | 1000.524 | +0.002734 | 1000.524            |           |
| -0.03877  | 1143.521 | 10 | G   | 8  | 869.4839 | +0.010138 | 869.4839            |           |
|           | 1240.574 | 11 | P   | 7  | 812.4625 | -0.02589  | 812.4625            |           |
| -0.11613  | 1339.642 | 12 | V   | 6  | 715.4097 |           | 715.4097            |           |
| -0.09743  | 1396.664 | 13 | G   | 5  | 616.3413 | +0.133858 | 616.3413            |           |
| +0.005675 | 1483.696 | 14 | S   | 4  | 559.3198 | +0.09215  | 559.3198            |           |
|           | 1580.749 | 15 | P   | 3  | 472.2878 | +0.063327 | 472.2878            |           |
| -0.27239  | 1693.833 | 16 | L   | 2  | 375.235  |           | 375.235             |           |
| -0.06052  | 1780.865 | 17 | S   | 1  | 262.151  |           | 262.151             |           |
|           |          | 18 | R   | 0  | 175.119  |           | 175.119             |           |

Scan number 10455 Raw file LNCAP\_Silac\_23F10\_set2\_03  
 Method ITMS; CID Pepti... 120.66

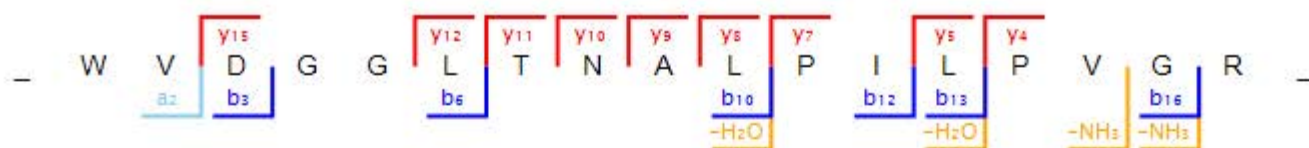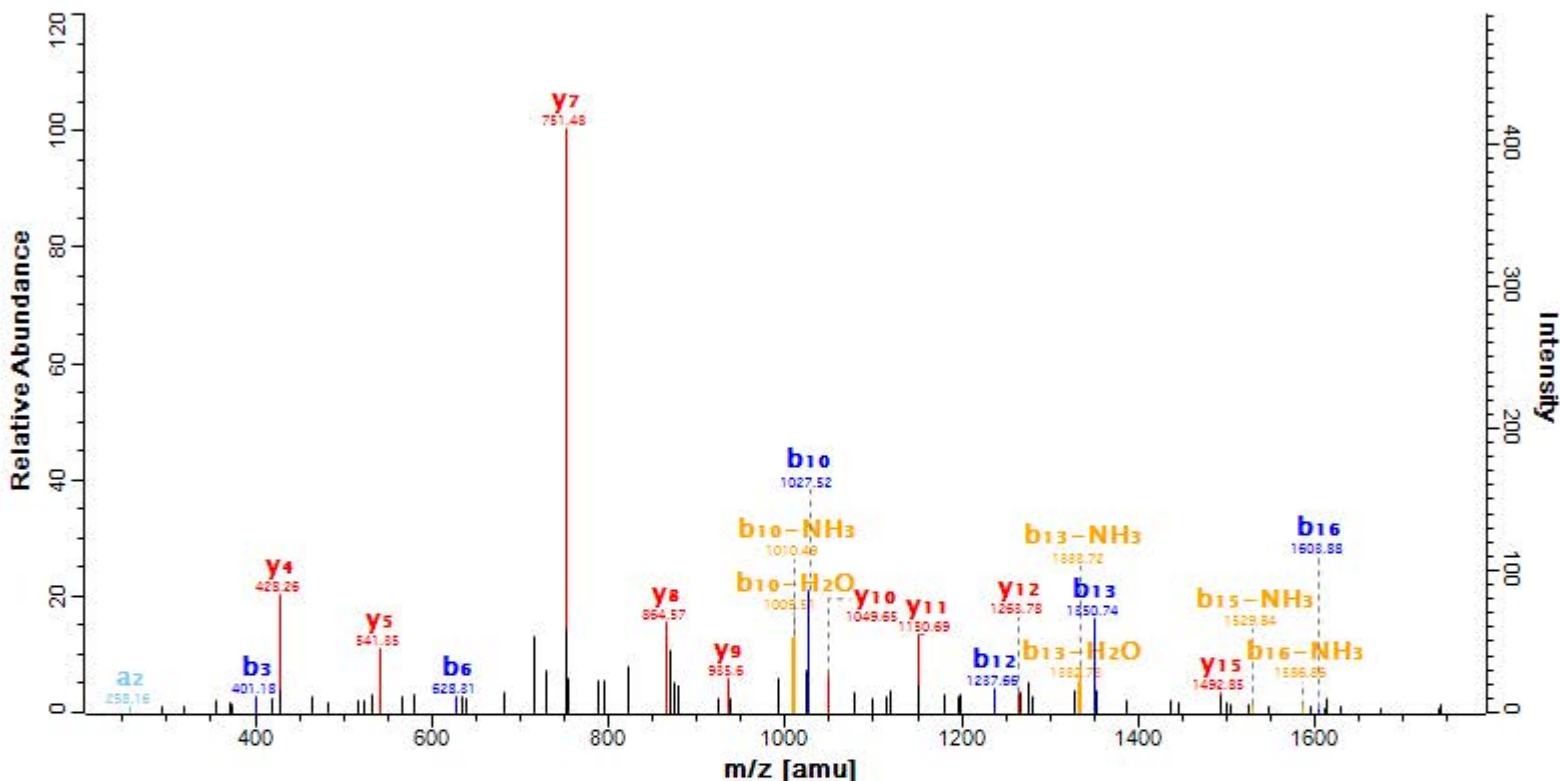

#### precursor information

|                   |                 |
|-------------------|-----------------|
| Mass:             | 1776.9889       |
| m/z:              | 889.50173       |
| Charge:           | 2+              |
| Retentiontime:    | 58.305435180664 |
| Score:            | 120.663         |
| Mass Error [ppm]: | 0.13902         |
| PEP:              | 7.0524E-12      |
| Precursor Type:   | MULTI           |

#### general information

|                       |             |
|-----------------------|-------------|
| Annotation:           | 13 of 17    |
| AminoAcids Coverage:  | 76 %        |
| Intensity Coverage:   | 55 %        |
| Peak Coverage:        | 26 %        |
| Protein Localisation: | 161 ... 177 |

| a ion     |          | b ion     |          |     |   | y ion    |          |
|-----------|----------|-----------|----------|-----|---|----------|----------|
| Δ dalton  | mass     | Δ dalton  | mass     | seq |   | Δ dalton | mass     |
|           | 159.0917 |           | 187.0866 | 1   | W | 16       |          |
| +0.244117 | 258.1601 |           | 286.155  | 2   | V | 15       | 1591.917 |
|           | 373.187  | -0.05493  | 401.1819 | 3   | D | 14       | 1492.848 |
|           | 430.2085 |           | 458.2034 | 4   | G | 13       | 1377.821 |
|           | 487.23   |           | 515.2249 | 5   | G | 12       | 1320.8   |
|           | 600.314  | +0.151511 | 628.3089 | 6   | L | 11       | 1263.778 |
|           | 701.3617 |           | 729.3566 | 7   | T | 10       | 1150.694 |
|           | 815.4046 |           | 843.3995 | 8   | N | 9        | 1049.647 |
|           | 886.4417 |           | 914.4367 | 9   | A | 8        | 935.6037 |
|           | 999.5258 | -0.24631  | 1027.521 | 10  | L | 7        | 864.5665 |
|           | 1096.579 |           | 1124.573 | 11  | P | 6        | 751.4825 |
|           | 1209.663 | -0.20064  | 1237.658 | 12  | I | 5        | 654.4297 |
|           | 1322.747 | -0.16324  | 1350.742 | 13  | L | 4        | 541.3457 |
|           | 1419.799 |           | 1447.794 | 14  | P | 3        | 428.2616 |
|           | 1518.868 |           | 1546.863 | 15  | V | 2        | 331.2088 |
|           | 1575.889 | +0.358177 | 1603.884 | 16  | G | 1        | 232.1404 |
|           |          |           |          | 17  | R | 0        | 175.119  |

Scan number 10724 Raw file LNCAP\_Silac\_23F10\_set2\_03  
 Method ITMS; CID Peptide 120.14

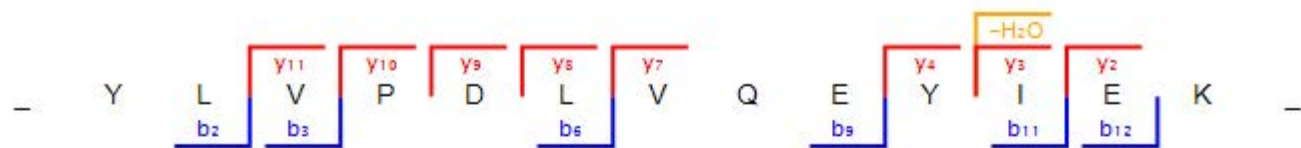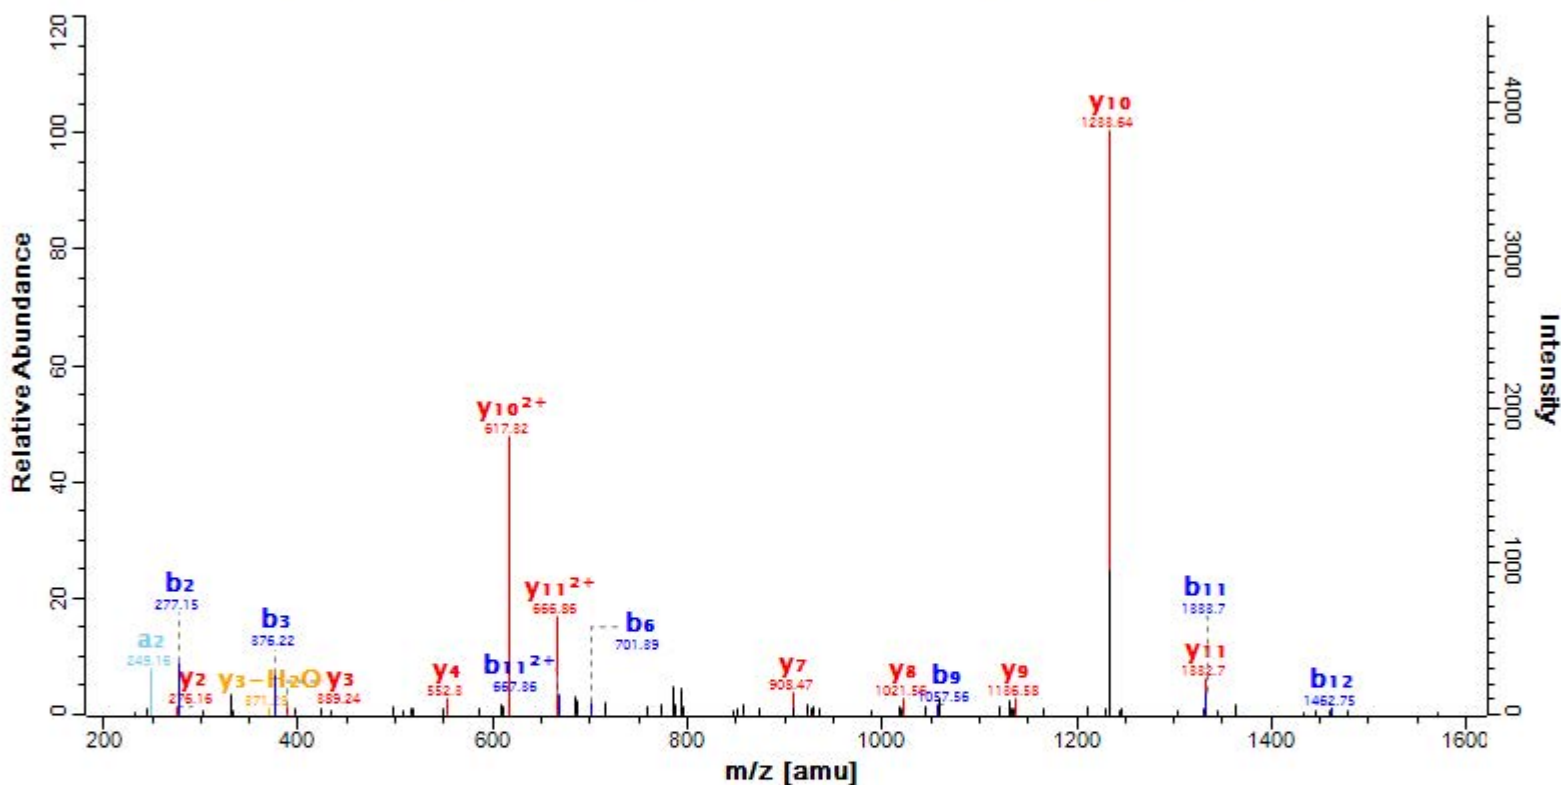

#### precursor information

|                   |                 |
|-------------------|-----------------|
| Mass:             | 1607.84571      |
| m/z:              | 804.93013       |
| Charge:           | 2+              |
| Retentiontime:    | 60.021999359130 |
| Score:            | 120.1359        |
| Mass Error [ppm]: | 0.64384         |
| PEP:              | 9.1937E-07      |
| Precursor Type:   | MULTI           |

#### general information

|                       |             |
|-----------------------|-------------|
| Annotation:           | 10 of 13    |
| AminoAcids Coverage:  | 77 %        |
| Intensity Coverage:   | 68 %        |
| Peak Coverage:        | 24 %        |
| Protein Localisation: | 238 ... 250 |

|       | a ion         | b <sup>2+</sup> ion | b ion         |     |   |               | y ion         | y <sup>2+</sup> ion |
|-------|---------------|---------------------|---------------|-----|---|---------------|---------------|---------------------|
|       | Δ dalton mass | Δ dalton mass       | Δ dalton mass | seq |   | Δ dalton mass | Δ dalton mass |                     |
|       | 136.1         | 164.1               | 164.1         | 1   | Y | 12            |               |                     |
| -0.03 | 249.2         | 277.2               | -0.08         | 2   | L | 11            | 1446          | 1446                |
|       | 348.2         | 376.2               | +0            | 3   | V | 10            | 1333          | -0.22 666.9 +0.04:  |
|       | 445.3         | 473.3               |               | 4   | P | 9             | 1234          | -0.02 617.3 +0.13:  |
|       | 560.3         | 588.3               |               | 5   | D | 8             | 1137          | -0.07 1137          |
|       | 673.4         | 701.4               | +0.108        | 6   | L | 7             | 1022          | +0.014 1022         |
|       | 772.5         | 800.5               |               | 7   | V | 6             | 908.5         | +0.014 908.5        |
|       | 900.5         | 928.5               |               | 8   | Q | 5             | 809.4         | 809.4               |
|       | 1030          | 1058                | +0.057        | 9   | E | 4             | 681.3         | 681.3               |
|       | 1193          | 1221                |               | 10  | Y | 3             | 552.3         | +0.118 552.3        |
|       | 1306          | 1462.75             | -0.15         | 11  | I | 2             | 389.2         | +0.059 389.2        |
|       | 1435          | 1463                | -0.18         | 12  | E | 1             | 276.2         | +0.118 276.2        |
|       |               |                     |               | 13  | K | 0             | 147.1         | 147.1               |

Scan number 10761 Raw file LNCAP\_Silac\_23F10\_set2\_03  
 Method ITMS; CID Pepti... 289.32

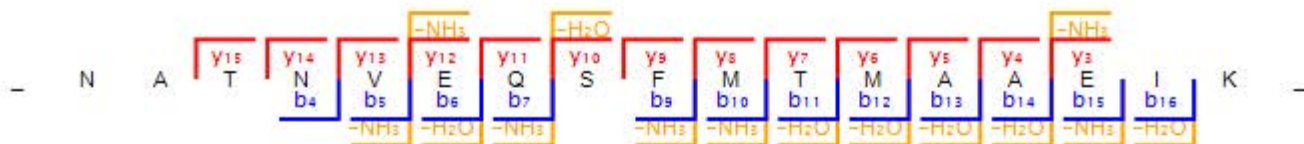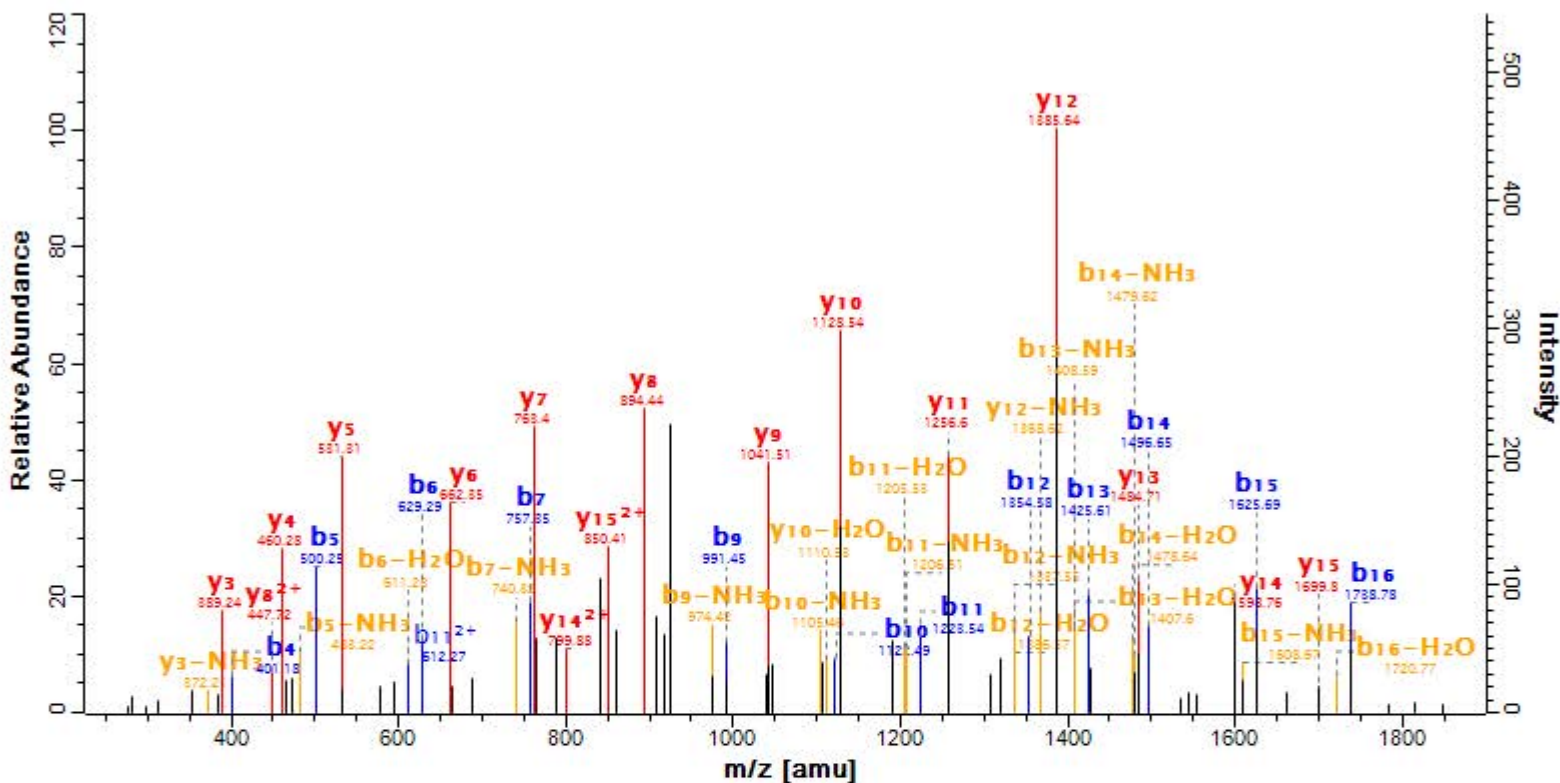

#### precursor information

|                   |                 |
|-------------------|-----------------|
| Mass:             | 1883.87688      |
| m/z:              | 942.94572       |
| Charge:           | 2+              |
| Retentiontime:    | 60.284439086914 |
| Score:            | 289.321         |
| Mass Error [ppm]: | 0.60802         |
| PEP:              | 5.7331E-95      |
| Precursor Type:   | MULTI           |

#### general information

|                       |             |
|-----------------------|-------------|
| Annotation:           | 14 of 17    |
| AminoAcids Coverage:  | 82 %        |
| Intensity Coverage:   | 65 %        |
| Peak Coverage:        | 48 %        |
| Protein Localisation: | 157 ... 173 |

| b <sup>2+</sup> ion |         | b ion    |        | seq |   |    | y ion    |         | y <sup>2+</sup> ion |         |
|---------------------|---------|----------|--------|-----|---|----|----------|---------|---------------------|---------|
| Δ dalton            | mass    | Δ dalton | mass   |     |   |    | Δ dalton | mass    | Δ dalton            | mass    |
|                     | 115.05  |          | 115.05 | 1   | N | 16 |          |         |                     |         |
|                     | 186.09  |          | 186.09 | 2   | A | 15 | 1770.8   |         | 1770.8              |         |
|                     | 287.13  |          | 287.13 | 3   | T | 14 | 1699.8   | -0.249  | 850.41              | +0.2171 |
|                     | 401.18  | +0.0407  | 401.18 | 4   | N | 13 | 1598.8   | -0.025  | 799.88              | -0.273  |
|                     | 500.25  | +0.1508  | 500.25 | 5   | V | 12 | 1484.7   | -0.225  | 1484.7              |         |
|                     | 629.29  | +0.0347  | 629.29 | 6   | E | 11 | 1385.6   | -0.024  | 1385.6              |         |
|                     | 757.35  | +0.0391  | 757.35 | 7   | Q | 10 | 1256.6   | -0.088  | 1256.6              |         |
|                     | 844.38  |          | 844.38 | 8   | S | 9  | 1128.5   | -0.091  | 1128.5              |         |
|                     | 991.45  | -0.208   | 991.45 | 9   | F | 8  | 1041.5   | -0.002  | 1041.5              |         |
|                     | 1122.5  | -0.211   | 1122.5 | 10  | M | 7  | 894.44   | -0.053  | 447.72              | +0.4413 |
| +0.0448             | 1122.27 | -0.088   | 1223.5 | 11  | T | 6  | 763.4    | -0.023  | 763.4               |         |
|                     | 1354.6  | -0.205   | 1354.6 | 12  | M | 5  | 662.35   | +0.0026 | 662.35              |         |
|                     | 1425.6  | -0.192   | 1425.6 | 13  | A | 4  | 531.31   | +0.0525 | 531.31              |         |
|                     | 1496.7  | +0.1596  | 1496.7 | 14  | A | 3  | 460.28   | +0.13   | 460.28              |         |
|                     | 1625.7  | -0.042   | 1625.7 | 15  | E | 2  | 389.24   | +0.1061 | 389.24              |         |
|                     | 1738.8  | -0.209   | 1738.8 | 16  | I | 1  | 260.2    |         | 260.2               |         |
|                     |         |          |        | 17  | K | 0  | 147.11   |         | 147.11              |         |

Scan number 10870 Raw file LNCAP\_Silac\_23F10\_set2\_03  
 Method ITMS; CID Pepti... 241.42

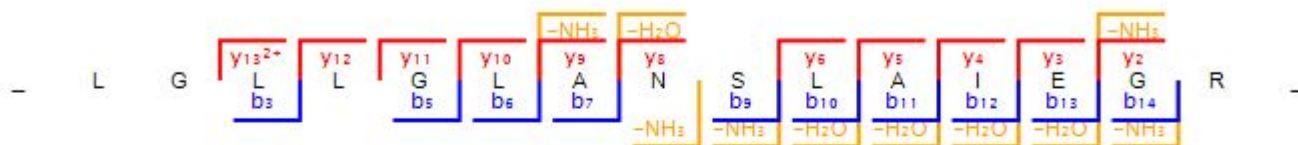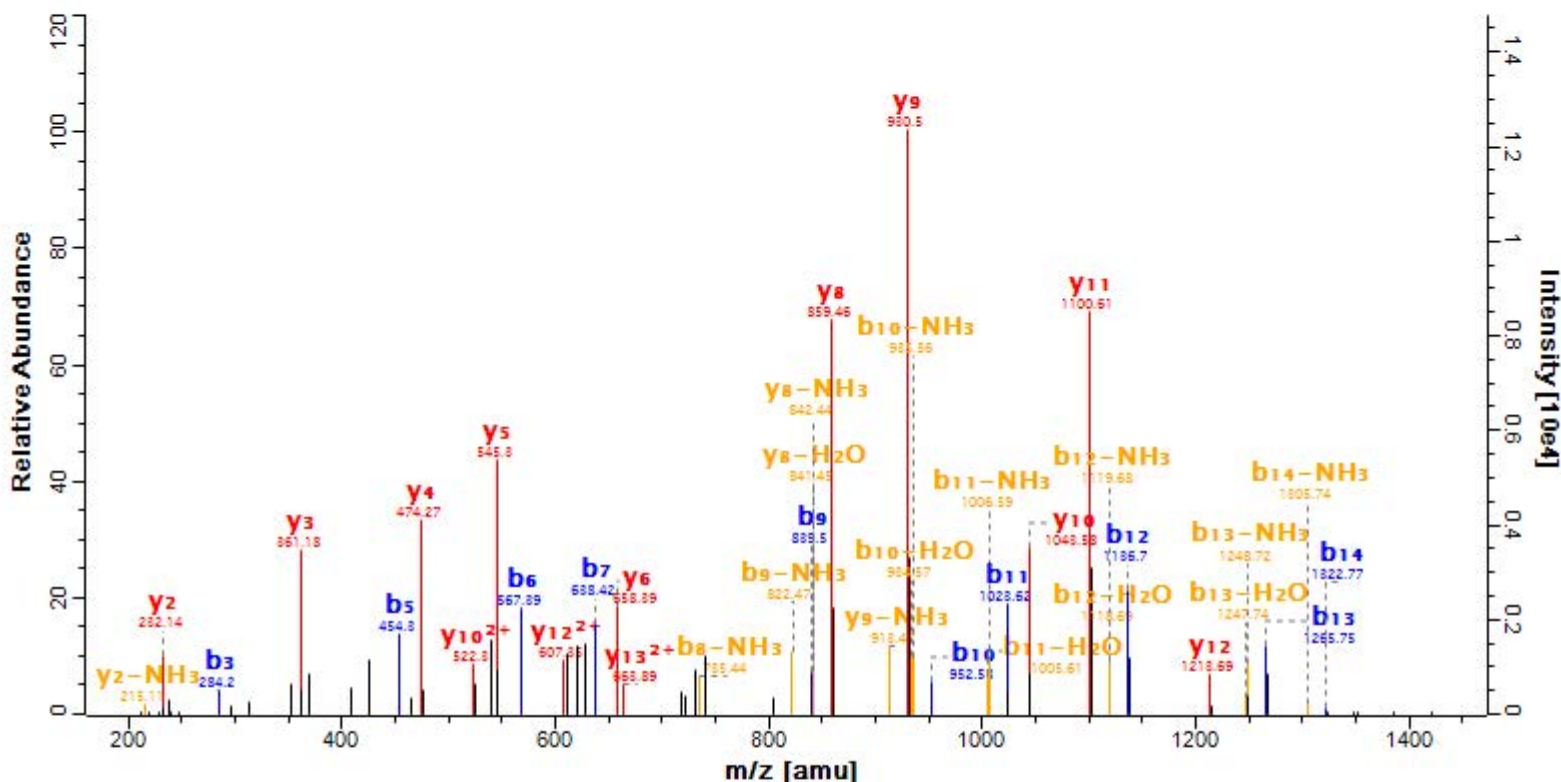

#### precursor information

|                   |                 |
|-------------------|-----------------|
| Mass:             | 1495.87233      |
| m/z:              | 748.94344       |
| Charge:           | 2+              |
| Retentiontime:    | 61.050968170166 |
| Score:            | 241.4166        |
| Mass Error [ppm]: | 0.067552        |
| PEP:              | 2.1229E-46      |
| Precursor Type:   | MULTI           |

#### general information

|                       |             |
|-----------------------|-------------|
| Annotation:           | 12 of 15    |
| AminoAcids Coverage:  | 80 %        |
| Intensity Coverage:   | 73 %        |
| Peak Coverage:        | 47 %        |
| Protein Localisation: | 169 ... 183 |

| b ion     |          |     |   | y ion    |          |           | y <sup>2+</sup> ion |  |
|-----------|----------|-----|---|----------|----------|-----------|---------------------|--|
| Δ dalton  | mass     | seq |   | Δ dalton | mass     | Δ dalton  | mass                |  |
|           | 114.0913 | 1   | L | 14       |          |           |                     |  |
|           | 171.1128 | 2   | G | 13       | 1383.795 | 1383.795  |                     |  |
| +0.092011 | 284.1969 | 3   | L | 12       | 1326.774 | 663.8906  | +0.112487           |  |
|           | 397.2809 | 4   | L | 11       | 1213.69  | +0.062773 | 607.3486            |  |
| +0.016757 | 454.3024 | 5   | G | 10       | 1100.606 | +0.006701 | 1100.606            |  |
| -0.03838  | 567.3865 | 6   | L | 9        | 1043.584 | +0.011197 | 522.2958            |  |
| -0.06267  | 638.4236 | 7   | A | 8        | 930.5003 | +0.051743 | 930.5003            |  |
|           | 752.4665 | 8   | N | 7        | 859.4632 | -0.01319  | 859.4632            |  |
| -0.05755  | 839.4985 | 9   | S | 6        | 745.4203 |           | 745.4203            |  |
| +0.044848 | 952.5826 | 10  | L | 5        | 658.3883 | +0.082819 | 658.3883            |  |
| -0.01796  | 1023.62  | 11  | A | 4        | 545.3042 | +0.073438 | 545.3042            |  |
| -0.11808  | 1136.704 | 12  | I | 3        | 474.2671 | +0.130327 | 474.2671            |  |
| -0.13516  | 1265.746 | 13  | E | 2        | 361.183  | +0.117589 | 361.183             |  |
| -0.25233  | 1322.768 | 14  | G | 1        | 232.1404 | +0.067256 | 232.1404            |  |
|           |          | 15  | R | 0        | 175.119  |           | 175.119             |  |

Scan number 10893 Raw file LNCAP\_Silac\_23F10\_set2\_03  
 Method ITMS; CID Pepti... 194.77

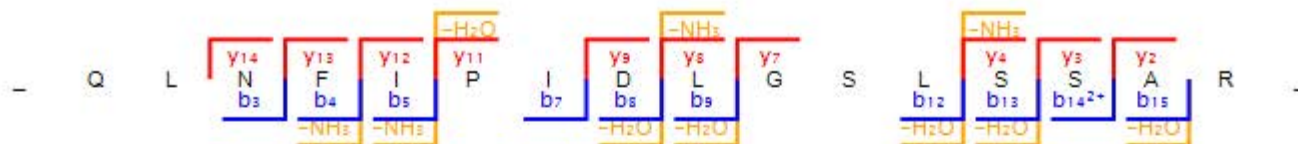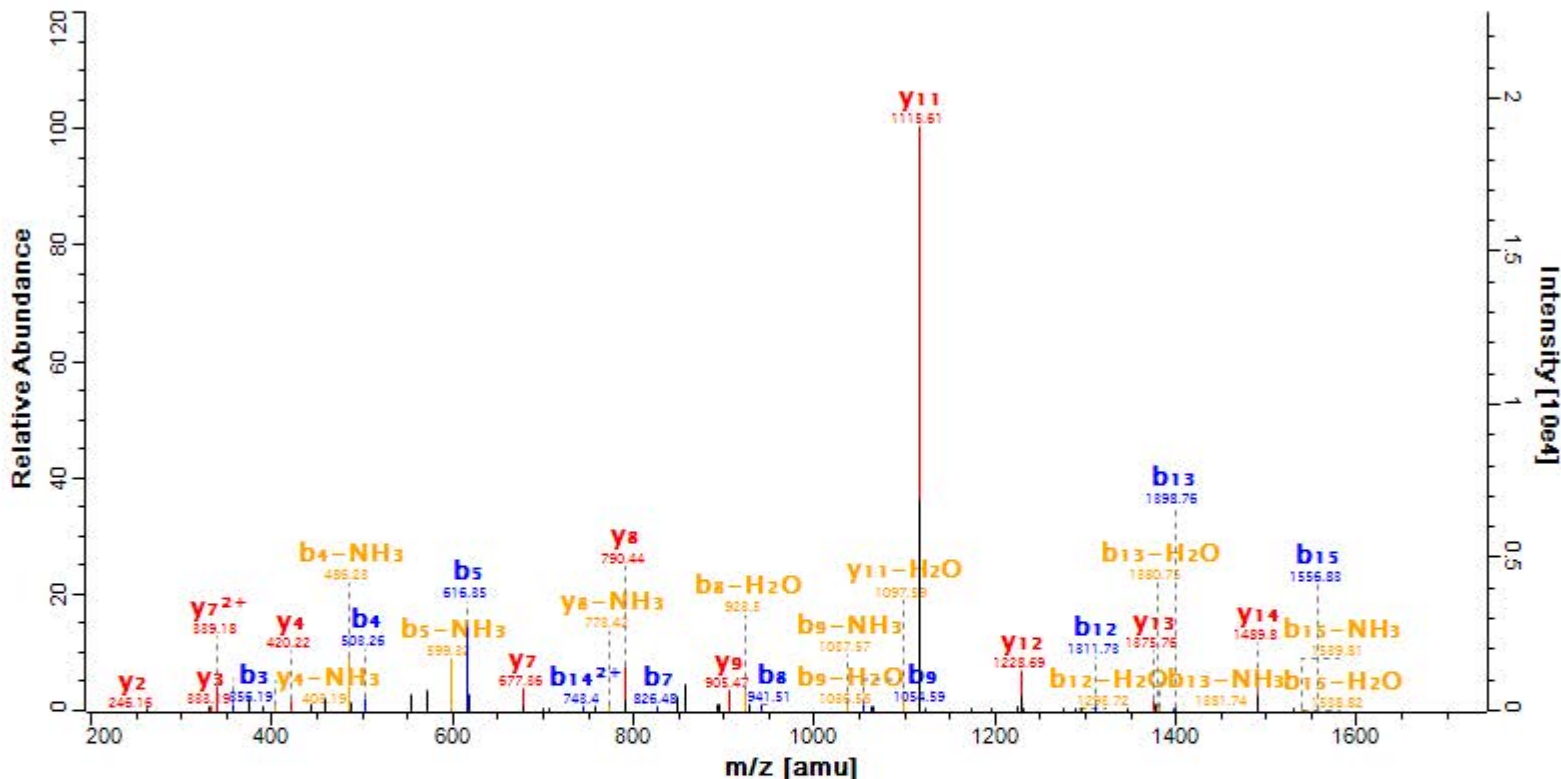

#### precursor information

|                   |                 |
|-------------------|-----------------|
| Mass:             | 1729.93622      |
| m/z:              | 865.97539       |
| Charge:           | 2+              |
| Retentiontime:    | 61.200981140136 |
| Score:            | 194.773         |
| Mass Error [ppm]: | -0.038245       |
| PEP:              | 3.398E-27       |
| Precursor Type:   | MULTI           |

#### general information

|                       |             |
|-----------------------|-------------|
| Annotation:           | 13 of 16    |
| AminoAcids Coverage:  | 81 %        |
| Intensity Coverage:   | 67 %        |
| Peak Coverage:        | 39 %        |
| Protein Localisation: | 184 ... 199 |

| b <sup>2+</sup> ion |        | b ion    |        | seq |   |    | y ion    |         | y <sup>2+</sup> ion |         |
|---------------------|--------|----------|--------|-----|---|----|----------|---------|---------------------|---------|
| Δ dalton            | mass   | Δ dalton | mass   |     |   |    | Δ dalton | mass    | Δ dalton            | mass    |
|                     | 129.07 |          | 129.07 | 1   | Q | 15 |          |         |                     |         |
|                     | 242.15 |          | 242.15 | 2   | L | 14 | 1602.9   |         | 1602.9              |         |
|                     | 356.19 | +0.0139  | 356.19 | 3   | N | 13 | 1489.8   | -0.033  | 1489.8              |         |
|                     | 503.26 | -0.144   | 503.26 | 4   | F | 12 | 1375.8   | -0.003  | 1375.8              |         |
|                     | 616.35 | -0.016   | 616.35 | 5   | I | 11 | 1228.7   | +0.006  | 1228.7              |         |
|                     | 713.4  |          | 713.4  | 6   | P | 10 | 1115.6   | -0.016  | 1115.6              |         |
|                     | 826.48 | -0.267   | 826.48 | 7   | I | 9  | 1018.6   |         | 1018.6              |         |
|                     | 941.51 | -0.13    | 941.51 | 8   | D | 8  | 905.47   | +0.0126 | 905.47              |         |
|                     | 1054.6 | -0.008   | 1054.6 | 9   | L | 7  | 790.44   | +0.0089 | 790.44              |         |
|                     | 1111.6 |          | 1111.6 | 10  | G | 6  | 677.36   | +0.0583 | 339.18              | +0.0782 |
|                     | 1198.6 |          | 1198.6 | 11  | S | 5  | 620.34   |         | 620.34              |         |
|                     | 1311.7 | -0.045   | 1311.7 | 12  | L | 4  | 533.3    |         | 533.3               |         |
|                     | 1398.8 | -0.18    | 1398.8 | 13  | S | 3  | 420.22   | +0.0197 | 420.22              |         |
| -0.019              | 743.4  |          | 1485.8 | 14  | S | 2  | 333.19   | +0.0192 | 333.19              |         |
|                     | 1556.8 | -0.18    | 1556.8 | 15  | A | 1  | 246.16   | -0.082  | 246.16              |         |
|                     |        |          |        | 16  | R | 0  | 175.12   |         | 175.12              |         |

Scan number 10909 Raw file LNCAP\_Silac\_23F10\_set2\_03  
 Method ITMS; CID Pepti... 100.93

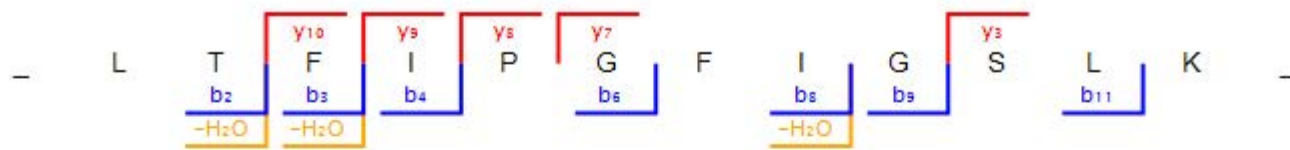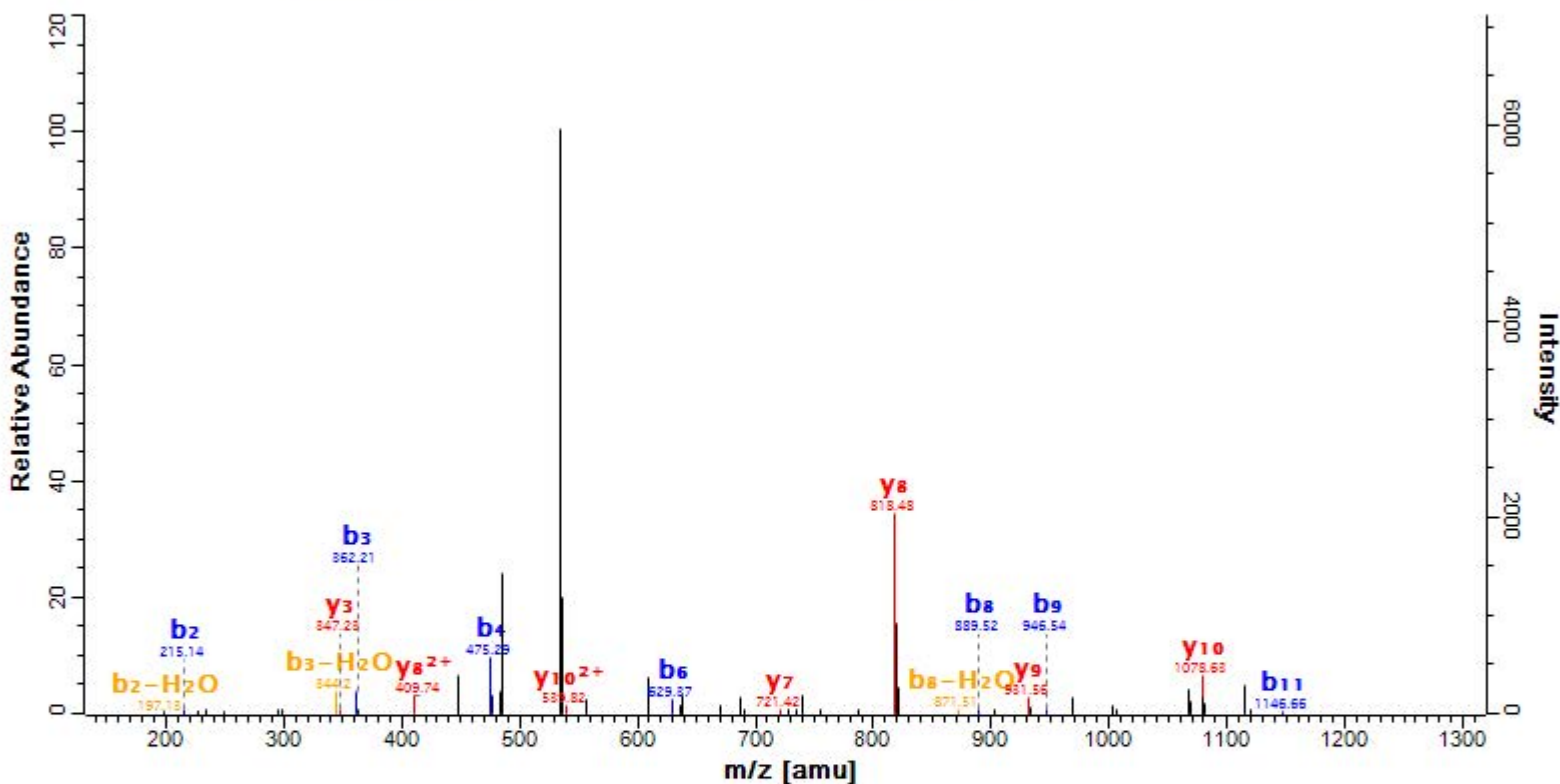

#### precursor information

|                   |                 |
|-------------------|-----------------|
| Mass:             | 1288.59723      |
| m/z:              | 645.30589       |
| Charge:           | 2+              |
| Retentiontime:    | 61.305160522460 |
| Score:            | 100.9311        |
| Mass Error [ppm]: | 0.064282        |
| PEP:              | 0.00025118      |
| Precursor Type:   | MULTI           |

#### general information

|                       |             |
|-----------------------|-------------|
| Annotation:           | 9 of 12     |
| AminoAcids Coverage:  | 75 %        |
| Intensity Coverage:   | 24 %        |
| Peak Coverage:        | 22 %        |
| Protein Localisation: | 219 ... 230 |

| b ion     |          |    |     |    | y ion    |           | y <sup>2+</sup> ion |           |
|-----------|----------|----|-----|----|----------|-----------|---------------------|-----------|
| Δ dalton  | mass     |    | seq |    | Δ dalton | mass      | Δ dalton            | mass      |
|           | 114.0913 | 1  | L   | 11 |          |           |                     |           |
| -0.02647  | 215.139  | 2  | T   | 10 | 1179.677 |           | 1179.677            |           |
| -0.07773  | 362.2074 | 3  | F   | 9  | 1078.63  | +0.048801 | 539.8184            | +0.178172 |
| +0.008552 | 475.2915 | 4  | I   | 8  | 931.5611 | -0.1337   | 931.5611            |           |
|           | 572.3443 | 5  | P   | 7  | 818.4771 | +0.017502 | 409.7422            | +0.176957 |
| +0.426817 | 629.3657 | 6  | G   | 6  | 721.4243 | +0.065627 | 721.4243            |           |
|           | 776.4341 | 7  | F   | 5  | 664.4028 |           | 664.4028            |           |
| +0.070482 | 889.5182 | 8  | I   | 4  | 517.3344 |           | 517.3344            |           |
| -0.03814  | 946.5397 | 9  | G   | 3  | 404.2504 |           | 404.2504            |           |
|           | 1033.572 | 10 | S   | 2  | 347.2289 | -0.0038   | 347.2289            |           |
| -0.281    | 1146.656 | 11 | L   | 1  | 260.1969 |           | 260.1969            |           |
|           |          | 12 | K   | 0  | 147.1128 |           | 147.1128            |           |



Scan number 10948 Raw file LNCAP\_Silac\_23F10\_set2\_03  
 Method ITMS; CID Pepti... 86.48

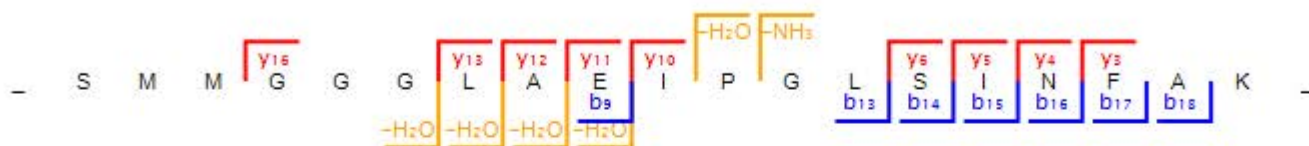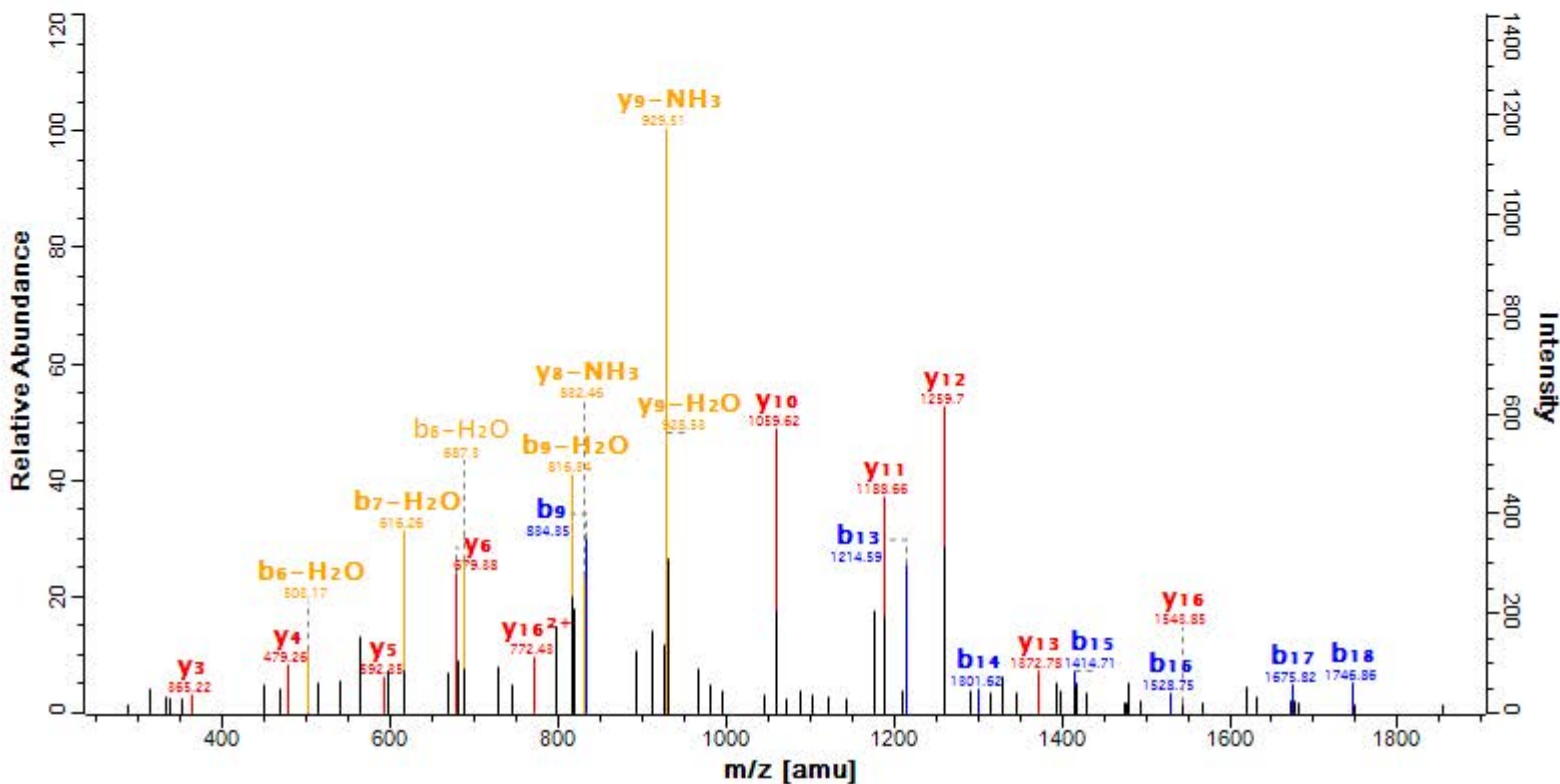

**precursor information**

|                   |                 |
|-------------------|-----------------|
| Mass:             | 1891.95368      |
| m/z:              | 946.98412       |
| Charge:           | 2+              |
| Retentiontime:    | 61.571578979492 |
| Score:            | 86.4794         |
| Mass Error [ppm]: | 0.045836        |
| PEP:              | 2.945E-05       |
| Precursor Type:   | MULTI           |

**general information**

|                       |             |
|-----------------------|-------------|
| Annotation:           | 14 of 19    |
| AminoAcids Coverage:  | 74 %        |
| Intensity Coverage:   | 58 %        |
| Peak Coverage:        | 28 %        |
| Protein Localisation: | 385 ... 403 |

| b ion    |          |    |     |    | y ion    |           | y <sup>2+</sup> ion |          |
|----------|----------|----|-----|----|----------|-----------|---------------------|----------|
| Δ dalton | mass     |    | seq |    | Δ dalton | mass      | Δ dalton            | mass     |
|          | 88.0393  | 1  | S   | 18 |          |           |                     |          |
|          | 219.0798 | 2  | M   | 17 | 1805.929 |           | 1805.929            |          |
|          | 350.1203 | 3  | M   | 16 | 1674.888 |           | 1674.888            |          |
|          | 407.1417 | 4  | G   | 15 | 1543.848 | -0.08993  | 772.4276            | -0.00759 |
|          | 464.1632 | 5  | G   | 14 | 1486.826 |           | 1486.826            |          |
|          | 521.1847 | 6  | G   | 13 | 1429.805 |           | 1429.805            |          |
|          | 634.2687 | 7  | L   | 12 | 1372.783 | +0.047943 | 1372.783            |          |
|          | 705.3058 | 8  | A   | 11 | 1259.699 | -0.10908  | 1259.699            |          |
| -0.02391 | 834.3484 | 9  | E   | 10 | 1188.662 | -0.06818  | 1188.662            |          |
|          | 947.4325 | 10 | I   | 9  | 1059.62  | -0.01961  | 1059.62             |          |
|          | 1044.485 | 11 | P   | 8  | 946.5356 |           | 946.5356            |          |
|          | 1101.507 | 12 | G   | 7  | 849.4829 |           | 849.4829            |          |
| -0.08689 | 1214.591 | 13 | L   | 6  | 792.4614 |           | 792.4614            |          |
| -0.13661 | 1301.623 | 14 | S   | 5  | 679.3774 | +0.114103 | 679.3774            |          |
| -0.13083 | 1414.707 | 15 | I   | 4  | 592.3453 | +0.043898 | 592.3453            |          |
| -0.04925 | 1528.75  | 16 | N   | 3  | 479.2613 | +0.107271 | 479.2613            |          |
| +0.1255  | 1675.818 | 17 | F   | 2  | 365.2183 | -0.03141  | 365.2183            |          |
| -0.17541 | 1746.855 | 18 | A   | 1  | 218.1499 |           | 218.1499            |          |
|          |          | 19 | K   | 0  | 147.1128 |           | 147.1128            |          |

Scan number 11185 Raw file LNCAP\_Silac\_23F10\_set2\_03  
 Method ITMS; CID Pepti... 239.87

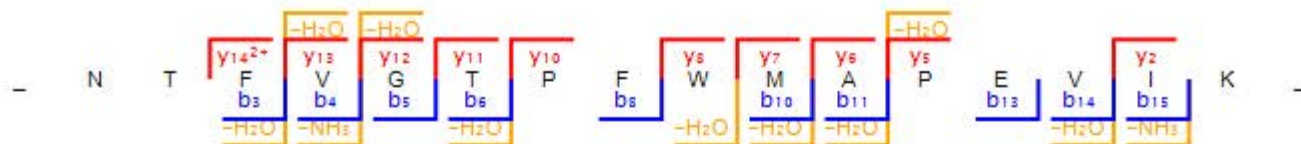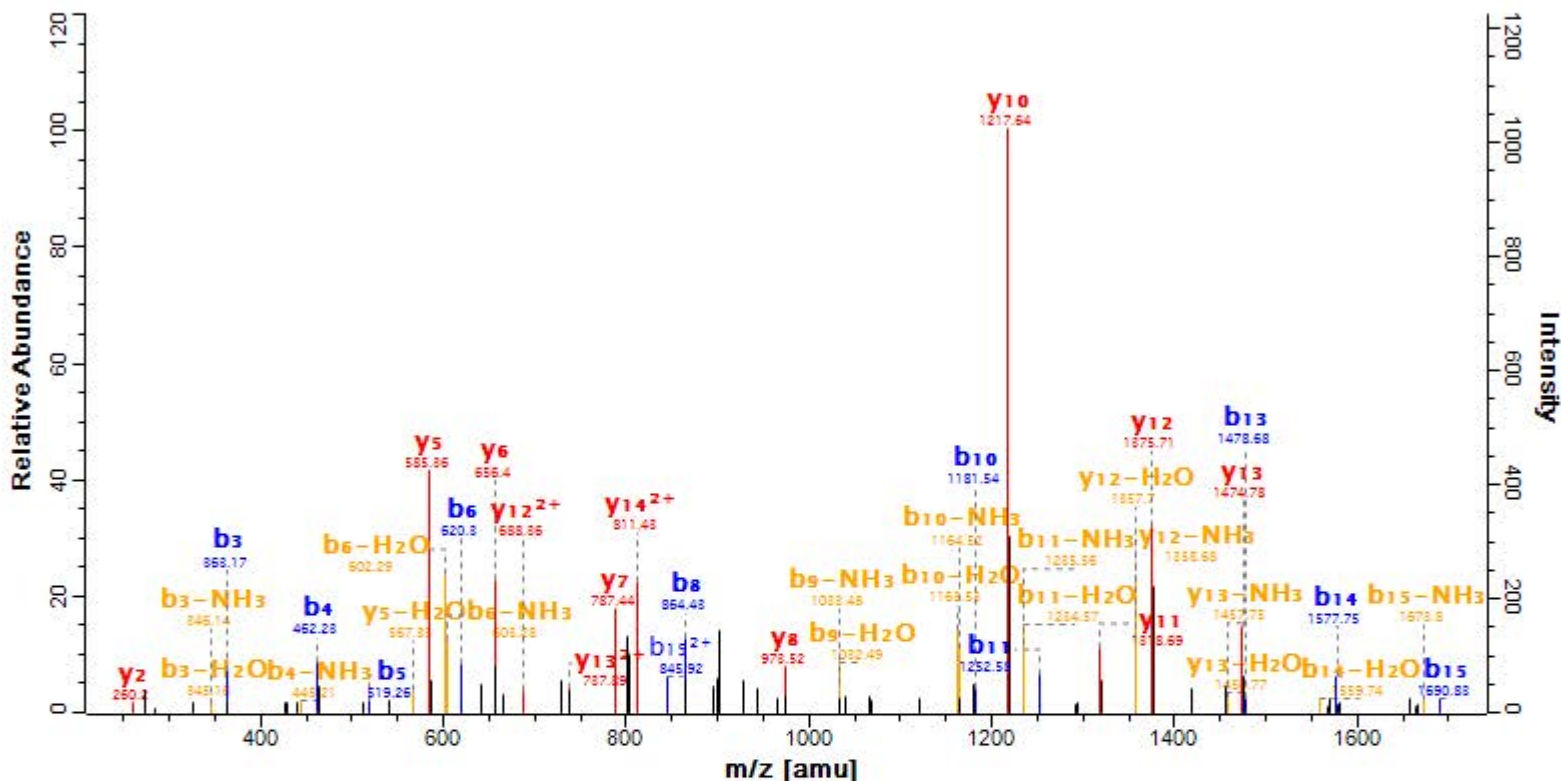

#### precursor information

|                   |                 |
|-------------------|-----------------|
| Mass:             | 1835.92779      |
| m/z:              | 918.97117       |
| Charge:           | 2+              |
| Retentiontime:    | 63.244575500488 |
| Score:            | 239.8716        |
| Mass Error [ppm]: | -0.12841        |
| PEP:              | 7.5507E-51      |
| Precursor Type:   | MULTI           |

#### general information

|                       |             |
|-----------------------|-------------|
| Annotation:           | 13 of 16    |
| AminoAcids Coverage:  | 81 %        |
| Intensity Coverage:   | 66 %        |
| Peak Coverage:        | 44 %        |
| Protein Localisation: | 196 ... 211 |

| b <sup>2+</sup> ion |        | b ion    |        | seq |   |    | y ion    |         | y <sup>2+</sup> ion |         |
|---------------------|--------|----------|--------|-----|---|----|----------|---------|---------------------|---------|
| Δ dalton            | mass   | Δ dalton | mass   |     |   |    | Δ dalton | mass    | Δ dalton            | mass    |
|                     | 115.05 |          | 115.05 | 1   | N | 15 |          |         |                     |         |
|                     | 216.1  |          | 216.1  | 2   | T | 14 | 1722.9   |         | 1722.9              |         |
|                     | 363.17 | +0.1582  | 363.17 | 3   | F | 13 | 1621.8   |         | 811.43              | +0.3534 |
|                     | 462.23 | +0.0427  | 462.23 | 4   | V | 12 | 1474.8   | -0.092  | 737.89              | +0.1379 |
|                     | 519.26 | +0.1465  | 519.26 | 5   | G | 11 | 1375.7   | +0.0669 | 688.36              | +0.0631 |
|                     | 620.3  | +0.0684  | 620.3  | 6   | T | 10 | 1318.7   | -0.149  | 1318.7              |         |
|                     | 717.36 |          | 717.36 | 7   | P | 9  | 1217.6   | +0.0021 | 1217.6              |         |
|                     | 864.43 | +0.2645  | 864.43 | 8   | F | 8  | 1120.6   |         | 1120.6              |         |
|                     | 1050.5 |          | 1050.5 | 9   | W | 7  | 973.52   | +0.0942 | 973.52              |         |
|                     | 1181.5 | -0.132   | 1181.5 | 10  | M | 6  | 787.44   | +0.1692 | 787.44              |         |
|                     | 1252.6 | -0.174   | 1252.6 | 11  | A | 5  | 656.4    | -0.043  | 656.4               |         |
|                     | 1349.6 |          | 1349.6 | 12  | P | 4  | 585.36   | -0.03   | 585.36              |         |
|                     | 1478.7 | -0.115   | 1478.7 | 13  | E | 3  | 488.31   |         | 488.31              |         |
|                     | 1577.7 | -0.342   | 1577.7 | 14  | V | 2  | 359.27   |         | 359.27              |         |
| +0.1581             | 845.92 | +0.0132  | 1690.8 | 15  | I | 1  | 260.2    | -0.147  | 260.2               |         |
|                     |        |          |        | 16  | K | 0  | 147.11   |         | 147.11              |         |

Scan number 11332 Raw file LNCAP\_Silac\_23F10\_set2\_03  
 Method ITMS; CID Pepti... 76.73

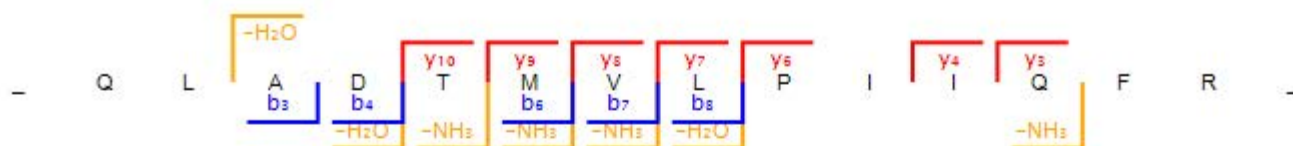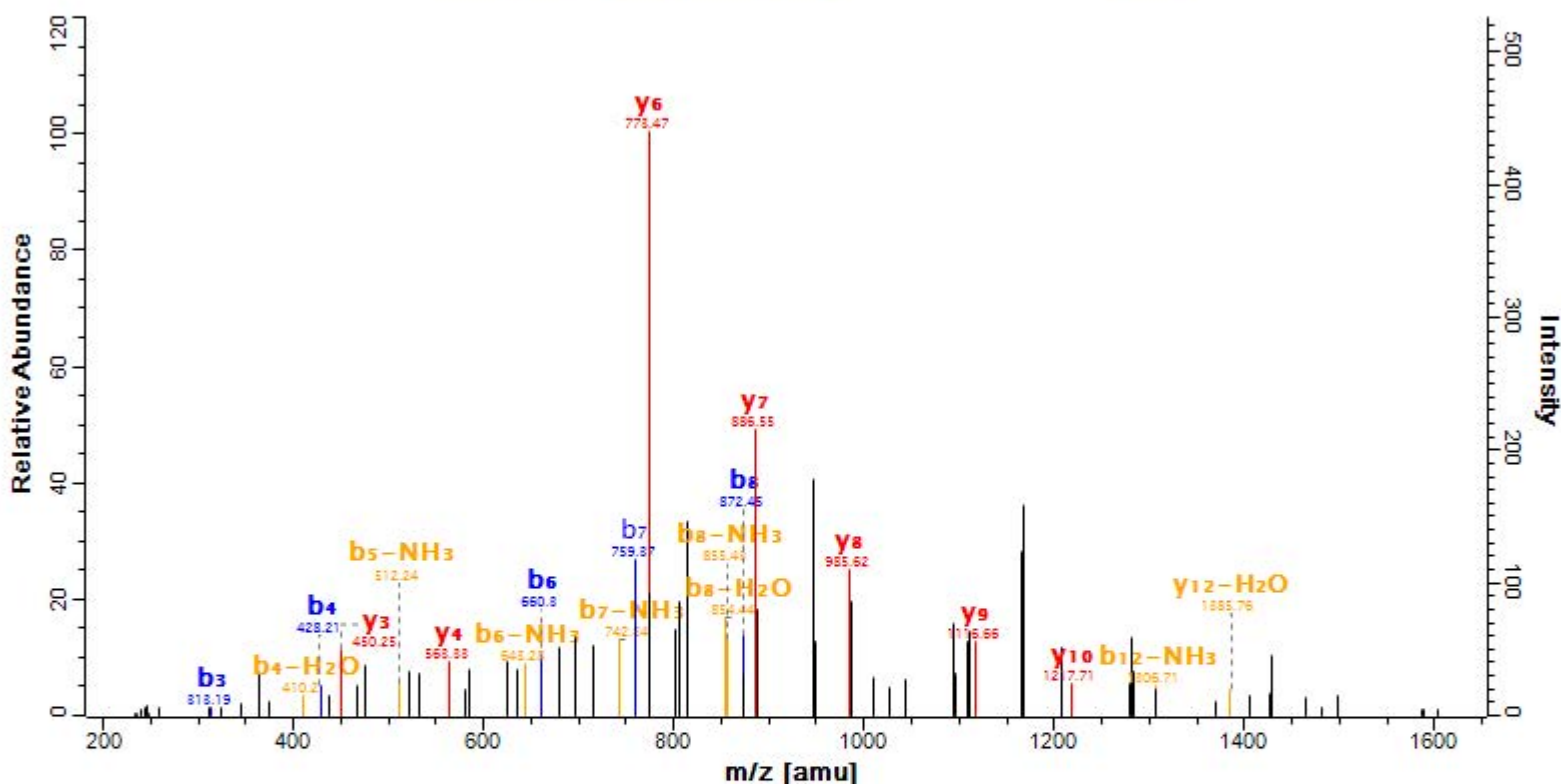

#### precursor information

|                   |                 |
|-------------------|-----------------|
| Mass:             | 1643.90581      |
| m/z:              | 822.96018       |
| Charge:           | 2+              |
| Retentiontime:    | 64.438270568847 |
| Score:            | 76.72825        |
| Mass Error [ppm]: | -0.66021        |
| PEP:              | 0.0012983       |
| Precursor Type:   | MULTI           |

#### general information

|                       |             |
|-----------------------|-------------|
| Annotation:           | 10 of 14    |
| AminoAcids Coverage:  | 71 %        |
| Intensity Coverage:   | 36 %        |
| Peak Coverage:        | 23 %        |
| Protein Localisation: | 106 ... 119 |

| b ion      |               |     |   | y ion    |               |            |  |
|------------|---------------|-----|---|----------|---------------|------------|--|
| Δ dalton   | mass          | seq |   | Δ dalton | mass          |            |  |
|            | 129.065853978 | 1   | Q | 13       |               |            |  |
|            | 242.149917958 | 2   | L | 12       | 1516.8555972  |            |  |
| +0.0734663 | 313.187031746 | 3   | A | 11       | 1403.77153322 |            |  |
| +0.1127464 | 428.213974778 | 4   | D | 10       | 1332.73441943 |            |  |
|            | 529.261653252 | 5   | T | 9        | 1217.7074764  | -0.0072811 |  |
| +0.0220199 | 660.302137859 | 6   | M | 8        | 1116.65979792 | -0.092171  |  |
| +0.0282519 | 759.370551775 | 7   | V | 7        | 985.619313318 | +0.0196027 |  |
| -0.0430557 | 872.454615755 | 8   | L | 6        | 886.550899402 | +0.01923   |  |
|            | 969.507379607 | 9   | P | 5        | 773.466835421 | +0.0158306 |  |
|            | 1082.59144359 | 10  | I | 4        | 676.414071569 |            |  |
|            | 1195.67550757 | 11  | I | 3        | 563.330007589 | -0.0016995 |  |
|            | 1323.73408508 | 12  | Q | 2        | 450.245943609 | +0.0171179 |  |
|            | 1470.802499   | 13  | F | 1        | 322.187366097 |            |  |
|            |               | 14  | R | 0        | 175.118952181 |            |  |

Scan number 11405 Raw file LNCAP\_Silac\_23F10\_set2\_03  
 Method ITMS; CID Pepti... 97.69

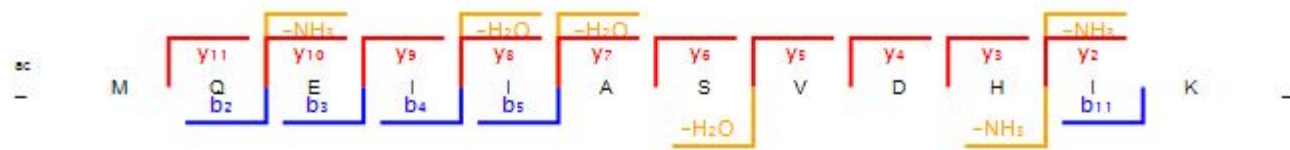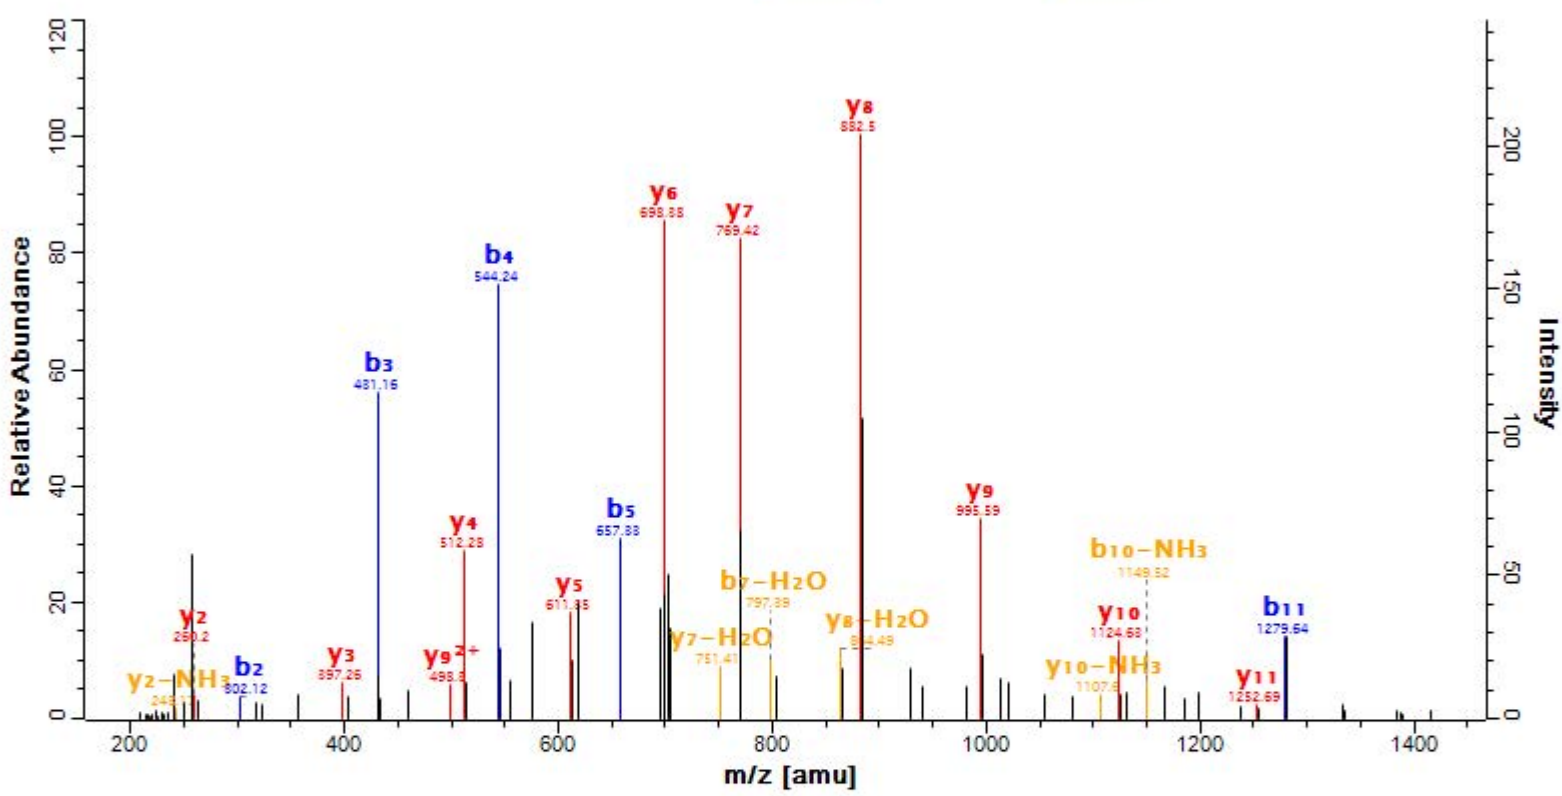

**precursor information**

|                   |                 |
|-------------------|-----------------|
| Mass:             | 1424.73383      |
| m/z:              | 713.37419       |
| Charge:           | 2+              |
| Retentiontime:    | 65.079048156738 |
| Score:            | 97.6896         |
| Mass Error [ppm]: | 0.33542         |
| PEP:              | 0.0012104       |
| Precursor Type:   | MULTI           |

**general information**

|                       |          |
|-----------------------|----------|
| Annotation:           | 10 of 12 |
| AminoAcids Coverage:  | 83 %     |
| Intensity Coverage:   | 58 %     |
| Peak Coverage:        | 27 %     |
| Protein Localisation: | 1 ... 12 |

| b ion     |          |    |     |    | y ion    |           | y <sup>2+</sup> ion |          |
|-----------|----------|----|-----|----|----------|-----------|---------------------|----------|
| Δ dalton  | mass     |    | seq |    | Δ dalton | mass      | Δ dalton            | mass     |
|           | 174.0583 | 1  | M   | 11 |          |           |                     |          |
| +0.117319 | 302.1169 | 2  | Q   | 10 | 1252.69  | -0.19043  | 1252.69             |          |
| -0.11287  | 431.1595 | 3  | E   | 9  | 1124.631 | -0.10256  | 1124.631            |          |
| -0.05875  | 544.2436 | 4  | I   | 8  | 995.5884 | -0.08401  | 498.2978            | -0.17541 |
| -0.0252   | 657.3276 | 5  | I   | 7  | 882.5043 | -0.03114  | 882.5043            |          |
|           | 728.3647 | 6  | A   | 6  | 769.4203 | +0.040048 | 769.4203            |          |
|           | 815.3968 | 7  | S   | 5  | 698.3832 | -0.02318  | 698.3832            |          |
|           | 914.4652 | 8  | V   | 4  | 611.3511 | -0.07916  | 611.3511            |          |
|           | 1029.492 | 9  | D   | 3  | 512.2827 | +0.087577 | 512.2827            |          |
|           | 1166.551 | 10 | H   | 2  | 397.2558 | +0.039569 | 397.2558            |          |
| -0.14425  | 1279.635 | 11 | I   | 1  | 260.1969 | +0.023103 | 260.1969            |          |
|           |          | 12 | K   | 0  | 147.1128 |           | 147.1128            |          |

Scan number 11689 Raw file LNCAP\_Silac\_23F10\_set2\_03  
 Method ITMS; CID Pepti... 163.23

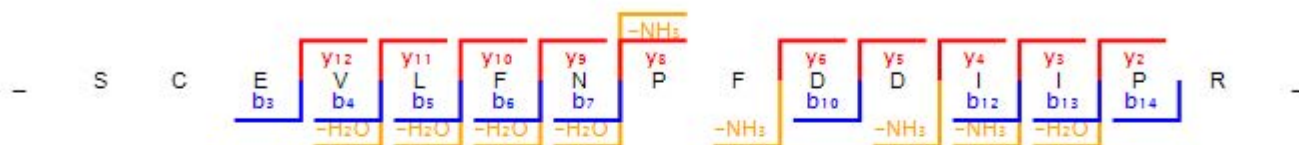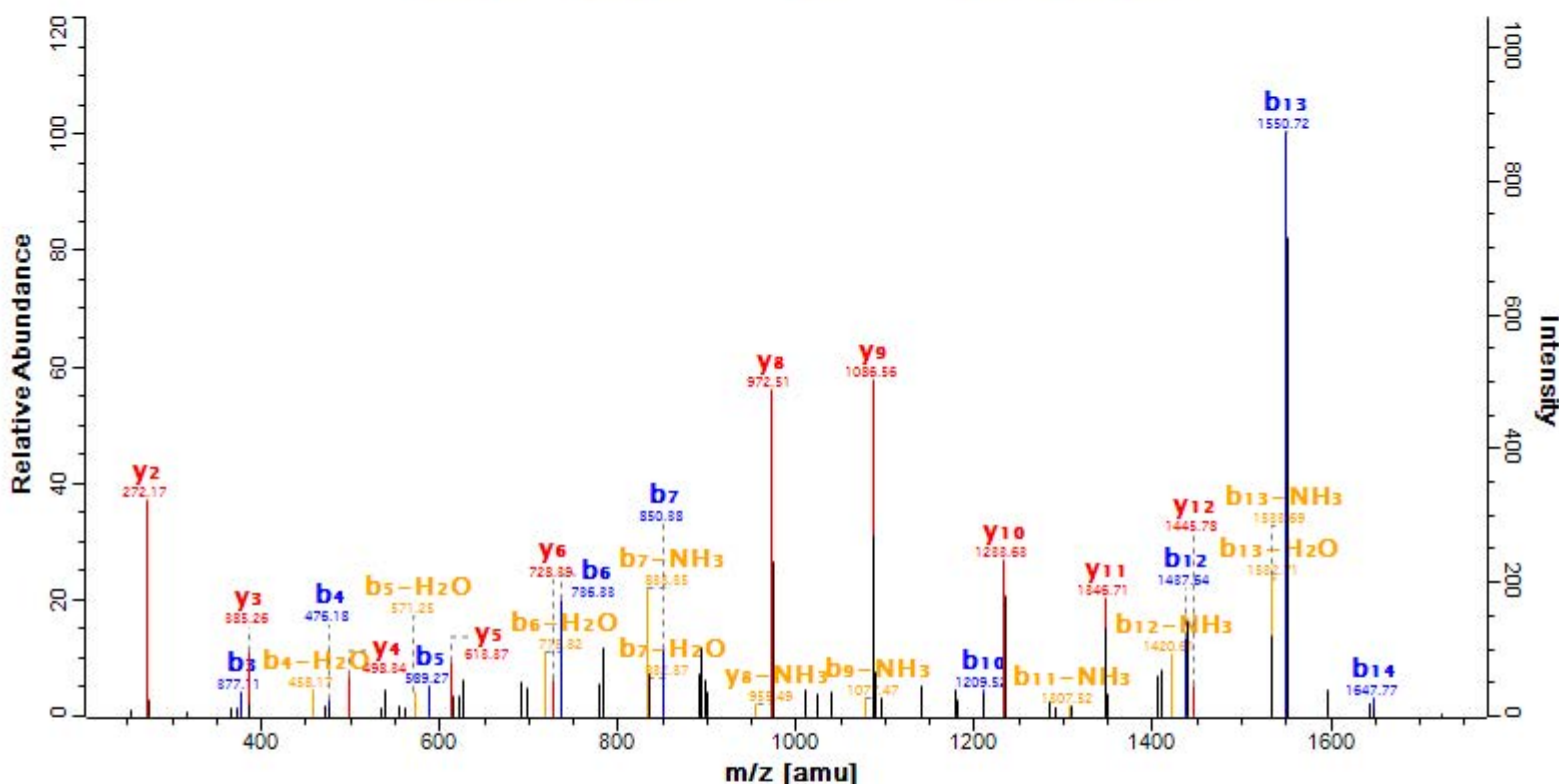

#### precursor information

|                   |                 |
|-------------------|-----------------|
| Mass:             | 1820.87718      |
| m/z:              | 911.44587       |
| Charge:           | 2+              |
| Retentiontime:    | 67.571876525878 |
| Score:            | 163.2325        |
| Mass Error [ppm]: | 0.25191         |
| PEP:              | 1.6231E-14      |
| Precursor Type:   | MULTI           |

#### general information

|                       |             |
|-----------------------|-------------|
| Annotation:           | 12 of 15    |
| AminoAcids Coverage:  | 80 %        |
| Intensity Coverage:   | 55 %        |
| Peak Coverage:        | 34 %        |
| Protein Localisation: | 163 ... 177 |

| b ion      |               |     |   | y ion    |               |
|------------|---------------|-----|---|----------|---------------|
| Δ dalton   | mass          | seq |   | Δ dalton | mass          |
|            | 88.039304876  | 1   | S | 14       |               |
|            | 248.069953078 | 2   | C | 13       | 1734.85196838 |
| +0.0199001 | 377.112546174 | 3   | E | 12       | 1574.82132018 |
| -0.0021881 | 476.18096009  | 4   | V | 11       | 1445.77872709 |
| -0.0269259 | 589.265024071 | 5   | L | 10       | 1346.71031317 |
| -0.0962554 | 736.333437987 | 6   | F | 9        | 1233.62624919 |
| -0.0448835 | 850.376365434 | 7   | N | 8        | 1086.55783527 |
|            | 947.429129286 | 8   | P | 7        | 972.514907826 |
|            | 1094.4975432  | 9   | F | 6        | 875.462143974 |
| +0.0983165 | 1209.52448623 | 10  | D | 5        | 728.393730058 |
|            | 1324.55142927 | 11  | D | 4        | 613.366787026 |
| -0.1030225 | 1437.63549325 | 12  | I | 3        | 498.339843994 |
| -0.2233414 | 1550.71955723 | 13  | I | 2        | 385.255780013 |
| -0.1945623 | 1647.7232108  | 14  | P | 1        | 272.171716033 |
|            |               | 15  | R | 0        | 175.118952181 |

Scan number 11743 Raw file LNCAP\_Silac\_23F10\_set2\_03  
 Method ITMS; CID Pepti... 240.12

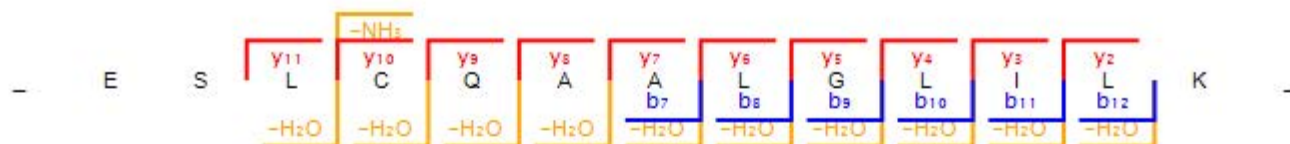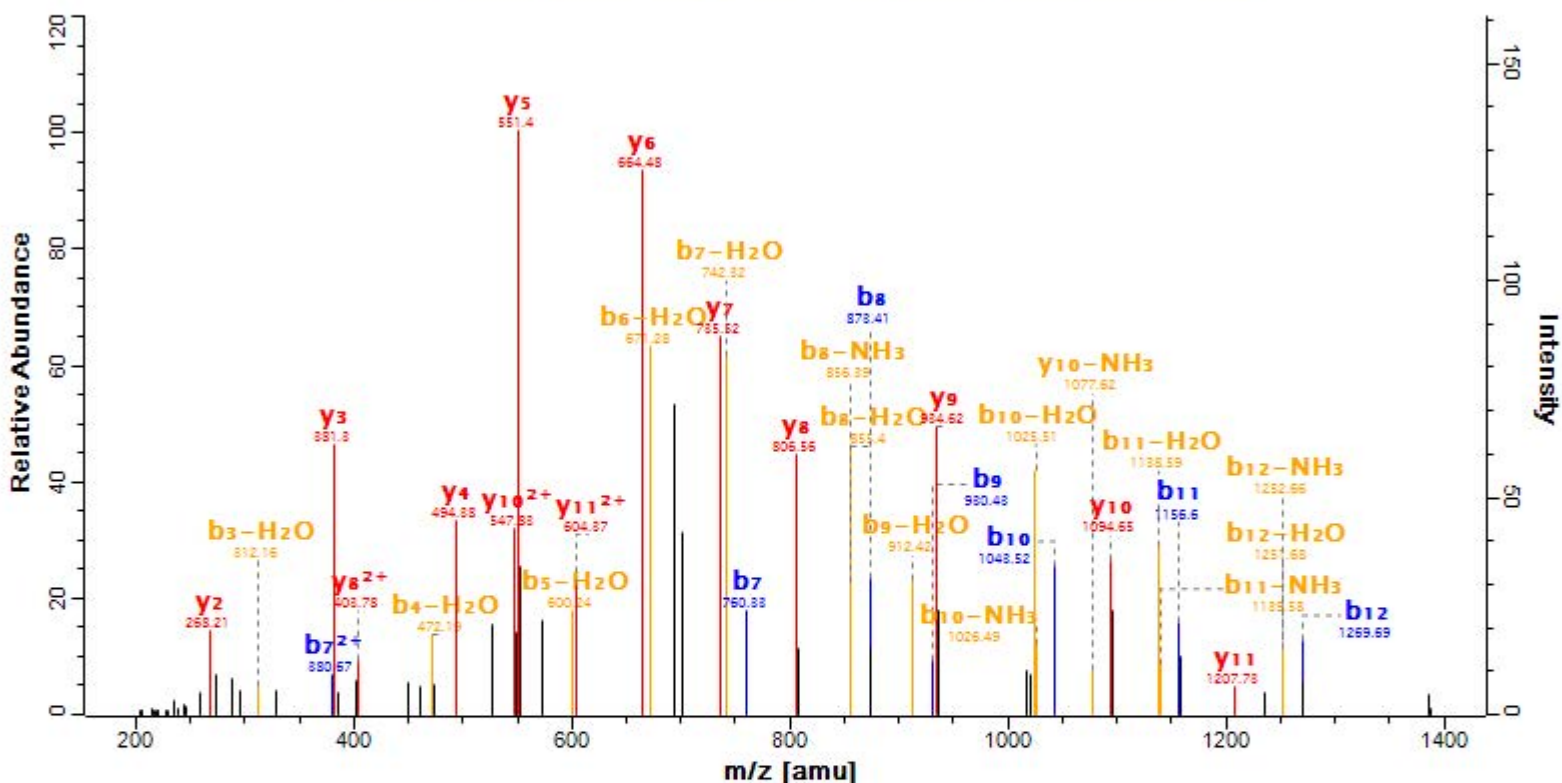

precursor information

|                   |                 |
|-------------------|-----------------|
| Mass:             | 1414.78539      |
| m/z:              | 708.39997       |
| Charge:           | 2+              |
| Retentiontime:    | 68.044044494628 |
| Score:            | 240.1218        |
| Mass Error [ppm]: | 0.0030273       |
| PEP:              | 5.445E-36       |
| Precursor Type:   | MULTI           |

general information

|                       |             |
|-----------------------|-------------|
| Annotation:           | 10 of 13    |
| AminoAcids Coverage:  | 77 %        |
| Intensity Coverage:   | 76 %        |
| Peak Coverage:        | 45 %        |
| Protein Localisation: | 506 ... 518 |

| b <sup>2+</sup> ion |        | b ion    |        |    |     |    | y ion    |         | y <sup>2+</sup> ion |         |
|---------------------|--------|----------|--------|----|-----|----|----------|---------|---------------------|---------|
| Δ dalton            | mass   | Δ dalton | mass   |    | seq |    | Δ dalton | mass    | Δ dalton            | mass    |
|                     | 130.05 |          | 130.05 | 1  | E   | 12 |          |         |                     |         |
|                     | 217.08 |          | 217.08 | 2  | S   | 11 | 1294.8   |         | 1294.8              |         |
|                     | 330.17 |          | 330.17 | 3  | L   | 10 | 1207.7   | +0.4037 | 604.37              | +0.3622 |
|                     | 490.2  |          | 490.2  | 4  | C   | 9  | 1094.6   | -0.094  | 547.83              | -0.155  |
|                     | 618.26 |          | 618.26 | 5  | Q   | 8  | 934.62   | -0.157  | 934.62              |         |
|                     | 689.29 |          | 689.29 | 6  | A   | 7  | 806.56   | +0.0653 | 403.78              | -0.465  |
| +0.0601             | 380.67 | +0.0832  | 760.33 | 7  | A   | 6  | 735.52   | -0.084  | 735.52              |         |
|                     | 873.41 | +0.058   | 873.41 | 8  | L   | 5  | 664.48   | +0.0764 | 664.48              |         |
|                     | 930.43 | +0.0158  | 930.43 | 9  | G   | 4  | 551.4    | -0.04   | 551.4               |         |
|                     | 1043.5 | +0.0215  | 1043.5 | 10 | L   | 3  | 494.38   | +0.0629 | 494.38              |         |
|                     | 1156.6 | -0.061   | 1156.6 | 11 | I   | 2  | 381.3    | +0.0813 | 381.3               |         |
|                     | 1269.7 | +0.0293  | 1269.7 | 12 | L   | 1  | 268.21   | +0.0513 | 268.21              |         |
|                     |        |          |        | 13 | K   | 0  | 155.13   |         | 155.13              |         |

Scan number 11791 Raw file LNCAP\_Silac\_23F10\_set2\_03  
 Method ITMS; CID Pepti... 117.7

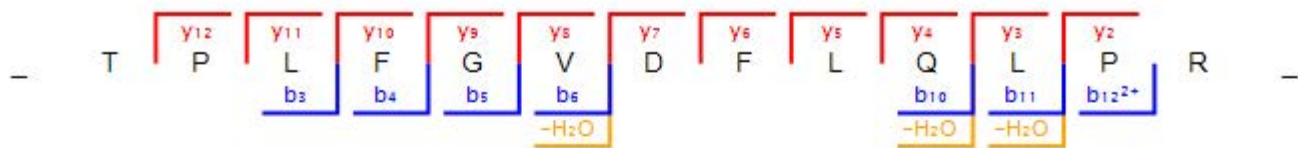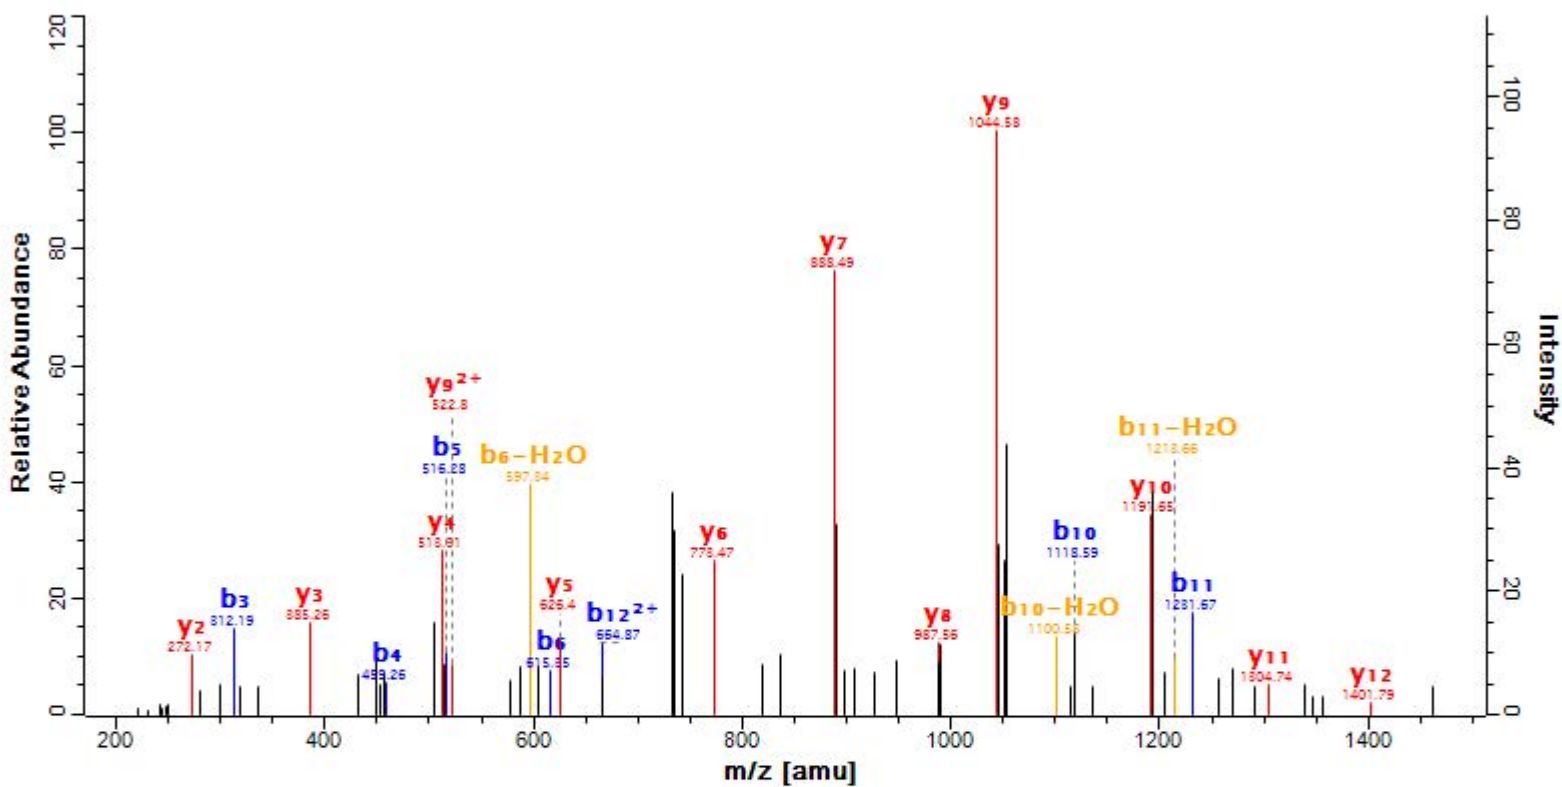

precursor information

|                   |                 |
|-------------------|-----------------|
| Mass:             | 1501.82956      |
| m/z:              | 751.92206       |
| Charge:           | 2+              |
| Retentiontime:    | 68.488830566406 |
| Score:            | 117.7039        |
| Mass Error [ppm]: | 0.17369         |
| PEP:              | 1.9542E-06      |
| Precursor Type:   | MULTI           |

general information

|                       |             |
|-----------------------|-------------|
| Annotation:           | 11 of 13    |
| AminoAcids Coverage:  | 85 %        |
| Intensity Coverage:   | 45 %        |
| Peak Coverage:        | 29 %        |
| Protein Localisation: | 546 ... 558 |

| b <sup>2+</sup> ion |        | b ion    |        | seq |   |    | y ion    |         | y <sup>2+</sup> ion |         |
|---------------------|--------|----------|--------|-----|---|----|----------|---------|---------------------|---------|
| Δ dalton            | mass   | Δ dalton | mass   |     |   |    | Δ dalton | mass    | Δ dalton            | mass    |
|                     | 102.05 |          | 102.05 | 1   | T | 12 |          |         |                     |         |
|                     | 199.11 |          | 199.11 | 2   | P | 11 | 1401.8   | +0.0918 | 1401.8              |         |
|                     | 312.19 | -0.079   | 312.19 | 3   | L | 10 | 1304.7   | +0.0946 | 1304.7              |         |
|                     | 459.26 | +0.2433  | 459.26 | 4   | F | 9  | 1191.7   | +0.0169 | 1191.7              |         |
|                     | 516.28 | +0.138   | 516.28 | 5   | G | 8  | 1044.6   | -0.061  | 522.8               | +0.0976 |
|                     | 615.35 | +0.1182  | 615.35 | 6   | V | 7  | 987.56   | -0.168  | 987.56              |         |
|                     | 730.38 |          | 730.38 | 7   | D | 6  | 888.49   | +0.0095 | 888.49              |         |
|                     | 877.45 |          | 877.45 | 8   | F | 5  | 773.47   | +0.0014 | 773.47              |         |
|                     | 990.53 |          | 990.53 | 9   | L | 4  | 626.4    | +0.1694 | 626.4               |         |
|                     | 1118.6 | -0.252   | 1118.6 | 10  | Q | 3  | 513.31   | -0.008  | 513.31              |         |
|                     | 1231.7 | -0.284   | 1231.7 | 11  | L | 2  | 385.26   | -0.035  | 385.26              |         |
| +0.361              | 664.87 |          | 1328.7 | 12  | P | 1  | 272.17   | +0.0942 | 272.17              |         |
|                     |        |          |        | 13  | R | 0  | 175.12   |         | 175.12              |         |

Scan number 1183 Raw file LNCAP\_Silac\_23F10\_set2\_03  
 Method ITMS: CID Pepti... 91.66

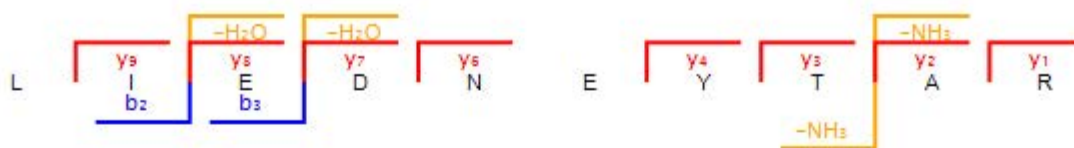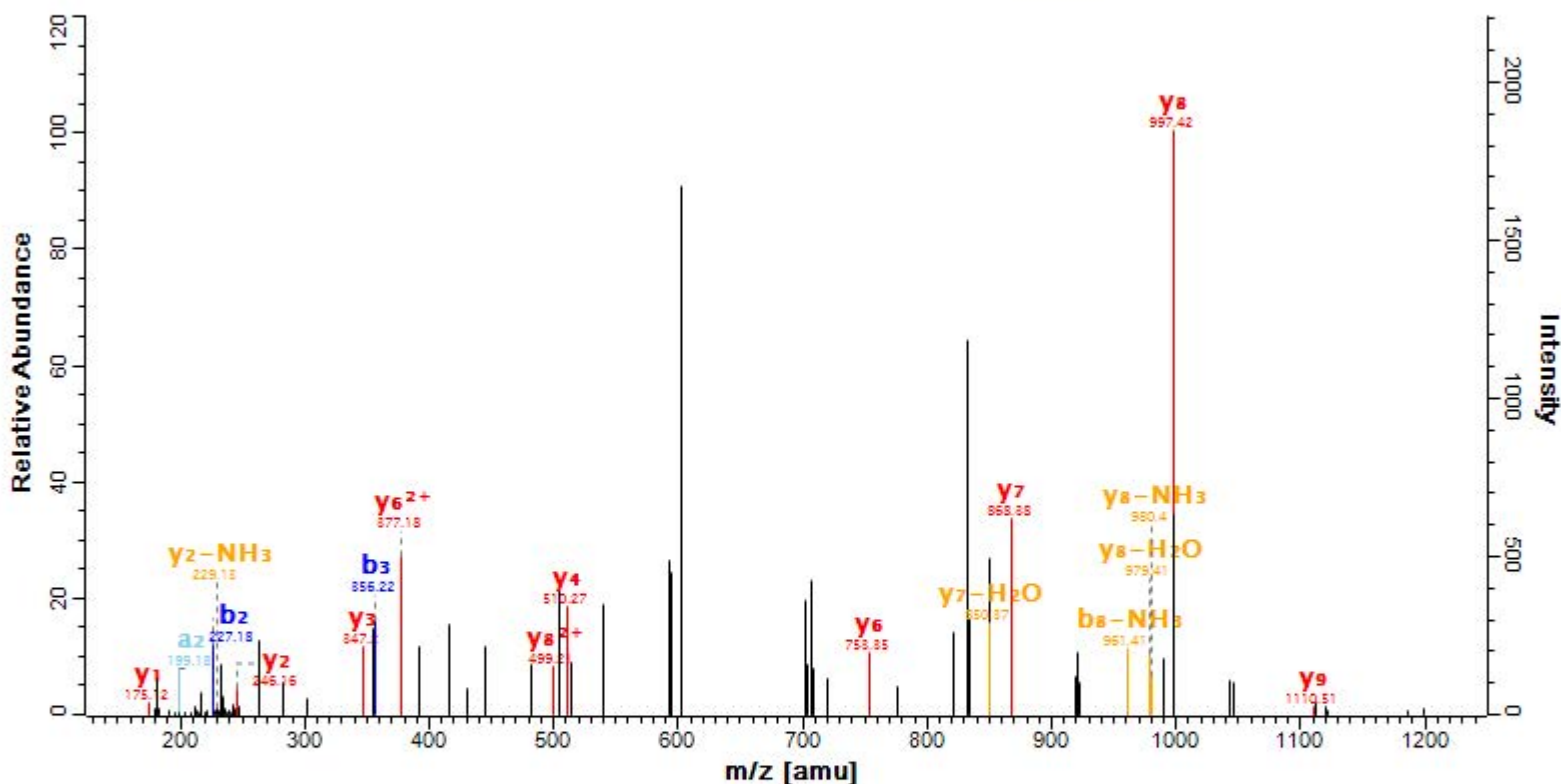

#### precursor information

|                   |                 |
|-------------------|-----------------|
| Mass:             | 1222.58199      |
| m/z:              | 612.29827       |
| Charge:           | 2+              |
| Retentiontime:    | 11.863523483276 |
| Score:            | 91.65834        |
| Mass Error [ppm]: | -0.81351        |
| PEP:              | 0.0073609       |
| Precursor Type:   | ISO             |

|                       |             |
|-----------------------|-------------|
| Annotation:           | 8 of 10     |
| AminoAcids Coverage:  | 80 %        |
| Intensity Coverage:   | 31 %        |
| Peak Coverage:        | 19 %        |
| Protein Localisation: | 419 ... 428 |

| a ion    |        | b ion    |        | seq |   |   | y ion    |         | y <sup>2+</sup> ion |         |
|----------|--------|----------|--------|-----|---|---|----------|---------|---------------------|---------|
| Δ dalton | mass   | Δ dalton | mass   |     |   |   | Δ dalton | mass    | Δ dalton            | mass    |
|          | 86.096 |          | 114.09 | 1   | L | 9 |          |         |                     |         |
| -0.053   | 199.18 | -0.058   | 227.18 | 2   | I | 8 | 1110.5   | -0.209  | 1110.5              |         |
|          | 328.22 | -0.065   | 356.22 | 3   | E | 7 | 997.42   | -0.008  | 499.21              | -0.045  |
|          | 443.25 |          | 471.24 | 4   | D | 6 | 868.38   | -0.031  | 868.38              |         |
|          | 557.29 |          | 585.29 | 5   | N | 5 | 753.35   | +0.1548 | 377.18              | +0.0887 |
|          | 686.34 |          | 714.33 | 6   | E | 4 | 639.31   |         | 639.31              |         |
|          | 849.4  |          | 877.39 | 7   | Y | 3 | 510.27   | +0.1442 | 510.27              |         |
|          | 950.45 |          | 978.44 | 8   | T | 2 | 347.2    | -0.014  | 347.2               |         |
|          | 1021.5 |          | 1049.5 | 9   | A | 1 | 246.16   | +0.1409 | 246.16              |         |
|          |        |          |        | 10  | R | 0 | 175.12   | +0.1032 | 175.12              |         |



Scan number 11851 Raw file LNCAP\_Silac\_23F10\_set2\_03  
 Method ITMS; CID Peptide 150.59

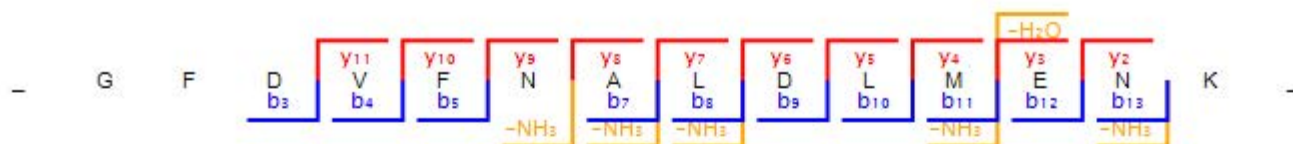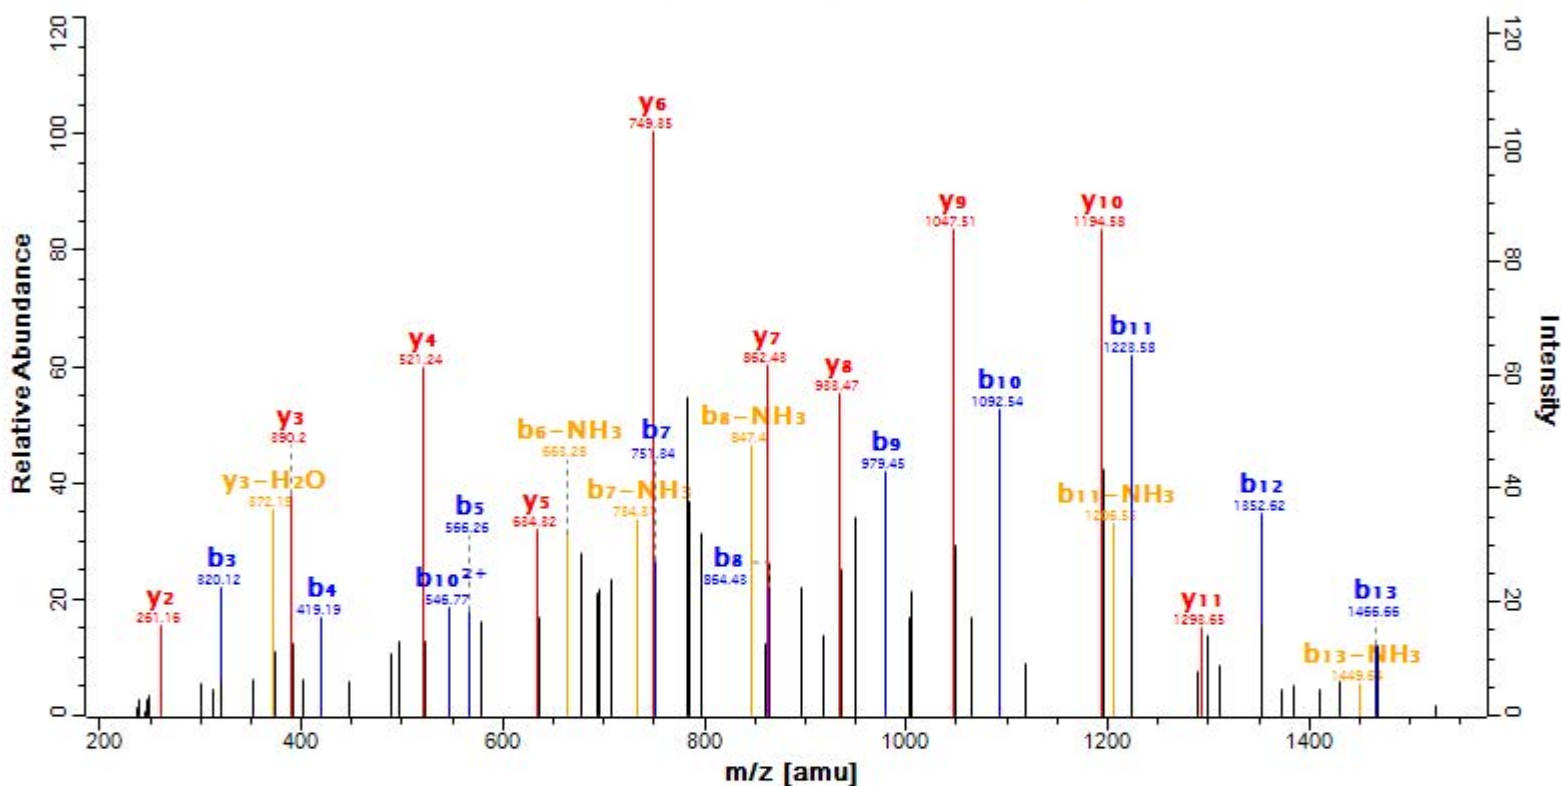

#### precursor information

|                   |                 |
|-------------------|-----------------|
| Mass:             | 1611.76091      |
| m/z:              | 806.88773       |
| Charge:           | 2+              |
| Retentiontime:    | 69.081176757812 |
| Score:            | 150.5891        |
| Mass Error [ppm]: | 0.38372         |
| PEP:              | 9.6279E-10      |
| Precursor Type:   | MULTI           |

#### general information

|                       |             |
|-----------------------|-------------|
| Annotation:           | 11 of 14    |
| AminoAcids Coverage:  | 79 %        |
| Intensity Coverage:   | 57 %        |
| Peak Coverage:        | 34 %        |
| Protein Localisation: | 446 ... 459 |

| b <sup>2+</sup> ion |          | b ion     |          |     | y ion    |      |                    |
|---------------------|----------|-----------|----------|-----|----------|------|--------------------|
| Δ dalton            | mass     | Δ dalton  | mass     | seq | Δ dalton | mass |                    |
|                     | 58.02874 |           | 58.02874 | 1   | G        | 13   |                    |
|                     | 205.0972 |           | 205.0972 | 2   | F        | 12   | 1555.746           |
|                     | 320.1241 | +0.10448  | 320.1241 | 3   | D        | 11   | 1408.678           |
|                     | 419.1925 | +0.072809 | 419.1925 | 4   | V        | 10   | 1293.651 +0.030403 |
|                     | 566.2609 | +0.1521   | 566.2609 | 5   | F        | 9    | 1194.582 -0.13495  |
|                     | 680.3039 |           | 680.3039 | 6   | N        | 8    | 1047.514 -0.11072  |
|                     | 751.341  | +0.097938 | 751.341  | 7   | A        | 7    | 933.471 -0.03356   |
|                     | 864.425  | +0.02309  | 864.425  | 8   | L        | 6    | 862.4339 -0.00743  |
|                     | 979.452  | -0.05763  | 979.452  | 9   | D        | 5    | 749.3498 -0.07082  |
| -0.47741            | 546.7717 | -0.02969  | 1092.536 | 10  | L        | 4    | 634.3229 +0.086673 |
|                     | 1223.577 | +0.031144 | 1223.577 | 11  | M        | 3    | 521.2388 +0.185263 |
|                     | 1352.619 | -0.30173  | 1352.619 | 12  | E        | 2    | 390.1983 +0.110696 |
|                     | 1466.662 | +0.119574 | 1466.662 | 13  | N        | 1    | 261.1557 +0.038879 |
|                     |          |           |          | 14  | K        | 0    | 147.1128           |

Scan number 1213 Raw file LNCAP\_Silac\_23F10\_set2\_03  
 Method ITMS: CID Pepti... 149.49

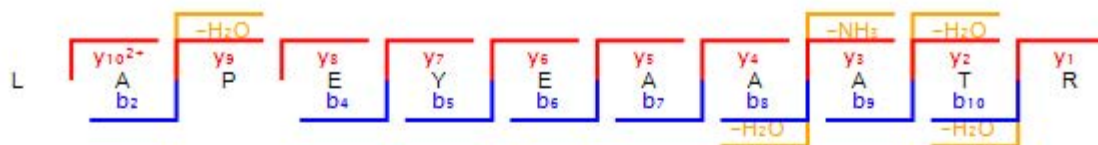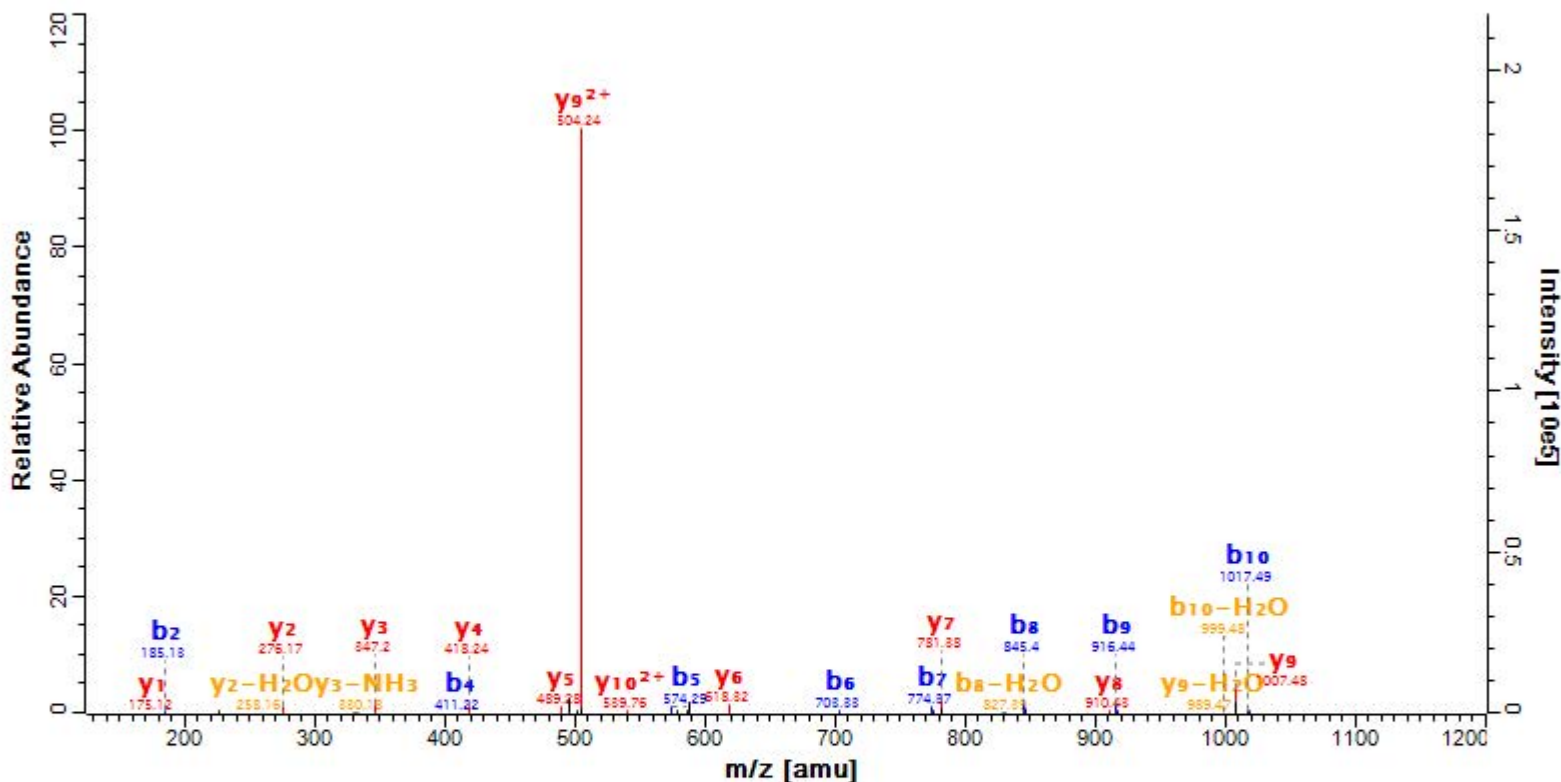

#### precursor information

|                   |                 |
|-------------------|-----------------|
| Mass:             | 1190.5929       |
| m/z:              | 596.30372       |
| Charge:           | 2+              |
| Retentiontime:    | 12.025785446167 |
| Score:            | 149.4918        |
| Mass Error [ppm]: | -0.21558        |
| PEP:              | 2.7415E-05      |
| Precursor Type:   | MULTI           |

#### general information

|                       |           |
|-----------------------|-----------|
| Annotation:           | 10 of 11  |
| AminoAcids Coverage:  | 91 %      |
| Intensity Coverage:   | 91 %      |
| Peak Coverage:        | 36 %      |
| Protein Localisation: | 63 ... 73 |

| b ion     |          |    |     |    | y ion    |           | y <sup>2+</sup> ion |          |
|-----------|----------|----|-----|----|----------|-----------|---------------------|----------|
| Δ dalton  | mass     |    | seq |    | Δ dalton | mass      | Δ dalton            | mass     |
|           | 114.0913 | 1  | L   | 10 |          |           |                     |          |
| -0.07731  | 185.1285 | 2  | A   | 9  | 1078.516 |           | 539.7618            | +0.13619 |
|           | 282.1812 | 3  | P   | 8  | 1007.479 | -0.01197  | 504.2433            | +0.2098  |
| +0.128972 | 411.2238 | 4  | E   | 7  | 910.4265 | +0.123013 | 910.4265            |          |
| -0.00729  | 574.2871 | 5  | Y   | 6  | 781.3839 | +0.095904 | 781.3839            |          |
| -0.01717  | 703.3297 | 6  | E   | 5  | 618.3206 | +0.0783   | 618.3206            |          |
| -0.04775  | 774.3668 | 7  | A   | 4  | 489.278  | +0.129804 | 489.278             |          |
| +0.004548 | 845.404  | 8  | A   | 3  | 418.2409 | +0.044115 | 418.2409            |          |
| -0.05881  | 916.4411 | 9  | A   | 2  | 347.2037 | +0.030447 | 347.2037            |          |
| -0.18876  | 1017.489 | 10 | T   | 1  | 276.1666 | +0.064906 | 276.1666            |          |
|           |          | 11 | R   | 0  | 175.119  | -0.05837  | 175.119             |          |

Scan number 12268 Raw file LNCAP\_Silac\_23F10\_set2\_03  
 Method ITMS; CID Pepti... 88.02

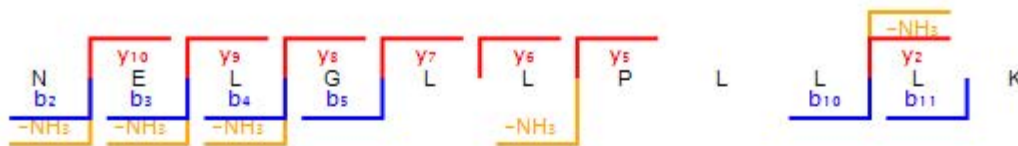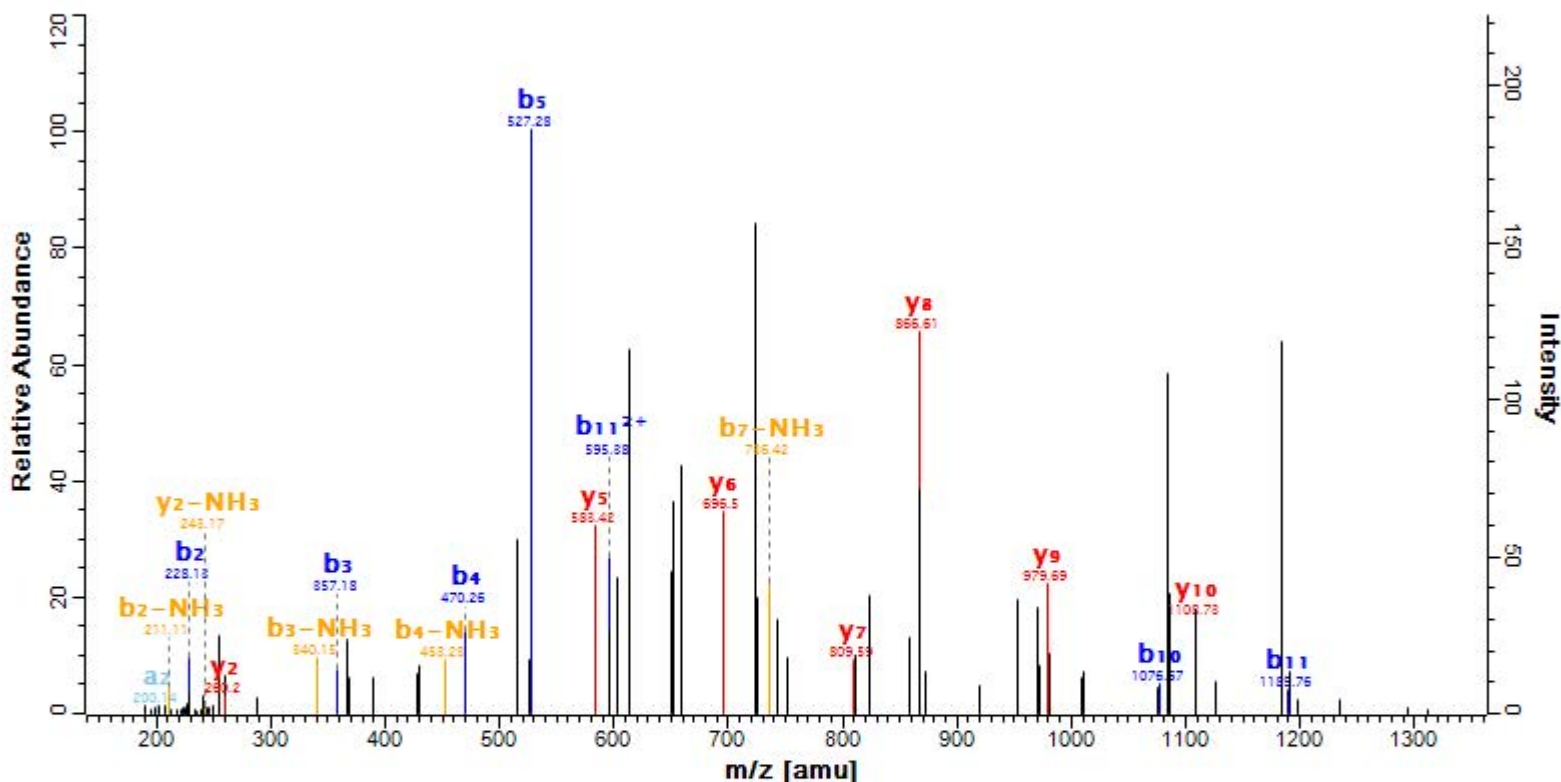

#### precursor information

|                   |                 |
|-------------------|-----------------|
| Mass:             | 1328.65396      |
| m/z:              | 665.33426       |
| Charge:           | 2+              |
| Retentiontime:    | 73.231643676757 |
| Score:            | 88.02058        |
| Mass Error [ppm]: | 0.26843         |
| PEP:              | 0.00419         |
| Precursor Type:   | MULTI           |

#### general information

|                       |             |
|-----------------------|-------------|
| Annotation:           | 9 of 12     |
| AminoAcids Coverage:  | 75 %        |
| Intensity Coverage:   | 32 %        |
| Peak Coverage:        | 23 %        |
| Protein Localisation: | 259 ... 270 |

| a ion    |        | b <sup>2+</sup> ion |        | b ion    |        |    |     |          | y ion         |  |
|----------|--------|---------------------|--------|----------|--------|----|-----|----------|---------------|--|
| Δ dalton | mass   | Δ dalton            | mass   | Δ dalton | mass   |    | seq | Δ dalton | mass          |  |
|          | 86.096 |                     | 114.09 |          | 114.09 | 1  | L   | 11       |               |  |
| +0.3567  | 200.14 |                     | 228.13 | +0.0544  | 228.13 | 2  | N   | 10       | 1222.8        |  |
|          | 329.18 |                     | 357.18 | +0.1888  | 357.18 | 3  | E   | 9        | 1108.7 -0.154 |  |
|          | 442.27 |                     | 470.26 | +0.0524  | 470.26 | 4  | L   | 8        | 979.69 -0.024 |  |
|          | 499.29 |                     | 527.28 | +0.208   | 527.28 | 5  | G   | 7        | 866.61 -0.01  |  |
|          | 612.37 |                     | 640.37 |          | 640.37 | 6  | L   | 6        | 809.59 -0.03  |  |
|          | 725.46 |                     | 753.45 |          | 753.45 | 7  | L   | 5        | 696.5 -0.083  |  |
|          | 822.51 |                     | 850.5  |          | 850.5  | 8  | P   | 4        | 583.42 -0.059 |  |
|          | 935.59 |                     | 963.59 |          | 963.59 | 9  | L   | 3        | 486.36        |  |
|          | 1048.7 |                     | 1076.7 | -0.002   | 1076.7 | 10 | L   | 2        | 373.28        |  |
|          | 1161.8 | +0.0702             | 595.38 | -0.249   | 1189.8 | 11 | L   | 1        | 260.2 -0.014  |  |
|          |        |                     |        |          |        | 12 | K   | 0        | 147.11        |  |

Scan number 1848 Raw file LNCAP\_Silac\_23F10\_set2\_03  
 Method ITMS: CID Pepti... 174.98

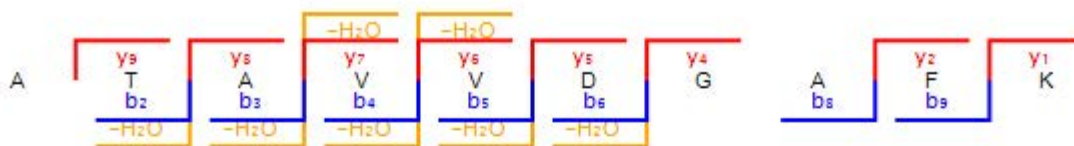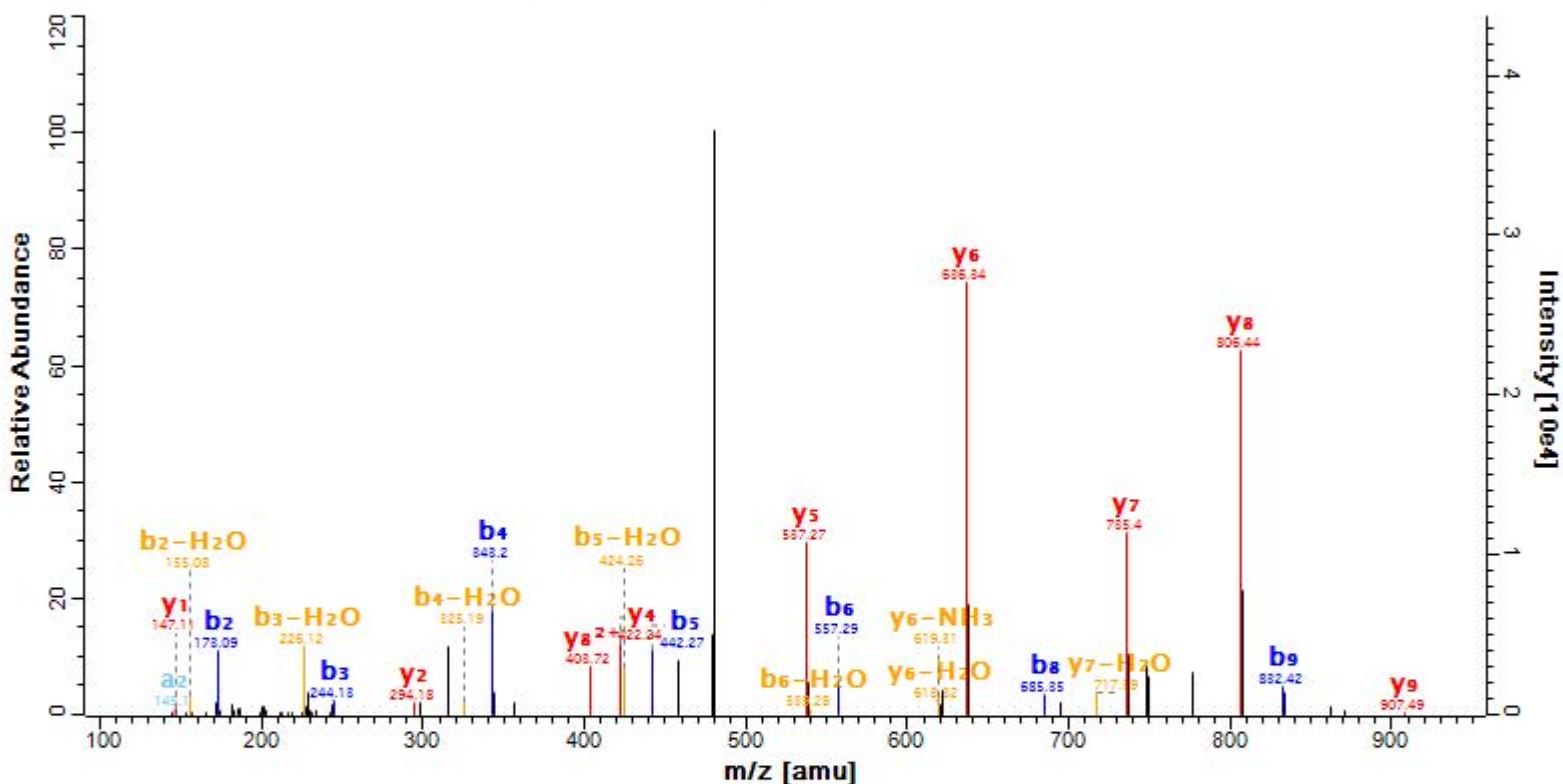

#### precursor information

|                   |                 |
|-------------------|-----------------|
| Mass:             | 977.51801       |
| m/z:              | 489.76628       |
| Charge:           | 2+              |
| Retentiontime:    | 15.109158515930 |
| Score:            | 174.9809        |
| Mass Error [ppm]: | -0.18793        |
| PEP:              | 6.7409E-06      |
| Precursor Type:   | MULTI           |

|                       |           |
|-----------------------|-----------|
| Annotation:           | 9 of 10   |
| AminoAcids Coverage:  | 90 %      |
| Intensity Coverage:   | 54 %      |
| Peak Coverage:        | 30 %      |
| Protein Localisation: | 17 ... 26 |

| a ion    |        | b ion    |        |    |     |   | y ion    |         | y <sup>2+</sup> ion |         |
|----------|--------|----------|--------|----|-----|---|----------|---------|---------------------|---------|
| Δ dalton | mass   | Δ dalton | mass   |    | seq |   | Δ dalton | mass    | Δ dalton            | mass    |
|          | 44.049 |          | 72.044 | 1  | A   | 9 |          |         |                     |         |
| +0.1253  | 145.1  | -0.008   | 173.09 | 2  | T   | 8 | 907.49   | +0.1564 | 907.49              |         |
|          | 216.13 | +0.1206  | 244.13 | 3  | A   | 7 | 806.44   | +0.0351 | 403.72              | +0.1483 |
|          | 315.2  | +0.0028  | 343.2  | 4  | V   | 6 | 735.4    | +0.0576 | 735.4               |         |
|          | 414.27 | +0.0323  | 442.27 | 5  | V   | 5 | 636.34   | -0.016  | 636.34              |         |
|          | 529.3  | +0.0648  | 557.29 | 6  | D   | 4 | 537.27   | +0.0224 | 537.27              |         |
|          | 586.32 |          | 614.31 | 7  | G   | 3 | 422.24   | +0.0637 | 422.24              |         |
|          | 657.36 | -0.017   | 685.35 | 8  | A   | 2 | 365.22   |         | 365.22              |         |
|          | 804.43 | -0.149   | 832.42 | 9  | F   | 1 | 294.18   | +0.0322 | 294.18              |         |
|          |        |          |        | 10 | K   | 0 | 147.11   | +0.0347 | 147.11              |         |

Scan number 2105 Raw file LNCAP\_Silac\_23F10\_set2\_03  
 Method ITMS; CID Pepti... 247.88

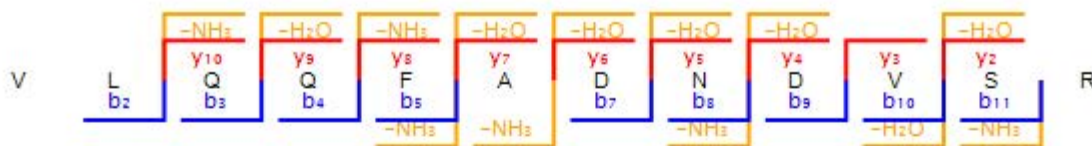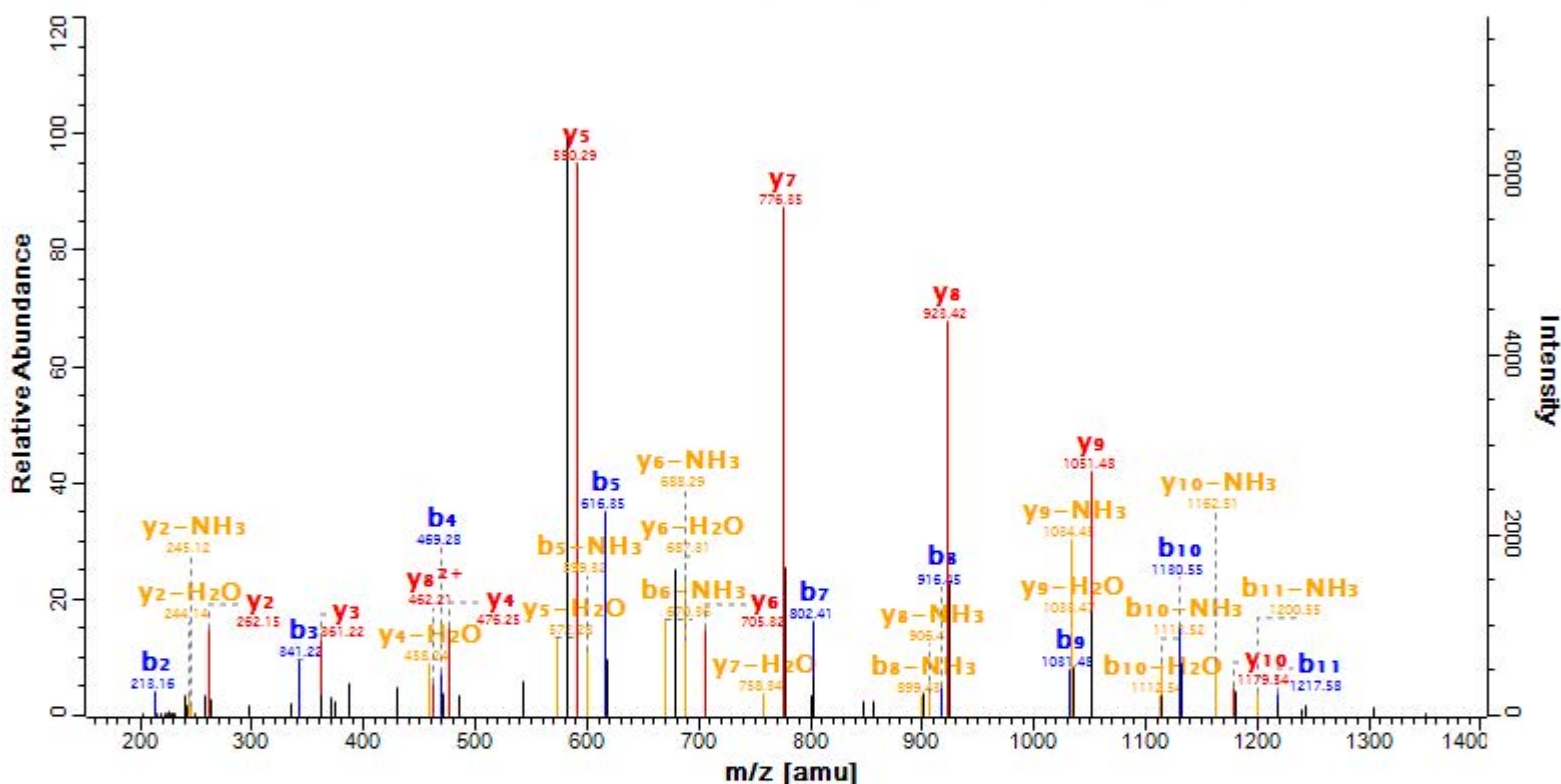

#### precursor information

|                   |                 |
|-------------------|-----------------|
| Mass:             | 1390.68377      |
| m/z:              | 696.34916       |
| Charge:           | 2+              |
| Retentiontime:    | 16.350507736206 |
| Score:            | 247.8791        |
| Mass Error [ppm]: | -0.22929        |
| PEP:              | 3.025E-33       |
| Precursor Type:   | MULTI           |

#### general information

|                       |             |
|-----------------------|-------------|
| Annotation:           | 10 of 12    |
| AminoAcids Coverage:  | 83 %        |
| Intensity Coverage:   | 67 %        |
| Peak Coverage:        | 41 %        |
| Protein Localisation: | 544 ... 555 |

| b ion     |          |    |     |    | y ion    |           | y <sup>2+</sup> ion |           |
|-----------|----------|----|-----|----|----------|-----------|---------------------|-----------|
| Δ dalton  | mass     |    | seq |    | Δ dalton | mass      | Δ dalton            | mass      |
|           | 100.0757 | 1  | V   | 11 |          |           |                     |           |
| +0.031377 | 213.1598 | 2  | L   | 10 | 1292.623 |           | 1292.623            |           |
| +0.067892 | 341.2183 | 3  | Q   | 9  | 1179.539 | +0.058643 | 1179.539            |           |
| -0.00433  | 469.2769 | 4  | Q   | 8  | 1051.48  | -0.00143  | 1051.48             |           |
| +0.023695 | 616.3453 | 5  | F   | 7  | 923.4217 | +0.028887 | 462.2145            | +0.172091 |
|           | 687.3824 | 6  | A   | 6  | 776.3533 | +0.067027 | 776.3533            |           |
| -0.07179  | 802.4094 | 7  | D   | 5  | 705.3162 | +0.047989 | 705.3162            |           |
| +0.06289  | 916.4523 | 8  | N   | 4  | 590.2893 | +0.13023  | 590.2893            |           |
| -0.01831  | 1031.479 | 9  | D   | 3  | 476.2463 | +0.044068 | 476.2463            |           |
| -0.07293  | 1130.548 | 10 | V   | 2  | 361.2194 | +0.112759 | 361.2194            |           |
| -0.06199  | 1217.58  | 11 | S   | 1  | 262.151  | +0.066884 | 262.151             |           |
|           |          | 12 | R   | 0  | 175.119  |           | 175.119             |           |

Scan number 2341 Raw file LNCAP\_Silac\_23F10\_set2\_03  
 Method ITMS; CID Peptide 132.81

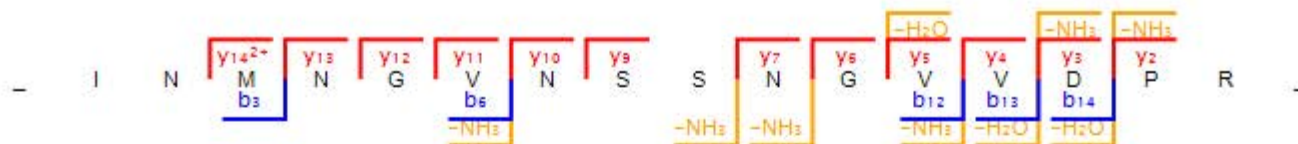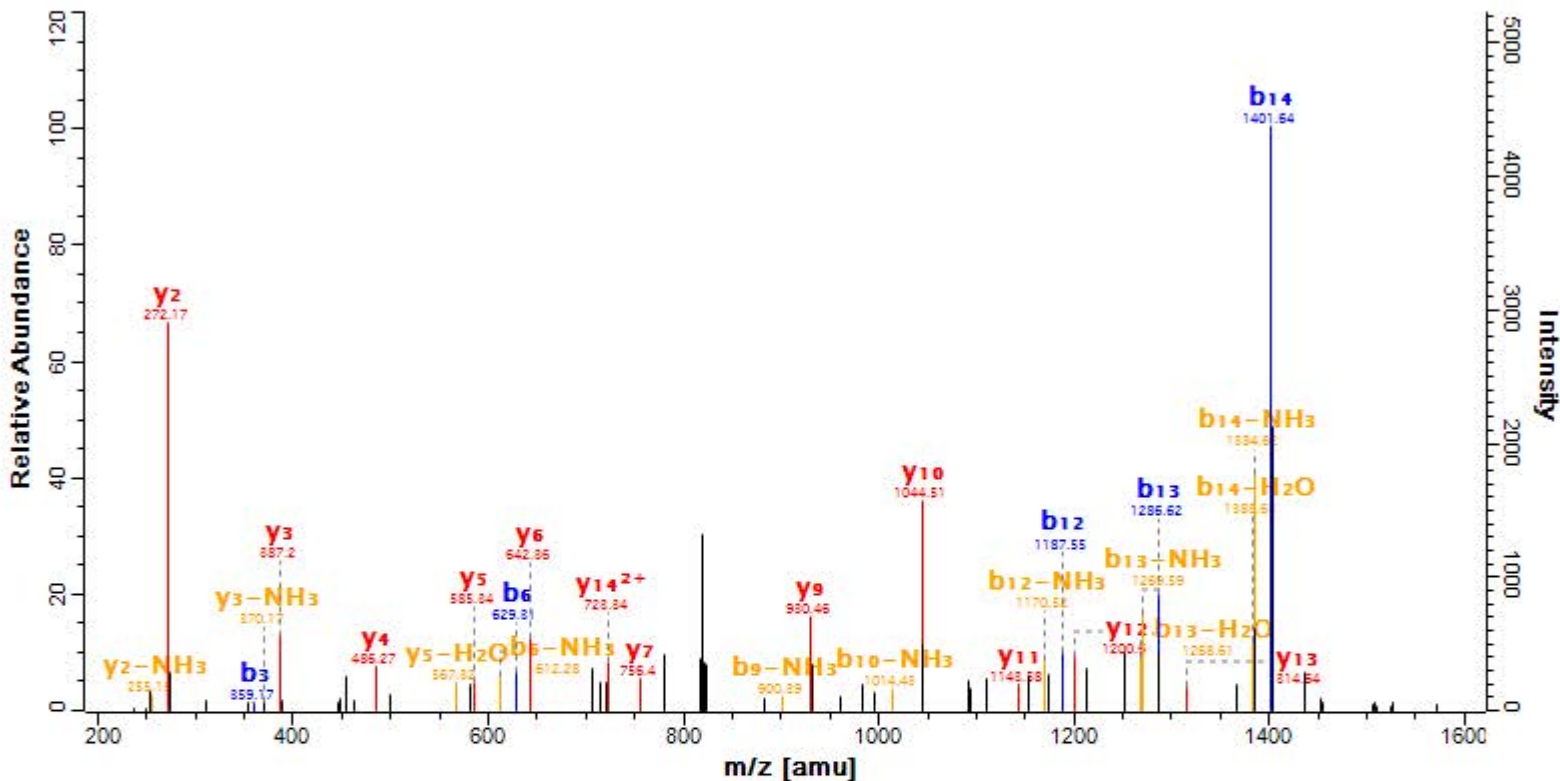

#### precursor information

|                   |                 |
|-------------------|-----------------|
| Mass:             | 1671.80069      |
| m/z:              | 836.90762       |
| Charge:           | 2+              |
| Retentiontime:    | 17.500610351562 |
| Score:            | 132.8108        |
| Mass Error [ppm]: | 0.49405         |
| PEP:              | 1.5105E-10      |
| Precursor Type:   | MULTI           |

#### general information

|                       |             |
|-----------------------|-------------|
| Annotation:           | 13 of 16    |
| AminoAcids Coverage:  | 81 %        |
| Intensity Coverage:   | 58 %        |
| Peak Coverage:        | 33 %        |
| Protein Localisation: | 311 ... 326 |

| b ion     |          |    |     |    | y ion    |           | y <sup>2+</sup> ion |           |
|-----------|----------|----|-----|----|----------|-----------|---------------------|-----------|
| Δ dalton  | mass     |    | seq |    | Δ dalton | mass      | Δ dalton            | mass      |
|           | 114.0913 | 1  | I   | 15 |          |           |                     |           |
|           | 228.1343 | 2  | N   | 14 | 1559.723 |           | 1559.723            |           |
| +0.046561 | 359.1748 | 3  | M   | 13 | 1445.68  |           | 723.3437            | +0.300878 |
|           | 473.2177 | 4  | N   | 12 | 1314.64  | +0.029156 | 1314.64             |           |
|           | 530.2391 | 5  | G   | 11 | 1200.597 | +0.066102 | 1200.597            |           |
| +0.054381 | 629.3076 | 6  | V   | 10 | 1143.575 | +0.072917 | 1143.575            |           |
|           | 743.3505 | 7  | N   | 9  | 1044.507 | -0.09329  | 1044.507            |           |
|           | 830.3825 | 8  | S   | 8  | 930.4639 | -0.00098  | 930.4639            |           |
|           | 917.4145 | 9  | S   | 7  | 843.4319 |           | 843.4319            |           |
|           | 1031.457 | 10 | N   | 6  | 756.3999 | +0.002405 | 756.3999            |           |
|           | 1088.479 | 11 | G   | 5  | 642.357  | +0.148787 | 642.357             |           |
| -0.15025  | 1187.547 | 12 | V   | 4  | 585.3355 | +0.128319 | 585.3355            |           |
| -0.12077  | 1286.616 | 13 | V   | 3  | 486.2671 | +0.017656 | 486.2671            |           |
| -0.1543   | 1401.643 | 14 | D   | 2  | 387.1987 | +0.164988 | 387.1987            |           |
|           | 1498.695 | 15 | P   | 1  | 272.1717 | -0.02734  | 272.1717            |           |
|           |          | 16 | R   | 0  | 175.119  |           | 175.119             |           |

Scan number 2609 Raw file LNCAP\_Silac\_23F10\_set2\_03  
 Method ITMS: CID Pepti... 202.32

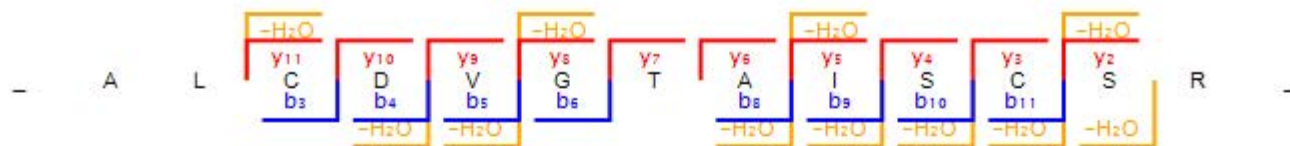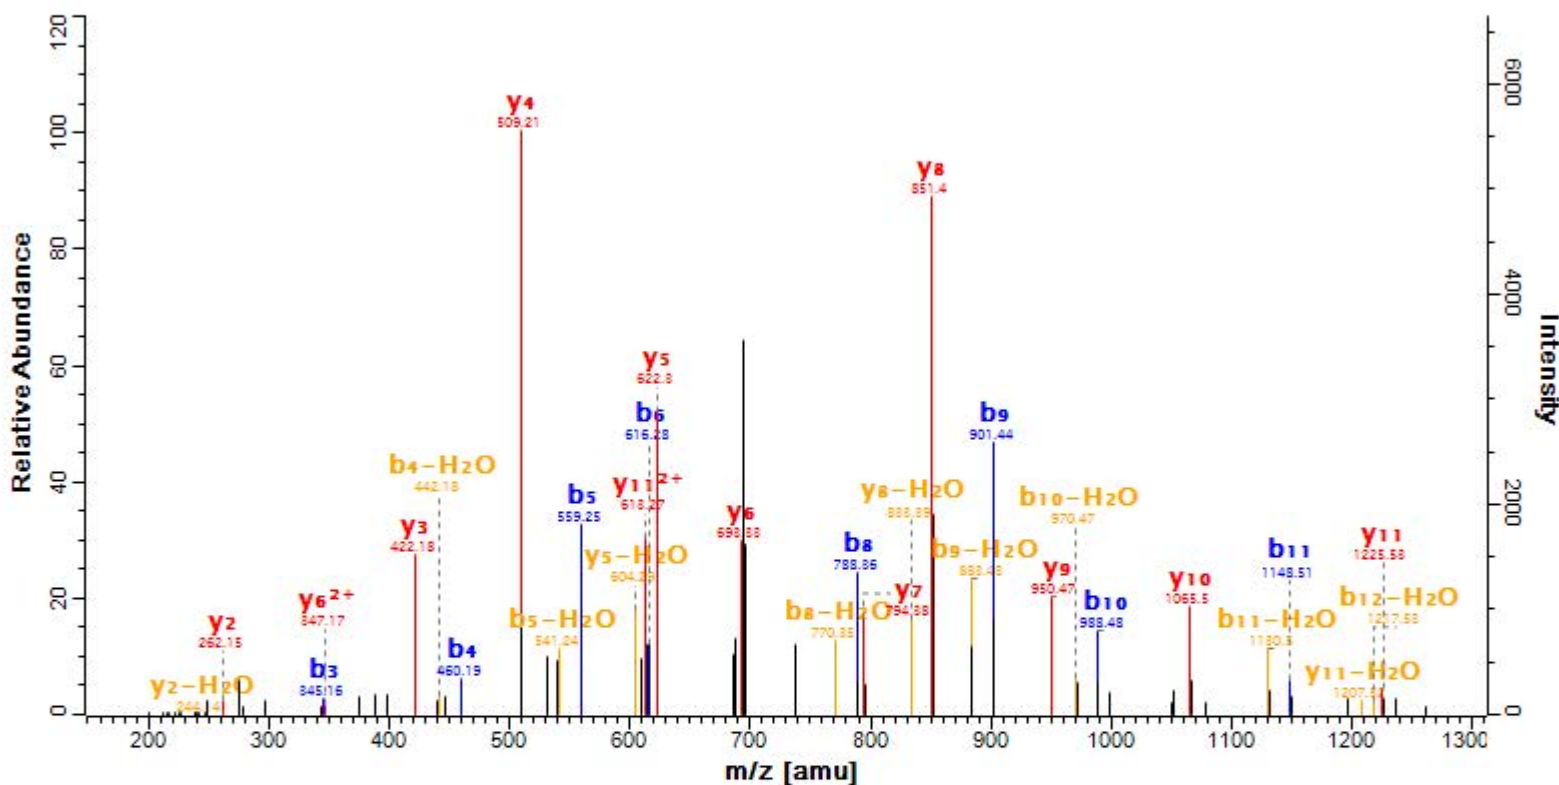

#### precursor information

|                   |                 |
|-------------------|-----------------|
| Mass:             | 1408.64371      |
| m/z:              | 705.32913       |
| Charge:           | 2+              |
| Retentiontime:    | 18.746564865112 |
| Score:            | 202.3206        |
| Mass Error [ppm]: | -0.12138        |
| PEP:              | 1.5655E-22      |
| Precursor Type:   | MULTI           |

#### general information

|                       |           |
|-----------------------|-----------|
| Annotation:           | 10 of 13  |
| AminoAcids Coverag    | 77 %      |
| Intensity Coverage:   | 65 %      |
| Peak Coverage:        | 34 %      |
| Protein Localisation: | 41 ... 53 |

| b ion     |          |    |     |    | y ion    |           | y <sup>2+</sup> ion |           |
|-----------|----------|----|-----|----|----------|-----------|---------------------|-----------|
| Δ dalton  | mass     |    | seq |    | Δ dalton | mass      | Δ dalton            | mass      |
|           | 72.04439 | 1  | A   | 12 |          |           |                     |           |
|           | 185.1285 | 2  | L   | 11 | 1338.614 |           | 1338.614            |           |
| +0.029313 | 345.1591 | 3  | C   | 10 | 1225.53  | -0.18684  | 613.2686            | +0.066271 |
| +0.074453 | 460.186  | 4  | D   | 9  | 1065.499 | +0.053766 | 1065.499            |           |
| -0.06189  | 559.2545 | 5  | V   | 8  | 950.4724 | +0.011557 | 950.4724            |           |
| -0.00554  | 616.2759 | 6  | G   | 7  | 851.404  | +0.031387 | 851.404             |           |
|           | 717.3236 | 7  | T   | 6  | 794.3825 | +0.037958 | 794.3825            |           |
| +0.016787 | 788.3607 | 8  | A   | 5  | 693.3348 | +0.068058 | 347.1711            | +0.19192  |
| +0.004989 | 901.4448 | 9  | I   | 4  | 622.2977 | +0.023019 | 622.2977            |           |
| -0.06494  | 988.4768 | 10 | S   | 3  | 509.2137 | +0.01321  | 509.2137            |           |
| -0.24952  | 1148.507 | 11 | C   | 2  | 422.1816 | +0.125378 | 422.1816            |           |
|           | 1235.539 | 12 | S   | 1  | 262.151  | +0.147786 | 262.151             |           |
|           |          | 13 | R   | 0  | 175.119  |           | 175.119             |           |

Scan number 2817 Raw file LNCAP\_Silac\_23F10\_set2\_03  
 Method ITMS; CID Pepti... 182.46

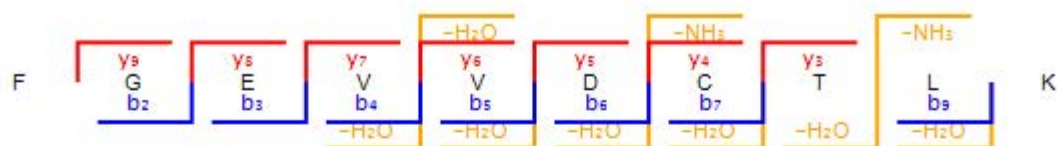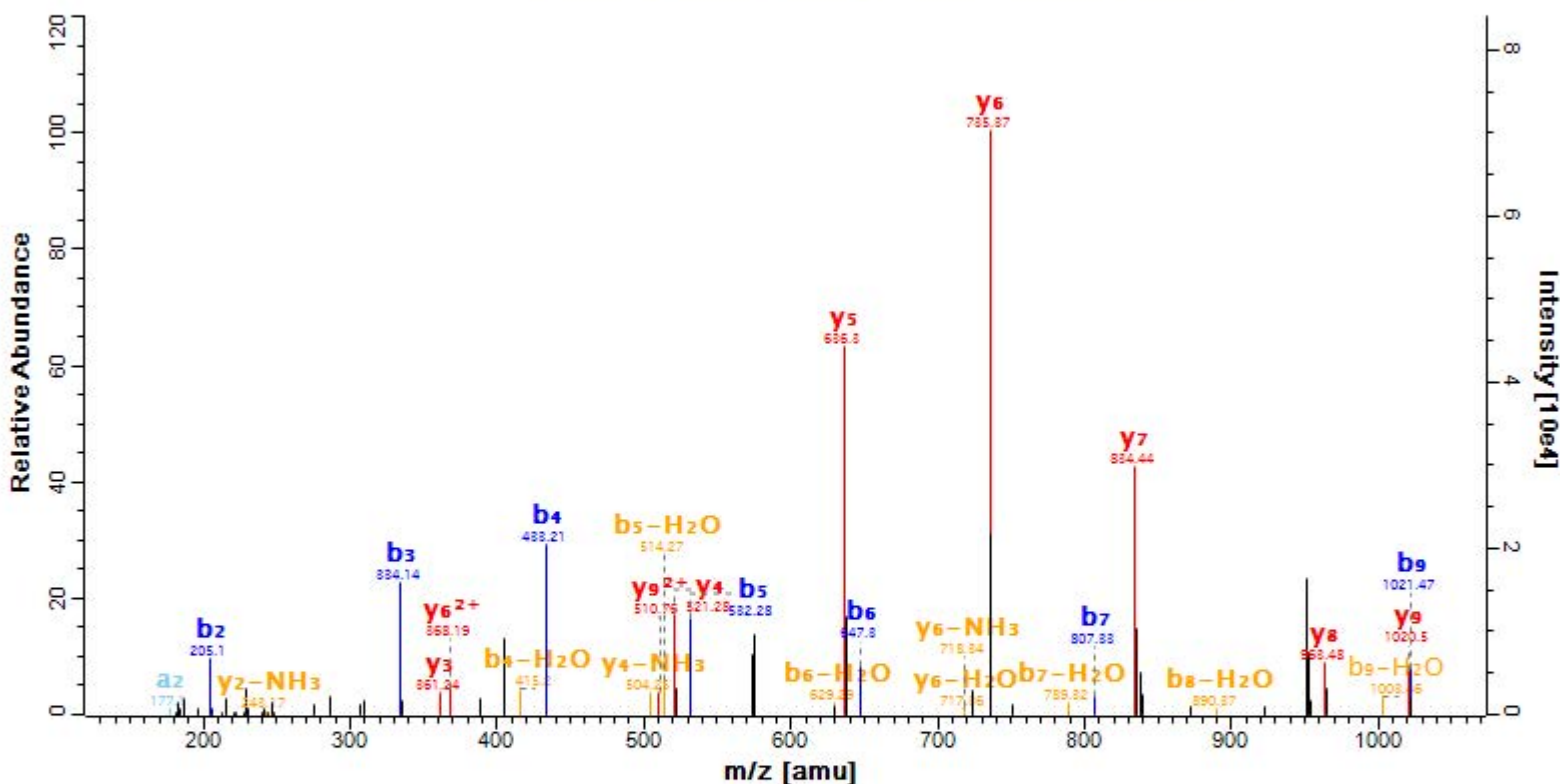

precursor information

|                   |                |
|-------------------|----------------|
| Mass:             | 1166.56414     |
| m/z:              | 584.28935      |
| Charge:           | 2+             |
| Retentiontime:    | 19.71848487854 |
| Score:            | 182.4607       |
| Mass Error [ppm]: | -0.016379      |
| PEP:              | 1.1351E-06     |
| Precursor Type:   | MULTI          |

|                       |             |
|-----------------------|-------------|
| Annotation:           | 8 of 10     |
| AminoAcids Coverage:  | 80 %        |
| Intensity Coverage:   | 64 %        |
| Peak Coverage:        | 32 %        |
| Protein Localisation: | 101 ... 110 |

| a ion    |        | b ion    |        |    |     |   | y ion    |         | y <sup>2+</sup> ion |         |
|----------|--------|----------|--------|----|-----|---|----------|---------|---------------------|---------|
| Δ dalton | mass   | Δ dalton | mass   |    | seq |   | Δ dalton | mass    | Δ dalton            | mass    |
|          | 120.08 |          | 148.08 | 1  | F   | 9 |          |         |                     |         |
| +0.0456  | 177.1  | -0.025   | 205.1  | 2  | G   | 8 | 1020.5   | -0.005  | 510.76              | -0.38   |
|          | 306.14 | -0.016   | 334.14 | 3  | E   | 7 | 963.48   | +0.0474 | 963.48              |         |
|          | 405.21 | -0.006   | 433.21 | 4  | V   | 6 | 834.44   | -0.003  | 834.44              |         |
|          | 504.28 | -0.03    | 532.28 | 5  | V   | 5 | 735.37   | +0.0265 | 368.19              | +0.0134 |
|          | 619.31 | -0.054   | 647.3  | 6  | D   | 4 | 636.3    | -0.008  | 636.3               |         |
|          | 779.34 | +0.1451  | 807.33 | 7  | C   | 3 | 521.28   | +0.0799 | 521.28              |         |
|          | 880.39 |          | 908.38 | 8  | T   | 2 | 361.24   | +0.0921 | 361.24              |         |
|          | 993.47 | -0.062   | 1021.5 | 9  | L   | 1 | 260.2    |         | 260.2               |         |
|          |        |          |        | 10 | K   | 0 | 147.11   |         | 147.11              |         |



Scan number 3318 Raw file LNCAP\_Silac\_23F10\_set2\_03  
 Method ITMS; CID Pepti... 135.02

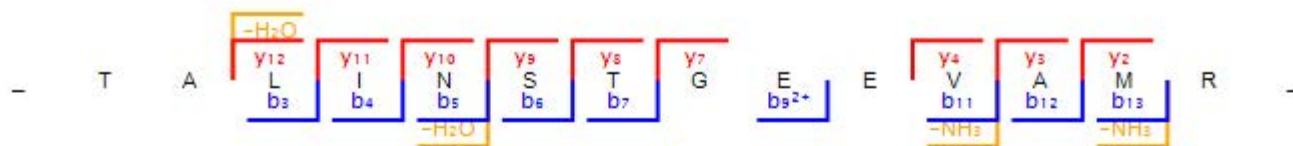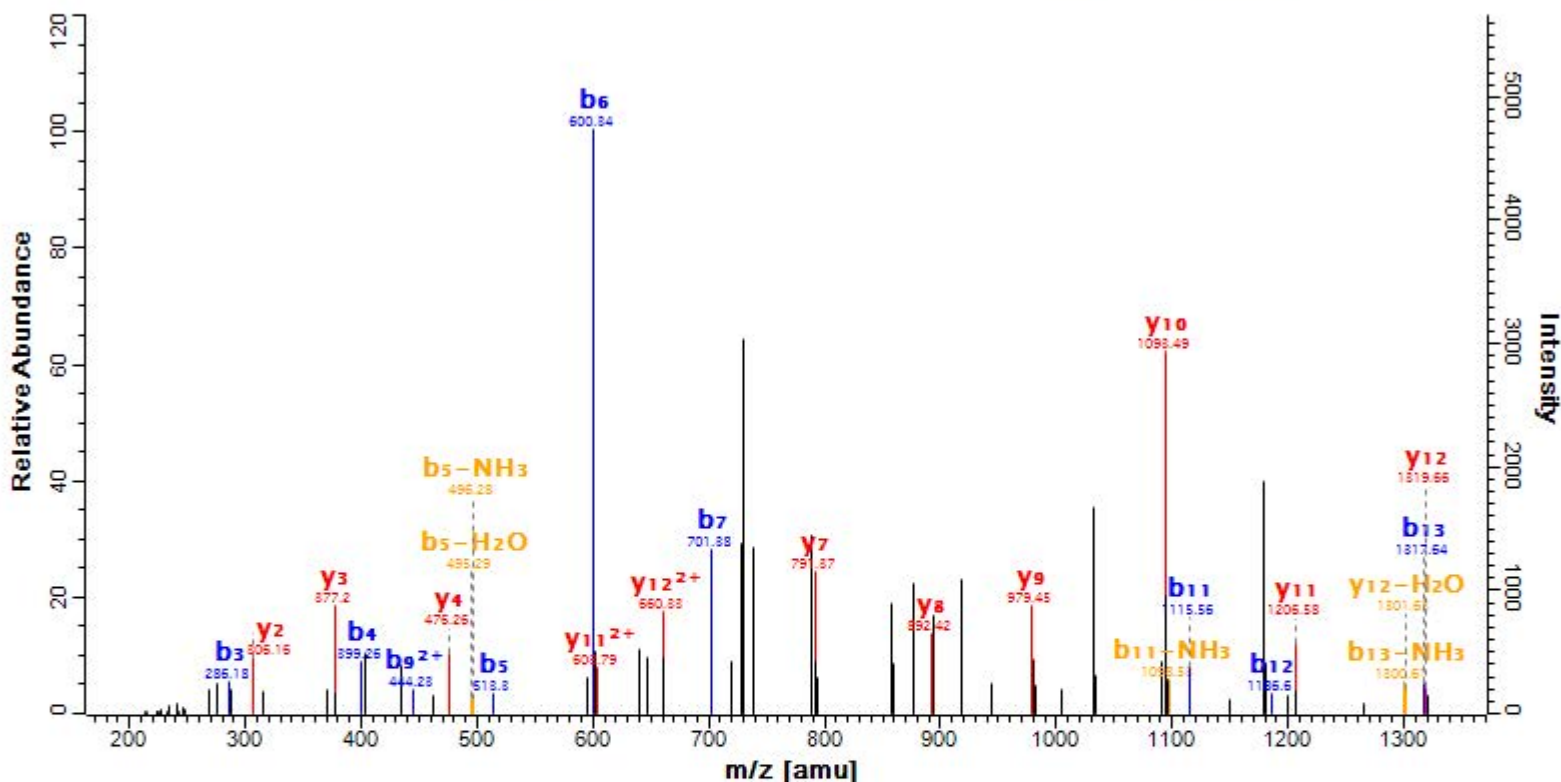

#### precursor information

|                   |                 |
|-------------------|-----------------|
| Mass:             | 1476.6871       |
| m/z:              | 739.35083       |
| Charge:           | 2+              |
| Retentiontime:    | 22.122484207153 |
| Score:            | 135.0247        |
| Mass Error [ppm]: | 0.62713         |
| PEP:              | 8.5526E-27      |
| Precursor Type:   | MULTI           |

| b <sup>2+</sup> ion |        | b ion    |        | seq |   |    | y ion    |         | y <sup>2+</sup> ion |         |
|---------------------|--------|----------|--------|-----|---|----|----------|---------|---------------------|---------|
| Δ dalton            | mass   | Δ dalton | mass   |     |   |    | Δ dalton | mass    | Δ dalton            | mass    |
|                     | 102.05 |          | 102.05 | 1   | T | 13 |          |         |                     |         |
|                     | 173.09 |          | 173.09 | 2   | A | 12 | 1390.7   |         | 1390.7              |         |
|                     | 286.18 | -0.008   | 286.18 | 3   | L | 11 | 1319.7   | -0.247  | 660.33              | -0.014  |
|                     | 399.26 | +0.0765  | 399.26 | 4   | I | 10 | 1206.6   | -0.038  | 603.79              | +0.0852 |
|                     | 513.3  | +0.0367  | 513.3  | 5   | N | 9  | 1093.5   | +0.0206 | 1093.5              |         |
|                     | 600.34 | +0.0375  | 600.34 | 6   | S | 8  | 979.45   | -0.017  | 979.45              |         |
|                     | 701.38 | +0.0844  | 701.38 | 7   | T | 7  | 892.42   | +0.0139 | 892.42              |         |
|                     | 758.4  |          | 758.4  | 8   | G | 6  | 791.37   | +0.0132 | 791.37              |         |
| +0.0387             | 444.23 |          | 887.45 | 9   | E | 5  | 734.35   |         | 734.35              |         |
|                     | 1016.5 |          | 1016.5 | 10  | E | 4  | 605.31   |         | 605.31              |         |
|                     | 1115.6 | -0.219   | 1115.6 | 11  | V | 3  | 476.26   | +0.0403 | 476.26              |         |
|                     | 1186.6 | -0.023   | 1186.6 | 12  | A | 2  | 377.2    | +0.1034 | 377.2               |         |
|                     | 1317.6 | -0.207   | 1317.6 | 13  | M | 1  | 306.16   | -0.04   | 306.16              |         |
|                     |        |          |        | 14  | R | 0  | 175.12   |         | 175.12              |         |

#### general information

|                       |             |
|-----------------------|-------------|
| Annotation:           | 10 of 14    |
| AminoAcids Coverage:  | 71 %        |
| Intensity Coverage:   | 42 %        |
| Peak Coverage:        | 30 %        |
| Protein Localisation: | 528 ... 541 |

Scan number 3328 Raw file LNCAP\_Silac\_23F10\_set2\_03  
 Method ITMS; CID Pepti... 89.7

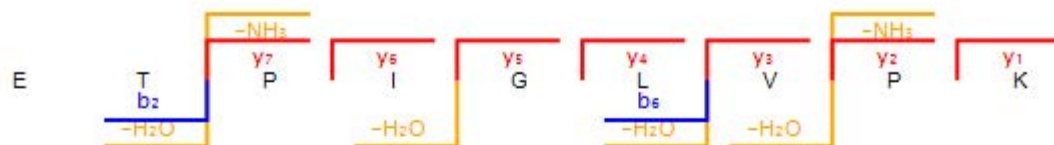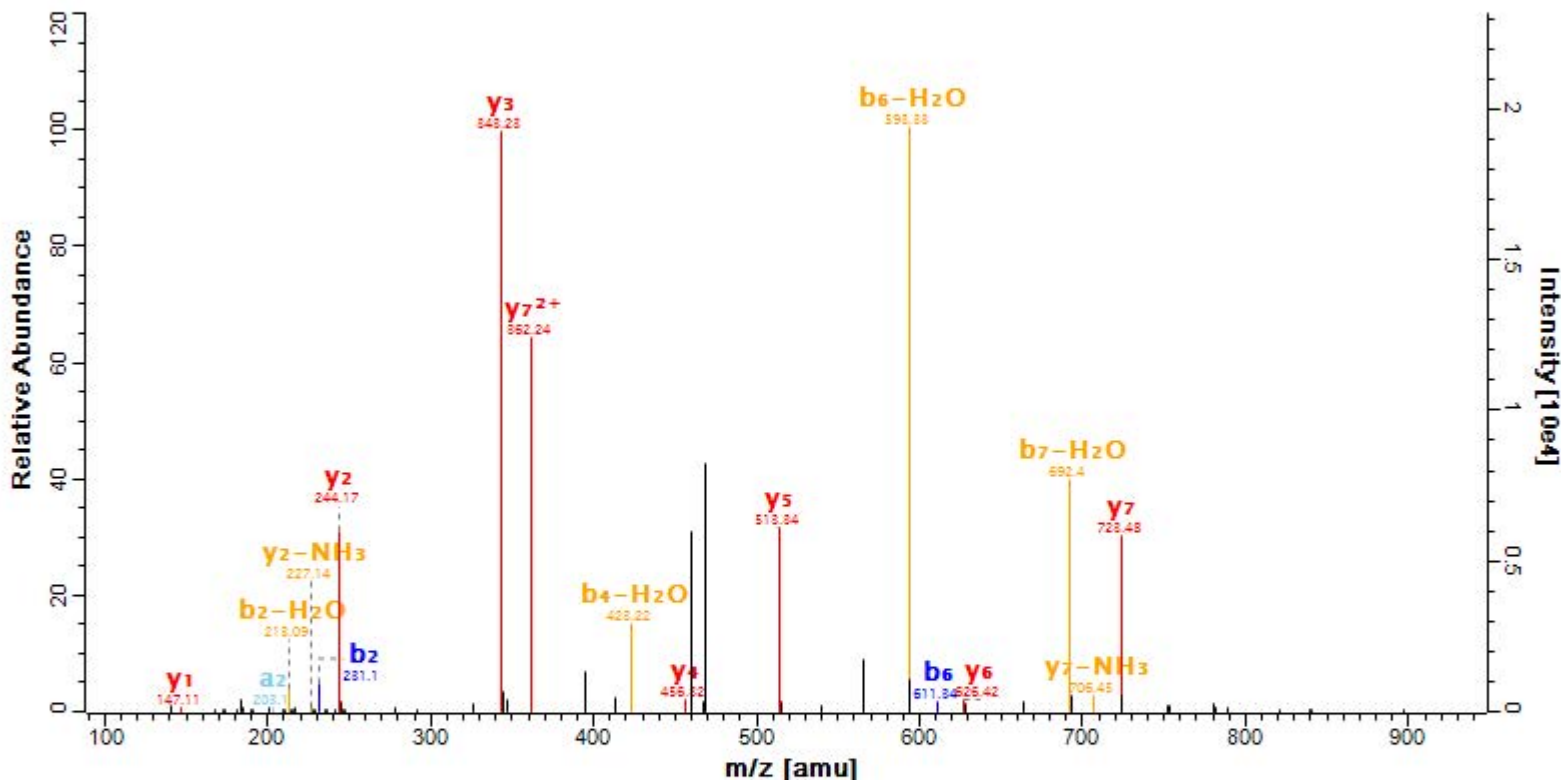

#### precursor information

|                       |                 |
|-----------------------|-----------------|
| Mass:                 | 952.55957       |
| m/z:                  | 477.28706       |
| Charge:               | 2+              |
| Retentiontime:        | 22.174257278442 |
| Score:                | 89.69799        |
| Mass Error [ppm]:     | 0.24588         |
| PEP:                  | 0.0053347       |
| Precursor Type:       | MULTI           |
| Annotation:           | 8 of 9          |
| AminoAcids Coverage:  | 89 %            |
| Intensity Coverage:   | 76 %            |
| Peak Coverage:        | 21 %            |
| Protein Localisation: | 570 ... 578     |

| a ion    |        | b ion    |        |   |     |   | y ion    |         | y <sup>2+</sup> ion |        |
|----------|--------|----------|--------|---|-----|---|----------|---------|---------------------|--------|
| Δ dalton | mass   | Δ dalton | mass   |   | seq |   | Δ dalton | mass    | Δ dalton            | mass   |
|          | 102.05 |          | 130.05 | 1 | E   | 8 |          |         |                     |        |
| -0.043   | 203.1  | -0.011   | 231.1  | 2 | T   | 7 | 824.52   |         | 824.52              |        |
|          | 300.16 |          | 328.15 | 3 | P   | 6 | 723.48   | -0.007  | 362.24              | +0.054 |
|          | 413.24 |          | 441.23 | 4 | I   | 5 | 626.42   | +0.0213 | 626.42              |        |
|          | 470.26 |          | 498.26 | 5 | G   | 4 | 513.34   | +0.0204 | 513.34              |        |
|          | 583.34 | +0.1992  | 611.34 | 6 | L   | 3 | 456.32   | +0.0805 | 456.32              |        |
|          | 682.41 |          | 710.41 | 7 | V   | 2 | 343.23   | +0.0465 | 343.23              |        |
|          | 779.47 |          | 807.46 | 8 | P   | 1 | 244.17   | -0.013  | 244.17              |        |
|          |        |          |        | 9 | K   | 0 | 147.11   | +0.0293 | 147.11              |        |

Scan number 379 Raw file LNCAP\_Silac\_23F10\_set2\_03  
 Method ITMS; CID Pepti... 205.13

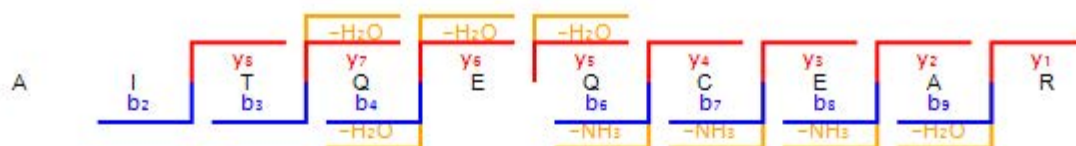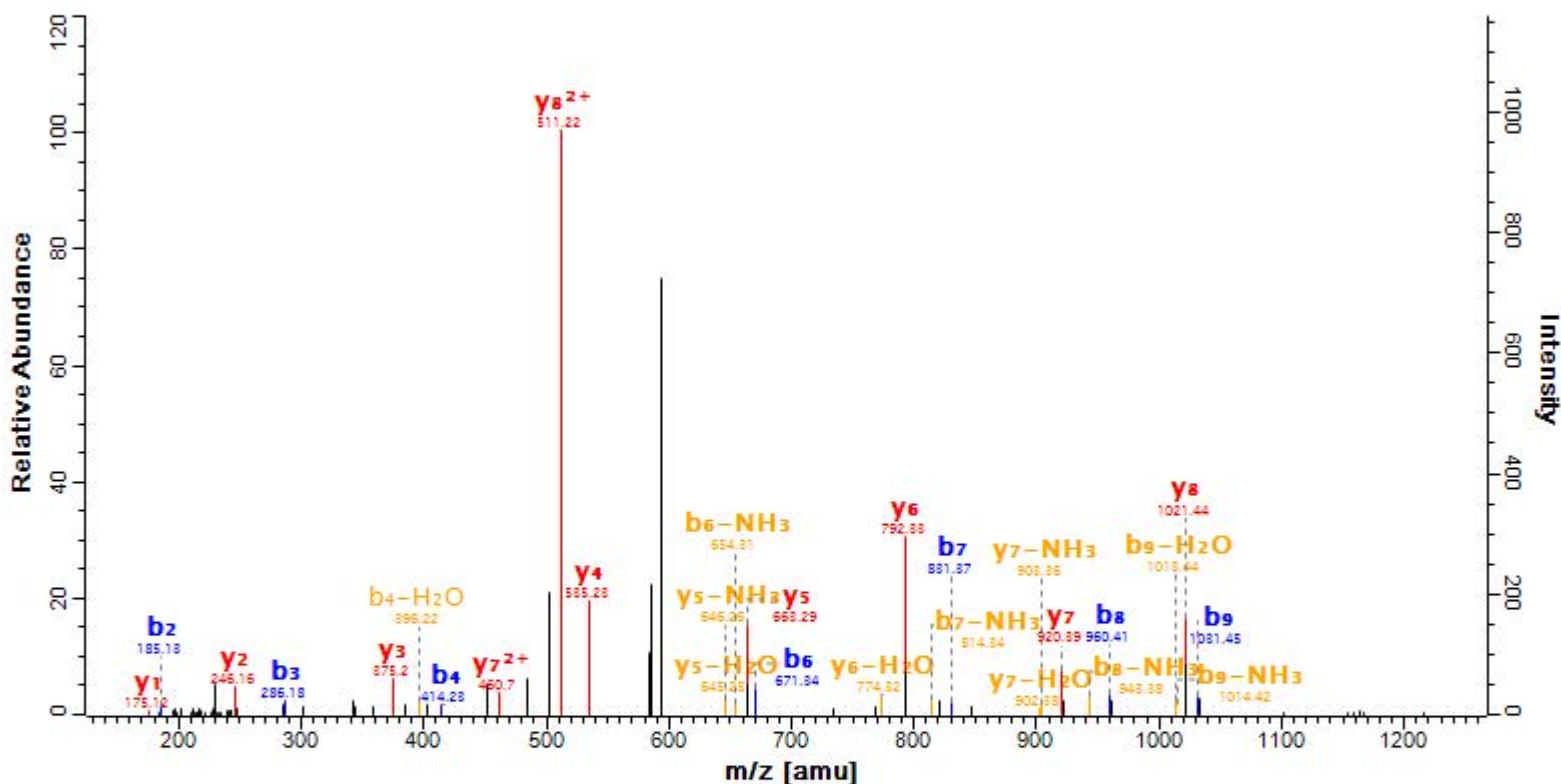

#### precursor information

|                   |                 |
|-------------------|-----------------|
| Mass:             | 1204.55094      |
| m/z:              | 603.28274       |
| Charge:           | 2+              |
| Retentiontime:    | 7.0963535308837 |
| Score:            | 205.1335        |
| Mass Error [ppm]: | 0.24952         |
| PEP:              | 1.3354E-28      |
| Precursor Type:   | ISO             |

g

|                       |            |
|-----------------------|------------|
| Annotation:           | 9 of 10    |
| AminoAcids Coverage:  | 90 %       |
| Intensity Coverage:   | 50 %       |
| Peak Coverage:        | 28 %       |
| Protein Localisation: | 97 ... 106 |

| b ion     |          |    |     |   | y ion    |           | y <sup>2+</sup> ion |           |
|-----------|----------|----|-----|---|----------|-----------|---------------------|-----------|
| Δ dalton  | mass     |    | seq |   | Δ dalton | mass      | Δ dalton            | mass      |
|           | 72.04439 | 1  | A   | 9 |          |           |                     |           |
| -0.00538  | 185.1285 | 2  | I   | 8 | 1134.521 |           | 1134.521            |           |
| -0.04863  | 286.1761 | 3  | T   | 7 | 1021.437 | -0.03604  | 511.222             | +0.181864 |
| +0.024933 | 414.2347 | 4  | Q   | 6 | 920.3891 | +0.052351 | 460.6982            | +0.479813 |
|           | 543.2773 | 5  | E   | 5 | 792.3305 | +0.03616  | 792.3305            |           |
| -0.13074  | 671.3359 | 6  | Q   | 4 | 663.2879 | -0.01146  | 663.2879            |           |
| +0.082079 | 831.3665 | 7  | C   | 3 | 535.2293 | -0.02063  | 535.2293            |           |
| +0.072628 | 960.4091 | 8  | E   | 2 | 375.1987 | +0.070567 | 375.1987            |           |
| -0.10139  | 1031.446 | 9  | A   | 1 | 246.1561 | +0.073823 | 246.1561            |           |
|           |          | 10 | R   | 0 | 175.119  | -0.01673  | 175.119             |           |

Scan number 3863 Raw file LNCAP\_Silac\_23F10\_set2\_03  
 Method ITMS; CID Pepti... 95.09

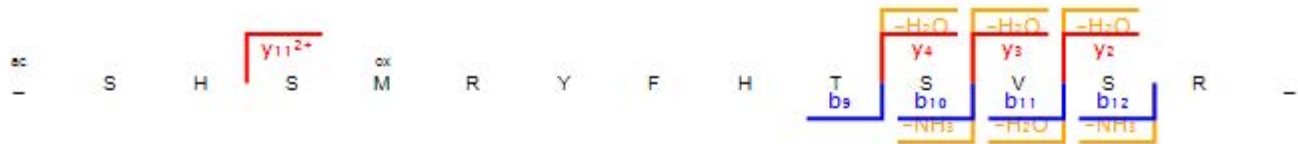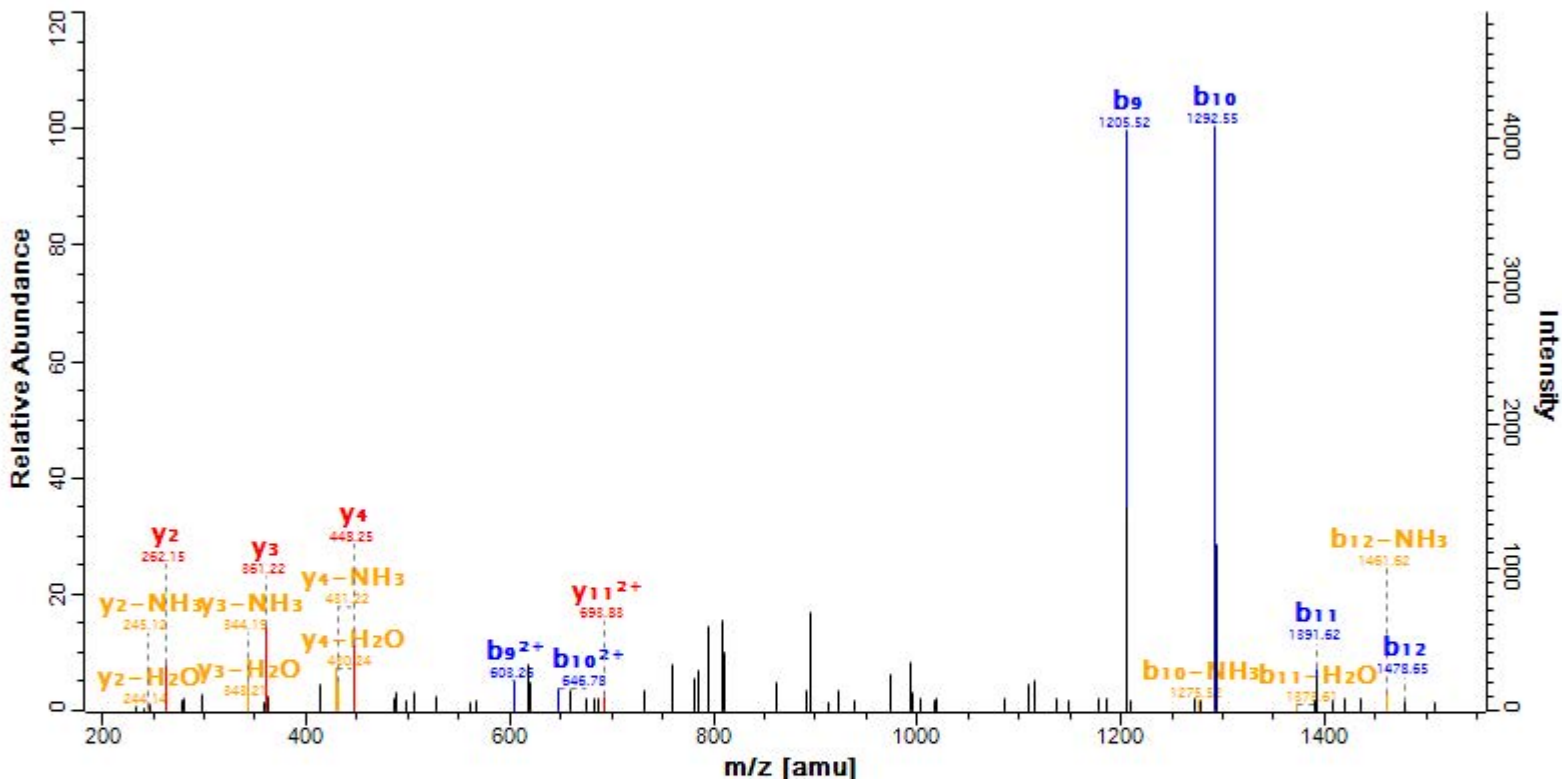

precursor information

|                   |                 |
|-------------------|-----------------|
| Mass:             | 1651.75339      |
| m/z:              | 826.88397       |
| Charge:           | 2+              |
| Retentiontime:    | 24.697696685791 |
| Score:            | 95.09386        |
| Mass Error [ppm]: | 0.52646         |
| PEP:              | 0.0032043       |
| Precursor Type:   | ISO             |

general information

|                       |          |
|-----------------------|----------|
| Annotation:           | 6 of 13  |
| AminoAcids Coverage:  | 46 %     |
| Intensity Coverage:   | 50 %     |
| Peak Coverage:        | 23 %     |
| Protein Localisation: | 1 ... 13 |

| b <sup>2+</sup> ion |        | b ion    |        |     | y ion |          | y <sup>2+</sup> ion |          |               |
|---------------------|--------|----------|--------|-----|-------|----------|---------------------|----------|---------------|
| Δ dalton            | mass   | Δ dalton | mass   | seq |       | Δ dalton | mass                | Δ dalton | mass          |
|                     | 130.05 |          | 130.05 | 1   | S     | 12       |                     |          |               |
|                     | 267.11 |          | 267.11 | 2   | H     | 11       | 1523.7              |          | 1523.7        |
|                     | 354.14 |          | 354.14 | 3   | S     | 10       | 1386.7              |          | 693.83 -0.376 |
|                     | 501.18 |          | 501.18 | 4   | M     | 9        | 1299.6              |          | 1299.6        |
|                     | 657.28 |          | 657.28 | 5   | R     | 8        | 1152.6              |          | 1152.6        |
|                     | 820.34 |          | 820.34 | 6   | Y     | 7        | 996.49              |          | 996.49        |
|                     | 967.41 |          | 967.41 | 7   | F     | 6        | 833.43              |          | 833.43        |
|                     | 1104.5 |          | 1104.5 | 8   | H     | 5        | 686.36              |          | 686.36        |
| +0.4667             | 603.26 | +0.0222  | 1205.5 | 9   | T     | 4        | 549.3               |          | 549.3         |
| +0.1196             | 646.78 | +0.0611  | 1292.5 | 10  | S     | 3        | 448.25 -0.02        |          | 448.25        |
|                     | 1391.6 | +0.1977  | 1391.6 | 11  | V     | 2        | 361.22 +0.0114      |          | 361.22        |
|                     | 1478.6 | +0.0699  | 1478.6 | 12  | S     | 1        | 262.15 -0.036       |          | 262.15        |
|                     |        |          |        | 13  | R     | 0        | 175.12              |          | 175.12        |

Scan number 3928 Raw file LNCAP\_Silac\_23F10\_set2\_03  
 Method ITMS; CID Pepti... 180.19

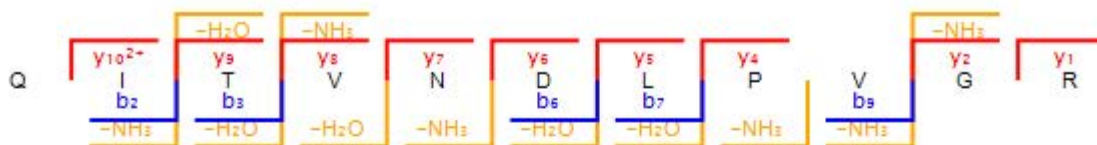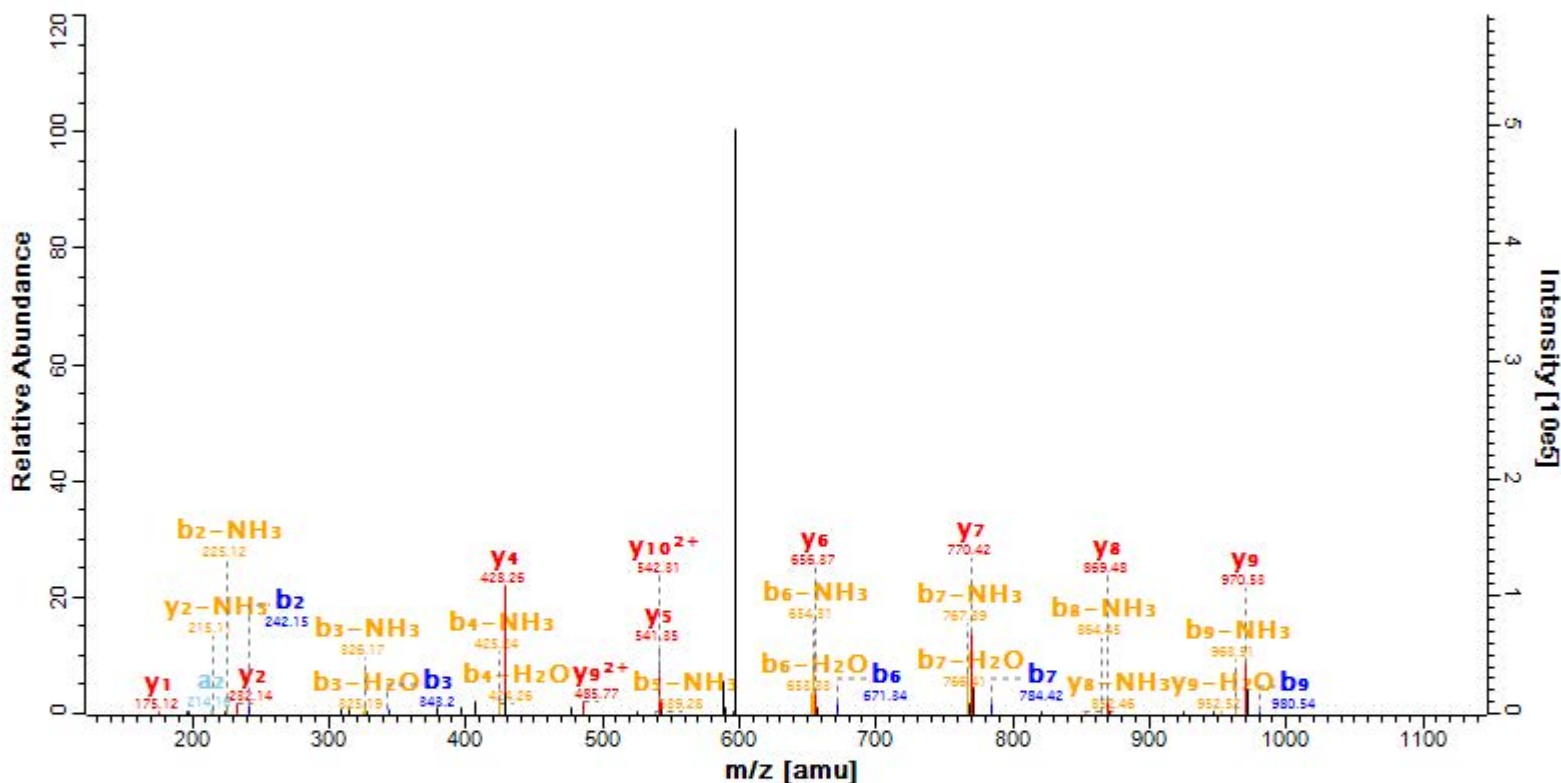

#### precursor information

|                   |                 |
|-------------------|-----------------|
| Mass:             | 1210.66675      |
| m/z:              | 606.34065       |
| Charge:           | 2+              |
| Retentiontime:    | 25.000156402587 |
| Score:            | 180.1916        |
| Mass Error [ppm]: | -0.19086        |
| PEP:              | 1.744E-08       |
| Precursor Type:   | MULTI           |

#### general information

|                       |             |
|-----------------------|-------------|
| Annotation:           | 10 of 11    |
| AminoAcids Coverage:  | 91 %        |
| Intensity Coverage:   | 43 %        |
| Peak Coverage:        | 44 %        |
| Protein Localisation: | 141 ... 151 |

| a ion    |        | b ion    |        |    |     |          | y ion  |          | y <sup>2+</sup> ion |  |
|----------|--------|----------|--------|----|-----|----------|--------|----------|---------------------|--|
| Δ dalton | mass   | Δ dalton | mass   |    | seq | Δ dalton | mass   | Δ dalton | mass                |  |
|          | 101.07 |          | 129.07 | 1  | Q   | 10       |        |          |                     |  |
| +0.0608  | 214.16 | +0.0757  | 242.15 | 2  | I   | 9        | 1083.6 |          | 542.31              |  |
|          | 315.2  | +0.1136  | 343.2  | 3  | T   | 8        | 970.53 | -0.04    | 485.77              |  |
|          | 414.27 |          | 442.27 | 4  | V   | 7        | 869.48 | +0.0041  | 869.48              |  |
|          | 528.31 |          | 556.31 | 5  | N   | 6        | 770.42 | +0.0126  | 770.42              |  |
|          | 643.34 | +0.0187  | 671.34 | 6  | D   | 5        | 656.37 | +0.0147  | 656.37              |  |
|          | 756.43 | -0.074   | 784.42 | 7  | L   | 4        | 541.35 | +0.0241  | 541.35              |  |
|          | 853.48 |          | 881.47 | 8  | P   | 3        | 428.26 | +0.0347  | 428.26              |  |
|          | 952.55 | -0.085   | 980.54 | 9  | V   | 2        | 331.21 |          | 331.21              |  |
|          | 1009.6 |          | 1037.6 | 10 | G   | 1        | 232.14 | -0.013   | 232.14              |  |
|          |        |          |        | 11 | R   | 0        | 175.12 | +0.0103  | 175.12              |  |

Scan number 404 Raw file LNCAP\_Silac\_23F10\_set2\_03  
 Method ITMS: CID Pepti... 132.17

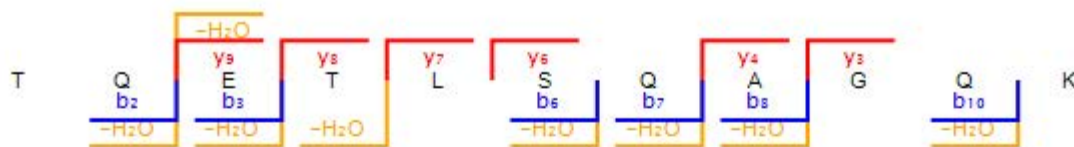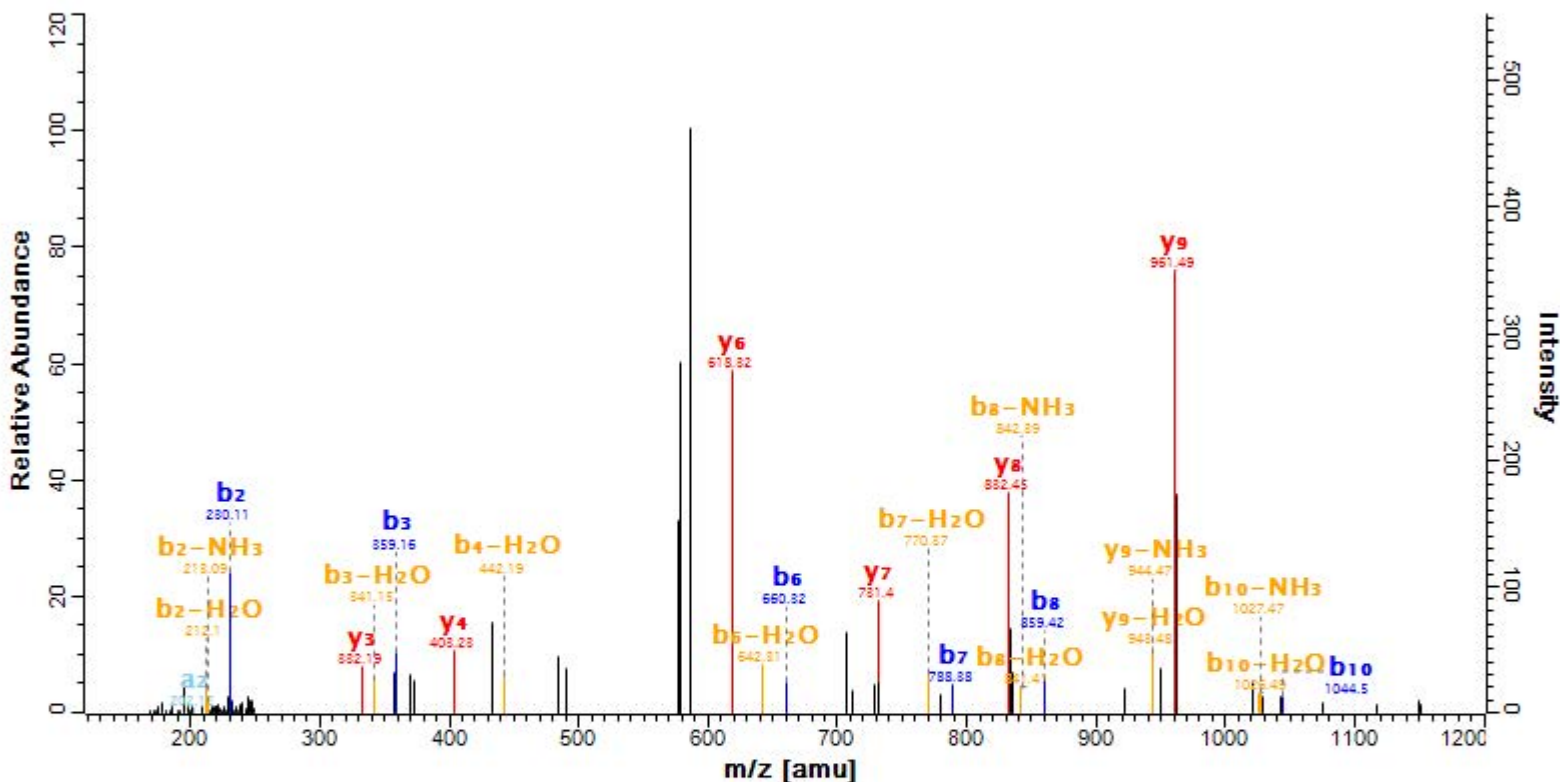

#### precursor information

|                   |                 |
|-------------------|-----------------|
| Mass:             | 1189.59372      |
| m/z:              | 595.80413       |
| Charge:           | 2+              |
| Retentiontime:    | 7.2942566871643 |
| Score:            | 132.1712        |
| Mass Error [ppm]: | -0.13857        |
| PEP:              | 0.00018428      |
| Precursor Type:   | MULTI           |

#### general information

|                       |             |
|-----------------------|-------------|
| Annotation:           | 9 of 11     |
| AminoAcids Coverage:  | 82 %        |
| Intensity Coverage:   | 40 %        |
| Peak Coverage:        | 24 %        |
| Protein Localisation: | 109 ... 119 |

| a ion    |          | b ion     |          | seq |   | y ion    |          |
|----------|----------|-----------|----------|-----|---|----------|----------|
| Δ dalton | mass     | Δ dalton  | mass     |     |   | Δ dalton | mass     |
|          | 74.06004 |           | 102.055  | 1   | T | 10       |          |
| -0.08978 | 202.1186 | -0.05332  | 230.1135 | 2   | Q | 9        | 1089.553 |
|          | 331.1612 | +0.008975 | 359.1561 | 3   | E | 8        | 961.4949 |
|          | 432.2089 |           | 460.2038 | 4   | T | 7        | 832.4523 |
|          | 545.293  |           | 573.2879 | 5   | L | 6        | 731.4046 |
|          | 632.325  | +0.083363 | 660.3199 | 6   | S | 5        | 618.3206 |
|          | 760.3836 | +0.00916  | 788.3785 | 7   | Q | 4        | 531.2885 |
|          | 831.4207 | -0.0166   | 859.4156 | 8   | A | 3        | 403.23   |
|          | 888.4421 |           | 916.4371 | 9   | G | 2        | 332.1928 |
|          | 1016.501 | -0.0779   | 1044.496 | 10  | Q | 1        | 275.1714 |
|          |          |           |          | 11  | K | 0        | 147.1128 |

Scan number 4382 Raw file LNCAP\_Silac\_23F10\_set2\_03  
 Method ITMS: CID Peptide 81.52

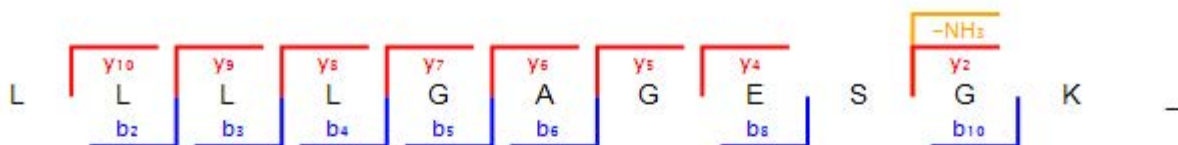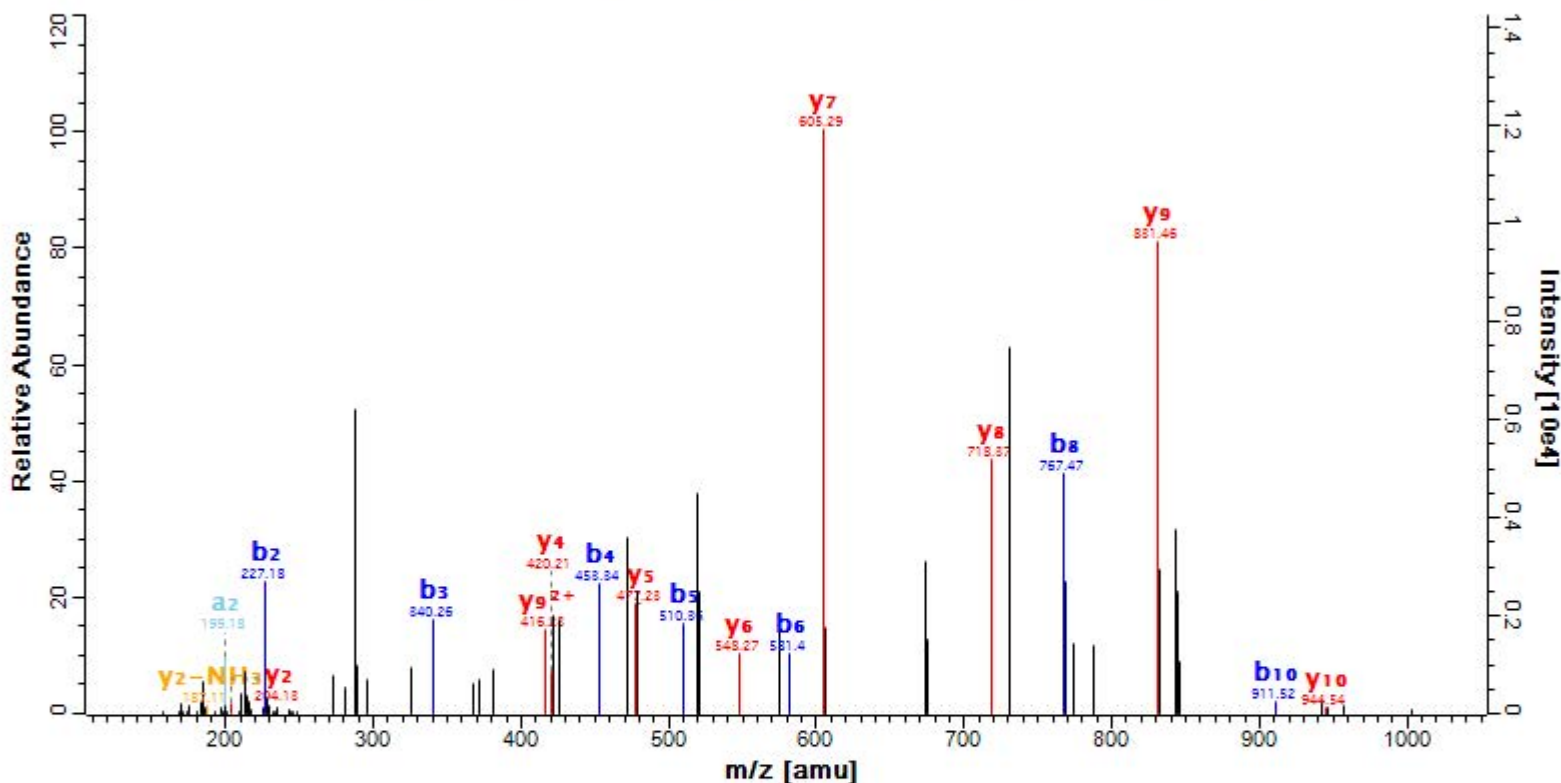

#### precursor information

|                   |                 |
|-------------------|-----------------|
| Mass:             | 1056.61777      |
| m/z:              | 529.31616       |
| Charge:           | 2+              |
| Retentiontime:    | 27.134902954101 |
| Score:            | 81.52473        |
| Mass Error [ppm]: | -0.13594        |
| PEP:              | 0.0033009       |
| Precursor Type:   | MULTI           |

#### general information

|                       |             |
|-----------------------|-------------|
| Annotation:           | 8 of 11     |
| AminoAcids Coverage:  | 73 %        |
| Intensity Coverage:   | 42 %        |
| Peak Coverage:        | 20 %        |
| Protein Localisation: | 686 ... 696 |

| a ion           |        | b ion           |        | seq |   |    | y ion           |         | y <sup>2+</sup> ion |         |
|-----------------|--------|-----------------|--------|-----|---|----|-----------------|---------|---------------------|---------|
| $\Delta$ dalton | mass   | $\Delta$ dalton | mass   |     |   |    | $\Delta$ dalton | mass    | $\Delta$ dalton     | mass    |
|                 | 86.096 |                 | 114.09 | 1   | L | 10 |                 |         |                     |         |
| -0.025          | 199.18 | -0.073          | 227.18 | 2   | L | 9  | 944.54          | -0.096  | 944.54              |         |
|                 | 312.26 | +0.0533         | 340.26 | 3   | L | 8  | 831.46          | -0.003  | 416.23              | +0.1134 |
|                 | 425.35 | -0.207          | 453.34 | 4   | L | 7  | 718.37          | +0.079  | 718.37              |         |
|                 | 482.37 | +0.0945         | 510.36 | 5   | G | 6  | 605.29          | -0.026  | 605.29              |         |
|                 | 553.41 | +0.104          | 581.4  | 6   | A | 5  | 548.27          | +0.1108 | 548.27              |         |
|                 | 610.43 |                 | 638.42 | 7   | G | 4  | 477.23          | -0.025  | 477.23              |         |
|                 | 739.47 | +0.0239         | 767.47 | 8   | E | 3  | 420.21          | +0.1879 | 420.21              |         |
|                 | 826.5  |                 | 854.5  | 9   | S | 2  | 291.17          |         | 291.17              |         |
|                 | 883.52 | +0.034          | 911.52 | 10  | G | 1  | 204.13          | +0.1276 | 204.13              |         |
|                 |        |                 |        | 11  | K | 0  | 147.11          |         | 147.11              |         |

Scan number 4449 Raw file LNCAP\_Silac\_23F10\_set2\_03  
 Method ITMS: CID Pepti... 43.31

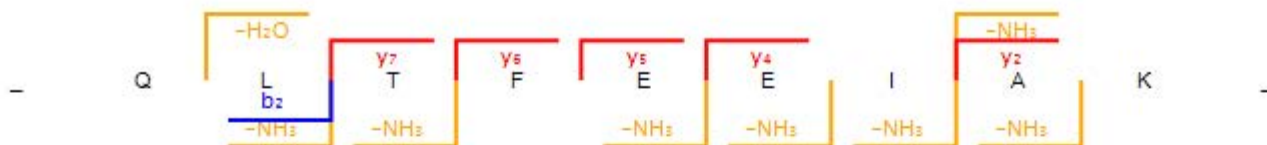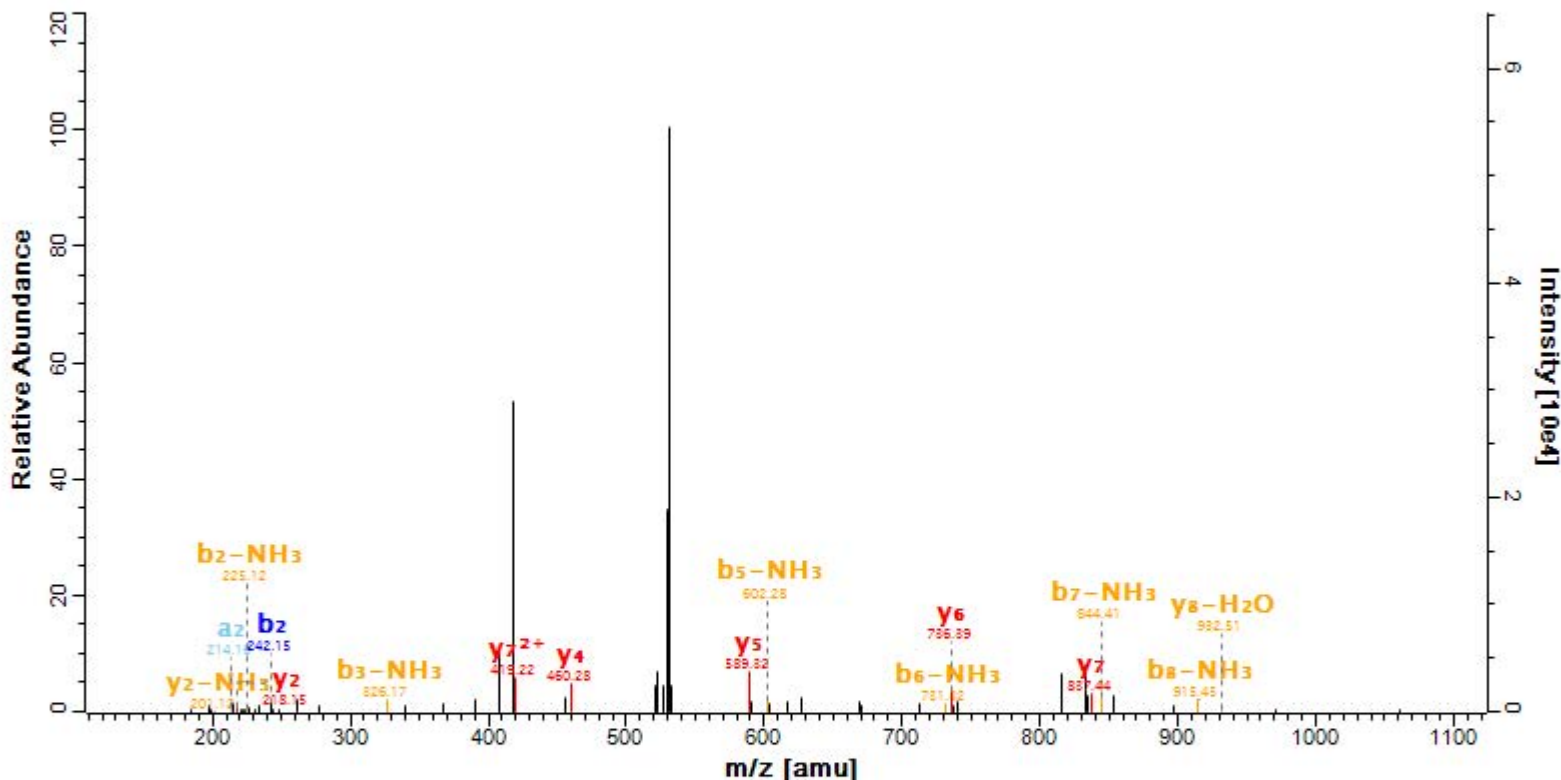

#### precursor information

|                       |                 |
|-----------------------|-----------------|
| Mass:                 | 1077.57137      |
| m/z:                  | 539.79296       |
| Charge:               | 2+              |
| Retention time:       | 27.446210861206 |
| Score:                | 43.30774        |
| Mass Error [ppm]:     | 0.69357         |
| PEP:                  | 0.079287        |
| Precursor Type:       | MULTI           |
| Annotation:           | 7 of 9          |
| AminoAcids Coverage:  | 78 %            |
| Intensity Coverage:   | 12 %            |
| Peak Coverage:        | 18 %            |
| Protein Localisation: | 290 ... 298     |

| a ion    |        | b ion    |        |   |     |          | y ion  |          | y <sup>2+</sup> ion |  |
|----------|--------|----------|--------|---|-----|----------|--------|----------|---------------------|--|
| Δ dalton | mass   | Δ dalton | mass   |   | seq | Δ dalton | mass   | Δ dalton | mass                |  |
|          | 101.07 |          | 129.07 | 1 | Q   | 8        |        |          |                     |  |
| -0.011   | 214.16 | -0.082   | 242.15 | 2 | L   | 7        | 950.52 |          | 950.52              |  |
|          | 315.2  |          | 343.2  | 3 | T   | 6        | 837.44 | +0.0459  | 419.22              |  |
|          | 462.27 |          | 490.27 | 4 | F   | 5        | 736.39 | +0.0743  | 736.39              |  |
|          | 591.31 |          | 619.31 | 5 | E   | 4        | 589.32 | +0.0464  | 589.32              |  |
|          | 720.36 |          | 748.35 | 6 | E   | 3        | 460.28 | -0.001   | 460.28              |  |
|          | 833.44 |          | 861.44 | 7 | I   | 2        | 331.23 |          | 331.23              |  |
|          | 904.48 |          | 932.47 | 8 | A   | 1        | 218.15 | +0.073   | 218.15              |  |
|          |        |          |        | 9 | K   | 0        | 147.11 |          | 147.11              |  |



Scan number 4517 Raw file LNCAP\_Silac\_23F10\_set2\_03  
 Method ITMS; CID Pepti... 219.03

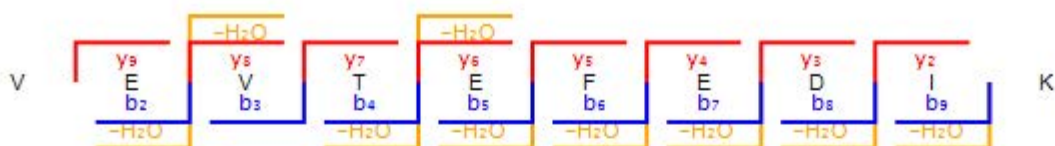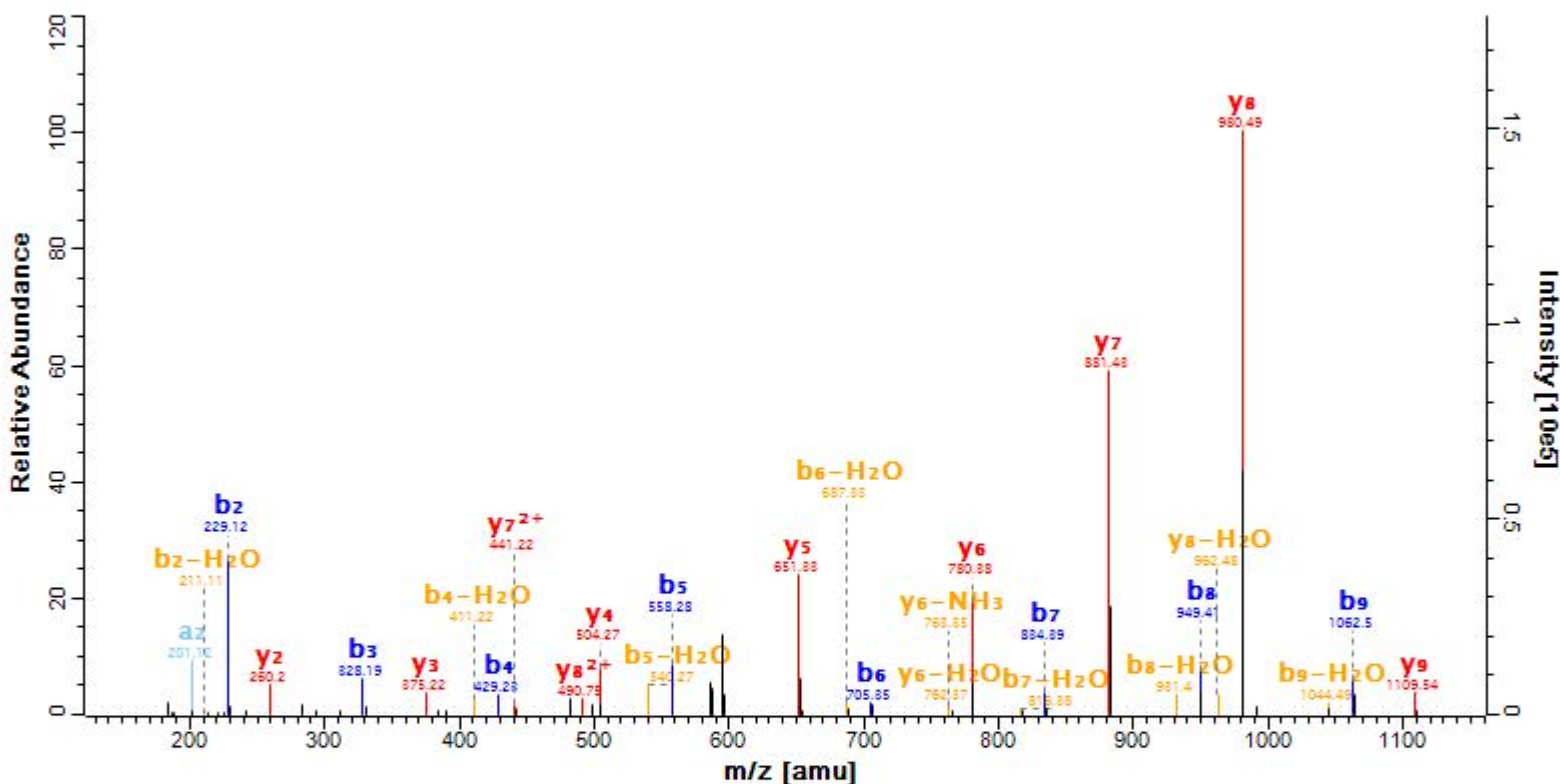

### precursor information

|                   |                 |
|-------------------|-----------------|
| Mass:             | 1207.59699      |
| m/z:              | 604.80577       |
| Charge:           | 2+              |
| Retentiontime:    | 27.768495559692 |
| Score:            | 219.0326        |
| Mass Error [ppm]: | -0.20174        |
| PEP:              | 3.4357E-19      |
| Precursor Type:   | MULTI           |

|                       |             |
|-----------------------|-------------|
| Annotation:           | 8 of 10     |
| AminoAcids Coverage:  | 80 %        |
| Intensity Coverage:   | 70 %        |
| Peak Coverage:        | 35 %        |
| Protein Localisation: | 110 ... 119 |

| a ion    |        | b ion    |        |    |     |   | y ion    |         | y <sup>2+</sup> ion |         |
|----------|--------|----------|--------|----|-----|---|----------|---------|---------------------|---------|
| Δ dalton | mass   | Δ dalton | mass   |    | seq |   | Δ dalton | mass    | Δ dalton            | mass    |
|          | 72.081 |          | 100.08 | 1  | V   | 9 |          |         |                     |         |
| -0.035   | 201.12 | -0.036   | 229.12 | 2  | E   | 8 | 1109.5   | -0.07   | 1109.5              |         |
|          | 300.19 | -0.067   | 328.19 | 3  | V   | 7 | 980.49   | -0.004  | 490.75              | +0.2037 |
|          | 401.24 | +0.0673  | 429.23 | 4  | T   | 6 | 881.43   | -0.012  | 441.22              | -0.045  |
|          | 530.28 | -0.003   | 558.28 | 5  | E   | 5 | 780.38   | +0.0296 | 780.38              |         |
|          | 677.35 | -0.038   | 705.35 | 6  | F   | 4 | 651.33   | +0.0097 | 651.33              |         |
|          | 806.39 | -0.037   | 834.39 | 7  | E   | 3 | 504.27   | +0.0123 | 504.27              |         |
|          | 921.42 | -0.042   | 949.41 | 8  | D   | 2 | 375.22   | +0.0945 | 375.22              |         |
|          | 1034.5 | -0.123   | 1062.5 | 9  | I   | 1 | 260.2    | -0.018  | 260.2               |         |
|          |        |          |        | 10 | K   | 0 | 147.11   |         | 147.11              |         |

Scan number 4671 Raw file LNCAP\_Silac\_23F10\_set2\_03  
 Method ITMS; CID Pepti... 121.9

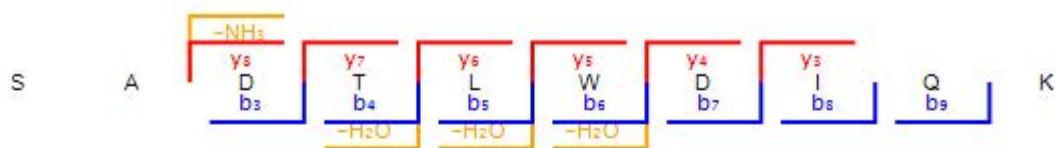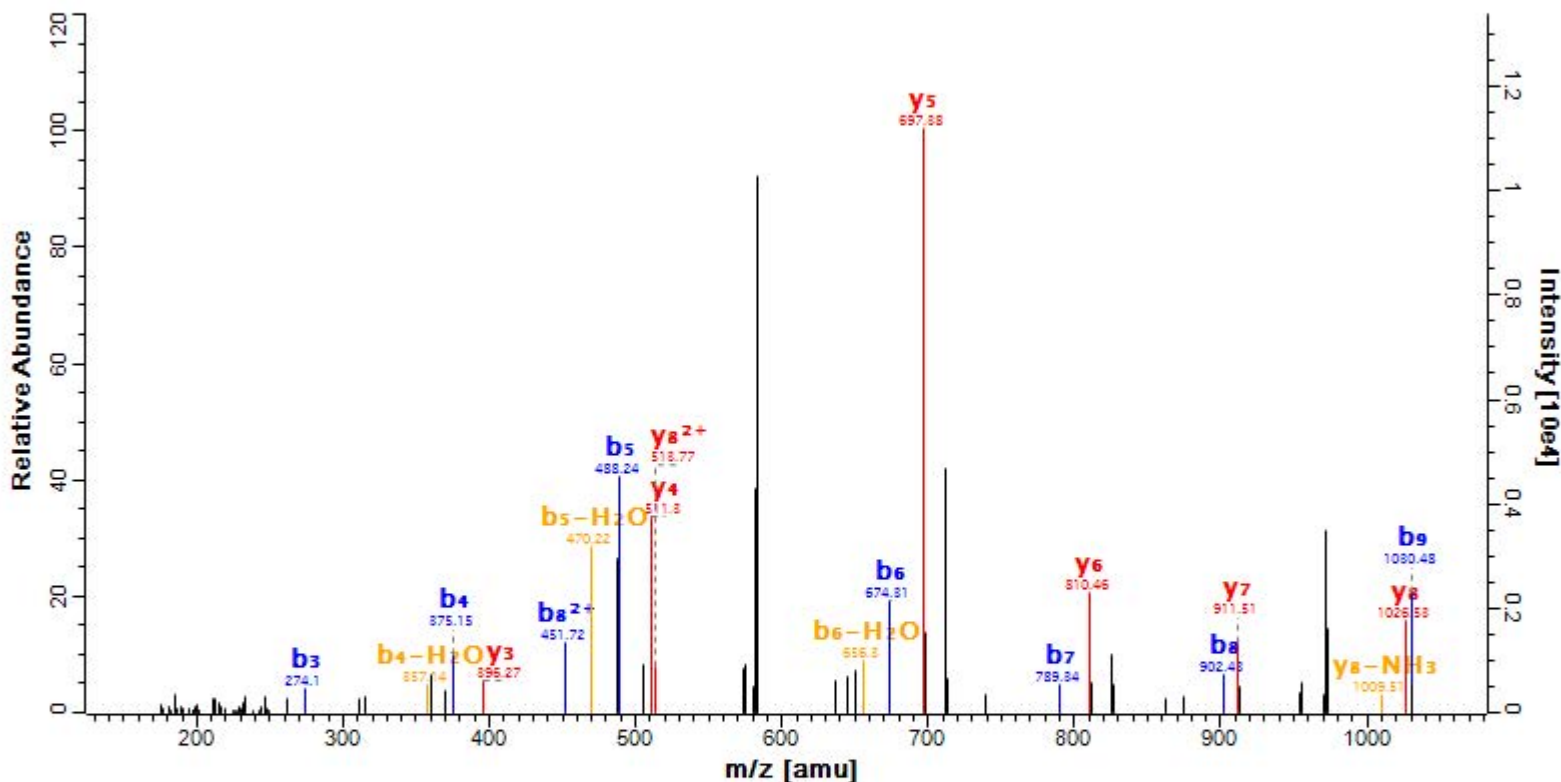

#### precursor information

|                   |                 |
|-------------------|-----------------|
| Mass:             | 1175.58282      |
| m/z:              | 588.79869       |
| Charge:           | 2+              |
| Retentiontime:    | 28.493818283081 |
| Score:            | 121.8986        |
| Mass Error [ppm]: | 0.4793          |
| PEP:              | 0.00027463      |
| Precursor Type:   | MULTI           |

|                       |             |
|-----------------------|-------------|
| Annotation:           | 7 of 10     |
| AminoAcids Coverage:  | 70 %        |
| Intensity Coverage:   | 46 %        |
| Peak Coverage:        | 21 %        |
| Protein Localisation: | 320 ... 329 |

| b <sup>2+</sup> ion |        | b ion    |        | seq |   |   | y ion    |         | y <sup>2+</sup> ion |        |
|---------------------|--------|----------|--------|-----|---|---|----------|---------|---------------------|--------|
| Δ dalton            | mass   | Δ dalton | mass   |     |   |   | Δ dalton | mass    | Δ dalton            | mass   |
|                     | 88.039 |          | 88.039 | 1   | S | 9 |          |         |                     |        |
|                     | 159.08 |          | 159.08 | 2   | A | 8 | 1097.6   |         | 1097.6              |        |
|                     | 274.1  | -0.115   | 274.1  | 3   | D | 7 | 1026.5   | -0.031  | 513.77              | -0.049 |
|                     | 375.15 | +0.0315  | 375.15 | 4   | T | 6 | 911.51   | +0.0734 | 911.51              |        |
|                     | 488.24 | +0.0042  | 488.24 | 5   | L | 5 | 810.46   | +0.0948 | 810.46              |        |
|                     | 674.31 | -0.087   | 674.31 | 6   | W | 4 | 697.38   | +0.0047 | 697.38              |        |
|                     | 789.34 | +0.014   | 789.34 | 7   | D | 3 | 511.3    | +0.0267 | 511.3               |        |
| +0.3953             | 451.72 | +0.0653  | 451.72 | 8   | I | 2 | 396.27   | +0.1516 | 396.27              |        |
|                     | 1030.5 | -0.112   | 1030.5 | 9   | Q | 1 | 283.19   |         | 283.19              |        |
|                     |        |          |        | 10  | K | 0 | 155.13   |         | 155.13              |        |

Scan number 482 Raw file LNCAP\_Silac\_23F10\_set2\_03  
 Method ITMS; CID Pepti... 167.18

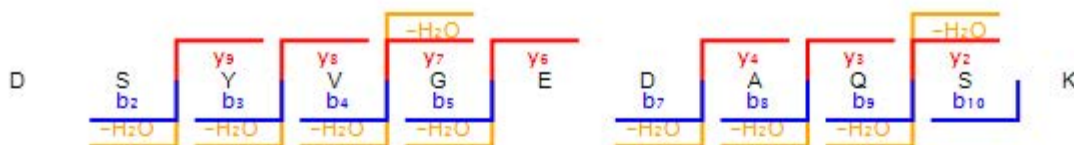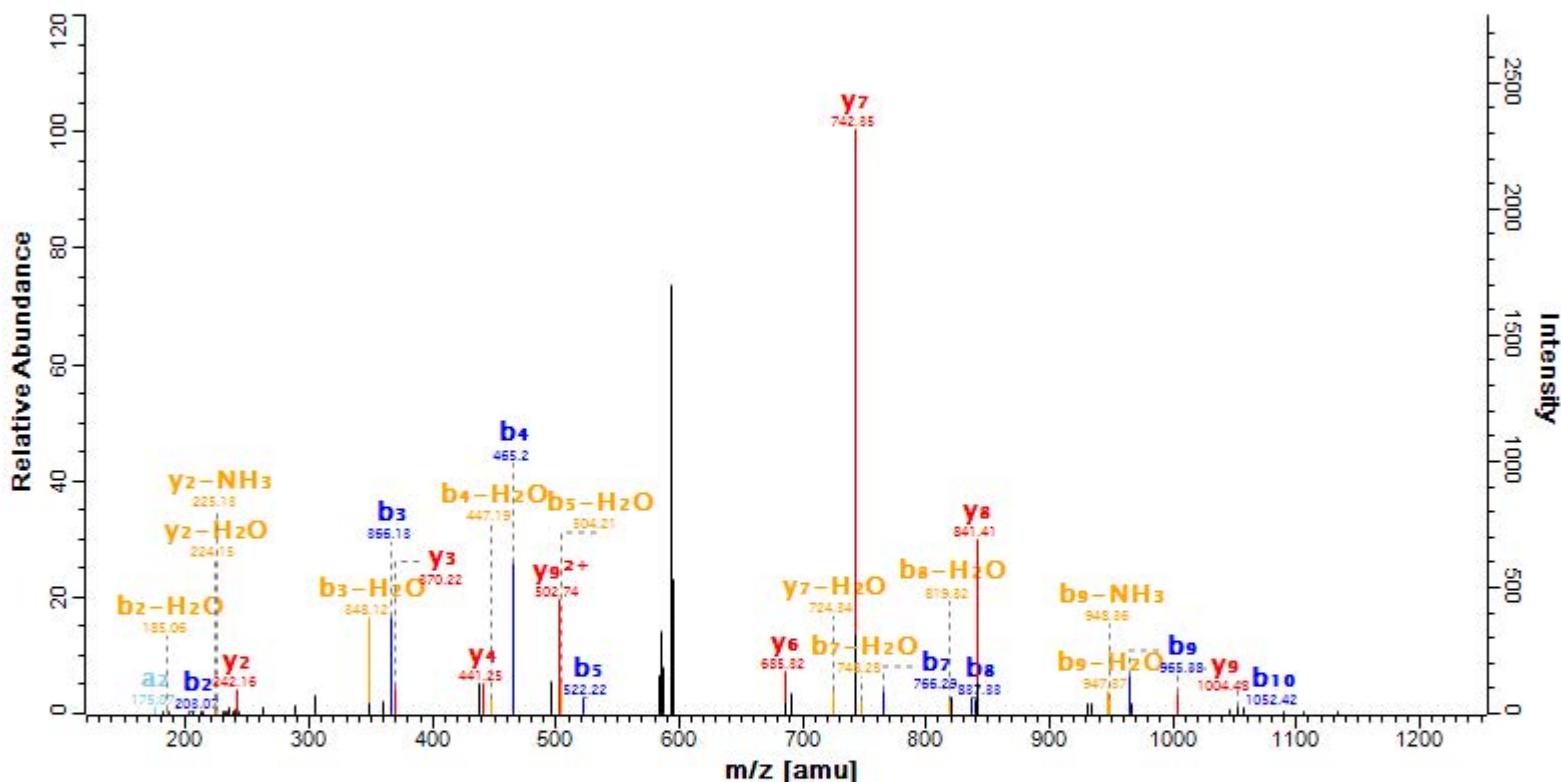

#### precursor information

|                   |                 |
|-------------------|-----------------|
| Mass:             | 1197.51515      |
| m/z:              | 599.76485       |
| Charge:           | 2+              |
| Retentiontime:    | 7.8564882278442 |
| Score:            | 167.1786        |
| Mass Error [ppm]: | 0.15619         |
| PEP:              | 2.1811E-07      |
| Precursor Type:   | MULTI           |

#### general information

|                       |             |
|-----------------------|-------------|
| Annotation:           | 9 of 11     |
| AminoAcids Coverage:  | 82 %        |
| Intensity Coverage:   | 58 %        |
| Peak Coverage:        | 28 %        |
| Protein Localisation: | 240 ... 250 |

| a ion    |        | b ion    |        |    |     |          | y ion  |          | y <sup>2+</sup> ion |  |
|----------|--------|----------|--------|----|-----|----------|--------|----------|---------------------|--|
| Δ dalton | mass   | Δ dalton | mass   |    | seq | Δ dalton | mass   | Δ dalton | mass                |  |
|          | 88.039 |          | 116.03 | 1  | D   | 10       |        |          |                     |  |
| +0.1686  | 175.07 | -0.155   | 203.07 | 2  | S   | 9        | 1091.5 |          | 1091.5              |  |
|          | 338.13 | +0.0015  | 366.13 | 3  | Y   | 8        | 1004.5 | -0.074   | 502.74              |  |
|          | 437.2  | -0.032   | 465.2  | 4  | V   | 7        | 841.41 | +0.0294  | 841.41              |  |
|          | 494.22 | +0.0074  | 522.22 | 5  | G   | 6        | 742.35 | +0.0104  | 742.35              |  |
|          | 623.27 |          | 651.26 | 6  | E   | 5        | 685.32 | -0.064   | 685.32              |  |
|          | 738.29 | -0.032   | 766.29 | 7  | D   | 4        | 556.28 |          | 556.28              |  |
|          | 809.33 | +0.1078  | 837.33 | 8  | A   | 3        | 441.25 | +0.0099  | 441.25              |  |
|          | 937.39 | -0.133   | 965.38 | 9  | Q   | 2        | 370.22 | +0.1315  | 370.22              |  |
|          | 1024.4 | -0.008   | 1052.4 | 10 | S   | 1        | 242.16 | +0.0309  | 242.16              |  |
|          |        |          |        | 11 | K   | 0        | 155.13 |          | 155.13              |  |

Scan number 4886 Raw file LNCAP\_Silac\_23F10\_set2\_03  
 Method ITMS; CID Pepti... 160.53

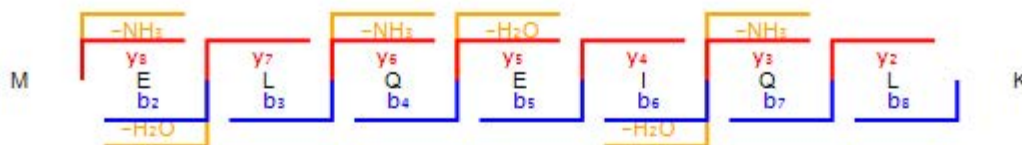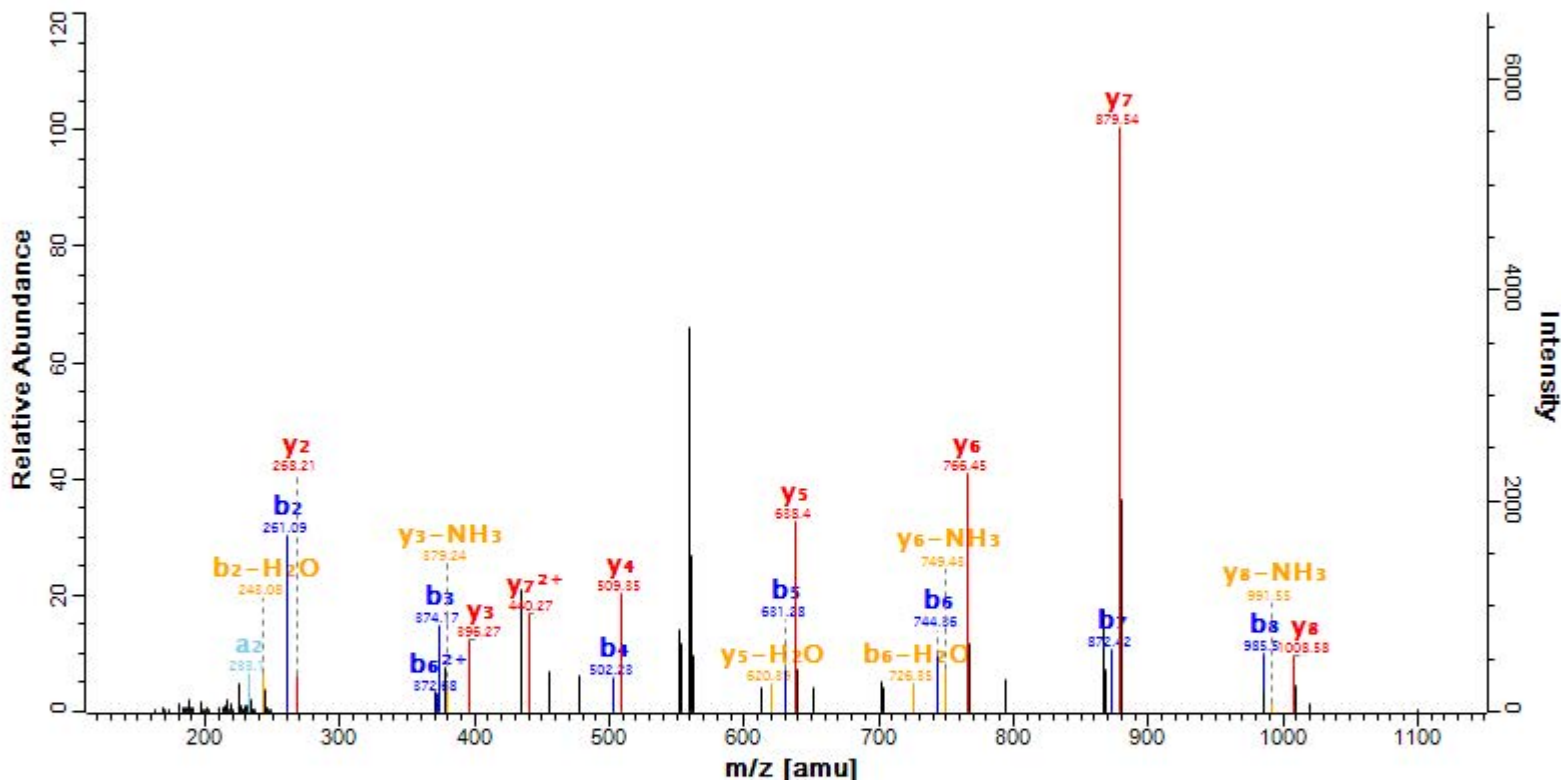

#### precursor information

|                       |                 |
|-----------------------|-----------------|
| Mass:                 | 1138.61489      |
| m/z:                  | 570.31472       |
| Charge:               | 2+              |
| Retention time:       | 29.493478775024 |
| Score:                | 160.5311        |
| Mass Error [ppm]:     | 0.12851         |
| PEP:                  | 2.1299E-15      |
| Precursor Type:       | ISO             |
| Annotation:           | 7 of 9          |
| AminoAcids Coverage:  | 78 %            |
| Intensity Coverage:   | 52 %            |
| Peak Coverage:        | 25 %            |
| Protein Localisation: | 105 ... 113     |

| a ion         |               | b <sup>2+</sup> ion |               | b ion |     | y ion         |               | y <sup>2+</sup> ion |        |
|---------------|---------------|---------------------|---------------|-------|-----|---------------|---------------|---------------------|--------|
| Δ dalton mass | Δ dalton mass | Δ dalton mass       | Δ dalton mass | seq   | seq | Δ dalton mass | Δ dalton mass | seq                 | seq    |
| 104.1         | 132           | 132                 | 132           | 1     | M   | 8             |               |                     |        |
| +0.083233.1   | 261.1         | -0.03 261.1         | 261.1         | 2     | E   | 7             | 1009          | -0.01 1009          |        |
| 346.2         | 374.2         | +0.029374.2         | 374.2         | 3     | L   | 6             | 879.5         | -0.02 440.3         | +0.083 |
| 474.2         | 502.2         | -0.02 502.2         | 502.2         | 4     | Q   | 5             | 766.5         | +0.047766.5         |        |
| 603.3         | 631.3         | +0.038631.3         | 631.3         | 5     | E   | 4             | 638.4         | +0.005638.4         |        |
| 716.4         | -0.18 372.7   | -0.18 744.4         | 744.4         | 6     | I   | 3             | 509.4         | +0.132509.4         |        |
| 844.4         | 872.4         | -0.05 872.4         | 872.4         | 7     | Q   | 2             | 396.3         | +0.094396.3         |        |
| 957.5         | 985.5         | -0.02 985.5         | 985.5         | 8     | L   | 1             | 268.2         | +0.08268.2          |        |
|               |               |                     |               | 9     | K   | 0             | 155.1         | 155.1               |        |

Scan number 5026 Raw file LNCAP\_Silac\_23F10\_set2\_03  
 Method ITMS; CID Pepti... 136.5

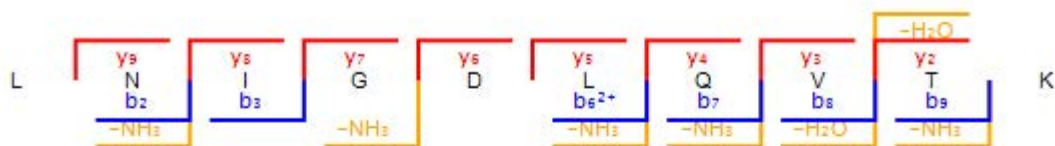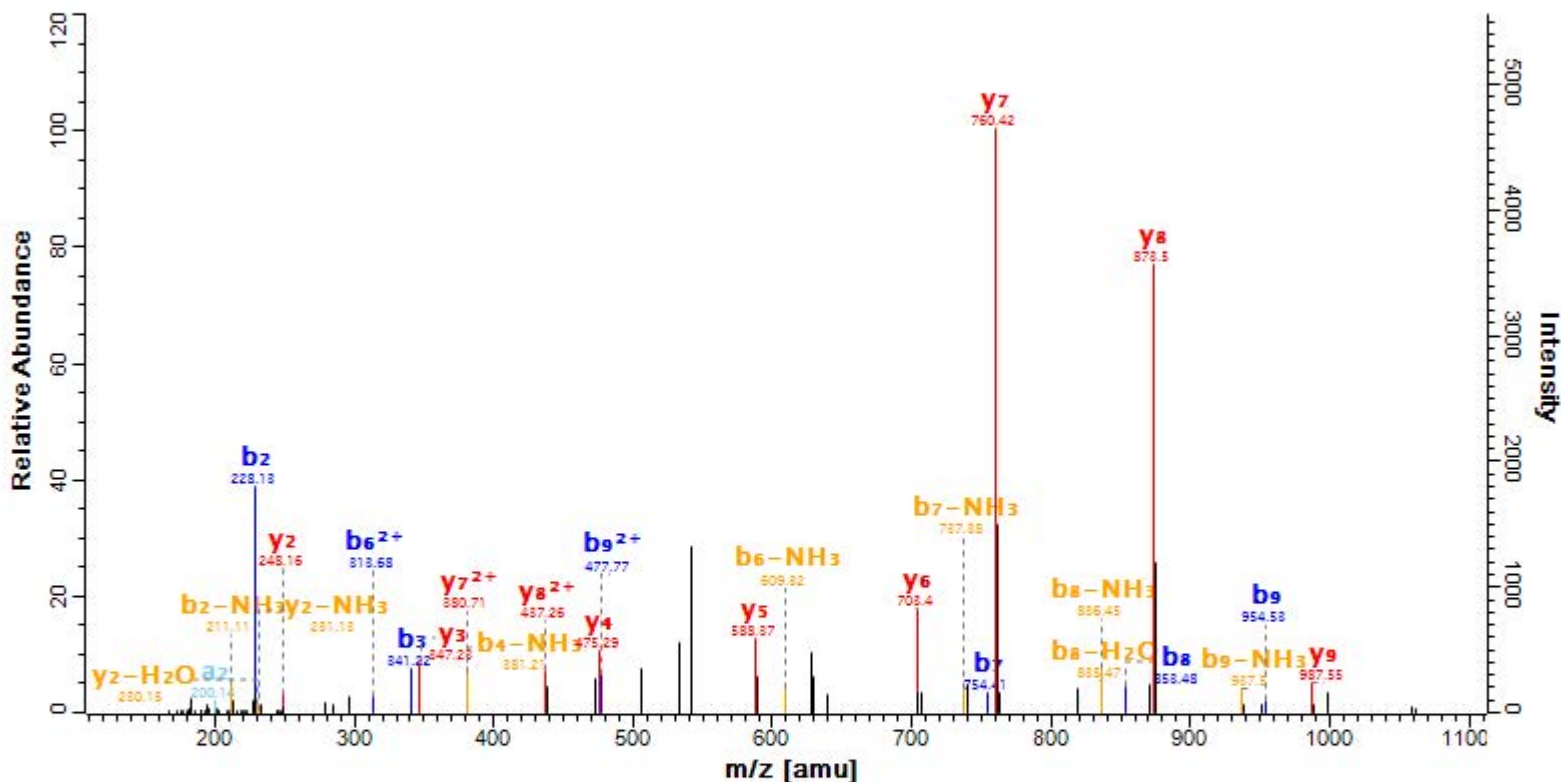

### precursor information

|                   |                 |
|-------------------|-----------------|
| Mass:             | 1099.62345      |
| m/z:              | 550.819         |
| Charge:           | 2+              |
| Retentiontime:    | 30.168365478515 |
| Score:            | 136.5002        |
| Mass Error [ppm]: | -0.25326        |
| PEP:              | 0.00021993      |
| Precursor Type:   | MULTI           |

|                       |             |
|-----------------------|-------------|
| Annotation:           | 8 of 10     |
| AminoAcids Coverage:  | 80 %        |
| Intensity Coverage:   | 59 %        |
| Peak Coverage:        | 28 %        |
| Protein Localisation: | 123 ... 132 |

| a ion         |               | b <sup>2+</sup> ion |               | b ion  |               | y ion         |       | y <sup>2+</sup> ion |  |
|---------------|---------------|---------------------|---------------|--------|---------------|---------------|-------|---------------------|--|
| Δ dalton mass | Δ dalton mass | Δ dalton mass       | Δ dalton mass | seq    | Δ dalton mass | Δ dalton mass |       |                     |  |
| 86.1          | 114.1         | 114.1               | 114.1         | 1 L 9  |               |               |       |                     |  |
| +0.116200.1   | 228.1         | -0.07 228.1         | 228.1         | 2 N 8  | 987.5         | +0.05 987.5   |       |                     |  |
| 313.2         | 341.2         | +0.072341.2         | 341.2         | 3 I 7  | 873.5         | -0.03 437.3   | -0.09 |                     |  |
| 370.2         | 398.2         | 398.2               | 398.2         | 4 G 6  | 760.4         | +0 380.7      | -0.43 |                     |  |
| 485.3         | 513.3         | 513.3               | 513.3         | 5 D 5  | 703.4         | +0.04 703.4   |       |                     |  |
| 598.4         | -0.45 313.7   | 626.4               | 626.4         | 6 L 4  | 588.4         | +0.01 7588.4  |       |                     |  |
| 726.4         | 754.4         | -0.06 754.4         | 754.4         | 7 Q 3  | 475.3         | +0.08 475.3   |       |                     |  |
| 825.5         | 853.5         | +0.019853.5         | 853.5         | 8 V 2  | 347.2         | -0.07 347.2   |       |                     |  |
| 926.5         | -0.39 477.8   | -0.13 954.5         | 954.5         | 9 T 1  | 248.2         | +0.09 248.2   |       |                     |  |
|               |               |                     |               | 10 K 0 | 147.1         | 147.1         |       |                     |  |

Scan number 5618 Raw file LNCAP\_Silac\_23F10\_set2\_03  
 Method ITMS; CID Pepti... 74.84

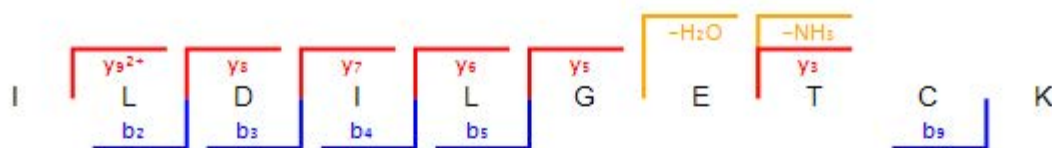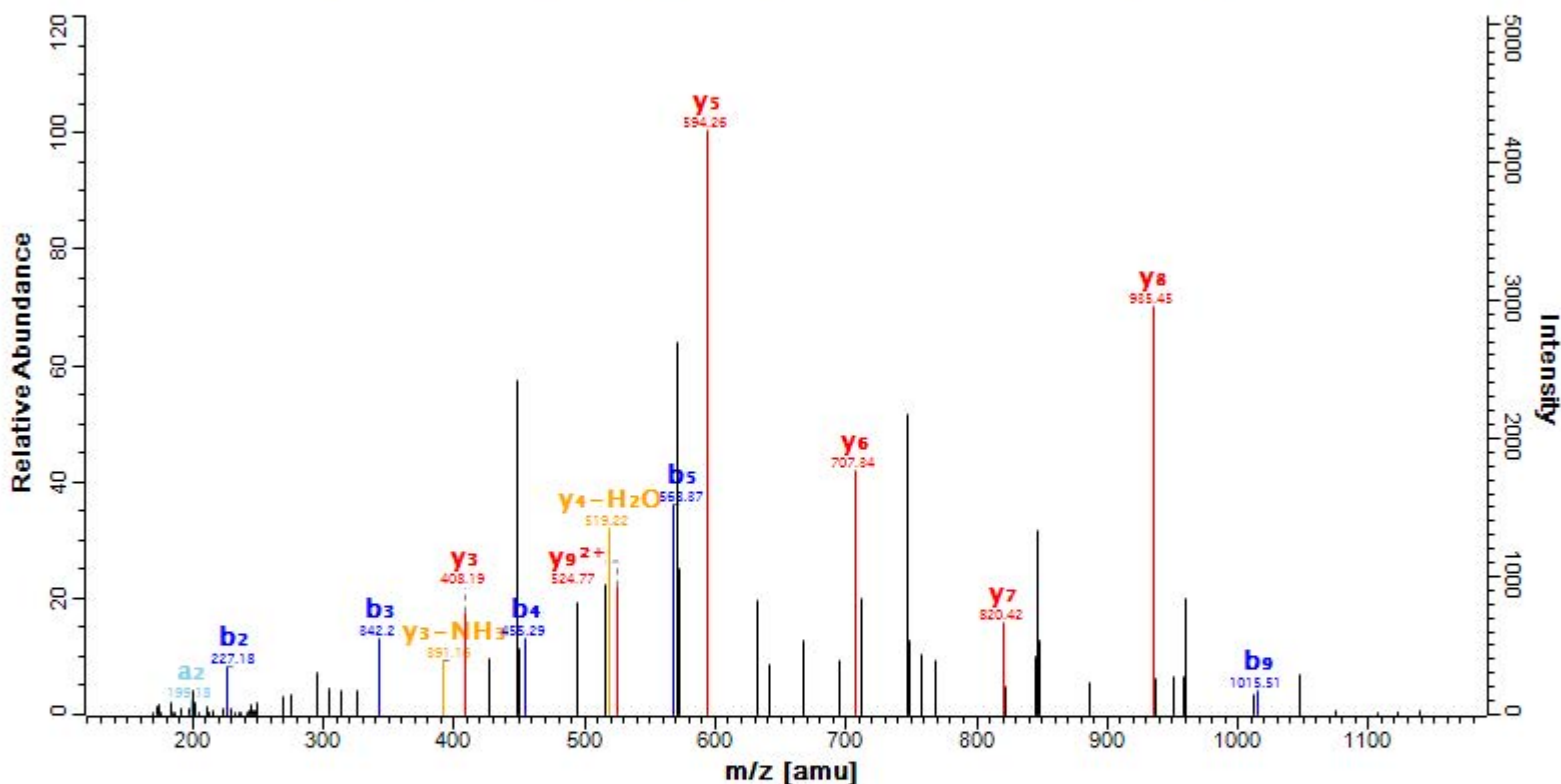

#### precursor information

|                   |                 |
|-------------------|-----------------|
| Mass:             | 1160.61136      |
| m/z:              | 581.31295       |
| Charge:           | 2+              |
| Retentiontime:    | 32.990474700927 |
| Score:            | 74.84109        |
| Mass Error [ppm]: | 0.21179         |
| PEP:              | 0.0077905       |
| Precursor Type:   | MULTI           |

|                       |             |
|-----------------------|-------------|
| Annotation:           | 8 of 10     |
| AminoAcids Coverage:  | 80 %        |
| Intensity Coverage:   | 42 %        |
| Peak Coverage:        | 17 %        |
| Protein Localisation: | 217 ... 226 |

| a ion    |        | b ion    |        | seq |   |   | y ion    |         | y <sup>2+</sup> ion |        |
|----------|--------|----------|--------|-----|---|---|----------|---------|---------------------|--------|
| Δ dalton | mass   | Δ dalton | mass   |     |   |   | Δ dalton | mass    | Δ dalton            | mass   |
|          | 86.096 |          | 114.09 | 1   | I | 9 |          |         |                     |        |
| +0.0018  | 199.18 | -0.014   | 227.18 | 2   | L | 8 | 1048.5   |         | 524.77              | -0.435 |
|          | 314.21 | +0.0185  | 342.2  | 3   | D | 7 | 935.45   | -0.032  | 935.45              |        |
|          | 427.29 | +0.093   | 455.29 | 4   | I | 6 | 820.42   | +0.0926 | 820.42              |        |
|          | 540.38 | -0.042   | 568.37 | 5   | L | 5 | 707.34   | +0.0072 | 707.34              |        |
|          | 597.4  |          | 625.39 | 6   | G | 4 | 594.26   | -0.039  | 594.26              |        |
|          | 726.44 |          | 754.43 | 7   | E | 3 | 537.23   |         | 537.23              |        |
|          | 827.49 |          | 855.48 | 8   | T | 2 | 408.19   | +0.0974 | 408.19              |        |
|          | 987.52 | -0.135   | 1015.5 | 9   | C | 1 | 307.14   |         | 307.14              |        |
|          |        |          |        | 10  | K | 0 | 147.11   |         | 147.11              |        |

Scan number 5658 Raw file LNCAP\_Silac\_23F10\_set2\_03  
 Method ITMS; CID Pepti... 165.58

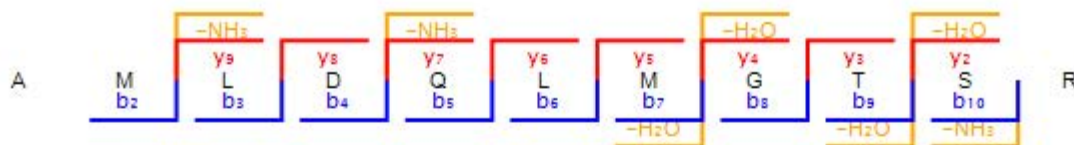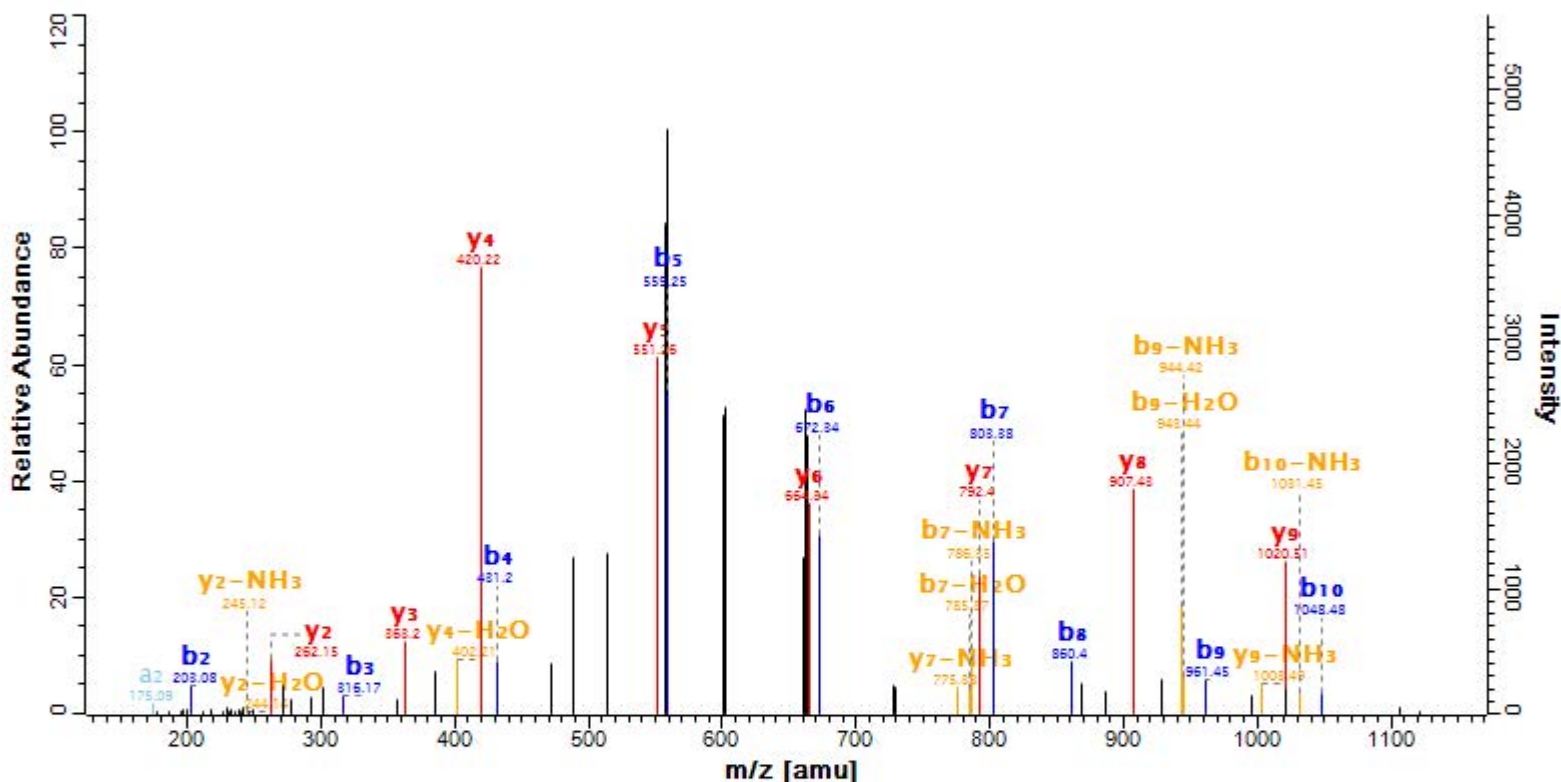

#### precursor information

|                   |                 |
|-------------------|-----------------|
| Mass:             | 1221.58484      |
| m/z:              | 611.7997        |
| Charge:           | 2+              |
| Retentiontime:    | 33.177593231201 |
| Score:            | 165.5837        |
| Mass Error [ppm]: | 0.2183          |
| PEP:              | 5.9201E-07      |
| Precursor Type:   | MULTI           |

#### general information

|                       |          |
|-----------------------|----------|
| Annotation:           | 10 of 11 |
| AminoAcids Coverage:  | 91 %     |
| Intensity Coverage:   | 48 %     |
| Peak Coverage:        | 38 %     |
| Protein Localisation: | 9 ... 19 |

| a ion    |          | b ion     |          | y ion |          |      |          |           |
|----------|----------|-----------|----------|-------|----------|------|----------|-----------|
| Δ dalton | mass     | Δ dalton  | mass     | seq   | Δ dalton | mass |          |           |
|          | 44.04948 | 72.04439  |          | 1     | A        | 10   |          |           |
| -0.06367 | 175.09   | -0.10639  | 203.0849 | 2     | M        | 9    | 1151.555 |           |
|          | 288.174  | +0.028113 | 316.1689 | 3     | L        | 8    | 1020.514 | -0.04038  |
|          | 403.201  | -0.02529  | 431.1959 | 4     | D        | 7    | 907.4302 | +0.006881 |
|          | 531.2595 | +0.069393 | 559.2545 | 5     | Q        | 6    | 792.4032 | +0.061168 |
|          | 644.3436 | +0.055642 | 672.3385 | 6     | L        | 5    | 664.3447 | +0.085077 |
|          | 775.3841 | -0.0366   | 803.379  | 7     | M        | 4    | 551.2606 | +0.028638 |
|          | 832.4056 | +0.018168 | 860.4005 | 8     | G        | 3    | 420.2201 | +0.03946  |
|          | 933.4532 | +0.102387 | 961.4482 | 9     | T        | 2    | 363.1987 | +0.083018 |
|          | 1020.485 | -0.08736  | 1048.48  | 10    | S        | 1    | 262.151  | +0.071889 |
|          |          |           |          | 11    | R        | 0    | 175.119  |           |

Scan number 5944 Raw file LNCAP\_Silac\_23F10\_set2\_03  
 Method ITMS: CID Peptide 180.11

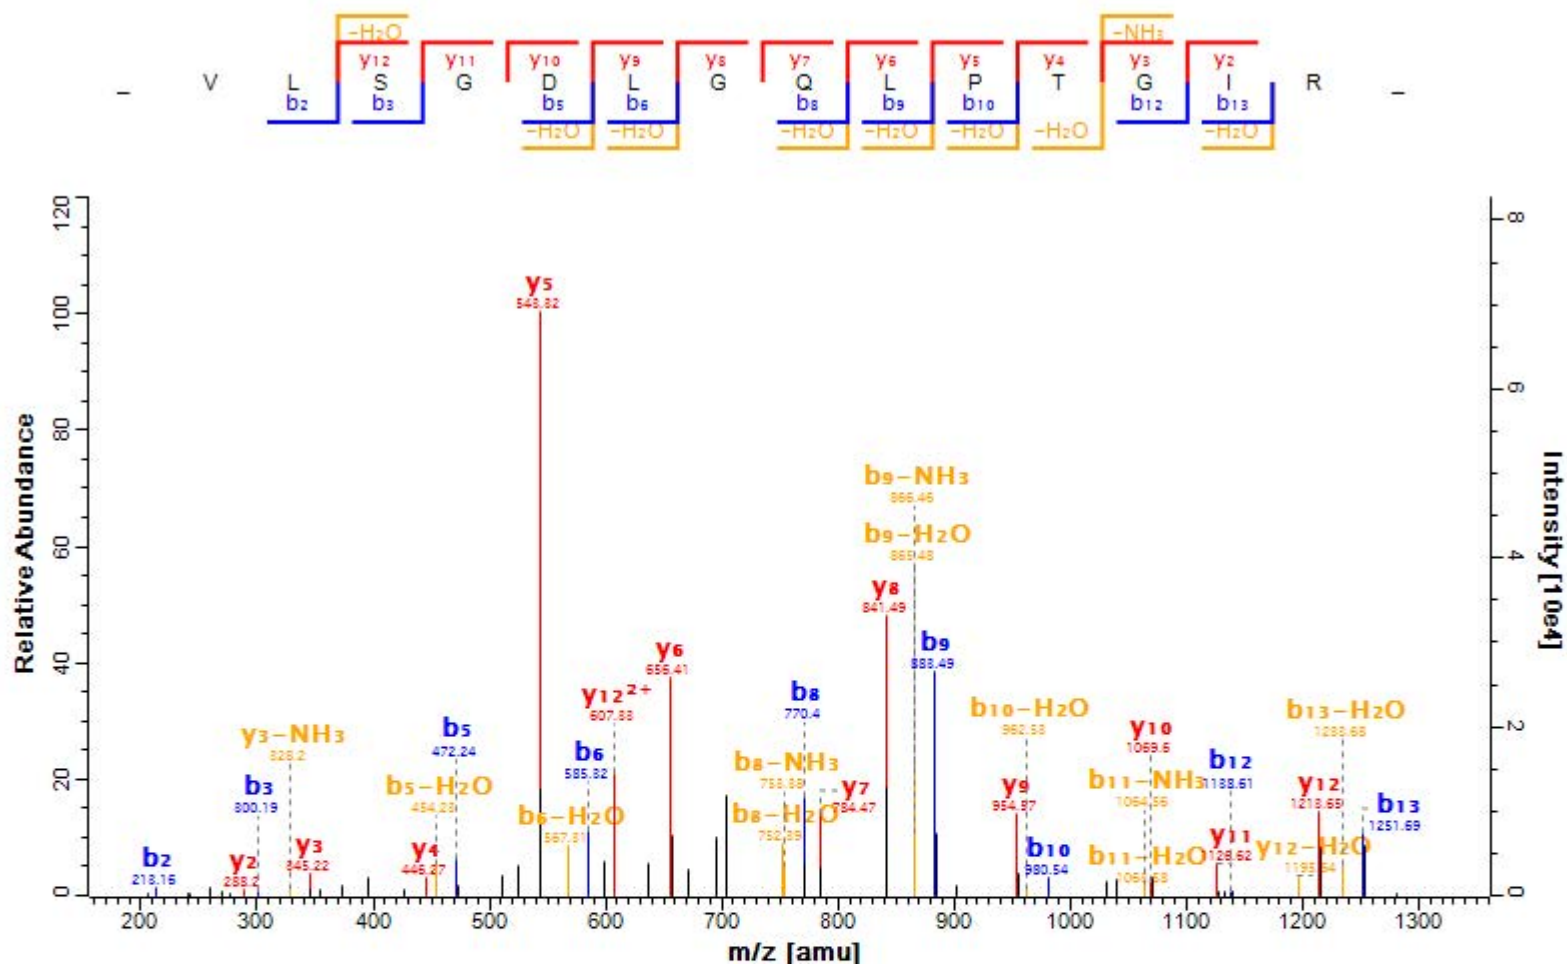

#### precursor information

|                   |                 |
|-------------------|-----------------|
| Mass:             | 1424.79844      |
| m/z:              | 713.40649       |
| Charge:           | 2+              |
| Retentiontime:    | 34.550453186035 |
| Score:            | 180.1071        |
| Mass Error [ppm]: | -0.20472        |
| PEP:              | 6.7433E-14      |
| Precursor Type:   | MULTI           |

#### general information

|                       |           |
|-----------------------|-----------|
| Annotation:           | 12 of 14  |
| AminoAcids Coverage:  | 86 %      |
| Intensity Coverage:   | 72 %      |
| Peak Coverage:        | 45 %      |
| Protein Localisation: | 32 ... 45 |

| b ion     |          |     |   | y ion    |          | y <sup>2+</sup> ion |          |           |
|-----------|----------|-----|---|----------|----------|---------------------|----------|-----------|
| Δ dalton  | mass     | seq |   | Δ dalton | mass     | Δ dalton            | mass     |           |
|           | 100.0757 | 1   | V | 13       |          |                     |          |           |
| -0.04391  | 213.1598 | 2   | L | 12       | 1326.738 |                     | 1326.738 |           |
| +0.251332 | 300.1918 | 3   | S | 11       | 1213.654 | +0.007728           | 607.3304 | +0.119306 |
|           | 357.2132 | 4   | G | 10       | 1126.621 | +0.068199           | 1126.621 |           |
| +0.073653 | 472.2402 | 5   | D | 9        | 1069.6   | -0.08294            | 1069.6   |           |
| -0.07767  | 585.3243 | 6   | L | 8        | 954.5731 | -0.03324            | 954.5731 |           |
|           | 642.3457 | 7   | G | 7        | 841.489  | +0.013902           | 841.489  |           |
| -0.04339  | 770.4043 | 8   | Q | 6        | 784.4676 | +0.012722           | 784.4676 |           |
| -0.06844  | 883.4884 | 9   | L | 5        | 656.409  | -0.0255             | 656.409  |           |
| +0.10878  | 980.5411 | 10  | P | 4        | 543.3249 | +0.054289           | 543.3249 |           |
|           | 1081.589 | 11  | T | 3        | 446.2722 | +0.133176           | 446.2722 |           |
| +0.048427 | 1138.61  | 12  | G | 2        | 345.2245 | -0.0115             | 345.2245 |           |
| -0.21386  | 1251.694 | 13  | I | 1        | 288.203  | +0.058184           | 288.203  |           |
|           |          | 14  | R | 0        | 175.119  |                     | 175.119  |           |



Scan number 5987 Raw file LNCAP\_Silac\_23F10\_set2\_03  
 Method ITMS; CID Pepti... 104.17

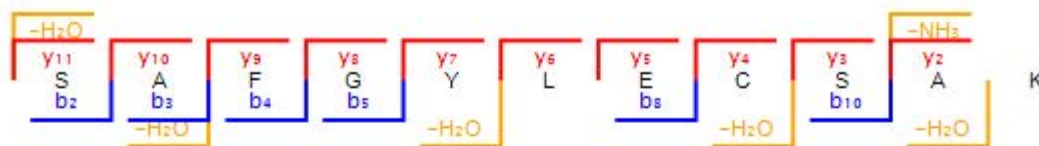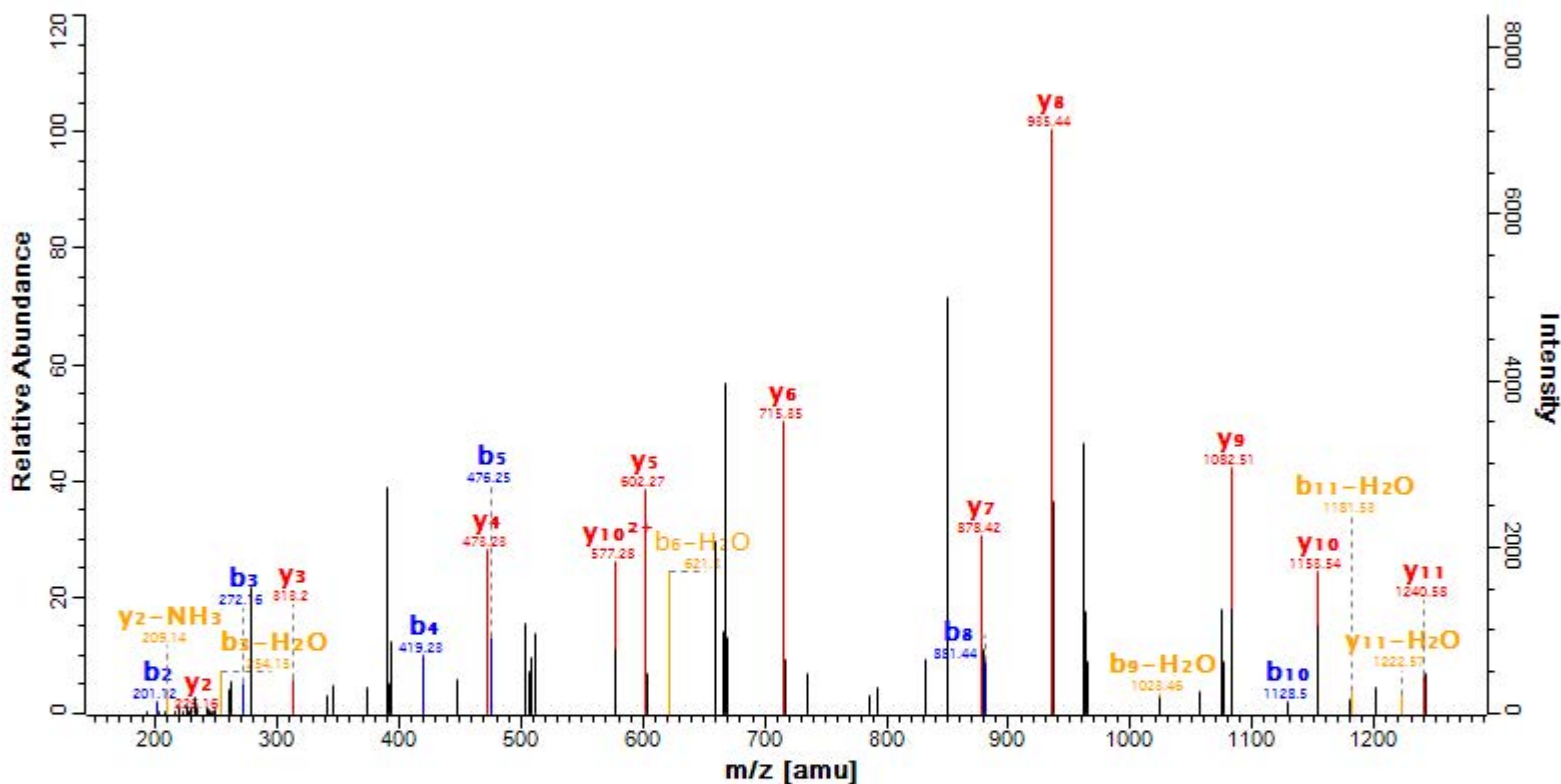

#### precursor information

|                   |                 |
|-------------------|-----------------|
| Mass:             | 1344.63927      |
| m/z:              | 673.32691       |
| Charge:           | 2+              |
| Retentiontime:    | 34.757106781005 |
| Score:            | 104.1745        |
| Mass Error [ppm]: | 0.65089         |
| PEP:              | 7.1559E-05      |
| Precursor Type:   | MULTI           |

#### general information

|                       |             |
|-----------------------|-------------|
| Annotation:           | 10 of 12    |
| AminoAcids Coverage:  | 83 %        |
| Intensity Coverage:   | 40 %        |
| Peak Coverage:        | 27 %        |
| Protein Localisation: | 151 ... 162 |

| b ion     |          |    |     |    | y ion    |           | y <sup>2+</sup> ion |          |
|-----------|----------|----|-----|----|----------|-----------|---------------------|----------|
| Δ dalton  | mass     |    | seq |    | Δ dalton | mass      | Δ dalton            | mass     |
|           | 114.0913 | 1  | I   | 11 |          |           |                     |          |
| +0.006544 | 201.1234 | 2  | S   | 10 | 1240.576 | -0.13036  | 1240.576            |          |
| +0.037851 | 272.1605 | 3  | A   | 9  | 1153.544 | -0.12409  | 577.2755            | -0.11103 |
| -0.10011  | 419.2289 | 4  | F   | 8  | 1082.507 | -0.11518  | 1082.507            |          |
| +0.08985  | 476.2504 | 5  | G   | 7  | 935.4382 | -0.00971  | 935.4382            |          |
|           | 639.3137 | 6  | Y   | 6  | 878.4168 | -0.004    | 878.4168            |          |
|           | 752.3978 | 7  | L   | 5  | 715.3535 | +0.016239 | 715.3535            |          |
| -0.13029  | 881.4403 | 8  | E   | 4  | 602.2694 | +0.005516 | 602.2694            |          |
|           | 1041.471 | 9  | C   | 3  | 473.2268 | -0.12572  | 473.2268            |          |
| +0.141265 | 1128.503 | 10 | S   | 2  | 313.1961 | +0.027366 | 313.1961            |          |
|           | 1199.54  | 11 | A   | 1  | 226.1641 | +0.025977 | 226.1641            |          |
|           |          | 12 | K   | 0  | 155.127  |           | 155.127             |          |

Scan number 647 Raw file LNCAP\_Silac\_23F10\_set2\_03  
 Method ITMS; CID Pepti... 94.47

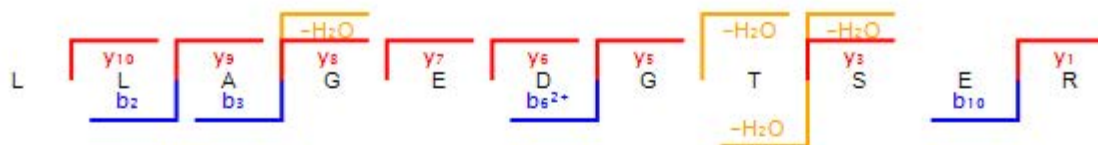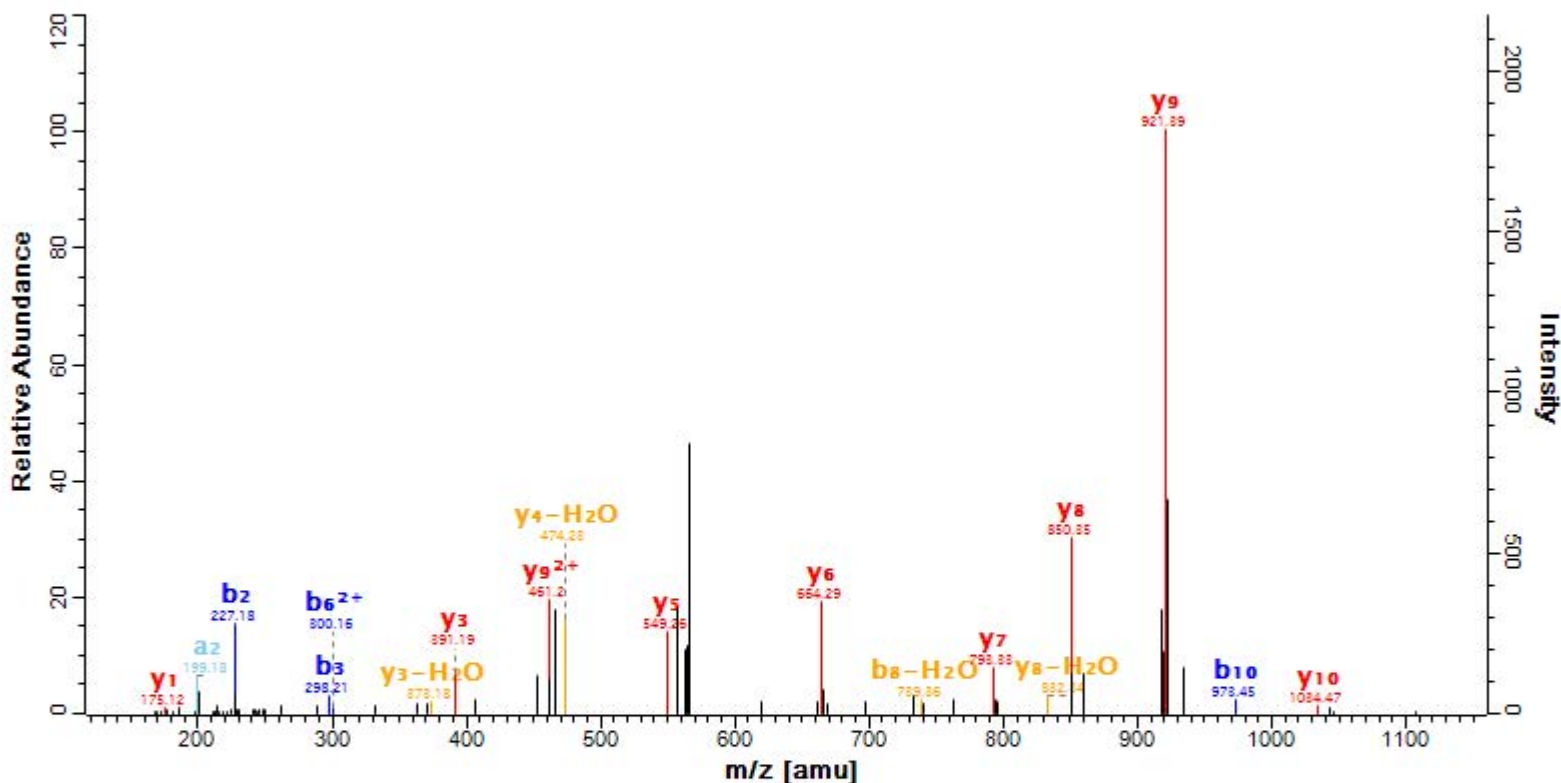

#### precursor information

|                   |                 |
|-------------------|-----------------|
| Mass:             | 1146.55159      |
| m/z:              | 574.28307       |
| Charge:           | 2+              |
| Retentiontime:    | 8.9340362548828 |
| Score:            | 94.46532        |
| Mass Error [ppm]: | -0.082438       |
| PEP:              | 0.0013015       |
| Precursor Type:   | MULTI           |

#### general information

|                       |             |
|-----------------------|-------------|
| Annotation:           | 10 of 11    |
| AminoAcids Coverage:  | 91 %        |
| Intensity Coverage:   | 49 %        |
| Peak Coverage:        | 19 %        |
| Protein Localisation: | 395 ... 405 |

| a ion         |               | b <sup>2+</sup> ion |               | b ion |               | y ion         |               | y <sup>2+</sup> ion |  |
|---------------|---------------|---------------------|---------------|-------|---------------|---------------|---------------|---------------------|--|
| Δ dalton mass | Δ dalton mass | Δ dalton mass       | Δ dalton mass | seq   | Δ dalton mass | Δ dalton mass | Δ dalton mass | Δ dalton mass       |  |
| 86.1          | 114.1         | 114.1               | 114.1         | 1     | L             | 10            |               |                     |  |
| -0.01         | 199.2         | 227.2               | -0.02         | 2     | L             | 9             | 1034          | +0.2621034          |  |
| 270.2         | 298.2         | +0.047298.2         | 3             | A     | 8             | 921.4         | -0.06         | 461.2               |  |
| 327.2         | 355.2         | 355.2               | 4             | G     | 7             | 850.4         | +0.058850.4   |                     |  |
| 456.3         | 484.3         | 484.3               | 5             | E     | 6             | 793.3         | +0.003793.3   |                     |  |
| 571.3         | -0.02         | 300.2               | 599.3         | 6     | D             | 5             | 664.3         | +0.045664.3         |  |
| 628.3         | 656.3         | 656.3               | 7             | G     | 4             | 549.3         | +0.07         | 549.3               |  |
| 729.4         | 757.4         | 757.4               | 8             | T     | 3             | 492.2         |               | 492.2               |  |
| 816.4         | 844.4         | 844.4               | 9             | S     | 2             | 391.2         | -0.02         | 391.2               |  |
| 945.5         | 973.4         | -0.05               | 973.4         | 10    | E             | 1             | 304.2         | 304.2               |  |
|               |               |                     |               | 11    | R             | 0             | 175.1         | +0.062175.1         |  |

Scan number 7713 Raw file LNCAP\_Silac\_23F10\_set2\_03  
 Method ITMS: CID Pepti... 196.18

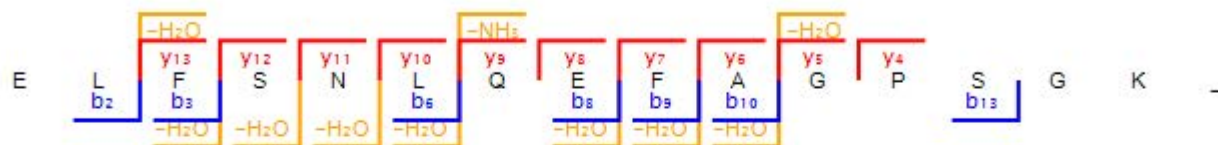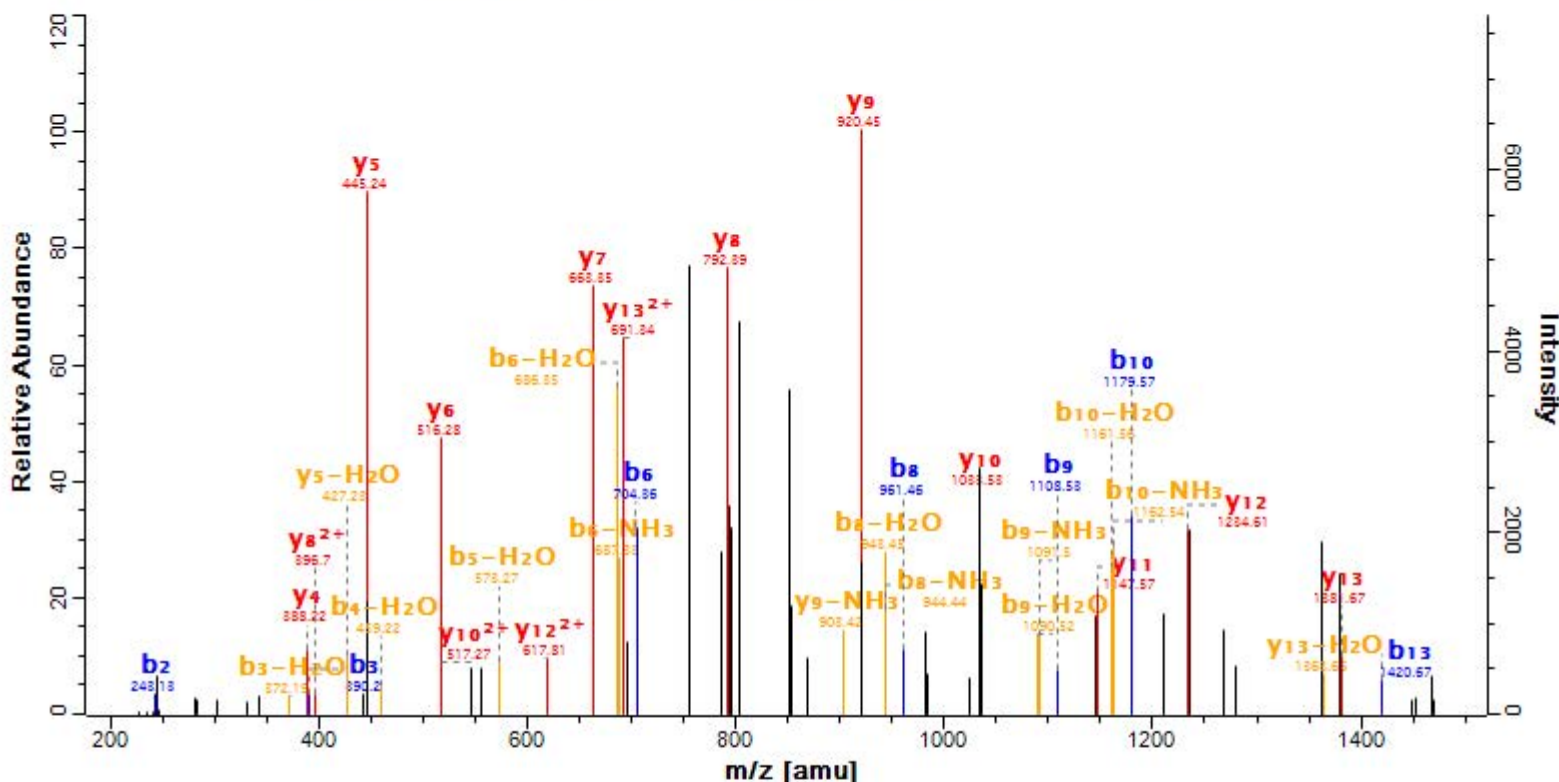

precursor information

|                   |                 |
|-------------------|-----------------|
| Mass:             | 1622.79445      |
| m/z:              | 812.4045        |
| Charge:           | 2+              |
| Retentiontime:    | 43.324489593505 |
| Score:            | 196.1781        |
| Mass Error [ppm]: | 0.2519          |
| PEP:              | 3.5986E-22      |
| Precursor Type:   | MULTI           |

general information

|                       |           |
|-----------------------|-----------|
| Annotation:           | 12 of 15  |
| AminoAcids Coverage:  | 80 %      |
| Intensity Coverage:   | 56 %      |
| Peak Coverage:        | 42 %      |
| Protein Localisation: | 57 ... 71 |

| b ion     |          |     |   | y ion    |          |           | y <sup>2+</sup> ion |           |
|-----------|----------|-----|---|----------|----------|-----------|---------------------|-----------|
| Δ dalton  | mass     | seq |   | Δ dalton | mass     | Δ dalton  | mass                |           |
|           | 130.0499 | 1   | E | 14       |          |           |                     |           |
| +0.146431 | 243.1339 | 2   | L | 13       | 1494.759 | 1494.759  |                     |           |
| -0.12257  | 390.2023 | 3   | F | 12       | 1381.675 | +0.041042 | 691.341             | +0.051734 |
|           | 477.2344 | 4   | S | 11       | 1234.606 | -0.08793  | 617.8068            | +0.330692 |
|           | 591.2773 | 5   | N | 10       | 1147.574 | +0.083135 | 1147.574            |           |
| +0.372092 | 704.3614 | 6   | L | 9        | 1033.531 | +0.027552 | 517.2693            | +0.205694 |
|           | 832.4199 | 7   | Q | 8        | 920.4472 | -0.0569   | 920.4472            |           |
| -0.03731  | 961.4625 | 8   | E | 7        | 792.3886 | +0.050381 | 396.698             | -0.37148  |
| +0.225884 | 1108.531 | 9   | F | 6        | 663.3461 | +0.059283 | 663.3461            |           |
| -0.09626  | 1179.568 | 10  | A | 5        | 516.2776 | +0.10432  | 516.2776            |           |
|           | 1236.59  | 11  | G | 4        | 445.2405 | +0.065812 | 445.2405            |           |
|           | 1333.642 | 12  | P | 3        | 388.2191 | +0.052913 | 388.2191            |           |
| +0.229731 | 1420.674 | 13  | S | 2        | 291.1663 |           | 291.1663            |           |
|           | 1477.696 | 14  | G | 1        | 204.1343 |           | 204.1343            |           |
|           |          | 15  | K | 0        | 147.1128 |           | 147.1128            |           |

Scan number 7763 Raw file LNCAP\_Silac\_23F10\_set2\_03  
 Method ITMS; CID Peptide 264.03

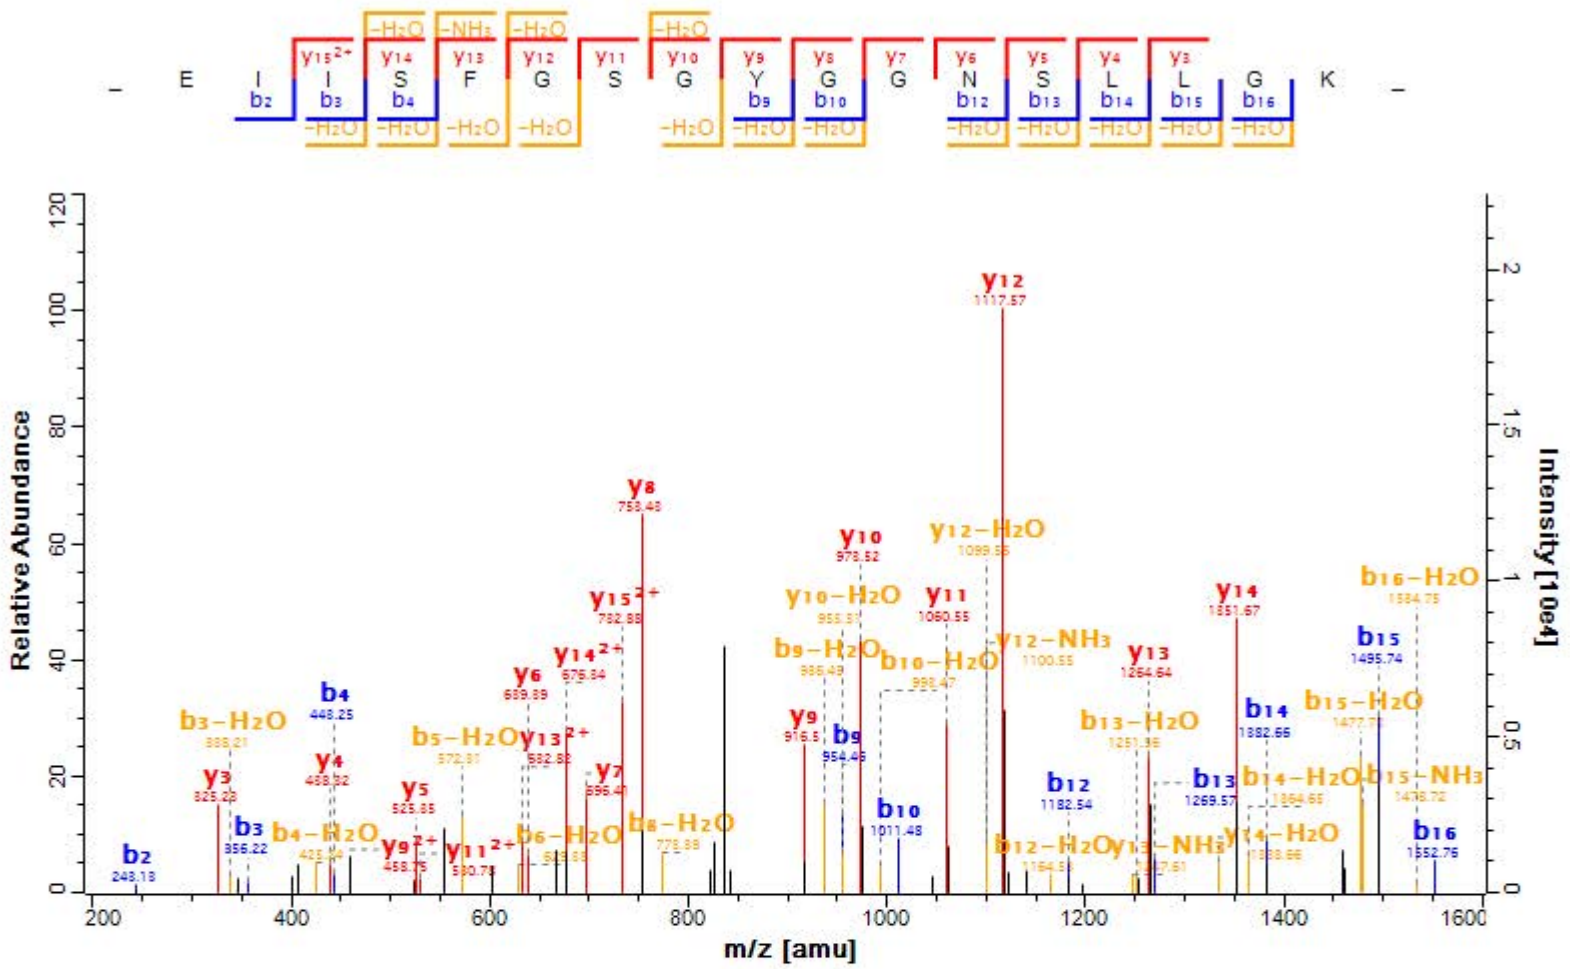

**precursor information**

|                   |                 |
|-------------------|-----------------|
| Mass:             | 1697.86241      |
| m/z:              | 849.93848       |
| Charge:           | 2+              |
| Retentiontime:    | 43.583534240722 |
| Score:            | 264.0251        |
| Mass Error [ppm]: | -0.025645       |
| PEP:              | 1.7246E-69      |
| Precursor Type:   | MULTI           |

**general information**

|                       |             |
|-----------------------|-------------|
| Annotation:           | 15 of 17    |
| AminoAcids Coverage:  | 88 %        |
| Intensity Coverage:   | 70 %        |
| Peak Coverage:        | 57 %        |
| Protein Localisation: | 245 ... 261 |

| b ion     |          |     |   | y ion    |          | y <sup>2+</sup> ion |                    |
|-----------|----------|-----|---|----------|----------|---------------------|--------------------|
| Δ dalton  | mass     | seq |   | Δ dalton | mass     | Δ dalton            | mass               |
|           | 130.0499 | 1   | E | 16       |          |                     |                    |
| -0.08463  | 243.1339 | 2   | I | 15       | 1577.841 |                     | 1577.841           |
| -0.05119  | 356.218  | 3   | I | 14       | 1464.757 |                     | 732.8823 +0.20867  |
| +0.033788 | 443.25   | 4   | S | 13       | 1351.673 | -0.01403            | 676.3402 +0.069977 |
|           | 590.3184 | 5   | F | 12       | 1264.641 | -0.12165            | 632.8242 +0.111992 |
|           | 647.3399 | 6   | G | 11       | 1117.573 | -0.08643            | 1117.573           |
|           | 734.3719 | 7   | S | 10       | 1060.551 | -0.05716            | 530.7793 -0.42028  |
|           | 791.3934 | 8   | G | 9        | 973.5193 | -0.04198            | 973.5193           |
| -0.08948  | 954.4567 | 9   | Y | 8        | 916.4978 | -0.01044            | 458.7525 -0.16221  |
| +0.018211 | 1011.478 | 10  | G | 7        | 753.4345 | +0.027253           | 753.4345           |
|           | 1068.5   | 11  | G | 6        | 696.413  | +0.124522           | 696.413            |
| +0.066796 | 1182.543 | 12  | N | 5        | 639.3916 | +0.066701           | 639.3916           |
| +0.02195  | 1269.575 | 13  | S | 4        | 525.3486 | +0.158579           | 525.3486           |
| -0.1063   | 1382.659 | 14  | L | 3        | 438.3166 | +0.037226           | 438.3166           |
| -0.12152  | 1495.743 | 15  | L | 2        | 325.2325 | +0.010389           | 325.2325           |
| -0.13493  | 1552.764 | 16  | G | 1        | 212.1485 |                     | 212.1485           |
|           |          | 17  | K | 0        | 155.127  |                     | 155.127            |

Scan number 781 Raw file LNCAP\_Silac\_23F10\_set2\_03  
 Method ITMS: CID Pepti... 104.82

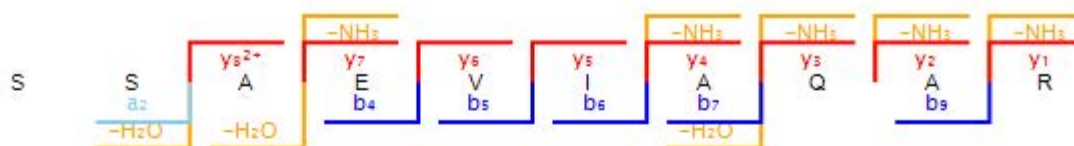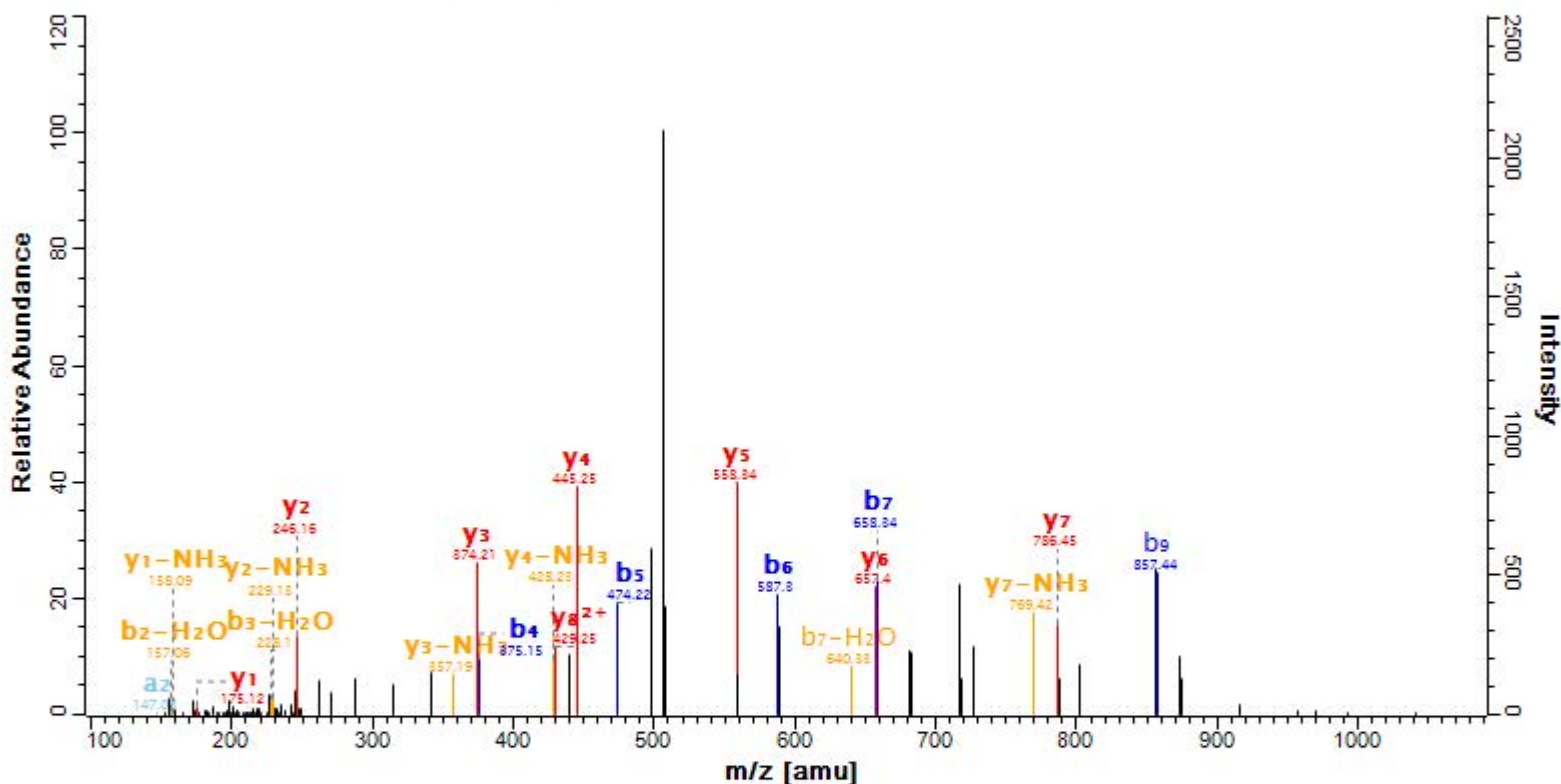

#### precursor information

|                   |                 |
|-------------------|-----------------|
| Mass:             | 1030.54173      |
| m/z:              | 516.27814       |
| Charge:           | 2+              |
| Retentiontime:    | 9.7214536666870 |
| Score:            | 104.8239        |
| Mass Error [ppm]: | 0.97941         |
| PEP:              | 0.00094399      |
| Precursor Type:   | ISO             |

|                       |             |
|-----------------------|-------------|
| Annotation:           | 9 of 10     |
| AminoAcids Coverage:  | 90 %        |
| Intensity Coverage:   | 41 %        |
| Peak Coverage:        | 20 %        |
| Protein Localisation: | 259 ... 268 |

| a ion    |        | b ion    |        |    |     |   | y ion    |         | y <sup>2+</sup> ion |         |
|----------|--------|----------|--------|----|-----|---|----------|---------|---------------------|---------|
| Δ dalton | mass   | Δ dalton | mass   |    | seq |   | Δ dalton | mass    | Δ dalton            | mass    |
|          | 60.044 |          | 88.039 | 1  | S   | 9 |          |         |                     |         |
| -0.093   | 147.08 |          | 175.07 | 2  | S   | 8 | 944.52   |         | 944.52              |         |
|          | 218.11 |          | 246.11 | 3  | A   | 7 | 857.48   |         | 429.25              | +0.3185 |
|          | 347.16 | +0.0804  | 375.15 | 4  | E   | 6 | 786.45   | +0.0399 | 786.45              |         |
|          | 446.22 | +0.0697  | 474.22 | 5  | V   | 5 | 657.4    | -0.021  | 657.4               |         |
|          | 559.31 | +0.0206  | 587.3  | 6  | I   | 4 | 558.34   | +0.1024 | 558.34              |         |
|          | 630.35 | +0.0796  | 658.34 | 7  | A   | 3 | 445.25   | -0.001  | 445.25              |         |
|          | 758.4  |          | 786.4  | 8  | Q   | 2 | 374.21   | -0.015  | 374.21              |         |
|          | 829.44 | -0.049   | 857.44 | 9  | A   | 1 | 246.16   | +0.0941 | 246.16              |         |
|          |        |          |        | 10 | R   | 0 | 175.12   | +0.0258 | 175.12              |         |

Scan number 7847 Raw file LNCAP\_Silac\_23F10\_set2\_03  
 Method ITMS; CID Pepti... 125.53

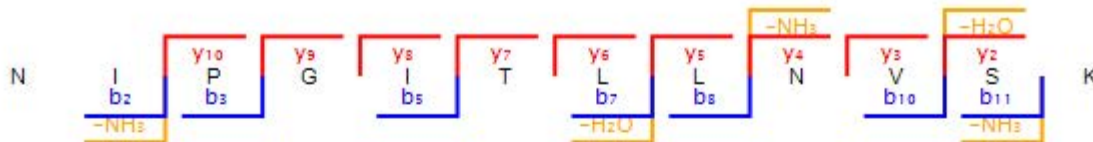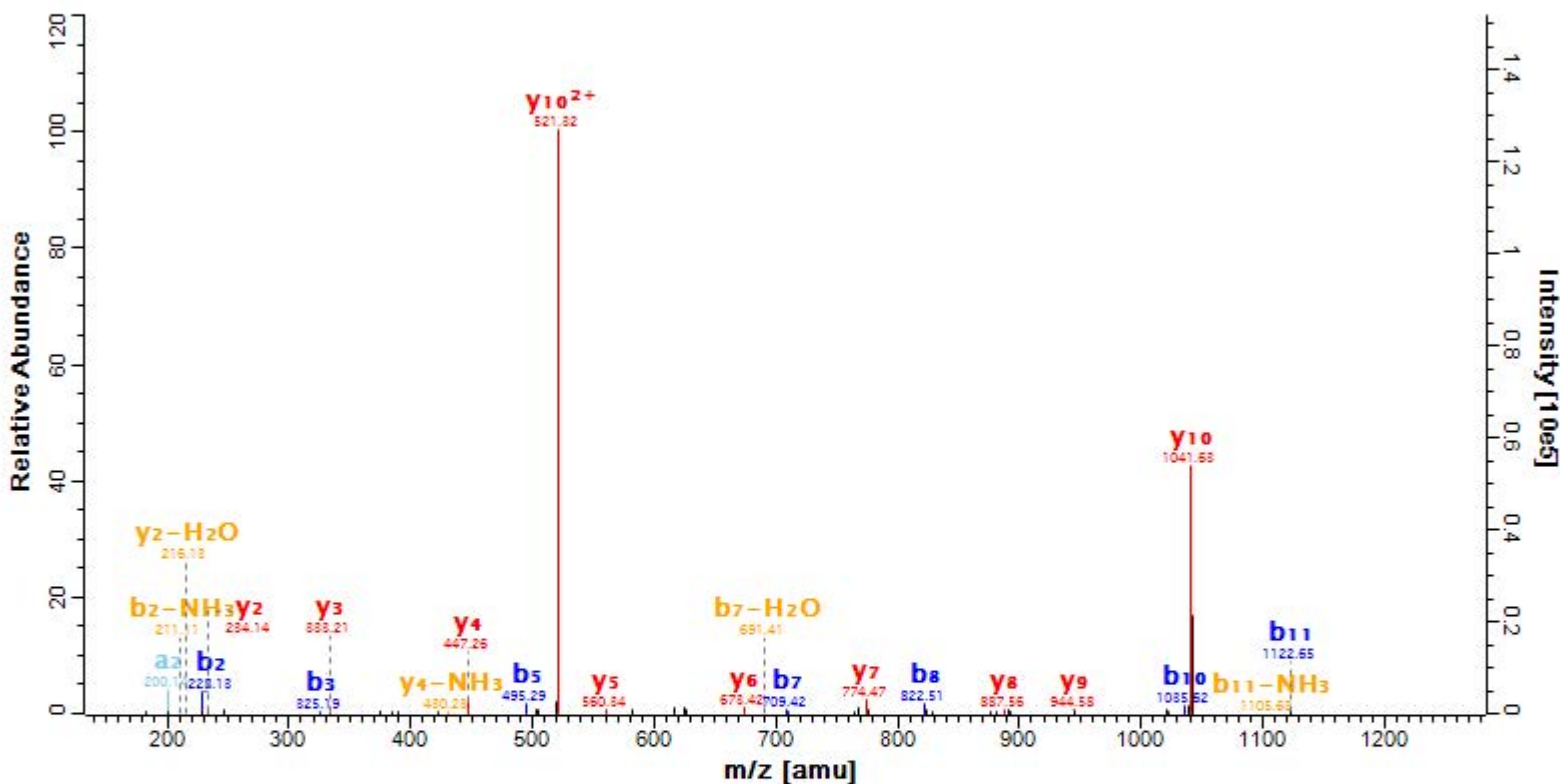

#### precursor information

|                   |                 |
|-------------------|-----------------|
| Mass:             | 1267.74959      |
| m/z:              | 634.88207       |
| Charge:           | 2+              |
| Retentiontime:    | 44.011249542236 |
| Score:            | 125.5269        |
| Mass Error [ppm]: | -0.31061        |
| PEP:              | 2.2012E-05      |
| Precursor Type:   | MULTI           |

#### general information

|                       |             |
|-----------------------|-------------|
| Annotation:           | 10 of 12    |
| AminoAcids Coverage:  | 83 %        |
| Intensity Coverage:   | 82 %        |
| Peak Coverage:        | 29 %        |
| Protein Localisation: | 223 ... 234 |

| a ion    |        | b ion    |        | seq |   |    | y ion    |         | y <sup>2+</sup> ion |         |
|----------|--------|----------|--------|-----|---|----|----------|---------|---------------------|---------|
| Δ dalton | mass   | Δ dalton | mass   |     |   |    | Δ dalton | mass    | Δ dalton            | mass    |
|          | 87.055 |          | 115.05 | 1   | N | 11 |          |         |                     |         |
| -0.006   | 200.14 | -0.101   | 228.13 | 2   | I | 10 | 1154.7   |         | 1154.7              |         |
|          | 297.19 | +0.0393  | 325.19 | 3   | P | 9  | 1041.6   | -0.029  | 521.32              | +0.1946 |
|          | 354.21 |          | 382.21 | 4   | G | 8  | 944.58   | +0.066  | 944.58              |         |
|          | 467.3  | +0.0727  | 495.29 | 5   | I | 7  | 887.56   | -0.022  | 887.56              |         |
|          | 568.35 |          | 596.34 | 6   | T | 6  | 774.47   | -0.005  | 774.47              |         |
|          | 681.43 | +0.0604  | 709.42 | 7   | L | 5  | 673.42   | -0.011  | 673.42              |         |
|          | 794.51 | -0.03    | 822.51 | 8   | L | 4  | 560.34   | +0.0855 | 560.34              |         |
|          | 908.56 |          | 936.55 | 9   | N | 3  | 447.26   | +0.0782 | 447.26              |         |
|          | 1007.6 | -0.047   | 1035.6 | 10  | V | 2  | 333.21   | +0.1738 | 333.21              |         |
|          | 1094.7 | -0.113   | 1122.7 | 11  | S | 1  | 234.14   | +0.0024 | 234.14              |         |
|          |        |          |        | 12  | K | 0  | 147.11   |         | 147.11              |         |

Scan number 8343 Raw file LNCAP\_Silac\_23F10\_set2\_03  
 Method ITMS; CID Pepti... 224.42

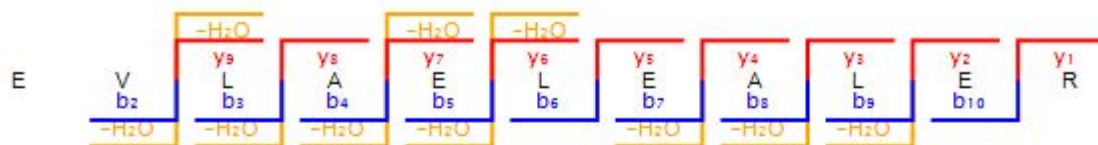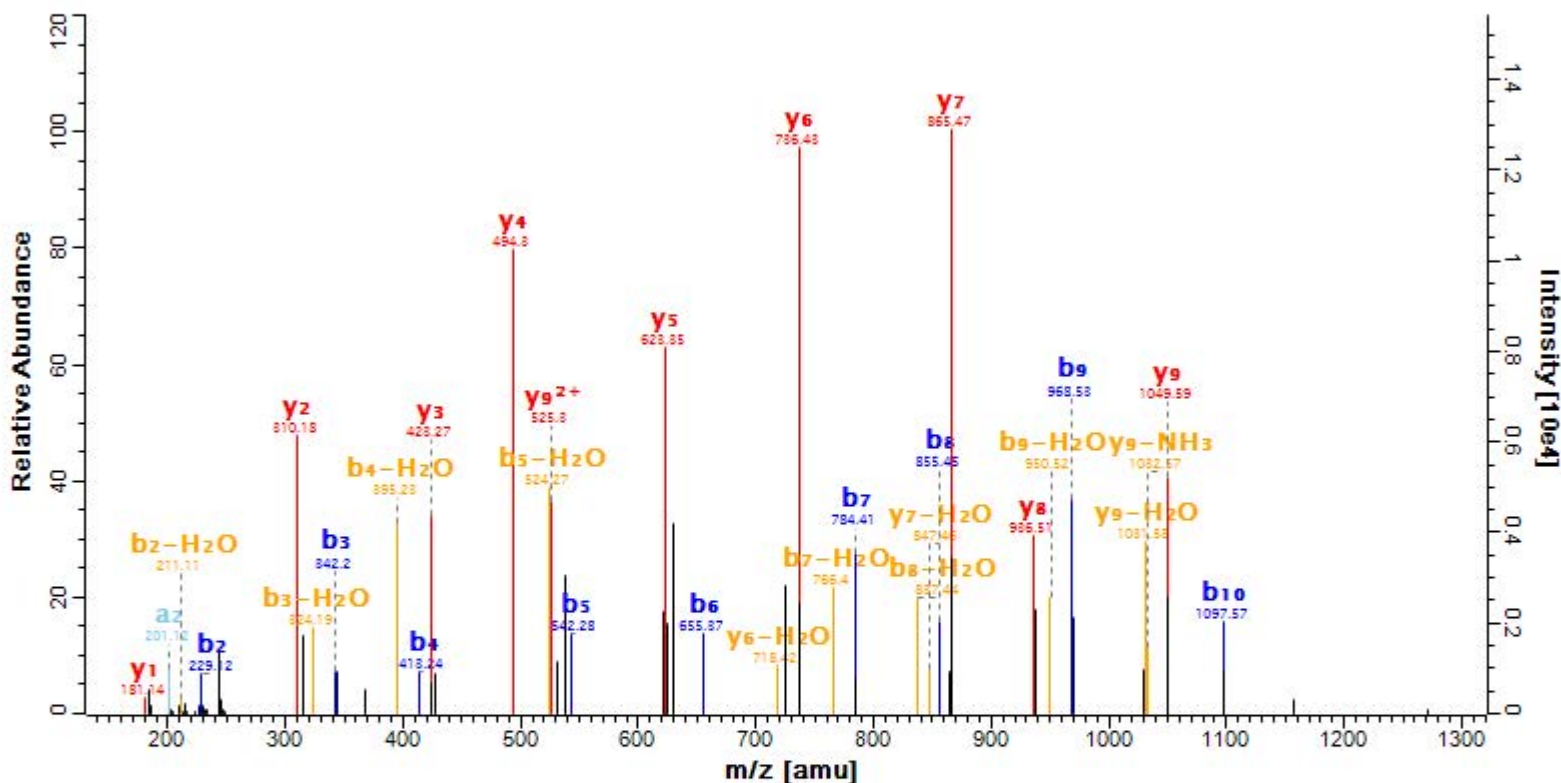

#### precursor information

|                   |                 |
|-------------------|-----------------|
| Mass:             | 1270.677        |
| m/z:              | 636.34578       |
| Charge:           | 2+              |
| Retentiontime:    | 46.525321960449 |
| Score:            | 224.4198        |
| Mass Error [ppm]: | 0.096249        |
| PEP:              | 3.0777E-21      |
| Precursor Type:   | MULTI           |

#### general information

|                       |             |
|-----------------------|-------------|
| Annotation:           | 10 of 11    |
| AminoAcids Coverage:  | 91 %        |
| Intensity Coverage:   | 72 %        |
| Peak Coverage:        | 39 %        |
| Protein Localisation: | 625 ... 635 |

| a ion    |        | b ion    |        |    |     |          | y ion  |          | y <sup>2+</sup> ion |  |
|----------|--------|----------|--------|----|-----|----------|--------|----------|---------------------|--|
| Δ dalton | mass   | Δ dalton | mass   |    | seq | Δ dalton | mass   | Δ dalton | mass                |  |
|          | 102.05 |          | 130.05 | 1  | E   | 10       |        |          |                     |  |
| +0.131   | 201.12 | -0.059   | 229.12 | 2  | V   | 9        | 1148.7 |          | 1148.7              |  |
|          | 314.21 | +0.0061  | 342.2  | 3  | L   | 8        | 1049.6 | -0.022   | 525.3               |  |
|          | 385.24 | -0.092   | 413.24 | 4  | A   | 7        | 936.51 | +0.0618  | 936.51              |  |
|          | 514.29 | +0.0969  | 542.28 | 5  | E   | 6        | 865.47 | +0.0314  | 865.47              |  |
|          | 627.37 | -0.114   | 655.37 | 6  | L   | 5        | 736.43 | -0.031   | 736.43              |  |
|          | 756.41 | -0.001   | 784.41 | 7  | E   | 4        | 623.35 | +0.0315  | 623.35              |  |
|          | 827.45 | -0.184   | 855.45 | 8  | A   | 3        | 494.3  | +0.0502  | 494.3               |  |
|          | 940.53 | -0.007   | 968.53 | 9  | L   | 2        | 423.27 | +0.0936  | 423.27              |  |
|          | 1069.6 | -0.324   | 1097.6 | 10 | E   | 1        | 310.18 | +0.047   | 310.18              |  |
|          |        |          |        | 11 | R   | 0        | 181.14 | +0.1265  | 181.14              |  |

Scan number 856 Raw file LNCAP\_Silac\_23F10\_set2\_03  
 Method ITMS: CID Pepti... 85.35

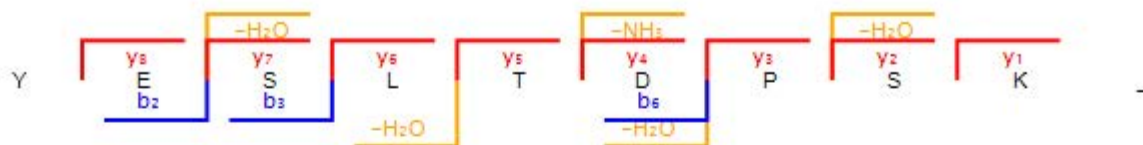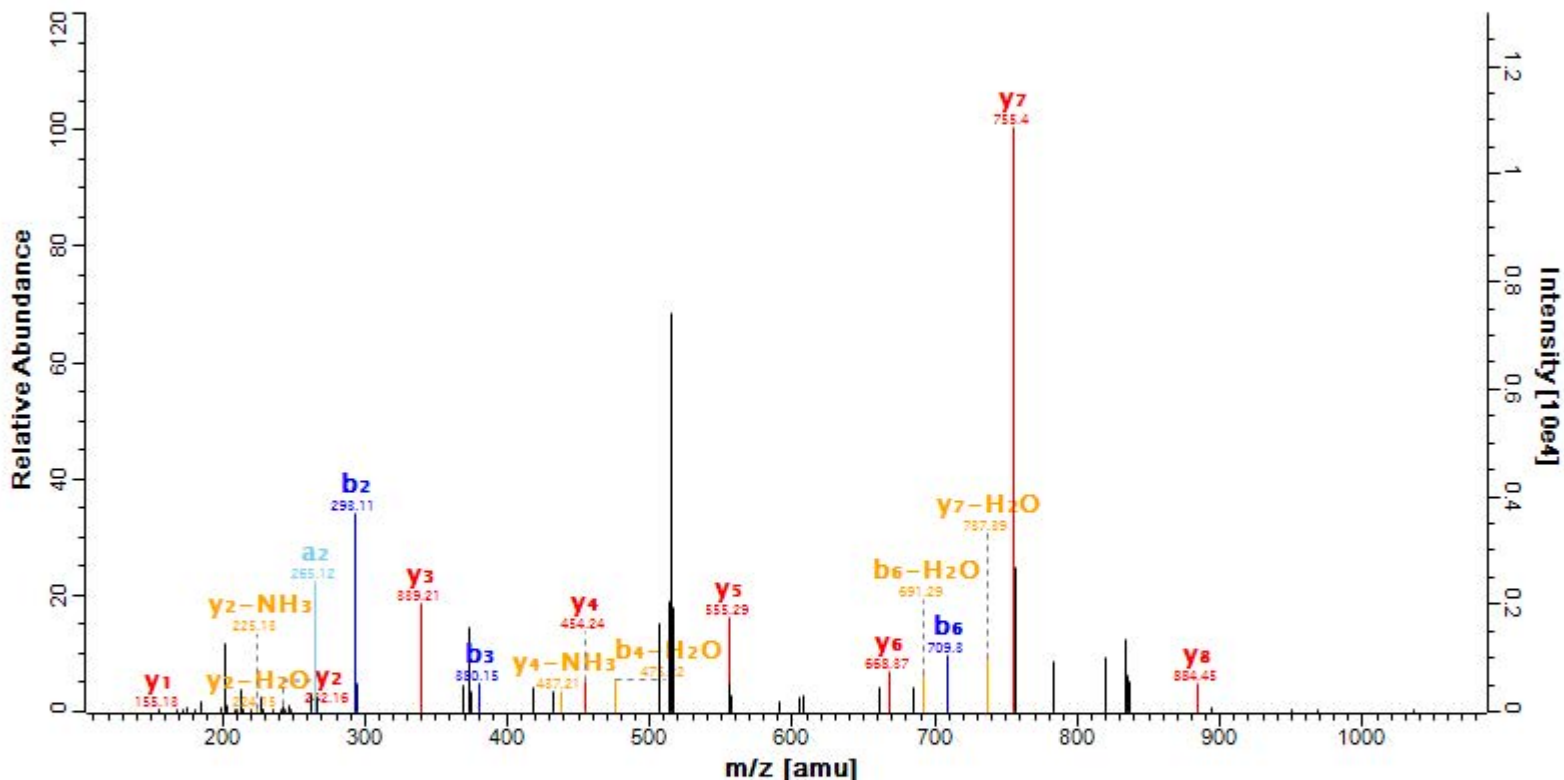

#### precursor information

|                       |                 |
|-----------------------|-----------------|
| Mass:                 | 1038.48695      |
| m/z:                  | 520.25075       |
| Charge:               | 2+              |
| Retentiontime:        | 10.120121955871 |
| Score:                | 85.35461        |
| Mass Error [ppm]:     | -0.0021924      |
| PEP:                  | 0.0066981       |
| Precursor Type:       | MULTI           |
| Annotation:           | 8 of 9          |
| AminoAcids Coverage:  | 89 %            |
| Intensity Coverage:   | 47 %            |
| Peak Coverage:        | 22 %            |
| Protein Localisation: | 183 ... 191     |

| a ion           |          | b ion           |          | y ion |                 |      |          |           |
|-----------------|----------|-----------------|----------|-------|-----------------|------|----------|-----------|
| $\Delta$ dalton | mass     | $\Delta$ dalton | mass     | seq   | $\Delta$ dalton | mass |          |           |
|                 | 136.0757 |                 | 164.0706 | 1     | Y               | 8    |          |           |
| +0.053592       | 265.1183 | -0.04075        | 293.1132 | 2     | E               | 7    | 884.4451 | +0.049588 |
|                 | 352.1503 | +0.09336        | 380.1452 | 3     | S               | 6    | 755.4025 | -0.06859  |
|                 | 465.2344 |                 | 493.2293 | 4     | L               | 5    | 668.3705 | +0.139102 |
|                 | 566.2821 |                 | 594.277  | 5     | T               | 4    | 555.2864 | -0.02311  |
|                 | 681.309  | -0.05263        | 709.3039 | 6     | D               | 3    | 454.2387 | +0.070283 |
|                 | 778.3618 |                 | 806.3567 | 7     | P               | 2    | 339.2118 | +0.052304 |
|                 | 865.3938 |                 | 893.3887 | 8     | S               | 1    | 242.159  | -0.03595  |
|                 |          |                 |          | 9     | K               | 0    | 155.127  | +0.097835 |



Scan number 863 Raw file LNCAP\_Silac\_23F10\_set2\_03  
 Method ITMS: CID Pepti... 225.67

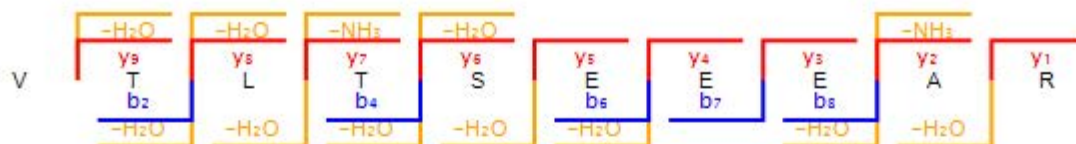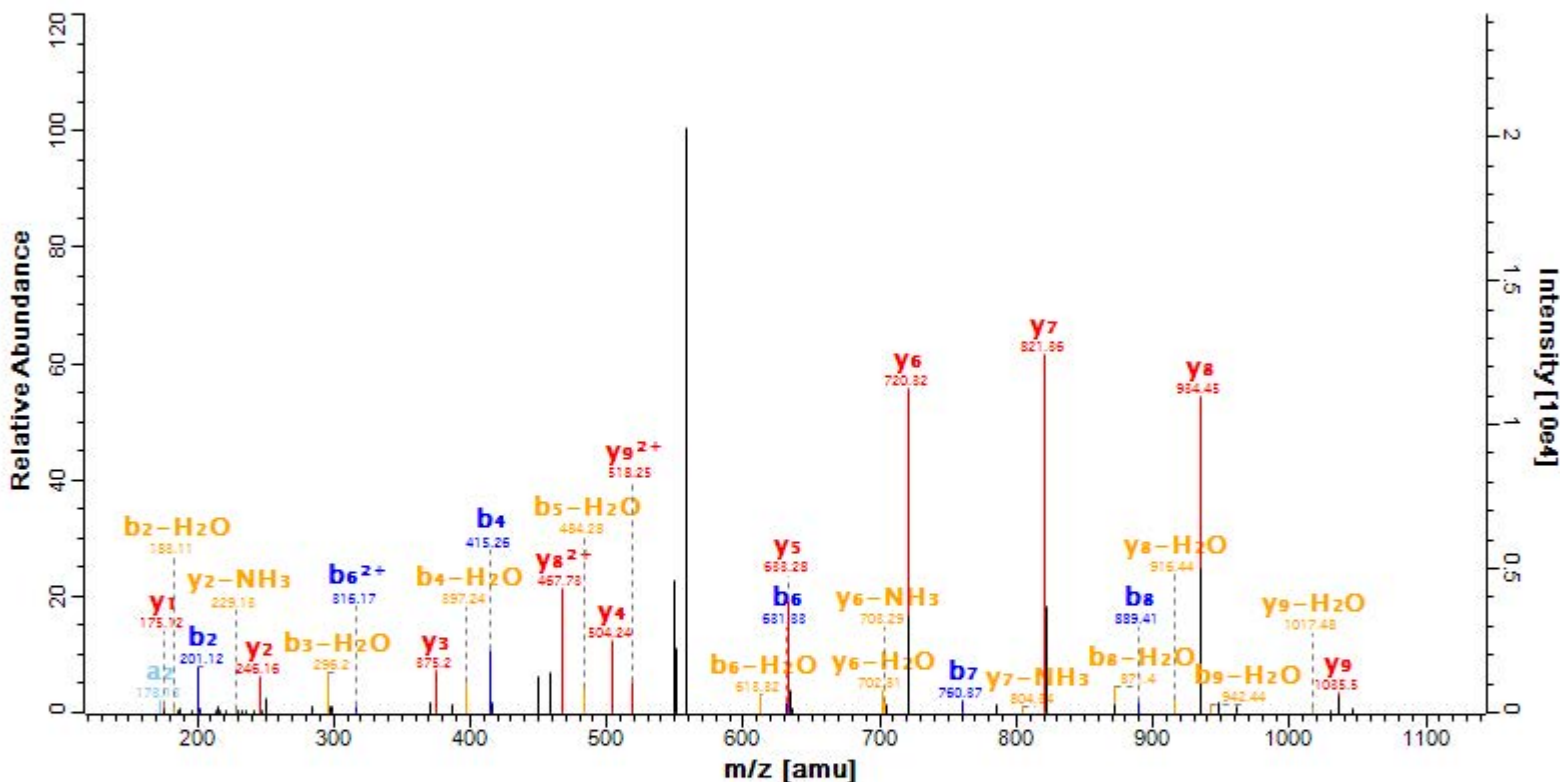

precursor information

|                   |                 |
|-------------------|-----------------|
| Mass:             | 1133.55642      |
| m/z:              | 567.78549       |
| Charge:           | 2+              |
| Retentiontime:    | 10.162733078002 |
| Score:            | 225.6719        |
| Mass Error [ppm]: | -0.011102       |
| PEP:              | 1.7316E-19      |

**g** Precursor Type: MULTI

|                       |             |
|-----------------------|-------------|
| Annotation:           | 9 of 10     |
| AminoAcids Coverage:  | 90 %        |
| Intensity Coverage:   | 56 %        |
| Peak Coverage:        | 34 %        |
| Protein Localisation: | 335 ... 344 |

|       | a ion         | b <sup>2+</sup> ion | b ion         |       |     |   | y ion         | y <sup>2+</sup> ion |        |        |  |
|-------|---------------|---------------------|---------------|-------|-----|---|---------------|---------------------|--------|--------|--|
|       | Δ dalton mass | Δ dalton mass       | Δ dalton mass |       | seq |   | Δ dalton mass | Δ dalton mass       |        |        |  |
|       | 72.08         | 100.1               | 100.1         | 1     | V   | 9 |               |                     |        |        |  |
| -0.01 | 173.1         | 201.1               | +0.014201.1   | 2     | T   | 8 | 1035          | +0.164518.3         | +0.04! |        |  |
|       | 286.2         | 314.2               | 314.2         | 3     | L   | 7 | 934.4         | -0.01               | 467.7  | -0.04  |  |
|       | 387.3         | 415.3               | +0.063415.3   | 4     | T   | 6 | 821.4         | +0.01               | 2821.4 |        |  |
|       | 474.3         | 502.3               | 502.3         | 5     | S   | 5 | 720.3         | +0.02               | 1720.3 |        |  |
|       | 603.3         | +0.077316.2         | +0.047631.3   | 6     | E   | 4 | 633.3         | +0.04               | 7633.3 |        |  |
|       | 732.4         | 760.4               | -0.08         | 760.4 | 7   | E | 3             | 504.2               | +0.01  | 7504.2 |  |
|       | 861.4         | 889.4               | +0.19         | 889.4 | 8   | E | 2             | 375.2               | -0.01  | 375.2  |  |
|       | 932.5         | 960.5               |               | 960.5 | 9   | A | 1             | 246.2               | +0.10  | 3246.2 |  |
|       |               |                     |               |       | 10  | R | 0             | 175.1               | +0.07  | 6175.1 |  |

Scan number 8659 Raw file LNCAP\_Silac\_23F10\_set2\_03  
 Method ITMS; CID Pepti... 121.32

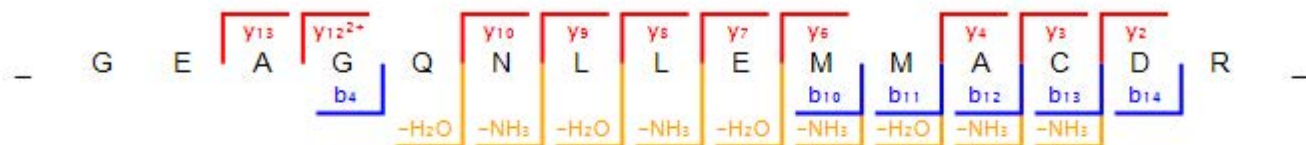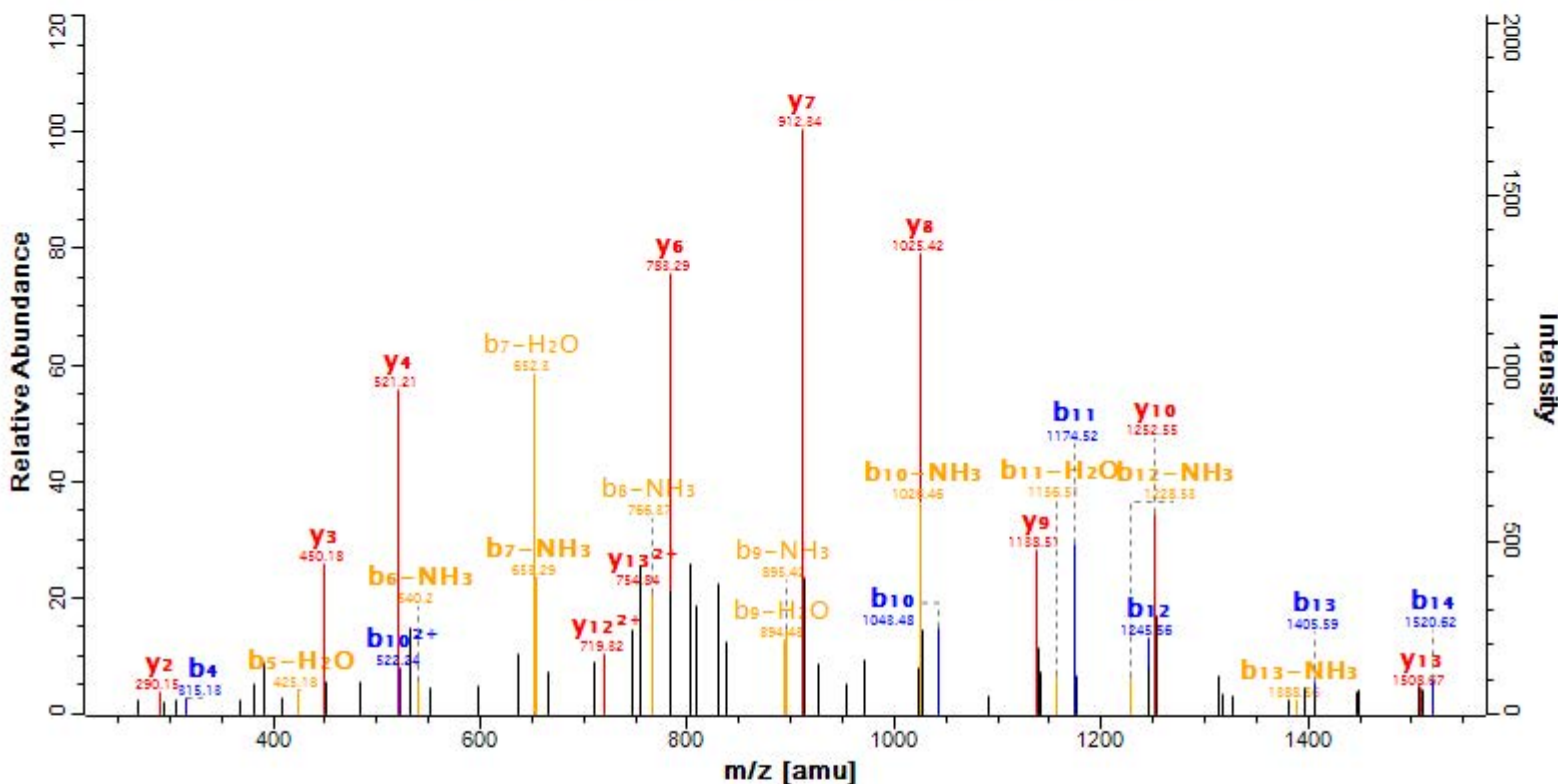

**precursor information**

|                   |                 |
|-------------------|-----------------|
| Mass:             | 1693.72203      |
| m/z:              | 847.86829       |
| Charge:           | 2+              |
| Retentiontime:    | 48.193000793457 |
| Score:            | 121.3213        |
| Mass Error [ppm]: | -0.10414        |
| PEP:              | 3.0238E-09      |
| Precursor Type:   | MULTI           |

**general information**

|                       |             |
|-----------------------|-------------|
| Annotation:           | 12 of 15    |
| AminoAcids Coverage:  | 80 %        |
| Intensity Coverage:   | 62 %        |
| Peak Coverage:        | 38 %        |
| Protein Localisation: | 336 ... 350 |

| b <sup>2+</sup> ion |        | b ion    |        | seq |   |    | y ion    |         | y <sup>2+</sup> ion |         |
|---------------------|--------|----------|--------|-----|---|----|----------|---------|---------------------|---------|
| Δ dalton            | mass   | Δ dalton | mass   |     |   |    | Δ dalton | mass    | Δ dalton            | mass    |
|                     | 58.029 |          | 58.029 | 1   | G | 14 |          |         |                     |         |
|                     | 187.07 |          | 187.07 | 2   | E | 13 | 1637.7   |         | 1637.7              |         |
|                     | 258.11 |          | 258.11 | 3   | A | 12 | 1508.7   | +0.148  | 754.84              | -0.059  |
|                     | 315.13 | -0.069   | 315.13 | 4   | G | 11 | 1437.6   |         | 719.32              | +0.3668 |
|                     | 443.19 |          | 443.19 | 5   | Q | 10 | 1380.6   |         | 1380.6              |         |
|                     | 557.23 |          | 557.23 | 6   | N | 9  | 1252.5   | -0.041  | 1252.5              |         |
|                     | 670.32 |          | 670.32 | 7   | L | 8  | 1138.5   | -0.061  | 1138.5              |         |
|                     | 783.4  |          | 783.4  | 8   | L | 7  | 1025.4   | -0.028  | 1025.4              |         |
|                     | 912.44 |          | 912.44 | 9   | E | 6  | 912.34   | +0.0299 | 912.34              |         |
| -0.115              | 522.24 | -0.072   | 1043.5 | 10  | M | 5  | 783.29   | -0.008  | 783.29              |         |
|                     | 1174.5 | -0.095   | 1174.5 | 11  | M | 4  | 652.25   |         | 652.25              |         |
|                     | 1245.6 | -0.165   | 1245.6 | 12  | A | 3  | 521.21   | +0.0162 | 521.21              |         |
|                     | 1405.6 | -0.006   | 1405.6 | 13  | C | 2  | 450.18   | +0.0074 | 450.18              |         |
|                     | 1520.6 | +0.1919  | 1520.6 | 14  | D | 1  | 290.15   | +0.0463 | 290.15              |         |
|                     |        |          |        | 15  | R | 0  | 175.12   |         | 175.12              |         |

Scan number 8679 Raw file LNCAP\_Silac\_23F10\_set2\_03  
 Method ITMS; CID Pepti... 101.89

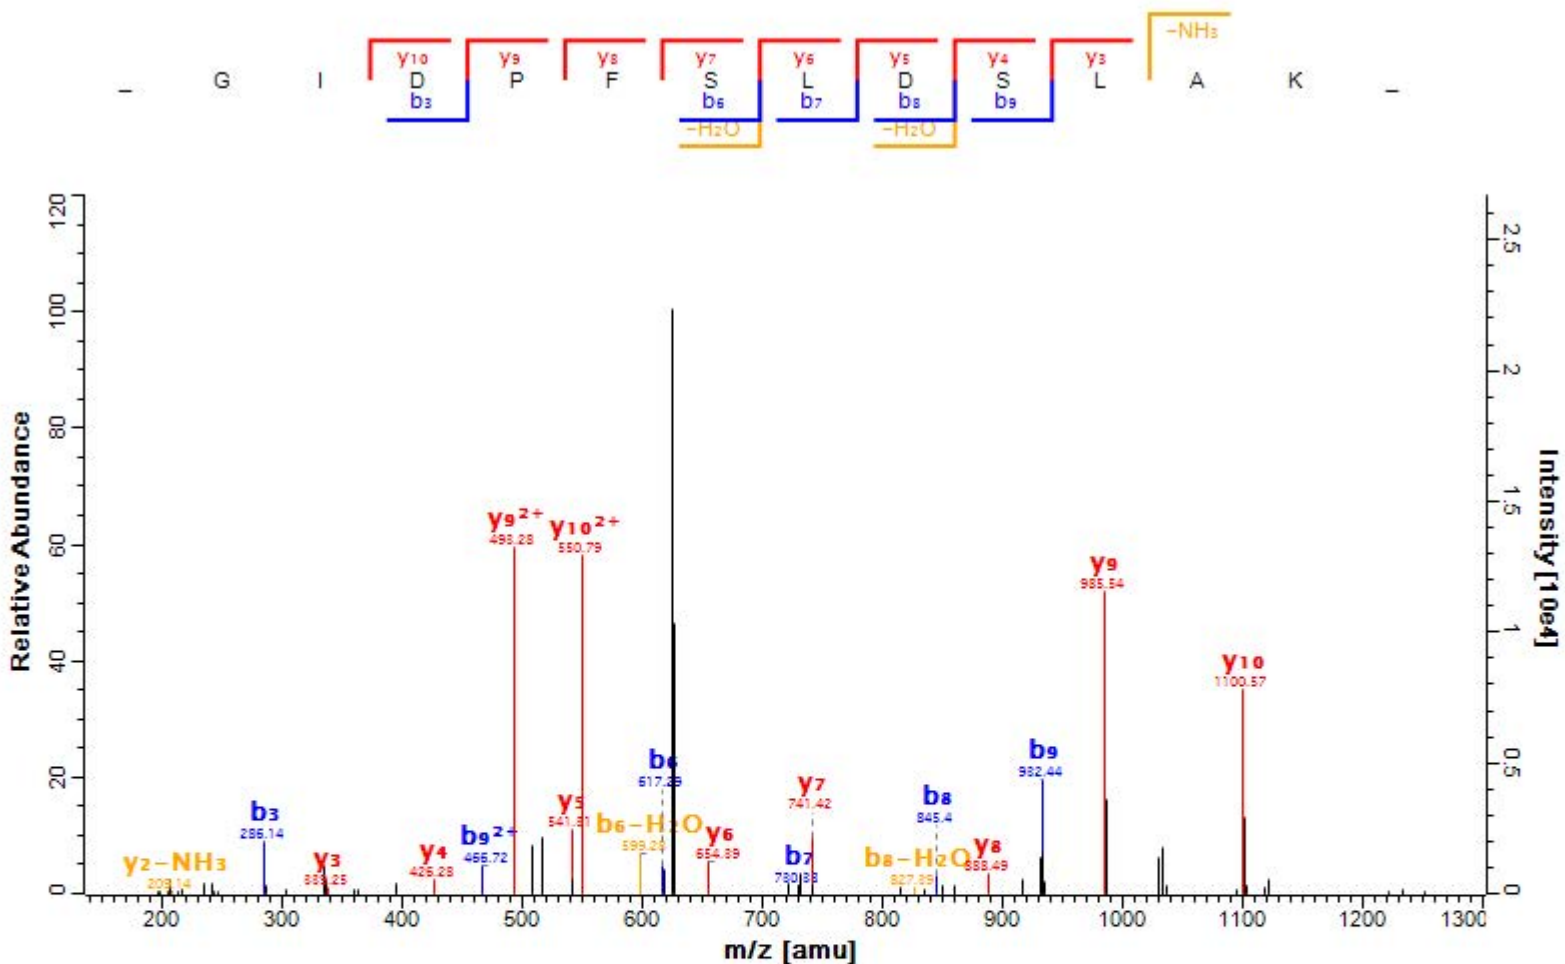

#### precursor information

|                   |                 |
|-------------------|-----------------|
| Mass:             | 1261.65585      |
| m/z:              | 631.8352        |
| Charge:           | 2+              |
| Retentiontime:    | 48.301105499267 |
| Score:            | 101.8882        |
| Mass Error [ppm]: | 0.33803         |
| PEP:              | 0.00015731      |
| Precursor Type:   | MULTI           |

#### general information

|                       |             |
|-----------------------|-------------|
| Annotation:           | 9 of 12     |
| AminoAcids Coverage:  | 75 %        |
| Intensity Coverage:   | 50 %        |
| Peak Coverage:        | 22 %        |
| Protein Localisation: | 296 ... 307 |

| b <sup>2+</sup> ion |        | b ion    |        | seq |   |    | y ion    |         | y <sup>2+</sup> ion |         |
|---------------------|--------|----------|--------|-----|---|----|----------|---------|---------------------|---------|
| Δ dalton            | mass   | Δ dalton | mass   |     |   |    | Δ dalton | mass    | Δ dalton            | mass    |
|                     | 58.029 |          | 58.029 | 1   | G | 11 |          |         |                     |         |
|                     | 171.11 |          | 171.11 | 2   | I | 10 | 1213.7   |         | 1213.7              |         |
|                     | 286.14 | -0.036   | 286.14 | 3   | D | 9  | 1100.6   | -0.104  | 550.79              | +0.1382 |
|                     | 383.19 |          | 383.19 | 4   | P | 8  | 985.54   | -0.048  | 493.28              | +0.1867 |
|                     | 530.26 |          | 530.26 | 5   | F | 7  | 888.49   | +0.0591 | 888.49              |         |
|                     | 617.29 | +0.0488  | 617.29 | 6   | S | 6  | 741.42   | +0.0367 | 741.42              |         |
|                     | 730.38 | -0.357   | 730.38 | 7   | L | 5  | 654.39   | +0.0021 | 654.39              |         |
|                     | 845.4  | -0.072   | 845.4  | 8   | D | 4  | 541.31   | +0.116  | 541.31              |         |
| +0.1334             | 466.72 | +0.0661  | 932.44 | 9   | S | 3  | 426.28   | +0.1028 | 426.28              |         |
|                     | 1045.5 |          | 1045.5 | 10  | L | 2  | 339.25   | +0.0683 | 339.25              |         |
|                     | 1116.6 |          | 1116.6 | 11  | A | 1  | 226.16   |         | 226.16              |         |
|                     |        |          |        | 12  | K | 0  | 155.13   |         | 155.13              |         |

Scan number 8888 Raw file LNCAP\_Silac\_23F10\_set2\_03  
 Method ITMS: CID Pepti... 174.39

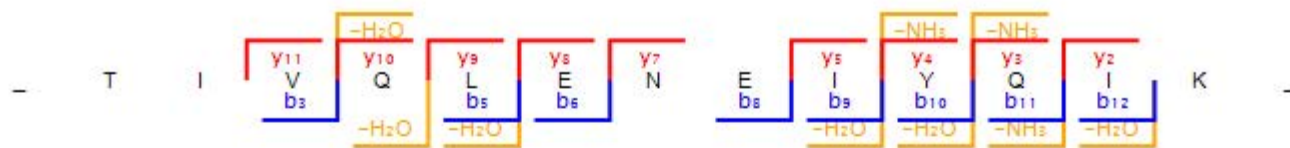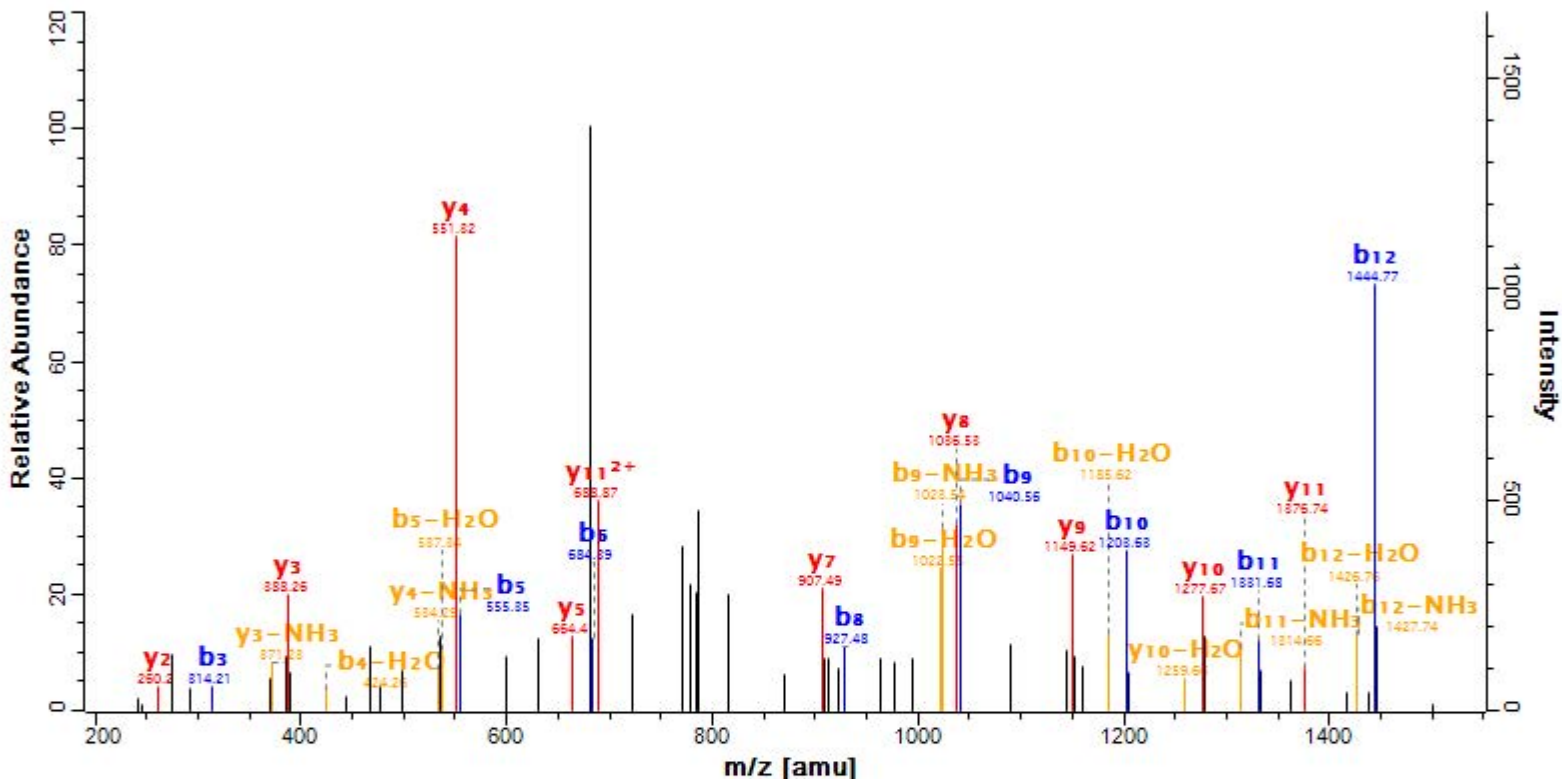

**precursor information**

|                   |                 |
|-------------------|-----------------|
| Mass:             | 1589.86728      |
| m/z:              | 795.94092       |
| Charge:           | 2+              |
| Retentiontime:    | 49.379085540771 |
| Score:            | 174.3936        |
| Mass Error [ppm]: | 0.50834         |
| PEP:              | 9.4916E-12      |
| Precursor Type:   | MULTI           |

**general information**

|                       |             |
|-----------------------|-------------|
| Annotation:           | 10 of 13    |
| AminoAcids Coverage:  | 77 %        |
| Intensity Coverage:   | 49 %        |
| Peak Coverage:        | 39 %        |
| Protein Localisation: | 198 ... 210 |

| b ion     |          |    |     |    | y ion    |           | y <sup>2+</sup> ion |          |
|-----------|----------|----|-----|----|----------|-----------|---------------------|----------|
| Δ dalton  | mass     |    | seq |    | Δ dalton | mass      | Δ dalton            | mass     |
|           | 102.055  | 1  | T   | 12 |          |           |                     |          |
|           | 215.139  | 2  | I   | 11 | 1489.826 |           | 1489.826            |          |
| -0.00785  | 314.2074 | 3  | V   | 10 | 1376.742 | +0.002866 | 688.8746            | -0.04511 |
|           | 442.266  | 4  | Q   | 9  | 1277.674 | +0.00646  | 1277.674            |          |
| +0.036828 | 555.3501 | 5  | L   | 8  | 1149.615 | +0.103734 | 1149.615            |          |
| -0.22738  | 684.3927 | 6  | E   | 7  | 1036.531 | +0.100152 | 1036.531            |          |
|           | 798.4356 | 7  | N   | 6  | 907.4884 | +0.054915 | 907.4884            |          |
| +0.117271 | 927.4782 | 8  | E   | 5  | 793.4454 |           | 793.4454            |          |
| -0.05542  | 1040.562 | 9  | I   | 4  | 664.4028 | +0.074823 | 664.4028            |          |
| -0.22836  | 1203.626 | 10 | Y   | 3  | 551.3188 | +0.02522  | 551.3188            |          |
| -0.15254  | 1331.684 | 11 | Q   | 2  | 388.2554 | +0.18181  | 388.2554            |          |
| -0.12357  | 1444.768 | 12 | I   | 1  | 260.1969 | +0.204163 | 260.1969            |          |
|           |          | 13 | K   | 0  | 147.1128 |           | 147.1128            |          |

Scan number 9080 Raw file LNCAP\_Silac\_23F10\_set2\_03  
 Method ITMS; CID Pepti... 203.06

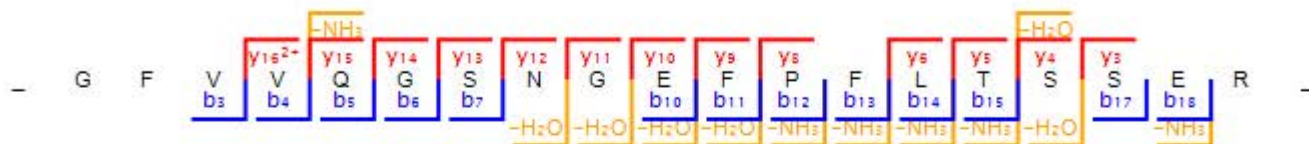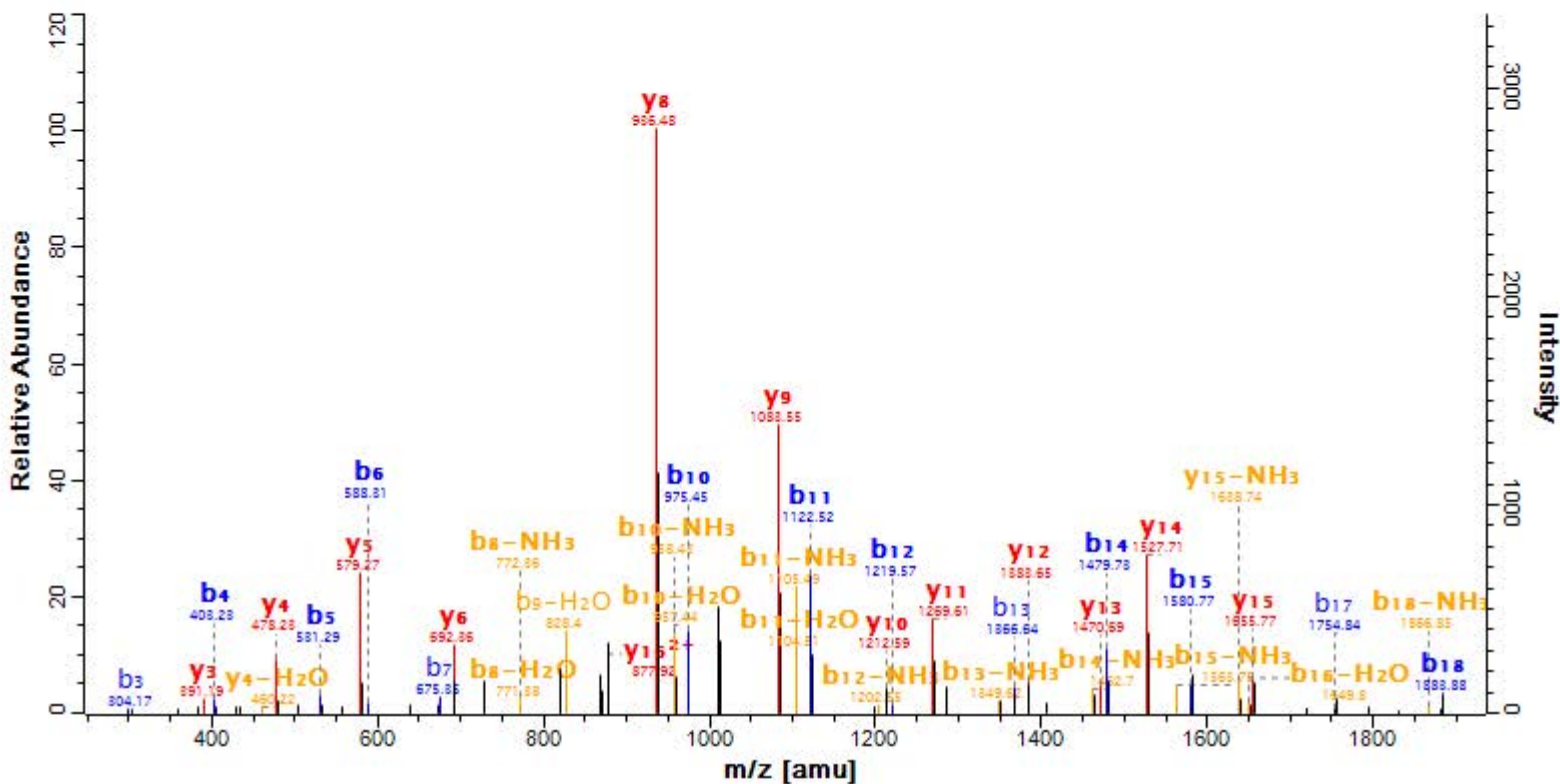

precursor information

|                   |                 |
|-------------------|-----------------|
| Mass:             | 2056.98623      |
| m/z:              | 1029.50039      |
| Charge:           | 2+              |
| Retentiontime:    | 50.360656738281 |
| Score:            | 203.0634        |
| Mass Error [ppm]: | 0.39298         |
| PEP:              | 1.2577E-48      |
| Precursor Type:   | MULTI           |

general information

|                       |           |
|-----------------------|-----------|
| Annotation:           | 16 of 19  |
| AminoAcids Coverage:  | 84 %      |
| Intensity Coverage:   | 62 %      |
| Peak Coverage:        | 43 %      |
| Protein Localisation: | 71 ... 89 |

| b ion     |          |    |     |    | y ion    |           | y <sup>2+</sup> ion |         |
|-----------|----------|----|-----|----|----------|-----------|---------------------|---------|
| Δ dalton  | mass     |    | seq |    | Δ dalton | mass      | Δ dalton            | mass    |
|           | 58.02874 | 1  | G   | 18 |          |           |                     |         |
|           | 205.0972 | 2  | F   | 17 | 2000.971 |           | 2000.971            |         |
| +0.093526 | 304.1656 | 3  | V   | 16 | 1853.903 |           | 1853.903            |         |
| +0.116573 | 403.234  | 4  | V   | 15 | 1754.834 |           | 877.9208            | -0.0976 |
| -0.14192  | 531.2926 | 5  | Q   | 14 | 1655.766 | -0.10168  | 1655.766            |         |
| +0.082644 | 588.314  | 6  | G   | 13 | 1527.707 | -0.0193   | 1527.707            |         |
| +0.122454 | 675.3461 | 7  | S   | 12 | 1470.686 | -0.05765  | 1470.686            |         |
|           | 789.389  | 8  | N   | 11 | 1383.654 | -0.09227  | 1383.654            |         |
|           | 846.4104 | 9  | G   | 10 | 1269.611 | +0.082855 | 1269.611            |         |
| -0.08499  | 975.453  | 10 | E   | 9  | 1212.59  | +0.181467 | 1212.59             |         |
| -0.07199  | 1122.521 | 11 | F   | 8  | 1083.547 | -0.02594  | 1083.547            |         |
| -0.05566  | 1219.574 | 12 | P   | 7  | 936.4785 | -0.02674  | 936.4785            |         |
| +0.08894  | 1366.643 | 13 | F   | 6  | 839.4258 |           | 839.4258            |         |
| -0.068    | 1479.727 | 14 | L   | 5  | 692.3573 | -0.00963  | 692.3573            |         |
| -0.03182  | 1580.774 | 15 | T   | 4  | 579.2733 | -0.04318  | 579.2733            |         |
|           | 1667.806 | 16 | S   | 3  | 478.2256 | +0.086867 | 478.2256            |         |
| +0.208204 | 1754.838 | 17 | S   | 2  | 391.1936 | +0.137725 | 391.1936            |         |
| -0.07475  | 1883.881 | 18 | E   | 1  | 304.1615 |           | 304.1615            |         |
|           |          | 19 | R   | 0  | 175.119  |           | 175.119             |         |

Scan number 9109 Raw file LNCAP\_Silac\_23F10\_set2\_03  
 Method ITMS; CID Pepti... 136.02

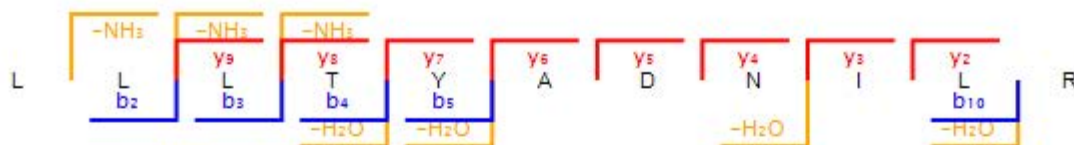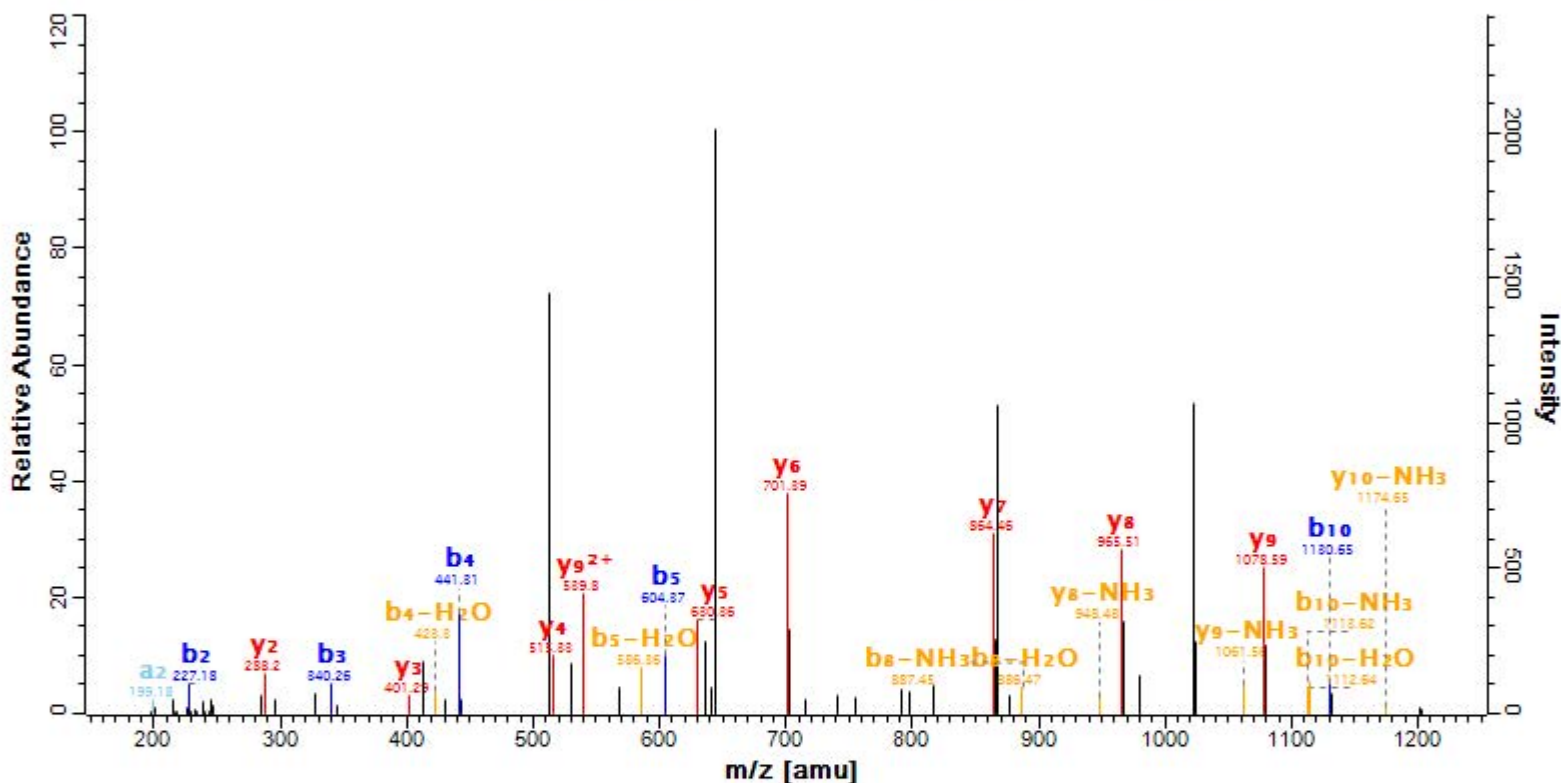

#### precursor information

|                   |                 |
|-------------------|-----------------|
| Mass:             | 1306.65587      |
| m/z:              | 654.33521       |
| Charge:           | 2+              |
| Retentiontime:    | 50.518951416015 |
| Score:            | 136.0225        |
| Mass Error [ppm]: | -0.067521       |
| PEP:              | 5.0939E-12      |
| Precursor Type:   | MULTI           |

#### general information

|                       |           |
|-----------------------|-----------|
| Annotation:           | 9 of 11   |
| AminoAcids Coverage:  | 82 %      |
| Intensity Coverage:   | 36 %      |
| Peak Coverage:        | 32 %      |
| Protein Localisation: | 34 ... 44 |

| a ion    |        | b ion    |        |    |     |          | y ion  |          | y <sup>2+</sup> ion |  |
|----------|--------|----------|--------|----|-----|----------|--------|----------|---------------------|--|
| Δ dalton | mass   | Δ dalton | mass   |    | seq | Δ dalton | mass   | Δ dalton | mass                |  |
|          | 86.096 |          | 114.09 | 1  | L   | 10       |        |          |                     |  |
| -0.002   | 199.18 | +0.0248  | 227.18 | 2  | L   | 9        | 1191.7 |          | 1191.7              |  |
|          | 312.26 | -0.069   | 340.26 | 3  | L   | 8        | 1078.6 | -0.049   | 539.8               |  |
|          | 413.31 | -0.005   | 441.31 | 4  | T   | 7        | 965.51 | -0.004   | 965.51              |  |
|          | 576.38 | -0.127   | 604.37 | 5  | Y   | 6        | 864.46 | -0.045   | 864.46              |  |
|          | 647.41 |          | 675.41 | 6  | A   | 5        | 701.39 | +0.0287  | 701.39              |  |
|          | 762.44 |          | 790.43 | 7  | D   | 4        | 630.36 | +0.2299  | 630.36              |  |
|          | 876.48 |          | 904.48 | 8  | N   | 3        | 515.33 | -0.006   | 515.33              |  |
|          | 989.57 |          | 1017.6 | 9  | I   | 2        | 401.29 | +0.1485  | 401.29              |  |
|          | 1102.7 | -0.003   | 1130.6 | 10 | L   | 1        | 288.2  | +0.0929  | 288.2               |  |
|          |        |          |        | 11 | R   | 0        | 175.12 |          | 175.12              |  |

Scan number 9292 Raw file LNCAP\_Silac\_23F10\_set2\_03  
 Method ITMS: CID Pepti... 111.86

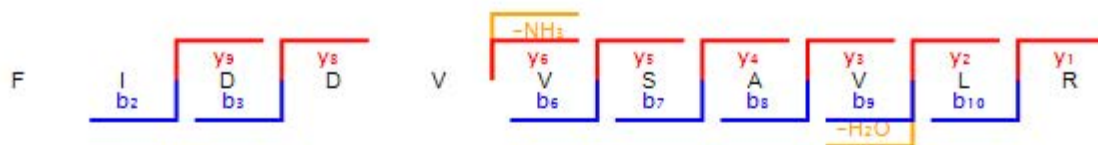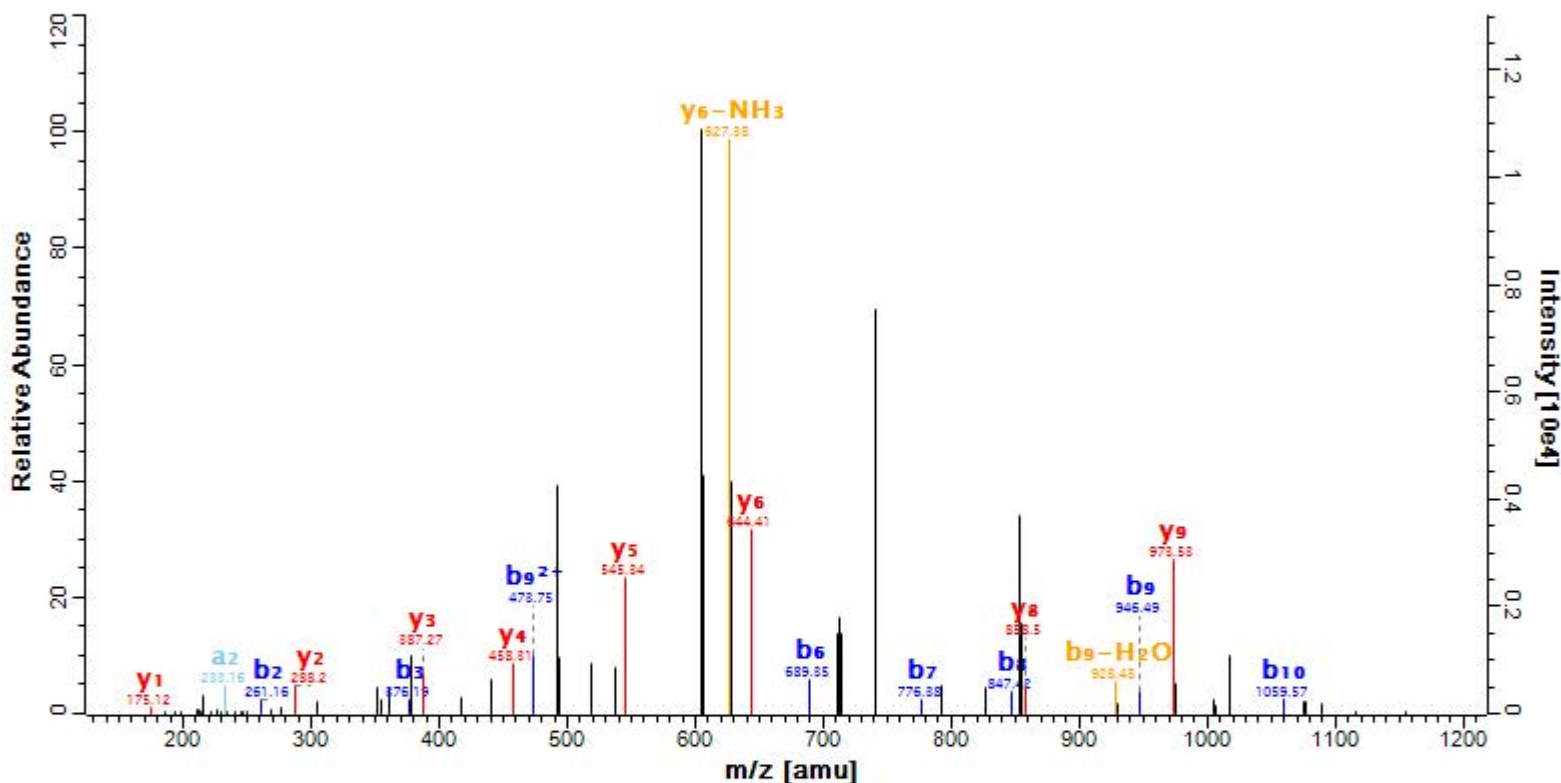

#### precursor information

|                   |                 |
|-------------------|-----------------|
| Mass:             | 1232.67616      |
| m/z:              | 617.34536       |
| Charge:           | 2+              |
| Retentiontime:    | 51.489658355712 |
| Score:            | 111.8553        |
| Mass Error [ppm]: | -0.2673         |
| PEP:              | 0.00026026      |
| Precursor Type:   | MULTI           |

#### general information

|                       |             |
|-----------------------|-------------|
| Annotation:           | 9 of 11     |
| AminoAcids Coverage:  | 82 %        |
| Intensity Coverage:   | 31 %        |
| Peak Coverage:        | 22 %        |
| Protein Localisation: | 204 ... 214 |

| a ion    |        | b <sup>2+</sup> ion |        | b ion    |        | y ion |   |          |                |
|----------|--------|---------------------|--------|----------|--------|-------|---|----------|----------------|
| Δ dalton | mass   | Δ dalton            | mass   | Δ dalton | mass   | seq   |   | Δ dalton | mass           |
|          | 120.08 |                     | 148.08 |          | 148.08 | 1     | F | 10       |                |
| +0.0416  | 233.16 |                     | 261.16 | -0.096   | 261.16 | 2     | I | 9        | 1086.6         |
|          | 348.19 |                     | 376.19 | +0.0283  | 376.19 | 3     | D | 8        | 973.53 -0.046  |
|          | 463.22 |                     | 491.21 |          | 491.21 | 4     | D | 7        | 858.5 -0.047   |
|          | 562.29 |                     | 590.28 |          | 590.28 | 5     | V | 6        | 743.48         |
|          | 661.36 |                     | 689.35 | -0.057   | 689.35 | 6     | V | 5        | 644.41 +0.0177 |
|          | 748.39 |                     | 776.38 | -0.017   | 776.38 | 7     | S | 4        | 545.34 +0.0817 |
|          | 819.42 |                     | 847.42 | +0.1031  | 847.42 | 8     | A | 3        | 458.31 +0.0567 |
|          | 918.49 | +0.4643             | 473.75 | -0.1     | 946.49 | 9     | V | 2        | 387.27 +0.1094 |
|          | 1031.6 |                     | 1059.6 | +0.2204  | 1059.6 | 10    | L | 1        | 288.2 +0.1805  |
|          |        |                     |        |          |        | 11    | R | 0        | 175.12 -0.007  |

Scan number 934 Raw file LNCAP\_Silac\_23F10\_set2\_03  
 Method ITMS: CID Peptide 209.19

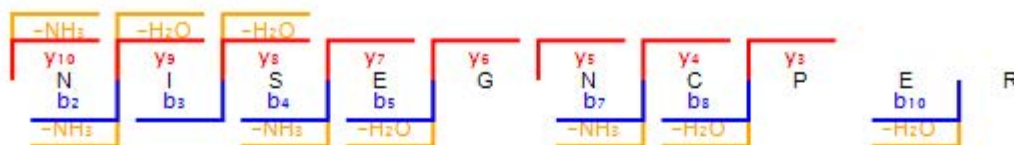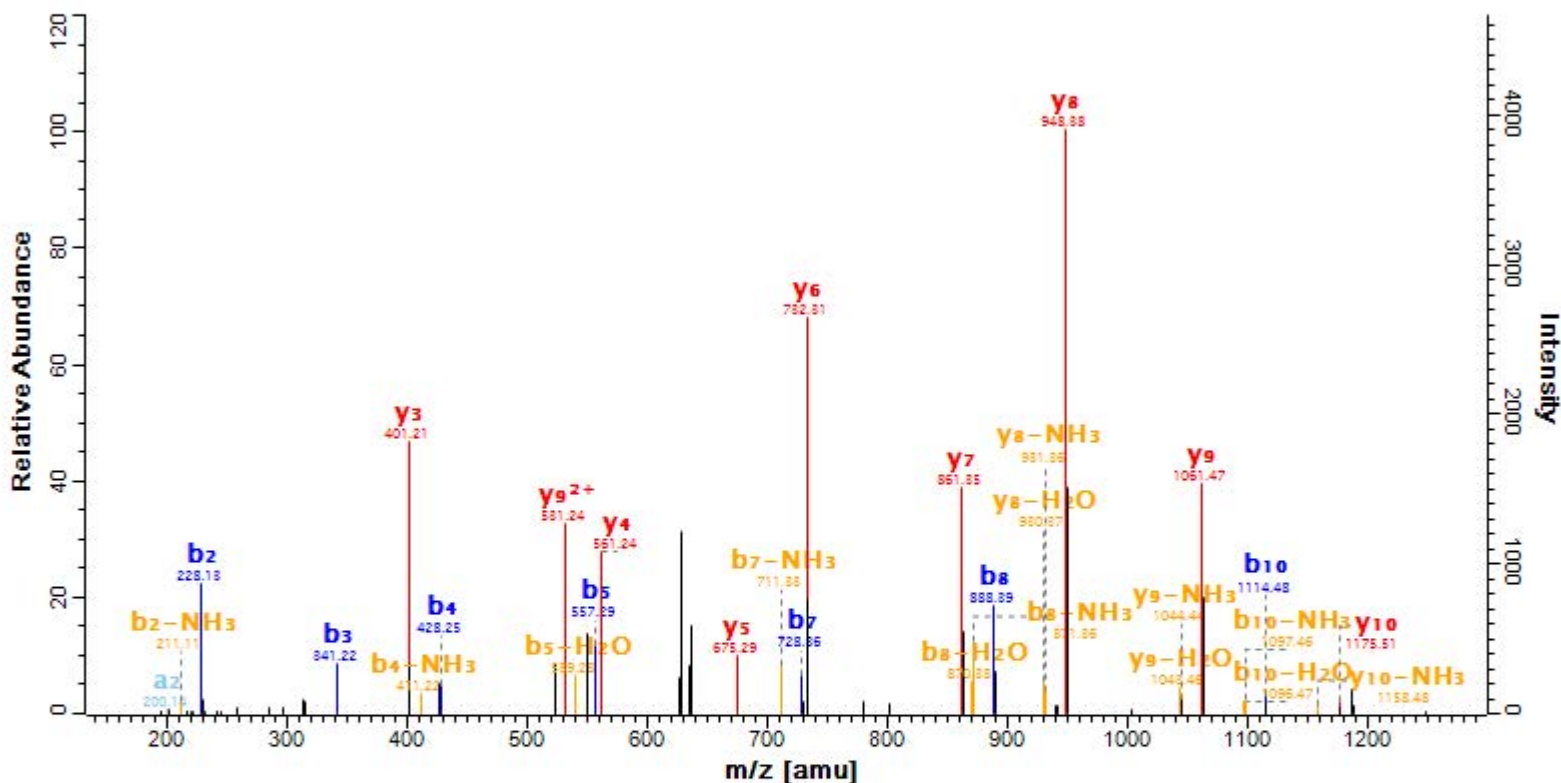

#### precursor information

|                   |                 |
|-------------------|-----------------|
| Mass:             | 1287.58756      |
| m/z:              | 644.80106       |
| Charge:           | 2+              |
| Retentiontime:    | 10.552663803100 |
| Score:            | 209.1883        |
| Mass Error [ppm]: | -0.1466         |
| PEP:              | 3.2085E-15      |
| Precursor Type:   | MULTI           |

#### general information

|                       |           |
|-----------------------|-----------|
| Annotation:           | 9 of 11   |
| AminoAcids Coverage:  | 82 %      |
| Intensity Coverage:   | 67 %      |
| Peak Coverage:        | 33 %      |
| Protein Localisation: | 47 ... 57 |

| a ion    |        | b ion    |        | seq |   |    | y ion    |         | y <sup>2+</sup> ion |         |
|----------|--------|----------|--------|-----|---|----|----------|---------|---------------------|---------|
| Δ dalton | mass   | Δ dalton | mass   |     |   |    | Δ dalton | mass    | Δ dalton            | mass    |
|          | 86.096 |          | 114.09 | 1   | I | 10 |          |         |                     |         |
| +0.016   | 200.14 | -0.038   | 228.13 | 2   | N | 9  | 1175.5   | +0.0352 | 1175.5              |         |
|          | 313.22 | -0.009   | 341.22 | 3   | I | 8  | 1061.5   | -0.032  | 531.24              | +0.2006 |
|          | 400.26 | -0.006   | 428.25 | 4   | S | 7  | 948.38   | +0.003  | 948.38              |         |
|          | 529.3  | +0.0317  | 557.29 | 5   | E | 6  | 861.35   | +0.0058 | 861.35              |         |
|          | 586.32 |          | 614.31 | 6   | G | 5  | 732.31   | +0.0023 | 732.31              |         |
|          | 700.36 | +0.1052  | 728.36 | 7   | N | 4  | 675.29   | +0.0785 | 675.29              |         |
|          | 860.39 | -0.034   | 888.39 | 8   | C | 3  | 561.24   | +0.0514 | 561.24              |         |
|          | 957.45 |          | 985.44 | 9   | P | 2  | 401.21   | +0.0386 | 401.21              |         |
|          | 1086.5 | -0.063   | 1114.5 | 10  | E | 1  | 304.16   |         | 304.16              |         |
|          |        |          |        | 11  | R | 0  | 175.12   |         | 175.12              |         |



Scan number 9420 Raw file LNCAP\_Silac\_23F10\_set2\_03  
 Method ITMS; CID Peptide 253.16

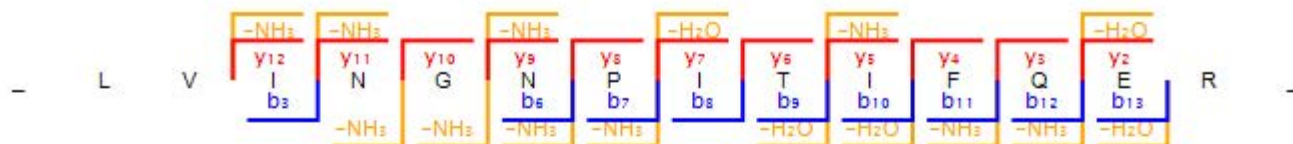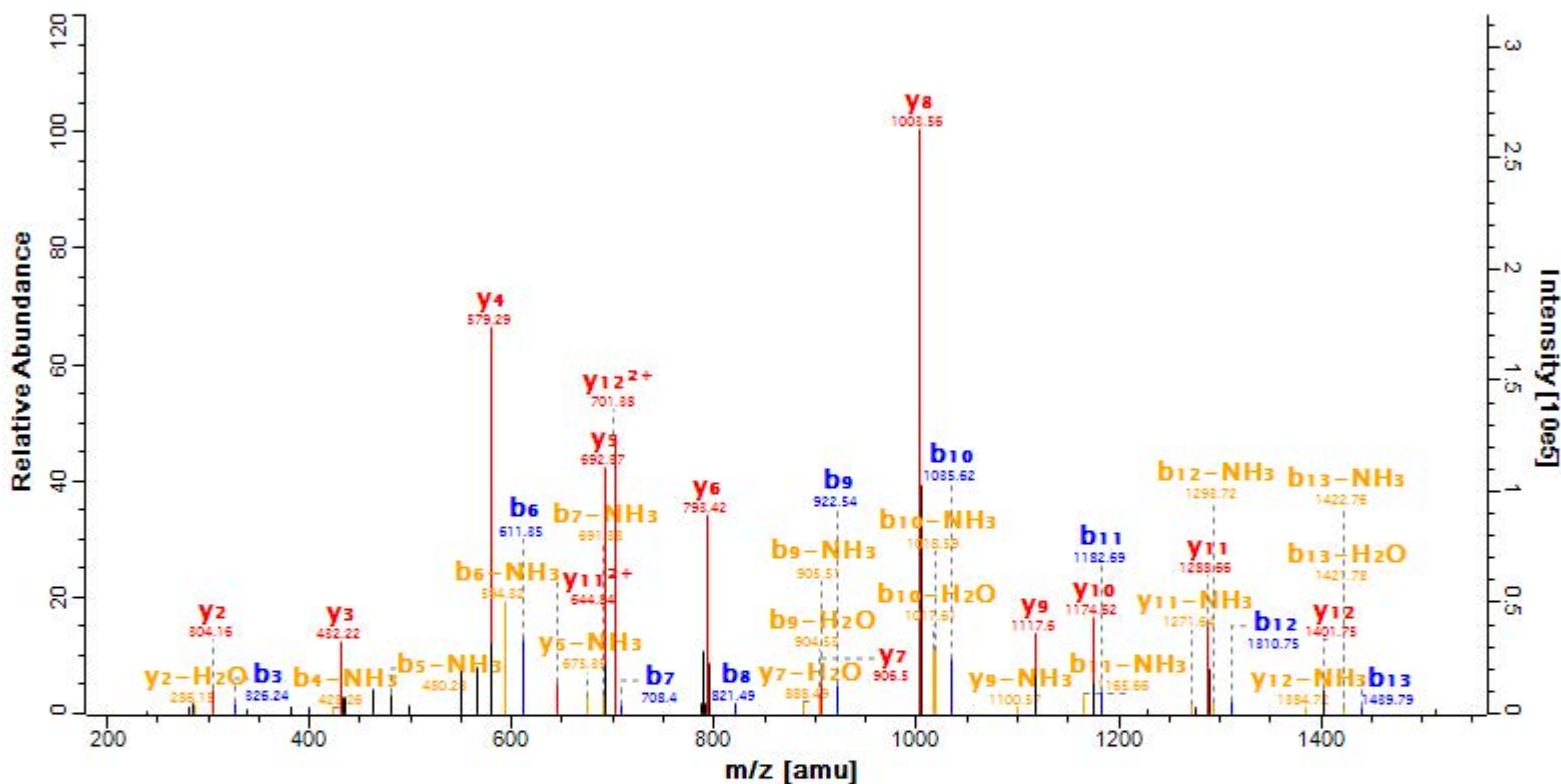

#### precursor information

|                   |                 |
|-------------------|-----------------|
| Mass:             | 1612.89334      |
| m/z:              | 807.45395       |
| Charge:           | 2+              |
| Retentiontime:    | 52.206375122070 |
| Score:            | 253.1591        |
| Mass Error [ppm]: | -0.21824        |
| PEP:              | 2.4731E-50      |
| Precursor Type:   | MULTI           |

| b ion     |          |     |   | y ion    |          | y <sup>2+</sup> ion |          |           |
|-----------|----------|-----|---|----------|----------|---------------------|----------|-----------|
| Δ dalton  | mass     | seq |   | Δ dalton | mass     | Δ dalton            | mass     |           |
|           | 114.0913 | 1   | L | 13       |          |                     |          |           |
|           | 213.1598 | 2   | V | 12       | 1500.817 |                     | 1500.817 |           |
| +0.203936 | 326.2438 | 3   | I | 11       | 1401.748 | +0.018722           | 701.3779 | +0.25908  |
|           | 440.2867 | 4   | N | 10       | 1288.664 | -0.01892            | 644.8359 | +0.279811 |
|           | 497.3082 | 5   | G | 9        | 1174.621 | +0.046959           | 1174.621 |           |
| +0.085692 | 611.3511 | 6   | N | 8        | 1117.6   | +0.023501           | 1117.6   |           |
| +0.010589 | 708.4039 | 7   | P | 7        | 1003.557 | +0.057212           | 1003.557 |           |
| +0.125377 | 821.488  | 8   | I | 6        | 906.5043 | -0.04194            | 906.5043 |           |
| -0.06152  | 922.5356 | 9   | T | 5        | 793.4203 | +0.012521           | 793.4203 |           |
| -0.12752  | 1035.62  | 10  | I | 4        | 692.3726 | +0.298725           | 692.3726 |           |
| -0.19984  | 1182.688 | 11  | F | 3        | 579.2885 | +0.087867           | 579.2885 |           |
| +0.129156 | 1310.747 | 12  | Q | 2        | 432.2201 | +0.022614           | 432.2201 |           |
| -0.23509  | 1439.789 | 13  | E | 1        | 304.1615 | +0.019485           | 304.1615 |           |
|           |          | 14  | R | 0        | 175.119  |                     | 175.119  |           |

#### general information

|                       |           |
|-----------------------|-----------|
| Annotation:           | 11 of 14  |
| AminoAcids Coverage:  | 79 %      |
| Intensity Coverage:   | 76 %      |
| Peak Coverage:        | 55 %      |
| Protein Localisation: | 67 ... 80 |

Scan number 9601 Raw file LNCAP\_Silac\_23F10\_set2\_03  
 Method ITMS: CID Pepti... 65.11

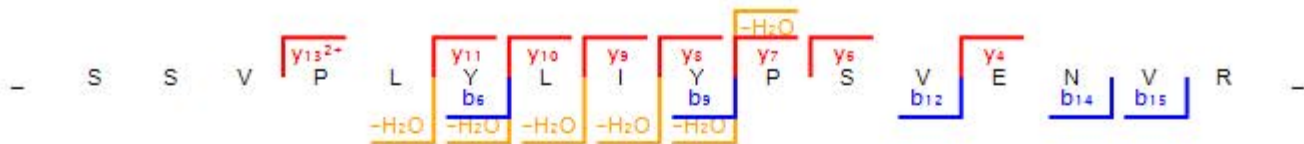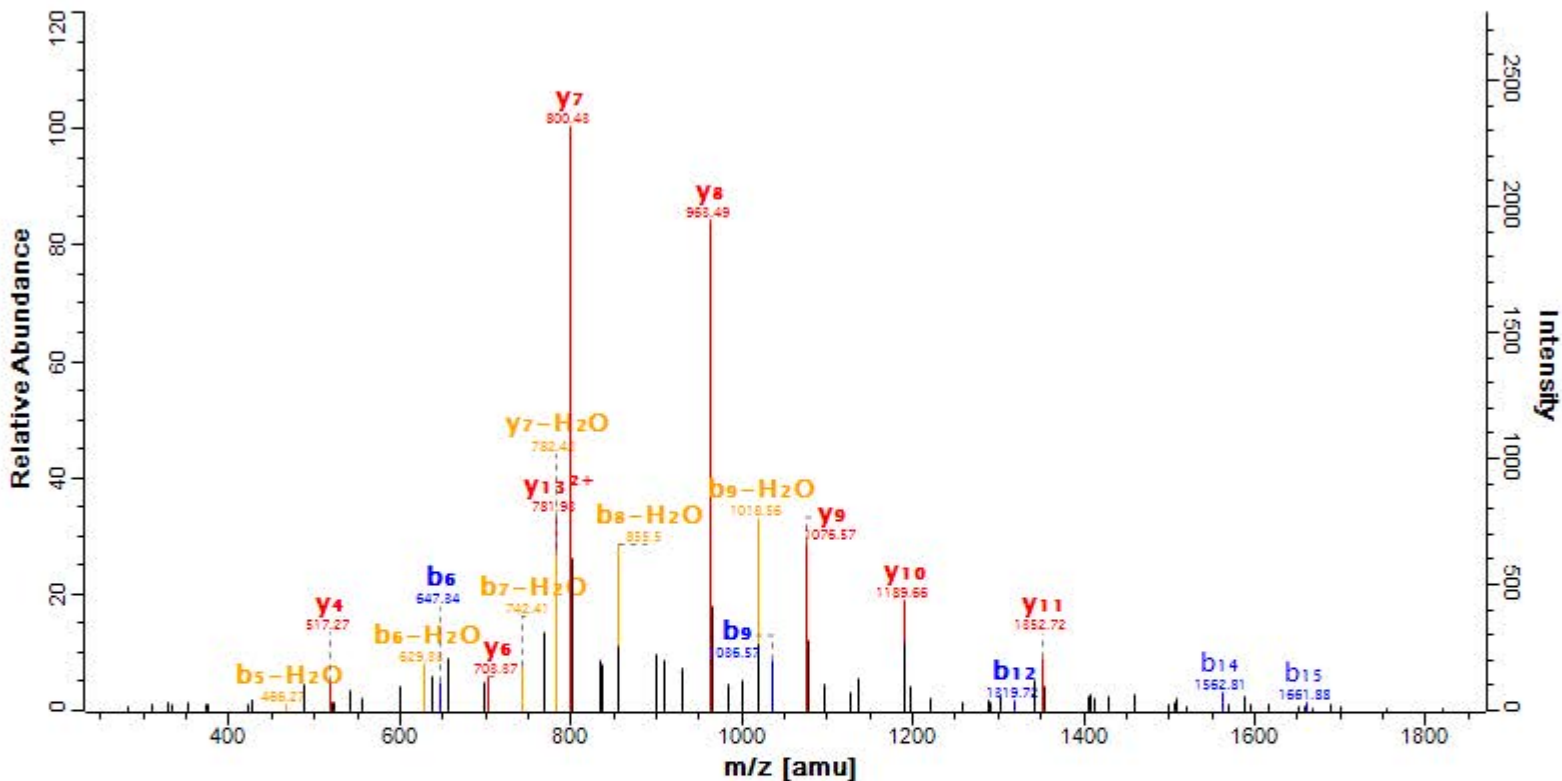

**precursor information**

|                   |                 |
|-------------------|-----------------|
| Mass:             | 1834.98263      |
| m/z:              | 918.49859       |
| Charge:           | 2+              |
| Retentiontime:    | 53.221874237060 |
| Score:            | 65.10685        |
| Mass Error [ppm]: | -0.14921        |
| PEP:              | 0.0018331       |
| Precursor Type:   | MULTI           |

**general information**

|                       |             |
|-----------------------|-------------|
| Annotation:           | 13 of 16    |
| AminoAcids Coverag    | 81 %        |
| Intensity Coverage:   | 60 %        |
| Peak Coverage:        | 22 %        |
| Protein Localisation: | 433 ... 448 |

| b ion     |          |    |     |    | y ion    |           | y <sup>2+</sup> ion |          |
|-----------|----------|----|-----|----|----------|-----------|---------------------|----------|
| Δ dalton  | mass     |    | seq |    | Δ dalton | mass      | Δ dalton            | mass     |
|           | 88.0393  | 1  | S   | 15 |          |           |                     |          |
|           | 175.0713 | 2  | S   | 14 | 1748.958 |           | 1748.958            |          |
|           | 274.1397 | 3  | V   | 13 | 1661.926 |           | 1661.926            |          |
|           | 371.1925 | 4  | P   | 12 | 1562.858 |           | 781.9325            | -0.00146 |
|           | 484.2766 | 5  | L   | 11 | 1465.805 |           | 1465.805            |          |
| +0.054445 | 647.3399 | 6  | Y   | 10 | 1352.721 | -0.03521  | 1352.721            |          |
|           | 760.424  | 7  | L   | 9  | 1189.658 | -7.9E-05  | 1189.658            |          |
|           | 873.508  | 8  | I   | 8  | 1076.573 | +0.021119 | 1076.573            |          |
| -0.11799  | 1036.571 | 9  | Y   | 7  | 963.4894 | +0.025898 | 963.4894            |          |
|           | 1133.624 | 10 | P   | 6  | 800.4261 | +0.036493 | 800.4261            |          |
|           | 1220.656 | 11 | S   | 5  | 703.3733 | +0.103234 | 703.3733            |          |
| -0.06697  | 1319.725 | 12 | V   | 4  | 616.3413 |           | 616.3413            |          |
|           | 1448.767 | 13 | E   | 3  | 517.2729 | +0.147829 | 517.2729            |          |
| -0.03702  | 1562.81  | 14 | N   | 2  | 388.2303 |           | 388.2303            |          |
| -0.00143  | 1661.879 | 15 | V   | 1  | 274.1874 |           | 274.1874            |          |
|           |          | 16 | R   | 0  | 175.119  |           | 175.119             |          |

Scan number 9929 Raw file LNCAP\_Silac\_23F10\_set2\_03  
 Method ITMS; CID Pepti... 83.86

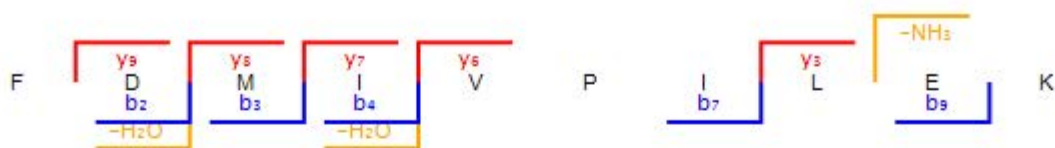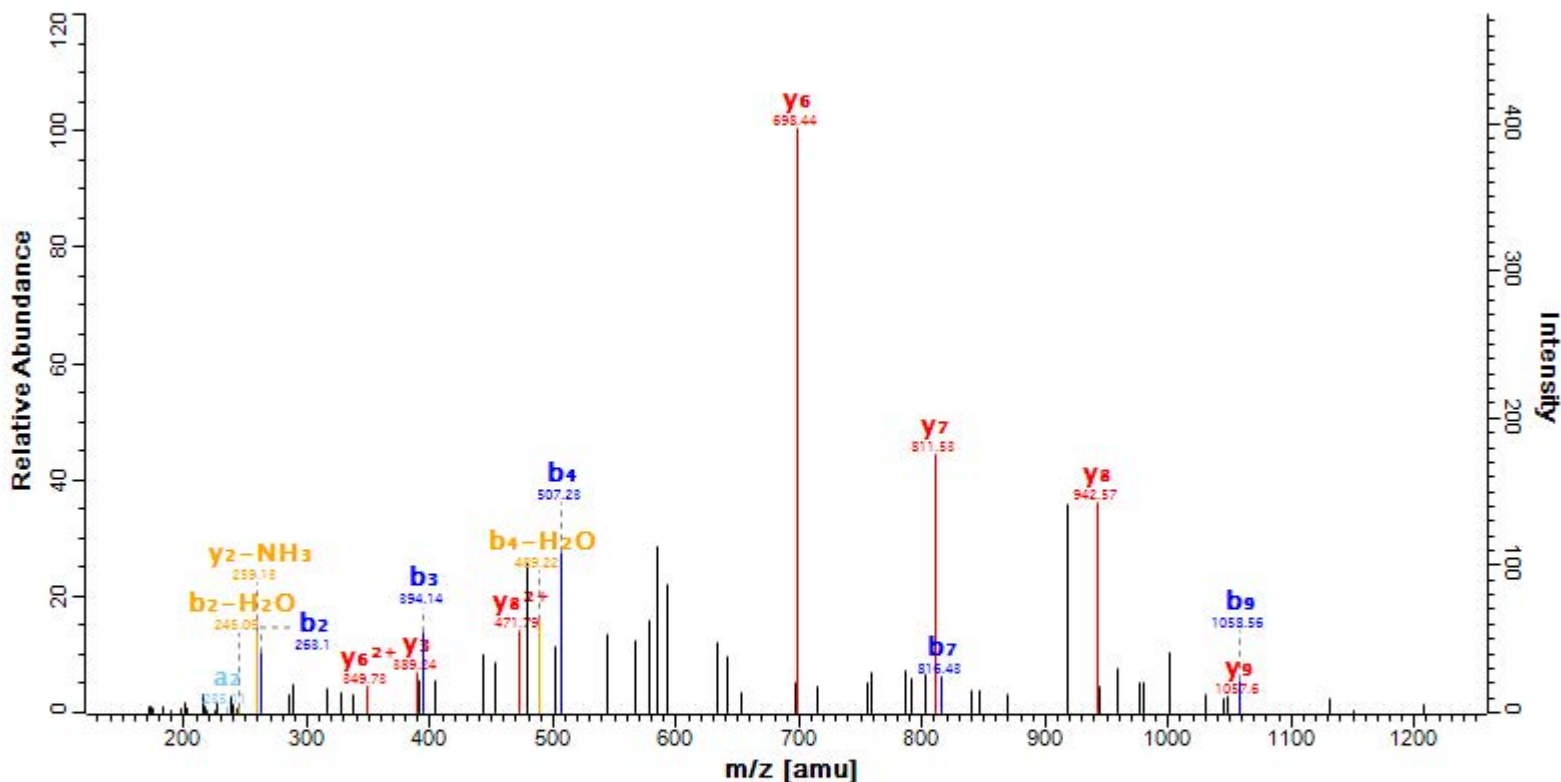

#### precursor information

|                   |                 |
|-------------------|-----------------|
| Mass:             | 1203.6574       |
| m/z:              | 602.83598       |
| Charge:           | 2+              |
| Retentiontime:    | 55.085334777832 |
| Score:            | 83.86178        |
| Mass Error [ppm]: | 0.057752        |
| PEP:              | 0.0039125       |
| Precursor Type:   | MULTI           |

|                       |             |
|-----------------------|-------------|
| Annotation:           | 7 of 10     |
| AminoAcids Coverage:  | 70 %        |
| Intensity Coverage:   | 45 %        |
| Peak Coverage:        | 21 %        |
| Protein Localisation: | 439 ... 448 |

| a ion    |        | b ion    |        |    |     |          | y ion  |          | y <sup>2+</sup> ion |  |
|----------|--------|----------|--------|----|-----|----------|--------|----------|---------------------|--|
| Δ dalton | mass   | Δ dalton | mass   |    | seq | Δ dalton | mass   | Δ dalton | mass                |  |
|          | 120.08 |          | 148.08 | 1  | F   | 9        |        |          |                     |  |
| +0.232   | 235.11 | +0.03    | 263.1  | 2  | D   | 8        | 1057.6 | +0.1014  | 1057.6              |  |
|          | 366.15 | +0.0426  | 394.14 | 3  | M   | 7        | 942.57 | -0.056   | 471.79              |  |
|          | 479.23 | +0.028   | 507.23 | 4  | I   | 6        | 811.53 | +0.0393  | 811.53              |  |
|          | 578.3  |          | 606.3  | 5  | V   | 5        | 698.44 | +0.0884  | 349.73              |  |
|          | 675.35 |          | 703.35 | 6  | P   | 4        | 599.38 |          | 599.38              |  |
|          | 788.44 | -0.052   | 816.43 | 7  | I   | 3        | 502.32 |          | 502.32              |  |
|          | 901.52 |          | 929.52 | 8  | L   | 2        | 389.24 | -0.084   | 389.24              |  |
|          | 1030.6 | -0.013   | 1058.6 | 9  | E   | 1        | 276.16 |          | 276.16              |  |
|          |        |          |        | 10 | K   | 0        | 147.11 |          | 147.11              |  |

Scan number 10054 Raw file LNCAP\_Silac\_23F10\_set2\_04  
 Method ITMS; CID Pepti... 176.78

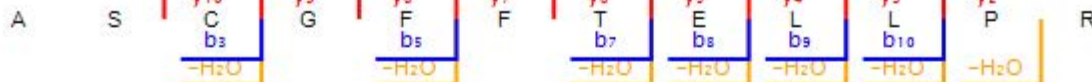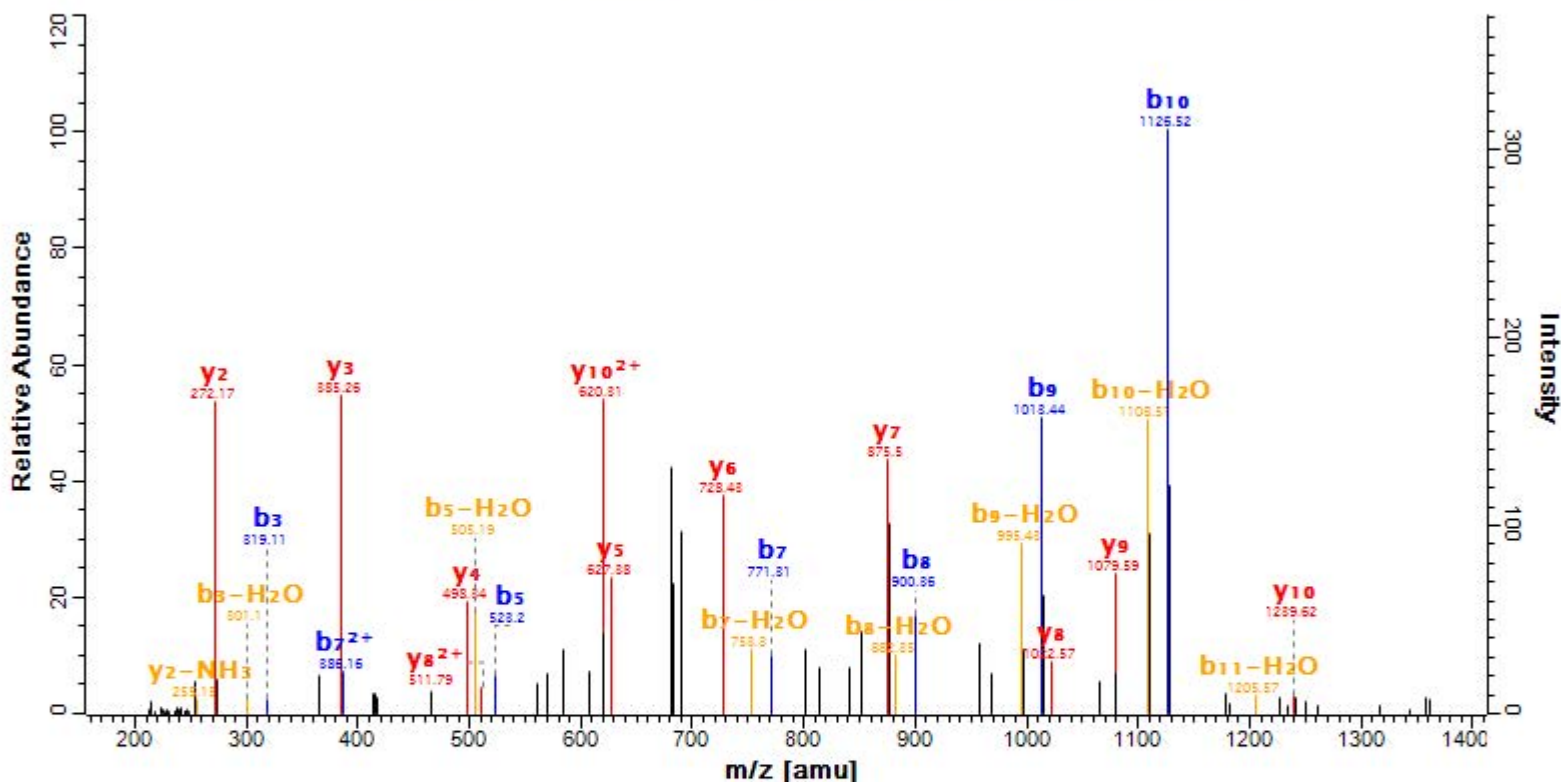

#### precursor information

|                   |                 |
|-------------------|-----------------|
| Mass:             | 1396.68082      |
| m/z:              | 699.34769       |
| Charge:           | 2+              |
| Retentiontime:    | 57.020168304443 |
| Score:            | 176.7758        |
| Mass Error [ppm]: | -0.06987        |
| PEP:              | 1.3115E-10      |
| Precursor Type:   | MULTI           |

#### general information

|                       |             |
|-----------------------|-------------|
| Annotation:           | 9 of 12     |
| AminoAcids Coverage:  | 75 %        |
| Intensity Coverage:   | 59 %        |
| Peak Coverage:        | 30 %        |
| Protein Localisation: | 836 ... 847 |

| b <sup>2+</sup> ion |        | b ion    |        | seq |   |    | y ion    |         | y <sup>2+</sup> ion |         |
|---------------------|--------|----------|--------|-----|---|----|----------|---------|---------------------|---------|
| Δ dalton            | mass   | Δ dalton | mass   |     |   |    | Δ dalton | mass    | Δ dalton            | mass    |
|                     | 72.044 |          | 72.044 | 1   | A | 11 |          |         |                     |         |
|                     | 159.08 |          | 159.08 | 2   | S | 10 | 1326.7   |         | 1326.7              |         |
|                     | 319.11 | -0.057   | 319.11 | 3   | C | 9  | 1239.6   | -0.041  | 620.31              | +0.0115 |
|                     | 376.13 |          | 376.13 | 4   | G | 8  | 1079.6   | -0.023  | 1079.6              |         |
|                     | 523.2  | +0.267   | 523.2  | 5   | F | 7  | 1022.6   | -0.028  | 511.79              | -0.497  |
|                     | 670.27 |          | 670.27 | 6   | F | 6  | 875.5    | +0.0369 | 875.5               |         |
| +0.1214             | 386.16 | +0.0708  | 771.31 | 7   | T | 5  | 728.43   | +0.0474 | 728.43              |         |
|                     | 900.36 | +0.025   | 900.36 | 8   | E | 4  | 627.38   | -0.022  | 627.38              |         |
|                     | 1013.4 | -0.168   | 1013.4 | 9   | L | 3  | 498.34   | +0.0278 | 498.34              |         |
|                     | 1126.5 | -0.102   | 1126.5 | 10  | L | 2  | 385.26   | +0.0117 | 385.26              |         |
|                     | 1223.6 |          | 1223.6 | 11  | P | 1  | 272.17   | -0.056  | 272.17              |         |
|                     |        |          |        | 12  | R | 0  | 175.12   |         | 175.12              |         |

Scan number 10279 Raw file LNCAP\_Silac\_23F10\_set2\_04  
 Method ITMS: CID Pepti... 63.17

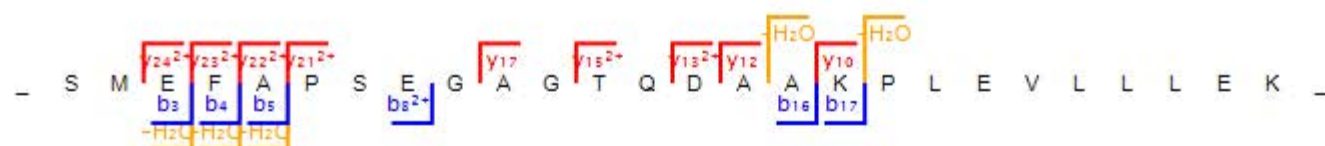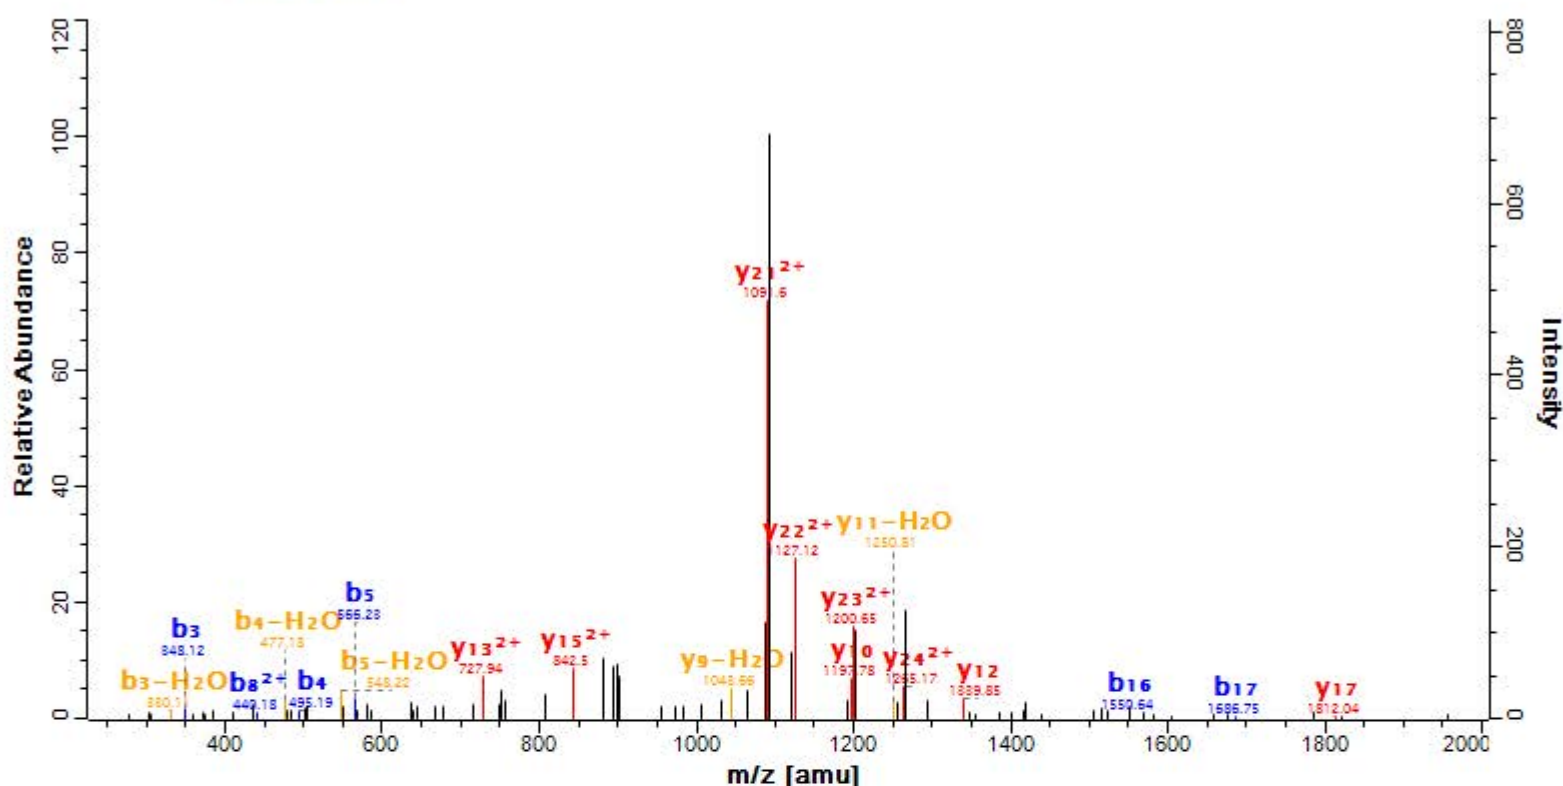

#### precursor information

|                   |                 |
|-------------------|-----------------|
| Mass:             | 2730.38001      |
| m/z:              | 911.13395       |
| Charge:           | 3+              |
| Retention time:   | 58.537189483642 |
| Score:            | 63.16536        |
| Mass Error [ppm]: | 0.51346         |
| PEP:              | 4.4306E-05      |
| Precursor Type:   | MULTI           |

| b <sup>2+</sup> ion |        | b ion    |        | seq |   |    | y ion    |         | y <sup>2+</sup> ion |         |
|---------------------|--------|----------|--------|-----|---|----|----------|---------|---------------------|---------|
| Δ dalton            | mass   | Δ dalton | mass   |     |   |    | Δ dalton | mass    | Δ dalton            | mass    |
|                     | 88.039 |          | 88.039 | 1   | S | 25 |          |         |                     |         |
|                     | 219.08 |          | 219.08 | 2   | M | 24 | 2660.4   |         | 2660.4              |         |
|                     | 348.12 | +0.2817  | 348.12 | 3   | E | 23 | 2529.3   |         | 1265.2              | -0.317  |
|                     | 495.19 | +0.3984  | 495.19 | 4   | F | 22 | 2400.3   |         | 1200.7              | -0.038  |
|                     | 566.23 | +0.0809  | 566.23 | 5   | A | 21 | 2253.2   |         | 1127.1              | +0.1707 |
|                     | 663.28 |          | 663.28 | 6   | P | 20 | 2182.2   |         | 1091.6              | -0.045  |
|                     | 750.31 |          | 750.31 | 7   | S | 19 | 2085.1   |         | 2085.1              |         |
| -0.024              | 440.18 |          | 879.36 | 8   | E | 18 | 1998.1   |         | 1998.1              |         |
|                     | 936.38 |          | 936.38 | 9   | G | 17 | 1869.1   |         | 1869.1              |         |
|                     | 1007.4 |          | 1007.4 | 10  | A | 16 | 1812     | +0.4727 | 1812                |         |
|                     | 1064.4 |          | 1064.4 | 11  | G | 15 | 1741     |         | 1741                |         |
|                     | 1165.5 |          | 1165.5 | 12  | T | 14 | 1684     |         | 842.5               | +0.0804 |
|                     | 1293.5 |          | 1293.5 | 13  | Q | 13 | 1582.9   |         | 1582.9              |         |
|                     | 1408.6 |          | 1408.6 | 14  | D | 12 | 1454.9   |         | 727.94              | +0.2444 |
|                     | 1479.6 |          | 1479.6 | 15  | A | 11 | 1339.9   | -0.138  | 1339.9              |         |
|                     | 1550.6 | -0.166   | 1550.6 | 16  | A | 10 | 1268.8   |         | 1268.8              |         |
|                     | 1686.8 | -0.279   | 1686.8 | 17  | K | 9  | 1197.8   | +0.2466 | 1197.8              |         |
|                     | 1783.8 |          | 1783.8 | 18  | P | 8  | 1061.7   |         | 1061.7              |         |
|                     | 1896.9 |          | 1896.9 | 19  | L | 7  | 964.62   |         | 964.62              |         |
|                     | 2025.9 |          | 2025.9 | 20  | E | 6  | 851.53   |         | 851.53              |         |
|                     | 2125   |          | 2125   | 21  | V | 5  | 722.49   |         | 722.49              |         |
|                     | 2238.1 |          | 2238.1 | 22  | L | 4  | 623.42   |         | 623.42              |         |
|                     | 2351.2 |          | 2351.2 | 23  | L | 3  | 510.34   |         | 510.34              |         |
|                     | 2464.3 |          | 2464.3 | 24  | L | 2  | 397.25   |         | 397.25              |         |
|                     | 2593.3 |          | 2593.3 | 25  | E | 1  | 284.17   |         | 284.17              |         |
|                     |        |          |        | 26  | K | 0  | 155.13   |         | 155.13              |         |

#### general information

|                       |             |
|-----------------------|-------------|
| Annotation:           | 12 of 26    |
| AminoAcids Coverage:  | 46 %        |
| Intensity Coverage:   | 35 %        |
| Peak Coverage:        | 22 %        |
| Protein Localisation: | 374 ... 399 |

Scan number 10526 Raw file LNCAP\_Silac\_23F10\_set2\_04  
 Method ITMS: CID Pepti... 177.44

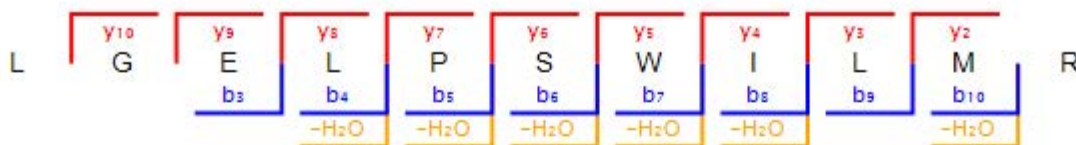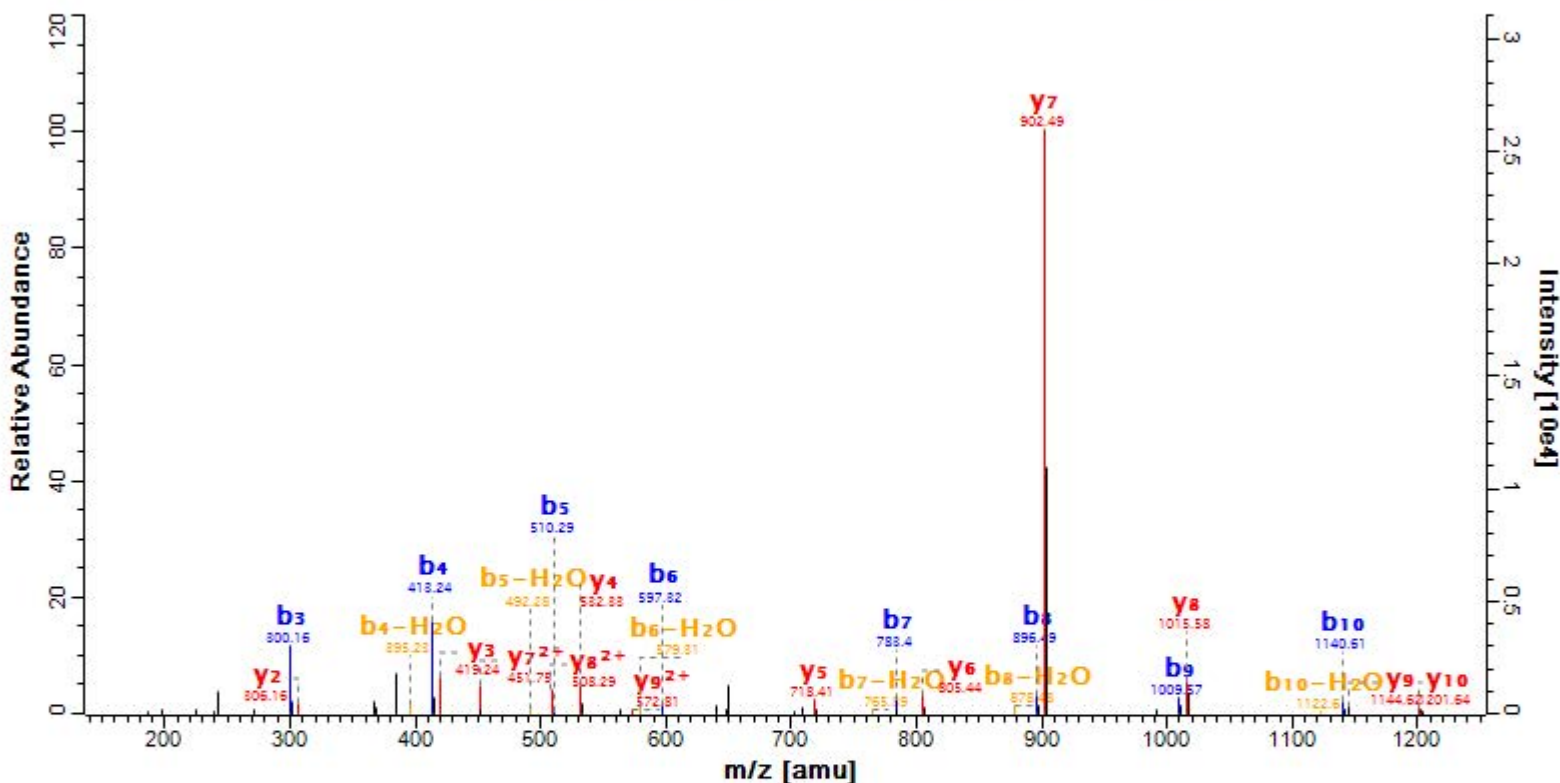

**precursor information**

|                   |                 |
|-------------------|-----------------|
| Mass:             | 1313.71641      |
| m/z:              | 657.86548       |
| Charge:           | 2+              |
| Retentiontime:    | 60.257251739502 |
| Score:            | 177.4392        |
| Mass Error [ppm]: | -0.12453        |
| PEP:              | 3.0091E-08      |
| Precursor Type:   | MULTI           |

**general information**

|                       |           |
|-----------------------|-----------|
| Annotation:           | 9 of 11   |
| AminoAcids Coverage:  | 82 %      |
| Intensity Coverage:   | 66 %      |
| Peak Coverage:        | 37 %      |
| Protein Localisation: | 23 ... 33 |

| b ion     |          |    |     |    | y ion    |           | y <sup>2+</sup> ion |           |
|-----------|----------|----|-----|----|----------|-----------|---------------------|-----------|
| Δ dalton  | mass     |    | seq |    | Δ dalton | mass      | Δ dalton            | mass      |
|           | 114.0913 | 1  | L   | 10 |          |           |                     |           |
|           | 171.1128 | 2  | G   | 9  | 1201.64  | -0.02907  | 1201.64             |           |
| -0.02582  | 300.1554 | 3  | E   | 8  | 1144.618 | -0.05363  | 572.8128            | +0.134647 |
| +0.047709 | 413.2395 | 4  | L   | 7  | 1015.576 | -0.06621  | 508.2915            | +0.265074 |
| +0.13081  | 510.2922 | 5  | P   | 6  | 902.4917 | +0.001494 | 451.7495            | +0.084511 |
| -0.07773  | 597.3243 | 6  | S   | 5  | 805.4389 | -0.00659  | 805.4389            |           |
| -0.03211  | 783.4036 | 7  | W   | 4  | 718.4069 | +0.041059 | 718.4069            |           |
| -0.12002  | 896.4876 | 8  | I   | 3  | 532.3276 | +0.079235 | 532.3276            |           |
| -0.1461   | 1009.572 | 9  | L   | 2  | 419.2435 | +0.037932 | 419.2435            |           |
| -0.06579  | 1140.612 | 10 | M   | 1  | 306.1594 | +0.045153 | 306.1594            |           |
|           |          | 11 | R   | 0  | 175.119  |           | 175.119             |           |

Scan number 10568 Raw file LNCAP\_Silac\_23F10\_set2\_04  
 Method ITMS; CID Pepti... 84.18

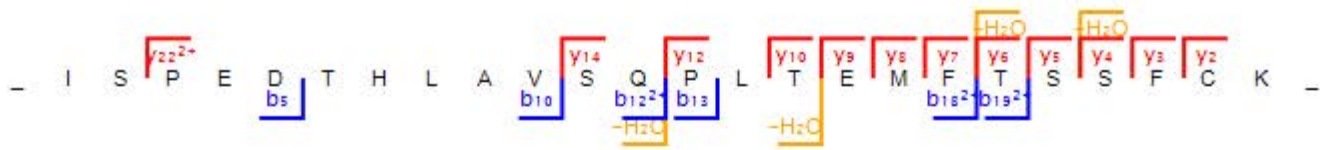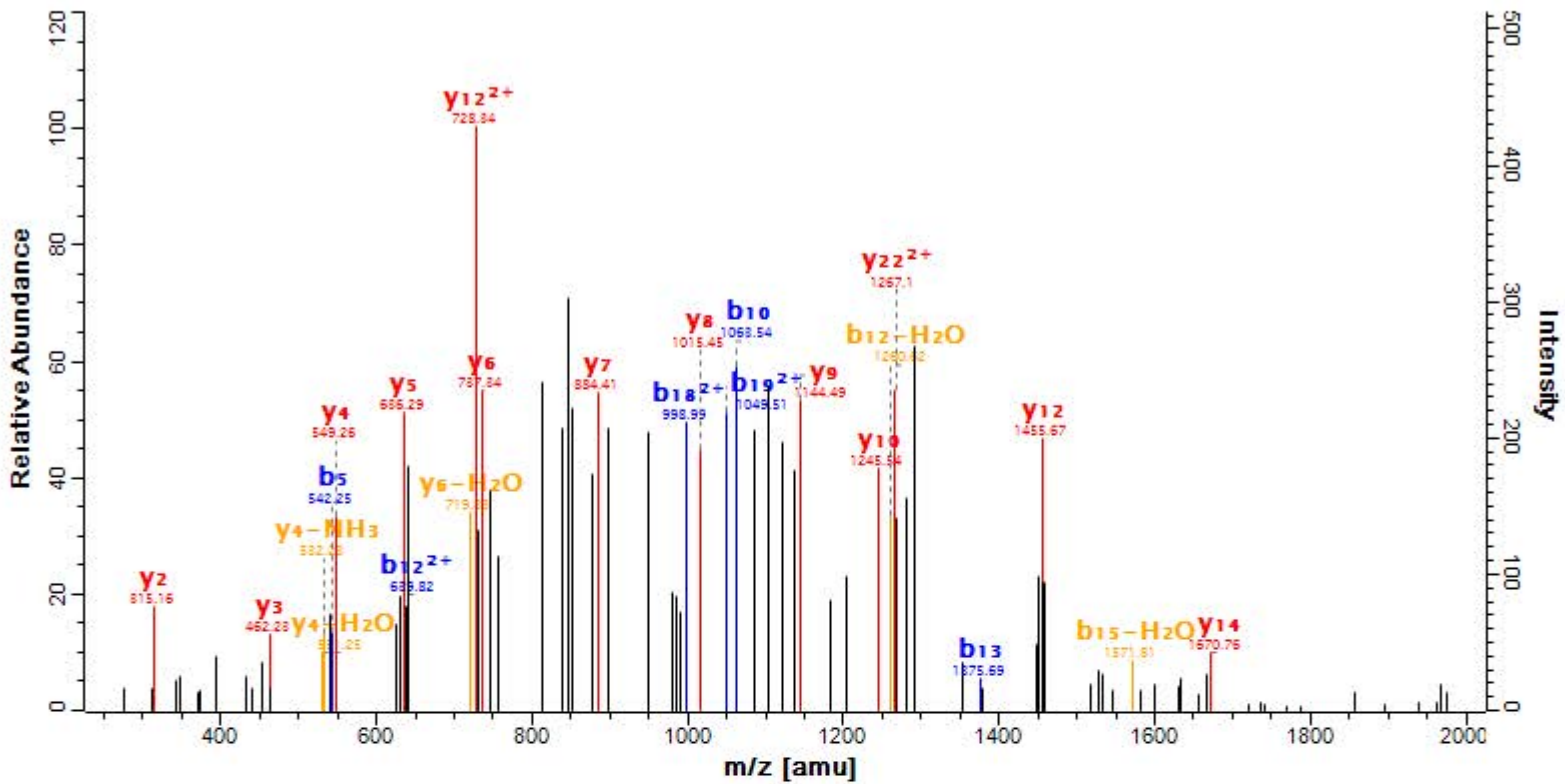

precursor information

|                   |                 |
|-------------------|-----------------|
| Mass:             | 2724.27952      |
| m/z:              | 909.10045       |
| Charge:           | 3+              |
| Retentiontime:    | 60.564037322998 |
| Score:            | 84.18081        |
| Mass Error [ppm]: | 0.73692         |
| PEP:              | 7.0891E-06      |
| Precursor Type:   | MULTI           |

| b <sup>2+</sup> ion |        | b ion    |        | seq |   |    | y ion    |         | y <sup>2+</sup> ion |         |
|---------------------|--------|----------|--------|-----|---|----|----------|---------|---------------------|---------|
| Δ dalton            | mass   | Δ dalton | mass   |     |   |    | Δ dalton | mass    | Δ dalton            | mass    |
|                     | 114.09 |          | 114.09 | 1   | I | 23 |          |         |                     |         |
|                     | 201.12 |          | 201.12 | 2   | S | 22 | 2620.2   |         | 2620.2              |         |
|                     | 298.18 |          | 298.18 | 3   | P | 21 | 2533.2   |         | 1267.1              | -0.153  |
|                     | 427.22 |          | 427.22 | 4   | E | 20 | 2436.1   |         | 2436.1              |         |
|                     | 542.25 | +0.025   | 542.25 | 5   | D | 19 | 2307.1   |         | 2307.1              |         |
|                     | 643.29 |          | 643.29 | 6   | T | 18 | 2192.1   |         | 2192.1              |         |
|                     | 780.35 |          | 780.35 | 7   | H | 17 | 2091     |         | 2091                |         |
|                     | 893.44 |          | 893.44 | 8   | L | 16 | 1954     |         | 1954                |         |
|                     | 964.47 |          | 964.47 | 9   | A | 15 | 1840.9   |         | 1840.9              |         |
|                     | 1063.5 | +0.122   | 1063.5 | 10  | V | 14 | 1769.8   |         | 1769.8              |         |
|                     | 1150.6 |          | 1150.6 | 11  | S | 13 | 1670.8   | +0.2697 | 1670.8              |         |
| -0.038              | 639.82 |          | 1278.6 | 12  | Q | 12 | 1583.7   |         | 1583.7              |         |
|                     | 1375.7 | -0.306   | 1375.7 | 13  | P | 11 | 1455.7   | -0.116  | 728.34              | +0.4026 |
|                     | 1488.8 |          | 1488.8 | 14  | L | 10 | 1358.6   |         | 1358.6              |         |
|                     | 1589.8 |          | 1589.8 | 15  | T | 9  | 1245.5   | -0.029  | 1245.5              |         |
|                     | 1718.9 |          | 1718.9 | 16  | E | 8  | 1144.5   | +0.0122 | 1144.5              |         |
|                     | 1849.9 |          | 1849.9 | 17  | M | 7  | 1015.4   | -0.03   | 1015.4              |         |
| +0.4372             | 998.99 |          | 1997   | 18  | F | 6  | 884.41   | -0.005  | 884.41              |         |
| +0.2507             | 1049.5 |          | 2098   | 19  | T | 5  | 737.34   | -0.089  | 737.34              |         |
|                     | 2185   |          | 2185   | 20  | S | 4  | 636.29   | +0.0086 | 636.29              |         |
|                     | 2272.1 |          | 2272.1 | 21  | S | 3  | 549.26   | +0.0583 | 549.26              |         |
|                     | 2419.1 |          | 2419.1 | 22  | F | 2  | 462.23   | +0.0671 | 462.23              |         |
|                     | 2579.2 |          | 2579.2 | 23  | C | 1  | 315.16   | +0.1872 | 315.16              |         |
|                     |        |          |        | 24  | K | 0  | 155.13   |         | 155.13              |         |

general information

|                       |           |
|-----------------------|-----------|
| Annotation:           | 15 of 24  |
| AminoAcids Coverage:  | 62 %      |
| Intensity Coverage:   | 41 %      |
| Peak Coverage:        | 26 %      |
| Protein Localisation: | 45 ... 68 |

Scan number 10998 Raw file LNCAP\_Silac\_23F10\_set2\_04  
 Method ITMS; CID Pepti... 39.09

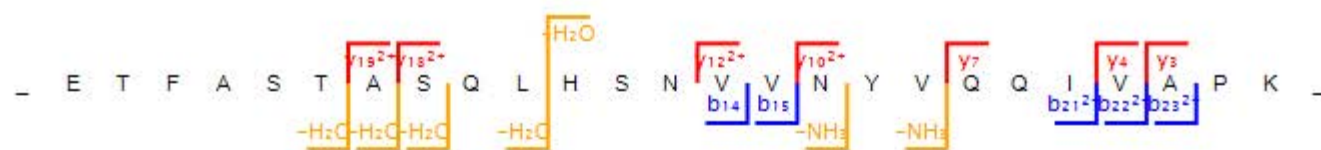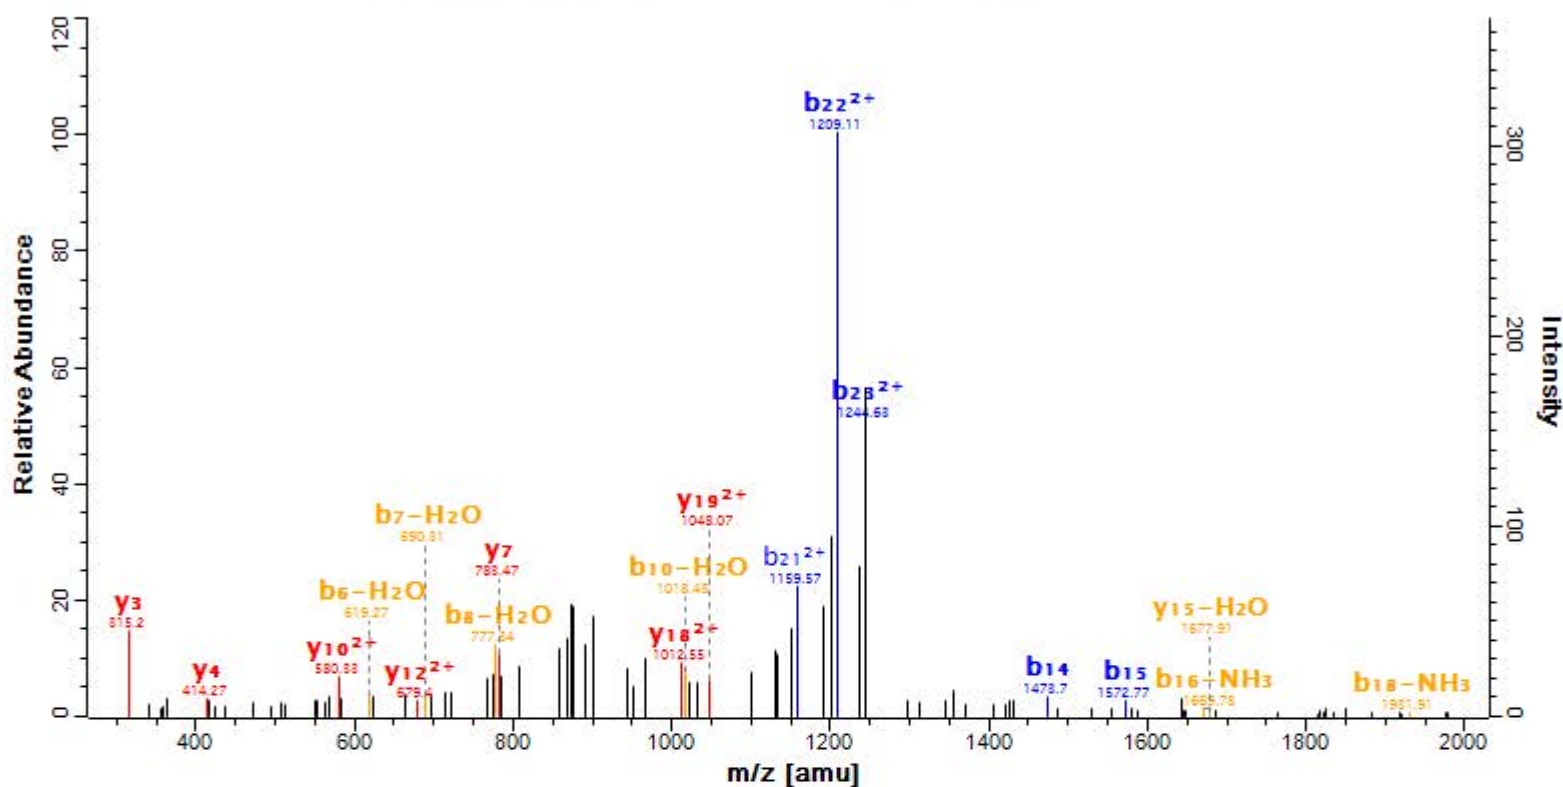

#### precursor information

|                   |                 |
|-------------------|-----------------|
| Mass:             | 2730.39912      |
| m/z:              | 911.14032       |
| Charge:           | 3+              |
| Retention time:   | 64.100265502929 |
| Score:            | 39.08555        |
| Mass Error [ppm]: | 0.52252         |
| PEP:              | 0.011744        |
| Precursor Type:   | MULTI           |

| b <sup>2+</sup> ion |        | b ion    |        | seq |   |    | y ion    |         | y <sup>2+</sup> ion |         |
|---------------------|--------|----------|--------|-----|---|----|----------|---------|---------------------|---------|
| Δ dalton            | mass   | Δ dalton | mass   |     |   |    | Δ dalton | mass    | Δ dalton            | mass    |
|                     | 130.05 |          | 130.05 | 1   | E | 24 |          |         |                     |         |
|                     | 231.1  |          | 231.1  | 2   | T | 23 | 2602.4   |         | 2602.4              |         |
|                     | 378.17 |          | 378.17 | 3   | F | 22 | 2501.3   |         | 2501.3              |         |
|                     | 449.2  |          | 449.2  | 4   | A | 21 | 2354.2   |         | 2354.2              |         |
|                     | 536.24 |          | 536.24 | 5   | S | 20 | 2283.2   |         | 2283.2              |         |
|                     | 637.28 |          | 637.28 | 6   | T | 19 | 2196.2   |         | 2196.2              |         |
|                     | 708.32 |          | 708.32 | 7   | A | 18 | 2095.1   |         | 1048.1              | +0.145  |
|                     | 795.35 |          | 795.35 | 8   | S | 17 | 2024.1   |         | 1012.5              | +0.0106 |
|                     | 923.41 |          | 923.41 | 9   | Q | 16 | 1937.1   |         | 1937.1              |         |
|                     | 1036.5 |          | 1036.5 | 10  | L | 15 | 1809     |         | 1809                |         |
|                     | 1173.6 |          | 1173.6 | 11  | H | 14 | 1695.9   |         | 1695.9              |         |
|                     | 1260.6 |          | 1260.6 | 12  | S | 13 | 1558.9   |         | 1558.9              |         |
|                     | 1374.6 |          | 1374.6 | 13  | N | 12 | 1471.8   |         | 1471.8              |         |
|                     | 1473.7 | -0.009   | 1473.7 | 14  | V | 11 | 1357.8   |         | 679.4               | -0.472  |
|                     | 1572.8 | +0.0959  | 1572.8 | 15  | V | 10 | 1258.7   |         | 1258.7              |         |
|                     | 1686.8 |          | 1686.8 | 16  | N | 9  | 1159.6   |         | 580.33              | +0.0866 |
|                     | 1849.9 |          | 1849.9 | 17  | Y | 8  | 1045.6   |         | 1045.6              |         |
|                     | 1948.9 |          | 1948.9 | 18  | V | 7  | 882.54   |         | 882.54              |         |
|                     | 2077   |          | 2077   | 19  | Q | 6  | 783.47   | -0.088  | 783.47              |         |
|                     | 2205.1 |          | 2205.1 | 20  | Q | 5  | 655.41   |         | 655.41              |         |
| -0.017              | 1159.6 |          | 2318.1 | 21  | I | 4  | 527.36   |         | 527.36              |         |
| +0.1954             | 1209.1 |          | 2417.2 | 22  | V | 3  | 414.27   | +0.2716 | 414.27              |         |
| -0.087              | 1244.6 |          | 2488.2 | 23  | A | 2  | 315.2    | +0.0224 | 315.2               |         |
|                     | 2585.3 |          | 2585.3 | 24  | P | 1  | 244.17   |         | 244.17              |         |
|                     |        |          |        | 25  | K | 0  | 147.11   |         | 147.11              |         |

#### general information

|                       |             |
|-----------------------|-------------|
| Annotation:           | 13 of 25    |
| AminoAcids Coverage:  | 52 %        |
| Intensity Coverage:   | 37 %        |
| Peak Coverage:        | 20 %        |
| Protein Localisation: | 632 ... 656 |



Scan number 11067 Raw file LNCAP\_Silac\_23F10\_set2\_04  
 Method ITMS; CID Pepti... 80.54

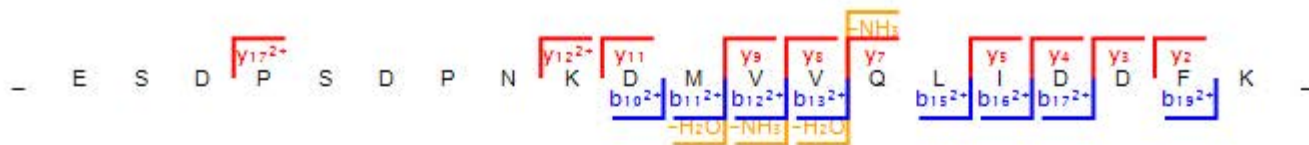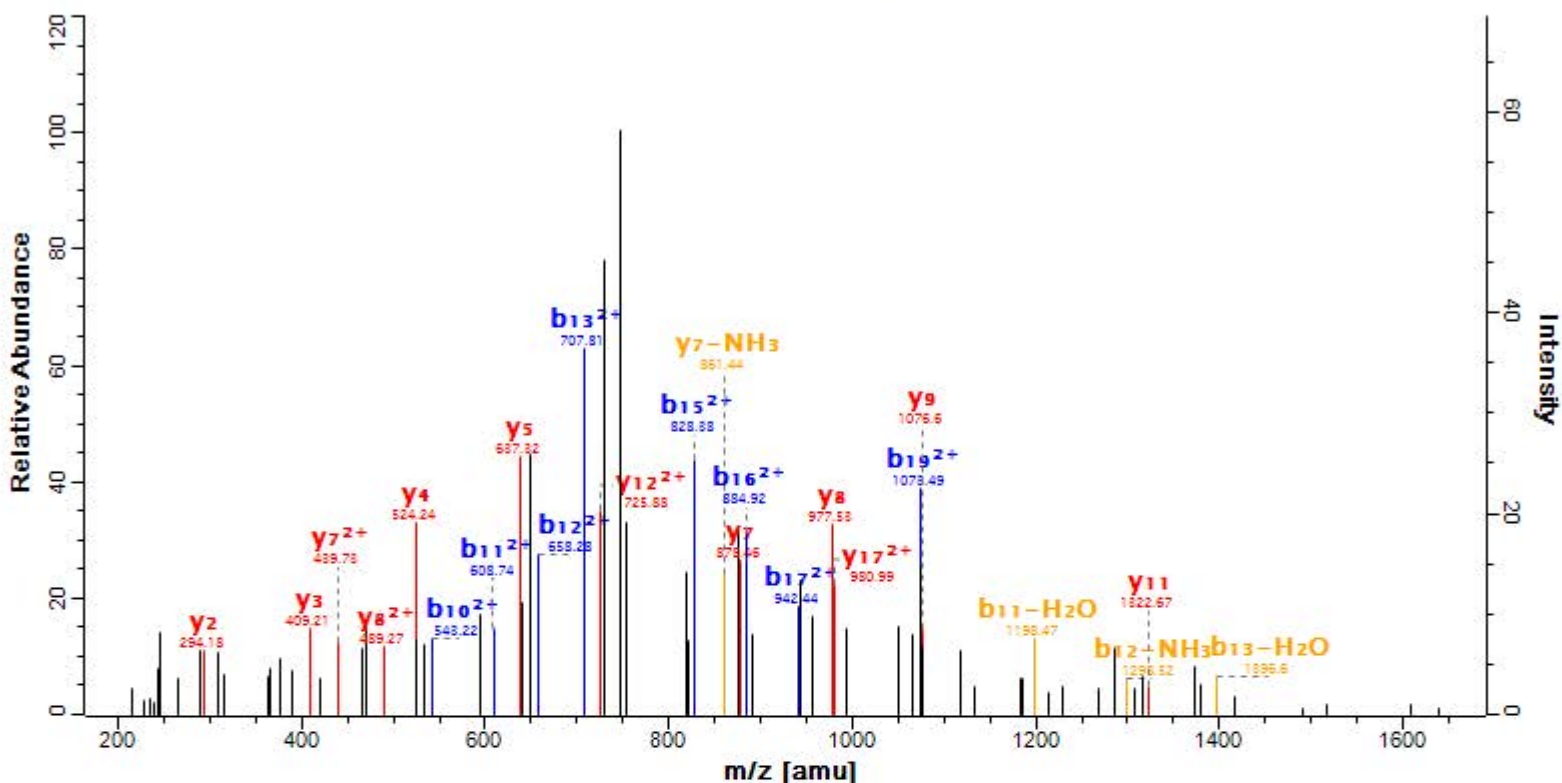

**precursor information**

|                   |                 |
|-------------------|-----------------|
| Mass:             | 2291.0634       |
| m/z:              | 764.69508       |
| Charge:           | 3+              |
| Retentiontime:    | 64.729248046875 |
| Score:            | 80.54491        |
| Mass Error [ppm]: | 0.28551         |
| PEP:              | 8.5693E-05      |
| Precursor Type:   | MULTI           |

**general information**

|                       |             |
|-----------------------|-------------|
| Annotation:           | 12 of 20    |
| AminoAcids Coverage:  | 60 %        |
| Intensity Coverage:   | 42 %        |
| Peak Coverage:        | 30 %        |
| Protein Localisation: | 176 ... 195 |

| b <sup>2+</sup> ion |         | b ion    |        | seq |   |    | y ion    |         | y <sup>2+</sup> ion |         |
|---------------------|---------|----------|--------|-----|---|----|----------|---------|---------------------|---------|
| Δ dalton            | mass    | Δ dalton | mass   |     |   |    | Δ dalton | mass    | Δ dalton            | mass    |
|                     | 130.05  |          | 130.05 | 1   | E | 19 |          |         |                     |         |
|                     | 217.08  |          | 217.08 | 2   | S | 18 | 2163     |         | 2163                |         |
|                     | 332.11  |          | 332.11 | 3   | D | 17 | 2076     |         | 2076                |         |
|                     | 429.16  |          | 429.16 | 4   | P | 16 | 1961     |         | 980.99              | +0.4235 |
|                     | 516.19  |          | 516.19 | 5   | S | 15 | 1863.9   |         | 1863.9              |         |
|                     | 631.22  |          | 631.22 | 6   | D | 14 | 1776.9   |         | 1776.9              |         |
|                     | 728.27  |          | 728.27 | 7   | P | 13 | 1661.9   |         | 1661.9              |         |
|                     | 842.32  |          | 842.32 | 8   | N | 12 | 1564.8   |         | 1564.8              |         |
|                     | 970.41  |          | 970.41 | 9   | K | 11 | 1450.8   |         | 725.88              | -0.463  |
| -0.02               | 543.22  |          | 1085.4 | 10  | D | 10 | 1322.7   | -0.091  | 1322.7              |         |
| +0.4423             | 608.74  |          | 1216.5 | 11  | M | 9  | 1207.6   |         | 1207.6              |         |
| +0.2843             | 658.28  |          | 1315.5 | 12  | V | 8  | 1076.6   | -0.249  | 1076.6              |         |
| -0.083              | 707.81  |          | 1414.6 | 13  | V | 7  | 977.53   | -0.009  | 489.27              | +0.0716 |
|                     | 1542.7  |          | 1542.7 | 14  | Q | 6  | 878.46   | +0.1225 | 439.73              | +0.4468 |
| +0.0934             | 4828.38 |          | 1655.8 | 15  | L | 5  | 750.4    |         | 750.4               |         |
| +0.2261             | 884.92  |          | 1768.8 | 16  | I | 4  | 637.32   | +0.1777 | 637.32              |         |
| -0.035              | 942.44  |          | 1883.9 | 17  | D | 3  | 524.24   | +0.0654 | 524.24              |         |
|                     | 1998.9  |          | 1998.9 | 18  | D | 2  | 409.21   | +0.038  | 409.21              |         |
| -0.097              | 1073.5  |          | 2146   | 19  | F | 1  | 294.18   | +0.2599 | 294.18              |         |
|                     |         |          |        | 20  | K | 0  | 147.11   |         | 147.11              |         |

Scan number 11082 Raw file LNCAP\_Silac\_23F10\_set2\_04  
 Method ITMS; CID Pepti... 127.57

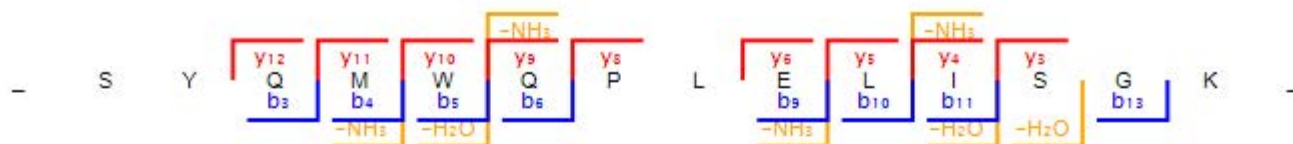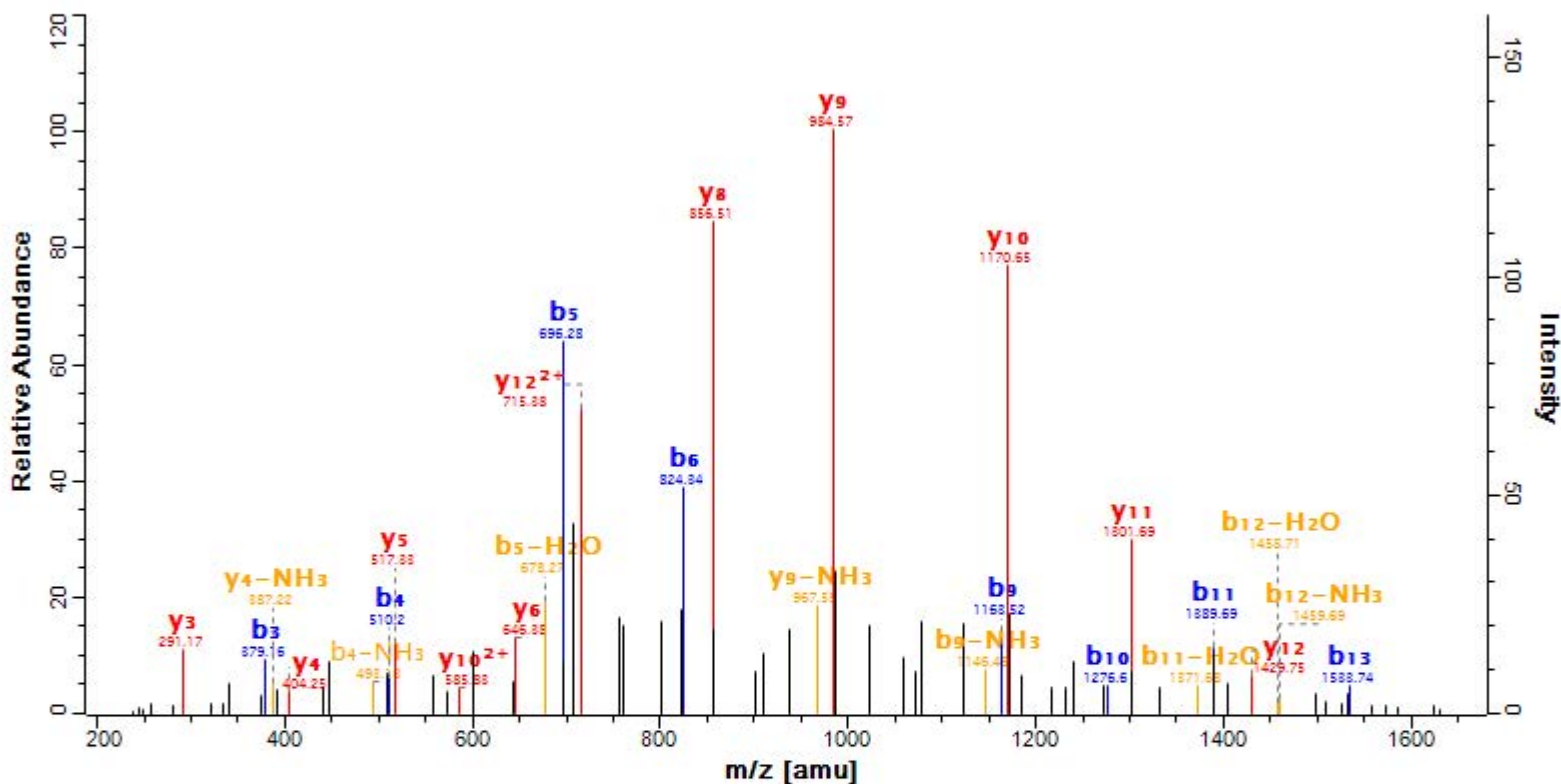

#### precursor information

|                   |                 |
|-------------------|-----------------|
| Mass:             | 1678.8401       |
| m/z:              | 840.42733       |
| Charge:           | 2+              |
| Retentiontime:    | 64.871635437011 |
| Score:            | 127.5703        |
| Mass Error [ppm]: | 0.72894         |
| PEP:              | 1.0697E-08      |
| Precursor Type:   | MULTI           |

| b ion     |          |     |   | y ion    |          | y <sup>2+</sup> ion |          |           |
|-----------|----------|-----|---|----------|----------|---------------------|----------|-----------|
| Δ dalton  | mass     | seq |   | Δ dalton | mass     | Δ dalton            | mass     |           |
|           | 88.0393  | 1   | S | 13       |          |                     |          |           |
|           | 251.1026 | 2   | Y | 12       | 1592.814 | 1592.814            |          |           |
| -0.02077  | 379.1612 | 3   | Q | 11       | 1429.751 | -0.16059            | 715.379  | +0.209647 |
| +0.261928 | 510.2017 | 4   | M | 10       | 1301.692 | -0.10323            | 1301.692 |           |
| -0.1073   | 696.281  | 5   | W | 9        | 1170.652 | -0.03369            | 585.8295 | +0.185387 |
| -0.0396   | 824.3396 | 6   | Q | 8        | 984.5724 | -0.01719            | 984.5724 |           |
|           | 921.3923 | 7   | P | 7        | 856.5138 | +0.101938           | 856.5138 |           |
|           | 1034.476 | 8   | L | 6        | 759.4611 |                     | 759.4611 |           |
| -0.11508  | 1163.519 | 9   | E | 5        | 646.377  | -0.12305            | 646.377  |           |
| -0.48637  | 1276.603 | 10  | L | 4        | 517.3344 | -0.04731            | 517.3344 |           |
| +0.074706 | 1389.687 | 11  | I | 3        | 404.2504 | +0.186468           | 404.2504 |           |
|           | 1476.719 | 12  | S | 2        | 291.1663 | -0.03892            | 291.1663 |           |
| +0.07346  | 1533.741 | 13  | G | 1        | 204.1343 |                     | 204.1343 |           |
|           |          | 14  | K | 0        | 147.1128 |                     | 147.1128 |           |

#### general information

|                       |             |
|-----------------------|-------------|
| Annotation:           | 11 of 14    |
| AminoAcids Coverage:  | 79 %        |
| Intensity Coverage:   | 56 %        |
| Peak Coverage:        | 31 %        |
| Protein Localisation: | 190 ... 203 |

Scan number 11177 Raw file LNCAP\_Silac\_23F10\_set2\_04  
 Method ITMS; CID Pepti... 50.5

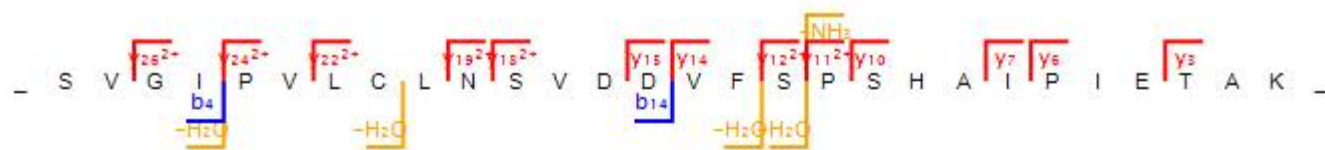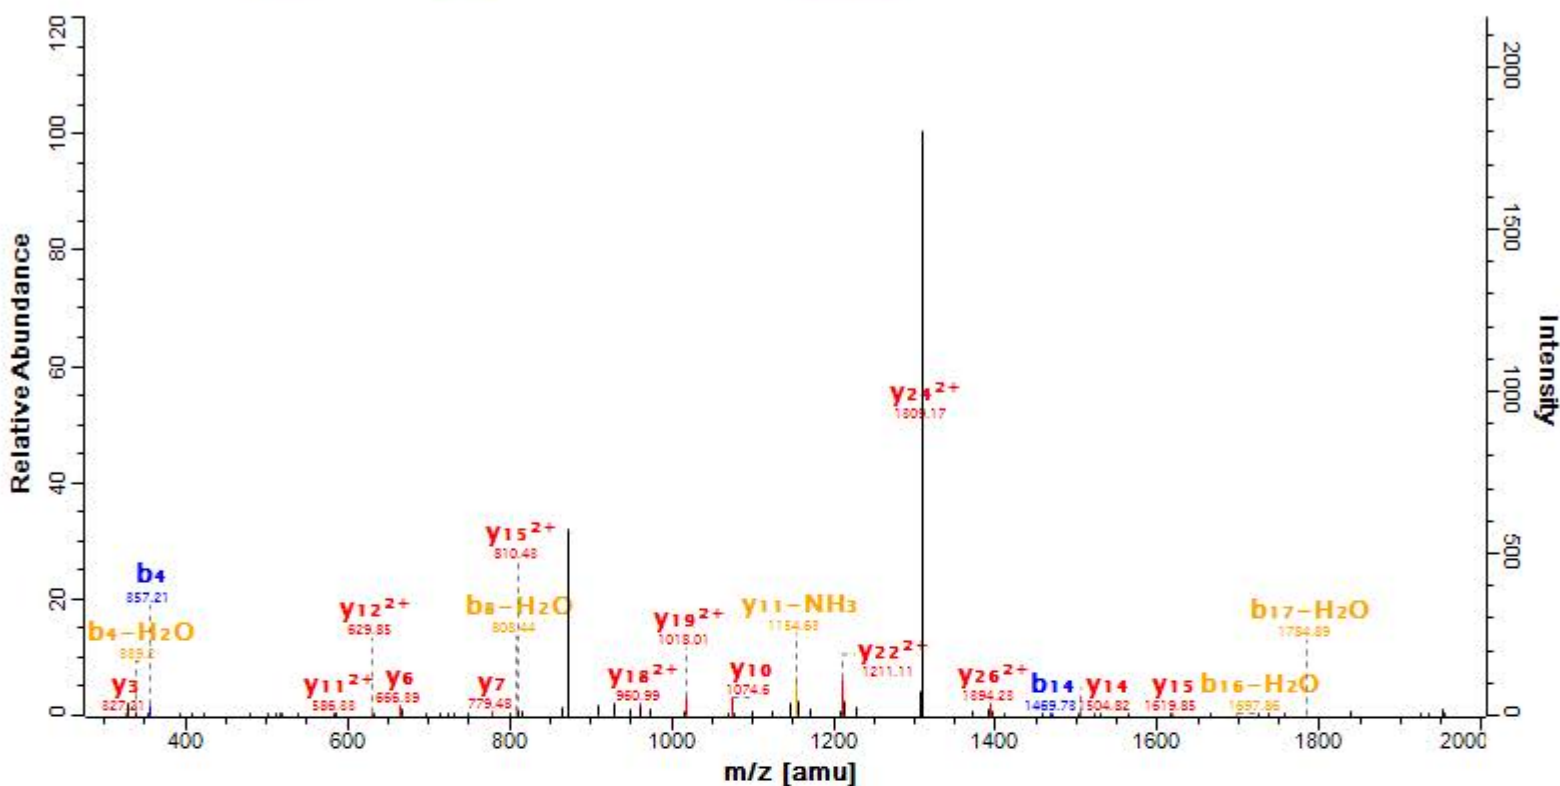

precursor information

|                   |                 |
|-------------------|-----------------|
| Mass:             | 2964.52622      |
| m/z:              | 989.18268       |
| Charge:           | 3+              |
| Retentiontime:    | 65.777084350585 |
| Score:            | 50.4978         |
| Mass Error [ppm]: | -0.14762        |
| PEP:              | 0.001785        |
| Precursor Type:   | MULTI           |

| b ion    |          |    |     |    | y ion    |           | y <sup>2+</sup> ion |           |
|----------|----------|----|-----|----|----------|-----------|---------------------|-----------|
| Δ dalton | mass     |    | seq |    | Δ dalton | mass      | Δ dalton            | mass      |
|          | 88.0393  | 1  | S   | 27 |          |           |                     |           |
|          | 187.1077 | 2  | V   | 26 | 2886.516 |           | 2886.516            |           |
|          | 244.1292 | 3  | G   | 25 | 2787.448 |           | 1394.227            | +0.244073 |
| -0.05962 | 357.2132 | 4  | I   | 24 | 2730.426 |           | 2730.426            |           |
|          | 454.266  | 5  | P   | 23 | 2617.342 |           | 1309.175            | -0.12138  |
|          | 553.3344 | 6  | V   | 22 | 2520.289 |           | 2520.289            |           |
|          | 666.4185 | 7  | L   | 21 | 2421.221 |           | 1211.114            | +0.191289 |
|          | 826.4491 | 8  | C   | 20 | 2308.137 |           | 2308.137            |           |
|          | 939.5332 | 9  | L   | 19 | 2148.106 |           | 2148.106            |           |
|          | 1053.576 | 10 | N   | 18 | 2035.022 |           | 1018.015            | +0.101468 |
|          | 1140.608 | 11 | S   | 17 | 1920.979 |           | 960.9933            | +0.202521 |
|          | 1239.677 | 12 | V   | 16 | 1833.947 |           | 1833.947            |           |
|          | 1354.704 | 13 | D   | 15 | 1734.879 |           | 1734.879            |           |
| -0.19567 | 1469.73  | 14 | D   | 14 | 1619.852 | -0.14181  | 810.4296            | -0.30324  |
|          | 1568.799 | 15 | V   | 13 | 1504.825 | -0.41712  | 1504.825            |           |
|          | 1715.867 | 16 | F   | 12 | 1405.757 |           | 1405.757            |           |
|          | 1802.899 | 17 | S   | 11 | 1258.688 |           | 629.8477            | +0.353715 |
|          | 1899.952 | 18 | P   | 10 | 1171.656 |           | 586.3317            | +0.045144 |
|          | 1986.984 | 19 | S   | 9  | 1074.603 | +0.005308 | 1074.603            |           |
|          | 2124.043 | 20 | H   | 8  | 987.5713 |           | 987.5713            |           |
|          | 2195.08  | 21 | A   | 7  | 850.5124 |           | 850.5124            |           |
|          | 2308.164 | 22 | I   | 6  | 779.4753 | +0.229066 | 779.4753            |           |
|          | 2405.217 | 23 | P   | 5  | 666.3912 | -0.01023  | 666.3912            |           |
|          | 2518.301 | 24 | I   | 4  | 569.3385 |           | 569.3385            |           |
|          | 2647.344 | 25 | E   | 3  | 456.2544 |           | 456.2544            |           |
|          | 2748.391 | 26 | T   | 2  | 327.2118 | +0.168545 | 327.2118            |           |
|          | 2819.428 | 27 | A   | 1  | 226.1641 |           | 226.1641            |           |
|          |          | 28 | K   | 0  | 155.127  |           | 155.127             |           |

general information

|                       |             |
|-----------------------|-------------|
| Annotation:           | 17 of 28    |
| AminoAcids Coverage:  | 61 %        |
| Intensity Coverage:   | 27 %        |
| Peak Coverage:        | 21 %        |
| Protein Localisation: | 333 ... 360 |

Scan number 11492 Raw file LNCAP\_Silac\_23F10\_set2\_04  
 Method ITMS; CID Pepti... 89.8

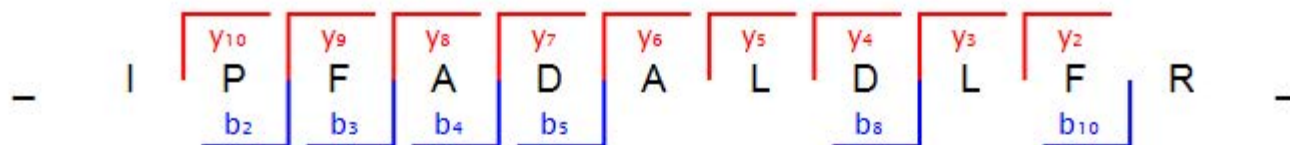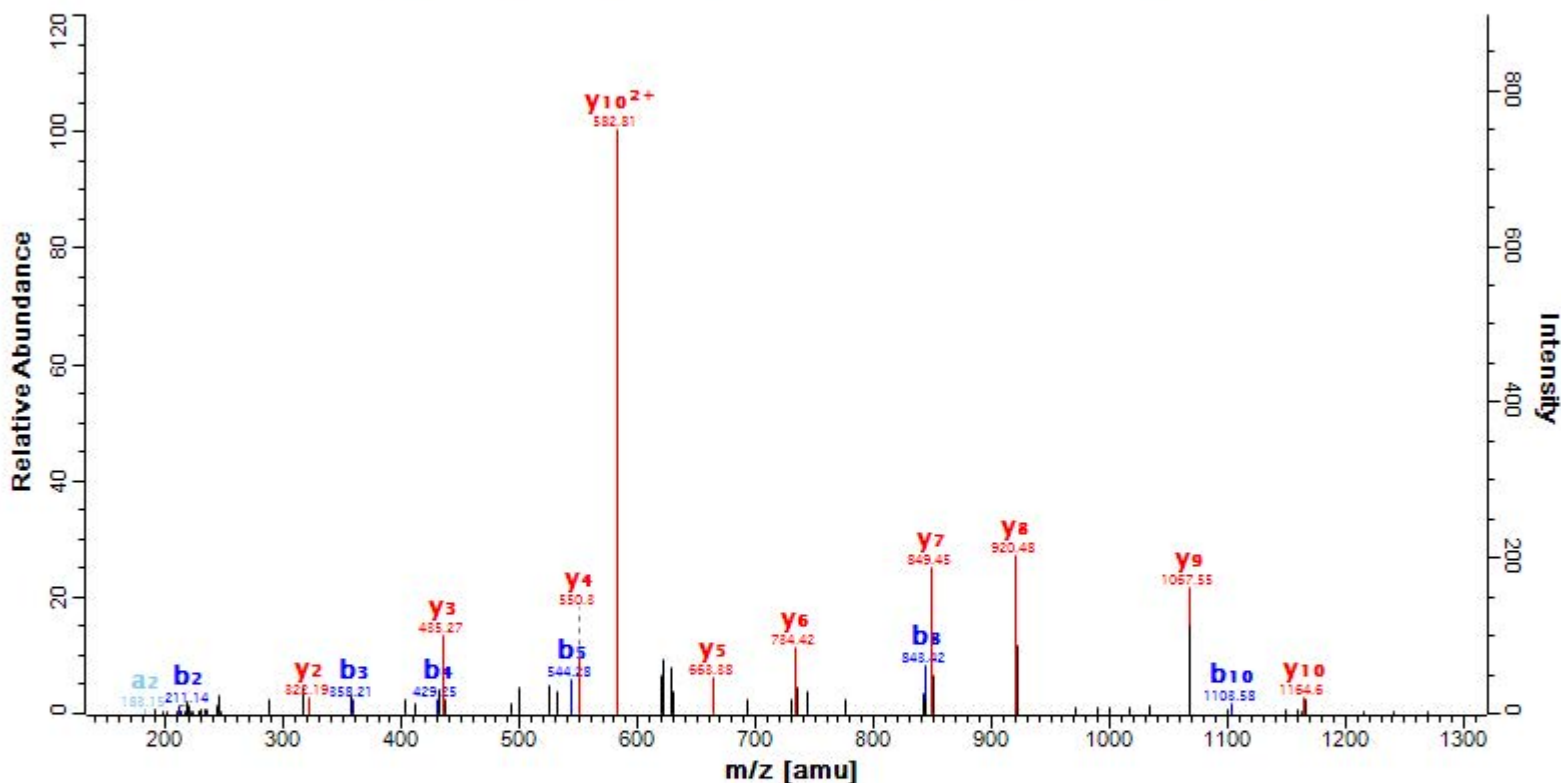

#### precursor information

|                   |                 |
|-------------------|-----------------|
| Mass:             | 1276.68205      |
| m/z:              | 639.3483        |
| Charge:           | 2+              |
| Retentiontime:    | 68.795059204101 |
| Score:            | 89.80456        |
| Mass Error [ppm]: | 0.37749         |
| PEP:              | 0.0018189       |
| Precursor Type:   | MULTI           |

#### general information

|                       |             |
|-----------------------|-------------|
| Annotation:           | 9 of 11     |
| AminoAcids Coverage:  | 82 %        |
| Intensity Coverage:   | 62 %        |
| Peak Coverage:        | 20 %        |
| Protein Localisation: | 186 ... 196 |

| a ion    |        | b ion    |        |    |     |          | y ion  |          | y <sup>2+</sup> ion |  |
|----------|--------|----------|--------|----|-----|----------|--------|----------|---------------------|--|
| Δ dalton | mass   | Δ dalton | mass   |    | seq | Δ dalton | mass   | Δ dalton | mass                |  |
|          | 86.096 |          | 114.09 | 1  | I   | 10       |        |          |                     |  |
| +0.0224  | 183.15 | -0.092   | 211.14 | 2  | P   | 9        | 1164.6 | +0.0174  | 582.81              |  |
|          | 330.22 | -0.173   | 358.21 | 3  | F   | 8        | 1067.6 | -0.012   | 1067.6              |  |
|          | 401.25 | +0.0818  | 429.25 | 4  | A   | 7        | 920.48 | +0.0864  | 920.48              |  |
|          | 516.28 | +0.1356  | 544.28 | 5  | D   | 6        | 849.45 | -0.029   | 849.45              |  |
|          | 587.32 |          | 615.31 | 6  | A   | 5        | 734.42 | +0.0543  | 734.42              |  |
|          | 700.4  |          | 728.4  | 7  | L   | 4        | 663.38 | +0.0734  | 663.38              |  |
|          | 815.43 | +0.1045  | 843.42 | 8  | D   | 3        | 550.3  | +0.0926  | 550.3               |  |
|          | 928.51 |          | 956.51 | 9  | L   | 2        | 435.27 | +0.0297  | 435.27              |  |
|          | 1075.6 | -0.118   | 1103.6 | 10 | F   | 1        | 322.19 | +0.0513  | 322.19              |  |
|          |        |          |        | 11 | R   | 0        | 175.12 |          | 175.12              |  |

Scan number 11530 Raw file LNCAP\_Silac\_23F10\_set2\_04  
 Method ITMS; CID Pepti... 51.09

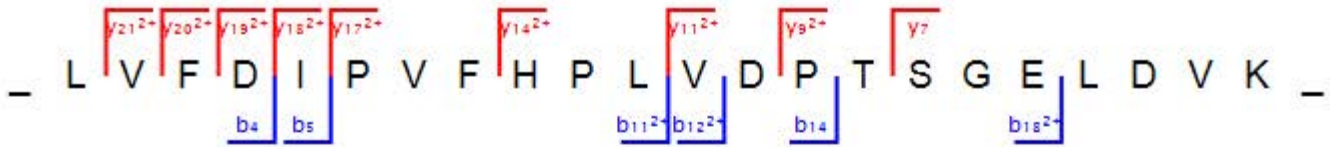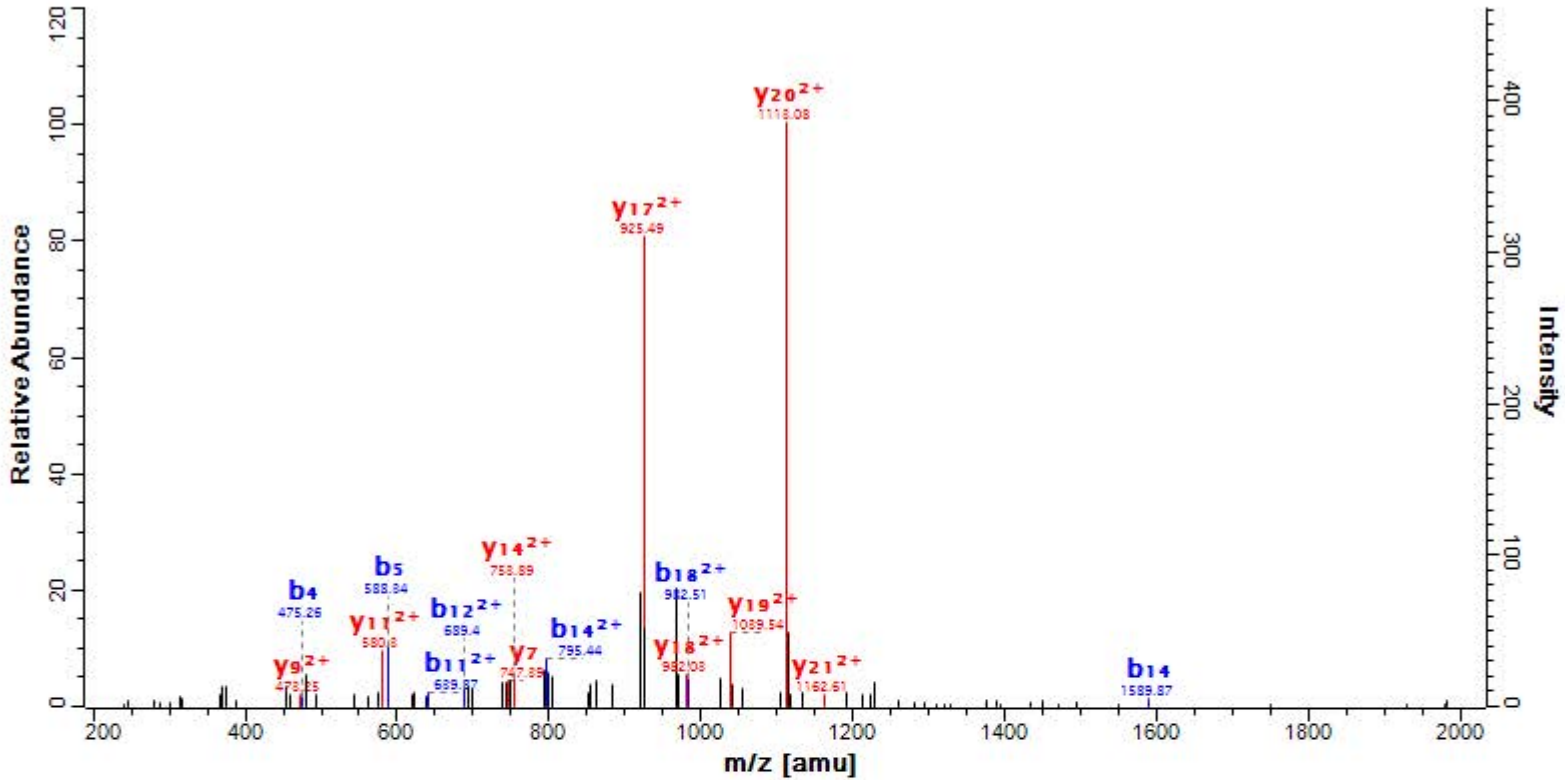

precursor information

|                   |                 |
|-------------------|-----------------|
| Mass:             | 2436.29525      |
| m/z:              | 813.10569       |
| Charge:           | 3+              |
| Retentiontime:    | 69.183265686035 |
| Score:            | 51.08867        |
| Mass Error [ppm]: | 0.48552         |
| PEP:              | 0.004197        |
| Precursor Type:   | MULTI           |

general information

|                       |             |
|-----------------------|-------------|
| Annotation:           | 12 of 22    |
| AminoAcids Coverage:  | 55 %        |
| Intensity Coverage:   | 53 %        |
| Peak Coverage:        | 17 %        |
| Protein Localisation: | 140 ... 161 |

| b <sup>2+</sup> ion |        | b ion    |        |     |   |          | y ion  |          | y <sup>2+</sup> ion |  |
|---------------------|--------|----------|--------|-----|---|----------|--------|----------|---------------------|--|
| Δ dalton            | mass   | Δ dalton | mass   | seq |   | Δ dalton | mass   | Δ dalton | mass                |  |
|                     | 114.09 |          | 114.09 | 1   | L | 21       |        |          |                     |  |
|                     | 213.16 |          | 213.16 | 2   | V | 20       | 2324.2 | 1162.6   | +0.02               |  |
|                     | 360.23 |          | 360.23 | 3   | F | 19       | 2225.1 | 1113.1   | +0.2496             |  |
|                     | 475.26 | +0.3643  | 475.26 | 4   | D | 18       | 2078.1 | 1039.5   | +0.0059             |  |
|                     | 588.34 | -0.048   | 588.34 | 5   | I | 17       | 1963.1 | 982.03   | -0.068              |  |
|                     | 685.39 |          | 685.39 | 6   | P | 16       | 1850   | 925.49   | +0.2494             |  |
|                     | 784.46 |          | 784.46 | 7   | V | 15       | 1752.9 | 1752.9   |                     |  |
|                     | 931.53 |          | 931.53 | 8   | F | 14       | 1653.8 | 1653.8   |                     |  |
|                     | 1068.6 |          | 1068.6 | 9   | H | 13       | 1506.8 | 753.89   | -0.033              |  |
|                     | 1165.6 |          | 1165.6 | 10  | P | 12       | 1369.7 | 1369.7   |                     |  |
| +0.4942             | 639.87 |          | 1278.7 | 11  | L | 11       | 1272.7 | 1272.7   |                     |  |
| -0.186              | 689.4  |          | 1377.8 | 12  | V | 10       | 1159.6 | 580.3    | -0.063              |  |
|                     | 1492.8 |          | 1492.8 | 13  | D | 9        | 1060.5 | 1060.5   |                     |  |
| +0                  | 795.44 | +0.1397  | 1589.9 | 14  | P | 8        | 945.49 | 473.25   | +0.2806             |  |
|                     | 1690.9 |          | 1690.9 | 15  | T | 7        | 848.44 | 848.44   |                     |  |
|                     | 1778   |          | 1778   | 16  | S | 6        | 747.39 | +0.1127  | 747.39              |  |
|                     | 1835   |          | 1835   | 17  | G | 5        | 660.36 | 660.36   |                     |  |
| +0.1937             | 982.51 |          | 1964   | 18  | E | 4        | 603.33 | 603.33   |                     |  |
|                     | 2077.1 |          | 2077.1 | 19  | L | 3        | 474.29 | 474.29   |                     |  |
|                     | 2192.1 |          | 2192.1 | 20  | D | 2        | 361.21 | 361.21   |                     |  |
|                     | 2291.2 |          | 2291.2 | 21  | V | 1        | 246.18 | 246.18   |                     |  |
|                     |        |          |        | 22  | K | 0        | 147.11 | 147.11   |                     |  |

Scan number 11577 Raw file LNCAP\_Silac\_23F10\_set2\_04  
 Method ITMS; CID Pepti... 142.99

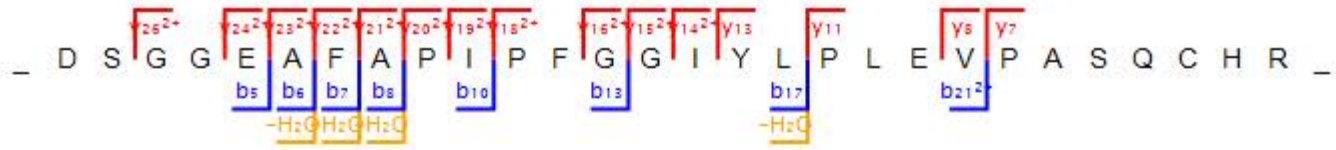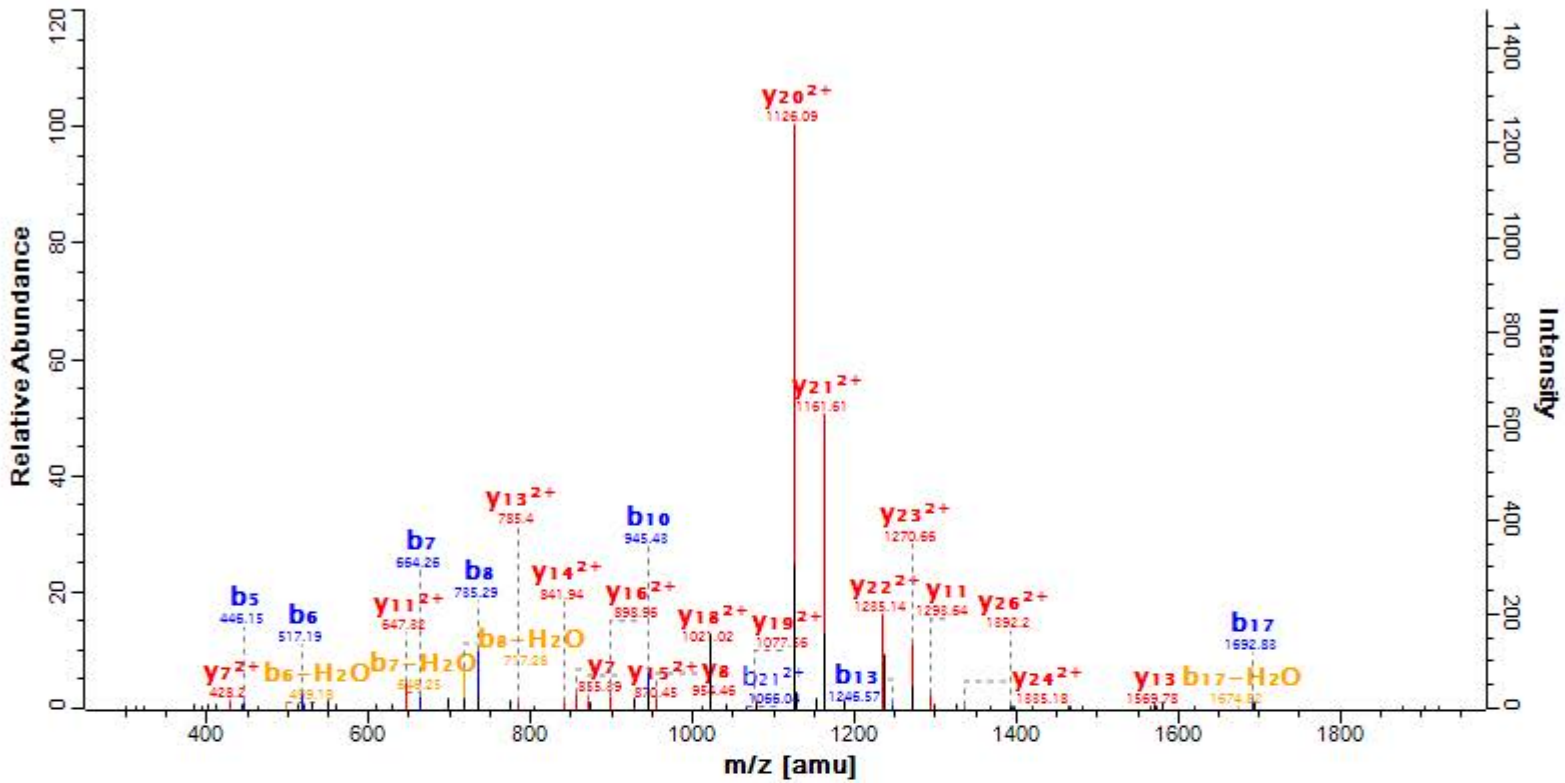

precursor information

|                   |                 |
|-------------------|-----------------|
| Mass:             | 2984.44881      |
| m/z:              | 995.82355       |
| Charge:           | 3+              |
| Retentiontime:    | 69.657081604003 |
| Score:            | 142.9873        |
| Mass Error [ppm]: | -0.087988       |
| PEP:              | 5.5879E-28      |
| Precursor Type:   | MULTI           |

| b <sup>2+</sup> ion |        | b ion    |        | seq |   | y ion    |        | y <sup>2+</sup> ion |                |
|---------------------|--------|----------|--------|-----|---|----------|--------|---------------------|----------------|
| Δ dalton            | mass   | Δ dalton | mass   |     |   | Δ dalton | mass   | Δ dalton            | mass           |
|                     | 116.03 | 116.03   |        | 1   | D | 27       |        |                     |                |
|                     | 203.07 | 203.07   |        | 2   | S | 26       | 2870.4 |                     | 2870.4         |
|                     | 260.09 | 260.09   |        | 3   | G | 25       | 2783.4 |                     | 1392.2 -0.152  |
|                     | 317.11 | 317.11   |        | 4   | G | 24       | 2726.4 |                     | 2726.4         |
|                     | 446.15 | +0.015   | 446.15 | 5   | E | 23       | 2669.4 |                     | 1335.2 +0.1005 |
|                     | 517.19 | +0.0882  | 517.19 | 6   | A | 22       | 2540.3 |                     | 1270.7 +0.1957 |
|                     | 664.26 | +0.1086  | 664.26 | 7   | F | 21       | 2469.3 |                     | 1235.1 +0.2055 |
|                     | 735.29 | +0.0973  | 735.29 | 8   | A | 20       | 2322.2 |                     | 1161.6 +0.2567 |
|                     | 832.35 |          | 832.35 | 9   | P | 19       | 2251.2 |                     | 1126.1 +0.2308 |
|                     | 945.43 | -0.078   | 945.43 | 10  | I | 18       | 2154.1 |                     | 1077.6 +0.2505 |
|                     | 1042.5 |          | 1042.5 | 11  | P | 17       | 2041   |                     | 1021 -0.014    |
|                     | 1189.6 |          | 1189.6 | 12  | F | 16       | 1944   |                     | 1944           |
|                     | 1246.6 | -0.028   | 1246.6 | 13  | G | 15       | 1796.9 |                     | 898.96 +0.3491 |
|                     | 1303.6 |          | 1303.6 | 14  | G | 14       | 1739.9 |                     | 870.45 +0.4264 |
|                     | 1416.7 |          | 1416.7 | 15  | I | 13       | 1682.9 |                     | 841.94 -0.43   |
|                     | 1579.7 |          | 1579.7 | 16  | Y | 12       | 1569.8 | +0.0515             | 785.4 +0.1956  |
|                     | 1692.8 | +0.1544  | 1692.8 | 17  | L | 11       | 1406.7 |                     | 1406.7         |
|                     | 1789.9 |          | 1789.9 | 18  | P | 10       | 1293.6 | +0.1607             | 647.32 +0.1214 |
|                     | 1903   |          | 1903   | 19  | L | 9        | 1196.6 |                     | 1196.6         |
|                     | 2032   |          | 2032   | 20  | E | 8        | 1083.5 |                     | 1083.5         |
| -0.089              | 1066   |          | 2131.1 | 21  | V | 7        | 954.46 | +0.0707             | 954.46         |
|                     | 2228.1 |          | 2228.1 | 22  | P | 6        | 855.39 | +0.1508             | 428.2 +0.0445  |
|                     | 2299.2 |          | 2299.2 | 23  | A | 5        | 758.34 |                     | 758.34         |
|                     | 2386.2 |          | 2386.2 | 24  | S | 4        | 687.3  |                     | 687.3          |
|                     | 2514.3 |          | 2514.3 | 25  | Q | 3        | 600.27 |                     | 600.27         |
|                     | 2674.3 |          | 2674.3 | 26  | C | 2        | 472.21 |                     | 472.21         |
|                     | 2811.3 |          | 2811.3 | 27  | H | 1        | 312.18 |                     | 312.18         |
|                     |        |          |        | 28  | R | 0        | 175.12 |                     | 175.12         |

general information

|                       |             |
|-----------------------|-------------|
| Annotation:           | 17 of 28    |
| AminoAcids Coverage:  | 61 %        |
| Intensity Coverage:   | 70 %        |
| Peak Coverage:        | 33 %        |
| Protein Localisation: | 320 ... 347 |

Scan number 11792 Raw file LNCAP\_Silac\_23F10\_set2\_04  
 Method ITMS; CID Pepti... 136.33

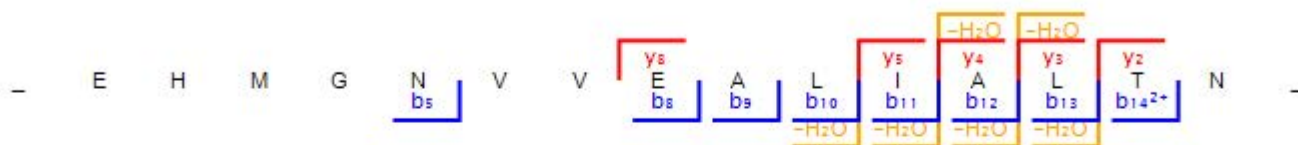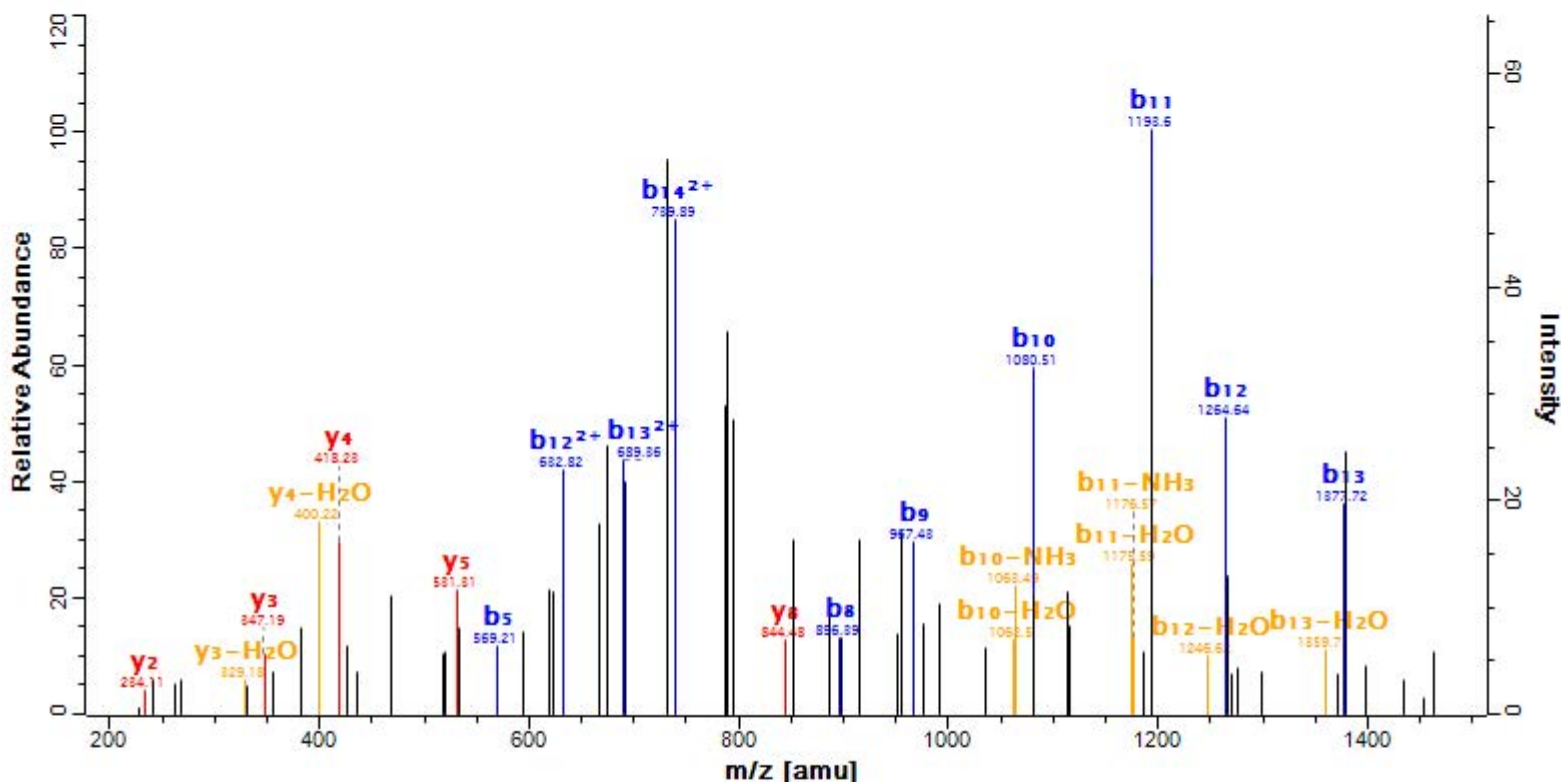

precursor information

|                   |                 |
|-------------------|-----------------|
| Mass:             | 1609.81296      |
| m/z:              | 805.91376       |
| Charge:           | 2+              |
| Retentiontime:    | 71.957252502441 |
| Score:            | 136.3266        |
| Mass Error [ppm]: | -0.26682        |
| PEP:              | 7.3503E-07      |
| Precursor Type:   | ISO             |

general information

|                       |             |
|-----------------------|-------------|
| Annotation:           | 8 of 15     |
| AminoAcids Coverage:  | 53 %        |
| Intensity Coverage:   | 38 %        |
| Peak Coverage:        | 31 %        |
| Protein Localisation: | 161 ... 175 |

| b <sup>2+</sup> ion |          | b ion     |          |     | y ion    |      |          |           |
|---------------------|----------|-----------|----------|-----|----------|------|----------|-----------|
| Δ dalton            | mass     | Δ dalton  | mass     | seq | Δ dalton | mass |          |           |
|                     | 130.0499 |           | 130.0499 | 1   | E        | 14   |          |           |
|                     | 267.1088 |           | 267.1088 | 2   | H        | 13   | 1481.778 |           |
|                     | 398.1493 |           | 398.1493 | 3   | M        | 12   | 1344.719 |           |
|                     | 455.1707 |           | 455.1707 | 4   | G        | 11   | 1213.679 |           |
|                     | 569.2137 | -0.12259  | 569.2137 | 5   | N        | 10   | 1156.657 |           |
|                     | 668.2821 |           | 668.2821 | 6   | V        | 9    | 1042.614 |           |
|                     | 767.3505 |           | 767.3505 | 7   | V        | 8    | 943.5459 |           |
|                     | 896.3931 | -0.06544  | 896.3931 | 8   | E        | 7    | 844.4775 | +0.063007 |
|                     | 967.4302 | +0.058578 | 967.4302 | 9   | A        | 6    | 715.4349 |           |
|                     | 1080.514 | -0.09812  | 1080.514 | 10  | L        | 5    | 644.3978 |           |
|                     | 1193.598 | -0.13958  | 1193.598 | 11  | I        | 4    | 531.3137 | +0.094026 |
| +0.295527           | 632.8214 | +0.015323 | 1264.635 | 12  | A        | 3    | 418.2296 | -0.03822  |
| +0.254899           | 689.3634 | -0.14906  | 1377.719 | 13  | L        | 2    | 347.1925 | +0.292352 |
| +0.034099           | 739.8872 |           | 1478.767 | 14  | T        | 1    | 234.1084 | -0.21497  |
|                     |          |           |          | 15  | N        | 0    | 133.0608 |           |





Scan number 2097 Raw file LNCAP\_Silac\_23F10\_set2\_04  
 Method ITMS: CID Pepti... 113.61

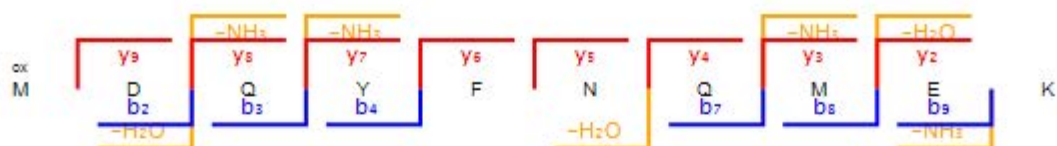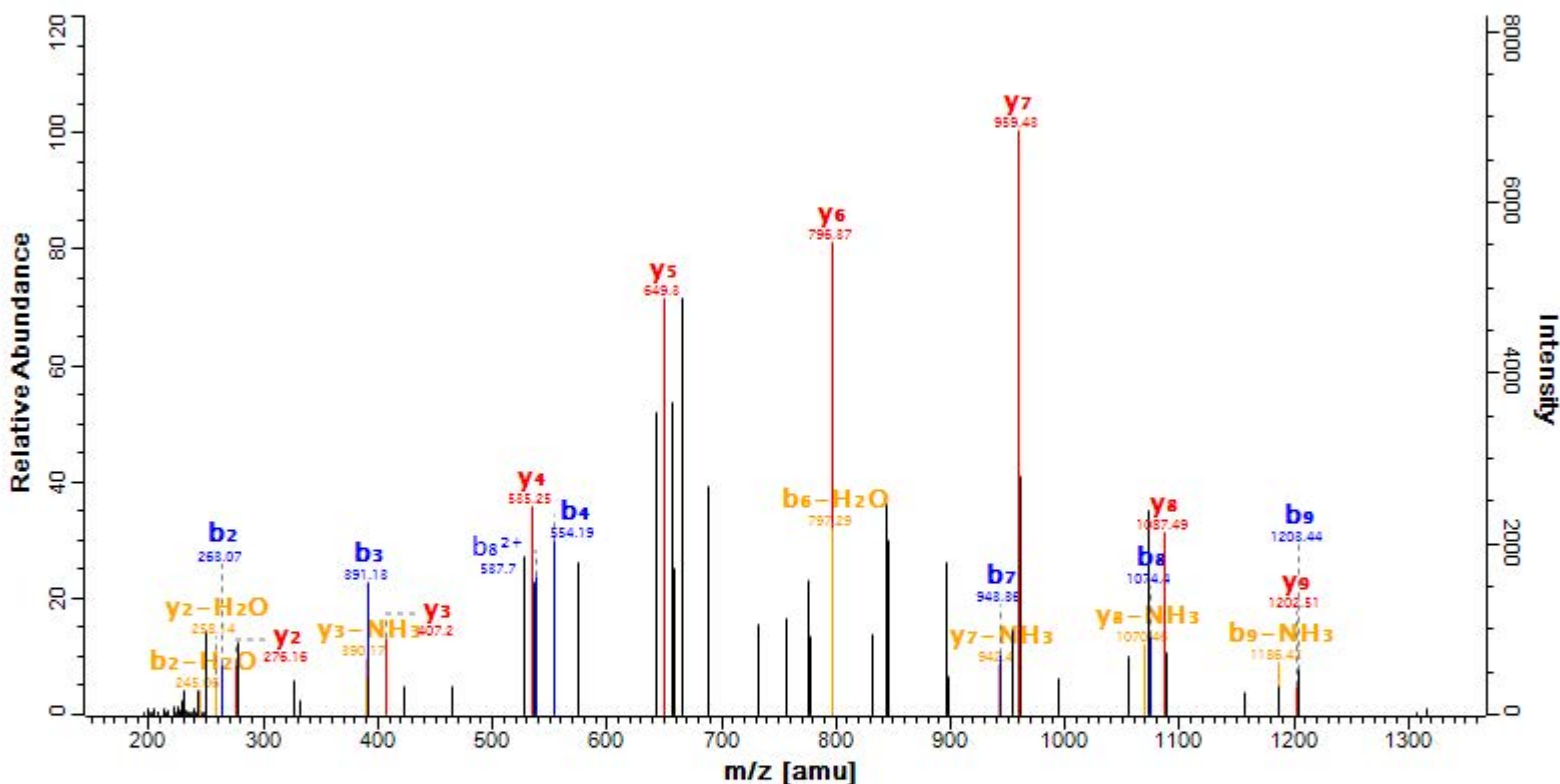

### precursor information

|                   |                 |
|-------------------|-----------------|
| Mass:             | 1348.54275      |
| m/z:              | 675.27865       |
| Charge:           | 2+              |
| Retentiontime:    | 16.134061813354 |
| Score:            | 113.609         |
| Mass Error [ppm]: | -0.020397       |
| PEP:              | 0.0012164       |
| Precursor Type:   | MULTI           |

|                       |             |
|-----------------------|-------------|
| Annotation:           | 8 of 10     |
| AminoAcids Coverage:  | 80 %        |
| Intensity Coverage:   | 43 %        |
| Peak Coverage:        | 24 %        |
| Protein Localisation: | 962 ... 971 |

| b <sup>2+</sup> ion |          | b ion     |          |     | y ion |          |          |
|---------------------|----------|-----------|----------|-----|-------|----------|----------|
| Δ dalton            | mass     | Δ dalton  | mass     | seq |       | Δ dalton | mass     |
|                     | 148.0427 |           | 148.0427 | 1   | M     | 9        |          |
|                     | 263.0696 | +0.011863 | 263.0696 | 2   | D     | 8        | 1202.515 |
|                     | 391.1282 | +0.135537 | 391.1282 | 3   | Q     | 7        | 1087.488 |
|                     | 554.1915 | +0.043705 | 554.1915 | 4   | Y     | 6        | 959.4291 |
|                     | 701.2599 |           | 701.2599 | 5   | F     | 5        | 796.3658 |
|                     | 815.3029 |           | 815.3029 | 6   | N     | 4        | 649.2974 |
|                     | 943.3614 | -0.0006   | 943.3614 | 7   | Q     | 3        | 535.2545 |
| -0.24568            | 537.7046 | +0.118091 | 1074.402 | 8   | M     | 2        | 407.1959 |
|                     | 1203.445 | +0.170103 | 1203.445 | 9   | E     | 1        | 276.1554 |
|                     |          |           |          | 10  | K     | 0        | 147.1128 |

Scan number 2162 Raw file LNCAP\_Silac\_23F10\_set2\_04  
 Method ITMS: CID Pepti... 115.57

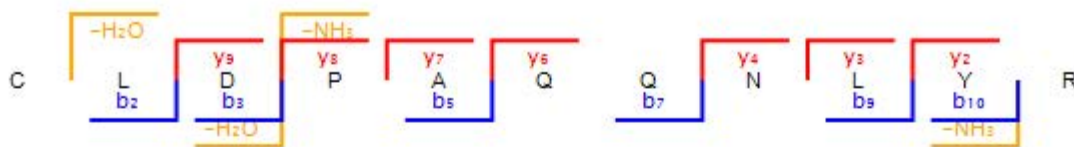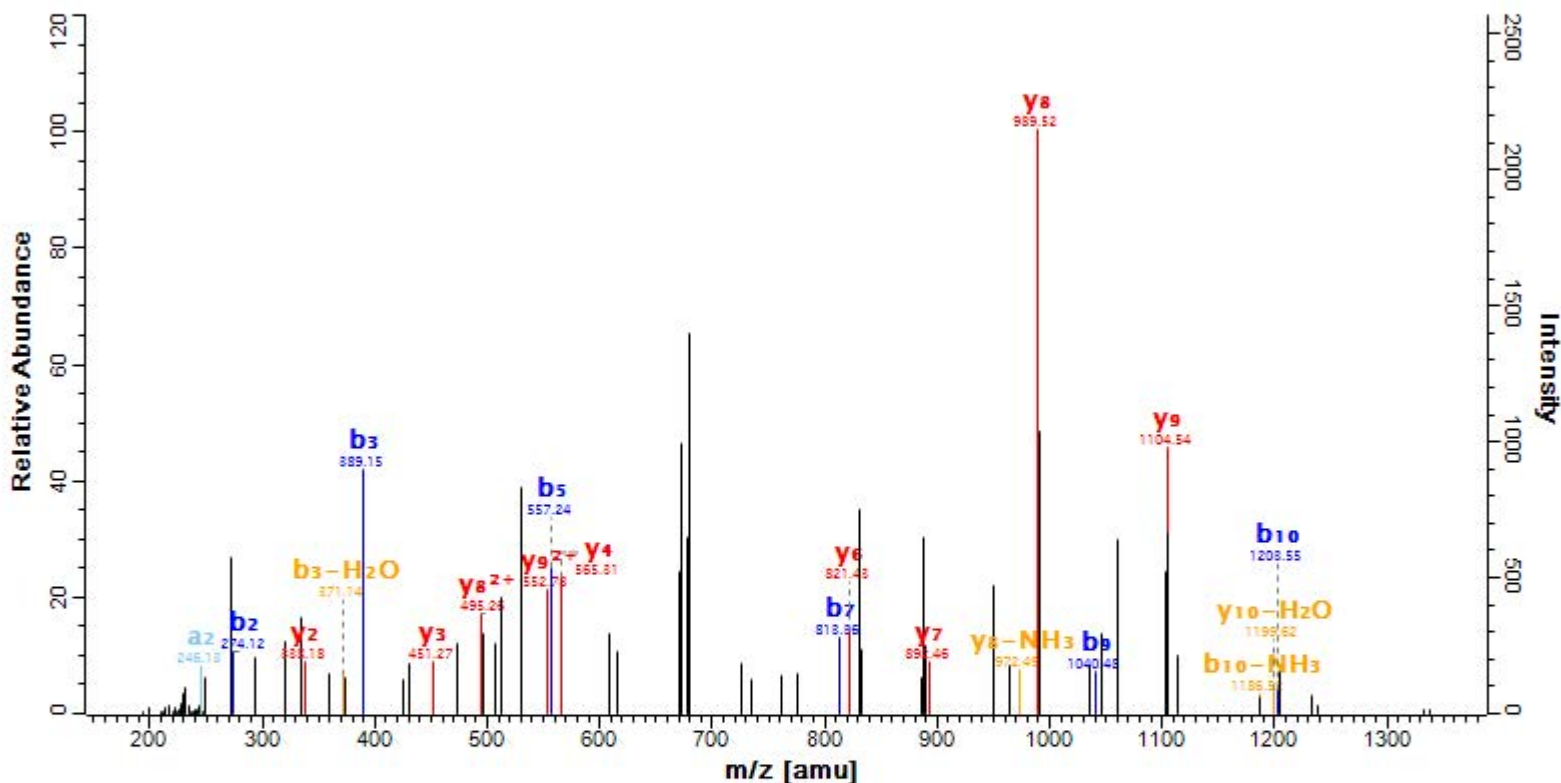

#### precursor information

|                   |                 |
|-------------------|-----------------|
| Mass:             | 1376.65005      |
| m/z:              | 689.3323        |
| Charge:           | 2+              |
| Retentiontime:    | 16.454347610473 |
| Score:            | 115.5738        |
| Mass Error [ppm]: | -0.46183        |
| PEP:              | 0.00022791      |
| Precursor Type:   | MULTI           |

#### general information

|                       |           |
|-----------------------|-----------|
| Annotation:           | 9 of 11   |
| AminoAcids Coverage:  | 82 %      |
| Intensity Coverage:   | 32 %      |
| Peak Coverage:        | 21 %      |
| Protein Localisation: | 20 ... 30 |

| a ion    |        | b ion    |        |    |     |          | y ion  |          | y <sup>2+</sup> ion |         |
|----------|--------|----------|--------|----|-----|----------|--------|----------|---------------------|---------|
| Δ dalton | mass   | Δ dalton | mass   |    | seq | Δ dalton | mass   | Δ dalton | mass                |         |
|          | 133.04 | 161.04   |        | 1  | C   | 10       |        |          |                     |         |
| +0.1172  | 246.13 | +0.0665  | 274.12 | 2  | L   | 9        | 1217.6 |          | 1217.6              |         |
|          | 361.15 | +0.0892  | 389.15 | 3  | D   | 8        | 1104.5 | -0.04    | 552.78              | -0.057  |
|          | 458.21 |          | 486.2  | 4  | P   | 7        | 989.52 | +0.0249  | 495.26              | +0.0209 |
|          | 529.24 | -0.173   | 557.24 | 5  | A   | 6        | 892.46 | +0.0198  | 892.46              |         |
|          | 657.3  |          | 685.3  | 6  | Q   | 5        | 821.43 | -0.008   | 821.43              |         |
|          | 785.36 | +0.0584  | 813.36 | 7  | Q   | 4        | 693.37 |          | 693.37              |         |
|          | 899.4  |          | 927.4  | 8  | N   | 3        | 565.31 | +0.0665  | 565.31              |         |
|          | 1012.5 | -0.052   | 1040.5 | 9  | L   | 2        | 451.27 | +0.0733  | 451.27              |         |
|          | 1175.6 | -0.267   | 1203.5 | 10 | Y   | 1        | 338.18 | +0.0602  | 338.18              |         |
|          |        |          |        | 11 | R   | 0        | 175.12 |          | 175.12              |         |

Scan number 2361 Raw file LNCAP\_Silac\_23F10\_set2\_04  
 Method ITMS; CID Pepti... 80.17

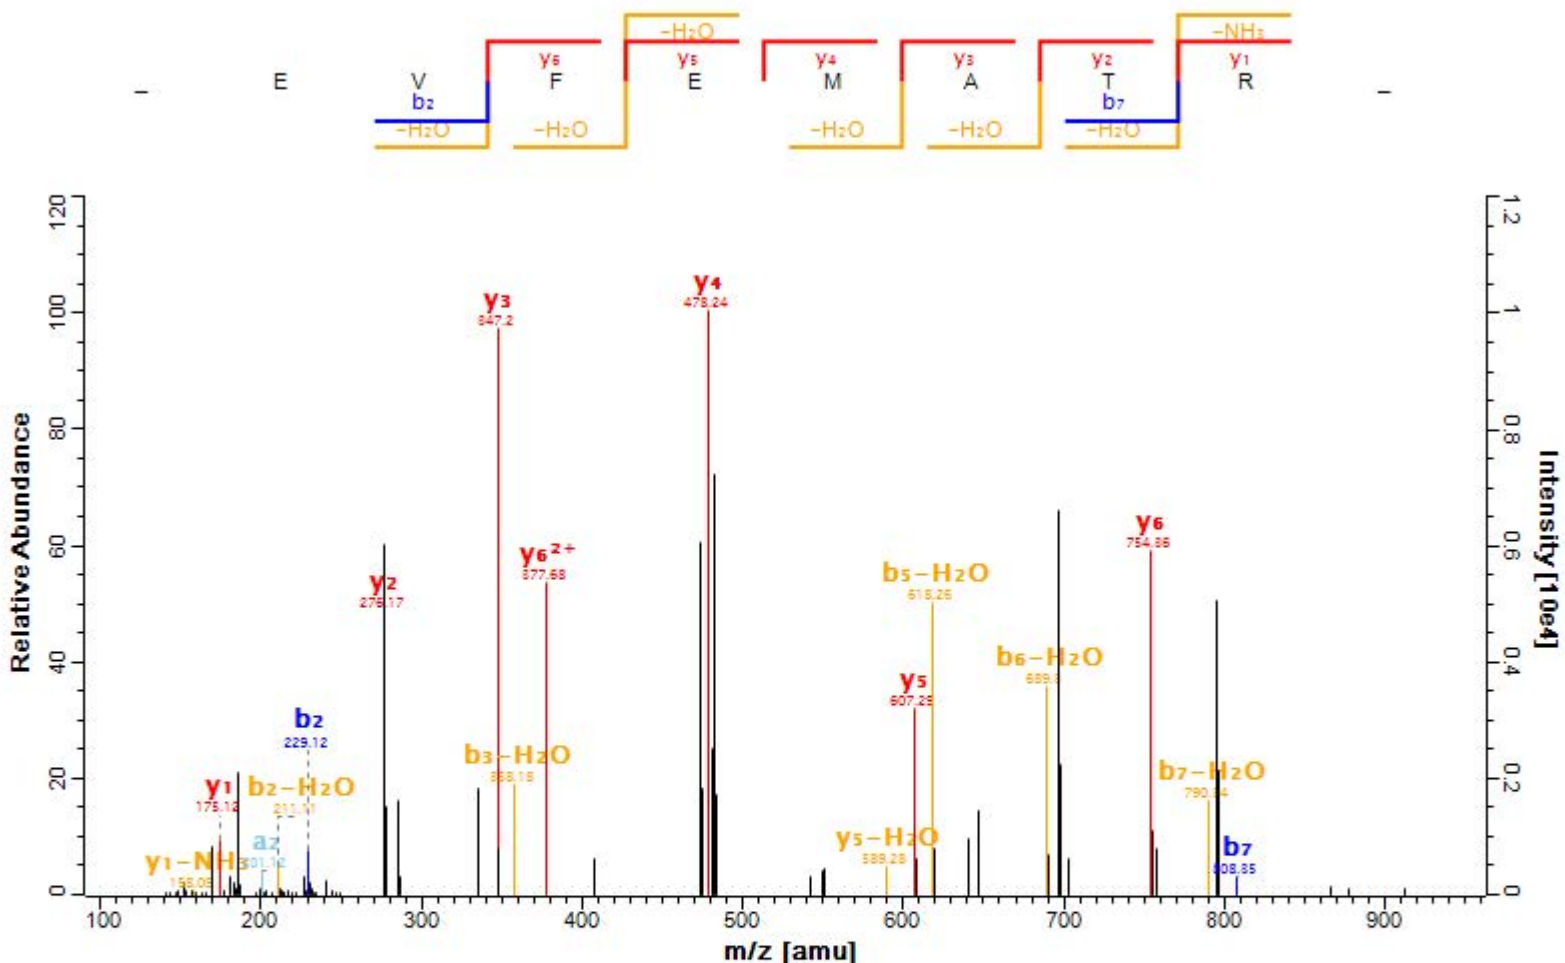

precursor information

|                       |                 |
|-----------------------|-----------------|
| Mass:                 | 981.45927       |
| m/z:                  | 491.73691       |
| Charge:               | 2+              |
| Retentiontime:        | 17.384159088134 |
| Score:                | 80.16541        |
| Mass Error [ppm]:     | 0.30802         |
| g PEP:                | 0.020382        |
| Annotation:           | 7 of 8          |
| AminoAcids Coverage:  | 88 %            |
| Intensity Coverage:   | 47 %            |
| Peak Coverage:        | 18 %            |
| Protein Localisation: | 169 ... 176     |

| a ion    |        | b ion    |        |     |   |          | y ion  |          | y <sup>2+</sup> ion |  |
|----------|--------|----------|--------|-----|---|----------|--------|----------|---------------------|--|
| Δ dalton | mass   | Δ dalton | mass   | seq |   | Δ dalton | mass   | Δ dalton | mass                |  |
|          | 102.05 | 130.05   |        | 1   | E | 7        |        |          |                     |  |
| +0.0484  | 201.12 | +0.0812  | 229.12 | 2   | V | 6        | 853.42 |          | 853.42              |  |
|          | 348.19 |          | 376.19 | 3   | F | 5        | 754.36 | +0.0624  | 377.68              |  |
|          | 477.23 |          | 505.23 | 4   | E | 4        | 607.29 | +0.1332  | 607.29              |  |
|          | 608.27 |          | 636.27 | 5   | M | 3        | 478.24 | +0.0309  | 478.24              |  |
|          | 679.31 |          | 707.31 | 6   | A | 2        | 347.2  | +0.0141  | 347.2               |  |
|          | 780.36 | -0.064   | 808.35 | 7   | T | 1        | 276.17 | +0.0644  | 276.17              |  |
|          |        |          |        | 8   | R | 0        | 175.12 | +0.0405  | 175.12              |  |

Scan number 2444 Raw file LNCAP\_Silac\_23F10\_set2\_04  
 Method ITMS; CID Pepti... 109.66

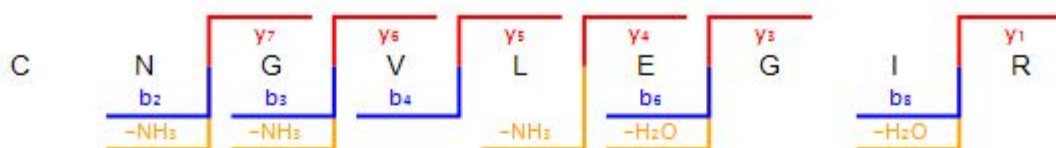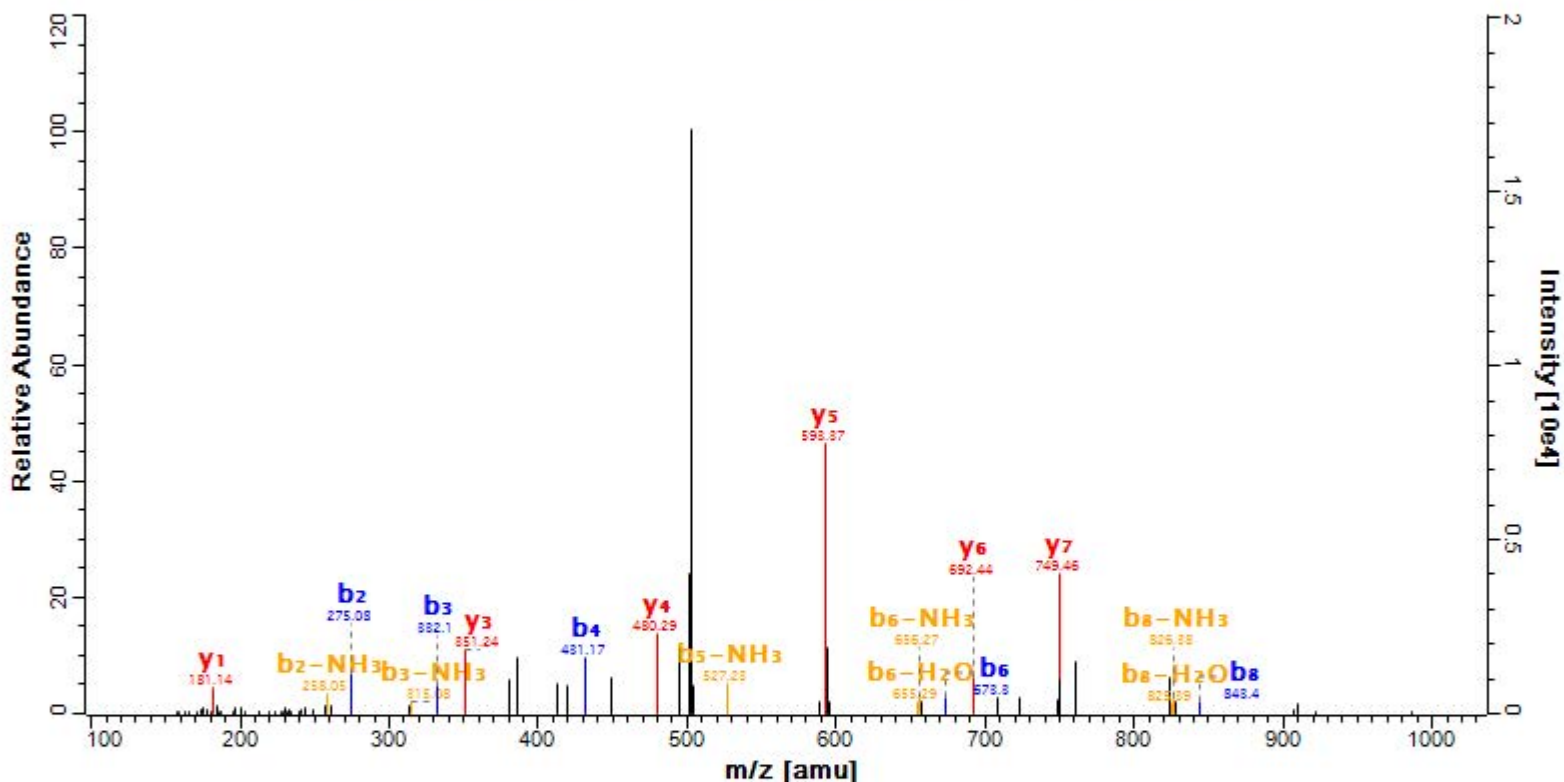

#### precursor information

|                       |                 |
|-----------------------|-----------------|
| Mass:                 | 1016.50738      |
| m/z:                  | 509.26097       |
| Charge:               | 2+              |
| Retentiontime:        | 17.777385711669 |
| Score:                | 109.6637        |
| Mass Error [ppm]:     | 0.064281        |
| PEP:                  | 0.0022783       |
| Precursor Type:       | MULTI           |
| Annotation:           | 8 of 9          |
| AminoAcids Coverage:  | 89 %            |
| Intensity Coverage:   | 37 %            |
| Peak Coverage:        | 17 %            |
| Protein Localisation: | 694 ... 702     |

| b ion      |               |     |   | y ion    |               |            |  |
|------------|---------------|-----|---|----------|---------------|------------|--|
| Δ dalton   | mass          | seq |   | Δ dalton | mass          |            |  |
|            | 161.037924668 | 1   | C | 8        |               |            |  |
| +0.02953   | 275.080852115 | 2   | N | 7        | 863.504071075 |            |  |
| -0.0032558 | 332.102315839 | 3   | G | 6        | 749.461143628 | +0.0274428 |  |
| -0.0092307 | 431.170729755 | 4   | V | 5        | 692.439679905 | +0.0548269 |  |
|            | 544.254793735 | 5   | L | 4        | 593.371265988 | +0.0405382 |  |
| +0.1548226 | 673.297386832 | 6   | E | 3        | 480.287202008 | +0.0419606 |  |
|            | 730.318850555 | 7   | G | 2        | 351.244608912 | +0.0763139 |  |
| +0.0069365 | 843.402914536 | 8   | I | 1        | 294.223145188 |            |  |
|            |               | 9   | R | 0        | 181.139081208 | +0.0473202 |  |

Scan number 2673 Raw file LNCAP\_Silac\_23F10\_set2\_04  
 Method ITMS: CID Pepti... 108.7

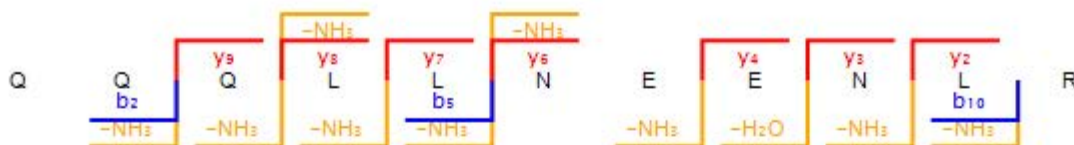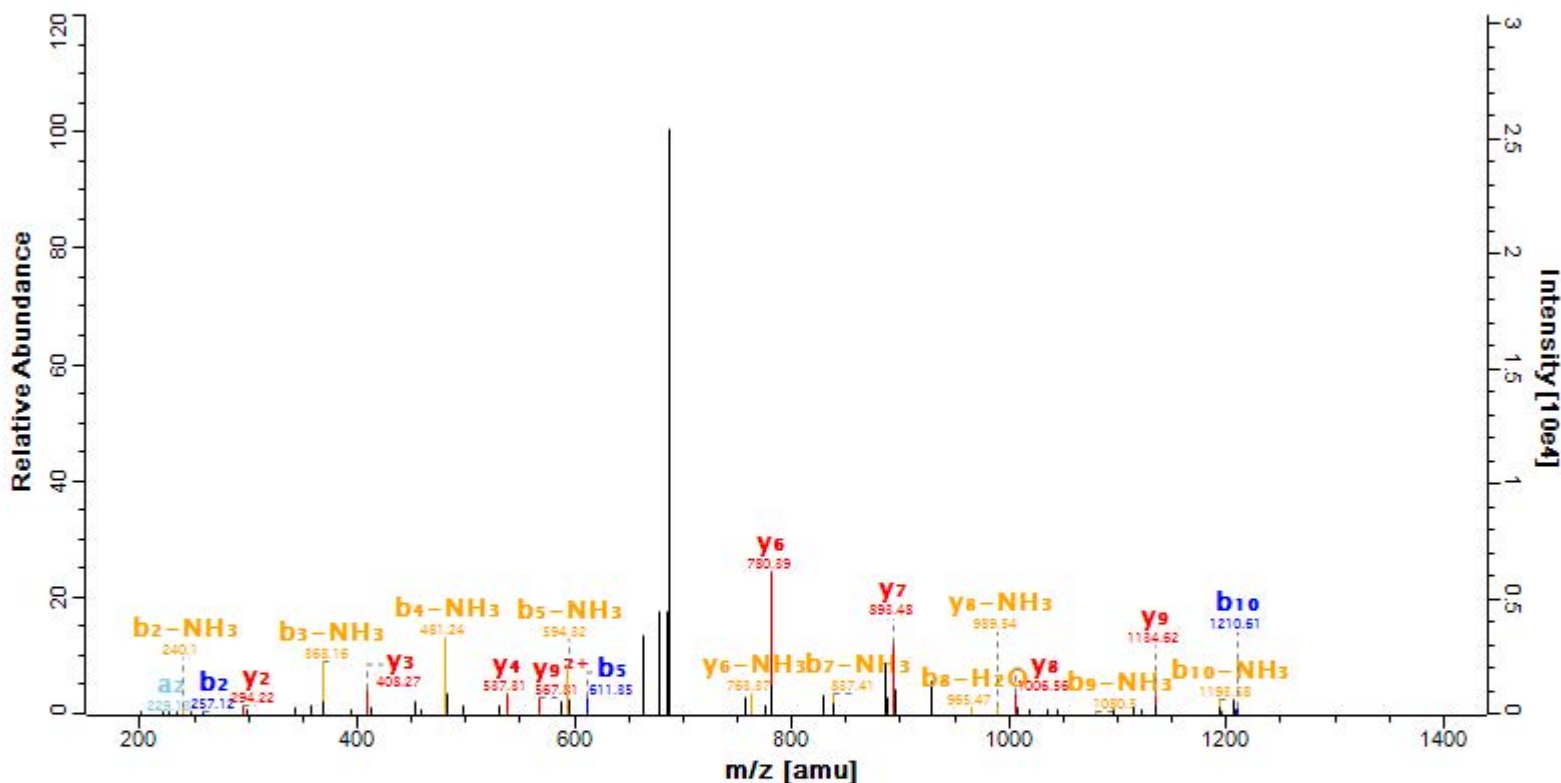

#### precursor information

|                   |                 |
|-------------------|-----------------|
| Mass:             | 1383.71052      |
| m/z:              | 692.86254       |
| Charge:           | 2+              |
| Retentiontime:    | 18.850095748901 |
| Score:            | 108.6968        |
| Mass Error [ppm]: | -0.088179       |
| PEP:              | 0.00028774      |
| Precursor Type:   | MULTI           |

#### general information

|                       |             |
|-----------------------|-------------|
| Annotation:           | 9 of 11     |
| AminoAcids Coverage:  | 82 %        |
| Intensity Coverage:   | 29 %        |
| Peak Coverage:        | 27 %        |
| Protein Localisation: | 147 ... 157 |

| a ion    |        | b ion    |        |    |     |          | y ion  |          | y <sup>2+</sup> ion |  |
|----------|--------|----------|--------|----|-----|----------|--------|----------|---------------------|--|
| Δ dalton | mass   | Δ dalton | mass   |    | seq | Δ dalton | mass   | Δ dalton | mass                |  |
|          | 101.07 |          | 129.07 | 1  | Q   | 10       |        |          |                     |  |
| +0.0885  | 229.13 | +0.0146  | 257.12 | 2  | Q   | 9        | 1262.7 |          | 1262.7              |  |
|          | 357.19 |          | 385.18 | 3  | Q   | 8        | 1134.6 | +0.2255  | 567.81              |  |
|          | 470.27 |          | 498.27 | 4  | L   | 7        | 1006.6 | +0.0413  | 1006.6              |  |
|          | 583.36 | -0.008   | 611.35 | 5  | L   | 6        | 893.48 | -0.013   | 893.48              |  |
|          | 697.4  |          | 725.39 | 6  | N   | 5        | 780.39 | +0.0346  | 780.39              |  |
|          | 826.44 |          | 854.44 | 7  | E   | 4        | 666.35 |          | 666.35              |  |
|          | 955.48 |          | 983.48 | 8  | E   | 3        | 537.31 | +0.1128  | 537.31              |  |
|          | 1069.5 |          | 1097.5 | 9  | N   | 2        | 408.27 | +0.0931  | 408.27              |  |
|          | 1182.6 | -0.172   | 1210.6 | 10 | L   | 1        | 294.22 | +0.1202  | 294.22              |  |
|          |        |          |        | 11 | R   | 0        | 181.14 |          | 181.14              |  |

Scan number 2879 Raw file LNCAP\_Silac\_23F10\_set2\_04  
 Method ITMS; CID Pepti... 123.79

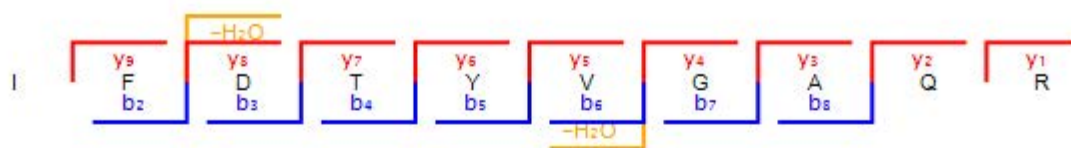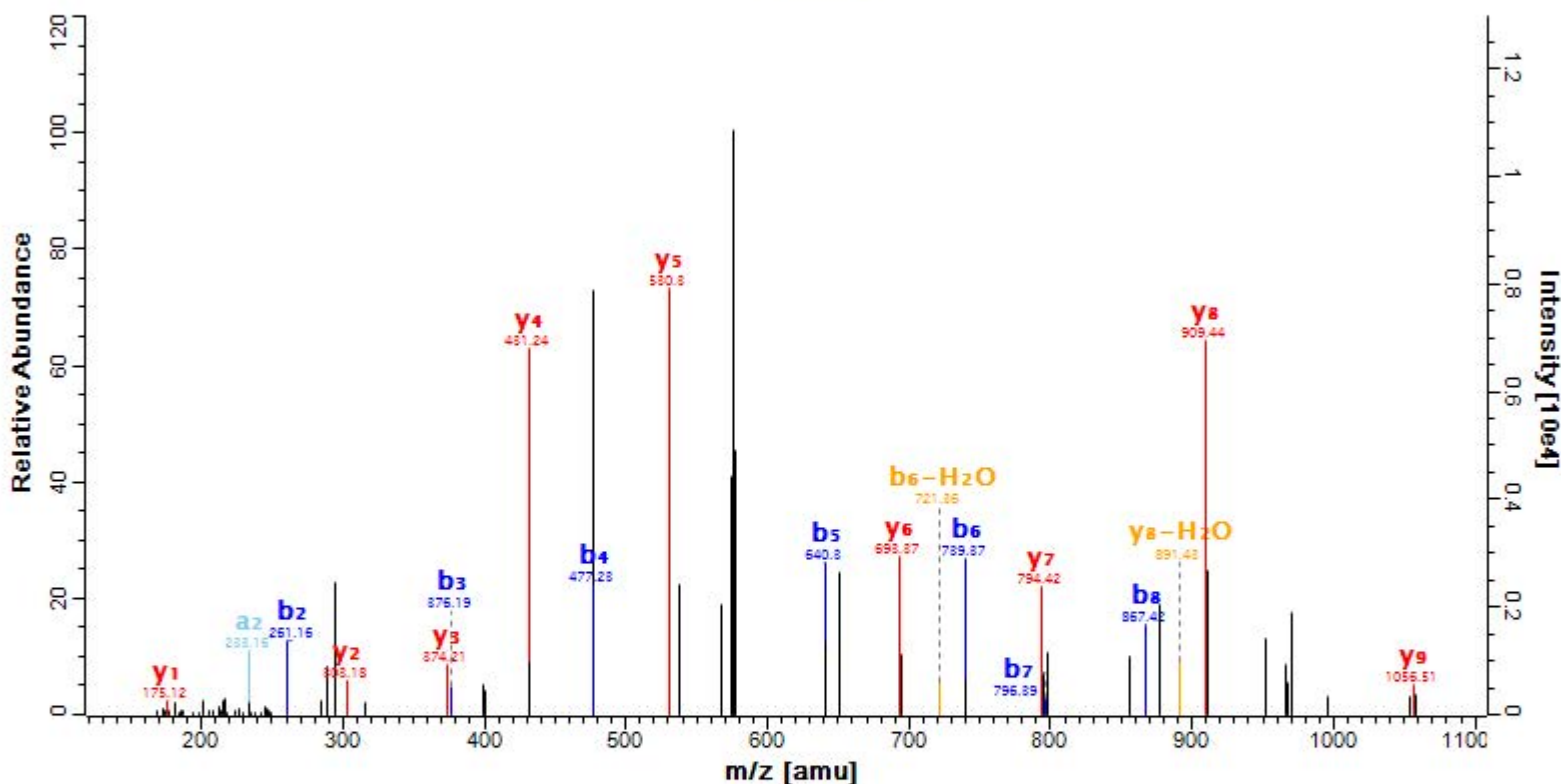

#### precursor information

|                   |                 |
|-------------------|-----------------|
| Mass:             | 1168.5882       |
| m/z:              | 585.30138       |
| Charge:           | 2+              |
| Retentiontime:    | 19.824600219726 |
| Score:            | 123.7925        |
| Mass Error [ppm]: | 0.45031         |
| PEP:              | 0.00026769      |
| Precursor Type:   | MULTI           |

|                       |           |
|-----------------------|-----------|
| Annotation:           | 9 of 10   |
| AminoAcids Coverage:  | 90 %      |
| Intensity Coverage:   | 42 %      |
| Peak Coverage:        | 22 %      |
| Protein Localisation: | 34 ... 43 |

| a ion           |          | b ion           |          | y ion |                 |      |          |           |
|-----------------|----------|-----------------|----------|-------|-----------------|------|----------|-----------|
| $\Delta$ dalton | mass     | $\Delta$ dalton | mass     | seq   | $\Delta$ dalton | mass |          |           |
|                 | 86.09643 |                 | 114.0913 | 1     | I               | 9    |          |           |
| -0.01672        | 233.1648 | -0.0277         | 261.1598 | 2     | F               | 8    | 1056.511 | +0.00181  |
|                 | 348.1918 | +0.123056       | 376.1867 | 3     | D               | 7    | 909.4425 | +0.040622 |
|                 | 449.2395 | +0.198791       | 477.2344 | 4     | T               | 6    | 794.4155 | -0.03711  |
|                 | 612.3028 | +0.03744        | 640.2977 | 5     | Y               | 5    | 693.3678 | +0.041025 |
|                 | 711.3712 | +0.058808       | 739.3661 | 6     | V               | 4    | 530.3045 | +0.057723 |
|                 | 768.3927 | +0.343741       | 796.3876 | 7     | G               | 3    | 431.2361 | +0.055275 |
|                 | 839.4298 | +0.046557       | 867.4247 | 8     | A               | 2    | 374.2146 | +0.068254 |
|                 | 967.4884 |                 | 995.4833 | 9     | Q               | 1    | 303.1775 | +0.140952 |
|                 |          |                 |          | 10    | R               | 0    | 175.119  | +0.039678 |

Scan number 2932 Raw file LNCAP\_Silac\_23F10\_set2\_04  
 Method ITMS: CID Pepti... 145.89

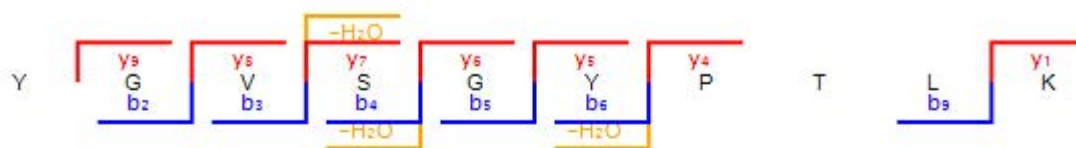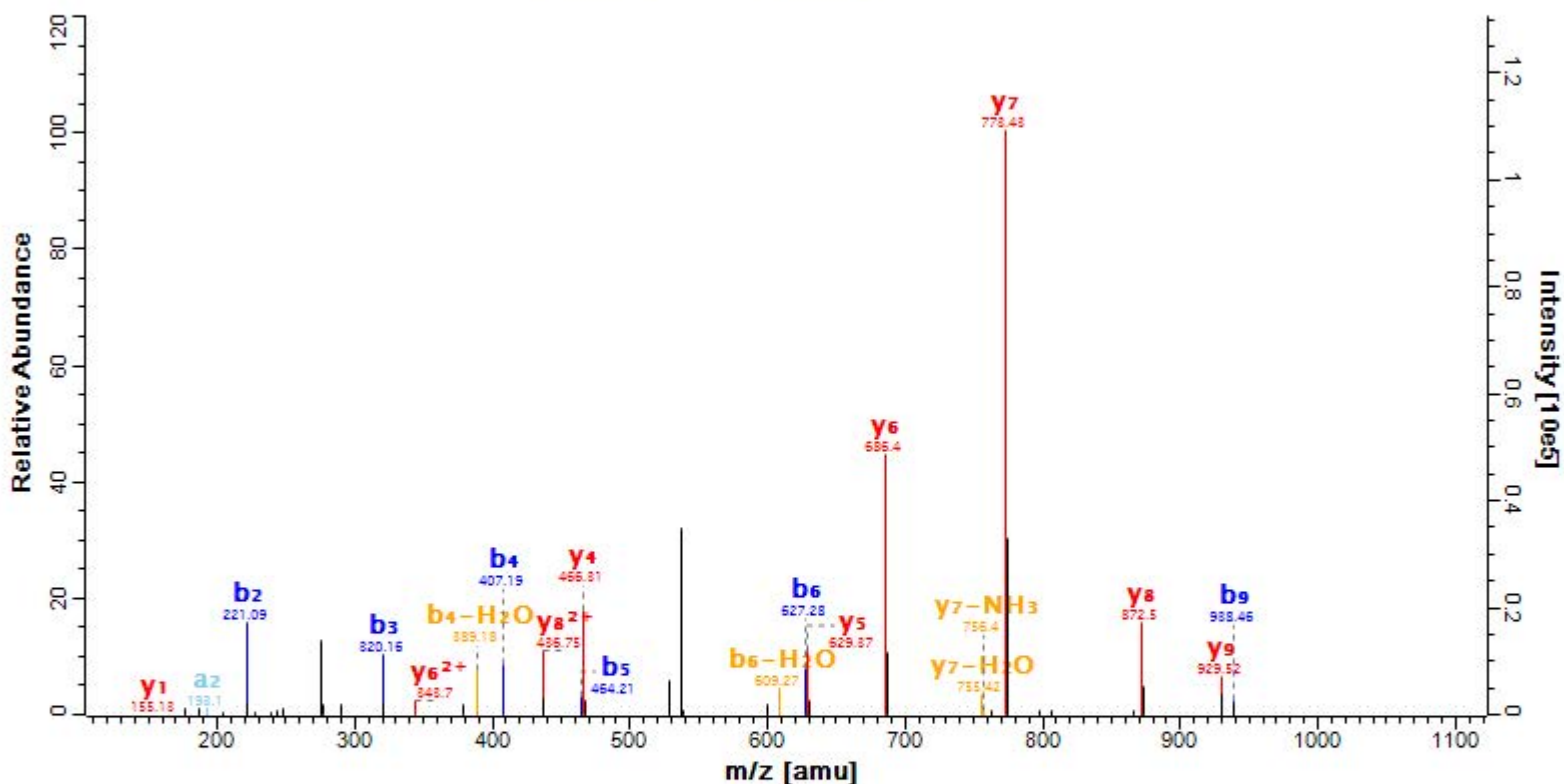

#### precursor information

|                   |                 |
|-------------------|-----------------|
| Mass:             | 1083.56061      |
| m/z:              | 542.78758       |
| Charge:           | 2+              |
| Retentiontime:    | 20.077526092529 |
| Score:            | 145.8865        |
| Mass Error [ppm]: | 0.50461         |
| PEP:              | 0.00017465      |
| Precursor Type:   | MULTI           |

|                       |            |
|-----------------------|------------|
| Annotation:           | 8 of 10    |
| AminoAcids Coverage:  | 80 %       |
| Intensity Coverage:   | 67 %       |
| Peak Coverage:        | 27 %       |
| Protein Localisation: | 95 ... 104 |

| a ion    |        | b ion    |        | seq |   |   | y ion    |         | y <sup>2+</sup> ion |         |
|----------|--------|----------|--------|-----|---|---|----------|---------|---------------------|---------|
| Δ dalton | mass   | Δ dalton | mass   |     |   |   | Δ dalton | mass    | Δ dalton            | mass    |
|          | 136.08 |          | 164.07 | 1   | Y | 9 |          |         |                     |         |
| -0.056   | 193.1  | +0.0203  | 221.09 | 2   | G | 8 | 929.52   | +0.0045 | 929.52              |         |
|          | 292.17 | -0.044   | 320.16 | 3   | V | 7 | 872.5    | +0.0237 | 436.75              | -0.112  |
|          | 379.2  | -0.038   | 407.19 | 4   | S | 6 | 773.43   | -0.025  | 773.43              |         |
|          | 436.22 | -0.021   | 464.21 | 5   | G | 5 | 686.4    | -0.018  | 343.7               | +0.4578 |
|          | 599.28 | -0.018   | 627.28 | 6   | Y | 4 | 629.37   | -0.008  | 629.37              |         |
|          | 696.34 |          | 724.33 | 7   | P | 3 | 466.31   | +0.0654 | 466.31              |         |
|          | 797.38 |          | 825.38 | 8   | T | 2 | 369.26   |         | 369.26              |         |
|          | 910.47 | +0.0079  | 938.46 | 9   | L | 1 | 268.21   |         | 268.21              |         |
|          |        |          |        | 10  | K | 0 | 155.13   | +0.147  | 155.13              |         |

Scan number 2967 Raw file LNCAP\_Silac\_23F10\_set2\_04  
 Method ITMS: CID Pepti... 136.7

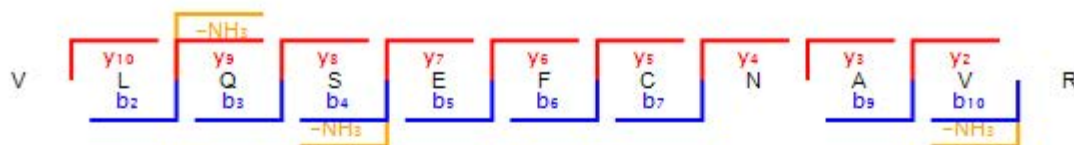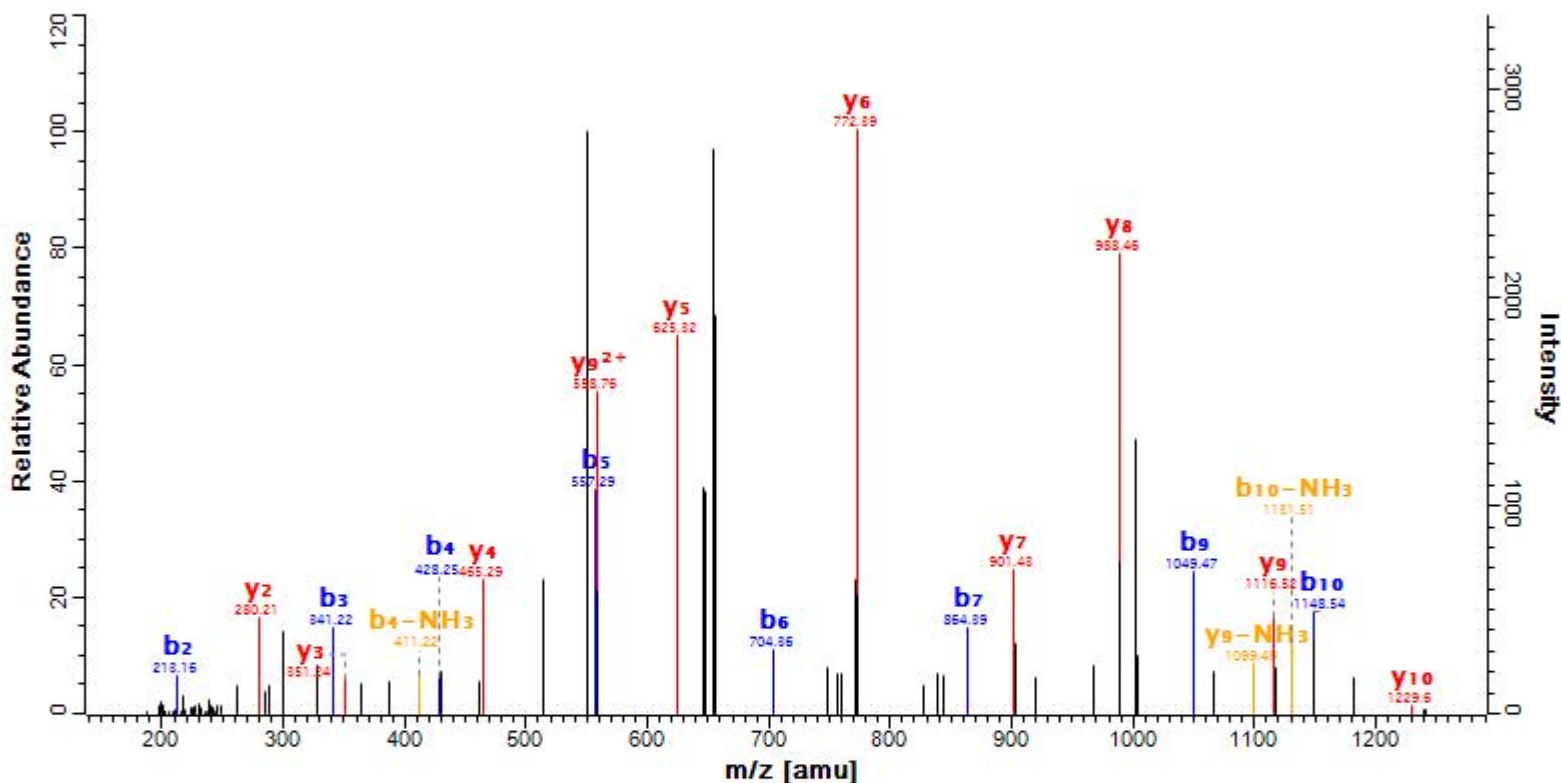

#### precursor information

|                   |                 |
|-------------------|-----------------|
| Mass:             | 1321.64491      |
| m/z:              | 661.82973       |
| Charge:           | 2+              |
| Retentiontime:    | 20.268697738647 |
| Score:            | 136.6982        |
| Mass Error [ppm]: | 0.033149        |
| PEP:              | 0.00016803      |
| Precursor Type:   | MULTI           |

#### general information

|                       |           |
|-----------------------|-----------|
| Annotation:           | 9 of 11   |
| AminoAcids Coverage:  | 82 %      |
| Intensity Coverage:   | 41 %      |
| Peak Coverage:        | 23 %      |
| Protein Localisation: | 41 ... 51 |

| b ion     |          |     |   | y ion    |          | y <sup>2+</sup> ion |          |          |
|-----------|----------|-----|---|----------|----------|---------------------|----------|----------|
| Δ dalton  | mass     | seq |   | Δ dalton | mass     | Δ dalton            | mass     |          |
|           | 100.0757 | 1   | V | 10       |          |                     |          |          |
| +0.005285 | 213.1598 | 2   | L | 9        | 1229.604 | +0.291768           | 1229.604 |          |
| +0.040884 | 341.2183 | 3   | Q | 8        | 1116.52  | +0.095193           | 558.7635 | -0.06694 |
| +0.003302 | 428.2504 | 4   | S | 7        | 988.4612 | -0.00663            | 988.4612 |          |
| -0.03099  | 557.293  | 5   | E | 6        | 901.4292 | -0.04711            | 901.4292 |          |
| +0.029441 | 704.3614 | 6   | F | 5        | 772.3866 | +0.072447           | 772.3866 |          |
| +0.025038 | 864.392  | 7   | C | 4        | 625.3182 | -0.02448            | 625.3182 |          |
|           | 978.4349 | 8   | N | 3        | 465.2875 | -0.01398            | 465.2875 |          |
| -0.12074  | 1049.472 | 9   | A | 2        | 351.2446 | +0.198567           | 351.2446 |          |
| -0.14643  | 1148.54  | 10  | V | 1        | 280.2075 | +0.044733           | 280.2075 |          |
|           |          | 11  | R | 0        | 181.1391 |                     | 181.1391 |          |



Scan number 2988 Raw file LNCAP\_Silac\_23F10\_set2\_04  
 Method ITMS; CID Pepti... 94.77

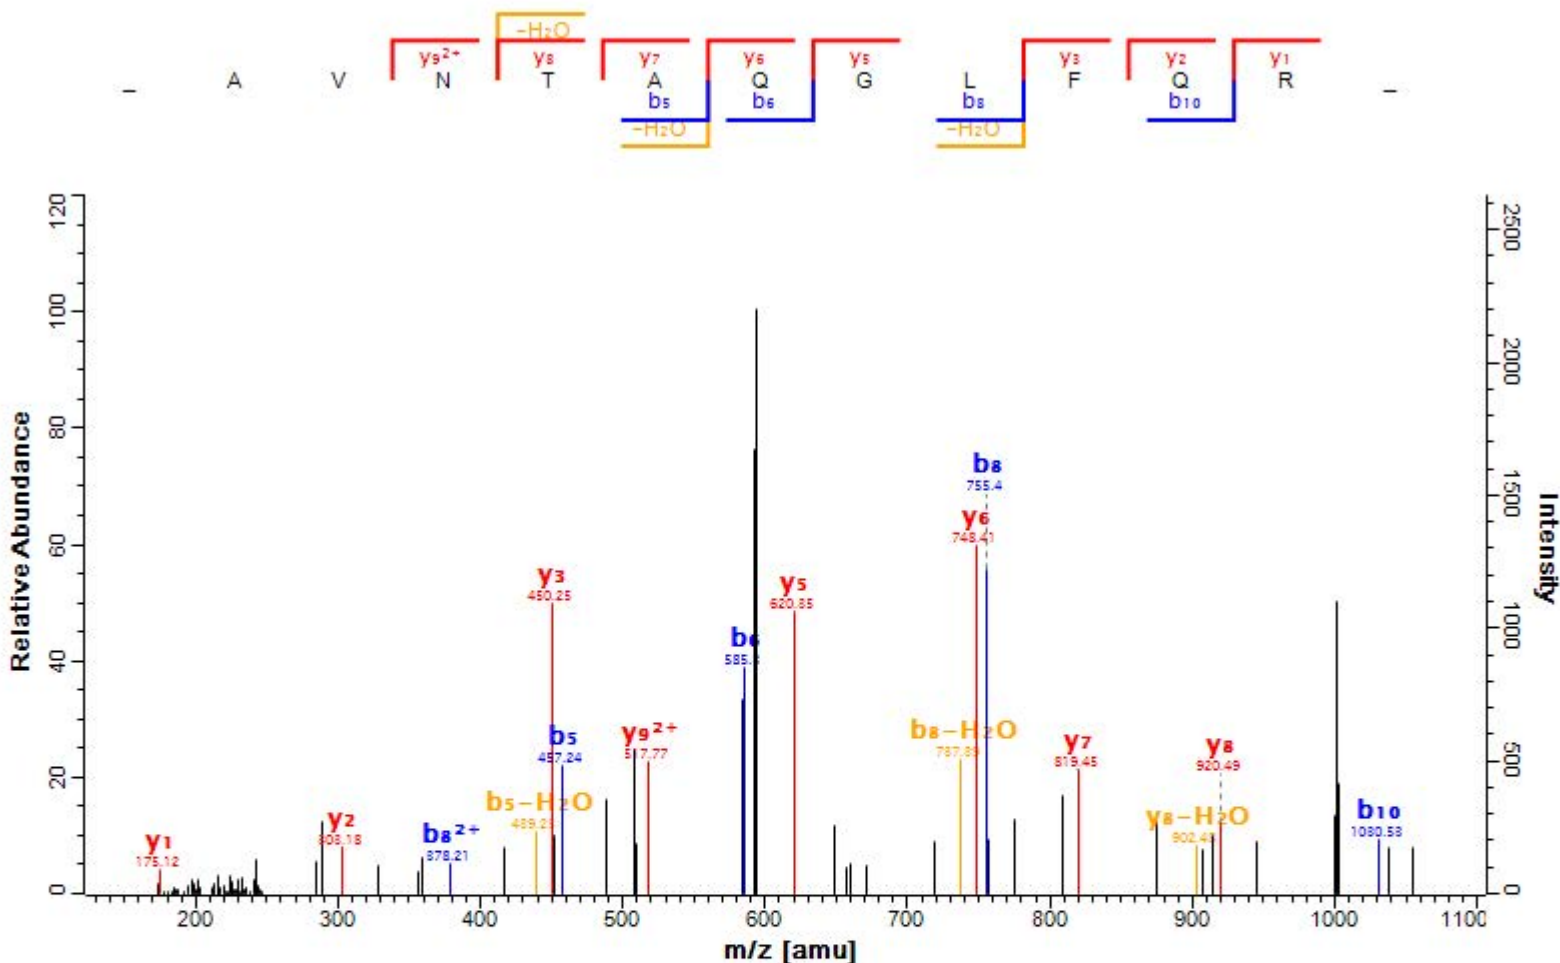

#### precursor information

|                   |                 |
|-------------------|-----------------|
| Mass:             | 1203.63605      |
| m/z:              | 602.8253        |
| Charge:           | 2+              |
| Retentiontime:    | 20.366750717163 |
| Score:            | 94.76728        |
| Mass Error [ppm]: | 0.023554        |
| PEP:              | 0.001268        |
| Precursor Type:   | MULTI           |

#### general information

|                       |           |
|-----------------------|-----------|
| Annotation:           | 9 of 11   |
| AminoAcids Coverage:  | 82 %      |
| Intensity Coverage:   | 38 %      |
| Peak Coverage:        | 17 %      |
| Protein Localisation: | 17 ... 27 |

| b <sup>2+</sup> ion |        | b ion    |        |    |     |          | y ion  |          | y <sup>2+</sup> ion |  |
|---------------------|--------|----------|--------|----|-----|----------|--------|----------|---------------------|--|
| Δ dalton            | mass   | Δ dalton | mass   |    | seq | Δ dalton | mass   | Δ dalton | mass                |  |
|                     | 72.044 |          | 72.044 | 1  | A   | 10       |        |          |                     |  |
|                     | 171.11 |          | 171.11 | 2  | V   | 9        | 1133.6 |          | 1133.6              |  |
|                     | 285.16 |          | 285.16 | 3  | N   | 8        | 1034.5 |          | 517.77 -0.035       |  |
|                     | 386.2  |          | 386.2  | 4  | T   | 7        | 920.49 | +0.0969  | 920.49              |  |
|                     | 457.24 | +0.0677  | 457.24 | 5  | A   | 6        | 819.45 | +0.0834  | 819.45              |  |
|                     | 585.3  | +0.0706  | 585.3  | 6  | Q   | 5        | 748.41 | +0.0348  | 748.41              |  |
|                     | 642.32 |          | 642.32 | 7  | G   | 4        | 620.35 | +0.003   | 620.35              |  |
| +0.0956             | 737.21 | +0.0484  | 755.4  | 8  | L   | 3        | 563.33 |          | 563.33              |  |
|                     | 902.47 |          | 902.47 | 9  | F   | 2        | 450.25 | +0.0143  | 450.25              |  |
|                     | 1030.5 | -0.057   | 1030.5 | 10 | Q   | 1        | 303.18 | +0.2222  | 303.18              |  |
|                     |        |          |        | 11 | R   | 0        | 175.12 | +0.0825  | 175.12              |  |

Scan number 3352 Raw file LNCAP\_Silac\_23F10\_set2\_04  
 Method ITMS; CID Pepti... 95.1

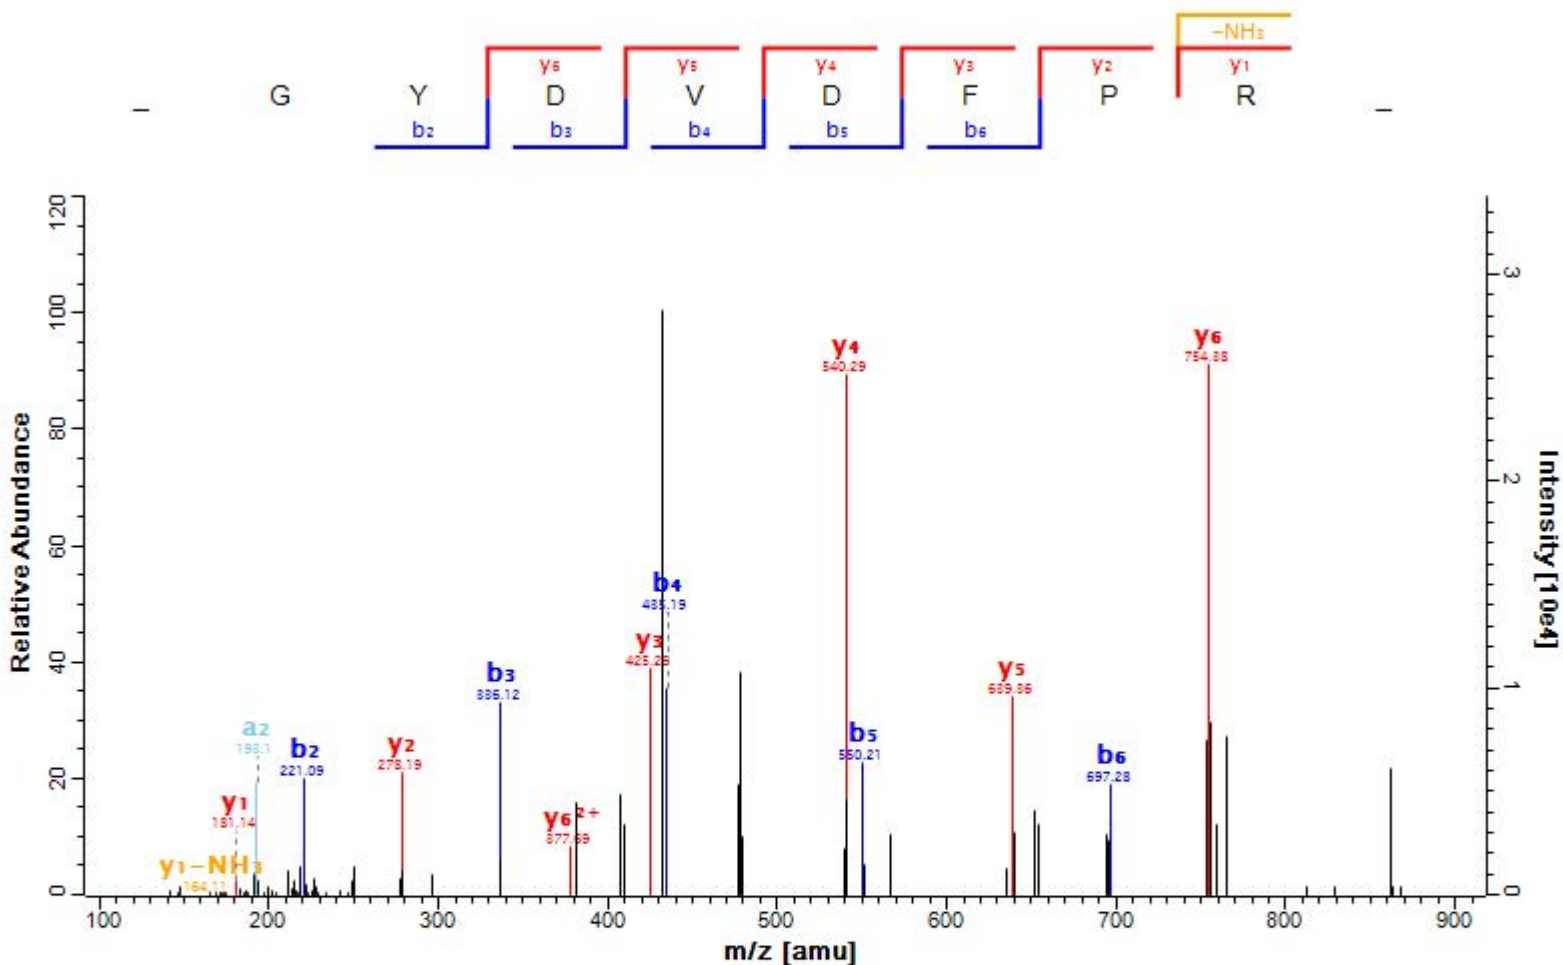

#### precursor information

|                       |                 |
|-----------------------|-----------------|
| Mass:                 | 967.44016       |
| m/z:                  | 484.72736       |
| Charge:               | 2+              |
| Retentiontime:        | 22.174198150634 |
| Score:                | 95.09868        |
| Mass Error [ppm]:     | 0.21794         |
| g PEP:                | 0.01211         |
| Annotation:           | 7 of 8          |
| AminoAcids Coverage:  | 88 %            |
| Intensity Coverage:   | 46 %            |
| Peak Coverage:        | 16 %            |
| Protein Localisation: | 683 ... 690     |

| a ion    |        | b ion    |        |   |     |          | y ion  |          | y <sup>2+</sup> ion |  |
|----------|--------|----------|--------|---|-----|----------|--------|----------|---------------------|--|
| Δ dalton | mass   | Δ dalton | mass   |   | seq | Δ dalton | mass   | Δ dalton | mass                |  |
|          | 30.034 |          | 58.029 | 1 | G   | 7        |        |          |                     |  |
| -0.064   | 193.1  | -0.018   | 221.09 | 2 | Y   | 6        | 917.45 |          | 917.45              |  |
|          | 308.12 | -0.092   | 336.12 | 3 | D   | 5        | 754.38 | +0.0042  | 377.69              |  |
|          | 407.19 | -0.088   | 435.19 | 4 | V   | 4        | 639.36 | +0.0518  | 639.36              |  |
|          | 522.22 | +0.0389  | 550.21 | 5 | D   | 3        | 540.29 | +0.0244  | 540.29              |  |
|          | 669.29 | +0.0282  | 697.28 | 6 | F   | 2        | 425.26 | +0.0091  | 425.26              |  |
|          | 766.34 |          | 794.34 | 7 | P   | 1        | 278.19 | -0.011   | 278.19              |  |
|          |        |          |        | 8 | R   | 0        | 181.14 | -0.025   | 181.14              |  |

Scan number 3464 Raw file LNCAP\_Silac\_23F10\_set2\_04  
 Method ITMS: CID Pepti... 49.42

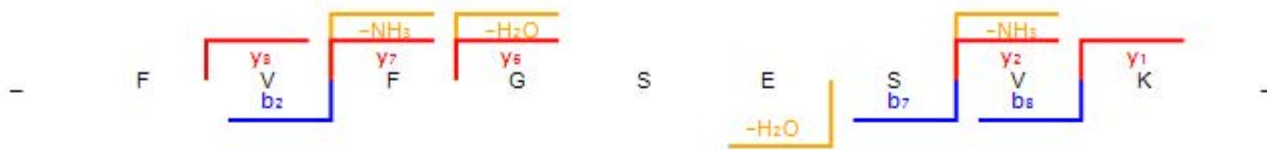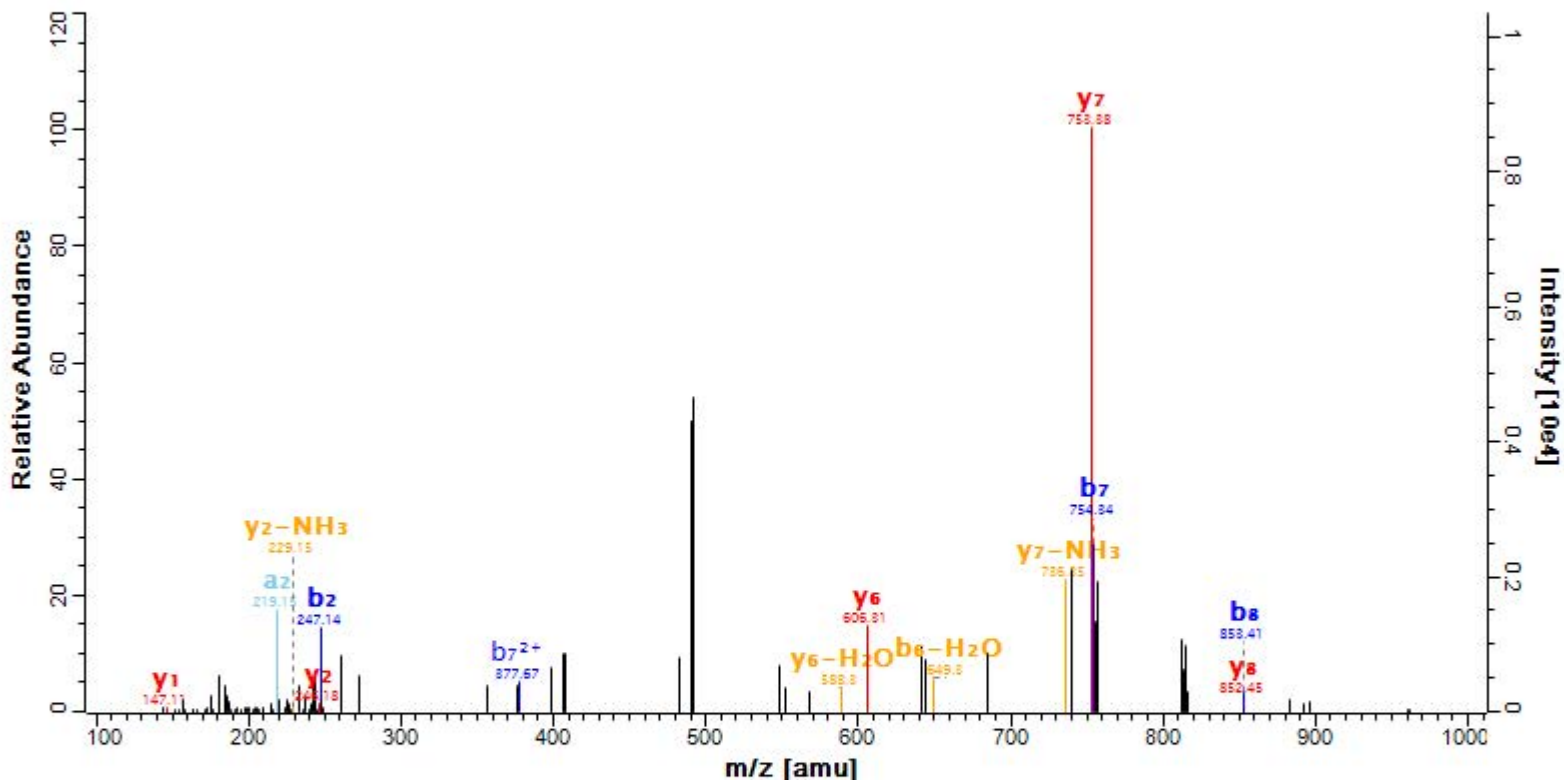

#### precursor information

|                       |                 |
|-----------------------|-----------------|
| Mass:                 | 998.5072        |
| m/z:                  | 500.26088       |
| Charge:               | 2+              |
| Retention time:       | 22.701210021972 |
| Score:                | 49.41815        |
| Mass Error [ppm]:     | -0.09499        |
| PEP:                  | 0.054405        |
| Precursor Type:       | MULTI           |
| Annotation:           | 7 of 9          |
| AminoAcids Coverage:  | 78 %            |
| Intensity Coverage:   | 34 %            |
| Peak Coverage:        | 14 %            |
| Protein Localisation: | 2514 ... 2522   |

| a ion    |        | b <sup>2+</sup> ion |        | b ion    |        | y ion |          |         |
|----------|--------|---------------------|--------|----------|--------|-------|----------|---------|
| Δ dalton | mass   | Δ dalton            | mass   | Δ dalton | mass   | seq   | Δ dalton | mass    |
|          | 120.08 |                     | 148.08 |          | 148.08 | 1 F 8 |          |         |
| +0.0508  | 219.15 |                     | 247.14 | +0.0197  | 247.14 | 2 V 7 | 852.45   | -0.18   |
|          | 366.22 |                     | 394.21 |          | 394.21 | 3 F 6 | 753.38   | +0.0231 |
|          | 423.24 |                     | 451.23 |          | 451.23 | 4 G 5 | 606.31   | -0.109  |
|          | 510.27 |                     | 538.27 |          | 538.27 | 5 S 4 | 549.29   |         |
|          | 639.31 |                     | 667.31 |          | 667.31 | 6 E 3 | 462.26   |         |
|          | 726.35 | -0.139              | 377.67 | +0.1128  | 754.34 | 7 S 2 | 333.21   |         |
|          | 825.41 |                     | 853.41 | +0.0828  | 853.41 | 8 V 1 | 246.18   | -0.176  |
|          |        |                     |        |          |        | 9 K 0 | 147.11   | +0.0572 |

Scan number 3503 Raw file LNCAP\_Silac\_23F10\_set2\_04  
 Method ITMS; CID Pepti... 65.56

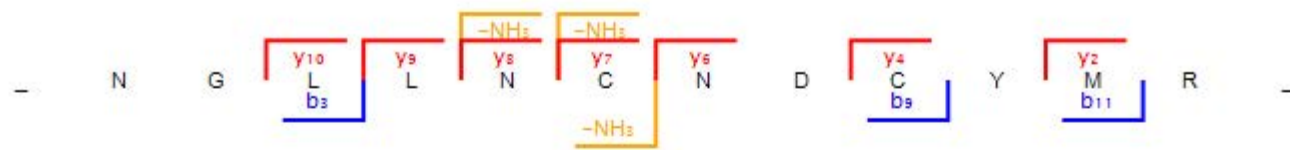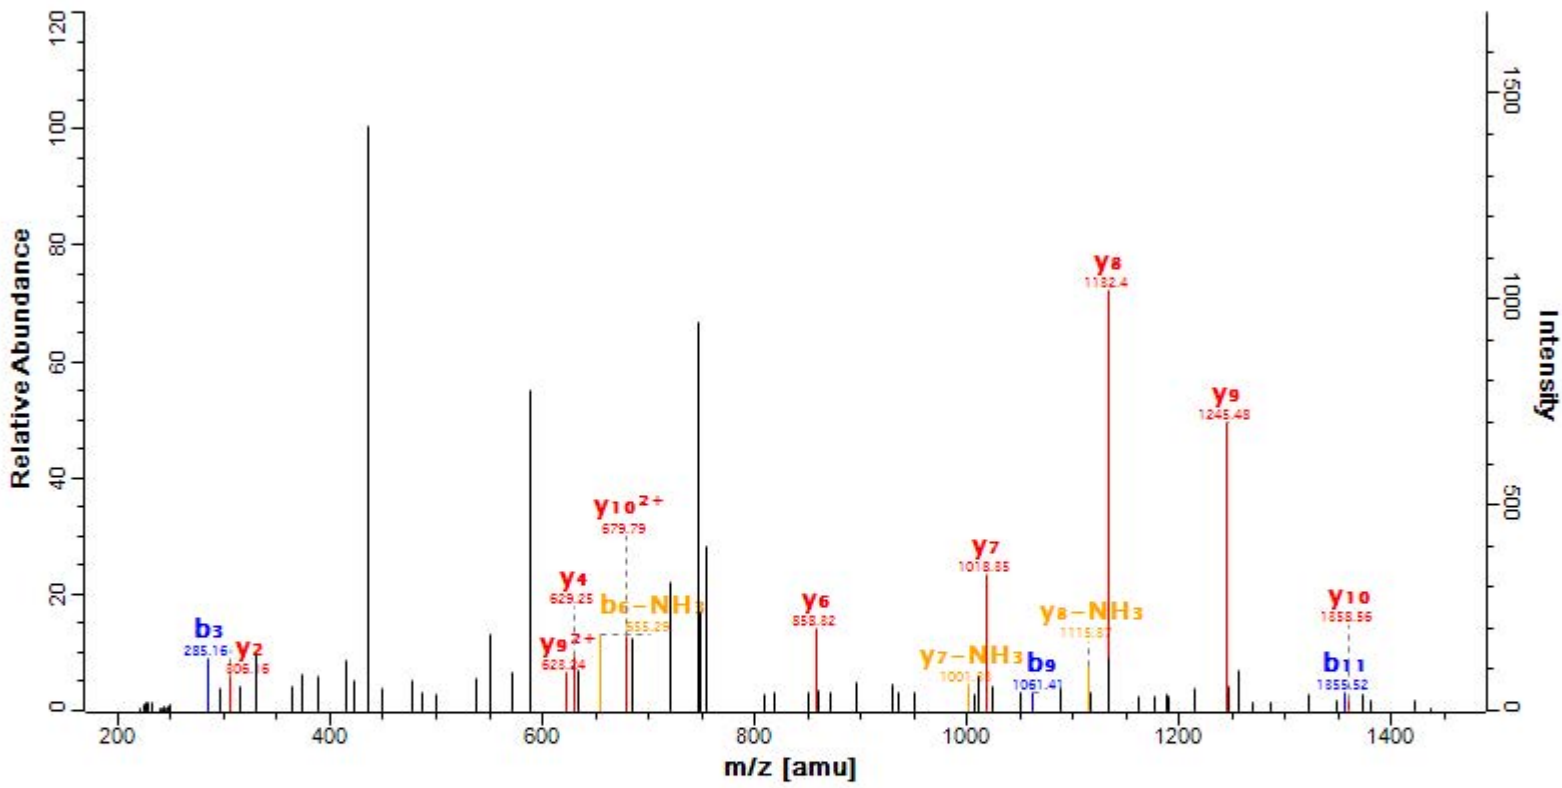

**precursor information**

|                   |                 |
|-------------------|-----------------|
| Mass:             | 1528.62111      |
| m/z:              | 765.31783       |
| Charge:           | 2+              |
| Retentiontime:    | 22.879905700683 |
| Score:            | 65.56252        |
| Mass Error [ppm]: | -0.64907        |
| PEP:              | 0.0077176       |
| Precursor Type:   | MULTI           |

**general information**

|                       |               |
|-----------------------|---------------|
| Annotation:           | 7 of 12       |
| AminoAcids Coverage:  | 58 %          |
| Intensity Coverage:   | 29 %          |
| Peak Coverage:        | 17 %          |
| Protein Localisation: | 1062 ... 1073 |

| b ion     |          |    |     |    | y ion    |           | y <sup>2+</sup> ion |           |
|-----------|----------|----|-----|----|----------|-----------|---------------------|-----------|
| Δ dalton  | mass     |    | seq |    | Δ dalton | mass      | Δ dalton            | mass      |
|           | 115.0502 | 1  | N   | 11 |          |           |                     |           |
|           | 172.0717 | 2  | G   | 10 | 1415.586 |           | 1415.586            |           |
| +0.082885 | 285.1557 | 3  | L   | 9  | 1358.565 | +0.126785 | 679.7861            | -0.10522  |
|           | 398.2398 | 4  | L   | 8  | 1245.481 | -0.03415  | 623.2441            | +0.143046 |
|           | 512.2827 | 5  | N   | 7  | 1132.397 | -0.02552  | 1132.397            |           |
|           | 672.3134 | 6  | C   | 6  | 1018.354 | +0.078441 | 1018.354            |           |
|           | 786.3563 | 7  | N   | 5  | 858.3233 | +0.075215 | 858.3233            |           |
|           | 901.3832 | 8  | D   | 4  | 744.2804 |           | 744.2804            |           |
| +0.130788 | 1061.414 | 9  | C   | 3  | 629.2534 | +0.124699 | 629.2534            |           |
|           | 1224.477 | 10 | Y   | 2  | 469.2228 |           | 469.2228            |           |
| +0.107053 | 1355.518 | 11 | M   | 1  | 306.1594 | +0.006609 | 306.1594            |           |
|           |          | 12 | R   | 0  | 175.119  |           | 175.119             |           |

Scan number 353 Raw file LNCAP\_Silac\_23F10\_set2\_04  
 Method ITMS: CID Pepti... 127.56

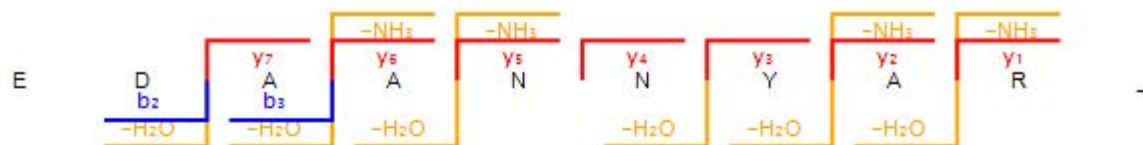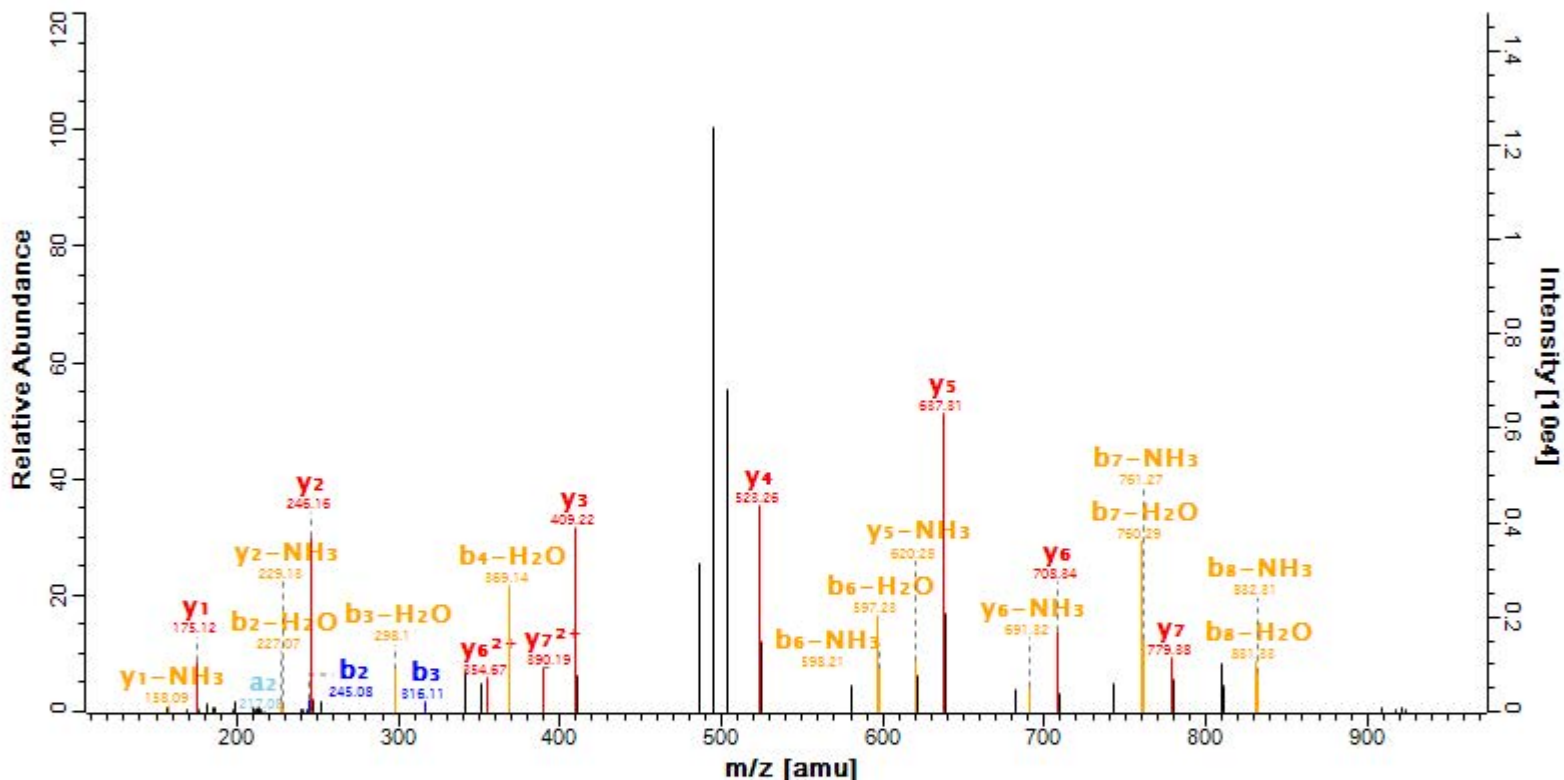

#### precursor information

|                       |                 |
|-----------------------|-----------------|
| Mass:                 | 1022.4417       |
| m/z:                  | 512.22813       |
| Charge:               | 2+              |
| Retentiontime:        | 6.9462800025939 |
| Score:                | 127.5647        |
| Mass Error [ppm]:     | -0.03855        |
| PEP:                  | 0.0011737       |
| Precursor Type:       | MULTI           |
| Annotation:           | 8 of 9          |
| AminoAcids Coverage:  | 89 %            |
| Intensity Coverage:   | 50 %            |
| Peak Coverage:        | 34 %            |
| Protein Localisation: | 97 ... 105      |

| a ion    |        | b ion    |        | seq |   |   | y ion    |         | y <sup>2+</sup> ion |         |
|----------|--------|----------|--------|-----|---|---|----------|---------|---------------------|---------|
| Δ dalton | mass   | Δ dalton | mass   |     |   |   | Δ dalton | mass    | Δ dalton            | mass    |
|          | 102.05 |          | 130.05 | 1   | E | 8 |          |         |                     |         |
| -0.367   | 217.08 | -0.055   | 245.08 | 2   | D | 7 | 894.41   |         | 894.41              |         |
|          | 288.12 | +0.0728  | 316.11 | 3   | A | 6 | 779.38   | -0.004  | 390.19              | +0.0185 |
|          | 359.16 |          | 387.15 | 4   | A | 5 | 708.34   | +0.0995 | 354.67              | +0.07   |
|          | 473.2  |          | 501.19 | 5   | N | 4 | 637.31   | +0.0342 | 637.31              |         |
|          | 587.24 |          | 615.24 | 6   | N | 3 | 523.26   | +0.0038 | 523.26              |         |
|          | 750.31 |          | 778.3  | 7   | Y | 2 | 409.22   | +0.115  | 409.22              |         |
|          | 821.34 |          | 849.34 | 8   | A | 1 | 246.16   | -0.032  | 246.16              |         |
|          |        |          |        | 9   | R | 0 | 175.12   | +0.0207 | 175.12              |         |

Scan number 3964 Raw file LNCAP\_Silac\_23F10\_set2\_04  
 Method ITMS: CID Peptide LNCAP\_Silac\_23F10\_set2\_04

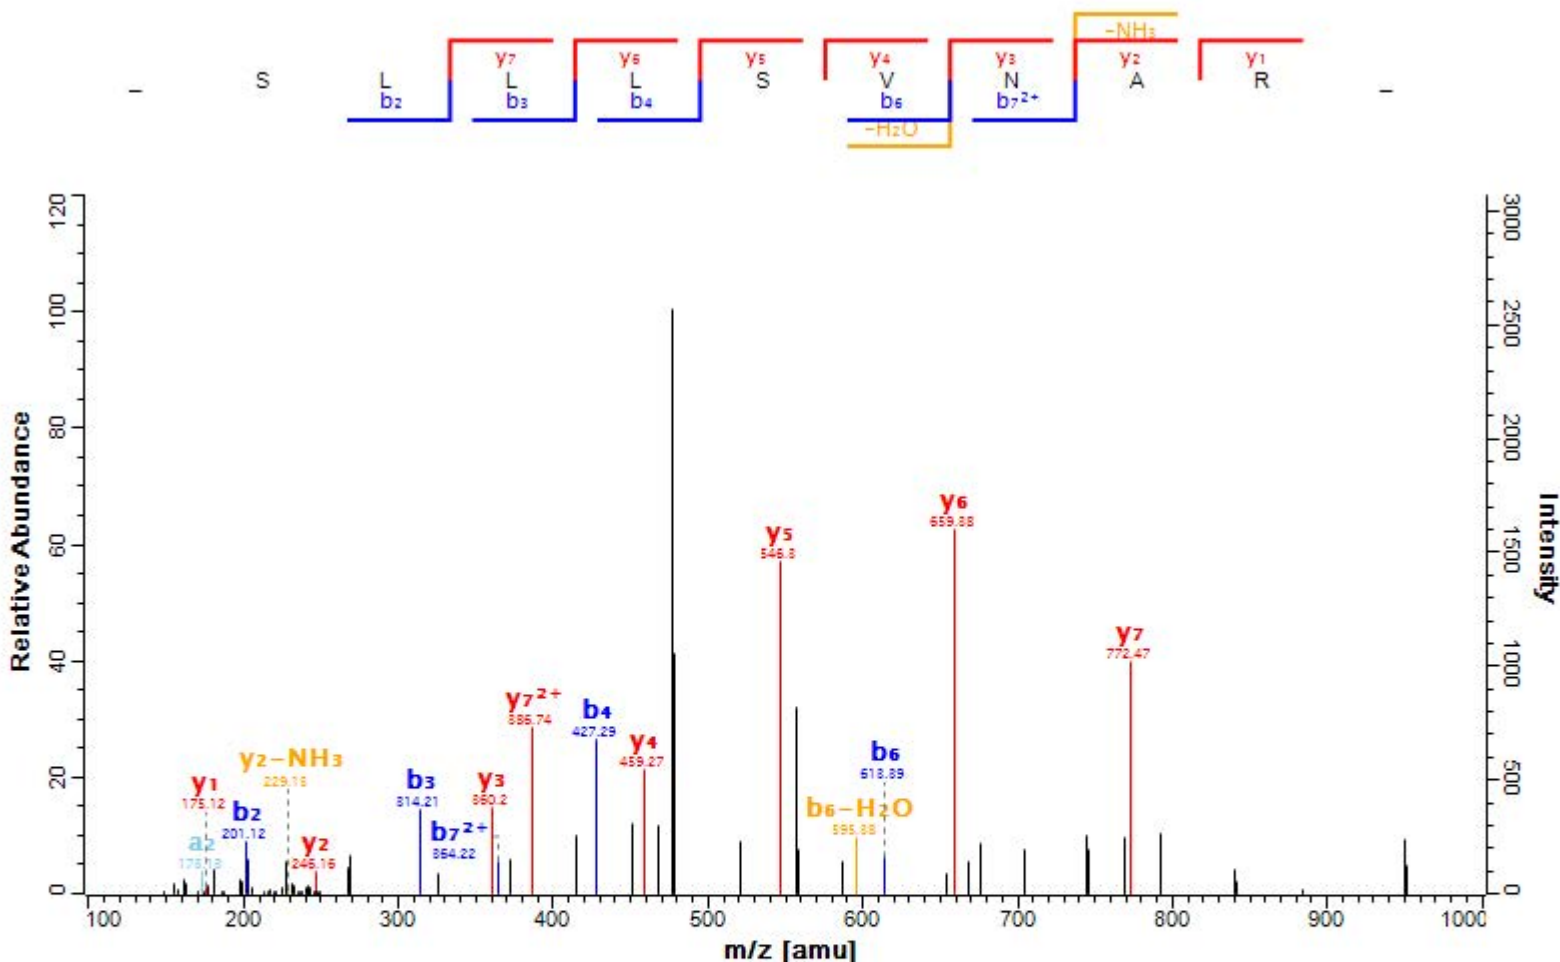

#### precursor information

|                       |                 |
|-----------------------|-----------------|
| Mass:                 | 971.57608       |
| m/z:                  | 486.79532       |
| Charge:               | 2+              |
| Retention time:       | 25.063606262207 |
| Score:                | 91.86671        |
| Mass Error [ppm]:     | -0.30388        |
| PEP:                  | 0.0094571       |
| Precursor Type:       | ISO             |
| Annotation:           | 8 of 9          |
| AminoAcids Coverage:  | 89 %            |
| Intensity Coverage:   | 44 %            |
| Peak Coverage:        | 19 %            |
| Protein Localisation: | 216 ... 224     |

| a ion         |               | b <sup>2+</sup> ion |               | b ion |               | y ion         |               | y <sup>2+</sup> ion |  |
|---------------|---------------|---------------------|---------------|-------|---------------|---------------|---------------|---------------------|--|
| Δ dalton mass | Δ dalton mass | Δ dalton mass       | Δ dalton mass | seq   | Δ dalton mass | Δ dalton mass | Δ dalton mass | Δ dalton mass       |  |
| 60.04         | 88.04         | 88.04               | 88.04         | 1     | S             | 8             |               |                     |  |
| -0.06         | 173.1         | 201.1               | -0.04         | 2     | L             | 7             | 885.6         | 885.6               |  |
| 286.2         | 314.2         | -0.04               | 314.2         | 3     | L             | 6             | 772.5         | +0.16               |  |
| 399.3         | 427.3         | -0.01               | 427.3         | 4     | L             | 5             | 659.4         | +0.08               |  |
| 486.3         | 514.3         |                     | 514.3         | 5     | S             | 4             | 546.3         | +0.006              |  |
| 585.4         | 613.4         | +0.12               | 613.4         | 6     | V             | 3             | 459.3         | +0.02               |  |
| 699.4         | +0.43         | 364.2               |               | 7     | N             | 2             | 360.2         | +0                  |  |
| 770.5         | 798.5         |                     | 798.5         | 8     | A             | 1             | 246.2         | -0.02               |  |
|               |               |                     |               | 9     | R             | 0             | 175.1         | +0.084              |  |

g

Scan number 4036 Raw file LNCAP\_Silac\_23F10\_set2\_04  
 Method ITMS; CID Pepti... 212.58

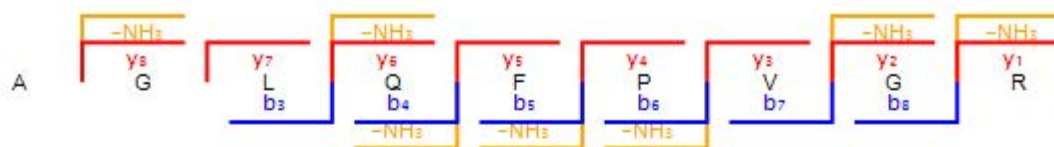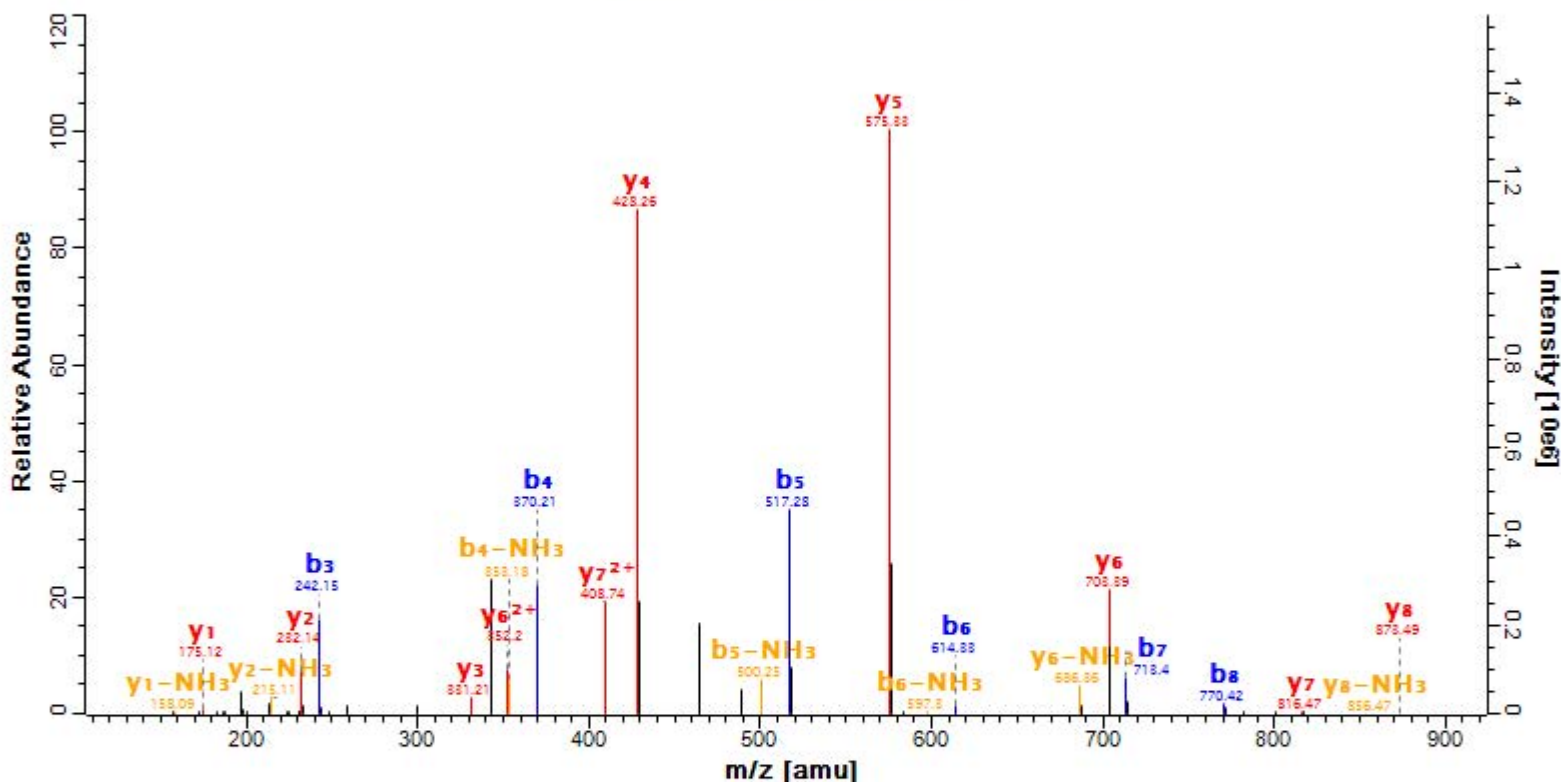

#### precursor information

|                       |                 |
|-----------------------|-----------------|
| Mass:                 | 943.52354       |
| m/z:                  | 472.76904       |
| Charge:               | 2+              |
| Retentiontime:        | 25.423799514770 |
| Score:                | 212.5806        |
| Mass Error [ppm]:     | -0.43951        |
| PEP:                  | 4.2885E-13      |
| Precursor Type:       | MULTI           |
| Annotation:           | 8 of 9          |
| AminoAcids Coverage:  | 89 %            |
| Intensity Coverage:   | 73 %            |
| Peak Coverage:        | 37 %            |
| Protein Localisation: | 22 ... 30       |

| b ion     |          |     |   | y ion    |          | y <sup>2+</sup> ion |          |           |
|-----------|----------|-----|---|----------|----------|---------------------|----------|-----------|
| Δ dalton  | mass     | seq |   | Δ dalton | mass     | Δ dalton            | mass     |           |
|           | 72.04439 | 1   | A | 8        |          |                     |          |           |
|           | 129.0659 | 2   | G | 7        | 873.4941 | +0.03201            | 873.4941 |           |
| -0.00615  | 242.1499 | 3   | L | 6        | 816.4726 | -0.01806            | 408.74   | +0.272702 |
| -0.03497  | 370.2085 | 4   | Q | 5        | 703.3886 | +0.010524           | 352.1979 | -0.02932  |
| -0.06158  | 517.2769 | 5   | F | 4        | 575.33   | +0.040537           | 575.33   |           |
| +0.006081 | 614.3297 | 6   | P | 3        | 428.2616 | +0.03287            | 428.2616 |           |
| +0.024459 | 713.3981 | 7   | V | 2        | 331.2088 | +0.018892           | 331.2088 |           |
| +0.179082 | 770.4196 | 8   | G | 1        | 232.1404 | +0.110927           | 232.1404 |           |
|           |          | 9   | R | 0        | 175.119  | +0.16361            | 175.119  |           |

Scan number 445 Raw file LNCAP\_Silac\_23F10\_set2\_04  
 Method ITMS: CID Pepti... 91.87

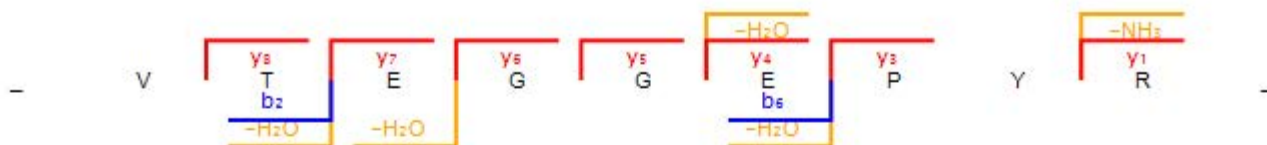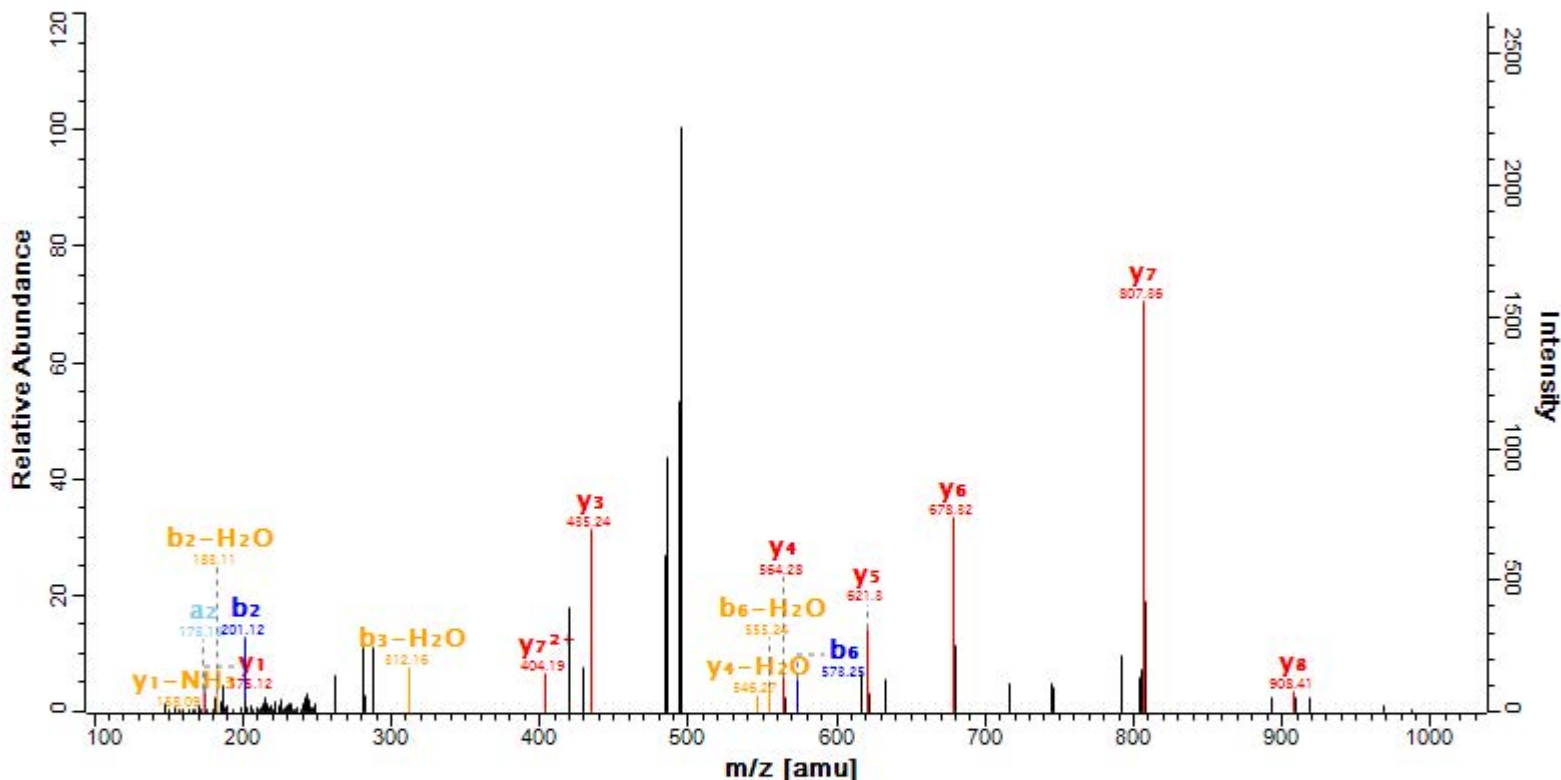

#### precursor information

|                       |                 |
|-----------------------|-----------------|
| Mass:                 | 1006.47135      |
| m/z:                  | 504.24295       |
| Charge:               | 2+              |
| Retentiontime:        | 7.5758252143859 |
| Score:                | 91.86671        |
| Mass Error [ppm]:     | -0.62125        |
| PEP:                  | 0.0049451       |
| Precursor Type:       | MULTI           |
| Annotation:           | 7 of 9          |
| AminoAcids Coverage:  | 78 %            |
| Intensity Coverage:   | 31 %            |
| Peak Coverage:        | 14 %            |
| Protein Localisation: | 321 ... 329     |

| a ion    |        | b ion    |        |   |     |   | y ion    |         | y <sup>2+</sup> ion |         |
|----------|--------|----------|--------|---|-----|---|----------|---------|---------------------|---------|
| Δ dalton | mass   | Δ dalton | mass   |   | seq |   | Δ dalton | mass    | Δ dalton            | mass    |
|          | 72.081 |          | 100.08 | 1 | V   | 8 |          |         |                     |         |
| +0.0903  | 173.13 | +0.05    | 201.12 | 2 | T   | 7 | 908.41   | -0.088  | 908.41              |         |
|          | 302.17 |          | 330.17 | 3 | E   | 6 | 807.36   | -0.044  | 404.19              | +0.1213 |
|          | 359.19 |          | 387.19 | 4 | G   | 5 | 678.32   | -0.025  | 678.32              |         |
|          | 416.21 |          | 444.21 | 5 | G   | 4 | 621.3    | +0.0453 | 621.3               |         |
|          | 545.26 | +0.0921  | 573.25 | 6 | E   | 3 | 564.28   | -0.012  | 564.28              |         |
|          | 642.31 |          | 670.3  | 7 | P   | 2 | 435.24   | +0.0055 | 435.24              |         |
|          | 805.37 |          | 833.37 | 8 | Y   | 1 | 338.18   |         | 338.18              |         |
|          |        |          |        | 9 | R   | 0 | 175.12   | +0.0621 | 175.12              |         |



Scan number 4592 Raw file LNCAP\_Silac\_23F10\_set2\_04  
 Method ITMS; CID Pepti... 108.08

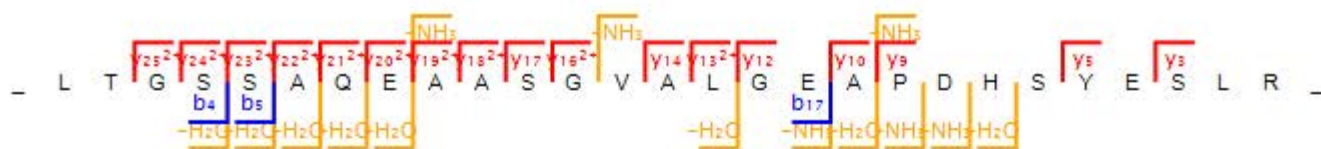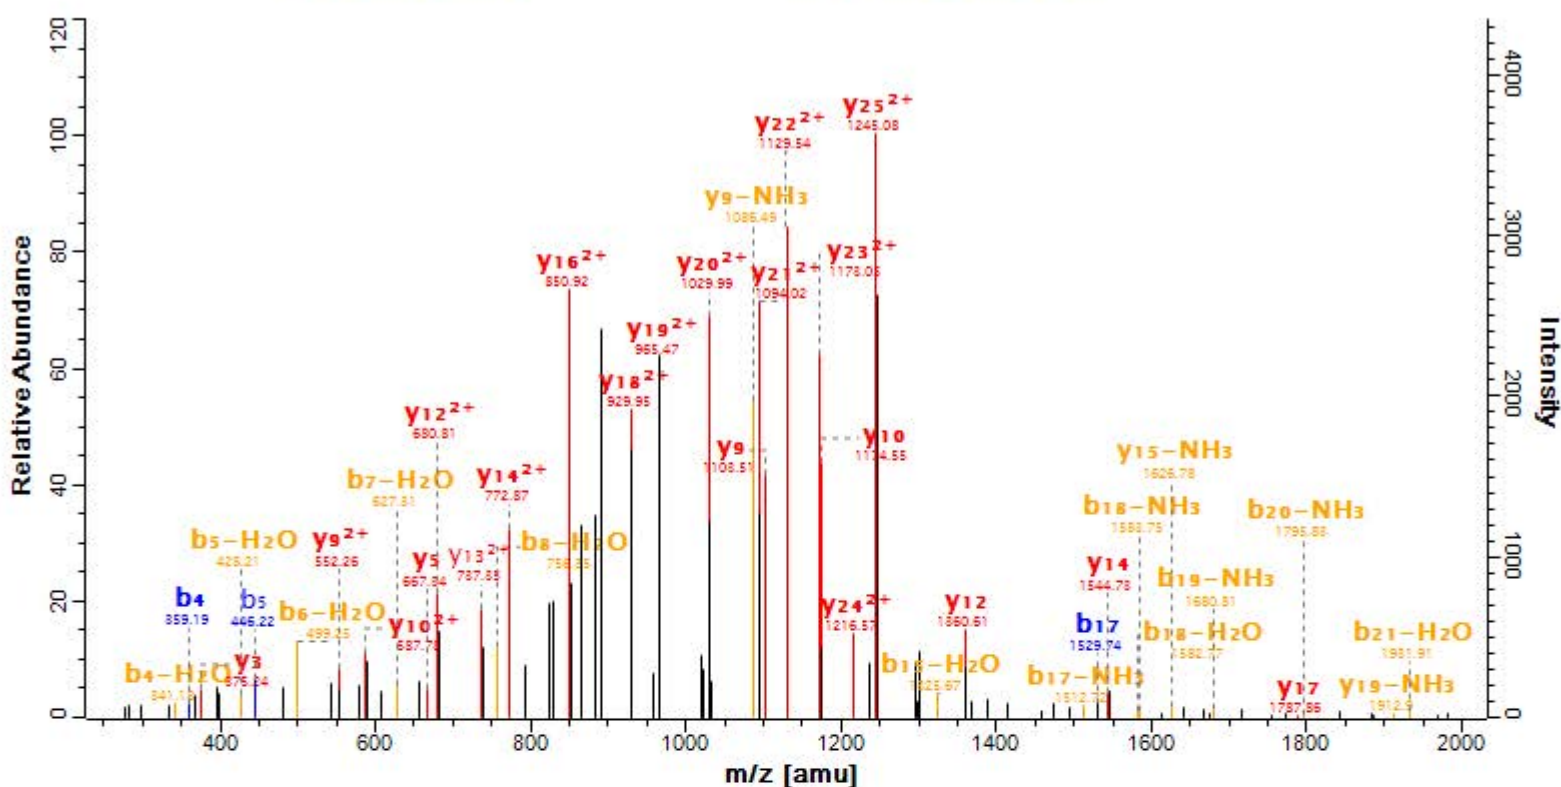

#### precursor information

|                   |                 |
|-------------------|-----------------|
| Mass:             | 2702.27898      |
| m/z:              | 901.76694       |
| Charge:           | 3+              |
| Retentiontime:    | 28.066053390502 |
| Score:            | 108.0798        |
| Mass Error [ppm]: | 0.22895         |
| PEP:              | 3.7523E-13      |
| Precursor Type:   | MULTI           |

| b ion     |          |     |   | y ion    |          | y <sup>2+</sup> ion |           |           |
|-----------|----------|-----|---|----------|----------|---------------------|-----------|-----------|
| Δ dalton  | mass     | seq |   | Δ dalton | mass     | Δ dalton            | mass      |           |
|           | 114.0913 | 1   | L | 26       |          |                     |           |           |
|           | 215.139  | 2   | T | 25       | 2590.202 | 2590.202            |           |           |
|           | 272.1605 | 3   | G | 24       | 2489.154 | 1245.081            | +0.210916 |           |
| -0.45252  | 359.1925 | 4   | S | 23       | 2432.132 | 1216.57             | +0.057707 |           |
| +0.104318 | 446.2245 | 5   | S | 22       | 2345.1   | 1173.054            | +0.292959 |           |
|           | 517.2617 | 6   | A | 21       | 2258.068 | 1129.538            | +0.234877 |           |
|           | 645.3202 | 7   | Q | 20       | 2187.031 | 1094.019            | +0.226578 |           |
|           | 774.3628 | 8   | E | 19       | 2058.973 | 1029.99             | +0.294319 |           |
|           | 845.3999 | 9   | A | 18       | 1929.93  | 965.4687            | +0.028934 |           |
|           | 916.4371 | 10  | A | 17       | 1858.893 | 929.9501            | +0.009588 |           |
|           | 1003.469 | 11  | S | 16       | 1787.856 | -0.23343            | 1787.856  |           |
|           | 1060.491 | 12  | G | 15       | 1700.824 |                     | 850.9156  | +0.203522 |
|           | 1159.559 | 13  | V | 14       | 1643.802 |                     | 1643.802  |           |
|           | 1230.596 | 14  | A | 13       | 1544.734 | -0.00459            | 772.8706  | +0.342149 |
|           | 1343.68  | 15  | L | 12       | 1473.697 |                     | 737.3521  | +0.211353 |
|           | 1400.702 | 16  | G | 11       | 1360.613 | -0.03185            | 680.81    | +0.118253 |
| -0.12761  | 1529.744 | 17  | E | 10       | 1303.591 |                     | 1303.591  |           |
|           | 1600.781 | 18  | A | 9        | 1174.549 | -0.17641            | 587.778   | +0.010572 |
|           | 1697.834 | 19  | P | 8        | 1103.512 | -0.05727            | 552.2594  | +0.076859 |
|           | 1812.861 | 20  | D | 7        | 1006.459 |                     | 1006.459  |           |
|           | 1949.92  | 21  | H | 6        | 891.4319 |                     | 891.4319  |           |
|           | 2036.952 | 22  | S | 5        | 754.373  |                     | 754.373   |           |
|           | 2200.015 | 23  | Y | 4        | 667.341  | -0.0732             | 667.341   |           |
|           | 2329.058 | 24  | E | 3        | 504.2776 |                     | 504.2776  |           |
|           | 2416.09  | 25  | S | 2        | 375.235  | +0.112093           | 375.235   |           |
|           | 2529.174 | 26  | L | 1        | 288.203  |                     | 288.203   |           |
|           |          | 27  | R | 0        | 175.119  |                     | 175.119   |           |

#### general information

|                       |           |
|-----------------------|-----------|
| Annotation:           | 22 of 27  |
| AminoAcids Coverage:  | 81 %      |
| Intensity Coverage:   | 56 %      |
| Peak Coverage:        | 38 %      |
| Protein Localisation: | 33 ... 59 |

Scan number 5093 Raw file LNCAP\_Silac\_23F10\_set2\_04  
 Method ITMS; CID Pepti... 123.51

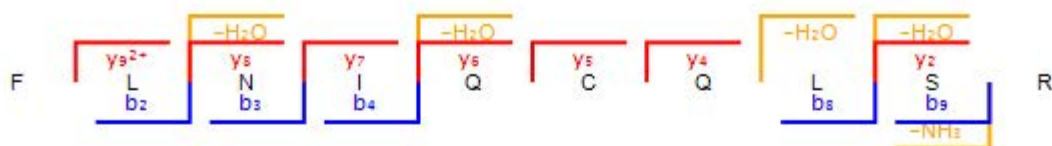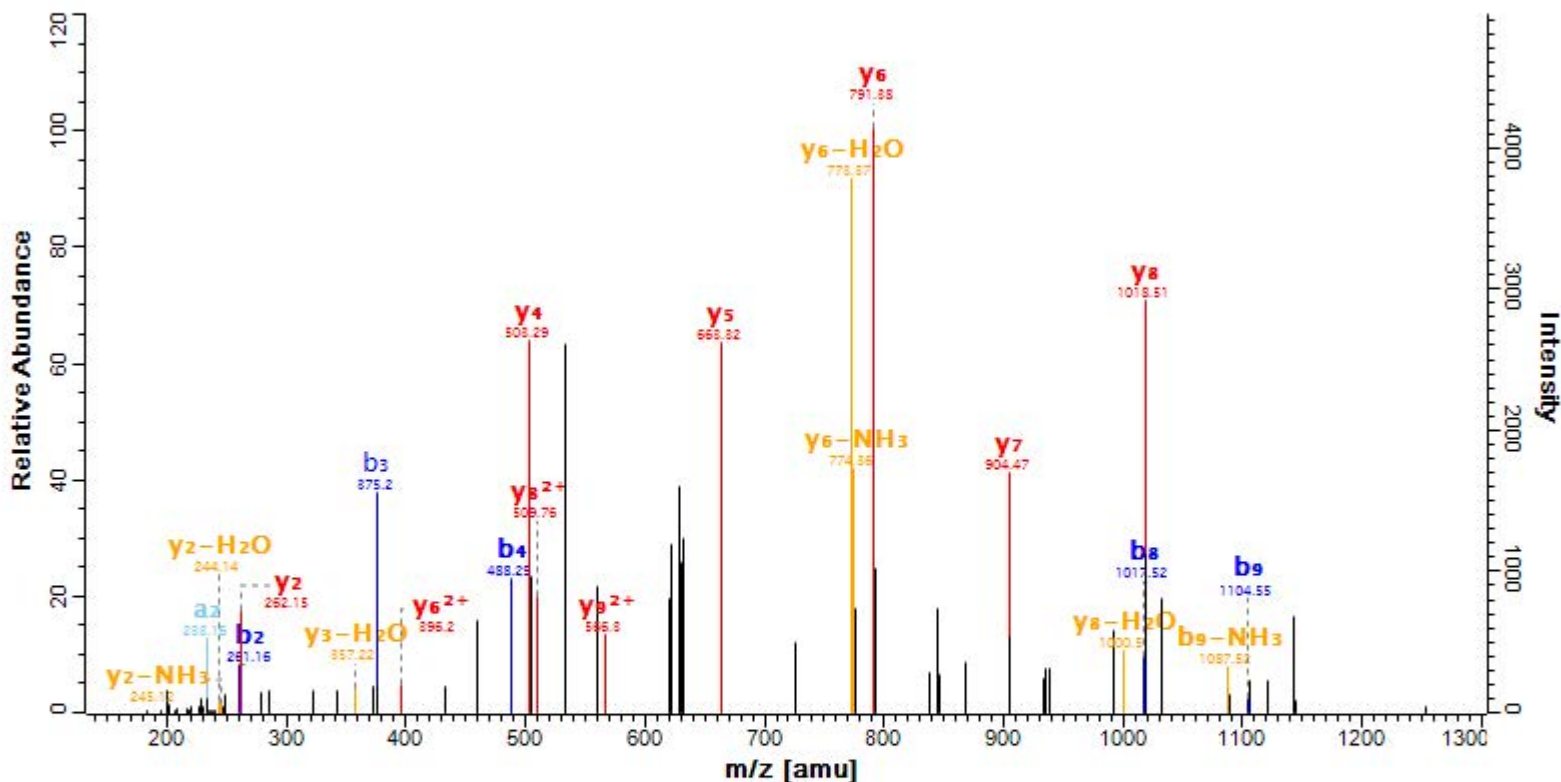

#### precursor information

|                   |                 |
|-------------------|-----------------|
| Mass:             | 1277.65541      |
| m/z:              | 639.83498       |
| Charge:           | 2+              |
| Retentiontime:    | 30.460821151733 |
| Score:            | 123.5133        |
| Mass Error [ppm]: | 0.29055         |
| PEP:              | 5.0842E-06      |
| Precursor Type:   | ISO             |

|                       |             |
|-----------------------|-------------|
| Annotation:           | 8 of 10     |
| AminoAcids Coverage:  | 80 %        |
| Intensity Coverage:   | 54 %        |
| Peak Coverage:        | 26 %        |
| Protein Localisation: | 238 ... 247 |

| a ion    |        | b ion    |        |    |     |   | y ion    |         | y <sup>2+</sup> ion |         |
|----------|--------|----------|--------|----|-----|---|----------|---------|---------------------|---------|
| Δ dalton | mass   | Δ dalton | mass   |    | seq |   | Δ dalton | mass    | Δ dalton            | mass    |
|          | 120.08 |          | 148.08 | 1  | F   | 9 |          |         |                     |         |
| -0.035   | 233.16 | +0.0487  | 261.16 | 2  | L   | 8 | 1131.6   |         | 566.3               | +0.0094 |
|          | 347.21 | -0.035   | 375.2  | 3  | N   | 7 | 1018.5   | +0.0094 | 509.76              | +0.0693 |
|          | 460.29 | -0.109   | 488.29 | 4  | I   | 6 | 904.47   | +0.0451 | 904.47              |         |
|          | 588.35 |          | 616.35 | 5  | Q   | 5 | 791.38   | +0.0128 | 396.2               | -0.11   |
|          | 748.38 |          | 776.38 | 6  | C   | 4 | 663.32   | +0.0754 | 663.32              |         |
|          | 876.44 |          | 904.43 | 7  | Q   | 3 | 503.29   | +0.0488 | 503.29              |         |
|          | 989.52 | +0.1318  | 1017.5 | 8  | L   | 2 | 375.24   |         | 375.24              |         |
|          | 1076.6 | -0.072   | 1104.6 | 9  | S   | 1 | 262.15   | +0.0507 | 262.15              |         |
|          |        |          |        | 10 | R   | 0 | 175.12   |         | 175.12              |         |

Scan number 5643 Raw file LNCAP\_Silac\_23F10\_set2\_04  
 Method ITMS; CID Pepti... 129.89

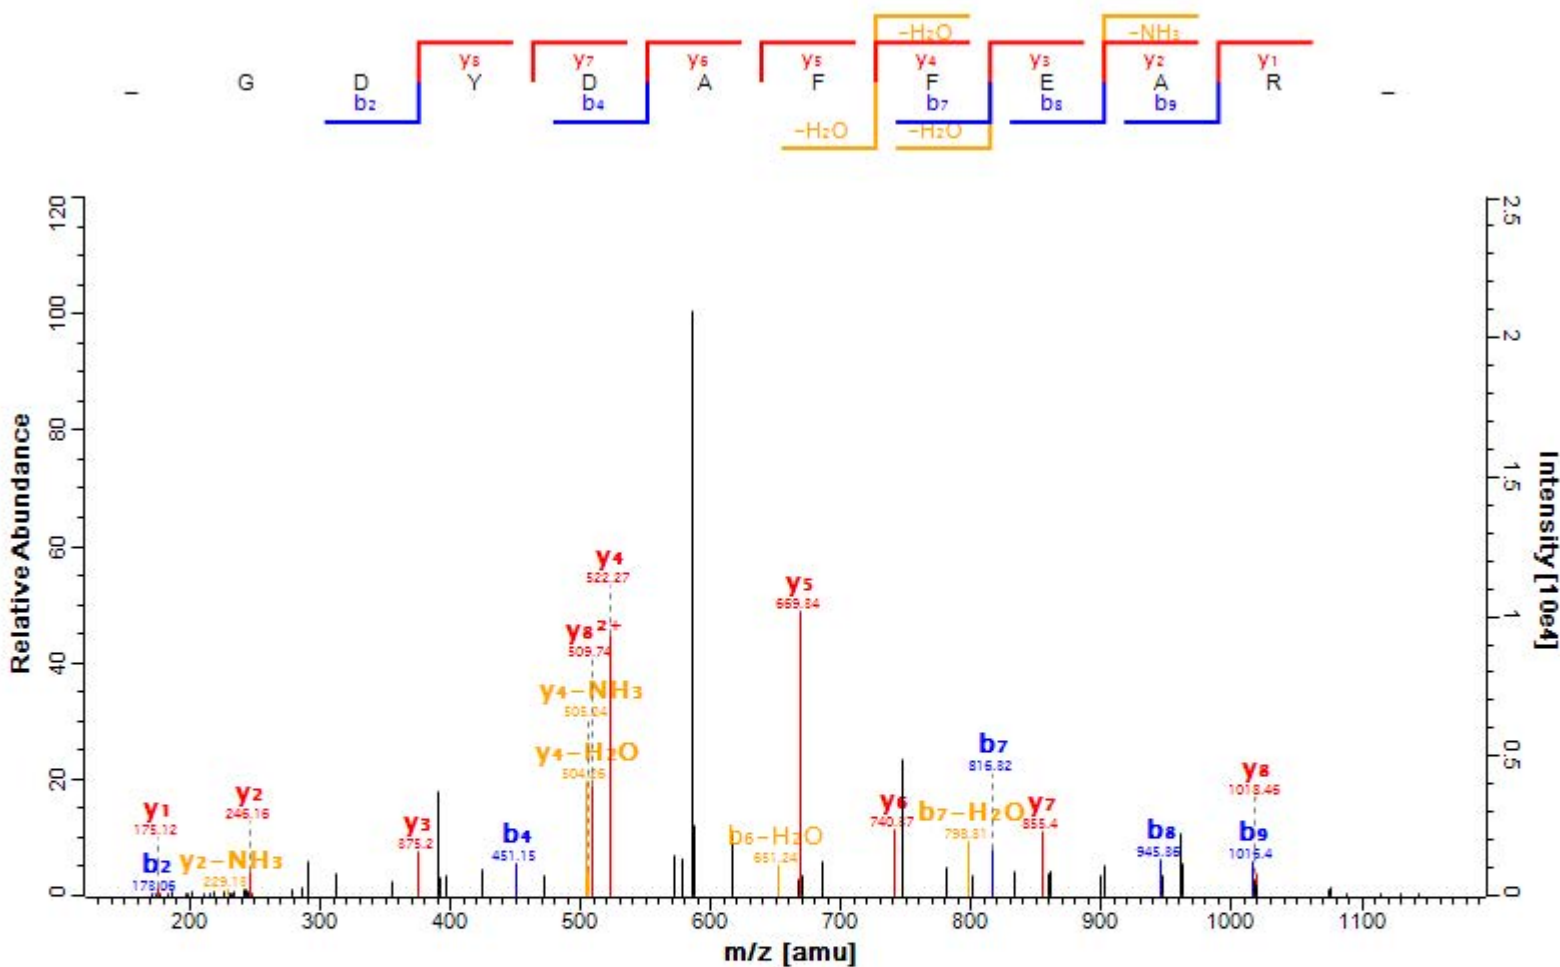

#### precursor information

|                   |                 |
|-------------------|-----------------|
| Mass:             | 1189.50454      |
| m/z:              | 595.75955       |
| Charge:           | 2+              |
| Retentiontime:    | 33.100513458252 |
| Score:            | 129.8889        |
| Mass Error [ppm]: | 0.45147         |
| PEP:              | 0.00024535      |
| Precursor Type:   | MULTI           |

|                       |           |
|-----------------------|-----------|
| Annotation:           | 9 of 10   |
| AminoAcids Coverage:  | 90 %      |
| Intensity Coverage:   | 42 %      |
| Peak Coverage:        | 22 %      |
| Protein Localisation: | 77 ... 86 |

| b ion     |          |    |     |   | y ion    |           | y <sup>2+</sup> ion |          |
|-----------|----------|----|-----|---|----------|-----------|---------------------|----------|
| Δ dalton  | mass     |    | seq |   | Δ dalton | mass      | Δ dalton            | mass     |
|           | 58.02874 | 1  | G   | 9 |          |           |                     |          |
| +0.182751 | 173.0557 | 2  | D   | 8 | 1133.49  |           | 1133.49             |          |
|           | 336.119  | 3  | Y   | 7 | 1018.463 | +0.047321 | 509.7351            | -0.08645 |
| -0.03182  | 451.146  | 4  | D   | 6 | 855.3995 | +0.07122  | 855.3995            |          |
|           | 522.1831 | 5  | A   | 5 | 740.3726 | +0.036335 | 740.3726            |          |
|           | 669.2515 | 6  | F   | 4 | 669.3355 | +0.009423 | 669.3355            |          |
| +0.014759 | 816.3199 | 7  | F   | 3 | 522.2671 | +0.064165 | 522.2671            |          |
| +0.070067 | 945.3625 | 8  | E   | 2 | 375.1987 | -0.04638  | 375.1987            |          |
| -0.21992  | 1016.4   | 9  | A   | 1 | 246.1561 | +0.02028  | 246.1561            |          |
|           |          | 10 | R   | 0 | 175.119  | +0.012731 | 175.119             |          |

Scan number 5896 Raw file LNCAP\_Silac\_23F10\_set2\_04  
 Method ITMS; CID Pepti... 114.28

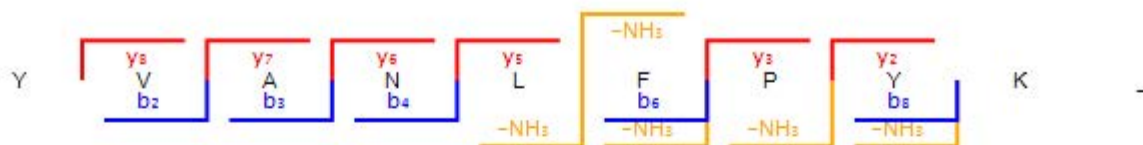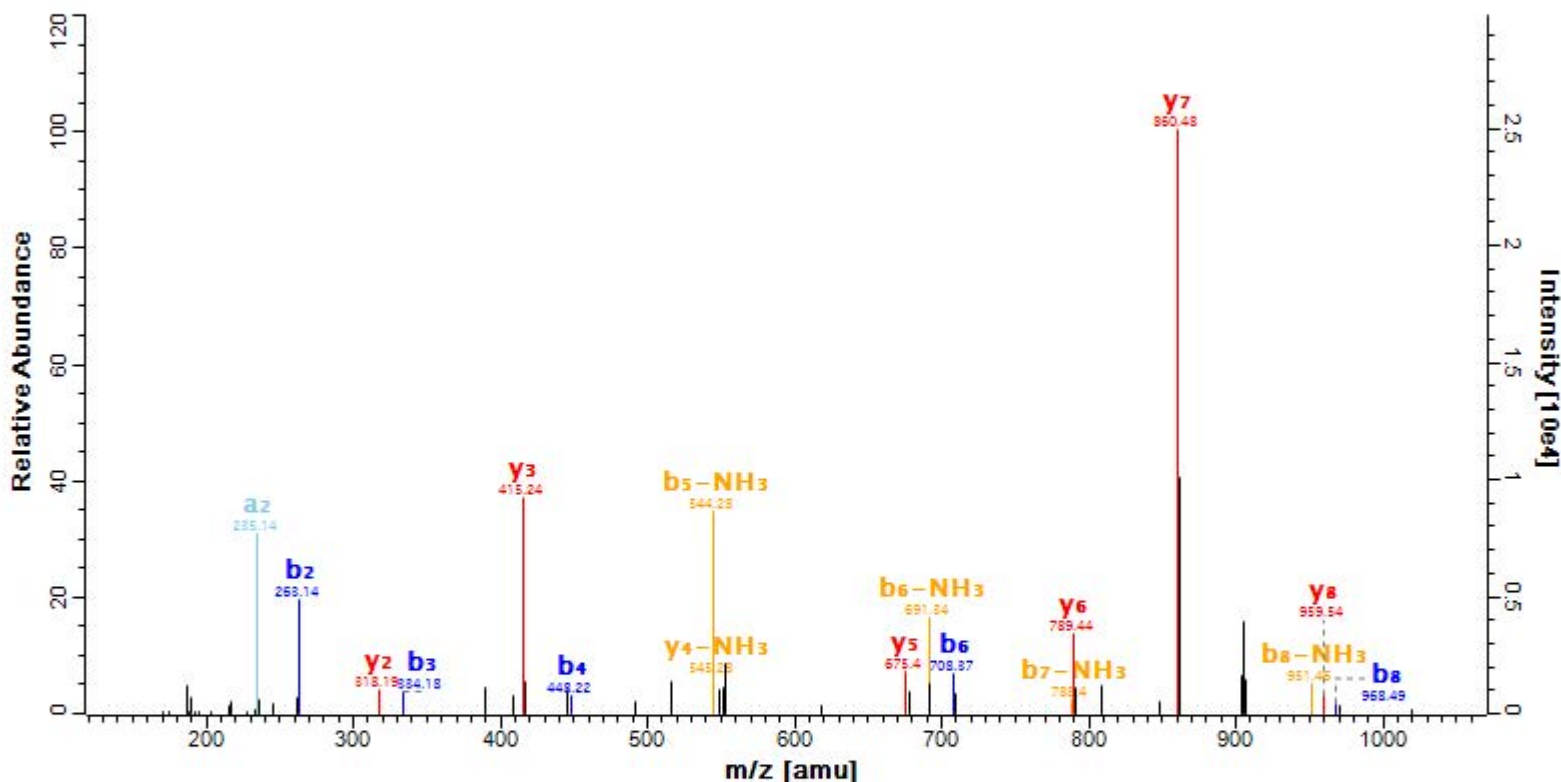

#### precursor information

|                       |                 |
|-----------------------|-----------------|
| Mass:                 | 1121.59986      |
| m/z:                  | 561.8072        |
| Charge:               | 2+              |
| Retentiontime:        | 34.329227447509 |
| Score:                | 114.2812        |
| Mass Error [ppm]:     | -0.20093        |
| PEP:                  | 0.0005212       |
| Precursor Type:       | ISO             |
| Annotation:           | 7 of 9          |
| AminoAcids Coverag    | 78 %            |
| Intensity Coverage:   | 62 %            |
| Peak Coverage:        | 26 %            |
| Protein Localisation: | 80 ... 88       |

| a ion    |          | b ion     |          | seq |   | y ion    |                    |
|----------|----------|-----------|----------|-----|---|----------|--------------------|
| Δ dalton | mass     | Δ dalton  | mass     |     |   | Δ dalton | mass               |
|          | 136.0757 |           | 164.0706 | 1   | Y | 8        |                    |
| -0.03499 | 235.1441 | +0.028339 | 263.139  | 2   | V | 7        | 959.544 +0.029763  |
|          | 306.1812 | +0.059524 | 334.1761 | 3   | A | 6        | 860.4756 +0.043123 |
|          | 420.2241 | +0.142939 | 448.2191 | 4   | N | 5        | 789.4385 +0.081153 |
|          | 533.3082 |           | 561.3031 | 5   | L | 4        | 675.3956 +0.13647  |
|          | 680.3766 | +0.089583 | 708.3715 | 6   | F | 3        | 562.3115           |
|          | 777.4294 |           | 805.4243 | 7   | P | 2        | 415.2431 -0.00982  |
|          | 940.4927 | -0.07998  | 968.4876 | 8   | Y | 1        | 318.1903 -0.05319  |
|          |          |           |          | 9   | K | 0        | 155.127            |

Scan number 6158 Raw file LNCAP\_Silac\_23F10\_set2\_04  
 Method ITMS; CID Pepti... 122.18

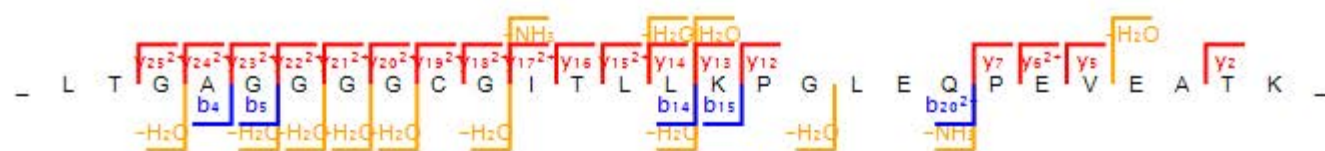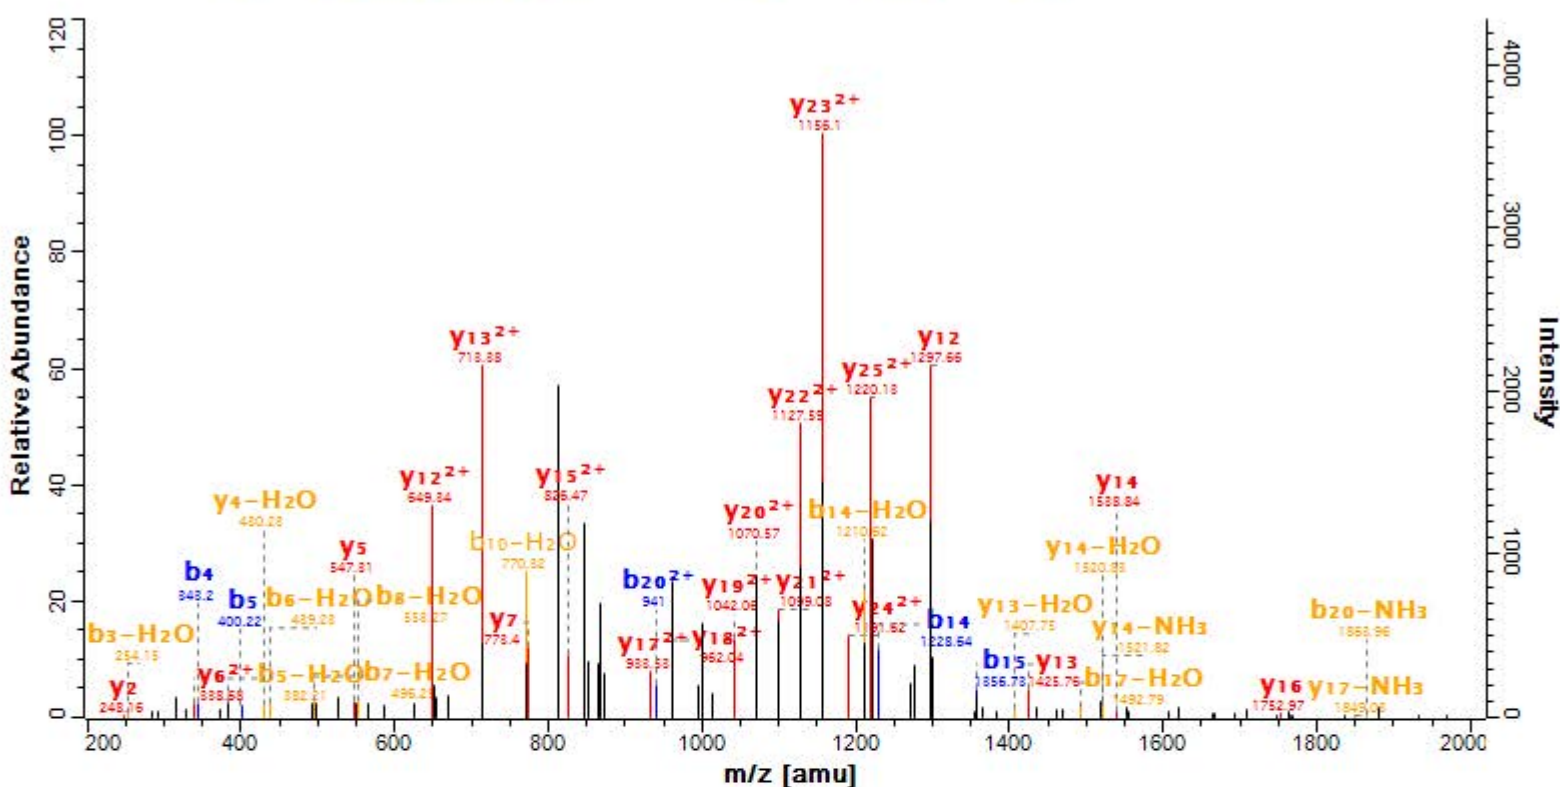

#### precursor information

|                   |                 |
|-------------------|-----------------|
| Mass:             | 2652.37925      |
| m/z:              | 885.13369       |
| Charge:           | 3+              |
| Retentiontime:    | 35.645549774169 |
| Score:            | 122.1781        |
| Mass Error [ppm]: | -0.0062823      |
| PEP:              | 4.2434E-18      |
| Precursor Type:   | MULTI           |

| b <sup>2+</sup> ion |        | b ion    |        | seq |   |    | y ion    |         | y <sup>2+</sup> ion |                |
|---------------------|--------|----------|--------|-----|---|----|----------|---------|---------------------|----------------|
| Δ dalton            | mass   | Δ dalton | mass   |     |   |    | Δ dalton | mass    | Δ dalton            | mass           |
|                     | 114.09 |          | 114.09 | 1   | L | 26 |          |         |                     |                |
|                     | 215.14 |          | 215.14 | 2   | T | 25 | 2540.3   |         |                     | 2540.3         |
|                     | 272.16 |          | 272.16 | 3   | G | 24 | 2439.3   |         |                     | 1220.1 +0.3038 |
|                     | 343.2  | +0.0923  | 343.2  | 4   | A | 23 | 2382.2   |         |                     | 1191.6 +0.0353 |
|                     | 400.22 | +0.4115  | 400.22 | 5   | G | 22 | 2311.2   |         |                     | 1156.1 +0.2577 |
|                     | 457.24 |          | 457.24 | 6   | G | 21 | 2254.2   |         |                     | 1127.6 +0.1585 |
|                     | 514.26 |          | 514.26 | 7   | G | 20 | 2197.2   |         |                     | 1099.1 -0.004  |
|                     | 571.28 |          | 571.28 | 8   | G | 19 | 2140.1   |         |                     | 1070.6 +0.0137 |
|                     | 731.31 |          | 731.31 | 9   | C | 18 | 2083.1   |         |                     | 1042.1 +0.4834 |
|                     | 788.34 |          | 788.34 | 10  | G | 17 | 1923.1   |         |                     | 962.04 +0.0088 |
|                     | 901.42 |          | 901.42 | 11  | I | 16 | 1866.1   |         |                     | 933.53 +0.3176 |
|                     | 1002.5 |          | 1002.5 | 12  | T | 15 | 1753     | +0.0295 |                     | 1753           |
|                     | 1115.6 |          | 1115.6 | 13  | L | 14 | 1651.9   |         |                     | 826.47 +0.2701 |
|                     | 1228.6 | -0.012   | 1228.6 | 14  | L | 13 | 1538.8   | -0.19   |                     | 1538.8         |
|                     | 1356.7 | -0.178   | 1356.7 | 15  | K | 12 | 1425.8   | -0.01   |                     | 713.38 +0.2193 |
|                     | 1453.8 |          | 1453.8 | 16  | P | 11 | 1297.7   | -0.008  |                     | 649.34 +0.2493 |
|                     | 1510.8 |          | 1510.8 | 17  | G | 10 | 1200.6   |         |                     | 1200.6         |
|                     | 1623.9 |          | 1623.9 | 18  | L | 9  | 1143.6   |         |                     | 1143.6         |
|                     | 1752.9 |          | 1752.9 | 19  | E | 8  | 1030.5   |         |                     | 1030.5         |
| +0.3036             | 941    |          | 1881   | 20  | Q | 7  | 901.46   |         |                     | 901.46         |
|                     | 1978   |          | 1978   | 21  | P | 6  | 773.4    | +0.1218 |                     | 773.4          |
|                     | 2107.1 |          | 2107.1 | 22  | E | 5  | 676.35   |         |                     | 338.68 +0.3506 |
|                     | 2206.2 |          | 2206.2 | 23  | V | 4  | 547.31   | +0.0488 |                     | 547.31         |
|                     | 2335.2 |          | 2335.2 | 24  | E | 3  | 448.24   |         |                     | 448.24         |
|                     | 2406.2 |          | 2406.2 | 25  | A | 2  | 319.2    |         |                     | 319.2          |
|                     | 2507.3 |          | 2507.3 | 26  | T | 1  | 248.16   | +0.2767 |                     | 248.16         |
|                     |        |          |        | 27  | K | 0  | 147.11   |         |                     | 147.11         |

#### general information

|                       |             |
|-----------------------|-------------|
| Annotation:           | 22 of 27    |
| AminoAcids Coverage:  | 81 %        |
| Intensity Coverage:   | 53 %        |
| Peak Coverage:        | 37 %        |
| Protein Localisation: | 331 ... 357 |

Scan number 6320 Raw file LNCAP\_Silac\_23F10\_set2\_04  
 Method ITMS; CID Pepti... 117.93

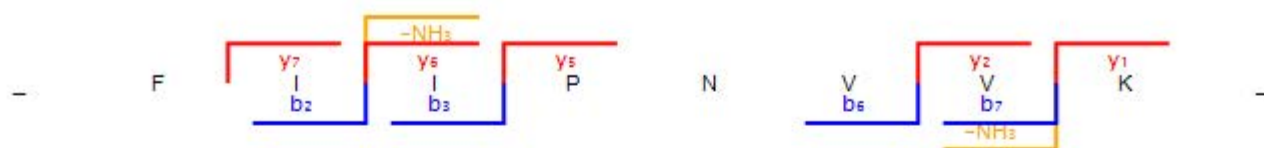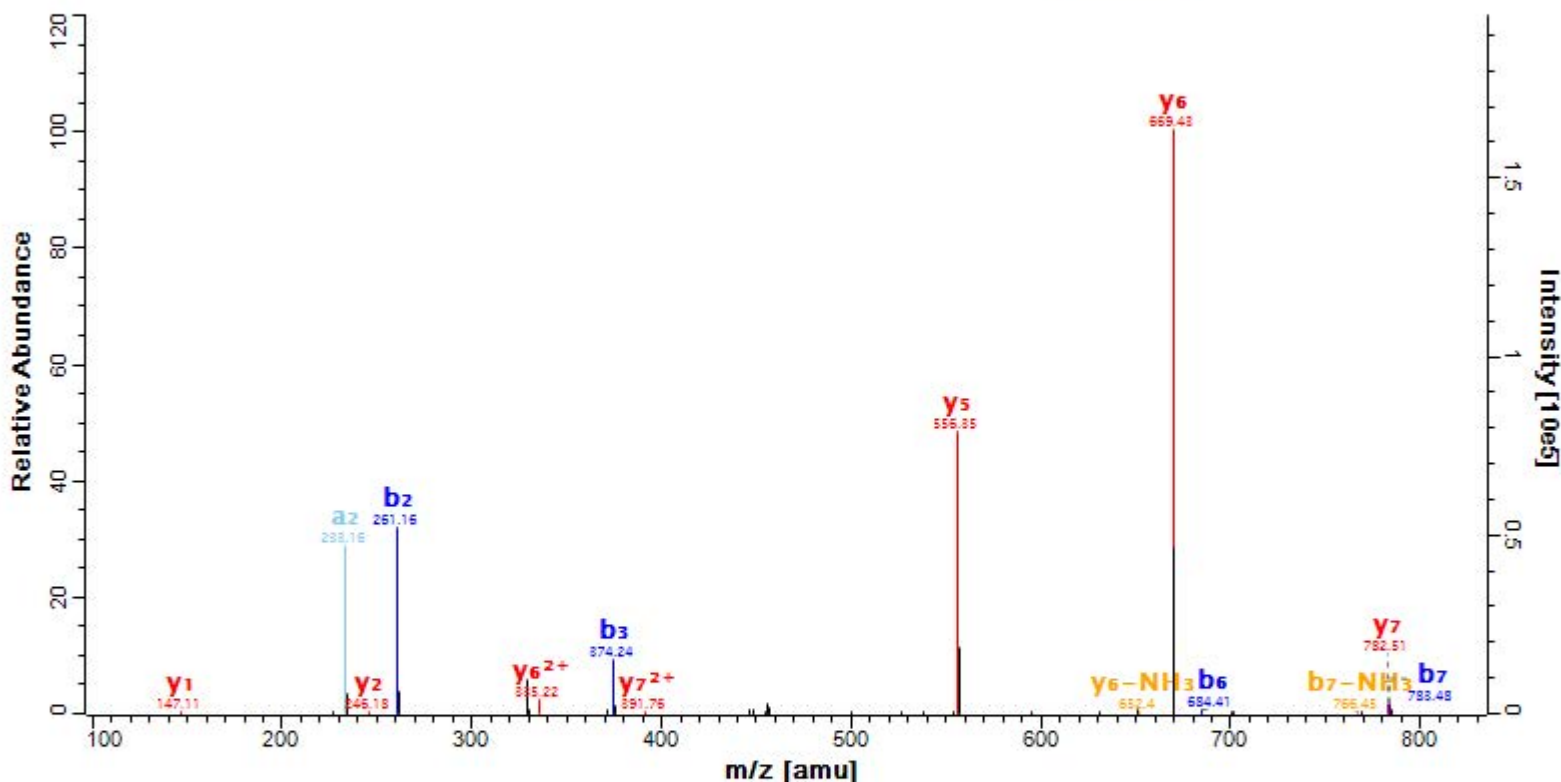

#### precursor information

|                       |                 |
|-----------------------|-----------------|
| Mass:                 | 928.57423       |
| m/z:                  | 465.29439       |
| Charge:               | 2+              |
| Retentiontime:        | 36.443859100341 |
| Score:                | 117.9339        |
| Mass Error [ppm]:     | -0.38617        |
| g PEP:                | 0.0019952       |
| Annotation:           | 6 of 8          |
| AminoAcids Coverag    | 75 %            |
| Intensity Coverage:   | 78 %            |
| Peak Coverage:        | 26 %            |
| Protein Localisation: | 148 ... 155     |

| a ion    |        | b ion    |        |   |     |   | y ion    |         | y <sup>2+</sup> ion |         |
|----------|--------|----------|--------|---|-----|---|----------|---------|---------------------|---------|
| Δ dalton | mass   | Δ dalton | mass   |   | seq |   | Δ dalton | mass    | Δ dalton            | mass    |
|          | 120.08 |          | 148.08 | 1 | F   | 7 |          |         |                     |         |
| -0.038   | 233.16 | -0.096   | 261.16 | 2 | I   | 6 | 782.51   | -0.021  | 391.76              | +0.1065 |
|          | 346.25 | -0.043   | 374.24 | 3 | I   | 5 | 669.43   | +0.0175 | 335.22              | +0.2653 |
|          | 443.3  |          | 471.3  | 4 | P   | 4 | 556.35   | +0.0468 | 556.35              |         |
|          | 557.34 |          | 585.34 | 5 | N   | 3 | 459.29   |         | 459.29              |         |
|          | 656.41 | +0.0846  | 684.41 | 6 | V   | 2 | 345.25   |         | 345.25              |         |
|          | 755.48 | +0.0159  | 783.48 | 7 | V   | 1 | 246.18   | -0.115  | 246.18              |         |
|          |        |          |        | 8 | K   | 0 | 147.11   | +0.0537 | 147.11              |         |

Scan number 642 Raw file LNCAP\_Silac\_23F10\_set2\_04  
 Method ITMS; CID Pepti... 60.02

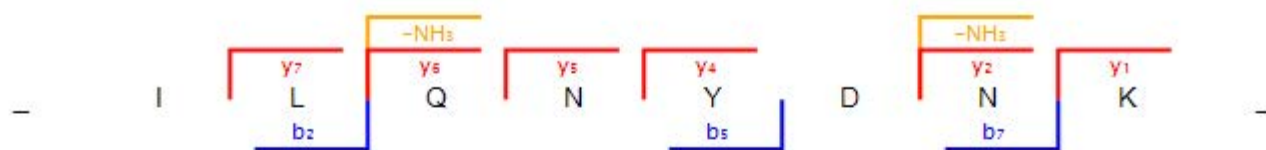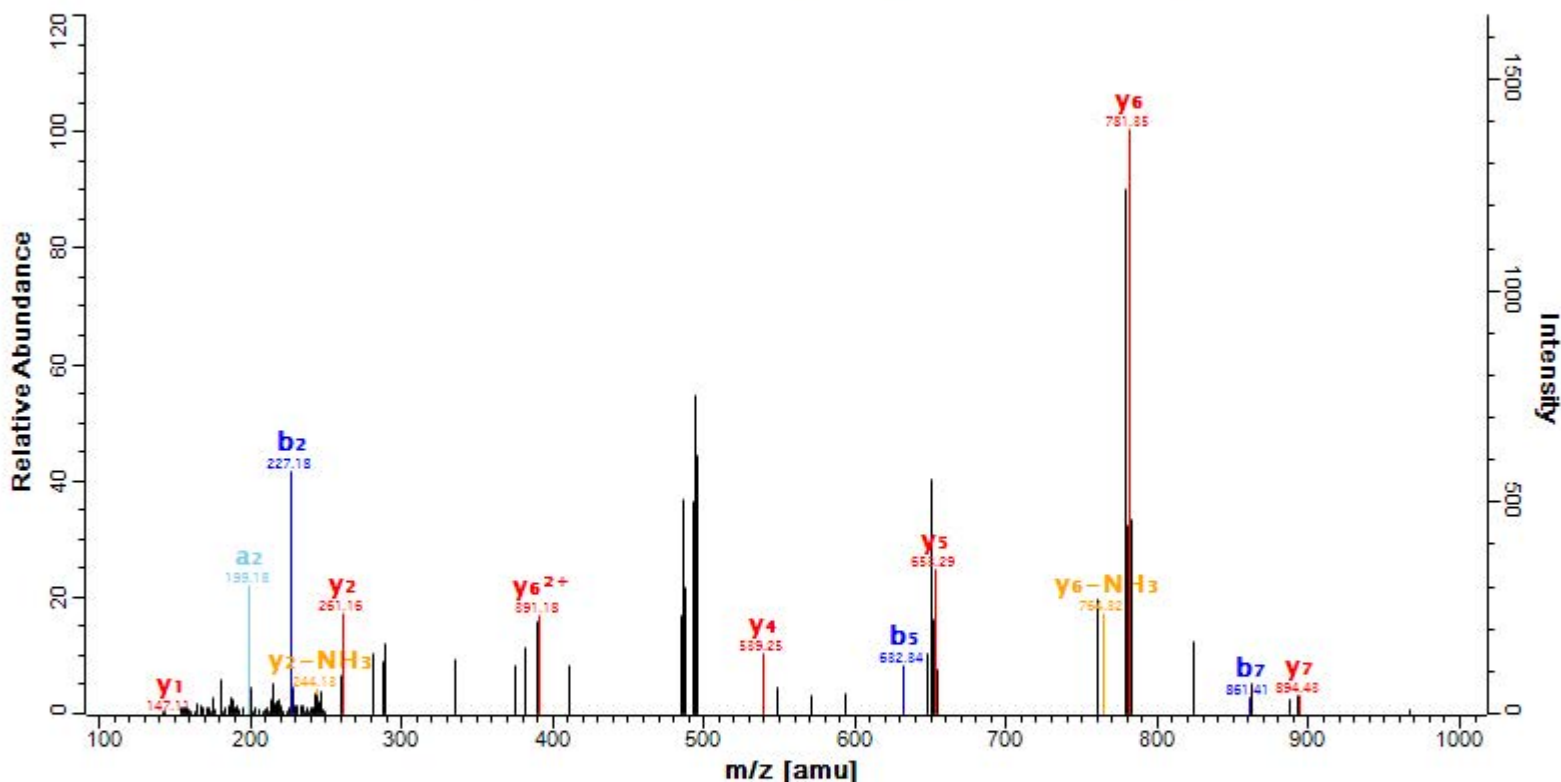

#### precursor information

|                       |                 |
|-----------------------|-----------------|
| Mass:                 | 1006.50856      |
| m/z:                  | 504.26155       |
| Charge:               | 2+              |
| Retentiontime:        | 8.7788152694702 |
| Score:                | 60.01913        |
| Mass Error [ppm]:     | 0.19509         |
| g PEP:                | 0.03806         |
| Annotation:           | 6 of 8          |
| AminoAcids Coverage:  | 75 %            |
| Intensity Coverage:   | 28 %            |
| Peak Coverage:        | 11 %            |
| Protein Localisation: | 2359 ... 2366   |

| a ion    |        | b ion    |        |   |     |          | y ion  |          | y <sup>2+</sup> ion |  |
|----------|--------|----------|--------|---|-----|----------|--------|----------|---------------------|--|
| Δ dalton | mass   | Δ dalton | mass   |   | seq | Δ dalton | mass   | Δ dalton | mass                |  |
|          | 86.096 |          | 114.09 | 1 | I   |          |        |          |                     |  |
| +0.0655  | 199.18 | -0.095   | 227.18 | 2 | L   | 6        | 894.43 | +0.1517  | 894.43              |  |
|          | 327.24 |          | 355.23 | 3 | Q   | 5        | 781.35 | +0.0142  | 391.18              |  |
|          | 441.28 |          | 469.28 | 4 | N   | 4        | 653.29 | +0.069   | 653.29              |  |
|          | 604.35 | +0.1296  | 632.34 | 5 | Y   | 3        | 539.25 | +0.0568  | 539.25              |  |
|          | 719.37 |          | 747.37 | 6 | D   | 2        | 376.18 |          | 376.18              |  |
|          | 833.42 | +0.1339  | 861.41 | 7 | N   | 1        | 261.16 | +0.0335  | 261.16              |  |
|          |        |          |        | 8 | K   | 0        | 147.11 | +0.1527  | 147.11              |  |

Scan number 7254 Raw file LNCAP\_Silac\_23F10\_set2\_04  
 Method ITMS: CID Pepti... 131.35

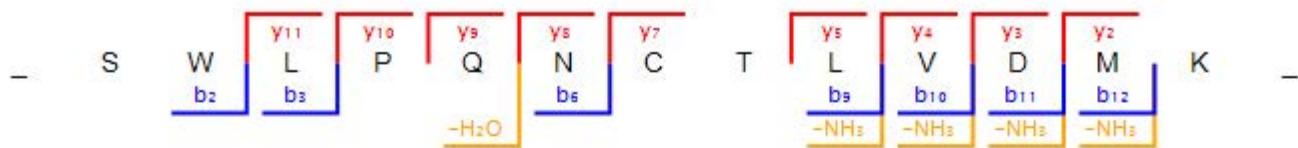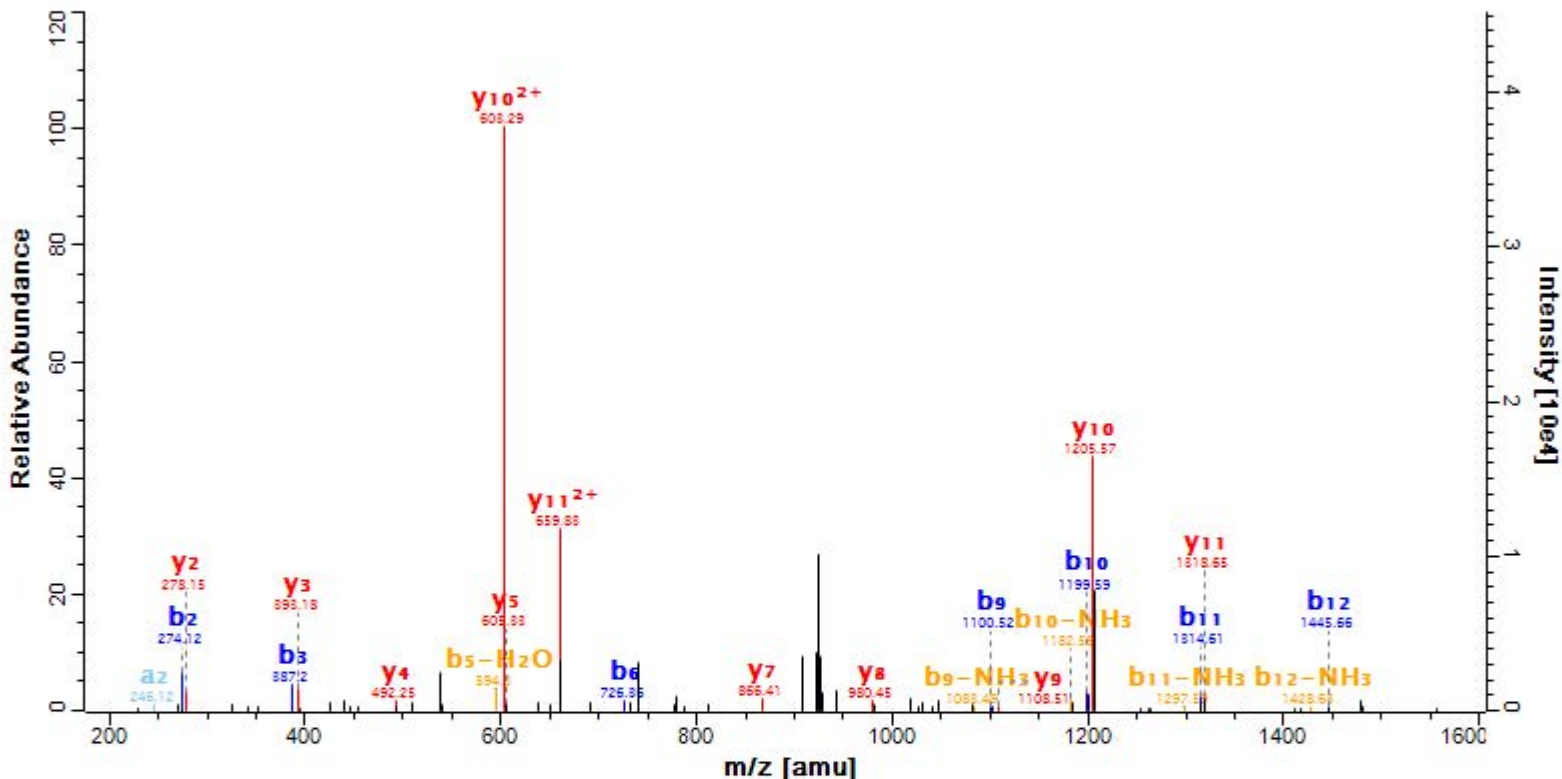

precursor information

|                   |                 |
|-------------------|-----------------|
| Mass:             | 1590.75317      |
| m/z:              | 796.38386       |
| Charge:           | 2+              |
| Retentiontime:    | 41.194412231445 |
| Score:            | 131.3523        |
| Mass Error [ppm]: | -0.1635         |
| PEP:              | 1.1631E-06      |
| Precursor Type:   | MULTI           |

general information

|                       |             |
|-----------------------|-------------|
| Annotation:           | 10 of 13    |
| AminoAcids Coverage:  | 77 %        |
| Intensity Coverage:   | 59 %        |
| Peak Coverage:        | 29 %        |
| Protein Localisation: | 205 ... 217 |

| a ion    |        | b ion    |        |     |   |          | y ion  |          | y <sup>2+</sup> ion |         |
|----------|--------|----------|--------|-----|---|----------|--------|----------|---------------------|---------|
| Δ dalton | mass   | Δ dalton | mass   | seq |   | Δ dalton | mass   | Δ dalton | mass                |         |
|          | 60.044 |          | 88.039 | 1   | S |          |        |          |                     |         |
| +0.0753  | 246.12 | -0.016   | 274.12 | 2   | W | 11       | 1504.7 |          | 1504.7              |         |
|          | 359.21 | +0.0639  | 387.2  | 3   | L | 10       | 1318.6 | -0.191   | 659.83              | +0.0694 |
|          | 456.26 |          | 484.26 | 4   | P | 9        | 1205.6 | -0.044   | 603.29              | +0.2223 |
|          | 584.32 |          | 612.31 | 5   | Q | 8        | 1108.5 | -0.053   | 1108.5              |         |
|          | 698.36 | +0.0605  | 726.36 | 6   | N | 7        | 980.45 | +0.0097  | 980.45              |         |
|          | 858.39 |          | 886.39 | 7   | C | 6        | 866.41 | +0.1035  | 866.41              |         |
|          | 959.44 |          | 987.44 | 8   | T | 5        | 706.38 |          | 706.38              |         |
|          | 1072.5 | -0.165   | 1100.5 | 9   | L | 4        | 605.33 | +0.0766  | 605.33              |         |
|          | 1171.6 | -0.113   | 1199.6 | 10  | V | 3        | 492.25 | +0.0297  | 492.25              |         |
|          | 1286.6 | -0.14    | 1314.6 | 11  | D | 2        | 393.18 | +0.0538  | 393.18              |         |
|          | 1417.7 | -0.157   | 1445.7 | 12  | M | 1        | 278.15 | +0.0894  | 278.15              |         |
|          |        |          |        | 13  | K | 0        | 147.11 |          | 147.11              |         |





Scan number 7531 Raw file LNCAP\_Silac\_23F10\_set2\_04  
 Method ITMS; CID Pepti... 196.33

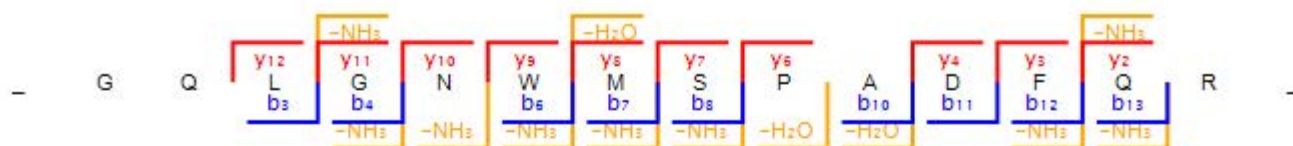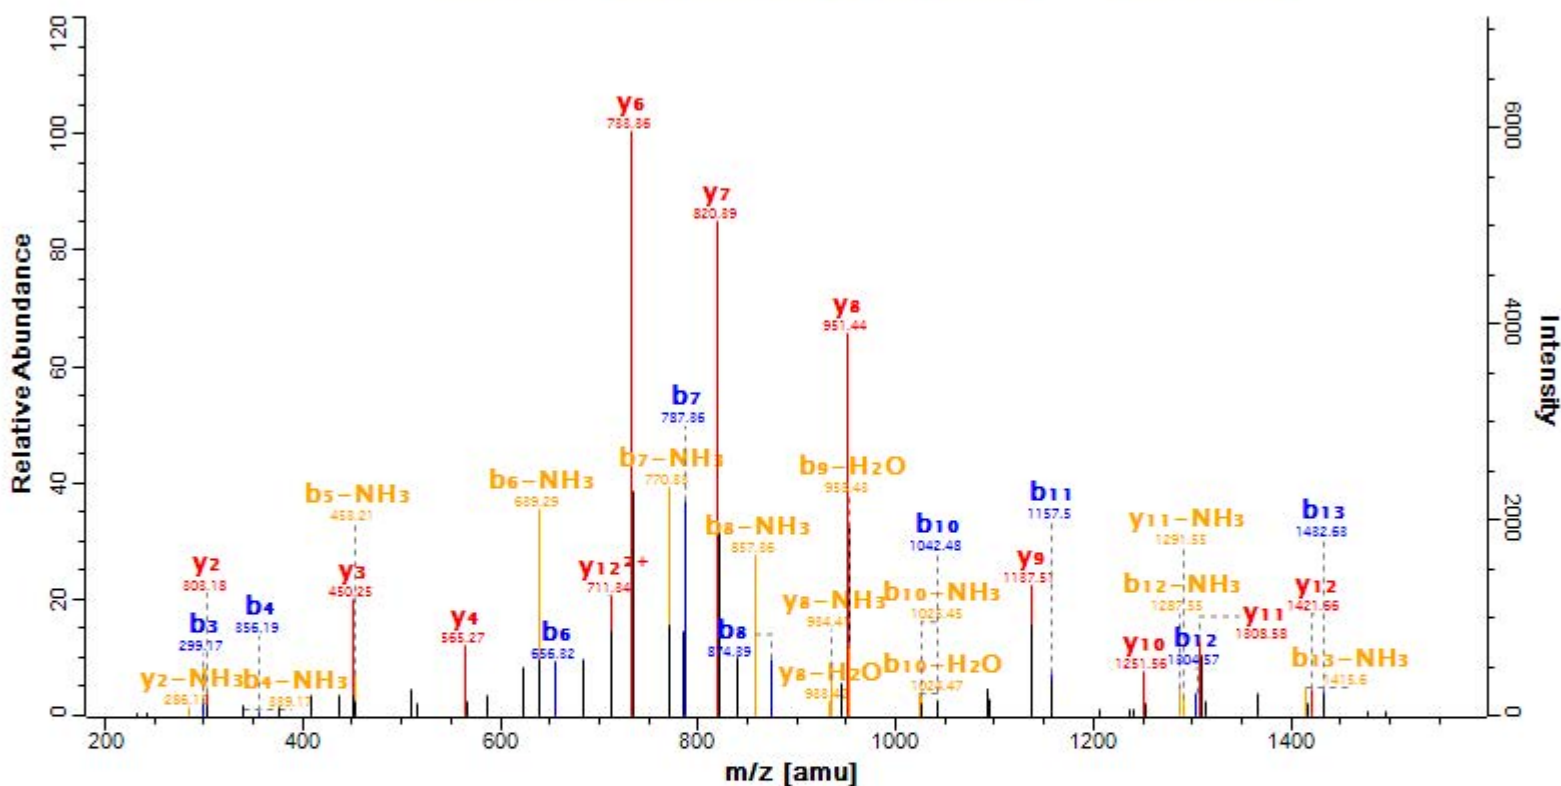

#### precursor information

|                   |                 |
|-------------------|-----------------|
| Mass:             | 1605.73591      |
| m/z:              | 803.87523       |
| Charge:           | 2+              |
| Retentiontime:    | 42.652976989746 |
| Score:            | 196.3342        |
| Mass Error [ppm]: | 0.062758        |
| PEP:              | 9.0273E-19      |
| Precursor Type:   | MULTI           |

#### general information

|                       |             |
|-----------------------|-------------|
| Annotation:           | 11 of 14    |
| AminoAcids Coverage:  | 79 %        |
| Intensity Coverage:   | 66 %        |
| Peak Coverage:        | 42 %        |
| Protein Localisation: | 129 ... 142 |

| b ion     |          |     |   | y ion    |          |           | y <sup>2+</sup> ion |           |
|-----------|----------|-----|---|----------|----------|-----------|---------------------|-----------|
| Δ dalton  | mass     | seq |   | Δ dalton | mass     | Δ dalton  | mass                |           |
|           | 58.02874 | 1   | G | 13       |          |           |                     |           |
|           | 186.0873 | 2   | Q | 12       | 1549.722 |           | 1549.722            |           |
| +0.021428 | 299.1714 | 3   | L | 11       | 1421.663 | +0.213175 | 711.3352            | +0.020186 |
| +0.142054 | 356.1928 | 4   | G | 10       | 1308.579 | +0.020262 | 1308.579            |           |
|           | 470.2358 | 5   | N | 9        | 1251.558 | +0.066994 | 1251.558            |           |
| +0.062295 | 656.3151 | 6   | W | 8        | 1137.515 | +0.005918 | 1137.515            |           |
| -0.22941  | 787.3556 | 7   | M | 7        | 951.4353 | +0.015834 | 951.4353            |           |
| +0.019139 | 874.3876 | 8   | S | 6        | 820.3948 | +0.02519  | 820.3948            |           |
|           | 971.4404 | 9   | P | 5        | 733.3628 | -0.00656  | 733.3628            |           |
| -0.04791  | 1042.477 | 10  | A | 4        | 636.31   |           | 636.31              |           |
| -0.02029  | 1157.504 | 11  | D | 3        | 565.2729 | +0.124635 | 565.2729            |           |
| -0.01729  | 1304.573 | 12  | F | 2        | 450.2459 | +0.034452 | 450.2459            |           |
| -0.15058  | 1432.631 | 13  | Q | 1        | 303.1775 | +0.105948 | 303.1775            |           |
|           |          | 14  | R | 0        | 175.119  |           | 175.119             |           |

Scan number 7955 Raw file LNCAP\_Silac\_23F10\_set2\_04  
 Method ITMS; CID Peptide 144.12

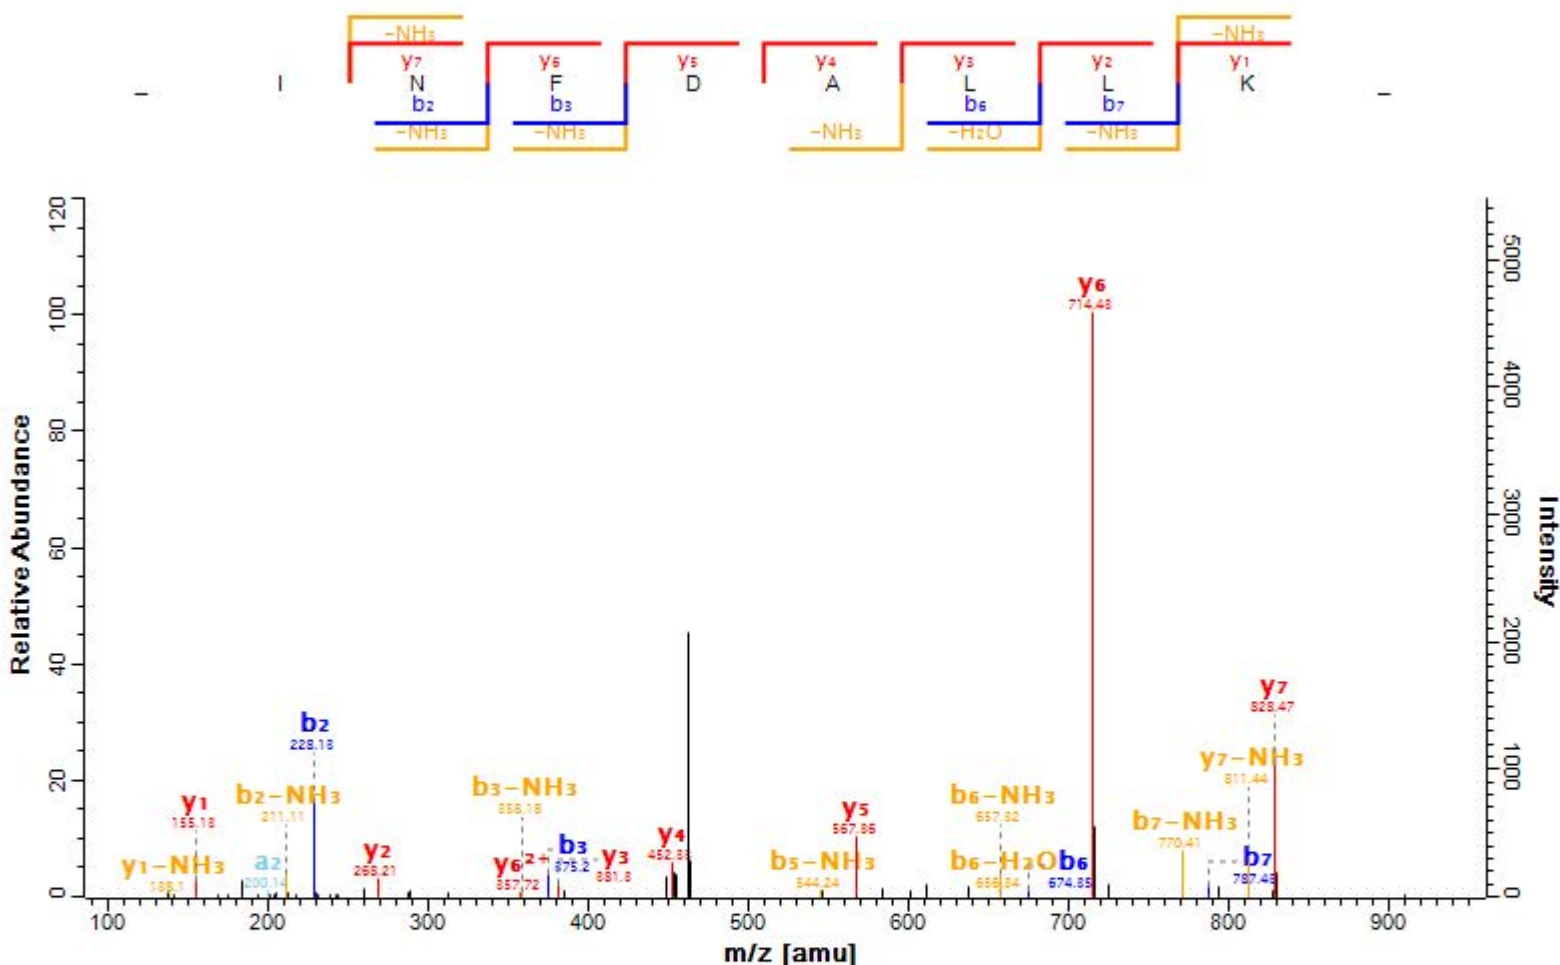

#### precursor information

|                       |                 |
|-----------------------|-----------------|
| Mass:                 | 932.533         |
| m/z:                  | 467.27378       |
| Charge:               | 2+              |
| Retentiontime:        | 44.905612945556 |
| Score:                | 144.1217        |
| Mass Error [ppm]:     | -0.12833        |
| g PEP:                | 0.00012129      |
| Annotation:           | 7 of 8          |
| AminoAcids Coverage:  | 88 %            |
| Intensity Coverage:   | 64 %            |
| Peak Coverage:        | 26 %            |
| Protein Localisation: | 66 ... 73       |

| a ion    |        | b ion    |        |   |     |          | y ion  |          | y <sup>2+</sup> ion |  |
|----------|--------|----------|--------|---|-----|----------|--------|----------|---------------------|--|
| Δ dalton | mass   | Δ dalton | mass   |   | seq | Δ dalton | mass   | Δ dalton | mass                |  |
|          | 86.096 |          | 114.09 | 1 | I   | 7        |        |          |                     |  |
| +0.0741  | 200.14 | -0.019   | 228.13 | 2 | N   | 6        | 828.47 | +0.0093  | 828.47              |  |
|          | 347.21 | +0.1144  | 375.2  | 3 | F   | 5        | 714.43 | -0.08    | 357.72              |  |
|          | 462.23 |          | 490.23 | 4 | D   | 4        | 567.36 | +0.1002  | 567.36              |  |
|          | 533.27 |          | 561.27 | 5 | A   | 3        | 452.33 | +0.0666  | 452.33              |  |
|          | 646.36 | -0.216   | 674.35 | 6 | L   | 2        | 381.3  | -0.009   | 381.3               |  |
|          | 759.44 | +0.0642  | 787.43 | 7 | L   | 1        | 268.21 | +0.0483  | 268.21              |  |
|          |        |          |        | 8 | K   | 0        | 155.13 | +0.007   | 155.13              |  |

Scan number 8153 Raw file LNCAP\_Silac\_23F10\_set2\_04  
 Method ITMS; CID Pepti... 96.55

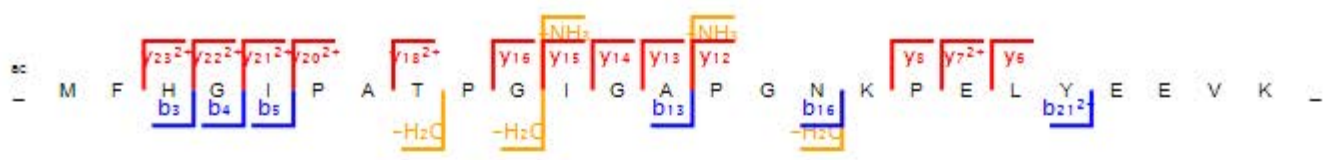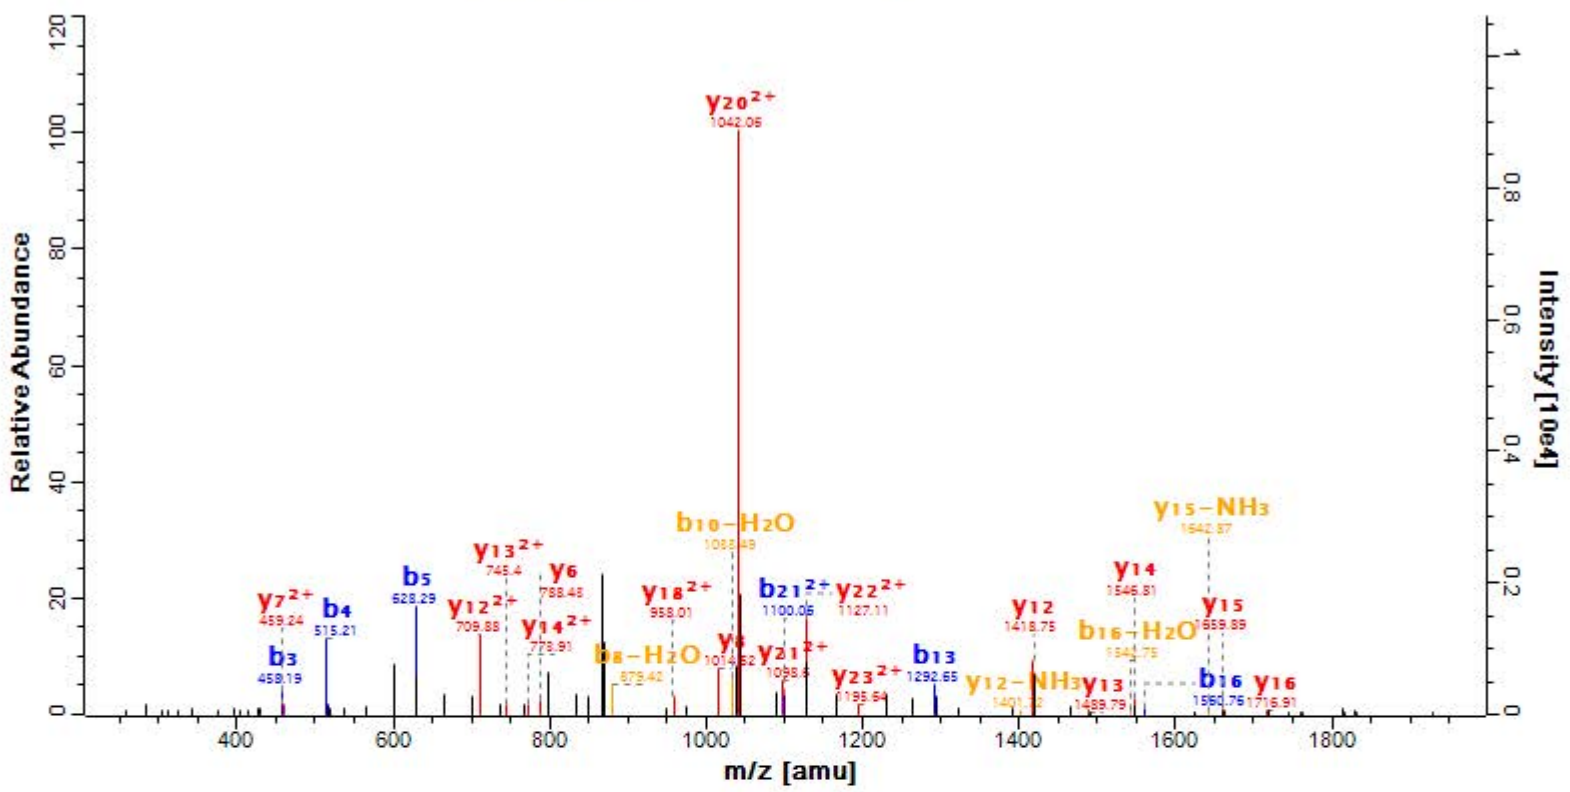

precursor information

|                   |                 |
|-------------------|-----------------|
| Mass:             | 2693.35267      |
| m/z:              | 898.7915        |
| Charge:           | 3+              |
| Retentiontime:    | 45.949150085449 |
| Score:            | 96.5498         |
| Mass Error [ppm]: | 0.12665         |
| PEP:              | 1.7692E-07      |
| Precursor Type:   | MULTI           |

| b <sup>2+</sup> ion |        | b ion    |        | seq |   |    | y ion    |         | y <sup>2+</sup> ion |         |
|---------------------|--------|----------|--------|-----|---|----|----------|---------|---------------------|---------|
| Δ dalton            | mass   | Δ dalton | mass   |     |   |    | Δ dalton | mass    | Δ dalton            | mass    |
|                     | 174.06 |          | 174.06 | 1   | M | 24 |          |         |                     |         |
|                     | 321.13 |          | 321.13 | 2   | F | 23 | 2537.3   |         | 2537.3              |         |
|                     | 458.19 | -0.066   | 458.19 | 3   | H | 22 | 2390.3   |         | 1195.6              | +0.3848 |
|                     | 515.21 | +0.042   | 515.21 | 4   | G | 21 | 2253.2   |         | 1127.1              | +0.038  |
|                     | 628.29 | +0.0669  | 628.29 | 5   | I | 20 | 2196.2   |         | 1098.6              | -0.007  |
|                     | 725.34 |          | 725.34 | 6   | P | 19 | 2083.1   |         | 1042.1              | +0.1936 |
|                     | 796.38 |          | 796.38 | 7   | A | 18 | 1986.1   |         | 1986.1              |         |
|                     | 897.43 |          | 897.43 | 8   | T | 17 | 1915     |         | 958.01              | +0.351  |
|                     | 994.48 |          | 994.48 | 9   | P | 16 | 1814     |         | 1814                |         |
|                     | 1051.5 |          | 1051.5 | 10  | G | 15 | 1716.9   | +0.3888 | 1716.9              |         |
|                     | 1164.6 |          | 1164.6 | 11  | I | 14 | 1659.9   | +0.1906 | 1659.9              |         |
|                     | 1221.6 |          | 1221.6 | 12  | G | 13 | 1546.8   | -0.177  | 773.91              | -0.303  |
|                     | 1292.6 | +0.0652  | 1292.6 | 13  | A | 12 | 1489.8   | +0.1978 | 745.4               | +0.2972 |
|                     | 1389.7 |          | 1389.7 | 14  | P | 11 | 1418.7   | -0.126  | 709.88              | +0.3377 |
|                     | 1446.7 |          | 1446.7 | 15  | G | 10 | 1321.7   |         | 1321.7              |         |
|                     | 1560.8 | -0.057   | 1560.8 | 16  | N | 9  | 1264.7   |         | 1264.7              |         |
|                     | 1696.9 |          | 1696.9 | 17  | K | 8  | 1150.6   |         | 1150.6              |         |
|                     | 1793.9 |          | 1793.9 | 18  | P | 7  | 1014.5   | +0.067  | 1014.5              |         |
|                     | 1923   |          | 1923   | 19  | E | 6  | 917.47   |         | 459.24              | +0.0277 |
|                     | 2036.1 |          | 2036.1 | 20  | L | 5  | 788.43   | +0.1797 | 788.43              |         |
| -0.406              | 1100.1 |          | 2199.1 | 21  | Y | 4  | 675.34   |         | 675.34              |         |
|                     | 2328.2 |          | 2328.2 | 22  | E | 3  | 512.28   |         | 512.28              |         |
|                     | 2457.2 |          | 2457.2 | 23  | E | 2  | 383.24   |         | 383.24              |         |
|                     | 2556.3 |          | 2556.3 | 24  | V | 1  | 254.2    |         | 254.2               |         |
|                     |        |          |        | 25  | K | 0  | 155.13   |         | 155.13              |         |

general information

|                       |          |
|-----------------------|----------|
| Annotation:           | 15 of 25 |
| AminoAcids Coverage:  | 60 %     |
| Intensity Coverage:   | 54 %     |
| Peak Coverage:        | 27 %     |
| Protein Localisation: | 1 ... 25 |

Scan number 8478 Raw file LNCAP\_Silac\_23F10\_set2\_04  
 Method ITMS; CID Pepti... 125.97

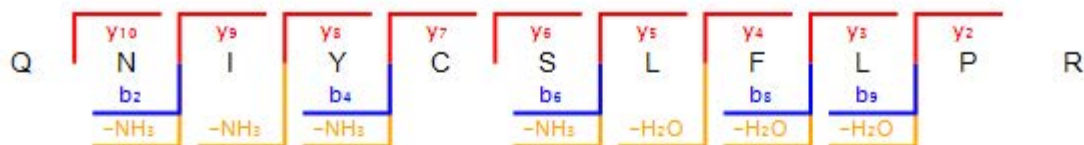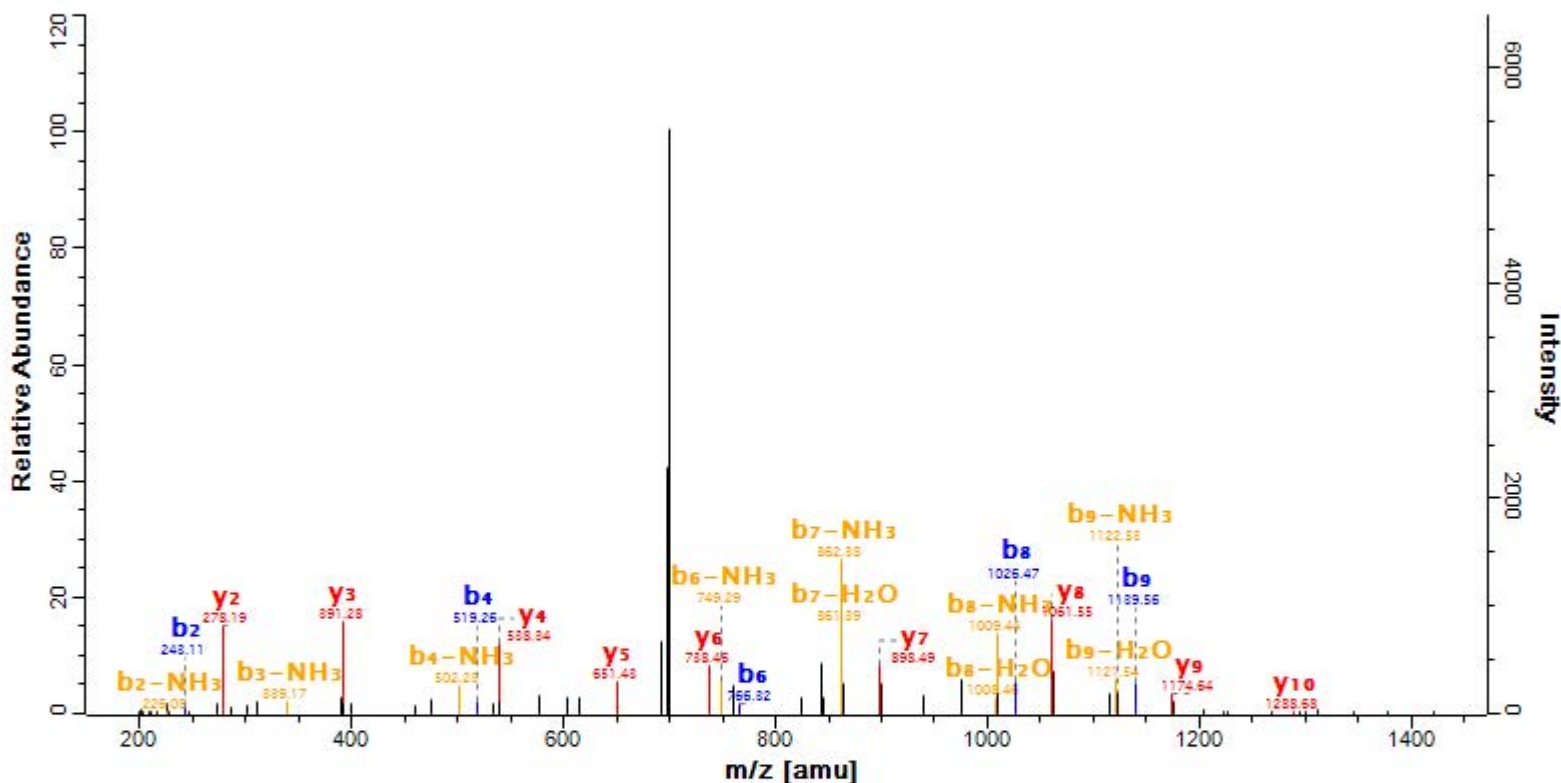

#### precursor information

|                   |                 |
|-------------------|-----------------|
| Mass:             | 1409.71271      |
| m/z:              | 705.86363       |
| Charge:           | 2+              |
| Retentiontime:    | 47.686119079589 |
| Score:            | 125.9703        |
| Mass Error [ppm]: | 0.11213         |
| PEP:              | 0.0001896       |
| Precursor Type:   | MULTI           |

#### general information

|                       |             |
|-----------------------|-------------|
| Annotation:           | 9 of 11     |
| AminoAcids Coverage:  | 82 %        |
| Intensity Coverage:   | 37 %        |
| Peak Coverage:        | 27 %        |
| Protein Localisation: | 170 ... 180 |

| b ion      |               |    |     |    | y ion         |            |
|------------|---------------|----|-----|----|---------------|------------|
| Δ dalton   | mass          |    | seq |    | Δ dalton      | mass       |
|            | 129.065853978 | 1  | Q   | 10 |               |            |
| +0.1070389 | 243.108781425 | 2  | N   | 9  | 1288.68138351 | -0.1669792 |
|            | 356.192845406 | 3  | I   | 8  | 1174.63845607 | -0.0165078 |
| +0.0845853 | 519.256173944 | 4  | Y   | 7  | 1061.55439209 | +0.0239771 |
|            | 679.286822145 | 5  | C   | 6  | 898.491063548 | +0.1476694 |
| +0.2647676 | 766.318850555 | 6  | S   | 5  | 738.460415347 | -0.0125394 |
|            | 879.402914536 | 7  | L   | 4  | 651.428386937 | -0.0218318 |
| -0.0506742 | 1026.47132845 | 8  | F   | 3  | 538.344322956 | +0.0318367 |
| -0.2029754 | 1139.55539243 | 9  | L   | 2  | 391.27590904  | +0.1288151 |
|            | 1236.60815628 | 10 | P   | 1  | 278.19184506  | +0.0421027 |
|            |               | 11 | R   | 0  | 181.139081208 |            |



Scan number 8501 Raw file LNCAP\_Silac\_23F10\_set2\_04  
 Method ITMS: CID Pepti... 126.19

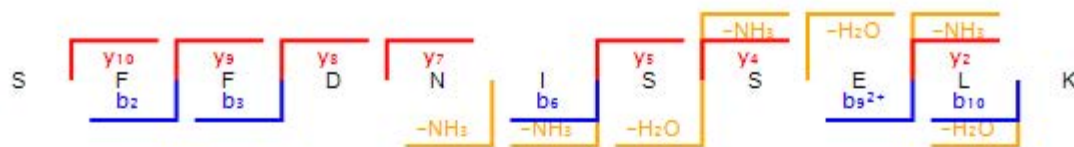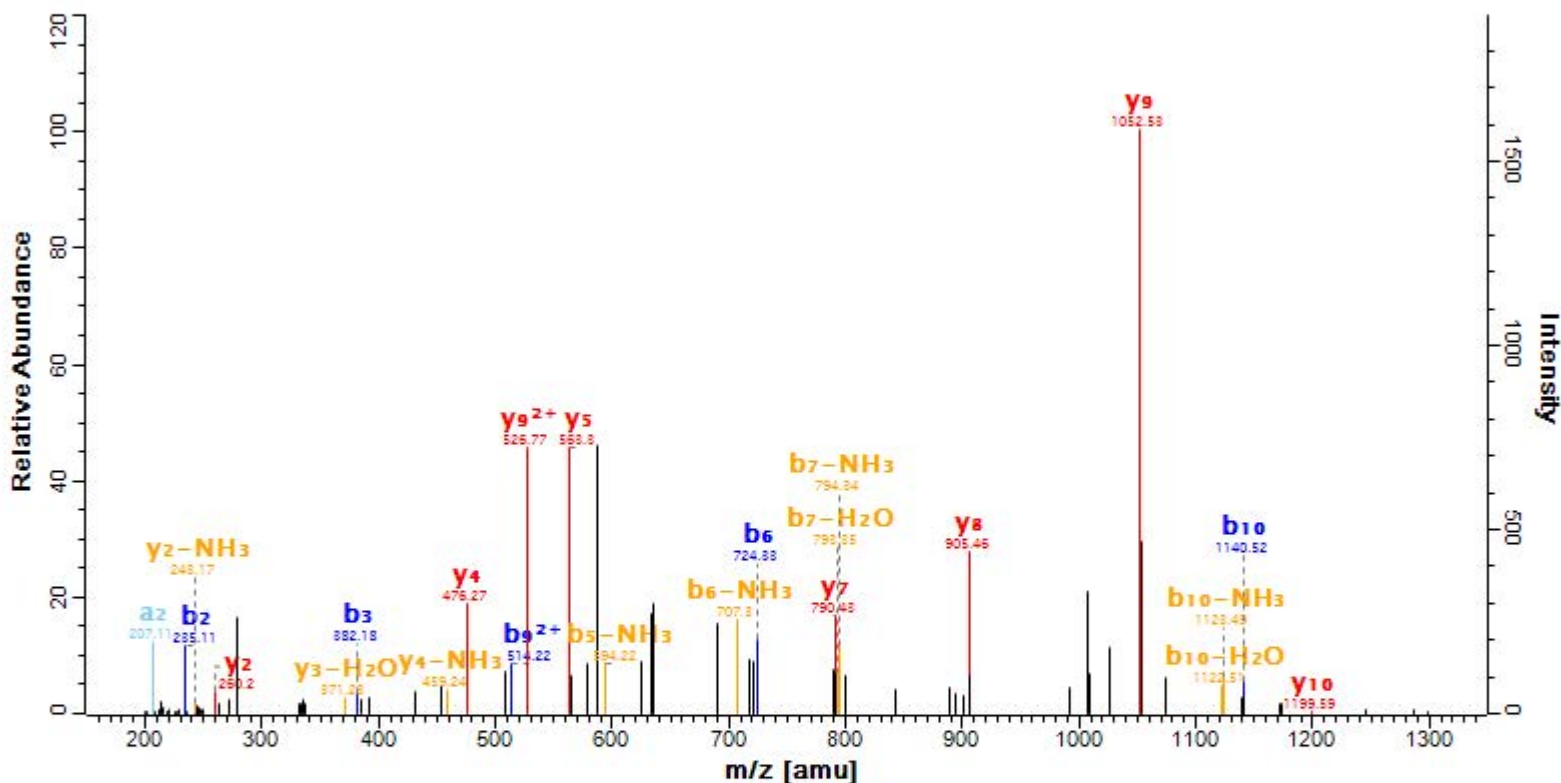

#### precursor information

|                   |                 |
|-------------------|-----------------|
| Mass:             | 1285.61942      |
| m/z:              | 643.81699       |
| Charge:           | 2+              |
| Retentiontime:    | 47.816772460937 |
| Score:            | 126.1938        |
| Mass Error [ppm]: | 0.3038          |
| PEP:              | 7.8407E-05      |
| Precursor Type:   | ISO             |

#### general information

|                       |             |
|-----------------------|-------------|
| Annotation:           | 9 of 11     |
| AminoAcids Coverage:  | 82 %        |
| Intensity Coverage:   | 53 %        |
| Peak Coverage:        | 27 %        |
| Protein Localisation: | 317 ... 327 |

| a ion         |               | b <sup>2+</sup> ion |               | b ion |               | y ion         |   | y <sup>2+</sup> ion |       |       |       |
|---------------|---------------|---------------------|---------------|-------|---------------|---------------|---|---------------------|-------|-------|-------|
| Δ dalton mass | Δ dalton mass | Δ dalton mass       | Δ dalton mass | seq   | Δ dalton mass | Δ dalton mass |   |                     |       |       |       |
|               | 60.04         | 88.04               | 88.04         | 1     | S             | 10            |   |                     |       |       |       |
| +0.074        | 207.1         | 235.1               | -0.17         | 235.1 | 2             | F             | 9 | 1200                | -0.04 | 1200  |       |
|               | 354.2         | 382.2               | +0.01         | 382.2 | 3             | F             | 8 | 1053                | -0.03 | 526.8 | +0.28 |
|               | 469.2         | 497.2               |               | 497.2 | 4             | D             | 7 | 905.5               | -0.06 | 905.5 |       |
|               | 583.3         | 611.2               |               | 611.2 | 5             | N             | 6 | 790.4               | +0.24 | 790.4 |       |
|               | 696.3         | 724.3               | -0.16         | 724.3 | 6             | I             | 5 | 676.4               |       | 676.4 |       |
|               | 783.4         | 811.4               |               | 811.4 | 7             | S             | 4 | 563.3               | +0.13 | 563.3 |       |
|               | 870.4         | 898.4               |               | 898.4 | 8             | S             | 3 | 476.3               | +0.17 | 476.3 |       |
|               | 999.4         | +0.18               | 2514.2        |       | 1027          | 9             | E | 2                   | 389.2 |       | 389.2 |
|               | 1113          |                     | 1141          | -0.05 | 1141          | 10            | L | 1                   | 260.2 | +0    | 260.2 |
|               |               |                     |               |       |               | 11            | K | 0                   | 147.1 |       | 147.1 |

Scan number 8757 Raw file LNCAP\_Silac\_23F10\_set2\_04  
 Method ITMS; CID Peptide... 90.37

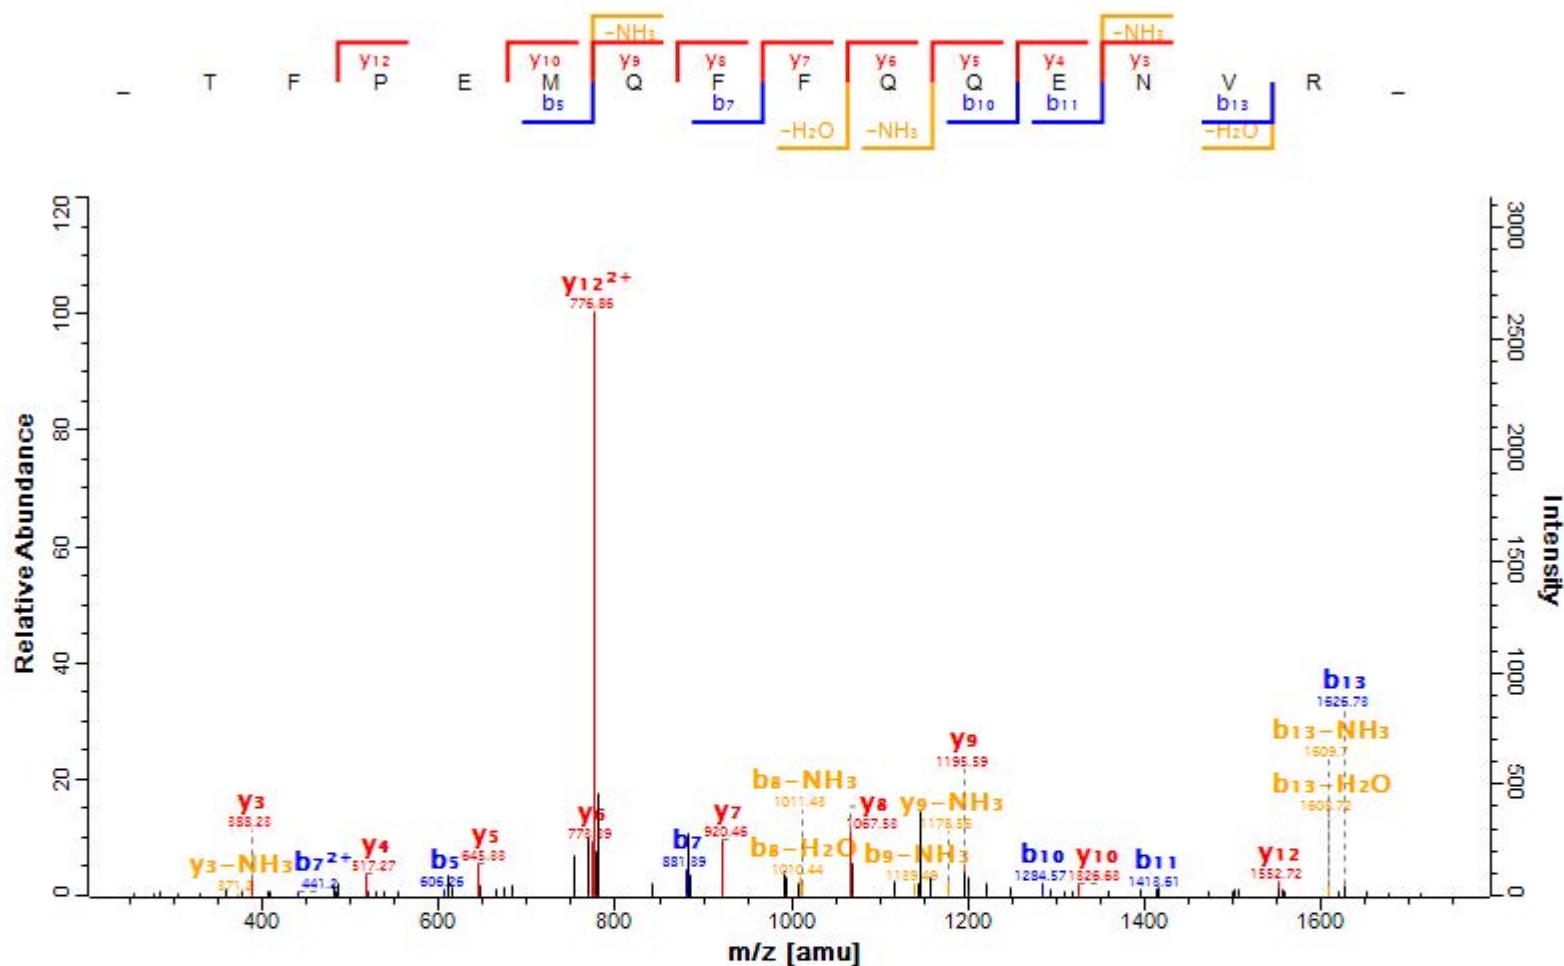

#### precursor information

|                   |                 |
|-------------------|-----------------|
| Mass:             | 1799.83174      |
| m/z:              | 900.92315       |
| Charge:           | 2+              |
| Retentiontime:    | 49.273174285888 |
| Score:            | 90.36653        |
| Mass Error [ppm]: | 0.91064         |
| PEP:              | 0.0003096       |
| Precursor Type:   | MULTI           |

#### general information

|                       |             |
|-----------------------|-------------|
| Annotation:           | 10 of 14    |
| AminoAcids Coverage:  | 71 %        |
| Intensity Coverage:   | 53 %        |
| Peak Coverage:        | 26 %        |
| Protein Localisation: | 170 ... 183 |

| b <sup>2+</sup> ion |        | b ion    |        | seq |   |    | y ion    |         | y <sup>2+</sup> ion |         |
|---------------------|--------|----------|--------|-----|---|----|----------|---------|---------------------|---------|
| Δ dalton            | mass   | Δ dalton | mass   |     |   |    | Δ dalton | mass    | Δ dalton            | mass    |
|                     | 102.05 |          | 102.05 | 1   | T | 13 |          |         |                     |         |
|                     | 249.12 |          | 249.12 | 2   | F | 12 | 1699.8   |         | 1699.8              |         |
|                     | 346.18 |          | 346.18 | 3   | P | 11 | 1552.7   | +0.0587 | 776.86              | +0.2616 |
|                     | 475.22 |          | 475.22 | 4   | E | 10 | 1455.7   |         | 1455.7              |         |
|                     | 606.26 | +0.0842  | 606.26 | 5   | M | 9  | 1326.6   | +0.0434 | 1326.6              |         |
|                     | 734.32 |          | 734.32 | 6   | Q | 8  | 1195.6   | +0.0789 | 1195.6              |         |
| -0.256              | 441.2  | +0.0086  | 881.39 | 7   | F | 7  | 1067.5   | +0.0132 | 1067.5              |         |
|                     | 1028.5 |          | 1028.5 | 8   | F | 6  | 920.46   | +0.0657 | 920.46              |         |
|                     | 1156.5 |          | 1156.5 | 9   | Q | 5  | 773.39   | -0.155  | 773.39              |         |
|                     | 1284.6 | -0.084   | 1284.6 | 10  | Q | 4  | 645.33   | +0.0741 | 645.33              |         |
|                     | 1413.6 | -0.191   | 1413.6 | 11  | E | 3  | 517.27   | +0.0928 | 517.27              |         |
|                     | 1527.7 |          | 1527.7 | 12  | N | 2  | 388.23   | +0.0982 | 388.23              |         |
|                     | 1626.7 | -0.09    | 1626.7 | 13  | V | 1  | 274.19   |         | 274.19              |         |
|                     |        |          |        | 14  | R | 0  | 175.12   |         | 175.12              |         |



Scan number 8766 Raw file LNCAP\_Silac\_23F10\_set2\_04  
 Method ITMS: CID Pepti... 147.56

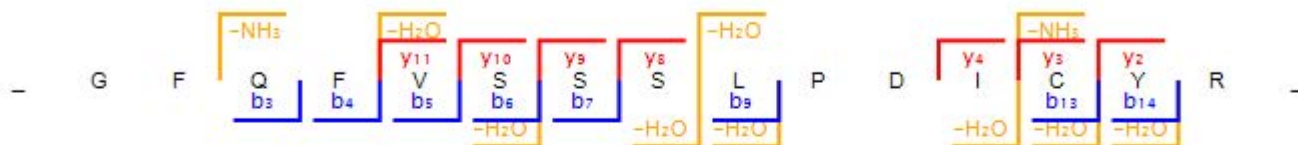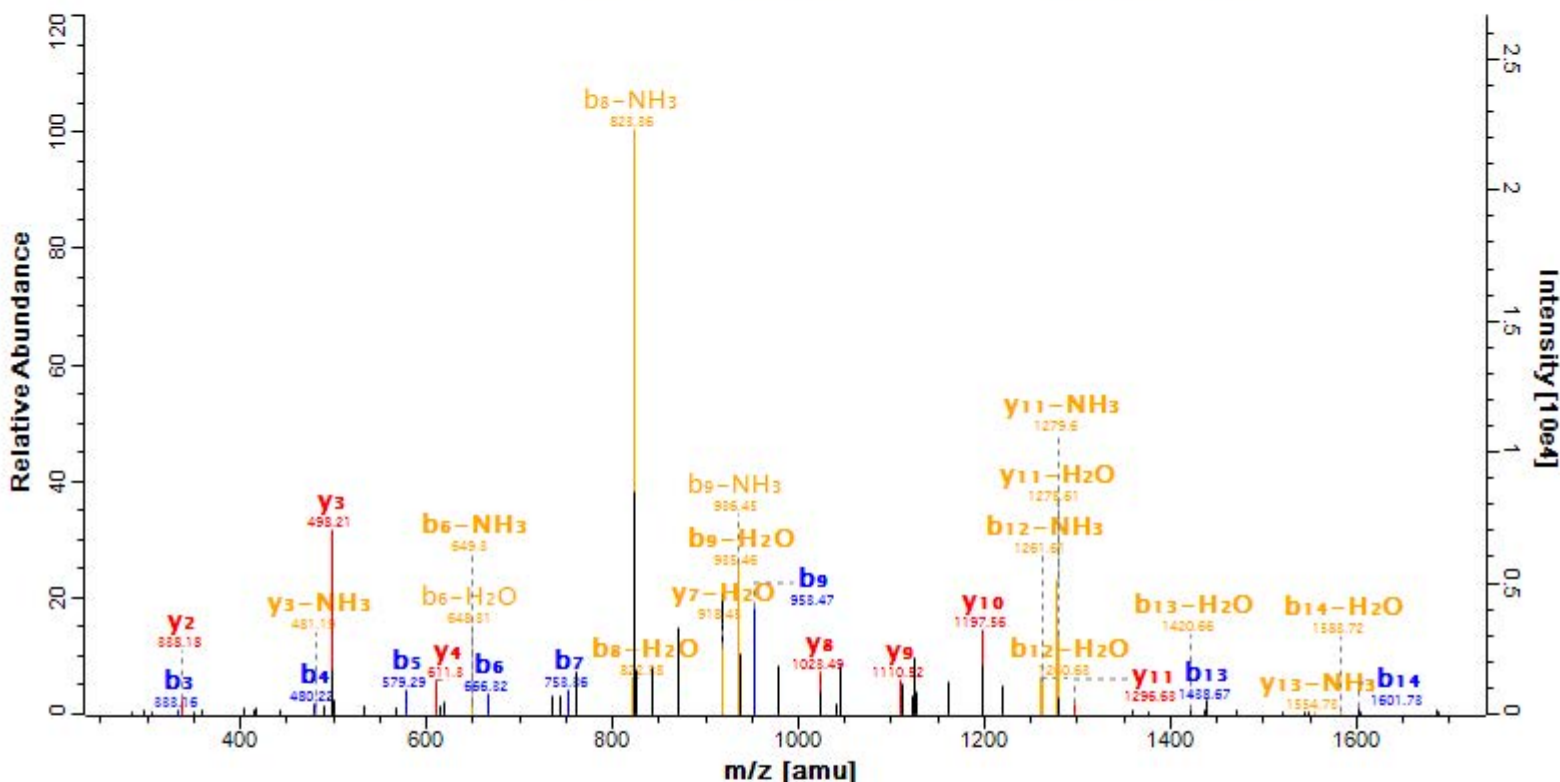

#### precursor information

|                   |                 |
|-------------------|-----------------|
| Mass:             | 1774.83465      |
| m/z:              | 888.4246        |
| Charge:           | 2+              |
| Retentiontime:    | 49.325603485107 |
| Score:            | 147.5608        |
| Mass Error [ppm]: | -0.11745        |
| PEP:              | 6.8065E-09      |
| Precursor Type:   | ISO             |

#### general information

|                       |           |
|-----------------------|-----------|
| Annotation:           | 11 of 15  |
| AminoAcids Coverage:  | 73 %      |
| Intensity Coverage:   | 60 %      |
| Peak Coverage:        | 36 %      |
| Protein Localisation: | 42 ... 56 |

| b ion      |               |     |   | y ion    |               |            |
|------------|---------------|-----|---|----------|---------------|------------|
| Δ dalton   | mass          | seq |   | Δ dalton | mass          |            |
|            | 58.02874019   | 1   | G | 14       |               |            |
|            | 205.097154106 | 2   | F | 13       | 1718.82066826 |            |
| +0.0194698 | 333.155731618 | 3   | Q | 12       | 1571.75225434 |            |
| +0.0154785 | 480.224145534 | 4   | F | 11       | 1443.69367683 |            |
| +0.0275089 | 579.29255945  | 5   | V | 10       | 1296.62526291 | -0.104633  |
| +0.0805635 | 666.32458786  | 6   | S | 9        | 1197.556849   | -0.0338998 |
| -0.1653931 | 753.35661627  | 7   | S | 8        | 1110.52482059 | -0.0132239 |
|            | 840.38864468  | 8   | S | 7        | 1023.49279218 | -0.0027409 |
| -0.1055822 | 953.47270866  | 9   | L | 6        | 936.460763766 |            |
|            | 1050.52547251 | 10  | P | 5        | 823.376699785 |            |
|            | 1165.55241554 | 11  | D | 4        | 726.323935933 |            |
|            | 1278.63647952 | 12  | I | 3        | 611.296992901 | +0.2068523 |
| -0.0971814 | 1438.66712773 | 13  | C | 2        | 498.212928921 | +0.0350569 |
| -0.2150754 | 1601.73045626 | 14  | Y | 1        | 338.182280719 | -0.0932915 |
|            |               | 15  | R | 0        | 175.118952181 |            |

Scan number 8797 Raw file LNCAP\_Silac\_23F10\_set2\_04  
 Method ITMS: CID Pepti... 278.82

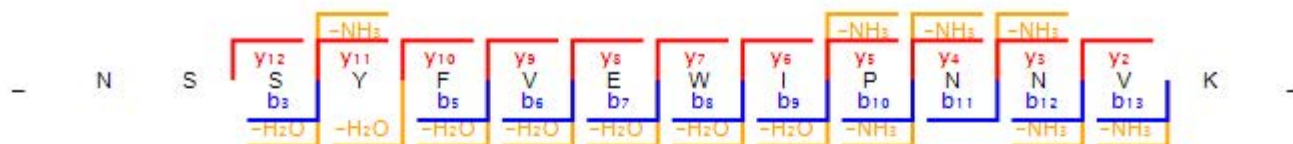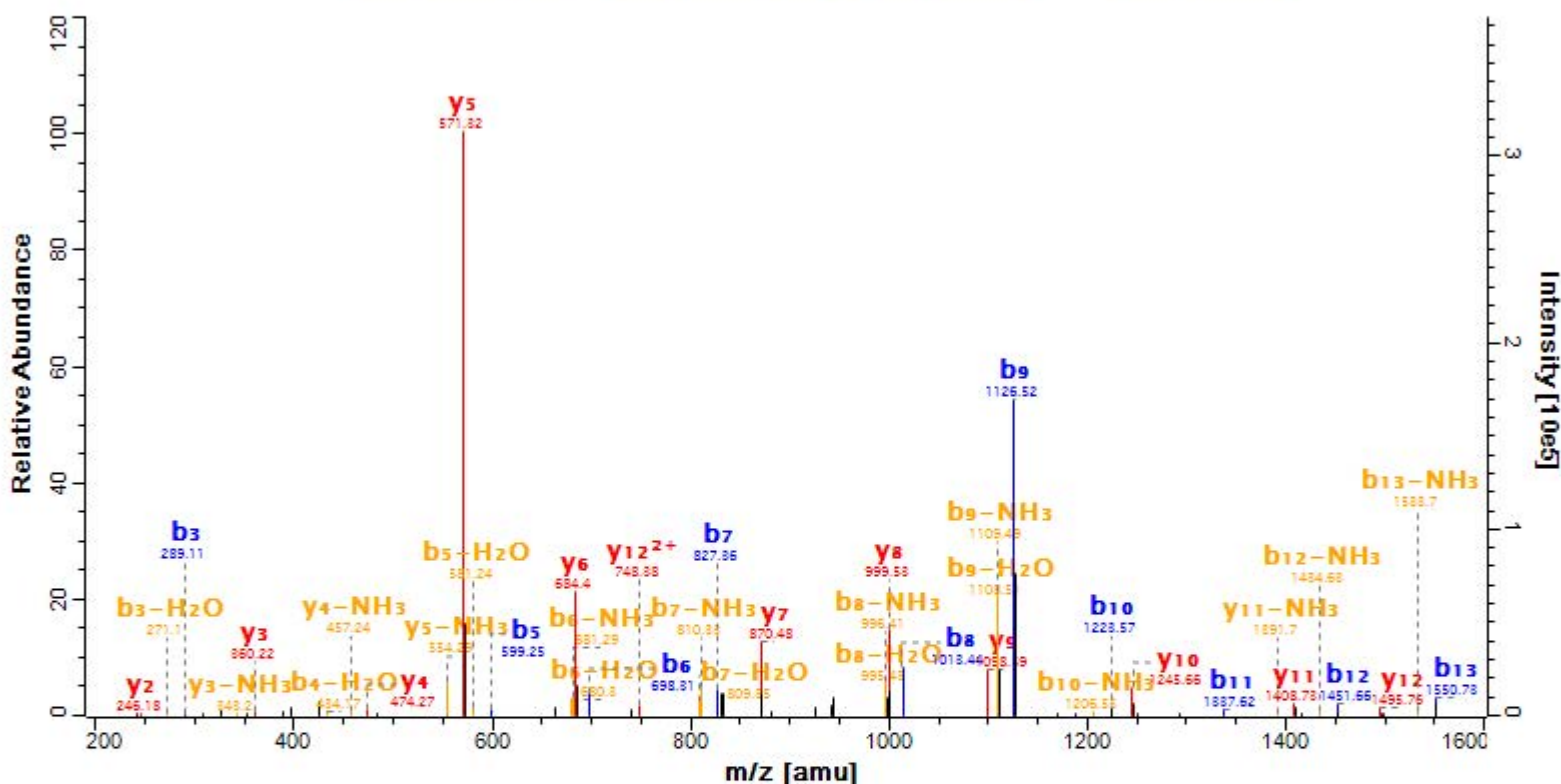

#### precursor information

|                   |                 |
|-------------------|-----------------|
| Mass:             | 1695.82604      |
| m/z:              | 848.92029       |
| Charge:           | 2+              |
| Retentiontime:    | 49.496974945068 |
| Score:            | 278.8232        |
| Mass Error [ppm]: | 0.21474         |
| PEP:              | 7.6308E-62      |
| Precursor Type:   | MULTI           |

| b ion     |          |     |   | y ion    |          | y <sup>2+</sup> ion |          |           |
|-----------|----------|-----|---|----------|----------|---------------------|----------|-----------|
| Δ dalton  | mass     | seq |   | Δ dalton | mass     | Δ dalton            | mass     |           |
|           | 115.0502 | 1   | N | 13       |          |                     |          |           |
|           | 202.0822 | 2   | S | 12       | 1582.79  |                     | 1582.79  |           |
| +0.087827 | 289.1143 | 3   | S | 11       | 1495.758 | -0.11554            | 748.3826 | +0.186397 |
|           | 452.1776 | 4   | Y | 10       | 1408.726 | +0.117909           | 1408.726 |           |
| -0.07553  | 599.246  | 5   | F | 9        | 1245.663 | -0.2045             | 1245.663 |           |
| -0.06826  | 698.3144 | 6   | V | 8        | 1098.594 | -0.12303            | 1098.594 |           |
| -0.13081  | 827.357  | 7   | E | 7        | 999.5258 | -0.07122            | 999.5258 |           |
| +0.157183 | 1013.436 | 8   | W | 6        | 870.4832 | -0.0495             | 870.4832 |           |
| -0.04456  | 1126.52  | 9   | I | 5        | 684.4039 | +0.018768           | 684.4039 |           |
| -0.14078  | 1223.573 | 10  | P | 4        | 571.3198 | +0.02489            | 571.3198 |           |
| +0.056163 | 1337.616 | 11  | N | 3        | 474.2671 | +0.158952           | 474.2671 |           |
| -0.133    | 1451.659 | 12  | N | 2        | 360.2241 | -0.01986            | 360.2241 |           |
| -0.05933  | 1550.727 | 13  | V | 1        | 246.1812 | +0.068812           | 246.1812 |           |
|           |          | 14  | K | 0        | 147.1128 |                     | 147.1128 |           |

#### general information

|                       |             |
|-----------------------|-------------|
| Annotation:           | 11 of 14    |
| AminoAcids Coverage:  | 79 %        |
| Intensity Coverage:   | 77 %        |
| Peak Coverage:        | 49 %        |
| Protein Localisation: | 337 ... 350 |

Scan number 8872 Raw file LNCAP\_Silac\_23F10\_set2\_04  
 Method ITMS; CID Pepti... 121.39

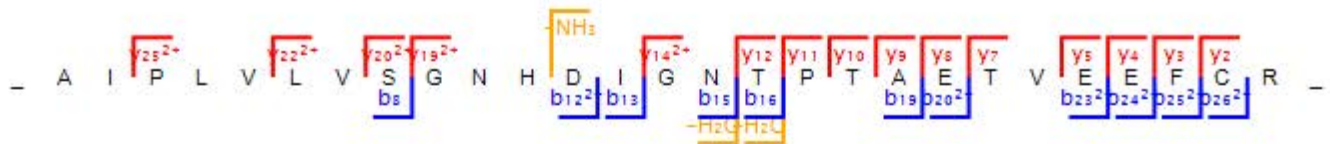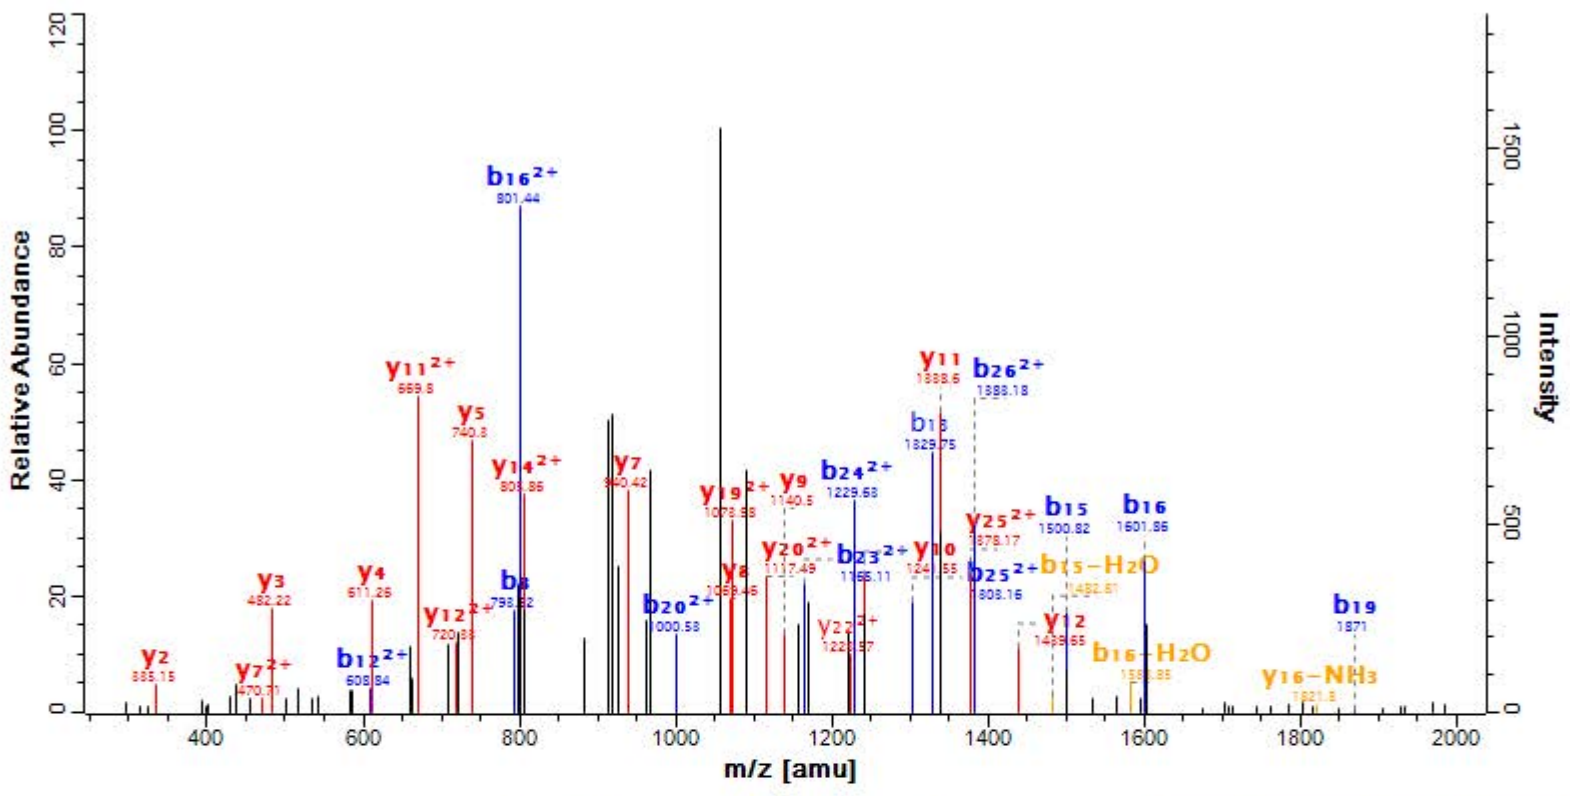

precursor information

|                   |                 |
|-------------------|-----------------|
| Mass:             | 2938.4484       |
| m/z:              | 980.49008       |
| Charge:           | 3+              |
| Retentiontime:    | 49.905361175537 |
| Score:            | 121.3915        |
| Mass Error [ppm]: | -0.36496        |
| PEP:              | 5.5008E-18      |
| Precursor Type:   | MULTI           |

general information

|                       |             |
|-----------------------|-------------|
| Annotation:           | 20 of 27    |
| AminoAcids Coverage:  | 74 %        |
| Intensity Coverage:   | 53 %        |
| Peak Coverage:        | 36 %        |
| Protein Localisation: | 118 ... 144 |

| b <sup>2+</sup> ion |        | b ion    |        | seq |   |    | y ion    |         | y <sup>2+</sup> ion |         |
|---------------------|--------|----------|--------|-----|---|----|----------|---------|---------------------|---------|
| Δ dalton            | mass   | Δ dalton | mass   |     |   |    | Δ dalton | mass    | Δ dalton            | mass    |
|                     | 72.044 |          | 72.044 | 1   | A | 26 |          |         |                     |         |
|                     | 185.13 |          | 185.13 | 2   | I | 25 | 2868.4   |         | 2868.4              |         |
|                     | 282.18 |          | 282.18 | 3   | P | 24 | 2755.3   |         | 1378.2              | +0.1512 |
|                     | 395.27 |          | 395.27 | 4   | L | 23 | 2658.3   |         | 2658.3              |         |
|                     | 494.33 |          | 494.33 | 5   | V | 22 | 2545.2   |         | 2545.2              |         |
|                     | 607.42 |          | 607.42 | 6   | L | 21 | 2446.1   |         | 1223.6              | +0.3523 |
|                     | 706.49 |          | 706.49 | 7   | V | 20 | 2333     |         | 2333                |         |
|                     | 793.52 | -0.14    | 793.52 | 8   | S | 19 | 2234     |         | 1117.5              | +0.0809 |
|                     | 850.54 |          | 850.54 | 9   | G | 18 | 2146.9   |         | 1074                | +0.1493 |
|                     | 964.58 |          | 964.58 | 10  | N | 17 | 2089.9   |         | 2089.9              |         |
|                     | 1101.6 |          | 1101.6 | 11  | H | 16 | 1975.9   |         | 1975.9              |         |
| -0.283              | 608.84 |          | 1216.7 | 12  | D | 15 | 1838.8   |         | 1838.8              |         |
|                     | 1329.8 | -0.047   | 1329.8 | 13  | I | 14 | 1723.8   |         | 1723.8              |         |
|                     | 1386.8 |          | 1386.8 | 14  | G | 13 | 1610.7   |         | 805.86              | -0.032  |
|                     | 1500.8 | -0.087   | 1500.8 | 15  | N | 12 | 1553.7   |         | 1553.7              |         |
| +0.073              | 801.44 | -0.124   | 1601.9 | 16  | T | 11 | 1439.6   | -0.065  | 720.33              | +0.0804 |
|                     | 1698.9 |          | 1698.9 | 17  | P | 10 | 1338.6   | -0.075  | 669.8               | +0.2197 |
|                     | 1800   |          | 1800   | 18  | T | 9  | 1241.5   | +0.3654 | 1241.5              |         |
|                     | 1871   | -0.113   | 1871   | 19  | A | 8  | 1140.5   | +0.0103 | 1140.5              |         |
| +0.0144             | 1000.5 |          | 2000   | 20  | E | 7  | 1069.5   | -0.025  | 1069.5              |         |
|                     | 2101.1 |          | 2101.1 | 21  | T | 6  | 940.42   | +0.0708 | 470.71              | -0.033  |
|                     | 2200.2 |          | 2200.2 | 22  | V | 5  | 839.37   |         | 839.37              |         |
| +0.1876             | 1165.1 |          | 2329.2 | 23  | E | 4  | 740.3    | +0.0266 | 740.3               |         |
| +0.2032             | 1229.6 |          | 2458.2 | 24  | E | 3  | 611.26   | +0.037  | 611.26              |         |
| +0.4955             | 1303.2 |          | 2605.3 | 25  | F | 2  | 482.22   | +0.1289 | 482.22              |         |
| +0.1158             | 1383.2 |          | 2765.3 | 26  | C | 1  | 335.15   | +0.0726 | 335.15              |         |
|                     |        |          |        | 27  | R | 0  | 175.12   |         | 175.12              |         |



Scan number 9144 Raw file LNCAP\_Silac\_23F10\_set2\_04  
 Method ITMS; CID Pepti... 51.26

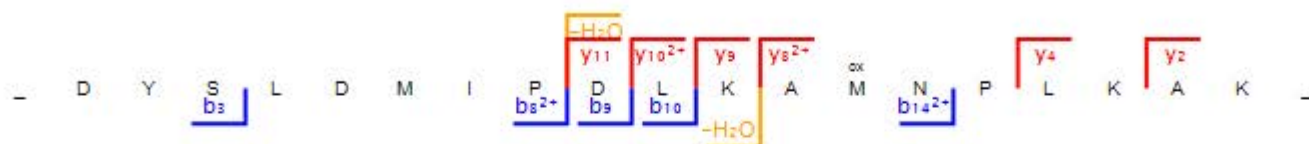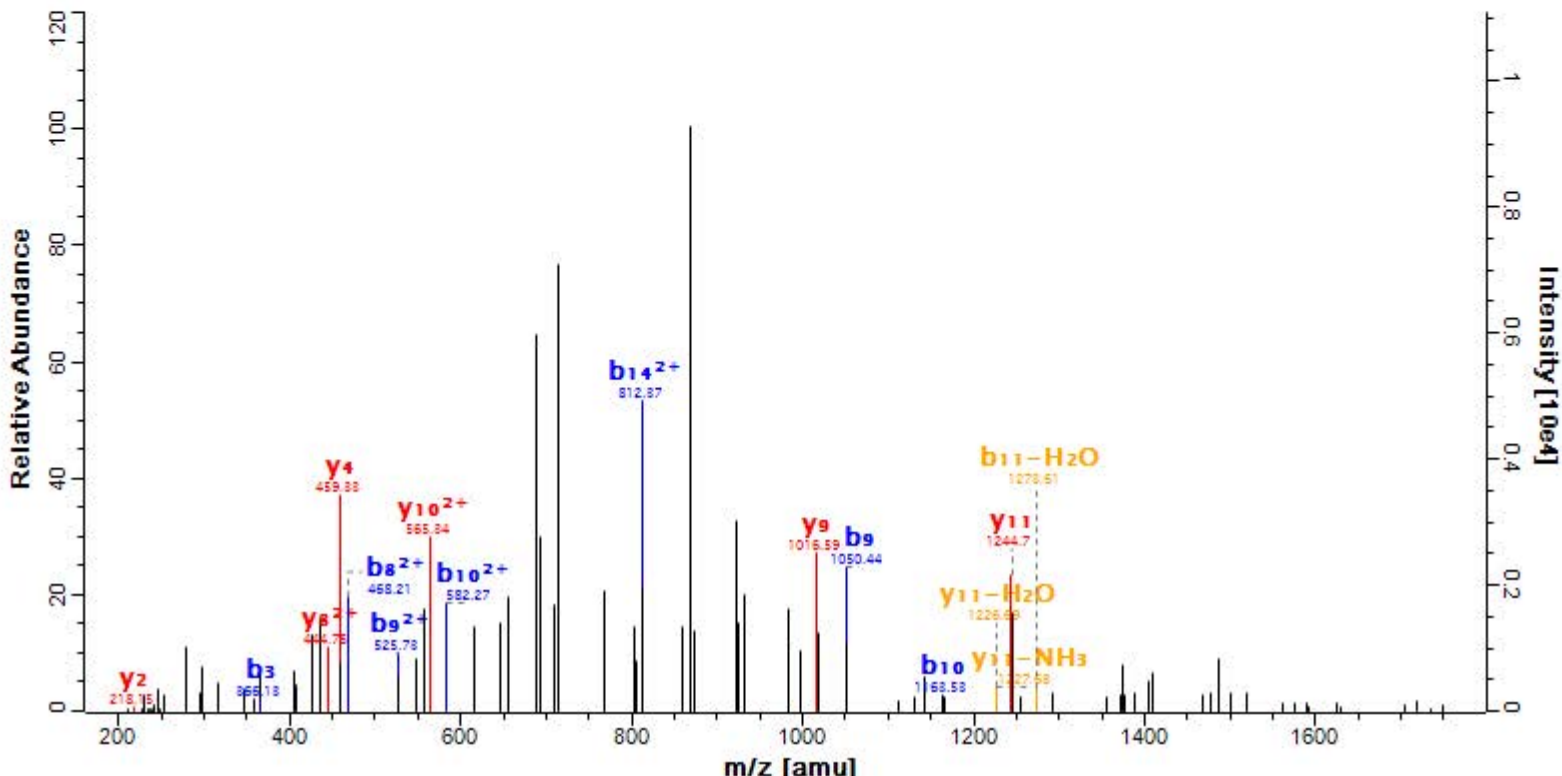

**precursor information**

|                   |                 |
|-------------------|-----------------|
| Mass:             | 2178.10627      |
| m/z:              | 727.0427        |
| Charge:           | 3+              |
| Retentiontime:    | 51.423927307128 |
| Score:            | 51.26491        |
| Mass Error [ppm]: | -0.086044       |
| PEP:              | 0.01971         |
| Precursor Type:   | MULTI           |

**general information**

|                       |             |
|-----------------------|-------------|
| Annotation:           | 9 of 19     |
| AminoAcids Coverage:  | 47 %        |
| Intensity Coverage:   | 24 %        |
| Peak Coverage:        | 16 %        |
| Protein Localisation: | 100 ... 118 |

| b <sup>2+</sup> ion |        | b ion    |        | seq |   |    | y ion    |        | y <sup>2+</sup> ion |         |
|---------------------|--------|----------|--------|-----|---|----|----------|--------|---------------------|---------|
| Δ dalton            | mass   | Δ dalton | mass   |     |   |    | Δ dalton | mass   | Δ dalton            | mass    |
|                     | 116.03 |          | 116.03 | 1   | D | 18 |          |        |                     |         |
|                     | 279.1  |          | 279.1  | 2   | Y | 17 | 2064.1   |        | 2064.1              |         |
|                     | 366.13 | +0.2063  | 366.13 | 3   | S | 16 | 1901     |        | 1901                |         |
|                     | 479.21 |          | 479.21 | 4   | L | 15 | 1814     |        | 1814                |         |
|                     | 594.24 |          | 594.24 | 5   | D | 14 | 1700.9   |        | 1700.9              |         |
|                     | 725.28 |          | 725.28 | 6   | M | 13 | 1585.9   |        | 1585.9              |         |
|                     | 838.37 |          | 838.37 | 7   | I | 12 | 1454.8   |        | 1454.8              |         |
| +0.074              | 468.21 |          | 935.42 | 8   | P | 11 | 1341.8   |        | 1341.8              |         |
| +0.2957             | 525.73 | +0.0555  | 1050.4 | 9   | D | 10 | 1244.7   | -0.248 | 1244.7              |         |
| +0.1512             | 582.27 | +0.1247  | 1163.5 | 10  | L | 9  | 1129.7   |        | 565.34              | +0.0443 |
|                     | 1291.6 |          | 1291.6 | 11  | K | 8  | 1016.6   | -0.061 | 1016.6              |         |
|                     | 1362.7 |          | 1362.7 | 12  | A | 7  | 888.5    |        | 444.75              | -0.396  |
|                     | 1509.7 |          | 1509.7 | 13  | M | 6  | 817.46   |        | 817.46              |         |
| -0.245              | 812.37 |          | 1623.7 | 14  | N | 5  | 670.42   |        | 670.42              |         |
|                     | 1720.8 |          | 1720.8 | 15  | P | 4  | 556.38   |        | 556.38              |         |
|                     | 1833.9 |          | 1833.9 | 16  | L | 3  | 459.33   | -0.004 | 459.33              |         |
|                     | 1962   |          | 1962   | 17  | K | 2  | 346.24   |        | 346.24              |         |
|                     | 2033   |          | 2033   | 18  | A | 1  | 218.15   | +0.11  | 218.15              |         |
|                     |        |          |        | 19  | K | 0  | 147.11   |        | 147.11              |         |

Scan number 9194 Raw file LNCAP\_Silac\_23F10\_set2\_04  
 Method ITMS; CID Pepti... 103.1

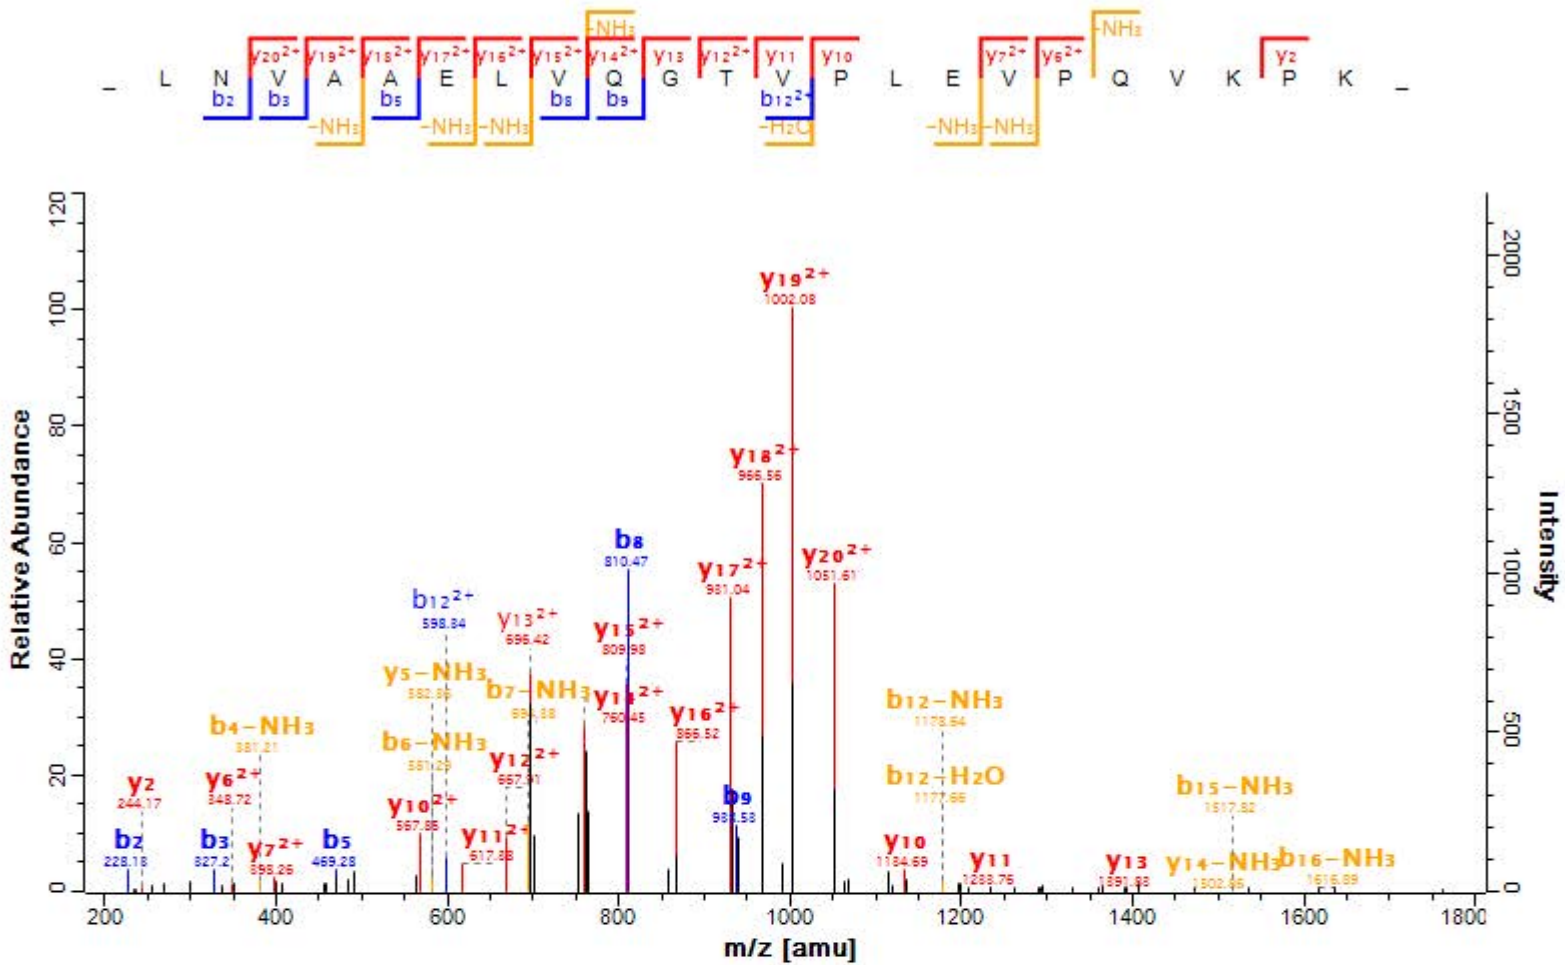

precursor information

|                   |                 |
|-------------------|-----------------|
| Mass:             | 2328.34135      |
| m/z:              | 777.12106       |
| Charge:           | 3+              |
| Retentiontime:    | 51.702125549316 |
| Score:            | 103.1036        |
| Mass Error [ppm]: | -0.1422         |
| PEP:              | 1.9234E-08      |
| Precursor Type:   | MULTI           |

general information

|                       |             |
|-----------------------|-------------|
| Annotation:           | 17 of 22    |
| AminoAcids Coverage:  | 77 %        |
| Intensity Coverage:   | 66 %        |
| Peak Coverage:        | 35 %        |
| Protein Localisation: | 196 ... 217 |

| b <sup>2+</sup> ion |        | b ion    |        | seq |   |    | y ion    |         | y <sup>2+</sup> ion |         |
|---------------------|--------|----------|--------|-----|---|----|----------|---------|---------------------|---------|
| Δ dalton            | mass   | Δ dalton | mass   |     |   |    | Δ dalton | mass    | Δ dalton            | mass    |
|                     | 114.09 |          | 114.09 | 1   | L | 21 |          |         |                     |         |
|                     | 228.13 | +0.0933  | 228.13 | 2   | N | 20 | 2216.3   |         | 2216.3              |         |
|                     | 327.2  | +0.0343  | 327.2  | 3   | V | 19 | 2102.2   |         | 1051.6              | +0.3136 |
|                     | 398.24 |          | 398.24 | 4   | A | 18 | 2003.2   |         | 1002.1              | +0.214  |
|                     | 469.28 | +0.1394  | 469.28 | 5   | A | 17 | 1932.1   |         | 966.56              | +0.2665 |
|                     | 598.32 |          | 598.32 | 6   | E | 16 | 1861.1   |         | 931.04              | +0.2064 |
|                     | 711.4  |          | 711.4  | 7   | L | 15 | 1732     |         | 866.52              | +0.2456 |
|                     | 810.47 | +0.1958  | 810.47 | 8   | V | 14 | 1619     |         | 809.98              | +0.0065 |
|                     | 938.53 | -0.222   | 938.53 | 9   | Q | 13 | 1519.9   |         | 760.45              | +0.0085 |
|                     | 995.55 |          | 995.55 | 10  | G | 12 | 1391.8   | +0.0741 | 696.42              | -0.087  |
|                     | 1096.6 |          | 1096.6 | 11  | T | 11 | 1334.8   |         | 667.91              | +0.3219 |
| +0.0592             | 598.34 |          | 1195.7 | 12  | V | 10 | 1233.8   | -0.097  | 617.38              | +0.2507 |
|                     | 1292.7 |          | 1292.7 | 13  | P | 9  | 1134.7   | -0.176  | 567.85              | +0.2577 |
|                     | 1405.8 |          | 1405.8 | 14  | L | 8  | 1037.6   |         | 1037.6              |         |
|                     | 1534.8 |          | 1534.8 | 15  | E | 7  | 924.55   |         | 924.55              |         |
|                     | 1633.9 |          | 1633.9 | 16  | V | 6  | 795.51   |         | 398.26              | +0.2101 |
|                     | 1731   |          | 1731   | 17  | P | 5  | 696.44   |         | 348.72              | +0.2704 |
|                     | 1859   |          | 1859   | 18  | Q | 4  | 599.39   |         | 599.39              |         |
|                     | 1958.1 |          | 1958.1 | 19  | V | 3  | 471.33   |         | 471.33              |         |
|                     | 2086.2 |          | 2086.2 | 20  | K | 2  | 372.26   |         | 372.26              |         |
|                     | 2183.2 |          | 2183.2 | 21  | P | 1  | 244.17   | +0.0379 | 244.17              |         |
|                     |        |          |        | 22  | K | 0  | 147.11   |         | 147.11              |         |

Scan number 9358 Raw file LNCAP\_Silac\_23F10\_set2\_04  
 Method ITMS; CID Pepti... 89.51

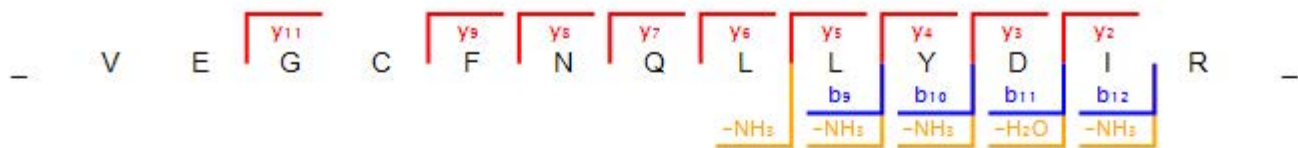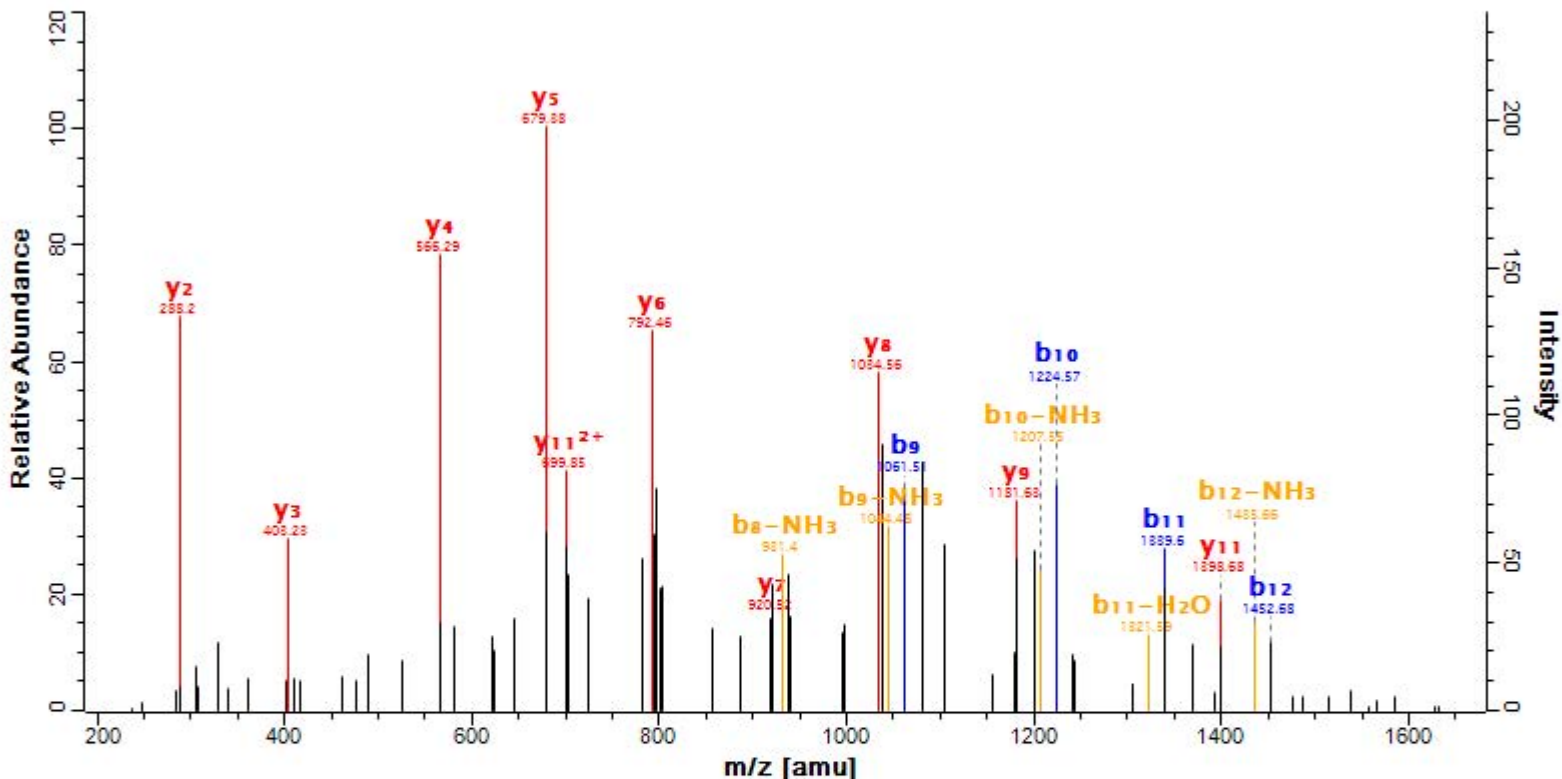

**precursor information**

|                   |                 |
|-------------------|-----------------|
| Mass:             | 1625.78854      |
| m/z:              | 813.90155       |
| Charge:           | 2+              |
| Retentiontime:    | 52.641571044921 |
| Score:            | 89.50678        |
| Mass Error [ppm]: | 0.84131         |
| PEP:              | 0.00027981      |
| Precursor Type:   | MULTI           |

**general information**

|                       |             |
|-----------------------|-------------|
| Annotation:           | 9 of 13     |
| AminoAcids Coverage:  | 69 %        |
| Intensity Coverage:   | 46 %        |
| Peak Coverage:        | 23 %        |
| Protein Localisation: | 197 ... 209 |

| b ion     |          |    |     |    | y ion    |           | y <sup>2+</sup> ion |          |
|-----------|----------|----|-----|----|----------|-----------|---------------------|----------|
| Δ dalton  | mass     |    | seq |    | Δ dalton | mass      | Δ dalton            | mass     |
|           | 100.0757 | 1  | V   | 12 |          |           |                     |          |
|           | 229.1183 | 2  | E   | 11 | 1527.726 |           | 1527.726            |          |
|           | 286.1397 | 3  | G   | 10 | 1398.683 | -0.02036  | 699.8454            | -0.01303 |
|           | 446.1704 | 4  | C   | 9  | 1341.662 |           | 1341.662            |          |
|           | 593.2388 | 5  | F   | 8  | 1181.631 | -0.11058  | 1181.631            |          |
|           | 707.2817 | 6  | N   | 7  | 1034.563 | +0.036323 | 1034.563            |          |
|           | 835.3403 | 7  | Q   | 6  | 920.52   | -0.23026  | 920.52              |          |
|           | 948.4244 | 8  | L   | 5  | 792.4614 | -0.03582  | 792.4614            |          |
| +0.032818 | 1061.508 | 9  | L   | 4  | 679.3774 | -0.02884  | 679.3774            |          |
| -0.01928  | 1224.572 | 10 | Y   | 3  | 566.2933 | +0.165636 | 566.2933            |          |
| -0.26973  | 1339.599 | 11 | D   | 2  | 403.23   | +0.085043 | 403.23              |          |
| -0.0496   | 1452.683 | 12 | I   | 1  | 288.203  | +0.055468 | 288.203             |          |
|           |          | 13 | R   | 0  | 175.119  |           | 175.119             |          |





Scan number 942 Raw file LNCAP\_Silac\_23F10\_set2\_04  
 Method ITMS; CID Pepti... 153.21

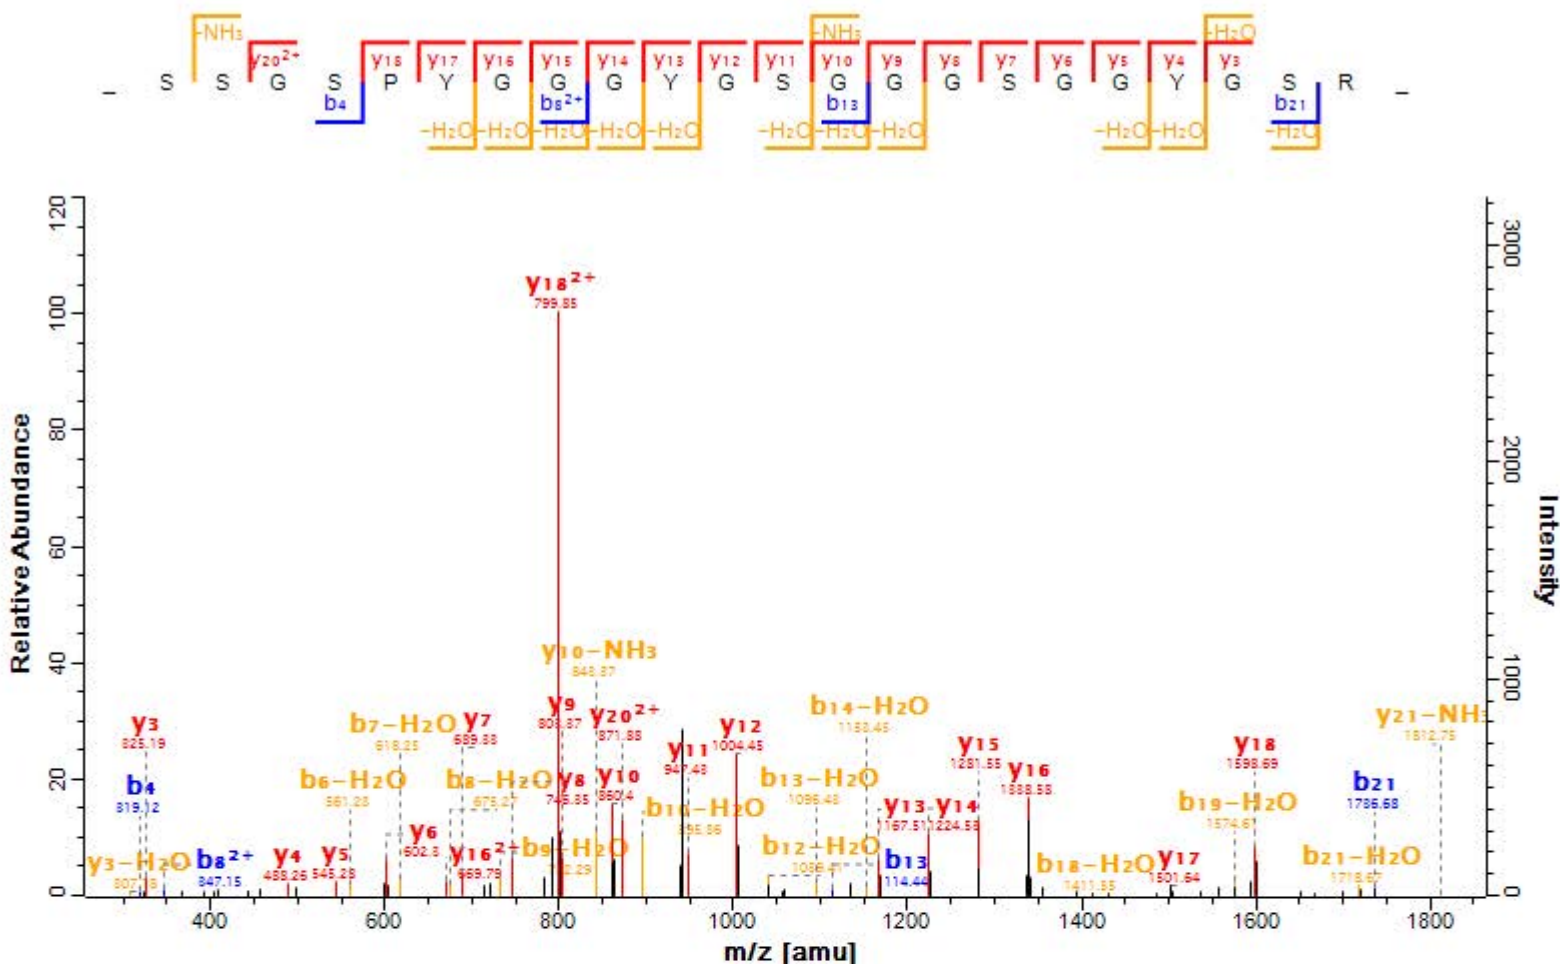

precursor information

|                   |                 |
|-------------------|-----------------|
| Mass:             | 1909.78321      |
| m/z:              | 955.89888       |
| Charge:           | 2+              |
| Retentiontime:    | 10.393086433410 |
| Score:            | 153.21          |
| Mass Error [ppm]: | 0.26852         |
| PEP:              | 3.6701E-28      |
| Precursor Type:   | MULTI           |

| b <sup>2+</sup> ion |        | b ion    |        | seq |   |    | y ion    |         | y <sup>2+</sup> ion |         |
|---------------------|--------|----------|--------|-----|---|----|----------|---------|---------------------|---------|
| Δ dalton            | mass   | Δ dalton | mass   |     |   |    | Δ dalton | mass    | Δ dalton            | mass    |
|                     | 88.039 |          | 88.039 | 1   | S | 21 |          |         |                     |         |
|                     | 175.07 |          | 175.07 | 2   | S | 20 | 1829.8   |         | 1829.8              |         |
|                     | 232.09 |          | 232.09 | 3   | G | 19 | 1742.7   |         | 871.88              | +0.0649 |
|                     | 319.12 | +0.1601  | 319.12 | 4   | S | 18 | 1685.7   |         | 1685.7              |         |
|                     | 416.18 |          | 416.18 | 5   | P | 17 | 1598.7   | -0.056  | 799.85              | +0.3048 |
|                     | 579.24 |          | 579.24 | 6   | Y | 16 | 1501.6   | +0.0189 | 1501.6              |         |
|                     | 636.26 |          | 636.26 | 7   | G | 15 | 1338.6   | +0.0103 | 669.79              | +0.1141 |
| +0.2662             | 347.15 |          | 693.28 | 8   | G | 14 | 1281.6   | +0.1276 | 1281.6              |         |
|                     | 750.31 |          | 750.31 | 9   | G | 13 | 1224.5   | -0.12   | 1224.5              |         |
|                     | 913.37 |          | 913.37 | 10  | Y | 12 | 1167.5   | +0.1293 | 1167.5              |         |
|                     | 970.39 |          | 970.39 | 11  | G | 11 | 1004.4   | +0.019  | 1004.4              |         |
|                     | 1057.4 |          | 1057.4 | 12  | S | 10 | 947.43   | +0.1059 | 947.43              |         |
|                     | 1114.4 | -0.089   | 1114.4 | 13  | G | 9  | 860.4    | +0.0952 | 860.4               |         |
|                     | 1171.5 |          | 1171.5 | 14  | G | 8  | 803.37   | +0.0323 | 803.37              |         |
|                     | 1228.5 |          | 1228.5 | 15  | G | 7  | 746.35   | +0.0133 | 746.35              |         |
|                     | 1315.5 |          | 1315.5 | 16  | S | 6  | 689.33   | +0.18   | 689.33              |         |
|                     | 1372.5 |          | 1372.5 | 17  | G | 5  | 602.3    | +0.0817 | 602.3               |         |
|                     | 1429.6 |          | 1429.6 | 18  | G | 4  | 545.28   | +0.0041 | 545.28              |         |
|                     | 1592.6 |          | 1592.6 | 19  | Y | 3  | 488.26   | +0.1389 | 488.26              |         |
|                     | 1649.6 |          | 1649.6 | 20  | G | 2  | 325.19   | +0.0846 | 325.19              |         |
|                     | 1736.7 | -0.097   | 1736.7 | 21  | S | 1  | 268.17   |         | 268.17              |         |
|                     |        |          |        | 22  | R | 0  | 181.14   |         | 181.14              |         |

general information

|                       |             |
|-----------------------|-------------|
| Annotation:           | 20 of 22    |
| AminoAcids Coverage:  | 91 %        |
| Intensity Coverage:   | 64 %        |
| Peak Coverage:        | 40 %        |
| Protein Localisation: | 355 ... 376 |

Scan number 9431 Raw file LNCAP\_Silac\_23F10\_set2\_04  
 Method ITMS; CID Pepti... 112.36

- A D L E S E S F R P N L S D P S E L L L P D Q I E K -  
 b<sub>3</sub> b<sub>6</sub> b<sub>7</sub> b<sub>9</sub> b<sub>12</sub><sup>2+</sup> b<sub>14</sub> b<sub>16</sub> b<sub>17</sub> b<sub>19</sub><sup>2+</sup> b<sub>20</sub><sup>2+</sup> b<sub>23</sub><sup>2+</sup> b<sub>24</sub><sup>2+</sup> b<sub>25</sub><sup>2+</sup>  
 y<sub>1</sub> y<sub>6</sub> y<sub>7</sub> y<sub>8</sub> y<sub>12</sub><sup>2+</sup> y<sub>13</sub><sup>2+</sup> y<sub>16</sub><sup>2+</sup> y<sub>17</sub><sup>2+</sup> y<sub>18</sub><sup>2+</sup> y<sub>20</sub><sup>2+</sup> y<sub>21</sub><sup>2+</sup> y<sub>22</sub><sup>2+</sup> y<sub>12</sub> y<sub>4</sub> y<sub>17</sub>-H<sub>2</sub>O

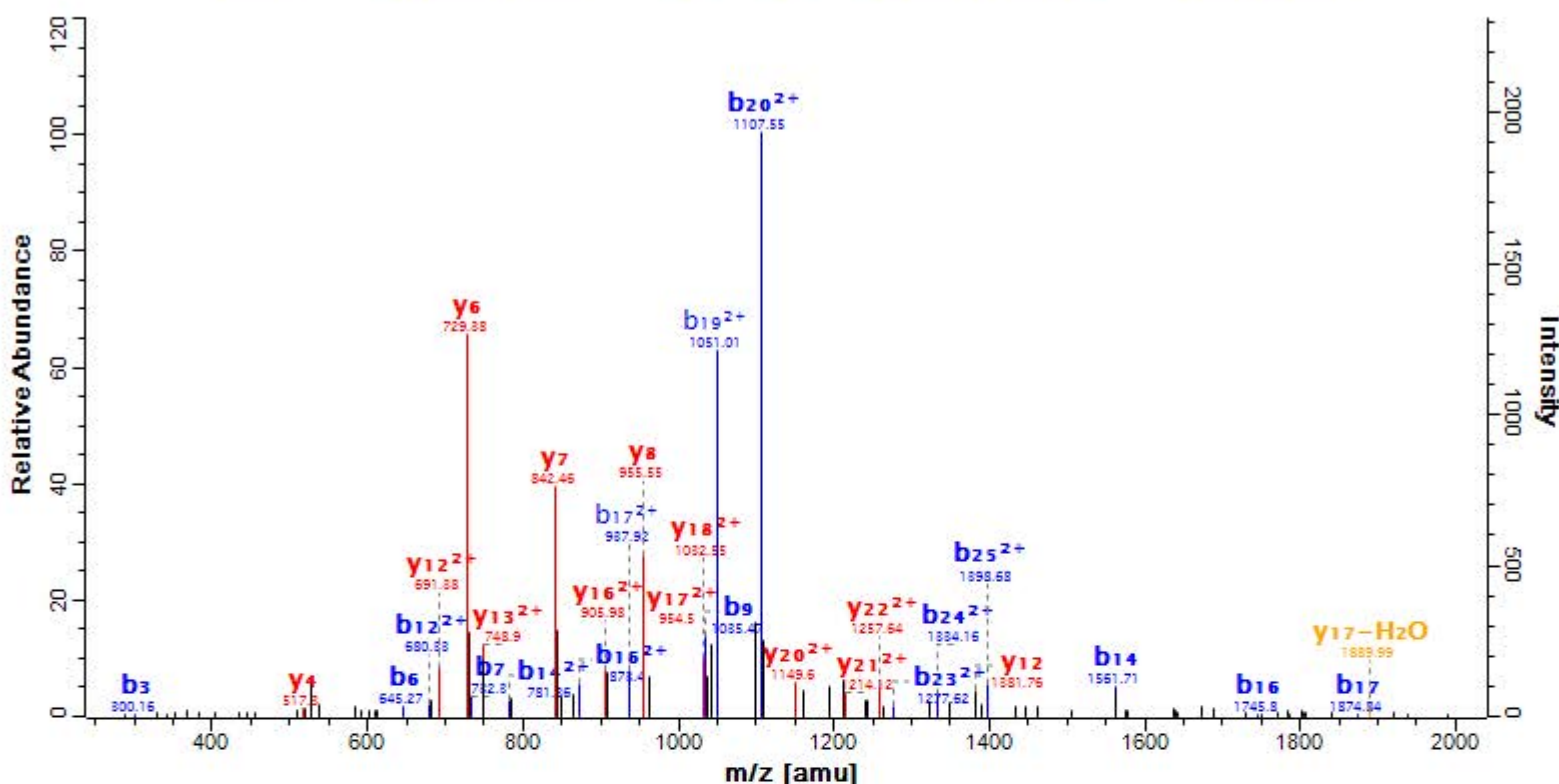

precursor information

|                   |                 |
|-------------------|-----------------|
| Mass:             | 2941.45748      |
| m/z:              | 981.4931        |
| Charge:           | 3+              |
| Retentiontime:    | 53.085021972656 |
| Score:            | 112.362         |
| Mass Error [ppm]: | 0.61916         |
| PEP:              | 2.8462E-11      |
| Precursor Type:   | ISO             |

| b <sup>2+</sup> ion |        | b ion    |        | seq |   |    | y ion    |         | y <sup>2+</sup> ion |         |
|---------------------|--------|----------|--------|-----|---|----|----------|---------|---------------------|---------|
| Δ dalton            | mass   | Δ dalton | mass   |     |   |    | Δ dalton | mass    | Δ dalton            | mass    |
|                     | 72.044 |          | 72.044 | 1   | A | 25 |          |         |                     |         |
|                     | 187.07 |          | 187.07 | 2   | D | 24 | 2871.4   |         | 2871.4              |         |
|                     | 300.16 | +0.1025  | 300.16 | 3   | L | 23 | 2756.4   |         | 2756.4              |         |
|                     | 429.2  |          | 429.2  | 4   | E | 22 | 2643.3   |         | 2643.3              |         |
|                     | 516.23 |          | 516.23 | 5   | S | 21 | 2514.3   |         | 1257.6              | +0.2352 |
|                     | 645.27 | +0.0728  | 645.27 | 6   | E | 20 | 2427.2   |         | 1214.1              | +0.3992 |
|                     | 732.3  | -0.006   | 732.3  | 7   | S | 19 | 2298.2   |         | 1149.6              | +0.2248 |
|                     | 879.37 |          | 879.37 | 8   | F | 18 | 2211.2   |         | 2211.2              |         |
|                     | 1035.5 | +0.0345  | 1035.5 | 9   | R | 17 | 2064.1   |         | 1032.6              | +0.1919 |
|                     | 1132.5 |          | 1132.5 | 10  | P | 16 | 1908     |         | 954.5               | -0.067  |
|                     | 1246.6 |          | 1246.6 | 11  | N | 15 | 1810.9   |         | 905.98              | +0.3956 |
| +0.104              | 680.33 |          | 1359.7 | 12  | L | 14 | 1696.9   |         | 1696.9              |         |
|                     | 1446.7 |          | 1446.7 | 13  | S | 13 | 1583.8   |         | 1583.8              |         |
| +0.0802             | 781.36 | -0.27    | 1561.7 | 14  | D | 12 | 1496.8   |         | 748.9               | -0.49   |
|                     | 1658.8 |          | 1658.8 | 15  | P | 11 | 1381.8   | -0.105  | 691.38              | -0.006  |
| -0.339              | 873.4  | +0.1277  | 1745.8 | 16  | S | 10 | 1284.7   |         | 1284.7              |         |
| +0.1855             | 937.92 | +0.4412  | 1874.8 | 17  | E | 9  | 1197.7   |         | 1197.7              |         |
|                     | 1987.9 |          | 1987.9 | 18  | L | 8  | 1068.6   |         | 1068.6              |         |
| +0.2579             | 1051   |          | 2101   | 19  | L | 7  | 955.55   | -0.112  | 955.55              |         |
| +0.2389             | 1107.5 |          | 2214.1 | 20  | L | 6  | 842.46   | +0.0384 | 842.46              |         |
|                     | 2311.1 |          | 2311.1 | 21  | P | 5  | 729.38   | +0.0452 | 729.38              |         |
|                     | 2426.2 |          | 2426.2 | 22  | D | 4  | 632.32   |         | 632.32              |         |
| +0.0563             | 1277.6 |          | 2554.2 | 23  | Q | 3  | 517.3    | +0.1337 | 517.3               |         |
| +0.0125             | 1334.2 |          | 2667.3 | 24  | I | 2  | 389.24   |         | 389.24              |         |
| +0.3018             | 1398.7 |          | 2796.4 | 25  | E | 1  | 276.16   |         | 276.16              |         |
|                     |        |          |        | 26  | K | 0  | 147.11   |         | 147.11              |         |

general information

|                       |             |
|-----------------------|-------------|
| Annotation:           | 19 of 26    |
| AminoAcids Coverage:  | 73 %        |
| Intensity Coverage:   | 67 %        |
| Peak Coverage:        | 29 %        |
| Protein Localisation: | 697 ... 722 |

Scan number 954 Raw file LNCAP\_Silac\_23F10\_set2\_04  
 Method ITMS; CID Pepti... 92.19

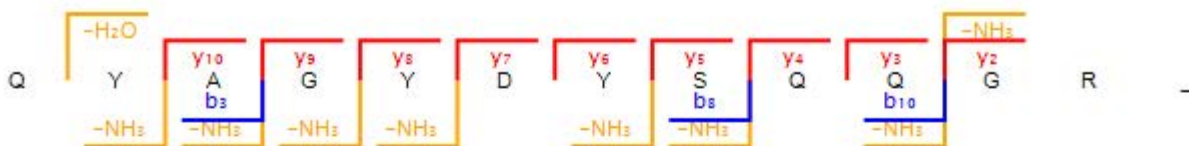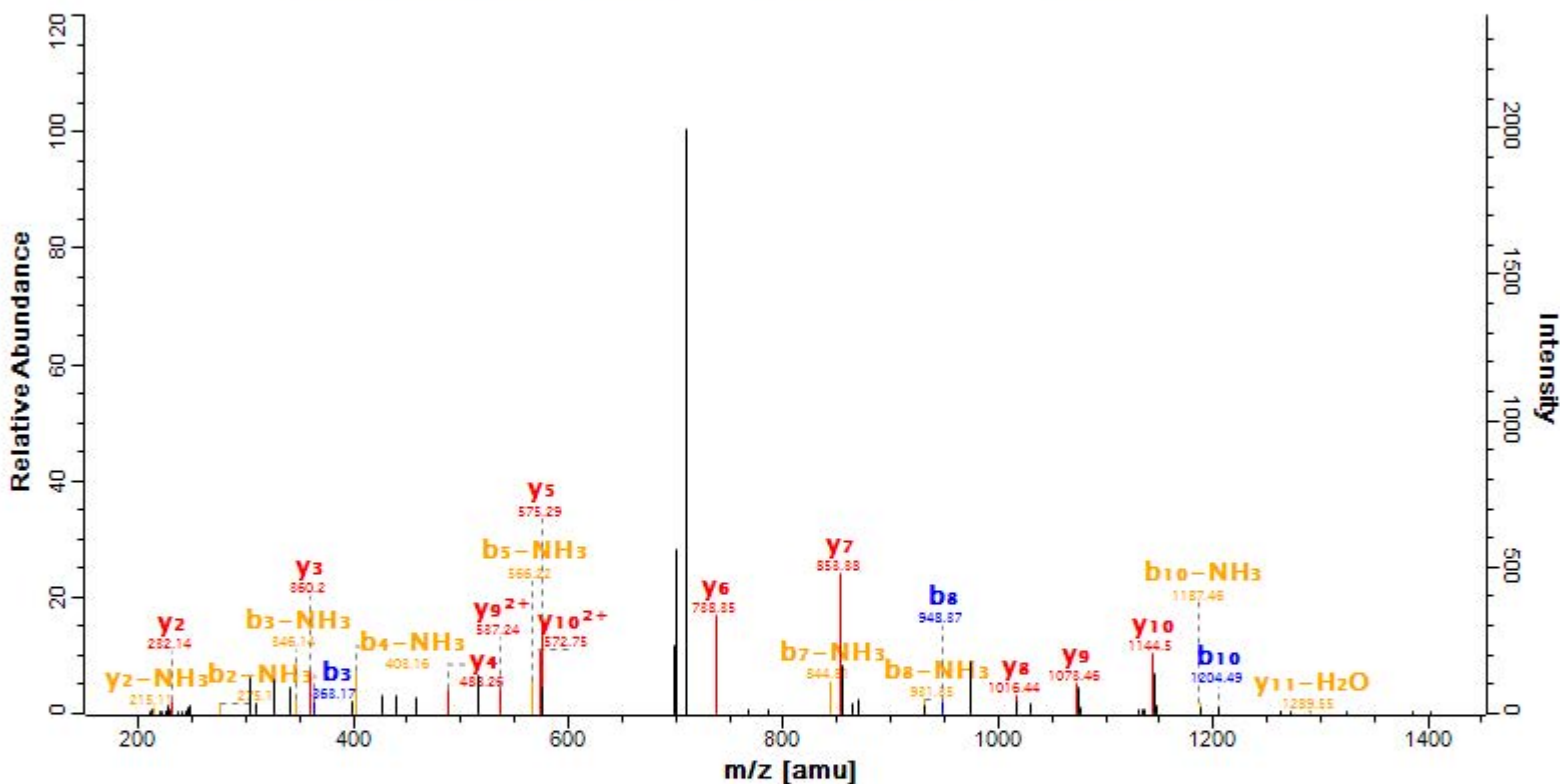

#### precursor information

|                   |                 |
|-------------------|-----------------|
| Mass:             | 1434.61659      |
| m/z:              | 718.31557       |
| Charge:           | 2+              |
| Retentiontime:    | 10.457500457763 |
| Score:            | 92.18982        |
| Mass Error [ppm]: | 0.12773         |
| PEP:              | 0.00078255      |
| Precursor Type:   | MULTI           |

#### general information

|                       |           |
|-----------------------|-----------|
| Annotation:           | 10 of 12  |
| AminoAcids Coverage:  | 83 %      |
| Intensity Coverage:   | 29 %      |
| Peak Coverage:        | 24 %      |
| Protein Localisation: | 38 ... 49 |

| b ion     |          |    |     |    | y ion    |           | y <sup>2+</sup> ion |           |
|-----------|----------|----|-----|----|----------|-----------|---------------------|-----------|
| Δ dalton  | mass     |    | seq |    | Δ dalton | mass      | Δ dalton            | mass      |
|           | 129.0659 | 1  | Q   | 11 |          |           |                     |           |
|           | 292.1292 | 2  | Y   | 10 | 1307.565 |           | 1307.565            |           |
| +0.181909 | 363.1663 | 3  | A   | 9  | 1144.502 | -0.12824  | 572.7545            | +0.257009 |
|           | 420.1878 | 4  | G   | 8  | 1073.465 | -0.14191  | 537.236             | +0.315361 |
|           | 583.2511 | 5  | Y   | 7  | 1016.443 | -0.04702  | 1016.443            |           |
|           | 698.278  | 6  | D   | 6  | 853.3799 | +0.014721 | 853.3799            |           |
|           | 861.3414 | 7  | Y   | 5  | 738.3529 | -0.04244  | 738.3529            |           |
| -0.06986  | 948.3734 | 8  | S   | 4  | 575.2896 | +0.109143 | 575.2896            |           |
|           | 1076.432 | 9  | Q   | 3  | 488.2576 | +0.097165 | 488.2576            |           |
| +0.105282 | 1204.491 | 10 | Q   | 2  | 360.199  | +0.000408 | 360.199             |           |
|           | 1261.512 | 11 | G   | 1  | 232.1404 | +0.008235 | 232.1404            |           |
|           |          | 12 | R   | 0  | 175.119  |           | 175.119             |           |

Scan number 9667 Raw file LNCAP\_Silac\_23F10\_set2\_04  
 Method ITMS; CID Pepti... 80.75

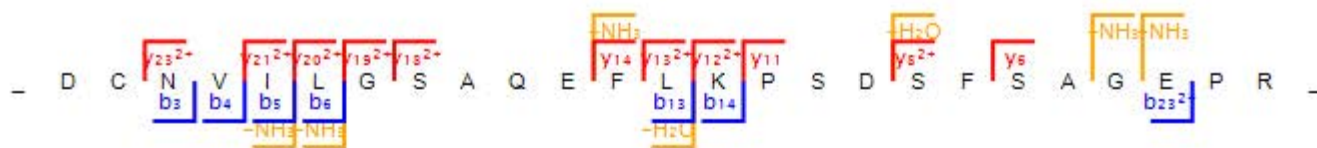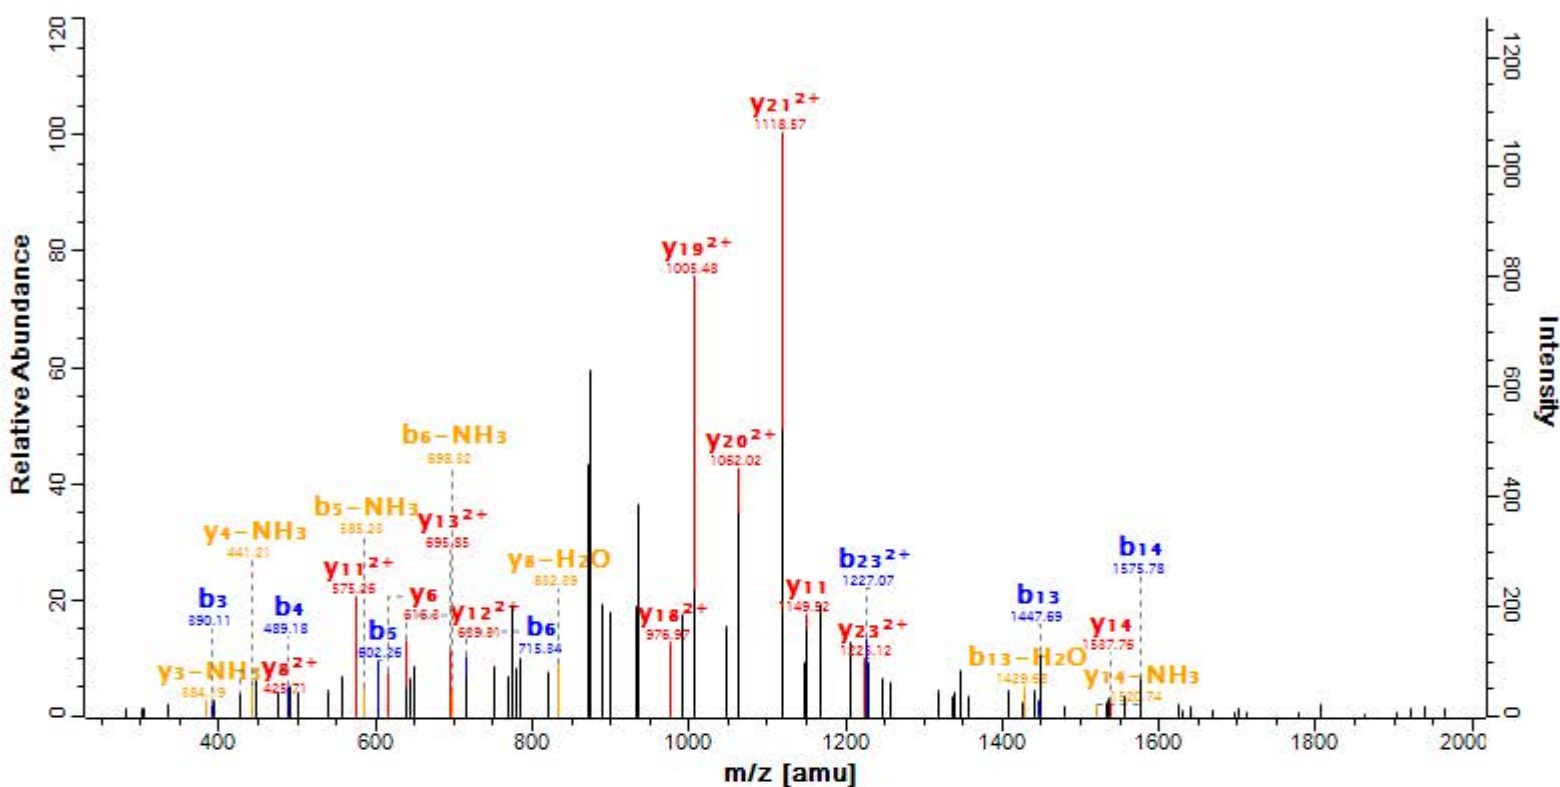

precursor information

|                   |                 |
|-------------------|-----------------|
| Mass:             | 2723.28925      |
| m/z:              | 908.77036       |
| Charge:           | 3+              |
| Retentiontime:    | 54.555961608886 |
| Score:            | 80.75249        |
| Mass Error [ppm]: | 1.1583          |
| PEP:              | 0.00061384      |
| Precursor Type:   | ISO             |

general information

|                       |             |
|-----------------------|-------------|
| Annotation:           | 14 of 25    |
| AminoAcids Coverage:  | 56 %        |
| Intensity Coverage:   | 38 %        |
| Peak Coverage:        | 26 %        |
| Protein Localisation: | 121 ... 145 |

| b <sup>2+</sup> ion |        | b ion    |        | seq |   |    | y ion    |         | y <sup>2+</sup> ion |         |
|---------------------|--------|----------|--------|-----|---|----|----------|---------|---------------------|---------|
| Δ dalton            | mass   | Δ dalton | mass   |     |   |    | Δ dalton | mass    | Δ dalton            | mass    |
|                     | 116.03 |          | 116.03 | 1   | D | 24 |          |         |                     |         |
|                     | 276.06 |          | 276.06 | 2   | C | 23 | 2609.3   |         | 2609.3              |         |
|                     | 390.11 | +0.074   | 390.11 | 3   | N | 22 | 2449.2   |         | 1225.1              | -0.109  |
|                     | 489.18 | -0.083   | 489.18 | 4   | V | 21 | 2335.2   |         | 2335.2              |         |
|                     | 602.26 | -0.09    | 602.26 | 5   | I | 20 | 2236.1   |         | 1118.6              | +0.2137 |
|                     | 715.34 | -0.077   | 715.34 | 6   | L | 19 | 2123     |         | 1062                | +0.181  |
|                     | 772.37 |          | 772.37 | 7   | G | 18 | 2010     |         | 1005.5              | +0.2042 |
|                     | 859.4  |          | 859.4  | 8   | S | 17 | 1952.9   |         | 976.97              | +0.3025 |
|                     | 930.43 |          | 930.43 | 9   | A | 16 | 1865.9   |         | 1865.9              |         |
|                     | 1058.5 |          | 1058.5 | 10  | Q | 15 | 1794.9   |         | 1794.9              |         |
|                     | 1187.5 |          | 1187.5 | 11  | E | 14 | 1666.8   |         | 1666.8              |         |
|                     | 1334.6 |          | 1334.6 | 12  | F | 13 | 1537.8   | +0.0776 | 1537.8              |         |
|                     | 1447.7 | -0.233   | 1447.7 | 13  | L | 12 | 1390.7   |         | 695.85              | +0.2475 |
|                     | 1575.8 | -0.036   | 1575.8 | 14  | K | 11 | 1277.6   |         | 639.31              | +0.1023 |
|                     | 1672.8 |          | 1672.8 | 15  | P | 10 | 1149.5   | +0.0148 | 575.26              | +0.1335 |
|                     | 1759.9 |          | 1759.9 | 16  | S | 9  | 1052.5   |         | 1052.5              |         |
|                     | 1874.9 |          | 1874.9 | 17  | D | 8  | 965.43   |         | 965.43              |         |
|                     | 1961.9 |          | 1961.9 | 18  | S | 7  | 850.41   |         | 425.71              | +0.029  |
|                     | 2109   |          | 2109   | 19  | F | 6  | 763.37   |         | 763.37              |         |
|                     | 2196   |          | 2196   | 20  | S | 5  | 616.3    | -0.008  | 616.3               |         |
|                     | 2267.1 |          | 2267.1 | 21  | A | 4  | 529.27   |         | 529.27              |         |
|                     | 2324.1 |          | 2324.1 | 22  | G | 3  | 458.24   |         | 458.24              |         |
| -0.08               | 1227.1 |          | 2453.1 | 23  | E | 2  | 401.21   |         | 401.21              |         |
|                     | 2550.2 |          | 2550.2 | 24  | P | 1  | 272.17   |         | 272.17              |         |
|                     |        |          |        | 25  | R | 0  | 175.12   |         | 175.12              |         |

Scan number 9980 Raw file LNCAP\_Silac\_23F10\_set2\_04  
 Method ITMS: CID Peptide 138.98

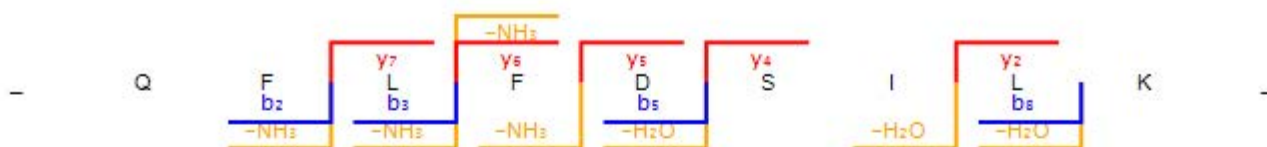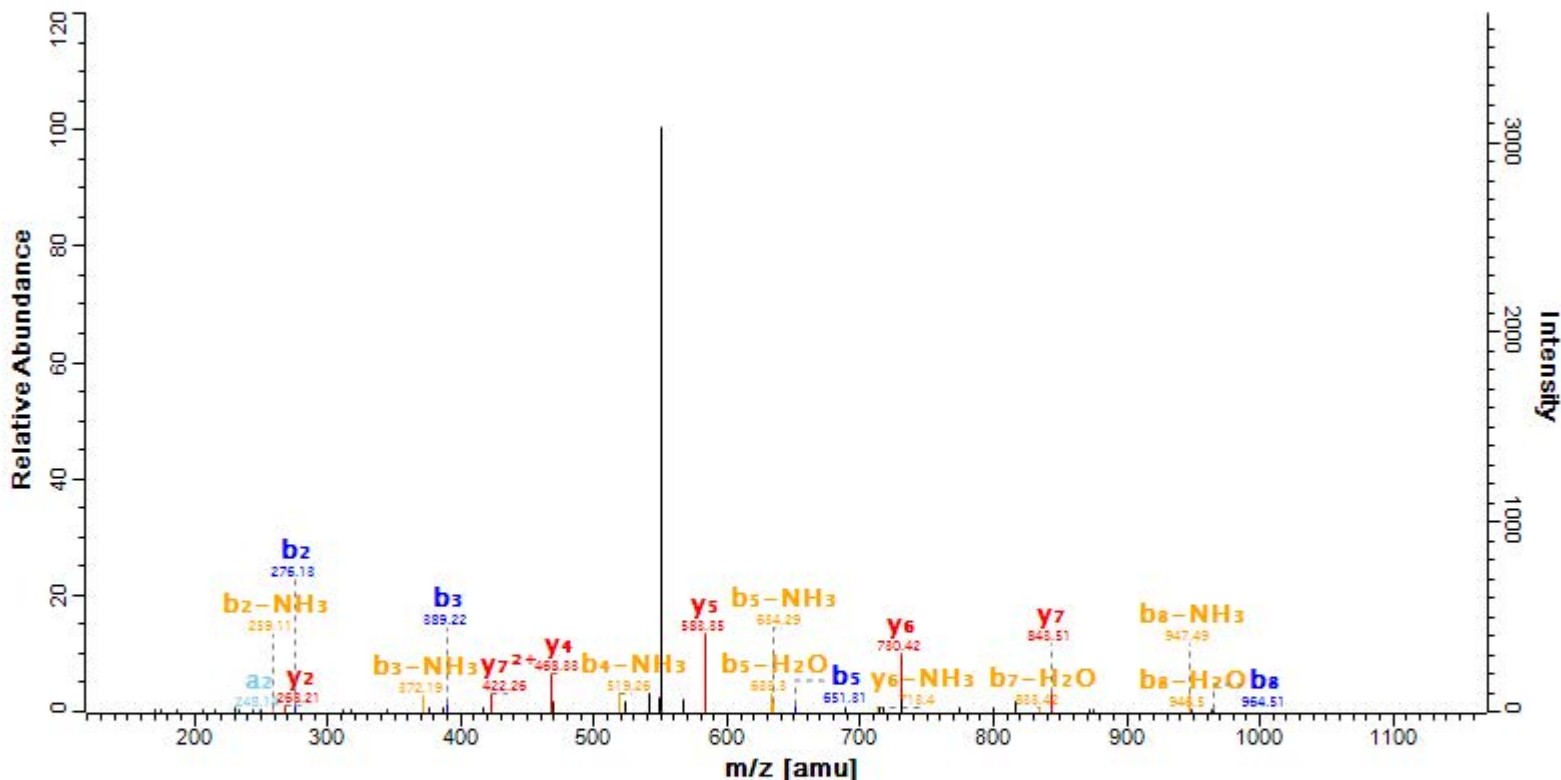

#### precursor information

|                       |                 |
|-----------------------|-----------------|
| Mass:                 | 1109.61217      |
| m/z:                  | 555.81336       |
| Charge:               | 2+              |
| Retention time:       | 56.520709991455 |
| Score:                | 138.9753        |
| Mass Error [ppm]:     | 0.070131        |
| PEP:                  | 0.00095852      |
| Precursor Type:       | MULTI           |
| Annotation:           | 7 of 9          |
| AminoAcids Coverage:  | 78 %            |
| Intensity Coverage:   | 31 %            |
| Peak Coverage:        | 26 %            |
| Protein Localisation: | 302 ... 310     |

| a ion    |        | b ion    |        |   |     |   | y ion    |         | y <sup>2+</sup> ion |        |
|----------|--------|----------|--------|---|-----|---|----------|---------|---------------------|--------|
| Δ dalton | mass   | Δ dalton | mass   |   | seq |   | Δ dalton | mass    | Δ dalton            | mass   |
|          | 101.07 |          | 129.07 | 1 | Q   | 8 |          |         |                     |        |
| -0.133   | 248.14 | -0.057   | 276.13 | 2 | F   | 7 | 990.57   |         | 990.57              |        |
|          | 361.22 | +0.1603  | 389.22 | 3 | L   | 6 | 843.51   | +0.0718 | 422.26              | -0.075 |
|          | 508.29 |          | 536.29 | 4 | F   | 5 | 730.42   | +0.0195 | 730.42              |        |
|          | 623.32 | +0.1869  | 651.31 | 5 | D   | 4 | 583.35   | -0.003  | 583.35              |        |
|          | 710.35 |          | 738.35 | 6 | S   | 3 | 468.33   | +0.0354 | 468.33              |        |
|          | 823.43 |          | 851.43 | 7 | I   | 2 | 381.3    |         | 381.3               |        |
|          | 936.52 | +0.1857  | 964.51 | 8 | L   | 1 | 268.21   | +0.1321 | 268.21              |        |
|          |        |          |        | 9 | K   | 0 | 155.13   |         | 155.13              |        |

Scan number 1036 Raw file LNCAP\_Silac\_23F10\_set2\_05  
 Method ITMS; CID Pepti... 72.32

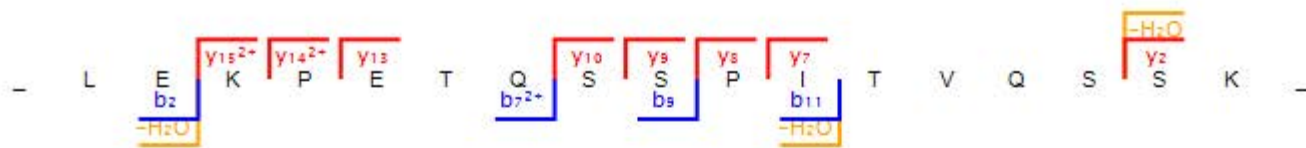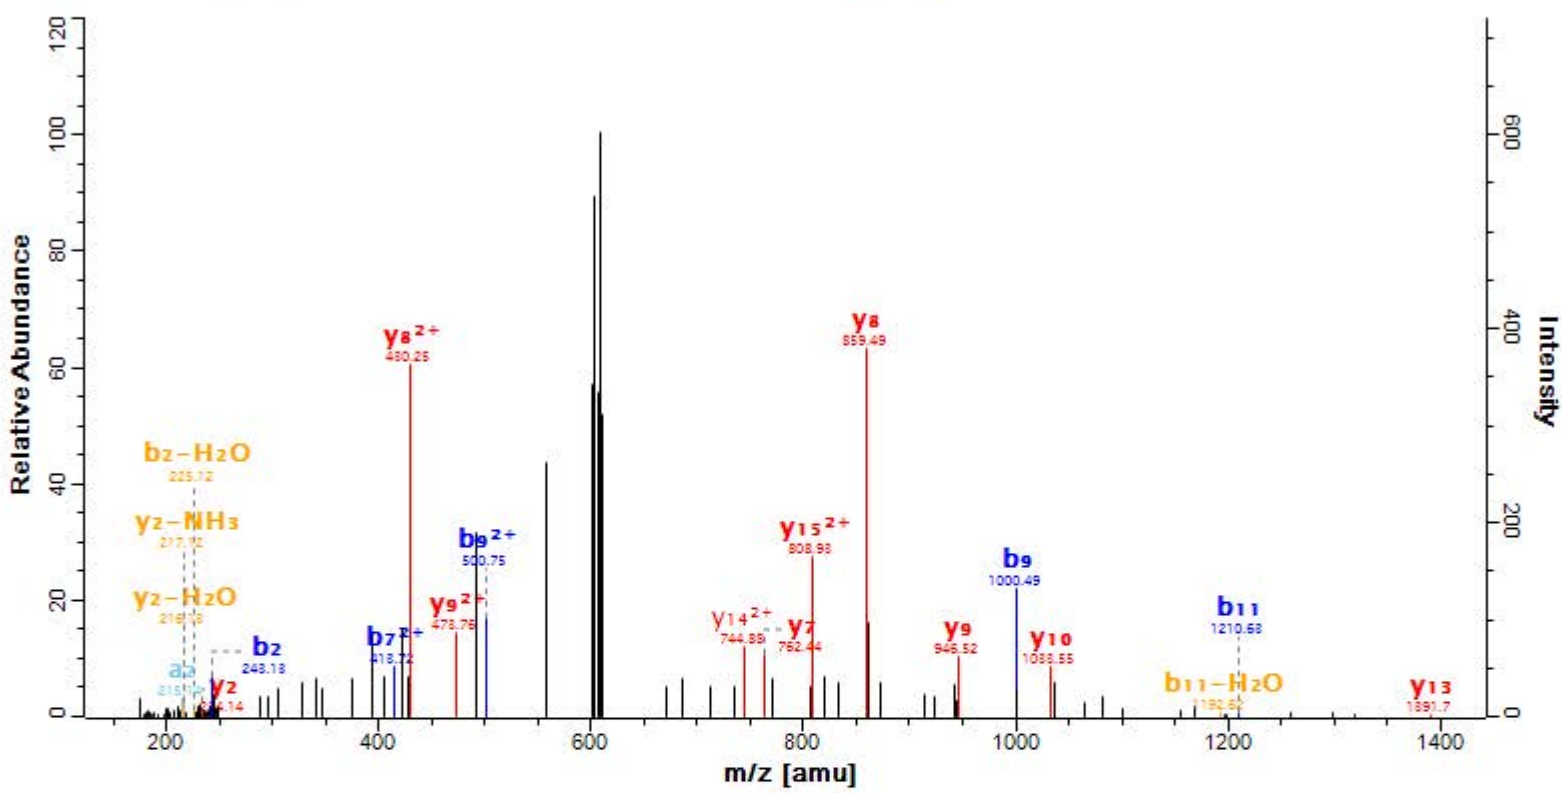

**precursor information**

|                   |                 |
|-------------------|-----------------|
| Mass:             | 1857.96874      |
| m/z:              | 620.33019       |
| Charge:           | 3+              |
| Retentiontime:    | 12.141283035278 |
| Score:            | 72.31547        |
| Mass Error [ppm]: | 0.19752         |
| PEP:              | 0.0001585       |
| Precursor Type:   | MULTI           |

**general information**

|                       |             |
|-----------------------|-------------|
| Annotation:           | 10 of 17    |
| AminoAcids Coverage:  | 59 %        |
| Intensity Coverage:   | 27 %        |
| Peak Coverage:        | 17 %        |
| Protein Localisation: | 120 ... 136 |

|       | a ion         | b <sup>2+</sup> ion | b ion         |    |     |    | y ion         | y <sup>2+</sup> ion |
|-------|---------------|---------------------|---------------|----|-----|----|---------------|---------------------|
|       | Δ dalton mass | Δ dalton mass       | Δ dalton mass |    | seq |    | Δ dalton mass | Δ dalton mass       |
|       | 86.1          | 114.1               | 114.1         | 1  | L   | 16 |               |                     |
| +0.00 | 1215.1        | 243.1               | +0.067243.1   | 2  | E   | 15 | 1746          | 1746                |
|       | 343.2         | 371.2               | 371.2         | 3  | K   | 14 | 1617          | 808.9 +0.209        |
|       | 440.3         | 468.3               | 468.3         | 4  | P   | 13 | 1489          | 744.9 +0.04         |
|       | 569.3         | 597.3               | 597.3         | 5  | E   | 12 | 1392          | +0.4161392          |
|       | 670.4         | 698.4               | 698.4         | 6  | T   | 11 | 1263          | 1263                |
|       | 798.4         | -0.05 413.7         | 826.4         | 7  | Q   | 10 | 1162          | 1162                |
|       | 885.5         | 913.5               | 913.5         | 8  | S   | 9  | 1034          | -0.07 1034          |
|       | 972.5         | +0.068500.8         | +0.1851000    | 9  | S   | 8  | 946.5         | +0.045473.8 -0.15   |
|       | 1070          | 1098                | 1098          | 10 | P   | 7  | 859.5         | +0.02 430.2 +0.17   |
|       | 1183          | 1211                | -0.11 1211    | 11 | I   | 6  | 762.4         | +0.246762.4         |
|       | 1284          | 1312                | 1312          | 12 | T   | 5  | 649.4         | 649.4               |
|       | 1383          | 1411                | 1411          | 13 | V   | 4  | 548.3         | 548.3               |
|       | 1511          | 1539                | 1539          | 14 | Q   | 3  | 449.2         | 449.2               |
|       | 1598          | 1626                | 1626          | 15 | S   | 2  | 321.2         | 321.2               |
|       | 1685          | 1713                | 1713          | 16 | S   | 1  | 234.1         | +0.148234.1         |
|       |               |                     |               | 17 | K   | 0  | 147.1         | 147.1               |

Scan number 1039 Raw file LNCAP\_Silac\_23F10\_set2\_05  
 Method ITMS; CID Pepti... 129.4

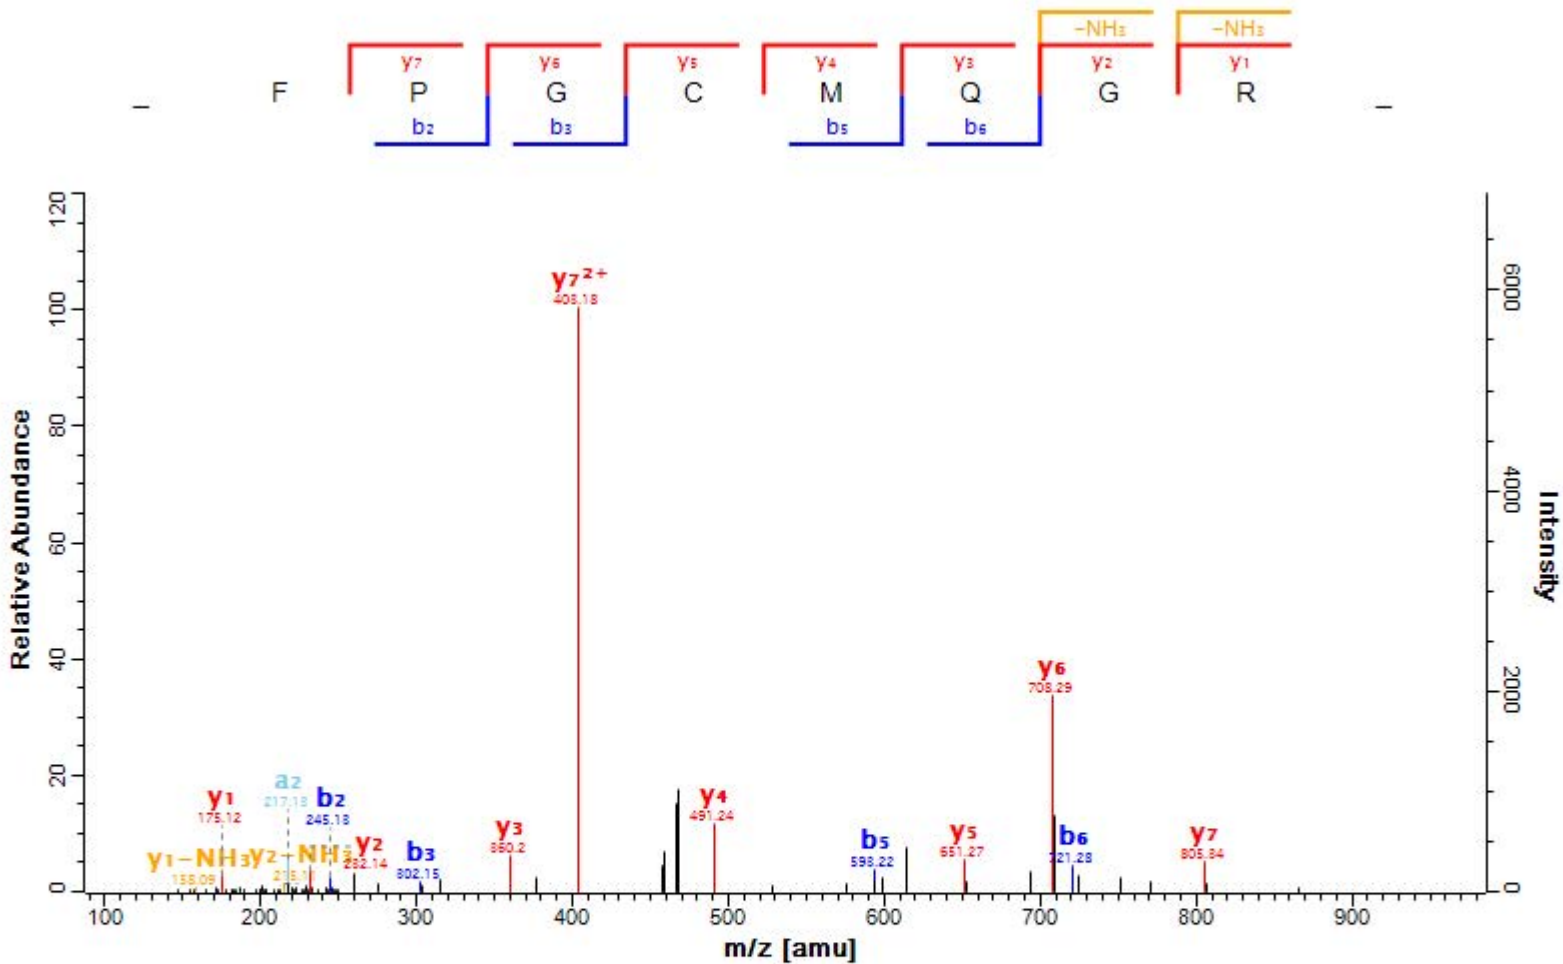

#### precursor information

|                       |                 |
|-----------------------|-----------------|
| Mass:                 | 951.40584       |
| m/z:                  | 476.7102        |
| Charge:               | 2+              |
| Retentiontime:        | 12.162103652954 |
| Score:                | 129.3973        |
| Mass Error [ppm]:     | 0.36602         |
| g PEP:                | 0.0006187       |
| Annotation:           | 7 of 8          |
| AminoAcids Coverag    | 88 %            |
| Intensity Coverage:   | 59 %            |
| Peak Coverage:        | 13 %            |
| Protein Localisation: | 148 ... 155     |

| a ion    |        | b ion    |        |   |     |          | y ion  |          | y <sup>2+</sup> ion |  |
|----------|--------|----------|--------|---|-----|----------|--------|----------|---------------------|--|
| Δ dalton | mass   | Δ dalton | mass   |   | seq | Δ dalton | mass   | Δ dalton | mass                |  |
|          | 120.08 | 148.08   |        | 1 | F   | 7        |        |          |                     |  |
| -0.11    | 217.13 | +0.1019  | 245.13 | 2 | P   | 6        | 805.34 | +0.0143  | 403.18              |  |
|          | 274.16 | -0.027   | 302.15 | 3 | G   | 5        | 708.29 | -0.018   | 708.29              |  |
|          | 434.19 |          | 462.18 | 4 | C   | 4        | 651.27 | +0.0995  | 651.27              |  |
|          | 565.23 | +0.1267  | 593.22 | 5 | M   | 3        | 491.24 | +0.0816  | 491.24              |  |
|          | 693.28 | +0.0485  | 721.28 | 6 | Q   | 2        | 360.2  | +0.059   | 360.2               |  |
|          | 750.31 |          | 778.3  | 7 | G   | 1        | 232.14 | +0.06    | 232.14              |  |
|          |        |          |        | 8 | R   | 0        | 175.12 | -0.08    | 175.12              |  |





Scan number 1327 Raw file LNCAP\_Silac\_23F10\_set2\_05  
 Method ITMS; CID Pepti... 115.33

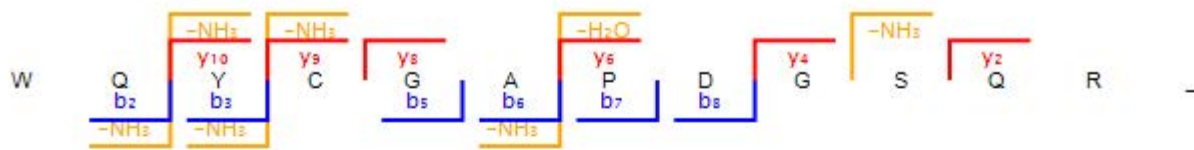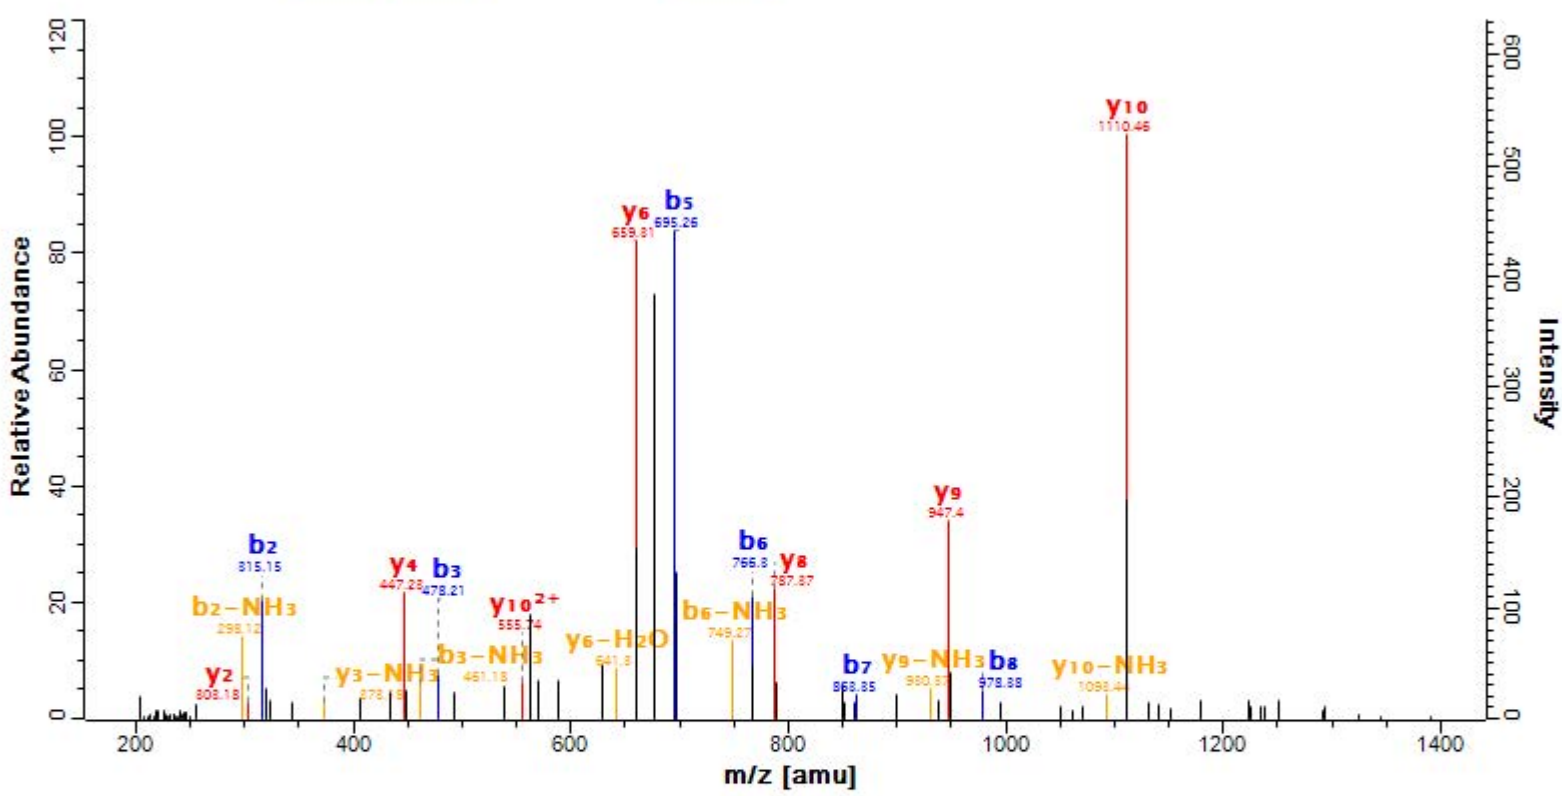

**precursor information**

|                   |                 |
|-------------------|-----------------|
| Mass:             | 1423.59434      |
| m/z:              | 712.80444       |
| Charge:           | 2+              |
| Retentiontime:    | 13.981951713562 |
| Score:            | 115.3266        |
| Mass Error [ppm]: | 0.30775         |
| PEP:              | 3.3388E-05      |
| Precursor Type:   | MULTI           |

**general information**

|                       |           |
|-----------------------|-----------|
| Annotation:           | 10 of 12  |
| AminoAcids Coverage:  | 83 %      |
| Intensity Coverage:   | 56 %      |
| Peak Coverage:        | 23 %      |
| Protein Localisation: | 11 ... 22 |

| b ion     |          |    |     |    | y ion    |           | y <sup>2+</sup> ion |           |
|-----------|----------|----|-----|----|----------|-----------|---------------------|-----------|
| Δ dalton  | mass     |    | seq |    | Δ dalton | mass      | Δ dalton            | mass      |
|           | 187.0866 | 1  | W   | 11 |          |           |                     |           |
| +0.058141 | 315.1452 | 2  | Q   | 10 | 1238.522 |           | 1238.522            |           |
| +0.09192  | 478.2085 | 3  | Y   | 9  | 1110.463 | -0.01821  | 555.7353            | +0.059825 |
|           | 638.2391 | 4  | C   | 8  | 947.4    | -0.00103  | 947.4               |           |
| +0.248548 | 695.2606 | 5  | G   | 7  | 787.3693 | +0.012713 | 787.3693            |           |
| -0.00848  | 766.2977 | 6  | A   | 6  | 730.3478 |           | 730.3478            |           |
| -0.17977  | 863.3505 | 7  | P   | 5  | 659.3107 | +0.025514 | 659.3107            |           |
| -0.22808  | 978.3774 | 8  | D   | 4  | 562.258  |           | 562.258             |           |
|           | 1035.399 | 9  | G   | 3  | 447.231  | +0.151424 | 447.231             |           |
|           | 1122.431 | 10 | S   | 2  | 390.2096 |           | 390.2096            |           |
|           | 1250.489 | 11 | Q   | 1  | 303.1775 | +0.105185 | 303.1775            |           |
|           |          | 12 | R   | 0  | 175.119  |           | 175.119             |           |

Scan number 1487 Raw file LNCAP\_Silac\_23F10\_set2\_05  
 Method ITMS: CID Pepti... 180.19

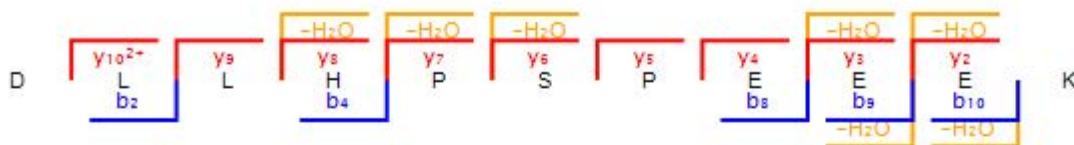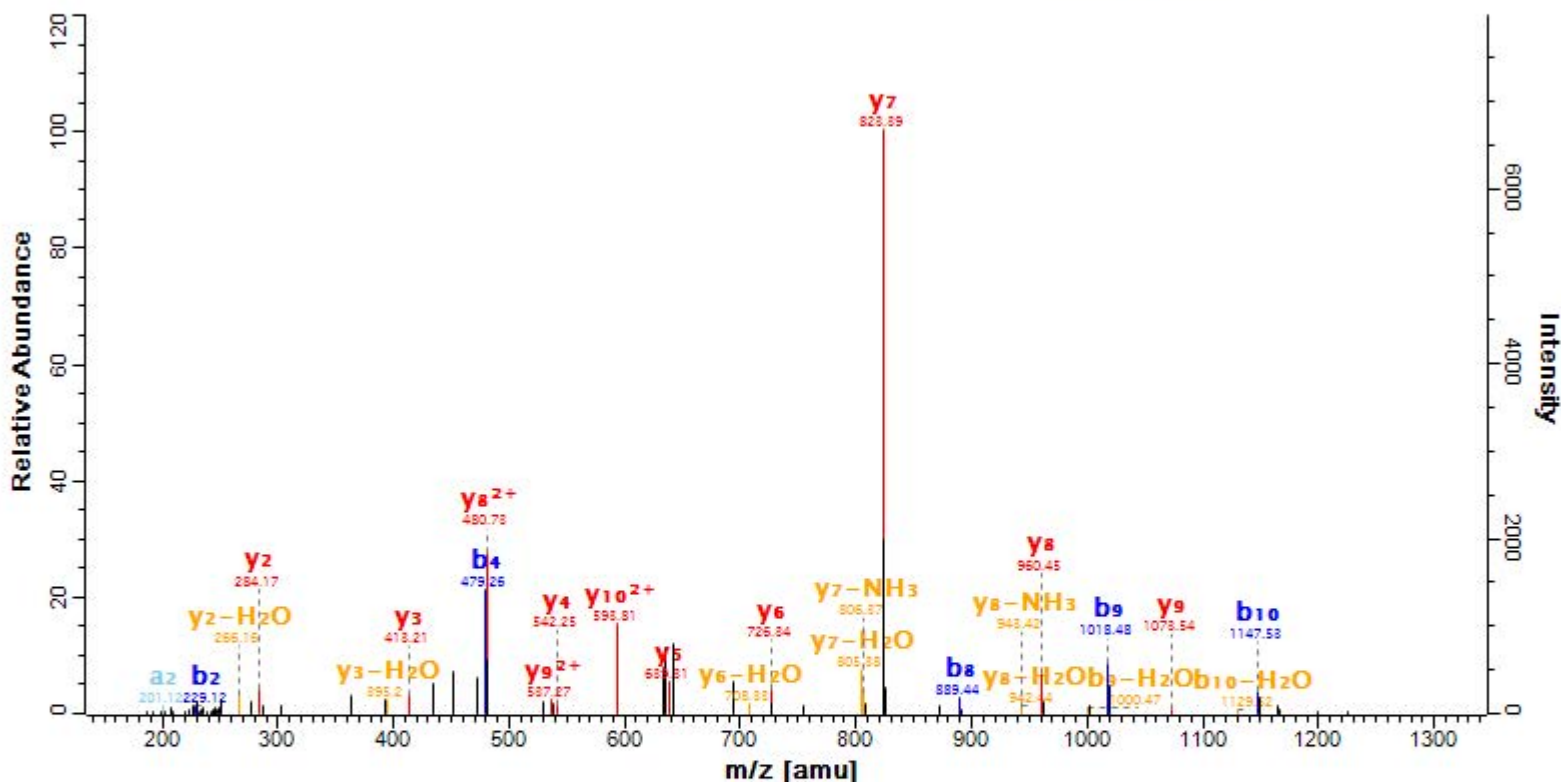

#### precursor information

|                   |                 |
|-------------------|-----------------|
| Mass:             | 1292.62489      |
| m/z:              | 647.31972       |
| Charge:           | 2+              |
| Retentiontime:    | 14.982003211975 |
| Score:            | 180.1916        |
| Mass Error [ppm]: | 0.036428        |
| PEP:              | 1.744E-08       |
| Precursor Type:   | MULTI           |

#### general information

|                       |          |
|-----------------------|----------|
| Annotation:           | 9 of 11  |
| AminoAcids Coverage:  | 82 %     |
| Intensity Coverage:   | 59 %     |
| Peak Coverage:        | 28 %     |
| Protein Localisation: | 6 ... 16 |

| a ion    |        | b ion    |        |    |     |          | y ion  |          | y <sup>2+</sup> ion |  |
|----------|--------|----------|--------|----|-----|----------|--------|----------|---------------------|--|
| Δ dalton | mass   | Δ dalton | mass   |    | seq | Δ dalton | mass   | Δ dalton | mass                |  |
|          | 88.039 |          | 116.03 | 1  | D   | 10       |        |          |                     |  |
| -0.048   | 201.12 | +0.0095  | 229.12 | 2  | L   | 9        | 1186.6 |          | 593.81              |  |
|          | 314.21 |          | 342.2  | 3  | L   | 8        | 1073.5 | +0.1223  | 537.27              |  |
|          | 451.27 | +0.0229  | 479.26 | 4  | H   | 7        | 960.45 | -0.025   | 480.73              |  |
|          | 548.32 |          | 576.31 | 5  | P   | 6        | 823.39 | -0.002   | 823.39              |  |
|          | 635.35 |          | 663.35 | 6  | S   | 5        | 726.34 | -0.037   | 726.34              |  |
|          | 732.4  |          | 760.4  | 7  | P   | 4        | 639.31 | +0.0814  | 639.31              |  |
|          | 861.45 | +0.1522  | 889.44 | 8  | E   | 3        | 542.25 | +0.2331  | 542.25              |  |
|          | 990.49 | -0.026   | 1018.5 | 9  | E   | 2        | 413.21 | -0.163   | 413.21              |  |
|          | 1119.5 | -0.065   | 1147.5 | 10 | E   | 1        | 284.17 | -0.059   | 284.17              |  |
|          |        |          |        | 11 | K   | 0        | 155.13 |          | 155.13              |  |

Scan number 1614 Raw file LNCAP\_Silac\_23F10\_set2\_05  
 Method ITMS: CID Pepti... 54.76

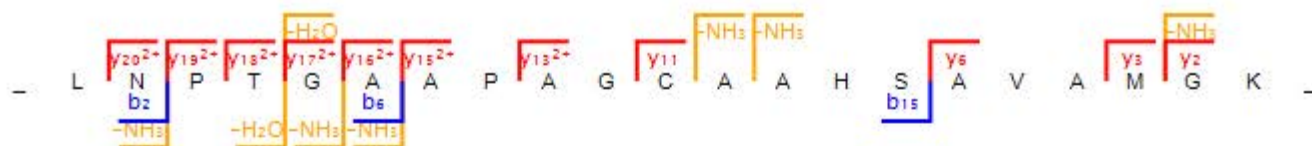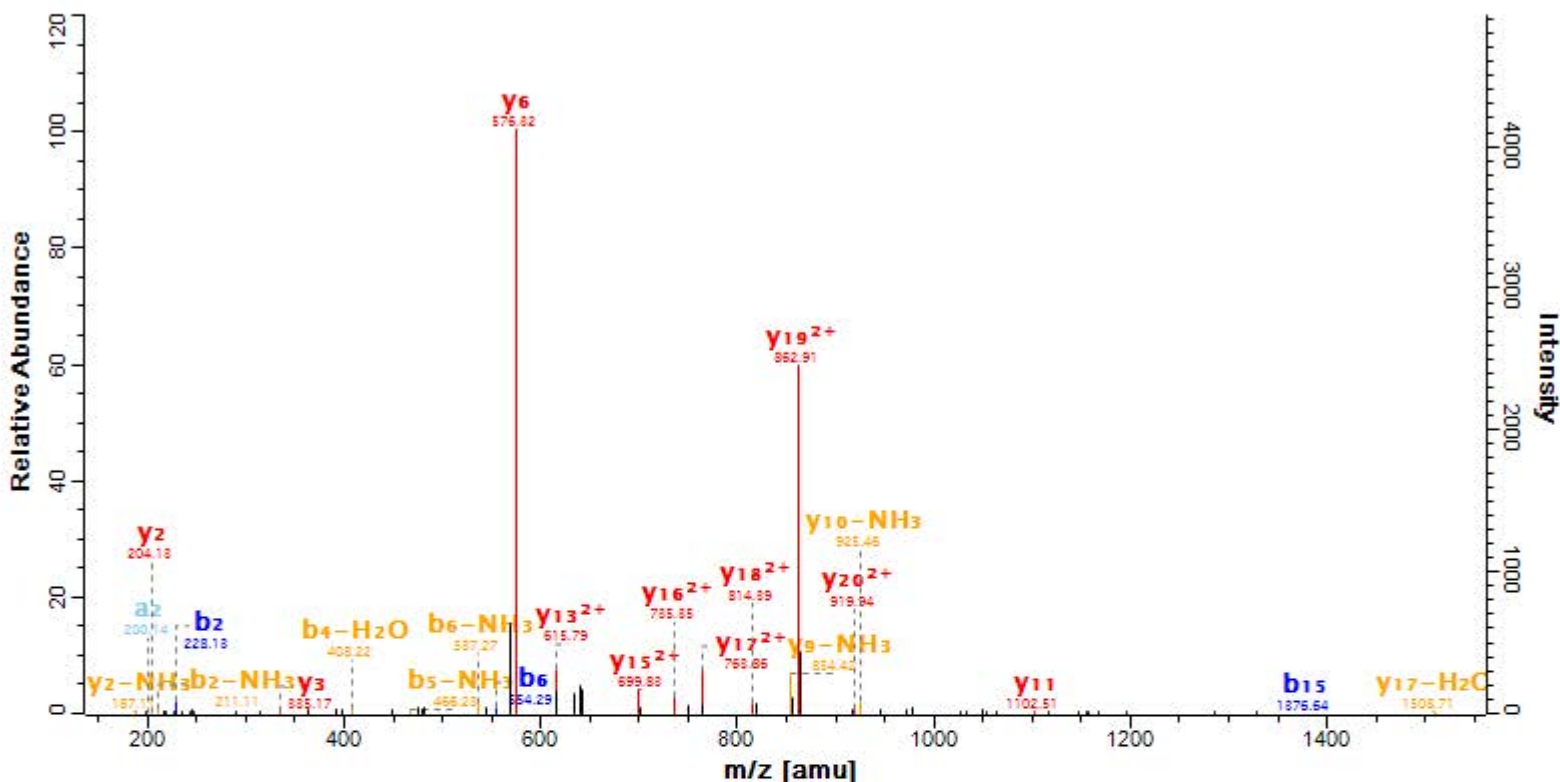

precursor information

|                   |                 |
|-------------------|-----------------|
| Mass:             | 1950.94016      |
| m/z:              | 651.32066       |
| Charge:           | 3+              |
| Retentiontime:    | 15.730754852294 |
| Score:            | 54.76434        |
| Mass Error [ppm]: | -0.12461        |
| PEP:              | 0.0018969       |
| Precursor Type:   | MULTI           |

| a ion    |        | b ion    |        |    |     |    | y ion    |         | y <sup>2+</sup> ion |         |
|----------|--------|----------|--------|----|-----|----|----------|---------|---------------------|---------|
| Δ dalton | mass   | Δ dalton | mass   |    | seq |    | Δ dalton | mass    | Δ dalton            | mass    |
|          | 86.096 |          | 114.09 | 1  | L   | 20 |          |         |                     |         |
| +0.2199  | 200.14 | +0.0671  | 228.13 | 2  | N   | 19 | 1838.9   |         | 919.94              | +0.3056 |
|          | 297.19 |          | 325.19 | 3  | P   | 18 | 1724.8   |         | 862.91              | +0.247  |
|          | 398.24 |          | 426.23 | 4  | T   | 17 | 1627.8   |         | 814.39              | +0.1476 |
|          | 455.26 |          | 483.26 | 5  | G   | 16 | 1526.7   |         | 763.86              | +0.235  |
|          | 526.3  | +0.3508  | 554.29 | 6  | A   | 15 | 1469.7   |         | 735.35              | +0.2088 |
|          | 597.34 |          | 625.33 | 7  | A   | 14 | 1398.7   |         | 699.83              | +0.1495 |
|          | 694.39 |          | 722.38 | 8  | P   | 13 | 1327.6   |         | 1327.6              |         |
|          | 765.43 |          | 793.42 | 9  | A   | 12 | 1230.6   |         | 615.79              | -0.336  |
|          | 822.45 |          | 850.44 | 10 | G   | 11 | 1159.5   |         | 1159.5              |         |
|          | 982.48 |          | 1010.5 | 11 | C   | 10 | 1102.5   | +0.0792 | 1102.5              |         |
|          | 1053.5 |          | 1081.5 | 12 | A   | 9  | 942.48   |         | 942.48              |         |
|          | 1124.6 |          | 1152.5 | 13 | A   | 8  | 871.45   |         | 871.45              |         |
|          | 1261.6 |          | 1289.6 | 14 | H   | 7  | 800.41   |         | 800.41              |         |
|          | 1348.6 | -0.143   | 1376.6 | 15 | S   | 6  | 663.35   |         | 663.35              |         |
|          | 1419.7 |          | 1447.7 | 16 | A   | 5  | 576.32   | -0.426  | 576.32              |         |
|          | 1518.7 |          | 1546.7 | 17 | V   | 4  | 505.28   |         | 505.28              |         |
|          | 1589.8 |          | 1617.8 | 18 | A   | 3  | 406.21   |         | 406.21              |         |
|          | 1720.8 |          | 1748.8 | 19 | M   | 2  | 335.17   | +0.4287 | 335.17              |         |
|          | 1777.8 |          | 1805.8 | 20 | G   | 1  | 204.13   | -0.016  | 204.13              |         |
|          |        |          |        | 21 | K   | 0  | 147.11   |         | 147.11              |         |

general information

|                       |             |
|-----------------------|-------------|
| Annotation:           | 14 of 21    |
| AminoAcids Coverage:  | 67 %        |
| Intensity Coverage:   | 74 %        |
| Peak Coverage:        | 23 %        |
| Protein Localisation: | 233 ... 253 |

Scan number 1655 Raw file LNCAP\_Silac\_23F10\_set2\_05  
 Method ITMS; CID Pepti... 157.58

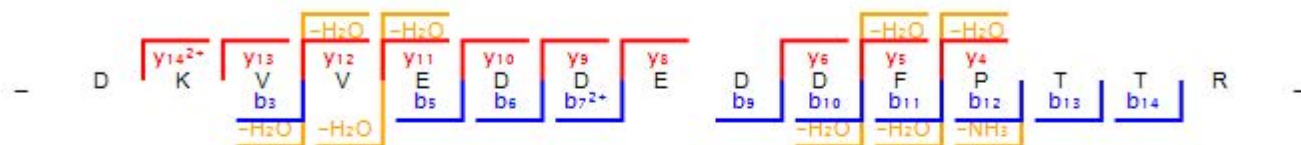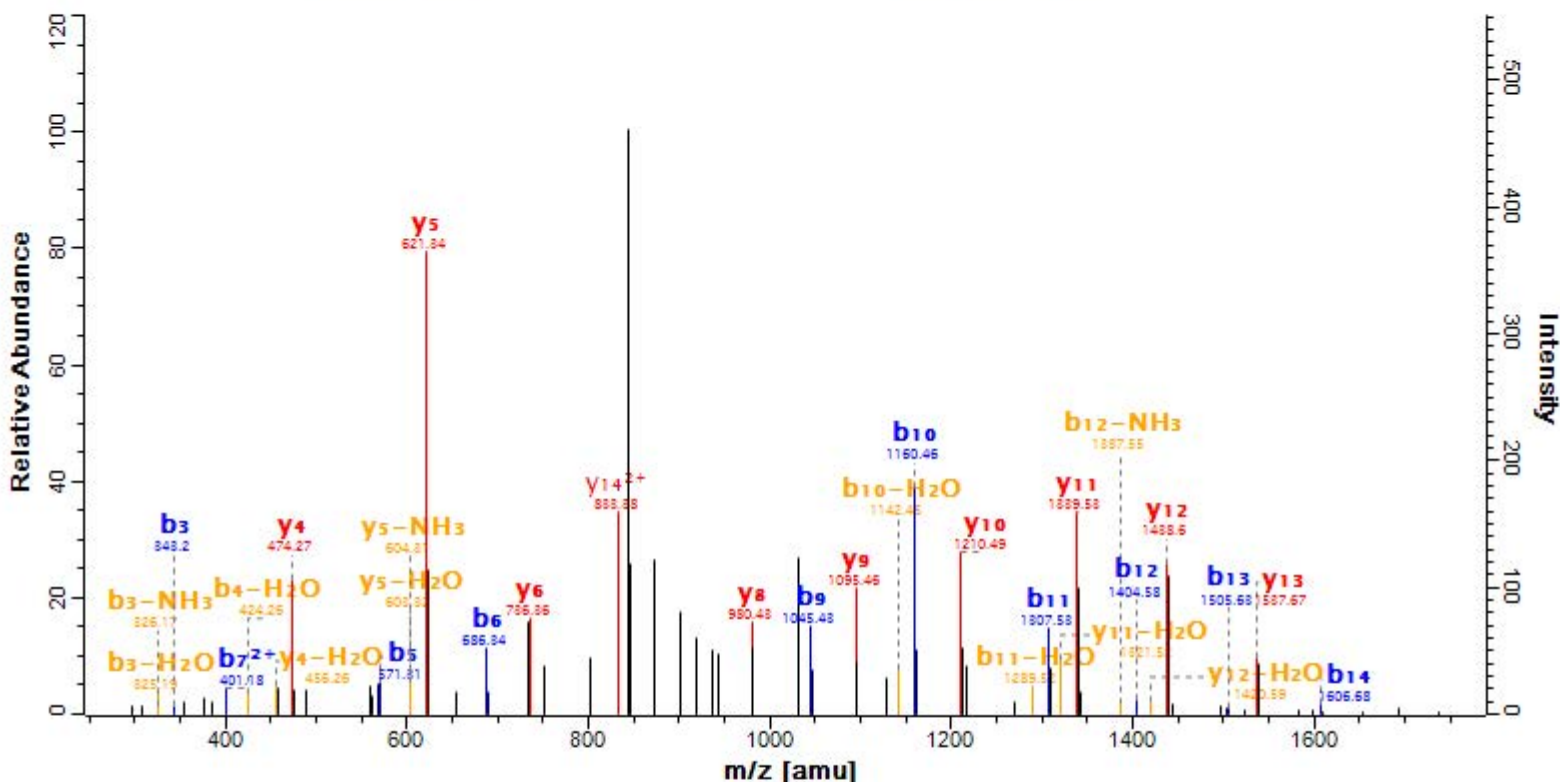

#### precursor information

|                   |                 |
|-------------------|-----------------|
| Mass:             | 1779.78282      |
| m/z:              | 890.89869       |
| Charge:           | 2+              |
| Retentiontime:    | 15.993234634399 |
| Score:            | 157.5766        |
| Mass Error [ppm]: | 1.6389          |
| PEP:              | 2.016E-09       |
| Precursor Type:   | ISO             |

#### general information

|                       |             |
|-----------------------|-------------|
| Annotation:           | 13 of 15    |
| AminoAcids Coverage:  | 87 %        |
| Intensity Coverage:   | 46 %        |
| Peak Coverage:        | 37 %        |
| Protein Localisation: | 325 ... 339 |

| b <sup>2+</sup> ion |        | b ion    |        | seq |   |    | y ion    |         | y <sup>2+</sup> ion |         |
|---------------------|--------|----------|--------|-----|---|----|----------|---------|---------------------|---------|
| Δ dalton            | mass   | Δ dalton | mass   |     |   |    | Δ dalton | mass    | Δ dalton            | mass    |
|                     | 116.03 |          | 116.03 | 1   | D | 14 |          |         |                     |         |
|                     | 244.13 |          | 244.13 | 2   | K | 13 | 1665.8   |         | 833.38              | +0.2871 |
|                     | 343.2  | -0.049   | 343.2  | 3   | V | 12 | 1537.7   | -0.098  | 1537.7              |         |
|                     | 442.27 |          | 442.27 | 4   | V | 11 | 1438.6   | -0.026  | 1438.6              |         |
|                     | 571.31 | +0.0531  | 571.31 | 5   | E | 10 | 1339.5   | -0.1    | 1339.5              |         |
|                     | 686.34 | +0.0756  | 686.34 | 6   | D | 9  | 1210.5   | -0.068  | 1210.5              |         |
| -0.003              | 401.18 |          | 801.36 | 7   | D | 8  | 1095.5   | -0.004  | 1095.5              |         |
|                     | 930.41 |          | 930.41 | 8   | E | 7  | 980.43   | -0.047  | 980.43              |         |
|                     | 1045.4 | -0.059   | 1045.4 | 9   | D | 6  | 851.39   |         | 851.39              |         |
|                     | 1160.5 | -0.051   | 1160.5 | 10  | D | 5  | 736.36   | +0.0453 | 736.36              |         |
|                     | 1307.5 | -0.043   | 1307.5 | 11  | F | 4  | 621.34   | +0.0301 | 621.34              |         |
|                     | 1404.6 | +0.0065  | 1404.6 | 12  | P | 3  | 474.27   | +0.1481 | 474.27              |         |
|                     | 1505.6 | +0.2009  | 1505.6 | 13  | T | 2  | 377.21   |         | 377.21              |         |
|                     | 1606.7 | -0.038   | 1606.7 | 14  | T | 1  | 276.17   |         | 276.17              |         |
|                     |        |          |        | 15  | R | 0  | 175.12   |         | 175.12              |         |

Scan number 1750 Raw file LNCAP\_Silac\_23F10\_set2\_05  
 Method ITMS; CID Pepti... 281.26

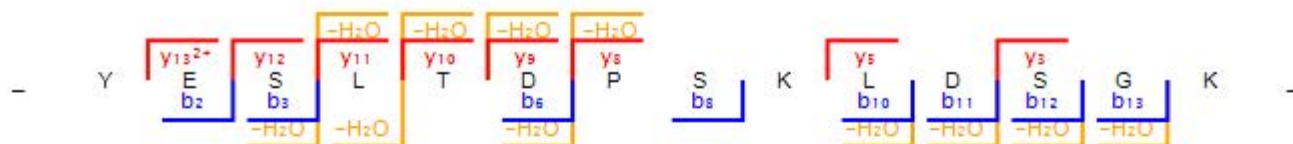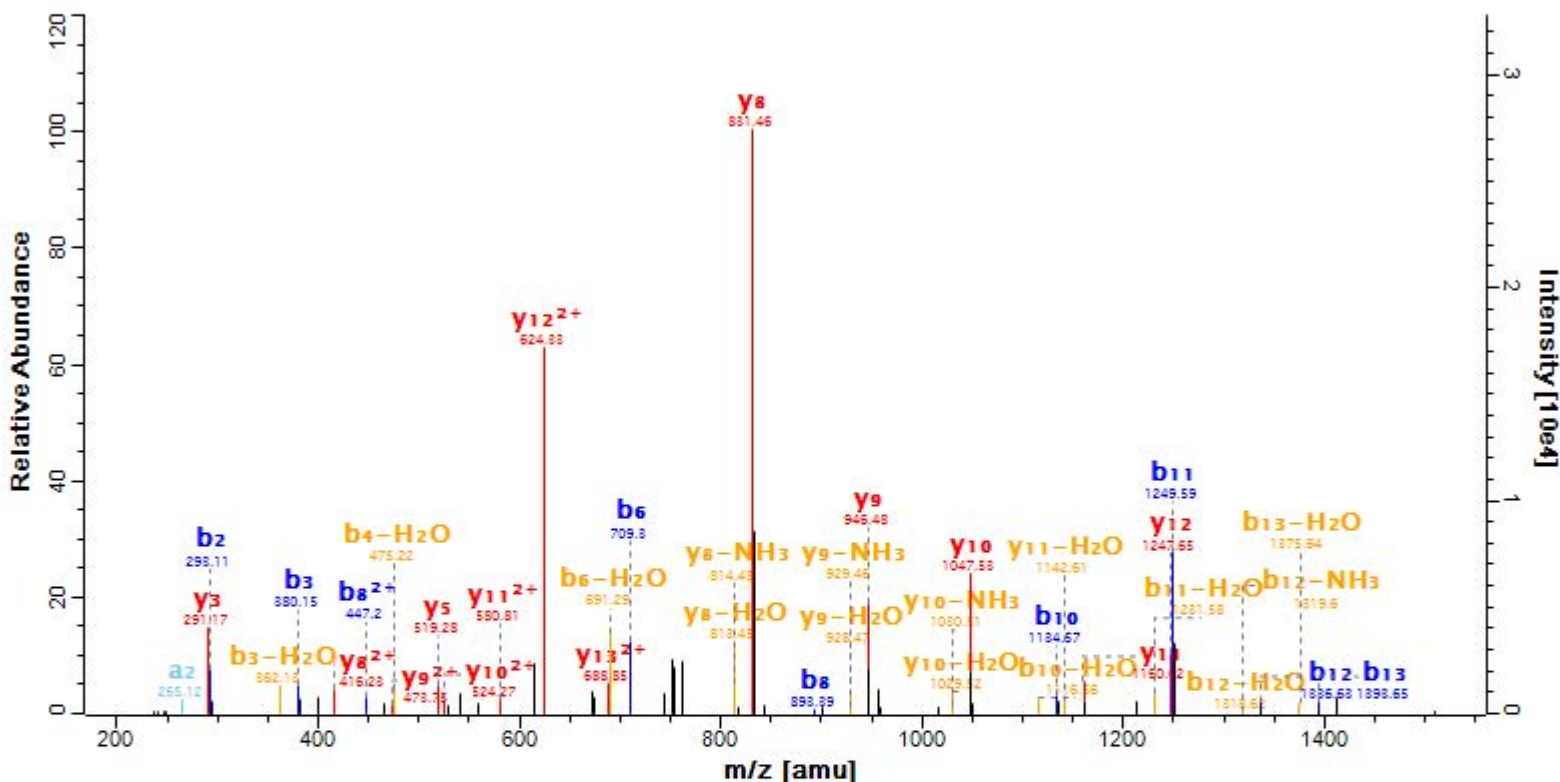

precursor information

|                   |                 |
|-------------------|-----------------|
| Mass:             | 1538.74645      |
| m/z:              | 770.3805        |
| Charge:           | 2+              |
| Retentiontime:    | 16.558956146240 |
| Score:            | 281.2599        |
| Mass Error [ppm]: | 0.021031        |
| PEP:              | 1.3393E-73      |
| Precursor Type:   | MULTI           |

general information

|                       |             |
|-----------------------|-------------|
| Annotation:           | 11 of 14    |
| AminoAcids Coverage:  | 79 %        |
| Intensity Coverage:   | 71 %        |
| Peak Coverage:        | 47 %        |
| Protein Localisation: | 183 ... 196 |

| a ion         |               | b <sup>2+</sup> ion |               | b ion |               | y ion         |               | y <sup>2+</sup> ion |        |
|---------------|---------------|---------------------|---------------|-------|---------------|---------------|---------------|---------------------|--------|
| Δ dalton mass | Δ dalton mass | Δ dalton mass       | Δ dalton mass | seq   | Δ dalton mass | Δ dalton mass | Δ dalton mass | Δ dalton mass       |        |
| 136.1         | 164.1         | 164.1               | 1             | Y     | 13            |               |               |                     |        |
| +0.007265.1   | 293.1         | +0.038293.1         | 2             | E     | 12            | 1377          | 688.8         | +0.20               |        |
| 352.2         | 380.1         | -0.03380.1          | 3             | S     | 11            | 1248          | +0.053624.3   | +0.184              |        |
| 465.2         | 493.2         | 493.2               | 4             | L     | 10            | 1161          | +0.039580.8   | -0.07               |        |
| 566.3         | 594.3         | 594.3               | 5             | T     | 9             | 1048          | +0            | 524.3               | +0.366 |
| 681.3         | 709.3         | +0.047709.3         | 6             | D     | 8             | 946.5         | -0.06         | 473.7               | -0.14  |
| 778.4         | 806.4         | 806.4               | 7             | P     | 7             | 831.5         | -0.01         | 416.2               | +0.493 |
| 865.4         | -0.01447.2    | +0.492893.4         | 8             | S     | 6             | 734.4         |               | 734.4               |        |
| 993.5         | 1021          | 1021                | 9             | K     | 5             | 647.4         |               | 647.4               |        |
| 1107          | 1135          | +0.0621135          | 10            | L     | 4             | 519.3         | +0.097519.3   |                     |        |
| 1222          | 1250          | +0.011250           | 11            | D     | 3             | 406.2         |               | 406.2               |        |
| 1309          | 1337          | -0.021337           | 12            | S     | 2             | 291.2         | -0.02         | 291.2               |        |
| 1366          | 1394          | +0.0291394          | 13            | G     | 1             | 204.1         |               | 204.1               |        |
|               |               |                     | 14            | K     | 0             | 147.1         |               | 147.1               |        |

Scan number 1821 Raw file LNCAP\_Silac\_23F10\_set2\_05  
 Method ITMS: CID Pepti... 48.5

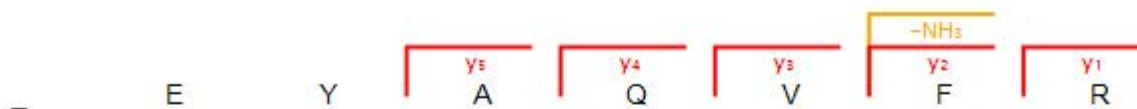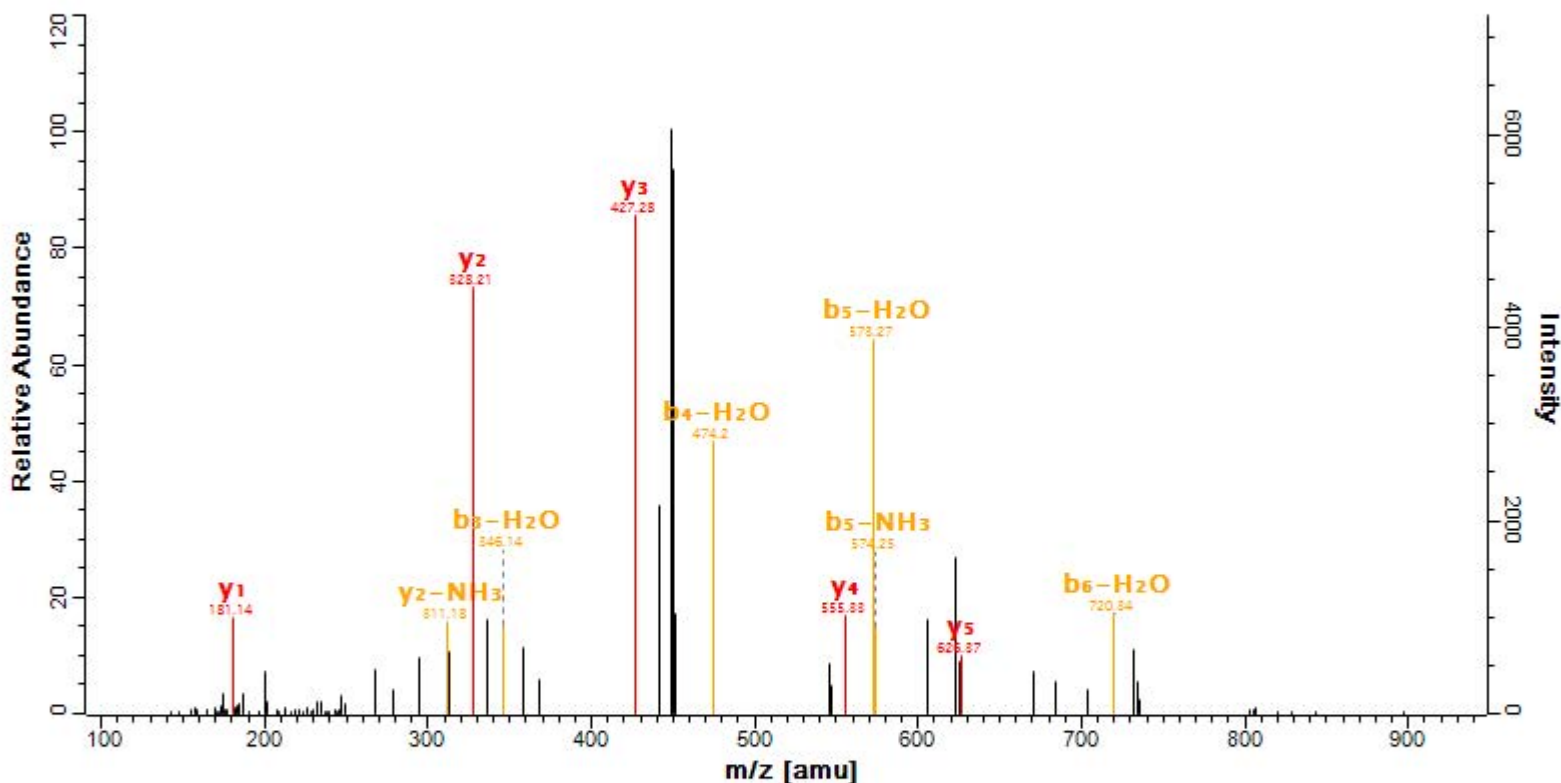

precursor information

|                      |                 |
|----------------------|-----------------|
| Mass:                | 911.45026       |
| m/z:                 | 456.7324        |
| Charge:              | 2+              |
| Retentiontime:       | 16.970092773437 |
| Score:               | 48.50368        |
| Mass Error [ppm]:    | 0.15132         |
| Annotation:          | 5 of 7          |
| AminoAcids Coverage: | 71 %            |
| Intensity Coverage:  | 45 %            |
| Peak Coverage:       | 12 %            |

| b ion    |               |   |     |   | y ion         |            |
|----------|---------------|---|-----|---|---------------|------------|
| Δ dalton | mass          |   | seq |   | Δ dalton      | mass       |
|          | 130.049869563 | 1 | E   | 6 |               |            |
|          | 293.113198101 | 2 | Y   | 5 | 789.434928878 |            |
|          | 364.150311889 | 3 | A   | 4 | 626.371600339 | +0.1132629 |
|          | 492.2088894   | 4 | Q   | 3 | 555.334486552 | +0.0140852 |
|          | 591.277303316 | 5 | V   | 2 | 427.27590904  | +0.0032047 |
|          | 738.345717233 | 6 | F   | 1 | 328.207495124 | -0.0112061 |
|          |               | 7 | R   | 0 | 181.139081208 | +0.030566  |

Scan number 1975 Raw file LNCAP\_Silac\_23F10\_set2\_05  
 Method ITMS: CID Pepti... 90.93

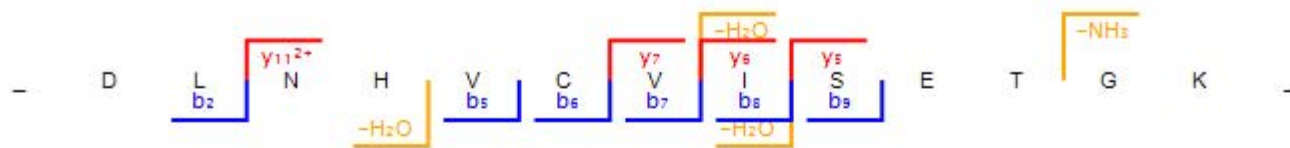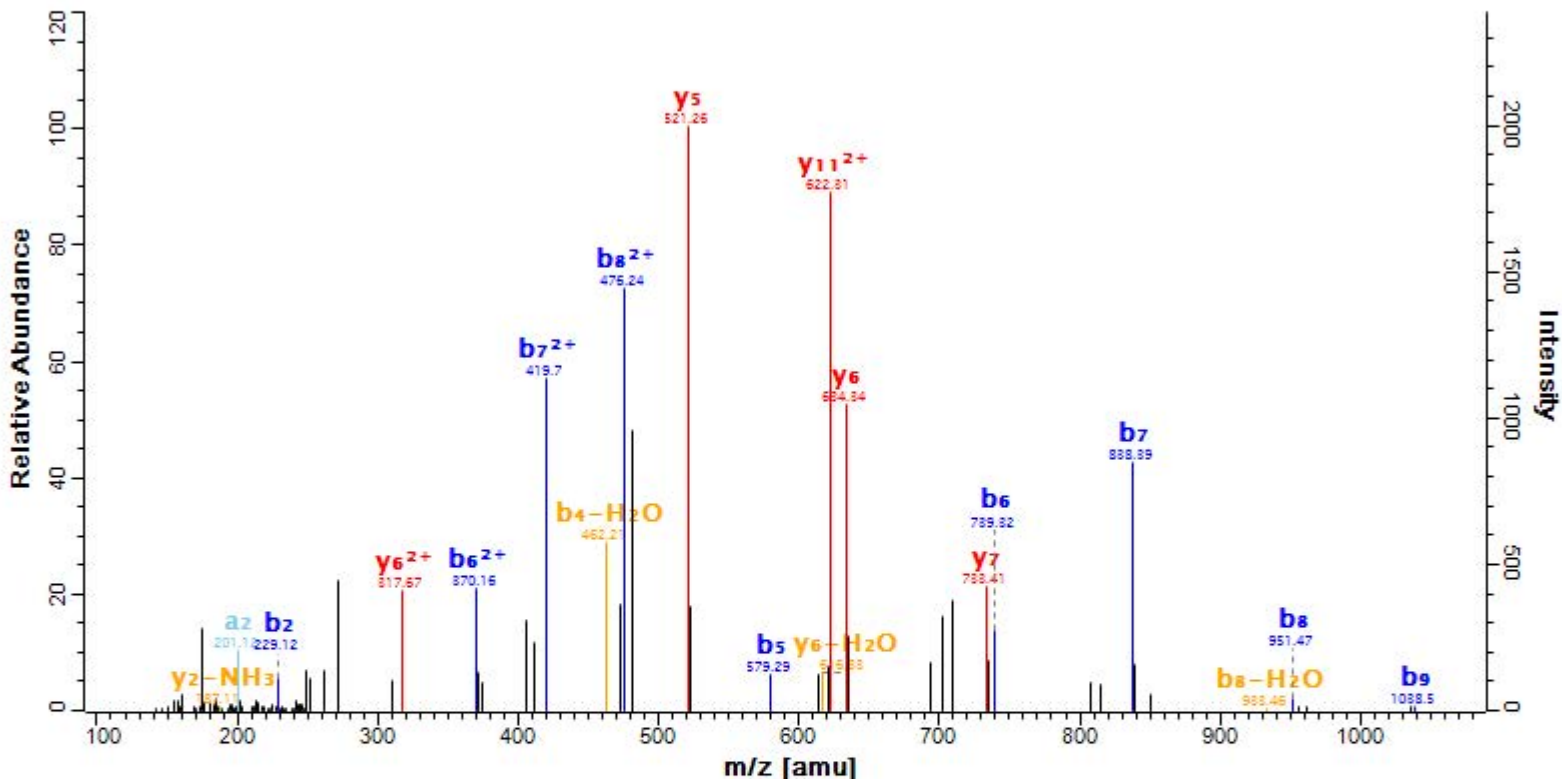

precursor information

|                   |                 |
|-------------------|-----------------|
| Mass:             | 1470.71321      |
| m/z:              | 491.24501       |
| Charge:           | 3+              |
| Retention time:   | 17.863754272460 |
| Score:            | 90.92576        |
| Mass Error [ppm]: | -0.3184         |
| PEP:              | 0.00025192      |
| Precursor Type:   | MULTI           |

general information

|                       |             |
|-----------------------|-------------|
| Annotation:           | 10 of 13    |
| AminoAcids Coverage:  | 77 %        |
| Intensity Coverage:   | 61 %        |
| Peak Coverage:        | 19 %        |
| Protein Localisation: | 201 ... 213 |

| a ion         |               | b <sup>2+</sup> ion |               | b ion       |               | y ion         |    | y <sup>2+</sup> ion |                   |
|---------------|---------------|---------------------|---------------|-------------|---------------|---------------|----|---------------------|-------------------|
| Δ dalton mass | Δ dalton mass | Δ dalton mass       | Δ dalton mass | seq         | Δ dalton mass | Δ dalton mass |    |                     |                   |
| 88.04         |               | 116                 |               | 116         | 1             | D             | 12 |                     |                   |
| +0.015201.1   |               | 229.1               |               | -0.18 229.1 | 2             | L             | 11 | 1357                | 1357              |
| 315.2         |               | 343.2               |               | 343.2       | 3             | N             | 10 | 1244                | 622.3 +0.24       |
| 452.2         |               | 480.2               |               | 480.2       | 4             | H             | 9  | 1130                | 1130              |
| 551.3         |               | 579.3               |               | +0.145579.3 | 5             | V             | 8  | 992.5               | 992.5             |
| 711.3         | -0.1          | 370.2               |               | +0.158739.3 | 6             | C             | 7  | 893.4               | 893.4             |
| 810.4         | +0.036419.7   | -0.02 838.4         |               | 838.4       | 7             | V             | 6  | 733.4               | +0.088733.4       |
| 923.5         | +0.085476.2   | -0.01 951.5         |               | 951.5       | 8             | I             | 5  | 634.3               | +0.014317.7 +0.13 |
| 1011          |               | 1039                |               | +0.1321039  | 9             | S             | 4  | 521.3               | -0.03 521.3       |
| 1140          |               | 1168                |               | 1168        | 10            | E             | 3  | 434.2               | 434.2             |
| 1241          |               | 1269                |               | 1269        | 11            | T             | 2  | 305.2               | 305.2             |
| 1298          |               | 1326                |               | 1326        | 12            | G             | 1  | 204.1               | 204.1             |
|               |               |                     |               |             | 13            | K             | 0  | 147.1               | 147.1             |

Scan number 2021 Raw file LNCAP\_Silac\_23F10\_set2\_05  
 Method ITMS; CID Pepti... 206.36

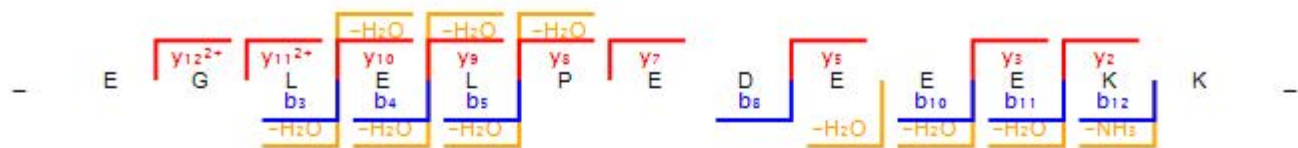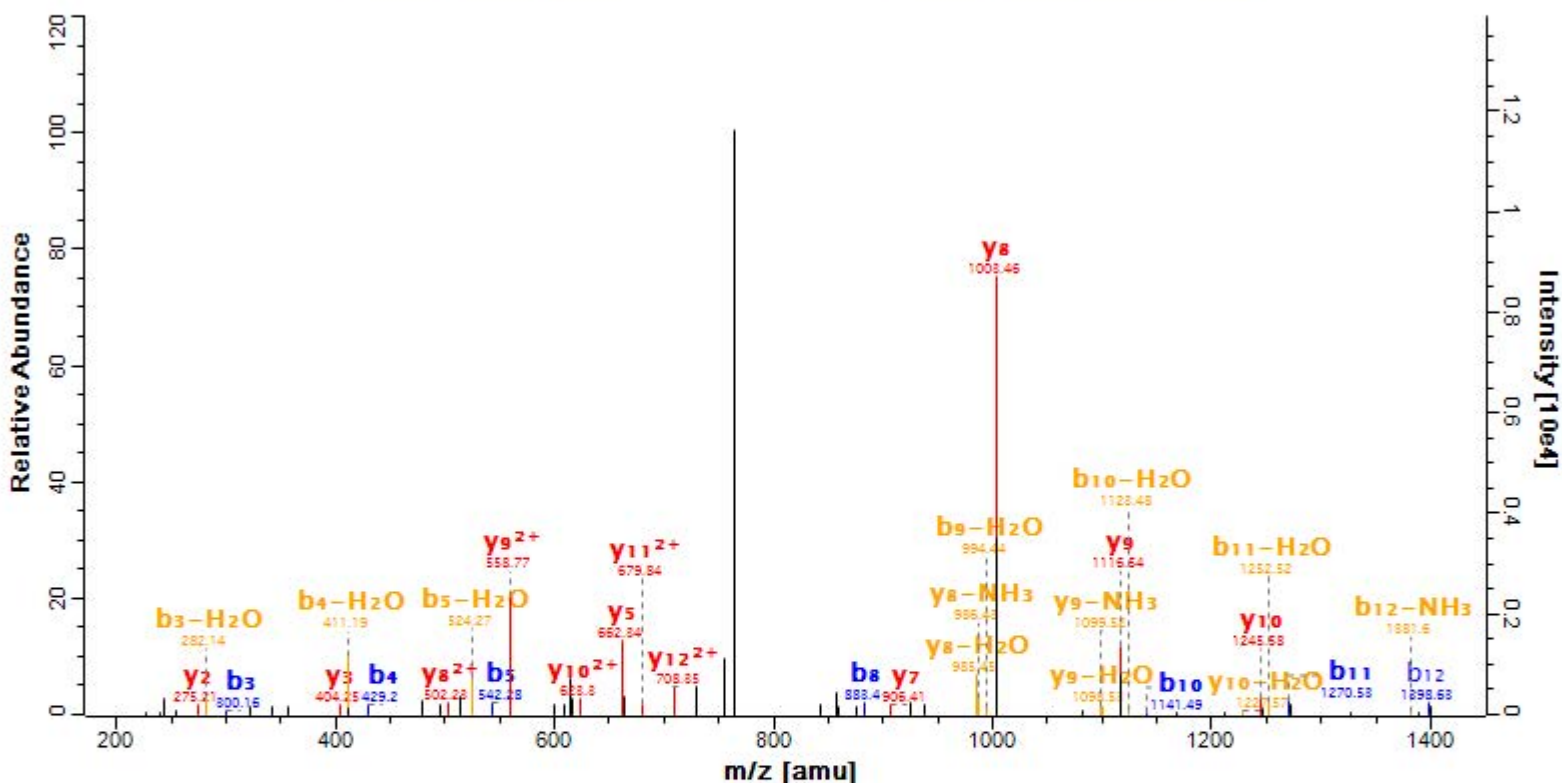

precursor information

|                   |                 |
|-------------------|-----------------|
| Mass:             | 1543.72559      |
| m/z:              | 772.87007       |
| Charge:           | 2+              |
| Retentiontime:    | 18.138372421264 |
| Score:            | 206.363         |
| Mass Error [ppm]: | 0.16            |
| PEP:              | 5.7029E-23      |
| Precursor Type:   | MULTI           |

general information

|                       |             |
|-----------------------|-------------|
| Annotation:           | 11 of 13    |
| AminoAcids Coverage:  | 85 %        |
| Intensity Coverage:   | 47 %        |
| Peak Coverage:        | 40 %        |
| Protein Localisation: | 669 ... 681 |

| b ion     |          |    |     |    | y ion    |           | y <sup>2+</sup> ion |           |
|-----------|----------|----|-----|----|----------|-----------|---------------------|-----------|
| Δ dalton  | mass     |    | seq |    | Δ dalton | mass      | Δ dalton            | mass      |
|           | 130.0499 | 1  | E   | 12 |          |           |                     |           |
|           | 187.0713 | 2  | G   | 11 | 1415.69  |           | 708.3487            | +0.157144 |
| -0.05225  | 300.1554 | 3  | L   | 10 | 1358.669 |           | 679.8379            | +0.063384 |
| +0.032967 | 429.198  | 4  | E   | 9  | 1245.585 | +0.048065 | 623.2959            | +0.138436 |
| +0.055165 | 542.2821 | 5  | L   | 8  | 1116.542 | -0.08879  | 558.7746            | +0.232731 |
|           | 639.3348 | 6  | P   | 7  | 1003.458 | +0.005227 | 502.2326            | +0.096967 |
|           | 768.3774 | 7  | E   | 6  | 906.4051 | +0.075142 | 906.4051            |           |
| -0.11505  | 883.4044 | 8  | D   | 5  | 777.3625 |           | 777.3625            |           |
|           | 1012.447 | 9  | E   | 4  | 662.3355 | -0.03123  | 662.3355            |           |
| -0.20902  | 1141.49  | 10 | E   | 3  | 533.293  |           | 533.293             |           |
| +0.009614 | 1270.532 | 11 | E   | 2  | 404.2504 | +0.073736 | 404.2504            |           |
| -0.04446  | 1398.627 | 12 | K   | 1  | 275.2078 | +0.084378 | 275.2078            |           |
|           |          | 13 | K   | 0  | 147.1128 |           | 147.1128            |           |



Scan number 2284 Raw file LNCAP\_Silac\_23F10\_set2\_05  
 Method ITMS; CID Pepti... 72.45

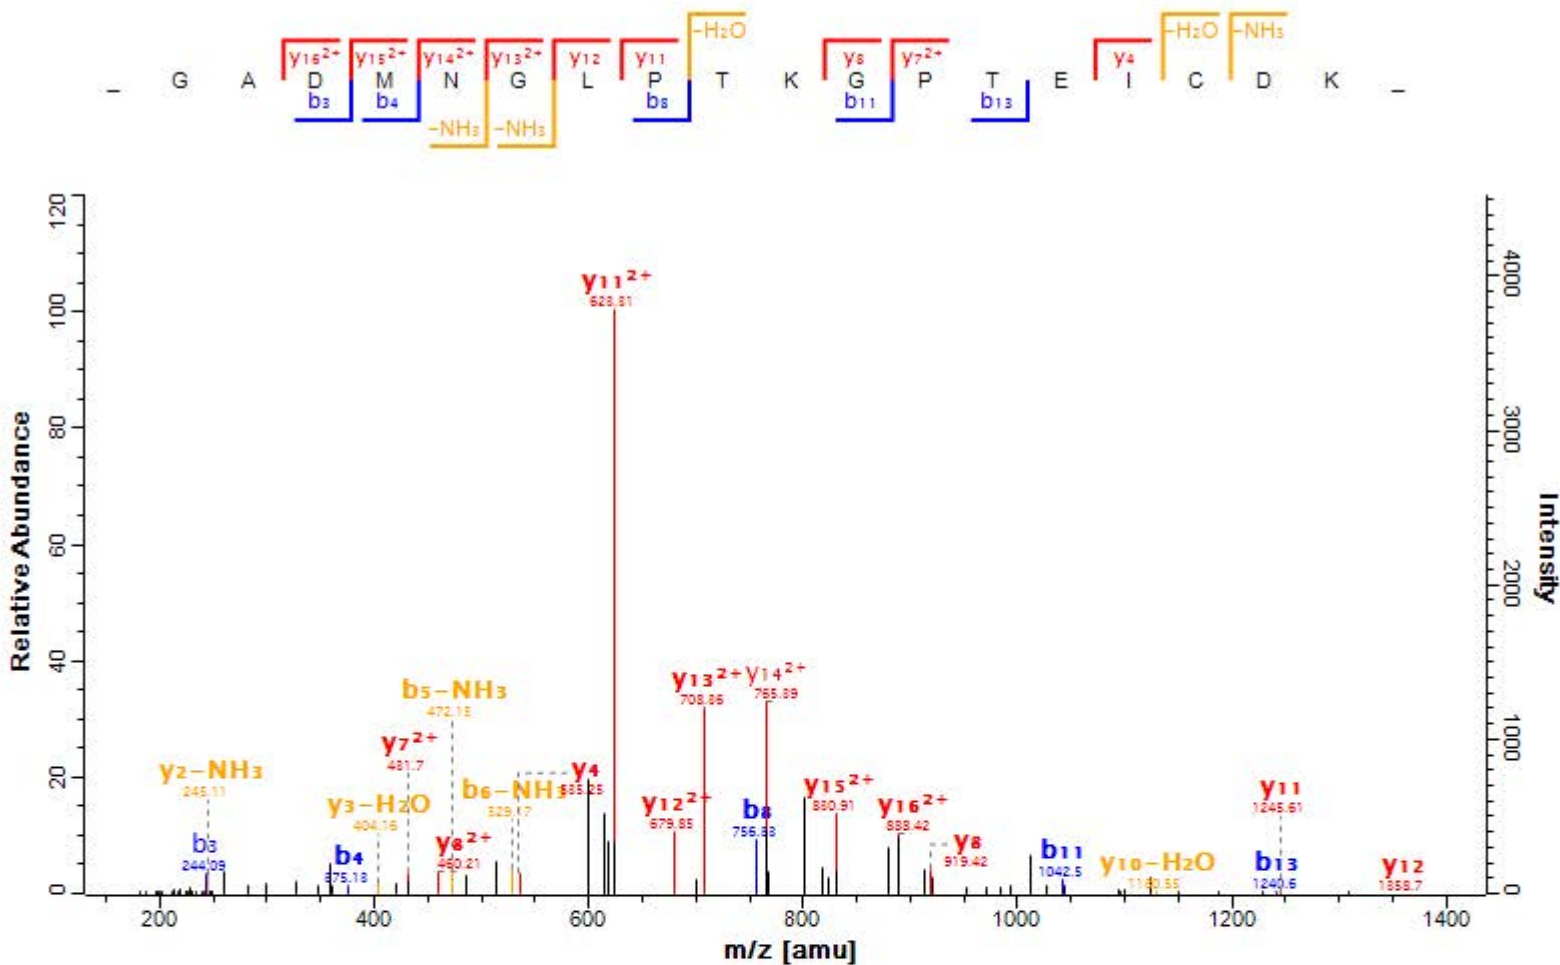

#### precursor information

|                   |                 |
|-------------------|-----------------|
| Mass:             | 1902.88164      |
| m/z:              | 635.30116       |
| Charge:           | 3+              |
| Retentiontime:    | 19.737129211425 |
| Score:            | 72.44628        |
| Mass Error [ppm]: | 0.050315        |
| PEP:              | 0.000266        |
| Precursor Type:   | MULTI           |

#### general information

|                       |           |
|-----------------------|-----------|
| Annotation:           | 13 of 18  |
| AminoAcids Coverage:  | 72 %      |
| Intensity Coverage:   | 56 %      |
| Peak Coverage:        | 22 %      |
| Protein Localisation: | 56 ... 73 |

| b ion     |          |     |   | y ion    |          | y <sup>2+</sup> ion |           |           |
|-----------|----------|-----|---|----------|----------|---------------------|-----------|-----------|
| Δ dalton  | mass     | seq |   | Δ dalton | mass     | Δ dalton            | mass      |           |
|           | 58.02874 | 1   | G | 17       |          |                     |           |           |
|           | 129.0659 | 2   | A | 16       | 1846.867 | 1846.867            |           |           |
| -0.13931  | 244.0928 | 3   | D | 15       | 1775.83  | 888.4188            | -0.01666  |           |
| +0.030048 | 375.1333 | 4   | M | 14       | 1660.803 | 830.9053            | +0.174971 |           |
|           | 489.1762 | 5   | N | 13       | 1529.763 | 765.385             | +0.100731 |           |
|           | 546.1977 | 6   | G | 12       | 1415.72  | 708.3636            | +0.229861 |           |
|           | 659.2817 | 7   | L | 11       | 1358.698 | -0.06391            | 679.8529  | +0.123771 |
| +0.420199 | 756.3345 | 8   | P | 10       | 1245.614 | -0.20994            | 623.3108  | +0.276155 |
|           | 857.3822 | 9   | T | 9        | 1148.562 |                     | 1148.562  |           |
|           | 985.4771 | 10  | K | 8        | 1047.514 |                     | 1047.514  |           |
| -0.27143  | 1042.499 | 11  | G | 7        | 919.419  | -0.04304            | 460.2131  | +0.321001 |
|           | 1139.551 | 12  | P | 6        | 862.3975 |                     | 431.7024  | +0.015205 |
| +0.481396 | 1240.599 | 13  | T | 5        | 765.3447 |                     | 765.3447  |           |
|           | 1369.642 | 14  | E | 4        | 664.2971 |                     | 664.2971  |           |
|           | 1482.726 | 15  | I | 3        | 535.2545 | +0.373409           | 535.2545  |           |
|           | 1642.756 | 16  | C | 2        | 422.1704 |                     | 422.1704  |           |
|           | 1757.783 | 17  | D | 1        | 262.1397 |                     | 262.1397  |           |
|           |          | 18  | K | 0        | 147.1128 |                     | 147.1128  |           |

Scan number 2537 Raw file LNCAP\_Silac\_23F10\_set2\_05  
 Method ITMS: CID Pepti... 108.7

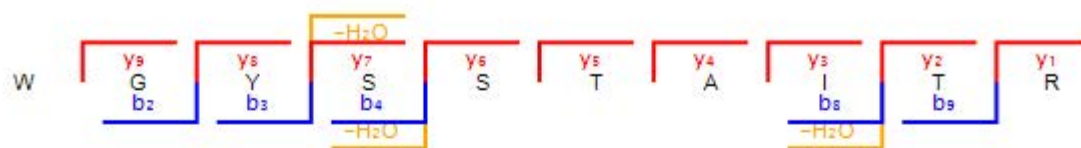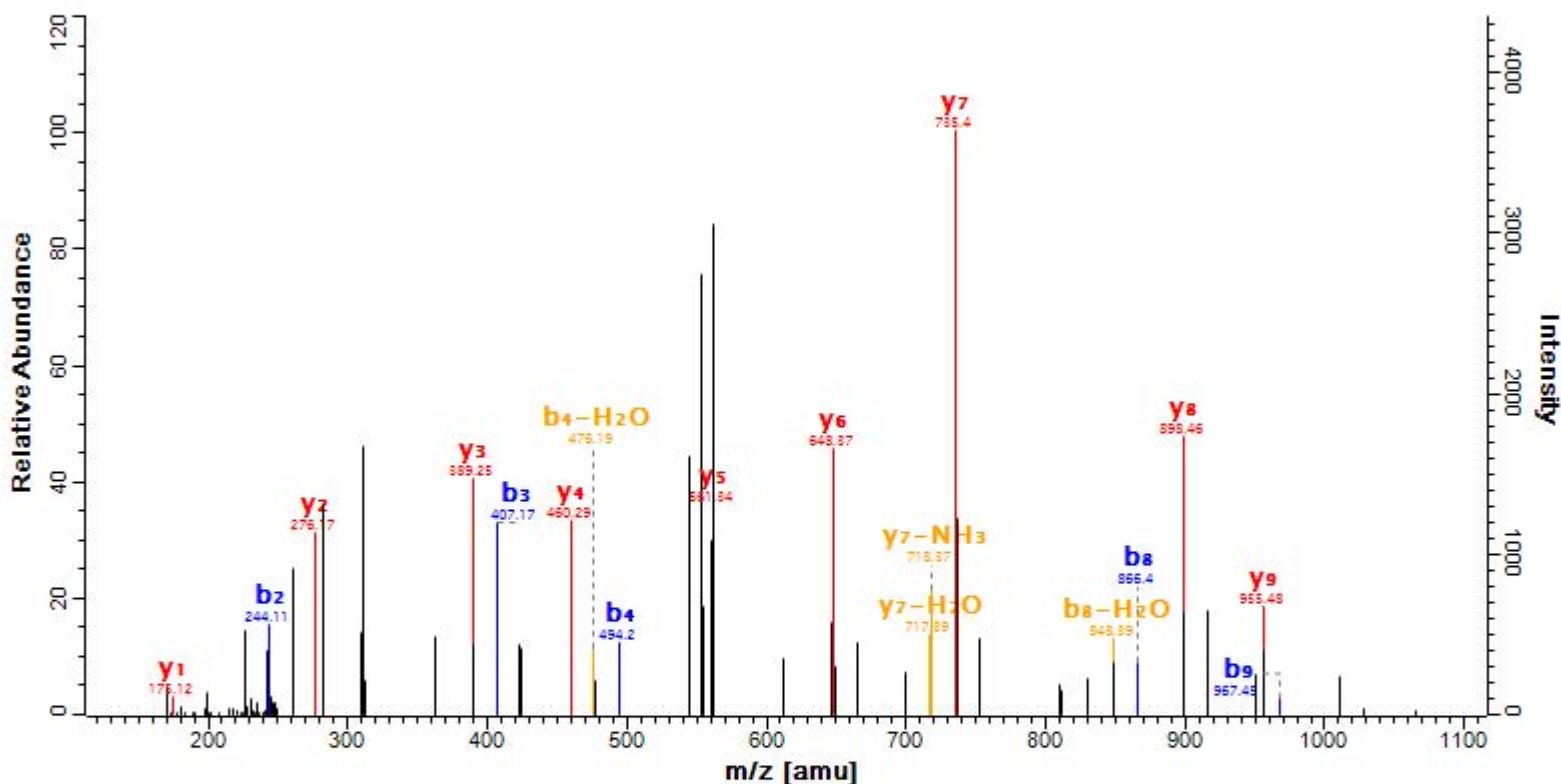

#### precursor information

|                   |                 |
|-------------------|-----------------|
| Mass:             | 1140.55643      |
| m/z:              | 571.28549       |
| Charge:           | 2+              |
| Retentiontime:    | 21.260763168335 |
| Score:            | 108.6968        |
| Mass Error [ppm]: | 0.048103        |
| PEP:              | 0.00054445      |
| Precursor Type:   | MULTI           |

|                       |             |
|-----------------------|-------------|
| Annotation:           | 9 of 10     |
| AminoAcids Coverage:  | 90 %        |
| Intensity Coverage:   | 41 %        |
| Peak Coverage:        | 19 %        |
| Protein Localisation: | 376 ... 385 |

| b ion      |               |     |   | y ion         |            |
|------------|---------------|-----|---|---------------|------------|
| Δ dalton   | mass          | seq |   | Δ dalton      | mass       |
|            | 187.08658942  | 1   | W |               |            |
| +0.0427952 | 244.108053144 | 2   | G | 955.484335979 | +0.1052636 |
| +0.0081837 | 407.171381682 | 3   | Y | 898.462872256 | -0.0065734 |
| +0.1315508 | 494.203410092 | 4   | S | 735.399543717 | +0.0336838 |
|            | 581.235438502 | 5   | S | 648.367515307 | +0.0422747 |
|            | 682.283116976 | 6   | T | 561.335486897 | +0.190331  |
|            | 753.320230764 | 7   | A | 460.287808423 | +0.0915861 |
| -0.0295999 | 866.404294744 | 8   | I | 389.250694636 | +0.0082775 |
| -0.1265948 | 967.451973218 | 9   | T | 276.166630655 | +0.0665236 |
|            |               | 10  | R | 175.118952181 | +0.1133476 |

Scan number 2567 Raw file LNCAP\_Silac\_23F10\_set2\_05  
 Method ITMS; CID Pepti... 91.86

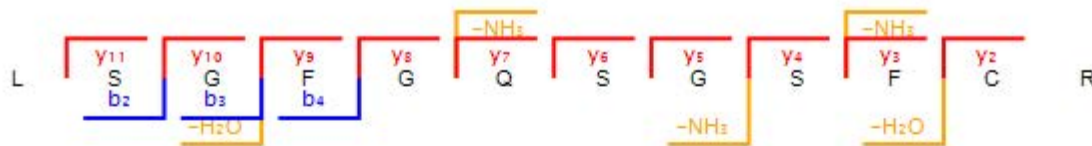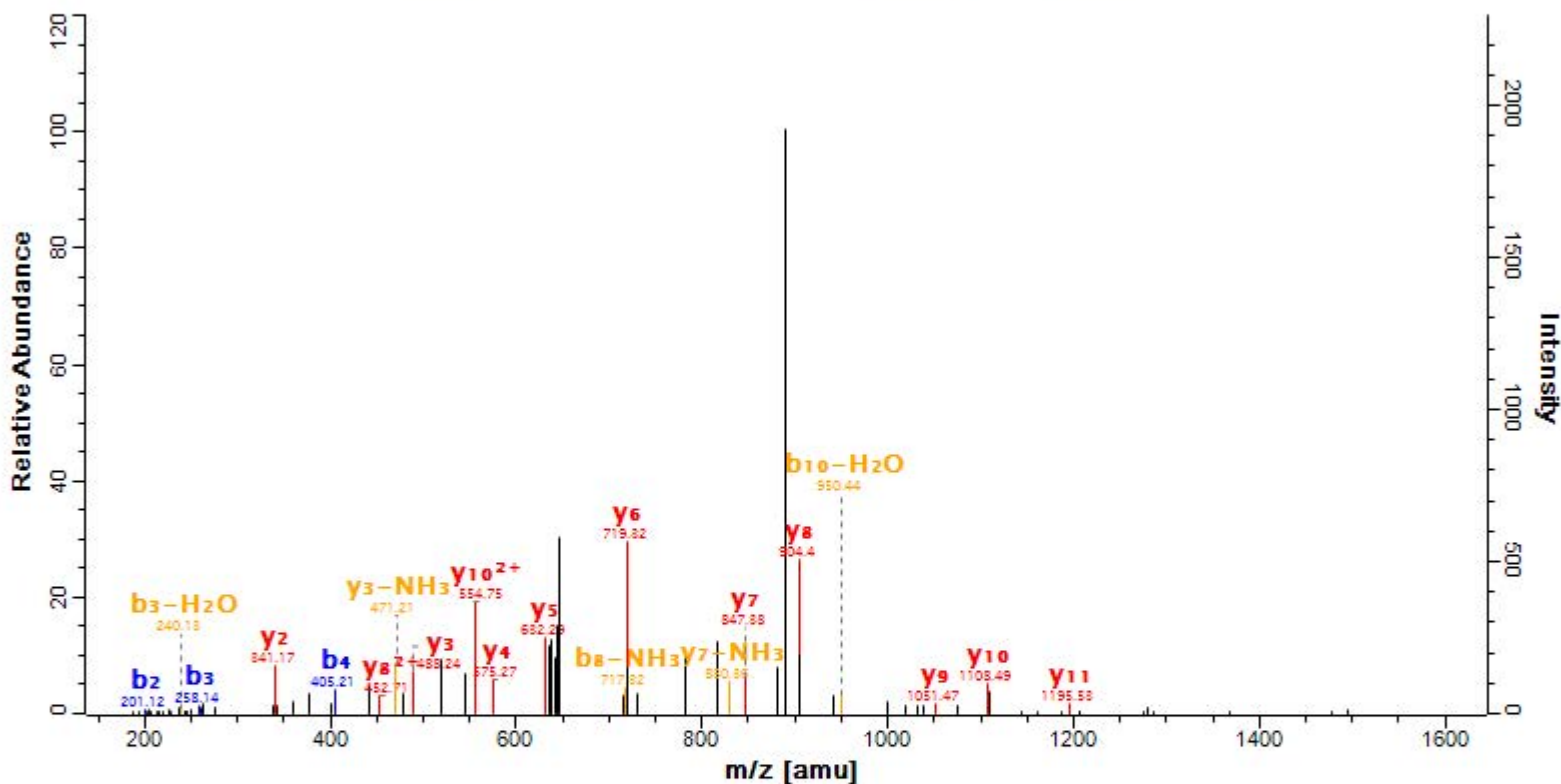

#### precursor information

|                   |                 |
|-------------------|-----------------|
| Mass:             | 1960.94905      |
| m/z:              | 654.65696       |
| Charge:           | 3+              |
| Retentiontime:    | 21.440256118774 |
| Score:            | 91.85767        |
| Mass Error [ppm]: | 0.61747         |
| PEP:              | 0.0024941       |
| Precursor Type:   | MULTI           |

#### general information

|                       |             |
|-----------------------|-------------|
| Annotation:           | 10 of 12    |
| AminoAcids Coverage:  | 83 %        |
| Intensity Coverage:   | 32 %        |
| Peak Coverage:        | 21 %        |
| Protein Localisation: | 107 ... 118 |

| b ion     |          |    |     |    | y ion    |           | y <sup>2+</sup> ion |           |
|-----------|----------|----|-----|----|----------|-----------|---------------------|-----------|
| Δ dalton  | mass     |    | seq |    | Δ dalton | mass      | Δ dalton            | mass      |
|           | 114.0913 | 1  | L   | 11 |          |           |                     |           |
| +0.011488 | 201.1234 | 2  | S   | 10 | 1195.526 | +0.006005 | 1195.526            |           |
| +0.047062 | 258.1448 | 3  | G   | 9  | 1108.494 | -0.02325  | 554.7504            | +0.295469 |
| +0.190928 | 405.2132 | 4  | F   | 8  | 1051.472 | +0.225757 | 1051.472            |           |
|           | 462.2347 | 5  | G   | 7  | 904.4037 | +0.053814 | 452.7055            | +0.30635  |
|           | 590.2933 | 6  | Q   | 6  | 847.3822 | +0.060935 | 847.3822            |           |
|           | 677.3253 | 7  | S   | 5  | 719.3237 | +0.050237 | 719.3237            |           |
|           | 734.3468 | 8  | G   | 4  | 632.2916 | +0.033987 | 632.2916            |           |
|           | 821.3788 | 9  | S   | 3  | 575.2702 | +0.024323 | 575.2702            |           |
|           | 968.4472 | 10 | F   | 2  | 488.2381 | +0.070145 | 488.2381            |           |
|           | 1128.478 | 11 | C   | 1  | 341.1697 | +0.164682 | 341.1697            |           |
|           |          | 12 | R   | 0  | 181.1391 |           | 181.1391            |           |

Scan number 2752 Raw file LNCAP\_Silac\_23F10\_set2\_05  
 Method ITMS; CID Pepti... 139.43

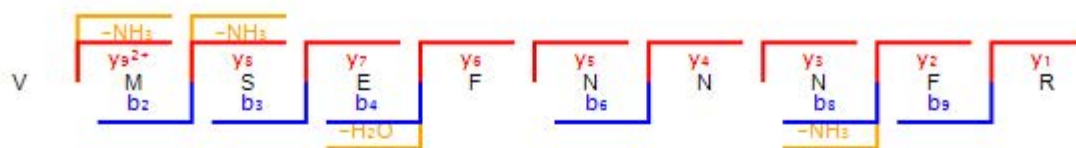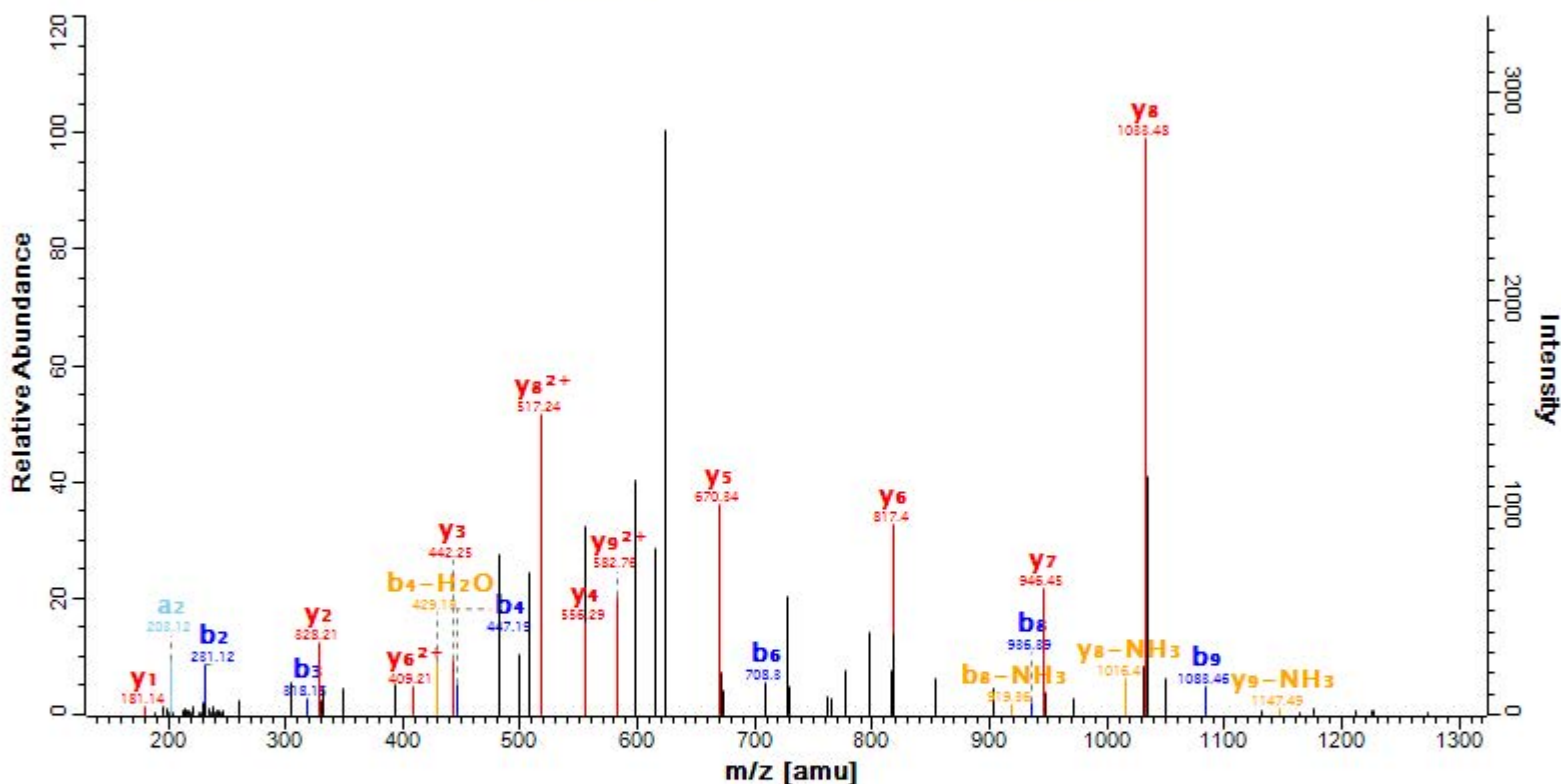

#### precursor information

|                   |                 |
|-------------------|-----------------|
| Mass:             | 1256.56089      |
| m/z:              | 629.28772       |
| Charge:           | 2+              |
| Retentiontime:    | 22.539461135864 |
| Score:            | 139.4331        |
| Mass Error [ppm]: | 0.063948        |
| PEP:              | 0.00020578      |
| Precursor Type:   | MULTI           |

|                       |             |
|-----------------------|-------------|
| Annotation:           | 9 of 10     |
| AminoAcids Coverage:  | 90 %        |
| Intensity Coverage:   | 41 %        |
| Peak Coverage:        | 23 %        |
| Protein Localisation: | 111 ... 120 |

| a ion    |        | b ion    |        |    |     |   | y ion    |         | y <sup>2+</sup> ion |         |
|----------|--------|----------|--------|----|-----|---|----------|---------|---------------------|---------|
| Δ dalton | mass   | Δ dalton | mass   |    | seq |   | Δ dalton | mass    | Δ dalton            | mass    |
|          | 72.081 |          | 100.08 | 1  | V   | 9 |          |         |                     |         |
| -0.014   | 203.12 | +0.0434  | 231.12 | 2  | M   | 8 | 1164.5   |         | 582.76              | -0.018  |
|          | 290.15 | +0.1262  | 318.15 | 3  | S   | 7 | 1033.5   | +0      | 517.24              | +0.0987 |
|          | 419.2  | +0.0123  | 447.19 | 4  | E   | 6 | 946.45   | +0.1501 | 946.45              |         |
|          | 566.26 |          | 594.26 | 5  | F   | 5 | 817.4    | +0.1265 | 409.21              | +0.4595 |
|          | 680.31 | +0.0437  | 708.3  | 6  | N   | 4 | 670.34   | +0.0295 | 670.34              |         |
|          | 794.35 |          | 822.35 | 7  | N   | 3 | 556.29   | -0.023  | 556.29              |         |
|          | 908.39 | +0.0826  | 936.39 | 8  | N   | 2 | 442.25   | +0.0667 | 442.25              |         |
|          | 1055.5 | +0.1138  | 1083.5 | 9  | F   | 1 | 328.21   | +0.0761 | 328.21              |         |
|          |        |          |        | 10 | R   | 0 | 181.14   | -0.194  | 181.14              |         |

Scan number 2758 Raw file LNCAP\_Silac\_23F10\_set2\_05  
 Method ITMS; CID Pepti... 99.89

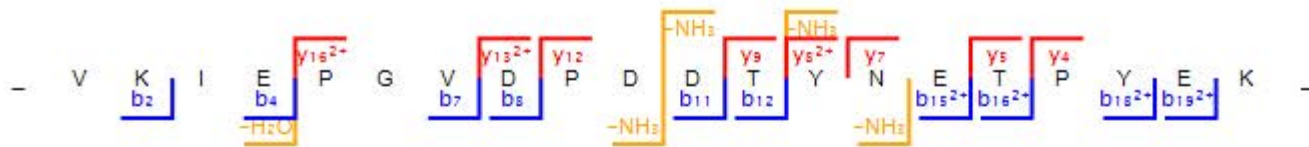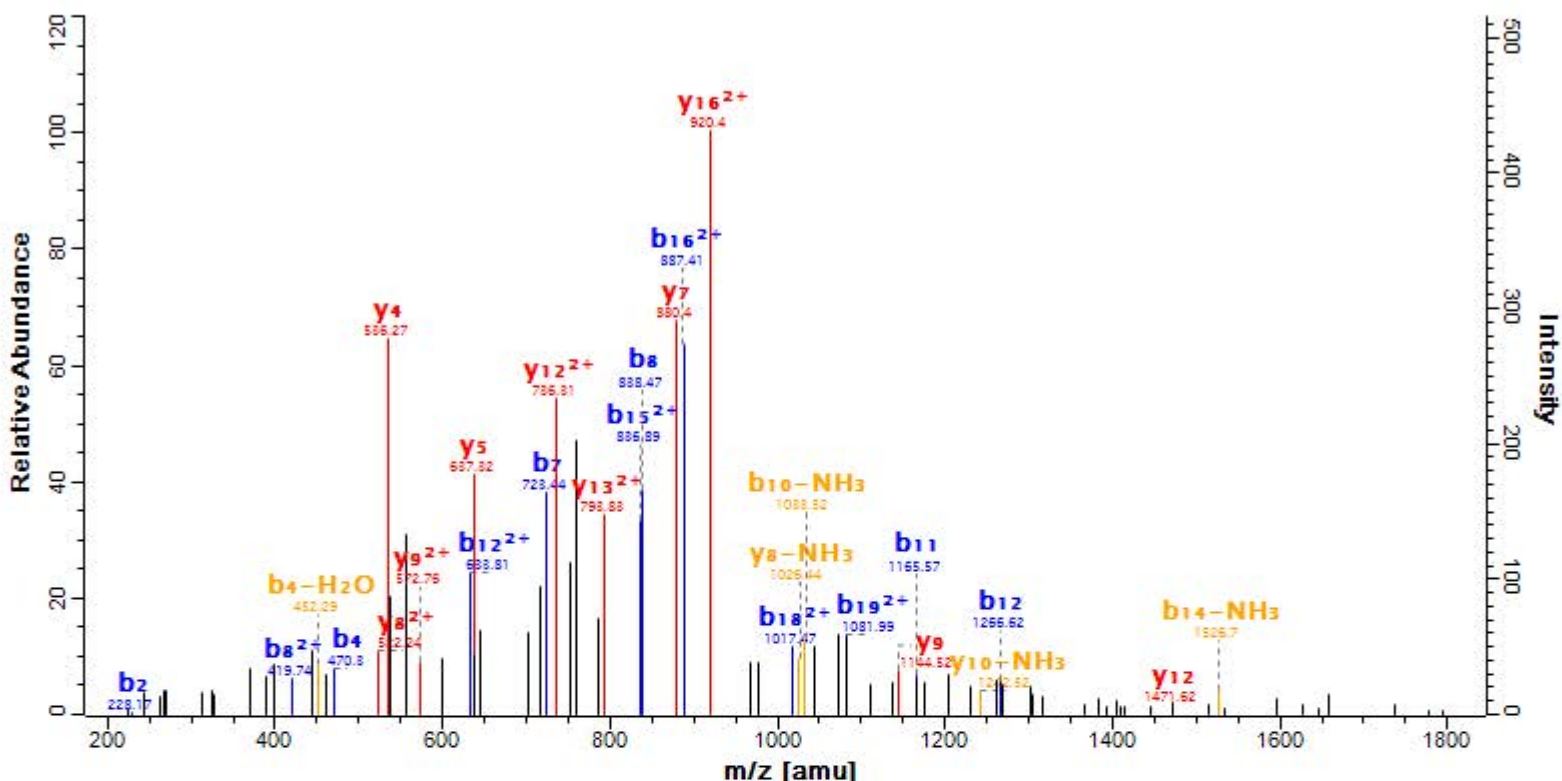

**precursor information**

|                   |                 |
|-------------------|-----------------|
| Mass:             | 2308.07512      |
| m/z:              | 770.36565       |
| Charge:           | 3+              |
| Retentiontime:    | 22.544143676757 |
| Score:            | 99.89084        |
| Mass Error [ppm]: | 0.18837         |
| PEP:              | 1.3125E-06      |
| Precursor Type:   | MULTI           |

**general information**

|                       |             |
|-----------------------|-------------|
| Annotation:           | 16 of 20    |
| AminoAcids Coverage:  | 80 %        |
| Intensity Coverage:   | 60 %        |
| Peak Coverage:        | 31 %        |
| Protein Localisation: | 405 ... 424 |

| b <sup>2+</sup> ion |        | b ion    |        | seq |   |    | y ion    |         | y <sup>2+</sup> ion |         |
|---------------------|--------|----------|--------|-----|---|----|----------|---------|---------------------|---------|
| Δ dalton            | mass   | Δ dalton | mass   |     |   |    | Δ dalton | mass    | Δ dalton            | mass    |
|                     | 100.08 |          | 100.08 | 1   | V | 19 |          |         |                     |         |
|                     | 228.17 | +0.0728  | 228.17 | 2   | K | 18 | 2210     |         | 2210                |         |
|                     | 341.25 |          | 341.25 | 3   | I | 17 | 2081.9   |         | 2081.9              |         |
|                     | 470.3  | -0.003   | 470.3  | 4   | E | 16 | 1968.8   |         | 1968.8              |         |
|                     | 567.35 |          | 567.35 | 5   | P | 15 | 1839.8   |         | 920.4               | +0.241  |
|                     | 624.37 |          | 624.37 | 6   | G | 14 | 1742.7   |         | 1742.7              |         |
|                     | 723.44 | +0.0157  | 723.44 | 7   | V | 13 | 1685.7   |         | 1685.7              |         |
| +0.3603             | 419.74 | -0.021   | 838.47 | 8   | D | 12 | 1586.6   |         | 793.83              | +0.1468 |
|                     | 935.52 |          | 935.52 | 9   | P | 11 | 1471.6   | +0.1784 | 736.31              | +0.2958 |
|                     | 1050.5 |          | 1050.5 | 10  | D | 10 | 1374.6   |         | 1374.6              |         |
|                     | 1165.6 | -0.189   | 1165.6 | 11  | D | 9  | 1259.5   |         | 1259.5              |         |
| +0.1655             | 633.81 | -0.008   | 1266.6 | 12  | T | 8  | 1144.5   | -0.138  | 572.76              | +0.0517 |
|                     | 1429.7 |          | 1429.7 | 13  | Y | 7  | 1043.5   |         | 522.24              | -0.068  |
|                     | 1543.7 |          | 1543.7 | 14  | N | 6  | 880.4    | -0.072  | 880.4               |         |
| +0.2627             | 836.89 |          | 1672.8 | 15  | E | 5  | 766.36   |         | 766.36              |         |
| +0.237              | 887.41 |          | 1773.8 | 16  | T | 4  | 637.32   | +0.0806 | 637.32              |         |
|                     | 1870.9 |          | 1870.9 | 17  | P | 3  | 536.27   | -0.025  | 536.27              |         |
| +0.4176             | 1017.5 |          | 2033.9 | 18  | Y | 2  | 439.22   |         | 439.22              |         |
| -0.109              | 1082   |          | 2163   | 19  | E | 1  | 276.16   |         | 276.16              |         |
|                     |        |          |        | 20  | K | 0  | 147.11   |         | 147.11              |         |

Scan number 2781 Raw file LNCAP\_Silac\_23F10\_set2\_05  
 Method ITMS; CID Pepti... 126.1

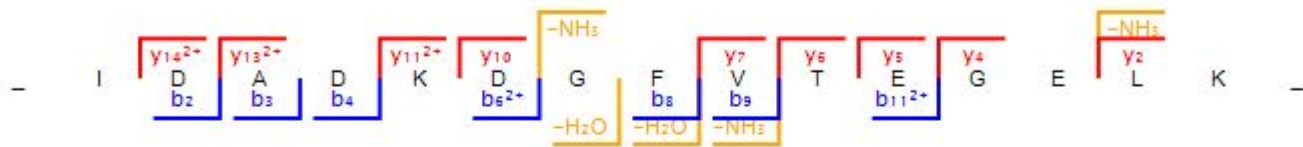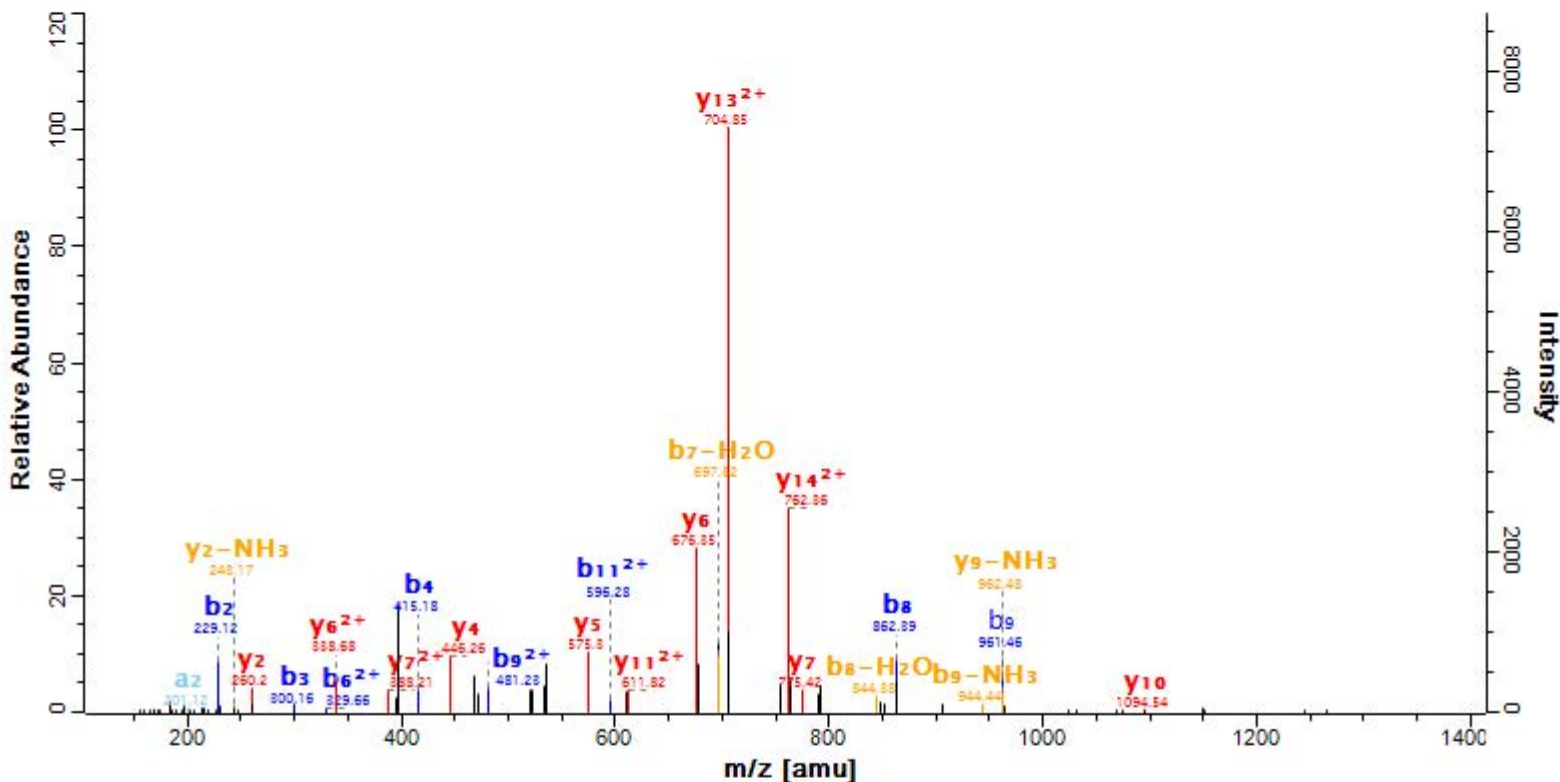

precursor information

|                   |                 |
|-------------------|-----------------|
| Mass:             | 1635.79969      |
| m/z:              | 546.27384       |
| Charge:           | 3+              |
| Retentiontime:    | 22.698566436767 |
| Score:            | 126.0972        |
| Mass Error [ppm]: | 0.30838         |
| PEP:              | 1.6374E-09      |
| Precursor Type:   | MULTI           |

general information

|                       |           |
|-----------------------|-----------|
| Annotation:           | 12 of 15  |
| AminoAcids Coverage:  | 80 %      |
| Intensity Coverage:   | 64 %      |
| Peak Coverage:        | 23 %      |
| Protein Localisation: | 80 ... 94 |

| a ion         |               | b <sup>2+</sup> ion |               | b ion       |               | y ion         |               | y <sup>2+</sup> ion |              |
|---------------|---------------|---------------------|---------------|-------------|---------------|---------------|---------------|---------------------|--------------|
| Δ dalton mass | Δ dalton mass | Δ dalton mass       | Δ dalton mass | seq         | Δ dalton mass | Δ dalton mass | Δ dalton mass | Δ dalton mass       |              |
| 86.1          |               | 114.1               |               | 114.1       | 1             | I             | 14            |                     |              |
| +0.067201.1   |               | 229.1               |               | +0.035229.1 | 2             | D             | 13            | 1524                | 762.4 +0.15% |
| 272.2         |               | 300.2               |               | -0.05 300.2 | 3             | A             | 12            | 1409                | 704.9 +0.23% |
| 387.2         |               | 415.2               |               | -0.13 415.2 | 4             | D             | 11            | 1338                | 1338         |
| 515.3         |               | 543.3               |               | 543.3       | 5             | K             | 10            | 1223                | 611.8 +0.03% |
| 630.3         | +0.448329.7   |                     |               | 658.3       | 6             | D             | 9             | 1095                | -0.14 1095   |
| 687.3         |               | 715.3               |               | 715.3       | 7             | G             | 8             | 979.5               | 979.5        |
| 834.4         |               | 862.4               | +0            | 862.4       | 8             | F             | 7             | 922.5               | 922.5        |
| 933.5         | -0.06 481.2   | -0.03 961.5         |               | 961.5       | 9             | V             | 6             | 775.4 +0.107388.2   | +0.15%       |
| 1035          |               | 1063                |               | 1063        | 10            | T             | 5             | 676.4 -0.04 338.7   | +0           |
| 1164          | +0.038596.3   |                     |               | 1192        | 11            | E             | 4             | 575.3 +0.041575.3   |              |
| 1221          |               | 1249                |               | 1249        | 12            | G             | 3             | 446.3 +0.033446.3   |              |
| 1350          |               | 1378                |               | 1378        | 13            | E             | 2             | 389.2               | 389.2        |
| 1463          |               | 1491                |               | 1491        | 14            | L             | 1             | 260.2 -0.05 260.2   |              |
|               |               |                     |               |             | 15            | K             | 0             | 147.1               | 147.1        |



Scan number 2808 Raw file LNCAP\_Silac\_23F10\_set2\_05  
 Method ITMS: CID Pepti... 77.42

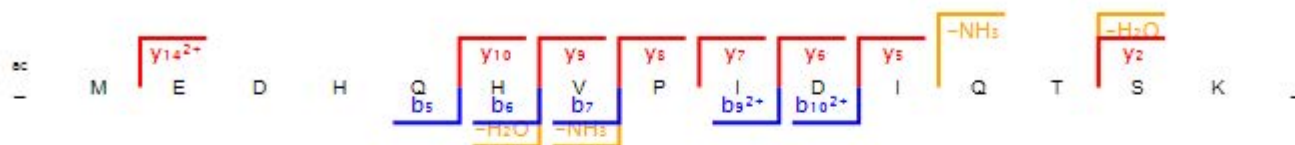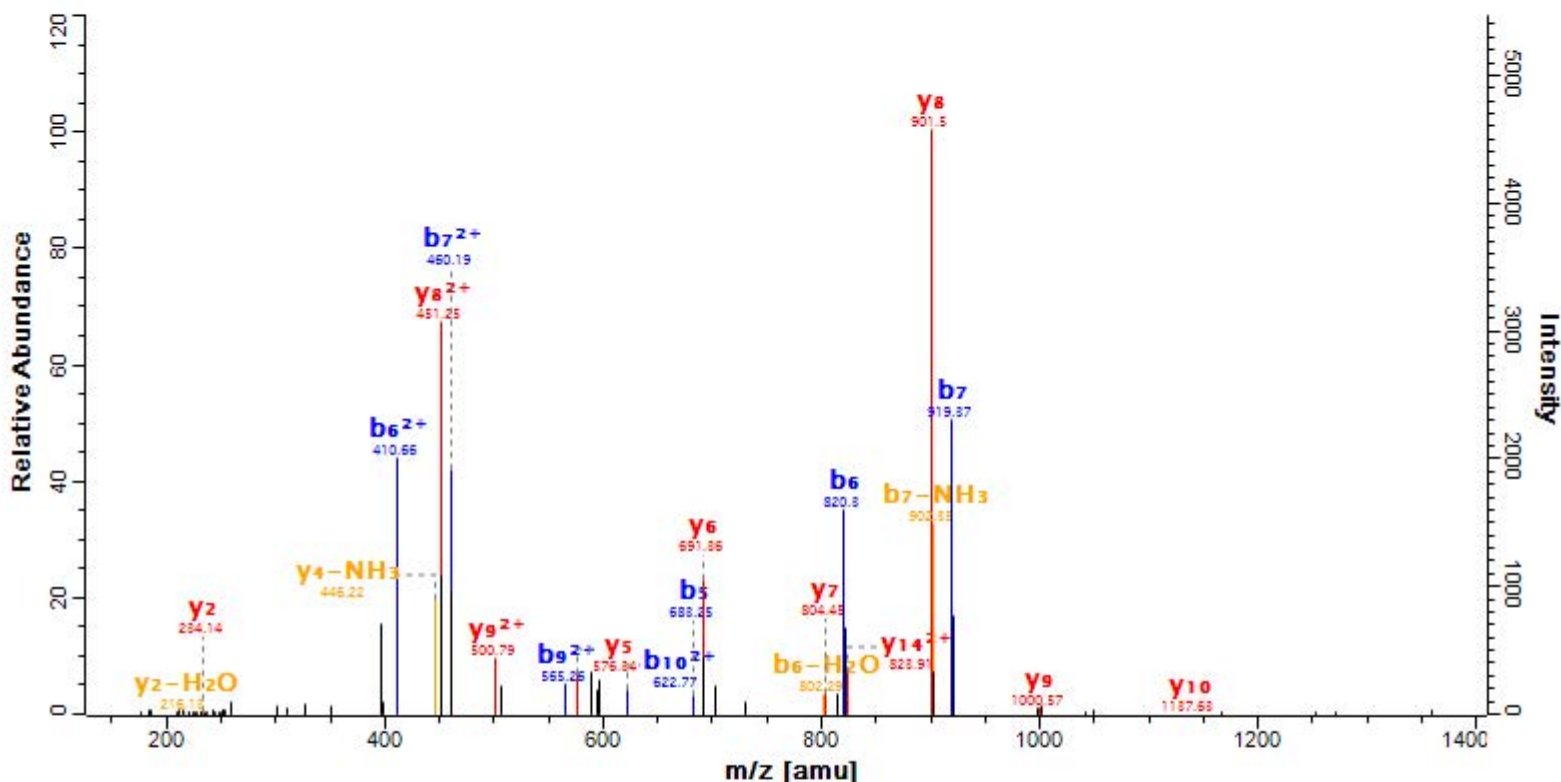

#### precursor information

|                   |                 |
|-------------------|-----------------|
| Mass:             | 1818.85798      |
| m/z:              | 607.29327       |
| Charge:           | 3+              |
| Retentiontime:    | 22.850254058837 |
| Score:            | 77.42032        |
| Mass Error [ppm]: | 0.51123         |
| PEP:              | 0.0019806       |
| Precursor Type:   | MULTI           |

#### general information

|                       |          |
|-----------------------|----------|
| Annotation:           | 10 of 15 |
| AminoAcids Coverage:  | 67 %     |
| Intensity Coverage:   | 72 %     |
| Peak Coverage:        | 26 %     |
| Protein Localisation: | 1 ... 15 |

| b <sup>2+</sup> ion |        | b ion    |        | seq |   |    | y ion    |         | y <sup>2+</sup> ion |         |
|---------------------|--------|----------|--------|-----|---|----|----------|---------|---------------------|---------|
| Δ dalton            | mass   | Δ dalton | mass   |     |   |    | Δ dalton | mass    | Δ dalton            | mass    |
|                     | 174.06 |          | 174.06 | 1   | M | 14 |          |         |                     |         |
|                     | 303.1  |          | 303.1  | 2   | E | 13 | 1646.8   |         | 823.91              | +0.304  |
|                     | 418.13 |          | 418.13 | 3   | D | 12 | 1517.8   |         | 1517.8              |         |
|                     | 555.19 |          | 555.19 | 4   | H | 11 | 1402.7   |         | 1402.7              |         |
|                     | 683.25 | -0.022   | 683.25 | 5   | Q | 10 | 1265.7   |         | 1265.7              |         |
| +0.1526             | 410.66 | -0.034   | 820.3  | 6   | H | 9  | 1137.6   | +0.31   | 1137.6              |         |
| -0.004              | 460.19 | -0.006   | 919.37 | 7   | V | 8  | 1000.6   | +0.1148 | 500.79              | +0.233  |
|                     | 1016.4 |          | 1016.4 | 8   | P | 7  | 901.5    | -0.01   | 451.25              | +0.0357 |
| +0.0302             | 565.26 |          | 1129.5 | 9   | I | 6  | 804.45   | +0.1702 | 804.45              |         |
| +0.2603             | 622.77 |          | 1244.5 | 10  | D | 5  | 691.36   | +0      | 691.36              |         |
|                     | 1357.6 |          | 1357.6 | 11  | I | 4  | 576.34   | +0.0564 | 576.34              |         |
|                     | 1485.7 |          | 1485.7 | 12  | Q | 3  | 463.25   |         | 463.25              |         |
|                     | 1586.7 |          | 1586.7 | 13  | T | 2  | 335.19   |         | 335.19              |         |
|                     | 1673.8 |          | 1673.8 | 14  | S | 1  | 234.14   | +0.2246 | 234.14              |         |
|                     |        |          |        | 15  | K | 0  | 147.11   |         | 147.11              |         |



Scan number 2895 Raw file LNCAP\_Silac\_23F10\_set2\_05  
 Method ITMS; CID Pepti... 95.26

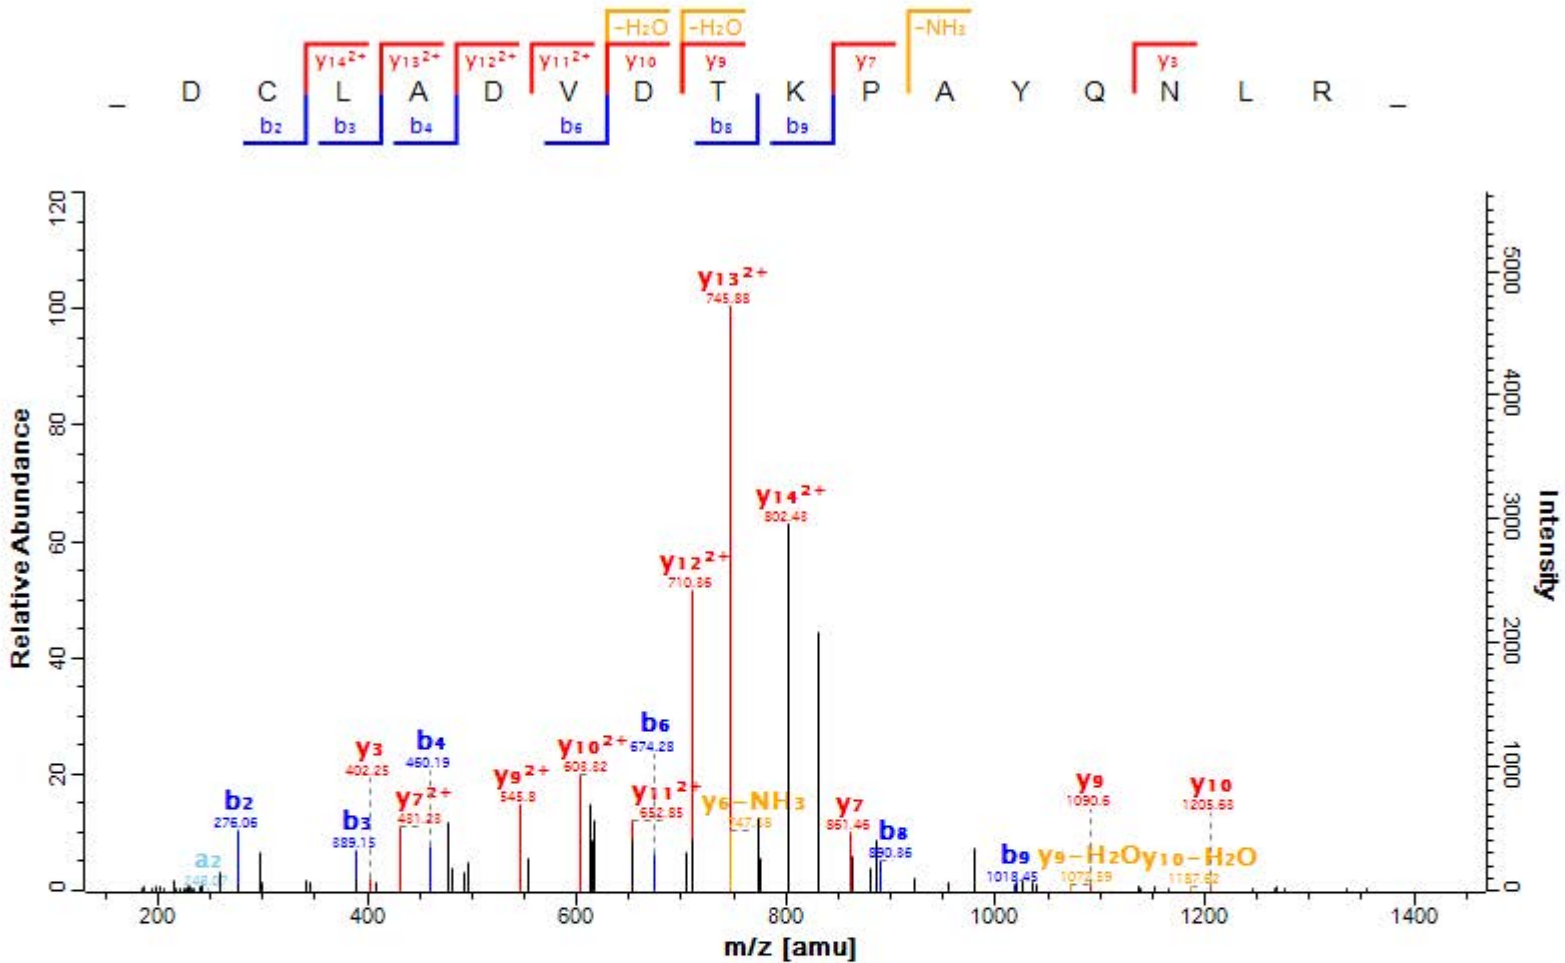

precursor information

|                   |                 |
|-------------------|-----------------|
| Mass:             | 1877.89348      |
| m/z:              | 626.97177       |
| Charge:           | 3+              |
| Retentiontime:    | 23.356206893920 |
| Score:            | 95.26447        |
| Mass Error [ppm]: | -0.36127        |
| PEP:              | 1.9919E-05      |
| Precursor Type:   | MULTI           |

general information

|                       |           |
|-----------------------|-----------|
| Annotation:           | 11 of 16  |
| AminoAcids Coverage:  | 69 %      |
| Intensity Coverage:   | 53 %      |
| Peak Coverage:        | 20 %      |
| Protein Localisation: | 73 ... 88 |

| a ion    |        | b ion    |        |    |     |    | y ion    |         | y <sup>2+</sup> ion |         |
|----------|--------|----------|--------|----|-----|----|----------|---------|---------------------|---------|
| Δ dalton | mass   | Δ dalton | mass   |    | seq |    | Δ dalton | mass    | Δ dalton            | mass    |
|          | 88.039 |          | 116.03 | 1  | D   | 15 |          |         |                     |         |
| -0.032   | 248.07 | +0.0247  | 276.06 | 2  | C   | 14 | 1763.9   |         | 1763.9              |         |
|          | 361.15 | +0.0154  | 389.15 | 3  | L   | 13 | 1603.8   |         | 802.43              | +0.0731 |
|          | 432.19 | +0.0364  | 460.19 | 4  | A   | 12 | 1490.8   |         | 745.88              | +0.2848 |
|          | 547.22 |          | 575.21 | 5  | D   | 11 | 1419.7   |         | 710.36              | +0.2233 |
|          | 646.29 | -0.011   | 674.28 | 6  | V   | 10 | 1304.7   |         | 652.85              | +0.0334 |
|          | 761.31 |          | 789.31 | 7  | D   | 9  | 1205.6   | +0.2147 | 603.32              | +0.1922 |
|          | 862.36 | -0.053   | 890.36 | 8  | T   | 8  | 1090.6   | +0.125  | 545.8               | +0.14   |
|          | 990.46 | +0.0171  | 1018.5 | 9  | K   | 7  | 989.55   |         | 989.55              |         |
|          | 1087.5 |          | 1115.5 | 10 | P   | 6  | 861.46   | +0.0299 | 431.23              | +0.1153 |
|          | 1158.5 |          | 1186.5 | 11 | A   | 5  | 764.4    |         | 764.4               |         |
|          | 1321.6 |          | 1349.6 | 12 | Y   | 4  | 693.37   |         | 693.37              |         |
|          | 1449.7 |          | 1477.7 | 13 | Q   | 3  | 530.3    |         | 530.3               |         |
|          | 1563.7 |          | 1591.7 | 14 | N   | 2  | 402.25   | +0.0837 | 402.25              |         |
|          | 1676.8 |          | 1704.8 | 15 | L   | 1  | 288.2    |         | 288.2               |         |
|          |        |          |        | 16 | R   | 0  | 175.12   |         | 175.12              |         |

Scan number 2909 Raw file LNCAP\_Silac\_23F10\_set2\_05  
 Method ITMS; CID Pepti... 173.71

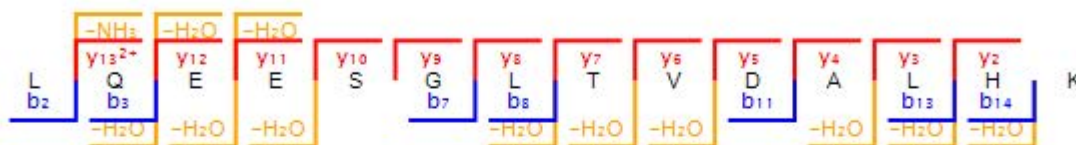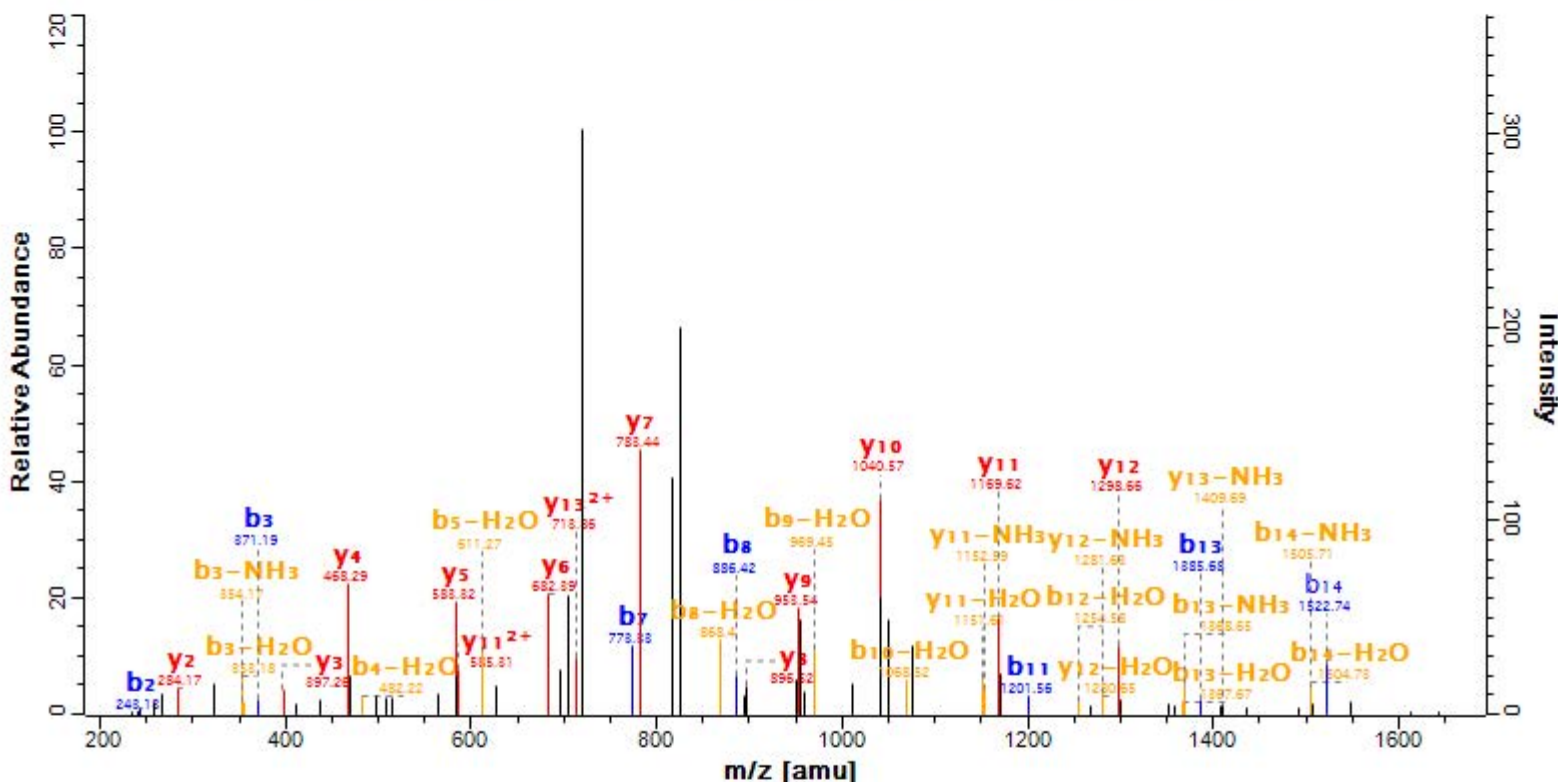

precursor information

|                   |                 |
|-------------------|-----------------|
| Mass:             | 1667.83685      |
| m/z:              | 834.9257        |
| Charge:           | 2+              |
| Retentiontime:    | 23.436609268188 |
| Score:            | 173.7146        |
| Mass Error [ppm]: | 0.13167         |
| PEP:              | 4.5692E-17      |
| Precursor Type:   | MULTI           |

general information

|                       |            |
|-----------------------|------------|
| Annotation:           | 13 of 15   |
| AminoAcids Coverage:  | 87 %       |
| Intensity Coverage:   | 41 %       |
| Peak Coverage:        | 43 %       |
| Protein Localisation: | 93 ... 107 |

| b ion     |          |     |   | y ion    |          |           | y <sup>2+</sup> ion |           |
|-----------|----------|-----|---|----------|----------|-----------|---------------------|-----------|
| Δ dalton  | mass     | seq |   | Δ dalton | mass     | Δ dalton  | mass                |           |
|           | 130.0499 | 1   | E | 14       |          |           |                     |           |
| +0.12333  | 243.1339 | 2   | L | 13       | 1539.801 | 1539.801  |                     |           |
| +0.067804 | 371.1925 | 3   | Q | 12       | 1426.717 | 713.8623  | +0.022381           |           |
|           | 500.2351 | 4   | E | 11       | 1298.659 | -0.10435  | 1298.659            |           |
|           | 629.2777 | 5   | E | 10       | 1169.616 | -0.14782  | 585.3117            | +0.223967 |
|           | 716.3097 | 6   | S | 9        | 1040.573 | -0.08923  | 1040.573            |           |
| -0.32148  | 773.3312 | 7   | G | 8        | 953.5415 | -0.01753  | 953.5415            |           |
| -0.04129  | 886.4153 | 8   | L | 7        | 896.52   | -0.27091  | 896.52              |           |
|           | 987.4629 | 9   | T | 6        | 783.4359 | +0.036666 | 783.4359            |           |
|           | 1086.531 | 10  | V | 5        | 682.3883 | +0.02984  | 682.3883            |           |
| -0.1059   | 1201.558 | 11  | D | 4        | 583.3198 | +0.080737 | 583.3198            |           |
|           | 1272.595 | 12  | A | 3        | 468.2929 | +0.04048  | 468.2929            |           |
| -0.07363  | 1385.679 | 13  | L | 2        | 397.2558 | +0.180438 | 397.2558            |           |
| -0.13791  | 1522.738 | 14  | H | 1        | 284.1717 | +0.107825 | 284.1717            |           |
|           |          | 15  | K | 0        | 147.1128 |           | 147.1128            |           |

Scan number 2944 Raw file LNCAP\_Silac\_23F10\_set2\_05  
 Method ITMS; CID Pepti... 100.38

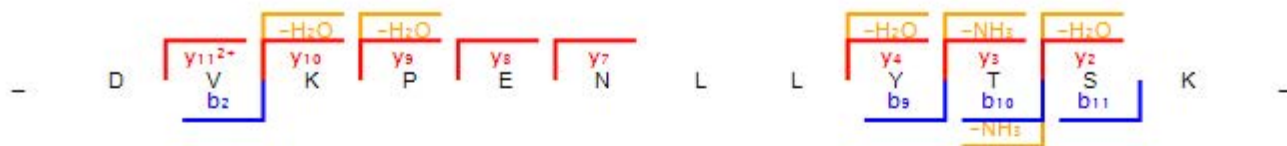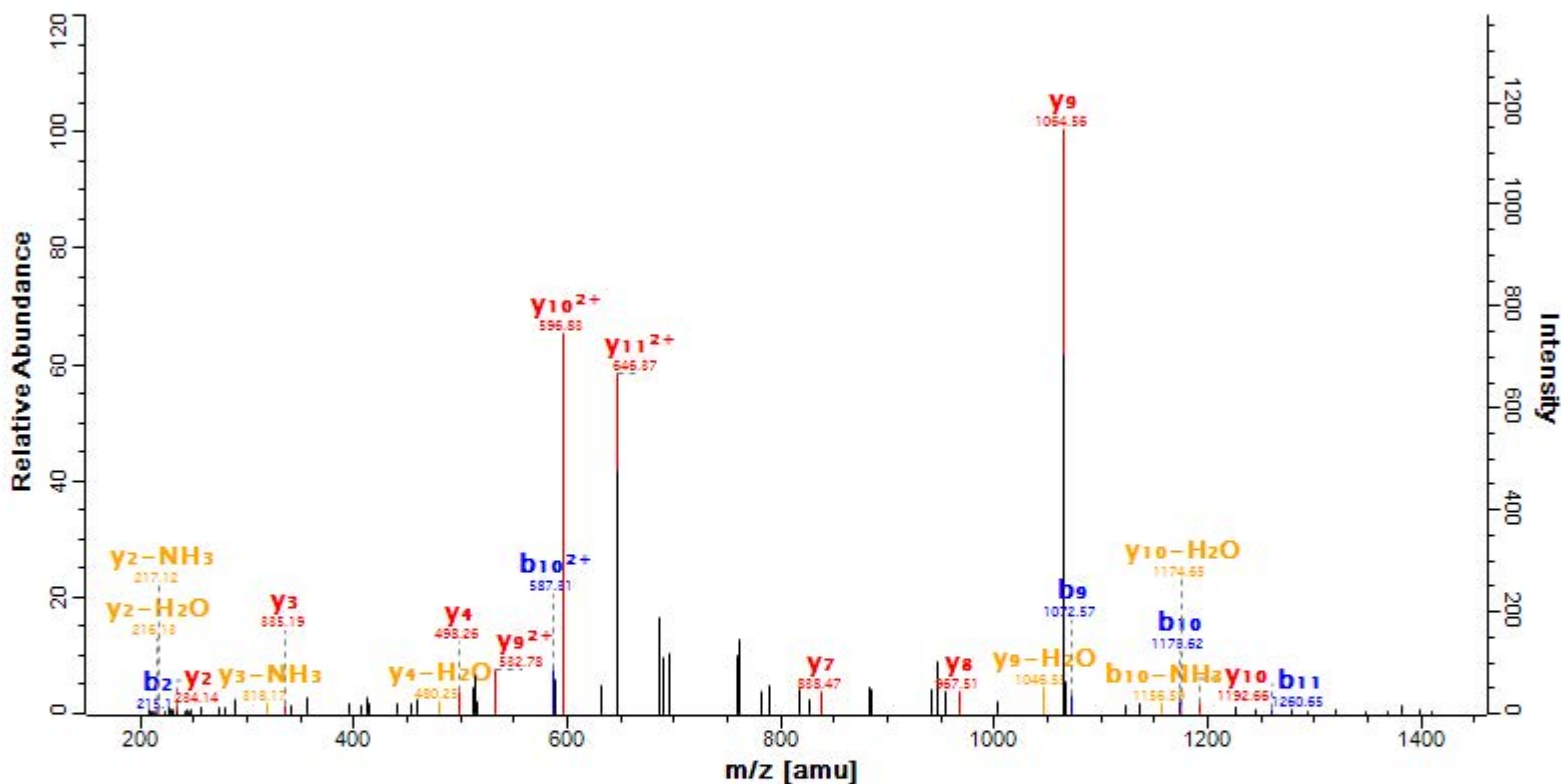

#### precursor information

|                   |                 |
|-------------------|-----------------|
| Mass:             | 1405.74504      |
| m/z:              | 703.8798        |
| Charge:           | 2+              |
| Retentiontime:    | 23.656993865966 |
| Score:            | 100.3762        |
| Mass Error [ppm]: | -0.17949        |
| PEP:              | 0.00020817      |
| Precursor Type:   | MULTI           |

#### general information

|                       |             |
|-----------------------|-------------|
| Annotation:           | 8 of 12     |
| AminoAcids Coverage:  | 67 %        |
| Intensity Coverage:   | 47 %        |
| Peak Coverage:        | 23 %        |
| Protein Localisation: | 186 ... 197 |

| b <sup>2+</sup> ion |        | b ion    |        | seq |   |    | y ion    |         | y <sup>2+</sup> ion |         |
|---------------------|--------|----------|--------|-----|---|----|----------|---------|---------------------|---------|
| Δ dalton            | mass   | Δ dalton | mass   |     |   |    | Δ dalton | mass    | Δ dalton            | mass    |
|                     | 116.03 |          | 116.03 | 1   | D | 11 |          |         |                     |         |
|                     | 215.1  | -0.029   | 215.1  | 2   | V | 10 | 1291.7   |         | 646.37              | +0.0084 |
|                     | 343.2  |          | 343.2  | 3   | K | 9  | 1192.7   | +0.1224 | 596.83              | +0.1588 |
|                     | 440.25 |          | 440.25 | 4   | P | 8  | 1064.6   | -0.024  | 532.78              | +0.1341 |
|                     | 569.29 |          | 569.29 | 5   | E | 7  | 967.51   | +0.0456 | 967.51              |         |
|                     | 683.34 |          | 683.34 | 6   | N | 6  | 838.47   | -0.036  | 838.47              |         |
|                     | 796.42 |          | 796.42 | 7   | L | 5  | 724.42   |         | 724.42              |         |
|                     | 909.5  |          | 909.5  | 8   | L | 4  | 611.34   |         | 611.34              |         |
|                     | 1072.6 | -0.012   | 1072.6 | 9   | Y | 3  | 498.26   | +0.0987 | 498.26              |         |
| +0.2189             | 587.31 | -0.324   | 1173.6 | 10  | T | 2  | 335.19   | +0.1412 | 335.19              |         |
|                     | 1260.6 | -0.471   | 1260.6 | 11  | S | 1  | 234.14   | -0.119  | 234.14              |         |
|                     |        |          |        | 12  | K | 0  | 147.11   |         | 147.11              |         |

Scan number 306 Raw file LNCAP\_Silac\_23F10\_set2\_05  
 Method ITMS; CID Peptide 286.26

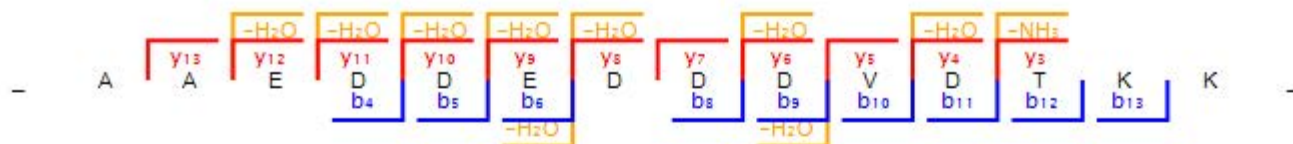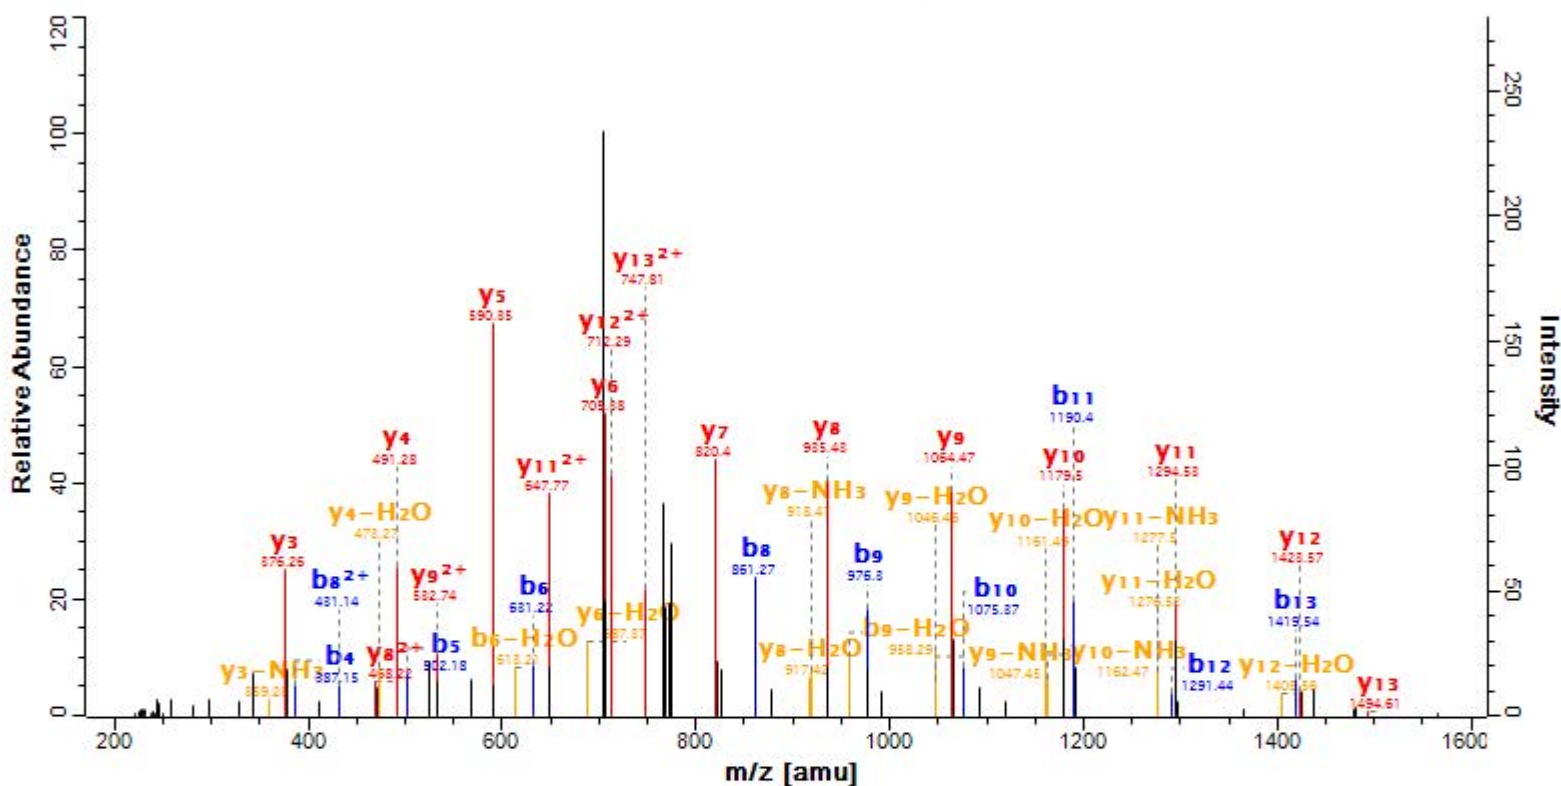

#### precursor information

|                   |                 |
|-------------------|-----------------|
| Mass:             | 1564.63821      |
| m/z:              | 783.32638       |
| Charge:           | 2+              |
| Retentiontime:    | 6.7152915000915 |
| Score:            | 286.2632        |
| Mass Error [ppm]: | 0.35452         |
| PEP:              | 2.754E-90       |
| Precursor Type:   | ISO             |

| b <sup>2+</sup> ion |        | b ion    |        | seq |   |    | y ion    |         | y <sup>2+</sup> ion |         |
|---------------------|--------|----------|--------|-----|---|----|----------|---------|---------------------|---------|
| Δ dalton            | mass   | Δ dalton | mass   |     |   |    | Δ dalton | mass    | Δ dalton            | mass    |
|                     | 72.044 |          | 72.044 | 1   | A | 13 |          |         |                     |         |
|                     | 143.08 |          | 143.08 | 2   | A | 12 | 1494.6   | -0.019  | 747.81              | -0.179  |
|                     | 272.12 |          | 272.12 | 3   | E | 11 | 1423.6   | -0.087  | 712.29              | +0.2431 |
|                     | 387.15 | +0.0214  | 387.15 | 4   | D | 10 | 1294.5   | -0.043  | 647.77              | +0.0867 |
|                     | 502.18 | +0.1839  | 502.18 | 5   | D | 9  | 1179.5   | -0.028  | 1179.5              |         |
|                     | 631.22 | +0.223   | 631.22 | 6   | E | 8  | 1064.5   | +0.0084 | 532.74              | +0.058  |
|                     | 746.25 |          | 746.25 | 7   | D | 7  | 935.43   | -0.068  | 468.22              | +0.1235 |
| +0.1171             | 431.14 | -0.012   | 861.27 | 8   | D | 6  | 820.4    | +0.01   | 820.4               |         |
|                     | 976.3  | -0.07    | 976.3  | 9   | D | 5  | 705.38   | +0.0701 | 705.38              |         |
|                     | 1075.4 | +0.0784  | 1075.4 | 10  | V | 4  | 590.35   | -0.005  | 590.35              |         |
|                     | 1190.4 | -0.064   | 1190.4 | 11  | D | 3  | 491.28   | -0.009  | 491.28              |         |
|                     | 1291.4 | +0.1505  | 1291.4 | 12  | T | 2  | 376.26   | +0.0355 | 376.26              |         |
|                     | 1419.5 | -0.33    | 1419.5 | 13  | K | 1  | 275.21   |         | 275.21              |         |
|                     |        |          |        | 14  | K | 0  | 147.11   |         | 147.11              |         |

#### general information

|                       |            |
|-----------------------|------------|
| Annotation:           | 12 of 14   |
| AminoAcids Coverage:  | 86 %       |
| Intensity Coverage:   | 61 %       |
| Peak Coverage:        | 43 %       |
| Protein Localisation: | 91 ... 104 |

Scan number 3198 Raw file LNCAP\_Silac\_23F10\_set2\_05  
 Method ITMS; CID Pepti... 130.56

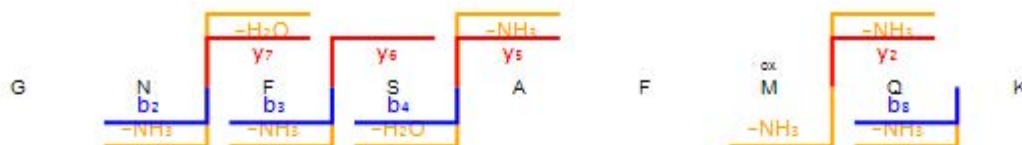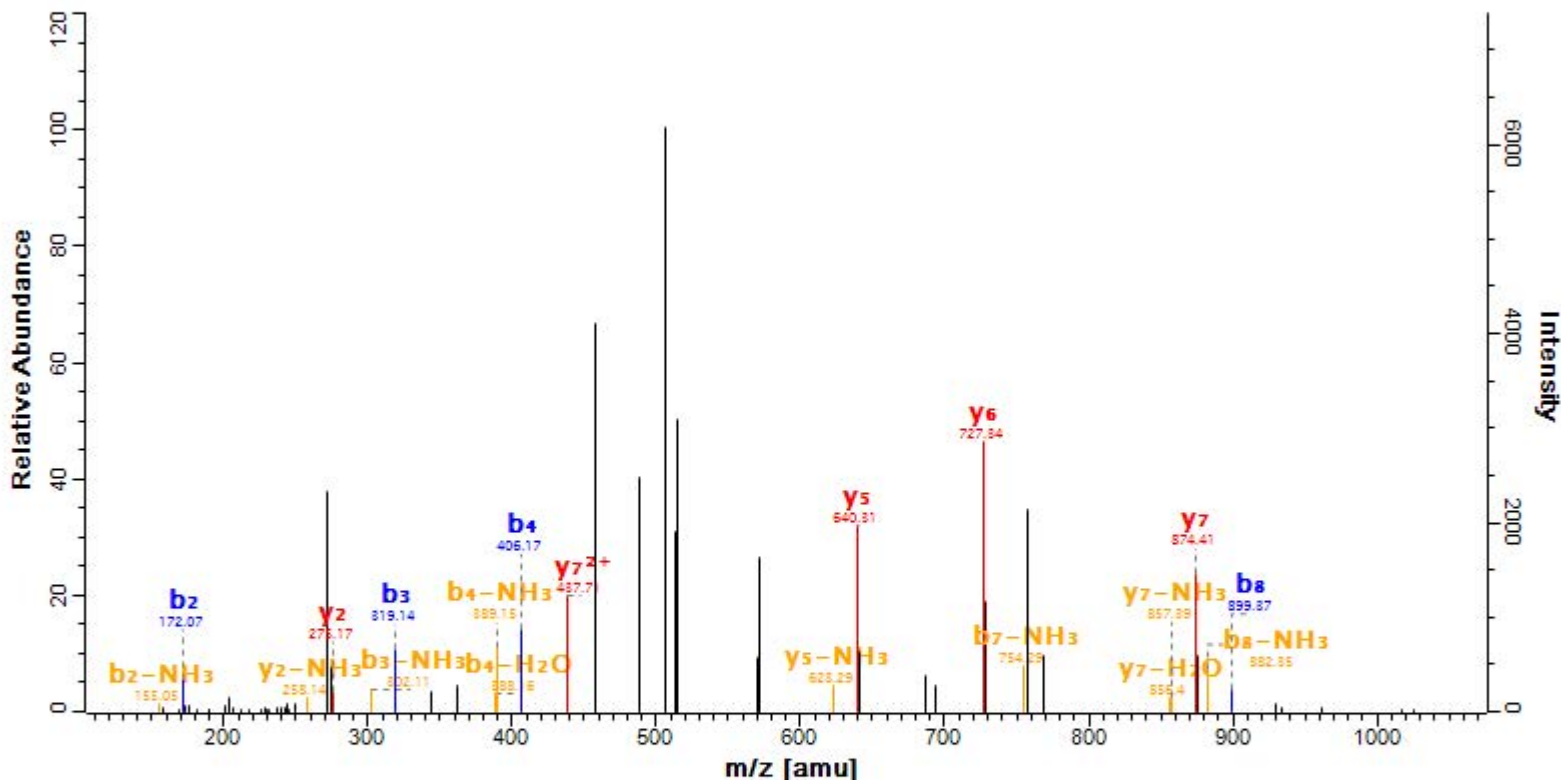

#### precursor information

|                       |                 |
|-----------------------|-----------------|
| Mass:                 | 1044.46814      |
| m/z:                  | 523.24135       |
| Charge:               | 2+              |
| Retentiontime:        | 25.090261459350 |
| Score:                | 130.5618        |
| Mass Error [ppm]:     | -1.6519         |
| PEP:                  | 0.0032015       |
| Precursor Type:       | MULTI           |
| Annotation:           | 6 of 9          |
| AminoAcids Coverage:  | 67 %            |
| Intensity Coverage:   | 28 %            |
| Peak Coverage:        | 24 %            |
| Protein Localisation: | 320 ... 328     |

| b ion     |          | seq |   | y ion    |          | y <sup>2+</sup> ion |           |
|-----------|----------|-----|---|----------|----------|---------------------|-----------|
| Δ dalton  | mass     |     |   | Δ dalton | mass     | Δ dalton            | mass      |
|           | 58.02874 | 1   | G | 8        |          |                     |           |
| -0.15765  | 172.0717 | 2   | N | 7        | 988.4557 | 988.4557            |           |
| -0.02161  | 319.1401 | 3   | F | 6        | 874.4128 | 437.71              | +0.165047 |
| +0.059274 | 406.1721 | 4   | S | 5        | 727.3443 | 727.3443            |           |
|           | 477.2092 | 5   | A | 4        | 640.3123 | 640.3123            |           |
|           | 624.2776 | 6   | F | 3        | 569.2752 | 569.2752            |           |
|           | 771.313  | 7   | M | 2        | 422.2068 | 422.2068            |           |
| -0.01608  | 899.3716 | 8   | Q | 1        | 275.1714 | +0.063298           | 275.1714  |
|           |          | 9   | K | 0        | 147.1128 |                     | 147.1128  |

Scan number 3320 Raw file LNCAP\_Silac\_23F10\_set2\_05  
 Method ITMS: CID Peptide 169.65

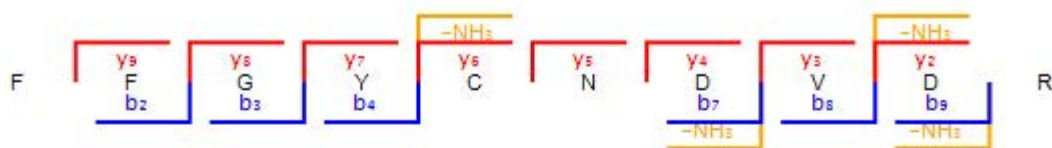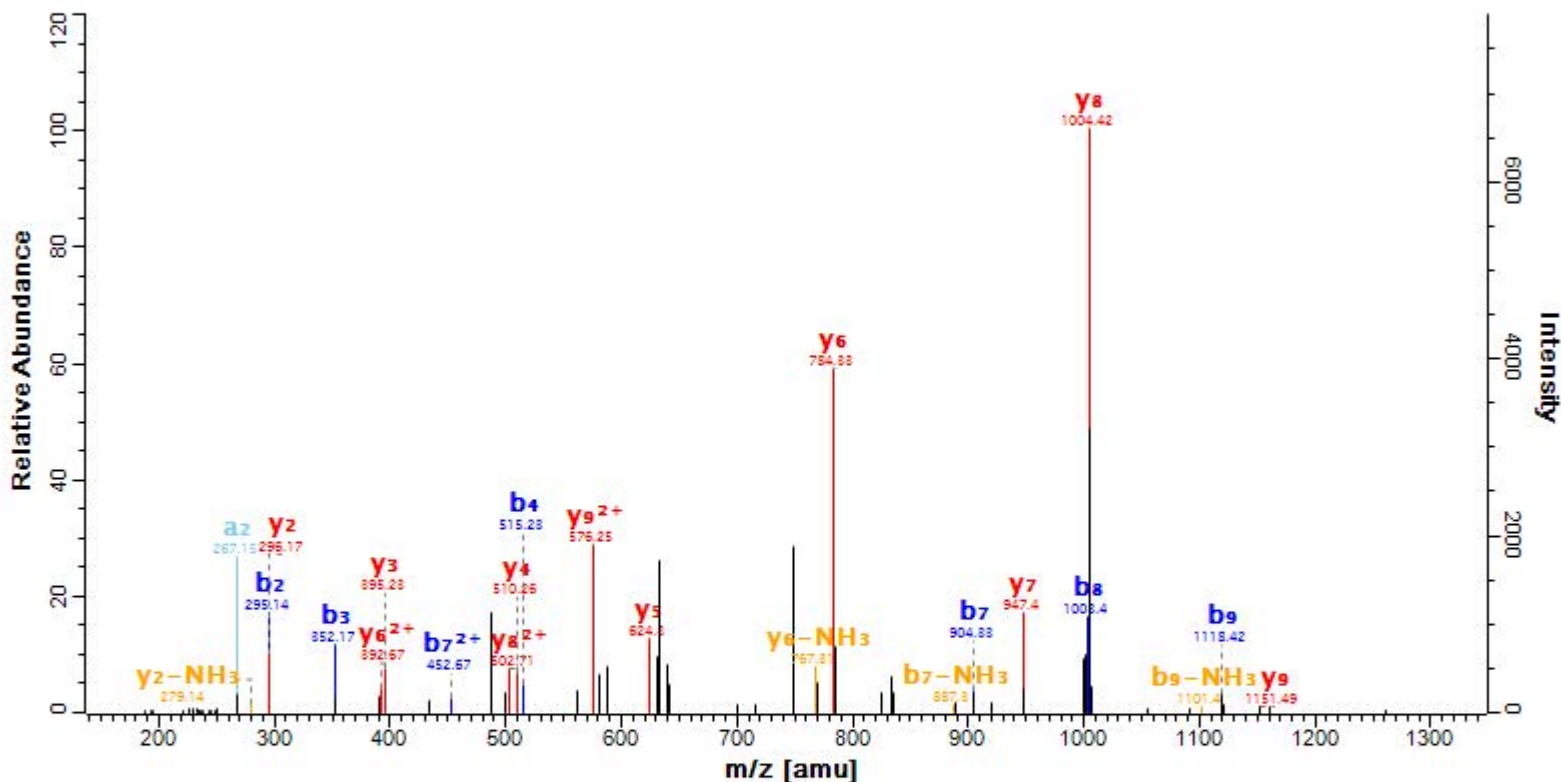

precursor information

|                   |                 |
|-------------------|-----------------|
| Mass:             | 1291.52924      |
| m/z:              | 646.7719        |
| Charge:           | 2+              |
| Retentiontime:    | 25.774934768676 |
| Score:            | 169.6546        |
| Mass Error [ppm]: | 0.05316         |
| PEP:              | 1.0733E-05      |
| Precursor Type:   | MULTI           |

|                       |           |
|-----------------------|-----------|
| Annotation:           | 8 of 10   |
| AminoAcids Coverage:  | 80 %      |
| Intensity Coverage:   | 57 %      |
| Peak Coverage:        | 26 %      |
| Protein Localisation: | 33 ... 42 |

|       | a ion         | b <sup>2+</sup> ion | b ion         |     |   | y ion         | y <sup>2+</sup> ion     |
|-------|---------------|---------------------|---------------|-----|---|---------------|-------------------------|
|       | Δ dalton mass | Δ dalton mass       | Δ dalton mass | seq |   | Δ dalton mass | Δ dalton mass           |
|       | 120.1         | 148.1               | 148.1         | 1   | F | 9             |                         |
| -0.05 | 267.1         | 295.1               | +0 295.1      | 2   | F | 8             | 1151 -0.08 576.2 +0.20  |
|       | 324.2         | 352.2               | -0.02 352.2   | 3   | G | 7             | 1004 +0.02 502.7 +0.05  |
|       | 487.2         | 515.2               | -0.15 515.2   | 4   | Y | 6             | 947.4 +0 947.4          |
|       | 647.3         | 675.3               | 675.3         | 5   | C | 5             | 784.3 -0.04 392.7 +0.26 |
|       | 761.3         | 789.3               | 789.3         | 6   | N | 4             | 624.3 +0.03 624.3       |
|       | 876.3         | -0.49 452.7         | +0.07 904.3   | 7   | D | 3             | 510.3 +0.08 3510.3      |
|       | 975.4         | 1003                | +0.17 31003   | 8   | V | 2             | 395.2 +0.04 395.2       |
|       | 1090          | 1118                | -0.12 1118    | 9   | D | 1             | 296.2 +0.07 296.2       |
|       |               |                     |               | 10  | R | 0             | 181.1 181.1             |

Scan number 3334 Raw file LNCAP\_Silac\_23F10\_set2\_05  
 Method ITMS; CID Pepti... 143.67

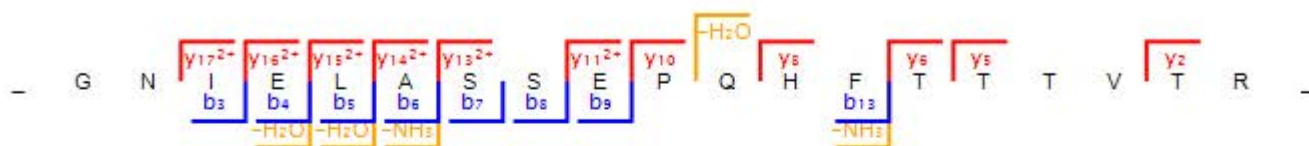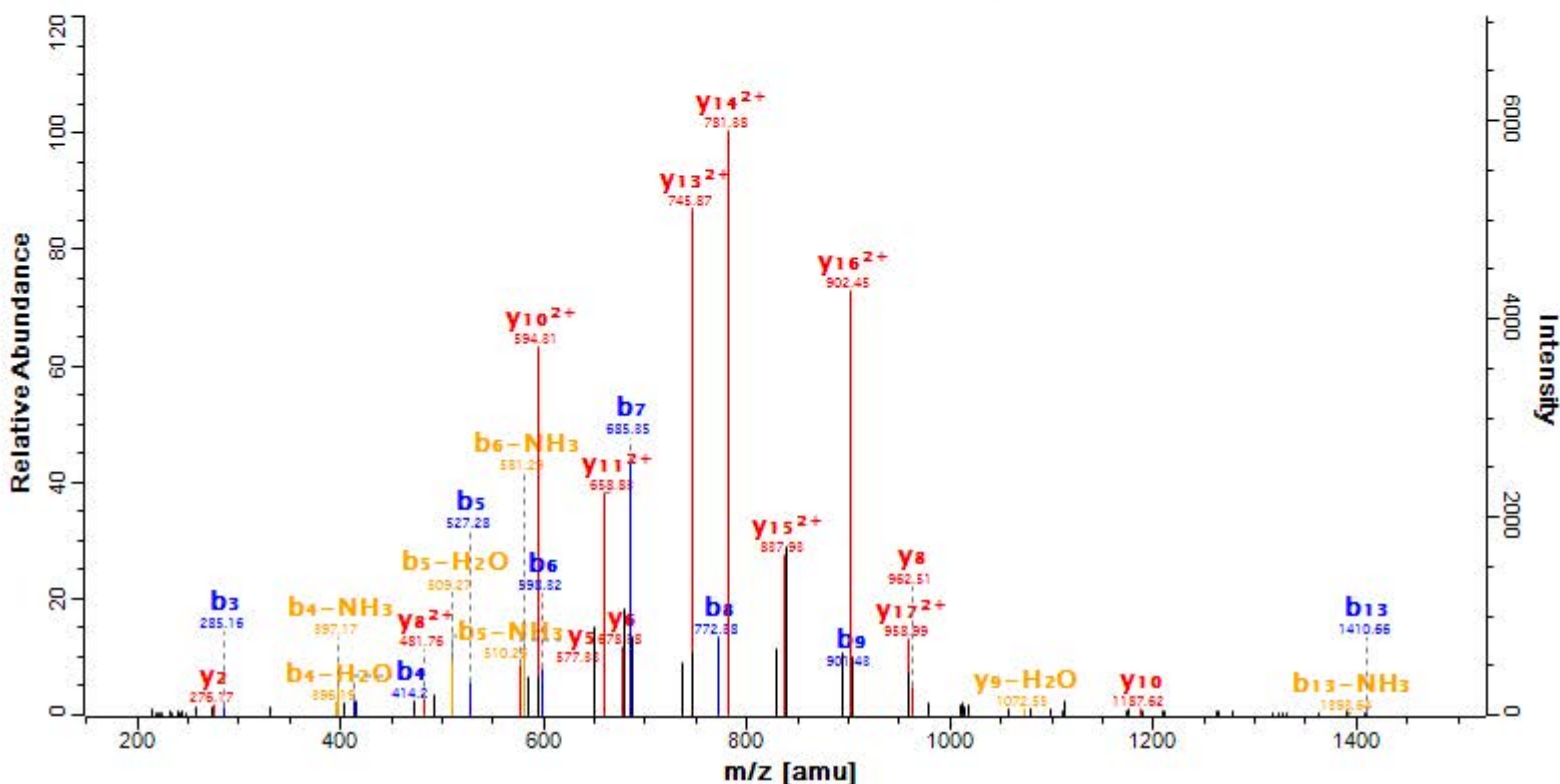

**precursor information**

|                   |                 |
|-------------------|-----------------|
| Mass:             | 2087.02844      |
| m/z:              | 696.68342       |
| Charge:           | 3+              |
| Retentiontime:    | 25.844264984130 |
| Score:            | 143.6723        |
| Mass Error [ppm]: | 0.045902        |
| PEP:              | 6.5834E-19      |
| Precursor Type:   | MULTI           |

**general information**

|                       |             |
|-----------------------|-------------|
| Annotation:           | 14 of 19    |
| AminoAcids Coverage:  | 74 %        |
| Intensity Coverage:   | 73 %        |
| Peak Coverage:        | 27 %        |
| Protein Localisation: | 650 ... 668 |

| b ion     |          |    |     |    | y ion    |           | y <sup>2+</sup> ion |           |
|-----------|----------|----|-----|----|----------|-----------|---------------------|-----------|
| Δ dalton  | mass     |    | seq |    | Δ dalton | mass      | Δ dalton            | mass      |
|           | 58.02874 | 1  | G   | 18 |          |           |                     |           |
|           | 172.0717 | 2  | N   | 17 | 2031.014 |           | 2031.014            |           |
| +0.138092 | 285.1557 | 3  | I   | 16 | 1916.971 |           | 958.9893            | +0.001041 |
| +0.103006 | 414.1983 | 4  | E   | 15 | 1803.887 |           | 902.4472            | +0.303327 |
| -0.05894  | 527.2824 | 5  | L   | 14 | 1674.845 |           | 837.9259            | -8.3E-05  |
| +0.09926  | 598.3195 | 6  | A   | 13 | 1561.761 |           | 781.3839            | +0.238909 |
| -0.1716   | 685.3515 | 7  | S   | 12 | 1490.723 |           | 745.8653            | +0.281148 |
| +0.228318 | 772.3836 | 8  | S   | 11 | 1403.691 |           | 1403.691            |           |
| -0.09113  | 901.4262 | 9  | E   | 10 | 1316.659 |           | 658.8333            | +0.288823 |
|           | 998.4789 | 10 | P   | 9  | 1187.617 | -0.0811   | 594.312             | +0.231872 |
|           | 1126.537 | 11 | Q   | 8  | 1090.564 |           | 1090.564            |           |
|           | 1263.596 | 12 | H   | 7  | 962.5054 | +0.1907   | 481.7563            | -0.22326  |
| +0.361181 | 1410.665 | 13 | F   | 6  | 825.4465 |           | 825.4465            |           |
|           | 1511.712 | 14 | T   | 5  | 678.3781 | -0.13913  | 678.3781            |           |
|           | 1612.76  | 15 | T   | 4  | 577.3304 | -0.1277   | 577.3304            |           |
|           | 1713.808 | 16 | T   | 3  | 476.2827 |           | 476.2827            |           |
|           | 1812.876 | 17 | V   | 2  | 375.235  |           | 375.235             |           |
|           | 1913.924 | 18 | T   | 1  | 276.1666 | +0.075862 | 276.1666            |           |
|           |          | 19 | R   | 0  | 175.119  |           | 175.119             |           |

Scan number 3598 Raw file LNCAP\_Silac\_23F10\_set2\_05  
 Method ITMS; CID Pepti... 106.67

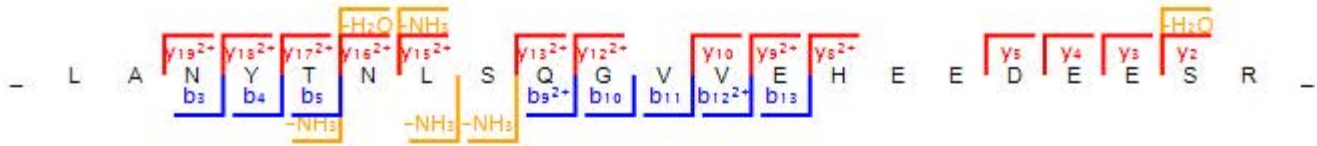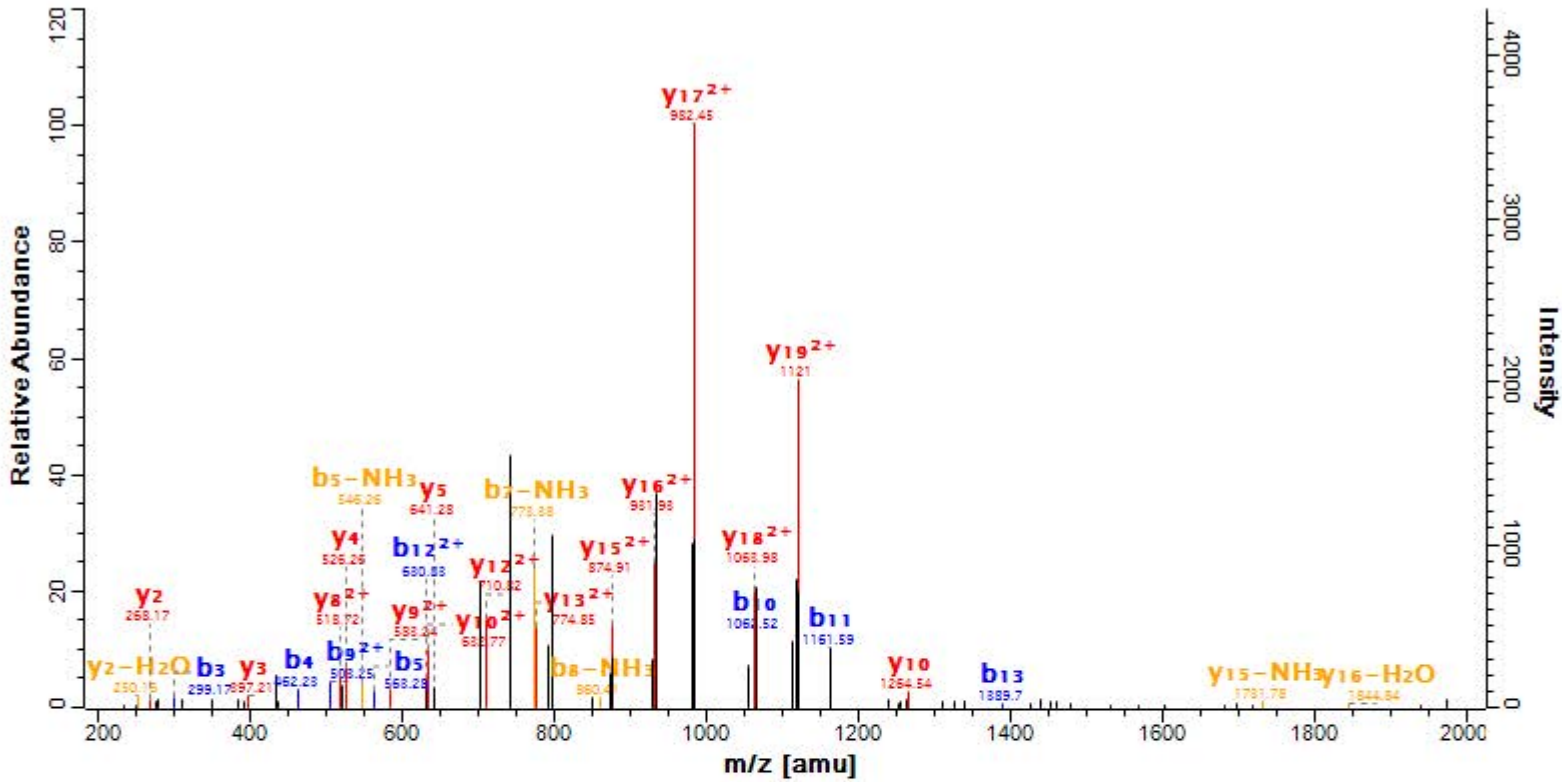

**precursor information**

|                   |                 |
|-------------------|-----------------|
| Mass:             | 2418.09408      |
| m/z:              | 807.03864       |
| Charge:           | 3+              |
| Retentiontime:    | 27.353332519531 |
| Score:            | 106.6661        |
| Mass Error [ppm]: | 0.22967         |
| PEP:              | 5.7842E-09      |
| Precursor Type:   | MULTI           |

**general information**

|                       |            |
|-----------------------|------------|
| Annotation:           | 16 of 21   |
| AminoAcids Coverage:  | 76 %       |
| Intensity Coverage:   | 48 %       |
| Peak Coverage:        | 33 %       |
| Protein Localisation: | 89 ... 109 |

| b <sup>2+</sup> ion |        | b ion    |        |    |     |    | y ion    |         | y <sup>2+</sup> ion |         |
|---------------------|--------|----------|--------|----|-----|----|----------|---------|---------------------|---------|
| Δ dalton            | mass   | Δ dalton | mass   |    | seq |    | Δ dalton | mass    | Δ dalton            | mass    |
|                     | 114.09 |          | 114.09 | 1  | L   | 20 |          |         |                     |         |
|                     | 185.13 |          | 185.13 | 2  | A   | 19 | 2312     |         | 2312                |         |
|                     | 299.17 | -0.043   | 299.17 | 3  | N   | 18 | 2241     |         | 1121                | +0.3078 |
|                     | 462.23 | +0.2206  | 462.23 | 4  | Y   | 17 | 2127     |         | 1064                | -0.115  |
|                     | 563.28 | +0.0614  | 563.28 | 5  | T   | 16 | 1963.9   |         | 982.45              | +0.2265 |
|                     | 677.33 |          | 677.33 | 6  | N   | 15 | 1862.8   |         | 931.93              | -0.083  |
|                     | 790.41 |          | 790.41 | 7  | L   | 14 | 1748.8   |         | 874.91              | -0.037  |
|                     | 877.44 |          | 877.44 | 8  | S   | 13 | 1635.7   |         | 1635.7              |         |
| +0.214              | 503.25 |          | 1005.5 | 9  | Q   | 12 | 1548.7   |         | 774.85              | +0.1563 |
|                     | 1062.5 | -0.424   | 1062.5 | 10 | G   | 11 | 1420.6   |         | 710.82              | +0.2897 |
|                     | 1161.6 | +0.2873  | 1161.6 | 11 | V   | 10 | 1363.6   |         | 1363.6              |         |
| -0.154              | 630.83 |          | 1260.7 | 12 | V   | 9  | 1264.5   | +0.3756 | 632.77              | +0.0148 |
|                     | 1389.7 | +0.2468  | 1389.7 | 13 | E   | 8  | 1165.5   |         | 583.24              | +0.1846 |
|                     | 1526.8 |          | 1526.8 | 14 | H   | 7  | 1036.4   |         | 518.72              | +0.0743 |
|                     | 1655.8 |          | 1655.8 | 15 | E   | 6  | 899.37   |         | 899.37              |         |
|                     | 1784.8 |          | 1784.8 | 16 | E   | 5  | 770.33   |         | 770.33              |         |
|                     | 1899.9 |          | 1899.9 | 17 | D   | 4  | 641.28   | +0.1195 | 641.28              |         |
|                     | 2028.9 |          | 2028.9 | 18 | E   | 3  | 526.26   | +0.1945 | 526.26              |         |
|                     | 2158   |          | 2158   | 19 | E   | 2  | 397.21   | -0.08   | 397.21              |         |
|                     | 2245   |          | 2245   | 20 | S   | 1  | 268.17   | +0.4166 | 268.17              |         |
|                     |        |          |        | 21 | R   | 0  | 181.14   |         | 181.14              |         |



Scan number 3867 Raw file LNCAP\_Silac\_23F10\_set2\_05  
 Method ITMS; CID Pepti... 105.14

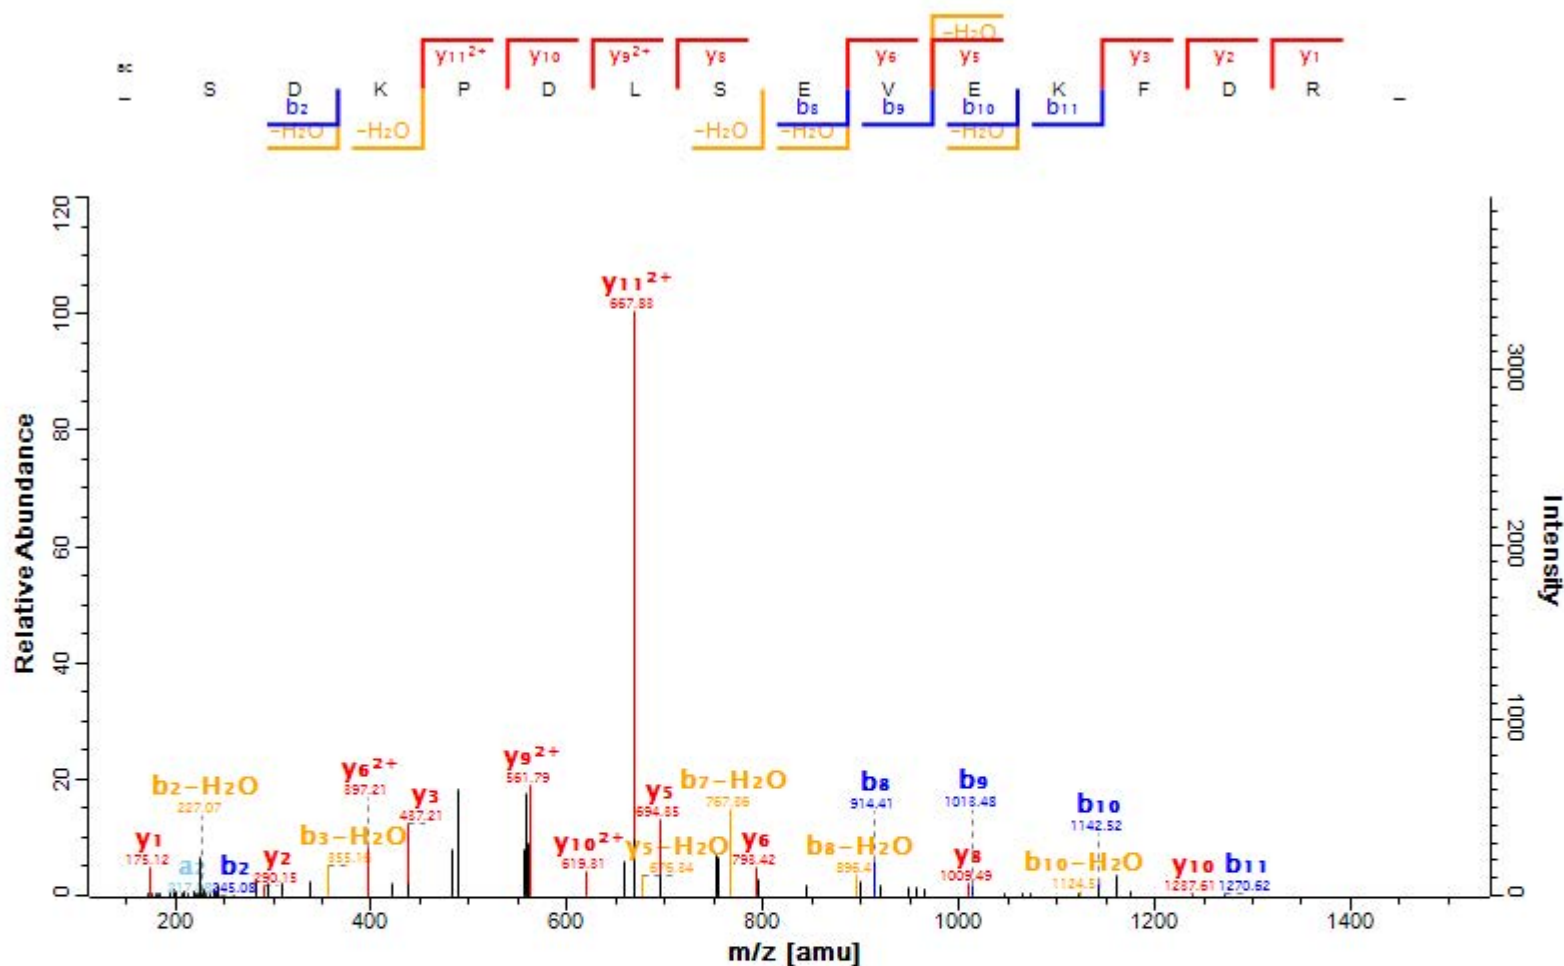

#### precursor information

|                   |                 |
|-------------------|-----------------|
| Mass:             | 1705.81605      |
| m/z:              | 569.61263       |
| Charge:           | 3+              |
| Retentiontime:    | 28.823268890380 |
| Score:            | 105.1393        |
| Mass Error [ppm]: | 0.090069        |
| PEP:              | 0.0039126       |
| Precursor Type:   | ISO             |

#### general information

|                       |          |
|-----------------------|----------|
| Annotation:           | 13 of 14 |
| AminoAcids Coverage:  | 93 %     |
| Intensity Coverage:   | 56 %     |
| Peak Coverage:        | 19 %     |
| Protein Localisation: | 2 ... 15 |

| a ion    |        | b ion    |        |    |     |    | y ion    |         | y <sup>2+</sup> ion |         |
|----------|--------|----------|--------|----|-----|----|----------|---------|---------------------|---------|
| Δ dalton | mass   | Δ dalton | mass   |    | seq |    | Δ dalton | mass    | Δ dalton            | mass    |
|          | 102.05 |          | 130.05 | 1  | S   | 13 |          |         |                     |         |
| +0.1452  | 217.08 | -0.005   | 245.08 | 2  | D   | 12 | 1577.8   |         | 1577.8              |         |
|          | 345.18 |          | 373.17 | 3  | K   | 11 | 1462.8   |         | 1462.8              |         |
|          | 442.23 |          | 470.22 | 4  | P   | 10 | 1334.7   |         | 667.83              | +0.2179 |
|          | 557.26 |          | 585.25 | 5  | D   | 9  | 1237.6   | +0.1017 | 619.31              | +0.0715 |
|          | 670.34 |          | 698.34 | 6  | L   | 8  | 1122.6   |         | 561.79              | +0.1101 |
|          | 757.37 |          | 785.37 | 7  | S   | 7  | 1009.5   | -0.053  | 1009.5              |         |
|          | 886.42 | +0.0804  | 914.41 | 8  | E   | 6  | 922.46   |         | 922.46              |         |
|          | 985.48 | +0.1337  | 1013.5 | 9  | V   | 5  | 793.42   | +0.0493 | 397.21              | +0.1678 |
|          | 1114.5 | -0.038   | 1142.5 | 10 | E   | 4  | 694.35   | +0.0655 | 694.35              |         |
|          | 1242.6 | -0.095   | 1270.6 | 11 | K   | 3  | 565.31   |         | 565.31              |         |
|          | 1389.7 |          | 1417.7 | 12 | F   | 2  | 437.21   | +0.0088 | 437.21              |         |
|          | 1504.7 |          | 1532.7 | 13 | D   | 1  | 290.15   | +0.0585 | 290.15              |         |
|          |        |          |        | 14 | R   | 0  | 175.12   | +0.0003 | 175.12              |         |

Scan number 391 Raw file LNCAP\_Silac\_23F10\_set2\_05  
 Method ITMS; CID Pepti... 286.7

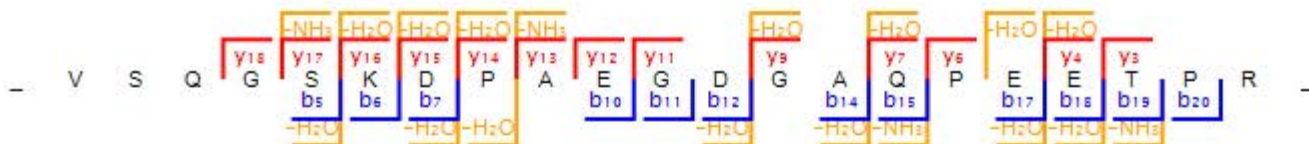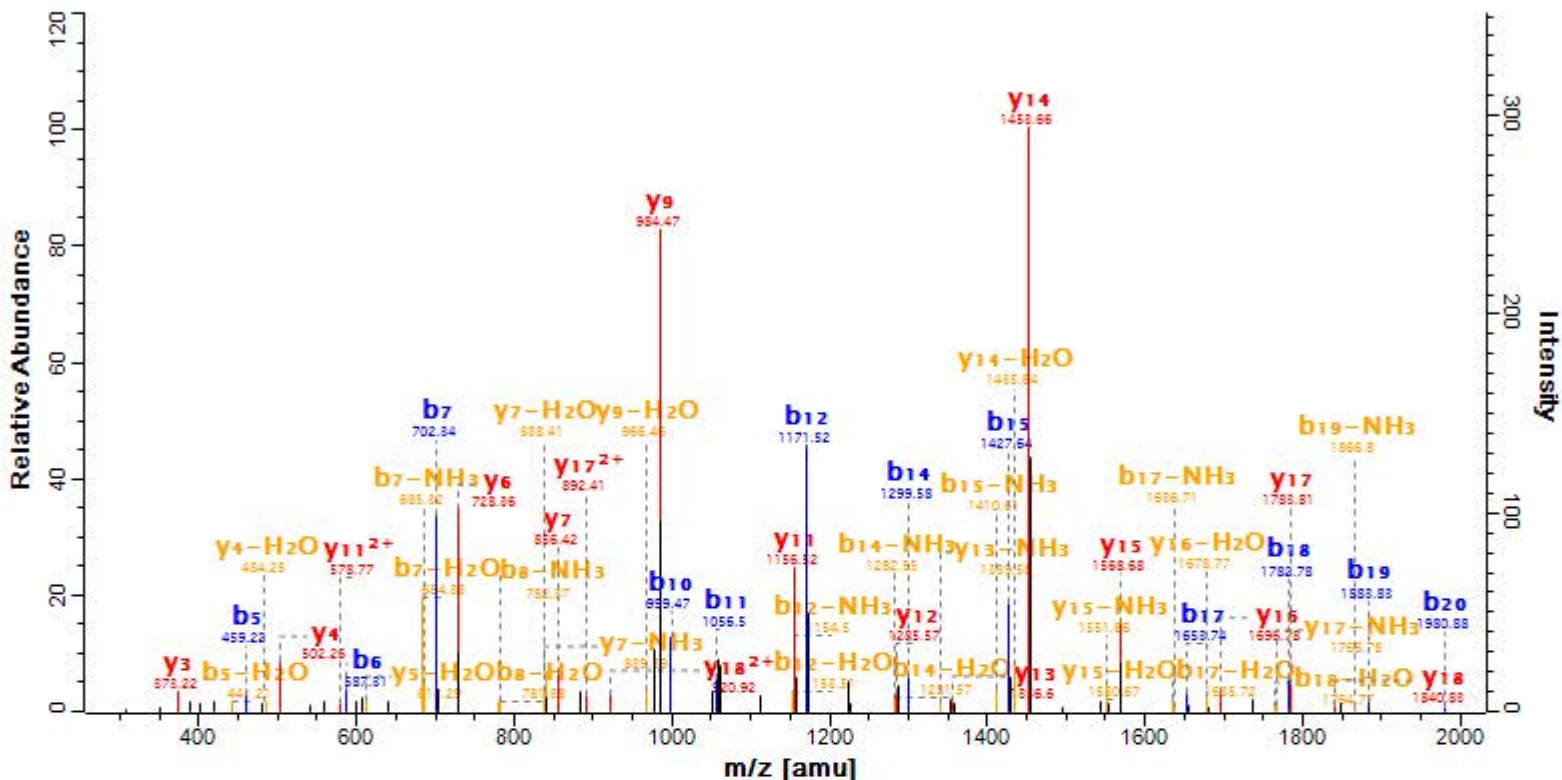

precursor information

|                   |                 |
|-------------------|-----------------|
| Mass:             | 2153.98371      |
| m/z:              | 1077.99913      |
| Charge:           | 2+              |
| Retentiontime:    | 7.5454382896423 |
| Score:            | 286.6989        |
| Mass Error [ppm]: | 0.553           |
| PEP:              | 1.1338E-112     |
| Precursor Type:   | MULTI           |

general information

|                       |             |
|-----------------------|-------------|
| Annotation:           | 17 of 21    |
| AminoAcids Coverage:  | 81 %        |
| Intensity Coverage:   | 72 %        |
| Peak Coverage:        | 57 %        |
| Protein Localisation: | 237 ... 257 |

| b ion     |          |    |     |    |          | y ion     |          | y <sup>2+</sup> ion |  |
|-----------|----------|----|-----|----|----------|-----------|----------|---------------------|--|
| Δ dalton  | mass     |    | seq |    | Δ dalton | mass      | Δ dalton | mass                |  |
|           | 100.0757 | 1  | V   | 20 |          |           |          |                     |  |
|           | 187.1077 | 2  | S   | 19 | 2055.921 |           | 2055.921 |                     |  |
|           | 315.1663 | 3  | Q   | 18 | 1968.889 |           | 1968.889 |                     |  |
|           | 372.1878 | 4  | G   | 17 | 1840.831 | -0.01168  | 920.919  | +0.041668           |  |
| +0.052795 | 459.2198 | 5  | S   | 16 | 1783.809 | +0.000625 | 892.4083 | +0.125886           |  |
| -0.14922  | 587.3148 | 6  | K   | 15 | 1696.777 | +0.327941 | 1696.777 |                     |  |
| +0.019145 | 702.3417 | 7  | D   | 14 | 1568.682 | -0.0384   | 1568.682 |                     |  |
|           | 799.3945 | 8  | P   | 13 | 1453.655 | -0.10716  | 1453.655 |                     |  |
|           | 870.4316 | 9  | A   | 12 | 1356.603 | +0.345995 | 1356.603 |                     |  |
| -0.21159  | 999.4742 | 10 | E   | 11 | 1285.565 | -0.09675  | 1285.565 |                     |  |
| +0.11753  | 1056.496 | 11 | G   | 10 | 1156.523 | -0.02083  | 578.7651 | -0.0583             |  |
| -0.04918  | 1171.523 | 12 | D   | 9  | 1099.501 |           | 1099.501 |                     |  |
|           | 1228.544 | 13 | G   | 8  | 984.4745 | -0.03261  | 984.4745 |                     |  |
| -0.14878  | 1299.581 | 14 | A   | 7  | 927.453  |           | 927.453  |                     |  |
| +0.055585 | 1427.64  | 15 | Q   | 6  | 856.4159 | +0.044527 | 856.4159 |                     |  |
|           | 1524.692 | 16 | P   | 5  | 728.3573 | -0.00334  | 728.3573 |                     |  |
| +0.005272 | 1653.735 | 17 | E   | 4  | 631.3046 |           | 631.3046 |                     |  |
| -0.12997  | 1782.778 | 18 | E   | 3  | 502.262  | +0.144262 | 502.262  |                     |  |
| -0.00724  | 1883.825 | 19 | T   | 2  | 373.2194 | +0.179165 | 373.2194 |                     |  |
| +0.028741 | 1980.878 | 20 | P   | 1  | 272.1717 |           | 272.1717 |                     |  |
|           |          | 21 | R   | 0  | 175.119  |           | 175.119  |                     |  |

Scan number 393 Raw file LNCAP\_Silac\_23F10\_set2\_05  
 Method ITMS: CID Pepti... 105.14

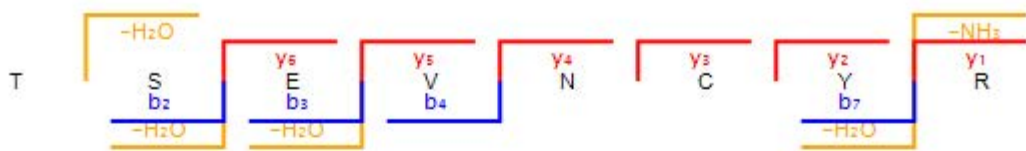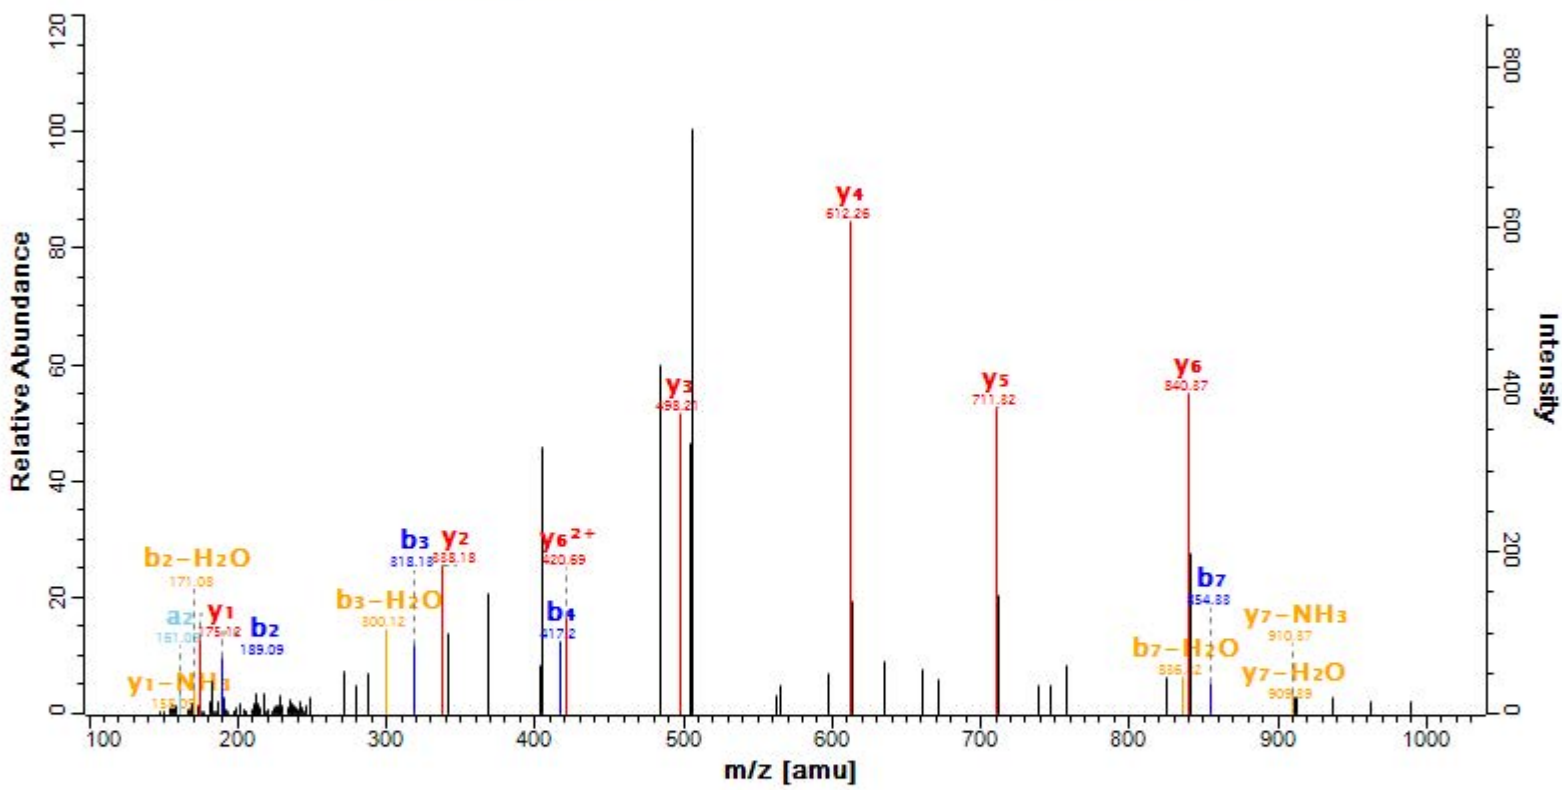

precursor information

|                       |                 |
|-----------------------|-----------------|
| Mass:                 | 1027.44102      |
| m/z:                  | 514.72779       |
| Charge:               | 2+              |
| Retentiontime:        | 7.5638732910156 |
| Score:                | 105.1356        |
| Mass Error (ppm):     | 1.6826          |
| g PEP:                | 0.0075731       |
| Annotation:           | 7 of 8          |
| AminoAcids Coverage:  | 88 %            |
| Intensity Coverage:   | 37 %            |
| Peak Coverage:        | 16 %            |
| Protein Localisation: | 153 ... 160     |

| a ion    |        | b ion    |        |     |   |          | y ion  |          | y <sup>2+</sup> ion |  |
|----------|--------|----------|--------|-----|---|----------|--------|----------|---------------------|--|
| Δ dalton | mass   | Δ dalton | mass   | seq |   | Δ dalton | mass   | Δ dalton | mass                |  |
|          | 74.06  |          | 102.05 | 1   | T | 7        |        |          |                     |  |
| +0.0957  | 161.09 | +0.0818  | 189.09 | 2   | S | 6        | 927.4  |          | 927.4               |  |
|          | 290.13 | -0.003   | 318.13 | 3   | E | 5        | 840.37 | +0.0438  | 420.69              |  |
|          | 389.2  | +0.0411  | 417.2  | 4   | V | 4        | 711.32 | -0.013   | 711.32              |  |
|          | 503.25 |          | 531.24 | 5   | N | 3        | 612.26 | +0.0121  | 612.26              |  |
|          | 663.28 |          | 691.27 | 6   | C | 2        | 498.21 | +0.1131  | 498.21              |  |
|          | 826.34 | -0.07    | 854.33 | 7   | Y | 1        | 338.18 | +0.0017  | 338.18              |  |
|          |        |          |        | 8   | R | 0        | 175.12 | +0.0769  | 175.12              |  |

Scan number 3997 Raw file LNCAP\_Silac\_23F10\_set2\_05  
 Method ITMS; CID Pepti... 182.39

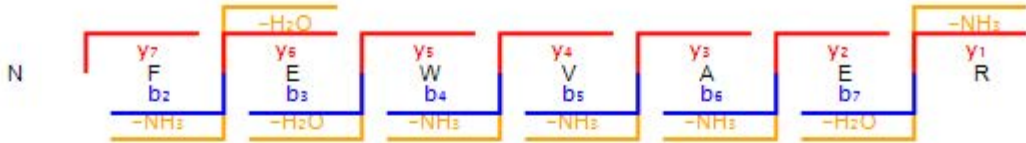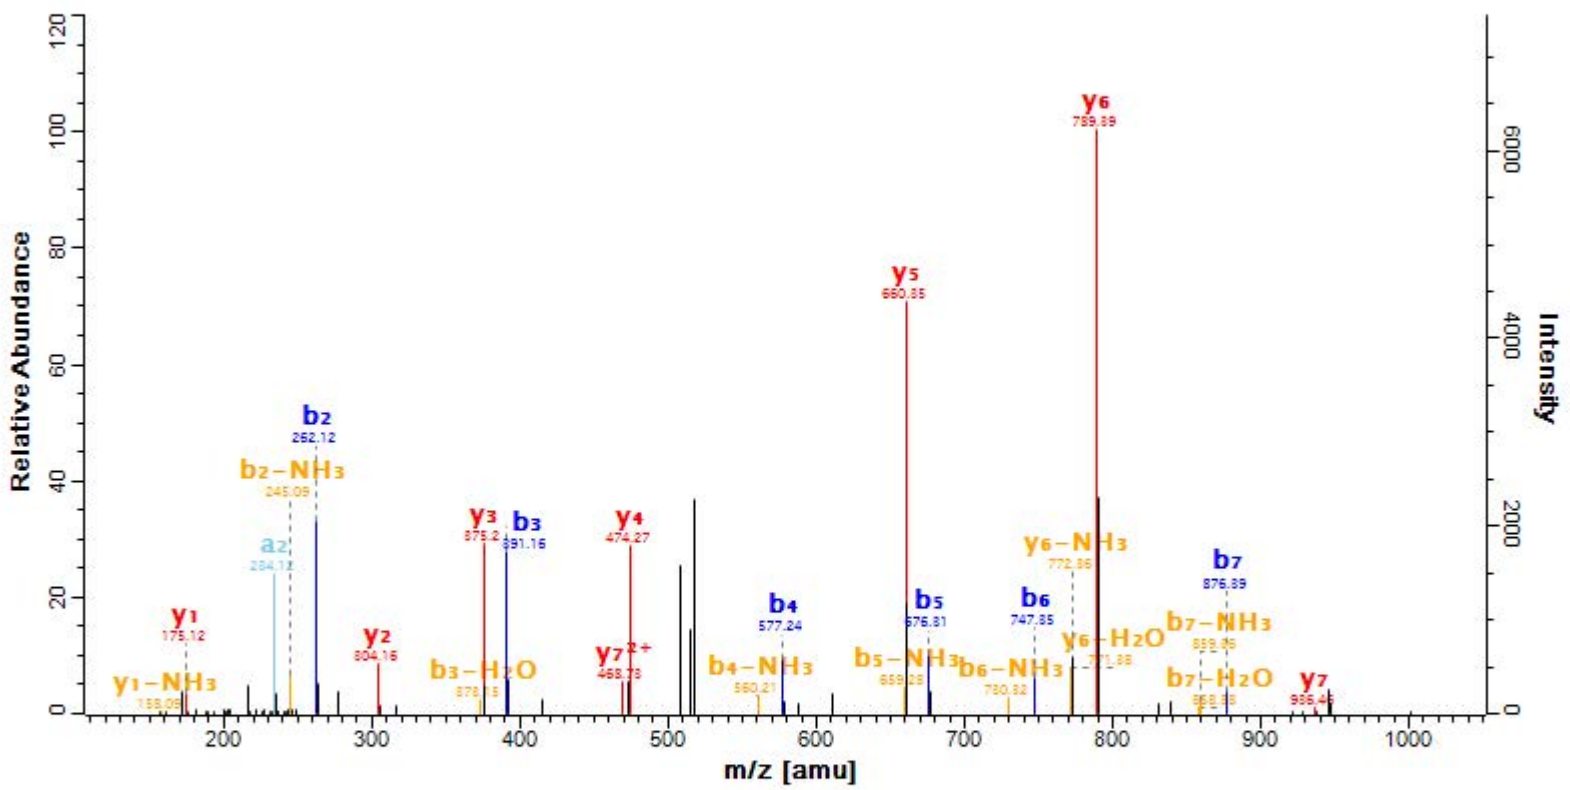

precursor information

|                       |                 |
|-----------------------|-----------------|
| Mass:                 | 1049.49326      |
| m/z:                  | 525.7539        |
| Charge:               | 2+              |
| Retentiontime:        | 29.556116104126 |
| Score:                | 182.391         |
| Mass Error [ppm]:     | 0.20219         |
| g PEP:                | 4.709E-07       |
| Annotation:           | 7 of 8          |
| AminoAcids Coverage:  | 88 %            |
| Intensity Coverage:   | 64 %            |
| Peak Coverage:        | 26 %            |
| Protein Localisation: | 274 ... 281     |

| a ion    |        | b ion    |        |   |     |          | y ion  |          | y <sup>2+</sup> ion |         |
|----------|--------|----------|--------|---|-----|----------|--------|----------|---------------------|---------|
| Δ dalton | mass   | Δ dalton | mass   |   | seq | Δ dalton | mass   | Δ dalton | mass                |         |
|          | 87.055 |          | 115.05 | 1 | N   | 7        |        |          |                     |         |
| +0.0443  | 234.12 | -0.026   | 262.12 | 2 | F   | 6        | 936.46 | +0.0961  | 468.73              | +0.0285 |
|          | 363.17 | +0.0254  | 391.16 | 3 | E   | 5        | 789.39 | -0.003   | 789.39              |         |
|          | 549.25 | +0.0136  | 577.24 | 4 | W   | 4        | 660.35 | +0.0146  | 660.35              |         |
|          | 648.31 | +0.0236  | 676.31 | 5 | V   | 3        | 474.27 | +0.0971  | 474.27              |         |
|          | 719.35 | -0.024   | 747.35 | 6 | A   | 2        | 375.2  | +0.0053  | 375.2               |         |
|          | 848.39 | +0.0453  | 876.39 | 7 | E   | 1        | 304.16 | -0.005   | 304.16              |         |
|          |        |          |        | 8 | R   | 0        | 175.12 | +0.0154  | 175.12              |         |

Scan number 4039 Raw file LNCAP\_Silac\_23F10\_set2\_05  
 Method ITMS; CID Pepti... 65.22

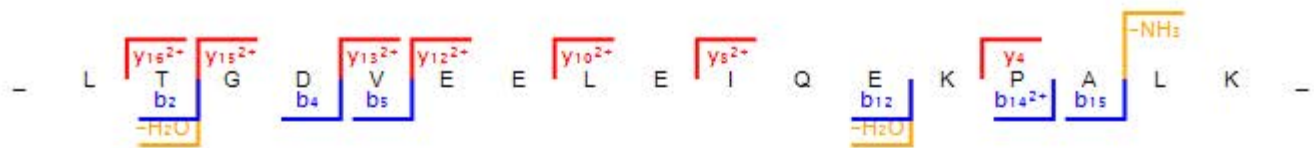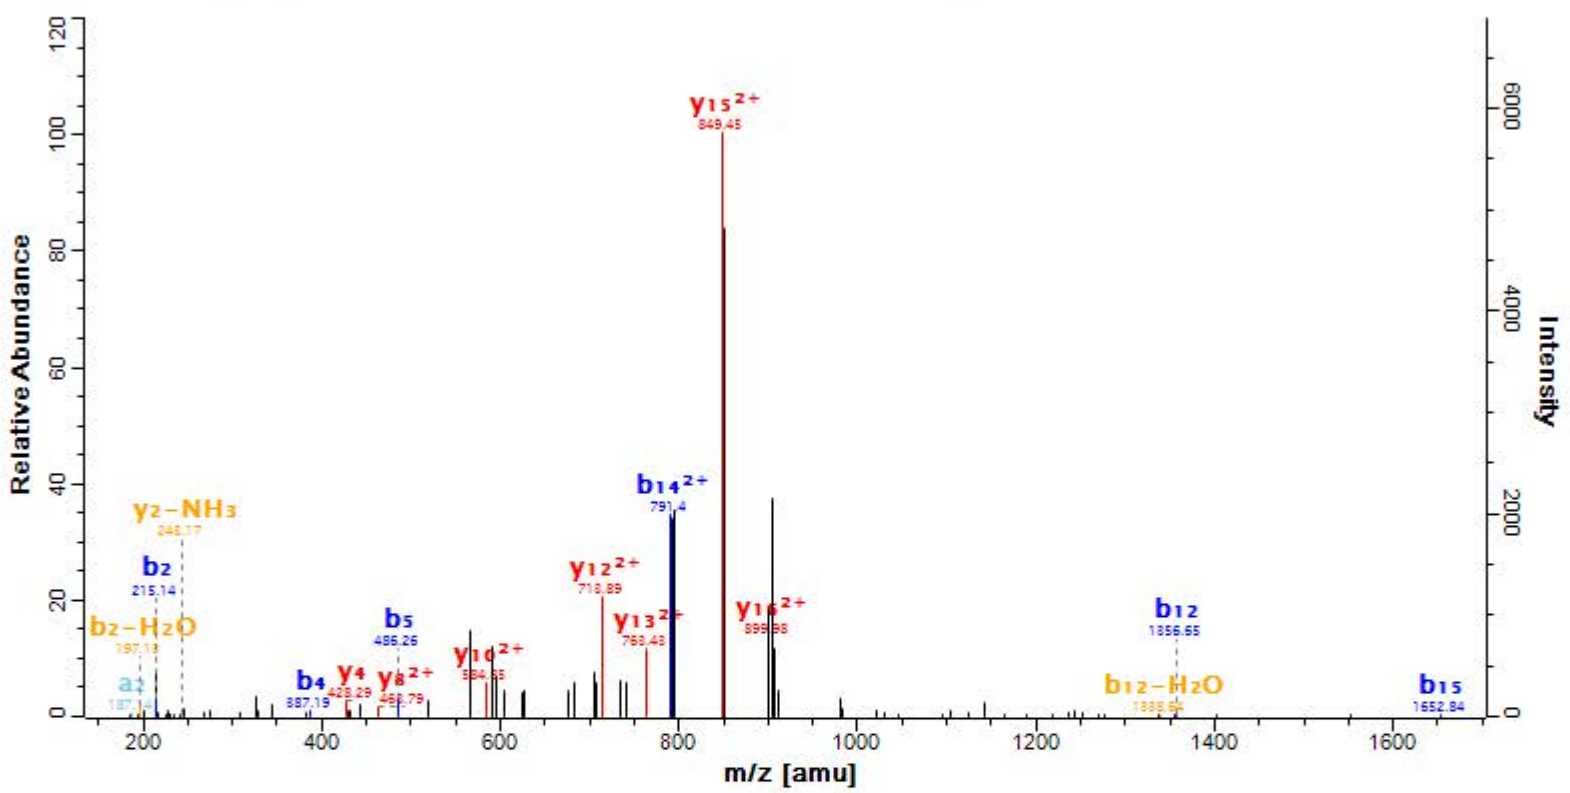

**precursor information**

|                   |                 |
|-------------------|-----------------|
| Mass:             | 1911.01985      |
| m/z:              | 638.01389       |
| Charge:           | 3+              |
| Retentiontime:    | 29.787187576293 |
| Score:            | 65.2186         |
| Mass Error [ppm]: | -0.11692        |
| PEP:              | 0.0010681       |
| Precursor Type:   | MULTI           |

**general information**

|                       |             |
|-----------------------|-------------|
| Annotation:           | 11 of 17    |
| AminoAcids Coverage:  | 65 %        |
| Intensity Coverage:   | 30 %        |
| Peak Coverage:        | 17 %        |
| Protein Localisation: | 533 ... 549 |

|        | a ion         | b <sup>2+</sup> ion | b ion         |     |    | y ion         | y <sup>2+</sup> ion |       |        |       |
|--------|---------------|---------------------|---------------|-----|----|---------------|---------------------|-------|--------|-------|
|        | Δ dalton mass | Δ dalton mass       | Δ dalton mass | seq |    | Δ dalton mass | Δ dalton mass       |       |        |       |
|        | 86.1          | 114.1               | 114.1         | 1   | L  | 16            |                     |       |        |       |
| +0.213 | 87.1          | 215.1               | +0.036        | 2   | T  | 15            | 1799                | 900   | -0.01  |       |
|        | 244.2         | 272.2               | 272.2         | 3   | G  | 14            | 1698                | 849.5 | -0.01  |       |
|        | 359.2         | 387.2               | +0.133        | 4   | D  | 13            | 1641                | 1641  |        |       |
|        | 458.3         | 486.3               | -0.03         | 5   | V  | 12            | 1526                | 763.4 | +0.009 |       |
|        | 587.3         | 615.3               |               | 6   | E  | 11            | 1427                | 713.9 | +0.151 |       |
|        | 716.3         | 744.3               | 744.3         | 7   | E  | 10            | 1298                | 1298  |        |       |
|        | 829.4         | 857.4               | 857.4         | 8   | L  | 9             | 1169                | 584.9 | -0.21  |       |
|        | 958.5         | 986.5               | 986.5         | 9   | E  | 8             | 1056                | 1056  |        |       |
|        | 1072          | 1100                | 1100          | 10  | I  | 7             | 926.6               | 463.8 | -0.28  |       |
|        | 1200          | 1228                | 1228          | 11  | Q  | 6             | 813.5               | 813.5 |        |       |
|        | 1329          | 1357                | -0.13         | 12  | E  | 5             | 685.4               | 685.4 |        |       |
|        | 1457          | 1485                |               | 13  | K  | 4             | 556.4               | 556.4 |        |       |
|        | 1554          | +0.05               | 1791.4        |     | 14 | P             | 3                   | 428.3 | +0.124 | 428.3 |
|        | 1625          | 1653                | -0.09         | 15  | A  | 2             | 331.2               | 331.2 |        |       |
|        | 1738          | 1766                | 1766          | 16  | L  | 1             | 260.2               | 260.2 |        |       |
|        |               |                     |               | 17  | K  | 0             | 147.1               | 147.1 |        |       |

Scan number 4149 Raw file LNCAP\_Silac\_23F10\_set2\_05  
 Method ITMS; CID Pepti... 83.14

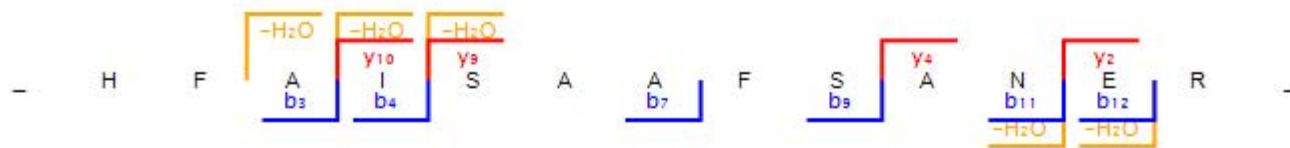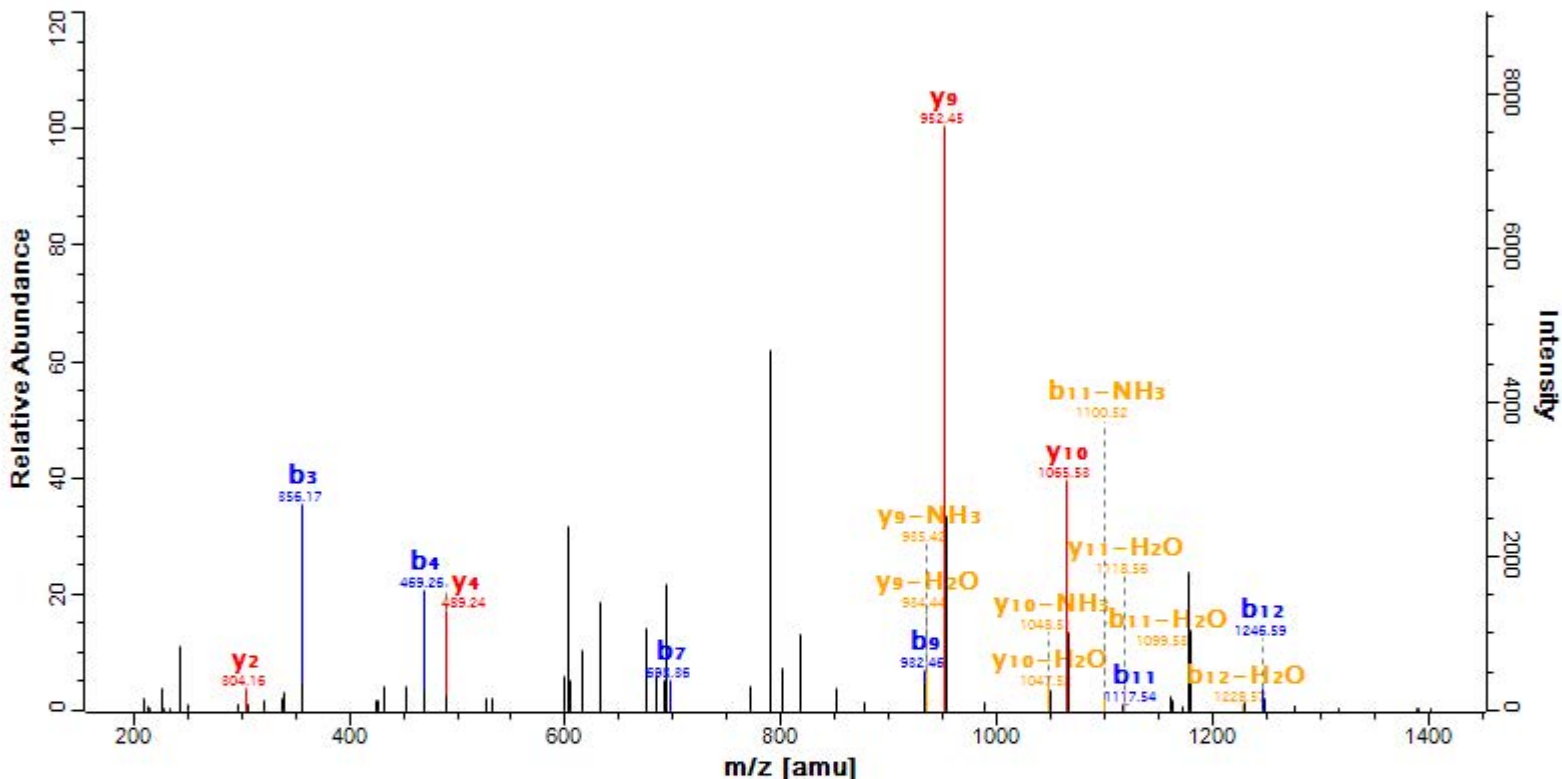

**precursor information**

|                   |                 |
|-------------------|-----------------|
| Mass:             | 1419.68968      |
| m/z:              | 710.85211       |
| Charge:           | 2+              |
| Retentiontime:    | 30.391849517822 |
| Score:            | 83.13724        |
| Mass Error [ppm]: | 0.11598         |
| PEP:              | 0.00068587      |
| Precursor Type:   | MULTI           |

**general information**

|                       |             |
|-----------------------|-------------|
| Annotation:           | 8 of 13     |
| AminoAcids Coverage:  | 62 %        |
| Intensity Coverage:   | 39 %        |
| Peak Coverage:        | 22 %        |
| Protein Localisation: | 141 ... 153 |

| b ion      |               |     |   | y ion    |               |            |
|------------|---------------|-----|---|----------|---------------|------------|
| Δ dalton   | mass          | seq |   | Δ dalton | mass          |            |
|            | 138.066188329 | 1   | H | 12       |               |            |
|            | 285.134602245 | 2   | F | 11       | 1283.63787651 |            |
| -0.0505612 | 356.171716033 | 3   | A | 10       | 1136.56946259 |            |
| -0.0478943 | 469.255780013 | 4   | I | 9        | 1065.5323488  | -0.0123293 |
|            | 556.287808423 | 5   | S | 8        | 952.448284824 | +0.0119813 |
|            | 627.324922211 | 6   | A | 7        | 865.416256414 |            |
| -0.096472  | 698.362035999 | 7   | A | 6        | 794.379142626 |            |
|            | 845.430449915 | 8   | F | 5        | 723.342028838 |            |
| -0.1153714 | 932.462478325 | 9   | S | 4        | 576.273614922 |            |
|            | 1003.49959211 | 10  | A | 3        | 489.241586512 | +0.0302641 |
| -0.0283594 | 1117.54251956 | 11  | N | 2        | 418.204472724 |            |
| -0.0080863 | 1246.58511266 | 12  | E | 1        | 304.161545277 | -0.062119  |
|            |               | 13  | R | 0        | 175.118952181 |            |

Scan number 4417 Raw file LNCAP\_Silac\_23F10\_set2\_05  
 Method ITMS; CID Pepti... 90.11

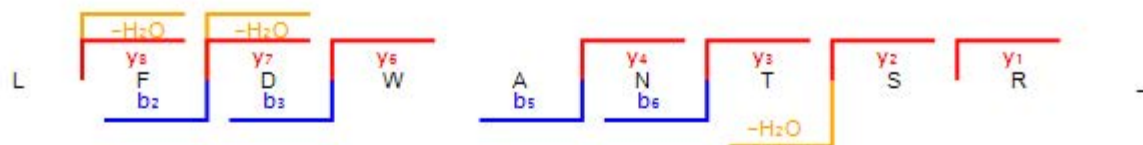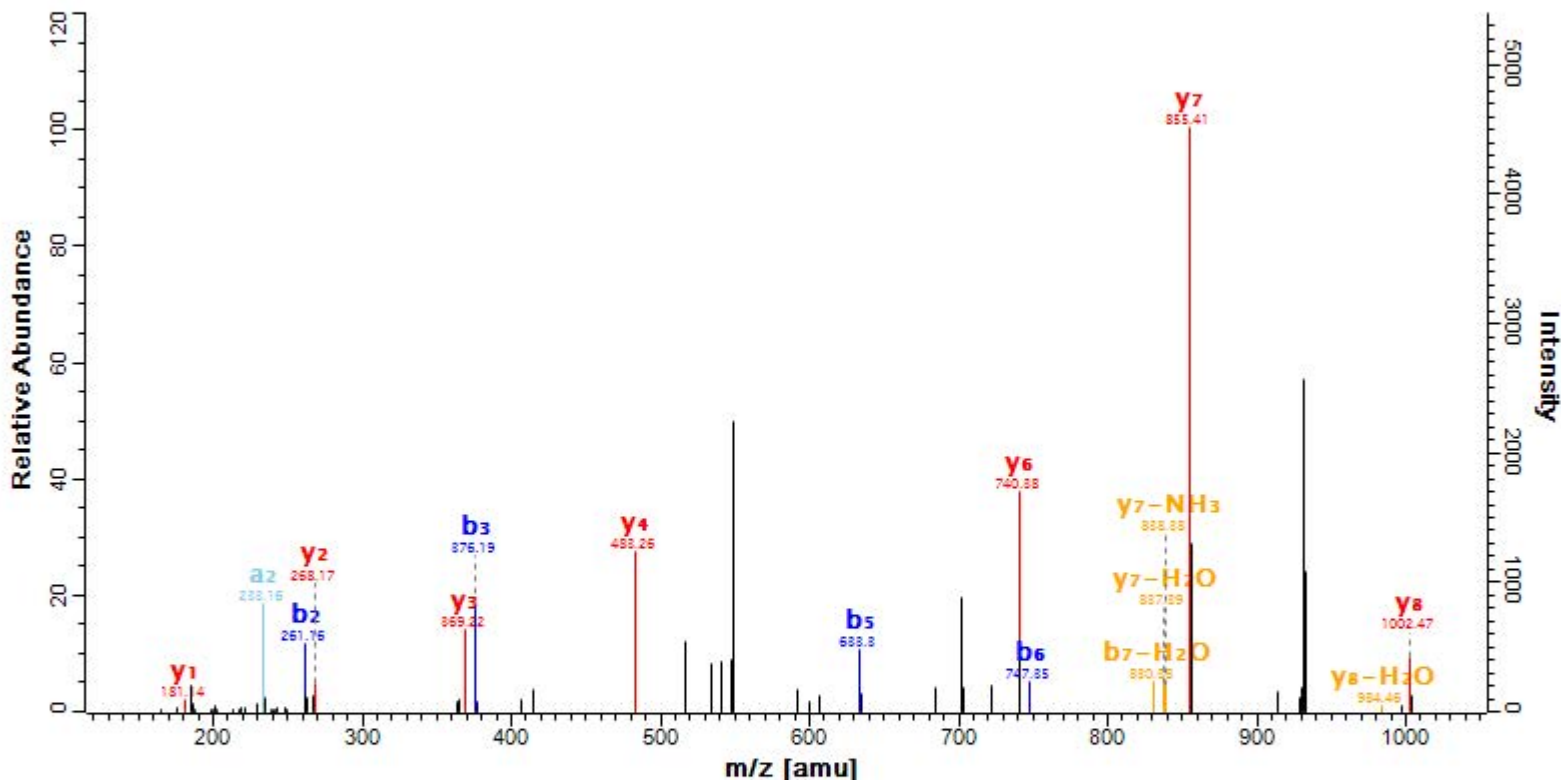

#### precursor information

|                       |                 |
|-----------------------|-----------------|
| Mass:                 | 1108.53045      |
| m/z:                  | 555.2725        |
| Charge:               | 2+              |
| Retentiontime:        | 31.942998886108 |
| Score:                | 90.10822        |
| Mass Error [ppm]:     | 0.26025         |
| PEP:                  | 0.005261        |
| Precursor Type:       | MULTI           |
| Annotation:           | 8 of 9          |
| AminoAcids Coverag    | 89 %            |
| Intensity Coverage:   | 46 %            |
| Peak Coverage:        | 21 %            |
| Protein Localisation: | 395 ... 403     |

| a ion     |          | b ion     |          | seq |   | y ion    |                    |
|-----------|----------|-----------|----------|-----|---|----------|--------------------|
| Δ dalton  | mass     | Δ dalton  | mass     |     |   | Δ dalton | mass               |
|           | 86.09643 |           | 114.0913 | 1   | L | 8        |                    |
| +0.002091 | 233.1648 | -0.0762   | 261.1598 | 2   | F | 7        | 1002.473 +0.037426 |
|           | 348.1918 | +0.076486 | 376.1867 | 3   | D | 6        | 855.4051 +0.0221   |
|           | 534.2711 |           | 562.266  | 4   | W | 5        | 740.3781 -0.03055  |
|           | 605.3082 | -0.07247  | 633.3031 | 5   | A | 4        | 554.2988           |
|           | 719.3511 | -0.0142   | 747.3461 | 6   | N | 3        | 483.2617 -0.01239  |
|           | 820.3988 |           | 848.3937 | 7   | T | 2        | 369.2188 +0.071312 |
|           | 907.4308 |           | 935.4258 | 8   | S | 1        | 268.1711 +0.137423 |
|           |          |           |          | 9   | R | 0        | 181.1391 -0.08493  |

Scan number 4439 Raw file LNCAP\_Silac\_23F10\_set2\_05  
 Method ITMS; CID Pepti... 143.52

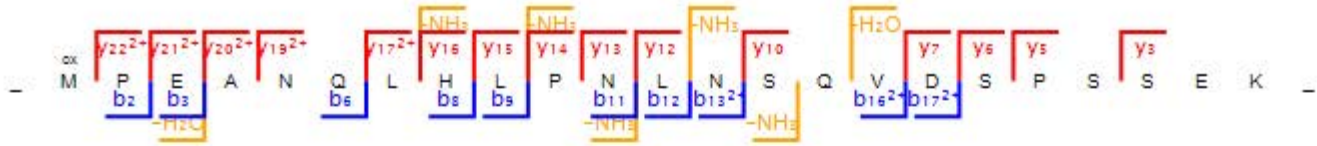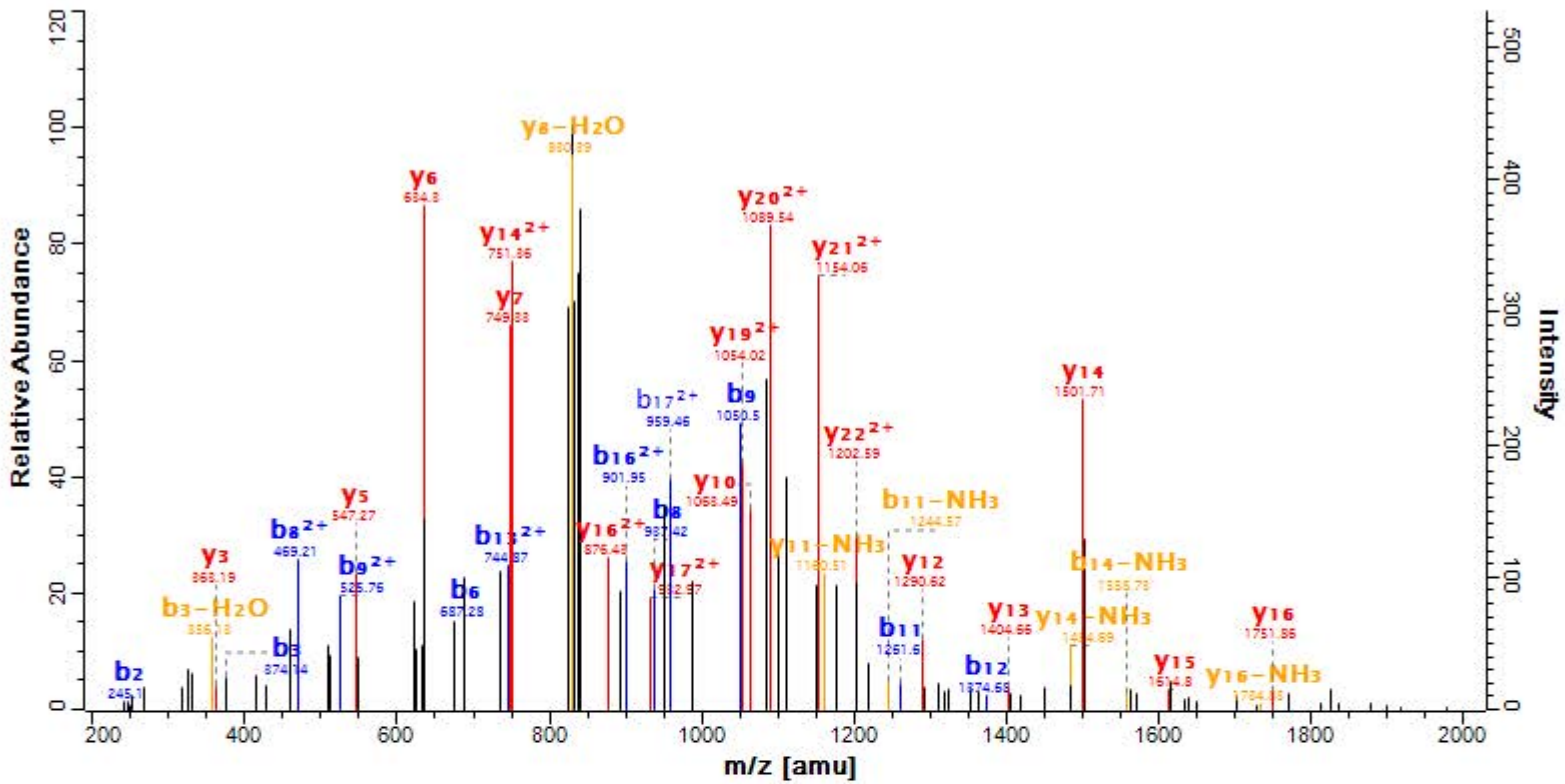

**precursor information**

|                   |                 |
|-------------------|-----------------|
| Mass:             | 2550.20058      |
| m/z:              | 851.07414       |
| Charge:           | 3+              |
| Retentiontime:    | 32.071010589599 |
| Score:            | 143.5151        |
| Mass Error [ppm]: | -0.56825        |
| PEP:              | 5.6095E-21      |
| Precursor Type:   | MULTI           |

| b <sup>2+</sup> ion |         | b ion    |        | seq |   |    | y ion    |         | y <sup>2+</sup> ion |         |
|---------------------|---------|----------|--------|-----|---|----|----------|---------|---------------------|---------|
| Δ dalton            | mass    | Δ dalton | mass   |     |   |    | Δ dalton | mass    | Δ dalton            | mass    |
|                     | 148.04  |          | 148.04 | 1   | M | 22 |          |         |                     |         |
|                     | 245.1   | +0.0445  | 245.1  | 2   | P | 21 | 2404.2   |         | 1202.6              | +0.23   |
|                     | 374.14  | -0.015   | 374.14 | 3   | E | 20 | 2307.1   |         | 1154.1              | +0.0527 |
|                     | 445.18  |          | 445.18 | 4   | A | 19 | 2178.1   |         | 1089.5              | +0.3157 |
|                     | 559.22  |          | 559.22 | 5   | N | 18 | 2107     |         | 1054                | +0.025  |
|                     | 687.28  | +0.1345  | 687.28 | 6   | Q | 17 | 1993     |         | 1993                |         |
|                     | 800.36  |          | 800.36 | 7   | L | 16 | 1864.9   |         | 932.97              | +0.2095 |
|                     | +0.1274 | +0.1636  | 937.42 | 8   | H | 15 | 1751.9   | -0.108  | 876.43              | +0.1251 |
|                     | +0.4554 | -0.054   | 1050.5 | 9   | L | 14 | 1614.8   | -0.085  | 1614.8              |         |
|                     | 1147.6  |          | 1147.6 | 10  | P | 13 | 1501.7   | -0.134  | 751.36              | +0.3256 |
|                     | 1261.6  | +0.0575  | 1261.6 | 11  | N | 12 | 1404.7   | +0.0603 | 1404.7              |         |
|                     | 1374.7  | +0.265   | 1374.7 | 12  | L | 11 | 1290.6   | +0.3788 | 1290.6              |         |
|                     | -0.003  |          | 1488.7 | 13  | N | 10 | 1177.5   |         | 1177.5              |         |
|                     | 1575.8  |          | 1575.8 | 14  | S | 9  | 1063.5   | -0.041  | 1063.5              |         |
|                     | 1703.8  |          | 1703.8 | 15  | Q | 8  | 976.46   |         | 976.46              |         |
|                     | +0.1319 |          | 1802.9 | 16  | V | 7  | 848.4    |         | 848.4               |         |
|                     | +0.2726 |          | 1917.9 | 17  | D | 6  | 749.33   | +0.0287 | 749.33              |         |
|                     | 2004.9  |          | 2004.9 | 18  | S | 5  | 634.3    | +0.0206 | 634.3               |         |
|                     | 2102    |          | 2102   | 19  | P | 4  | 547.27   | +0.0771 | 547.27              |         |
|                     | 2189    |          | 2189   | 20  | S | 3  | 450.22   |         | 450.22              |         |
|                     | 2276.1  |          | 2276.1 | 21  | S | 2  | 363.19   | +0.1015 | 363.19              |         |
|                     | 2405.1  |          | 2405.1 | 22  | E | 1  | 276.16   |         | 276.16              |         |
|                     |         |          |        | 23  | K | 0  | 147.11   |         | 147.11              |         |

**general information**

|                       |             |
|-----------------------|-------------|
| Annotation:           | 20 of 23    |
| AminoAcids Coverage:  | 87 %        |
| Intensity Coverage:   | 49 %        |
| Peak Coverage:        | 33 %        |
| Protein Localisation: | 733 ... 755 |



Scan number 4781 Raw file LNCAP\_Silac\_23F10\_set2\_05  
 Method ITMS; CID Pepti... 123.72

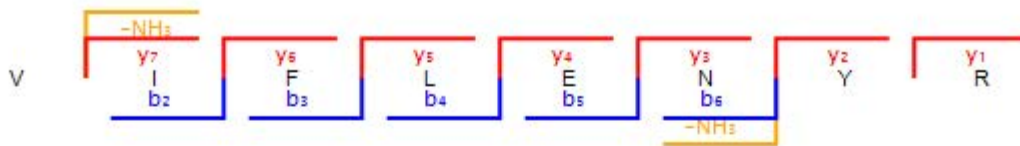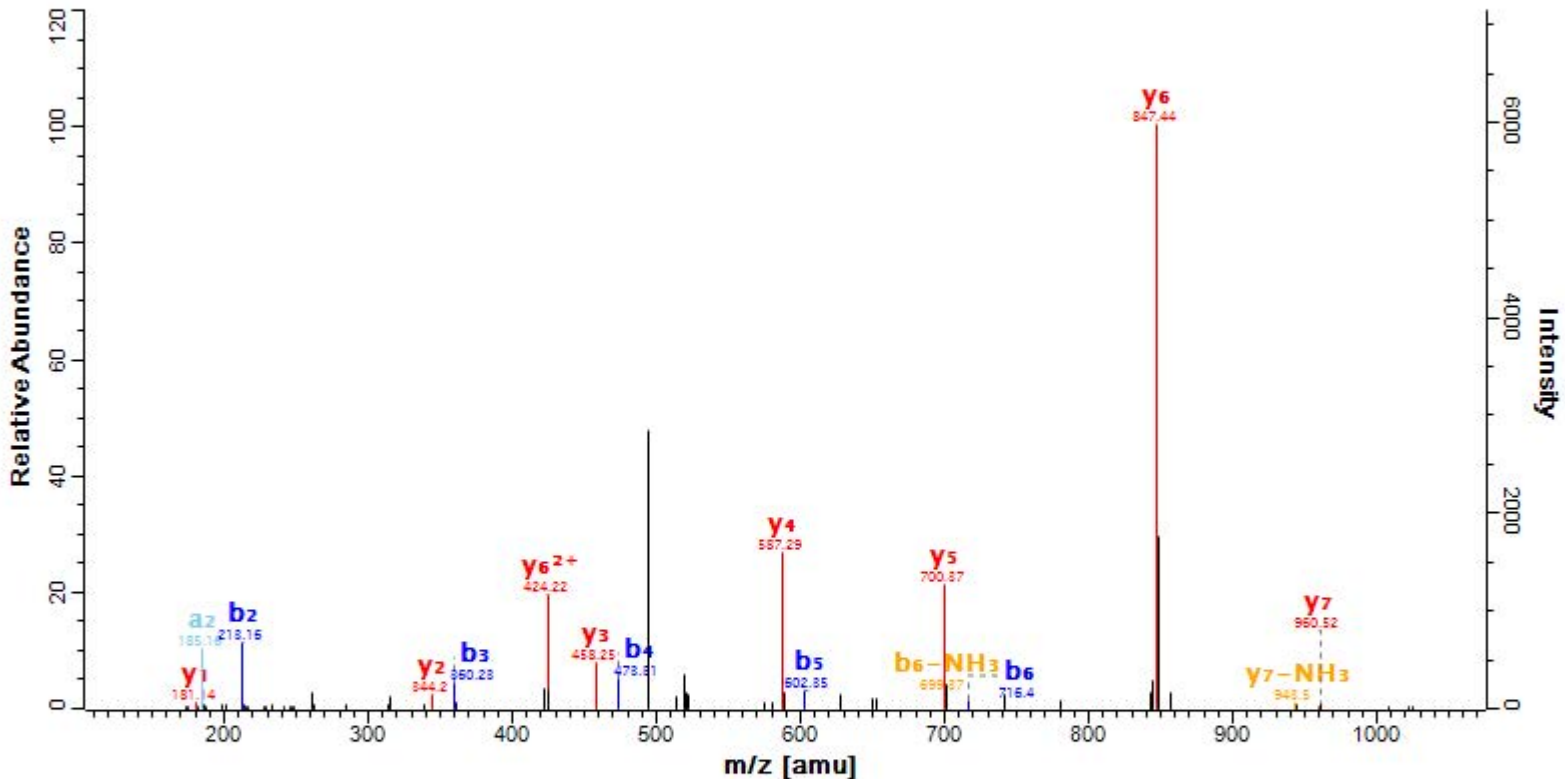

#### precursor information

|                       |                 |
|-----------------------|-----------------|
| Mass:                 | 1052.56528      |
| m/z:                  | 527.28992       |
| Charge:               | 2+              |
| Retentiontime:        | 34.056735992431 |
| Score:                | 123.7204        |
| Mass Error [ppm]:     | -0.18794        |
| g PEP:                | 0.0010535       |
| Annotation:           | 7 of 8          |
| AminoAcids Coverage:  | 88 %            |
| Intensity Coverage:   | 60 %            |
| Peak Coverage:        | 21 %            |
| Protein Localisation: | 643 ... 650     |

| a ion    |        | b ion    |        |   |     |          | y ion  |          | y <sup>2+</sup> ion |  |
|----------|--------|----------|--------|---|-----|----------|--------|----------|---------------------|--|
| Δ dalton | mass   | Δ dalton | mass   |   | seq | Δ dalton | mass   | Δ dalton | mass                |  |
|          | 72.081 |          | 100.08 | 1 | V   |          |        |          |                     |  |
| +0.0207  | 185.16 | -0.061   | 213.16 | 2 | I   | 6        | 960.52 | -0.199   | 960.52              |  |
|          | 332.23 | +0.0832  | 360.23 | 3 | F   | 5        | 847.44 | -0.075   | 424.22              |  |
|          | 445.32 | -0.178   | 473.31 | 4 | L   | 4        | 700.37 | +0.0271  | 700.37              |  |
|          | 574.36 | +0.039   | 602.35 | 5 | E   | 3        | 587.29 | +0.0571  | 587.29              |  |
|          | 688.4  | +0.0103  | 716.4  | 6 | N   | 2        | 458.25 | +0.151   | 458.25              |  |
|          | 851.47 |          | 879.46 | 7 | Y   | 1        | 344.2  | +0.1352  | 344.2               |  |
|          |        |          |        | 8 | R   | 0        | 181.14 | -0.014   | 181.14              |  |

Scan number 5165 Raw file LNCAP\_Silac\_23F10\_set2\_05  
 Method ITMS; CID Pepti... 150.4

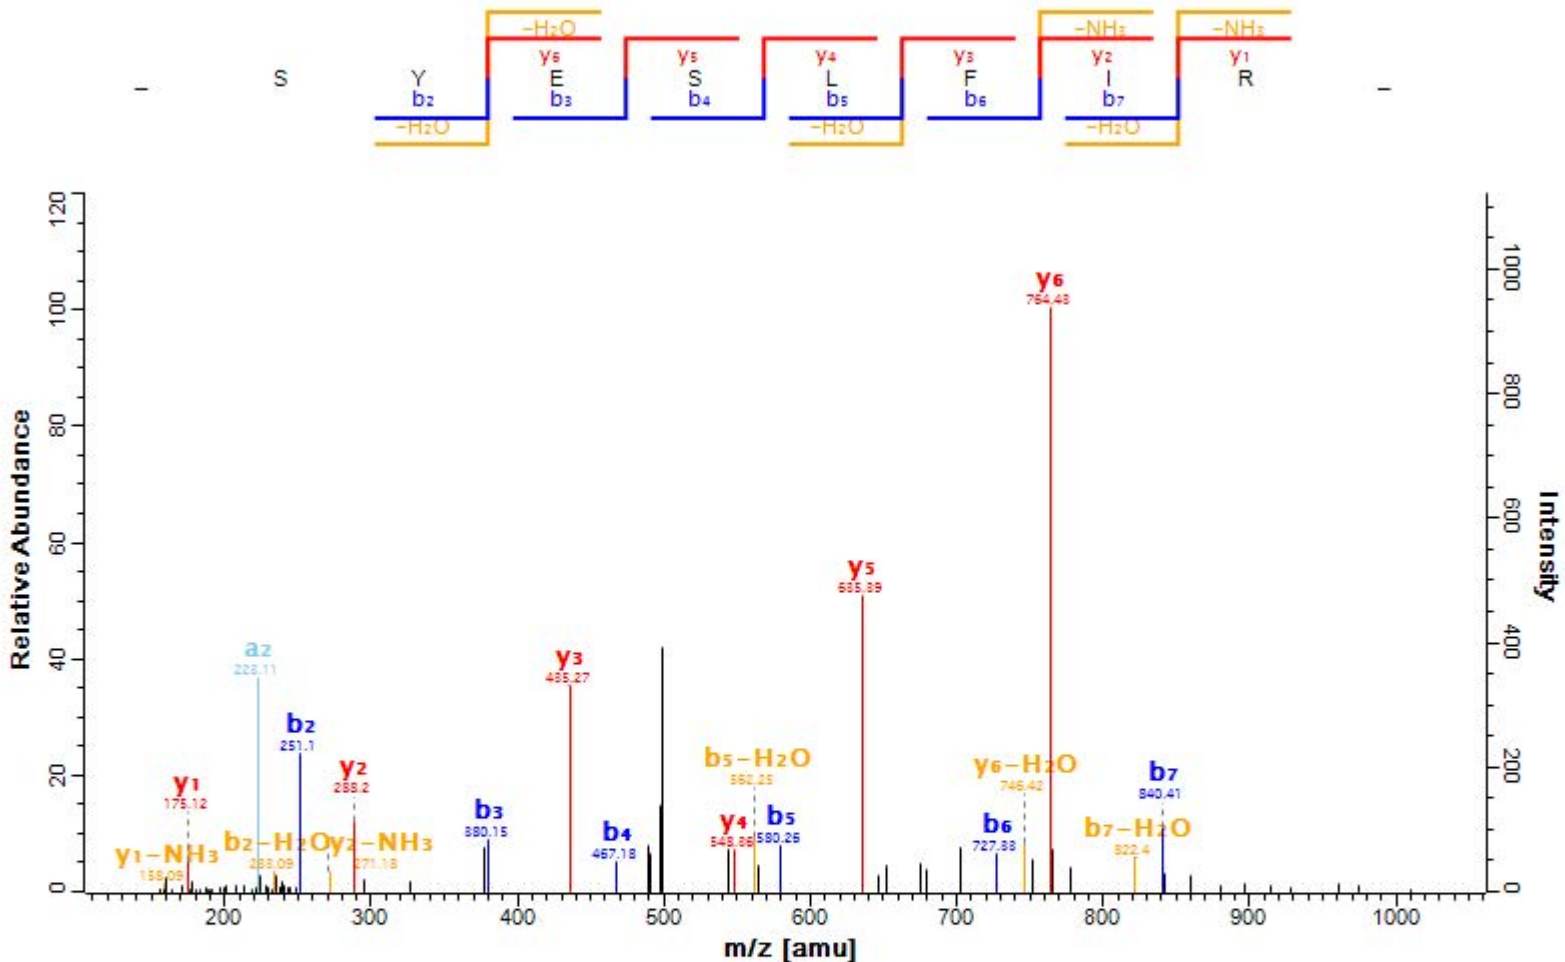

### precursor information

|                       |                 |
|-----------------------|-----------------|
| Mass:                 | 1013.51813      |
| m/z:                  | 507.76634       |
| Charge:               | 2+              |
| Retentiontime:        | 36.240787506103 |
| Score:                | 150.3989        |
| Mass Error [ppm]:     | -0.064531       |
| g PEP:                | 5.6236E-10      |
| Annotation:           | 7 of 8          |
| AminoAcids Coverage:  | 88 %            |
| Intensity Coverage:   | 66 %            |
| Peak Coverage:        | 23 %            |
| Protein Localisation: | 205 ... 212     |

| a ion    |          | b ion     |          |   |     | y ion    |                    |
|----------|----------|-----------|----------|---|-----|----------|--------------------|
| Δ dalton | mass     | Δ dalton  | mass     |   | seq | Δ dalton | mass               |
|          | 60.04439 |           | 88.0393  | 1 | S   | 7        |                    |
| -0.04684 | 223.1077 | -0.10651  | 251.1026 | 2 | Y   | 6        | 927.4934           |
|          | 352.1503 | +0.114325 | 380.1452 | 3 | E   | 5        | 764.4301 +0.02777  |
|          | 439.1823 | +0.038962 | 467.1773 | 4 | S   | 4        | 635.3875 +0.141896 |
|          | 552.2664 | -0.00442  | 580.2613 | 5 | L   | 3        | 548.3555 +0.163854 |
|          | 699.3348 | -0.03023  | 727.3297 | 6 | F   | 2        | 435.2714 +0.128442 |
|          | 812.4189 | -0.01438  | 840.4138 | 7 | I   | 1        | 288.203 +0.032213  |
|          |          |           |          | 8 | R   | 0        | 175.119 -0.00759   |

Scan number 5382 Raw file LNCAP\_Silac\_23F10\_set2\_05  
 Method ITMS; CID Pepti... 54.81

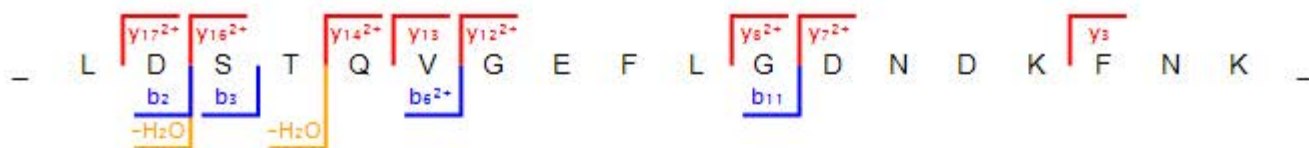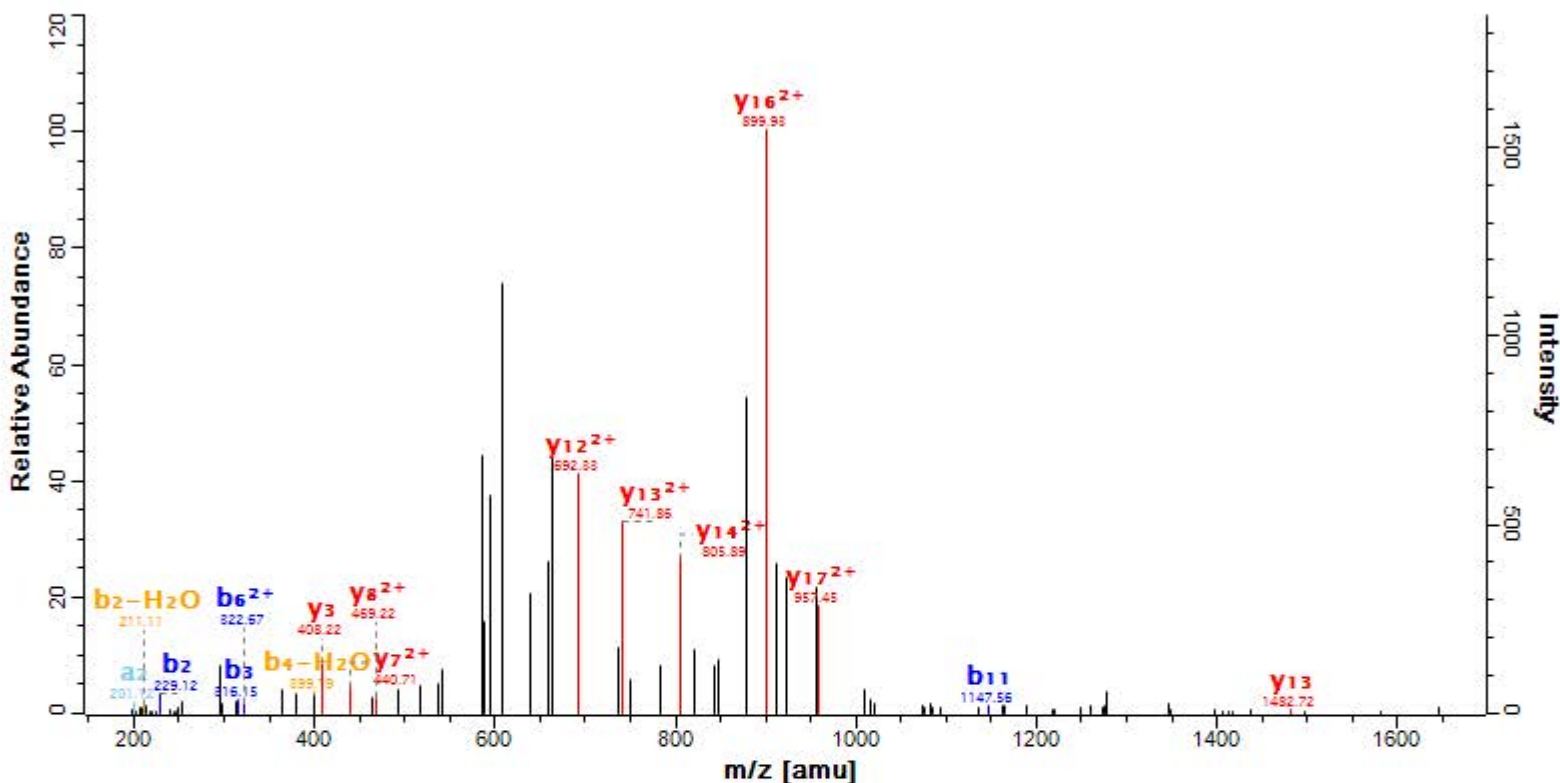

precursor information

|                   |                 |
|-------------------|-----------------|
| Mass:             | 2025.96531      |
| m/z:              | 676.32905       |
| Charge:           | 3+              |
| Retentiontime:    | 37.527416229248 |
| Score:            | 54.81177        |
| Mass Error [ppm]: | 0.47305         |
| PEP:              | 0.0022355       |
| Precursor Type:   | MULTI           |

| a ion         | b <sup>2+</sup> ion | b ion         |    | seq |    | y ion         | y <sup>2+</sup> ion |
|---------------|---------------------|---------------|----|-----|----|---------------|---------------------|
| Δ dalton mass | Δ dalton mass       | Δ dalton mass |    |     |    | Δ dalton mass | Δ dalton mass       |
| 86.1          | 114.1               | 114.1         | 1  | L   | 17 |               |                     |
| +0.035201.1   | 229.1               | -0.05 229.1   | 2  | D   | 16 | 1914          | 957.4 +0.11         |
| 288.2         | 316.2               | +0.22 316.2   | 3  | S   | 15 | 1799          | 899.9 +0.22         |
| 389.2         | 417.2               | 417.2         | 4  | T   | 14 | 1712          | 1712                |
| 517.3         | 545.3               | 545.3         | 5  | Q   | 13 | 1611          | 805.9 -0.05         |
| 616.3         | -0.23 322.7         | 644.3         | 6  | V   | 12 | 1483          | +0.018741.9 +0.06   |
| 673.4         | 701.3               | 701.3         | 7  | G   | 11 | 1384          | 692.3 +0.17         |
| 802.4         | 830.4               | 830.4         | 8  | E   | 10 | 1327          | 1327                |
| 949.5         | 977.5               | 977.5         | 9  | F   | 9  | 1198          | 1198                |
| 1063          | 1091                | 1091          | 10 | L   | 8  | 1051          | 1051                |
| 1120          | 1148                | +0.11 1148    | 11 | G   | 7  | 937.4         | 469.2 +0.01         |
| 1235          | 1263                | 1263          | 12 | D   | 6  | 880.4         | 440.7 -0.41         |
| 1349          | 1377                | 1377          | 13 | N   | 5  | 765.4         | 765.4               |
| 1464          | 1492                | 1492          | 14 | D   | 4  | 651.3         | 651.3               |
| 1592          | 1620                | 1620          | 15 | K   | 3  | 536.3         | 536.3               |
| 1739          | 1767                | 1767          | 16 | F   | 2  | 408.2         | -0.04 408.2         |
| 1853          | 1881                | 1881          | 17 | N   | 1  | 261.2         | 261.2               |
|               |                     |               | 18 | K   | 0  | 147.1         | 147.1               |

general information

|                       |             |
|-----------------------|-------------|
| Annotation:           | 9 of 18     |
| AminoAcids Coverage:  | 50 %        |
| Intensity Coverage:   | 30 %        |
| Peak Coverage:        | 18 %        |
| Protein Localisation: | 743 ... 760 |

Scan number 5911 Raw file LNCAP\_Silac\_23F10\_set2\_05  
 Method ITMS; CID Pepti... 69.36

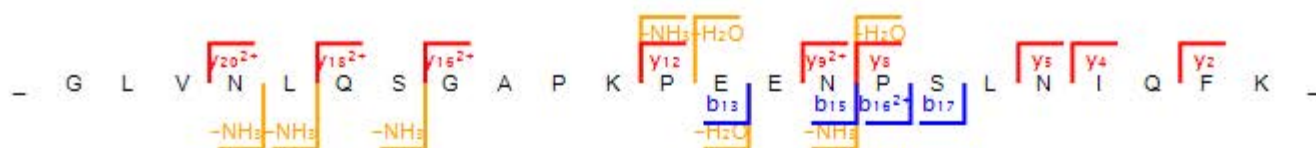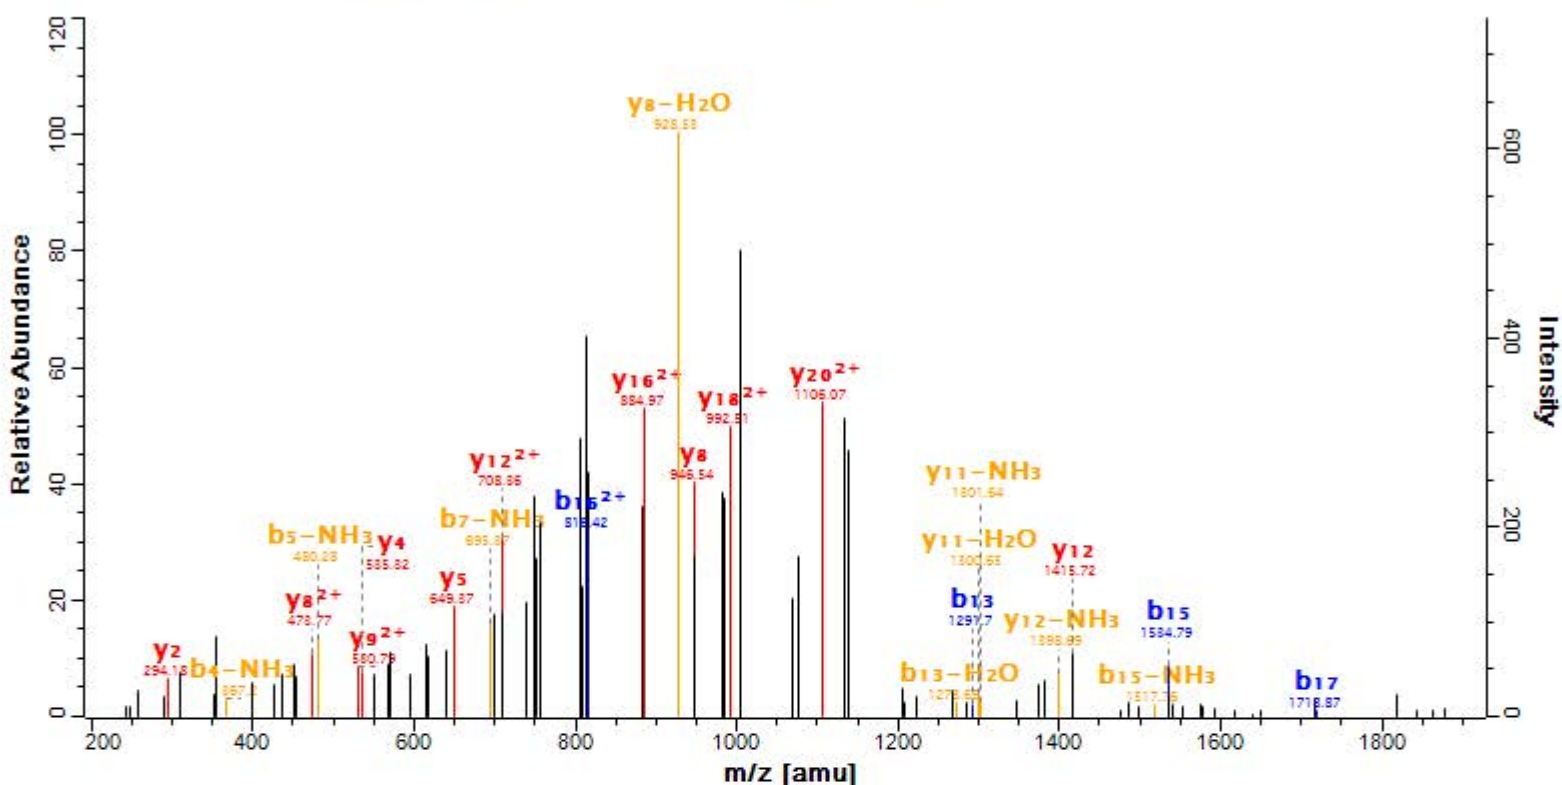

precursor information

|                   |                 |
|-------------------|-----------------|
| Mass:             | 2479.30838      |
| m/z:              | 827.4434        |
| Charge:           | 3+              |
| Retentiontime:    | 40.582332611084 |
| Score:            | 69.36105        |
| Mass Error [ppm]: | 0.52189         |
| PEP:              | 0.00015658      |
| Precursor Type:   | MULTI           |

general information

|                       |             |
|-----------------------|-------------|
| Annotation:           | 13 of 23    |
| AminoAcids Coverage:  | 57 %        |
| Intensity Coverage:   | 32 %        |
| Peak Coverage:        | 25 %        |
| Protein Localisation: | 356 ... 378 |

| b <sup>2+</sup> ion |        | b ion    |        | seq |   |    | y ion    |         | y <sup>2+</sup> ion |         |
|---------------------|--------|----------|--------|-----|---|----|----------|---------|---------------------|---------|
| Δ dalton            | mass   | Δ dalton | mass   |     |   |    | Δ dalton | mass    | Δ dalton            | mass    |
|                     | 58.029 |          | 58.029 | 1   | G | 22 |          |         |                     |         |
|                     | 171.11 |          | 171.11 | 2   | L | 21 | 2423.3   |         | 2423.3              |         |
|                     | 270.18 |          | 270.18 | 3   | V | 20 | 2310.2   |         | 2310.2              |         |
|                     | 384.22 |          | 384.22 | 4   | N | 19 | 2211.1   |         | 1106.1              | +0.0861 |
|                     | 497.31 |          | 497.31 | 5   | L | 18 | 2097.1   |         | 2097.1              |         |
|                     | 625.37 |          | 625.37 | 6   | Q | 17 | 1984     |         | 992.51              | +0.2972 |
|                     | 712.4  |          | 712.4  | 7   | S | 16 | 1856     |         | 1856                |         |
|                     | 769.42 |          | 769.42 | 8   | G | 15 | 1768.9   |         | 884.97              | +0.0022 |
|                     | 840.46 |          | 840.46 | 9   | A | 14 | 1711.9   |         | 1711.9              |         |
|                     | 937.51 |          | 937.51 | 10  | P | 13 | 1640.9   |         | 1640.9              |         |
|                     | 1065.6 |          | 1065.6 | 11  | K | 12 | 1543.8   |         | 1543.8              |         |
|                     | 1162.7 |          | 1162.7 | 12  | P | 11 | 1415.7   | -0.149  | 708.36              | +0.0254 |
|                     | 1291.7 | -0.127   | 1291.7 | 13  | E | 10 | 1318.7   |         | 1318.7              |         |
|                     | 1420.7 |          | 1420.7 | 14  | E | 9  | 1189.6   |         | 1189.6              |         |
|                     | 1534.8 | +0.0808  | 1534.8 | 15  | N | 8  | 1060.6   |         | 530.79              | +0.3484 |
| -0.392              | 816.42 |          | 1631.8 | 16  | P | 7  | 946.54   | -0.097  | 473.77              | +0.3078 |
|                     | 1718.9 | +0.0114  | 1718.9 | 17  | S | 6  | 849.48   |         | 849.48              |         |
|                     | 1832   |          | 1832   | 18  | L | 5  | 762.45   |         | 762.45              |         |
|                     | 1946   |          | 1946   | 19  | N | 4  | 649.37   | +0.0902 | 649.37              |         |
|                     | 2059.1 |          | 2059.1 | 20  | I | 3  | 535.32   | +0.0939 | 535.32              |         |
|                     | 2187.1 |          | 2187.1 | 21  | Q | 2  | 422.24   |         | 422.24              |         |
|                     | 2334.2 |          | 2334.2 | 22  | F | 1  | 294.18   | -0.04   | 294.18              |         |
|                     |        |          |        | 23  | K | 0  | 147.11   |         | 147.11              |         |

Scan number 6028 Raw file LNCAP\_Silac\_23F10\_set2\_05  
 Method ITMS; CID Pepti... 72.62

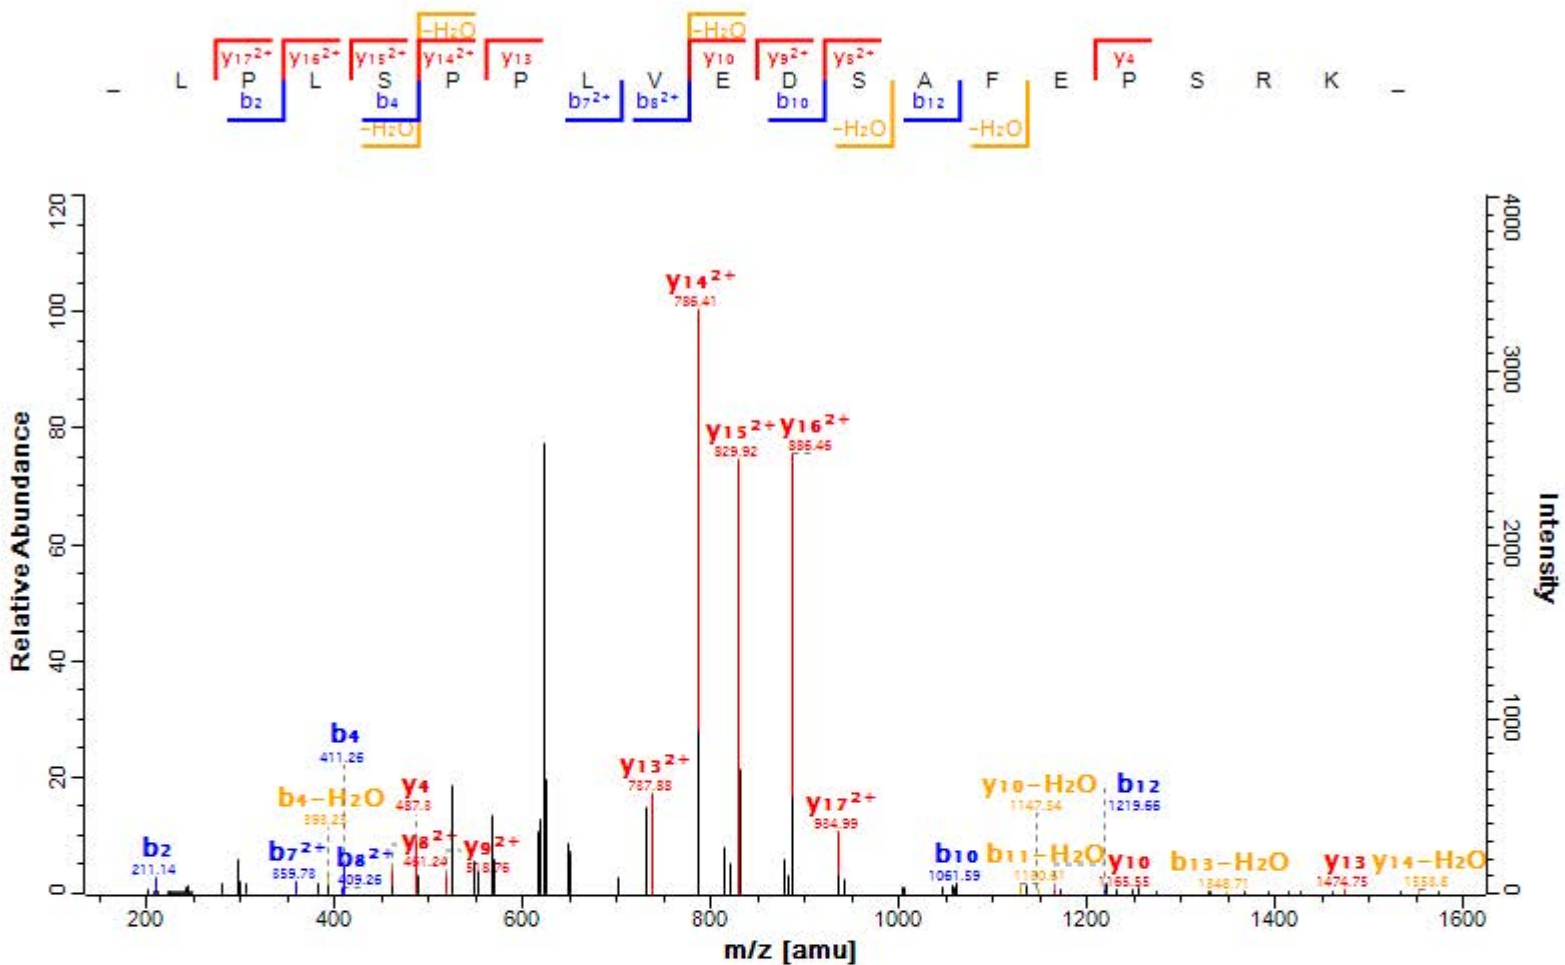

precursor information

|                   |                 |
|-------------------|-----------------|
| Mass:             | 1981.05229      |
| m/z:              | 661.35804       |
| Charge:           | 3+              |
| Retentiontime:    | 41.298217773437 |
| Score:            | 72.61512        |
| Mass Error [ppm]: | 0.12276         |
| PEP:              | 0.00016528      |
| Precursor Type:   | MULTI           |

general information

|                       |           |
|-----------------------|-----------|
| Annotation:           | 13 of 18  |
| AminoAcids Coverage:  | 72 %      |
| Intensity Coverage:   | 48 %      |
| Peak Coverage:        | 20 %      |
| Protein Localisation: | 17 ... 34 |

| b <sup>2+</sup> ion |        | b ion    |        |    |     |    | y ion    |         | y <sup>2+</sup> ion |         |
|---------------------|--------|----------|--------|----|-----|----|----------|---------|---------------------|---------|
| Δ dalton            | mass   | Δ dalton | mass   |    | seq |    | Δ dalton | mass    | Δ dalton            | mass    |
|                     | 114.09 |          | 114.09 | 1  | L   | 17 |          |         |                     |         |
|                     | 211.14 | +0.0017  | 211.14 | 2  | P   | 16 | 1869     |         | 934.99              | +0.3229 |
|                     | 324.23 |          | 324.23 | 3  | L   | 15 | 1771.9   |         | 886.46              | +0.3152 |
|                     | 411.26 | -0.006   | 411.26 | 4  | S   | 14 | 1658.8   |         | 829.92              | +0.2198 |
|                     | 508.31 |          | 508.31 | 5  | P   | 13 | 1571.8   |         | 786.41              | +0.217  |
|                     | 605.37 |          | 605.37 | 6  | P   | 12 | 1474.8   | -0.152  | 737.88              | +0.4268 |
| -0.435              | 359.73 |          | 718.45 | 7  | L   | 11 | 1377.7   |         | 1377.7              |         |
| -0.106              | 409.26 |          | 817.52 | 8  | V   | 10 | 1264.6   |         | 1264.6              |         |
|                     | 946.56 |          | 946.56 | 9  | E   | 9  | 1165.5   | +0.4027 | 1165.5              |         |
|                     | 1061.6 | +0.0087  | 1061.6 | 10 | D   | 8  | 1036.5   |         | 518.76              | -0.135  |
|                     | 1148.6 |          | 1148.6 | 11 | S   | 7  | 921.48   |         | 461.24              | +0.2362 |
|                     | 1219.7 | +0.053   | 1219.7 | 12 | A   | 6  | 834.45   |         | 834.45              |         |
|                     | 1366.7 |          | 1366.7 | 13 | F   | 5  | 763.41   |         | 763.41              |         |
|                     | 1495.8 |          | 1495.8 | 14 | E   | 4  | 616.34   |         | 616.34              |         |
|                     | 1592.8 |          | 1592.8 | 15 | P   | 3  | 487.3    | +0.0276 | 487.3               |         |
|                     | 1679.9 |          | 1679.9 | 16 | S   | 2  | 390.25   |         | 390.25              |         |
|                     | 1836   |          | 1836   | 17 | R   | 1  | 303.21   |         | 303.21              |         |
|                     |        |          |        | 18 | K   | 0  | 147.11   |         | 147.11              |         |

Scan number 6110 Raw file LNCAP\_Silac\_23F10\_set2\_05  
 Method ITMS; CID Pepti... 81.45

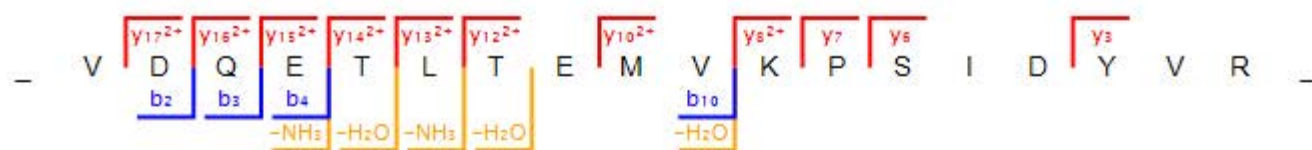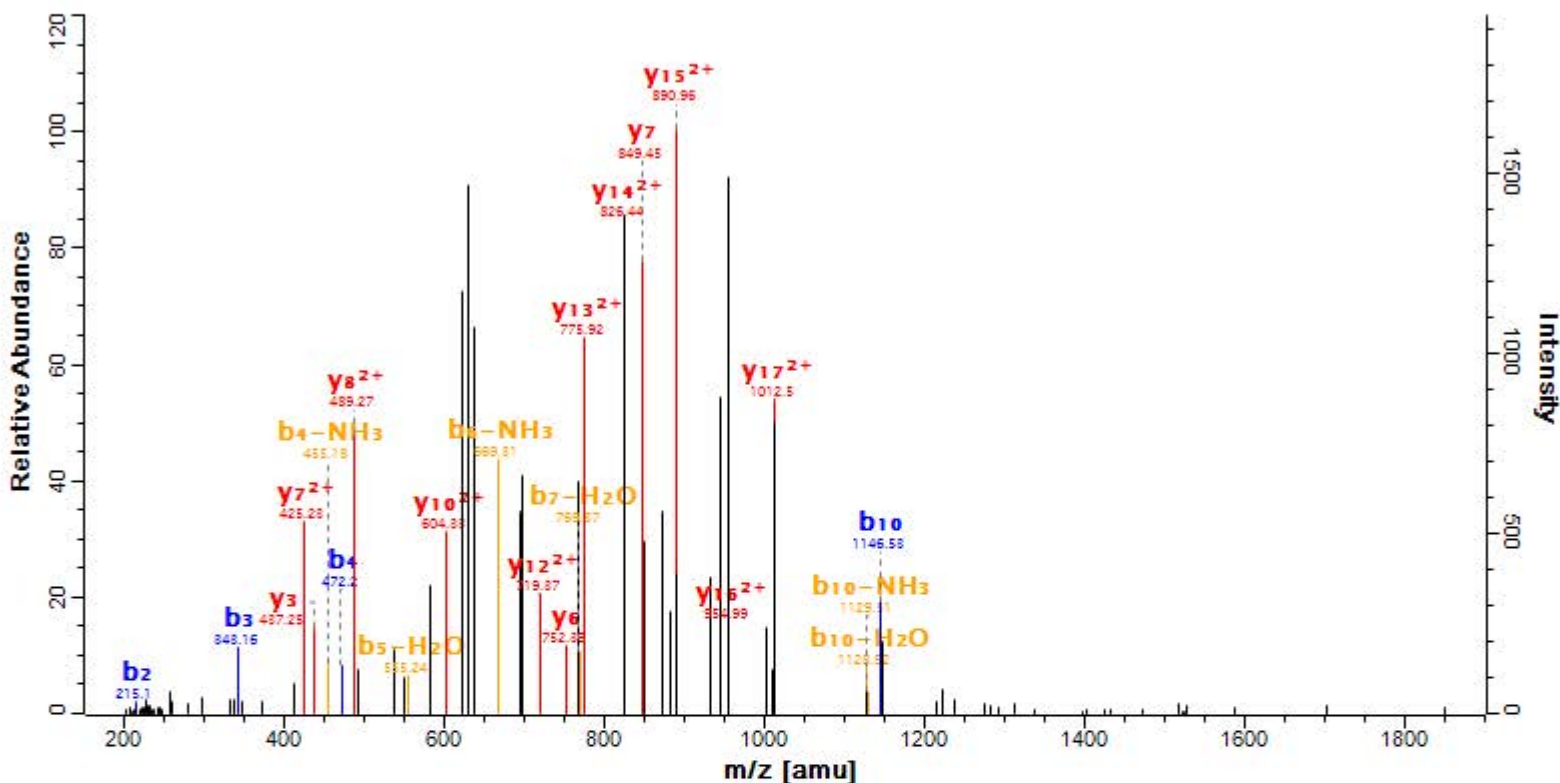

#### precursor information

|                   |                 |
|-------------------|-----------------|
| Mass:             | 2122.06194      |
| m/z:              | 708.36126       |
| Charge:           | 3+              |
| Retentiontime:    | 41.790824890136 |
| Score:            | 81.44754        |
| Mass Error [ppm]: | 0.15128         |
| PEP:              | 0.00011754      |
| Precursor Type:   | MULTI           |

| b ion     |          |    |     |    | y ion    |           | y <sup>2+</sup> ion |           |
|-----------|----------|----|-----|----|----------|-----------|---------------------|-----------|
| Δ dalton  | mass     |    | seq |    | Δ dalton | mass      | Δ dalton            | mass      |
|           | 100.0757 | 1  | V   | 17 |          |           |                     |           |
| +0.072293 | 215.1026 | 2  | D   | 16 | 2024     |           | 1012.504            | -0.05497  |
| +0.022749 | 343.1612 | 3  | Q   | 15 | 1908.974 |           | 954.9904            | -0.1682   |
| +0.178276 | 472.2038 | 4  | E   | 14 | 1780.915 |           | 890.9611            | +0.291261 |
|           | 573.2515 | 5  | T   | 13 | 1651.872 |           | 826.4398            | +0.054074 |
|           | 686.3355 | 6  | L   | 12 | 1550.825 |           | 775.916             | +0.388948 |
|           | 787.3832 | 7  | T   | 11 | 1437.741 |           | 719.374             | +0.384166 |
|           | 916.4258 | 8  | E   | 10 | 1336.693 |           | 1336.693            |           |
|           | 1047.466 | 9  | M   | 9  | 1207.65  |           | 604.3288            | +0.142803 |
| -0.23357  | 1146.535 | 10 | V   | 8  | 1076.61  |           | 1076.61             |           |
|           | 1274.63  | 11 | K   | 7  | 977.5415 |           | 489.2744            | +0.257372 |
|           | 1371.682 | 12 | P   | 6  | 849.4465 | +0.007547 | 425.2269            | +0.153181 |
|           | 1458.714 | 13 | S   | 5  | 752.3937 | -0.01525  | 752.3937            |           |
|           | 1571.799 | 14 | I   | 4  | 665.3617 |           | 665.3617            |           |
|           | 1686.825 | 15 | D   | 3  | 552.2776 |           | 552.2776            |           |
|           | 1849.889 | 16 | Y   | 2  | 437.2507 | +0.061561 | 437.2507            |           |
|           | 1948.957 | 17 | V   | 1  | 274.1874 |           | 274.1874            |           |
|           |          | 18 | R   | 0  | 175.119  |           | 175.119             |           |

#### general information

|                       |             |
|-----------------------|-------------|
| Annotation:           | 12 of 18    |
| AminoAcids Coverage:  | 67 %        |
| Intensity Coverage:   | 42 %        |
| Peak Coverage:        | 22 %        |
| Protein Localisation: | 280 ... 297 |

Scan number 6297 Raw file LNCAP\_Silac\_23F10\_set2\_05  
 Method ITMS; CID Pepti... 85.99

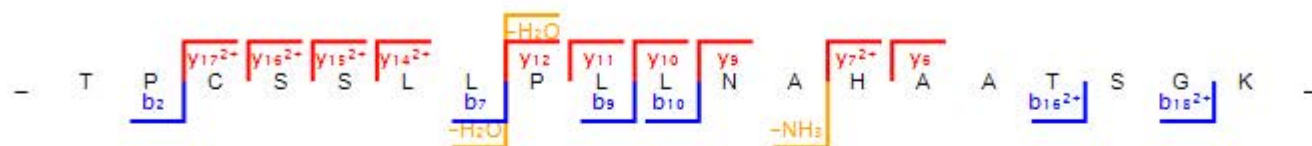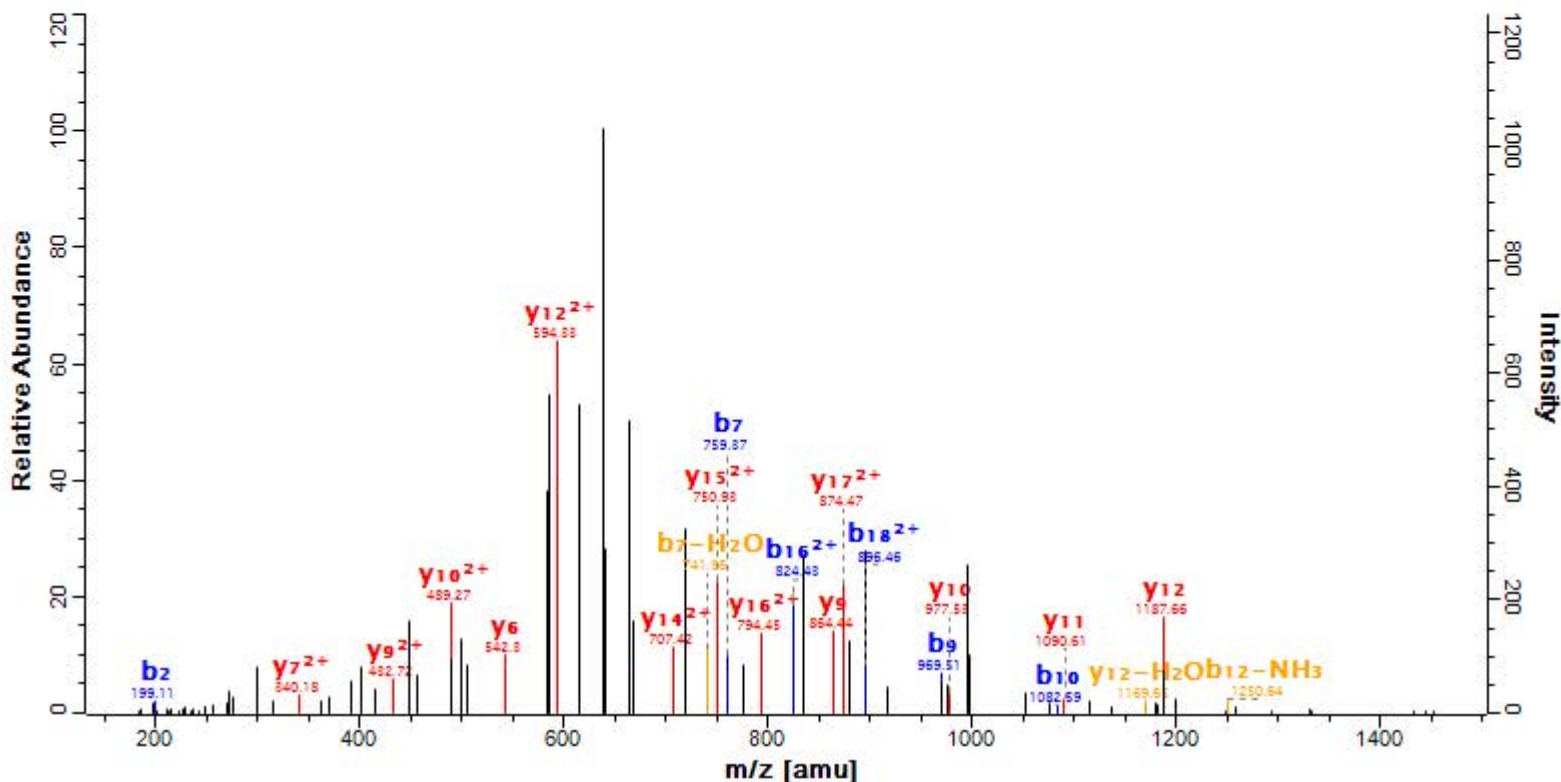

#### precursor information

|                   |                 |
|-------------------|-----------------|
| Mass:             | 1937.00383      |
| m/z:              | 646.67522       |
| Charge:           | 3+              |
| Retentiontime:    | 42.915946960449 |
| Score:            | 85.98805        |
| Mass Error [ppm]: | -0.11166        |
| PEP:              | 3.7355E-05      |
| Precursor Type:   | MULTI           |

| b <sup>2+</sup> ion |        | b ion    |        | seq |   |    | y ion    |         | y <sup>2+</sup> ion |         |
|---------------------|--------|----------|--------|-----|---|----|----------|---------|---------------------|---------|
| Δ dalton            | mass   | Δ dalton | mass   |     |   |    | Δ dalton | mass    | Δ dalton            | mass    |
|                     | 102.05 |          | 102.05 | 1   | T | 18 |          |         |                     |         |
|                     | 199.11 | +0.0388  | 199.11 | 2   | P | 17 | 1845     |         | 1845                |         |
|                     | 359.14 |          | 359.14 | 3   | C | 16 | 1747.9   |         | 874.47              | -0.001  |
|                     | 446.17 |          | 446.17 | 4   | S | 15 | 1587.9   |         | 794.45              | +0.0883 |
|                     | 533.2  |          | 533.2  | 5   | S | 14 | 1500.9   |         | 750.93              | +0.292  |
|                     | 646.29 |          | 646.29 | 6   | L | 13 | 1413.8   |         | 707.42              | -0.197  |
|                     | 759.37 | +0.0163  | 759.37 | 7   | L | 12 | 1300.7   |         | 1300.7              |         |
|                     | 856.42 |          | 856.42 | 8   | P | 11 | 1187.7   | -0.061  | 594.33              | +0.117  |
|                     | 969.51 | +0.0056  | 969.51 | 9   | L | 10 | 1090.6   | -0.186  | 1090.6              |         |
|                     | 1082.6 | +0.2566  | 1082.6 | 10  | L | 9  | 977.53   | +0      | 489.27              | +0.4259 |
|                     | 1196.6 |          | 1196.6 | 11  | N | 8  | 864.44   | +0.0238 | 432.72              | +0.2392 |
|                     | 1267.7 |          | 1267.7 | 12  | A | 7  | 750.4    |         | 750.4               |         |
|                     | 1404.7 |          | 1404.7 | 13  | H | 6  | 679.36   |         | 340.18              | +0.1441 |
|                     | 1475.8 |          | 1475.8 | 14  | A | 5  | 542.3    | -0.056  | 542.3               |         |
|                     | 1546.8 |          | 1546.8 | 15  | A | 4  | 471.27   |         | 471.27              |         |
| +0.0557             | 824.43 |          | 1647.9 | 16  | T | 3  | 400.23   |         | 400.23              |         |
|                     | 1734.9 |          | 1734.9 | 17  | S | 2  | 299.18   |         | 299.18              |         |
| +0.0187             | 896.46 |          | 1791.9 | 18  | G | 1  | 212.15   |         | 212.15              |         |
|                     |        |          |        | 19  | K | 0  | 155.13   |         | 155.13              |         |

#### general information

|                       |             |
|-----------------------|-------------|
| Annotation:           | 15 of 19    |
| AminoAcids Coverage:  | 79 %        |
| Intensity Coverage:   | 29 %        |
| Peak Coverage:        | 23 %        |
| Protein Localisation: | 395 ... 413 |

Scan number 6302 Raw file LNCAP\_Silac\_23F10\_set2\_05  
 Method ITMS; CID Pepti... 75.91

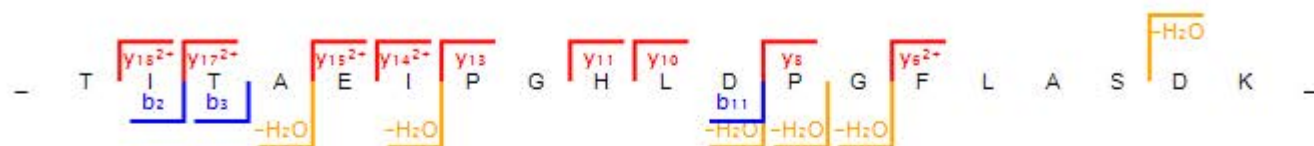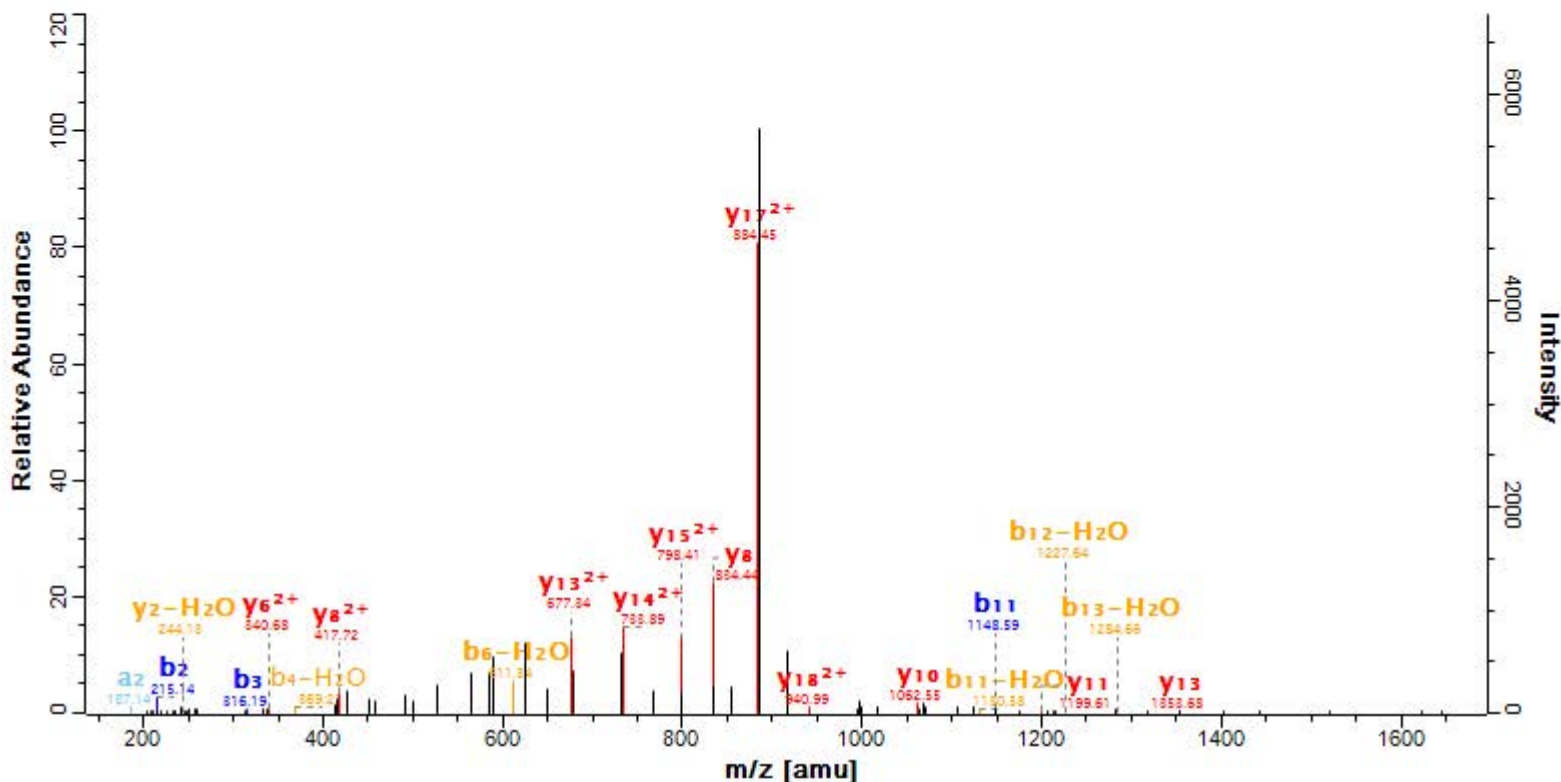

#### precursor information

|                   |                 |
|-------------------|-----------------|
| Mass:             | 1981.01639      |
| m/z:              | 661.34607       |
| Charge:           | 3+              |
| Retentiontime:    | 42.949020385742 |
| Score:            | 75.91064        |
| Mass Error [ppm]: | 0.37125         |
| PEP:              | 0.00019947      |
| Precursor Type:   | MULTI           |

| a ion    |        | b ion    |        |    |     |    | y ion    |         | y <sup>2+</sup> ion |         |
|----------|--------|----------|--------|----|-----|----|----------|---------|---------------------|---------|
| Δ dalton | mass   | Δ dalton | mass   |    | seq |    | Δ dalton | mass    | Δ dalton            | mass    |
|          | 74.06  |          | 102.05 | 1  | T   | 18 |          |         |                     |         |
| +0.0724  | 187.14 | +0.0063  | 215.14 | 2  | I   | 17 | 1881     |         | 940.99              | -0.234  |
|          | 288.19 | -0.102   | 316.19 | 3  | T   | 16 | 1767.9   |         | 884.45              | -0.006  |
|          | 359.23 |          | 387.22 | 4  | A   | 15 | 1666.8   |         | 1666.8              |         |
|          | 488.27 |          | 516.27 | 5  | E   | 14 | 1595.8   |         | 798.41              | +0.2202 |
|          | 601.36 |          | 629.35 | 6  | I   | 13 | 1466.8   |         | 733.89              | +0.1991 |
|          | 698.41 |          | 726.4  | 7  | P   | 12 | 1353.7   | +0.1995 | 677.34              | -0.029  |
|          | 755.43 |          | 783.42 | 8  | G   | 11 | 1256.6   |         | 1256.6              |         |
|          | 892.49 |          | 920.48 | 9  | H   | 10 | 1199.6   | +0.1949 | 1199.6              |         |
|          | 1005.6 |          | 1033.6 | 10 | L   | 9  | 1062.5   | -0.206  | 1062.5              |         |
|          | 1120.6 | -0.205   | 1148.6 | 11 | D   | 8  | 949.46   |         | 949.46              |         |
|          | 1217.7 |          | 1245.6 | 12 | P   | 7  | 834.44   | -0.147  | 417.72              | +0.2916 |
|          | 1274.7 |          | 1302.7 | 13 | G   | 6  | 737.38   |         | 737.38              |         |
|          | 1421.7 |          | 1449.7 | 14 | F   | 5  | 680.36   |         | 340.68              | +0.3802 |
|          | 1534.8 |          | 1562.8 | 15 | L   | 4  | 533.29   |         | 533.29              |         |
|          | 1605.9 |          | 1633.9 | 16 | A   | 3  | 420.21   |         | 420.21              |         |
|          | 1692.9 |          | 1720.9 | 17 | S   | 2  | 349.17   |         | 349.17              |         |
|          | 1807.9 |          | 1835.9 | 18 | D   | 1  | 262.14   |         | 262.14              |         |
|          |        |          |        | 19 | K   | 0  | 147.11   |         | 147.11              |         |

#### general information

|                       |             |
|-----------------------|-------------|
| Annotation:           | 13 of 19    |
| AminoAcids Coverage:  | 68 %        |
| Intensity Coverage:   | 40 %        |
| Peak Coverage:        | 20 %        |
| Protein Localisation: | 232 ... 250 |



Scan number 6353 Raw file LNCAP\_Silac\_23F10\_set2\_05  
 Method ITMS; CID Pepti... 53.17

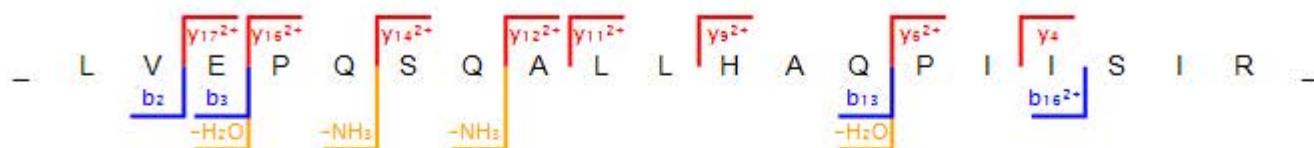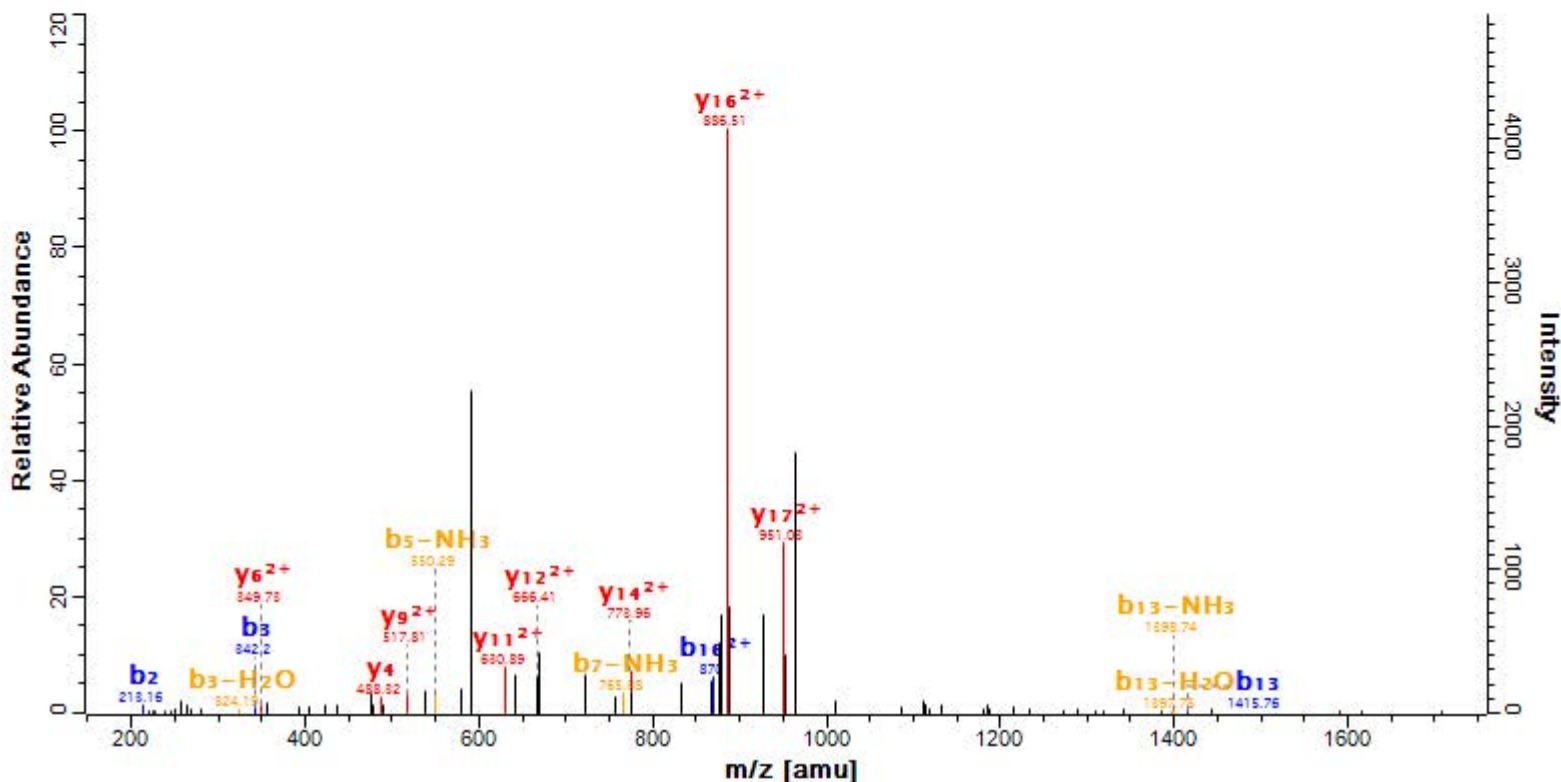

**precursor information**

|                   |                 |
|-------------------|-----------------|
| Mass:             | 2112.20608      |
| m/z:              | 705.07597       |
| Charge:           | 3+              |
| Retentiontime:    | 43.282321929931 |
| Score:            | 53.16797        |
| Mass Error [ppm]: | 0.26214         |
| PEP:              | 0.005095        |
| Precursor Type:   | MULTI           |

| b <sup>2+</sup> ion |        | b ion    |        |    |     |    | y ion    |         | y <sup>2+</sup> ion |         |
|---------------------|--------|----------|--------|----|-----|----|----------|---------|---------------------|---------|
| Δ dalton            | mass   | Δ dalton | mass   |    | seq |    | Δ dalton | mass    | Δ dalton            | mass    |
|                     | 114.09 |          | 114.09 | 1  | L   | 18 |          |         |                     |         |
|                     | 213.16 | +0.0156  | 213.16 | 2  | V   | 17 | 2000.1   |         | 2000.1              |         |
|                     | 342.2  | -0.043   | 342.2  | 3  | E   | 16 | 1901.1   |         | 951.03              | +0.2666 |
|                     | 439.26 |          | 439.26 | 4  | P   | 15 | 1772     |         | 886.51              | +0.227  |
|                     | 567.31 |          | 567.31 | 5  | Q   | 14 | 1675     |         | 1675                |         |
|                     | 654.35 |          | 654.35 | 6  | S   | 13 | 1546.9   |         | 773.96              | +0.285  |
|                     | 782.4  |          | 782.4  | 7  | Q   | 12 | 1459.9   |         | 1459.9              |         |
|                     | 853.44 |          | 853.44 | 8  | A   | 11 | 1331.8   |         | 666.41              | -0.127  |
|                     | 966.53 |          | 966.53 | 9  | L   | 10 | 1260.8   |         | 630.89              | +0.1246 |
|                     | 1079.6 |          | 1079.6 | 10 | L   | 9  | 1147.7   |         | 1147.7              |         |
|                     | 1216.7 |          | 1216.7 | 11 | H   | 8  | 1034.6   |         | 517.81              | +0.2979 |
|                     | 1287.7 |          | 1287.7 | 12 | A   | 7  | 897.55   |         | 897.55              |         |
|                     | 1415.8 | +0.0553  | 1415.8 | 13 | Q   | 6  | 826.51   |         | 826.51              |         |
|                     | 1512.8 |          | 1512.8 | 14 | P   | 5  | 698.46   |         | 349.73              | +0.1032 |
|                     | 1625.9 |          | 1625.9 | 15 | I   | 4  | 601.4    |         | 601.4               |         |
| -0.28               | 870    |          | 1739   | 16 | I   | 3  | 488.32   | +0.0695 | 488.32              |         |
|                     | 1826   |          | 1826   | 17 | S   | 2  | 375.24   |         | 375.24              |         |
|                     | 1939.1 |          | 1939.1 | 18 | I   | 1  | 288.2    |         | 288.2               |         |
|                     |        |          |        | 19 | R   | 0  | 175.12   |         | 175.12              |         |

**general information**

|                       |             |
|-----------------------|-------------|
| Annotation:           | 12 of 19    |
| AminoAcids Coverage:  | 63 %        |
| Intensity Coverage:   | 38 %        |
| Peak Coverage:        | 20 %        |
| Protein Localisation: | 433 ... 451 |

Scan number 6705 Raw file LNCAP\_Silac\_23F10\_set2\_05  
 Method ITMS; CID Pepti... 154.34

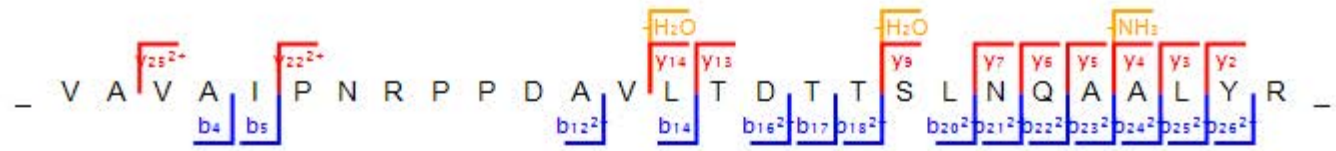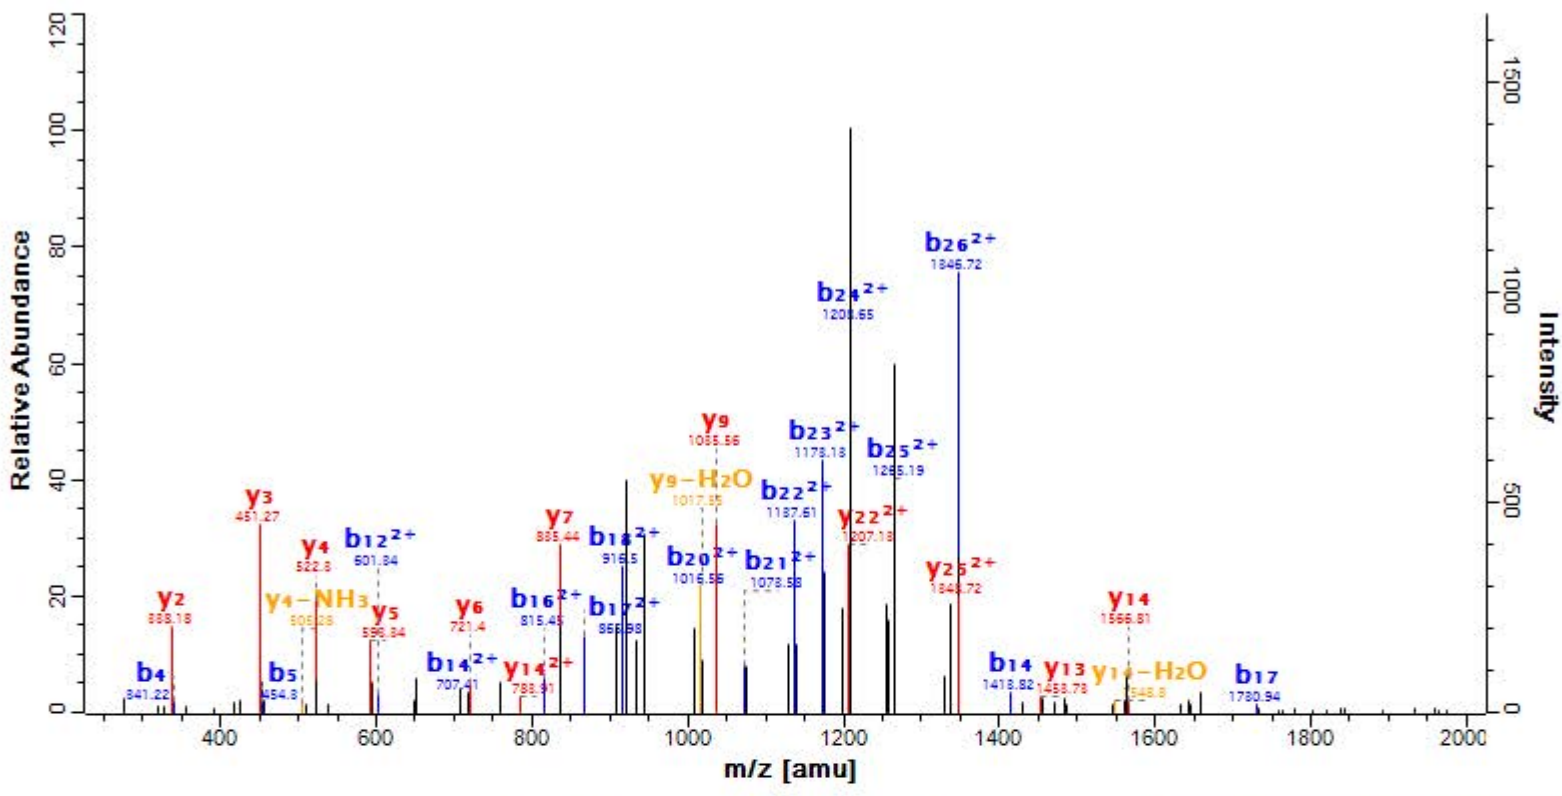

precursor information

|                   |                 |
|-------------------|-----------------|
| Mass:             | 2865.53476      |
| m/z:              | 956.18553       |
| Charge:           | 3+              |
| Retentiontime:    | 45.459671020507 |
| Score:            | 154.336         |
| Mass Error [ppm]: | -0.033219       |
| PEP:              | 3.3243E-33      |
| Precursor Type:   | MULTI           |

| b <sup>2+</sup> ion |        | b ion    |        | seq |   |    | y ion    |         | y <sup>2+</sup> ion |         |
|---------------------|--------|----------|--------|-----|---|----|----------|---------|---------------------|---------|
| Δ dalton            | mass   | Δ dalton | mass   |     |   |    | Δ dalton | mass    | Δ dalton            | mass    |
|                     | 100.08 |          | 100.08 | 1   | V | 26 |          |         |                     |         |
|                     | 171.11 |          | 171.11 | 2   | A | 25 | 2767.5   |         | 2767.5              |         |
|                     | 270.18 |          | 270.18 | 3   | V | 24 | 2696.4   |         | 1348.7              | -0.421  |
|                     | 341.22 | -0.355   | 341.22 | 4   | A | 23 | 2597.4   |         | 2597.4              |         |
|                     | 454.3  | +0.0736  | 454.3  | 5   | I | 22 | 2526.3   |         | 2526.3              |         |
|                     | 551.36 |          | 551.36 | 6   | P | 21 | 2413.2   |         | 1207.1              | +0.0518 |
|                     | 665.4  |          | 665.4  | 7   | N | 20 | 2316.2   |         | 2316.2              |         |
|                     | 821.5  |          | 821.5  | 8   | R | 19 | 2202.2   |         | 2202.2              |         |
|                     | 918.55 |          | 918.55 | 9   | P | 18 | 2046.1   |         | 2046.1              |         |
|                     | 1015.6 |          | 1015.6 | 10  | P | 17 | 1949     |         | 1949                |         |
| +0.112              | 601.34 |          | 1201.7 | 12  | A | 15 | 1736.9   |         | 1736.9              |         |
|                     | 1300.7 |          | 1300.7 | 13  | V | 14 | 1665.9   |         | 1665.9              |         |
| +0.0146             | 707.41 | -0.101   | 1413.8 | 14  | L | 13 | 1566.8   | +0.246  | 783.91              | -0.076  |
|                     | 1514.9 |          | 1514.9 | 15  | T | 12 | 1453.7   | -0.123  | 1453.7              |         |
| -0.144              | 815.45 |          | 1629.9 | 16  | D | 11 | 1352.7   |         | 1352.7              |         |
| +0.2351             | 865.98 | -0.261   | 1730.9 | 17  | T | 10 | 1237.7   |         | 1237.7              |         |
| +0.2974             | 916.5  |          | 1832   | 18  | T | 9  | 1136.6   |         | 1136.6              |         |
|                     | 1919   |          | 1919   | 19  | S | 8  | 1035.6   | -0.027  | 1035.6              |         |
| -0.11               | 1016.6 |          | 2032.1 | 20  | L | 7  | 948.53   |         | 948.53              |         |
| +0.3402             | 1073.6 |          | 2146.2 | 21  | N | 6  | 835.44   | +0.0673 | 835.44              |         |
| +0.2491             | 1137.6 |          | 2274.2 | 22  | Q | 5  | 721.4    | +0.1989 | 721.4               |         |
| +0.2309             | 1173.1 |          | 2345.2 | 23  | A | 4  | 593.34   | +0.0121 | 593.34              |         |
| -0.424              | 1208.6 |          | 2416.3 | 24  | A | 3  | 522.3    | +0.0776 | 522.3               |         |
| -0.09               | 1265.2 |          | 2529.4 | 25  | L | 2  | 451.27   | +0.1003 | 451.27              |         |
| +0.2246             | 1346.7 |          | 2692.4 | 26  | Y | 1  | 338.18   | +0.0936 | 338.18              |         |
|                     |        |          |        | 27  | R | 0  | 175.12   |         | 175.12              |         |

general information

|                       |             |
|-----------------------|-------------|
| Annotation:           | 18 of 27    |
| AminoAcids Coverage:  | 67 %        |
| Intensity Coverage:   | 49 %        |
| Peak Coverage:        | 30 %        |
| Protein Localisation: | 480 ... 506 |

Scan number 6980 Raw file LNCAP\_Silac\_23F10\_set2\_05  
 Method ITMS; CID Pepti... 170.47

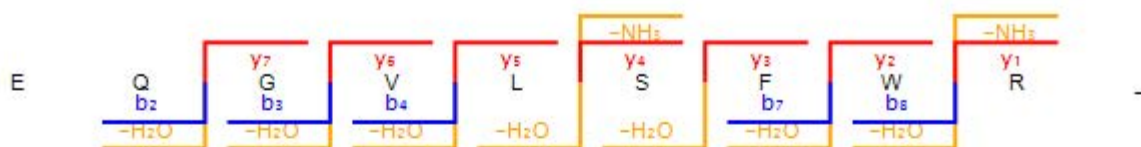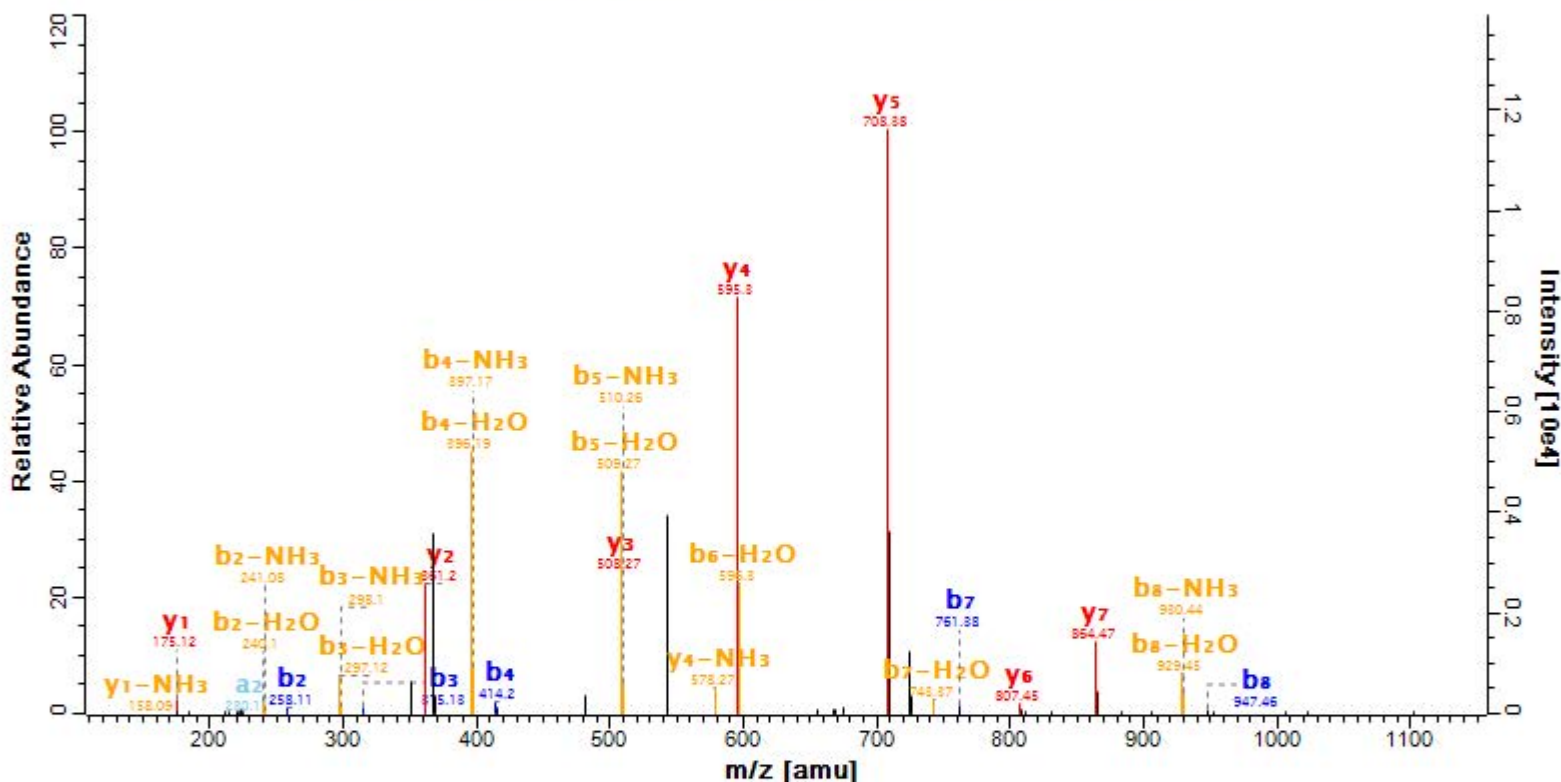

#### precursor information

|                       |                 |
|-----------------------|-----------------|
| Mass:                 | 1120.56695      |
| m/z:                  | 561.29075       |
| Charge:               | 2+              |
| Retentiontime:        | 47.141563415527 |
| Score:                | 170.4714        |
| Mass Error [ppm]:     | 0.36362         |
| PEP:                  | 4.0885E-05      |
| Precursor Type:       | MULTI           |
| Annotation:           | 8 of 9          |
| AminoAcids Coverage:  | 89 %            |
| Intensity Coverage:   | 74 %            |
| Peak Coverage:        | 39 %            |
| Protein Localisation: | 64 ... 72       |

| a ion    |          | b ion     |          | y ion |          |                      |
|----------|----------|-----------|----------|-------|----------|----------------------|
| Δ dalton | mass     | Δ dalton  | mass     | seq   | Δ dalton | mass                 |
|          | 102.055  |           | 130.0499 | 1     | E        | 8                    |
| -0.21224 | 230.1135 | -0.07708  | 258.1084 | 2     | Q        | 7 992.5312           |
|          | 287.135  | +0.02463  | 315.1299 | 3     | G        | 6 864.4726 +0.04737  |
|          | 386.2034 | +0.077493 | 414.1983 | 4     | V        | 5 807.4512 +0.161669 |
|          | 499.2875 |           | 527.2824 | 5     | L        | 4 708.3828 +0.028361 |
|          | 586.3195 |           | 614.3144 | 6     | S        | 3 595.2987 +0.024535 |
|          | 733.3879 | +0.102948 | 761.3828 | 7     | F        | 2 508.2667 +0.100569 |
|          | 919.4672 | +0.077956 | 947.4621 | 8     | W        | 1 361.1983 +0.044472 |
|          |          |           |          | 9     | R        | 0 175.119 +0.100927  |

Scan number 7037 Raw file LNCAP\_Silac\_23F10\_set2\_05  
 Method ITMS; CID Pepti... 89.51

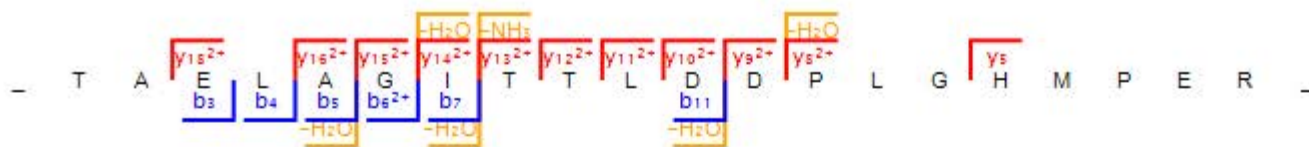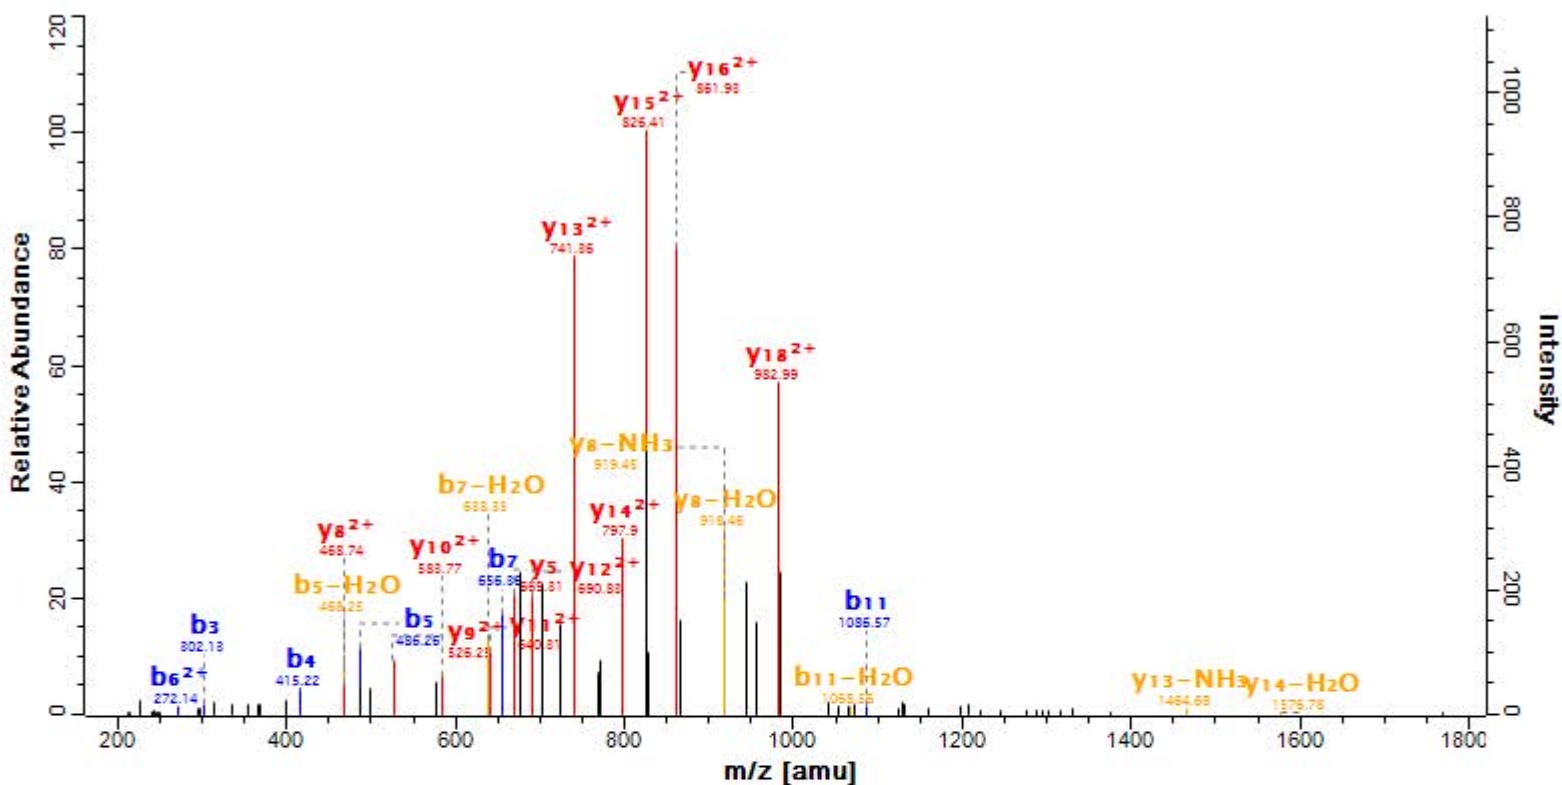

precursor information

|                   |                 |
|-------------------|-----------------|
| Mass:             | 2136.05349      |
| m/z:              | 713.02511       |
| Charge:           | 3+              |
| Retentiontime:    | 47.487735748291 |
| Score:            | 89.50639        |
| Mass Error [ppm]: | 0.64036         |
| PEP:              | 6.6408E-06      |
| Precursor Type:   | MULTI           |

| b <sup>2+</sup> ion |        | b ion    |        |     |   |          | y ion  |          | y <sup>2+</sup> ion |  |
|---------------------|--------|----------|--------|-----|---|----------|--------|----------|---------------------|--|
| Δ dalton            | mass   | Δ dalton | mass   | seq |   | Δ dalton | mass   | Δ dalton | mass                |  |
|                     | 102.05 |          | 102.05 | 1   | T | 19       |        |          |                     |  |
|                     | 173.09 |          | 173.09 | 2   | A | 18       | 2036   |          | 2036                |  |
|                     | 302.13 | +0.1355  | 302.13 | 3   | E | 17       | 1965   |          | 982.99 -0.011       |  |
|                     | 415.22 | -0.083   | 415.22 | 4   | L | 16       | 1835.9 |          | 1835.9              |  |
|                     | 486.26 | -0.094   | 486.26 | 5   | A | 15       | 1722.8 |          | 861.93 +0.211       |  |
| +0.0287             | 272.14 |          | 543.28 | 6   | G | 14       | 1651.8 |          | 826.41 +0.0382      |  |
|                     | 656.36 | -0.351   | 656.36 | 7   | I | 13       | 1594.8 |          | 797.9 +0.2132       |  |
|                     | 757.41 |          | 757.41 | 8   | T | 12       | 1481.7 |          | 741.36 +0.1443      |  |
|                     | 858.46 |          | 858.46 | 9   | T | 11       | 1380.7 |          | 690.83 +0.0433      |  |
|                     | 971.54 |          | 971.54 | 10  | L | 10       | 1279.6 |          | 640.31 +0.3421      |  |
|                     | 1086.6 | +0.2667  | 1086.6 | 11  | D | 9        | 1166.5 |          | 583.77 -0.039       |  |
|                     | 1201.6 |          | 1201.6 | 12  | D | 8        | 1051.5 |          | 526.25 +0.083       |  |
|                     | 1298.6 |          | 1298.6 | 13  | P | 7        | 936.47 |          | 468.74 +0.3523      |  |
|                     | 1411.7 |          | 1411.7 | 14  | L | 6        | 839.42 |          | 839.42              |  |
|                     | 1468.8 |          | 1468.8 | 15  | G | 5        | 726.34 |          | 726.34              |  |
|                     | 1605.8 |          | 1605.8 | 16  | H | 4        | 669.31 | +0.1496  | 669.31              |  |
|                     | 1736.9 |          | 1736.9 | 17  | M | 3        | 532.25 |          | 532.25              |  |
|                     | 1833.9 |          | 1833.9 | 18  | P | 2        | 401.21 |          | 401.21              |  |
|                     | 1962.9 |          | 1962.9 | 19  | E | 1        | 304.16 |          | 304.16              |  |
|                     |        |          |        | 20  | R | 0        | 175.12 |          | 175.12              |  |

general information

|                       |             |
|-----------------------|-------------|
| Annotation:           | 12 of 20    |
| AminoAcids Coverage:  | 60 %        |
| Intensity Coverage:   | 65 %        |
| Peak Coverage:        | 30 %        |
| Protein Localisation: | 153 ... 172 |

Scan number 7170 Raw file LNCAP\_Silac\_23F10\_set2\_05  
 Method ITMS; CID Pepti... 66.61

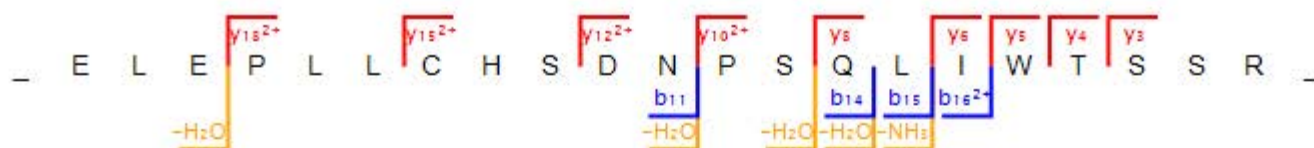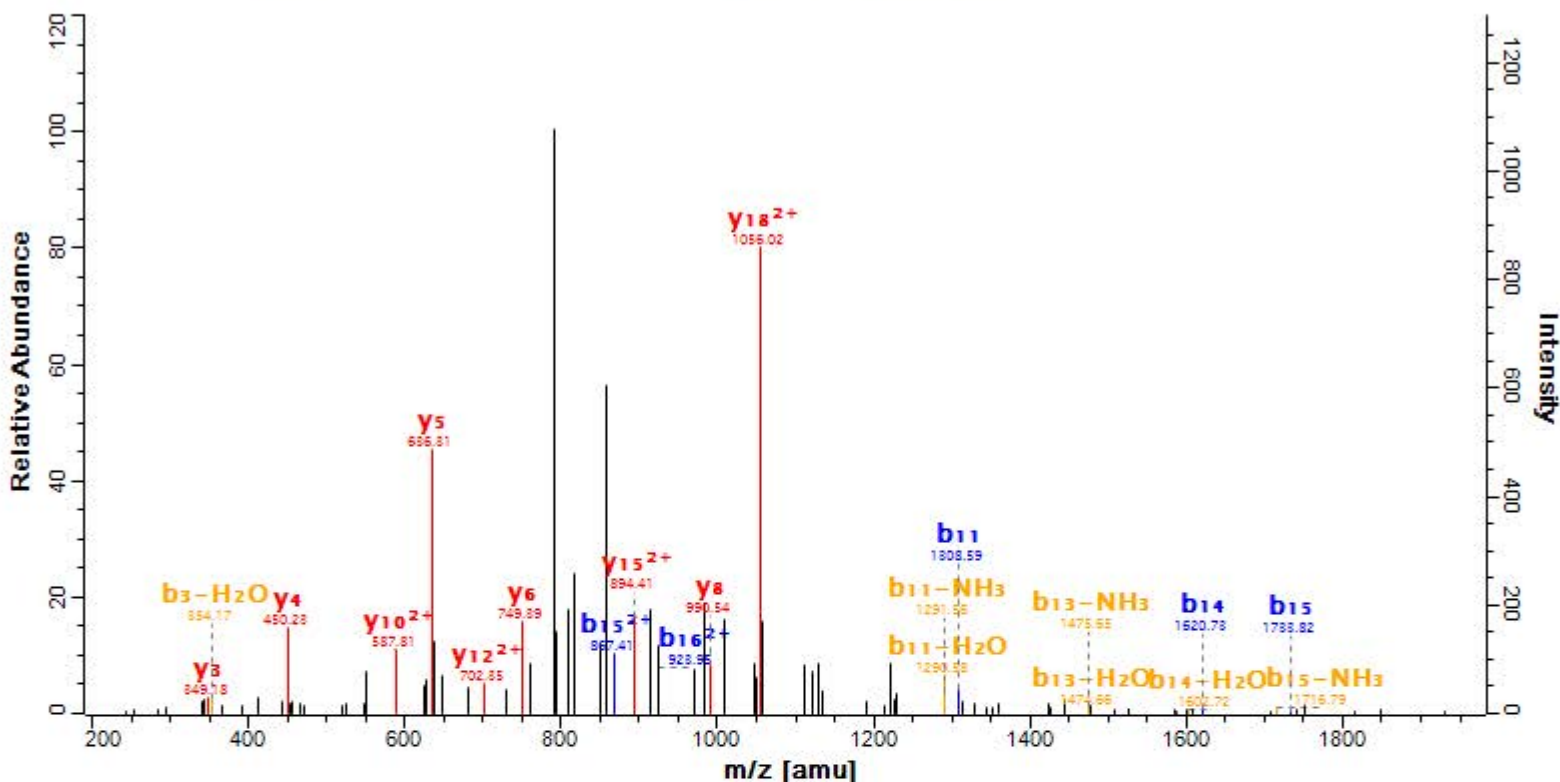

precursor information

|                   |                 |
|-------------------|-----------------|
| Mass:             | 2481.19557      |
| m/z:              | 828.07247       |
| Charge:           | 3+              |
| Retentiontime:    | 48.324138641357 |
| Score:            | 66.60609        |
| Mass Error [ppm]: | -0.10077        |
| PEP:              | 0.00088585      |
| Precursor Type:   | MULTI           |

| b <sup>2+</sup> ion |        | b ion    |        | seq |   |    | y ion    |         | y <sup>2+</sup> ion |         |
|---------------------|--------|----------|--------|-----|---|----|----------|---------|---------------------|---------|
| Δ dalton            | mass   | Δ dalton | mass   |     |   |    | Δ dalton | mass    | Δ dalton            | mass    |
|                     | 130.05 | 130.05   |        | 1   | E | 20 |          |         |                     |         |
|                     | 243.13 | 243.13   |        | 2   | L | 19 | 2353.2   |         | 2353.2              |         |
|                     | 372.18 | 372.18   |        | 3   | E | 18 | 2240.1   |         | 2240.1              |         |
|                     | 469.23 | 469.23   |        | 4   | P | 17 | 2111     |         | 1056                | +0.1992 |
|                     | 582.31 | 582.31   |        | 5   | L | 16 | 2014     |         | 2014                |         |
|                     | 695.4  | 695.4    |        | 6   | L | 15 | 1900.9   |         | 1900.9              |         |
|                     | 855.43 | 855.43   |        | 7   | C | 14 | 1787.8   |         | 894.41              | +0.3135 |
|                     | 992.49 | 992.49   |        | 8   | H | 13 | 1627.8   |         | 1627.8              |         |
|                     | 1079.5 | 1079.5   |        | 9   | S | 12 | 1490.7   |         | 1490.7              |         |
|                     | 1194.5 | 1194.5   |        | 10  | D | 11 | 1403.7   |         | 702.35              | +0.4605 |
|                     | 1308.6 | -0.069   | 1308.6 | 11  | N | 10 | 1288.7   |         | 1288.7              |         |
|                     | 1405.6 |          | 1405.6 | 12  | P | 9  | 1174.6   |         | 587.81              | +0.2338 |
|                     | 1492.7 |          | 1492.7 | 13  | S | 8  | 1077.6   |         | 1077.6              |         |
|                     | 1620.7 | +0.1722  | 1620.7 | 14  | Q | 7  | 990.54   | +0.218  | 990.54              |         |
| -0.105              | 867.41 | +0.0764  | 1733.8 | 15  | L | 6  | 862.48   |         | 862.48              |         |
| -0.049              | 923.95 |          | 1846.9 | 16  | I | 5  | 749.39   | +0.0343 | 749.39              |         |
|                     | 2033   |          | 2033   | 17  | W | 4  | 636.31   | +0.0988 | 636.31              |         |
|                     | 2134   |          | 2134   | 18  | T | 3  | 450.23   | +0.0739 | 450.23              |         |
|                     | 2221.1 |          | 2221.1 | 19  | S | 2  | 349.18   | +0.0782 | 349.18              |         |
|                     | 2308.1 |          | 2308.1 | 20  | S | 1  | 262.15   |         | 262.15              |         |
|                     |        |          |        | 21  | R | 0  | 175.12   |         | 175.12              |         |

general information

|                       |             |
|-----------------------|-------------|
| Annotation:           | 13 of 21    |
| AminoAcids Coverag    | 62 %        |
| Intensity Coverage:   | 33 %        |
| Peak Coverage:        | 22 %        |
| Protein Localisation: | 152 ... 172 |

Scan number 7249 Raw file LNCAP\_Silac\_23F10\_set2\_05  
 Method ITMS; CID Pepti... 139.67

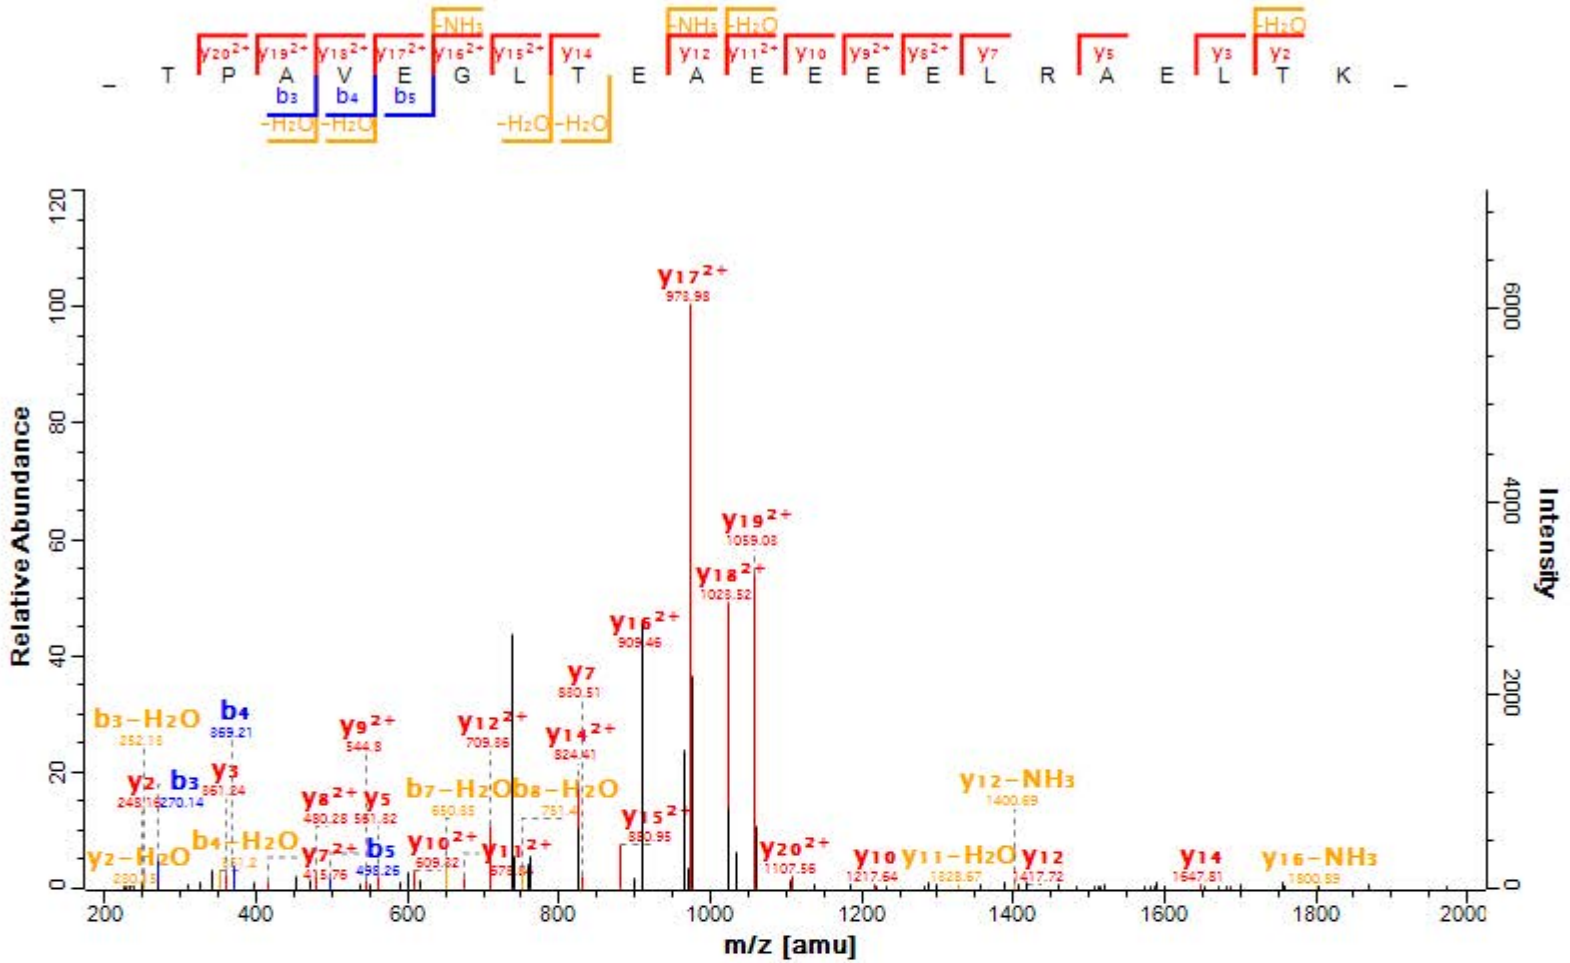

precursor information

|                   |               |
|-------------------|---------------|
| Mass:             | 2314.15355    |
| m/z:              | 772.39179     |
| Charge:           | 3+            |
| Retentiontime:    | 48.8662109375 |
| Score:            | 139.6694      |
| Mass Error [ppm]: | -0.19433      |
| PEP:              | 2.0436E-19    |
| Precursor Type:   | MULTI         |

general information

|                       |           |
|-----------------------|-----------|
| Annotation:           | 16 of 21  |
| AminoAcids Coverage:  | 76 %      |
| Intensity Coverage:   | 56 %      |
| Peak Coverage:        | 29 %      |
| Protein Localisation: | 35 ... 55 |

| b ion     |          |     |   | y ion    |          | y <sup>2+</sup> ion |           |           |
|-----------|----------|-----|---|----------|----------|---------------------|-----------|-----------|
| Δ dalton  | mass     | seq |   | Δ dalton | mass     | Δ dalton            | mass      |           |
|           | 102.055  | 1   | T | 20       |          |                     |           |           |
|           | 199.1077 | 2   | P | 19       | 2214.114 | 1107.56             | +0.051623 |           |
| +0.101383 | 270.1448 | 3   | A | 18       | 2117.061 | 1059.034            | +0.319216 |           |
| +0.086131 | 369.2132 | 4   | V | 17       | 2046.024 | 1023.515            | +0.23029  |           |
| +0.038899 | 498.2558 | 5   | E | 16       | 1946.955 | 973.9813            | +0.278291 |           |
|           | 555.2773 | 6   | G | 15       | 1817.913 | 909.46              | +0.005398 |           |
|           | 668.3614 | 7   | L | 14       | 1760.891 | 880.9493            | +0.387346 |           |
|           | 769.409  | 8   | T | 13       | 1647.807 | -0.38702            | 824.4072  | +0.056025 |
|           | 898.4516 | 9   | E | 12       | 1546.76  |                     | 1546.76   |           |
|           | 969.4888 | 10  | A | 11       | 1417.717 | +0.043461           | 709.3621  | +0.190944 |
|           | 1098.531 | 11  | E | 10       | 1346.68  |                     | 673.8435  | +0.108793 |
|           | 1227.574 | 12  | E | 9        | 1217.637 | -0.16919            | 609.3222  | +0.22445  |
|           | 1356.617 | 13  | E | 8        | 1088.595 |                     | 544.8009  | +0.228168 |
|           | 1485.659 | 14  | E | 7        | 959.552  |                     | 480.2796  | +0.030349 |
|           | 1598.743 | 15  | L | 6        | 830.5094 | +0.010408           | 415.7584  | +0.190439 |
|           | 1754.844 | 16  | R | 5        | 717.4254 |                     | 717.4254  |           |
|           | 1825.881 | 17  | A | 4        | 561.3243 | +0.227077           | 561.3243  |           |
|           | 1954.924 | 18  | E | 3        | 490.2871 |                     | 490.2871  |           |
|           | 2068.008 | 19  | L | 2        | 361.2445 | -0.05967            | 361.2445  |           |
|           | 2169.056 | 20  | T | 1        | 248.1605 | -0.04351            | 248.1605  |           |
|           |          | 21  | K | 0        | 147.1128 |                     | 147.1128  |           |

Scan number 7306 Raw file LNCAP\_Silac\_23F10\_set2\_05  
 Method ITMS; CID Peptide LNCAP\_Silac\_23F10\_set2\_05

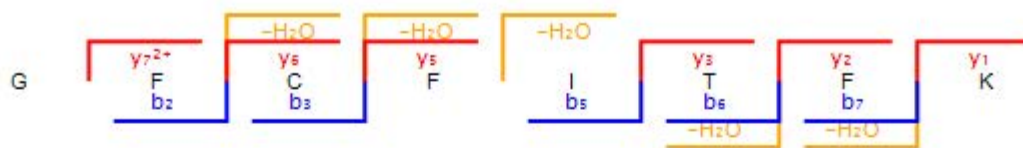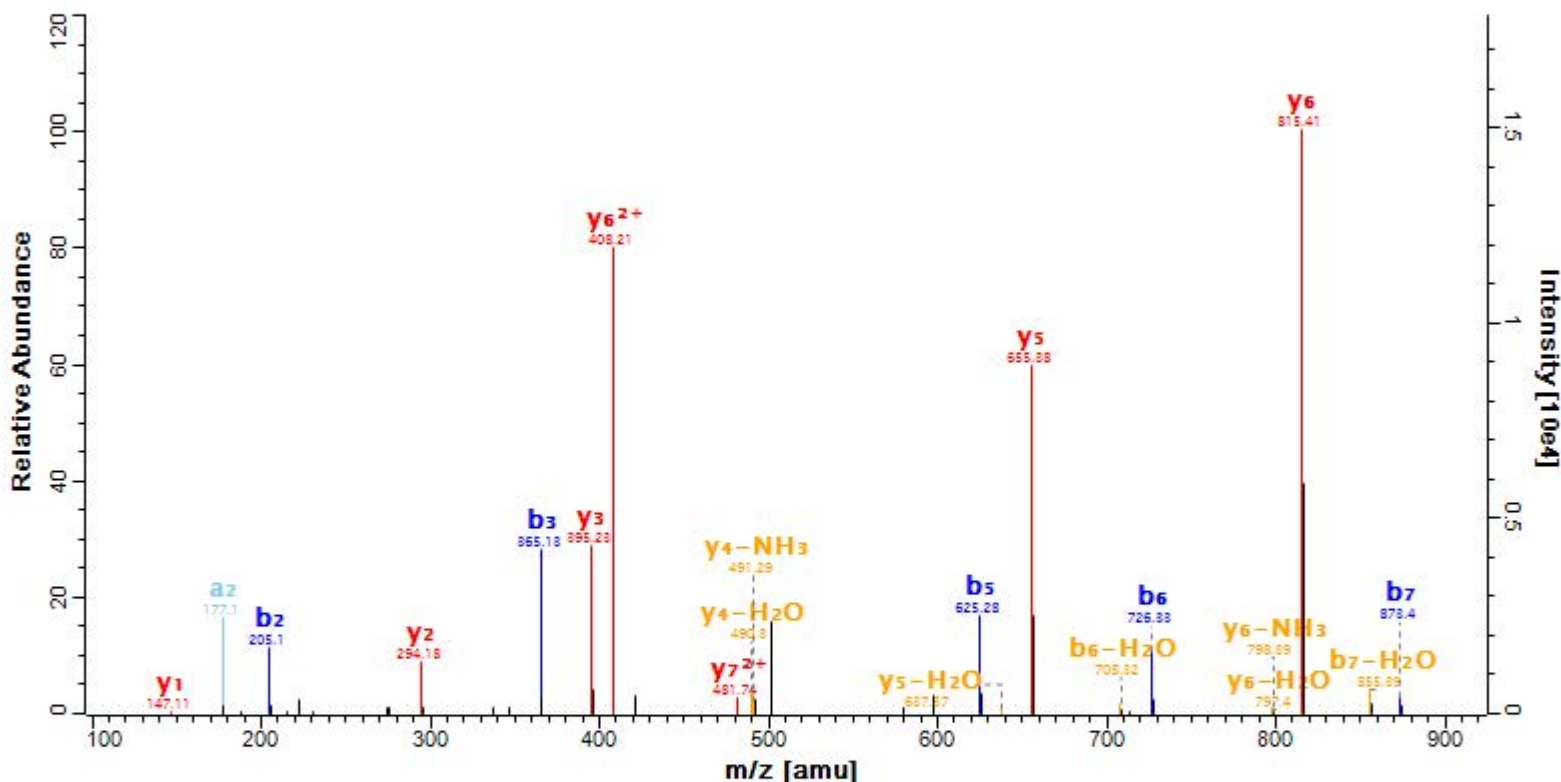

#### precursor information

|                       |                 |
|-----------------------|-----------------|
| Mass:                 | 1018.49497      |
| m/z:                  | 510.25476       |
| Charge:               | 2+              |
| Retentiontime:        | 49.221870422363 |
| Score:                | 166.1692        |
| Mass Error [ppm]:     | 0.33723         |
| g PEP:                | 1.377E-05       |
| Annotation:           | 7 of 8          |
| AminoAcids Coverage:  | 88 %            |
| Intensity Coverage:   | 77 %            |
| Peak Coverage:        | 33 %            |
| Protein Localisation: | 205 ... 212     |

| a ion    |        | b ion    |        |   |     |          | y ion  |          | y <sup>2+</sup> ion |  |
|----------|--------|----------|--------|---|-----|----------|--------|----------|---------------------|--|
| Δ dalton | mass   | Δ dalton | mass   |   | seq | Δ dalton | mass   | Δ dalton | mass                |  |
|          | 30.034 |          | 58.029 | 1 | G   |          |        |          |                     |  |
| +0.0209  | 177.1  | +0.0018  | 205.1  | 2 | F   | 6        | 962.48 |          | 481.74              |  |
|          | 337.13 | +0.0025  | 365.13 | 3 | C   | 5        | 815.41 | -0.036   | 408.21              |  |
|          | 484.2  |          | 512.2  | 4 | F   | 4        | 655.38 | -0.019   | 655.38              |  |
|          | 597.29 | -0.027   | 625.28 | 5 | I   | 3        | 508.31 |          | 508.31              |  |
|          | 698.33 | -0.061   | 726.33 | 6 | T   | 2        | 395.23 | +0.0052  | 395.23              |  |
|          | 845.4  | -0.052   | 873.4  | 7 | F   | 1        | 294.18 | +0.0572  | 294.18              |  |
|          |        |          |        | 8 | K   | 0        | 147.11 | -0.072   | 147.11              |  |

Scan number 7676 Raw file LNCAP\_Silac\_23F10\_set2\_05  
 Method ITMS; CID Pepti... 74.56

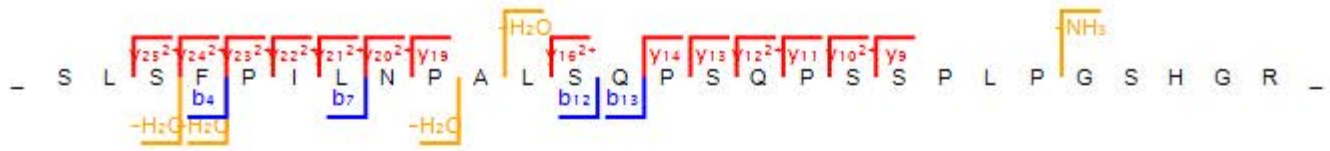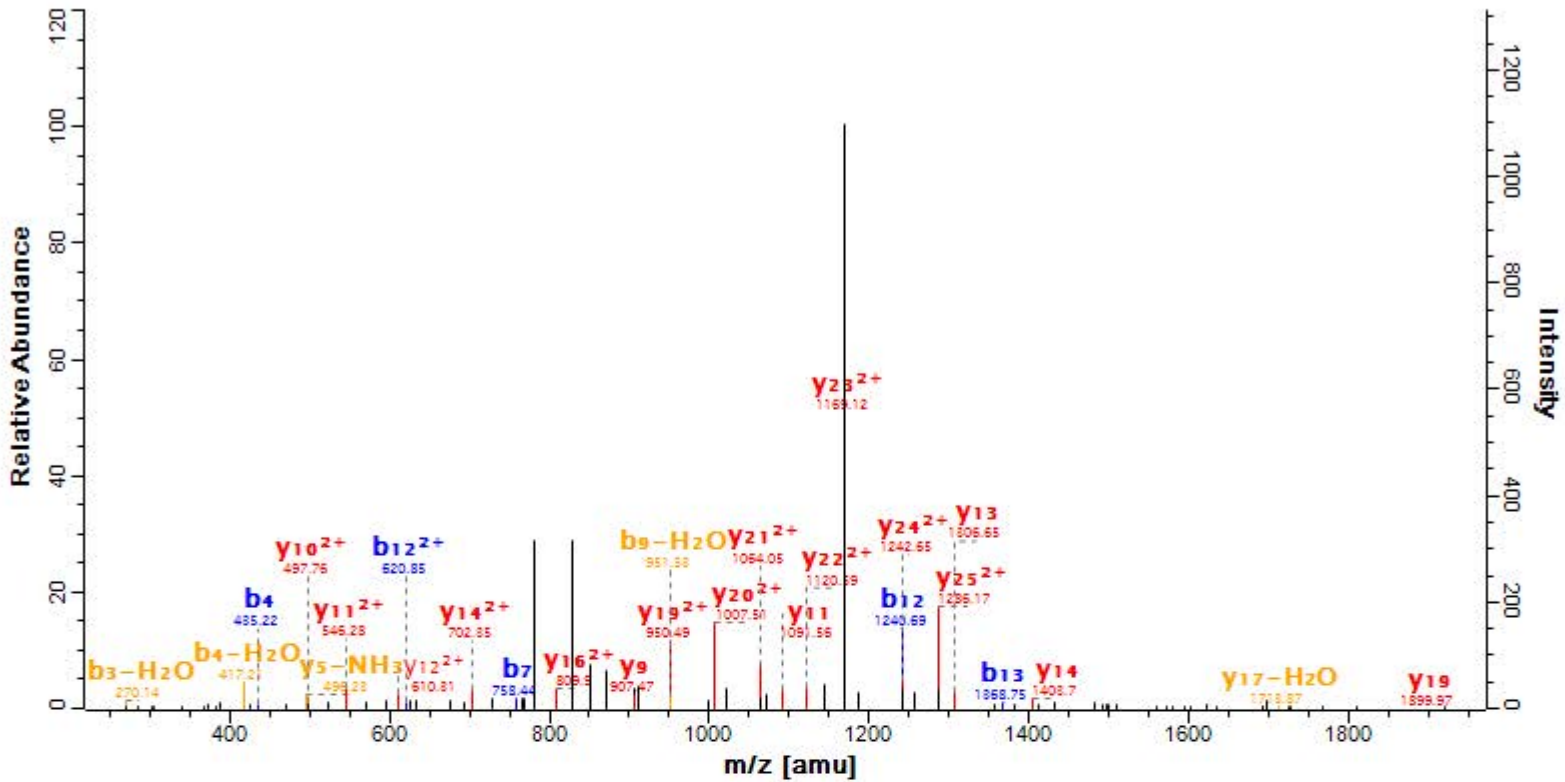

precursor information

|                   |                 |
|-------------------|-----------------|
| Mass:             | 2770.44016      |
| m/z:              | 924.48733       |
| Charge:           | 3+              |
| Retentiontime:    | 51.716648101806 |
| Score:            | 74.56078        |
| Mass Error [ppm]: | -0.022439       |
| PEP:              | 4.6188E-08      |
| Precursor Type:   | MULTI           |

| b <sup>2+</sup> ion |        | b ion    |        | seq |   |    | y ion    |         | y <sup>2+</sup> ion |         |
|---------------------|--------|----------|--------|-----|---|----|----------|---------|---------------------|---------|
| Δ dalton            | mass   | Δ dalton | mass   |     |   |    | Δ dalton | mass    | Δ dalton            | mass    |
|                     | 88.039 |          | 88.039 | 1   | S | 26 |          |         |                     |         |
|                     | 201.12 |          | 201.12 | 2   | L | 25 | 2684.4   |         | 2684.4              |         |
|                     | 288.16 |          | 288.16 | 3   | S | 24 | 2571.3   |         | 1286.2              | +0.3134 |
|                     | 435.22 | -0.058   | 435.22 | 4   | F | 23 | 2484.3   |         | 1242.7              | -0.326  |
|                     | 532.28 |          | 532.28 | 5   | P | 22 | 2337.2   |         | 1169.1              | -0.015  |
|                     | 645.36 |          | 645.36 | 6   | I | 21 | 2240.2   |         | 1120.6              | -0.024  |
|                     | 758.44 | -0.105   | 758.44 | 7   | L | 20 | 2127.1   |         | 1064.1              | +0.403  |
|                     | 872.49 |          | 872.49 | 8   | N | 19 | 2014     |         | 1007.5              | +0.198  |
|                     | 969.54 |          | 969.54 | 9   | P | 18 | 1900     | -0.255  | 950.49              | +0.2447 |
|                     | 1040.6 |          | 1040.6 | 10  | A | 17 | 1802.9   |         | 1802.9              |         |
|                     | 1153.7 |          | 1153.7 | 11  | L | 16 | 1731.9   |         | 1731.9              |         |
| +0.3158             | 620.85 | +0.4805  | 1240.7 | 12  | S | 15 | 1618.8   |         | 809.9               | -0.05   |
|                     | 1368.8 | -0.234   | 1368.8 | 13  | Q | 14 | 1531.8   |         | 1531.8              |         |
|                     | 1465.8 |          | 1465.8 | 14  | P | 13 | 1403.7   | -0.046  | 702.35              | +0.162  |
|                     | 1552.8 |          | 1552.8 | 15  | S | 12 | 1306.6   | +0.0483 | 1306.6              |         |
|                     | 1680.9 |          | 1680.9 | 16  | Q | 11 | 1219.6   |         | 610.31              | +0.1805 |
|                     | 1777.9 |          | 1777.9 | 17  | P | 10 | 1091.6   | +0.0457 | 546.28              | +0.4405 |
|                     | 1865   |          | 1865   | 18  | S | 9  | 994.51   |         | 497.76              | -0.098  |
|                     | 1952   |          | 1952   | 19  | S | 8  | 907.47   | +0.083  | 907.47              |         |
|                     | 2049.1 |          | 2049.1 | 20  | P | 7  | 820.44   |         | 820.44              |         |
|                     | 2162.1 |          | 2162.1 | 21  | L | 6  | 723.39   |         | 723.39              |         |
|                     | 2259.2 |          | 2259.2 | 22  | P | 5  | 610.31   |         | 610.31              |         |
|                     | 2316.2 |          | 2316.2 | 23  | G | 4  | 513.25   |         | 513.25              |         |
|                     | 2403.3 |          | 2403.3 | 24  | S | 3  | 456.23   |         | 456.23              |         |
|                     | 2540.3 |          | 2540.3 | 25  | H | 2  | 369.2    |         | 369.2               |         |
|                     | 2597.3 |          | 2597.3 | 26  | G | 1  | 232.14   |         | 232.14              |         |
|                     |        |          |        | 27  | R | 0  | 175.12   |         | 175.12              |         |

general information

|                       |             |
|-----------------------|-------------|
| Annotation:           | 18 of 27    |
| AminoAcids Coverage:  | 67 %        |
| Intensity Coverage:   | 38 %        |
| Peak Coverage:        | 28 %        |
| Protein Localisation: | 483 ... 509 |



Scan number 7746 Raw file LNCAP\_Silac\_23F10\_set2\_05  
 Method ITMS; CID Pepti... 101.01

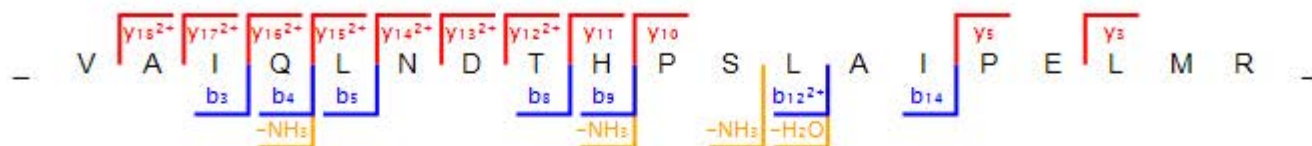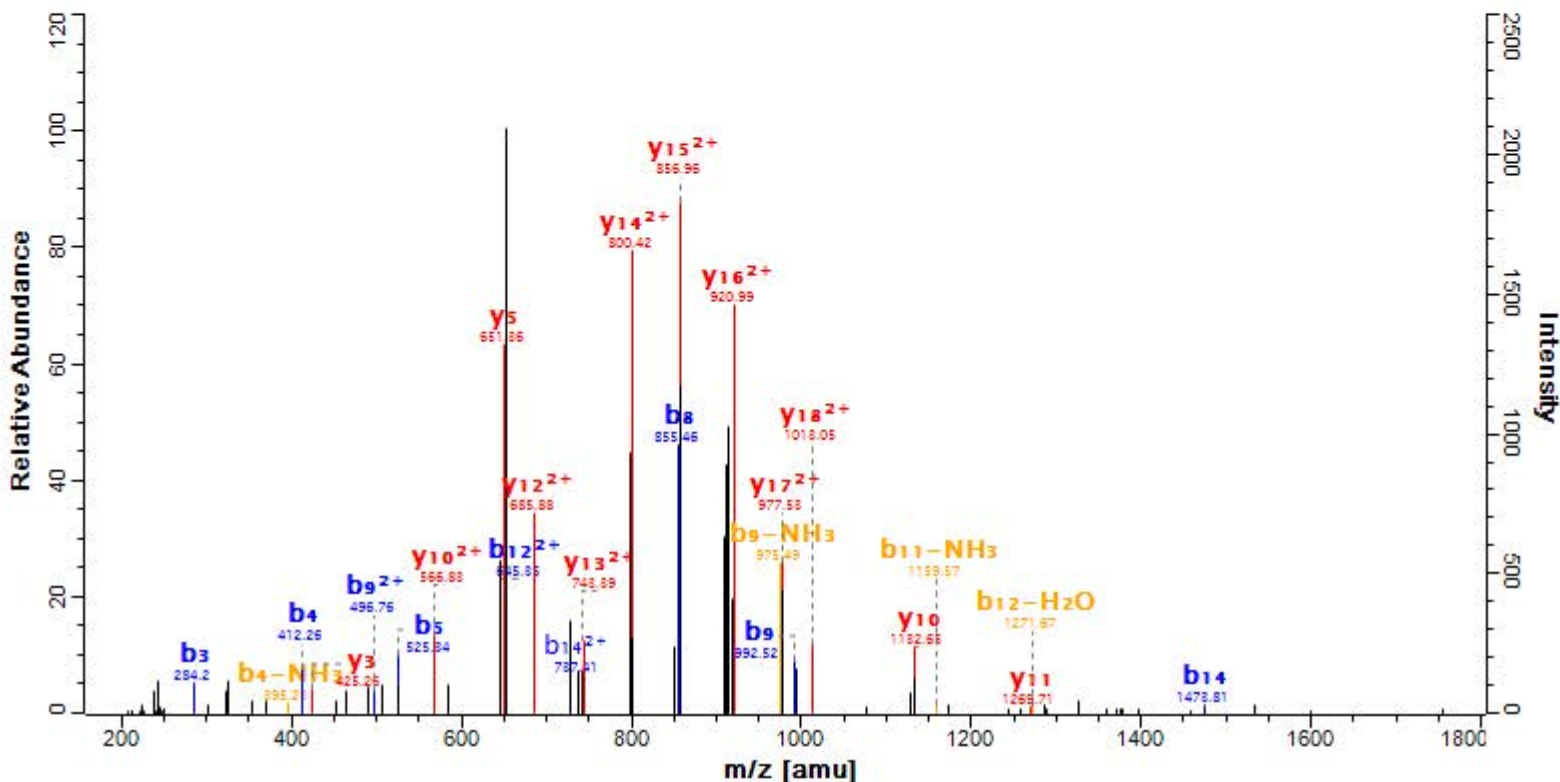

#### precursor information

|                   |                 |
|-------------------|-----------------|
| Mass:             | 2117.12973      |
| m/z:              | 706.71719       |
| Charge:           | 3+              |
| Retentiontime:    | 52.212528228759 |
| Score:            | 101.0086        |
| Mass Error [ppm]: | -0.27352        |
| PEP:              | 2.8338E-06      |
| Precursor Type:   | MULTI           |

#### general information

|                       |             |
|-----------------------|-------------|
| Annotation:           | 14 of 19    |
| AminoAcids Coverage:  | 74 %        |
| Intensity Coverage:   | 47 %        |
| Peak Coverage:        | 26 %        |
| Protein Localisation: | 334 ... 352 |

| b <sup>2+</sup> ion |        | b ion    |        |    |     |    | y ion    |         | y <sup>2+</sup> ion |         |
|---------------------|--------|----------|--------|----|-----|----|----------|---------|---------------------|---------|
| Δ dalton            | mass   | Δ dalton | mass   |    | seq |    | Δ dalton | mass    | Δ dalton            | mass    |
|                     | 100.08 |          | 100.08 | 1  | V   | 18 |          |         |                     |         |
|                     | 171.11 |          | 171.11 | 2  | A   | 17 | 2025.1   |         | 1013                | -0.05   |
|                     | 284.2  | +0.0214  | 284.2  | 3  | I   | 16 | 1954.1   |         | 977.53              | +0.0622 |
|                     | 412.26 | +0.0939  | 412.26 | 4  | Q   | 15 | 1841     |         | 920.99              | +0.2972 |
|                     | 525.34 | +0.0035  | 525.34 | 5  | L   | 14 | 1712.9   |         | 856.96              | +0.0286 |
|                     | 639.38 |          | 639.38 | 6  | N   | 13 | 1599.8   |         | 800.42              | +0.1273 |
|                     | 754.41 |          | 754.41 | 7  | D   | 12 | 1485.8   |         | 743.39              | +0.2295 |
|                     | 855.46 | -0.229   | 855.46 | 8  | T   | 11 | 1370.8   |         | 685.88              | +0.2227 |
| +0.0487             | 496.76 | +0.0087  | 992.52 | 9  | H   | 10 | 1269.7   | +0.1066 | 1269.7              |         |
|                     | 1089.6 |          | 1089.6 | 10 | P   | 9  | 1132.6   | -0.008  | 566.83              | +0.1625 |
|                     | 1176.6 |          | 1176.6 | 11 | S   | 8  | 1035.6   |         | 1035.6              |         |
| -0.101              | 645.35 |          | 1289.7 | 12 | L   | 7  | 948.56   |         | 948.56              |         |
|                     | 1360.7 |          | 1360.7 | 13 | A   | 6  | 835.48   |         | 835.48              |         |
| +0.0872             | 737.41 | +0.4656  | 1473.8 | 14 | I   | 5  | 764.44   |         | 764.44              |         |
|                     | 1570.9 |          | 1570.9 | 15 | P   | 4  | 651.36   | +0.1163 | 651.36              |         |
|                     | 1699.9 |          | 1699.9 | 16 | E   | 3  | 554.31   |         | 554.31              |         |
|                     | 1813   |          | 1813   | 17 | L   | 2  | 425.26   | +0.0355 | 425.26              |         |
|                     | 1944   |          | 1944   | 18 | M   | 1  | 312.18   |         | 312.18              |         |
|                     |        |          |        | 19 | R   | 0  | 181.14   |         | 181.14              |         |

Scan number 7845 Raw file LNCAP\_Silac\_23F10\_set2\_05  
 Method ITMS; CID Pepti... 92.39

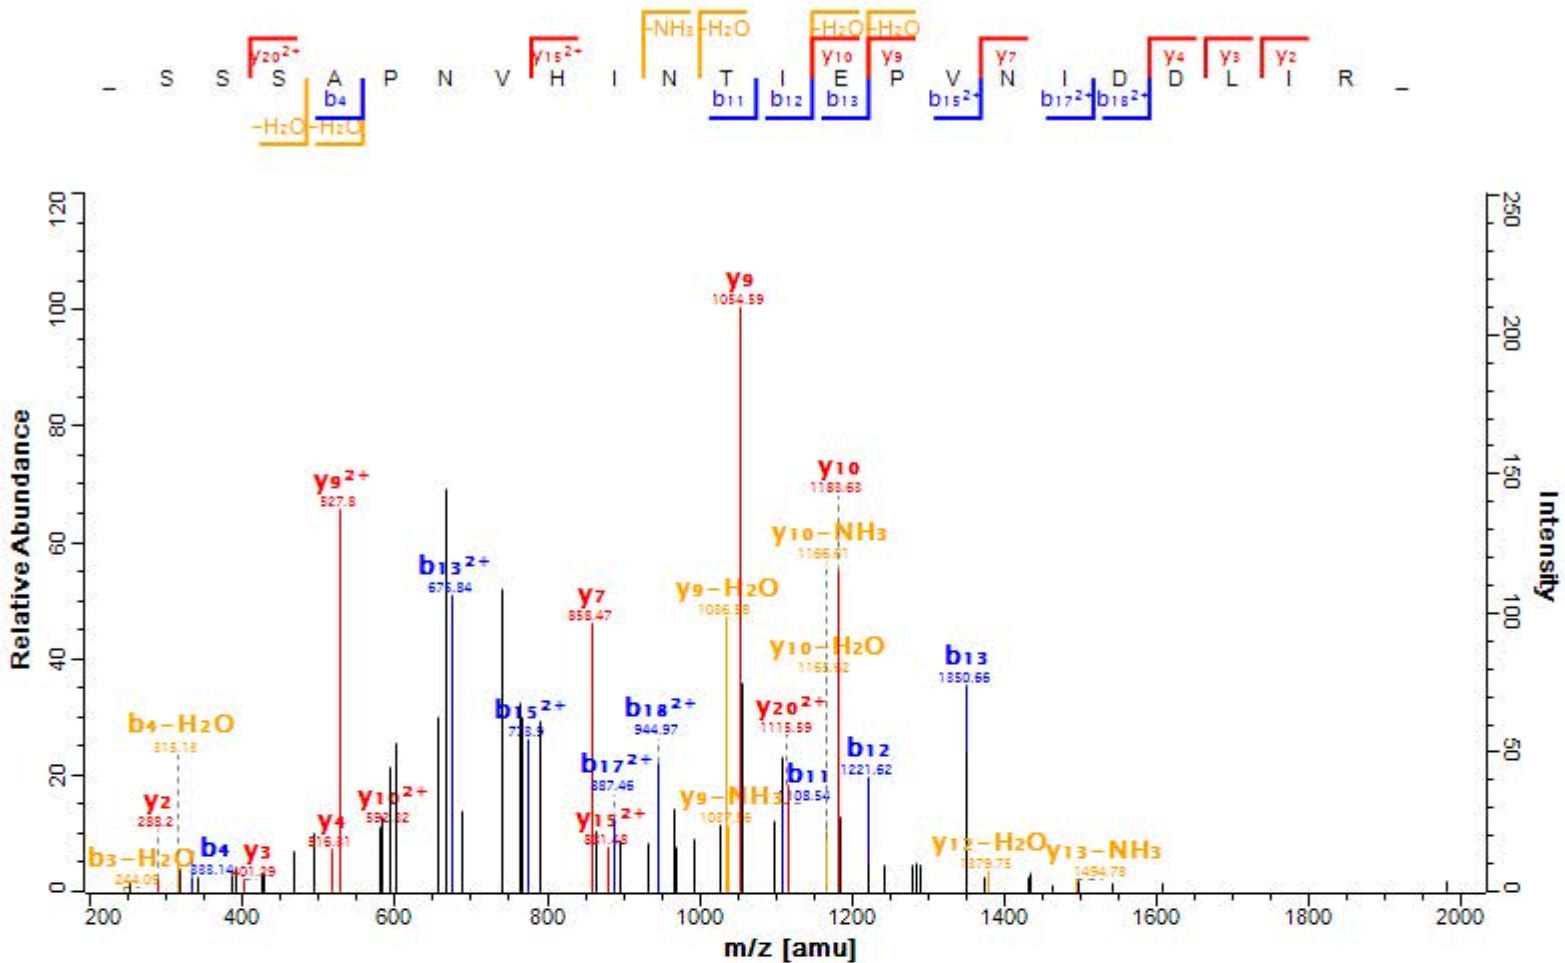

precursor information

|                   |                 |
|-------------------|-----------------|
| Mass:             | 2403.23988      |
| m/z:              | 802.08724       |
| Charge:           | 3+              |
| Retentiontime:    | 52.963550567627 |
| Score:            | 92.39011        |
| Mass Error [ppm]: | 0.2007          |
| PEP:              | 3.9E-06         |
| Precursor Type:   | MULTI           |

| b <sup>2+</sup> ion |        | b ion    |        | seq |   |    | y ion    |         | y <sup>2+</sup> ion |         |
|---------------------|--------|----------|--------|-----|---|----|----------|---------|---------------------|---------|
| Δ dalton            | mass   | Δ dalton | mass   |     |   |    | Δ dalton | mass    | Δ dalton            | mass    |
|                     | 88.039 |          | 88.039 | 1   | S | 21 |          |         |                     |         |
|                     | 175.07 |          | 175.07 | 2   | S | 20 | 2317.2   |         | 2317.2              |         |
|                     | 262.1  |          | 262.1  | 3   | S | 19 | 2230.2   |         | 1115.6              | +0.2141 |
|                     | 333.14 | +0.0469  | 333.14 | 4   | A | 18 | 2143.2   |         | 2143.2              |         |
|                     | 430.19 |          | 430.19 | 5   | P | 17 | 2072.1   |         | 2072.1              |         |
|                     | 544.24 |          | 544.24 | 6   | N | 16 | 1975.1   |         | 1975.1              |         |
|                     | 643.3  |          | 643.3  | 7   | V | 15 | 1861     |         | 1861                |         |
|                     | 780.36 |          | 780.36 | 8   | H | 14 | 1761.9   |         | 881.48              | +0.0259 |
|                     | 893.45 |          | 893.45 | 9   | I | 13 | 1624.9   |         | 1624.9              |         |
|                     | 1007.5 |          | 1007.5 | 10  | N | 12 | 1511.8   |         | 1511.8              |         |
|                     | 1108.5 | +0.2548  | 1108.5 | 11  | T | 11 | 1397.8   |         | 1397.8              |         |
|                     | 1221.6 | +0.1076  | 1221.6 | 12  | I | 10 | 1296.7   |         | 1296.7              |         |
| -0.083              | 675.84 | -0.052   | 1350.7 | 13  | E | 9  | 1183.6   | -0.011  | 592.32              | +0.306  |
|                     | 1447.7 |          | 1447.7 | 14  | P | 8  | 1054.6   | +0.0564 | 527.8               | +0.1338 |
| +0.1446             | 773.9  |          | 1546.8 | 15  | V | 7  | 957.54   |         | 957.54              |         |
|                     | 1660.8 |          | 1660.8 | 16  | N | 6  | 858.47   | +0.0635 | 858.47              |         |
| -0.161              | 887.46 |          | 1773.9 | 17  | I | 5  | 744.43   |         | 744.43              |         |
| -0.112              | 944.97 |          | 1888.9 | 18  | D | 4  | 631.34   |         | 631.34              |         |
|                     | 2004   |          | 2004   | 19  | D | 3  | 516.31   | +0.1026 | 516.31              |         |
|                     | 2117.1 |          | 2117.1 | 20  | L | 2  | 401.29   | +0.2782 | 401.29              |         |
|                     | 2230.1 |          | 2230.1 | 21  | I | 1  | 288.2    | +0.1526 | 288.2               |         |
|                     |        |          |        | 22  | R | 0  | 175.12   |         | 175.12              |         |

general information

|                       |             |
|-----------------------|-------------|
| Annotation:           | 16 of 22    |
| AminoAcids Coverage:  | 73 %        |
| Intensity Coverage:   | 48 %        |
| Peak Coverage:        | 35 %        |
| Protein Localisation: | 363 ... 384 |

Scan number 7852 Raw file LNCAP\_Silac\_23F10\_set2\_05  
 Method ITMS; CID Pepti... 69.08

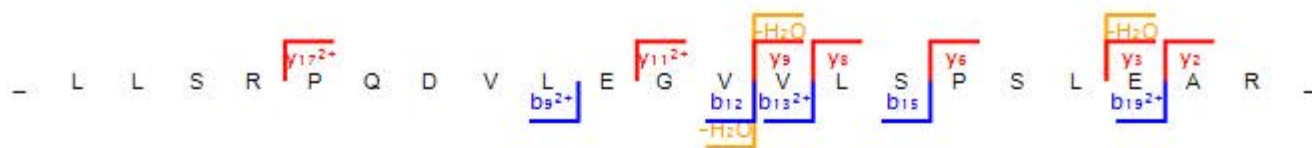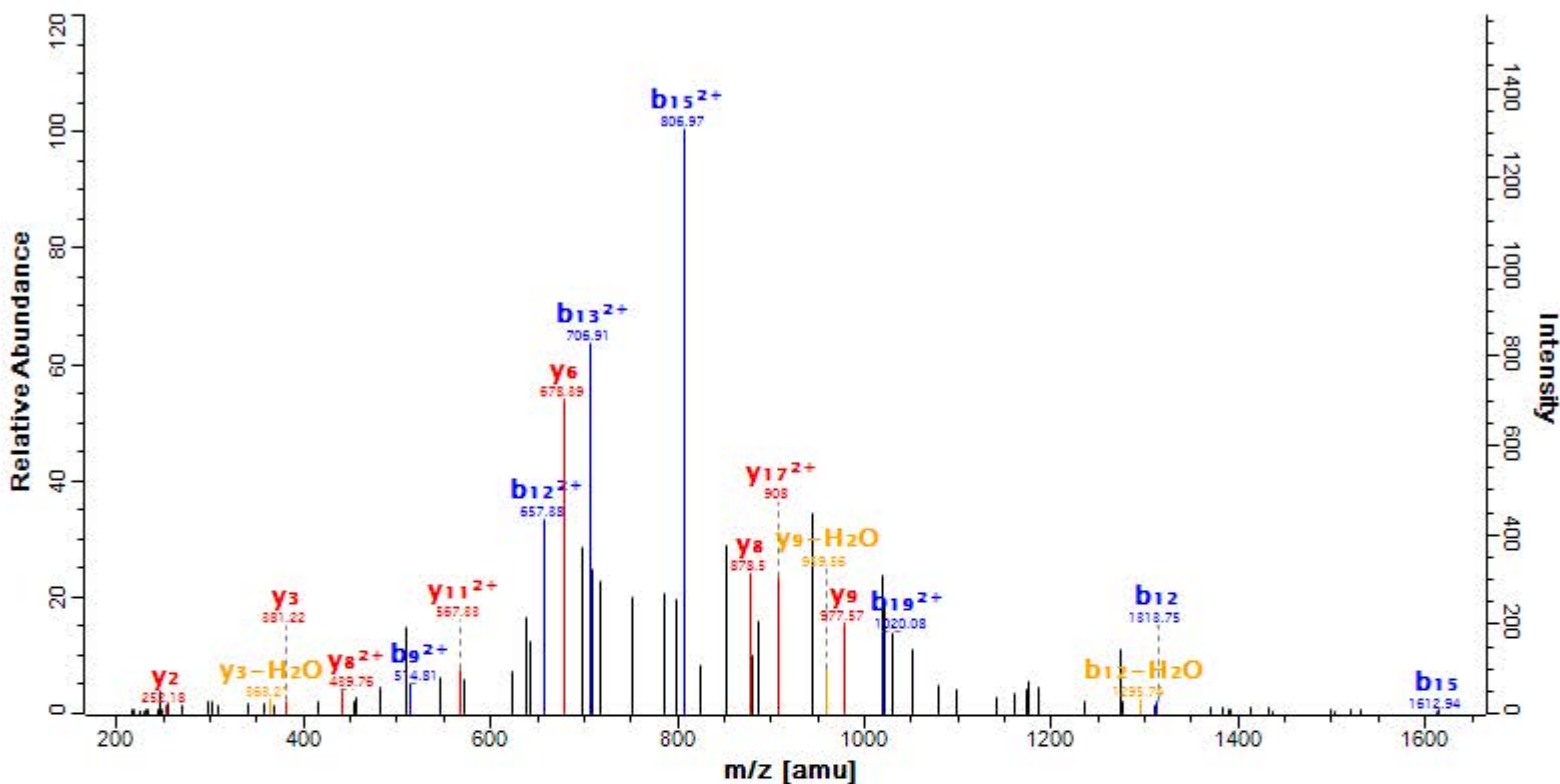

precursor information

|                   |                 |
|-------------------|-----------------|
| Mass:             | 2277.26955      |
| m/z:              | 760.09713       |
| Charge:           | 3+              |
| Retentiontime:    | 53.021354675293 |
| Score:            | 69.08141        |
| Mass Error [ppm]: | 0.13482         |
| PEP:              | 0.0005511       |
| Precursor Type:   | MULTI           |

| b <sup>2+</sup> ion |        | b ion    |        |     |   |          | y ion  |          | y <sup>2+</sup> ion |  |
|---------------------|--------|----------|--------|-----|---|----------|--------|----------|---------------------|--|
| Δ dalton            | mass   | Δ dalton | mass   | seq |   | Δ dalton | mass   | Δ dalton | mass                |  |
|                     | 114.09 |          | 114.09 | 1   | L | 20       |        |          |                     |  |
|                     | 227.18 |          | 227.18 | 2   | L | 19       | 2177.2 |          | 2177.2              |  |
|                     | 314.21 |          | 314.21 | 3   | S | 18       | 2064.1 |          | 2064.1              |  |
|                     | 476.33 |          | 476.33 | 4   | R | 17       | 1977.1 |          | 1977.1              |  |
|                     | 573.38 |          | 573.38 | 5   | P | 16       | 1815   |          | 908 +0.1812         |  |
|                     | 701.44 |          | 701.44 | 6   | Q | 15       | 1717.9 |          | 1717.9              |  |
|                     | 816.47 |          | 816.47 | 7   | D | 14       | 1589.9 |          | 1589.9              |  |
|                     | 915.54 |          | 915.54 | 8   | V | 13       | 1474.9 |          | 1474.9              |  |
| -0.139              | 514.81 |          | 1028.6 | 9   | L | 12       | 1375.8 |          | 1375.8              |  |
|                     | 1157.7 |          | 1157.7 | 10  | E | 11       | 1262.7 |          | 1262.7              |  |
|                     | 1214.7 |          | 1214.7 | 11  | G | 10       | 1133.7 |          | 567.33 -0.008       |  |
| +0.0384             | 657.38 | -0.06    | 1313.8 | 12  | V | 9        | 1076.6 |          | 1076.6              |  |
| +0.0354             | 706.91 |          | 1412.8 | 13  | V | 8        | 977.57 | +0.0102  | 977.57              |  |
|                     | 1525.9 |          | 1525.9 | 14  | L | 7        | 878.5  | -0.049   | 439.76 +0.4365      |  |
| +0.1033             | 806.97 | +0.0141  | 1612.9 | 15  | S | 6        | 765.42 |          | 765.42              |  |
|                     | 1710   |          | 1710   | 16  | P | 5        | 678.39 | +0.0499  | 678.39              |  |
|                     | 1797   |          | 1797   | 17  | S | 4        | 581.33 |          | 581.33              |  |
|                     | 1910.1 |          | 1910.1 | 18  | L | 3        | 494.3  |          | 494.3               |  |
| -0.451              | 1020.1 |          | 2039.1 | 19  | E | 2        | 381.22 | +0.0208  | 381.22              |  |
|                     | 2110.2 |          | 2110.2 | 20  | A | 1        | 252.18 | +0.1182  | 252.18              |  |
|                     |        |          |        | 21  | R | 0        | 181.14 |          | 181.14              |  |

general information

|                       |             |
|-----------------------|-------------|
| Annotation:           | 10 of 21    |
| AminoAcids Coverag    | 48 %        |
| Intensity Coverage:   | 42 %        |
| Peak Coverage:        | 20 %        |
| Protein Localisation: | 307 ... 327 |

Scan number 8210 Raw file LNCAP\_Silac\_23F10\_set2\_05  
 Method ITMS; CID Pepti... 139.28

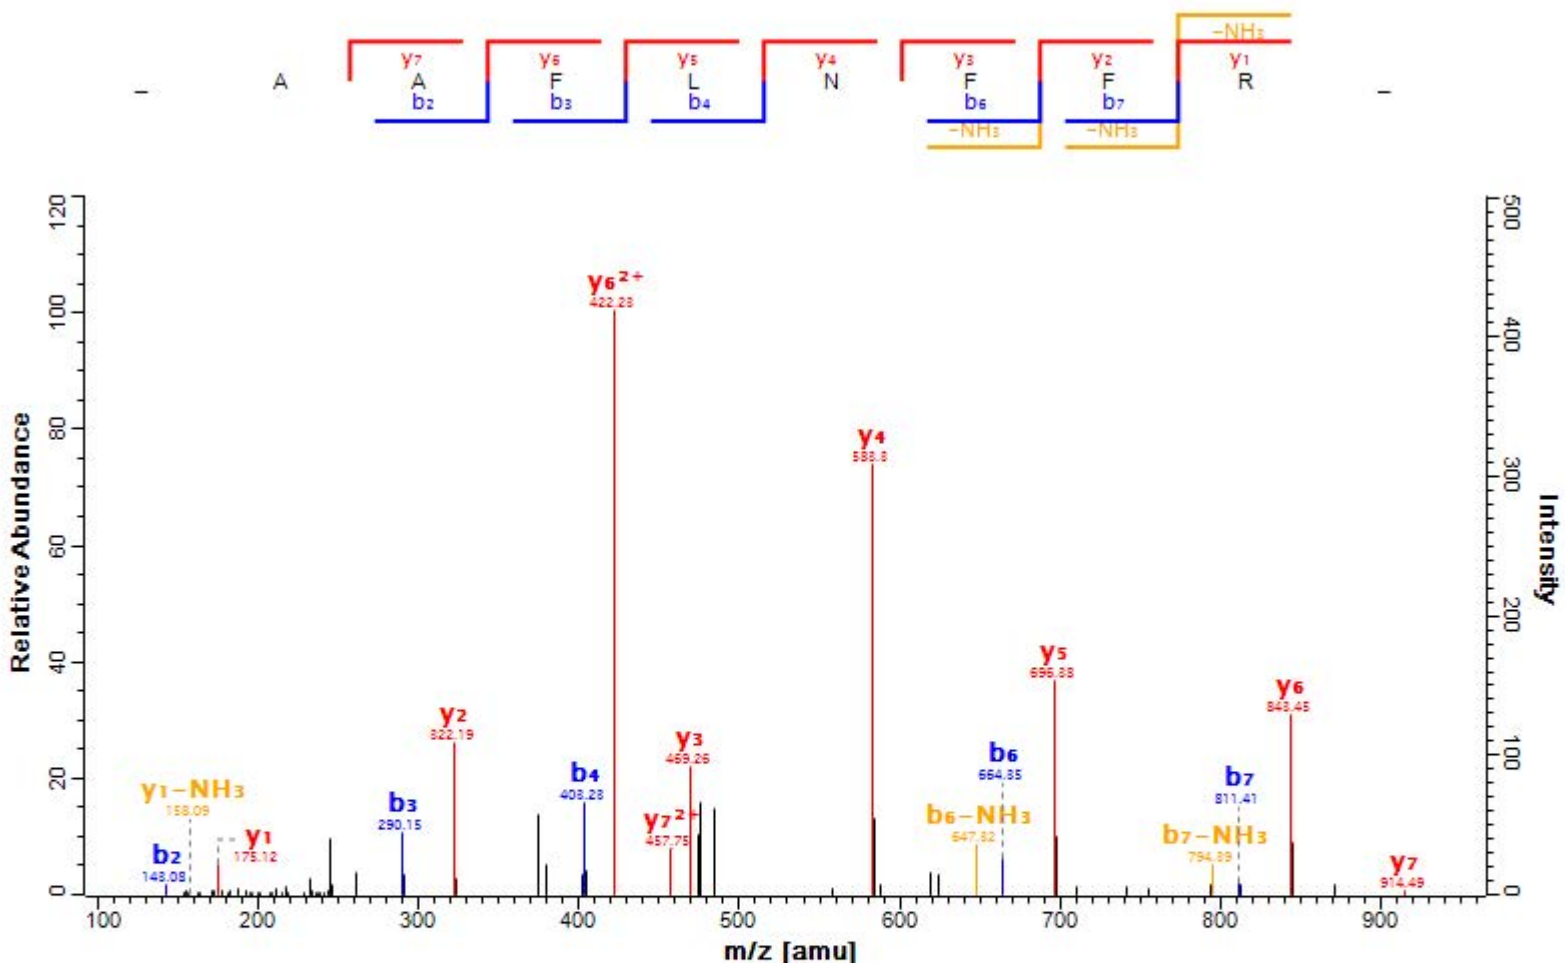

#### precursor information

|                       |                 |
|-----------------------|-----------------|
| Mass:                 | 984.51816       |
| m/z:                  | 493.26636       |
| Charge:               | 2+              |
| Retentiontime:        | 55.918598175048 |
| Score:                | 139.2797        |
| Mass Error [ppm]:     | 0.027658        |
| g PEP:                | 1.1769E-06      |
| Annotation:           | 7 of 8          |
| AminoAcids Coverage:  | 88 %            |
| Intensity Coverage:   | 68 %            |
| Peak Coverage:        | 21 %            |
| Protein Localisation: | 44 ... 51       |

| b ion           |          |     |   | y ion           |          | $y^{2+}$ ion    |          |           |
|-----------------|----------|-----|---|-----------------|----------|-----------------|----------|-----------|
| $\Delta$ dalton | mass     | seq |   | $\Delta$ dalton | mass     | $\Delta$ dalton | mass     |           |
|                 | 72.04439 | 1   | A | 7               |          |                 |          |           |
| +0.058282       | 143.0815 | 2   | A | 6               | 914.4883 | -0.08864        | 457.7478 | -0.35506  |
| +0.034439       | 290.1499 | 3   | F | 5               | 843.4512 | +0.021227       | 422.2292 | +0.169756 |
| +0.071163       | 403.234  | 4   | L | 4               | 696.3828 | +0.102214       | 696.3828 |           |
|                 | 517.2769 | 5   | N | 3               | 583.2987 | +0.052306       | 583.2987 |           |
| -0.04906        | 664.3453 | 6   | F | 2               | 469.2558 | +0.012836       | 469.2558 |           |
| -0.25791        | 811.4137 | 7   | F | 1               | 322.1874 | +0.099469       | 322.1874 |           |
|                 |          | 8   | R | 0               | 175.119  | -0.01211        | 175.119  |           |

Scan number 8712 Raw file LNCAP\_Silac\_23F10\_set2\_05  
 Method ITMS; CID Pepti... 139.65

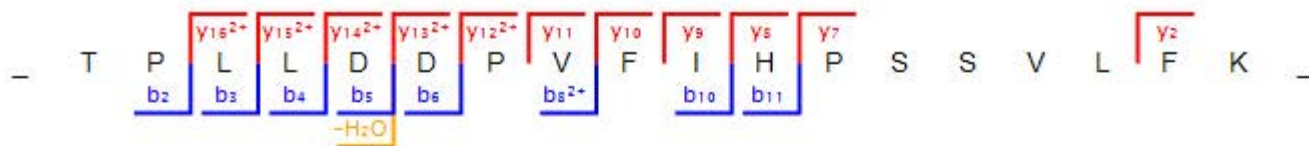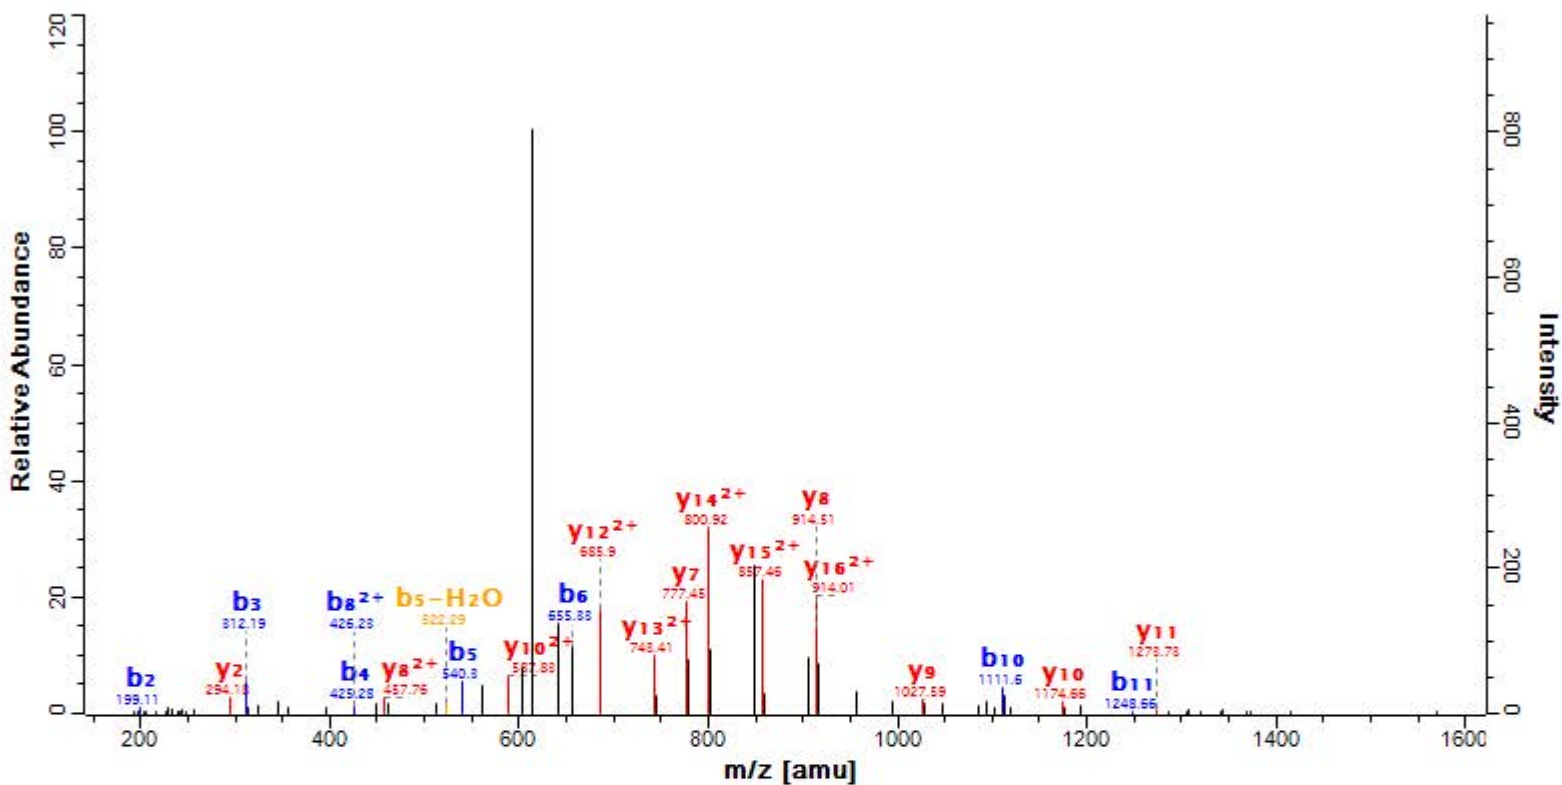

precursor information

|                   |                 |
|-------------------|-----------------|
| Mass:             | 2024.09809      |
| m/z:              | 675.70664       |
| Charge:           | 3+              |
| Retentiontime:    | 60.425247192382 |
| Score:            | 139.6463        |
| Mass Error [ppm]: | -0.086907       |
| PEP:              | 2.908E-17       |
| Precursor Type:   | MULTI           |

general information

|                       |             |
|-----------------------|-------------|
| Annotation:           | 12 of 18    |
| AminoAcids Coverage:  | 67 %        |
| Intensity Coverage:   | 38 %        |
| Peak Coverage:        | 22 %        |
| Protein Localisation: | 957 ... 974 |

| b <sup>2+</sup> ion |        | b ion    |        |    |     |    | y ion    |         | y <sup>2+</sup> ion |         |
|---------------------|--------|----------|--------|----|-----|----|----------|---------|---------------------|---------|
| Δ dalton            | mass   | Δ dalton | mass   |    | seq |    | Δ dalton | mass    | Δ dalton            | mass    |
|                     | 102.05 |          | 102.05 | 1  | T   | 17 |          |         |                     |         |
|                     | 199.11 | +0.0187  | 199.11 | 2  | P   | 16 | 1924.1   |         | 1924.1              |         |
|                     | 312.19 | +0.0769  | 312.19 | 3  | L   | 15 | 1827     |         | 914.01              | +0.0095 |
|                     | 425.28 | -0.042   | 425.28 | 4  | L   | 14 | 1713.9   |         | 857.46              | +0.2476 |
|                     | 540.3  | +0.1816  | 540.3  | 5  | D   | 13 | 1600.8   |         | 800.92              | +0.2407 |
|                     | 655.33 | +0.1099  | 655.33 | 6  | D   | 12 | 1485.8   |         | 743.41              | +0.2228 |
|                     | 752.38 |          | 752.38 | 7  | P   | 11 | 1370.8   |         | 685.9               | +0.2727 |
| -0.03               | 426.23 |          | 851.45 | 8  | V   | 10 | 1273.7   | -0.001  | 1273.7              |         |
|                     | 998.52 |          | 998.52 | 9  | F   | 9  | 1174.7   | -0.011  | 587.83              | +0.28   |
|                     | 1111.6 | -0.085   | 1111.6 | 10 | I   | 8  | 1027.6   | -0.16   | 1027.6              |         |
|                     | 1248.7 | -0.052   | 1248.7 | 11 | H   | 7  | 914.51   | +0.1314 | 457.76              | -0.043  |
|                     | 1345.7 |          | 1345.7 | 12 | P   | 6  | 777.45   | -0.003  | 777.45              |         |
|                     | 1432.7 |          | 1432.7 | 13 | S   | 5  | 680.4    |         | 680.4               |         |
|                     | 1519.8 |          | 1519.8 | 14 | S   | 4  | 593.37   |         | 593.37              |         |
|                     | 1618.8 |          | 1618.8 | 15 | V   | 3  | 506.33   |         | 506.33              |         |
|                     | 1731.9 |          | 1731.9 | 16 | L   | 2  | 407.27   |         | 407.27              |         |
|                     | 1879   |          | 1879   | 17 | F   | 1  | 294.18   | -0.066  | 294.18              |         |
|                     |        |          |        | 18 | K   | 0  | 147.11   |         | 147.11              |         |

Scan number 9113 Raw file LNCAP\_Silac\_23F10\_set2\_05  
 Method ITMS; CID Pepti... 142.39

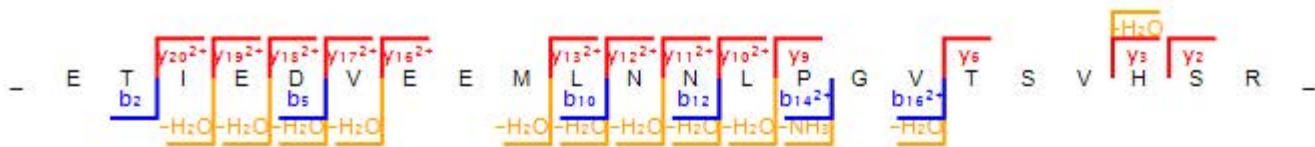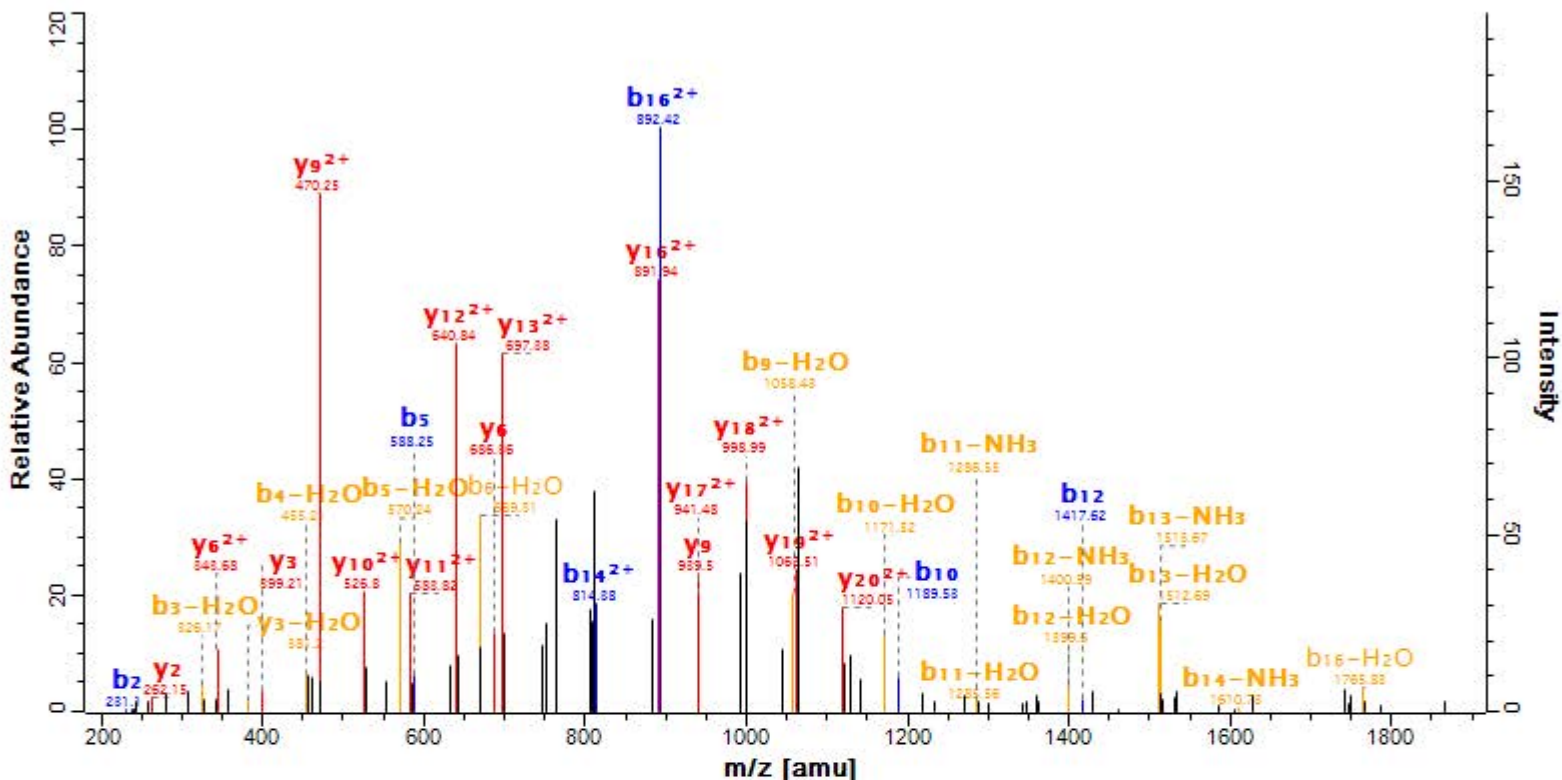

precursor information

|                   |                 |
|-------------------|-----------------|
| Mass:             | 2468.18465      |
| m/z:              | 823.73549       |
| Charge:           | 3+              |
| Retentiontime:    | 64.338180541992 |
| Score:            | 142.3905        |
| Mass Error [ppm]: | -0.27243        |
| PEP:              | 8.3846E-21      |
| Precursor Type:   | MULTI           |

general information

|                       |             |
|-----------------------|-------------|
| Annotation:           | 16 of 22    |
| AminoAcids Coverage:  | 73 %        |
| Intensity Coverage:   | 62 %        |
| Peak Coverage:        | 37 %        |
| Protein Localisation: | 133 ... 154 |

| b <sup>2+</sup> ion |        | b ion    |        | seq |   |    | y ion    |         | y <sup>2+</sup> ion |         |
|---------------------|--------|----------|--------|-----|---|----|----------|---------|---------------------|---------|
| Δ dalton            | mass   | Δ dalton | mass   |     |   |    | Δ dalton | mass    | Δ dalton            | mass    |
|                     | 130.05 |          | 130.05 | 1   | E | 21 |          |         |                     |         |
|                     | 231.1  | +0.0917  | 231.1  | 2   | T | 20 | 2340.2   |         | 2340.2              |         |
|                     | 344.18 |          | 344.18 | 3   | I | 19 | 2239.1   |         | 1120.1              | +0.2272 |
|                     | 473.22 |          | 473.22 | 4   | E | 18 | 2126     |         | 1063.5              | -0.168  |
|                     | 588.25 | -0.144   | 588.25 | 5   | D | 17 | 1997     |         | 998.99              | +0.1435 |
|                     | 687.32 |          | 687.32 | 6   | V | 16 | 1881.9   |         | 941.48              | +0.0247 |
|                     | 816.36 |          | 816.36 | 7   | E | 15 | 1782.9   |         | 891.94              | +0.0288 |
|                     | 945.4  |          | 945.4  | 8   | E | 14 | 1653.8   |         | 1653.8              |         |
|                     | 1076.4 |          | 1076.4 | 9   | M | 13 | 1524.8   |         | 1524.8              |         |
|                     | 1189.5 | -0.291   | 1189.5 | 10  | L | 12 | 1393.8   |         | 697.38              | +0.2273 |
|                     | 1303.6 |          | 1303.6 | 11  | N | 11 | 1280.7   |         | 640.84              | +0.2264 |
|                     | 1417.6 | -0.007   | 1417.6 | 12  | N | 10 | 1166.6   |         | 583.82              | +0.0233 |
|                     | 1530.7 |          | 1530.7 | 13  | L | 9  | 1052.6   |         | 526.8               | +0.0556 |
| -0.217              | 814.38 |          | 1627.8 | 14  | P | 8  | 939.5    | +0.0201 | 470.25              | +0.266  |
|                     | 1684.8 |          | 1684.8 | 15  | G | 7  | 842.45   |         | 842.45              |         |
| +0.3013             | 892.42 |          | 1783.8 | 16  | V | 6  | 785.43   |         | 785.43              |         |
|                     | 1884.9 |          | 1884.9 | 17  | T | 5  | 686.36   | -0.003  | 343.68              | +0.146  |
|                     | 1971.9 |          | 1971.9 | 18  | S | 4  | 585.31   |         | 585.31              |         |
|                     | 2071   |          | 2071   | 19  | V | 3  | 498.28   |         | 498.28              |         |
|                     | 2208   |          | 2208   | 20  | H | 2  | 399.21   | +0.0093 | 399.21              |         |
|                     | 2295.1 |          | 2295.1 | 21  | S | 1  | 262.15   | +0.0586 | 262.15              |         |
|                     |        |          |        | 22  | R | 0  | 175.12   |         | 175.12              |         |

Scan number 977 Raw file LNCAP\_Silac\_23F10\_set2\_05  
 Method ITMS; CID Pepti... 102.51

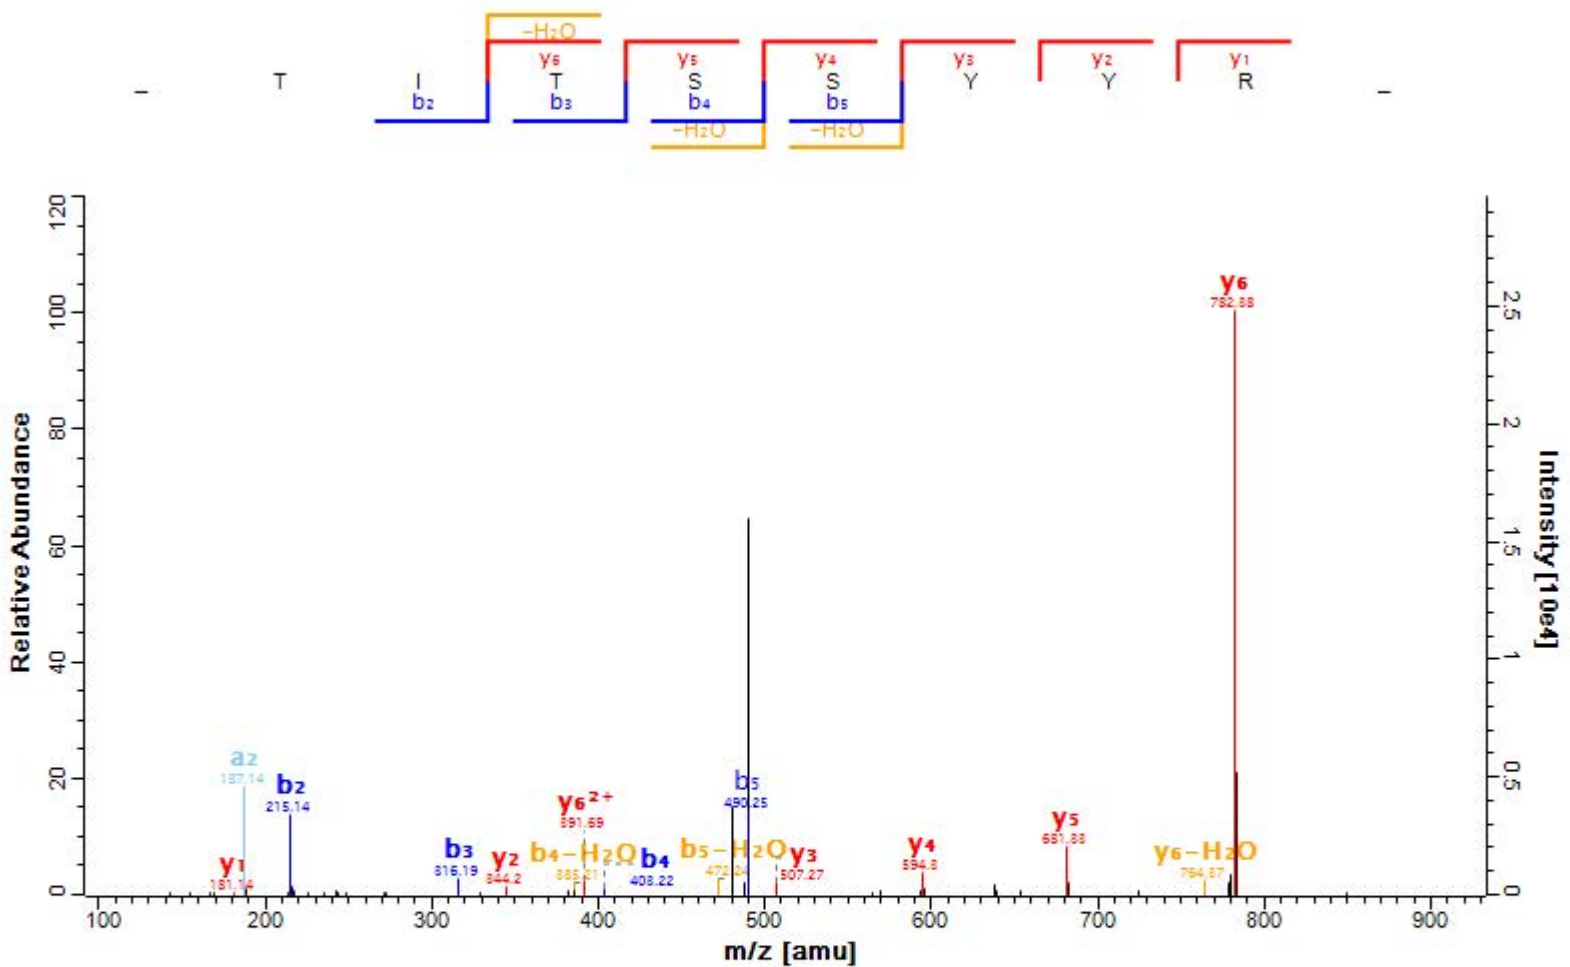

precursor information

|                       |                 |
|-----------------------|-----------------|
| Mass:                 | 989.48162       |
| m/z:                  | 495.74808       |
| Charge:               | 2+              |
| Retentiontime:        | 11.748274803161 |
| Score:                | 102.5137        |
| Mass Error [ppm]:     | -0.19459        |
| g PEP:                | 0.0087289       |
| Annotation:           | 7 of 8          |
| AminoAcids Coverag    | 88 %            |
| Intensity Coverage:   | 58 %            |
| Peak Coverage:        | 20 %            |
| Protein Localisation: | 72 ... 79       |

| a ion    |        | b ion    |        |   |     |   | y ion    |         | y <sup>2+</sup> ion |         |
|----------|--------|----------|--------|---|-----|---|----------|---------|---------------------|---------|
| Δ dalton | mass   | Δ dalton | mass   |   | seq |   | Δ dalton | mass    | Δ dalton            | mass    |
|          | 74.06  |          | 102.05 | 1 | T   | 7 |          |         |                     |         |
| +0.0502  | 187.14 | -0.041   | 215.14 | 2 | I   | 6 | 895.46   |         | 895.46              |         |
|          | 288.19 | +0.0929  | 316.19 | 3 | T   | 5 | 782.38   | -0.046  | 391.69              | +0.0277 |
|          | 375.22 | +0.0583  | 403.22 | 4 | S   | 4 | 681.33   | -0.098  | 681.33              |         |
|          | 462.26 | +0.1979  | 490.25 | 5 | S   | 3 | 594.3    | +0.0972 | 594.3               |         |
|          | 625.32 |          | 653.31 | 6 | Y   | 2 | 507.27   | +0.1776 | 507.27              |         |
|          | 788.38 |          | 816.38 | 7 | Y   | 1 | 344.2    | +0.1243 | 344.2               |         |
|          |        |          |        | 8 | R   | 0 | 181.14   | +0.1334 | 181.14              |         |

Scan number 1005 Raw file LNCAP\_Silac\_23F10\_set2\_06  
 Method ITMS; CID Pepti... 140.14

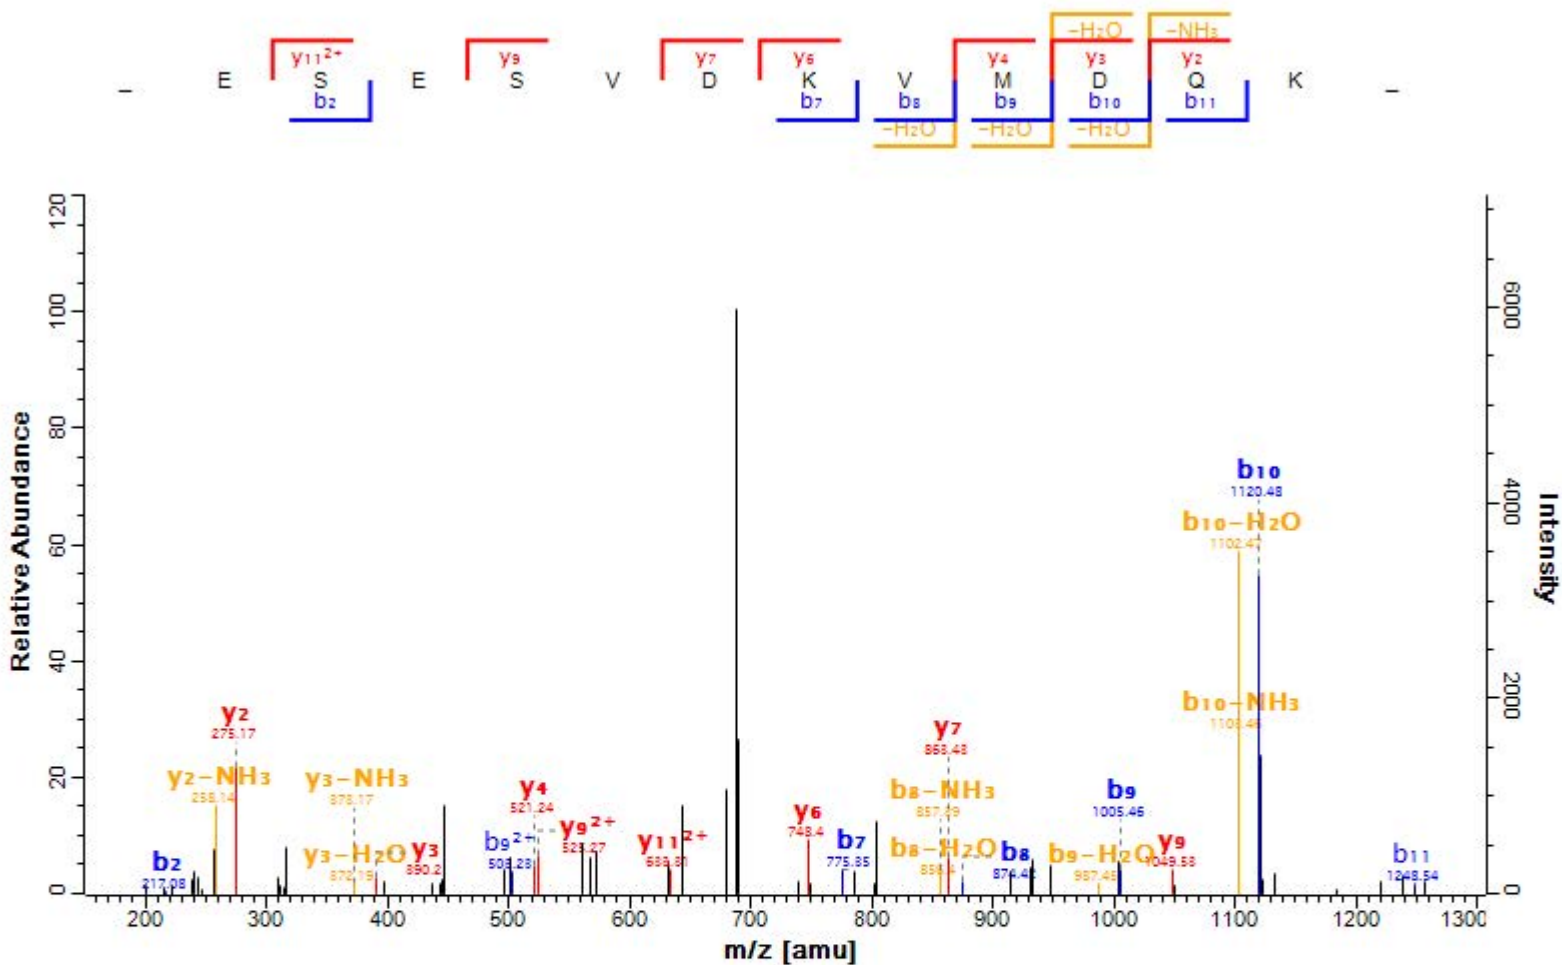

#### precursor information

|                   |                 |
|-------------------|-----------------|
| Mass:             | 1393.6397       |
| m/z:              | 697.82713       |
| Charge:           | 2+              |
| Retentiontime:    | 11.145038604736 |
| Score:            | 140.1416        |
| Mass Error [ppm]: | 0.13541         |
| PEP:              | 1.5086E-05      |
| Precursor Type:   | MULTI           |

#### general information

|                       |             |
|-----------------------|-------------|
| Annotation:           | 8 of 12     |
| AminoAcids Coverage:  | 67 %        |
| Intensity Coverage:   | 34 %        |
| Peak Coverage:        | 28 %        |
| Protein Localisation: | 128 ... 139 |

| b <sup>2+</sup> ion |        | b ion    |        | seq |   |    | y ion    |         | y <sup>2+</sup> ion |         |
|---------------------|--------|----------|--------|-----|---|----|----------|---------|---------------------|---------|
| Δ dalton            | mass   | Δ dalton | mass   |     |   |    | Δ dalton | mass    | Δ dalton            | mass    |
|                     | 130.05 |          | 130.05 | 1   | E | 11 |          |         |                     |         |
|                     | 217.08 | +0.1281  | 217.08 | 2   | S | 10 | 1265.6   |         | 633.31              | +0.1211 |
|                     | 346.12 |          | 346.12 | 3   | E | 9  | 1178.6   |         | 1178.6              |         |
|                     | 433.16 |          | 433.16 | 4   | S | 8  | 1049.5   | +0.0322 | 525.27              | -0.001  |
|                     | 532.22 |          | 532.22 | 5   | V | 7  | 962.5    |         | 962.5               |         |
|                     | 647.25 |          | 647.25 | 6   | D | 6  | 863.43   | -0.032  | 863.43              |         |
|                     | 775.35 | +0.028   | 775.35 | 7   | K | 5  | 748.4    | -0.034  | 748.4               |         |
|                     | 874.42 | +0.0814  | 874.42 | 8   | V | 4  | 620.31   |         | 620.31              |         |
| +0.0582             | 503.23 | +0.0661  | 1005.5 | 9   | M | 3  | 521.24   | +0.1505 | 521.24              |         |
|                     | 1120.5 | -0.017   | 1120.5 | 10  | D | 2  | 390.2    | -0.004  | 390.2               |         |
|                     | 1248.5 | -0.067   | 1248.5 | 11  | Q | 1  | 275.17   | +0.0095 | 275.17              |         |
|                     |        |          |        | 12  | K | 0  | 147.11   |         | 147.11              |         |



Scan number 1022 Raw file LNCAP\_Silac\_23F10\_set2\_06  
 Method ITMS; CID Pepti... 80.32

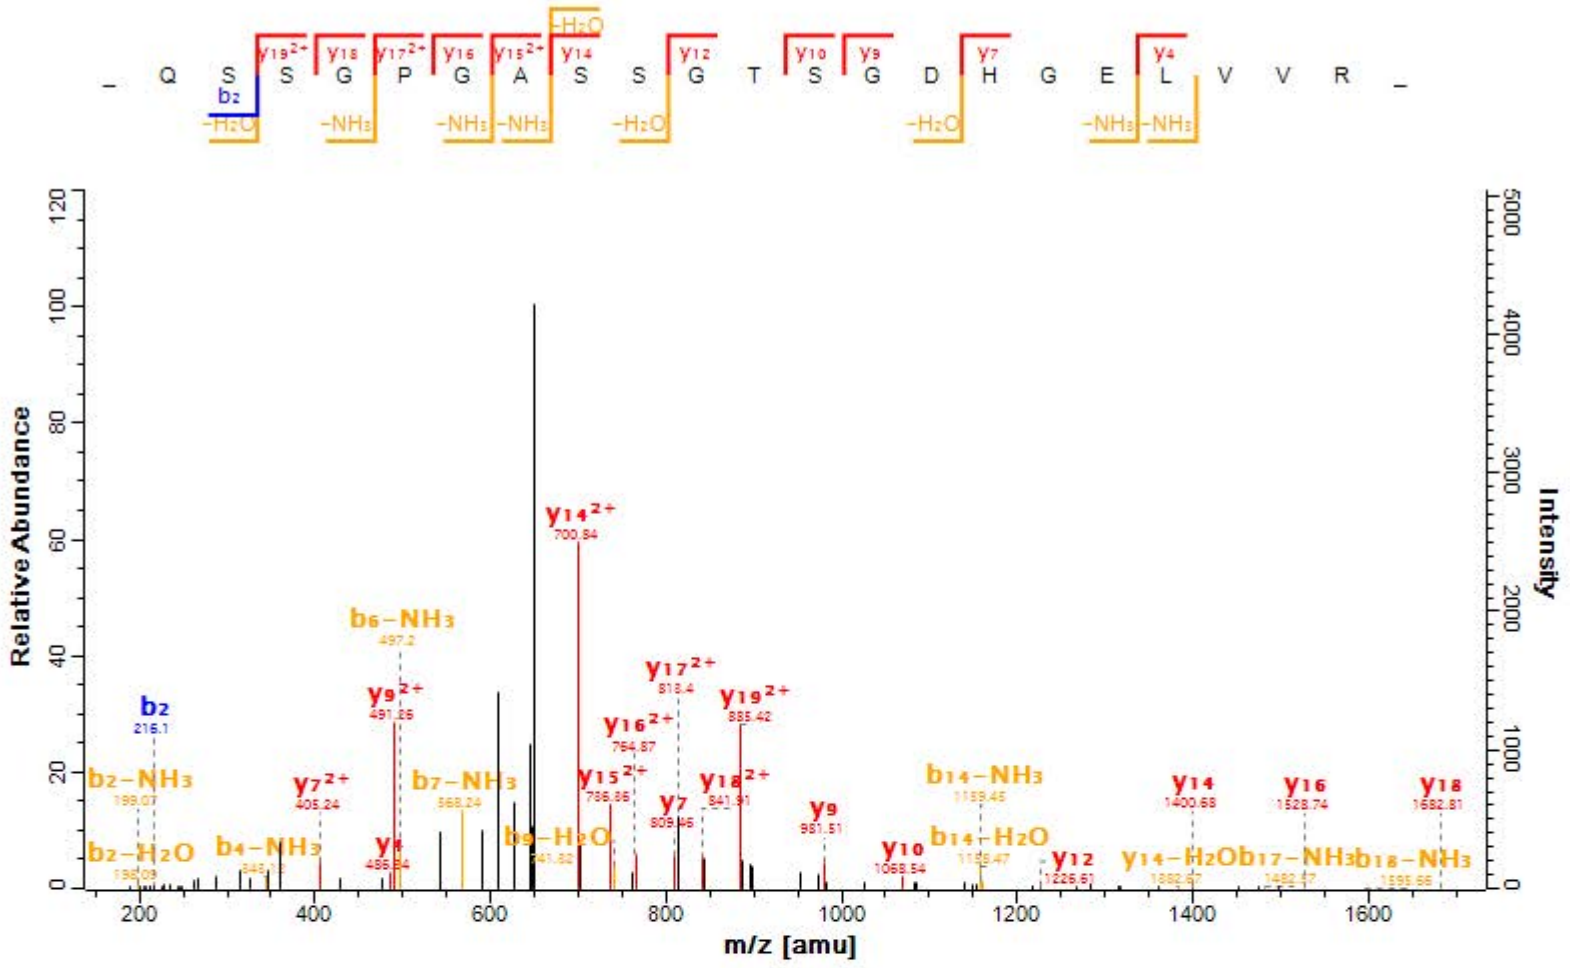

precursor information

|                   |                 |
|-------------------|-----------------|
| Mass:             | 1983.92452      |
| m/z:              | 662.31545       |
| Charge:           | 3+              |
| Retentiontime:    | 11.235930442810 |
| Score:            | 80.31623        |
| Mass Error [ppm]: | -0.044967       |
| PEP:              | 0.00022135      |
| Precursor Type:   | MULTI           |

general information

|                       |           |
|-----------------------|-----------|
| Annotation:           | 15 of 21  |
| AminoAcids Coverage:  | 71 %      |
| Intensity Coverage:   | 39 %      |
| Peak Coverage:        | 27 %      |
| Protein Localisation: | 39 ... 59 |

| b ion     |          |     |   |          | y ion    |           | y <sup>2+</sup> ion |  |
|-----------|----------|-----|---|----------|----------|-----------|---------------------|--|
| Δ dalton  | mass     | seq |   | Δ dalton | mass     | Δ dalton  | mass                |  |
|           | 129.0659 | 1   | Q | 20       |          |           |                     |  |
| +0.426623 | 216.0979 | 2   | S | 19       | 1856.873 |           | 1856.873            |  |
|           | 303.1299 | 3   | S | 18       | 1769.841 |           | 885.4243 +0.259804  |  |
|           | 360.1514 | 4   | G | 17       | 1682.809 | +0.058058 | 841.9083 -0.08618   |  |
|           | 457.2041 | 5   | P | 16       | 1625.788 |           | 813.3975 -0.0168    |  |
|           | 514.2256 | 6   | G | 15       | 1528.735 | -0.13029  | 764.8712 +0.222539  |  |
|           | 585.2627 | 7   | A | 14       | 1471.714 |           | 736.3604 +0.322626  |  |
|           | 672.2947 | 8   | S | 13       | 1400.676 | +0.146429 | 700.8419 +0.243282  |  |
|           | 759.3268 | 9   | S | 12       | 1313.644 |           | 1313.644            |  |
|           | 816.3482 | 10  | G | 11       | 1226.612 | -0.09152  | 1226.612            |  |
|           | 917.3959 | 11  | T | 10       | 1169.591 |           | 1169.591            |  |
|           | 1004.428 | 12  | S | 9        | 1068.543 | -0.06681  | 1068.543            |  |
|           | 1061.449 | 13  | G | 8        | 981.5112 | +0.098339 | 491.2592 +0.150969  |  |
|           | 1176.476 | 14  | D | 7        | 924.4898 |           | 924.4898            |  |
|           | 1313.535 | 15  | H | 6        | 809.4628 | +0.056719 | 405.235 +0.145204   |  |
|           | 1370.557 | 16  | G | 5        | 672.4039 |           | 672.4039            |  |
|           | 1499.599 | 17  | E | 4        | 615.3824 |           | 615.3824            |  |
|           | 1612.683 | 18  | L | 3        | 486.3398 | +0.095337 | 486.3398            |  |
|           | 1711.752 | 19  | V | 2        | 373.2558 |           | 373.2558            |  |
|           | 1810.82  | 20  | V | 1        | 274.1874 |           | 274.1874            |  |
|           |          | 21  | R | 0        | 175.119  |           | 175.119             |  |

Scan number 10575 Raw file LNCAP\_Silac\_23F10\_set2\_06  
 Method ITMS; CID Pepti... 121.29

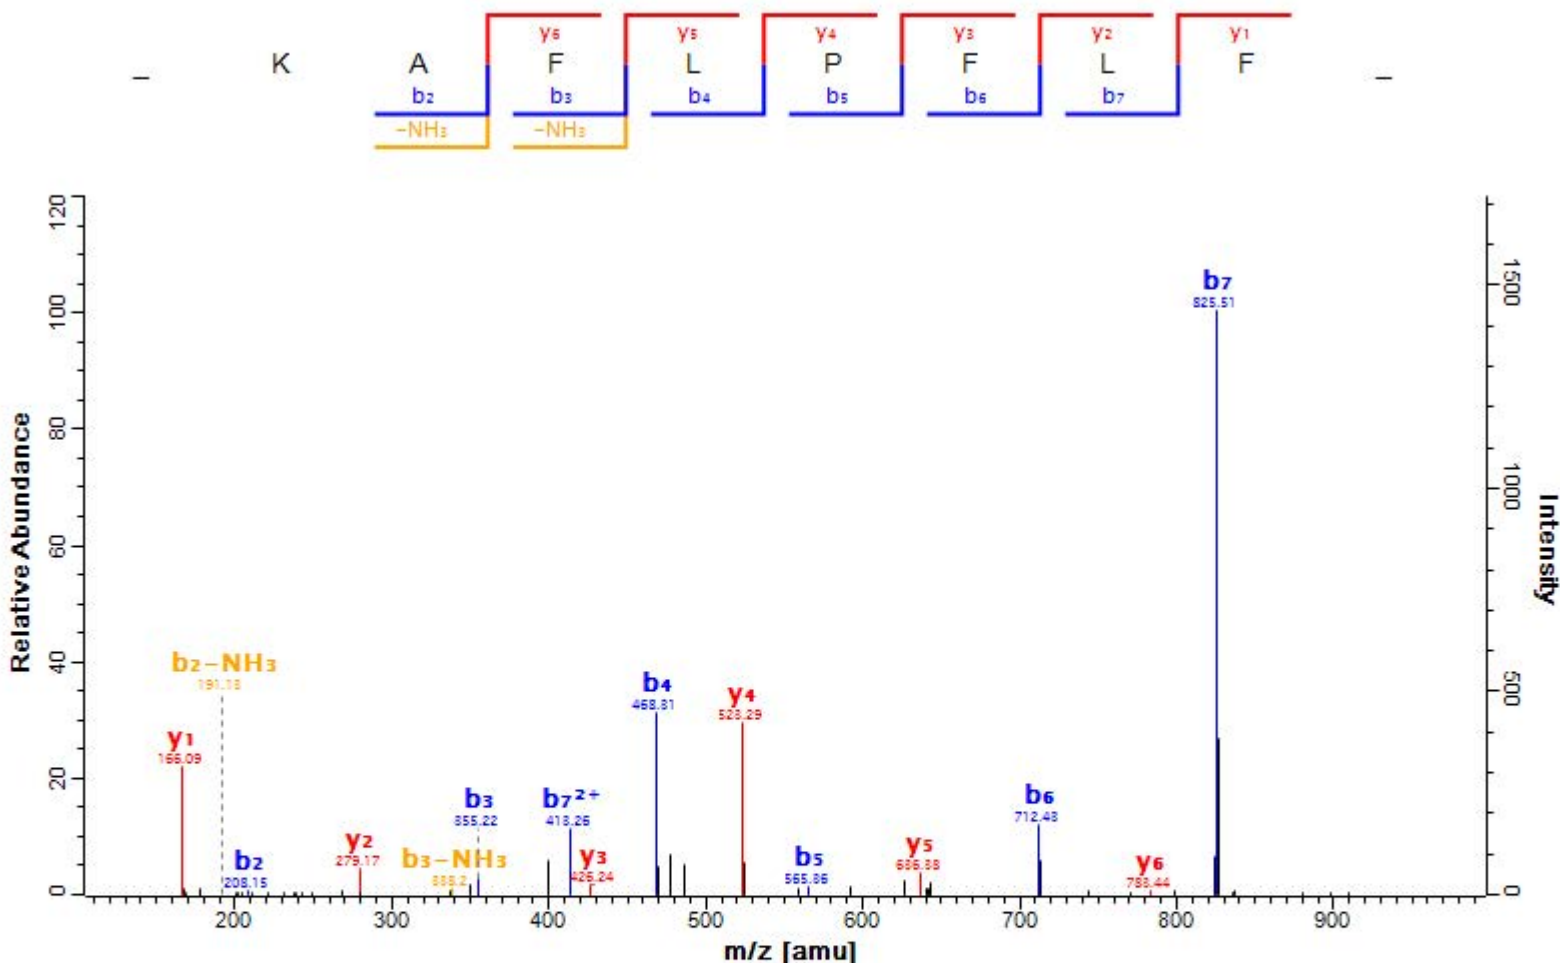

#### precursor information

|                       |                 |
|-----------------------|-----------------|
| Mass:                 | 981.56901       |
| m/z:                  | 491.79178       |
| Charge:               | 2+              |
| Retentiontime:        | 72.843193054199 |
| Score:                | 121.2923        |
| Mass Error [ppm]:     | 0.23538         |
| g PEP:                | 0.00063594      |
| Annotation:           | 7 of 8          |
| AminoAcids Coverage:  | 88 %            |
| Intensity Coverage:   | 71 %            |
| Peak Coverage:        | 18 %            |
| Protein Localisation: | 311 ... 318     |

| b <sup>2+</sup> ion |          | b ion     |          |     | y ion    |      |          |           |
|---------------------|----------|-----------|----------|-----|----------|------|----------|-----------|
| Δ dalton            | mass     | Δ dalton  | mass     | seq | Δ dalton | mass |          |           |
|                     | 137.1164 |           | 137.1164 | 1   | K        | 7    |          |           |
|                     | 208.1536 | -0.06798  | 208.1536 | 2   | A        | 6    | 854.4811 |           |
|                     | 355.222  | +0.082538 | 355.222  | 3   | F        | 5    | 783.444  | -0.2132   |
|                     | 468.306  | +0.013245 | 468.306  | 4   | L        | 4    | 636.3756 | -0.00648  |
|                     | 565.3588 | +0.174592 | 565.3588 | 5   | P        | 3    | 523.2915 | -0.03448  |
|                     | 712.4272 | +0.021828 | 712.4272 | 6   | F        | 2    | 426.2387 | +0.091833 |
| +0.114292           | 413.2593 | -0.01835  | 825.5113 | 7   | L        | 1    | 279.1703 | -0.01202  |
|                     |          |           |          | 8   | F        | 0    | 166.0863 | -0.0018   |

Scan number 1428 Raw file LNCAP\_Silac\_23F10\_set2\_06  
 Method ITMS: CID Pepti... 75.09

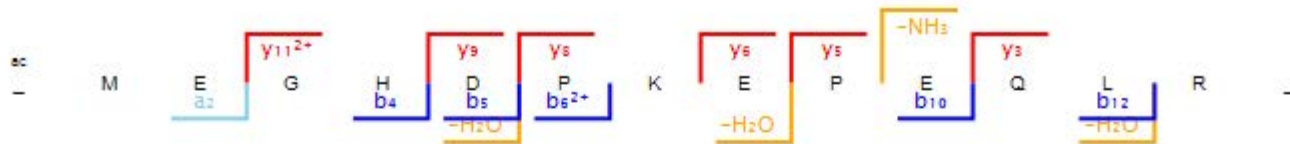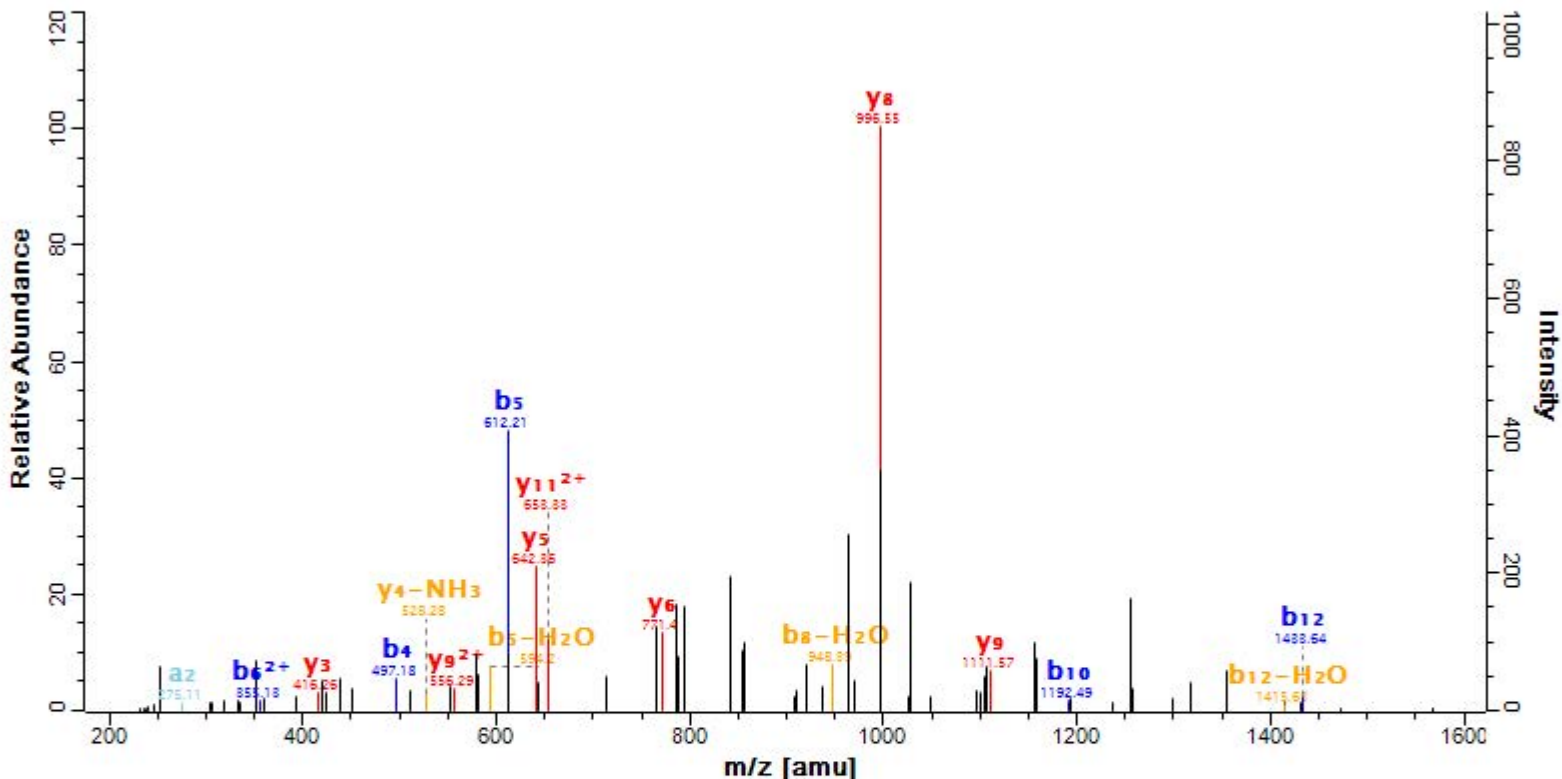

precursor information

|                   |                 |
|-------------------|-----------------|
| Mass:             | 0               |
| m/z:              | 804.3637        |
| Charge:           | 0+              |
| Retentiontime:    | 13.582697868347 |
| Score:            | 75.08768        |
| Mass Error [ppm]: | -0.54556        |
| PEP:              | 0.018413        |
| Precursor Type:   | PEAK            |

general information

|                       |          |
|-----------------------|----------|
| Annotation:           | 10 of 13 |
| AminoAcids Coverag    | 77 %     |
| Intensity Coverage:   | 35 %     |
| Peak Coverage:        | 19 %     |
| Protein Localisation: | 1 ... 13 |

| a ion         |               | b <sup>2+</sup> ion |               | b ion |     |               |               |       | y ion  |       | y <sup>2+</sup> ion |  |
|---------------|---------------|---------------------|---------------|-------|-----|---------------|---------------|-------|--------|-------|---------------------|--|
| Δ dalton mass | Δ dalton mass | Δ dalton mass       | Δ dalton mass | seq   | seq | Δ dalton mass | Δ dalton mass |       |        |       |                     |  |
| 146.1         |               | 174.1               |               | 174.1 | 1   | M             | 12            |       |        |       |                     |  |
| +0.05275.1    |               | 303.1               |               | 303.1 | 2   | E             | 11            | 1435  |        | 1435  |                     |  |
| 332.1         |               | 360.1               |               | 360.1 | 3   | G             | 10            | 1306  |        | 653.3 | +0.25               |  |
| 469.2         |               | 497.2               | +0.096        | 497.2 | 4   | H             | 9             | 1249  |        | 1249  |                     |  |
| 584.2         |               | 612.2               | +0.006        | 612.2 | 5   | D             | 8             | 1112  | +0.058 | 556.3 | -0.15               |  |
| 681.3         | +0.057        | 735.1               |               | 709.3 | 6   | P             | 7             | 996.5 | -0.03  | 996.5 |                     |  |
| 809.4         |               | 837.4               |               | 837.4 | 7   | K             | 6             | 899.5 |        | 899.5 |                     |  |
| 938.4         |               | 966.4               |               | 966.4 | 8   | E             | 5             | 771.4 | +0.107 | 771.4 |                     |  |
| 1035          |               | 1063                |               | 1063  | 9   | P             | 4             | 642.4 | -0.03  | 642.4 |                     |  |
| 1164          |               | 1192                | -0.25         | 1192  | 10  | E             | 3             | 545.3 |        | 545.3 |                     |  |
| 1293          |               | 1321                |               | 1321  | 11  | Q             | 2             | 416.3 | -0.05  | 416.3 |                     |  |
| 1406          |               | 1434                | -0.03         | 1434  | 12  | L             | 1             | 288.2 |        | 288.2 |                     |  |
|               |               |                     |               |       | 13  | R             | 0             | 175.1 |        | 175.1 |                     |  |

Scan number 1535 Raw file LNCAP\_Silac\_23F10\_set2\_06  
 Method ITMS; CID Pepti... 57.35

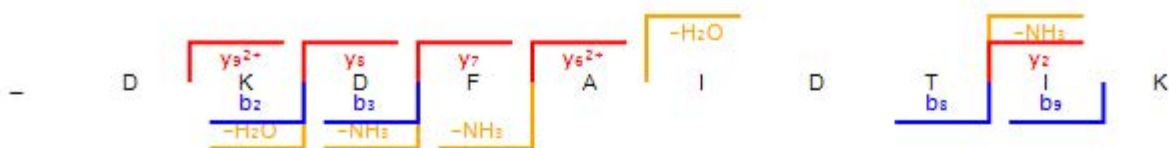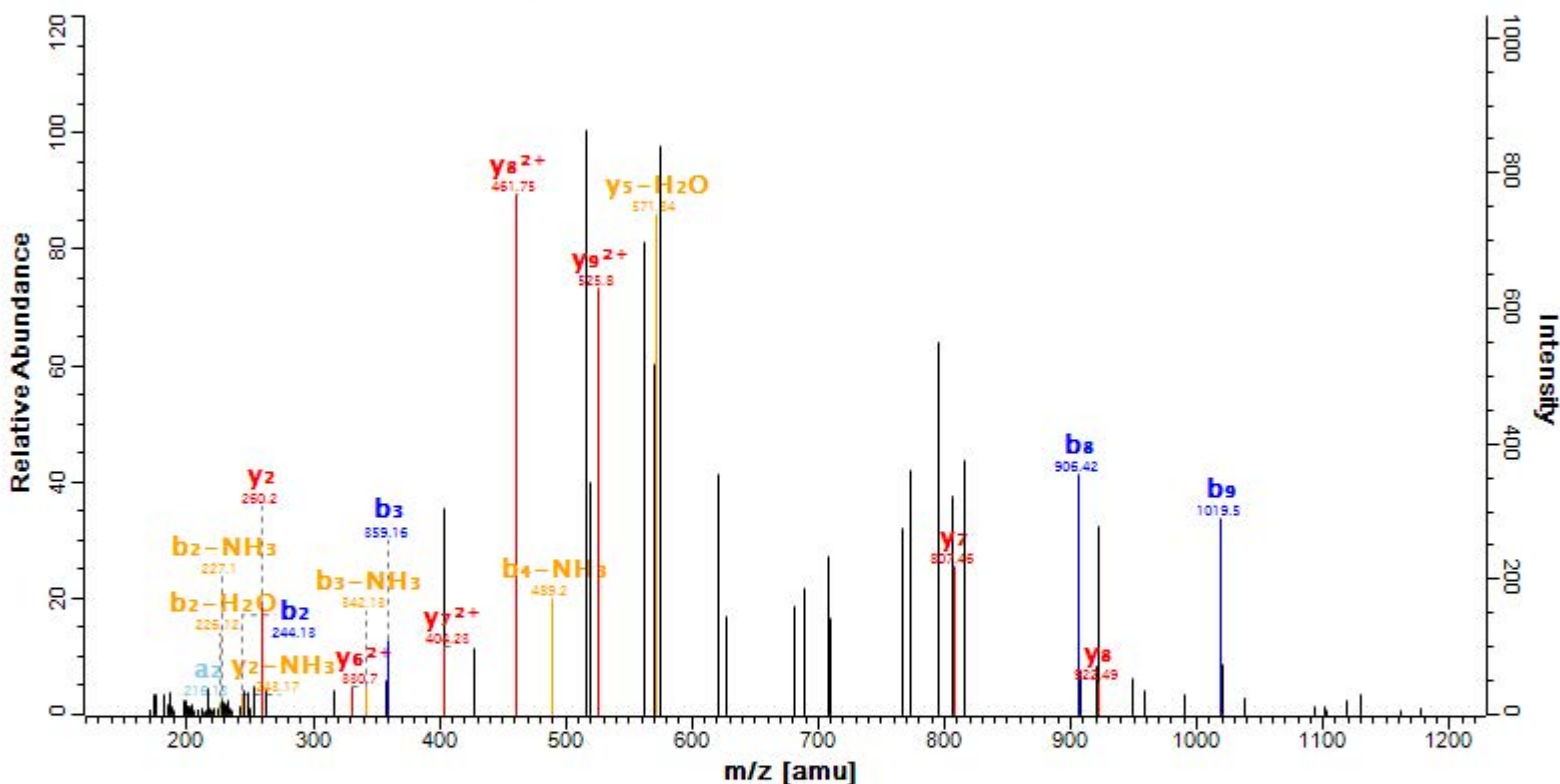

### precursor information

|                   |                 |
|-------------------|-----------------|
| Mass:             | 1164.60226      |
| m/z:              | 583.30841       |
| Charge:           | 2+              |
| Retentiontime:    | 14.193103790283 |
| Score:            | 57.3472         |
| Mass Error [ppm]: | -0.33858        |
| PEP:              | 0.019943        |
| Precursor Type:   | MULTI           |

|                       |             |
|-----------------------|-------------|
| Annotation:           | 7 of 10     |
| AminoAcids Coverage:  | 70 %        |
| Intensity Coverage:   | 30 %        |
| Peak Coverage:        | 19 %        |
| Protein Localisation: | 154 ... 163 |

| a ion    |        | b ion    |        |    |     |          | y ion  |          | y <sup>2+</sup> ion |  |
|----------|--------|----------|--------|----|-----|----------|--------|----------|---------------------|--|
| Δ dalton | mass   | Δ dalton | mass   |    | seq | Δ dalton | mass   | Δ dalton | mass                |  |
|          | 88.039 |          | 116.03 | 1  | D   | 9        |        |          |                     |  |
| +0.4106  | 216.13 | +0.3153  | 244.13 | 2  | K   | 8        | 1050.6 |          | 525.8 +0.2919       |  |
|          | 331.16 | +0.0752  | 359.16 | 3  | D   | 7        | 922.49 | +0.1597  | 461.75 -0.351       |  |
|          | 478.23 |          | 506.22 | 4  | F   | 6        | 807.46 | -0.064   | 404.23 +0.1148      |  |
|          | 549.27 |          | 577.26 | 5  | A   | 5        | 660.39 |          | 330.7 -0.488        |  |
|          | 662.35 |          | 690.35 | 6  | I   | 4        | 589.36 |          | 589.36              |  |
|          | 777.38 |          | 805.37 | 7  | D   | 3        | 476.27 |          | 476.27              |  |
|          | 878.43 | -0.02    | 906.42 | 8  | T   | 2        | 361.24 |          | 361.24              |  |
|          | 991.51 | +0.0041  | 1019.5 | 9  | I   | 1        | 260.2  | -0.089   | 260.2               |  |
|          |        |          |        | 10 | K   | 0        | 147.11 |          | 147.11              |  |

Scan number 1612 Raw file LNCAP\_Silac\_23F10\_set2\_06  
 Method ITMS; CID Pepti... 90.93

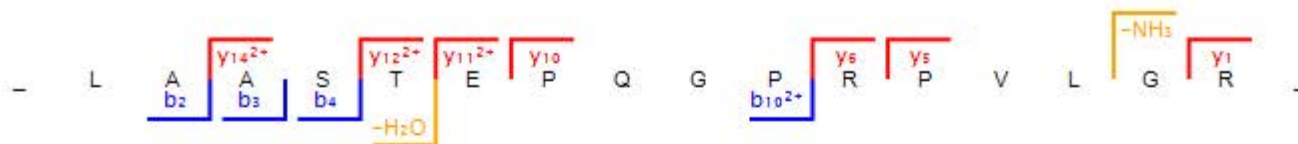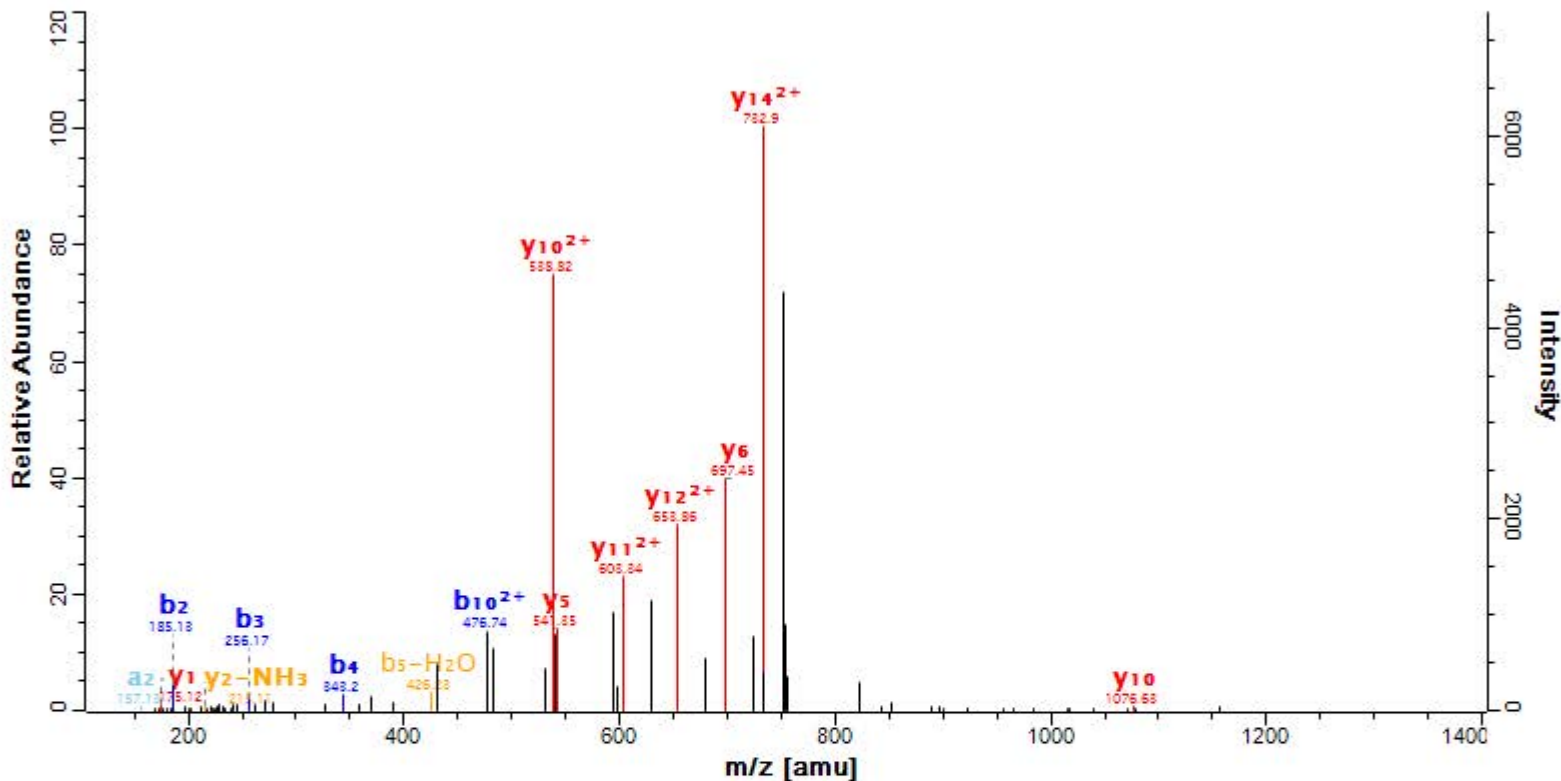

precursor information

|                   |                 |
|-------------------|-----------------|
| Mass:             | 1647.90545      |
| m/z:              | 550.30909       |
| Charge:           | 3+              |
| Retentiontime:    | 14.611180305481 |
| Score:            | 90.92576        |
| Mass Error [ppm]: | -0.12569        |
| PEP:              | 3.0455E-05      |
| Precursor Type:   | MULTI           |

| a ion         |               | b <sup>2+</sup> ion |               | b ion |               |               |       |        | y ion |       | y <sup>2+</sup> ion |  |
|---------------|---------------|---------------------|---------------|-------|---------------|---------------|-------|--------|-------|-------|---------------------|--|
| Δ dalton mass | Δ dalton mass | Δ dalton mass       | Δ dalton mass | seq   | Δ dalton mass | Δ dalton mass |       |        |       |       |                     |  |
| 86.1          | 114.1         | 114.1               | 114.1         | 1     | L             | 15            |       |        |       |       |                     |  |
| -0.15 157.1   | 185.1         | -0.08 185.1         | 185.1         | 2     | A             | 14            | 1536  |        |       | 1536  |                     |  |
| 228.2         | 256.2         | -0.1 256.2          | 256.2         | 3     | A             | 13            | 1465  |        |       | 732.9 | +0.236              |  |
| 315.2         | 343.2         | -0.02 343.2         | 343.2         | 4     | S             | 12            | 1394  |        |       | 1394  |                     |  |
| 416.3         | 444.2         |                     | 444.2         | 5     | T             | 11            | 1307  |        |       | 653.9 | +0.29               |  |
| 545.3         | 573.3         |                     | 573.3         | 6     | E             | 10            | 1206  |        |       | 603.3 | +0.18               |  |
| 642.3         | 670.3         |                     | 670.3         | 7     | P             | 9             | 1077  | +0.167 | 538.8 | 979.6 | +0.01               |  |
| 770.4         | 798.4         |                     | 798.4         | 8     | Q             | 8             | 979.6 |        |       | 979.6 |                     |  |
| 827.4         | 855.4         |                     | 855.4         | 9     | G             | 7             | 851.5 |        |       | 851.5 |                     |  |
| 924.5         | -0.24 476.7   |                     | 952.5         | 10    | P             | 6             | 794.5 |        |       | 794.5 |                     |  |
| 1081          | 1109          |                     | 1109          | 11    | R             | 5             | 697.4 | +0.197 | 697.4 |       |                     |  |
| 1178          | 1206          |                     | 1206          | 12    | P             | 4             | 541.3 | +0.102 | 541.3 |       |                     |  |
| 1277          | 1305          |                     | 1305          | 13    | V             | 3             | 444.3 |        |       | 444.3 |                     |  |
| 1390          | 1418          |                     | 1418          | 14    | L             | 2             | 345.2 |        |       | 345.2 |                     |  |
| 1447          | 1475          |                     | 1475          | 15    | G             | 1             | 232.1 |        |       | 232.1 |                     |  |
|               |               |                     |               | 16    | R             | 0             | 175.1 | +0.053 | 175.1 |       |                     |  |

general information

|                       |          |
|-----------------------|----------|
| Annotation:           | 12 of 16 |
| AminoAcids Coverag    | 75 %     |
| Intensity Coverage:   | 54 %     |
| Peak Coverage:        | 16 %     |
| Protein Localisation: | 4 ... 19 |

Scan number 1755 Raw file LNCAP\_Silac\_23F10\_set2\_06  
 Method ITMS; CID Pepti... 233.78

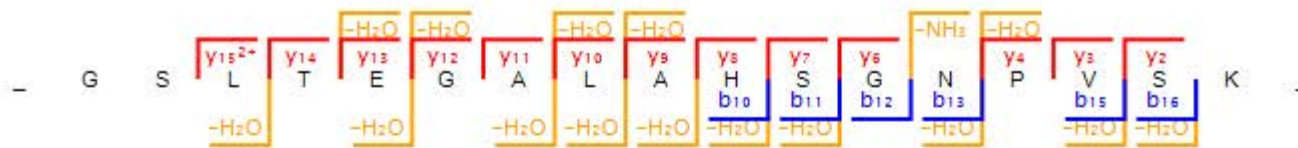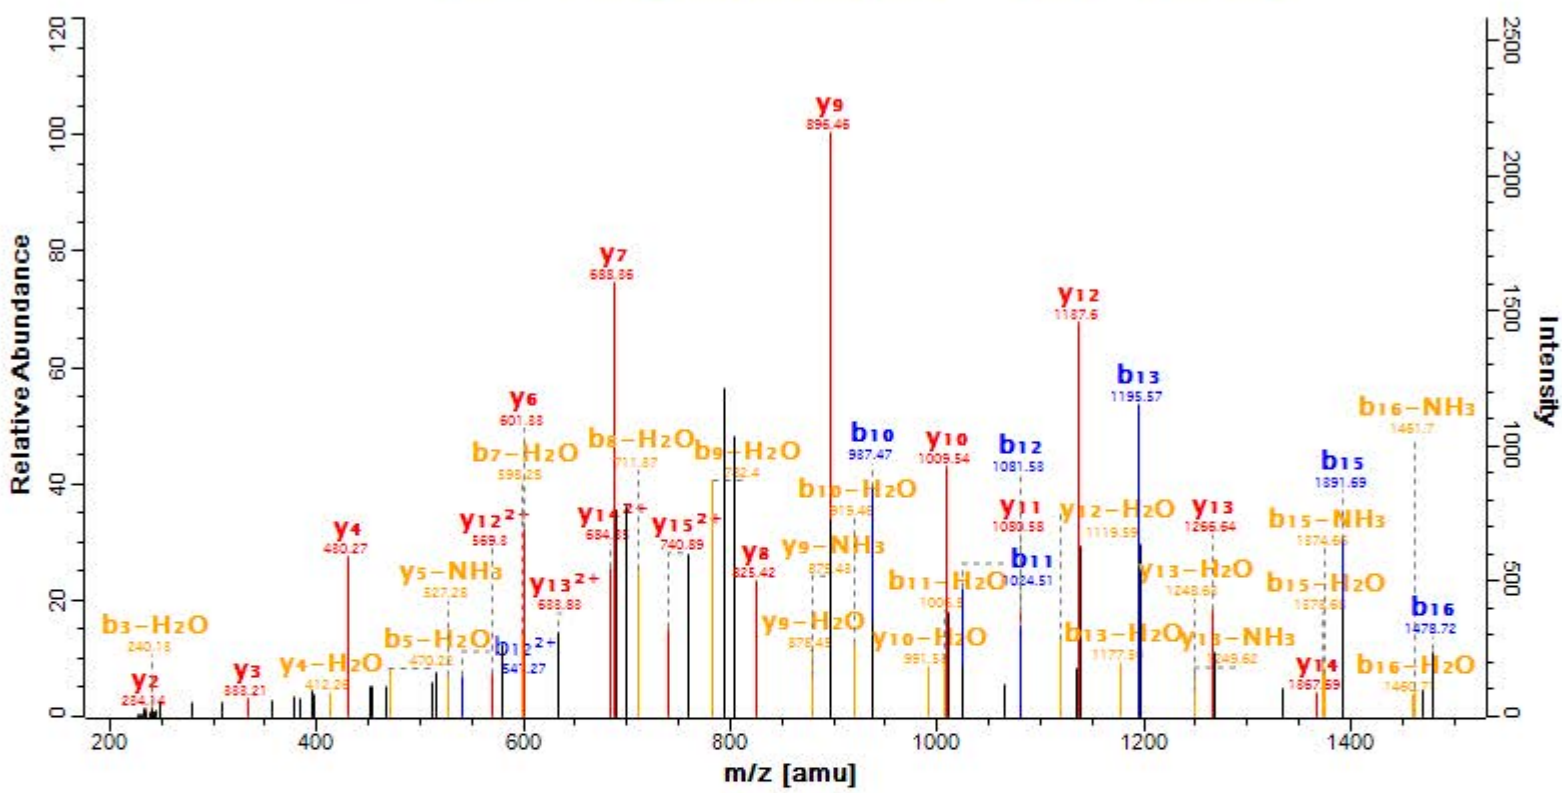

**precursor information**

|                   |                 |
|-------------------|-----------------|
| Mass:             | 1623.82178      |
| m/z:              | 812.91817       |
| Charge:           | 2+              |
| Retentiontime:    | 15.384973526001 |
| Score:            | 233.7795        |
| Mass Error [ppm]: | 0.081566        |
| PEP:              | 6.174E-57       |
| Precursor Type:   | MULTI           |

**general information**

|                       |             |
|-----------------------|-------------|
| Annotation:           | 14 of 17    |
| AminoAcids Coverage:  | 82 %        |
| Intensity Coverage:   | 62 %        |
| Peak Coverage:        | 48 %        |
| Protein Localisation: | 897 ... 913 |

| b <sup>2+</sup> ion |        | b ion    |        | seq |   |    | y ion    |         | y <sup>2+</sup> ion |         |
|---------------------|--------|----------|--------|-----|---|----|----------|---------|---------------------|---------|
| Δ dalton            | mass   | Δ dalton | mass   |     |   |    | Δ dalton | mass    | Δ dalton            | mass    |
|                     | 58.029 | 58.029   |        | 1   | G | 16 |          |         |                     |         |
|                     | 145.06 | 145.06   |        | 2   | S | 15 | 1567.8   |         | 1567.8              |         |
|                     | 258.14 | 258.14   |        | 3   | L | 14 | 1480.8   |         | 740.89              | -0.146  |
|                     | 359.19 | 359.19   |        | 4   | T | 13 | 1367.7   | -0.192  | 684.35              | +0.2725 |
|                     | 488.24 | 488.24   |        | 5   | E | 12 | 1266.6   | +0.0353 | 633.83              | -0.089  |
|                     | 545.26 | 545.26   |        | 6   | G | 11 | 1137.6   | +0.008  | 569.3               | +0.1156 |
|                     | 616.29 | 616.29   |        | 7   | A | 10 | 1080.6   | +0.1173 | 1080.6              |         |
|                     | 729.38 | 729.38   |        | 8   | L | 9  | 1009.5   | -0.018  | 1009.5              |         |
|                     | 800.41 | 800.41   |        | 9   | A | 8  | 896.46   | -0.073  | 896.46              |         |
|                     | 937.47 | -0.016   | 937.47 | 10  | H | 7  | 825.42   | -0.017  | 825.42              |         |
|                     | 1024.5 | +0.0748  | 1024.5 | 11  | S | 6  | 688.36   | -0.008  | 688.36              |         |
| -0.173              | 541.27 | +0.0025  | 1081.5 | 12  | G | 5  | 601.33   | +0.1119 | 601.33              |         |
|                     | 1195.6 | -0.055   | 1195.6 | 13  | N | 4  | 544.31   |         | 544.31              |         |
|                     | 1292.6 |          | 1292.6 | 14  | P | 3  | 430.27   | +0.0942 | 430.27              |         |
|                     | 1391.7 | -0.08    | 1391.7 | 15  | V | 2  | 333.21   | +0.1276 | 333.21              |         |
|                     | 1478.7 | -0.255   | 1478.7 | 16  | S | 1  | 234.14   | +0.2078 | 234.14              |         |
|                     |        |          |        | 17  | K | 0  | 147.11   |         | 147.11              |         |

Scan number 1846 Raw file LNCAP\_Silac\_23F10\_set2\_06  
 Method ITMS; CID Pepti... 169.37

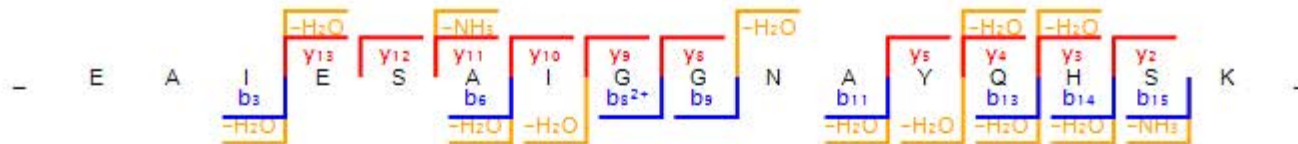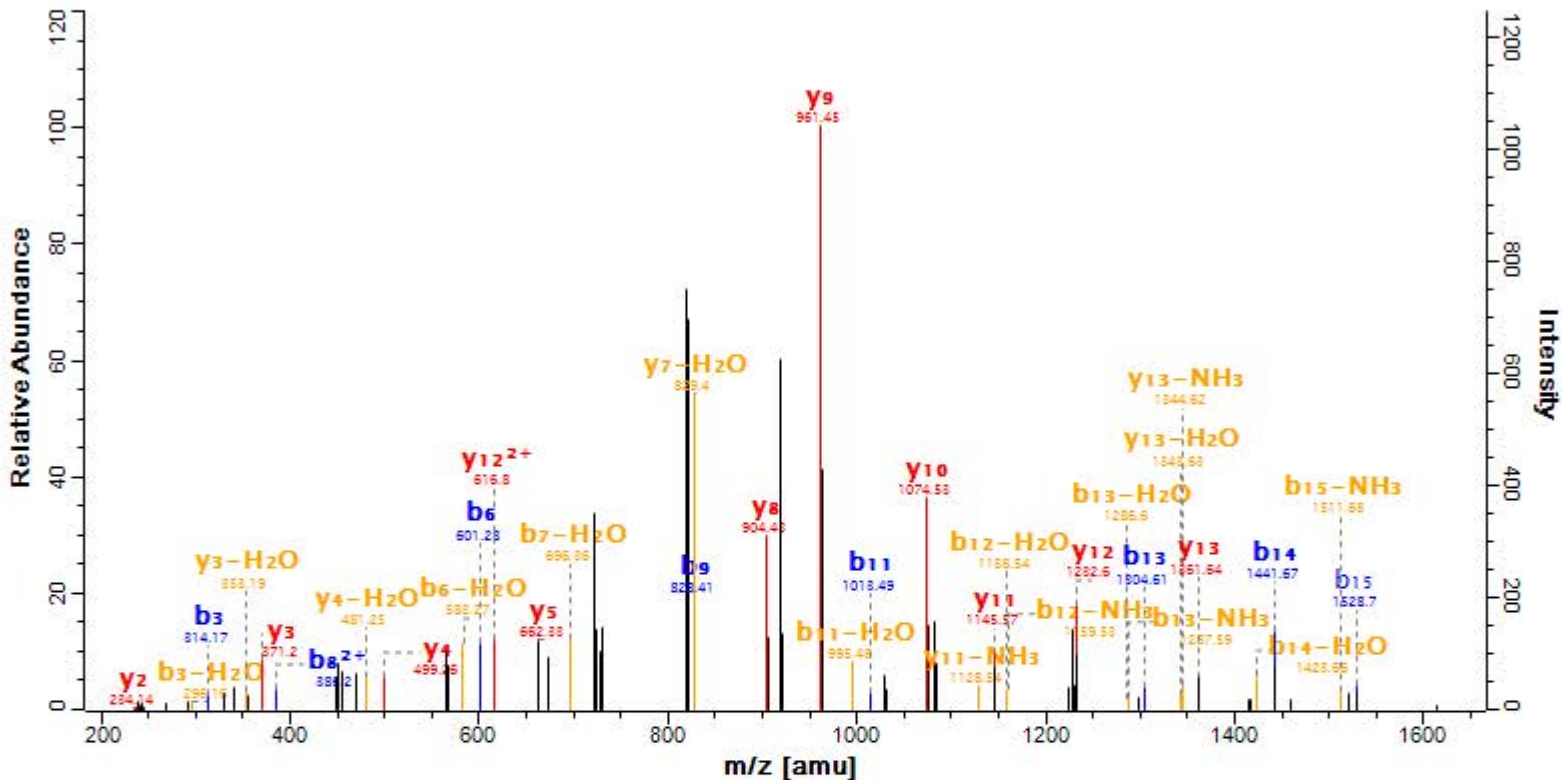

**precursor information**

|                   |                 |
|-------------------|-----------------|
| Mass:             | 1673.80083      |
| m/z:              | 837.90769       |
| Charge:           | 2+              |
| Retentiontime:    | 15.880887031555 |
| Score:            | 169.3689        |
| Mass Error [ppm]: | -0.051203       |
| PEP:              | 2.21E-14        |
| Precursor Type:   | ISO             |

**general information**

|                       |           |
|-----------------------|-----------|
| Annotation:           | 14 of 16  |
| AminoAcids Coverage:  | 88 %      |
| Intensity Coverage:   | 42 %      |
| Peak Coverage:        | 39 %      |
| Protein Localisation: | 23 ... 38 |

| b <sup>2+</sup> ion |        | b ion    |        |     |   |          | y ion  |          | y <sup>2+</sup> ion |  |
|---------------------|--------|----------|--------|-----|---|----------|--------|----------|---------------------|--|
| Δ dalton            | mass   | Δ dalton | mass   | seq |   | Δ dalton | mass   | Δ dalton | mass                |  |
|                     | 130.05 |          | 130.05 | 1   | E | 15       |        |          |                     |  |
|                     | 201.09 |          | 201.09 | 2   | A | 14       | 1545.8 |          | 1545.8              |  |
|                     | 314.17 | -0.034   | 314.17 | 3   | I | 13       | 1474.7 |          | 1474.7              |  |
|                     | 443.21 |          | 443.21 | 4   | E | 12       | 1361.6 | -0.114   | 1361.6              |  |
|                     | 530.25 |          | 530.25 | 5   | S | 11       | 1232.6 | -0.022   | 616.8               |  |
|                     | 601.28 | +0.0799  | 601.28 | 6   | A | 10       | 1145.6 | +0.062   | 1145.6              |  |
|                     | 714.37 |          | 714.37 | 7   | I | 9        | 1074.5 | -0.036   | 1074.5              |  |
| -0.041              | 386.2  |          | 771.39 | 8   | G | 8        | 961.45 | +0.0102  | 961.45              |  |
|                     | 828.41 | -0.473   | 828.41 | 9   | G | 7        | 904.43 | -0.032   | 904.43              |  |
|                     | 942.45 |          | 942.45 | 10  | N | 6        | 847.41 |          | 847.41              |  |
|                     | 1013.5 | +0.0688  | 1013.5 | 11  | A | 5        | 733.36 |          | 733.36              |  |
|                     | 1176.6 |          | 1176.6 | 12  | Y | 4        | 662.33 | +0.054   | 662.33              |  |
|                     | 1304.6 | -0.134   | 1304.6 | 13  | Q | 3        | 499.26 | +0.0374  | 499.26              |  |
|                     | 1441.7 | -0.012   | 1441.7 | 14  | H | 2        | 371.2  | +0.0321  | 371.2               |  |
|                     | 1528.7 | -0.226   | 1528.7 | 15  | S | 1        | 234.14 | -0.269   | 234.14              |  |
|                     |        |          |        | 16  | K | 0        | 147.11 |          | 147.11              |  |

Scan number 2631 Raw file LNCAP\_Silac\_23F10\_set2\_06  
 Method ITMS; CID Peptide 101.32

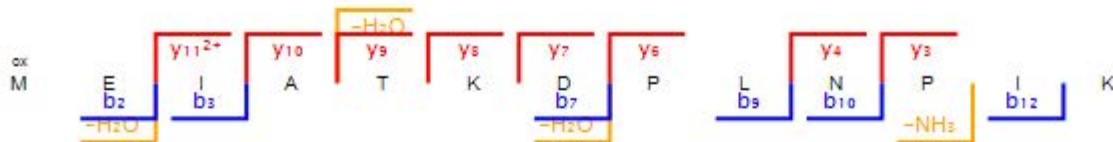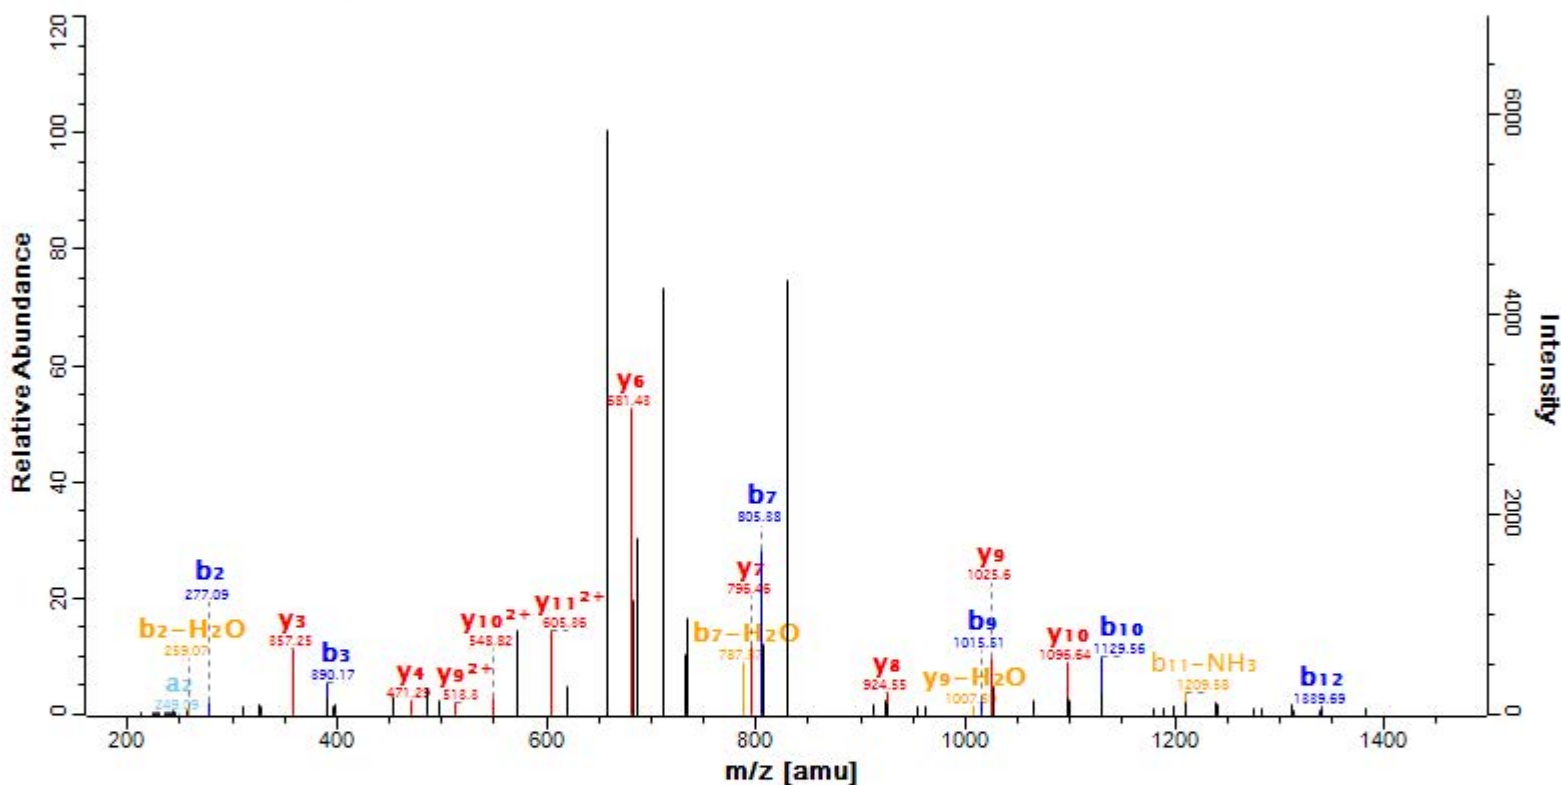

#### precursor information

|                   |                 |
|-------------------|-----------------|
| Mass:             | 1484.78933      |
| m/z:              | 743.40194       |
| Charge:           | 2+              |
| Retentiontime:    | 20.161993026733 |
| Score:            | 101.3204        |
| Mass Error [ppm]: | -1.0367         |
| PEP:              | 0.00011169      |
| Precursor Type:   | MULTI           |

#### general information

|                       |           |
|-----------------------|-----------|
| Annotation:           | 11 of 13  |
| AminoAcids Coverage:  | 85 %      |
| Intensity Coverage:   | 26 %      |
| Peak Coverage:        | 25 %      |
| Protein Localisation: | 58 ... 70 |

| a ion    |        | b ion    |        |    |     |    | y ion    |         | y <sup>2+</sup> ion |         |
|----------|--------|----------|--------|----|-----|----|----------|---------|---------------------|---------|
| Δ dalton | mass   | Δ dalton | mass   |    | seq |    | Δ dalton | mass    | Δ dalton            | mass    |
|          | 120.05 |          | 148.04 | 1  | M   | 12 |          |         |                     |         |
| +0.0616  | 249.09 | +0.0887  | 277.09 | 2  | E   | 11 | 1338.8   |         | 1338.8              |         |
|          | 362.17 | +0.0669  | 390.17 | 3  | I   | 10 | 1209.7   |         | 605.36              | +0.2201 |
|          | 433.21 |          | 461.21 | 4  | A   | 9  | 1096.6   | +0.0275 | 548.82              | +0.0392 |
|          | 534.26 |          | 562.25 | 5  | T   | 8  | 1025.6   | -0.075  | 513.3               | +0.117  |
|          | 662.35 |          | 690.35 | 6  | K   | 7  | 924.55   | +0.2172 | 924.55              |         |
|          | 777.38 | +0.0381  | 805.38 | 7  | D   | 6  | 796.46   | +0.0323 | 796.46              |         |
|          | 874.43 |          | 902.43 | 8  | P   | 5  | 681.43   | +0.0309 | 681.43              |         |
|          | 987.52 | +0.203   | 1015.5 | 9  | L   | 4  | 584.38   |         | 584.38              |         |
|          | 1101.6 | -0.009   | 1129.6 | 10 | N   | 3  | 471.29   | +0.1985 | 471.29              |         |
|          | 1198.6 |          | 1226.6 | 11 | P   | 2  | 357.25   | +0.1587 | 357.25              |         |
|          | 1311.7 | -0.021   | 1339.7 | 12 | I   | 1  | 260.2    |         | 260.2               |         |
|          |        |          |        | 13 | K   | 0  | 147.11   |         | 147.11              |         |



Scan number 289 Raw file LNCAP\_Silac\_23F10\_set2\_06  
 Method ITMS: CID Pepti... 177.42

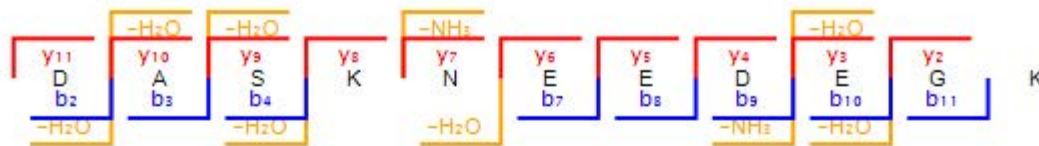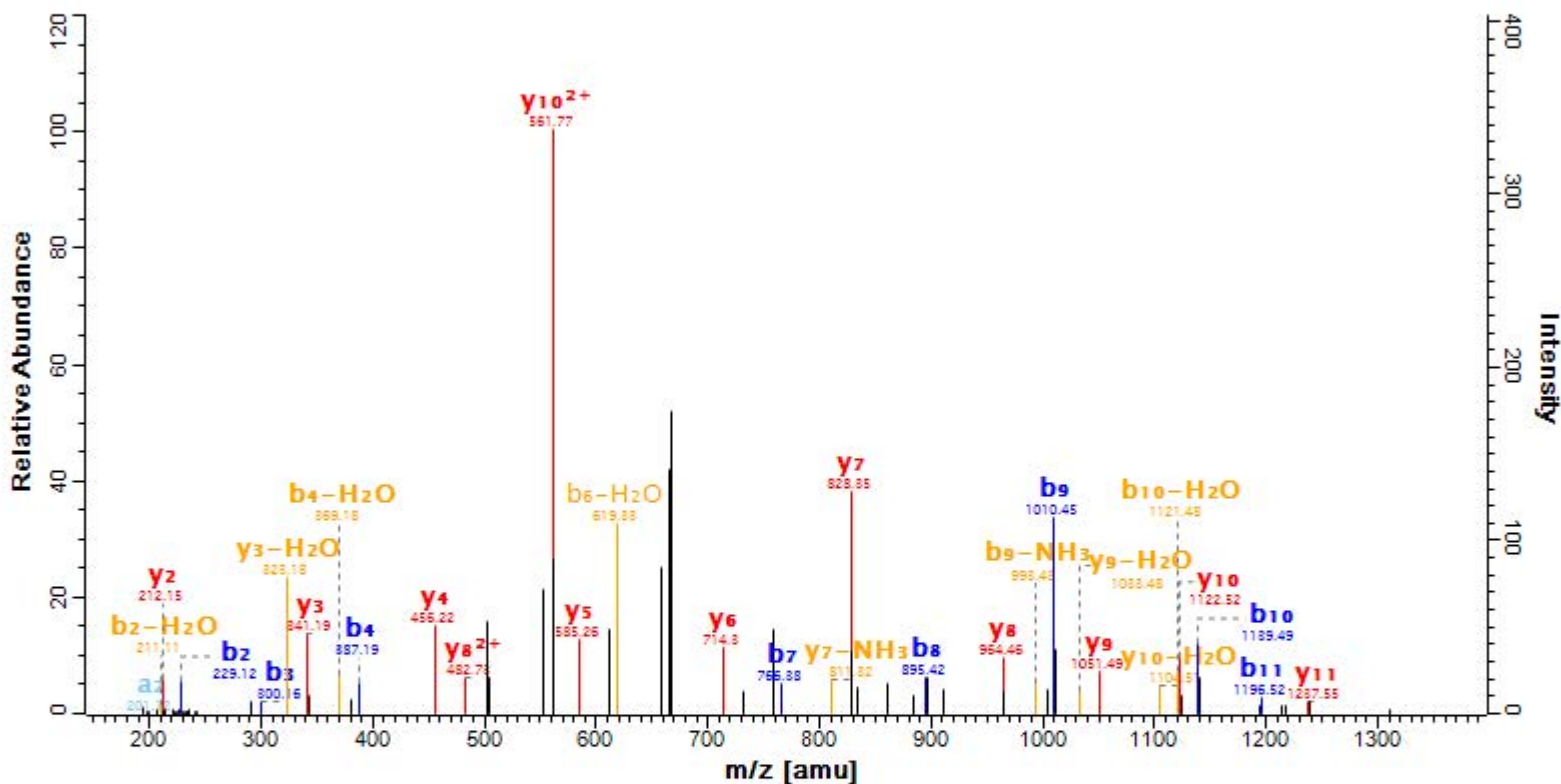

#### precursor information

|                   |                 |
|-------------------|-----------------|
| Mass:             | 1333.59938      |
| m/z:              | 667.80697       |
| Charge:           | 2+              |
| Retentiontime:    | 6.4079685211181 |
| Score:            | 177.4186        |
| Mass Error [ppm]: | -0.27829        |
| PEP:              | 9.7558E-11      |
| Precursor Type:   | MULTI           |

#### general information

|                       |           |
|-----------------------|-----------|
| Annotation:           | 10 of 12  |
| AminoAcids Coverage:  | 83 %      |
| Intensity Coverage:   | 53 %      |
| Peak Coverage:        | 36 %      |
| Protein Localisation: | 68 ... 79 |

| a ion    |        | b ion    |        | seq |   |    | y ion    |         | y <sup>2+</sup> ion |         |
|----------|--------|----------|--------|-----|---|----|----------|---------|---------------------|---------|
| Δ dalton | mass   | Δ dalton | mass   |     |   |    | Δ dalton | mass    | Δ dalton            | mass    |
|          | 86.096 |          | 114.09 | 1   | I | 11 |          |         |                     |         |
| -0.298   | 201.12 | +0.0002  | 229.12 | 2   | D | 10 | 1237.6   | +0.2976 | 1237.6              |         |
|          | 272.16 | -0.107   | 300.16 | 3   | A | 9  | 1122.5   | -0.023  | 561.77              | -0.05   |
|          | 359.19 | -0.065   | 387.19 | 4   | S | 8  | 1051.5   | -0.085  | 1051.5              |         |
|          | 495.3  |          | 523.3  | 5   | K | 7  | 964.46   | -0.015  | 482.73              | +0.3585 |
|          | 609.34 |          | 637.34 | 6   | N | 6  | 828.35   | +0.0184 | 828.35              |         |
|          | 738.39 | +0.125   | 766.38 | 7   | E | 5  | 714.3    | +0.2581 | 714.3               |         |
|          | 867.43 | +0.0155  | 895.42 | 8   | E | 4  | 585.26   | +0.0882 | 585.26              |         |
|          | 982.46 | -0.048   | 1010.5 | 9   | D | 3  | 456.22   | -0.025  | 456.22              |         |
|          | 1111.5 | -0.043   | 1139.5 | 10  | E | 2  | 341.19   | +0.1199 | 341.19              |         |
|          | 1168.5 | +0.0693  | 1196.5 | 11  | G | 1  | 212.15   | +0.1722 | 212.15              |         |
|          |        |          |        | 12  | K | 0  | 155.13   |         | 155.13              |         |

Scan number 3210 Raw file LNCAP\_Silac\_23F10\_set2\_06  
 Method ITMS: CID Pepti... 56.48

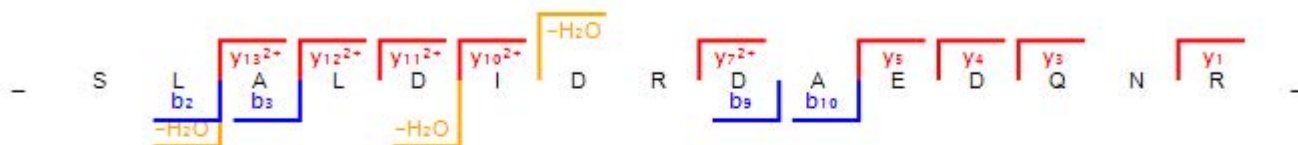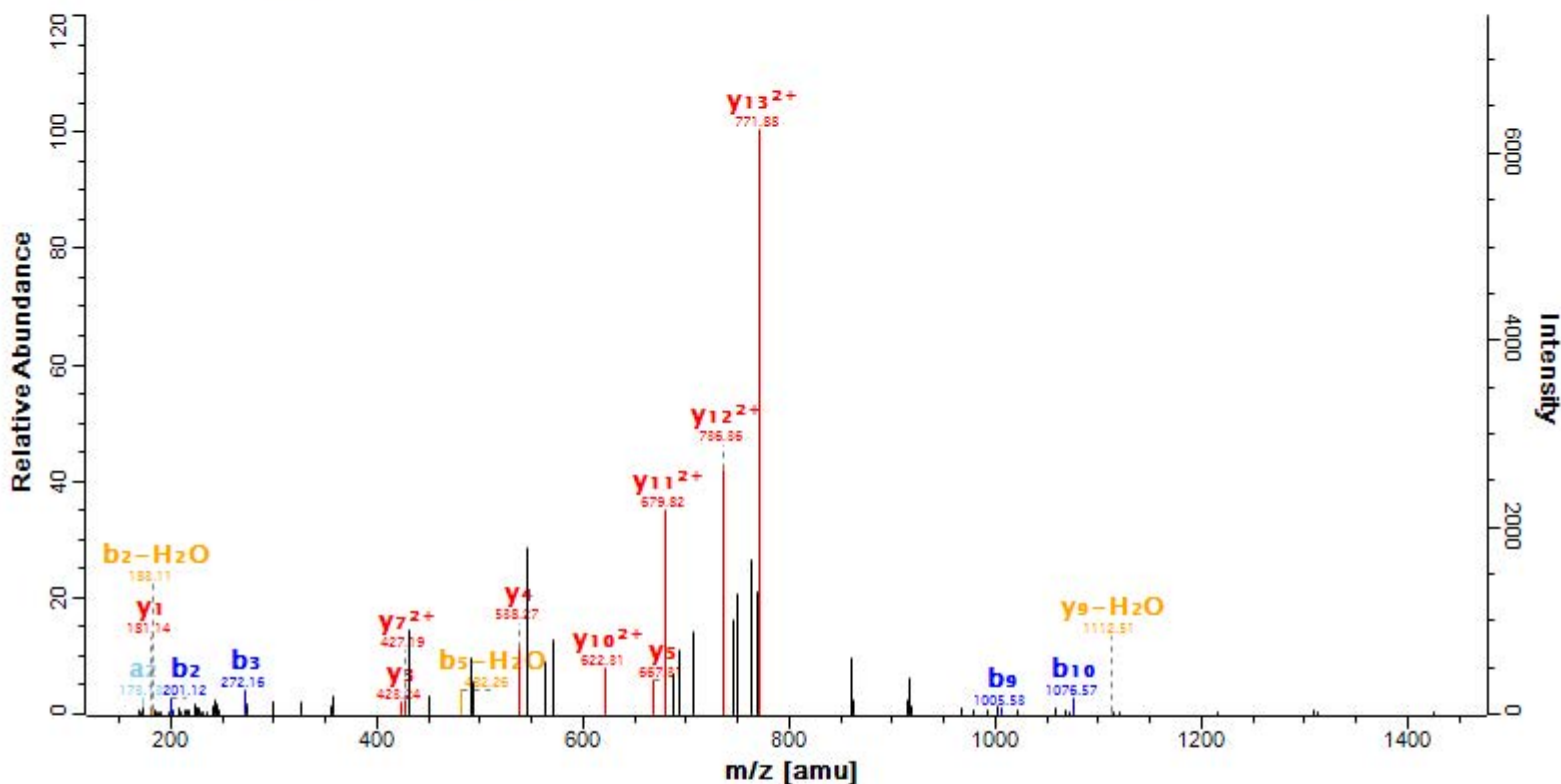

#### precursor information

|                   |                 |
|-------------------|-----------------|
| Mass:             | 1729.82236      |
| m/z:              | 577.61473       |
| Charge:           | 3+              |
| Retentiontime:    | 23.327249526977 |
| Score:            | 56.48154        |
| Mass Error [ppm]: | -0.42559        |
| PEP:              | 0.0050493       |
| Precursor Type:   | MULTI           |

| a ion    |        | b ion    |        | seq |   |    | y ion    |         | y <sup>2+</sup> ion |         |
|----------|--------|----------|--------|-----|---|----|----------|---------|---------------------|---------|
| Δ dalton | mass   | Δ dalton | mass   |     |   |    | Δ dalton | mass    | Δ dalton            | mass    |
|          | 60.044 |          | 88.039 | 1   | S | 14 |          |         |                     |         |
| +0.043   | 173.13 | -0.048   | 201.12 | 2   | L | 13 | 1655.8   |         | 1655.8              |         |
|          | 244.17 | -0.024   | 272.16 | 3   | A | 12 | 1542.8   |         | 771.88              | +0.0813 |
|          | 357.25 |          | 385.24 | 4   | L | 11 | 1471.7   |         | 736.36              | -0.118  |
|          | 472.28 |          | 500.27 | 5   | D | 10 | 1358.6   |         | 679.82              | +0.1142 |
|          | 585.36 |          | 613.36 | 6   | I | 9  | 1243.6   |         | 622.31              | +0.0904 |
|          | 700.39 |          | 728.38 | 7   | D | 8  | 1130.5   |         | 1130.5              |         |
|          | 862.51 |          | 890.5  | 8   | R | 7  | 1015.5   |         | 1015.5              |         |
|          | 977.54 | +0.1026  | 1005.5 | 9   | D | 6  | 853.37   |         | 427.19              | +0.044  |
|          | 1048.6 | +0.1057  | 1076.6 | 10  | A | 5  | 738.35   |         | 738.35              |         |
|          | 1177.6 |          | 1205.6 | 11  | E | 4  | 667.31   | +0.1276 | 667.31              |         |
|          | 1292.6 |          | 1320.6 | 12  | D | 3  | 538.27   | -0.142  | 538.27              |         |
|          | 1420.7 |          | 1448.7 | 13  | Q | 2  | 423.24   | +0.0386 | 423.24              |         |
|          | 1534.7 |          | 1562.7 | 14  | N | 1  | 295.18   |         | 295.18              |         |
|          |        |          |        | 15  | R | 0  | 181.14   | +0.045  | 181.14              |         |

#### general information

|                       |           |
|-----------------------|-----------|
| Annotation:           | 12 of 15  |
| AminoAcids Coverage:  | 80 %      |
| Intensity Coverage:   | 44 %      |
| Peak Coverage:        | 17 %      |
| Protein Localisation: | 37 ... 51 |

Scan number 3441 Raw file LNCAP\_Silac\_23F10\_set2\_06  
 Method ITMS: CID Pepti... 77.91

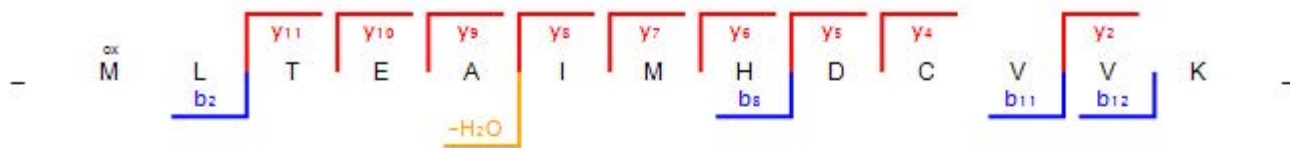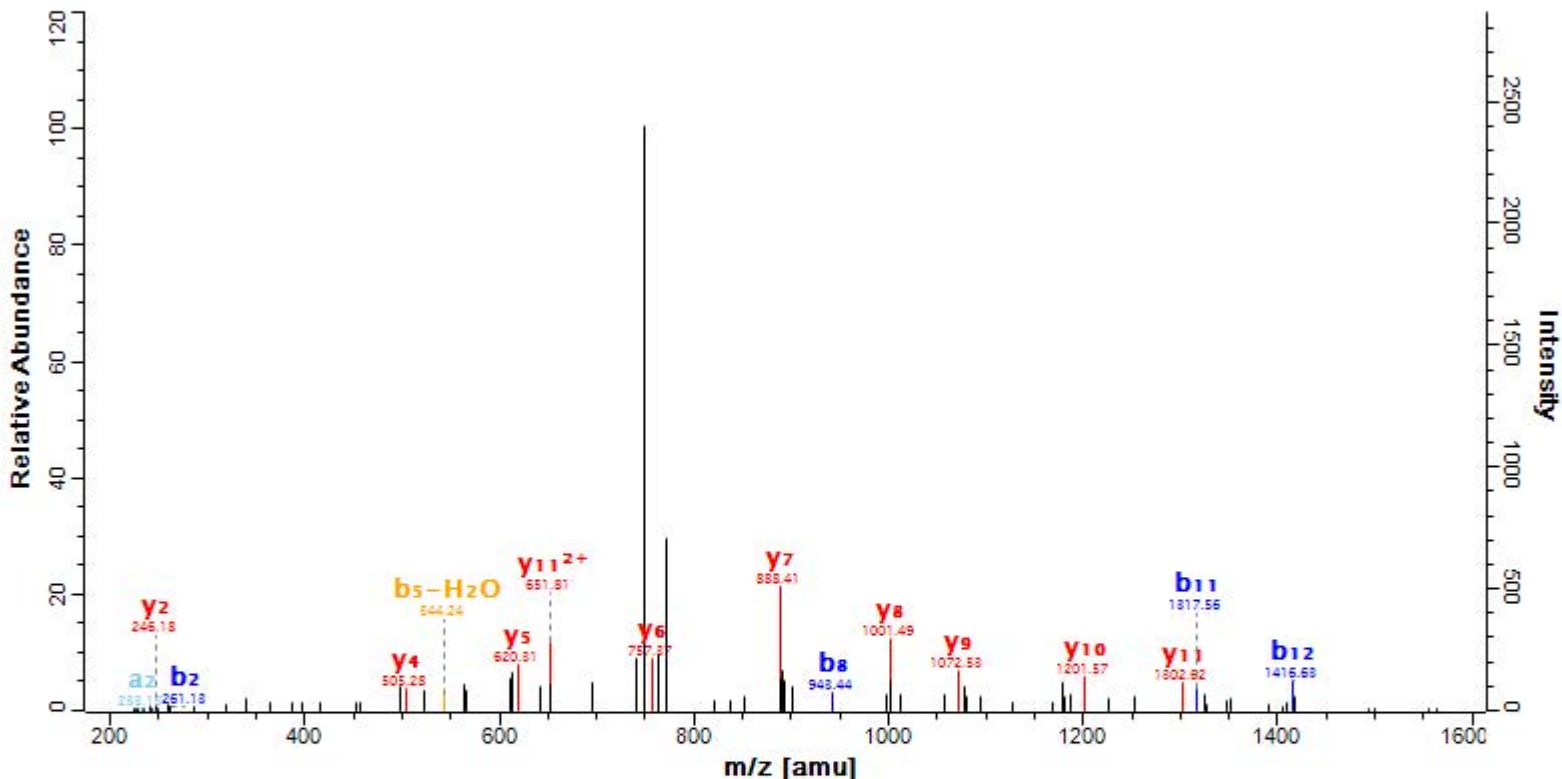

precursor information

|                   |                 |
|-------------------|-----------------|
| Mass:             | 1561.73021      |
| m/z:              | 781.87238       |
| Charge:           | 2+              |
| Retentiontime:    | 24.552791595459 |
| Score:            | 77.91169        |
| Mass Error [ppm]: | -0.031429       |
| PEP:              | 0.0033496       |
| Precursor Type:   | MULTI           |

general information

|                       |             |
|-----------------------|-------------|
| Annotation:           | 11 of 13    |
| AminoAcids Coverage:  | 85 %        |
| Intensity Coverage:   | 25 %        |
| Peak Coverage:        | 18 %        |
| Protein Localisation: | 917 ... 929 |

| a ion    |        | b ion    |        |    |     |    | y ion    |         | y <sup>2+</sup> ion |        |
|----------|--------|----------|--------|----|-----|----|----------|---------|---------------------|--------|
| Δ dalton | mass   | Δ dalton | mass   |    | seq |    | Δ dalton | mass    | Δ dalton            | mass   |
|          | 120.05 |          | 148.04 | 1  | M   | 12 |          |         |                     |        |
| +0.0158  | 233.13 | -0.082   | 261.13 | 2  | L   | 11 | 1415.7   |         | 1415.7              |        |
|          | 334.18 |          | 362.17 | 3  | T   | 10 | 1302.6   | -0.096  | 651.81              | -0.168 |
|          | 463.22 |          | 491.22 | 4  | E   | 9  | 1201.6   | -0.074  | 1201.6              |        |
|          | 534.26 |          | 562.25 | 5  | A   | 8  | 1072.5   | -0.042  | 1072.5              |        |
|          | 647.34 |          | 675.34 | 6  | I   | 7  | 1001.5   | -0.003  | 1001.5              |        |
|          | 778.38 |          | 806.38 | 7  | M   | 6  | 888.41   | -0.068  | 888.41              |        |
|          | 915.44 | +0.0277  | 943.44 | 8  | H   | 5  | 757.37   | +0.0776 | 757.37              |        |
|          | 1030.5 |          | 1058.5 | 9  | D   | 4  | 620.31   | +0.0477 | 620.31              |        |
|          | 1190.5 |          | 1218.5 | 10 | C   | 3  | 505.28   | +0.0189 | 505.28              |        |
|          | 1289.6 | -0.006   | 1317.6 | 11 | V   | 2  | 345.25   |         | 345.25              |        |
|          | 1388.6 | -0.149   | 1416.6 | 12 | V   | 1  | 246.18   | +0.0899 | 246.18              |        |
|          |        |          |        | 13 | K   | 0  | 147.11   |         | 147.11              |        |

Scan number 3497 Raw file LNCAP\_Silac\_23F10\_set2\_06  
 Method ITMS; CID Pepti... 256.8

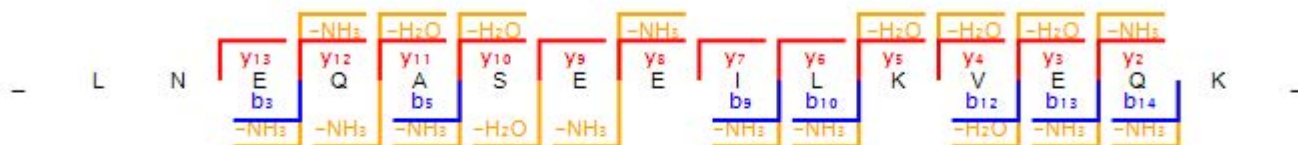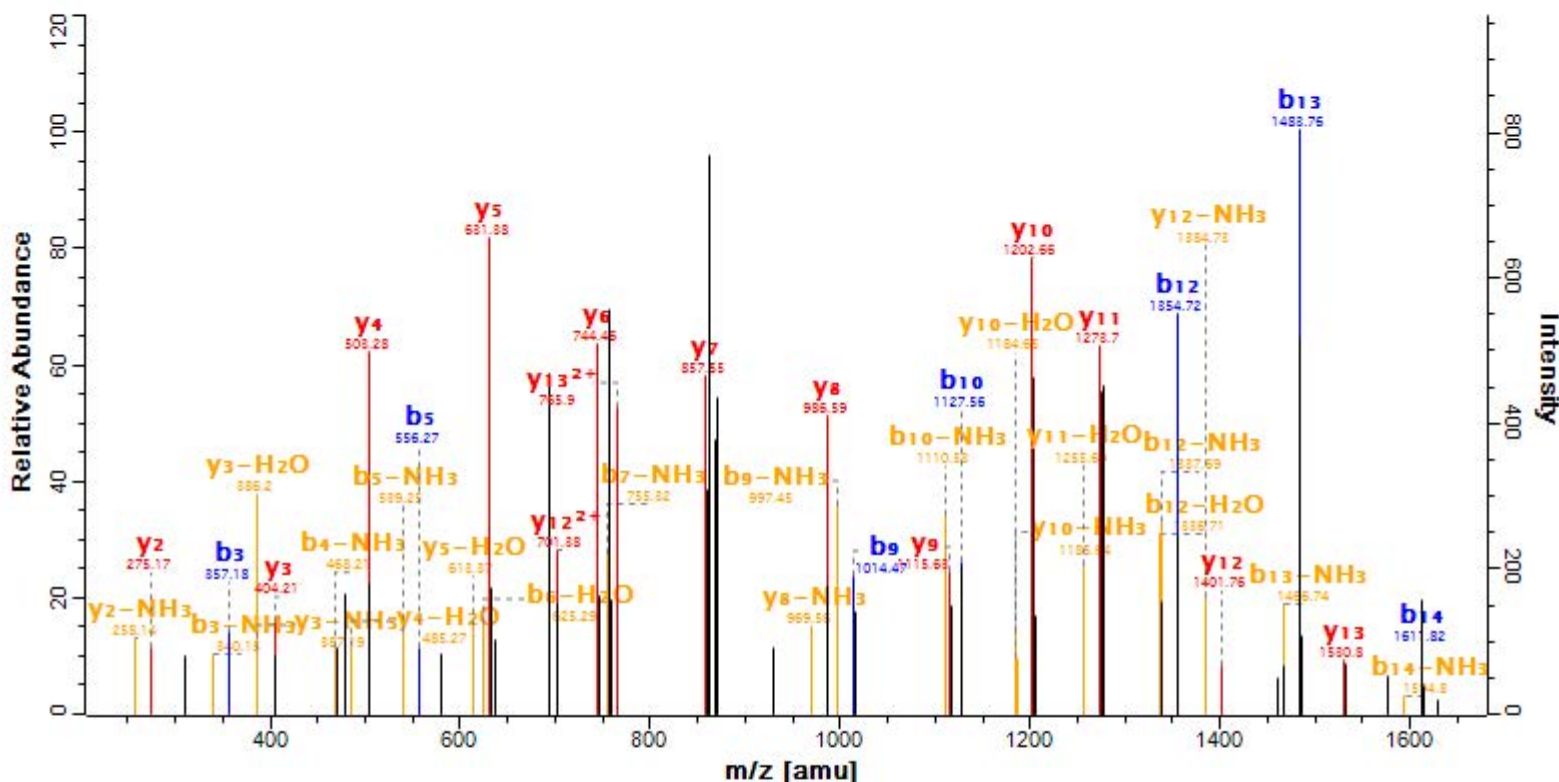

#### precursor information

|                   |                 |
|-------------------|-----------------|
| Mass:             | 1756.91989      |
| m/z:              | 879.46722       |
| Charge:           | 2+              |
| Retentiontime:    | 24.839689254760 |
| Score:            | 256.7987        |
| Mass Error [ppm]: | -0.45577        |
| PEP:              | 1.4237E-57      |
| Precursor Type:   | MULTI           |

#### general information

|                       |           |
|-----------------------|-----------|
| Annotation:           | 12 of 15  |
| AminoAcids Coverage:  | 80 %      |
| Intensity Coverage:   | 52 %      |
| Peak Coverage:        | 49 %      |
| Protein Localisation: | 45 ... 59 |

| b ion     |          |     |   | y ion    |          |           | y <sup>2+</sup> ion |           |
|-----------|----------|-----|---|----------|----------|-----------|---------------------|-----------|
| Δ dalton  | mass     | seq |   | Δ dalton | mass     | Δ dalton  | mass                |           |
|           | 114.0913 | 1   | L | 14       |          |           |                     |           |
|           | 228.1343 | 2   | N | 13       | 1644.844 |           | 1644.844            |           |
| +0.10329  | 357.1769 | 3   | E | 12       | 1530.801 | -0.01277  | 765.9041            | +0.250291 |
|           | 485.2354 | 4   | Q | 11       | 1401.758 | +0.011512 | 701.3828            | +0.09013  |
| +0.081085 | 556.2726 | 5   | A | 10       | 1273.7   | -0.0333   | 1273.7              |           |
|           | 643.3046 | 6   | S | 9        | 1202.663 | -0.14194  | 1202.663            |           |
|           | 772.3472 | 7   | E | 8        | 1115.631 | -0.15716  | 1115.631            |           |
|           | 901.3898 | 8   | E | 7        | 986.5881 | -0.04047  | 986.5881            |           |
| +0.046189 | 1014.474 | 9   | I | 6        | 857.5455 | -0.15614  | 857.5455            |           |
| +0.216275 | 1127.558 | 10  | L | 5        | 744.4614 | +0.110423 | 744.4614            |           |
|           | 1255.653 | 11  | K | 4        | 631.3774 | +0.086149 | 631.3774            |           |
| +0.006633 | 1354.721 | 12  | V | 3        | 503.2824 | -0.07871  | 503.2824            |           |
| -0.12532  | 1483.764 | 13  | E | 2        | 404.214  | +0.077651 | 404.214             |           |
| -0.03838  | 1611.822 | 14  | Q | 1        | 275.1714 | +0.056157 | 275.1714            |           |
|           |          | 15  | K | 0        | 147.1128 |           | 147.1128            |           |

Scan number 3793 Raw file LNCAP\_Silac\_23F10\_set2\_06  
 Method ITMS; CID Pepti... 58.32

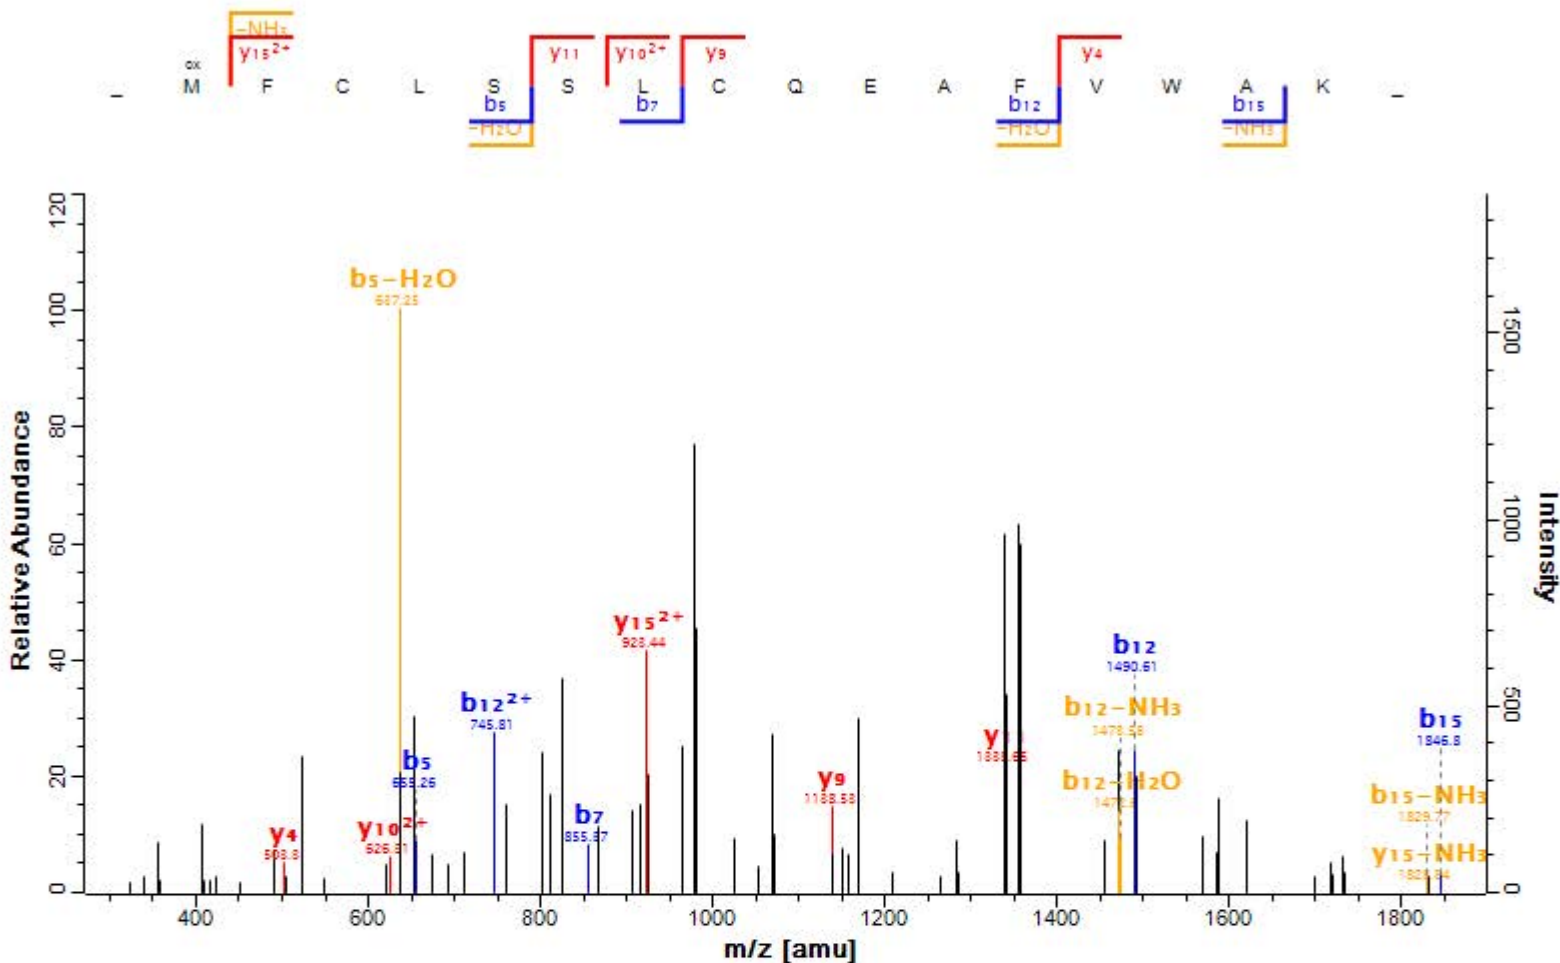

precursor information

|                   |                |
|-------------------|----------------|
| Mass:             | 1991.89388     |
| m/z:              | 996.95421      |
| Charge:           | 2+             |
| Retentiontime:    | 26.41357421875 |
| Score:            | 58.32032       |
| Mass Error [ppm]: | -0.24354       |
| PEP:              | 0.0099672      |
| Precursor Type:   | MULTI          |

general information

|                       |          |
|-----------------------|----------|
| Annotation:           | 9 of 16  |
| AminoAcids Coverag    | 56 %     |
| Intensity Coverage:   | 23 %     |
| Peak Coverage:        | 18 %     |
| Protein Localisation: | 1 ... 16 |

| b <sup>2+</sup> ion |        | b ion    |        | seq |   |    | y ion    |         | y <sup>2+</sup> ion |         |
|---------------------|--------|----------|--------|-----|---|----|----------|---------|---------------------|---------|
| Δ dalton            | mass   | Δ dalton | mass   |     |   |    | Δ dalton | mass    | Δ dalton            | mass    |
|                     | 148.04 |          | 148.04 | 1   | M | 15 |          |         |                     |         |
|                     | 295.11 |          | 295.11 | 2   | F | 14 | 1845.9   |         | 923.44              | +0.1795 |
|                     | 455.14 |          | 455.14 | 3   | C | 13 | 1698.8   |         | 1698.8              |         |
|                     | 568.23 |          | 568.23 | 4   | L | 12 | 1538.8   |         | 1538.8              |         |
|                     | 655.26 | +0.178   | 655.26 | 5   | S | 11 | 1425.7   |         | 1425.7              |         |
|                     | 742.29 |          | 742.29 | 6   | S | 10 | 1338.7   | -0.043  | 1338.7              |         |
|                     | 855.37 | -0.097   | 855.37 | 7   | L | 9  | 1251.6   |         | 626.31              | +0.0104 |
|                     | 1015.4 |          | 1015.4 | 8   | C | 8  | 1138.5   | +0.1578 | 1138.5              |         |
|                     | 1143.5 |          | 1143.5 | 9   | Q | 7  | 978.5    |         | 978.5               |         |
|                     | 1272.5 |          | 1272.5 | 10  | E | 6  | 850.45   |         | 850.45              |         |
|                     | 1343.5 |          | 1343.5 | 11  | A | 5  | 721.4    |         | 721.4               |         |
| +0.2314             | 745.81 | -0.098   | 1490.6 | 12  | F | 4  | 650.37   |         | 650.37              |         |
|                     | 1589.7 |          | 1589.7 | 13  | V | 3  | 503.3    | +0.001  | 503.3               |         |
|                     | 1775.8 |          | 1775.8 | 14  | W | 2  | 404.23   |         | 404.23              |         |
|                     | 1846.8 | +0.2188  | 1846.8 | 15  | A | 1  | 218.15   |         | 218.15              |         |
|                     |        |          |        | 16  | K | 0  | 147.11   |         | 147.11              |         |

Scan number 4229 Raw file LNCAP\_Silac\_23F10\_set2\_06  
 Method ITMS; CID Pepti... 112.01

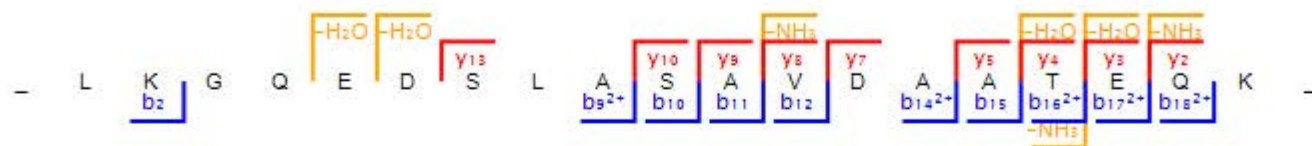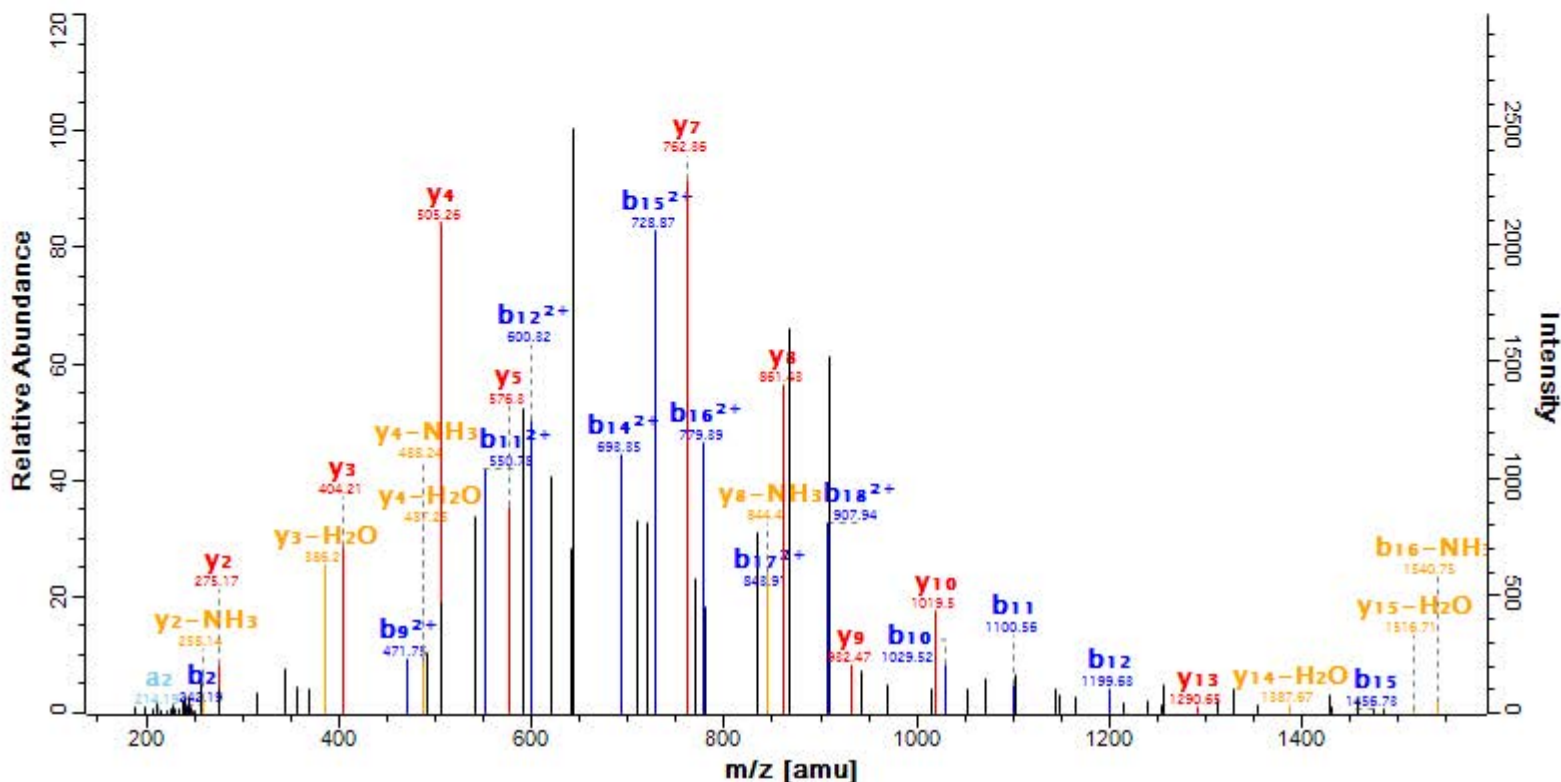

#### precursor information

|                   |                 |
|-------------------|-----------------|
| Mass:             | 1959.97509      |
| m/z:              | 654.33231       |
| Charge:           | 3+              |
| Retentiontime:    | 28.757925033569 |
| Score:            | 112.0116        |
| Mass Error [ppm]: | 0.090444        |
| PEP:              | 1.6366E-08      |
| Precursor Type:   | MULTI           |

| a ion    |        | b <sup>2+</sup> ion |        | b ion    |        |     |   |          | y ion  |         |
|----------|--------|---------------------|--------|----------|--------|-----|---|----------|--------|---------|
| Δ dalton | mass   | Δ dalton            | mass   | Δ dalton | mass   | seq |   | Δ dalton | mass   |         |
|          | 86.096 |                     | 114.09 |          | 114.09 | 1   | L | 18       |        |         |
| +0.0319  | 214.19 |                     | 242.19 | +0.3233  | 242.19 | 2   | K | 17       | 1847.9 |         |
|          | 271.21 |                     | 299.21 |          | 299.21 | 3   | G | 16       | 1719.8 |         |
|          | 399.27 |                     | 427.27 |          | 427.27 | 4   | Q | 15       | 1662.8 |         |
|          | 528.31 |                     | 556.31 |          | 556.31 | 5   | E | 14       | 1534.7 |         |
|          | 643.34 |                     | 671.34 |          | 671.34 | 6   | D | 13       | 1405.7 |         |
|          | 730.37 |                     | 758.37 |          | 758.37 | 7   | S | 12       | 1290.7 | -0.032  |
|          | 843.46 |                     | 871.45 |          | 871.45 | 8   | L | 11       | 1203.6 |         |
|          | 914.49 | +0.0708             | 847.75 |          | 942.49 | 9   | A | 10       | 1090.5 |         |
|          | 1001.5 |                     | 1029.5 | +0.0875  | 1029.5 | 10  | S | 9        | 1019.5 | +0.0038 |
|          | 1072.6 | +0.1902             | 550.78 | +0.1617  | 1100.6 | 11  | A | 8        | 932.47 | -0.161  |
|          | 1171.6 | +0.1851             | 600.32 | -0.111   | 1199.6 | 12  | V | 7        | 861.43 | +0.0834 |
|          | 1286.7 |                     | 1314.7 |          | 1314.7 | 13  | D | 6        | 762.36 | -0.012  |
|          | 1357.7 | +0.1717             | 693.35 |          | 1385.7 | 14  | A | 5        | 647.34 |         |
|          | 1428.7 | +0.1424             | 728.87 | +0.0497  | 1456.7 | 15  | A | 4        | 576.3  | +0.0067 |
|          | 1529.8 | +0.0046             | 779.39 |          | 1557.8 | 16  | T | 3        | 505.26 | +0.0537 |
|          | 1658.8 | +0.1039             | 843.91 |          | 1686.8 | 17  | E | 2        | 404.21 | +0.017  |
|          | 1786.9 | -0.028              | 907.94 |          | 1814.9 | 18  | Q | 1        | 275.17 | +0.0197 |
|          |        |                     |        |          |        | 19  | K | 0        | 147.11 |         |

#### general information

|                       |             |
|-----------------------|-------------|
| Annotation:           | 14 of 19    |
| AminoAcids Coverage:  | 74 %        |
| Intensity Coverage:   | 51 %        |
| Peak Coverage:        | 31 %        |
| Protein Localisation: | 156 ... 174 |

Scan number 4423 Raw file LNCAP\_Silac\_23F10\_set2\_06  
 Method ITMS; CID Peptide 69.81

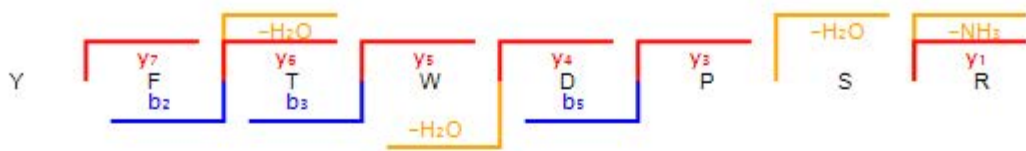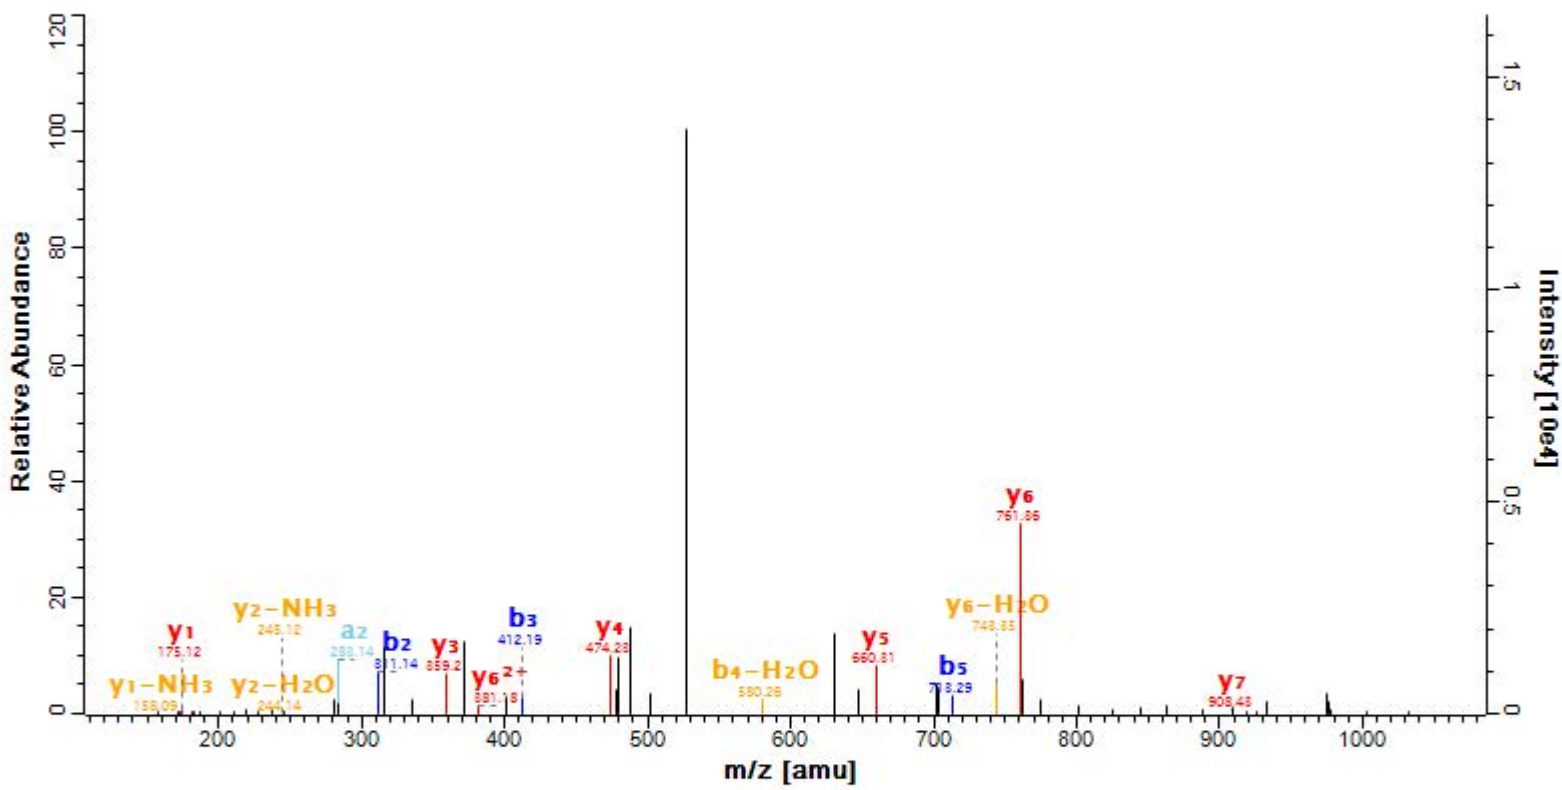

precursor information

|                       |                 |
|-----------------------|-----------------|
| Mass:                 | 1070.48254      |
| m/z:                  | 536.24855       |
| Charge:               | 2+              |
| Retentiontime:        | 29.791877746582 |
| Score:                | 69.81167        |
| Mass Error [ppm]:     | 0.37217         |
| g PEP:                | 0.02772         |
| Annotation:           | 7 of 8          |
| AminoAcids Coverage:  | 88 %            |
| Intensity Coverage:   | 29 %            |
| Peak Coverage:        | 19 %            |
| Protein Localisation: | 489 ... 496     |

| a ion    |        | b ion    |        |   |     |          | y ion  |          | y <sup>2+</sup> ion |  |
|----------|--------|----------|--------|---|-----|----------|--------|----------|---------------------|--|
| Δ dalton | mass   | Δ dalton | mass   |   | seq | Δ dalton | mass   | Δ dalton | mass                |  |
|          | 136.08 |          | 164.07 | 1 | Y   | 7        |        |          |                     |  |
| -0.023   | 283.14 | -0.102   | 311.14 | 2 | F   | 6        | 908.43 | +0.2993  | 908.43              |  |
|          | 384.19 | -0.068   | 412.19 | 3 | T   | 5        | 761.36 | +0.0616  | 381.18              |  |
|          | 570.27 |          | 598.27 | 4 | W   | 4        | 660.31 | +0.0013  | 360.31              |  |
|          | 685.3  | -0.013   | 713.29 | 5 | D   | 3        | 474.23 | +0.1709  | 474.23              |  |
|          | 782.35 |          | 810.35 | 6 | P   | 2        | 359.2  | +0.0923  | 359.2               |  |
|          | 869.38 |          | 897.38 | 7 | S   | 1        | 262.15 |          | 262.15              |  |
|          |        |          |        | 8 | R   | 0        | 175.12 | +0.0109  | 175.12              |  |

Scan number 457 Raw file LNCAP\_Silac\_23F10\_set2\_06  
 Method ITMS; CID Pepti... 143.25

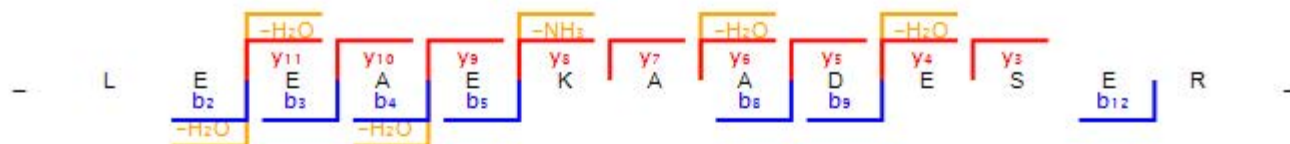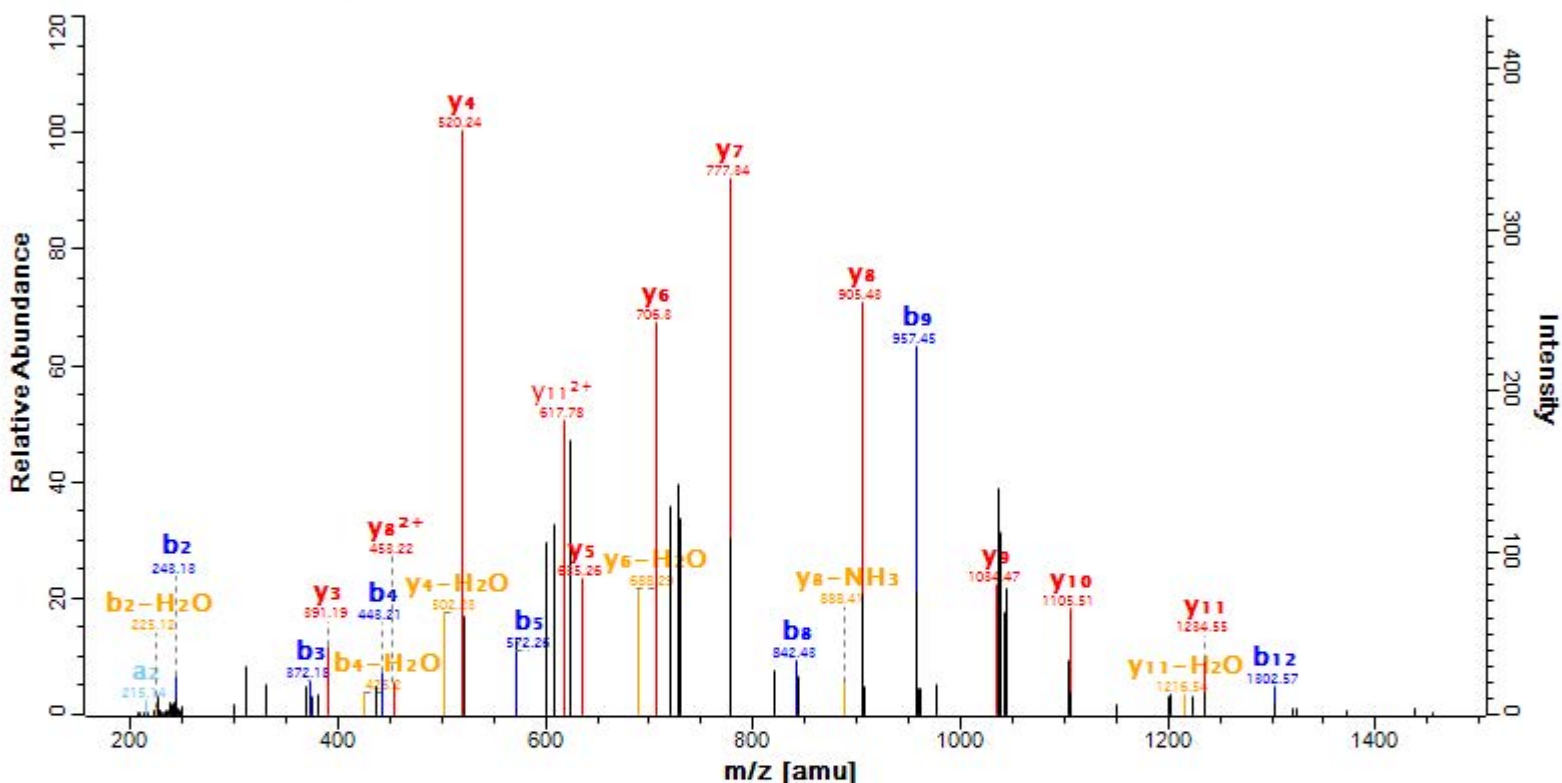

precursor information

|                   |                 |
|-------------------|-----------------|
| Mass:             | 1475.67491      |
| m/z:              | 738.84473       |
| Charge:           | 2+              |
| Retentiontime:    | 7.6769585609436 |
| Score:            | 143.2488        |
| Mass Error [ppm]: | 0.6313          |
| PEP:              | 5.4435E-07      |
| Precursor Type:   | MULTI           |

general information

|                       |           |
|-----------------------|-----------|
| Annotation:           | 11 of 13  |
| AminoAcids Coverage:  | 85 %      |
| Intensity Coverage:   | 52 %      |
| Peak Coverage:        | 27 %      |
| Protein Localisation: | 77 ... 89 |

| a ion    |        | b ion    |        |    |     |    | y ion    |         | y <sup>2+</sup> ion |         |
|----------|--------|----------|--------|----|-----|----|----------|---------|---------------------|---------|
| Δ dalton | mass   | Δ dalton | mass   |    | seq |    | Δ dalton | mass    | Δ dalton            | mass    |
|          | 86.096 |          | 114.09 | 1  | L   | 12 |          |         |                     |         |
| -0.163   | 215.14 | +0.1623  | 243.13 | 2  | E   | 11 | 1363.6   |         | 1363.6              |         |
|          | 344.18 | +0.11053 | 372.18 | 3  | E   | 10 | 1234.6   | -0.014  | 617.78              | +0.2046 |
|          | 415.22 | +0.0496  | 443.21 | 4  | A   | 9  | 1105.5   | +0.0089 | 1105.5              |         |
|          | 544.26 | +0.1514  | 572.26 | 5  | E   | 8  | 1034.5   | -0.119  | 1034.5              |         |
|          | 672.36 |          | 700.35 | 6  | K   | 7  | 905.43   | +0.0673 | 453.22              | +0.1475 |
|          | 743.39 |          | 771.39 | 7  | A   | 6  | 777.34   | +0.0524 | 777.34              |         |
|          | 814.43 | -0.023   | 842.43 | 8  | A   | 5  | 706.3    | +0.2267 | 706.3               |         |
|          | 929.46 | -0.059   | 957.45 | 9  | D   | 4  | 635.26   | -0.04   | 635.26              |         |
|          | 1058.5 |          | 1086.5 | 10 | E   | 3  | 520.24   | -0.028  | 520.24              |         |
|          | 1145.5 |          | 1173.5 | 11 | S   | 2  | 391.19   | +0.1622 | 391.19              |         |
|          | 1274.6 | -0.014   | 1302.6 | 12 | E   | 1  | 304.16   |         | 304.16              |         |
|          |        |          |        | 13 | R   | 0  | 175.12   |         | 175.12              |         |



Scan number 4670 Raw file LNCAP\_Silac\_23F10\_set2\_06  
 Method ITMS; CID Pepti... 64.44

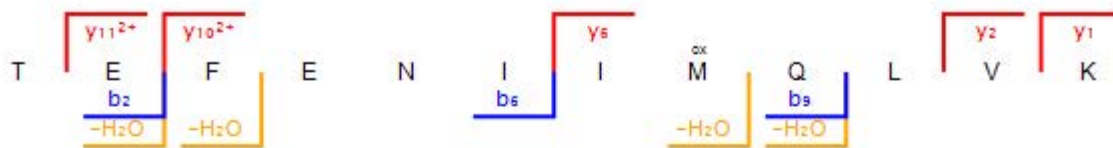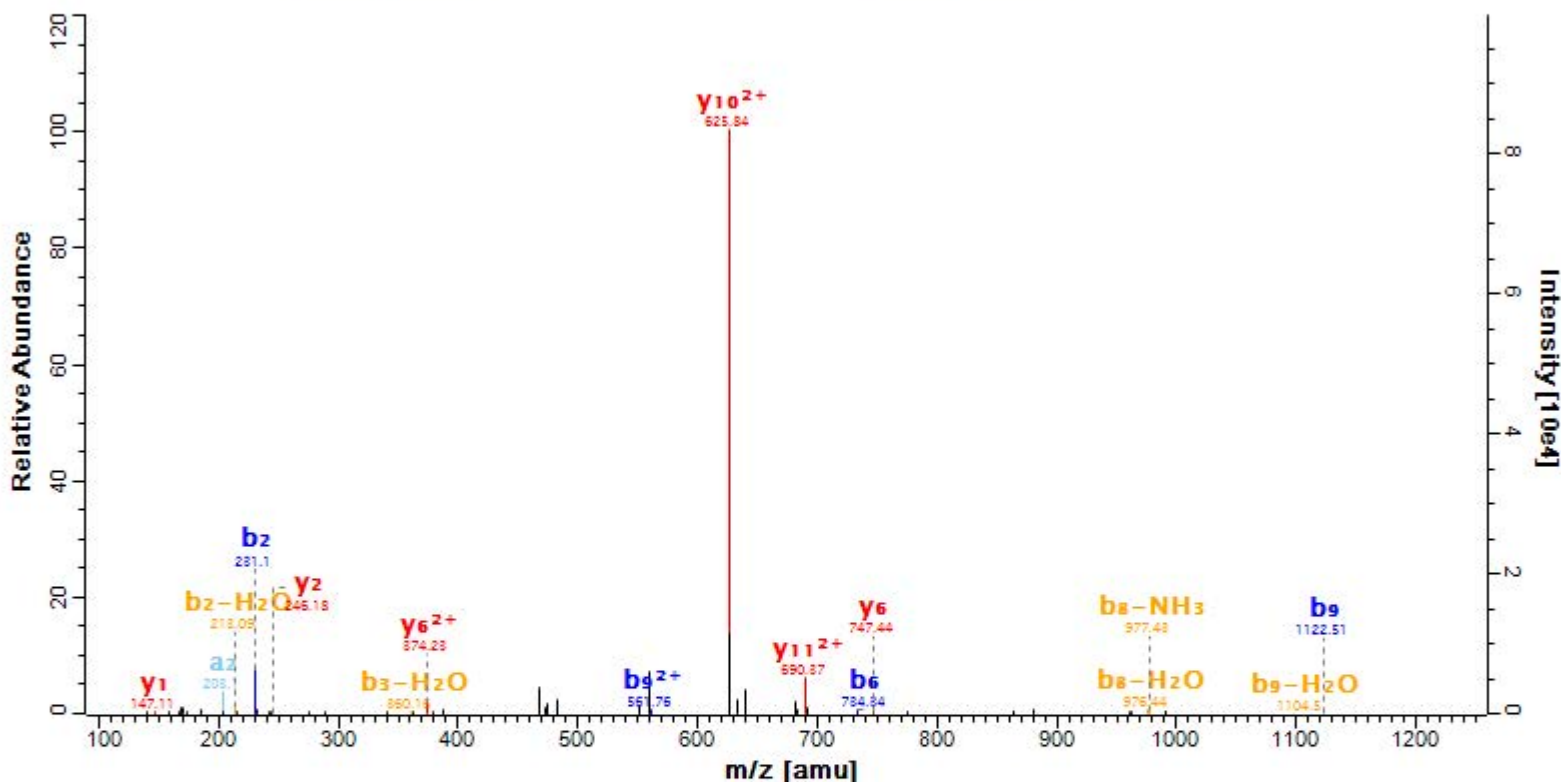

#### precursor information

|                   |                 |
|-------------------|-----------------|
| Mass:             | 1479.76412      |
| m/z:              | 494.26198       |
| Charge:           | 3+              |
| Retentiontime:    | 31.100227355957 |
| Score:            | 64.43861        |
| Mass Error [ppm]: | -0.13039        |
| PEP:              | 0.02431         |
| Precursor Type:   | MULTI           |

#### general information

|                       |           |
|-----------------------|-----------|
| Annotation:           | 8 of 12   |
| AminoAcids Coverage:  | 67 %      |
| Intensity Coverage:   | 68 %      |
| Peak Coverage:        | 17 %      |
| Protein Localisation: | 83 ... 94 |

| a ion         |               | b <sup>2+</sup> ion |               | b ion |               |               |             |       | y ion |  | y <sup>2+</sup> ion |  |
|---------------|---------------|---------------------|---------------|-------|---------------|---------------|-------------|-------|-------|--|---------------------|--|
| Δ dalton mass | Δ dalton mass | Δ dalton mass       | Δ dalton mass | seq   | Δ dalton mass | Δ dalton mass |             |       |       |  |                     |  |
| 74.06         | 102.1         | 102.1               | 1             | T     | 11            |               |             |       |       |  |                     |  |
| -0.02 203.1   | 231.1         | -0.04 231.1         | 2             | E     | 10            | 1380          | 690.4       | +0.16 |       |  |                     |  |
| 350.2         | 378.2         | 378.2               | 3             | F     | 9             | 1251          | 625.8       | +0.28 |       |  |                     |  |
| 479.2         | 507.2         | 507.2               | 4             | E     | 8             | 1104          | 1104        |       |       |  |                     |  |
| 593.3         | 621.3         | 621.3               | 5             | N     | 7             | 974.6         | 974.6       |       |       |  |                     |  |
| 706.3         | 734.3         | -0.01 734.3         | 6             | I     | 6             | 860.5         | 860.5       |       |       |  |                     |  |
| 819.4         | 847.4         | 847.4               | 7             | I     | 5             | 747.4         | +0.12 874.2 | +0.13 |       |  |                     |  |
| 966.5         | 994.5         | 994.5               | 8             | M     | 4             | 634.4         | 634.4       |       |       |  |                     |  |
| 1095          | -0.42 561.8   | -0.14 1123          | 9             | Q     | 3             | 487.3         | 487.3       |       |       |  |                     |  |
| 1208          | 1236          | 1236                | 10            | L     | 2             | 359.3         | 359.3       |       |       |  |                     |  |
| 1307          | 1335          | 1335                | 11            | V     | 1             | 246.2         | -0.14 246.2 |       |       |  |                     |  |
|               |               |                     | 12            | K     | 0             | 147.1         | -0.16 147.1 |       |       |  |                     |  |

Scan number 5062 Raw file LNCAP\_Silac\_23F10\_set2\_06  
 Method ITMS; CID Pepti... 89.91

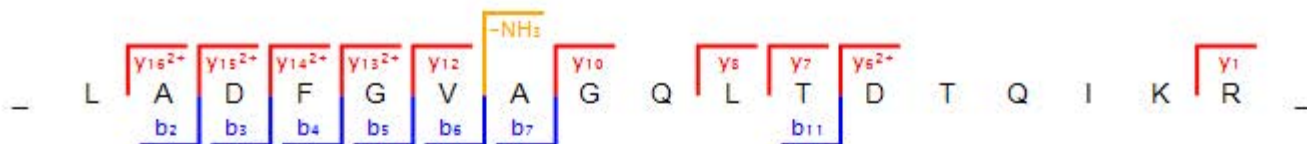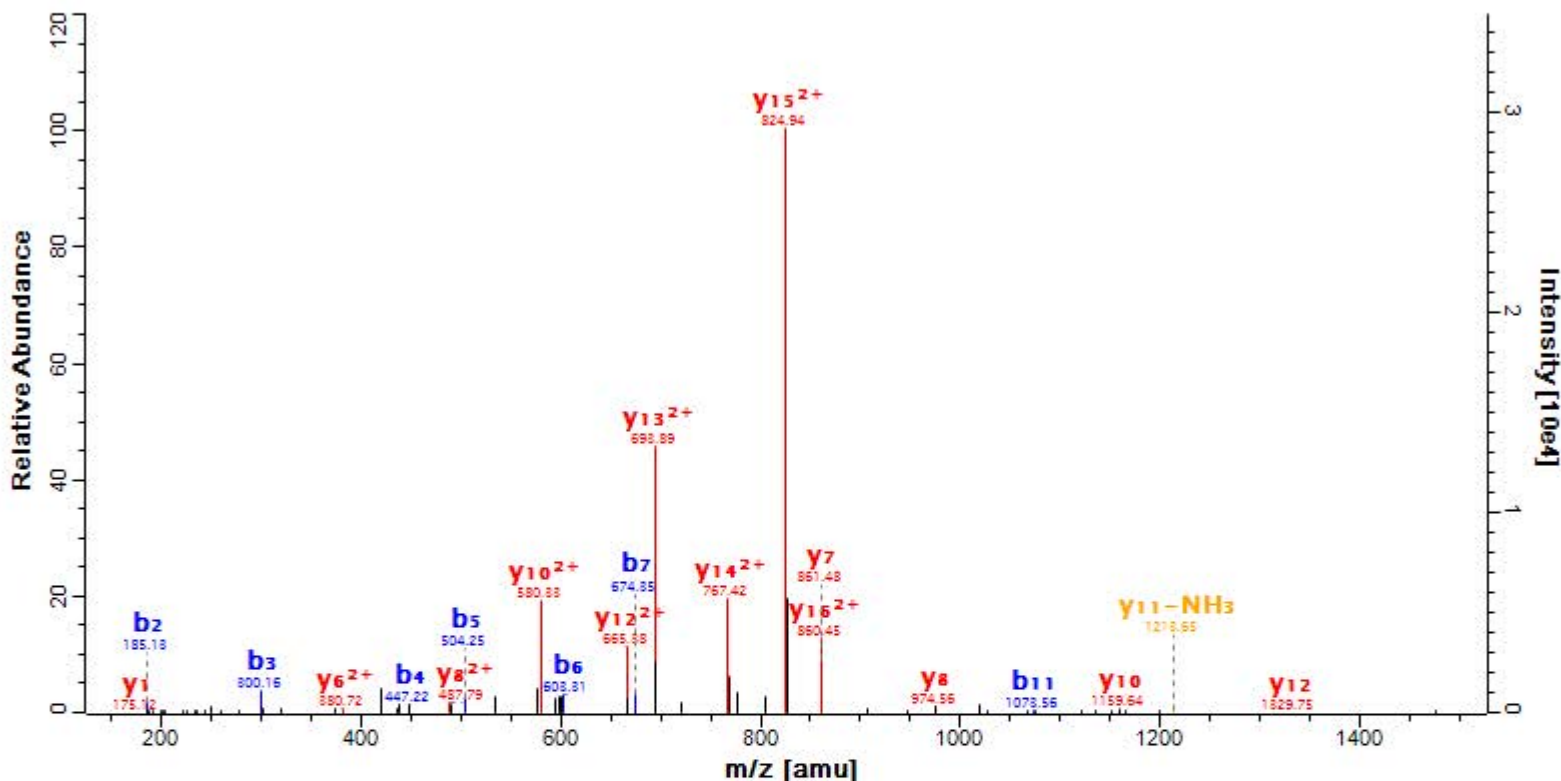

#### precursor information

|                   |                 |
|-------------------|-----------------|
| Mass:             | 1831.97953      |
| m/z:              | 611.66712       |
| Charge:           | 3+              |
| Retentiontime:    | 33.179981231689 |
| Score:            | 89.9108         |
| Mass Error [ppm]: | 0.17518         |
| PEP:              | 5.2324E-06      |
| Precursor Type:   | MULTI           |

#### general information

|                       |             |
|-----------------------|-------------|
| Annotation:           | 11 of 17    |
| AminoAcids Coverage:  | 65 %        |
| Intensity Coverage:   | 73 %        |
| Peak Coverage:        | 23 %        |
| Protein Localisation: | 182 ... 198 |

| b ion     |          |    |     |    | y ion    |           | y <sup>2+</sup> ion |           |
|-----------|----------|----|-----|----|----------|-----------|---------------------|-----------|
| Δ dalton  | mass     |    | seq |    | Δ dalton | mass      | Δ dalton            | mass      |
|           | 114.0913 | 1  | L   | 16 |          |           |                     |           |
| +0.010614 | 185.1285 | 2  | A   | 15 | 1719.902 |           | 860.4549            | +0.247542 |
| -0.03247  | 300.1554 | 3  | D   | 14 | 1648.865 |           | 824.9363            | +0.236253 |
| +0.18842  | 447.2238 | 4  | F   | 13 | 1533.838 |           | 767.4228            | +0.223479 |
| +0.019679 | 504.2453 | 5  | G   | 12 | 1386.77  |           | 693.8886            | +0.222042 |
| -0.39419  | 603.3137 | 6  | V   | 11 | 1329.748 | +0.232223 | 665.3779            | +0.278062 |
| +0.014615 | 674.3508 | 7  | A   | 10 | 1230.68  |           | 1230.68             |           |
|           | 731.3723 | 8  | G   | 9  | 1159.643 | -0.19887  | 580.3251            | +0.309952 |
|           | 859.4308 | 9  | Q   | 8  | 1102.621 |           | 1102.621            |           |
|           | 972.5149 | 10 | L   | 7  | 974.5629 | -0.00311  | 487.7851            | +0.207272 |
| +0.20255  | 1073.563 | 11 | T   | 6  | 861.4789 | +0.162196 | 861.4789            |           |
|           | 1188.59  | 12 | D   | 5  | 760.4312 |           | 380.7192            | +0.297069 |
|           | 1289.637 | 13 | T   | 4  | 645.4042 |           | 645.4042            |           |
|           | 1417.696 | 14 | Q   | 3  | 544.3566 |           | 544.3566            |           |
|           | 1530.78  | 15 | I   | 2  | 416.298  |           | 416.298             |           |
|           | 1658.875 | 16 | K   | 1  | 303.2139 |           | 303.2139            |           |
|           |          | 17 | R   | 0  | 175.119  | -0.00395  | 175.119             |           |

Scan number 5065 Raw file LNCAP\_Silac\_23F10\_set2\_06  
 Method ITMS; CID Pepti... 93.51

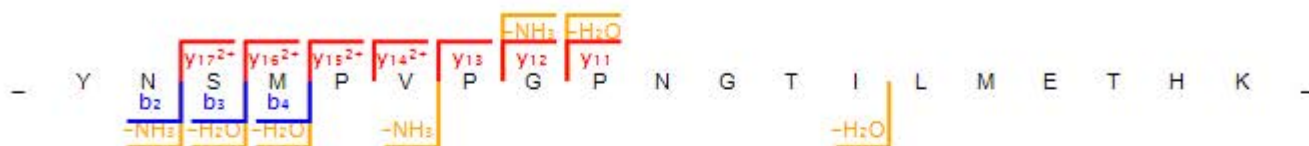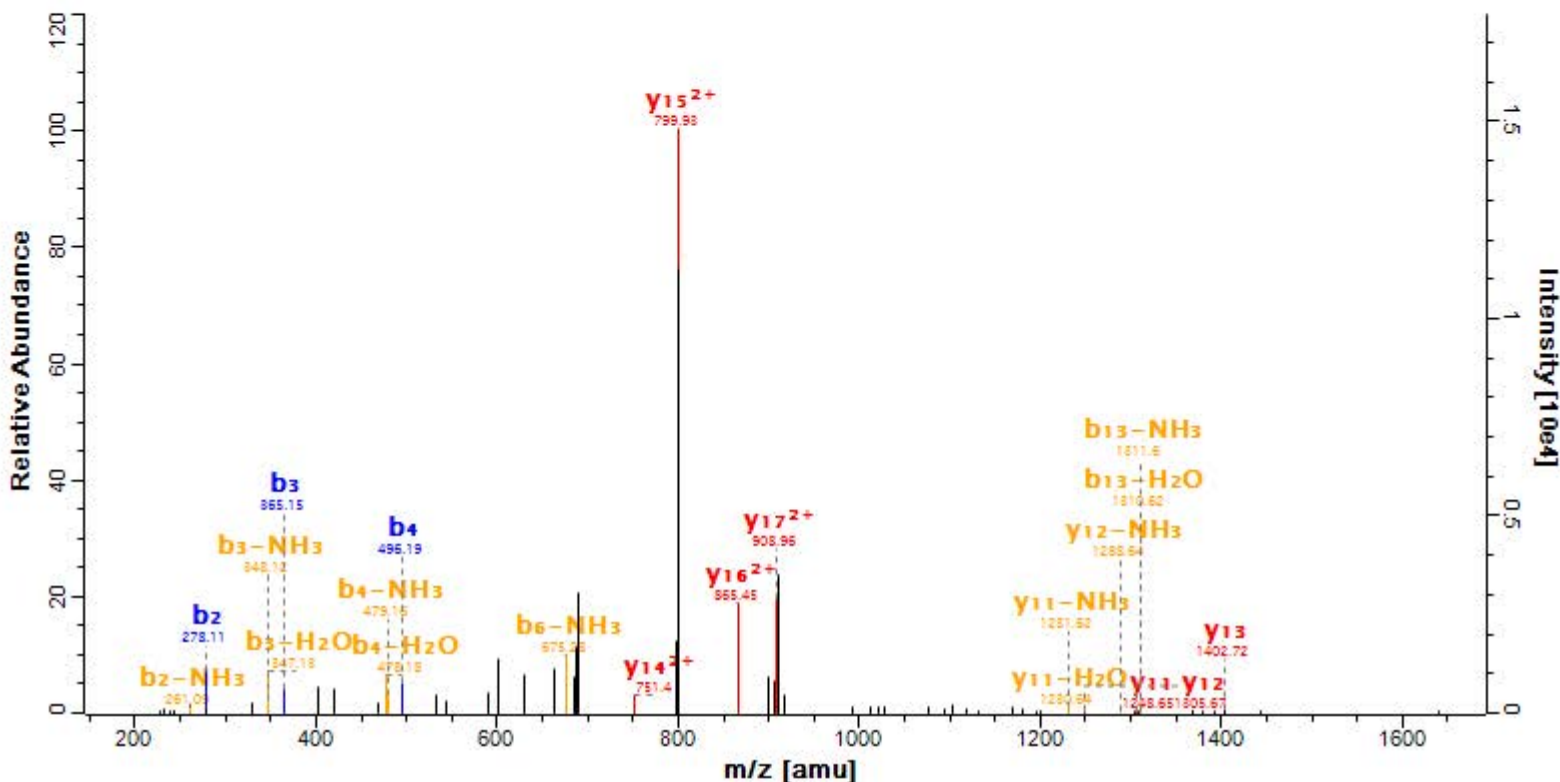

#### precursor information

|                   |                 |
|-------------------|-----------------|
| Mass:             | 2085.00126      |
| m/z:              | 696.0077        |
| Charge:           | 3+              |
| Retentiontime:    | 33.194236755371 |
| Score:            | 93.50977        |
| Mass Error [ppm]: | -0.51143        |
| PEP:              | 1.2536E-05      |
| Precursor Type:   | MULTI           |

| b ion     |          |     |   | y ion    |          | y <sup>2+</sup> ion |           |
|-----------|----------|-----|---|----------|----------|---------------------|-----------|
| Δ dalton  | mass     | seq |   | Δ dalton | mass     | Δ dalton            | mass      |
|           | 164.0706 | 1   | Y | 18       |          |                     |           |
| +0.058465 | 278.1135 | 2   | N | 17       | 1930.96  | 1930.96             |           |
| +0.042366 | 365.1456 | 3   | S | 16       | 1816.918 | 908.9624            | +0.011524 |
| -0.0088   | 496.186  | 4   | M | 15       | 1729.886 | 865.4464            | +0.139355 |
|           | 593.2388 | 5   | P | 14       | 1598.845 | 799.9262            | -0.02729  |
|           | 692.3072 | 6   | V | 13       | 1501.792 | 751.3998            | +0.178411 |
|           | 789.36   | 7   | P | 12       | 1402.724 | -0.15269            | 1402.724  |
|           | 846.3815 | 8   | G | 11       | 1305.671 | -0.38118            | 1305.671  |
|           | 943.4342 | 9   | P | 10       | 1248.65  | -0.39121            | 1248.65   |
|           | 1057.477 | 10  | N | 9        | 1151.597 |                     | 1151.597  |
|           | 1114.499 | 11  | G | 8        | 1037.554 |                     | 1037.554  |
|           | 1215.546 | 12  | T | 7        | 980.5325 |                     | 980.5325  |
|           | 1328.63  | 13  | I | 6        | 879.4848 |                     | 879.4848  |
|           | 1441.714 | 14  | L | 5        | 766.4007 |                     | 766.4007  |
|           | 1572.755 | 15  | M | 4        | 653.3167 |                     | 653.3167  |
|           | 1701.797 | 16  | E | 3        | 522.2762 |                     | 522.2762  |
|           | 1802.845 | 17  | T | 2        | 393.2336 |                     | 393.2336  |
|           | 1939.904 | 18  | H | 1        | 292.1859 |                     | 292.1859  |
|           |          | 19  | K | 0        | 155.127  |                     | 155.127   |

#### general information

|                       |             |
|-----------------------|-------------|
| Annotation:           | 9 of 19     |
| AminoAcids Coverage:  | 47 %        |
| Intensity Coverage:   | 44 %        |
| Peak Coverage:        | 24 %        |
| Protein Localisation: | 103 ... 121 |

Scan number 5211 Raw file LNCAP\_Silac\_23F10\_set2\_06  
 Method ITMS; CID Peptide 127.71

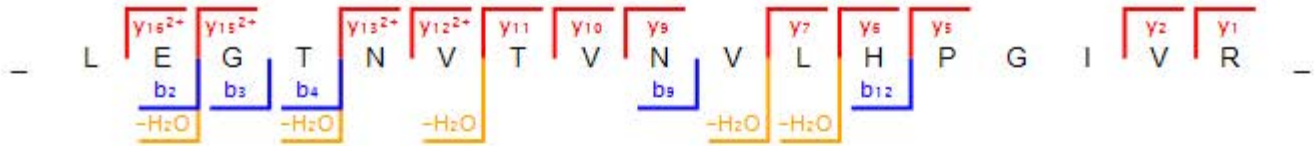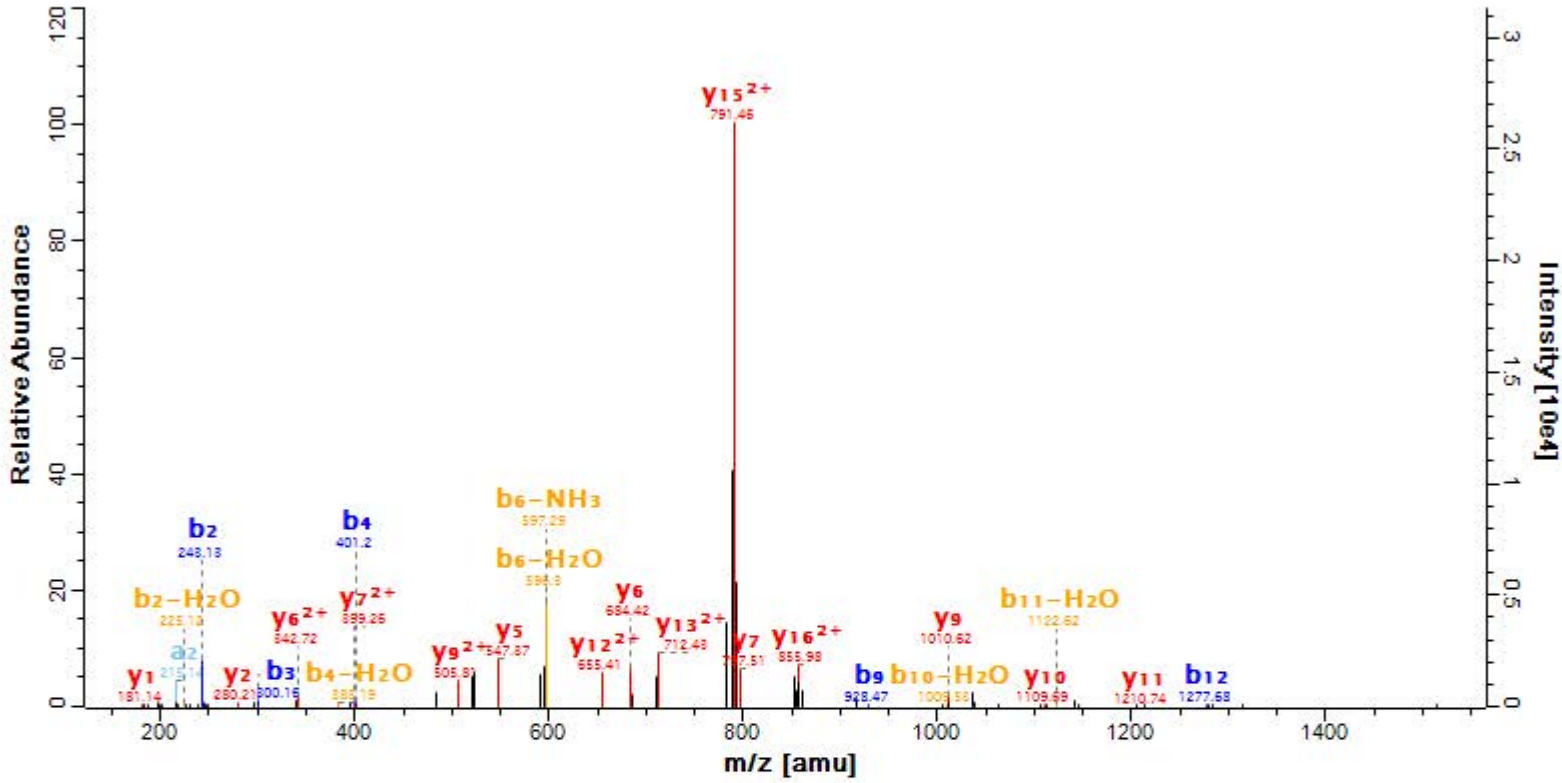

precursor information

|                   |                 |
|-------------------|-----------------|
| Mass:             | 1817.01602      |
| m/z:              | 606.67928       |
| Charge:           | 3+              |
| Retentiontime:    | 33.982402801513 |
| Score:            | 127.712         |
| Mass Error [ppm]: | 0.046904        |
| PEP:              | 3.697E-12       |
| Precursor Type:   | MULTI           |

general information

|                       |             |
|-----------------------|-------------|
| Annotation:           | 14 of 17    |
| AminoAcids Coverage:  | 82 %        |
| Intensity Coverage:   | 56 %        |
| Peak Coverage:        | 27 %        |
| Protein Localisation: | 235 ... 251 |

| a ion    |        | b ion    |        |    |     |    | y ion    |         | y <sup>2+</sup> ion |         |
|----------|--------|----------|--------|----|-----|----|----------|---------|---------------------|---------|
| Δ dalton | mass   | Δ dalton | mass   |    | seq |    | Δ dalton | mass    | Δ dalton            | mass    |
|          | 86.096 |          | 114.09 | 1  | L   | 16 |          |         |                     |         |
| +0.0366  | 215.14 | +0.0098  | 243.13 | 2  | E   | 15 | 1711     |         | 855.98              | +0.2409 |
|          | 272.16 | +0.0966  | 300.16 | 3  | G   | 14 | 1581.9   |         | 791.46              | +0.1793 |
|          | 373.21 | +0.1216  | 401.2  | 4  | T   | 13 | 1524.9   |         | 1524.9              |         |
|          | 487.25 |          | 515.25 | 5  | N   | 12 | 1423.8   |         | 712.43              | +0.2349 |
|          | 586.32 |          | 614.31 | 6  | V   | 11 | 1309.8   |         | 655.41              | +0.2393 |
|          | 687.37 |          | 715.36 | 7  | T   | 10 | 1210.7   | -0.086  | 1210.7              |         |
|          | 786.44 |          | 814.43 | 8  | V   | 9  | 1109.7   | +0.3039 | 1109.7              |         |
|          | 900.48 | -0.025   | 928.47 | 9  | N   | 8  | 1010.6   | +0.0474 | 505.81              | +0.3561 |
|          | 999.55 |          | 1027.5 | 10 | V   | 7  | 896.58   |         | 896.58              |         |
|          | 1112.6 |          | 1140.6 | 11 | L   | 6  | 797.51   | -0.03   | 399.26              | +0.1289 |
|          | 1249.7 | -0.033   | 1277.7 | 12 | H   | 5  | 684.42   | +0.0655 | 342.72              | -0.07   |
|          | 1346.7 |          | 1374.7 | 13 | P   | 4  | 547.37   | -0.003  | 547.37              |         |
|          | 1403.8 |          | 1431.8 | 14 | G   | 3  | 450.31   |         | 450.31              |         |
|          | 1516.8 |          | 1544.8 | 15 | I   | 2  | 393.29   |         | 393.29              |         |
|          | 1615.9 |          | 1643.9 | 16 | V   | 1  | 280.21   | -0.166  | 280.21              |         |
|          |        |          |        | 17 | R   | 0  | 181.14   | -0.081  | 181.14              |         |

Scan number 5352 Raw file LNCAP\_Silac\_23F10\_set2\_06  
 Method ITMS; CID Pepti... 171.21

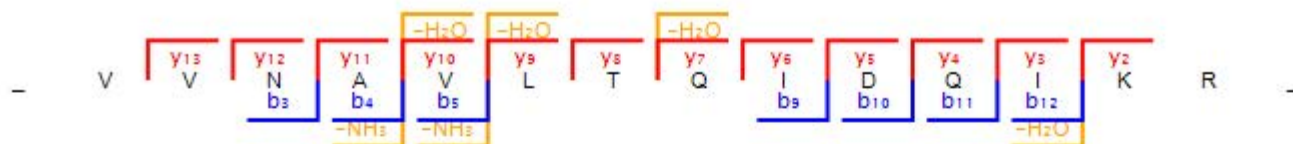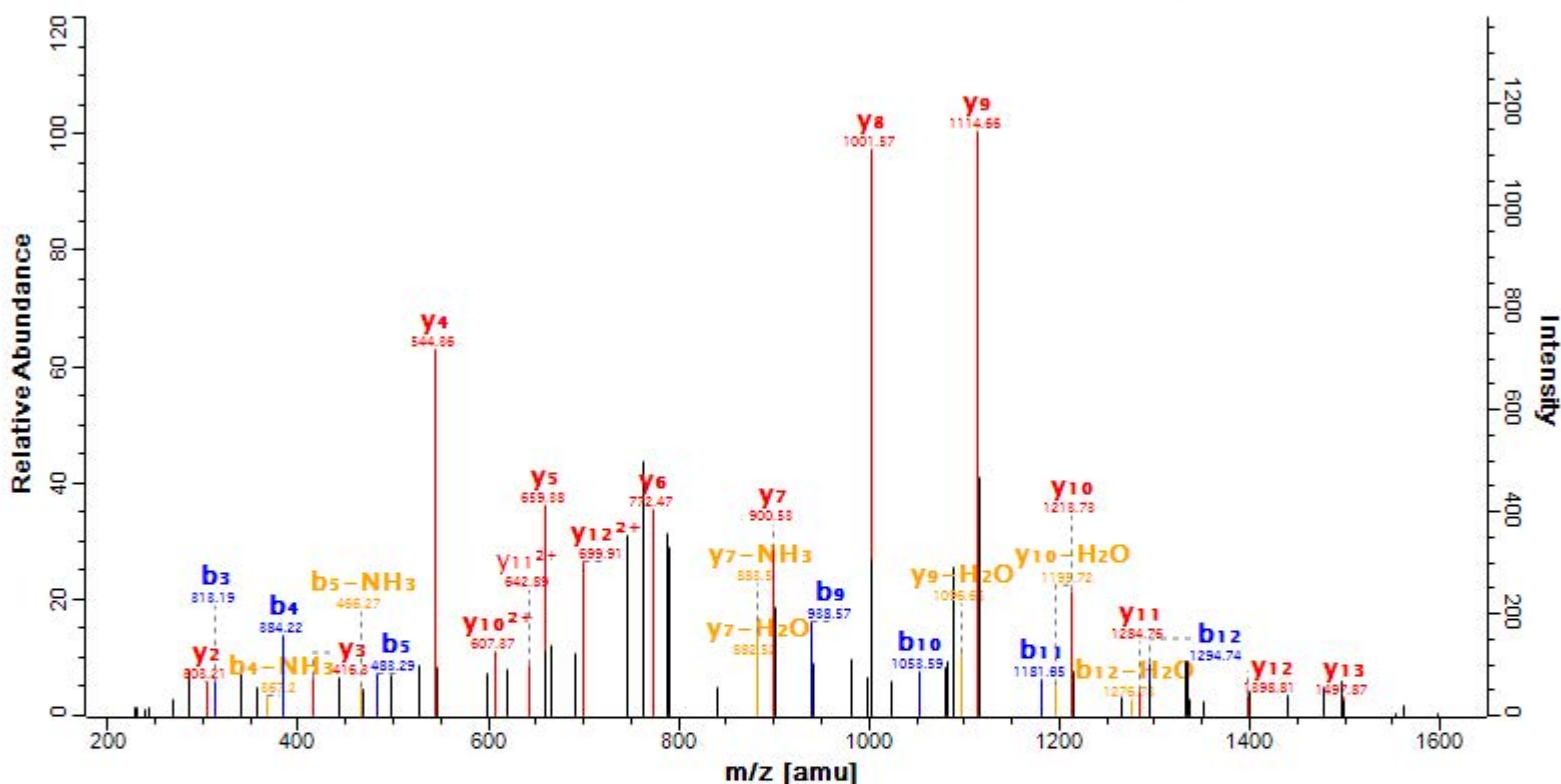

precursor information

|                   |                 |
|-------------------|-----------------|
| Mass:             | 1595.93629      |
| m/z:              | 798.97542       |
| Charge:           | 2+              |
| Retentiontime:    | 34.738822937011 |
| Score:            | 171.2105        |
| Mass Error [ppm]: | 0.25191         |
| PEP:              | 4.6767E-12      |
| Precursor Type:   | ISO             |

| b ion     |          |     |   | y ion    |          | y <sup>2+</sup> ion |          |           |
|-----------|----------|-----|---|----------|----------|---------------------|----------|-----------|
| Δ dalton  | mass     | seq |   | Δ dalton | mass     | Δ dalton            | mass     |           |
|           | 100.0757 | 1   | V | 13       |          |                     |          |           |
|           | 199.1441 | 2   | V | 12       | 1497.875 | +0.00867            | 1497.875 |           |
| +0.040385 | 313.187  | 3   | N | 11       | 1398.806 | -0.32697            | 699.9068 | +0.142509 |
| +0.068518 | 384.2241 | 4   | A | 10       | 1284.763 | -0.07164            | 642.8853 | -0.22684  |
| -0.0472   | 483.2926 | 5   | V | 9        | 1213.726 | +0.032369           | 607.3668 | +0.257481 |
|           | 596.3766 | 6   | L | 8        | 1114.658 | -0.02116            | 1114.658 |           |
|           | 697.4243 | 7   | T | 7        | 1001.574 | -0.02914            | 1001.574 |           |
|           | 825.4829 | 8   | Q | 6        | 900.5261 | -0.01644            | 900.5261 |           |
| -0.09526  | 938.5669 | 9   | I | 5        | 772.4676 | +0.072903           | 772.4676 |           |
| +0.143174 | 1053.594 | 10  | D | 4        | 659.3835 | -0.01497            | 659.3835 |           |
| -0.45788  | 1181.652 | 11  | Q | 3        | 544.3566 | +0.027477           | 544.3566 |           |
| -0.15328  | 1294.737 | 12  | I | 2        | 416.298  | +0.158503           | 416.298  |           |
|           | 1422.831 | 13  | K | 1        | 303.2139 | +0.156416           | 303.2139 |           |
|           |          | 14  | R | 0        | 175.119  |                     | 175.119  |           |

general information

|                       |             |
|-----------------------|-------------|
| Annotation:           | 12 of 14    |
| AminoAcids Coverage:  | 86 %        |
| Intensity Coverage:   | 54 %        |
| Peak Coverage:        | 35 %        |
| Protein Localisation: | 276 ... 289 |

Scan number 567 Raw file LNCAP\_Silac\_23F10\_set2\_06  
 Method ITMS: CID Pepti... 141.08

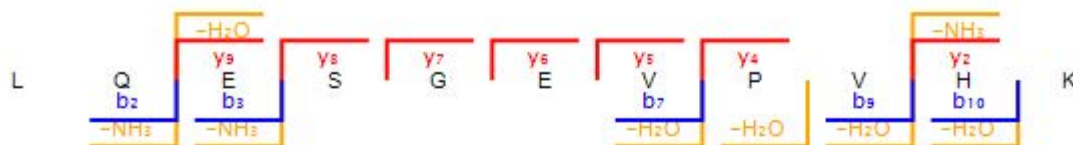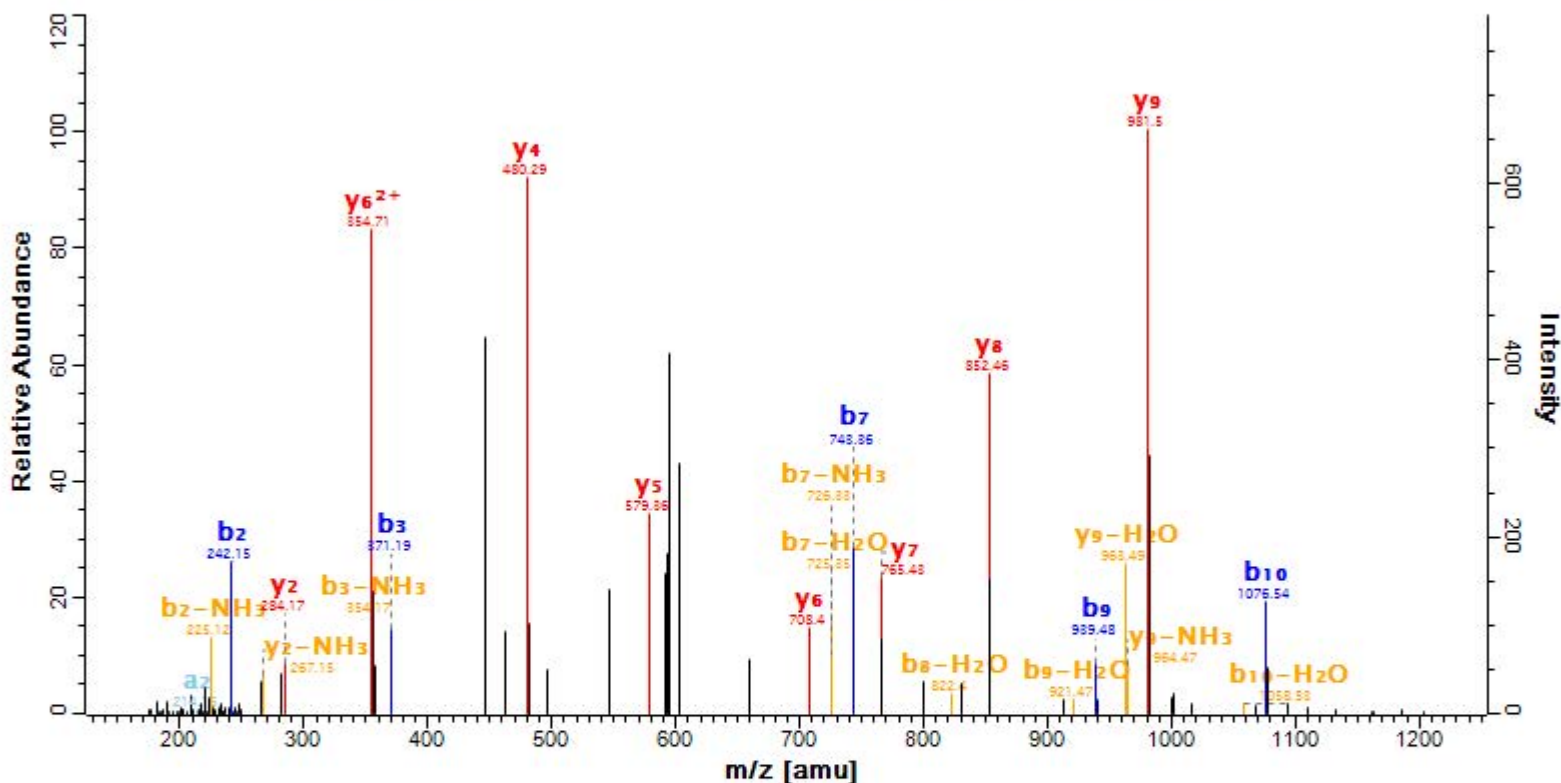

#### precursor information

|                   |                 |
|-------------------|-----------------|
| Mass:             | 1221.63536      |
| m/z:              | 611.82496       |
| Charge:           | 2+              |
| Retentiontime:    | 8.3789520263671 |
| Score:            | 141.0841        |
| Mass Error [ppm]: | 0.0073032       |
| PEP:              | 0.00011982      |
| Precursor Type:   | MULTI           |

#### general information

|                       |           |
|-----------------------|-----------|
| Annotation:           | 9 of 11   |
| AminoAcids Coverage:  | 82 %      |
| Intensity Coverage:   | 53 %      |
| Peak Coverage:        | 23 %      |
| Protein Localisation: | 39 ... 49 |

| a ion    |        | b ion    |        |    |     |          | y ion  |          | y <sup>2+</sup> ion |  |
|----------|--------|----------|--------|----|-----|----------|--------|----------|---------------------|--|
| Δ dalton | mass   | Δ dalton | mass   |    | seq | Δ dalton | mass   | Δ dalton | mass                |  |
|          | 86.096 |          | 114.09 | 1  | L   | 10       |        |          |                     |  |
| +0.1034  | 214.16 | -0.01    | 242.15 | 2  | Q   | 9        | 1109.6 |          | 1109.6              |  |
|          | 343.2  | +0.0084  | 371.19 | 3  | E   | 8        | 981.5  | +0.0059  | 981.5               |  |
|          | 430.23 |          | 458.22 | 4  | S   | 7        | 852.46 | -0.019   | 852.46              |  |
|          | 487.25 |          | 515.25 | 5  | G   | 6        | 765.43 | -0.077   | 765.43              |  |
|          | 616.29 |          | 644.29 | 6  | E   | 5        | 708.4  | +0.0396  | 354.71              |  |
|          | 715.36 | +0.0171  | 743.36 | 7  | V   | 4        | 579.36 | +0.1118  | 579.36              |  |
|          | 812.41 |          | 840.41 | 8  | P   | 3        | 480.29 | +0.0386  | 480.29              |  |
|          | 911.48 | +0.0291  | 939.48 | 9  | V   | 2        | 383.24 |          | 383.24              |  |
|          | 1048.5 | -0.078   | 1076.5 | 10 | H   | 1        | 284.17 | +0.1405  | 284.17              |  |
|          |        |          |        | 11 | K   | 0        | 147.11 |          | 147.11              |  |

Scan number 5746 Raw file LNCAP\_Silac\_23F10\_set2\_06  
 Method ITMS: CID Pepti... 248.05

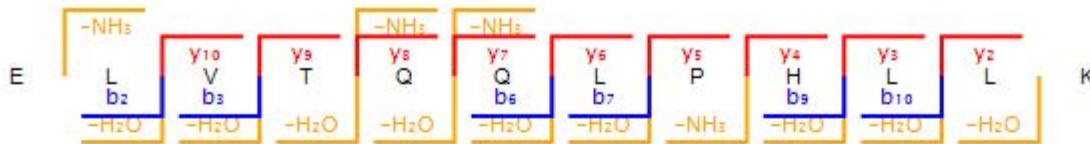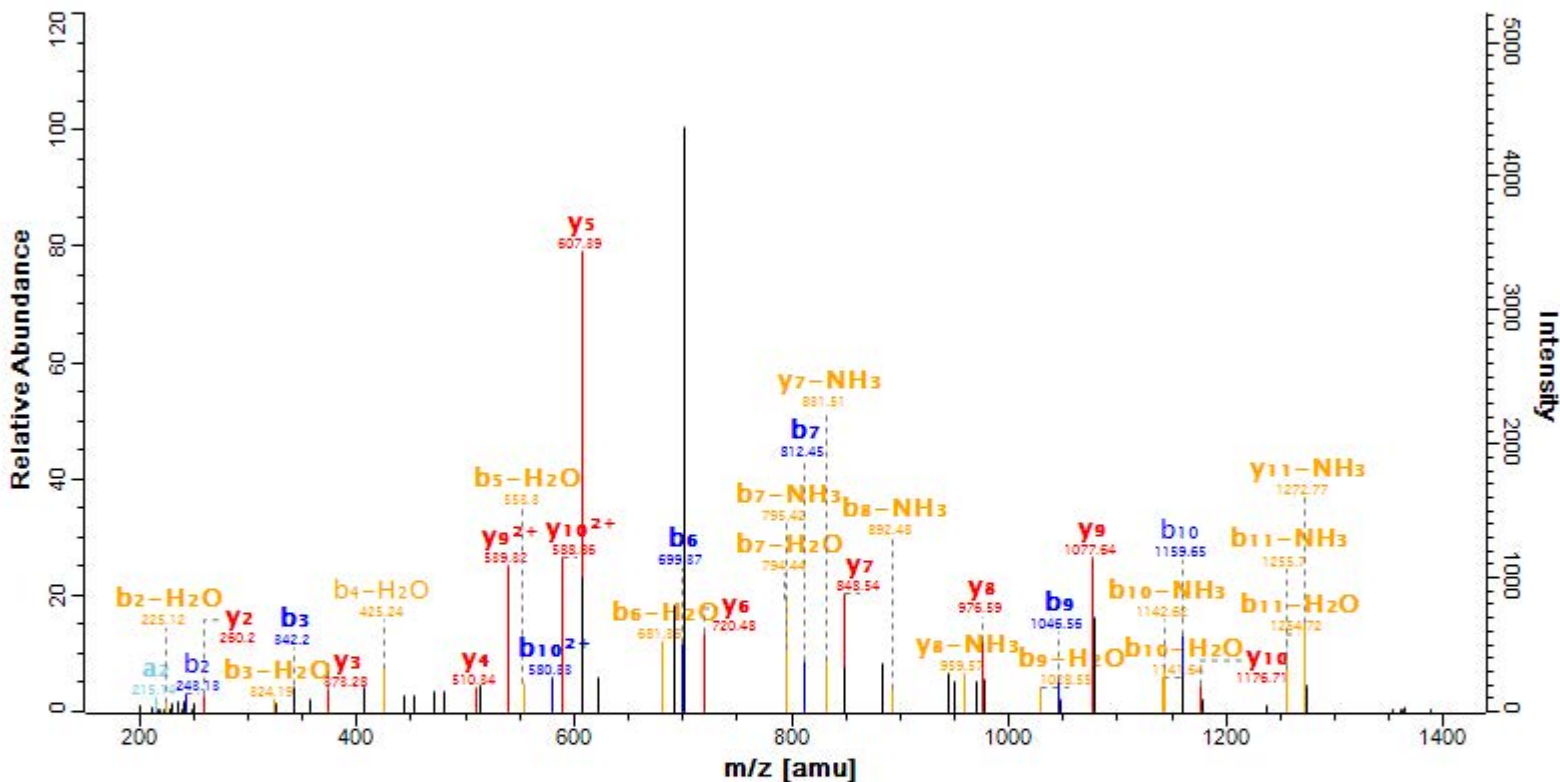

#### precursor information

|                   |                 |
|-------------------|-----------------|
| Mass:             | 1417.82892      |
| m/z:              | 709.92174       |
| Charge:           | 2+              |
| Retention time:   | 36.838928222656 |
| Score:            | 248.0509        |
| Mass Error [ppm]: | -0.26855        |
| PEP:              | 1.0663E-47      |
| Precursor Type:   | ISO             |

#### general information

|                       |           |
|-----------------------|-----------|
| Annotation:           | 10 of 12  |
| AminoAcids Coverage:  | 83 %      |
| Intensity Coverage:   | 59 %      |
| Peak Coverage:        | 38 %      |
| Protein Localisation: | 40 ... 51 |

|       | a ion         | b <sup>2+</sup> ion | b ion         |     |   |               | y ion         | y <sup>2+</sup> ion |
|-------|---------------|---------------------|---------------|-----|---|---------------|---------------|---------------------|
|       | Δ dalton mass | Δ dalton mass       | Δ dalton mass | seq |   | Δ dalton mass | Δ dalton mass |                     |
|       | 102.1         | 130                 | 130           | 1   | E | 11            |               |                     |
| -0.09 | 215.1         | 243.1               | +0 243.1      | 2   | L | 10            | 1290          | 1290                |
|       | 314.2         | 342.2               | -0.04 342.2   | 3   | V | 9             | 1177          | -0.02 588.9         |
|       | 415.3         | 443.3               | 443.3         | 4   | T | 8             | 1078          | -0.05 539.3         |
|       | 543.3         | 571.3               | 571.3         | 5   | Q | 7             | 976.6         | -0.04 976.6         |
|       | 671.4         | 699.4               | +0.23 699.4   | 6   | Q | 6             | 848.5         | +0.02 848.5         |
|       | 784.5         | 812.5               | +0.08 812.5   | 7   | L | 5             | 720.5         | +0.10 720.5         |
|       | 881.5         | 909.5               | 909.5         | 8   | P | 4             | 607.4         | +0.01 607.4         |
|       | 1019          | 1047                | -0.08 1047    | 9   | H | 3             | 510.3         | +0.10 510.3         |
|       | 1132          | +0.20 580.3         | -0.04 1160    | 10  | L | 2             | 373.3         | +0.12 373.3         |
|       | 1245          | 1273                | 1273          | 11  | L | 1             | 260.2         | +0.08 260.2         |
|       |               |                     |               | 12  | K | 0             | 147.1         | 147.1               |

Scan number 5835 Raw file LNCAP\_Silac\_23F10\_set2\_06  
 Method ITMS; CID Pepti... 244.52

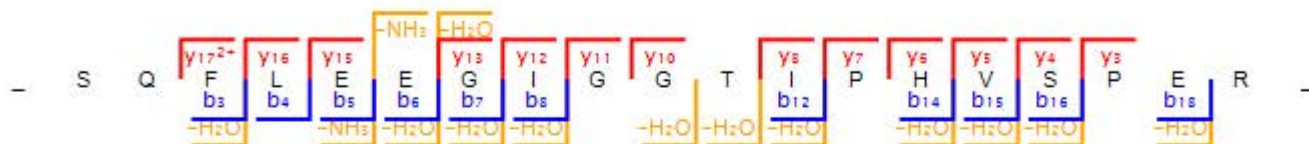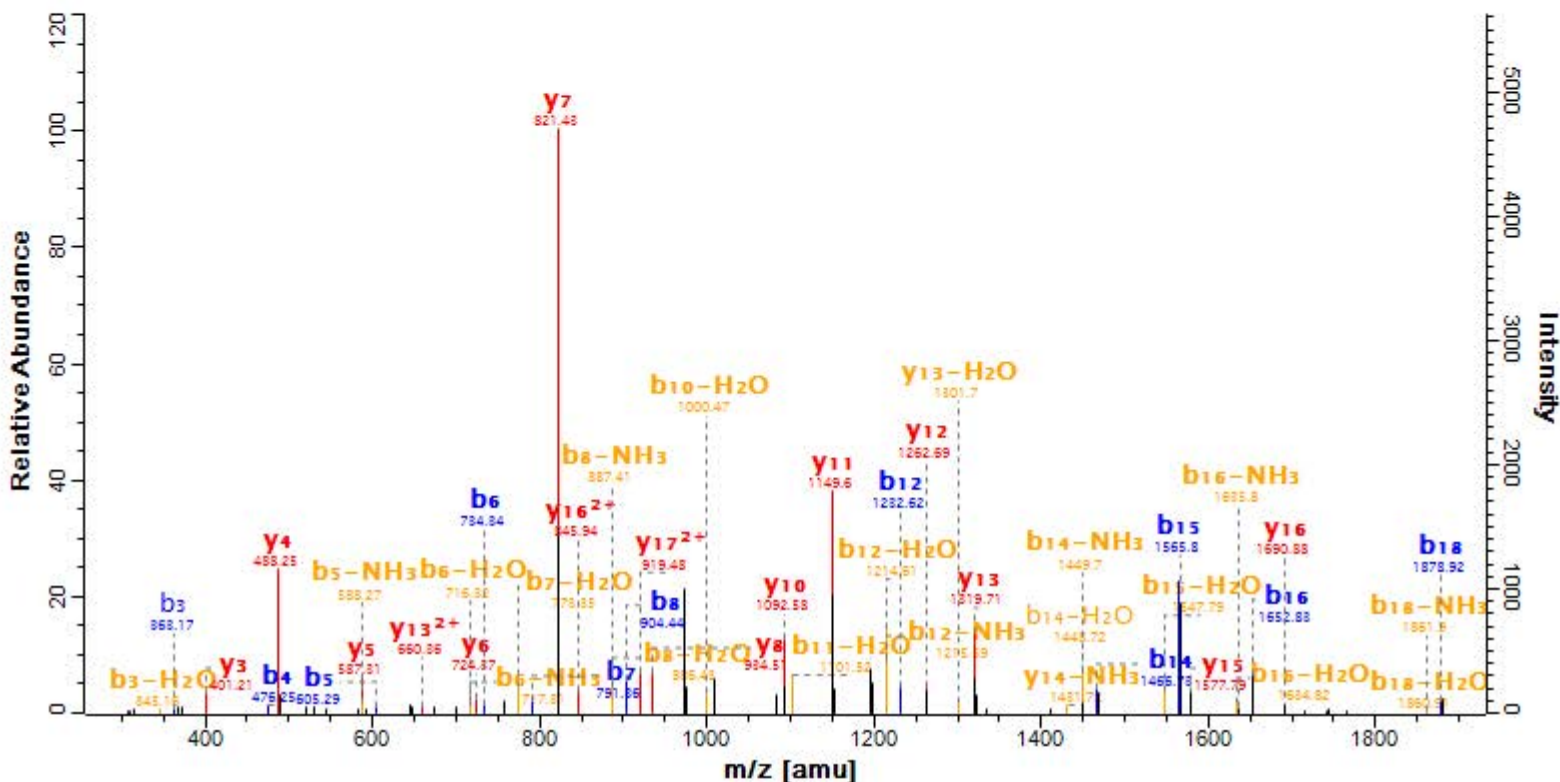

#### precursor information

|                   |                 |
|-------------------|-----------------|
| Mass:             | 2052.02703      |
| m/z:              | 1027.02079      |
| Charge:           | 2+              |
| Retentiontime:    | 37.314022064209 |
| Score:            | 244.5194        |
| Mass Error [ppm]: | -0.28701        |
| PEP:              | 6.4383E-66      |
| Precursor Type:   | MULTI           |

#### general information

|                       |             |
|-----------------------|-------------|
| Annotation:           | 16 of 19    |
| AminoAcids Coverage:  | 84 %        |
| Intensity Coverage:   | 62 %        |
| Peak Coverage:        | 46 %        |
| Protein Localisation: | 468 ... 486 |

| b ion     |          |    |     |    | y ion    |           | y <sup>2+</sup> ion |           |
|-----------|----------|----|-----|----|----------|-----------|---------------------|-----------|
| Δ dalton  | mass     |    | seq |    | Δ dalton | mass      | Δ dalton            | mass      |
|           | 88.0393  | 1  | S   | 18 |          |           |                     |           |
|           | 216.0979 | 2  | Q   | 17 | 1966.003 |           | 1966.003            |           |
| +0.006494 | 363.1663 | 3  | F   | 16 | 1837.944 |           | 919.4758            | +0.320238 |
| -0.04635  | 476.2504 | 4  | L   | 15 | 1690.876 | +0.014506 | 845.9416            | +0.304762 |
| -0.06212  | 605.293  | 5  | E   | 14 | 1577.792 | -0.04901  | 1577.792            |           |
| -0.02518  | 734.3355 | 6  | E   | 13 | 1448.749 |           | 1448.749            |           |
| -0.01717  | 791.357  | 7  | G   | 12 | 1319.707 | -0.07955  | 660.357             | +0.145491 |
| +0.021572 | 904.4411 | 8  | I   | 11 | 1262.685 | -0.00206  | 1262.685            |           |
|           | 961.4625 | 9  | G   | 10 | 1149.601 | +0.049294 | 1149.601            |           |
|           | 1018.484 | 10 | G   | 9  | 1092.58  | -0.07841  | 1092.58             |           |
|           | 1119.532 | 11 | T   | 8  | 1035.558 |           | 1035.558            |           |
| +0.034769 | 1232.616 | 12 | I   | 7  | 934.5105 | +0.135993 | 934.5105            |           |
|           | 1329.669 | 13 | P   | 6  | 821.4264 | +0.046473 | 821.4264            |           |
| -0.03553  | 1466.727 | 14 | H   | 5  | 724.3737 | +0.11828  | 724.3737            |           |
| -0.0711   | 1565.796 | 15 | V   | 4  | 587.3148 | +0.079902 | 587.3148            |           |
| -0.00132  | 1652.828 | 16 | S   | 3  | 488.2463 | +0.036133 | 488.2463            |           |
|           | 1749.881 | 17 | P   | 2  | 401.2143 | +0.006272 | 401.2143            |           |
| -0.1106   | 1878.923 | 18 | E   | 1  | 304.1615 |           | 304.1615            |           |
|           |          | 19 | R   | 0  | 175.119  |           | 175.119             |           |



Scan number 5927 Raw file LNCAP\_Silac\_23F10\_set2\_06  
 Method ITMS; CID Pepti... 79.81

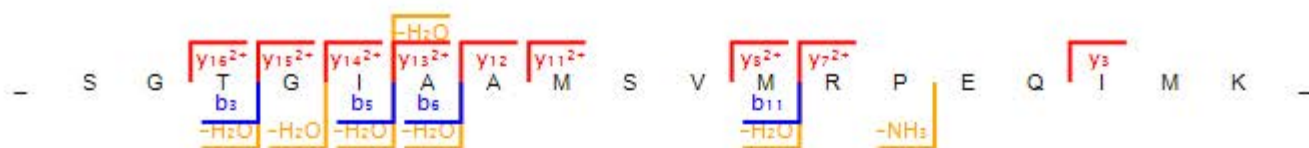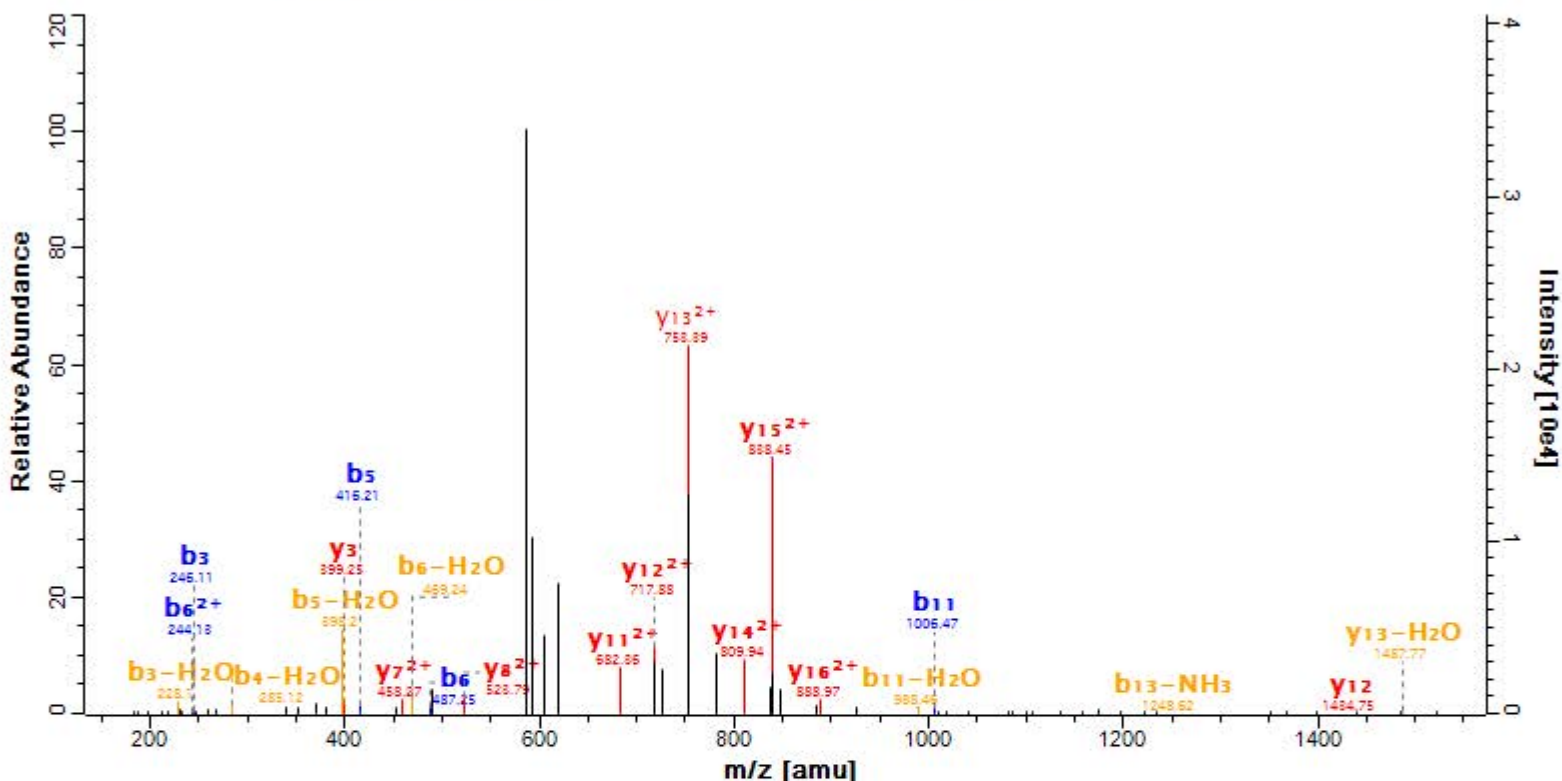

precursor information

|                   |                 |
|-------------------|-----------------|
| Mass:             | 1905.94687      |
| m/z:              | 636.3229        |
| Charge:           | 3+              |
| Retentiontime:    | 37.812095642089 |
| Score:            | 79.81033        |
| Mass Error [ppm]: | -0.30509        |
| PEP:              | 0.00014455      |
| Precursor Type:   | MULTI           |

general information

|                       |           |
|-----------------------|-----------|
| Annotation:           | 10 of 18  |
| AminoAcids Coverage:  | 56 %      |
| Intensity Coverage:   | 37 %      |
| Peak Coverage:        | 27 %      |
| Protein Localisation: | 37 ... 54 |

| b <sup>2+</sup> ion |        | b ion    |        |    |     |    | y ion    |        | y <sup>2+</sup> ion |         |
|---------------------|--------|----------|--------|----|-----|----|----------|--------|---------------------|---------|
| Δ dalton            | mass   | Δ dalton | mass   |    | seq |    | Δ dalton | mass   | Δ dalton            | mass    |
|                     | 88.039 |          | 88.039 | 1  | S   | 17 |          |        |                     |         |
|                     | 145.06 |          | 145.06 | 2  | G   | 16 | 1834     |        | 1834                |         |
|                     | 246.11 | +0.0238  | 246.11 | 3  | T   | 15 | 1776.9   |        | 888.97              | +0.3521 |
|                     | 303.13 |          | 303.13 | 4  | G   | 14 | 1675.9   |        | 838.45              | +0.1621 |
|                     | 416.21 | -0.025   | 416.21 | 5  | I   | 13 | 1618.9   |        | 809.94              | +0.1483 |
| -0.072              | 244.13 | +0.2487  | 487.25 | 6  | A   | 12 | 1505.8   |        | 753.39              | -0.005  |
|                     | 558.29 |          | 558.29 | 7  | A   | 11 | 1434.7   | -0.325 | 717.88              | +0.1664 |
|                     | 689.33 |          | 689.33 | 8  | M   | 10 | 1363.7   |        | 682.36              | +0.1687 |
|                     | 776.36 |          | 776.36 | 9  | S   | 9  | 1232.7   |        | 1232.7              |         |
|                     | 875.43 |          | 875.43 | 10 | V   | 8  | 1145.6   |        | 1145.6              |         |
|                     | 1006.5 | -0.091   | 1006.5 | 11 | M   | 7  | 1046.6   |        | 523.79              | -0.046  |
|                     | 1168.6 |          | 1168.6 | 12 | R   | 6  | 915.53   |        | 458.27              | -0.024  |
|                     | 1265.6 |          | 1265.6 | 13 | P   | 5  | 753.41   |        | 753.41              |         |
|                     | 1394.7 |          | 1394.7 | 14 | E   | 4  | 656.35   |        | 656.35              |         |
|                     | 1522.7 |          | 1522.7 | 15 | Q   | 3  | 527.31   |        | 527.31              |         |
|                     | 1635.8 |          | 1635.8 | 16 | I   | 2  | 399.25   | +0.058 | 399.25              |         |
|                     | 1766.9 |          | 1766.9 | 17 | M   | 1  | 286.17   |        | 286.17              |         |
|                     |        |          |        | 18 | K   | 0  | 155.13   |        | 155.13              |         |

Scan number 5993 Raw file LNCAP\_Silac\_23F10\_set2\_06  
 Method ITMS; CID Pepti... 60.4

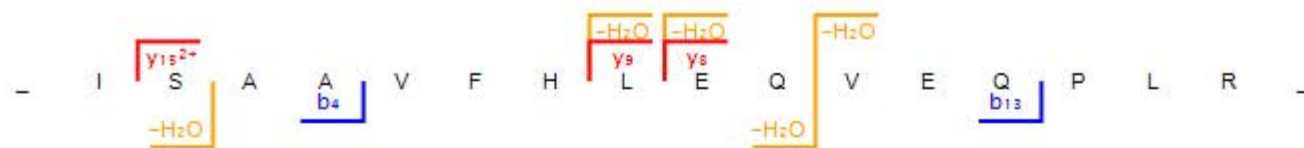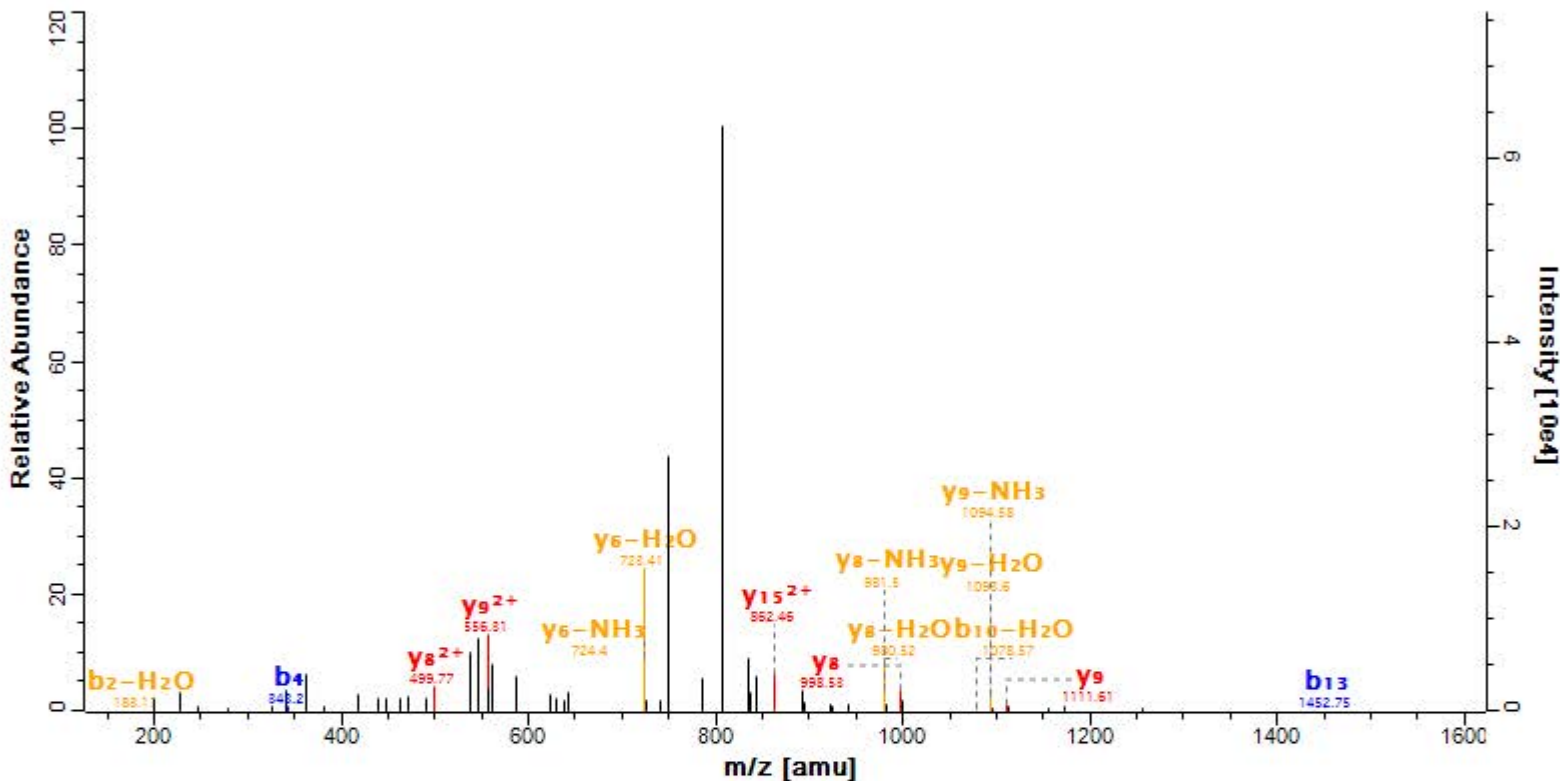

**precursor information**

|                   |                 |
|-------------------|-----------------|
| Mass:             | 1835.98991      |
| m/z:              | 613.00391       |
| Charge:           | 3+              |
| Retentiontime:    | 38.176208496093 |
| Score:            | 60.40071        |
| Mass Error [ppm]: | 0.28675         |
| PEP:              | 0.0029715       |
| Precursor Type:   | MULTI           |

**general information**

|                       |               |
|-----------------------|---------------|
| Annotation:           | 7 of 16       |
| AminoAcids Coverag    | 44 %          |
| Intensity Coverage:   | 23 %          |
| Peak Coverage:        | 16 %          |
| Protein Localisation: | 3454 ... 3469 |

| b ion     |          |    |     |    | y ion    |          | y <sup>2+</sup> ion |           |
|-----------|----------|----|-----|----|----------|----------|---------------------|-----------|
| Δ dalton  | mass     |    | seq |    | Δ dalton | mass     | Δ dalton            | mass      |
|           | 114.0913 | 1  | I   | 15 |          |          |                     |           |
|           | 201.1234 | 2  | S   | 14 | 1723.913 |          | 862.4599            | +0.297572 |
|           | 272.1605 | 3  | A   | 13 | 1636.881 |          | 1636.881            |           |
| +0.202428 | 343.1976 | 4  | A   | 12 | 1565.843 |          | 1565.843            |           |
|           | 442.266  | 5  | V   | 11 | 1494.806 |          | 1494.806            |           |
|           | 589.3344 | 6  | F   | 10 | 1395.738 |          | 1395.738            |           |
|           | 726.3933 | 7  | H   | 9  | 1248.67  |          | 1248.67             |           |
|           | 839.4774 | 8  | L   | 8  | 1111.611 | -0.10413 | 556.3089            | +0.132407 |
|           | 968.52   | 9  | E   | 7  | 998.5265 | -0.14543 | 499.7669            | -0.25757  |
|           | 1096.579 | 10 | Q   | 6  | 869.4839 |          | 869.4839            |           |
|           | 1195.647 | 11 | V   | 5  | 741.4254 |          | 741.4254            |           |
|           | 1324.69  | 12 | E   | 4  | 642.357  |          | 642.357             |           |
| -0.04393  | 1452.748 | 13 | Q   | 3  | 513.3144 |          | 513.3144            |           |
|           | 1549.801 | 14 | P   | 2  | 385.2558 |          | 385.2558            |           |
|           | 1662.885 | 15 | L   | 1  | 288.203  |          | 288.203             |           |
|           |          | 16 | R   | 0  | 175.119  |          | 175.119             |           |

Scan number 6224 Raw file LNCAP\_Silac\_23F10\_set2\_06  
 Method ITMS; CID Pepti... 70.44

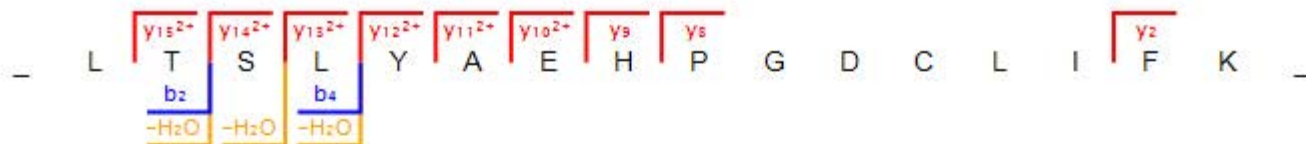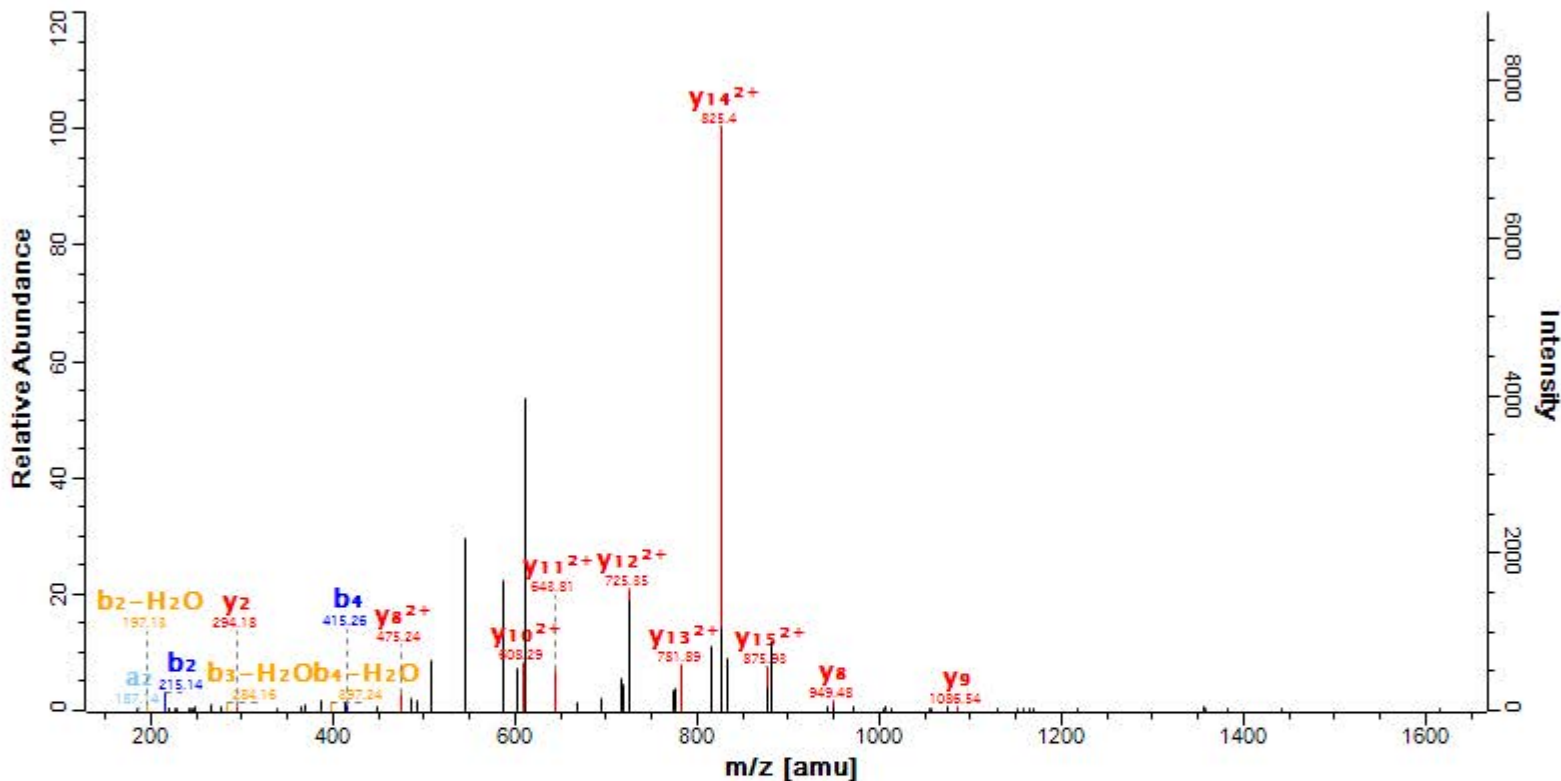

**precursor information**

|                   |                 |
|-------------------|-----------------|
| Mass:             | 1862.92442      |
| m/z:              | 621.98208       |
| Charge:           | 3+              |
| Retentiontime:    | 39.497760772705 |
| Score:            | 70.43787        |
| Mass Error [ppm]: | 0.39976         |
| PEP:              | 0.00054339      |
| Precursor Type:   | MULTI           |

**general information**

|                       |             |
|-----------------------|-------------|
| Annotation:           | 9 of 16     |
| AminoAcids Coverage:  | 56 %        |
| Intensity Coverage:   | 39 %        |
| Peak Coverage:        | 14 %        |
| Protein Localisation: | 651 ... 666 |

| a ion    |        | b ion    |        |    |     |    | y ion    |         | y <sup>2+</sup> ion |         |
|----------|--------|----------|--------|----|-----|----|----------|---------|---------------------|---------|
| Δ dalton | mass   | Δ dalton | mass   |    | seq |    | Δ dalton | mass    | Δ dalton            | mass    |
|          | 86.096 |          | 114.09 | 1  | L   | 15 |          |         |                     |         |
| +0.0792  | 187.14 | +0.0425  | 215.14 | 2  | T   | 14 | 1750.8   |         | 875.93              | +0.1925 |
|          | 274.18 |          | 302.17 | 3  | S   | 13 | 1649.8   |         | 825.4               | +0.2187 |
|          | 387.26 | +0.175   | 415.26 | 4  | L   | 12 | 1562.8   |         | 781.89              | +0.3325 |
|          | 550.32 |          | 578.32 | 5  | Y   | 11 | 1449.7   |         | 725.35              | +0.0272 |
|          | 621.36 |          | 649.36 | 6  | A   | 10 | 1286.6   |         | 643.81              | +0.1191 |
|          | 750.4  |          | 778.4  | 7  | E   | 9  | 1215.6   |         | 608.29              | +0.3745 |
|          | 887.46 |          | 915.46 | 8  | H   | 8  | 1086.5   | +0.3322 | 1086.5              |         |
|          | 984.51 |          | 1012.5 | 9  | P   | 7  | 949.48   | +0.0843 | 475.24              | +0.0232 |
|          | 1041.5 |          | 1069.5 | 10 | G   | 6  | 852.43   |         | 852.43              |         |
|          | 1156.6 |          | 1184.6 | 11 | D   | 5  | 795.41   |         | 795.41              |         |
|          | 1316.6 |          | 1344.6 | 12 | C   | 4  | 680.38   |         | 680.38              |         |
|          | 1429.7 |          | 1457.7 | 13 | L   | 3  | 520.35   |         | 520.35              |         |
|          | 1542.8 |          | 1570.8 | 14 | I   | 2  | 407.27   |         | 407.27              |         |
|          | 1689.8 |          | 1717.8 | 15 | F   | 1  | 294.18   | -0.012  | 294.18              |         |
|          |        |          |        | 16 | K   | 0  | 147.11   |         | 147.11              |         |

Scan number 6473 Raw file LNCAP\_Silac\_23F10\_set2\_06  
 Method ITMS: CID Pepti... 117.2

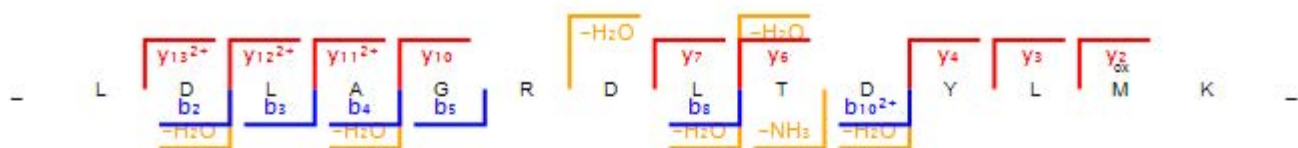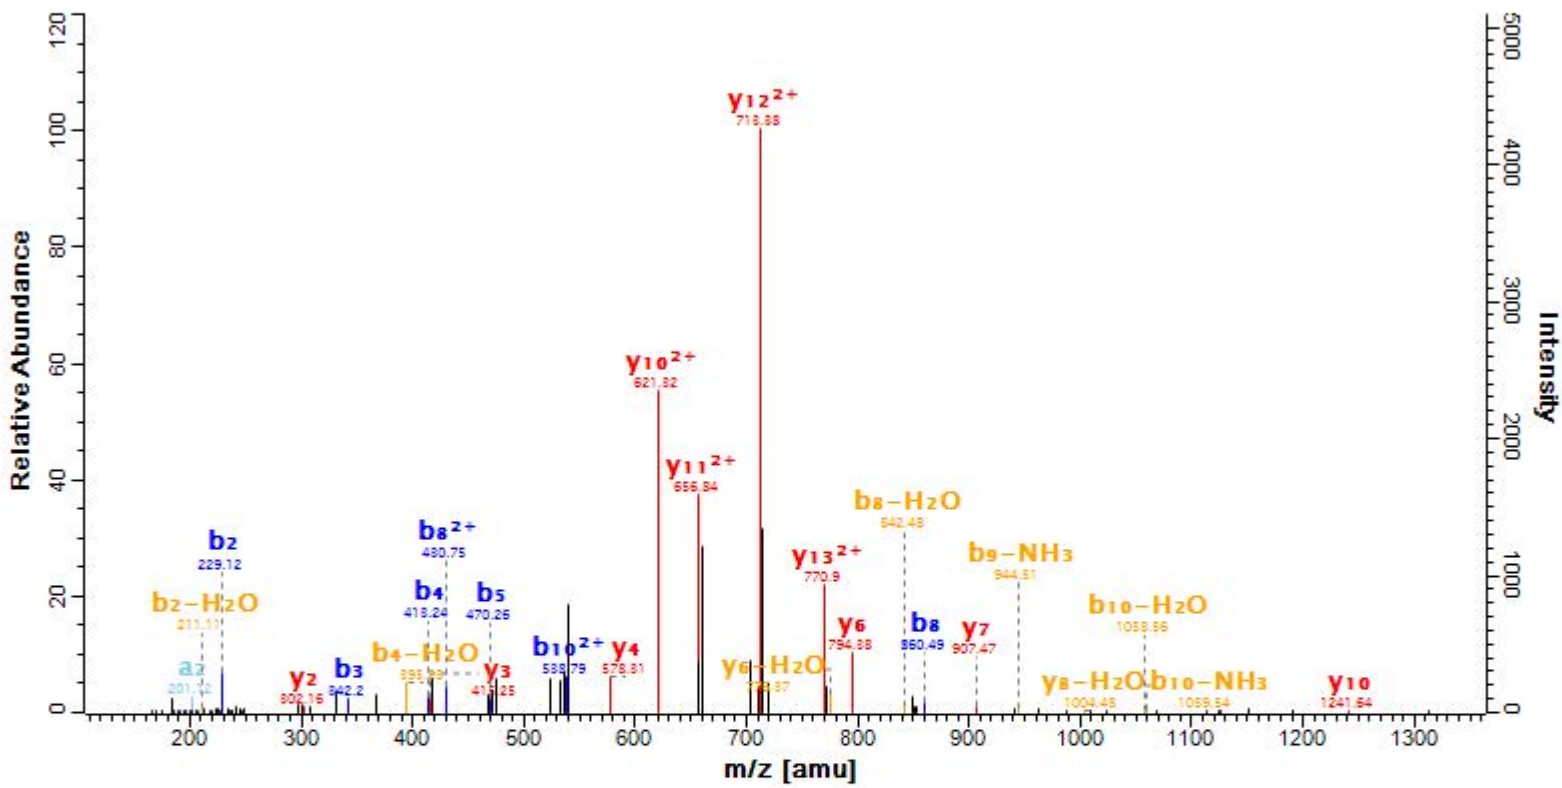

precursor information

|                   |                 |
|-------------------|-----------------|
| Mass:             | 1638.82863      |
| m/z:              | 547.28349       |
| Charge:           | 3+              |
| Retentiontime:    | 40.885448455810 |
| Score:            | 117.2           |
| Mass Error [ppm]: | -0.048372       |
| PEP:              | 3.0564E-06      |
| Precursor Type:   | MULTI           |

general information

|                       |             |
|-----------------------|-------------|
| Annotation:           | 11 of 14    |
| AminoAcids Coverage:  | 79 %        |
| Intensity Coverage:   | 59 %        |
| Peak Coverage:        | 23 %        |
| Protein Localisation: | 178 ... 191 |

|       | a ion         | b <sup>2+</sup> ion | b ion         |     |   |               | y ion         | y <sup>2+</sup> ion |
|-------|---------------|---------------------|---------------|-----|---|---------------|---------------|---------------------|
|       | Δ dalton mass | Δ dalton mass       | Δ dalton mass | seq |   | Δ dalton mass | Δ dalton mass |                     |
|       | 86.1          | 114.1               | 114.1         | 1   | L | 13            |               |                     |
| -0.01 | 201.1         | 229.1               | -0.13 229.1   | 2   | D | 12            | 1541          | 770.9 +0.01         |
|       | 314.2         | 342.2               | -0.07 342.2   | 3   | L | 11            | 1426          | 713.4 -0.04         |
|       | 385.2         | 413.2               | +0.086 413.2  | 4   | A | 10            | 1313          | 656.8 -0.03         |
|       | 442.3         | 470.3               | -0.22 470.3   | 5   | G | 9             | 1242          | +0.28 721.3 +0.13   |
|       | 604.4         | 632.4               |               | 6   | R | 8             | 1185          | 1185                |
|       | 719.4         | 747.4               |               | 7   | D | 7             | 1022          | 1022                |
|       | 832.5         | -0.05 430.8         | +0.082 2860.5 | 8   | L | 6             | 907.5         | +0.079 907.5        |
|       | 933.5         | 961.5               |               | 9   | T | 5             | 794.4         | -0.01 794.4         |
|       | 1049          | -0.07 538.8         |               | 10  | D | 4             | 693.3         | 693.3               |
|       | 1212          | 1240                |               | 11  | Y | 3             | 578.3         | +0.00 578.3         |
|       | 1325          | 1353                |               | 12  | L | 2             | 415.2         | +0.049 415.2        |
|       | 1472          | 1500                |               | 13  | M | 1             | 302.2         | +0 302.2            |
|       |               |                     |               | 14  | K | 0             | 155.1         | 155.1               |

Scan number 6820 Raw file LNCAP\_Silac\_23F10\_set2\_06  
 Method ITMS: CID Pepti... 107.24

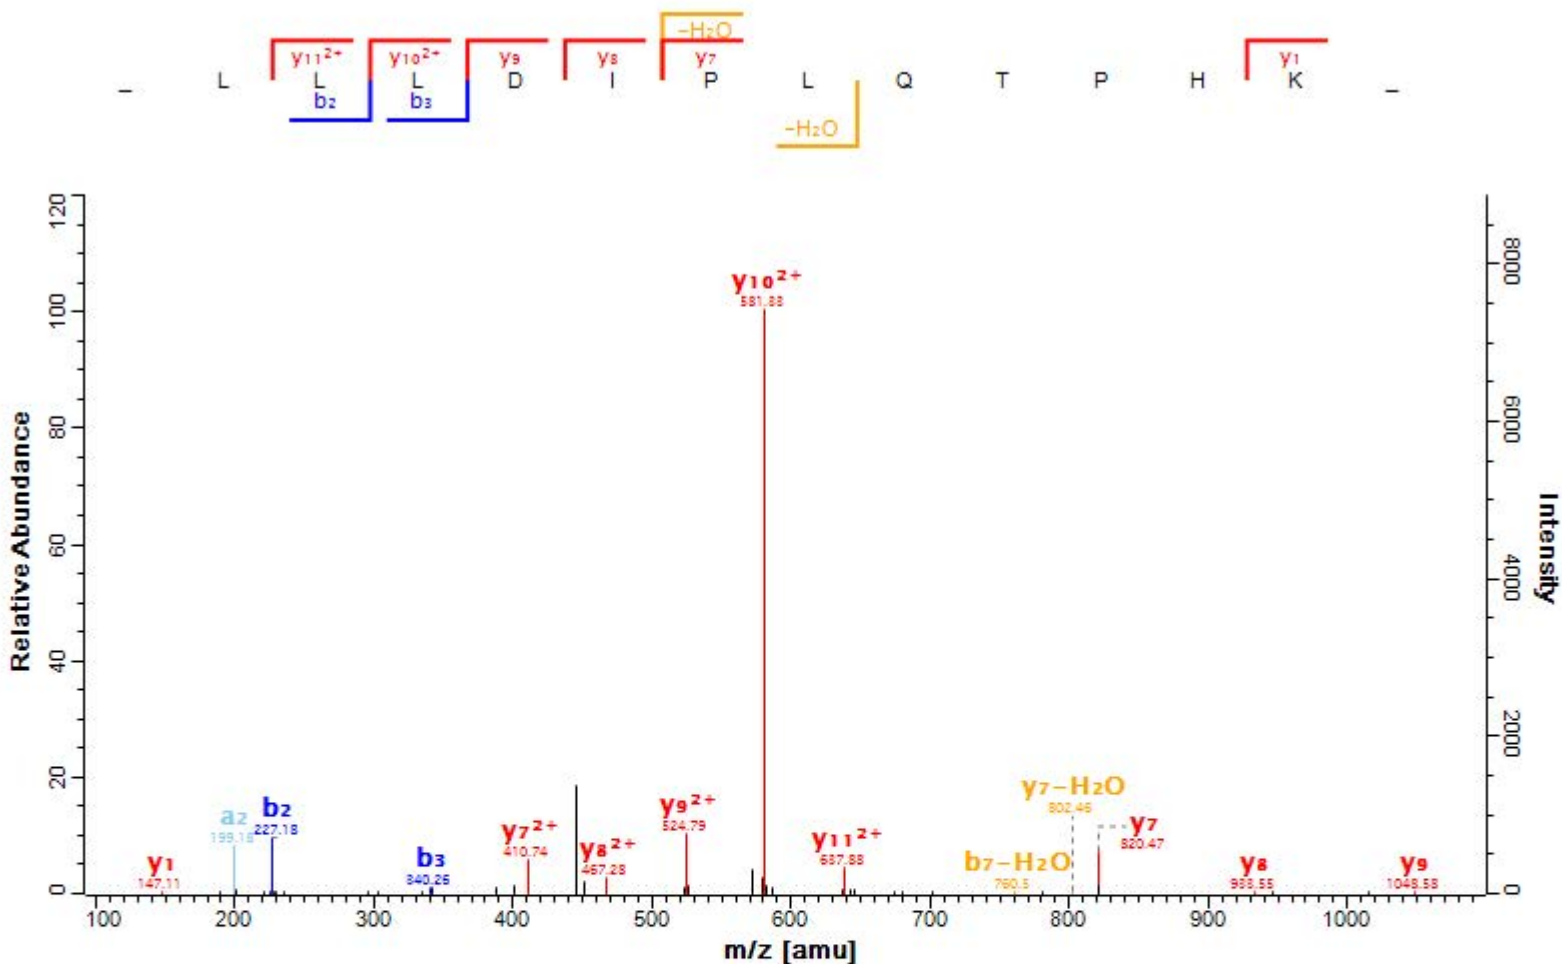

#### precursor information

|                   |                 |
|-------------------|-----------------|
| Mass:             | 1386.82384      |
| m/z:              | 463.28189       |
| Charge:           | 3+              |
| Retentiontime:    | 42.831897735595 |
| Score:            | 107.244         |
| Mass Error [ppm]: | 0.2583          |
| PEP:              | 6.1053E-05      |
| Precursor Type:   | MULTI           |

#### general information

|                       |               |
|-----------------------|---------------|
| Annotation:           | 7 of 12       |
| AminoAcids Coverage:  | 58 %          |
| Intensity Coverage:   | 75 %          |
| Peak Coverage:        | 18 %          |
| Protein Localisation: | 2145 ... 2156 |

| a ion    |        | b ion    |        | seq |   |    | y ion    |         | y <sup>2+</sup> ion |         |
|----------|--------|----------|--------|-----|---|----|----------|---------|---------------------|---------|
| Δ dalton | mass   | Δ dalton | mass   |     |   |    | Δ dalton | mass    | Δ dalton            | mass    |
|          | 86.096 |          | 114.09 | 1   | L | 11 |          |         |                     |         |
| -0.067   | 199.18 | -0.144   | 227.18 | 2   | L | 10 | 1274.7   |         | 637.88              | +0.2321 |
|          | 312.26 | -0.033   | 340.26 | 3   | L | 9  | 1161.7   |         | 581.33              | +0.0803 |
|          | 427.29 |          | 455.29 | 4   | D | 8  | 1048.6   | +0.2387 | 524.79              | -0.007  |
|          | 540.38 |          | 568.37 | 5   | I | 7  | 933.55   | -0.06   | 467.28              | +0.1587 |
|          | 637.43 |          | 665.42 | 6   | P | 6  | 820.47   | -0.018  | 410.74              | +0.1803 |
|          | 750.51 |          | 778.51 | 7   | L | 5  | 723.41   |         | 723.41              |         |
|          | 878.57 |          | 906.57 | 8   | Q | 4  | 610.33   |         | 610.33              |         |
|          | 979.62 |          | 1007.6 | 9   | T | 3  | 482.27   |         | 482.27              |         |
|          | 1076.7 |          | 1104.7 | 10  | P | 2  | 381.22   |         | 381.22              |         |
|          | 1213.7 |          | 1241.7 | 11  | H | 1  | 284.17   |         | 284.17              |         |
|          |        |          |        | 12  | K | 0  | 147.11   | +0.4795 | 147.11              |         |

Scan number 7009 Raw file LNCAP\_Silac\_23F10\_set2\_06  
 Method ITMS; CID Pepti... 110.51

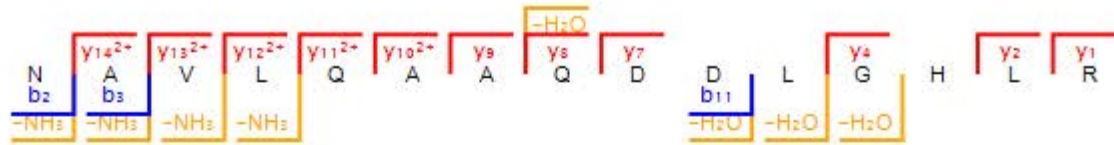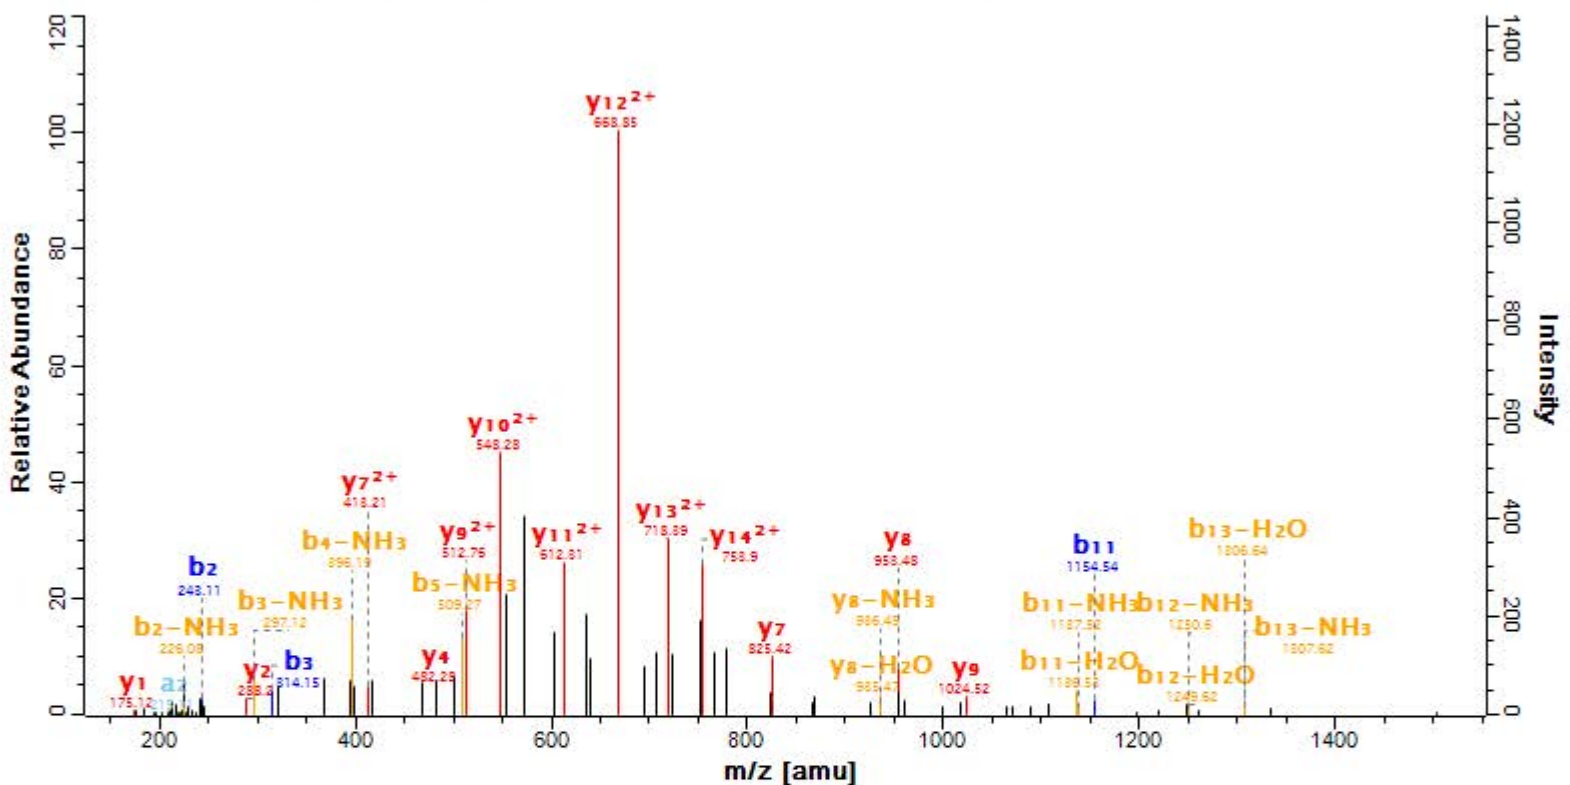

**precursor information**

|                   |                 |
|-------------------|-----------------|
| Mass:             | 1747.89688      |
| m/z:              | 583.63957       |
| Charge:           | 3+              |
| Retentiontime:    | 43.892982482910 |
| Score:            | 110.5098        |
| Mass Error [ppm]: | 0.19267         |
| PEP:              | 3.3823E-05      |
| Precursor Type:   | ISO             |

**general information**

|                       |           |
|-----------------------|-----------|
| Annotation:           | 14 of 16  |
| AminoAcids Coverag    | 88 %      |
| Intensity Coverage:   | 53 %      |
| Peak Coverage:        | 31 %      |
| Protein Localisation: | 60 ... 75 |

| a ion    |        | b ion    |        | seq |   |    | y ion    |         | y <sup>2+</sup> ion |         |
|----------|--------|----------|--------|-----|---|----|----------|---------|---------------------|---------|
| Δ dalton | mass   | Δ dalton | mass   |     |   |    | Δ dalton | mass    | Δ dalton            | mass    |
|          | 101.07 |          | 129.07 | 1   | Q | 15 |          |         |                     |         |
| -0.117   | 215.11 | +0.2419  | 243.11 | 2   | N | 14 | 1620.8   |         | 1620.8              |         |
|          | 286.15 | +0.0761  | 314.15 | 3   | A | 13 | 1506.8   |         | 753.9               | +0.0719 |
|          | 385.22 |          | 413.21 | 4   | V | 12 | 1435.8   |         | 718.39              | +0.1041 |
|          | 498.3  |          | 526.3  | 5   | L | 11 | 1336.7   |         | 668.85              | +0.1672 |
|          | 626.36 |          | 654.36 | 6   | Q | 10 | 1223.6   |         | 612.31              | +0.0959 |
|          | 697.4  |          | 725.39 | 7   | A | 9  | 1095.6   |         | 548.28              | +0.1902 |
|          | 768.44 |          | 796.43 | 8   | A | 8  | 1024.5   | +0.0518 | 512.76              | +0.0246 |
|          | 896.49 |          | 924.49 | 9   | Q | 7  | 953.48   | +0.1865 | 953.48              |         |
|          | 1011.5 |          | 1039.5 | 10  | D | 6  | 825.42   | +0.0782 | 413.21              | +0.1493 |
|          | 1126.5 | +0.366   | 1154.5 | 11  | D | 5  | 710.39   |         | 710.39              |         |
|          | 1239.6 |          | 1267.6 | 12  | L | 4  | 595.37   |         | 595.37              |         |
|          | 1296.7 |          | 1324.6 | 13  | G | 3  | 482.28   | +0.0202 | 482.28              |         |
|          | 1433.7 |          | 1461.7 | 14  | H | 2  | 425.26   |         | 425.26              |         |
|          | 1546.8 |          | 1574.8 | 15  | L | 1  | 288.2    | +0.1093 | 288.2               |         |
|          |        |          |        | 16  | R | 0  | 175.12   | +0.0948 | 175.12              |         |

Scan number 7252 Raw file LNCAP\_Silac\_23F10\_set2\_06  
 Method ITMS; CID Pepti... 98.16

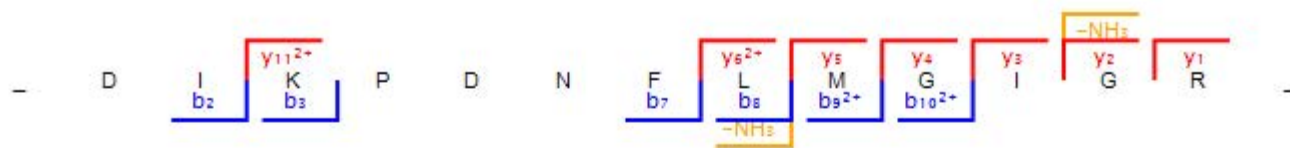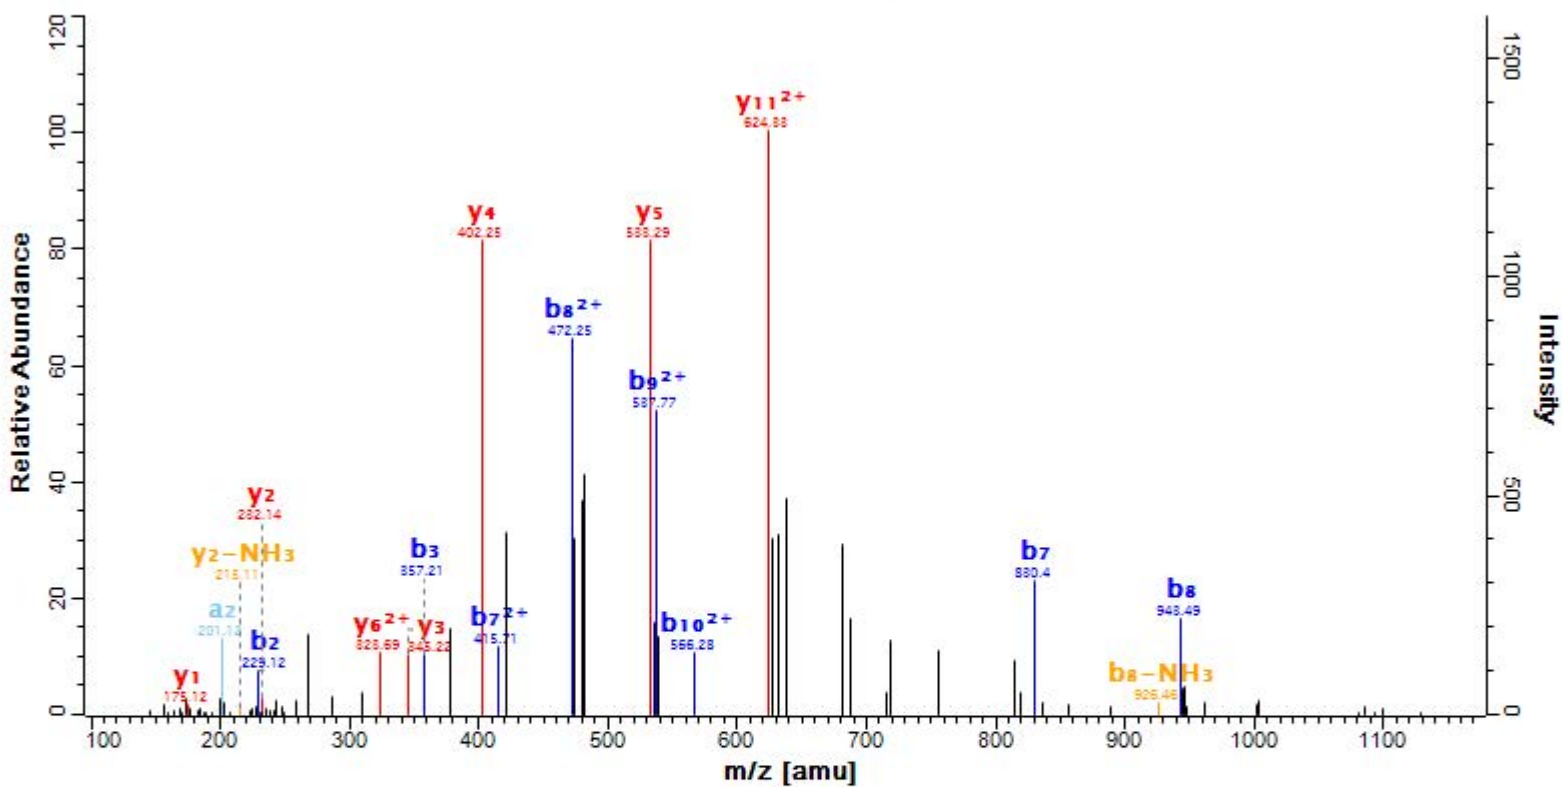

#### precursor information

|                   |                 |
|-------------------|-----------------|
| Mass:             | 1474.75994      |
| m/z:              | 492.59392       |
| Charge:           | 3+              |
| Retentiontime:    | 45.276378631591 |
| Score:            | 98.15634        |
| Mass Error [ppm]: | -0.1993         |
| PEP:              | 8.974E-05       |
| Precursor Type:   | MULTI           |

#### general information

|                       |             |
|-----------------------|-------------|
| Annotation:           | 9 of 13     |
| AminoAcids Coverage:  | 69 %        |
| Intensity Coverage:   | 51 %        |
| Peak Coverage:        | 21 %        |
| Protein Localisation: | 136 ... 148 |

| a ion         |               | b <sup>2+</sup> ion |               | b ion |               | y ion         |               | y <sup>2+</sup> ion |  |
|---------------|---------------|---------------------|---------------|-------|---------------|---------------|---------------|---------------------|--|
| Δ dalton mass | Δ dalton mass | Δ dalton mass       | Δ dalton mass | seq   | Δ dalton mass | Δ dalton mass | Δ dalton mass | Δ dalton mass       |  |
| 88.04         | 116           | 116                 | 116           | 1     | D             | 12            |               |                     |  |
| +0.115201.1   | 229.1         | +0.048229.1         | 2             | I     | 11            | 1361          | 1361          |                     |  |
| 329.2         | 357.2         | +0.039357.2         | 3             | K     | 10            | 1248          | 624.3         | +0.105              |  |
| 426.3         | 454.3         | 454.3               | 4             | P     | 9             | 1120          | 1120          |                     |  |
| 541.3         | 569.3         | 569.3               | 5             | D     | 8             | 1023          | 1023          |                     |  |
| 655.3         | 683.3         | 683.3               | 6             | N     | 7             | 907.5         | 907.5         |                     |  |
| 802.4         | -0.03 415.7   | +0.007830.4         | 7             | F     | 6             | 793.4         | 793.4         |                     |  |
| 915.5         | +0.132472.2   | -0.12 943.5         | 8             | L     | 5             | 646.4         | 323.7         | +0.059              |  |
| 1047          | +0.097537.8   | 1075                | 9             | M     | 4             | 533.3         | +0.02533.3    |                     |  |
| 1104          | -0.07 566.3   | 1132                | 10            | G     | 3             | 402.2         | -0.06 402.2   |                     |  |
| 1217          | 1245          | 1245                | 11            | I     | 2             | 345.2         | +0.03345.2    |                     |  |
| 1274          | 1302          | 1302                | 12            | G     | 1             | 232.1         | +0.008232.1   |                     |  |
|               |               |                     | 13            | R     | 0             | 175.1         | -0.18 175.1   |                     |  |

Scan number 7361 Raw file LNCAP\_Silac\_23F10\_set2\_06  
 Method ITMS; CID Pepti... 120.63

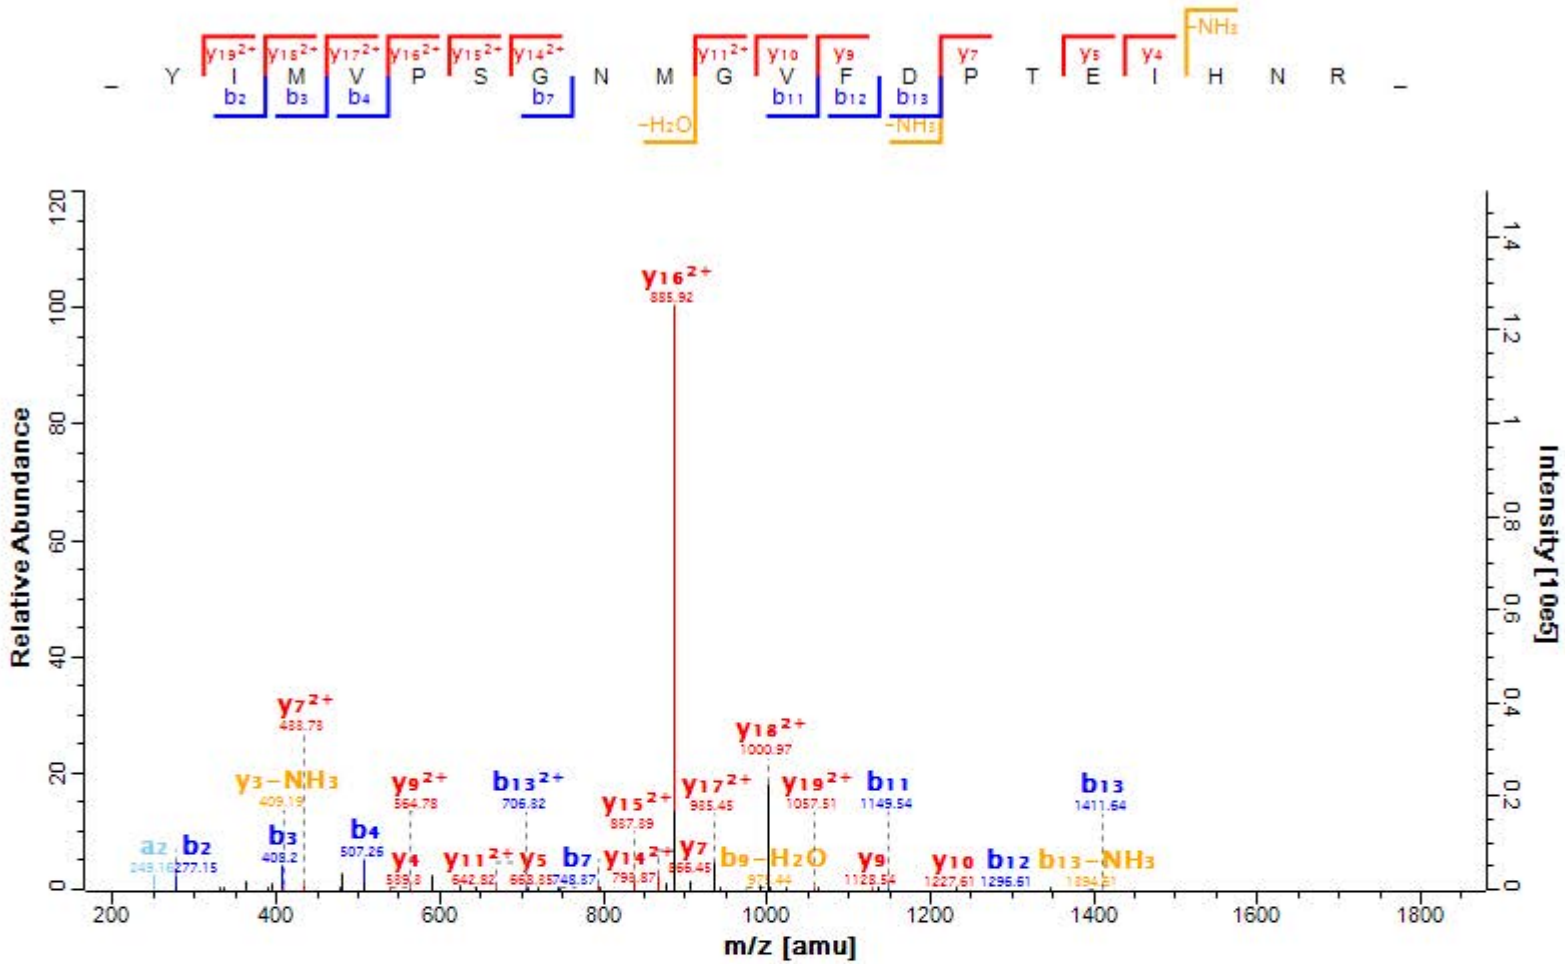

precursor information

|                   |                 |
|-------------------|-----------------|
| Mass:             | 2276.07187      |
| m/z:              | 759.6979        |
| Charge:           | 3+              |
| Retentiontime:    | 45.876476287841 |
| Score:            | 120.6271        |
| Mass Error [ppm]: | 0.02853         |
| PEP:              | 9.4916E-13      |
| Precursor Type:   | MULTI           |

general information

|                       |            |
|-----------------------|------------|
| Annotation:           | 15 of 20   |
| AminoAcids Coverage:  | 75 %       |
| Intensity Coverage:   | 72 %       |
| Peak Coverage:        | 31 %       |
| Protein Localisation: | 85 ... 104 |

| a ion         | b <sup>2+</sup> ion | b ion         | seq |   | y ion         | y <sup>2+</sup> ion |
|---------------|---------------------|---------------|-----|---|---------------|---------------------|
| Δ dalton mass | Δ dalton mass       | Δ dalton mass |     |   | Δ dalton mass | Δ dalton mass       |
| 136.1         | 164.1               | 164.1         | 1   | Y | 19            |                     |
| +0.022 249.2  | 277.2               | -0.02 277.2   | 2   | I | 18            | 2114                |
| 380.2         | 408.2               | -0.03 408.2   | 3   | M | 17            | 2001                |
| 479.3         | 507.3               | -0.05 507.3   | 4   | V | 16            | 1870                |
| 576.3         | 604.3               | 604.3         | 5   | P | 15            | 1771                |
| 663.4         | 691.3               | 691.3         | 6   | S | 14            | 1674                |
| 720.4         | 748.4               | -0.29 748.4   | 7   | G | 13            | 1587                |
| 834.4         | 862.4               | 862.4         | 8   | N | 12            | 1530                |
| 965.5         | 993.5               | 993.5         | 9   | M | 11            | 1416                |
| 1022          | 1050                | 1050          | 10  | G | 10            | 1285                |
| 1122          | 1150                | -0.04 1150    | 11  | V | 9             | 1228                |
| 1269          | 1297                | +0.02 1297    | 12  | F | 8             | 1129                |
| 1384          | +0.41 1570.3        | -0.12 1412    | 13  | D | 7             | 981.5               |
| 1481          | 1509                | 1509          | 14  | P | 6             | 866.4               |
| 1582          | 1610                | 1610          | 15  | T | 5             | 769.4               |
| 1711          | 1739                | 1739          | 16  | E | 4             | 668.3               |
| 1824          | 1852                | 1852          | 17  | I | 3             | 539.3               |
| 1961          | 1989                | 1989          | 18  | H | 2             | 426.2               |
| 2075          | 2103                | 2103          | 19  | N | 1             | 289.2               |
|               |                     |               | 20  | R | 0             | 175.1               |



Scan number 7412 Raw file LNCAP\_Silac\_23F10\_set2\_06  
 Method ITMS; CID Pepti... 55.72

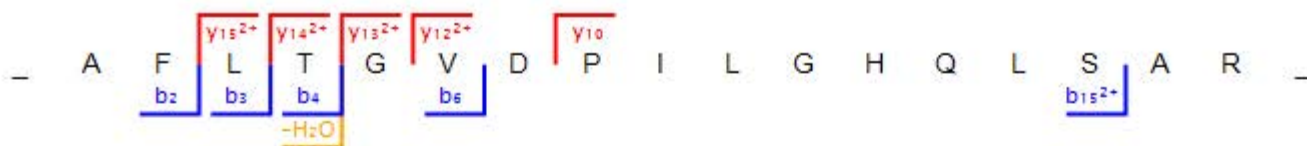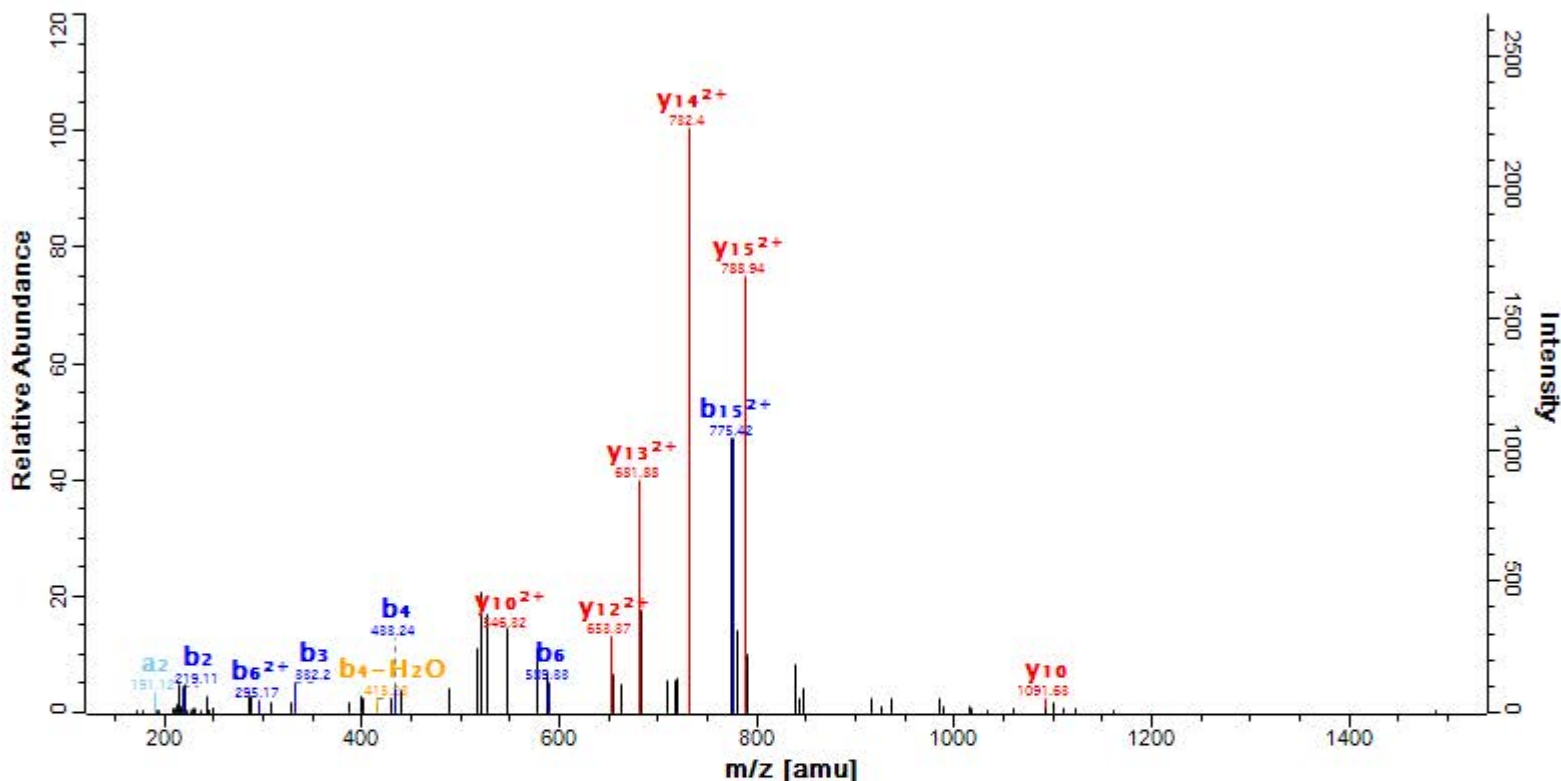

#### precursor information

|                   |                 |
|-------------------|-----------------|
| Mass:             | 1793.97572      |
| m/z:              | 598.99918       |
| Charge:           | 3+              |
| Retentiontime:    | 46.152130126953 |
| Score:            | 55.72391        |
| Mass Error [ppm]: | -1.7258         |
| PEP:              | 0.0031535       |
| Precursor Type:   | MULTI           |

|       | a ion         | b <sup>2+</sup> ion | b ion         |    |     |    | y ion         | y <sup>2+</sup> ion |
|-------|---------------|---------------------|---------------|----|-----|----|---------------|---------------------|
|       | Δ dalton mass | Δ dalton mass       | Δ dalton mass |    | seq |    | Δ dalton mass | Δ dalton mass       |
|       | 44.05         | 72.04               | 72.04         | 1  | A   | 16 |               |                     |
| +0.01 | 191.1         | 219.1               | -0.08 219.1   | 2  | F   | 15 | 1724          | 1724                |
|       | 304.2         | 332.2               | +0.077332.2   | 3  | L   | 14 | 1577          | 788.9 +0.201        |
|       | 405.2         | 433.2               | +0.091433.2   | 4  | T   | 13 | 1464          | 732.4 +0.211        |
|       | 462.3         | 490.3               | 490.3         | 5  | G   | 12 | 1363          | 681.9 +0            |
|       | 561.3         | -0.11 295.2         | -0.29 589.3   | 6  | V   | 11 | 1306          | 653.4 +0.125        |
|       | 676.4         | 704.4               | 704.4         | 7  | D   | 10 | 1207          | 1207                |
|       | 773.4         | 801.4               | 801.4         | 8  | P   | 9  | 1092 +0       | 546.3 +0.011        |
|       | 886.5         | 914.5               | 914.5         | 9  | I   | 8  | 994.6         | 994.6               |
|       | 999.6         | 1028                | 1028          | 10 | L   | 7  | 881.5         | 881.5               |
|       | 1057          | 1085                | 1085          | 11 | G   | 6  | 768.4         | 768.4               |
|       | 1194          | 1222                | 1222          | 12 | H   | 5  | 711.4         | 711.4               |
|       | 1322          | 1350                | 1350          | 13 | Q   | 4  | 574.3         | 574.3               |
|       | 1435          | 1463                | 1463          | 14 | L   | 3  | 446.3         | 446.3               |
|       | 1522          | +0.269775.4         | 1550          | 15 | S   | 2  | 333.2         | 333.2               |
|       | 1593          | 1621                | 1621          | 16 | A   | 1  | 246.2         | 246.2               |
|       |               |                     |               | 17 | R   | 0  | 175.1         | 175.1               |

#### general information

|                       |           |
|-----------------------|-----------|
| Annotation:           | 7 of 17   |
| AminoAcids Coverage:  | 41 %      |
| Intensity Coverage:   | 50 %      |
| Peak Coverage:        | 17 %      |
| Protein Localisation: | 37 ... 53 |

Scan number 757 Raw file LNCAP\_Silac\_23F10\_set2\_06  
 Method ITMS; CID Pepti... 107.99

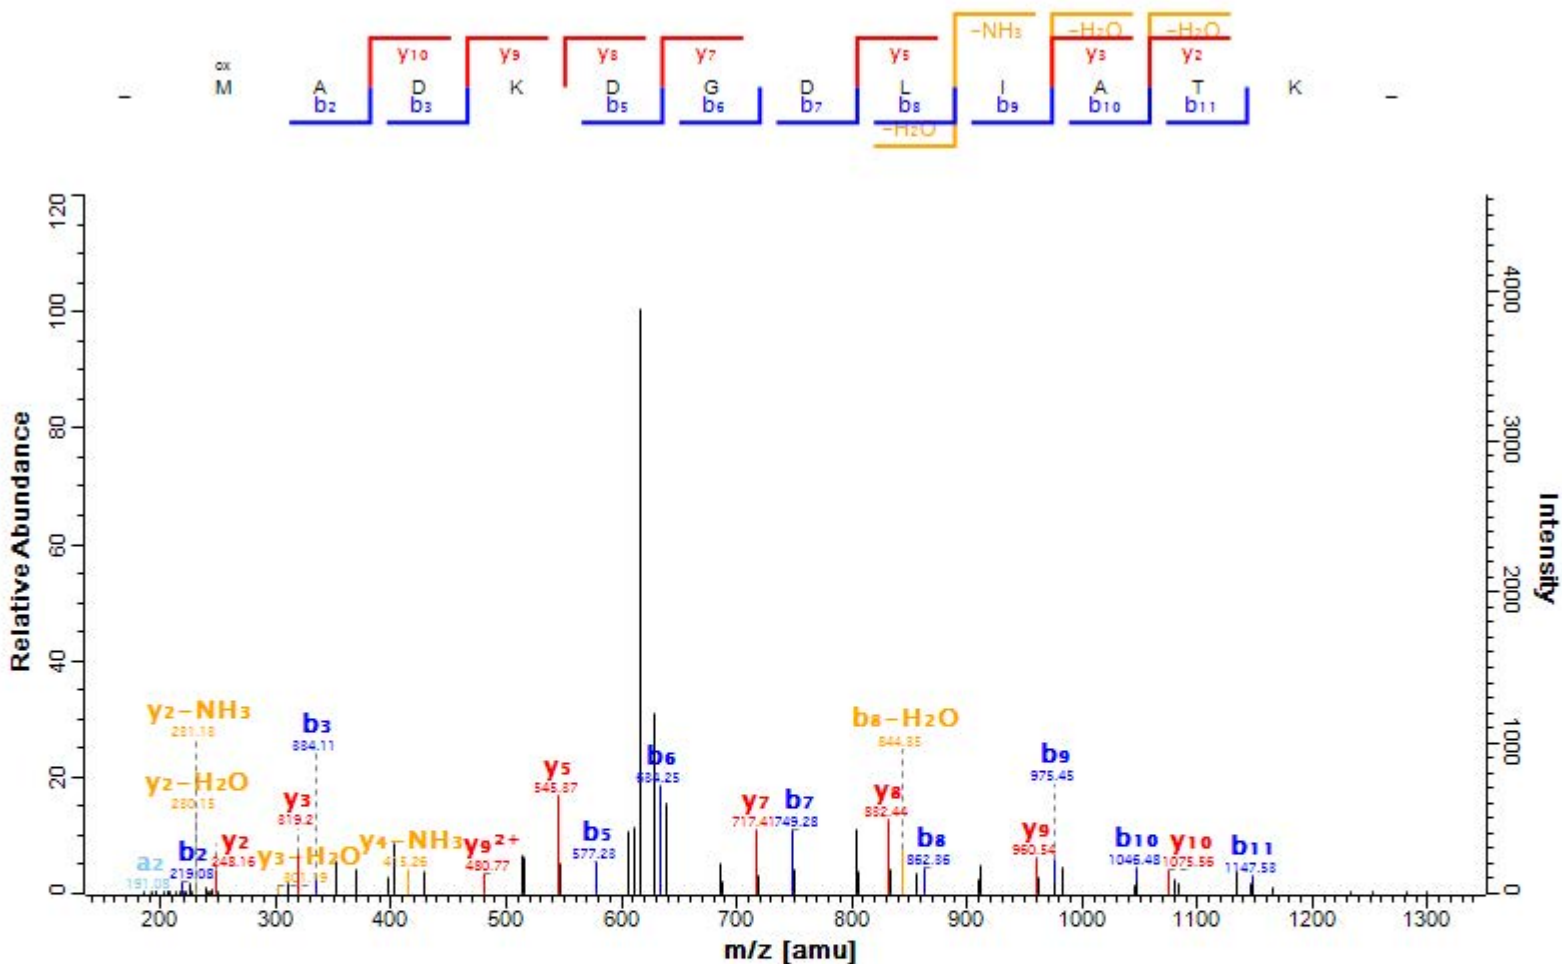

#### precursor information

|                   |                 |
|-------------------|-----------------|
| Mass:             | 1292.62788      |
| m/z:              | 647.32122       |
| Charge:           | 2+              |
| Retentiontime:    | 9.6618881225585 |
| Score:            | 107.9941        |
| Mass Error [ppm]: | -0.2615         |
| PEP:              | 0.00013707      |
| Precursor Type:   | MULTI           |

#### general information

|                       |             |
|-----------------------|-------------|
| Annotation:           | 10 of 12    |
| AminoAcids Coverage:  | 83 %        |
| Intensity Coverage:   | 31 %        |
| Peak Coverage:        | 22 %        |
| Protein Localisation: | 170 ... 181 |

| a ion    |        | b ion    |        | seq |   |    | y ion    |         | y <sup>2+</sup> ion |        |
|----------|--------|----------|--------|-----|---|----|----------|---------|---------------------|--------|
| Δ dalton | mass   | Δ dalton | mass   |     |   |    | Δ dalton | mass    | Δ dalton            | mass   |
|          | 120.05 |          | 148.04 | 1   | M | 11 |          |         |                     |        |
| +0.0774  | 191.08 | +0.0793  | 219.08 | 2   | A | 10 | 1146.6   |         | 1146.6              |        |
|          | 306.11 | +0.0874  | 434.11 | 3   | D | 9  | 1075.6   | +0.0128 | 1075.6              |        |
|          | 434.21 |          | 462.2  | 4   | K | 8  | 960.54   | -0.084  | 480.77              | -0.178 |
|          | 549.23 | +0.1339  | 577.23 | 5   | D | 7  | 832.44   | +0.0524 | 832.44              |        |
|          | 606.26 | +0.3154  | 634.25 | 6   | G | 6  | 717.41   | +0.0192 | 717.41              |        |
|          | 721.28 | -0.005   | 749.28 | 7   | D | 5  | 660.39   |         | 660.39              |        |
|          | 834.37 | -0.05    | 862.36 | 8   | L | 4  | 545.37   | +0.0745 | 545.37              |        |
|          | 947.45 | -0.134   | 975.45 | 9   | I | 3  | 432.28   |         | 432.28              |        |
|          | 1018.5 | +0.1578  | 1046.5 | 10  | A | 2  | 319.2    | -0.026  | 319.2               |        |
|          | 1119.5 | +0.2862  | 1147.5 | 11  | T | 1  | 248.16   | +0.0975 | 248.16              |        |
|          |        |          |        | 12  | K | 0  | 147.11   |         | 147.11              |        |

Scan number 7757 Raw file LNCAP\_Silac\_23F10\_set2\_06  
 Method ITMS: CID Pepti... 86.31

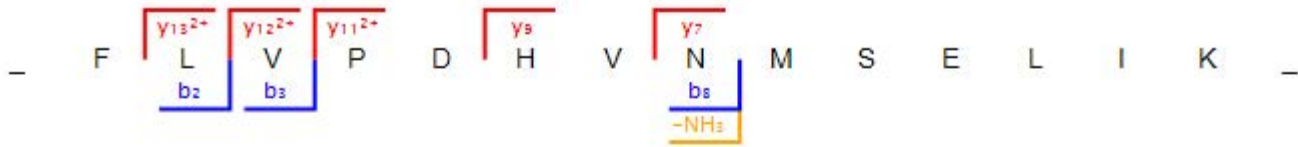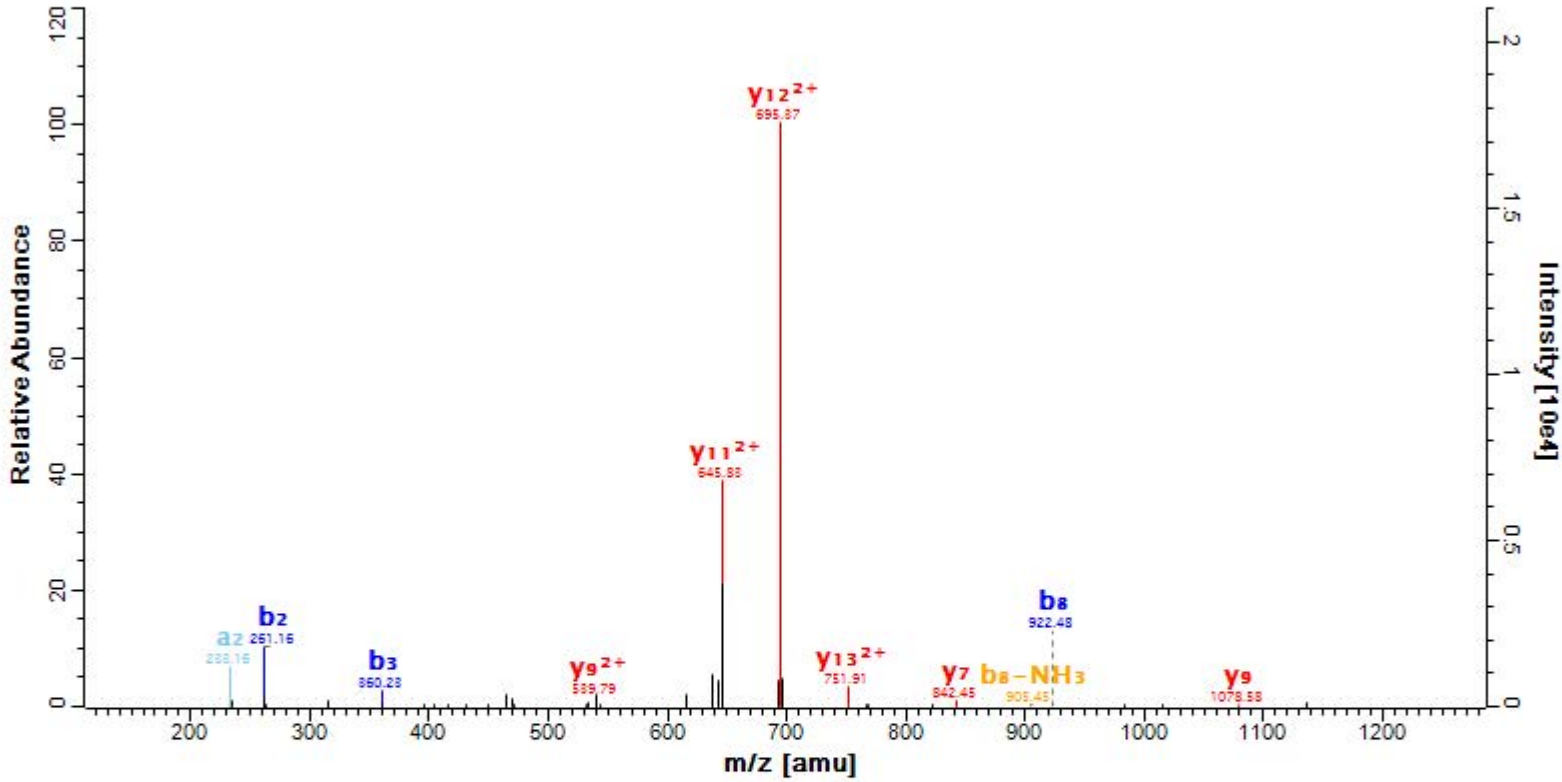

**precursor information**

|                   |                 |
|-------------------|-----------------|
| Mass:             | 1640.85956      |
| m/z:              | 547.96046       |
| Charge:           | 3+              |
| Retentiontime:    | 48.122783660888 |
| Score:            | 86.31258        |
| Mass Error [ppm]: | -0.030261       |
| PEP:              | 0.00044982      |
| Precursor Type:   | MULTI           |

**general information**

|                       |           |
|-----------------------|-----------|
| Annotation:           | 5 of 14   |
| AminoAcids Coverage:  | 36 %      |
| Intensity Coverage:   | 73 %      |
| Peak Coverage:        | 15 %      |
| Protein Localisation: | 52 ... 65 |

| a ion    |        | b ion    |        |    |     |    | y ion    |        | y <sup>2+</sup> ion |         |
|----------|--------|----------|--------|----|-----|----|----------|--------|---------------------|---------|
| Δ dalton | mass   | Δ dalton | mass   |    | seq |    | Δ dalton | mass   | Δ dalton            | mass    |
|          | 120.08 |          | 148.08 | 1  | F   | 13 |          |        |                     |         |
| -0.048   | 233.16 | -0.031   | 261.16 | 2  | L   | 12 | 1502.8   |        | 751.91              | +0.3291 |
|          | 332.23 | -0.026   | 360.23 | 3  | V   | 11 | 1389.7   |        | 695.37              | +0.1843 |
|          | 429.29 |          | 457.28 | 4  | P   | 10 | 1290.7   |        | 645.83              | +0.0381 |
|          | 544.31 |          | 572.31 | 5  | D   | 9  | 1193.6   |        | 1193.6              |         |
|          | 681.37 |          | 709.37 | 6  | H   | 8  | 1078.6   | -0.034 | 539.79              | +0.0511 |
|          | 780.44 |          | 808.44 | 7  | V   | 7  | 941.52   |        | 941.52              |         |
|          | 894.48 | +0.0062  | 922.48 | 8  | N   | 6  | 842.45   | -0.22  | 842.45              |         |
|          | 1025.5 |          | 1053.5 | 9  | M   | 5  | 728.41   |        | 728.41              |         |
|          | 1112.6 |          | 1140.6 | 10 | S   | 4  | 597.37   |        | 597.37              |         |
|          | 1241.6 |          | 1269.6 | 11 | E   | 3  | 510.34   |        | 510.34              |         |
|          | 1354.7 |          | 1382.7 | 12 | L   | 2  | 381.3    |        | 381.3               |         |
|          | 1467.8 |          | 1495.8 | 13 | I   | 1  | 268.21   |        | 268.21              |         |
|          |        |          |        | 14 | K   | 0  | 155.13   |        | 155.13              |         |

Scan number 7877 Raw file LNCAP\_Silac\_23F10\_set2\_06  
 Method ITMS; CID Pepti... 152.88

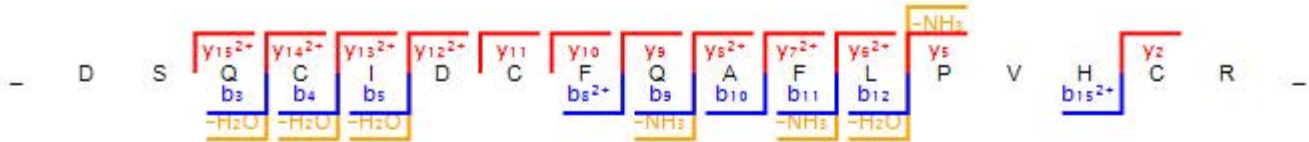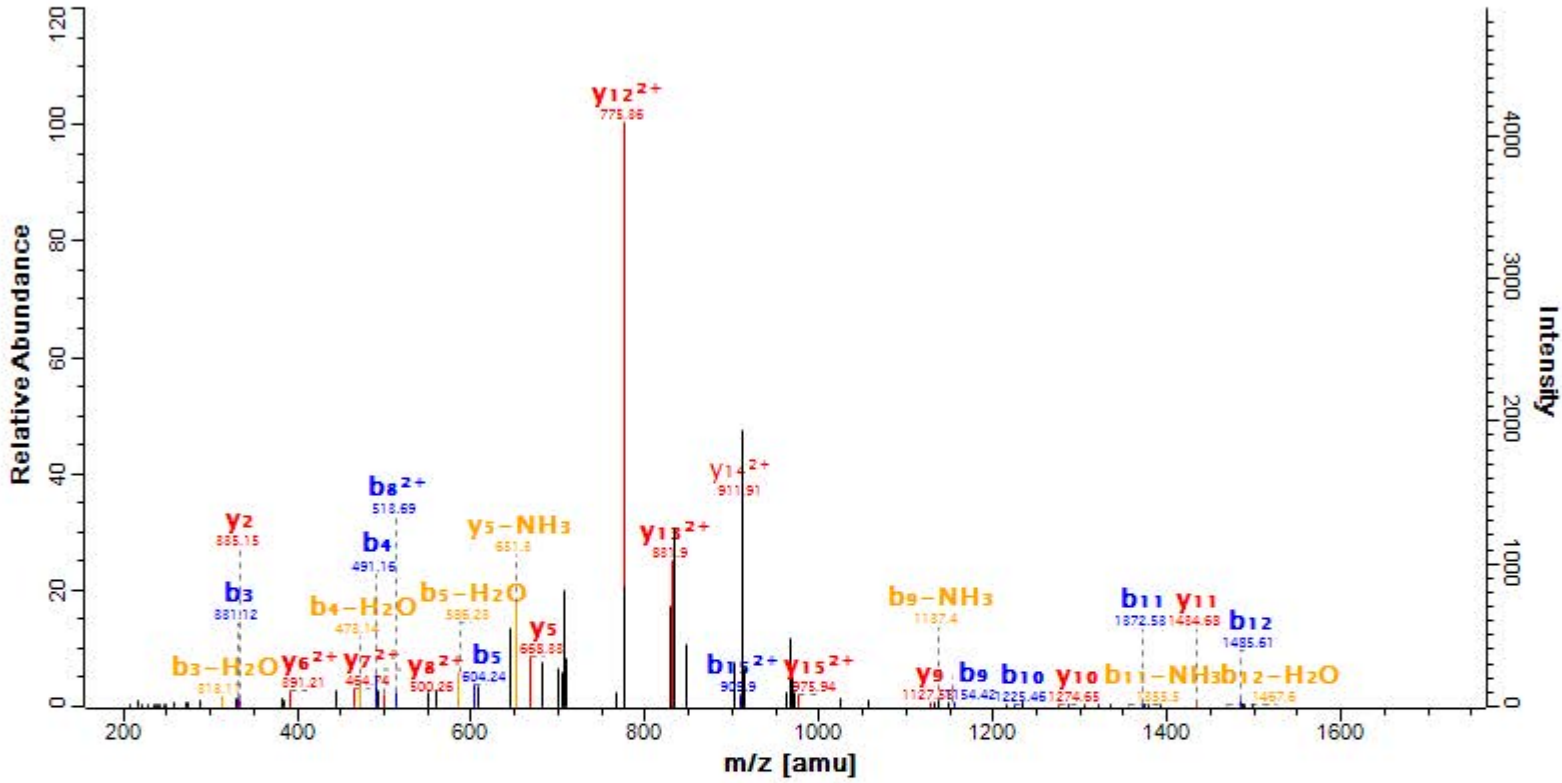

precursor information

|                   |                 |
|-------------------|-----------------|
| Mass:             | 2151.92885      |
| m/z:              | 718.31689       |
| Charge:           | 3+              |
| Retentiontime:    | 48.826297760009 |
| Score:            | 152.8763        |
| Mass Error [ppm]: | 0.002086        |
| PEP:              | 1.5081E-22      |
| Precursor Type:   | MULTI           |

general information

|                       |             |
|-----------------------|-------------|
| Annotation:           | 13 of 17    |
| AminoAcids Coverage:  | 76 %        |
| Intensity Coverage:   | 45 %        |
| Peak Coverage:        | 28 %        |
| Protein Localisation: | 135 ... 151 |

| b <sup>2+</sup> ion |        | b ion    |        |    |     |    | y ion    |         | y <sup>2+</sup> ion |         |
|---------------------|--------|----------|--------|----|-----|----|----------|---------|---------------------|---------|
| Δ dalton            | mass   | Δ dalton | mass   |    | seq |    | Δ dalton | mass    | Δ dalton            | mass    |
|                     | 116.03 |          | 116.03 | 1  | D   | 16 |          |         |                     |         |
|                     | 203.07 |          | 203.07 | 2  | S   | 15 | 2037.9   |         | 2037.9              |         |
|                     | 331.12 | +0.0574  | 331.12 | 3  | Q   | 14 | 1950.9   |         | 975.94              | +0.3163 |
|                     | 491.16 | +0.1213  | 491.16 | 4  | C   | 13 | 1822.8   |         | 911.91              | -0.051  |
|                     | 604.24 | +0.1615  | 604.24 | 5  | I   | 12 | 1662.8   |         | 831.9               | +0.0213 |
|                     | 719.27 |          | 719.27 | 6  | D   | 11 | 1549.7   |         | 775.36              | +0.2536 |
|                     | 879.3  |          | 879.3  | 7  | C   | 10 | 1434.7   | +0.3105 | 1434.7              |         |
| -0.381              | 513.69 |          | 1026.4 | 8  | F   | 9  | 1274.6   | +0.2068 | 1274.6              |         |
|                     | 1154.4 | +0.2963  | 1154.4 | 9  | Q   | 8  | 1127.6   | +0.257  | 1127.6              |         |
|                     | 1225.5 | +0.0289  | 1225.5 | 10 | A   | 7  | 999.52   |         | 500.26              | +0.2215 |
|                     | 1372.5 | +0.0051  | 1372.5 | 11 | F   | 6  | 928.48   |         | 464.74              | -0.158  |
|                     | 1485.6 | -0.126   | 1485.6 | 12 | L   | 5  | 781.41   |         | 391.21              | +0.2861 |
|                     | 1582.7 |          | 1582.7 | 13 | P   | 4  | 668.33   | +0.1132 | 668.33              |         |
|                     | 1681.7 |          | 1681.7 | 14 | V   | 3  | 571.28   |         | 571.28              |         |
| +0.3253             | 909.9  |          | 1818.8 | 15 | H   | 2  | 472.21   |         | 472.21              |         |
|                     | 1978.8 |          | 1978.8 | 16 | C   | 1  | 335.15   | -0.168  | 335.15              |         |
|                     |        |          |        | 17 | R   | 0  | 175.12   |         | 175.12              |         |

Scan number 7977 Raw file LNCAP\_Silac\_23F10\_set2\_06  
 Method ITMS; CID Pepti... 184.62

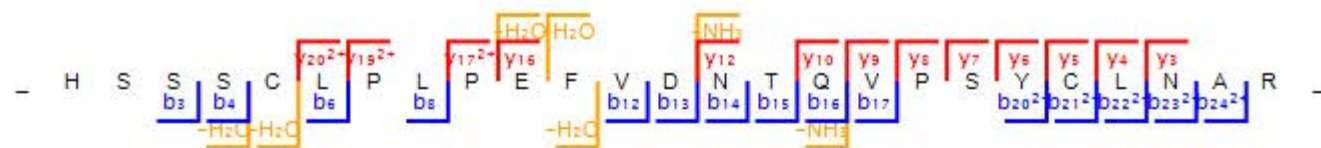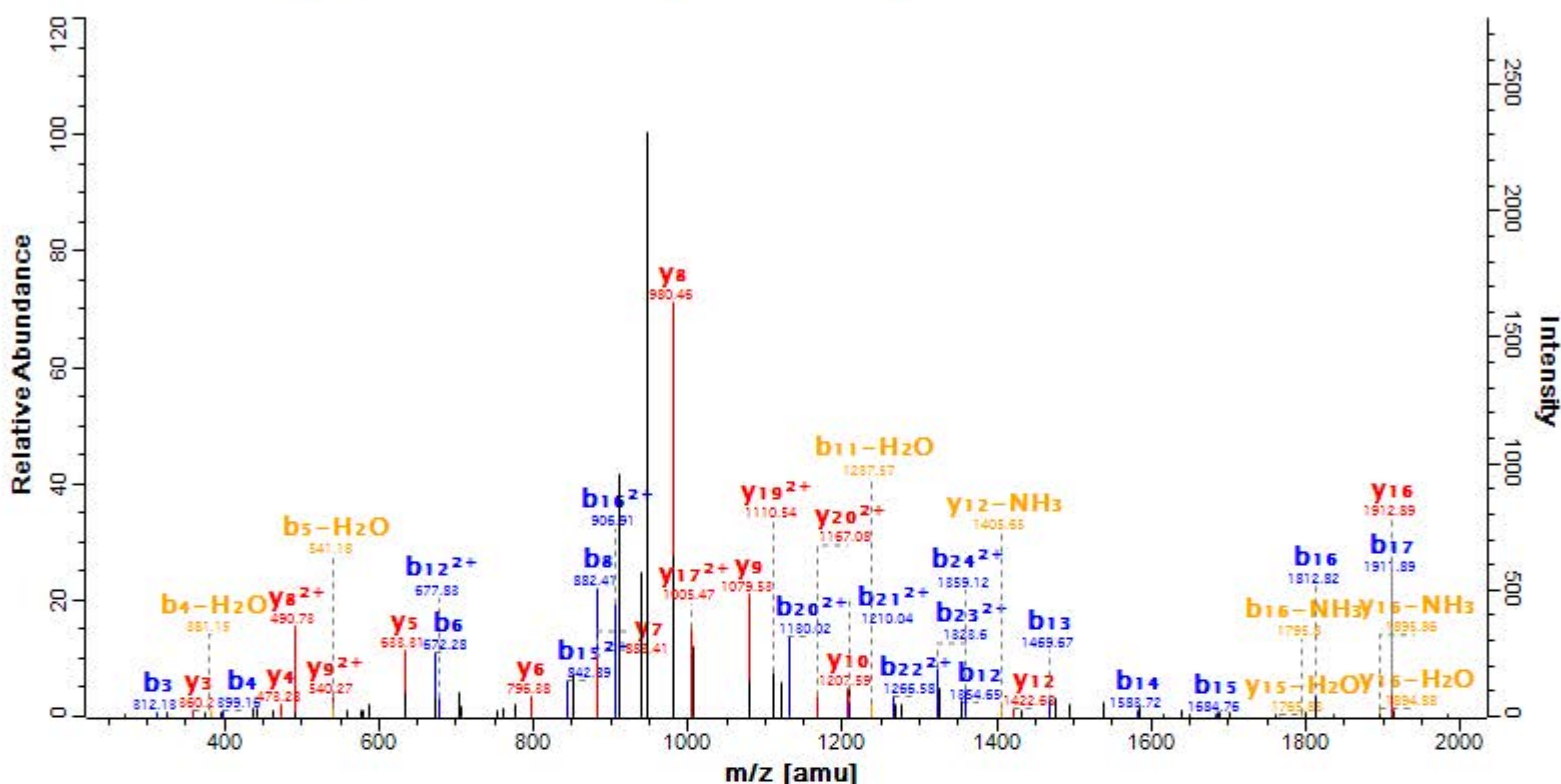

precursor information

|                   |                 |
|-------------------|-----------------|
| Mass:             | 2890.33626      |
| m/z:              | 964.4527        |
| Charge:           | 3+              |
| Retentiontime:    | 49.434211730957 |
| Score:            | 184.6166        |
| Mass Error [ppm]: | -0.53641        |
| PEP:              | 6.257E-52       |
| Precursor Type:   | MULTI           |

general information

|                       |            |
|-----------------------|------------|
| Annotation:           | 22 of 25   |
| AminoAcids Coverage:  | 88 %       |
| Intensity Coverage:   | 45 %       |
| Peak Coverage:        | 42 %       |
| Protein Localisation: | 85 ... 109 |

| b <sup>2+</sup> ion |        | b ion    |        | seq |   |    | y ion    |         | y <sup>2+</sup> ion |         |
|---------------------|--------|----------|--------|-----|---|----|----------|---------|---------------------|---------|
| Δ dalton            | mass   | Δ dalton | mass   |     |   |    | Δ dalton | mass    | Δ dalton            | mass    |
|                     | 138.07 |          | 138.07 | 1   | H | 24 |          |         |                     |         |
|                     | 225.1  |          | 225.1  | 2   | S | 23 | 2754.3   |         | 2754.3              |         |
|                     | 312.13 | -0.452   | 312.13 | 3   | S | 22 | 2667.3   |         | 2667.3              |         |
|                     | 399.16 | +0.1978  | 399.16 | 4   | S | 21 | 2580.2   |         | 2580.2              |         |
|                     | 559.19 |          | 559.19 | 5   | C | 20 | 2493.2   |         | 2493.2              |         |
|                     | 672.28 | -0.051   | 672.28 | 6   | L | 19 | 2333.2   |         | 1167.1              | +0.3568 |
|                     | 769.33 |          | 769.33 | 7   | P | 18 | 2220.1   |         | 1110.5              | +0.3041 |
|                     | 882.41 | +0.0637  | 882.41 | 8   | L | 17 | 2123     |         | 2123                |         |
|                     | 979.47 |          | 979.47 | 9   | P | 16 | 2009.9   |         | 1005.5              | -0.015  |
|                     | 1108.5 |          | 1108.5 | 10  | E | 15 | 1912.9   | -0.14   | 1912.9              |         |
|                     | 1255.6 |          | 1255.6 | 11  | F | 14 | 1783.8   |         | 1783.8              |         |
| +0.1597             | 677.83 | -0.272   | 1354.6 | 12  | V | 13 | 1636.8   |         | 1636.8              |         |
|                     | 1469.7 | -0.229   | 1469.7 | 13  | D | 12 | 1537.7   |         | 1537.7              |         |
|                     | 1583.7 | +0       | 1583.7 | 14  | N | 11 | 1422.7   | -0.068  | 1422.7              |         |
| +0.0561             | 842.89 | +0.0615  | 1684.8 | 15  | T | 10 | 1308.6   |         | 1308.6              |         |
| +0.2777             | 906.91 | -0.37    | 1812.8 | 16  | Q | 9  | 1207.6   | -0.074  | 1207.6              |         |
|                     | 1911.9 | +0.0428  | 1911.9 | 17  | V | 8  | 1079.5   | +0.0176 | 540.27              | +0.2427 |
|                     | 2008.9 |          | 2008.9 | 18  | P | 7  | 980.46   | -0.019  | 490.73              | +0.2268 |
|                     | 2096   |          | 2096   | 19  | S | 6  | 883.41   | +0.0651 | 883.41              |         |
| +0.2533             | 1130   |          | 2259   | 20  | Y | 5  | 796.38   | +0.0174 | 796.38              |         |
| +0.3377             | 1210   |          | 2419.1 | 21  | C | 4  | 633.31   | +0.0521 | 633.31              |         |
| -0.161              | 1266.6 |          | 2532.2 | 22  | L | 3  | 473.28   | +0.1048 | 473.28              |         |
| +0.3888             | 1323.6 |          | 2646.2 | 23  | N | 2  | 360.2    | +0.0131 | 360.2               |         |
| +0.4182             | 1359.1 |          | 2717.2 | 24  | A | 1  | 246.16   |         | 246.16              |         |
|                     |        |          |        | 25  | R | 0  | 175.12   |         | 175.12              |         |

Scan number 7989 Raw file LNCAP\_Silac\_23F10\_set2\_06  
 Method ITMS: CID Pepti... 227.47

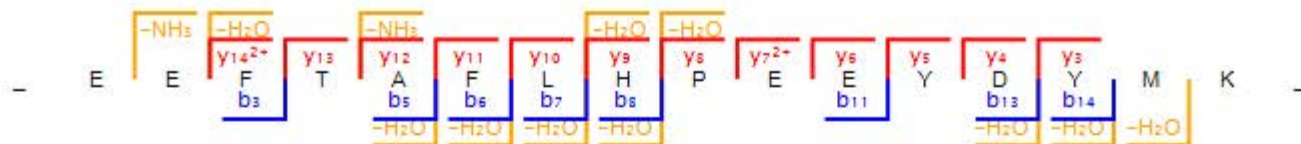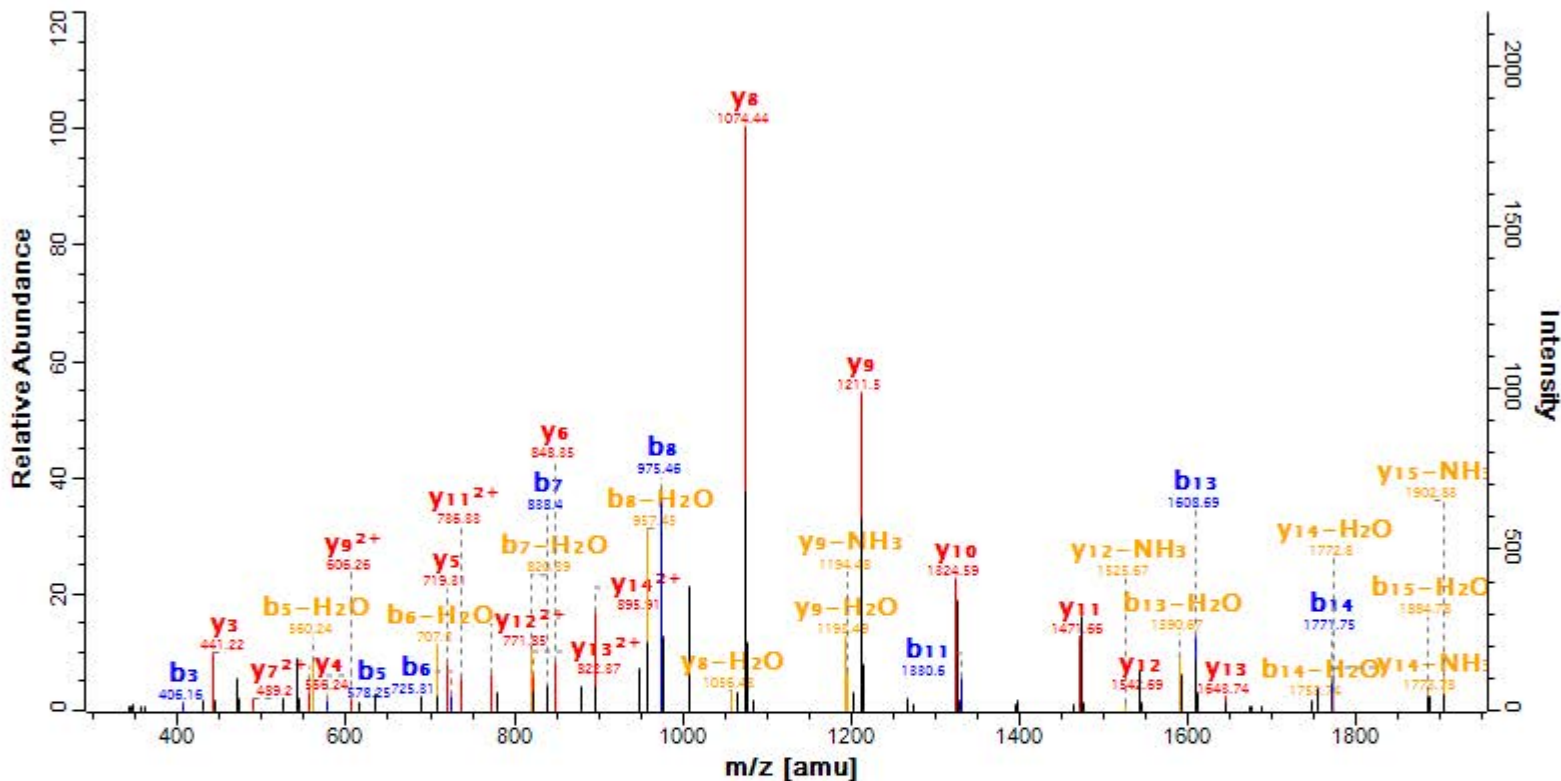

#### precursor information

|                   |                 |
|-------------------|-----------------|
| Mass:             | 2047.88718      |
| m/z:              | 1024.95087      |
| Charge:           | 2+              |
| Retentiontime:    | 49.505222320556 |
| Score:            | 227.4685        |
| Mass Error [ppm]: | -0.079255       |
| PEP:              | 2.2613E-41      |
| Precursor Type:   | MULTI           |

#### general information

|                       |             |
|-----------------------|-------------|
| Annotation:           | 14 of 16    |
| AminoAcids Coverage:  | 88 %        |
| Intensity Coverage:   | 60 %        |
| Peak Coverage:        | 39 %        |
| Protein Localisation: | 182 ... 197 |

| b ion     |          |    |     |    | y ion    |           | y <sup>2+</sup> ion |           |
|-----------|----------|----|-----|----|----------|-----------|---------------------|-----------|
| Δ dalton  | mass     |    | seq |    | Δ dalton | mass      | Δ dalton            | mass      |
|           | 130.0499 | 1  | E   | 15 |          |           |                     |           |
|           | 259.0925 | 2  | E   | 14 | 1919.852 |           | 1919.852            |           |
| +0.248151 | 406.1609 | 3  | F   | 13 | 1790.809 |           | 895.9084            | +0.315521 |
|           | 507.2086 | 4  | T   | 12 | 1643.741 | -0.10345  | 822.3741            | +0.191647 |
| +0.108457 | 578.2457 | 5  | A   | 11 | 1542.693 | -0.22227  | 771.8503            | -0.19626  |
| +0.047673 | 725.3141 | 6  | F   | 10 | 1471.656 | -0.06236  | 736.3318            | +0.235264 |
| -0.02302  | 838.3981 | 7  | L   | 9  | 1324.588 | -0.01042  | 1324.588            |           |
| -0.03933  | 975.4571 | 8  | H   | 8  | 1211.504 | -0.0477   | 606.2555            | +0.162577 |
|           | 1072.51  | 9  | P   | 7  | 1074.445 | +0.001084 | 1074.445            |           |
|           | 1201.552 | 10 | E   | 6  | 977.3921 |           | 489.1997            | +0.339936 |
| -0.02726  | 1330.595 | 11 | E   | 5  | 848.3495 | -0.01892  | 848.3495            |           |
|           | 1493.658 | 12 | Y   | 4  | 719.3069 | -0.02088  | 719.3069            |           |
| -0.02476  | 1608.685 | 13 | D   | 3  | 556.2436 | +0.114594 | 556.2436            |           |
| -0.20344  | 1771.749 | 14 | Y   | 2  | 441.2166 | +0.060147 | 441.2166            |           |
|           | 1902.789 | 15 | M   | 1  | 278.1533 |           | 278.1533            |           |
|           |          | 16 | K   | 0  | 147.1128 |           | 147.1128            |           |

Scan number 8080 Raw file LNCAP\_Silac\_23F10\_set2\_06  
 Method ITMS; CID Pepti... 80.54

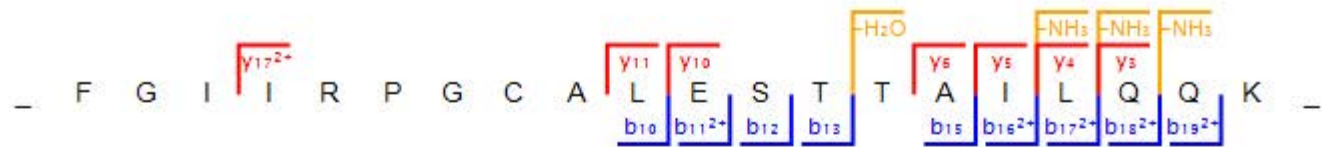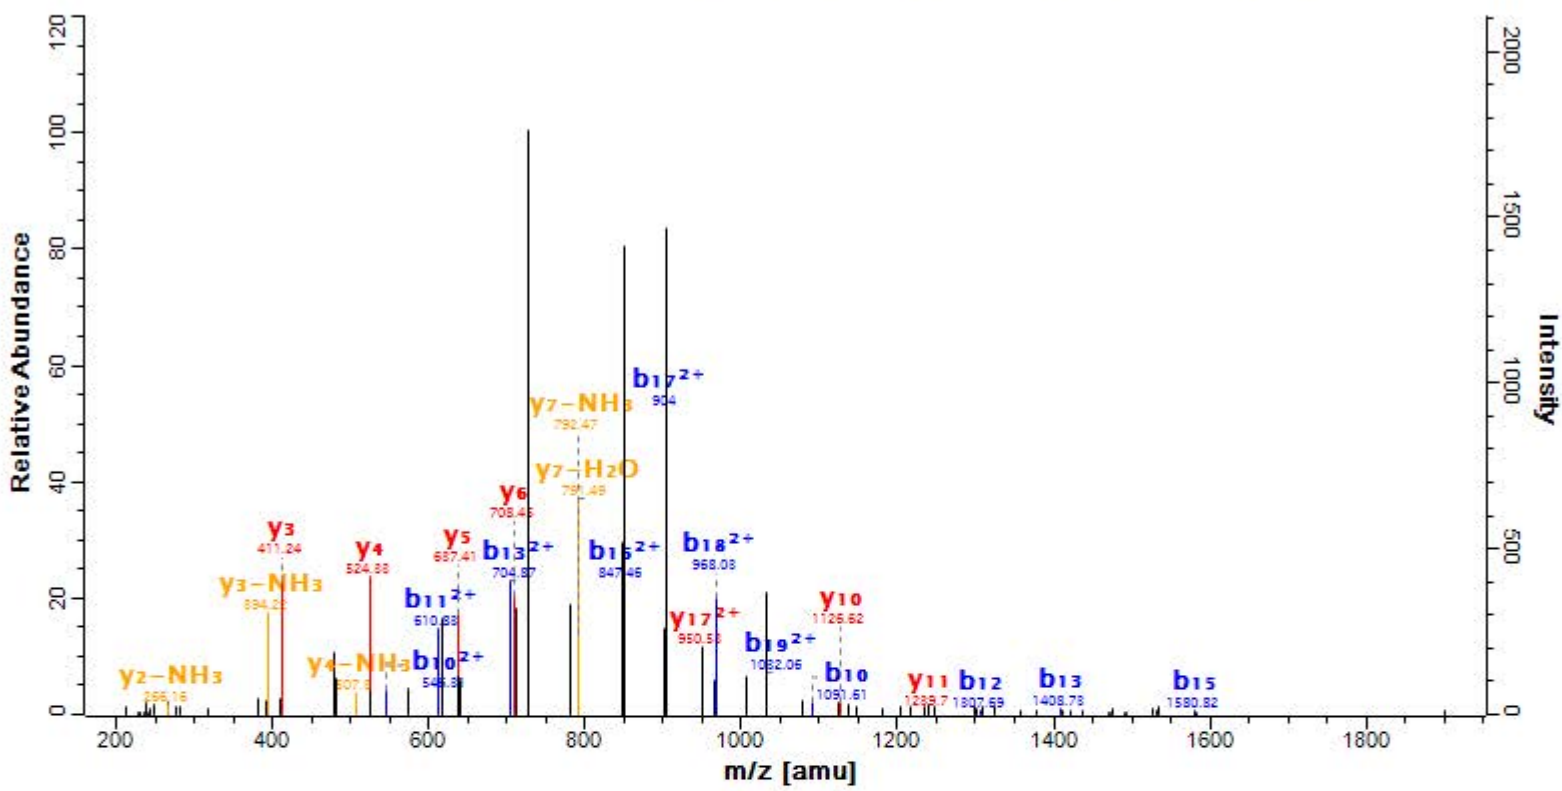

**precursor information**

|                   |            |
|-------------------|------------|
| Mass:             | 2202.18318 |
| m/z:              | 735.06834  |
| Charge:           | 3+         |
| Retentiontime:    | 50.078125  |
| Score:            | 80.54491   |
| Mass Error [ppm]: | 0.046369   |
| PEP:              | 8.5693E-05 |
| Precursor Type:   | MULTI      |

**general information**

|                       |             |
|-----------------------|-------------|
| Annotation:           | 11 of 20    |
| AminoAcids Coverag    | 55 %        |
| Intensity Coverage:   | 34 %        |
| Peak Coverage:        | 25 %        |
| Protein Localisation: | 249 ... 268 |

| b <sup>2+</sup> ion |        | b ion    |        |    |     |    | y ion    |         | y <sup>2+</sup> ion |        |
|---------------------|--------|----------|--------|----|-----|----|----------|---------|---------------------|--------|
| Δ dalton            | mass   | Δ dalton | mass   |    | seq |    | Δ dalton | mass    | Δ dalton            | mass   |
|                     | 148.08 |          | 148.08 | 1  | F   | 19 |          |         |                     |        |
|                     | 205.1  |          | 205.1  | 2  | G   | 18 | 2070.2   |         | 2070.2              |        |
|                     | 318.18 |          | 318.18 | 3  | I   | 17 | 2013.1   |         | 2013.1              |        |
|                     | 431.27 |          | 431.27 | 4  | I   | 16 | 1900.1   |         | 950.53              | -0.224 |
|                     | 593.39 |          | 593.39 | 5  | R   | 15 | 1787     |         | 1787                |        |
|                     | 690.44 |          | 690.44 | 6  | P   | 14 | 1624.8   |         | 1624.8              |        |
|                     | 747.46 |          | 747.46 | 7  | G   | 13 | 1527.8   |         | 1527.8              |        |
|                     | 907.49 |          | 907.49 | 8  | C   | 12 | 1470.8   |         | 1470.8              |        |
|                     | 978.53 |          | 978.53 | 9  | A   | 11 | 1310.7   |         | 1310.7              |        |
| +0.0638             | 546.31 | -0.137   | 1091.6 | 10 | L   | 10 | 1239.7   | -0.191  | 1239.7              |        |
| +0.1426             | 610.83 |          | 1220.7 | 11 | E   | 9  | 1126.6   | -0.423  | 1126.6              |        |
|                     | 1307.7 | -0.025   | 1307.7 | 12 | S   | 8  | 997.58   |         | 997.58              |        |
| +0.0293             | 704.87 | +0.2765  | 1408.7 | 13 | T   | 7  | 910.54   |         | 910.54              |        |
|                     | 1509.8 |          | 1509.8 | 14 | T   | 6  | 809.5    |         | 809.5               |        |
|                     | 1580.8 | -0.092   | 1580.8 | 15 | A   | 5  | 708.45   | +0.0398 | 708.45              |        |
| -0.083              | 847.46 |          | 1693.9 | 16 | I   | 4  | 637.41   | +0.014  | 637.41              |        |
| -0.101              | 904    |          | 1807   | 17 | L   | 3  | 524.33   | -0.01   | 524.33              |        |
| +0.291              | 968.03 |          | 1935   | 18 | Q   | 2  | 411.24   | +0.0915 | 411.24              |        |
| -0.234              | 1032.1 |          | 2063.1 | 19 | Q   | 1  | 283.19   |         | 283.19              |        |
|                     |        |          |        | 20 | K   | 0  | 155.13   |         | 155.13              |        |

Scan number 8331 Raw file LNCAP\_Silac\_23F10\_set2\_06  
 Method ITMS; CID Pepti... 96.39

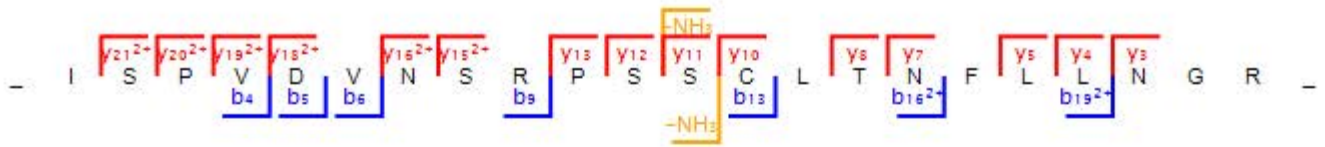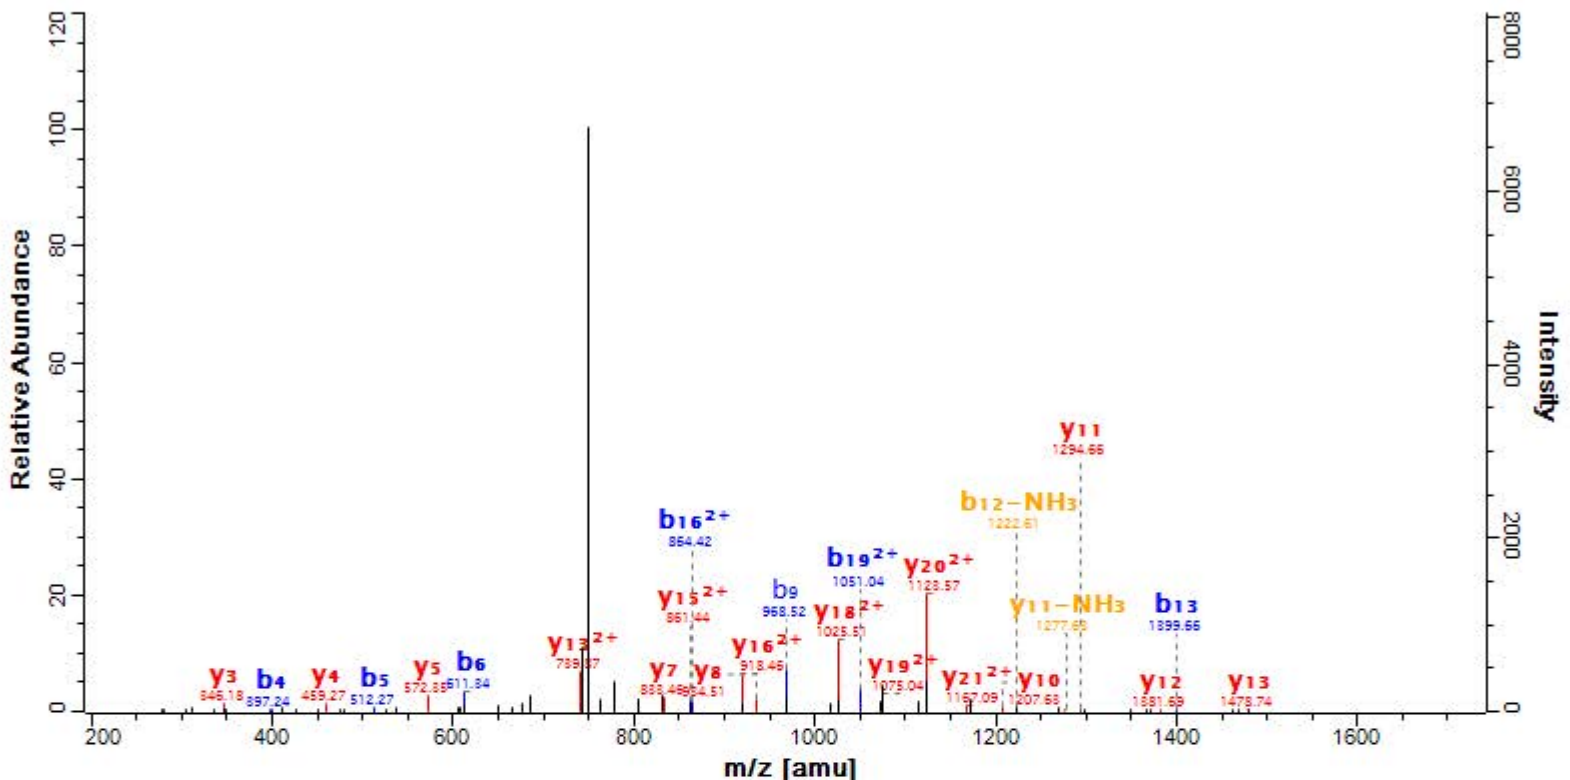

**precursor information**

|                   |                 |
|-------------------|-----------------|
| Mass:             | 2445.24324      |
| m/z:              | 816.08836       |
| Charge:           | 3+              |
| Retentiontime:    | 51.647369384765 |
| Score:            | 96.39133        |
| Mass Error [ppm]: | -0.08069        |
| PEP:              | 2.0036E-06      |
| Precursor Type:   | MULTI           |

**general information**

|                       |             |
|-----------------------|-------------|
| Annotation:           | 17 of 22    |
| AminoAcids Coverage:  | 77 %        |
| Intensity Coverage:   | 33 %        |
| Peak Coverage:        | 30 %        |
| Protein Localisation: | 337 ... 358 |

| b <sup>2+</sup> ion |        | b ion    |        | seq |   |    | y ion    |         | y <sup>2+</sup> ion |         |
|---------------------|--------|----------|--------|-----|---|----|----------|---------|---------------------|---------|
| Δ dalton            | mass   | Δ dalton | mass   |     |   |    | Δ dalton | mass    | Δ dalton            | mass    |
|                     | 114.09 | 114.09   |        | 1   | I | 21 |          |         |                     |         |
|                     | 201.12 | 201.12   |        | 2   | S | 20 | 2333.2   |         | 1167.1              | +0.1625 |
|                     | 298.18 | 298.18   |        | 3   | P | 19 | 2246.1   |         | 1123.6              | +0.1511 |
|                     | 397.24 | +0.0648  | 397.24 | 4   | V | 18 | 2149.1   |         | 1075                | -0.265  |
|                     | 512.27 | -0.066   | 512.27 | 5   | D | 17 | 2050     |         | 1025.5              | +0.1745 |
|                     | 611.34 | +0.2203  | 611.34 | 6   | V | 16 | 1935     |         | 1935                |         |
|                     | 725.38 |          | 725.38 | 7   | N | 15 | 1835.9   |         | 918.46              | +0.4268 |
|                     | 812.41 |          | 812.41 | 8   | S | 14 | 1721.9   |         | 861.44              | +0.1613 |
|                     | 968.52 | -0.03    | 968.52 | 9   | R | 13 | 1634.8   |         | 1634.8              |         |
|                     | 1065.6 |          | 1065.6 | 10  | P | 12 | 1478.7   | +0.2002 | 739.87              | +0.2463 |
|                     | 1152.6 |          | 1152.6 | 11  | S | 11 | 1381.7   | +0.0627 | 1381.7              |         |
|                     | 1239.6 |          | 1239.6 | 12  | S | 10 | 1294.7   | -0.13   | 1294.7              |         |
|                     | 1399.7 | -0.008   | 1399.7 | 13  | C | 9  | 1207.6   | +0.0433 | 1207.6              |         |
|                     | 1512.7 |          | 1512.7 | 14  | L | 8  | 1047.6   |         | 1047.6              |         |
|                     | 1613.8 |          | 1613.8 | 15  | T | 7  | 934.51   | -0.035  | 934.51              |         |
| +0.4338             | 864.42 |          | 1727.8 | 16  | N | 6  | 833.46   | -0.129  | 833.46              |         |
|                     | 1874.9 |          | 1874.9 | 17  | F | 5  | 719.42   |         | 719.42              |         |
|                     | 1988   |          | 1988   | 18  | L | 4  | 572.35   | +0.0807 | 572.35              |         |
| +0.3445             | 1051   |          | 2101.1 | 19  | L | 3  | 459.27   | +0.0275 | 459.27              |         |
|                     | 2215.1 |          | 2215.1 | 20  | N | 2  | 346.18   | +0.0123 | 346.18              |         |
|                     | 2272.1 |          | 2272.1 | 21  | G | 1  | 232.14   |         | 232.14              |         |
|                     |        |          |        | 22  | R | 0  | 175.12   |         | 175.12              |         |



Scan number 8344 Raw file LNCAP\_Silac\_23F10\_set2\_06  
 Method ITMS; CID Peptide L122.63

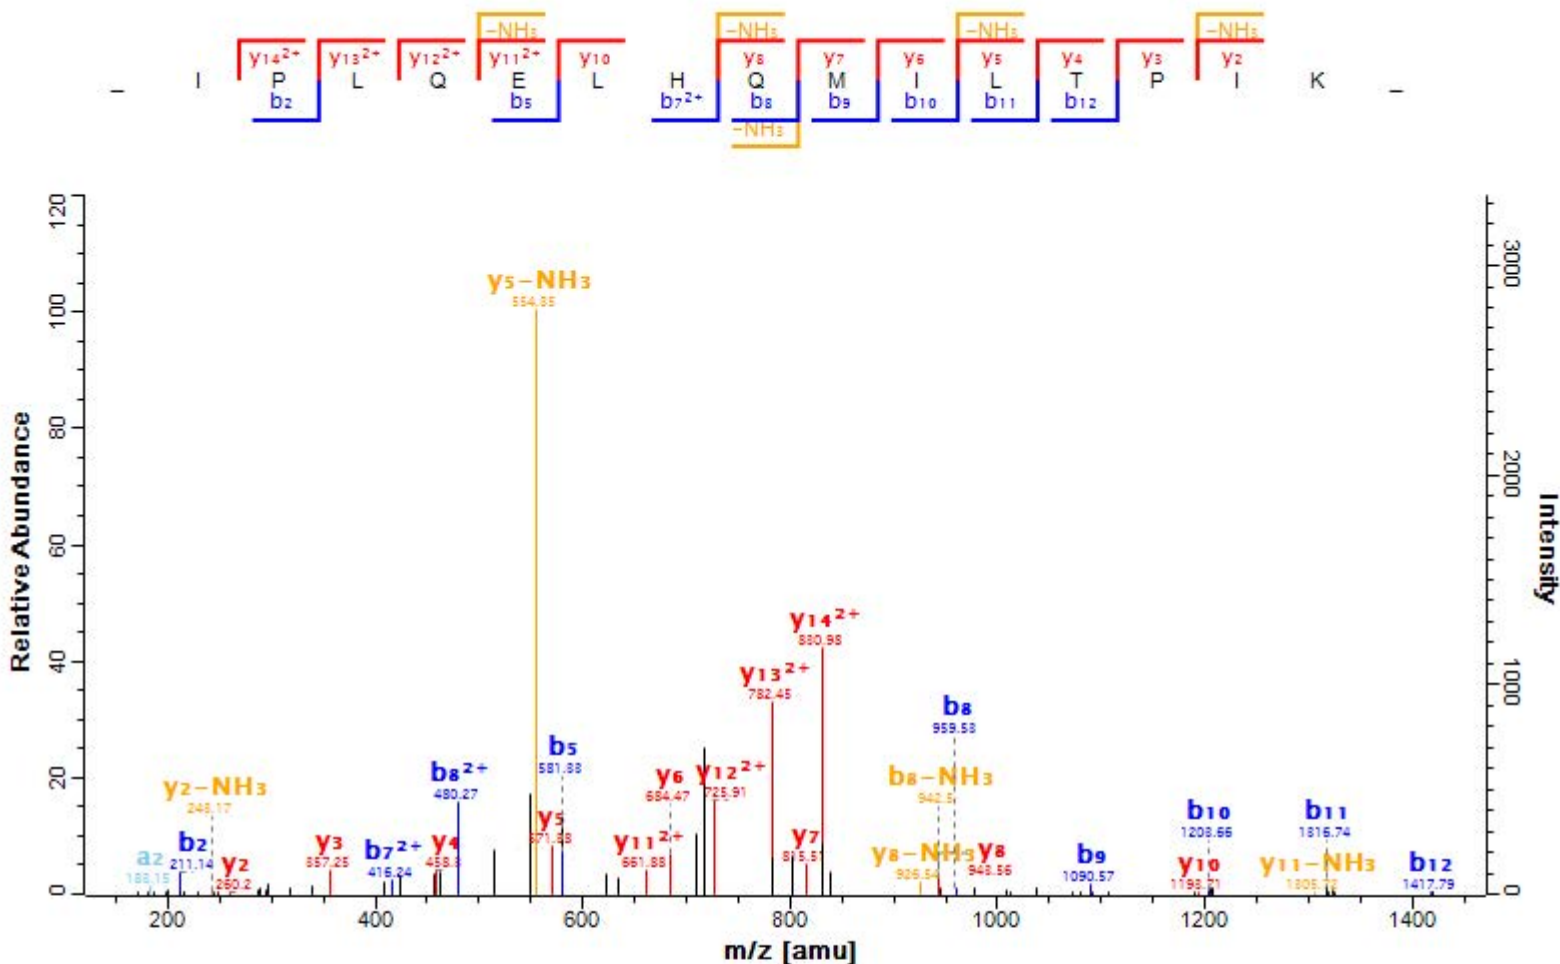

precursor information

|                   |                 |
|-------------------|-----------------|
| Mass:             | 1773.02256      |
| m/z:              | 592.0148        |
| Charge:           | 3+              |
| Retentiontime:    | 51.728141784668 |
| Score:            | 122.6294        |
| Mass Error [ppm]: | 0.16727         |
| PEP:              | 2.7445E-09      |
| Precursor Type:   | MULTI           |

general information

|                       |             |
|-----------------------|-------------|
| Annotation:           | 13 of 15    |
| AminoAcids Coverage:  | 87 %        |
| Intensity Coverage:   | 64 %        |
| Peak Coverage:        | 28 %        |
| Protein Localisation: | 402 ... 416 |

|    | a ion         | b <sup>2+</sup> ion | b ion         |     |   | y ion         | y <sup>2+</sup> ion |
|----|---------------|---------------------|---------------|-----|---|---------------|---------------------|
|    | Δ dalton mass | Δ dalton mass       | Δ dalton mass | seq |   | Δ dalton mass | Δ dalton mass       |
|    | 86.1          | 114.1               | 114.1         | 1   | I | 14            |                     |
| +0 | 183.1         | 211.1               | -0.13 211.1   | 2   | P | 13            | 1661 831 +0.209     |
|    | 296.2         | 324.2               | 324.2         | 3   | L | 12            | 1564 782.4 +0.234   |
|    | 424.3         | 452.3               | 452.3         | 4   | Q | 11            | 1451 725.9 +0.227   |
|    | 553.3         | 581.3               | +0.026 581.3  | 5   | E | 10            | 1323 661.9 +0.029   |
|    | 666.4         | 694.4               | 694.4         | 6   | L | 9             | 1194 -0.16 1194     |
|    | 803.5         | -0.05 416.2         | 831.5         | 7   | H | 8             | 1081 1081           |
|    | 931.5         | +0.134 480.3        | +0.137 959.5  | 8   | Q | 7             | 943.6 -0.09 943.6   |
|    | 1063          | 1091                | +0.02 1091    | 9   | M | 6             | 815.5 +0.164 815.5  |
|    | 1176          | 1204                | -0.18 1204    | 10  | I | 5             | 684.5 -0.02 684.5   |
|    | 1289          | 1317                | +0.26 1317    | 11  | L | 4             | 571.4 +0.064 571.4  |
|    | 1390          | 1418                | +0.118 1418   | 12  | T | 3             | 458.3 +0.094 458.3  |
|    | 1487          | 1515                | 1515          | 13  | P | 2             | 357.2 +0.015 357.2  |
|    | 1600          | 1628                | 1628          | 14  | I | 1             | 260.2 +0.231 260.2  |
|    |               |                     |               | 15  | K | 0             | 147.1 147.1         |

Scan number 8360 Raw file LNCAP\_Silac\_23F10\_set2\_06  
 Method ITMS; CID Pepti... 137.21

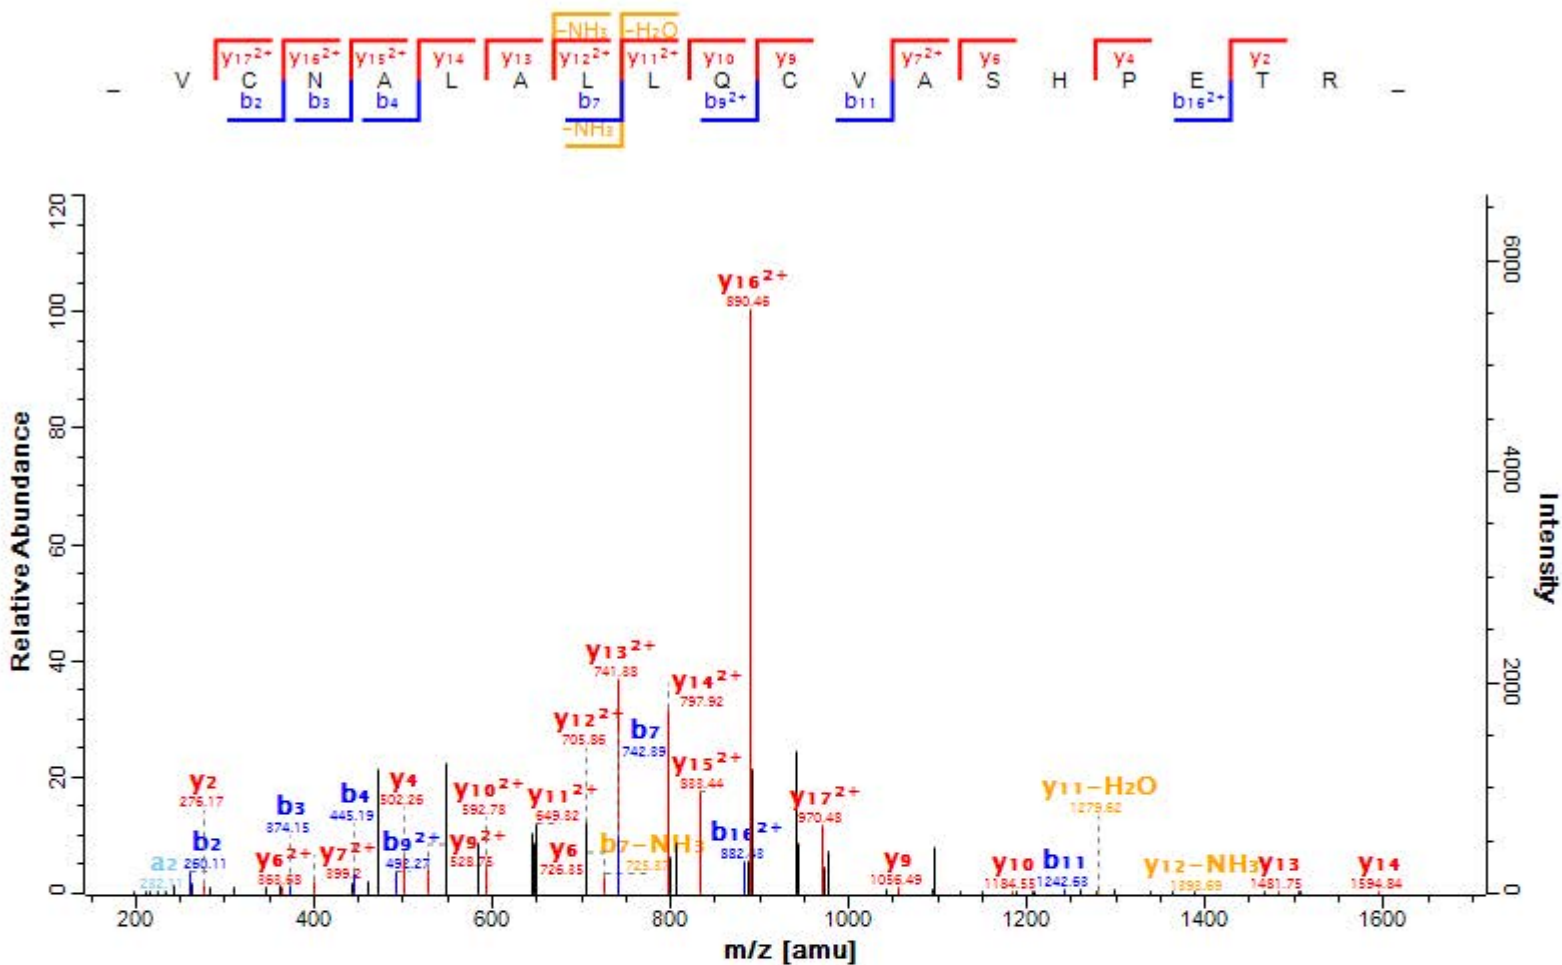

precursor information

|                   |                 |
|-------------------|-----------------|
| Mass:             | 2038.00899      |
| m/z:              | 680.34361       |
| Charge:           | 3+              |
| Retentiontime:    | 51.833724975585 |
| Score:            | 137.207         |
| Mass Error [ppm]: | 0.084682        |
| PEP:              | 3.4997E-17      |
| Precursor Type:   | MULTI           |

general information

|                       |            |
|-----------------------|------------|
| Annotation:           | 15 of 18   |
| AminoAcids Coverage:  | 83 %       |
| Intensity Coverage:   | 52 %       |
| Peak Coverage:        | 28 %       |
| Protein Localisation: | 90 ... 107 |

|    | a ion         | b <sup>2+</sup> ion | b ion         |     |   | y ion         | y <sup>2+</sup> ion      |
|----|---------------|---------------------|---------------|-----|---|---------------|--------------------------|
|    | Δ dalton mass | Δ dalton mass       | Δ dalton mass | seq |   | Δ dalton mass | Δ dalton mass            |
|    | 72.08         | 100.1               | 100.1         | 1   | V | 17            |                          |
| +0 | 232.1         | 260.1               | +0.088260.1   | 2   | C | 16            | 1940 970.5 +0.196        |
|    | 346.2         | 374.1               | -0.01 374.1   | 3   | N | 15            | 1780 890.5 +0.344        |
|    | 417.2         | 445.2               | +0.002445.2   | 4   | A | 14            | 1666 833.4 +0.212        |
|    | 530.3         | 558.3               | 558.3         | 5   | L | 13            | 1595 +0.113797.9 +0.191  |
|    | 601.3         | 629.3               | 629.3         | 6   | A | 12            | 1482 +0.058741.4 +0.253  |
|    | 714.4         | 742.4               | +0.215742.4   | 7   | L | 11            | 1411 705.9 +0.052        |
|    | 827.5         | 855.5               | 855.5         | 8   | L | 10            | 1298 649.3 +0.109        |
|    | 955.5         | -0.39 492.3         | 983.5         | 9   | Q | 9             | 1185 +0.129592.8 +0.077  |
|    | 1116          | 1144                | 1144          | 10  | C | 8             | 1056 +0.152528.7 +0.184  |
|    | 1215          | 1243                | +0.0171243    | 11  | V | 7             | 896.5 896.5              |
|    | 1286          | 1314                | 1314          | 12  | A | 6             | 797.4 399.2 +0.177       |
|    | 1373          | 1401                | 1401          | 13  | S | 5             | 726.4 +0.094363.7 +0.367 |
|    | 1510          | 1538                | 1538          | 14  | H | 4             | 639.3 639.3              |
|    | 1607          | 1635                | 1635          | 15  | P | 3             | 502.3 -0.02 502.3        |
|    | 1736          | -0.28 882.4         | 1764          | 16  | E | 2             | 405.2 405.2              |
|    | 1837          | 1865                | 1865          | 17  | T | 1             | 276.2 +0.10276.2         |
|    |               |                     |               | 18  | R | 0             | 175.1 175.1              |

Scan number 8650 Raw file LNCAP\_Silac\_23F10\_set2\_06  
 Method ITMS: CID Peptide 74.61

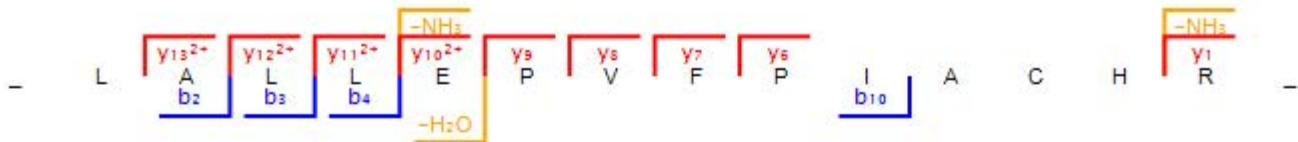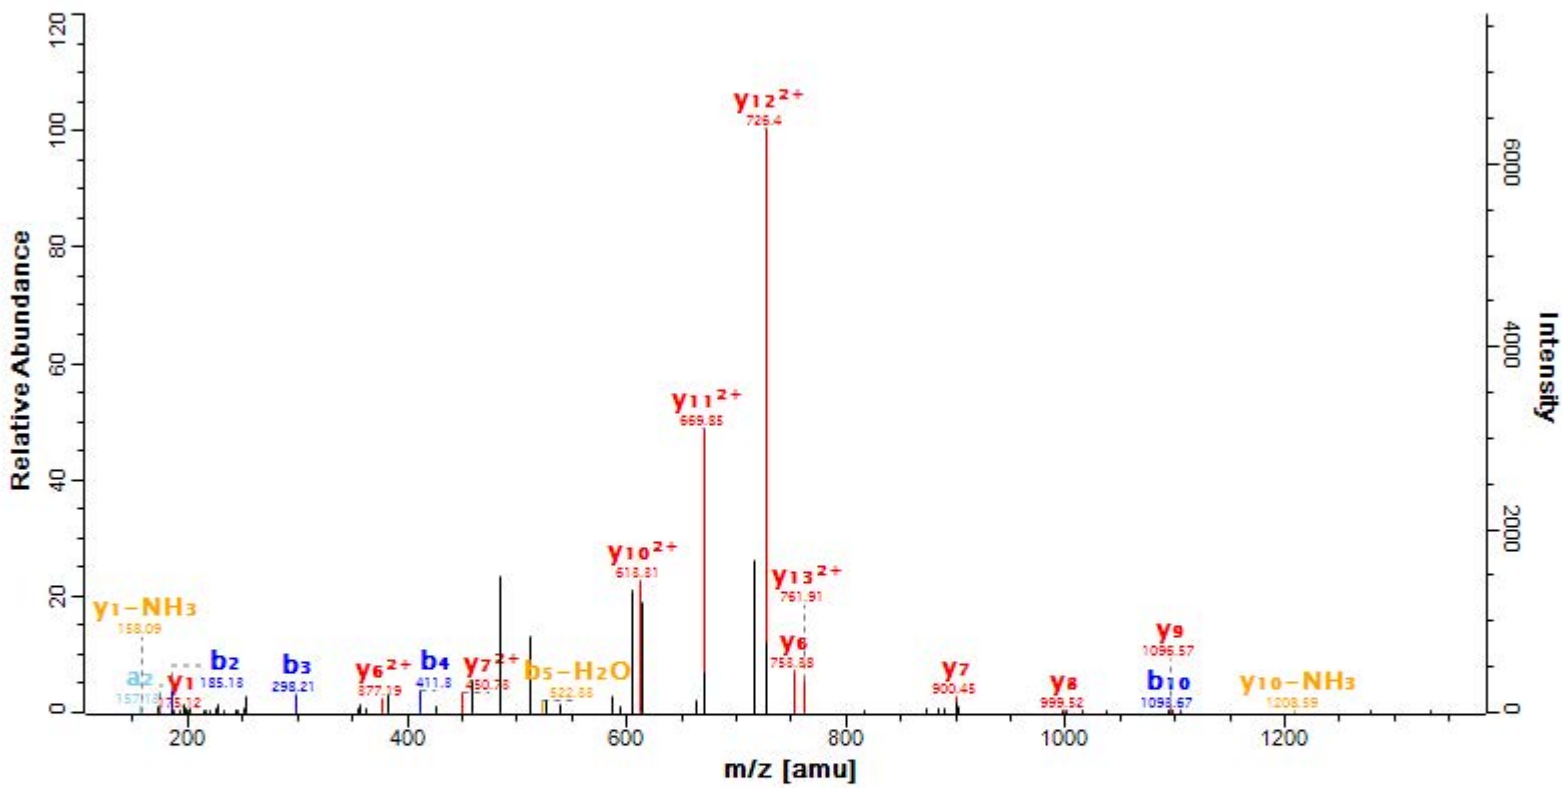

precursor information

|                   |                 |
|-------------------|-----------------|
| Mass:             | 1634.89695      |
| m/z:              | 545.97293       |
| Charge:           | 3+              |
| Retentiontime:    | 53.745914459228 |
| Score:            | 74.61087        |
| Mass Error [ppm]: | 0.17397         |
| PEP:              | 0.0014857       |
| Precursor Type:   | MULTI           |

general information

|                       |             |
|-----------------------|-------------|
| Annotation:           | 10 of 14    |
| AminoAcids Coverage:  | 71 %        |
| Intensity Coverage:   | 54 %        |
| Peak Coverage:        | 20 %        |
| Protein Localisation: | 742 ... 755 |

| a ion    |        | b ion    |        |    |     |    | y ion    |         | y <sup>2+</sup> ion |         |
|----------|--------|----------|--------|----|-----|----|----------|---------|---------------------|---------|
| Δ dalton | mass   | Δ dalton | mass   |    | seq |    | Δ dalton | mass    | Δ dalton            | mass    |
|          | 86.096 |          | 114.09 | 1  | L   | 13 |          |         |                     |         |
| +0.0101  | 157.13 | -0.018   | 185.13 | 2  | A   | 12 | 1522.8   |         | 761.91              | -0.01   |
|          | 270.22 | +0.0538  | 298.21 | 3  | L   | 11 | 1451.8   |         | 726.4               | +0.2217 |
|          | 383.3  | -0.099   | 411.3  | 4  | L   | 10 | 1338.7   |         | 669.85              | +0.2839 |
|          | 512.34 |          | 540.34 | 5  | E   | 9  | 1225.6   |         | 613.31              | -0.006  |
|          | 609.4  |          | 637.39 | 6  | P   | 8  | 1096.6   | +0.2049 | 1096.6              |         |
|          | 708.47 |          | 736.46 | 7  | V   | 7  | 999.52   | -0.043  | 999.52              |         |
|          | 855.53 |          | 883.53 | 8  | F   | 6  | 900.45   | +0.059  | 450.73              | +0.1905 |
|          | 952.59 |          | 980.58 | 9  | P   | 5  | 753.38   | +0.055  | 377.19              | +0.0833 |
|          | 1065.7 | -0.239   | 1093.7 | 10 | I   | 4  | 656.33   |         | 656.33              |         |
|          | 1136.7 |          | 1164.7 | 11 | A   | 3  | 543.25   |         | 543.25              |         |
|          | 1296.7 |          | 1324.7 | 12 | C   | 2  | 472.21   |         | 472.21              |         |
|          | 1433.8 |          | 1461.8 | 13 | H   | 1  | 312.18   |         | 312.18              |         |
|          |        |          |        | 14 | R   | 0  | 175.12   | -0.045  | 175.12              |         |

Scan number 8915 Raw file LNCAP\_Silac\_23F10\_set2\_06  
 Method ITMS; CID Pepti... 107.03

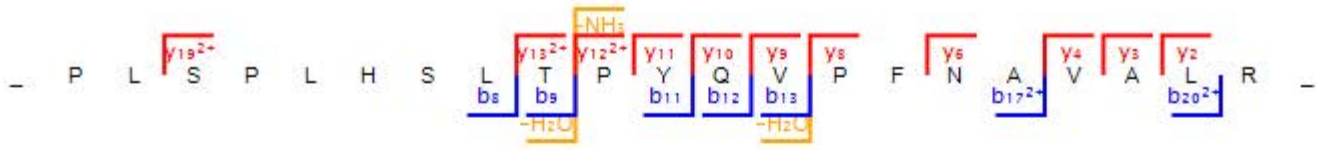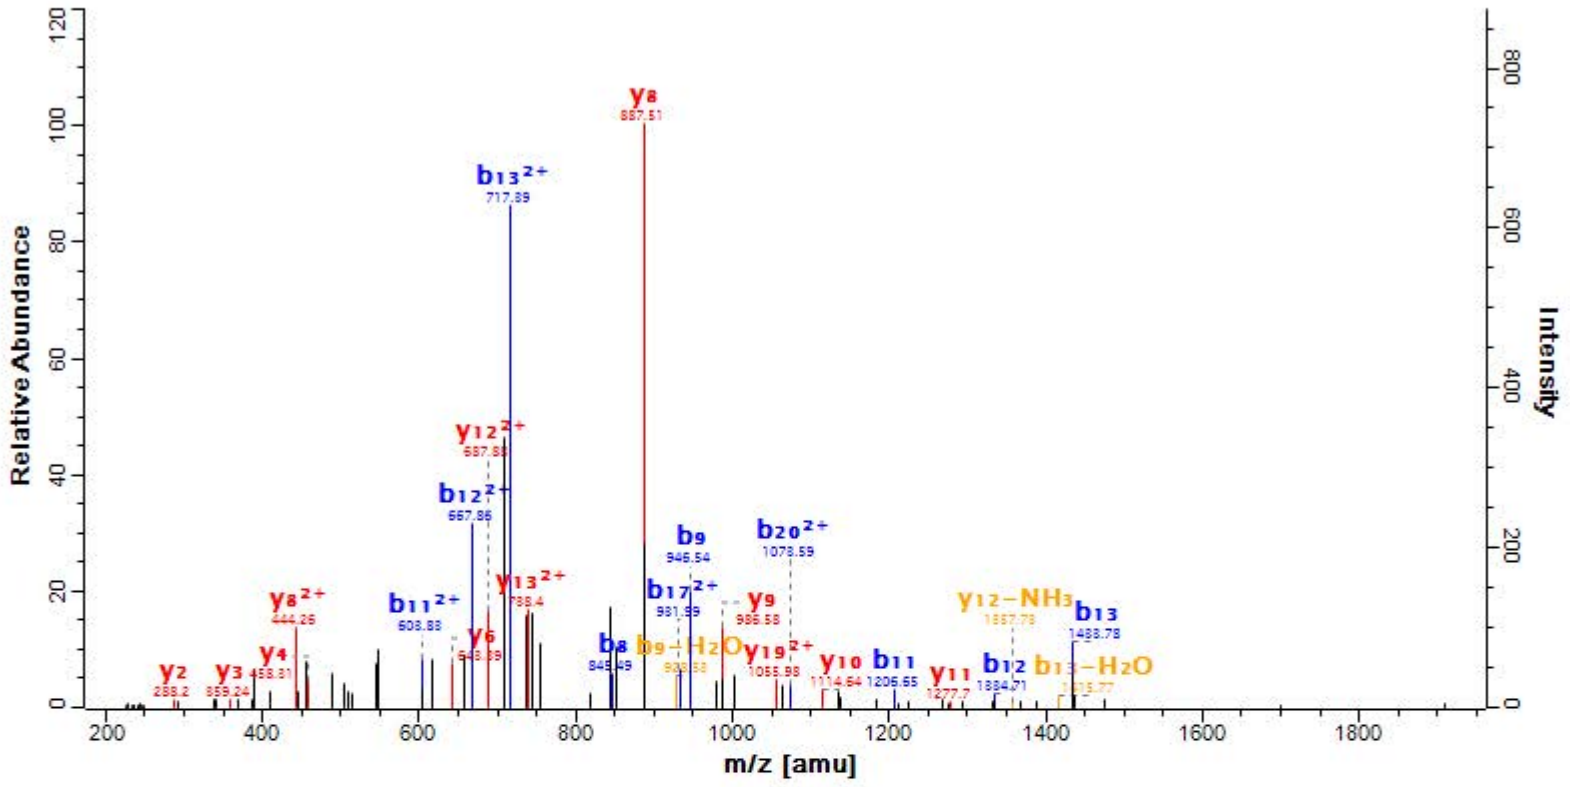

precursor information

|                   |                 |
|-------------------|-----------------|
| Mass:             | 2319.27214      |
| m/z:              | 774.09799       |
| Charge:           | 3+              |
| Retentiontime:    | 55.677364349365 |
| Score:            | 107.0252        |
| Mass Error [ppm]: | -0.77363        |
| PEP:              | 2.3284E-06      |
| Precursor Type:   | ISO             |

| b <sup>2+</sup> ion |        | b ion    |        | seq |   |    | y ion    |         | y <sup>2+</sup> ion |         |
|---------------------|--------|----------|--------|-----|---|----|----------|---------|---------------------|---------|
| Δ dalton            | mass   | Δ dalton | mass   |     |   |    | Δ dalton | mass    | Δ dalton            | mass    |
|                     | 98.06  |          | 98.06  | 1   | P | 20 |          |         |                     |         |
|                     | 211.14 |          | 211.14 | 2   | L | 19 | 2223.2   |         | 2223.2              |         |
|                     | 298.18 |          | 298.18 | 3   | S | 18 | 2110.1   |         | 1055.6              | +0.4837 |
|                     | 395.23 |          | 395.23 | 4   | P | 17 | 2023.1   |         | 2023.1              |         |
|                     | 508.31 |          | 508.31 | 5   | L | 16 | 1926.1   |         | 1926.1              |         |
|                     | 645.37 |          | 645.37 | 6   | H | 15 | 1813     |         | 1813                |         |
|                     | 732.4  |          | 732.4  | 7   | S | 14 | 1675.9   |         | 1675.9              |         |
|                     | 845.49 | +0.1327  | 845.49 | 8   | L | 13 | 1588.9   |         | 1588.9              |         |
|                     | 946.54 | -0.028   | 946.54 | 9   | T | 12 | 1475.8   |         | 738.4               | +0.0631 |
|                     | 1043.6 |          | 1043.6 | 10  | P | 11 | 1374.8   |         | 687.88              | +0.0028 |
| +0.0664             | 603.83 | +0.1228  | 1206.7 | 11  | Y | 10 | 1277.7   | +0.1218 | 1277.7              |         |
| +0.205              | 667.86 | -0.376   | 1334.7 | 12  | Q | 9  | 1114.6   | -0.115  | 1114.6              |         |
| +0.1892             | 717.39 | -0.027   | 1433.8 | 13  | V | 8  | 986.58   | +0.0377 | 986.58              |         |
|                     | 1530.8 |          | 1530.8 | 14  | P | 7  | 887.51   | -0.025  | 444.26              | +0.1534 |
|                     | 1677.9 |          | 1677.9 | 15  | F | 6  | 790.46   |         | 790.46              |         |
|                     | 1791.9 |          | 1791.9 | 16  | N | 5  | 643.39   | -0.004  | 643.39              |         |
| +0.4485             | 931.99 |          | 1863   | 17  | A | 4  | 529.35   |         | 529.35              |         |
|                     | 1962   |          | 1962   | 18  | V | 3  | 458.31   | -0.052  | 458.31              |         |
|                     | 2033.1 |          | 2033.1 | 19  | A | 2  | 359.24   | +0.0925 | 359.24              |         |
| +0.3056             | 1073.6 |          | 2146.2 | 20  | L | 1  | 288.2    | +0.1096 | 288.2               |         |
|                     |        |          |        | 21  | R | 0  | 175.12   |         | 175.12              |         |

general information

|                       |             |
|-----------------------|-------------|
| Annotation:           | 13 of 21    |
| AminoAcids Coverage:  | 62 %        |
| Intensity Coverage:   | 57 %        |
| Peak Coverage:        | 29 %        |
| Protein Localisation: | 538 ... 558 |

Scan number 8959 Raw file LNCAP\_Silac\_23F10\_set2\_06  
 Method ITMS; CID Peptide 170.11

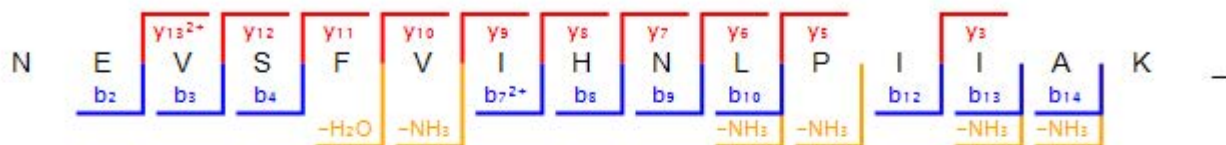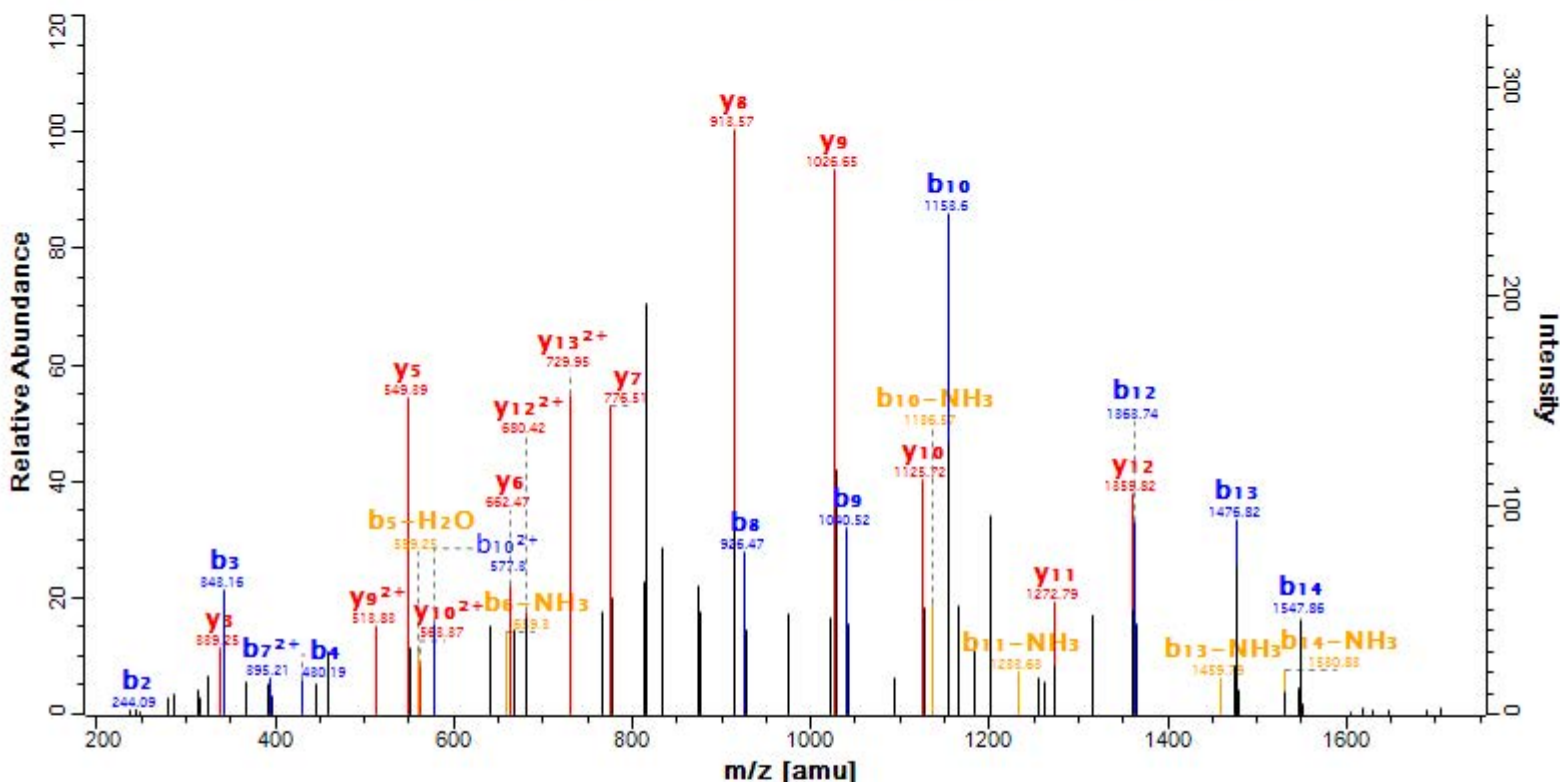

precursor information

|                   |                 |
|-------------------|-----------------|
| Mass:             | 1692.95635      |
| m/z:              | 847.48545       |
| Charge:           | 2+              |
| Retentiontime:    | 56.007953643798 |
| Score:            | 170.1144        |
| Mass Error [ppm]: | 0.035385        |
| PEP:              | 6.1765E-17      |
| Precursor Type:   | MULTI           |

general information

|                       |             |
|-----------------------|-------------|
| Annotation:           | 13 of 15    |
| AminoAcids Coverage:  | 87 %        |
| Intensity Coverage:   | 53 %        |
| Peak Coverage:        | 33 %        |
| Protein Localisation: | 335 ... 349 |

| b <sup>2+</sup> ion |        | b ion    |        | seq |   |    | y ion    |         | y <sup>2+</sup> ion |         |
|---------------------|--------|----------|--------|-----|---|----|----------|---------|---------------------|---------|
| Δ dalton            | mass   | Δ dalton | mass   |     |   |    | Δ dalton | mass    | Δ dalton            | mass    |
|                     | 115.05 |          | 115.05 | 1   | N | 14 |          |         |                     |         |
|                     | 244.09 | -0.059   | 244.09 | 2   | E | 13 | 1587.9   |         | 1587.9              |         |
|                     | 343.16 | -0.009   | 343.16 | 3   | V | 12 | 1458.9   |         | 729.95              | +0.1569 |
|                     | 430.19 | +0.1557  | 430.19 | 4   | S | 11 | 1359.8   | -0.066  | 680.42              | +0.0534 |
|                     | 577.26 |          | 577.26 | 5   | F | 10 | 1272.8   | -0.005  | 1272.8              |         |
|                     | 676.33 |          | 676.33 | 6   | V | 9  | 1125.7   | +0.0809 | 563.37              | +0.1167 |
| +0.0469             | 395.21 |          | 789.41 | 7   | I | 8  | 1026.7   | +0.003  | 513.83              | +0.2182 |
|                     | 926.47 | -0.06    | 926.47 | 8   | H | 7  | 913.57   | +0.0102 | 913.57              |         |
|                     | 1040.5 | +0.0123  | 1040.5 | 9   | N | 6  | 776.51   | +0.0012 | 776.51              |         |
| +0.0527             | 577.3  | -0.12    | 1153.6 | 10  | L | 5  | 662.47   | +0.0946 | 662.47              |         |
|                     | 1250.7 |          | 1250.7 | 11  | P | 4  | 549.39   | +0.043  | 549.39              |         |
|                     | 1363.7 | -0.037   | 1363.7 | 12  | I | 3  | 452.33   |         | 452.33              |         |
|                     | 1476.8 | -0.13    | 1476.8 | 13  | I | 2  | 339.25   | +0.0954 | 339.25              |         |
|                     | 1547.9 | +0.081   | 1547.9 | 14  | A | 1  | 226.16   |         | 226.16              |         |
|                     |        |          |        | 15  | K | 0  | 155.13   |         | 155.13              |         |

Scan number 9079 Raw file LNCAP\_Silac\_23F10\_set2\_06  
 Method ITMS; CID Pepti... 117.78

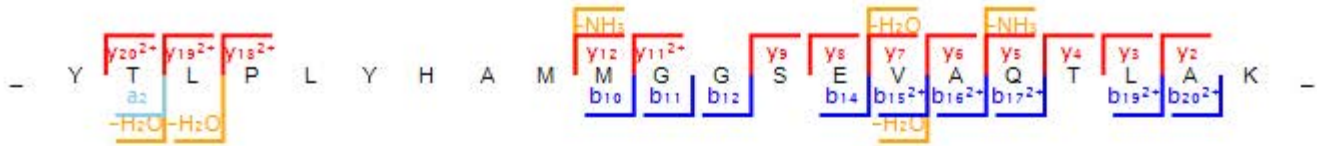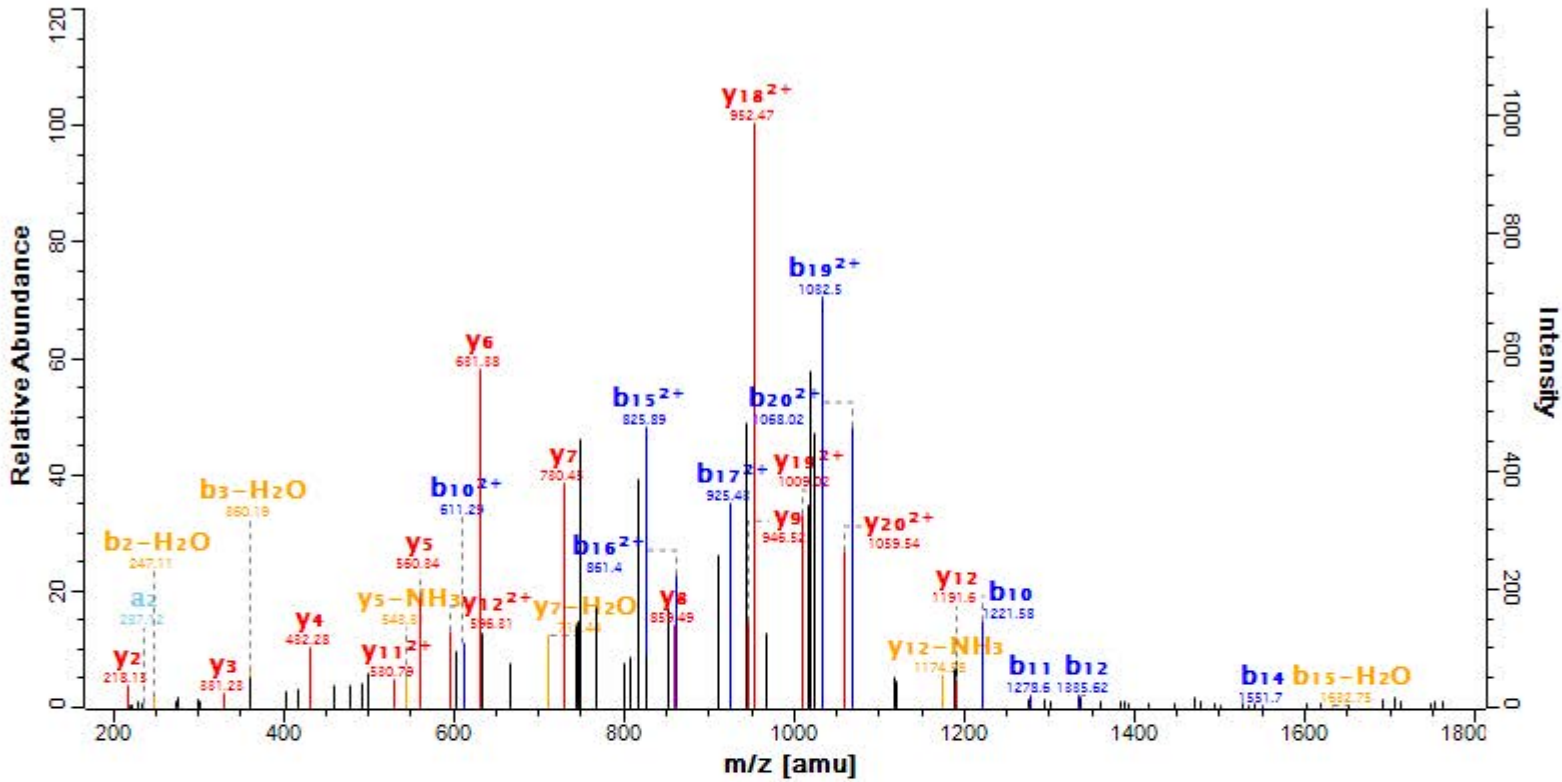

precursor information

|                   |                 |
|-------------------|-----------------|
| Mass:             | 2280.12811      |
| m/z:              | 761.04998       |
| Charge:           | 3+              |
| Retentiontime:    | 56.952949523925 |
| Score:            | 117.784         |
| Mass Error [ppm]: | -0.067715       |
| PEP:              | 7.0296E-10      |
| Precursor Type:   | MULTI           |

general information

|                       |             |
|-----------------------|-------------|
| Annotation:           | 14 of 21    |
| AminoAcids Coverage:  | 67 %        |
| Intensity Coverage:   | 53 %        |
| Peak Coverage:        | 31 %        |
| Protein Localisation: | 611 ... 631 |

| a ion         | b <sup>2+</sup> ion | b ion         |    | seq |    | y ion         | y <sup>2+</sup> ion |
|---------------|---------------------|---------------|----|-----|----|---------------|---------------------|
| Δ dalton mass | Δ dalton mass       | Δ dalton mass |    |     |    | Δ dalton mass | Δ dalton mass       |
| 136.1         | 164.1               | 164.1         | 1  | Y   | 20 |               |                     |
| +0.05237.1    | 265.1               | 265.1         | 2  | T   | 19 | 2118          | 1060 +0.26          |
| 350.2         | 378.2               | 378.2         | 3  | L   | 18 | 2017          | 1009 +0.20          |
| 447.3         | 475.3               | 475.3         | 4  | P   | 17 | 1904          | 952.5 +0.33         |
| 560.3         | 588.3               | 588.3         | 5  | L   | 16 | 1807          | 1807                |
| 723.4         | 751.4               | 751.4         | 6  | Y   | 15 | 1694          | 1694                |
| 860.5         | 888.5               | 888.5         | 7  | H   | 14 | 1531          | 1531                |
| 931.5         | 959.5               | 959.5         | 8  | A   | 13 | 1394          | 1394                |
| 1063          | 1091                | 1091          | 9  | M   | 12 | 1323          | 1323                |
| 1194          | +0.223611.3         | -0.13 1222    | 10 | M   | 11 | 1192          | +0.058596.3 +0.27   |
| 1251          | 1279                | -0.14 1279    | 11 | G   | 10 | 1061          | 530.8 +0.28         |
| 1308          | 1336                | -0.49 1336    | 12 | G   | 9  | 1004          | 1004                |
| 1395          | 1423                | 1423          | 13 | S   | 8  | 946.5         | -0.06 946.5         |
| 1524          | 1552                | +0.0211552    | 14 | E   | 7  | 859.5         | +0.038859.5         |
| 1623          | +0.154825.9         | 1651          | 15 | V   | 6  | 730.4         | +0.008730.4         |
| 1694          | +0.238861.4         | 1722          | 16 | A   | 5  | 631.4         | +0.041631.4         |
| 1822          | +0.183925.4         | 1850          | 17 | Q   | 4  | 560.3         | +0.008560.3         |
| 1923          | 1951                | 1951          | 18 | T   | 3  | 432.3         | +0.105432.3         |
| 2036          | +0.2011033          | 2064          | 19 | L   | 2  | 331.2         | +0.111331.2         |
| 2107          | +0.1821068          | 2135          | 20 | A   | 1  | 218.1         | -0.06 218.1         |
|               |                     |               | 21 | K   | 0  | 147.1         | 147.1               |

Scan number 9169 Raw file LNCAP\_Silac\_23F10\_set2\_06  
 Method ITMS; CID Pepti... 202.13

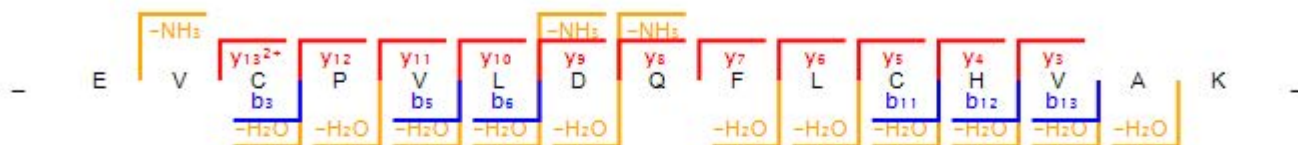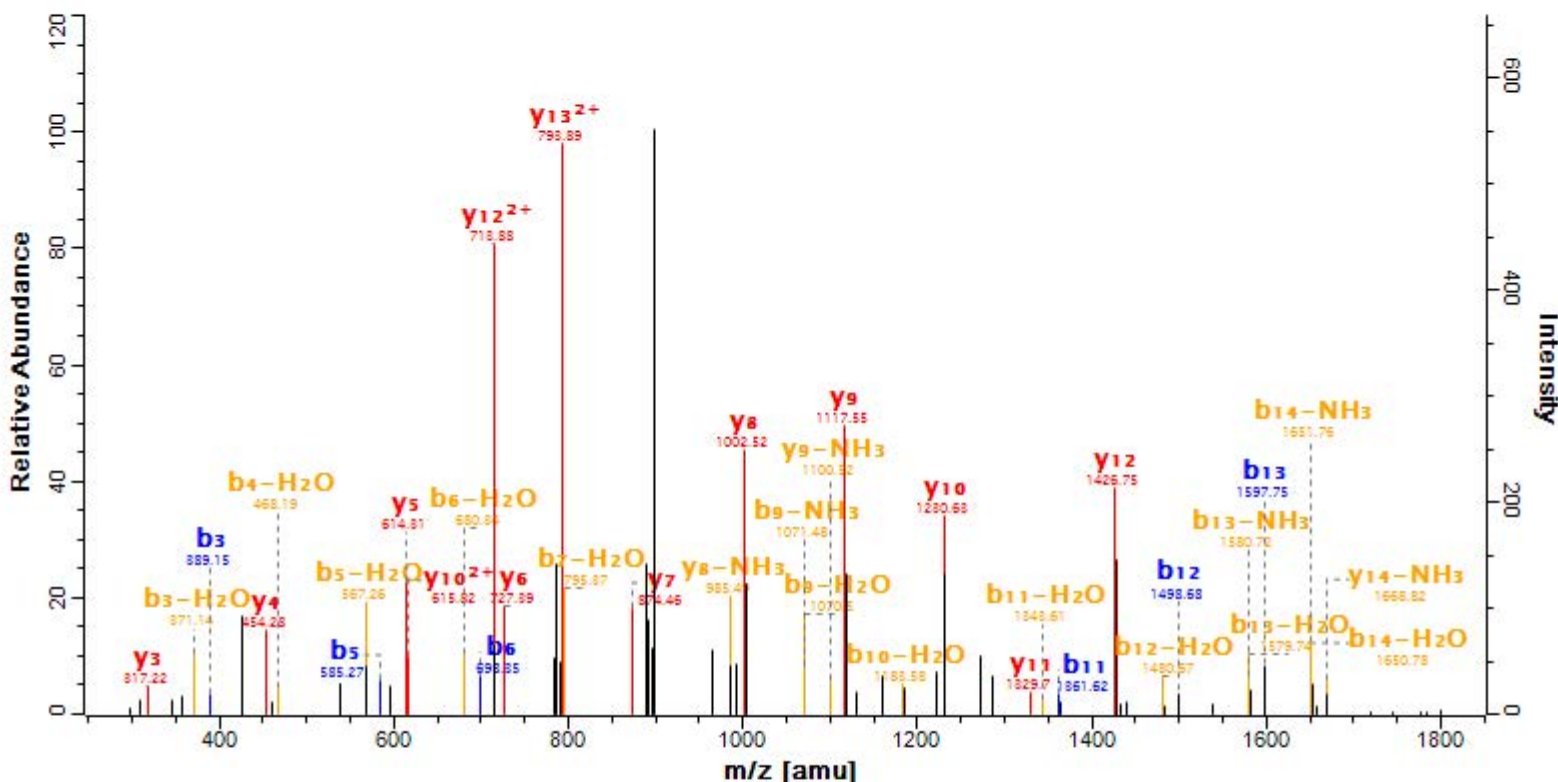

#### precursor information

|                   |                 |
|-------------------|-----------------|
| Mass:             | 1813.88539      |
| m/z:              | 907.94997       |
| Charge:           | 2+              |
| Retentiontime:    | 57.741981506347 |
| Score:            | 202.1269        |
| Mass Error [ppm]: | -0.066605       |
| PEP:              | 4.9227E-28      |
| Precursor Type:   | MULTI           |

#### general information

|                       |           |
|-----------------------|-----------|
| Annotation:           | 13 of 15  |
| AminoAcids Coverage:  | 87 %      |
| Intensity Coverage:   | 56 %      |
| Peak Coverage:        | 40 %      |
| Protein Localisation: | 20 ... 34 |

| b ion     |          |     |   | y ion    |          |           | y <sup>2+</sup> ion |          |
|-----------|----------|-----|---|----------|----------|-----------|---------------------|----------|
| Δ dalton  | mass     | seq |   | Δ dalton | mass     | Δ dalton  | mass                |          |
|           | 130.0499 | 1   | E | 14       |          |           |                     |          |
|           | 229.1183 | 2   | V | 13       | 1685.85  | 1685.85   |                     |          |
| -0.04731  | 389.1489 | 3   | C | 12       | 1586.782 | 793.8945  | +0.24335            |          |
|           | 486.2017 | 4   | P | 11       | 1426.751 | -0.0391   | 713.8792            | +0.28321 |
| +0.130098 | 585.2701 | 5   | V | 10       | 1329.698 | +0.026119 | 1329.698            |          |
| +0.017409 | 698.3542 | 6   | L | 9        | 1230.63  | -0.08772  | 615.8186            | -0.15742 |
|           | 813.3811 | 7   | D | 8        | 1117.546 | -0.12975  | 1117.546            |          |
|           | 941.4397 | 8   | Q | 7        | 1002.519 | -0.03555  | 1002.519            |          |
|           | 1088.508 | 9   | F | 6        | 874.4604 | -0.03642  | 874.4604            |          |
|           | 1201.592 | 10  | L | 5        | 727.392  | +0.035229 | 727.392             |          |
| -0.17653  | 1361.623 | 11  | C | 4        | 614.3079 | +0.066193 | 614.3079            |          |
| -0.06662  | 1498.682 | 12  | H | 3        | 454.2772 | +0.000893 | 454.2772            |          |
| -0.08193  | 1597.75  | 13  | V | 2        | 317.2183 | +0.015372 | 317.2183            |          |
|           | 1668.787 | 14  | A | 1        | 218.1499 |           | 218.1499            |          |
|           |          | 15  | K | 0        | 147.1128 |           | 147.1128            |          |

Scan number 920 Raw file LNCAP\_Silac\_23F10\_set2\_06  
 Method ITMS; CID Pepti... 108.9

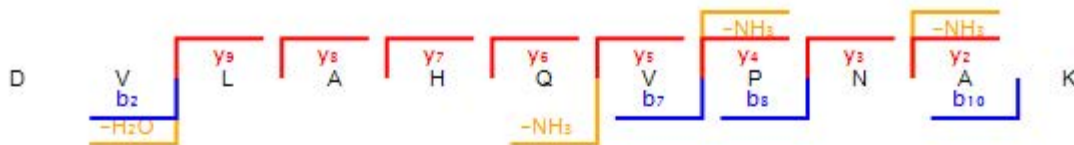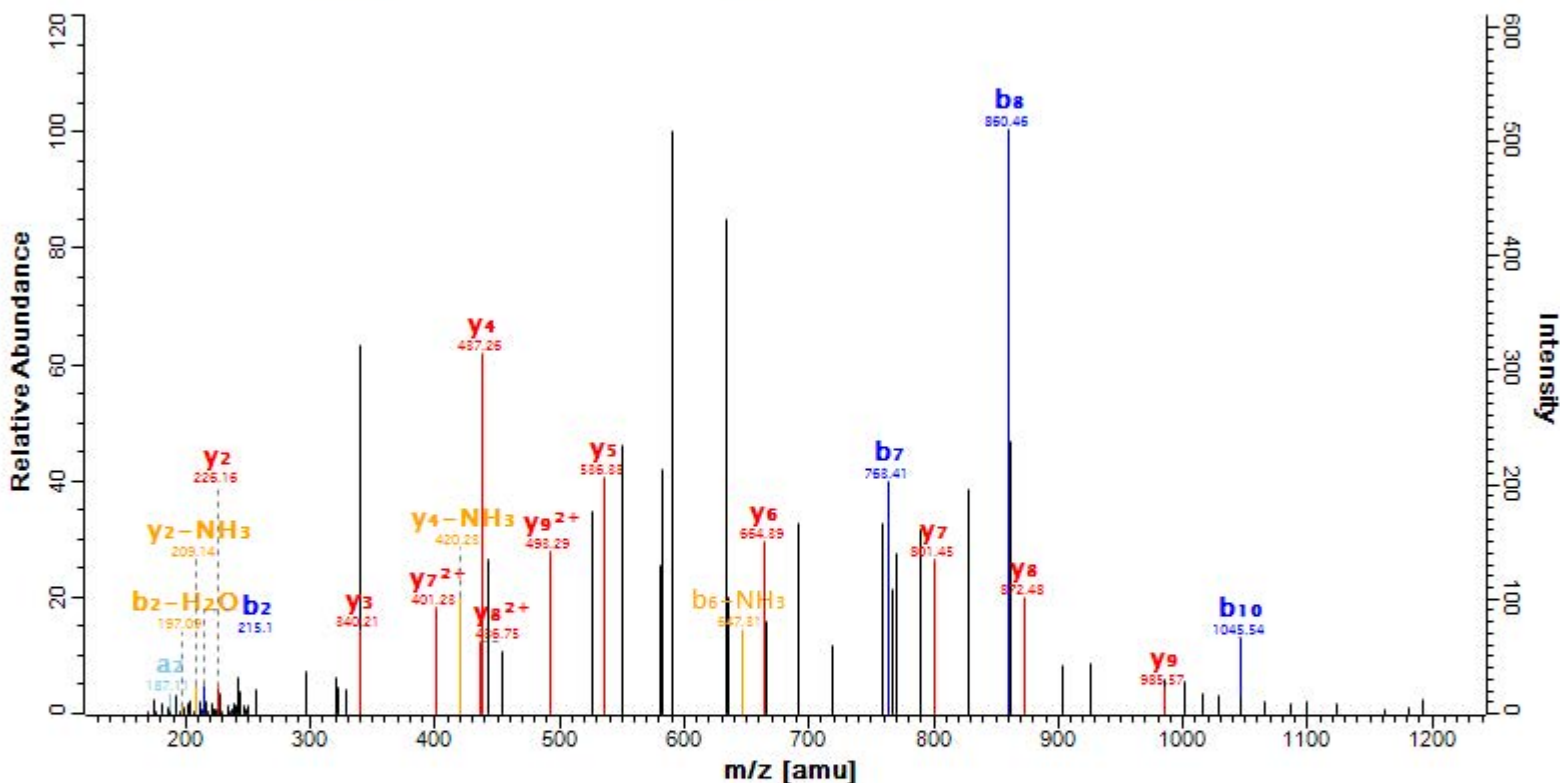

#### precursor information

|                   |                 |
|-------------------|-----------------|
| Mass:             | 1190.64067      |
| m/z:              | 596.32761       |
| Charge:           | 2+              |
| Retentiontime:    | 10.652101516723 |
| Score:            | 108.9032        |
| Mass Error [ppm]: | -0.082709       |
| PEP:              | 0.00028594      |
| Precursor Type:   | MULTI           |

#### general information

|                       |                      |
|-----------------------|----------------------|
| Annotation:           | 9 of 11              |
| AminoAcids Coverage:  | 82 %                 |
| Intensity Coverage:   | 34 %                 |
| Peak Coverage:        | 20 %                 |
| Protein Localisation: | 133 ... 143; 414 ... |

| a ion    |        | b ion    |        |    |     |          | y ion  |          | y <sup>2+</sup> ion |  |
|----------|--------|----------|--------|----|-----|----------|--------|----------|---------------------|--|
| Δ dalton | mass   | Δ dalton | mass   |    | seq | Δ dalton | mass   | Δ dalton | mass                |  |
|          | 88.039 |          | 116.03 | 1  | D   | 10       |        |          |                     |  |
| +0.011   | 187.11 | -0.068   | 215.1  | 2  | V   | 9        | 1084.6 |          | 1084.6              |  |
|          | 300.19 |          | 328.19 | 3  | L   | 8        | 985.57 | +0.036   | 493.29              |  |
|          | 371.23 |          | 399.22 | 4  | A   | 7        | 872.48 | -0.06    | 436.75              |  |
|          | 508.29 |          | 536.28 | 5  | H   | 6        | 801.45 | +0.0512  | 401.23              |  |
|          | 636.35 |          | 664.34 | 6  | Q   | 5        | 664.39 | -0.003   | 664.39              |  |
|          | 735.41 | -0.022   | 763.41 | 7  | V   | 4        | 536.33 | +0.1386  | 536.33              |  |
|          | 832.47 | +0.0773  | 860.46 | 8  | P   | 3        | 437.26 | -0.039   | 437.26              |  |
|          | 946.51 |          | 974.51 | 9  | N   | 2        | 340.21 | +0.0237  | 340.21              |  |
|          | 1017.5 | +0.2327  | 1045.5 | 10 | A   | 1        | 226.16 | +0.1373  | 226.16              |  |
|          |        |          |        | 11 | K   | 0        | 155.13 |          | 155.13              |  |



Scan number 9328 Raw file LNCAP\_Silac\_23F10\_set2\_06  
 Method ITMS; CID Pepti... 67.43

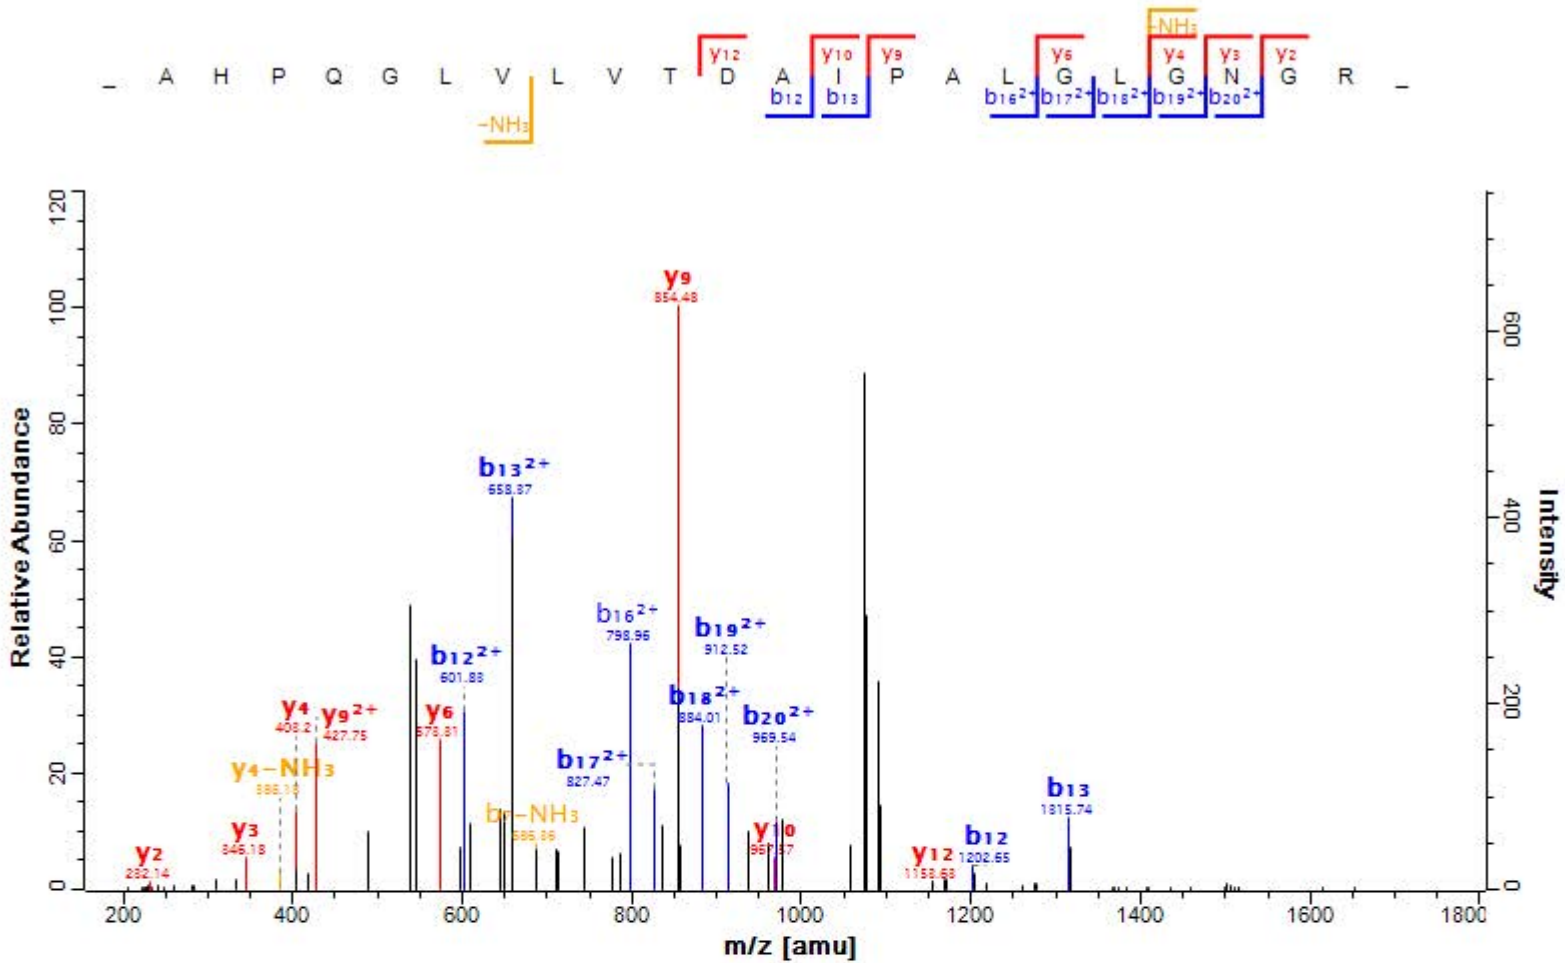

precursor information

|                   |                 |
|-------------------|-----------------|
| Mass:             | 2168.20654      |
| m/z:              | 723.74279       |
| Charge:           | 3+              |
| Retentiontime:    | 59.065235137939 |
| Score:            | 67.43032        |
| Mass Error [ppm]: | -0.021196       |
| PEP:              | 0.00066329      |
| Precursor Type:   | MULTI           |

general information

|                       |             |
|-----------------------|-------------|
| Annotation:           | 12 of 22    |
| AminoAcids Coverage:  | 55 %        |
| Intensity Coverage:   | 39 %        |
| Peak Coverage:        | 20 %        |
| Protein Localisation: | 284 ... 305 |

| b <sup>2+</sup> ion |        | b ion    |        | seq |   |    | y ion    |         | y <sup>2+</sup> ion |         |
|---------------------|--------|----------|--------|-----|---|----|----------|---------|---------------------|---------|
| Δ dalton            | mass   | Δ dalton | mass   |     |   |    | Δ dalton | mass    | Δ dalton            | mass    |
|                     | 72.044 |          | 72.044 | 1   | A | 21 |          |         |                     |         |
|                     | 209.1  |          | 209.1  | 2   | H | 20 | 2098.2   |         | 2098.2              |         |
|                     | 306.16 |          | 306.16 | 3   | P | 19 | 1961.1   |         | 1961.1              |         |
|                     | 434.21 |          | 434.21 | 4   | Q | 18 | 1864.1   |         | 1864.1              |         |
|                     | 491.24 |          | 491.24 | 5   | G | 17 | 1736     |         | 1736                |         |
|                     | 604.32 |          | 604.32 | 6   | L | 16 | 1679     |         | 1679                |         |
|                     | 703.39 |          | 703.39 | 7   | V | 15 | 1565.9   |         | 1565.9              |         |
|                     | 816.47 |          | 816.47 | 8   | L | 14 | 1466.8   |         | 1466.8              |         |
|                     | 915.54 |          | 915.54 | 9   | V | 13 | 1353.7   |         | 1353.7              |         |
|                     | 1016.6 |          | 1016.6 | 10  | T | 12 | 1254.7   |         | 1254.7              |         |
|                     | 1131.6 |          | 1131.6 | 11  | D | 11 | 1153.6   | +0.0241 | 1153.6              |         |
| +0.2246             | 601.83 | -0.206   | 1202.7 | 12  | A | 10 | 1038.6   |         | 1038.6              |         |
| +0.0163             | 658.37 | -0.074   | 1315.7 | 13  | I | 9  | 967.57   | +0.1544 | 967.57              |         |
|                     | 1412.8 |          | 1412.8 | 14  | P | 8  | 854.48   | +0.019  | 427.75              | +0.2116 |
|                     | 1483.8 |          | 1483.8 | 15  | A | 7  | 757.43   |         | 757.43              |         |
| +0.1939             | 798.96 |          | 1596.9 | 16  | L | 6  | 686.39   |         | 686.39              |         |
| +0.1644             | 827.47 |          | 1653.9 | 17  | G | 5  | 573.31   | +0.0482 | 573.31              |         |
| +0.2455             | 884.01 |          | 1767   | 18  | L | 4  | 516.29   |         | 516.29              |         |
| +0.2551             | 912.52 |          | 1824   | 19  | G | 3  | 403.2    | +0.0544 | 403.2               |         |
| +0.2474             | 969.54 |          | 1938.1 | 20  | N | 2  | 346.18   | +0.022  | 346.18              |         |
|                     | 1995.1 |          | 1995.1 | 21  | G | 1  | 232.14   | +0.1263 | 232.14              |         |
|                     |        |          |        | 22  | R | 0  | 175.12   |         | 175.12              |         |

Scan number 9349 Raw file LNCAP\_Silac\_23F10\_set2\_06  
 Method ITMS; CID Pepti... 159.31

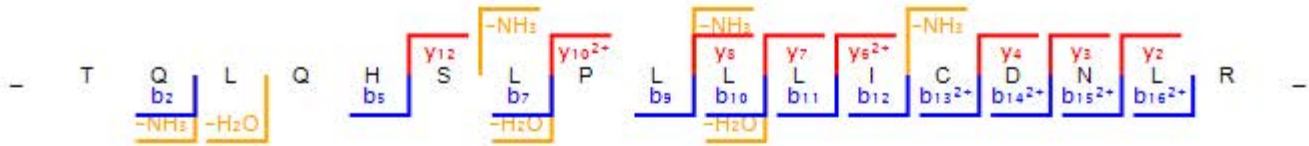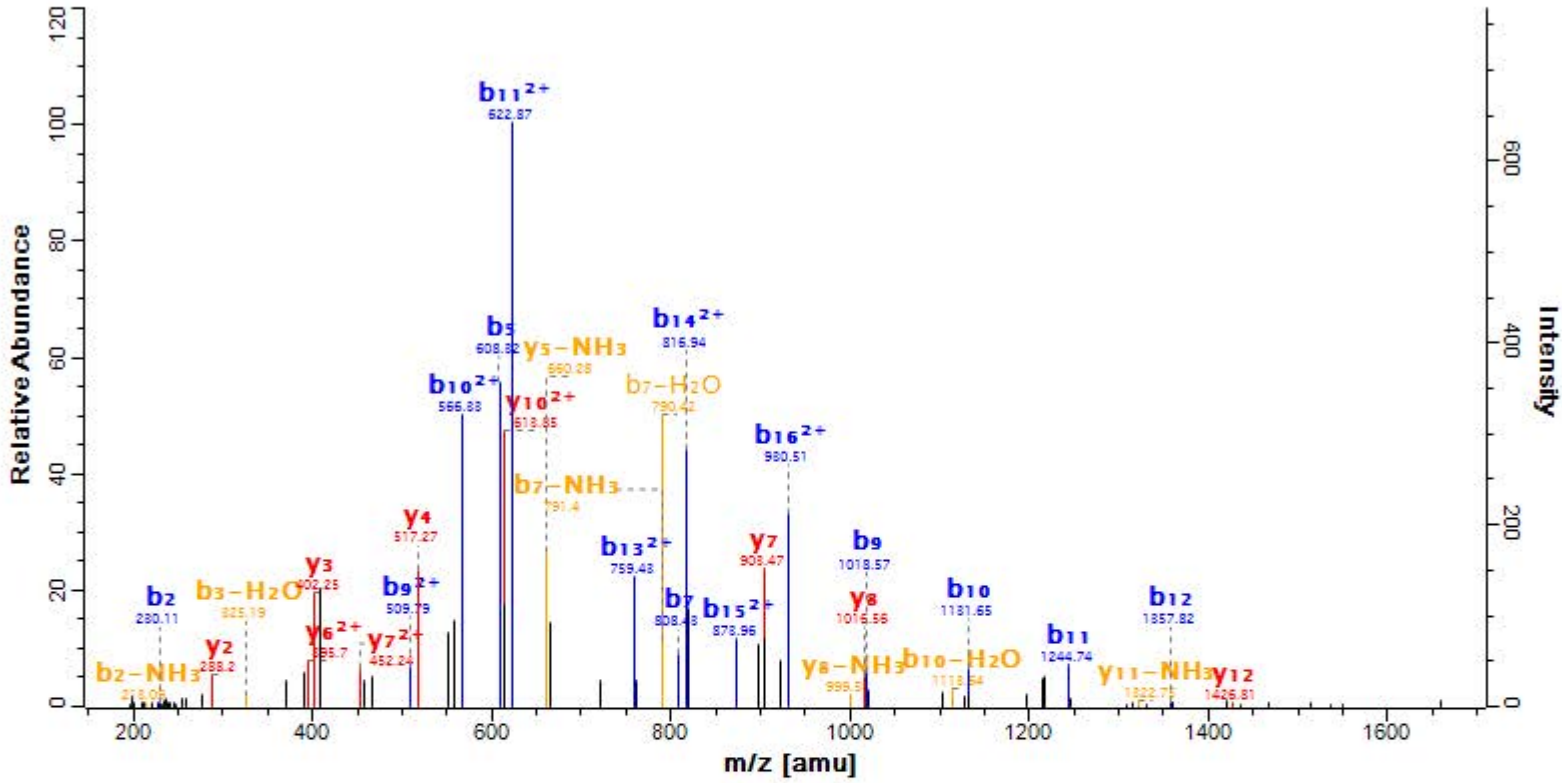

**precursor information**

|                   |                 |
|-------------------|-----------------|
| Mass:             | 2033.10867      |
| m/z:              | 678.71017       |
| Charge:           | 3+              |
| Retentiontime:    | 59.236019134521 |
| Score:            | 159.3142        |
| Mass Error [ppm]: | -0.24894        |
| PEP:              | 8.5717E-23      |
| Precursor Type:   | MULTI           |

**general information**

|                       |             |
|-----------------------|-------------|
| Annotation:           | 14 of 17    |
| AminoAcids Coverage:  | 82 %        |
| Intensity Coverage:   | 73 %        |
| Peak Coverage:        | 33 %        |
| Protein Localisation: | 202 ... 218 |

| b <sup>2+</sup> ion |        | b ion    |        | seq |   |    | y ion    |         | y <sup>2+</sup> ion |         |
|---------------------|--------|----------|--------|-----|---|----|----------|---------|---------------------|---------|
| Δ dalton            | mass   | Δ dalton | mass   |     |   |    | Δ dalton | mass    | Δ dalton            | mass    |
|                     | 102.05 |          | 102.05 | 1   | T | 16 |          |         |                     |         |
|                     | 230.11 | +0.0149  | 230.11 | 2   | Q | 15 | 1933.1   |         | 1933.1              |         |
|                     | 343.2  |          | 343.2  | 3   | L | 14 | 1805     |         | 1805                |         |
|                     | 471.26 |          | 471.26 | 4   | Q | 13 | 1691.9   |         | 1691.9              |         |
|                     | 608.32 | +0.3211  | 608.32 | 5   | H | 12 | 1563.9   |         | 1563.9              |         |
|                     | 695.35 |          | 695.35 | 6   | S | 11 | 1426.8   | +0.0533 | 1426.8              |         |
|                     | 808.43 | +0.1479  | 808.43 | 7   | L | 10 | 1339.8   |         | 1339.8              |         |
|                     | 905.48 |          | 905.48 | 8   | P | 9  | 1226.7   |         | 613.85              | +0.0176 |
| +0.0424             | 509.79 | +0.0926  | 1018.6 | 9   | L | 8  | 1129.6   |         | 1129.6              |         |
| +0.1681             | 566.33 | +0.0069  | 1131.7 | 10  | L | 7  | 1016.6   | +0.2317 | 1016.6              |         |
| +0.15               | 622.87 | -0.096   | 1244.7 | 11  | L | 6  | 903.47   | +0.0004 | 452.24              | +0.007  |
|                     | 1357.8 | +0.0354  | 1357.8 | 12  | I | 5  | 790.39   |         | 395.7               | +0.1634 |
| +0.1871             | 759.43 |          | 1517.9 | 13  | C | 4  | 677.3    |         | 677.3               |         |
| +0.4931             | 816.94 |          | 1632.9 | 14  | D | 3  | 517.27   | +0.0635 | 517.27              |         |
| +0.267              | 873.96 |          | 1746.9 | 15  | N | 2  | 402.25   | -0.018  | 402.25              |         |
| +0.1497             | 930.51 |          | 1860   | 16  | L | 1  | 288.2    | +0.1153 | 288.2               |         |
|                     |        |          |        | 17  | R | 0  | 175.12   |         | 175.12              |         |

Scan number 9469 Raw file LNCAP\_Silac\_23F10\_set2\_06  
 Method ITMS; CID Pepti... 60.31

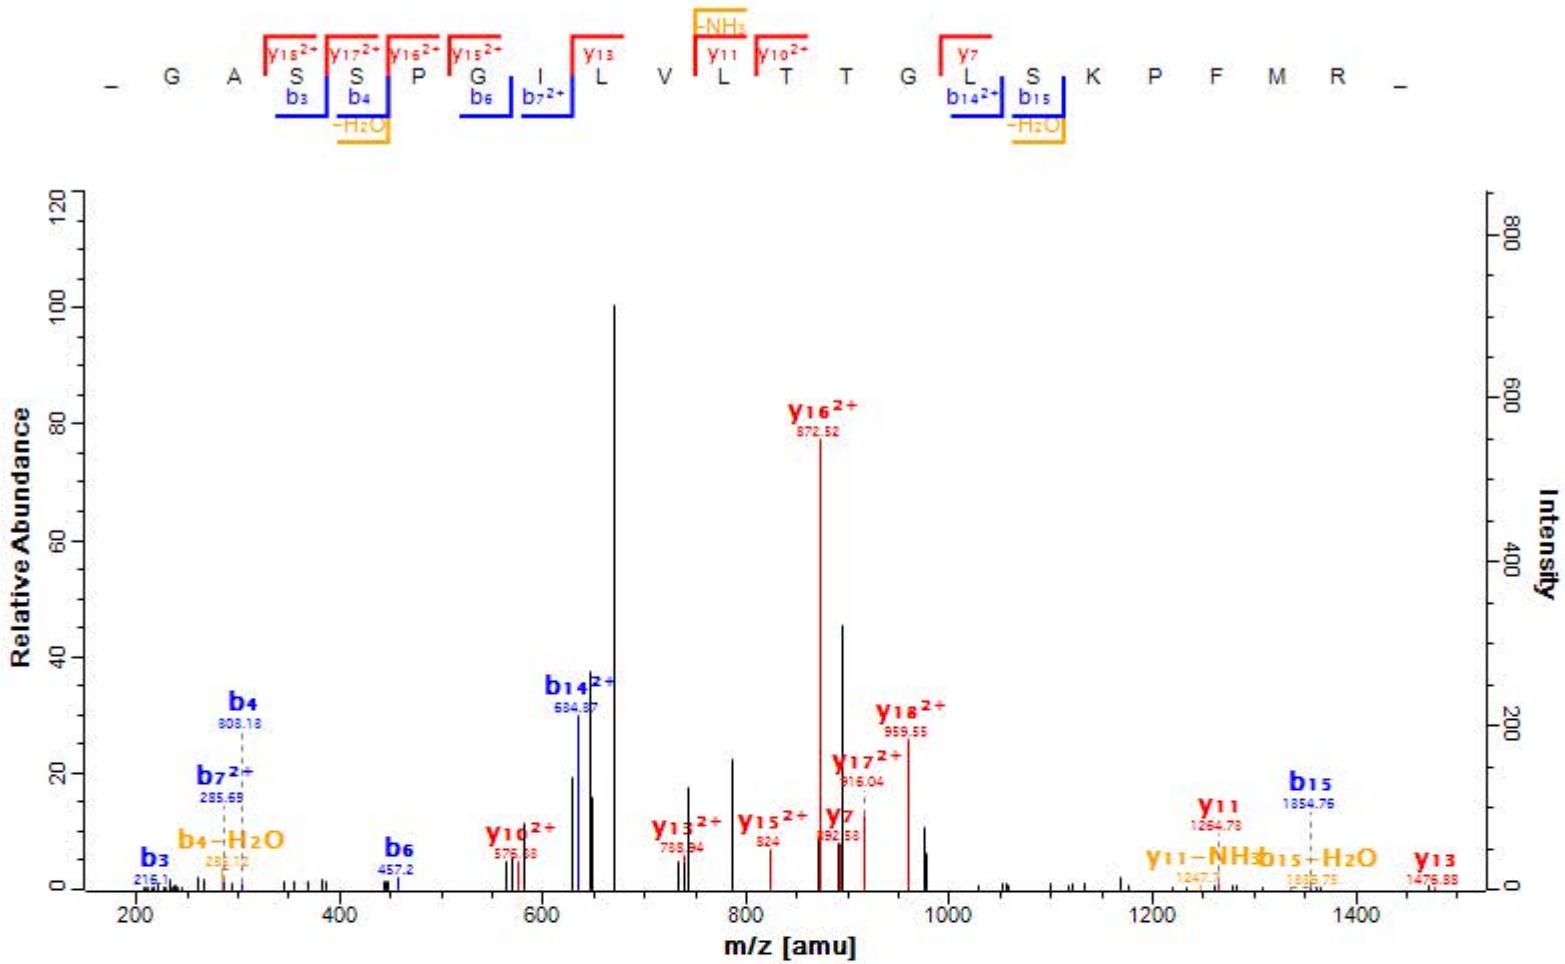

**precursor information**

|                   |                 |
|-------------------|-----------------|
| Mass:             | 2031.11766      |
| m/z:              | 678.0465        |
| Charge:           | 3+              |
| Retentiontime:    | 60.232273101806 |
| Score:            | 60.30704        |
| Mass Error [ppm]: | -0.50137        |
| PEP:              | 0.0011906       |
| Precursor Type:   | MULTI           |

| b <sup>2+</sup> ion |        | b ion    |        | seq |   |    | y ion    |         | y <sup>2+</sup> ion |         |
|---------------------|--------|----------|--------|-----|---|----|----------|---------|---------------------|---------|
| Δ dalton            | mass   | Δ dalton | mass   |     |   |    | Δ dalton | mass    | Δ dalton            | mass    |
|                     | 58.029 |          | 58.029 | 1   | G | 19 |          |         |                     |         |
|                     | 129.07 |          | 129.07 | 2   | A | 18 | 1989.1   |         | 1989.1              |         |
|                     | 216.1  | +0.1417  | 216.1  | 3   | S | 17 | 1918.1   |         | 959.55              | +0.2413 |
|                     | 303.13 | +0.0992  | 303.13 | 4   | S | 16 | 1831.1   |         | 916.04              | -0.107  |
|                     | 400.18 |          | 400.18 | 5   | P | 15 | 1744     |         | 872.52              | +0.199  |
|                     | 457.2  | +0.4203  | 457.2  | 6   | G | 14 | 1647     |         | 824                 | +0.1519 |
| +0.4695             | 285.65 |          | 570.29 | 7   | I | 13 | 1590     |         | 1590                |         |
|                     | 683.37 |          | 683.37 | 8   | L | 12 | 1476.9   | +0.0175 | 738.94              | -0.037  |
|                     | 782.44 |          | 782.44 | 9   | V | 11 | 1363.8   |         | 1363.8              |         |
|                     | 895.52 |          | 895.52 | 10  | L | 10 | 1264.7   | -0.102  | 1264.7              |         |
|                     | 996.57 |          | 996.57 | 11  | T | 9  | 1151.6   |         | 576.33              | +0.2791 |
|                     | 1097.6 |          | 1097.6 | 12  | T | 8  | 1050.6   |         | 1050.6              |         |
|                     | 1154.6 |          | 1154.6 | 13  | G | 7  | 949.55   |         | 949.55              |         |
| -0.073              | 634.37 |          | 1267.7 | 14  | L | 6  | 892.53   | +0.2548 | 892.53              |         |
|                     | 1354.8 | +0.398   | 1354.8 | 15  | S | 5  | 779.44   |         | 779.44              |         |
|                     | 1490.9 |          | 1490.9 | 16  | K | 4  | 692.41   |         | 692.41              |         |
|                     | 1587.9 |          | 1587.9 | 17  | P | 3  | 556.3    |         | 556.3               |         |
|                     | 1735   |          | 1735   | 18  | F | 2  | 459.25   |         | 459.25              |         |
|                     | 1866   |          | 1866   | 19  | M | 1  | 312.18   |         | 312.18              |         |
|                     |        |          |        | 20  | R | 0  | 181.14   |         | 181.14              |         |

**general information**

|                       |             |
|-----------------------|-------------|
| Annotation:           | 10 of 20    |
| AminoAcids Coverage:  | 50 %        |
| Intensity Coverage:   | 32 %        |
| Peak Coverage:        | 19 %        |
| Protein Localisation: | 390 ... 409 |

Scan number 9742 Raw file LNCAP\_Silac\_23F10\_set2\_06  
 Method ITMS; CID Pepti... 57.14

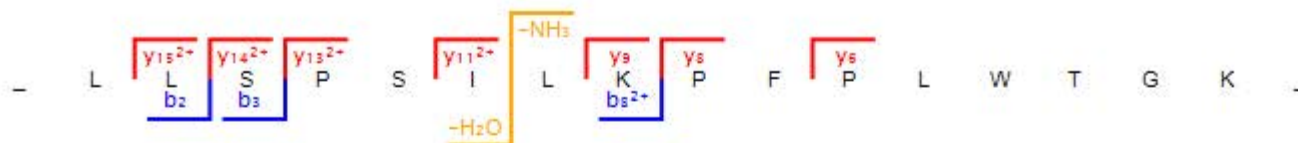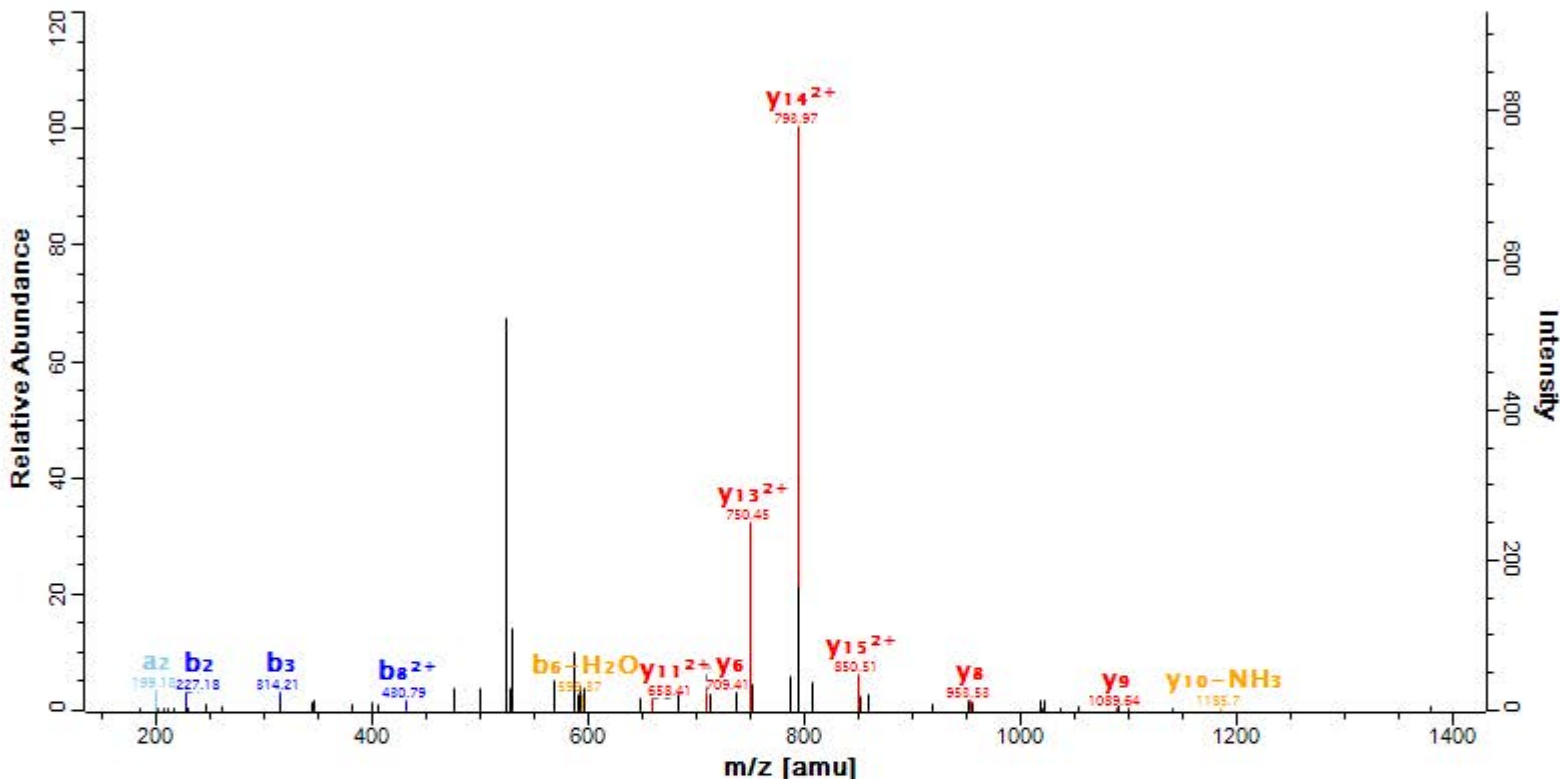

**precursor information**

|                   |                 |
|-------------------|-----------------|
| Mass:             | 1796.06087      |
| m/z:              | 599.69423       |
| Charge:           | 3+              |
| Retentiontime:    | 62.742202758789 |
| Score:            | 57.13573        |
| Mass Error [ppm]: | 0.4644          |
| PEP:              | 0.0030732       |
| Precursor Type:   | MULTI           |

**general information**

|                       |             |
|-----------------------|-------------|
| Annotation:           | 10 of 16    |
| AminoAcids Coverage:  | 62 %        |
| Intensity Coverage:   | 43 %        |
| Peak Coverage:        | 18 %        |
| Protein Localisation: | 670 ... 685 |

| a ion         | b <sup>2+</sup> ion | b ion         |     |   |               | y ion         | y <sup>2+</sup> ion |
|---------------|---------------------|---------------|-----|---|---------------|---------------|---------------------|
| Δ dalton mass | Δ dalton mass       | Δ dalton mass | seq |   | Δ dalton mass | Δ dalton mass |                     |
| 86.1          | 114.1               | 114.1         | 1   | L | 15            |               |                     |
| +0.069 99.2   | 227.2               | +0.135227.2   | 2   | L | 14            | 1700          | 850.5 +0.43:        |
| 286.2         | 314.2               | +0.112314.2   | 3   | S | 13            | 1587          | 794 +0.16:          |
| 383.3         | 411.3               | 411.3         | 4   | P | 12            | 1500          | 750.5 +0.18:        |
| 470.3         | 498.3               | 498.3         | 5   | S | 11            | 1403          | 1403                |
| 583.4         | 611.4               | 611.4         | 6   | I | 10            | 1316          | 658.4 +0.00:        |
| 696.5         | 724.5               | 724.5         | 7   | L | 9             | 1203          | 1203                |
| 832.6         | -0.14 430.8         | 860.6         | 8   | K | 8             | 1090          | +0.1181090          |
| 929.6         | 957.6               | 957.6         | 9   | P | 7             | 953.5         | -0.1 953.5          |
| 1077          | 1105                | 1105          | 10  | F | 6             | 856.5         | 856.5               |
| 1174          | 1202                | 1202          | 11  | P | 5             | 709.4         | +0.002709.4         |
| 1287          | 1315                | 1315          | 12  | L | 4             | 612.4         | 612.4               |
| 1473          | 1501                | 1501          | 13  | W | 3             | 499.3         | 499.3               |
| 1574          | 1602                | 1602          | 14  | T | 2             | 313.2         | 313.2               |
| 1631          | 1659                | 1659          | 15  | G | 1             | 212.1         | 212.1               |
|               |                     |               | 16  | K | 0             | 155.1         | 155.1               |

Scan number 9821 Raw file LNCAP\_Silac\_23F10\_set2\_06  
 Method ITMS; CID Pepti... 228.08

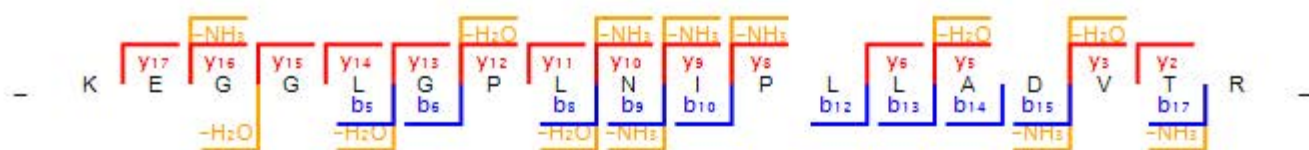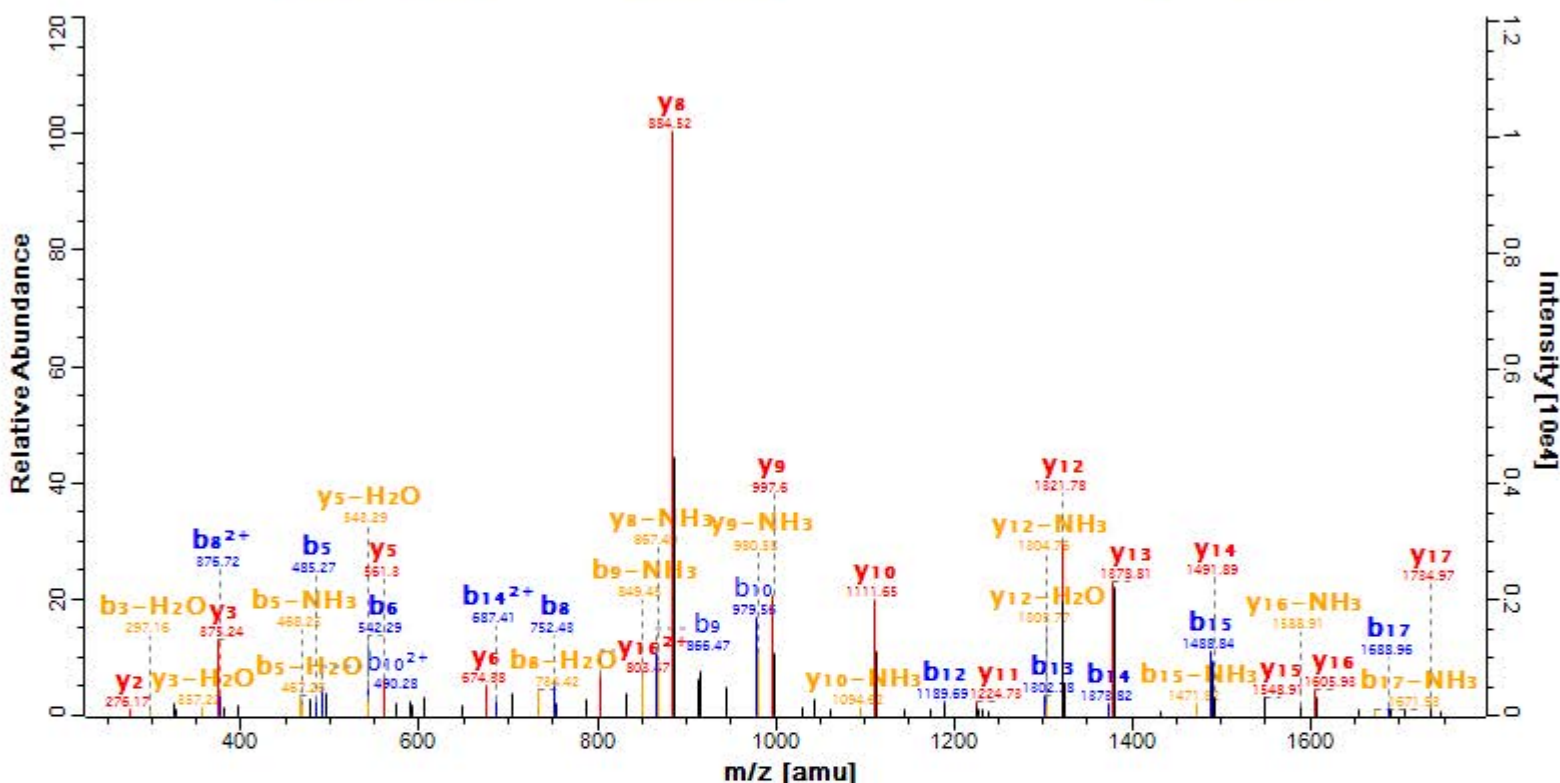

precursor information

|                   |                 |
|-------------------|-----------------|
| Mass:             | 1862.06275      |
| m/z:              | 932.03865       |
| Charge:           | 2+              |
| Retentiontime:    | 63.498092651367 |
| Score:            | 228.0807        |
| Mass Error [ppm]: | 0.10673         |
| PEP:              | 4.5008E-49      |
| Precursor Type:   | MULTI           |

general information

|                       |            |
|-----------------------|------------|
| Annotation:           | 16 of 18   |
| AminoAcids Coverage:  | 89 %       |
| Intensity Coverage:   | 62 %       |
| Peak Coverage:        | 47 %       |
| Protein Localisation: | 92 ... 109 |

| b <sup>2+</sup> ion |        | b ion    |        | seq |   |    | y ion    |         | y <sup>2+</sup> ion |         |
|---------------------|--------|----------|--------|-----|---|----|----------|---------|---------------------|---------|
| Δ dalton            | mass   | Δ dalton | mass   |     |   |    | Δ dalton | mass    | Δ dalton            | mass    |
|                     | 129.1  |          | 129.1  | 1   | K | 17 |          |         |                     |         |
|                     | 258.14 |          | 258.14 | 2   | E | 16 | 1735     | -0.139  | 1735                |         |
|                     | 315.17 |          | 315.17 | 3   | G | 15 | 1605.9   | -0.035  | 803.47              | +0.0685 |
|                     | 372.19 |          | 372.19 | 4   | G | 14 | 1548.9   | -0.12   | 1548.9              |         |
|                     | 485.27 | +0.0518  | 485.27 | 5   | L | 13 | 1491.9   | -0.115  | 1491.9              |         |
|                     | 542.29 | -0.026   | 542.29 | 6   | G | 12 | 1378.8   | -0.101  | 1378.8              |         |
|                     | 639.35 |          | 639.35 | 7   | P | 11 | 1321.8   | +0.0083 | 1321.8              |         |
| -0.334              | 376.72 | -0.089   | 752.43 | 8   | L | 10 | 1224.7   | -0.127  | 1224.7              |         |
|                     | 866.47 | +0.0058  | 866.47 | 9   | N | 9  | 1111.6   | -0.067  | 1111.6              |         |
| +0.0458             | 490.28 | -0.019   | 979.56 | 10  | I | 8  | 997.6    | -0.018  | 997.6               |         |
|                     | 1076.6 |          | 1076.6 | 11  | P | 7  | 884.52   | +0.0043 | 884.52              |         |
|                     | 1189.7 | -0.115   | 1189.7 | 12  | L | 6  | 787.47   |         | 787.47              |         |
|                     | 1302.8 | +0.1055  | 1302.8 | 13  | L | 5  | 674.38   | +0.1138 | 674.38              |         |
| +0.0257             | 687.41 | +0.0466  | 1373.8 | 14  | A | 4  | 561.3    | +0.0525 | 561.3               |         |
|                     | 1488.8 | -0.082   | 1488.8 | 15  | D | 3  | 490.26   |         | 490.26              |         |
|                     | 1587.9 |          | 1587.9 | 16  | V | 2  | 375.24   | +0.0087 | 375.24              |         |
|                     | 1689   | -0.026   | 1689   | 17  | T | 1  | 276.17   | +0.0341 | 276.17              |         |
|                     |        |          |        | 18  | R | 0  | 175.12   |         | 175.12              |         |

Scan number 9917 Raw file LNCAP\_Silac\_23F10\_set2\_06  
 Method ITMS; CID Pepti... 57.8

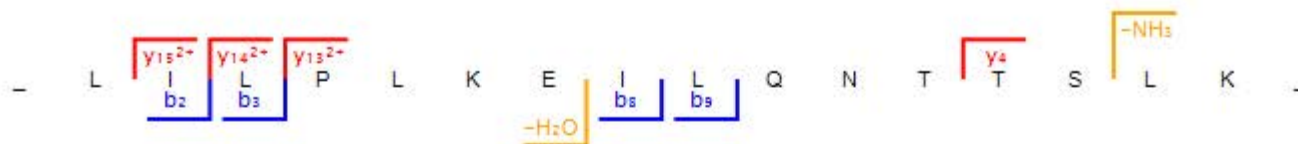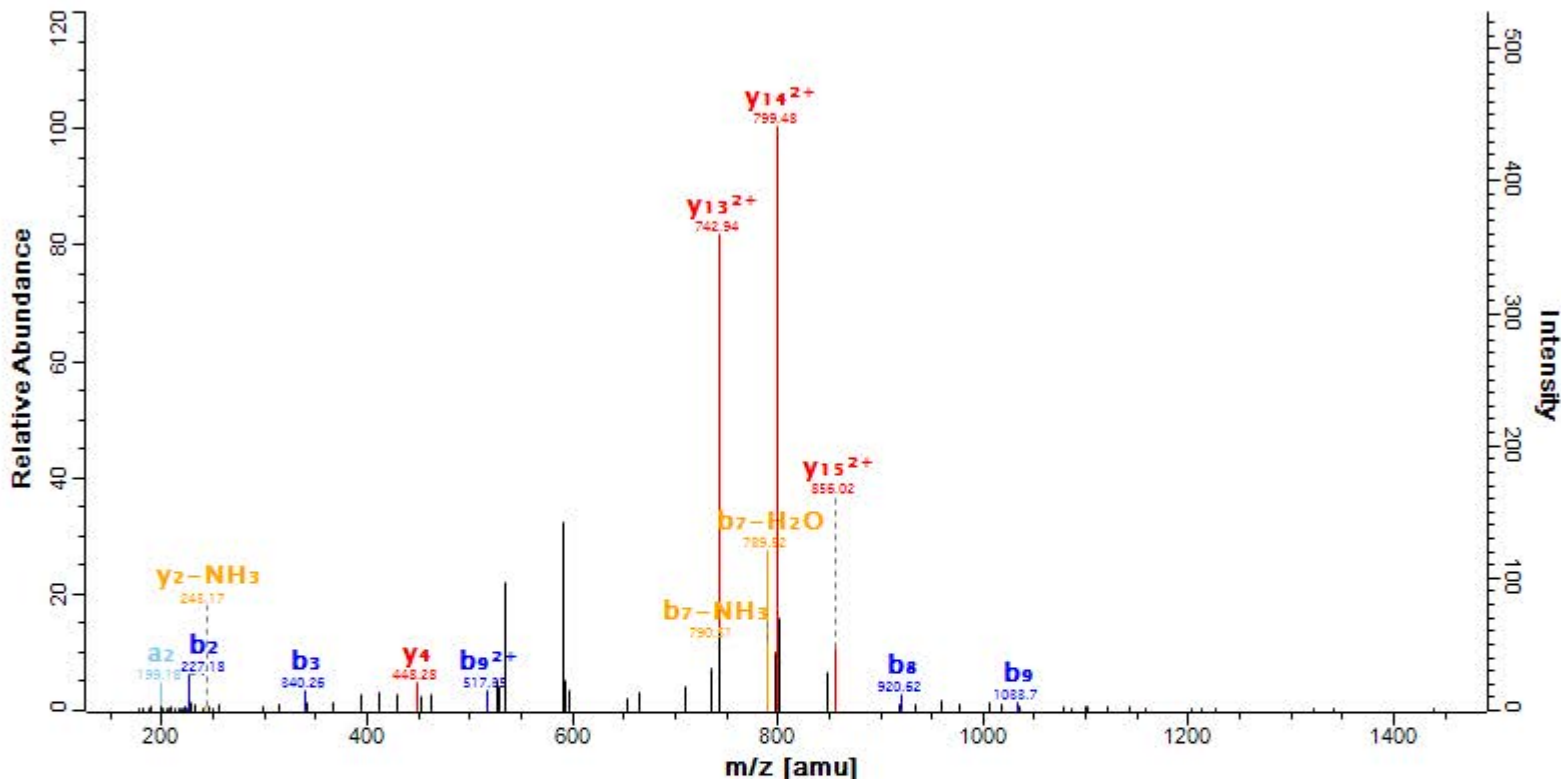

precursor information

|                   |                 |
|-------------------|-----------------|
| Mass:             | 1823.11383      |
| m/z:              | 608.71189       |
| Charge:           | 3+              |
| Retentiontime:    | 64.391525268554 |
| Score:            | 57.80392        |
| Mass Error [ppm]: | 0.35244         |
| PEP:              | 0.0029412       |
| Precursor Type:   | MULTI           |

general information

|                       |               |
|-----------------------|---------------|
| Annotation:           | 9 of 16       |
| AminoAcids Coverage:  | 56 %          |
| Intensity Coverage:   | 59 %          |
| Peak Coverage:        | 15 %          |
| Protein Localisation: | 1980 ... 1995 |

|       | a ion         | b <sup>2+</sup> ion | b ion         |    |     |    | y ion         | y <sup>2+</sup> ion |
|-------|---------------|---------------------|---------------|----|-----|----|---------------|---------------------|
|       | Δ dalton mass | Δ dalton mass       | Δ dalton mass |    | seq |    | Δ dalton mass | Δ dalton mass       |
|       | 86.1          | 114.1               | 114.1         | 1  | L   | 15 |               |                     |
| -0.05 | 199.2         | 227.2               | -0.11 227.2   | 2  | I   | 14 | 1711          | 856 +0.32           |
|       | 312.3         | 340.3               | -0.16 340.3   | 3  | L   | 13 | 1598          | 799.5 +0.16         |
|       | 409.3         | 437.3               | 437.3         | 4  | P   | 12 | 1485          | 742.9 +0.30         |
|       | 522.4         | 550.4               | 550.4         | 5  | L   | 11 | 1388          | 1388                |
|       | 650.5         | 678.5               | 678.5         | 6  | K   | 10 | 1275          | 1275                |
|       | 779.5         | 807.5               | 807.5         | 7  | E   | 9  | 1147          | 1147                |
|       | 892.6         | 920.6               | +0.11 920.6   | 8  | I   | 8  | 1018          | 1018                |
|       | 1006          | +0.16 8517.4        | +0.17 51034   | 9  | L   | 7  | 904.5         | 904.5               |
|       | 1134          | 1162                | 1162          | 10 | Q   | 6  | 791.4         | 791.4               |
|       | 1248          | 1276                | 1276          | 11 | N   | 5  | 663.4         | 663.4               |
|       | 1349          | 1377                | 1377          | 12 | T   | 4  | 549.3         | 549.3               |
|       | 1450          | 1478                | 1478          | 13 | T   | 3  | 448.3 +0.038  | 448.3               |
|       | 1537          | 1565                | 1565          | 14 | S   | 2  | 347.2         | 347.2               |
|       | 1650          | 1678                | 1678          | 15 | L   | 1  | 260.2         | 260.2               |
|       |               |                     |               | 16 | K   | 0  | 147.1         | 147.1               |

Scan number 1011 Raw file LNCAP\_Silac\_23F10\_set2\_07  
 Method ITMS; CID Pepti... 108.9

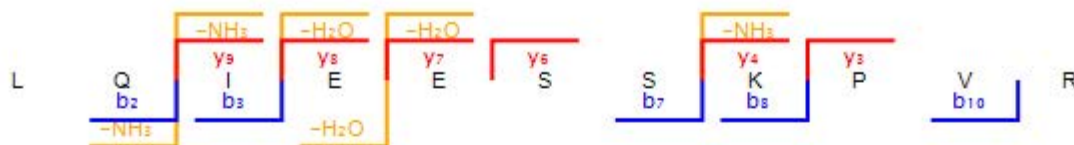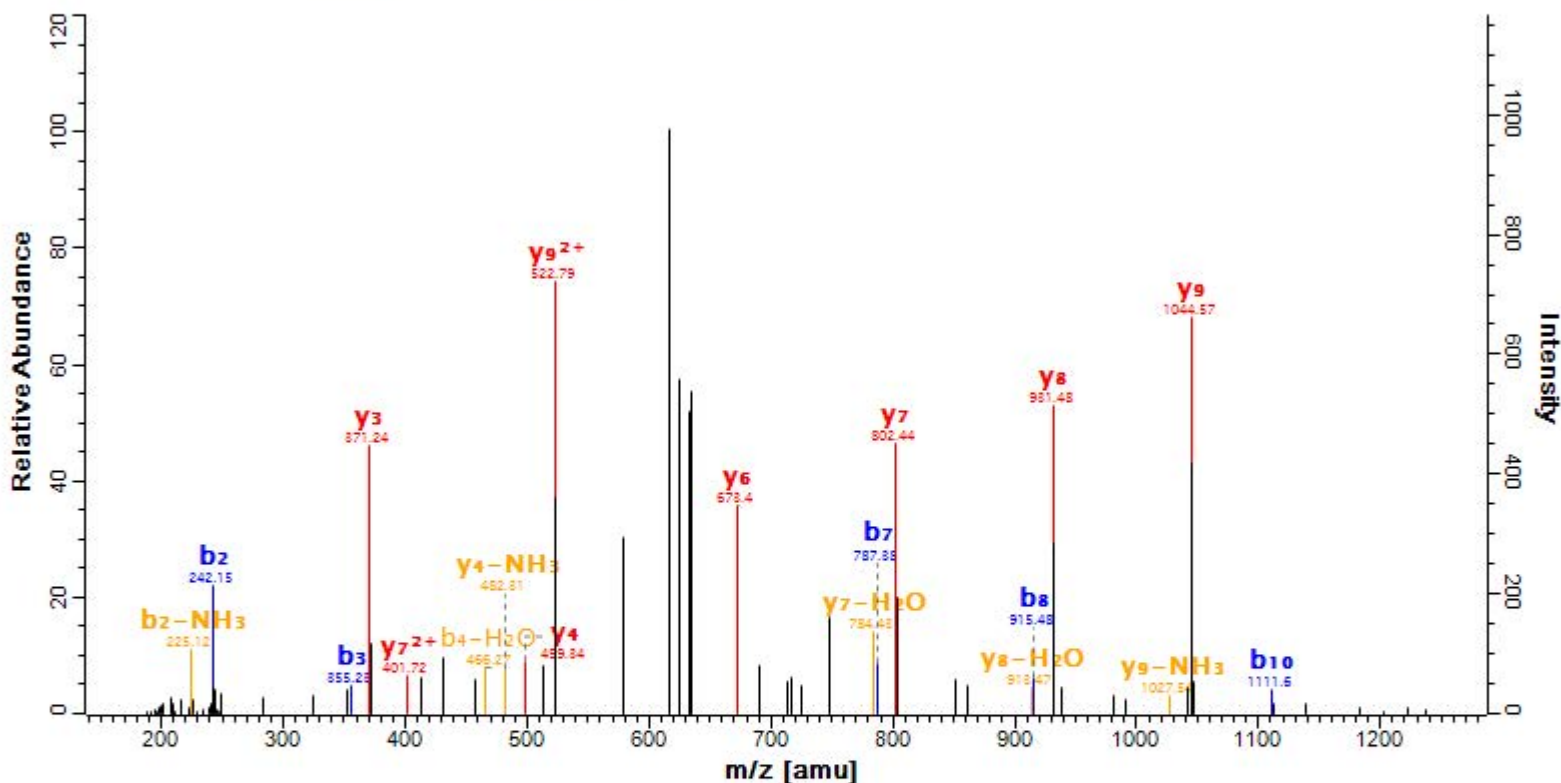

#### precursor information

|                   |                 |
|-------------------|-----------------|
| Mass:             | 1284.70381      |
| m/z:              | 643.35918       |
| Charge:           | 2+              |
| Retentiontime:    | 10.330109596252 |
| Score:            | 108.9032        |
| Mass Error [ppm]: | 0.031402        |
| PEP:              | 0.00023363      |
| Precursor Type:   | MULTI           |

#### general information

|                       |             |
|-----------------------|-------------|
| Annotation:           | 9 of 11     |
| AminoAcids Coverage:  | 82 %        |
| Intensity Coverage:   | 41 %        |
| Peak Coverage:        | 22 %        |
| Protein Localisation: | 130 ... 140 |

| b ion     |          |    |     |    | y ion    |           | y <sup>2+</sup> ion |           |
|-----------|----------|----|-----|----|----------|-----------|---------------------|-----------|
| Δ dalton  | mass     |    | seq |    | Δ dalton | mass      | Δ dalton            | mass      |
|           | 114.0913 | 1  | L   | 10 |          |           |                     |           |
| -0.01062  | 242.1499 | 2  | Q   | 9  | 1172.627 |           | 1172.627            |           |
| +0.09866  | 355.234  | 3  | I   | 8  | 1044.568 | -0.02592  | 522.7878            | +0.005741 |
|           | 484.2766 | 4  | E   | 7  | 931.4843 | +0.010232 | 931.4843            |           |
|           | 613.3192 | 5  | E   | 6  | 802.4417 | -0.05106  | 401.7245            | +0.152138 |
|           | 700.3512 | 6  | S   | 5  | 673.3991 | -0.03709  | 673.3991            |           |
| -0.06169  | 787.3832 | 7  | S   | 4  | 586.3671 |           | 586.3671            |           |
| +0.172264 | 915.4782 | 8  | K   | 3  | 499.3351 | -0.02174  | 499.3351            |           |
|           | 1012.531 | 9  | P   | 2  | 371.2401 | +0.006818 | 371.2401            |           |
| -0.09277  | 1111.599 | 10 | V   | 1  | 274.1874 |           | 274.1874            |           |
|           |          | 11 | R   | 0  | 175.119  |           | 175.119             |           |

Scan number 1135 Raw file LNCAP\_Silac\_23F10\_set2\_07  
 Method ITMS; CID Pepti... 128.03

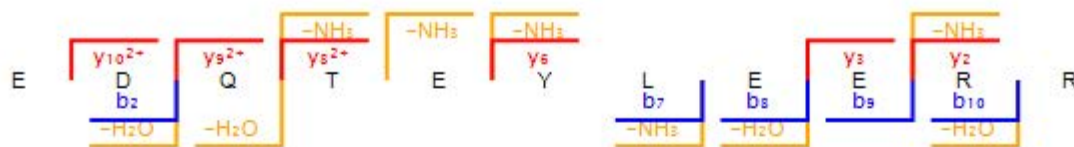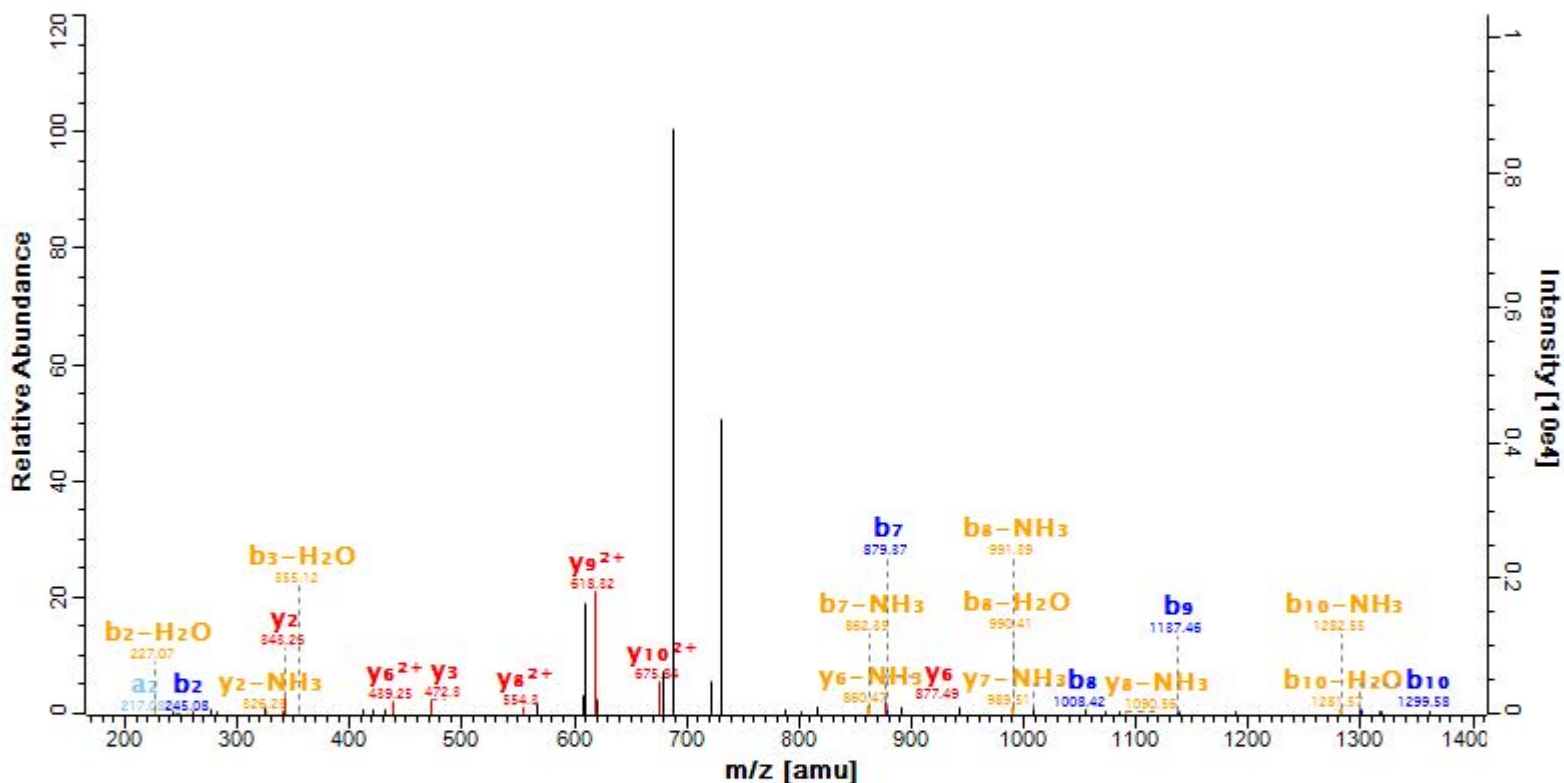

#### precursor information

|                   |                 |
|-------------------|-----------------|
| Mass:             | 1478.70488      |
| m/z:              | 740.35971       |
| Charge:           | 2+              |
| Retentiontime:    | 10.987442016601 |
| Score:            | 128.0347        |
| Mass Error [ppm]: | 0.587           |
| PEP:              | 0.00018405      |
| Precursor Type:   | ISO             |

#### general information

|                       |             |
|-----------------------|-------------|
| Annotation:           | 9 of 11     |
| AminoAcids Coverage:  | 82 %        |
| Intensity Coverage:   | 17 %        |
| Peak Coverage:        | 32 %        |
| Protein Localisation: | 314 ... 324 |

| a ion    |        | b ion    |        | seq |   |    | y ion    |         | y <sup>2+</sup> ion |         |
|----------|--------|----------|--------|-----|---|----|----------|---------|---------------------|---------|
| Δ dalton | mass   | Δ dalton | mass   |     |   |    | Δ dalton | mass    | Δ dalton            | mass    |
|          | 102.05 |          | 130.05 | 1   | E | 10 |          |         |                     |         |
| +0.2018  | 217.08 | -0.074   | 245.08 | 2   | D | 9  | 1350.7   |         | 675.84              | +0.2542 |
|          | 345.14 |          | 373.14 | 3   | Q | 8  | 1235.6   |         | 618.32              | +0.1907 |
|          | 446.19 |          | 474.18 | 4   | T | 7  | 1107.6   |         | 554.3               | +0.2918 |
|          | 575.23 |          | 603.23 | 5   | E | 6  | 1006.5   |         | 1006.5              |         |
|          | 738.29 |          | 766.29 | 6   | Y | 5  | 877.49   | -0.018  | 439.25              | +0.298  |
|          | 851.38 | +0.167   | 879.37 | 7   | L | 4  | 714.43   |         | 714.43              |         |
|          | 980.42 | -0.128   | 1008.4 | 8   | E | 3  | 601.35   |         | 601.35              |         |
|          | 1109.5 | +0.1157  | 1137.5 | 9   | E | 2  | 472.3    | -0.089  | 472.3               |         |
|          | 1271.6 | -0.025   | 1299.6 | 10  | R | 1  | 343.26   | +0.1421 | 343.26              |         |
|          |        |          |        | 11  | R | 0  | 181.14   |         | 181.14              |         |



Scan number 1385 Raw file LNCAP\_Silac\_23F10\_set2\_07  
 Method ITMS: CID Pepti... 97.73

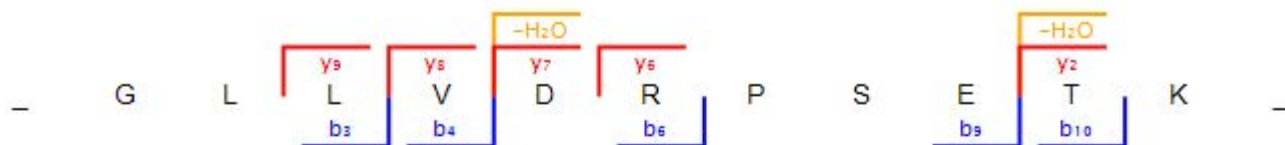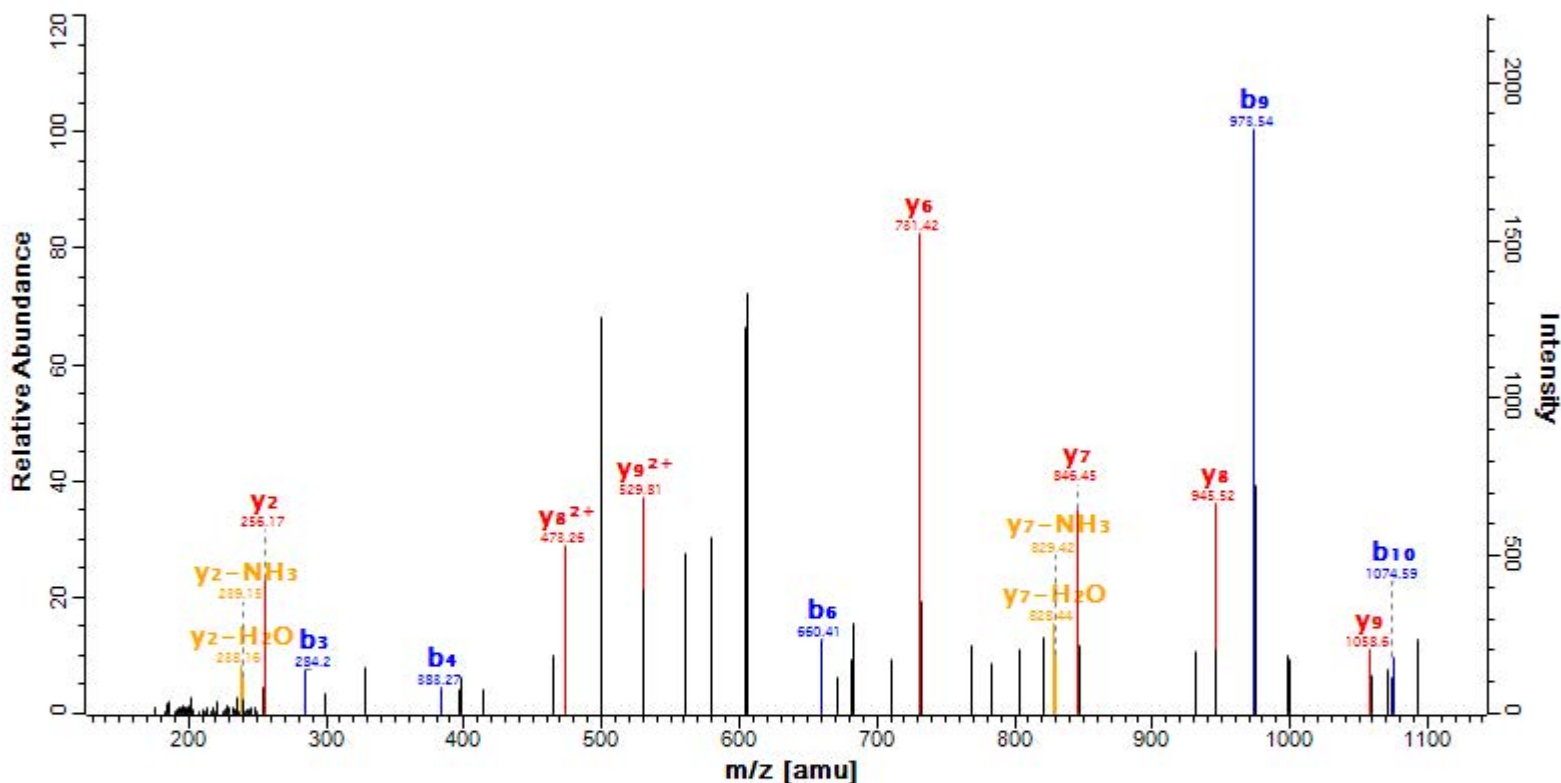

#### precursor information

|                   |                 |
|-------------------|-----------------|
| Mass:             | 1213.66633      |
| m/z:              | 607.84044       |
| Charge:           | 2+              |
| Retentiontime:    | 12.337809562683 |
| Score:            | 97.73378        |
| Mass Error [ppm]: | -0.25831        |
| PEP:              | 0.00076696      |
| Precursor Type:   | MULTI           |

#### general information

|                       |               |
|-----------------------|---------------|
| Annotation:           | 6 of 11       |
| AminoAcids Coverage:  | 55 %          |
| Intensity Coverage:   | 38 %          |
| Peak Coverage:        | 17 %          |
| Protein Localisation: | 1001 ... 1011 |

| b ion     |          |    |     | y ion |          | y <sup>2+</sup> ion |          |           |
|-----------|----------|----|-----|-------|----------|---------------------|----------|-----------|
| Δ dalton  | mass     |    | seq |       | Δ dalton | mass                | Δ dalton | mass      |
|           | 58.02874 | 1  | G   | 10    |          |                     |          |           |
|           | 171.1128 | 2  | L   | 9     | 1171.687 |                     | 1171.687 |           |
| +0.014008 | 284.1969 | 3  | L   | 8     | 1058.603 | -0.43964            | 529.805  | -0.11988  |
| +0.004921 | 383.2653 | 4  | V   | 7     | 945.5187 | +0.071729           | 473.263  | +0.192047 |
|           | 498.2922 | 5  | D   | 6     | 846.4502 | -0.00958            | 846.4502 |           |
| -0.09364  | 660.4135 | 6  | R   | 5     | 731.4233 | +0.049532           | 731.4233 |           |
|           | 757.4662 | 7  | P   | 4     | 569.3021 |                     | 569.3021 |           |
|           | 844.4983 | 8  | S   | 3     | 472.2493 |                     | 472.2493 |           |
| +0.051374 | 973.5409 | 9  | E   | 2     | 385.2173 |                     | 385.2173 |           |
| +0.05942  | 1074.589 | 10 | T   | 1     | 256.1747 | +0.007264           | 256.1747 |           |
|           |          | 11 | K   | 0     | 155.127  |                     | 155.127  |           |

Scan number 1387 Raw file LNCAP\_Silac\_23F10\_set2\_07  
 Method ITMS: CID Peptide LNCAP\_Silac\_23F10\_set2\_07

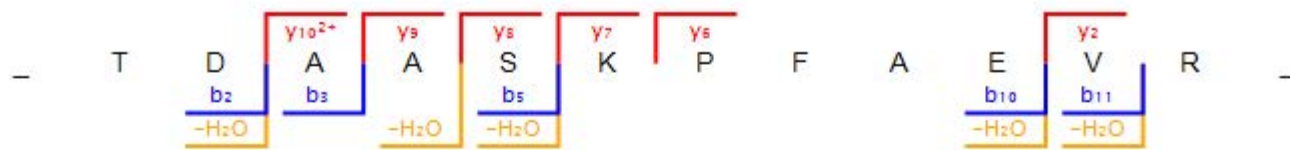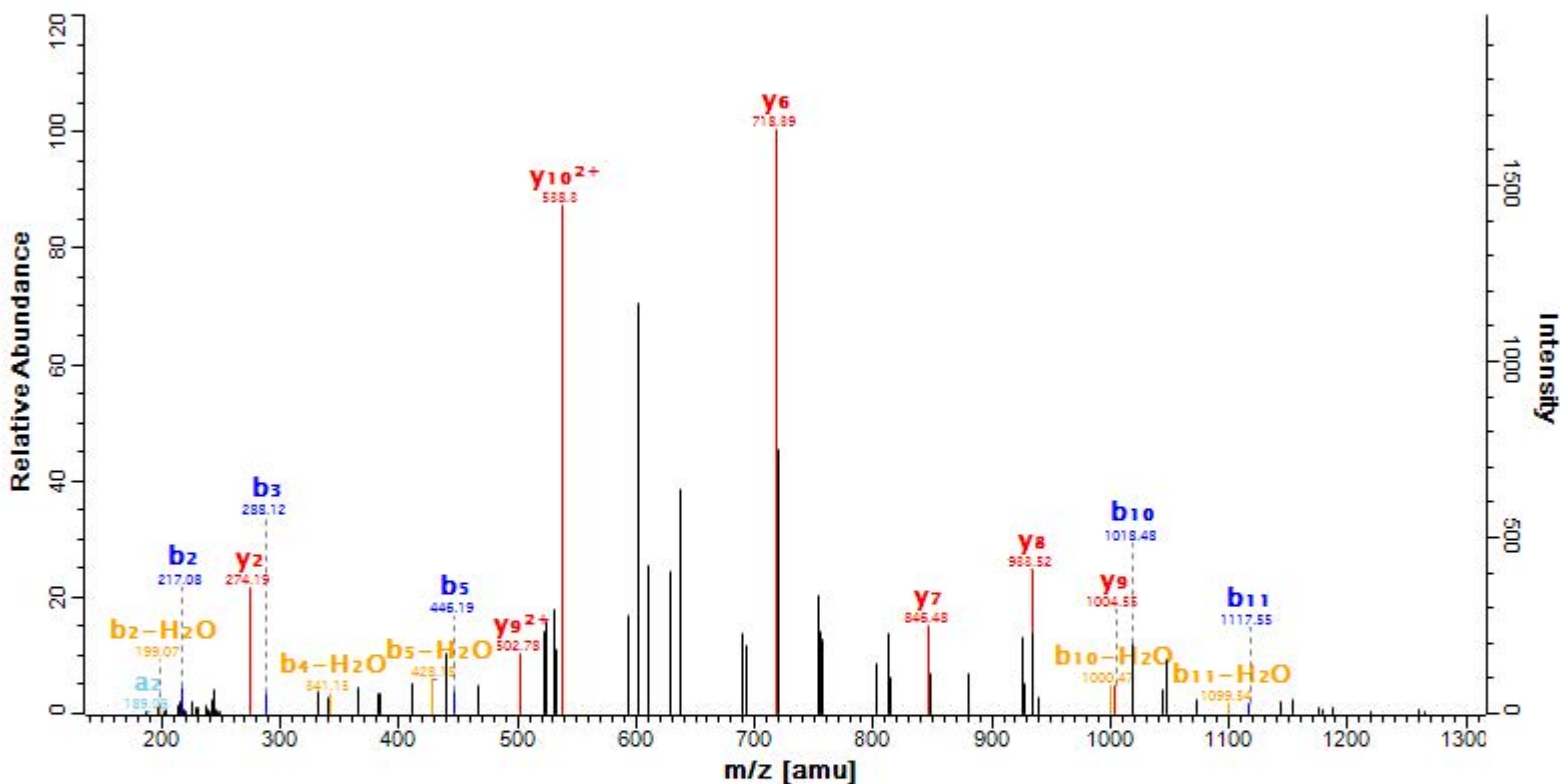

#### precursor information

|                   |                |
|-------------------|----------------|
| Mass:             | 1290.65641     |
| m/z:              | 646.33548      |
| Charge:           | 2+             |
| Retentiontime:    | 12.34792137146 |
| Score:            | 69.86363       |
| Mass Error [ppm]: | -0.31543       |
| PEP:              | 0.003937       |
| Precursor Type:   | MULTI          |

#### general information

|                       |             |
|-----------------------|-------------|
| Annotation:           | 8 of 12     |
| AminoAcids Coverage:  | 67 %        |
| Intensity Coverage:   | 35 %        |
| Peak Coverage:        | 19 %        |
| Protein Localisation: | 159 ... 170 |

| a ion    |        | b ion    |        | seq |   |    | y ion    |         | y <sup>2+</sup> ion |         |
|----------|--------|----------|--------|-----|---|----|----------|---------|---------------------|---------|
| Δ dalton | mass   | Δ dalton | mass   |     |   |    | Δ dalton | mass    | Δ dalton            | mass    |
|          | 74.06  |          | 102.05 | 1   | T | 11 |          |         |                     |         |
| -0.059   | 189.09 | +0.1058  | 217.08 | 2   | D | 10 | 1190.6   |         | 1190.6              |         |
|          | 260.12 | -0.058   | 288.12 | 3   | A | 9  | 1075.6   |         | 538.3               | +0.1424 |
|          | 331.16 |          | 359.16 | 4   | A | 8  | 1004.6   | -0.144  | 502.78              | -0.114  |
|          | 418.19 | +0.1498  | 446.19 | 5   | S | 7  | 933.52   | +0.0695 | 933.52              |         |
|          | 546.29 |          | 574.28 | 6   | K | 6  | 846.48   | -0.005  | 846.48              |         |
|          | 643.34 |          | 671.34 | 7   | P | 5  | 718.39   | +0.0336 | 718.39              |         |
|          | 790.41 |          | 818.4  | 8   | F | 4  | 621.34   |         | 621.34              |         |
|          | 861.45 |          | 889.44 | 9   | A | 3  | 474.27   |         | 474.27              |         |
|          | 990.49 | +0.025   | 1018.5 | 10  | E | 2  | 403.23   |         | 403.23              |         |
|          | 1089.6 | -0.165   | 1117.6 | 11  | V | 1  | 274.19   | +0.0226 | 274.19              |         |
|          |        |          |        | 12  | R | 0  | 175.12   |         | 175.12              |         |

Scan number 1453 Raw file LNCAP\_Silac\_23F10\_set2\_07  
 Method ITMS; CID Pepti... 87

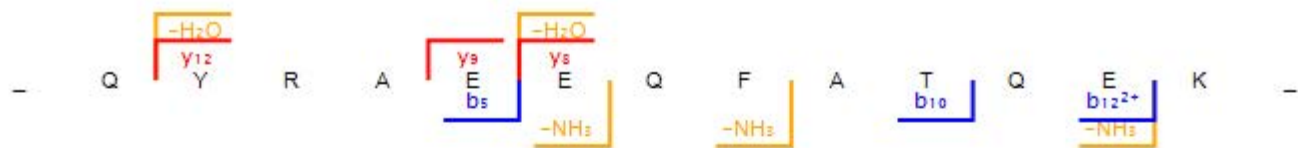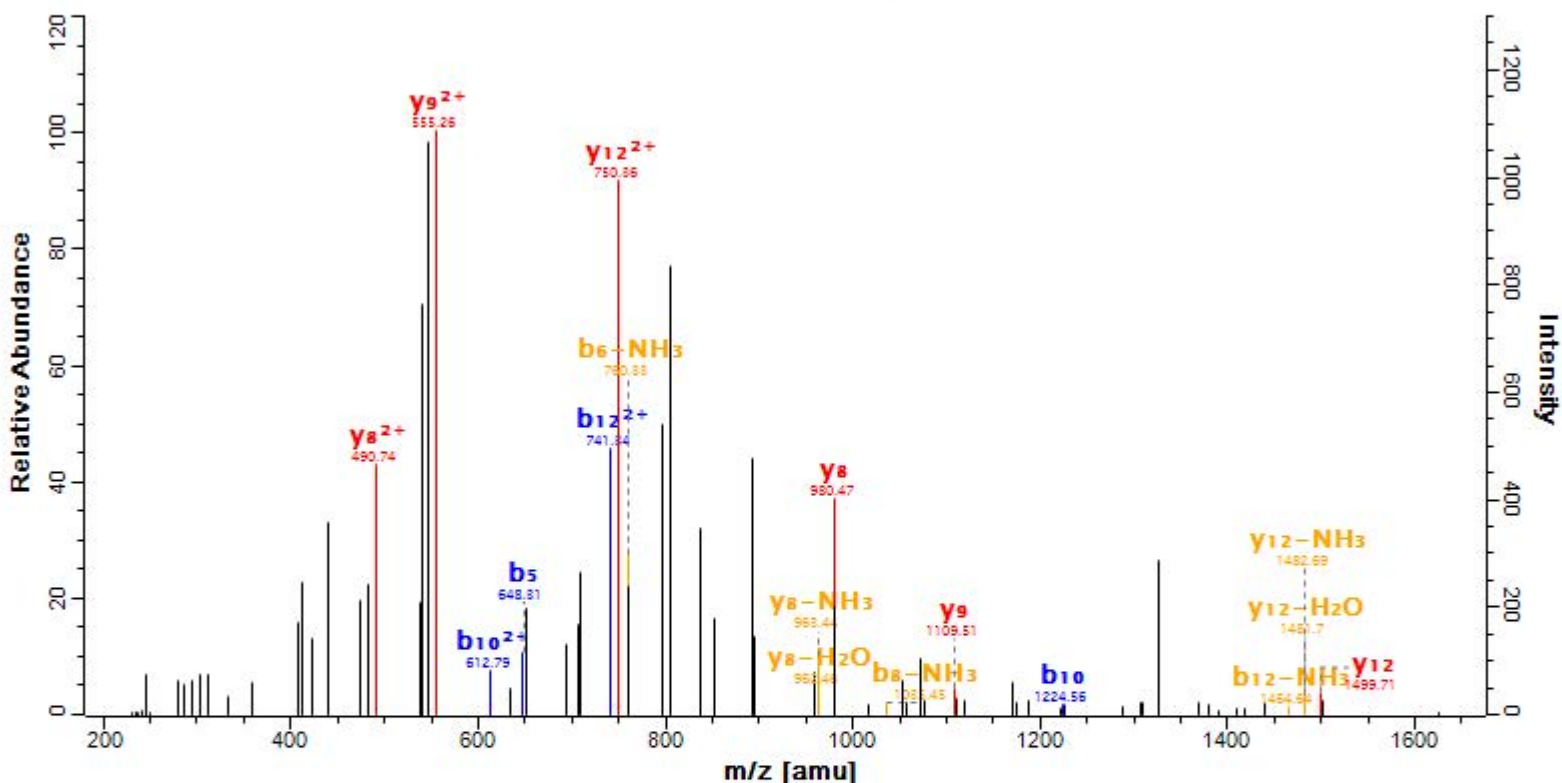

**precursor information**

|                   |                 |
|-------------------|-----------------|
| Mass:             | 1626.76396      |
| m/z:              | 814.38925       |
| Charge:           | 2+              |
| Retentiontime:    | 12.696511268615 |
| Score:            | 87.00086        |
| Mass Error [ppm]: | 0.096701        |
| PEP:              | 0.00026927      |
| Precursor Type:   | MULTI           |

**general information**

|                       |               |
|-----------------------|---------------|
| Annotation:           | 6 of 13       |
| AminoAcids Coverag    | 46 %          |
| Intensity Coverage:   | 32 %          |
| Peak Coverage:        | 19 %          |
| Protein Localisation: | 1844 ... 1856 |

| b <sup>2+</sup> ion |        | b ion    |        |    |     |    | y ion    |         | y <sup>2+</sup> ion |         |
|---------------------|--------|----------|--------|----|-----|----|----------|---------|---------------------|---------|
| Δ dalton            | mass   | Δ dalton | mass   |    | seq |    | Δ dalton | mass    | Δ dalton            | mass    |
|                     | 129.07 |          | 129.07 | 1  | Q   | 12 |          |         |                     |         |
|                     | 292.13 |          | 292.13 | 2  | Y   | 11 | 1499.7   | +0.0183 | 750.36              | +0.1557 |
|                     | 448.23 |          | 448.23 | 3  | R   | 10 | 1336.6   |         | 1336.6              |         |
|                     | 519.27 |          | 519.27 | 4  | A   | 9  | 1180.5   |         | 1180.5              |         |
|                     | 648.31 | -0.169   | 648.31 | 5  | E   | 8  | 1109.5   | +0.1552 | 555.26              | +0.2917 |
|                     | 777.35 |          | 777.35 | 6  | E   | 7  | 980.47   | +0.0688 | 490.74              | +0.2867 |
|                     | 905.41 |          | 905.41 | 7  | Q   | 6  | 851.43   |         | 851.43              |         |
|                     | 1052.5 |          | 1052.5 | 8  | F   | 5  | 723.37   |         | 723.37              |         |
|                     | 1123.5 |          | 1123.5 | 9  | A   | 4  | 576.3    |         | 576.3               |         |
| +0.2393             | 612.79 | +0.2047  | 1224.6 | 10 | T   | 3  | 505.26   |         | 505.26              |         |
|                     | 1352.6 |          | 1352.6 | 11 | Q   | 2  | 404.21   |         | 404.21              |         |
| +0.2086             | 741.34 |          | 1481.7 | 12 | E   | 1  | 276.16   |         | 276.16              |         |
|                     |        |          |        | 13 | K   | 0  | 147.11   |         | 147.11              |         |

Scan number 1606 Raw file LNCAP\_Silac\_23F10\_set2\_07  
 Method ITMS: CID Pepti... 92.27

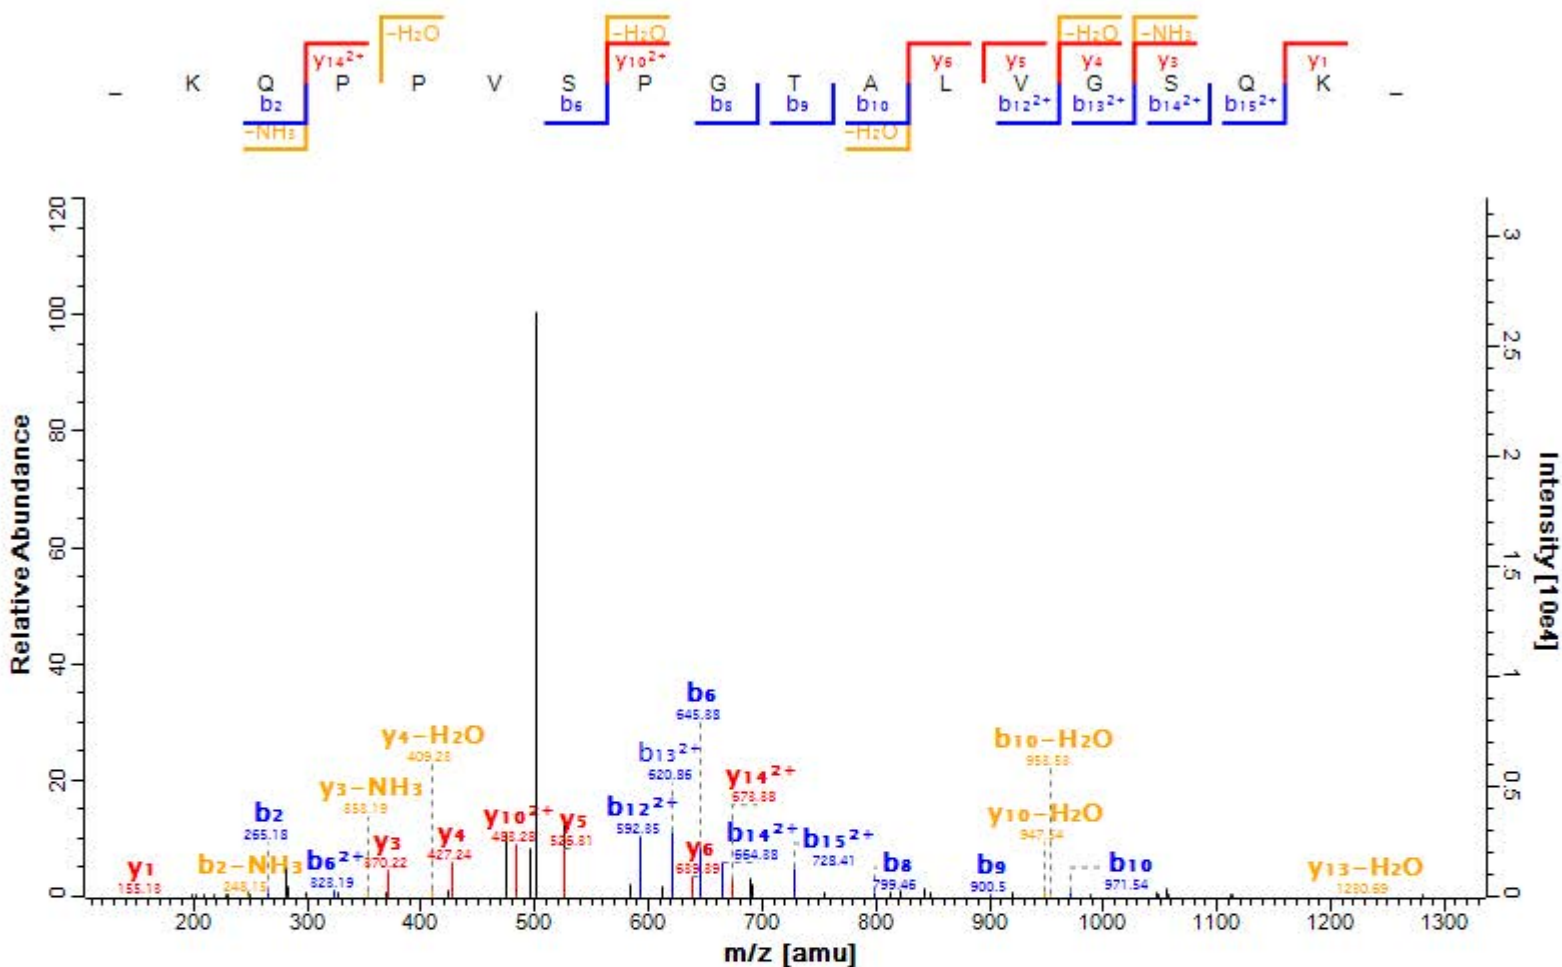

**precursor information**

|                   |                 |
|-------------------|-----------------|
| Mass:             | 1592.88889      |
| m/z:              | 531.97024       |
| Charge:           | 3+              |
| Retentiontime:    | 13.543733596801 |
| Score:            | 92.26516        |
| Mass Error [ppm]: | 0.17801         |
| PEP:              | 1.7081E-05      |
| Precursor Type:   | MULTI           |

**general information**

|                       |           |
|-----------------------|-----------|
| Annotation:           | 14 of 16  |
| AminoAcids Coverag    | 88 %      |
| Intensity Coverage:   | 33 %      |
| Peak Coverage:        | 22 %      |
| Protein Localisation: | 31 ... 46 |

| b <sup>2+</sup> ion |        | b ion    |        | seq |   |    | y ion    |         | y <sup>2+</sup> ion |         |
|---------------------|--------|----------|--------|-----|---|----|----------|---------|---------------------|---------|
| Δ dalton            | mass   | Δ dalton | mass   |     |   |    | Δ dalton | mass    | Δ dalton            | mass    |
|                     | 137.12 |          | 137.12 | 1   | K | 15 |          |         |                     |         |
|                     | 265.18 | +0.145   | 265.18 | 2   | Q | 14 | 1473.8   |         | 1473.8              |         |
|                     | 362.23 |          | 362.23 | 3   | P | 13 | 1345.8   |         | 673.38              | +0.0687 |
|                     | 459.28 |          | 459.28 | 4   | P | 12 | 1248.7   |         | 1248.7              |         |
|                     | 558.35 |          | 558.35 | 5   | V | 11 | 1151.7   |         | 1151.7              |         |
| +0.0266             | 623.19 | +0.0706  | 645.38 | 6   | S | 10 | 1052.6   |         | 1052.6              |         |
|                     | 742.43 |          | 742.43 | 7   | P | 9  | 965.55   |         | 483.28              | +0.2133 |
|                     | 799.46 | +0.0137  | 799.46 | 8   | G | 8  | 868.5    |         | 868.5               |         |
|                     | 900.5  | -0.095   | 900.5  | 9   | T | 7  | 811.48   |         | 811.48              |         |
|                     | 971.54 | +0.2647  | 971.54 | 10  | A | 6  | 710.43   |         | 710.43              |         |
|                     | 1084.6 |          | 1084.6 | 11  | L | 5  | 639.39   | -0.013  | 639.39              |         |
| +0.2442             | 592.35 |          | 1183.7 | 12  | V | 4  | 526.31   | +0.0023 | 526.31              |         |
| +0.1797             | 620.86 |          | 1240.7 | 13  | G | 3  | 427.24   | +0.0777 | 427.24              |         |
| +0.083              | 664.38 |          | 1327.7 | 14  | S | 2  | 370.22   | +0.1866 | 370.22              |         |
| +0.1128             | 728.41 |          | 1455.8 | 15  | Q | 1  | 283.19   |         | 283.19              |         |
|                     |        |          |        | 16  | K | 0  | 155.13   | +0.0776 | 155.13              |         |

Scan number 1842 Raw file LNCAP\_Silac\_23F10\_set2\_07  
 Method ITMS: CID Pepti... 142.97

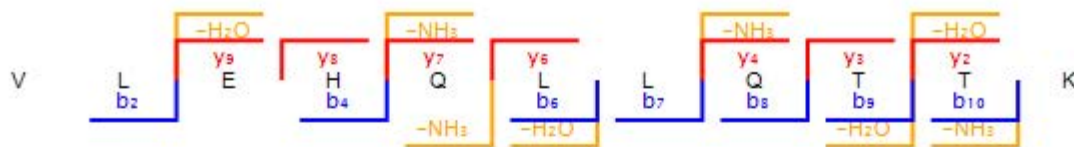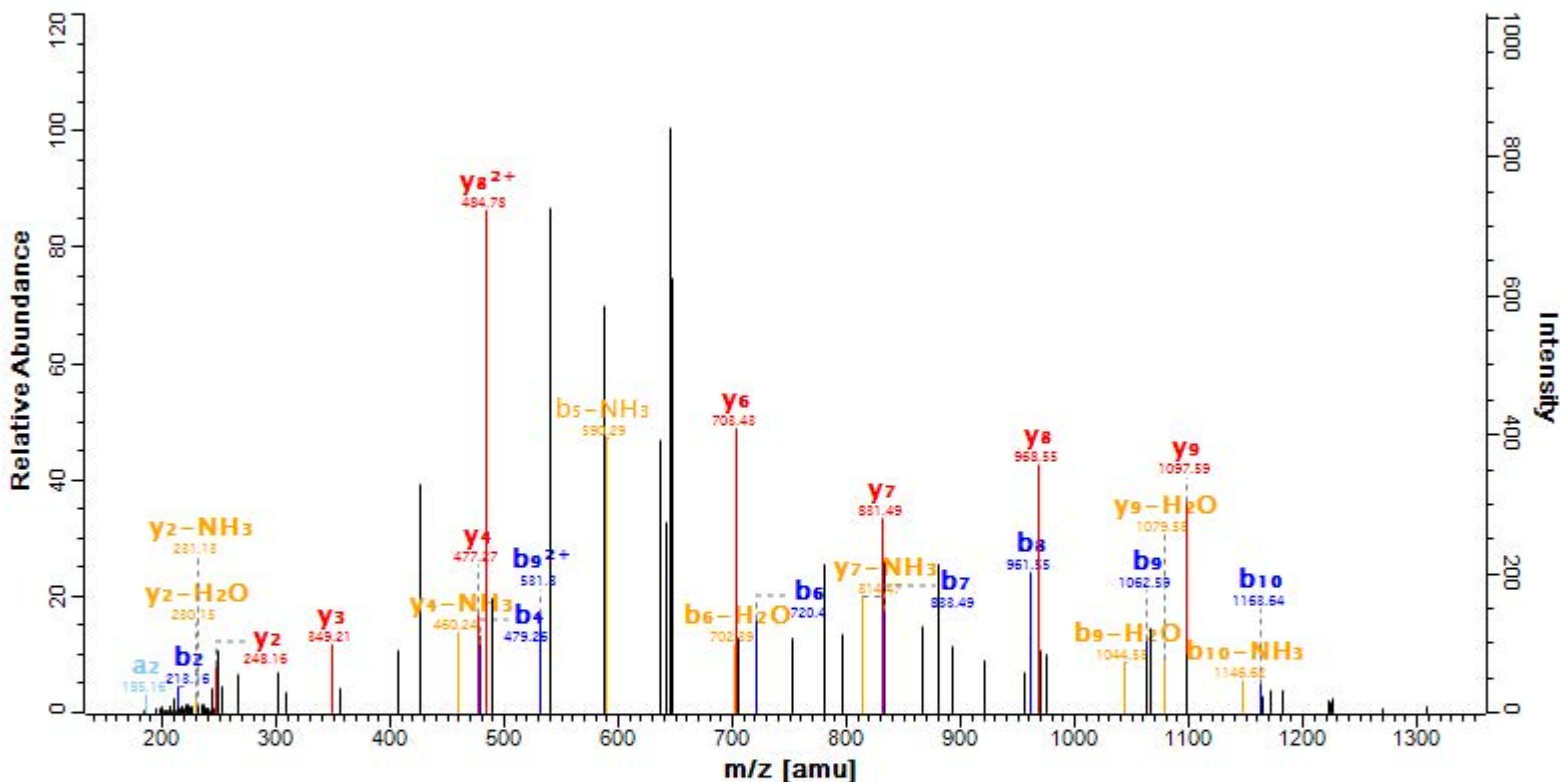

#### precursor information

|                   |                 |
|-------------------|-----------------|
| Mass:             | 1308.73999      |
| m/z:              | 655.37727       |
| Charge:           | 2+              |
| Retentiontime:    | 14.794393539428 |
| Score:            | 142.9682        |
| Mass Error [ppm]: | -0.12412        |
| PEP:              | 9.9117E-05      |
| Precursor Type:   | MULTI           |

#### general information

|                       |           |
|-----------------------|-----------|
| Annotation:           | 9 of 11   |
| AminoAcids Coverage:  | 82 %      |
| Intensity Coverage:   | 37 %      |
| Peak Coverage:        | 25 %      |
| Protein Localisation: | 13 ... 23 |

|        | a ion         | b <sup>2+</sup> ion | b ion         |       |   | y ion         | y <sup>2+</sup> ion |       |
|--------|---------------|---------------------|---------------|-------|---|---------------|---------------------|-------|
|        | Δ dalton mass | Δ dalton mass       | Δ dalton mass | seq   |   | Δ dalton mass | Δ dalton mass       |       |
|        | 72.08         | 100.1               | 100.1         | 1     | V | 10            |                     |       |
| +0.049 | 85.2          | 213.2               | +0.108        | 2     | L | 9             | 1211                |       |
|        | 314.2         | 342.2               | 342.2         | 3     | E | 8             | 1098                |       |
|        | 451.3         | 479.3               | +0.201        | 4     | H | 7             | 968.6               |       |
|        | 579.3         | 607.3               | 607.3         | 5     | Q | 6             | 831.5               |       |
|        | 692.4         | 720.4               | -0.15         | 6     | L | 5             | 703.4               |       |
|        | 805.5         | 833.5               | +0.035        | 7     | L | 4             | 590.4               |       |
|        | 933.6         | 961.5               | +0.054        | 8     | Q | 3             | 477.3               |       |
|        | 1035          | -0.07               | 531.8         | -0.01 | 9 | T             | 2                   | 349.2 |
|        | 1136          | 1164                | +0.108        | 10    | T | 1             | 248.2               |       |
|        |               |                     |               | 11    | K | 0             | 147.1               |       |

Scan number 1847 Raw file LNCAP\_Silac\_23F10\_set2\_07  
 Method ITMS; CID Pepti... 102.07

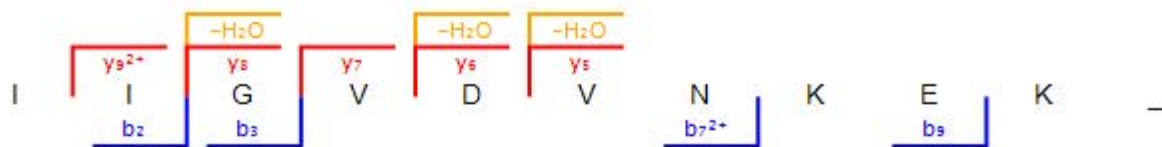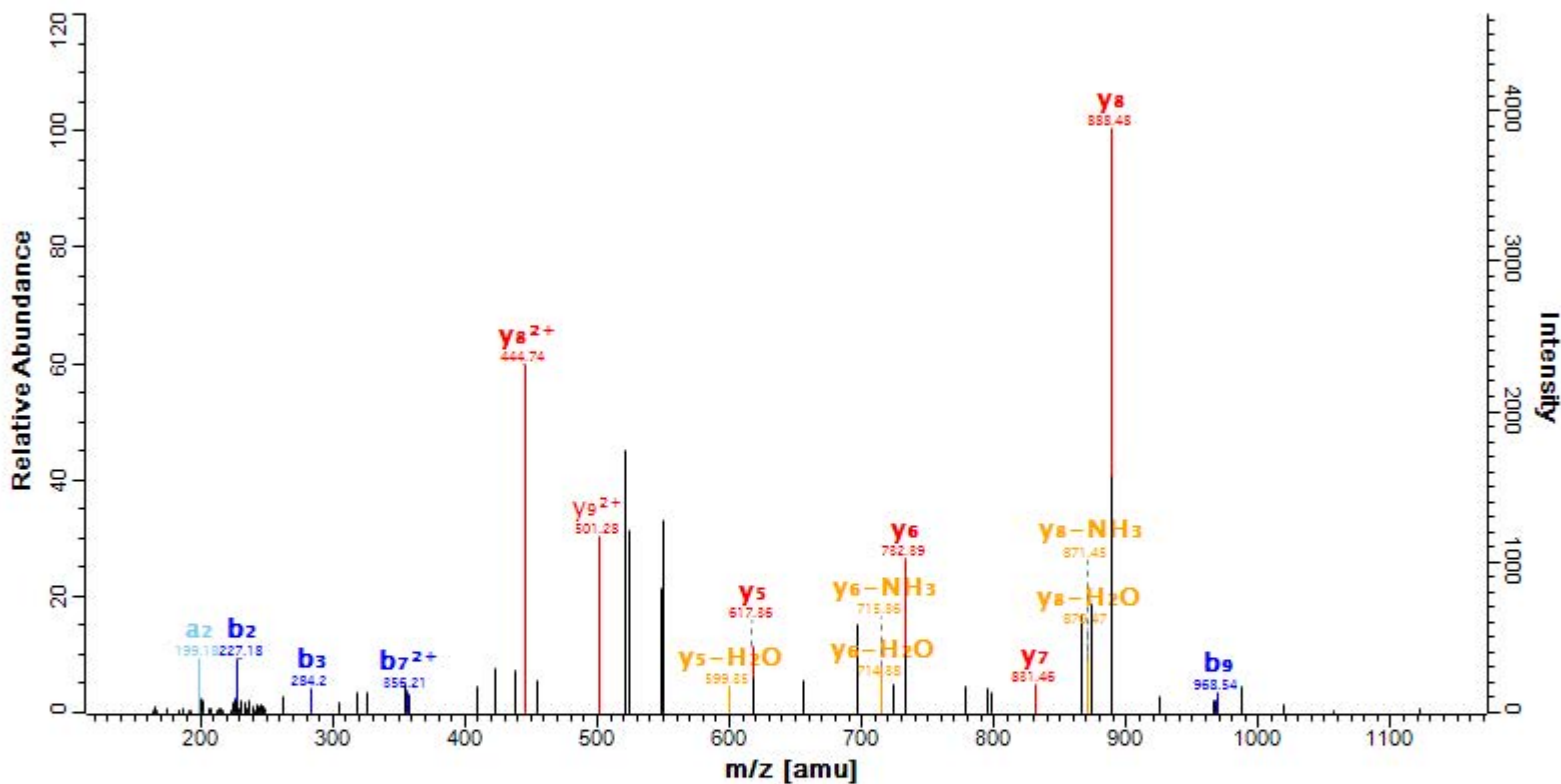

#### precursor information

|                   |                 |
|-------------------|-----------------|
| Mass:             | 1113.63999      |
| m/z:              | 557.82727       |
| Charge:           | 2+              |
| Retentiontime:    | 14.821597099304 |
| Score:            | 102.0672        |
| Mass Error [ppm]: | 0.55137         |
| PEP:              | 0.00065995      |
| Precursor Type:   | MULTI           |

|                       |             |
|-----------------------|-------------|
| Annotation:           | 7 of 10     |
| AminoAcids Coverage:  | 70 %        |
| Intensity Coverage:   | 44 %        |
| Peak Coverage:        | 18 %        |
| Protein Localisation: | 220 ... 229 |

| a ion         | b <sup>2+</sup> ion | b ion         | seq |   |   | y ion         | y <sup>2+</sup> ion |
|---------------|---------------------|---------------|-----|---|---|---------------|---------------------|
| Δ dalton mass | Δ dalton mass       | Δ dalton mass |     |   |   | Δ dalton mass | Δ dalton mass       |
| 86.1          | 114.1               | 114.1         | 1   | I | 9 |               |                     |
| +0.025 99.2   | 227.2               | -0.02 227.2   | 2   | I | 8 | 1002          | 501.3 +0.256        |
| 256.2         | 284.2               | -0.09 284.2   | 3   | G | 7 | 888.5 +0.00   | 444.7 +0.133        |
| 355.3         | 383.3               | 383.3         | 4   | V | 6 | 831.5 -0.03   | 831.5               |
| 470.3         | 498.3               | 498.3         | 5   | D | 5 | 732.4 -0.03   | 732.4               |
| 569.4         | 597.4               | 597.4         | 6   | V | 4 | 617.4 +0.117  | 617.4               |
| 683.4 +0.24   | 3356.2              | 711.4         | 7   | N | 3 | 518.3         | 518.3               |
| 811.5         | 839.5               | 839.5         | 8   | K | 2 | 404.3         | 404.3               |
| 940.5         | 968.5 +0.076        | 968.5         | 9   | E | 1 | 276.2         | 276.2               |
|               |                     |               | 10  | K | 0 | 147.1         | 147.1               |

Scan number 2230 Raw file LNCAP\_Silac\_23F10\_set2\_07  
 Method ITMS; CID Pepti... 163.27

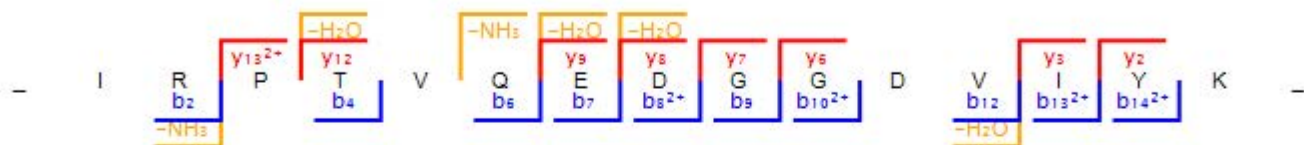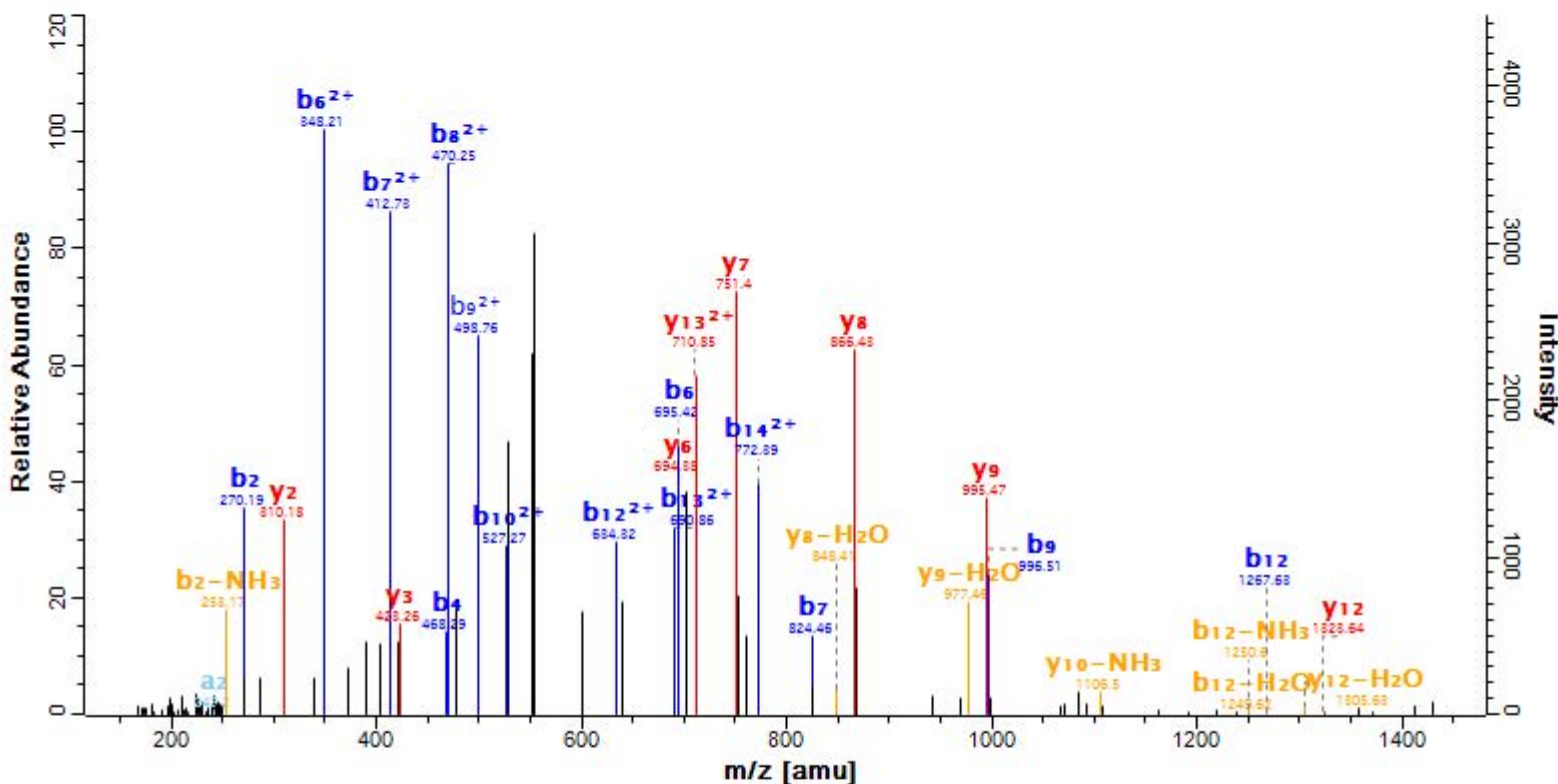

#### precursor information

|                   |                 |
|-------------------|-----------------|
| Mass:             | 1688.87369      |
| m/z:              | 563.96517       |
| Charge:           | 3+              |
| Retentiontime:    | 16.866405487060 |
| Score:            | 163.2696        |
| Mass Error [ppm]: | 0.19973         |
| PEP:              | 1.3154E-14      |
| Precursor Type:   | MULTI           |

#### general information

|                       |             |
|-----------------------|-------------|
| Annotation:           | 11 of 15    |
| AminoAcids Coverage:  | 73 %        |
| Intensity Coverage:   | 65 %        |
| Peak Coverage:        | 29 %        |
| Protein Localisation: | 181 ... 195 |

| a ion         |               | b <sup>2+</sup> ion |               | b ion  |               | y ion         |               | y <sup>2+</sup> ion |             |        |
|---------------|---------------|---------------------|---------------|--------|---------------|---------------|---------------|---------------------|-------------|--------|
| Δ dalton mass | Δ dalton mass | Δ dalton mass       | Δ dalton mass | seq    | Δ dalton mass | Δ dalton mass | Δ dalton mass | Δ dalton mass       |             |        |
| 86.1          |               | 114.1               |               | 114.1  | 1             | I             | 14            |                     |             |        |
| -0.03         | 242.2         | 270.2               | +0.01         | 270.2  | 2             | R             | 13            | 1577                | 1577        |        |
|               | 339.3         | 367.2               |               | 367.2  | 3             | P             | 12            | 1421                | 710.9 +0.33 |        |
|               | 440.3         | 468.3               | +0.167        | 468.3  | 4             | T             | 11            | 1324                | +0.495      |        |
|               | 539.4         | 567.4               |               | 567.4  | 5             | V             | 10            | 1223                | 1223        |        |
|               | 667.4         | +0.137              | 348.2         | +0.003 | 695.4         | 6             | Q             | 9                   | 1124        | 1124   |
|               | 796.5         | +0.156              | 412.7         | -0.07  | 824.5         | 7             | E             | 8                   | 995.5       | +0.02  |
|               | 911.5         | +0.159              | 470.2         |        | 939.5         | 8             | D             | 7                   | 866.4       | -0.01  |
|               | 968.5         | -0.05               | 498.8         | +0.064 | 996.5         | 9             | G             | 6                   | 751.4       | -0.02  |
|               | 1026          | +0                  | 527.3         |        | 1054          | 10            | G             | 5                   | 694.4       | -0.04  |
|               | 1141          |                     | 1169          |        | 1169          | 11            | D             | 4                   | 637.4       | 637.4  |
|               | 1240          | +0.139              | 634.3         | +0.257 | 1268          | 12            | V             | 3                   | 522.3       | 522.3  |
|               | 1353          | -0.04               | 690.9         |        | 1381          | 13            | I             | 2                   | 423.3       | +0.044 |
|               | 1516          | +0.338              | 772.4         |        | 1544          | 14            | Y             | 1                   | 310.2       | +0.091 |
|               |               |                     |               |        |               | 15            | K             | 0                   | 147.1       | 147.1  |

Scan number 2268 Raw file LNCAP\_Silac\_23F10\_set2\_07  
 Method ITMS; CID Pepti... 198.32

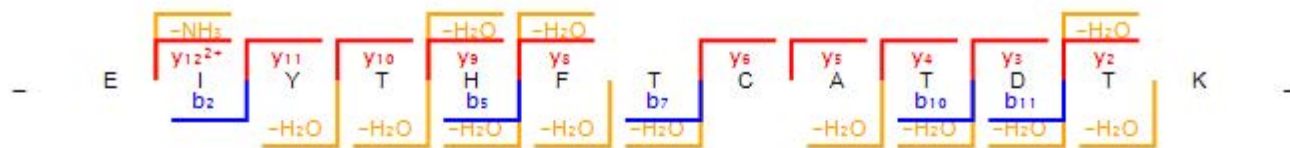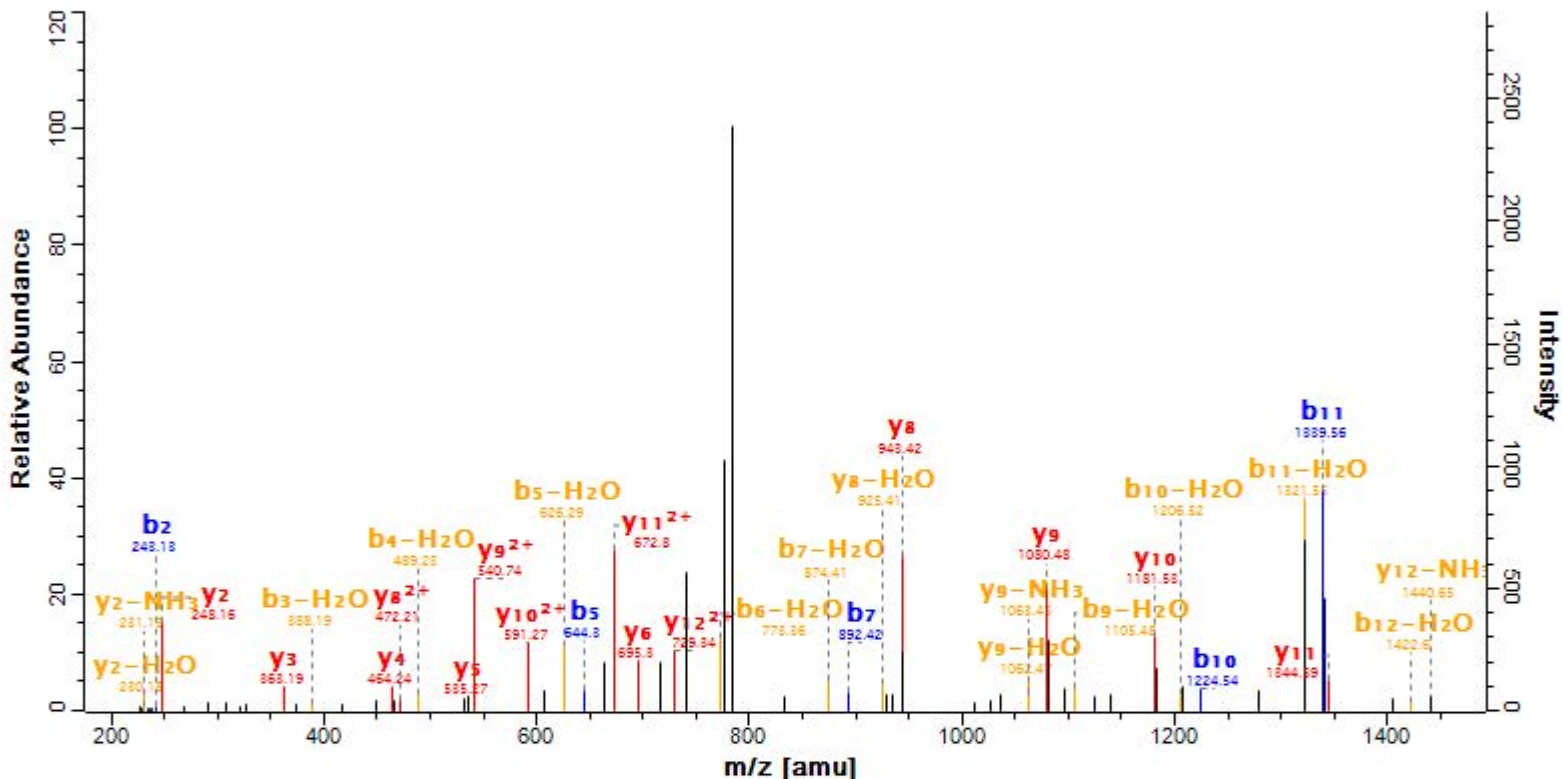

**precursor information**

|                   |                 |
|-------------------|-----------------|
| Mass:             | 1585.70869      |
| m/z:              | 793.86162       |
| Charge:           | 2+              |
| Retentiontime:    | 17.067661285400 |
| Score:            | 198.3184        |
| Mass Error [ppm]: | 0.27539         |
| PEP:              | 1.7204E-17      |
| Precursor Type:   | MULTI           |

**general information**

|                       |             |
|-----------------------|-------------|
| Annotation:           | 11 of 13    |
| AminoAcids Coverage:  | 85 %        |
| Intensity Coverage:   | 47 %        |
| Peak Coverage:        | 44 %        |
| Protein Localisation: | 318 ... 330 |

| b ion     |          |    |     |    | y ion    |           | y <sup>2+</sup> ion |           |
|-----------|----------|----|-----|----|----------|-----------|---------------------|-----------|
| Δ dalton  | mass     |    | seq |    | Δ dalton | mass      | Δ dalton            | mass      |
|           | 130.0499 | 1  | E   | 12 |          |           |                     |           |
| -0.17245  | 243.1339 | 2  | I   | 11 | 1457.673 |           | 729.3401            | +0.209757 |
|           | 406.1973 | 3  | Y   | 10 | 1344.589 | +0.048574 | 672.7981            | +0.258503 |
|           | 507.2449 | 4  | T   | 9  | 1181.526 | -0.00455  | 591.2664            | +0.179571 |
| +0.126506 | 644.3039 | 5  | H   | 8  | 1080.478 | +0.025303 | 540.7426            | +0.214275 |
|           | 791.3723 | 6  | F   | 7  | 943.419  | -0.00636  | 472.2131            | -0.14061  |
| +0.17765  | 892.4199 | 7  | T   | 6  | 796.3505 |           | 796.3505            |           |
|           | 1052.451 | 8  | C   | 5  | 695.3029 | +0.032156 | 695.3029            |           |
|           | 1123.488 | 9  | A   | 4  | 535.2722 | +0.198607 | 535.2722            |           |
| +0.021255 | 1224.535 | 10 | T   | 3  | 464.2351 | +0.11182  | 464.2351            |           |
| -0.0102   | 1339.562 | 11 | D   | 2  | 363.1874 | +0.15193  | 363.1874            |           |
|           | 1440.61  | 12 | T   | 1  | 248.1605 | +0.011698 | 248.1605            |           |
|           |          | 13 | K   | 0  | 147.1128 |           | 147.1128            |           |



Scan number 2353 Raw file LNCAP\_Silac\_23F10\_set2\_07  
 Method ITMS; CID Pepti... 84.17

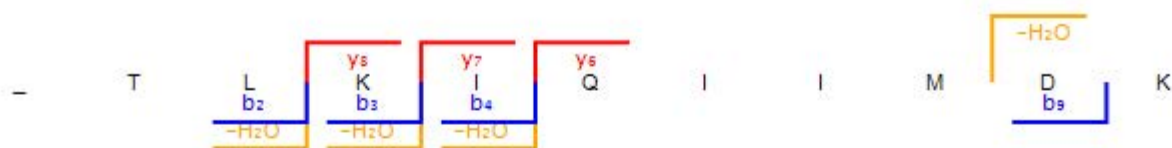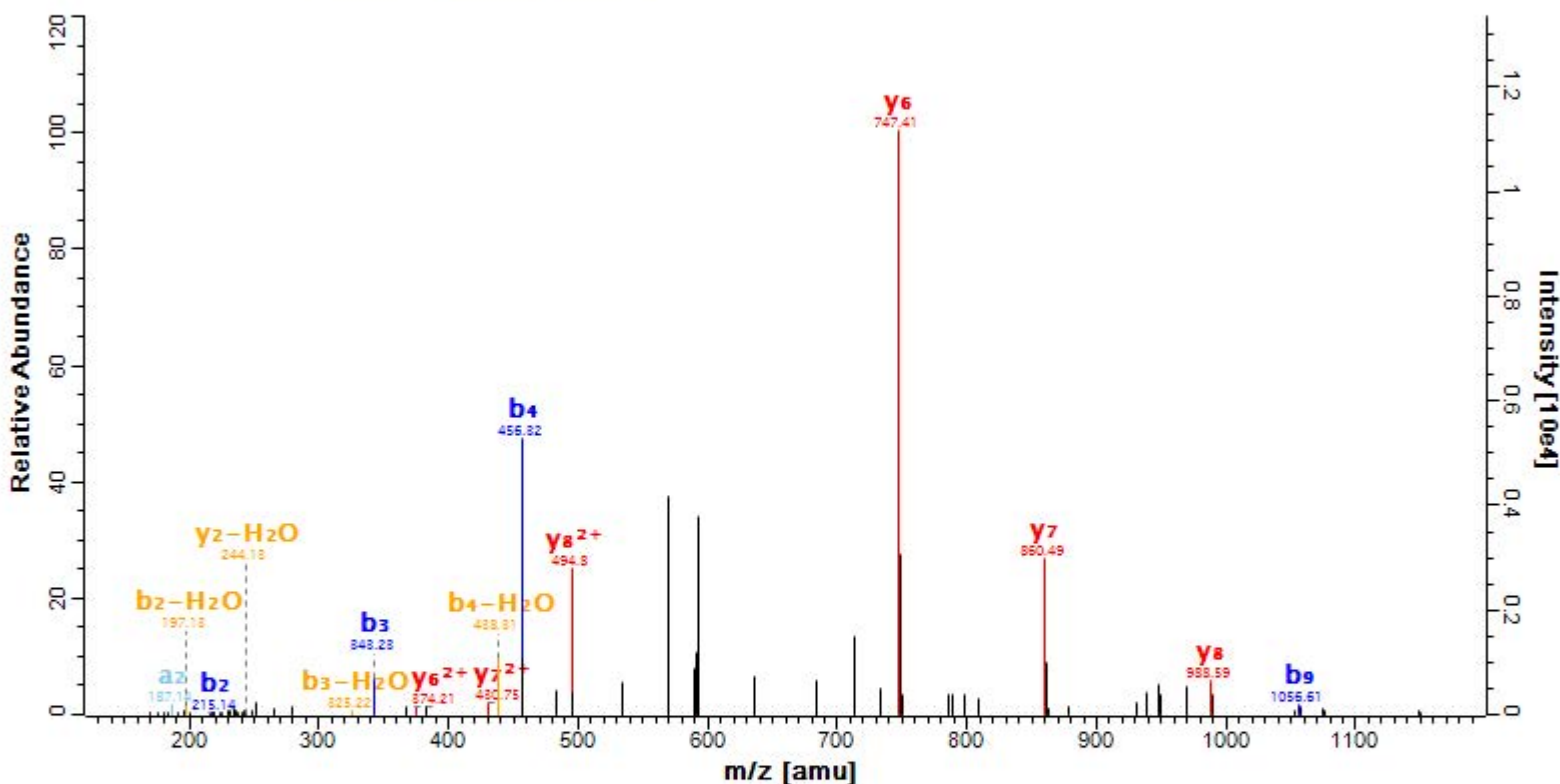

precursor information

|                   |                 |
|-------------------|-----------------|
| Mass:             | 1201.7106       |
| m/z:              | 601.86257       |
| Charge:           | 2+              |
| Retentiontime:    | 17.518669128418 |
| Score:            | 84.17           |
| Mass Error [ppm]: | 0.13814         |
| PEP:              | 0.0030884       |
| Precursor Type:   | MULTI           |

|                       |          |
|-----------------------|----------|
| Annotation:           | 5 of 10  |
| AminoAcids Coverage:  | 50 %     |
| Intensity Coverage:   | 46 %     |
| Peak Coverage:        | 17 %     |
| Protein Localisation: | 6 ... 15 |

| a ion    |        | b ion    |        |    |     |          | y ion  |          | y <sup>2+</sup> ion |         |
|----------|--------|----------|--------|----|-----|----------|--------|----------|---------------------|---------|
| Δ dalton | mass   | Δ dalton | mass   |    | seq | Δ dalton | mass   | Δ dalton | mass                |         |
|          | 74.06  |          | 102.05 | 1  | T   | 9        |        |          |                     |         |
| +0.0467  | 187.14 | +0.0484  | 215.14 | 2  | L   | 8        | 1101.7 |          | 1101.7              |         |
|          | 315.24 | -0.03    | 343.23 | 3  | K   | 7        | 988.59 | +0.0478  | 494.8               | +0.1768 |
|          | 428.32 | +0.0244  | 456.32 | 4  | I   | 6        | 860.49 | +0.0337  | 430.75              | +0.1597 |
|          | 556.38 |          | 584.38 | 5  | Q   | 5        | 747.41 | +0.0269  | 374.21              | +0.2446 |
|          | 669.47 |          | 697.46 | 6  | I   | 4        | 619.35 |          | 619.35              |         |
|          | 782.55 |          | 810.54 | 7  | I   | 3        | 506.26 |          | 506.26              |         |
|          | 913.59 |          | 941.59 | 8  | M   | 2        | 393.18 |          | 393.18              |         |
|          | 1028.6 | +0.1294  | 1056.6 | 9  | D   | 1        | 262.14 |          | 262.14              |         |
|          |        |          |        | 10 | K   | 0        | 147.11 |          | 147.11              |         |

Scan number 2764 Raw file LNCAP\_Silac\_23F10\_set2\_07  
 Method ITMS; CID Pepti... 98.9

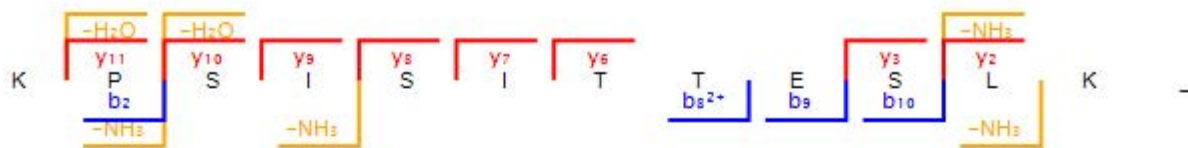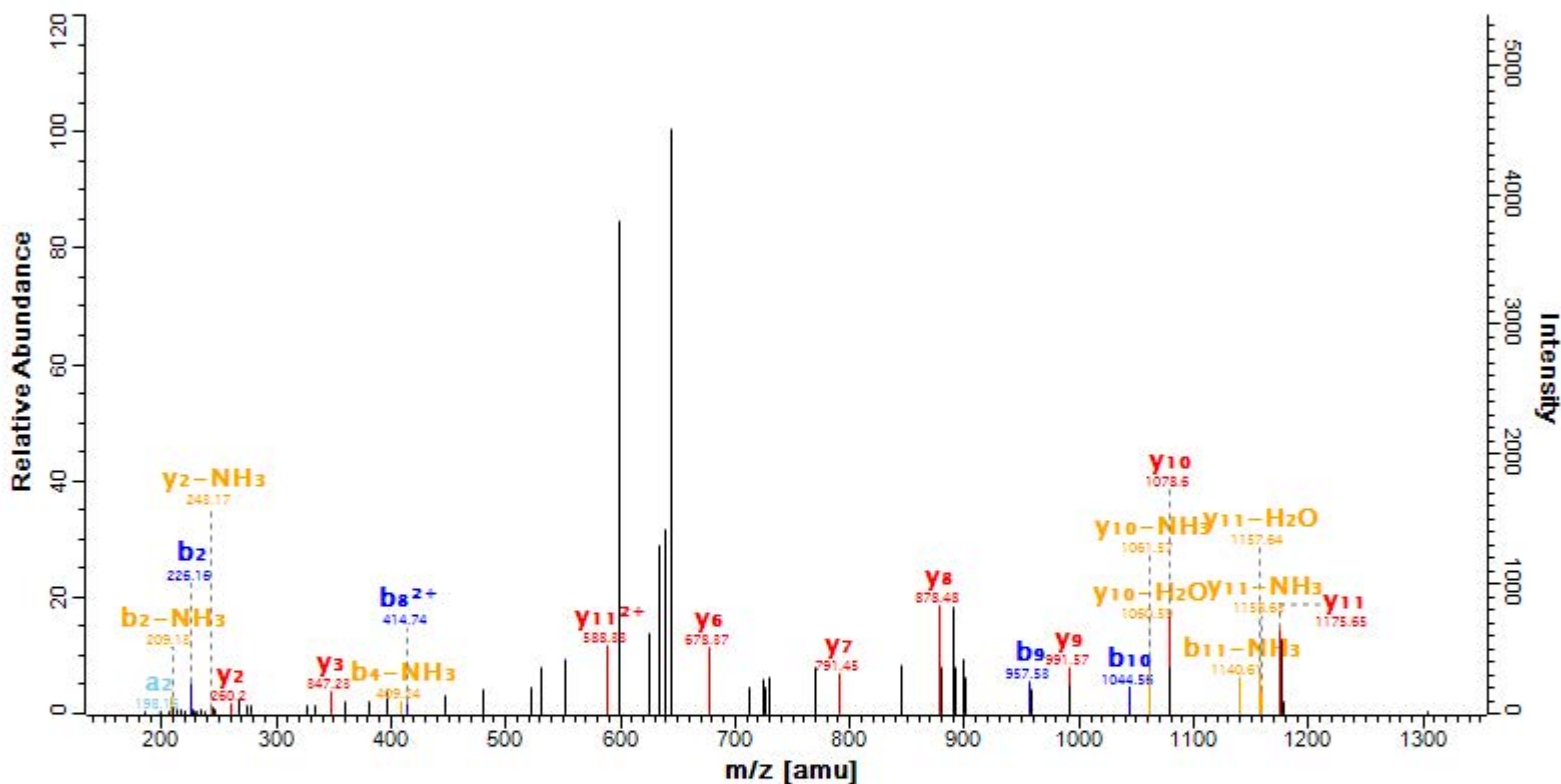

#### precursor information

|                   |                 |
|-------------------|-----------------|
| Mass:             | 1302.73986      |
| m/z:              | 652.3772        |
| Charge:           | 2+              |
| Retentiontime:    | 19.657924652099 |
| Score:            | 98.90169        |
| Mass Error [ppm]: | 0.28702         |
| PEP:              | 0.00017949      |
| Precursor Type:   | MULTI           |

#### general information

|                       |             |
|-----------------------|-------------|
| Annotation:           | 10 of 12    |
| AminoAcids Coverage:  | 83 %        |
| Intensity Coverage:   | 24 %        |
| Peak Coverage:        | 27 %        |
| Protein Localisation: | 765 ... 776 |

| a ion         |               | b <sup>2+</sup> ion |               | b ion |               | y ion         |               | y <sup>2+</sup> ion |                        |
|---------------|---------------|---------------------|---------------|-------|---------------|---------------|---------------|---------------------|------------------------|
| Δ dalton mass | Δ dalton mass | Δ dalton mass       | Δ dalton mass | seq   | Δ dalton mass | Δ dalton mass | Δ dalton mass | Δ dalton mass       |                        |
|               | 101.1         |                     | 129.1         |       | 129.1         | 1             | K             | 11                  |                        |
| +0.175        | 98.2          |                     | 226.2         | -0.05 | 226.2         | 2             | P             | 10                  | 1176 -0.08 588.3 -0.01 |
|               | 285.2         |                     | 313.2         |       | 313.2         | 3             | S             | 9                   | 1079 -0.06 1079        |
|               | 398.3         |                     | 426.3         |       | 426.3         | 4             | I             | 8                   | 991.6 -0.23 991.6      |
|               | 485.3         |                     | 513.3         |       | 513.3         | 5             | S             | 7                   | 878.5 +0.04 878.5      |
|               | 598.4         |                     | 626.4         |       | 626.4         | 6             | I             | 6                   | 791.5 -0.01 791.5      |
|               | 699.4         |                     | 727.4         |       | 727.4         | 7             | T             | 5                   | 678.4 -0.09 678.4      |
|               | 800.5         | +0.10               | 1414.7        |       | 828.5         | 8             | T             | 4                   | 577.3 577.3            |
|               | 929.5         |                     | 957.5         | +0.06 | 2957.5        | 9             | E             | 3                   | 476.3 476.3            |
|               | 1017          |                     | 1045          | -0.17 | 1045          | 10            | S             | 2                   | 347.2 +0.03 347.2      |
|               | 1130          |                     | 1158          |       | 1158          | 11            | L             | 1                   | 260.2 +0.10 260.2      |
|               |               |                     |               |       |               | 12            | K             | 0                   | 147.1 147.1            |

Scan number 2975 Raw file LNCAP\_Silac\_23F10\_set2\_07  
 Method ITMS; CID Pepti... 194.58

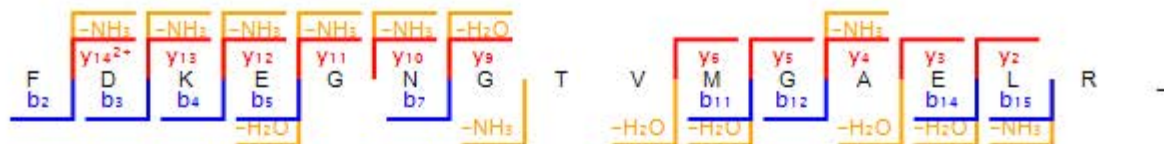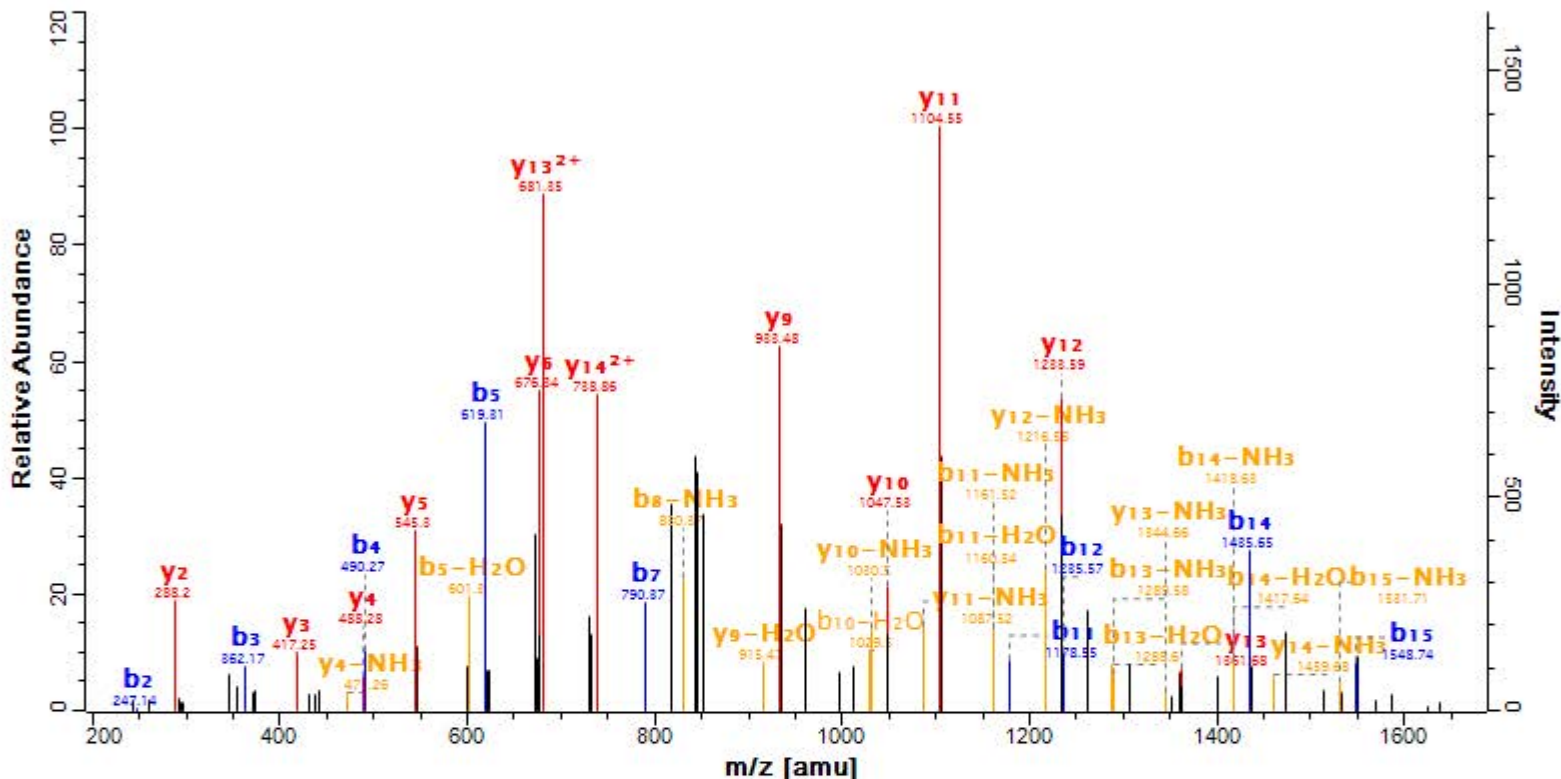

#### precursor information

|                   |                 |
|-------------------|-----------------|
| Mass:             | 0               |
| m/z:              | 861.92711       |
| Charge:           | 0+              |
| Retentiontime:    | 20.775049209594 |
| Score:            | 194.5789        |
| Mass Error [ppm]: | -0.57936        |
| PEP:              | 6.3596E-29      |
| Precursor Type:   | PEAK            |

#### general information

|                       |             |
|-----------------------|-------------|
| Annotation:           | 13 of 16    |
| AminoAcids Coverag    | 81 %        |
| Intensity Coverage:   | 58 %        |
| Peak Coverage:        | 43 %        |
| Protein Localisation: | 139 ... 154 |

| b ion     |          |    |     |    | y ion    |           | y <sup>2+</sup> ion |           |
|-----------|----------|----|-----|----|----------|-----------|---------------------|-----------|
| Δ dalton  | mass     |    | seq |    | Δ dalton | mass      | Δ dalton            | mass      |
|           | 100.0757 | 1  | V   | 15 |          |           |                     |           |
| -0.15097  | 247.1441 | 2  | F   | 14 | 1623.78  |           | 1623.78             |           |
| +0.076328 | 362.171  | 3  | D   | 13 | 1476.711 |           | 738.8592            | +0.279047 |
| +0.041302 | 490.266  | 4  | K   | 12 | 1361.684 | +0.006621 | 681.3457            | +0.295998 |
| +0.107839 | 619.3086 | 5  | E   | 11 | 1233.589 | +0.007712 | 1233.589            |           |
|           | 676.3301 | 6  | G   | 10 | 1104.547 | -0.10704  | 1104.547            |           |
| +0.02941  | 790.373  | 7  | N   | 9  | 1047.525 | +0.026481 | 1047.525            |           |
|           | 847.3945 | 8  | G   | 8  | 933.4822 | +0.037121 | 933.4822            |           |
|           | 948.4421 | 9  | T   | 7  | 876.4608 |           | 876.4608            |           |
|           | 1047.511 | 10 | V   | 6  | 775.4131 |           | 775.4131            |           |
| +0.068105 | 1178.551 | 11 | M   | 5  | 676.3447 | +0.040521 | 676.3447            |           |
| +0.087169 | 1235.572 | 12 | G   | 4  | 545.3042 | +0.085034 | 545.3042            |           |
|           | 1306.61  | 13 | A   | 3  | 488.2827 | +0.112541 | 488.2827            |           |
| -0.01756  | 1435.652 | 14 | E   | 2  | 417.2456 | +0.140682 | 417.2456            |           |
| -0.22418  | 1548.736 | 15 | L   | 1  | 288.203  | +0.003649 | 288.203             |           |
|           |          | 16 | R   | 0  | 175.119  |           | 175.119             |           |

Scan number 3120 Raw file LNCAP\_Silac\_23F10\_set2\_07  
 Method ITMS; CID Pepti... 147.26

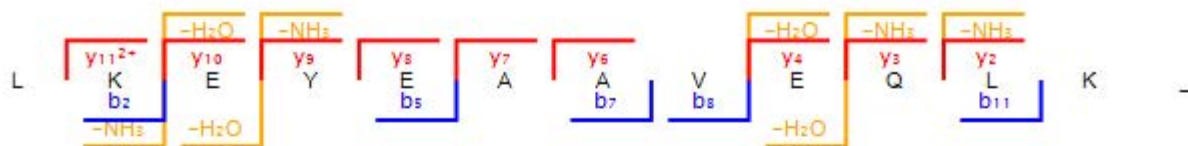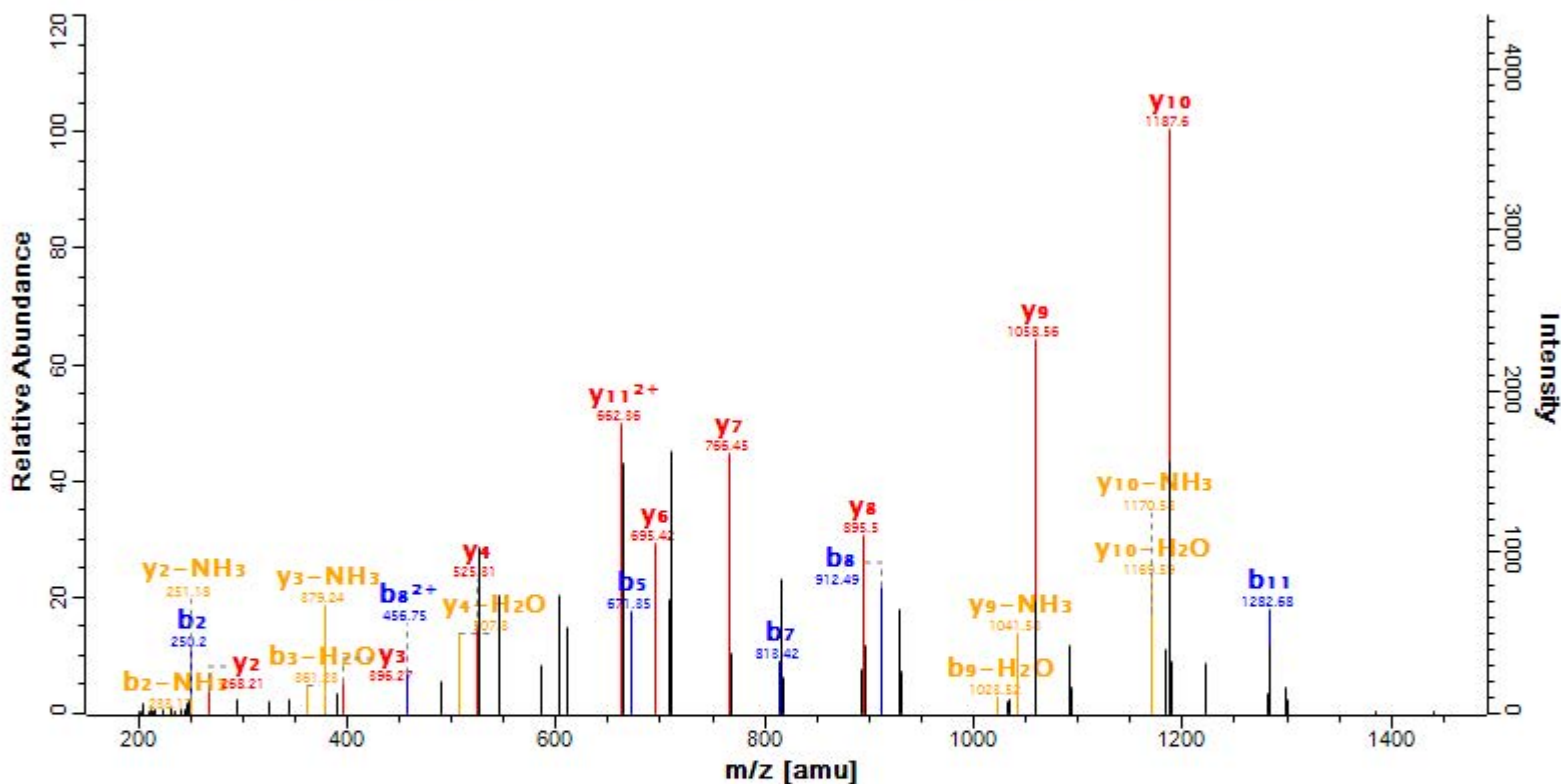

#### precursor information

|                   |                 |
|-------------------|-----------------|
| Mass:             | 1419.7601       |
| m/z:              | 710.88733       |
| Charge:           | 2+              |
| Retentiontime:    | 21.586795806884 |
| Score:            | 147.2618        |
| Mass Error [ppm]: | -0.58959        |
| PEP:              | 6.0628E-06      |
| Precursor Type:   | MULTI           |

#### general information

|                       |            |
|-----------------------|------------|
| Annotation:           | 10 of 12   |
| AminoAcids Coverage:  | 83 %       |
| Intensity Coverage:   | 52 %       |
| Peak Coverage:        | 28 %       |
| Protein Localisation: | 93 ... 104 |

| b <sup>2+</sup> ion |        | b ion    |        | seq |   |    | y ion    |         | y <sup>2+</sup> ion |        |
|---------------------|--------|----------|--------|-----|---|----|----------|---------|---------------------|--------|
| Δ dalton            | mass   | Δ dalton | mass   |     |   |    | Δ dalton | mass    | Δ dalton            | mass   |
|                     | 114.09 |          | 114.09 | 1   | L | 11 |          |         |                     |        |
|                     | 250.2  | +0.0784  | 250.2  | 2   | K | 10 | 1323.7   |         | 662.36              | -0.074 |
|                     | 379.24 |          | 379.24 | 3   | E | 9  | 1187.6   | -0.025  | 1187.6              |        |
|                     | 542.31 |          | 542.31 | 4   | Y | 8  | 1058.6   | -0.036  | 1058.6              |        |
|                     | 671.35 | +0.0403  | 671.35 | 5   | E | 7  | 895.5    | -0.003  | 895.5               |        |
|                     | 742.39 |          | 742.39 | 6   | A | 6  | 766.45   | +0.088  | 766.45              |        |
|                     | 813.42 | -0.063   | 813.42 | 7   | A | 5  | 695.42   | +0.0149 | 695.42              |        |
| +0.4706             | 456.75 | -0.043   | 912.49 | 8   | V | 4  | 624.38   |         | 624.38              |        |
|                     | 1041.5 |          | 1041.5 | 9   | E | 3  | 525.31   | +0.085  | 525.31              |        |
|                     | 1169.6 |          | 1169.6 | 10  | Q | 2  | 396.27   | -0.016  | 396.27              |        |
|                     | 1282.7 | -0.012   | 1282.7 | 11  | L | 1  | 268.21   | -0.049  | 268.21              |        |
|                     |        |          |        | 12  | K | 0  | 155.13   |         | 155.13              |        |

Scan number 3686 Raw file LNCAP\_Silac\_23F10\_set2\_07  
 Method ITMS; CID Pepti... 99.22

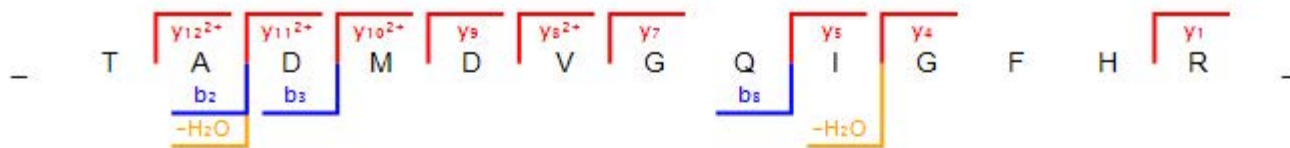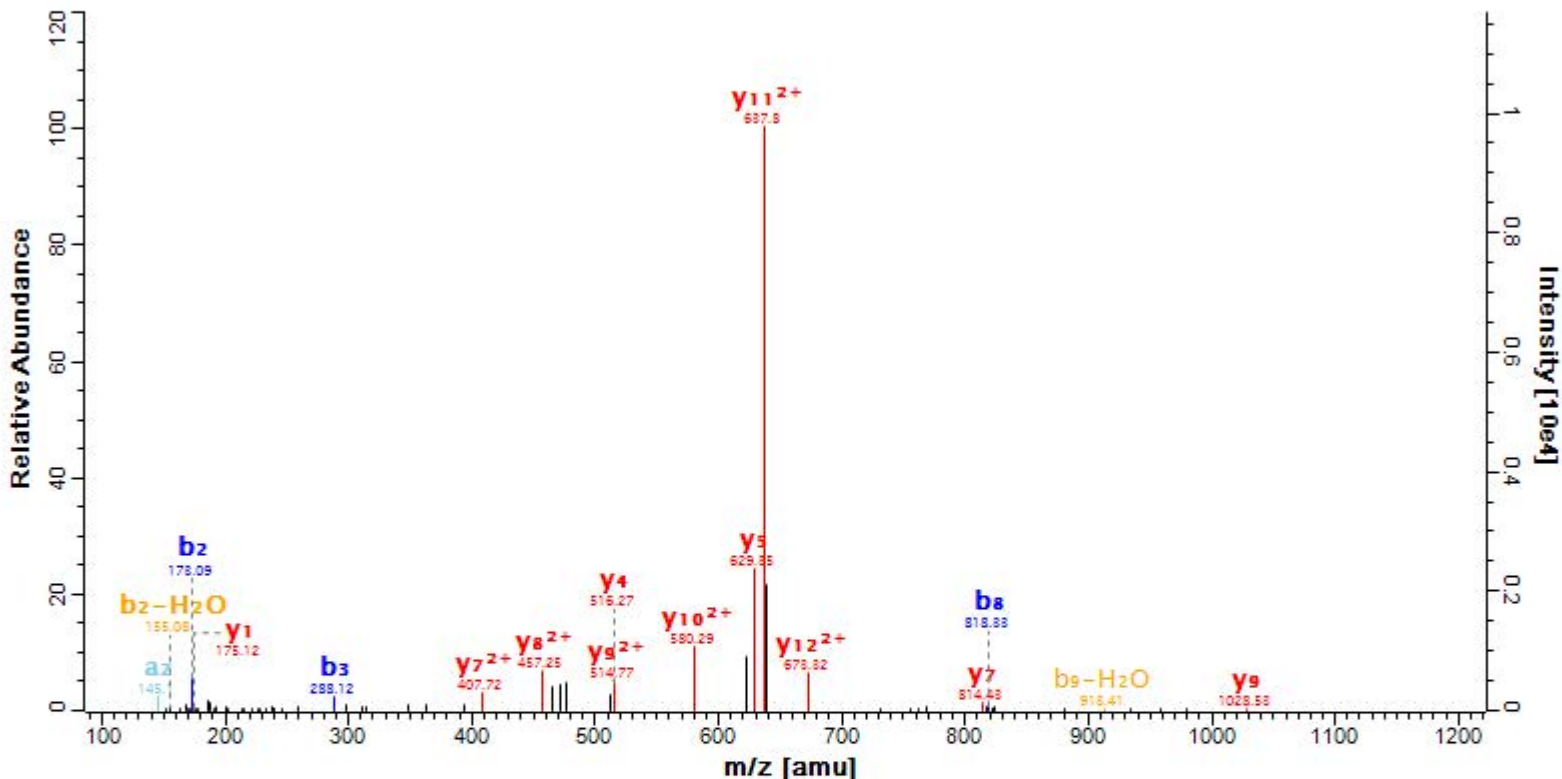

**precursor information**

|                   |                 |
|-------------------|-----------------|
| Mass:             | 1445.67225      |
| m/z:              | 482.89803       |
| Charge:           | 3+              |
| Retentiontime:    | 24.617240905761 |
| Score:            | 99.21528        |
| Mass Error [ppm]: | 0.068262        |
| PEP:              | 8.9025E-05      |
| Precursor Type:   | MULTI           |

**general information**

|                       |             |
|-----------------------|-------------|
| Annotation:           | 10 of 13    |
| AminoAcids Coverage:  | 77 %        |
| Intensity Coverage:   | 66 %        |
| Peak Coverage:        | 15 %        |
| Protein Localisation: | 101 ... 113 |

| a ion    |        | b ion    |        |     |   |          | y ion  |          | y <sup>2+</sup> ion |         |
|----------|--------|----------|--------|-----|---|----------|--------|----------|---------------------|---------|
| Δ dalton | mass   | Δ dalton | mass   | seq |   | Δ dalton | mass   | Δ dalton | mass                |         |
|          | 74.06  |          | 102.05 | 1   | T | 12       |        |          |                     |         |
| -0.05    | 145.1  | -0.058   | 173.09 | 2   | A | 11       | 1345.6 |          | 673.32              | +0.134  |
|          | 260.12 | -0.004   | 288.12 | 3   | D | 10       | 1274.6 |          | 637.8               | -0.014  |
|          | 391.16 |          | 419.16 | 4   | M | 9        | 1159.6 |          | 580.29              | -0.014  |
|          | 506.19 |          | 534.19 | 5   | D | 8        | 1028.5 | -0.005   | 514.77              | +0.08   |
|          | 605.26 |          | 633.25 | 6   | V | 7        | 913.5  |          | 457.25              | +0.0943 |
|          | 662.28 |          | 690.28 | 7   | G | 6        | 814.43 | -0.025   | 407.72              | +0.108  |
|          | 790.34 | +0.2223  | 818.33 | 8   | Q | 5        | 757.41 |          | 757.41              |         |
|          | 903.42 |          | 931.42 | 9   | I | 4        | 629.35 | +0.0576  | 629.35              |         |
|          | 960.45 |          | 988.44 | 10  | G | 3        | 516.27 | -0.021   | 516.27              |         |
|          | 1107.5 |          | 1135.5 | 11  | F | 2        | 459.25 |          | 459.25              |         |
|          | 1244.6 |          | 1272.6 | 12  | H | 1        | 312.18 |          | 312.18              |         |
|          |        |          |        | 13  | R | 0        | 175.12 | -0.025   | 175.12              |         |

Scan number 371 Raw file LNCAP\_Silac\_23F10\_set2\_07  
 Method ITMS: CID Pepti... 192.39

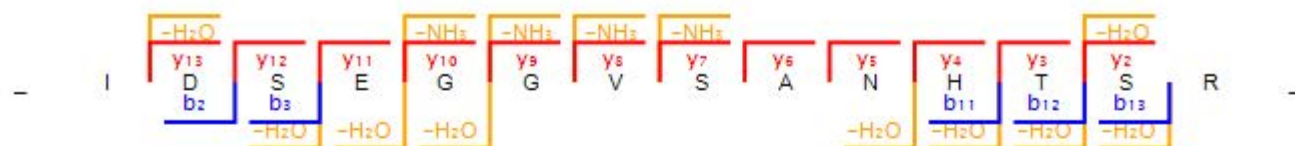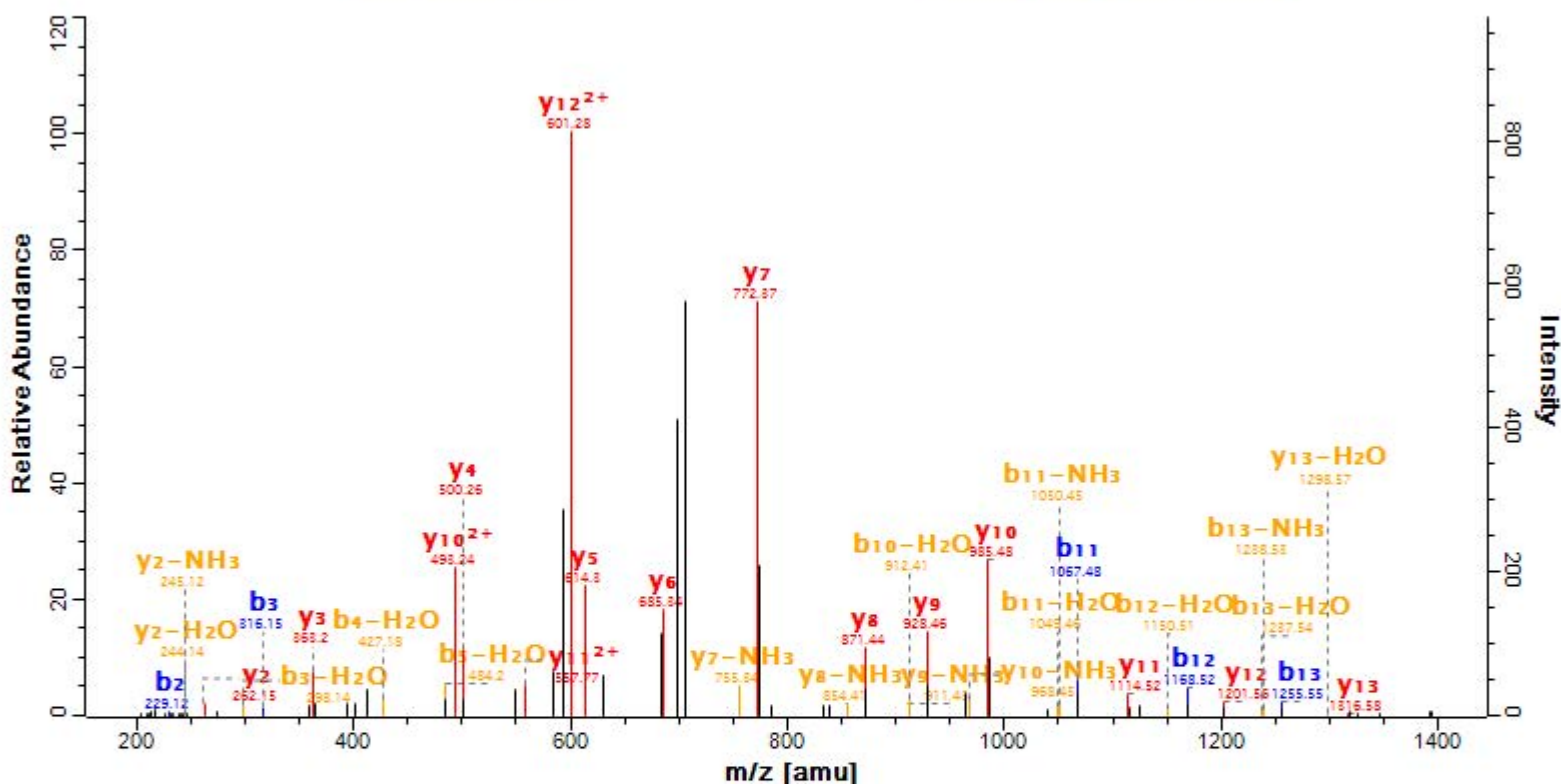

#### precursor information

|                   |                 |
|-------------------|-----------------|
| Mass:             | 1428.65911      |
| m/z:              | 715.33683       |
| Charge:           | 2+              |
| Retentiontime:    | 6.8609633445739 |
| Score:            | 192.3947        |
| Mass Error [ppm]: | -0.15426        |
| PEP:              | 1.8459E-18      |
| Precursor Type:   | MULTI           |

#### general information

|                       |             |
|-----------------------|-------------|
| Annotation:           | 12 of 14    |
| AminoAcids Coverage:  | 86 %        |
| Intensity Coverage:   | 54 %        |
| Peak Coverage:        | 40 %        |
| Protein Localisation: | 302 ... 315 |

| b ion     |          |    |     |    | y ion    |           | y <sup>2+</sup> ion |           |
|-----------|----------|----|-----|----|----------|-----------|---------------------|-----------|
| Δ dalton  | mass     |    | seq |    | Δ dalton | mass      | Δ dalton            | mass      |
|           | 114.0913 | 1  | I   | 13 |          |           |                     |           |
| +0.103045 | 229.1183 | 2  | D   | 12 | 1316.583 | -0.10452  | 1316.583            |           |
| +0.269183 | 316.1503 | 3  | S   | 11 | 1201.556 | +0.066467 | 601.2814            | +0.180108 |
|           | 445.1929 | 4  | E   | 10 | 1114.524 | +0.058578 | 557.7654            | +0.150895 |
|           | 502.2144 | 5  | G   | 9  | 985.481  | -0.00515  | 493.2441            | +0.21278  |
|           | 559.2358 | 6  | G   | 8  | 928.4595 | -0.02403  | 928.4595            |           |
|           | 658.3042 | 7  | V   | 7  | 871.4381 | -0.01648  | 871.4381            |           |
|           | 745.3363 | 8  | S   | 6  | 772.3696 | +0.002491 | 772.3696            |           |
|           | 816.3734 | 9  | A   | 5  | 685.3376 | +0.067356 | 685.3376            |           |
|           | 930.4163 | 10 | N   | 4  | 614.3005 | +0.090554 | 614.3005            |           |
| -0.14967  | 1067.475 | 11 | H   | 3  | 500.2576 | +0.051816 | 500.2576            |           |
| -0.03804  | 1168.523 | 12 | T   | 2  | 363.1987 | +0.089915 | 363.1987            |           |
| -0.24451  | 1255.555 | 13 | S   | 1  | 262.151  | +0.076772 | 262.151             |           |
|           |          | 14 | R   | 0  | 175.119  |           | 175.119             |           |

Scan number 3845 Raw file LNCAP\_Silac\_23F10\_set2\_07  
 Method ITMS; CID Pepti... 139.58

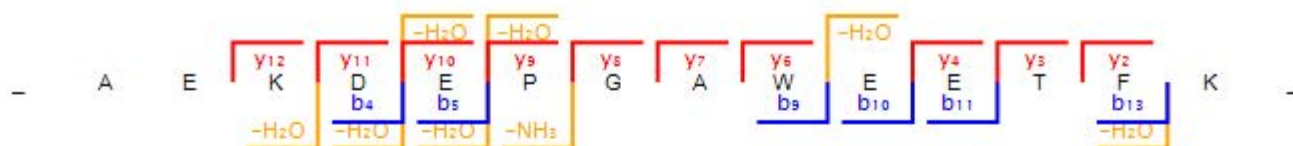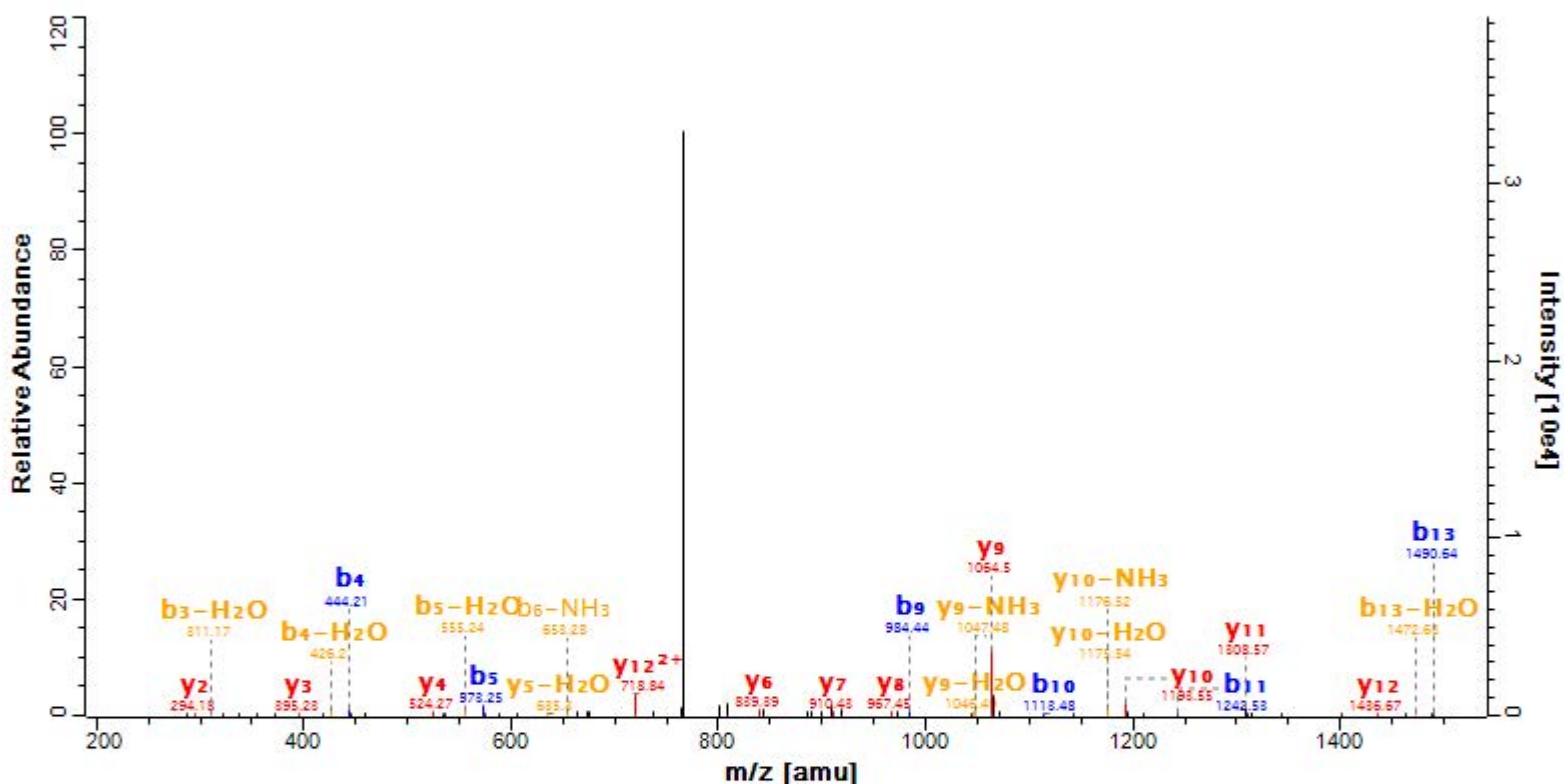

#### precursor information

|                   |                 |
|-------------------|-----------------|
| Mass:             | 1635.73721      |
| m/z:              | 818.87588       |
| Charge:           | 2+              |
| Retentiontime:    | 25.477540969848 |
| Score:            | 139.582         |
| Mass Error [ppm]: | -2.7274         |
| PEP:              | 5.7351E-09      |
| Precursor Type:   | MULTI           |

|           | b ion    |          |     |   | y ion    |          | y <sup>2+</sup> ion |          |           |
|-----------|----------|----------|-----|---|----------|----------|---------------------|----------|-----------|
|           | Δ dalton | mass     | seq |   | Δ dalton | mass     | Δ dalton            | mass     |           |
|           |          | 72.04439 | 1   | A | 13       |          |                     |          |           |
|           |          | 201.087  | 2   | E | 12       | 1565.712 |                     | 1565.712 |           |
|           |          | 329.1819 | 3   | K | 11       | 1436.669 | -0.45549            | 718.8383 | +0.297669 |
| +0.092685 |          | 444.2089 | 4   | D | 10       | 1308.574 | -0.06365            | 1308.574 |           |
| +0.110578 |          | 573.2515 | 5   | E | 9        | 1193.547 | -0.20797            | 1193.547 |           |
|           |          | 670.3042 | 6   | P | 8        | 1064.505 | +0.025292           | 1064.505 |           |
|           |          | 727.3257 | 7   | G | 7        | 967.452  | +0.042656           | 967.452  |           |
|           |          | 798.3628 | 8   | A | 6        | 910.4305 | +0.214693           | 910.4305 |           |
| -0.01446  |          | 984.4421 | 9   | W | 5        | 839.3934 | -0.03329            | 839.3934 |           |
| +0.301403 |          | 1113.485 | 10  | E | 4        | 653.3141 |                     | 653.3141 |           |
| +0.324606 |          | 1242.527 | 11  | E | 3        | 524.2715 | +0.071955           | 524.2715 |           |
|           |          | 1343.575 | 12  | T | 2        | 395.2289 | +0.118149           | 395.2289 |           |
| -0.0991   |          | 1490.643 | 13  | F | 1        | 294.1812 | +0.036952           | 294.1812 |           |
|           |          |          | 14  | K | 0        | 147.1128 |                     | 147.1128 |           |

#### general information

|                       |             |
|-----------------------|-------------|
| Annotation:           | 11 of 14    |
| AminoAcids Coverage:  | 79 %        |
| Intensity Coverage:   | 18 %        |
| Peak Coverage:        | 33 %        |
| Protein Localisation: | 269 ... 282 |

Scan number 404 Raw file LNCAP\_Silac\_23F10\_set2\_07  
 Method ITMS; CID Pepti... 83.73

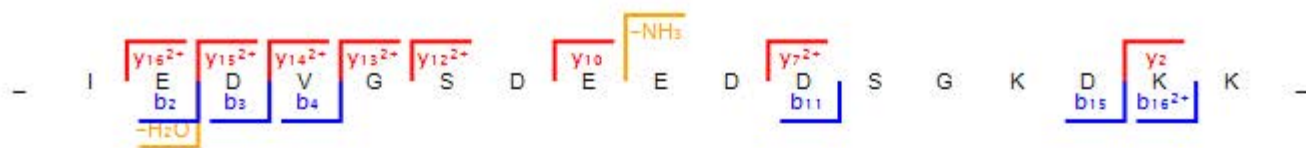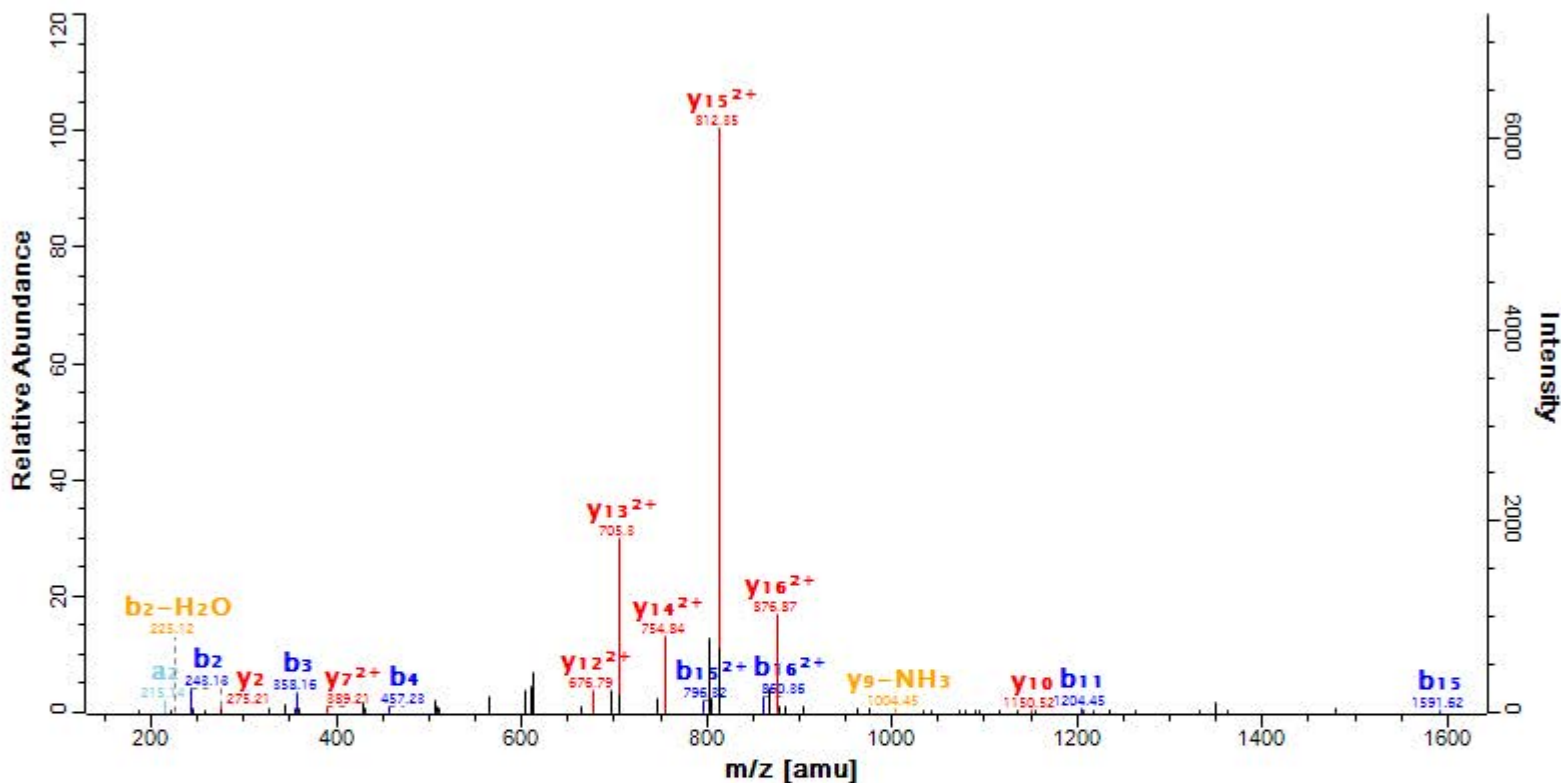

#### precursor information

|                   |                 |
|-------------------|-----------------|
| Mass:             | 1864.81802      |
| m/z:              | 622.61328       |
| Charge:           | 3+              |
| Retentiontime:    | 7.0885548591613 |
| Score:            | 83.729          |
| Mass Error [ppm]: | 0.32637         |
| PEP:              | 4.292E-05       |
| Precursor Type:   | MULTI           |

|       | a ion         | b <sup>2+</sup> ion | b ion         |       |    | y ion         | y <sup>2+</sup> ion |       |        |       |
|-------|---------------|---------------------|---------------|-------|----|---------------|---------------------|-------|--------|-------|
|       | Δ dalton mass | Δ dalton mass       | Δ dalton mass | seq   |    | Δ dalton mass | Δ dalton mass       |       |        |       |
|       | 86.1          | 114.1               | 114.1         | 1     | I  | 16            |                     |       |        |       |
| +0.03 | 1215.1        | 243.1               | +0.04         | 2     | E  | 15            | 1753                | 876.9 | +0.206 |       |
|       | 330.2         | 358.2               | +0.162        | 3     | D  | 14            | 1624                | 812.4 | +0.26  |       |
|       | 429.2         | 457.2               | +0.094        | 4     | V  | 13            | 1509                | 754.8 | +0.254 |       |
|       | 486.3         | 514.3               |               | 5     | G  | 12            | 1410                | 705.3 | +0.279 |       |
|       | 573.3         | 601.3               |               | 6     | S  | 11            | 1353                | 676.8 | +0.199 |       |
|       | 688.3         | 716.3               |               | 7     | D  | 10            | 1266                | 1266  |        |       |
|       | 817.4         | 845.4               |               | 8     | E  | 9             | 1151                | -0.01 | 1151   |       |
|       | 946.4         | 974.4               |               | 9     | E  | 8             | 1021                |       | 1021   |       |
|       | 1061          | 1089                |               | 10    | D  | 7             | 892.4               |       | 892.4  |       |
|       | 1176          | 1204                | +0.014        | 11    | D  | 6             | 777.4               | 389.2 | +0.06  |       |
|       | 1263          | 1291                |               | 12    | S  | 5             | 662.4               |       | 662.4  |       |
|       | 1321          | 1349                |               | 13    | G  | 4             | 575.4               |       | 575.4  |       |
|       | 1449          | 1477                |               | 14    | K  | 3             | 518.3               |       | 518.3  |       |
|       | 1564          | +0.279              | 976.3         | -0.13 | 15 | D             | 2                   | 390.2 |        | 390.2 |
|       | 1692          | +0.21               | 3860.4        |       | 16 | K             | 1                   | 275.2 | +0.183 | 275.2 |
|       |               |                     |               | 17    | K  | 0             | 147.1               |       | 147.1  |       |

#### general information

|                       |             |
|-----------------------|-------------|
| Annotation:           | 11 of 17    |
| AminoAcids Coverage:  | 65 %        |
| Intensity Coverage:   | 66 %        |
| Peak Coverage:        | 19 %        |
| Protein Localisation: | 250 ... 266 |



Scan number 4063 Raw file LNCAP\_Silac\_23F10\_set2\_07  
 Method ITMS; CID Pepti... 113.25

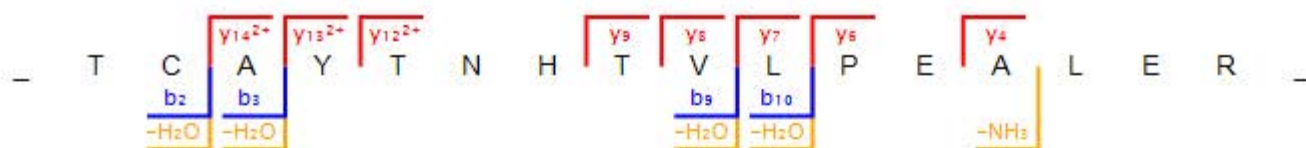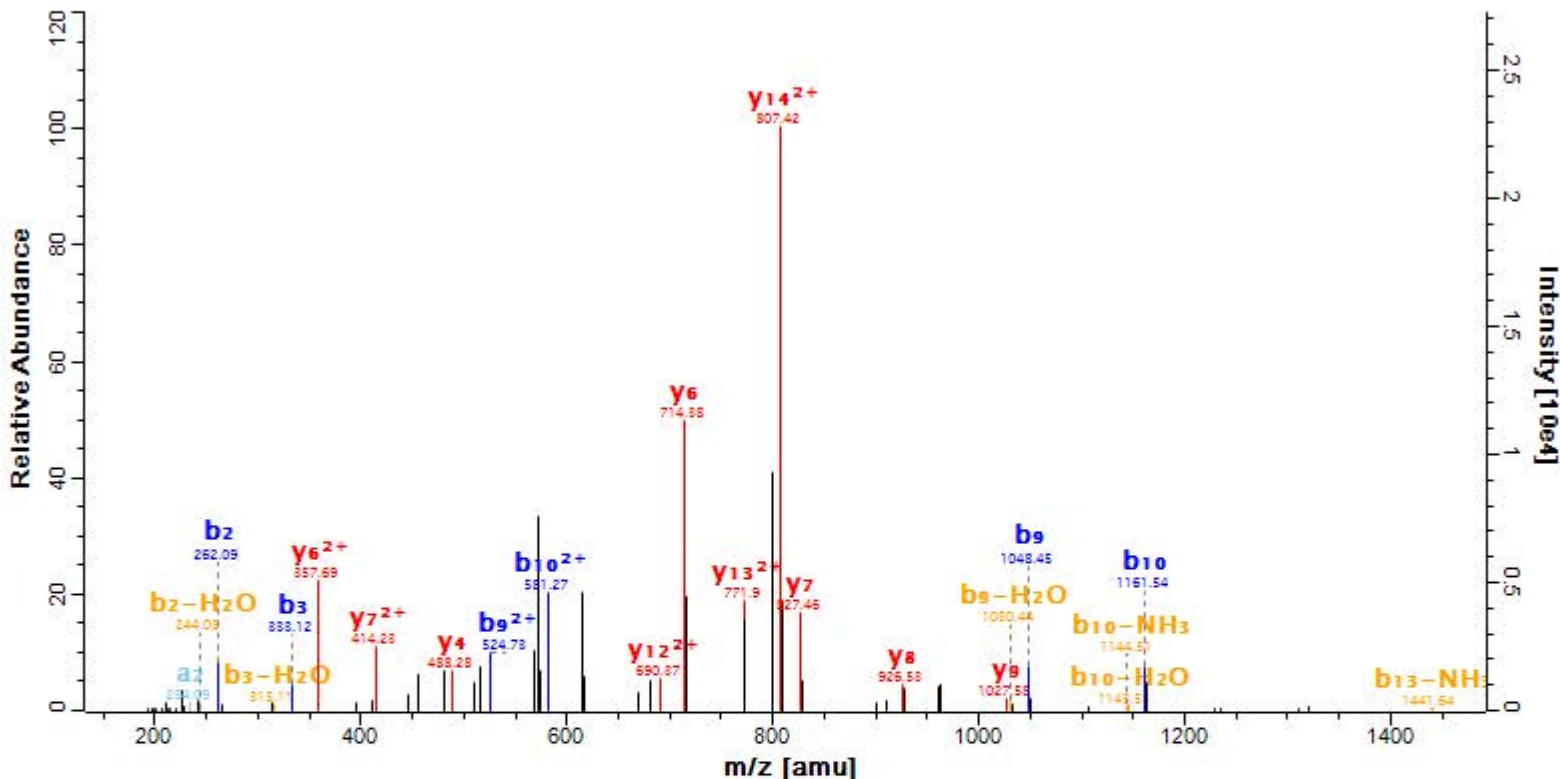

#### precursor information

|                   |                 |
|-------------------|-----------------|
| Mass:             | 1873.89879      |
| m/z:              | 625.64021       |
| Charge:           | 3+              |
| Retentiontime:    | 26.631736755371 |
| Score:            | 113.2528        |
| Mass Error [ppm]: | -0.24121        |
| PEP:              | 3.3815E-07      |
| Precursor Type:   | MULTI           |

#### general information

|                       |             |
|-----------------------|-------------|
| Annotation:           | 9 of 16     |
| AminoAcids Coverage:  | 56 %        |
| Intensity Coverage:   | 53 %        |
| Peak Coverage:        | 25 %        |
| Protein Localisation: | 372 ... 387 |

|       | a ion         | b <sup>2+</sup> ion | b ion         |     |   | y ion         | y <sup>2+</sup> ion |                    |
|-------|---------------|---------------------|---------------|-----|---|---------------|---------------------|--------------------|
|       | Δ dalton mass | Δ dalton mass       | Δ dalton mass | seq |   | Δ dalton mass | Δ dalton mass       |                    |
|       | 74.06         | 102.1               | 102.1         | 1   | T | 15            |                     |                    |
| +0.06 | 234.1         | 262.1               | +0.088262.1   | 2   | C | 14            | 1774                | 1774               |
|       | 305.1         | 333.1               | -0.01 333.1   | 3   | A | 13            | 1614                | 807.4 +0.276       |
|       | 468.2         | 496.2               | 496.2         | 4   | Y | 12            | 1543                | 771.9 -0.1         |
|       | 569.2         | 597.2               | 597.2         | 5   | T | 11            | 1380                | 690.4 +0.224       |
|       | 683.3         | 711.3               | 711.3         | 6   | N | 10            | 1279                | 1279               |
|       | 820.3         | 848.3               | 848.3         | 7   | H | 9             | 1165                | 1165               |
|       | 921.4         | 949.4               | 949.4         | 8   | T | 8             | 1028                | +0.01 1028         |
|       | 1020          | +0.163524.7         | +0.0031048    | 9   | V | 7             | 926.5               | -0.02 926.5        |
|       | 1134          | +0.239581.3         | -0.11 1162    | 10  | L | 6             | 827.5               | -0.02 414.2 +0.15  |
|       | 1231          | 1259                | 1259          | 11  | P | 5             | 714.4               | +0.02 357.7 +0.224 |
|       | 1360          | 1388                | 1388          | 12  | E | 4             | 617.3               | 617.3              |
|       | 1431          | 1459                | 1459          | 13  | A | 3             | 488.3               | +0.17 488.3        |
|       | 1544          | 1572                | 1572          | 14  | L | 2             | 417.2               | 417.2              |
|       | 1673          | 1701                | 1701          | 15  | E | 1             | 304.2               | 304.2              |
|       |               |                     |               | 16  | R | 0             | 175.1               | 175.1              |

Scan number 4358 Raw file LNCAP\_Silac\_23F10\_set2\_07  
 Method ITMS; CID Pepti... 112.02

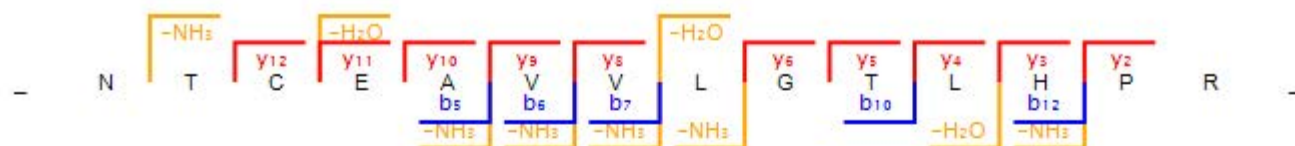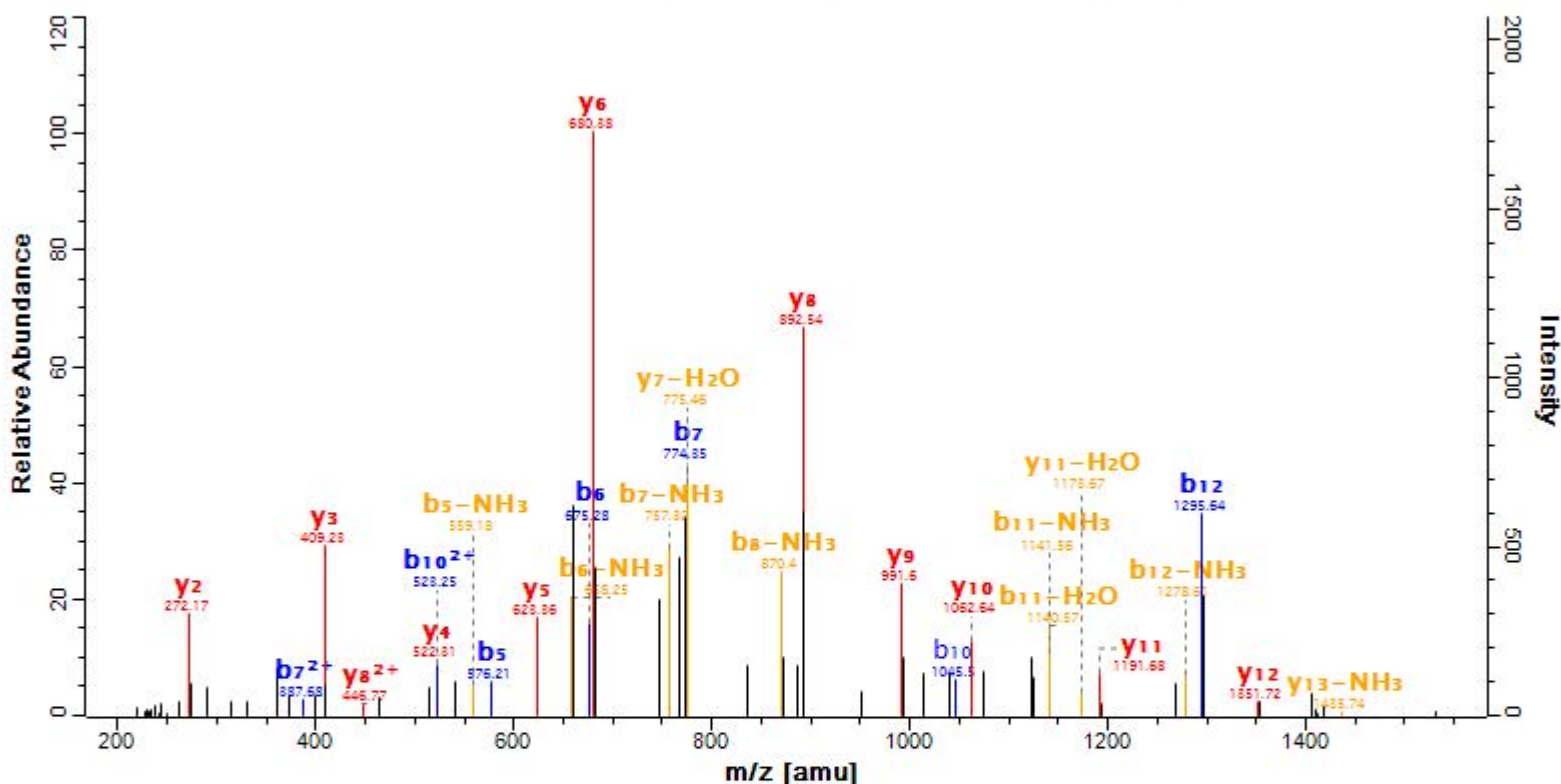

#### precursor information

|                   |                 |
|-------------------|-----------------|
| Mass:             | 1565.79856      |
| m/z:              | 783.90655       |
| Charge:           | 2+              |
| Retentiontime:    | 28.219326019287 |
| Score:            | 112.0222        |
| Mass Error [ppm]: | 0.092387        |
| PEP:              | 4.4575E-06      |
| Precursor Type:   | MULTI           |

#### general information

|                       |             |
|-----------------------|-------------|
| Annotation:           | 12 of 14    |
| AminoAcids Coverage:  | 86 %        |
| Intensity Coverage:   | 58 %        |
| Peak Coverage:        | 35 %        |
| Protein Localisation: | 133 ... 146 |

| b <sup>2+</sup> ion |        | b ion    |        |    |     |    | y ion    |         | y <sup>2+</sup> ion |         |
|---------------------|--------|----------|--------|----|-----|----|----------|---------|---------------------|---------|
| Δ dalton            | mass   | Δ dalton | mass   |    | seq |    | Δ dalton | mass    | Δ dalton            | mass    |
|                     | 115.05 |          | 115.05 | 1  | N   | 13 |          |         |                     |         |
|                     | 216.1  |          | 216.1  | 2  | T   | 12 | 1452.8   |         | 1452.8              |         |
|                     | 376.13 |          | 376.13 | 3  | C   | 11 | 1351.7   | +0.072  | 1351.7              |         |
|                     | 505.17 |          | 505.17 | 4  | E   | 10 | 1191.7   | +0.0446 | 1191.7              |         |
|                     | 576.21 | +0.0603  | 576.21 | 5  | A   | 9  | 1062.6   | -0.064  | 1062.6              |         |
|                     | 675.28 | +0.0275  | 675.28 | 6  | V   | 8  | 991.6    | +0.0345 | 991.6               |         |
| -0.34               | 387.68 | +0.4374  | 774.35 | 7  | V   | 7  | 892.54   | -0.068  | 446.77              | +0.4231 |
|                     | 887.43 |          | 887.43 | 8  | L   | 6  | 793.47   |         | 793.47              |         |
|                     | 944.45 |          | 944.45 | 9  | G   | 5  | 680.38   | +0.0237 | 680.38              |         |
| +0.2279             | 523.25 | -0.096   | 1045.5 | 10 | T   | 4  | 623.36   | +0.0605 | 623.36              |         |
|                     | 1158.6 |          | 1158.6 | 11 | L   | 3  | 522.31   | +0.135  | 522.31              |         |
|                     | 1295.6 | -0.037   | 1295.6 | 12 | H   | 2  | 409.23   | +0.0412 | 409.23              |         |
|                     | 1392.7 |          | 1392.7 | 13 | P   | 1  | 272.17   | -0.047  | 272.17              |         |
|                     |        |          |        | 14 | R   | 0  | 175.12   |         | 175.12              |         |

Scan number 4427 Raw file LNCAP\_Silac\_23F10\_set2\_07  
 Method ITMS; CID Pepti... 60.55

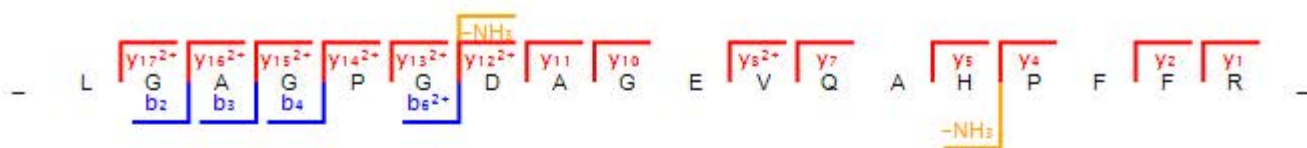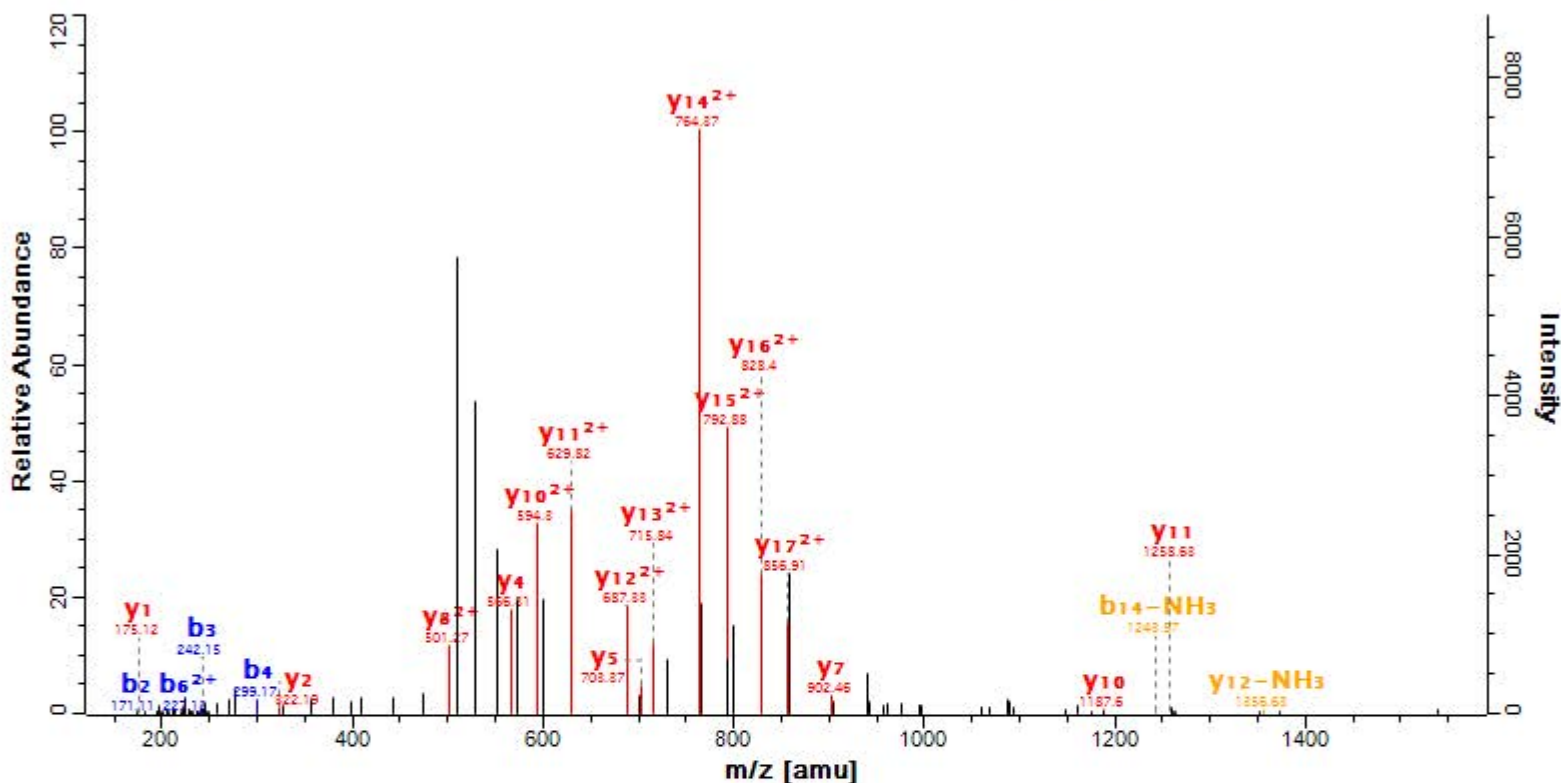

precursor information

|                   |                 |
|-------------------|-----------------|
| Mass:             | 1824.8903       |
| m/z:              | 609.30404       |
| Charge:           | 3+              |
| Retentiontime:    | 28.580305099487 |
| Score:            | 60.54892        |
| Mass Error [ppm]: | -0.2378         |
| PEP:              | 0.0018854       |
| Precursor Type:   | MULTI           |

| b <sup>2+</sup> ion |        | b ion    |        |    |     |    | y ion    |         | y <sup>2+</sup> ion |         |
|---------------------|--------|----------|--------|----|-----|----|----------|---------|---------------------|---------|
| Δ dalton            | mass   | Δ dalton | mass   |    | seq |    | Δ dalton | mass    | Δ dalton            | mass    |
|                     | 114.09 |          | 114.09 | 1  | L   | 17 |          |         |                     |         |
|                     | 171.11 | +0.2281  | 171.11 | 2  | G   | 16 | 1712.8   |         | 856.91              | +0.0481 |
|                     | 242.15 | -0.059   | 242.15 | 3  | A   | 15 | 1655.8   |         | 828.4               | +0.2229 |
|                     | 299.17 | +0.0117  | 299.17 | 4  | G   | 14 | 1584.8   |         | 792.88              | +0.1981 |
|                     | 396.22 |          | 396.22 | 5  | P   | 13 | 1527.7   |         | 764.37              | +0.3004 |
| +0.162              | 227.13 |          | 453.25 | 6  | G   | 12 | 1430.7   |         | 715.84              | +0.1612 |
|                     | 568.27 |          | 568.27 | 7  | D   | 11 | 1373.7   |         | 687.33              | +0.1222 |
|                     | 639.31 |          | 639.31 | 8  | A   | 10 | 1258.6   | +0.0133 | 629.82              | +0.2614 |
|                     | 696.33 |          | 696.33 | 9  | G   | 9  | 1187.6   | +0.1414 | 594.3               | +0.2059 |
|                     | 825.37 |          | 825.37 | 10 | E   | 8  | 1130.6   |         | 1130.6              |         |
|                     | 924.44 |          | 924.44 | 11 | V   | 7  | 1001.5   |         | 501.27              | +0.2059 |
|                     | 1052.5 |          | 1052.5 | 12 | Q   | 6  | 902.46   | -0.118  | 902.46              |         |
|                     | 1123.5 |          | 1123.5 | 13 | A   | 5  | 774.4    |         | 774.4               |         |
|                     | 1260.6 |          | 1260.6 | 14 | H   | 4  | 703.37   | +0.1173 | 703.37              |         |
|                     | 1357.6 |          | 1357.6 | 15 | P   | 3  | 566.31   | +0.0383 | 566.31              |         |
|                     | 1504.7 |          | 1504.7 | 16 | F   | 2  | 469.26   |         | 469.26              |         |
|                     | 1651.8 |          | 1651.8 | 17 | F   | 1  | 322.19   | -0.009  | 322.19              |         |
|                     |        |          |        | 18 | R   | 0  | 175.12   | -0.062  | 175.12              |         |

general information

|                       |             |
|-----------------------|-------------|
| Annotation:           | 14 of 18    |
| AminoAcids Coverage:  | 78 %        |
| Intensity Coverage:   | 48 %        |
| Peak Coverage:        | 20 %        |
| Protein Localisation: | 336 ... 353 |

Scan number 4645 Raw file LNCAP\_Silac\_23F10\_set2\_07  
 Method ITMS; CID Pepti... 54.29

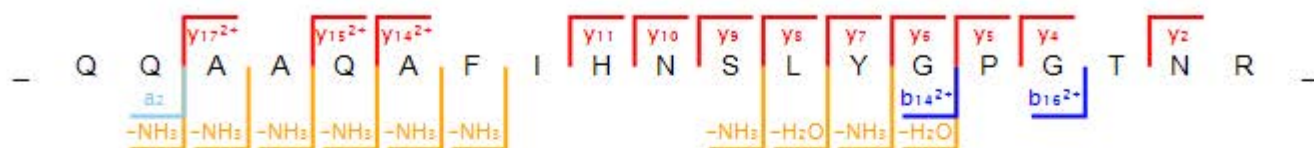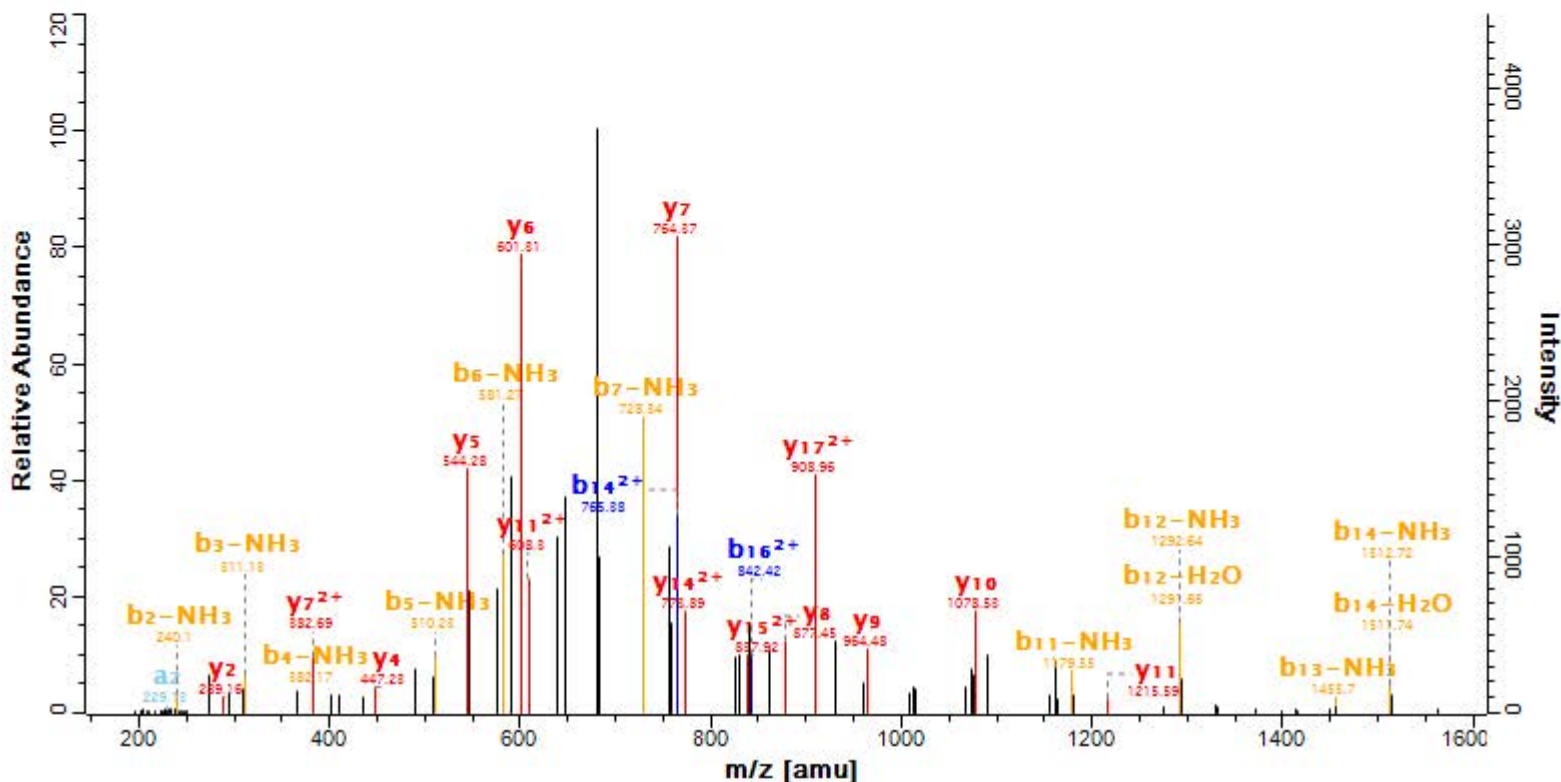

precursor information

|                   |                 |
|-------------------|-----------------|
| Mass:             | 2072.01913      |
| m/z:              | 691.68032       |
| Charge:           | 3+              |
| Retentiontime:    | 29.740674972534 |
| Score:            | 54.29184        |
| Mass Error [ppm]: | 0.16644         |
| PEP:              | 0.0030981       |
| Precursor Type:   | MULTI           |

general information

|                       |             |
|-----------------------|-------------|
| Annotation:           | 15 of 19    |
| AminoAcids Coverage:  | 79 %        |
| Intensity Coverage:   | 47 %        |
| Peak Coverage:        | 27 %        |
| Protein Localisation: | 187 ... 205 |

| a ion      | b <sup>2+</sup> ion | b ion |    |   | y ion | y <sup>2+</sup> ion |
|------------|---------------------|-------|----|---|-------|---------------------|
| 101.1      | 129.1               | 129.1 | 1  | Q | 18    |                     |
| +0.13229.1 | 257.1               | 257.1 | 2  | Q | 17    | 1945                |
| 300.2      | 328.2               | 328.2 | 3  | A | 16    | 1817                |
| 371.2      | 399.2               | 399.2 | 4  | A | 15    | 1746                |
| 499.3      | 527.3               | 527.3 | 5  | Q | 14    | 1675                |
| 570.3      | 598.3               | 598.3 | 6  | A | 13    | 1547                |
| 717.4      | 745.4               | 745.4 | 7  | F | 12    | 1476                |
| 830.5      | 858.4               | 858.4 | 8  | I | 11    | 1329                |
| 967.5      | 995.5               | 995.5 | 9  | H | 10    | 1216                |
| 1082       | 1110                | 1110  | 10 | N | 9     | 1079                |
| 1169       | 1197                | 1197  | 11 | S | 8     | 964.5               |
| 1282       | 1310                | 1310  | 12 | L | 7     | 877.5               |
| 1445       | 1473                | 1473  | 13 | Y | 6     | 764.4               |
| 1502       | +0.115765.4         | 1530  | 14 | G | 5     | 601.3               |
| 1599       | 1627                | 1627  | 15 | P | 4     | 544.3               |
| 1656       | +0.114842.4         | 1684  | 16 | G | 3     | 447.2               |
| 1757       | 1785                | 1785  | 17 | T | 2     | 390.2               |
| 1871       | 1899                | 1899  | 18 | N | 1     | 289.2               |
|            |                     |       | 19 | R | 0     | 175.1               |

Scan number 497 Raw file LNCAP\_Silac\_23F10\_set2\_07  
 Method ITMS: CID Pepti... 30.56

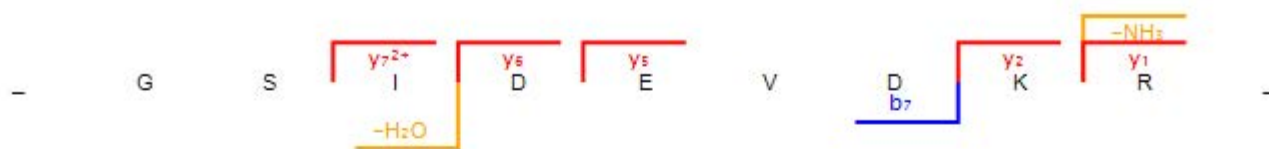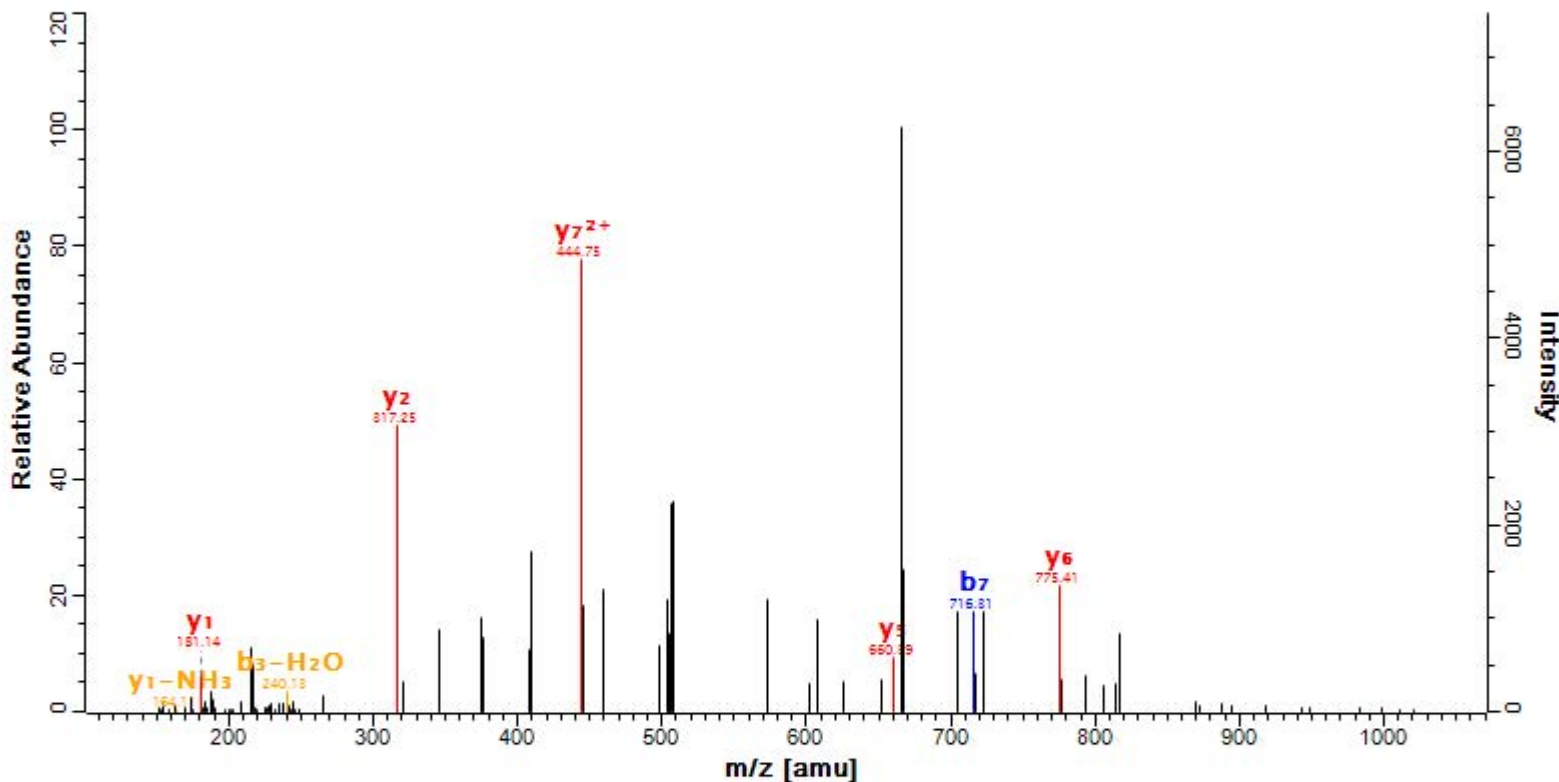

#### precursor information

|                       |                 |
|-----------------------|-----------------|
| Mass:                 | 1017.50907      |
| m/z:                  | 509.76181       |
| Charge:               | 2+              |
| Retentiontime:        | 7.5844750404357 |
| Score:                | 30.56388        |
| Mass Error [ppm]:     | -0.020829       |
| PEP:                  | 0.086726        |
| Precursor Type:       | MULTI           |
| Annotation:           | 6 of 9          |
| AminoAcids Coverage:  | 67 %            |
| Intensity Coverage:   | 24 %            |
| Peak Coverage:        | 8 %             |
| Protein Localisation: | 322 ... 330     |

| b ion    |          |     |   | y ion    |          | y <sup>2+</sup> ion |          |
|----------|----------|-----|---|----------|----------|---------------------|----------|
| Δ dalton | mass     | seq |   | Δ dalton | mass     | Δ dalton            | mass     |
|          | 58.02874 | 1   | G | 8        |          |                     |          |
|          | 145.0608 | 2   | S | 7        | 975.5292 | 975.5292            |          |
|          | 258.1448 | 3   | I | 6        | 888.4972 | 444.7522            | -0.0612  |
|          | 373.1718 | 4   | D | 5        | 775.4131 | +0.026073           | 775.4131 |
|          | 502.2144 | 5   | E | 4        | 660.3862 | +0.035743           | 660.3862 |
|          | 601.2828 | 6   | V | 3        | 531.3436 |                     | 531.3436 |
| -0.05393 | 716.3097 | 7   | D | 2        | 432.2752 |                     | 432.2752 |
|          | 852.4189 | 8   | K | 1        | 317.2482 | +0.023241           | 317.2482 |
|          |          | 9   | R | 0        | 181.1391 | +0.017169           | 181.1391 |

Scan number 5794 Raw file LNCAP\_Silac\_23F10\_set2\_07  
 Method ITMS; CID Pepti... 56.85

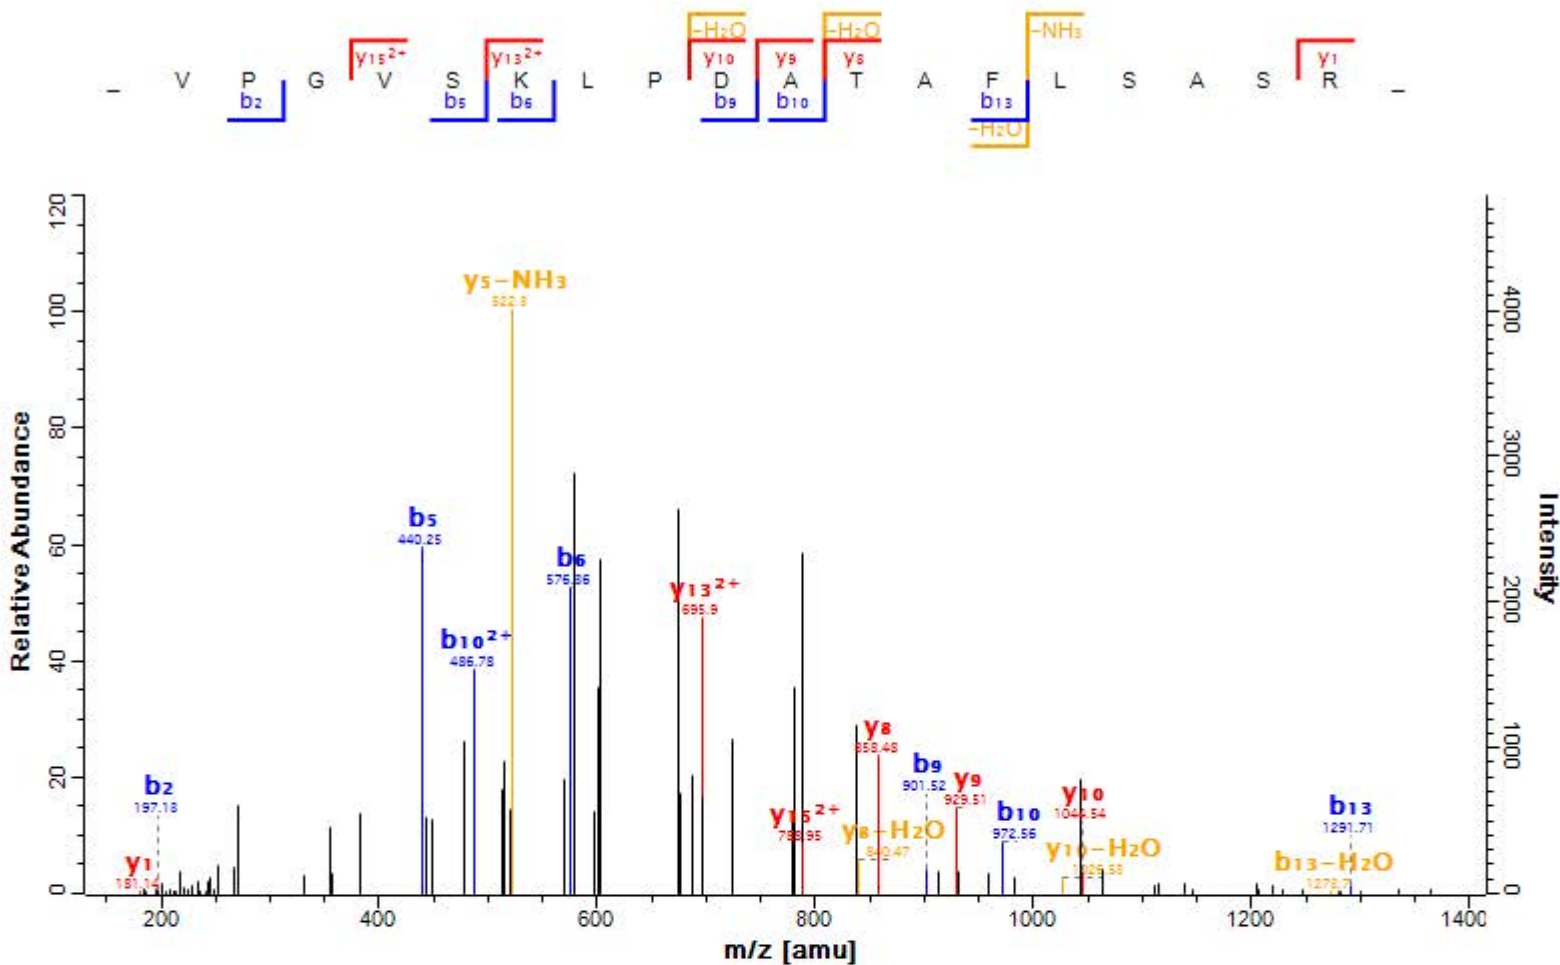

precursor information

|                   |                 |
|-------------------|-----------------|
| Mass:             | 1814.98914      |
| m/z:              | 606.00365       |
| Charge:           | 3+              |
| Retentiontime:    | 35.935310363769 |
| Score:            | 56.85138        |
| Mass Error [ppm]: | 0.047697        |
| PEP:              | 0.0019884       |
| Precursor Type:   | MULTI           |

general information

|                       |          |
|-----------------------|----------|
| Annotation:           | 10 of 18 |
| AminoAcids Coverage:  | 56 %     |
| Intensity Coverage:   | 34 %     |
| Peak Coverage:        | 18 %     |
| Protein Localisation: | 2 ... 19 |

| b <sup>2+</sup> ion |        | b ion    |        | seq |   |    | y ion    |         | y <sup>2+</sup> ion |        |
|---------------------|--------|----------|--------|-----|---|----|----------|---------|---------------------|--------|
| Δ dalton            | mass   | Δ dalton | mass   |     |   |    | Δ dalton | mass    | Δ dalton            | mass   |
|                     | 100.08 |          | 100.08 | 1   | V | 17 |          |         |                     |        |
|                     | 197.13 | +0.0432  | 197.13 | 2   | P | 16 | 1731     |         | 1731                |        |
|                     | 254.15 |          | 254.15 | 3   | G | 15 | 1633.9   |         | 1633.9              |        |
|                     | 353.22 |          | 353.22 | 4   | V | 14 | 1576.9   |         | 788.95              | -0.226 |
|                     | 440.25 | +0.0031  | 440.25 | 5   | S | 13 | 1477.8   |         | 1477.8              |        |
|                     | 576.36 | -0.469   | 576.36 | 6   | K | 12 | 1390.8   |         | 695.9               | -0.116 |
|                     | 689.44 |          | 689.44 | 7   | L | 11 | 1254.7   |         | 1254.7              |        |
|                     | 786.5  |          | 786.5  | 8   | P | 10 | 1141.6   |         | 1141.6              |        |
|                     | 901.52 | +0.0346  | 901.52 | 9   | D | 9  | 1044.5   | +0.1904 | 1044.5              |        |
| +0.0841             | 486.78 | -0.111   | 972.56 | 10  | A | 8  | 929.51   | +0.0147 | 929.51              |        |
|                     | 1073.6 |          | 1073.6 | 11  | T | 7  | 858.48   | +0.0073 | 858.48              |        |
|                     | 1144.6 |          | 1144.6 | 12  | A | 6  | 757.43   |         | 757.43              |        |
|                     | 1291.7 | +0.2743  | 1291.7 | 13  | F | 5  | 686.39   |         | 686.39              |        |
|                     | 1404.8 |          | 1404.8 | 14  | L | 4  | 539.32   |         | 539.32              |        |
|                     | 1491.8 |          | 1491.8 | 15  | S | 3  | 426.24   |         | 426.24              |        |
|                     | 1562.9 |          | 1562.9 | 16  | A | 2  | 339.21   |         | 339.21              |        |
|                     | 1649.9 |          | 1649.9 | 17  | S | 1  | 268.17   |         | 268.17              |        |
|                     |        |          |        | 18  | R | 0  | 181.14   | +0.0224 | 181.14              |        |

Scan number 594 Raw file LNCAP\_Silac\_23F10\_set2\_07  
 Method ITMS; CID Pepti... 119.96

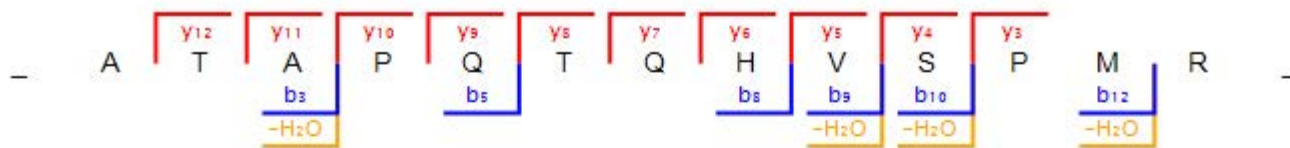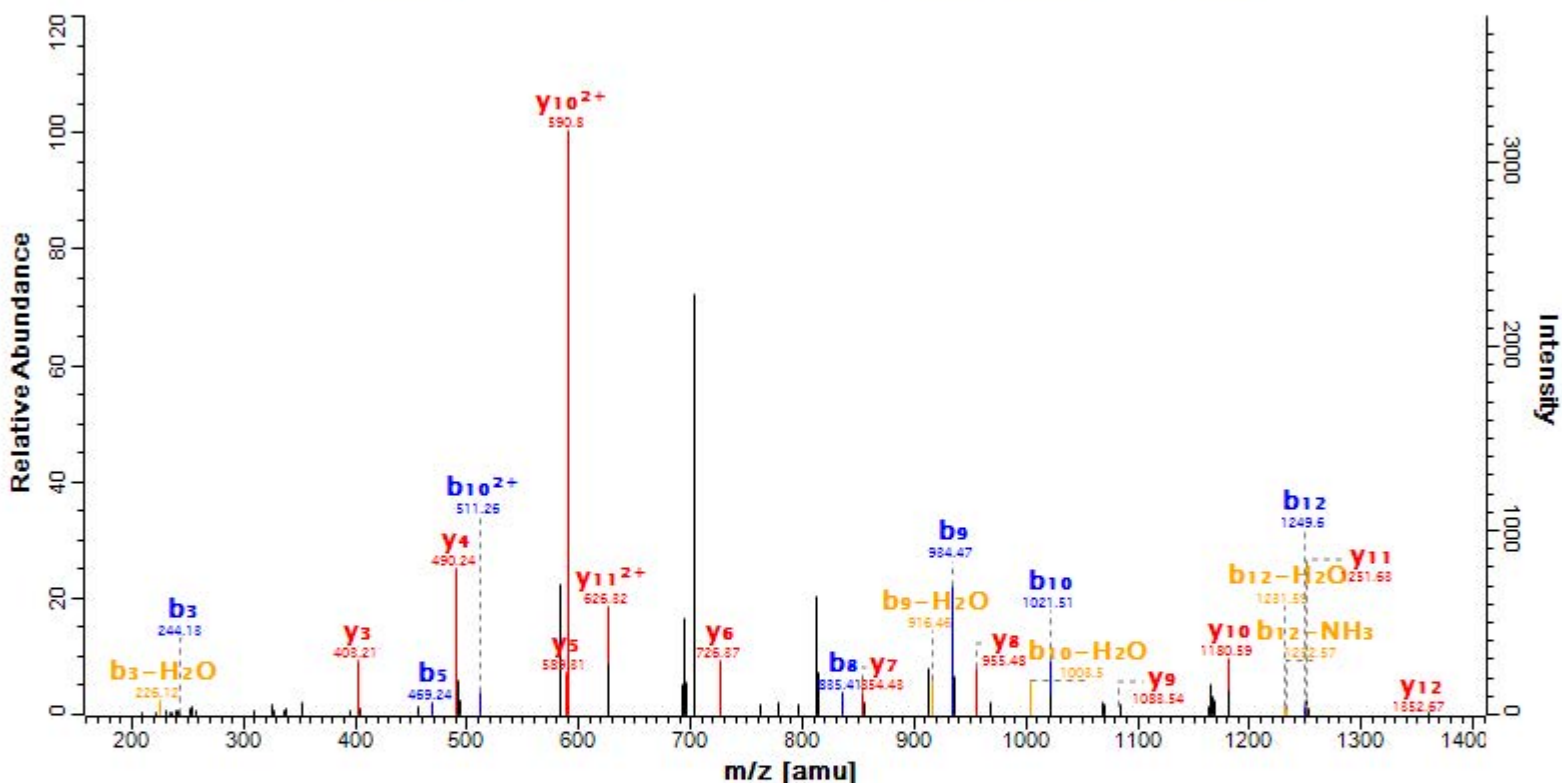

precursor information

|                   |                 |
|-------------------|-----------------|
| Mass:             | 1422.70394      |
| m/z:              | 712.35925       |
| Charge:           | 2+              |
| Retentiontime:    | 8.0976467132568 |
| Score:            | 119.9631        |
| Mass Error [ppm]: | 0.11121         |
| PEP:              | 9.1562E-07      |
| Precursor Type:   | MULTI           |

general information

|                       |             |
|-----------------------|-------------|
| Annotation:           | 11 of 13    |
| AminoAcids Coverage:  | 85 %        |
| Intensity Coverage:   | 48 %        |
| Peak Coverage:        | 28 %        |
| Protein Localisation: | 124 ... 136 |

| b <sup>2+</sup> ion |        | b ion    |        |    |     |    | y ion    |         | y <sup>2+</sup> ion |         |
|---------------------|--------|----------|--------|----|-----|----|----------|---------|---------------------|---------|
| Δ dalton            | mass   | Δ dalton | mass   |    | seq |    | Δ dalton | mass    | Δ dalton            | mass    |
|                     | 72.044 |          | 72.044 | 1  | A   | 12 |          |         |                     |         |
|                     | 173.09 |          | 173.09 | 2  | T   | 11 | 1352.7   | +0.2018 | 1352.7              |         |
|                     | 244.13 | +0.122   | 244.13 | 3  | A   | 10 | 1251.6   | -0.136  | 626.32              | +0.0375 |
|                     | 341.18 |          | 341.18 | 4  | P   | 9  | 1180.6   | -0.015  | 590.8               | +0.2023 |
|                     | 469.24 | +0.2461  | 469.24 | 5  | Q   | 8  | 1083.5   | +0.1938 | 1083.5              |         |
|                     | 570.29 |          | 570.29 | 6  | T   | 7  | 955.48   | +0.0461 | 955.48              |         |
|                     | 698.35 |          | 698.35 | 7  | Q   | 6  | 854.43   | +0.0897 | 854.43              |         |
|                     | 835.41 | +0.0902  | 835.41 | 8  | H   | 5  | 726.37   | +0.1125 | 726.37              |         |
|                     | 934.47 | -0.02    | 934.47 | 9  | V   | 4  | 589.31   | +0.0358 | 589.31              |         |
| -0.283              | 511.26 | -0.063   | 1021.5 | 10 | S   | 3  | 490.24   | +0.0265 | 490.24              |         |
|                     | 1118.6 |          | 1118.6 | 11 | P   | 2  | 403.21   | -0.007  | 403.21              |         |
|                     | 1249.6 | -0.079   | 1249.6 | 12 | M   | 1  | 306.16   |         | 306.16              |         |
|                     |        |          |        | 13 | R   | 0  | 175.12   |         | 175.12              |         |

Scan number 6139 Raw file LNCAP\_Silac\_23F10\_set2\_07  
 Method ITMS; CID Pepti... 76.12

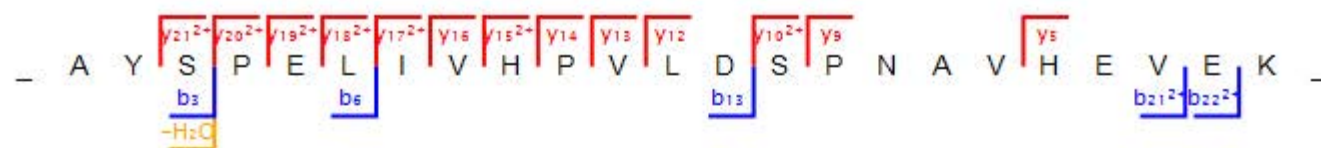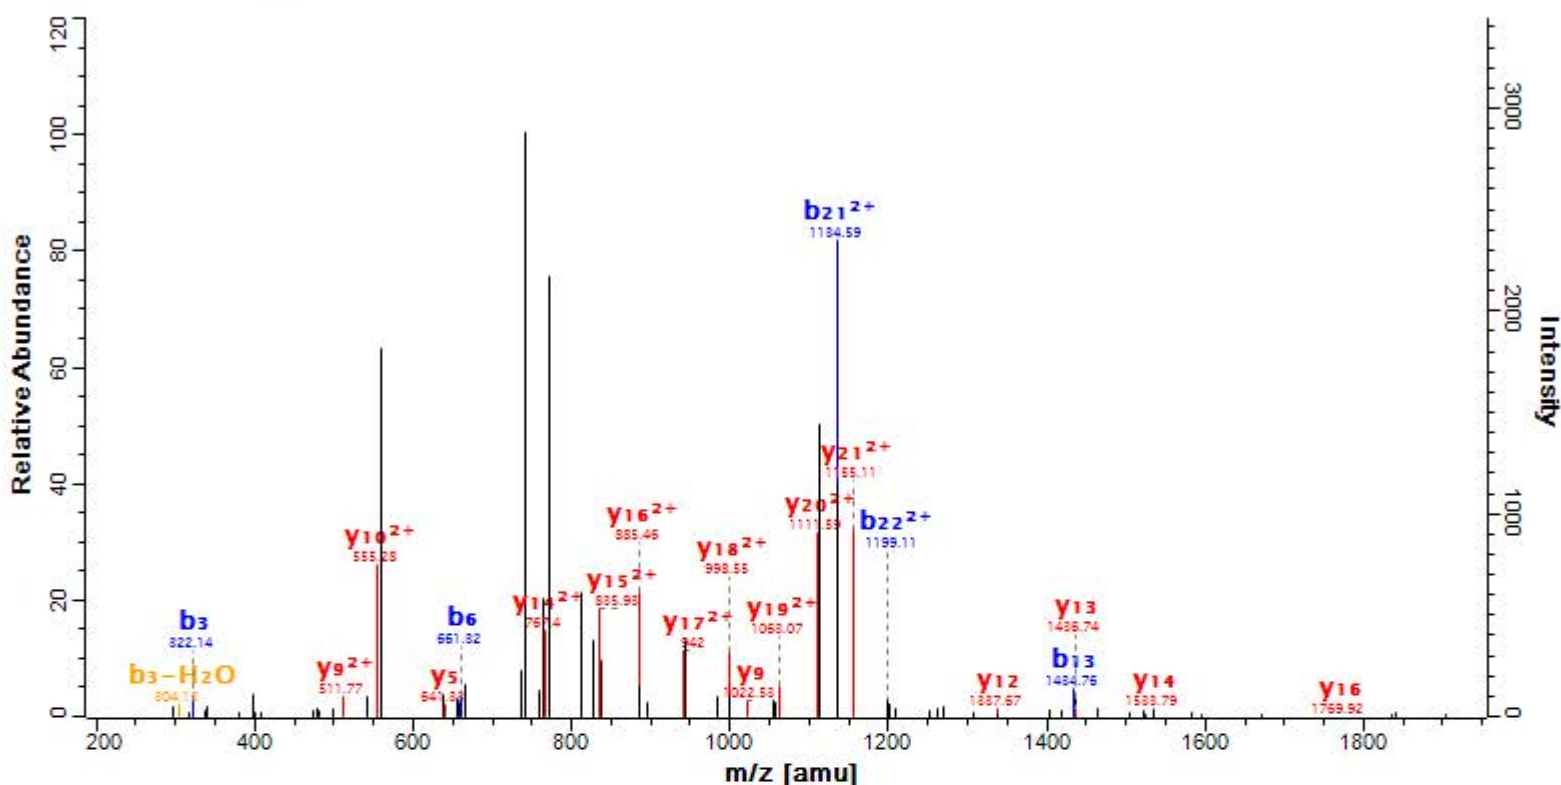

precursor information

|                   |                 |
|-------------------|-----------------|
| Mass:             | 2542.30623      |
| m/z:              | 848.44269       |
| Charge:           | 3+              |
| Retentiontime:    | 37.895618438720 |
| Score:            | 76.11842        |
| Mass Error [ppm]: | -0.20611        |
| PEP:              | 0.00010844      |
| Precursor Type:   | MULTI           |

| b <sup>2+</sup> ion |        | b ion    |        |    |     |    | y ion    |         | y <sup>2+</sup> ion |         |
|---------------------|--------|----------|--------|----|-----|----|----------|---------|---------------------|---------|
| Δ dalton            | mass   | Δ dalton | mass   |    | seq |    | Δ dalton | mass    | Δ dalton            | mass    |
|                     | 72.044 |          | 72.044 | 1  | A   | 22 |          |         |                     |         |
|                     | 235.11 |          | 235.11 | 2  | Y   | 21 | 2472.3   |         | 2472.3              |         |
|                     | 322.14 | +0.062   | 322.14 | 3  | S   | 20 | 2309.2   |         | 1155.1              | +0.3092 |
|                     | 419.19 |          | 419.19 | 4  | P   | 19 | 2222.2   |         | 1111.6              | -0.069  |
|                     | 548.24 |          | 548.24 | 5  | E   | 18 | 2125.1   |         | 1063.1              | +0.4043 |
|                     | 661.32 | +0.0481  | 661.32 | 6  | L   | 17 | 1996.1   |         | 998.55              | +0.2818 |
|                     | 774.4  |          | 774.4  | 7  | I   | 16 | 1883     |         | 942                 | -8E-06  |
|                     | 873.47 |          | 873.47 | 8  | V   | 15 | 1769.9   | -0.057  | 885.46              | +0.097  |
|                     | 1010.5 |          | 1010.5 | 9  | H   | 14 | 1670.8   |         | 835.93              | +0.0692 |
|                     | 1107.6 |          | 1107.6 | 10 | P   | 13 | 1533.8   | -0.083  | 767.4               | +0.174  |
|                     | 1206.7 |          | 1206.7 | 11 | V   | 12 | 1436.7   | -0.294  | 1436.7              |         |
|                     | 1319.7 |          | 1319.7 | 12 | L   | 11 | 1337.7   | +0.1362 | 1337.7              |         |
|                     | 1434.8 | -0.142   | 1434.8 | 13 | D   | 10 | 1224.6   |         | 1224.6              |         |
|                     | 1521.8 |          | 1521.8 | 14 | S   | 9  | 1109.6   |         | 555.28              | +0.3143 |
|                     | 1618.8 |          | 1618.8 | 15 | P   | 8  | 1022.5   | -0.085  | 511.77              | +0.463  |
|                     | 1732.9 |          | 1732.9 | 16 | N   | 7  | 925.47   |         | 925.47              |         |
|                     | 1803.9 |          | 1803.9 | 17 | A   | 6  | 811.43   |         | 811.43              |         |
|                     | 1903   |          | 1903   | 18 | V   | 5  | 740.39   |         | 740.39              |         |
|                     | 2040.1 |          | 2040.1 | 19 | H   | 4  | 641.33   | +0.1229 | 641.33              |         |
|                     | 2169.1 |          | 2169.1 | 20 | E   | 3  | 504.27   |         | 504.27              |         |
| -0.011              | 1134.6 |          | 2268.2 | 21 | V   | 2  | 375.22   |         | 375.22              |         |
| +0.2123             | 1199.1 |          | 2397.2 | 22 | E   | 1  | 276.16   |         | 276.16              |         |
|                     |        |          |        | 23 | K   | 0  | 147.11   |         | 147.11              |         |

general information

|                       |             |
|-----------------------|-------------|
| Annotation:           | 16 of 23    |
| AminoAcids Coverage:  | 70 %        |
| Intensity Coverage:   | 34 %        |
| Peak Coverage:        | 23 %        |
| Protein Localisation: | 118 ... 140 |



Scan number 6197 Raw file LNCAP\_Silac\_23F10\_set2\_07  
 Method ITMS; CID Pepti... 140.31

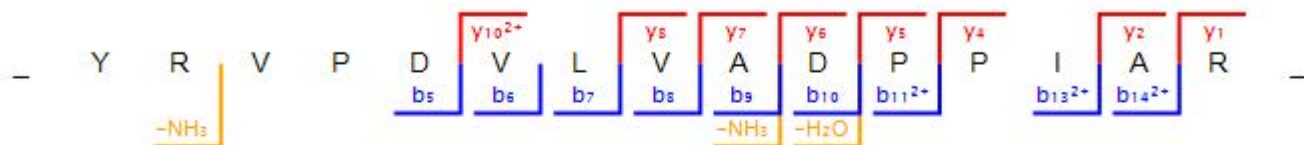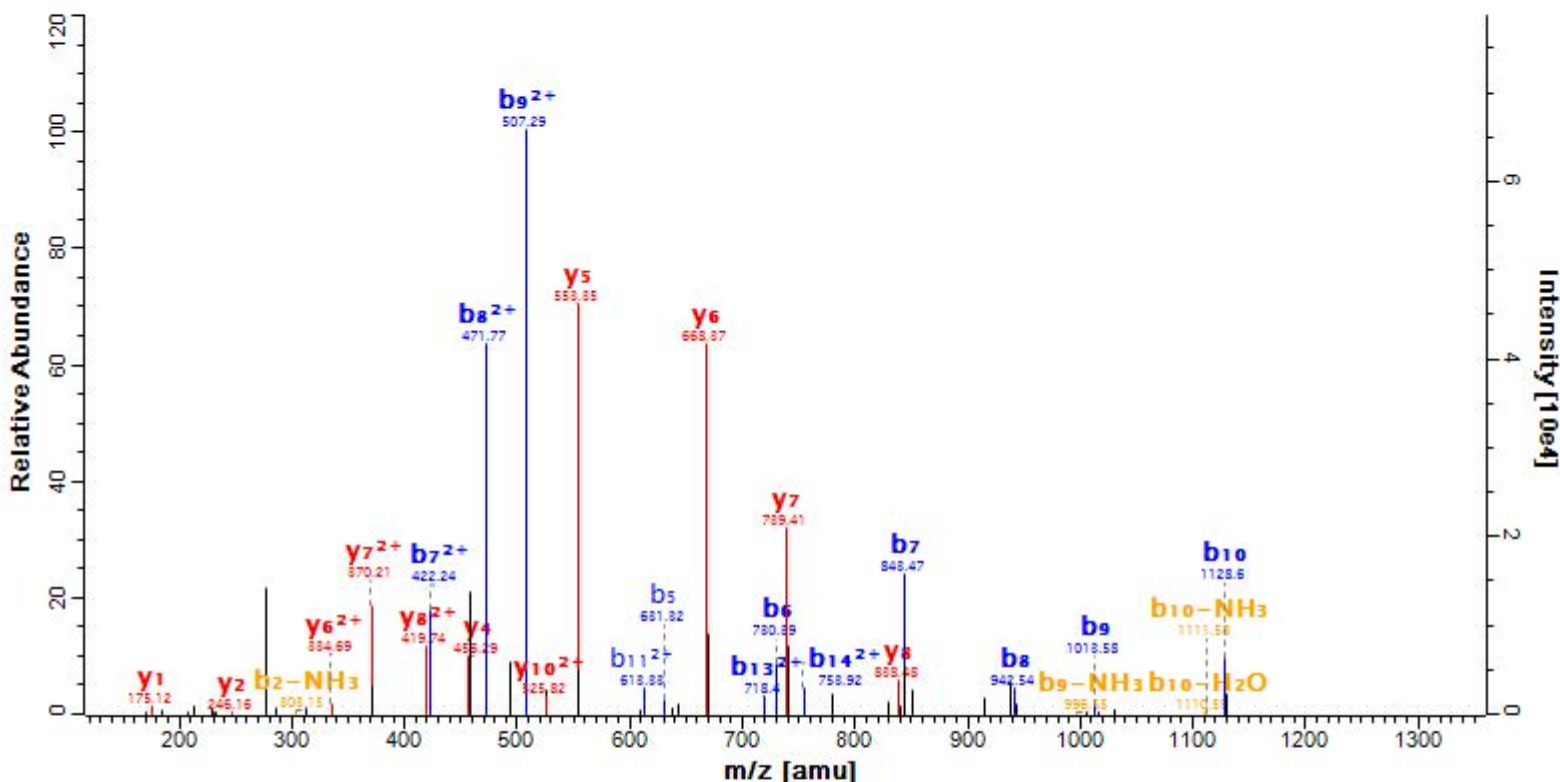

#### precursor information

|                   |                 |
|-------------------|-----------------|
| Mass:             | 1679.93597      |
| m/z:              | 560.98593       |
| Charge:           | 3+              |
| Retentiontime:    | 38.237602233886 |
| Score:            | 140.3079        |
| Mass Error [ppm]: | 0.044941        |
| PEP:              | 3.1327E-07      |
| Precursor Type:   | ISO             |

#### general information

|                       |             |
|-----------------------|-------------|
| Annotation:           | 14 of 15    |
| AminoAcids Coverage:  | 93 %        |
| Intensity Coverage:   | 76 %        |
| Peak Coverage:        | 36 %        |
| Protein Localisation: | 164 ... 178 |

| b <sup>2+</sup> ion |         | b ion    |        |     | y ion |          | y <sup>2+</sup> ion |          |                |
|---------------------|---------|----------|--------|-----|-------|----------|---------------------|----------|----------------|
| Δ dalton            | mass    | Δ dalton | mass   | seq |       | Δ dalton | mass                | Δ dalton | mass           |
|                     | 164.07  |          | 164.07 | 1   | Y     | 14       |                     |          |                |
|                     | 320.17  |          | 320.17 | 2   | R     | 13       | 1517.9              |          | 1517.9         |
|                     | 419.24  |          | 419.24 | 3   | V     | 12       | 1361.8              |          | 1361.8         |
|                     | 516.29  |          | 516.29 | 4   | P     | 11       | 1262.7              |          | 1262.7         |
|                     | 631.32  | +0.055   | 631.32 | 5   | D     | 10       | 1165.7              |          | 1165.7         |
|                     | 730.39  | +0.0207  | 730.39 | 6   | V     | 9        | 1050.6              |          | 525.82 +0.4693 |
| +0.175              | 422.24  | +0.0642  | 843.47 | 7   | L     | 8        | 951.56              |          | 951.56         |
| +0.1633             | 471.77  | -0.086   | 942.54 | 8   | V     | 7        | 838.48              | -0.003   | 419.74 -0.104  |
| +0.1614             | 507.29  | +0.0567  | 1013.6 | 9   | A     | 6        | 739.41              | +0.0249  | 370.21 +0.4836 |
|                     | 1128.6  | -0.002   | 1128.6 | 10  | D     | 5        | 668.37              | +0.021   | 334.69 +0.1362 |
| +0.0013             | 3613.33 |          | 1225.7 | 11  | P     | 4        | 553.35              | +0.0327  | 553.35         |
|                     | 1322.7  |          | 1322.7 | 12  | P     | 3        | 456.29              | +0.0444  | 456.29         |
| +0.3495             | 718.4   |          | 1435.8 | 13  | I     | 2        | 359.24              |          | 359.24         |
| +0.356              | 753.92  |          | 1506.8 | 14  | A     | 1        | 246.16              | +0.0248  | 246.16         |
|                     |         |          |        | 15  | R     | 0        | 175.12              | -0.003   | 175.12         |

Scan number 6257 Raw file LNCAP\_Silac\_23F10\_set2\_07  
 Method ITMS; CID Pepti... 126.71

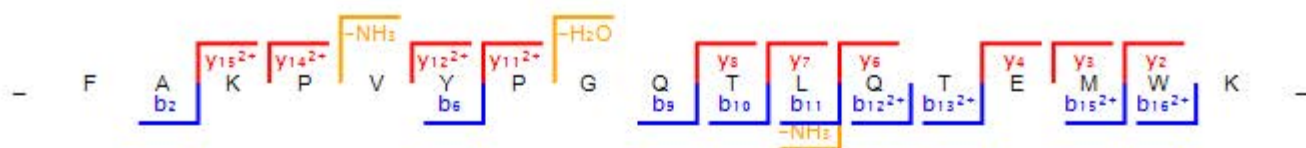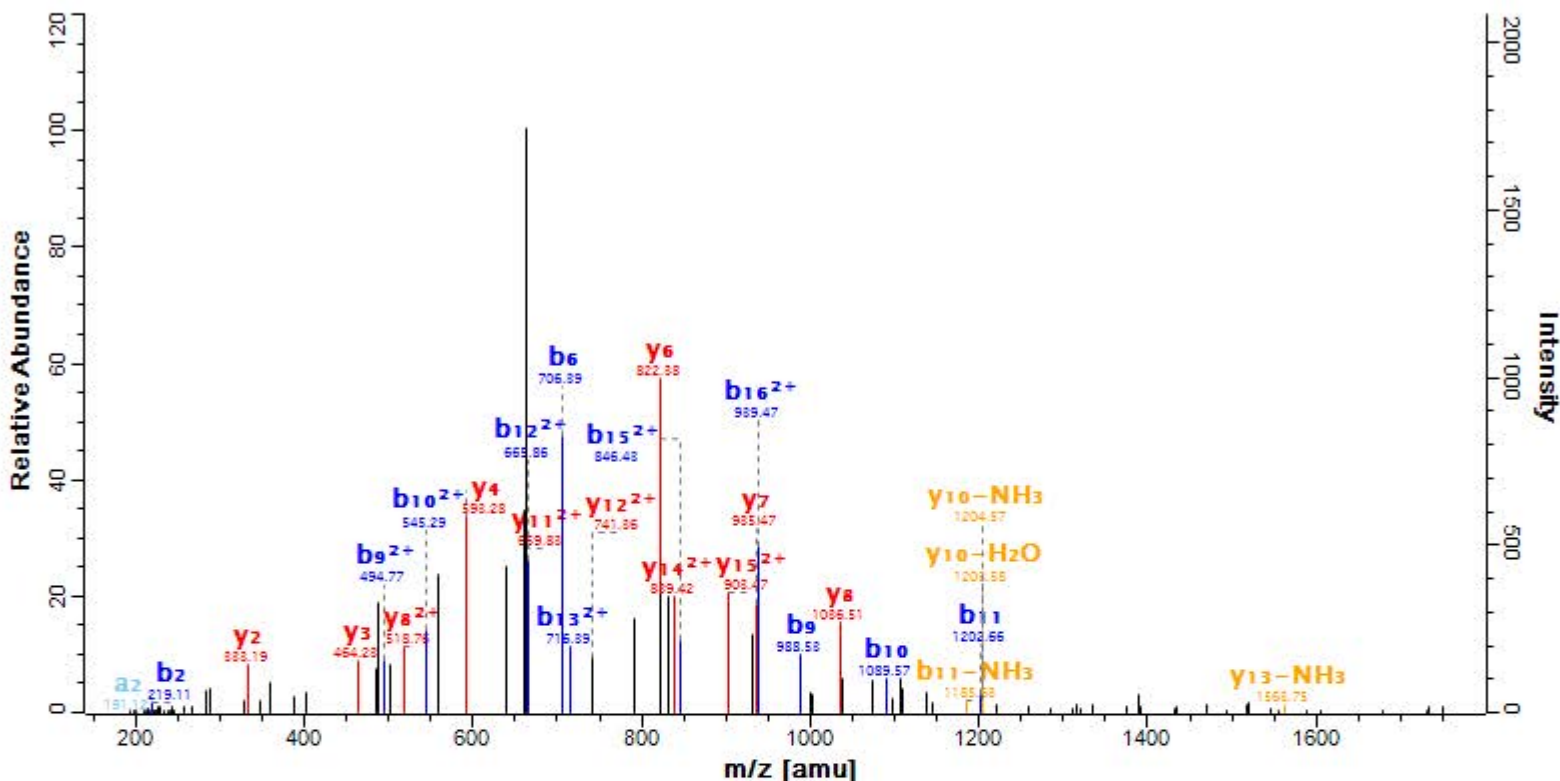

### precursor information

|                   |                 |
|-------------------|-----------------|
| Mass:             | 2023.0242       |
| m/z:              | 675.34868       |
| Charge:           | 3+              |
| Retentiontime:    | 38.570861816406 |
| Score:            | 126.7053        |
| Mass Error [ppm]: | 0.23901         |
| PEP:              | 3.4121E-12      |
| Precursor Type:   | MULTI           |

### general information

|                       |             |
|-----------------------|-------------|
| Annotation:           | 15 of 17    |
| AminoAcids Coverage:  | 88 %        |
| Intensity Coverage:   | 50 %        |
| Peak Coverage:        | 24 %        |
| Protein Localisation: | 563 ... 579 |

|        | a ion         | b <sup>2+</sup> ion | b ion         |    |     |    | y ion         | y <sup>2+</sup> ion |
|--------|---------------|---------------------|---------------|----|-----|----|---------------|---------------------|
|        | Δ dalton mass | Δ dalton mass       | Δ dalton mass |    | seq |    | Δ dalton mass | Δ dalton mass       |
|        | 120.1         | 148.1               | 148.1         | 1  | F   | 16 |               |                     |
| +0.228 | 91.1          | 219.1               | -0.03 219.1   | 2  | A   | 15 | 1877          | 1877                |
|        | 319.2         | 347.2               | 347.2         | 3  | K   | 14 | 1806          | 903.5 +0.231        |
|        | 416.3         | 444.3               | 444.3         | 4  | P   | 13 | 1678          | 839.4 +0.396        |
|        | 515.3         | 543.3               | 543.3         | 5  | V   | 12 | 1581          | 1581                |
|        | 678.4         | 706.4               | +0.028 706.4  | 6  | Y   | 11 | 1482          | 741.4 +0.14         |
|        | 775.5         | 803.4               | 803.4         | 7  | P   | 10 | 1319          | 659.8 +0.011        |
|        | 832.5         | 860.5               | 860.5         | 8  | G   | 9  | 1222          | 1222                |
|        | 960.5         | +0.044 494.8        | -0.01 988.5   | 9  | Q   | 8  | 1165          | 1165                |
|        | 1062          | +0.068 545.3        | -0.02 1090    | 10 | T   | 7  | 1037          | -0.06 518.8 +0.15   |
|        | 1175          | 1203                | -0.22 1203    | 11 | L   | 6  | 935.5         | +0.032 935.5        |
|        | 1303          | -0.24 665.9         | 1331          | 12 | Q   | 5  | 822.4         | -0.06 822.4         |
|        | 1404          | +0.038 716.4        | 1432          | 13 | T   | 4  | 694.3         | 694.3               |
|        | 1533          | 1561                | 1561          | 14 | E   | 3  | 593.3         | -0.08 593.3         |
|        | 1664          | +0.18 846.4         | 1692          | 15 | M   | 2  | 464.2         | +0.062 464.2        |
|        | 1850          | +0.173 939.5        | 1878          | 16 | W   | 1  | 333.2         | +0.194 333.2        |
|        |               |                     |               | 17 | K   | 0  | 147.1         | 147.1               |

Scan number 6264 Raw file LNCAP\_Silac\_23F10\_set2\_07  
 Method ITMS: CID Pepti... 49.22

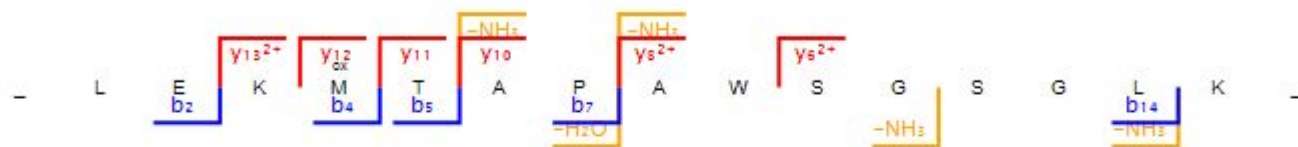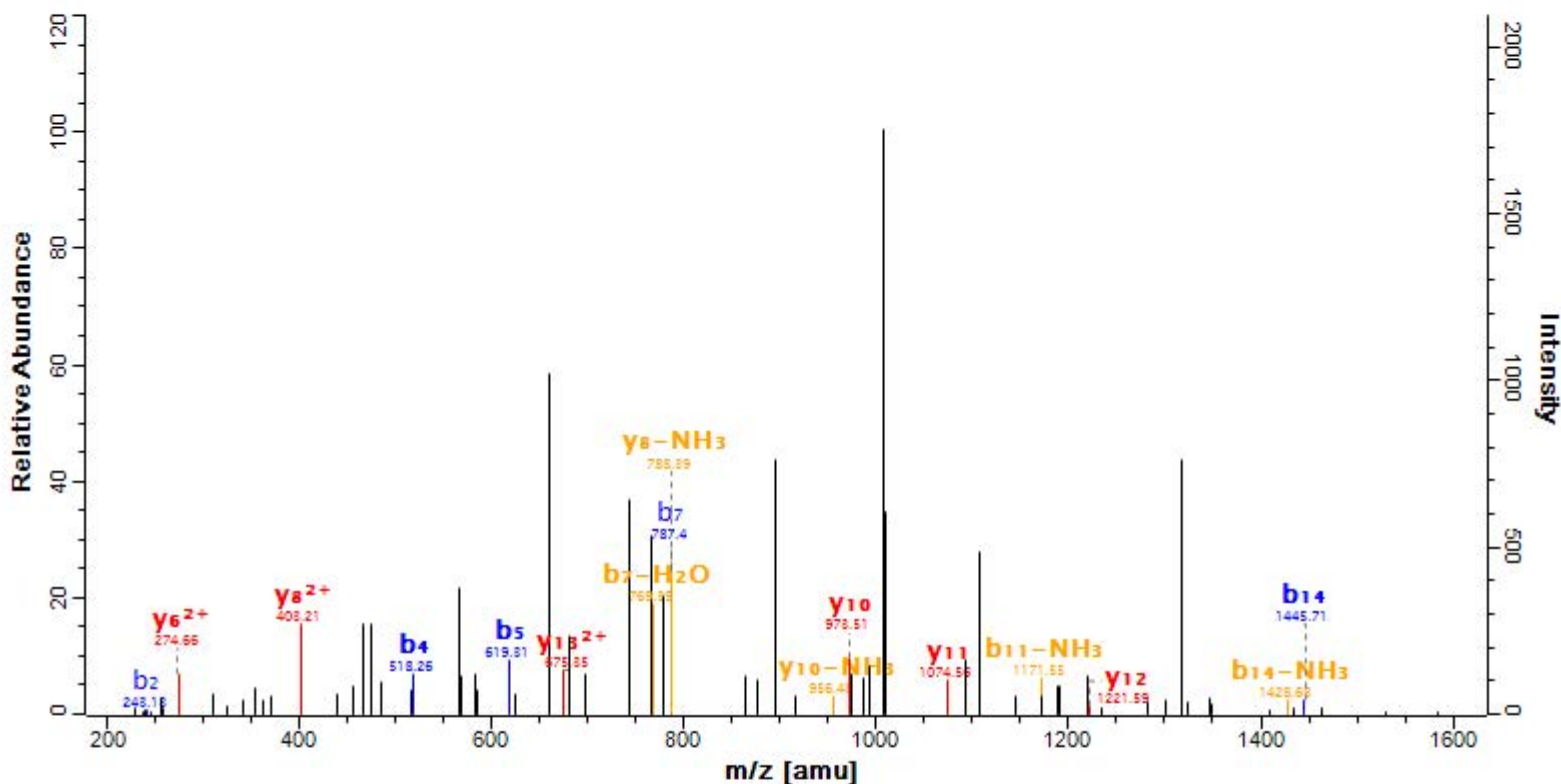

#### precursor information

|                   |             |
|-------------------|-------------|
| Mass:             | 1590.80753  |
| m/z:              | 796.41104   |
| Charge:           | 2+          |
| Retentiontime:    | 38.61328125 |
| Score:            | 49.21613    |
| Mass Error [ppm]: | -0.028372   |
| PEP:              | 0.048098    |
| Precursor Type:   | MULTI       |

#### general information

|                       |             |
|-----------------------|-------------|
| Annotation:           | 10 of 15    |
| AminoAcids Coverag    | 67 %        |
| Intensity Coverage:   | 17 %        |
| Peak Coverage:        | 19 %        |
| Protein Localisation: | 627 ... 641 |

| b ion     |          |     |   | y ion    |          |          | y <sup>2+</sup> ion |           |
|-----------|----------|-----|---|----------|----------|----------|---------------------|-----------|
| Δ dalton  | mass     | seq |   | Δ dalton | mass     | Δ dalton | mass                |           |
|           | 114.0913 | 1   | L | 14       |          |          |                     |           |
| -0.02157  | 243.1339 | 2   | E | 13       | 1478.731 | 1478.731 |                     |           |
|           | 371.2289 | 3   | K | 12       | 1349.688 | 675.3477 | +0.417949           |           |
| +0.06389  | 518.2643 | 4   | M | 11       | 1221.593 | +0.24075 | 1221.593            |           |
| +0.188941 | 619.312  | 5   | T | 10       | 1074.558 | +0.1459  | 1074.558            |           |
|           | 690.3491 | 6   | A | 9        | 973.5102 | -0.29733 | 973.5102            |           |
| -0.11889  | 787.4019 | 7   | P | 8        | 902.473  |          | 902.473             |           |
|           | 858.439  | 8   | A | 7        | 805.4203 |          | 403.2138            | +0.101225 |
|           | 1044.518 | 9   | W | 6        | 734.3832 |          | 734.3832            |           |
|           | 1131.55  | 10  | S | 5        | 548.3039 |          | 274.6556            | +0.49916  |
|           | 1188.572 | 11  | G | 4        | 461.2718 |          | 461.2718            |           |
|           | 1275.604 | 12  | S | 3        | 404.2504 |          | 404.2504            |           |
|           | 1332.625 | 13  | G | 2        | 317.2183 |          | 317.2183            |           |
| -0.06333  | 1445.709 | 14  | L | 1        | 260.1969 |          | 260.1969            |           |
|           |          | 15  | K | 0        | 147.1128 |          | 147.1128            |           |

Scan number 6335 Raw file LNCAP\_Silac\_23F10\_set2\_07  
 Method ITMS; CID Pepti... 54.5

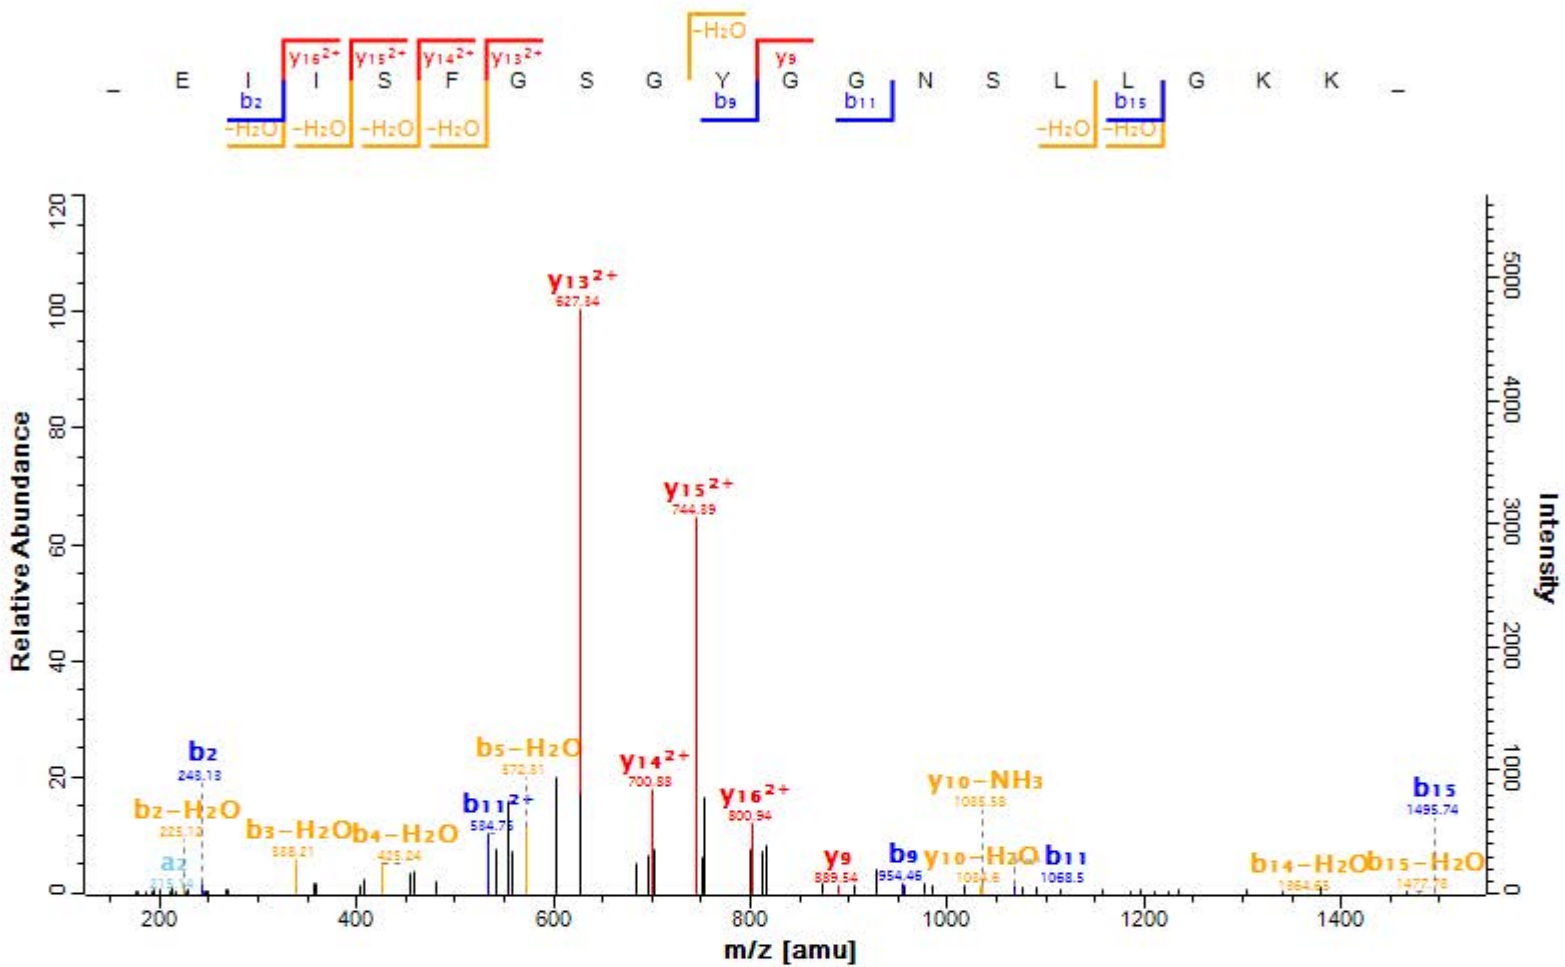

#### precursor information

|                   |                 |
|-------------------|-----------------|
| Mass:             | 1825.95827      |
| m/z:              | 609.66003       |
| Charge:           | 3+              |
| Retentiontime:    | 39.015834808349 |
| Score:            | 54.50062        |
| Mass Error [ppm]: | 0.46492         |
| PEP:              | 0.0016241       |
| Precursor Type:   | MULTI           |

#### general information

|                       |             |
|-----------------------|-------------|
| Annotation:           | 10 of 18    |
| AminoAcids Coverage:  | 56 %        |
| Intensity Coverage:   | 56 %        |
| Peak Coverage:        | 21 %        |
| Protein Localisation: | 245 ... 262 |

|       | a ion         | b <sup>2+</sup> ion | b ion         |       |      | y ion         | y <sup>2+</sup> ion |       |       |       |
|-------|---------------|---------------------|---------------|-------|------|---------------|---------------------|-------|-------|-------|
|       | Δ dalton mass | Δ dalton mass       | Δ dalton mass | seq   |      | Δ dalton mass | Δ dalton mass       |       |       |       |
|       | 102.1         | 130                 | 130           | 1     | E    | 17            |                     |       |       |       |
| -0.11 | 215.1         | 243.1               | +0.078        | 2     | I    | 16            | 1714                |       |       |       |
|       | 328.2         | 356.2               | 356.2         | 3     | I    | 15            | 1601                |       |       |       |
|       | 415.3         | 443.3               | 443.3         | 4     | S    | 14            | 1488                |       |       |       |
|       | 562.3         | 590.3               | 590.3         | 5     | F    | 13            | 1401                |       |       |       |
|       | 619.3         | 647.3               | 647.3         | 6     | G    | 12            | 1254                |       |       |       |
|       | 706.4         | 734.4               | 734.4         | 7     | S    | 11            | 1197                |       |       |       |
|       | 763.4         | 791.4               | 791.4         | 8     | G    | 10            | 1110                |       |       |       |
|       | 926.5         | 954.5               | -0.34         | 9     | Y    | 9             | 1053                |       |       |       |
|       | 983.5         | 1011                | 1011          | 10    | G    | 8             | 889.5 +0            |       |       |       |
|       | 1041          | -0.35               | 534.8         | -0.08 | 1068 | 11            | G                   | 7     | 832.5 | 832.5 |
|       | 1155          | 1183                | 1183          | 12    | N    | 6             | 775.5               | 775.5 |       |       |
|       | 1242          | 1270                | 1270          | 13    | S    | 5             | 661.5               | 661.5 |       |       |
|       | 1355          | 1383                | 1383          | 14    | L    | 4             | 574.4               | 574.4 |       |       |
|       | 1468          | 1496                | +0.192        | 1496  | 15   | L             | 3                   | 461.3 | 461.3 |       |
|       | 1525          | 1553                | 1553          | 16    | G    | 2             | 348.3               | 348.3 |       |       |
|       | 1661          | 1689                | 1689          | 17    | K    | 1             | 291.2               | 291.2 |       |       |
|       |               |                     |               | 18    | K    | 0             | 155.1               | 155.1 |       |       |

Scan number 6529 Raw file LNCAP\_Silac\_23F10\_set2\_07  
 Method ITMS; CID Pepti... 153.94

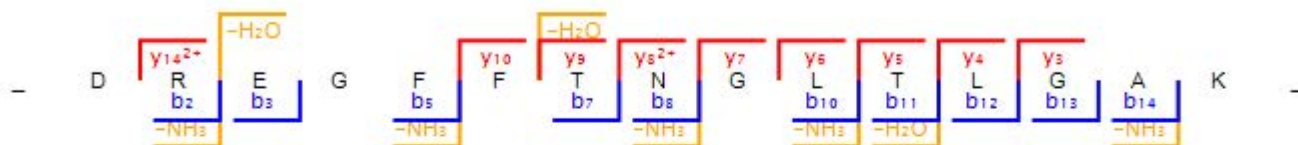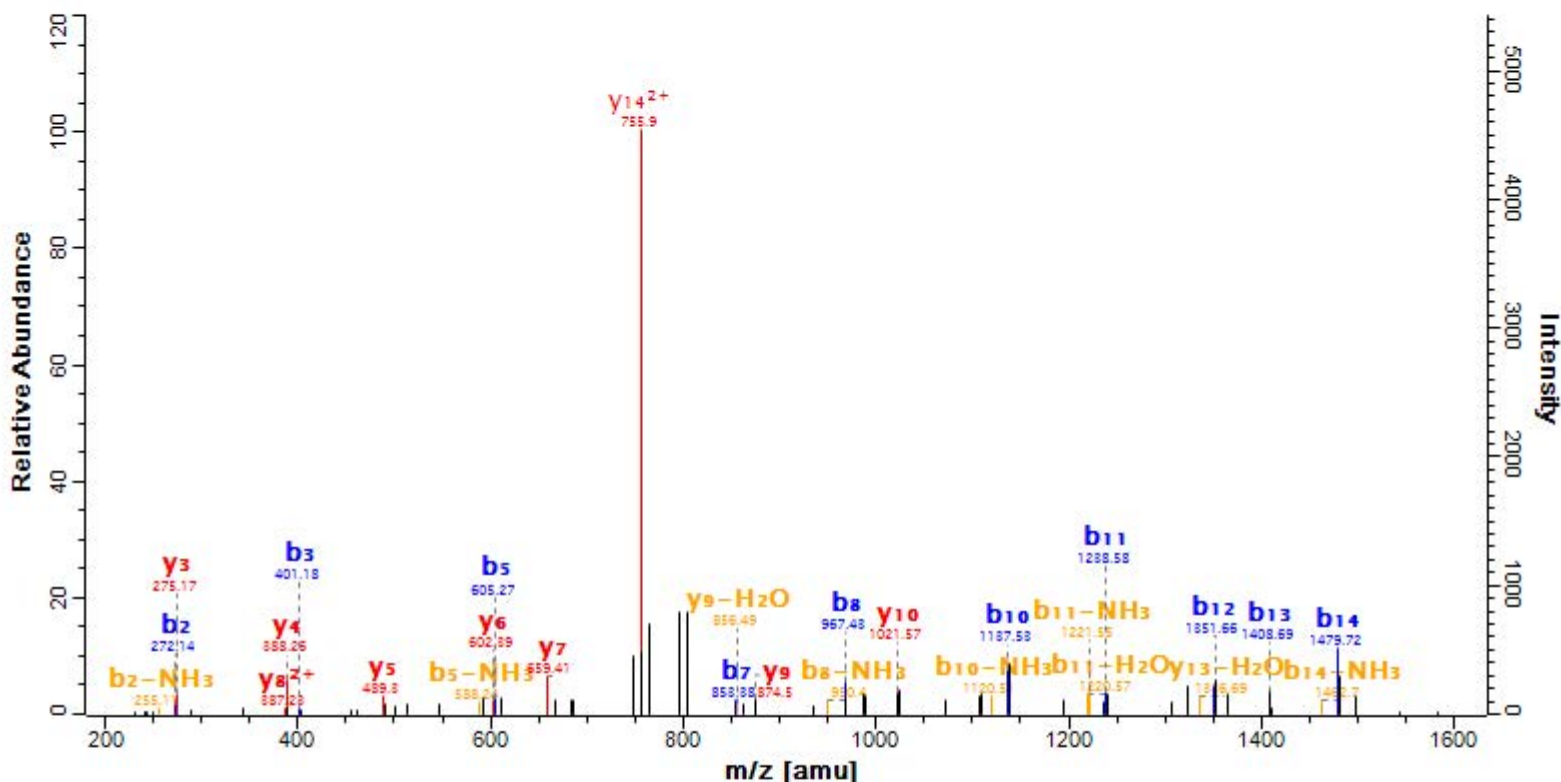

#### precursor information

|                   |                 |
|-------------------|-----------------|
| Mass:             | 1624.82102      |
| m/z:              | 813.41778       |
| Charge:           | 2+              |
| Retentiontime:    | 40.129360198974 |
| Score:            | 153.9401        |
| Mass Error [ppm]: | 0.058996        |
| PEP:              | 4.0173E-14      |
| Precursor Type:   | MULTI           |

#### general information

|                       |           |
|-----------------------|-----------|
| Annotation:           | 12 of 15  |
| AminoAcids Coverage:  | 80 %      |
| Intensity Coverage:   | 51 %      |
| Peak Coverage:        | 34 %      |
| Protein Localisation: | 55 ... 69 |

| b ion     |          |     |   | y ion    |          |           | y <sup>2+</sup> ion |           |
|-----------|----------|-----|---|----------|----------|-----------|---------------------|-----------|
| Δ dalton  | mass     | seq |   | Δ dalton | mass     | Δ dalton  | mass                |           |
|           | 116.0342 | 1   | D | 14       |          |           |                     |           |
| +0.145523 | 272.1353 | 2   | R | 13       | 1510.801 | 755.9043  | +0.237154           |           |
| +0.104913 | 401.1779 | 3   | E | 12       | 1354.7   | 1354.7    |                     |           |
|           | 458.1994 | 4   | G | 11       | 1225.658 | 1225.658  |                     |           |
| +0.075399 | 605.2678 | 5   | F | 10       | 1168.636 | 1168.636  |                     |           |
|           | 752.3362 | 6   | F | 9        | 1021.568 | +0.111467 | 1021.568            |           |
| +0.054034 | 853.3839 | 7   | T | 8        | 874.4993 | +0.006235 | 874.4993            |           |
| +0.010008 | 967.4268 | 8   | N | 7        | 773.4516 |           | 387.2294            | +0.041568 |
|           | 1024.448 | 9   | G | 6        | 659.4087 | +0.175516 | 659.4087            |           |
| +0.009399 | 1137.532 | 10  | L | 5        | 602.3872 | -0.02958  | 602.3872            |           |
| -0.45173  | 1238.58  | 11  | T | 4        | 489.3031 | +0.076331 | 489.3031            |           |
| -0.15225  | 1351.664 | 12  | L | 3        | 388.2554 | +0.077379 | 388.2554            |           |
| +0.071037 | 1408.686 | 13  | G | 2        | 275.1714 | +0.026586 | 275.1714            |           |
| -0.06117  | 1479.723 | 14  | A | 1        | 218.1499 |           | 218.1499            |           |
|           |          | 15  | K | 0        | 147.1128 |           | 147.1128            |           |

Scan number 657 Raw file LNCAP\_Silac\_23F10\_set2\_07  
 Method ITMS; CID Pepti... 80.24

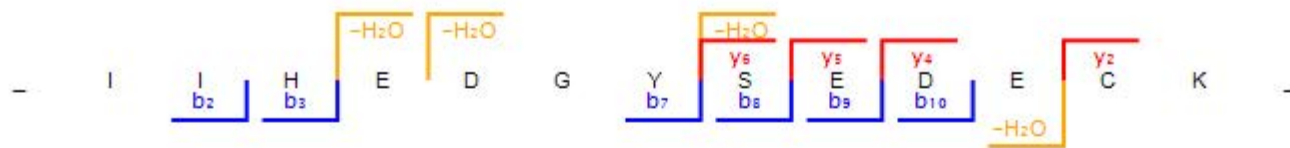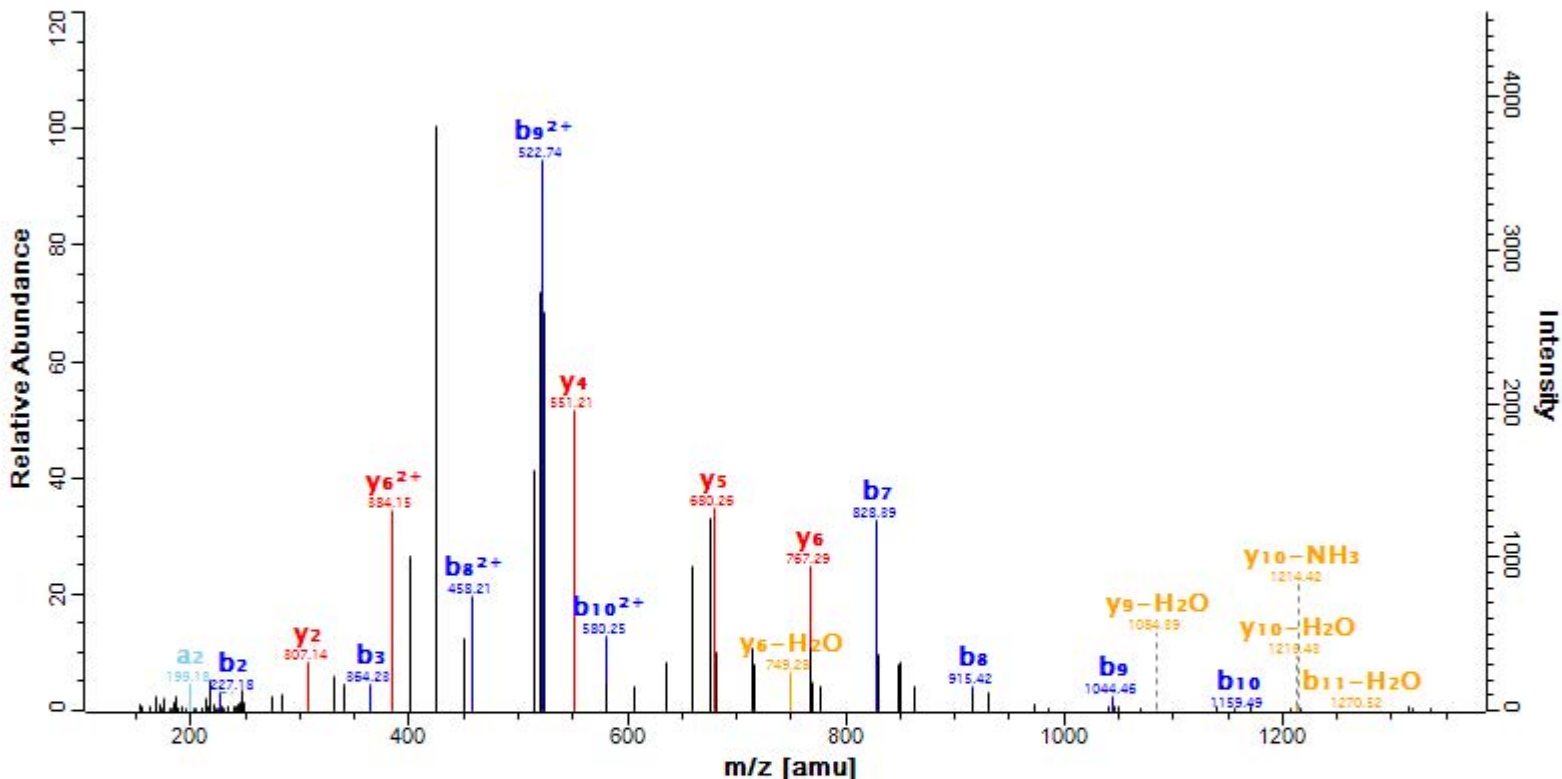

**precursor information**

|                   |                 |
|-------------------|-----------------|
| Mass:             | 1593.66218      |
| m/z:              | 532.228         |
| Charge:           | 3+              |
| Retentiontime:    | 8.4400730133056 |
| Score:            | 80.24471        |
| Mass Error [ppm]: | 0.30124         |
| PEP:              | 0.00095262      |
| Precursor Type:   | MULTI           |

**general information**

|                       |           |
|-----------------------|-----------|
| Annotation:           | 10 of 13  |
| AminoAcids Coverage:  | 77 %      |
| Intensity Coverage:   | 34 %      |
| Peak Coverage:        | 17 %      |
| Protein Localisation: | 55 ... 67 |

|       | a ion         | b <sup>2+</sup> ion | b ion         |       |    |    | y ion         | y <sup>2+</sup> ion |       |
|-------|---------------|---------------------|---------------|-------|----|----|---------------|---------------------|-------|
|       | Δ dalton mass | Δ dalton mass       | Δ dalton mass | seq   |    |    | Δ dalton mass | Δ dalton mass       |       |
|       | 86.1          | 114.1               | 114.1         | 1     | I  | 12 |               |                     |       |
| -0.14 | 199.2         | 227.2               | +0.003227.2   | 2     | I  | 11 | 1482          | 1482                |       |
|       | 336.2         | 364.2               | +0            | 3     | H  | 10 | 1369          | 1369                |       |
|       | 465.3         | 493.3               |               | 4     | E  | 9  | 1231          | 1231                |       |
|       | 580.3         | 608.3               |               | 5     | D  | 8  | 1102          | 1102                |       |
|       | 637.3         | 665.3               |               | 6     | G  | 7  | 987.4         | 987.4               |       |
|       | 800.4         | 828.4               | -0.04         | 7     | Y  | 6  | 930.4         | 930.4               |       |
|       | 887.4         | +0.168458.2         | -0.05         | 8     | S  | 5  | 767.3         | -0.04 384.1 +0.18   |       |
|       | 1016          | -0.06               | 522.7         | -0.12 | 9  | E  | 4             | 680.3 +0.074680.3   |       |
|       | 1131          | -0.04               | 580.2         | -0.01 | 10 | D  | 3             | 551.2 +0.023551.2   |       |
|       | 1261          |                     | 1289          |       | 11 | E  | 2             | 436.2               | 436.2 |
|       | 1421          |                     | 1449          |       | 12 | C  | 1             | 307.1 +0.038307.1   |       |
|       |               |                     |               | 13    | K  | 0  | 147.1         | 147.1               |       |

Scan number 6931 Raw file LNCAP\_Silac\_23F10\_set2\_07  
 Method ITMS; CID Pepti... 107.74

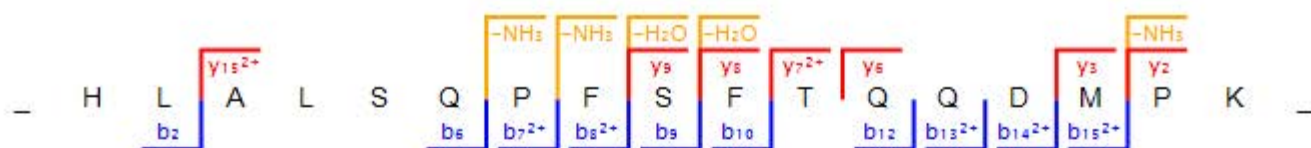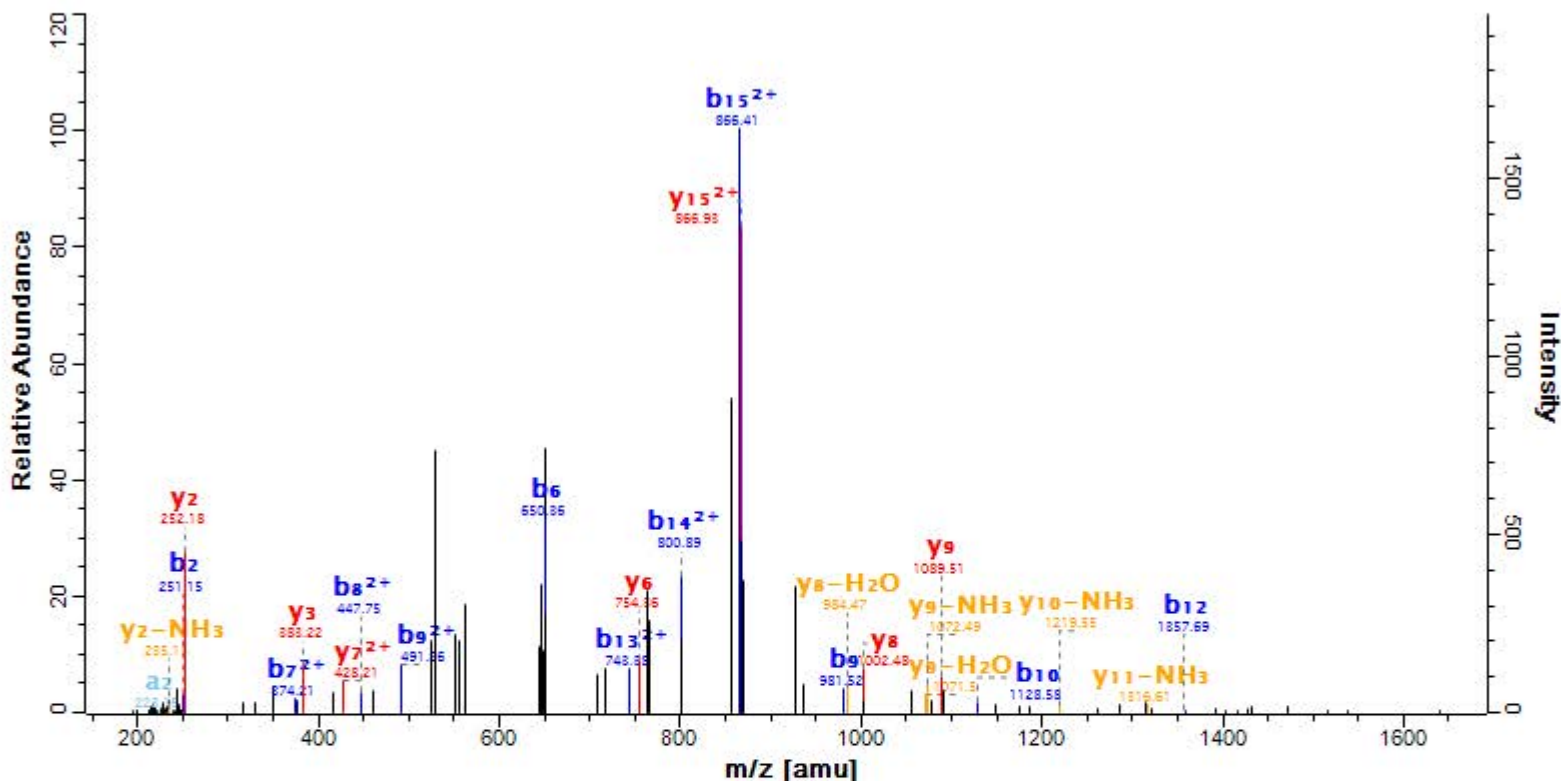

precursor information

|                   |                 |
|-------------------|-----------------|
| Mass:             | 1973.96542      |
| m/z:              | 658.99575       |
| Charge:           | 3+              |
| Retentiontime:    | 42.498817443847 |
| Score:            | 107.7354        |
| Mass Error [ppm]: | -0.76216        |
| PEP:              | 2.1339E-08      |
| Precursor Type:   | MULTI           |

general information

|                       |             |
|-----------------------|-------------|
| Annotation:           | 13 of 17    |
| AminoAcids Coverage:  | 76 %        |
| Intensity Coverage:   | 41 %        |
| Peak Coverage:        | 25 %        |
| Protein Localisation: | 542 ... 558 |

| a ion         | b <sup>2+</sup> ion | b ion         |        |       |    | y ion         | y <sup>2+</sup> ion |             |             |       |
|---------------|---------------------|---------------|--------|-------|----|---------------|---------------------|-------------|-------------|-------|
| Δ dalton mass | Δ dalton mass       | Δ dalton mass |        | seq   |    | Δ dalton mass | Δ dalton mass       |             |             |       |
|               | 110.1               | 138.1         |        | 1     | H  | 16            |                     |             |             |       |
| +0.165        | 223.2               | 251.2         | +0.052 | 2     | L  | 15            | 1846                | 1846        |             |       |
|               | 294.2               | 322.2         |        | 3     | A  | 14            | 1733                | 866.9 +0.08 |             |       |
|               | 407.3               | 435.3         |        | 4     | L  | 13            | 1662                | 1662        |             |       |
|               | 494.3               | 522.3         |        | 5     | S  | 12            | 1549                | 1549        |             |       |
|               | 622.4               | 650.4         | +0.079 | 6     | Q  | 11            | 1462                | 1462        |             |       |
|               | 719.4               | 1374.2        |        | 7     | P  | 10            | 1334                | 1334        |             |       |
|               | 866.5               | +0.109        | 447.7  | 8     | F  | 9             | 1237                | 1237        |             |       |
|               | 953.5               | +0.166        | 491.3  | -0.07 | 9  | S             | 8                   | 1090        | -0.13       | 1090  |
|               | 1101                | 1129          | +0.101 | 10    | F  | 7             | 1002                | -0.02       | 1002        |       |
|               | 1202                | 1230          |        | 11    | T  | 6             | 855.4               |             | 428.2 +0.14 |       |
|               | 1330                | 1358          | +0.481 | 12    | Q  | 5             | 754.4               | +0          | 754.4       |       |
|               | 1458                | -0.07         | 743.4  |       | 13 | Q             | 4                   | 626.3       |             | 626.3 |
|               | 1573                | +0.234        | 800.9  |       | 14 | D             | 3                   | 498.2       |             | 498.2 |
|               | 1704                | -0.01         | 866.4  |       | 15 | M             | 2                   | 383.2       | +0.159      | 383.2 |
|               | 1801                | 1829          |        | 16    | P  | 1             | 252.2               | +0.058      | 252.2       |       |
|               |                     |               |        | 17    | K  | 0             | 155.1               |             | 155.1       |       |

Scan number 7041 Raw file LNCAP\_Silac\_23F10\_set2\_07  
 Method ITMS; CID Pepti... 64.51

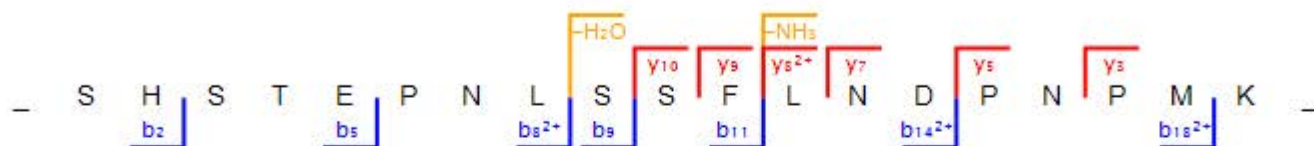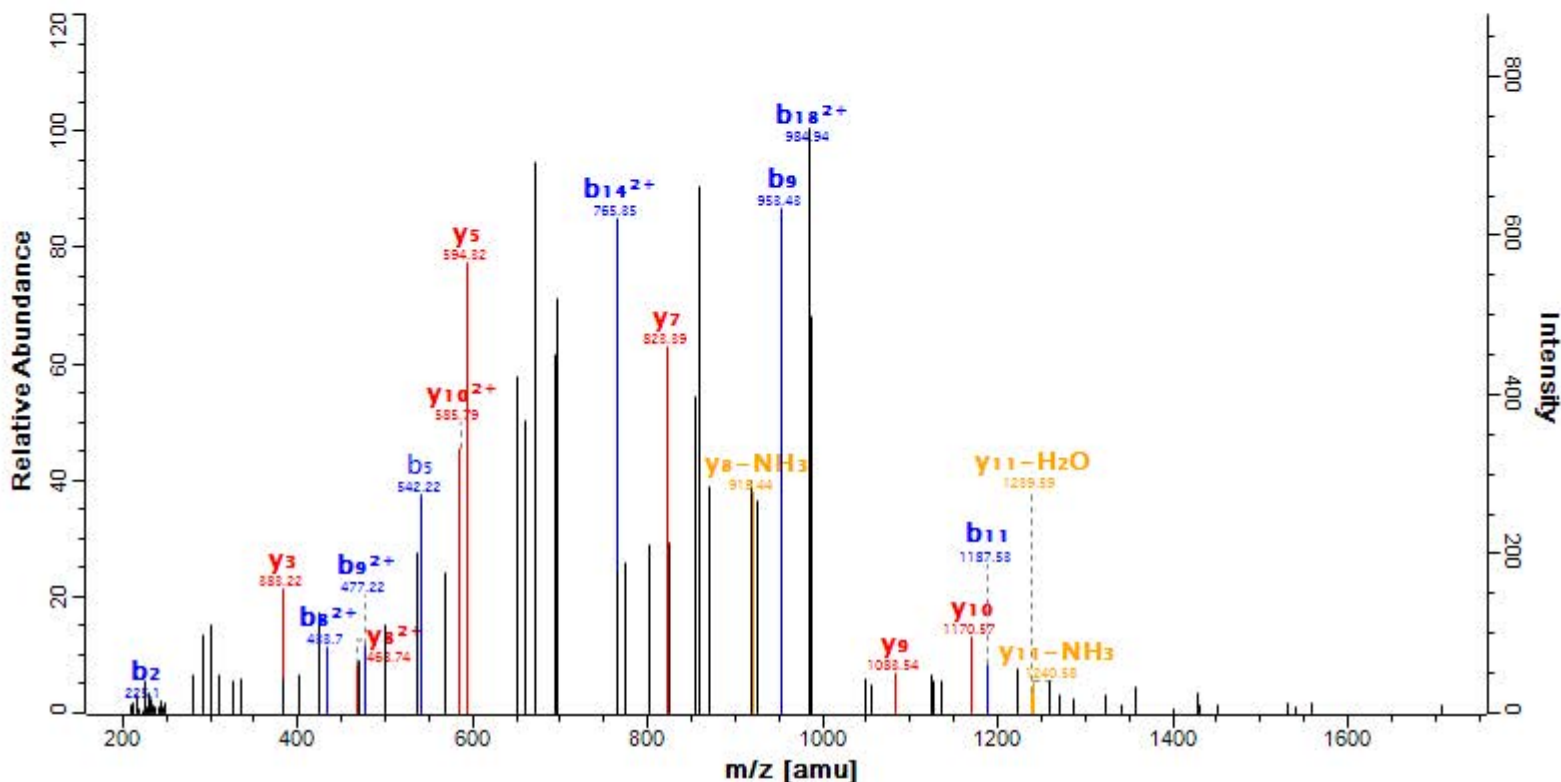

### precursor information

|                   |                 |
|-------------------|-----------------|
| Mass:             | 2113.97393      |
| m/z:              | 705.66525       |
| Charge:           | 3+              |
| Retentiontime:    | 43.181644439697 |
| Score:            | 64.50748        |
| Mass Error [ppm]: | 0.028415        |
| PEP:              | 0.0011061       |
| Precursor Type:   | MULTI           |

### general information

|                       |             |
|-----------------------|-------------|
| Annotation:           | 12 of 19    |
| AminoAcids Coverage:  | 63 %        |
| Intensity Coverage:   | 33 %        |
| Peak Coverage:        | 20 %        |
| Protein Localisation: | 469 ... 487 |

| b <sup>2+</sup> ion |        | b ion    |        | seq |   |    | y ion    |         | y <sup>2+</sup> ion |        |
|---------------------|--------|----------|--------|-----|---|----|----------|---------|---------------------|--------|
| Δ dalton            | mass   | Δ dalton | mass   |     |   |    | Δ dalton | mass    | Δ dalton            | mass   |
|                     | 88.039 |          | 88.039 | 1   | S | 18 |          |         |                     |        |
|                     | 225.1  | -0.067   | 225.1  | 2   | H | 17 | 2036     |         | 2036                |        |
|                     | 312.13 |          | 312.13 | 3   | S | 16 | 1898.9   |         | 1898.9              |        |
|                     | 413.18 |          | 413.18 | 4   | T | 15 | 1811.9   |         | 1811.9              |        |
|                     | 542.22 | -0.037   | 542.22 | 5   | E | 14 | 1710.8   |         | 1710.8              |        |
|                     | 639.27 |          | 639.27 | 6   | P | 13 | 1581.8   |         | 1581.8              |        |
|                     | 753.32 |          | 753.32 | 7   | N | 12 | 1484.7   |         | 1484.7              |        |
| -0.026              | 433.7  |          | 866.4  | 8   | L | 11 | 1370.7   |         | 1370.7              |        |
| +0.2643             | 477.22 | -0.104   | 953.43 | 9   | S | 10 | 1257.6   |         | 1257.6              |        |
|                     | 1040.5 |          | 1040.5 | 10  | S | 9  | 1170.6   | +0.0485 | 585.79              | -0.293 |
|                     | 1187.5 | -0.042   | 1187.5 | 11  | F | 8  | 1083.5   | -0.116  | 1083.5              |        |
|                     | 1300.6 |          | 1300.6 | 12  | L | 7  | 936.47   |         | 468.74              | -0.028 |
|                     | 1414.7 |          | 1414.7 | 13  | N | 6  | 823.39   | -0.024  | 823.39              |        |
| +0.0695             | 765.35 |          | 1529.7 | 14  | D | 5  | 709.34   |         | 709.34              |        |
|                     | 1626.7 |          | 1626.7 | 15  | P | 4  | 594.32   | +0.2201 | 594.32              |        |
|                     | 1740.8 |          | 1740.8 | 16  | N | 3  | 497.26   |         | 497.26              |        |
|                     | 1837.8 |          | 1837.8 | 17  | P | 2  | 383.22   | +0.1056 | 383.22              |        |
| -0.035              | 984.94 |          | 1968.9 | 18  | M | 1  | 286.17   |         | 286.17              |        |
|                     |        |          |        | 19  | K | 0  | 155.13   |         | 155.13              |        |



Scan number 7087 Raw file LNCAP\_Silac\_23F10\_set2\_07  
 Method ITMS; CID Pepti... 73.08

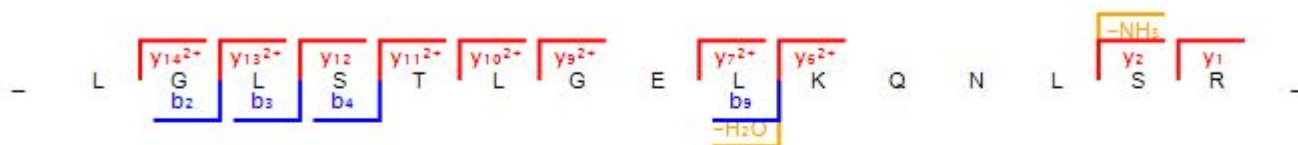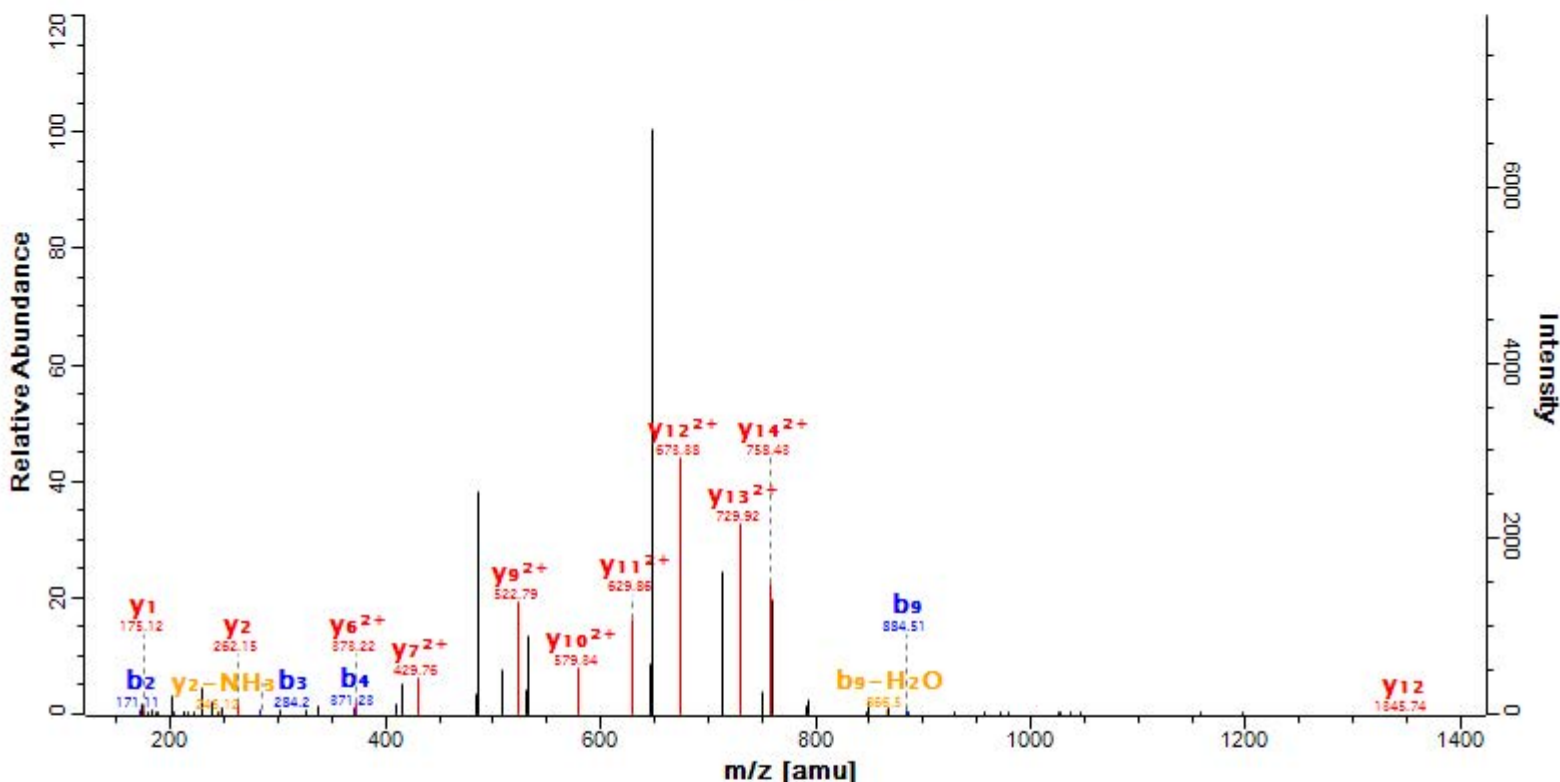

#### precursor information

|                   |                 |
|-------------------|-----------------|
| Mass:             | 1627.92543      |
| m/z:              | 543.64909       |
| Charge:           | 3+              |
| Retentiontime:    | 43.477947235107 |
| Score:            | 73.082          |
| Mass Error [ppm]: | -0.17948        |
| PEP:              | 0.00076112      |
| Precursor Type:   | MULTI           |

#### general information

|                       |           |
|-----------------------|-----------|
| Annotation:           | 10 of 15  |
| AminoAcids Coverage:  | 67 %      |
| Intensity Coverage:   | 32 %      |
| Peak Coverage:        | 20 %      |
| Protein Localisation: | 81 ... 95 |

| b ion     |          |     |   | y ion    |          | y <sup>2+</sup> ion |           |
|-----------|----------|-----|---|----------|----------|---------------------|-----------|
| Δ dalton  | mass     | seq |   | Δ dalton | mass     | Δ dalton            | mass      |
|           | 114.0913 | 1   | L | 14       |          |                     |           |
| +0.061543 | 171.1128 | 2   | G | 13       | 1515.849 | 758.4281            | +0.015072 |
| -0.12405  | 284.1969 | 3   | L | 12       | 1458.827 | 729.9174            | +0.307603 |
| +0.062241 | 371.2289 | 4   | S | 11       | 1345.743 | +0.465458 673.3753  | +0.284389 |
|           | 472.2766 | 5   | T | 10       | 1258.711 | 629.8593            | +0.127795 |
|           | 585.3606 | 6   | L | 9        | 1157.664 | 579.3355            | +0.279198 |
|           | 642.3821 | 7   | G | 8        | 1044.58  | 522.7935            | +0.197329 |
|           | 771.4247 | 8   | E | 7        | 987.5582 | 987.5582            |           |
| +0.260588 | 884.5088 | 9   | L | 6        | 858.5156 | 429.7614            | +0.313158 |
|           | 1012.604 | 10  | K | 5        | 745.4315 | 373.2194            | -0.02811  |
|           | 1140.662 | 11  | Q | 4        | 617.3365 | 617.3365            |           |
|           | 1254.705 | 12  | N | 3        | 489.278  | 489.278             |           |
|           | 1367.789 | 13  | L | 2        | 375.235  | 375.235             |           |
|           | 1454.821 | 14  | S | 1        | 262.151  | +0.033101 262.151   |           |
|           |          | 15  | R | 0        | 175.119  | -0.10255 175.119    |           |

Scan number 7150 Raw file LNCAP\_Silac\_23F10\_set2\_07  
 Method ITMS; CID Pepti... 33.09

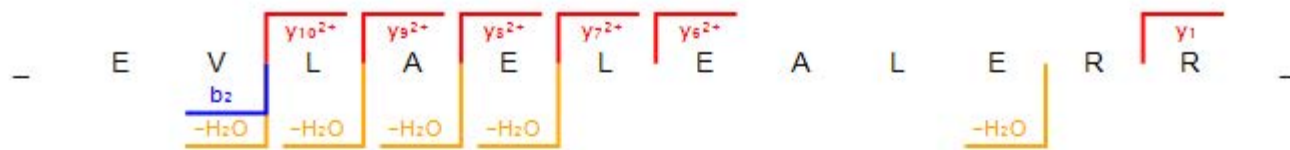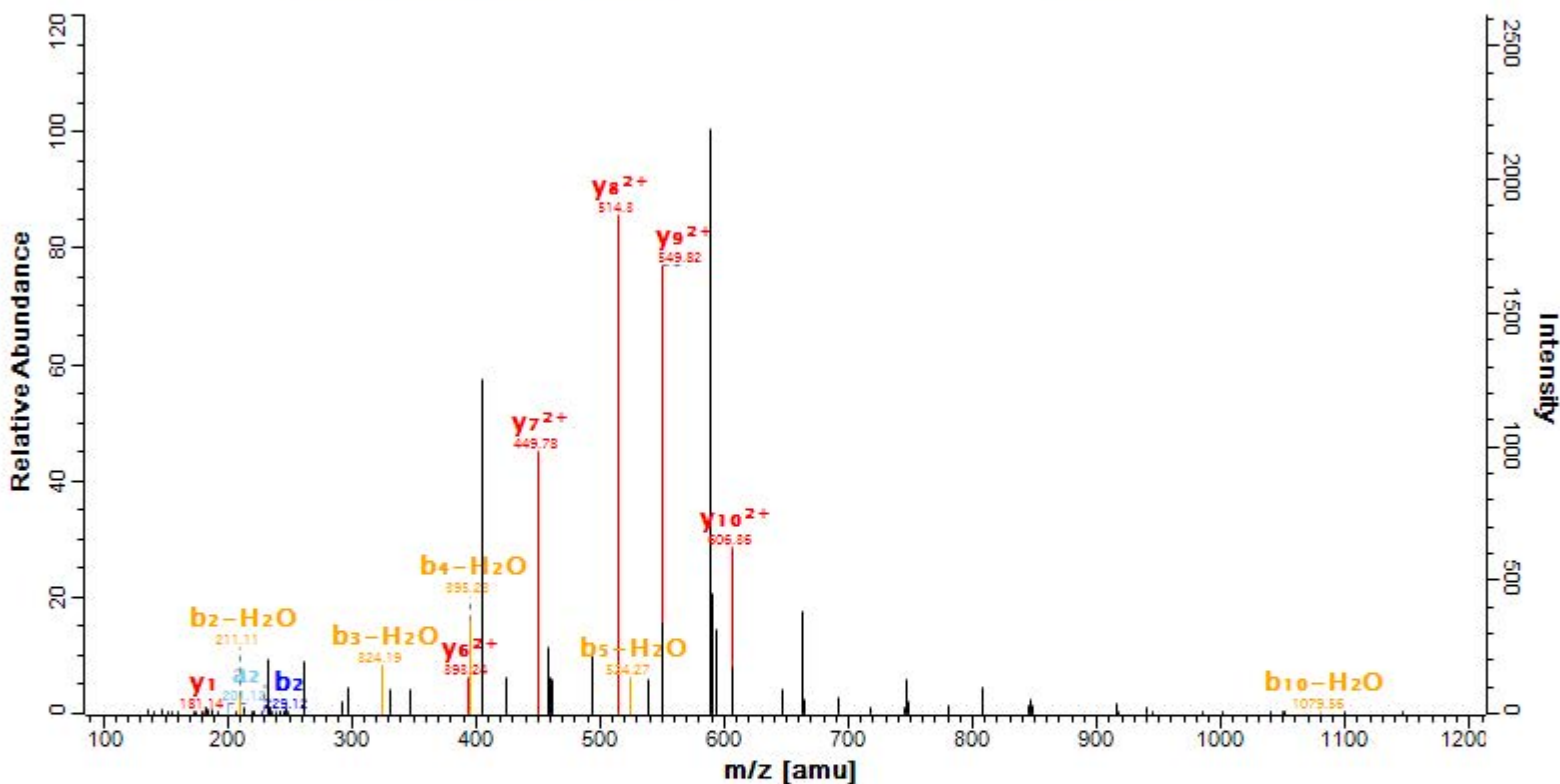

#### precursor information

|                   |                 |
|-------------------|-----------------|
| Mass:             | 1426.7774       |
| m/z:              | 476.59974       |
| Charge:           | 3+              |
| Retentiontime:    | 43.865676879882 |
| Score:            | 33.08828        |
| Mass Error [ppm]: | -0.41324        |
| PEP:              | 0.064024        |
| Precursor Type:   | MULTI           |

#### general information

|                       |             |
|-----------------------|-------------|
| Annotation:           | 8 of 12     |
| AminoAcids Coverage:  | 67 %        |
| Intensity Coverage:   | 43 %        |
| Peak Coverage:        | 12 %        |
| Protein Localisation: | 625 ... 636 |

| a ion    |        | b ion    |        |     |   |          | y ion  |          | y <sup>2+</sup> ion |  |
|----------|--------|----------|--------|-----|---|----------|--------|----------|---------------------|--|
| Δ dalton | mass   | Δ dalton | mass   | seq |   | Δ dalton | mass   | Δ dalton | mass                |  |
|          | 102.05 |          | 130.05 | 1   | E | 11       |        |          |                     |  |
| -0.055   | 201.12 | -0.419   | 229.12 | 2   | V | 10       | 1310.8 |          | 1310.8              |  |
|          | 314.21 |          | 342.2  | 3   | L | 9        | 1211.7 |          | 606.36              |  |
|          | 385.24 |          | 413.24 | 4   | A | 8        | 1098.6 |          | 549.82              |  |
|          | 514.29 |          | 542.28 | 5   | E | 7        | 1027.6 |          | 514.3               |  |
|          | 627.37 |          | 655.37 | 6   | L | 6        | 898.55 |          | 449.78              |  |
|          | 756.41 |          | 784.41 | 7   | E | 5        | 785.47 |          | 393.24              |  |
|          | 827.45 |          | 855.45 | 8   | A | 4        | 656.42 |          | 656.42              |  |
|          | 940.53 |          | 968.53 | 9   | L | 3        | 585.39 |          | 585.39              |  |
|          | 1069.6 |          | 1097.6 | 10  | E | 2        | 472.3  |          | 472.3               |  |
|          | 1231.7 |          | 1259.7 | 11  | R | 1        | 343.26 |          | 343.26              |  |
|          |        |          |        | 12  | R | 0        | 181.14 | -0.164   | 181.14              |  |

Scan number 7174 Raw file LNCAP\_Silac\_23F10\_set2\_07  
 Method ITMS; CID Pepti... 110.92

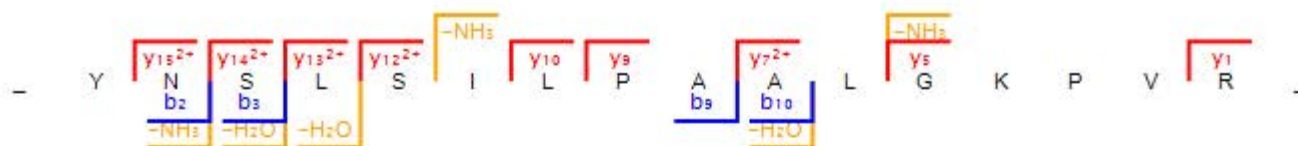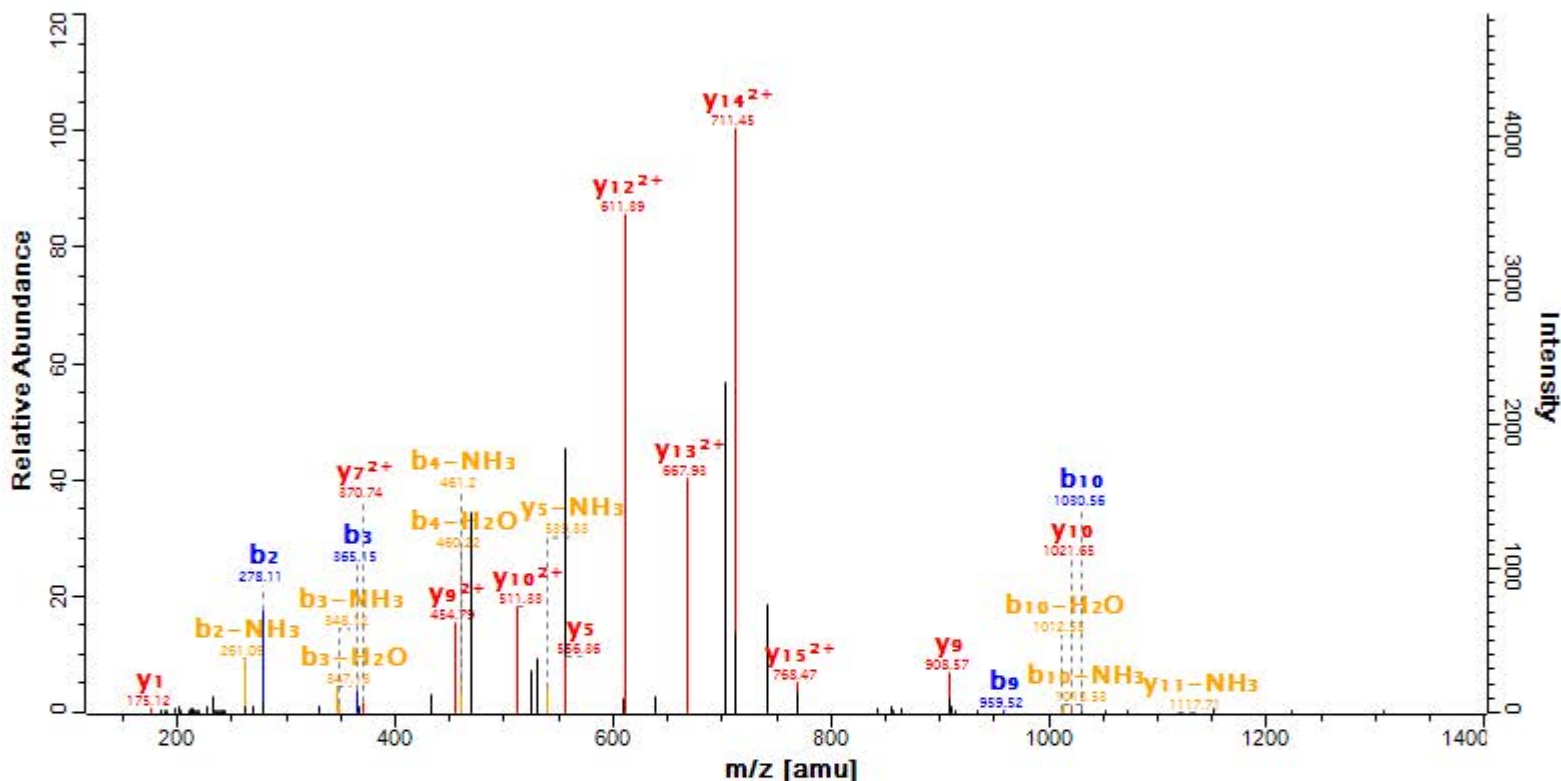

#### precursor information

|                   |                 |
|-------------------|-----------------|
| Mass:             | 1697.98273      |
| m/z:              | 567.00152       |
| Charge:           | 3+              |
| Retentiontime:    | 44.008666992187 |
| Score:            | 110.9227        |
| Mass Error [ppm]: | -0.06524        |
| PEP:              | 3.8208E-07      |
| Precursor Type:   | MULTI           |

#### general information

|                       |             |
|-----------------------|-------------|
| Annotation:           | 11 of 16    |
| AminoAcids Coverag    | 69 %        |
| Intensity Coverage:   | 59 %        |
| Peak Coverage:        | 25 %        |
| Protein Localisation: | 138 ... 153 |

| b ion     |          |    |     |    | y ion    |           | y <sup>2+</sup> ion |           |
|-----------|----------|----|-----|----|----------|-----------|---------------------|-----------|
| Δ dalton  | mass     |    | seq |    | Δ dalton | mass      | Δ dalton            | mass      |
|           | 164.0706 | 1  | Y   | 15 |          |           |                     |           |
| -0.01014  | 278.1135 | 2  | N   | 14 | 1535.927 | 768.467   | -0.07818            |           |
| +0.013314 | 365.1456 | 3  | S   | 13 | 1421.884 | 711.4456  | +0.236011           |           |
|           | 478.2296 | 4  | L   | 12 | 1334.852 | 667.9296  | +0.238536           |           |
|           | 565.2617 | 5  | S   | 11 | 1221.768 | 611.3875  | +0.194692           |           |
|           | 678.3457 | 6  | I   | 10 | 1134.736 | 1134.736  |                     |           |
|           | 791.4298 | 7  | L   | 9  | 1021.652 | -0.12049  | 511.3295            | +0.292411 |
|           | 888.4825 | 8  | P   | 8  | 908.5676 | +0.090286 | 454.7874            | -0.00174  |
| -0.22602  | 959.5197 | 9  | A   | 7  | 811.5148 |           | 811.5148            |           |
| -0.0951   | 1030.557 | 10 | A   | 6  | 740.4777 |           | 370.7425            | -0.03908  |
|           | 1143.641 | 11 | L   | 5  | 669.4406 |           | 669.4406            |           |
|           | 1200.662 | 12 | G   | 4  | 556.3566 | +0.196117 | 556.3566            |           |
|           | 1328.757 | 13 | K   | 3  | 499.3351 |           | 499.3351            |           |
|           | 1425.81  | 14 | P   | 2  | 371.2401 |           | 371.2401            |           |
|           | 1524.878 | 15 | V   | 1  | 274.1874 |           | 274.1874            |           |
|           |          | 16 | R   | 0  | 175.119  | -0.00225  | 175.119             |           |

Scan number 7306 Raw file LNCAP\_Silac\_23F10\_set2\_07  
 Method ITMS; CID Pepti... 88.71

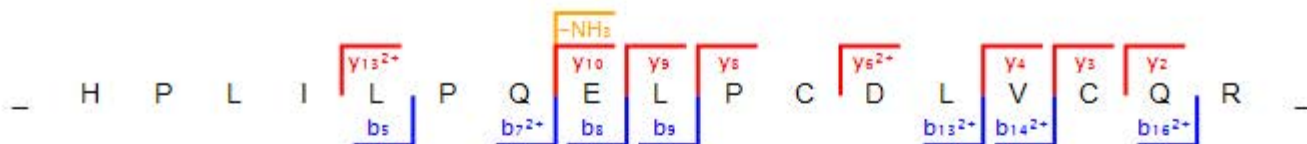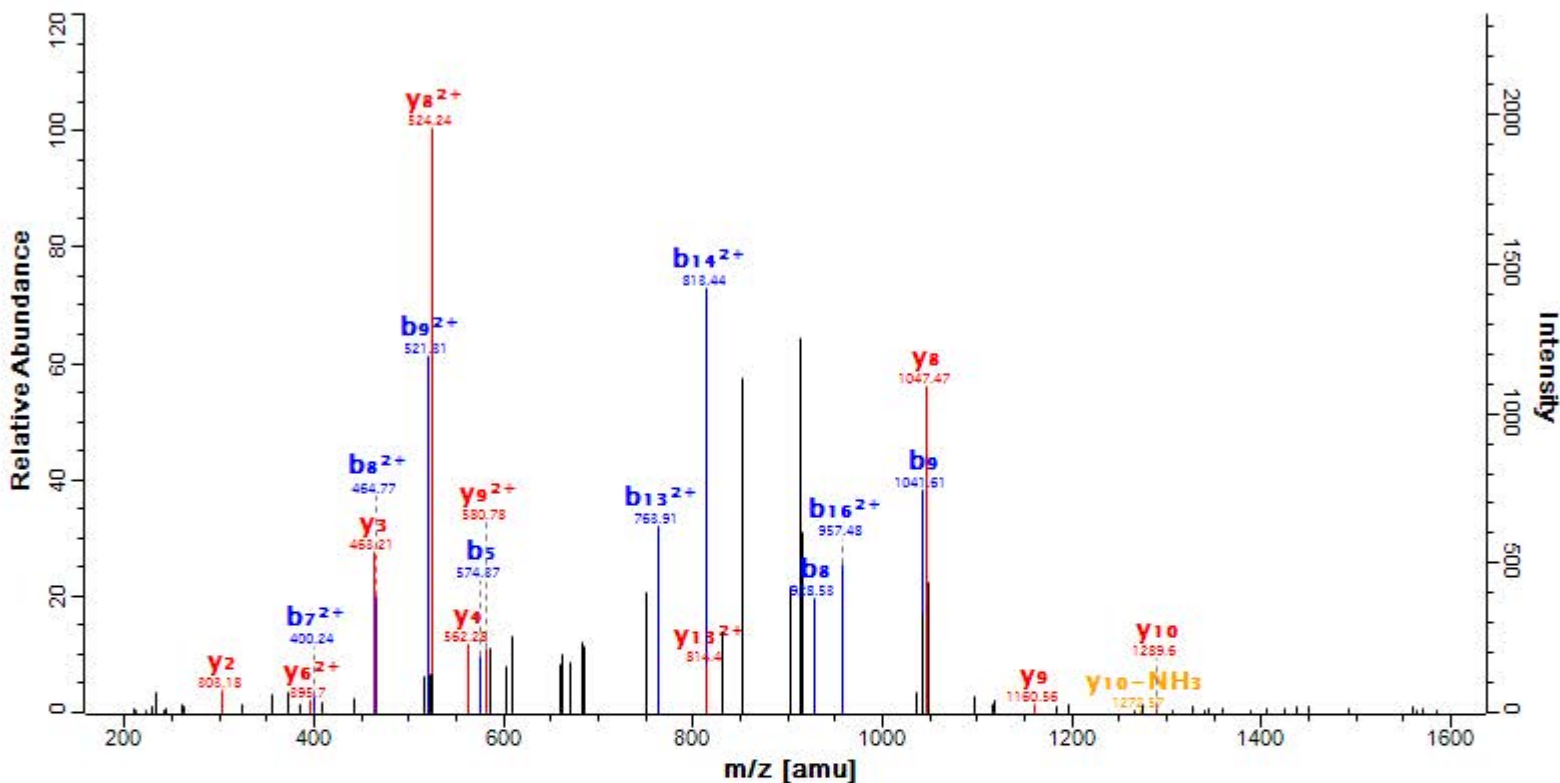

**precursor information**

|                   |                 |
|-------------------|-----------------|
| Mass:             | 2087.06502      |
| m/z:              | 696.69561       |
| Charge:           | 3+              |
| Retentiontime:    | 44.817176818847 |
| Score:            | 88.70626        |
| Mass Error [ppm]: | -0.28044        |
| PEP:              | 1.1123E-05      |
| Precursor Type:   | MULTI           |

| b <sup>2+</sup> ion |         | b ion    |        |     |   |          | y ion  |          | y <sup>2+</sup> ion |  |
|---------------------|---------|----------|--------|-----|---|----------|--------|----------|---------------------|--|
| Δ dalton            | mass    | Δ dalton | mass   | seq |   | Δ dalton | mass   | Δ dalton | mass                |  |
|                     | 138.07  |          | 138.07 | 1   | H | 16       |        |          |                     |  |
|                     | 235.12  |          | 235.12 | 2   | P | 15       | 1951   |          | 1951                |  |
|                     | 348.2   |          | 348.2  | 3   | L | 14       | 1854   |          | 1854                |  |
|                     | 461.29  |          | 461.29 | 4   | I | 13       | 1740.9 |          | 1740.9              |  |
|                     | 574.37  | -0.04    | 574.37 | 5   | L | 12       | 1627.8 |          | 814.4 +0.2715       |  |
|                     | 671.42  |          | 671.42 | 6   | P | 11       | 1514.7 |          | 1514.7              |  |
| +0.1604             | 4400.24 |          | 799.48 | 7   | Q | 10       | 1417.7 |          | 1417.7              |  |
| +0.0182             | 464.77  | +0.0049  | 928.53 | 8   | E | 9        | 1289.6 | -0.397   | 1289.6              |  |
| +0.1124             | 521.31  | -0.127   | 1041.6 | 9   | L | 8        | 1160.6 | -0.073   | 580.78 +0.139       |  |
|                     | 1138.7  |          | 1138.7 | 10  | P | 7        | 1047.5 | +0.0007  | 524.24 +0.222       |  |
|                     | 1298.7  |          | 1298.7 | 11  | C | 6        | 950.42 |          | 950.42              |  |
|                     | 1413.7  |          | 1413.7 | 12  | D | 5        | 790.39 |          | 395.7 -0.133        |  |
| +0.1275             | 763.91  |          | 1526.8 | 13  | L | 4        | 675.36 |          | 675.36              |  |
| +0.2089             | 813.44  |          | 1625.9 | 14  | V | 3        | 562.28 | +0.122   | 562.28              |  |
|                     | 1785.9  |          | 1785.9 | 15  | C | 2        | 463.21 | +0.1815  | 463.21              |  |
| +0.2508             | 957.48  |          | 1914   | 16  | Q | 1        | 303.18 | +0.0708  | 303.18              |  |
|                     |         |          |        | 17  | R | 0        | 175.12 |          | 175.12              |  |

**general information**

|                       |             |
|-----------------------|-------------|
| Annotation:           | 10 of 17    |
| AminoAcids Coverage:  | 59 %        |
| Intensity Coverage:   | 51 %        |
| Peak Coverage:        | 22 %        |
| Protein Localisation: | 391 ... 407 |

Scan number 7826 Raw file LNCAP\_Silac\_23F10\_set2\_07  
 Method ITMS: CID Pepti... 115.57

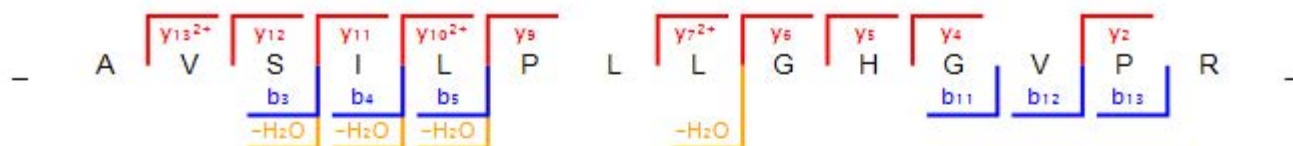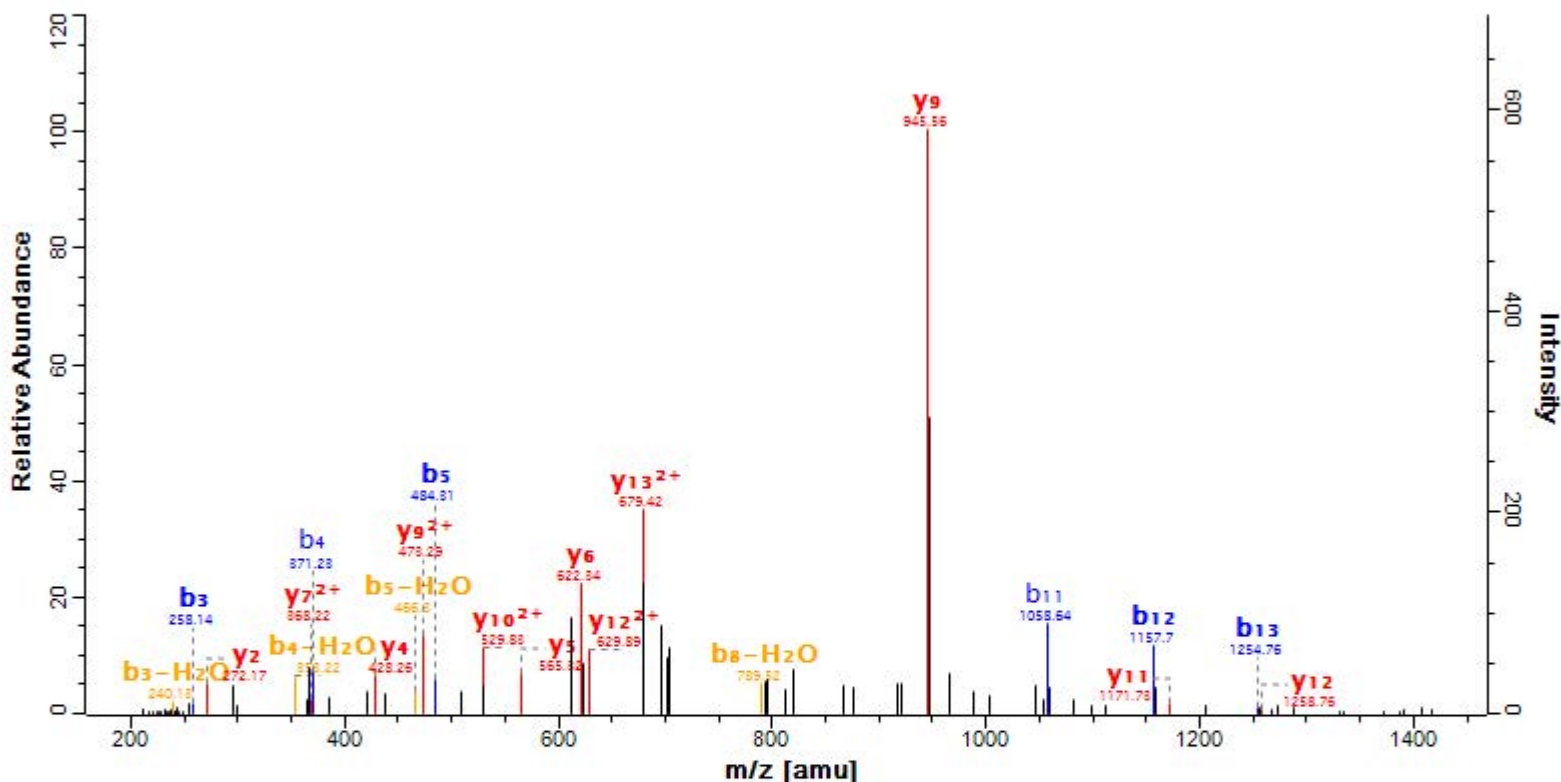

#### precursor information

|                   |                 |
|-------------------|-----------------|
| Mass:             | 1427.86208      |
| m/z:              | 714.93832       |
| Charge:           | 2+              |
| Retentiontime:    | 48.214912414550 |
| Score:            | 115.5744        |
| Mass Error [ppm]: | 0.56676         |
| PEP:              | 0.00019376      |
| Precursor Type:   | ISO             |

| b ion     |          |     |   |          | y ion    |           | y <sup>2+</sup> ion |           |
|-----------|----------|-----|---|----------|----------|-----------|---------------------|-----------|
| Δ dalton  | mass     | seq |   | Δ dalton | mass     | Δ dalton  | mass                |           |
|           | 72.04439 | 1   | A | 13       |          |           |                     |           |
|           | 171.1128 | 2   | V | 12       | 1357.831 |           | 679.4194            | -0.16429  |
| -0.00463  | 258.1448 | 3   | S | 11       | 1258.763 | -0.123    | 629.8851            | -0.10536  |
| +0.002793 | 371.2289 | 4   | I | 10       | 1171.731 | +0.102385 | 1171.731            |           |
| -0.00986  | 484.313  | 5   | L | 9        | 1058.647 |           | 529.8271            | +0.034166 |
|           | 581.3657 | 6   | P | 8        | 945.5629 | +0.012761 | 473.2851            | +0.265163 |
|           | 694.4498 | 7   | L | 7        | 848.5101 |           | 848.5101            |           |
|           | 807.5339 | 8   | L | 6        | 735.426  |           | 368.2167            | +0.022969 |
|           | 864.5553 | 9   | G | 5        | 622.342  | +0.06129  | 622.342             |           |
|           | 1001.614 | 10  | H | 4        | 565.3205 | +0.079092 | 565.3205            |           |
| -0.03779  | 1058.636 | 11  | G | 3        | 428.2616 | +0.113528 | 428.2616            |           |
| -0.04871  | 1157.704 | 12  | V | 2        | 371.2401 |           | 371.2401            |           |
| -0.00431  | 1254.757 | 13  | P | 1        | 272.1717 | +0.042395 | 272.1717            |           |
|           |          | 14  | R | 0        | 175.119  |           | 175.119             |           |

#### general information

|                       |             |
|-----------------------|-------------|
| Annotation:           | 11 of 14    |
| AminoAcids Coverage:  | 79 %        |
| Intensity Coverage:   | 49 %        |
| Peak Coverage:        | 22 %        |
| Protein Localisation: | 179 ... 192 |

Scan number 795 Raw file LNCAP\_Silac\_23F10\_set2\_07  
 Method ITMS: CID Pepti... 73.23

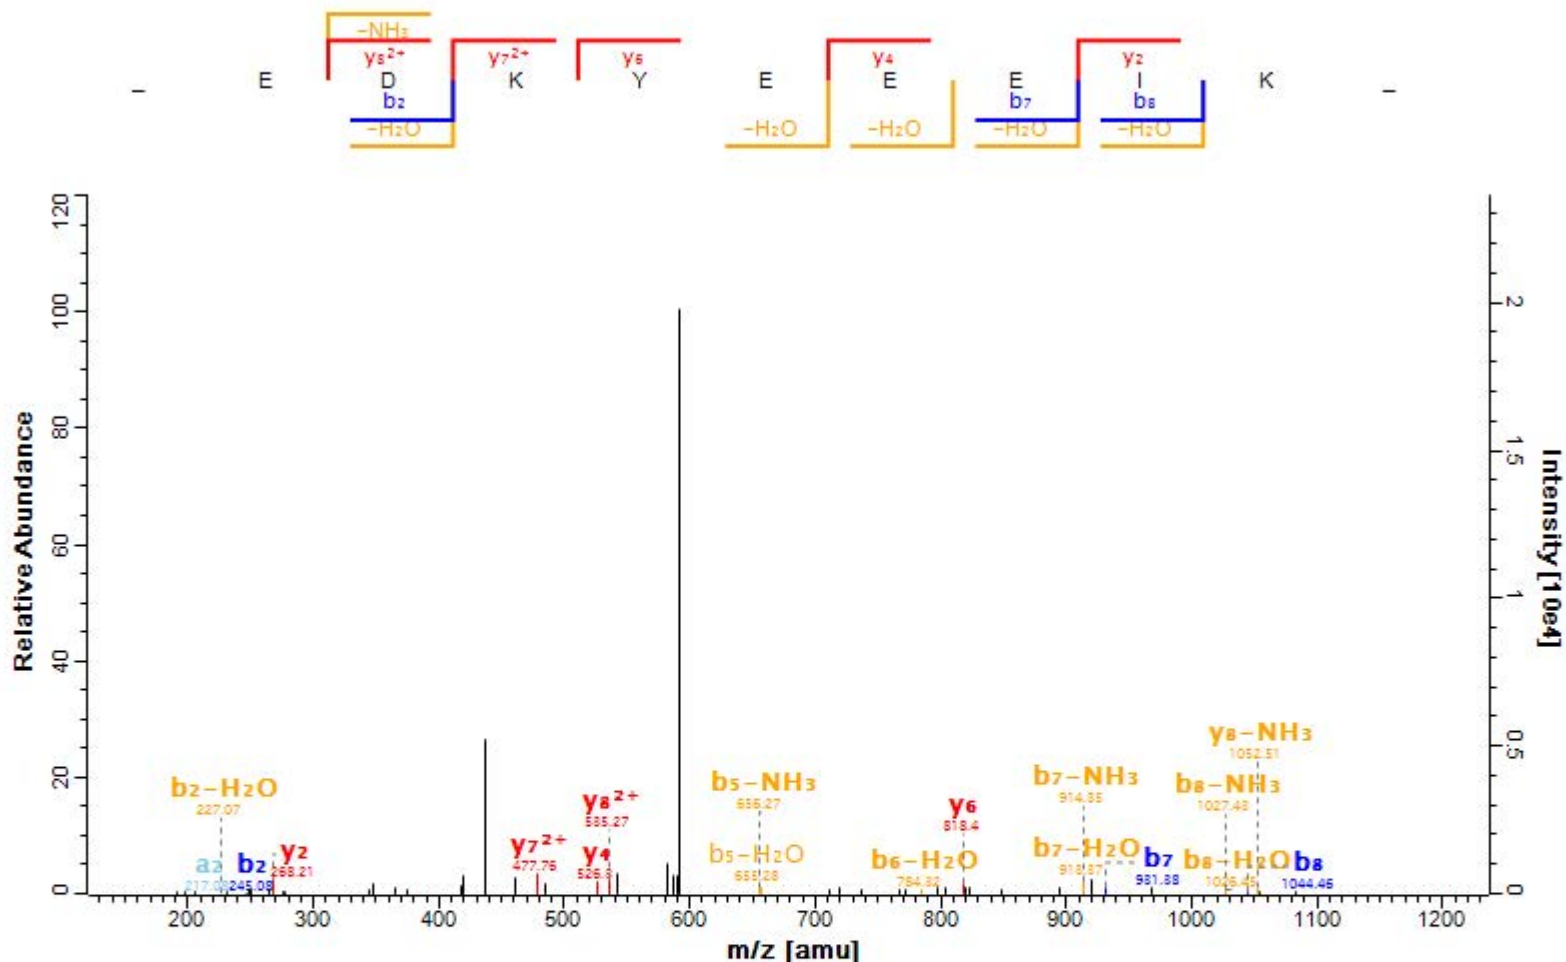

#### precursor information

|                       |                 |
|-----------------------|-----------------|
| Mass:                 | 1181.54534      |
| m/z:                  | 591.77995       |
| Charge:               | 2+              |
| Retentiontime:        | 9.1939296722412 |
| Score:                | 73.23321        |
| Mass Error [ppm]:     | 0.11577         |
| PEP:                  | 0.010744        |
| Precursor Type:       | MULTI           |
| Annotation:           | 7 of 9          |
| AminoAcids Coverage:  | 78 %            |
| Intensity Coverage:   | 12 %            |
| Peak Coverage:        | 18 %            |
| Protein Localisation: | 182 ... 190     |

| a ion    |        | b ion    |        | seq |   |   | y ion    |         | y <sup>2+</sup> ion |         |
|----------|--------|----------|--------|-----|---|---|----------|---------|---------------------|---------|
| Δ dalton | mass   | Δ dalton | mass   |     |   |   | Δ dalton | mass    | Δ dalton            | mass    |
|          | 102.05 |          | 130.05 | 1   | E | 8 |          |         |                     |         |
| +0.0951  | 217.08 | +0.2286  | 245.08 | 2   | D | 7 | 1069.5   |         | 535.27              | -0.009  |
|          | 353.19 |          | 381.19 | 3   | K | 6 | 954.51   |         | 477.76              | +0.3488 |
|          | 516.25 |          | 544.25 | 4   | Y | 5 | 818.4    | +0.0332 | 818.4               |         |
|          | 645.3  |          | 673.29 | 5   | E | 4 | 655.34   |         | 655.34              |         |
|          | 774.34 |          | 802.33 | 6   | E | 3 | 526.3    | +0.0285 | 526.3               |         |
|          | 903.38 | -0.184   | 931.38 | 7   | E | 2 | 397.25   |         | 397.25              |         |
|          | 1016.5 | +0.1421  | 1044.5 | 8   | I | 1 | 268.21   | +0.0069 | 268.21              |         |
|          |        |          |        | 9   | K | 0 | 155.13   |         | 155.13              |         |

Scan number 7954 Raw file LNCAP\_Silac\_23F10\_set2\_07  
 Method ITMS; CID Pepti... 212.7

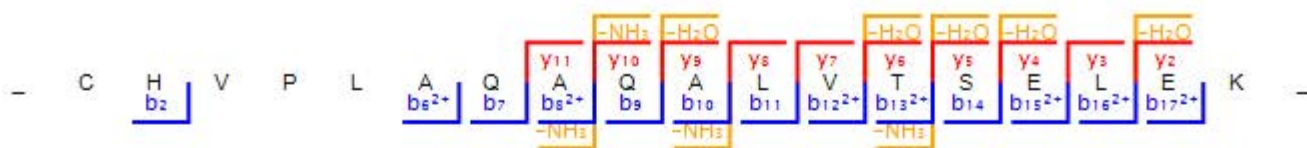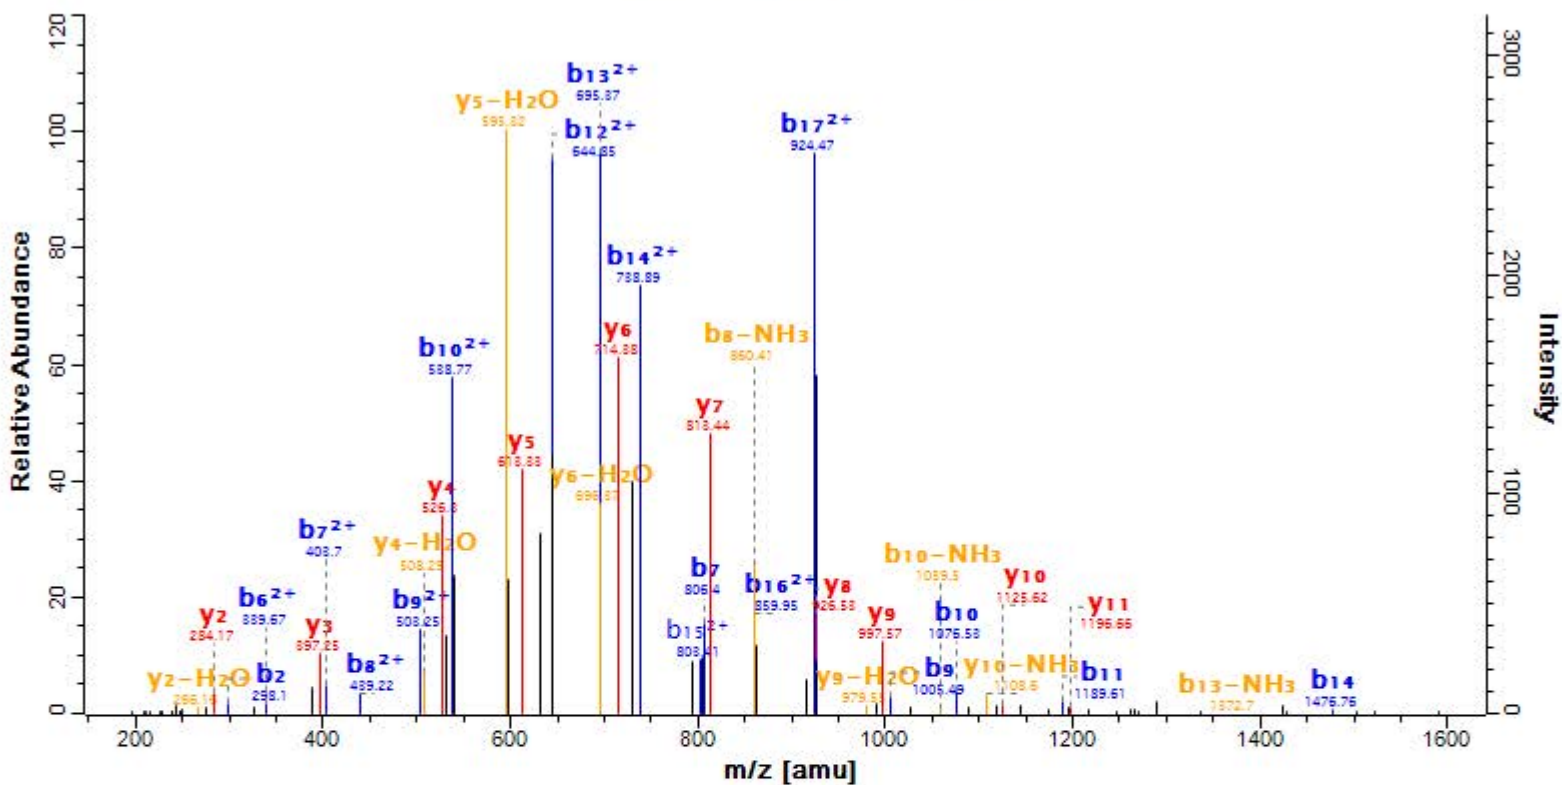

precursor information

|                   |                 |
|-------------------|-----------------|
| Mass:             | 1993.02971      |
| m/z:              | 665.35051       |
| Charge:           | 3+              |
| Retentiontime:    | 49.154876708984 |
| Score:            | 212.7039        |
| Mass Error [ppm]: | -0.27652        |
| PEP:              | 3.8098E-41      |
| Precursor Type:   | MULTI           |

general information

|                       |             |
|-----------------------|-------------|
| Annotation:           | 15 of 18    |
| AminoAcids Coverage:  | 83 %        |
| Intensity Coverage:   | 75 %        |
| Peak Coverage:        | 40 %        |
| Protein Localisation: | 164 ... 181 |

| b <sup>2+</sup> ion |          | b ion     |          |     | y ion    |      |                    |
|---------------------|----------|-----------|----------|-----|----------|------|--------------------|
| Δ dalton            | mass     | Δ dalton  | mass     | seq | Δ dalton | mass |                    |
|                     | 161.0379 |           | 161.0379 | 1   | C        | 17   |                    |
|                     | 298.0968 | +0.035488 | 298.0968 | 2   | H        | 16   | 1842.021           |
|                     | 397.1653 |           | 397.1653 | 3   | V        | 15   | 1704.962           |
|                     | 494.218  |           | 494.218  | 4   | P        | 14   | 1605.894           |
|                     | 607.3021 |           | 607.3021 | 5   | L        | 13   | 1508.841           |
| +0.14244            | 339.6732 |           | 678.3392 | 6   | A        | 12   | 1395.757           |
| +0.246635           | 403.7025 | -0.10273  | 806.3978 | 7   | Q        | 11   | 1324.72            |
| -0.01173            | 439.2211 |           | 877.4349 | 8   | A        | 10   | 1196.661 +0.250134 |
| +0.243528           | 503.2504 | +0.027962 | 1005.493 | 9   | Q        | 9    | 1125.624 +0.127091 |
| +0.034968           | 538.7689 | +0.027775 | 1076.531 | 10  | A        | 8    | 997.5656 +0.023865 |
|                     | 1189.615 | +0.19835  | 1189.615 | 11  | L        | 7    | 926.5284 +0.261784 |
| +0.072682           | 644.8452 |           | 1288.683 | 12  | V        | 6    | 813.4444 +0.029869 |
| +0.2444             | 695.369  |           | 1389.731 | 13  | T        | 5    | 714.376 +0.025285  |
| +0.257865           | 738.885  | -0.32343  | 1476.763 | 14  | S        | 4    | 613.3283 +0.068325 |
| -0.07843            | 803.4063 |           | 1605.805 | 15  | E        | 3    | 526.2963 +0.203869 |
| -0.10924            | 859.9483 |           | 1718.889 | 16  | L        | 2    | 397.2537 +0.062258 |
| +0.182884           | 924.4696 |           | 1847.932 | 17  | E        | 1    | 284.1696 +0.00234  |
|                     |          |           |          | 18  | K        | 0    | 155.127            |

Scan number 8038 Raw file LNCAP\_Silac\_23F10\_set2\_07  
 Method ITMS; CID Pepti... 86.01

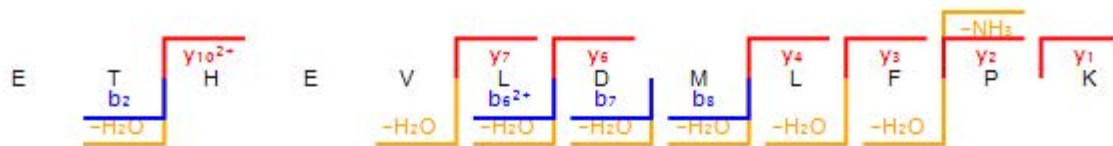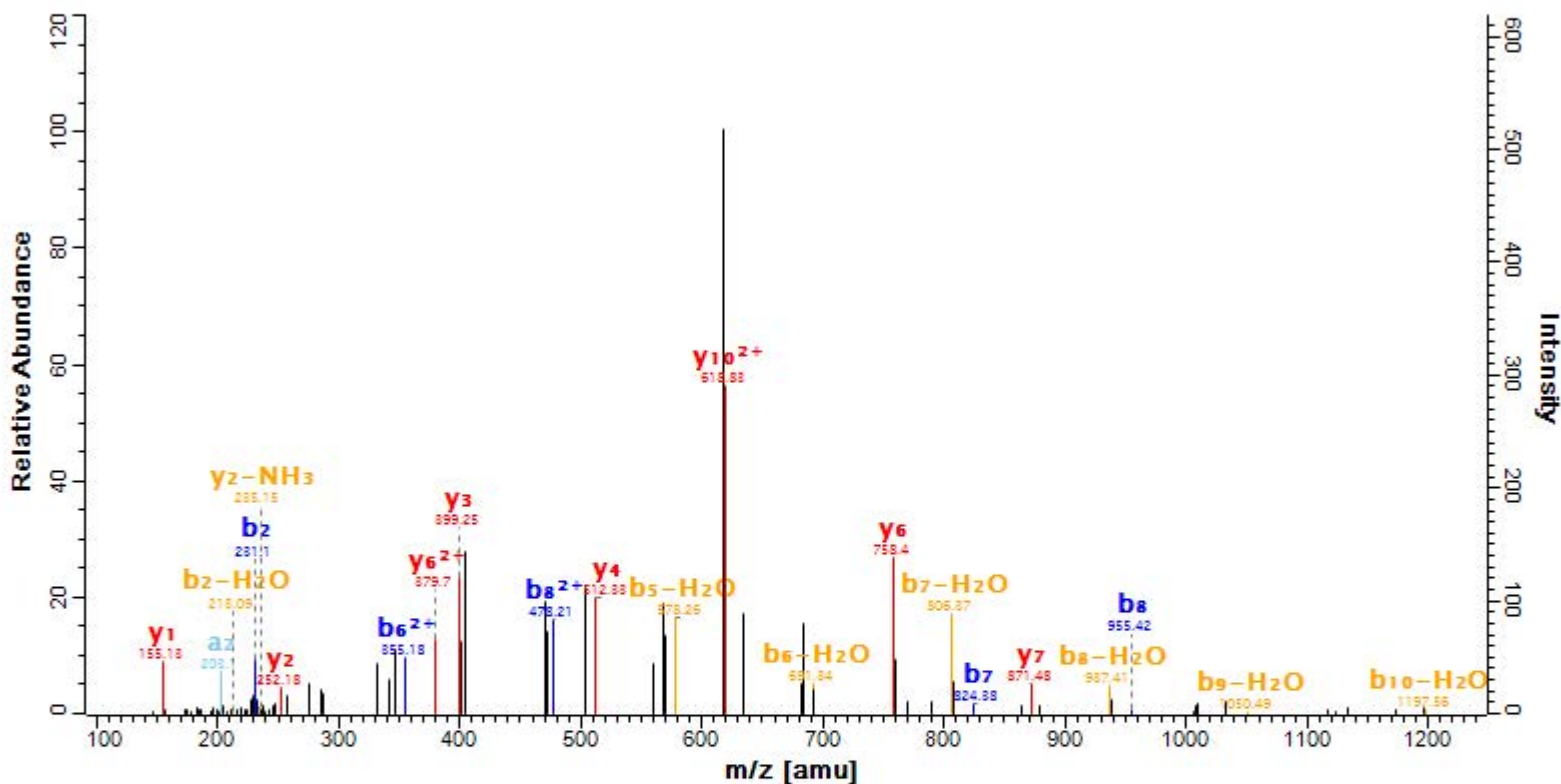

#### precursor information

|                   |                 |
|-------------------|-----------------|
| Mass:             | 1457.7216       |
| m/z:              | 486.91448       |
| Charge:           | 3+              |
| Retentiontime:    | 49.722396850585 |
| Score:            | 86.01421        |
| Mass Error [ppm]: | -0.58173        |
| PEP:              | 0.0013034       |
| Precursor Type:   | MULTI           |

#### general information

|                       |             |
|-----------------------|-------------|
| Annotation:           | 10 of 12    |
| AminoAcids Coverage:  | 83 %        |
| Intensity Coverage:   | 33 %        |
| Peak Coverage:        | 22 %        |
| Protein Localisation: | 422 ... 433 |

| a ion         | b <sup>2+</sup> ion | b ion         |    |     |    | y ion         | y <sup>2+</sup> ion |
|---------------|---------------------|---------------|----|-----|----|---------------|---------------------|
| Δ dalton mass | Δ dalton mass       | Δ dalton mass |    | seq |    | Δ dalton mass | Δ dalton mass       |
| 102.1         | 130                 | 130           | 1  | E   | 11 |               |                     |
| -0.04 203.1   | 231.1               | +0.074 231.1  | 2  | T   | 10 | 1338          | 1338                |
| 340.2         | 368.2               | 368.2         | 3  | H   | 9  | 1237          | 618.8 +0.246        |
| 469.2         | 497.2               | 497.2         | 4  | E   | 8  | 1100          | 1100                |
| 568.3         | 596.3               | 596.3         | 5  | V   | 7  | 970.6         | 970.6               |
| 681.4         | -0.1 355.2          | 709.4         | 6  | L   | 6  | 871.5         | +0.11 871.5         |
| 796.4         | 824.4               | -0.25 824.4   | 7  | D   | 5  | 758.4         | +0.03 379.7 +0.13   |
| 927.4         | -0.49 478.2         | +0.2 955.4    | 8  | M   | 4  | 643.4         | 643.4               |
| 1041          | 1069                | 1069          | 9  | L   | 3  | 512.3         | -0.02 512.3         |
| 1188          | 1216                | 1216          | 10 | F   | 2  | 399.2         | -0.08 399.2         |
| 1285          | 1313                | 1313          | 11 | P   | 1  | 252.2         | -0.03 252.2         |
|               |                     |               | 12 | K   | 0  | 155.1         | -0.03 155.1         |



Scan number 8396 Raw file LNCAP\_Silac\_23F10\_set2\_07  
 Method ITMS; CID Pepti... 130.24

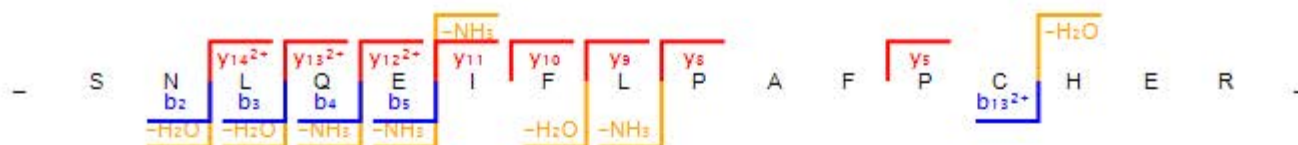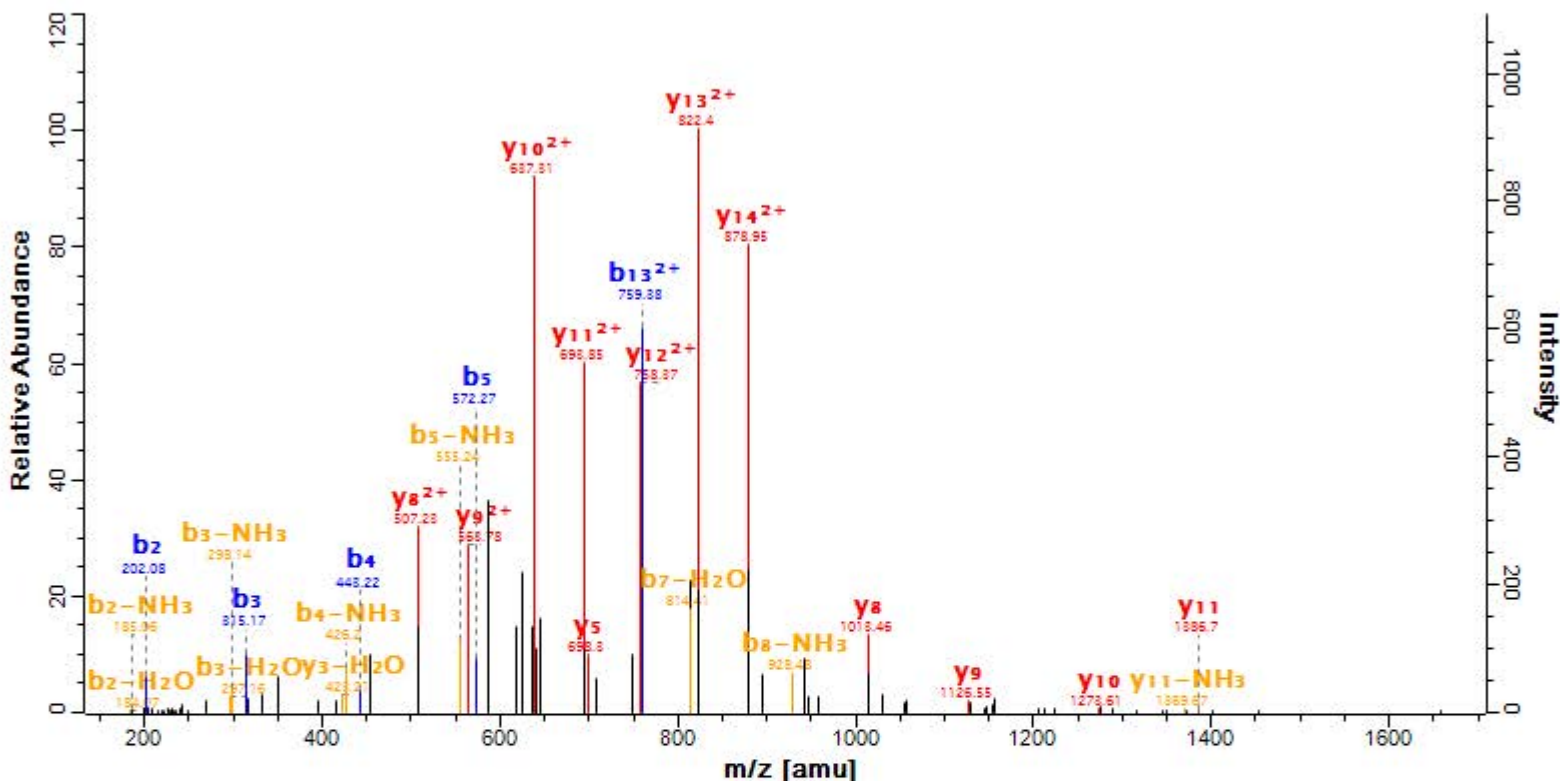

#### precursor information

|                   |                 |
|-------------------|-----------------|
| Mass:             | 1956.95115      |
| m/z:              | 653.32433       |
| Charge:           | 3+              |
| Retentiontime:    | 52.377712249755 |
| Score:            | 130.2359        |
| Mass Error [ppm]: | -0.23628        |
| PEP:              | 2.9685E-10      |
| Precursor Type:   | MULTI           |

#### general information

|                       |             |
|-----------------------|-------------|
| Annotation:           | 12 of 16    |
| AminoAcids Coverage:  | 75 %        |
| Intensity Coverage:   | 66 %        |
| Peak Coverage:        | 25 %        |
| Protein Localisation: | 325 ... 340 |

| b <sup>2+</sup> ion |        | b ion    |        | seq |   |    | y ion    |         | y <sup>2+</sup> ion |         |
|---------------------|--------|----------|--------|-----|---|----|----------|---------|---------------------|---------|
| Δ dalton            | mass   | Δ dalton | mass   |     |   |    | Δ dalton | mass    | Δ dalton            | mass    |
|                     | 88.039 |          | 88.039 | 1   | S | 15 |          |         |                     |         |
|                     | 202.08 | +0.0307  | 202.08 | 2   | N | 14 | 1870.9   |         | 1870.9              |         |
|                     | 315.17 | -0.037   | 315.17 | 3   | L | 13 | 1756.9   |         | 878.95              | +0.2492 |
|                     | 443.22 | +0.126   | 443.22 | 4   | Q | 12 | 1643.8   |         | 822.4               | +0.1957 |
|                     | 572.27 | +0.2064  | 572.27 | 5   | E | 11 | 1515.7   |         | 758.37              | +0.0011 |
|                     | 685.35 |          | 685.35 | 6   | I | 10 | 1386.7   | +0.1029 | 693.85              | +0.2125 |
|                     | 832.42 |          | 832.42 | 7   | F | 9  | 1273.6   | +0.1858 | 637.31              | +0.2446 |
|                     | 945.5  |          | 945.5  | 8   | L | 8  | 1126.5   | +0.0628 | 563.78              | +0.2132 |
|                     | 1042.6 |          | 1042.6 | 9   | P | 7  | 1013.5   | +0.0185 | 507.23              | +0.1485 |
|                     | 1113.6 |          | 1113.6 | 10  | A | 6  | 916.41   |         | 916.41              |         |
|                     | 1260.7 |          | 1260.7 | 11  | F | 5  | 845.37   |         | 845.37              |         |
|                     | 1357.7 |          | 1357.7 | 12  | P | 4  | 698.3    | +0.0585 | 698.3               |         |
| -0.262              | 759.38 |          | 1517.7 | 13  | C | 3  | 601.25   |         | 601.25              |         |
|                     | 1654.8 |          | 1654.8 | 14  | H | 2  | 441.22   |         | 441.22              |         |
|                     | 1783.8 |          | 1783.8 | 15  | E | 1  | 304.16   |         | 304.16              |         |
|                     |        |          |        | 16  | R | 0  | 175.12   |         | 175.12              |         |

Scan number 8462 Raw file LNCAP\_Silac\_23F10\_set2\_07  
 Method ITMS; CID Pepti... 164.65

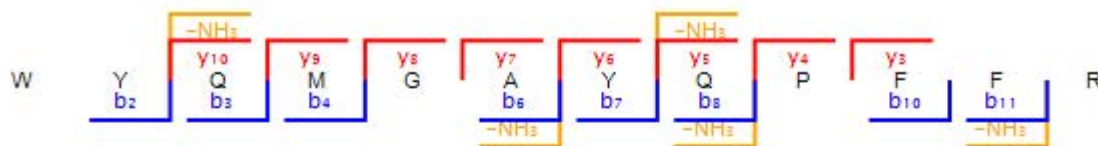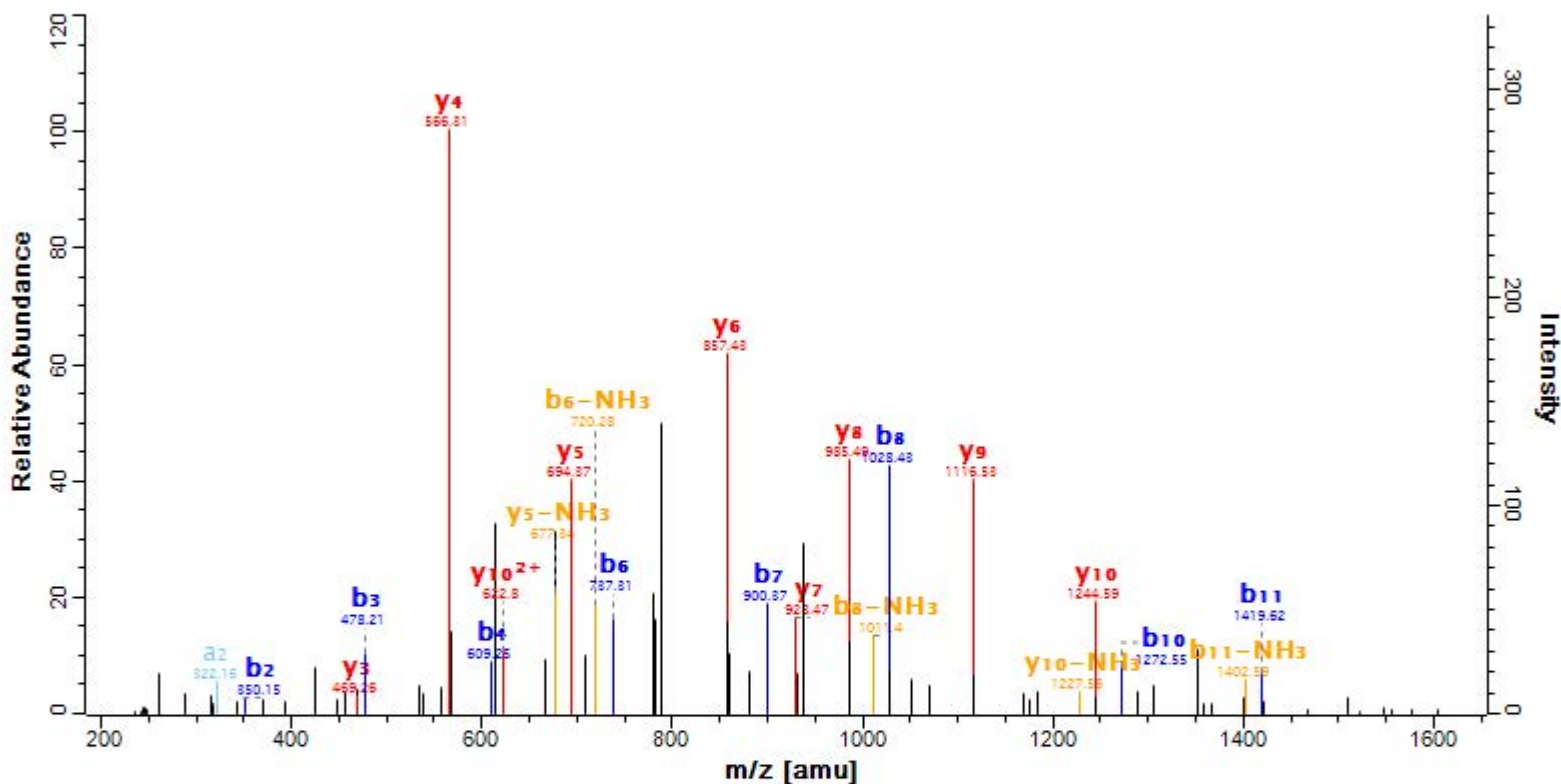

#### precursor information

|                   |                 |
|-------------------|-----------------|
| Mass:             | 1592.72393      |
| m/z:              | 797.36924       |
| Charge:           | 2+              |
| Retentiontime:    | 52.932929992675 |
| Score:            | 164.6517        |
| Mass Error [ppm]: | 0.30059         |
| PEP:              | 1.2423E-07      |
| Precursor Type:   | MULTI           |

#### general information

|                       |             |
|-----------------------|-------------|
| Annotation:           | 10 of 12    |
| AminoAcids Coverage:  | 83 %        |
| Intensity Coverage:   | 53 %        |
| Peak Coverage:        | 27 %        |
| Protein Localisation: | 714 ... 725 |

| a ion    |        | b ion    |        | seq |   |    | y ion    |         | y <sup>2+</sup> ion |        |
|----------|--------|----------|--------|-----|---|----|----------|---------|---------------------|--------|
| Δ dalton | mass   | Δ dalton | mass   |     |   |    | Δ dalton | mass    | Δ dalton            | mass   |
|          | 159.09 |          | 187.09 | 1   | W | 11 |          |         |                     |        |
| -0.017   | 322.16 | +0.2052  | 350.15 | 2   | Y | 10 | 1407.7   |         | 1407.7              |        |
|          | 450.21 | +0.0954  | 478.21 | 3   | Q | 9  | 1244.6   | +0.0728 | 622.8               | -0.004 |
|          | 581.25 | +0.0965  | 609.25 | 4   | M | 8  | 1116.5   | +0.0021 | 1116.5              |        |
|          | 638.28 |          | 666.27 | 5   | G | 7  | 985.49   | -0.043  | 985.49              |        |
|          | 709.31 | -0.09    | 737.31 | 6   | A | 6  | 928.47   | +0.2032 | 928.47              |        |
|          | 872.38 | -0.105   | 900.37 | 7   | Y | 5  | 857.43   | +0.0036 | 857.43              |        |
|          | 1000.4 | -0.073   | 1028.4 | 8   | Q | 4  | 694.37   | +0.08   | 694.37              |        |
|          | 1097.5 |          | 1125.5 | 9   | P | 3  | 566.31   | +0.0596 | 566.31              |        |
|          | 1244.6 | -0.27    | 1272.6 | 10  | F | 2  | 469.26   | +0.0204 | 469.26              |        |
|          | 1391.6 | +0.3244  | 1419.6 | 11  | F | 1  | 322.19   |         | 322.19              |        |
|          |        |          |        | 12  | R | 0  | 175.12   |         | 175.12              |        |

Scan number 8597 Raw file LNCAP\_Silac\_23F10\_set2\_07  
 Method ITMS; CID Pepti... 47.64

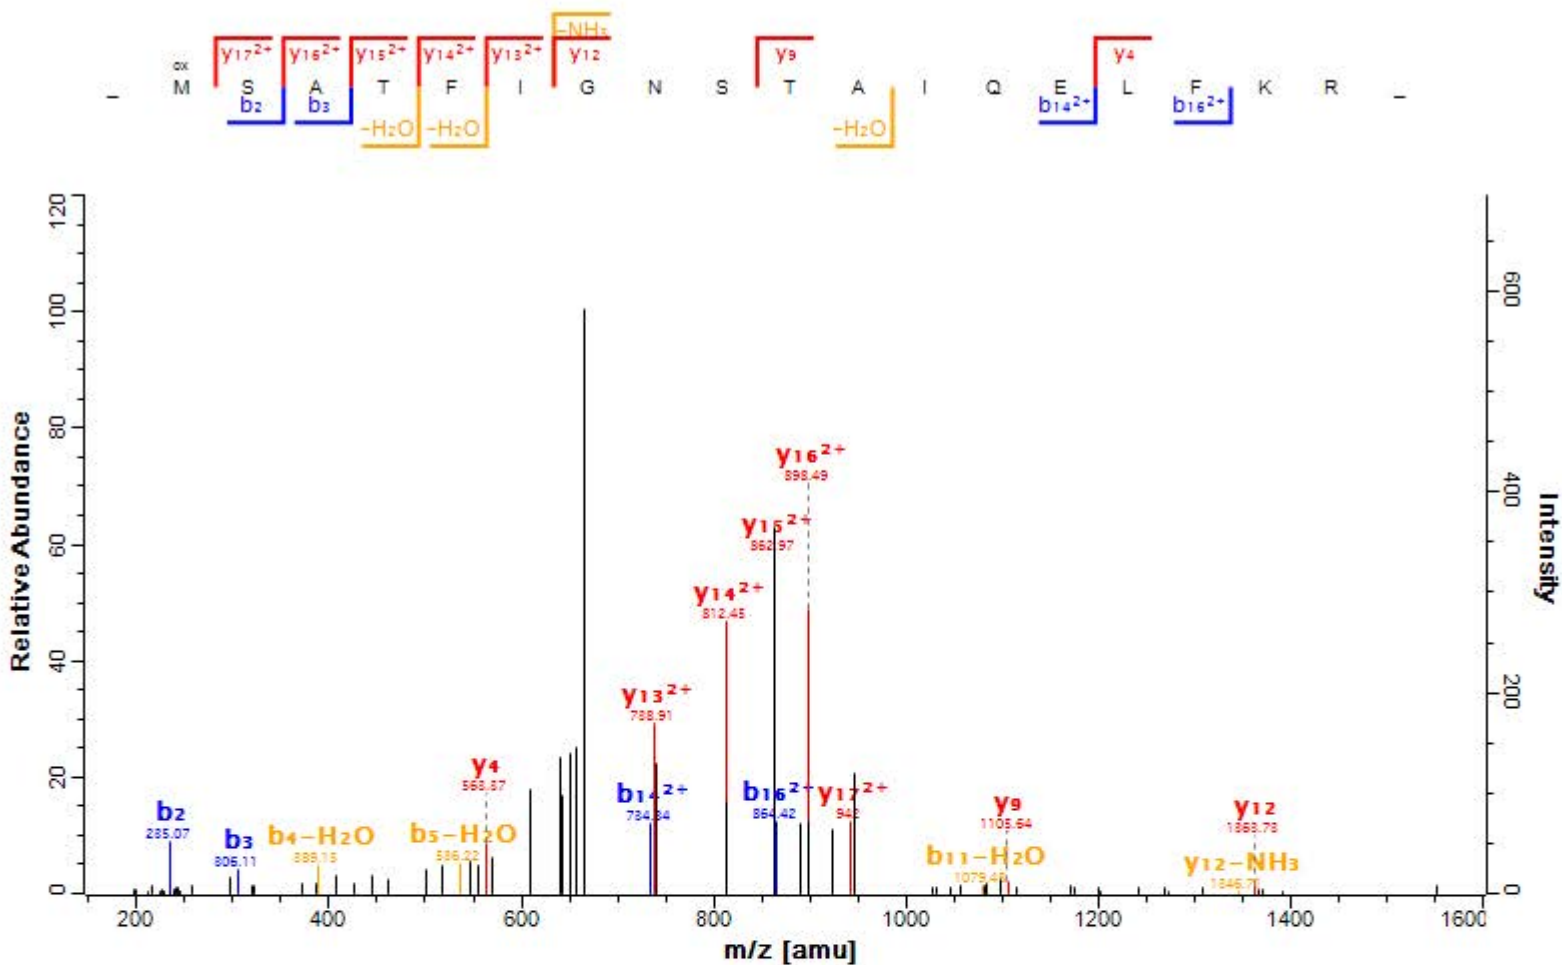

precursor information

|                   |                 |
|-------------------|-----------------|
| Mass:             | 2029.0299       |
| m/z:              | 677.35058       |
| Charge:           | 3+              |
| Retentiontime:    | 54.052192687988 |
| Score:            | 47.63908        |
| Mass Error [ppm]: | -0.17994        |
| PEP:              | 0.026113        |
| Precursor Type:   | MULTI           |

general information

|                       |             |
|-----------------------|-------------|
| Annotation:           | 11 of 18    |
| AminoAcids Coverage:  | 61 %        |
| Intensity Coverage:   | 36 %        |
| Peak Coverage:        | 20 %        |
| Protein Localisation: | 363 ... 380 |

| b <sup>2+</sup> ion |        | b ion    |        |    |     |    | y ion    |        | y <sup>2+</sup> ion |         |
|---------------------|--------|----------|--------|----|-----|----|----------|--------|---------------------|---------|
| Δ dalton            | mass   | Δ dalton | mass   |    | seq |    | Δ dalton | mass   | Δ dalton            | mass    |
|                     | 148.04 |          | 148.04 | 1  | M   | 17 |          |        |                     |         |
|                     | 235.07 | -0.025   | 235.07 | 2  | S   | 16 | 1883     |        | 942                 | -0.006  |
|                     | 306.11 | +0.0998  | 306.11 | 3  | A   | 15 | 1796     |        | 898.49              | +0.2603 |
|                     | 407.16 |          | 407.16 | 4  | T   | 14 | 1724.9   |        | 862.97              | -0.007  |
|                     | 554.23 |          | 554.23 | 5  | F   | 13 | 1623.9   |        | 812.45              | +0.2053 |
|                     | 667.31 |          | 667.31 | 6  | I   | 12 | 1476.8   |        | 738.91              | +0.0825 |
|                     | 724.33 |          | 724.33 | 7  | G   | 11 | 1363.7   | -0.026 | 1363.7              |         |
|                     | 838.38 |          | 838.38 | 8  | N   | 10 | 1306.7   |        | 1306.7              |         |
|                     | 925.41 |          | 925.41 | 9  | S   | 9  | 1192.7   |        | 1192.7              |         |
|                     | 1026.5 |          | 1026.5 | 10 | T   | 8  | 1105.6   | +0.24  | 1105.6              |         |
|                     | 1097.5 |          | 1097.5 | 11 | A   | 7  | 1004.6   |        | 1004.6              |         |
|                     | 1210.6 |          | 1210.6 | 12 | I   | 6  | 933.55   |        | 933.55              |         |
|                     | 1338.6 |          | 1338.6 | 13 | Q   | 5  | 820.47   |        | 820.47              |         |
| -0.239              | 734.34 |          | 1467.7 | 14 | E   | 4  | 692.41   |        | 692.41              |         |
|                     | 1580.8 |          | 1580.8 | 15 | L   | 3  | 563.37   | -0.303 | 563.37              |         |
| +0.2584             | 864.42 |          | 1727.8 | 16 | F   | 2  | 450.28   |        | 450.28              |         |
|                     | 1855.9 |          | 1855.9 | 17 | K   | 1  | 303.21   |        | 303.21              |         |
|                     |        |          |        | 18 | R   | 0  | 175.12   |        | 175.12              |         |

Scan number 8687 Raw file LNCAP\_Silac\_23F10\_set2\_07  
 Method ITMS; CID Peptide 160.81

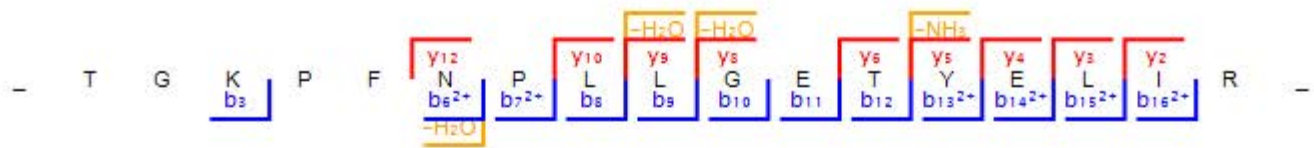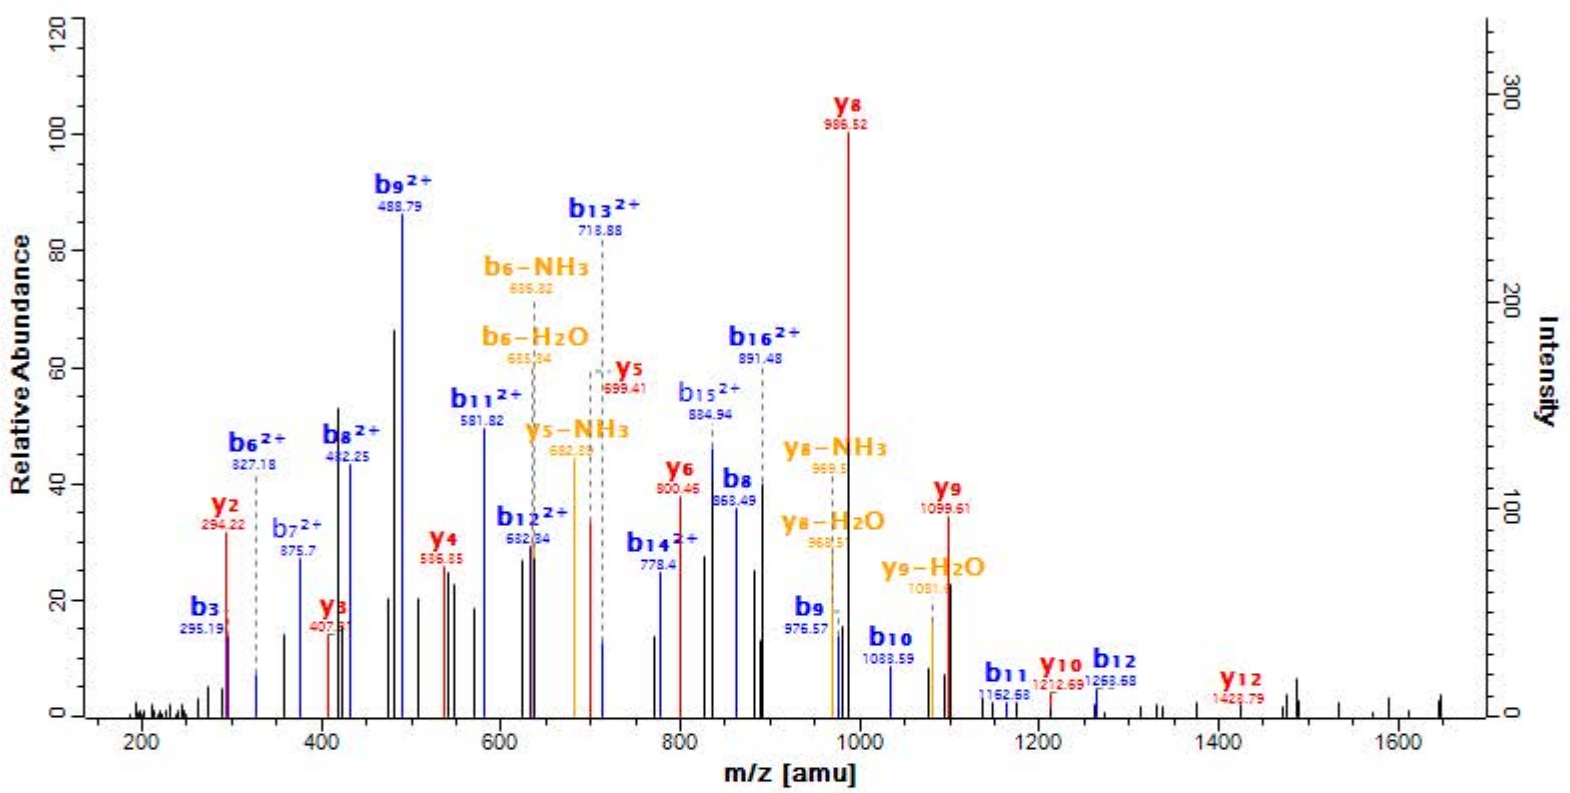

**precursor information**

|                   |                 |
|-------------------|-----------------|
| Mass:             | 1947.04709      |
| m/z:              | 650.02297       |
| Charge:           | 3+              |
| Retentiontime:    | 54.847591400146 |
| Score:            | 160.8066        |
| Mass Error [ppm]: | 0.26882         |
| PEP:              | 5.7705E-23      |
| Precursor Type:   | MULTI           |

**general information**

|                       |             |
|-----------------------|-------------|
| Annotation:           | 13 of 17    |
| AminoAcids Coverage:  | 76 %        |
| Intensity Coverage:   | 56 %        |
| Peak Coverage:        | 30 %        |
| Protein Localisation: | 148 ... 164 |

| b <sup>2+</sup> ion |          | b ion     |          | y ion |          |      |
|---------------------|----------|-----------|----------|-------|----------|------|
| Δ dalton            | mass     | Δ dalton  | mass     | seq   | Δ dalton | mass |
|                     | 102.055  |           | 102.055  | 1     | T        | 16   |
|                     | 159.0764 |           | 159.0764 | 2     | G        | 15   |
|                     | 295.1856 | -0.09146  | 295.1856 | 3     | K        | 14   |
|                     | 392.2383 |           | 392.2383 | 4     | P        | 13   |
|                     | 539.3068 |           | 539.3068 | 5     | F        | 12   |
| +0.043199           | 327.1785 |           | 653.3497 | 6     | N        | 11   |
| -0.03299            | 375.7049 |           | 750.4024 | 7     | P        | 10   |
| +0.210869           | 432.2469 | -0.15009  | 863.4865 | 8     | L        | 9    |
| +0.106581           | 488.7889 | +0.059061 | 976.5706 | 9     | L        | 8    |
|                     | 1033.592 | -0.07532  | 1033.592 | 10    | G        | 7    |
| +0.250761           | 581.821  | -0.00414  | 1162.635 | 11    | E        | 6    |
| +0.050652           | 632.3448 | -0.16644  | 1263.682 | 12    | T        | 5    |
| +0.079413           | 713.8765 |           | 1426.746 | 13    | Y        | 4    |
| -0.08068            | 778.3978 |           | 1555.788 | 14    | E        | 3    |
| -0.0242             | 834.9398 |           | 1668.872 | 15    | L        | 2    |
| -0.12708            | 891.4818 |           | 1781.956 | 16    | I        | 1    |
|                     |          |           |          | 17    | R        | 0    |

Scan number 8785 Raw file LNCAP\_Silac\_23F10\_set2\_07  
 Method ITMS; CID Pepti... 72.7

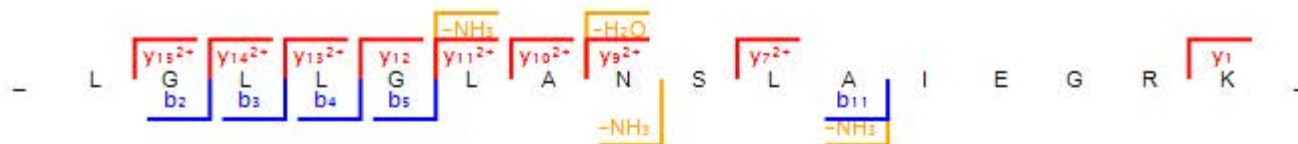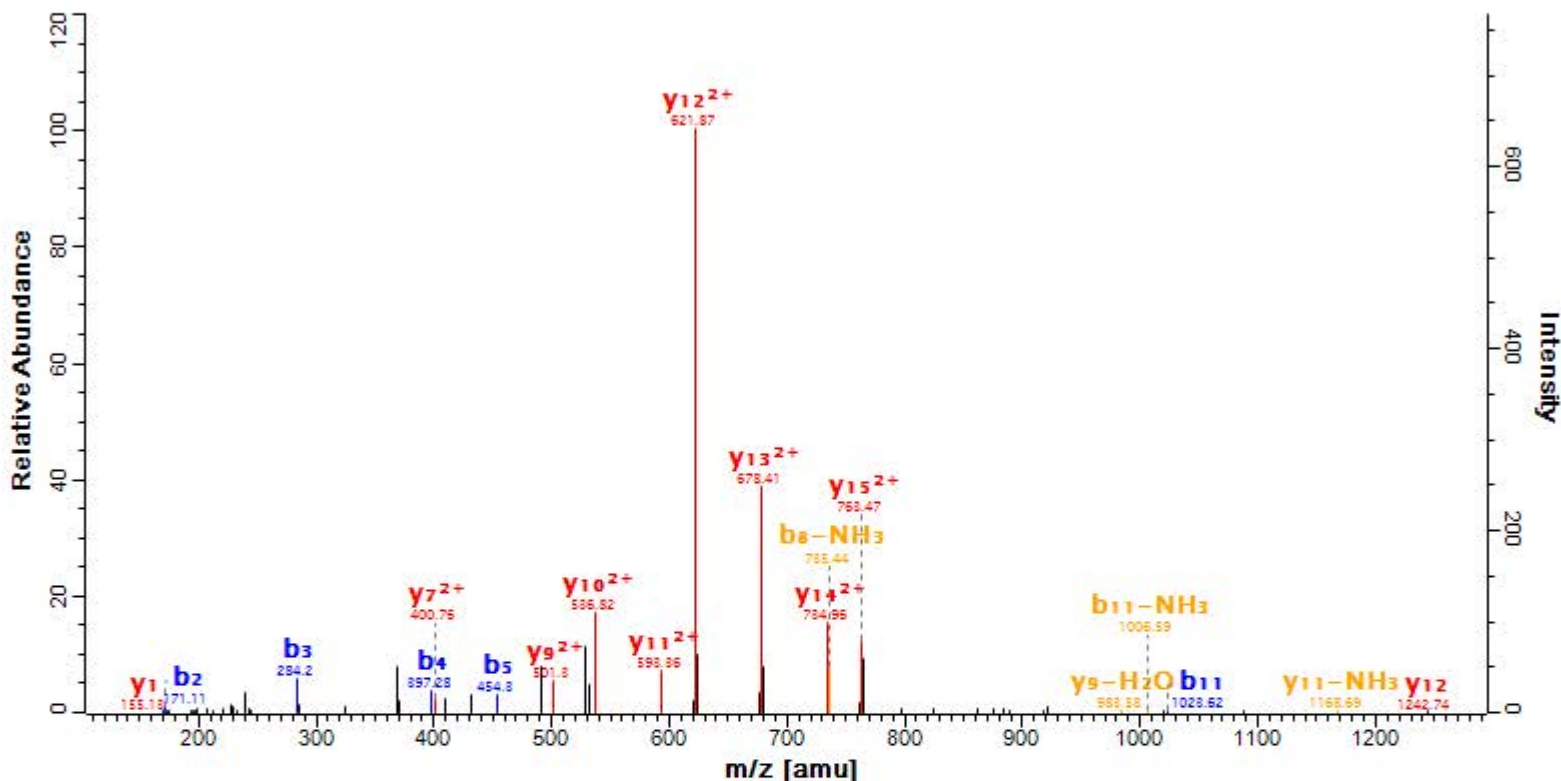

#### precursor information

|                   |                 |
|-------------------|-----------------|
| Mass:             | 1623.96667      |
| m/z:              | 542.3295        |
| Charge:           | 3+              |
| Retentiontime:    | 55.767482757568 |
| Score:            | 72.70486        |
| Mass Error [ppm]: | -0.31511        |
| PEP:              | 0.00020426      |
| Precursor Type:   | MULTI           |

#### general information

|                       |             |
|-----------------------|-------------|
| Annotation:           | 10 of 16    |
| AminoAcids Coverage:  | 62 %        |
| Intensity Coverage:   | 68 %        |
| Peak Coverage:        | 24 %        |
| Protein Localisation: | 169 ... 184 |

| b ion           |          |     |   | y ion           |          | y <sup>2+</sup> ion |           |
|-----------------|----------|-----|---|-----------------|----------|---------------------|-----------|
| $\Delta$ dalton | mass     | seq |   | $\Delta$ dalton | mass     | $\Delta$ dalton     | mass      |
|                 | 114.0913 | 1   | L | 15              |          |                     |           |
| +0.025822       | 171.1128 | 2   | G | 14              | 1525.925 | 763.466             | -0.0025   |
| -0.14682        | 284.1969 | 3   | L | 13              | 1468.903 | 734.9553            | -0.14918  |
| -0.04454        | 397.2809 | 4   | L | 12              | 1355.819 | 678.4132            | +0.114409 |
| -0.10037        | 454.3024 | 5   | G | 11              | 1242.735 | +0.15805 621.8712   | +0.176644 |
|                 | 567.3865 | 6   | L | 10              | 1185.714 | 593.3605            | +0.08325  |
|                 | 638.4236 | 7   | A | 9               | 1072.63  | 536.8184            | +0.115333 |
|                 | 752.4665 | 8   | N | 8               | 1001.592 | 501.2999            | +0.0991   |
|                 | 839.4985 | 9   | S | 7               | 887.5496 | 887.5496            |           |
|                 | 952.5826 | 10  | L | 6               | 800.5175 | 400.7624            | -0.22084  |
| +0.071943       | 1023.62  | 11  | A | 5               | 687.4335 | 687.4335            |           |
|                 | 1136.704 | 12  | I | 4               | 616.3964 | 616.3964            |           |
|                 | 1265.746 | 13  | E | 3               | 503.3123 | 503.3123            |           |
|                 | 1322.768 | 14  | G | 2               | 374.2697 | 374.2697            |           |
|                 | 1484.889 | 15  | R | 1               | 317.2482 | 317.2482            |           |
|                 |          | 16  | K | 0               | 155.127  | +0.194408 155.127   |           |

Scan number 9017 Raw file LNCAP\_Silac\_23F10\_set2\_07  
 Method ITMS; CID Pepti... 132.81

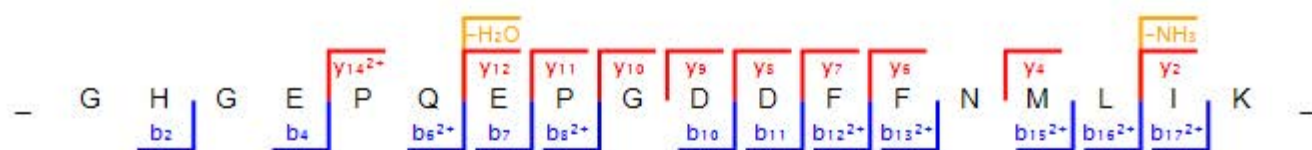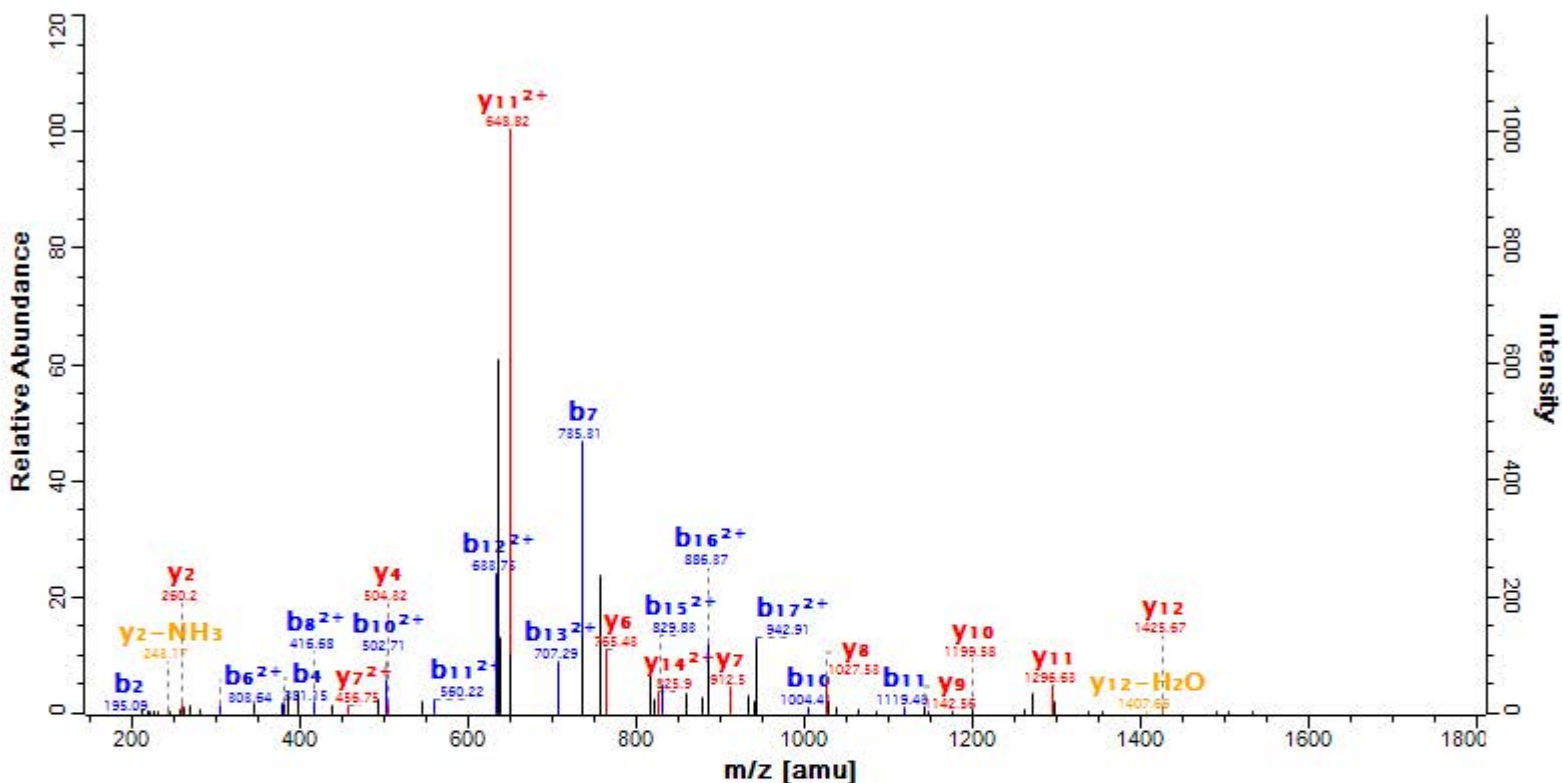

precursor information

|                   |                 |
|-------------------|-----------------|
| Mass:             | 2029.92042      |
| m/z:              | 677.64742       |
| Charge:           | 3+              |
| Retentiontime:    | 58.129158020019 |
| Score:            | 132.8108        |
| Mass Error [ppm]: | 0.021302        |
| PEP:              | 5.3061E-13      |
| Precursor Type:   | MULTI           |

| b <sup>2+</sup> ion |         | b ion    |        | seq |   |    | y ion    |         | y <sup>2+</sup> ion |         |
|---------------------|---------|----------|--------|-----|---|----|----------|---------|---------------------|---------|
| Δ dalton            | mass    | Δ dalton | mass   |     |   |    | Δ dalton | mass    | Δ dalton            | mass    |
|                     | 58.029  |          | 58.029 | 1   | G | 17 |          |         |                     |         |
|                     | 195.09  | +0.1876  | 195.09 | 2   | H | 16 | 1973.9   |         | 1973.9              |         |
|                     | 252.11  |          | 252.11 | 3   | G | 15 | 1836.8   |         | 1836.8              |         |
|                     | 381.15  | +0.1283  | 381.15 | 4   | E | 14 | 1779.8   |         | 1779.8              |         |
|                     | 478.2   |          | 478.2  | 5   | P | 13 | 1650.8   |         | 825.9               | +0.1431 |
| +0.0413             | 3303.64 |          | 606.26 | 6   | Q | 12 | 1553.7   |         | 1553.7              |         |
|                     | 735.31  | -0.002   | 735.31 | 7   | E | 11 | 1425.7   | -0.063  | 1425.7              |         |
| +0.0144             | 4416.68 |          | 832.36 | 8   | P | 10 | 1296.6   | -0.105  | 648.82              | +0.255  |
|                     | 889.38  |          | 889.38 | 9   | G | 9  | 1199.6   | -0.4    | 1199.6              |         |
| +0.1093             | 502.71  | -0.143   | 1004.4 | 10  | D | 8  | 1142.6   | -0.078  | 1142.6              |         |
| -0.073              | 560.22  | +0.1641  | 1119.4 | 11  | D | 7  | 1027.5   | -0.028  | 1027.5              |         |
| +0.1539             | 633.75  |          | 1266.5 | 12  | F | 6  | 912.5    | -0.275  | 456.75              | +0.1195 |
| +0.1568             | 707.29  |          | 1413.6 | 13  | F | 5  | 765.43   | -0.017  | 765.43              |         |
|                     | 1527.6  |          | 1527.6 | 14  | N | 4  | 618.36   |         | 618.36              |         |
| +0.3064             | 829.83  |          | 1658.7 | 15  | M | 3  | 504.32   | +0.3524 | 504.32              |         |
| -0.158              | 886.37  |          | 1771.7 | 16  | L | 2  | 373.28   |         | 373.28              |         |
| +0.011              | 942.91  |          | 1884.8 | 17  | I | 1  | 260.2    | +0.0333 | 260.2               |         |
|                     |         |          |        | 18  | K | 0  | 147.11   |         | 147.11              |         |

general information

|                       |             |
|-----------------------|-------------|
| Annotation:           | 14 of 18    |
| AminoAcids Coverage:  | 78 %        |
| Intensity Coverage:   | 55 %        |
| Peak Coverage:        | 27 %        |
| Protein Localisation: | 588 ... 605 |



Scan number 9185 Raw file LNCAP\_Silac\_23F10\_set2\_07  
 Method ITMS; CID Pepti... 92.77

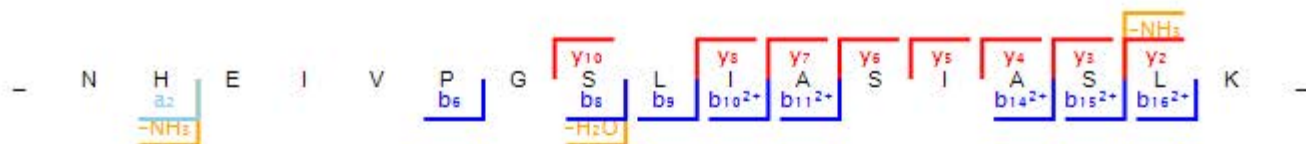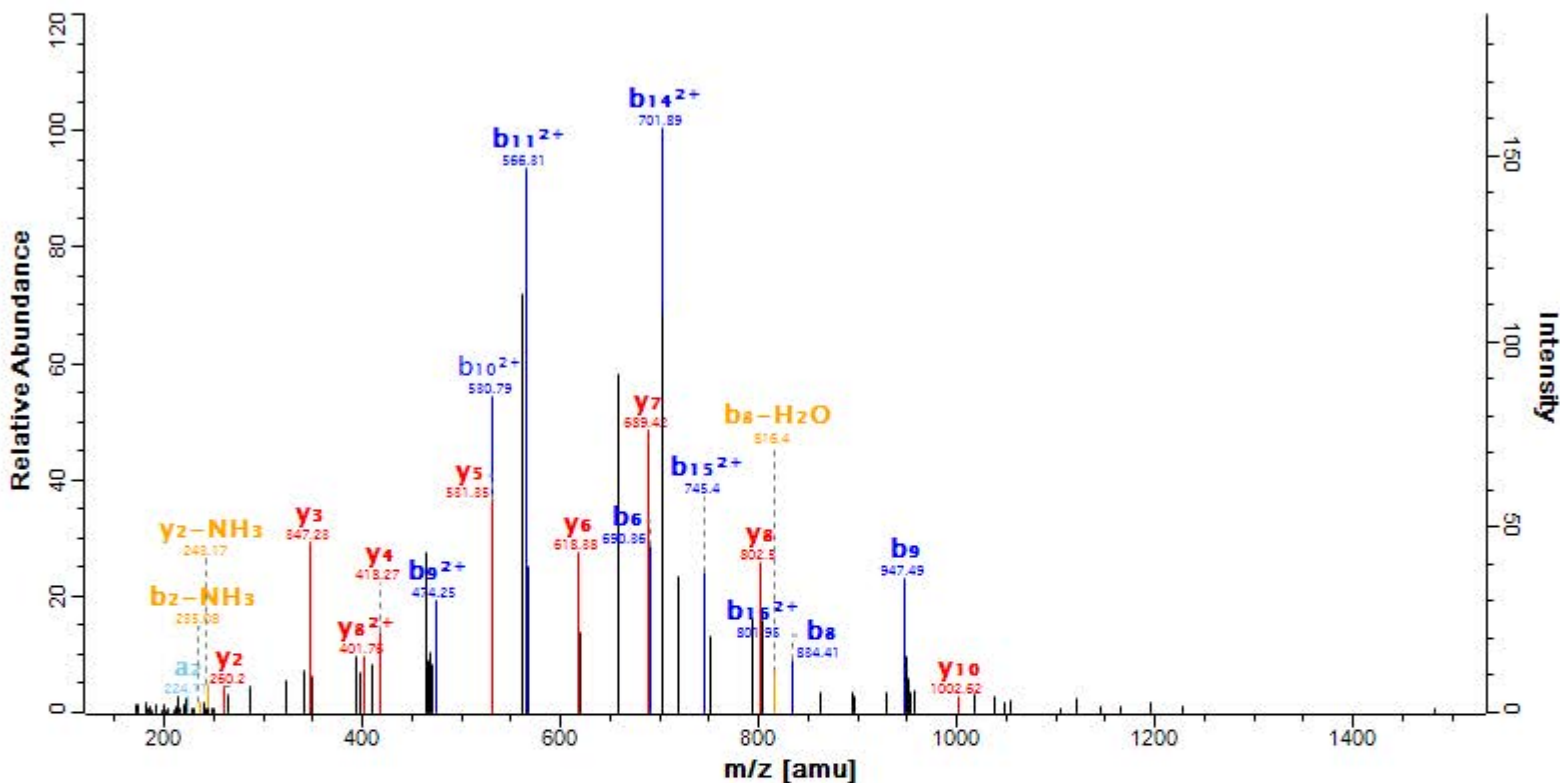

precursor information

|                   |                 |
|-------------------|-----------------|
| Mass:             | 1747.98333      |
| m/z:              | 583.66839       |
| Charge:           | 3+              |
| Retentiontime:    | 59.880058288574 |
| Score:            | 92.77254        |
| Mass Error [ppm]: | 0.052517        |
| PEP:              | 8.0029E-06      |
| Precursor Type:   | MULTI           |

general information

|                       |           |
|-----------------------|-----------|
| Annotation:           | 12 of 17  |
| AminoAcids Coverage:  | 71 %      |
| Intensity Coverage:   | 52 %      |
| Peak Coverage:        | 24 %      |
| Protein Localisation: | 29 ... 45 |

|        | a ion         | b <sup>2+</sup> ion | b ion         |    |     |    | y ion         | y <sup>2+</sup> ion |
|--------|---------------|---------------------|---------------|----|-----|----|---------------|---------------------|
|        | Δ dalton mass | Δ dalton mass       | Δ dalton mass |    | seq |    | Δ dalton mass | Δ dalton mass       |
|        | 87.06         | 115.1               | 115.1         | 1  | N   | 16 |               |                     |
| +0.025 | 224.1         | 252.1               | 252.1         | 2  | H   | 15 | 1635          | 1635                |
|        | 353.2         | 381.2               | 381.2         | 3  | E   | 14 | 1498          | 1498                |
|        | 466.2         | 494.2               | 494.2         | 4  | I   | 13 | 1369          | 1369                |
|        | 565.3         | 593.3               | 593.3         | 5  | V   | 12 | 1256          | 1256                |
|        | 662.4         | 690.4               | +0.054 690.4  | 6  | P   | 11 | 1157          | 1157                |
|        | 719.4         | 747.4               | 747.4         | 7  | G   | 10 | 1060          | 1060                |
|        | 806.4         | 834.4               | -0.04 834.4   | 8  | S   | 9  | 1003          | -0.17 1003          |
|        | 919.5         | +0.126 747.3        | -0.15 947.5   | 9  | L   | 8  | 915.6         | 915.6               |
|        | 1033          | -0.07 530.8         | 1061          | 10 | I   | 7  | 802.5         | +0.142 401.8        |
|        | 1104          | -0.01 566.3         | 1132          | 11 | A   | 6  | 689.4         | -0.02 689.4         |
|        | 1191          | 1219                | 1219          | 12 | S   | 5  | 618.4         | -0.05 618.4         |
|        | 1304          | 1332                | 1332          | 13 | I   | 4  | 531.4         | +0.018 531.4        |
|        | 1375          | +0.017 701.9        | 1403          | 14 | A   | 3  | 418.3         | +0.146 418.3        |
|        | 1462          | +0.256 745.4        | 1490          | 15 | S   | 2  | 347.2         | +0.187 347.2        |
|        | 1575          | -0.18 801.9         | 1603          | 16 | L   | 1  | 260.2         | +0.23 260.2         |
|        |               |                     |               | 17 | K   | 0  | 147.1         | 147.1               |



Scan number 9209 Raw file LNCAP\_Silac\_23F10\_set2\_07  
 Method ITMS; CID Pepti... 102.64

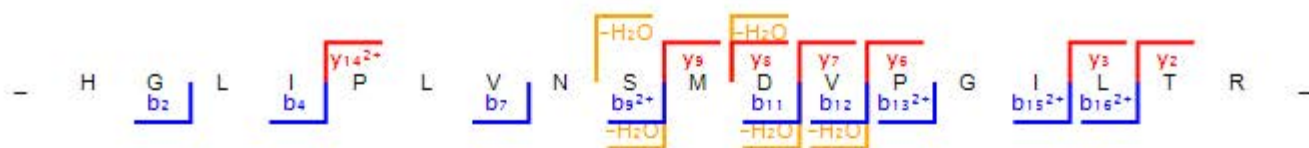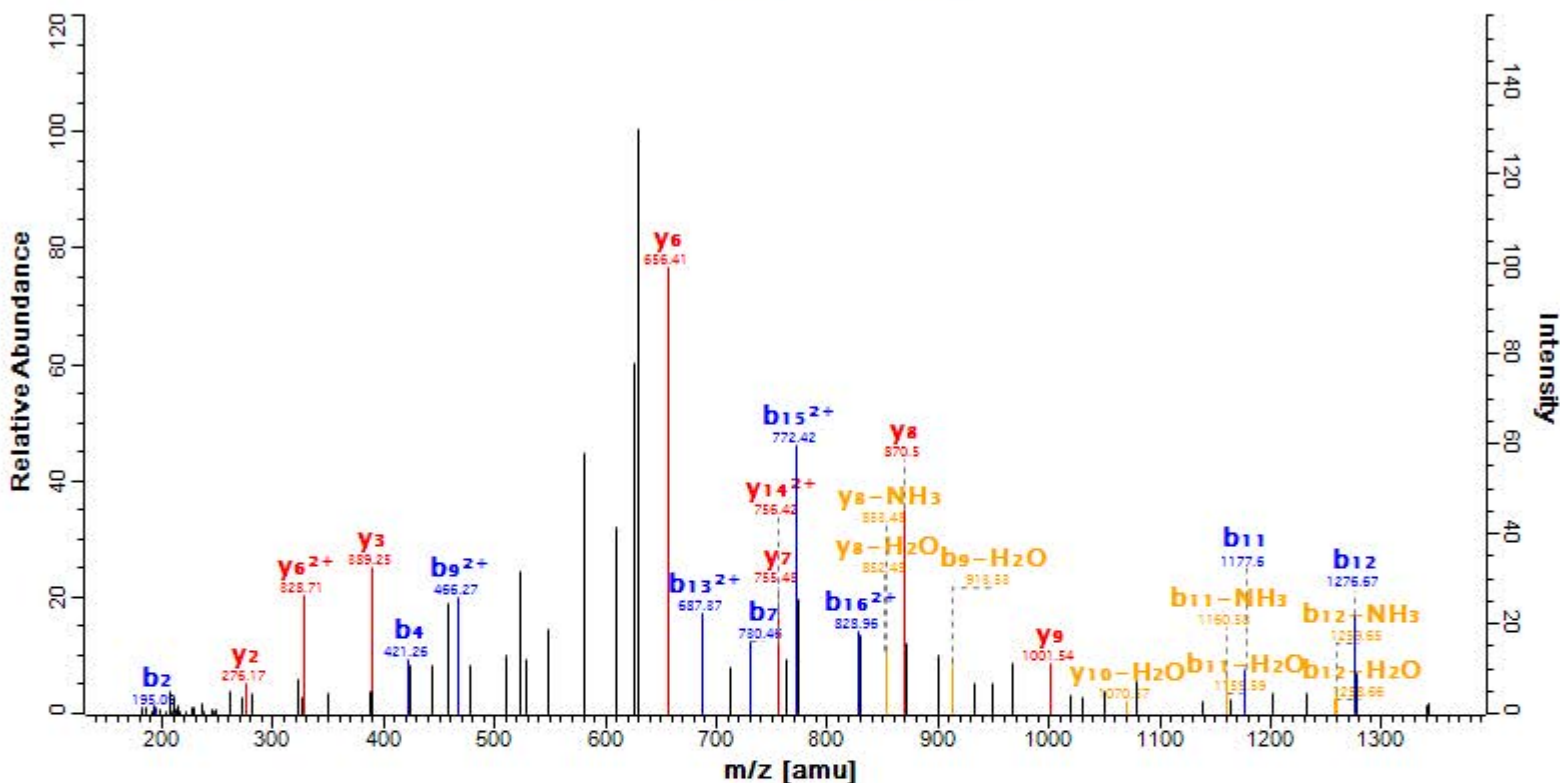

precursor information

|                   |                 |
|-------------------|-----------------|
| Mass:             | 1931.06647      |
| m/z:              | 644.6961        |
| Charge:           | 3+              |
| Retentiontime:    | 60.115833282470 |
| Score:            | 102.6366        |
| Mass Error [ppm]: | 0.11244         |
| PEP:              | 1.0937E-06      |
| Precursor Type:   | MULTI           |

| b <sup>2+</sup> ion |        | b ion    |        |    |     |          | y ion  |          | y <sup>2+</sup> ion |  |
|---------------------|--------|----------|--------|----|-----|----------|--------|----------|---------------------|--|
| Δ dalton            | mass   | Δ dalton | mass   |    | seq | Δ dalton | mass   | Δ dalton | mass                |  |
|                     | 138.07 |          | 138.07 | 1  | H   | 17       |        |          |                     |  |
|                     | 195.09 | +0.137   | 195.09 | 2  | G   | 16       | 1795   |          | 1795                |  |
|                     | 308.17 |          | 308.17 | 3  | L   | 15       | 1738   |          | 1738                |  |
|                     | 421.26 | +0.0395  | 421.26 | 4  | I   | 14       | 1624.9 |          | 1624.9              |  |
|                     | 518.31 |          | 518.31 | 5  | P   | 13       | 1511.8 |          | 756.42              |  |
|                     | 631.39 |          | 631.39 | 6  | L   | 12       | 1414.8 |          | 1414.8              |  |
|                     | 730.46 | -0.034   | 730.46 | 7  | V   | 11       | 1301.7 |          | 1301.7              |  |
|                     | 844.5  |          | 844.5  | 8  | N   | 10       | 1202.6 |          | 1202.6              |  |
| +0.0879             | 466.27 |          | 931.54 | 9  | S   | 9        | 1088.6 |          | 1088.6              |  |
|                     | 1062.6 |          | 1062.6 | 10 | M   | 8        | 1001.5 | +0.1527  | 1001.5              |  |
|                     | 1177.6 | -0.283   | 1177.6 | 11 | D   | 7        | 870.5  | -0.084   | 870.5               |  |
|                     | 1276.7 | -0.121   | 1276.7 | 12 | V   | 6        | 755.48 | -0.29    | 755.48              |  |
| -0.166              | 687.37 |          | 1373.7 | 13 | P   | 5        | 656.41 | +0.0149  | 328.71              |  |
|                     | 1430.7 |          | 1430.7 | 14 | G   | 4        | 559.36 |          | 559.36              |  |
| -0.108              | 772.42 |          | 1543.8 | 15 | I   | 3        | 502.33 |          | 502.33              |  |
| -0.202              | 828.96 |          | 1656.9 | 16 | L   | 2        | 389.25 | +0.0732  | 389.25              |  |
|                     | 1758   |          | 1758   | 17 | T   | 1        | 276.17 | -0.057   | 276.17              |  |
|                     |        |          |        | 18 | R   | 0        | 175.12 |          | 175.12              |  |

general information

|                       |             |
|-----------------------|-------------|
| Annotation:           | 12 of 18    |
| AminoAcids Coverage:  | 67 %        |
| Intensity Coverage:   | 41 %        |
| Peak Coverage:        | 27 %        |
| Protein Localisation: | 218 ... 235 |

Scan number 9369 Raw file LNCAP\_Silac\_23F10\_set2\_07  
 Method ITMS; CID Pepti... 59

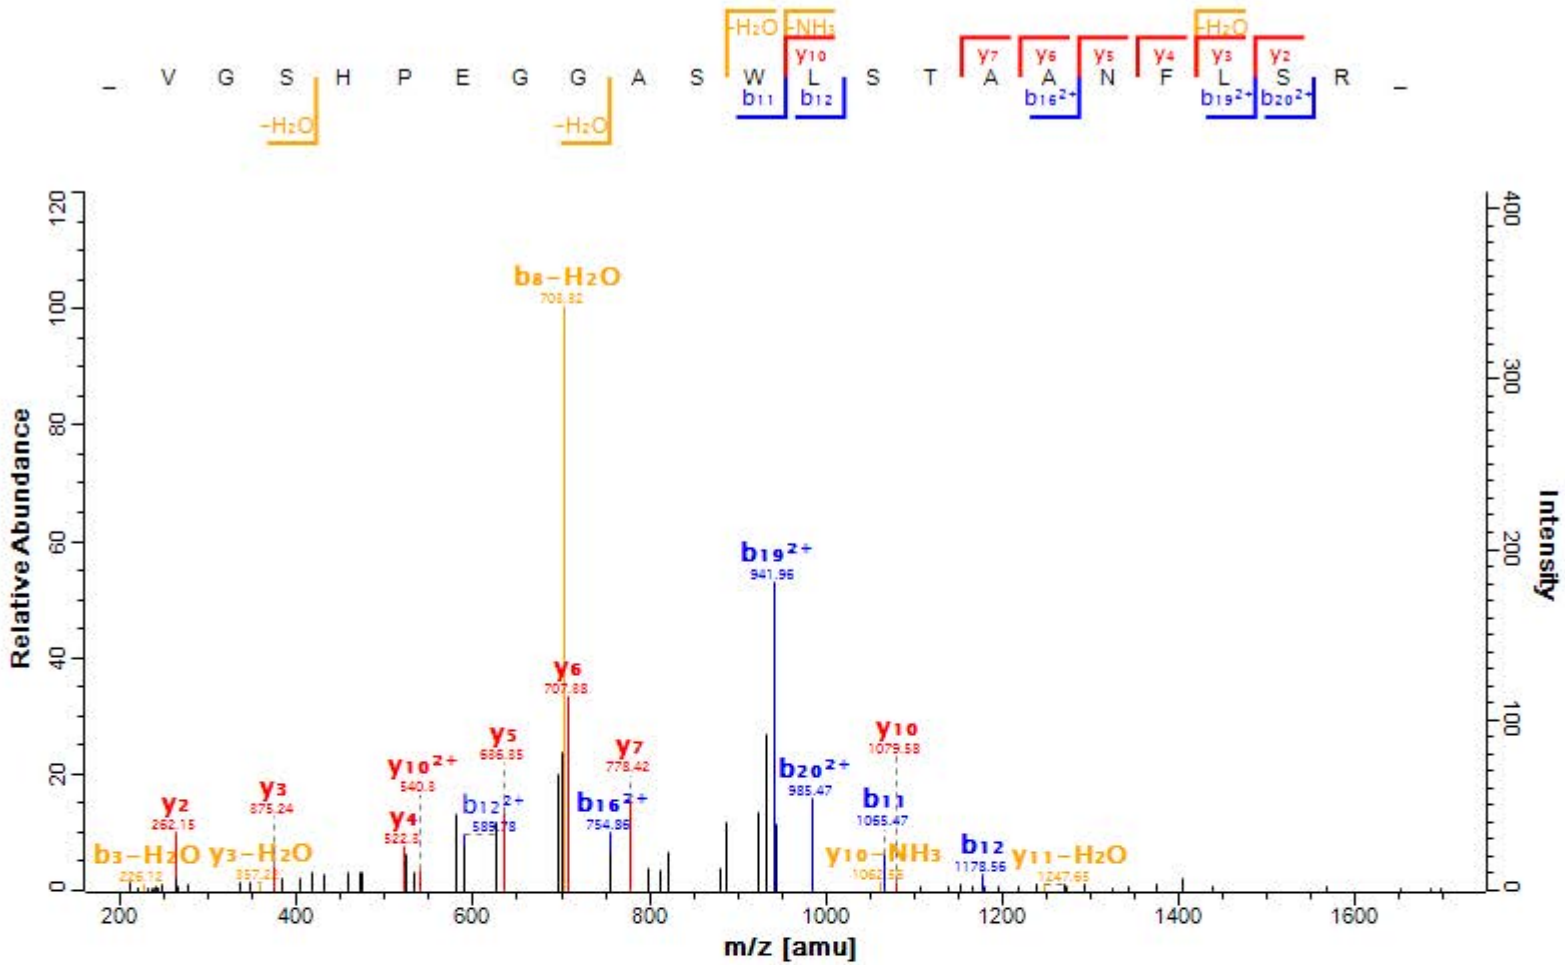

precursor information

|                   |                 |
|-------------------|-----------------|
| Mass:             | 2143.04546      |
| m/z:              | 715.35576       |
| Charge:           | 3+              |
| Retentiontime:    | 61.866130828857 |
| Score:            | 58.99711        |
| Mass Error [ppm]: | 0.37044         |
| PEP:              | 0.0015355       |
| Precursor Type:   | MULTI           |

general information

|                       |             |
|-----------------------|-------------|
| Annotation:           | 12 of 21    |
| AminoAcids Coverag    | 57 %        |
| Intensity Coverage:   | 53 %        |
| Peak Coverage:        | 23 %        |
| Protein Localisation: | 258 ... 278 |

| b <sup>2+</sup> ion |         | b ion         |        |    |     |    | y ion    |         | y <sup>2+</sup> ion |         |
|---------------------|---------|---------------|--------|----|-----|----|----------|---------|---------------------|---------|
| Δ dalton            | mass    | Δ dalton      | mass   |    | seq |    | Δ dalton | mass    | Δ dalton            | mass    |
|                     | 100.08  | 100.08        |        | 1  | V   | 20 |          |         |                     |         |
|                     | 157.1   | 157.1         |        | 2  | G   | 19 | 2045     |         | 2045                |         |
|                     | 244.13  | 244.13        |        | 3  | S   | 18 | 1988     |         | 1988                |         |
|                     | 381.19  | 381.19        |        | 4  | H   | 17 | 1900.9   |         | 1900.9              |         |
|                     | 478.24  | 478.24        |        | 5  | P   | 16 | 1763.9   |         | 1763.9              |         |
|                     | 607.28  | 607.28        |        | 6  | E   | 15 | 1666.8   |         | 1666.8              |         |
|                     | 664.3   | 664.3         |        | 7  | G   | 14 | 1537.8   |         | 1537.8              |         |
|                     | 721.33  | 721.33        |        | 8  | G   | 13 | 1480.8   |         | 1480.8              |         |
|                     | 792.36  | 792.36        |        | 9  | A   | 12 | 1423.7   |         | 1423.7              |         |
|                     | 879.4   | 879.4         |        | 10 | S   | 11 | 1352.7   |         | 1352.7              |         |
|                     | 1065.5  | +0.11541065.5 |        | 11 | W   | 10 | 1265.7   |         | 1265.7              |         |
| -0.045              | 589.78  | -0.019        | 1178.6 | 12 | L   | 9  | 1079.6   | -0.112  | 540.3               | +0.2812 |
|                     | 1265.6  |               | 1265.6 | 13 | S   | 8  | 966.5    |         | 966.5               |         |
|                     | 1366.6  |               | 1366.6 | 14 | T   | 7  | 879.47   |         | 879.47              |         |
|                     | 1437.7  |               | 1437.7 | 15 | A   | 6  | 778.42   | -0.021  | 778.42              |         |
| -0.037              | 754.86  |               | 1508.7 | 16 | A   | 5  | 707.38   | -0.041  | 707.38              |         |
|                     | 1622.8  |               | 1622.8 | 17 | N   | 4  | 636.35   | -0.145  | 636.35              |         |
|                     | 1769.8  |               | 1769.8 | 18 | F   | 3  | 522.3    | +0.2229 | 522.3               |         |
| +0.265              | 3941.96 |               | 1882.9 | 19 | L   | 2  | 375.24   | +0.195  | 375.24              |         |
| +0.3206             | 985.47  |               | 1969.9 | 20 | S   | 1  | 262.15   | +0.0892 | 262.15              |         |
|                     |         |               |        | 21 | R   | 0  | 175.12   |         | 175.12              |         |

Scan number 9414 Raw file LNCAP\_Silac\_23F10\_set2\_07  
 Method ITMS: CID Pepti... 175.29

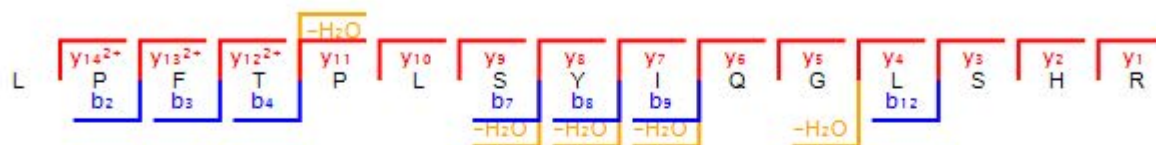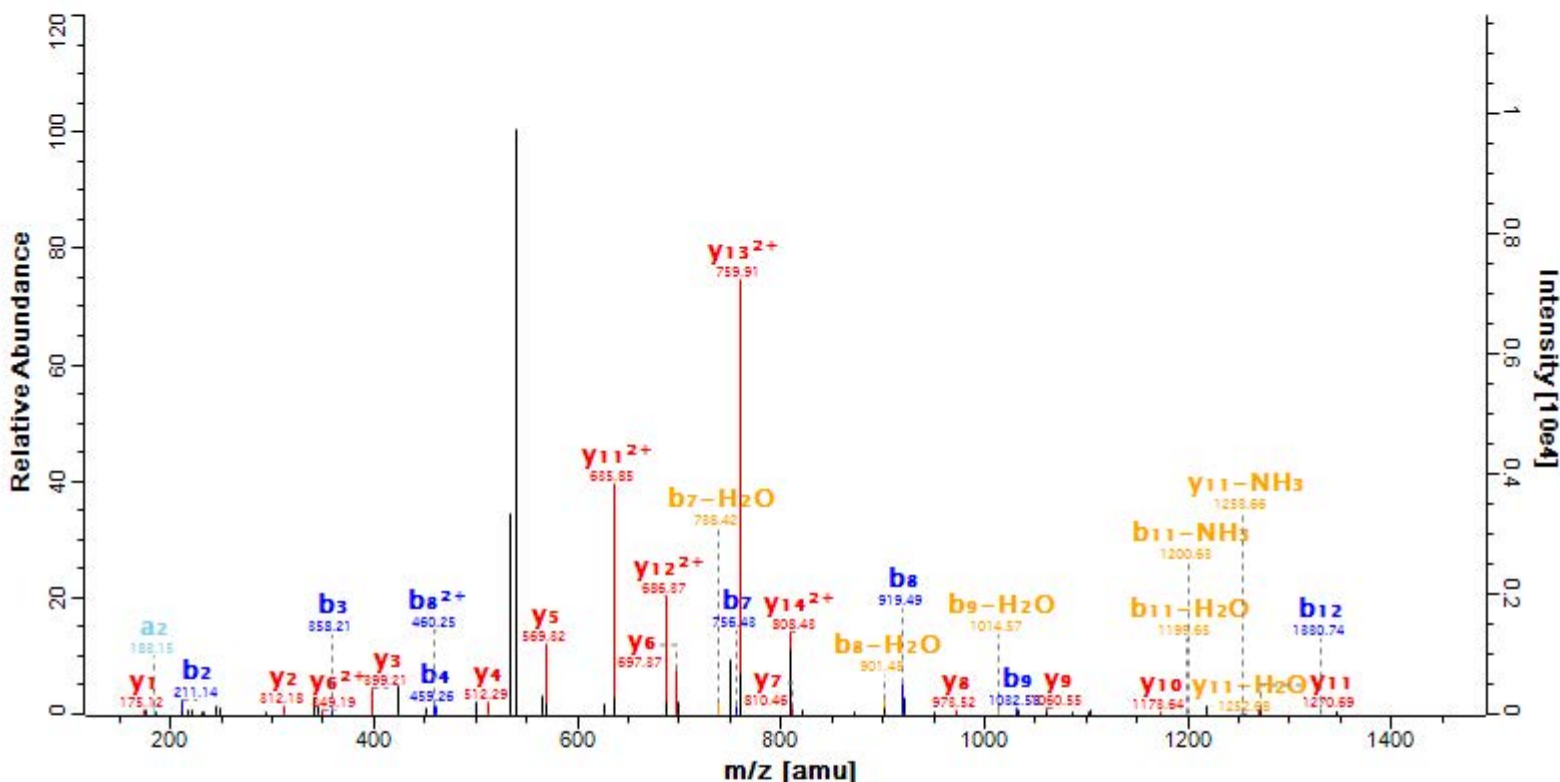

#### precursor information

|                   |                 |
|-------------------|-----------------|
| Mass:             | 1727.93569      |
| m/z:              | 576.98584       |
| Charge:           | 3+              |
| Retentiontime:    | 62.377456665039 |
| Score:            | 175.2936        |
| Mass Error [ppm]: | -0.11689        |
| PEP:              | 3.8642E-17      |
| Precursor Type:   | MULTI           |

#### general information

|                       |             |
|-----------------------|-------------|
| Annotation:           | 14 of 15    |
| AminoAcids Coverage:  | 93 %        |
| Intensity Coverage:   | 49 %        |
| Peak Coverage:        | 30 %        |
| Protein Localisation: | 117 ... 131 |

| a ion         |               | b <sup>2+</sup> ion |               | b ion |    |               |               |       | y ion  |       | y <sup>2+</sup> ion |  |
|---------------|---------------|---------------------|---------------|-------|----|---------------|---------------|-------|--------|-------|---------------------|--|
| Δ dalton mass | Δ dalton mass | Δ dalton mass       | Δ dalton mass | seq   |    | Δ dalton mass | Δ dalton mass |       |        |       |                     |  |
| 86.1          |               | 114.1               |               | 114.1 | 1  | L             | 14            |       |        |       |                     |  |
| +0.036 83.1   |               | 211.1               | +0.076        | 211.1 | 2  | P             | 13            | 1616  |        | 808.4 | -0.02               |  |
| 330.2         |               | 358.2               | +0.122        | 358.2 | 3  | F             | 12            | 1519  |        | 759.9 | +0.274              |  |
| 431.3         |               | 459.3               | +0.064        | 459.3 | 4  | T             | 11            | 1372  |        | 686.4 | +0.241              |  |
| 528.3         |               | 556.3               |               | 556.3 | 5  | P             | 10            | 1271  | -0.13  | 635.8 | +0.274              |  |
| 641.4         |               | 669.4               |               | 669.4 | 6  | L             | 9             | 1174  | +0.11  | 1174  |                     |  |
| 728.4         |               | 756.4               | -0.02         | 756.4 | 7  | S             | 8             | 1061  | +0.13  | 1061  |                     |  |
| 891.5         | +0.163        | 946.2               | +0.055        | 919.5 | 8  | Y             | 7             | 973.5 | +0.054 | 973.5 |                     |  |
| 1005          |               | 1033                | -0.08         | 1033  | 9  | I             | 6             | 810.5 | +0.049 | 810.5 |                     |  |
| 1133          |               | 1161                |               | 1161  | 10 | Q             | 5             | 697.4 | +0.052 | 349.2 | +0.175              |  |
| 1190          |               | 1218                |               | 1218  | 11 | G             | 4             | 569.3 | +0.075 | 569.3 |                     |  |
| 1303          |               | 1331                | +0.17         | 1331  | 12 | L             | 3             | 512.3 | +0.162 | 512.3 |                     |  |
| 1390          |               | 1418                |               | 1418  | 13 | S             | 2             | 399.2 | +0.07  | 399.2 |                     |  |
| 1527          |               | 1555                |               | 1555  | 14 | H             | 1             | 312.2 | +0.007 | 312.2 |                     |  |
|               |               |                     |               |       | 15 | R             | 0             | 175.1 | -0.06  | 175.1 |                     |  |

Scan number 9501 Raw file LNCAP\_Silac\_23F10\_set2\_07  
 Method ITMS; CID Pepti... 126.63

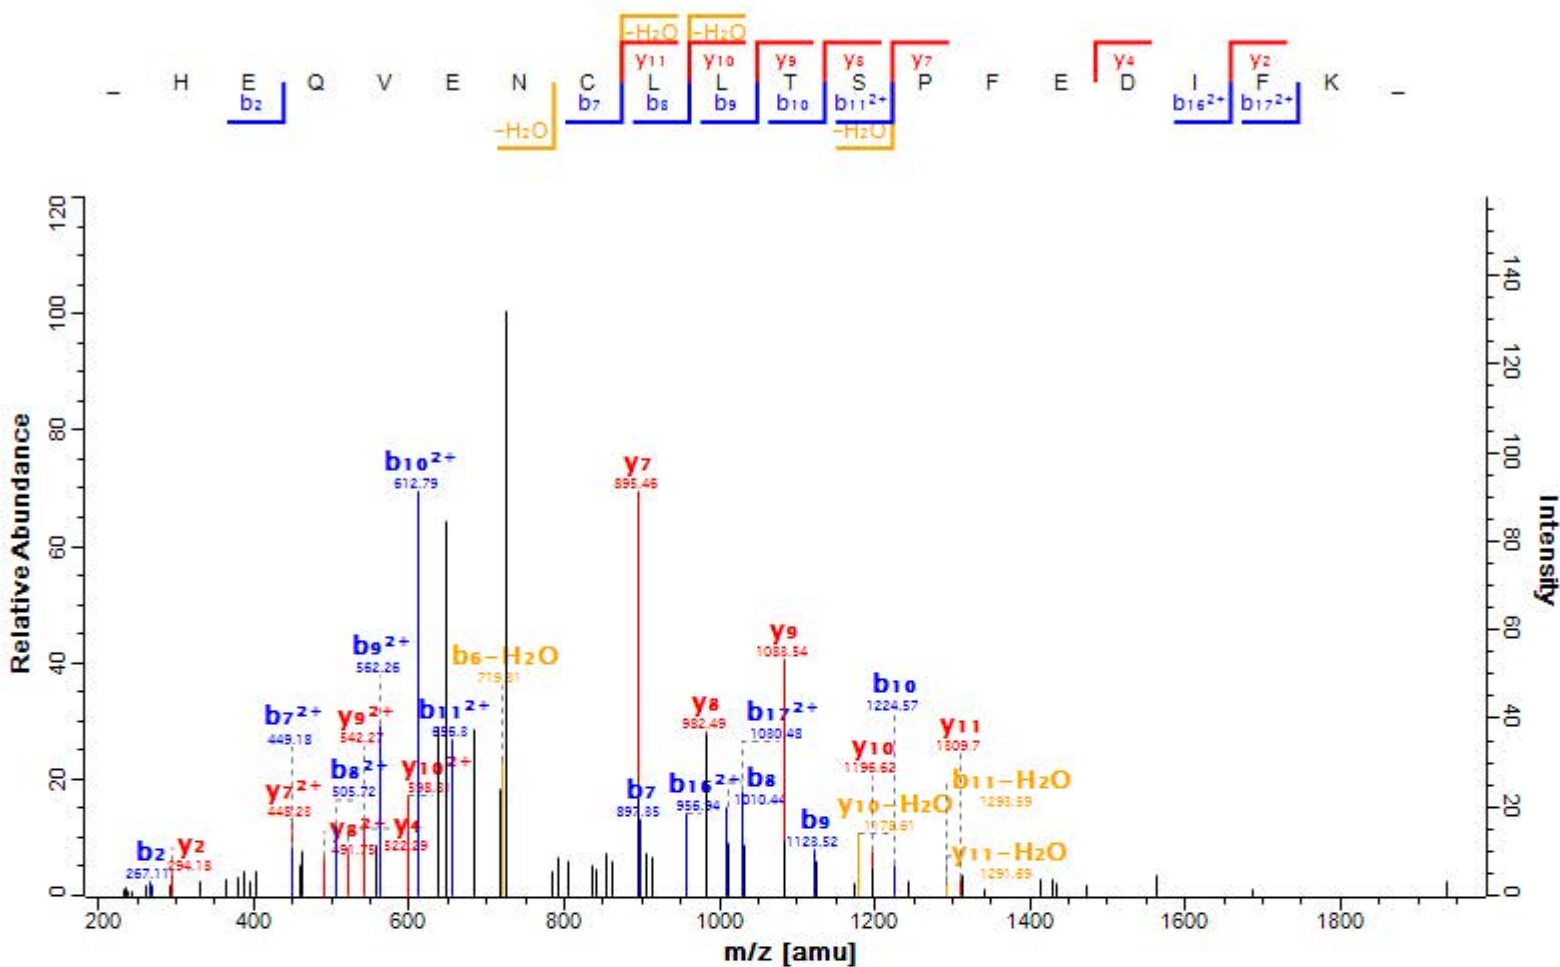

precursor information

|                   |                 |
|-------------------|-----------------|
| Mass:             | 2205.04185      |
| m/z:              | 736.02123       |
| Charge:           | 3+              |
| Retentiontime:    | 63.331623077392 |
| Score:            | 126.6291        |
| Mass Error [ppm]: | 0.28398         |
| PEP:              | 1.7603E-12      |
| Precursor Type:   | MULTI           |

general information

|                       |             |
|-----------------------|-------------|
| Annotation:           | 11 of 18    |
| AminoAcids Coverage:  | 61 %        |
| Intensity Coverage:   | 48 %        |
| Peak Coverage:        | 35 %        |
| Protein Localisation: | 386 ... 403 |

| b <sup>2+</sup> ion |         | b ion    |        | seq |   |    | y ion    |         | y <sup>2+</sup> ion |         |
|---------------------|---------|----------|--------|-----|---|----|----------|---------|---------------------|---------|
| Δ dalton            | mass    | Δ dalton | mass   |     |   |    | Δ dalton | mass    | Δ dalton            | mass    |
|                     | 138.07  |          | 138.07 | 1   | H | 17 |          |         |                     |         |
|                     | 267.11  | +0.2683  | 267.11 | 2   | E | 16 | 2069     |         | 2069                |         |
|                     | 395.17  |          | 395.17 | 3   | Q | 15 | 1939.9   |         | 1939.9              |         |
|                     | 494.24  |          | 494.24 | 4   | V | 14 | 1811.9   |         | 1811.9              |         |
|                     | 623.28  |          | 623.28 | 5   | E | 13 | 1712.8   |         | 1712.8              |         |
|                     | 737.32  |          | 737.32 | 6   | N | 12 | 1583.8   |         | 1583.8              |         |
| +0.2282             | 449.18  | +0.0317  | 897.35 | 7   | C | 11 | 1469.7   |         | 1469.7              |         |
| +0.1088             | 505.72  | -0.184   | 1010.4 | 8   | L | 10 | 1309.7   | -0.161  | 1309.7              |         |
| +0.1653             | 562.26  | -0.055   | 1123.5 | 9   | L | 9  | 1196.6   | +0.1318 | 598.81              | +0.3533 |
| +0.2887             | 612.79  | -0.236   | 1224.6 | 10  | T | 8  | 1083.5   | +0.0422 | 542.27              | +0.3411 |
| +0.0514             | 656.3   |          | 1311.6 | 11  | S | 7  | 982.49   | +0.0391 | 491.75              | +0.2495 |
|                     | 1408.7  |          | 1408.7 | 12  | P | 6  | 895.46   | +0.0098 | 448.23              | +0.1283 |
|                     | 1555.7  |          | 1555.7 | 13  | F | 5  | 798.4    |         | 798.4               |         |
|                     | 1684.8  |          | 1684.8 | 14  | E | 4  | 651.33   |         | 651.33              |         |
|                     | 1799.8  |          | 1799.8 | 15  | D | 3  | 522.29   | +0.2985 | 522.29              |         |
| +0.1671             | 1956.94 |          | 1912.9 | 16  | I | 2  | 407.27   |         | 407.27              |         |
| +0.0338             | 1030.5  |          | 2059.9 | 17  | F | 1  | 294.18   | -0.065  | 294.18              |         |
|                     |         |          |        | 18  | K | 0  | 147.11   |         | 147.11              |         |

Scan number 9633 Raw file LNCAP\_Silac\_23F10\_set2\_07  
 Method ITMS; CID Pepti... 77.89

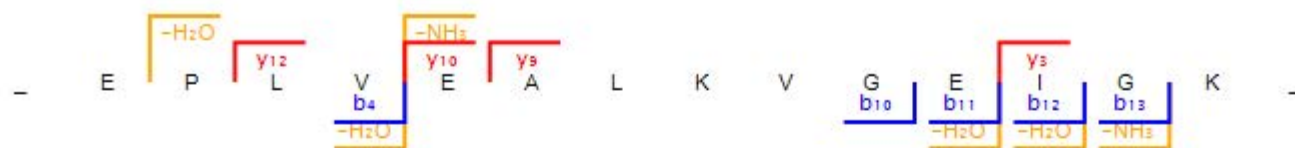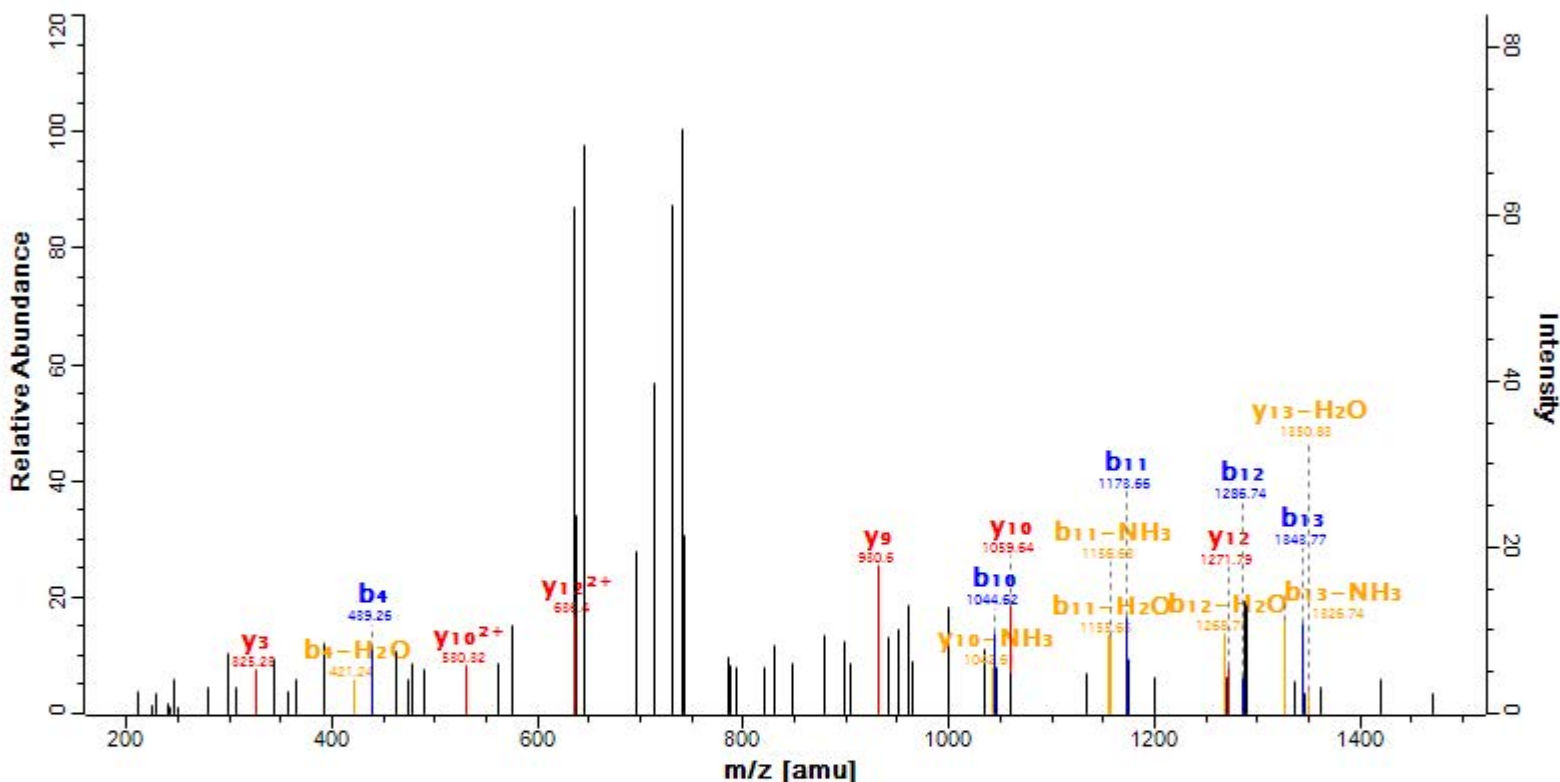

#### precursor information

|                   |                 |
|-------------------|-----------------|
| Mass:             | 1480.85023      |
| m/z:              | 741.43239       |
| Charge:           | 2+              |
| Retentiontime:    | 64.937850952148 |
| Score:            | 77.89446        |
| Mass Error [ppm]: | 0.091091        |
| PEP:              | 0.00097641      |
| Precursor Type:   | MULTI           |

| b ion           |          |     |   | y ion           |          | y <sup>2+</sup> ion |          |
|-----------------|----------|-----|---|-----------------|----------|---------------------|----------|
| $\Delta$ dalton | mass     | seq |   | $\Delta$ dalton | mass     | $\Delta$ dalton     | mass     |
|                 | 130.0499 | 1   | E | 13              |          |                     |          |
|                 | 227.1026 | 2   | P | 12              | 1368.843 |                     | 1368.843 |
|                 | 340.1867 | 3   | L | 11              | 1271.79  | -0.20631            | 636.3988 |
| +0.122513       | 439.2551 | 4   | V | 10              | 1158.706 |                     | 1158.706 |
|                 | 568.2977 | 5   | E | 9               | 1059.638 | -0.05187            | 530.3226 |
|                 | 639.3348 | 6   | A | 8               | 930.5953 | +0.402767           | 930.5953 |
|                 | 752.4189 | 7   | L | 7               | 859.5582 |                     | 859.5582 |
|                 | 888.528  | 8   | K | 6               | 746.4742 |                     | 746.4742 |
|                 | 987.5965 | 9   | V | 5               | 610.365  |                     | 610.365  |
| +0.032713       | 1044.618 | 10  | G | 4               | 511.2966 |                     | 511.2966 |
| +0.149056       | 1173.661 | 11  | E | 3               | 454.2751 |                     | 454.2751 |
| +0.029957       | 1286.745 | 12  | I | 2               | 325.2325 | +0.035719           | 325.2325 |
| +0.202708       | 1343.766 | 13  | G | 1               | 212.1485 |                     | 212.1485 |
|                 |          | 14  | K | 0               | 155.127  |                     | 155.127  |

#### general information

|                       |             |
|-----------------------|-------------|
| Annotation:           | 9 of 14     |
| AminoAcids Coverage:  | 64 %        |
| Intensity Coverage:   | 18 %        |
| Peak Coverage:        | 23 %        |
| Protein Localisation: | 927 ... 940 |

Scan number 9714 Raw file LNCAP\_Silac\_23F10\_set2\_07  
 Method ITMS; CID Pepti... 68.41

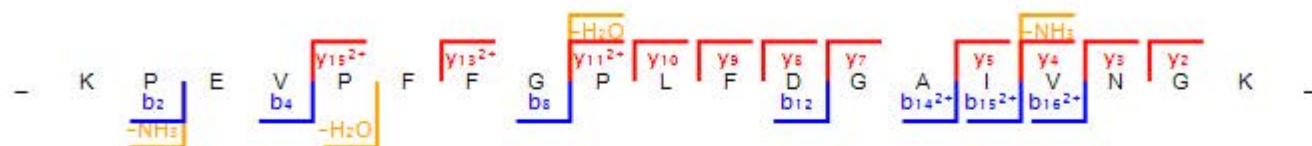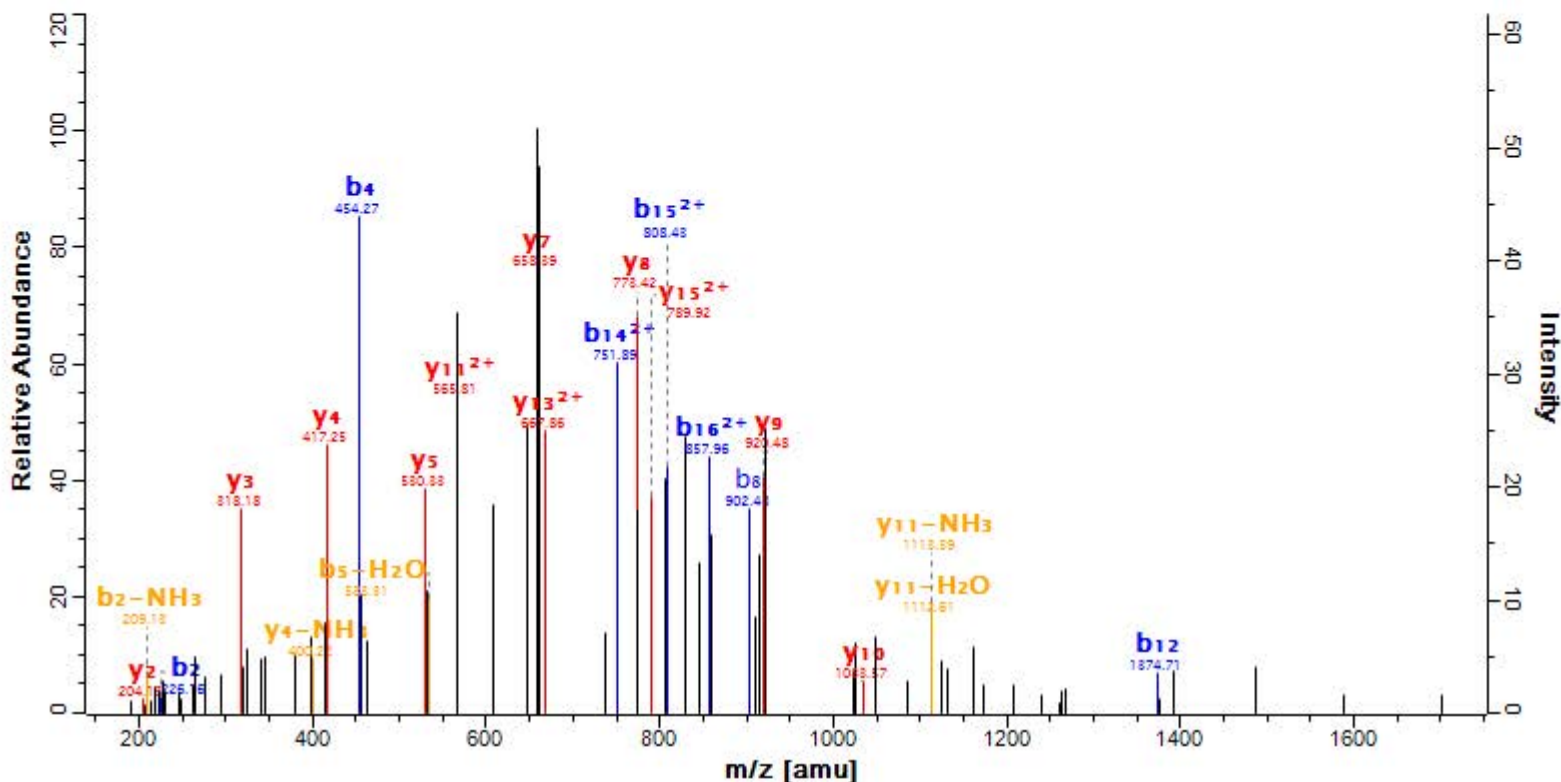

precursor information

|                   |                 |
|-------------------|-----------------|
| Mass:             | 2031.08352      |
| m/z:              | 678.03512       |
| Charge:           | 3+              |
| Retentiontime:    | 66.120849609375 |
| Score:            | 68.41048        |
| Mass Error [ppm]: | 0.282           |
| PEP:              | 0.000307        |
| Precursor Type:   | MULTI           |

| b <sup>2+</sup> ion |         | b ion    |        | seq |   |    | y ion    |         | y <sup>2+</sup> ion |         |
|---------------------|---------|----------|--------|-----|---|----|----------|---------|---------------------|---------|
| Δ dalton            | mass    | Δ dalton | mass   |     |   |    | Δ dalton | mass    | Δ dalton            | mass    |
|                     | 129.1   |          | 129.1  | 1   | K | 18 |          |         |                     |         |
|                     | 226.16  | -0.165   | 226.16 | 2   | P | 17 | 1904     |         | 1904                |         |
|                     | 355.2   |          | 355.2  | 3   | E | 16 | 1806.9   |         | 1806.9              |         |
|                     | 454.27  | +0.0003  | 454.27 | 4   | V | 15 | 1677.9   |         | 1677.9              |         |
|                     | 551.32  |          | 551.32 | 5   | P | 14 | 1578.8   |         | 789.92              | +0.0491 |
|                     | 698.39  |          | 698.39 | 6   | F | 13 | 1481.8   |         | 1481.8              |         |
|                     | 845.46  |          | 845.46 | 7   | F | 12 | 1334.7   |         | 667.86              | -0.483  |
|                     | 902.48  | +0.0835  | 902.48 | 8   | G | 11 | 1187.6   |         | 1187.6              |         |
|                     | 999.53  |          | 999.53 | 9   | P | 10 | 1130.6   |         | 565.81              | +0.1077 |
|                     | 1112.6  |          | 1112.6 | 10  | L | 9  | 1033.6   | +0.3009 | 1033.6              |         |
|                     | 1259.7  |          | 1259.7 | 11  | F | 8  | 920.48   | +0.0351 | 920.48              |         |
|                     | 1374.7  | +0.0191  | 1374.7 | 12  | D | 7  | 773.42   | +0.0086 | 773.42              |         |
|                     | 1431.7  |          | 1431.7 | 13  | G | 6  | 658.39   | +0.0709 | 658.39              |         |
| +0.1519             | 1751.89 |          | 1502.8 | 14  | A | 5  | 601.37   |         | 601.37              |         |
| +0.0438             | 1808.43 |          | 1615.9 | 15  | I | 4  | 530.33   | +0.1664 | 530.33              |         |
| +0.3147             | 1857.96 |          | 1714.9 | 16  | V | 3  | 417.25   | +0.1455 | 417.25              |         |
|                     | 1829    |          | 1829   | 17  | N | 2  | 318.18   | +0.1551 | 318.18              |         |
|                     | 1886    |          | 1886   | 18  | G | 1  | 204.13   | +0.1904 | 204.13              |         |
|                     |         |          |        | 19  | K | 0  | 147.11   |         | 147.11              |         |

general information

|                       |               |
|-----------------------|---------------|
| Annotation:           | 15 of 19      |
| AminoAcids Coverage:  | 79 %          |
| Intensity Coverage:   | 45 %          |
| Peak Coverage:        | 27 %          |
| Protein Localisation: | 1948 ... 1966 |

Scan number 9725 Raw file LNCAP\_Silac\_23F10\_set2\_07  
 Method ITMS: CID Pepti... 163.51

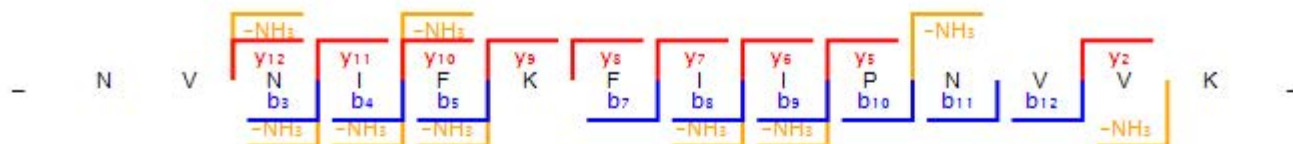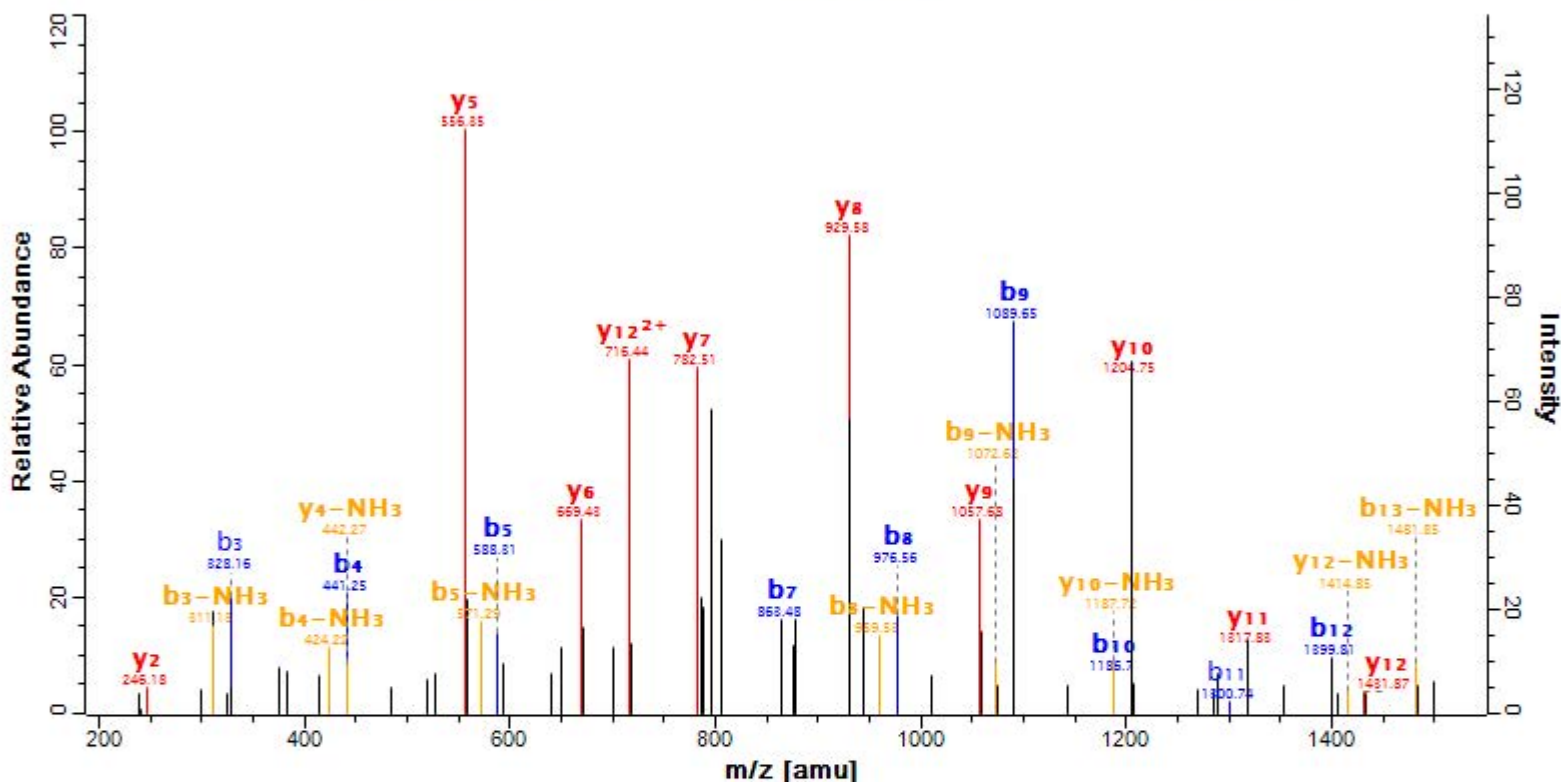

#### precursor information

|                   |                 |
|-------------------|-----------------|
| Mass:             | 1643.97667      |
| m/z:              | 822.99561       |
| Charge:           | 2+              |
| Retentiontime:    | 66.277511596679 |
| Score:            | 163.5068        |
| Mass Error [ppm]: | 0.22498         |
| PEP:              | 8.4116E-11      |
| Precursor Type:   | MULTI           |

#### general information

|                       |             |
|-----------------------|-------------|
| Annotation:           | 11 of 14    |
| AminoAcids Coverage:  | 79 %        |
| Intensity Coverage:   | 54 %        |
| Peak Coverage:        | 38 %        |
| Protein Localisation: | 142 ... 155 |

| b ion     |          |     |   | y ion    |          | y <sup>2+</sup> ion |          |           |
|-----------|----------|-----|---|----------|----------|---------------------|----------|-----------|
| Δ dalton  | mass     | seq |   | Δ dalton | mass     | Δ dalton            | mass     |           |
|           | 115.0502 | 1   | N | 13       |          |                     |          |           |
|           | 214.1186 | 2   | V | 12       | 1530.941 |                     | 1530.941 |           |
| +0.014205 | 328.1615 | 3   | N | 11       | 1431.872 | +0.041463           | 716.4398 | +0.421268 |
| -0.01068  | 441.2456 | 4   | I | 10       | 1317.829 | +0.090982           | 1317.829 |           |
| -0.14618  | 588.314  | 5   | F | 9        | 1204.745 | -0.05469            | 1204.745 |           |
|           | 716.409  | 6   | K | 8        | 1057.677 | -0.15119            | 1057.677 |           |
| +0.387285 | 863.4774 | 7   | F | 7        | 929.5819 | +0.035811           | 929.5819 |           |
| +0.17993  | 976.5615 | 8   | I | 6        | 782.5135 | +0.031165           | 782.5135 |           |
| -0.05044  | 1089.646 | 9   | I | 5        | 669.4294 | -0.0423             | 669.4294 |           |
| -0.16826  | 1186.698 | 10  | P | 4        | 556.3453 | +0.006666           | 556.3453 |           |
| -0.02747  | 1300.741 | 11  | N | 3        | 459.2926 |                     | 459.2926 |           |
| +0.062925 | 1399.81  | 12  | V | 2        | 345.2496 |                     | 345.2496 |           |
|           | 1498.878 | 13  | V | 1        | 246.1812 | +0.173427           | 246.1812 |           |
|           |          | 14  | K | 0        | 147.1128 |                     | 147.1128 |           |

Scan number 976 Raw file LNCAP\_Silac\_23F10\_set2\_07  
 Method ITMS; CID Pepti... 150.34

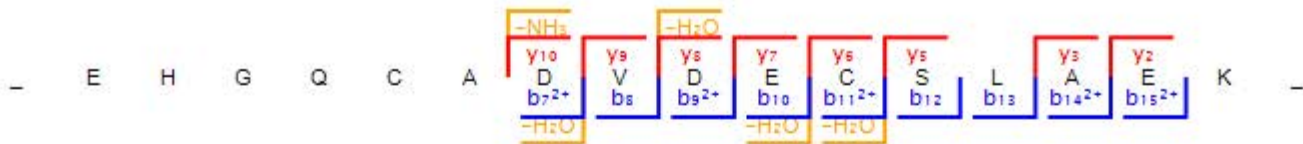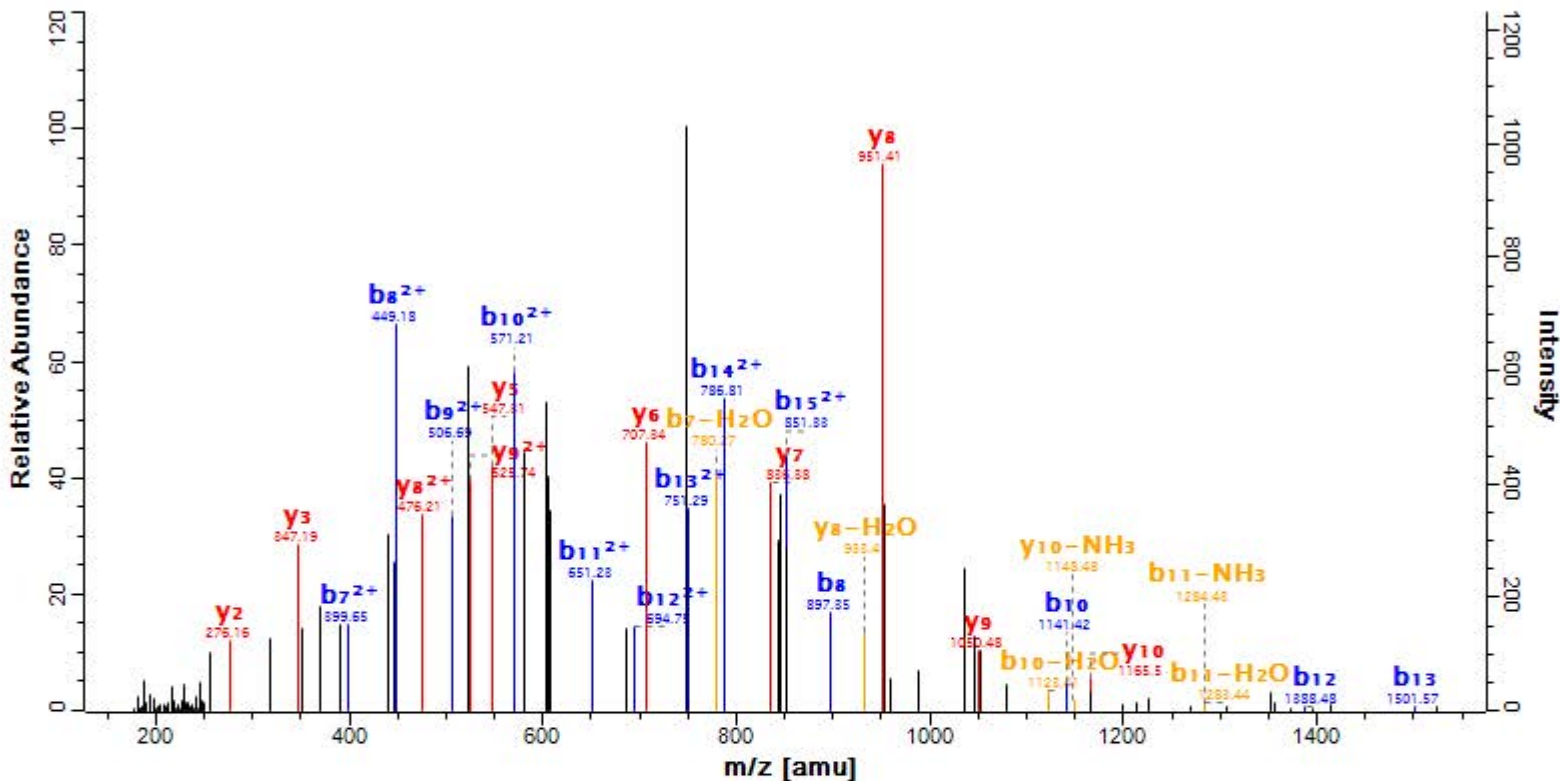

**precursor information**

|                   |                 |
|-------------------|-----------------|
| Mass:             | 1846.74687      |
| m/z:              | 616.58957       |
| Charge:           | 3+              |
| Retentiontime:    | 10.150964736938 |
| Score:            | 150.3361        |
| Mass Error [ppm]: | 0.37777         |
| PEP:              | 1.6725E-15      |
| Precursor Type:   | MULTI           |

**general information**

|                       |             |
|-----------------------|-------------|
| Annotation:           | 9 of 16     |
| AminoAcids Coverage:  | 56 %        |
| Intensity Coverage:   | 51 %        |
| Peak Coverage:        | 26 %        |
| Protein Localisation: | 333 ... 348 |

| b <sup>2+</sup> ion |        | b ion    |        |    |     |    | y ion    |         | y <sup>2+</sup> ion |         |
|---------------------|--------|----------|--------|----|-----|----|----------|---------|---------------------|---------|
| Δ dalton            | mass   | Δ dalton | mass   |    | seq |    | Δ dalton | mass    | Δ dalton            | mass    |
|                     | 130.05 |          | 130.05 | 1  | E   | 15 |          |         |                     |         |
|                     | 267.11 |          | 267.11 | 2  | H   | 14 | 1718.7   |         | 1718.7              |         |
|                     | 324.13 |          | 324.13 | 3  | G   | 13 | 1581.7   |         | 1581.7              |         |
|                     | 452.19 |          | 452.19 | 4  | Q   | 12 | 1524.6   |         | 1524.6              |         |
|                     | 612.22 |          | 612.22 | 5  | C   | 11 | 1396.6   |         | 1396.6              |         |
|                     | 683.26 |          | 683.26 | 6  | A   | 10 | 1236.5   |         | 1236.5              |         |
| +0.0295             | 399.65 |          | 798.28 | 7  | D   | 9  | 1165.5   | +0.1824 | 1165.5              |         |
| +0.2178             | 449.18 | +0.1192  | 897.35 | 8  | V   | 8  | 1050.5   | -0.024  | 525.74              | +0.1905 |
| +0.0077             | 506.69 |          | 1012.4 | 9  | D   | 7  | 951.41   | -0.044  | 476.21              | +0.0285 |
| +0.2115             | 571.21 | -0.15    | 1141.4 | 10 | E   | 6  | 836.38   | -0.089  | 836.38              |         |
| +0.0392             | 651.23 |          | 1301.5 | 11 | C   | 5  | 707.34   | +0.0599 | 707.34              |         |
| +0.0565             | 694.75 | -0.16    | 1388.5 | 12 | S   | 4  | 547.31   | -0.001  | 547.31              |         |
| -0.027              | 751.29 | +0.2456  | 1501.6 | 13 | L   | 3  | 460.28   |         | 460.28              |         |
| -0.061              | 786.81 |          | 1572.6 | 14 | A   | 2  | 347.19   | +0.0759 | 347.19              |         |
| -0.032              | 851.33 |          | 1701.6 | 15 | E   | 1  | 276.16   | +0.0767 | 276.16              |         |
|                     |        |          |        | 16 | K   | 0  | 147.11   |         | 147.11              |         |



Scan number 1149 Raw file LNCAP\_Silac\_23F10\_set2\_08  
 Method ITMS: CID Pepti... 60.52

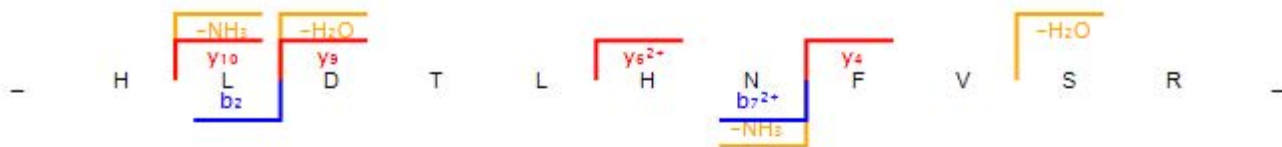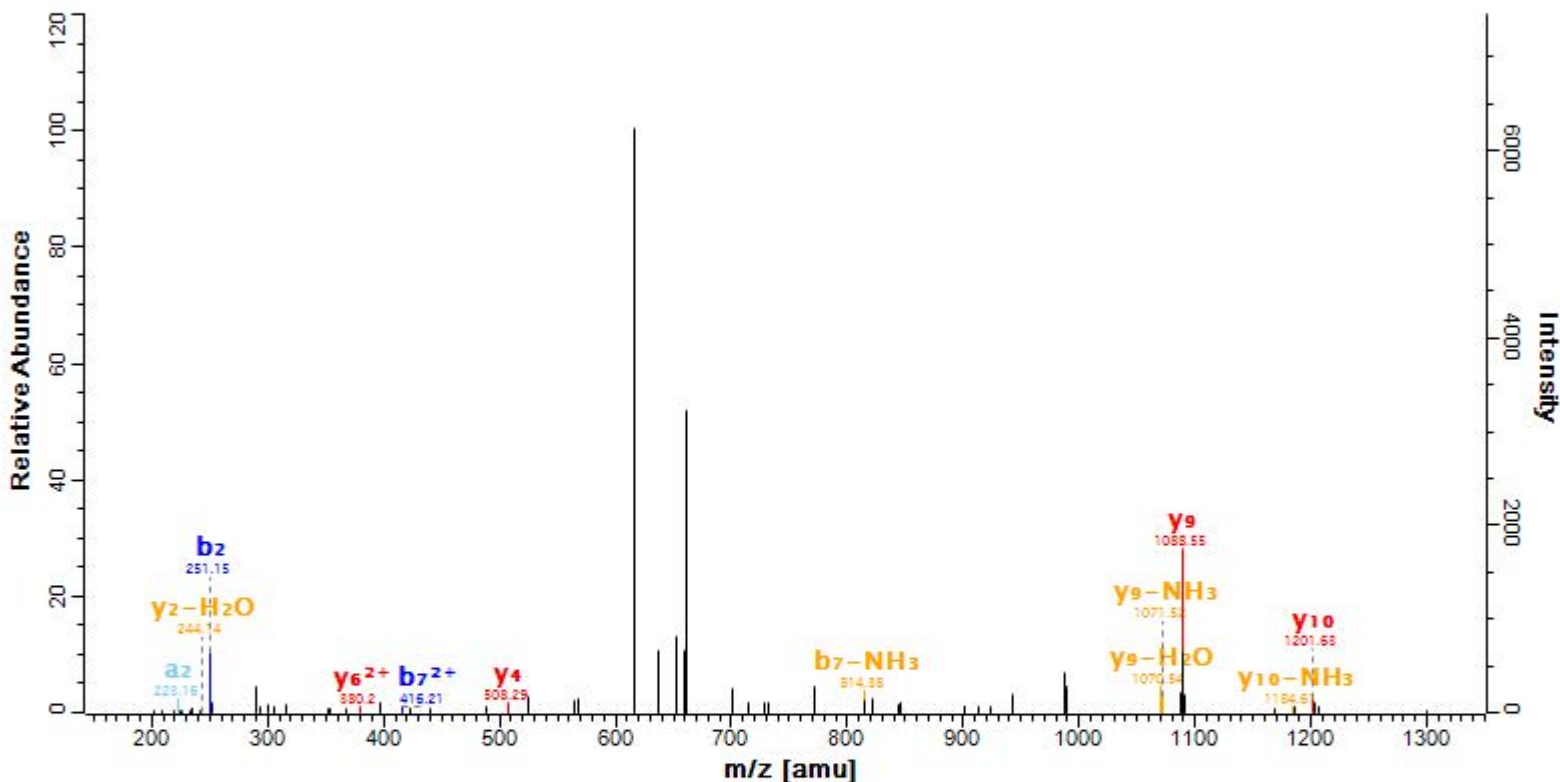

#### precursor information

|                   |                 |
|-------------------|-----------------|
| Mass:             | 1337.68311      |
| m/z:              | 669.84883       |
| Charge:           | 2+              |
| Retentiontime:    | 10.601613044738 |
| Score:            | 60.51846        |
| Mass Error [ppm]: | -0.68974        |
| PEP:              | 0.01371         |
| Precursor Type:   | MULTI           |

#### general information

|                       |             |
|-----------------------|-------------|
| Annotation:           | 6 of 11     |
| AminoAcids Coverage:  | 55 %        |
| Intensity Coverage:   | 17 %        |
| Peak Coverage:        | 14 %        |
| Protein Localisation: | 702 ... 712 |

|        | a ion         | b <sup>2+</sup> ion | b ion         |    | seq |    | y ion         | y <sup>2+</sup> ion |
|--------|---------------|---------------------|---------------|----|-----|----|---------------|---------------------|
|        | Δ dalton mass | Δ dalton mass       | Δ dalton mass |    |     |    | Δ dalton mass | Δ dalton mass       |
|        | 110.1         | 138.1               | 138.1         | 1  | H   | 10 |               |                     |
| +0.039 | 223.2         | 251.2               | -0.05 251.2   | 2  | L   | 9  | 1202          | -0.11 1202          |
|        | 338.2         | 366.2               | 366.2         | 3  | D   | 8  | 1089          | -0.01 1089          |
|        | 439.2         | 467.2               | 467.2         | 4  | T   | 7  | 973.5         | 973.5               |
|        | 552.3         | 580.3               | 580.3         | 5  | L   | 6  | 872.5         | 872.5               |
|        | 689.4         | 717.4               | 717.4         | 6  | H   | 5  | 759.4         | 380.2 +0.19         |
|        | 803.4         | +0.129 916.2        | 831.4         | 7  | N   | 4  | 622.3         | 622.3               |
|        | 950.5         | 978.5               | 978.5         | 8  | F   | 3  | 508.3         | +0.11 508.3         |
|        | 1050          | 1078                | 1078          | 9  | V   | 2  | 361.2         | 361.2               |
|        | 1137          | 1165                | 1165          | 10 | S   | 1  | 262.2         | 262.2               |
|        |               |                     |               | 11 | R   | 0  | 175.1         | 175.1               |

Scan number 1152 Raw file LNCAP\_Silac\_23F10\_set2\_08  
 Method ITMS; CID Pepti... 72.53

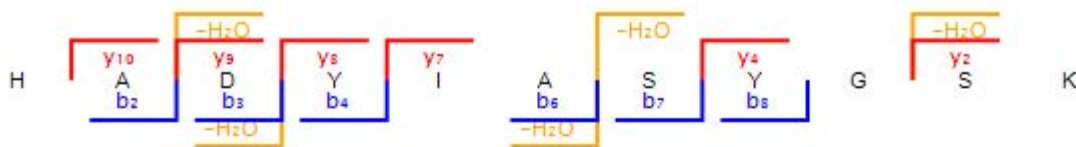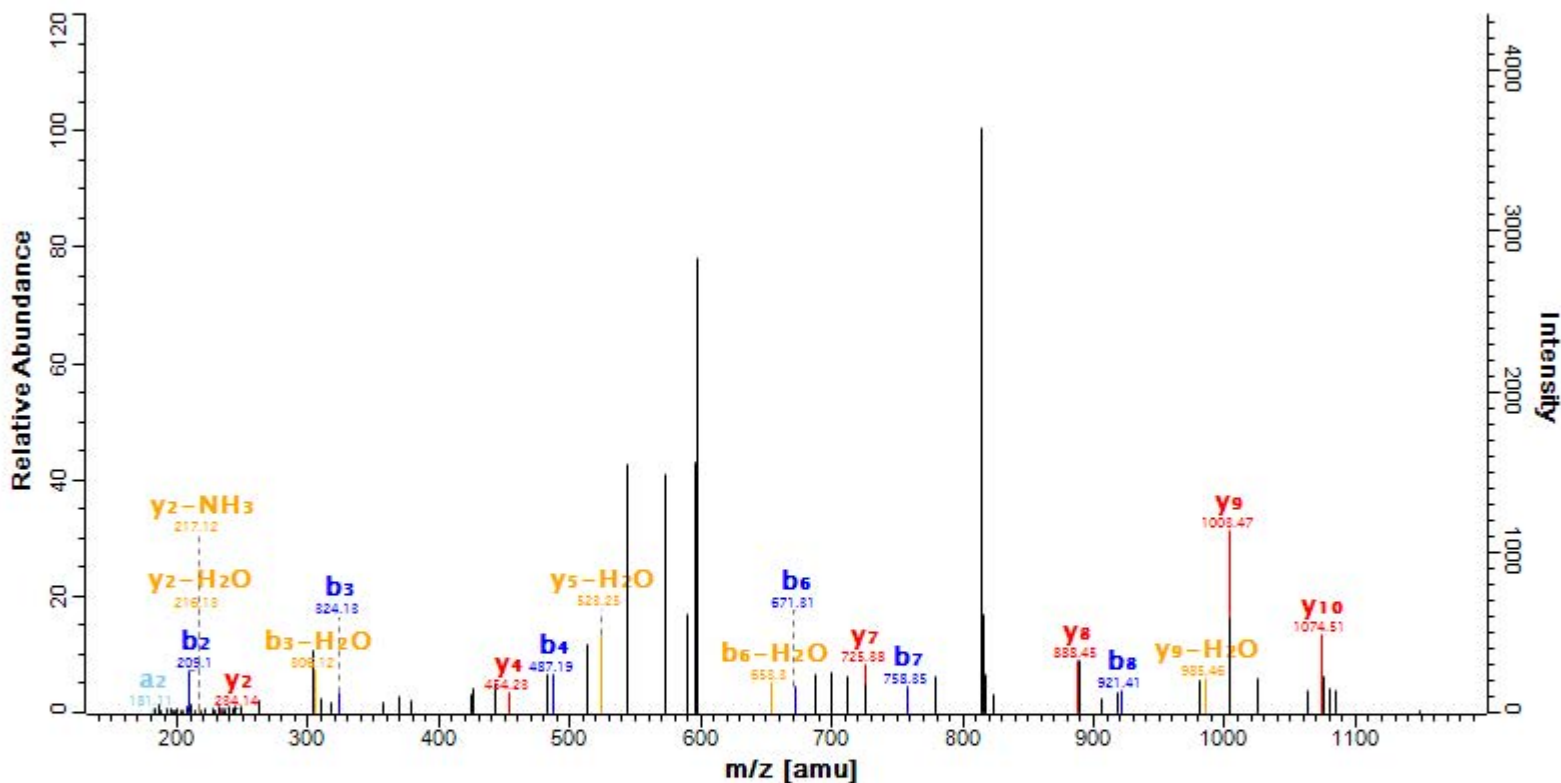

#### precursor information

|                   |                 |
|-------------------|-----------------|
| Mass:             | 1210.56185      |
| m/z:              | 606.2882        |
| Charge:           | 2+              |
| Retentiontime:    | 10.617179870605 |
| Score:            | 72.53116        |
| Mass Error [ppm]: | 0.00077017      |
| PEP:              | 0.0052226       |
| Precursor Type:   | MULTI           |

#### general information

|                       |           |
|-----------------------|-----------|
| Annotation:           | 8 of 11   |
| AminoAcids Coverage:  | 73 %      |
| Intensity Coverage:   | 19 %      |
| Peak Coverage:        | 19 %      |
| Protein Localisation: | 23 ... 33 |

| a ion     |          | b ion     |          |     |   | y ion    |                    |
|-----------|----------|-----------|----------|-----|---|----------|--------------------|
| Δ dalton  | mass     | Δ dalton  | mass     | seq |   | Δ dalton | mass               |
|           | 110.0713 |           | 138.0662 | 1   | H | 10       |                    |
| +0.028881 | 181.1084 | +0.004104 | 209.1033 | 2   | A | 9        | 1074.51 -0.07931   |
|           | 296.1353 | -0.09616  | 324.1302 | 3   | D | 8        | 1003.473 -0.04738  |
|           | 459.1987 | -0.03989  | 487.1936 | 4   | Y | 7        | 888.4462 +0.03138  |
|           | 572.2827 |           | 600.2776 | 5   | I | 6        | 725.3828 -0.04634  |
|           | 643.3198 | +0.278327 | 671.3148 | 6   | A | 5        | 612.2988           |
|           | 730.3519 | -0.17082  | 758.3468 | 7   | S | 4        | 541.2617           |
|           | 893.4152 | +0.186083 | 921.4101 | 8   | Y | 3        | 454.2296 +0.083974 |
|           | 950.4367 |           | 978.4316 | 9   | G | 2        | 291.1663           |
|           | 1037.469 |           | 1065.464 | 10  | S | 1        | 234.1448 +0.122074 |
|           |          |           |          | 11  | K | 0        | 147.1128           |

Scan number 1295 Raw file LNCAP\_Silac\_23F10\_set2\_08  
 Method ITMS; CID Pepti... 228.12

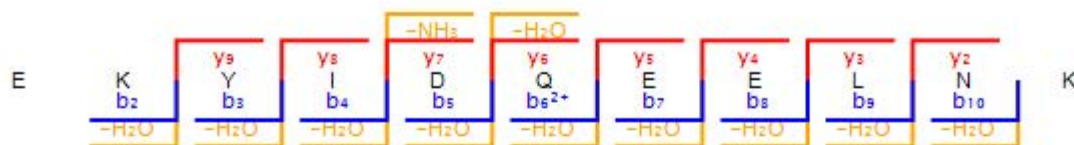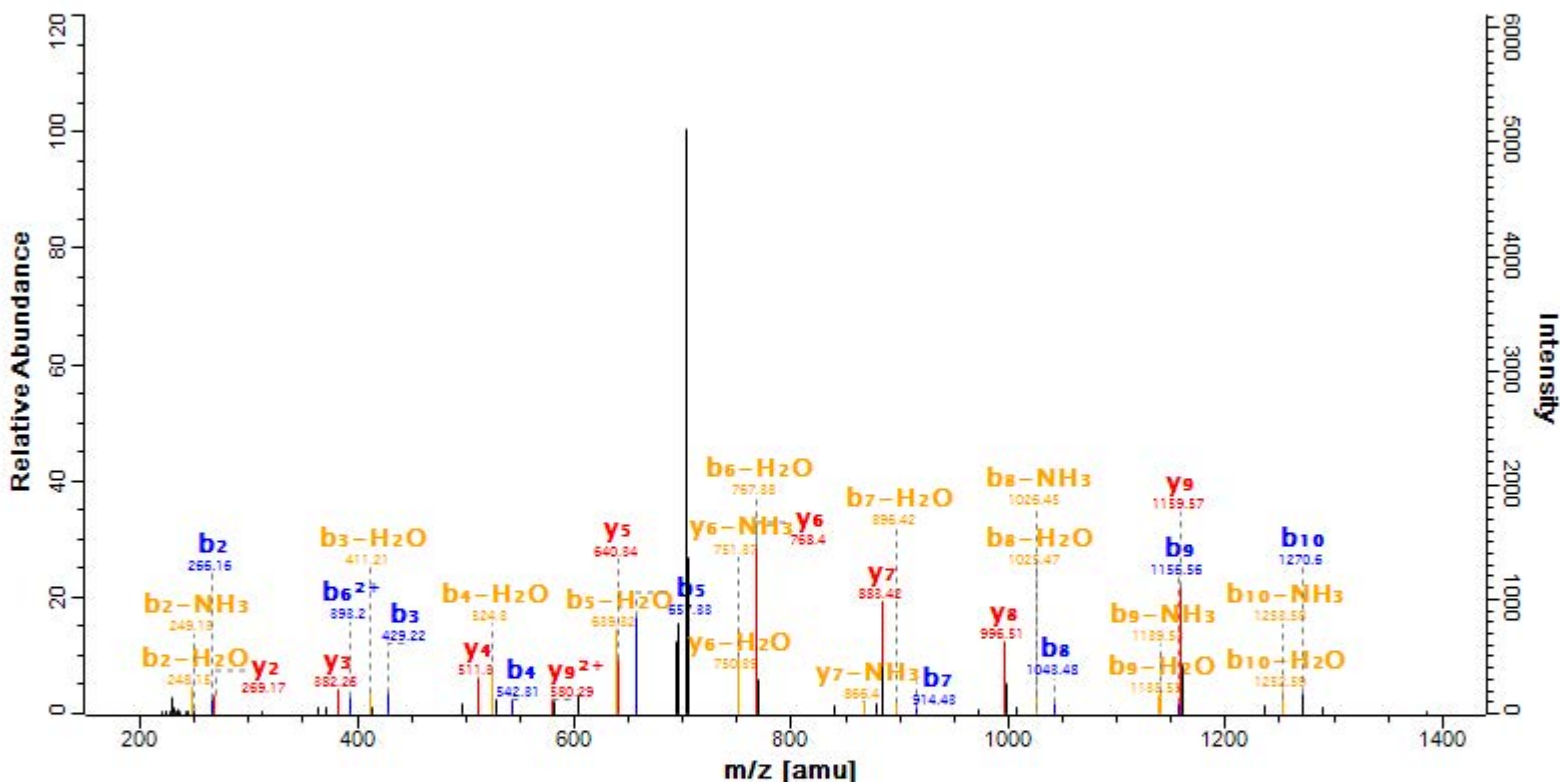

#### precursor information

|                   |                 |
|-------------------|-----------------|
| Mass:             | 1407.6884       |
| m/z:              | 704.85148       |
| Charge:           | 2+              |
| Retentiontime:    | 11.335071563720 |
| Score:            | 228.1163        |
| Mass Error [ppm]: | 0.15904         |
| PEP:              | 1.3525E-21      |
| Precursor Type:   | MULTI           |

#### general information

|                       |             |
|-----------------------|-------------|
| Annotation:           | 9 of 11     |
| AminoAcids Coverage:  | 82 %        |
| Intensity Coverage:   | 50 %        |
| Peak Coverage:        | 38 %        |
| Protein Localisation: | 404 ... 414 |

| b <sup>2+</sup> ion |        | b ion    |        | seq |   |    | y ion    |         | y <sup>2+</sup> ion |        |
|---------------------|--------|----------|--------|-----|---|----|----------|---------|---------------------|--------|
| Δ dalton            | mass   | Δ dalton | mass   |     |   |    | Δ dalton | mass    | Δ dalton            | mass   |
|                     | 130.05 |          | 130.05 | 1   | E | 10 |          |         |                     |        |
|                     | 266.16 | -0.131   | 266.16 | 2   | K | 9  | 1295.7   |         | 1295.7              |        |
|                     | 429.22 | -0.096   | 429.22 | 3   | Y | 8  | 1159.6   | -0.008  | 580.29              | -0.061 |
|                     | 542.31 | +0.1324  | 542.31 | 4   | I | 7  | 996.51   | -0.088  | 996.51              |        |
|                     | 657.33 | +0.1165  | 657.33 | 5   | D | 6  | 883.42   | -0.036  | 883.42              |        |
| +0.1048             | 393.2  |          | 785.39 | 6   | Q | 5  | 768.4    | +0.0455 | 768.4               |        |
|                     | 914.43 | +0.1731  | 914.43 | 7   | E | 4  | 640.34   | +0.0104 | 640.34              |        |
|                     | 1043.5 | -0.395   | 1043.5 | 8   | E | 3  | 511.3    | +0.0702 | 511.3               |        |
|                     | 1156.6 | -0.078   | 1156.6 | 9   | L | 2  | 382.25   | +0.0754 | 382.25              |        |
|                     | 1270.6 | +0.1049  | 1270.6 | 10  | N | 1  | 269.17   | -0.165  | 269.17              |        |
|                     |        |          |        | 11  | K | 0  | 155.13   |         | 155.13              |        |

Scan number 1575 Raw file LNCAP\_Silac\_23F10\_set2\_08  
 Method ITMS: CID Pepti... 120.06

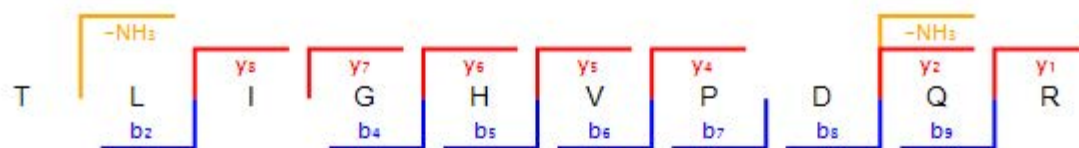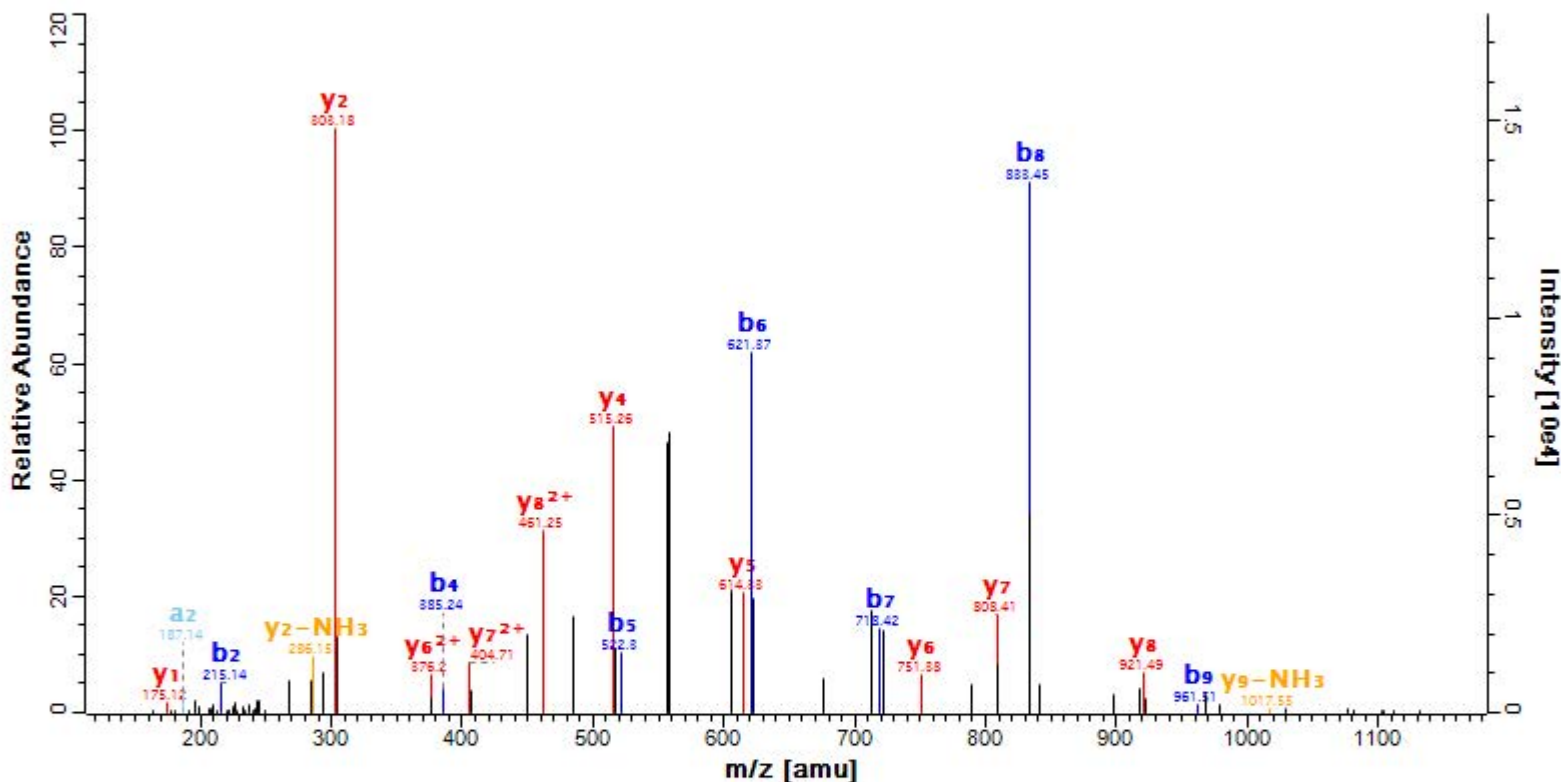

#### precursor information

|                   |                 |
|-------------------|-----------------|
| Mass:             | 1134.61499      |
| m/z:              | 568.31477       |
| Charge:           | 2+              |
| Retentiontime:    | 12.770462036132 |
| Score:            | 120.0616        |
| Mass Error [ppm]: | 0.38395         |
| PEP:              | 0.00028136      |
| Precursor Type:   | MULTI           |

|                       |             |
|-----------------------|-------------|
| Annotation:           | 9 of 10     |
| AminoAcids Coverage:  | 90 %        |
| Intensity Coverage:   | 56 %        |
| Peak Coverage:        | 21 %        |
| Protein Localisation: | 235 ... 244 |

| a ion    |        | b ion    |        |    |     |   | y ion    |         | y <sup>2+</sup> ion |         |
|----------|--------|----------|--------|----|-----|---|----------|---------|---------------------|---------|
| Δ dalton | mass   | Δ dalton | mass   |    | seq |   | Δ dalton | mass    | Δ dalton            | mass    |
|          | 74.06  |          | 102.05 | 1  | T   | 9 |          |         |                     |         |
| +0.0643  | 187.14 | -0.04    | 215.14 | 2  | L   | 8 | 1034.6   |         | 1034.6              |         |
|          | 300.23 |          | 328.22 | 3  | I   | 7 | 921.49   | +0.0253 | 461.25              | +0.2423 |
|          | 357.25 | -0.386   | 385.24 | 4  | G   | 6 | 808.41   | +0.0692 | 404.71              | +0.0459 |
|          | 494.31 | -0.069   | 522.3  | 5  | H   | 5 | 751.38   | +0.0195 | 376.2               | -0.077  |
|          | 593.38 | +0.0069  | 621.37 | 6  | V   | 4 | 614.33   | +0.0428 | 614.33              |         |
|          | 690.43 | +0.0066  | 718.42 | 7  | P   | 3 | 515.26   | -0.048  | 515.26              |         |
|          | 805.46 | +0.0254  | 833.45 | 8  | D   | 2 | 418.2    |         | 418.2               |         |
|          | 933.52 | +0.253   | 961.51 | 9  | Q   | 1 | 303.18   | +0.0047 | 303.18              |         |
|          |        |          |        | 10 | R   | 0 | 175.12   | -0.077  | 175.12              |         |

Scan number 1706 Raw file LNCAP\_Silac\_23F10\_set2\_08  
 Method ITMS: CID Pepti... 155.43

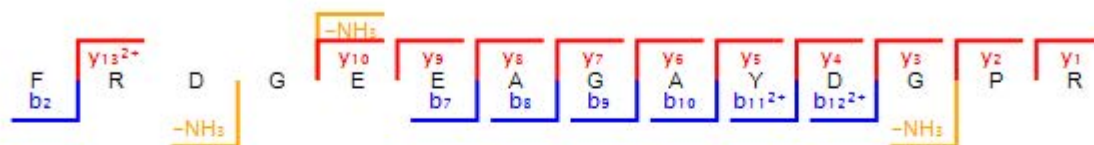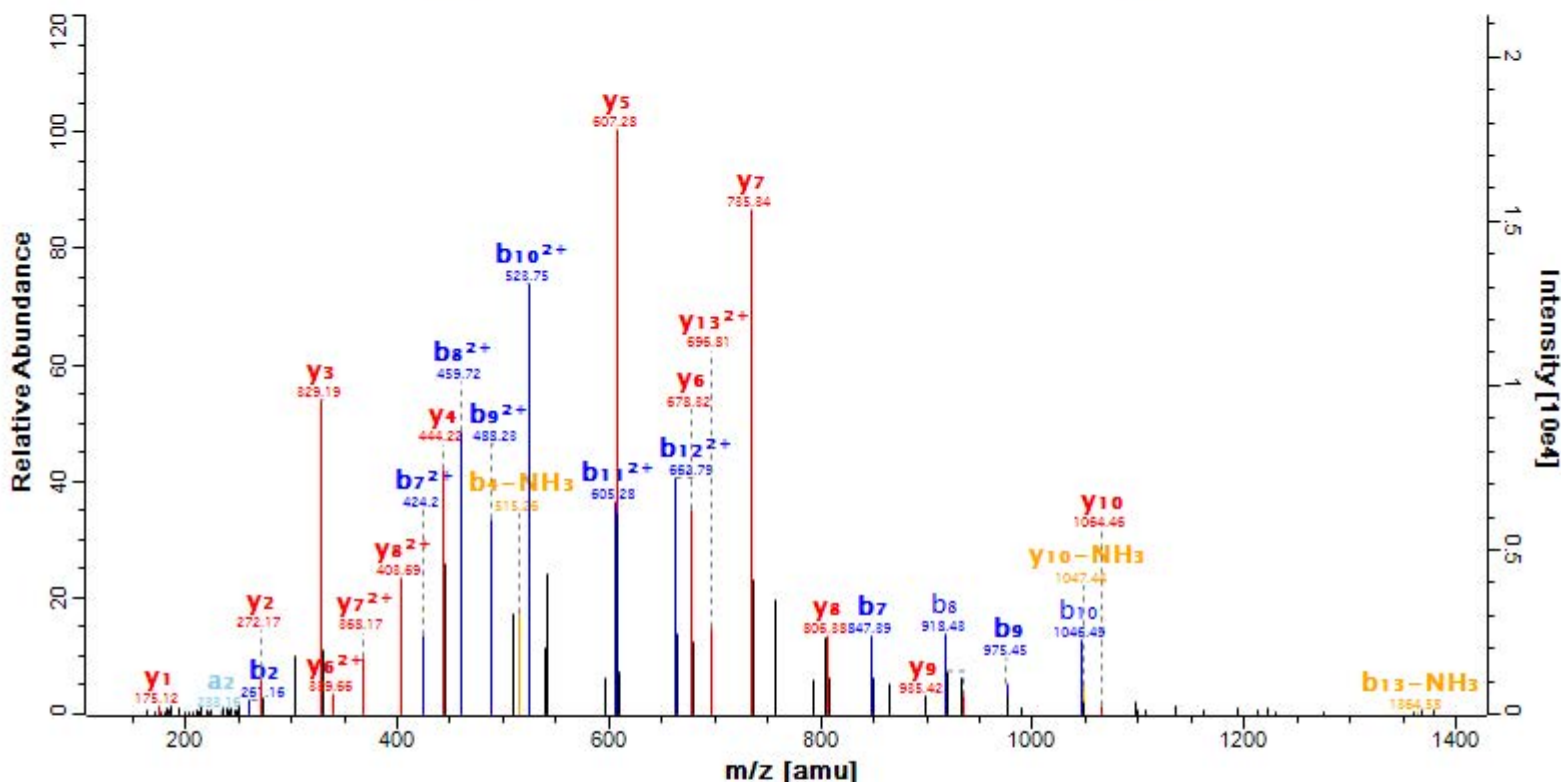

#### precursor information

|                   |                 |
|-------------------|-----------------|
| Mass:             | 1651.75898      |
| m/z:              | 551.5936        |
| Charge:           | 3+              |
| Retentiontime:    | 13.451230049133 |
| Score:            | 155.4334        |
| Mass Error [ppm]: | -0.044085       |
| PEP:              | 4.8213E-09      |
| Precursor Type:   | ISO             |

#### general information

|                       |             |
|-----------------------|-------------|
| Annotation:           | 13 of 15    |
| AminoAcids Coverage:  | 87 %        |
| Intensity Coverage:   | 70 %        |
| Peak Coverage:        | 27 %        |
| Protein Localisation: | 105 ... 119 |

| a ion         |               | b <sup>2+</sup> ion |               | b ion         |               | seq |               |               | y ion         |               | y <sup>2+</sup> ion |               |
|---------------|---------------|---------------------|---------------|---------------|---------------|-----|---------------|---------------|---------------|---------------|---------------------|---------------|
| Δ dalton mass | Δ dalton mass | Δ dalton mass       | Δ dalton mass | Δ dalton mass | Δ dalton mass | seq | Δ dalton mass | Δ dalton mass | Δ dalton mass | Δ dalton mass | Δ dalton mass       | Δ dalton mass |
| 86.1          |               | 114.1               |               | 114.1         |               | 1   | I             | 14            |               |               |                     |               |
| -0.1          | 233.2         | 261.2               | -0.15         | 261.2         |               | 2   | F             | 13            | 1540          |               | 1540                |               |
|               | 389.3         | 417.3               |               | 417.3         |               | 3   | R             | 12            | 1393          |               | 696.8               | +0.260        |
|               | 504.3         | 532.3               |               | 532.3         |               | 4   | D             | 11            | 1237          |               | 1237                |               |
|               | 561.3         | 589.3               |               | 589.3         |               | 5   | G             | 10            | 1121          |               | 1121                |               |
|               | 690.4         | 718.4               |               | 718.4         |               | 6   | E             | 9             | 1064          | -0.01         | 1064                |               |
|               | 819.4         | +0.029424.2         | +0.018847.4   |               |               | 7   | E             | 8             | 935.4         | +0.098        | 935.4               |               |
|               | 890.4         | +0.088459.7         | +0            | 918.4         |               | 8   | A             | 7             | 806.4         | +0.084        | 403.7               | +0.010        |
|               | 947.5         | +0.217488.2         | +0.191975.5   |               |               | 9   | G             | 6             | 735.3         | +0.092        | 368.2               | +0.110        |
|               | 1018          | +0.19523.7          | +0.0081046    |               |               | 10  | A             | 5             | 678.3         | +0.046        | 339.7               | +0.089        |
|               | 1182          | +0.165605.3         |               | 1210          |               | 11  | Y             | 4             | 607.3         | -0.04         | 607.3               |               |
|               | 1297          | +0.287662.8         |               | 1325          |               | 12  | D             | 3             | 444.2         | -0.01         | 444.2               |               |
|               | 1354          |                     |               | 1382          |               | 13  | G             | 2             | 329.2         | -0.04         | 329.2               |               |
|               | 1451          |                     |               | 1479          |               | 14  | P             | 1             | 272.2         | +0.153        | 272.2               |               |
|               |               |                     |               |               |               | 15  | R             | 0             | 175.1         | -0.07         | 175.1               |               |

Scan number 1796 Raw file LNCAP\_Silac\_23F10\_set2\_08  
 Method ITMS: CID Pepti... 143.31

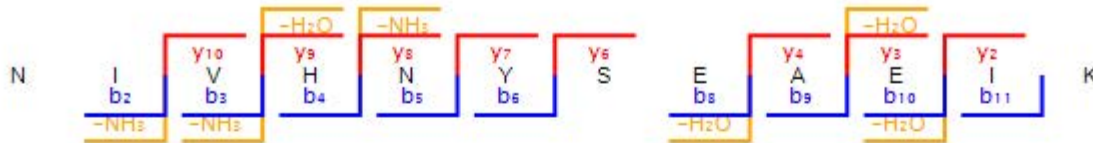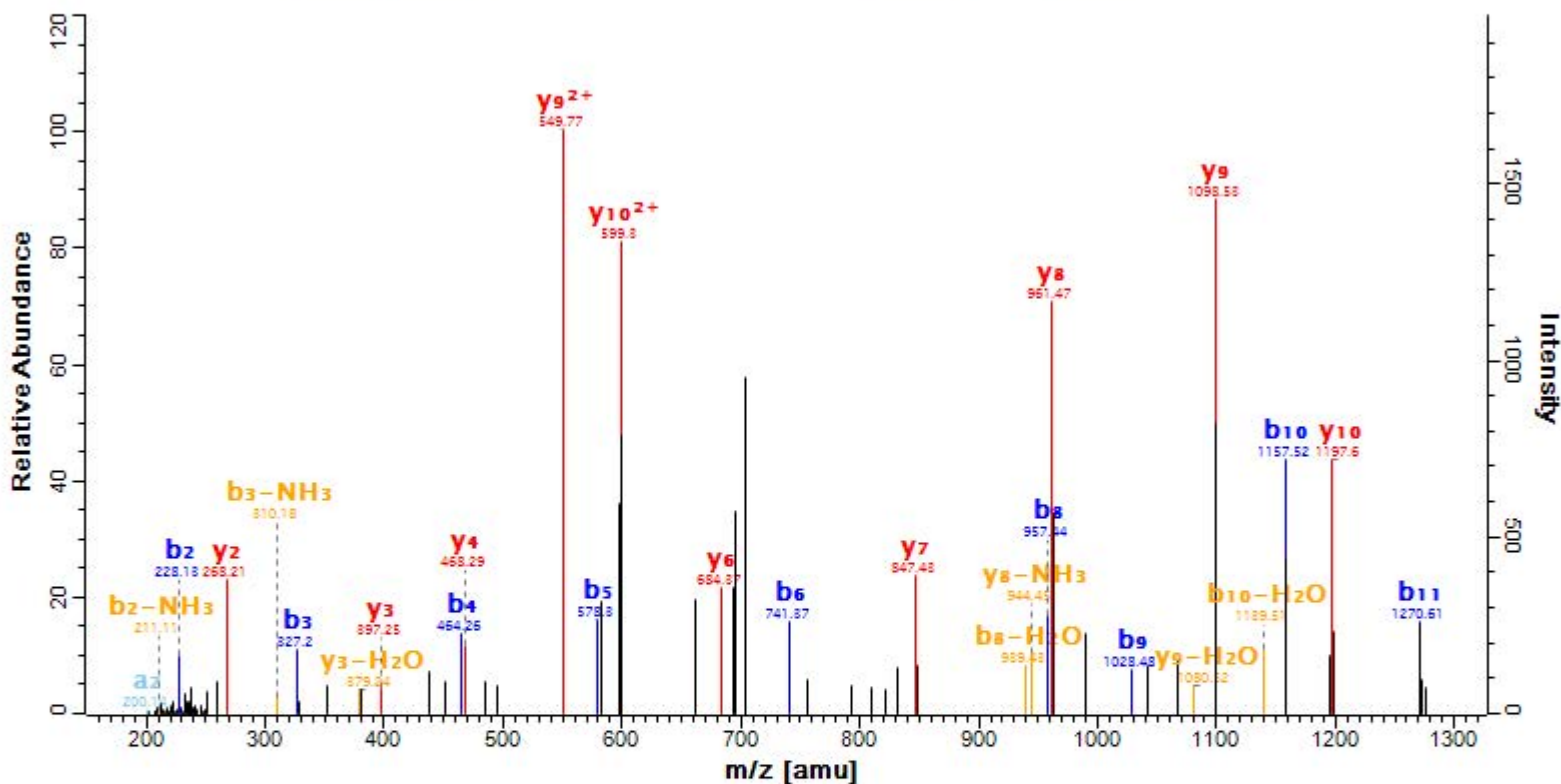

#### precursor information

|                   |                 |
|-------------------|-----------------|
| Mass:             | 1415.70476      |
| m/z:              | 708.85966       |
| Charge:           | 2+              |
| Retentiontime:    | 13.921246528625 |
| Score:            | 143.3089        |
| Mass Error [ppm]: | 0.18997         |
| PEP:              | 1.3551E-05      |
| Precursor Type:   | MULTI           |

#### general information

|                       |             |
|-----------------------|-------------|
| Annotation:           | 10 of 12    |
| AminoAcids Coverage:  | 83 %        |
| Intensity Coverage:   | 52 %        |
| Peak Coverage:        | 28 %        |
| Protein Localisation: | 123 ... 134 |

| a ion    |        | b ion    |        | seq |   |    | y ion    |         | y <sup>2+</sup> ion |         |
|----------|--------|----------|--------|-----|---|----|----------|---------|---------------------|---------|
| Δ dalton | mass   | Δ dalton | mass   |     |   |    | Δ dalton | mass    | Δ dalton            | mass    |
|          | 87.055 |          | 115.05 | 1   | N | 11 |          |         |                     |         |
| -0.051   | 200.14 | +0.04    | 228.13 | 2   | I | 10 | 1310.7   |         | 1310.7              |         |
|          | 299.21 | +0.0645  | 327.2  | 3   | V | 9  | 1197.6   | -0.23   | 599.3               | +0.0544 |
|          | 436.27 | -0.021   | 464.26 | 4   | H | 8  | 1098.5   | -0.065  | 549.77              | +0.1453 |
|          | 550.31 | +0.2306  | 578.3  | 5   | N | 7  | 961.47   | +0.0009 | 961.47              |         |
|          | 713.37 | +0.138   | 741.37 | 6   | Y | 6  | 847.43   | -0.022  | 847.43              |         |
|          | 800.4  |          | 828.4  | 7   | S | 5  | 684.37   | -0.233  | 684.37              |         |
|          | 929.45 | -0.086   | 957.44 | 8   | E | 4  | 597.33   |         | 597.33              |         |
|          | 1000.5 | +0.2021  | 1028.5 | 9   | A | 3  | 468.29   | +0.2307 | 468.29              |         |
|          | 1129.5 | -0.074   | 1157.5 | 10  | E | 2  | 397.25   | +0.0322 | 397.25              |         |
|          | 1242.6 | -0.197   | 1270.6 | 11  | I | 1  | 268.21   | +0.1114 | 268.21              |         |
|          |        |          |        | 12  | K | 0  | 155.13   |         | 155.13              |         |

Scan number 1836 Raw file LNCAP\_Silac\_23F10\_set2\_08  
 Method ITMS: CID Pepti... 160.67

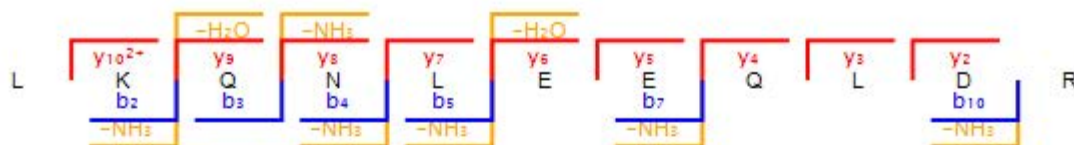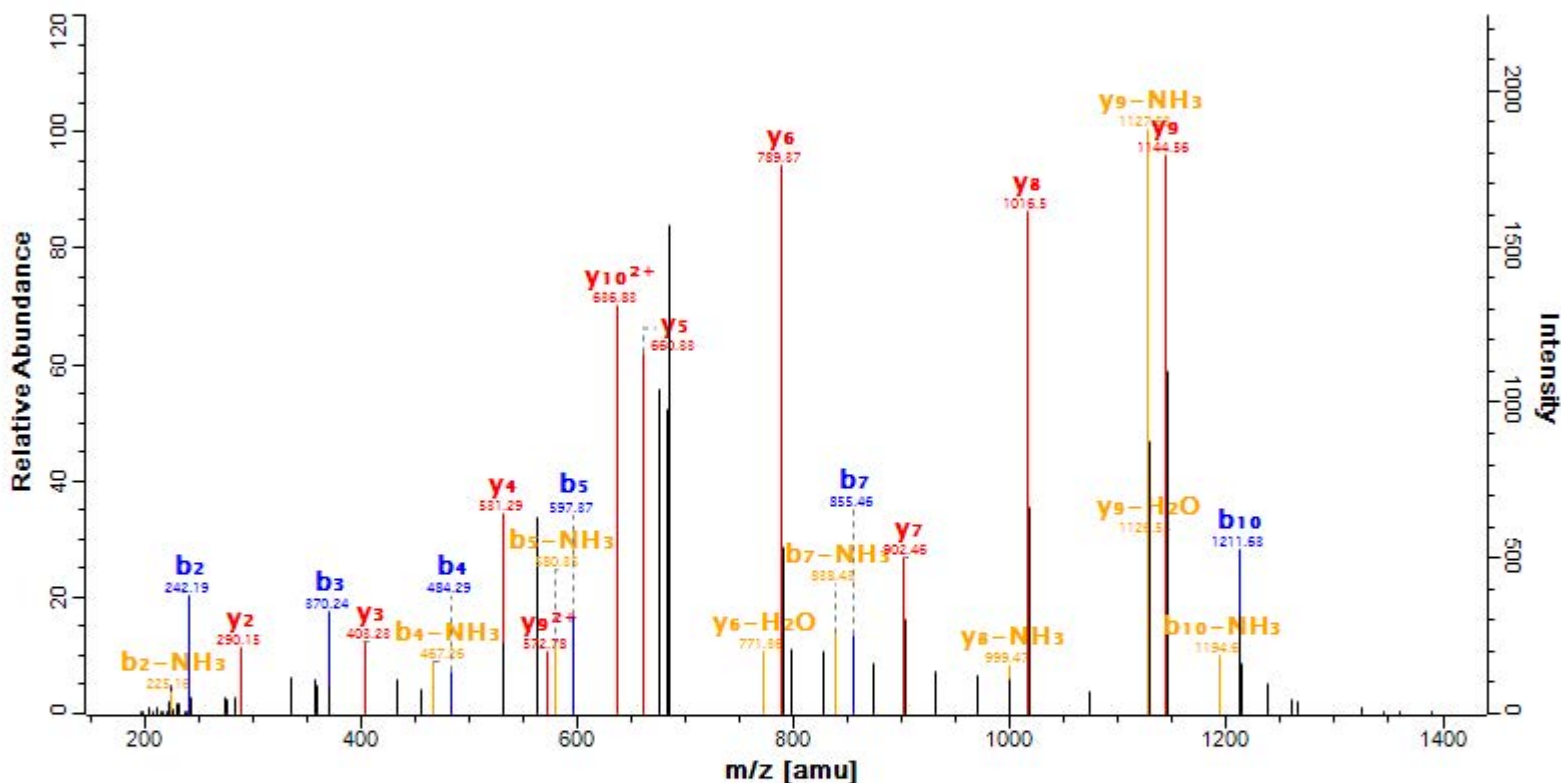

#### precursor information

|                   |                 |
|-------------------|-----------------|
| Mass:             | 1384.73074      |
| m/z:              | 693.37264       |
| Charge:           | 2+              |
| Retentiontime:    | 14.114624977111 |
| Score:            | 160.6748        |
| Mass Error [ppm]: | -0.2214         |
| PEP:              | 1.424E-06       |
| Precursor Type:   | MULTI           |

#### general information

|                       |           |
|-----------------------|-----------|
| Annotation:           | 9 of 11   |
| AminoAcids Coverage:  | 82 %      |
| Intensity Coverage:   | 56 %      |
| Peak Coverage:        | 30 %      |
| Protein Localisation: | 33 ... 43 |

| b ion     |          |     |   | y ion    |          | y <sup>2+</sup> ion |           |
|-----------|----------|-----|---|----------|----------|---------------------|-----------|
| Δ dalton  | mass     | seq |   | Δ dalton | mass     | Δ dalton            | mass      |
|           | 114.0913 | 1   | L | 10       |          |                     |           |
| -0.04098  | 242.1863 | 2   | K | 9        | 1272.654 | 636.8308            | +0.218856 |
| +0.043876 | 370.2449 | 3   | Q | 8        | 1144.559 | +0.01688            | 572.7833  |
| +0.179233 | 484.2878 | 4   | N | 7        | 1016.501 | -0.0291             | 1016.501  |
| +0.025527 | 597.3719 | 5   | L | 6        | 902.4578 | -0.03085            | 902.4578  |
|           | 726.4145 | 6   | E | 5        | 789.3737 | -0.01258            | 789.3737  |
| -0.00424  | 855.4571 | 7   | E | 4        | 660.3311 | +0.104478           | 660.3311  |
|           | 983.5156 | 8   | Q | 3        | 531.2885 | -0.006              | 531.2885  |
|           | 1096.6   | 9   | L | 2        | 403.23   | +0.093649           | 403.23    |
| -0.07916  | 1211.627 | 10  | D | 1        | 290.1459 | -0.03747            | 290.1459  |
|           |          | 11  | R | 0        | 175.119  |                     | 175.119   |

Scan number 1854 Raw file LNCAP\_Silac\_23F10\_set2\_08  
 Method ITMS; CID Pepti... 220.53

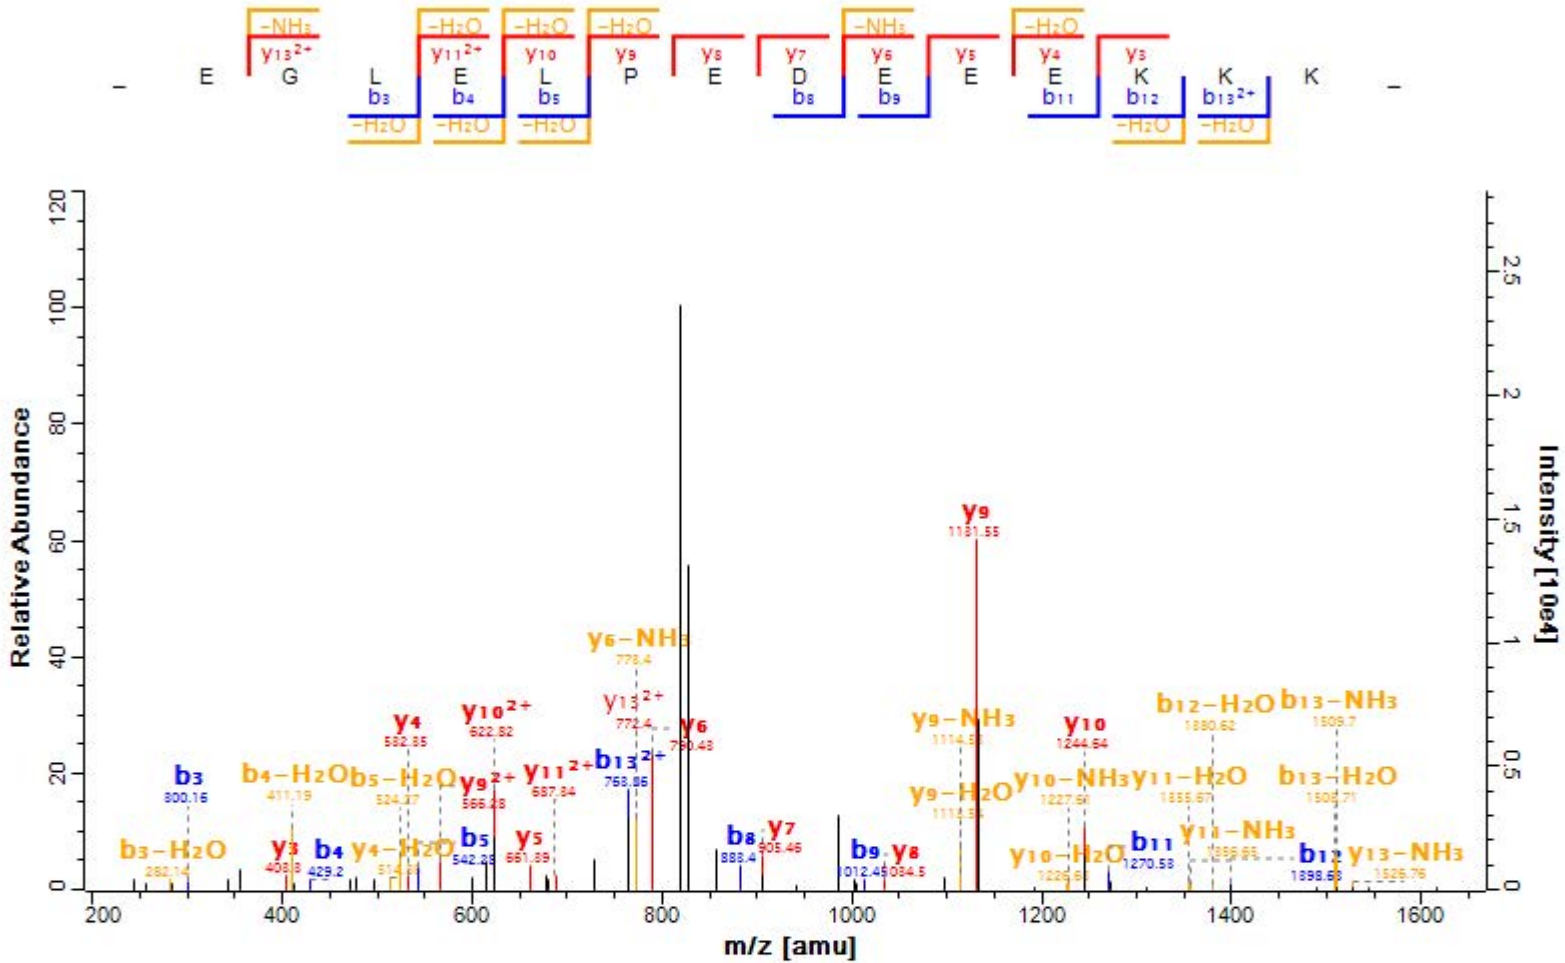

**precursor information**

|                   |                 |
|-------------------|-----------------|
| Mass:             | 1671.82032      |
| m/z:              | 836.91744       |
| Charge:           | 2+              |
| Retentiontime:    | 14.204671859741 |
| Score:            | 220.5303        |
| Mass Error [ppm]: | 0.0057468       |
| PEP:              | 8.3924E-35      |
| Precursor Type:   | ISO             |

**general information**

|                       |             |
|-----------------------|-------------|
| Annotation:           | 12 of 14    |
| AminoAcids Coverage:  | 86 %        |
| Intensity Coverage:   | 46 %        |
| Peak Coverage:        | 45 %        |
| Protein Localisation: | 669 ... 682 |

| b <sup>2+</sup> ion |        | b ion    |        | seq |   |    | y ion    |         | y <sup>2+</sup> ion |         |
|---------------------|--------|----------|--------|-----|---|----|----------|---------|---------------------|---------|
| Δ dalton            | mass   | Δ dalton | mass   |     |   |    | Δ dalton | mass    | Δ dalton            | mass    |
|                     | 130.05 |          | 130.05 | 1   | E | 13 |          |         |                     |         |
|                     | 187.07 |          | 187.07 | 2   | G | 12 | 1543.8   |         | 772.4               | +0.0095 |
|                     | 300.16 | +0.0556  | 300.16 | 3   | L | 11 | 1486.8   |         | 1486.8              |         |
|                     | 429.2  | +0.0376  | 429.2  | 4   | E | 10 | 1373.7   |         | 687.34              | +0.4355 |
|                     | 542.28 | +0.066   | 542.28 | 5   | L | 9  | 1244.6   | -0.113  | 622.82              | +0.0321 |
|                     | 639.33 |          | 639.33 | 6   | P | 8  | 1131.6   | +0.0051 | 566.28              | +0.1762 |
|                     | 768.38 |          | 768.38 | 7   | E | 7  | 1034.5   | +0.181  | 1034.5              |         |
|                     | 883.4  | -0.072   | 883.4  | 8   | D | 6  | 905.46   | +0.1224 | 905.46              |         |
|                     | 1012.4 | +0.0654  | 1012.4 | 9   | E | 5  | 790.43   | +0.0169 | 790.43              |         |
|                     | 1141.5 |          | 1141.5 | 10  | E | 4  | 661.39   | +0.112  | 661.39              |         |
|                     | 1270.5 | +0.0719  | 1270.5 | 11  | E | 3  | 532.35   | +0.0716 | 532.35              |         |
|                     | 1398.6 | +0.1382  | 1398.6 | 12  | K | 2  | 403.3    | +0.1024 | 403.3               |         |
| -0.046              | 763.86 |          | 1526.7 | 13  | K | 1  | 275.21   |         | 275.21              |         |
|                     |        |          |        | 14  | K | 0  | 147.11   |         | 147.11              |         |



Scan number 1873 Raw file LNCAP\_Silac\_23F10\_set2\_08  
 Method ITMS; CID Pepti... 56.23

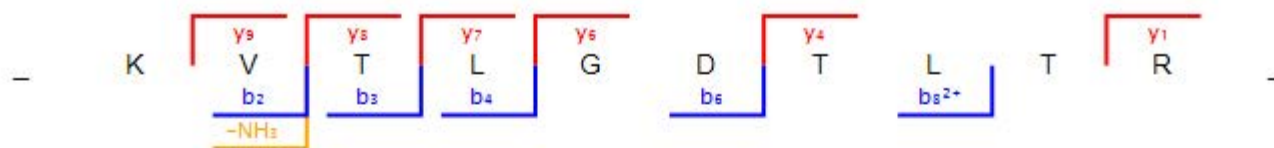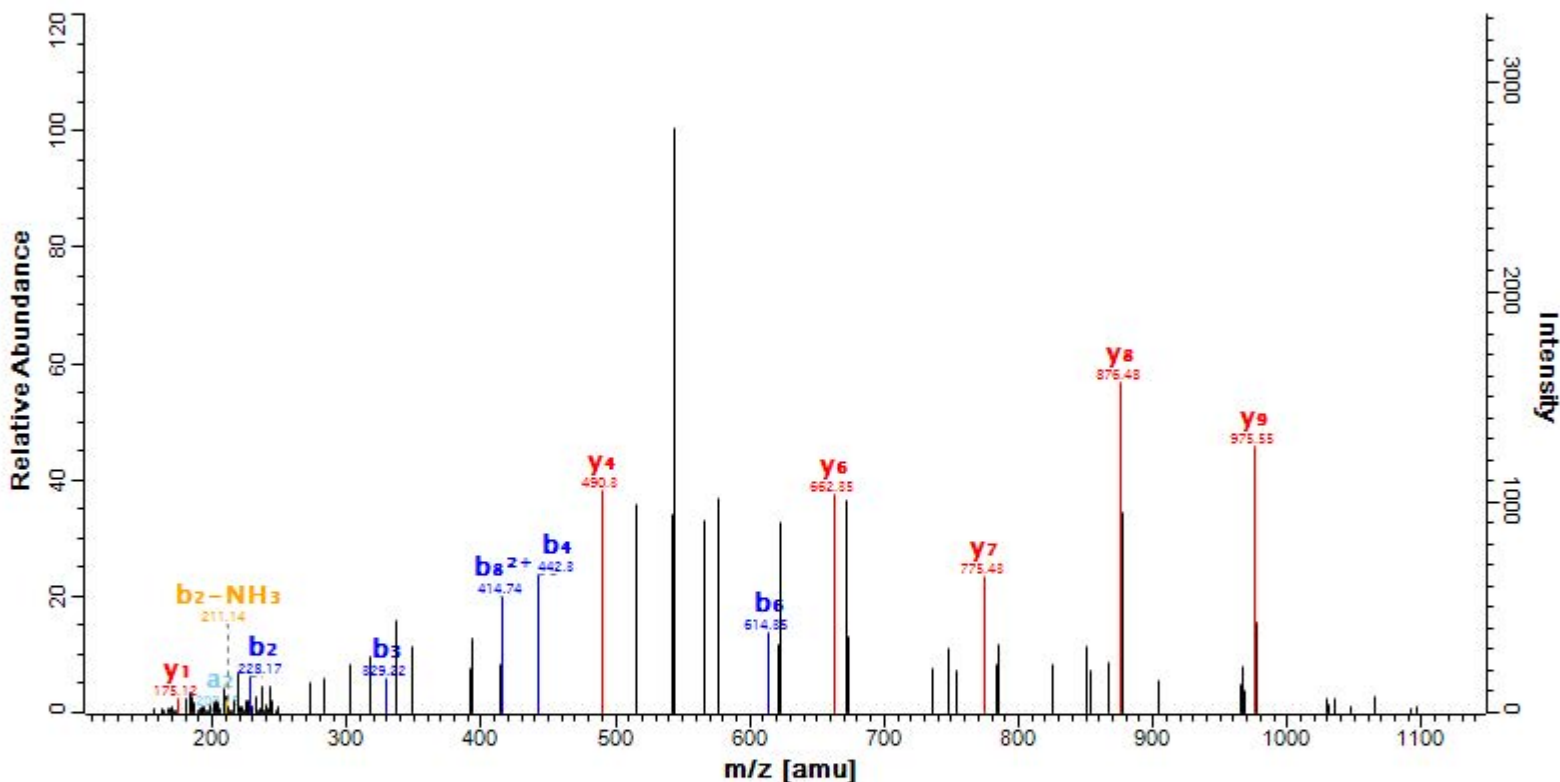

**precursor information**

|                   |                 |
|-------------------|-----------------|
| Mass:             | 1102.6354       |
| m/z:              | 552.32497       |
| Charge:           | 2+              |
| Retentiontime:    | 14.292401313781 |
| Score:            | 56.22507        |
| Mass Error [ppm]: | 0.70203         |
| PEP:              | 0.013158        |
| Precursor Type:   | MULTI           |

|                       |             |
|-----------------------|-------------|
| Annotation:           | 8 of 10     |
| AminoAcids Coverage:  | 80 %        |
| Intensity Coverage:   | 27 %        |
| Peak Coverage:        | 12 %        |
| Protein Localisation: | 874 ... 883 |

| a ion    |        | b <sup>2+</sup> ion |        | b ion    |        | y ion |   |          |                |
|----------|--------|---------------------|--------|----------|--------|-------|---|----------|----------------|
| Δ dalton | mass   | Δ dalton            | mass   | Δ dalton | mass   | seq   |   | Δ dalton | mass           |
|          | 101.11 |                     | 129.1  |          | 129.1  | 1     | K | 9        |                |
| -0.009   | 200.18 |                     | 228.17 | +0.0086  | 228.17 | 2     | V | 8        | 975.55 +0.0107 |
|          | 301.22 |                     | 329.22 | +0.0002  | 329.22 | 3     | T | 7        | 876.48 +0.0102 |
|          | 414.31 |                     | 442.3  | +0.4146  | 442.3  | 4     | L | 6        | 775.43 -0.093  |
|          | 471.33 |                     | 499.32 |          | 499.32 | 5     | G | 5        | 662.35 +0.0167 |
|          | 586.36 |                     | 614.35 | -0.047   | 614.35 | 6     | D | 4        | 605.33         |
|          | 687.4  |                     | 715.4  |          | 715.4  | 7     | T | 3        | 490.3 +0.0324  |
|          | 800.49 | +0.401              | 414.74 |          | 828.48 | 8     | L | 2        | 389.25         |
|          | 901.54 |                     | 929.53 |          | 929.53 | 9     | T | 1        | 276.17         |
|          |        |                     |        |          |        | 10    | R | 0        | 175.12 -0.004  |

Scan number 2038 Raw file LNCAP\_Silac\_23F10\_set2\_08  
 Method ITMS; CID Pepti... 79.15

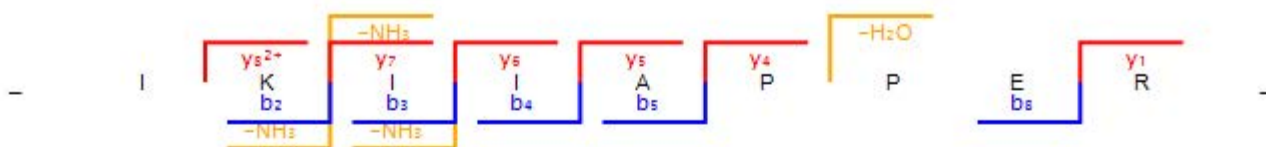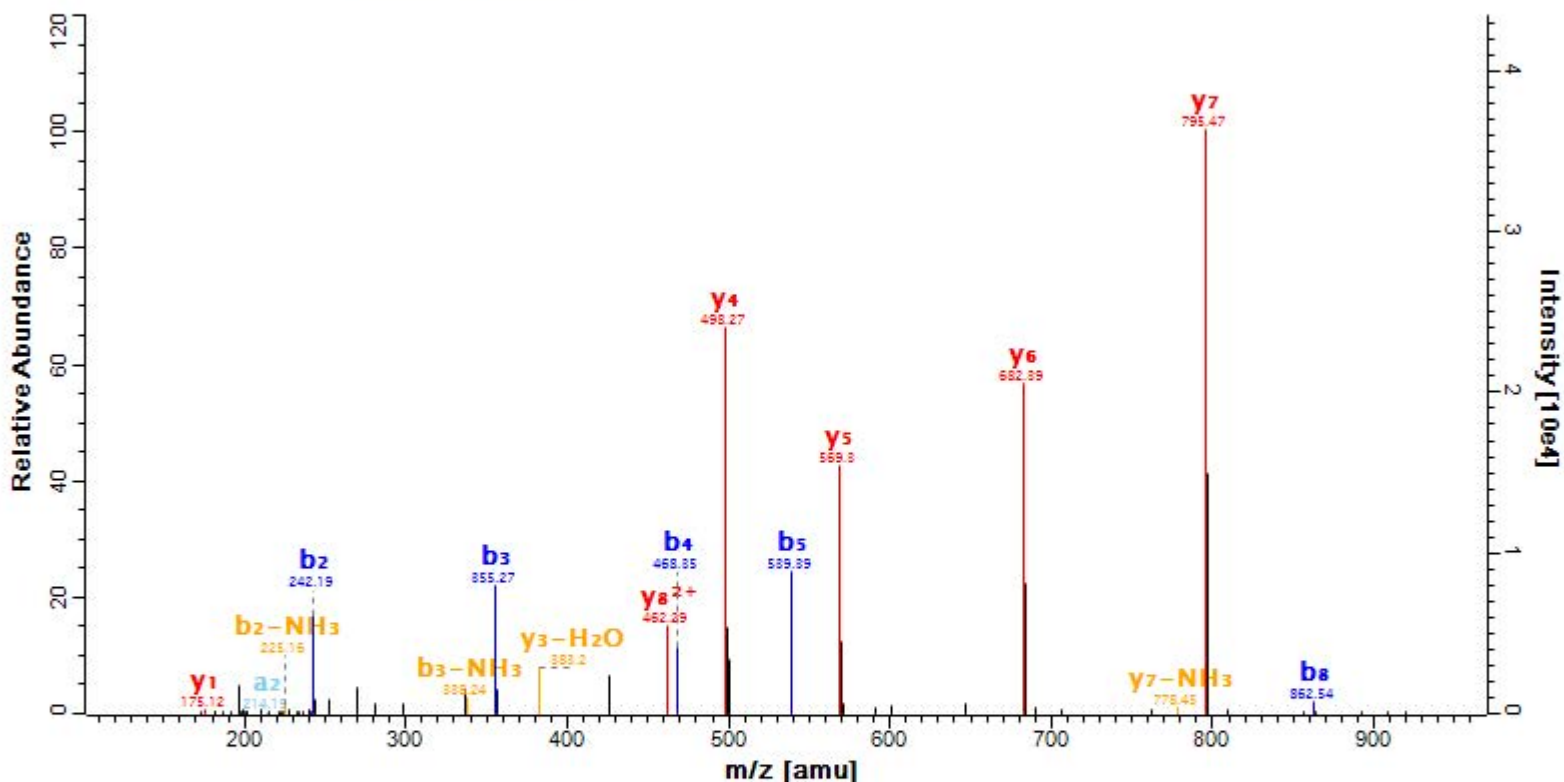

#### precursor information

|                       |                 |
|-----------------------|-----------------|
| Mass:                 | 1035.64424      |
| m/z:                  | 518.8294        |
| Charge:               | 2+              |
| Retentiontime:        | 15.134737968444 |
| Score:                | 79.14819        |
| Mass Error [ppm]:     | 0.17072         |
| PEP:                  | 0.0081715       |
| Precursor Type:       | MULTI           |
| Annotation:           | 8 of 9          |
| AminoAcids Coverage:  | 89 %            |
| Intensity Coverage:   | 70 %            |
| Peak Coverage:        | 20 %            |
| Protein Localisation: | 327 ... 335     |

| a ion    |        | b ion    |        | seq |   |   | y ion    |         | y <sup>2+</sup> ion |         |
|----------|--------|----------|--------|-----|---|---|----------|---------|---------------------|---------|
| Δ dalton | mass   | Δ dalton | mass   |     |   |   | Δ dalton | mass    | Δ dalton            | mass    |
|          | 86.096 |          | 114.09 | 1   | I | 8 |          |         |                     |         |
| +0.0328  | 214.19 | -0.005   | 242.19 | 2   | K | 7 | 923.57   |         | 462.29              | +0.1559 |
|          | 327.28 | +0.0375  | 355.27 | 3   | I | 6 | 795.47   | +0.02   | 795.47              |         |
|          | 440.36 | +0.0489  | 468.35 | 4   | I | 5 | 682.39   | +0.0019 | 682.39              |         |
|          | 511.4  | +0.0101  | 539.39 | 5   | A | 4 | 569.3    | +0.018  | 569.3               |         |
|          | 608.45 |          | 636.44 | 6   | P | 3 | 498.27   | +0.0184 | 498.27              |         |
|          | 705.5  |          | 733.5  | 7   | P | 2 | 401.21   |         | 401.21              |         |
|          | 834.54 | +0.1428  | 862.54 | 8   | E | 1 | 304.16   |         | 304.16              |         |
|          |        |          |        | 9   | R | 0 | 175.12   | +0.0068 | 175.12              |         |

Scan number 2072 Raw file LNCAP\_Silac\_23F10\_set2\_08  
 Method ITMS: CID Pepti... 120.57

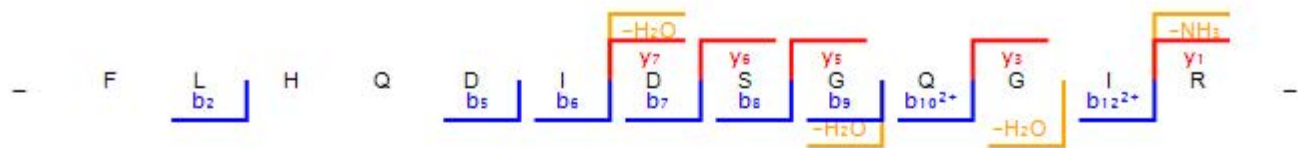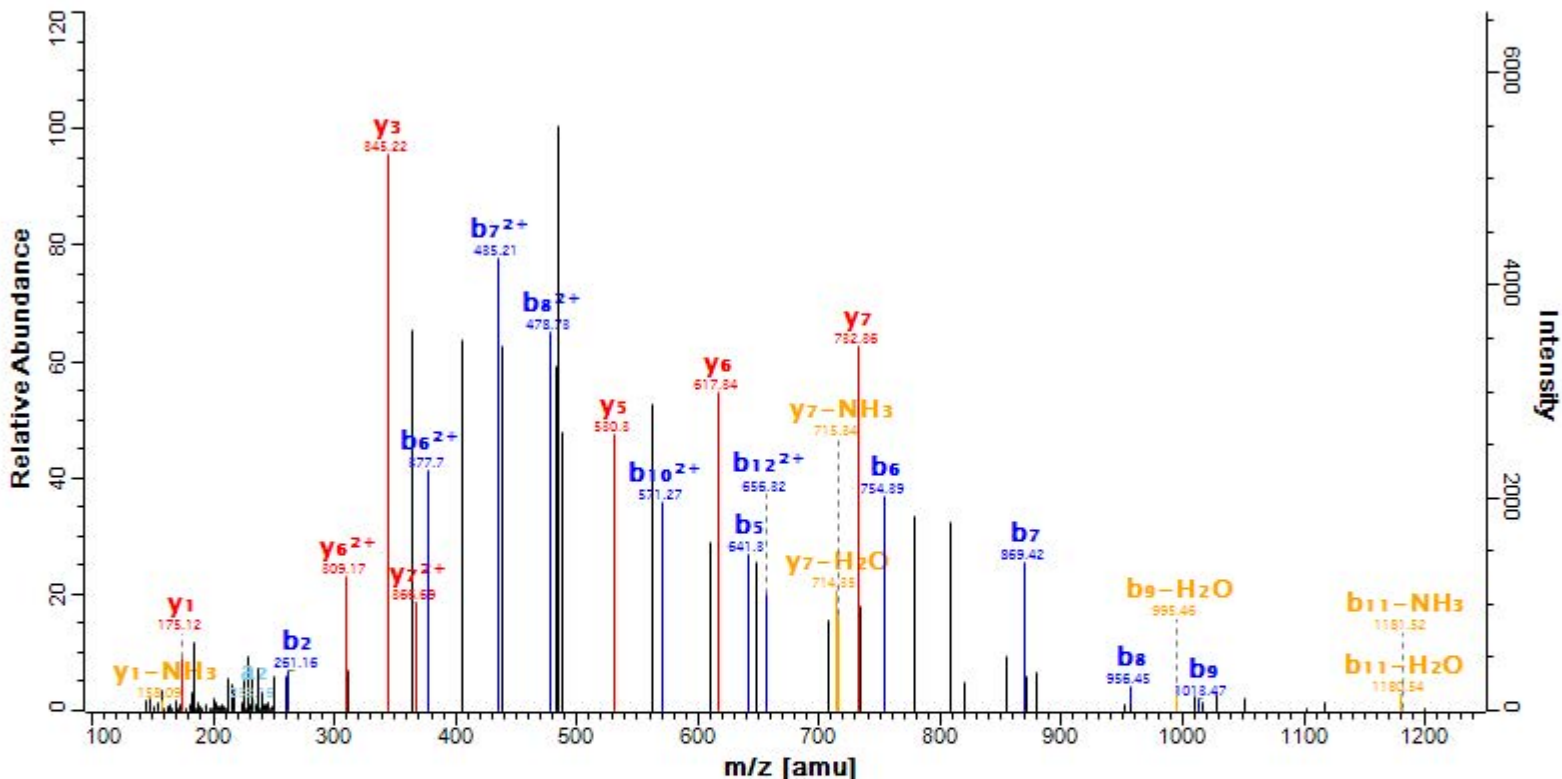

**precursor information**

|                   |                 |
|-------------------|-----------------|
| Mass:             | 1484.73688      |
| m/z:              | 495.91957       |
| Charge:           | 3+              |
| Retentiontime:    | 15.308121681213 |
| Score:            | 120.5736        |
| Mass Error [ppm]: | -0.21229        |
| PEP:              | 9.2888E-07      |
| Precursor Type:   | MULTI           |

**general information**

|                       |               |
|-----------------------|---------------|
| Annotation:           | 10 of 13      |
| AminoAcids Coverage:  | 77 %          |
| Intensity Coverage:   | 46 %          |
| Peak Coverage:        | 22 %          |
| Protein Localisation: | 1053 ... 1065 |

|       | a ion         | b <sup>2+</sup> ion | b ion         |            |    |               | y ion         | y <sup>2+</sup> ion |             |
|-------|---------------|---------------------|---------------|------------|----|---------------|---------------|---------------------|-------------|
|       | Δ dalton mass | Δ dalton mass       | Δ dalton mass | seq        |    | Δ dalton mass | Δ dalton mass |                     |             |
|       | 120.1         | 148.1               | 148.1         | 1          | F  | 12            |               |                     |             |
| -0.05 | 233.2         | 261.2               | +0.027261.2   | 2          | L  | 11            | 1339          | 1339                |             |
|       | 370.2         | 398.2               | 398.2         | 3          | H  | 10            | 1226          | 1226                |             |
|       | 498.3         | 526.3               | 526.3         | 4          | Q  | 9             | 1089          | 1089                |             |
|       | 613.3         | 641.3               | +0.017641.3   | 5          | D  | 8             | 960.5         | 960.5               |             |
|       | 726.4         | +0.155377.7         | -0.02 754.4   | 6          | I  | 7             | 845.4         | 845.4               |             |
|       | 841.4         | +0.18 435.2         | +0.075869.4   | 7          | D  | 6             | 732.4         | +0.047366.7         | +0.08:      |
|       | 928.5         | -0.1 478.7          | +0.17 956.4   | 8          | S  | 5             | 617.3         | +0 309.2            | +0.136      |
|       | 985.5         |                     | 1013          | +0.2291013 | 9  | G             | 4             | 530.3               | +0.067530.3 |
|       | 1114          | +0.187571.3         |               | 1142       | 10 | Q             | 3             | 473.3               | 473.3       |
|       | 1171          |                     | 1199          |            | 11 | G             | 2             | 345.2               | +0.008345.2 |
|       | 1284          | +0.039656.3         |               | 1312       | 12 | I             | 1             | 288.2               | 288.2       |
|       |               |                     |               |            | 13 | R             | 0             | 175.1               | -0.03 175.1 |



Scan number 287 Raw file LNCAP\_Silac\_23F10\_set2\_08  
 Method ITMS: CID Pepti... 131.44

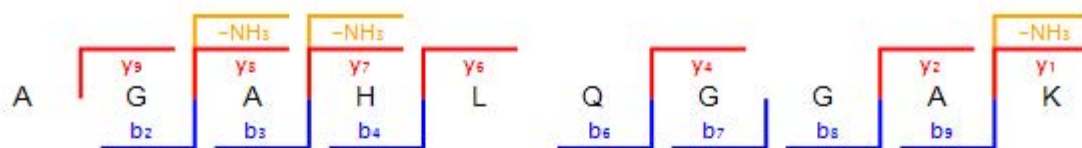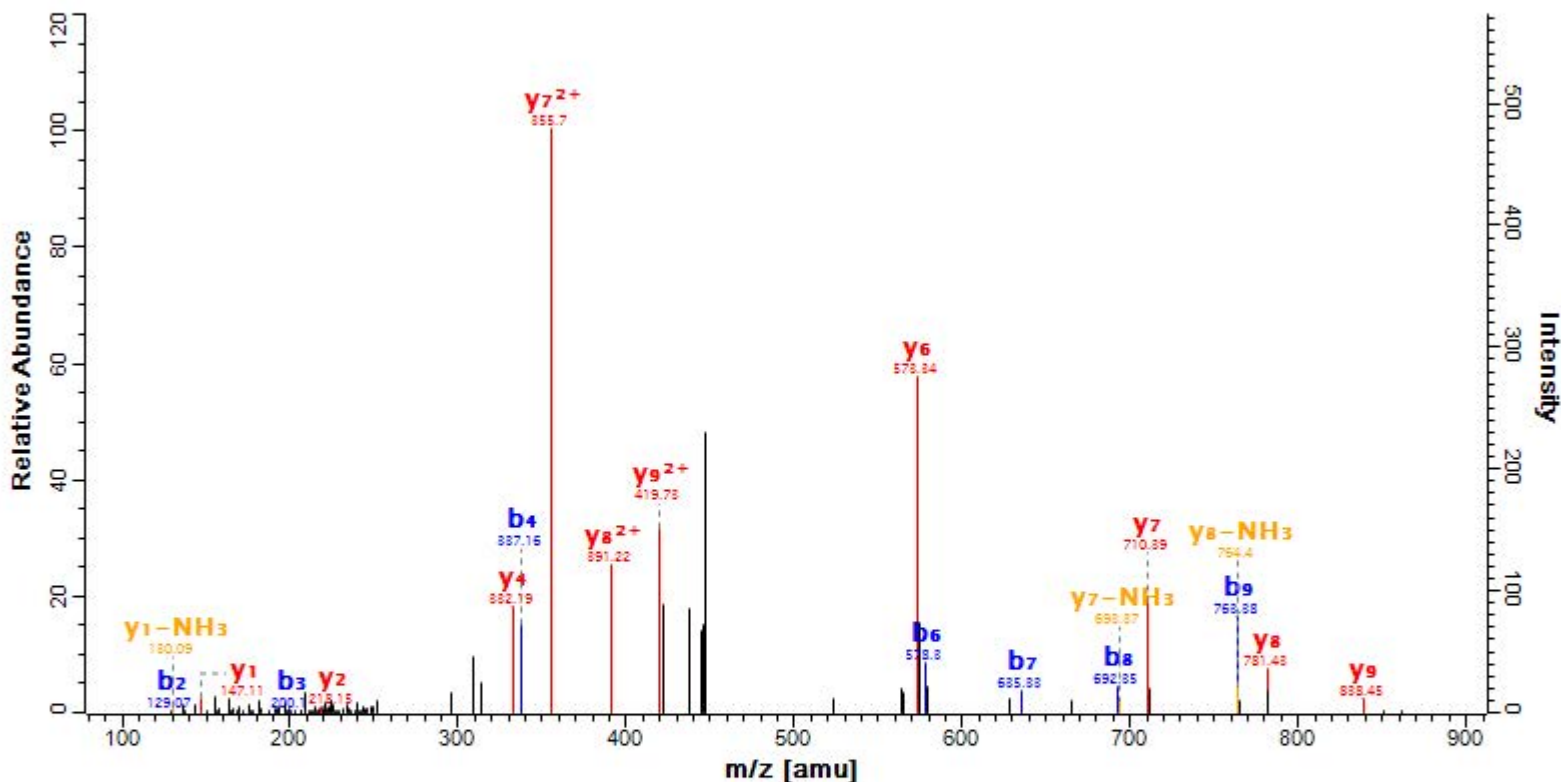

#### precursor information

|                   |                 |
|-------------------|-----------------|
| Mass:             | 908.4832        |
| m/z:              | 455.24887       |
| Charge:           | 2+              |
| Retentiontime:    | 5.9056167602539 |
| Score:            | 131.4395        |
| Mass Error [ppm]: | 0.42101         |
| PEP:              | 2.8046E-06      |
| Precursor Type:   | ISO             |

|                       |             |
|-----------------------|-------------|
| Annotation:           | 9 of 10     |
| AminoAcids Coverage:  | 90 %        |
| Intensity Coverage:   | 58 %        |
| Peak Coverage:        | 19 %        |
| Protein Localisation: | 108 ... 117 |

| b ion     |          |    |     |   | y ion    |           | y <sup>2+</sup> ion |           |
|-----------|----------|----|-----|---|----------|-----------|---------------------|-----------|
| Δ dalton  | mass     |    | seq |   | Δ dalton | mass      | Δ dalton            | mass      |
|           | 72.04439 | 1  | A   | 9 |          |           |                     |           |
| +0.040256 | 129.0659 | 2  | G   | 8 | 838.453  | +0.274258 | 419.7301            | +0.065803 |
| +0.106795 | 200.103  | 3  | A   | 7 | 781.4315 | -0.00213  | 391.2194            | +0.21777  |
| +0.002519 | 337.1619 | 4  | H   | 6 | 710.3944 | +0.006907 | 355.7008            | +0.180144 |
|           | 450.2459 | 5  | L   | 5 | 573.3355 | +0.008324 | 573.3355            |           |
| -0.02998  | 578.3045 | 6  | Q   | 4 | 460.2514 |           | 460.2514            |           |
| -0.1336   | 635.326  | 7  | G   | 3 | 332.1928 | +0.122676 | 332.1928            |           |
| -0.05558  | 692.3474 | 8  | G   | 2 | 275.1714 |           | 275.1714            |           |
| +0.145467 | 763.3846 | 9  | A   | 1 | 218.1499 | -0.00624  | 218.1499            |           |
|           |          | 10 | K   | 0 | 147.1128 | +0.029743 | 147.1128            |           |

Scan number 2870 Raw file LNCAP\_Silac\_23F10\_set2\_08  
 Method ITMS; CID Pepti... 126.71

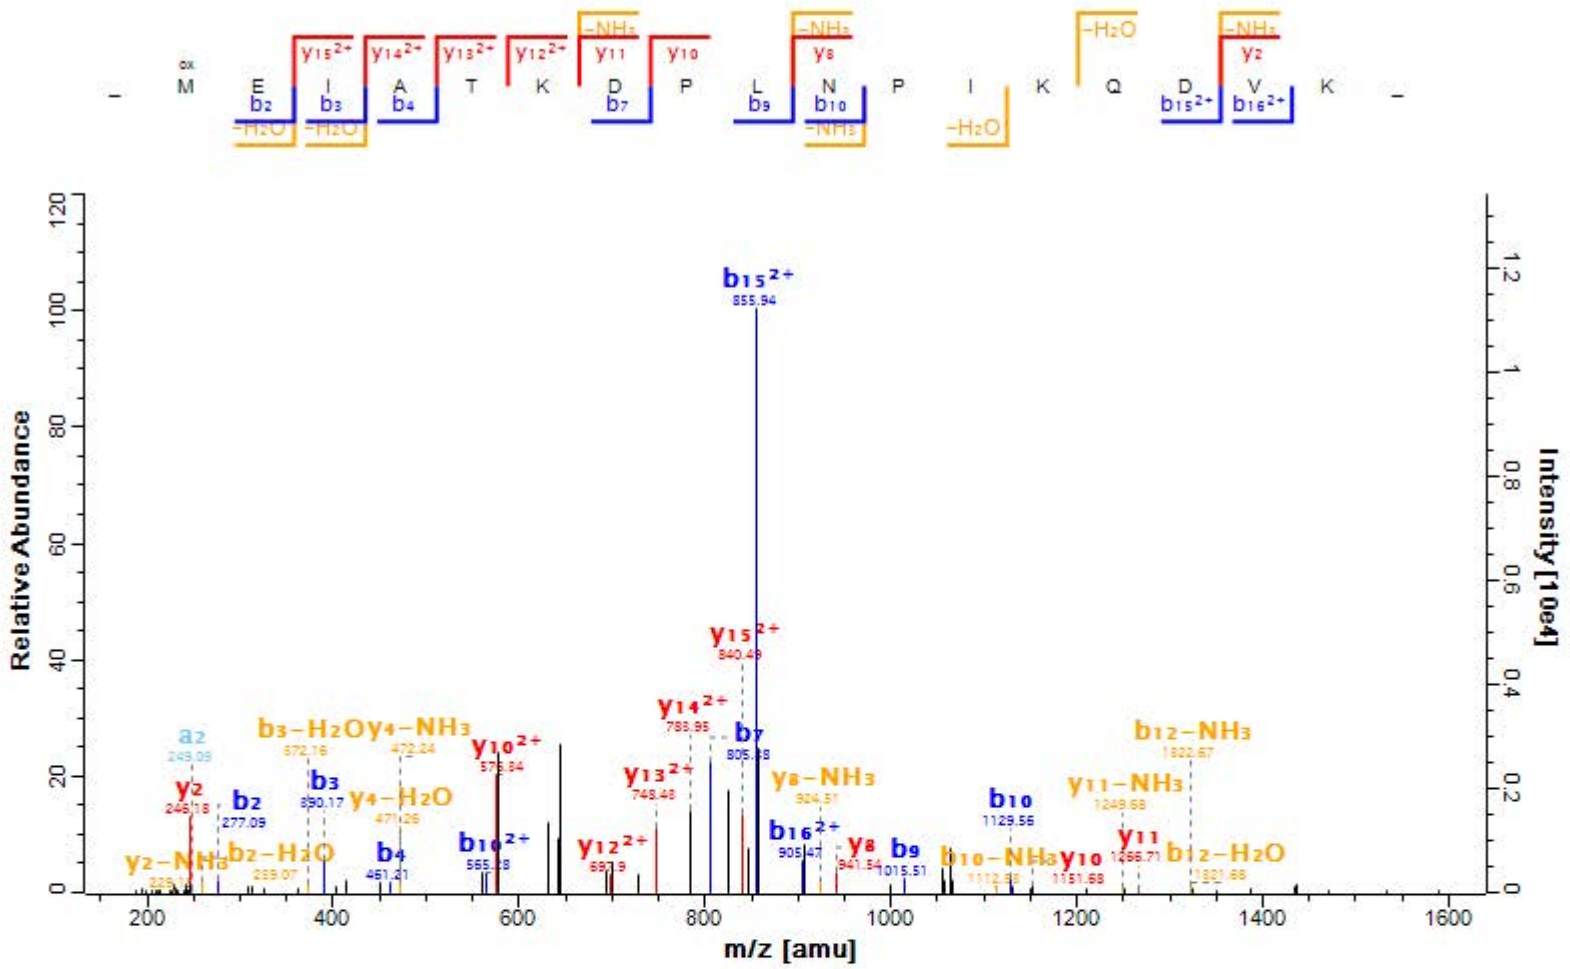

**precursor information**

|                   |                 |
|-------------------|-----------------|
| Mass:             | 1955.03997      |
| m/z:              | 652.68727       |
| Charge:           | 3+              |
| Retentiontime:    | 19.468547821044 |
| Score:            | 126.7053        |
| Mass Error [ppm]: | 0.10777         |
| PEP:              | 9.7106E-12      |
| Precursor Type:   | MULTI           |

**general information**

|                       |           |
|-----------------------|-----------|
| Annotation:           | 13 of 17  |
| AminoAcids Coverage:  | 76 %      |
| Intensity Coverage:   | 49 %      |
| Peak Coverage:        | 26 %      |
| Protein Localisation: | 58 ... 74 |

|       | a ion         | b <sup>2+</sup> ion | b ion         |     |   | y ion         | y <sup>2+</sup> ion |
|-------|---------------|---------------------|---------------|-----|---|---------------|---------------------|
|       | Δ dalton mass | Δ dalton mass       | Δ dalton mass | seq |   | Δ dalton mass | Δ dalton mass       |
|       | 120           | 148                 | 148           | 1   | M |               |                     |
| -0.12 | 249.1         | 277.1               | -0.05 277.1   | 2   | E | 15 1809       | 1809                |
|       | 362.2         | 390.2               | +0.01 8390.2  | 3   | I | 14 1680       | 840.5 +0.261        |
|       | 433.2         | 461.2               | +0.12 7461.2  | 4   | A | 13 1567       | 783.9 +0            |
|       | 534.3         | 562.3               |               | 5   | T | 12 1496       | 748.4 +0.221        |
|       | 662.4         | 690.3               |               | 6   | K | 11 1395       | 697.9 -0.04         |
|       | 777.4         | 805.4               | -0.03 805.4   | 7   | D | 10 1267       | -0.23 1267          |
|       | 874.4         | 902.4               |               | 8   | P | 9 1152        | +0.298 576.3 +0     |
|       | 987.5         | 1016                | +0.00 11016   | 9   | L | 8 1055        | 1055                |
|       | 1102          | +0.11 4565.3        | -0.02 1130    | 10  | N | 7 941.5       | -0.11 941.5         |
|       | 1199          | 1227                |               | 11  | P | 6 827.5       | 827.5               |
|       | 1312          | 1340                |               | 12  | I | 5 730.4       | 730.4               |
|       | 1440          | 1468                |               | 13  | K | 4 617.4       | 617.4               |
|       | 1568          | 1596                |               | 14  | Q | 3 489.3       | 489.3               |
|       | 1683          | +0.27 7855.9        |               | 15  | D | 2 361.2       | 361.2               |
|       | 1782          | +0.33 5905.5        |               | 16  | V | 1 246.2       | -0.06 246.2         |
|       |               |                     |               | 17  | K | 0 147.1       | 147.1               |

Scan number 3102 Raw file LNCAP\_Silac\_23F10\_set2\_08  
 Method ITMS; CID Peptide 87.36

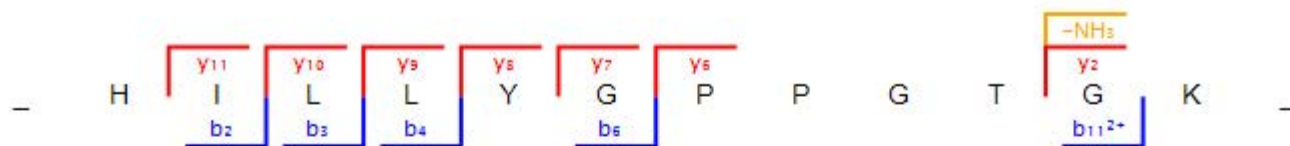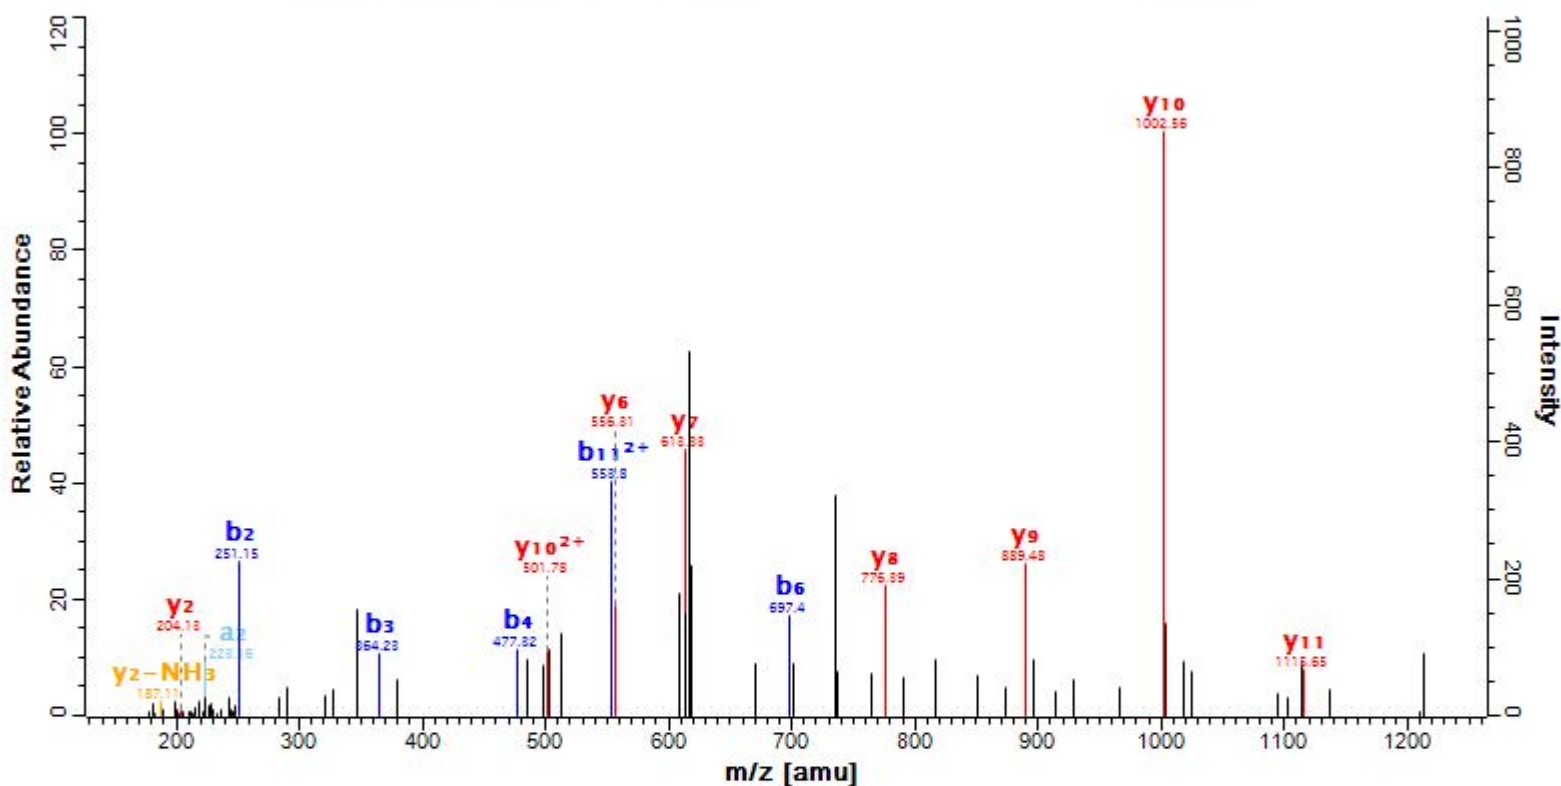

#### precursor information

|                   |                 |
|-------------------|-----------------|
| Mass:             | 1251.69724      |
| m/z:              | 626.8559        |
| Charge:           | 2+              |
| Retentiontime:    | 20.695783615112 |
| Score:            | 87.36301        |
| Mass Error [ppm]: | -0.25154        |
| PEP:              | 0.0010937       |
| Precursor Type:   | MULTI           |

#### general information

|                       |             |
|-----------------------|-------------|
| Annotation:           | 7 of 12     |
| AminoAcids Coverage:  | 58 %        |
| Intensity Coverage:   | 41 %        |
| Peak Coverage:        | 17 %        |
| Protein Localisation: | 347 ... 358 |

| a ion         |               | b <sup>2+</sup> ion |               | b ion |               |               |       | y ion       |       | y <sup>2+</sup> ion |  |
|---------------|---------------|---------------------|---------------|-------|---------------|---------------|-------|-------------|-------|---------------------|--|
| Δ dalton mass | Δ dalton mass | Δ dalton mass       | Δ dalton mass | seq   | Δ dalton mass | Δ dalton mass |       |             |       |                     |  |
| 110.1         | 138.1         | 138.1               | 138.1         | 1     | H             | 11            |       |             |       |                     |  |
| +0.053223.2   | 251.2         | -0.12 251.2         | 251.2         | 2     | I             | 10            | 1116  | +0.0231116  |       |                     |  |
| 336.2         | 364.2         | +0.034364.2         | 364.2         | 3     | L             | 9             | 1003  | -0.07 501.8 | -0.42 |                     |  |
| 449.3         | 477.3         | -0.15 477.3         | 477.3         | 4     | L             | 8             | 889.5 | +0.024889.5 |       |                     |  |
| 612.4         | 640.4         | 640.4               | 640.4         | 5     | Y             | 7             | 776.4 | +0.103776.4 |       |                     |  |
| 669.4         | 697.4         | +0 697.4            | 697.4         | 6     | G             | 6             | 613.3 | +0.091613.3 |       |                     |  |
| 766.5         | 794.5         | 794.5               | 794.5         | 7     | P             | 5             | 556.3 | +0.013556.3 |       |                     |  |
| 863.5         | 891.5         | 891.5               | 891.5         | 8     | P             | 4             | 459.3 | 459.3       |       |                     |  |
| 920.5         | 948.5         | 948.5               | 948.5         | 9     | G             | 3             | 362.2 | 362.2       |       |                     |  |
| 1022          | 1050          | 1050                | 1050          | 10    | T             | 2             | 305.2 | 305.2       |       |                     |  |
| 1079          | +0.34553.8    | 1107                | 1107          | 11    | G             | 1             | 204.1 | -0.16 204.1 |       |                     |  |
|               |               |                     |               | 12    | K             | 0             | 147.1 | 147.1       |       |                     |  |

Scan number 3251 Raw file LNCAP\_Silac\_23F10\_set2\_08  
 Method ITMS; CID Peptide 73.93

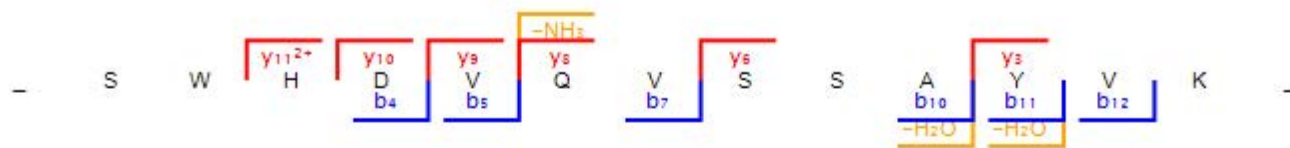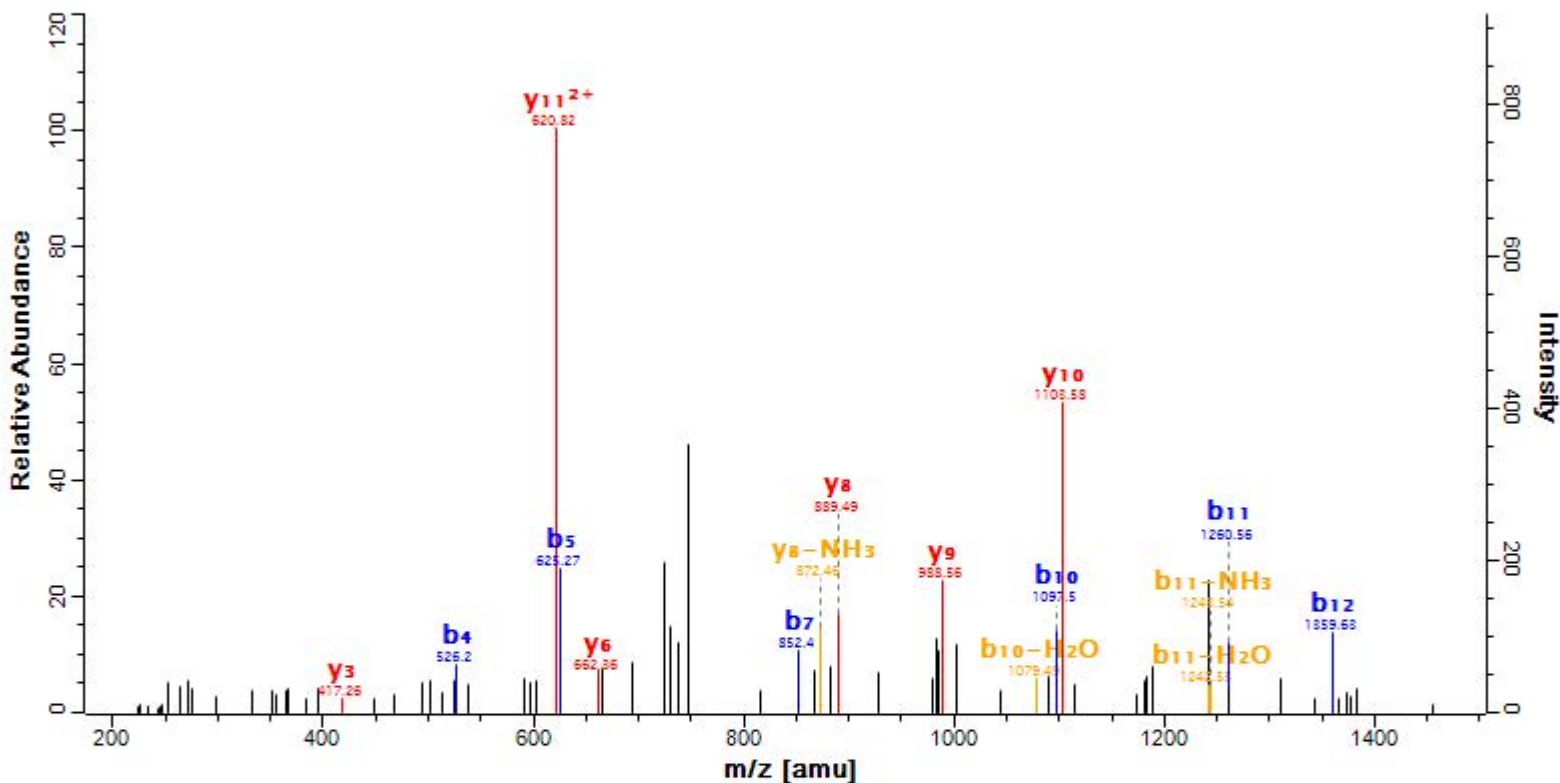

#### precursor information

|                   |                 |
|-------------------|-----------------|
| Mass:             | 1504.73216      |
| m/z:              | 753.37336       |
| Charge:           | 2+              |
| Retentiontime:    | 21.546146392822 |
| Score:            | 73.92713        |
| Mass Error [ppm]: | 0.73789         |
| PEP:              | 0.0015352       |
| Precursor Type:   | MULTI           |

#### general information

|                       |            |
|-----------------------|------------|
| Annotation:           | 9 of 13    |
| AminoAcids Coverage:  | 69 %       |
| Intensity Coverage:   | 43 %       |
| Peak Coverage:        | 20 %       |
| Protein Localisation: | 96 ... 108 |

| b ion     |          |    |     |    | y ion    |           | y <sup>2+</sup> ion |           |
|-----------|----------|----|-----|----|----------|-----------|---------------------|-----------|
| Δ dalton  | mass     |    | seq |    | Δ dalton | mass      | Δ dalton            | mass      |
|           | 88.0393  | 1  | S   | 12 |          |           |                     |           |
|           | 274.1186 | 2  | W   | 11 | 1426.72  |           | 1426.72             |           |
|           | 411.1775 | 3  | H   | 10 | 1240.641 |           | 620.8242            | +0.082756 |
| +0.153926 | 526.2045 | 4  | D   | 9  | 1103.582 | -0.02562  | 1103.582            |           |
| +0.125002 | 625.2729 | 5  | V   | 8  | 988.5553 | -0.15524  | 988.5553            |           |
|           | 753.3315 | 6  | Q   | 7  | 889.4869 | +0.006989 | 889.4869            |           |
| -0.19755  | 852.3999 | 7  | V   | 6  | 761.4283 |           | 761.4283            |           |
|           | 939.4319 | 8  | S   | 5  | 662.3599 | +0.262215 | 662.3599            |           |
|           | 1026.464 | 9  | S   | 4  | 575.3279 |           | 575.3279            |           |
| +0.062306 | 1097.501 | 10 | A   | 3  | 488.2959 |           | 488.2959            |           |
| -0.0269   | 1260.564 | 11 | Y   | 2  | 417.2587 | -0.01479  | 417.2587            |           |
| -0.10996  | 1359.633 | 12 | V   | 1  | 254.1954 |           | 254.1954            |           |
|           |          | 13 | K   | 0  | 155.127  |           | 155.127             |           |



Scan number 3345 Raw file LNCAP\_Silac\_23F10\_set2\_08  
 Method ITMS; CID Pepti... 97.81

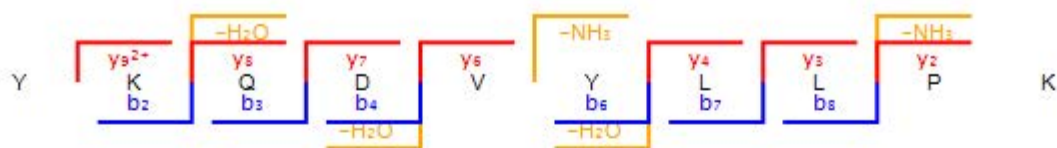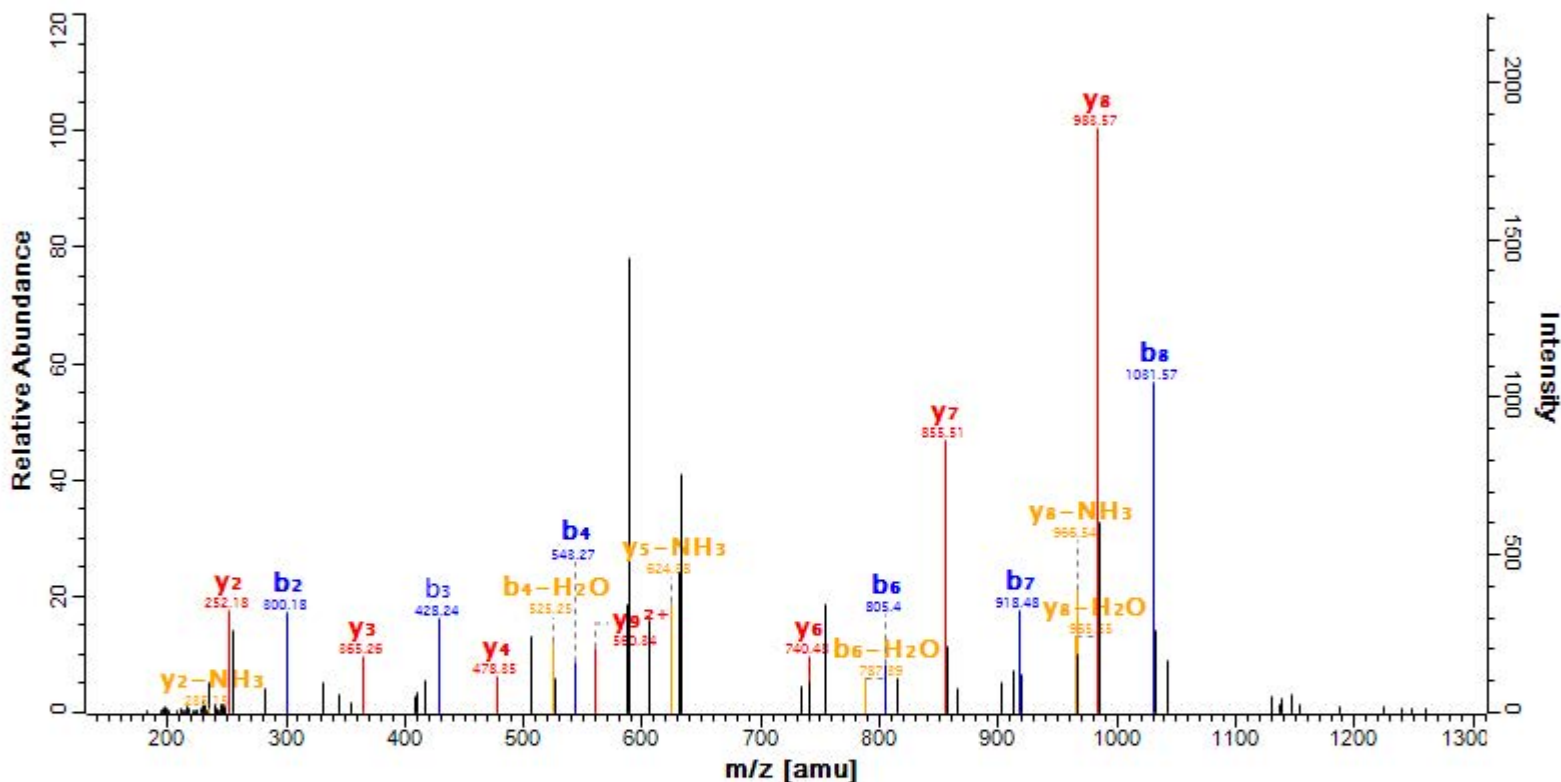

#### precursor information

|                   |                 |
|-------------------|-----------------|
| Mass:             | 1265.70353      |
| m/z:              | 633.85904       |
| Charge:           | 2+              |
| Retentiontime:    | 22.074428558349 |
| Score:            | 97.81339        |
| Mass Error [ppm]: | 1.2168          |
| PEP:              | 0.0010644       |
| Precursor Type:   | MULTI           |

|                       |             |
|-----------------------|-------------|
| Annotation:           | 8 of 10     |
| AminoAcids Coverage:  | 80 %        |
| Intensity Coverage:   | 48 %        |
| Peak Coverage:        | 20 %        |
| Protein Localisation: | 558 ... 567 |

| b ion           |          |    |     |   | y ion           |           | $y^{2+}$ ion    |           |
|-----------------|----------|----|-----|---|-----------------|-----------|-----------------|-----------|
| $\Delta$ dalton | mass     |    | seq |   | $\Delta$ dalton | mass      | $\Delta$ dalton | mass      |
|                 | 164.0706 | 1  | Y   | 9 |                 |           |                 |           |
| -0.0215         | 300.1798 | 2  | K   | 8 | 1119.674        |           | 560.3408        | +0.008445 |
| -0.00562        | 428.2383 | 3  | Q   | 7 | 983.5652        | -0.06424  | 983.5652        |           |
| +0.087069       | 543.2653 | 4  | D   | 6 | 855.5066        | -0.04906  | 855.5066        |           |
|                 | 642.3337 | 5  | V   | 5 | 740.4796        | +0.246315 | 740.4796        |           |
| +0.197392       | 805.397  | 6  | Y   | 4 | 641.4112        |           | 641.4112        |           |
| -0.13118        | 918.4811 | 7  | L   | 3 | 478.3479        | -0.13403  | 478.3479        |           |
| -0.05673        | 1031.565 | 8  | L   | 2 | 365.2638        | +0.115075 | 365.2638        |           |
|                 | 1128.618 | 9  | P   | 1 | 252.1798        | +0.026532 | 252.1798        |           |
|                 |          | 10 | K   | 0 | 155.127         |           | 155.127         |           |

Scan number 343 Raw file LNCAP\_Silac\_23F10\_set2\_08  
 Method ITMS; CID Pepti... 157.74

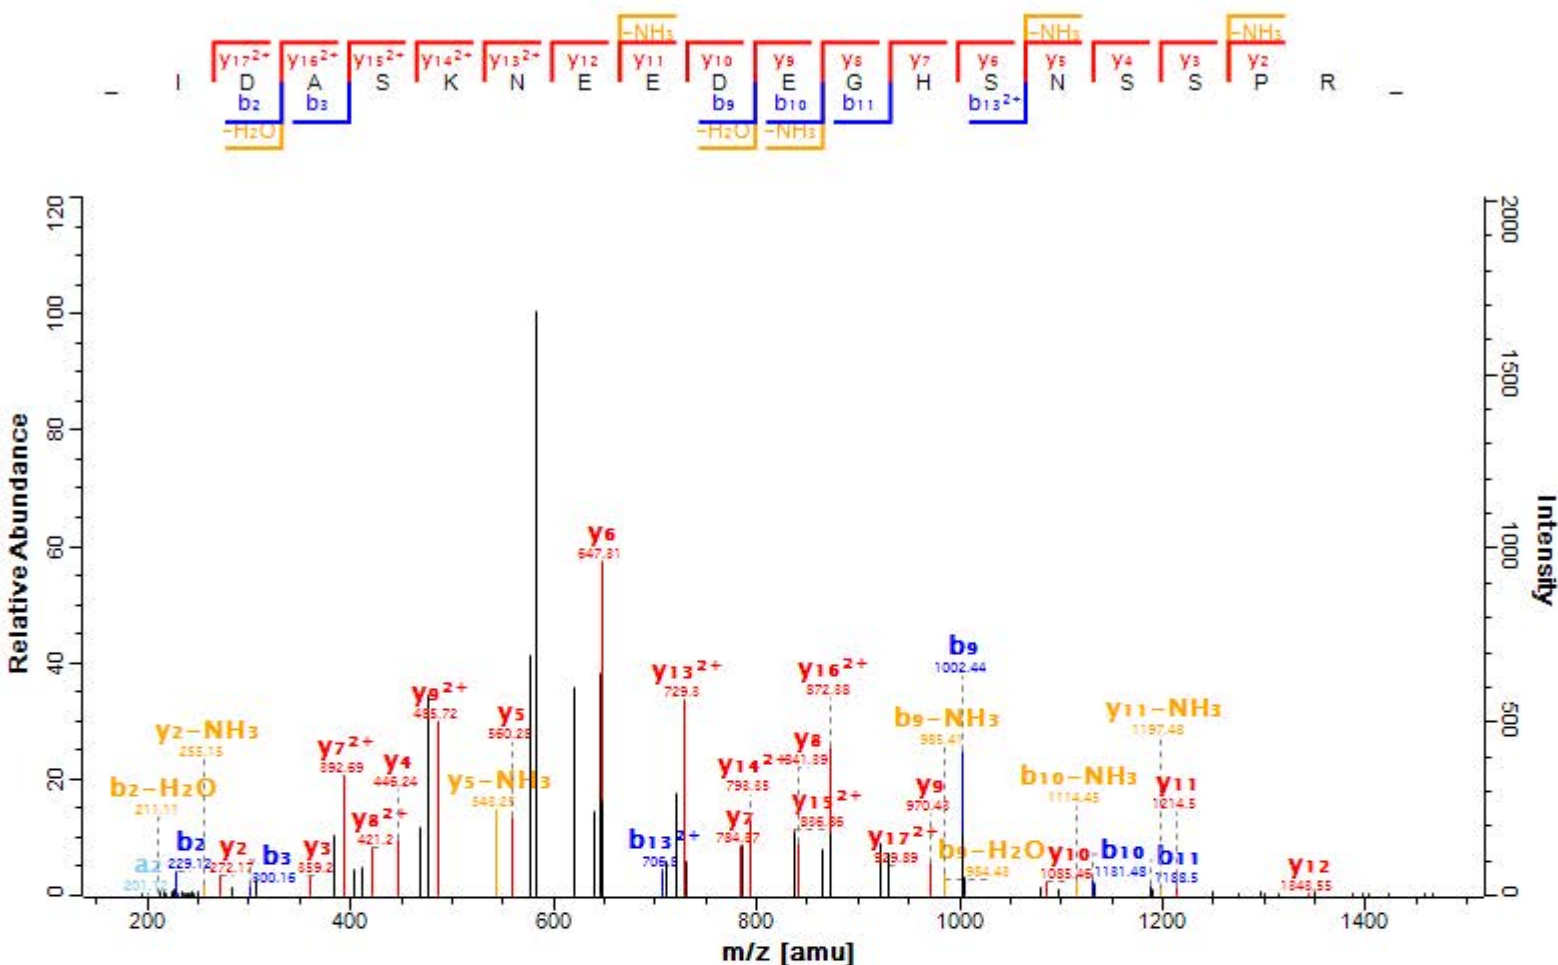

precursor information

|                   |                 |
|-------------------|-----------------|
| Mass:             | 1970.85799      |
| m/z:              | 657.95994       |
| Charge:           | 3+              |
| Retentiontime:    | 6.4095482826232 |
| Score:            | 157.741         |
| Mass Error [ppm]: | 0.71267         |
| PEP:              | 1.3191E-23      |
| Precursor Type:   | MULTI           |

general information

|                       |           |
|-----------------------|-----------|
| Annotation:           | 16 of 18  |
| AminoAcids Coverage:  | 89 %      |
| Intensity Coverage:   | 42 %      |
| Peak Coverage:        | 29 %      |
| Protein Localisation: | 68 ... 85 |

|        | a ion         | b <sup>2+</sup> ion | b ion         |     |   |               | y ion         | y <sup>2+</sup> ion |
|--------|---------------|---------------------|---------------|-----|---|---------------|---------------|---------------------|
|        | Δ dalton mass | Δ dalton mass       | Δ dalton mass | seq |   | Δ dalton mass | Δ dalton mass |                     |
|        | 86.1          | 114.1               | 114.1         | 1   | I | 17            |               |                     |
| +0.159 | 201.1         | 229.1               | -0.05 229.1   | 2   | D | 16            | 1859          | 929.9 -0.02         |
|        | 272.2         | 300.2               | +0.12 300.2   | 3   | A | 15            | 1744          | 872.4 +0.26         |
|        | 359.2         | 387.2               | 387.2         | 4   | S | 14            | 1673          | 836.9 +0.06         |
|        | 487.3         | 515.3               | 515.3         | 5   | K | 13            | 1586          | 793.3 +0.15         |
|        | 601.3         | 629.3               | 629.3         | 6   | N | 12            | 1458          | 729.3 +0.30         |
|        | 730.4         | 758.4               | 758.4         | 7   | E | 11            | 1344          | +0.08 1344          |
|        | 859.4         | 887.4               | 887.4         | 8   | E | 10            | 1215          | +0.10 1215          |
|        | 974.4         | 1002                | -0.05 1002    | 9   | D | 9             | 1085          | +0.08 1085          |
|        | 1103          | 1131                | -0.04 1131    | 10  | E | 8             | 970.4         | +0.07 885.7 +0.16   |
|        | 1161          | 1189                | -0.38 1189    | 11  | G | 7             | 841.4         | +0.14 7421.2 +0.07  |
|        | 1298          | 1326                | 1326          | 12  | H | 6             | 784.4         | +0 392.7 +0.20      |
|        | 1385          | +0.17 1706.8        | 1413          | 13  | S | 5             | 647.3         | +0.03 7647.3        |
|        | 1499          | 1527                | 1527          | 14  | N | 4             | 560.3         | -0.02 560.3         |
|        | 1586          | 1614                | 1614          | 15  | S | 3             | 446.2         | +0.03 1446.2        |
|        | 1673          | 1701                | 1701          | 16  | S | 2             | 359.2         | +0.02 9359.2        |
|        | 1770          | 1798                | 1798          | 17  | P | 1             | 272.2         | +0.06 7272.2        |
|        |               |                     |               | 18  | R | 0             | 175.1         | 175.1               |

Scan number 3854 Raw file LNCAP\_Silac\_23F10\_set2\_08  
 Method ITMS; CID Peptide 160.53

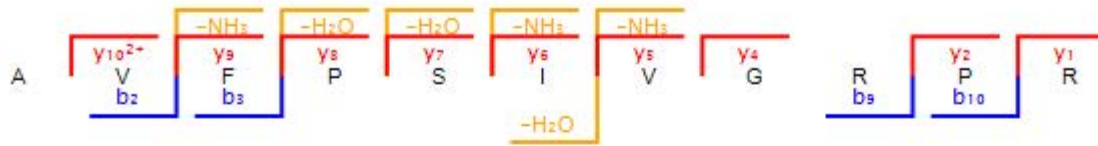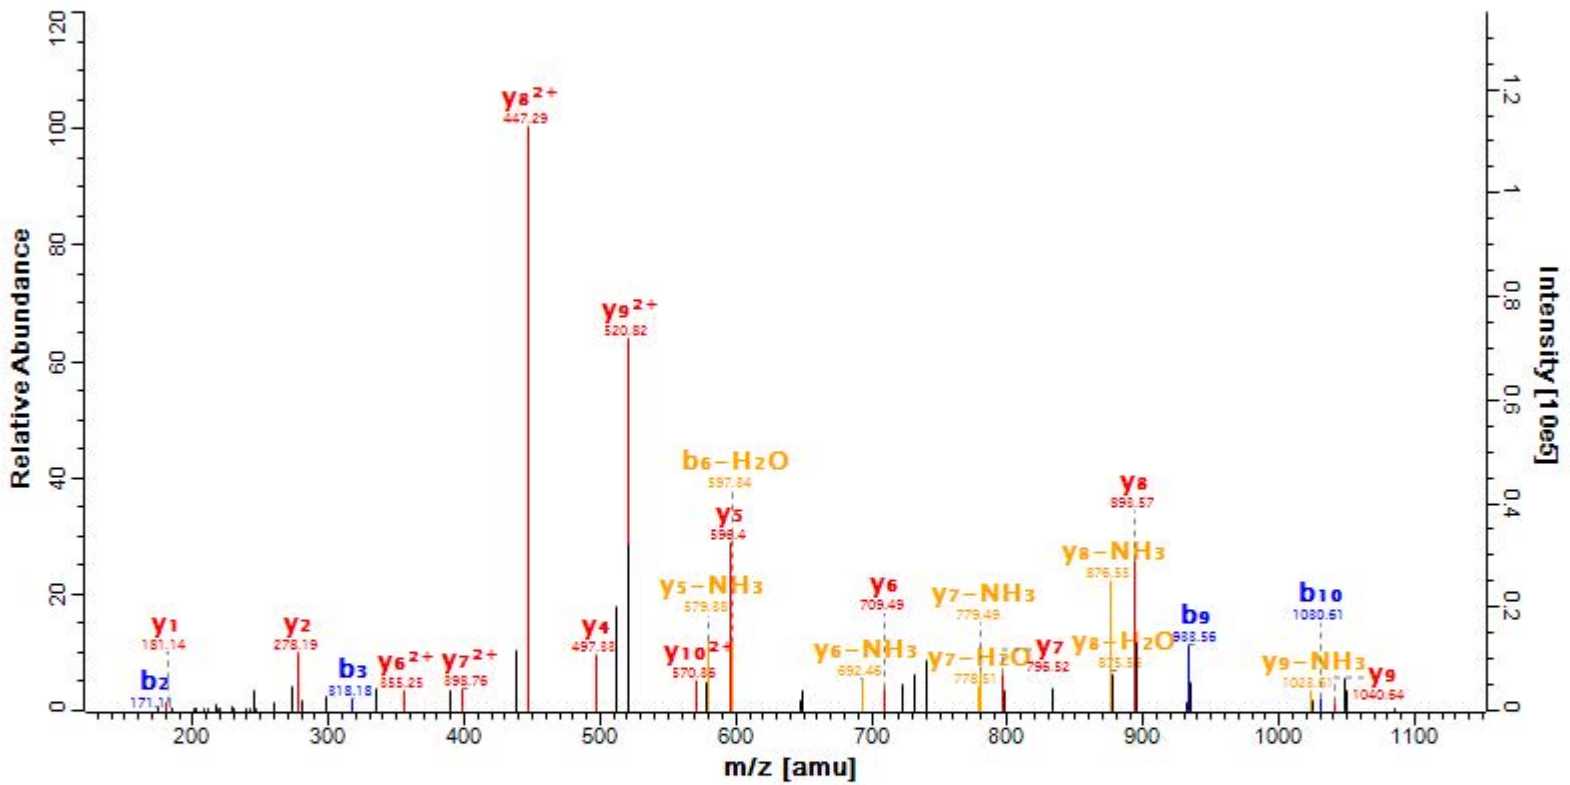

**precursor information**

|                   |                 |
|-------------------|-----------------|
| Mass:             | 1197.69802      |
| m/z:              | 599.85629       |
| Charge:           | 2+              |
| Retentiontime:    | 24.743335723877 |
| Score:            | 160.5311        |
| Mass Error [ppm]: | -0.17036        |
| PEP:              | 1.4515E-06      |
| Precursor Type:   | MULTI           |

**general information**

|                       |           |
|-----------------------|-----------|
| Annotation:           | 10 of 11  |
| AminoAcids Coverage:  | 91 %      |
| Intensity Coverage:   | 67 %      |
| Peak Coverage:        | 30 %      |
| Protein Localisation: | 29 ... 39 |

| b ion     |          |    |     |    | y ion    |           | y <sup>2+</sup> ion |           |
|-----------|----------|----|-----|----|----------|-----------|---------------------|-----------|
| Δ dalton  | mass     |    | seq |    | Δ dalton | mass      | Δ dalton            | mass      |
|           | 72.04439 | 1  | A   | 10 |          |           |                     |           |
| +0.304035 | 171.1128 | 2  | V   | 9  | 1139.709 |           | 570.358             | +0.06666  |
| -0.03647  | 318.1812 | 3  | F   | 8  | 1040.64  | -0.05808  | 520.8238            | +0.01261  |
|           | 415.234  | 4  | P   | 7  | 893.5718 | +0.014851 | 447.2895            | +0.142825 |
|           | 502.266  | 5  | S   | 6  | 796.5191 | +0.039233 | 398.7632            | +0.096942 |
|           | 615.3501 | 6  | I   | 5  | 709.487  | +0.135715 | 355.2472            | -0.00698  |
|           | 714.4185 | 7  | V   | 4  | 596.403  | +0.218924 | 596.403             |           |
|           | 771.44   | 8  | G   | 3  | 497.3345 | +0.09819  | 497.3345            |           |
| -0.04093  | 933.5612 | 9  | R   | 2  | 440.3131 |           | 440.3131            |           |
| +0.109677 | 1030.614 | 10 | P   | 1  | 278.1918 | -0.06422  | 278.1918            |           |
|           |          | 11 | R   | 0  | 181.1391 | -0.08714  | 181.1391            |           |





Scan number 507 Raw file LNCAP\_Silac\_23F10\_set2\_08  
 Method ITMS: CID Pepti... 73.26

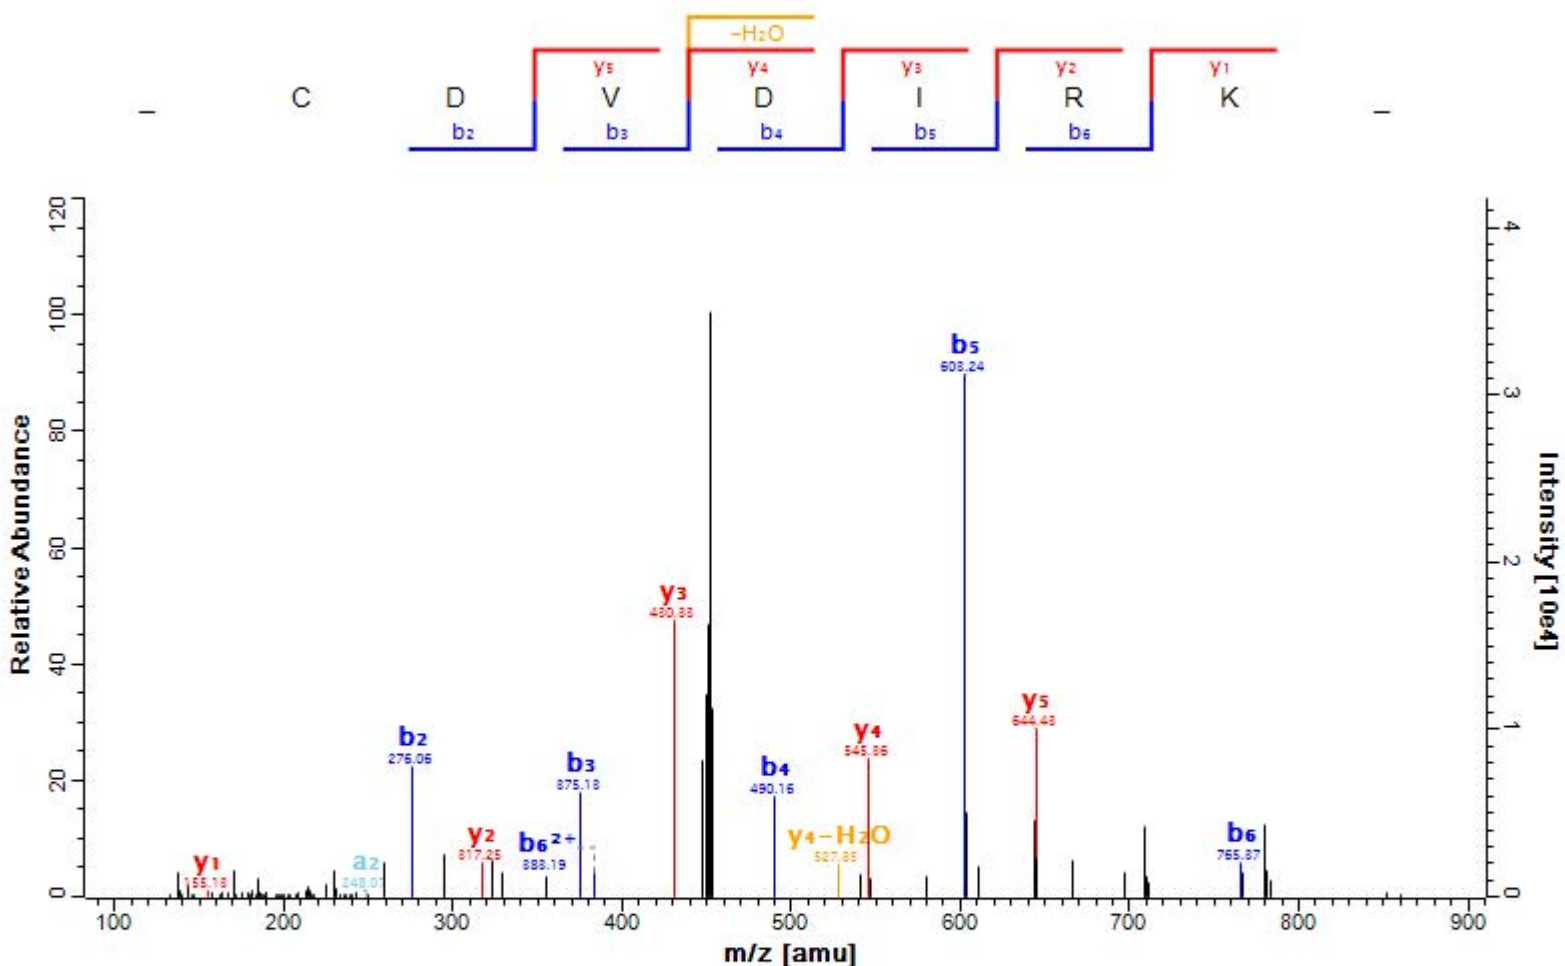

#### precursor information

|                      |                 |
|----------------------|-----------------|
| Mass:                | 904.44371       |
| m/z:                 | 453.22913       |
| Charge:              | 2+              |
| Retentiontime:       | 7.3546781539917 |
| Score:               | 73.26006        |
| Mass Error [ppm]:    | 0.061459        |
| Annotation:          | 6 of 7          |
| AminoAcids Coverage: | 86 %            |
| Intensity Coverage:  | 40 %            |
| Peak Coverage:       | 12 %            |

| a ion    |        | b <sup>2+</sup> ion |        | b ion    |        | y ion |   |          |                |
|----------|--------|---------------------|--------|----------|--------|-------|---|----------|----------------|
| Δ dalton | mass   | Δ dalton            | mass   | Δ dalton | mass   | seq   |   | Δ dalton | mass           |
|          | 133.04 |                     | 161.04 |          | 161.04 | 1     | C | 6        |                |
| +0.0927  | 248.07 |                     | 276.06 | -0.045   | 276.06 | 2     | D | 5        | 759.45         |
|          | 347.14 |                     | 375.13 | +0.0728  | 375.13 | 3     | V | 4        | 644.43 +0.1809 |
|          | 462.17 |                     | 490.16 | -0.064   | 490.16 | 4     | D | 3        | 545.36 +0.0459 |
|          | 575.25 |                     | 603.24 | -0.249   | 603.24 | 5     | I | 2        | 430.33 +0.0706 |
|          | 737.37 | +0.0969             | 383.19 | -0.074   | 765.37 | 6     | R | 1        | 317.25 -0.054  |
|          |        |                     |        |          |        | 7     | K | 0        | 155.13 +0.0038 |

Scan number 519 Raw file LNCAP\_Silac\_23F10\_set2\_08  
 Method ITMS: CID Pepti... 134.68

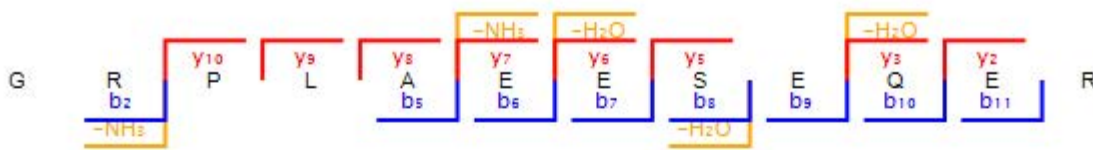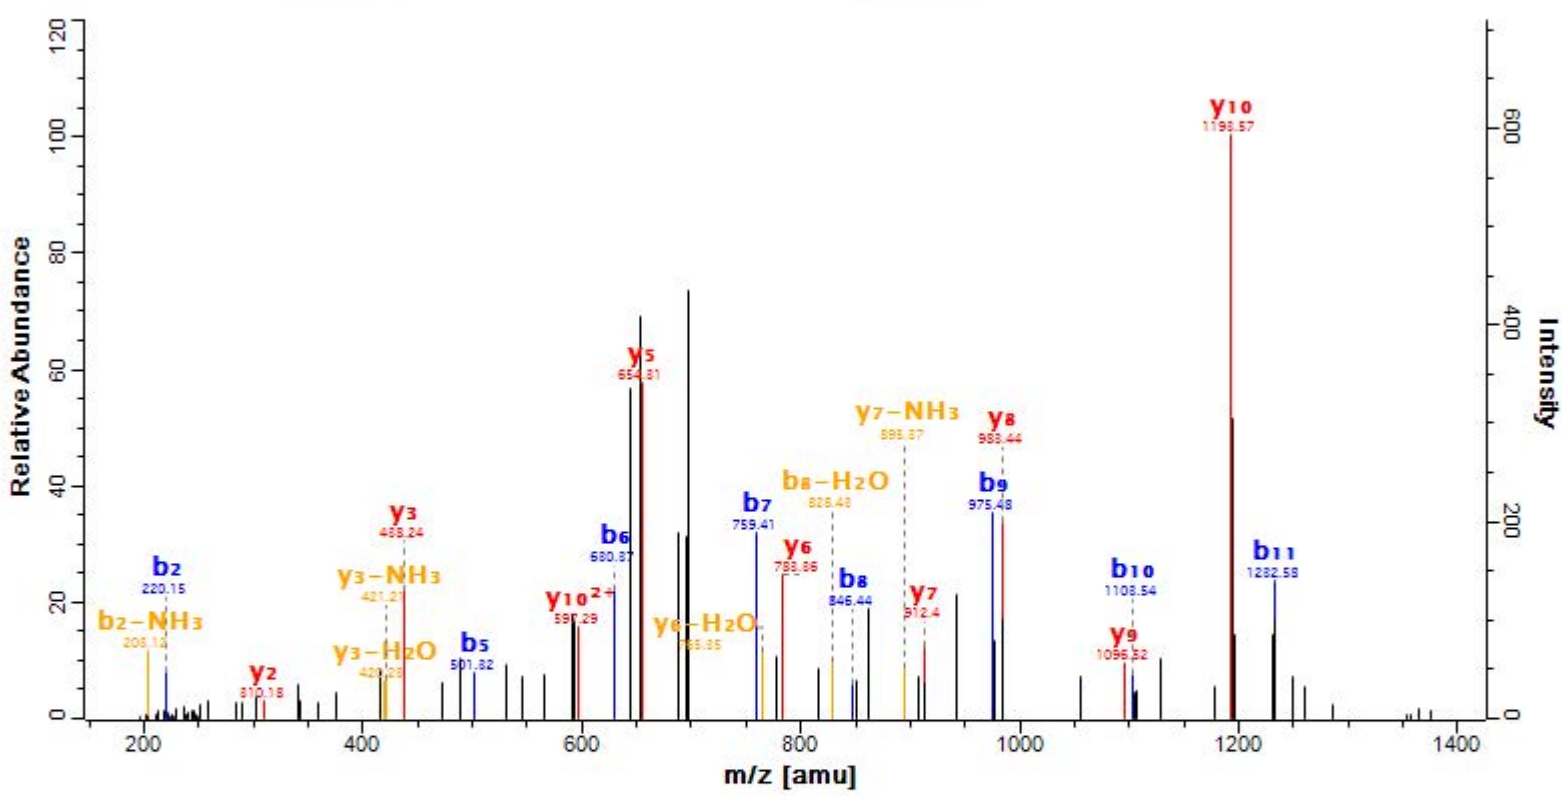

**precursor information**

|                   |                 |
|-------------------|-----------------|
| Mass:             | 1411.70846      |
| m/z:              | 706.86151       |
| Charge:           | 2+              |
| Retentiontime:    | 7.4155917167663 |
| Score:            | 134.6848        |
| Mass Error [ppm]: | -0.6851         |
| PEP:              | 0.00012298      |
| Precursor Type:   | ISO             |

**general information**

|                       |             |
|-----------------------|-------------|
| Annotation:           | 10 of 12    |
| AminoAcids Coverage:  | 83 %        |
| Intensity Coverage:   | 40 %        |
| Peak Coverage:        | 24 %        |
| Protein Localisation: | 347 ... 358 |

| b ion     |          |    |     |    | y ion    |           | y <sup>2+</sup> ion |           |
|-----------|----------|----|-----|----|----------|-----------|---------------------|-----------|
| Δ dalton  | mass     |    | seq |    | Δ dalton | mass      | Δ dalton            | mass      |
|           | 58.02874 | 1  | G   | 11 |          |           |                     |           |
| +0.079237 | 220.15   | 2  | R   | 10 | 1355.695 |           | 1355.695            |           |
|           | 317.2027 | 3  | P   | 9  | 1193.574 | -0.07425  | 597.2906            | +0.273265 |
|           | 430.2868 | 4  | L   | 8  | 1096.521 | +0.099246 | 1096.521            |           |
| +0.051688 | 501.3239 | 5  | A   | 7  | 983.4372 | -0.04331  | 983.4372            |           |
| -0.0755   | 630.3665 | 6  | E   | 6  | 912.4001 | +0.07632  | 912.4001            |           |
| +0.030894 | 759.4091 | 7  | E   | 5  | 783.3575 | -0.03465  | 783.3575            |           |
| +0.15243  | 846.4411 | 8  | S   | 4  | 654.3149 | +0.067268 | 654.3149            |           |
| +0.210057 | 975.4837 | 9  | E   | 3  | 567.2828 |           | 567.2828            |           |
| -0.02265  | 1103.542 | 10 | Q   | 2  | 438.2403 | +0.084272 | 438.2403            |           |
| -0.03424  | 1232.585 | 11 | E   | 1  | 310.1817 | +0.091214 | 310.1817            |           |
|           |          | 12 | R   | 0  | 181.1391 |           | 181.1391            |           |

Scan number 5332 Raw file LNCAP\_Silac\_23F10\_set2\_08  
 Method ITMS; CID Peptide 110.84

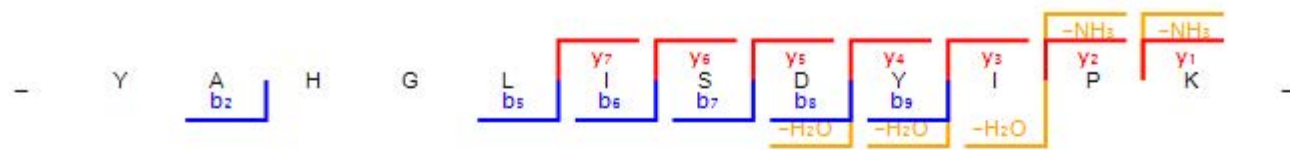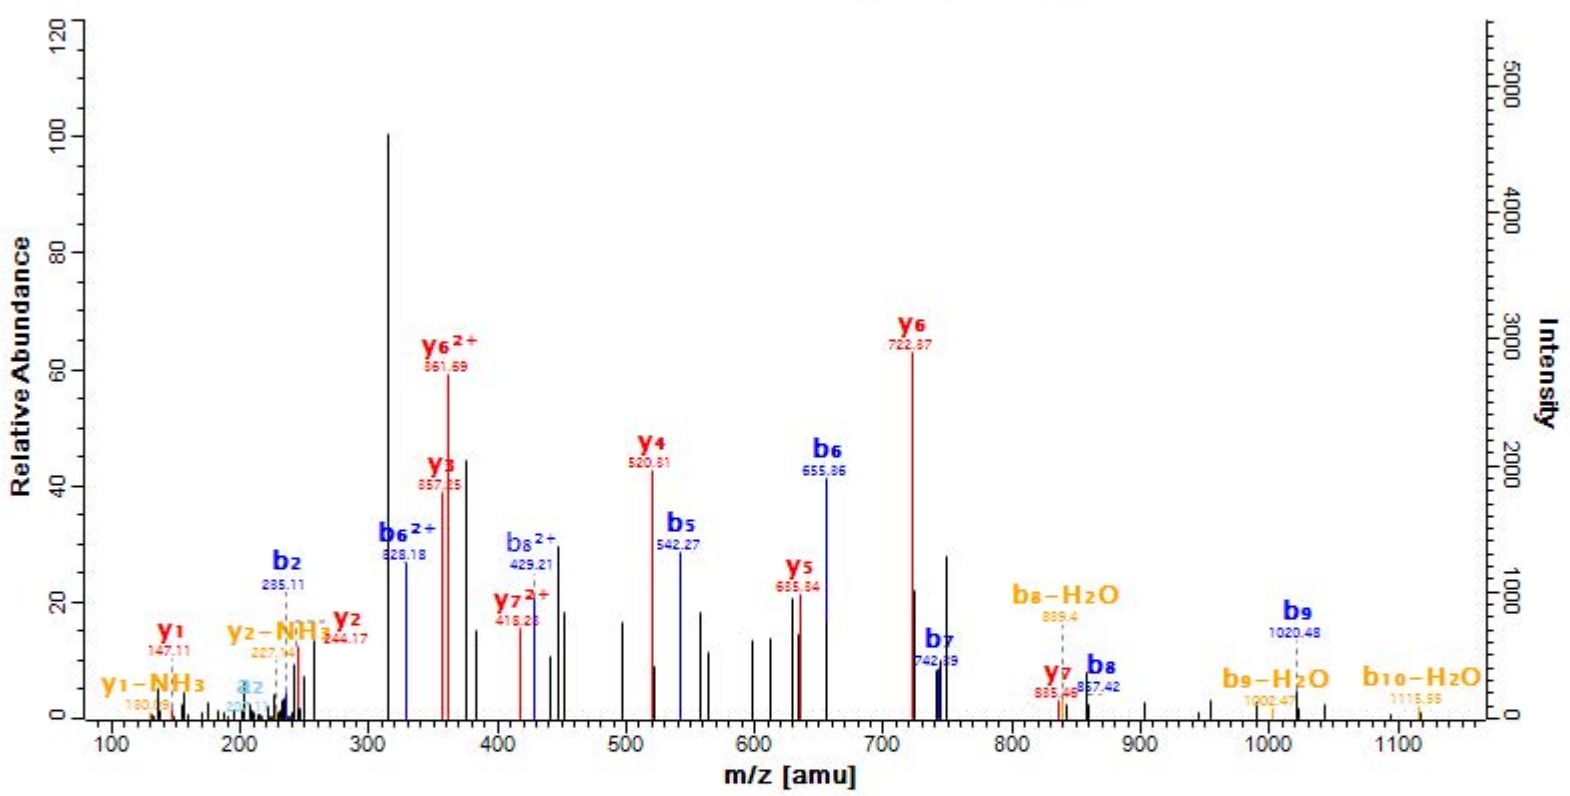

**precursor information**

|                   |                 |
|-------------------|-----------------|
| Mass:             | 1375.71337      |
| m/z:              | 459.5784        |
| Charge:           | 3+              |
| Retentiontime:    | 32.472579956054 |
| Score:            | 110.8379        |
| Mass Error [ppm]: | -0.16942        |
| PEP:              | 4.8752E-05      |
| Precursor Type:   | MULTI           |

**general information**

|                       |             |
|-----------------------|-------------|
| Annotation:           | 10 of 12    |
| AminoAcids Coverage:  | 83 %        |
| Intensity Coverage:   | 42 %        |
| Peak Coverage:        | 23 %        |
| Protein Localisation: | 211 ... 222 |

|       | a ion         | b <sup>2+</sup> ion | b ion         |     |   |               | y ion         | y <sup>2+</sup> ion |        |
|-------|---------------|---------------------|---------------|-----|---|---------------|---------------|---------------------|--------|
|       | Δ dalton mass | Δ dalton mass       | Δ dalton mass | seq |   | Δ dalton mass | Δ dalton mass |                     |        |
|       | 136.1         | 164.1               | 164.1         | 1   | Y | 11            |               |                     |        |
| -0.01 | 207.1         | 235.1               | +0.119235.1   | 2   | A | 10            | 1214          | 1214                |        |
|       | 344.2         | 372.2               | 372.2         | 3   | H | 9             | 1143          | 1143                |        |
|       | 401.2         | 429.2               | 429.2         | 4   | G | 8             | 1006          | 1006                |        |
|       | 514.3         | 542.3               | +0.114542.3   | 5   | L | 7             | 948.5         | 948.5               |        |
|       | 627.4         | +0.052328.2         | -0.02 655.4   | 6   | I | 6             | 835.5         | -0.03 418.2         | +0.106 |
|       | 714.4         | 742.4               | +0.234742.4   | 7   | S | 5             | 722.4         | -0.05 361.7         | +0.27  |
|       | 829.4         | +0.046429.2         | -0.01 857.4   | 8   | D | 4             | 635.3         | +0 635.3            |        |
|       | 992.5         | 1020                | +0.0181020    | 9   | Y | 3             | 520.3         | +0.046520.3         |        |
|       | 1106          | 1134                | 1134          | 10  | I | 2             | 357.2         | +0.163357.2         |        |
|       | 1203          | 1231                | 1231          | 11  | P | 1             | 244.2         | +0.146244.2         |        |
|       |               |                     |               | 12  | K | 0             | 147.1         | -0.03 147.1         |        |



Scan number 5401 Raw file LNCAP\_Silac\_23F10\_set2\_08  
 Method ITMS; CID Pepti... 81.57

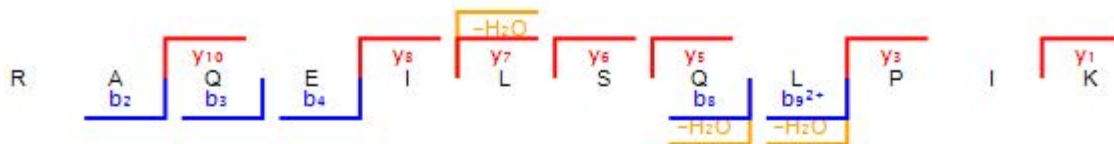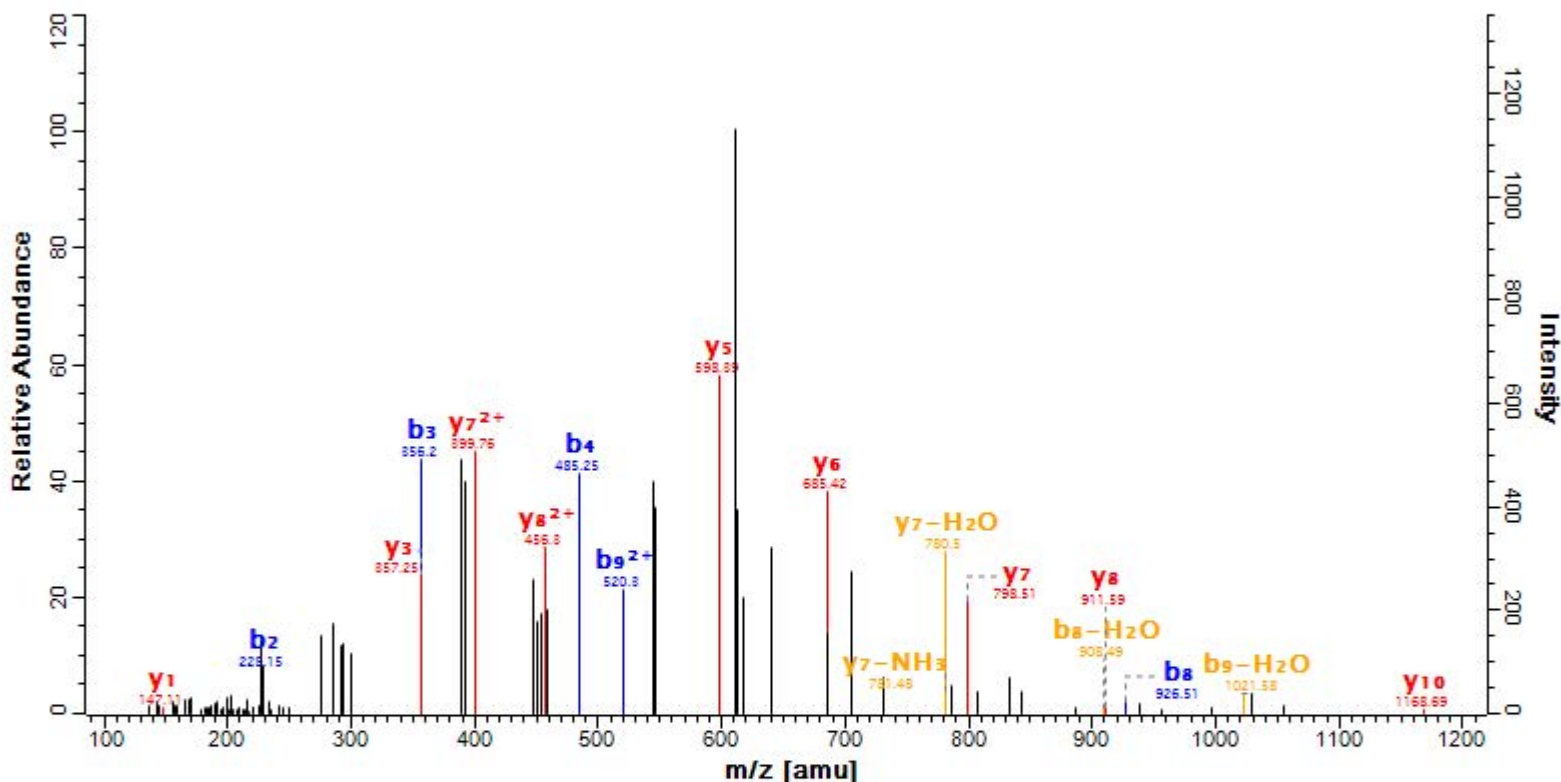

**precursor information**

|                   |                 |
|-------------------|-----------------|
| Mass:             | 1394.82466      |
| m/z:              | 465.94883       |
| Charge:           | 3+              |
| Retentiontime:    | 32.859565734863 |
| Score:            | 81.56528        |
| Mass Error [ppm]: | 0.082553        |
| PEP:              | 0.0010976       |
| Precursor Type:   | MULTI           |

**general information**

|                       |           |
|-----------------------|-----------|
| Annotation:           | 10 of 12  |
| AminoAcids Coverage:  | 83 %      |
| Intensity Coverage:   | 35 %      |
| Peak Coverage:        | 19 %      |
| Protein Localisation: | 28 ... 39 |

| b <sup>2+</sup> ion |        | b ion    |        | seq |   |    | y ion    |         | y <sup>2+</sup> ion |         |
|---------------------|--------|----------|--------|-----|---|----|----------|---------|---------------------|---------|
| Δ dalton            | mass   | Δ dalton | mass   |     |   |    | Δ dalton | mass    | Δ dalton            | mass    |
|                     | 157.11 |          | 157.11 | 1   | R | 11 |          |         |                     |         |
|                     | 228.15 | +0.0797  | 228.15 | 2   | A | 10 | 1239.7   |         | 1239.7              |         |
|                     | 356.2  | -0.009   | 356.2  | 3   | Q | 9  | 1168.7   | +0.062  | 1168.7              |         |
|                     | 485.25 | +0.0898  | 485.25 | 4   | E | 8  | 1040.6   |         | 1040.6              |         |
|                     | 598.33 |          | 598.33 | 5   | I | 7  | 911.59   | -0.053  | 456.3               | +0.3377 |
|                     | 711.41 |          | 711.41 | 6   | L | 6  | 798.51   | +0.0303 | 399.76              | +0.092  |
|                     | 798.45 |          | 798.45 | 7   | S | 5  | 685.42   | -0.009  | 685.42              |         |
|                     | 926.51 | +0.3106  | 926.51 | 8   | Q | 4  | 598.39   | +0.0048 | 598.39              |         |
| -0.04               | 520.3  |          | 1039.6 | 9   | L | 3  | 470.33   |         | 470.33              |         |
|                     | 1136.6 |          | 1136.6 | 10  | P | 2  | 357.25   | +0.0081 | 357.25              |         |
|                     | 1249.7 |          | 1249.7 | 11  | I | 1  | 260.2    |         | 260.2               |         |
|                     |        |          |        | 12  | K | 0  | 147.11   | +0.1893 | 147.11              |         |



Scan number 6292 Raw file LNCAP\_Silac\_23F10\_set2\_08  
 Method ITMS; CID Pepti... 63.18

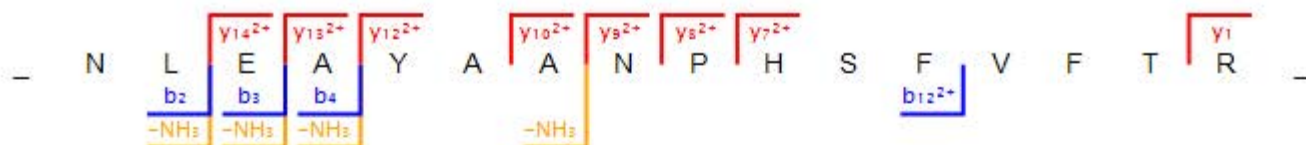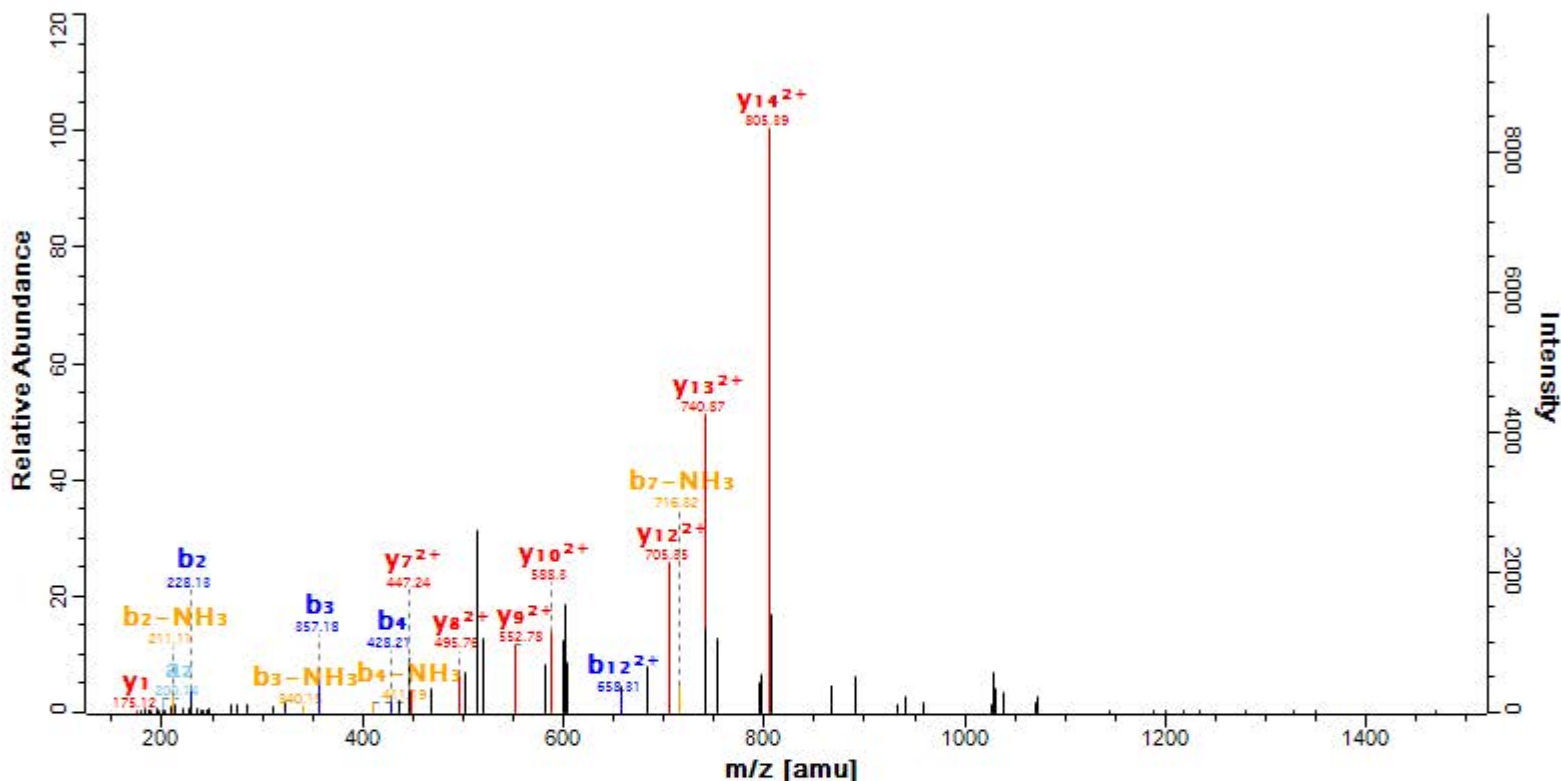

#### precursor information

|                   |                 |
|-------------------|-----------------|
| Mass:             | 1835.89624      |
| m/z:              | 612.97269       |
| Charge:           | 3+              |
| Retentiontime:    | 37.744781494140 |
| Score:            | 63.18053        |
| Mass Error [ppm]: | 0.41269         |
| PEP:              | 0.0022991       |
| Precursor Type:   | MULTI           |

#### general information

|                       |           |
|-----------------------|-----------|
| Annotation:           | 10 of 16  |
| AminoAcids Coverag    | 62 %      |
| Intensity Coverage:   | 49 %      |
| Peak Coverage:        | 18 %      |
| Protein Localisation: | 21 ... 36 |

| a ion         | b <sup>2+</sup> ion | b ion         |    |     |    | y ion         | y <sup>2+</sup> ion |
|---------------|---------------------|---------------|----|-----|----|---------------|---------------------|
| Δ dalton mass | Δ dalton mass       | Δ dalton mass |    | seq |    | Δ dalton mass | Δ dalton mass       |
| 87.06         | 115.1               | 115.1         | 1  | N   | 15 |               |                     |
| +0.034200.1   | 228.1               | -0.05 228.1   | 2  | L   | 14 | 1723          | 1723                |
| 329.2         | 357.2               | +0.173357.2   | 3  | E   | 13 | 1610          | 805.4 +0.24%        |
| 400.2         | 428.2               | -0.07 428.2   | 4  | A   | 12 | 1481          | 740.9 +0.33%        |
| 563.3         | 591.3               | 591.3         | 5  | Y   | 11 | 1410          | 705.4 +0.20%        |
| 634.3         | 662.3               | 662.3         | 6  | A   | 10 | 1247          | 1247                |
| 705.4         | 733.4               | 733.4         | 7  | A   | 9  | 1176          | 588.3 +0.04%        |
| 819.4         | 847.4               | 847.4         | 8  | N   | 8  | 1105          | 552.8 +0.24%        |
| 916.5         | 944.4               | 944.4         | 9  | P   | 7  | 990.5         | 495.8 +0.14%        |
| 1054          | 1082                | 1082          | 10 | H   | 6  | 893.5         | 447.2 +0.32%        |
| 1141          | 1169                | 1169          | 11 | S   | 5  | 756.4         | 756.4               |
| 1288          | +0.301658.3         | 1316          | 12 | F   | 4  | 669.4         | 669.4               |
| 1387          | 1415                | 1415          | 13 | V   | 3  | 522.3         | 522.3               |
| 1534          | 1562                | 1562          | 14 | F   | 2  | 423.2         | 423.2               |
| 1635          | 1663                | 1663          | 15 | T   | 1  | 276.2         | 276.2               |
|               |                     |               | 16 | R   | 0  | 175.1         | +0.1175.1           |

Scan number 631 Raw file LNCAP\_Silac\_23F10\_set2\_08  
 Method ITMS: CID Pepti... 80.18

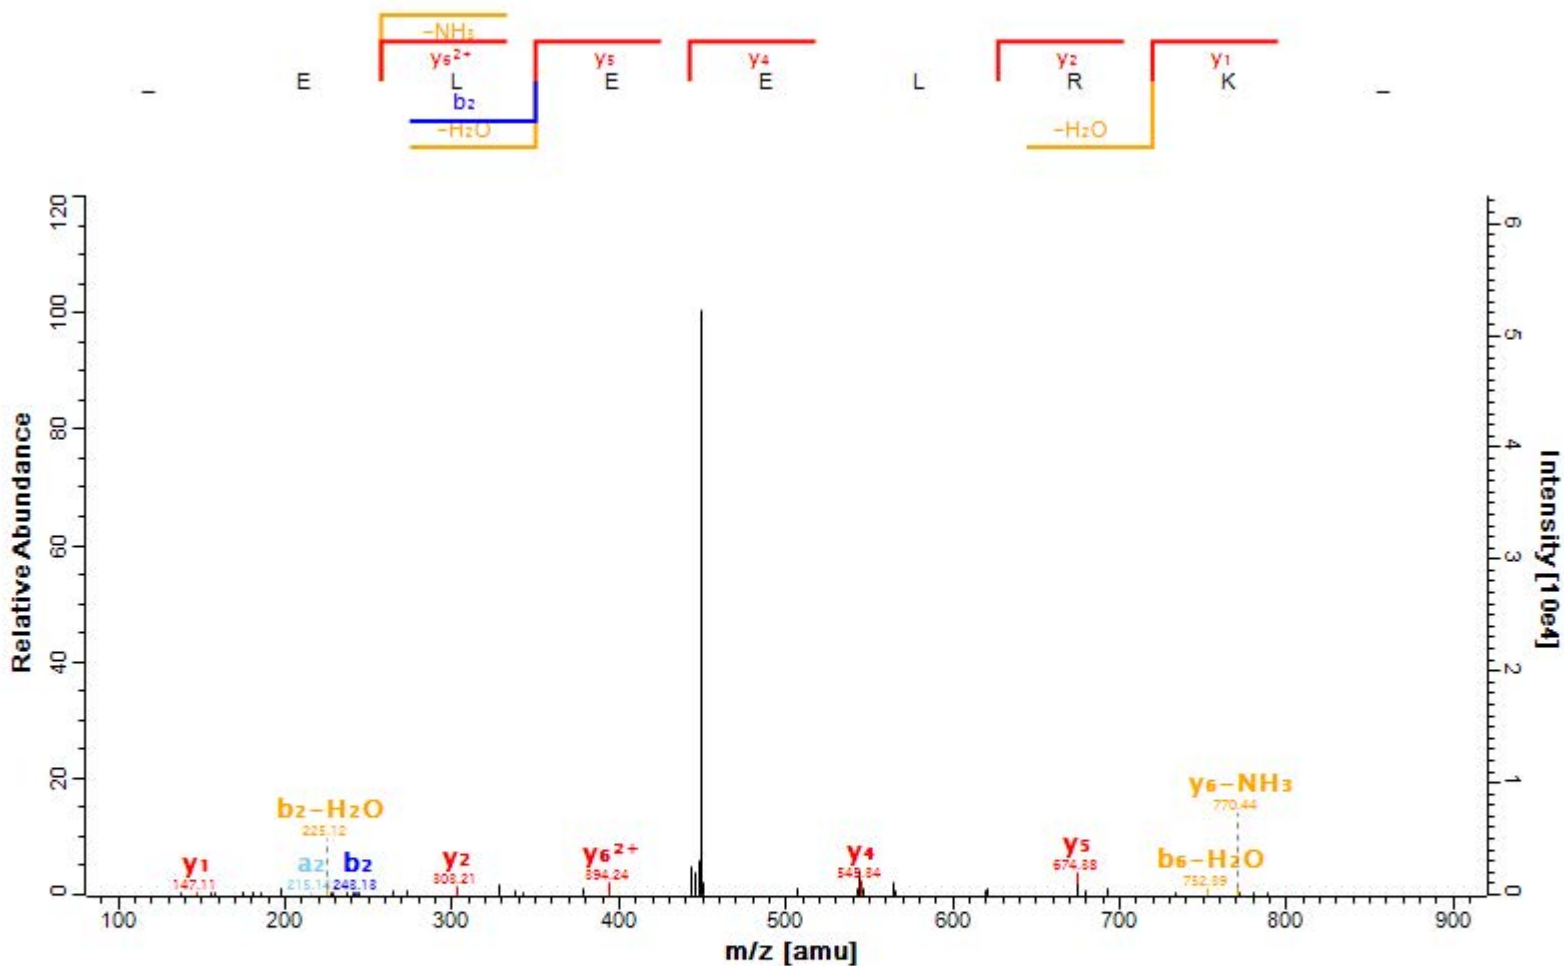

#### precursor information

|                      |                 |
|----------------------|-----------------|
| Mass:                | 915.50259       |
| m/z:                 | 458.75857       |
| Charge:              | 2+              |
| Retentiontime:       | 7.9809184074401 |
| Score:               | 80.1795         |
| g Mass Error [ppm]:  | 0.047932        |
| Annotation:          | 5 of 7          |
| AminoAcids Coverage: | 71 %            |
| Intensity Coverage:  | 9 %             |
| Peak Coverage:       | 11 %            |

| a ion    |        | b ion    |        |   |     |   | y ion    |         | y <sup>2+</sup> ion |        |
|----------|--------|----------|--------|---|-----|---|----------|---------|---------------------|--------|
| Δ dalton | mass   | Δ dalton | mass   |   | seq |   | Δ dalton | mass    | Δ dalton            | mass   |
|          | 102.05 |          | 130.05 | 1 | E   | 6 |          |         |                     |        |
| -0.038   | 215.14 | +0.0816  | 243.13 | 2 | L   | 5 | 787.47   |         | 394.24              | -0.052 |
|          | 344.18 |          | 372.18 | 3 | E   | 4 | 674.38   | -0.004  | 674.38              |        |
|          | 473.22 |          | 501.22 | 4 | E   | 3 | 545.34   | +0.059  | 545.34              |        |
|          | 586.31 |          | 614.3  | 5 | L   | 2 | 416.3    |         | 416.3               |        |
|          | 742.41 |          | 770.4  | 6 | R   | 1 | 303.21   | +0.0678 | 303.21              |        |
|          |        |          |        | 7 | K   | 0 | 147.11   | -0.071  | 147.11              |        |

Scan number 6712 Raw file LNCAP\_Silac\_23F10\_set2\_08  
 Method ITMS; CID Pepti... 206.36

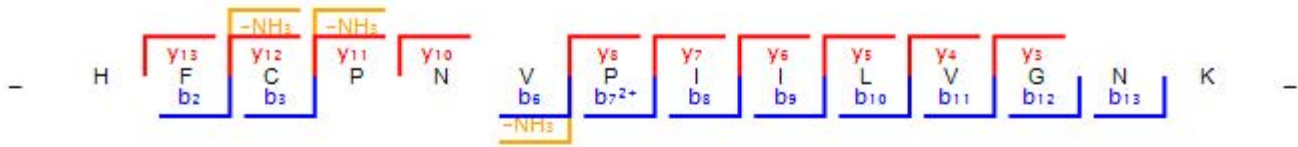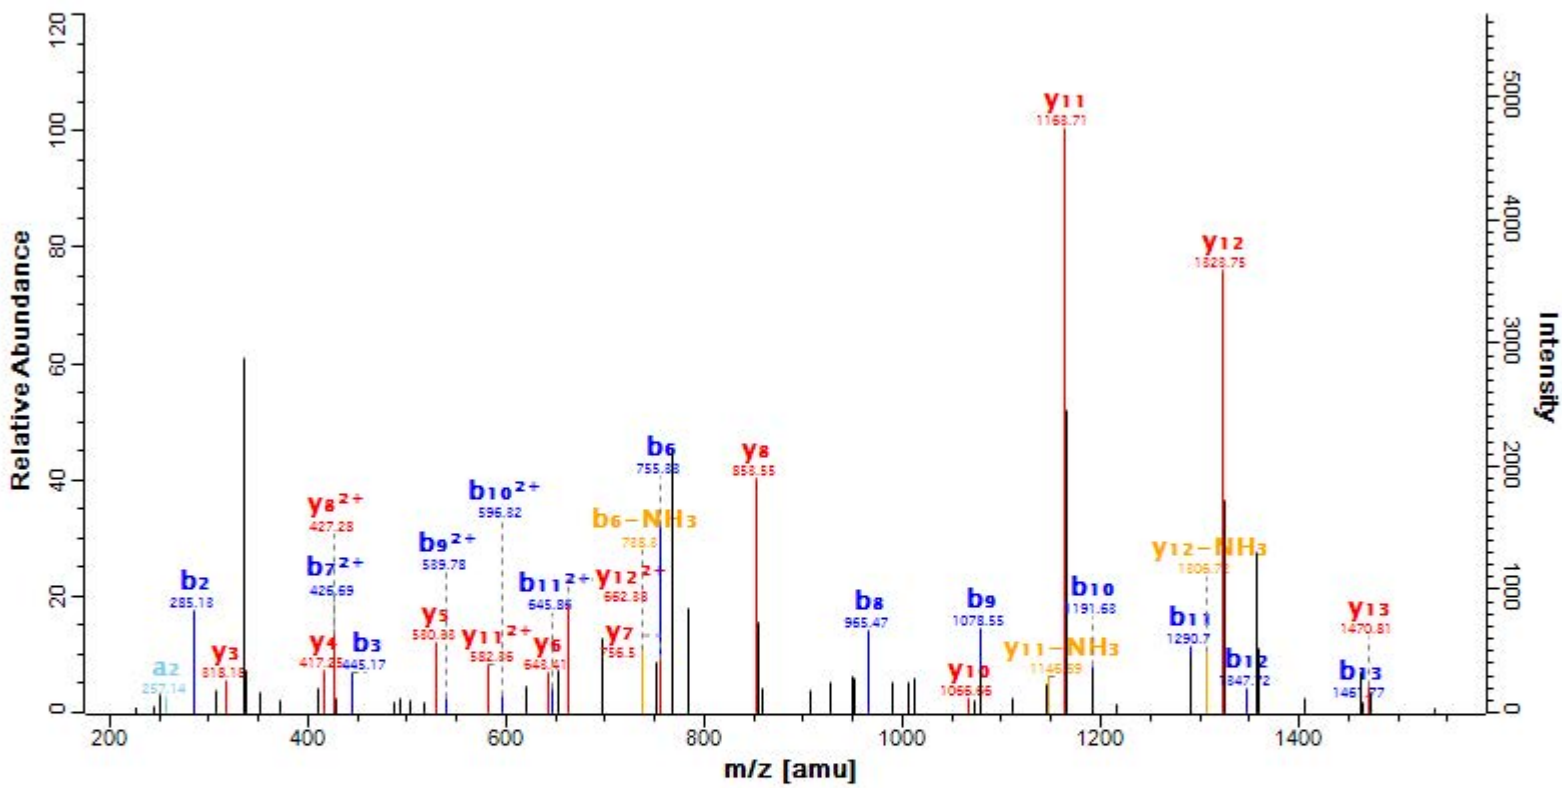

precursor information

|                   |                 |
|-------------------|-----------------|
| Mass:             | 1606.86538      |
| m/z:              | 804.43996       |
| Charge:           | 2+              |
| Retentiontime:    | 40.165607452392 |
| Score:            | 206.363         |
| Mass Error [ppm]: | 0.0055515       |
| PEP:              | 5.8354E-25      |
| Precursor Type:   | MULTI           |

general information

|                       |             |
|-----------------------|-------------|
| Annotation:           | 12 of 14    |
| AminoAcids Coverage:  | 86 %        |
| Intensity Coverage:   | 51 %        |
| Peak Coverage:        | 37 %        |
| Protein Localisation: | 105 ... 118 |

|        | a ion         | b <sup>2+</sup> ion | b ion         |        |    |               | y ion         | y <sup>2+</sup> ion |        |        |       |
|--------|---------------|---------------------|---------------|--------|----|---------------|---------------|---------------------|--------|--------|-------|
|        | Δ dalton mass | Δ dalton mass       | Δ dalton mass | seq    |    | Δ dalton mass | Δ dalton mass |                     |        |        |       |
|        | 110.1         | 138.1               | 138.1         | 1      | H  | 13            |               |                     |        |        |       |
| +0.028 | 257.1         | 285.1               | +0.155        | 2      | F  | 12            | 1471          | +0.015              | 1471   |        |       |
|        | 417.2         | 445.2               | +0.043        | 3      | C  | 11            | 1324          | -0.01               | 662.4  | +0.064 |       |
|        | 514.2         | 542.2               |               | 4      | P  | 10            | 1164          | -0.09               | 582.4  | +0.063 |       |
|        | 628.3         | 656.3               |               | 5      | N  | 9             | 1067          | +0.316              | 1067   |        |       |
|        | 727.3         | 755.3               | +0.021        | 6      | V  | 8             | 952.6         |                     | 952.6  |        |       |
|        | 824.4         | -0.08               | 426.7         |        | 7  | P             | 7             | 853.6               | +0.008 | 8427.3 | -0.02 |
|        | 937.5         |                     | 965.5         | -0.05  | 8  | I             | 6             | 756.5               | -0.03  | 756.5  |       |
|        | 1051          | -0.02               | 539.8         | +0.067 | 9  | I             | 5             | 643.4               | +0.18  | 643.4  |       |
|        | 1164          | +0.139              | 596.3         | -0.2   | 10 | L             | 4             | 530.3               | +0.03  | 530.3  |       |
|        | 1263          | +0.099              | 645.9         | +0.054 | 11 | V             | 3             | 417.2               | +0.207 | 417.2  |       |
|        | 1320          |                     | 1348          | -0.07  | 12 | G             | 2             | 318.2               | -0.01  | 318.2  |       |
|        | 1434          |                     | 1462          | -0.19  | 13 | N             | 1             | 261.2               |        | 261.2  |       |
|        |               |                     |               |        | 14 | K             | 0             | 147.1               |        | 147.1  |       |

Scan number 676 Raw file LNCAP\_Silac\_23F10\_set2\_08  
 Method ITMS; CID Pepti... 145.29

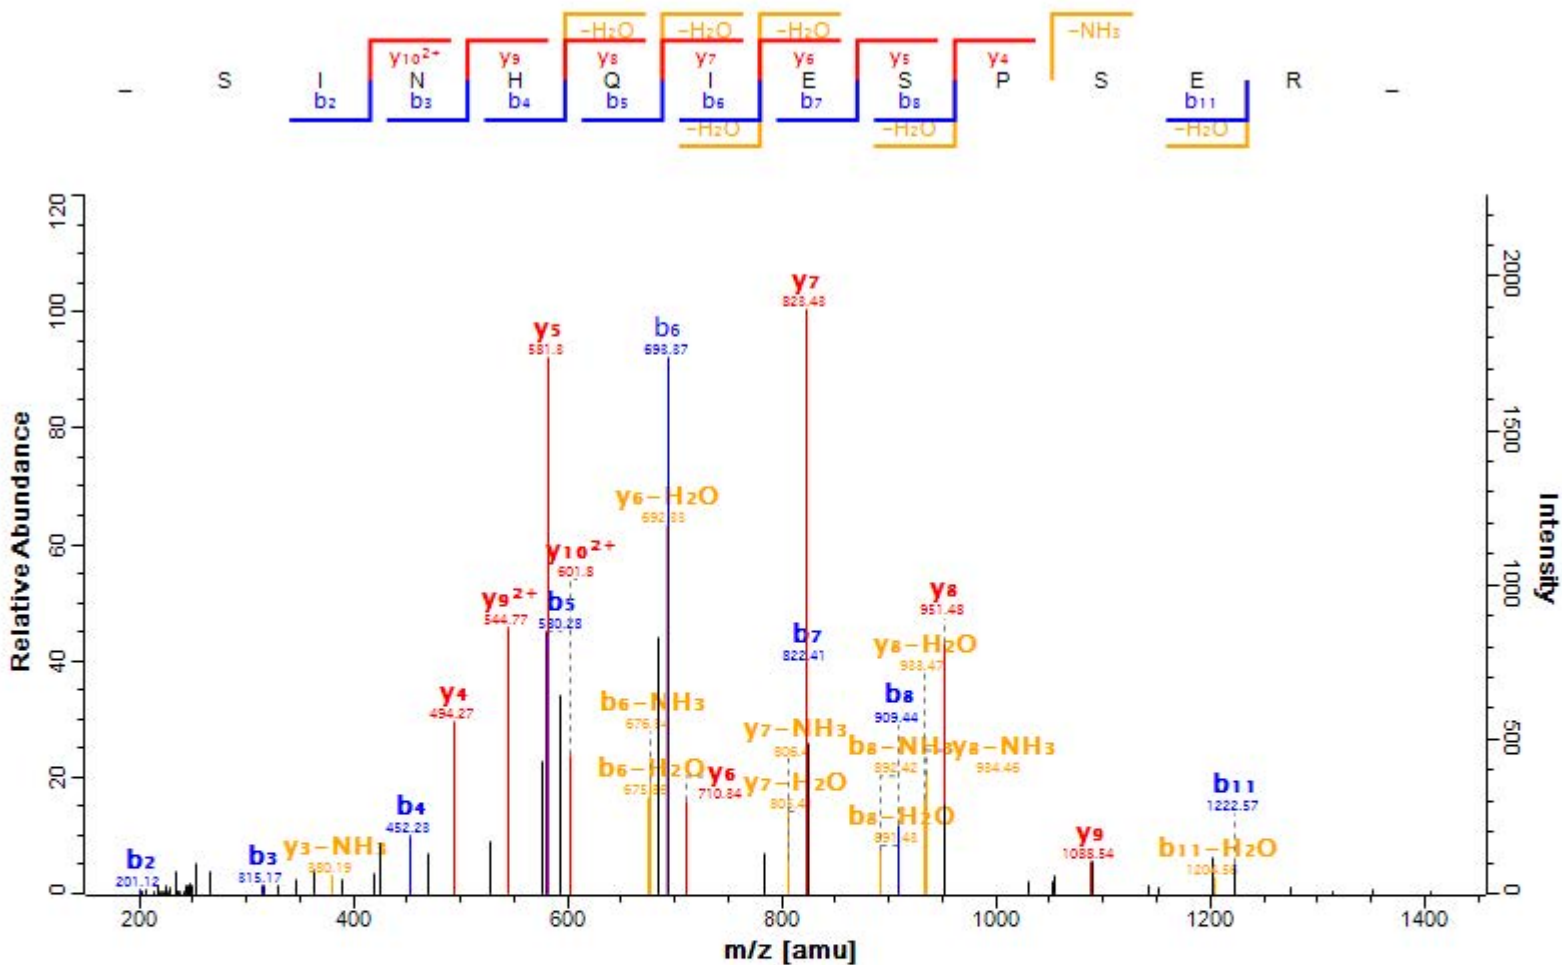

#### precursor information

|                   |                 |
|-------------------|-----------------|
| Mass:             | 1395.67455      |
| m/z:              | 698.84455       |
| Charge:           | 2+              |
| Retentiontime:    | 8.2022418975830 |
| Score:            | 145.2936        |
| Mass Error [ppm]: | 0.20852         |
| PEP:              | 1.0473E-05      |
| Precursor Type:   | MULTI           |

#### general information

|                       |             |
|-----------------------|-------------|
| Annotation:           | 10 of 12    |
| AminoAcids Coverage:  | 83 %        |
| Intensity Coverage:   | 74 %        |
| Peak Coverage:        | 30 %        |
| Protein Localisation: | 966 ... 977 |

| b ion     |          |    |     |    | y ion    |           | y <sup>2+</sup> ion |           |
|-----------|----------|----|-----|----|----------|-----------|---------------------|-----------|
| Δ dalton  | mass     |    | seq |    | Δ dalton | mass      | Δ dalton            | mass      |
|           | 88.0393  | 1  | S   | 11 |          |           |                     |           |
| +0.111479 | 201.1234 | 2  | I   | 10 | 1315.67  |           | 1315.67             |           |
| +0.173425 | 315.1663 | 3  | N   | 9  | 1202.586 |           | 601.7964            | +0.010279 |
| +0.101879 | 452.2252 | 4  | H   | 8  | 1088.543 | +0.026328 | 544.775             | +0.160466 |
| +0.022184 | 580.2838 | 5  | Q   | 7  | 951.4837 | -0.0585   | 951.4837            |           |
| -0.01055  | 693.3678 | 6  | I   | 6  | 823.4252 | +0.00655  | 823.4252            |           |
| -0.04344  | 822.4104 | 7  | E   | 5  | 710.3411 | +0.032874 | 710.3411            |           |
| +0.069187 | 909.4425 | 8  | S   | 4  | 581.2985 | +0.042508 | 581.2985            |           |
|           | 1006.495 | 9  | P   | 3  | 494.2665 | +0.062696 | 494.2665            |           |
|           | 1093.527 | 10 | S   | 2  | 397.2137 |           | 397.2137            |           |
| -0.01492  | 1222.57  | 11 | E   | 1  | 310.1817 |           | 310.1817            |           |
|           |          | 12 | R   | 0  | 181.1391 |           | 181.1391            |           |

Scan number 679 Raw file LNCAP\_Silac\_23F10\_set2\_08  
 Method ITMS; CID Pepti... 199.15

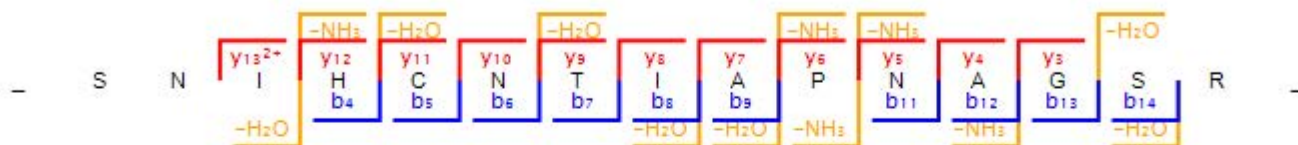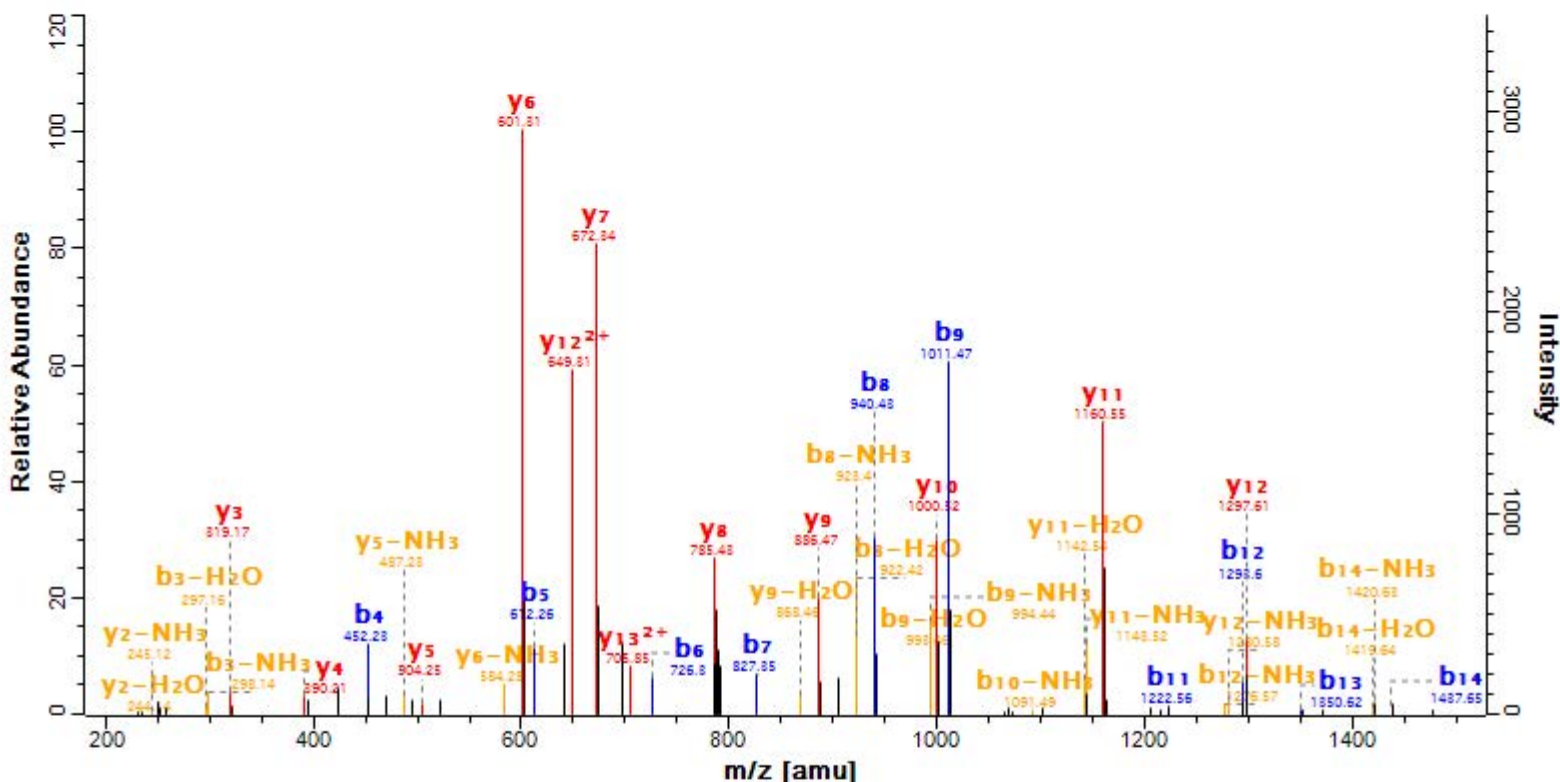

#### precursor information

|                   |                 |
|-------------------|-----------------|
| Mass:             | 1610.75813      |
| m/z:              | 806.38634       |
| Charge:           | 2+              |
| Retentiontime:    | 8.2184896469116 |
| Score:            | 199.1479        |
| Mass Error [ppm]: | -0.12853        |
| PEP:              | 8.7699E-23      |
| Precursor Type:   | MULTI           |

#### general information

|                       |             |
|-----------------------|-------------|
| Annotation:           | 12 of 15    |
| AminoAcids Coverage:  | 80 %        |
| Intensity Coverage:   | 73 %        |
| Peak Coverage:        | 49 %        |
| Protein Localisation: | 185 ... 199 |

| b ion     |          |     |   |          | y ion    |           | y <sup>2+</sup> ion |  |
|-----------|----------|-----|---|----------|----------|-----------|---------------------|--|
| Δ dalton  | mass     | seq |   | Δ dalton | mass     | Δ dalton  | mass                |  |
|           | 88.0393  | 1   | S | 14       |          |           |                     |  |
|           | 202.0822 | 2   | N | 13       | 1524.734 |           | 1524.734            |  |
|           | 315.1663 | 3   | I | 12       | 1410.691 |           | 705.849 +0.093233   |  |
| +0.032177 | 452.2252 | 4   | H | 11       | 1297.607 | -0.00161  | 649.3069 +0.287853  |  |
| +0.040958 | 612.2559 | 5   | C | 10       | 1160.548 | -0.04036  | 1160.548            |  |
| +0.085005 | 726.2988 | 6   | N | 9        | 1000.517 | -0.00245  | 1000.517            |  |
| -0.04556  | 827.3465 | 7   | T | 8        | 886.4741 | -0.09166  | 886.4741            |  |
| -0.06779  | 940.4305 | 8   | I | 7        | 785.4264 | -0.02512  | 785.4264            |  |
| -0.02617  | 1011.468 | 9   | A | 6        | 672.3424 | +0.004988 | 672.3424            |  |
|           | 1108.52  | 10  | P | 5        | 601.3052 | +0.068835 | 601.3052            |  |
| +0.065087 | 1222.563 | 11  | N | 4        | 504.2525 | -0.04808  | 504.2525            |  |
| -0.03978  | 1293.6   | 12  | A | 3        | 390.2096 | +0.162817 | 390.2096            |  |
| +0.172159 | 1350.622 | 13  | G | 2        | 319.1724 | +0.035869 | 319.1724            |  |
| +0.299798 | 1437.654 | 14  | S | 1        | 262.151  |           | 262.151             |  |
|           |          | 15  | R | 0        | 175.119  |           | 175.119             |  |

Scan number 6804 Raw file LNCAP\_Silac\_23F10\_set2\_08  
 Method ITMS: CID Pepti... 106.26

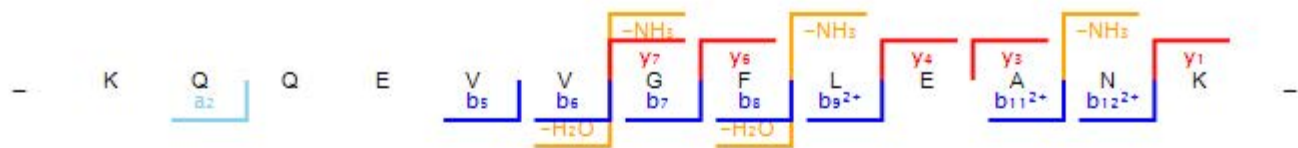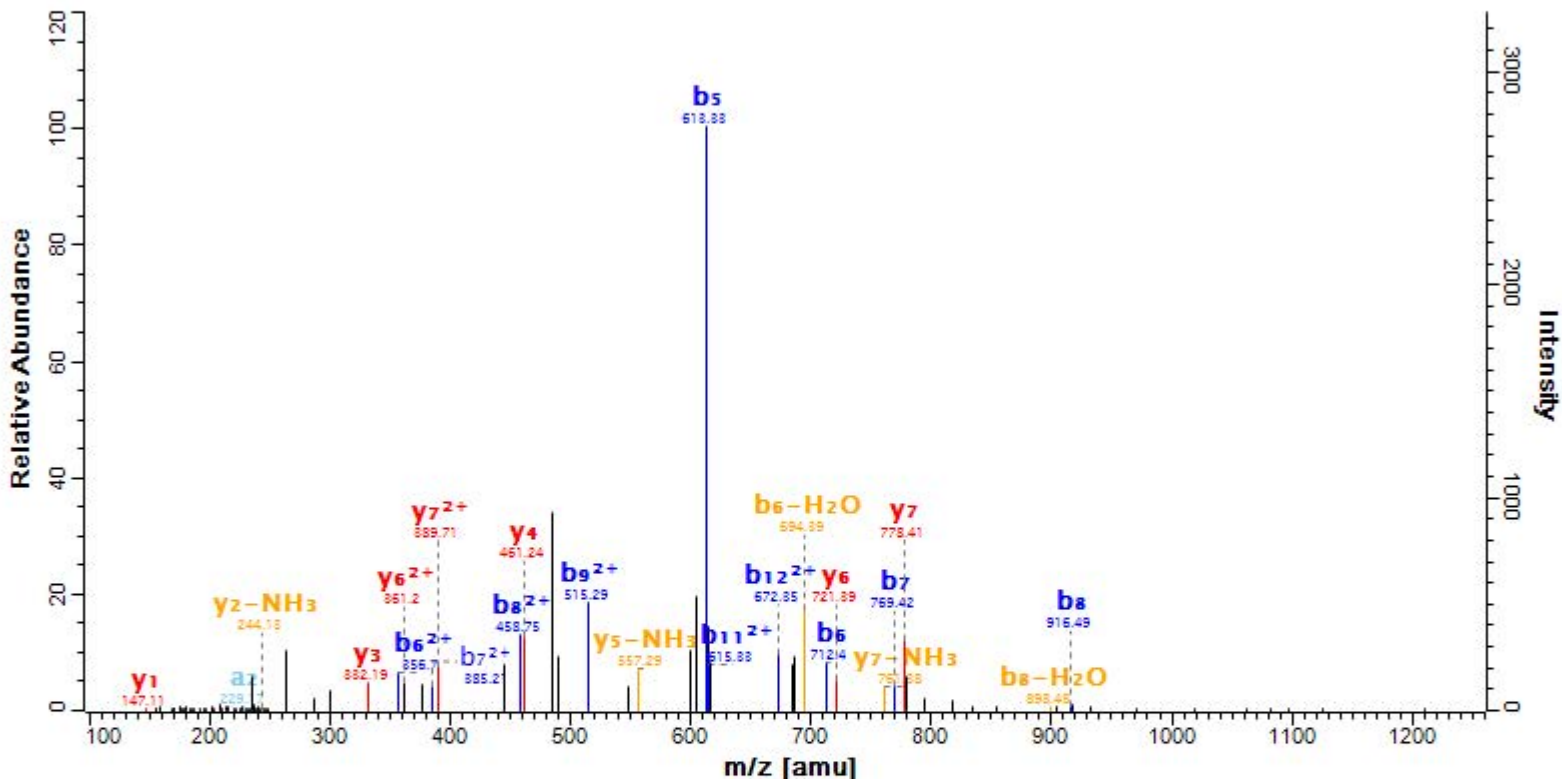

**precursor information**

|                   |                 |
|-------------------|-----------------|
| Mass:             | 1488.79435      |
| m/z:              | 497.27206       |
| Charge:           | 3+              |
| Retentiontime:    | 40.698860168457 |
| Score:            | 106.2576        |
| Mass Error [ppm]: | 0.47823         |
| PEP:              | 0.003331        |
| Precursor Type:   | ISO             |

**general information**

|                       |           |
|-----------------------|-----------|
| Annotation:           | 11 of 13  |
| AminoAcids Coverage:  | 85 %      |
| Intensity Coverage:   | 53 %      |
| Peak Coverage:        | 21 %      |
| Protein Localisation: | 82 ... 94 |

|       | a ion         | b <sup>2+</sup> ion | b ion         |     |   |               | y ion         | y <sup>2+</sup> ion |        |
|-------|---------------|---------------------|---------------|-----|---|---------------|---------------|---------------------|--------|
|       | Δ dalton mass | Δ dalton mass       | Δ dalton mass | seq |   | Δ dalton mass | Δ dalton mass |                     |        |
|       | 101.1         | 129.1               | 129.1         | 1   | K | 12            |               |                     |        |
| -0.11 | 229.2         | 257.2               | 257.2         | 2   | Q | 11            | 1362          | 1362                |        |
|       | 357.2         | 385.2               | 385.2         | 3   | Q | 10            | 1234          | 1234                |        |
|       | 486.3         | 514.3               | 514.3         | 4   | E | 9             | 1106          | 1106                |        |
|       | 585.3         | 613.3               | -0.24 613.3   | 5   | V | 8             | 976.5         | 976.5               |        |
|       | 684.4         | -0.1 356.7          | +0.12 712.4   | 6   | V | 7             | 877.5         | 877.5               |        |
|       | 741.4         | -0.05 385.2         | -0.03 769.4   | 7   | G | 6             | 778.4         | +0.02 389.7         | +0.06: |
|       | 888.5         | -0.03 458.7         | +0.02 6916.5  | 8   | F | 5             | 721.4         | +0.09 8361.2        | +0.01: |
|       | 1002          | +0.20 5515.3        | 1030          | 9   | L | 4             | 574.3         | 574.3               |        |
|       | 1131          | 1159                | 1159          | 10  | E | 3             | 461.2         | +0.22 461.2         |        |
|       | 1202          | +0.00 6615.3        | 1230          | 11  | A | 2             | 332.2         | +0.08 4332.2        |        |
|       | 1316          | +0.25 672.4         | 1344          | 12  | N | 1             | 261.2         | 261.2               |        |
|       |               |                     |               | 13  | K | 0             | 147.1         | +0.13 5147.1        |        |



Scan number 6839 Raw file LNCAP\_Silac\_23F10\_set2\_08  
 Method ITMS; CID Pepti... 148.06

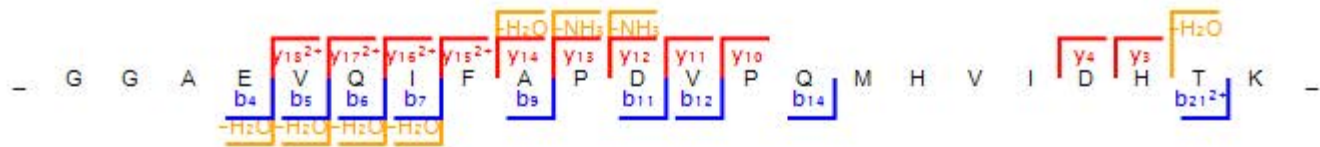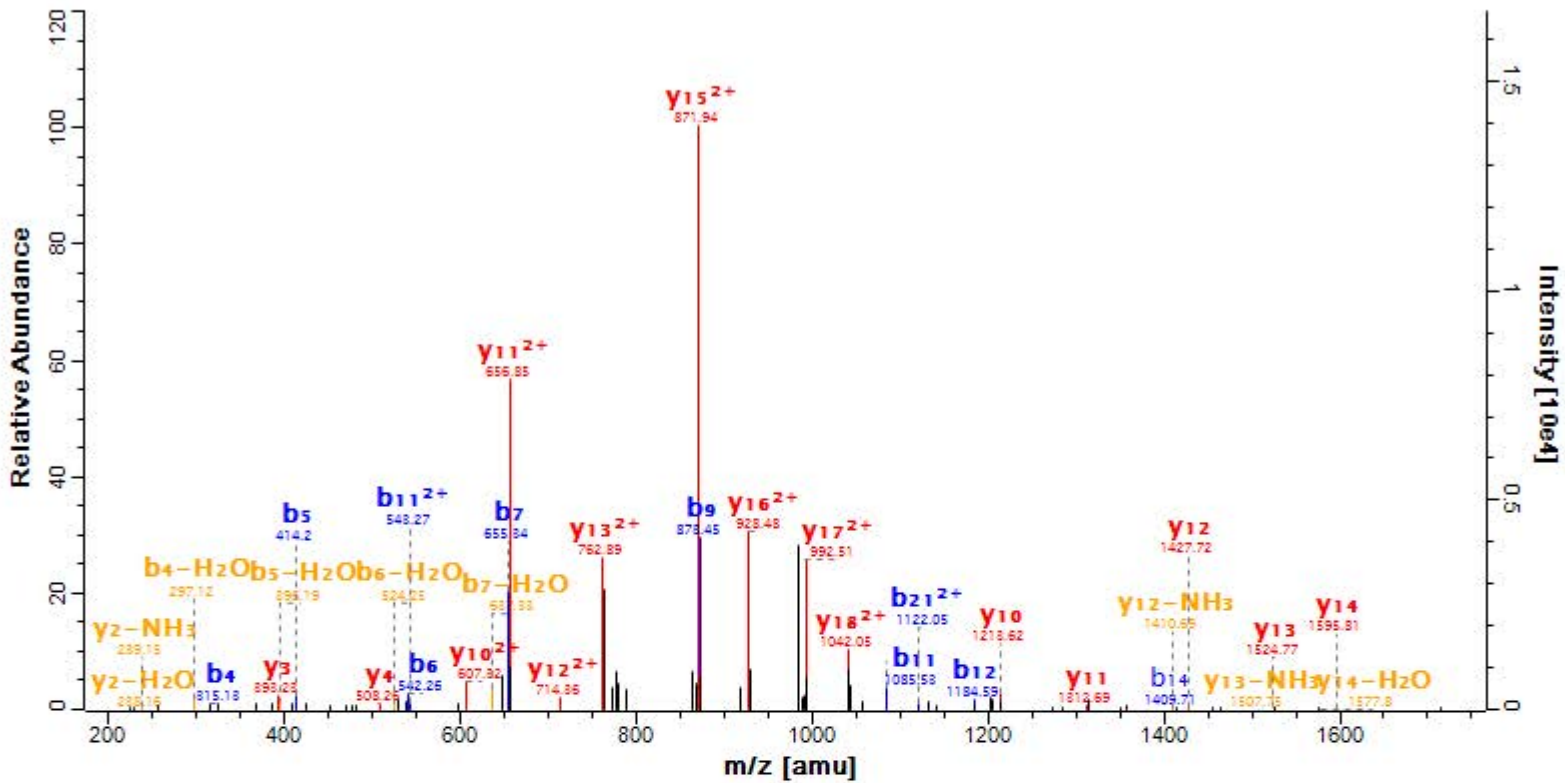

precursor information

|                   |                 |
|-------------------|-----------------|
| Mass:             | 2388.18913      |
| m/z:              | 797.07032       |
| Charge:           | 3+              |
| Retentiontime:    | 40.897342681884 |
| Score:            | 148.0627        |
| Mass Error [ppm]: | -0.20248        |
| PEP:              | 3.2399E-21      |
| Precursor Type:   | MULTI           |

general information

|                       |           |
|-----------------------|-----------|
| Annotation:           | 14 of 22  |
| AminoAcids Coverage:  | 64 %      |
| Intensity Coverage:   | 65 %      |
| Peak Coverage:        | 37 %      |
| Protein Localisation: | 73 ... 94 |

| b <sup>2+</sup> ion |        | b ion    |        | seq |   |    | y ion    |         | y <sup>2+</sup> ion |         |
|---------------------|--------|----------|--------|-----|---|----|----------|---------|---------------------|---------|
| Δ dalton            | mass   | Δ dalton | mass   |     |   |    | Δ dalton | mass    | Δ dalton            | mass    |
|                     | 58.029 |          | 58.029 | 1   | G | 21 |          |         |                     |         |
|                     | 115.05 |          | 115.05 | 2   | G | 20 | 2340.2   |         | 2340.2              |         |
|                     | 186.09 |          | 186.09 | 3   | A | 19 | 2283.2   |         | 2283.2              |         |
|                     | 315.13 | +0.0303  | 315.13 | 4   | E | 18 | 2212.1   |         | 2212.1              |         |
|                     | 414.2  | +0.0857  | 414.2  | 5   | V | 17 | 2083.1   |         | 1042                | -0.023  |
|                     | 542.26 | +0.0914  | 542.26 | 6   | Q | 16 | 1984     |         | 992.51              | +0.2915 |
|                     | 655.34 | -0.127   | 655.34 | 7   | I | 15 | 1856     |         | 928.48              | +0.1931 |
|                     | 802.41 |          | 802.41 | 8   | F | 14 | 1742.9   |         | 871.94              | +0.2496 |
|                     | 873.45 | -0.253   | 873.45 | 9   | A | 13 | 1595.8   | -0.197  | 1595.8              |         |
|                     | 970.5  |          | 970.5  | 10  | P | 12 | 1524.8   | +0.2582 | 762.89              | -0.008  |
| +0.0256             | 543.27 | -0.11    | 1085.5 | 11  | D | 11 | 1427.7   | +0.1477 | 714.36              | -0.021  |
|                     | 1184.6 | -0.098   | 1184.6 | 12  | V | 10 | 1312.7   | -0.284  | 656.85              | +0.1708 |
|                     | 1281.6 |          | 1281.6 | 13  | P | 9  | 1213.6   | +0.2386 | 607.32              | +0.3292 |
|                     | 1409.7 | -0.04    | 1409.7 | 14  | Q | 8  | 1116.6   |         | 1116.6              |         |
|                     | 1540.7 |          | 1540.7 | 15  | M | 7  | 988.51   |         | 988.51              |         |
|                     | 1677.8 |          | 1677.8 | 16  | H | 6  | 857.47   |         | 857.47              |         |
|                     | 1776.9 |          | 1776.9 | 17  | V | 5  | 720.41   |         | 720.41              |         |
|                     | 1890   |          | 1890   | 18  | I | 4  | 621.34   |         | 621.34              |         |
|                     | 2005   |          | 2005   | 19  | D | 3  | 508.26   | +0.0707 | 508.26              |         |
|                     | 2142   |          | 2142   | 20  | H | 2  | 393.23   | -0.016  | 393.23              |         |
| +0.2164             | 1122   |          | 2243.1 | 21  | T | 1  | 256.17   |         | 256.17              |         |
|                     |        |          |        | 22  | K | 0  | 155.13   |         | 155.13              |         |

Scan number 7139 Raw file LNCAP\_Silac\_23F10\_set2\_08  
 Method ITMS; CID Pepti... 143.94

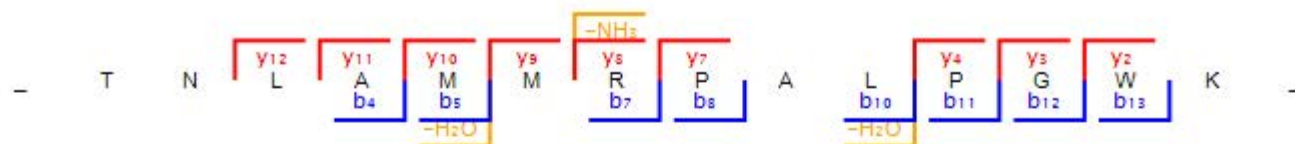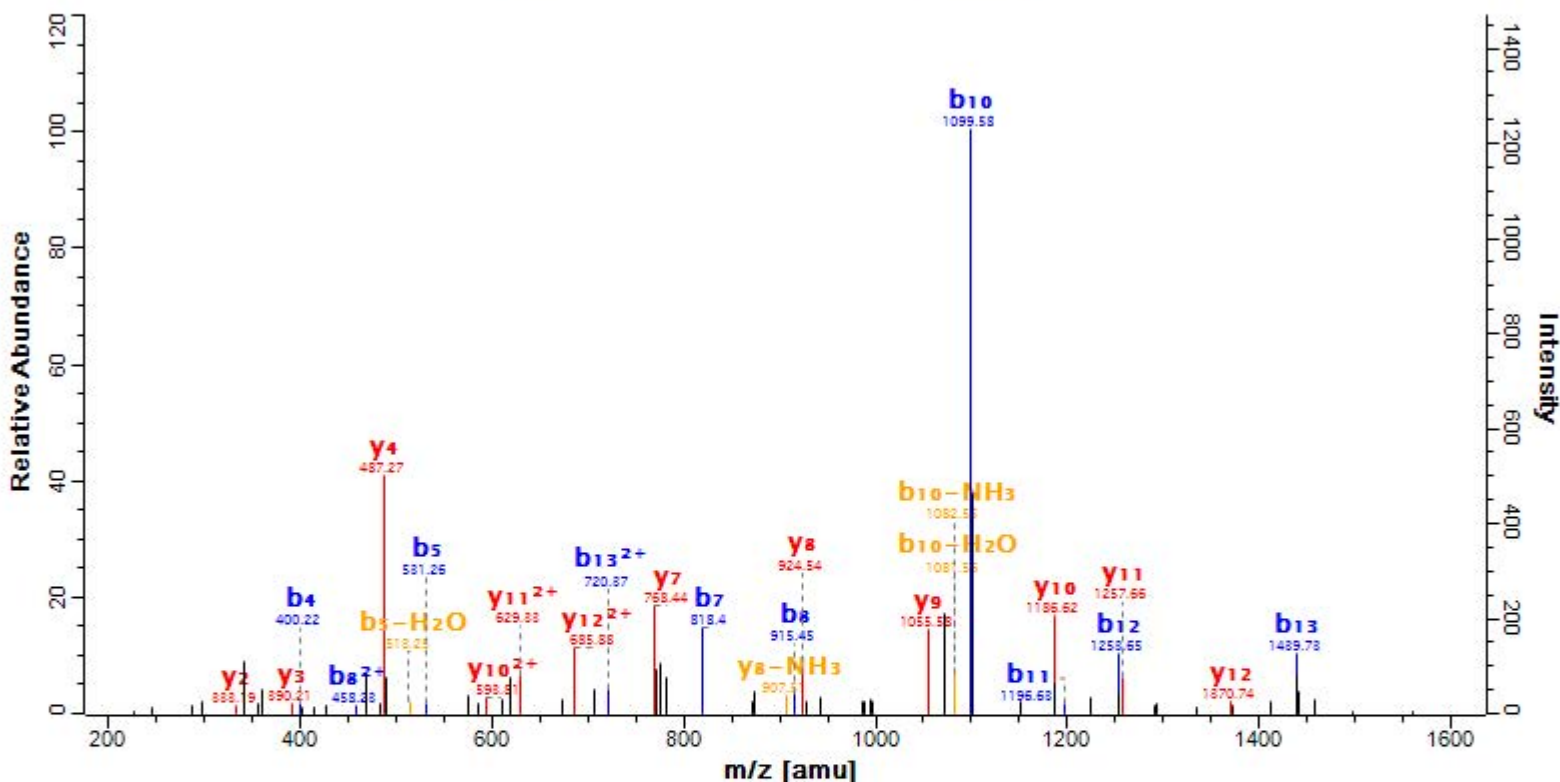

#### precursor information

|                   |                 |
|-------------------|-----------------|
| Mass:             | 1584.82686      |
| m/z:              | 793.42071       |
| Charge:           | 2+              |
| Retentiontime:    | 42.646732330322 |
| Score:            | 143.9394        |
| Mass Error [ppm]: | -0.0067318      |
| PEP:              | 3.7762E-09      |
| Precursor Type:   | MULTI           |

| b <sup>2+</sup> ion |        | b ion    |        | seq |   |    | y ion    |         | y <sup>2+</sup> ion |         |
|---------------------|--------|----------|--------|-----|---|----|----------|---------|---------------------|---------|
| Δ dalton            | mass   | Δ dalton | mass   |     |   |    | Δ dalton | mass    | Δ dalton            | mass    |
|                     | 102.05 |          | 102.05 | 1   | T | 13 |          |         |                     |         |
|                     | 216.1  |          | 216.1  | 2   | N | 12 | 1484.8   |         | 1484.8              |         |
|                     | 329.18 |          | 329.18 | 3   | L | 11 | 1370.7   | +0.0427 | 685.88              | +0.1156 |
|                     | 400.22 | +0.1563  | 400.22 | 4   | A | 10 | 1257.7   | -0.034  | 629.33              | -0.092  |
|                     | 531.26 | +0.2129  | 531.26 | 5   | M | 9  | 1186.6   | -0.013  | 593.81              | +0.0425 |
|                     | 662.3  |          | 662.3  | 6   | M | 8  | 1055.6   | +0.1693 | 1055.6              |         |
|                     | 818.4  | -0.128   | 818.4  | 7   | R | 7  | 924.54   | +0.0157 | 924.54              |         |
| -0.068              | 458.23 | +0.2746  | 915.45 | 8   | P | 6  | 768.44   | -0.022  | 768.44              |         |
|                     | 986.49 |          | 986.49 | 9   | A | 5  | 671.39   |         | 671.39              |         |
|                     | 1099.6 | -0.043   | 1099.6 | 10  | L | 4  | 600.35   |         | 600.35              |         |
|                     | 1196.6 | -0.241   | 1196.6 | 11  | P | 3  | 487.27   | +0.1188 | 487.27              |         |
|                     | 1253.6 | -0.165   | 1253.6 | 12  | G | 2  | 390.21   | +0.1665 | 390.21              |         |
| +0.0492             | 720.37 | -0.226   | 1439.7 | 13  | W | 1  | 333.19   | +0.0933 | 333.19              |         |
|                     |        |          |        | 14  | K | 0  | 147.11   |         | 147.11              |         |

#### general information

|                       |             |
|-----------------------|-------------|
| Annotation:           | 10 of 14    |
| AminoAcids Coverage:  | 71 %        |
| Intensity Coverage:   | 60 %        |
| Peak Coverage:        | 34 %        |
| Protein Localisation: | 309 ... 322 |

Scan number 7169 Raw file LNCAP\_Silac\_23F10\_set2\_08  
 Method ITMS; CID Pepti... 101.48

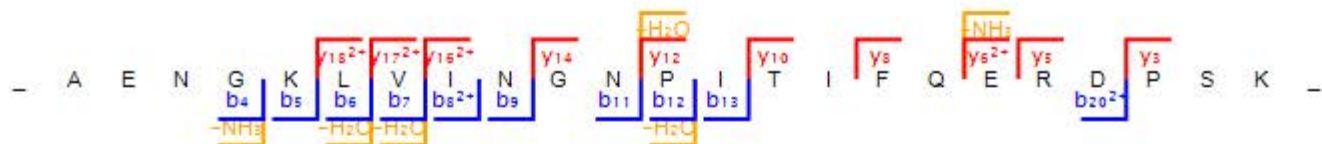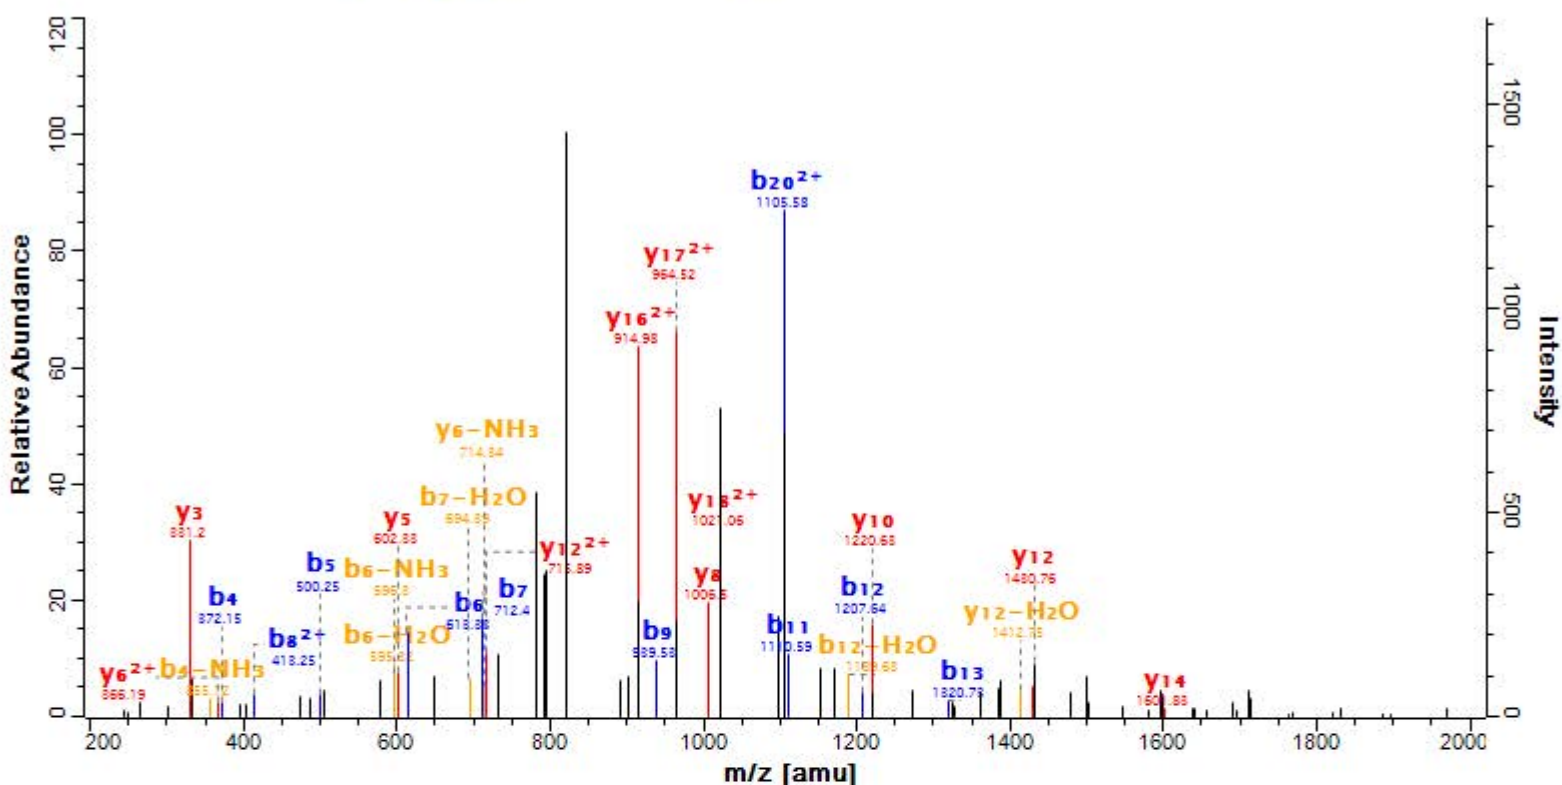

precursor information

|                   |                 |
|-------------------|-----------------|
| Mass:             | 2539.33991      |
| m/z:              | 847.45391       |
| Charge:           | 3+              |
| Retentiontime:    | 42.822555541992 |
| Score:            | 101.4772        |
| Mass Error [ppm]: | 0.18275         |
| PEP:              | 7.0925E-06      |
| Precursor Type:   | ISO             |

general information

|                       |           |
|-----------------------|-----------|
| Annotation:           | 16 of 23  |
| AminoAcids Coverage:  | 70 %      |
| Intensity Coverage:   | 41 %      |
| Peak Coverage:        | 29 %      |
| Protein Localisation: | 62 ... 84 |

| b <sup>2+</sup> ion |        | b ion    |        | seq |   |    | y ion    |         | y <sup>2+</sup> ion |         |
|---------------------|--------|----------|--------|-----|---|----|----------|---------|---------------------|---------|
| Δ dalton            | mass   | Δ dalton | mass   |     |   |    | Δ dalton | mass    | Δ dalton            | mass    |
|                     | 72.044 |          | 72.044 | 1   | A | 22 |          |         |                     |         |
|                     | 201.09 |          | 201.09 | 2   | E | 21 | 2469.3   |         | 2469.3              |         |
|                     | 315.13 |          | 315.13 | 3   | N | 20 | 2340.3   |         | 2340.3              |         |
|                     | 372.15 | -0.034   | 372.15 | 4   | G | 19 | 2226.2   |         | 2226.2              |         |
|                     | 500.25 | +0.2278  | 500.25 | 5   | K | 18 | 2169.2   |         | 2169.2              |         |
|                     | 613.33 | +0.1907  | 613.33 | 6   | L | 17 | 2041.1   |         | 1021.1              | -0.08   |
|                     | 712.4  | +0.1773  | 712.4  | 7   | V | 16 | 1928     |         | 964.52              | +0.311  |
| +0.0141             | 825.48 |          | 825.48 | 8   | I | 15 | 1829     |         | 914.98              | +0.236  |
|                     | 939.53 | +0.1583  | 939.53 | 9   | N | 14 | 1715.9   |         | 1715.9              |         |
|                     | 996.55 |          | 996.55 | 10  | G | 13 | 1601.8   | +0.4543 | 1601.8              |         |
|                     | 1110.6 | -0.431   | 1110.6 | 11  | N | 12 | 1544.8   |         | 1544.8              |         |
|                     | 1207.6 | -0.118   | 1207.6 | 12  | P | 11 | 1430.8   | -0.109  | 715.89              | +0.2233 |
|                     | 1320.7 | -0.124   | 1320.7 | 13  | I | 10 | 1333.7   |         | 1333.7              |         |
|                     | 1421.8 |          | 1421.8 | 14  | T | 9  | 1220.6   | +0.0293 | 1220.6              |         |
|                     | 1534.9 |          | 1534.9 | 15  | I | 8  | 1119.6   |         | 1119.6              |         |
|                     | 1681.9 |          | 1681.9 | 16  | F | 7  | 1006.5   | -0.407  | 1006.5              |         |
|                     | 1810   |          | 1810   | 17  | Q | 6  | 859.43   |         | 859.43              |         |
|                     | 1939   |          | 1939   | 18  | E | 5  | 731.37   |         | 366.19              | +0.2136 |
|                     | 2095.1 |          | 2095.1 | 19  | R | 4  | 602.33   | -0.017  | 602.33              |         |
| +0.1602             | 2210.2 |          | 2210.2 | 20  | D | 3  | 446.22   |         | 446.22              |         |
|                     | 2307.2 |          | 2307.2 | 21  | P | 2  | 331.2    | +0.0912 | 331.2               |         |
|                     | 2394.2 |          | 2394.2 | 22  | S | 1  | 234.14   |         | 234.14              |         |
|                     |        |          |        | 23  | K | 0  | 147.11   |         | 147.11              |         |

Scan number 7335 Raw file LNCAP\_Silac\_23F10\_set2\_08  
 Method ITMS; CID Pepti... 59.67

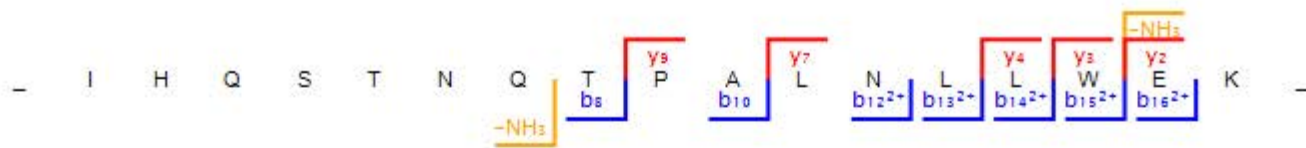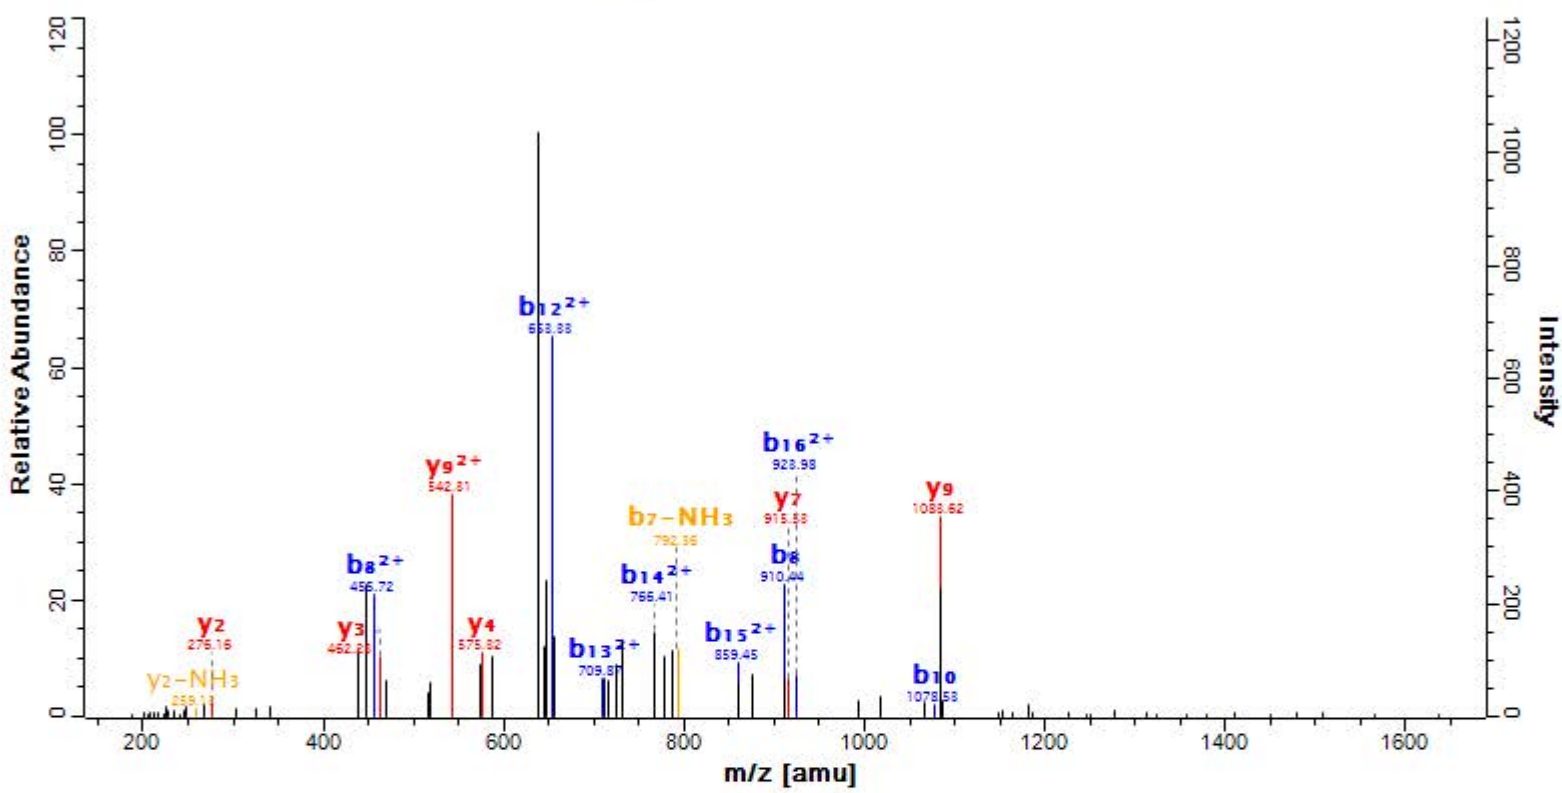

**precursor information**

|                   |                 |
|-------------------|-----------------|
| Mass:             | 1992.04387      |
| m/z:              | 665.0219        |
| Charge:           | 3+              |
| Retentiontime:    | 43.857536315918 |
| Score:            | 59.67264        |
| Mass Error [ppm]: | 0.49855         |
| PEP:              | 0.0023857       |
| Precursor Type:   | MULTI           |

**general information**

|                       |           |
|-----------------------|-----------|
| Annotation:           | 10 of 17  |
| AminoAcids Coverage:  | 59 %      |
| Intensity Coverage:   | 40 %      |
| Peak Coverage:        | 19 %      |
| Protein Localisation: | 38 ... 54 |

| b <sup>2+</sup> ion |        | b ion    |        |    |     |    | y ion    |         | y <sup>2+</sup> ion |         |
|---------------------|--------|----------|--------|----|-----|----|----------|---------|---------------------|---------|
| Δ dalton            | mass   | Δ dalton | mass   |    | seq |    | Δ dalton | mass    | Δ dalton            | mass    |
|                     | 114.09 |          | 114.09 | 1  | I   | 16 |          |         |                     |         |
|                     | 251.15 |          | 251.15 | 2  | H   | 15 | 1880     |         | 1880                |         |
|                     | 379.21 |          | 379.21 | 3  | Q   | 14 | 1742.9   |         | 1742.9              |         |
|                     | 466.24 |          | 466.24 | 4  | S   | 13 | 1614.8   |         | 1614.8              |         |
|                     | 567.29 |          | 567.29 | 5  | T   | 12 | 1527.8   |         | 1527.8              |         |
|                     | 681.33 |          | 681.33 | 6  | N   | 11 | 1426.8   |         | 1426.8              |         |
|                     | 809.39 |          | 809.39 | 7  | Q   | 10 | 1312.7   |         | 1312.7              |         |
| +0.047              | 455.72 | +0.1013  | 910.44 | 8  | T   | 9  | 1184.7   |         | 1184.7              |         |
|                     | 1007.5 |          | 1007.5 | 9  | P   | 8  | 1083.6   | -0.074  | 542.31              | +0.2867 |
|                     | 1078.5 | +0.1658  | 1078.5 | 10 | A   | 7  | 986.57   |         | 986.57              |         |
|                     | 1191.6 |          | 1191.6 | 11 | L   | 6  | 915.53   | +0.0944 | 915.53              |         |
| +0.1825             | 653.33 |          | 1305.7 | 12 | N   | 5  | 802.45   |         | 802.45              |         |
| -0.014              | 709.87 |          | 1418.7 | 13 | L   | 4  | 688.4    |         | 688.4               |         |
| -0.009              | 766.41 |          | 1531.8 | 14 | L   | 3  | 575.32   | +0.1166 | 575.32              |         |
| -0.168              | 859.45 |          | 1717.9 | 15 | W   | 2  | 462.23   | +0.0786 | 462.23              |         |
| -0.114              | 923.98 |          | 1846.9 | 16 | E   | 1  | 276.16   | +0.0055 | 276.16              |         |
|                     |        |          |        | 17 | K   | 0  | 147.11   |         | 147.11              |         |

Scan number 7391 Raw file LNCAP\_Silac\_23F10\_set2\_08  
 Method ITMS; CID Pepti... 98.94

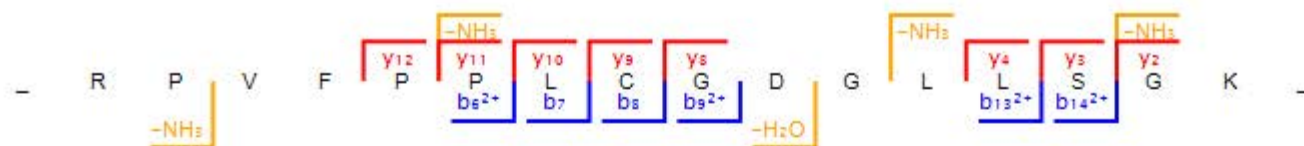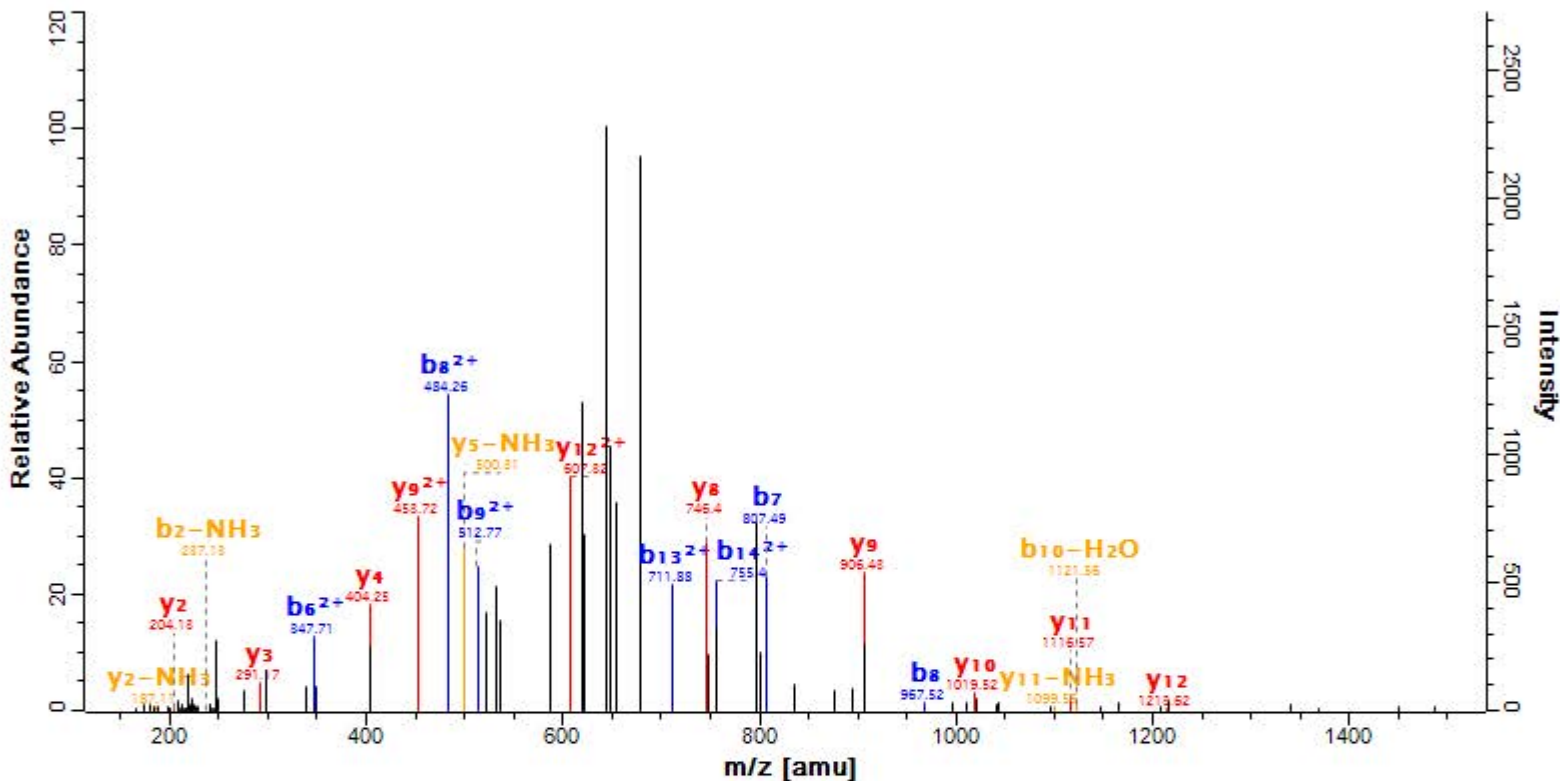

precursor information

|                   |                 |
|-------------------|-----------------|
| Mass:             | 1711.90787      |
| m/z:              | 571.64323       |
| Charge:           | 3+              |
| Retentiontime:    | 44.221366882324 |
| Score:            | 98.94319        |
| Mass Error [ppm]: | -0.053582       |
| PEP:              | 6.8983E-06      |
| Precursor Type:   | MULTI           |

general information

|                       |           |
|-----------------------|-----------|
| Annotation:           | 12 of 16  |
| AminoAcids Coverage:  | 75 %      |
| Intensity Coverage:   | 36 %      |
| Peak Coverage:        | 24 %      |
| Protein Localisation: | 57 ... 72 |

| b <sup>2+</sup> ion |        | b ion    |        |    |     |    | y ion    |         | y <sup>2+</sup> ion |         |
|---------------------|--------|----------|--------|----|-----|----|----------|---------|---------------------|---------|
| Δ dalton            | mass   | Δ dalton | mass   |    | seq |    | Δ dalton | mass    | Δ dalton            | mass    |
|                     | 157.11 |          | 157.11 | 1  | R   | 15 |          |         |                     |         |
|                     | 254.16 |          | 254.16 | 2  | P   | 14 | 1556.8   |         | 1556.8              |         |
|                     | 353.23 |          | 353.23 | 3  | V   | 13 | 1459.8   |         | 1459.8              |         |
|                     | 500.3  |          | 500.3  | 4  | F   | 12 | 1360.7   |         | 1360.7              |         |
|                     | 597.35 |          | 597.35 | 5  | P   | 11 | 1213.6   | +0.0069 | 607.32              | +0.0997 |
| -0.107              | 347.71 |          | 694.4  | 6  | P   | 10 | 1116.6   | -0.123  | 1116.6              |         |
|                     | 807.49 | -0.074   | 807.49 | 7  | L   | 9  | 1019.5   | -0.148  | 1019.5              |         |
| -0.022              | 484.26 | +0.2731  | 967.52 | 8  | C   | 8  | 906.43   | -0.072  | 453.72              | +0.0712 |
| +0.2729             | 512.77 |          | 1024.5 | 9  | G   | 7  | 746.4    | +0.0441 | 746.4               |         |
|                     | 1139.6 |          | 1139.6 | 10 | D   | 6  | 689.38   |         | 689.38              |         |
|                     | 1196.6 |          | 1196.6 | 11 | G   | 5  | 574.36   |         | 574.36              |         |
|                     | 1309.7 |          | 1309.7 | 12 | L   | 4  | 517.33   |         | 517.33              |         |
| +0.2374             | 711.88 |          | 1422.8 | 13 | L   | 3  | 404.25   | +0.0018 | 404.25              |         |
| +0.1075             | 755.4  |          | 1509.8 | 14 | S   | 2  | 291.17   | +0.0948 | 291.17              |         |
|                     | 1566.8 |          | 1566.8 | 15 | G   | 1  | 204.13   | +0.258  | 204.13              |         |
|                     |        |          |        | 16 | K   | 0  | 147.11   |         | 147.11              |         |

Scan number 7455 Raw file LNCAP\_Silac\_23F10\_set2\_08  
 Method ITMS; CID Pepti... 119.25

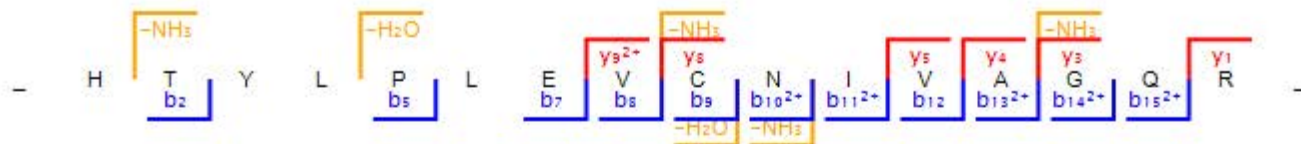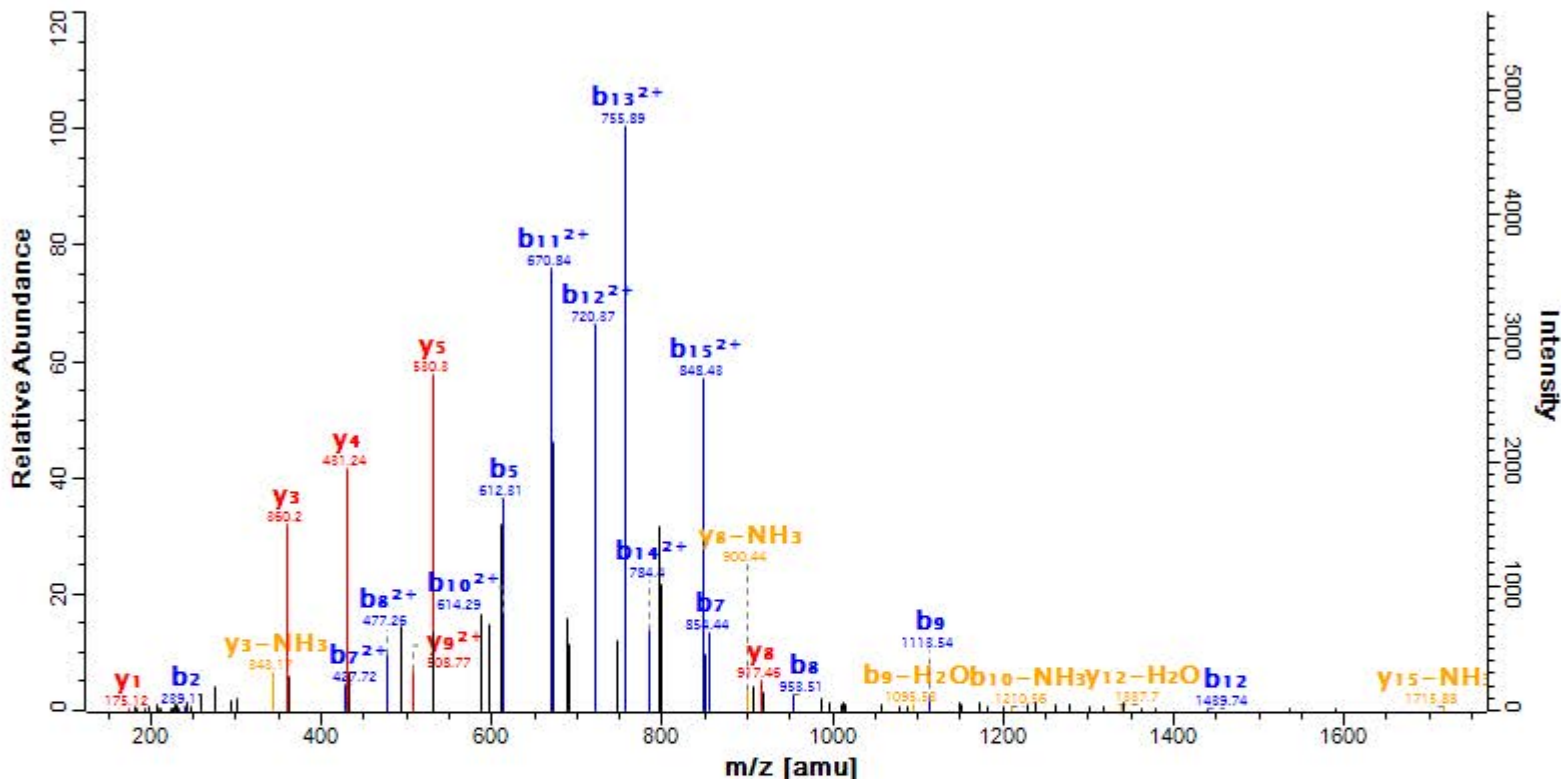

#### precursor information

|                   |                 |
|-------------------|-----------------|
| Mass:             | 1868.95685      |
| m/z:              | 623.99289       |
| Charge:           | 3+              |
| Retentiontime:    | 44.641334533691 |
| Score:            | 119.2534        |
| Mass Error [ppm]: | 0.079795        |
| PEP:              | 4.6907E-09      |
| Precursor Type:   | MULTI           |

#### general information

|                       |             |
|-----------------------|-------------|
| Annotation:           | 12 of 16    |
| AminoAcids Coverage:  | 75 %        |
| Intensity Coverage:   | 62 %        |
| Peak Coverage:        | 25 %        |
| Protein Localisation: | 326 ... 341 |

| b <sup>2+</sup> ion |        | b ion    |        |    |     |    | y ion    |         | y <sup>2+</sup> ion |        |
|---------------------|--------|----------|--------|----|-----|----|----------|---------|---------------------|--------|
| Δ dalton            | mass   | Δ dalton | mass   |    | seq |    | Δ dalton | mass    | Δ dalton            | mass   |
|                     | 138.07 |          | 138.07 | 1  | H   | 15 |          |         |                     |        |
|                     | 239.11 | +0.1595  | 239.11 | 2  | T   | 14 | 1732.9   |         | 1732.9              |        |
|                     | 402.18 |          | 402.18 | 3  | Y   | 13 | 1631.9   |         | 1631.9              |        |
|                     | 515.26 |          | 515.26 | 4  | L   | 12 | 1468.8   |         | 1468.8              |        |
|                     | 612.31 | +0.3514  | 612.31 | 5  | P   | 11 | 1355.7   |         | 1355.7              |        |
|                     | 725.4  |          | 725.4  | 6  | L   | 10 | 1258.7   |         | 1258.7              |        |
| +0.0144             | 427.72 | +0.0055  | 854.44 | 7  | E   | 9  | 1145.6   |         | 1145.6              |        |
| +0.1086             | 477.26 | +0.0386  | 953.51 | 8  | V   | 8  | 1016.5   |         | 508.77              | -0.066 |
|                     | 1113.5 | +0.3309  | 1113.5 | 9  | C   | 7  | 917.46   | +0.0561 | 917.46              |        |
| +0.1635             | 614.29 |          | 1227.6 | 10 | N   | 6  | 757.43   |         | 757.43              |        |
| +0.1045             | 670.84 |          | 1340.7 | 11 | I   | 5  | 643.39   |         | 643.39              |        |
| +0.1902             | 720.37 | -0.041   | 1439.7 | 12 | V   | 4  | 530.3    | +0.0135 | 530.3               |        |
| +0.1722             | 755.89 |          | 1510.8 | 13 | A   | 3  | 431.24   | +0.0524 | 431.24              |        |
| +0.1206             | 784.4  |          | 1567.8 | 14 | G   | 2  | 360.2    | +0.0063 | 360.2               |        |
| +0.2299             | 848.43 |          | 1695.9 | 15 | Q   | 1  | 303.18   |         | 303.18              |        |
|                     |        |          |        | 16 | R   | 0  | 175.12   | +0.1872 | 175.12              |        |

Scan number 7840 Raw file LNCAP\_Silac\_23F10\_set2\_08  
 Method ITMS; CID Pepti... 42.96

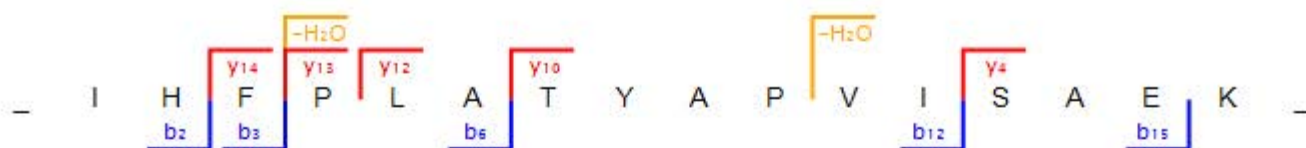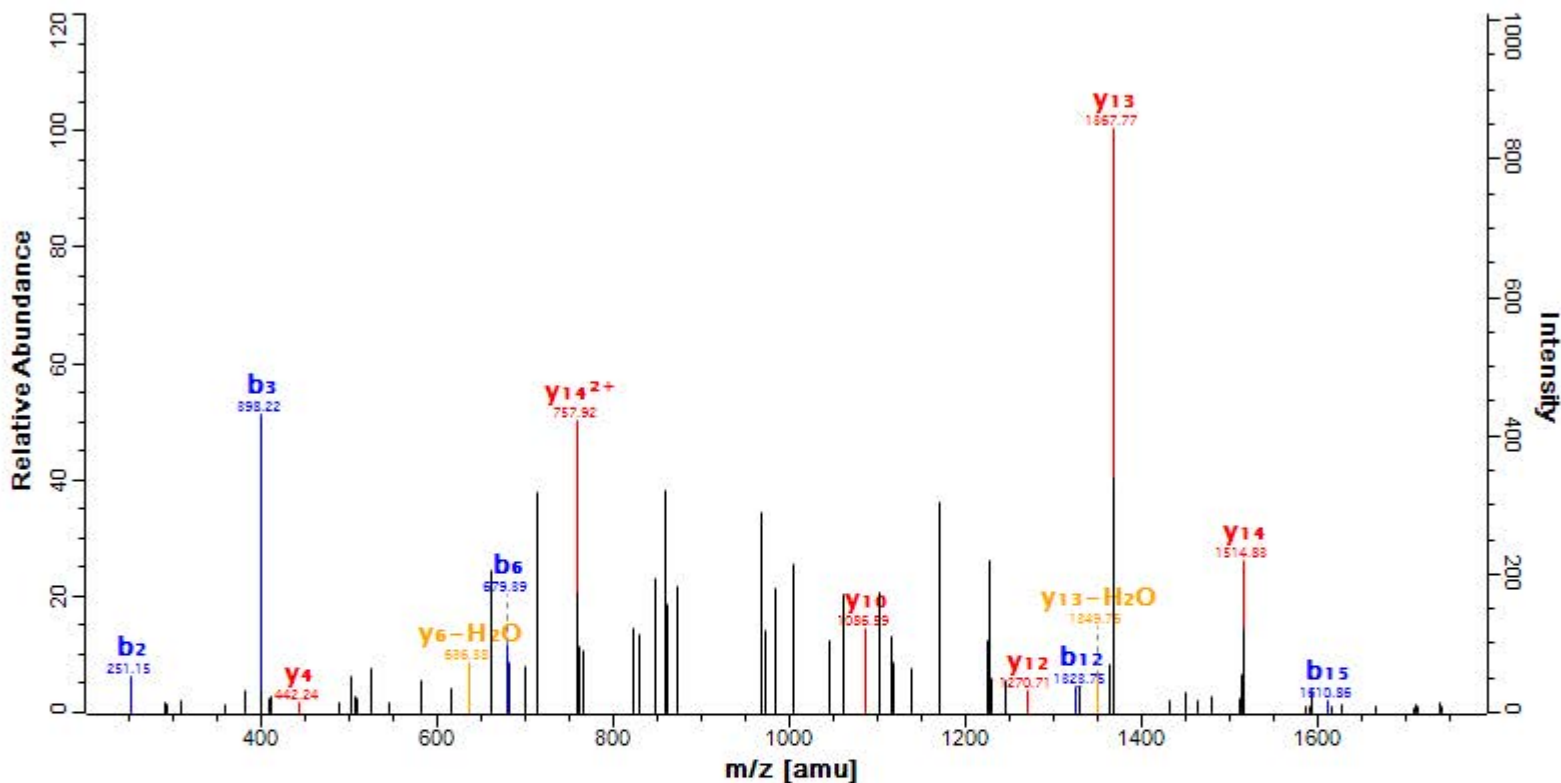

#### precursor information

|                   |                 |
|-------------------|-----------------|
| Mass:             | 1755.95597      |
| m/z:              | 878.98526       |
| Charge:           | 2+              |
| Retentiontime:    | 47.052516937255 |
| Score:            | 42.95784        |
| Mass Error [ppm]: | 0.0091225       |
| PEP:              | 0.031424        |
| Precursor Type:   | MULTI           |

#### general information

|                       |             |
|-----------------------|-------------|
| Annotation:           | 10 of 16    |
| AminoAcids Coverag    | 62 %        |
| Intensity Coverage:   | 28 %        |
| Peak Coverage:        | 15 %        |
| Protein Localisation: | 265 ... 280 |

| b ion     |          |    |     |    | y ion    |           | y <sup>2+</sup> ion |          |
|-----------|----------|----|-----|----|----------|-----------|---------------------|----------|
| Δ dalton  | mass     |    | seq |    | Δ dalton | mass      | Δ dalton            | mass     |
|           | 114.0913 | 1  | I   | 15 |          |           |                     |          |
| +0.091279 | 251.1503 | 2  | H   | 14 | 1651.893 |           | 1651.893            |          |
| -0.00053  | 398.2187 | 3  | F   | 13 | 1514.834 | -0.00597  | 757.9209            | +0.24698 |
|           | 495.2714 | 4  | P   | 12 | 1367.766 | -0.19756  | 1367.766            |          |
|           | 608.3555 | 5  | L   | 11 | 1270.713 | -0.08864  | 1270.713            |          |
| +0.094392 | 679.3926 | 6  | A   | 10 | 1157.629 |           | 1157.629            |          |
|           | 780.4403 | 7  | T   | 9  | 1086.592 | -0.05438  | 1086.592            |          |
|           | 943.5036 | 8  | Y   | 8  | 985.5444 |           | 985.5444            |          |
|           | 1014.541 | 9  | A   | 7  | 822.4811 |           | 822.4811            |          |
|           | 1111.593 | 10 | P   | 6  | 751.444  |           | 751.444             |          |
|           | 1210.662 | 11 | V   | 5  | 654.3912 |           | 654.3912            |          |
| -0.07202  | 1323.746 | 12 | I   | 4  | 555.3228 |           | 555.3228            |          |
|           | 1410.778 | 13 | S   | 3  | 442.2387 | +0.052399 | 442.2387            |          |
|           | 1481.815 | 14 | A   | 2  | 355.2067 |           | 355.2067            |          |
| +0.035239 | 1610.858 | 15 | E   | 1  | 284.1696 |           | 284.1696            |          |
|           |          | 16 | K   | 0  | 155.127  |           | 155.127             |          |

Scan number 8201 Raw file LNCAP\_Silac\_23F10\_set2\_08  
 Method ITMS: CID Pepti... 84.17

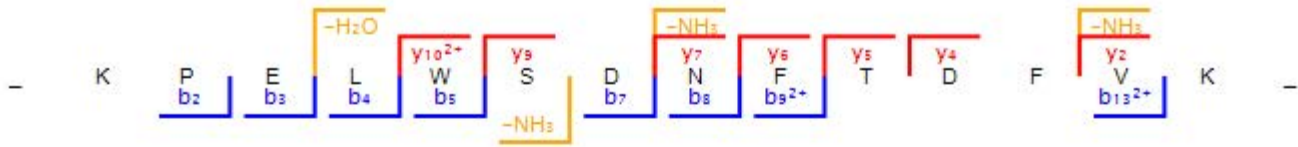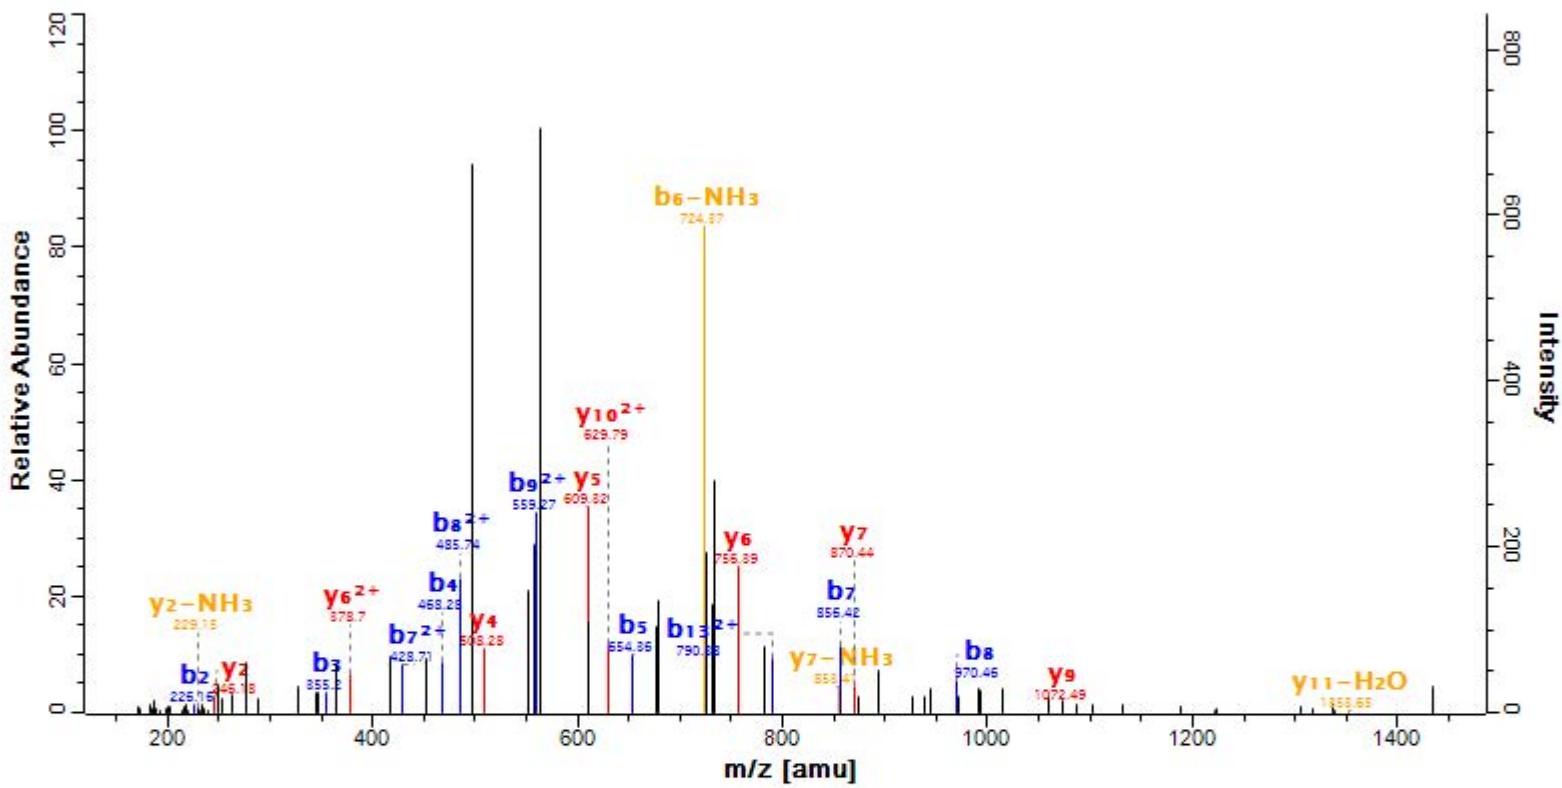

precursor information

|                   |                 |
|-------------------|-----------------|
| Mass:             | 1724.84045      |
| m/z:              | 575.95409       |
| Charge:           | 3+              |
| Retentiontime:    | 49.547061920166 |
| Score:            | 84.17338        |
| Mass Error [ppm]: | -0.3122         |
| PEP:              | 0.00032794      |
| Precursor Type:   | MULTI           |

| b <sup>2+</sup> ion |        | b ion    |        | seq |   |    | y ion    |         | y <sup>2+</sup> ion |         |
|---------------------|--------|----------|--------|-----|---|----|----------|---------|---------------------|---------|
| Δ dalton            | mass   | Δ dalton | mass   |     |   |    | Δ dalton | mass    | Δ dalton            | mass    |
|                     | 129.1  |          | 129.1  | 1   | K | 13 |          |         |                     |         |
|                     | 226.16 | +0.302   | 226.16 | 2   | P | 12 | 1597.8   |         | 1597.8              |         |
|                     | 355.2  | +0.1784  | 355.2  | 3   | E | 11 | 1500.7   |         | 1500.7              |         |
|                     | 468.28 | -0.094   | 468.28 | 4   | L | 10 | 1371.7   |         | 1371.7              |         |
|                     | 654.36 | -0.033   | 654.36 | 5   | W | 9  | 1258.6   |         | 629.79              | +0.2046 |
|                     | 741.39 |          | 741.39 | 6   | S | 8  | 1072.5   | +0.0611 | 1072.5              |         |
| +0.2708             | 428.71 | -0.001   | 856.42 | 7   | D | 7  | 985.46   |         | 985.46              |         |
| +0.0381             | 485.74 | +0.0029  | 970.46 | 8   | N | 6  | 870.44   | -0.006  | 870.44              |         |
| +0.1932             | 559.27 |          | 1117.5 | 9   | F | 5  | 756.39   | -0.018  | 378.7               | +0.0361 |
|                     | 1218.6 |          | 1218.6 | 10  | T | 4  | 609.32   | +0.1486 | 609.32              |         |
|                     | 1333.6 |          | 1333.6 | 11  | D | 3  | 508.28   | +0.06   | 508.28              |         |
|                     | 1480.7 |          | 1480.7 | 12  | F | 2  | 393.25   |         | 393.25              |         |
| -0.079              | 790.38 |          | 1579.7 | 13  | V | 1  | 246.18   | -0.139  | 246.18              |         |
|                     |        |          |        | 14  | K | 0  | 147.11   |         | 147.11              |         |

general information

|                       |             |
|-----------------------|-------------|
| Annotation:           | 11 of 14    |
| AminoAcids Coverage:  | 79 %        |
| Intensity Coverage:   | 36 %        |
| Peak Coverage:        | 24 %        |
| Protein Localisation: | 246 ... 259 |



Scan number 8342 Raw file LNCAP\_Silac\_23F10\_set2\_08  
 Method ITMS; CID Pepti... 69.26

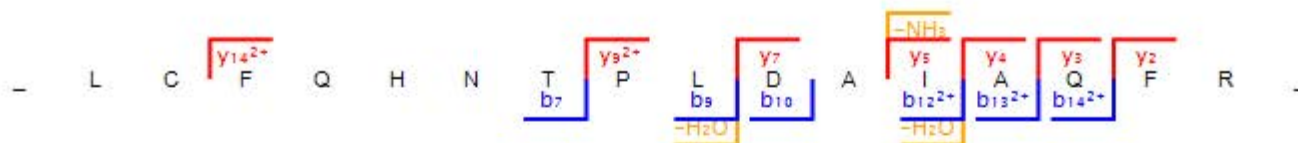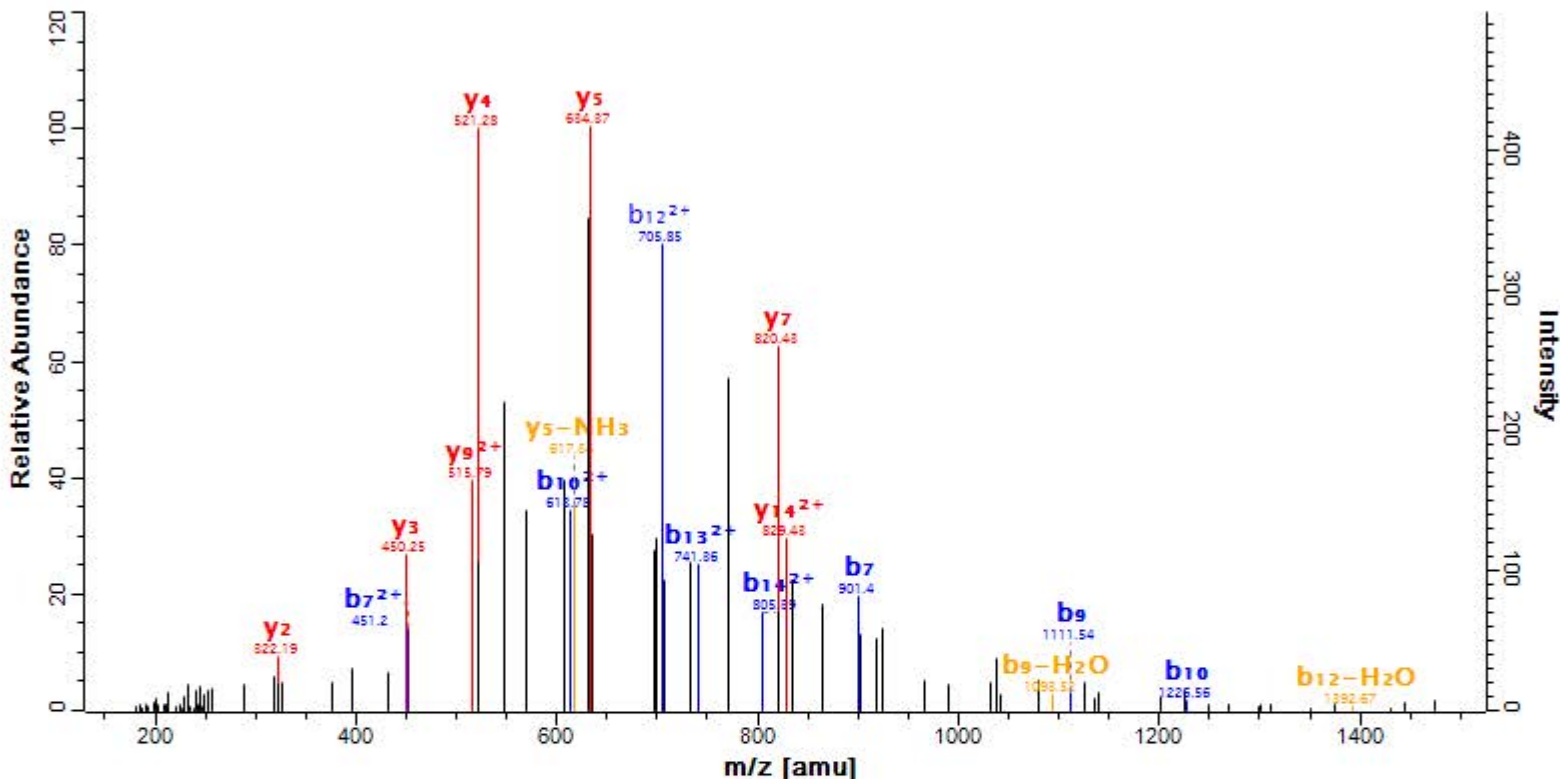

precursor information

|                   |                 |
|-------------------|-----------------|
| Mass:             | 1929.95243      |
| m/z:              | 644.32475       |
| Charge:           | 3+              |
| Retentiontime:    | 50.679939270019 |
| Score:            | 69.25761        |
| Mass Error [ppm]: | 0.24952         |
| PEP:              | 0.00082891      |
| Precursor Type:   | MULTI           |

general information

|                       |             |
|-----------------------|-------------|
| Annotation:           | 10 of 16    |
| AminoAcids Coverage:  | 62 %        |
| Intensity Coverage:   | 47 %        |
| Peak Coverage:        | 19 %        |
| Protein Localisation: | 281 ... 296 |

| b <sup>2+</sup> ion |        | b ion    |        | seq |   |    | y ion    |         | y <sup>2+</sup> ion |         |
|---------------------|--------|----------|--------|-----|---|----|----------|---------|---------------------|---------|
| Δ dalton            | mass   | Δ dalton | mass   |     |   |    | Δ dalton | mass    | Δ dalton            | mass    |
|                     | 114.09 |          | 114.09 | 1   | L | 15 |          |         |                     |         |
|                     | 274.12 |          | 274.12 | 2   | C | 14 | 1817.9   |         | 1817.9              |         |
|                     | 421.19 |          | 421.19 | 3   | F | 13 | 1657.8   |         | 829.43              | +0.2543 |
|                     | 549.25 |          | 549.25 | 4   | Q | 12 | 1510.8   |         | 1510.8              |         |
|                     | 686.31 |          | 686.31 | 5   | H | 11 | 1382.7   |         | 1382.7              |         |
|                     | 800.35 |          | 800.35 | 6   | N | 10 | 1245.7   |         | 1245.7              |         |
| +0.051              | 451.2  | -0.04    | 901.4  | 7   | T | 9  | 1131.6   |         | 1131.6              |         |
|                     | 998.45 |          | 998.45 | 8   | P | 8  | 1030.6   |         | 515.79              | +0.0672 |
|                     | 1111.5 | +0.2032  | 1111.5 | 9   | L | 7  | 933.52   |         | 933.52              |         |
| +0.0047             | 613.78 | +0.2975  | 1226.6 | 10  | D | 6  | 820.43   | -0.084  | 820.43              |         |
|                     | 1297.6 |          | 1297.6 | 11  | A | 5  | 705.4    |         | 705.4               |         |
| -0.201              | 705.85 |          | 1410.7 | 12  | I | 4  | 634.37   | -0.079  | 634.37              |         |
| +0.2487             | 741.36 |          | 1481.7 | 13  | A | 3  | 521.28   | +0.0354 | 521.28              |         |
| +0.0501             | 805.39 |          | 1609.8 | 14  | Q | 2  | 450.25   | -0.006  | 450.25              |         |
|                     | 1756.8 |          | 1756.8 | 15  | F | 1  | 322.19   | +0.1303 | 322.19              |         |
|                     |        |          |        | 16  | R | 0  | 175.12   |         | 175.12              |         |

Scan number 8399 Raw file LNCAP\_Silac\_23F10\_set2\_08  
 Method ITMS; CID Pepti... 88.28

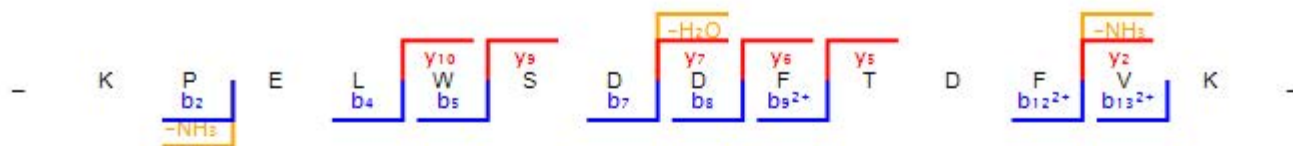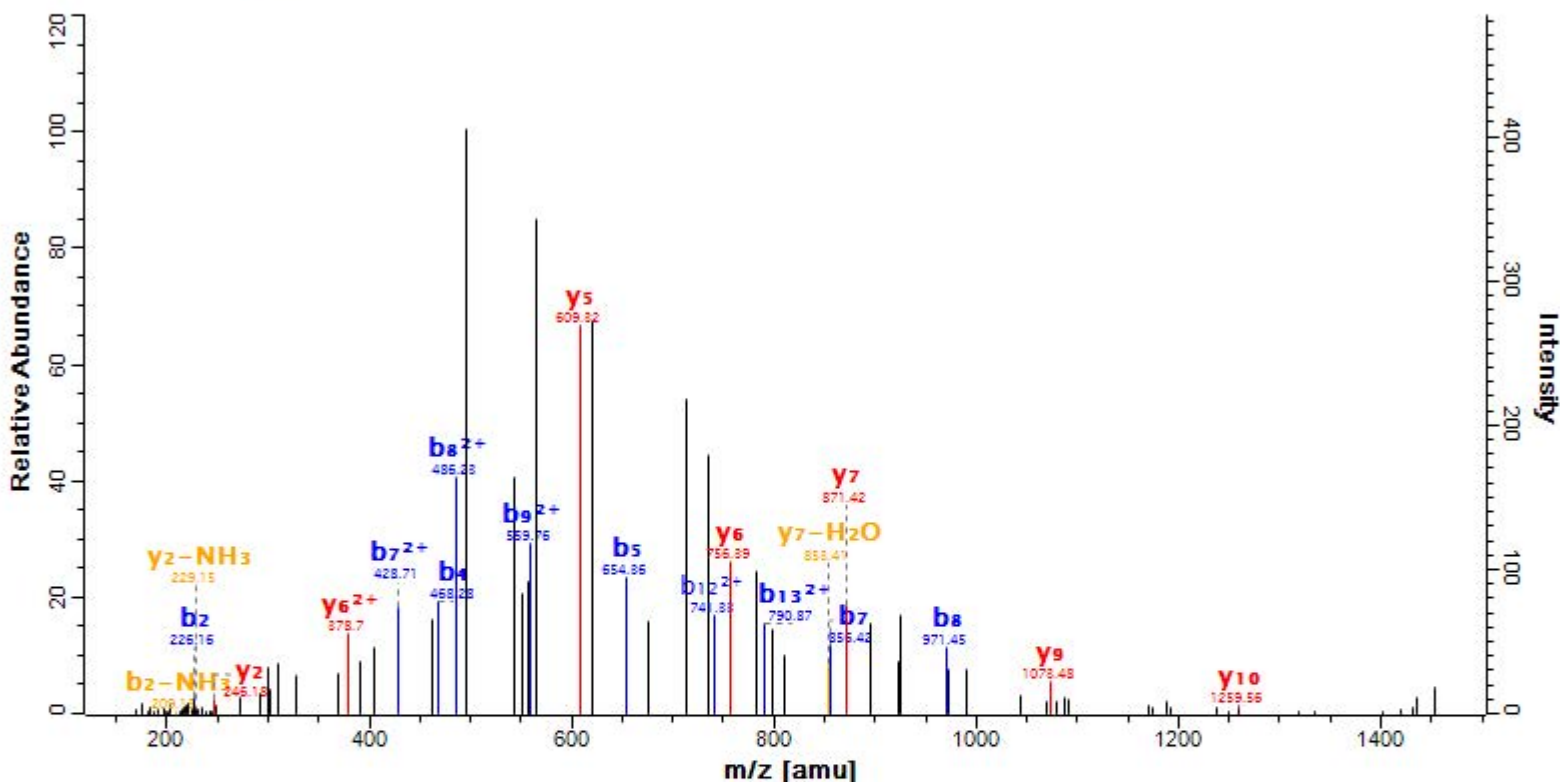

#### precursor information

|                   |                 |
|-------------------|-----------------|
| Mass:             | 1725.82602      |
| m/z:              | 576.28262       |
| Charge:           | 3+              |
| Retentiontime:    | 51.162002563476 |
| Score:            | 88.28183        |
| Mass Error [ppm]: | 0.59048         |
| PEP:              | 0.00018389      |
| Precursor Type:   | MULTI           |

| b <sup>2+</sup> ion |        | b ion    |        | seq |   |    | y ion    |         | y <sup>2+</sup> ion |         |
|---------------------|--------|----------|--------|-----|---|----|----------|---------|---------------------|---------|
| Δ dalton            | mass   | Δ dalton | mass   |     |   |    | Δ dalton | mass    | Δ dalton            | mass    |
|                     | 129.1  |          | 129.1  | 1   | K | 13 |          |         |                     |         |
|                     | 226.16 | +0.046   | 226.16 | 2   | P | 12 | 1598.7   |         | 1598.7              |         |
|                     | 355.2  |          | 355.2  | 3   | E | 11 | 1501.7   |         | 1501.7              |         |
|                     | 468.28 | -0.09    | 468.28 | 4   | L | 10 | 1372.6   |         | 1372.6              |         |
|                     | 654.36 | +0.0667  | 654.36 | 5   | W | 9  | 1259.6   | +0.0697 | 1259.6              |         |
|                     | 741.39 |          | 741.39 | 6   | S | 8  | 1073.5   | +0.0982 | 1073.5              |         |
| +0.0128             | 428.71 | +0.0551  | 856.42 | 7   | D | 7  | 986.45   |         | 986.45              |         |
| +0.2108             | 486.23 | -0.098   | 971.45 | 8   | D | 6  | 871.42   | +0.0994 | 871.42              |         |
| -0.098              | 559.76 |          | 1118.5 | 9   | F | 5  | 756.39   | -0.114  | 378.7               | +0.0723 |
|                     | 1219.6 |          | 1219.6 | 10  | T | 4  | 609.32   | +0.0664 | 609.32              |         |
|                     | 1334.6 |          | 1334.6 | 11  | D | 3  | 508.28   |         | 508.28              |         |
| -0.031              | 741.33 |          | 1481.7 | 12  | F | 2  | 393.25   |         | 393.25              |         |
| -0.079              | 790.87 |          | 1580.7 | 13  | V | 1  | 246.18   | -0.074  | 246.18              |         |
|                     |        |          |        | 14  | K | 0  | 147.11   |         | 147.11              |         |

#### general information

|                       |             |
|-----------------------|-------------|
| Annotation:           | 10 of 14    |
| AminoAcids Coverage:  | 71 %        |
| Intensity Coverage:   | 31 %        |
| Peak Coverage:        | 21 %        |
| Protein Localisation: | 271 ... 284 |

Scan number 8810 Raw file LNCAP\_Silac\_23F10\_set2\_08  
 Method ITMS; CID Pepti... 266.45

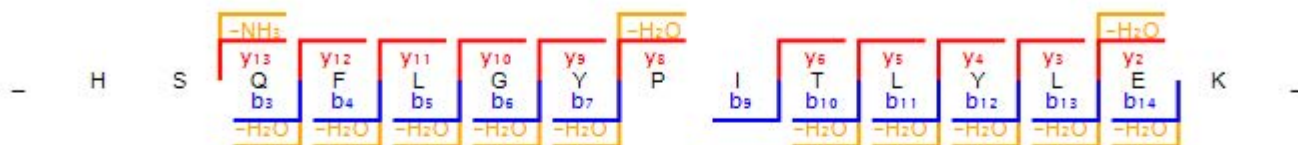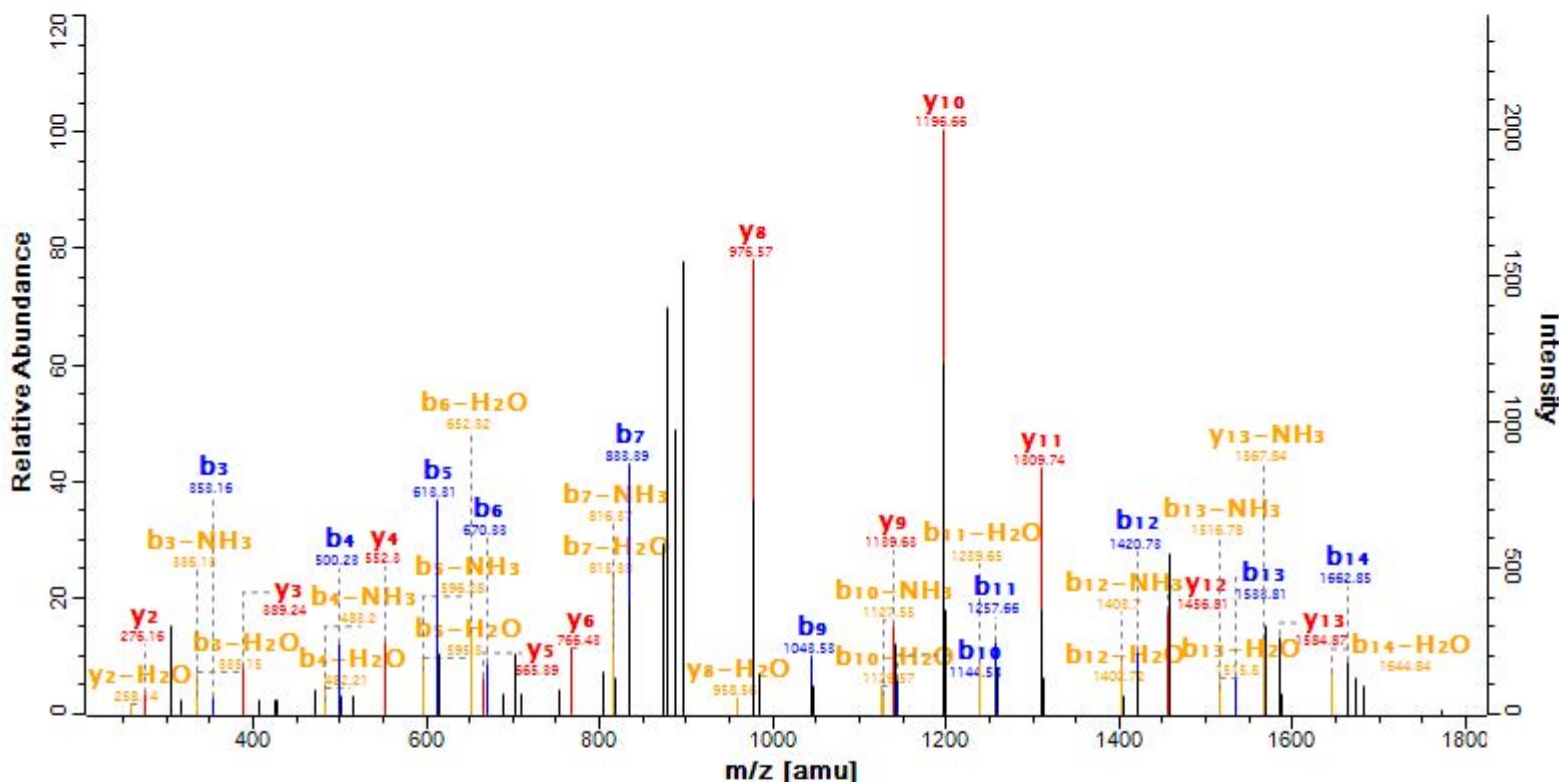

#### precursor information

|                   |                 |
|-------------------|-----------------|
| Mass:             | 1807.95084      |
| m/z:              | 904.9827        |
| Charge:           | 2+              |
| Retentiontime:    | 54.612751007080 |
| Score:            | 266.4517        |
| Mass Error [ppm]: | -0.018335       |
| PEP:              | 6.5342E-68      |
| Precursor Type:   | MULTI           |

#### general information

|                       |             |
|-----------------------|-------------|
| Annotation:           | 12 of 15    |
| AminoAcids Coverage:  | 80 %        |
| Intensity Coverage:   | 48 %        |
| Peak Coverage:        | 47 %        |
| Protein Localisation: | 168 ... 182 |

| b ion      |               |     |   | y ion    |               |            |
|------------|---------------|-----|---|----------|---------------|------------|
| Δ dalton   | mass          | seq |   | Δ dalton | mass          |            |
|            | 138.066188329 | 1   | H | 14       |               |            |
|            | 225.098216739 | 2   | S | 13       | 1671.89923615 |            |
| -0.0149485 | 353.15679425  | 3   | Q | 12       | 1584.86720774 | -0.2007038 |
| +0.0786248 | 500.225208166 | 4   | F | 11       | 1456.80863023 | -0.1510375 |
| -0.0013498 | 613.309272147 | 5   | L | 10       | 1309.74021631 | -0.0440493 |
| +0.1280654 | 670.330735871 | 6   | G | 9        | 1196.65615233 | -0.0232178 |
| -0.0093598 | 833.394064409 | 7   | Y | 8        | 1139.63468861 | -0.1827843 |
|            | 930.446828261 | 8   | P | 7        | 976.571360072 | +0.0020652 |
| -0.0609215 | 1043.53089224 | 9   | I | 6        | 879.51859622  |            |
| +0.0210387 | 1144.57857072 | 10  | T | 5        | 766.43453224  | +0.1292495 |
| -0.0658329 | 1257.6626347  | 11  | L | 4        | 665.386853766 | +0.0237297 |
| -0.1019398 | 1420.72596323 | 12  | Y | 3        | 552.302789786 | +0.035406  |
| +0.0433663 | 1533.81002721 | 13  | L | 2        | 389.239461247 | +0.1287028 |
| -0.1515705 | 1662.85262031 | 14  | E | 1        | 276.155397267 | -1.8E-06   |
|            |               | 15  | K | 0        | 147.112804171 |            |

Scan number 8977 Raw file LNCAP\_Silac\_23F10\_set2\_08  
 Method ITMS; CID Pepti... 74.46

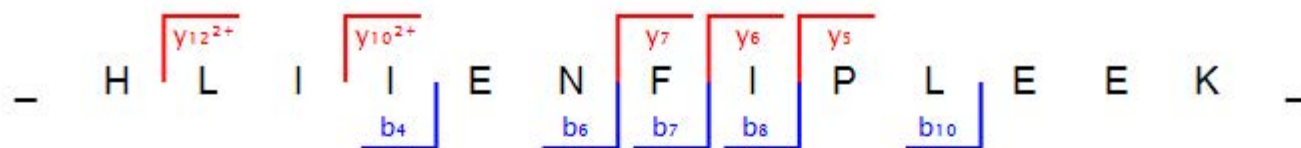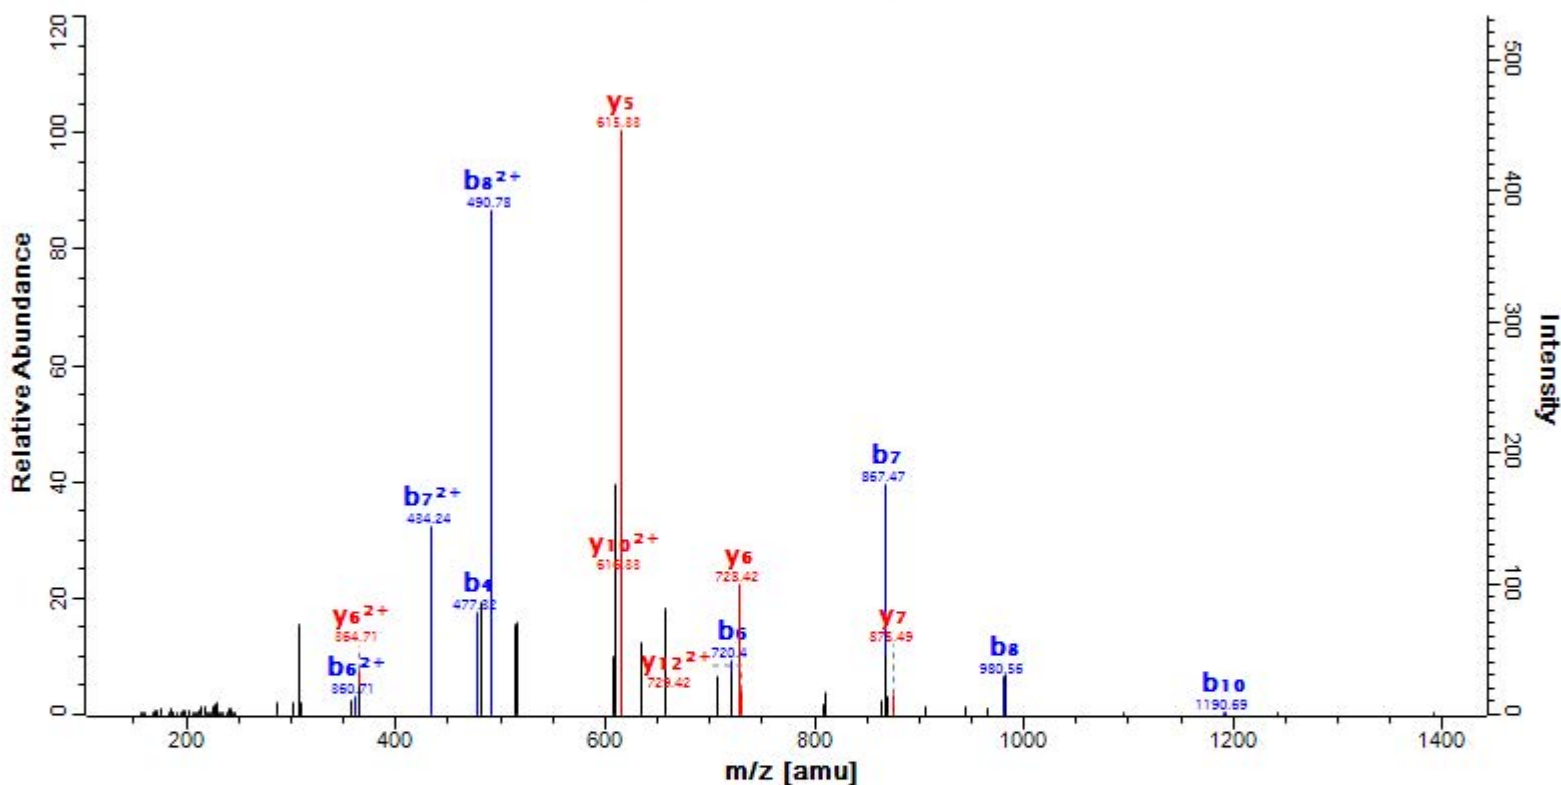

**precursor information**

|                   |                 |
|-------------------|-----------------|
| Mass:             | 1593.87721      |
| m/z:              | 532.29968       |
| Charge:           | 3+              |
| Retentiontime:    | 56.196918487548 |
| Score:            | 74.46019        |
| Mass Error [ppm]: | 0.35625         |
| PEP:              | 0.0014861       |
| Precursor Type:   | MULTI           |

**general information**

|                       |             |
|-----------------------|-------------|
| Annotation:           | 7 of 13     |
| AminoAcids Coverage:  | 54 %        |
| Intensity Coverage:   | 60 %        |
| Peak Coverage:        | 15 %        |
| Protein Localisation: | 584 ... 596 |

| b <sup>2+</sup> ion |        | b ion    |        |    |     |    | y ion    |         | y <sup>2+</sup> ion |         |
|---------------------|--------|----------|--------|----|-----|----|----------|---------|---------------------|---------|
| Δ dalton            | mass   | Δ dalton | mass   |    | seq |    | Δ dalton | mass    | Δ dalton            | mass    |
|                     | 138.07 |          | 138.07 | 1  | H   | 12 |          |         |                     |         |
|                     | 251.15 |          | 251.15 | 2  | L   | 11 | 1457.8   |         | 729.42              | +0.2278 |
|                     | 364.23 |          | 364.23 | 3  | I   | 10 | 1344.7   |         | 1344.7              |         |
|                     | 477.32 | +0.1309  | 477.32 | 4  | I   | 9  | 1231.7   |         | 616.33              | +0.0529 |
|                     | 606.36 |          | 606.36 | 5  | E   | 8  | 1118.6   |         | 1118.6              |         |
| -0.286              | 360.71 | -0.088   | 720.4  | 6  | N   | 7  | 989.53   |         | 989.53              |         |
| +0.061              | 434.24 | -0.058   | 867.47 | 7  | F   | 6  | 875.49   | -0.082  | 875.49              |         |
| +0.1478             | 490.78 | -0.039   | 980.56 | 8  | I   | 5  | 728.42   | -0.072  | 364.71              | +0.0868 |
|                     | 1077.6 |          | 1077.6 | 9  | P   | 4  | 615.33   | +0.0449 | 615.33              |         |
|                     | 1190.7 | +0.0227  | 1190.7 | 10 | L   | 3  | 518.28   |         | 518.28              |         |
|                     | 1319.7 |          | 1319.7 | 11 | E   | 2  | 405.2    |         | 405.2               |         |
|                     | 1448.8 |          | 1448.8 | 12 | E   | 1  | 276.16   |         | 276.16              |         |
|                     |        |          |        | 13 | K   | 0  | 147.11   |         | 147.11              |         |

Scan number 9261  
Method ITMS; CID

Raw file LNCAP\_Silac\_23F10\_set2\_08  
Peptide 86.29

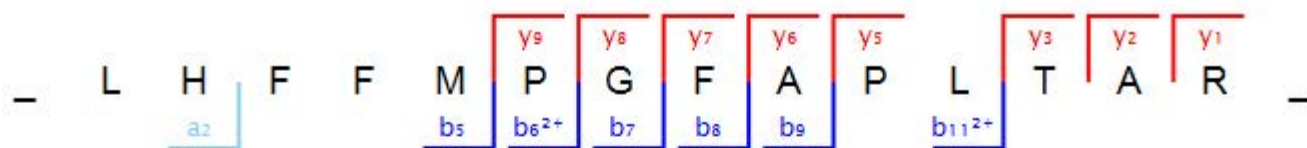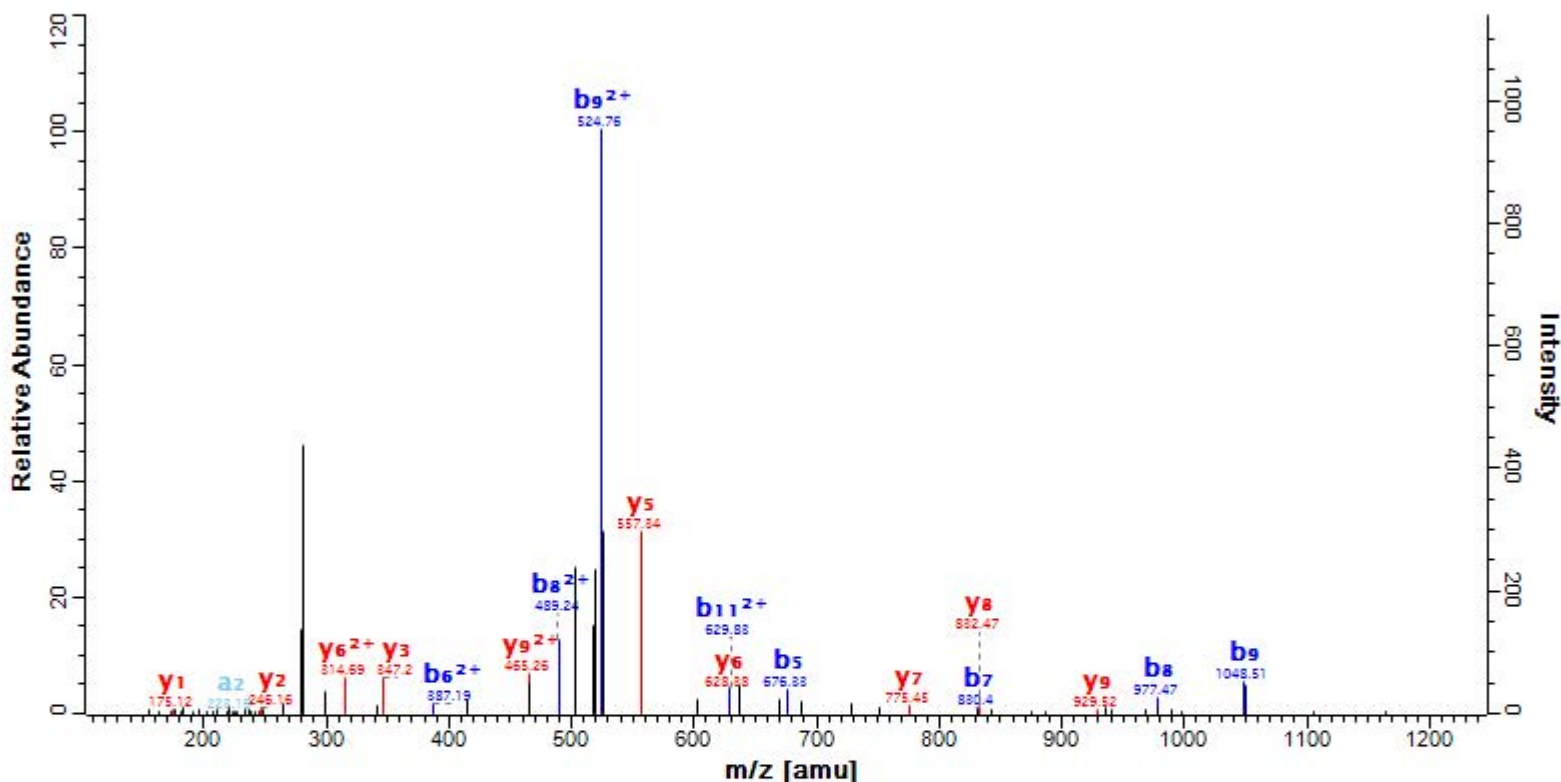

#### precursor information

|                   |                 |
|-------------------|-----------------|
| Mass:             | 1603.83371      |
| m/z:              | 535.61851       |
| Charge:           | 3+              |
| Retentiontime:    | 58.863822937011 |
| Score:            | 86.2877         |
| Mass Error [ppm]: | 0.23301         |
| PEP:              | 0.00045202      |
| Precursor Type:   | MULTI           |

#### general information

|                       |             |
|-----------------------|-------------|
| Annotation:           | 11 of 14    |
| AminoAcids Coverage:  | 79 %        |
| Intensity Coverage:   | 48 %        |
| Peak Coverage:        | 19 %        |
| Protein Localisation: | 610 ... 623 |

|       | a ion         | b <sup>2+</sup> ion | b ion         |     |   |               | y ion         | y <sup>2+</sup> ion |        |
|-------|---------------|---------------------|---------------|-----|---|---------------|---------------|---------------------|--------|
|       | Δ dalton mass | Δ dalton mass       | Δ dalton mass | seq |   | Δ dalton mass | Δ dalton mass |                     |        |
|       | 86.1          | 114.1               | 114.1         | 1   | L | 13            |               |                     |        |
| +0.09 | 223.2         | 251.2               | 251.2         | 2   | H | 12            | 1492          | 1492                |        |
|       | 370.2         | 398.2               | 398.2         | 3   | F | 11            | 1355          | 1355                |        |
|       | 517.3         | 545.3               | 545.3         | 4   | F | 10            | 1208          | 1208                |        |
|       | 648.3         | 676.3               | -0.01 676.3   | 5   | M | 9             | 1061          | 1061                |        |
|       | 745.4         | +0.138887.2         | 773.4         | 6   | P | 8             | 929.5         | -0.02 465.3         | +0.011 |
|       | 802.4         | 830.4               | +0.147830.4   | 7   | G | 7             | 832.5         | +0.172832.5         |        |
|       | 949.5         | +0.237489.2         | +0.028977.5   | 8   | F | 6             | 775.4         | +0.11 775.4         |        |
|       | 1021          | +0.325524.8         | +0.0881049    | 9   | A | 5             | 628.4         | -0.16 314.7         | +0.19: |
|       | 1118          | 1146                | 1146          | 10  | P | 4             | 557.3         | +0.079557.3         |        |
|       | 1231          | -0.31 629.8         | 1259          | 11  | L | 3             | 460.3         | 460.3               |        |
|       | 1332          | 1360                | 1360          | 12  | T | 2             | 347.2         | -0.06 347.2         |        |
|       | 1403          | 1431                | 1431          | 13  | A | 1             | 246.2         | +0.084246.2         |        |
|       |               |                     |               | 14  | R | 0             | 175.1         | -0.01 175.1         |        |

Scan number 9286 Raw file LNCAP\_Silac\_23F10\_set2\_08  
 Method ITMS; CID Pepti... 130.01

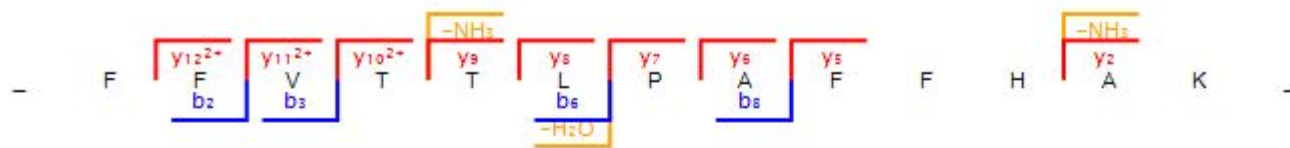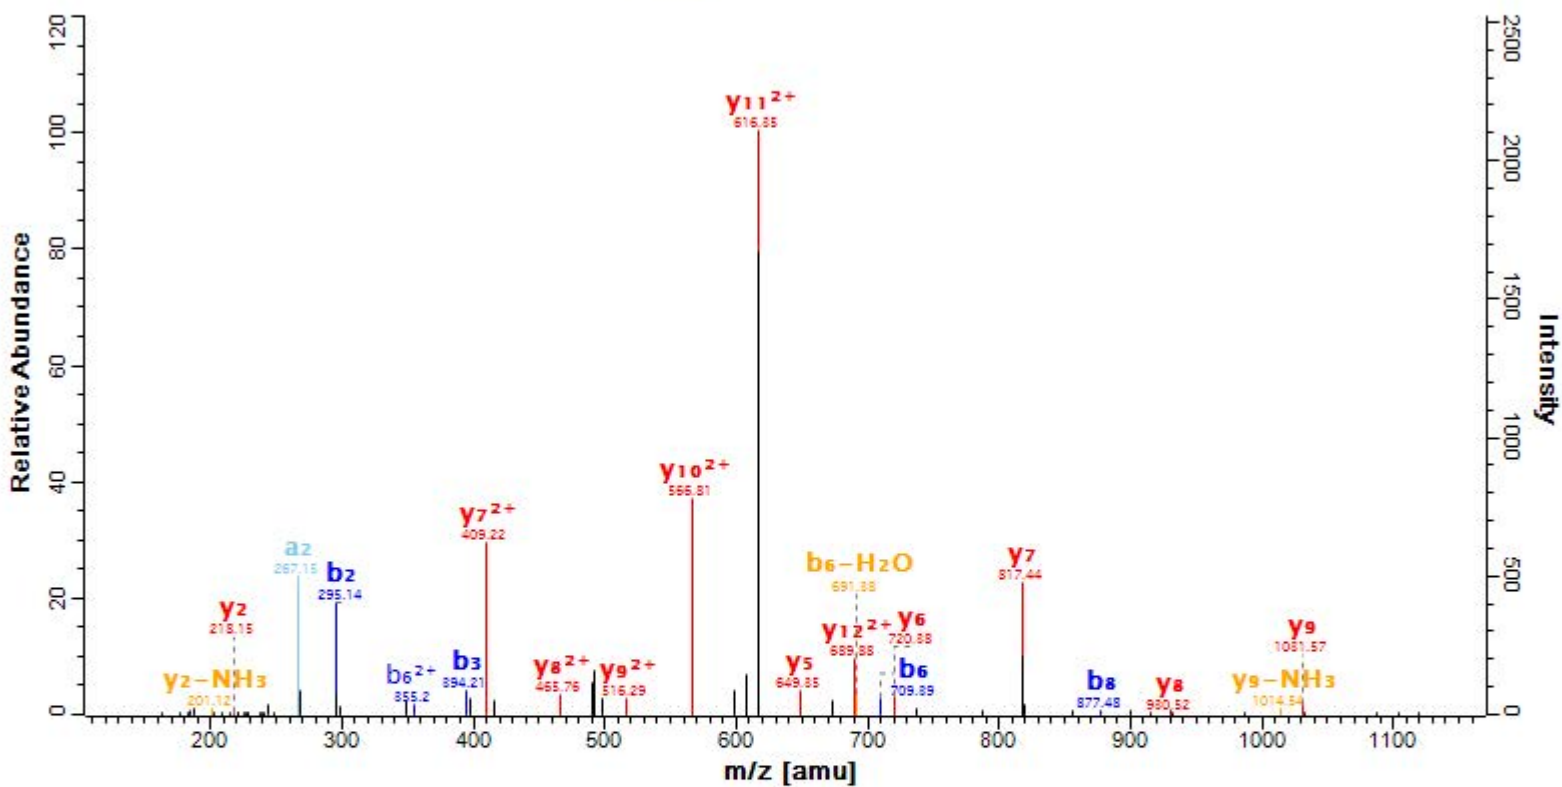

precursor information

|                   |                 |
|-------------------|-----------------|
| Mass:             | 1524.81317      |
| m/z:              | 509.27833       |
| Charge:           | 3+              |
| Retentiontime:    | 59.113864898681 |
| Score:            | 130.006         |
| Mass Error [ppm]: | 0.16202         |
| PEP:              | 1.1338E-06      |
| Precursor Type:   | MULTI           |

general information

|                       |             |
|-----------------------|-------------|
| Annotation:           | 10 of 13    |
| AminoAcids Coverage:  | 77 %        |
| Intensity Coverage:   | 63 %        |
| Peak Coverage:        | 24 %        |
| Protein Localisation: | 103 ... 115 |

| a ion         |               | b <sup>2+</sup> ion |               | b ion         |     |               |               |               | y ion         |               | y <sup>2+</sup> ion |               |
|---------------|---------------|---------------------|---------------|---------------|-----|---------------|---------------|---------------|---------------|---------------|---------------------|---------------|
| Δ dalton mass | Δ dalton mass | Δ dalton mass       | Δ dalton mass | Δ dalton mass | seq | Δ dalton mass | Δ dalton mass | Δ dalton mass | Δ dalton mass | Δ dalton mass | Δ dalton mass       | Δ dalton mass |
| 120.1         |               | 148.1               |               | 148.1         | 1   | F             | 12            |               |               |               |                     |               |
| +0.017267.1   |               | 295.1               |               | +0.018295.1   | 2   | F             | 11            | 1379          |               | 689.9         |                     | +0.163        |
| 366.2         |               | 394.2               |               | +0.085394.2   | 3   | V             | 10            | 1232          |               | 616.3         |                     | +0.031        |
| 467.3         |               | 495.3               |               | 495.3         | 4   | T             | 9             | 1133          |               | 566.8         |                     | +0.257        |
| 568.3         |               | 596.3               |               | 596.3         | 5   | T             | 8             | 1032          | +0.259        | 516.3         |                     | +0.163        |
| 681.4         | -0.03         | 355.2               | -0.03         | 709.4         | 6   | L             | 7             | 930.5         | +0.217        | 465.8         |                     | -0.02         |
| 778.4         |               | 806.4               |               | 806.4         | 7   | P             | 6             | 817.4         | -0.01         | 409.2         |                     | +0.143        |
| 849.5         |               | 877.5               | -0.16         | 877.5         | 8   | A             | 5             | 720.4         | -0.04         | 720.4         |                     |               |
| 996.6         |               | 1025                |               | 1025          | 9   | F             | 4             | 649.3         | +0.023        | 649.3         |                     |               |
| 1144          |               | 1172                |               | 1172          | 10  | F             | 3             | 502.3         |               | 502.3         |                     |               |
| 1281          |               | 1309                |               | 1309          | 11  | H             | 2             | 355.2         |               | 355.2         |                     |               |
| 1352          |               | 1380                |               | 1380          | 12  | A             | 1             | 218.1         | -0.1          | 218.1         |                     |               |
|               |               |                     |               |               | 13  | K             | 0             | 147.1         |               | 147.1         |                     |               |

Scan number 942 Raw file LNCAP\_Silac\_23F10\_set2\_08  
 Method ITMS; CID Pepti... 46.82

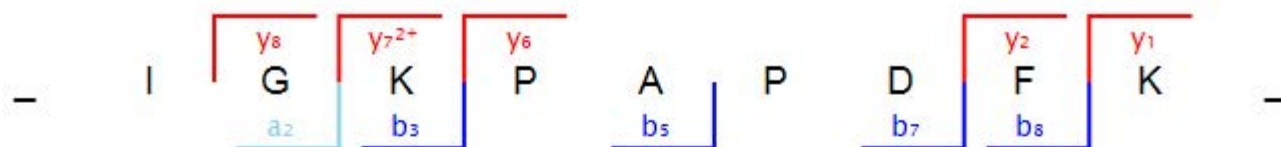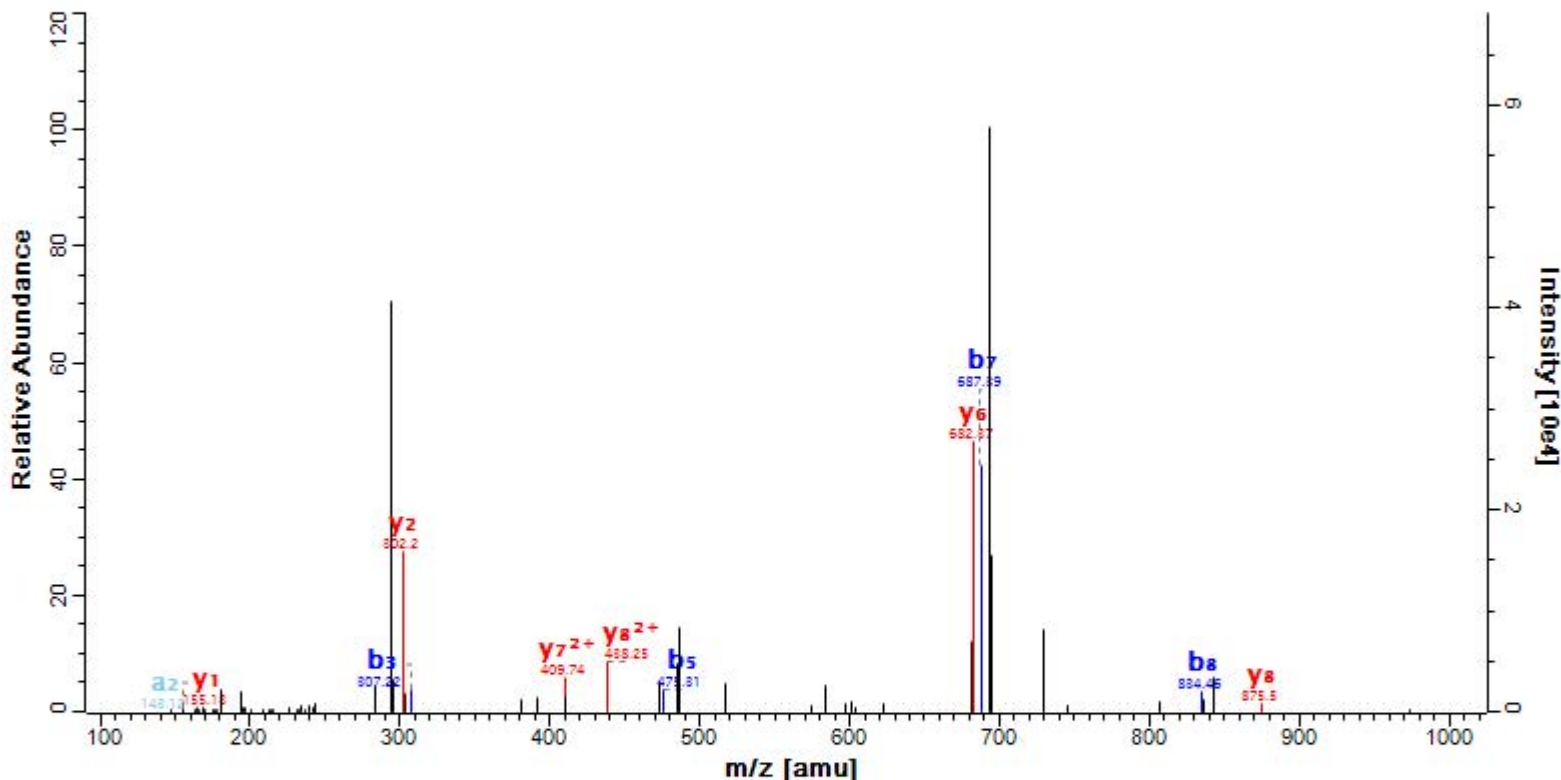

#### precursor information

|                       |                 |
|-----------------------|-----------------|
| Mass:                 | 971.54461       |
| m/z:                  | 486.77958       |
| Charge:               | 2+              |
| Retentiontime:        | 9.5426998138427 |
| Score:                | 46.81889        |
| Mass Error [ppm]:     | 0.60158         |
| PEP:                  | 0.053099        |
| Precursor Type:       | MULTI           |
| Annotation:           | 7 of 9          |
| AminoAcids Coverage:  | 78 %            |
| Intensity Coverage:   | 31 %            |
| Peak Coverage:        | 13 %            |
| Protein Localisation: | 8 ... 16        |

| a ion    |        | b ion    |        | seq |   |   | y ion    |         | y <sup>2+</sup> ion |        |
|----------|--------|----------|--------|-----|---|---|----------|---------|---------------------|--------|
| Δ dalton | mass   | Δ dalton | mass   |     |   |   | Δ dalton | mass    | Δ dalton            | mass   |
|          | 86.096 |          | 114.09 | 1   | I | 8 |          |         |                     |        |
| -0.013   | 143.12 |          | 171.11 | 2   | G | 7 | 875.5    | +0.1147 | 438.25              | -0.124 |
|          | 279.23 | +0.1323  | 307.22 | 3   | K | 6 | 818.47   |         | 409.74              | -0.035 |
|          | 376.28 |          | 404.27 | 4   | P | 5 | 682.37   | +0.043  | 682.37              |        |
|          | 447.32 | -0.07    | 475.31 | 5   | A | 4 | 585.31   |         | 585.31              |        |
|          | 544.37 |          | 572.36 | 6   | P | 3 | 514.28   |         | 514.28              |        |
|          | 659.4  | +0.0135  | 687.39 | 7   | D | 2 | 417.22   |         | 417.22              |        |
|          | 806.47 | -0.077   | 834.46 | 8   | F | 1 | 302.2    | +0.018  | 302.2               |        |
|          |        |          |        | 9   | K | 0 | 155.13   | +0.0509 | 155.13              |        |

Scan number 1104 Raw file LNCAP\_Silac\_23F10\_set2\_09  
 Method ITMS: CID Pepti... 117.31

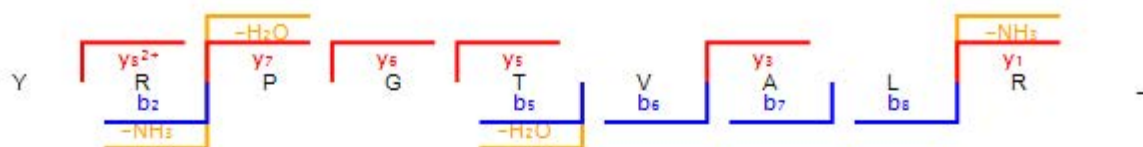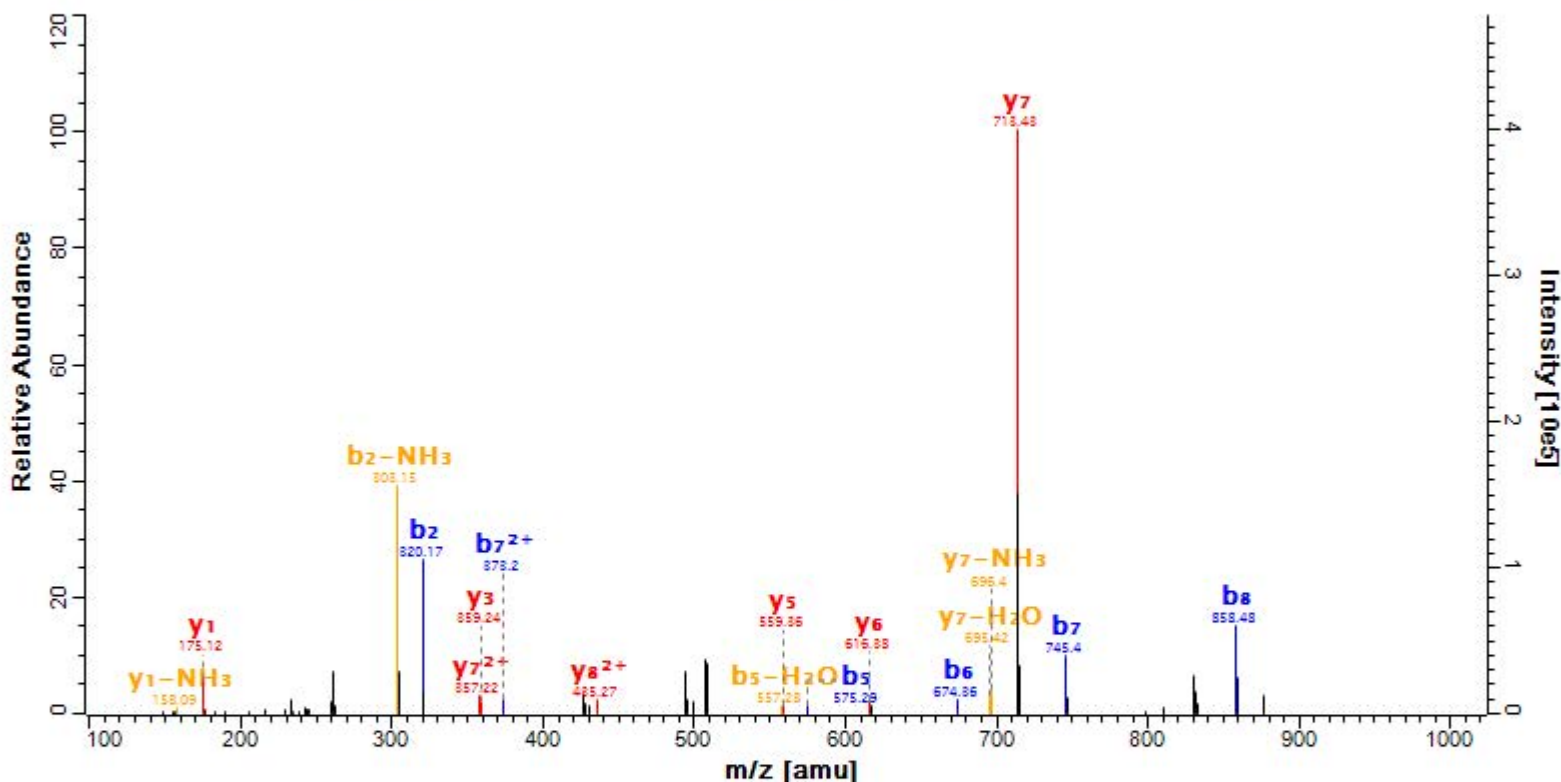

#### precursor information

|                       |                 |
|-----------------------|-----------------|
| Mass:                 | 1031.5873       |
| m/z:                  | 516.80093       |
| Charge:               | 2+              |
| Retentiontime:        | 10.964016914367 |
| Score:                | 117.3115        |
| Mass Error [ppm]:     | -0.30542        |
| PEP:                  | 0.00077121      |
| Precursor Type:       | ISO             |
| Annotation:           | 8 of 9          |
| AminoAcids Coverage:  | 89 %            |
| Intensity Coverage:   | 61 %            |
| Peak Coverage:        | 21 %            |
| Protein Localisation: | 42 ... 50       |

| b <sup>z</sup> ion |        | b ion    |        | seq |   |   | y ion    |         | y <sup>z</sup> ion |         |
|--------------------|--------|----------|--------|-----|---|---|----------|---------|--------------------|---------|
| Δ dalton           | mass   | Δ dalton | mass   |     |   |   | Δ dalton | mass    | Δ dalton           | mass    |
|                    | 164.07 |          | 164.07 | 1   | Y | 8 |          |         |                    |         |
|                    | 320.17 | +0.0226  | 320.17 | 2   | R | 7 | 869.53   |         | 435.27             | +0.0834 |
|                    | 417.22 |          | 417.22 | 3   | P | 6 | 713.43   | +0.0016 | 357.22             | +0.1453 |
|                    | 474.25 |          | 474.25 | 4   | G | 5 | 616.38   | -0.042  | 616.38             |         |
|                    | 575.29 | +0.0908  | 575.29 | 5   | T | 4 | 559.36   | -0.025  | 559.36             |         |
|                    | 674.36 | +0.108   | 674.36 | 6   | V | 3 | 458.31   |         | 458.31             |         |
| +0.0481            | 373.2  | +0.003   | 745.4  | 7   | A | 2 | 359.24   | +0.0771 | 359.24             |         |
|                    | 858.48 | -0.003   | 858.48 | 8   | L | 1 | 288.2    |         | 288.2              |         |
|                    |        |          |        | 9   | R | 0 | 175.12   | +0.0287 | 175.12             |         |



Scan number 1304 Raw file LNCAP\_Silac\_23F10\_set2\_09  
 Method ITMS: CID Pepti... 93.65

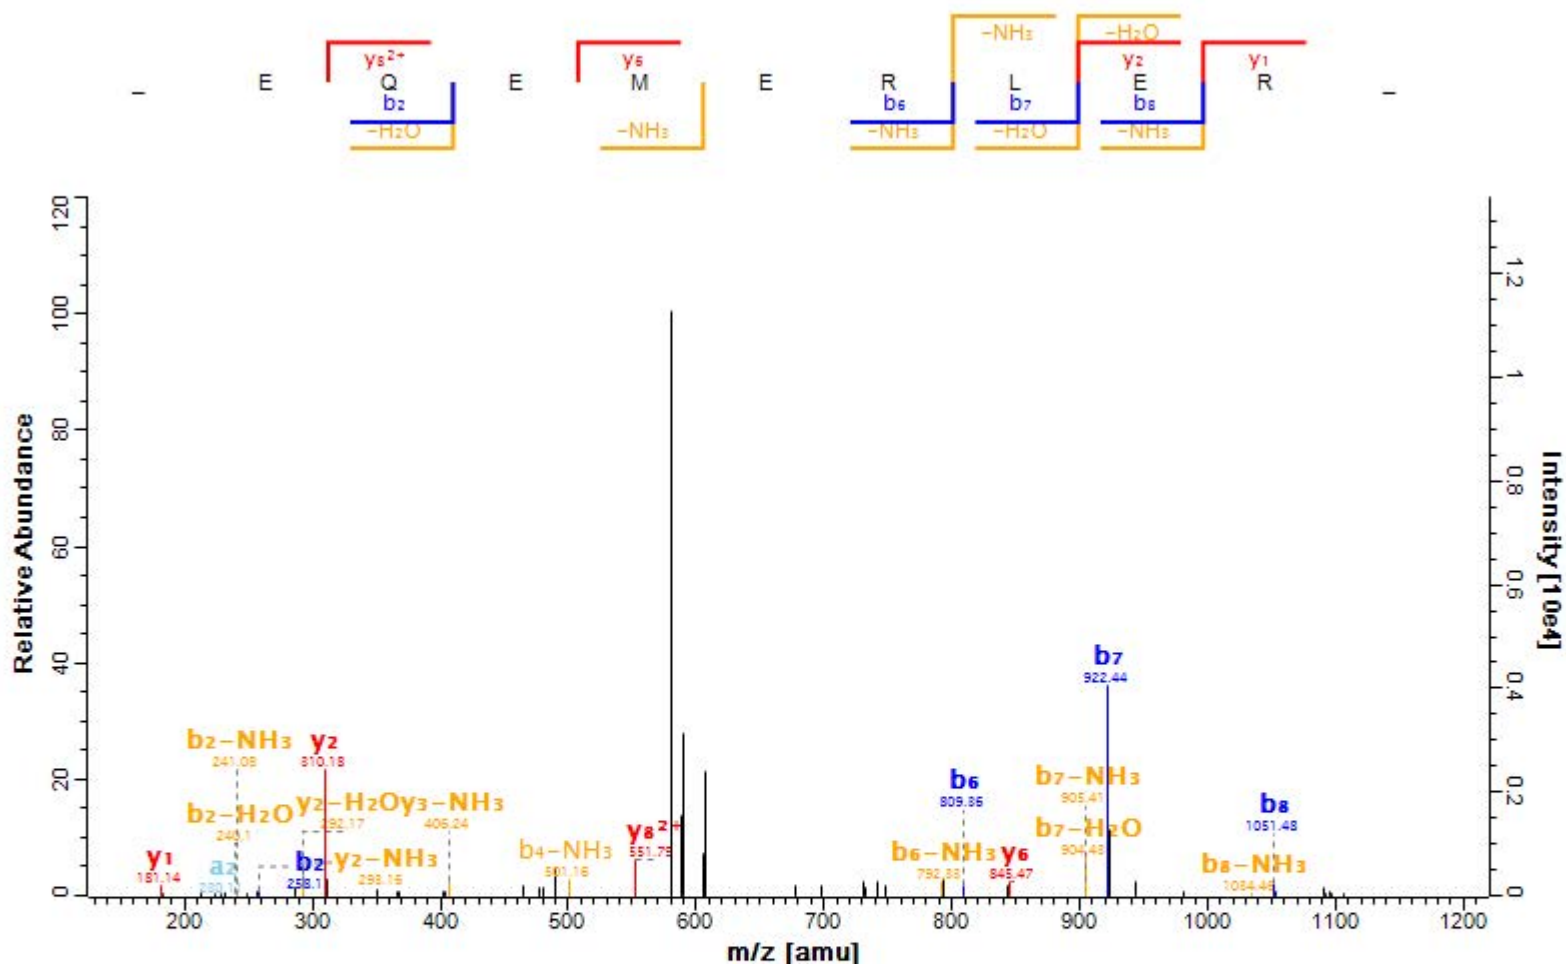

#### precursor information

|                       |                 |
|-----------------------|-----------------|
| Mass:                 | 1218.56656      |
| m/z:                  | 610.29056       |
| Charge:               | 2+              |
| Retentiontime:        | 12.107703208923 |
| Score:                | 93.64885        |
| Mass Error [ppm]:     | 0.2218          |
| PEP:                  | 0.0037787       |
| Precursor Type:       | MULTI           |
| Annotation:           | 6 of 9          |
| AminoAcids Coverage:  | 67 %            |
| Intensity Coverage:   | 27 %            |
| Peak Coverage:        | 20 %            |
| Protein Localisation: | 603 ... 611     |

| a ion    |        | b ion    |        |   |     |          | y ion  |          | y <sup>2+</sup> ion |  |
|----------|--------|----------|--------|---|-----|----------|--------|----------|---------------------|--|
| Δ dalton | mass   | Δ dalton | mass   |   | seq | Δ dalton | mass   | Δ dalton | mass                |  |
|          | 102.05 |          | 130.05 | 1 | E   | 8        |        |          |                     |  |
| -0.02    | 230.11 | +0.1025  | 258.11 | 2 | Q   | 7        | 1102.6 |          | 551.79 +0.1735      |  |
|          | 359.16 |          | 387.15 | 3 | E   | 6        | 974.51 |          | 974.51              |  |
|          | 490.2  |          | 518.19 | 4 | M   | 5        | 845.47 | +0.1339  | 845.47              |  |
|          | 619.24 |          | 647.23 | 5 | E   | 4        | 714.43 |          | 714.43              |  |
|          | 781.36 | +0.1268  | 809.36 | 6 | R   | 3        | 585.39 |          | 585.39              |  |
|          | 894.44 | +0.0446  | 922.44 | 7 | L   | 2        | 423.27 |          | 423.27              |  |
|          | 1023.5 | -0.009   | 1051.5 | 8 | E   | 1        | 310.18 | +0.0344  | 310.18              |  |
|          |        |          |        | 9 | R   | 0        | 181.14 | +0.0385  | 181.14              |  |

Scan number 1673 Raw file LNCAP\_Silac\_23F10\_set2\_09  
 Method ITMS: CID Pepti... 174.77

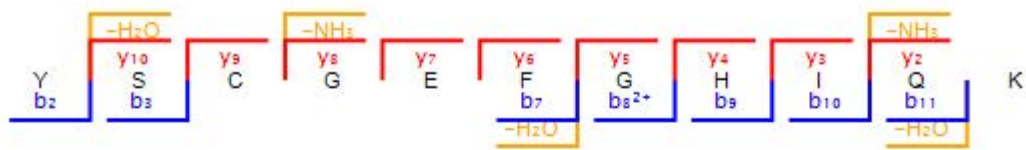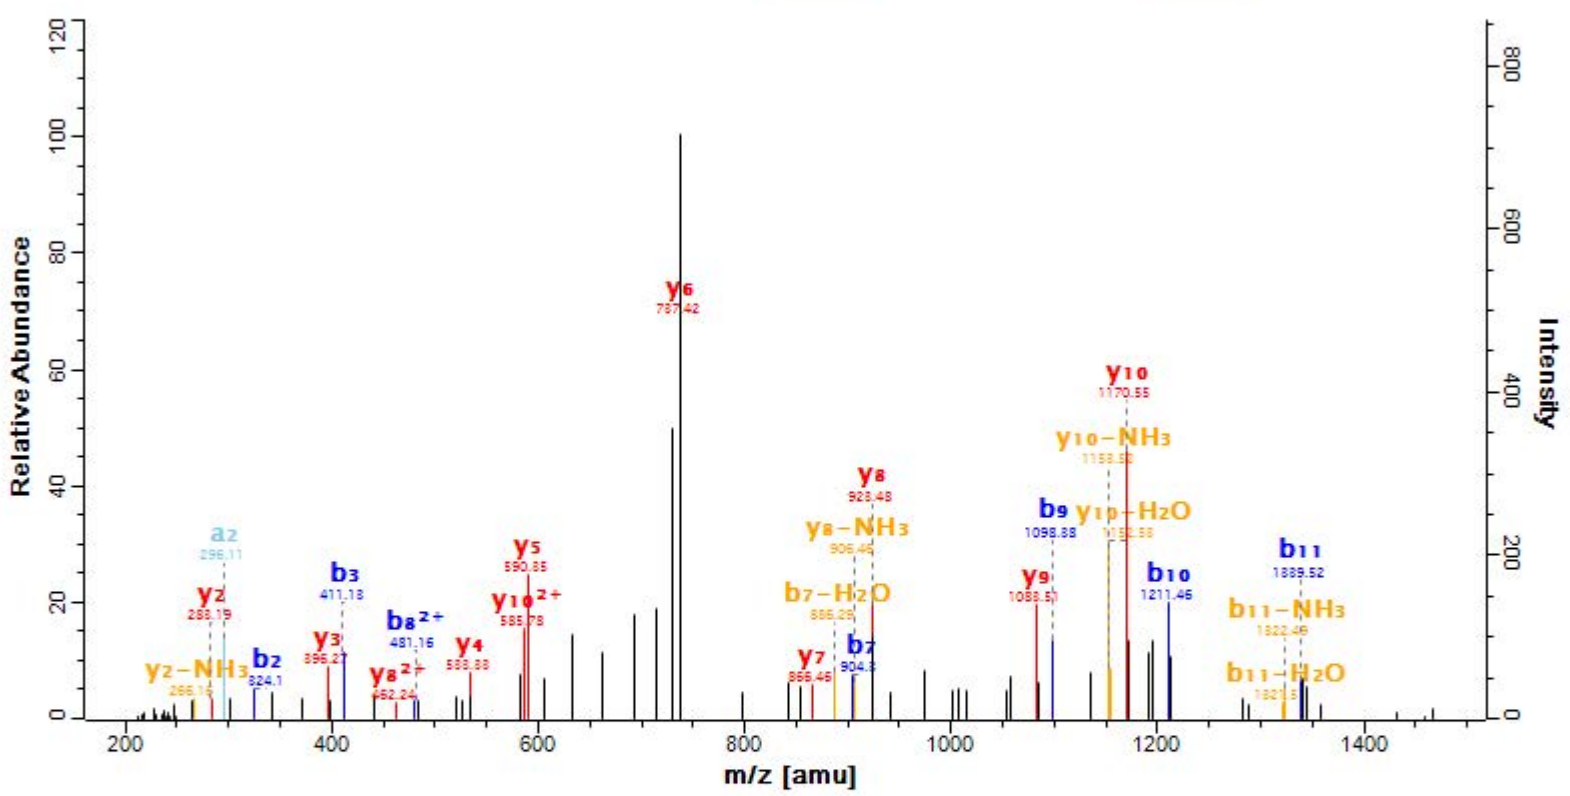

**precursor information**

|                   |                 |
|-------------------|-----------------|
| Mass:             | 1484.61754      |
| m/z:              | 743.31605       |
| Charge:           | 2+              |
| Retentiontime:    | 14.207658767700 |
| Score:            | 174.7679        |
| Mass Error [ppm]: | -0.086735       |
| PEP:              | 1.6786E-10      |
| Precursor Type:   | MULTI           |

**general information**

|                       |             |
|-----------------------|-------------|
| Annotation:           | 10 of 12    |
| AminoAcids Coverage:  | 83 %        |
| Intensity Coverage:   | 44 %        |
| Peak Coverage:        | 30 %        |
| Protein Localisation: | 119 ... 130 |

|       | a ion         | b <sup>2+</sup> ion | b ion         |     |   |               | y ion         | y <sup>2+</sup> ion |
|-------|---------------|---------------------|---------------|-----|---|---------------|---------------|---------------------|
|       | Δ dalton mass | Δ dalton mass       | Δ dalton mass | seq |   | Δ dalton mass | Δ dalton mass |                     |
|       | 133           | 161                 | 161           | 1   | C | 11            |               |                     |
| +0.02 | 1296.1        | 324.1               | +0.045324.1   | 2   | Y | 10            | 1334          | 1334                |
|       | 383.1         | 411.1               | +0.122411.1   | 3   | S | 9             | 1171          | -0.11 585.8 +0.00   |
|       | 543.2         | 571.2               | 571.2         | 4   | C | 8             | 1084          | -0.03 1084          |
|       | 600.2         | 628.2               | 628.2         | 5   | G | 7             | 923.5         | +0.005462.2 +0.10   |
|       | 729.2         | 757.2               | 757.2         | 6   | E | 6             | 866.5         | +0.055866.5         |
|       | 876.3         | 904.3               | -0.24 904.3   | 7   | F | 5             | 737.4         | +0.196737.4         |
|       | 933.3         | -0.32 481.2         | 961.3         | 8   | G | 4             | 590.4         | +0.122590.4         |
|       | 1070          | 1098                | -0.01 1098    | 9   | H | 3             | 533.3         | +0.108533.3         |
|       | 1183          | 1211                | -0.09 1211    | 10  | I | 2             | 396.3         | +0.013396.3         |
|       | 1312          | 1340                | +0 1340       | 11  | Q | 1             | 283.2         | +0.048283.2         |
|       |               |                     |               | 12  | K | 0             | 155.1         | 155.1               |

Scan number 1820 Raw file LNCAP\_Silac\_23F10\_set2\_09  
 Method ITMS: CID Pepti... 97.2

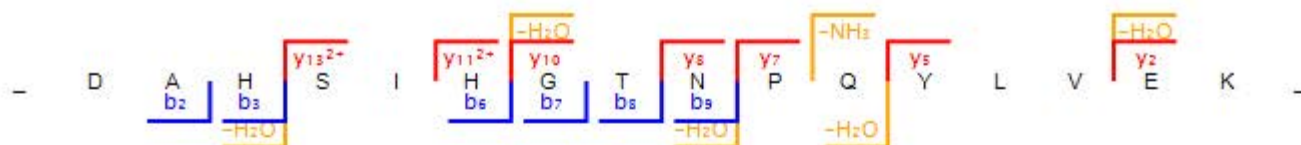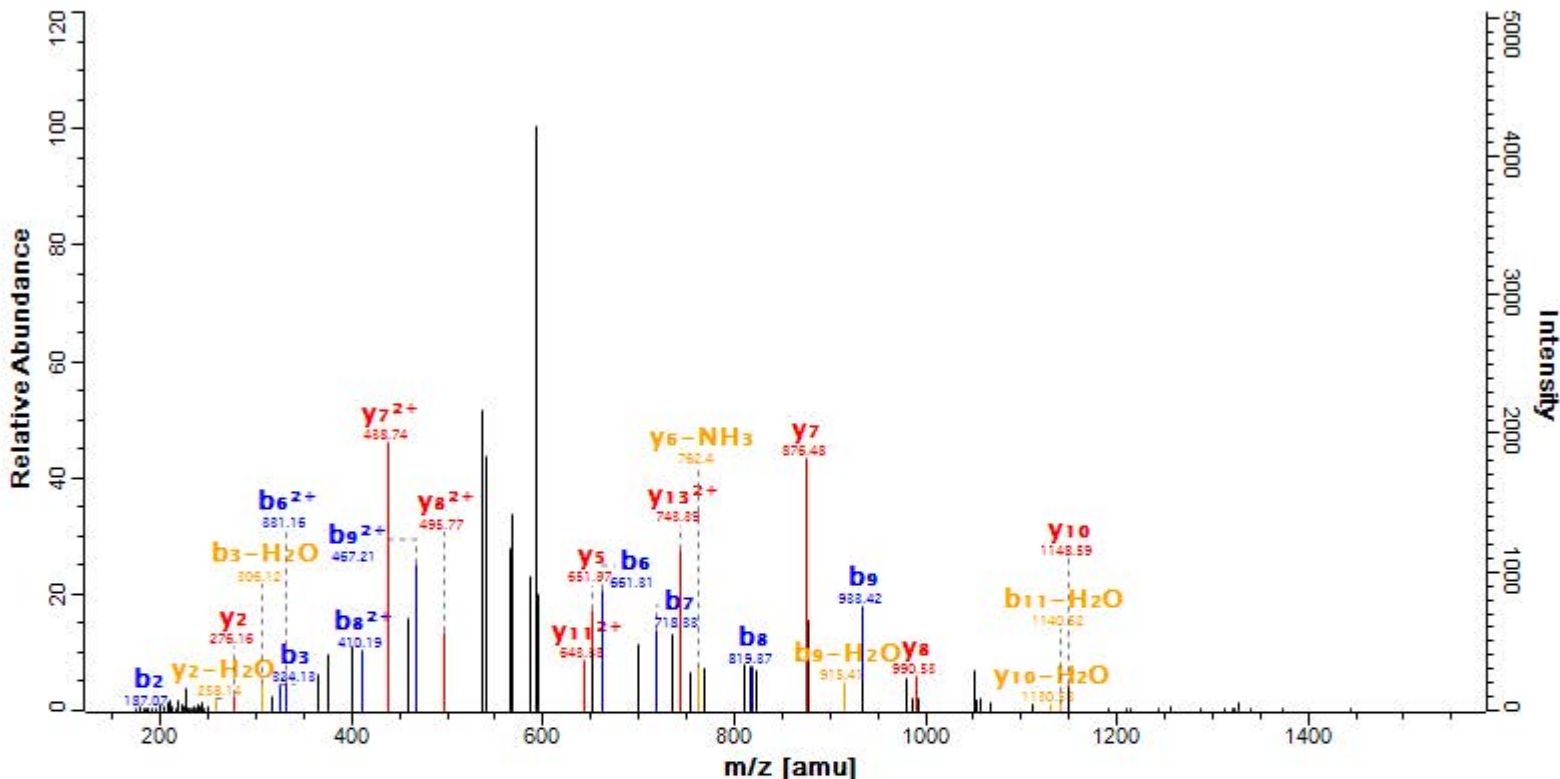

#### precursor information

|                   |                 |
|-------------------|-----------------|
| Mass:             | 1807.88628      |
| m/z:              | 603.63604       |
| Charge:           | 3+              |
| Retentiontime:    | 15.036221504211 |
| Score:            | 97.20335        |
| Mass Error [ppm]: | 0.53823         |
| PEP:              | 1.8617E-05      |
| Precursor Type:   | MULTI           |

#### general information

|                       |          |
|-----------------------|----------|
| Annotation:           | 12 of 16 |
| AminoAcids Coverage:  | 75 %     |
| Intensity Coverage:   | 35 %     |
| Peak Coverage:        | 20 %     |
| Protein Localisation: | 8 ... 23 |

| b <sup>2+</sup> ion |         | b ion    |        |     |   |          | y ion  |          | y <sup>2+</sup> ion |  |
|---------------------|---------|----------|--------|-----|---|----------|--------|----------|---------------------|--|
| Δ dalton            | mass    | Δ dalton | mass   | seq |   | Δ dalton | mass   | Δ dalton | mass                |  |
|                     | 116.03  |          | 116.03 | 1   | D | 15       |        |          |                     |  |
|                     | 187.07  | -0.075   | 187.07 | 2   | A | 14       | 1693.9 |          | 1693.9              |  |
|                     | 324.13  | +0.1259  | 324.13 | 3   | H | 13       | 1622.8 |          | 1622.8              |  |
|                     | 411.16  |          | 411.16 | 4   | S | 12       | 1485.8 |          | 743.39 +0.2334      |  |
|                     | 524.25  |          | 524.25 | 5   | I | 11       | 1398.7 |          | 1398.7              |  |
| +0.1106             | 6331.16 | +0.2298  | 661.31 | 6   | H | 10       | 1285.7 |          | 643.33 +0.1422      |  |
|                     | 718.33  | -0.218   | 718.33 | 7   | G | 9        | 1148.6 | -0.027   | 1148.6              |  |
| +0.0215             | 410.19  | +0.3141  | 819.37 | 8   | T | 8        | 1091.6 |          | 1091.6              |  |
| +0.3617             | 467.21  | -0.15    | 933.42 | 9   | N | 7        | 990.53 | -0.021   | 495.77 +0.3592      |  |
|                     | 1030.5  |          | 1030.5 | 10  | P | 6        | 876.48 | +0.0475  | 438.74 +0.2464      |  |
|                     | 1158.5  |          | 1158.5 | 11  | Q | 5        | 779.43 |          | 779.43              |  |
|                     | 1321.6  |          | 1321.6 | 12  | Y | 4        | 651.37 | +0.0736  | 651.37              |  |
|                     | 1434.7  |          | 1434.7 | 13  | L | 3        | 488.31 |          | 488.31              |  |
|                     | 1533.7  |          | 1533.7 | 14  | V | 2        | 375.22 |          | 375.22              |  |
|                     | 1662.8  |          | 1662.8 | 15  | E | 1        | 276.16 | +0.0405  | 276.16              |  |
|                     |         |          |        | 16  | K | 0        | 147.11 |          | 147.11              |  |

Scan number 1822 Raw file LNCAP\_Silac\_23F10\_set2\_09  
 Method ITMS: CID Pepti... 55.46

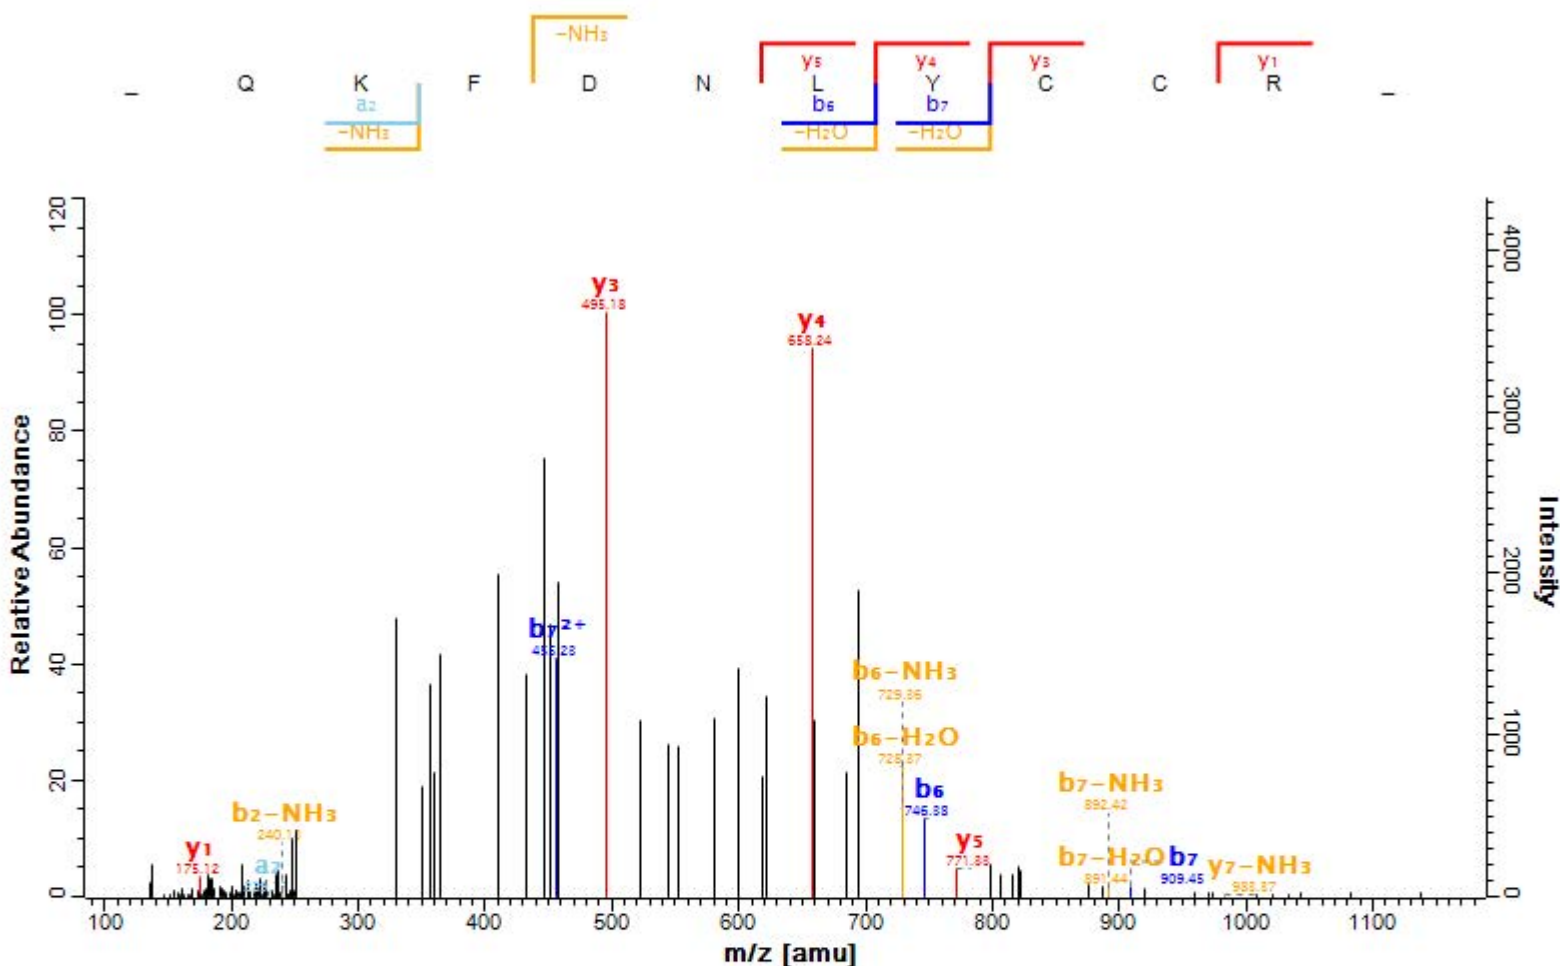

#### precursor information

|                   |                 |
|-------------------|-----------------|
| Mass:             | 1402.61214      |
| m/z:              | 468.54466       |
| Charge:           | 3+              |
| Retentiontime:    | 15.045789718627 |
| Score:            | 55.46144        |
| Mass Error [ppm]: | -0.036995       |
| PEP:              | 0.021644        |
| Precursor Type:   | MULTI           |

|                       |             |
|-----------------------|-------------|
| Annotation:           | 6 of 10     |
| AminoAcids Coverage:  | 60 %        |
| Intensity Coverage:   | 25 %        |
| Peak Coverage:        | 11 %        |
| Protein Localisation: | 366 ... 375 |

| a ion    |        | b <sup>2+</sup> ion |        | b ion    |        |     |   | y ion    |                |
|----------|--------|---------------------|--------|----------|--------|-----|---|----------|----------------|
| Δ dalton | mass   | Δ dalton            | mass   | Δ dalton | mass   | seq |   | Δ dalton | mass           |
|          | 101.07 |                     | 129.07 |          | 129.07 | 1   | Q | 9        |                |
| +0.1195  | 229.17 |                     | 257.16 |          | 257.16 | 2   | K | 8        | 1275.6         |
|          | 376.23 |                     | 404.23 |          | 404.23 | 3   | F | 7        | 1147.5         |
|          | 491.26 |                     | 519.26 |          | 519.26 | 4   | D | 6        | 1000.4         |
|          | 605.3  |                     | 633.3  |          | 633.3  | 5   | N | 5        | 885.37         |
|          | 718.39 |                     | 746.38 | +0.0104  | 746.38 | 6   | L | 4        | 771.33 +0.2192 |
|          | 881.45 | +0.2233             | 455.23 | +0.1771  | 909.45 | 7   | Y | 3        | 658.24 +0.0391 |
|          | 1041.5 |                     | 1069.5 |          | 1069.5 | 8   | C | 2        | 495.18 +0.0409 |
|          | 1201.5 |                     | 1229.5 |          | 1229.5 | 9   | C | 1        | 335.15         |
|          |        |                     |        |          |        | 10  | R | 0        | 175.12 +0.0241 |

Scan number 2075 Raw file LNCAP\_Silac\_23F10\_set2\_09  
 Method ITMS; CID Pepti... 83

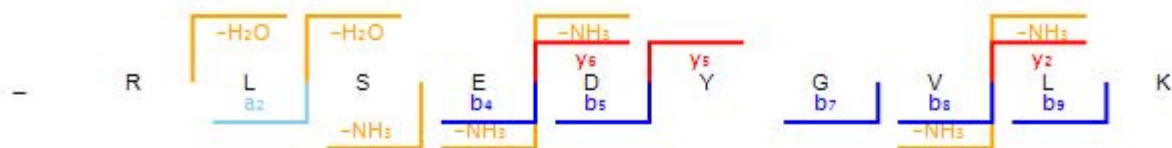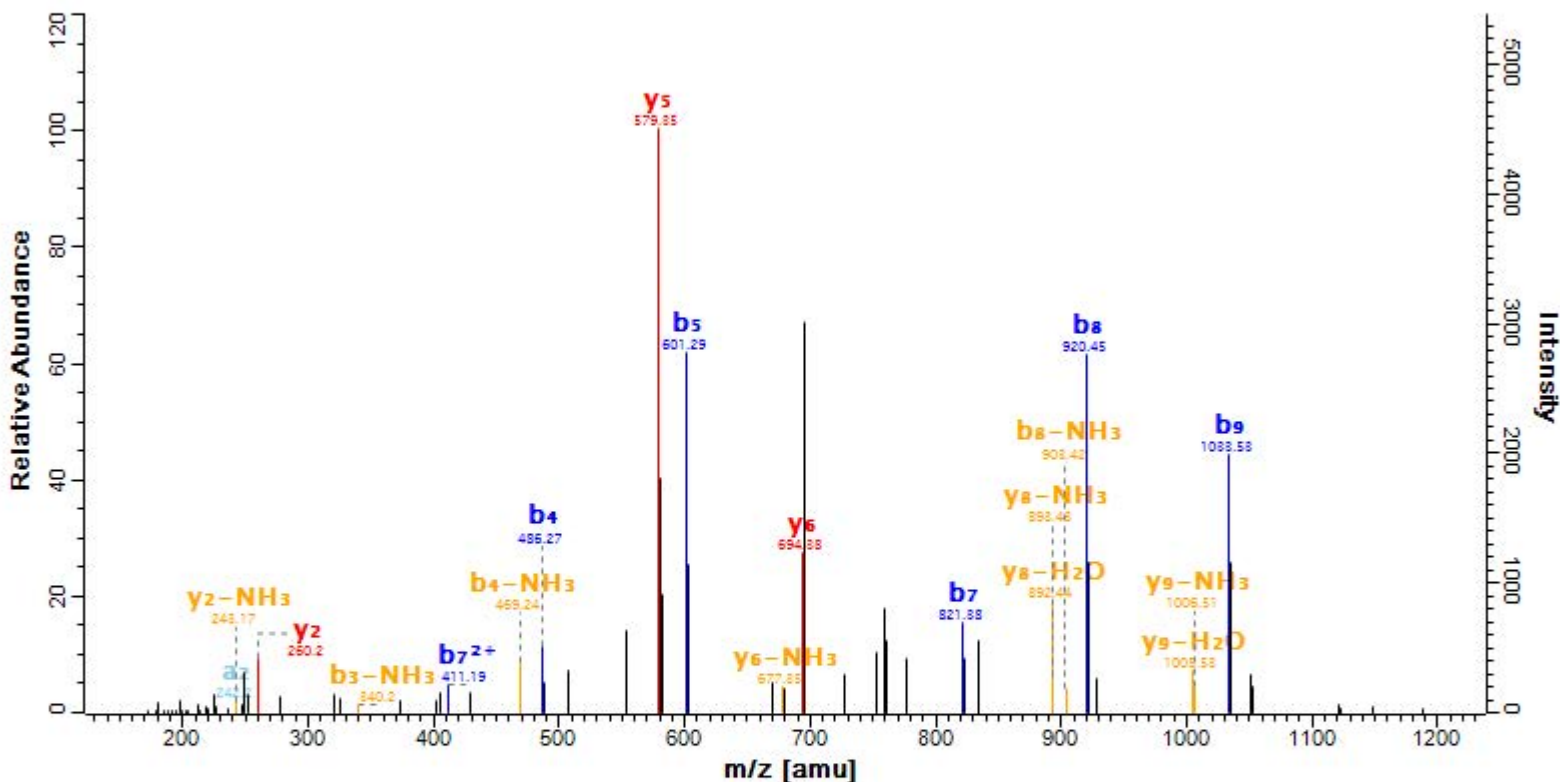

### precursor information

|                   |                 |
|-------------------|-----------------|
| Mass:             | 1178.62983      |
| m/z:              | 590.32219       |
| Charge:           | 2+              |
| Retentiontime:    | 16.462930679321 |
| Score:            | 82.99993        |
| Mass Error [ppm]: | 0.24601         |
| PEP:              | 0.0021974       |
| Precursor Type:   | MULTI           |

|                       |             |
|-----------------------|-------------|
| Annotation:           | 8 of 10     |
| AminoAcids Coverage:  | 80 %        |
| Intensity Coverage:   | 50 %        |
| Peak Coverage:        | 25 %        |
| Protein Localisation: | 110 ... 119 |

| a ion    |        | b <sup>2+</sup> ion |        | b ion    |        | y ion |   |          |        |         |
|----------|--------|---------------------|--------|----------|--------|-------|---|----------|--------|---------|
| Δ dalton | mass   | Δ dalton            | mass   | Δ dalton | mass   | seq   |   | Δ dalton | mass   |         |
|          | 129.11 |                     | 157.11 |          | 157.11 | 1     | R | 9        |        |         |
| -0.008   | 242.2  |                     | 270.19 |          | 270.19 | 2     | L | 8        | 1023.5 |         |
|          | 329.23 |                     | 357.22 |          | 357.22 | 3     | S | 7        | 910.45 |         |
|          | 458.27 |                     | 486.27 | +0.0018  | 486.27 | 4     | E | 6        | 823.42 |         |
|          | 573.3  |                     | 601.29 | +0.0284  | 601.29 | 5     | D | 5        | 694.38 | +0.2208 |
|          | 736.36 |                     | 764.36 |          | 764.36 | 6     | Y | 4        | 579.35 | +0.0427 |
|          | 793.38 | +0.1582             | 411.19 | +0.0292  | 821.38 | 7     | G | 3        | 416.29 |         |
|          | 892.45 |                     | 920.45 | +0.0162  | 920.45 | 8     | V | 2        | 359.27 |         |
|          | 1005.5 |                     | 1033.5 | +0.0236  | 1033.5 | 9     | L | 1        | 260.2  | +0.0338 |
|          |        |                     |        |          |        | 10    | K | 0        | 147.11 |         |

Scan number 2109 Raw file LNCAP\_Silac\_23F10\_set2\_09  
 Method ITMS; CID Pepti... 87.72

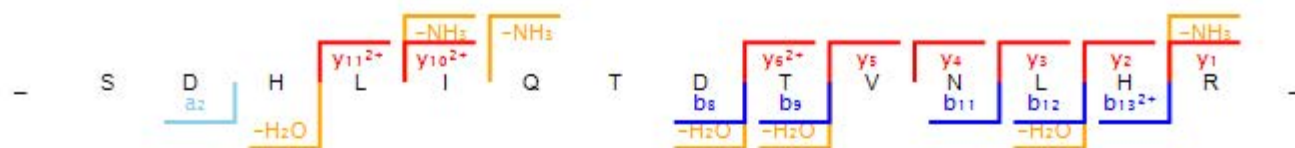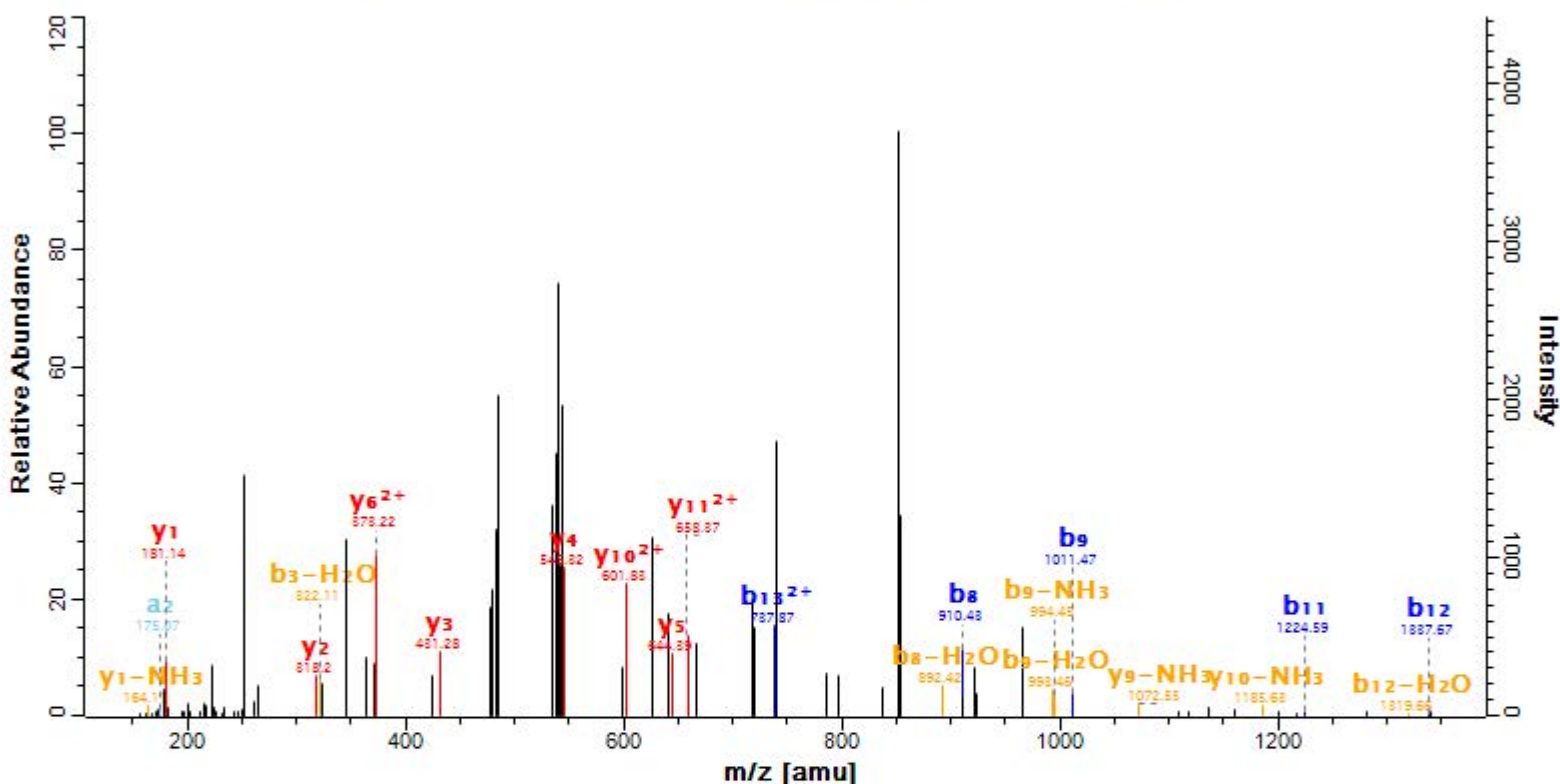

precursor information

|                   |                 |
|-------------------|-----------------|
| Mass:             | 1647.83276      |
| m/z:              | 550.28486       |
| Charge:           | 3+              |
| Retentiontime:    | 16.647510528564 |
| Score:            | 87.71938        |
| Mass Error [ppm]: | -0.073216       |
| PEP:              | 0.0003716       |
| Precursor Type:   | MULTI           |

general information

|                       |             |
|-----------------------|-------------|
| Annotation:           | 12 of 14    |
| AminoAcids Coverage:  | 86 %        |
| Intensity Coverage:   | 17 %        |
| Peak Coverage:        | 23 %        |
| Protein Localisation: | 179 ... 192 |

|        | a ion         | b <sup>2+</sup> ion | b ion         |     |   |    | y ion         | y <sup>2+</sup> ion |
|--------|---------------|---------------------|---------------|-----|---|----|---------------|---------------------|
|        | Δ dalton mass | Δ dalton mass       | Δ dalton mass | seq |   |    | Δ dalton mass | Δ dalton mass       |
|        | 60.04         | 88.04               | 88.04         | 1   | S | 13 |               |                     |
| +0.229 | 75.1          | 203.1               | 203.1         | 2   | D | 12 | 1568          | 1568                |
|        | 312.1         | 340.1               | 340.1         | 3   | H | 11 | 1453          | 1453                |
|        | 425.2         | 453.2               | 453.2         | 4   | L | 10 | 1316          | 658.4 +0.20:        |
|        | 538.3         | 566.3               | 566.3         | 5   | I | 9  | 1203          | 601.8 +0.29:        |
|        | 666.4         | 694.4               | 694.4         | 6   | Q | 8  | 1090          | 1090                |
|        | 767.4         | 795.4               | 795.4         | 7   | T | 7  | 961.5         | 961.5               |
|        | 882.4         | 910.4               | +0.148910.4   | 8   | D | 6  | 860.5         | 860.5               |
|        | 983.5         | 1011                | +0.0141011    | 9   | T | 5  | 745.4         | 373.2 +0.11:        |
|        | 1083          | 1111                | 1111          | 10  | V | 4  | 644.4         | -0.19 644.4         |
|        | 1197          | 1225                | -0.02 1225    | 11  | N | 3  | 545.3         | +0.124545.3         |
|        | 1310          | 1338                | +0.0491338    | 12  | L | 2  | 431.3         | +0.02 431.3         |
|        | 1447          | +0.204737.9         | 1475          | 13  | H | 1  | 318.2         | +0.036318.2         |
|        |               |                     |               | 14  | R | 0  | 181.1         | +0.0181.1           |

Scan number 2224 Raw file LNCAP\_Silac\_23F10\_set2\_09  
 Method ITMS; CID Pepti... 62.38

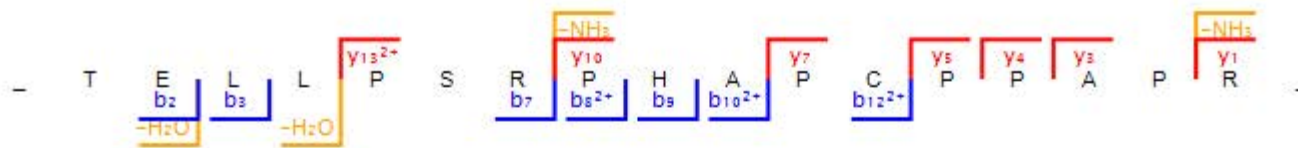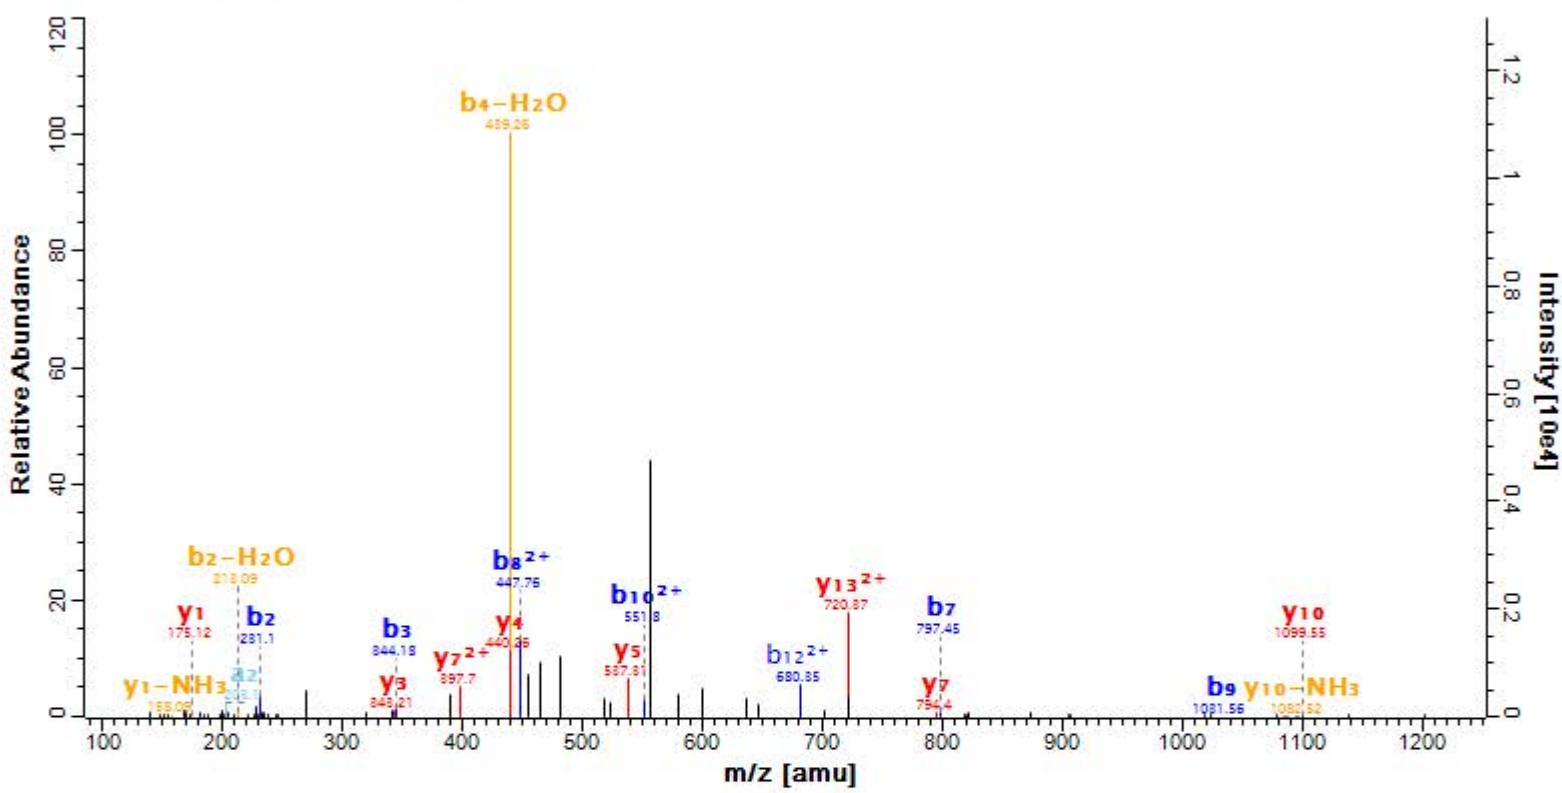

**precursor information**

|                   |                 |
|-------------------|-----------------|
| Mass:             | 1894.98337      |
| m/z:              | 474.75312       |
| Charge:           | 4+              |
| Retentiontime:    | 17.275318145752 |
| Score:            | 62.37733        |
| Mass Error [ppm]: | -0.11588        |
| PEP:              | 0.0015195       |
| Precursor Type:   | MULTI           |

**general information**

|                       |               |
|-----------------------|---------------|
| Annotation:           | 14 of 17      |
| AminoAcids Coverage:  | 82 %          |
| Intensity Coverage:   | 58 %          |
| Peak Coverage:        | 18 %          |
| Protein Localisation: | 1863 ... 1879 |

|       | a ion         | b <sup>2+</sup> ion | b ion         |    |     |    | y ion         | y <sup>2+</sup> ion |
|-------|---------------|---------------------|---------------|----|-----|----|---------------|---------------------|
|       | Δ dalton mass | Δ dalton mass       | Δ dalton mass |    | seq |    | Δ dalton mass | Δ dalton mass       |
|       | 74.06         | 102.1               | 102.1         | 1  | T   | 16 |               |                     |
| +0.11 | 203.1         | 231.1               | +0.079231.1   | 2  | E   | 15 | 1795          | 1795                |
|       | 316.2         | 344.2               | +0.148344.2   | 3  | L   | 14 | 1666          | 1666                |
|       | 429.3         | 457.3               | 457.3         | 4  | L   | 13 | 1553          | 1553                |
|       | 526.3         | 554.3               | 554.3         | 5  | P   | 12 | 1440          | 720.4 +0.12:        |
|       | 613.4         | 641.4               | 641.4         | 6  | S   | 11 | 1343          | 1343                |
|       | 769.5         | 797.5               | -0.01 797.5   | 7  | R   | 10 | 1256          | 1256                |
|       | 866.5         | +0.038447.8         | 894.5         | 8  | P   | 9  | 1100          | +0.1371100          |
|       | 1004          | 1032                | -0.04 1032    | 9  | H   | 8  | 1002          | 1002                |
|       | 1075          | -0.23 551.8         | 1103          | 10 | A   | 7  | 865.4         | 865.4               |
|       | 1172          | 1200                | 1200          | 11 | P   | 6  | 794.4         | +0.399397.7 +0.06:  |
|       | 1332          | +0.286580.3         | 1360          | 12 | C   | 5  | 697.3         | 697.3               |
|       | 1429          | 1457                | 1457          | 13 | P   | 4  | 537.3         | +0.044537.3         |
|       | 1526          | 1554                | 1554          | 14 | P   | 3  | 440.3         | -0.04 440.3         |
|       | 1597          | 1625                | 1625          | 15 | A   | 2  | 343.2         | +0.047343.2         |
|       | 1694          | 1722                | 1722          | 16 | P   | 1  | 272.2         | 272.2               |
|       |               |                     |               | 17 | R   | 0  | 175.1         | -0.06 175.1         |

Scan number 2276 Raw file LNCAP\_Silac\_23F10\_set2\_09  
 Method ITMS; CID Pepti... 53.17

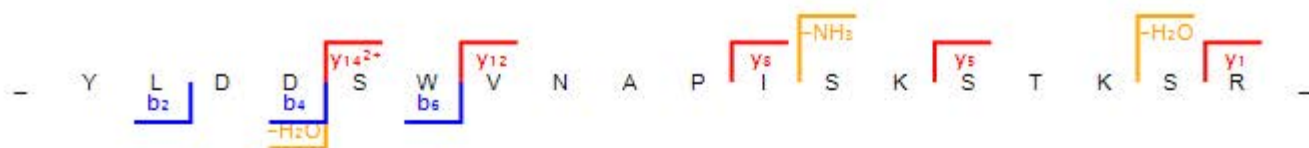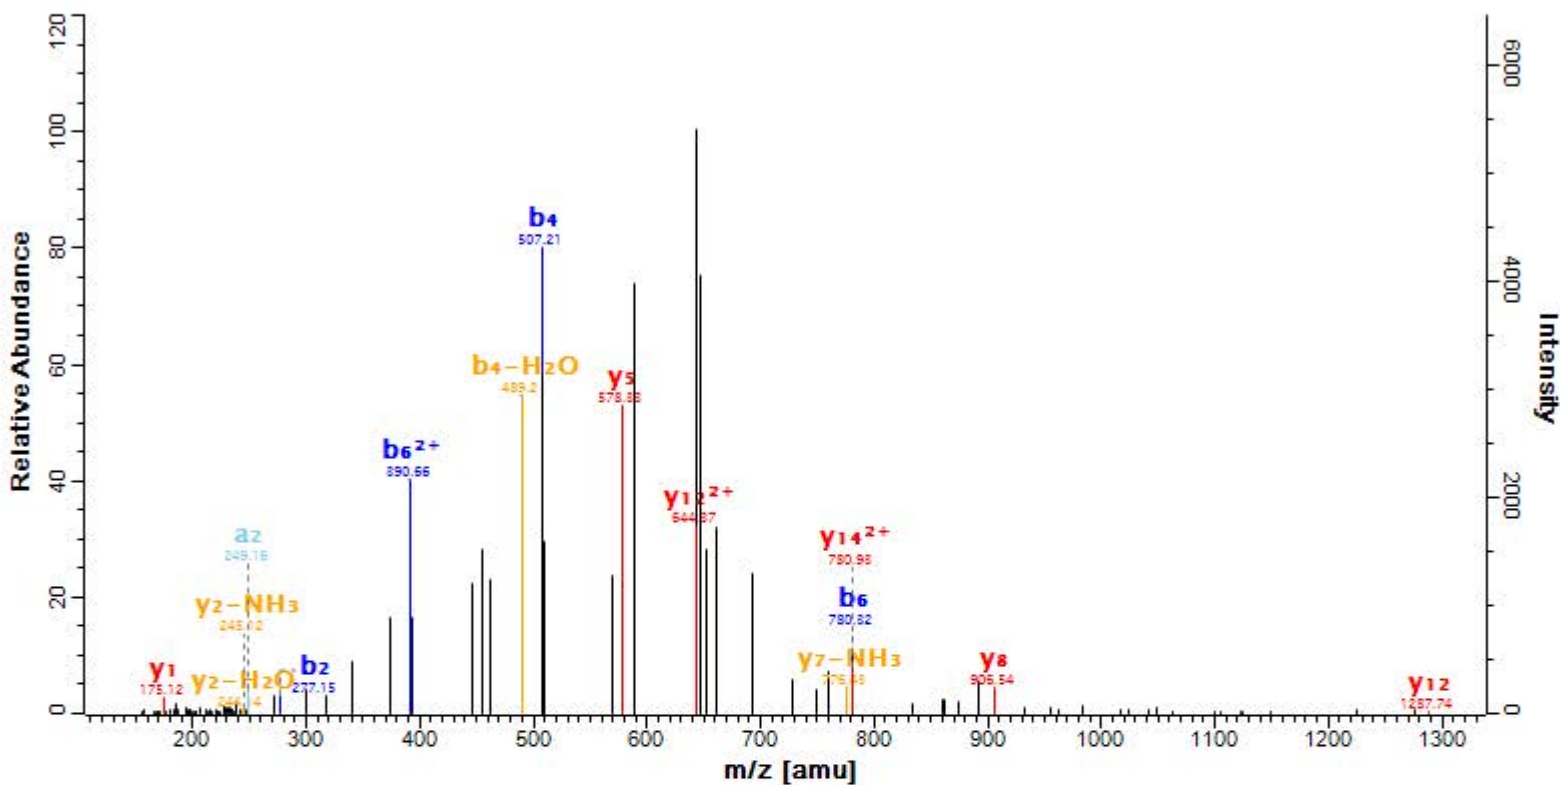

**precursor information**

|                   |                 |
|-------------------|-----------------|
| Mass:             | 2066.04226      |
| m/z:              | 517.51784       |
| Charge:           | 4+              |
| Retentiontime:    | 17.590311050415 |
| Score:            | 53.16922        |
| Mass Error [ppm]: | -0.48732        |
| PEP:              | 0.0048592       |
| Precursor Type:   | MULTI           |

| a ion         |               | b <sup>2+</sup> ion |               | b ion |               | y ion         |       | y <sup>2+</sup> ion |        |
|---------------|---------------|---------------------|---------------|-------|---------------|---------------|-------|---------------------|--------|
| Δ dalton mass | Δ dalton mass | Δ dalton mass       | Δ dalton mass | seq   | Δ dalton mass | Δ dalton mass |       |                     |        |
| 136.1         | 164.1         | 164.1               | 164.1         | 1     | Y             | 17            |       |                     |        |
| +0.035249.2   | 277.2         | +0.136277.2         | 277.2         | 2     | L             | 16            | 1904  | 1904                |        |
| 364.2         | 392.2         | 392.2               | 392.2         | 3     | D             | 15            | 1791  | 1791                |        |
| 479.2         | 507.2         | +0.478507.2         | 507.2         | 4     | D             | 14            | 1676  | 1676                |        |
| 566.2         | 594.2         | 594.2               | 594.2         | 5     | S             | 13            | 1561  | 780.9               | +0.331 |
| 752.3         | +0.164390.7   | -0.05               | 780.3         | 6     | W             | 12            | 1474  | 1474                |        |
| 851.4         | 879.4         | 879.4               | 879.4         | 7     | V             | 11            | 1288  | +0.061644.4         | -0.39  |
| 965.4         | 993.4         | 993.4               | 993.4         | 8     | N             | 10            | 1189  | 1189                |        |
| 1036          | 1064          | 1064                | 1064          | 9     | A             | 9             | 1075  | 1075                |        |
| 1134          | 1162          | 1162                | 1162          | 10    | P             | 8             | 1004  | 1004                |        |
| 1247          | 1275          | 1275                | 1275          | 11    | I             | 7             | 906.5 | +0.091906.5         |        |
| 1334          | 1362          | 1362                | 1362          | 12    | S             | 6             | 793.5 | 793.5               |        |
| 1462          | 1490          | 1490                | 1490          | 13    | K             | 5             | 706.4 | 706.4               |        |
| 1549          | 1577          | 1577                | 1577          | 14    | S             | 4             | 578.3 | +0.258578.3         |        |
| 1650          | 1678          | 1678                | 1678          | 15    | T             | 3             | 491.3 | 491.3               |        |
| 1778          | 1806          | 1806                | 1806          | 16    | K             | 2             | 390.2 | 390.2               |        |
| 1865          | 1893          | 1893                | 1893          | 17    | S             | 1             | 262.2 | 262.2               |        |
|               |               |                     |               | 18    | R             | 0             | 175.1 | +0.162175.1         |        |

**general information**

|                       |           |
|-----------------------|-----------|
| Annotation:           | 10 of 18  |
| AminoAcids Coverage:  | 56 %      |
| Intensity Coverage:   | 30 %      |
| Peak Coverage:        | 14 %      |
| Protein Localisation: | 82 ... 99 |



Scan number 2335 Raw file LNCAP\_Silac\_23F10\_set2\_09  
 Method ITMS; CID Pepti... 103.08

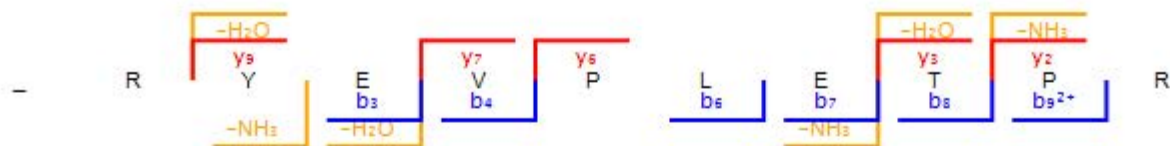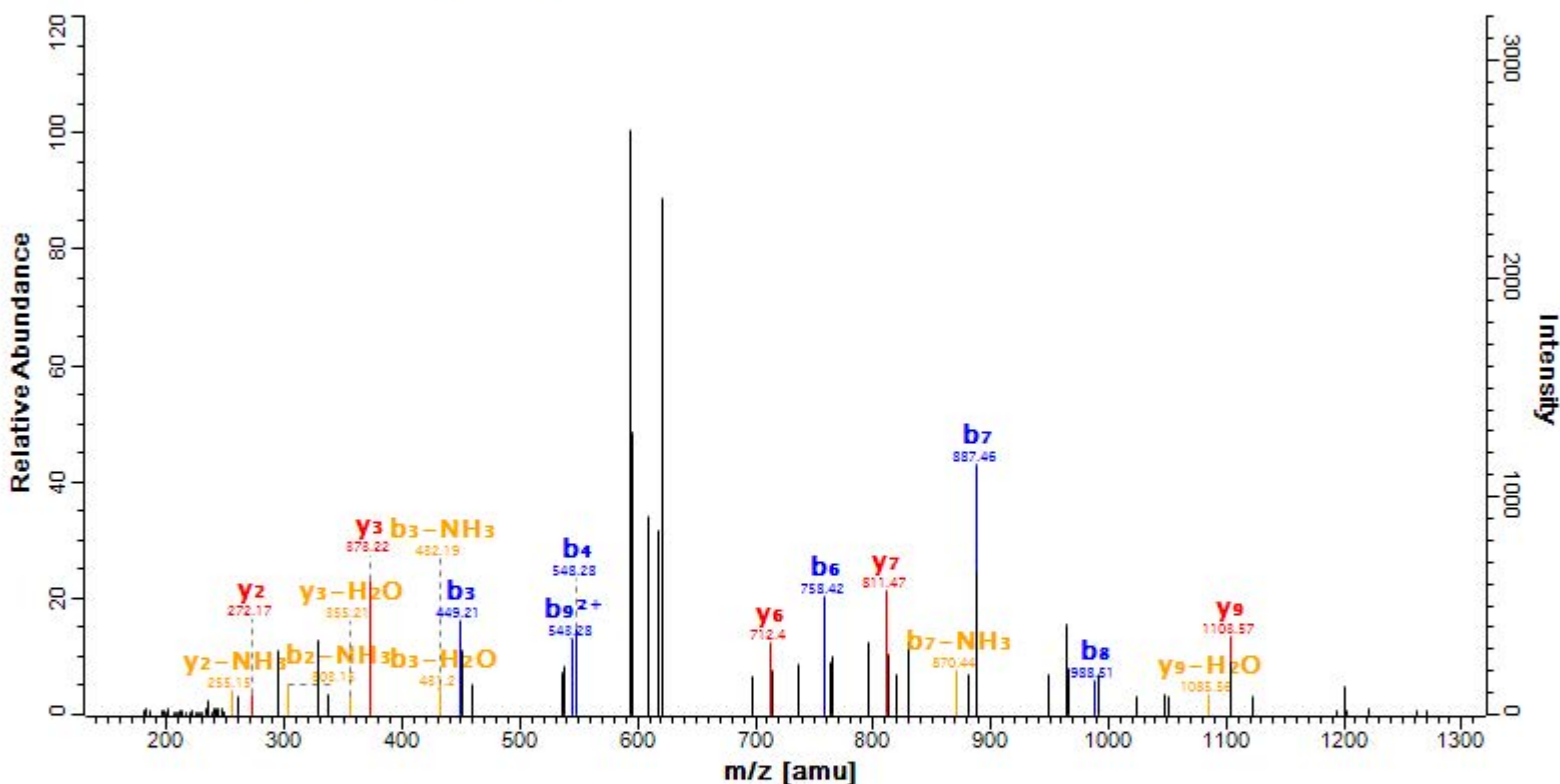

#### precursor information

|                   |                 |
|-------------------|-----------------|
| Mass:             | 1258.66699      |
| m/z:              | 630.34077       |
| Charge:           | 2+              |
| Retentiontime:    | 17.932689666748 |
| Score:            | 103.0832        |
| Mass Error [ppm]: | 0.003639        |
| PEP:              | 0.00035375      |
| Precursor Type:   | MULTI           |

|                       |             |
|-----------------------|-------------|
| Annotation:           | 8 of 10     |
| AminoAcids Coverage:  | 80 %        |
| Intensity Coverage:   | 26 %        |
| Peak Coverage:        | 18 %        |
| Protein Localisation: | 190 ... 199 |

| b <sup>2+</sup> ion |          | b ion     |          |     |   | y ion    |                    |
|---------------------|----------|-----------|----------|-----|---|----------|--------------------|
| Δ dalton            | mass     | Δ dalton  | mass     | seq |   | Δ dalton | mass               |
|                     | 157.1084 |           | 157.1084 | 1   | R | 9        |                    |
|                     | 320.1717 |           | 320.1717 | 2   | Y | 8        | 1103.573 +0.078216 |
|                     | 449.2143 | +0.014878 | 449.2143 | 3   | E | 7        | 940.5098           |
|                     | 548.2827 | -0.04237  | 548.2827 | 4   | V | 6        | 811.4672 +0.040278 |
|                     | 645.3355 |           | 645.3355 | 5   | P | 5        | 712.3988 +0.024341 |
|                     | 758.4196 | +0.038823 | 758.4196 | 6   | L | 4        | 615.3461           |
|                     | 887.4621 | -0.06511  | 887.4621 | 7   | E | 3        | 502.262            |
|                     | 988.5098 | -0.07739  | 988.5098 | 8   | T | 2        | 373.2194 +0.078945 |
| +0.405987           | 543.2849 |           | 1085.563 | 9   | P | 1        | 272.1717 +0.011878 |
|                     |          |           |          | 10  | R | 0        | 175.119            |

Scan number 2596 Raw file LNCAP\_Silac\_23F10\_set2\_09  
 Method ITMS; CID Pepti... 116.05

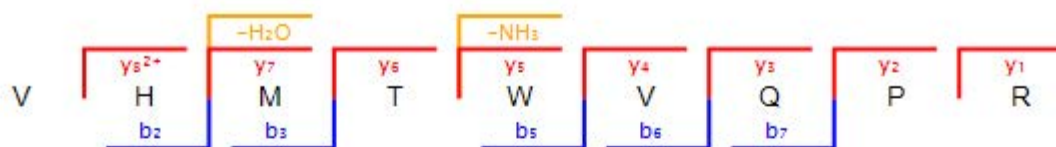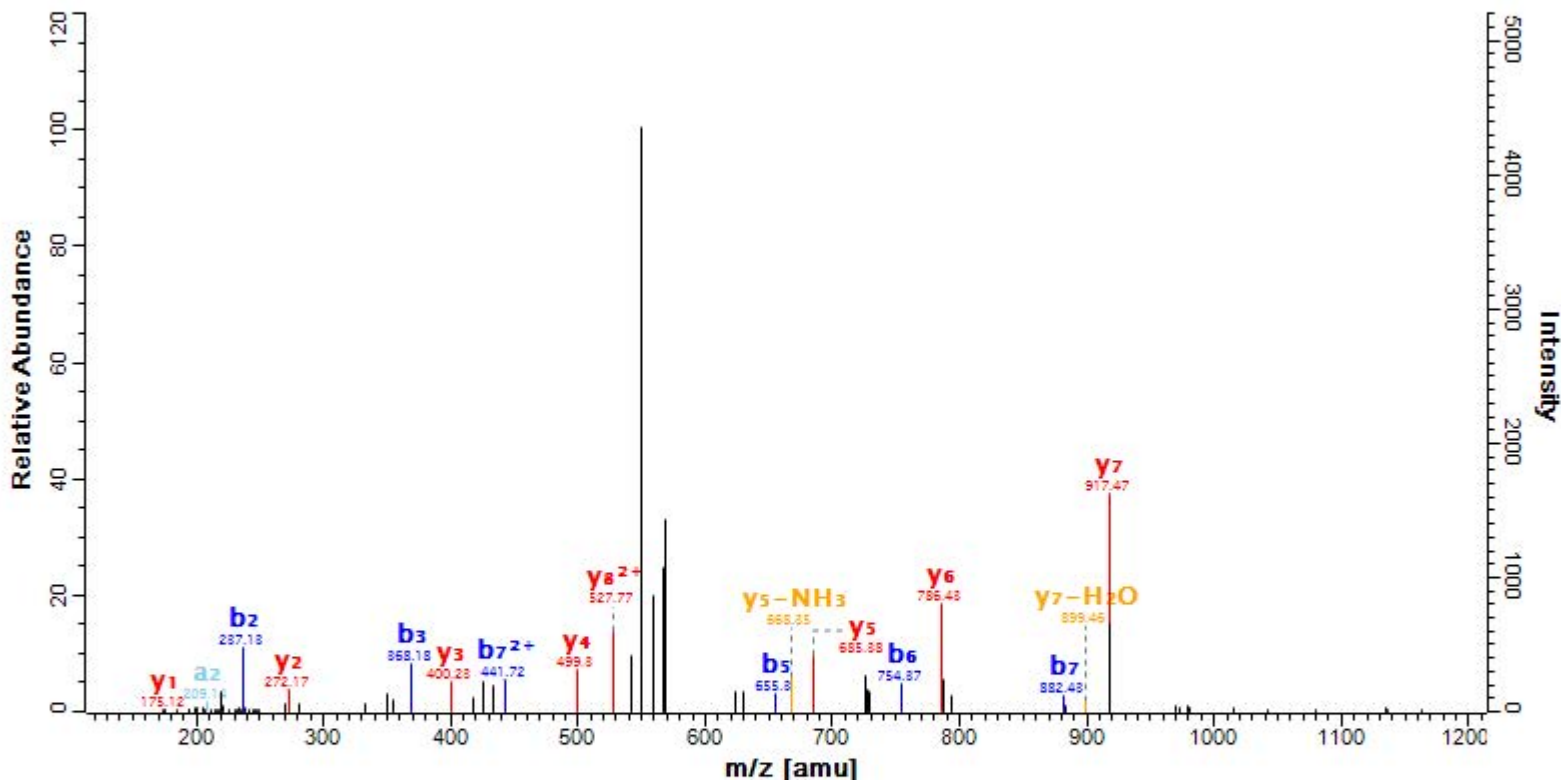

#### precursor information

|                       |                 |
|-----------------------|-----------------|
| Mass:                 | 1152.58656      |
| m/z:                  | 577.30055       |
| Charge:               | 2+              |
| Retention time:       | 19.377676010131 |
| Score:                | 116.0506        |
| Mass Error [ppm]:     | 0.27989         |
| PEP:                  | 0.0016525       |
| Precursor Type:       | MULTI           |
| Annotation:           | 8 of 9          |
| AminoAcids Coverage:  | 89 %            |
| Intensity Coverage:   | 33 %            |
| Peak Coverage:        | 19 %            |
| Protein Localisation: | 331 ... 339     |

| a ion         | b <sup>2+</sup> ion | b ion         |   |     | y ion         | y <sup>2+</sup> ion |
|---------------|---------------------|---------------|---|-----|---------------|---------------------|
| Δ dalton mass | Δ dalton mass       | Δ dalton mass |   | seq | Δ dalton mass | Δ dalton mass       |
| 72.08         | 100.1               | 100.1         | 1 | V   | 8             |                     |
| -0.05 209.1   | 237.1               | +0.01 7237.1  | 2 | H   | 7             | 1055 527.8 +0.05!   |
| 340.2         | 368.2               | +0.05 368.2   | 3 | M   | 6             | 917.5 +0.00 917.5   |
| 441.2         | 469.2               | 469.2         | 4 | T   | 5             | 786.4 -0.03 786.4   |
| 627.3         | 655.3               | -0.04 655.3   | 5 | W   | 4             | 685.4 +0.06 685.4   |
| 726.4         | 754.4               | -0.01 754.4   | 6 | V   | 3             | 499.3 +0.15 499.3   |
| 854.4         | +0.40 441.7         | -0.06 882.4   | 7 | Q   | 2             | 400.2 +0.07 400.2   |
| 951.5         | 979.5               | 979.5         | 8 | P   | 1             | 272.2 +0.08 272.2   |
|               |                     |               | 9 | R   | 0             | 175.1 +0.07 175.1   |

Scan number 2746 Raw file LNCAP\_Silac\_23F10\_set2\_09  
 Method ITMS; CID Pepti... 123.42

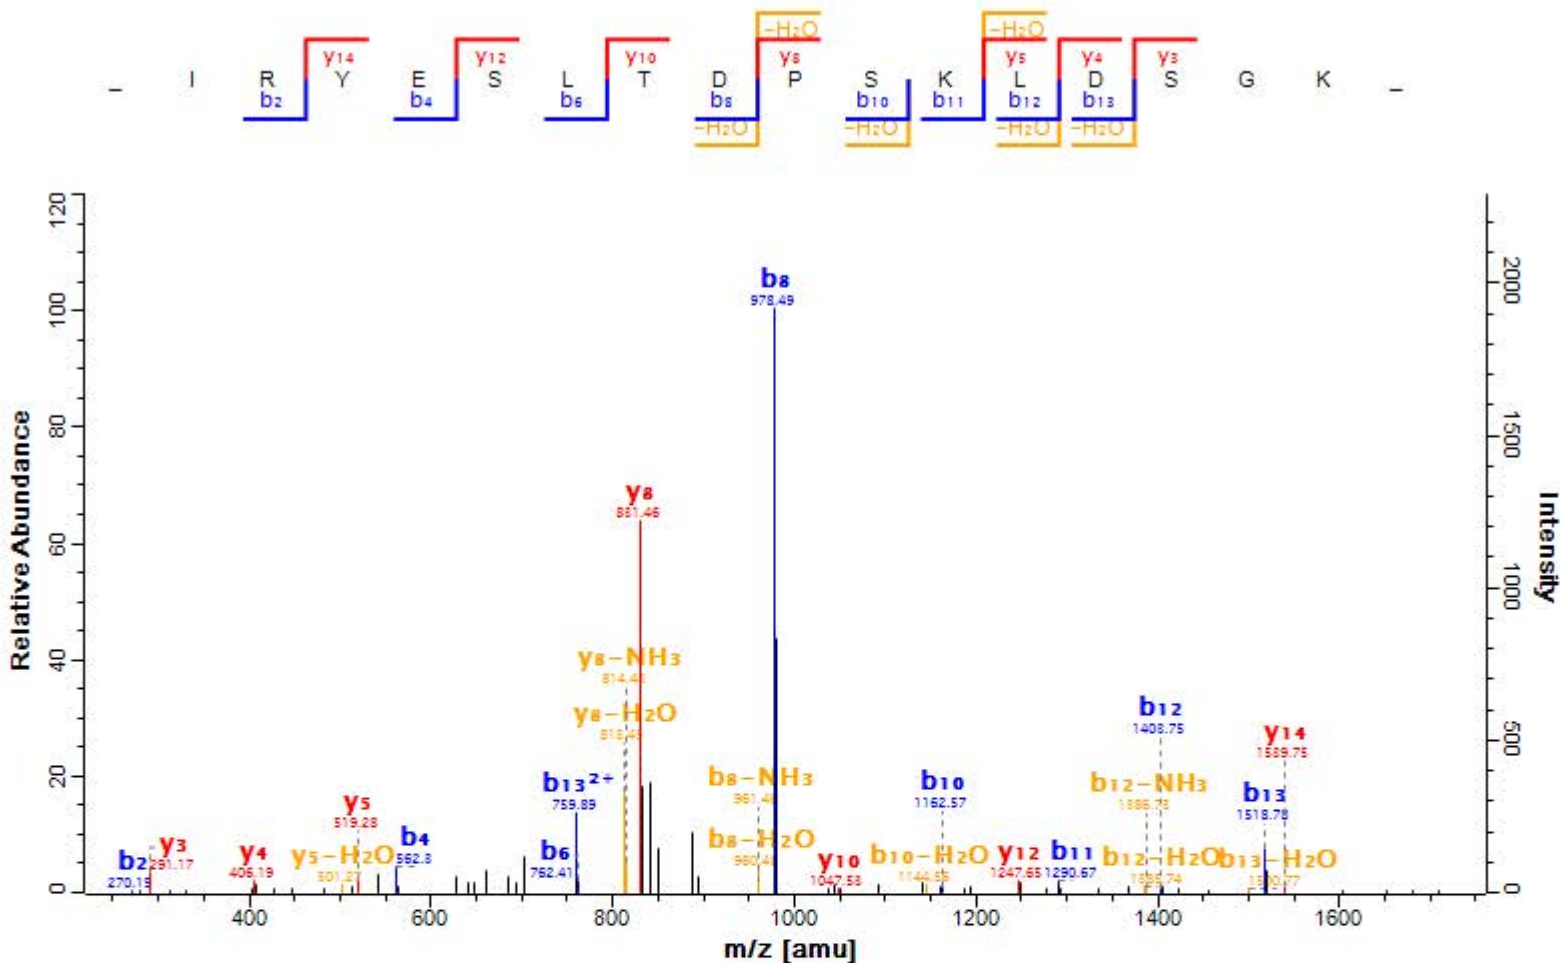

#### precursor information

|                   |                 |
|-------------------|-----------------|
| Mass:             | 1807.93163      |
| m/z:              | 904.97309       |
| Charge:           | 2+              |
| Retentiontime:    | 20.222425460815 |
| Score:            | 123.4163        |
| Mass Error [ppm]: | 0.023045        |
| PEP:              | 5.5367E-10      |
| Precursor Type:   | MULTI           |

#### general information

|                       |             |
|-----------------------|-------------|
| Annotation:           | 14 of 16    |
| AminoAcids Coverag    | 88 %        |
| Intensity Coverage:   | 58 %        |
| Peak Coverage:        | 32 %        |
| Protein Localisation: | 181 ... 196 |

| b <sup>2+</sup> ion |          | b ion     |          |     |   |          | y ion    |           |
|---------------------|----------|-----------|----------|-----|---|----------|----------|-----------|
| Δ dalton            | mass     | Δ dalton  | mass     | seq |   | Δ dalton | mass     |           |
|                     | 114.0913 |           | 114.0913 | 1   | I | 15       |          |           |
|                     | 270.1925 | +0.136162 | 270.1925 | 2   | R | 14       | 1695.855 |           |
|                     | 433.2558 |           | 433.2558 | 3   | Y | 13       | 1539.754 | +0.162444 |
|                     | 562.2984 | +0.003507 | 562.2984 | 4   | E | 12       | 1376.69  |           |
|                     | 649.3304 |           | 649.3304 | 5   | S | 11       | 1247.648 | -0.00568  |
|                     | 762.4145 | +0.139062 | 762.4145 | 6   | L | 10       | 1160.616 |           |
|                     | 863.4621 |           | 863.4621 | 7   | T | 9        | 1047.532 | +0.067441 |
|                     | 978.4891 | -0.0265   | 978.4891 | 8   | D | 8        | 946.484  |           |
|                     | 1075.542 |           | 1075.542 | 9   | P | 7        | 831.4571 | +0.042941 |
|                     | 1162.574 | +0.284275 | 1162.574 | 10  | S | 6        | 734.4043 |           |
|                     | 1290.669 | -0.0635   | 1290.669 | 11  | K | 5        | 647.3723 |           |
|                     | 1403.753 | -0.1146   | 1403.753 | 12  | L | 4        | 519.2773 | -0.01449  |
| +0.197074           | 759.8936 | -0.11518  | 1518.78  | 13  | D | 3        | 406.1932 | +0.048765 |
|                     | 1605.812 |           | 1605.812 | 14  | S | 2        | 291.1663 | -0.0015   |
|                     | 1662.833 |           | 1662.833 | 15  | G | 1        | 204.1343 |           |
|                     |          |           |          | 16  | K | 0        | 147.1128 |           |

Scan number 2795 Raw file LNCAP\_Silac\_23F10\_set2\_09  
 Method ITMS; CID Pepti... 58.07

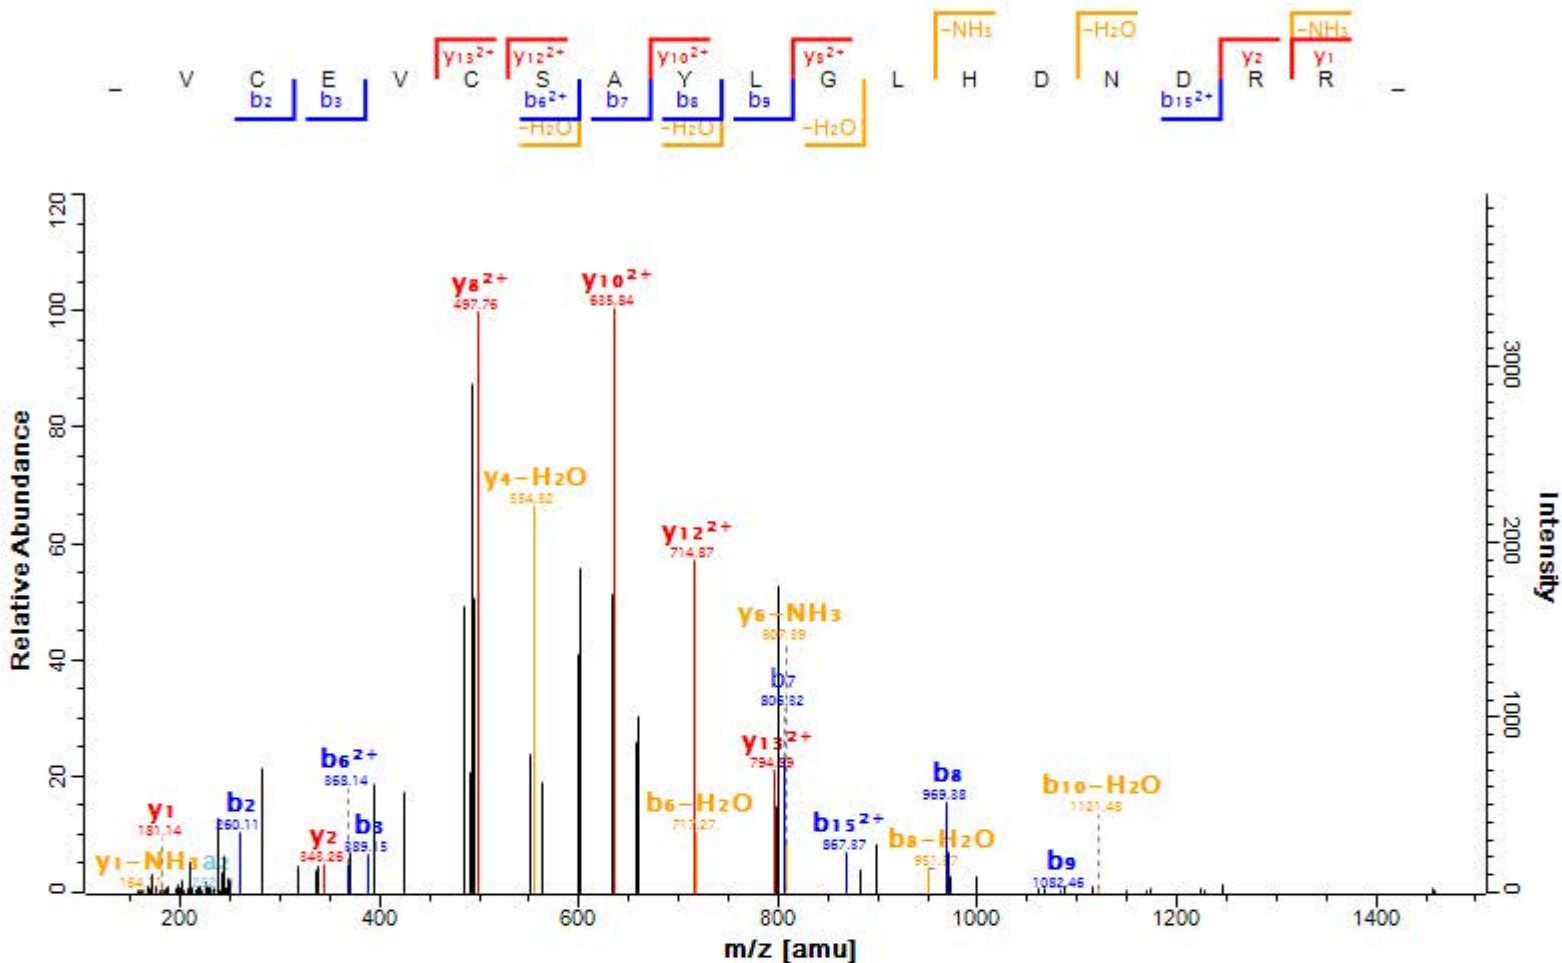

precursor information

|                   |                 |
|-------------------|-----------------|
| Mass:             | 2062.93068      |
| m/z:              | 516.73995       |
| Charge:           | 4+              |
| Retentiontime:    | 20.508506774902 |
| Score:            | 58.07133        |
| Mass Error [ppm]: | -0.29391        |
| PEP:              | 0.0013837       |
| Precursor Type:   | MULTI           |

general information

|                       |             |
|-----------------------|-------------|
| Annotation:           | 13 of 17    |
| AminoAcids Coverage:  | 76 %        |
| Intensity Coverage:   | 36 %        |
| Peak Coverage:        | 17 %        |
| Protein Localisation: | 255 ... 271 |

|       | a ion         | b <sup>2+</sup> ion | b ion         |    |     |    | y ion             | y <sup>2+</sup> ion |
|-------|---------------|---------------------|---------------|----|-----|----|-------------------|---------------------|
|       | Δ dalton mass | Δ dalton mass       | Δ dalton mass |    | seq |    | Δ dalton mass     | Δ dalton mass       |
|       | 72.08         | 100.1               | 100.1         | 1  | V   | 16 |                   |                     |
| -0.01 | 232.1         | 260.1               | +0.102260.1   | 2  | C   | 15 | 1977              | 1977                |
|       | 361.2         | 389.1               | +0.036389.1   | 3  | E   | 14 | 1817              | 1817                |
|       | 460.2         | 488.2               | 488.2         | 4  | V   | 13 | 1688              | 1688                |
|       | 620.3         | 648.2               | 648.2         | 5  | C   | 12 | 1589              | 794.9 +0.331        |
|       | 707.3         | -0.09 368.1         | 735.3         | 6  | S   | 11 | 1429              | 714.9 +0.270        |
|       | 778.3         | 806.3               | +0.023806.3   | 7  | A   | 10 | 1342              | 1342                |
|       | 941.4         | 969.4               | -0.06 969.4   | 8  | Y   | 9  | 1271              | 635.8 +0.223        |
|       | 1054          | 1082                | +0.1331082    | 9  | L   | 8  | 1108              | 1108                |
|       | 1111          | 1139                | 1139          | 10 | G   | 7  | 994.5             | 497.8 +0.249        |
|       | 1225          | 1253                | 1253          | 11 | L   | 6  | 937.5             | 937.5               |
|       | 1362          | 1390                | 1390          | 12 | H   | 5  | 824.4             | 824.4               |
|       | 1477          | 1505                | 1505          | 13 | D   | 4  | 687.4             | 687.4               |
|       | 1591          | 1619                | 1619          | 14 | N   | 3  | 572.3             | 572.3               |
|       | 1706          | +0.273867.4         | 1734          | 15 | D   | 2  | 458.3             | 458.3               |
|       | 1868          | 1896                | 1896          | 16 | R   | 1  | 343.3 +0.093343.3 |                     |
|       |               |                     |               | 17 | R   | 0  | 181.1 +0.011181.1 |                     |

Scan number 308 Raw file LNCAP\_Silac\_23F10\_set2\_09  
 Method ITMS: CID Pepti... 65.72

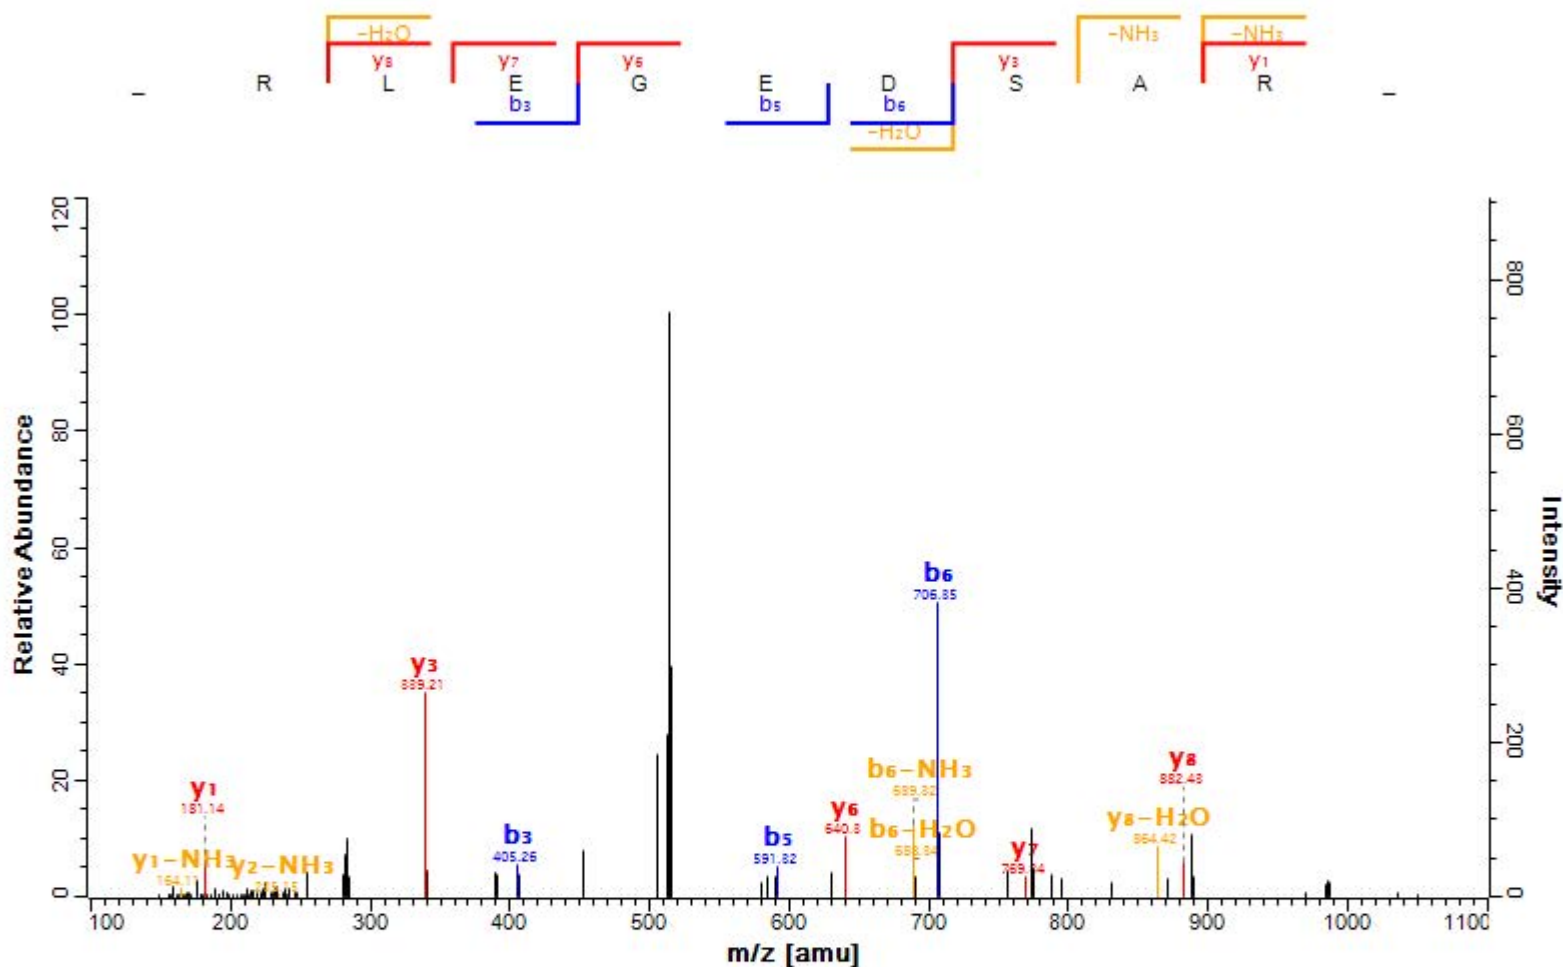

#### precursor information

|                       |                 |
|-----------------------|-----------------|
| Mass:                 | 1031.50029      |
| m/z:                  | 516.75742       |
| Charge:               | 2+              |
| Retentiontime:        | 6.2934150695800 |
| Score:                | 65.71947        |
| Mass Error [ppm]:     | 0.67889         |
| PEP:                  | 0.010412        |
| Precursor Type:       | MULTI           |
| Annotation:           | 8 of 9          |
| AminoAcids Coverage:  | 89 %            |
| Intensity Coverage:   | 26 %            |
| Peak Coverage:        | 11 %            |
| Protein Localisation: | 561 ... 569     |

| b ion           |               |     |   | y ion           |                          |
|-----------------|---------------|-----|---|-----------------|--------------------------|
| $\Delta$ dalton | mass          | seq |   | $\Delta$ dalton | mass                     |
|                 | 163.128516522 | 1   | R | 8               |                          |
|                 | 276.212580502 | 2   | L | 7               | 882.425880334 +0.0558091 |
| +0.1408225      | 405.255173598 | 3   | E | 6               | 769.341816354 -0.1303906 |
|                 | 462.276637322 | 4   | G | 5               | 640.299223257 +0.0341508 |
| +0.1107012      | 591.319230418 | 5   | E | 4               | 583.277759534            |
| -0.0029728      | 706.34617345  | 6   | D | 3               | 454.235166438            |
|                 | 793.37820186  | 7   | S | 2               | 339.208223406 -0.0549031 |
|                 | 864.415315648 | 8   | A | 1               | 252.176194996            |
|                 |               | 9   | R | 0               | 181.139081208 +0.0077389 |

Scan number 3334 Raw file LNCAP\_Silac\_23F10\_set2\_09  
 Method ITMS; CID Pepti... 110.35

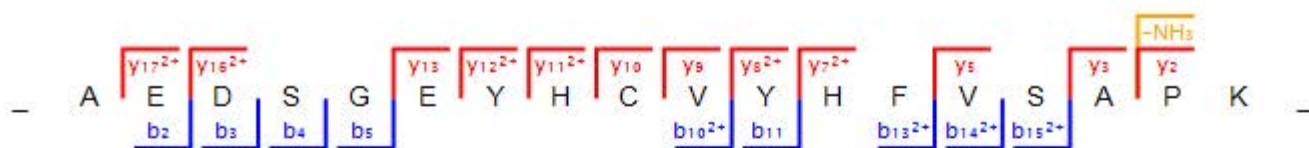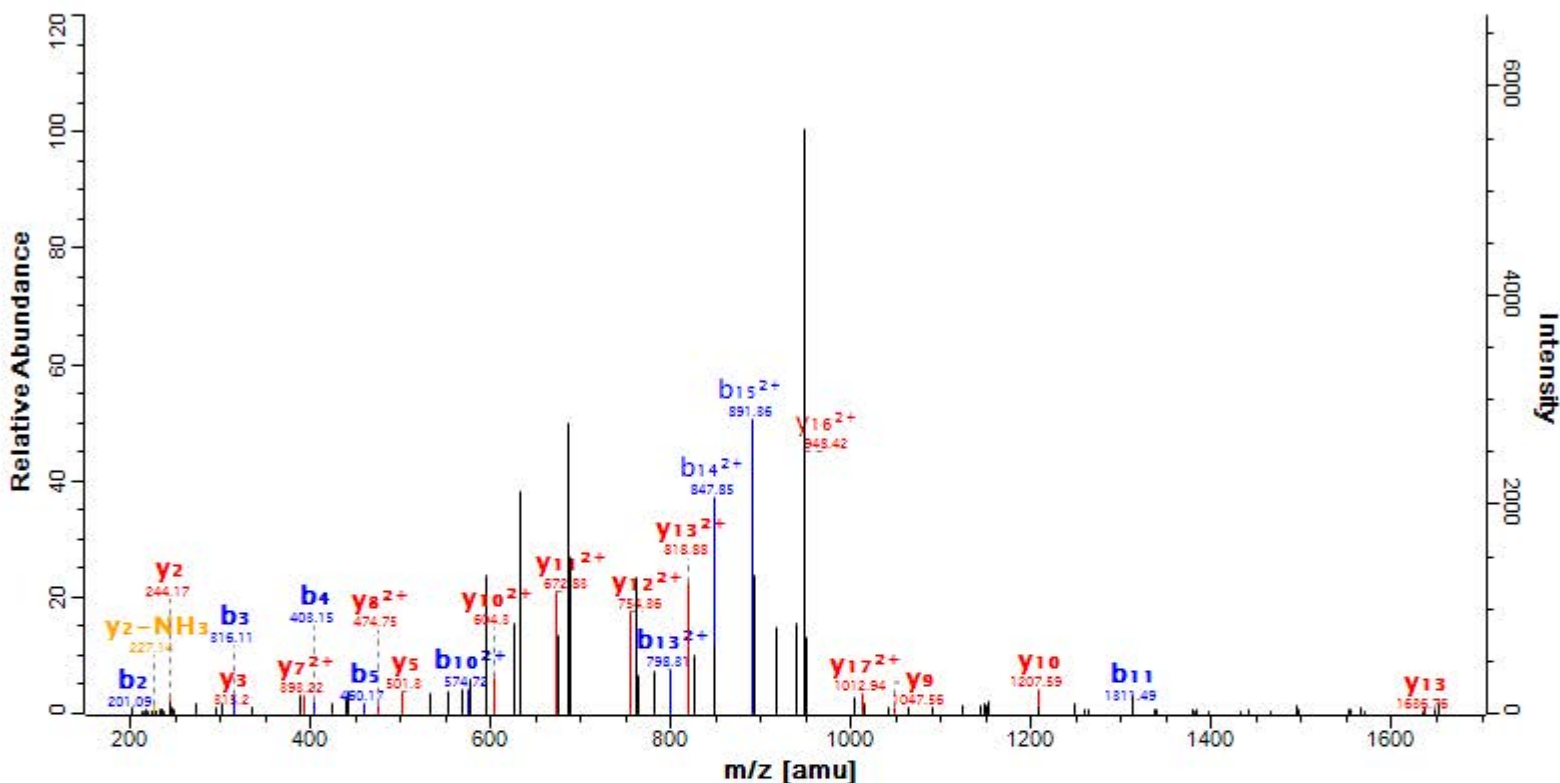

precursor information

|                   |                 |
|-------------------|-----------------|
| Mass:             | 2094.91089      |
| m/z:              | 699.3109        |
| Charge:           | 3+              |
| Retentiontime:    | 23.586513519287 |
| Score:            | 110.3472        |
| Mass Error [ppm]: | 0.165           |
| PEP:              | 3.4605E-08      |
| Precursor Type:   | MULTI           |

| b <sup>2+</sup> ion |        | b ion    |        |    |     |    | y ion    |         | y <sup>2+</sup> ion |         |
|---------------------|--------|----------|--------|----|-----|----|----------|---------|---------------------|---------|
| Δ dalton            | mass   | Δ dalton | mass   |    | seq |    | Δ dalton | mass    | Δ dalton            | mass    |
|                     | 72.044 |          | 72.044 | 1  | A   | 17 |          |         |                     |         |
|                     | 201.09 | -0.072   | 201.09 | 2  | E   | 16 | 2024.9   |         | 1012.9              | -0.126  |
|                     | 316.11 | -0.023   | 316.11 | 3  | D   | 15 | 1895.8   |         | 948.42              | -0.117  |
|                     | 403.15 | +0.2575  | 403.15 | 4  | S   | 14 | 1780.8   |         | 1780.8              |         |
|                     | 460.17 | -0.28    | 460.17 | 5  | G   | 13 | 1693.8   |         | 1693.8              |         |
|                     | 589.21 |          | 589.21 | 6  | E   | 12 | 1636.8   | -0.091  | 818.88              | +0.3632 |
|                     | 752.27 |          | 752.27 | 7  | Y   | 11 | 1507.7   |         | 754.36              | +0.2801 |
|                     | 889.33 |          | 889.33 | 8  | H   | 10 | 1344.7   |         | 672.83              | +0.26   |
|                     | 1049.4 |          | 1049.4 | 9  | C   | 9  | 1207.6   | +0.1321 | 604.3               | +0.3545 |
| -0.195              | 574.72 |          | 1148.4 | 10 | V   | 8  | 1047.6   | -0.02   | 1047.6              |         |
|                     | 1311.5 | -0.1     | 1311.5 | 11 | Y   | 7  | 948.49   |         | 474.75              | +0.1294 |
|                     | 1448.6 |          | 1448.6 | 12 | H   | 6  | 785.43   |         | 393.22              | +0.1698 |
| +0.1065             | 798.31 |          | 1595.6 | 13 | F   | 5  | 648.37   |         | 648.37              |         |
| -0.198              | 847.85 |          | 1694.7 | 14 | V   | 4  | 501.3    | -0.011  | 501.3               |         |
| -0.196              | 891.36 |          | 1781.7 | 15 | S   | 3  | 402.23   |         | 402.23              |         |
|                     | 1852.8 |          | 1852.8 | 16 | A   | 2  | 315.2    | -0.086  | 315.2               |         |
|                     | 1949.8 |          | 1949.8 | 17 | P   | 1  | 244.17   | -0.102  | 244.17              |         |
|                     |        |          |        | 18 | K   | 0  | 147.11   |         | 147.11              |         |

general information

|                       |             |
|-----------------------|-------------|
| Annotation:           | 16 of 18    |
| AminoAcids Coverage:  | 89 %        |
| Intensity Coverage:   | 34 %        |
| Peak Coverage:        | 22 %        |
| Protein Localisation: | 210 ... 227 |

Scan number 3534 Raw file LNCAP\_Silac\_23F10\_set2\_09  
 Method ITMS; CID Pepti... 158.45

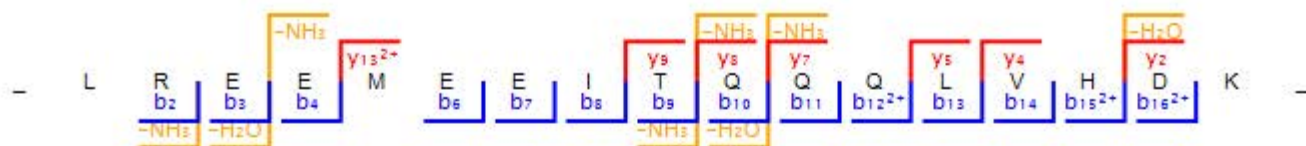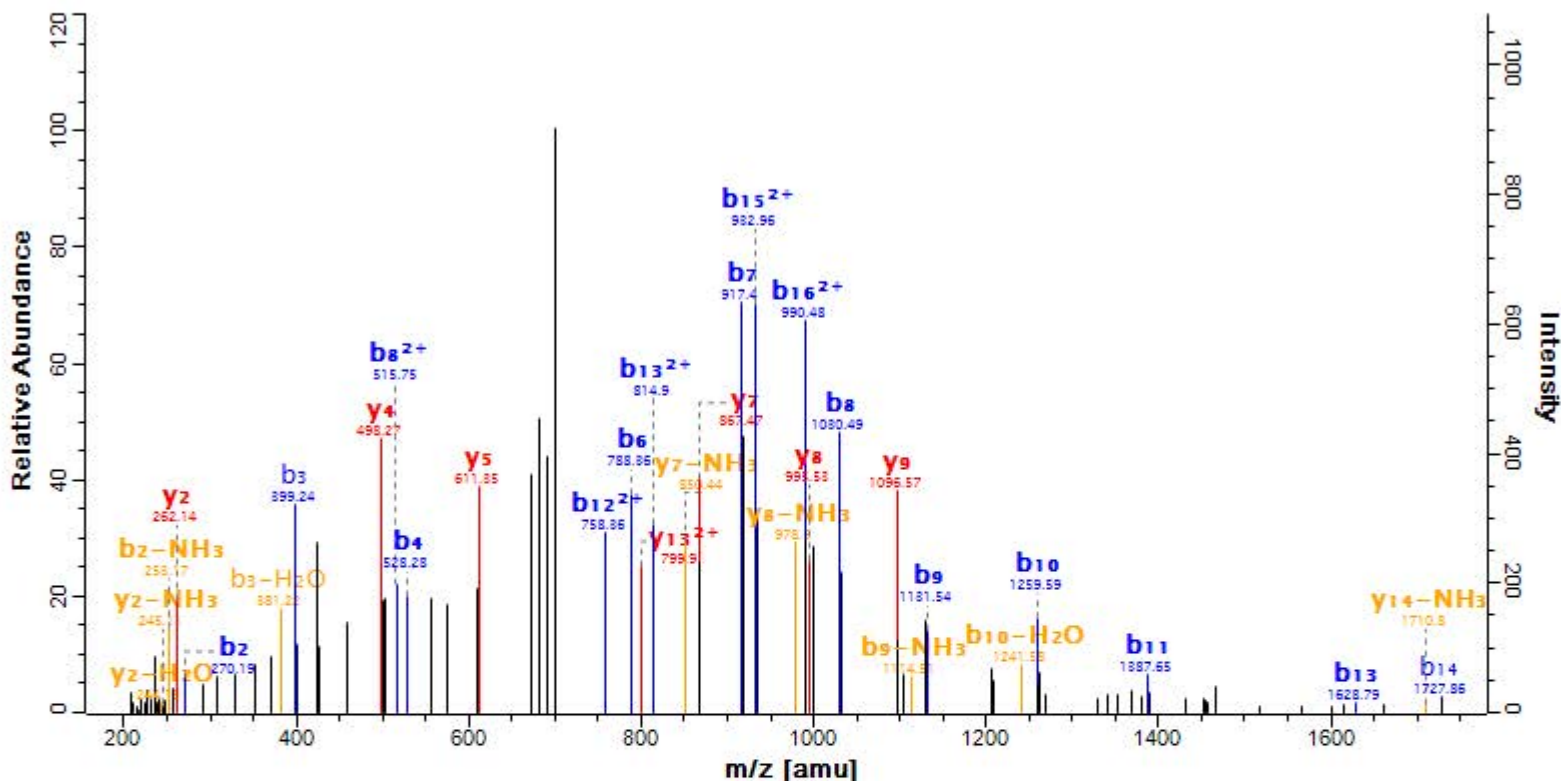

#### precursor information

|                   |                 |
|-------------------|-----------------|
| Mass:             | 2125.04714      |
| m/z:              | 709.35632       |
| Charge:           | 3+              |
| Retentiontime:    | 24.740625381469 |
| Score:            | 158.4521        |
| Mass Error [ppm]: | -0.10897        |
| PEP:              | 7.7157E-23      |
| Precursor Type:   | MULTI           |

| b <sup>2+</sup> ion |        | b ion    |        | seq |   |    | y ion    |         | y <sup>2+</sup> ion |         |
|---------------------|--------|----------|--------|-----|---|----|----------|---------|---------------------|---------|
| Δ dalton            | mass   | Δ dalton | mass   |     |   |    | Δ dalton | mass    | Δ dalton            | mass    |
|                     | 114.09 |          | 114.09 | 1   | L | 16 |          |         |                     |         |
|                     | 270.19 | +0.1082  | 270.19 | 2   | R | 15 | 2013     |         | 2013                |         |
|                     | 399.24 | +0.0473  | 399.24 | 3   | E | 14 | 1856.9   |         | 1856.9              |         |
|                     | 528.28 | +0.1455  | 528.28 | 4   | E | 13 | 1727.8   |         | 1727.8              |         |
|                     | 659.32 |          | 659.32 | 5   | M | 12 | 1598.8   |         | 799.9               | +0.4715 |
|                     | 788.36 | -0.024   | 788.36 | 6   | E | 11 | 1467.7   |         | 1467.7              |         |
|                     | 917.4  | -0.037   | 917.4  | 7   | E | 10 | 1338.7   |         | 1338.7              |         |
| +0.21375            | 115.75 | -0.035   | 1030.5 | 8   | I | 9  | 1209.7   |         | 1209.7              |         |
|                     | 1131.5 | +0.0043  | 1131.5 | 9   | T | 8  | 1096.6   | +0.1343 | 1096.6              |         |
|                     | 1259.6 | +0.3427  | 1259.6 | 10  | Q | 7  | 995.53   | -0.06   | 995.53              |         |
|                     | 1387.7 | -0.105   | 1387.7 | 11  | Q | 6  | 867.47   | +0.0845 | 867.47              |         |
| +0.3774             | 758.36 |          | 1515.7 | 12  | Q | 5  | 739.41   |         | 739.41              |         |
| +0.166              | 814.9  | -0.048   | 1628.8 | 13  | L | 4  | 611.35   | +0.0328 | 611.35              |         |
|                     | 1727.9 | +0.1322  | 1727.9 | 14  | V | 3  | 498.27   | +0.0226 | 498.27              |         |
| +0.2621             | 932.96 |          | 1864.9 | 15  | H | 2  | 399.2    |         | 399.2               |         |
| +0.2149             | 990.48 |          | 1979.9 | 16  | D | 1  | 262.14   | +0.1571 | 262.14              |         |
|                     |        |          |        | 17  | K | 0  | 147.11   |         | 147.11              |         |

#### general information

|                       |             |
|-----------------------|-------------|
| Annotation:           | 15 of 17    |
| AminoAcids Coverage:  | 88 %        |
| Intensity Coverage:   | 47 %        |
| Peak Coverage:        | 29 %        |
| Protein Localisation: | 282 ... 298 |

Scan number 379 Raw file LNCAP\_Silac\_23F10\_set2\_09  
 Method ITMS: CID Pepti... 108.97

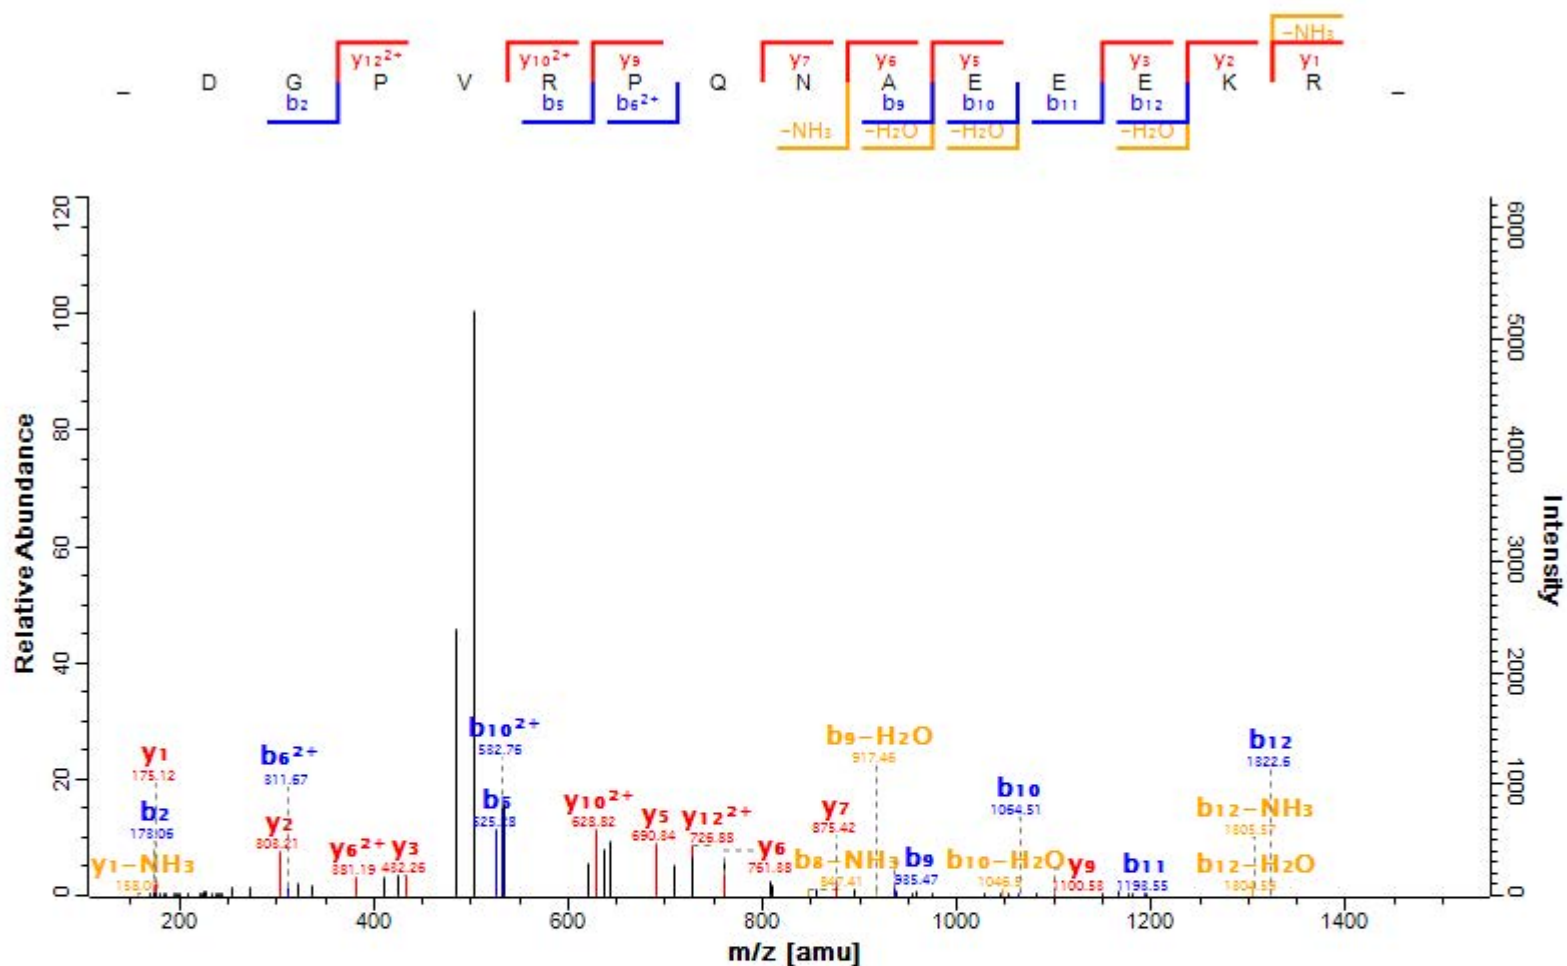

#### precursor information

|                   |                 |
|-------------------|-----------------|
| Mass:             | 1623.79577      |
| m/z:              | 542.27253       |
| Charge:           | 3+              |
| Retentiontime:    | 6.8781599998474 |
| Score:            | 108.9706        |
| Mass Error [ppm]: | -0.44511        |
| PEP:              | 5.1199E-06      |
| Precursor Type:   | MULTI           |

#### general information

|                       |             |
|-----------------------|-------------|
| Annotation:           | 11 of 14    |
| AminoAcids Coverage:  | 79 %        |
| Intensity Coverage:   | 26 %        |
| Peak Coverage:        | 23 %        |
| Protein Localisation: | 298 ... 311 |

| b <sup>2+</sup> ion |        | b ion    |        | seq |   |    | y ion    |         | y <sup>2+</sup> ion |         |
|---------------------|--------|----------|--------|-----|---|----|----------|---------|---------------------|---------|
| Δ dalton            | mass   | Δ dalton | mass   |     |   |    | Δ dalton | mass    | Δ dalton            | mass    |
|                     | 116.03 |          | 116.03 | 1   | D | 13 |          |         |                     |         |
|                     | 173.06 | +0.1681  | 173.06 | 2   | G | 12 | 1509.8   |         | 1509.8              |         |
|                     | 270.11 |          | 270.11 | 3   | P | 11 | 1452.8   |         | 726.88              | -0.015  |
|                     | 369.18 |          | 369.18 | 4   | V | 10 | 1355.7   |         | 1355.7              |         |
|                     | 525.28 | -0.126   | 525.28 | 5   | R | 9  | 1256.6   |         | 628.82              | +0.3524 |
| -0.499              | 311.67 |          | 622.33 | 6   | P | 8  | 1100.5   | -0.275  | 1100.5              |         |
|                     | 750.39 |          | 750.39 | 7   | Q | 7  | 1003.5   |         | 1003.5              |         |
|                     | 864.43 |          | 864.43 | 8   | N | 6  | 875.42   | -0.006  | 875.42              |         |
|                     | 935.47 | +0.141   | 935.47 | 9   | A | 5  | 761.38   | +0.1501 | 381.19              | +0.2333 |
| -0.127              | 532.76 | -0.125   | 1064.5 | 10  | E | 4  | 690.34   | +0.0685 | 690.34              |         |
|                     | 1193.6 | -0.096   | 1193.6 | 11  | E | 3  | 561.3    |         | 561.3               |         |
|                     | 1322.6 | +0.273   | 1322.6 | 12  | E | 2  | 432.26   | +0.2305 | 432.26              |         |
|                     | 1450.7 |          | 1450.7 | 13  | K | 1  | 303.21   | +0.077  | 303.21              |         |
|                     |        |          |        | 14  | R | 0  | 175.12   | +0.0022 | 175.12              |         |



Scan number 409 Raw file LNCAP\_Silac\_23F10\_set2\_09  
 Method ITMS: CID Pepti... 110.44

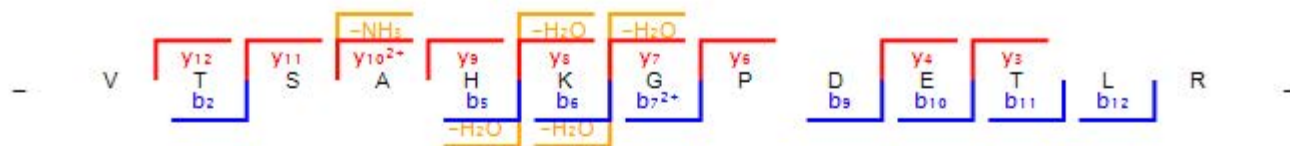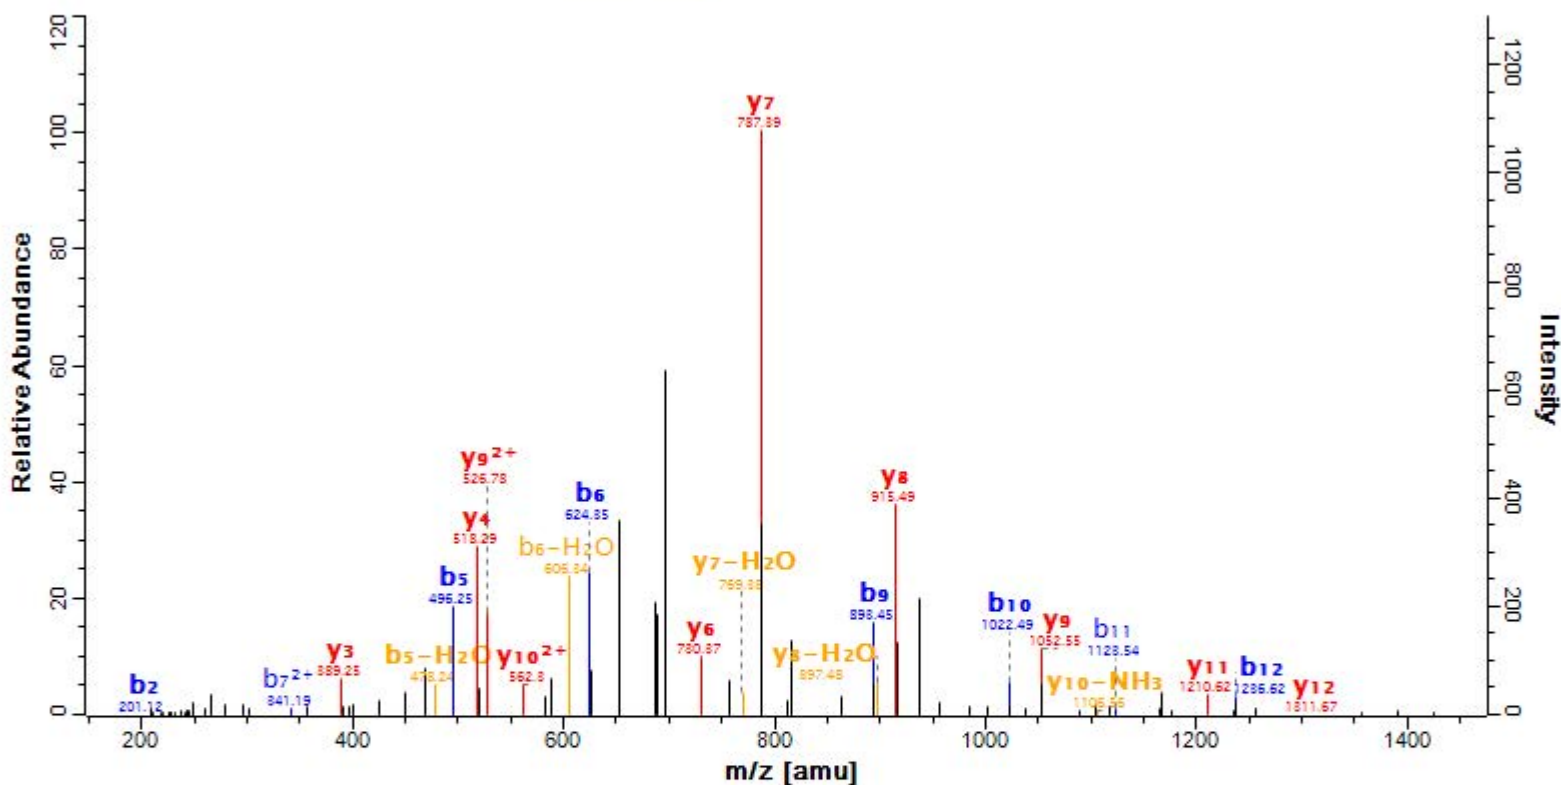

#### precursor information

|                   |                 |
|-------------------|-----------------|
| Mass:             | 1409.72537      |
| m/z:              | 705.86996       |
| Charge:           | 2+              |
| Retentiontime:    | 7.0583767890930 |
| Score:            | 110.438         |
| Mass Error [ppm]: | -0.65507        |
| PEP:              | 0.002168        |
| Precursor Type:   | ISO             |

#### general information

|                       |             |
|-----------------------|-------------|
| Annotation:           | 11 of 13    |
| AminoAcids Coverage:  | 85 %        |
| Intensity Coverage:   | 50 %        |
| Peak Coverage:        | 22 %        |
| Protein Localisation: | 325 ... 337 |

| b <sup>2+</sup> ion |        | b ion    |        | seq |   |    | y ion    |         | y <sup>2+</sup> ion |         |
|---------------------|--------|----------|--------|-----|---|----|----------|---------|---------------------|---------|
| Δ dalton            | mass   | Δ dalton | mass   |     |   |    | Δ dalton | mass    | Δ dalton            | mass    |
|                     | 100.08 |          | 100.08 | 1   | V | 12 |          |         |                     |         |
|                     | 201.12 | -0.197   | 201.12 | 2   | T | 11 | 1311.7   | +0.0582 | 1311.7              |         |
|                     | 288.16 |          | 288.16 | 3   | S | 10 | 1210.6   | -0.101  | 1210.6              |         |
|                     | 359.19 |          | 359.19 | 4   | A | 9  | 1123.6   |         | 562.3               | +0.3556 |
|                     | 496.25 | -0.062   | 496.25 | 5   | H | 8  | 1052.5   | +0.0228 | 526.78              | +0.2357 |
|                     | 624.35 | +0.0329  | 624.35 | 6   | K | 7  | 915.49   | +0.0391 | 915.49              |         |
| +0.0093             | 341.19 |          | 681.37 | 7   | G | 6  | 787.39   | +0.0385 | 787.39              |         |
|                     | 778.42 |          | 778.42 | 8   | P | 5  | 730.37   | +0.0477 | 730.37              |         |
|                     | 893.45 | -0.038   | 893.45 | 9   | D | 4  | 633.32   |         | 633.32              |         |
|                     | 1022.5 | -0.06    | 1022.5 | 10  | E | 3  | 518.29   | +0.0361 | 518.29              |         |
|                     | 1123.5 | -0.016   | 1123.5 | 11  | T | 2  | 389.25   | +0.16   | 389.25              |         |
|                     | 1236.6 | -0.102   | 1236.6 | 12  | L | 1  | 288.2    |         | 288.2               |         |
|                     |        |          |        | 13  | R | 0  | 175.12   |         | 175.12              |         |

Scan number 4165 Raw file LNCAP\_Silac\_23F10\_set2\_09  
 Method ITMS; CID Pepti... 102.98

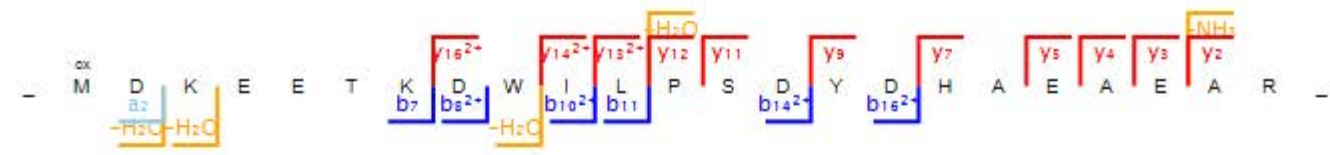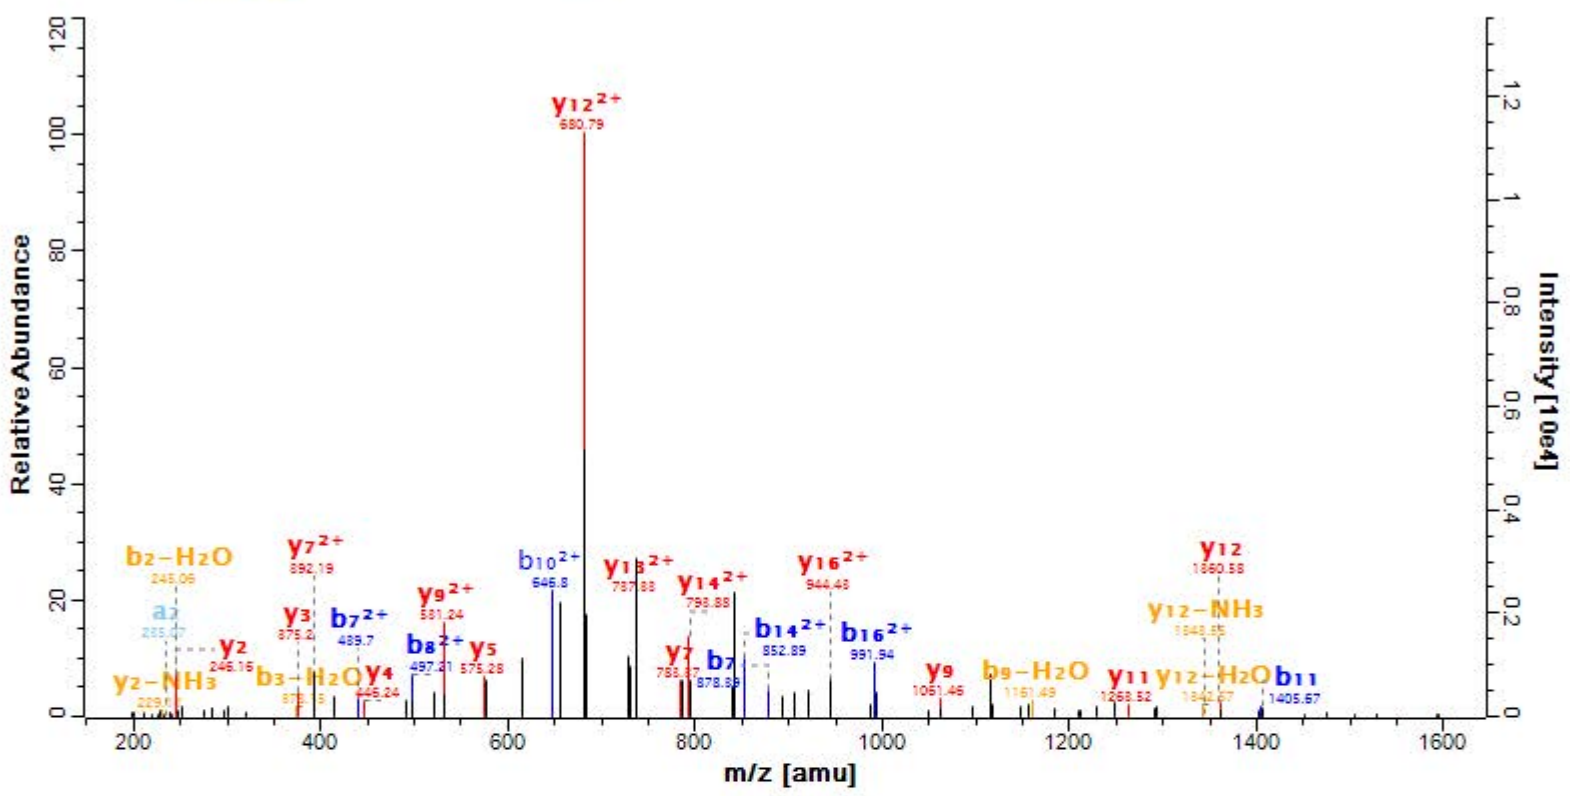

precursor information

|                   |                 |
|-------------------|-----------------|
| Mass:             | 2764.2275       |
| m/z:              | 692.06415       |
| Charge:           | 4+              |
| Retentiontime:    | 28.246881484985 |
| Score:            | 102.9783        |
| Mass Error [ppm]: | -0.41351        |
| PEP:              | 6.2035E-08      |
| Precursor Type:   | MULTI           |

general information

|                       |             |
|-----------------------|-------------|
| Annotation:           | 19 of 23    |
| AminoAcids Coverage:  | 83 %        |
| Intensity Coverage:   | 46 %        |
| Peak Coverage:        | 27 %        |
| Protein Localisation: | 257 ... 279 |

| a ion        | b <sup>2+</sup> ion | b ion       | seq     | y ion | y <sup>2+</sup> ion |
|--------------|---------------------|-------------|---------|-------|---------------------|
| 120          | 148                 | 148         | 1 M 22  |       |                     |
| +0.396 351.1 | 263.1               | 263.1       | 2 D 21  | 2618  | 2618                |
| 363.2        | 391.2               | 391.2       | 3 K 20  | 2503  | 2503                |
| 492.2        | 520.2               | 520.2       | 4 E 19  | 2375  | 2375                |
| 621.3        | 649.2               | 649.2       | 5 E 18  | 2246  | 2246                |
| 722.3        | 750.3               | 750.3       | 6 T 17  | 2117  | 2117                |
| 850.4        | +0.377 439.7        | -0.14 878.4 | 7 K 16  | 2016  | 2016                |
| 965.4        | +0.11 497.2         | 993.4       | 8 D 15  | 1888  | 944.4 -0.25         |
| 1152         | 1179                | 1179        | 9 W 14  | 1773  | 1773                |
| 1265         | -0.13 646.8         | 1293        | 10 I 13 | 1587  | 793.9 -0.08         |
| 1378         | 1406                | -0.3 1406   | 11 L 12 | 1474  | 737.3 +0.036        |
| 1475         | 1503                | 1503        | 12 P 11 | 1361  | +0.30 680.8 +0.26   |
| 1562         | 1590                | 1590        | 13 S 10 | 1264  | +0.165 1264         |
| 1677         | +0.29 3852.9        | 1705        | 14 D 9  | 1176  | 1176                |
| 1840         | 1868                | 1868        | 15 Y 8  | 1061  | +0.12 531.2 +0.11   |
| 1955         | -0.02 991.9         | 1983        | 16 D 7  | 898.4 | 898.4               |
| 2092         | 2120                | 2120        | 17 H 6  | 783.4 | +0.14 392.2 +0.04   |
| 2163         | 2191                | 2191        | 18 A 5  | 646.3 | 646.3               |
| 2292         | 2320                | 2320        | 19 E 4  | 575.3 | -0.01 575.3         |
| 2363         | 2391                | 2391        | 20 A 3  | 446.2 | +0.276 446.2        |
| 2492         | 2520                | 2520        | 21 E 2  | 375.2 | +0.13 375.2         |
| 2563         | 2591                | 2591        | 22 A 1  | 246.2 | -0.07 246.2         |
|              |                     |             | 23 R 0  | 175.1 | 175.1               |

Scan number 507 Raw file LNCAP\_Silac\_23F10\_set2\_09  
 Method ITMS; CID Pepti... 138.4

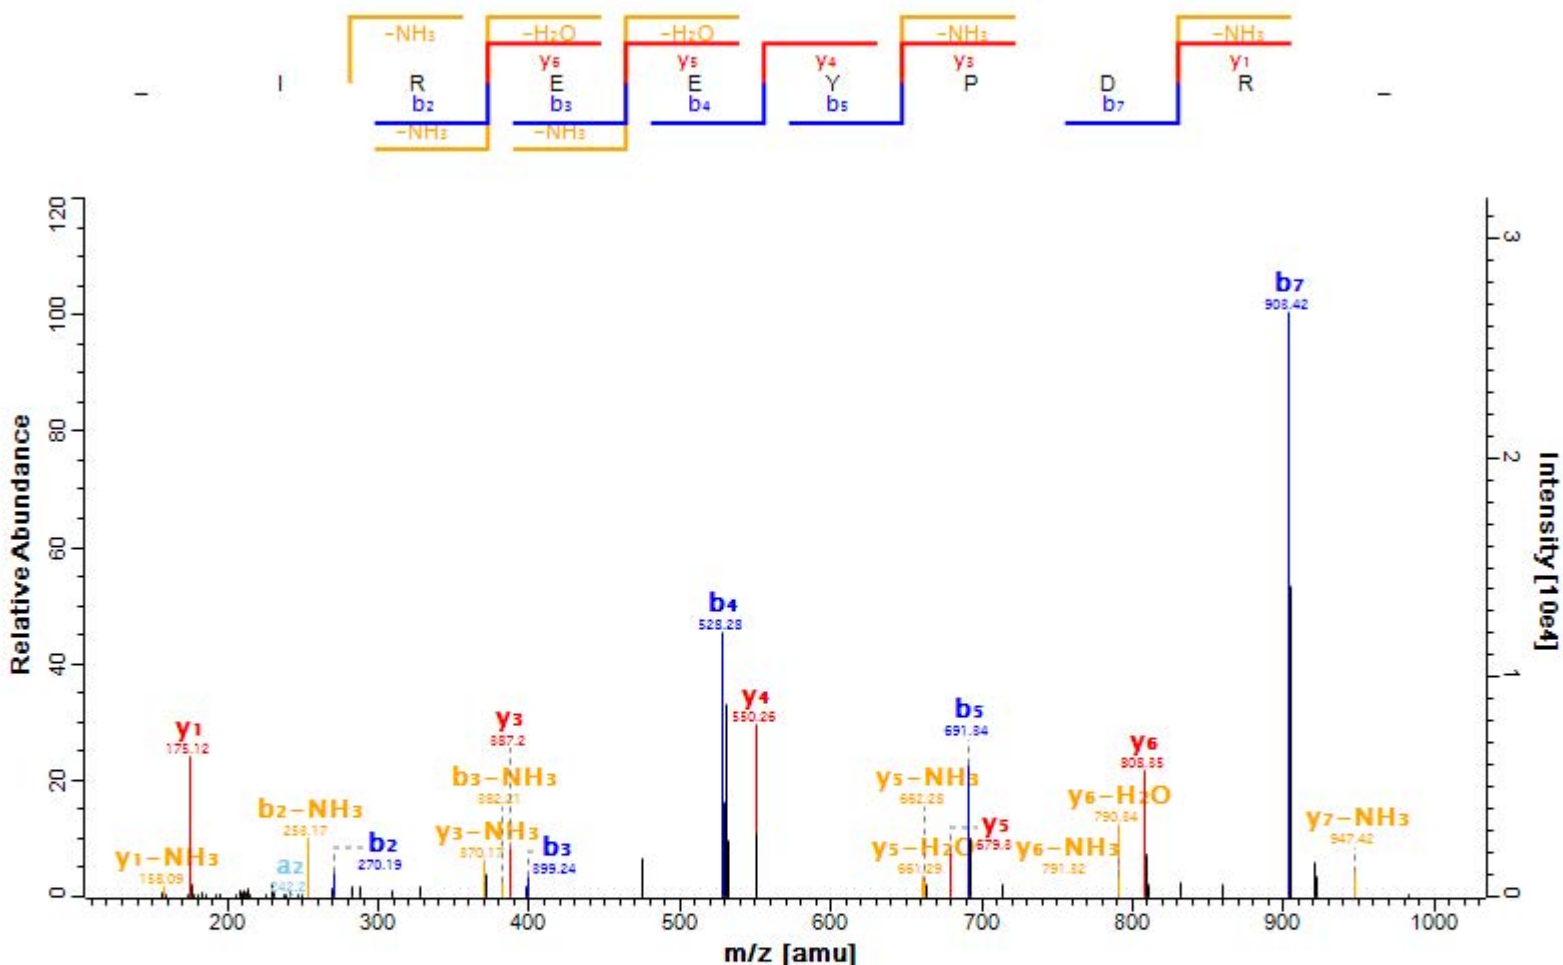

#### precursor information

|                       |                 |
|-----------------------|-----------------|
| Mass:                 | 1076.52527      |
| m/z:                  | 539.26991       |
| Charge:               | 2+              |
| Retentiontime:        | 7.6463365554809 |
| Score:                | 138.3957        |
| Mass Error [ppm]:     | 0.18092         |
| g PEP:                | 3.8296E-06      |
| Annotation:           | 7 of 8          |
| AminoAcids Coverage:  | 88 %            |
| Intensity Coverage:   | 60 %            |
| Peak Coverage:        | 24 %            |
| Protein Localisation: | 155 ... 162     |

| a ion    |          | b ion     |          | y ion |          |      |          |           |
|----------|----------|-----------|----------|-------|----------|------|----------|-----------|
| Δ dalton | mass     | Δ dalton  | mass     | seq   | Δ dalton | mass |          |           |
|          | 86.09643 |           | 114.0913 | 1     | I        | 7    |          |           |
| -0.21817 | 242.1975 | +0.082207 | 270.1925 | 2     | R        | 6    | 964.4483 |           |
|          | 371.2401 | -0.03723  | 399.235  | 3     | E        | 5    | 808.3472 | +0.022394 |
|          | 500.2827 | +0.033031 | 528.2776 | 4     | E        | 4    | 679.3046 | +0.046555 |
|          | 663.3461 | +0.049354 | 691.341  | 5     | Y        | 3    | 550.262  | +0.067419 |
|          | 760.3988 |           | 788.3937 | 6     | P        | 2    | 387.1987 | -0.00841  |
|          | 875.4258 | -0.00032  | 903.4207 | 7     | D        | 1    | 290.1459 |           |
|          |          |           |          | 8     | R        | 0    | 175.119  | -0.04565  |

Scan number 5168 Raw file LNCAP\_Silac\_23F10\_set2\_09  
 Method ITMS; CID Pepti... 77.19

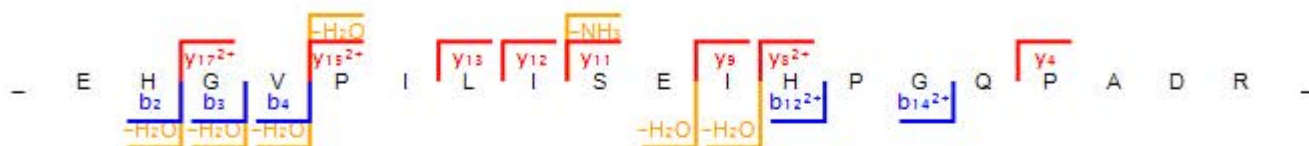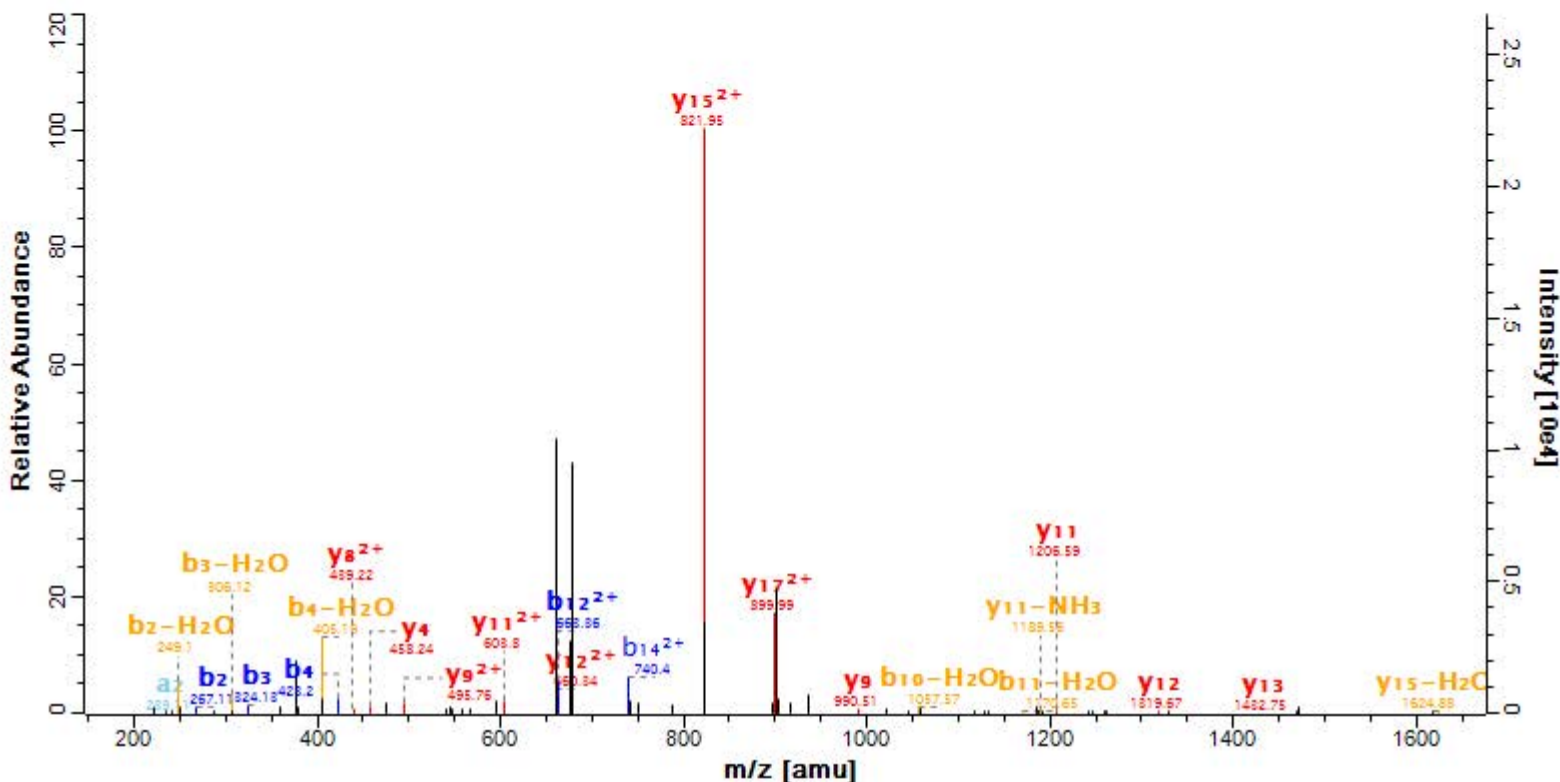

precursor information

|                   |                 |
|-------------------|-----------------|
| Mass:             | 2064.0754       |
| m/z:              | 689.03241       |
| Charge:           | 3+              |
| Retentiontime:    | 34.125946044921 |
| Score:            | 77.19144        |
| Mass Error [ppm]: | 0.077372        |
| PEP:              | 0.00017887      |
| Precursor Type:   | MULTI           |

| a ion       | b <sup>2+</sup> ion | b ion        | seq | y ion | y <sup>2+</sup> ion |
|-------------|---------------------|--------------|-----|-------|---------------------|
| 102.1       | 130                 | 130          | 1   | E     | 18                  |
| +0.136 39.1 | 267.1               | +0.105 267.1 | 2   | H     | 17                  |
| 1936        |                     |              |     | 1799  | 900                 |
|             |                     |              |     |       | -0.03               |
| 296.1       | 324.1               | +0.19 324.1  | 3   | G     | 16                  |
| 1742        |                     |              |     | 1742  |                     |
| 395.2       | 423.2               | +0.20 423.2  | 4   | V     | 15                  |
| 1643        |                     |              |     | 1643  |                     |
| 492.3       | 520.3               | 520.3        | 5   | P     | 14                  |
| 821.9       |                     |              |     | 821.9 | +0.30               |
| 605.3       | 633.3               | 633.3        | 6   | I     | 13                  |
| 1546        |                     |              |     | 1546  |                     |
| 718.4       | 746.4               | 746.4        | 7   | L     | 12                  |
| 1433        |                     |              |     | 1433  | -0.41               |
| 831.5       | 859.5               | 859.5        | 8   | I     | 11                  |
| 1320        |                     |              |     | 1320  | -0.12               |
| 660.3       |                     |              |     | 660.3 | +0.31               |
| 918.5       | 946.5               | 946.5        | 9   | S     | 10                  |
| 703.8       |                     |              |     | 703.8 | +0.20               |
| 1048        | 1076                | 1076         | 10  | E     | 9                   |
| 1120        |                     |              |     | 1120  |                     |
| 1161        | 1189                | 1189         | 11  | I     | 8                   |
| 990.5       |                     |              |     | 990.5 | -0.09               |
| 495.8       |                     |              |     | 495.8 | +0.06               |
| 1298        | -0.25 663.4         | 1326         | 12  | H     | 7                   |
| 877.4       |                     |              |     | 877.4 | +0.15               |
| 1395        | 1423                | 1423         | 13  | P     | 6                   |
| 740.4       |                     |              |     | 740.4 |                     |
| 1452        | +0.04 740.4         | 1480         | 14  | G     | 5                   |
| 643.3       |                     |              |     | 643.3 |                     |
| 1580        | 1608                | 1608         | 15  | Q     | 4                   |
| 586.3       |                     |              |     | 586.3 |                     |
| 1677        | 1705                | 1705         | 16  | P     | 3                   |
| 458.2       |                     |              |     | 458.2 | +0.15               |
| 1748        | 1776                | 1776         | 17  | A     | 2                   |
| 361.2       |                     |              |     | 361.2 |                     |
| 1863        | 1891                | 1891         | 18  | D     | 1                   |
| 290.1       |                     |              |     | 290.1 |                     |
| 175.1       |                     |              | 19  | R     | 0                   |
| 175.1       |                     |              |     | 175.1 |                     |

general information

|                       |             |
|-----------------------|-------------|
| Annotation:           | 13 of 19    |
| AminoAcids Coverage:  | 68 %        |
| Intensity Coverage:   | 47 %        |
| Peak Coverage:        | 25 %        |
| Protein Localisation: | 308 ... 326 |

Scan number 518 Raw file LNCAP\_Silac\_23F10\_set2\_09  
 Method ITMS: CID Pepti... 89.35

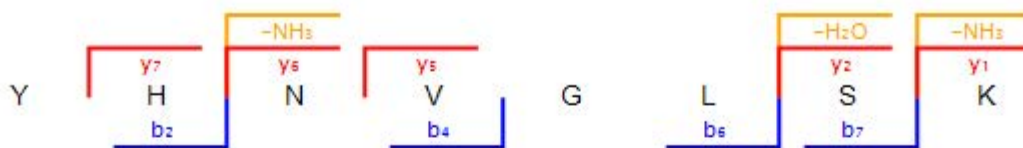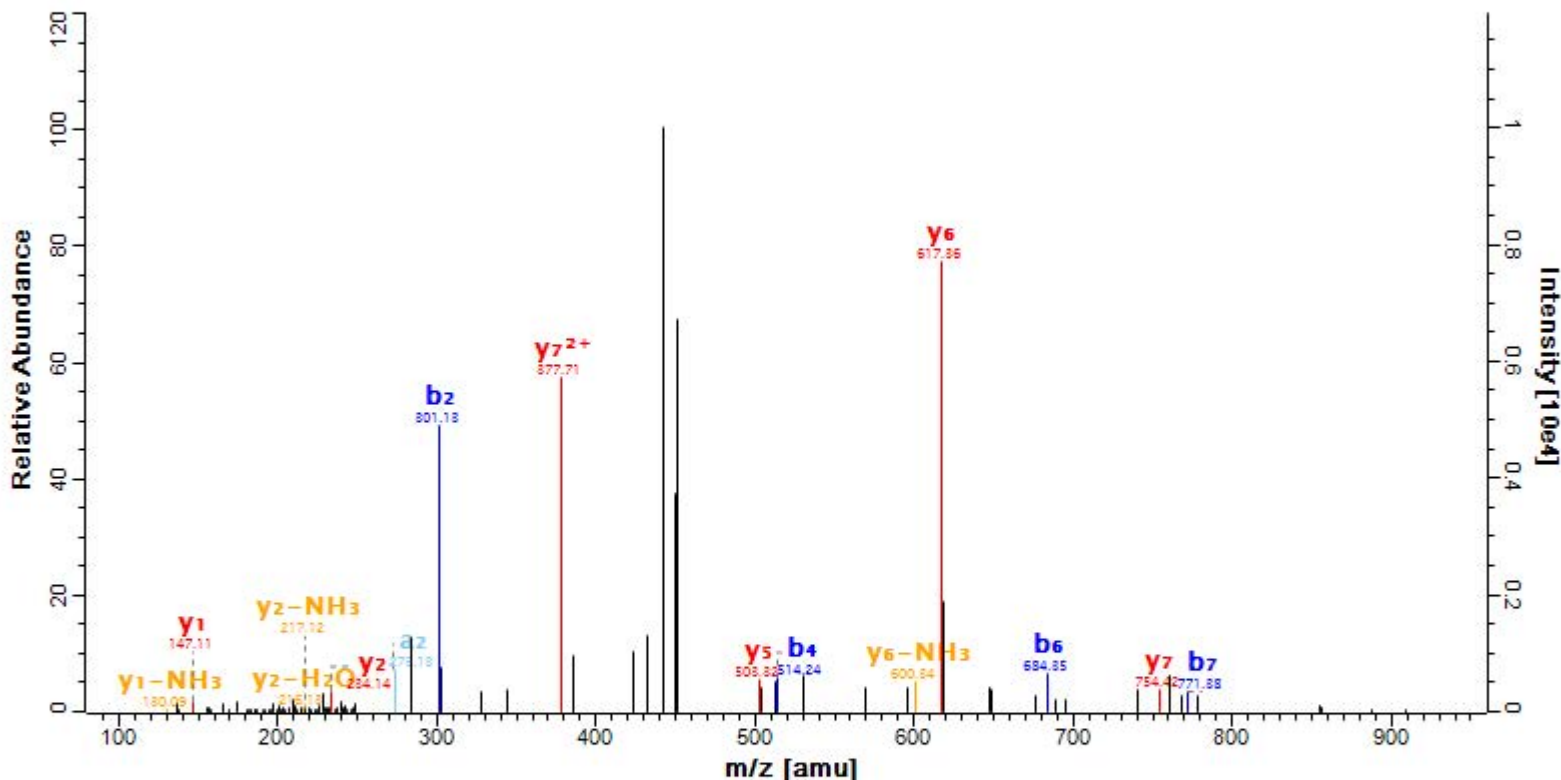

#### precursor information

|                       |                 |
|-----------------------|-----------------|
| Mass:                 | 916.47634       |
| m/z:                  | 459.24545       |
| Charge:               | 2+              |
| Retentiontime:        | 7.7095866203308 |
| Score:                | 89.35464        |
| Mass Error [ppm]:     | -0.3522         |
| g PEP:                | 0.014729        |
| Annotation:           | 6 of 8          |
| AminoAcids Coverage:  | 75 %            |
| Intensity Coverage:   | 37 %            |
| Peak Coverage:        | 12 %            |
| Protein Localisation: | 225 ... 232     |

| a ion    |        | b ion    |        |     |   |          | y ion  |          | y <sup>2+</sup> ion |         |
|----------|--------|----------|--------|-----|---|----------|--------|----------|---------------------|---------|
| Δ dalton | mass   | Δ dalton | mass   | seq |   | Δ dalton | mass   | Δ dalton | mass                |         |
|          | 136.08 | 164.07   | 1      | Y   | 7 |          |        |          |                     |         |
| +0.0747  | 273.13 | +0.0183  | 301.13 | 2   | H | 6        | 754.42 | +0.0178  | 377.71              | +0.1636 |
|          | 387.18 |          | 415.17 | 3   | N | 5        | 617.36 | -0.008   | 617.36              |         |
|          | 486.25 | +0.0921  | 514.24 | 4   | V | 4        | 503.32 | +0.0364  | 503.32              |         |
|          | 543.27 |          | 571.26 | 5   | G | 3        | 404.25 |          | 404.25              |         |
|          | 656.35 | -0.017   | 684.35 | 6   | L | 2        | 347.23 |          | 347.23              |         |
|          | 743.38 | +0.1205  | 771.38 | 7   | S | 1        | 234.14 | +0.0142  | 234.14              |         |
|          |        |          |        | 8   | K | 0        | 147.11 | +0.0303  | 147.11              |         |

Scan number 5255 Raw file LNCAP\_Silac\_23F10\_set2\_09  
 Method ITMS; CID Pepti... 124.51

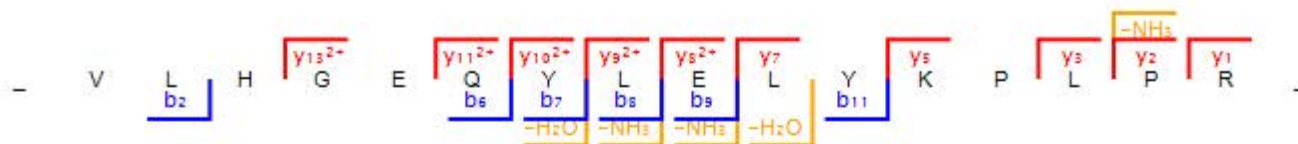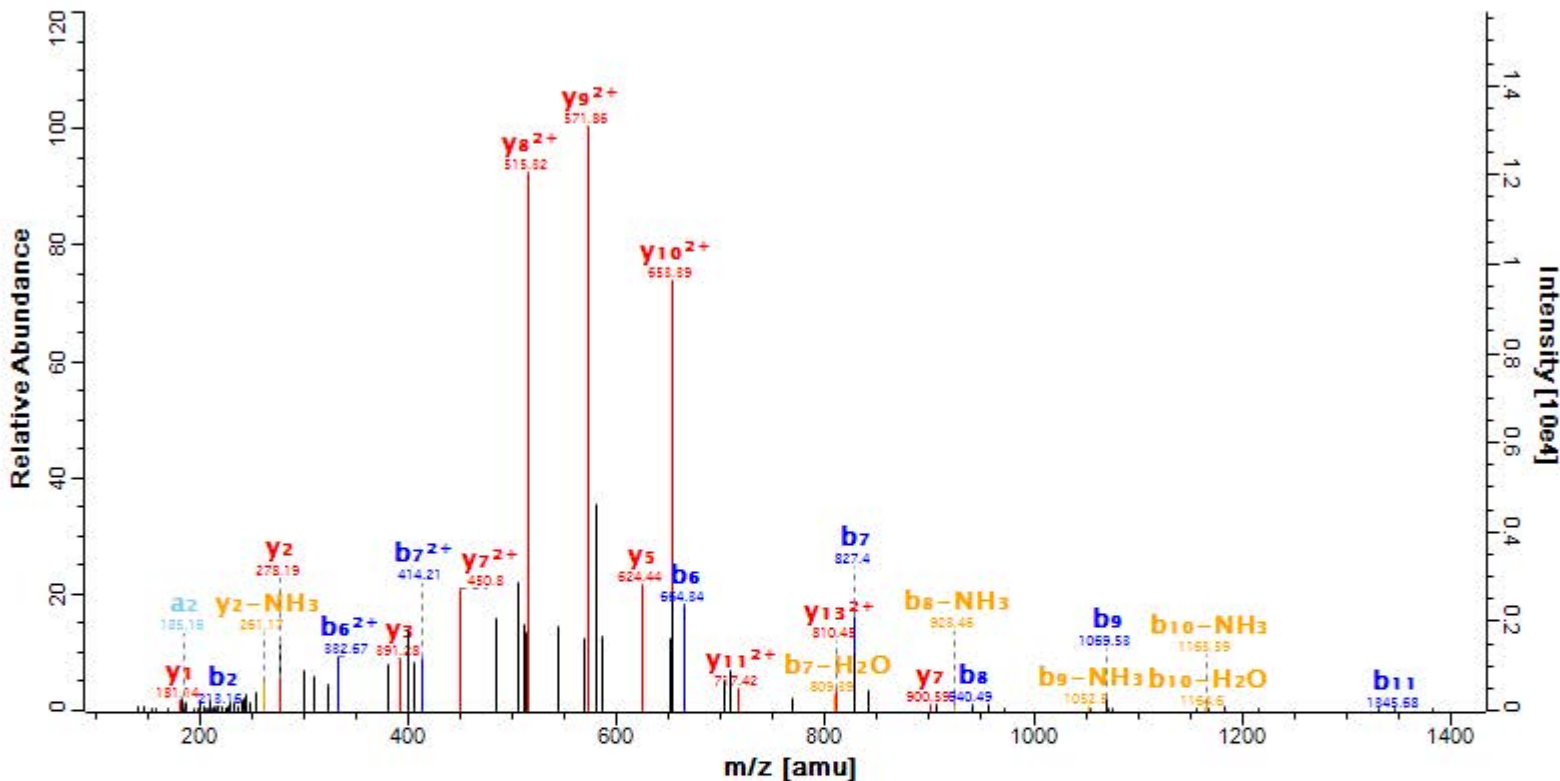

precursor information

|                   |                 |
|-------------------|-----------------|
| Mass:             | 1954.06768      |
| m/z:              | 489.5242        |
| Charge:           | 4+              |
| Retentiontime:    | 34.666339874267 |
| Score:            | 124.5147        |
| Mass Error [ppm]: | 0.024455        |
| PEP:              | 5.0723E-10      |
| Precursor Type:   | MULTI           |

general information

|                       |             |
|-----------------------|-------------|
| Annotation:           | 12 of 16    |
| AminoAcids Coverage:  | 75 %        |
| Intensity Coverage:   | 57 %        |
| Peak Coverage:        | 24 %        |
| Protein Localisation: | 404 ... 419 |

| a ion         | b <sup>2+</sup> ion | b ion         |    |     |    | y ion         | y <sup>2+</sup> ion |
|---------------|---------------------|---------------|----|-----|----|---------------|---------------------|
| Δ dalton mass | Δ dalton mass       | Δ dalton mass |    | seq |    | Δ dalton mass | Δ dalton mass       |
| 72.08         | 100.1               | 100.1         | 1  | V   | 15 |               |                     |
| +0.013 85.2   | 213.2               | +0.092213.2   | 2  | L   | 14 | 1870          | 1870                |
| 322.2         | 350.2               | 350.2         | 3  | H   | 13 | 1757          | 1757                |
| 379.2         | 407.2               | 407.2         | 4  | G   | 12 | 1620          | 810.5 +0.14         |
| 508.3         | 536.3               | 536.3         | 5  | E   | 11 | 1563          | 1563                |
| 636.3         | +0.296332.7         | -0.03 664.3   | 6  | Q   | 10 | 1434          | 717.4 +0.186        |
| 799.4         | +0.184414.2         | +0.052827.4   | 7  | Y   | 9  | 1306          | 653.4 +0.113        |
| 912.5         | 940.5               | +0.191940.5   | 8  | L   | 8  | 1143          | 571.9 +0.173        |
| 1042          | 1070                | -0.19 1070    | 9  | E   | 7  | 1030          | 515.3 +0.109        |
| 1155          | 1183                | 1183          | 10 | L   | 6  | 900.6 -0.12   | 450.8 -0.04         |
| 1318          | 1346                | +0.1611346    | 11 | Y   | 5  | 787.5         | 787.5               |
| 1454          | 1482                | 1482          | 12 | K   | 4  | 624.4 -0.12   | 624.4               |
| 1551          | 1579                | 1579          | 13 | P   | 3  | 488.3         | 488.3               |
| 1664          | 1692                | 1692          | 14 | L   | 2  | 391.3 +0.37   | 391.3               |
| 1761          | 1789                | 1789          | 15 | P   | 1  | 278.2 +0.029  | 278.2               |
|               |                     |               | 16 | R   | 0  | 181.1 -0.02   | 181.1               |

Scan number 5374 Raw file LNCAP\_Silac\_23F10\_set2\_09  
 Method ITMS; CID Pepti... 58.32

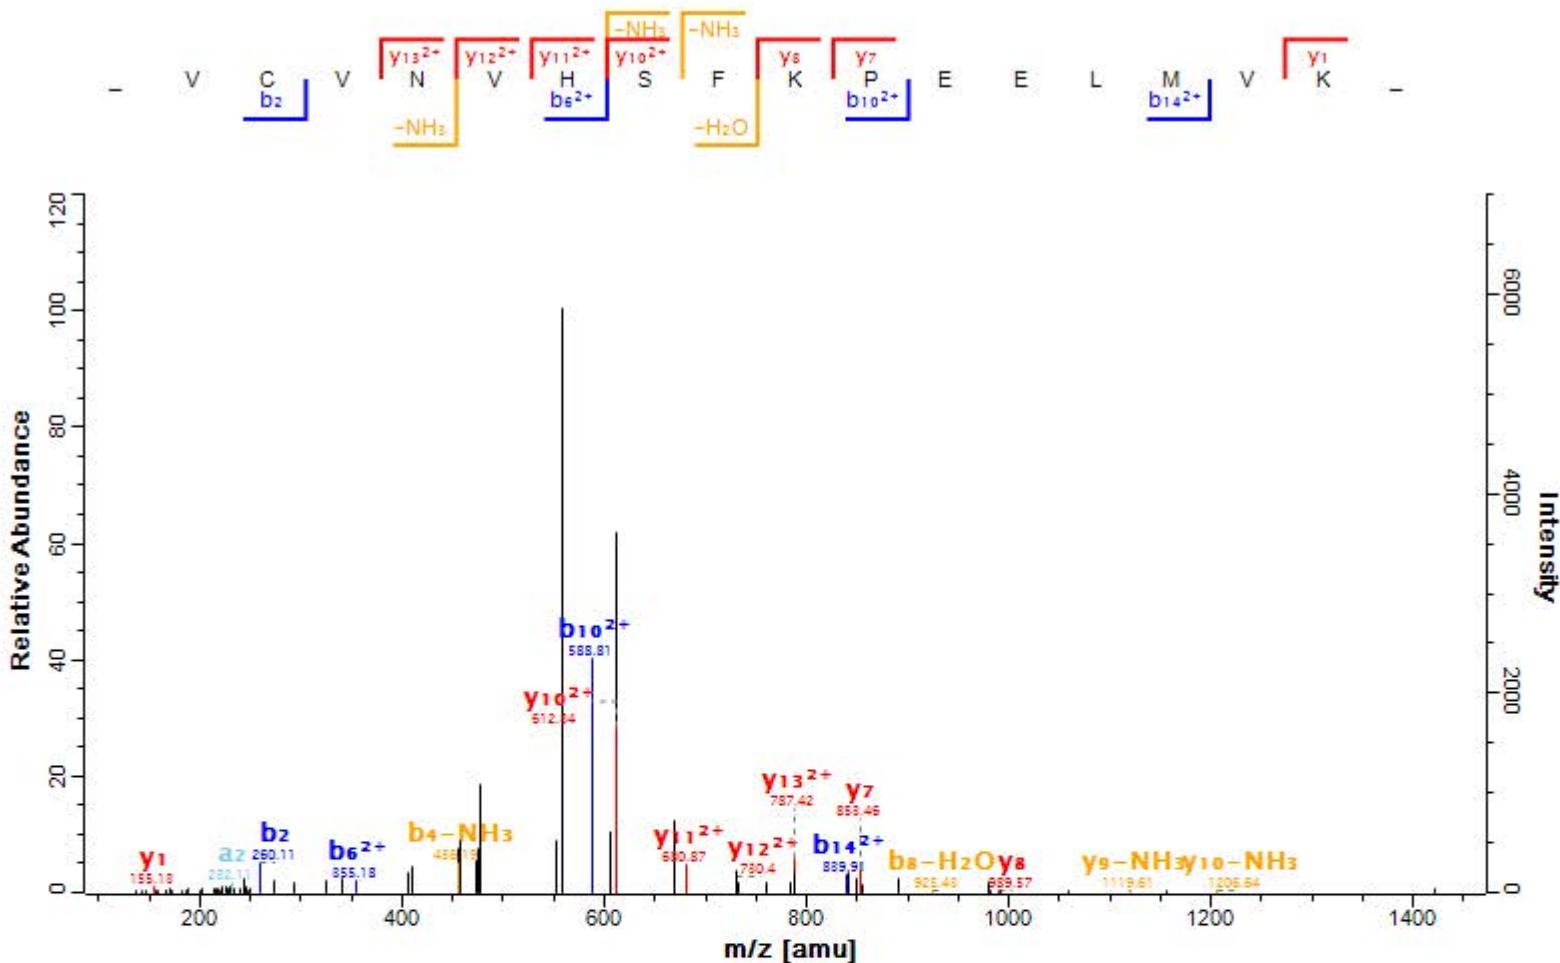

**precursor information**

|                   |                 |
|-------------------|-----------------|
| Mass:             | 1914.9687       |
| m/z:              | 479.74945       |
| Charge:           | 4+              |
| Retention time:   | 35.390209197998 |
| Score:            | 58.31998        |
| Mass Error [ppm]: | -0.45428        |
| PEP:              | 0.0028392       |
| Precursor Type:   | MULTI           |

**general information**

|                       |            |
|-----------------------|------------|
| Annotation:           | 10 of 16   |
| AminoAcids Coverage:  | 62 %       |
| Intensity Coverage:   | 25 %       |
| Peak Coverage:        | 16 %       |
| Protein Localisation: | 98 ... 113 |

| a ion         |               | b <sup>2+</sup> ion |               | b ion |               |               |       |       | y ion |       | y <sup>2+</sup> ion |  |
|---------------|---------------|---------------------|---------------|-------|---------------|---------------|-------|-------|-------|-------|---------------------|--|
| Δ dalton mass | Δ dalton mass | Δ dalton mass       | Δ dalton mass | seq   | Δ dalton mass | Δ dalton mass |       |       |       |       |                     |  |
| 72.08         | 100.1         | 100.1               | 100.1         | 1     | V             | 15            |       |       |       |       |                     |  |
| +0.06 1232.1  | 260.1         | +0.10 4260.1        | 260.1         | 2     | C             | 14            | 1833  |       |       | 1833  |                     |  |
| 331.2         | 359.2         | 359.2               | 359.2         | 3     | V             | 13            | 1673  |       |       | 1673  |                     |  |
| 445.2         | 473.2         | 473.2               | 473.2         | 4     | N             | 12            | 1574  |       |       | 787.4 | +0.08:              |  |
| 544.3         | 572.3         | 572.3               | 572.3         | 5     | V             | 11            | 1460  |       |       | 730.4 | -0.03               |  |
| 681.4         | +0.03 355.2   | 709.3               | 681.4         | 6     | H             | 10            | 1361  |       |       | 680.9 | +0.07:              |  |
| 768.4         | 796.4         | 796.4               | 768.4         | 7     | S             | 9             | 1224  |       |       | 612.3 | +0.30               |  |
| 915.5         | 943.4         | 943.4               | 915.5         | 8     | F             | 8             | 1137  |       |       | 1137  |                     |  |
| 1052          | 1080          | 1080                | 1052          | 9     | K             | 7             | 989.6 | -0.02 |       | 989.6 |                     |  |
| 1149          | -0.27 588.8   | 1177                | 1149          | 10    | P             | 6             | 853.5 | -0.05 |       | 853.5 |                     |  |
| 1278          | 1306          | 1306                | 1278          | 11    | E             | 5             | 756.4 |       |       | 756.4 |                     |  |
| 1407          | 1435          | 1435                | 1407          | 12    | E             | 4             | 627.4 |       |       | 627.4 |                     |  |
| 1520          | 1548          | 1548                | 1520          | 13    | L             | 3             | 498.3 |       |       | 498.3 |                     |  |
| 1651          | +0.05 3839.9  | 1679                | 1651          | 14    | M             | 2             | 385.2 |       |       | 385.2 |                     |  |
| 1750          | 1778          | 1778                | 1750          | 15    | V             | 1             | 254.2 |       |       | 254.2 |                     |  |
|               |               |                     |               | 16    | K             | 0             | 155.1 | -0.11 |       | 155.1 |                     |  |

Scan number 5793 Raw file LNCAP\_Silac\_23F10\_set2\_09  
 Method ITMS; CID Pepti... 50.81

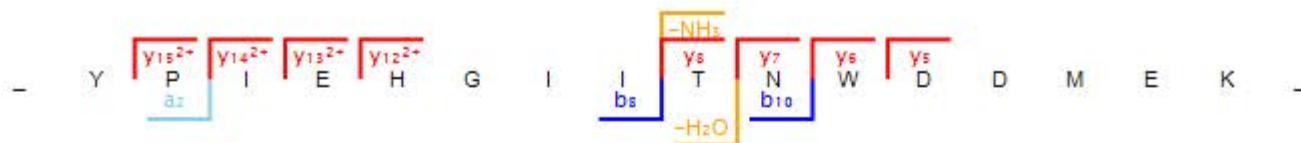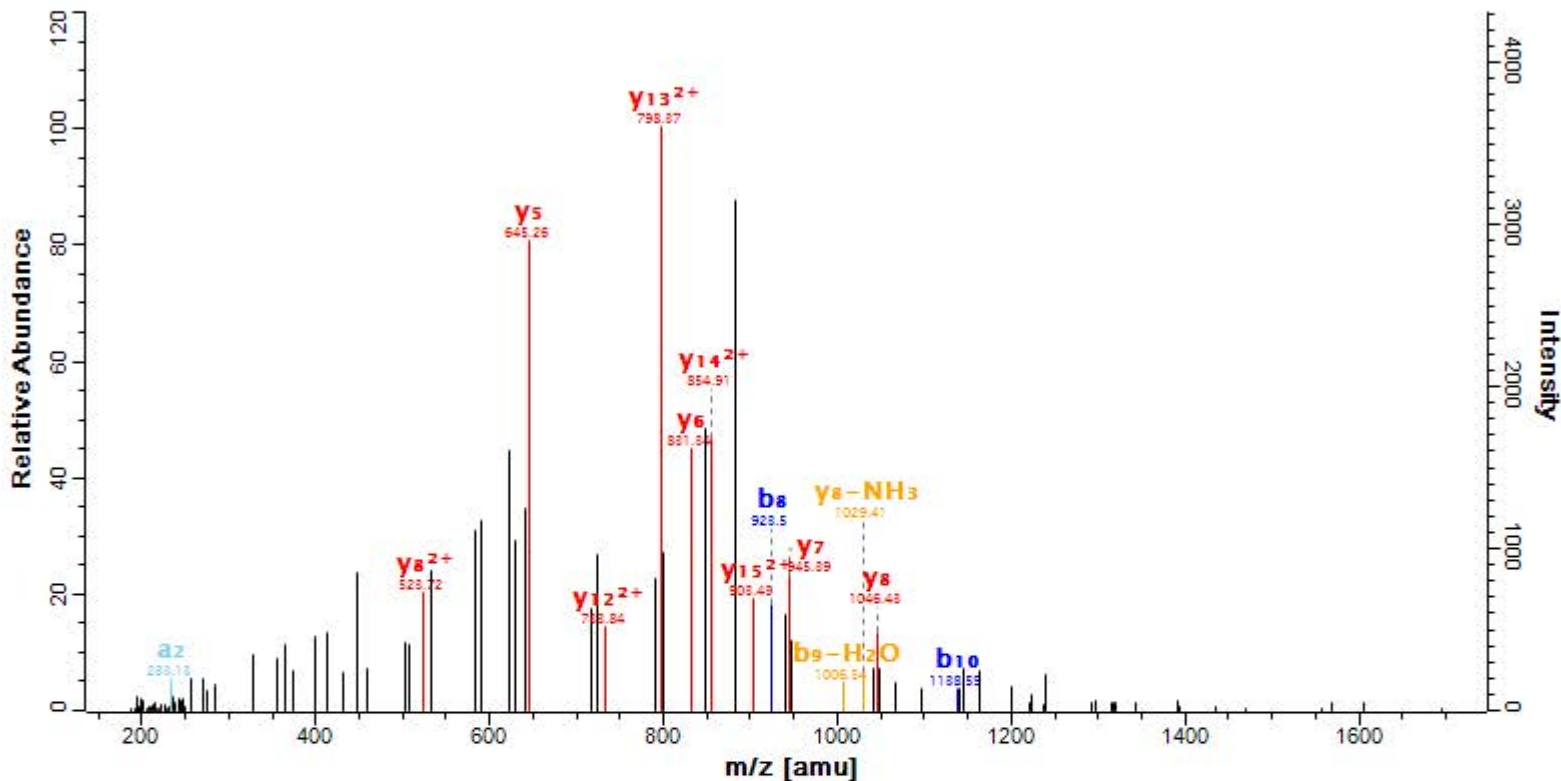

#### precursor information

|                   |                 |
|-------------------|-----------------|
| Mass:             | 1959.90377      |
| m/z:              | 654.30853       |
| Charge:           | 3+              |
| Retentiontime:    | 38.006404876709 |
| Score:            | 50.80611        |
| Mass Error [ppm]: | 0.053715        |
| PEP:              | 0.013321        |
| Precursor Type:   | MULTI           |

#### general information

|                       |           |
|-----------------------|-----------|
| Annotation:           | 9 of 16   |
| AminoAcids Coverage:  | 56 %      |
| Intensity Coverage:   | 34 %      |
| Peak Coverage:        | 14 %      |
| Protein Localisation: | 71 ... 86 |

| a ion    |        | b ion    |        | seq |   |    | y ion    |         | y <sup>2+</sup> ion |         |
|----------|--------|----------|--------|-----|---|----|----------|---------|---------------------|---------|
| Δ dalton | mass   | Δ dalton | mass   |     |   |    | Δ dalton | mass    | Δ dalton            | mass    |
|          | 136.08 |          | 164.07 | 1   | Y | 15 |          |         |                     |         |
| -0.097   | 233.13 |          | 261.12 | 2   | P | 14 | 1805.9   |         | 903.43              | +0.4627 |
|          | 346.21 |          | 374.21 | 3   | I | 13 | 1708.8   |         | 854.91              | +0.2477 |
|          | 475.26 |          | 503.25 | 4   | E | 12 | 1595.7   |         | 798.37              | -0.168  |
|          | 612.31 |          | 640.31 | 5   | H | 11 | 1466.7   |         | 733.84              | +0.2896 |
|          | 669.34 |          | 697.33 | 6   | G | 10 | 1329.6   |         | 1329.6              |         |
|          | 782.42 |          | 810.41 | 7   | I | 9  | 1272.6   |         | 1272.6              |         |
|          | 895.5  | +0.0273  | 923.5  | 8   | I | 8  | 1159.5   |         | 1159.5              |         |
|          | 996.55 |          | 1024.5 | 9   | T | 7  | 1046.4   | -0.023  | 523.72              | +0.2644 |
|          | 1110.6 | -0.082   | 1138.6 | 10  | N | 6  | 945.39   | +0.0127 | 945.39              |         |
|          | 1296.7 |          | 1324.7 | 11  | W | 5  | 831.34   | +0.0216 | 831.34              |         |
|          | 1411.7 |          | 1439.7 | 12  | D | 4  | 645.26   | +0.2378 | 645.26              |         |
|          | 1526.7 |          | 1554.7 | 13  | D | 3  | 530.24   |         | 530.24              |         |
|          | 1657.8 |          | 1685.8 | 14  | M | 2  | 415.21   |         | 415.21              |         |
|          | 1786.8 |          | 1814.8 | 15  | E | 1  | 284.17   |         | 284.17              |         |
|          |        |          |        | 16  | K | 0  | 155.13   |         | 155.13              |         |



Scan number 6115 Raw file LNCAP\_Silac\_23F10\_set2\_09  
 Method ITMS; CID Pepti... 232.78

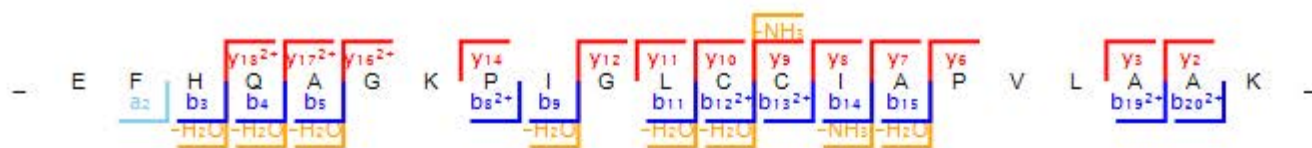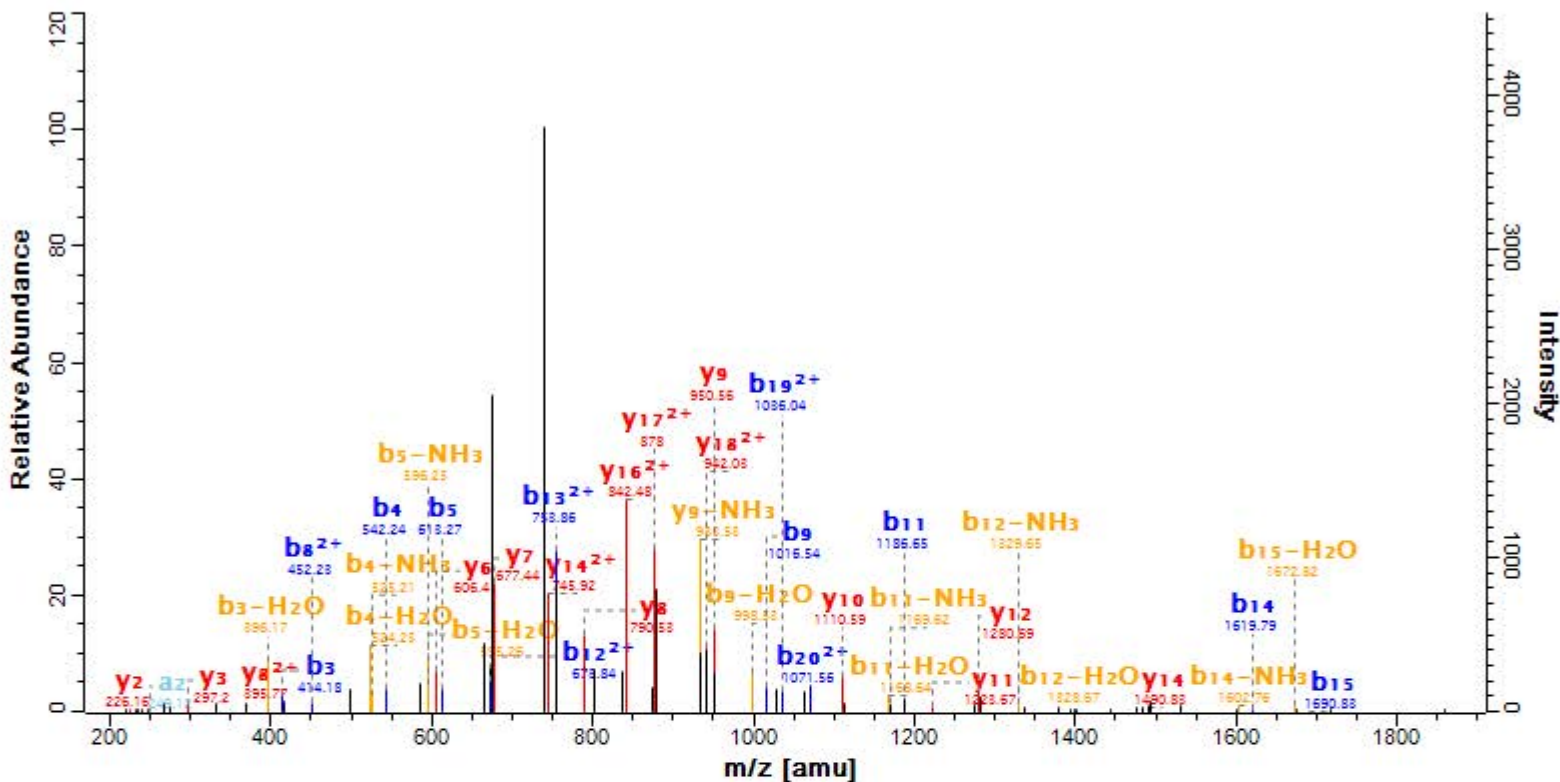

precursor information

|                   |                 |
|-------------------|-----------------|
| Mass:             | 2279.19145      |
| m/z:              | 760.73776       |
| Charge:           | 3+              |
| Retentiontime:    | 39.967727661132 |
| Score:            | 232.7801        |
| Mass Error [ppm]: | -0.18151        |
| PEP:              | 1.503E-75       |
| Precursor Type:   | MULTI           |

|       | a ion         | b <sup>2+</sup> ion | b ion         |     |   | y ion         | y <sup>2+</sup> ion |
|-------|---------------|---------------------|---------------|-----|---|---------------|---------------------|
|       | Δ dalton mass | Δ dalton mass       | Δ dalton mass | seq |   | Δ dalton mass | Δ dalton mass       |
|       | 102.1         | 130                 | 130           | 1   | E | 20            |                     |
| +0.07 | 249.1         | 277.1               | 277.1         | 2   | F | 19            | 2167                |
|       | 386.2         | 414.2               | +0.057414.2   | 3   | H | 18            | 2020                |
|       | 514.2         | 542.2               | -0.02 542.2   | 4   | Q | 17            | 1883                |
|       | 585.3         | 613.3               | +0.196613.3   | 5   | A | 16            | 1755                |
|       | 642.3         | 670.3               |               | 6   | G | 15            | 1684                |
|       | 778.4         | 806.4               |               | 7   | K | 14            | 1627                |
|       | 875.5         | +0.144452.2         |               | 8   | P | 13            | 1491                |
|       | 988.5         | 1017                | -0.34 1017    | 9   | I | 12            | 1394                |
|       | 1046          | 1074                |               | 10  | G | 11            | 1281                |
|       | 1159          | 1187                | -0.06 1187    | 11  | L | 10            | 1224                |
|       | 1319          | -0.23 673.8         |               | 12  | C | 9             | 1111                |
|       | 1479          | +0.472753.9         |               | 13  | C | 8             | 950.6               |
|       | 1592          | 1620                | +0.38 1620    | 14  | I | 7             | 790.5               |
|       | 1663          | 1691                | +0.1681691    | 15  | A | 6             | 677.4               |
|       | 1760          | 1788                |               | 16  | P | 5             | 606.4               |
|       | 1859          | 1887                |               | 17  | V | 4             | 509.4               |
|       | 1972          | 2000                |               | 18  | L | 3             | 410.3               |
|       | 2043          | +0.4551036          |               | 19  | A | 2             | 297.2               |
|       | 2114          | +0.1061072          |               | 20  | A | 1             | 226.2               |
|       |               |                     |               | 21  | K | 0             | 155.1               |

general information

|                       |             |
|-----------------------|-------------|
| Annotation:           | 16 of 21    |
| AminoAcids Coverage:  | 76 %        |
| Intensity Coverage:   | 50 %        |
| Peak Coverage:        | 41 %        |
| Protein Localisation: | 165 ... 185 |

Scan number 6279 Raw file LNCAP\_Silac\_23F10\_set2\_09  
 Method ITMS; CID Peptide 129.37

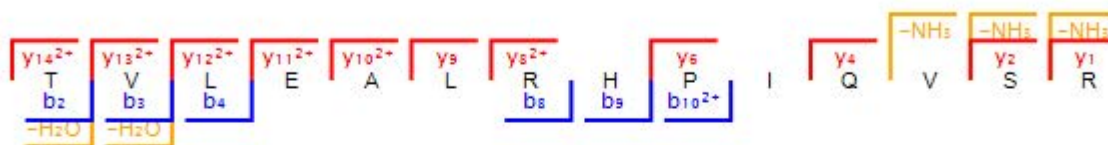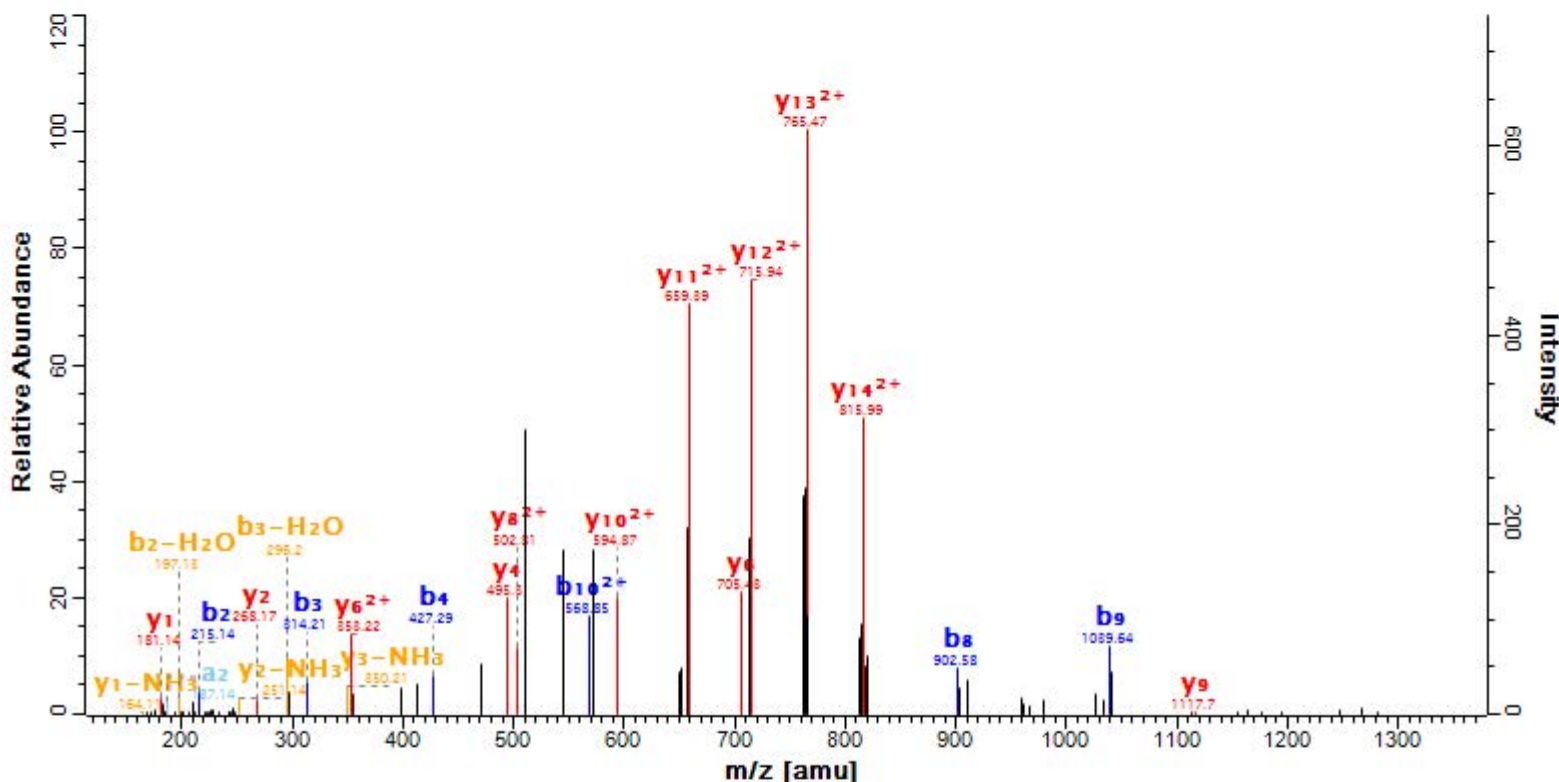

precursor information

|                   |                 |
|-------------------|-----------------|
| Mass:             | 1731.01569      |
| m/z:              | 578.01251       |
| Charge:           | 3+              |
| Retentiontime:    | 41.015319824218 |
| Score:            | 129.3682        |
| Mass Error [ppm]: | 0.088473        |
| PEP:              | 1.0667E-09      |
| Precursor Type:   | MULTI           |

general information

|                       |             |
|-----------------------|-------------|
| Annotation:           | 13 of 15    |
| AminoAcids Coverage:  | 87 %        |
| Intensity Coverage:   | 52 %        |
| Peak Coverage:        | 26 %        |
| Protein Localisation: | 291 ... 305 |

| a ion         | b <sup>2+</sup> ion | b ion         |    |     |    | y ion         | y <sup>2+</sup> ion |
|---------------|---------------------|---------------|----|-----|----|---------------|---------------------|
| Δ dalton mass | Δ dalton mass       | Δ dalton mass |    | seq |    | Δ dalton mass | Δ dalton mass       |
| 86.1          | 114.1               | 114.1         | 1  | I   | 14 |               |                     |
| +0.014 87.1   | 215.1               | +0.034 215.1  | 2  | T   | 13 | 1631          | 816 +0.183          |
| 286.2         | 314.2               | +0.072 314.2  | 3  | V   | 12 | 1530          | 765.5 -0.1          |
| 399.3         | 427.3               | +0.142 427.3  | 4  | L   | 11 | 1431          | 715.9 +0            |
| 528.3         | 556.3               | 556.3         | 5  | E   | 10 | 1318          | 659.4 +0.213        |
| 599.4         | 627.4               | 627.4         | 6  | A   | 9  | 1189          | 594.9 -0.02         |
| 712.5         | 740.5               | 740.5         | 7  | L   | 8  | 1118 -0.1     | 1118                |
| 874.6         | 902.6               | -0.16 902.6   | 8  | R   | 7  | 1005          | 502.8 -0.15         |
| 1012          | 1040                | -0.07 1040    | 9  | H   | 6  | 842.5         | 842.5               |
| 1109          | +0.393 568.8        | 1137          | 10 | P   | 5  | 705.4 +0.129  | 653.2 +0.203        |
| 1222          | 1250                | 1250          | 11 | I   | 4  | 608.4         | 608.4               |
| 1350          | 1378                | 1378          | 12 | Q   | 3  | 495.3 +0.03   | 495.3               |
| 1449          | 1477                | 1477          | 13 | V   | 2  | 367.2         | 367.2               |
| 1536          | 1564                | 1564          | 14 | S   | 1  | 268.2 +0.03   | 268.2               |
|               |                     |               | 15 | R   | 0  | 181.1 -0.08   | 181.1               |

Scan number 6302 Raw file LNCAP\_Silac\_23F10\_set2\_09  
 Method ITMS: CID Pepti... 63.41

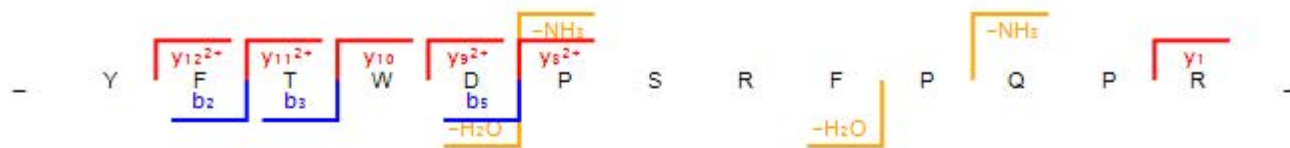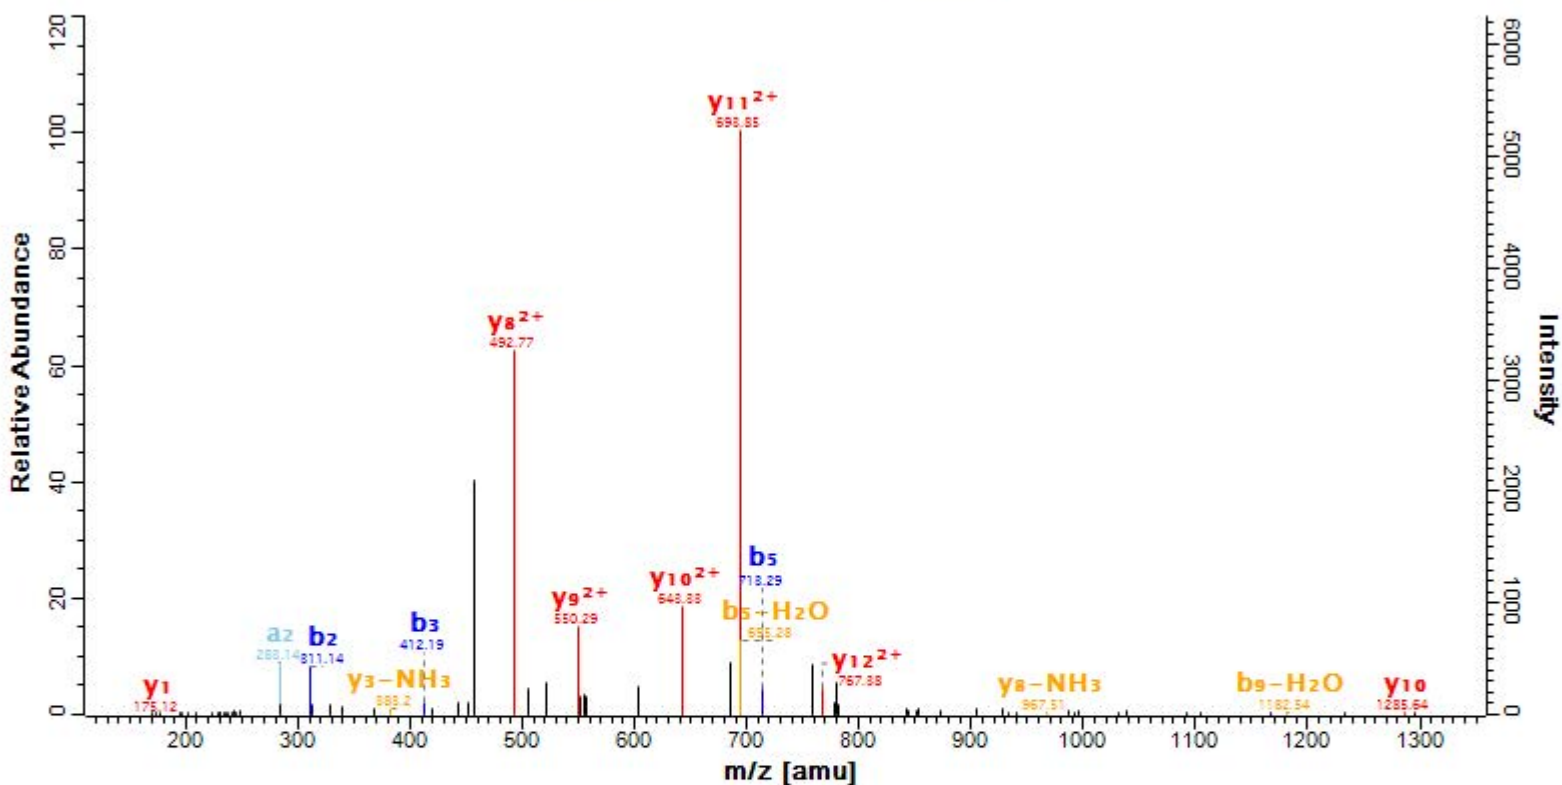

**precursor information**

|                   |                  |
|-------------------|------------------|
| Mass:             | 1695.81601       |
| m/z:              | 566.27928        |
| Charge:           | 3+               |
| Retentiontime:    | 41.1511100158691 |
| Score:            | 63.40819         |
| Mass Error [ppm]: | 0.1368           |
| PEP:              | 0.0052532        |
| Precursor Type:   | MULTI            |

**general information**

|                       |             |
|-----------------------|-------------|
| Annotation:           | 8 of 13     |
| AminoAcids Coverage:  | 62 %        |
| Intensity Coverage:   | 65 %        |
| Peak Coverage:        | 16 %        |
| Protein Localisation: | 489 ... 501 |

| a ion    |        | b ion    |        |    |     |    | y ion    |        | y <sup>2+</sup> ion |         |
|----------|--------|----------|--------|----|-----|----|----------|--------|---------------------|---------|
| Δ dalton | mass   | Δ dalton | mass   |    | seq |    | Δ dalton | mass   | Δ dalton            | mass    |
|          | 136.08 |          | 164.07 | 1  | Y   | 12 |          |        |                     |         |
| +0.0693  | 283.14 | -0.055   | 311.14 | 2  | F   | 11 | 1533.8   |        | 767.38              | +0.0412 |
|          | 384.19 | -0.218   | 412.19 | 3  | T   | 10 | 1386.7   |        | 693.85              | +0.181  |
|          | 570.27 |          | 598.27 | 4  | W   | 9  | 1285.6   | +0.044 | 643.33              | +0.1738 |
|          | 685.3  | -0.053   | 713.29 | 5  | D   | 8  | 1099.6   |        | 550.29              | +0.237  |
|          | 782.35 |          | 810.35 | 6  | P   | 7  | 984.54   |        | 492.77              | +0.197  |
|          | 869.38 |          | 897.38 | 7  | S   | 6  | 887.48   |        | 887.48              |         |
|          | 1025.5 |          | 1053.5 | 8  | R   | 5  | 800.45   |        | 800.45              |         |
|          | 1172.6 |          | 1200.5 | 9  | F   | 4  | 644.35   |        | 644.35              |         |
|          | 1269.6 |          | 1297.6 | 10 | P   | 3  | 497.28   |        | 497.28              |         |
|          | 1397.7 |          | 1425.7 | 11 | Q   | 2  | 400.23   |        | 400.23              |         |
|          | 1494.7 |          | 1522.7 | 12 | P   | 1  | 272.17   |        | 272.17              |         |
|          |        |          |        | 13 | R   | 0  | 175.12   | -0.067 | 175.12              |         |

Scan number 6351 Raw file LNCAP\_Silac\_23F10\_set2\_09  
 Method ITMS; CID Pepti... 187.59

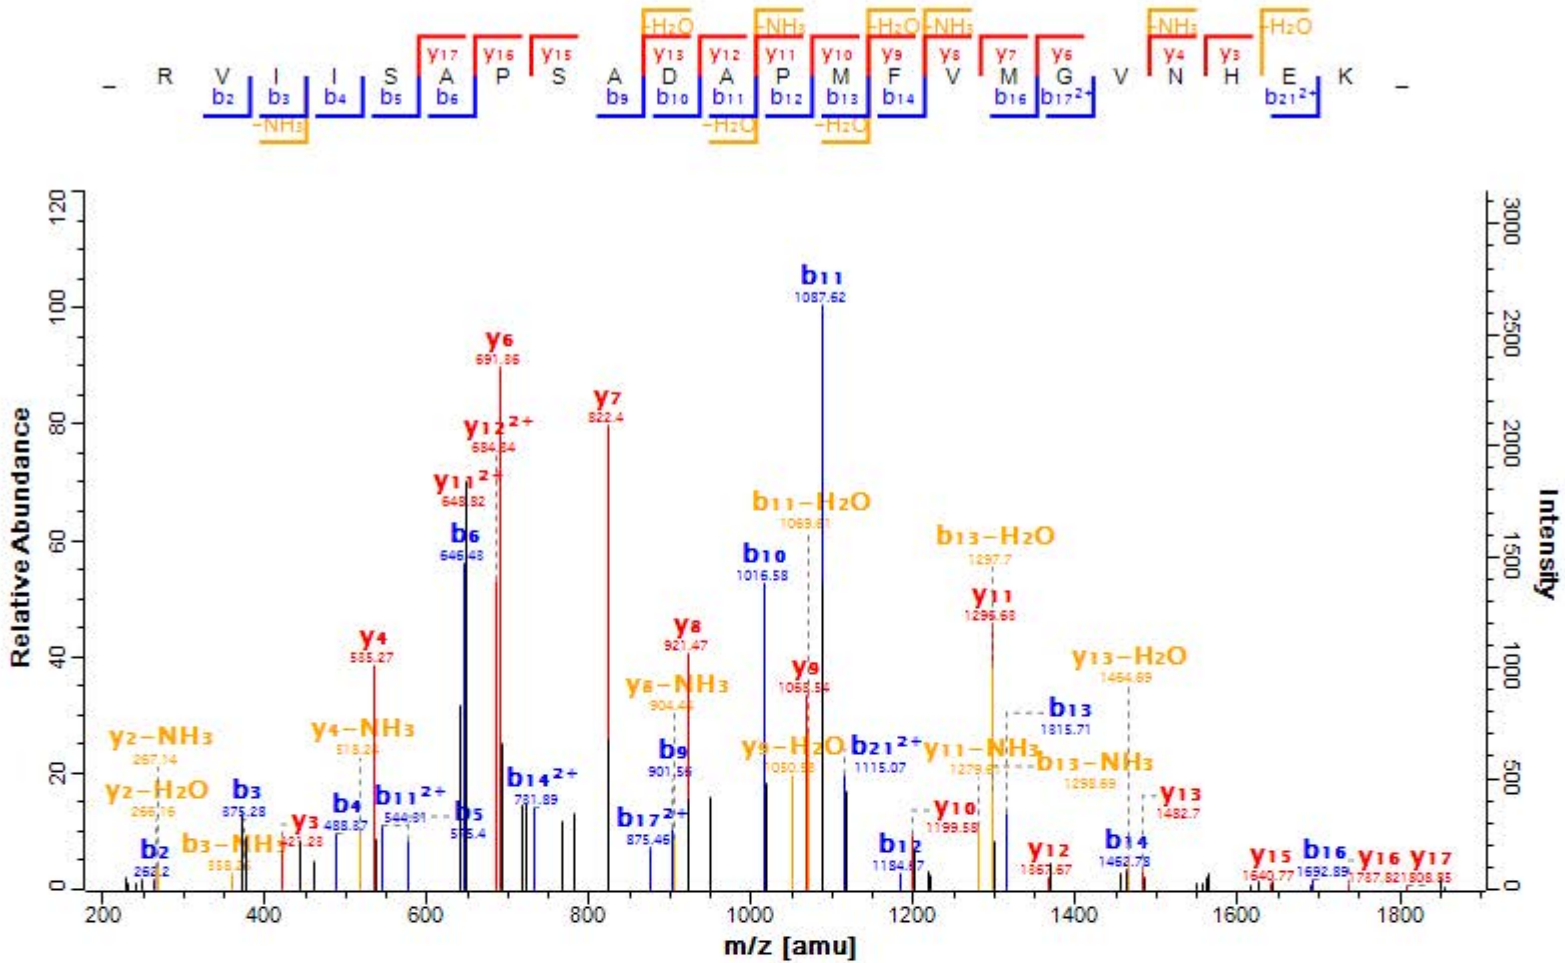

precursor information

|                   |                 |
|-------------------|-----------------|
| Mass:             | 2368.20213      |
| m/z:              | 790.40799       |
| Charge:           | 3+              |
| Retentiontime:    | 41.454513549804 |
| Score:            | 187.5905        |
| Mass Error [ppm]: | -0.42991        |
| PEP:              | 7.384E-49       |
| Precursor Type:   | MULTI           |

general information

|                       |             |
|-----------------------|-------------|
| Annotation:           | 19 of 22    |
| AminoAcids Coverage:  | 86 %        |
| Intensity Coverage:   | 67 %        |
| Peak Coverage:        | 47 %        |
| Protein Localisation: | 118 ... 139 |

| b <sup>2+</sup> ion |         | b ion    |        | seq |   |    | y ion    |         | y <sup>2+</sup> ion |         |
|---------------------|---------|----------|--------|-----|---|----|----------|---------|---------------------|---------|
| Δ dalton            | mass    | Δ dalton | mass   |     |   |    | Δ dalton | mass    | Δ dalton            | mass    |
|                     | 163.13  | 163.13   |        | 1   | R | 21 |          |         |                     |         |
|                     | 262.2   | +0.1838  | 262.2  | 2   | V | 20 | 2221.1   |         | 2221.1              |         |
|                     | 375.28  | +0.3042  | 375.28 | 3   | I | 19 | 2122.1   |         | 2122.1              |         |
|                     | 488.37  | +0.0362  | 488.37 | 4   | I | 18 | 2009     |         | 2009                |         |
|                     | 575.4   | +0.2109  | 575.4  | 5   | S | 17 | 1895.9   |         | 1895.9              |         |
|                     | 646.43  | -0.054   | 646.43 | 6   | A | 16 | 1808.9   | +0.3772 | 1808.9              |         |
|                     | 743.49  |          | 743.49 | 7   | P | 15 | 1737.8   | -0.082  | 1737.8              |         |
|                     | 830.52  |          | 830.52 | 8   | S | 14 | 1640.8   | -0.046  | 1640.8              |         |
|                     | 901.56  | +0.0795  | 901.56 | 9   | A | 13 | 1553.7   |         | 1553.7              |         |
|                     | 1016.6  | +0.0443  | 1016.6 | 10  | D | 12 | 1482.7   | -0.231  | 1482.7              |         |
| +0.081              | 1254.31 | -0.019   | 1087.6 | 11  | A | 11 | 1367.7   | -0.042  | 684.34              | +0.1273 |
|                     | 1184.7  | -0.14    | 1184.7 | 12  | P | 10 | 1296.6   | -0.012  | 648.82              | -0.047  |
|                     | 1315.7  | -0.005   | 1315.7 | 13  | M | 9  | 1199.6   | +0.4169 | 1199.6              |         |
| -0.133              | 731.89  | +0.1057  | 1462.8 | 14  | F | 8  | 1068.5   | +0.0131 | 1068.5              |         |
|                     | 1561.9  |          | 1561.9 | 15  | V | 7  | 921.47   | +0.064  | 921.47              |         |
|                     | 1692.9  | +0.2234  | 1692.9 | 16  | M | 6  | 822.4    | -0.035  | 822.4               |         |
| +0.0687             | 875.46  |          | 1749.9 | 17  | G | 5  | 691.36   | +0.046  | 691.36              |         |
|                     | 1849    |          | 1849   | 18  | V | 4  | 634.34   |         | 634.34              |         |
|                     | 1963    |          | 1963   | 19  | N | 3  | 535.27   | -0.034  | 535.27              |         |
|                     | 2100.1  |          | 2100.1 | 20  | H | 2  | 421.23   | -0.082  | 421.23              |         |
| +0.1212             | 1115.1  |          | 2229.1 | 21  | E | 1  | 284.17   |         | 284.17              |         |
|                     |         |          |        | 22  | K | 0  | 155.13   |         | 155.13              |         |

Scan number 6649 Raw file LNCAP\_Silac\_23F10\_set2\_09  
 Method ITMS; CID Pepti... 71.08

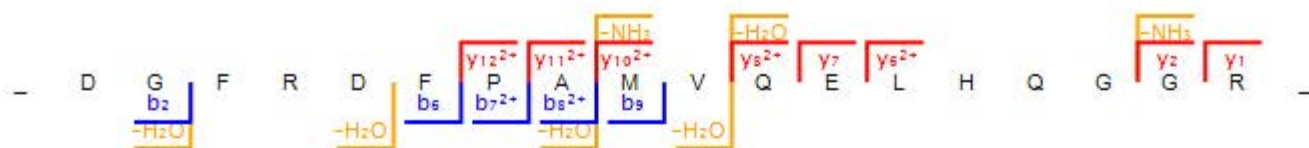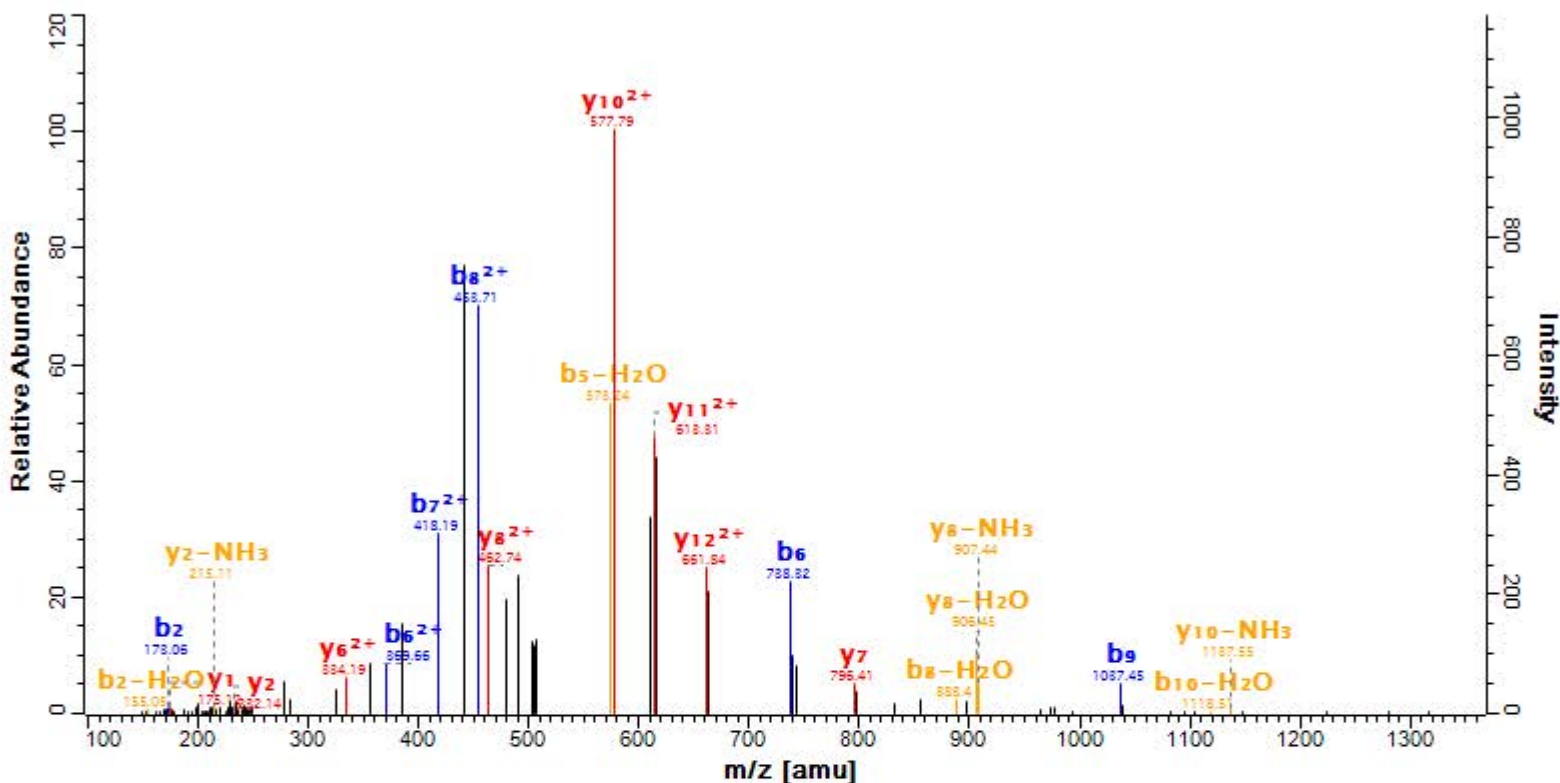

precursor information

|                   |                 |
|-------------------|-----------------|
| Mass:             | 2058.96984      |
| m/z:              | 515.74974       |
| Charge:           | 4+              |
| Retentiontime:    | 43.511604309082 |
| Score:            | 71.07995        |
| Mass Error [ppm]: | 0.21646         |
| PEP:              | 0.00028854      |
| Precursor Type:   | MULTI           |

| b <sup>2+</sup> ion |        | b ion    |        | seq |   |    | y ion    |         | y <sup>2+</sup> ion |         |
|---------------------|--------|----------|--------|-----|---|----|----------|---------|---------------------|---------|
| Δ dalton            | mass   | Δ dalton | mass   |     |   |    | Δ dalton | mass    | Δ dalton            | mass    |
|                     | 116.03 |          | 116.03 | 1   | D | 17 |          |         |                     |         |
|                     | 173.06 | +0.1125  | 173.06 | 2   | G | 16 | 1944.9   |         | 1944.9              |         |
|                     | 320.12 |          | 320.12 | 3   | F | 15 | 1887.9   |         | 1887.9              |         |
|                     | 476.23 |          | 476.23 | 4   | R | 14 | 1740.9   |         | 1740.9              |         |
|                     | 591.25 |          | 591.25 | 5   | D | 13 | 1584.8   |         | 1584.8              |         |
| +0.1215             | 369.66 | -0.003   | 738.32 | 6   | F | 12 | 1469.7   |         | 1469.7              |         |
| +0.2508             | 418.19 |          | 835.37 | 7   | P | 11 | 1322.7   |         | 661.84              | -0.027  |
| +0.2495             | 453.71 |          | 906.41 | 8   | A | 10 | 1225.6   |         | 613.31              | +0.255  |
|                     | 1037.5 | +0.0757  | 1037.5 | 9   | M | 9  | 1154.6   |         | 577.79              | +0.4405 |
|                     | 1136.5 |          | 1136.5 | 10  | V | 8  | 1023.5   |         | 1023.5              |         |
|                     | 1264.6 |          | 1264.6 | 11  | Q | 7  | 924.46   |         | 462.74              | +0.0321 |
|                     | 1393.6 |          | 1393.6 | 12  | E | 6  | 796.41   | +0.0589 | 796.41              |         |
|                     | 1506.7 |          | 1506.7 | 13  | L | 5  | 667.36   |         | 334.19              | -0.073  |
|                     | 1643.8 |          | 1643.8 | 14  | H | 4  | 554.28   |         | 554.28              |         |
|                     | 1771.8 |          | 1771.8 | 15  | Q | 3  | 417.22   |         | 417.22              |         |
|                     | 1828.8 |          | 1828.8 | 16  | G | 2  | 289.16   |         | 289.16              |         |
|                     | 1885.9 |          | 1885.9 | 17  | G | 1  | 232.14   | -0.014  | 232.14              |         |
|                     |        |          |        | 18  | R | 0  | 175.12   | -0.019  | 175.12              |         |

general information

|                       |             |
|-----------------------|-------------|
| Annotation:           | 12 of 18    |
| AminoAcids Coverage:  | 67 %        |
| Intensity Coverage:   | 54 %        |
| Peak Coverage:        | 21 %        |
| Protein Localisation: | 419 ... 436 |

Scan number 6700 Raw file LNCAP\_Silac\_23F10\_set2\_09  
 Method ITMS; CID Peptide 61.64

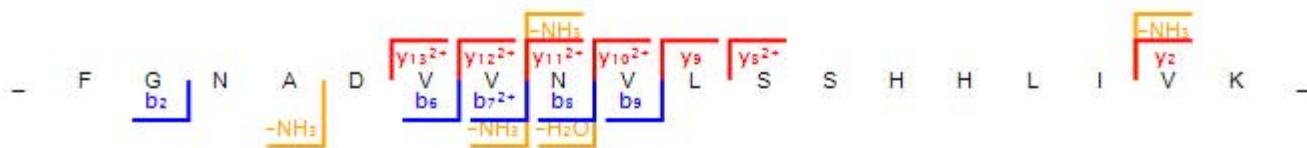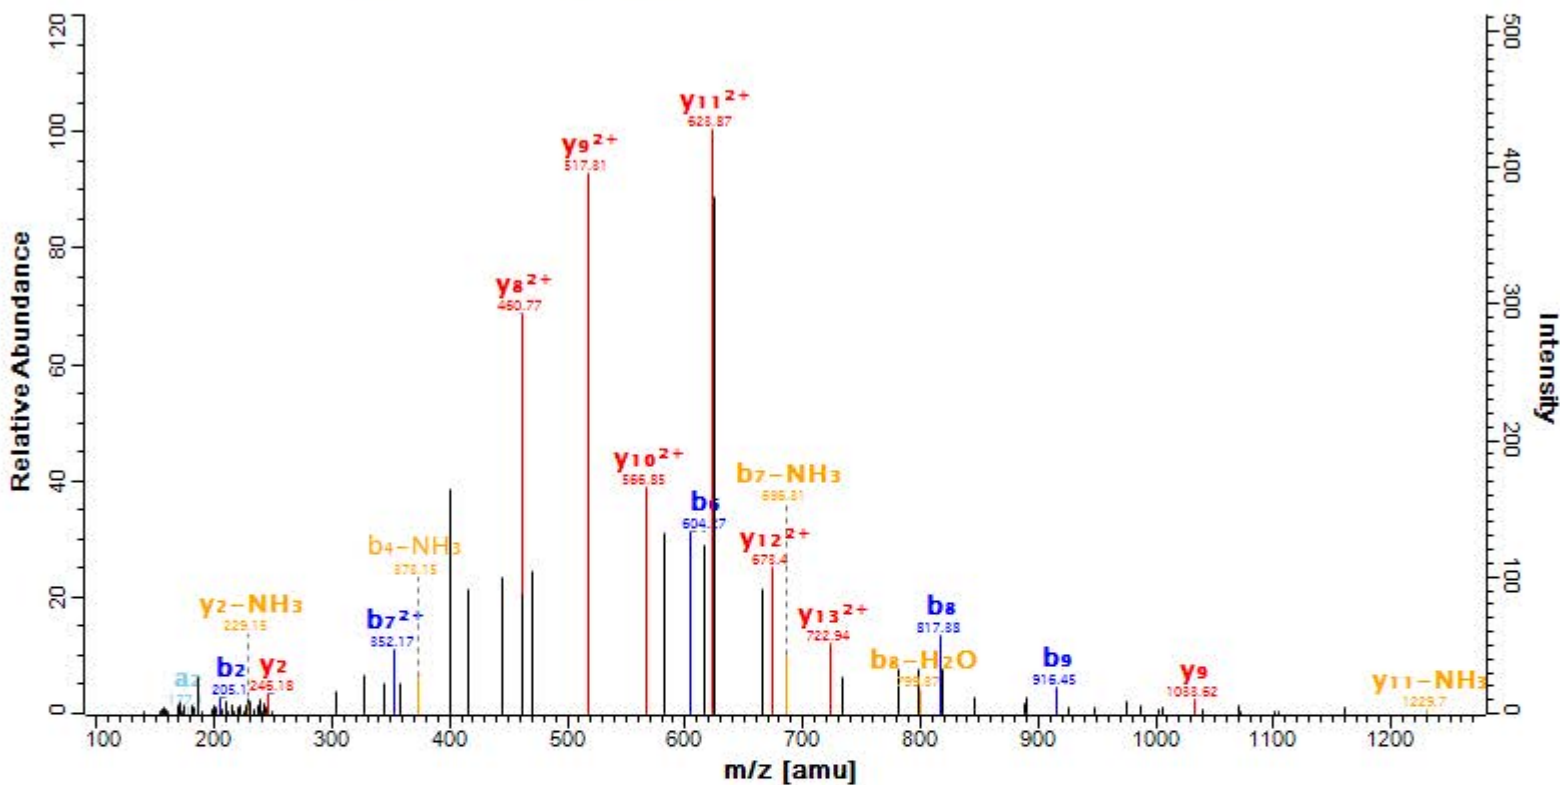

precursor information

|                   |                 |
|-------------------|-----------------|
| Mass:             | 1948.05271      |
| m/z:              | 488.02045       |
| Charge:           | 4+              |
| Retentiontime:    | 43.875320434570 |
| Score:            | 61.64093        |
| Mass Error [ppm]: | -0.17387        |
| PEP:              | 0.0017235       |
| Precursor Type:   | MULTI           |

|       | a ion         | b <sup>2+</sup> ion | b ion         |     |   | y ion         | y <sup>2+</sup> ion |
|-------|---------------|---------------------|---------------|-----|---|---------------|---------------------|
|       | Δ dalton mass | Δ dalton mass       | Δ dalton mass | seq |   | Δ dalton mass | Δ dalton mass       |
|       | 120.1         | 148.1               | 148.1         | 1   | F | 17            |                     |
| +0.07 | 177.1         | 205.1               | -0.22 205.1   | 2   | G | 16            | 1802                |
|       | 291.1         | 319.1               | 319.1         | 3   | N | 15            | 1745                |
|       | 362.2         | 390.2               | 390.2         | 4   | A | 14            | 1631                |
|       | 477.2         | 505.2               | 505.2         | 5   | D | 13            | 1560                |
|       | 576.3         | 604.3               | +0.02 604.3   | 6   | V | 12            | 1445                |
|       | 675.3         | -0.02 352.2         | 703.3         | 7   | V | 11            | 1346                |
|       | 789.4         | 817.4               | +0 817.4      | 8   | N | 10            | 1247                |
|       | 888.5         | 916.5               | -0.11 916.5   | 9   | V | 9             | 1133                |
|       | 1002          | 1030                | 1030          | 10  | L | 8             | 1034                |
|       | 1089          | 1117                | 1117          | 11  | S | 7             | 920.5               |
|       | 1176          | 1204                | 1204          | 12  | S | 6             | 833.5               |
|       | 1313          | 1341                | 1341          | 13  | H | 5             | 746.5               |
|       | 1450          | 1478                | 1478          | 14  | H | 4             | 609.4               |
|       | 1563          | 1591                | 1591          | 15  | L | 3             | 472.3               |
|       | 1676          | 1704                | 1704          | 16  | I | 2             | 359.3               |
|       | 1775          | 1803                | 1803          | 17  | V | 1             | 246.2               |
|       |               |                     |               | 18  | K | 0             | 147.1               |

general information

|                       |             |
|-----------------------|-------------|
| Annotation:           | 10 of 18    |
| AminoAcids Coverage:  | 56 %        |
| Intensity Coverage:   | 48 %        |
| Peak Coverage:        | 19 %        |
| Protein Localisation: | 422 ... 439 |

Scan number 6940 Raw file LNCAP\_Silac\_23F10\_set2\_09  
 Method ITMS; CID Pepti... 120.77

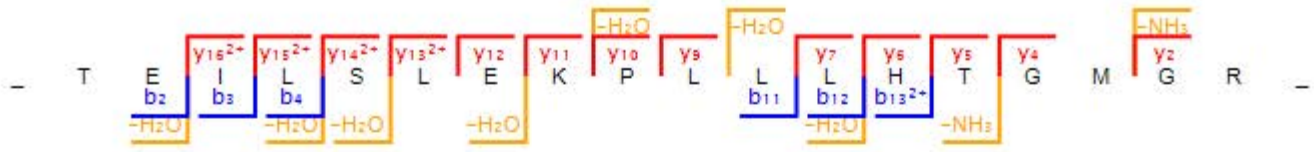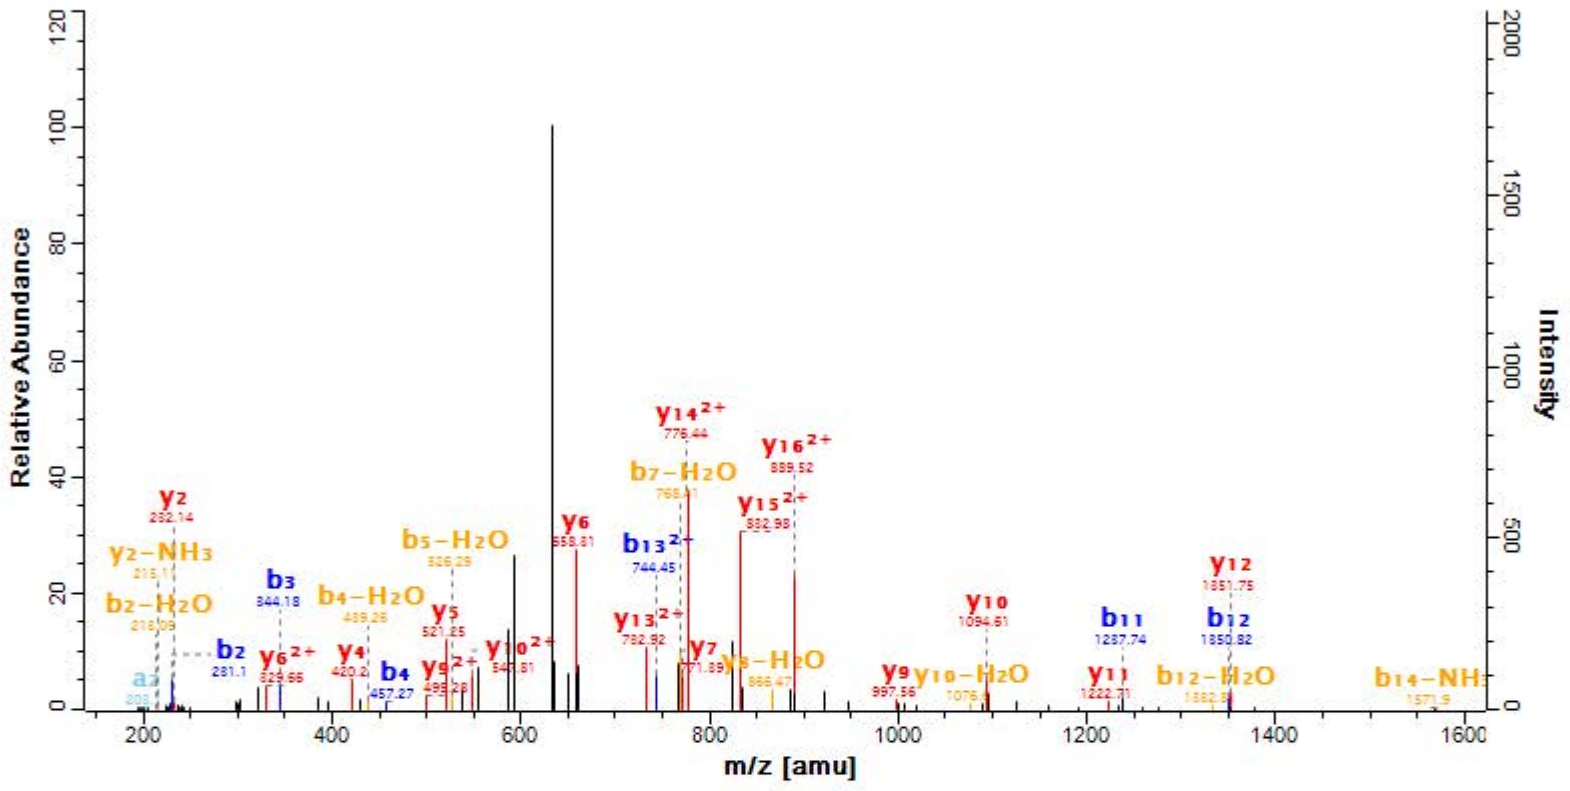

**precursor information**

|                   |                 |
|-------------------|-----------------|
| Mass:             | 2007.11945      |
| m/z:              | 670.04709       |
| Charge:           | 3+              |
| Retentiontime:    | 45.644332885742 |
| Score:            | 120.7663        |
| Mass Error [ppm]: | 0.38081         |
| PEP:              | 2.3911E-12      |
| Precursor Type:   | MULTI           |

**general information**

|                       |             |
|-----------------------|-------------|
| Annotation:           | 15 of 18    |
| AminoAcids Coverage:  | 83 %        |
| Intensity Coverage:   | 47 %        |
| Peak Coverage:        | 32 %        |
| Protein Localisation: | 235 ... 252 |

|       | a ion         | b <sup>2+</sup> ion | b ion         |     |   |               | y ion         | y <sup>2+</sup> ion |
|-------|---------------|---------------------|---------------|-----|---|---------------|---------------|---------------------|
|       | Δ dalton mass | Δ dalton mass       | Δ dalton mass | seq |   | Δ dalton mass | Δ dalton mass |                     |
|       | 74.06         | 102.1               | 102.1         | 1   | T | 17            |               |                     |
| -0.26 | 203.1         | 231.1               | -0.03         | 2   | E | 16            | 1907          | 1907                |
|       | 316.2         | 344.2               | +0.04         | 3   | I | 15            | 1778          | 889.5 +0.191        |
|       | 429.3         | 457.3               | +0.12         | 4   | L | 14            | 1665          | 833 +0.28           |
|       | 516.3         | 544.3               |               | 5   | S | 13            | 1552          | 776.4 +0.263        |
|       | 629.4         | 657.4               |               | 6   | L | 12            | 1465          | 732.9 +0.234        |
|       | 758.4         | 786.4               |               | 7   | E | 11            | 1352          | +0.031352           |
|       | 886.5         | 914.5               |               | 8   | K | 10            | 1223          | +0.0241223          |
|       | 983.6         | 1012                |               | 9   | P | 9             | 1095          | -0.01547.8 +0.219   |
|       | 1097          | 1125                |               | 10  | L | 8             | 997.6         | +0.194499.3 -0.11   |
|       | 1210          | 1238                | +0.235        | 11  | L | 7             | 884.5         | 884.5               |
|       | 1323          | 1351                | -0.1          | 12  | L | 6             | 771.4         | -0.09771.4          |
|       | 1460          | 1488                | +0.186        | 13  | H | 5             | 658.3         | +0.067329.7 +0.131  |
|       | 1561          | 1589                |               | 14  | T | 4             | 521.3         | +0.029521.3         |
|       | 1618          | 1646                |               | 15  | G | 3             | 420.2         | +0.067420.2         |
|       | 1749          | 1777                |               | 16  | M | 2             | 363.2         | 363.2               |
|       | 1806          | 1834                |               | 17  | G | 1             | 232.1         | +0.062232.1         |
|       |               |                     |               | 18  | R | 0             | 175.1         | 175.1               |

Scan number 6979 Raw file LNCAP\_Silac\_23F10\_set2\_09  
 Method ITMS: CID Peptide 124.3

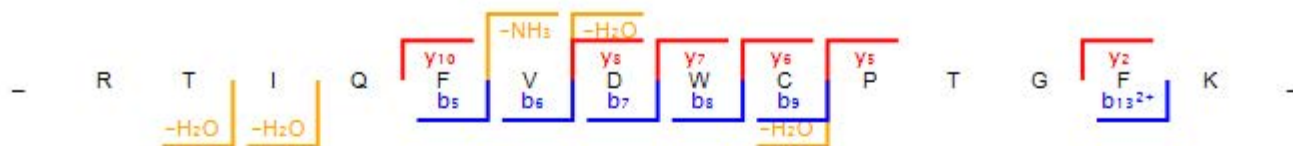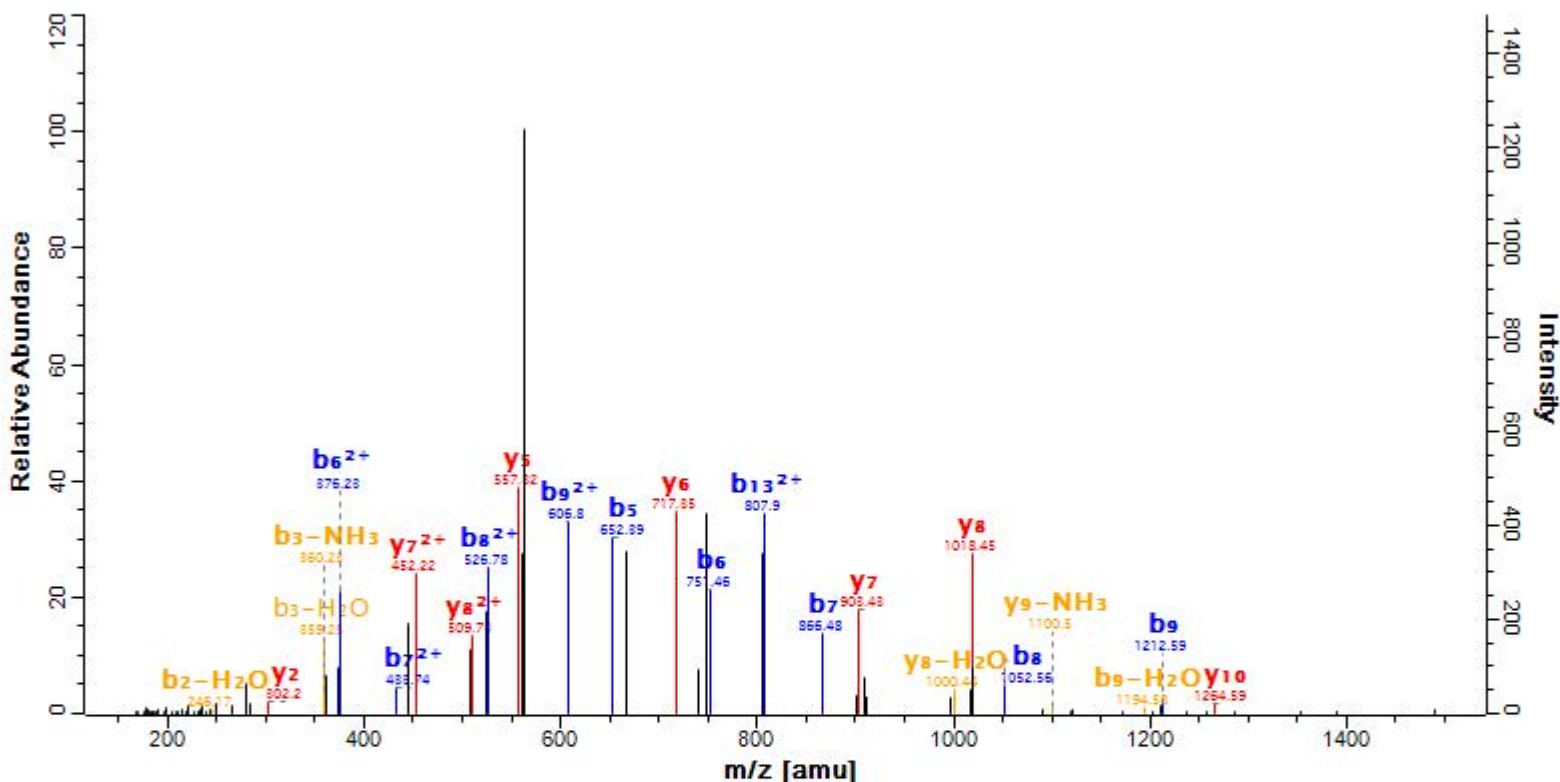

#### precursor information

|                   |                 |
|-------------------|-----------------|
| Mass:             | 1753.86095      |
| m/z:              | 585.62759       |
| Charge:           | 3+              |
| Retentiontime:    | 45.934658050537 |
| Score:            | 124.3021        |
| Mass Error [ppm]: | -0.036293       |
| PEP:              | 5.7887E-09      |
| Precursor Type:   | MULTI           |

| b <sup>2+</sup> ion |        | b ion    |        | seq |   |    | y ion    |         | y <sup>2+</sup> ion |        |
|---------------------|--------|----------|--------|-----|---|----|----------|---------|---------------------|--------|
| Δ dalton            | mass   | Δ dalton | mass   |     |   |    | Δ dalton | mass    | Δ dalton            | mass   |
|                     | 163.13 |          | 163.13 | 1   | R | 13 |          |         |                     |        |
|                     | 264.18 |          | 264.18 | 2   | T | 12 | 1606.8   |         | 1606.8              |        |
|                     | 377.26 |          | 377.26 | 3   | I | 11 | 1505.7   |         | 1505.7              |        |
|                     | 505.32 |          | 505.32 | 4   | Q | 10 | 1392.6   |         | 1392.6              |        |
|                     | 652.39 | +0.0164  | 652.39 | 5   | F | 9  | 1264.6   | +0.1882 | 1264.6              |        |
| +0.0544             | 376.23 | +0.094   | 751.46 | 6   | V | 8  | 1117.5   |         | 1117.5              |        |
| -0.004              | 433.74 | -0.13    | 866.48 | 7   | D | 7  | 1018.5   | -0.011  | 509.73              | +0.355 |
| -0.015              | 526.78 | +0.0036  | 1052.6 | 8   | W | 6  | 903.43   | +0.0459 | 452.22              | +0.126 |
| +0.1262             | 606.8  | -0.031   | 1212.6 | 9   | C | 5  | 717.35   | +0.0149 | 717.35              |        |
|                     | 1309.6 |          | 1309.6 | 10  | P | 4  | 557.32   | +0.0873 | 557.32              |        |
|                     | 1410.7 |          | 1410.7 | 11  | T | 3  | 460.26   |         | 460.26              |        |
|                     | 1467.7 |          | 1467.7 | 12  | G | 2  | 359.22   |         | 359.22              |        |
| -0.011              | 807.9  |          | 1614.8 | 13  | F | 1  | 302.2    | -0.231  | 302.2               |        |
|                     |        |          |        | 14  | K | 0  | 155.13   |         | 155.13              |        |

#### general information

|                       |             |
|-----------------------|-------------|
| Annotation:           | 10 of 14    |
| AminoAcids Coverage:  | 71 %        |
| Intensity Coverage:   | 46 %        |
| Peak Coverage:        | 25 %        |
| Protein Localisation: | 339 ... 352 |



Scan number 709 Raw file LNCAP\_Silac\_23F10\_set2\_09  
 Method ITMS; CID Pepti... 189.24

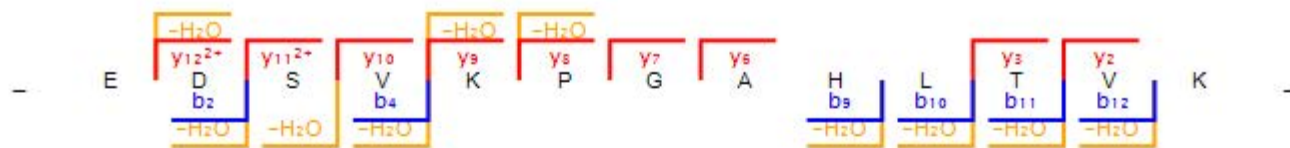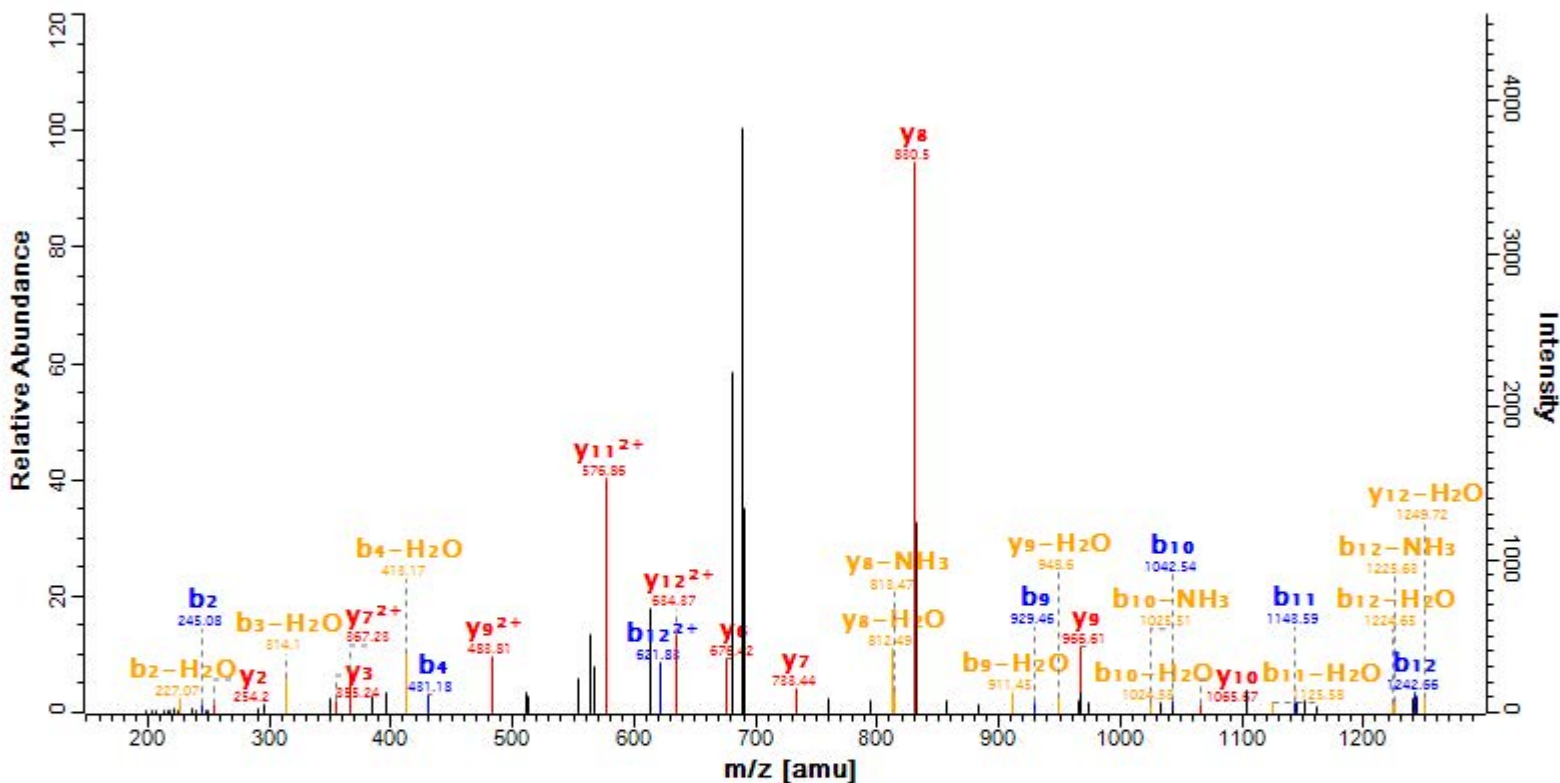

#### precursor information

|                   |                 |
|-------------------|-----------------|
| Mass:             | 1379.74097      |
| m/z:              | 690.87776       |
| Charge:           | 2+              |
| Retentiontime:    | 8.7821149826049 |
| Score:            | 189.2425        |
| Mass Error [ppm]: | 0.065055        |
| PEP:              | 8.5468E-17      |
| Precursor Type:   | MULTI           |

#### general information

|                       |             |
|-----------------------|-------------|
| Annotation:           | 11 of 13    |
| AminoAcids Coverage:  | 85 %        |
| Intensity Coverage:   | 44 %        |
| Peak Coverage:        | 39 %        |
| Protein Localisation: | 114 ... 126 |

| b <sup>2+</sup> ion |        | b ion    |        |        | y ion |          | y <sup>2+</sup> ion |          |         |         |
|---------------------|--------|----------|--------|--------|-------|----------|---------------------|----------|---------|---------|
| Δ dalton            | mass   | Δ dalton | mass   | seq    |       | Δ dalton | mass                | Δ dalton | mass    |         |
|                     | 130.05 |          | 130.05 | 1      | E     | 12       |                     |          |         |         |
|                     | 245.08 | +0.0718  | 245.08 | 2      | D     | 11       | 1267.7              | 634.37   | +0.2215 |         |
|                     | 332.11 |          | 332.11 | 3      | S     | 10       | 1152.7              | 576.86   | +0.1834 |         |
|                     | 431.18 | +0.0101  | 431.18 | 4      | V     | 9        | 1065.7              | -0.006   | 1065.7  |         |
|                     | 567.29 |          | 567.29 | 5      | K     | 8        | 966.61              | +0.0317  | 483.81  | +0.1716 |
|                     | 664.34 |          | 664.34 | 6      | P     | 7        | 830.5               | -0.02    | 830.5   |         |
|                     | 721.36 |          | 721.36 | 7      | G     | 6        | 733.44              | +0.0919  | 367.23  | -0.059  |
|                     | 792.4  |          | 792.4  | 8      | A     | 5        | 676.42              | +0.0014  | 676.42  |         |
|                     | 929.46 | +0.0482  | 929.46 | 9      | H     | 4        | 605.39              |          | 605.39  |         |
|                     | 1042.5 | +0.2625  | 1042.5 | 10     | L     | 3        | 468.33              |          | 468.33  |         |
|                     | 1143.6 | +0.0344  | 1143.6 | 11     | T     | 2        | 355.24              | +0.0895  | 355.24  |         |
|                     | -0.014 | 621.83   | -0.086 | 1242.7 | 12    | V        | 1                   | 254.2    | -0.131  | 254.2   |
|                     |        |          |        | 13     | K     | 0        | 155.13              |          | 155.13  |         |

Scan number 7150 Raw file LNCAP\_Silac\_23F10\_set2\_09  
 Method ITMS; CID Pepti... 59.29

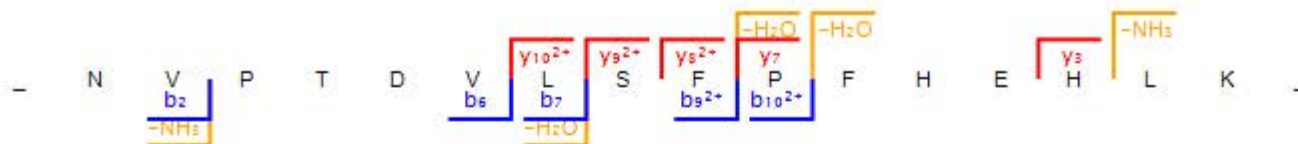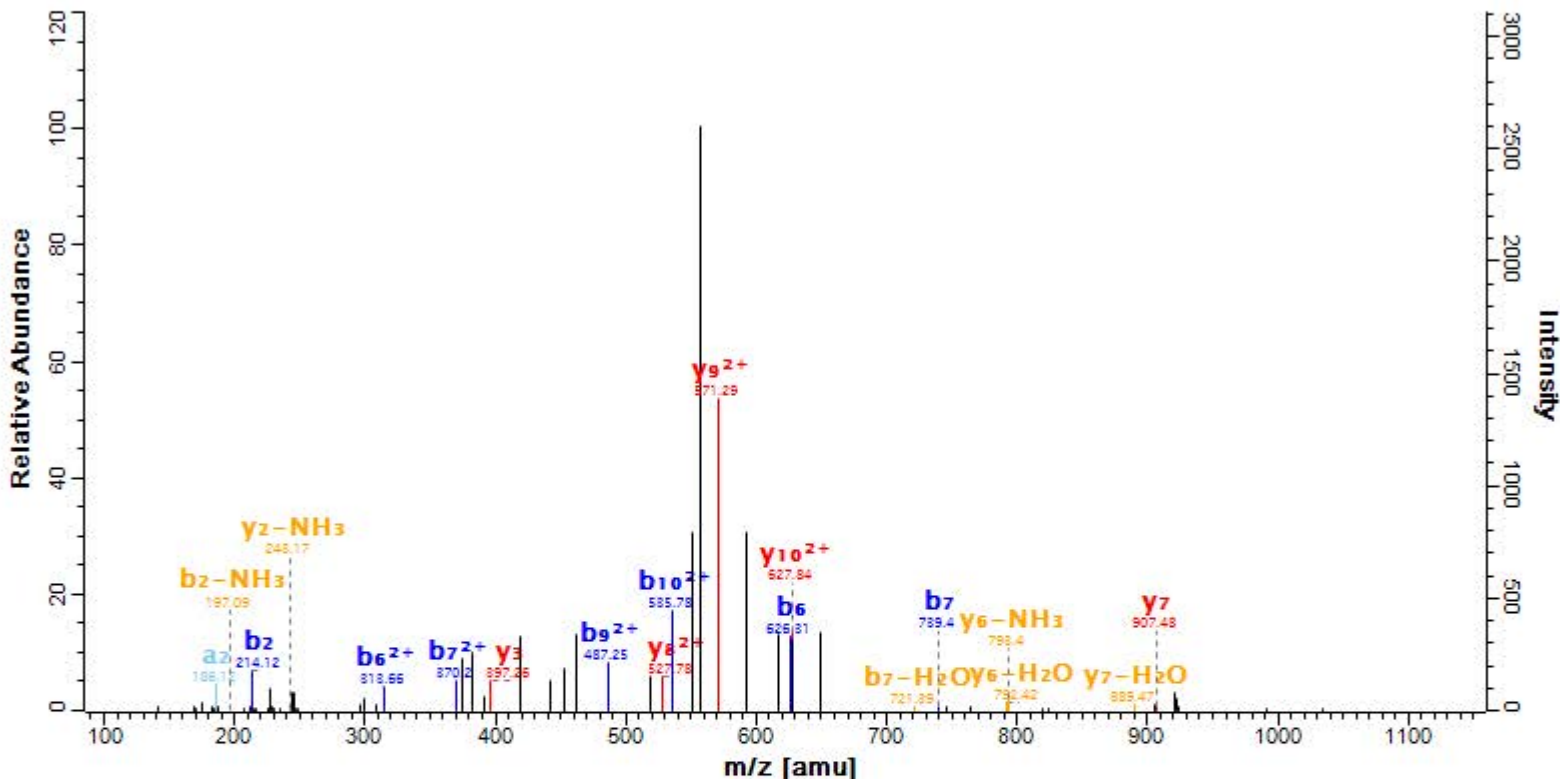

#### precursor information

|                   |                 |
|-------------------|-----------------|
| Mass:             | 1878.96304      |
| m/z:              | 470.74804       |
| Charge:           | 4+              |
| Retentiontime:    | 47.253753662109 |
| Score:            | 59.29396        |
| Mass Error [ppm]: | 0.11206         |
| PEP:              | 0.0032393       |
| Precursor Type:   | MULTI           |

#### general information

|                       |           |
|-----------------------|-----------|
| Annotation:           | 9 of 16   |
| AminoAcids Coverage:  | 56 %      |
| Intensity Coverage:   | 32 %      |
| Peak Coverage:        | 17 %      |
| Protein Localisation: | 58 ... 73 |

|       | a ion         | b <sup>2+</sup> ion | b ion         |    |     |    | y ion         | y <sup>2+</sup> ion |
|-------|---------------|---------------------|---------------|----|-----|----|---------------|---------------------|
|       | Δ dalton mass | Δ dalton mass       | Δ dalton mass |    | seq |    | Δ dalton mass | Δ dalton mass       |
|       | 87.06         | 115.1               | 115.1         | 1  | N   | 15 |               |                     |
| +0.05 | 186.1         | 214.1               | +0.03 214.1   | 2  | V   | 14 | 1766          | 1766                |
|       | 283.2         | 311.2               | 311.2         | 3  | P   | 13 | 1667          | 1667                |
|       | 384.2         | 412.2               | 412.2         | 4  | T   | 12 | 1570          | 1570                |
|       | 499.3         | 527.2               | 527.2         | 5  | D   | 11 | 1469          | 1469                |
|       | 598.3         | +0.425313.7         | -0.02 626.3   | 6  | V   | 10 | 1354          | 1354                |
|       | 711.4         | +0.071370.2         | -0.22 739.4   | 7  | L   | 9  | 1255          | 627.8 -0.04         |
|       | 798.4         | 826.4               | 826.4         | 8  | S   | 8  | 1142          | 571.3 +0.181        |
|       | 945.5         | +0.059487.3         | 973.5         | 9  | F   | 7  | 1055          | 527.8 +0.222        |
|       | 1043          | -0.21 535.8         | 1071          | 10 | P   | 6  | 907.5 +0.207  | 907.5               |
|       | 1190          | 1218                | 1218          | 11 | F   | 5  | 810.4         | 810.4               |
|       | 1327          | 1355                | 1355          | 12 | H   | 4  | 663.4         | 663.4               |
|       | 1456          | 1484                | 1484          | 13 | E   | 3  | 526.3         | 526.3               |
|       | 1593          | 1621                | 1621          | 14 | H   | 2  | 397.3 -0.48   | 397.3               |
|       | 1706          | 1734                | 1734          | 15 | L   | 1  | 260.2         | 260.2               |
|       |               |                     |               | 16 | K   | 0  | 147.1         | 147.1               |

Scan number 7577 Raw file LNCAP\_Silac\_23F10\_set2\_09  
 Method ITMS; CID Pepti... 69.33

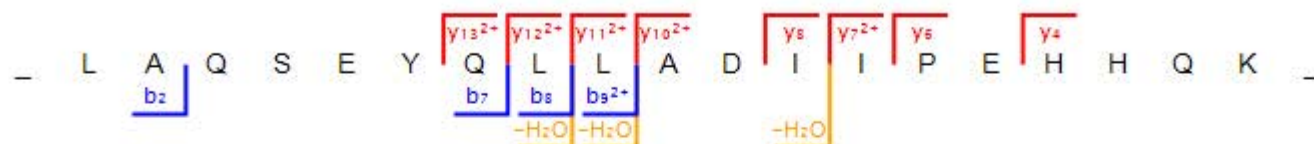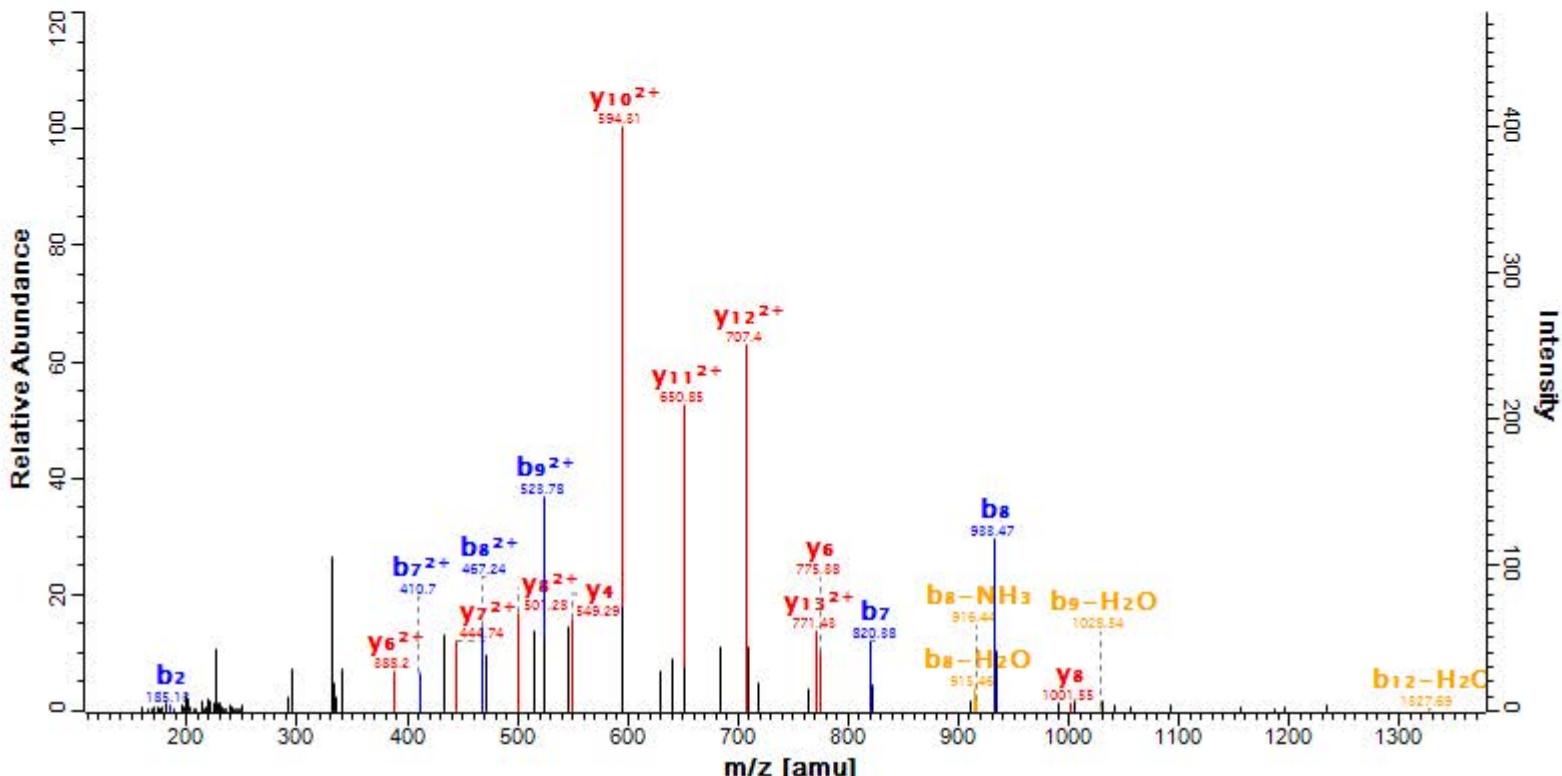

**precursor information**

|                   |                 |
|-------------------|-----------------|
| Mass:             | 2232.15337      |
| m/z:              | 559.04562       |
| Charge:           | 4+              |
| Retentiontime:    | 51.018989562988 |
| Score:            | 69.33073        |
| Mass Error [ppm]: | -0.22757        |
| PEP:              | 0.00047866      |
| Precursor Type:   | MULTI           |

| b <sup>2+</sup> ion |        | b ion    |        |    |     |    | y ion    |         | y <sup>2+</sup> ion |         |
|---------------------|--------|----------|--------|----|-----|----|----------|---------|---------------------|---------|
| Δ dalton            | mass   | Δ dalton | mass   |    | seq |    | Δ dalton | mass    | Δ dalton            | mass    |
|                     | 114.09 |          | 114.09 | 1  | L   | 18 |          |         |                     |         |
|                     | 185.13 | -0.007   | 185.13 | 2  | A   | 17 | 2120.1   |         | 2120.1              |         |
|                     | 313.19 |          | 313.19 | 3  | Q   | 16 | 2049     |         | 2049                |         |
|                     | 400.22 |          | 400.22 | 4  | S   | 15 | 1921     |         | 1921                |         |
|                     | 529.26 |          | 529.26 | 5  | E   | 14 | 1833.9   |         | 1833.9              |         |
|                     | 692.32 |          | 692.32 | 6  | Y   | 13 | 1704.9   |         | 1704.9              |         |
| +0.2724             | 410.7  | +0.1164  | 820.38 | 7  | Q   | 12 | 1541.8   |         | 771.43              | +0.1736 |
| +0.0422             | 467.24 | -0.119   | 933.47 | 8  | L   | 11 | 1413.8   |         | 707.4               | +0.2674 |
| -0.396              | 523.78 |          | 1046.6 | 9  | L   | 10 | 1300.7   |         | 650.85              | +0.2241 |
|                     | 1117.6 |          | 1117.6 | 10 | A   | 9  | 1187.6   |         | 594.31              | +0.2151 |
|                     | 1232.6 |          | 1232.6 | 11 | D   | 8  | 1116.6   |         | 1116.6              |         |
|                     | 1345.7 |          | 1345.7 | 12 | I   | 7  | 1001.6   | +0.0151 | 501.28              | +0.1357 |
|                     | 1458.8 |          | 1458.8 | 13 | I   | 6  | 888.47   |         | 444.74              | +0.1164 |
|                     | 1555.8 |          | 1555.8 | 14 | P   | 5  | 775.38   | -0.133  | 388.2               | +0.1135 |
|                     | 1684.9 |          | 1684.9 | 15 | E   | 4  | 678.33   |         | 678.33              |         |
|                     | 1821.9 |          | 1821.9 | 16 | H   | 3  | 549.29   | -0.198  | 549.29              |         |
|                     | 1959   |          | 1959   | 17 | H   | 2  | 412.23   |         | 412.23              |         |
|                     | 2087.1 |          | 2087.1 | 18 | Q   | 1  | 275.17   |         | 275.17              |         |
|                     |        |          |        | 19 | K   | 0  | 147.11   |         | 147.11              |         |

**general information**

|                       |             |
|-----------------------|-------------|
| Annotation:           | 9 of 19     |
| AminoAcids Coverage:  | 47 %        |
| Intensity Coverage:   | 61 %        |
| Peak Coverage:        | 20 %        |
| Protein Localisation: | 374 ... 392 |

Scan number 7624 Raw file LNCAP\_Silac\_23F10\_set2\_09  
 Method ITMS: CID Pepti... 66.39

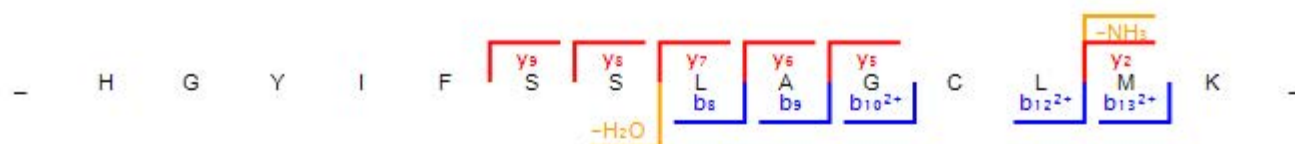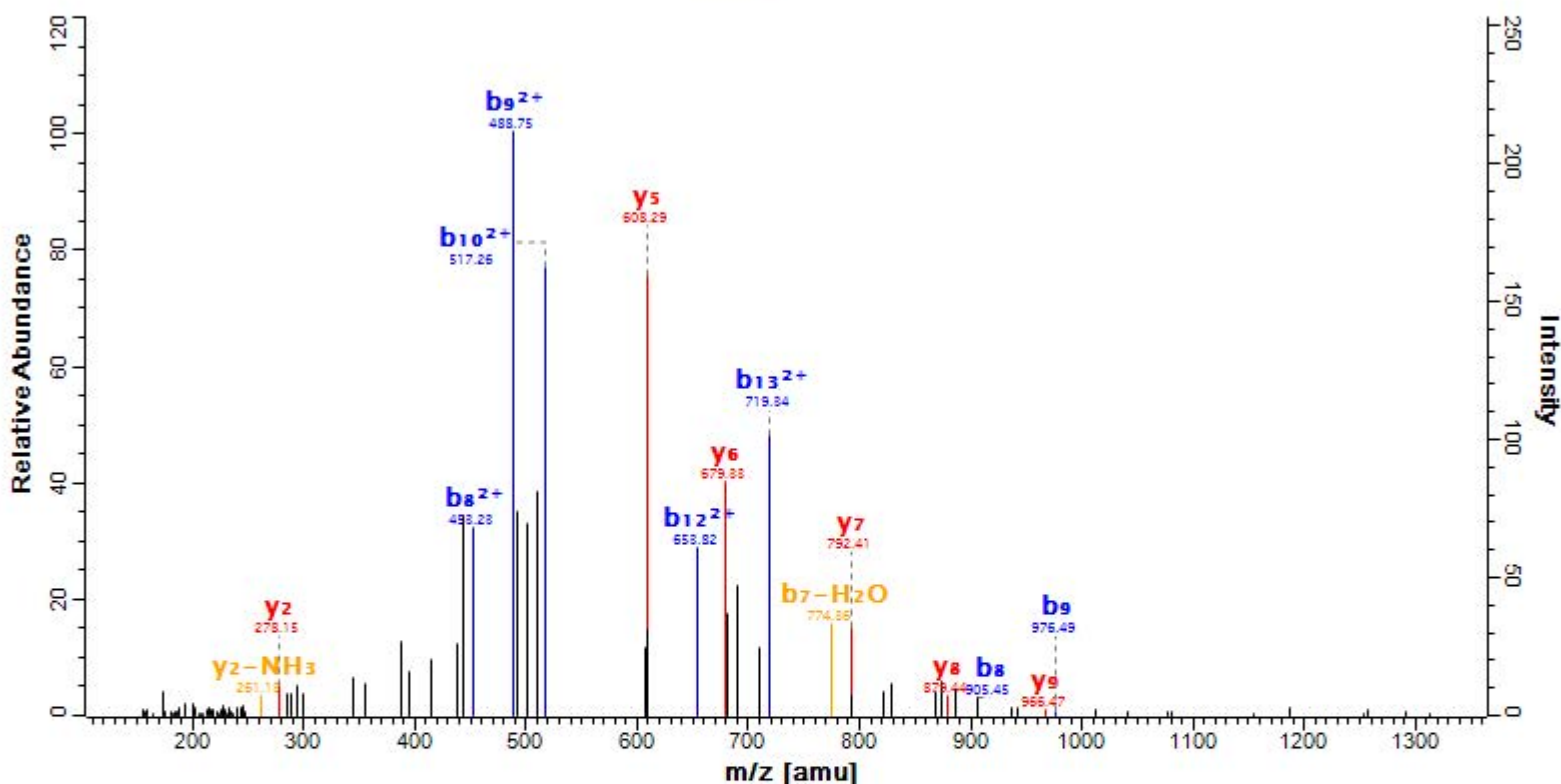

#### precursor information

|                   |                 |
|-------------------|-----------------|
| Mass:             | 1582.76349      |
| m/z:              | 528.59511       |
| Charge:           | 3+              |
| Retentiontime:    | 51.477283477783 |
| Score:            | 66.3926         |
| Mass Error [ppm]: | -0.073665       |
| PEP:              | 0.0042568       |
| Precursor Type:   | MULTI           |

#### general information

|                       |           |
|-----------------------|-----------|
| Annotation:           | 7 of 14   |
| AminoAcids Coverage:  | 50 %      |
| Intensity Coverage:   | 55 %      |
| Peak Coverage:        | 16 %      |
| Protein Localisation: | 30 ... 43 |

| b <sup>2+</sup> ion |          | b ion     |          |     |   | y ion    |          |           |
|---------------------|----------|-----------|----------|-----|---|----------|----------|-----------|
| Δ dalton            | mass     | Δ dalton  | mass     | seq |   | Δ dalton | mass     |           |
|                     | 138.0662 |           | 138.0662 | 1   | H | 13       |          |           |
|                     | 195.0877 |           | 195.0877 | 2   | G | 12       | 1446.712 |           |
|                     | 358.151  |           | 358.151  | 3   | Y | 11       | 1389.691 |           |
|                     | 471.235  |           | 471.235  | 4   | I | 10       | 1226.627 |           |
|                     | 618.3035 |           | 618.3035 | 5   | F | 9        | 1113.543 |           |
|                     | 705.3355 |           | 705.3355 | 6   | S | 8        | 966.4747 | +0.081758 |
|                     | 792.3675 |           | 792.3675 | 7   | S | 7        | 879.4427 | +0.055376 |
| +0.099552           | 453.2294 | +0.073567 | 905.4516 | 8   | L | 6        | 792.4106 | +0.009707 |
| +0.013612           | 488.748  | -0.35069  | 976.4887 | 9   | A | 5        | 679.3266 | +0.223898 |
| -0.44585            | 517.2587 |           | 1033.51  | 10  | G | 4        | 608.2895 | +0.008204 |
|                     | 1193.541 |           | 1193.541 | 11  | C | 3        | 551.268  |           |
| +0.256498           | 653.8161 |           | 1306.625 | 12  | L | 2        | 391.2374 |           |
| +0.206104           | 719.3363 |           | 1437.665 | 13  | M | 1        | 278.1533 | +0.07895  |
|                     |          |           |          | 14  | K | 0        | 147.1128 |           |

Scan number 8210 Raw file LNCAP\_Silac\_23F10\_set2\_09  
 Method ITMS; CID Pepti... 122.75

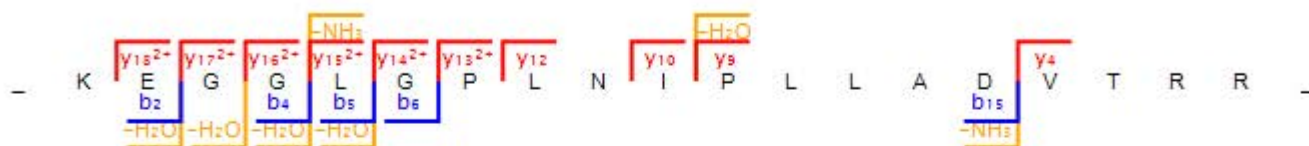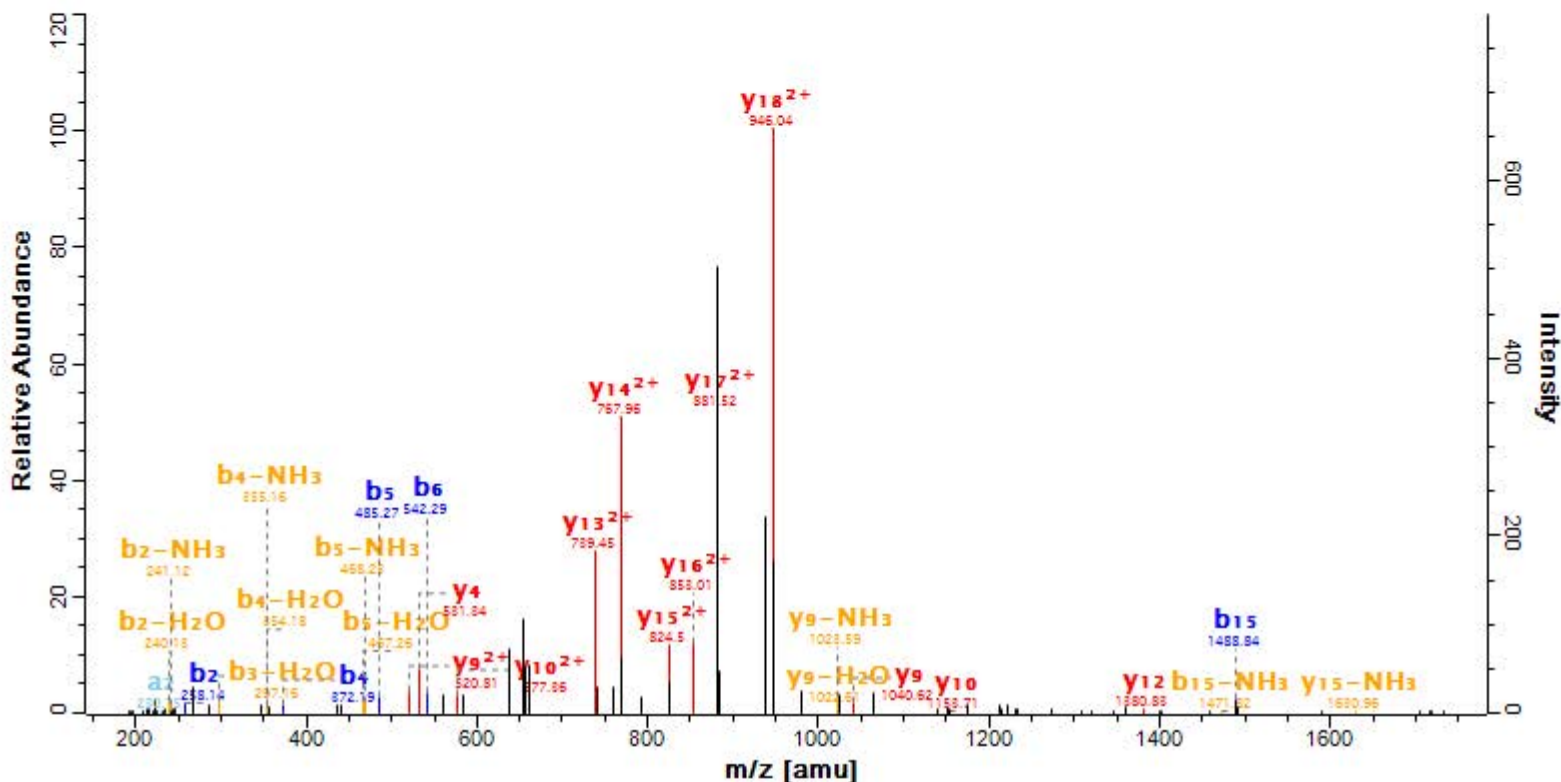

**precursor information**

|                   |                 |
|-------------------|-----------------|
| Mass:             | 2018.16333      |
| m/z:              | 673.72839       |
| Charge:           | 3+              |
| Retentiontime:    | 58.070903778076 |
| Score:            | 122.7454        |
| Mass Error [ppm]: | -0.16396        |
| PEP:              | 7.9443E-06      |
| Precursor Type:   | ISO             |

**general information**

|                       |            |
|-----------------------|------------|
| Annotation:           | 11 of 19   |
| AminoAcids Coverage:  | 58 %       |
| Intensity Coverage:   | 50 %       |
| Peak Coverage:        | 27 %       |
| Protein Localisation: | 92 ... 110 |

| a ion    |        | b ion    |        |    |     |    | y ion    |         | y <sup>2+</sup> ion |         |
|----------|--------|----------|--------|----|-----|----|----------|---------|---------------------|---------|
| Δ dalton | mass   | Δ dalton | mass   |    | seq |    | Δ dalton | mass    | Δ dalton            | mass    |
|          | 101.11 |          | 129.1  | 1  | K   | 18 |          |         |                     |         |
| -0.099   | 230.15 | +0.0553  | 258.14 | 2  | E   | 17 | 1891.1   |         | 946.04              | +0.2945 |
|          | 287.17 |          | 315.17 | 3  | G   | 16 | 1762     |         | 881.52              | +0.0227 |
|          | 344.19 | +0.3707  | 372.19 | 4  | G   | 15 | 1705     |         | 853.01              | +0.2832 |
|          | 457.28 | +0.2024  | 485.27 | 5  | L   | 14 | 1648     |         | 824.5               | +0.1888 |
|          | 514.3  | -0.222   | 542.29 | 6  | G   | 13 | 1534.9   |         | 767.96              | +0.2352 |
|          | 611.35 |          | 639.35 | 7  | P   | 12 | 1477.9   |         | 739.45              | +0.2544 |
|          | 724.44 |          | 752.43 | 8  | L   | 11 | 1380.8   | +0.1451 | 1380.8              |         |
|          | 838.48 |          | 866.47 | 9  | N   | 10 | 1267.7   |         | 1267.7              |         |
|          | 951.56 |          | 979.56 | 10 | I   | 9  | 1153.7   | +0.0426 | 577.36              | +0.0766 |
|          | 1048.6 |          | 1076.6 | 11 | P   | 8  | 1040.6   | -0.105  | 520.81              | +0.1986 |
|          | 1161.7 |          | 1189.7 | 12 | L   | 7  | 943.57   |         | 943.57              |         |
|          | 1274.8 |          | 1302.8 | 13 | L   | 6  | 830.48   |         | 830.48              |         |
|          | 1345.8 |          | 1373.8 | 14 | A   | 5  | 717.4    |         | 717.4               |         |
|          | 1460.8 | +0.0605  | 1488.8 | 15 | D   | 4  | 646.36   |         | 646.36              |         |
|          | 1559.9 |          | 1587.9 | 16 | V   | 3  | 531.34   | +0.1052 | 531.34              |         |
|          | 1661   |          | 1689   | 17 | T   | 2  | 432.27   |         | 432.27              |         |
|          | 1817.1 |          | 1845.1 | 18 | R   | 1  | 331.22   |         | 331.22              |         |
|          |        |          |        | 19 | R   | 0  | 175.12   |         | 175.12              |         |

Scan number 852 Raw file LNCAP\_Silac\_23F10\_set2\_09  
 Method ITMS: CID Pepti... 77.68

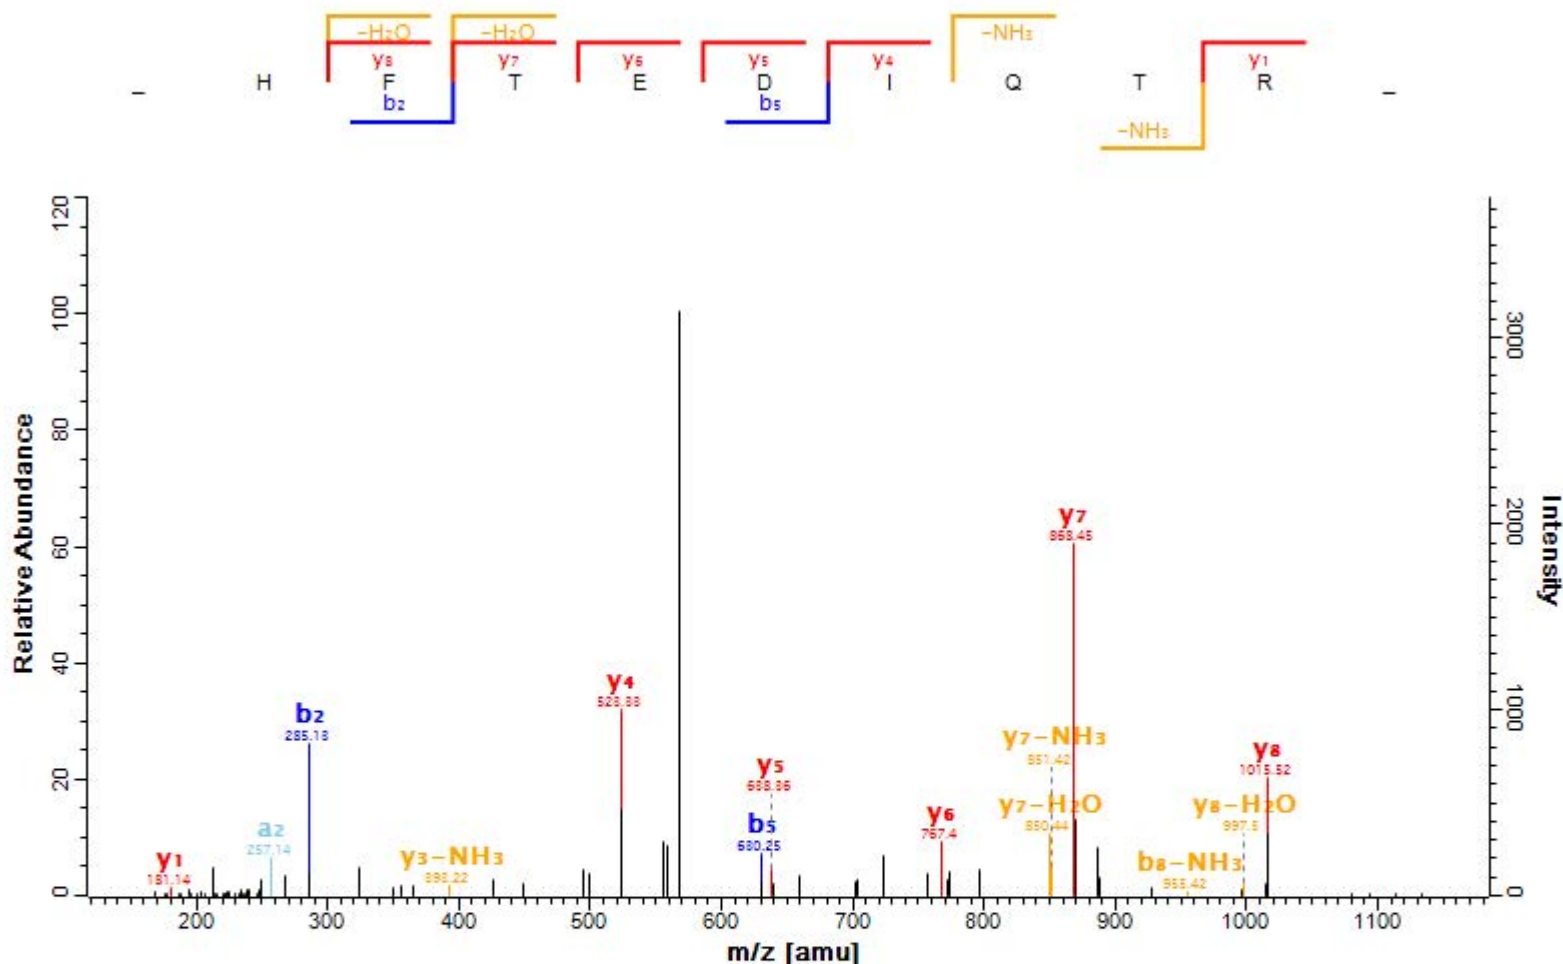

precursor information

|                       |                 |
|-----------------------|-----------------|
| Mass:                 | 1145.54682      |
| m/z:                  | 573.78068       |
| Charge:               | 2+              |
| Retentiontime:        | 9.5866346359252 |
| Score:                | 77.67735        |
| Mass Error [ppm]:     | 0.24347         |
| PEP:                  | 0.010784        |
| Precursor Type:       | MULTI           |
| Annotation:           | 8 of 9          |
| AminoAcids Coverag    | 89 %            |
| Intensity Coverage:   | 40 %            |
| Peak Coverage:        | 15 %            |
| Protein Localisation: | 507 ... 515     |

| a ion           |          | b ion           |          | seq |   | y ion           |                    |
|-----------------|----------|-----------------|----------|-----|---|-----------------|--------------------|
| $\Delta$ dalton | mass     | $\Delta$ dalton | mass     |     |   | $\Delta$ dalton | mass               |
|                 | 110.0713 |                 | 138.0662 | 1   | H | 8               |                    |
| +0.033164       | 257.1397 | +0.034984       | 285.1346 | 2   | F | 7               | 1015.515 -0.02339  |
|                 | 358.1874 |                 | 386.1823 | 3   | T | 6               | 868.4466 -0.00234  |
|                 | 487.23   |                 | 515.2249 | 4   | E | 5               | 767.3989 -0.00544  |
|                 | 602.2569 | +0.07466        | 630.2518 | 5   | D | 4               | 638.3563 +0.186014 |
|                 | 715.341  |                 | 743.3359 | 6   | I | 3               | 523.3294 +0.128912 |
|                 | 843.3995 |                 | 871.3945 | 7   | Q | 2               | 410.2453           |
|                 | 944.4472 |                 | 972.4421 | 8   | T | 1               | 282.1868           |
|                 |          |                 |          | 9   | R | 0               | 181.1391 +0.027224 |

Scan number 1410 Raw file LNCAP\_Silac\_23F10\_set2\_10  
 Method ITMS; CID Peptide 84.17

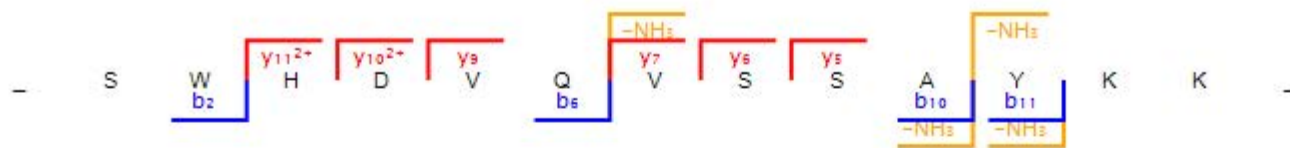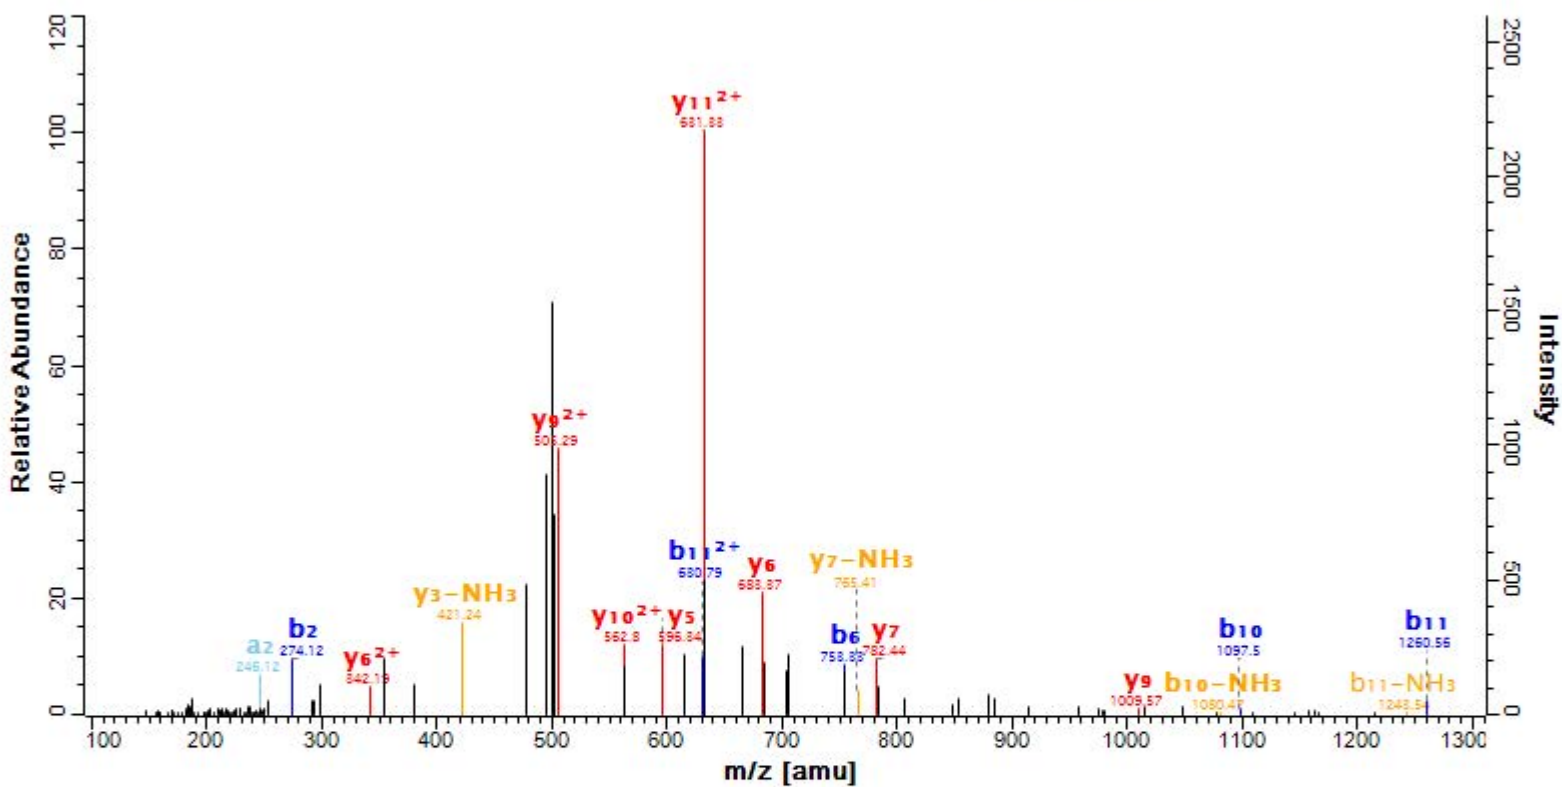

### precursor information

|                   |                 |
|-------------------|-----------------|
| Mass:             | 1533.75805      |
| m/z:              | 512.25996       |
| Charge:           | 3+              |
| Retentiontime:    | 13.887853622436 |
| Score:            | 84.16871        |
| Mass Error [ppm]: | 0.29868         |
| PEP:              | 0.00030308      |
| Precursor Type:   | MULTI           |

### general information

|                       |            |
|-----------------------|------------|
| Annotation:           | 10 of 13   |
| AminoAcids Coverag    | 77 %       |
| Intensity Coverage:   | 41 %       |
| Peak Coverage:        | 15 %       |
| Protein Localisation: | 96 ... 108 |

|    | a ion         | b <sup>2+</sup> ion | b ion         |        |       | y ion         | y <sup>2+</sup> ion |
|----|---------------|---------------------|---------------|--------|-------|---------------|---------------------|
|    | Δ dalton mass | Δ dalton mass       | Δ dalton mass | seq    |       | Δ dalton mass | Δ dalton mass       |
|    | 60.04         | 88.04               | 88.04         | 1 S 12 |       |               |                     |
| +0 | 246.1         | 274.1               | +0.068274.1   | 2 W 11 | 1448  | 1448          |                     |
|    | 383.2         | 411.2               | 411.2         | 3 H 10 | 1262  | 631.3         | +0.209              |
|    | 498.2         | 526.2               | 526.2         | 4 D 9  | 1125  | 562.8         | +0.000              |
|    | 597.3         | 625.3               | 625.3         | 5 V 8  | 1010  | +0.073505.3   | -0.42               |
|    | 725.3         | 753.3               | +0.048753.3   | 6 Q 7  | 910.5 | 910.5         |                     |
|    | 824.4         | 852.4               | 852.4         | 7 V 6  | 782.4 | +0.046782.4   |                     |
|    | 911.4         | 939.4               | 939.4         | 8 S 5  | 683.4 | +0.028342.2   | +0.020              |
|    | 998.5         | 1026                | 1026          | 9 S 4  | 596.3 | +0.057596.3   |                     |
|    | 1070          | 1098                | +0.1741098    | 10 A 3 | 509.3 | 509.3         |                     |
|    | 1233          | -0.13 630.8         | +0.07 1261    | 11 Y 2 | 438.3 | 438.3         |                     |
|    | 1361          | 1389                | 1389          | 12 K 1 | 275.2 | 275.2         |                     |
|    |               |                     |               | 13 K 0 | 147.1 | 147.1         |                     |

Scan number 1479 Raw file LNCAP\_Silac\_23F10\_set2\_10  
 Method ITMS; CID Pepti... 53.55

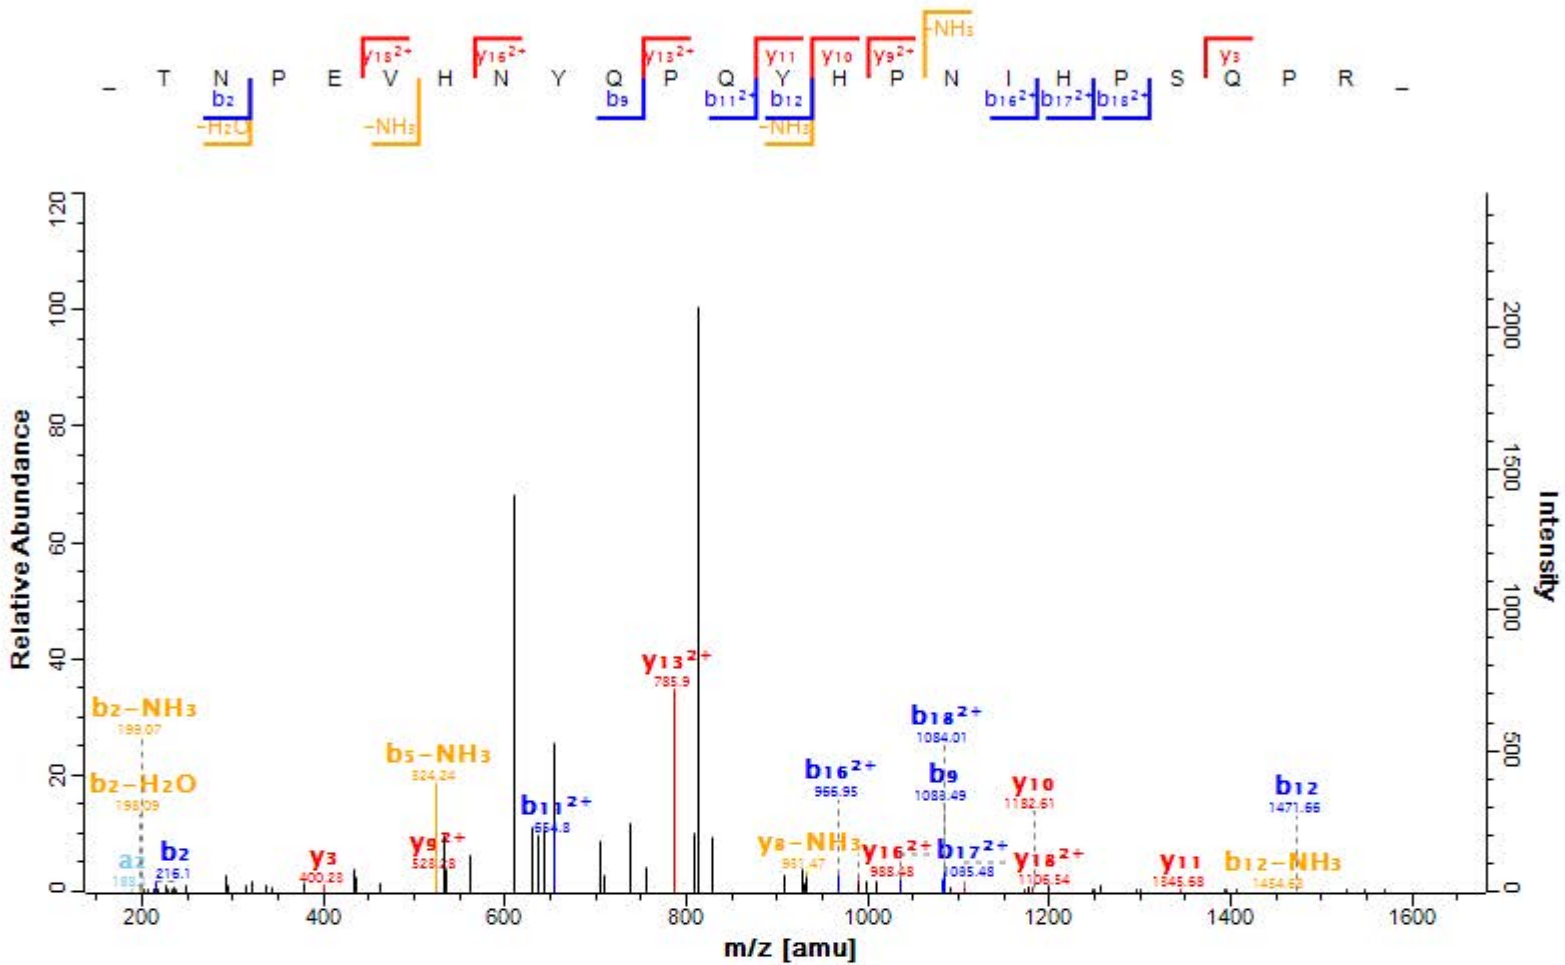

precursor information

|                   |                 |
|-------------------|-----------------|
| Mass:             | 2652.25731      |
| m/z:              | 664.0716        |
| Charge:           | 4+              |
| Retentiontime:    | 14.328432083129 |
| Score:            | 53.55374        |
| Mass Error [ppm]: | -0.32803        |
| PEP:              | 0.0022534       |
| Precursor Type:   | MULTI           |

general information

|                       |             |
|-----------------------|-------------|
| Annotation:           | 15 of 22    |
| AminoAcids Coverage:  | 68 %        |
| Intensity Coverage:   | 18 %        |
| Peak Coverage:        | 20 %        |
| Protein Localisation: | 440 ... 461 |

|       | a ion         | b <sup>2+</sup> ion | b ion         |    |     |    | y ion         | y <sup>2+</sup> ion |
|-------|---------------|---------------------|---------------|----|-----|----|---------------|---------------------|
|       | Δ dalton mass | Δ dalton mass       | Δ dalton mass |    | seq |    | Δ dalton mass | Δ dalton mass       |
|       | 74.06         | 102.1               | 102.1         | 1  | T   | 21 |               |                     |
| +0.22 | 188.1         | 216.1               | +0.11 216.1   | 2  | N   | 20 | 2552          | 2552                |
|       | 285.2         | 313.2               | 313.2         | 3  | P   | 19 | 2438          | 2438                |
|       | 414.2         | 442.2               | 442.2         | 4  | E   | 18 | 2341          | 2341                |
|       | 513.3         | 541.3               | 541.3         | 5  | V   | 17 | 2212          | 1107 +0.44          |
|       | 650.3         | 678.3               | 678.3         | 6  | H   | 16 | 2113          | 2113                |
|       | 764.4         | 792.4               | 792.4         | 7  | N   | 15 | 1976          | 988.5 +0.25         |
|       | 927.4         | 955.4               | 955.4         | 8  | Y   | 14 | 1862          | 1862                |
|       | 1055          | 1083                | -0.29 1083    | 9  | Q   | 13 | 1699          | 1699                |
|       | 1153          | 1181                | 1181          | 10 | P   | 12 | 1571          | 785.9 +0.21         |
|       | 1281          | +0.19 654.8         | 1309          | 11 | Q   | 11 | 1474          | 1474                |
|       | 1444          | 1472                | -0.17 1472    | 12 | Y   | 10 | 1346          | -0.08 1346          |
|       | 1581          | 1609                | 1609          | 13 | H   | 9  | 1183          | -0.09 1183          |
|       | 1678          | 1706                | 1706          | 14 | P   | 8  | 1046          | 523.3 +0.10         |
|       | 1792          | 1820                | 1820          | 15 | N   | 7  | 948.5         | 948.5               |
|       | 1905          | +0.22 1967          | 1933          | 16 | I   | 6  | 834.5         | 834.5               |
|       | 2042          | +0.26 1035          | 2070          | 17 | H   | 5  | 721.4         | 721.4               |
|       | 2139          | +0.39 1084          | 2167          | 18 | P   | 4  | 584.3         | 584.3               |
|       | 2226          | 2254                | 2254          | 19 | S   | 3  | 487.3         | 487.3               |
|       | 2354          | 2382                | 2382          | 20 | Q   | 2  | 400.2         | +0.10 400.2         |
|       | 2451          | 2479                | 2479          | 21 | P   | 1  | 272.2         | 272.2               |
|       |               |                     |               | 22 | R   | 0  | 175.1         | 175.1               |



Scan number 1489 Raw file LNCAP\_Silac\_23F10\_set2\_10  
 Method ITMS; CID Pepti... 141.55

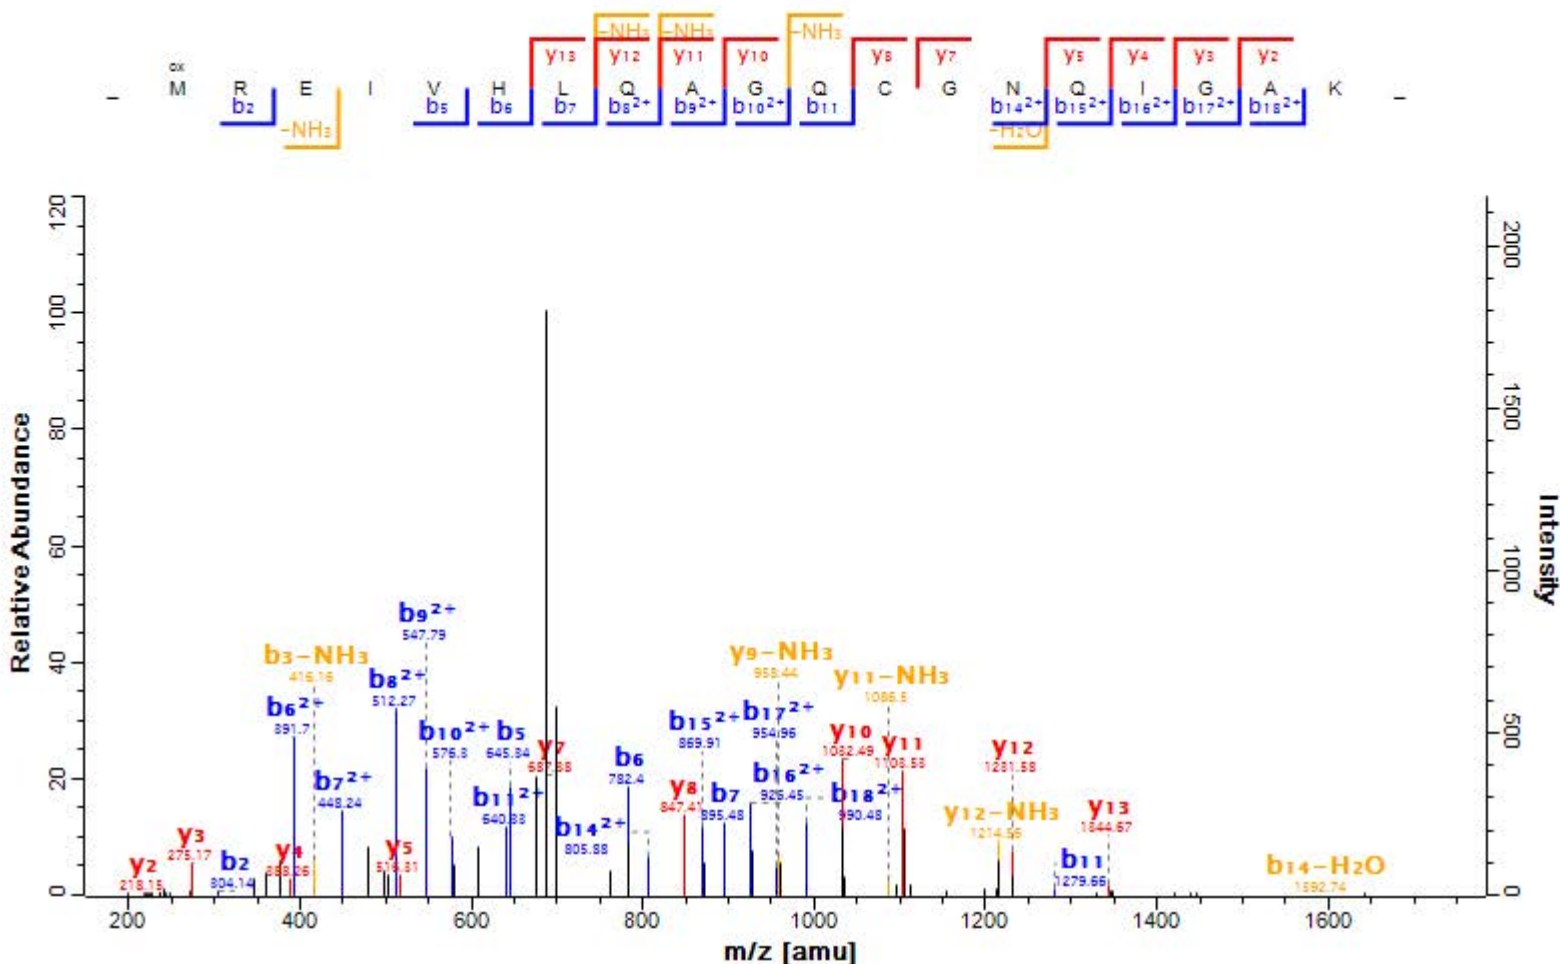

#### precursor information

|                   |                 |
|-------------------|-----------------|
| Mass:             | 2125.05169      |
| m/z:              | 709.35784       |
| Charge:           | 3+              |
| Retentiontime:    | 14.391808509826 |
| Score:            | 141.5524        |
| Mass Error [ppm]: | -0.18155        |
| PEP:              | 1.9537E-18      |
| Precursor Type:   | MULTI           |

#### general information

|                       |          |
|-----------------------|----------|
| Annotation:           | 17 of 19 |
| AminoAcids Coverage:  | 89 %     |
| Intensity Coverage:   | 52 %     |
| Peak Coverage:        | 30 %     |
| Protein Localisation: | 1 ... 19 |

| b <sup>2+</sup> ion |          | b ion     |          |     |   |          | y ion    |           |
|---------------------|----------|-----------|----------|-----|---|----------|----------|-----------|
| Δ dalton            | mass     | Δ dalton  | mass     | seq |   | Δ dalton | mass     |           |
|                     | 148.0427 |           | 148.0427 | 1   | M | 18       |          |           |
|                     | 304.1438 | +0.244946 | 304.1438 | 2   | R | 17       | 1979.024 |           |
|                     | 433.1864 |           | 433.1864 | 3   | E | 16       | 1822.923 |           |
|                     | 546.2704 |           | 546.2704 | 4   | I | 15       | 1693.88  |           |
|                     | 645.3389 | -0.00115  | 645.3389 | 5   | V | 14       | 1580.796 |           |
| +0.217277           | 391.7025 | -0.03162  | 782.3978 | 6   | H | 13       | 1481.728 |           |
| +0.152418           | 448.2446 | +0.054299 | 895.4818 | 7   | L | 12       | 1344.669 | -0.08573  |
| +0.265097           | 512.2738 |           | 1023.54  | 8   | Q | 11       | 1231.585 | -0.06893  |
| +0.208759           | 547.7924 |           | 1094.578 | 9   | A | 10       | 1103.526 | -0.05381  |
| +0.245451           | 576.3031 |           | 1151.599 | 10  | G | 9        | 1032.489 | -0.0112   |
| +0.055091           | 640.3324 | -0.15049  | 1279.658 | 11  | Q | 8        | 975.4676 |           |
|                     | 1439.688 |           | 1439.688 | 12  | C | 7        | 847.4091 | -0.00715  |
|                     | 1496.71  |           | 1496.71  | 13  | G | 6        | 687.3784 | +0.087711 |
| +0.492679           | 805.8799 |           | 1610.753 | 14  | N | 5        | 630.357  |           |
| +0.251354           | 869.9092 |           | 1738.811 | 15  | Q | 4        | 516.314  | -0.4906   |
| +0.037569           | 926.4513 |           | 1851.895 | 16  | I | 3        | 388.2554 | +0.116197 |
| +0.224591           | 954.962  |           | 1908.917 | 17  | G | 2        | 275.1714 | -0.05661  |
| +0.187418           | 990.4806 |           | 1979.954 | 18  | A | 1        | 218.1499 | -0.092    |
|                     |          |           |          | 19  | K | 0        | 147.1128 |           |

Scan number 2236 Raw file LNCAP\_Silac\_23F10\_set2\_10  
 Method ITMS; CID Pepti... 142.45

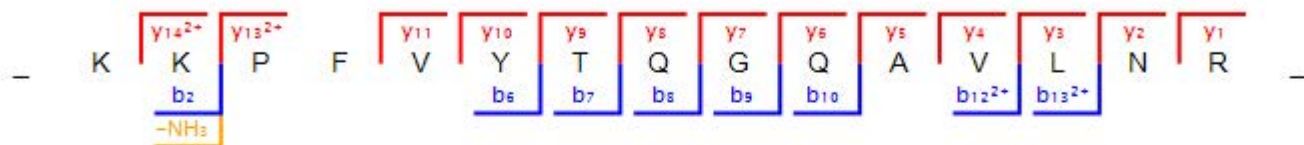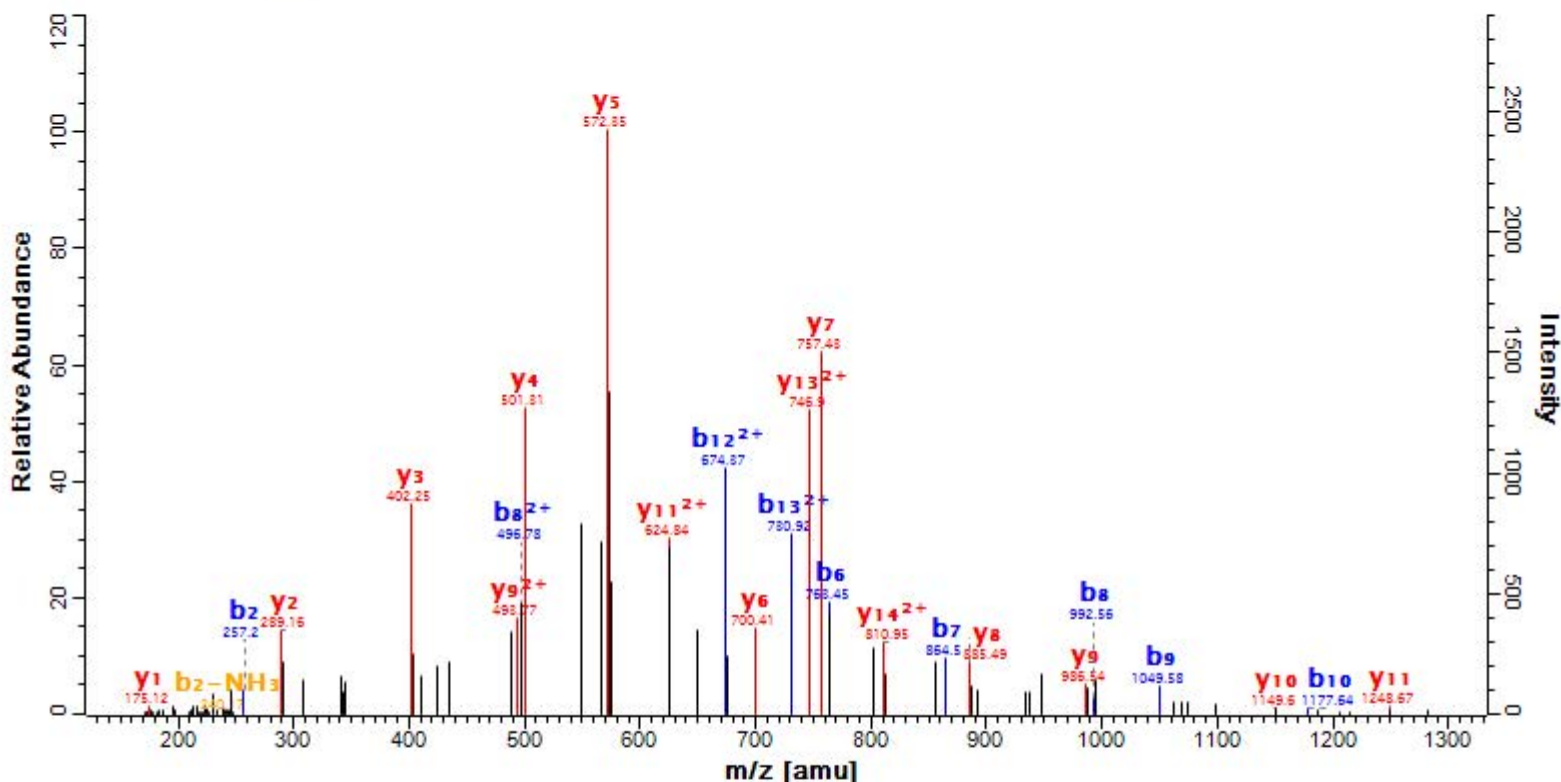

#### precursor information

|                   |                 |
|-------------------|-----------------|
| Mass:             | 1747.97402      |
| m/z:              | 583.66528       |
| Charge:           | 3+              |
| Retentiontime:    | 19.275974273681 |
| Score:            | 142.451         |
| Mass Error [ppm]: | 0.38951         |
| PEP:              | 4.2745E-13      |
| Precursor Type:   | MULTI           |

#### general information

|                       |             |
|-----------------------|-------------|
| Annotation:           | 14 of 15    |
| AminoAcids Coverage:  | 93 %        |
| Intensity Coverage:   | 55 %        |
| Peak Coverage:        | 26 %        |
| Protein Localisation: | 170 ... 184 |

| b <sup>2+</sup> ion |        | b ion    |        | seq |   |    | y ion    |         | y <sup>2+</sup> ion |         |
|---------------------|--------|----------|--------|-----|---|----|----------|---------|---------------------|---------|
| Δ dalton            | mass   | Δ dalton | mass   |     |   |    | Δ dalton | mass    | Δ dalton            | mass    |
|                     | 129.1  |          | 129.1  | 1   | K | 14 |          |         |                     |         |
|                     | 257.2  | -0.101   | 257.2  | 2   | K | 13 | 1620.9   |         | 810.95              | +0.3534 |
|                     | 354.25 |          | 354.25 | 3   | P | 12 | 1492.8   |         | 746.9               | +0.2791 |
|                     | 501.32 |          | 501.32 | 4   | F | 11 | 1395.7   |         | 1395.7              |         |
|                     | 600.39 |          | 600.39 | 5   | V | 10 | 1248.7   | -0.09   | 624.84              | -0.064  |
|                     | 763.45 | -0.056   | 763.45 | 6   | Y | 9  | 1149.6   | +0.0724 | 1149.6              |         |
|                     | 864.5  | +0.0166  | 864.5  | 7   | T | 8  | 986.54   | -0.052  | 493.77              | +0.3231 |
| -0.088              | 496.78 | -0.116   | 992.56 | 8   | Q | 7  | 885.49   | +0.1079 | 885.49              |         |
|                     | 1049.6 | +0.0663  | 1049.6 | 9   | G | 6  | 757.43   | +0.1049 | 757.43              |         |
|                     | 1177.6 | +0.1635  | 1177.6 | 10  | Q | 5  | 700.41   | -0.022  | 700.41              |         |
|                     | 1248.7 |          | 1248.7 | 11  | A | 4  | 572.35   | +0.1624 | 572.35              |         |
| +0.1297             | 674.37 |          | 1347.7 | 12  | V | 3  | 501.31   | -0.019  | 501.31              |         |
| +0.2138             | 730.92 |          | 1460.8 | 13  | L | 2  | 402.25   | +0.1284 | 402.25              |         |
|                     | 1574.9 |          | 1574.9 | 14  | N | 1  | 289.16   | +0.0737 | 289.16              |         |
|                     |        |          |        | 15  | R | 0  | 175.12   | +0.0517 | 175.12              |         |

Scan number 2243 Raw file LNCAP\_Silac\_23F10\_set2\_10  
 Method ITMS; CID Pepti... 208.27

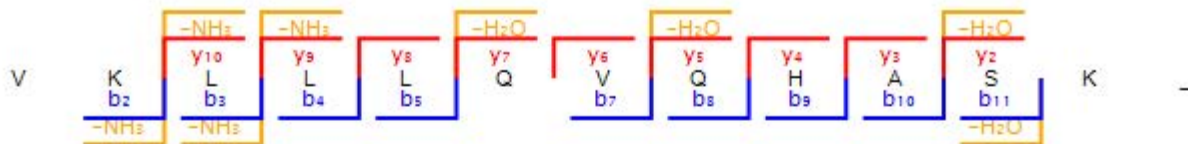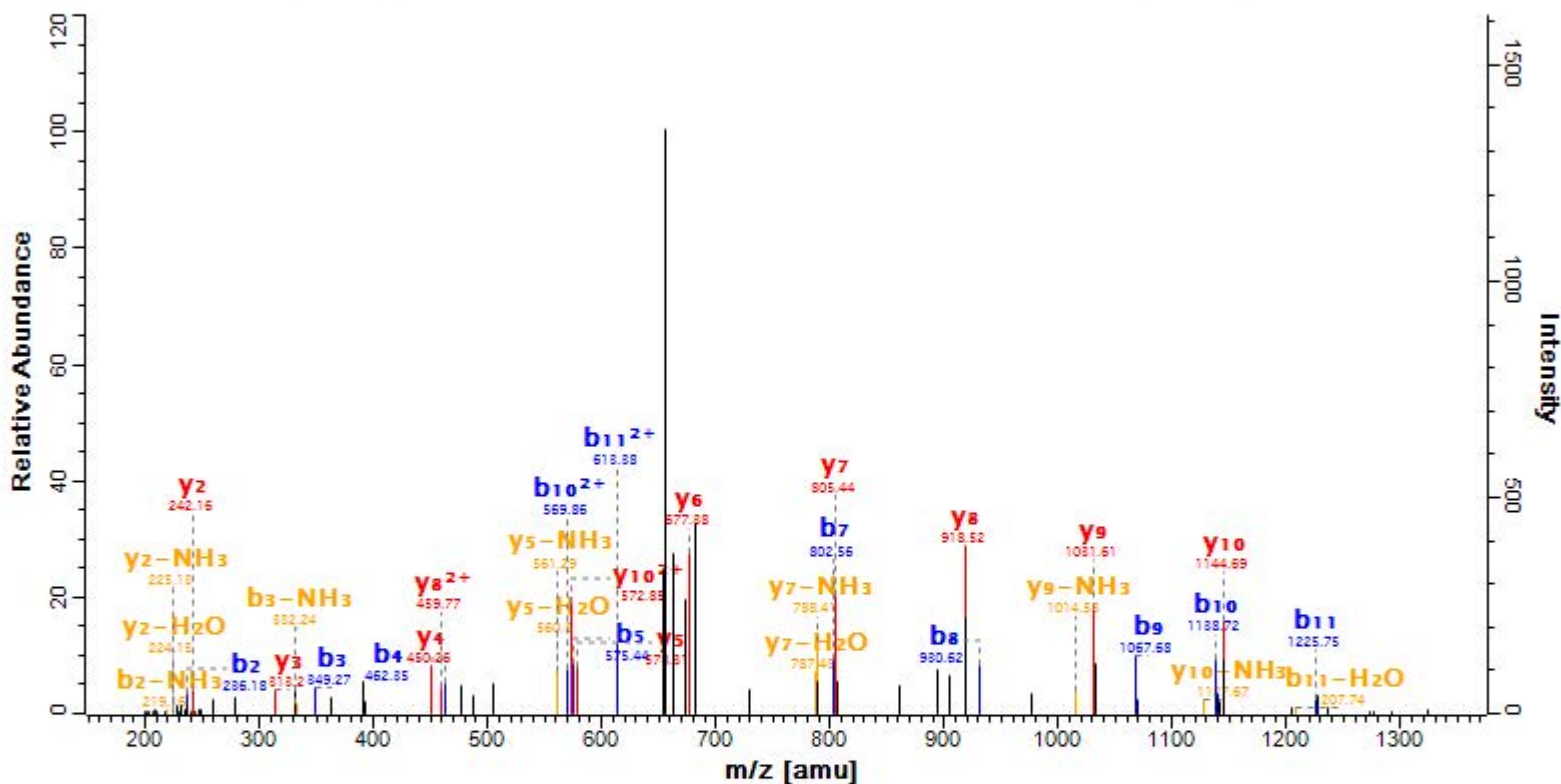

#### precursor information

|                   |                 |
|-------------------|-----------------|
| Mass:             | 1362.83488      |
| m/z:              | 682.42471       |
| Charge:           | 2+              |
| Retentiontime:    | 19.315662384033 |
| Score:            | 208.2652        |
| Mass Error [ppm]: | 0.11346         |
| PEP:              | 9.6962E-19      |
| Precursor Type:   | MULTI           |

#### general information

|                       |           |
|-----------------------|-----------|
| Annotation:           | 10 of 12  |
| AminoAcids Coverage:  | 83 %      |
| Intensity Coverage:   | 45 %      |
| Peak Coverage:        | 33 %      |
| Protein Localisation: | 32 ... 43 |

| b <sup>2+</sup> ion |        | b ion    |        | seq |   |    | y ion    |         | y <sup>2+</sup> ion |         |
|---------------------|--------|----------|--------|-----|---|----|----------|---------|---------------------|---------|
| Δ dalton            | mass   | Δ dalton | mass   |     |   |    | Δ dalton | mass    | Δ dalton            | mass    |
|                     | 100.08 |          | 100.08 | 1   | V | 11 |          |         |                     |         |
|                     | 236.18 | +0.0068  | 236.18 | 2   | K | 10 | 1280.8   |         | 1280.8              |         |
|                     | 349.27 | +0.215   | 349.27 | 3   | L | 9  | 1144.7   | -0.121  | 572.85              | +0.1749 |
|                     | 462.35 | -0.011   | 462.35 | 4   | L | 8  | 1031.6   | +0.0924 | 1031.6              |         |
|                     | 575.44 | +0.1051  | 575.44 | 5   | L | 7  | 918.52   | +0.1266 | 459.77              | +0.2143 |
|                     | 703.5  |          | 703.5  | 6   | Q | 6  | 805.44   | -0.017  | 805.44              |         |
|                     | 802.56 | +0.1566  | 802.56 | 7   | V | 5  | 677.38   | -0.045  | 677.38              |         |
|                     | 930.62 | -0.057   | 930.62 | 8   | Q | 4  | 578.31   | +0.1358 | 578.31              |         |
|                     | 1067.7 | +0.0714  | 1067.7 | 9   | H | 3  | 450.26   | +0.1379 | 450.26              |         |
| +0.2769             | 569.86 | -0.099   | 1138.7 | 10  | A | 2  | 313.2    | +0.0117 | 313.2               |         |
| +0.2089             | 613.38 | -0.043   | 1225.8 | 11  | S | 1  | 242.16   | +0.0477 | 242.16              |         |
|                     |        |          |        | 12  | K | 0  | 155.13   |         | 155.13              |         |

Scan number 2593 Raw file LNCAP\_Silac\_23F10\_set2\_10  
 Method ITMS; CID Pepti... 71.03

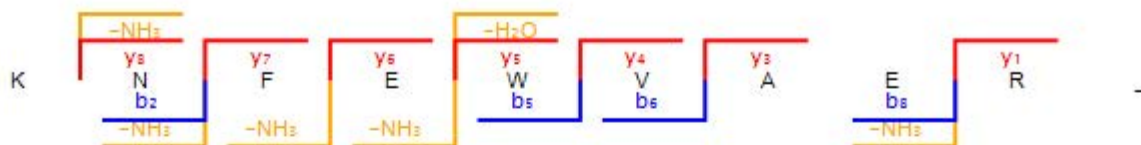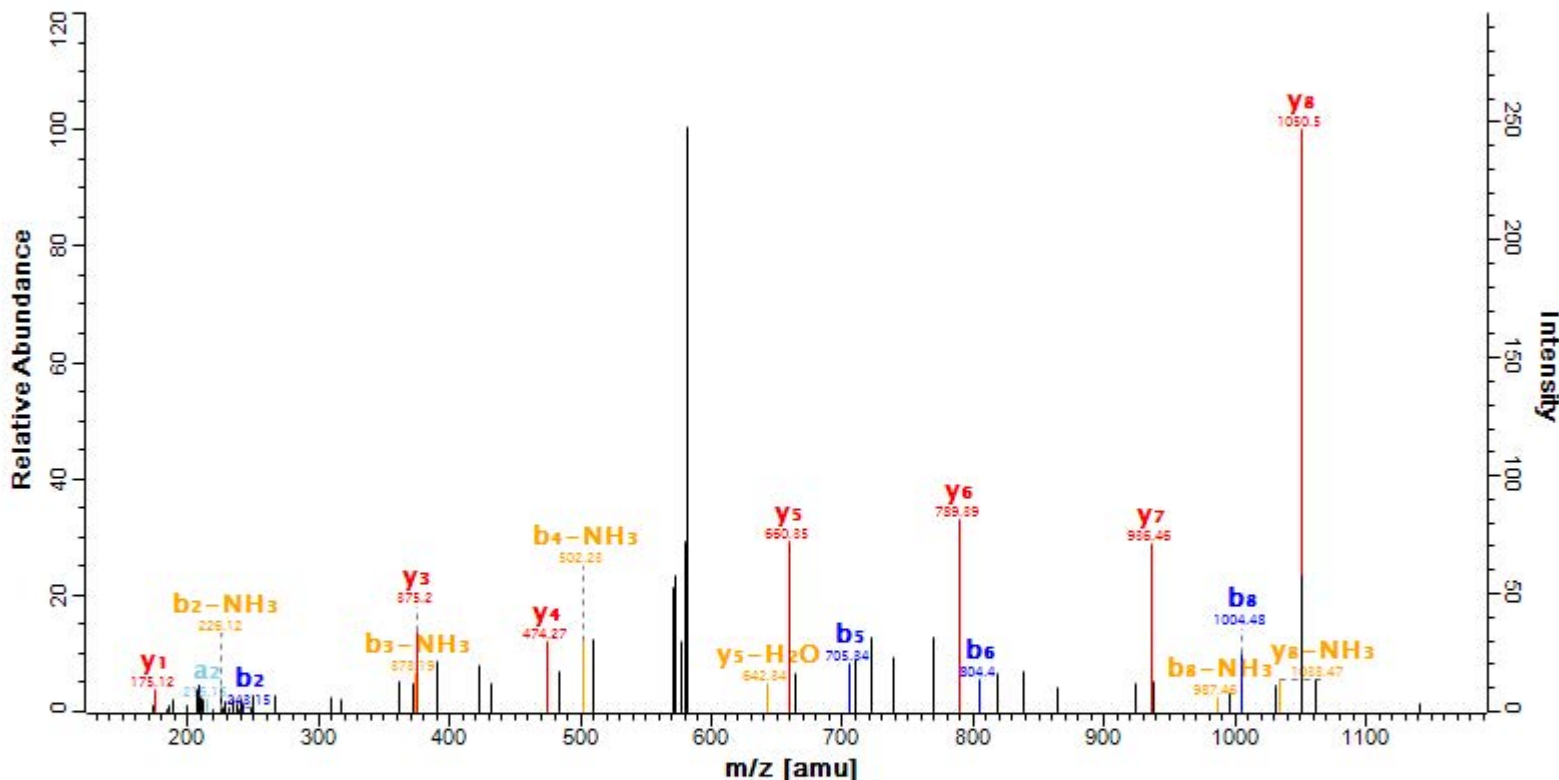

#### precursor information

|                       |                 |
|-----------------------|-----------------|
| Mass:                 | 1177.58786      |
| m/z:                  | 589.80121       |
| Charge:               | 2+              |
| Retentiontime:        | 21.734296798706 |
| Score:                | 71.03031        |
| Mass Error [ppm]:     | -0.12427        |
| PEP:                  | 0.0073479       |
| Precursor Type:       | MULTI           |
| Annotation:           | 8 of 9          |
| AminoAcids Coverage:  | 89 %            |
| Intensity Coverage:   | 39 %            |
| Peak Coverage:        | 24 %            |
| Protein Localisation: | 273 ... 281     |

| a ion           |          | b ion           |          | seq |   | y ion           |                    |
|-----------------|----------|-----------------|----------|-----|---|-----------------|--------------------|
| $\Delta$ dalton | mass     | $\Delta$ dalton | mass     |     |   | $\Delta$ dalton | mass               |
|                 | 101.1073 |                 | 129.1022 | 1   | K | 8               |                    |
| +0.111497       | 215.1503 | -0.16842        | 243.1452 | 2   | N | 7               | 1050.5 +0.023605   |
|                 | 362.2187 |                 | 390.2136 | 3   | F | 6               | 936.4574 +0.141728 |
|                 | 491.2613 |                 | 519.2562 | 4   | E | 5               | 789.389 -0.18433   |
|                 | 677.3406 | -0.28941        | 705.3355 | 5   | W | 4               | 660.3464 -0.04841  |
|                 | 776.409  | -0.12961        | 804.4039 | 6   | V | 3               | 474.2671 +0.177324 |
|                 | 847.4461 |                 | 875.441  | 7   | A | 2               | 375.1987 -0.01818  |
|                 | 976.4887 | +0.095494       | 1004.484 | 8   | E | 1               | 304.1615           |
|                 |          |                 |          | 9   | R | 0               | 175.119 +0.010488  |

Scan number 2819 Raw file LNCAP\_Silac\_23F10\_set2\_10  
 Method ITMS: CID Pepti... 65.04

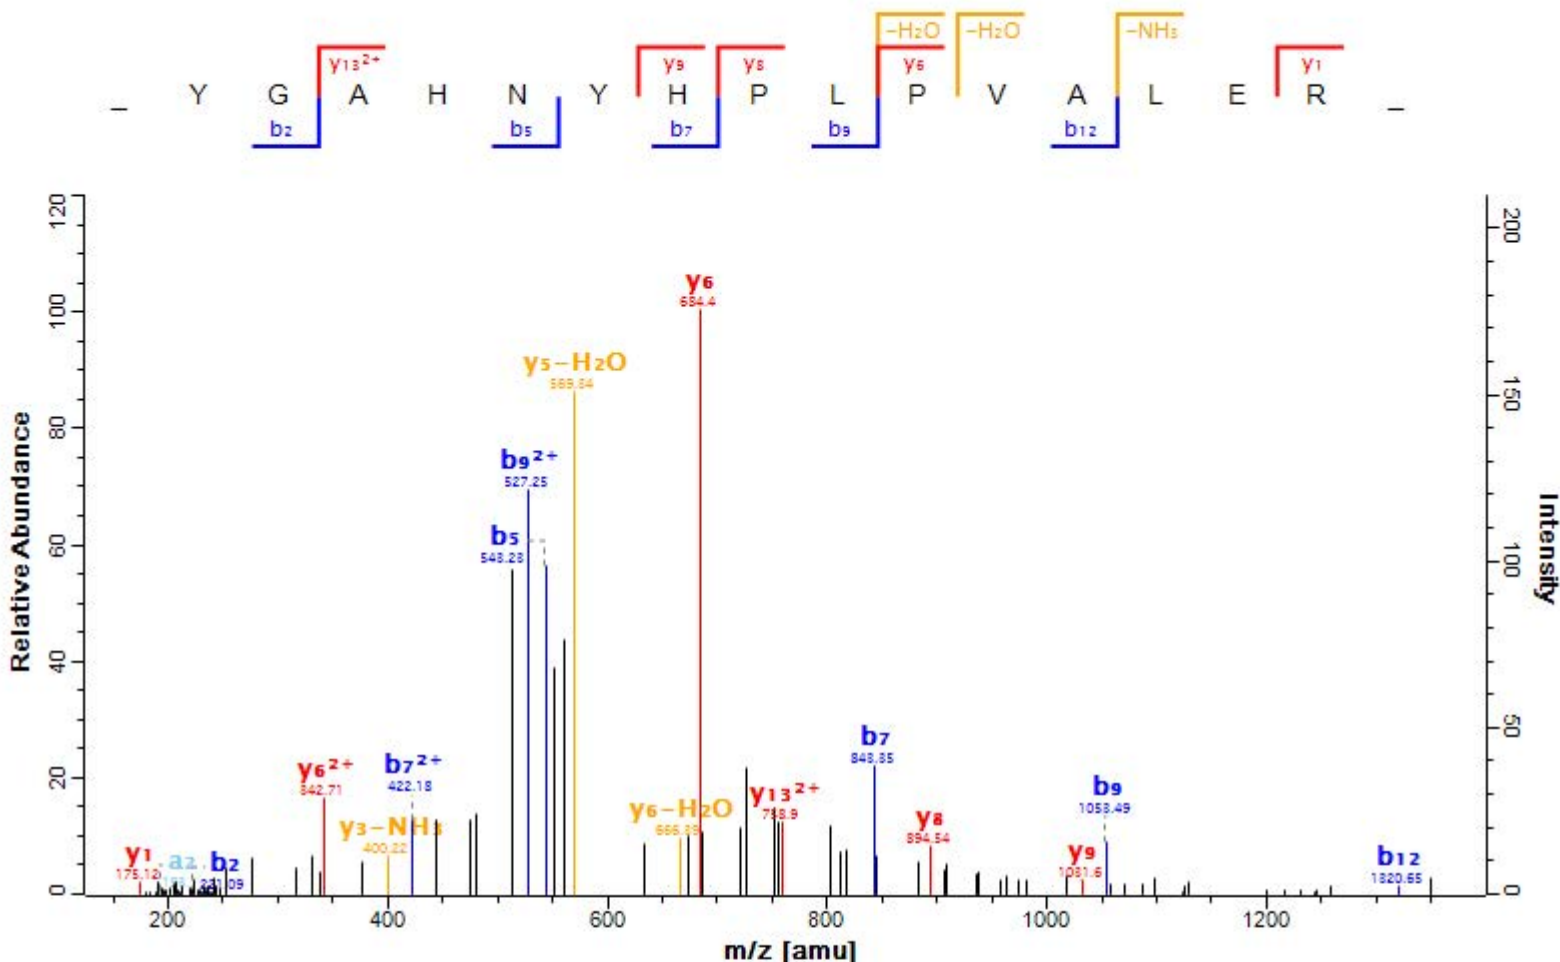

#### precursor information

|                   |                 |
|-------------------|-----------------|
| Mass:             | 1735.87954      |
| m/z:              | 579.63379       |
| Charge:           | 3+              |
| Retentiontime:    | 23.340553283691 |
| Score:            | 65.04293        |
| Mass Error [ppm]: | 0.058699        |
| PEP:              | 0.0031238       |
| Precursor Type:   | MULTI           |

#### general information

|                       |           |
|-----------------------|-----------|
| Annotation:           | 11 of 15  |
| AminoAcids Coverag    | 73 %      |
| Intensity Coverage:   | 50 %      |
| Peak Coverage:        | 18 %      |
| Protein Localisation: | 50 ... 64 |

|       | a ion         | b <sup>2+</sup> ion | b ion         |     |   | y ion         | y <sup>2+</sup> ion |
|-------|---------------|---------------------|---------------|-----|---|---------------|---------------------|
|       | Δ dalton mass | Δ dalton mass       | Δ dalton mass | seq |   | Δ dalton mass | Δ dalton mass       |
|       | 136.1         | 164.1               | 164.1         | 1   | Y | 14            |                     |
| -0.04 | 193.1         | 221.1               | +0.053221.1   | 2   | G | 13            | 1574                |
|       | 264.1         | 292.1               | 292.1         | 3   | A | 12            | 1517                |
|       | 401.2         | 429.2               | 429.2         | 4   | H | 11            | 1446                |
|       | 515.2         | 543.2               | +0.226543.2   | 5   | N | 10            | 1309                |
|       | 678.3         | 706.3               | 706.3         | 6   | Y | 9             | 1195                |
|       | 815.4         | +0.137422.2         | +0.067843.4   | 7   | H | 8             | 1032                |
|       | 912.4         | 940.4               | 940.4         | 8   | P | 7             | 894.5               |
|       | 1025          | +0.086527.2         | +0.0351053    | 9   | L | 6             | 797.5               |
|       | 1123          | 1151                | 1151          | 10  | P | 5             | 684.4               |
|       | 1222          | 1250                | 1250          | 11  | V | 4             | 587.4               |
|       | 1293          | 1321                | +0.3          | 12  | A | 3             | 488.3               |
|       | 1406          | 1434                | 1434          | 13  | L | 2             | 417.2               |
|       | 1535          | 1563                | 1563          | 14  | E | 1             | 304.2               |
|       |               |                     |               | 15  | R | 0             | 175.1               |

Scan number 3245 Raw file LNCAP\_Silac\_23F10\_set2\_10  
 Method ITMS: CID Pepti... 106.26

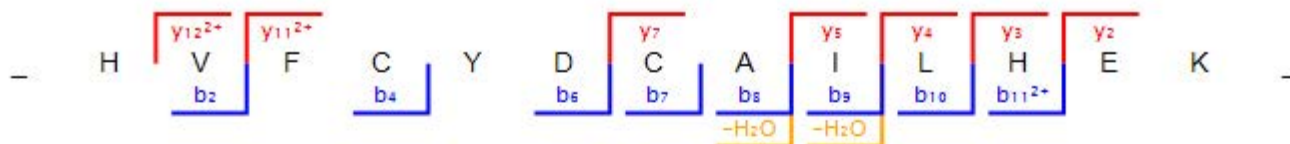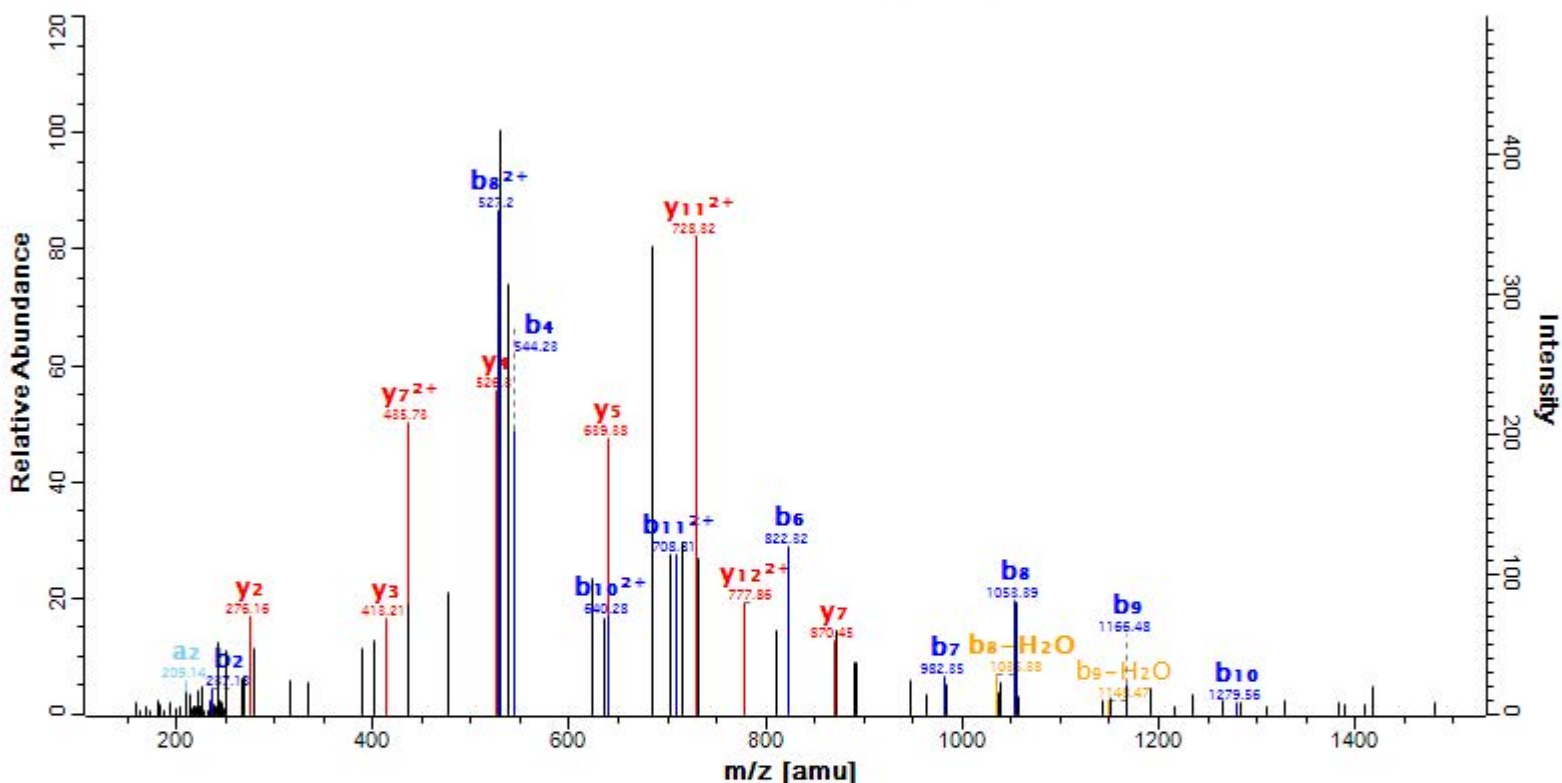

precursor information

|                   |                 |
|-------------------|-----------------|
| Mass:             | 1690.75922      |
| m/z:              | 564.59368       |
| Charge:           | 3+              |
| Retentiontime:    | 26.233316421508 |
| Score:            | 106.2576        |
| Mass Error [ppm]: | -0.21578        |
| PEP:              | 9.4026E-06      |
| Precursor Type:   | MULTI           |

general information

|                       |             |
|-----------------------|-------------|
| Annotation:           | 11 of 13    |
| AminoAcids Coverage:  | 85 %        |
| Intensity Coverage:   | 43 %        |
| Peak Coverage:        | 19 %        |
| Protein Localisation: | 127 ... 139 |

| a ion         | b <sup>2+</sup> ion | b ion         |     |   | y ion         | y <sup>2+</sup> ion     |
|---------------|---------------------|---------------|-----|---|---------------|-------------------------|
| Δ dalton mass | Δ dalton mass       | Δ dalton mass | seq |   | Δ dalton mass | Δ dalton mass           |
| 110.1         | 138.1               | 138.1         | 1   | H | 12            |                         |
| +0.089 209.1  | 237.1               | +0.018 237.1  | 2   | V | 11            | 1555 777.9 -0.02        |
| 356.2         | 384.2               | 384.2         | 3   | F | 10            | 1456 728.3 +0.24        |
| 516.2         | 544.2               | -0.18 544.2   | 4   | C | 9             | 1309 1309               |
| 679.3         | 707.3               | 707.3         | 5   | Y | 8             | 1149 1149               |
| 794.3         | 822.3               | +0.148 822.3  | 6   | D | 7             | 985.5 985.5             |
| 954.4         | 982.4               | -0.27 982.4   | 7   | C | 6             | 870.5 -0.12 435.7 -0.05 |
| 1025          | +0.449 527.2        | -0.02 1053    | 8   | A | 5             | 710.4 710.4             |
| 1138          | 1166                | -0.04 1166    | 9   | I | 4             | 639.4 -0.04 639.4       |
| 1252          | +0.052 640.3        | -0.01 1280    | 10  | L | 3             | 526.3 +0.03 526.3       |
| 1389          | +0.112 708.8        | 1417          | 11  | H | 2             | 413.2 +0.169 413.2      |
| 1518          | 1546                | 1546          | 12  | E | 1             | 276.2 -0.01 276.2       |
|               |                     |               | 13  | K | 0             | 147.1 147.1             |

Scan number 3385 Raw file LNCAP\_Silac\_23F10\_set2\_10  
 Method ITMS; CID Pepti... 119.47

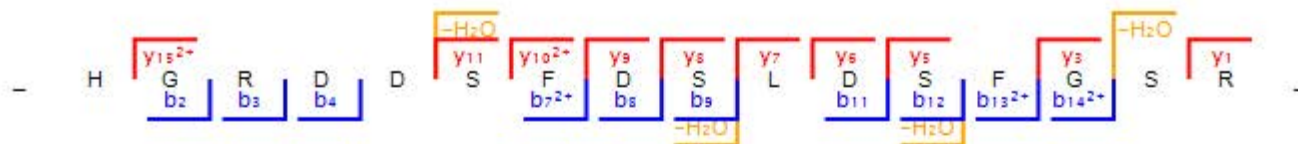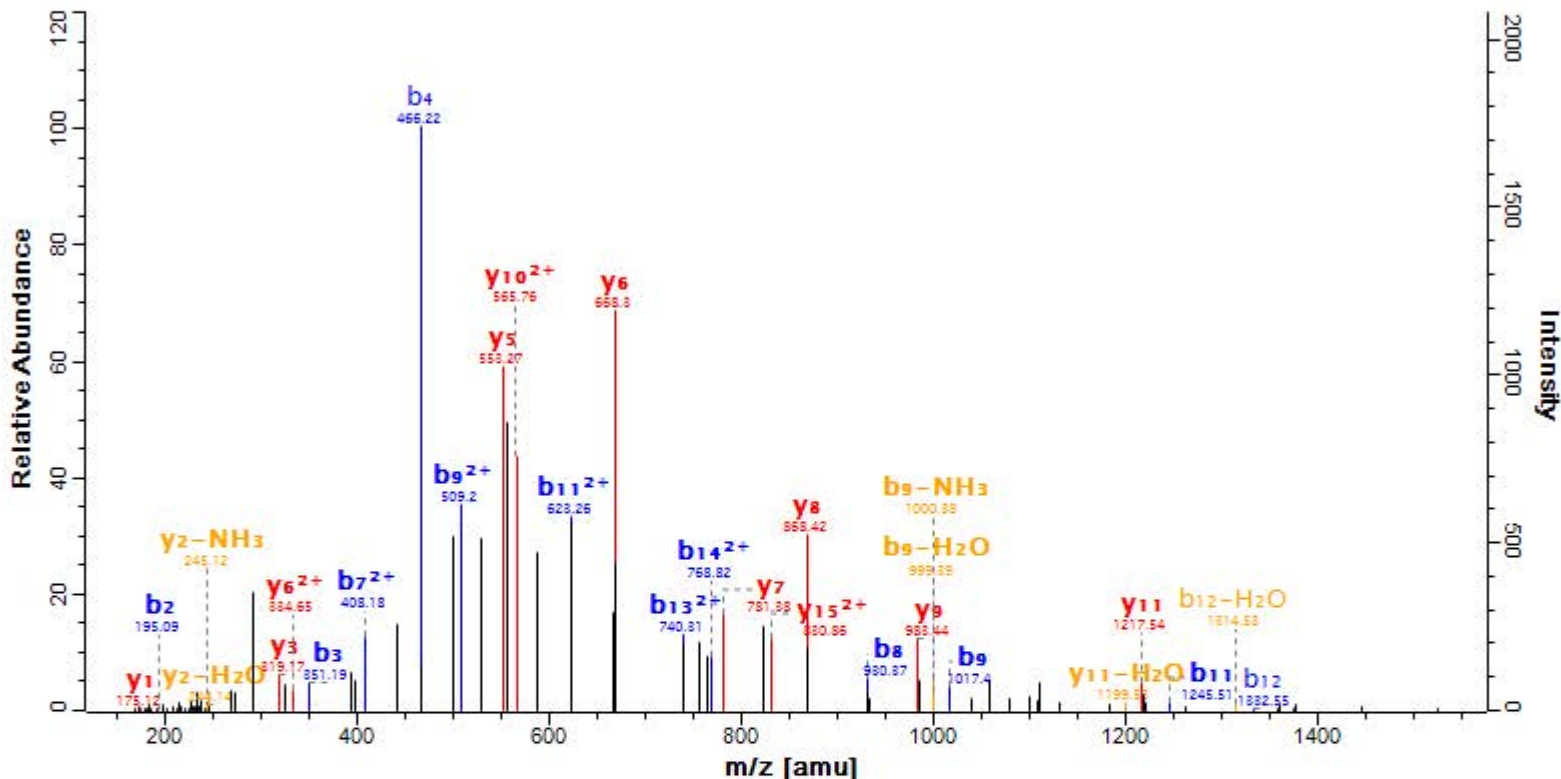

#### precursor information

|                   |                 |
|-------------------|-----------------|
| Mass:             | 1796.77152      |
| m/z:              | 599.93112       |
| Charge:           | 3+              |
| Retentiontime:    | 27.224260330200 |
| Score:            | 119.4749        |
| Mass Error [ppm]: | 0.064874        |
| PEP:              | 2.257E-05       |
| Precursor Type:   | ISO             |

#### general information

|                       |             |
|-----------------------|-------------|
| Annotation:           | 15 of 16    |
| AminoAcids Coverage:  | 94 %        |
| Intensity Coverage:   | 55 %        |
| Peak Coverage:        | 27 %        |
| Protein Localisation: | 196 ... 211 |

| b <sup>2+</sup> ion |        | b ion    |        | seq |   |    | y ion    |         | y <sup>2+</sup> ion |         |
|---------------------|--------|----------|--------|-----|---|----|----------|---------|---------------------|---------|
| Δ dalton            | mass   | Δ dalton | mass   |     |   |    | Δ dalton | mass    | Δ dalton            | mass    |
|                     | 138.07 |          | 138.07 | 1   | H | 15 |          |         |                     |         |
|                     | 195.09 | +0.1251  | 195.09 | 2   | G | 14 | 1660.7   |         | 830.86              | +0.2094 |
|                     | 351.19 | +0.1928  | 351.19 | 3   | R | 13 | 1603.7   |         | 1603.7              |         |
|                     | 466.22 | -0.209   | 466.22 | 4   | D | 12 | 1447.6   |         | 1447.6              |         |
|                     | 581.24 |          | 581.24 | 5   | D | 11 | 1332.6   |         | 1332.6              |         |
|                     | 668.27 |          | 668.27 | 6   | S | 10 | 1217.5   | -0.17   | 1217.5              |         |
| +0.3342             | 408.18 |          | 815.34 | 7   | F | 9  | 1130.5   |         | 565.76              | +0.2712 |
|                     | 930.37 | -0.088   | 930.37 | 8   | D | 8  | 983.44   | +0.0354 | 983.44              |         |
| +0.1642             | 509.2  | +0.1859  | 1017.4 | 9   | S | 7  | 868.42   | -0.026  | 868.42              |         |
|                     | 1130.5 |          | 1130.5 | 10  | L | 6  | 781.38   | +0.1084 | 781.38              |         |
| +0.0848             | 623.26 | +0.1926  | 1245.5 | 11  | D | 5  | 668.3    | +0.13   | 334.65              | +0.0418 |
|                     | 1332.5 | -0.045   | 1332.5 | 12  | S | 4  | 553.27   | +0.0118 | 553.27              |         |
| -0.148              | 740.31 |          | 1479.6 | 13  | F | 3  | 466.24   |         | 466.24              |         |
| +0.1164             | 768.82 |          | 1536.6 | 14  | G | 2  | 319.17   | +0.0792 | 319.17              |         |
|                     | 1623.7 |          | 1623.7 | 15  | S | 1  | 262.15   |         | 262.15              |         |
|                     |        |          |        | 16  | R | 0  | 175.12   | +0.0238 | 175.12              |         |

Scan number 340 Raw file LNCAP\_Silac\_23F10\_set2\_10  
 Method ITMS; CID Pepti... 62.55

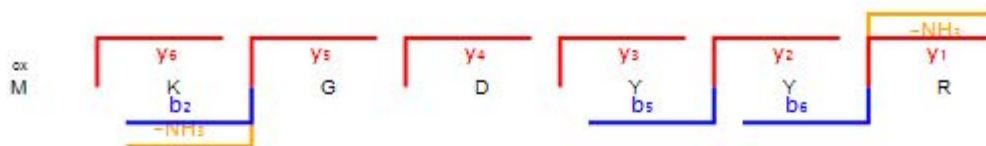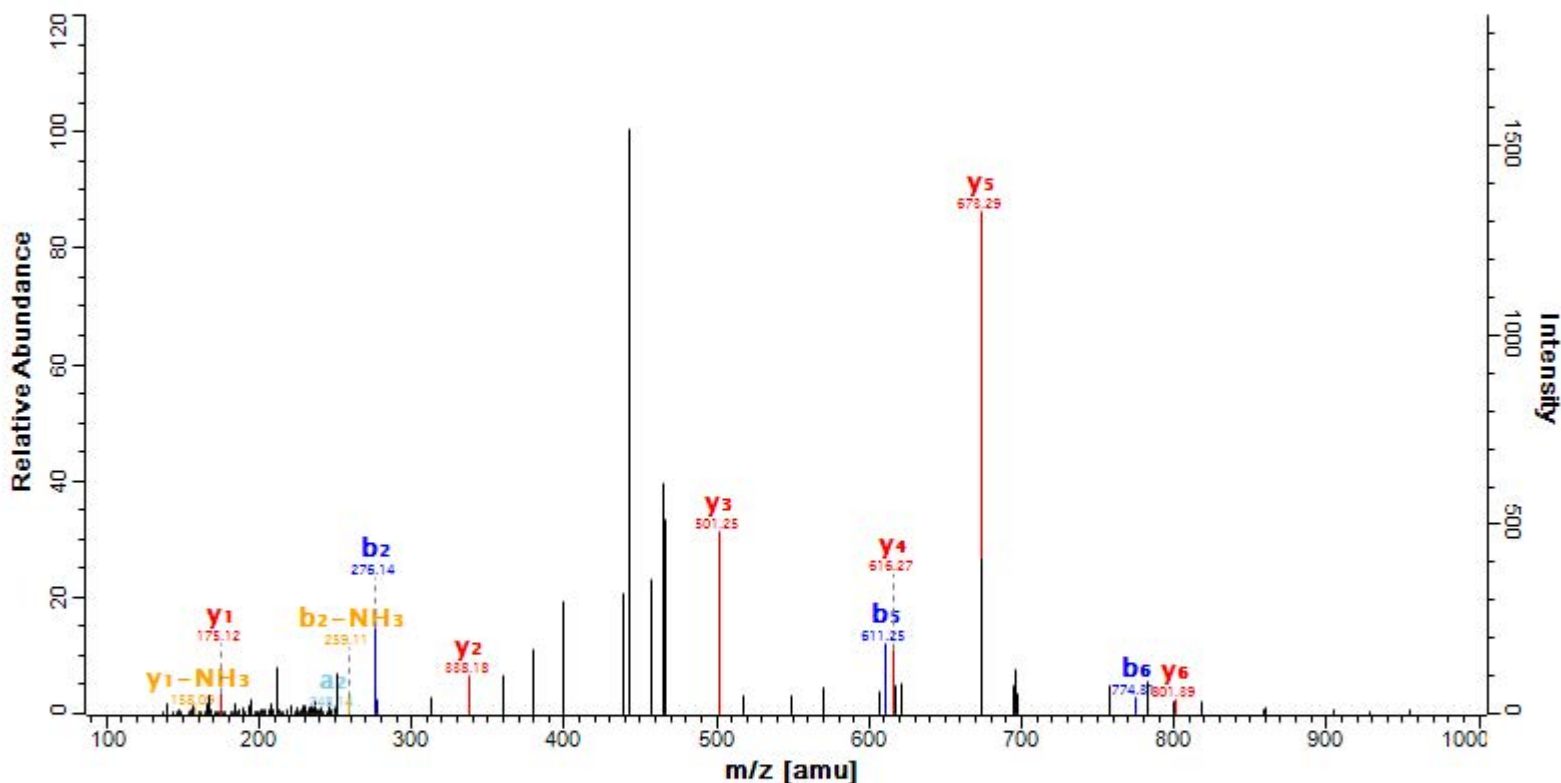

#### precursor information

|                      |                 |
|----------------------|-----------------|
| Mass:                | 947.41732       |
| $m/z$ :              | 474.71594       |
| Charge:              | 2+              |
| Retentiontime:       | 6.7635149955749 |
| Score:               | 62.54623        |
| Mass Error [ppm]:    | 0.23489         |
| Annotation:          | 6 of 7          |
| AminoAcids Coverage: | 86 %            |
| Intensity Coverage:  | 30 %            |
| Peak Coverage:       | 10 %            |

| a ion           |          | b ion           |          |   |     | y ion           |                    |
|-----------------|----------|-----------------|----------|---|-----|-----------------|--------------------|
| $\Delta$ dalton | mass     | $\Delta$ dalton | mass     |   | seq | $\Delta$ dalton | mass               |
|                 | 120.0478 |                 | 148.0427 | 1 | M   | 6               |                    |
| -0.01641        | 248.1427 | +0.030238       | 276.1376 | 2 | K   | 5               | 801.389 +0.100706  |
|                 | 305.1642 |                 | 333.1591 | 3 | G   | 4               | 673.294 +0.046743  |
|                 | 420.1911 |                 | 448.186  | 4 | D   | 3               | 616.2726 -0.06009  |
|                 | 583.2545 | -0.16527        | 611.2494 | 5 | Y   | 2               | 501.2456 +0.035183 |
|                 | 746.3178 | +0.105571       | 774.3127 | 6 | Y   | 1               | 338.1823 +0.062348 |
|                 |          |                 |          | 7 | R   | 0               | 175.119 +0.037481  |



Scan number 3953 Raw file LNCAP\_Silac\_23F10\_set2\_10  
 Method ITMS; CID Pepti... 75.59

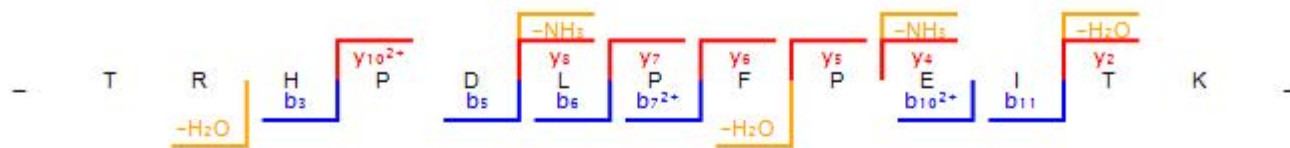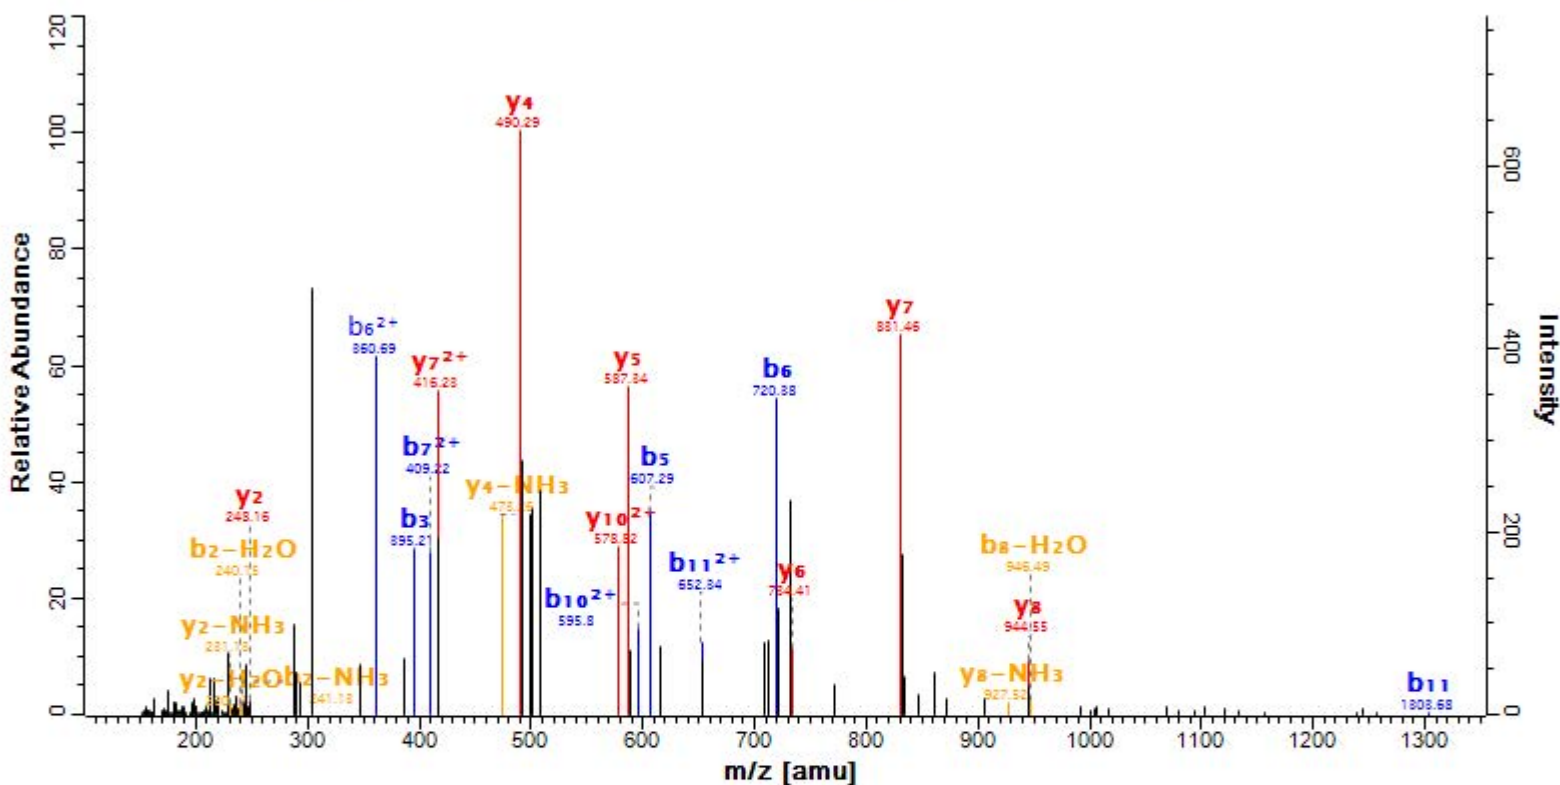

#### precursor information

|                   |                 |
|-------------------|-----------------|
| Mass:             | 1549.8254       |
| m/z:              | 517.61574       |
| Charge:           | 3+              |
| Retentiontime:    | 31.488765716552 |
| Score:            | 75.58884        |
| Mass Error [ppm]: | 0.081354        |
| PEP:              | 0.0011291       |
| Precursor Type:   | MULTI           |

#### general information

|                       |            |
|-----------------------|------------|
| Annotation:           | 11 of 13   |
| AminoAcids Coverage:  | 85 %       |
| Intensity Coverage:   | 51 %       |
| Peak Coverage:        | 18 %       |
| Protein Localisation: | 90 ... 102 |

| b <sup>2+</sup> ion |        | b ion    |        | seq |   |    | y ion    |         | y <sup>2+</sup> ion |         |
|---------------------|--------|----------|--------|-----|---|----|----------|---------|---------------------|---------|
| Δ dalton            | mass   | Δ dalton | mass   |     |   |    | Δ dalton | mass    | Δ dalton            | mass    |
|                     | 102.05 |          | 102.05 | 1   | T | 12 |          |         |                     |         |
|                     | 258.16 |          | 258.16 | 2   | R | 11 | 1449.8   |         | 1449.8              |         |
|                     | 395.21 | +0.115   | 395.21 | 3   | H | 10 | 1293.7   |         | 1293.7              |         |
|                     | 492.27 |          | 492.27 | 4   | P | 9  | 1156.6   |         | 578.82              | +0.1623 |
|                     | 607.29 | +0.0751  | 607.29 | 5   | D | 8  | 1059.6   |         | 1059.6              |         |
| +0.1899             | 360.69 | -0.014   | 720.38 | 6   | L | 7  | 944.55   | +0.1482 | 944.55              |         |
| +0.2055             | 409.22 |          | 817.43 | 7   | P | 6  | 831.46   | +0.0079 | 416.23              | +0.0535 |
|                     | 964.5  |          | 964.5  | 8   | F | 5  | 734.41   | -0.026  | 734.41              |         |
|                     | 1061.6 |          | 1061.6 | 9   | P | 4  | 587.34   | -0.01   | 587.34              |         |
| +0.1915             | 595.8  |          | 1190.6 | 10  | E | 3  | 490.29   | +0.1945 | 490.29              |         |
| +0.2297             | 652.34 | -0.003   | 1303.7 | 11  | I | 2  | 361.24   |         | 361.24              |         |
|                     | 1404.7 |          | 1404.7 | 12  | T | 1  | 248.16   | +0.0118 | 248.16              |         |
|                     |        |          |        | 13  | K | 0  | 147.11   |         | 147.11              |         |

Scan number 4149 Raw file LNCAP\_Silac\_23F10\_set2\_10  
 Method ITMS: CID Pepti... 76.14

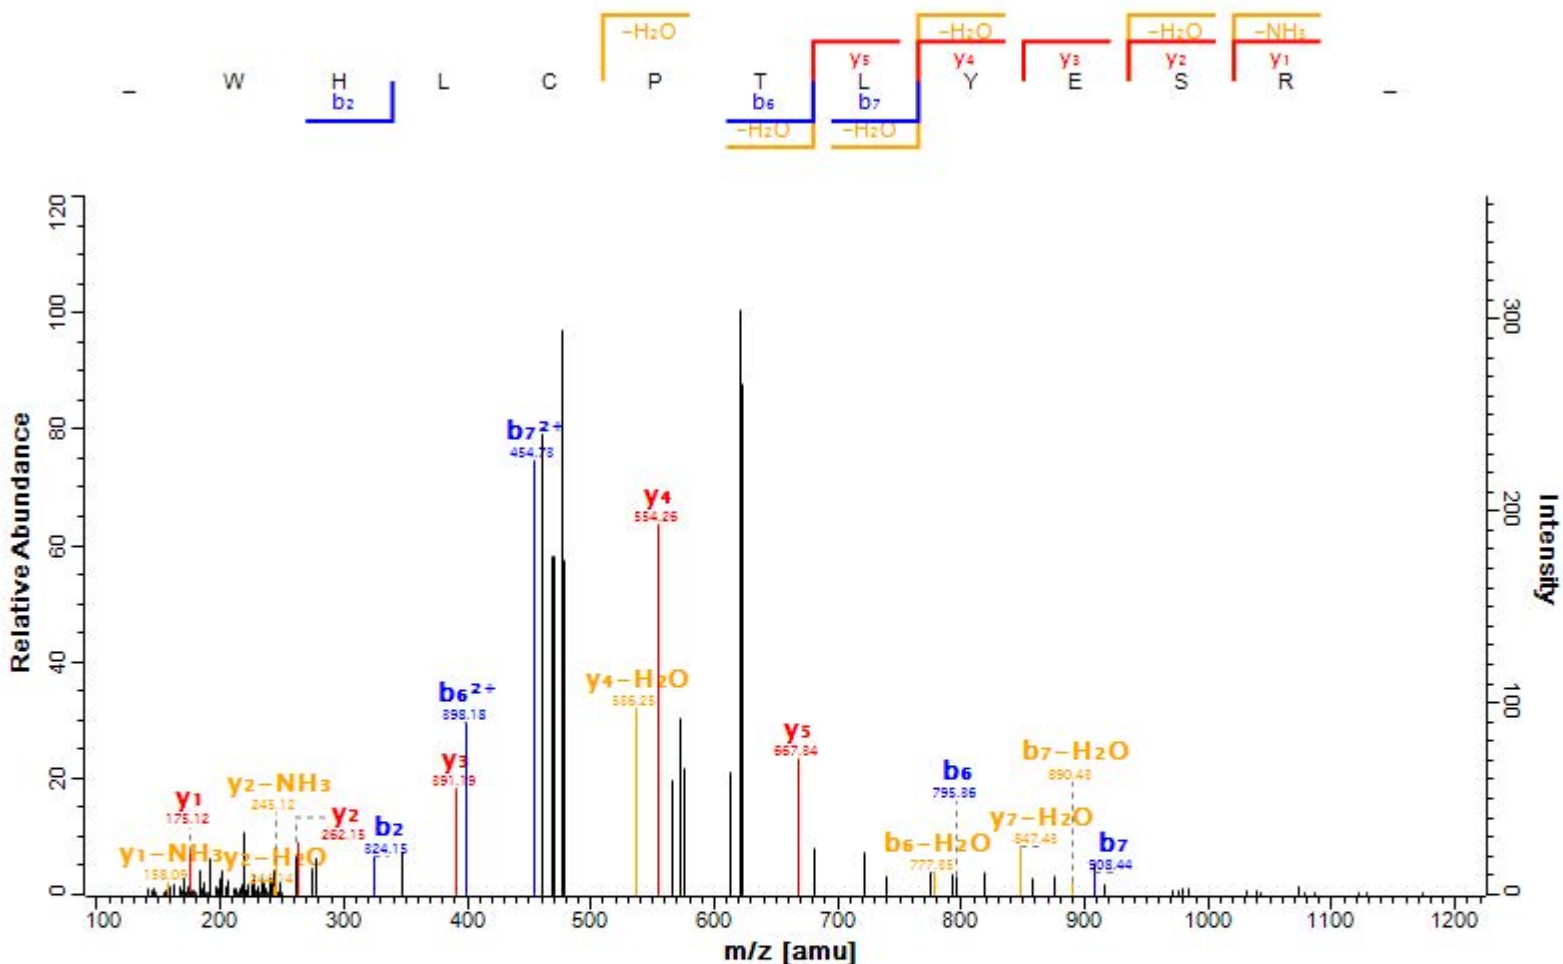

**precursor information**

|                   |                 |
|-------------------|-----------------|
| Mass:             | 1460.68706      |
| m/z:              | 487.90296       |
| Charge:           | 3+              |
| Retentiontime:    | 33.103023529052 |
| Score:            | 76.14272        |
| Mass Error [ppm]: | -0.0088681      |
| PEP:              | 0.0044509       |
| Precursor Type:   | MULTI           |

**general information**

|                       |             |
|-----------------------|-------------|
| Annotation:           | 8 of 11     |
| AminoAcids Coverage:  | 73 %        |
| Intensity Coverage:   | 27 %        |
| Peak Coverage:        | 14 %        |
| Protein Localisation: | 261 ... 271 |

| b <sup>2+</sup> ion |          | b ion     |          |     |   | y ion    |          |           |
|---------------------|----------|-----------|----------|-----|---|----------|----------|-----------|
| Δ dalton            | mass     | Δ dalton  | mass     | seq |   | Δ dalton | mass     |           |
|                     | 187.0866 |           | 187.0866 | 1   | W | 10       |          |           |
|                     | 324.1455 | +0.046363 | 324.1455 | 2   | H | 9        | 1275.615 |           |
|                     | 437.2296 |           | 437.2296 | 3   | L | 8        | 1138.556 |           |
|                     | 597.2602 |           | 597.2602 | 4   | C | 7        | 1025.472 |           |
|                     | 694.313  |           | 694.313  | 5   | P | 6        | 865.4414 |           |
| +0.17074            | 398.184  | +0.10193  | 795.3607 | 6   | T | 5        | 768.3886 |           |
| -0.03163            | 454.726  | +0.285749 | 908.4447 | 7   | L | 4        | 667.341  | -0.00118  |
|                     | 1071.508 |           | 1071.508 | 8   | Y | 3        | 554.2569 | -0.01343  |
|                     | 1200.551 |           | 1200.551 | 9   | E | 2        | 391.1936 | +0.088012 |
|                     | 1287.583 |           | 1287.583 | 10  | S | 1        | 262.151  | +0.109884 |
|                     |          |           |          | 11  | R | 0        | 175.119  | +0.052511 |

Scan number 4411 Raw file LNCAP\_Silac\_23F10\_set2\_10  
 Method ITMS: CID Pepti... 251.03

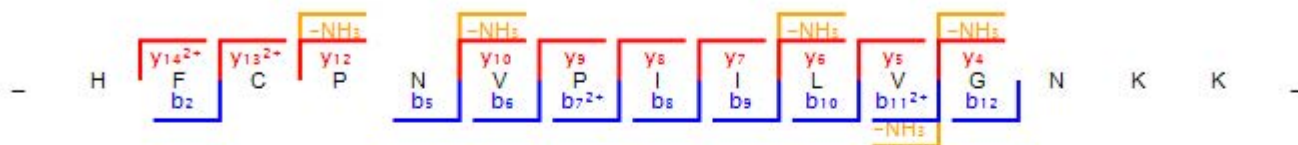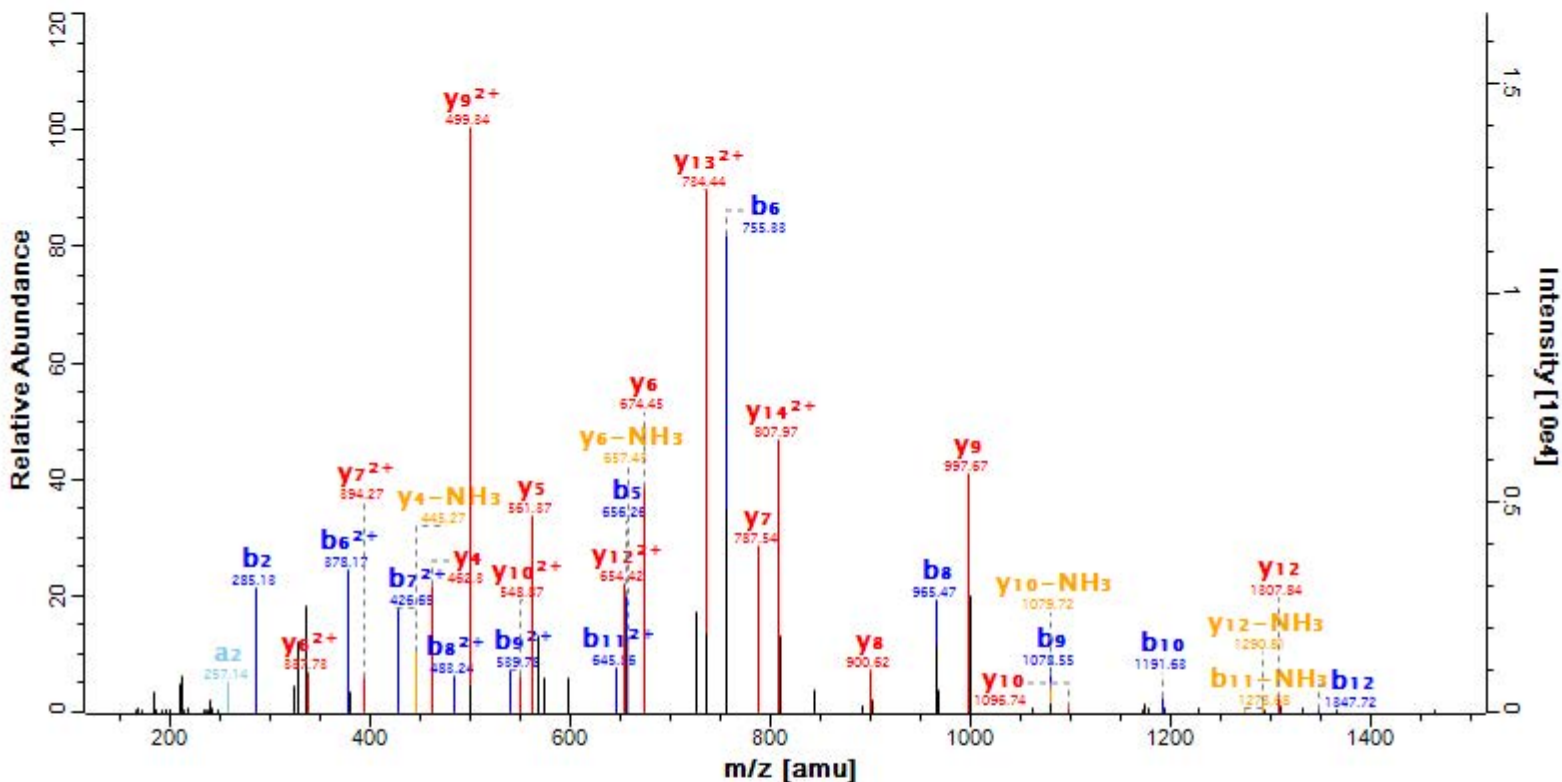

### precursor information

|                   |                 |
|-------------------|-----------------|
| Mass:             | 1734.96002      |
| m/z:              | 579.32728       |
| Charge:           | 3+              |
| Retentiontime:    | 35.338375091552 |
| Score:            | 251.0254        |
| Mass Error [ppm]: | -0.17804        |
| PEP:              | 1.5446E-57      |
| Precursor Type:   | MULTI           |

### general information

|                       |             |
|-----------------------|-------------|
| Annotation:           | 11 of 15    |
| AminoAcids Coverage:  | 73 %        |
| Intensity Coverage:   | 74 %        |
| Peak Coverage:        | 35 %        |
| Protein Localisation: | 105 ... 119 |

| a ion         |               | b <sup>2+</sup> ion |               | b ion       |    |               |               |             | y ion  |        | y <sup>2+</sup> ion |  |
|---------------|---------------|---------------------|---------------|-------------|----|---------------|---------------|-------------|--------|--------|---------------------|--|
| Δ dalton mass | Δ dalton mass | Δ dalton mass       | Δ dalton mass | seq         |    | Δ dalton mass | Δ dalton mass |             |        |        |                     |  |
| 110.1         |               | 138.1               |               | 138.1       | 1  | H             | 14            |             |        |        |                     |  |
| +0.005257.1   |               | 285.1               |               | +0.059285.1 | 2  | F             | 13            | 1615        |        | 808    | +0.29:              |  |
| 417.2         |               | 445.2               |               | 445.2       | 3  | C             | 12            | 1468        |        | 734.4  | +0.31:              |  |
| 514.2         |               | 542.2               |               | 542.2       | 4  | P             | 11            | 1308        | +0.198 | 654.4  | -0.06               |  |
| 628.3         |               | 656.3               | +0.002656.3   | 5           | N  | 10            | 1211          |             |        | 1211   |                     |  |
| 727.3         | +0.174378.2   | -0.01               | 755.3         | 6           | V  | 9             | 1097          | -0.07       | 548.9  | +0.19: |                     |  |
| 824.4         | +0.242426.7   |                     | 852.4         | 7           | P  | 8             | 997.7         | -0.03       | 499.3  | +0.12: |                     |  |
| 937.5         | +0.023483.2   | +0.016              | 965.5         | 8           | I  | 7             | 900.6         | -0.04       | 900.6  |        |                     |  |
| 1051          | +0.178539.8   | +0                  | 1079          | 9           | I  | 6             | 787.5         | -0.02       | 394.3  | -0.06  |                     |  |
| 1164          |               | 1192                | +0.0261192    | 10          | L  | 5             | 674.5         | +0.005337.7 | -0.44  |        |                     |  |
| 1263          | +0.197645.9   |                     | 1291          | 11          | V  | 4             | 561.4         | +0.041561.4 |        |        |                     |  |
| 1320          |               | 1348                | +0.0141348    | 12          | G  | 3             | 462.3         | +0.031462.3 |        |        |                     |  |
| 1434          |               | 1462                |               | 1462        | 13 | N             | 2             | 405.3       |        | 405.3  |                     |  |
| 1570          |               | 1598                |               | 1598        | 14 | K             | 1             | 291.2       |        | 291.2  |                     |  |
|               |               |                     |               |             | 15 | K             | 0             | 155.1       |        | 155.1  |                     |  |

Scan number 615 Raw file LNCAP\_Silac\_23F10\_set2\_10  
 Method ITMS; CID Pepti... 62.09

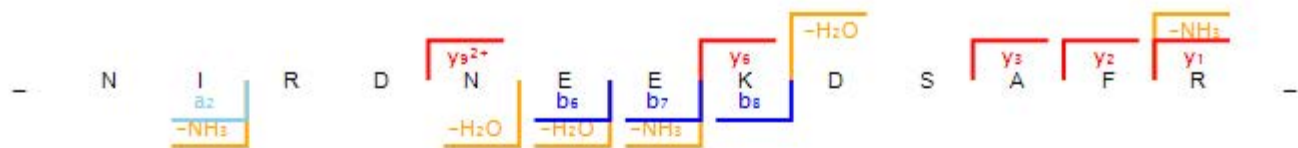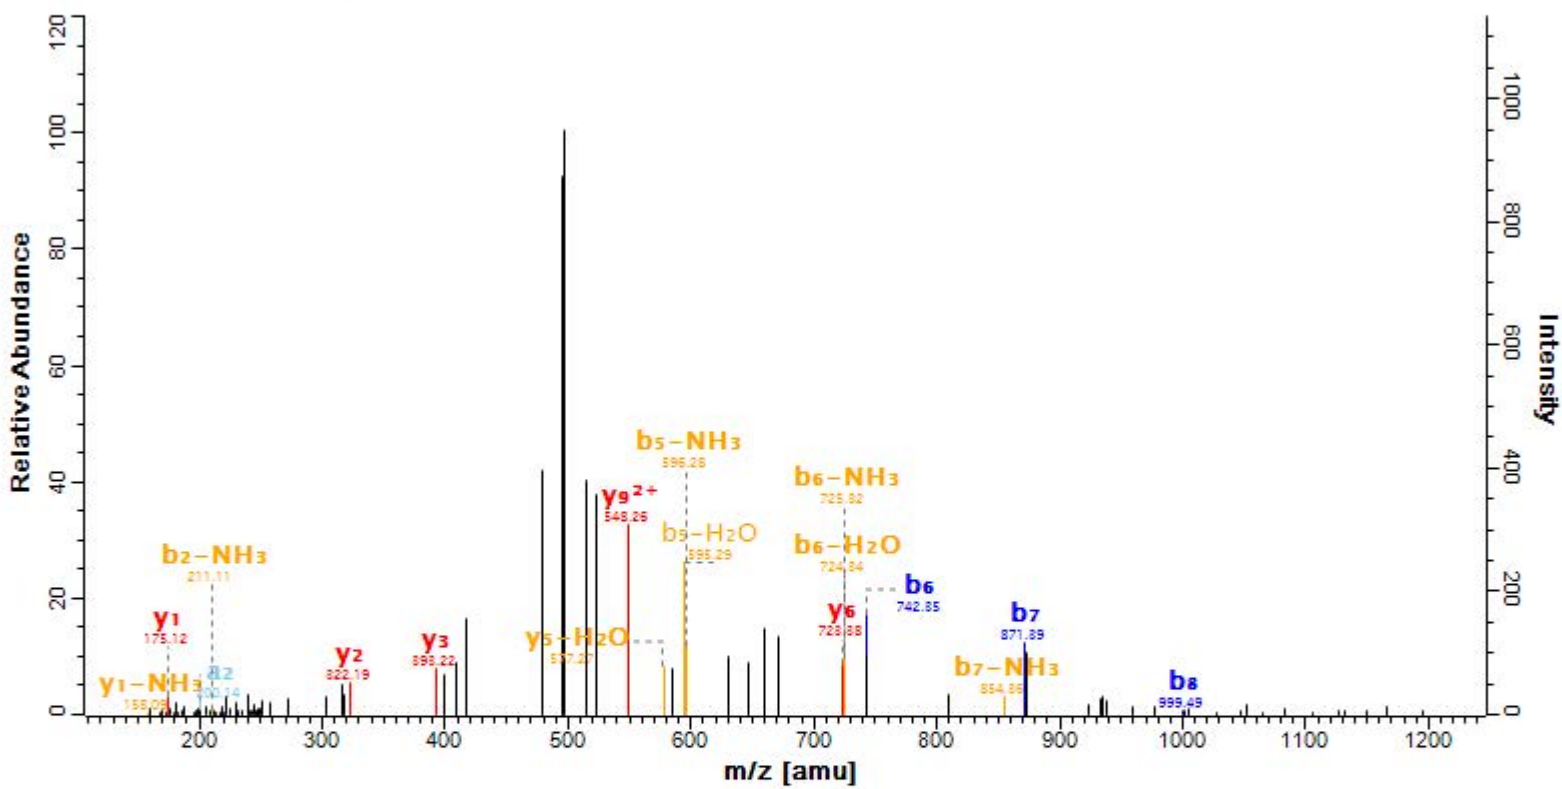

**precursor information**

|                   |                 |
|-------------------|-----------------|
| Mass:             | 1592.75547      |
| m/z:              | 531.92577       |
| Charge:           | 3+              |
| Retentiontime:    | 8.6735286712646 |
| Score:            | 62.08793        |
| Mass Error [ppm]: | 0.73799         |
| PEP:              | 0.0058749       |
| Precursor Type:   | MULTI           |

**general information**

|                       |             |
|-----------------------|-------------|
| Annotation:           | 9 of 13     |
| AminoAcids Coverage:  | 69 %        |
| Intensity Coverage:   | 24 %        |
| Peak Coverage:        | 16 %        |
| Protein Localisation: | 811 ... 823 |

| a ion    |        | b ion    |        |    |     |    | y ion    |         | y <sup>2+</sup> ion |         |
|----------|--------|----------|--------|----|-----|----|----------|---------|---------------------|---------|
| Δ dalton | mass   | Δ dalton | mass   |    | seq |    | Δ dalton | mass    | Δ dalton            | mass    |
|          | 87.055 |          | 115.05 | 1  | N   | 12 |          |         |                     |         |
| +0.0123  | 200.14 |          | 228.13 | 2  | I   | 11 | 1479.7   |         | 1479.7              |         |
|          | 356.24 |          | 384.24 | 3  | R   | 10 | 1366.6   |         | 1366.6              |         |
|          | 471.27 |          | 499.26 | 4  | D   | 9  | 1210.5   |         | 1210.5              |         |
|          | 585.31 |          | 613.31 | 5  | N   | 8  | 1095.5   |         | 548.26              | +0.1218 |
|          | 714.35 | +0.0472  | 742.35 | 6  | E   | 7  | 981.46   |         | 981.46              |         |
|          | 843.4  | +0.0961  | 871.39 | 7  | E   | 6  | 852.42   |         | 852.42              |         |
|          | 971.49 | +0.1747  | 999.49 | 8  | K   | 5  | 723.38   | +0.2387 | 723.38              |         |
|          | 1086.5 |          | 1114.5 | 9  | D   | 4  | 595.28   |         | 595.28              |         |
|          | 1173.5 |          | 1201.5 | 10 | S   | 3  | 480.26   |         | 480.26              |         |
|          | 1244.6 |          | 1272.6 | 11 | A   | 2  | 393.22   | +0.0313 | 393.22              |         |
|          | 1391.7 |          | 1419.6 | 12 | F   | 1  | 322.19   | +0.0645 | 322.19              |         |
|          |        |          |        | 13 | R   | 0  | 175.12   | +0.1565 | 175.12              |         |

Scan number 1045 Raw file LNCAP\_Silac\_23F10\_set2\_11  
 Method ITMS; CID Pepti... 79.2

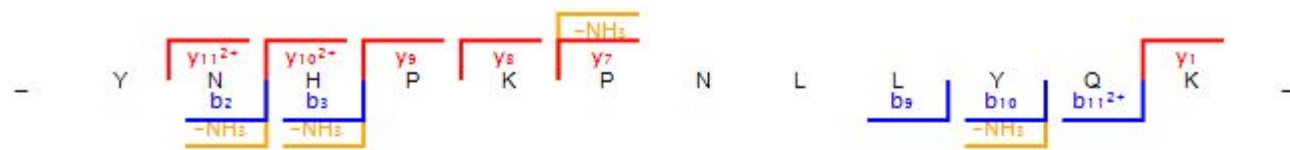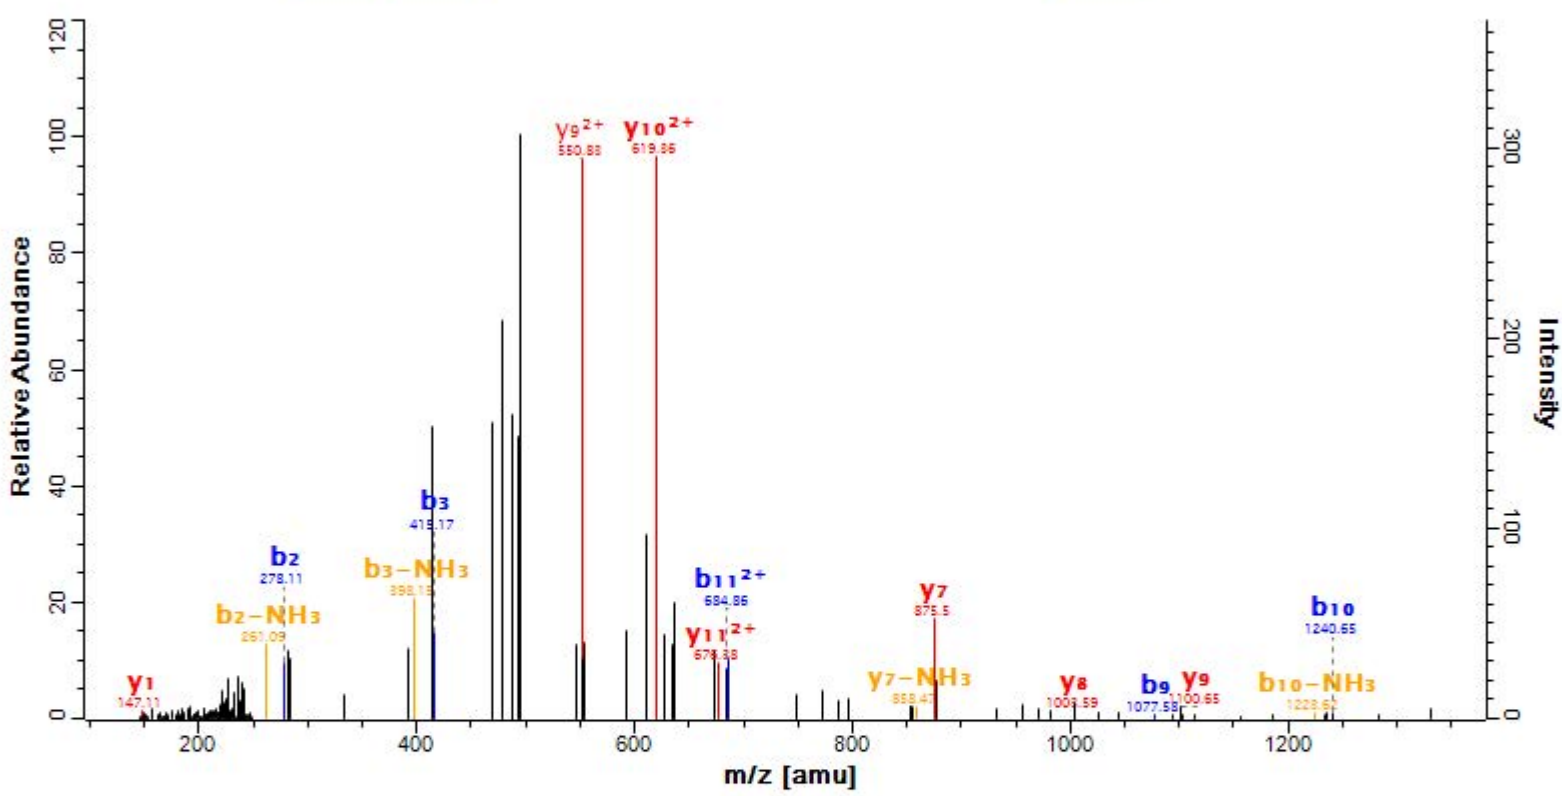

**precursor information**

|                   |                 |
|-------------------|-----------------|
| Mass:             | 1513.80479      |
| m/z:              | 505.60887       |
| Charge:           | 3+              |
| Retentiontime:    | 13.427463531494 |
| Score:            | 79.20142        |
| Mass Error [ppm]: | 0.42661         |
| PEP:              | 0.002111        |
| Precursor Type:   | MULTI           |

**general information**

|                       |            |
|-----------------------|------------|
| Annotation:           | 9 of 12    |
| AminoAcids Coverage:  | 75 %       |
| Intensity Coverage:   | 27 %       |
| Peak Coverage:        | 11 %       |
| Protein Localisation: | 97 ... 108 |

| b <sup>2+</sup> ion |        | b ion    |        | seq |   |    | y ion    |         | y <sup>2+</sup> ion |         |
|---------------------|--------|----------|--------|-----|---|----|----------|---------|---------------------|---------|
| Δ dalton            | mass   | Δ dalton | mass   |     |   |    | Δ dalton | mass    | Δ dalton            | mass    |
|                     | 164.07 |          | 164.07 | 1   | Y | 11 |          |         |                     |         |
|                     | 278.11 | +0.0319  | 278.11 | 2   | N | 10 | 1351.7   |         | 676.38              | +0.1514 |
|                     | 415.17 | +0.093   | 415.17 | 3   | H | 9  | 1237.7   |         | 619.36              | +0.3721 |
|                     | 512.23 |          | 512.23 | 4   | P | 8  | 1100.6   | +0.0001 | 550.83              | +0.2388 |
|                     | 640.32 |          | 640.32 | 5   | K | 7  | 1003.6   | +0.013  | 1003.6              |         |
|                     | 737.37 |          | 737.37 | 6   | P | 6  | 875.5    | -0.069  | 875.5               |         |
|                     | 851.42 |          | 851.42 | 7   | N | 5  | 778.45   |         | 778.45              |         |
|                     | 964.5  |          | 964.5  | 8   | L | 4  | 664.4    |         | 664.4               |         |
|                     | 1077.6 | +0.1583  | 1077.6 | 9   | L | 3  | 551.32   |         | 551.32              |         |
|                     | 1240.6 | +0.1184  | 1240.6 | 10  | Y | 2  | 438.23   |         | 438.23              |         |
| +0.3673             | 684.86 |          | 1368.7 | 11  | Q | 1  | 275.17   |         | 275.17              |         |
|                     |        |          |        | 12  | K | 0  | 147.11   | +0.1878 | 147.11              |         |

Scan number 1155 Raw file LNCAP\_Silac\_23F10\_set2\_11  
 Method ITMS: CID Pepti... 64.65

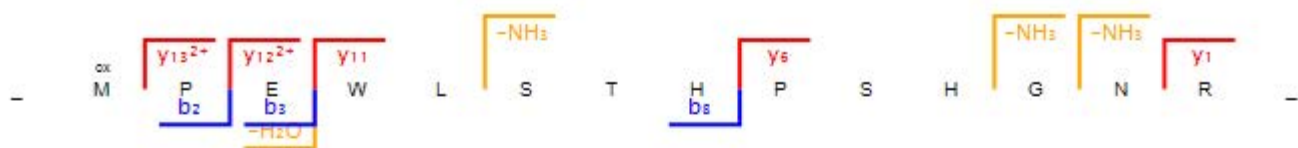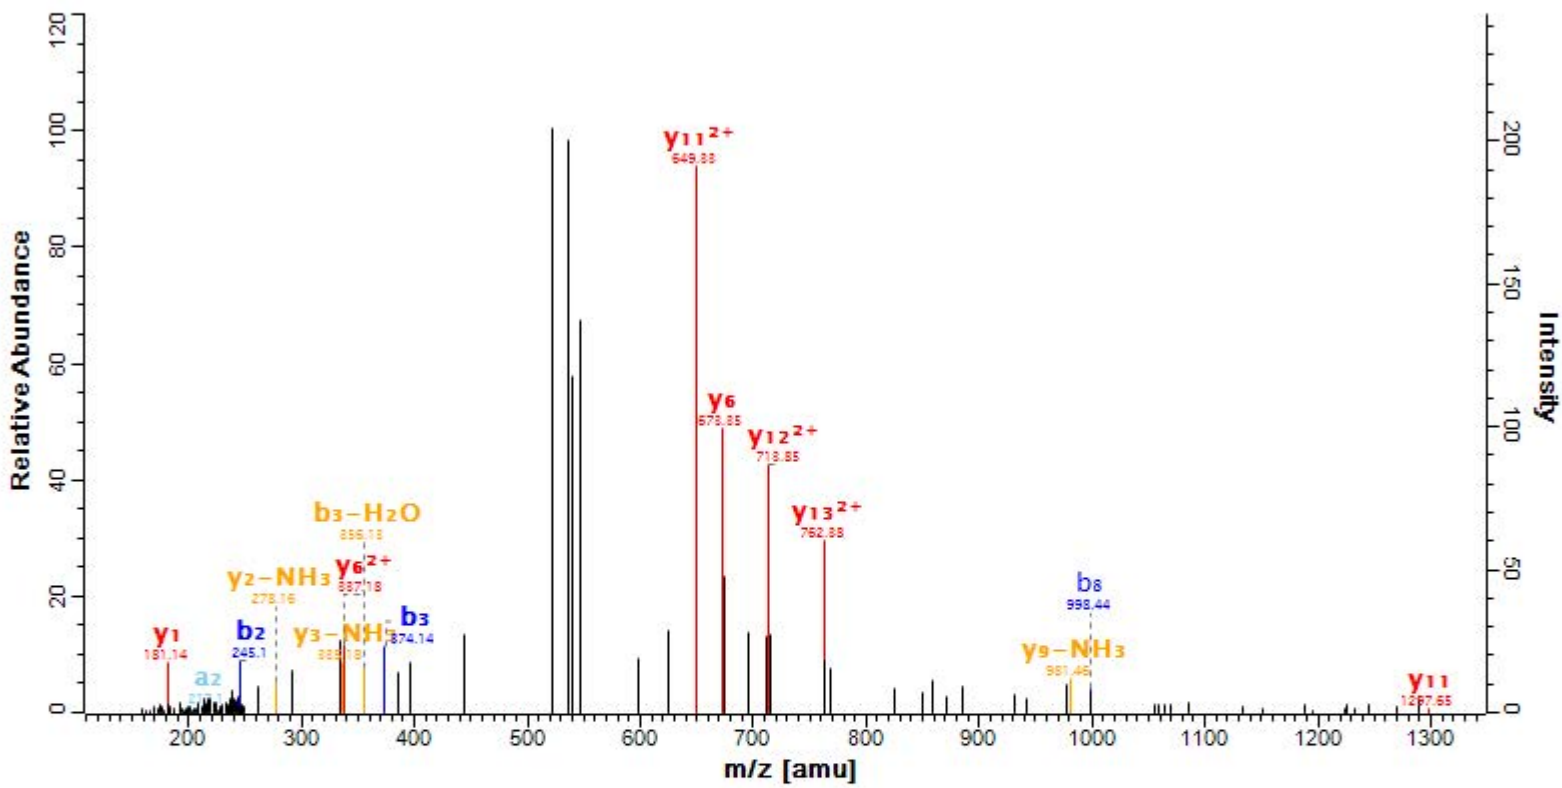

**precursor information**

|                   |                 |
|-------------------|-----------------|
| Mass:             | 1663.7524       |
| m/z:              | 555.59141       |
| Charge:           | 3+              |
| Retentiontime:    | 14.582811355590 |
| Score:            | 64.65038        |
| Mass Error [ppm]: | -0.07208        |
| PEP:              | 0.014943        |
| Precursor Type:   | MULTI           |

**general information**

|                       |             |
|-----------------------|-------------|
| Annotation:           | 10 of 14    |
| AminoAcids Coverage:  | 71 %        |
| Intensity Coverage:   | 28 %        |
| Peak Coverage:        | 13 %        |
| Protein Localisation: | 432 ... 445 |

| a ion    |        | b ion    |        |    |     |    | y ion    |         | y <sup>2+</sup> ion |         |
|----------|--------|----------|--------|----|-----|----|----------|---------|---------------------|---------|
| Δ dalton | mass   | Δ dalton | mass   |    | seq |    | Δ dalton | mass    | Δ dalton            | mass    |
|          | 120.05 |          | 148.04 | 1  | M   | 13 |          |         |                     |         |
| -0.101   | 217.1  | +0.0613  | 245.1  | 2  | P   | 12 | 1523.7   |         | 762.38              | +0.4015 |
|          | 346.14 | -0.067   | 374.14 | 3  | E   | 11 | 1426.7   |         | 713.85              | +0.1183 |
|          | 532.22 |          | 560.22 | 4  | W   | 10 | 1297.6   | +0.3212 | 649.33              | +0.1595 |
|          | 645.31 |          | 673.3  | 5  | L   | 9  | 1111.6   |         | 1111.6              |         |
|          | 732.34 |          | 760.33 | 6  | S   | 8  | 998.49   |         | 998.49              |         |
|          | 833.39 |          | 861.38 | 7  | T   | 7  | 911.45   |         | 911.45              |         |
|          | 970.45 | -0.012   | 998.44 | 8  | H   | 6  | 810.41   |         | 810.41              |         |
|          | 1067.5 |          | 1095.5 | 9  | P   | 5  | 673.35   | +0.0248 | 337.18              | +0.1586 |
|          | 1154.5 |          | 1182.5 | 10 | S   | 4  | 576.29   |         | 576.29              |         |
|          | 1291.6 |          | 1319.6 | 11 | H   | 3  | 489.26   |         | 489.26              |         |
|          | 1348.6 |          | 1376.6 | 12 | G   | 2  | 352.2    |         | 352.2               |         |
|          | 1462.7 |          | 1490.6 | 13 | N   | 1  | 295.18   |         | 295.18              |         |
|          |        |          |        | 14 | R   | 0  | 181.14   | -0.032  | 181.14              |         |

Scan number 1346 Raw file LNCAP\_Silac\_23F10\_set2\_11  
 Method ITMS: CID Pepti... 110.66

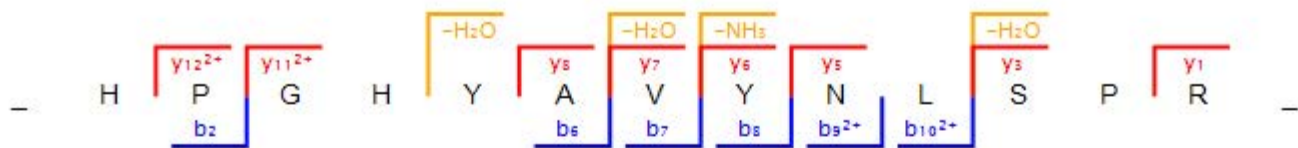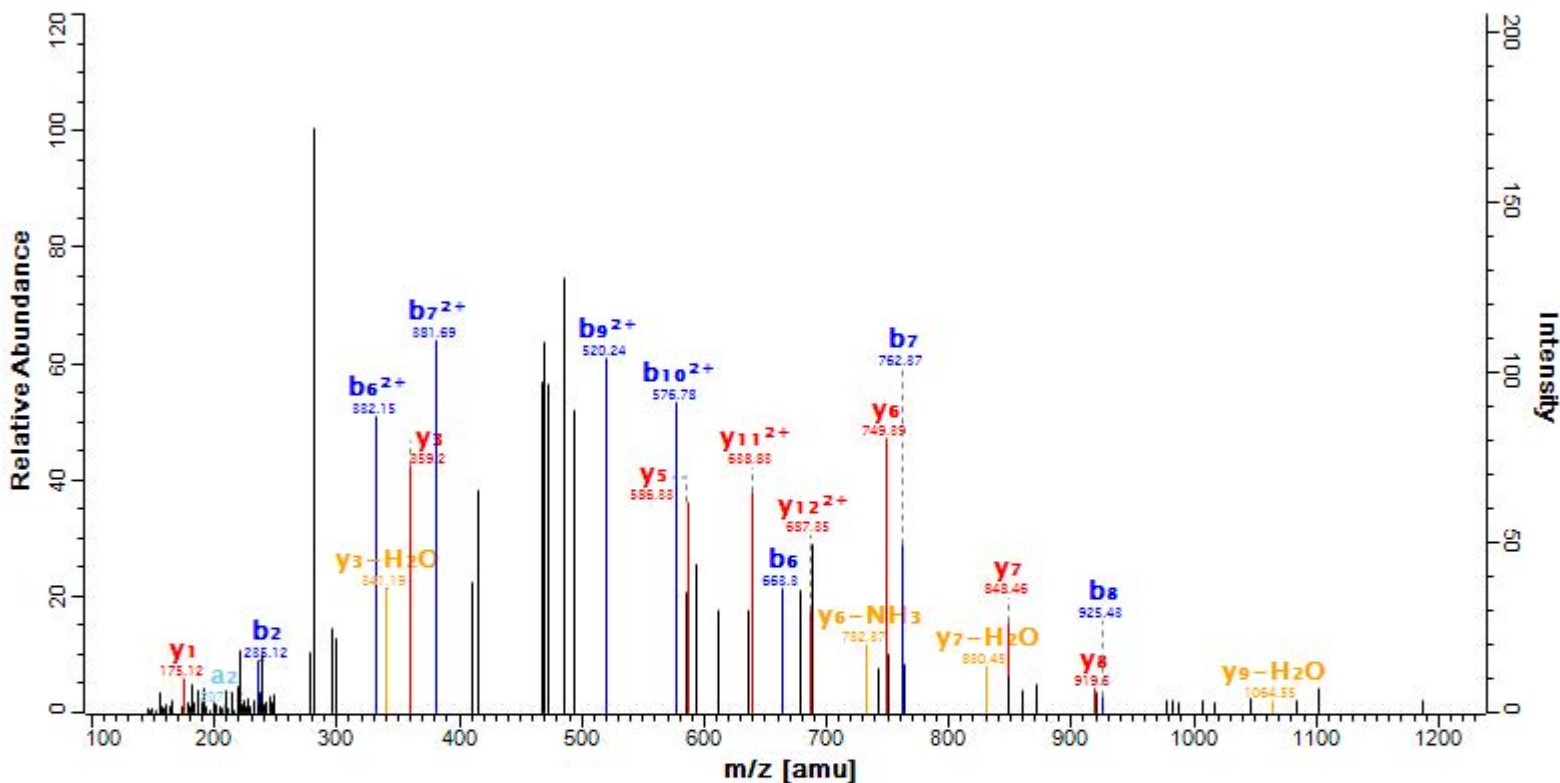

#### precursor information

|                   |                 |
|-------------------|-----------------|
| Mass:             | 1509.74852      |
| m/z:              | 504.25678       |
| Charge:           | 3+              |
| Retentiontime:    | 16.611505508422 |
| Score:            | 110.6616        |
| Mass Error [ppm]: | 0.54875         |
| PEP:              | 6.5368E-06      |
| Precursor Type:   | MULTI           |

#### general information

|                       |             |
|-----------------------|-------------|
| Annotation:           | 10 of 13    |
| AminoAcids Coverage:  | 77 %        |
| Intensity Coverage:   | 39 %        |
| Peak Coverage:        | 19 %        |
| Protein Localisation: | 446 ... 458 |

| a ion         | b <sup>2+</sup> ion | b ion         |    |     |    | y ion         | y <sup>2+</sup> ion |
|---------------|---------------------|---------------|----|-----|----|---------------|---------------------|
| Δ dalton mass | Δ dalton mass       | Δ dalton mass |    | seq |    | Δ dalton mass | Δ dalton mass       |
| 110.1         | 138.1               | 138.1         | 1  | H   | 12 |               |                     |
| +0.012207.1   | 235.1               | -0.15 235.1   | 2  | P   | 11 | 1374          | 687.4 -0.14         |
| 264.1         | 292.1               | 292.1         | 3  | G   | 10 | 1277          | 638.8 -0.11         |
| 401.2         | 429.2               | 429.2         | 4  | H   | 9  | 1220          | 1220                |
| 564.3         | 592.3               | 592.3         | 5  | Y   | 8  | 1083          | 1083                |
| 635.3         | +0.215332.2         | -0.01 663.3   | 6  | A   | 7  | 919.5         | -0.02 919.5         |
| 734.4         | +0.202381.7         | +0.007762.4   | 7  | V   | 6  | 848.5         | -0.03 848.5         |
| 897.4         | 925.4               | -0.04 925.4   | 8  | Y   | 5  | 749.4         | +0.099749.4         |
| 1011          | +0.296520.2         | 1039          | 9  | N   | 4  | 586.3         | +0.062586.3         |
| 1125          | +0.258576.8         | 1153          | 10 | L   | 3  | 472.3         | 472.3               |
| 1212          | 1240                | 1240          | 11 | S   | 2  | 359.2         | -0.01 359.2         |
| 1309          | 1337                | 1337          | 12 | P   | 1  | 272.2         | 272.2               |
|               |                     |               | 13 | R   | 0  | 175.1         | +0.082175.1         |

Scan number 1413 Raw file LNCAP\_Silac\_23F10\_set2\_11  
 Method ITMS: CID Pepti... 107.97

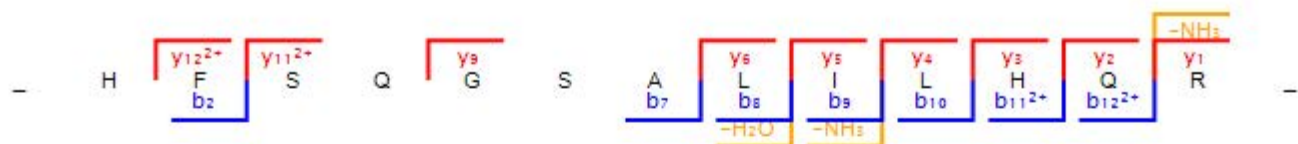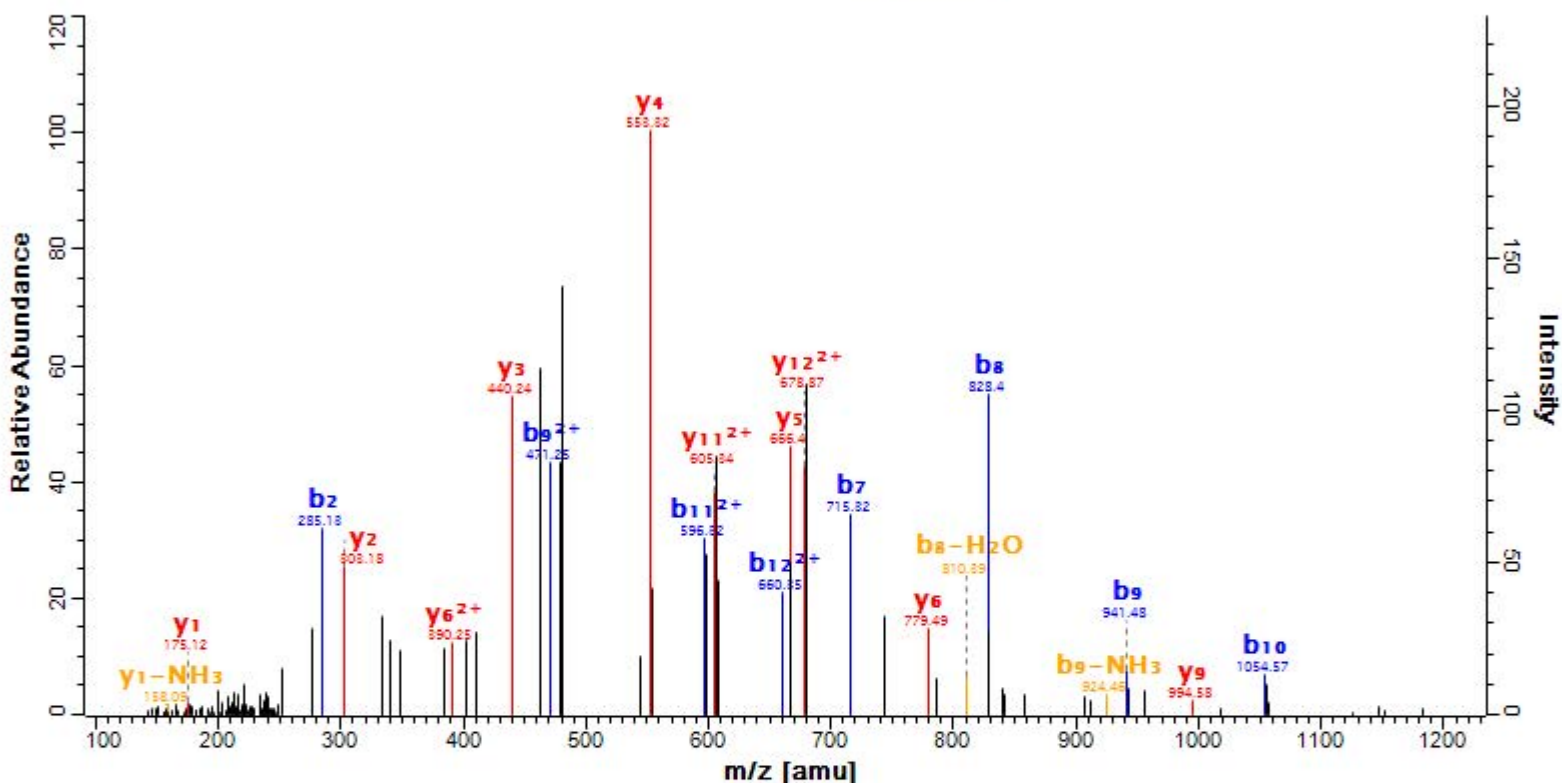

precursor information

|                   |                 |
|-------------------|-----------------|
| Mass:             | 1492.78992      |
| m/z:              | 498.60392       |
| Charge:           | 3+              |
| Retentiontime:    | 17.313058853149 |
| Score:            | 107.9664        |
| Mass Error [ppm]: | 0.018299        |
| PEP:              | 8.2906E-06      |
| Precursor Type:   | MULTI           |

general information

|                       |             |
|-----------------------|-------------|
| Annotation:           | 10 of 13    |
| AminoAcids Coverage:  | 77 %        |
| Intensity Coverage:   | 45 %        |
| Peak Coverage:        | 18 %        |
| Protein Localisation: | 259 ... 271 |

| b <sup>2+</sup> ion |        | b ion    |        | seq |   |    | y ion    |         | y <sup>2+</sup> ion |         |
|---------------------|--------|----------|--------|-----|---|----|----------|---------|---------------------|---------|
| Δ dalton            | mass   | Δ dalton | mass   |     |   |    | Δ dalton | mass    | Δ dalton            | mass    |
|                     | 138.07 |          | 138.07 | 1   | H | 12 |          |         |                     |         |
|                     | 285.13 | +0.0037  | 285.13 | 2   | F | 11 | 1356.7   |         | 678.87              | -0.058  |
|                     | 372.17 |          | 372.17 | 3   | S | 10 | 1209.7   |         | 605.34              | -0.059  |
|                     | 500.23 |          | 500.23 | 4   | Q | 9  | 1122.6   |         | 1122.6              |         |
|                     | 557.25 |          | 557.25 | 5   | G | 8  | 994.58   | +0.1332 | 994.58              |         |
|                     | 644.28 |          | 644.28 | 6   | S | 7  | 937.56   |         | 937.56              |         |
|                     | 715.32 | +0.1386  | 715.32 | 7   | A | 6  | 850.53   |         | 850.53              |         |
|                     | 828.4  | -0.03    | 828.4  | 8   | L | 5  | 779.49   | -0.051  | 390.25              | +0.0698 |
| +0.1695             | 471.25 | +0.0223  | 941.48 | 9   | I | 4  | 666.4    | +0.131  | 666.4               |         |
|                     | 1054.6 | +0.0389  | 1054.6 | 10  | L | 3  | 553.32   | -0.041  | 553.32              |         |
| +0.2558             | 596.32 |          | 1191.6 | 11  | H | 2  | 440.24   | +0.04   | 440.24              |         |
| +0.1817             | 660.35 |          | 1319.7 | 12  | Q | 1  | 303.18   | +0.0182 | 303.18              |         |
|                     |        |          |        | 13  | R | 0  | 175.12   | +0.0683 | 175.12              |         |



Scan number 383 Raw file LNCAP\_Silac\_23F10\_set2\_11  
 Method ITMS; CID Peptide 228.12

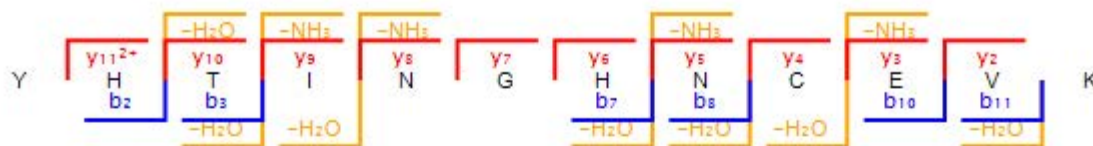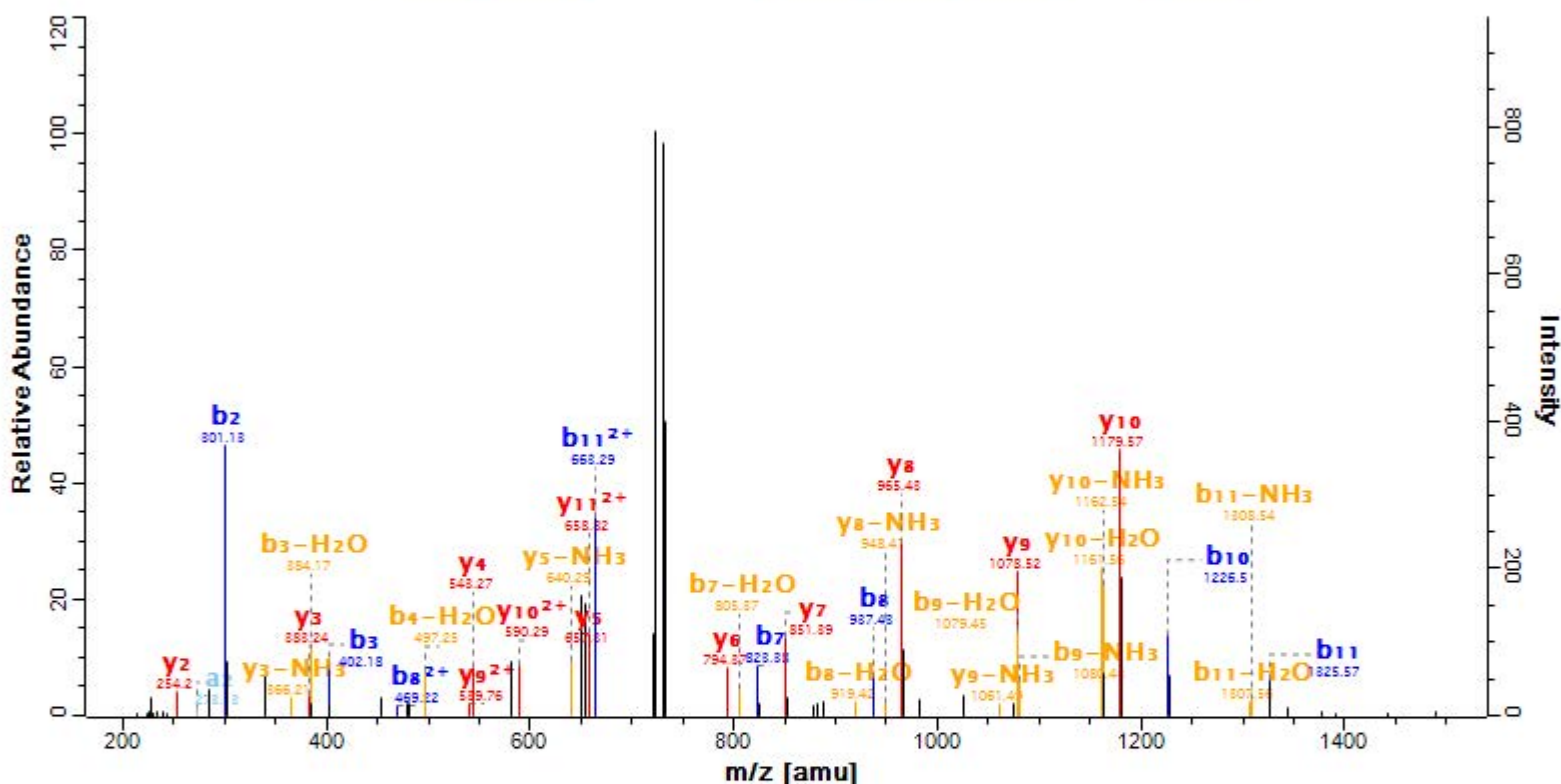

#### precursor information

|                   |                 |
|-------------------|-----------------|
| Mass:             | 1470.66704      |
| m/z:              | 736.3408        |
| Charge:           | 2+              |
| Retentiontime:    | 7.1988801956176 |
| Score:            | 228.1163        |
| Mass Error [ppm]: | -0.23914        |
| PEP:              | 7.7432E-25      |
| Precursor Type:   | MULTI           |

#### general information

|                       |             |
|-----------------------|-------------|
| Annotation:           | 10 of 12    |
| AminoAcids Coverage:  | 83 %        |
| Intensity Coverage:   | 45 %        |
| Peak Coverage:        | 39 %        |
| Protein Localisation: | 188 ... 199 |

| a ion         | b <sup>2+</sup> ion | b ion         |    |     |    | y ion         | y <sup>2+</sup> ion |
|---------------|---------------------|---------------|----|-----|----|---------------|---------------------|
| Δ dalton mass | Δ dalton mass       | Δ dalton mass |    | seq |    | Δ dalton mass | Δ dalton mass       |
| 136.1         | 164.1               | 164.1         | 1  | Y   | 11 |               |                     |
| +0.004273.1   | 301.1               | +0 301.1      | 2  | H   | 10 | 1317          | 658.8 +0.06         |
| 374.2         | 402.2               | +0.082402.2   | 3  | T   | 9  | 1180          | -0.05 590.3 -0.01   |
| 487.3         | 515.3               | 515.3         | 4  | I   | 8  | 1079          | +0.019539.8 -0.13   |
| 601.3         | 629.3               | 629.3         | 5  | N   | 7  | 965.4         | -0.04 965.4         |
| 658.3         | 686.3               | 686.3         | 6  | G   | 6  | 851.4         | -0.06 851.4         |
| 795.4         | 823.4               | -0.13 823.4   | 7  | H   | 5  | 794.4         | +0.05 794.4         |
| 909.4         | +0.041469.2         | +0.004937.4   | 8  | N   | 4  | 657.3         | +0.212657.3         |
| 1069          | 1097                | 1097          | 9  | C   | 3  | 543.3         | +0.151543.3         |
| 1199          | 1227                | -0.04 1227    | 10 | E   | 2  | 383.2         | +0.39 383.2         |
| 1298          | +0.248663.3         | +0.0491326    | 11 | V   | 1  | 254.2         | +0.071254.2         |
|               |                     |               | 12 | K   | 0  | 155.1         | 155.1               |

Scan number 633 Raw file LNCAP\_Silac\_23F10\_set2\_11  
 Method ITMS: CID Pepti... 96.11

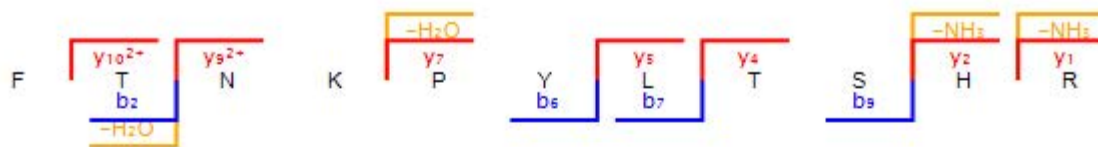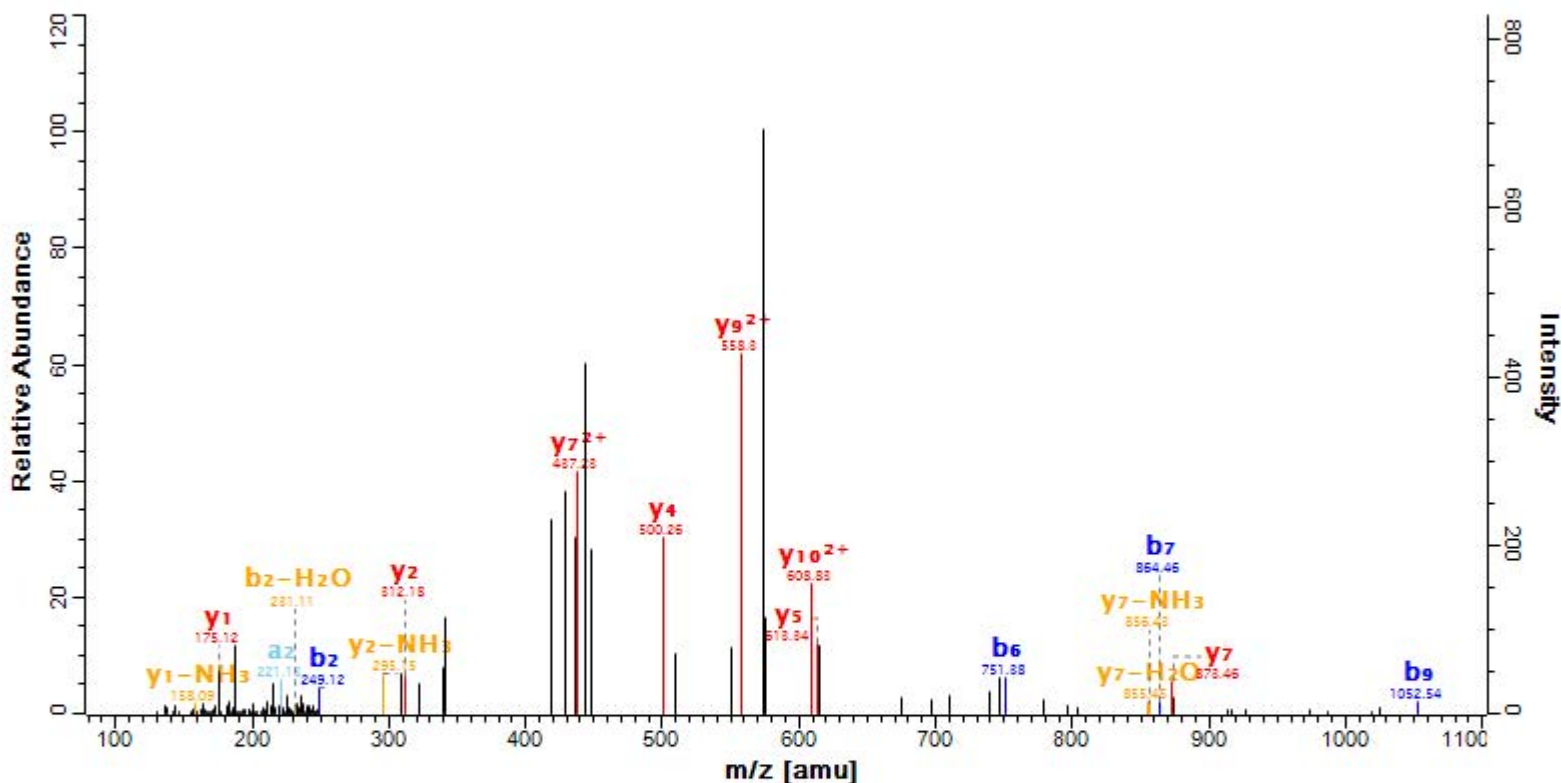

#### precursor information

|                   |                 |
|-------------------|-----------------|
| Mass:             | 1362.70472      |
| m/z:              | 455.24218       |
| Charge:           | 3+              |
| Retentiontime:    | 9.4482250213623 |
| Score:            | 96.11349        |
| Mass Error [ppm]: | 0.20821         |
| PEP:              | 0.00091392      |
| Precursor Type:   | MULTI           |

#### general information

|                       |             |
|-----------------------|-------------|
| Annotation:           | 9 of 11     |
| AminoAcids Coverage:  | 82 %        |
| Intensity Coverage:   | 30 %        |
| Peak Coverage:        | 13 %        |
| Protein Localisation: | 330 ... 340 |

| a ion    |        | b ion    |        |    |     |          | y ion  |          | y <sup>2+</sup> ion |  |
|----------|--------|----------|--------|----|-----|----------|--------|----------|---------------------|--|
| Δ dalton | mass   | Δ dalton | mass   |    | seq | Δ dalton | mass   | Δ dalton | mass                |  |
|          | 120.08 |          | 148.08 | 1  | F   | 10       |        |          |                     |  |
| +0.1105  | 221.13 | +0.1044  | 249.12 | 2  | T   | 9        | 1216.6 |          | 608.83              |  |
|          | 335.17 |          | 363.17 | 3  | N   | 8        | 1115.6 |          | 558.3               |  |
|          | 463.27 |          | 491.26 | 4  | K   | 7        | 1001.6 |          | 1001.6              |  |
|          | 560.32 |          | 588.31 | 5  | P   | 6        | 873.46 | -0.082   | 437.23              |  |
|          | 723.38 | +0.0419  | 751.38 | 6  | Y   | 5        | 776.4  |          | 776.4               |  |
|          | 836.47 | -0.025   | 864.46 | 7  | L   | 4        | 613.34 | +0.4825  | 613.34              |  |
|          | 937.51 |          | 965.51 | 8  | T   | 3        | 500.26 | +0.0184  | 500.26              |  |
|          | 1024.5 | -0.005   | 1052.5 | 9  | S   | 2        | 399.21 |          | 399.21              |  |
|          | 1161.6 |          | 1189.6 | 10 | H   | 1        | 312.18 | +0.0541  | 312.18              |  |
|          |        |          |        | 11 | R   | 0        | 175.12 | -0.003   | 175.12              |  |

Scan number 989 Raw file LNCAP\_Silac\_23F10\_set2\_11  
 Method ITMS; CID Pepti... 65.5

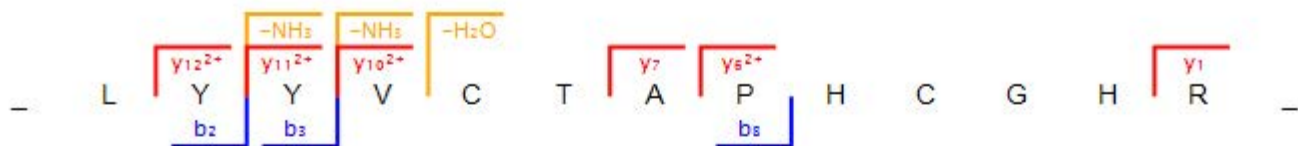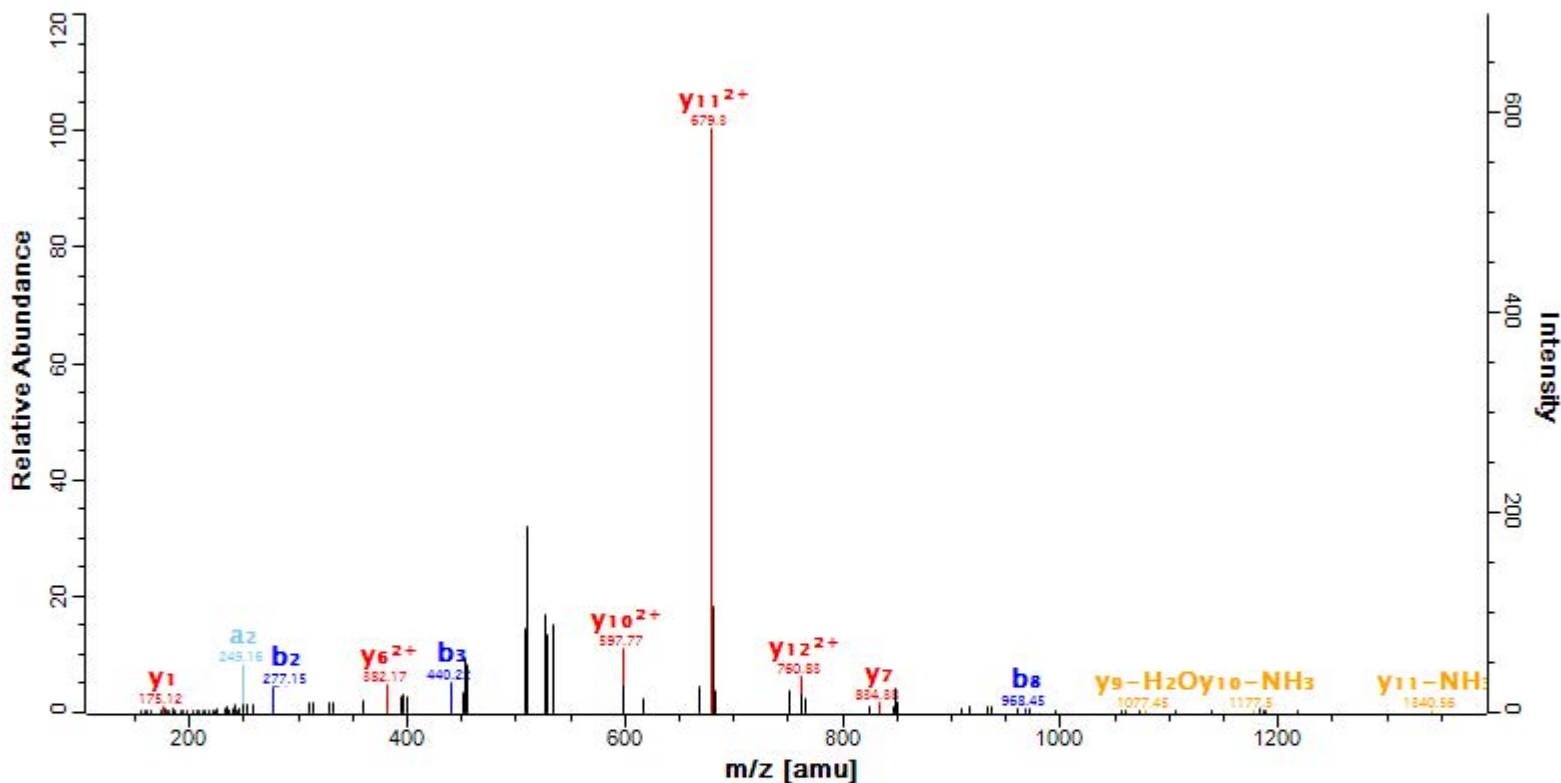

#### precursor information

|                   |                 |
|-------------------|-----------------|
| Mass:             | 1632.72872      |
| m/z:              | 545.25018       |
| Charge:           | 3+              |
| Retentiontime:    | 12.825242042541 |
| Score:            | 65.50046        |
| Mass Error [ppm]: | -0.14029        |
| PEP:              | 0.0051334       |
| Precursor Type:   | MULTI           |

#### general information

|                       |             |
|-----------------------|-------------|
| Annotation:           | 7 of 13     |
| AminoAcids Coverage:  | 54 %        |
| Intensity Coverage:   | 39 %        |
| Peak Coverage:        | 12 %        |
| Protein Localisation: | 110 ... 122 |

| a ion    |        | b ion    |        | seq |   |    | y ion    |         | y <sup>2+</sup> ion |         |
|----------|--------|----------|--------|-----|---|----|----------|---------|---------------------|---------|
| Δ dalton | mass   | Δ dalton | mass   |     |   |    | Δ dalton | mass    | Δ dalton            | mass    |
|          | 86.096 |          | 114.09 | 1   | L | 12 |          |         |                     |         |
| -0.008   | 249.16 | +0.0612  | 277.15 | 2   | Y | 11 | 1520.7   |         | 760.83              | +0.3799 |
|          | 412.22 | -0.142   | 440.22 | 3   | Y | 10 | 1357.6   |         | 679.3               | +0.2383 |
|          | 511.29 |          | 539.29 | 4   | V | 9  | 1194.5   |         | 597.77              | -0.04   |
|          | 671.32 |          | 699.32 | 5   | C | 8  | 1095.5   |         | 1095.5              |         |
|          | 772.37 |          | 800.36 | 6   | T | 7  | 935.43   |         | 935.43              |         |
|          | 843.41 |          | 871.4  | 7   | A | 6  | 834.38   | +0.0622 | 834.38              |         |
|          | 940.46 | +0.1393  | 968.45 | 8   | P | 5  | 763.34   |         | 382.17              | +0.1289 |
|          | 1077.5 |          | 1105.5 | 9   | H | 4  | 666.29   |         | 666.29              |         |
|          | 1237.5 |          | 1265.5 | 10  | C | 3  | 529.23   |         | 529.23              |         |
|          | 1294.6 |          | 1322.6 | 11  | G | 2  | 369.2    |         | 369.2               |         |
|          | 1431.6 |          | 1459.6 | 12  | H | 1  | 312.18   |         | 312.18              |         |
|          |        |          |        | 13  | R | 0  | 175.12   | +0.1518 | 175.12              |         |

Scan number 1068 Raw file LNCAP\_Silac\_23F10\_set3\_01  
 Method ITMS; CID Pepti... 67.22

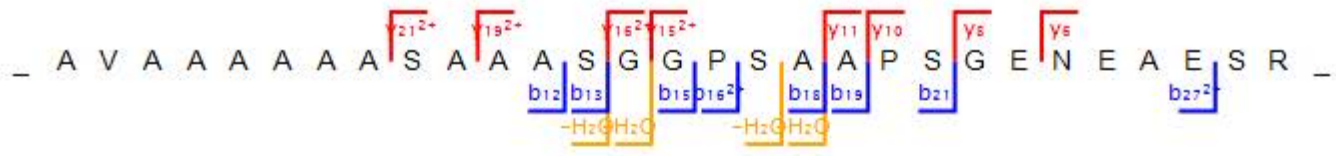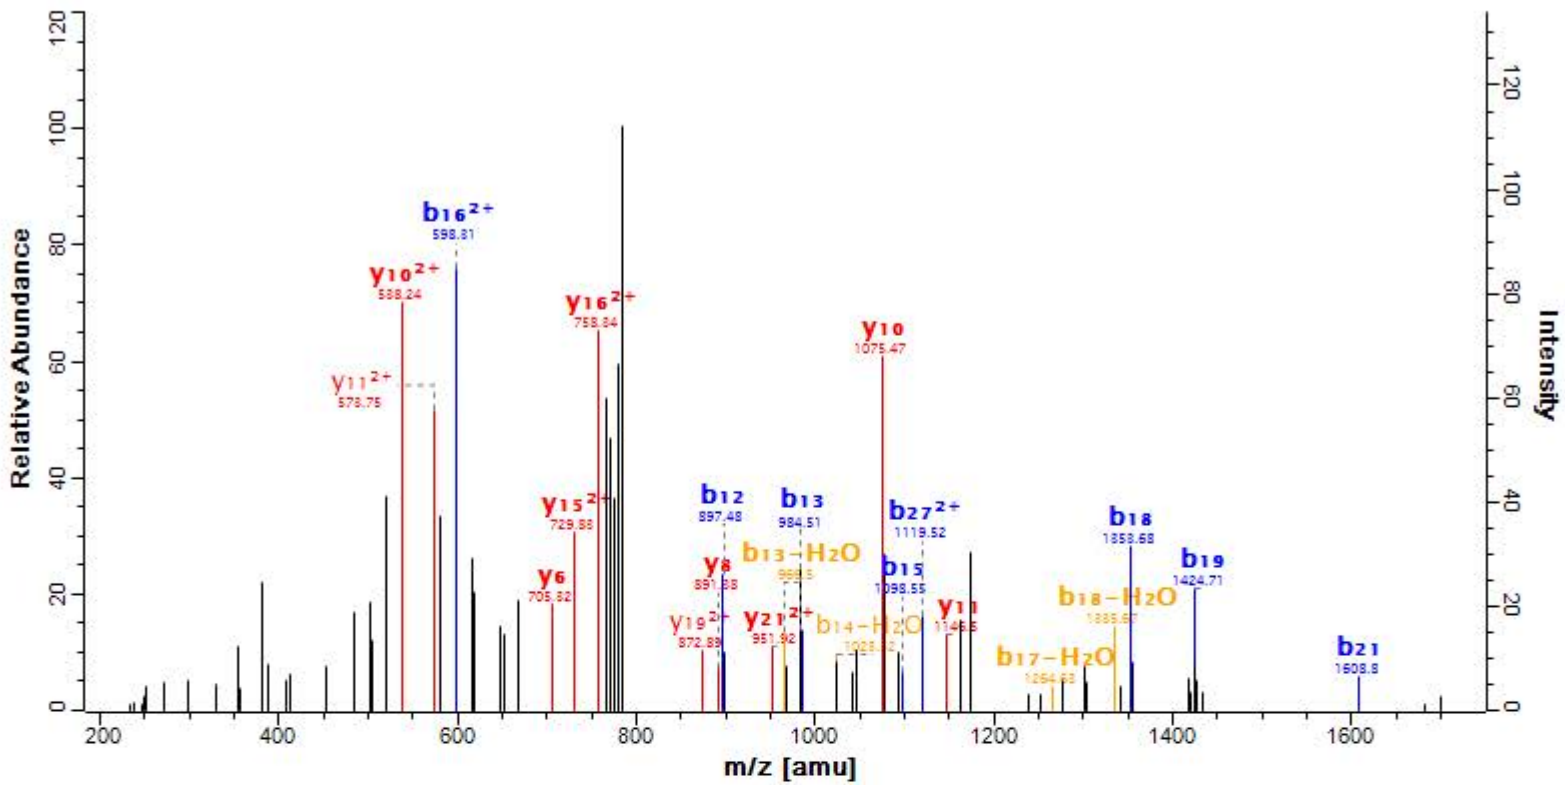

**precursor information**

|                   |                 |
|-------------------|-----------------|
| Mass:             | 2498.1631       |
| m/z:              | 833.72831       |
| Charge:           | 3+              |
| Retention time:   | 15.868140220642 |
| Score:            | 67.21661        |
| Mass Error [ppm]: | -0.096028       |
| PEP:              | 5.1628E-06      |
| Precursor Type:   | MULTI           |

**general information**

|                       |          |
|-----------------------|----------|
| Annotation:           | 17 of 29 |
| AminoAcids Coverage:  | 59 %     |
| Intensity Coverage:   | 41 %     |
| Peak Coverage:        | 28 %     |
| Protein Localisation: | 8 ... 36 |

| b <sup>2+</sup> ion |        | b ion    |        | seq |   |    | y ion    |         | y <sup>2+</sup> ion |         |
|---------------------|--------|----------|--------|-----|---|----|----------|---------|---------------------|---------|
| Δ dalton            | mass   | Δ dalton | mass   |     |   |    | Δ dalton | mass    | Δ dalton            | mass    |
|                     | 72.044 |          | 72.044 | 1   | A | 28 |          |         |                     |         |
|                     | 171.11 |          | 171.11 | 2   | V | 27 | 2428.1   |         | 2428.1              |         |
|                     | 242.15 |          | 242.15 | 3   | A | 26 | 2329.1   |         | 2329.1              |         |
|                     | 313.19 |          | 313.19 | 4   | A | 25 | 2258     |         | 2258                |         |
|                     | 384.22 |          | 384.22 | 5   | A | 24 | 2187     |         | 2187                |         |
|                     | 455.26 |          | 455.26 | 6   | A | 23 | 2116     |         | 2116                |         |
|                     | 526.3  |          | 526.3  | 7   | A | 22 | 2044.9   |         | 2044.9              |         |
|                     | 597.34 |          | 597.34 | 8   | A | 21 | 1973.9   |         | 1973.9              |         |
|                     | 684.37 |          | 684.37 | 9   | S | 20 | 1902.8   |         | 951.92              | -0.119  |
|                     | 755.4  |          | 755.4  | 10  | A | 19 | 1815.8   |         | 1815.8              |         |
|                     | 826.44 |          | 826.44 | 11  | A | 18 | 1744.8   |         | 872.89              | +0.1859 |
|                     | 897.48 | -0.188   | 897.48 | 12  | A | 17 | 1673.7   |         | 1673.7              |         |
|                     | 984.51 | +0.2032  | 984.51 | 13  | S | 16 | 1602.7   |         | 1602.7              |         |
|                     | 1041.5 |          | 1041.5 | 14  | G | 15 | 1515.7   |         | 758.34              | -0.02   |
|                     | 1098.6 | +0.0192  | 1098.6 | 15  | G | 14 | 1458.6   |         | 729.83              | +0.0135 |
| -0.217              | 598.31 |          | 1195.6 | 16  | P | 13 | 1401.6   |         | 1401.6              |         |
|                     | 1282.6 |          | 1282.6 | 17  | S | 12 | 1304.6   |         | 1304.6              |         |
|                     | 1353.7 | -0.03    | 1353.7 | 18  | A | 11 | 1217.5   |         | 1217.5              |         |
|                     | 1424.7 | -0.172   | 1424.7 | 19  | A | 10 | 1146.5   | +0.0513 | 573.75              | +0.1018 |
|                     | 1521.8 |          | 1521.8 | 20  | P | 9  | 1075.5   | -0.056  | 538.24              | +0.2377 |
|                     | 1608.8 | -0.071   | 1608.8 | 21  | S | 8  | 978.41   |         | 978.41              |         |
|                     | 1665.8 |          | 1665.8 | 22  | G | 7  | 891.38   | -0.213  | 891.38              |         |
|                     | 1794.9 |          | 1794.9 | 23  | E | 6  | 834.36   |         | 834.36              |         |
|                     | 1908.9 |          | 1908.9 | 24  | N | 5  | 705.32   | +0.2407 | 705.32              |         |
|                     | 2037.9 |          | 2037.9 | 25  | E | 4  | 591.27   |         | 591.27              |         |
|                     | 2109   |          | 2109   | 26  | A | 3  | 462.23   |         | 462.23              |         |
| +0.3379             | 1119.5 |          | 2238   | 27  | E | 2  | 391.19   |         | 391.19              |         |
|                     | 2325.1 |          | 2325.1 | 28  | S | 1  | 262.15   |         | 262.15              |         |
|                     |        |          |        | 29  | R | 0  | 175.12   |         | 175.12              |         |

Scan number 1144 Raw file LNCAP\_Silac\_23F10\_set3\_01  
 Method ITMS; CID Peptide 198.47

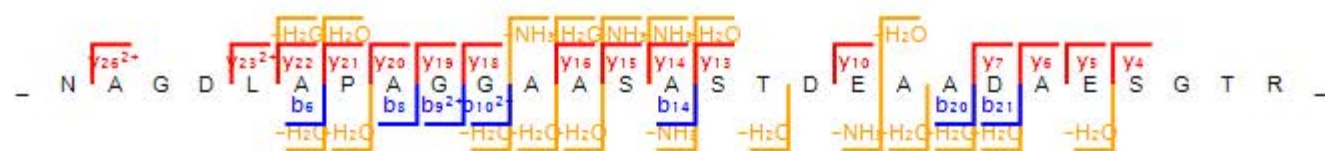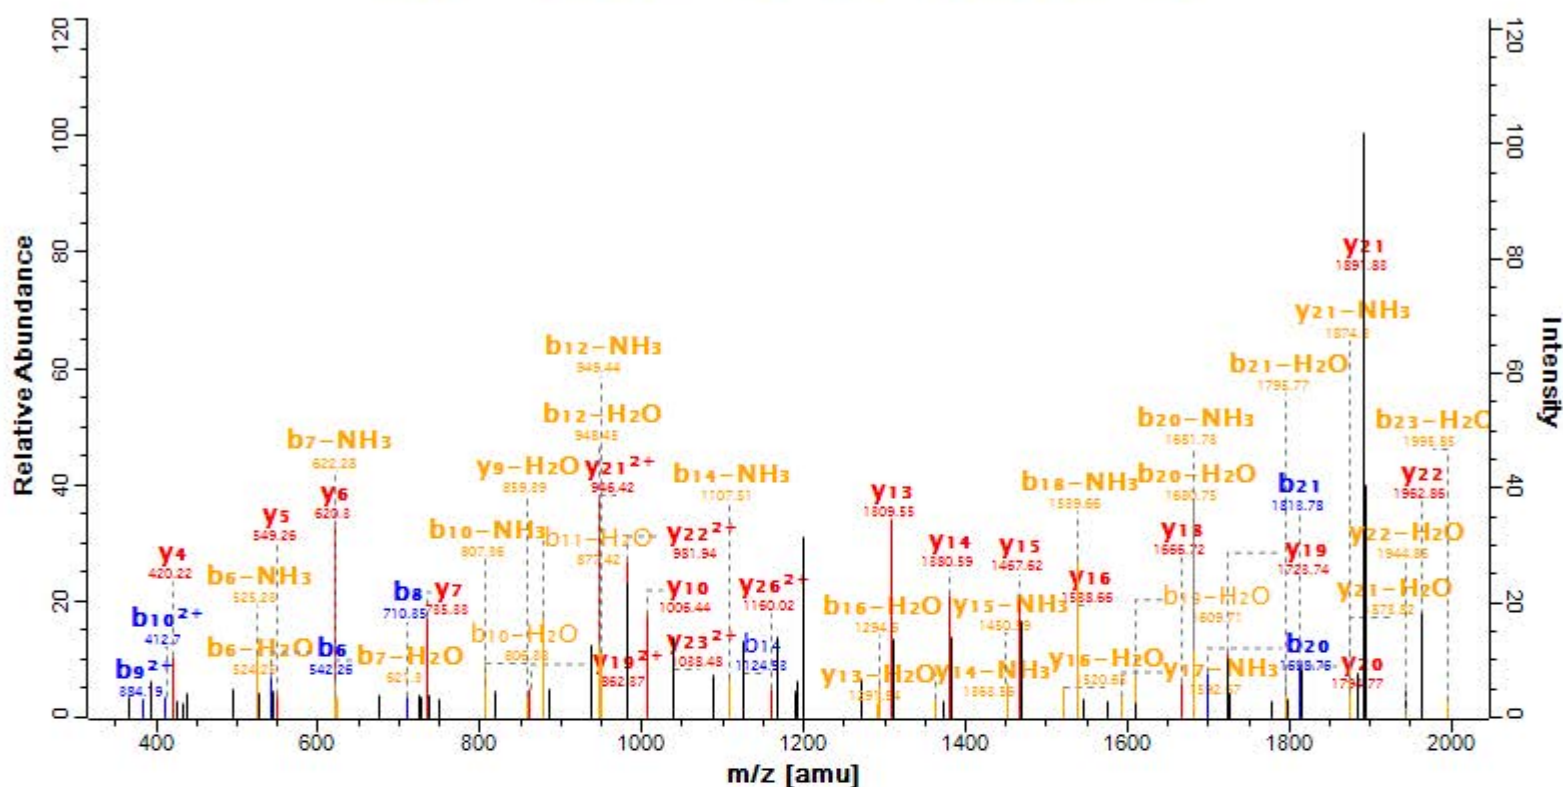

precursor information

|                   |                 |
|-------------------|-----------------|
| Mass:             | 2432.06897      |
| m/z:              | 1217.04176      |
| Charge:           | 2+              |
| Retentiontime:    | 16.664182662963 |
| Score:            | 198.4651        |
| Mass Error [ppm]: | 0.08317         |
| PEP:              | 4.9819E-56      |
| Precursor Type:   | MULTI           |

| b <sup>2+</sup> ion |        | b ion    |        | seq |   |    | y ion    |         | y <sup>2+</sup> ion |         |
|---------------------|--------|----------|--------|-----|---|----|----------|---------|---------------------|---------|
| Δ dalton            | mass   | Δ dalton | mass   |     |   |    | Δ dalton | mass    | Δ dalton            | mass    |
|                     | 115.05 |          | 115.05 | 1   | N | 26 |          |         |                     |         |
|                     | 186.09 |          | 186.09 | 2   | A | 25 | 2319     |         | 1160                | +0.4431 |
|                     | 243.11 |          | 243.11 | 3   | G | 24 | 2248     |         | 2248                |         |
|                     | 358.14 |          | 358.14 | 4   | D | 23 | 2191     |         | 2191                |         |
|                     | 471.22 |          | 471.22 | 5   | L | 22 | 2075.9   |         | 1038.5              | -0.141  |
|                     | 542.26 | +0.0823  | 542.26 | 6   | A | 21 | 1962.9   | -0.139  | 981.94              | +0.0569 |
|                     | 639.31 |          | 639.31 | 7   | P | 20 | 1891.8   | -0.153  | 946.42              | +0.4042 |
|                     | 710.35 | -0.053   | 710.35 | 8   | A | 19 | 1794.8   | -0.017  | 1794.8              |         |
| -0.078              | 384.19 |          | 767.37 | 9   | G | 18 | 1723.7   | +0.0835 | 862.37              | -0.111  |
| -0.44               | 412.7  |          | 824.39 | 10  | G | 17 | 1666.7   | +0.2174 | 1666.7              |         |
|                     | 895.43 |          | 895.43 | 11  | A | 16 | 1609.7   |         | 1609.7              |         |
|                     | 966.46 |          | 966.46 | 12  | A | 15 | 1538.7   | -0.186  | 1538.7              |         |
|                     | 1053.5 |          | 1053.5 | 13  | S | 14 | 1467.6   | -0.093  | 1467.6              |         |
|                     | 1124.5 | +0.078   | 1124.5 | 14  | A | 13 | 1380.6   | -0.031  | 1380.6              |         |
|                     | 1211.6 |          | 1211.6 | 15  | S | 12 | 1309.6   | -0.173  | 1309.6              |         |
|                     | 1312.6 |          | 1312.6 | 16  | T | 11 | 1222.5   |         | 1222.5              |         |
|                     | 1427.6 |          | 1427.6 | 17  | D | 10 | 1121.5   |         | 1121.5              |         |
|                     | 1556.7 |          | 1556.7 | 18  | E | 9  | 1006.4   | -0.157  | 1006.4              |         |
|                     | 1627.7 |          | 1627.7 | 19  | A | 8  | 877.4    |         | 877.4               |         |
|                     | 1698.8 | -0.12    | 1698.8 | 20  | A | 7  | 806.36   |         | 806.36              |         |
|                     | 1813.8 | -0.16    | 1813.8 | 21  | D | 6  | 735.33   | +0.0774 | 735.33              |         |
|                     | 1884.8 |          | 1884.8 | 22  | A | 5  | 620.3    | +0.1289 | 620.3               |         |
|                     | 2013.9 |          | 2013.9 | 23  | E | 4  | 549.26   | +0.1465 | 549.26              |         |
|                     | 2100.9 |          | 2100.9 | 24  | S | 3  | 420.22   | +0.0996 | 420.22              |         |
|                     | 2157.9 |          | 2157.9 | 25  | G | 2  | 333.19   |         | 333.19              |         |
|                     | 2259   |          | 2259   | 26  | T | 1  | 276.17   |         | 276.17              |         |
|                     |        |          |        | 27  | R | 0  | 175.12   |         | 175.12              |         |

general information

|                       |           |
|-----------------------|-----------|
| Annotation:           | 21 of 27  |
| AminoAcids Coverage:  | 78 %      |
| Intensity Coverage:   | 57 %      |
| Peak Coverage:        | 53 %      |
| Protein Localisation: | 42 ... 68 |

Scan number 1465 Raw file LNCAP\_Silac\_23F10\_set3\_01  
 Method ITMS; CID Pepti... 120.9

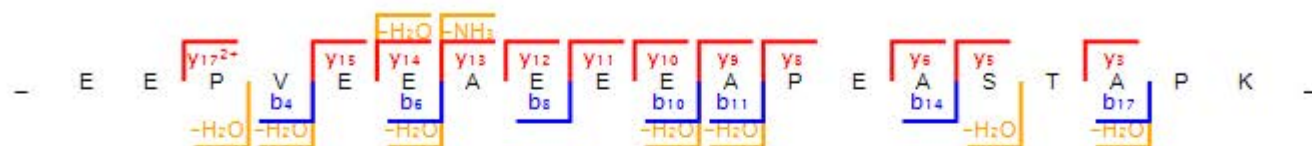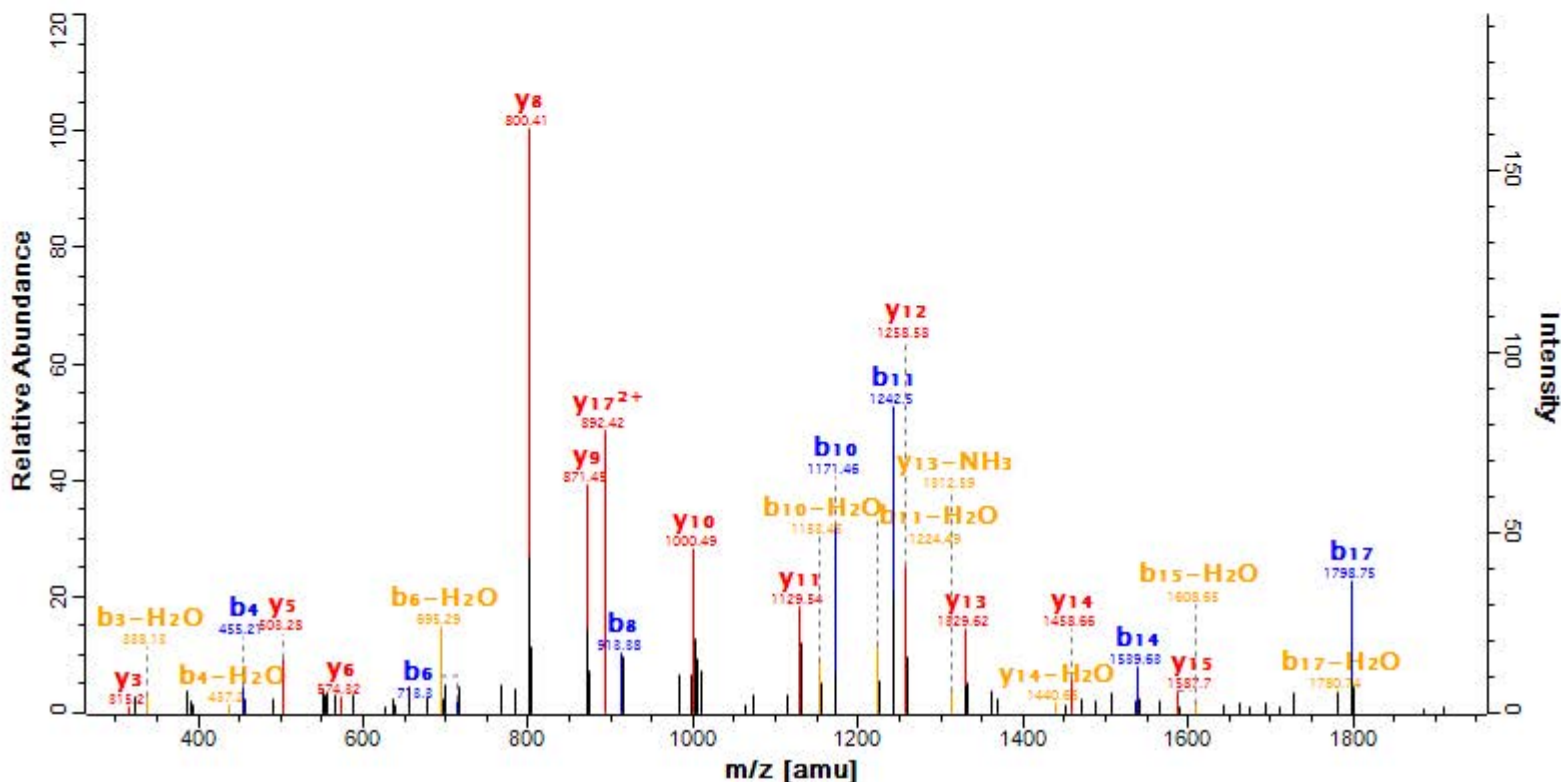

#### precursor information

|                   |                 |
|-------------------|-----------------|
| Mass:             | 2040.90257      |
| m/z:              | 1021.45856      |
| Charge:           | 2+              |
| Retentiontime:    | 19.856170654296 |
| Score:            | 120.8965        |
| Mass Error [ppm]: | 0.70243         |
| PEP:              | 1.5871E-12      |
| Precursor Type:   | MULTI           |

#### general information

|                       |             |
|-----------------------|-------------|
| Annotation:           | 13 of 19    |
| AminoAcids Coverage:  | 68 %        |
| Intensity Coverage:   | 61 %        |
| Peak Coverage:        | 30 %        |
| Protein Localisation: | 880 ... 898 |

| b ion     |          |    |     |    | y ion    |           | y <sup>2+</sup> ion |           |
|-----------|----------|----|-----|----|----------|-----------|---------------------|-----------|
| Δ dalton  | mass     |    | seq |    | Δ dalton | mass      | Δ dalton            | mass      |
|           | 130.0499 | 1  | E   | 18 |          |           |                     |           |
|           | 259.0925 | 2  | E   | 17 | 1912.866 |           | 1912.866            |           |
|           | 356.1452 | 3  | P   | 16 | 1783.823 |           | 892.4153            | +0.288604 |
| +0.088331 | 455.2136 | 4  | V   | 15 | 1686.77  |           | 1686.77             |           |
|           | 584.2562 | 5  | E   | 14 | 1587.702 | -0.0502   | 1587.702            |           |
| +0.123903 | 713.2988 | 6  | E   | 13 | 1458.659 | -0.21842  | 1458.659            |           |
|           | 784.3359 | 7  | A   | 12 | 1329.617 | -0.05119  | 1329.617            |           |
| +0.139411 | 913.3785 | 8  | E   | 11 | 1258.58  | -0.03483  | 1258.58             |           |
|           | 1042.421 | 9  | E   | 10 | 1129.537 | +0.020824 | 1129.537            |           |
| +0.014308 | 1171.464 | 10 | E   | 9  | 1000.495 | +0.115053 | 1000.495            |           |
| -0.14121  | 1242.501 | 11 | A   | 8  | 871.452  | +0.084038 | 871.452             |           |
|           | 1339.554 | 12 | P   | 7  | 800.4149 | +0.029599 | 800.4149            |           |
|           | 1468.596 | 13 | E   | 6  | 703.3621 |           | 703.3621            |           |
| -0.16614  | 1539.633 | 14 | A   | 5  | 574.3195 | +0.134843 | 574.3195            |           |
|           | 1626.665 | 15 | S   | 4  | 503.2824 | +0.198141 | 503.2824            |           |
|           | 1727.713 | 16 | T   | 3  | 416.2504 |           | 416.2504            |           |
| +0.066159 | 1798.75  | 17 | A   | 2  | 315.2027 | -0.05     | 315.2027            |           |
|           | 1895.803 | 18 | P   | 1  | 244.1656 |           | 244.1656            |           |
|           |          | 19 | K   | 0  | 147.1128 |           | 147.1128            |           |

Scan number 1590 Raw file LNCAP\_Silac\_23F10\_set3\_01  
 Method ITMS; CID Peptide 143.14

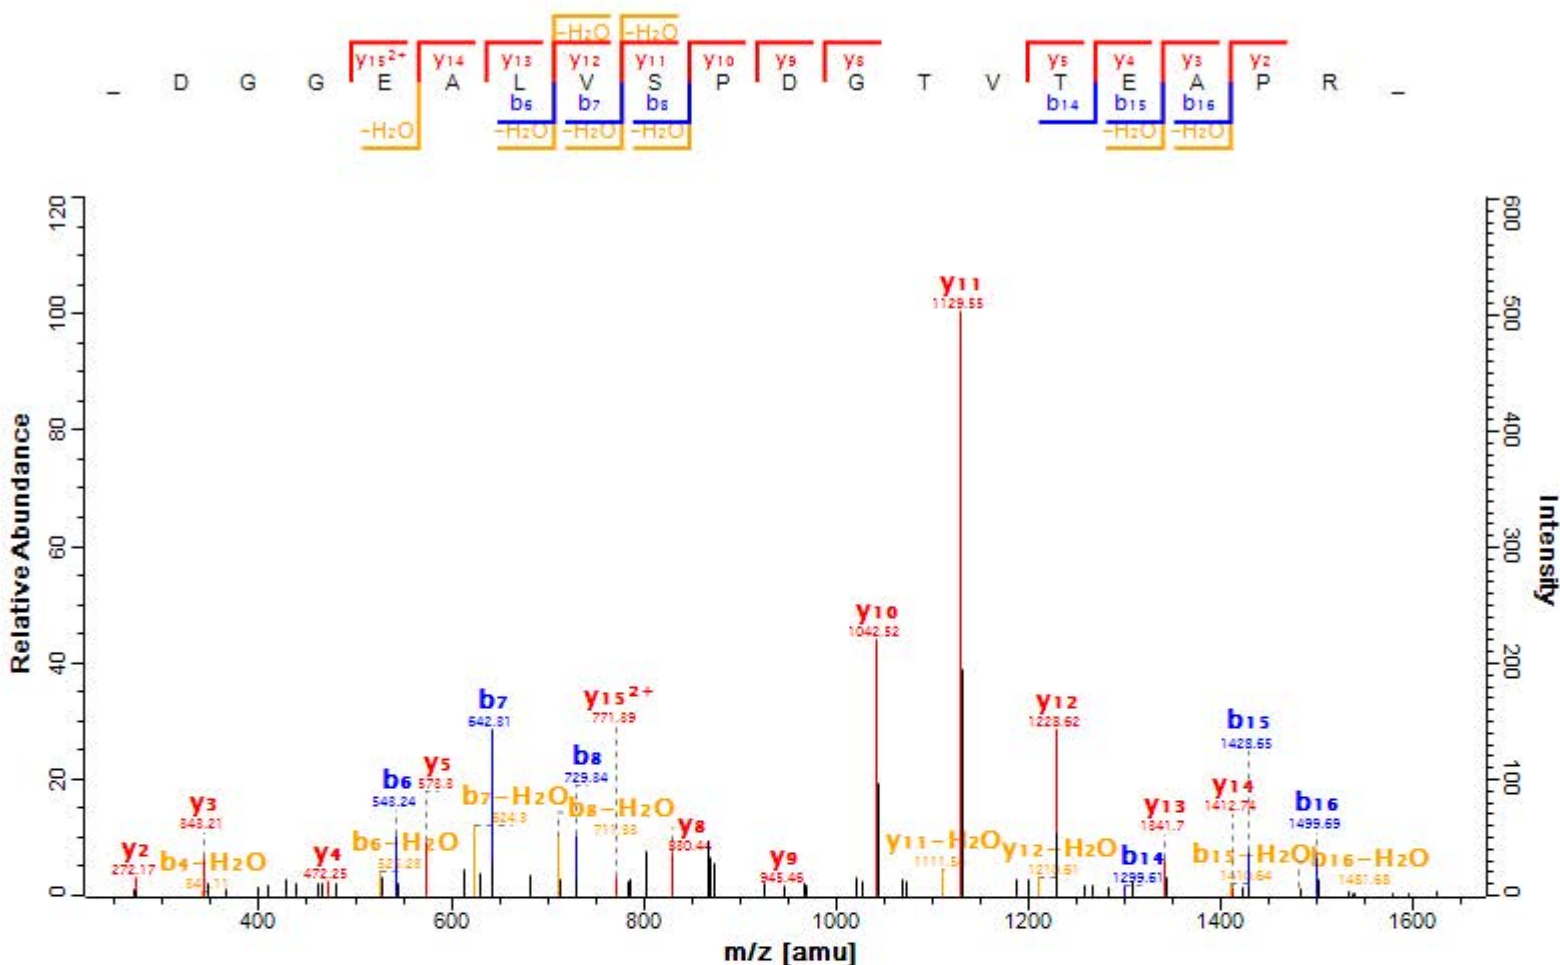

#### precursor information

|                   |                 |
|-------------------|-----------------|
| Mass:             | 1769.84328      |
| m/z:              | 885.92892       |
| Charge:           | 2+              |
| Retentiontime:    | 21.088050842285 |
| Score:            | 143.1416        |
| Mass Error [ppm]: | 0.06162         |
| PEP:              | 2.0602E-17      |
| Precursor Type:   | MULTI           |

#### general information

|                       |             |
|-----------------------|-------------|
| Annotation:           | 12 of 18    |
| AminoAcids Coverage:  | 67 %        |
| Intensity Coverage:   | 61 %        |
| Peak Coverage:        | 31 %        |
| Protein Localisation: | 100 ... 117 |

| b ion    |          |     |   | y ion    |          | y <sup>2+</sup> ion |          |
|----------|----------|-----|---|----------|----------|---------------------|----------|
| Δ dalton | mass     | seq |   | Δ dalton | mass     | Δ dalton            | mass     |
|          | 116.0342 | 1   | D | 17       |          |                     |          |
|          | 173.0557 | 2   | G | 16       | 1655.824 | 1655.824            |          |
|          | 230.0771 | 3   | G | 15       | 1598.802 | 1598.802            |          |
|          | 359.1197 | 4   | E | 14       | 1541.781 | 771.3939            | -0.17939 |
|          | 430.1569 | 5   | A | 13       | 1412.738 | -0.12397            | 1412.738 |
| -0.03865 | 543.2409 | 6   | L | 12       | 1341.701 | -0.08991            | 1341.701 |
| -0.04999 | 642.3093 | 7   | V | 11       | 1228.617 | -0.06505            | 1228.617 |
| -0.0067  | 729.3414 | 8   | S | 10       | 1129.548 | +0.000313           | 1129.548 |
|          | 826.3941 | 9   | P | 9        | 1042.516 | +0.021233           | 1042.516 |
|          | 941.4211 | 10  | D | 8        | 945.4636 | +0.227317           | 945.4636 |
|          | 998.4425 | 11  | G | 7        | 830.4367 | -0.10933            | 830.4367 |
|          | 1099.49  | 12  | T | 6        | 773.4152 |                     | 773.4152 |
|          | 1198.559 | 13  | V | 5        | 672.3675 |                     | 672.3675 |
| +0.08132 | 1299.606 | 14  | T | 4        | 573.2991 | +0.052156           | 573.2991 |
| -0.2662  | 1428.649 | 15  | E | 3        | 472.2514 | -0.09127            | 472.2514 |
| -0.09153 | 1499.686 | 16  | A | 2        | 343.2088 | +0.08127            | 343.2088 |
|          | 1596.739 | 17  | P | 1        | 272.1717 | +0.090918           | 272.1717 |
|          |          | 18  | R | 0        | 175.119  |                     | 175.119  |

Scan number 1662 Raw file LNCAP\_Silac\_23F10\_set3\_01  
 Method ITMS; CID Pepti... 166.91

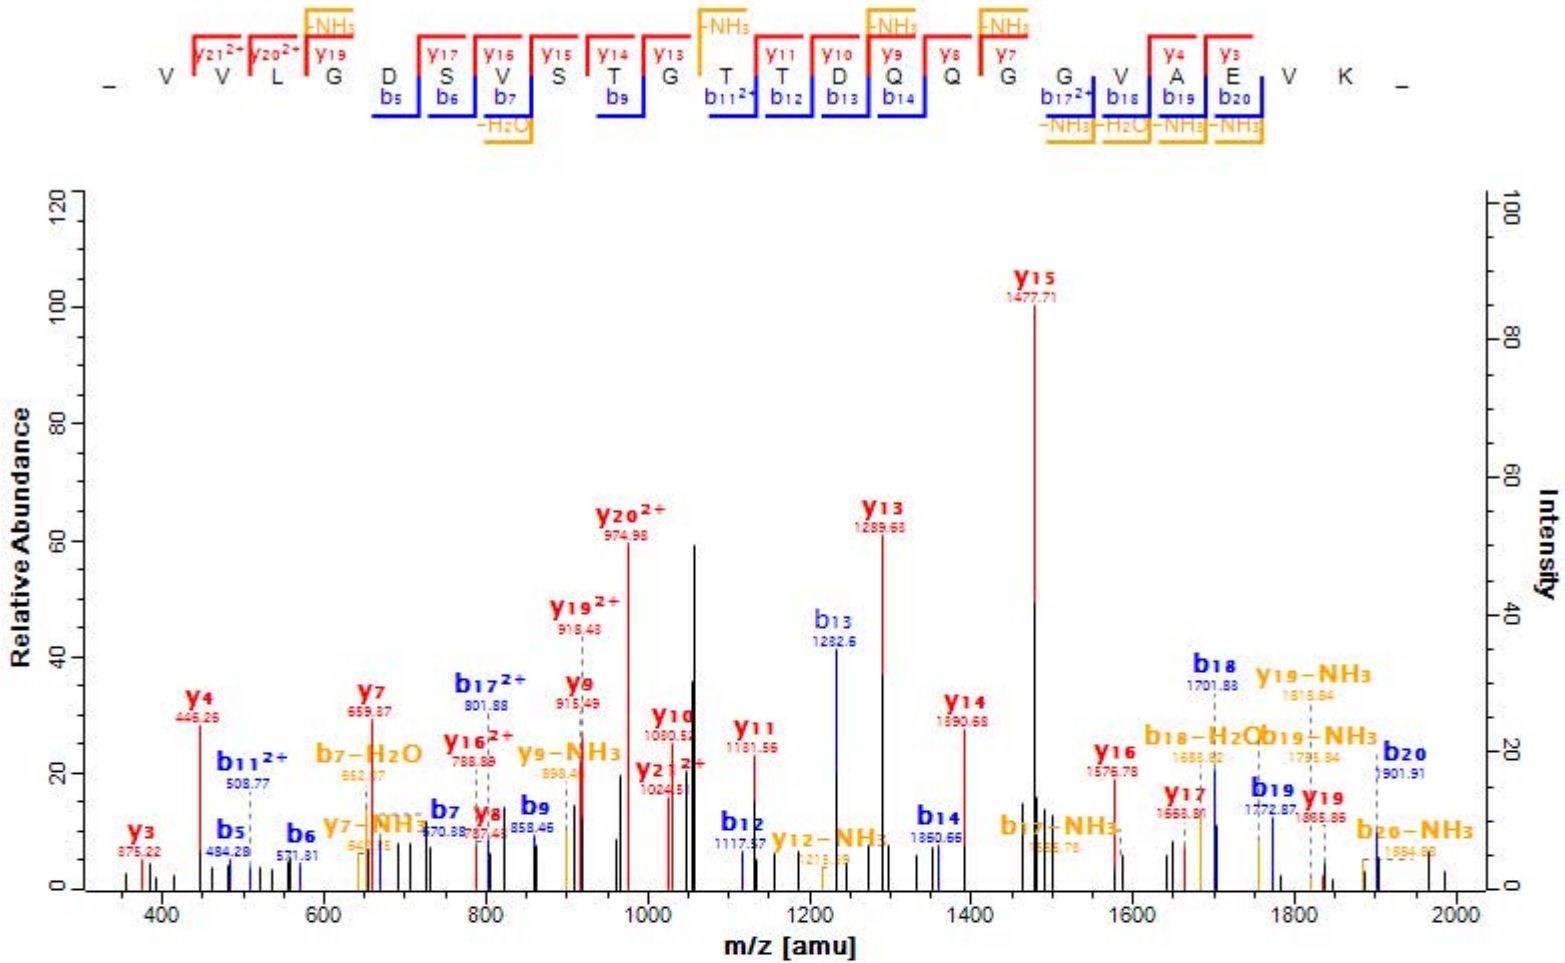

precursor information

|                   |                 |
|-------------------|-----------------|
| Mass:             | 2146.0766       |
| m/z:              | 1074.04557      |
| Charge:           | 2+              |
| Retentiontime:    | 21.804317474365 |
| Score:            | 166.9057        |
| Mass Error [ppm]: | 0.57769         |
| PEP:              | 2.2294E-29      |
| Precursor Type:   | MULTI           |

general information

|                       |            |
|-----------------------|------------|
| Annotation:           | 19 of 22   |
| AminoAcids Coverage:  | 86 %       |
| Intensity Coverage:   | 52 %       |
| Peak Coverage:        | 38 %       |
| Protein Localisation: | 85 ... 106 |

| b <sup>2+</sup> ion |        | b ion    |        | seq |   |    | y ion    |         | y <sup>2+</sup> ion |         |
|---------------------|--------|----------|--------|-----|---|----|----------|---------|---------------------|---------|
| Δ dalton            | mass   | Δ dalton | mass   |     |   |    | Δ dalton | mass    | Δ dalton            | mass    |
|                     | 100.08 | 100.08   |        | 1   | V | 21 |          |         |                     |         |
|                     | 199.14 | 199.14   |        | 2   | V | 20 | 2048     |         | 1024.5              | +0.3085 |
|                     | 312.23 | 312.23   |        | 3   | L | 19 | 1948.9   |         | 974.98              | +0.3172 |
|                     | 369.25 | 369.25   |        | 4   | G | 18 | 1835.9   | -0.339  | 918.43              | +0.1701 |
|                     | 484.28 | +0.1919  | 484.28 | 5   | D | 17 | 1778.8   |         | 1778.8              |         |
|                     | 571.31 | +0.0148  | 571.31 | 6   | S | 16 | 1663.8   | -0.067  | 1663.8              |         |
|                     | 670.38 | -0.004   | 670.38 | 7   | V | 15 | 1576.8   | -0.034  | 788.89              | -0.38   |
|                     | 757.41 |          | 757.41 | 8   | S | 14 | 1477.7   | -0.057  | 1477.7              |         |
|                     | 858.46 | +0.0051  | 858.46 | 9   | T | 13 | 1390.7   | +0.1122 | 1390.7              |         |
|                     | 915.48 |          | 915.48 | 10  | G | 12 | 1289.6   | -0.104  | 1289.6              |         |
| -0.288              | 508.77 |          | 1016.5 | 11  | T | 11 | 1232.6   |         | 1232.6              |         |
|                     | 1117.6 | -0.056   | 1117.6 | 12  | T | 10 | 1131.6   | -0.205  | 1131.6              |         |
|                     | 1232.6 | -0.09    | 1232.6 | 13  | D | 9  | 1030.5   | +0.1338 | 1030.5              |         |
|                     | 1360.7 | -0.042   | 1360.7 | 14  | Q | 8  | 915.49   | +0.0601 | 915.49              |         |
|                     | 1488.7 |          | 1488.7 | 15  | Q | 7  | 787.43   | +0.1367 | 787.43              |         |
|                     | 1545.7 |          | 1545.7 | 16  | G | 6  | 659.37   | -0.008  | 659.37              |         |
| -0.024              | 801.88 |          | 1602.8 | 17  | G | 5  | 602.35   |         | 602.35              |         |
|                     | 1701.8 | +0.1854  | 1701.8 | 18  | V | 4  | 545.33   |         | 545.33              |         |
|                     | 1772.9 | +0.3354  | 1772.9 | 19  | A | 3  | 446.26   | +0.1282 | 446.26              |         |
|                     | 1901.9 | -0.109   | 1901.9 | 20  | E | 2  | 375.22   | +0.0623 | 375.22              |         |
|                     | 2001   |          | 2001   | 21  | V | 1  | 246.18   |         | 246.18              |         |
|                     |        |          |        | 22  | K | 0  | 147.11   |         | 147.11              |         |



Scan number 1817 Raw file LNCAP\_Silac\_23F10\_set3\_01  
 Method ITMS; CID Pepti... 119.45

- A L Q P G Q P G T T P P Q D A A Q D P N L S P G P S P A V A R -

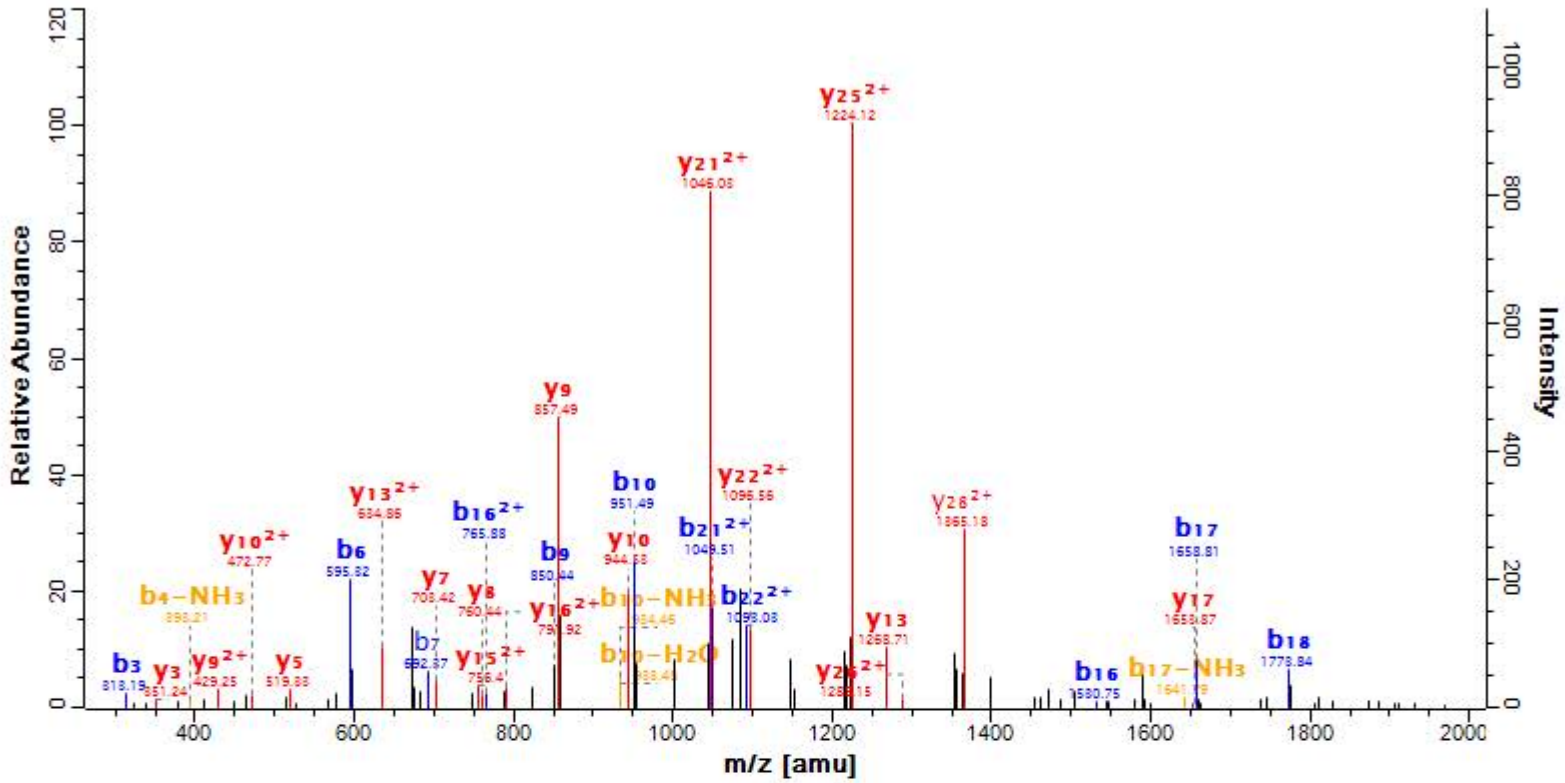

precursor information

|                   |                 |
|-------------------|-----------------|
| Mass:             | 3040.53007      |
| m/z:              | 1014.5173       |
| Charge:           | 3+              |
| Retentiontime:    | 23.297088623046 |
| Score:            | 119.4498        |
| Mass Error [ppm]: | -0.28973        |
| PEP:              | 6.6281E-14      |
| Precursor Type:   | ISO             |

general information

|                       |             |
|-----------------------|-------------|
| Annotation:           | 19 of 31    |
| AminoAcids Coverage:  | 61 %        |
| Intensity Coverage:   | 63 %        |
| Peak Coverage:        | 33 %        |
| Protein Localisation: | 375 ... 405 |

| b <sup>2+</sup> ion |        | b ion    |        | seq |   |    | y ion    |         | y <sup>2+</sup> ion |         |
|---------------------|--------|----------|--------|-----|---|----|----------|---------|---------------------|---------|
| Δ dalton            | mass   | Δ dalton | mass   |     |   |    | Δ dalton | mass    | Δ dalton            | mass    |
|                     | 72.044 |          | 72.044 | 1   | A | 30 |          |         |                     |         |
|                     | 185.13 |          | 185.13 | 2   | L | 29 | 2970.5   |         | 2970.5              |         |
|                     | 313.19 | +0.1069  | 313.19 | 3   | Q | 28 | 2857.4   |         | 2857.4              |         |
|                     | 410.24 |          | 410.24 | 4   | P | 27 | 2729.4   |         | 1365.2              | +0.1086 |
|                     | 467.26 |          | 467.26 | 5   | G | 26 | 2632.3   |         | 2632.3              |         |
|                     | 595.32 | -0.005   | 595.32 | 6   | Q | 25 | 2575.3   |         | 1288.1              | -0.013  |
|                     | 692.37 | +0.2989  | 692.37 | 7   | P | 24 | 2447.2   |         | 1224.1              | +0.1992 |
|                     | 749.39 |          | 749.39 | 8   | G | 23 | 2350.2   |         | 2350.2              |         |
|                     | 850.44 | +0.029   | 850.44 | 9   | T | 22 | 2293.2   |         | 2293.2              |         |
|                     | 951.49 | -0.046   | 951.49 | 10  | T | 21 | 2192.1   |         | 1096.6              | +0.2045 |
|                     | 1048.5 |          | 1048.5 | 11  | P | 20 | 2091.1   |         | 1046                | +0.2576 |
|                     | 1145.6 |          | 1145.6 | 12  | P | 19 | 1994     |         | 1994                |         |
|                     | 1273.7 |          | 1273.7 | 13  | Q | 18 | 1897     |         | 1897                |         |
|                     | 1388.7 |          | 1388.7 | 14  | D | 17 | 1768.9   |         | 1768.9              |         |
|                     | 1459.7 |          | 1459.7 | 15  | A | 16 | 1653.9   | -0.126  | 1653.9              |         |
| +0.2185             | 765.88 | +0.0152  | 1530.8 | 16  | A | 15 | 1582.8   |         | 791.92              | +0.0361 |
|                     | 1658.8 | -0.152   | 1658.8 | 17  | Q | 14 | 1511.8   |         | 756.4               | +0.0175 |
|                     | 1773.8 | +0.0808  | 1773.8 | 18  | D | 13 | 1383.7   |         | 1383.7              |         |
|                     | 1870.9 |          | 1870.9 | 19  | P | 12 | 1268.7   | -0.043  | 634.86              | -0.098  |
|                     | 1984.9 |          | 1984.9 | 20  | N | 11 | 1171.7   |         | 1171.7              |         |
| +0.0973             | 1049.5 |          | 2098   | 21  | L | 10 | 1057.6   |         | 1057.6              |         |
| +0.1422             | 1093   |          | 2185.1 | 22  | S | 9  | 944.53   | +0.0489 | 472.77              | -0.031  |
|                     | 2282.1 |          | 2282.1 | 23  | P | 8  | 857.49   | -0.143  | 429.25              | -0.135  |
|                     | 2339.1 |          | 2339.1 | 24  | G | 7  | 760.44   | +0.0303 | 760.44              |         |
|                     | 2436.2 |          | 2436.2 | 25  | P | 6  | 703.42   | +0.1571 | 703.42              |         |
|                     | 2523.2 |          | 2523.2 | 26  | S | 5  | 606.37   |         | 606.37              |         |
|                     | 2620.3 |          | 2620.3 | 27  | P | 4  | 519.33   | +0.0173 | 519.33              |         |
|                     | 2691.3 |          | 2691.3 | 28  | A | 3  | 422.28   |         | 422.28              |         |
|                     | 2790.4 |          | 2790.4 | 29  | V | 2  | 351.24   | +0.1334 | 351.24              |         |
|                     | 2861.4 |          | 2861.4 | 30  | A | 1  | 252.18   |         | 252.18              |         |
|                     |        |          |        | 31  | R | 0  | 181.14   |         | 181.14              |         |

Scan number 2034 Raw file LNCAP\_Silac\_23F10\_set3\_01  
 Method ITMS; CID Pepti... 87.49

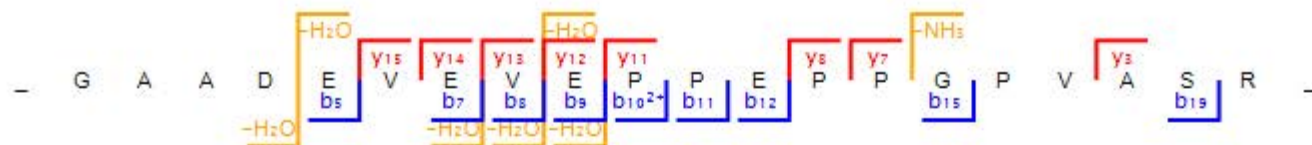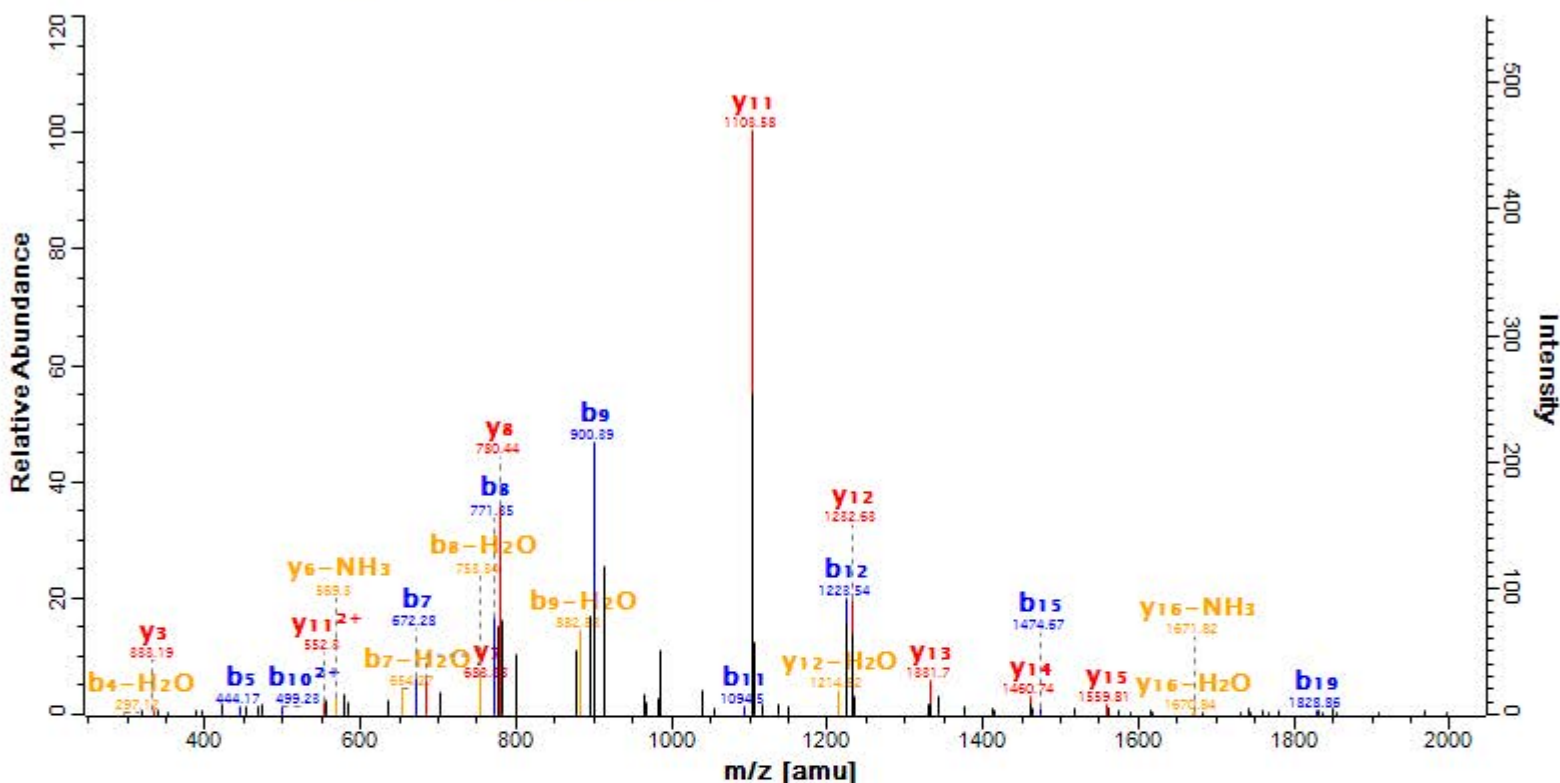

#### precursor information

|                   |                 |
|-------------------|-----------------|
| Mass:             | 2001.96474      |
| m/z:              | 1001.98965      |
| Charge:           | 2+              |
| Retentiontime:    | 25.189147949218 |
| Score:            | 87.48995        |
| Mass Error [ppm]: | 0.19745         |
| PEP:              | 7.6184E-06      |
| Precursor Type:   | MULTI           |

| b <sup>2+</sup> ion |        | b ion    |        | seq |   |    | y ion    |         | y <sup>2+</sup> ion |         |
|---------------------|--------|----------|--------|-----|---|----|----------|---------|---------------------|---------|
| Δ dalton            | mass   | Δ dalton | mass   |     |   |    | Δ dalton | mass    | Δ dalton            | mass    |
|                     | 58.029 |          | 58.029 | 1   | G | 19 |          |         |                     |         |
|                     | 129.07 |          | 129.07 | 2   | A | 18 | 1946     |         | 1946                |         |
|                     | 200.1  |          | 200.1  | 3   | A | 17 | 1874.9   |         | 1874.9              |         |
|                     | 315.13 |          | 315.13 | 4   | D | 16 | 1803.9   |         | 1803.9              |         |
|                     | 444.17 | -0.096   | 444.17 | 5   | E | 15 | 1688.8   |         | 1688.8              |         |
|                     | 543.24 |          | 543.24 | 6   | V | 14 | 1559.8   | -0.109  | 1559.8              |         |
|                     | 672.28 | +0.0008  | 672.28 | 7   | E | 13 | 1460.7   | -0.064  | 1460.7              |         |
|                     | 771.35 | +0.0941  | 771.35 | 8   | V | 12 | 1331.7   | +0.1088 | 1331.7              |         |
|                     | 900.39 | -0.001   | 900.39 | 9   | E | 11 | 1232.6   | +0.024  | 1232.6              |         |
| +0.1758             | 499.23 |          | 997.45 | 10  | P | 10 | 1103.6   | -0.051  | 552.3               | +0.1071 |
|                     | 1094.5 | -0.204   | 1094.5 | 11  | P | 9  | 1006.5   |         | 1006.5              |         |
|                     | 1223.5 | -0.039   | 1223.5 | 12  | E | 8  | 909.48   |         | 909.48              |         |
|                     | 1320.6 |          | 1320.6 | 13  | P | 7  | 780.44   | -0.01   | 780.44              |         |
|                     | 1417.6 |          | 1417.6 | 14  | P | 6  | 683.38   | +0.0578 | 683.38              |         |
|                     | 1474.7 | -0.142   | 1474.7 | 15  | G | 5  | 586.33   |         | 586.33              |         |
|                     | 1571.7 |          | 1571.7 | 16  | P | 4  | 529.31   |         | 529.31              |         |
|                     | 1670.8 |          | 1670.8 | 17  | V | 3  | 432.26   |         | 432.26              |         |
|                     | 1741.8 |          | 1741.8 | 18  | A | 2  | 333.19   | +0.2794 | 333.19              |         |
|                     | 1828.9 | -0.269   | 1828.9 | 19  | S | 1  | 262.15   |         | 262.15              |         |
|                     |        |          |        | 20  | R | 0  | 175.12   |         | 175.12              |         |

#### general information

|                       |           |
|-----------------------|-----------|
| Annotation:           | 15 of 20  |
| AminoAcids Coverage:  | 75 %      |
| Intensity Coverage:   | 51 %      |
| Peak Coverage:        | 28 %      |
| Protein Localisation: | 66 ... 85 |

Scan number 2231 Raw file LNCAP\_Silac\_23F10\_set3\_01  
 Method ITMS; CID Pepti... 136.26

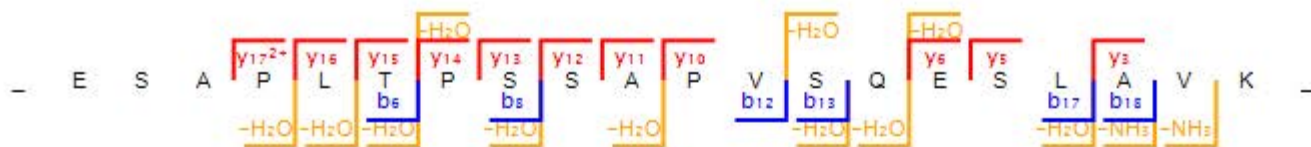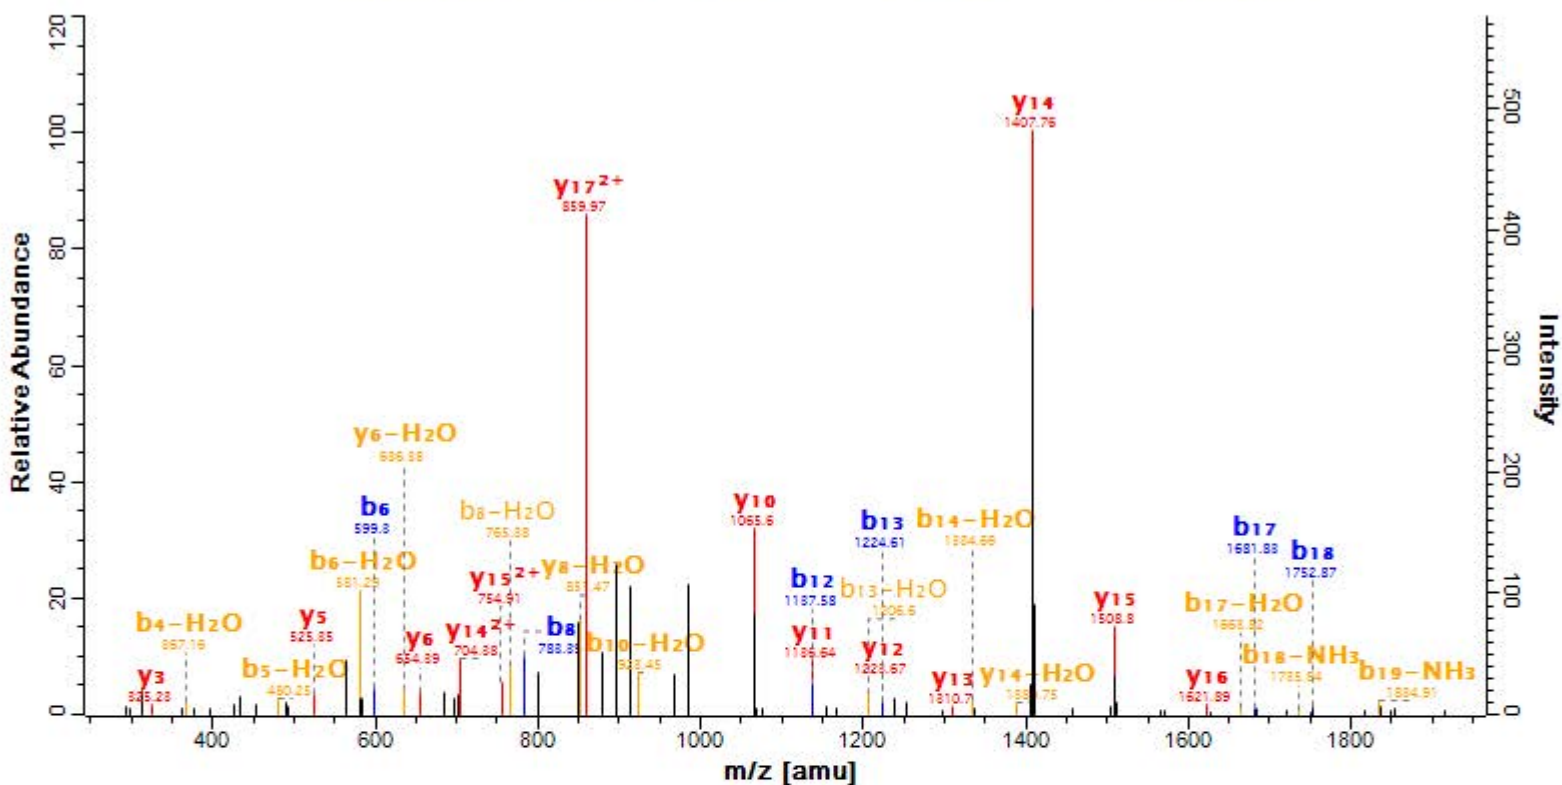

precursor information

|                   |                 |
|-------------------|-----------------|
| Mass:             | 1997.03197      |
| m/z:              | 999.52326       |
| Charge:           | 2+              |
| Retentiontime:    | 26.961641311645 |
| Score:            | 136.2613        |
| Mass Error [ppm]: | 0.13208         |
| PEP:              | 9.7524E-19      |
| Precursor Type:   | MULTI           |

general information

|                       |               |
|-----------------------|---------------|
| Annotation:           | 16 of 20      |
| AminoAcids Coverage:  | 80 %          |
| Intensity Coverage:   | 51 %          |
| Peak Coverage:        | 33 %          |
| Protein Localisation: | 2402 ... 2421 |

| b ion     |          |     |   | y ion    |          | y <sup>2+</sup> ion |                    |
|-----------|----------|-----|---|----------|----------|---------------------|--------------------|
| Δ dalton  | mass     | seq |   | Δ dalton | mass     | Δ dalton            | mass               |
|           | 130.0499 | 1   | E | 19       |          |                     |                    |
|           | 217.0819 | 2   | S | 18       | 1877.011 |                     | 1877.011           |
|           | 288.119  | 3   | A | 17       | 1789.979 |                     | 1789.979           |
|           | 385.1718 | 4   | P | 16       | 1718.941 |                     | 859.9744 +0.3357   |
|           | 498.2558 | 5   | L | 15       | 1621.889 | +0.007686           | 1621.889           |
| +0.167673 | 599.3035 | 6   | T | 14       | 1508.805 | -0.1646             | 754.9059 +0.21637  |
|           | 696.3563 | 7   | P | 13       | 1407.757 | -0.05015            | 704.3821 +0.030981 |
| -0.06104  | 783.3883 | 8   | S | 12       | 1310.704 | +0.097831           | 1310.704           |
|           | 870.4203 | 9   | S | 11       | 1223.672 | +0.322487           | 1223.672           |
|           | 941.4575 | 10  | A | 10       | 1136.64  | -0.02879            | 1136.64            |
|           | 1038.51  | 11  | P | 9        | 1065.603 | -0.03488            | 1065.603           |
| +0.214949 | 1137.579 | 12  | V | 8        | 968.5502 |                     | 968.5502           |
| +0.146666 | 1224.611 | 13  | S | 7        | 869.4818 |                     | 869.4818           |
|           | 1352.669 | 14  | Q | 6        | 782.4498 |                     | 782.4498           |
|           | 1481.712 | 15  | E | 5        | 654.3912 | +0.097248           | 654.3912           |
|           | 1568.744 | 16  | S | 4        | 525.3486 | +0.068369           | 525.3486           |
| +0.078695 | 1681.828 | 17  | L | 3        | 438.3166 |                     | 438.3166           |
| -0.23015  | 1752.865 | 18  | A | 2        | 325.2325 | +0.038954           | 325.2325           |
|           | 1851.933 | 19  | V | 1        | 254.1954 |                     | 254.1954           |
|           |          | 20  | K | 0        | 155.127  |                     | 155.127            |

Scan number 2505 Raw file LNCAP\_Silac\_23F10\_set3\_01  
 Method ITMS; CID Pepti... 69.72

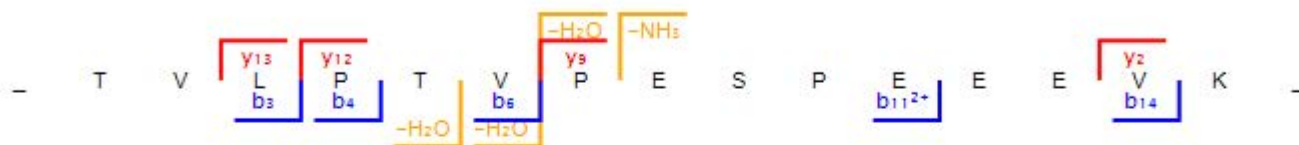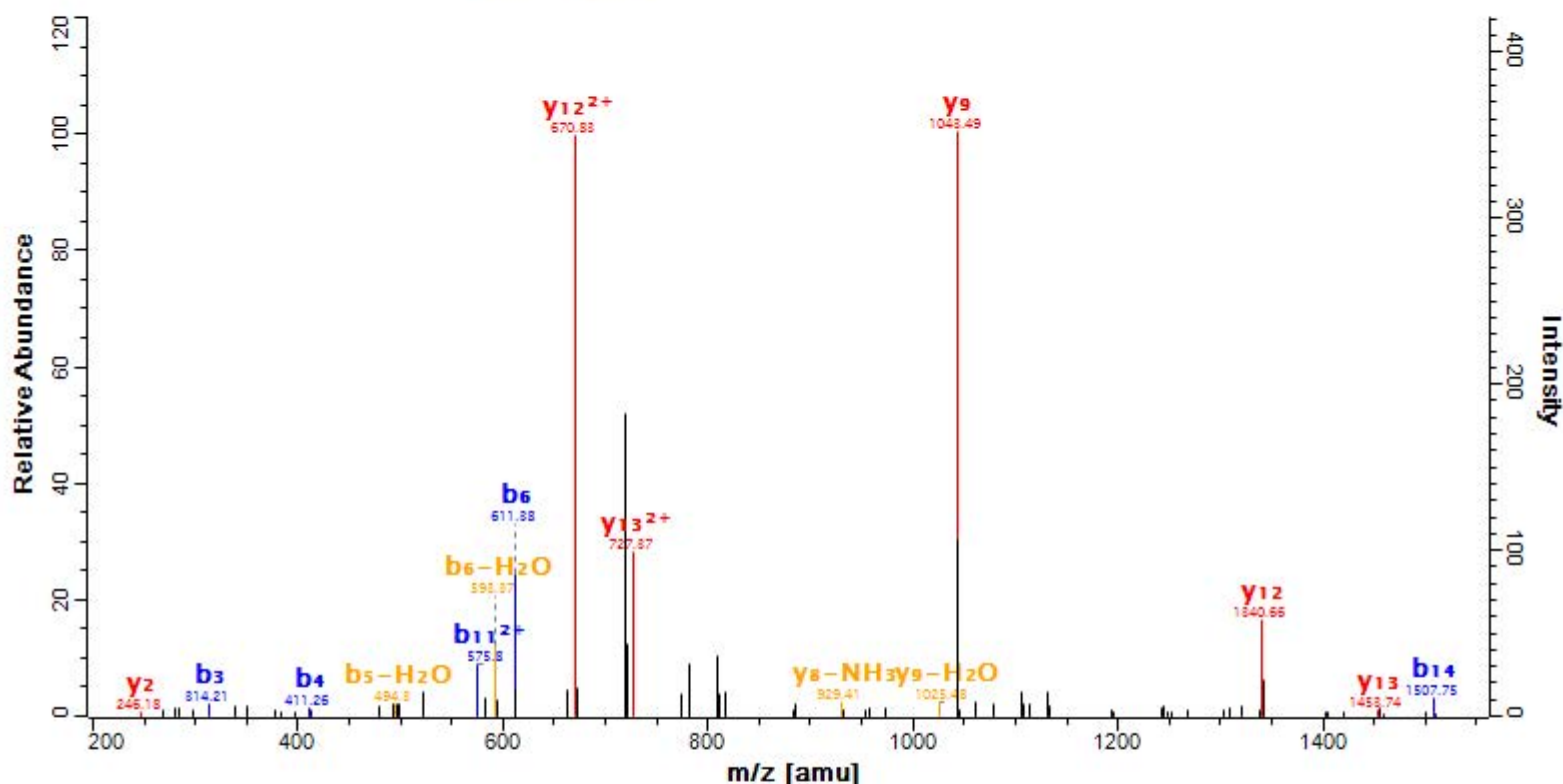

#### precursor information

|                   |                 |
|-------------------|-----------------|
| Mass:             | 1652.85091      |
| m/z:              | 827.43273       |
| Charge:           | 2+              |
| Retentiontime:    | 29.349010467529 |
| Score:            | 69.71599        |
| Mass Error [ppm]: | 0.015123        |
| PEP:              | 0.0014557       |
| Precursor Type:   | MULTI           |

| b <sup>2+</sup> ion |        | b ion    |        | seq |   |    | y ion    |         | y <sup>2+</sup> ion |         |
|---------------------|--------|----------|--------|-----|---|----|----------|---------|---------------------|---------|
| Δ dalton            | mass   | Δ dalton | mass   |     |   |    | Δ dalton | mass    | Δ dalton            | mass    |
|                     | 102.05 |          | 102.05 | 1   | T | 14 |          |         |                     |         |
|                     | 201.12 |          | 201.12 | 2   | V | 13 | 1552.8   |         | 1552.8              |         |
|                     | 314.21 | -0.044   | 314.21 | 3   | L | 12 | 1453.7   | -0.075  | 727.37              | +0.1156 |
|                     | 411.26 | +0.0958  | 411.26 | 4   | P | 11 | 1340.7   | -0.036  | 670.83              | +0.1252 |
|                     | 512.31 |          | 512.31 | 5   | T | 10 | 1243.6   |         | 1243.6              |         |
|                     | 611.38 | -0.01    | 611.38 | 6   | V | 9  | 1142.6   |         | 1142.6              |         |
|                     | 708.43 |          | 708.43 | 7   | P | 8  | 1043.5   | -0.038  | 1043.5              |         |
|                     | 837.47 |          | 837.47 | 8   | E | 7  | 946.44   |         | 946.44              |         |
|                     | 924.5  |          | 924.5  | 9   | S | 6  | 817.39   |         | 817.39              |         |
|                     | 1021.6 |          | 1021.6 | 10  | P | 5  | 730.36   |         | 730.36              |         |
| -0.444              | 575.8  |          | 1150.6 | 11  | E | 4  | 633.31   |         | 633.31              |         |
|                     | 1279.6 |          | 1279.6 | 12  | E | 3  | 504.27   |         | 504.27              |         |
|                     | 1408.7 |          | 1408.7 | 13  | E | 2  | 375.22   |         | 375.22              |         |
|                     | 1507.8 | -0.165   | 1507.8 | 14  | V | 1  | 246.18   | +0.1012 | 246.18              |         |
|                     |        |          |        | 15  | K | 0  | 147.11   |         | 147.11              |         |

#### general information

|                       |             |
|-----------------------|-------------|
| Annotation:           | 8 of 15     |
| AminoAcids Coverage:  | 53 %        |
| Intensity Coverage:   | 56 %        |
| Peak Coverage:        | 19 %        |
| Protein Localisation: | 100 ... 114 |

Scan number 2535 Raw file LNCAP\_Silac\_23F10\_set3\_01  
 Method ITMS; CID Pepti... 171.84

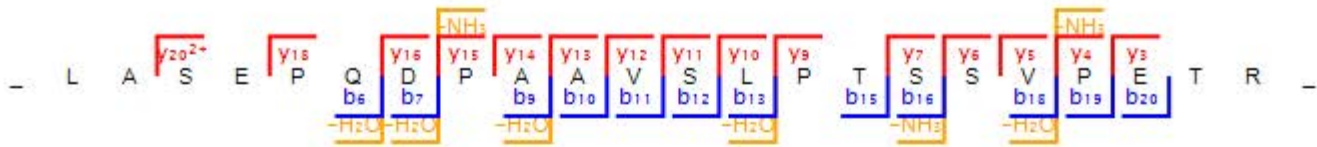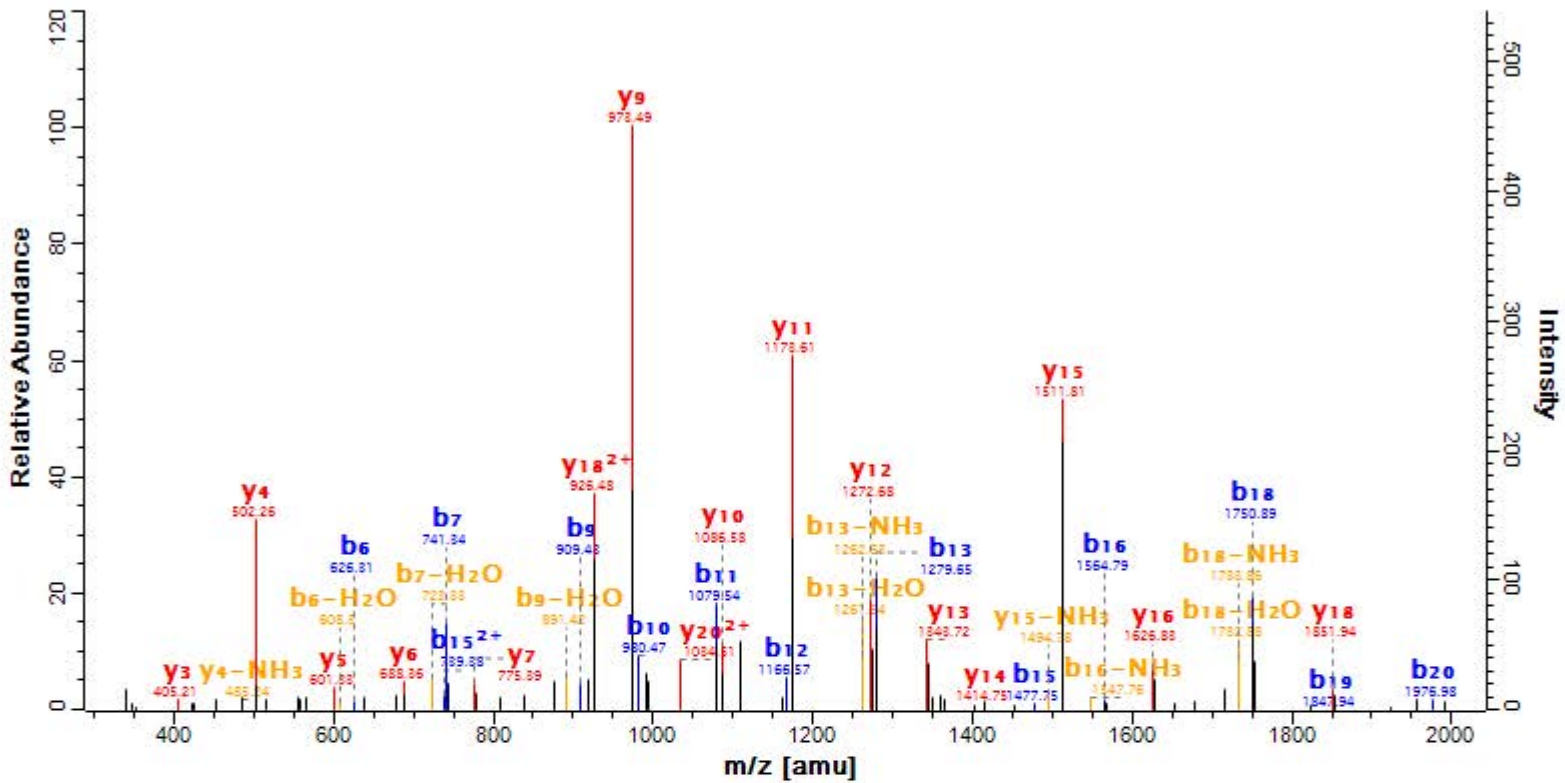

precursor information

|                   |                 |
|-------------------|-----------------|
| Mass:             | 2251.13308      |
| m/z:              | 1126.57382      |
| Charge:           | 2+              |
| Retentiontime:    | 29.629743576049 |
| Score:            | 171.8372        |
| Mass Error [ppm]: | -0.053905       |
| PEP:              | 1.5322E-37      |
| Precursor Type:   | MULTI           |

general information

|                       |            |
|-----------------------|------------|
| Annotation:           | 17 of 22   |
| AminoAcids Coverage:  | 77 %       |
| Intensity Coverage:   | 60 %       |
| Peak Coverage:        | 39 %       |
| Protein Localisation: | 94 ... 115 |

| b <sup>2+</sup> ion |        | b ion    |        | seq |   |    | y ion    |         | y <sup>2+</sup> ion |         |
|---------------------|--------|----------|--------|-----|---|----|----------|---------|---------------------|---------|
| Δ dalton            | mass   | Δ dalton | mass   |     |   |    | Δ dalton | mass    | Δ dalton            | mass    |
|                     | 114.09 |          | 114.09 | 1   | L | 21 |          |         |                     |         |
|                     | 185.13 |          | 185.13 | 2   | A | 20 | 2139.1   |         | 2139.1              |         |
|                     | 272.16 |          | 272.16 | 3   | S | 19 | 2068     |         | 1034.5              | +0.1851 |
|                     | 401.2  |          | 401.2  | 4   | E | 18 | 1981     |         | 1981                |         |
|                     | 498.26 |          | 498.26 | 5   | P | 17 | 1851.9   | +0.0585 | 926.48              | +0.0123 |
|                     | 626.31 | +0.1845  | 626.31 | 6   | Q | 16 | 1754.9   |         | 1754.9              |         |
|                     | 741.34 | -0.057   | 741.34 | 7   | D | 15 | 1626.8   | -0.103  | 1626.8              |         |
|                     | 838.39 |          | 838.39 | 8   | P | 14 | 1511.8   | -0.051  | 1511.8              |         |
|                     | 909.43 | -0.118   | 909.43 | 9   | A | 13 | 1414.8   | +0.0226 | 1414.8              |         |
|                     | 980.47 | +0.0473  | 980.47 | 10  | A | 12 | 1343.7   | -0.122  | 1343.7              |         |
|                     | 1079.5 | +0.0616  | 1079.5 | 11  | V | 11 | 1272.7   | -0.098  | 1272.7              |         |
|                     | 1166.6 | -0.096   | 1166.6 | 12  | S | 10 | 1173.6   | -0.055  | 1173.6              |         |
|                     | 1279.7 | -0.028   | 1279.7 | 13  | L | 9  | 1086.6   | -0.013  | 1086.6              |         |
|                     | 1376.7 |          | 1376.7 | 14  | P | 8  | 973.49   | +0.0229 | 973.49              |         |
| +0.1558             | 1477.8 | -0.082   | 1477.8 | 15  | T | 7  | 876.44   |         | 876.44              |         |
|                     | 1564.8 | +0.236   | 1564.8 | 16  | S | 6  | 775.39   | -0.032  | 775.39              |         |
|                     | 1651.8 |          | 1651.8 | 17  | S | 5  | 688.36   | +0.0602 | 688.36              |         |
|                     | 1750.9 | -0.121   | 1750.9 | 18  | V | 4  | 601.33   | +0.0918 | 601.33              |         |
|                     | 1847.9 | +0.1688  | 1847.9 | 19  | P | 3  | 502.26   | +0.0792 | 502.26              |         |
|                     | 1977   | -0.242   | 1977   | 20  | E | 2  | 405.21   | +0.2194 | 405.21              |         |
|                     | 2078   |          | 2078   | 21  | T | 1  | 276.17   |         | 276.17              |         |
|                     |        |          |        | 22  | R | 0  | 175.12   |         | 175.12              |         |

Scan number 2650 Raw file LNCAP\_Silac\_23F10\_set3\_01  
 Method ITMS; CID Pepti... 111.77

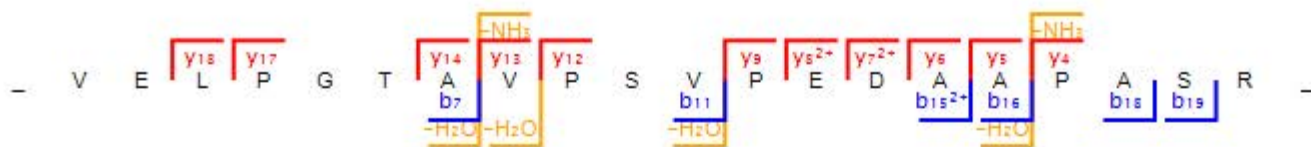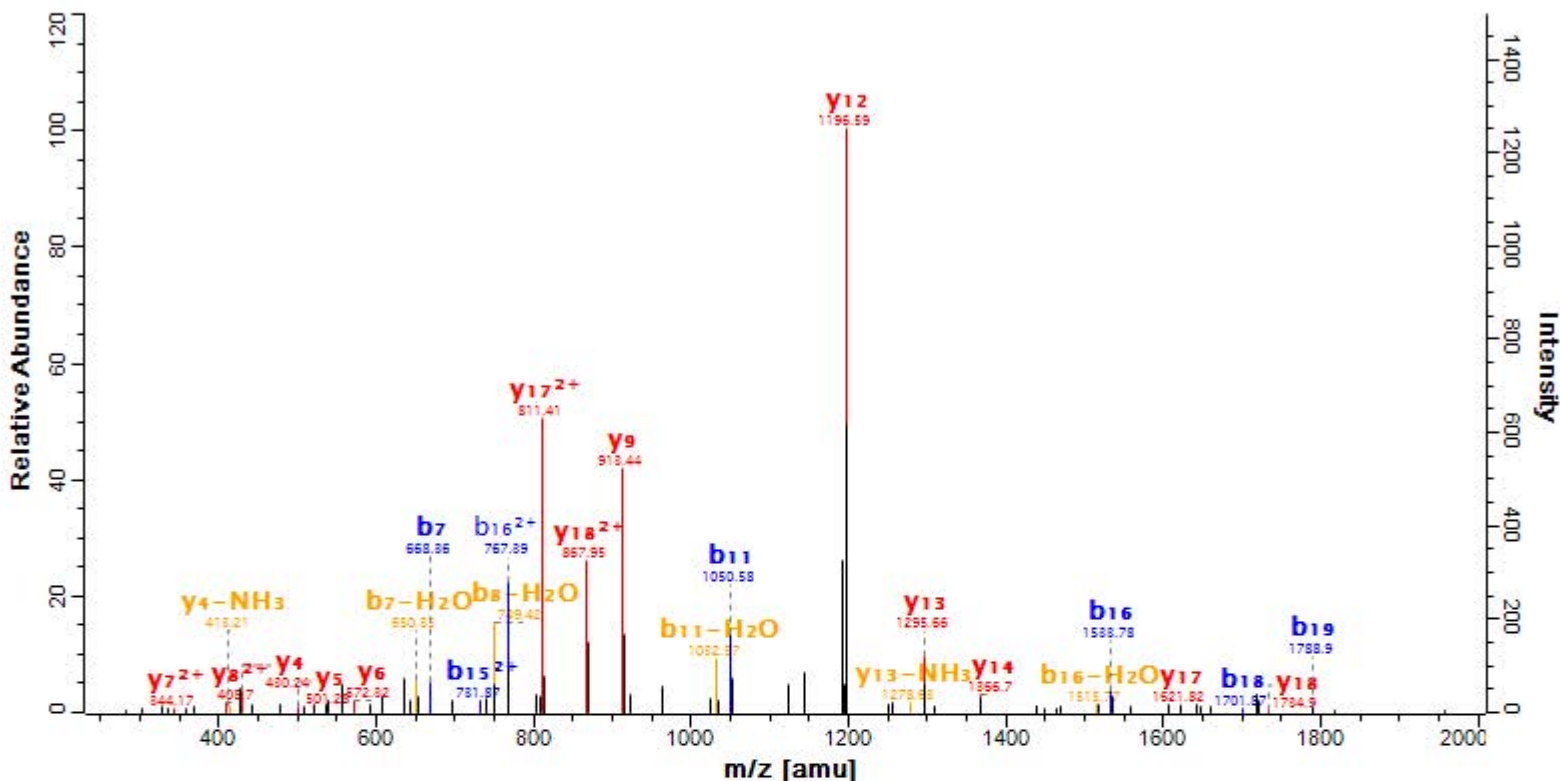

**precursor information**

|                   |                 |
|-------------------|-----------------|
| Mass:             | 1962.00612      |
| m/z:              | 982.01034       |
| Charge:           | 2+              |
| Retentiontime:    | 30.642309188842 |
| Score:            | 111.769         |
| Mass Error [ppm]: | 0.15532         |
| PEP:              | 9.0244E-09      |
| Precursor Type:   | MULTI           |

| b <sup>2+</sup> ion |        | b ion    |        | seq |   |    | y ion    |         | y <sup>2+</sup> ion |         |
|---------------------|--------|----------|--------|-----|---|----|----------|---------|---------------------|---------|
| Δ dalton            | mass   | Δ dalton | mass   |     |   |    | Δ dalton | mass    | Δ dalton            | mass    |
|                     | 100.08 |          | 100.08 | 1   | V | 19 |          |         |                     |         |
|                     | 229.12 |          | 229.12 | 2   | E | 18 | 1863.9   |         | 1863.9              |         |
|                     | 342.2  |          | 342.2  | 3   | L | 17 | 1734.9   | -0.389  | 867.95              | -0.145  |
|                     | 439.26 |          | 439.26 | 4   | P | 16 | 1621.8   | +0.0415 | 811.41              | +0.2206 |
|                     | 496.28 |          | 496.28 | 5   | G | 15 | 1524.8   |         | 1524.8              |         |
|                     | 597.32 |          | 597.32 | 6   | T | 14 | 1467.7   |         | 1467.7              |         |
|                     | 668.36 | +0.1723  | 668.36 | 7   | A | 13 | 1366.7   | +0.0364 | 1366.7              |         |
|                     | 767.43 |          | 767.43 | 8   | V | 12 | 1295.7   | -0.03   | 1295.7              |         |
|                     | 864.48 |          | 864.48 | 9   | P | 11 | 1196.6   | -0.023  | 1196.6              |         |
|                     | 951.51 |          | 951.51 | 10  | S | 10 | 1099.5   |         | 1099.5              |         |
|                     | 1050.6 | -0.1     | 1050.6 | 11  | V | 9  | 1012.5   |         | 1012.5              |         |
|                     | 1147.6 |          | 1147.6 | 12  | P | 8  | 913.44   | +0.0005 | 913.44              |         |
|                     | 1276.7 |          | 1276.7 | 13  | E | 7  | 816.38   |         | 408.7               | -0.343  |
|                     | 1391.7 |          | 1391.7 | 14  | D | 6  | 687.34   |         | 344.17              | -0.034  |
| -0.429              | 731.87 |          | 1462.7 | 15  | A | 5  | 572.32   | -0.034  | 572.32              |         |
| -0.001              | 767.39 | -0.073   | 1533.8 | 16  | A | 4  | 501.28   | +0.1972 | 501.28              |         |
|                     | 1630.8 |          | 1630.8 | 17  | P | 3  | 430.24   | -0.003  | 430.24              |         |
|                     | 1701.9 | +0.0586  | 1701.9 | 18  | A | 2  | 333.19   |         | 333.19              |         |
|                     | 1788.9 | +0.0882  | 1788.9 | 19  | S | 1  | 262.15   |         | 262.15              |         |
|                     |        |          |        | 20  | R | 0  | 175.12   |         | 175.12              |         |

**general information**

|                       |           |
|-----------------------|-----------|
| Annotation:           | 14 of 20  |
| AminoAcids Coverage:  | 70 %      |
| Intensity Coverage:   | 54 %      |
| Peak Coverage:        | 27 %      |
| Protein Localisation: | 32 ... 51 |

Scan number 2669 Raw file LNCAP\_Silac\_23F10\_set3\_01  
 Method ITMS; CID Pepti... 86.21

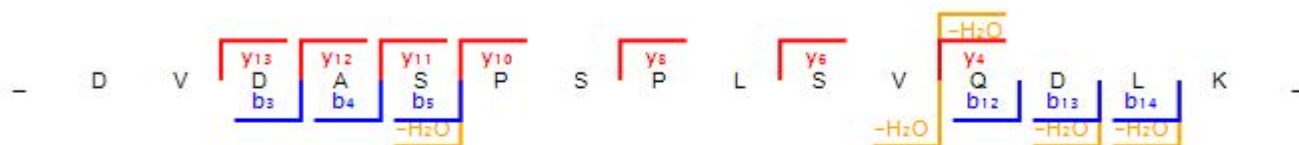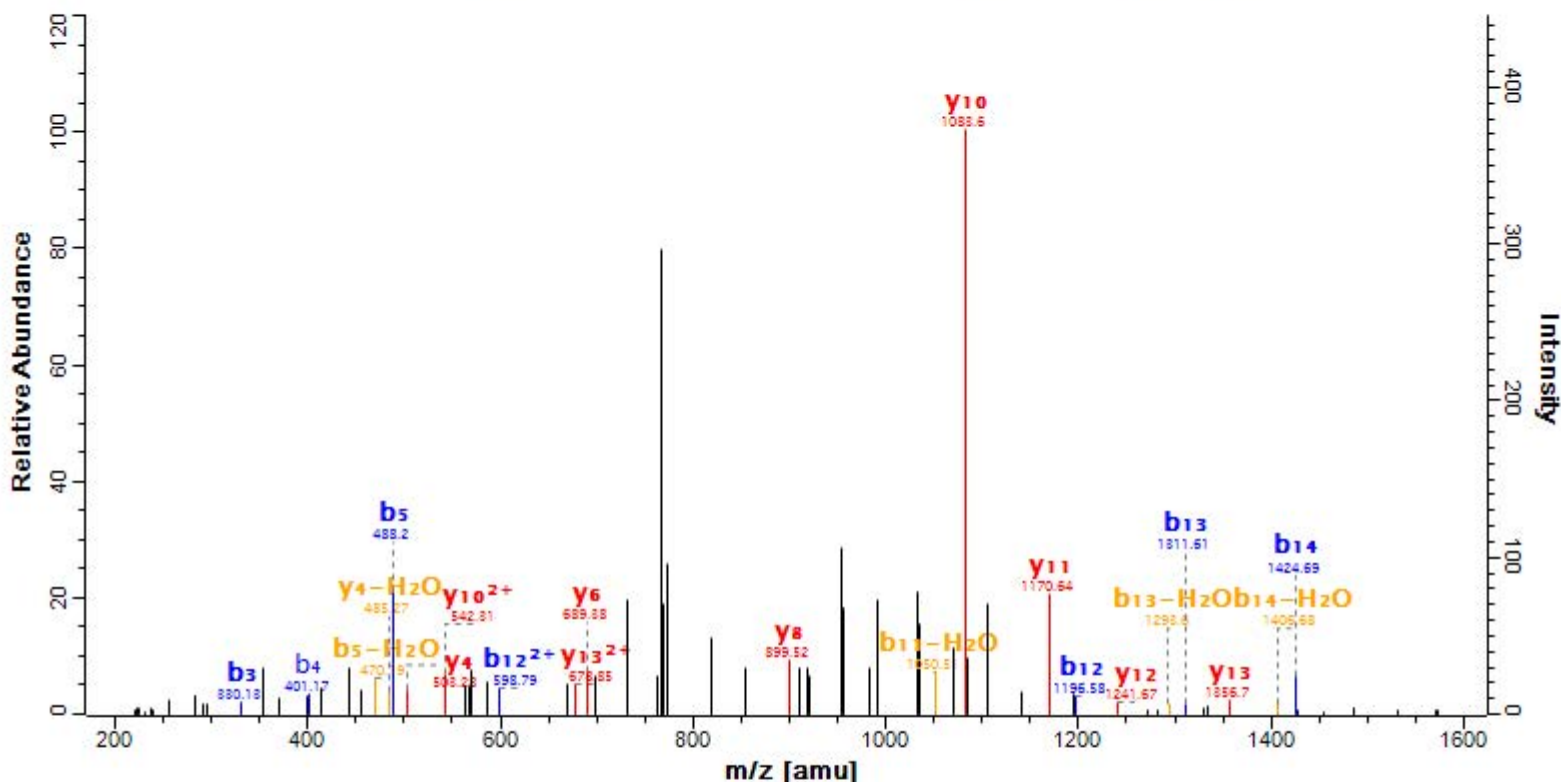

#### precursor information

|                   |                 |
|-------------------|-----------------|
| Mass:             | 1569.78909      |
| m/z:              | 785.90182       |
| Charge:           | 2+              |
| Retentiontime:    | 30.813194274902 |
| Score:            | 86.21425        |
| Mass Error [ppm]: | 0.30043         |
| PEP:              | 0.00023163      |
| Precursor Type:   | MULTI           |

| b <sup>2+</sup> ion |        | b ion    |        | seq |   |    | y ion    |         | y <sup>2+</sup> ion |         |
|---------------------|--------|----------|--------|-----|---|----|----------|---------|---------------------|---------|
| Δ dalton            | mass   | Δ dalton | mass   |     |   |    | Δ dalton | mass    | Δ dalton            | mass    |
|                     | 116.03 |          | 116.03 | 1   | D | 14 |          |         |                     |         |
|                     | 215.1  |          | 215.1  | 2   | V | 13 | 1455.8   |         | 1455.8              |         |
|                     | 330.13 | +0.1094  | 330.13 | 3   | D | 12 | 1356.7   | -0.046  | 678.85              | +0.0251 |
|                     | 401.17 | +0.0737  | 401.17 | 4   | A | 11 | 1241.7   | -0.272  | 1241.7              |         |
|                     | 488.2  | -0.084   | 488.2  | 5   | S | 10 | 1170.6   | +0.0657 | 1170.6              |         |
|                     | 585.25 |          | 585.25 | 6   | P | 9  | 1083.6   | -0.035  | 542.31              | +0.2413 |
|                     | 672.28 |          | 672.28 | 7   | S | 8  | 986.55   |         | 986.55              |         |
|                     | 769.34 |          | 769.34 | 8   | P | 7  | 899.52   | +0.0353 | 899.52              |         |
|                     | 882.42 |          | 882.42 | 9   | L | 6  | 802.47   |         | 802.47              |         |
|                     | 969.45 |          | 969.45 | 10  | S | 5  | 689.38   | +0.1192 | 689.38              |         |
|                     | 1068.5 |          | 1068.5 | 11  | V | 4  | 602.35   |         | 602.35              |         |
| -0.155              | 598.79 | -0.017   | 1196.6 | 12  | Q | 3  | 503.28   | -0.056  | 503.28              |         |
|                     | 1311.6 | +0.3058  | 1311.6 | 13  | D | 2  | 375.22   |         | 375.22              |         |
|                     | 1424.7 | -0.042   | 1424.7 | 14  | L | 1  | 260.2    |         | 260.2               |         |
|                     |        |          |        | 15  | K | 0  | 147.11   |         | 147.11              |         |

#### general information

|                       |             |
|-----------------------|-------------|
| Annotation:           | 11 of 15    |
| AminoAcids Coverag    | 73 %        |
| Intensity Coverage:   | 31 %        |
| Peak Coverage:        | 26 %        |
| Protein Localisation: | 405 ... 419 |

Scan number 2811 Raw file LNCAP\_Silac\_23F10\_set3\_01  
 Method ITMS; CID Pepti... 206.64

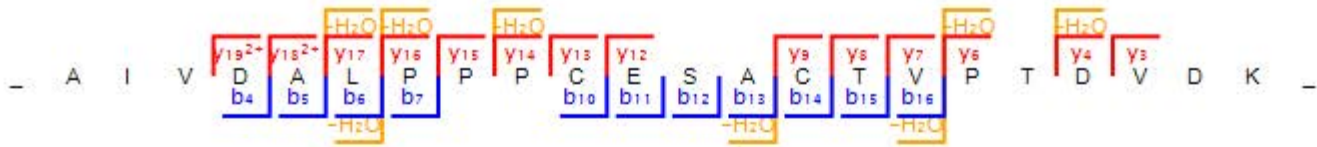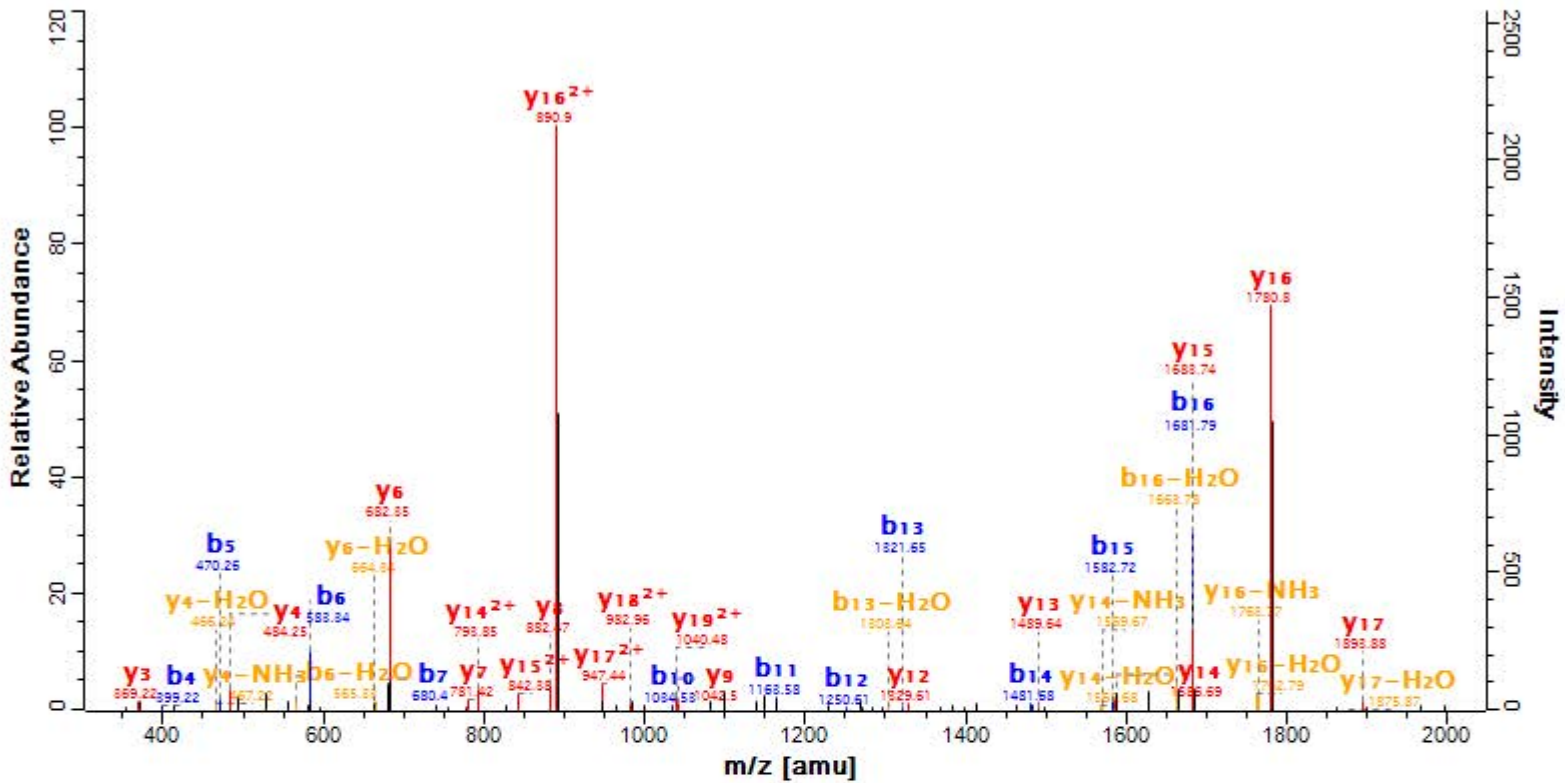

precursor information

|                   |                 |
|-------------------|-----------------|
| Mass:             | 2354.1134       |
| m/z:              | 1178.06398      |
| Charge:           | 2+              |
| Retentiontime:    | 32.022045135498 |
| Score:            | 206.6444        |
| Mass Error [ppm]: | 0.00075178      |
| PEP:              | 2.0971E-61      |
| Precursor Type:   | MULTI           |

general information

|                       |             |
|-----------------------|-------------|
| Annotation:           | 16 of 22    |
| AminoAcids Coverage:  | 73 %        |
| Intensity Coverage:   | 59 %        |
| Peak Coverage:        | 40 %        |
| Protein Localisation: | 261 ... 282 |

| b ion     |          |    |     |    | y ion    |           | y <sup>2+</sup> ion |           |
|-----------|----------|----|-----|----|----------|-----------|---------------------|-----------|
| Δ dalton  | mass     |    | seq |    | Δ dalton | mass      | Δ dalton            | mass      |
|           | 72.04439 | 1  | A   | 21 |          |           |                     |           |
|           | 185.1285 | 2  | I   | 20 | 2292.098 |           | 2292.098            |           |
|           | 284.1969 | 3  | V   | 19 | 2179.014 |           | 2179.014            |           |
| +0.170659 | 399.2238 | 4  | D   | 18 | 2079.945 |           | 1040.476            | +0.166543 |
| -0.02124  | 470.2609 | 5  | A   | 17 | 1964.918 |           | 982.9628            | -0.26579  |
| -0.03224  | 583.345  | 6  | L   | 16 | 1893.881 | +0.385987 | 947.4443            | +0.171472 |
| -0.04711  | 680.3978 | 7  | P   | 15 | 1780.797 | -0.04264  | 890.9022            | -0.01745  |
|           | 777.4505 | 8  | P   | 14 | 1683.744 | +0.014514 | 842.3758            | +0.184832 |
|           | 874.5033 | 9  | P   | 13 | 1586.692 | -0.09593  | 793.8495            | +0.058016 |
| -0.04089  | 1034.534 | 10 | C   | 12 | 1489.639 | -0.00764  | 1489.639            |           |
| -0.09154  | 1163.577 | 11 | E   | 11 | 1329.608 | +0.226862 | 1329.608            |           |
| +0.259003 | 1250.609 | 12 | S   | 10 | 1200.566 |           | 1200.566            |           |
| -0.23136  | 1321.646 | 13 | A   | 9  | 1113.534 |           | 1113.534            |           |
| -0.15959  | 1481.676 | 14 | C   | 8  | 1042.496 | +0.058934 | 1042.496            |           |
| -0.04711  | 1582.724 | 15 | T   | 7  | 882.4658 | -0.18349  | 882.4658            |           |
| -0.16264  | 1681.792 | 16 | V   | 6  | 781.4182 | -0.3592   | 781.4182            |           |
|           | 1778.845 | 17 | P   | 5  | 682.3497 | +0.105577 | 682.3497            |           |
|           | 1879.893 | 18 | T   | 4  | 585.297  |           | 585.297             |           |
|           | 1994.92  | 19 | D   | 3  | 484.2493 | +0.106135 | 484.2493            |           |
|           | 2093.988 | 20 | V   | 2  | 369.2224 | +0.055014 | 369.2224            |           |
|           | 2209.015 | 21 | D   | 1  | 270.1539 |           | 270.1539            |           |
|           |          | 22 | K   | 0  | 155.127  |           | 155.127             |           |



Scan number 3287 Raw file LNCAP\_Silac\_23F10\_set3\_01  
 Method ITMS: CID Peptide LNCAP\_Silac\_23F10\_set3\_01

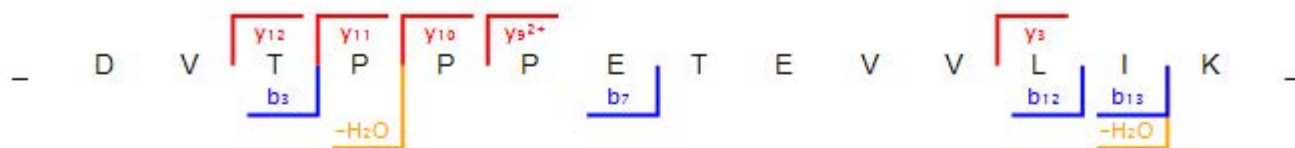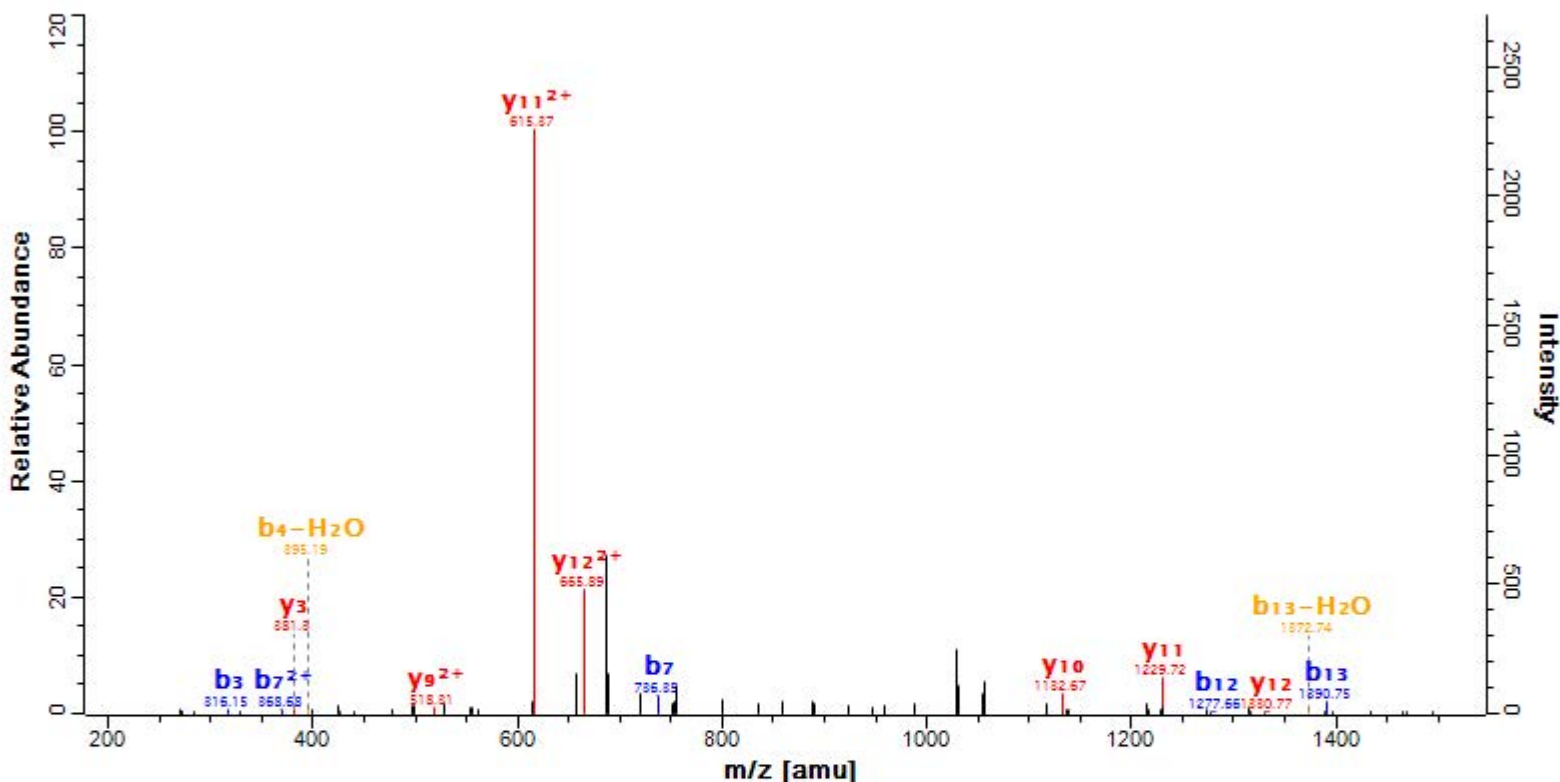

#### precursor information

|                   |                 |
|-------------------|-----------------|
| Mass:             | 1535.84473      |
| m/z:              | 768.92964       |
| Charge:           | 2+              |
| Retentiontime:    | 36.102569580078 |
| Score:            | 54.52445        |
| Mass Error [ppm]: | 0.034579        |
| PEP:              | 0.011168        |
| Precursor Type:   | MULTI           |

| b <sup>2+</sup> ion |        | b ion    |        |    |     |    | y ion    |         | y <sup>2+</sup> ion |         |
|---------------------|--------|----------|--------|----|-----|----|----------|---------|---------------------|---------|
| Δ dalton            | mass   | Δ dalton | mass   |    | seq |    | Δ dalton | mass    | Δ dalton            | mass    |
|                     | 116.03 |          | 116.03 | 1  | D   | 13 |          |         |                     |         |
|                     | 215.1  |          | 215.1  | 2  | V   | 12 | 1429.8   |         | 1429.8              |         |
|                     | 316.15 | +0.1036  | 316.15 | 3  | T   | 11 | 1330.8   | +0.1152 | 665.89              | -0.073  |
|                     | 413.2  |          | 413.2  | 4  | P   | 10 | 1229.7   | -0.025  | 615.37              | +0.0477 |
|                     | 510.26 |          | 510.26 | 5  | P   | 9  | 1132.7   | +0.1026 | 1132.7              |         |
|                     | 607.31 |          | 607.31 | 6  | P   | 8  | 1035.6   |         | 518.31              | +0.156  |
| +0.2562             | 368.68 | +0.3443  | 736.35 | 7  | E   | 7  | 938.56   |         | 938.56              |         |
|                     | 837.4  |          | 837.4  | 8  | T   | 6  | 809.52   |         | 809.52              |         |
|                     | 966.44 |          | 966.44 | 9  | E   | 5  | 708.47   |         | 708.47              |         |
|                     | 1065.5 |          | 1065.5 | 10 | V   | 4  | 579.43   |         | 579.43              |         |
|                     | 1164.6 |          | 1164.6 | 11 | V   | 3  | 480.36   |         | 480.36              |         |
|                     | 1277.7 | -0.212   | 1277.7 | 12 | L   | 2  | 381.3    | +0.1588 | 381.3               |         |
|                     | 1390.7 | -0.034   | 1390.7 | 13 | I   | 1  | 268.21   |         | 268.21              |         |
|                     |        |          |        | 14 | K   | 0  | 155.13   |         | 155.13              |         |

#### general information

|                       |             |
|-----------------------|-------------|
| Annotation:           | 7 of 14     |
| AminoAcids Coverage:  | 50 %        |
| Intensity Coverage:   | 51 %        |
| Peak Coverage:        | 16 %        |
| Protein Localisation: | 519 ... 532 |

Scan number 3386 Raw file LNCAP\_Silac\_23F10\_set3\_01  
 Method ITMS; CID Pepti... 172.24

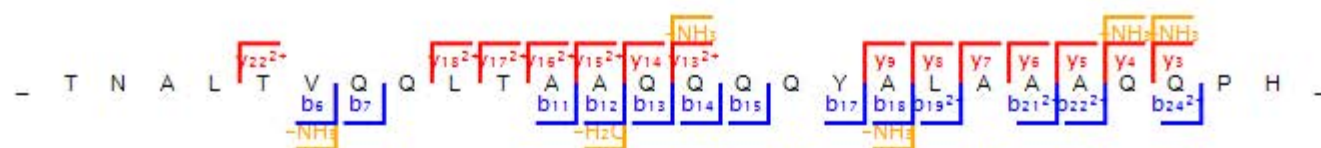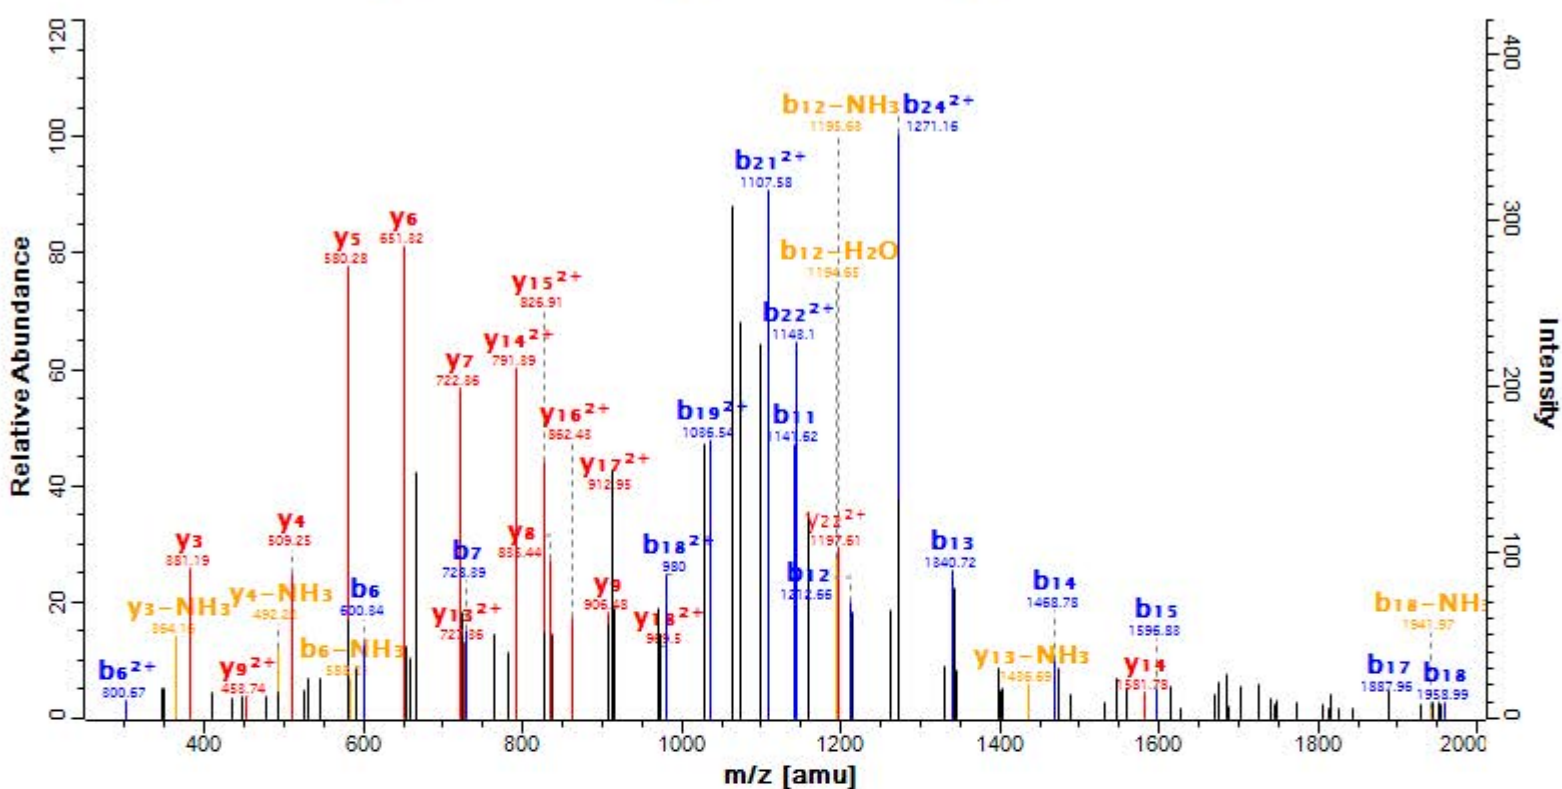

precursor information

|                   |                 |
|-------------------|-----------------|
| Mass:             | 2792.42236      |
| m/z:              | 931.81473       |
| Charge:           | 3+              |
| Retention time:   | 36.843063354492 |
| Score:            | 172.2399        |
| Mass Error [ppm]: | 0.64587         |
| PEP:              | 5.5198E-27      |
| Precursor Type:   | ISO             |

| b <sup>2+</sup> ion |        | b ion    |        | seq |   |    | y ion    |         | y <sup>2+</sup> ion |         |
|---------------------|--------|----------|--------|-----|---|----|----------|---------|---------------------|---------|
| Δ dalton            | mass   | Δ dalton | mass   |     |   |    | Δ dalton | mass    | Δ dalton            | mass    |
|                     | 102.05 |          | 102.05 | 1   | T | 25 |          |         |                     |         |
|                     | 216.1  |          | 216.1  | 2   | N | 24 | 2692.4   |         | 2692.4              |         |
|                     | 287.13 |          | 287.13 | 3   | A | 23 | 2578.3   |         | 2578.3              |         |
|                     | 400.22 |          | 400.22 | 4   | L | 22 | 2507.3   |         | 2507.3              |         |
|                     | 501.27 |          | 501.27 | 5   | T | 21 | 2394.2   |         | 1197.6              | +0.4777 |
| +0.2915             | 300.67 | +0.003   | 600.34 | 6   | V | 20 | 2293.2   |         | 2293.2              |         |
|                     | 728.39 | -0.068   | 728.39 | 7   | Q | 19 | 2194.1   |         | 2194.1              |         |
|                     | 856.45 |          | 856.45 | 8   | Q | 18 | 2066     |         | 2066                |         |
|                     | 969.54 |          | 969.54 | 9   | L | 17 | 1938     |         | 969.5               | -0.002  |
|                     | 1070.6 |          | 1070.6 | 10  | T | 16 | 1824.9   |         | 912.95              | -0.158  |
|                     | 1141.6 | -0.165   | 1141.6 | 11  | A | 15 | 1723.9   |         | 862.43              | +0.133  |
|                     | 1212.7 | +0.0025  | 1212.7 | 12  | A | 14 | 1652.8   |         | 826.91              | +0.0435 |
|                     | 1340.7 | -0.112   | 1340.7 | 13  | Q | 13 | 1581.8   | -0.348  | 791.39              | +0.2045 |
|                     | 1468.8 | +0.4334  | 1468.8 | 14  | Q | 12 | 1453.7   |         | 727.36              | -0.118  |
|                     | 1596.8 | -0.171   | 1596.8 | 15  | Q | 11 | 1325.7   |         | 1325.7              |         |
|                     | 1724.9 |          | 1724.9 | 16  | Q | 10 | 1197.6   |         | 1197.6              |         |
|                     | 1888   | -0.185   | 1888   | 17  | Y | 9  | 1069.5   |         | 1069.5              |         |
| +0.097              | 980    | +0.4457  | 1959   | 18  | A | 8  | 906.48   | -0.119  | 453.74              | -0.268  |
| +0.1251             | 1036.5 |          | 2072.1 | 19  | L | 7  | 835.44   | +0.0843 | 835.44              |         |
|                     | 2143.1 |          | 2143.1 | 20  | A | 6  | 722.36   | +0.0976 | 722.36              |         |
| +0.176              | 1107.6 |          | 2214.2 | 21  | A | 5  | 651.32   | -0.038  | 651.32              |         |
| +0.3868             | 1143.1 |          | 2285.2 | 22  | A | 4  | 580.28   | +0.0866 | 580.28              |         |
|                     | 2413.2 |          | 2413.2 | 23  | Q | 3  | 509.25   | +0.0362 | 509.25              |         |
| +0.2529             | 1271.2 |          | 2541.3 | 24  | Q | 2  | 381.19   | +0.1402 | 381.19              |         |
|                     | 2638.4 |          | 2638.4 | 25  | P | 1  | 253.13   |         | 253.13              |         |
|                     |        |          |        | 26  | H | 0  | 156.08   |         | 156.08              |         |

general information

|                       |             |
|-----------------------|-------------|
| Annotation:           | 19 of 26    |
| AminoAcids Coverage:  | 73 %        |
| Intensity Coverage:   | 54 %        |
| Peak Coverage:        | 34 %        |
| Protein Localisation: | 268 ... 293 |

Scan number 3465 Raw file LNCAP\_Silac\_23F10\_set3\_01  
 Method ITMS: CID Pepti... 102.69

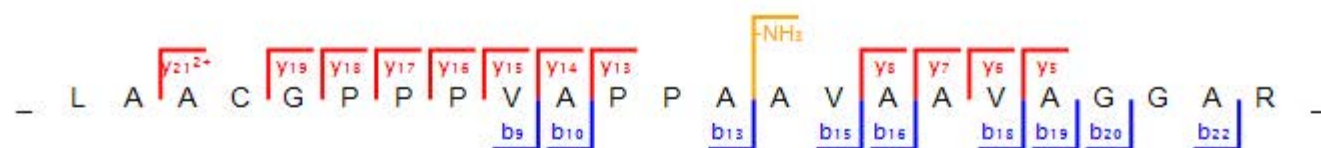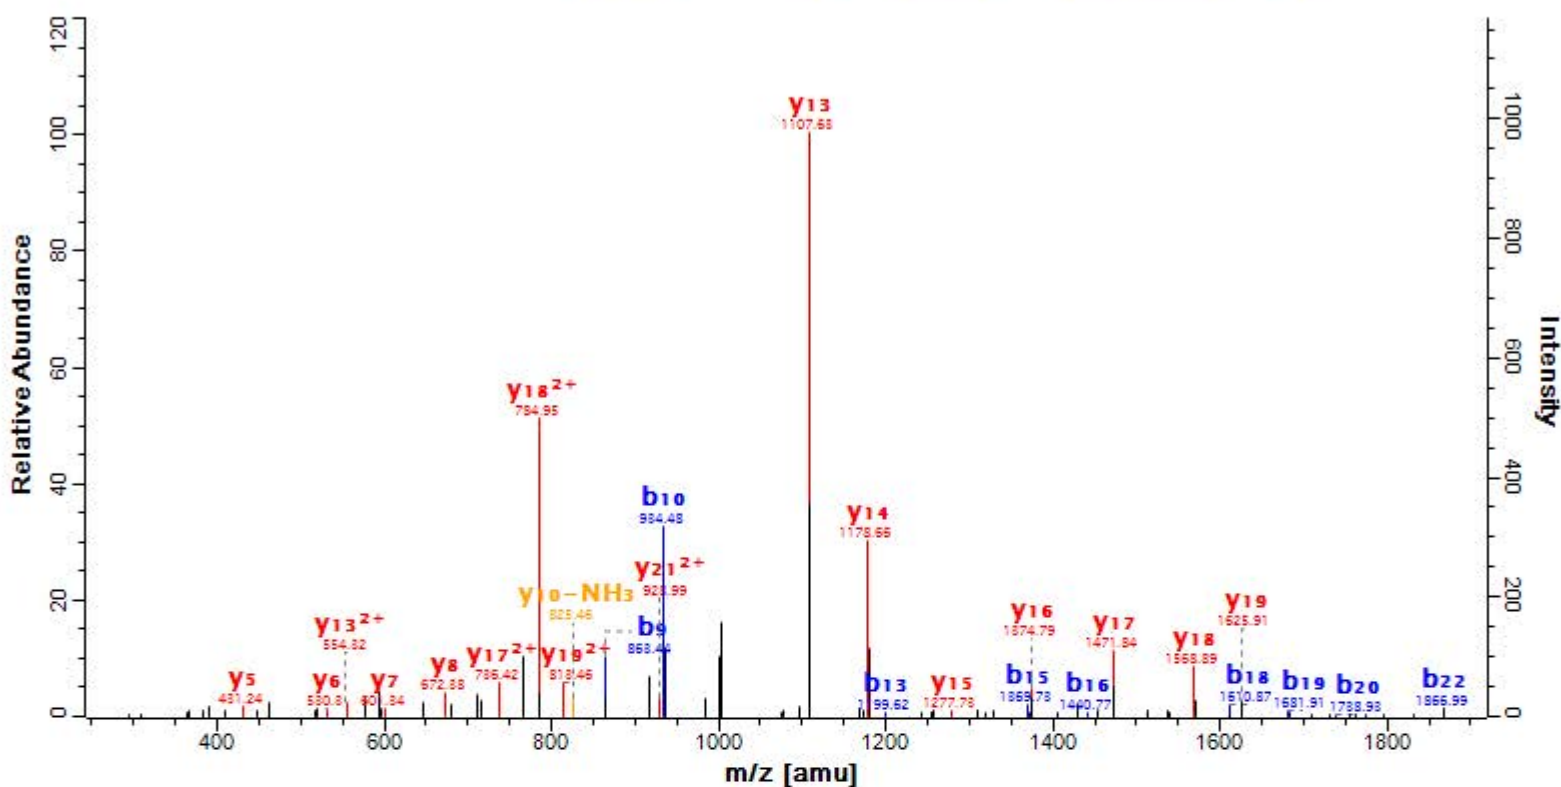

#### precursor information

|                   |                 |
|-------------------|-----------------|
| Mass:             | 2040.09185      |
| m/z:              | 1021.0532       |
| Charge:           | 2+              |
| Retentiontime:    | 37.550273895263 |
| Score:            | 102.6893        |
| Mass Error [ppm]: | -0.98494        |
| PEP:              | 6.7029E-08      |
| Precursor Type:   | MULTI           |

| b ion     |          |    |     |    | y ion    |           | y <sup>2+</sup> ion |           |
|-----------|----------|----|-----|----|----------|-----------|---------------------|-----------|
| Δ dalton  | mass     |    | seq |    | Δ dalton | mass      | Δ dalton            | mass      |
|           | 114.0913 | 1  | L   | 22 |          |           |                     |           |
|           | 185.1285 | 2  | A   | 21 | 1928.017 |           | 1928.017            |           |
|           | 256.1656 | 3  | A   | 20 | 1856.98  |           | 928.9936            | +0.159701 |
|           | 416.1962 | 4  | C   | 19 | 1785.943 |           | 1785.943            |           |
|           | 473.2177 | 5  | G   | 18 | 1625.912 | -0.11105  | 813.4597            | +0.369363 |
|           | 570.2704 | 6  | P   | 17 | 1568.891 | +0.035777 | 784.949             | +0.301726 |
|           | 667.3232 | 7  | P   | 16 | 1471.838 | -0.02657  | 736.4226            | +0.082258 |
|           | 764.376  | 8  | P   | 15 | 1374.785 | -0.13348  | 1374.785            |           |
| +0.025341 | 863.4444 | 9  | V   | 14 | 1277.732 | -0.1155   | 1277.732            |           |
| -0.02715  | 934.4815 | 10 | A   | 13 | 1178.664 | -0.02536  | 1178.664            |           |
|           | 1031.534 | 11 | P   | 12 | 1107.627 | -0.00839  | 554.3171            | +0.201213 |
|           | 1128.587 | 12 | P   | 11 | 1010.574 |           | 1010.574            |           |
| -0.38391  | 1199.624 | 13 | A   | 10 | 913.5214 |           | 913.5214            |           |
|           | 1270.661 | 14 | A   | 9  | 842.4843 |           | 842.4843            |           |
| +0.002387 | 1369.73  | 15 | V   | 8  | 771.4472 |           | 771.4472            |           |
| -0.30072  | 1440.767 | 16 | A   | 7  | 672.3787 | -0.00863  | 672.3787            |           |
|           | 1511.804 | 17 | A   | 6  | 601.3416 | +0.078348 | 601.3416            |           |
| -0.05114  | 1610.872 | 18 | V   | 5  | 530.3045 | +0.460982 | 530.3045            |           |
| +0.093628 | 1681.909 | 19 | A   | 4  | 431.2361 | +0.147621 | 431.2361            |           |
| +0.287618 | 1738.931 | 20 | G   | 3  | 360.199  |           | 360.199             |           |
|           | 1795.952 | 21 | G   | 2  | 303.1775 |           | 303.1775            |           |
| -0.15438  | 1866.989 | 22 | A   | 1  | 246.1561 |           | 246.1561            |           |
|           |          | 23 | R   | 0  | 175.119  |           | 175.119             |           |

#### general information

|                       |           |
|-----------------------|-----------|
| Annotation:           | 17 of 23  |
| AminoAcids Coverage:  | 74 %      |
| Intensity Coverage:   | 58 %      |
| Peak Coverage:        | 27 %      |
| Protein Localisation: | 53 ... 75 |

Scan number 3572 Raw file LNCAP\_Silac\_23F10\_set3\_01  
 Method ITMS; CID Pepti... 139.81

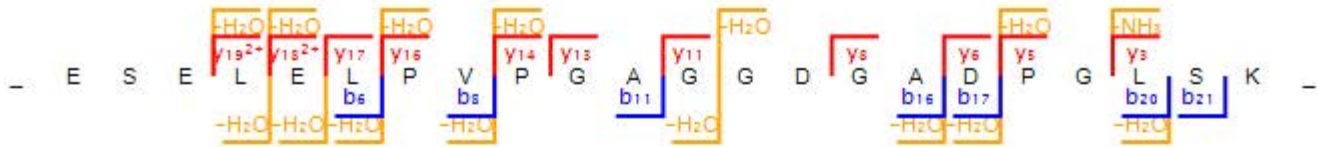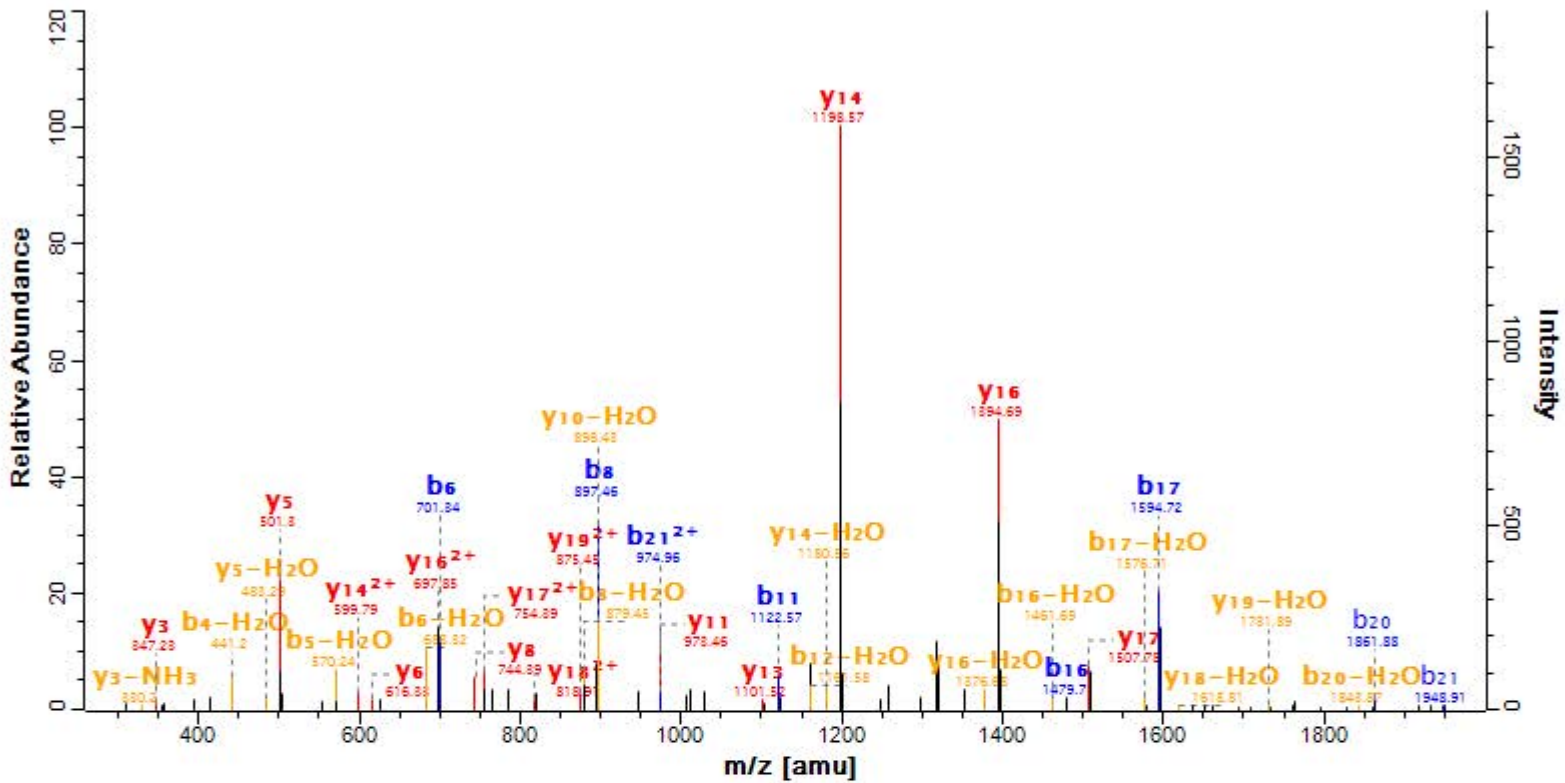

**precursor information**

|                   |                 |
|-------------------|-----------------|
| Mass:             | 2094.01136      |
| m/z:              | 1048.01296      |
| Charge:           | 2+              |
| Retentiontime:    | 38.418273925781 |
| Score:            | 139.8125        |
| Mass Error [ppm]: | -0.15692        |
| PEP:              | 1.0723E-20      |
| Precursor Type:   | MULTI           |

**general information**

|                       |           |
|-----------------------|-----------|
| Annotation:           | 18 of 22  |
| AminoAcids Coverage:  | 82 %      |
| Intensity Coverage:   | 57 %      |
| Peak Coverage:        | 38 %      |
| Protein Localisation: | 25 ... 46 |

| b <sup>2+</sup> ion |        | b ion    |        | seq |   |    | y ion    |         | y <sup>2+</sup> ion |         |
|---------------------|--------|----------|--------|-----|---|----|----------|---------|---------------------|---------|
| Δ dalton            | mass   | Δ dalton | mass   |     |   |    | Δ dalton | mass    | Δ dalton            | mass    |
|                     | 130.05 |          | 130.05 | 1   | E | 21 |          |         |                     |         |
|                     | 217.08 |          | 217.08 | 2   | S | 20 | 1966     |         | 1966                |         |
|                     | 346.12 |          | 346.12 | 3   | E | 19 | 1878.9   |         | 1878.9              |         |
|                     | 459.21 |          | 459.21 | 4   | L | 18 | 1749.9   |         | 875.45              | +0.3834 |
|                     | 588.25 |          | 588.25 | 5   | E | 17 | 1636.8   |         | 818.91              | -0.312  |
|                     | 701.34 | +0.0461  | 701.34 | 6   | L | 16 | 1507.8   | -0.192  | 754.39              | -0.07   |
|                     | 798.39 |          | 798.39 | 7   | P | 15 | 1394.7   | -0.124  | 697.85              | -0.151  |
|                     | 897.46 | -0.085   | 897.46 | 8   | V | 14 | 1297.6   |         | 1297.6              |         |
|                     | 994.51 |          | 994.51 | 9   | P | 13 | 1198.6   | -0.056  | 599.79              | +0.0442 |
|                     | 1051.5 |          | 1051.5 | 10  | G | 12 | 1101.5   | +0.097  | 1101.5              |         |
|                     | 1122.6 | -0.146   | 1122.6 | 11  | A | 11 | 1044.5   |         | 1044.5              |         |
|                     | 1179.6 |          | 1179.6 | 12  | G | 10 | 973.46   | +0.0119 | 973.46              |         |
|                     | 1236.6 |          | 1236.6 | 13  | G | 9  | 916.44   |         | 916.44              |         |
|                     | 1351.6 |          | 1351.6 | 14  | D | 8  | 859.42   |         | 859.42              |         |
|                     | 1408.7 |          | 1408.7 | 15  | G | 7  | 744.39   | -0.075  | 744.39              |         |
|                     | 1479.7 | -0.228   | 1479.7 | 16  | A | 6  | 687.37   |         | 687.37              |         |
|                     | 1594.7 | -0.168   | 1594.7 | 17  | D | 5  | 616.33   | +0.1101 | 616.33              |         |
|                     | 1691.8 |          | 1691.8 | 18  | P | 4  | 501.3    | +0.0107 | 501.3               |         |
|                     | 1748.8 |          | 1748.8 | 19  | G | 3  | 404.25   |         | 404.25              |         |
|                     | 1861.9 | -0.093   | 1861.9 | 20  | L | 2  | 347.23   | +0.0144 | 347.23              |         |
| -0.472              | 974.96 | -0.331   | 1948.9 | 21  | S | 1  | 234.14   |         | 234.14              |         |
|                     |        |          |        | 22  | K | 0  | 147.11   |         | 147.11              |         |

Scan number 4049 Raw file LNCAP\_Silac\_23F10\_set3\_01  
 Method ITMS; CID Pepti... 106.82

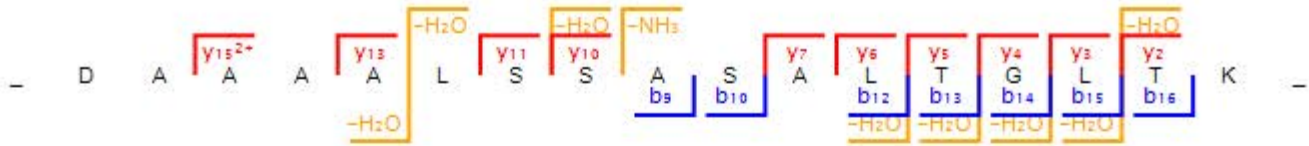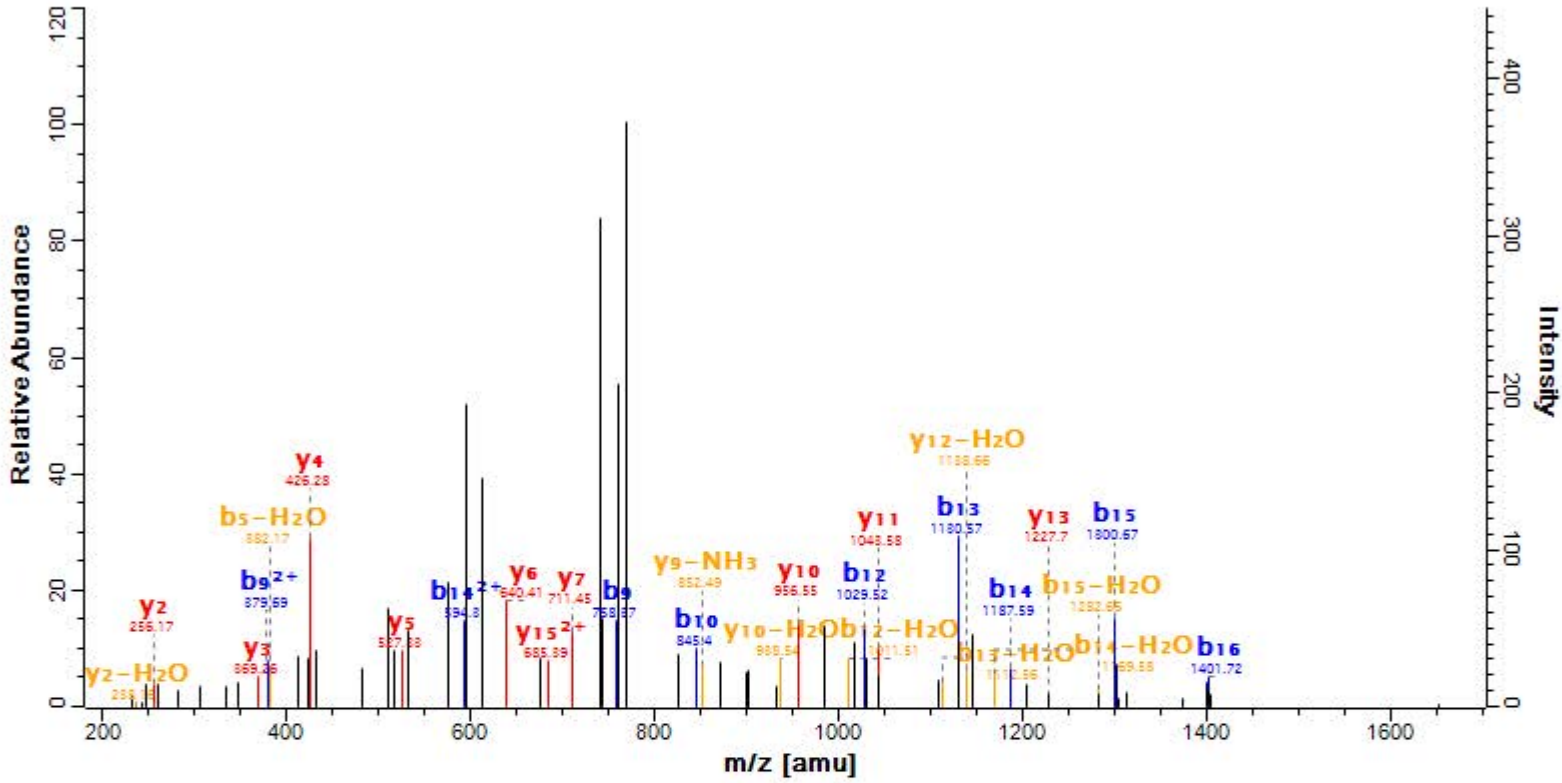

precursor information

|                   |                 |
|-------------------|-----------------|
| Mass:             | 2335.2376       |
| m/z:              | 779.41981       |
| Charge:           | 3+              |
| Retentiontime:    | 42.424575805664 |
| Score:            | 106.82          |
| Mass Error [ppm]: | -0.010558       |
| PEP:              | 1.6291E-09      |
| Precursor Type:   | MULTI           |

general information

|                       |             |
|-----------------------|-------------|
| Annotation:           | 13 of 17    |
| AminoAcids Coverage:  | 76 %        |
| Intensity Coverage:   | 29 %        |
| Peak Coverage:        | 35 %        |
| Protein Localisation: | 188 ... 204 |

| b <sup>2+</sup> ion |        | b ion    |        | seq |   |    | y ion    |         | y <sup>2+</sup> ion |         |
|---------------------|--------|----------|--------|-----|---|----|----------|---------|---------------------|---------|
| Δ dalton            | mass   | Δ dalton | mass   |     |   |    | Δ dalton | mass    | Δ dalton            | mass    |
|                     | 116.03 |          | 116.03 | 1   | D | 16 |          |         |                     |         |
|                     | 187.07 |          | 187.07 | 2   | A | 15 | 1440.8   |         | 1440.8              |         |
|                     | 258.11 |          | 258.11 | 3   | A | 14 | 1369.8   |         | 685.39              | +0.2763 |
|                     | 329.15 |          | 329.15 | 4   | A | 13 | 1298.7   |         | 1298.7              |         |
|                     | 400.18 |          | 400.18 | 5   | A | 12 | 1227.7   | +0.0585 | 1227.7              |         |
|                     | 513.27 |          | 513.27 | 6   | L | 11 | 1156.7   |         | 1156.7              |         |
|                     | 600.3  |          | 600.3  | 7   | S | 10 | 1043.6   | +0.2249 | 1043.6              |         |
|                     | 687.33 |          | 687.33 | 8   | S | 9  | 956.55   | +0.0193 | 956.55              |         |
| +0.3885             | 379.69 | -0.274   | 758.37 | 9   | A | 8  | 869.52   |         | 869.52              |         |
|                     | 845.4  | +0.048   | 845.4  | 10  | S | 7  | 798.48   |         | 798.48              |         |
|                     | 916.44 |          | 916.44 | 11  | A | 6  | 711.45   | +0.1966 | 711.45              |         |
|                     | 1029.5 | -0.017   | 1029.5 | 12  | L | 5  | 640.41   | +0.1198 | 640.41              |         |
|                     | 1130.6 | +0.0322  | 1130.6 | 13  | T | 4  | 527.33   | +0.0615 | 527.33              |         |
| +0.1593             | 594.3  | -0.128   | 1187.6 | 14  | G | 3  | 426.28   | +0.0569 | 426.28              |         |
|                     | 1300.7 | -0.181   | 1300.7 | 15  | L | 2  | 369.26   | +0.0713 | 369.26              |         |
|                     | 1401.7 | +0.0612  | 1401.7 | 16  | T | 1  | 256.17   | +0.1168 | 256.17              |         |
|                     |        |          |        | 17  | K | 0  | 155.13   |         | 155.13              |         |

Scan number 4243 Raw file LNCAP\_Silac\_23F10\_set3\_01  
 Method ITMS; CID Pepti... 165.13

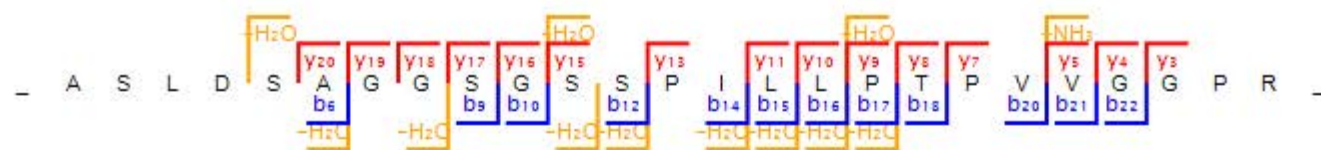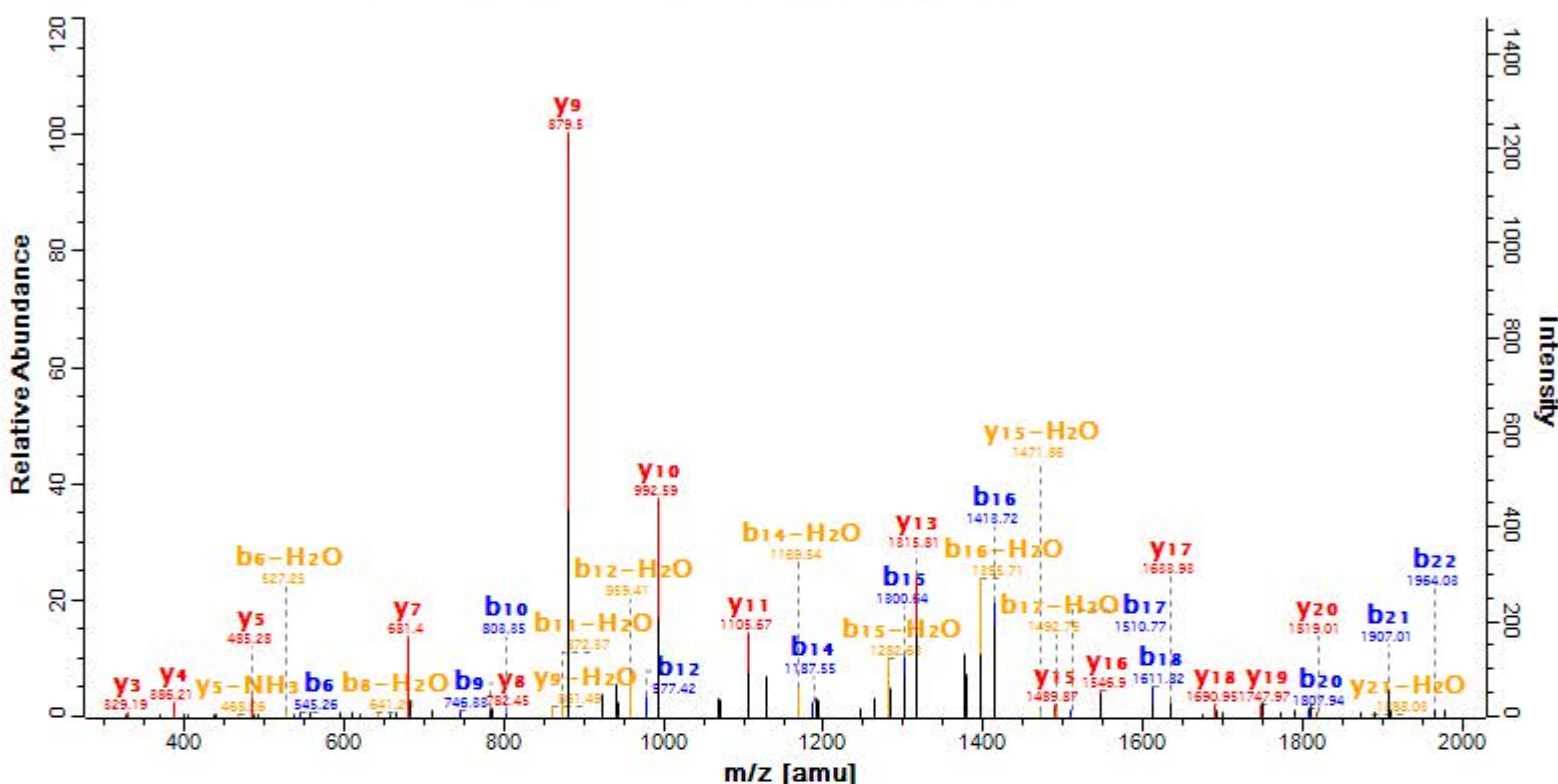

#### precursor information

|                   |                 |
|-------------------|-----------------|
| Mass:             | 2291.21166      |
| m/z:              | 1146.61311      |
| Charge:           | 2+              |
| Retentiontime:    | 44.072620391845 |
| Score:            | 165.1253        |
| Mass Error [ppm]: | -0.20392        |
| PEP:              | 3.4462E-32      |
| Precursor Type:   | MULTI           |

#### general information

|                       |             |
|-----------------------|-------------|
| Annotation:           | 19 of 25    |
| AminoAcids Coverage:  | 76 %        |
| Intensity Coverage:   | 59 %        |
| Peak Coverage:        | 38 %        |
| Protein Localisation: | 235 ... 259 |

| b ion      |               |     |   | y ion    |               |            |
|------------|---------------|-----|---|----------|---------------|------------|
| Δ dalton   | mass          | seq |   | Δ dalton | mass          |            |
|            | 72.044390254  | 1   | A | 24       |               |            |
|            | 159.076418664 | 2   | S | 23       | 2221.1822873  |            |
|            | 272.160482645 | 3   | L | 22       | 2134.15025889 |            |
|            | 387.187425677 | 4   | D | 21       | 2021.06619491 |            |
|            | 474.219454087 | 5   | S | 20       | 1906.03925188 |            |
| +0.0377436 | 545.256567874 | 6   | A | 19       | 1819.00722347 | -0.4448455 |
|            | 602.278031598 | 7   | G | 18       | 1747.97010968 | -0.2194993 |
|            | 659.299495322 | 8   | G | 17       | 1690.94864596 | -0.0371469 |
| +0.0780222 | 746.331523732 | 9   | S | 16       | 1633.92718224 | -0.1575289 |
| -0.1267912 | 803.352987455 | 10  | G | 15       | 1546.89515383 | -0.0630005 |
|            | 890.385015865 | 11  | S | 14       | 1489.8736901  | -0.0569176 |
| -0.0283724 | 977.417044275 | 12  | S | 13       | 1402.84166169 |            |
|            | 1074.46980813 | 13  | P | 12       | 1315.80963328 | -0.0106831 |
| -0.0648584 | 1187.55387211 | 14  | I | 11       | 1218.75686943 |            |
| -0.0803189 | 1300.63793609 | 15  | L | 10       | 1105.67280545 | -0.0429226 |
| -0.1615753 | 1413.72200007 | 16  | L | 9        | 992.588741471 | -0.0329553 |
| -0.1678303 | 1510.77476392 | 17  | P | 8        | 879.504677491 | +0.0381692 |
| -0.0931943 | 1611.82244239 | 18  | T | 7        | 782.451913639 | +0.0615751 |
|            | 1708.87520625 | 19  | P | 6        | 681.404235165 | +0.0239875 |
| -0.0820479 | 1807.94362016 | 20  | V | 5        | 584.351471313 |            |
| -0.1309306 | 1907.01203408 | 21  | V | 4        | 485.283057396 | +0.1637199 |
| +0.1338606 | 1964.0334978  | 22  | G | 3        | 386.21464348  | +0.1621265 |
|            | 2021.05496153 | 23  | G | 2        | 329.193179757 | +0.1557887 |
|            | 2118.1072538  | 24  | P | 1        | 272.171716033 |            |
|            |               | 25  | R | 0        | 175.118952181 |            |

Scan number 4280 Raw file LNCAP\_Silac\_23F10\_set3\_01  
 Method ITMS; CID Pepti... 86.18

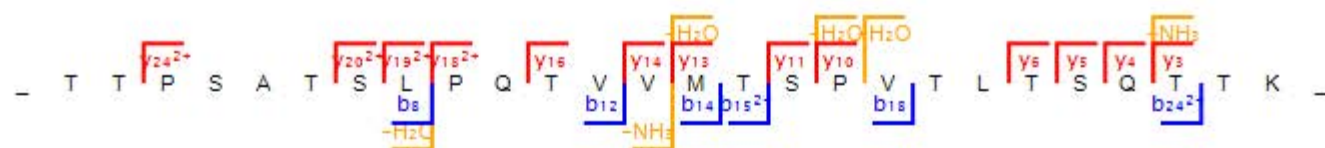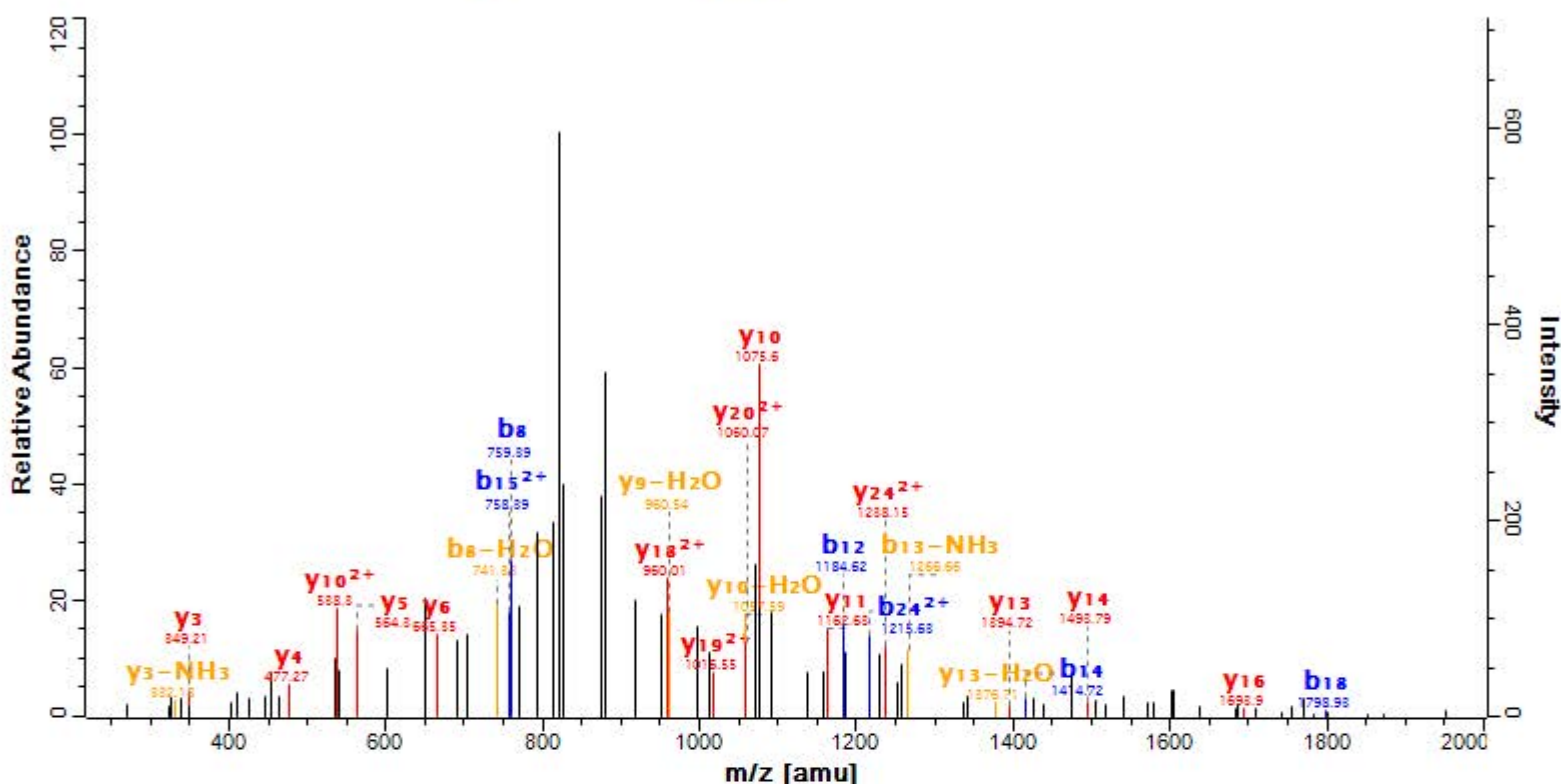

#### precursor information

|                   |                 |
|-------------------|-----------------|
| Mass:             | 2676.38721      |
| m/z:              | 893.13635       |
| Charge:           | 3+              |
| Retentiontime:    | 44.411331176757 |
| Score:            | 86.18197        |
| Mass Error [ppm]: | -0.72944        |
| PEP:              | 9.2533E-09      |
| Precursor Type:   | MULTI           |

| b <sup>2+</sup> ion |        | b ion    |        | seq |   |    | y ion    |         | y <sup>2+</sup> ion |         |
|---------------------|--------|----------|--------|-----|---|----|----------|---------|---------------------|---------|
| Δ dalton            | mass   | Δ dalton | mass   |     |   |    | Δ dalton | mass    | Δ dalton            | mass    |
|                     | 102.05 |          | 102.05 | 1   | T | 25 |          |         |                     |         |
|                     | 203.1  |          | 203.1  | 2   | T | 24 | 2576.3   |         | 2576.3              |         |
|                     | 300.16 |          | 300.16 | 3   | P | 23 | 2475.3   |         | 1238.2              | +0.2729 |
|                     | 387.19 |          | 387.19 | 4   | S | 22 | 2378.2   |         | 2378.2              |         |
|                     | 458.22 |          | 458.22 | 5   | A | 21 | 2291.2   |         | 2291.2              |         |
|                     | 559.27 |          | 559.27 | 6   | T | 20 | 2220.2   |         | 2220.2              |         |
|                     | 646.3  |          | 646.3  | 7   | S | 19 | 2119.1   |         | 1060.1              | -0.234  |
|                     | 759.39 | -0.025   | 759.39 | 8   | L | 18 | 2032.1   |         | 1016.6              | +0.2596 |
|                     | 856.44 |          | 856.44 | 9   | P | 17 | 1919     |         | 960.01              | -0.097  |
|                     | 984.5  |          | 984.5  | 10  | Q | 16 | 1822     |         | 1822                |         |
|                     | 1085.5 |          | 1085.5 | 11  | T | 15 | 1693.9   | -0.148  | 1693.9              |         |
|                     | 1184.6 | +0.1487  | 1184.6 | 12  | V | 14 | 1592.9   |         | 1592.9              |         |
|                     | 1283.7 |          | 1283.7 | 13  | V | 13 | 1493.8   | +0.4995 | 1493.8              |         |
|                     | 1414.7 | +0.0376  | 1414.7 | 14  | M | 12 | 1394.7   | +0.2999 | 1394.7              |         |
| -0.145              | 758.39 |          | 1515.8 | 15  | T | 11 | 1263.7   |         | 1263.7              |         |
|                     | 1602.8 |          | 1602.8 | 16  | S | 10 | 1162.6   | -0.062  | 1162.6              |         |
|                     | 1699.9 |          | 1699.9 | 17  | P | 9  | 1075.6   | -0.005  | 538.3               | +0.2566 |
|                     | 1798.9 | -0.053   | 1798.9 | 18  | V | 8  | 978.55   |         | 978.55              |         |
|                     | 1900   |          | 1900   | 19  | T | 7  | 879.48   |         | 879.48              |         |
|                     | 2013.1 |          | 2013.1 | 20  | L | 6  | 778.43   |         | 778.43              |         |
|                     | 2114.1 |          | 2114.1 | 21  | T | 5  | 665.35   | +0.0988 | 665.35              |         |
|                     | 2201.1 |          | 2201.1 | 22  | S | 4  | 564.3    | +0.0434 | 564.3               |         |
|                     | 2329.2 |          | 2329.2 | 23  | Q | 3  | 477.27   | +0.0814 | 477.27              |         |
| +0.0491             | 1215.6 |          | 2430.2 | 24  | T | 2  | 349.21   | +0.0939 | 349.21              |         |
|                     | 2531.3 |          | 2531.3 | 25  | T | 1  | 248.16   |         | 248.16              |         |
|                     |        |          |        | 26  | K | 0  | 147.11   |         | 147.11              |         |

#### general information

|                       |             |
|-----------------------|-------------|
| Annotation:           | 17 of 26    |
| AminoAcids Coverage:  | 65 %        |
| Intensity Coverage:   | 32 %        |
| Peak Coverage:        | 28 %        |
| Protein Localisation: | 183 ... 208 |

Scan number 4377 Raw file LNCAP\_Silac\_23F10\_set3\_01  
 Method ITMS; CID Pepti... 169.64

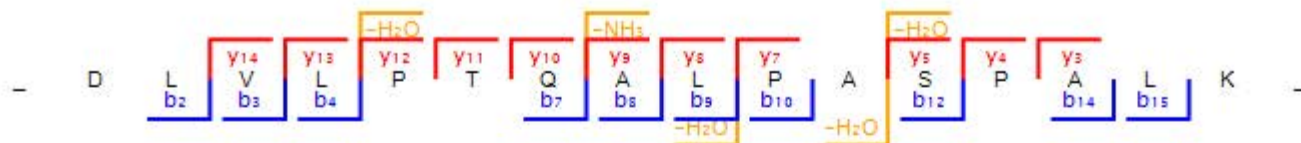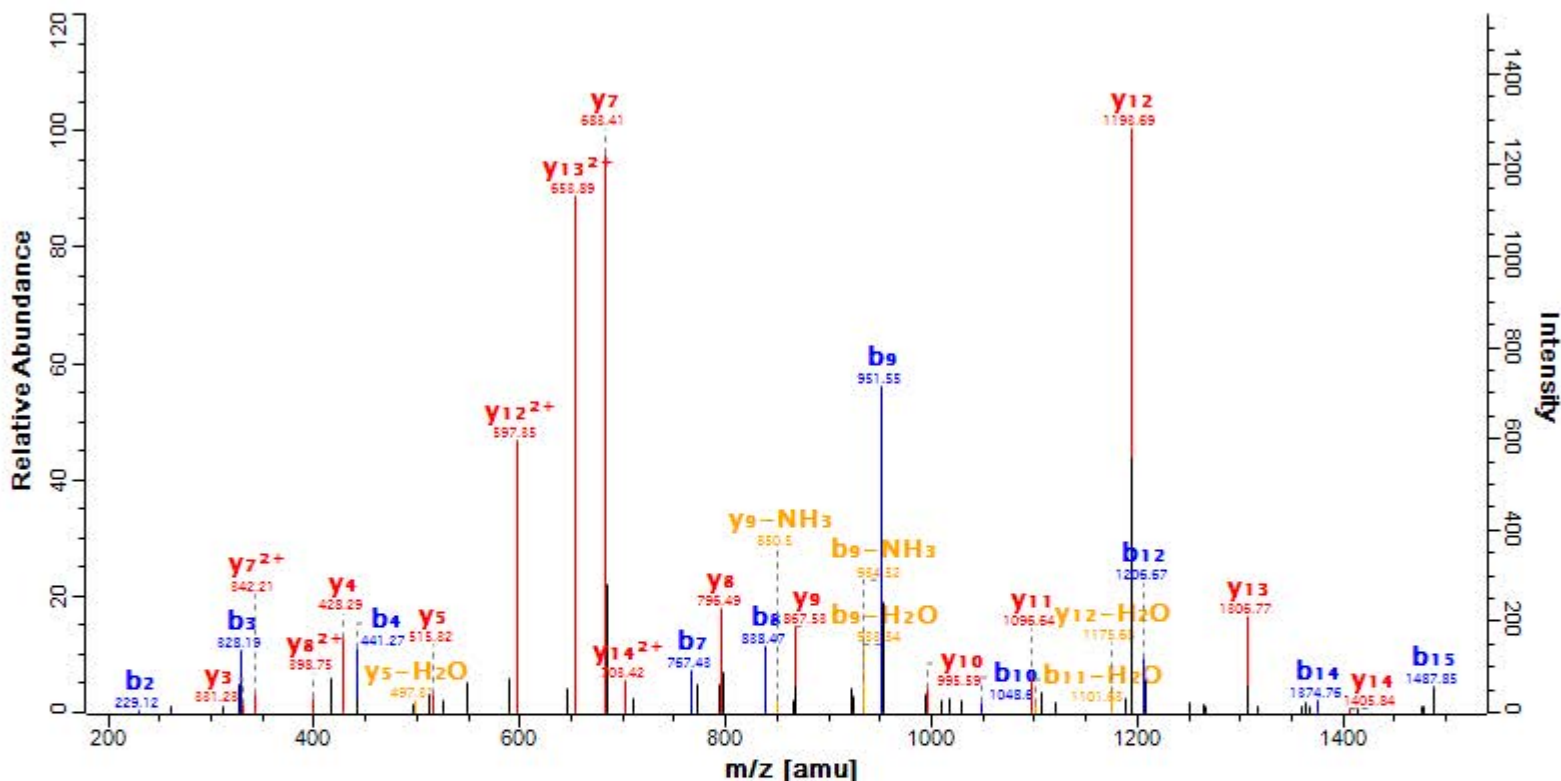

#### precursor information

|                   |                 |
|-------------------|-----------------|
| Mass:             | 1632.94611      |
| m/z:              | 817.48033       |
| Charge:           | 2+              |
| Retentiontime:    | 45.258213043212 |
| Score:            | 169.6427        |
| Mass Error [ppm]: | 0.64564         |
| PEP:              | 2.6452E-22      |
| Precursor Type:   | MULTI           |

#### general information

|                       |             |
|-----------------------|-------------|
| Annotation:           | 14 of 16    |
| AminoAcids Coverage:  | 88 %        |
| Intensity Coverage:   | 73 %        |
| Peak Coverage:        | 41 %        |
| Protein Localisation: | 312 ... 327 |

| b ion     |          |    |     |    | y ion    |           | y <sup>2+</sup> ion |           |
|-----------|----------|----|-----|----|----------|-----------|---------------------|-----------|
| Δ dalton  | mass     |    | seq |    | Δ dalton | mass      | Δ dalton            | mass      |
|           | 116.0342 | 1  | D   | 15 |          |           |                     |           |
| +0.209567 | 229.1183 | 2  | L   | 14 | 1518.925 |           | 1518.925            |           |
| +0.100046 | 328.1867 | 3  | V   | 13 | 1405.841 | -0.24623  | 703.4243            | -0.03789  |
| -0.00215  | 441.2708 | 4  | L   | 12 | 1306.773 | +0.030675 | 653.8901            | +0.074932 |
|           | 538.3235 | 5  | P   | 11 | 1193.689 | -0.09193  | 597.3481            | +0.223592 |
|           | 639.3712 | 6  | T   | 10 | 1096.636 | +0.080345 | 1096.636            |           |
| -0.21103  | 767.4298 | 7  | Q   | 9  | 995.5884 | -0.09457  | 995.5884            |           |
| -0.12345  | 838.4669 | 8  | A   | 8  | 867.5298 | +0.033464 | 867.5298            |           |
| -0.12182  | 951.551  | 9  | L   | 7  | 796.4927 | +0.125875 | 398.75              | +0.457096 |
| -0.08273  | 1048.604 | 10 | P   | 6  | 683.4087 | +0.015115 | 342.208             | +0.123396 |
|           | 1119.641 | 11 | A   | 5  | 586.3559 |           | 586.3559            |           |
| -0.13551  | 1206.673 | 12 | S   | 4  | 515.3188 | +0.125196 | 515.3188            |           |
|           | 1303.726 | 13 | P   | 3  | 428.2867 | +0.052243 | 428.2867            |           |
| -0.22136  | 1374.763 | 14 | A   | 2  | 331.234  | -0.06552  | 331.234             |           |
| +0.103511 | 1487.847 | 15 | L   | 1  | 260.1969 |           | 260.1969            |           |
|           |          | 16 | K   | 0  | 147.1128 |           | 147.1128            |           |



Scan number 4824 Raw file LNCAP\_Silac\_23F10\_set3\_01  
 Method ITMS; CID Pepti... 144.68

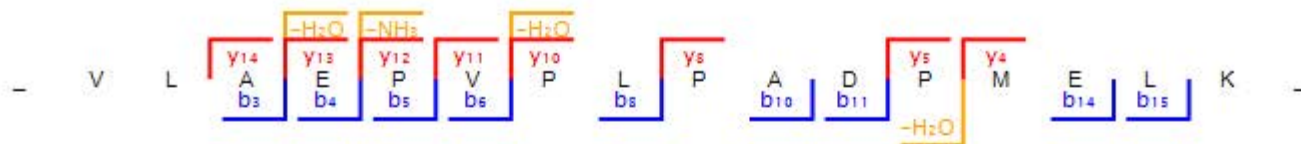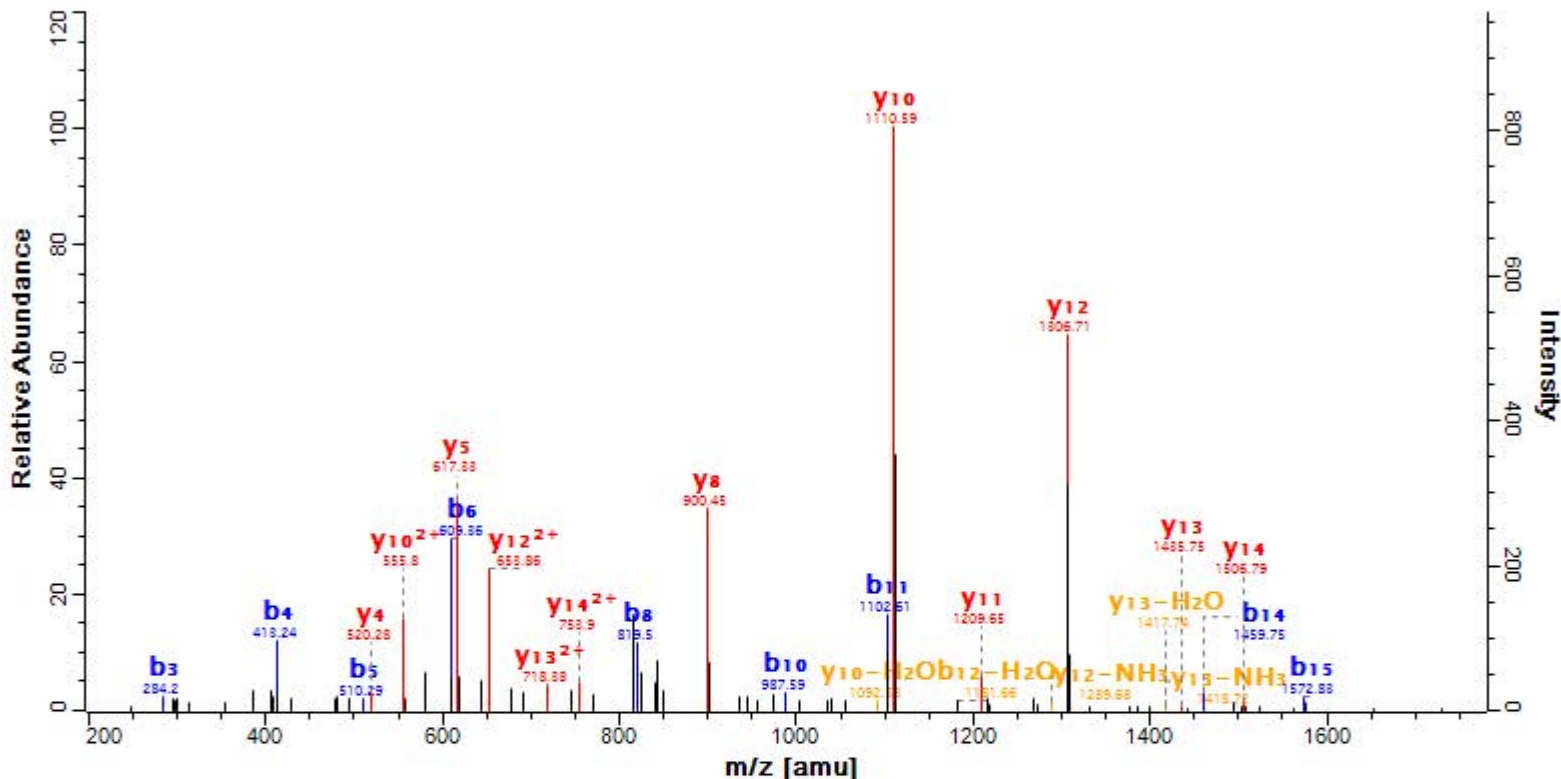

#### precursor information

|                   |                 |
|-------------------|-----------------|
| Mass:             | 1717.93327      |
| m/z:              | 859.97391       |
| Charge:           | 2+              |
| Retentiontime:    | 48.895057678222 |
| Score:            | 144.6781        |
| Mass Error [ppm]: | 0.47852         |
| PEP:              | 5.4148E-10      |
| Precursor Type:   | ISO             |

#### general information

|                       |            |
|-----------------------|------------|
| Annotation:           | 13 of 16   |
| AminoAcids Coverag    | 81 %       |
| Intensity Coverage:   | 59 %       |
| Peak Coverage:        | 29 %       |
| Protein Localisation: | 98 ... 113 |

| b ion     |          |    |     |    | y ion    |           | y <sup>2+</sup> ion |           |
|-----------|----------|----|-----|----|----------|-----------|---------------------|-----------|
| Δ dalton  | mass     |    | seq |    | Δ dalton | mass      | Δ dalton            | mass      |
|           | 100.0757 | 1  | V   | 15 |          |           |                     |           |
|           | 213.1598 | 2  | L   | 14 | 1619.871 |           | 1619.871            |           |
| +0.09961  | 284.1969 | 3  | A   | 13 | 1506.787 | -0.15333  | 753.8973            | +0.021075 |
| -0.01943  | 413.2395 | 4  | E   | 12 | 1435.75  | +0.055413 | 718.3787            | +0.190633 |
| +0.120495 | 510.2922 | 5  | P   | 11 | 1306.708 | -0.07863  | 653.8574            | +0.162918 |
| -0.00822  | 609.3606 | 6  | V   | 10 | 1209.655 | +0.165296 | 1209.655            |           |
|           | 706.4134 | 7  | P   | 9  | 1110.586 | -0.08978  | 555.7968            | +0.082089 |
| -0.00449  | 819.4975 | 8  | L   | 8  | 1013.534 |           | 1013.534            |           |
|           | 916.5502 | 9  | P   | 7  | 900.4495 | -0.02155  | 900.4495            |           |
| +0.043454 | 987.5873 | 10 | A   | 6  | 803.3968 |           | 803.3968            |           |
| -0.11648  | 1102.614 | 11 | D   | 5  | 732.3597 |           | 732.3597            |           |
|           | 1199.667 | 12 | P   | 4  | 617.3327 | +0.095452 | 617.3327            |           |
|           | 1330.708 | 13 | M   | 3  | 520.2799 | +0.065269 | 520.2799            |           |
| -0.21485  | 1459.75  | 14 | E   | 2  | 389.2395 |           | 389.2395            |           |
| -0.07077  | 1572.834 | 15 | L   | 1  | 260.1969 |           | 260.1969            |           |
|           |          | 16 | K   | 0  | 147.1128 |           | 147.1128            |           |



Scan number 5394 Raw file LNCAP\_Silac\_23F10\_set3\_01  
 Method ITMS; CID Pepti... 162.32

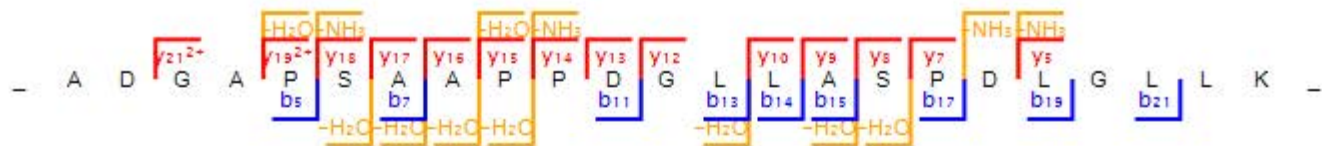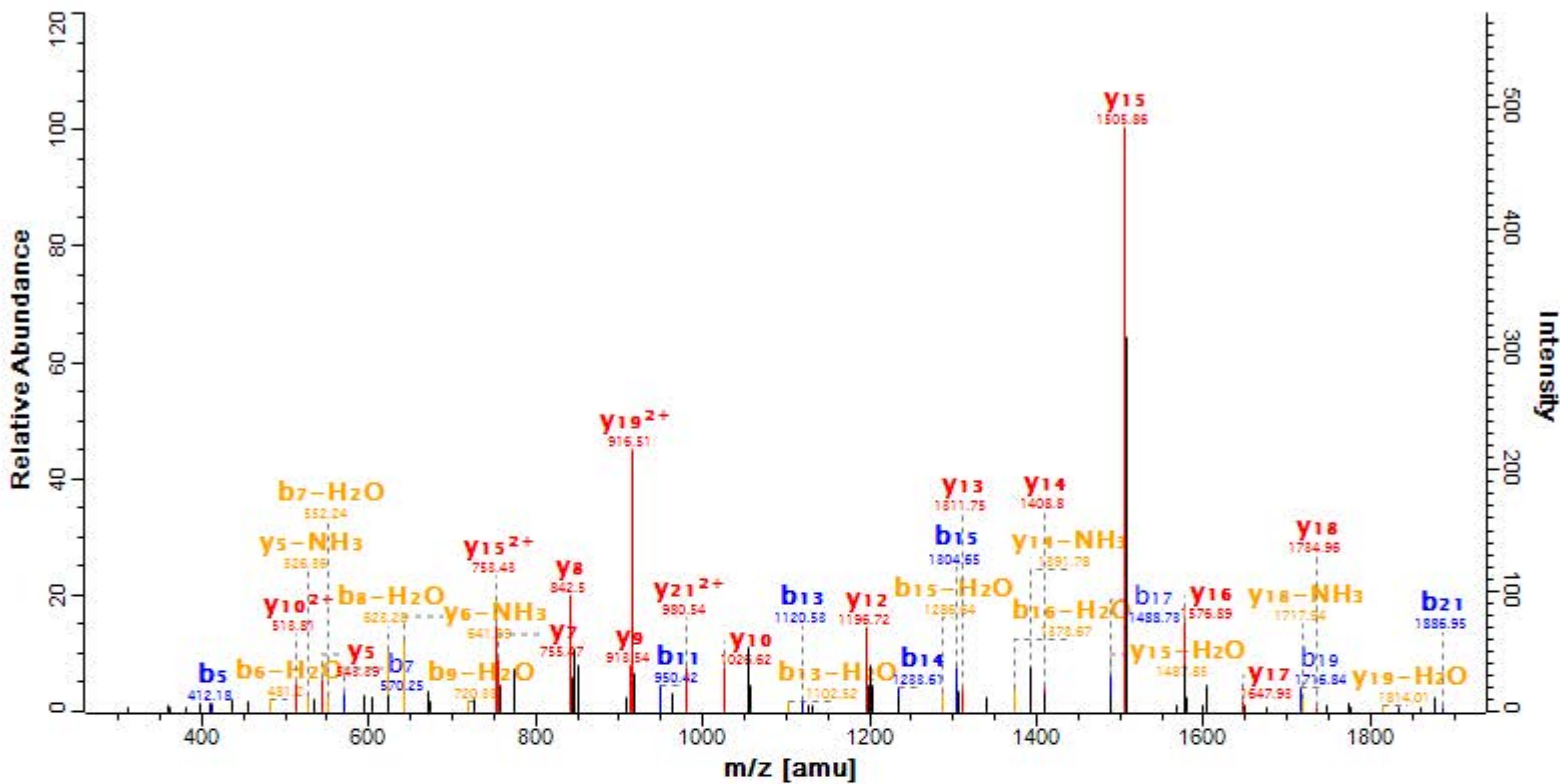

precursor information

|                   |                 |
|-------------------|-----------------|
| Mass:             | 2145.13257      |
| m/z:              | 1073.57356      |
| Charge:           | 2+              |
| Retentiontime:    | 53.860843658447 |
| Score:            | 162.3238        |
| Mass Error [ppm]: | 0.38337         |
| PEP:              | 3.4155E-29      |
| Precursor Type:   | MULTI           |

| b ion     |          |     |   | y ion    |          | y <sup>2+</sup> ion |                    |
|-----------|----------|-----|---|----------|----------|---------------------|--------------------|
| Δ dalton  | mass     | seq |   | Δ dalton | mass     | Δ dalton            | mass               |
|           | 72.04439 | 1   | A | 22       |          |                     |                    |
|           | 187.0713 | 2   | D | 21       | 2075.102 |                     | 2075.102           |
|           | 244.0928 | 3   | G | 20       | 1960.075 |                     | 980.5411 +0.369522 |
|           | 315.1299 | 4   | A | 19       | 1903.054 |                     | 1903.054           |
| +0.119175 | 412.1827 | 5   | P | 18       | 1832.016 |                     | 916.5118 +0.211921 |
|           | 499.2147 | 6   | S | 17       | 1734.964 | -0.14124            | 1734.964           |
| +0.042739 | 570.2518 | 7   | A | 16       | 1647.932 | -0.15328            | 1647.932           |
|           | 641.2889 | 8   | A | 15       | 1576.894 | -0.14192            | 1576.894           |
|           | 738.3417 | 9   | P | 14       | 1505.857 | -0.10627            | 753.4323 +0.170337 |
|           | 835.3945 | 10  | P | 13       | 1408.805 | +0.009724           | 1408.805           |
| -0.12453  | 950.4214 | 11  | D | 12       | 1311.752 | -0.00929            | 1311.752           |
|           | 1007.443 | 12  | G | 11       | 1196.725 | +0.068312           | 1196.725           |
| +0.212817 | 1120.527 | 13  | L | 10       | 1139.703 |                     | 1139.703           |
| -0.09244  | 1233.611 | 14  | L | 9        | 1026.619 | +0.049572           | 513.8133 -0.42014  |
| -0.09354  | 1304.648 | 15  | A | 8        | 913.5353 | +0.030121           | 913.5353           |
|           | 1391.68  | 16  | S | 7        | 842.4982 | -0.04446            | 842.4982           |
| +0.046886 | 1488.733 | 17  | P | 6        | 755.4662 | +0.018636           | 755.4662           |
|           | 1603.76  | 18  | D | 5        | 658.4134 |                     | 658.4134           |
| -0.15909  | 1716.844 | 19  | L | 4        | 543.3865 | +0.109024           | 543.3865           |
|           | 1773.865 | 20  | G | 3        | 430.3024 |                     | 430.3024           |
| +0.061919 | 1886.949 | 21  | L | 2        | 373.2809 |                     | 373.2809           |
|           | 2000.033 | 22  | L | 1        | 260.1969 |                     | 260.1969           |
|           |          | 23  | K | 0        | 147.1128 |                     | 147.1128           |

general information

|                       |           |
|-----------------------|-----------|
| Annotation:           | 17 of 23  |
| AminoAcids Coverage:  | 74 %      |
| Intensity Coverage:   | 58 %      |
| Peak Coverage:        | 40 %      |
| Protein Localisation: | 75 ... 97 |

Scan number 5466 Raw file LNCAP\_Silac\_23F10\_set3\_01  
 Method ITMS; CID Pepti... 126.25

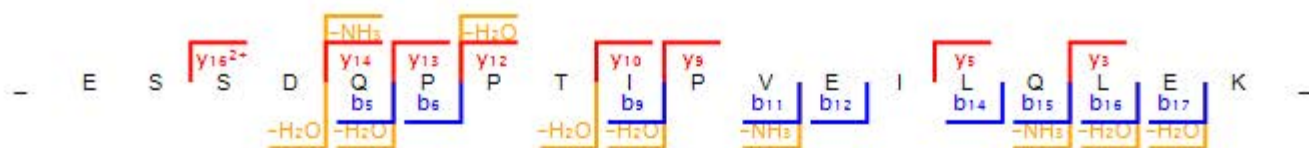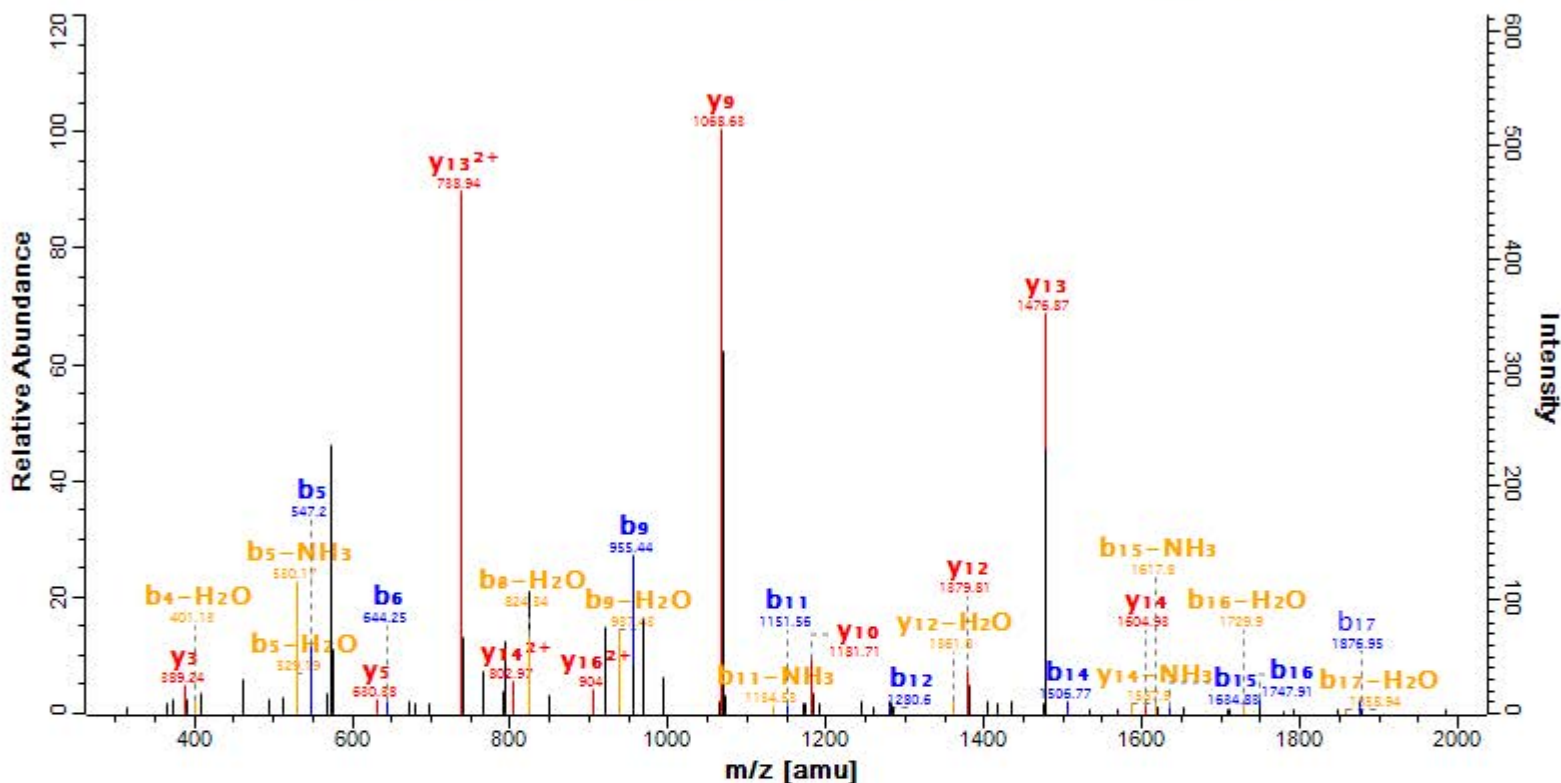

#### precursor information

|                   |                 |
|-------------------|-----------------|
| Mass:             | 2022.05187      |
| m/z:              | 1012.03321      |
| Charge:           | 2+              |
| Retentiontime:    | 54.518241882324 |
| Score:            | 126.2474        |
| Mass Error [ppm]: | -0.11534        |
| PEP:              | 1.8362E-12      |
| Precursor Type:   | MULTI           |

| b ion     |          |    |     |    | y ion    |           |          | y <sup>2+</sup> ion |  |
|-----------|----------|----|-----|----|----------|-----------|----------|---------------------|--|
| Δ dalton  | mass     |    | seq |    | Δ dalton | mass      | Δ dalton | mass                |  |
|           | 130.0499 | 1  | E   | 17 |          |           |          |                     |  |
|           | 217.0819 | 2  | S   | 16 | 1894.017 |           | 1894.017 |                     |  |
|           | 304.1139 | 3  | S   | 15 | 1806.985 |           | 903.996  | +0.361772           |  |
|           | 419.1409 | 4  | D   | 14 | 1719.953 |           | 1719.953 |                     |  |
| +0.06569  | 547.1994 | 5  | Q   | 13 | 1604.926 | +0.015621 | 802.9665 | +0.29116            |  |
| +0.216112 | 644.2522 | 6  | P   | 12 | 1476.867 | -0.1017   | 738.9372 | +0.203993           |  |
|           | 741.305  | 7  | P   | 11 | 1379.814 | -0.17809  | 1379.814 |                     |  |
|           | 842.3527 | 8  | T   | 10 | 1282.762 |           | 1282.762 |                     |  |
| -0.0893   | 955.4367 | 9  | I   | 9  | 1181.714 | -0.04628  | 1181.714 |                     |  |
|           | 1052.489 | 10 | P   | 8  | 1068.63  | -0.02557  | 1068.63  |                     |  |
| -0.06522  | 1151.558 | 11 | V   | 7  | 971.5772 |           | 971.5772 |                     |  |
| -0.2405   | 1280.6   | 12 | E   | 6  | 872.5088 |           | 872.5088 |                     |  |
|           | 1393.685 | 13 | I   | 5  | 743.4662 |           | 743.4662 |                     |  |
| +0.055725 | 1506.769 | 14 | L   | 4  | 630.3821 | +0.117592 | 630.3821 |                     |  |
| -0.14677  | 1634.827 | 15 | Q   | 3  | 517.298  |           | 517.298  |                     |  |
| +0.063108 | 1747.911 | 16 | L   | 2  | 389.2395 | +0.047343 | 389.2395 |                     |  |
| -0.08093  | 1876.954 | 17 | E   | 1  | 276.1554 |           | 276.1554 |                     |  |
|           |          | 18 | K   | 0  | 147.1128 |           | 147.1128 |                     |  |

#### general information

|                       |             |
|-----------------------|-------------|
| Annotation:           | 15 of 18    |
| AminoAcids Coverage:  | 83 %        |
| Intensity Coverage:   | 51 %        |
| Peak Coverage:        | 32 %        |
| Protein Localisation: | 164 ... 181 |

Scan number 5511 Raw file LNCAP\_Silac\_23F10\_set3\_01  
 Method ITMS; CID Pepti... 90.72

$y_{21}^{2+}$   
 A L P P A Q A G A L L L A L P P A S P S A A R  
 $b_8^{2+}$   $b_{11}$   $b_{12}$   $b_{13}$   $b_{14}$   $b_{15}$   $H_2O$   $NH_3$   $y_5$   $y_2$

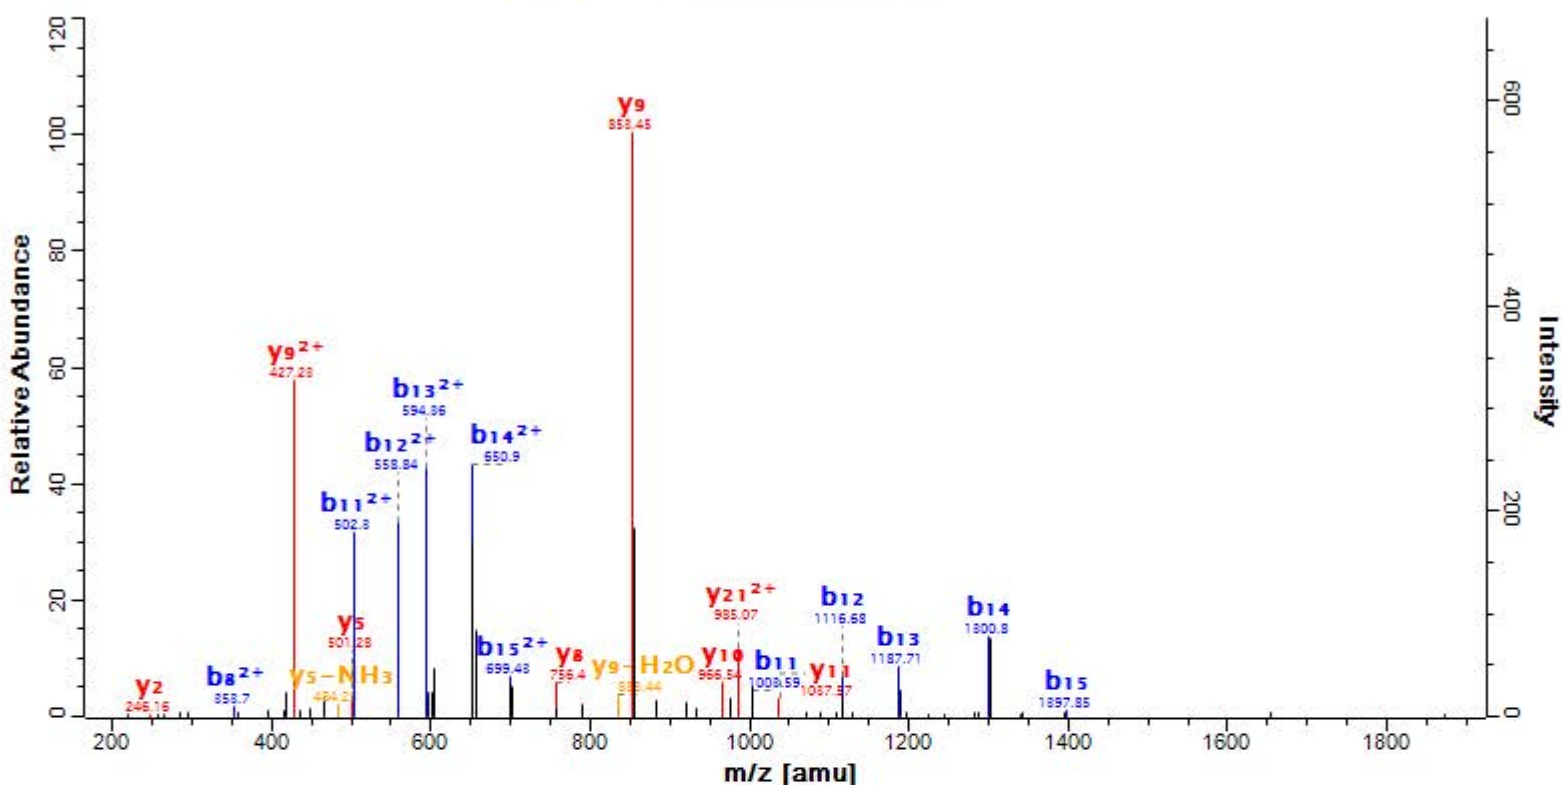

precursor information

|                   |                 |
|-------------------|-----------------|
| Mass:             | 2152.23644      |
| m/z:              | 718.41942       |
| Charge:           | 3+              |
| Retentiontime:    | 54.905693054199 |
| Score:            | 90.7179         |
| Mass Error [ppm]: | -0.17781        |
| PEP:              | 1.7385E-06      |
| Precursor Type:   | MULTI           |

| b <sup>2+</sup> ion |        | b ion    |        | seq |   |    | y ion    |         | y <sup>2+</sup> ion |         |
|---------------------|--------|----------|--------|-----|---|----|----------|---------|---------------------|---------|
| Δ dalton            | mass   | Δ dalton | mass   |     |   |    | Δ dalton | mass    | Δ dalton            | mass    |
|                     | 72.044 |          | 72.044 | 1   | A | 22 |          |         |                     |         |
|                     | 185.13 |          | 185.13 | 2   | L | 21 | 2082.2   |         | 2082.2              |         |
|                     | 282.18 |          | 282.18 | 3   | P | 20 | 1969.1   |         | 985.07              | +0.3627 |
|                     | 379.23 |          | 379.23 | 4   | P | 19 | 1872.1   |         | 1872.1              |         |
|                     | 450.27 |          | 450.27 | 5   | A | 18 | 1775     |         | 1775                |         |
|                     | 578.33 |          | 578.33 | 6   | Q | 17 | 1704     |         | 1704                |         |
|                     | 649.37 |          | 649.37 | 7   | A | 16 | 1575.9   |         | 1575.9              |         |
| -0.425              | 353.7  |          | 706.39 | 8   | G | 15 | 1504.9   |         | 1504.9              |         |
|                     | 777.43 |          | 777.43 | 9   | A | 14 | 1447.9   |         | 1447.9              |         |
|                     | 890.51 |          | 890.51 | 10  | L | 13 | 1376.8   |         | 1376.8              |         |
| +0.18975            | 502.3  | +0.1262  | 1003.6 | 11  | L | 12 | 1263.7   |         | 1263.7              |         |
| +0.09985            | 558.84 | -0.024   | 1116.7 | 12  | L | 11 | 1150.7   |         | 1150.7              |         |
| +0.10775            | 594.36 | -0.19    | 1187.7 | 13  | A | 10 | 1037.6   | -0.141  | 1037.6              |         |
| -0.117              | 650.9  | -0.128   | 1300.8 | 14  | L | 9  | 966.54   | +0.0563 | 966.54              |         |
| +0.0589             | 699.43 | -0.398   | 1397.9 | 15  | P | 8  | 853.45   | +0.0036 | 427.23              | +0.1384 |
|                     | 1494.9 |          | 1494.9 | 16  | P | 7  | 756.4    | +0.2324 | 756.4               |         |
|                     | 1565.9 |          | 1565.9 | 17  | A | 6  | 659.35   |         | 659.35              |         |
|                     | 1653   |          | 1653   | 18  | S | 5  | 588.31   |         | 588.31              |         |
|                     | 1750   |          | 1750   | 19  | P | 4  | 501.28   | +0.0693 | 501.28              |         |
|                     | 1837.1 |          | 1837.1 | 20  | S | 3  | 404.23   |         | 404.23              |         |
|                     | 1908.1 |          | 1908.1 | 21  | A | 2  | 317.19   |         | 317.19              |         |
|                     | 1979.1 |          | 1979.1 | 22  | A | 1  | 246.16   | +0.0739 | 246.16              |         |
|                     |        |          |        | 23  | R | 0  | 175.12   |         | 175.12              |         |

general information

|                       |             |
|-----------------------|-------------|
| Annotation:           | 10 of 23    |
| AminoAcids Coverage:  | 43 %        |
| Intensity Coverage:   | 69 %        |
| Peak Coverage:        | 30 %        |
| Protein Localisation: | 449 ... 471 |

Scan number 5650 Raw file LNCAP\_Silac\_23F10\_set3\_01  
 Method ITMS; CID Pepti... 84.38

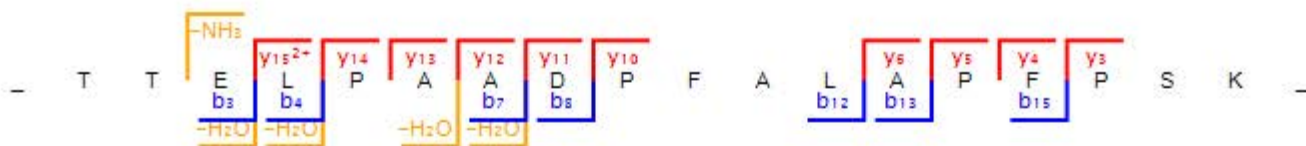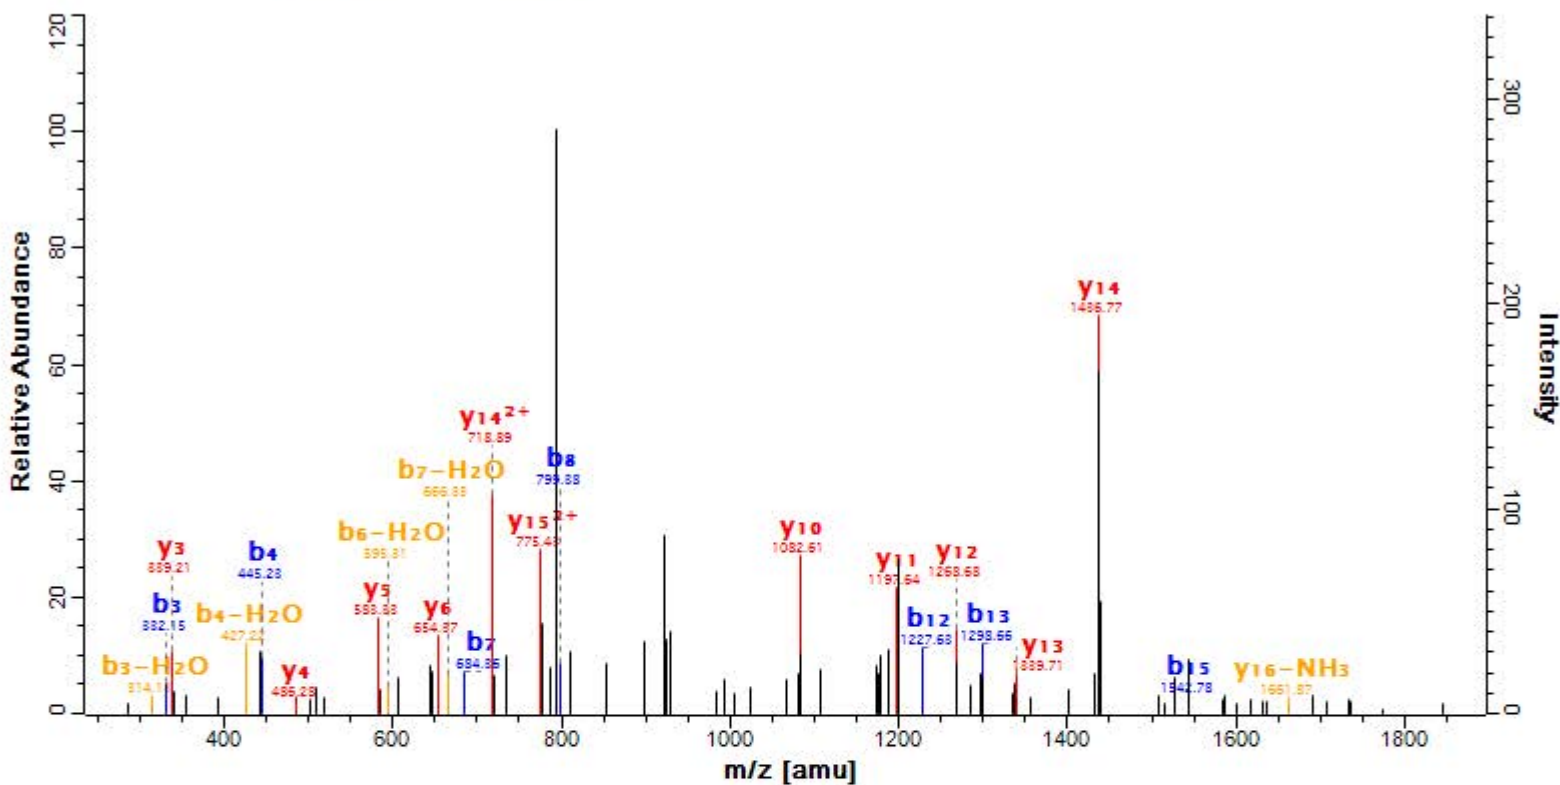

**precursor information**

|                   |                 |
|-------------------|-----------------|
| Mass:             | 1871.9672       |
| m/z:              | 936.99087       |
| Charge:           | 2+              |
| Retentiontime:    | 56.219230651855 |
| Score:            | 84.37524        |
| Mass Error [ppm]: | 0.14921         |
| PEP:              | 8.4764E-05      |
| Precursor Type:   | MULTI           |

**general information**

|                       |             |
|-----------------------|-------------|
| Annotation:           | 12 of 18    |
| AminoAcids Coverage:  | 67 %        |
| Intensity Coverage:   | 35 %        |
| Peak Coverage:        | 25 %        |
| Protein Localisation: | 333 ... 350 |

| b ion     |          |    |     |    | y ion    |           | y <sup>2+</sup> ion |           |
|-----------|----------|----|-----|----|----------|-----------|---------------------|-----------|
| Δ dalton  | mass     |    | seq |    | Δ dalton | mass      | Δ dalton            | mass      |
|           | 102.055  | 1  | T   | 17 |          |           |                     |           |
|           | 203.1026 | 2  | T   | 16 | 1779.941 |           | 1779.941            |           |
| +0.211982 | 332.1452 | 3  | E   | 15 | 1678.893 |           | 1678.893            |           |
| +0.054096 | 445.2293 | 4  | L   | 14 | 1549.85  |           | 775.4289            | +0.129796 |
|           | 542.2821 | 5  | P   | 13 | 1436.766 | -0.05947  | 718.8868            | +0.369094 |
|           | 613.3192 | 6  | A   | 12 | 1339.714 | +0.111949 | 1339.714            |           |
| -0.10054  | 684.3563 | 7  | A   | 11 | 1268.676 | +0.018569 | 1268.676            |           |
| +0.356094 | 799.3832 | 8  | D   | 10 | 1197.639 | +0.003437 | 1197.639            |           |
|           | 896.436  | 9  | P   | 9  | 1082.612 | +0.04161  | 1082.612            |           |
|           | 1043.504 | 10 | F   | 8  | 985.5597 |           | 985.5597            |           |
|           | 1114.542 | 11 | A   | 7  | 838.4913 |           | 838.4913            |           |
| -0.10141  | 1227.626 | 12 | L   | 6  | 767.4542 |           | 767.4542            |           |
| +0.210475 | 1298.663 | 13 | A   | 5  | 654.3701 | +0.018036 | 654.3701            |           |
|           | 1395.715 | 14 | P   | 4  | 583.333  | +0.074803 | 583.333             |           |
| -0.12066  | 1542.784 | 15 | F   | 3  | 486.2802 | +0.121707 | 486.2802            |           |
|           | 1639.837 | 16 | P   | 2  | 339.2118 | -0.03681  | 339.2118            |           |
|           | 1726.869 | 17 | S   | 1  | 242.159  |           | 242.159             |           |
|           |          | 18 | K   | 0  | 155.127  |           | 155.127             |           |

Scan number 5660 Raw file LNCAP\_Silac\_23F10\_set3\_01  
 Method ITMS; CID Pepti... 44.44

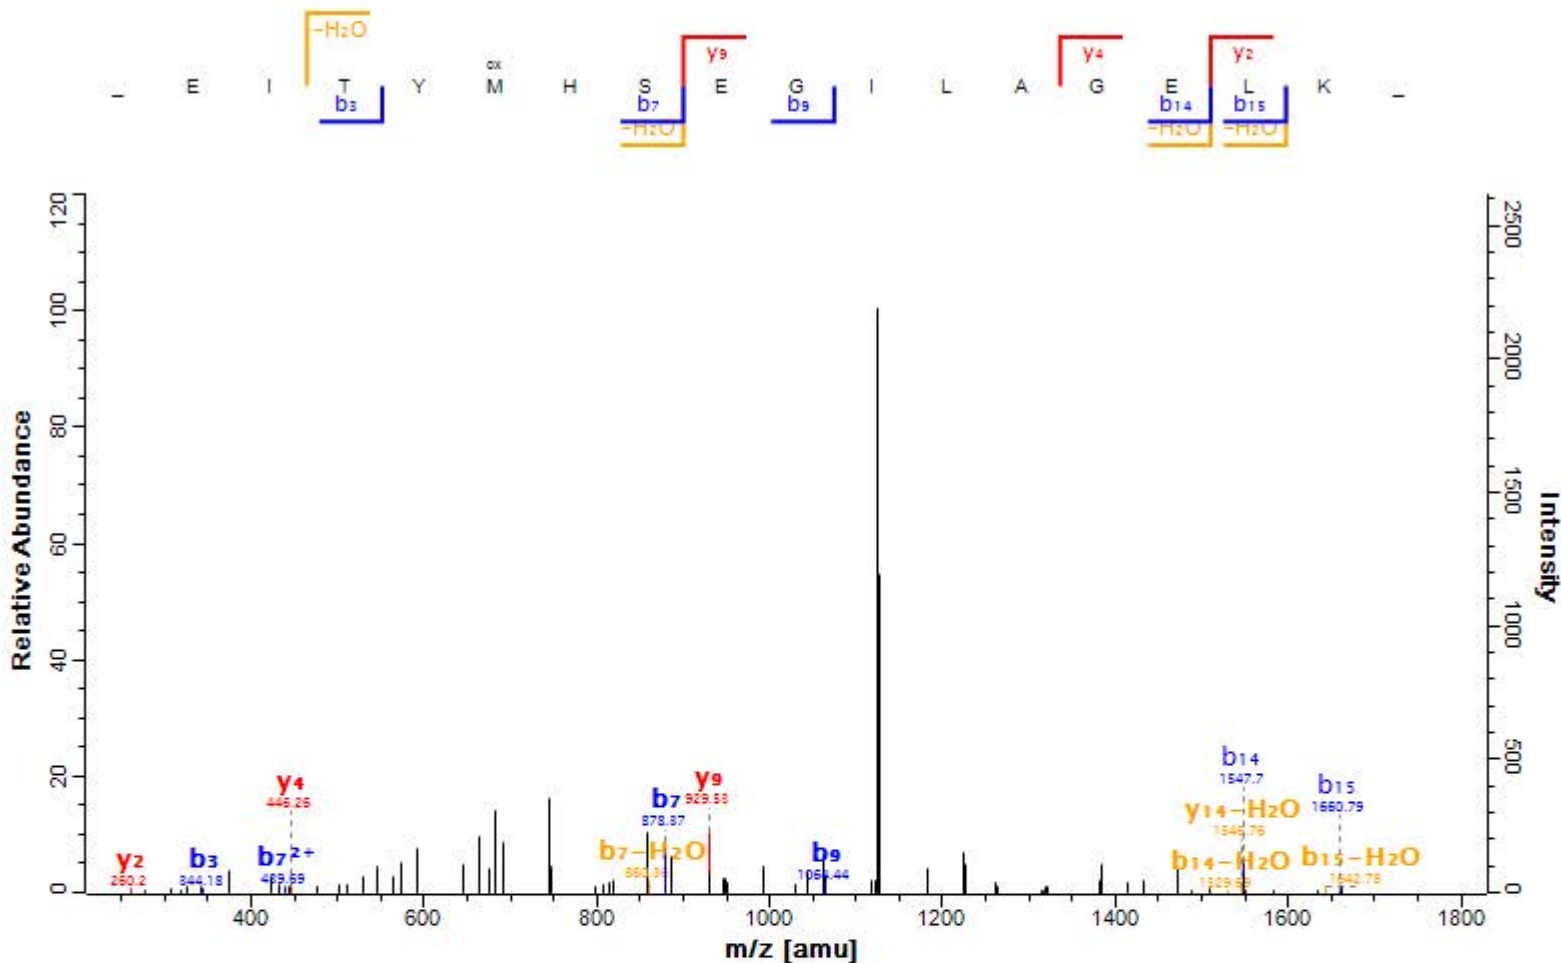

#### precursor information

|                   |                 |
|-------------------|-----------------|
| Mass:             | 1805.88696      |
| m/z:              | 903.95076       |
| Charge:           | 2+              |
| Retention time:   | 56.318492889404 |
| Score:            | 44.43975        |
| Mass Error [ppm]: | 0.003855        |
| PEP:              | 0.080332        |
| Precursor Type:   | MULTI           |

#### general information

|                       |             |
|-----------------------|-------------|
| Annotation:           | 8 of 16     |
| AminoAcids Coverage:  | 50 %        |
| Intensity Coverage:   | 8 %         |
| Peak Coverage:        | 14 %        |
| Protein Localisation: | 579 ... 594 |

| b <sup>2+</sup> ion |          | b ion     |          |     |   | y ion    |          |           |
|---------------------|----------|-----------|----------|-----|---|----------|----------|-----------|
| Δ dalton            | mass     | Δ dalton  | mass     | seq |   | Δ dalton | mass     |           |
|                     | 130.0499 |           | 130.0499 | 1   | E | 15       |          |           |
|                     | 243.1339 |           | 243.1339 | 2   | I | 14       | 1677.852 |           |
|                     | 344.1816 | +0.096891 | 344.1816 | 3   | T | 13       | 1564.768 |           |
|                     | 507.2449 |           | 507.2449 | 4   | Y | 12       | 1463.72  |           |
|                     | 654.2803 |           | 654.2803 | 5   | M | 11       | 1300.657 |           |
|                     | 791.3393 |           | 791.3393 | 6   | H | 10       | 1153.621 |           |
| +0.44744            | 439.6893 | -0.21039  | 878.3713 | 7   | S | 9        | 1016.562 |           |
|                     | 1007.414 |           | 1007.414 | 8   | E | 8        | 929.5302 | -0.04994  |
|                     | 1064.435 | -0.09146  | 1064.435 | 9   | G | 7        | 800.4876 |           |
|                     | 1177.519 |           | 1177.519 | 10  | I | 6        | 743.4662 |           |
|                     | 1290.603 |           | 1290.603 | 11  | L | 5        | 630.3821 |           |
|                     | 1361.641 |           | 1361.641 | 12  | A | 4        | 517.298  |           |
|                     | 1418.662 |           | 1418.662 | 13  | G | 3        | 446.2609 | +0.045594 |
|                     | 1547.705 | +0.003494 | 1547.705 | 14  | E | 2        | 389.2395 |           |
|                     | 1660.789 | -0.01319  | 1660.789 | 15  | L | 1        | 260.1969 | -0.30533  |
|                     |          |           |          | 16  | K | 0        | 147.1128 |           |

Scan number 5678 Raw file LNCAP\_Silac\_23F10\_set3\_01  
 Method ITMS; CID Pepti... 53.45

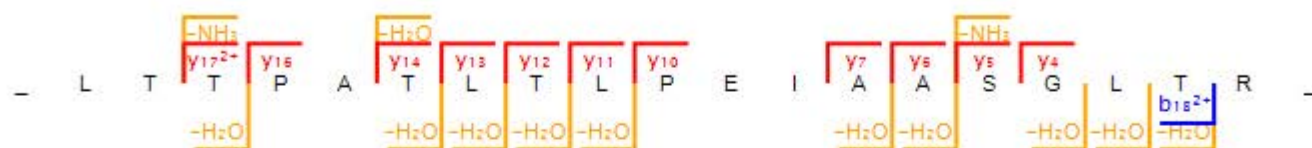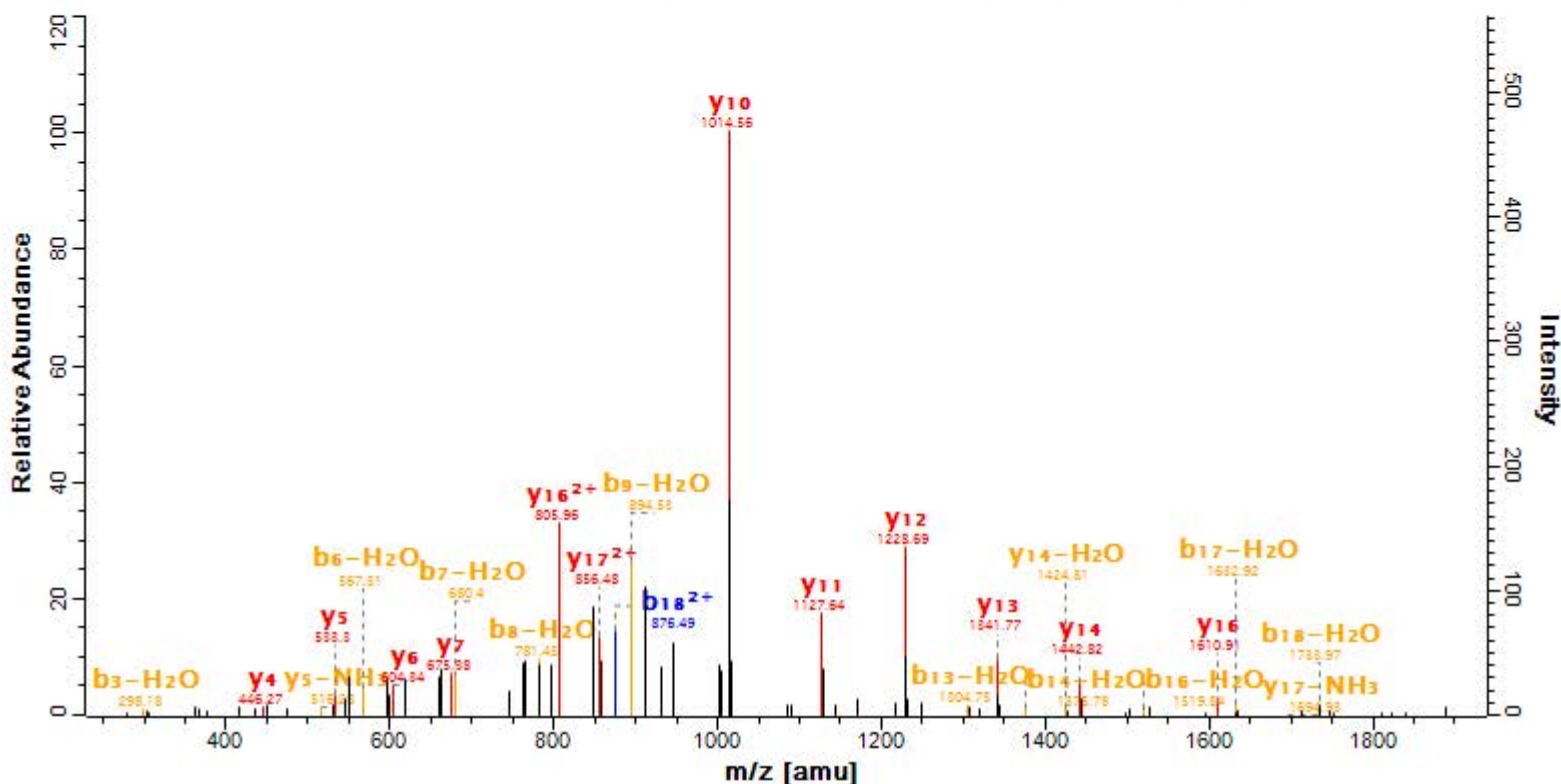

#### precursor information

|                   |                 |
|-------------------|-----------------|
| Mass:             | 1925.08356      |
| m/z:              | 963.54906       |
| Charge:           | 2+              |
| Retentiontime:    | 56.497066497802 |
| Score:            | 53.45319        |
| Mass Error [ppm]: | 0.11189         |
| PEP:              | 0.0045882       |
| Precursor Type:   | MULTI           |

#### general information

|                       |             |
|-----------------------|-------------|
| Annotation:           | 13 of 19    |
| AminoAcids Coverage:  | 68 %        |
| Intensity Coverage:   | 50 %        |
| Peak Coverage:        | 28 %        |
| Protein Localisation: | 160 ... 178 |

| b <sup>2+</sup> ion |        | b ion    |        | seq |   |    | y ion    |         | y <sup>2+</sup> ion |         |
|---------------------|--------|----------|--------|-----|---|----|----------|---------|---------------------|---------|
| Δ dalton            | mass   | Δ dalton | mass   |     |   |    | Δ dalton | mass    | Δ dalton            | mass    |
|                     | 114.09 |          | 114.09 | 1   | L | 18 |          |         |                     |         |
|                     | 215.14 |          | 215.14 | 2   | T | 17 | 1813     |         | 1813                |         |
|                     | 316.19 |          | 316.19 | 3   | T | 16 | 1712     |         | 856.48              | +0.1021 |
|                     | 413.24 |          | 413.24 | 4   | P | 15 | 1610.9   | +0.1568 | 805.96              | +0.2057 |
|                     | 484.28 |          | 484.28 | 5   | A | 14 | 1513.9   |         | 1513.9              |         |
|                     | 585.32 |          | 585.32 | 6   | T | 13 | 1442.8   | -0.024  | 1442.8              |         |
|                     | 698.41 |          | 698.41 | 7   | L | 12 | 1341.8   | -0.068  | 1341.8              |         |
|                     | 799.46 |          | 799.46 | 8   | T | 11 | 1228.7   | -0.035  | 1228.7              |         |
|                     | 912.54 |          | 912.54 | 9   | L | 10 | 1127.6   | -0.031  | 1127.6              |         |
|                     | 1009.6 |          | 1009.6 | 10  | P | 9  | 1014.6   | -0.071  | 1014.6              |         |
|                     | 1138.6 |          | 1138.6 | 11  | E | 8  | 917.51   |         | 917.51              |         |
|                     | 1251.7 |          | 1251.7 | 12  | I | 7  | 788.46   |         | 788.46              |         |
|                     | 1322.8 |          | 1322.8 | 13  | A | 6  | 675.38   | +0.0887 | 675.38              |         |
|                     | 1393.8 |          | 1393.8 | 14  | A | 5  | 604.34   | +0.1724 | 604.34              |         |
|                     | 1480.8 |          | 1480.8 | 15  | S | 4  | 533.3    | +0.1464 | 533.3               |         |
|                     | 1537.8 |          | 1537.8 | 16  | G | 3  | 446.27   | +0.0772 | 446.27              |         |
|                     | 1650.9 |          | 1650.9 | 17  | L | 2  | 389.25   |         | 389.25              |         |
| -0.008              | 876.49 |          | 1752   | 18  | T | 1  | 276.17   |         | 276.17              |         |
|                     |        |          |        | 19  | R | 0  | 175.12   |         | 175.12              |         |



Scan number 5741 Raw file LNCAP\_Silac\_23F10\_set3\_01  
 Method ITMS; CID Pepti... 170.16

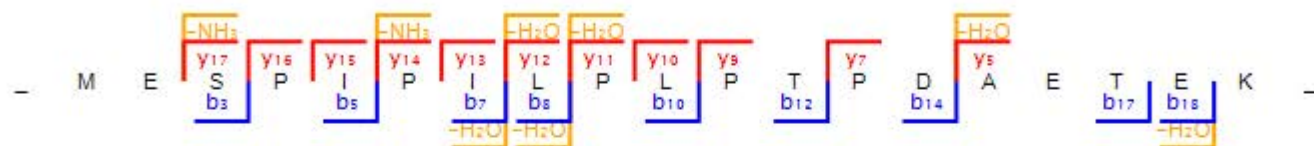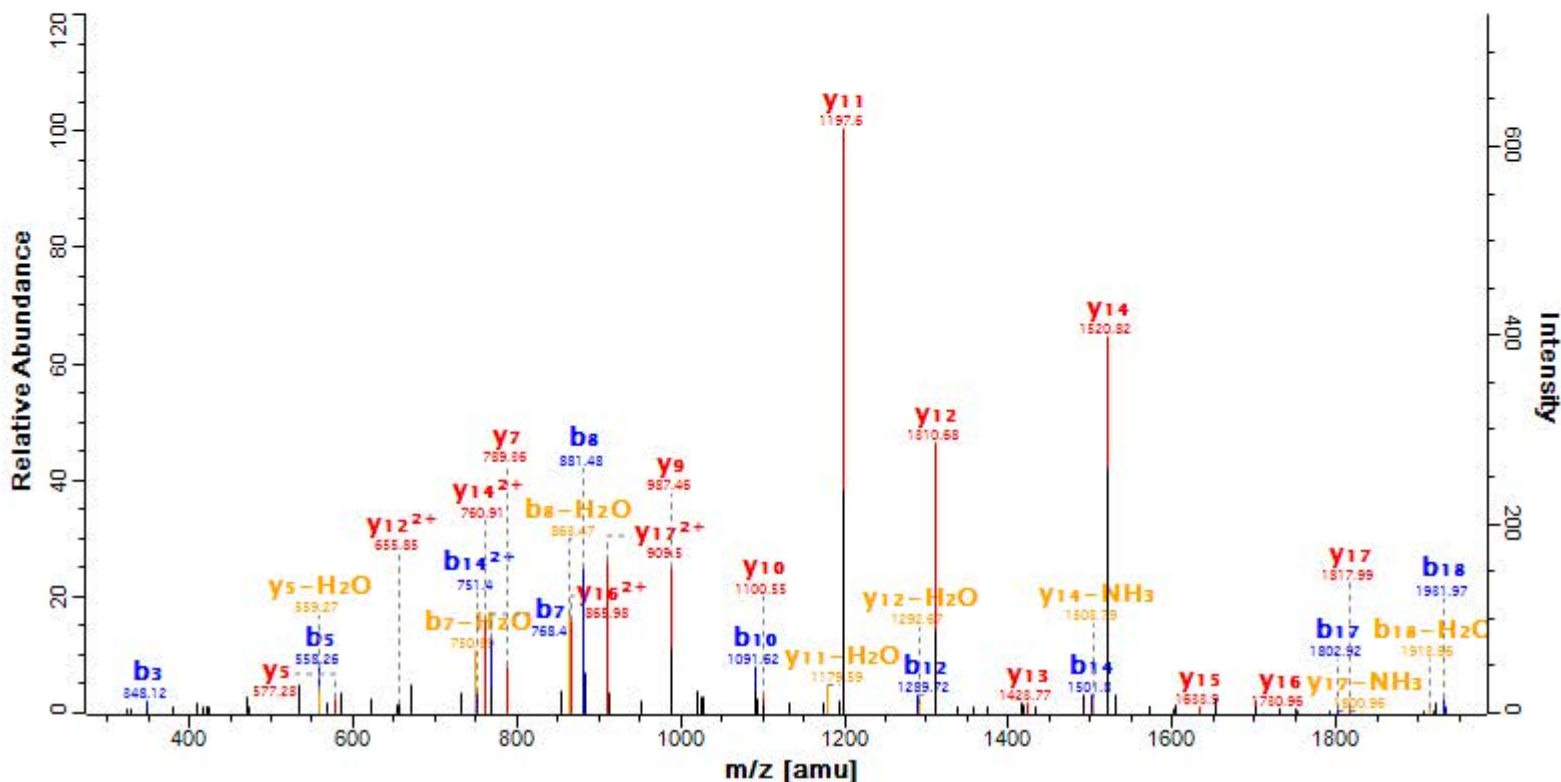

### precursor information

|                   |                 |
|-------------------|-----------------|
| Mass:             | 2077.06555      |
| m/z:              | 1039.54005      |
| Charge:           | 2+              |
| Retentiontime:    | 57.116527557373 |
| Score:            | 170.1628        |
| Mass Error [ppm]: | 0.11633         |
| PEP:              | 4.2254E-34      |
| Precursor Type:   | MULTI           |

### general information

|                       |             |
|-----------------------|-------------|
| Annotation:           | 15 of 19    |
| AminoAcids Coverage:  | 79 %        |
| Intensity Coverage:   | 66 %        |
| Peak Coverage:        | 34 %        |
| Protein Localisation: | 373 ... 391 |

| b <sup>2+</sup> ion |        | b ion    |        | seq |   |    | y ion    |         | y <sup>2+</sup> ion |         |
|---------------------|--------|----------|--------|-----|---|----|----------|---------|---------------------|---------|
| Δ dalton            | mass   | Δ dalton | mass   |     |   |    | Δ dalton | mass    | Δ dalton            | mass    |
|                     | 132.05 |          | 132.05 | 1   | M | 18 |          |         |                     |         |
|                     | 261.09 |          | 261.09 | 2   | E | 17 | 1947     |         | 1947                |         |
|                     | 348.12 | +0.0417  | 348.12 | 3   | S | 16 | 1818     | -0.154  | 909.5               | +0.1415 |
|                     | 445.18 |          | 445.18 | 4   | P | 15 | 1731     | -0.086  | 865.98              | +0.1351 |
|                     | 558.26 | +0.082   | 558.26 | 5   | I | 14 | 1633.9   | -0.031  | 1633.9              |         |
|                     | 655.31 |          | 655.31 | 6   | P | 13 | 1520.8   | -0.129  | 760.91              | +0.1006 |
|                     | 768.4  | -0.077   | 768.4  | 7   | I | 12 | 1423.8   | +0.1456 | 1423.8              |         |
|                     | 881.48 | -0.072   | 881.48 | 8   | L | 11 | 1310.7   | -0.144  | 655.85              | +0.0354 |
|                     | 978.53 |          | 978.53 | 9   | P | 10 | 1197.6   | -0.065  | 1197.6              |         |
|                     | 1091.6 | -0.201   | 1091.6 | 10  | L | 9  | 1100.5   | +0.1122 | 1100.5              |         |
|                     | 1188.7 |          | 1188.7 | 11  | P | 8  | 987.46   | +0.0158 | 987.46              |         |
|                     | 1289.7 | -0.076   | 1289.7 | 12  | T | 7  | 890.41   |         | 890.41              |         |
|                     | 1386.8 |          | 1386.8 | 13  | P | 6  | 789.36   | +0.0628 | 789.36              |         |
| +0.2641             | 751.4  | -0.108   | 1501.8 | 14  | D | 5  | 692.31   |         | 692.31              |         |
|                     | 1572.8 |          | 1572.8 | 15  | A | 4  | 577.28   | -0.324  | 577.28              |         |
|                     | 1701.9 |          | 1701.9 | 16  | E | 3  | 506.25   |         | 506.25              |         |
|                     | 1802.9 | +0.0953  | 1802.9 | 17  | T | 2  | 377.2    |         | 377.2               |         |
|                     | 1932   | -0.066   | 1932   | 18  | E | 1  | 276.16   |         | 276.16              |         |
|                     |        |          |        | 19  | K | 0  | 147.11   |         | 147.11              |         |

Scan number 6039 Raw file LNCAP\_Silac\_23F10\_set3\_01  
 Method ITMS; CID Pepti... 158.44

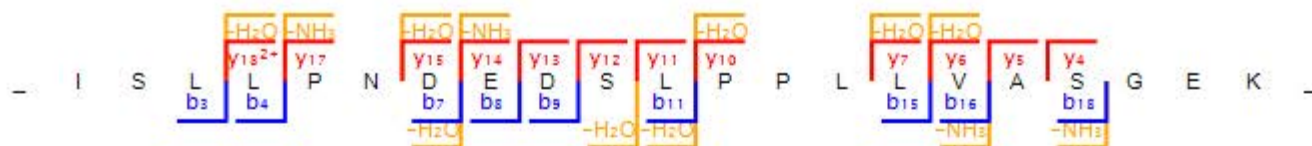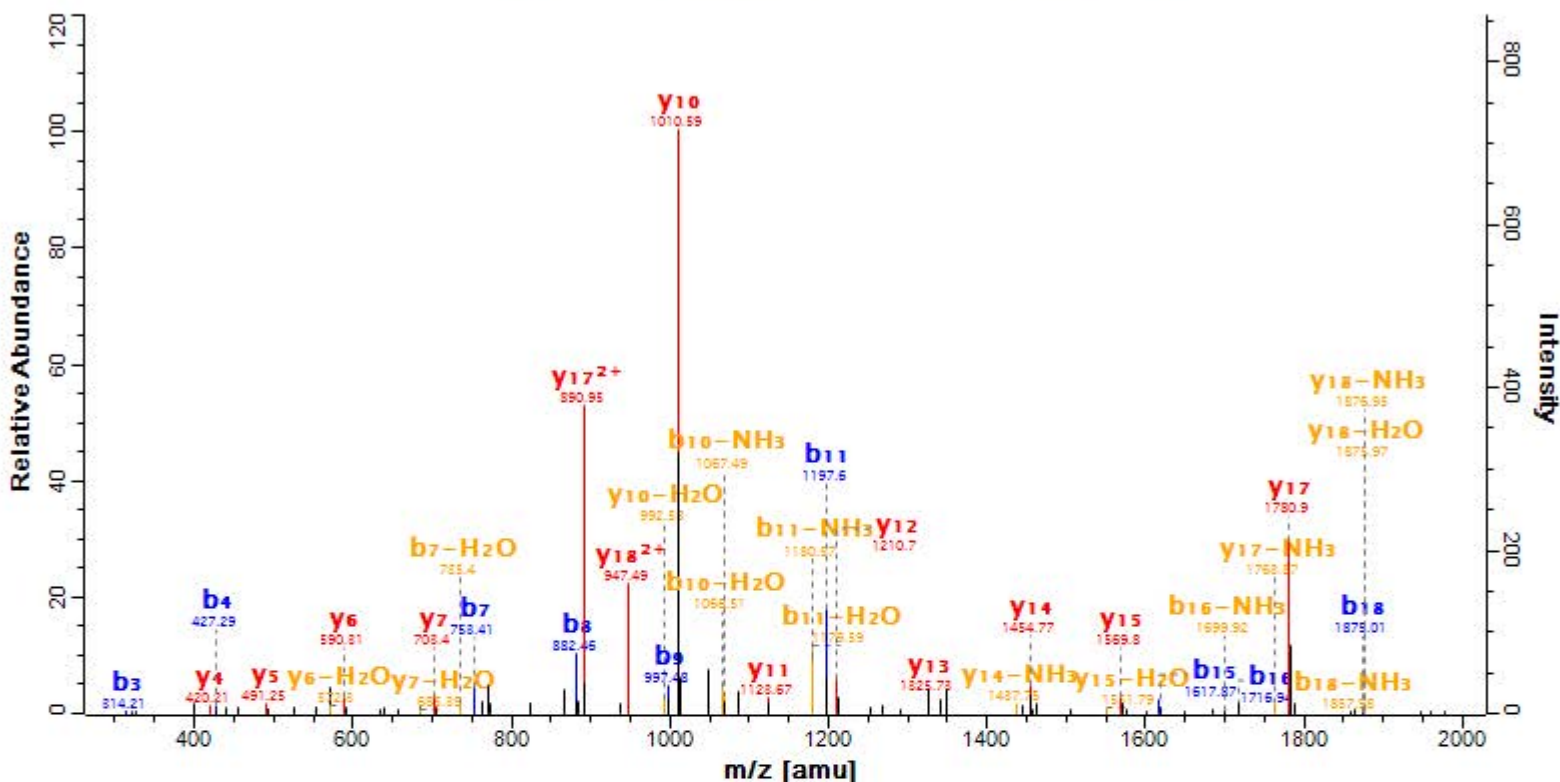

precursor information

|                   |                 |
|-------------------|-----------------|
| Mass:             | 2206.17386      |
| m/z:              | 1104.09421      |
| Charge:           | 2+              |
| Retentiontime:    | 60.035194396972 |
| Score:            | 158.4369        |
| Mass Error [ppm]: | 0.26387         |
| PEP:              | 3.3087E-27      |
| Precursor Type:   | MULTI           |

| b ion     |          |     |   | y ion    |          |           | y <sup>2+</sup> ion |  |
|-----------|----------|-----|---|----------|----------|-----------|---------------------|--|
| Δ dalton  | mass     | seq |   | Δ dalton | mass     | Δ dalton  | mass                |  |
|           | 114.0913 | 1   | I | 20       |          |           |                     |  |
|           | 201.1234 | 2   | S | 19       | 2094.096 |           | 2094.096            |  |
| +0.108027 | 314.2074 | 3   | L | 18       | 2007.064 |           | 2007.064            |  |
| -0.06371  | 427.2915 | 4   | L | 17       | 1893.98  |           | 947.4938 +0.191587  |  |
|           | 524.3443 | 5   | P | 16       | 1780.896 | +0.082302 | 890.9518 +0.32688   |  |
|           | 638.3872 | 6   | N | 15       | 1683.844 |           | 1683.844            |  |
| -0.08717  | 753.4141 | 7   | D | 14       | 1569.801 | -0.14525  | 1569.801            |  |
| -0.17206  | 882.4567 | 8   | E | 13       | 1454.774 | -0.14248  | 1454.774            |  |
| +0.023291 | 997.4837 | 9   | D | 12       | 1325.731 | +0.001436 | 1325.731            |  |
|           | 1084.516 | 10  | S | 11       | 1210.704 | +0.042783 | 1210.704            |  |
| -0.10953  | 1197.6   | 11  | L | 10       | 1123.672 | +0.08885  | 1123.672            |  |
|           | 1294.653 | 12  | P | 9        | 1010.588 | -0.01105  | 1010.588            |  |
|           | 1391.705 | 13  | P | 8        | 913.5353 |           | 913.5353            |  |
|           | 1504.789 | 14  | L | 7        | 816.4825 |           | 816.4825            |  |
| -0.15137  | 1617.873 | 15  | L | 6        | 703.3985 | +0.008257 | 703.3985            |  |
| -0.05328  | 1716.942 | 16  | V | 5        | 590.3144 | +0.033361 | 590.3144            |  |
|           | 1787.979 | 17  | A | 4        | 491.246  | +0.020202 | 491.246             |  |
| -0.22948  | 1875.011 | 18  | S | 3        | 420.2089 | +0.148594 | 420.2089            |  |
|           | 1932.032 | 19  | G | 2        | 333.1769 |           | 333.1769            |  |
|           | 2061.075 | 20  | E | 1        | 276.1554 |           | 276.1554            |  |
|           |          | 21  | K | 0        | 147.1128 |           | 147.1128            |  |

general information

|                       |               |
|-----------------------|---------------|
| Annotation:           | 14 of 21      |
| AminoAcids Coverage:  | 67 %          |
| Intensity Coverage:   | 65 %          |
| Peak Coverage:        | 35 %          |
| Protein Localisation: | 1012 ... 1032 |

Scan number 6266 Raw file LNCAP\_Silac\_23F10\_set3\_01  
 Method ITMS; CID Pepti... 190.19

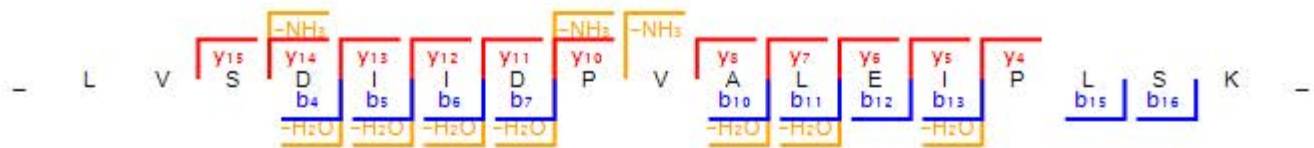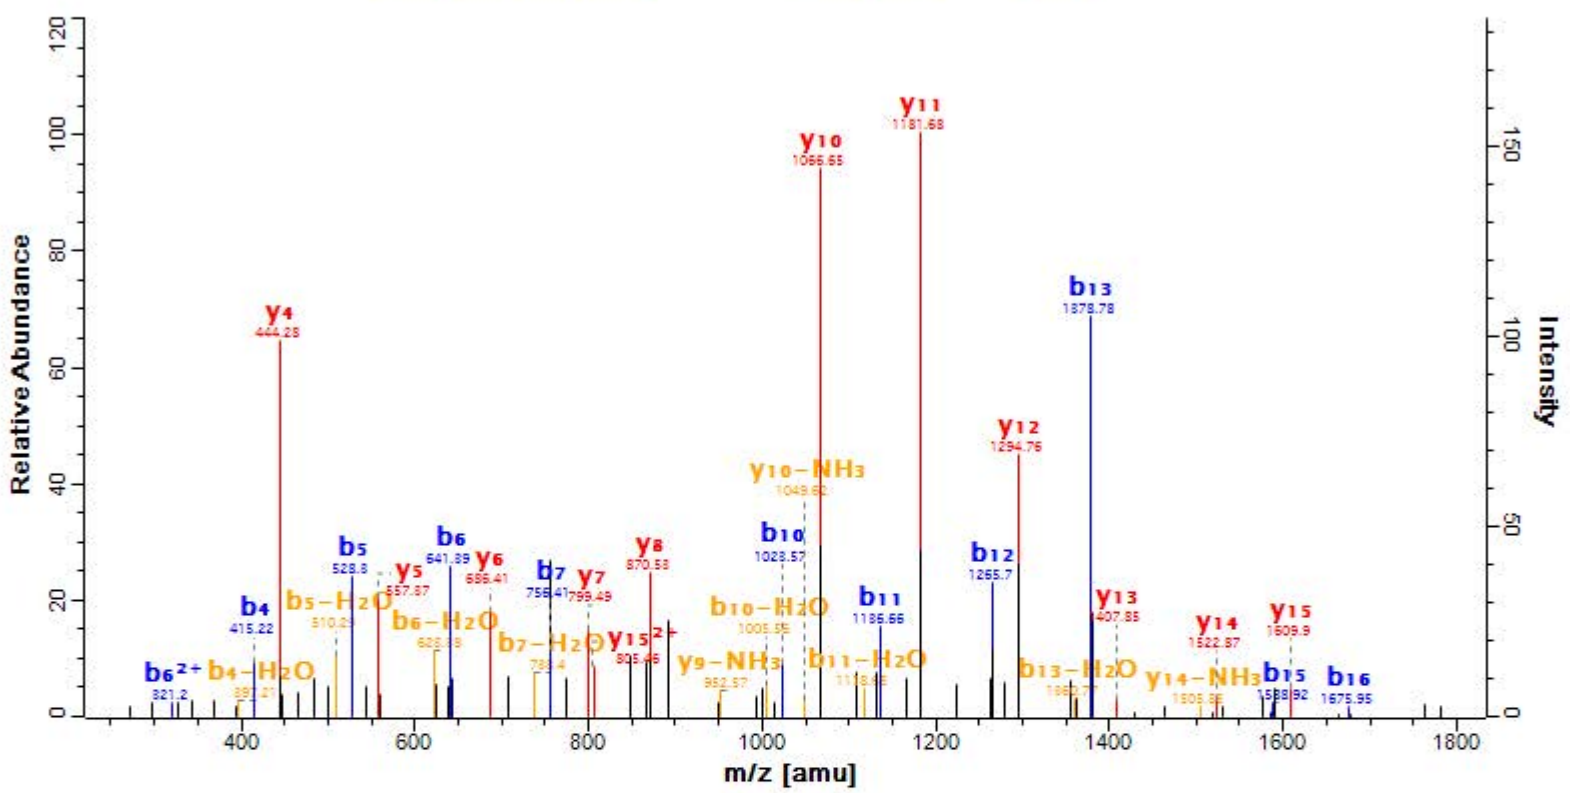

**precursor information**

|                   |                 |
|-------------------|-----------------|
| Mass:             | 1821.04932      |
| m/z:              | 911.53194       |
| Charge:           | 2+              |
| Retentiontime:    | 62.294456481933 |
| Score:            | 190.1851        |
| Mass Error [ppm]: | -0.32756        |
| PEP:              | 6.6563E-34      |
| Precursor Type:   | MULTI           |

**general information**

|                       |               |
|-----------------------|---------------|
| Annotation:           | 14 of 17      |
| AminoAcids Coverage:  | 82 %          |
| Intensity Coverage:   | 64 %          |
| Peak Coverage:        | 38 %          |
| Protein Localisation: | 2399 ... 2415 |

| b <sup>2+</sup> ion |        | b ion    |        | seq |   |    | y ion    |         | y <sup>2+</sup> ion |         |
|---------------------|--------|----------|--------|-----|---|----|----------|---------|---------------------|---------|
| Δ dalton            | mass   | Δ dalton | mass   |     |   |    | Δ dalton | mass    | Δ dalton            | mass    |
|                     | 114.09 |          | 114.09 | 1   | L | 16 |          |         |                     |         |
|                     | 213.16 |          | 213.16 | 2   | V | 15 | 1709     |         | 1709                |         |
|                     | 300.19 |          | 300.19 | 3   | S | 14 | 1609.9   | +0.0784 | 805.46              | +0.4238 |
|                     | 415.22 | -0.01    | 415.22 | 4   | D | 13 | 1522.9   | +0.1604 | 1522.9              |         |
|                     | 528.3  | +0.0632  | 528.3  | 5   | I | 12 | 1407.8   | -0.038  | 1407.8              |         |
| +0.0661             | 321.2  | -0.094   | 641.39 | 6   | I | 11 | 1294.8   | -0.053  | 1294.8              |         |
|                     | 756.41 | +0.2902  | 756.41 | 7   | D | 10 | 1181.7   | -0.085  | 1181.7              |         |
|                     | 853.47 |          | 853.47 | 8   | P | 9  | 1066.7   | -0.085  | 1066.7              |         |
|                     | 952.53 |          | 952.53 | 9   | V | 8  | 969.6    |         | 969.6               |         |
|                     | 1023.6 | -0.084   | 1023.6 | 10  | A | 7  | 870.53   | -0.035  | 870.53              |         |
|                     | 1136.7 | -0.07    | 1136.7 | 11  | L | 6  | 799.49   | +0.0314 | 799.49              |         |
|                     | 1265.7 | -0.286   | 1265.7 | 12  | E | 5  | 686.41   | -0.016  | 686.41              |         |
|                     | 1378.8 | -0.055   | 1378.8 | 13  | I | 4  | 557.37   | +0.2072 | 557.37              |         |
|                     | 1475.8 |          | 1475.8 | 14  | P | 3  | 444.28   | -0.005  | 444.28              |         |
|                     | 1588.9 | -0.263   | 1588.9 | 15  | L | 2  | 347.23   |         | 347.23              |         |
|                     | 1676   | -0.002   | 1676   | 16  | S | 1  | 234.14   |         | 234.14              |         |
|                     |        |          |        | 17  | K | 0  | 147.11   |         | 147.11              |         |

Scan number 6410 Raw file LNCAP\_Silac\_23F10\_set3\_01  
 Method ITMS; CID Pepti... 85.2

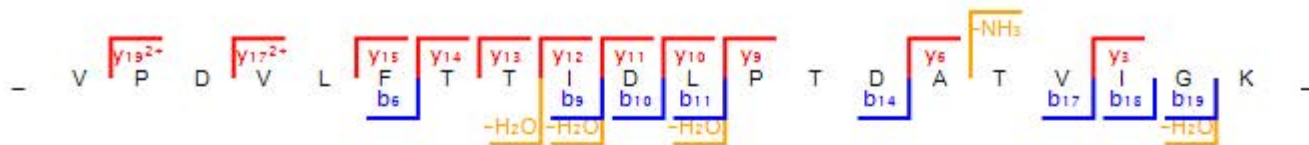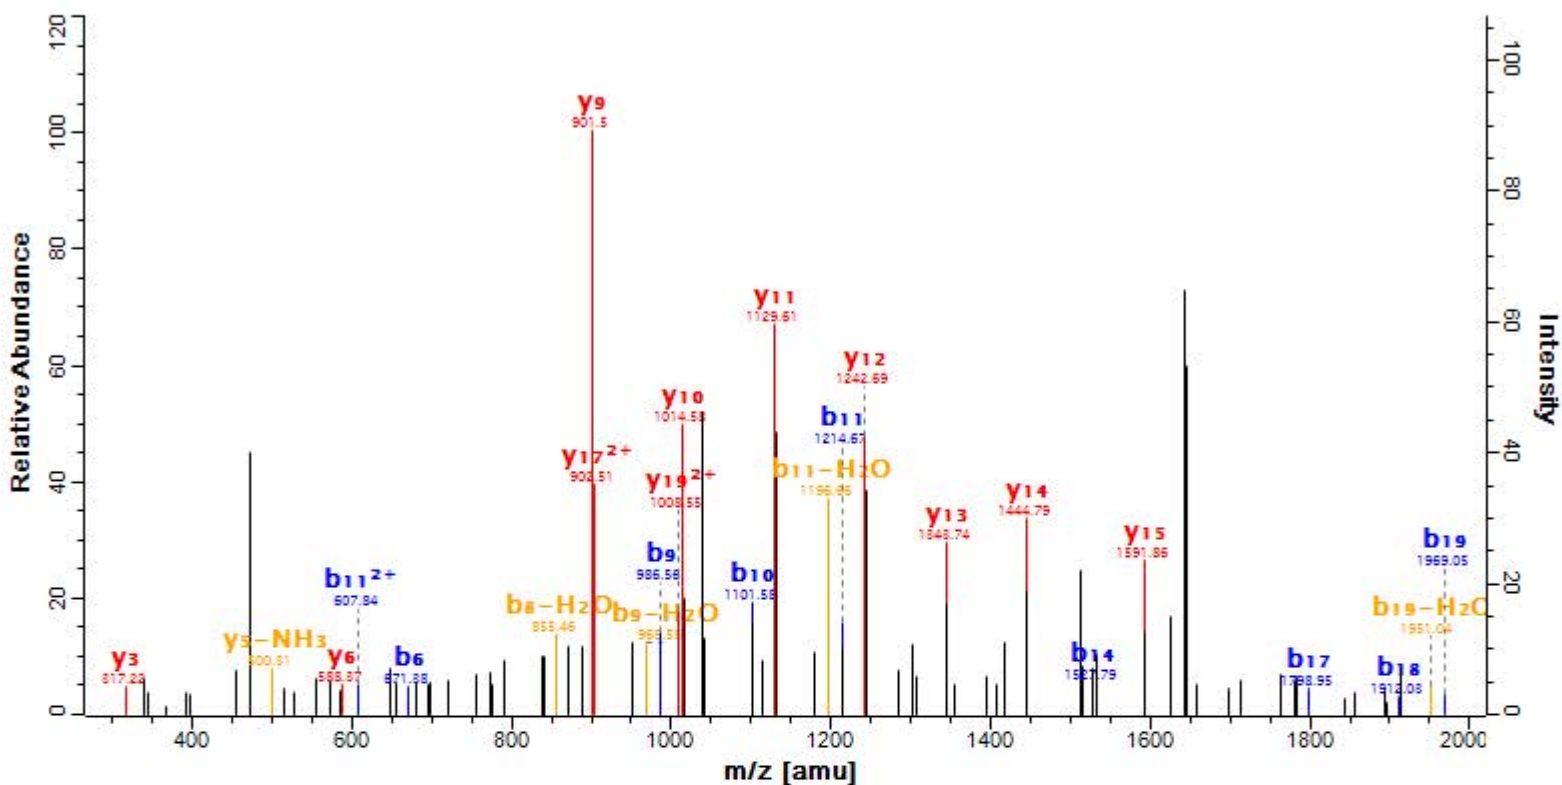

#### precursor information

|                   |                 |
|-------------------|-----------------|
| Mass:             | 2114.15103      |
| m/z:              | 1058.08279      |
| Charge:           | 2+              |
| Retentiontime:    | 63.560852050781 |
| Score:            | 85.20261        |
| Mass Error [ppm]: | -0.027589       |
| PEP:              | 3.4955E-05      |
| Precursor Type:   | MULTI           |

| b <sup>2+</sup> ion |        | b ion    |        | seq |   |    | y ion    |         | y <sup>2+</sup> ion |         |
|---------------------|--------|----------|--------|-----|---|----|----------|---------|---------------------|---------|
| Δ dalton            | mass   | Δ dalton | mass   |     |   |    | Δ dalton | mass    | Δ dalton            | mass    |
|                     | 100.08 |          | 100.08 | 1   | V | 19 |          |         |                     |         |
|                     | 197.13 |          | 197.13 | 2   | P | 18 | 2016.1   |         | 1008.5              | -0.114  |
|                     | 312.16 |          | 312.16 | 3   | D | 17 | 1919     |         | 1919                |         |
|                     | 411.22 |          | 411.22 | 4   | V | 16 | 1804     |         | 902.51              | +0.0254 |
|                     | 524.31 |          | 524.31 | 5   | L | 15 | 1704.9   |         | 1704.9              |         |
|                     | 671.38 | +0.0861  | 671.38 | 6   | F | 14 | 1591.9   | +0.0281 | 1591.9              |         |
|                     | 772.42 |          | 772.42 | 7   | T | 13 | 1444.8   | +0.1235 | 1444.8              |         |
|                     | 873.47 |          | 873.47 | 8   | T | 12 | 1343.7   | +0.0716 | 1343.7              |         |
|                     | 986.56 | -0.193   | 986.56 | 9   | I | 11 | 1242.7   | -0.047  | 1242.7              |         |
|                     | 1101.6 | -0.091   | 1101.6 | 10  | D | 10 | 1129.6   | -0.041  | 1129.6              |         |
| -0.251              | 607.84 | +0.0297  | 1214.7 | 11  | L | 9  | 1014.6   | -0.039  | 1014.6              |         |
|                     | 1311.7 |          | 1311.7 | 12  | P | 8  | 901.5    | -0.045  | 901.5               |         |
|                     | 1412.8 |          | 1412.8 | 13  | T | 7  | 804.45   |         | 804.45              |         |
|                     | 1527.8 | +0.3757  | 1527.8 | 14  | D | 6  | 703.4    |         | 703.4               |         |
|                     | 1598.8 |          | 1598.8 | 15  | A | 5  | 588.37   | +0.1498 | 588.37              |         |
|                     | 1699.9 |          | 1699.9 | 16  | T | 4  | 517.33   |         | 517.33              |         |
|                     | 1798.9 | -0.096   | 1798.9 | 17  | V | 3  | 416.29   |         | 416.29              |         |
|                     | 1912   | -0.087   | 1912   | 18  | I | 2  | 317.22   | -0.166  | 317.22              |         |
|                     | 1969.1 | +0.0832  | 1969.1 | 19  | G | 1  | 204.13   |         | 204.13              |         |
|                     |        |          |        | 20  | K | 0  | 147.11   |         | 147.11              |         |

#### general information

|                       |             |
|-----------------------|-------------|
| Annotation:           | 15 of 20    |
| AminoAcids Coverage:  | 75 %        |
| Intensity Coverage:   | 38 %        |
| Peak Coverage:        | 24 %        |
| Protein Localisation: | 540 ... 559 |

Scan number 6547 Raw file LNCAP\_Silac\_23F10\_set3\_01  
 Method ITMS; CID Pepti... 185.33

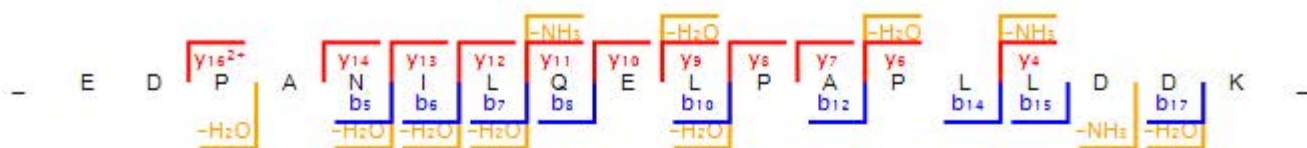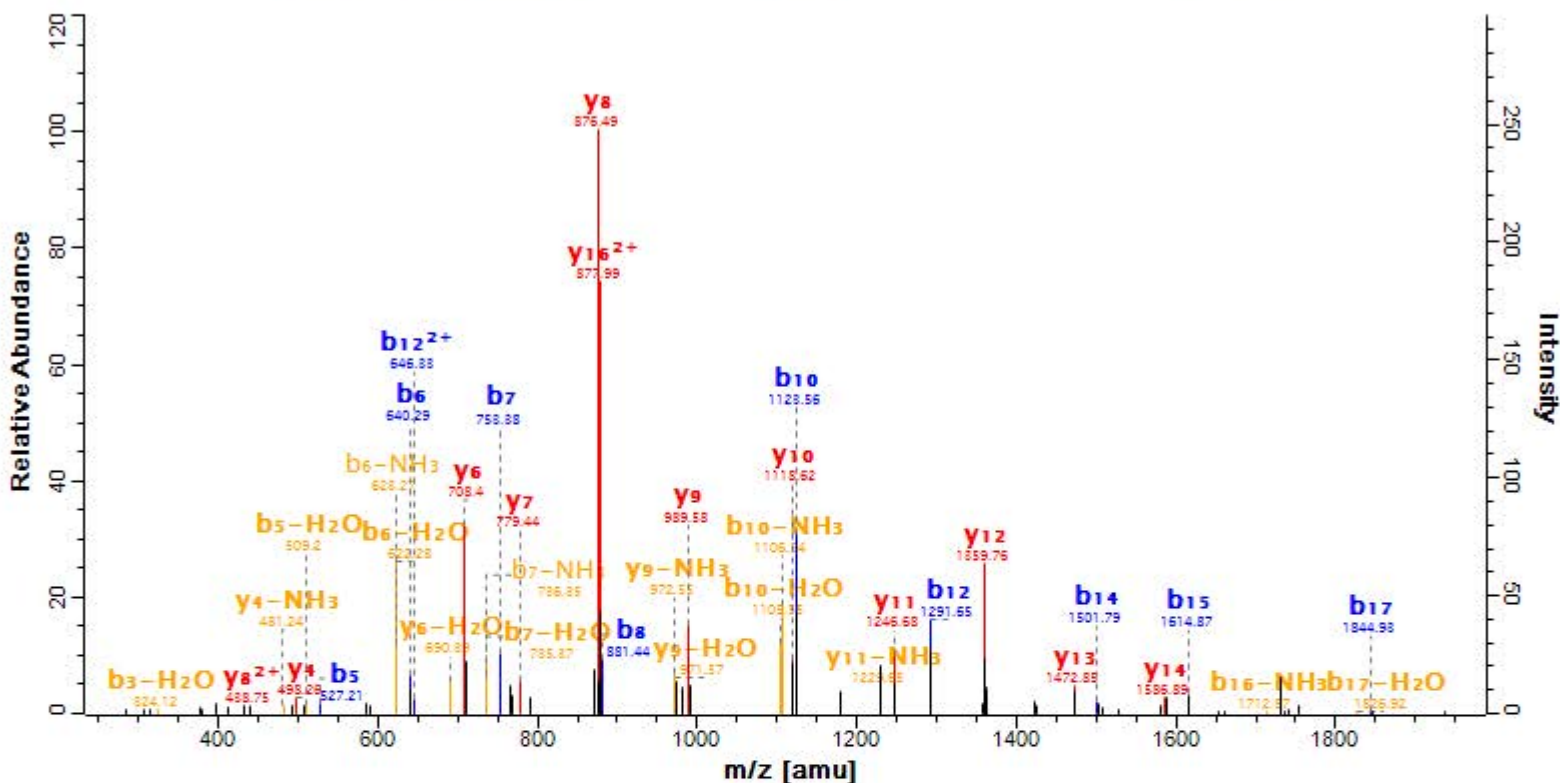

precursor information

|                   |                 |
|-------------------|-----------------|
| Mass:             | 1990.0254       |
| m/z:              | 996.01998       |
| Charge:           | 2+              |
| Retentiontime:    | 64.993896484375 |
| Score:            | 185.3261        |
| Mass Error [ppm]: | -0.24154        |
| PEP:              | 1.572E-34       |
| Precursor Type:   | MULTI           |

| b <sup>2+</sup> ion |        | b ion    |        | seq |   |    | y ion    |         | y <sup>2+</sup> ion |         |
|---------------------|--------|----------|--------|-----|---|----|----------|---------|---------------------|---------|
| Δ dalton            | mass   | Δ dalton | mass   |     |   |    | Δ dalton | mass    | Δ dalton            | mass    |
|                     | 130.05 |          | 130.05 | 1   | E | 17 |          |         |                     |         |
|                     | 245.08 |          | 245.08 | 2   | D | 16 | 1870     |         | 1870                |         |
|                     | 342.13 |          | 342.13 | 3   | P | 15 | 1755     |         | 877.99              | -0.298  |
|                     | 413.17 |          | 413.17 | 4   | A | 14 | 1657.9   |         | 1657.9              |         |
|                     | 527.21 | +0.2661  | 527.21 | 5   | N | 13 | 1586.9   | +0.0416 | 1586.9              |         |
|                     | 640.29 | +0.0399  | 640.29 | 6   | I | 12 | 1472.8   | -0.24   | 1472.8              |         |
|                     | 753.38 | -0.07    | 753.38 | 7   | L | 11 | 1359.8   | -0.102  | 1359.8              |         |
|                     | 881.44 | +0.0376  | 881.44 | 8   | Q | 10 | 1246.7   | +0.0753 | 1246.7              |         |
|                     | 1010.5 |          | 1010.5 | 9   | E | 9  | 1118.6   | -0.001  | 1118.6              |         |
|                     | 1123.6 | -0.136   | 1123.6 | 10  | L | 8  | 989.58   | -0.03   | 989.58              |         |
|                     | 1220.6 |          | 1220.6 | 11  | P | 7  | 876.49   | -0.073  | 438.75              | +0.3736 |
| +0.2994             | 646.33 | -0.107   | 1291.7 | 12  | A | 6  | 779.44   | -0.035  | 779.44              |         |
|                     | 1388.7 |          | 1388.7 | 13  | P | 5  | 708.4    | +0.1065 | 708.4               |         |
|                     | 1501.8 | -0.201   | 1501.8 | 14  | L | 4  | 611.35   |         | 611.35              |         |
|                     | 1614.9 | +0.257   | 1614.9 | 15  | L | 3  | 498.26   | +0.1115 | 498.26              |         |
|                     | 1729.9 |          | 1729.9 | 16  | D | 2  | 385.18   |         | 385.18              |         |
|                     | 1844.9 | -0.451   | 1844.9 | 17  | D | 1  | 270.15   |         | 270.15              |         |
|                     |        |          |        | 18  | K | 0  | 155.13   |         | 155.13              |         |

general information

|                       |             |
|-----------------------|-------------|
| Annotation:           | 14 of 18    |
| AminoAcids Coverage:  | 78 %        |
| Intensity Coverage:   | 71 %        |
| Peak Coverage:        | 40 %        |
| Protein Localisation: | 120 ... 137 |

Scan number 6580 Raw file LNCAP\_Silac\_23F10\_set3\_01  
 Method ITMS: CID Pepti... 251.91

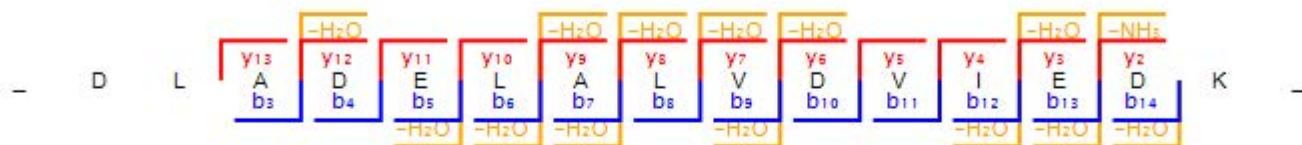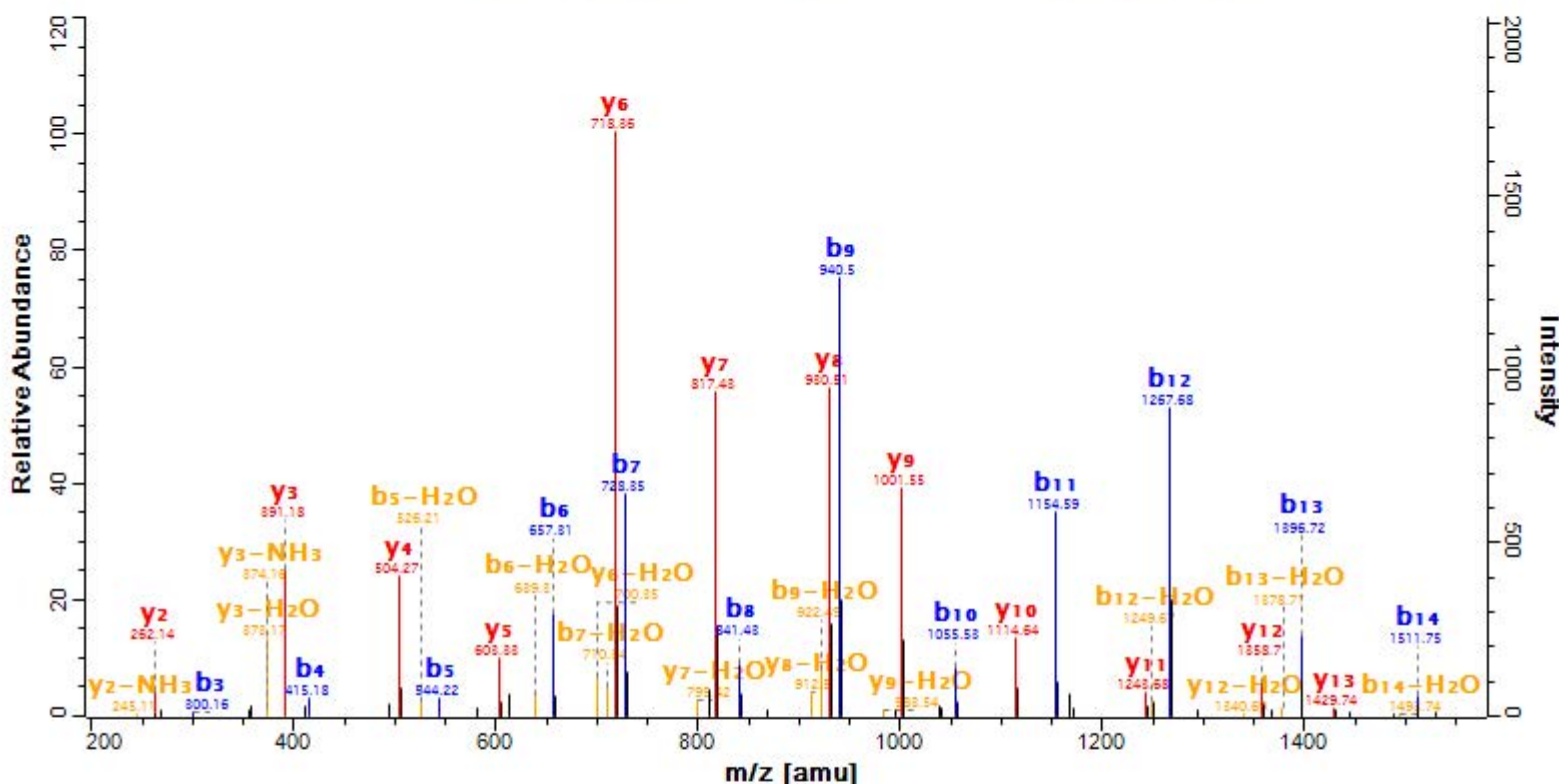

#### precursor information

|                   |                 |
|-------------------|-----------------|
| Mass:             | 1656.84525      |
| m/z:              | 829.4299        |
| Charge:           | 2+              |
| Retentiontime:    | 65.344779968261 |
| Score:            | 251.9055        |
| Mass Error [ppm]: | -0.32964        |
| PEP:              | 2.8174E-57      |
| Precursor Type:   | MULTI           |

#### general information

|                       |           |
|-----------------------|-----------|
| Annotation:           | 12 of 15  |
| AminoAcids Coverage:  | 80 %      |
| Intensity Coverage:   | 78 %      |
| Peak Coverage:        | 48 %      |
| Protein Localisation: | 72 ... 86 |

| b ion      |               |     |   | y ion    |               |            |
|------------|---------------|-----|---|----------|---------------|------------|
| Δ dalton   | mass          | seq |   | Δ dalton | mass          |            |
|            | 116.034219499 | 1   | D | 14       |               |            |
|            | 229.118283479 | 2   | L | 13       | 1542.82613079 |            |
| -0.1030291 | 300.155397267 | 3   | A | 12       | 1429.74206681 | -0.0185561 |
| +0.1435264 | 415.182340299 | 4   | D | 11       | 1358.70495302 | -0.0463837 |
| +0.2278864 | 544.224933395 | 5   | E | 10       | 1243.67800999 | -0.0250559 |
| +0.0194328 | 657.308997375 | 6   | L | 9        | 1114.63541689 | -0.0541181 |
| +0.0246164 | 728.346111163 | 7   | A | 8        | 1001.55135291 | +0.0003439 |
| -0.0546258 | 841.430175144 | 8   | L | 7        | 930.514239124 | -0.0582455 |
| -0.0319753 | 940.49858906  | 9   | V | 6        | 817.430175144 | -0.0118402 |
| -0.134663  | 1055.52553209 | 10  | D | 5        | 718.361761227 | +0.041376  |
| -0.0652595 | 1154.59394601 | 11  | V | 4        | 603.334818195 | +0.0934655 |
| -0.1952219 | 1267.67800999 | 12  | I | 3        | 504.266404279 | +0.0094136 |
| -0.1938697 | 1396.72060308 | 13  | E | 2        | 391.182340299 | +0.0358604 |
| +0.0190554 | 1511.74754612 | 14  | D | 1        | 262.139747203 | +0.0718922 |
|            |               | 15  | K | 0        | 147.112804171 |            |

Scan number 845 Raw file LNCAP\_Silac\_23F10\_set3\_01  
 Method ITMS; CID Pepti... 61.52

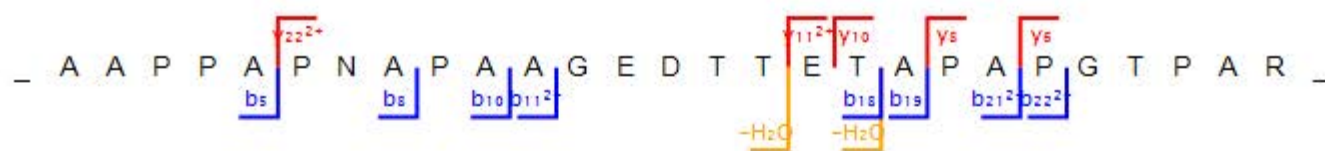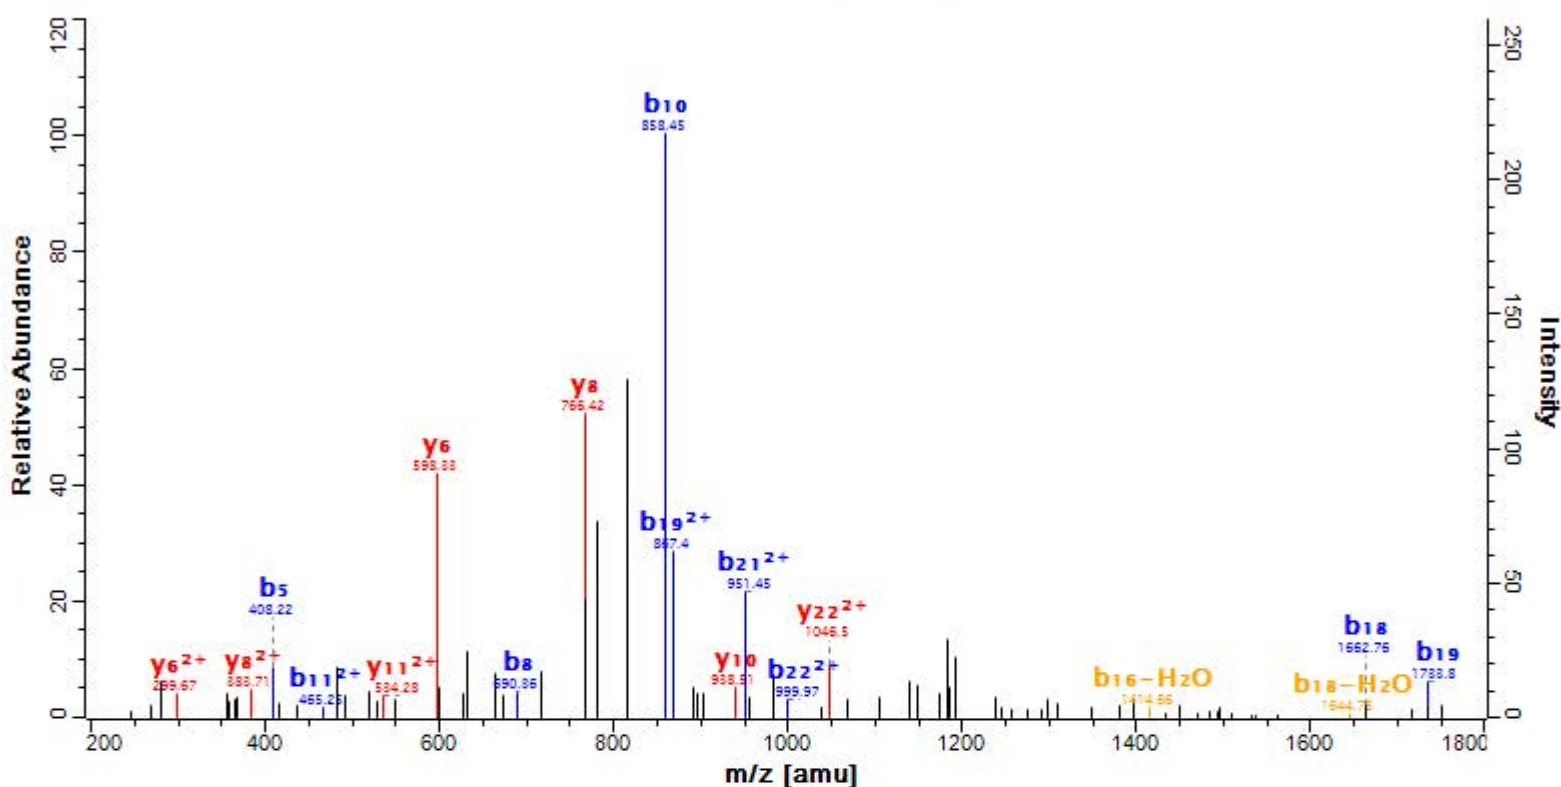

precursor information

|                   |                 |
|-------------------|-----------------|
| Mass:             | 2498.20407      |
| m/z:              | 833.74196       |
| Charge:           | 3+              |
| Retentiontime:    | 13.538198471069 |
| Score:            | 61.52413        |
| Mass Error [ppm]: | 0.12841         |
| PEP:              | 4.2098E-05      |
| Precursor Type:   | MULTI           |

| b <sup>2+</sup> ion |        | b ion    |        |    |     |          | y ion  |          | y <sup>2+</sup> ion |  |
|---------------------|--------|----------|--------|----|-----|----------|--------|----------|---------------------|--|
| Δ dalton            | mass   | Δ dalton | mass   |    | seq | Δ dalton | mass   | Δ dalton | mass                |  |
|                     | 72.044 |          | 72.044 | 1  | A   | 26       |        |          |                     |  |
|                     | 143.08 |          | 143.08 | 2  | A   | 25       | 2428.2 |          | 2428.2              |  |
|                     | 240.13 |          | 240.13 | 3  | P   | 24       | 2357.1 |          | 2357.1              |  |
|                     | 337.19 |          | 337.19 | 4  | P   | 23       | 2260.1 |          | 2260.1              |  |
|                     | 408.22 | +0.0415  | 408.22 | 5  | A   | 22       | 2163   |          | 2163                |  |
|                     | 505.28 |          | 505.28 | 6  | P   | 21       | 2092   |          | 1046.5 +0.0541      |  |
|                     | 619.32 |          | 619.32 | 7  | N   | 20       | 1994.9 |          | 1994.9              |  |
|                     | 690.36 | -0.121   | 690.36 | 8  | A   | 19       | 1880.9 |          | 1880.9              |  |
|                     | 787.41 |          | 787.41 | 9  | P   | 18       | 1809.9 |          | 1809.9              |  |
|                     | 858.45 | +0.1561  | 858.45 | 10 | A   | 17       | 1712.8 |          | 1712.8              |  |
| +0.1451             | 465.25 |          | 929.48 | 11 | A   | 16       | 1641.8 |          | 1641.8              |  |
|                     | 986.51 |          | 986.51 | 12 | G   | 15       | 1570.7 |          | 1570.7              |  |
|                     | 1115.5 |          | 1115.5 | 13 | E   | 14       | 1513.7 |          | 1513.7              |  |
|                     | 1230.6 |          | 1230.6 | 14 | D   | 13       | 1384.7 |          | 1384.7              |  |
|                     | 1331.6 |          | 1331.6 | 15 | T   | 12       | 1269.6 |          | 1269.6              |  |
|                     | 1432.7 |          | 1432.7 | 16 | T   | 11       | 1168.6 |          | 1168.6              |  |
|                     | 1561.7 |          | 1561.7 | 17 | E   | 10       | 1067.5 |          | 534.28 +0.3457      |  |
|                     | 1662.8 | -0.066   | 1662.8 | 18 | T   | 9        | 938.51 | +0.499   | 938.51              |  |
| -0.057              | 867.4  | +0.019   | 1733.8 | 19 | A   | 8        | 837.46 |          | 837.46              |  |
|                     | 1830.9 |          | 1830.9 | 20 | P   | 7        | 766.42 | -0.05    | 383.71 +0.0517      |  |
| +0.3365             | 951.45 |          | 1901.9 | 21 | A   | 6        | 669.37 |          | 669.37              |  |
| -0.093              | 999.97 |          | 1998.9 | 22 | P   | 5        | 598.33 | -0.039   | 299.67 -0.351       |  |
|                     | 2056   |          | 2056   | 23 | G   | 4        | 501.28 |          | 501.28              |  |
|                     | 2157   |          | 2157   | 24 | T   | 3        | 444.26 |          | 444.26              |  |
|                     | 2254.1 |          | 2254.1 | 25 | P   | 2        | 343.21 |          | 343.21              |  |
|                     | 2325.1 |          | 2325.1 | 26 | A   | 1        | 246.16 |          | 246.16              |  |
|                     |        |          |        | 27 | R   | 0        | 175.12 |          | 175.12              |  |

general information

|                       |             |
|-----------------------|-------------|
| Annotation:           | 12 of 27    |
| AminoAcids Coverage:  | 44 %        |
| Intensity Coverage:   | 46 %        |
| Peak Coverage:        | 21 %        |
| Protein Localisation: | 170 ... 196 |

Scan number 886 Raw file LNCAP\_Silac\_23F10\_set3\_01  
 Method ITMS; CID Peptide 107.39

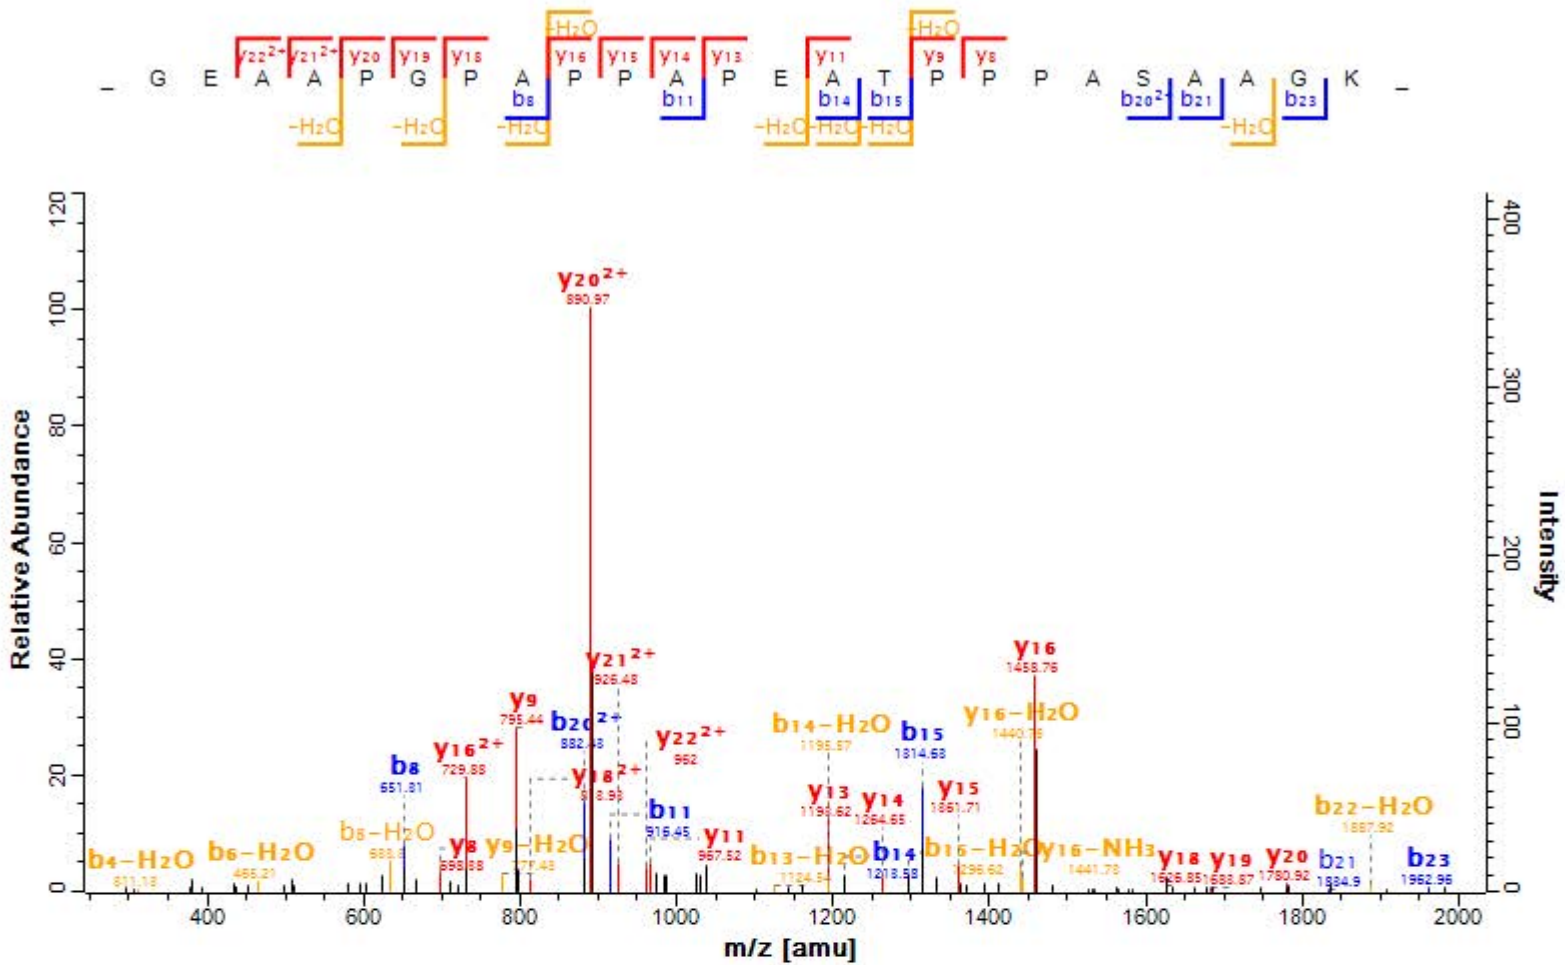

precursor information

|                   |                 |
|-------------------|-----------------|
| Mass:             | 2108.05479      |
| m/z:              | 1055.03467      |
| Charge:           | 2+              |
| Retentiontime:    | 13.956355094909 |
| Score:            | 107.3907        |
| Mass Error [ppm]: | 0.45378         |
| PEP:              | 1.9791E-10      |
| Precursor Type:   | MULTI           |

general information

|                       |           |
|-----------------------|-----------|
| Annotation:           | 19 of 24  |
| AminoAcids Coverag    | 79 %      |
| Intensity Coverage:   | 63 %      |
| Peak Coverage:        | 33 %      |
| Protein Localisation: | 20 ... 43 |

| b <sup>2+</sup> ion |        | b ion    |        | seq |   |    | y ion    |         | y <sup>2+</sup> ion |         |
|---------------------|--------|----------|--------|-----|---|----|----------|---------|---------------------|---------|
| Δ dalton            | mass   | Δ dalton | mass   |     |   |    | Δ dalton | mass    | Δ dalton            | mass    |
|                     | 58.029 |          | 58.029 | 1   | G | 23 |          |         |                     |         |
|                     | 187.07 |          | 187.07 | 2   | E | 22 | 2052     |         | 2052                |         |
|                     | 258.11 |          | 258.11 | 3   | A | 21 | 1923     |         | 962                 | -0.212  |
|                     | 329.15 |          | 329.15 | 4   | A | 20 | 1852     |         | 926.48              | +0.2491 |
|                     | 426.2  |          | 426.2  | 5   | P | 19 | 1780.9   | -0.16   | 890.97              | +0.165  |
|                     | 483.22 |          | 483.22 | 6   | G | 18 | 1683.9   | +0.2756 | 1683.9              |         |
|                     | 580.27 |          | 580.27 | 7   | P | 17 | 1626.8   | -0.063  | 813.93              | +0.0985 |
|                     | 651.31 | +0.0191  | 651.31 | 8   | A | 16 | 1529.8   |         | 1529.8              |         |
|                     | 748.36 |          | 748.36 | 9   | P | 15 | 1458.8   | -0.107  | 729.88              | +0.2234 |
|                     | 845.42 |          | 845.42 | 10  | P | 14 | 1361.7   | -0.024  | 1361.7              |         |
|                     | 916.45 | -0.004   | 916.45 | 11  | A | 13 | 1264.7   | +0.0813 | 1264.7              |         |
|                     | 1013.5 |          | 1013.5 | 12  | P | 12 | 1193.6   | -0.067  | 1193.6              |         |
|                     | 1142.5 |          | 1142.5 | 13  | E | 11 | 1096.6   |         | 1096.6              |         |
|                     | 1213.6 | +0.0869  | 1213.6 | 14  | A | 10 | 967.52   | -0.179  | 967.52              |         |
|                     | 1314.6 | -0.192   | 1314.6 | 15  | T | 9  | 896.48   |         | 896.48              |         |
|                     | 1411.7 |          | 1411.7 | 16  | P | 8  | 795.44   | -0.089  | 795.44              |         |
|                     | 1508.7 |          | 1508.7 | 17  | P | 7  | 698.38   | +0.0121 | 698.38              |         |
|                     | 1605.8 |          | 1605.8 | 18  | P | 6  | 601.33   |         | 601.33              |         |
|                     | 1676.8 |          | 1676.8 | 19  | A | 5  | 504.28   |         | 504.28              |         |
| -0.271              | 882.43 |          | 1763.9 | 20  | S | 4  | 433.24   |         | 433.24              |         |
|                     | 1834.9 | -0.273   | 1834.9 | 21  | A | 3  | 346.21   |         | 346.21              |         |
|                     | 1905.9 |          | 1905.9 | 22  | A | 2  | 275.17   |         | 275.17              |         |
|                     | 1963   | -0.177   | 1963   | 23  | G | 1  | 204.13   |         | 204.13              |         |
|                     |        |          |        | 24  | K | 0  | 147.11   |         | 147.11              |         |



Scan number 10120 Raw file LNCAP\_Silac\_23F10\_set3\_02  
 Method ITMS; CID Peptide 158.98

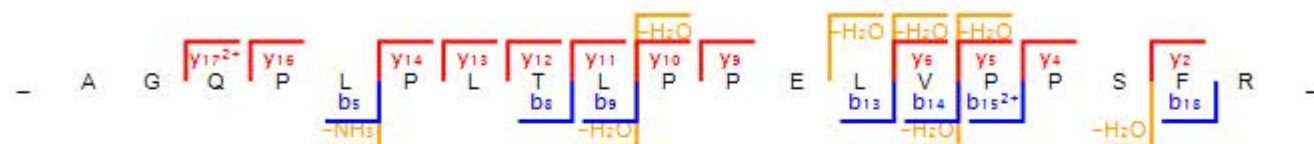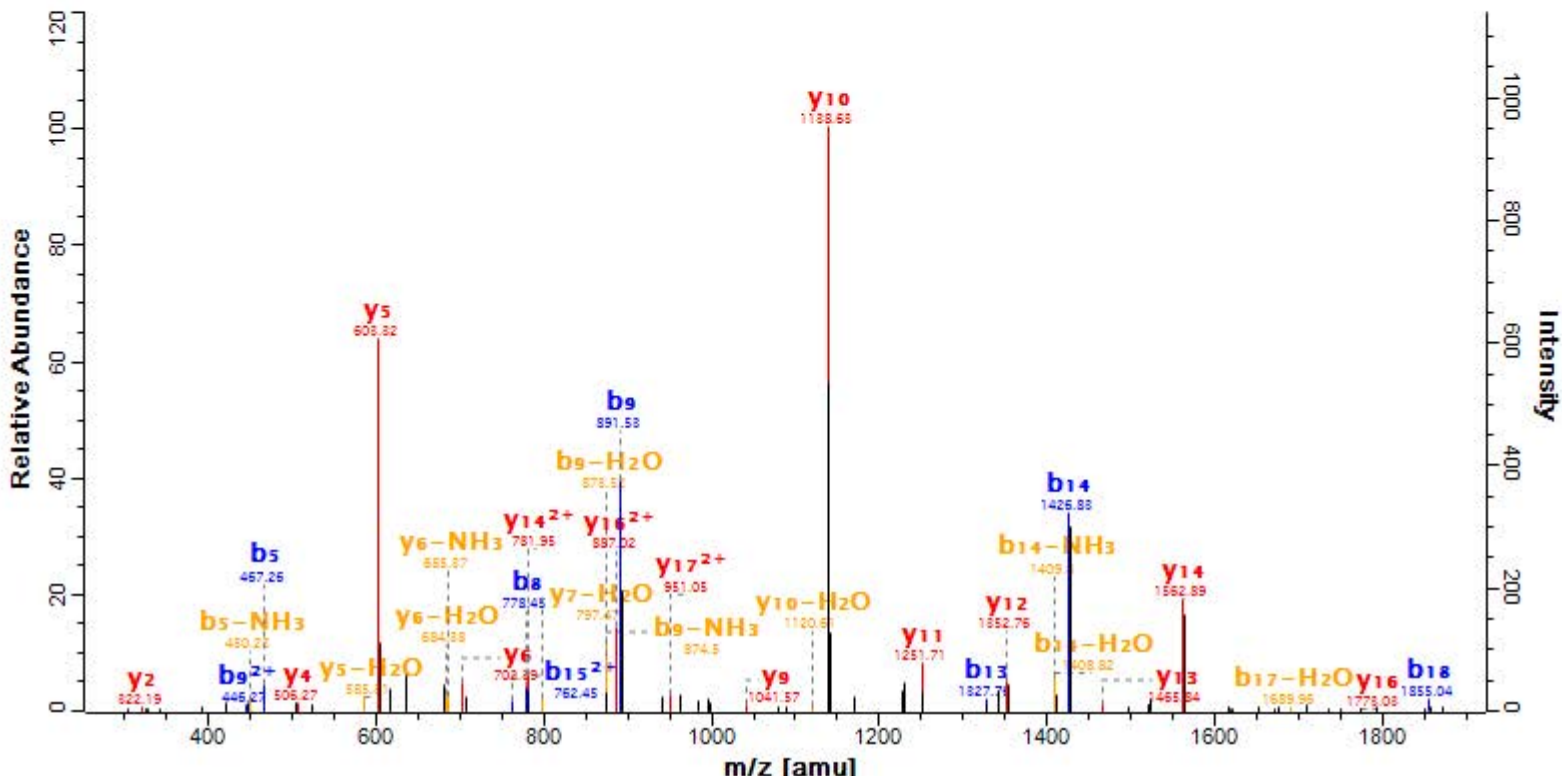

precursor information

|                   |                 |
|-------------------|-----------------|
| Mass:             | 2028.14062      |
| m/z:              | 1015.07759      |
| Charge:           | 2+              |
| Retentiontime:    | 66.273178100585 |
| Score:            | 158.9763        |
| Mass Error [ppm]: | -0.088328       |
| PEP:              | 2.3122E-26      |
| Precursor Type:   | MULTI           |

general information

|                       |             |
|-----------------------|-------------|
| Annotation:           | 15 of 19    |
| AminoAcids Coverage:  | 79 %        |
| Intensity Coverage:   | 59 %        |
| Peak Coverage:        | 35 %        |
| Protein Localisation: | 314 ... 332 |

| b <sup>2+</sup> ion |        | b ion    |        |     |   |          | y ion  |          | y <sup>2+</sup> ion |  |
|---------------------|--------|----------|--------|-----|---|----------|--------|----------|---------------------|--|
| Δ dalton            | mass   | Δ dalton | mass   | seq |   | Δ dalton | mass   | Δ dalton | mass                |  |
|                     | 72.044 |          | 72.044 | 1   | A | 18       |        |          |                     |  |
|                     | 129.07 |          | 129.07 | 2   | G | 17       | 1958.1 |          | 1958.1              |  |
|                     | 257.12 |          | 257.12 | 3   | Q | 16       | 1901.1 |          | 951.05 -0.27        |  |
|                     | 354.18 |          | 354.18 | 4   | P | 15       | 1773   | +0.0006  | 887.02 +0.2554      |  |
|                     | 467.26 | +0.0576  | 467.26 | 5   | L | 14       | 1676   |          | 1676                |  |
|                     | 564.31 |          | 564.31 | 6   | P | 13       | 1562.9 | -0.154   | 781.95 -0.15        |  |
|                     | 677.4  |          | 677.4  | 7   | L | 12       | 1465.8 | +0.0991  | 1465.8              |  |
|                     | 778.45 | +0.0308  | 778.45 | 8   | T | 11       | 1352.8 | +0.006   | 1352.8              |  |
| +0.0968             | 446.27 | -0.042   | 891.53 | 9   | L | 10       | 1251.7 | -0.143   | 1251.7              |  |
|                     | 988.58 |          | 988.58 | 10  | P | 9        | 1138.6 | +0.0036  | 1138.6              |  |
|                     | 1085.6 |          | 1085.6 | 11  | P | 8        | 1041.6 | +0.064   | 1041.6              |  |
|                     | 1214.7 |          | 1214.7 | 12  | E | 7        | 944.52 |          | 944.52              |  |
|                     | 1327.8 | -0.02    | 1327.8 | 13  | L | 6        | 815.48 |          | 815.48              |  |
|                     | 1426.8 | -0.154   | 1426.8 | 14  | V | 5        | 702.39 | -0.031   | 702.39              |  |
| -0.053              | 762.45 |          | 1523.9 | 15  | P | 4        | 603.32 | +0.0294  | 603.32              |  |
|                     | 1620.9 |          | 1620.9 | 16  | P | 3        | 506.27 | +0.1     | 506.27              |  |
|                     | 1708   |          | 1708   | 17  | S | 2        | 409.22 |          | 409.22              |  |
|                     | 1855   | -0.249   | 1855   | 18  | F | 1        | 322.19 | -0.071   | 322.19              |  |
|                     |        |          |        | 19  | R | 0        | 175.12 |          | 175.12              |  |

Scan number 10205 Raw file LNCAP\_Silac\_23F10\_set3\_02  
 Method ITMS; CID Pepti... 171.08

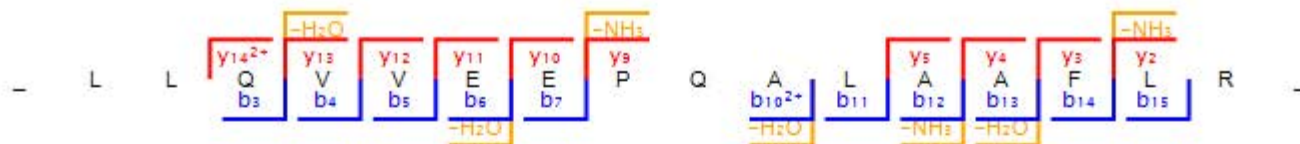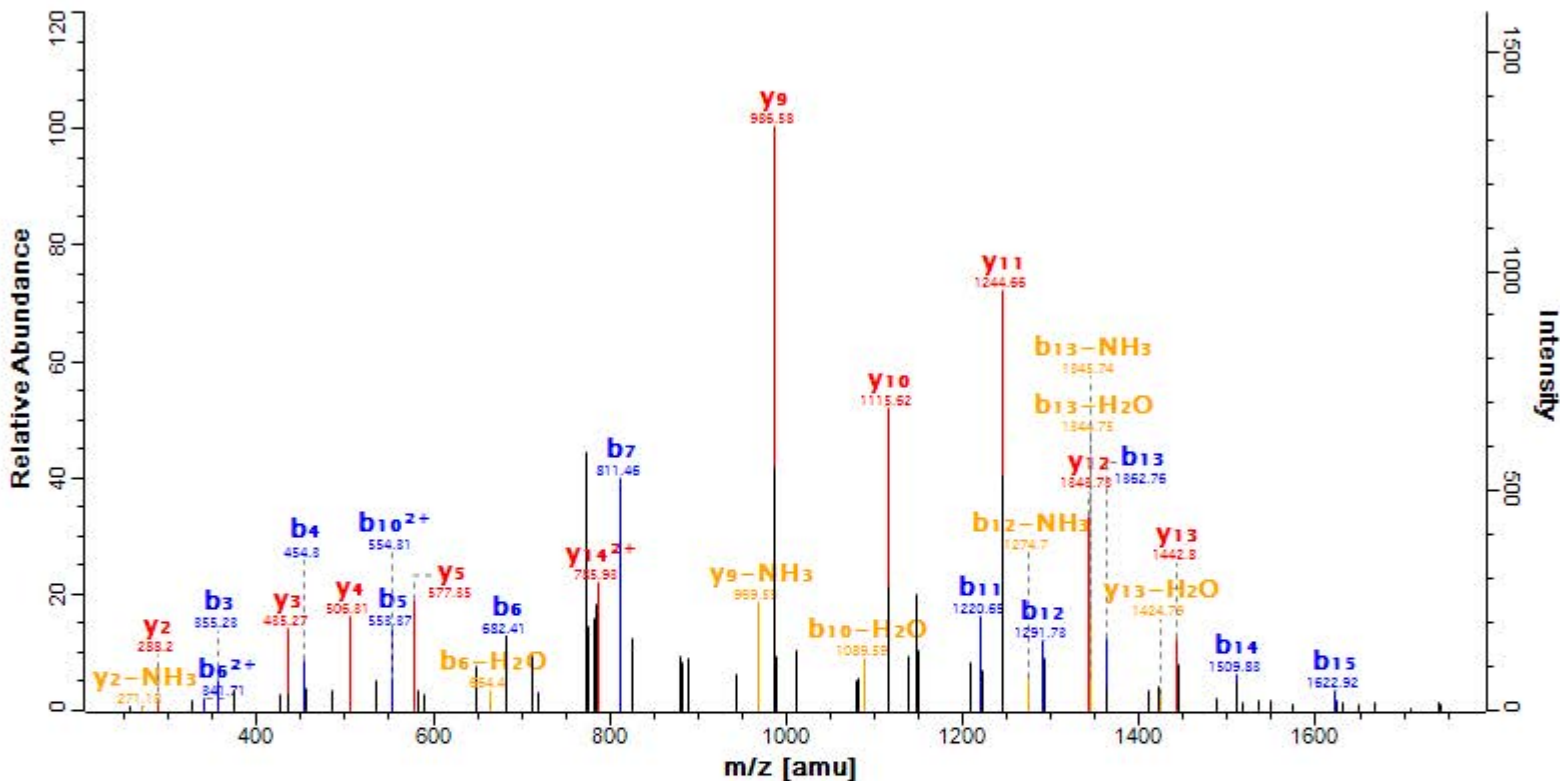

#### precursor information

|                   |                 |
|-------------------|-----------------|
| Mass:             | 1796.01889      |
| m/z:              | 899.01672       |
| Charge:           | 2+              |
| Retentiontime:    | 66.891716003418 |
| Score:            | 171.0793        |
| Mass Error [ppm]: | -0.40434        |
| PEP:              | 2.3795E-22      |
| Precursor Type:   | MULTI           |

#### general information

|                       |             |
|-----------------------|-------------|
| Annotation:           | 12 of 16    |
| AminoAcids Coverage:  | 75 %        |
| Intensity Coverage:   | 54 %        |
| Peak Coverage:        | 34 %        |
| Protein Localisation: | 183 ... 198 |

| b <sup>2+</sup> ion |        | b ion    |        | seq |   |    | y ion    |         | y <sup>2+</sup> ion |        |
|---------------------|--------|----------|--------|-----|---|----|----------|---------|---------------------|--------|
| Δ dalton            | mass   | Δ dalton | mass   |     |   |    | Δ dalton | mass    | Δ dalton            | mass   |
|                     | 114.09 |          | 114.09 | 1   | L | 15 |          |         |                     |        |
|                     | 227.18 |          | 227.18 | 2   | L | 14 | 1683.9   |         | 1683.9              |        |
|                     | 355.23 | +0.0279  | 355.23 | 3   | Q | 13 | 1570.9   |         | 785.93              | +0.181 |
|                     | 454.3  | +0.1034  | 454.3  | 4   | V | 12 | 1442.8   | -0.002  | 1442.8              |        |
|                     | 553.37 | -0.041   | 553.37 | 5   | V | 11 | 1343.7   | -0.092  | 1343.7              |        |
| -0.435              | 341.71 | -0.007   | 682.41 | 6   | E | 10 | 1244.7   | -0.033  | 1244.7              |        |
|                     | 811.46 | -0.02    | 811.46 | 7   | E | 9  | 1115.6   | -0.011  | 1115.6              |        |
|                     | 908.51 |          | 908.51 | 8   | P | 8  | 986.58   | +0.0134 | 986.58              |        |
|                     | 1036.6 |          | 1036.6 | 9   | Q | 7  | 889.53   |         | 889.53              |        |
| +0.0198             | 554.31 |          | 1107.6 | 10  | A | 6  | 761.47   |         | 761.47              |        |
|                     | 1220.7 | +0.1256  | 1220.7 | 11  | L | 5  | 690.43   |         | 690.43              |        |
|                     | 1291.7 | -0.134   | 1291.7 | 12  | A | 4  | 577.35   | +0.1175 | 577.35              |        |
|                     | 1362.8 | -0.085   | 1362.8 | 13  | A | 3  | 506.31   | +0.0032 | 506.31              |        |
|                     | 1509.8 | -0.215   | 1509.8 | 14  | F | 2  | 435.27   | +0.1742 | 435.27              |        |
|                     | 1622.9 | -0.326   | 1622.9 | 15  | L | 1  | 288.2    | +0.0959 | 288.2               |        |
|                     |        |          |        | 16  | R | 0  | 175.12   |         | 175.12              |        |

Scan number 10543 Raw file LNCAP\_Silac\_23F10\_set3\_02  
 Method ITMS; CID Pepti... 194.39

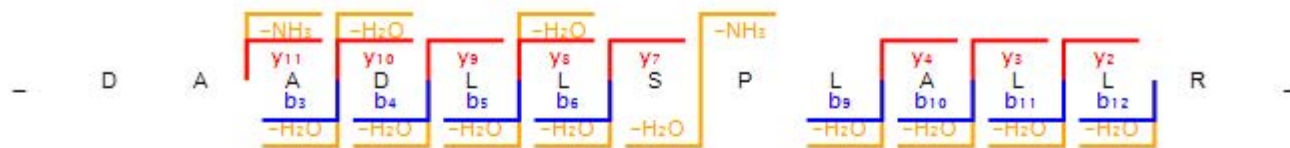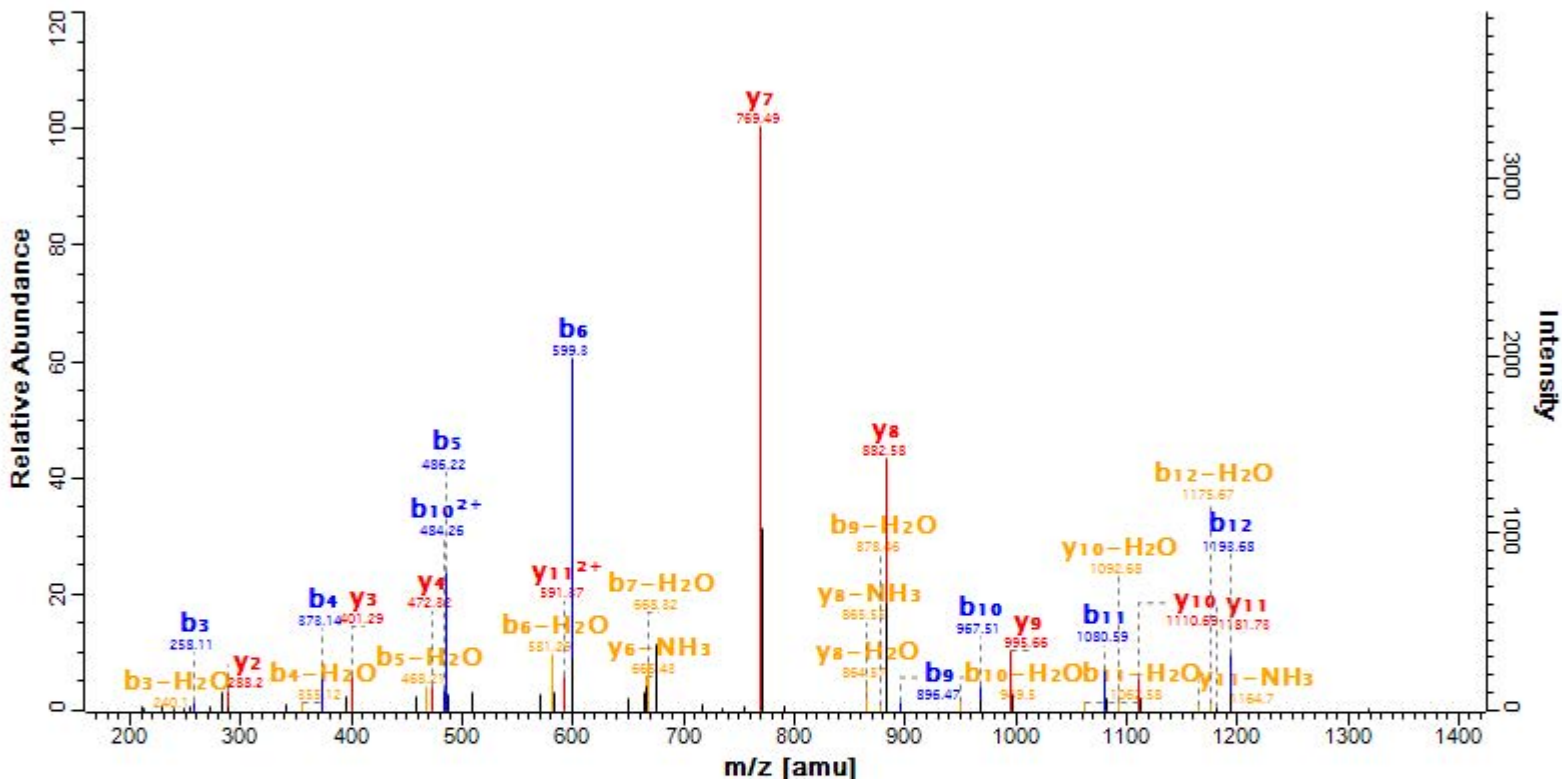

precursor information

|                   |                 |
|-------------------|-----------------|
| Mass:             | 1366.78192      |
| m/z:              | 684.39824       |
| Charge:           | 2+              |
| Retentiontime:    | 69.680870056152 |
| Score:            | 194.3944        |
| Mass Error [ppm]: | -0.071281       |
| PEP:              | 5.4993E-17      |
| Precursor Type:   | MULTI           |

general information

|                       |             |
|-----------------------|-------------|
| Annotation:           | 10 of 13    |
| AminoAcids Coverage:  | 77 %        |
| Intensity Coverage:   | 74 %        |
| Peak Coverage:        | 42 %        |
| Protein Localisation: | 241 ... 253 |

| b <sup>2+</sup> ion |        | b ion    |        |     | y ion |          | y <sup>2+</sup> ion |          |        |        |
|---------------------|--------|----------|--------|-----|-------|----------|---------------------|----------|--------|--------|
| Δ dalton            | mass   | Δ dalton | mass   | seq |       | Δ dalton | mass                | Δ dalton | mass   |        |
|                     | 116.03 |          | 116.03 | 1   | D     | 12       |                     |          |        |        |
|                     | 187.07 |          | 187.07 | 2   | A     | 11       | 1252.8              |          | 1252.8 |        |
|                     | 258.11 | +0.042   | 258.11 | 3   | A     | 10       | 1181.7              | -0.186   | 591.37 | -0.043 |
|                     | 373.14 | +0.0282  | 373.14 | 4   | D     | 9        | 1110.7              | -0.063   | 1110.7 |        |
|                     | 486.22 | +0.0429  | 486.22 | 5   | L     | 8        | 995.66              | +0.0371  | 995.66 |        |
|                     | 599.3  | -0.051   | 599.3  | 6   | L     | 7        | 882.58              | -0.015   | 882.58 |        |
|                     | 686.34 |          | 686.34 | 7   | S     | 6        | 769.49              | +0.038   | 769.49 |        |
|                     | 783.39 |          | 783.39 | 8   | P     | 5        | 682.46              |          | 682.46 |        |
|                     | 896.47 | -0.095   | 896.47 | 9   | L     | 4        | 585.41              |          | 585.41 |        |
| +0.0742             | 484.26 | -0.166   | 967.51 | 10  | A     | 3        | 472.32              | +0.0522  | 472.32 |        |
|                     | 1080.6 | -0.057   | 1080.6 | 11  | L     | 2        | 401.29              | +0.1335  | 401.29 |        |
|                     | 1193.7 | -0.155   | 1193.7 | 12  | L     | 1        | 288.2               | +0.0405  | 288.2  |        |
|                     |        |          |        | 13  | R     | 0        | 175.12              |          | 175.12 |        |

Scan number 10712 Raw file LNCAP\_Silac\_23F10\_set3\_02  
 Method ITMS; CID Pepti... 106.6

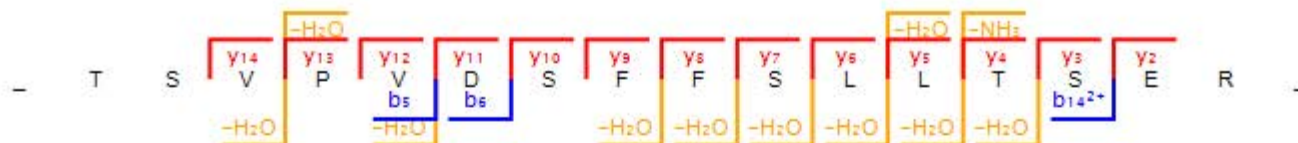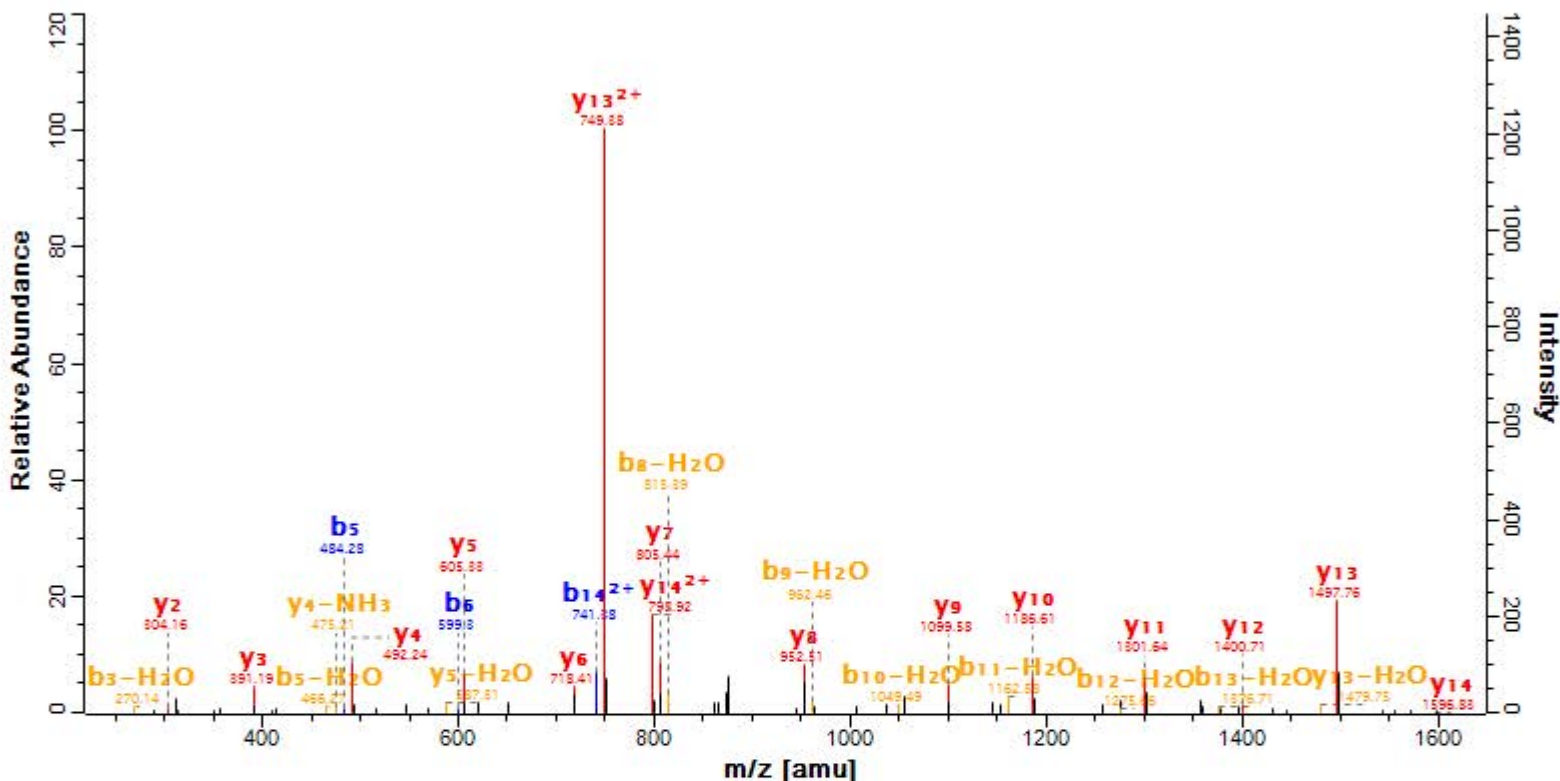

precursor information

|                   |                 |
|-------------------|-----------------|
| Mass:             | 1783.90071      |
| m/z:              | 892.95763       |
| Charge:           | 2+              |
| Retentiontime:    | 71.217323303222 |
| Score:            | 106.5974        |
| Mass Error [ppm]: | 0.83087         |
| PEP:              | 7.08E-07        |
| Precursor Type:   | MULTI           |

general information

|                       |             |
|-----------------------|-------------|
| Annotation:           | 13 of 16    |
| AminoAcids Coverage:  | 81 %        |
| Intensity Coverage:   | 69 %        |
| Peak Coverage:        | 35 %        |
| Protein Localisation: | 115 ... 130 |

| b <sup>2+</sup> ion |        | b ion    |        |     | y ion |          | y <sup>2+</sup> ion |          |        |         |
|---------------------|--------|----------|--------|-----|-------|----------|---------------------|----------|--------|---------|
| Δ dalton            | mass   | Δ dalton | mass   | seq |       | Δ dalton | mass                | Δ dalton | mass   |         |
|                     | 102.05 |          | 102.05 | 1   | T     | 15       |                     |          |        |         |
|                     | 189.09 |          | 189.09 | 2   | S     | 14       | 1683.9              |          | 1683.9 |         |
|                     | 288.16 |          | 288.16 | 3   | V     | 13       | 1596.8              | +0.2956  | 798.92 | +0.1774 |
|                     | 385.21 |          | 385.21 | 4   | P     | 12       | 1497.8              | -0.084   | 749.38 | +0.2231 |
|                     | 484.28 | +0.107   | 484.28 | 5   | V     | 11       | 1400.7              | +0.0947  | 1400.7 |         |
|                     | 599.3  | +0.1914  | 599.3  | 6   | D     | 10       | 1301.6              | -0.073   | 1301.6 |         |
|                     | 686.34 |          | 686.34 | 7   | S     | 9        | 1186.6              | -0.084   | 1186.6 |         |
|                     | 833.4  |          | 833.4  | 8   | F     | 8        | 1099.6              | -0.026   | 1099.6 |         |
|                     | 980.47 |          | 980.47 | 9   | F     | 7        | 952.51              | -0.029   | 952.51 |         |
|                     | 1067.5 |          | 1067.5 | 10  | S     | 6        | 805.44              | +0.0567  | 805.44 |         |
|                     | 1180.6 |          | 1180.6 | 11  | L     | 5        | 718.41              | +0.0122  | 718.41 |         |
|                     | 1293.7 |          | 1293.7 | 12  | L     | 4        | 605.33              | +0.0173  | 605.33 |         |
|                     | 1394.7 |          | 1394.7 | 13  | T     | 3        | 492.24              | +0.0112  | 492.24 |         |
| -0.266              | 741.38 |          | 1481.8 | 14  | S     | 2        | 391.19              | +0.0981  | 391.19 |         |
|                     | 1610.8 |          | 1610.8 | 15  | E     | 1        | 304.16              | +0.0736  | 304.16 |         |
|                     |        |          |        | 16  | R     | 0        | 175.12              |          | 175.12 |         |

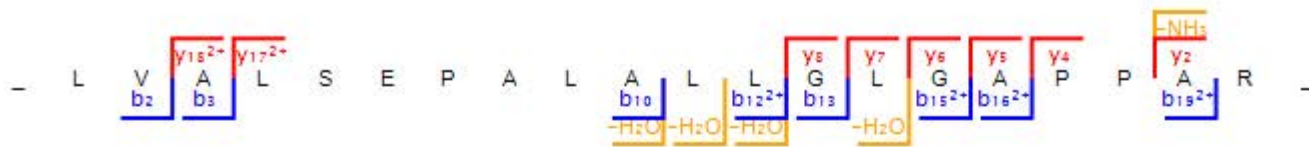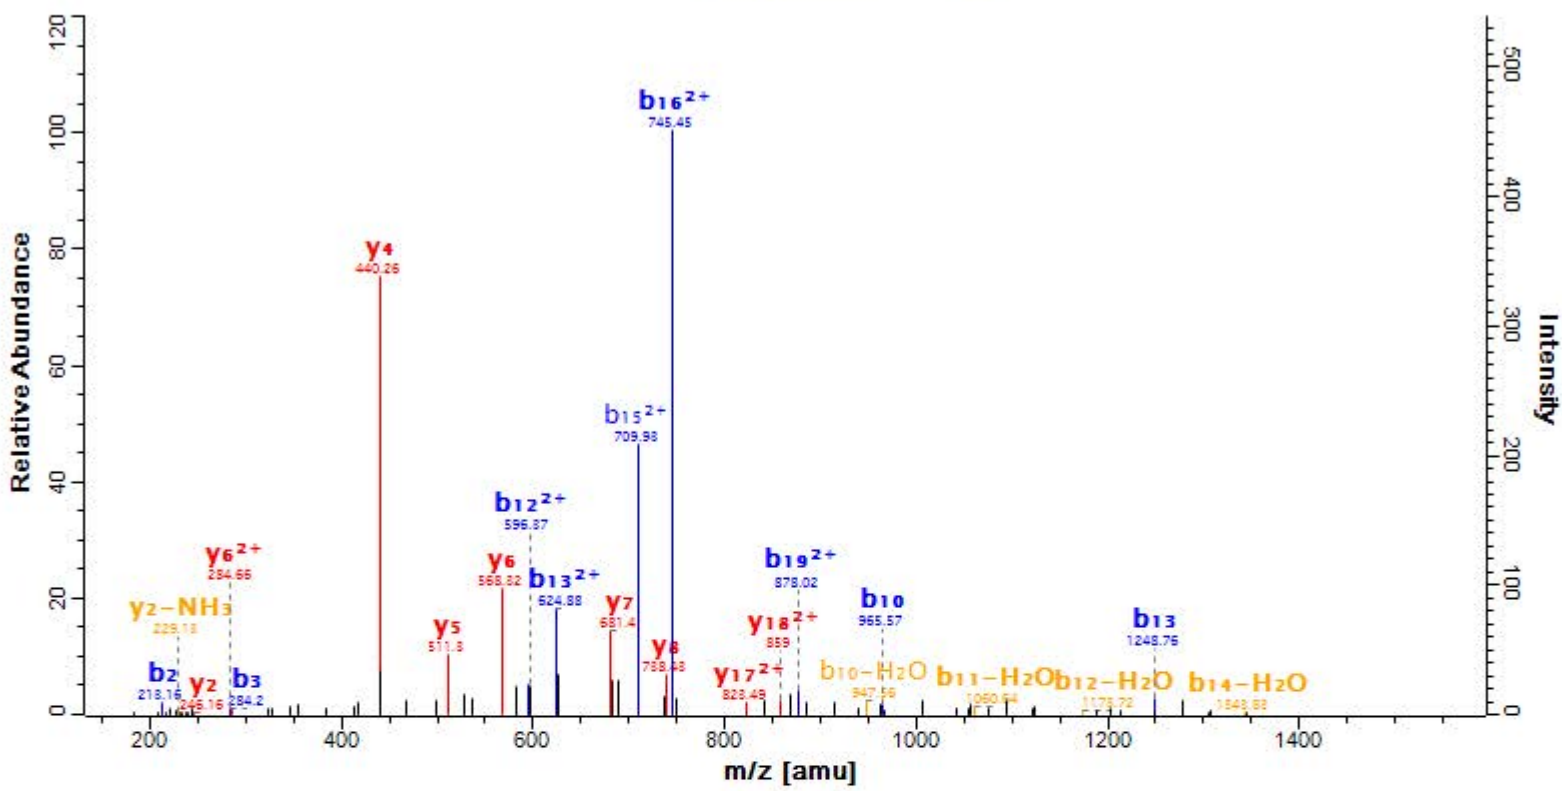

**precursor information**

|                   |                 |
|-------------------|-----------------|
| Mass:             | 1928.14608      |
| m/z:              | 643.72264       |
| Charge:           | 3+              |
| Retentiontime:    | 71.413688659668 |
| Score:            | 91.65682        |
| Mass Error [ppm]: | 0.10348         |
| PEP:              | 5.5983E-06      |
| Precursor Type:   | MULTI           |

**general information**

|                       |            |
|-----------------------|------------|
| Annotation:           | 13 of 20   |
| AminoAcids Coverage:  | 65 %       |
| Intensity Coverage:   | 75 %       |
| Peak Coverage:        | 28 %       |
| Protein Localisation: | 95 ... 114 |

| b <sup>2+</sup> ion |        | b ion    |        |    |     |    | y ion    |         | y <sup>2+</sup> ion |         |
|---------------------|--------|----------|--------|----|-----|----|----------|---------|---------------------|---------|
| Δ dalton            | mass   | Δ dalton | mass   |    | seq |    | Δ dalton | mass    | Δ dalton            | mass    |
|                     | 114.09 |          | 114.09 | 1  | L   | 19 |          |         |                     |         |
|                     | 213.16 | -0.132   | 213.16 | 2  | V   | 18 | 1816.1   |         | 1816.1              |         |
|                     | 284.2  | -0.087   | 284.2  | 3  | A   | 17 | 1717     |         | 859                 | +0.0607 |
|                     | 397.28 |          | 397.28 | 4  | L   | 16 | 1646     |         | 823.49              | +0.188  |
|                     | 484.31 |          | 484.31 | 5  | S   | 15 | 1532.9   |         | 1532.9              |         |
|                     | 613.36 |          | 613.36 | 6  | E   | 14 | 1445.8   |         | 1445.8              |         |
|                     | 710.41 |          | 710.41 | 7  | P   | 13 | 1316.8   |         | 1316.8              |         |
|                     | 781.45 |          | 781.45 | 8  | A   | 12 | 1219.8   |         | 1219.8              |         |
|                     | 894.53 |          | 894.53 | 9  | L   | 11 | 1148.7   |         | 1148.7              |         |
|                     | 965.57 | -0.145   | 965.57 | 10 | A   | 10 | 1035.6   |         | 1035.6              |         |
|                     | 1078.7 |          | 1078.7 | 11 | L   | 9  | 964.59   |         | 964.59              |         |
| -0.383              | 596.37 |          | 1191.7 | 12 | L   | 8  | 851.51   |         | 851.51              |         |
| +0.1919             | 624.88 | -0.319   | 1248.8 | 13 | G   | 7  | 738.43   | +0.1016 | 738.43              |         |
|                     | 1361.8 |          | 1361.8 | 14 | L   | 6  | 681.4    | -0.042  | 681.4               |         |
| +0.1274             | 709.93 |          | 1418.9 | 15 | G   | 5  | 568.32   | +0.0166 | 284.66              | +0.4216 |
| +0.0385             | 745.45 |          | 1489.9 | 16 | A   | 4  | 511.3    | +0.0876 | 511.3               |         |
|                     | 1587   |          | 1587   | 17 | P   | 3  | 440.26   | +0.0467 | 440.26              |         |
|                     | 1684   |          | 1684   | 18 | P   | 2  | 343.21   |         | 343.21              |         |
| -0.309              | 878.02 |          | 1755   | 19 | A   | 1  | 246.16   | +0.1215 | 246.16              |         |
|                     |        |          |        | 20 | R   | 0  | 175.12   |         | 175.12              |         |

Scan number 10847 Raw file LNCAP\_Silac\_23F10\_set3\_02  
 Method ITMS: CID Pepti... 86.55

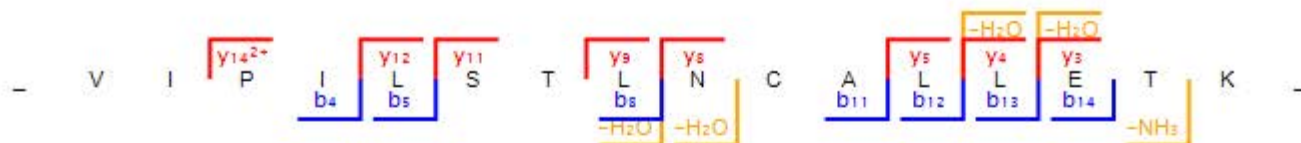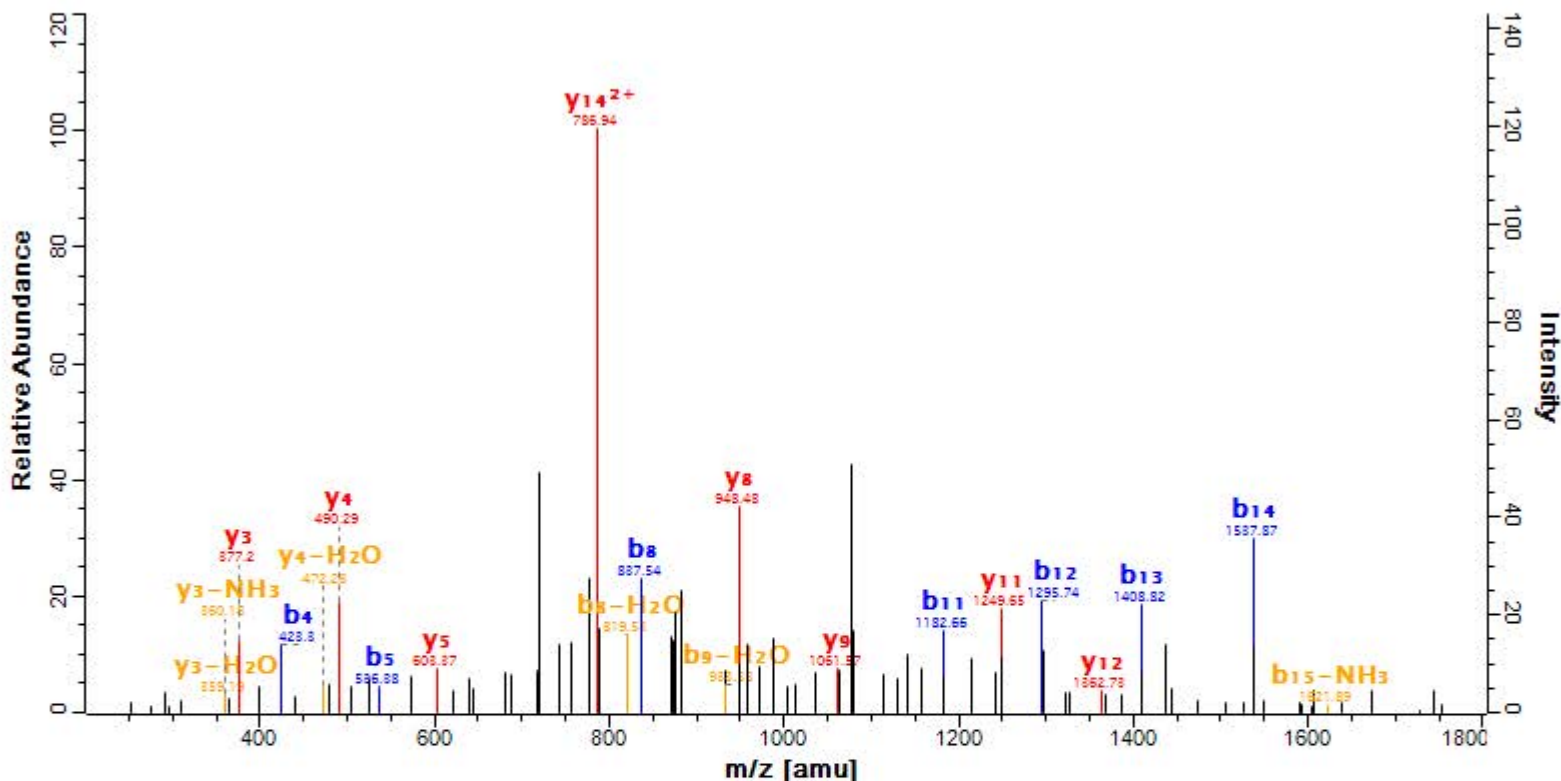

#### precursor information

|                   |                 |
|-------------------|-----------------|
| Mass:             | 1784.01323      |
| m/z:              | 893.01389       |
| Charge:           | 2+              |
| Retentiontime:    | 72.470031738281 |
| Score:            | 86.54771        |
| Mass Error [ppm]: | 0.82484         |
| PEP:              | 0.0034891       |
| Precursor Type:   | ISO             |

#### general information

|                       |             |
|-----------------------|-------------|
| Annotation:           | 11 of 16    |
| AminoAcids Coverage:  | 69 %        |
| Intensity Coverage:   | 40 %        |
| Peak Coverage:        | 23 %        |
| Protein Localisation: | 177 ... 192 |

| b ion     |          |    |     |    | y ion    |           | y <sup>2+</sup> ion |           |
|-----------|----------|----|-----|----|----------|-----------|---------------------|-----------|
| Δ dalton  | mass     |    | seq |    | Δ dalton | mass      | Δ dalton            | mass      |
|           | 100.0757 | 1  | V   | 15 |          |           |                     |           |
|           | 213.1598 | 2  | I   | 14 | 1685.951 |           | 1685.951            |           |
|           | 310.2125 | 3  | P   | 13 | 1572.867 |           | 786.9369            | +0.011997 |
| -0.0019   | 423.2966 | 4  | I   | 12 | 1475.814 |           | 1475.814            |           |
| -0.28635  | 536.3806 | 5  | L   | 11 | 1362.73  | -0.05041  | 1362.73             |           |
|           | 623.4127 | 6  | S   | 10 | 1249.646 | -0.32853  | 1249.646            |           |
|           | 724.4604 | 7  | T   | 9  | 1162.614 |           | 1162.614            |           |
| -0.20555  | 837.5444 | 8  | L   | 8  | 1061.566 | +0.085166 | 1061.566            |           |
|           | 951.5873 | 9  | N   | 7  | 948.4819 | +0.037455 | 948.4819            |           |
|           | 1111.618 | 10 | C   | 6  | 834.439  |           | 834.439             |           |
| +0.066817 | 1182.655 | 11 | A   | 5  | 674.4083 |           | 674.4083            |           |
| -0.22648  | 1295.739 | 12 | L   | 4  | 603.3712 | +0.149548 | 603.3712            |           |
| +0.133431 | 1408.823 | 13 | L   | 3  | 490.2871 | +0.223297 | 490.2871            |           |
| +0.012957 | 1537.866 | 14 | E   | 2  | 377.2031 | +0.023914 | 377.2031            |           |
|           | 1638.914 | 15 | T   | 1  | 248.1605 |           | 248.1605            |           |
|           |          | 16 | K   | 0  | 147.1128 |           | 147.1128            |           |

Scan number 11230 Raw file LNCAP\_Silac\_23F10\_set3\_02  
 Method ITMS; CID Pepti... 63

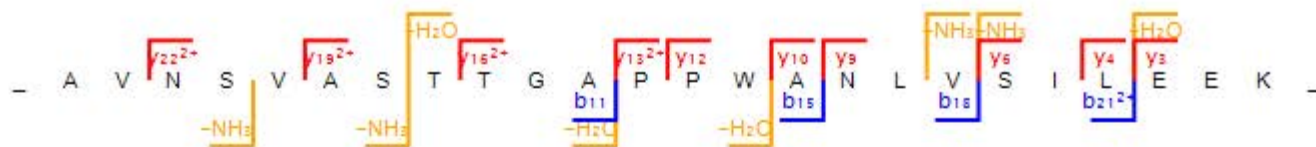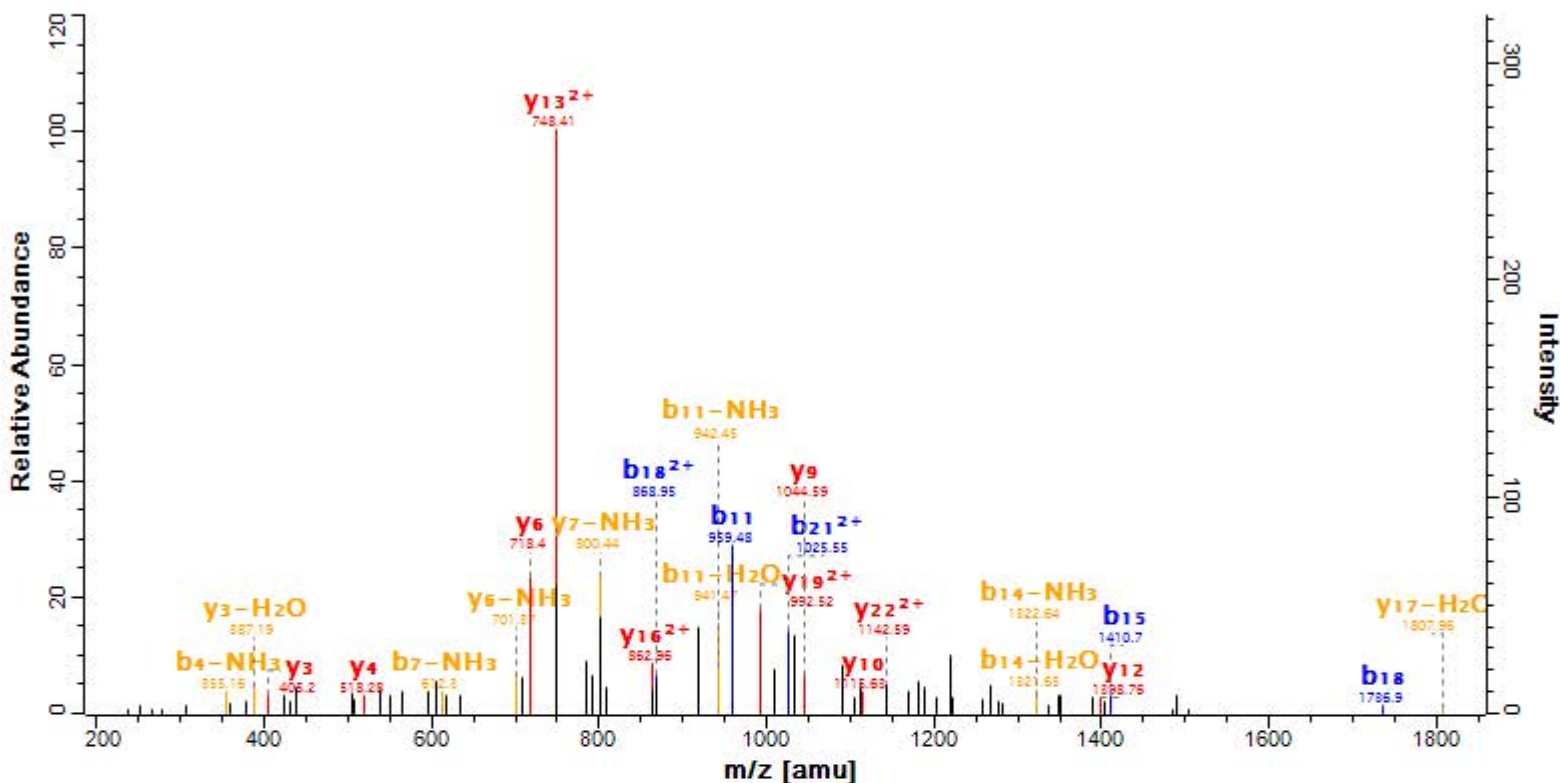

**precursor information**

|                   |                 |
|-------------------|-----------------|
| Mass:             | 2453.27902      |
| m/z:              | 818.76695       |
| Charge:           | 3+              |
| Retentiontime:    | 76.333229064941 |
| Score:            | 62.99929        |
| Mass Error [ppm]: | -0.48312        |
| PEP:              | 0.00011563      |
| Precursor Type:   | MULTI           |

| b <sup>2+</sup> ion |        | b ion    |        |     | y ion    |      | y <sup>2+</sup> ion |                |
|---------------------|--------|----------|--------|-----|----------|------|---------------------|----------------|
| Δ dalton            | mass   | Δ dalton | mass   | seq | Δ dalton | mass | Δ dalton            | mass           |
|                     | 72.044 |          | 72.044 | 1   | A        | 23   |                     |                |
|                     | 171.11 |          | 171.11 | 2   | V        | 22   | 2383.3              | 2383.3         |
|                     | 285.16 |          | 285.16 | 3   | N        | 21   | 2284.2              | 1142.6 +0.027  |
|                     | 372.19 |          | 372.19 | 4   | S        | 20   | 2170.1              | 2170.1         |
|                     | 471.26 |          | 471.26 | 5   | V        | 19   | 2083.1              | 2083.1         |
|                     | 542.29 |          | 542.29 | 6   | A        | 18   | 1984                | 992.52 +0.1204 |
|                     | 629.33 |          | 629.33 | 7   | S        | 17   | 1913                | 1913           |
|                     | 730.37 |          | 730.37 | 8   | T        | 16   | 1826                | 1826           |
|                     | 831.42 |          | 831.42 | 9   | T        | 15   | 1724.9              | 862.96 +0.1604 |
|                     | 888.44 |          | 888.44 | 10  | G        | 14   | 1623.9              | 1623.9         |
|                     | 959.48 | -0.177   | 959.48 | 11  | A        | 13   | 1566.9              | 1566.9         |
|                     | 1056.5 |          | 1056.5 | 12  | P        | 12   | 1495.8              | 748.41 +0.1765 |
|                     | 1153.6 |          | 1153.6 | 13  | P        | 11   | 1398.8 +0.0625      | 1398.8         |
|                     | 1339.7 |          | 1339.7 | 14  | W        | 10   | 1301.7              | 1301.7         |
|                     | 1410.7 | -0.028   | 1410.7 | 15  | A        | 9    | 1115.6 +0.0377      | 1115.6         |
|                     | 1524.7 |          | 1524.7 | 16  | N        | 8    | 1044.6 -0.13        | 1044.6         |
|                     | 1637.8 |          | 1637.8 | 17  | L        | 7    | 930.55              | 930.55         |
| -0.048              | 868.95 | -0.125   | 1736.9 | 18  | V        | 6    | 817.47              | 817.47         |
|                     | 1823.9 |          | 1823.9 | 19  | S        | 5    | 718.4 +0.0509       | 718.4          |
|                     | 1937   |          | 1937   | 20  | I        | 4    | 631.37              | 631.37         |
| +0.3235             | 1025.6 |          | 2050.1 | 21  | L        | 3    | 518.28 +0.1558      | 518.28         |
|                     | 2179.1 |          | 2179.1 | 22  | E        | 2    | 405.2 +0.0704       | 405.2          |
|                     | 2308.2 |          | 2308.2 | 23  | E        | 1    | 276.16              | 276.16         |
|                     |        |          |        | 24  | K        | 0    | 147.11              | 147.11         |

**general information**

|                       |             |
|-----------------------|-------------|
| Annotation:           | 16 of 24    |
| AminoAcids Coverage:  | 67 %        |
| Intensity Coverage:   | 54 %        |
| Peak Coverage:        | 31 %        |
| Protein Localisation: | 243 ... 266 |

Scan number 1642 Raw file LNCAP\_Silac\_23F10\_set3\_02  
 Method ITMS; CID Pepti... 196.11

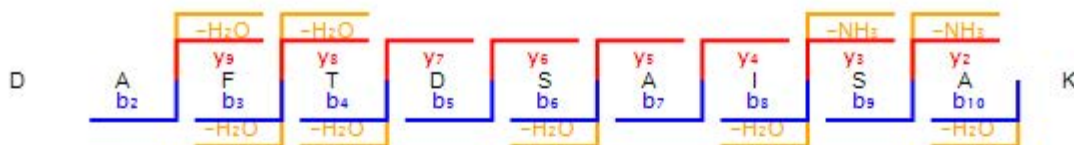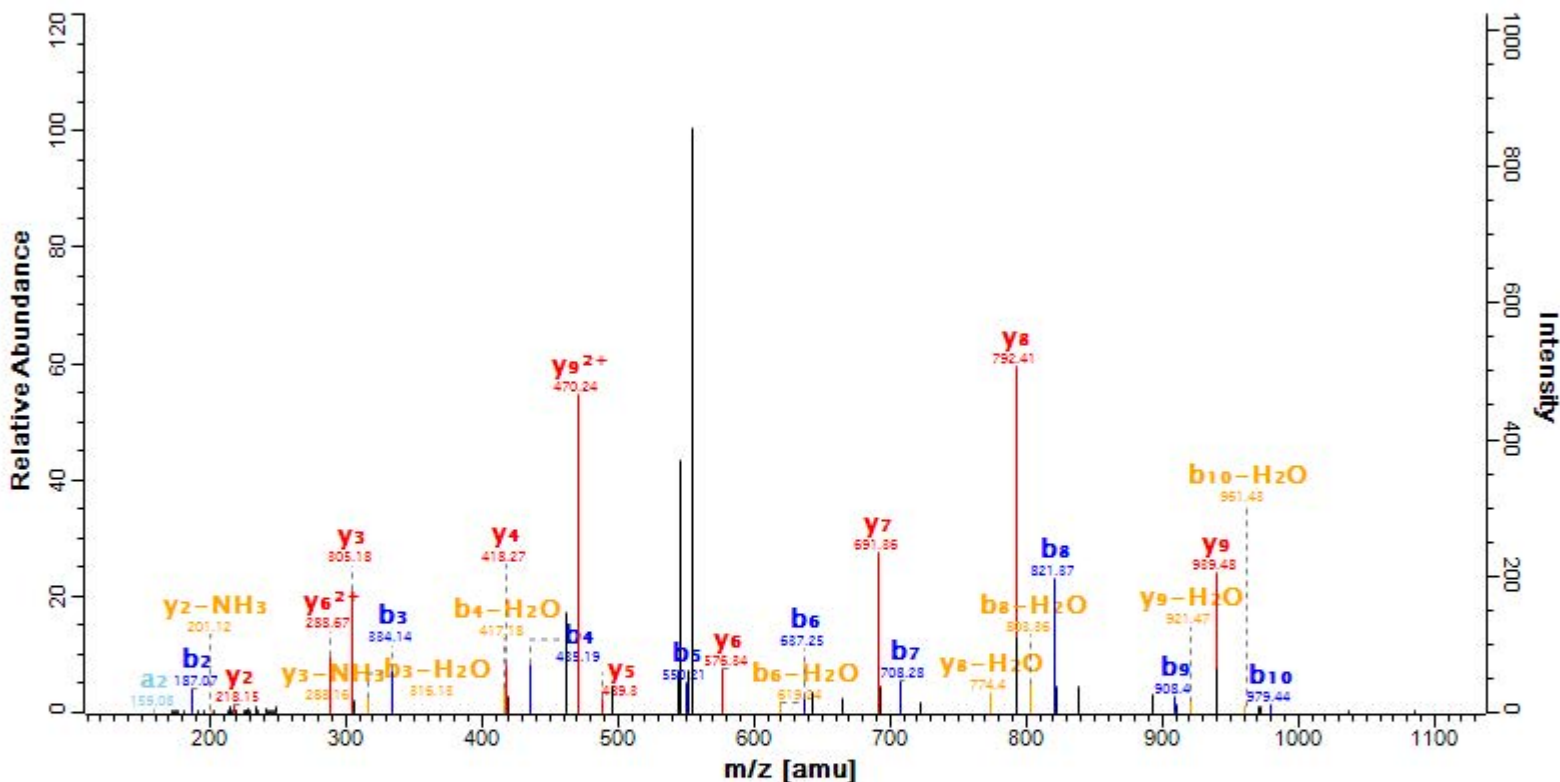

#### precursor information

|                   |                 |
|-------------------|-----------------|
| Mass:             | 1124.53544      |
| m/z:              | 563.275         |
| Charge:           | 2+              |
| Retentiontime:    | 17.685832977294 |
| Score:            | 196.114         |
| Mass Error [ppm]: | 0.42095         |
| PEP:              | 4.2881E-11      |
| Precursor Type:   | MULTI           |

#### general information

|                       |             |
|-----------------------|-------------|
| Annotation:           | 9 of 11     |
| AminoAcids Coverage:  | 82 %        |
| Intensity Coverage:   | 55 %        |
| Peak Coverage:        | 30 %        |
| Protein Localisation: | 351 ... 361 |

| a ion    |        | b ion    |        |    |     |    | y ion    |         | y <sup>2+</sup> ion |         |
|----------|--------|----------|--------|----|-----|----|----------|---------|---------------------|---------|
| Δ dalton | mass   | Δ dalton | mass   |    | seq |    | Δ dalton | mass    | Δ dalton            | mass    |
|          | 88.039 |          | 116.03 | 1  | D   | 10 |          |         |                     |         |
| +0.1871  | 159.08 | +0.0401  | 187.07 | 2  | A   | 9  | 1010.5   |         | 1010.5              |         |
|          | 306.14 | +0.0639  | 334.14 | 3  | F   | 8  | 939.48   | -0.028  | 470.24              | +0.0972 |
|          | 407.19 | +0.0681  | 435.19 | 4  | T   | 7  | 792.41   | +0.019  | 792.41              |         |
|          | 522.22 | -0.037   | 550.21 | 5  | D   | 6  | 691.36   | +0.0241 | 691.36              |         |
|          | 609.25 | -0.13    | 637.25 | 6  | S   | 5  | 576.34   | +0.0327 | 288.67              | +0.482  |
|          | 680.29 | -0.244   | 708.28 | 7  | A   | 4  | 489.3    | +0.0045 | 489.3               |         |
|          | 793.37 | -0.08    | 821.37 | 8  | I   | 3  | 418.27   | +0.024  | 418.27              |         |
|          | 880.4  | +0.1755  | 908.4  | 9  | S   | 2  | 305.18   | -0.017  | 305.18              |         |
|          | 951.44 | -0.14    | 979.44 | 10 | A   | 1  | 218.15   | -0.048  | 218.15              |         |
|          |        |          |        | 11 | K   | 0  | 147.11   |         | 147.11              |         |



Scan number 1927 Raw file LNCAP\_Silac\_23F10\_set3\_02  
 Method ITMS; CID Pepti... 50.61

- E P S V Y12 P A Y10 Y9 Y8 Y7<sup>-H<sub>2</sub>O</sup> Y6 S A Y4 Y3 Y2 R -

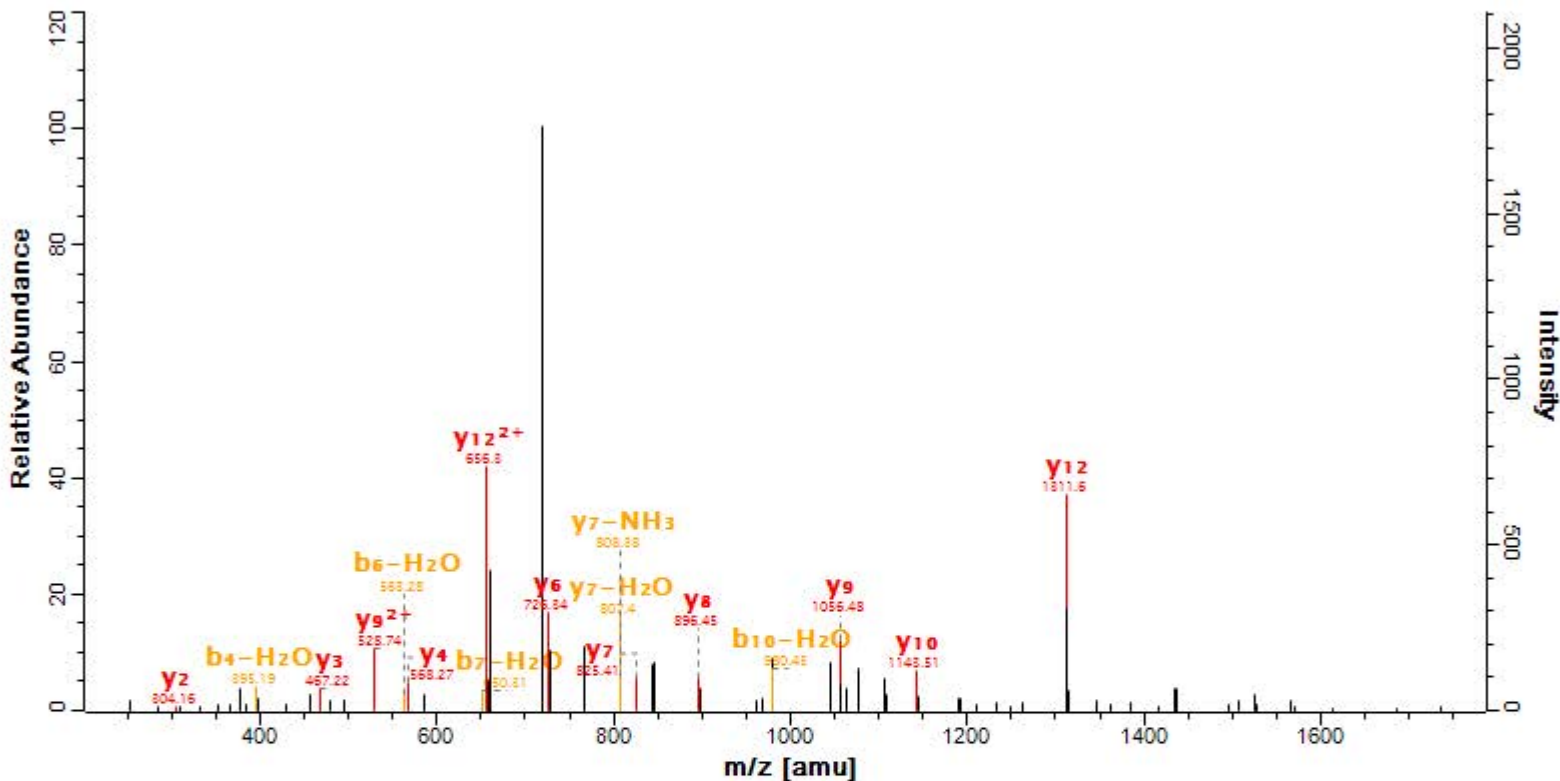

#### precursor information

|                   |                 |
|-------------------|-----------------|
| Mass:             | 1722.78938      |
| m/z:              | 862.40197       |
| Charge:           | 2+              |
| Retentiontime:    | 19.540180206298 |
| Score:            | 50.60823        |
| Mass Error [ppm]: | 0.62872         |
| PEP:              | 0.013777        |
| Precursor Type:   | MULTI           |

#### general information

|                       |             |
|-----------------------|-------------|
| Annotation:           | 11 of 16    |
| AminoAcids Coverage:  | 69 %        |
| Intensity Coverage:   | 36 %        |
| Peak Coverage:        | 22 %        |
| Protein Localisation: | 588 ... 603 |

| b ion    |          |    |     |    | y ion    |           | y <sup>2+</sup> ion |           |
|----------|----------|----|-----|----|----------|-----------|---------------------|-----------|
| Δ dalton | mass     |    | seq |    | Δ dalton | mass      | Δ dalton            | mass      |
|          | 130.0499 | 1  | E   | 15 |          |           |                     |           |
|          | 227.1026 | 2  | P   | 14 | 1594.753 |           | 1594.753            |           |
|          | 314.1347 | 3  | S   | 13 | 1497.7   |           | 1497.7              |           |
|          | 413.2031 | 4  | V   | 12 | 1410.668 |           | 1410.668            |           |
|          | 510.2558 | 5  | P   | 11 | 1311.6   | -0.0479   | 656.3035            | +0.266664 |
|          | 581.293  | 6  | A   | 10 | 1214.547 |           | 1214.547            |           |
|          | 668.325  | 7  | S   | 9  | 1143.51  | -0.05165  | 1143.51             |           |
|          | 828.3556 | 8  | C   | 8  | 1056.478 | -0.08859  | 528.7426            | +0.217449 |
|          | 899.3927 | 9  | A   | 7  | 896.4472 | +0.008527 | 896.4472            |           |
|          | 998.4612 | 10 | V   | 6  | 825.4101 | -0.00502  | 825.4101            |           |
|          | 1085.493 | 11 | S   | 5  | 726.3417 | -0.08199  | 726.3417            |           |
|          | 1156.53  | 12 | A   | 4  | 639.3097 |           | 639.3097            |           |
|          | 1257.578 | 13 | T   | 3  | 568.2726 | +0.153534 | 568.2726            |           |
|          | 1420.641 | 14 | Y   | 2  | 467.2249 | -0.04665  | 467.2249            |           |
|          | 1549.684 | 15 | E   | 1  | 304.1615 | +0.135574 | 304.1615            |           |
|          |          | 16 | R   | 0  | 175.119  |           | 175.119             |           |

Scan number 2072 Raw file LNCAP\_Silac\_23F10\_set3\_02  
 Method ITMS; CID Pepti... 123.4

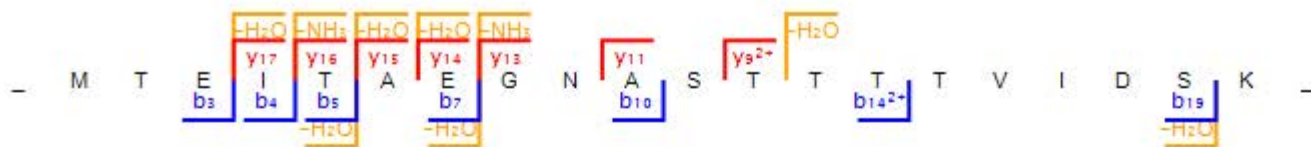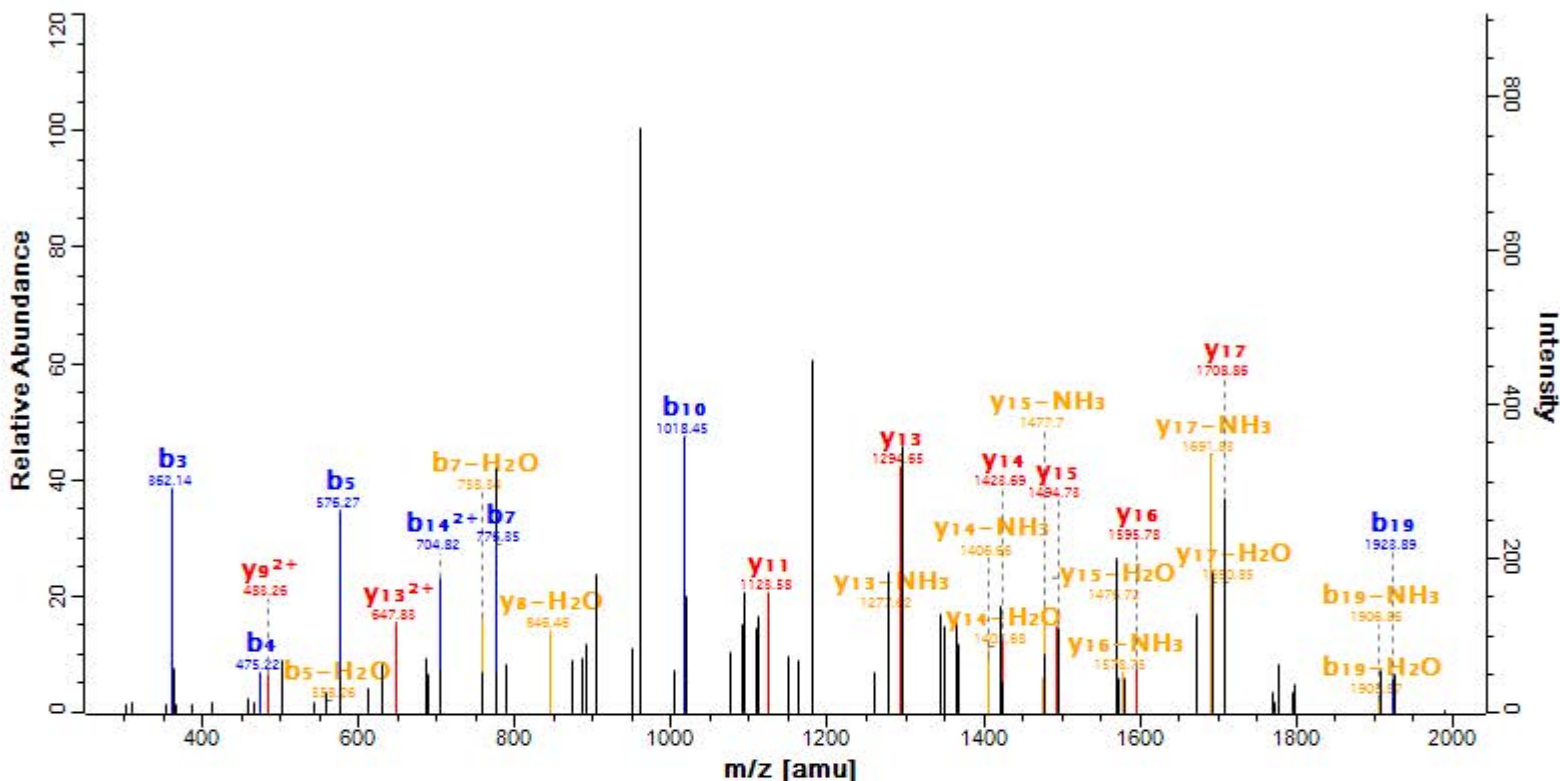

**precursor information**

|                   |                 |
|-------------------|-----------------|
| Mass:             | 2068.98322      |
| m/z:              | 1035.49889      |
| Charge:           | 2+              |
| Retentiontime:    | 20.466842651367 |
| Score:            | 123.3966        |
| Mass Error [ppm]: | -0.099652       |
| PEP:              | 7.7215E-13      |
| Precursor Type:   | MULTI           |

**general information**

|                       |          |
|-----------------------|----------|
| Annotation:           | 11 of 20 |
| AminoAcids Coverag    | 55 %     |
| Intensity Coverage:   | 34 %     |
| Peak Coverage:        | 27 %     |
| Protein Localisation: | 1 ... 20 |

| b <sup>2+</sup> ion |        | b ion    |        | seq |   |    | y ion    |         | y <sup>2+</sup> ion |        |
|---------------------|--------|----------|--------|-----|---|----|----------|---------|---------------------|--------|
| Δ dalton            | mass   | Δ dalton | mass   |     |   |    | Δ dalton | mass    | Δ dalton            | mass   |
|                     | 132.05 |          | 132.05 | 1   | M | 19 |          |         |                     |        |
|                     | 233.1  |          | 233.1  | 2   | T | 18 | 1939     |         |                     | 1939   |
|                     | 362.14 | +0.0368  | 362.14 | 3   | E | 17 | 1837.9   |         |                     | 1837.9 |
|                     | 475.22 | +0.1544  | 475.22 | 4   | I | 16 | 1708.9   | -0.018  |                     | 1708.9 |
|                     | 576.27 | +0.0544  | 576.27 | 5   | T | 15 | 1595.8   | -0.223  |                     | 1595.8 |
|                     | 647.31 |          | 647.31 | 6   | A | 14 | 1494.7   | -0.275  |                     | 1494.7 |
|                     | 776.35 | +0.1075  | 776.35 | 7   | E | 13 | 1423.7   | +0.0672 |                     | 1423.7 |
|                     | 833.37 |          | 833.37 | 8   | G | 12 | 1294.6   | -0.028  |                     | 647.83 |
|                     | 947.41 |          | 947.41 | 9   | N | 11 | 1237.6   |         |                     | 1237.6 |
|                     | 1018.5 | -0.237   | 1018.5 | 10  | A | 10 | 1123.6   | -0.042  |                     | 1123.6 |
|                     | 1105.5 |          | 1105.5 | 11  | S | 9  | 1052.5   |         |                     | 1052.5 |
|                     | 1206.5 |          | 1206.5 | 12  | T | 8  | 965.51   |         |                     | 483.26 |
|                     | 1307.6 |          | 1307.6 | 13  | T | 7  | 864.47   |         |                     | 864.47 |
| -0.292              | 704.82 |          | 1408.6 | 14  | T | 6  | 763.42   |         |                     | 763.42 |
|                     | 1509.7 |          | 1509.7 | 15  | T | 5  | 662.37   |         |                     | 662.37 |
|                     | 1608.7 |          | 1608.7 | 16  | V | 4  | 561.32   |         |                     | 561.32 |
|                     | 1721.8 |          | 1721.8 | 17  | I | 3  | 462.26   |         |                     | 462.26 |
|                     | 1836.9 |          | 1836.9 | 18  | D | 2  | 349.17   |         |                     | 349.17 |
|                     | 1923.9 | +0.1077  | 1923.9 | 19  | S | 1  | 234.14   |         |                     | 234.14 |
|                     |        |          |        | 20  | K | 0  | 147.11   |         |                     | 147.11 |

Scan number 2234 Raw file LNCAP\_Silac\_23F10\_set3\_02  
 Method ITMS; CID Pepti... 133.48

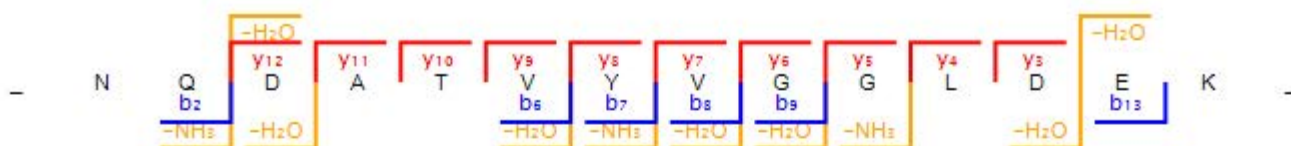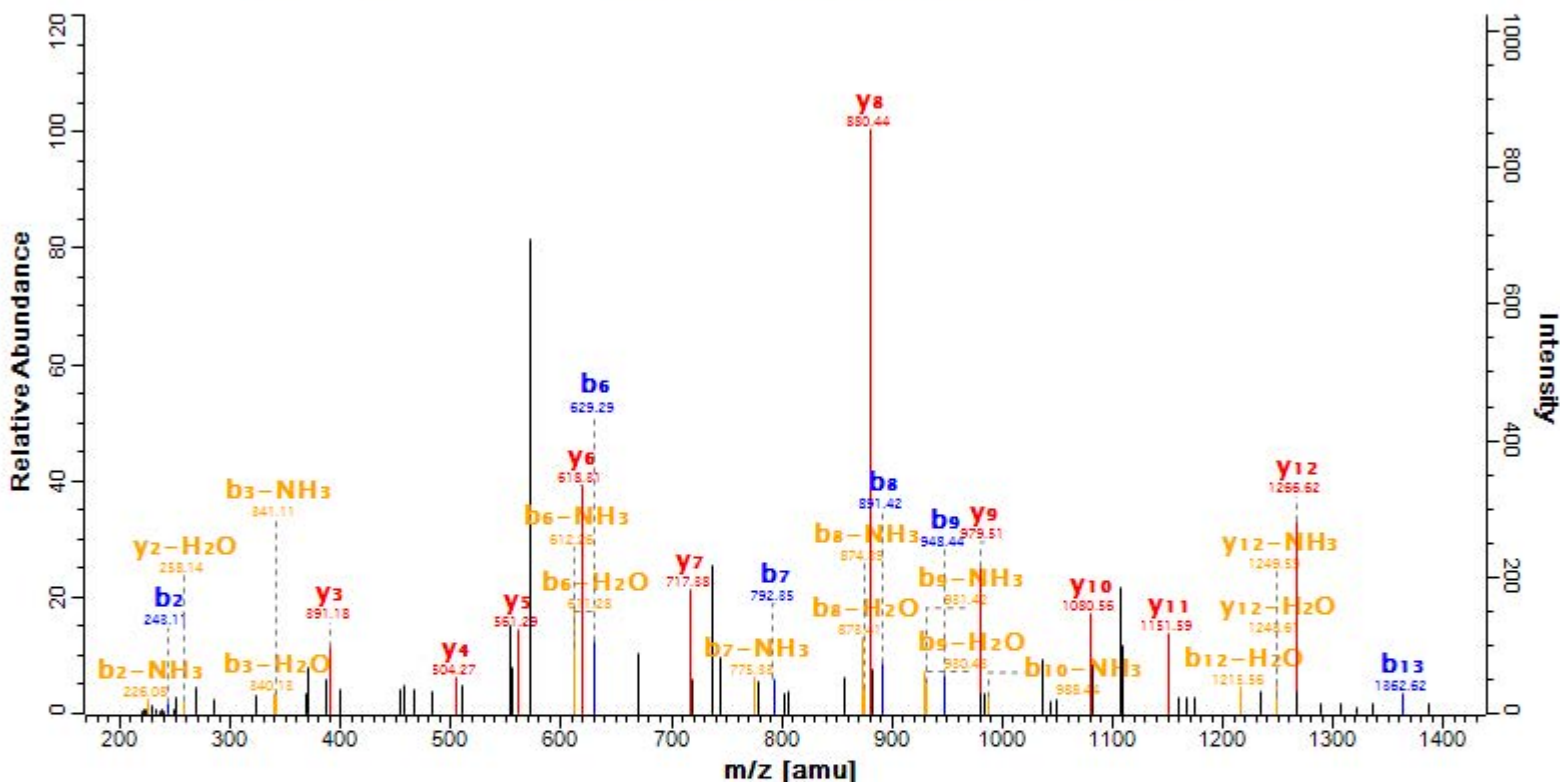

#### precursor information

|                   |                 |
|-------------------|-----------------|
| Mass:             | 1507.71649      |
| m/z:              | 754.86552       |
| Charge:           | 2+              |
| Retentiontime:    | 21.399969100952 |
| Score:            | 133.4825        |
| Mass Error [ppm]: | 0.6898          |
| PEP:              | 9.6356E-09      |
| Precursor Type:   | MULTI           |

#### general information

|                       |           |
|-----------------------|-----------|
| Annotation:           | 12 of 14  |
| AminoAcids Coverage:  | 86 %      |
| Intensity Coverage:   | 54 %      |
| Peak Coverage:        | 36 %      |
| Protein Localisation: | 10 ... 23 |

| b ion      |               |     |   | y ion    |               |            |
|------------|---------------|-----|---|----------|---------------|------------|
| Δ dalton   | mass          | seq |   | Δ dalton | mass          |            |
|            | 115.050203914 | 1   | N | 13       |               |            |
| +0.1263718 | 243.108781425 | 2   | Q | 12       | 1394.6798009  |            |
|            | 358.135724457 | 3   | D | 11       | 1266.62122339 | -0.0009841 |
|            | 429.172838245 | 4   | A | 10       | 1151.59428036 | -0.0146905 |
|            | 530.220516719 | 5   | T | 9        | 1080.55716657 | +0.0264516 |
| +0.154856  | 629.288930635 | 6   | V | 8        | 979.509488097 | +0.0490446 |
| +0.1900382 | 792.352259174 | 7   | Y | 7        | 880.441074181 | +0.0650904 |
| +0.0321467 | 891.42067309  | 8   | V | 6        | 717.377745643 | +0.0476084 |
| +0.0004901 | 948.442136813 | 9   | G | 5        | 618.309331726 | +0.084345  |
|            | 1005.46360054 | 10  | G | 4        | 561.287868003 | +0.1734967 |
|            | 1118.54766452 | 11  | L | 3        | 504.266404279 | +0.0480488 |
|            | 1233.57460755 | 12  | D | 2        | 391.182340299 | +0.0055259 |
| +0.0805533 | 1362.61720065 | 13  | E | 1        | 276.155397267 |            |
|            |               | 14  | K | 0        | 147.112804171 |            |

Scan number 2817 Raw file LNCAP\_Silac\_23F10\_set3\_02  
 Method ITMS; CID Pepti... 142.08

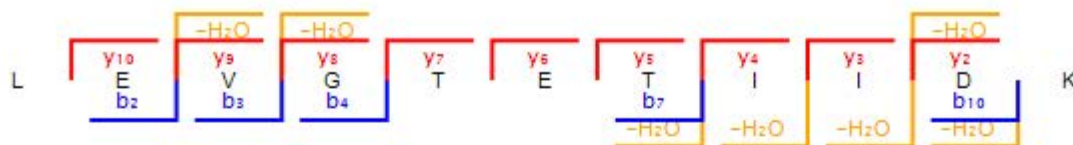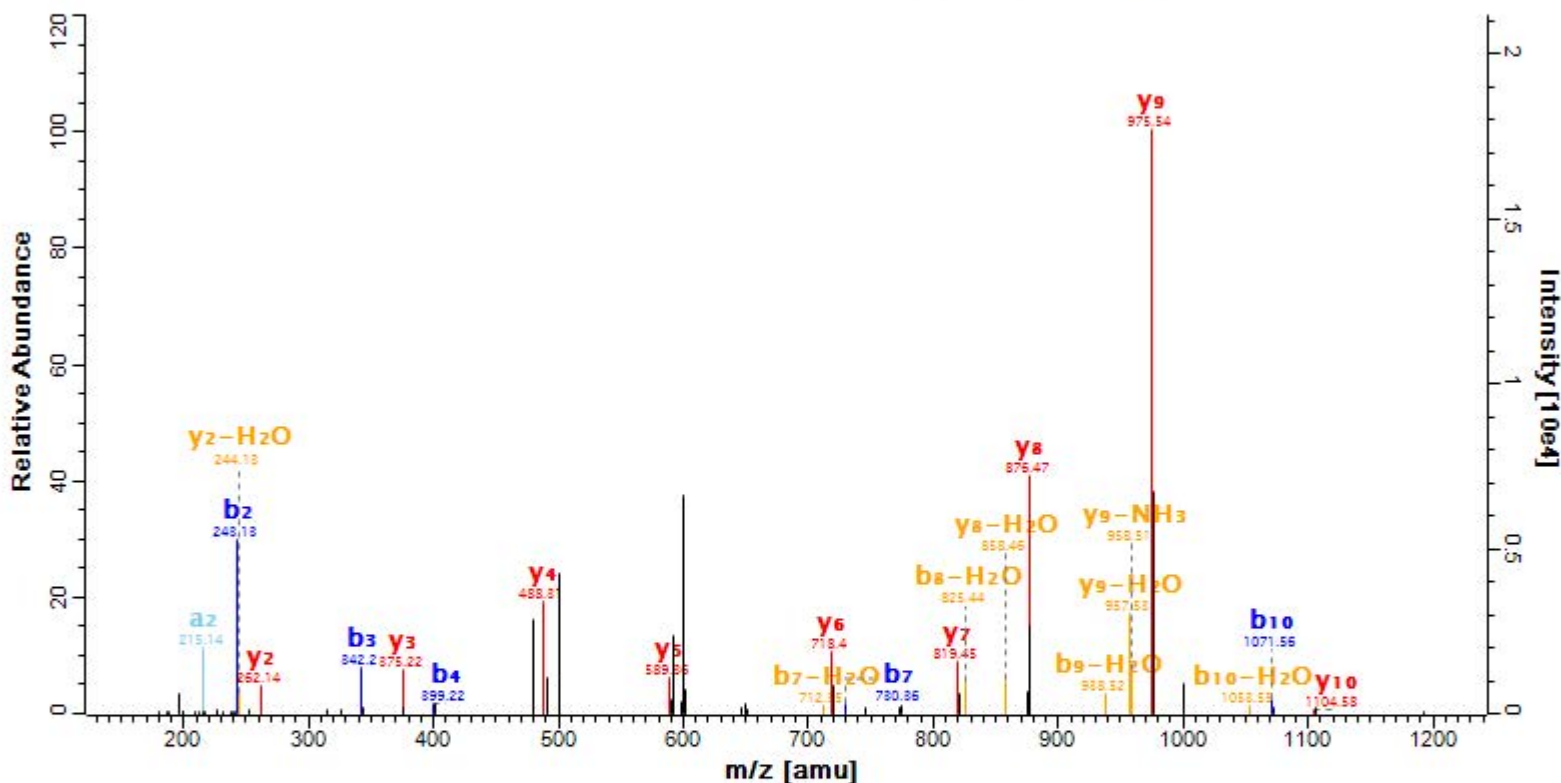

#### precursor information

|                   |                 |
|-------------------|-----------------|
| Mass:             | 1216.65466      |
| m/z:              | 609.33461       |
| Charge:           | 2+              |
| Retentiontime:    | 24.874820709228 |
| Score:            | 142.0848        |
| Mass Error [ppm]: | -0.34792        |
| PEP:              | 0.00010883      |
| Precursor Type:   | MULTI           |

#### general information

|                       |             |
|-----------------------|-------------|
| Annotation:           | 9 of 11     |
| AminoAcids Coverage:  | 82 %        |
| Intensity Coverage:   | 57 %        |
| Peak Coverage:        | 29 %        |
| Protein Localisation: | 127 ... 137 |

| a ion     |          | b ion     |          | seq |   | y ion    |                    |
|-----------|----------|-----------|----------|-----|---|----------|--------------------|
| Δ dalton  | mass     | Δ dalton  | mass     |     |   | Δ dalton | mass               |
|           | 86.09643 |           | 114.0913 | 1   | L | 10       |                    |
| +0.037632 | 215.139  | -0.01363  | 243.1339 | 2   | E | 9        | 1104.578 +0.085034 |
|           | 314.2074 | +0.017013 | 342.2023 | 3   | V | 8        | 975.5357 -0.03393  |
|           | 371.2289 | +0.123662 | 399.2238 | 4   | G | 7        | 876.4673 -0.03168  |
|           | 472.2766 |           | 500.2715 | 5   | T | 6        | 819.4458 +0.008276 |
|           | 601.3192 |           | 629.3141 | 6   | E | 5        | 718.3981 -0.00069  |
|           | 702.3668 | +0.100458 | 730.3618 | 7   | T | 4        | 589.3556 +0.047217 |
|           | 815.4509 |           | 843.4458 | 8   | I | 3        | 488.3079 +0.08159  |
|           | 928.535  |           | 956.5299 | 9   | I | 2        | 375.2238 +0.117375 |
|           | 1043.562 | -0.13178  | 1071.557 | 10  | D | 1        | 262.1397 +0.047326 |
|           |          |           |          | 11  | K | 0        | 147.1128           |

Scan number 2904 Raw file LNCAP\_Silac\_23F10\_set3\_02  
 Method ITMS; CID Pepti... 116.51

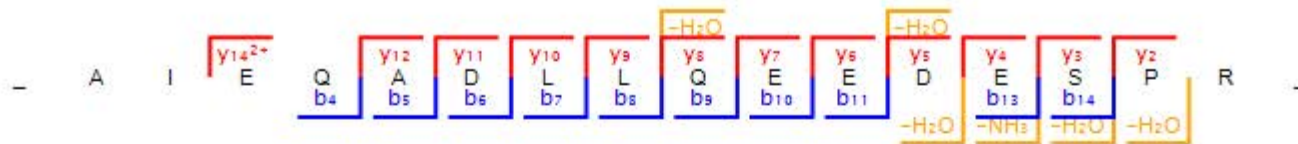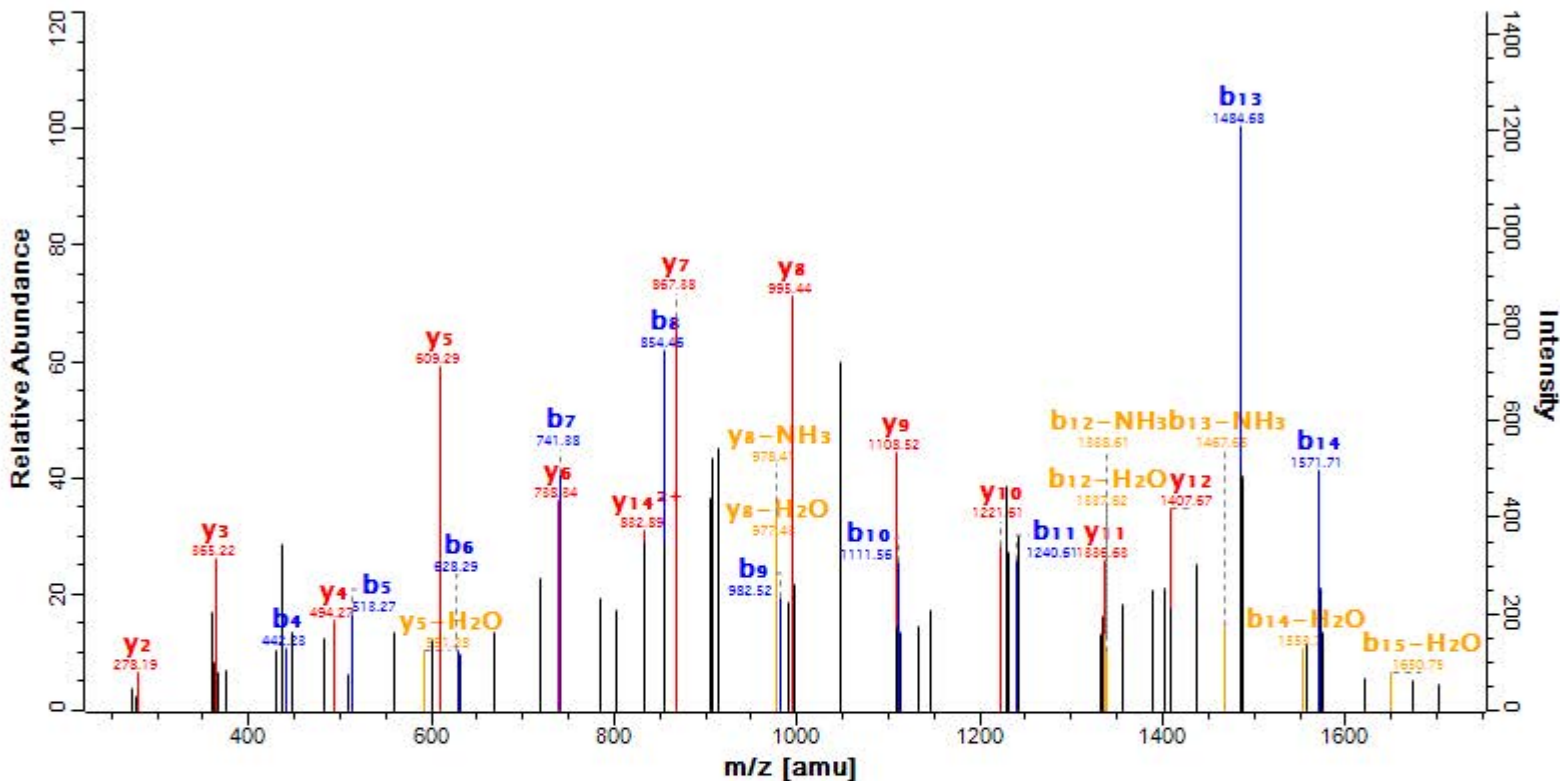

precursor information

|                   |                 |
|-------------------|-----------------|
| Mass:             | 1841.86359      |
| m/z:              | 921.93907       |
| Charge:           | 2+              |
| Retentiontime:    | 25.346410751342 |
| Score:            | 116.5128        |
| Mass Error [ppm]: | -0.38629        |
| PEP:              | 1.5699E-07      |
| Precursor Type:   | MULTI           |

general information

|                       |             |
|-----------------------|-------------|
| Annotation:           | 13 of 16    |
| AminoAcids Coverag    | 81 %        |
| Intensity Coverage:   | 45 %        |
| Peak Coverage:        | 34 %        |
| Protein Localisation: | 176 ... 191 |

| b ion     |          |     |   | y ion    |          | y <sup>2+</sup> ion |                   |
|-----------|----------|-----|---|----------|----------|---------------------|-------------------|
| Δ dalton  | mass     | seq |   | Δ dalton | mass     | Δ dalton            | mass              |
|           | 72.04439 | 1   | A | 15       |          |                     |                   |
|           | 185.1285 | 2   | I | 14       | 1777.855 |                     | 1777.855          |
|           | 314.171  | 3   | E | 13       | 1664.771 |                     | 832.8889 -0.00383 |
| -0.44801  | 442.2296 | 4   | Q | 12       | 1535.728 |                     | 1535.728          |
| -7.6E-05  | 513.2667 | 5   | A | 11       | 1407.669 | +0.264236           | 1407.669          |
| +0.078083 | 628.2937 | 6   | D | 10       | 1336.632 | -0.12931            | 1336.632          |
| +0.072877 | 741.3777 | 7   | L | 9        | 1221.605 | +0.162033           | 1221.605          |
| +0.027814 | 854.4618 | 8   | L | 8        | 1108.521 | +0.069705           | 1108.521          |
| +0.203307 | 982.5204 | 9   | Q | 7        | 995.4372 | -0.01017            | 995.4372          |
| +0.02491  | 1111.563 | 10  | E | 6        | 867.3786 | +0.01148            | 867.3786          |
| -0.0648   | 1240.606 | 11  | E | 5        | 738.336  | -0.01197            | 738.336           |
|           | 1355.633 | 12  | D | 4        | 609.2934 | +0.12401            | 609.2934          |
| -0.16608  | 1484.675 | 13  | E | 3        | 494.2665 | +0.001905           | 494.2665          |
| -0.06566  | 1571.707 | 14  | S | 2        | 365.2239 | +0.115146           | 365.2239          |
|           | 1668.76  | 15  | P | 1        | 278.1918 | +0.059132           | 278.1918          |
|           |          | 16  | R | 0        | 181.1391 |                     | 181.1391          |

Scan number 3076 Raw file LNCAP\_Silac\_23F10\_set3\_02  
 Method ITMS; CID Pepti... 278.93

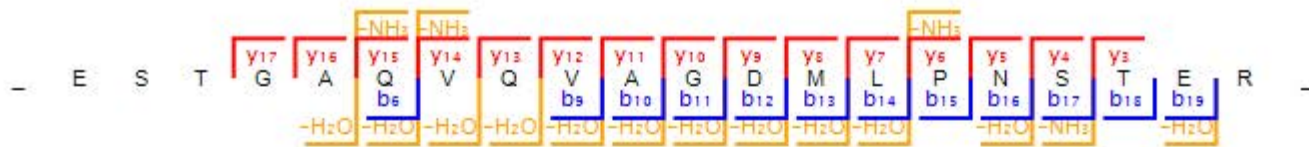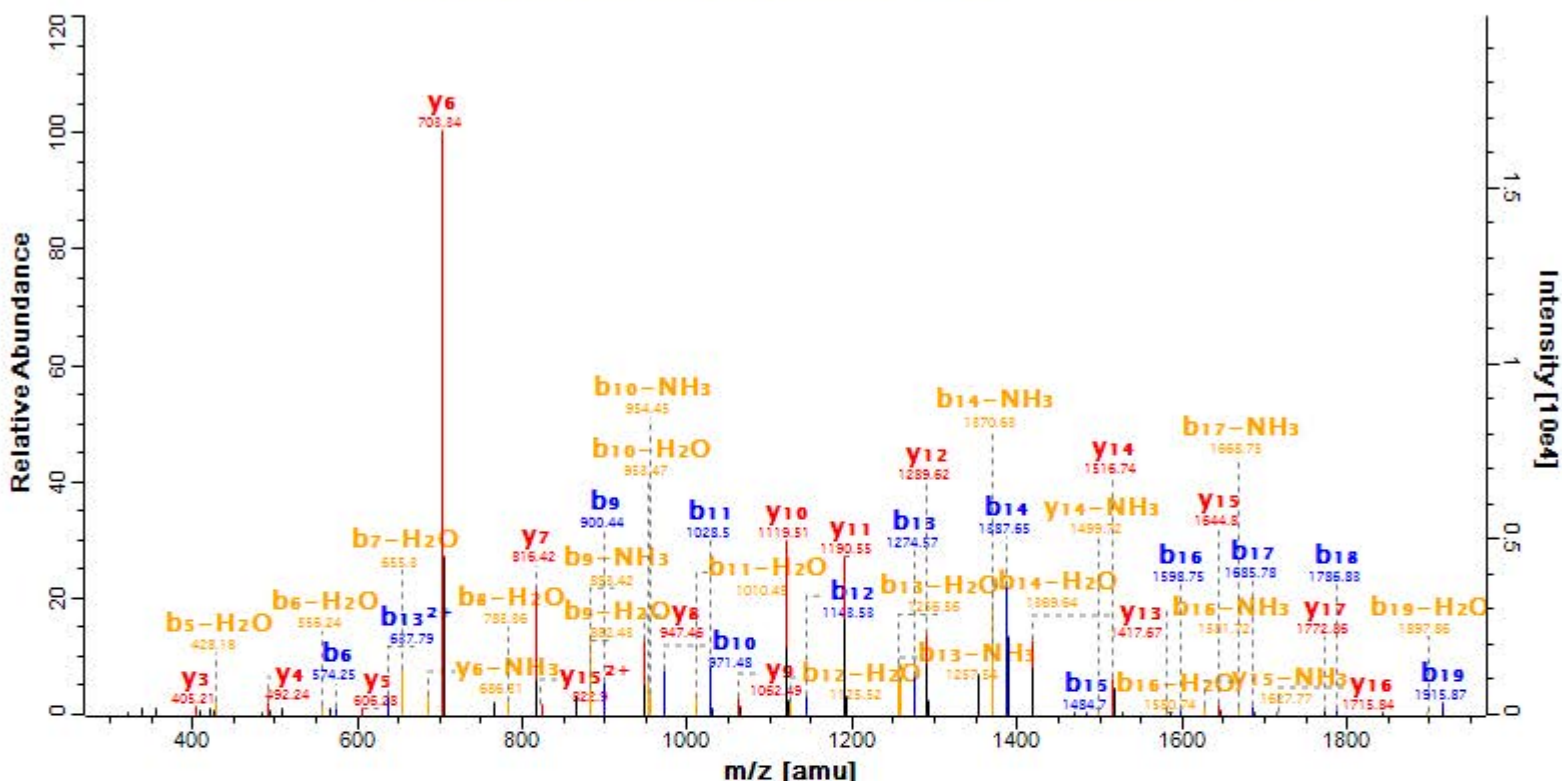

**precursor information**

|                   |                 |
|-------------------|-----------------|
| Mass:             | 2088.97451      |
| m/z:              | 1045.49453      |
| Charge:           | 2+              |
| Retentiontime:    | 26.265327453613 |
| Score:            | 278.9311        |
| Mass Error [ppm]: | -0.041109       |
| PEP:              | 2.9186E-99      |
| Precursor Type:   | MULTI           |

**general information**

|                       |             |
|-----------------------|-------------|
| Annotation:           | 16 of 20    |
| AminoAcids Coverag    | 80 %        |
| Intensity Coverage:   | 72 %        |
| Peak Coverage:        | 52 %        |
| Protein Localisation: | 125 ... 144 |

| b <sup>2+</sup> ion |        | b ion    |        | seq |   |    | y ion    |         | y <sup>2+</sup> ion |         |
|---------------------|--------|----------|--------|-----|---|----|----------|---------|---------------------|---------|
| Δ dalton            | mass   | Δ dalton | mass   |     |   |    | Δ dalton | mass    | Δ dalton            | mass    |
|                     | 130.05 |          | 130.05 | 1   | E | 19 |          |         |                     |         |
|                     | 217.08 |          | 217.08 | 2   | S | 18 | 1960.9   |         | 1960.9              |         |
|                     | 318.13 |          | 318.13 | 3   | T | 17 | 1873.9   |         | 1873.9              |         |
|                     | 375.15 |          | 375.15 | 4   | G | 16 | 1772.9   | -0.377  | 1772.9              |         |
|                     | 446.19 |          | 446.19 | 5   | A | 15 | 1715.8   | -0.127  | 1715.8              |         |
|                     | 574.25 | -0.003   | 574.25 | 6   | Q | 14 | 1644.8   | +0.0177 | 822.9               | +0.4483 |
|                     | 673.32 |          | 673.32 | 7   | V | 13 | 1516.7   | +0.0232 | 1516.7              |         |
|                     | 801.37 |          | 801.37 | 8   | Q | 12 | 1417.7   | -0.072  | 1417.7              |         |
|                     | 900.44 | -0.018   | 900.44 | 9   | V | 11 | 1289.6   | -0.009  | 1289.6              |         |
|                     | 971.48 | +0.0366  | 971.48 | 10  | A | 10 | 1190.5   | -0.039  | 1190.5              |         |
|                     | 1028.5 | -0.227   | 1028.5 | 11  | G | 9  | 1119.5   | -0.004  | 1119.5              |         |
|                     | 1143.5 | -0.167   | 1143.5 | 12  | D | 8  | 1062.5   | +0.0384 | 1062.5              |         |
| +0.45               | 637.79 | -0.126   | 1274.6 | 13  | M | 7  | 947.46   | +0.0134 | 947.46              |         |
|                     | 1387.7 | -0.074   | 1387.7 | 14  | L | 6  | 816.42   | +0.007  | 816.42              |         |
|                     | 1484.7 | -0.035   | 1484.7 | 15  | P | 5  | 703.34   | +0.0199 | 703.34              |         |
|                     | 1598.7 | -0.015   | 1598.7 | 16  | N | 4  | 606.28   | +0.0444 | 606.28              |         |
|                     | 1685.8 | -0.042   | 1685.8 | 17  | S | 3  | 492.24   | +0.0748 | 492.24              |         |
|                     | 1786.8 | +0.0257  | 1786.8 | 18  | T | 2  | 405.21   | +0.0306 | 405.21              |         |
|                     | 1915.9 | -0.039   | 1915.9 | 19  | E | 1  | 304.16   |         | 304.16              |         |
|                     |        |          |        | 20  | R | 0  | 175.12   |         | 175.12              |         |

Scan number 3193 Raw file LNCAP\_Silac\_23F10\_set3\_02  
 Method ITMS: CID Pepti... 59.68

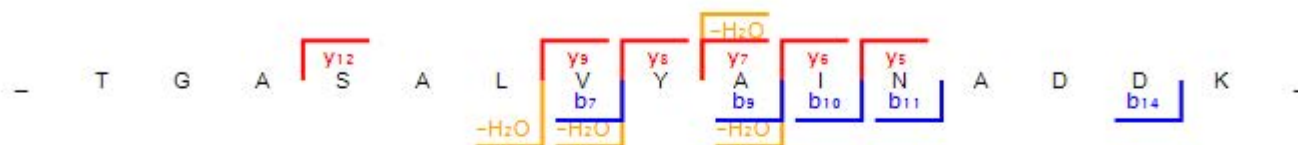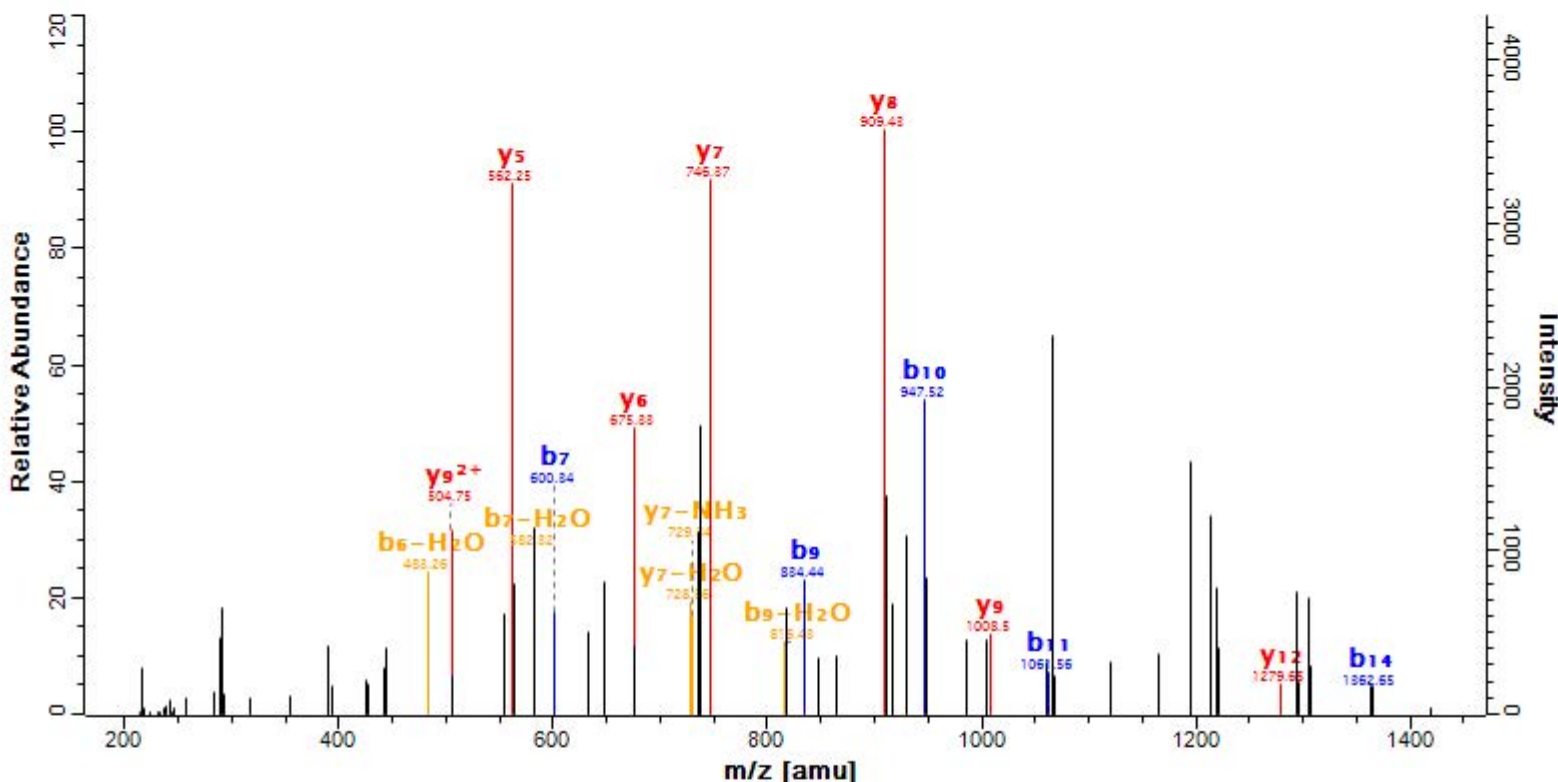

#### precursor information

|                   |                 |
|-------------------|-----------------|
| Mass:             | 1507.75108      |
| m/z:              | 754.88282       |
| Charge:           | 2+              |
| Retentiontime:    | 26.884788513183 |
| Score:            | 59.67965        |
| Mass Error [ppm]: | -0.50405        |
| PEP:              | 0.0050383       |
| Precursor Type:   | MULTI           |

#### general information

|                       |             |
|-----------------------|-------------|
| Annotation:           | 9 of 15     |
| AminoAcids Coverage:  | 60 %        |
| Intensity Coverage:   | 40 %        |
| Peak Coverage:        | 20 %        |
| Protein Localisation: | 118 ... 132 |

| b ion     |          |     |   | y ion    |          | y <sup>2+</sup> ion |          |           |
|-----------|----------|-----|---|----------|----------|---------------------|----------|-----------|
| Δ dalton  | mass     | seq |   | Δ dalton | mass     | Δ dalton            | mass     |           |
|           | 102.055  | 1   | T | 14       |          |                     |          |           |
|           | 159.0764 | 2   | G | 13       | 1407.711 | 1407.711            |          |           |
|           | 230.1135 | 3   | A | 12       | 1350.69  | 1350.69             |          |           |
|           | 317.1456 | 4   | S | 11       | 1279.653 | -0.11428            | 1279.653 |           |
|           | 388.1827 | 5   | A | 10       | 1192.621 |                     | 1192.621 |           |
|           | 501.2667 | 6   | L | 9        | 1121.584 |                     | 1121.584 |           |
| +0.177726 | 600.3352 | 7   | V | 8        | 1008.5   | +0.169294           | 504.7535 | +0.422866 |
|           | 763.3985 | 8   | Y | 7        | 909.4312 | +0.053137           | 909.4312 |           |
| -0.04161  | 834.4356 | 9   | A | 6        | 746.3679 | -0.01616            | 746.3679 |           |
| -0.10486  | 947.5197 | 10  | I | 5        | 675.3308 | +0.034439           | 675.3308 |           |
| -0.04098  | 1061.563 | 11  | N | 4        | 562.2467 | +0.095859           | 562.2467 |           |
|           | 1132.6   | 12  | A | 3        | 448.2038 |                     | 448.2038 |           |
|           | 1247.627 | 13  | D | 2        | 377.1667 |                     | 377.1667 |           |
| -0.20632  | 1362.654 | 14  | D | 1        | 262.1397 |                     | 262.1397 |           |
|           |          | 15  | K | 0        | 147.1128 |                     | 147.1128 |           |

Scan number 3408 Raw file LNCAP\_Silac\_23F10\_set3\_02  
 Method ITMS; CID Pepti... 91.08

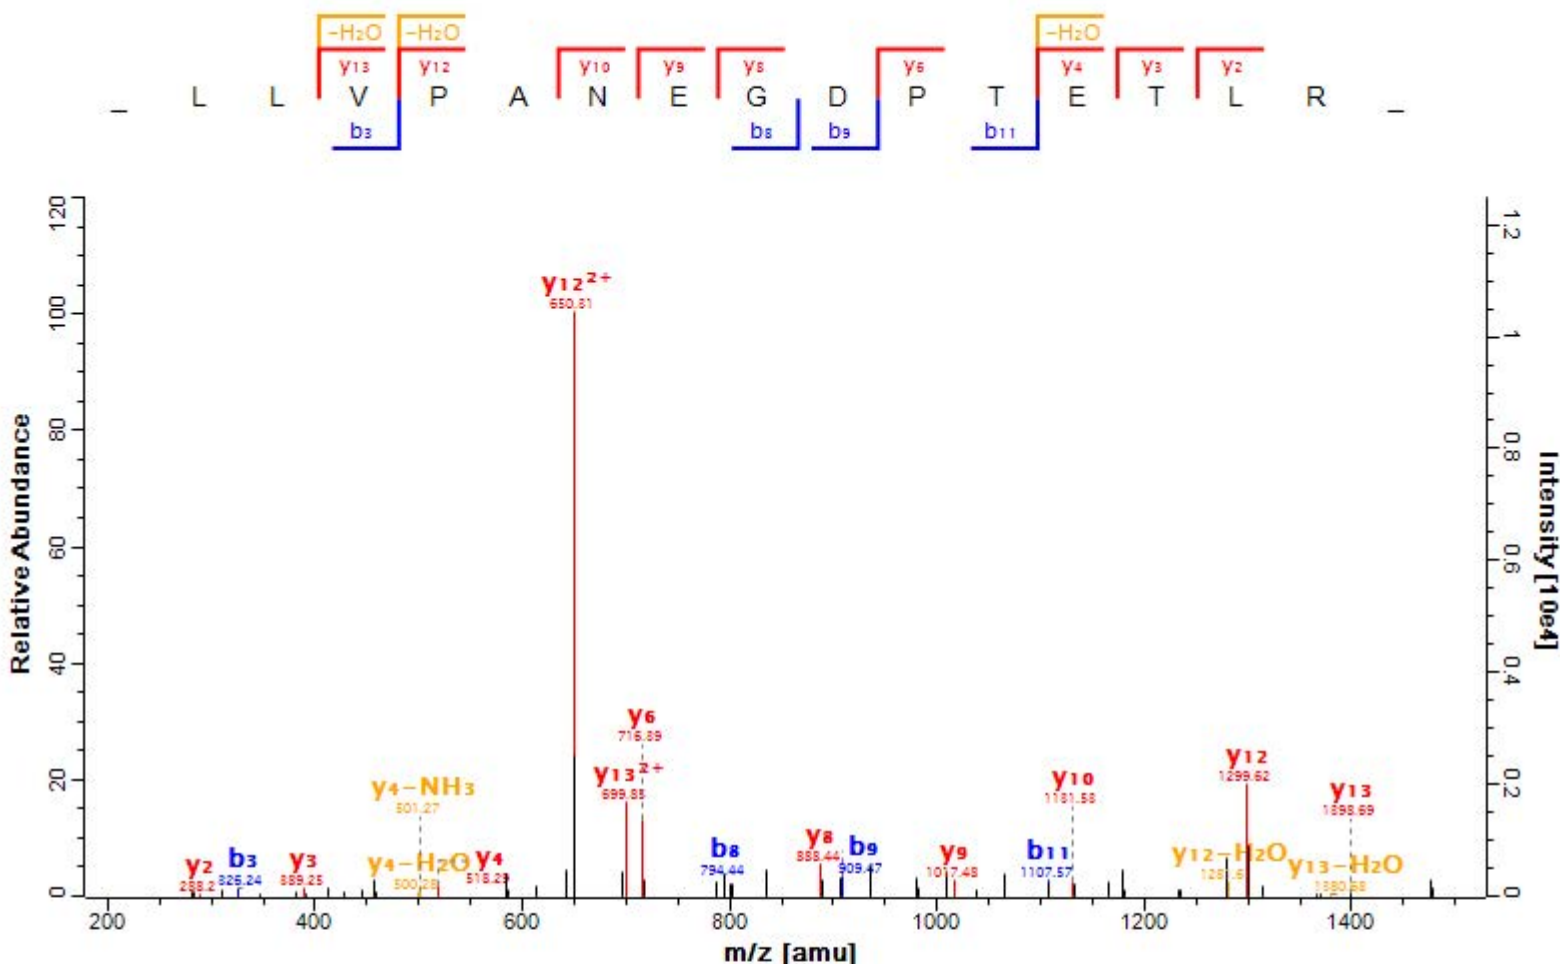

#### precursor information

|                   |                 |
|-------------------|-----------------|
| Mass:             | 1623.84616      |
| m/z:              | 812.93036       |
| Charge:           | 2+              |
| Retentiontime:    | 28.019496917724 |
| Score:            | 91.07624        |
| Mass Error [ppm]: | -0.3918         |
| PEP:              | 0.00014277      |
| Precursor Type:   | MULTI           |

#### general information

|                       |             |
|-----------------------|-------------|
| Annotation:           | 11 of 15    |
| AminoAcids Coverag    | 73 %        |
| Intensity Coverage:   | 55 %        |
| Peak Coverage:        | 24 %        |
| Protein Localisation: | 325 ... 339 |

| b ion           |          |     |   | y ion           |          | $y^{2+}$ ion    |          |           |
|-----------------|----------|-----|---|-----------------|----------|-----------------|----------|-----------|
| $\Delta$ dalton | mass     | seq |   | $\Delta$ dalton | mass     | $\Delta$ dalton | mass     |           |
|                 | 114.0913 | 1   | L | 14              |          |                 |          |           |
|                 | 227.1754 | 2   | L | 13              | 1511.77  | 1511.77         |          |           |
| +0.04915        | 326.2438 | 3   | V | 12              | 1398.686 | +0.134852       | 699.8466 | +0.240607 |
|                 | 423.2966 | 4   | P | 11              | 1299.618 | -0.04612        | 650.3124 | +0.092379 |
|                 | 494.3337 | 5   | A | 10              | 1202.565 |                 | 1202.565 |           |
|                 | 608.3766 | 6   | N | 9               | 1131.528 | -0.01191        | 1131.528 |           |
|                 | 737.4192 | 7   | E | 8               | 1017.485 | -0.05962        | 1017.485 |           |
| -0.2046         | 794.4407 | 8   | G | 7               | 888.4421 | +0.005007       | 888.4421 |           |
| -0.04581        | 909.4676 | 9   | D | 6               | 831.4207 |                 | 831.4207 |           |
|                 | 1006.52  | 10  | P | 5               | 716.3937 | -0.00634        | 716.3937 |           |
| -0.02412        | 1107.568 | 11  | T | 4               | 619.341  |                 | 619.341  |           |
|                 | 1236.611 | 12  | E | 3               | 518.2933 | +0.065721       | 518.2933 |           |
|                 | 1337.658 | 13  | T | 2               | 389.2507 | -0.05367        | 389.2507 |           |
|                 | 1450.742 | 14  | L | 1               | 288.203  | +0.111406       | 288.203  |           |
|                 |          | 15  | R | 0               | 175.119  |                 | 175.119  |           |



Scan number 3636 Raw file LNCAP\_Silac\_23F10\_set3\_02  
 Method ITMS; CID Pepti... 43.38

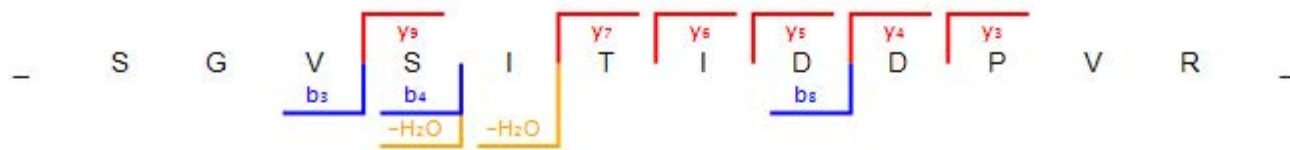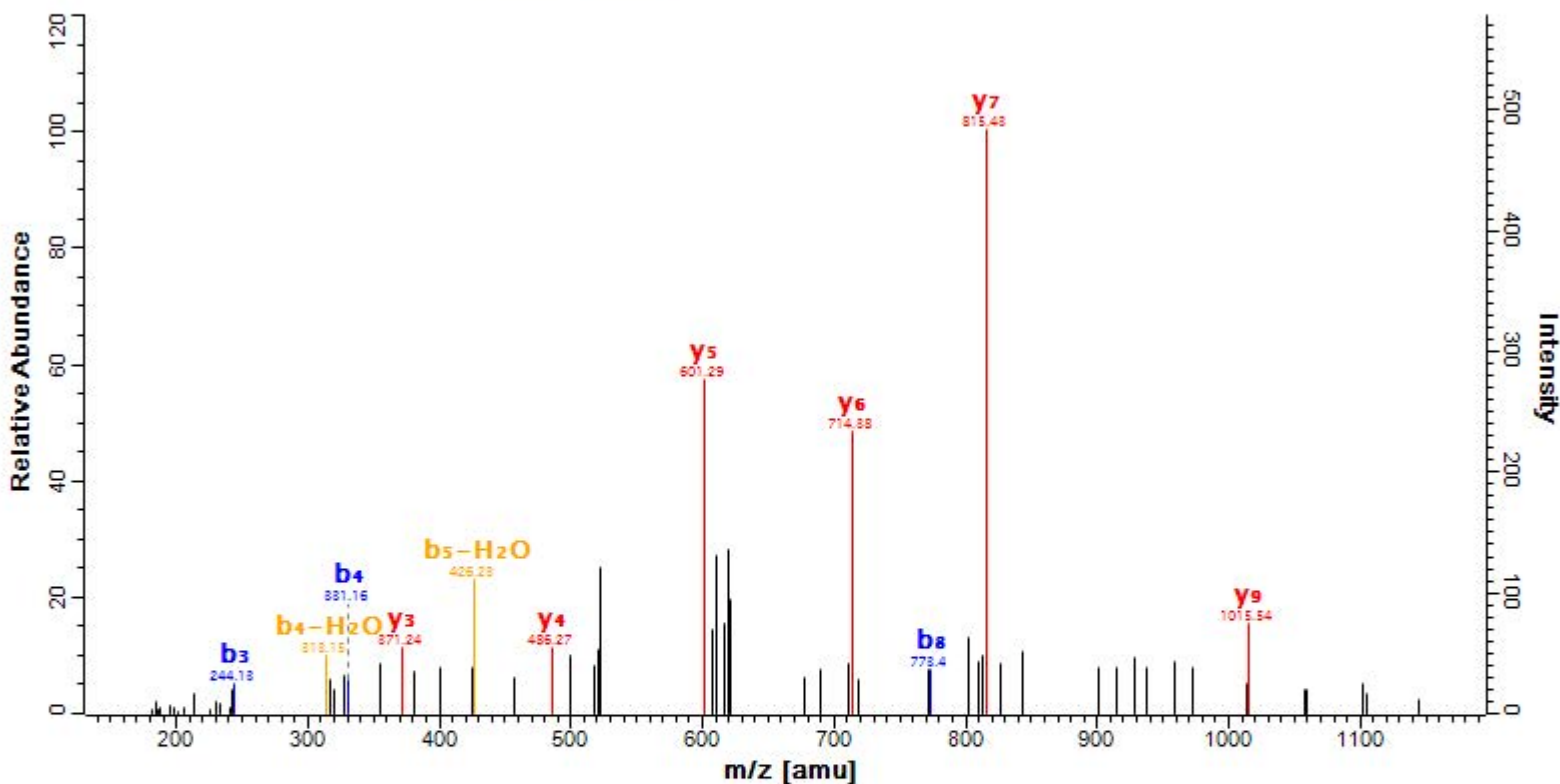

#### precursor information

|                   |                 |
|-------------------|-----------------|
| Mass:             | 1257.65719      |
| m/z:              | 629.83587       |
| Charge:           | 2+              |
| Retentiontime:    | 29.227579116821 |
| Score:            | 43.38239        |
| Mass Error [ppm]: | 0.56087         |
| PEP:              | 0.053319        |
| Precursor Type:   | MULTI           |

#### general information

|                       |             |
|-----------------------|-------------|
| Annotation:           | 8 of 12     |
| AminoAcids Coverage:  | 67 %        |
| Intensity Coverage:   | 41 %        |
| Peak Coverage:        | 16 %        |
| Protein Localisation: | 891 ... 902 |

| b ion      |               |    |     |    | y ion         |            |
|------------|---------------|----|-----|----|---------------|------------|
| Δ dalton   | mass          |    | seq |    | Δ dalton      | mass       |
|            | 88.039304876  | 1  | S   | 11 |               |            |
|            | 145.0607686   | 2  | G   | 10 | 1171.6317285  |            |
| +0.1086715 | 244.129182516 | 3  | V   | 9  | 1114.61026477 |            |
| +0.1352368 | 331.161210926 | 4  | S   | 8  | 1015.54185086 | +0.1253244 |
|            | 444.245274907 | 5  | I   | 7  | 928.509822448 |            |
|            | 545.292953381 | 6  | T   | 6  | 815.425758468 | -0.0584489 |
|            | 658.377017361 | 7  | I   | 5  | 714.378079994 | +0.0063194 |
| +0.1166695 | 773.403960393 | 8  | D   | 4  | 601.294016013 | +0.0236109 |
|            | 888.430903425 | 9  | D   | 3  | 486.267072981 | -0.0651687 |
|            | 985.483667277 | 10 | P   | 2  | 371.240129949 | +0.1219916 |
|            | 1084.55208119 | 11 | V   | 1  | 274.187366097 |            |
|            |               | 12 | R   | 0  | 175.118952181 |            |

Scan number 3915 Raw file LNCAP\_Silac\_23F10\_set3\_02  
 Method ITMS; CID Pepti... 151.95

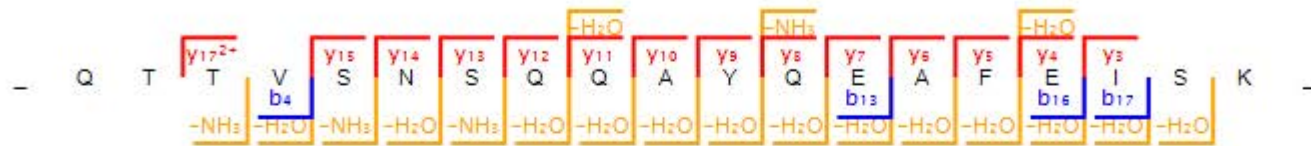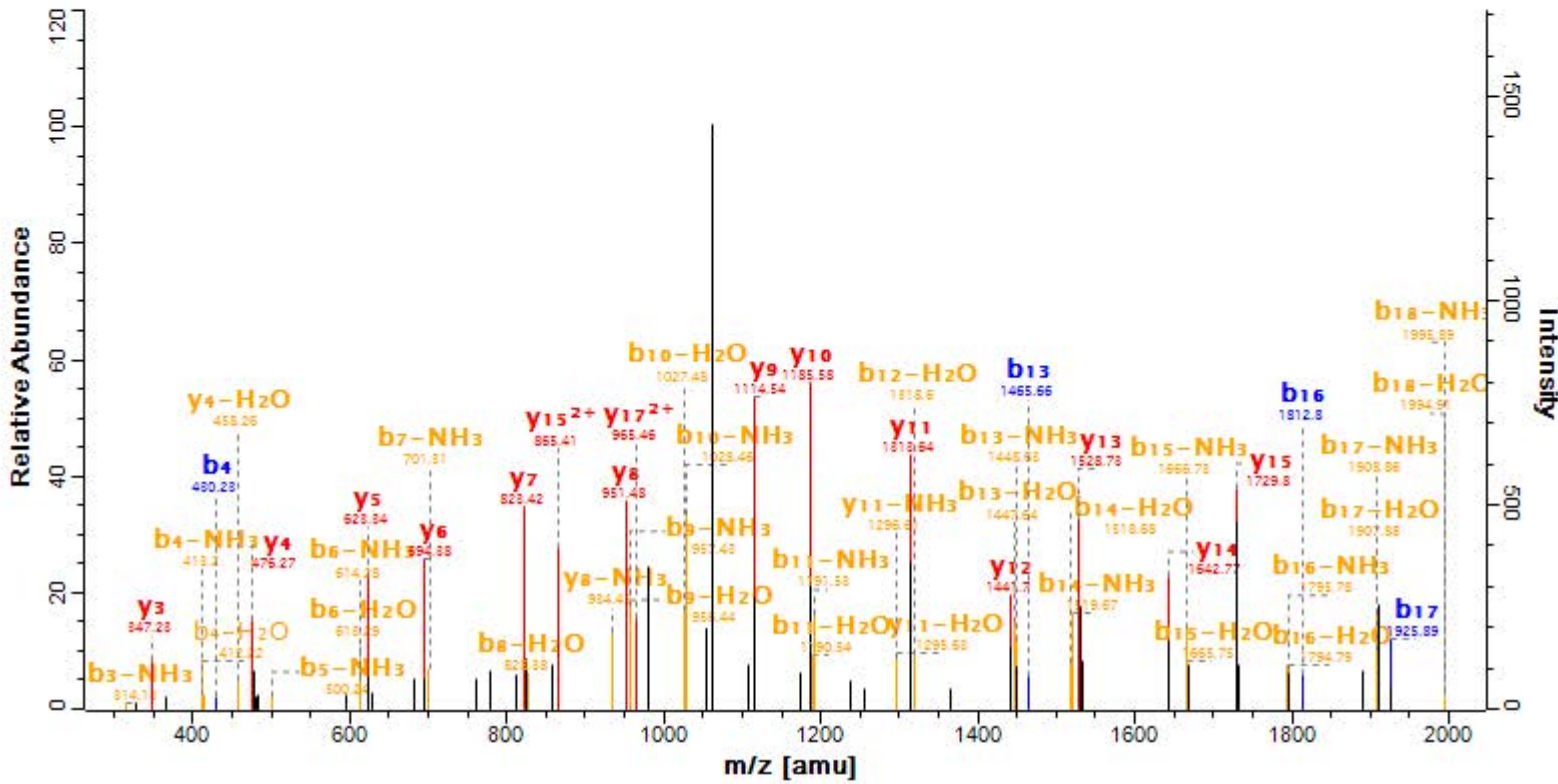

**precursor information**

|                   |                 |
|-------------------|-----------------|
| Mass:             | 2158.01552      |
| m/z:              | 1080.01504      |
| Charge:           | 2+              |
| Retentiontime:    | 30.702781677246 |
| Score:            | 151.948         |
| Mass Error [ppm]: | -1.0756         |
| PEP:              | 3.7589E-13      |
| Precursor Type:   | ISO             |

**general information**

|                       |             |
|-----------------------|-------------|
| Annotation:           | 16 of 19    |
| AminoAcids Coverage:  | 84 %        |
| Intensity Coverage:   | 59 %        |
| Peak Coverage:        | 53 %        |
| Protein Localisation: | 141 ... 159 |

| b ion     |          |    |     |    | y ion    |           | y <sup>2+</sup> ion |           |
|-----------|----------|----|-----|----|----------|-----------|---------------------|-----------|
| Δ dalton  | mass     |    | seq |    | Δ dalton | mass      | Δ dalton            | mass      |
|           | 129.0659 | 1  | Q   | 18 |          |           |                     |           |
|           | 230.1135 | 2  | T   | 17 | 2030.967 |           | 2030.967            |           |
|           | 331.1612 | 3  | T   | 16 | 1929.919 |           | 965.4631            | +0.372624 |
| +0.166249 | 430.2296 | 4  | V   | 15 | 1828.871 |           | 1828.871            |           |
|           | 517.2617 | 5  | S   | 14 | 1729.803 | -0.16471  | 865.405             | +0.153327 |
|           | 631.3046 | 6  | N   | 13 | 1642.771 | -0.09923  | 1642.771            |           |
|           | 718.3366 | 7  | S   | 12 | 1528.728 | -0.11832  | 1528.728            |           |
|           | 846.3952 | 8  | Q   | 11 | 1441.696 | -0.21226  | 1441.696            |           |
|           | 974.4538 | 9  | Q   | 10 | 1313.637 | -0.09168  | 1313.637            |           |
|           | 1045.491 | 10 | A   | 9  | 1185.579 | +0.016218 | 1185.579            |           |
|           | 1208.554 | 11 | Y   | 8  | 1114.542 | +0.006945 | 1114.542            |           |
|           | 1336.613 | 12 | Q   | 7  | 951.4782 | -0.02091  | 951.4782            |           |
| -0.30919  | 1465.655 | 13 | E   | 6  | 823.4196 | +0.042426 | 823.4196            |           |
|           | 1536.692 | 14 | A   | 5  | 694.377  | +0.081357 | 694.377             |           |
|           | 1683.761 | 15 | F   | 4  | 623.3399 | +0.06476  | 623.3399            |           |
| -0.04288  | 1812.803 | 16 | E   | 3  | 476.2715 | +0.059992 | 476.2715            |           |
| +0.184826 | 1925.888 | 17 | I   | 2  | 347.2289 | +0.130784 | 347.2289            |           |
|           | 2012.92  | 18 | S   | 1  | 234.1448 |           | 234.1448            |           |
|           |          | 19 | K   | 0  | 147.1128 |           | 147.1128            |           |

Scan number 4083 Raw file LNCAP\_Silac\_23F10\_set3\_02  
 Method ITMS; CID Pepti... 210.39

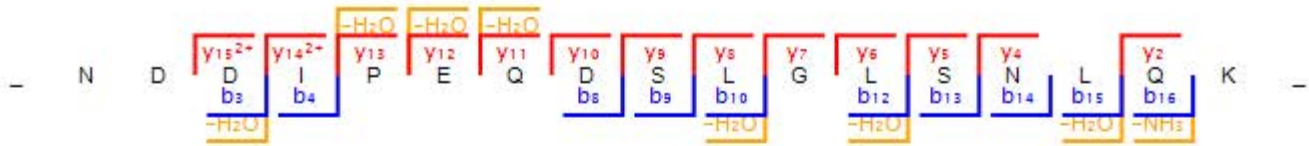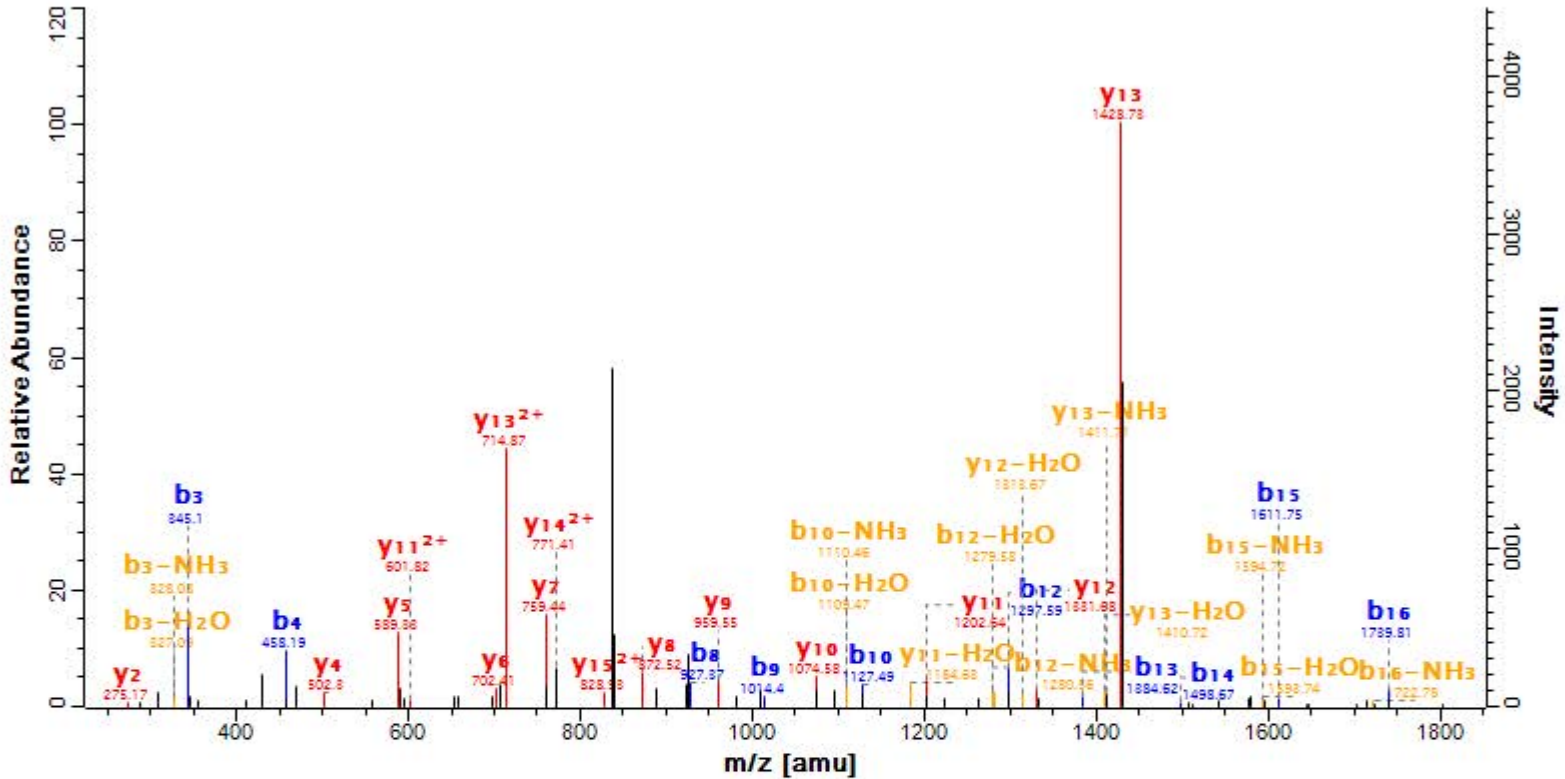

**precursor information**

|                   |                 |
|-------------------|-----------------|
| Mass:             | 1884.90622      |
| m/z:              | 943.46039       |
| Charge:           | 2+              |
| Retentiontime:    | 31.613727569580 |
| Score:            | 210.3904        |
| Mass Error [ppm]: | -0.14945        |
| PEP:              | 3.9663E-40      |
| Precursor Type:   | MULTI           |

**general information**

|                       |           |
|-----------------------|-----------|
| Annotation:           | 14 of 17  |
| AminoAcids Coverage:  | 82 %      |
| Intensity Coverage:   | 55 %      |
| Peak Coverage:        | 43 %      |
| Protein Localisation: | 41 ... 57 |

| b ion     |          |     |   | y ion    |          |           | y <sup>2+</sup> ion |  |
|-----------|----------|-----|---|----------|----------|-----------|---------------------|--|
| Δ dalton  | mass     | seq |   | Δ dalton | mass     | Δ dalton  | mass                |  |
|           | 115.0502 | 1   | N | 16       |          |           |                     |  |
|           | 230.0771 | 2   | D | 15       | 1771.871 |           | 1771.871            |  |
| +0.005316 | 345.1041 | 3   | D | 14       | 1656.844 |           | 828.9256 +0.13111   |  |
| +0.006914 | 458.1882 | 4   | I | 13       | 1541.817 |           | 771.4121 -0.07197   |  |
|           | 555.2409 | 5   | P | 12       | 1428.733 | -0.09667  | 714.8701 +0.183318  |  |
|           | 684.2835 | 6   | E | 11       | 1331.68  | -0.08504  | 1331.68             |  |
|           | 812.3421 | 7   | Q | 10       | 1202.638 | -0.01852  | 601.8224 +0.065347  |  |
| -0.09968  | 927.369  | 8   | D | 9        | 1074.579 | -0.07591  | 1074.579            |  |
| +0.063723 | 1014.401 | 9   | S | 8        | 959.552  | +0.156169 | 959.552             |  |
| -0.05007  | 1127.485 | 10  | L | 7        | 872.52   | +0.115078 | 872.52              |  |
|           | 1184.507 | 11  | G | 6        | 759.4359 | +0.038436 | 759.4359            |  |
| -0.06514  | 1297.591 | 12  | L | 5        | 702.4145 | -0.00187  | 702.4145            |  |
| -0.1355   | 1384.623 | 13  | S | 4        | 589.3304 | +0.02403  | 589.3304            |  |
| -0.02657  | 1498.666 | 14  | N | 3        | 502.2984 | +0.170926 | 502.2984            |  |
| -0.07963  | 1611.75  | 15  | L | 2        | 388.2554 |           | 388.2554            |  |
| -0.05459  | 1739.808 | 16  | Q | 1        | 275.1714 | +0.129766 | 275.1714            |  |
|           |          | 17  | K | 0        | 147.1128 |           | 147.1128            |  |

Scan number 4172 Raw file LNCAP\_Silac\_23F10\_set3\_02  
 Method ITMS: CID Pepti... 223.22

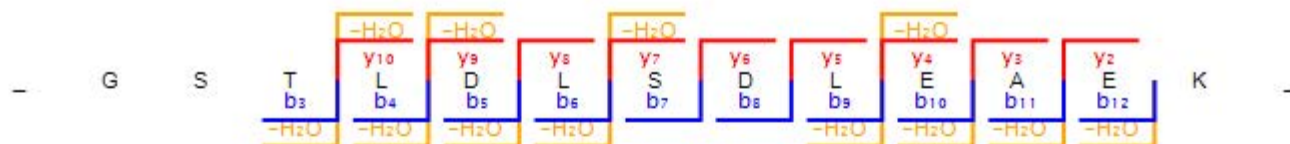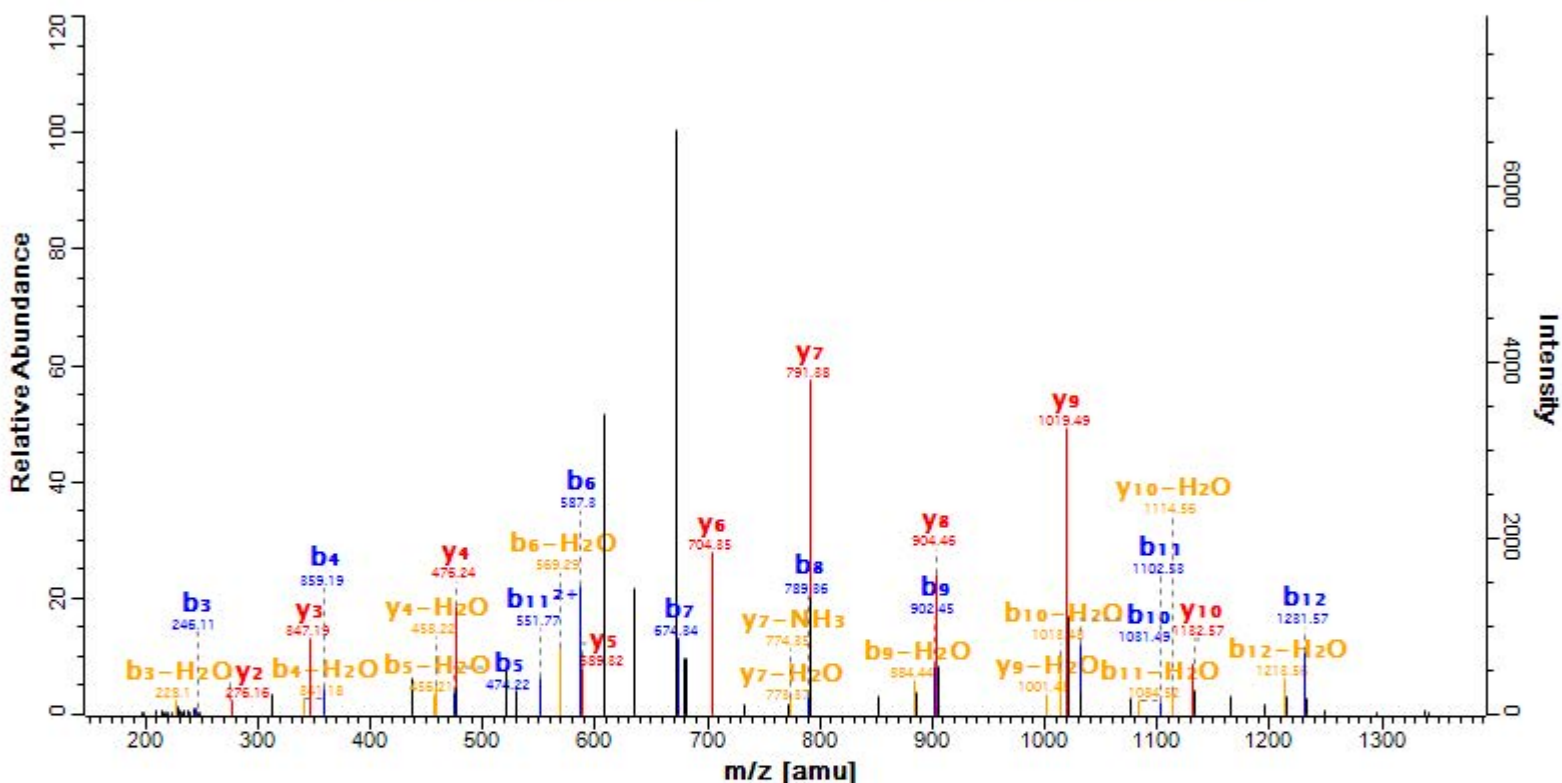

**precursor information**

|                   |                 |
|-------------------|-----------------|
| Mass:             | 1376.66732      |
| m/z:              | 689.34094       |
| Charge:           | 2+              |
| Retentiontime:    | 32.091754913330 |
| Score:            | 223.2162        |
| Mass Error [ppm]: | 0.15693         |
| PEP:              | 1.5878E-28      |
| Precursor Type:   | MULTI           |

**general information**

|                       |             |
|-----------------------|-------------|
| Annotation:           | 10 of 13    |
| AminoAcids Coverage:  | 77 %        |
| Intensity Coverage:   | 51 %        |
| Peak Coverage:        | 37 %        |
| Protein Localisation: | 197 ... 209 |

| b <sup>2+</sup> ion |          | b ion     |          |     | y ion |          |          |           |
|---------------------|----------|-----------|----------|-----|-------|----------|----------|-----------|
| Δ dalton            | mass     | Δ dalton  | mass     | seq |       | Δ dalton | mass     |           |
|                     | 58.02874 |           | 58.02874 | 1   | G     | 12       |          |           |
|                     | 145.0608 |           | 145.0608 | 2   | S     | 11       | 1320.653 |           |
|                     | 246.1084 | -0.16834  | 246.1084 | 3   | T     | 10       | 1233.621 |           |
|                     | 359.1925 | -0.07673  | 359.1925 | 4   | L     | 9        | 1132.573 | -0.10116  |
|                     | 474.2195 | +0.005705 | 474.2195 | 5   | D     | 8        | 1019.489 | -0.0196   |
|                     | 587.3035 | -0.07262  | 587.3035 | 6   | L     | 7        | 904.4622 | -0.0164   |
|                     | 674.3355 | -0.05491  | 674.3355 | 7   | S     | 6        | 791.3781 | +0.011814 |
|                     | 789.3625 | +0.141966 | 789.3625 | 8   | D     | 5        | 704.3461 | +0.001545 |
|                     | 902.4466 | -0.13521  | 902.4466 | 9   | L     | 4        | 589.3192 | +0.154648 |
|                     | 1031.489 | -0.12953  | 1031.489 | 10  | E     | 3        | 476.2351 | +0.158817 |
| -0.41026            | 551.7668 | +0.074326 | 1102.526 | 11  | A     | 2        | 347.1925 | +0.079828 |
|                     | 1231.569 | -0.05543  | 1231.569 | 12  | E     | 1        | 276.1554 | +0.139006 |
|                     |          |           |          | 13  | K     | 0        | 147.1128 |           |

Scan number 4192 Raw file LNCAP\_Silac\_23F10\_set3\_02  
 Method ITMS; CID Peptide 84.36

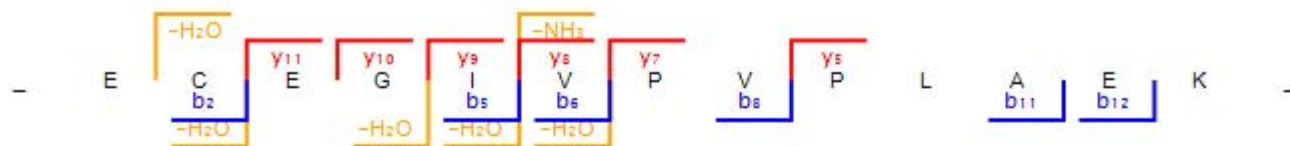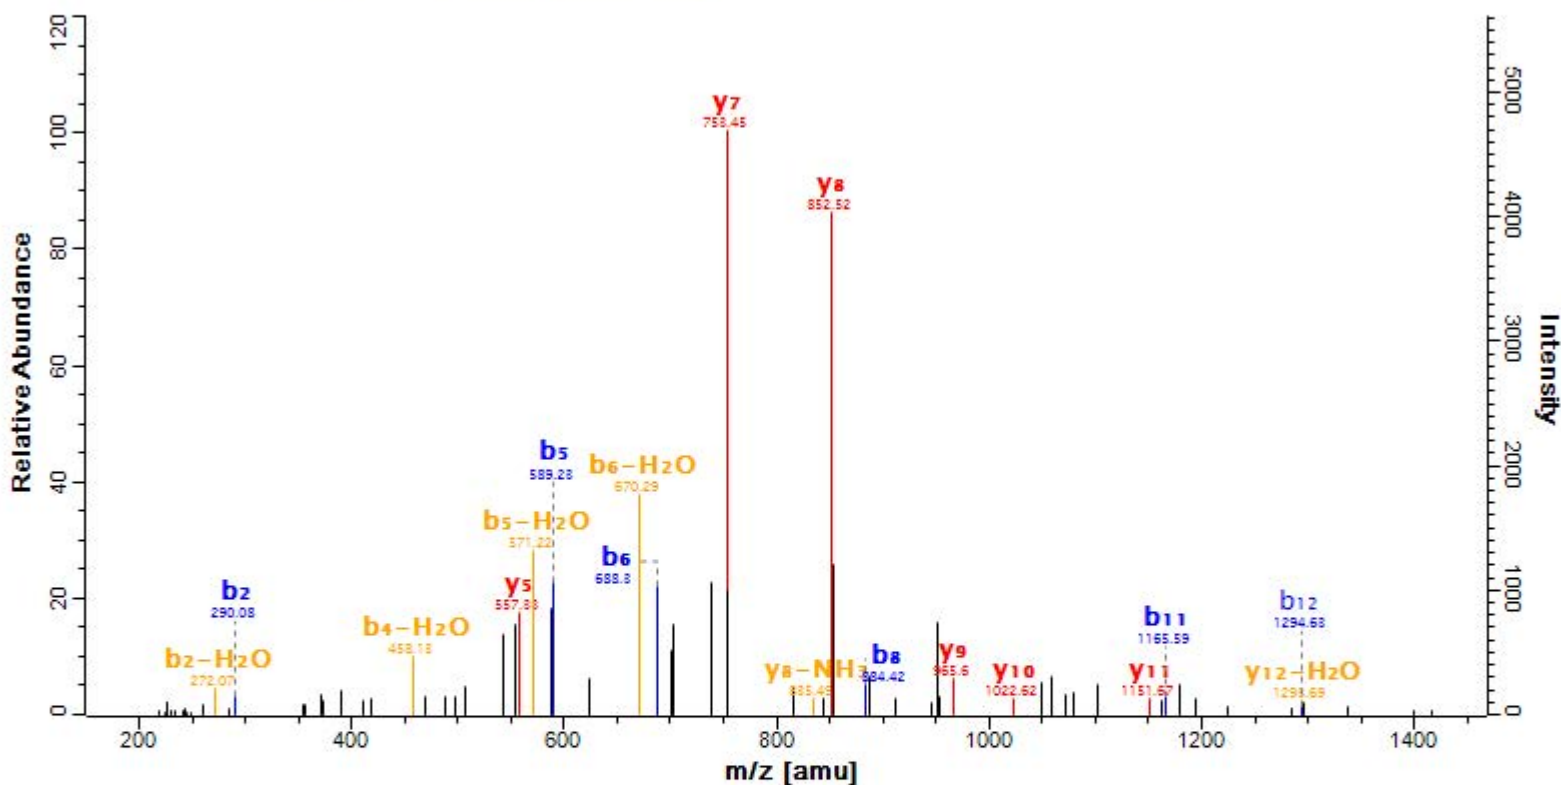

#### precursor information

|                   |                 |
|-------------------|-----------------|
| Mass:             | 1439.73434      |
| m/z:              | 720.87444       |
| Charge:           | 2+              |
| Retentiontime:    | 32.191608428955 |
| Score:            | 84.36493        |
| Mass Error [ppm]: | 0.91663         |
| PEP:              | 0.00057265      |
| Precursor Type:   | MULTI           |

#### general information

|                       |             |
|-----------------------|-------------|
| Annotation:           | 10 of 13    |
| AminoAcids Coverage:  | 77 %        |
| Intensity Coverage:   | 56 %        |
| Peak Coverage:        | 23 %        |
| Protein Localisation: | 104 ... 116 |

|            |          | b ion         |     |   | y ion    |               |            |
|------------|----------|---------------|-----|---|----------|---------------|------------|
|            | Δ dalton | mass          | seq |   | Δ dalton | mass          |            |
|            |          | 130.049869563 | 1   | E | 12       |               |            |
| -0.0952272 |          | 290.080517764 | 2   | C | 11       | 1311.69769957 |            |
|            |          | 419.12311086  | 3   | E | 10       | 1151.66705137 | -0.2047711 |
|            |          | 476.144574584 | 4   | G | 9        | 1022.62445828 | -0.2696609 |
| +0.0227652 |          | 589.228638564 | 5   | I | 8        | 965.602994552 | +0.05765   |
| +0.0094661 |          | 688.297052481 | 6   | V | 7        | 852.518930571 | -0.0793554 |
|            |          | 785.349816333 | 7   | P | 6        | 753.450516655 | +0.003768  |
| -0.1098196 |          | 884.418230249 | 8   | V | 5        | 656.397752803 |            |
|            |          | 981.470994101 | 9   | P | 4        | 557.329338887 | +0.00373   |
|            |          | 1094.55505808 | 10  | L | 3        | 460.276575035 |            |
| +0.0471104 |          | 1165.59217187 | 11  | A | 2        | 347.192511055 |            |
| -0.0709222 |          | 1294.63476497 | 12  | E | 1        | 276.155397267 |            |
|            |          |               | 13  | K | 0        | 147.112804171 |            |

Scan number 4338 Raw file LNCAP\_Silac\_23F10\_set3\_02  
 Method ITMS; CID Pepti... 107.53

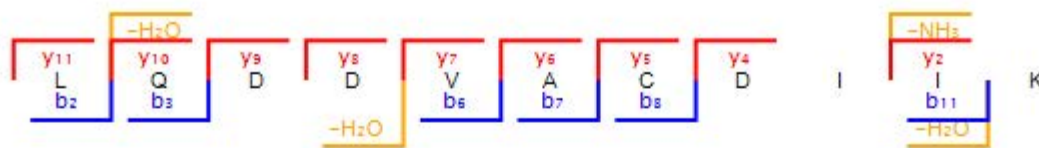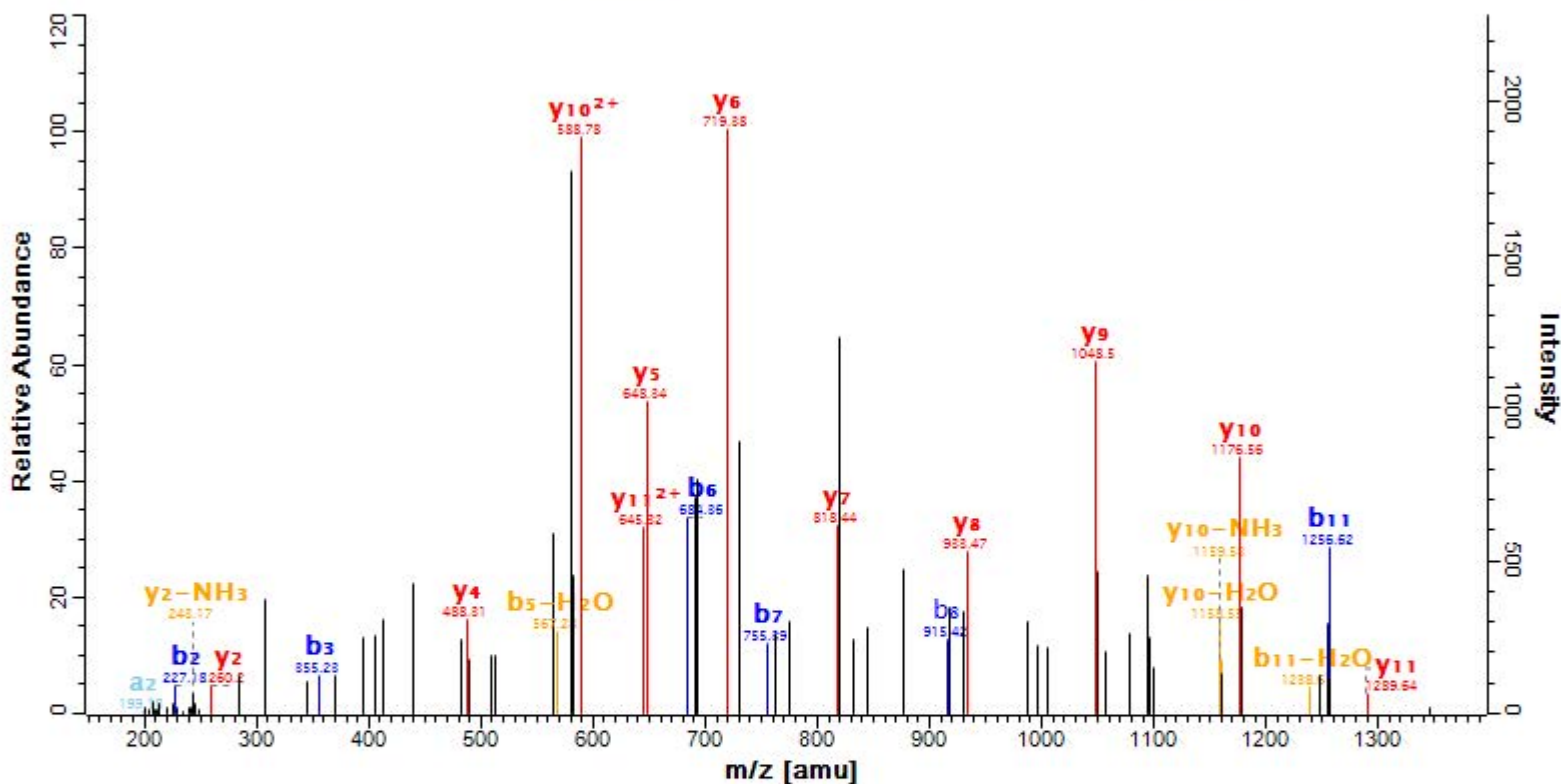

#### precursor information

|                   |                 |
|-------------------|-----------------|
| Mass:             | 1401.71706      |
| m/z:              | 701.86581       |
| Charge:           | 2+              |
| Retentiontime:    | 32.979476928710 |
| Score:            | 107.5291        |
| Mass Error [ppm]: | -0.21544        |
| PEP:              | 6.0077E-05      |
| Precursor Type:   | MULTI           |

#### general information

|                       |             |
|-----------------------|-------------|
| Annotation:           | 9 of 12     |
| AminoAcids Coverage:  | 75 %        |
| Intensity Coverage:   | 41 %        |
| Peak Coverage:        | 27 %        |
| Protein Localisation: | 135 ... 146 |

| a ion    |        | b ion    |        | seq |   |    | y ion    |         | y <sup>2+</sup> ion |         |
|----------|--------|----------|--------|-----|---|----|----------|---------|---------------------|---------|
| Δ dalton | mass   | Δ dalton | mass   |     |   |    | Δ dalton | mass    | Δ dalton            | mass    |
|          | 86.096 |          | 114.09 | 1   | I | 11 |          |         |                     |         |
| -0.331   | 199.18 | +0.0921  | 227.18 | 2   | L | 10 | 1289.6   | +0.2001 | 645.32              | +0.2272 |
|          | 327.24 | -0.029   | 355.23 | 3   | Q | 9  | 1176.6   | -0.166  | 588.78              | +0.2005 |
|          | 442.27 |          | 470.26 | 4   | D | 8  | 1048.5   | -0.014  | 1048.5              |         |
|          | 557.29 |          | 585.29 | 5   | D | 7  | 933.47   | -0.021  | 933.47              |         |
|          | 656.36 | +0.0044  | 684.36 | 6   | V | 6  | 818.44   | +0.08   | 818.44              |         |
|          | 727.4  | -0.147   | 755.39 | 7   | A | 5  | 719.38   | +0.0138 | 719.38              |         |
|          | 887.43 | -0.049   | 915.42 | 8   | C | 4  | 648.34   | +0.0537 | 648.34              |         |
|          | 1002.5 |          | 1030.5 | 9   | D | 3  | 488.31   | -0.287  | 488.31              |         |
|          | 1115.5 |          | 1143.5 | 10  | I | 2  | 373.28   |         | 373.28              |         |
|          | 1228.6 | -0.056   | 1256.6 | 11  | I | 1  | 260.2    | +0.0623 | 260.2               |         |
|          |        |          |        | 12  | K | 0  | 147.11   |         | 147.11              |         |

Scan number 4382 Raw file LNCAP\_Silac\_23F10\_set3\_02  
 Method ITMS; CID Pepti... 92.65

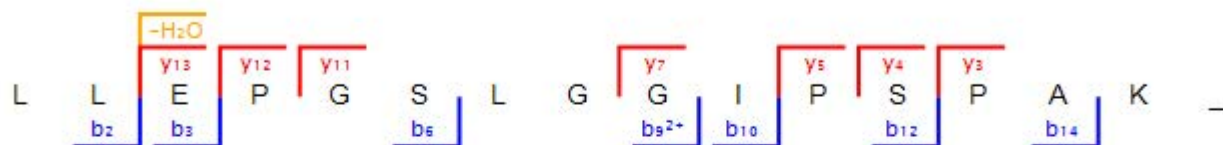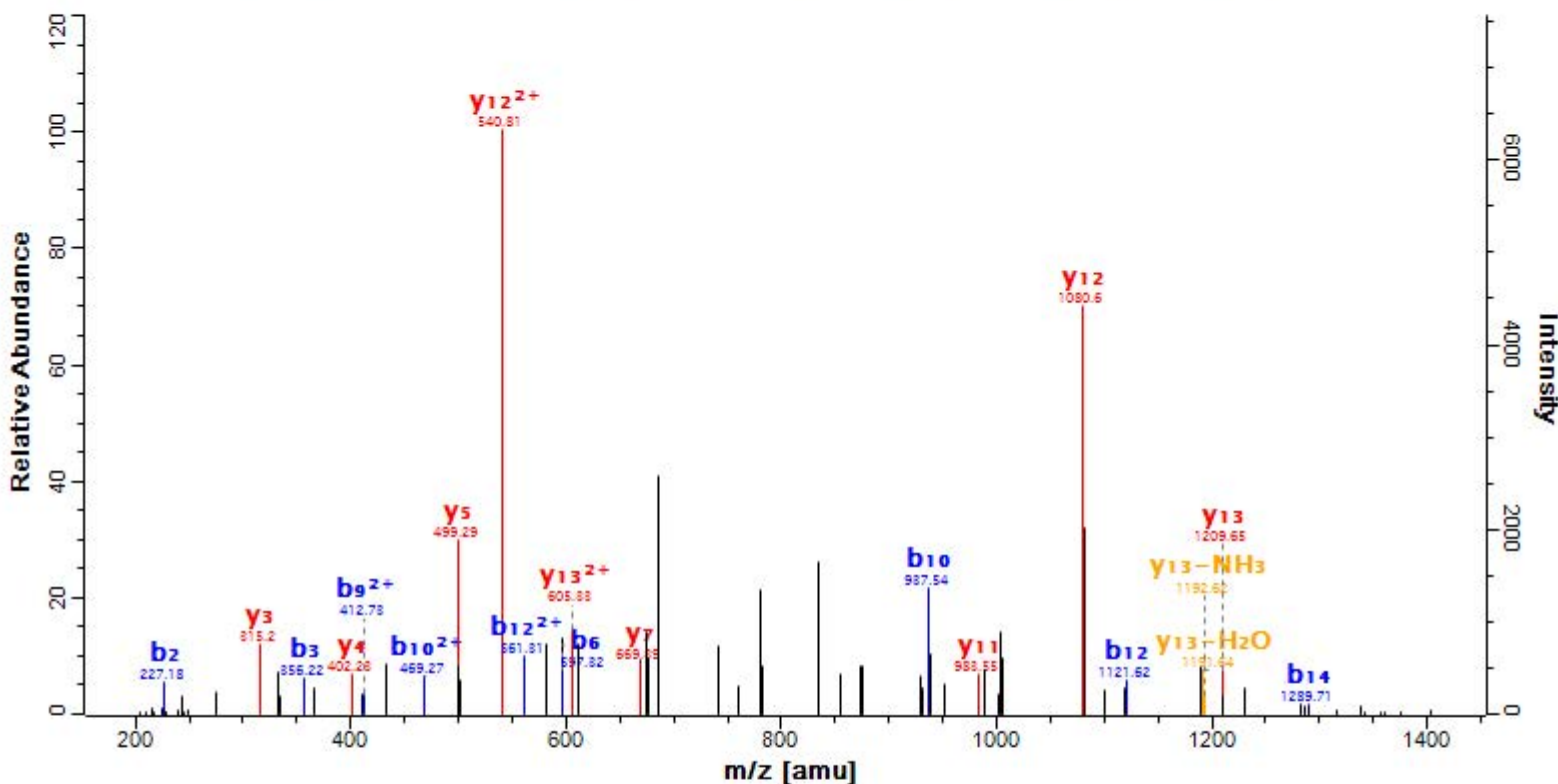

precursor information

|                   |                 |
|-------------------|-----------------|
| Mass:             | 1434.80731      |
| m/z:              | 718.41093       |
| Charge:           | 2+              |
| Retentiontime:    | 33.221351623535 |
| Score:            | 92.64977        |
| Mass Error [ppm]: | -0.6409         |
| PEP:              | 0.00012476      |
| Precursor Type:   | MULTI           |

general information

|                       |           |
|-----------------------|-----------|
| Annotation:           | 11 of 15  |
| AminoAcids Coverage:  | 73 %      |
| Intensity Coverage:   | 44 %      |
| Peak Coverage:        | 23 %      |
| Protein Localisation: | 41 ... 55 |

| b <sup>2+</sup> ion |        | b ion    |        | seq |   |    | y ion    |         | y <sup>2+</sup> ion |         |
|---------------------|--------|----------|--------|-----|---|----|----------|---------|---------------------|---------|
| Δ dalton            | mass   | Δ dalton | mass   |     |   |    | Δ dalton | mass    | Δ dalton            | mass    |
|                     | 114.09 |          | 114.09 | 1   | L | 14 |          |         |                     |         |
|                     | 227.18 | -0.028   | 227.18 | 2   | L | 13 | 1322.7   |         | 1322.7              |         |
|                     | 356.22 | +0.0808  | 356.22 | 3   | E | 12 | 1209.6   | +0.1402 | 605.33              | +0.0864 |
|                     | 453.27 |          | 453.27 | 4   | P | 11 | 1080.6   | -0.009  | 540.81              | +0.2165 |
|                     | 510.29 |          | 510.29 | 5   | G | 10 | 983.55   | -0.361  | 983.55              |         |
|                     | 597.32 | -0.319   | 597.32 | 6   | S | 9  | 926.53   |         | 926.53              |         |
|                     | 710.41 |          | 710.41 | 7   | L | 8  | 839.5    |         | 839.5               |         |
|                     | 767.43 |          | 767.43 | 8   | G | 7  | 726.41   |         | 726.41              |         |
| -0.253              | 412.73 |          | 824.45 | 9   | G | 6  | 669.39   | +0.0394 | 669.39              |         |
| -0.095              | 469.27 | -0.113   | 937.54 | 10  | I | 5  | 612.37   |         | 612.37              |         |
|                     | 1034.6 |          | 1034.6 | 11  | P | 4  | 499.29   | -0.053  | 499.29              |         |
| +0.0433             | 561.31 | +0.0007  | 1121.6 | 12  | S | 3  | 402.23   | -0.032  | 402.23              |         |
|                     | 1218.7 |          | 1218.7 | 13  | P | 2  | 315.2    | -0.033  | 315.2               |         |
|                     | 1289.7 | -0.057   | 1289.7 | 14  | A | 1  | 218.15   |         | 218.15              |         |
|                     |        |          |        | 15  | K | 0  | 147.11   |         | 147.11              |         |

Scan number 4583 Raw file LNCAP\_Silac\_23F10\_set3\_02  
 Method ITMS; CID Pepti... 187.78

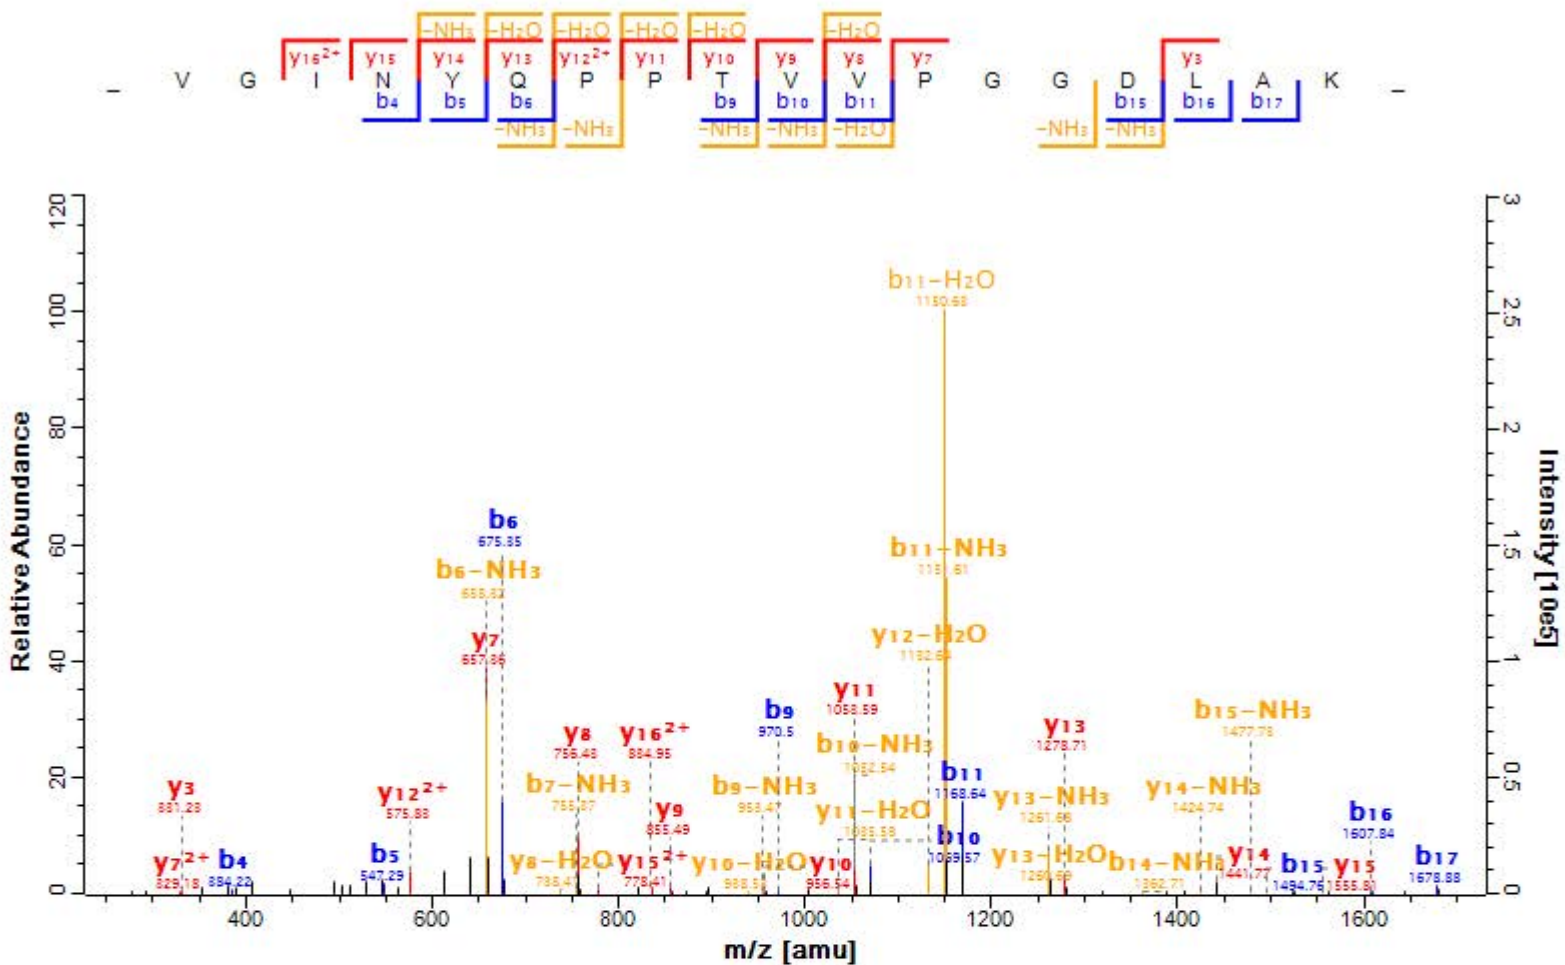

precursor information

|                   |                 |
|-------------------|-----------------|
| Mass:             | 1823.97804      |
| m/z:              | 912.9963        |
| Charge:           | 2+              |
| Retentiontime:    | 34.262466430664 |
| Score:            | 187.776         |
| Mass Error [ppm]: | -0.058609       |
| PEP:              | 1.3114E-34      |
| Precursor Type:   | MULTI           |

general information

|                       |             |
|-----------------------|-------------|
| Annotation:           | 14 of 18    |
| AminoAcids Coverag    | 78 %        |
| Intensity Coverage:   | 82 %        |
| Peak Coverage:        | 43 %        |
| Protein Localisation: | 353 ... 370 |

| b ion     |          |    |     |    | y ion    |           | y <sup>2+</sup> ion |           |
|-----------|----------|----|-----|----|----------|-----------|---------------------|-----------|
| Δ dalton  | mass     |    | seq |    | Δ dalton | mass      | Δ dalton            | mass      |
|           | 100.0757 | 1  | V   | 17 |          |           |                     |           |
|           | 157.0972 | 2  | G   | 16 | 1725.917 |           | 1725.917            |           |
|           | 270.1812 | 3  | I   | 15 | 1668.896 |           | 834.9514            | +0.129582 |
| +0.09281  | 384.2241 | 4  | N   | 14 | 1555.811 | +0.04838  | 778.4094            | +0.290632 |
| +0.060915 | 547.2875 | 5  | Y   | 13 | 1441.769 | -0.06726  | 1441.769            |           |
| +0.009112 | 675.3461 | 6  | Q   | 12 | 1278.705 | -0.05752  | 1278.705            |           |
|           | 772.3988 | 7  | P   | 11 | 1150.647 |           | 575.827             | +0.324648 |
|           | 869.4516 | 8  | P   | 10 | 1053.594 | +0.029405 | 1053.594            |           |
| -0.03393  | 970.4993 | 9  | T   | 9  | 956.5411 | +0.024734 | 956.5411            |           |
| -0.002    | 1069.568 | 10 | V   | 8  | 855.4934 | +0.079981 | 855.4934            |           |
| -0.09068  | 1168.636 | 11 | V   | 7  | 756.425  | -0.03959  | 756.425             |           |
|           | 1265.689 | 12 | P   | 6  | 657.3566 | -0.02086  | 329.1819            | +0.056396 |
|           | 1322.71  | 13 | G   | 5  | 560.3039 |           | 560.3039            |           |
|           | 1379.732 | 14 | G   | 4  | 503.2824 |           | 503.2824            |           |
| -0.1159   | 1494.759 | 15 | D   | 3  | 446.2609 |           | 446.2609            |           |
| +0.082753 | 1607.843 | 16 | L   | 2  | 331.234  | +0.122341 | 331.234             |           |
| -0.04323  | 1678.88  | 17 | A   | 1  | 218.1499 |           | 218.1499            |           |
|           |          | 18 | K   | 0  | 147.1128 |           | 147.1128            |           |



Scan number 4914 Raw file LNCAP\_Silac\_23F10\_set3\_02  
 Method ITMS; CID Peptide 328.29

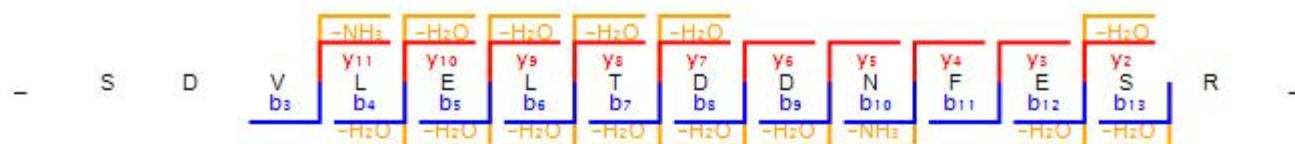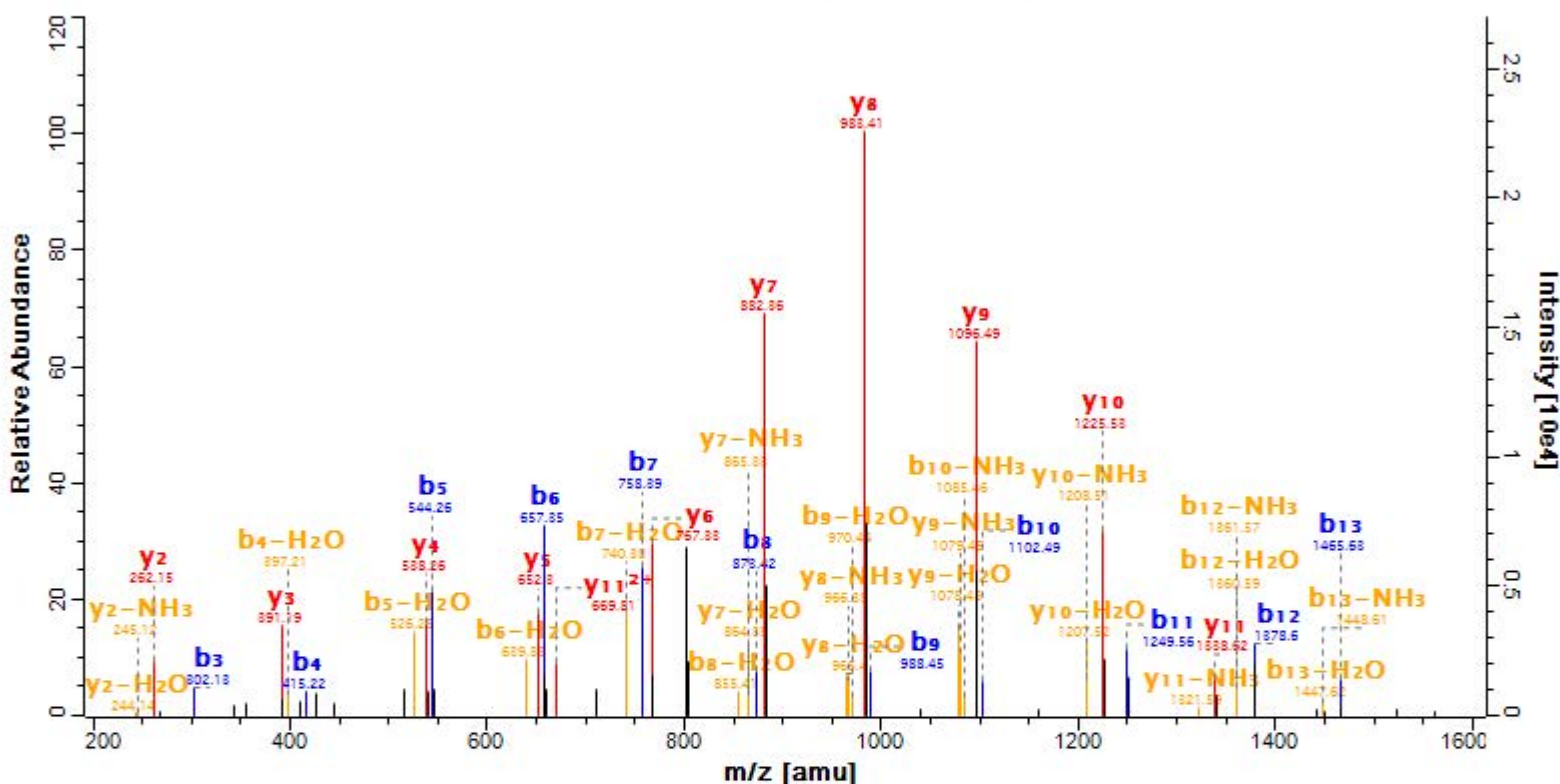

#### precursor information

|                   |                 |
|-------------------|-----------------|
| Mass:             | 1638.73699      |
| m/z:              | 820.37577       |
| Charge:           | 2+              |
| Retentiontime:    | 35.983951568603 |
| Score:            | 328.2873        |
| Mass Error [ppm]: | -0.19377        |
| PEP:              | 2.7341E-102     |
| Precursor Type:   | MULTI           |

| b ion     |          |     |   | y ion    |          | y <sup>2+</sup> ion |          |           |
|-----------|----------|-----|---|----------|----------|---------------------|----------|-----------|
| Δ dalton  | mass     | seq |   | Δ dalton | mass     | Δ dalton            | mass     |           |
|           | 88.0393  | 1   | S | 13       |          |                     |          |           |
|           | 203.0662 | 2   | D | 12       | 1552.713 |                     | 1552.713 |           |
| +0.07655  | 302.1347 | 3   | V | 11       | 1437.686 |                     | 1437.686 |           |
| +0.00332  | 415.2187 | 4   | L | 10       | 1338.617 | -0.05836            | 669.8122 | +0.183611 |
| -0.02359  | 544.2613 | 5   | E | 9        | 1225.533 | +0.007513           | 1225.533 |           |
| +0.051468 | 657.3454 | 6   | L | 8        | 1096.491 | -0.01239            | 1096.491 |           |
| -0.05621  | 758.3931 | 7   | T | 7        | 983.4065 | +0.010757           | 983.4065 |           |
| -0.06679  | 873.42   | 8   | D | 6        | 882.3588 | -0.00504            | 882.3588 |           |
| +0.012586 | 988.4469 | 9   | D | 5        | 767.3319 | +0.043447           | 767.3319 |           |
| -0.05225  | 1102.49  | 10  | N | 4        | 652.3049 | +0.013383           | 652.3049 |           |
| -0.04547  | 1249.558 | 11  | F | 3        | 538.262  | +0.071936           | 538.262  |           |
| -0.20525  | 1378.601 | 12  | E | 2        | 391.1936 | +0.018401           | 391.1936 |           |
| -0.21396  | 1465.633 | 13  | S | 1        | 262.151  | +0.103658           | 262.151  |           |
|           |          | 14  | R | 0        | 175.119  |                     | 175.119  |           |

#### general information

|                       |          |
|-----------------------|----------|
| Annotation:           | 11 of 14 |
| AminoAcids Coverage:  | 79 %     |
| Intensity Coverage:   | 76 %     |
| Peak Coverage:        | 59 %     |
| Protein Localisation: | 1 ... 14 |

Scan number 5113 Raw file LNCAP\_Silac\_23F10\_set3\_02  
 Method ITMS; CID Peptide 235.92

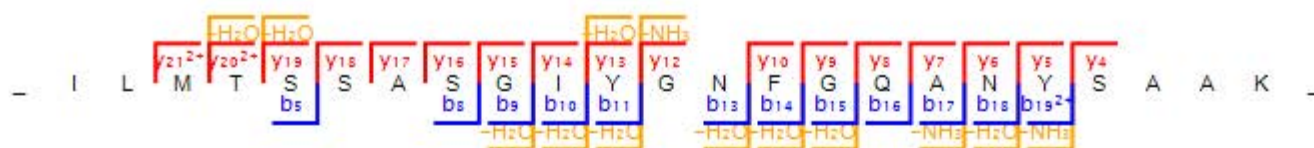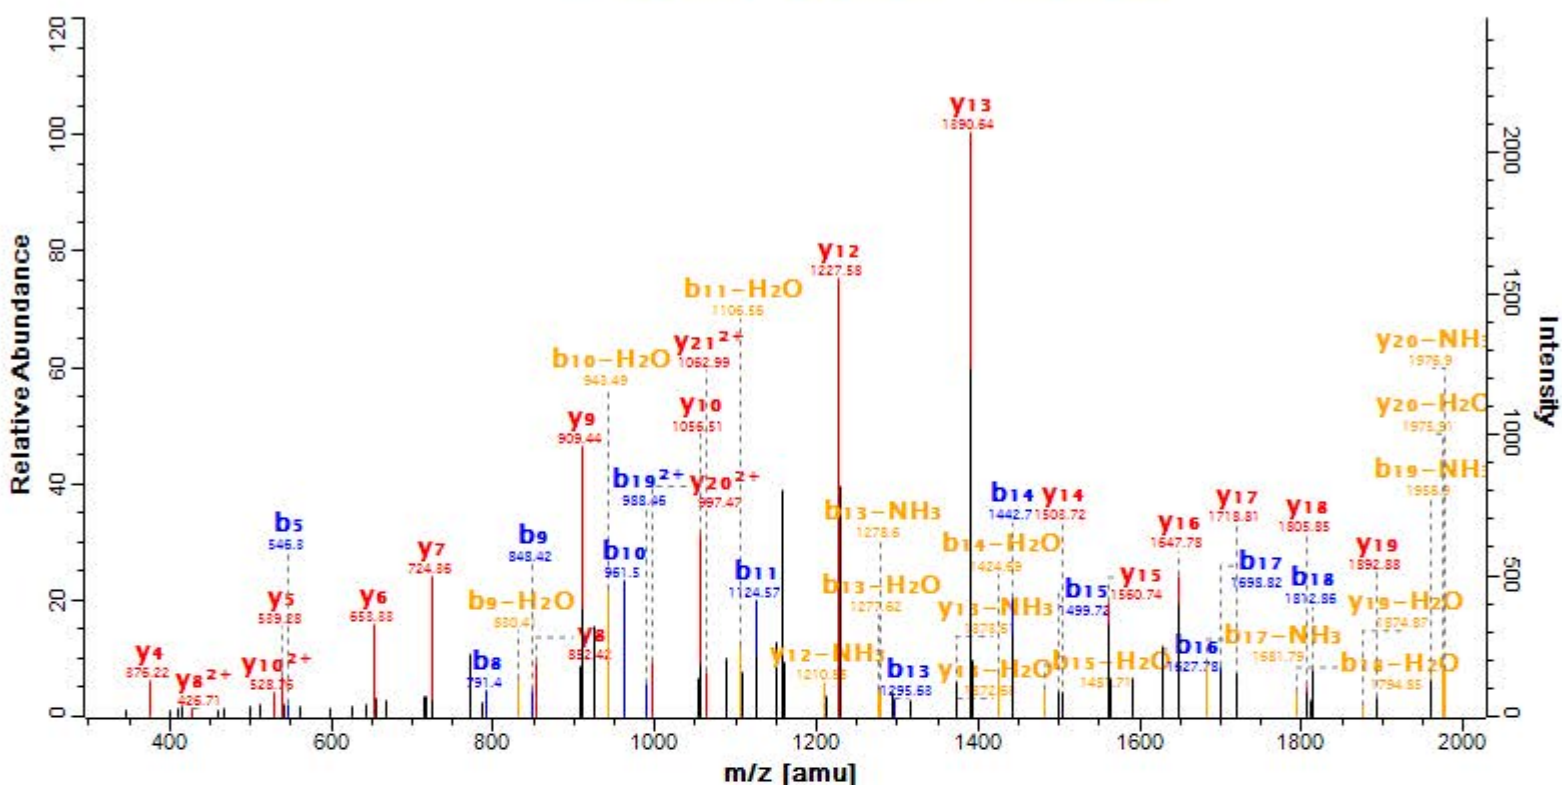

**precursor information**

|                   |                 |
|-------------------|-----------------|
| Mass:             | 2350.12735      |
| m/z:              | 1176.07095      |
| Charge:           | 2+              |
| Retention time:   | 37.039775848388 |
| Score:            | 235.9228        |
| Mass Error [ppm]: | 0.42642         |
| PEP:              | 2.9125E-87      |
| Precursor Type:   | MULTI           |

**general information**

|                       |          |
|-----------------------|----------|
| Annotation:           | 18 of 23 |
| AminoAcids Coverage:  | 78 %     |
| Intensity Coverage:   | 57 %     |
| Peak Coverage:        | 46 %     |
| Protein Localisation: | 9 ... 31 |

| b <sup>2+</sup> ion |         | b ion    |        | seq |   |    | y ion    |         | y <sup>2+</sup> ion |         |
|---------------------|---------|----------|--------|-----|---|----|----------|---------|---------------------|---------|
| Δ dalton            | mass    | Δ dalton | mass   |     |   |    | Δ dalton | mass    | Δ dalton            | mass    |
|                     | 114.09  |          | 114.09 | 1   | I | 22 |          |         |                     |         |
|                     | 227.18  |          | 227.18 | 2   | L | 21 | 2238     |         | 2238                |         |
|                     | 358.22  |          | 358.22 | 3   | M | 20 | 2125     |         | 1063                | -0.079  |
|                     | 459.26  |          | 459.26 | 4   | T | 19 | 1993.9   |         | 997.47              | +0.3535 |
|                     | 546.3   | -0.045   | 546.3  | 5   | S | 18 | 1892.9   | -0.017  | 1892.9              |         |
|                     | 633.33  |          | 633.33 | 6   | S | 17 | 1805.8   | -0.104  | 1805.8              |         |
|                     | 704.36  |          | 704.36 | 7   | A | 16 | 1718.8   | -0.191  | 1718.8              |         |
|                     | 791.4   | -0.012   | 791.4  | 8   | S | 15 | 1647.8   | -0.059  | 1647.8              |         |
|                     | 848.42  | -0.067   | 848.42 | 9   | G | 14 | 1560.7   | -0.021  | 1560.7              |         |
|                     | 961.5   | -0.105   | 961.5  | 10  | I | 13 | 1503.7   | +0.0133 | 1503.7              |         |
|                     | 1124.6  | +0.0478  | 1124.6 | 11  | Y | 12 | 1390.6   | -0.029  | 1390.6              |         |
|                     | 1181.6  |          | 1181.6 | 12  | G | 11 | 1227.6   | -0.081  | 1227.6              |         |
|                     | 1295.6  | +0.0046  | 1295.6 | 13  | N | 10 | 1170.6   |         | 1170.6              |         |
|                     | 1442.7  | -0.066   | 1442.7 | 14  | F | 9  | 1056.5   | -0.084  | 528.76              | +0.4353 |
|                     | 1499.7  | -0.179   | 1499.7 | 15  | G | 8  | 909.44   | +0.0559 | 909.44              |         |
|                     | 1627.8  | -0.241   | 1627.8 | 16  | Q | 7  | 852.42   | +0.0047 | 426.71              | -0.391  |
|                     | 1698.8  | +0.0539  | 1698.8 | 17  | A | 6  | 724.36   | +0.082  | 724.36              |         |
|                     | 1812.9  | +0.1389  | 1812.9 | 18  | N | 5  | 653.33   | -0.002  | 653.33              |         |
| +0.0628             | 1988.46 |          | 1975.9 | 19  | Y | 4  | 539.28   | +0.2222 | 539.28              |         |
|                     | 2063    |          | 2063   | 20  | S | 3  | 376.22   | +0.051  | 376.22              |         |
|                     | 2134    |          | 2134   | 21  | A | 2  | 289.19   |         | 289.19              |         |
|                     | 2205    |          | 2205   | 22  | A | 1  | 218.15   |         | 218.15              |         |
|                     |         |          |        | 23  | K | 0  | 147.11   |         | 147.11              |         |

Scan number 520 Raw file LNCAP\_Silac\_23F10\_set3\_02  
 Method ITMS; CID Pepti... 125.22

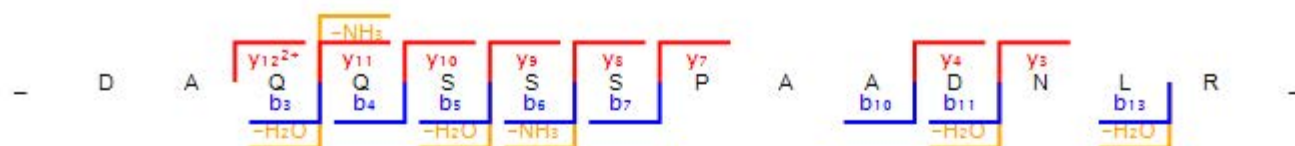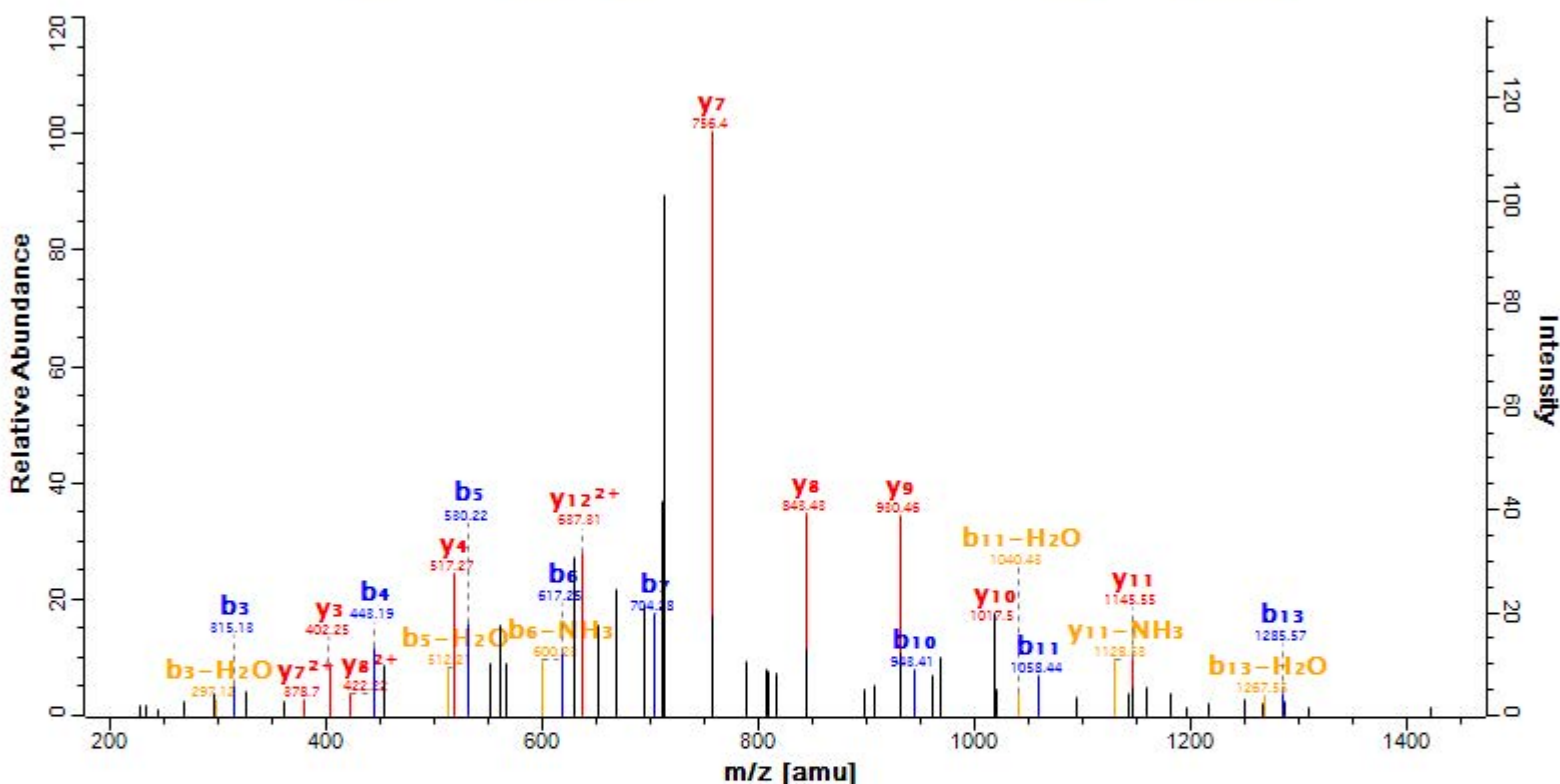

#### precursor information

|                   |                 |
|-------------------|-----------------|
| Mass:             | 1458.67074      |
| m/z:              | 730.34265       |
| Charge:           | 2+              |
| Retentiontime:    | 8.7666864395141 |
| Score:            | 125.2174        |
| Mass Error [ppm]: | 0.57509         |
| PEP:              | 3.4757E-05      |
| Precursor Type:   | ISO             |

#### general information

|                       |             |
|-----------------------|-------------|
| Annotation:           | 10 of 14    |
| AminoAcids Coverage:  | 71 %        |
| Intensity Coverage:   | 45 %        |
| Peak Coverage:        | 35 %        |
| Protein Localisation: | 552 ... 565 |

| b ion     |          |     |   | y ion    |          | y <sup>2+</sup> ion |           |           |
|-----------|----------|-----|---|----------|----------|---------------------|-----------|-----------|
| Δ dalton  | mass     | seq |   | Δ dalton | mass     | Δ dalton            | mass      |           |
|           | 116.0342 | 1   | D | 13       |          |                     |           |           |
|           | 187.0713 | 2   | A | 12       | 1344.65  | 1344.65             |           |           |
| +0.001223 | 315.1299 | 3   | Q | 11       | 1273.613 | 637.3102            | +0.058821 |           |
| +0.049732 | 443.1885 | 4   | Q | 10       | 1145.555 | +0.072656           | 1145.555  |           |
| +0.099124 | 530.2205 | 5   | S | 9        | 1017.496 | +0.023568           | 1017.496  |           |
| -0.01353  | 617.2525 | 6   | S | 8        | 930.4639 | +0.025506           | 930.4639  |           |
| -0.3107   | 704.2846 | 7   | S | 7        | 843.4319 | +0.106851           | 422.2196  | -0.04656  |
|           | 801.3373 | 8   | P | 6        | 756.3999 | +0.045862           | 378.7036  | +0.306738 |
|           | 872.3745 | 9   | A | 5        | 659.3471 |                     | 659.3471  |           |
| -0.03705  | 943.4116 | 10  | A | 4        | 588.31   |                     | 588.31    |           |
| -0.2764   | 1058.439 | 11  | D | 3        | 517.2729 | -0.06232            | 517.2729  |           |
|           | 1172.481 | 12  | N | 2        | 402.2459 | +0.072111           | 402.2459  |           |
| -0.00288  | 1285.565 | 13  | L | 1        | 288.203  |                     | 288.203   |           |
|           |          | 14  | R | 0        | 175.119  |                     | 175.119   |           |

Scan number 6010 Raw file LNCAP\_Silac\_23F10\_set3\_02  
 Method ITMS; CID Pepti... 238.07

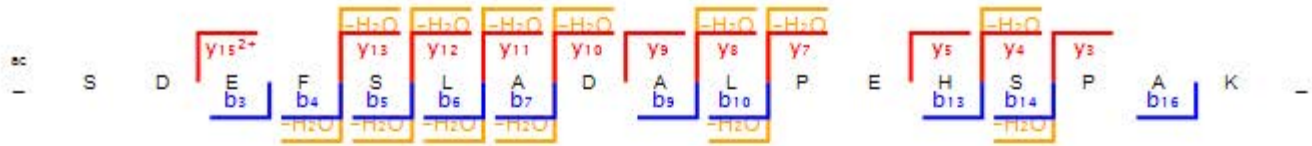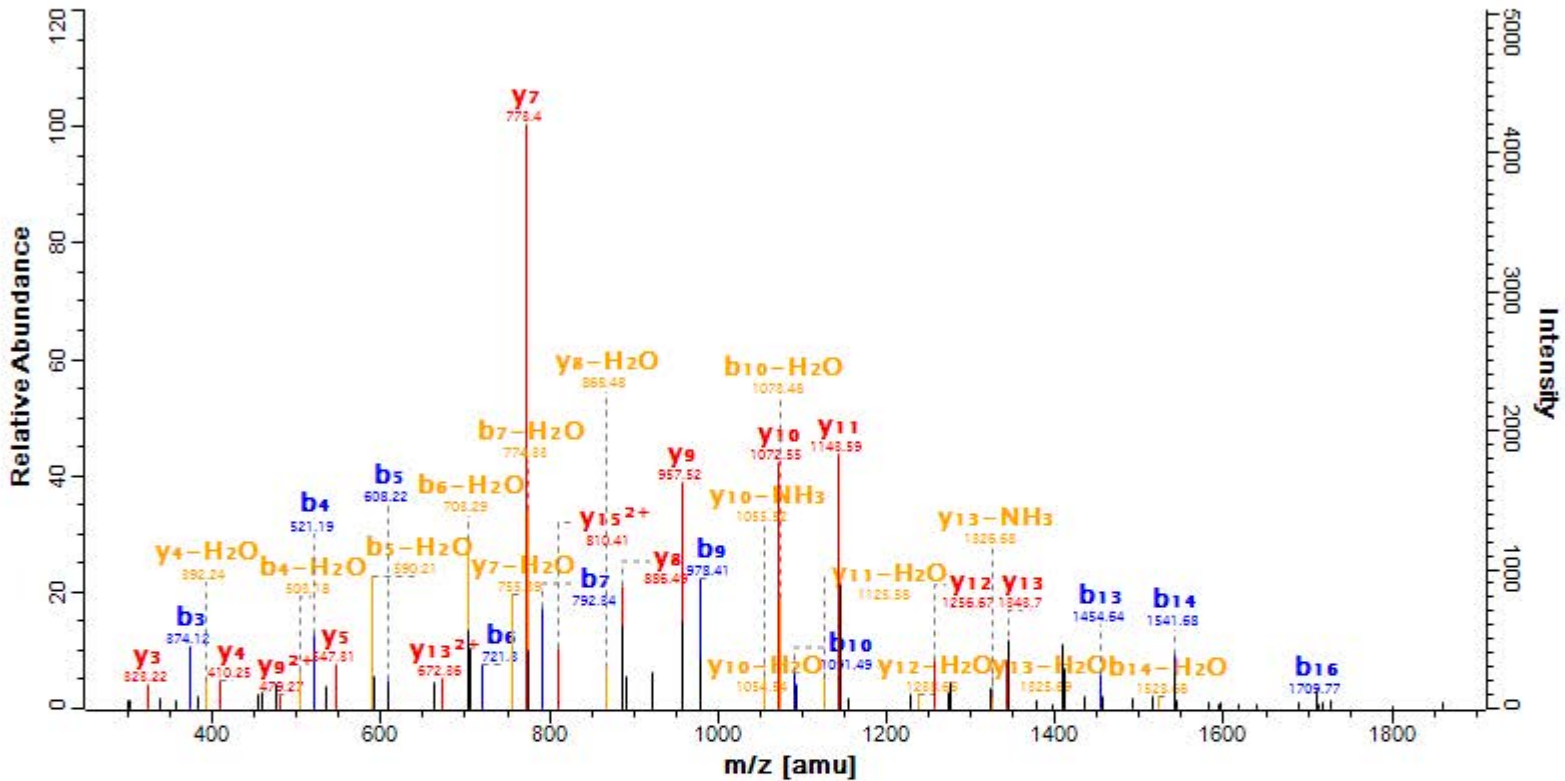

**precursor information**

|                   |                 |
|-------------------|-----------------|
| Mass:             | 1854.86361      |
| m/z:              | 928.43908       |
| Charge:           | 2+              |
| Retentiontime:    | 41.785461425781 |
| Score:            | 238.0663        |
| Mass Error [ppm]: | 0.021304        |
| PEP:              | 1.2402E-56      |
| Precursor Type:   | MULTI           |

**general information**

|                       |          |
|-----------------------|----------|
| Annotation:           | 13 of 17 |
| AminoAcids Coverage:  | 76 %     |
| Intensity Coverage:   | 70 %     |
| Peak Coverage:        | 42 %     |
| Protein Localisation: | 2 ... 18 |

| b ion     |          |     |   | y ion    |          | y <sup>2+</sup> ion |           |
|-----------|----------|-----|---|----------|----------|---------------------|-----------|
| Δ dalton  | mass     | seq |   | Δ dalton | mass     | Δ dalton            | mass      |
|           | 130.0499 | 1   | S | 16       |          |                     |           |
|           | 245.0768 | 2   | D | 15       | 1734.842 |                     | 1734.842  |
| -0.02816  | 374.1194 | 3   | E | 14       | 1619.816 | 810.4114            | +0.047773 |
| +0.045457 | 521.1878 | 4   | F | 13       | 1490.773 |                     | 1490.773  |
| +0.12671  | 608.2198 | 5   | S | 12       | 1343.705 | -0.29374            | 672.3559  |
| -0.09218  | 721.3039 | 6   | L | 11       | 1256.672 | +0.033578           | 1256.672  |
| -0.0685   | 792.341  | 7   | A | 10       | 1143.588 | -0.0784             | 1143.588  |
|           | 907.368  | 8   | D | 9        | 1072.551 | -0.10904            | 1072.551  |
| -0.07549  | 978.4051 | 9   | A | 8        | 957.5244 | -0.04138            | 479.2658  |
| -0.25025  | 1091.489 | 10  | L | 7        | 886.4872 | +0.033571           | 886.4872  |
|           | 1188.542 | 11  | P | 6        | 773.4032 | +0.059774           | 773.4032  |
|           | 1317.585 | 12  | E | 5        | 676.3504 |                     | 676.3504  |
| -0.15831  | 1454.643 | 13  | H | 4        | 547.3078 | +0.079874           | 547.3078  |
| -0.14358  | 1541.675 | 14  | S | 3        | 410.2489 | +0.058891           | 410.2489  |
|           | 1638.728 | 15  | P | 2        | 323.2169 | +0.050453           | 323.2169  |
| -0.04108  | 1709.765 | 16  | A | 1        | 226.1641 |                     | 226.1641  |
|           |          | 17  | K | 0        | 155.127  |                     | 155.127   |

Scan number 6103 Raw file LNCAP\_Silac\_23F10\_set3\_02  
 Method ITMS; CID Pepti... 254.58

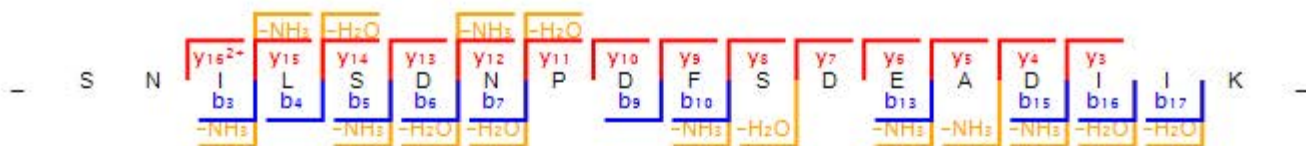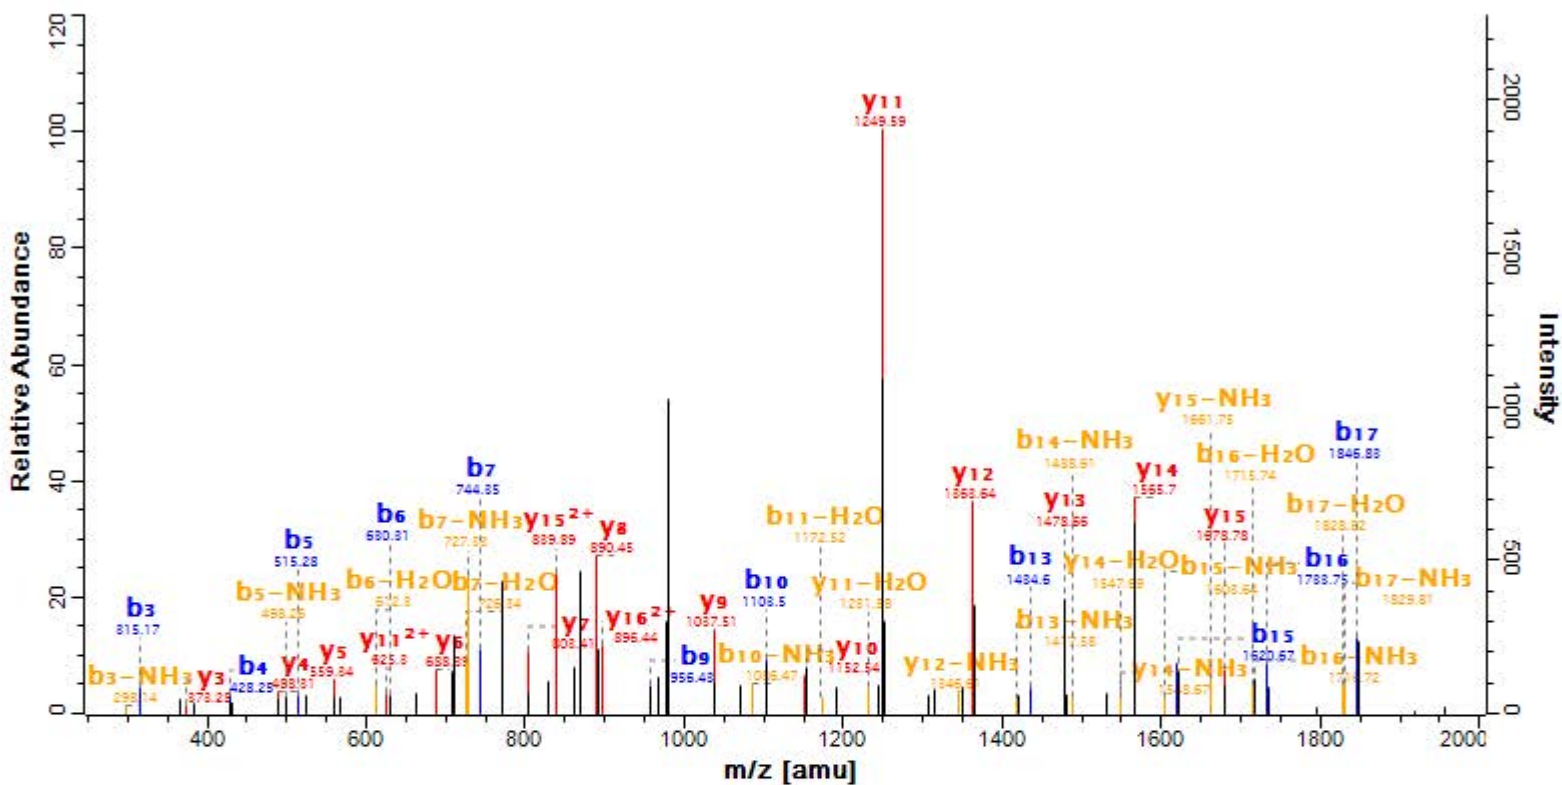

**precursor information**

|                   |                 |
|-------------------|-----------------|
| Mass:             | 1991.93164      |
| m/z:              | 996.9731        |
| Charge:           | 2+              |
| Retentiontime:    | 42.294292449951 |
| Score:            | 254.5751        |
| Mass Error [ppm]: | -0.37059        |
| PEP:              | 1.9278E-63      |
| Precursor Type:   | ISO             |

| b ion     |          |    |     |    | y ion    |           | y <sup>2+</sup> ion |           |
|-----------|----------|----|-----|----|----------|-----------|---------------------|-----------|
| Δ dalton  | mass     |    | seq |    | Δ dalton | mass      | Δ dalton            | mass      |
|           | 88.0393  | 1  | S   | 17 |          |           |                     |           |
|           | 202.0822 | 2  | N   | 16 | 1905.908 |           | 1905.908            |           |
| -0.0113   | 315.1663 | 3  | I   | 15 | 1791.865 |           | 896.436             | +0.024338 |
| +0.050451 | 428.2504 | 4  | L   | 14 | 1678.781 | -0.08056  | 839.894             | +0.26327  |
| +0.312033 | 515.2824 | 5  | S   | 13 | 1565.697 | -0.11271  | 1565.697            |           |
| +0.127863 | 630.3093 | 6  | D   | 12 | 1478.665 | -0.32653  | 1478.665            |           |
| -0.03414  | 744.3523 | 7  | N   | 11 | 1363.638 | -0.06753  | 1363.638            |           |
|           | 841.405  | 8  | P   | 10 | 1249.595 | -0.11372  | 625.301             | +0.115956 |
| -0.04635  | 956.432  | 9  | D   | 9  | 1152.542 | -0.11296  | 1152.542            |           |
| -0.06508  | 1103.5   | 10 | F   | 8  | 1037.515 | -0.00911  | 1037.515            |           |
|           | 1190.532 | 11 | S   | 7  | 890.4466 | +0.063822 | 890.4466            |           |
|           | 1305.559 | 12 | D   | 6  | 803.4145 | -0.03562  | 803.4145            |           |
| -0.21498  | 1434.602 | 13 | E   | 5  | 688.3876 | +0.036002 | 688.3876            |           |
|           | 1505.639 | 14 | A   | 4  | 559.345  | -0.04463  | 559.345             |           |
| -0.20982  | 1620.666 | 15 | D   | 3  | 488.3079 | +0.098253 | 488.3079            |           |
| -0.22748  | 1733.75  | 16 | I   | 2  | 373.2809 | +0.067396 | 373.2809            |           |
| -0.1177   | 1846.834 | 17 | I   | 1  | 260.1969 |           | 260.1969            |           |
|           |          | 18 | K   | 0  | 147.1128 |           | 147.1128            |           |

**general information**

|                       |               |
|-----------------------|---------------|
| Annotation:           | 15 of 18      |
| AminoAcids Coverage:  | 83 %          |
| Intensity Coverage:   | 50 %          |
| Peak Coverage:        | 45 %          |
| Protein Localisation: | 1031 ... 1048 |

Scan number 6110 Raw file LNCAP\_Silac\_23F10\_set3\_02  
 Method ITMS; CID Pepti... 141.37

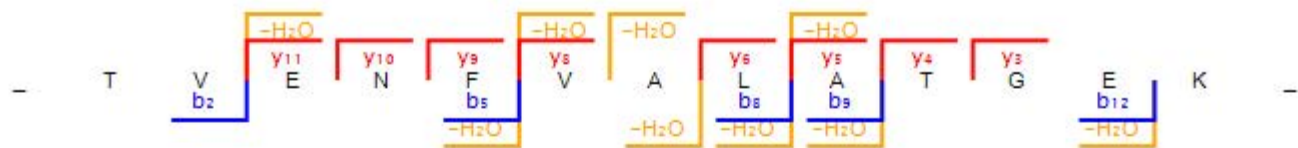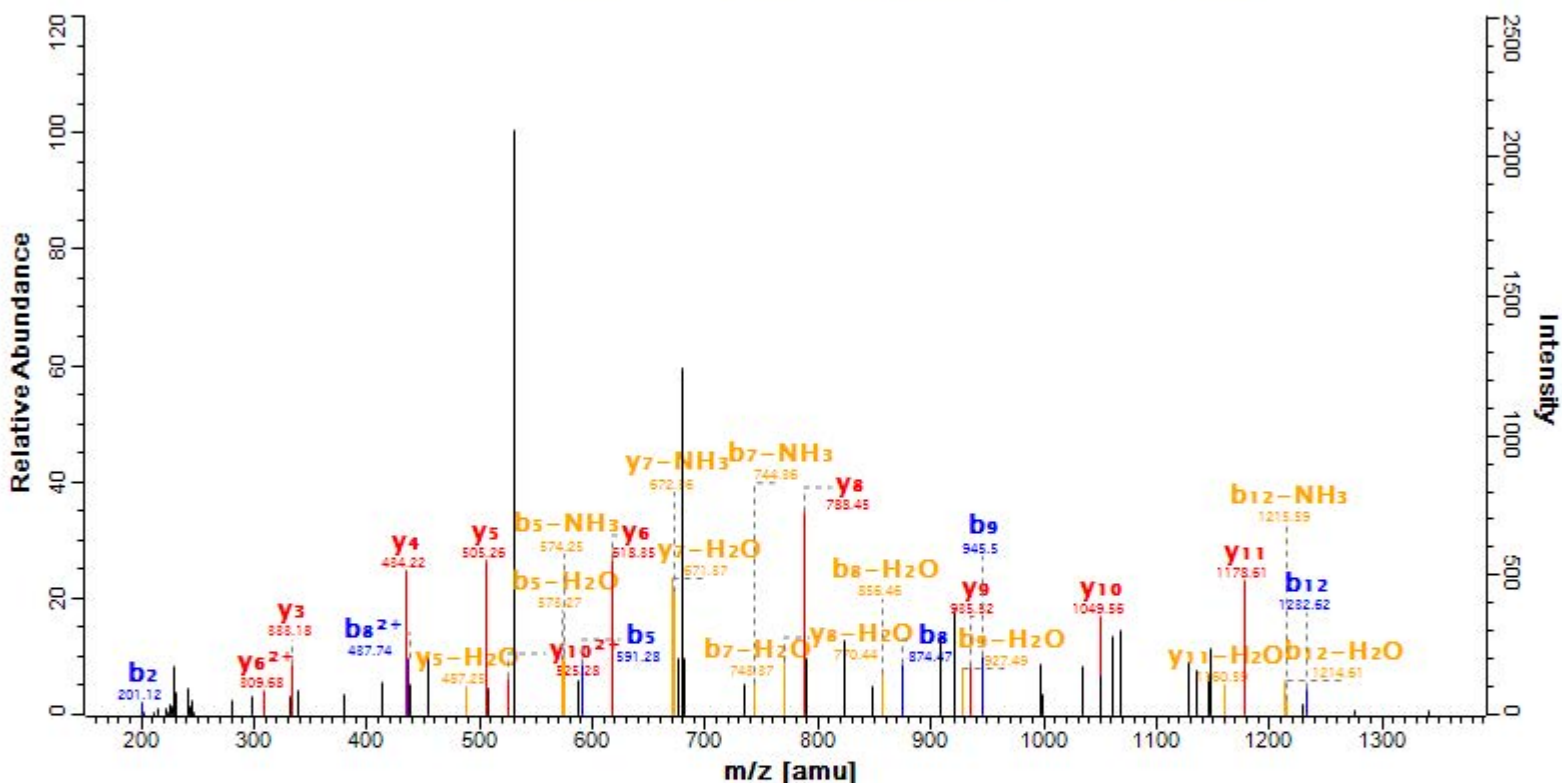

**precursor information**

|                   |                 |
|-------------------|-----------------|
| Mass:             | 1377.71341      |
| m/z:              | 689.86398       |
| Charge:           | 2+              |
| Retentiontime:    | 42.330818176269 |
| Score:            | 141.3704        |
| Mass Error [ppm]: | -0.42535        |
| PEP:              | 8.0801E-07      |
| Precursor Type:   | MULTI           |

**general information**

|                       |           |
|-----------------------|-----------|
| Annotation:           | 11 of 13  |
| AminoAcids Coverage:  | 85 %      |
| Intensity Coverage:   | 44 %      |
| Peak Coverage:        | 36 %      |
| Protein Localisation: | 66 ... 78 |

| b <sup>2+</sup> ion |        | b ion    |        | seq |   |    | y ion    |         | y <sup>2+</sup> ion |         |
|---------------------|--------|----------|--------|-----|---|----|----------|---------|---------------------|---------|
| Δ dalton            | mass   | Δ dalton | mass   |     |   |    | Δ dalton | mass    | Δ dalton            | mass    |
|                     | 102.05 |          | 102.05 | 1   | T | 12 |          |         |                     |         |
|                     | 201.12 | -0.087   | 201.12 | 2   | V | 11 | 1277.7   |         | 1277.7              |         |
|                     | 330.17 |          | 330.17 | 3   | E | 10 | 1178.6   | -0.126  | 1178.6              |         |
|                     | 444.21 |          | 444.21 | 4   | N | 9  | 1049.6   | -0.05   | 525.28              | +0.4071 |
|                     | 591.28 | -0.013   | 591.28 | 5   | F | 8  | 935.52   | +0.1533 | 935.52              |         |
|                     | 690.35 |          | 690.35 | 6   | V | 7  | 788.45   | +0.0906 | 788.45              |         |
|                     | 761.38 |          | 761.38 | 7   | A | 6  | 689.38   |         | 689.38              |         |
| -0.378              | 437.74 | -0.015   | 874.47 | 8   | L | 5  | 618.35   | +0.082  | 309.68              | -0.366  |
|                     | 945.5  | +0.013   | 945.5  | 9   | A | 4  | 505.26   | +0.0851 | 505.26              |         |
|                     | 1046.6 |          | 1046.6 | 10  | T | 3  | 434.22   | -0.006  | 434.22              |         |
|                     | 1103.6 |          | 1103.6 | 11  | G | 2  | 333.18   | +0.0738 | 333.18              |         |
|                     | 1232.6 | -0.22    | 1232.6 | 12  | E | 1  | 276.16   |         | 276.16              |         |
|                     |        |          |        | 13  | K | 0  | 147.11   |         | 147.11              |         |

Scan number 6326 Raw file LNCAP\_Silac\_23F10\_set3\_02  
 Method ITMS; CID Pepti... 175.51

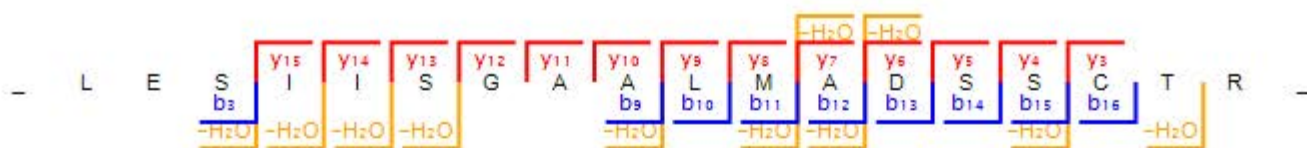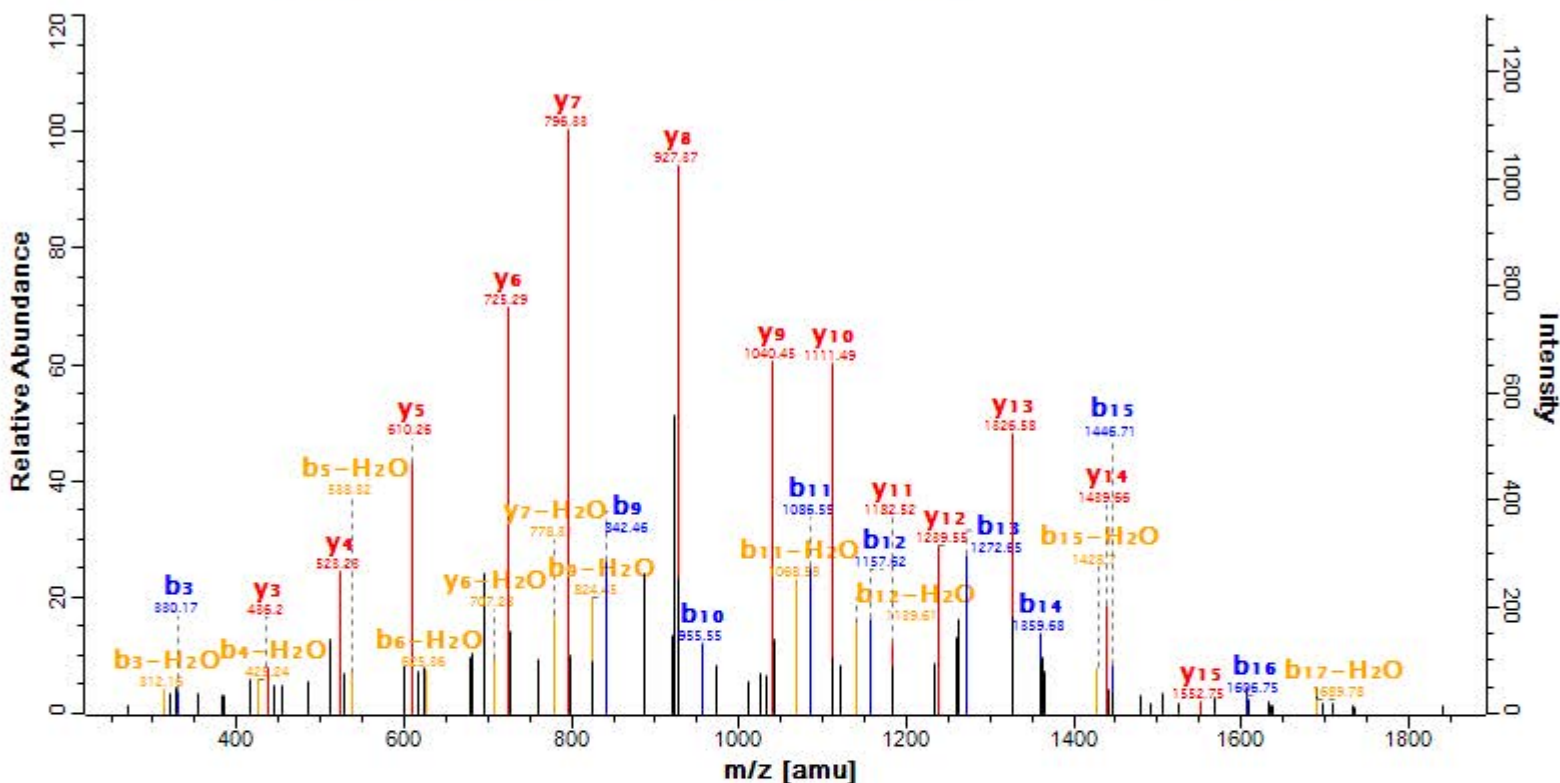

precursor information

|                   |                 |
|-------------------|-----------------|
| Mass:             | 1880.89686      |
| m/z:              | 941.45571       |
| Charge:           | 2+              |
| Retentiontime:    | 43.462425231933 |
| Score:            | 175.5093        |
| Mass Error [ppm]: | -0.17853        |
| PEP:              | 1.824E-30       |
| Precursor Type:   | MULTI           |

general information

|                       |             |
|-----------------------|-------------|
| Annotation:           | 15 of 18    |
| AminoAcids Coverage:  | 83 %        |
| Intensity Coverage:   | 62 %        |
| Peak Coverage:        | 34 %        |
| Protein Localisation: | 309 ... 326 |

| b ion      |               |     |   |          | y ion         |            |
|------------|---------------|-----|---|----------|---------------|------------|
| Δ dalton   | mass          | seq |   | Δ dalton | mass          |            |
|            | 114.091340447 | 1   | L | 17       |               |            |
|            | 243.133933543 | 2   | E | 16       | 1768.82041026 |            |
| -0.1105115 | 330.165961953 | 3   | S | 15       | 1639.77781716 |            |
|            | 443.250025933 | 4   | I | 14       | 1552.74578875 | -0.1730348 |
|            | 556.334089914 | 5   | I | 13       | 1439.66172477 | +0.0002625 |
|            | 643.366118324 | 6   | S | 12       | 1326.57766079 | -0.1078122 |
|            | 700.387582047 | 7   | G | 11       | 1239.54563238 | -0.0164576 |
|            | 771.424695835 | 8   | A | 10       | 1182.52416866 | -0.0390612 |
| +0.0283027 | 842.461809623 | 9   | A | 9        | 1111.48705487 | -0.0418644 |
| -0.0997676 | 955.545873603 | 10  | L | 8        | 1040.44994108 | +0.0500589 |
| -0.1552059 | 1086.58635821 | 11  | M | 7        | 927.365877102 | +0.0499554 |
| -0.2334573 | 1157.623472   | 12  | A | 6        | 796.325392496 | -0.0059345 |
| -0.1617676 | 1272.65041503 | 13  | D | 5        | 725.288278708 | +0.0108546 |
| -0.24238   | 1359.68244344 | 14  | S | 4        | 610.261335676 | +0.111345  |
| -0.2000676 | 1446.71447185 | 15  | S | 3        | 523.229307266 | -0.0683576 |
| +0.2700167 | 1606.74512005 | 16  | C | 2        | 436.197278856 | +0.1588002 |
|            | 1707.79279852 | 17  | T | 1        | 276.166630655 |            |
|            |               | 18  | R | 0        | 175.118952181 |            |

Scan number 6448 Raw file LNCAP\_Silac\_23F10\_set3\_02  
 Method ITMS; CID Pepti... 129.01

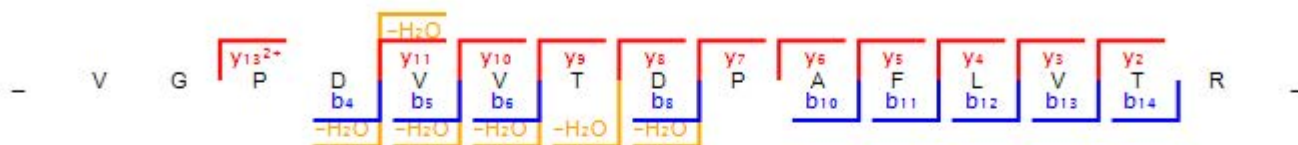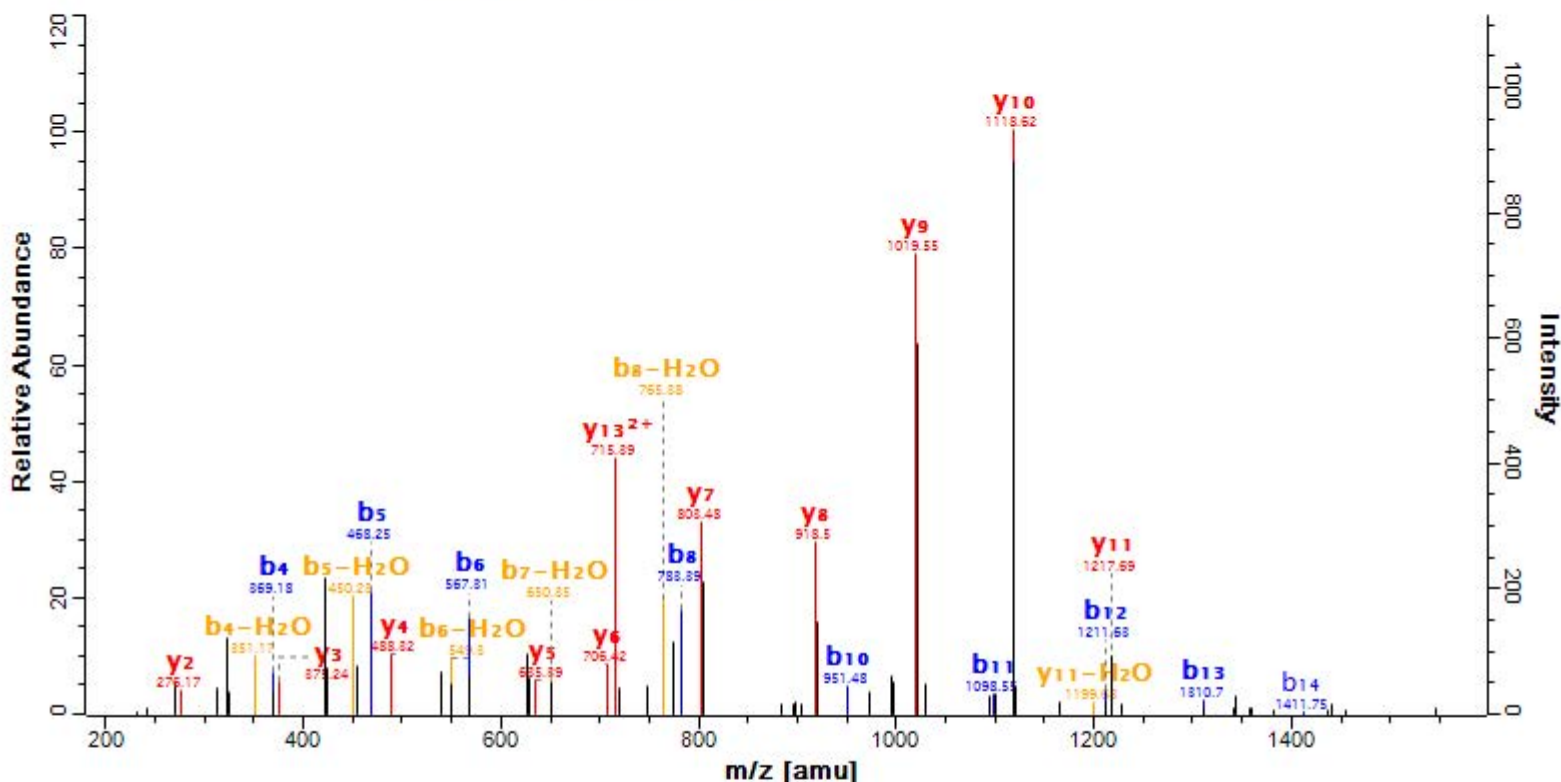

#### precursor information

|                   |                 |
|-------------------|-----------------|
| Mass:             | 1584.85185      |
| m/z:              | 793.4332        |
| Charge:           | 2+              |
| Retentiontime:    | 44.131961822509 |
| Score:            | 129.0058        |
| Mass Error [ppm]: | 0.4339          |
| PEP:              | 1.8274E-06      |
| Precursor Type:   | ISO             |

#### general information

|                       |             |
|-----------------------|-------------|
| Annotation:           | 12 of 15    |
| AminoAcids Coverage:  | 80 %        |
| Intensity Coverage:   | 54 %        |
| Peak Coverage:        | 35 %        |
| Protein Localisation: | 138 ... 152 |

| b ion           |          |     |   | y ion           |          |                 | y <sup>2+</sup> ion |  |
|-----------------|----------|-----|---|-----------------|----------|-----------------|---------------------|--|
| $\Delta$ dalton | mass     | seq |   | $\Delta$ dalton | mass     | $\Delta$ dalton | mass                |  |
|                 | 100.0757 | 1   | V | 14              |          |                 |                     |  |
|                 | 157.0972 | 2   | G | 13              | 1486.79  | 1486.79         |                     |  |
|                 | 254.1499 | 3   | P | 12              | 1429.769 | 715.3879        | +0.271691           |  |
| +0.097736       | 369.1769 | 4   | D | 11              | 1332.716 | 1332.716        |                     |  |
| -0.00278        | 468.2453 | 5   | V | 10              | 1217.689 | -0.15467        | 1217.689            |  |
| +0.0701         | 567.3137 | 6   | V | 9               | 1118.62  | -0.0533         | 1118.62             |  |
|                 | 668.3614 | 7   | T | 8               | 1019.552 | -0.01864        | 1019.552            |  |
| -0.01416        | 783.3883 | 8   | D | 7               | 918.5043 | +0.012808       | 918.5043            |  |
|                 | 880.4411 | 9   | P | 6               | 803.4774 | +0.103349       | 803.4774            |  |
| -0.14347        | 951.4782 | 10  | A | 5               | 706.4246 | +0.248765       | 706.4246            |  |
| -0.03183        | 1098.547 | 11  | F | 4               | 635.3875 | +0.003957       | 635.3875            |  |
| -0.17925        | 1211.631 | 12  | L | 3               | 488.3191 | +0.201338       | 488.3191            |  |
| -0.25413        | 1310.699 | 13  | V | 2               | 375.235  | +0.078524       | 375.235             |  |
| -0.2597         | 1411.747 | 14  | T | 1               | 276.1666 | +0.092799       | 276.1666            |  |
|                 |          | 15  | R | 0               | 175.119  |                 | 175.119             |  |



Scan number 656 Raw file LNCAP\_Silac\_23F10\_set3\_02  
 Method ITMS: CID Pepti... 64.44

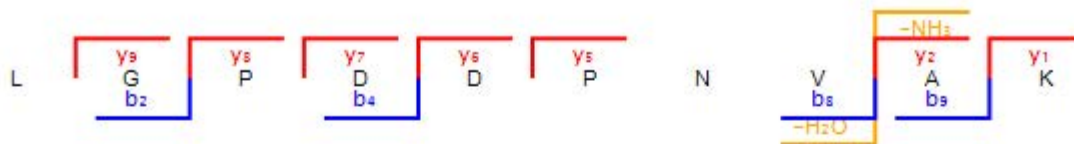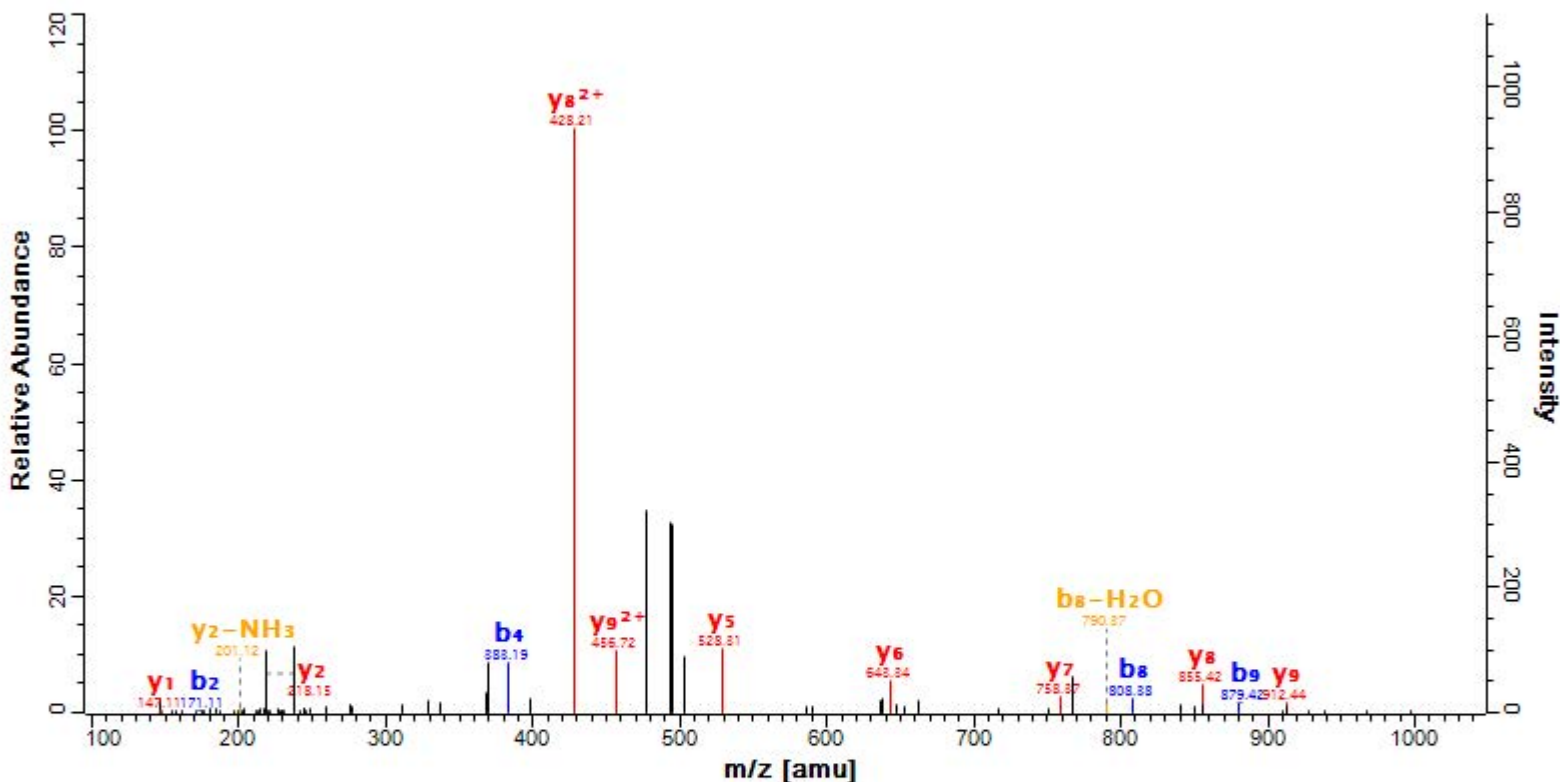

#### precursor information

|                   |                 |
|-------------------|-----------------|
| Mass:             | 1024.51917      |
| m/z:              | 513.26686       |
| Charge:           | 2+              |
| Retentiontime:    | 10.063848495483 |
| Score:            | 64.43861        |
| Mass Error [ppm]: | 0.24113         |
| PEP:              | 0.056933        |
| Precursor Type:   | ISO             |

|                       |             |
|-----------------------|-------------|
| Annotation:           | 8 of 10     |
| AminoAcids Coverage:  | 80 %        |
| Intensity Coverage:   | 44 %        |
| Peak Coverage:        | 15 %        |
| Protein Localisation: | 545 ... 554 |

| b ion     |          |    |     |   | y ion    |           | y <sup>2+</sup> ion |           |
|-----------|----------|----|-----|---|----------|-----------|---------------------|-----------|
| Δ dalton  | mass     |    | seq |   | Δ dalton | mass      | Δ dalton            | mass      |
|           | 114.0913 | 1  | L   | 9 |          |           |                     |           |
| -0.09567  | 171.1128 | 2  | G   | 8 | 912.4421 | -0.18182  | 456.7247            | -0.02292  |
|           | 268.1656 | 3  | P   | 7 | 855.4207 | -0.0317   | 428.214             | +0.178115 |
| +0.387628 | 383.1925 | 4  | D   | 6 | 758.3679 | +0.073009 | 758.3679            |           |
|           | 498.2195 | 5  | D   | 5 | 643.341  | -0.00118  | 643.341             |           |
|           | 595.2722 | 6  | P   | 4 | 528.314  | +0.047427 | 528.314             |           |
|           | 709.3151 | 7  | N   | 3 | 431.2613 |           | 431.2613            |           |
| +0.079209 | 808.3836 | 8  | V   | 2 | 317.2183 |           | 317.2183            |           |
| +0.106976 | 879.4207 | 9  | A   | 1 | 218.1499 | +0.053253 | 218.1499            |           |
|           |          | 10 | K   | 0 | 147.1128 | +0.105946 | 147.1128            |           |

Scan number 6593 Raw file LNCAP\_Silac\_23F10\_set3\_02  
 Method ITMS; CID Peptide L21.36

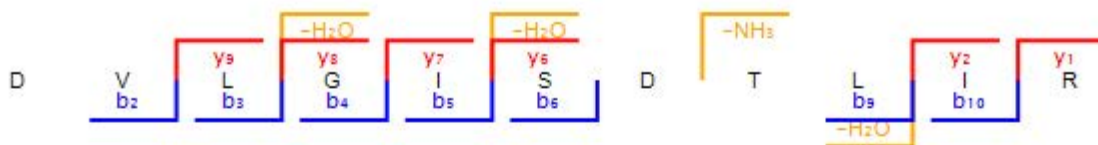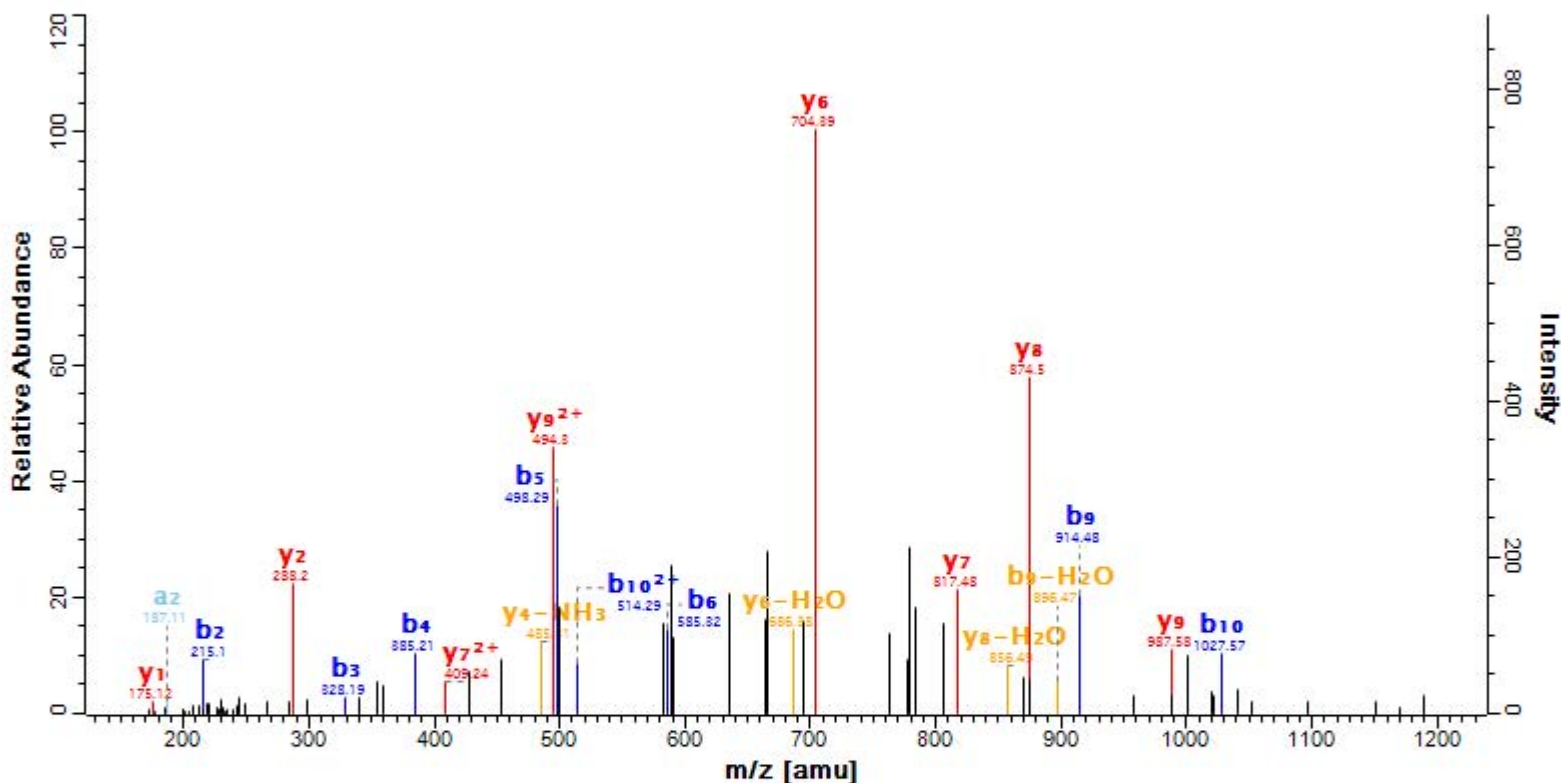

#### precursor information

|                   |                 |
|-------------------|-----------------|
| Mass:             | 1200.67131      |
| m/z:              | 601.34293       |
| Charge:           | 2+              |
| Retentiontime:    | 44.922489166259 |
| Score:            | 121.3605        |
| Mass Error [ppm]: | -0.075775       |
| PEP:              | 0.00019356      |
| Precursor Type:   | MULTI           |

#### general information

|                       |             |
|-----------------------|-------------|
| Annotation:           | 9 of 11     |
| AminoAcids Coverage:  | 82 %        |
| Intensity Coverage:   | 53 %        |
| Peak Coverage:        | 25 %        |
| Protein Localisation: | 365 ... 375 |

|       | a ion         | b <sup>2+</sup> ion | b ion         |     |   |               | y ion         | y <sup>2+</sup> ion |
|-------|---------------|---------------------|---------------|-----|---|---------------|---------------|---------------------|
|       | Δ dalton mass | Δ dalton mass       | Δ dalton mass | seq |   | Δ dalton mass | Δ dalton mass |                     |
|       | 88.04         | 116                 | 116           | 1   | D | 10            |               |                     |
| -0.04 | 187.1         | 215.1               | -0.02 215.1   | 2   | V | 9             | 1087          | 1087                |
|       | 300.2         | 328.2               | +0.149328.2   | 3   | L | 8             | 987.6         | -0.1 494.3 +0.09    |
|       | 357.2         | 385.2               | -0.07 385.2   | 4   | G | 7             | 874.5         | -0.02 874.5         |
|       | 470.3         | 498.3               | +0.11 498.3   | 5   | I | 6             | 817.5         | +0.045409.2 +0.18   |
|       | 557.3         | 585.3               | +0.026585.3   | 6   | S | 5             | 704.4         | +0.075704.4         |
|       | 672.4         | 700.4               | 700.4         | 7   | D | 4             | 617.4         | 617.4               |
|       | 773.4         | 801.4               | 801.4         | 8   | T | 3             | 502.3         | 502.3               |
|       | 886.5         | 914.5               | -0.12 914.5   | 9   | L | 2             | 401.3         | 401.3               |
|       | 999.6         | +0.354514.3         | -0.17 1028    | 10  | I | 1             | 288.2         | -0.06 288.2         |
|       |               |                     |               | 11  | R | 0             | 175.1         | +0 175.1            |

Scan number 6603 Raw file LNCAP\_Silac\_23F10\_set3\_02  
 Method ITMS: CID Pepti... 106.42

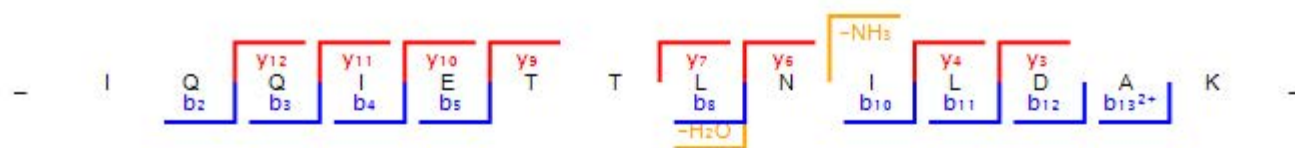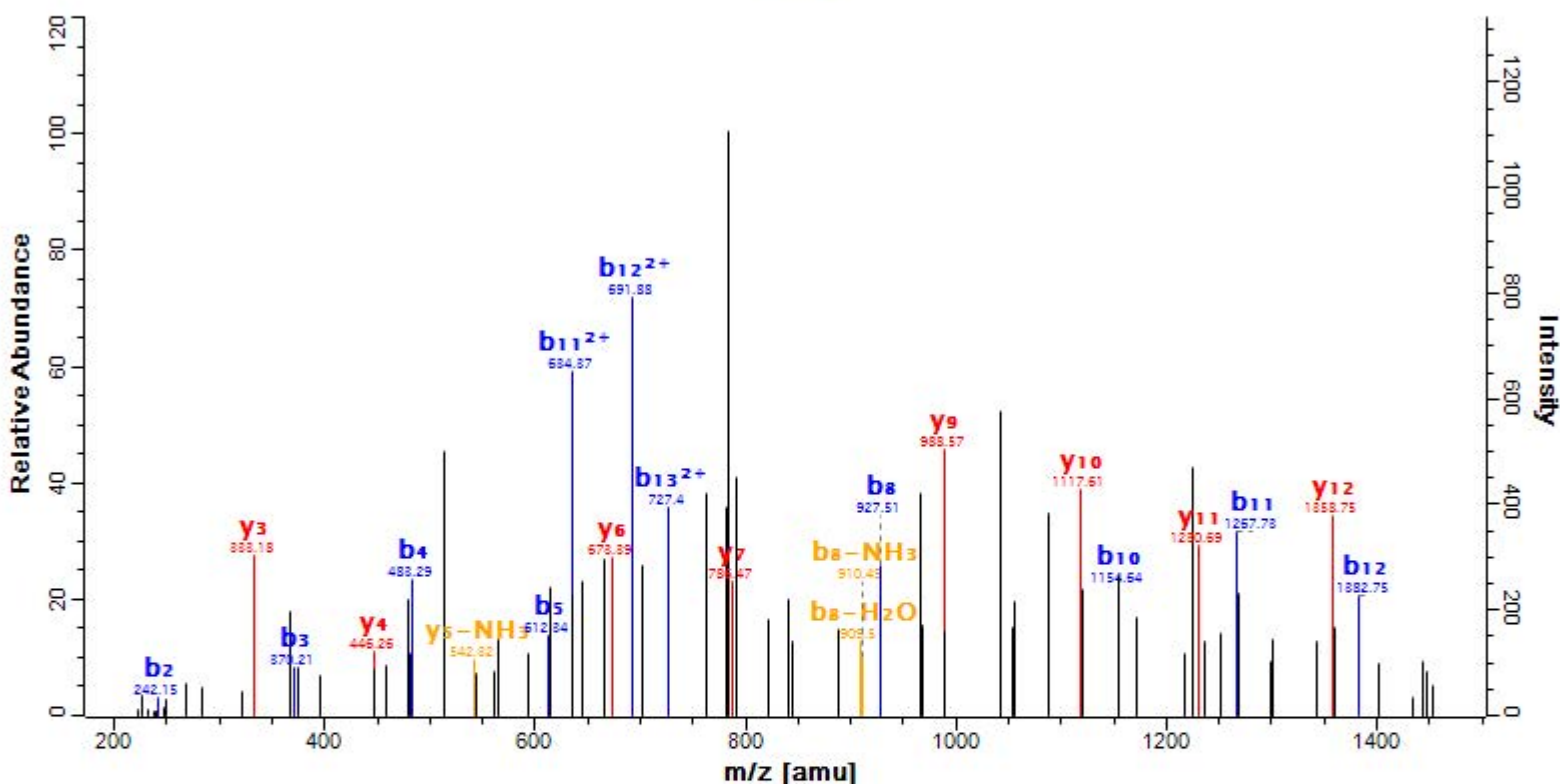

#### precursor information

|                   |                 |
|-------------------|-----------------|
| Mass:             | 1592.83064      |
| m/z:              | 797.4226        |
| Charge:           | 2+              |
| Retentiontime:    | 44.982566833496 |
| Score:            | 106.4236        |
| Mass Error [ppm]: | -0.060835       |
| PEP:              | 6.2866E-08      |
| Precursor Type:   | MULTI           |

| b <sup>2+</sup> ion |          | b ion     |          |     | y ion    |      |          |           |
|---------------------|----------|-----------|----------|-----|----------|------|----------|-----------|
| Δ dalton            | mass     | Δ dalton  | mass     | seq | Δ dalton | mass |          |           |
|                     | 114.0913 |           | 114.0913 | 1   | I        | 13   |          |           |
|                     | 242.1499 | +0.031234 | 242.1499 | 2   | Q        | 12   | 1486.811 |           |
|                     | 370.2085 | +0.12024  | 370.2085 | 3   | Q        | 11   | 1358.753 | -0.08534  |
|                     | 483.2926 | +0.084577 | 483.2926 | 4   | I        | 10   | 1230.694 | +0.16831  |
|                     | 612.3352 | +0.267936 | 612.3352 | 5   | E        | 9    | 1117.61  | +0.107355 |
|                     | 713.3828 |           | 713.3828 | 6   | T        | 8    | 988.5673 | +0.026718 |
|                     | 814.4305 |           | 814.4305 | 7   | T        | 7    | 887.5197 |           |
|                     | 927.5146 | -0.1367   | 927.5146 | 8   | L        | 6    | 786.472  | +0.028203 |
|                     | 1041.558 |           | 1041.558 | 9   | N        | 5    | 673.3879 | +0.076012 |
|                     | 1154.642 | -0.1329   | 1154.642 | 10  | I        | 4    | 559.345  |           |
| -0.01623            | 634.3665 | +0.062823 | 1267.726 | 11  | L        | 3    | 446.2609 | +0.069764 |
| +0.406026           | 691.8799 | -0.03101  | 1382.753 | 12  | D        | 2    | 333.1769 | +0.131611 |
| -0.09605            | 727.3985 |           | 1453.79  | 13  | A        | 1    | 218.1499 |           |
|                     |          |           |          | 14  | K        | 0    | 147.1128 |           |

#### general information

|                       |           |
|-----------------------|-----------|
| Annotation:           | 11 of 14  |
| AminoAcids Coverage:  | 79 %      |
| Intensity Coverage:   | 36 %      |
| Peak Coverage:        | 26 %      |
| Protein Localisation: | 59 ... 72 |

Scan number 668 Raw file LNCAP\_Silac\_23F10\_set3\_02  
 Method ITMS: CID Pepti... 132.32

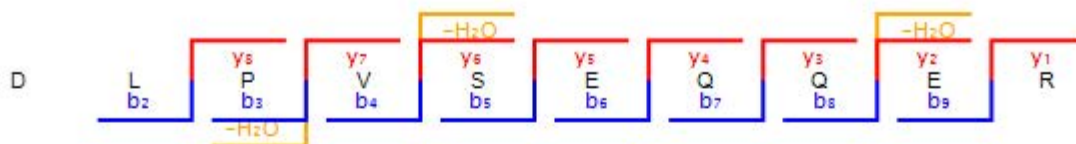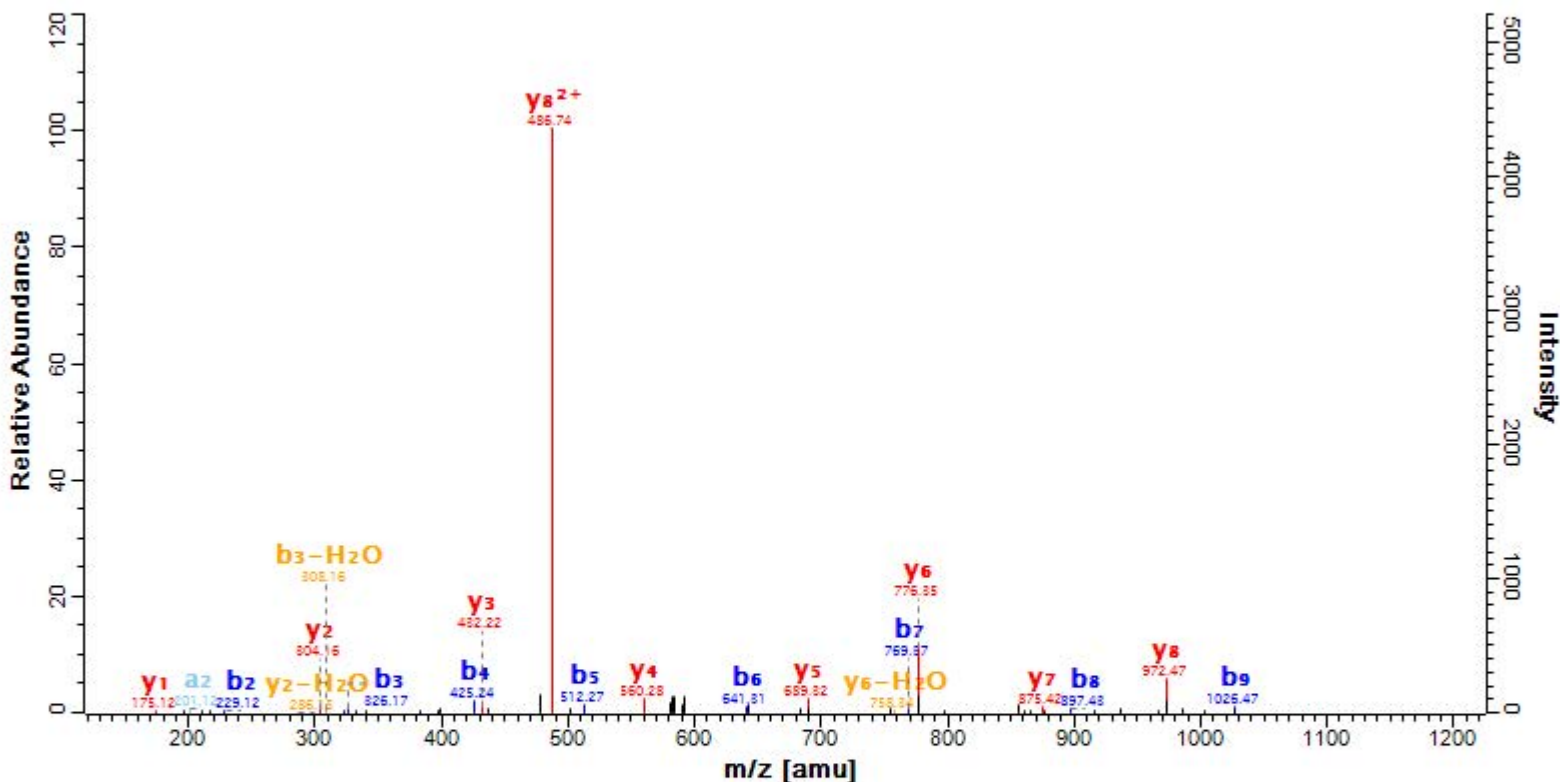

precursor information

|                   |                 |
|-------------------|-----------------|
| Mass:             | 1199.57817      |
| m/z:              | 600.79636       |
| Charge:           | 2+              |
| Retentiontime:    | 10.179546356201 |
| Score:            | 132.3229        |
| Mass Error [ppm]: | -0.046437       |
| PEP:              | 0.00023643      |
| Precursor Type:   | MULTI           |

|                       |             |
|-----------------------|-------------|
| Annotation:           | 9 of 10     |
| AminoAcids Coverage:  | 90 %        |
| Intensity Coverage:   | 80 %        |
| Peak Coverage:        | 25 %        |
| Protein Localisation: | 187 ... 196 |

| a ion    |        | b ion    |        |    |     |   | y ion    |         | y <sup>2+</sup> ion |         |
|----------|--------|----------|--------|----|-----|---|----------|---------|---------------------|---------|
| Δ dalton | mass   | Δ dalton | mass   |    | seq |   | Δ dalton | mass    | Δ dalton            | mass    |
|          | 88.039 |          | 116.03 | 1  | D   | 9 |          |         |                     |         |
| +0.0695  | 201.12 | -0.141   | 229.12 | 2  | L   | 8 | 1085.6   |         | 1085.6              |         |
|          | 298.18 | -0.028   | 326.17 | 3  | P   | 7 | 972.47   | +0.024  | 486.74              | +0.1404 |
|          | 397.24 | -0.058   | 425.24 | 4  | V   | 6 | 875.42   | +0.2089 | 875.42              |         |
|          | 484.28 | +0.0519  | 512.27 | 5  | S   | 5 | 776.35   | +0.0133 | 776.35              |         |
|          | 613.32 | -0.028   | 641.31 | 6  | E   | 4 | 689.32   | +0.0214 | 689.32              |         |
|          | 741.38 | +0.0017  | 769.37 | 7  | Q   | 3 | 560.28   | +0.0572 | 560.28              |         |
|          | 869.44 | +0.0484  | 897.43 | 8  | Q   | 2 | 432.22   | +0.1359 | 432.22              |         |
|          | 998.48 | -0.175   | 1026.5 | 9  | E   | 1 | 304.16   | +0.039  | 304.16              |         |
|          |        |          |        | 10 | R   | 0 | 175.12   | +0.0138 | 175.12              |         |

Scan number 6700 Raw file LNCAP\_Silac\_23F10\_set3\_02  
 Method ITMS; CID Pepti... 138.19

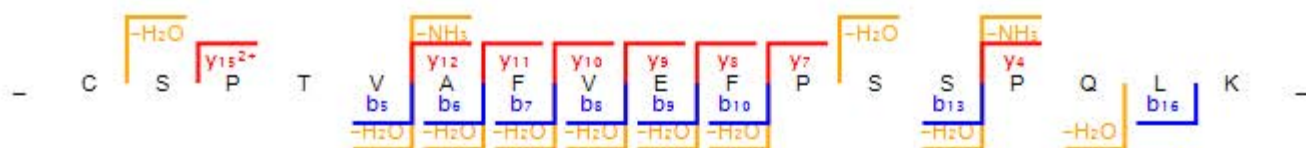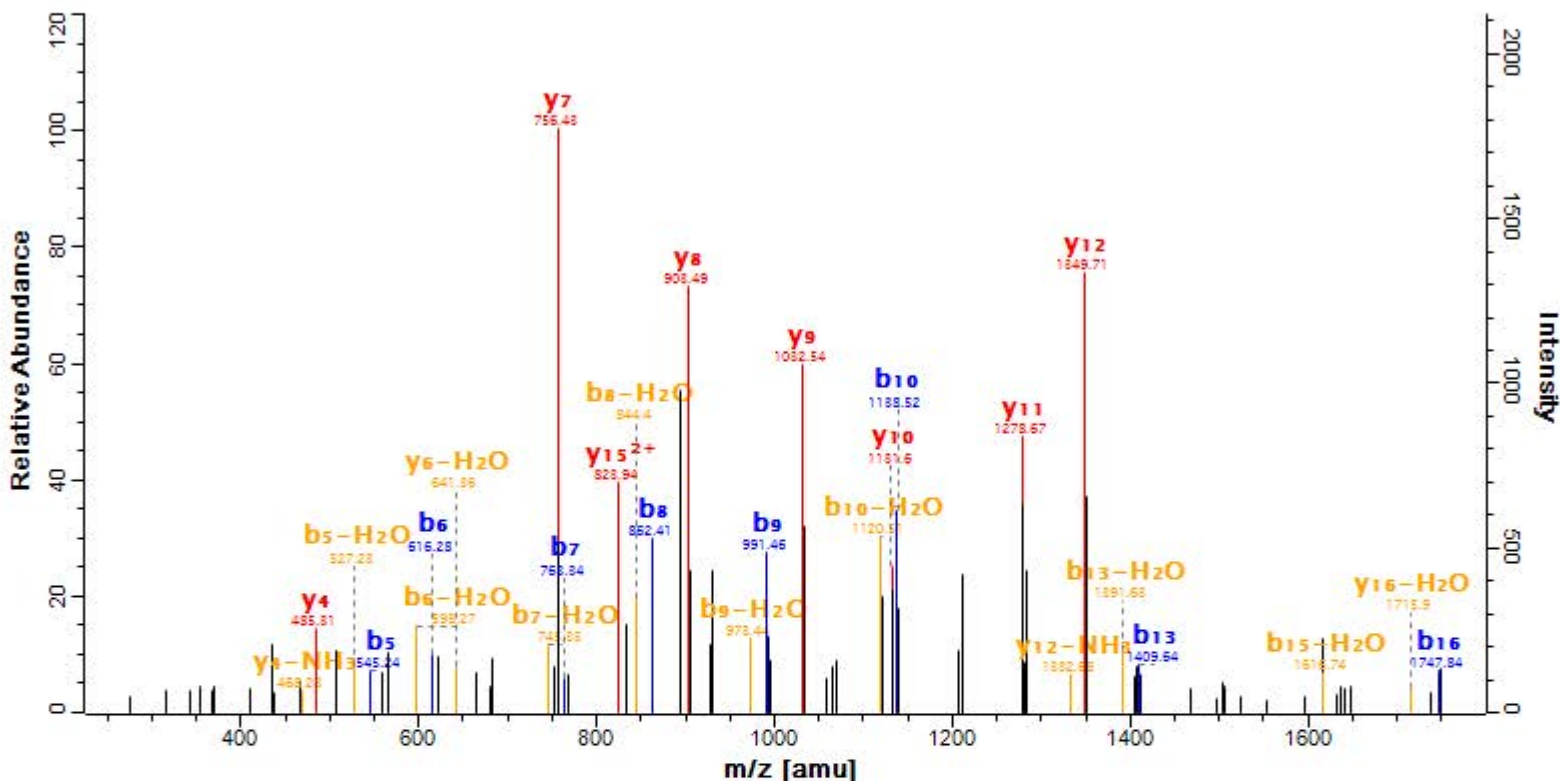

#### precursor information

|                   |                 |
|-------------------|-----------------|
| Mass:             | 1892.93449      |
| m/z:              | 947.47452       |
| Charge:           | 2+              |
| Retentiontime:    | 45.509956359863 |
| Score:            | 138.1857        |
| Mass Error [ppm]: | 0.13387         |
| PEP:              | 1.9919E-16      |
| Precursor Type:   | MULTI           |

#### general information

|                       |             |
|-----------------------|-------------|
| Annotation:           | 14 of 17    |
| AminoAcids Coverage:  | 82 %        |
| Intensity Coverage:   | 50 %        |
| Peak Coverage:        | 31 %        |
| Protein Localisation: | 669 ... 685 |

| b ion     |          |     |   | y ion    |          | y <sup>2+</sup> ion |                    |
|-----------|----------|-----|---|----------|----------|---------------------|--------------------|
| Δ dalton  | mass     | seq |   | Δ dalton | mass     | Δ dalton            | mass               |
|           | 161.0379 | 1   | C | 16       |          |                     |                    |
|           | 248.07   | 2   | S | 15       | 1733.911 |                     | 1733.911           |
|           | 345.1227 | 3   | P | 14       | 1646.879 |                     | 823.9431 +0.152647 |
|           | 446.1704 | 4   | T | 13       | 1549.826 |                     | 1549.826           |
| +0.19985  | 545.2388 | 5   | V | 12       | 1448.778 |                     | 1448.778           |
| +0.025041 | 616.2759 | 6   | A | 11       | 1349.71  | -0.03261            | 1349.71            |
| +0.022301 | 763.3443 | 7   | F | 10       | 1278.673 | -0.06056            | 1278.673           |
| +0.065948 | 862.4128 | 8   | V | 9        | 1131.604 | +0.117961           | 1131.604           |
| +0.043924 | 991.4553 | 9   | E | 8        | 1032.536 | -0.03811            | 1032.536           |
| -0.1097   | 1138.524 | 10  | F | 7        | 903.4934 | -0.07859            | 903.4934           |
|           | 1235.577 | 11  | P | 6        | 756.425  | +0.010089           | 756.425            |
|           | 1322.609 | 12  | S | 5        | 659.3723 |                     | 659.3723           |
| -0.45784  | 1409.641 | 13  | S | 4        | 572.3402 |                     | 572.3402           |
|           | 1506.693 | 14  | P | 3        | 485.3082 | -0.01597            | 485.3082           |
|           | 1634.752 | 15  | Q | 2        | 388.2554 |                     | 388.2554           |
| -0.14787  | 1747.836 | 16  | L | 1        | 260.1969 |                     | 260.1969           |
|           |          | 17  | K | 0        | 147.1128 |                     | 147.1128           |

Scan number 689 Raw file LNCAP\_Silac\_23F10\_set3\_02  
 Method ITMS: CID Pepti... 196.11

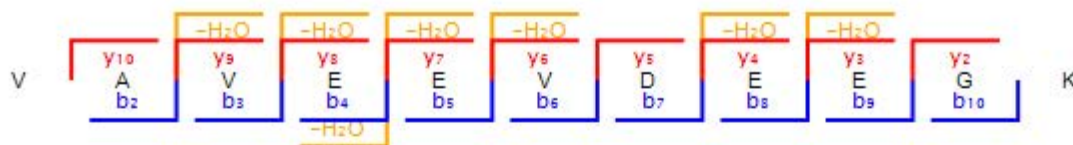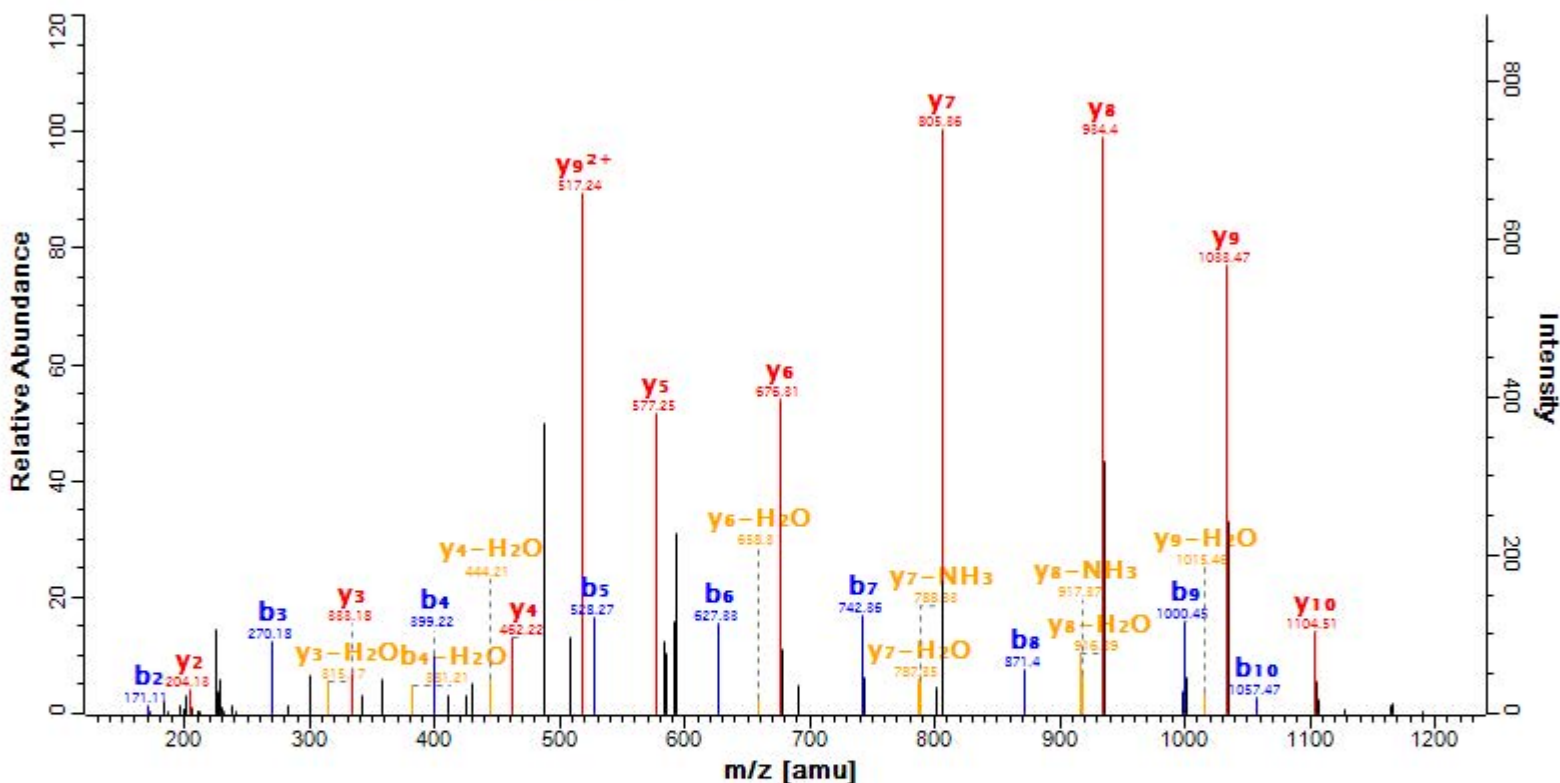

#### precursor information

|                   |                 |
|-------------------|-----------------|
| Mass:             | 1202.56665      |
| m/z:              | 602.2906        |
| Charge:           | 2+              |
| Retentiontime:    | 10.374613761901 |
| Score:            | 196.114         |
| Mass Error [ppm]: | -0.013643       |
| PEP:              | 4.2881E-11      |
| Precursor Type:   | MULTI           |

#### general information

|                       |             |
|-----------------------|-------------|
| Annotation:           | 9 of 11     |
| AminoAcids Coverage:  | 82 %        |
| Intensity Coverage:   | 65 %        |
| Peak Coverage:        | 35 %        |
| Protein Localisation: | 440 ... 450 |

| b ion     |          |    |     |    | y ion    |           | y <sup>2+</sup> ion |           |
|-----------|----------|----|-----|----|----------|-----------|---------------------|-----------|
| Δ dalton  | mass     |    | seq |    | Δ dalton | mass      | Δ dalton            | mass      |
|           | 100.0757 | 1  | V   | 10 |          |           |                     |           |
| +0.032673 | 171.1128 | 2  | A   | 9  | 1104.506 | -0.11734  | 1104.506            |           |
| +0.003108 | 270.1812 | 3  | V   | 8  | 1033.468 | -0.03848  | 517.2378            | +0.178416 |
| +0.031804 | 399.2238 | 4  | E   | 7  | 934.4    | -0.02988  | 934.4               |           |
| -0.05321  | 528.2664 | 5  | E   | 6  | 805.3574 | -0.02385  | 805.3574            |           |
| +0.040121 | 627.3348 | 6  | V   | 5  | 676.3148 | -0.00927  | 676.3148            |           |
| -0.04066  | 742.3618 | 7  | D   | 4  | 577.2464 | +0.071047 | 577.2464            |           |
| +0.050297 | 871.4044 | 8  | E   | 3  | 462.2195 | +0.040922 | 462.2195            |           |
| -0.08977  | 1000.447 | 9  | E   | 2  | 333.1769 | +0.038166 | 333.1769            |           |
| -0.16153  | 1057.468 | 10 | G   | 1  | 204.1343 | -0.03998  | 204.1343            |           |
|           |          | 11 | K   | 0  | 147.1128 |           | 147.1128            |           |

Scan number 7153 Raw file LNCAP\_Silac\_23F10\_set3\_02  
 Method ITMS: CID Peptide 154.15

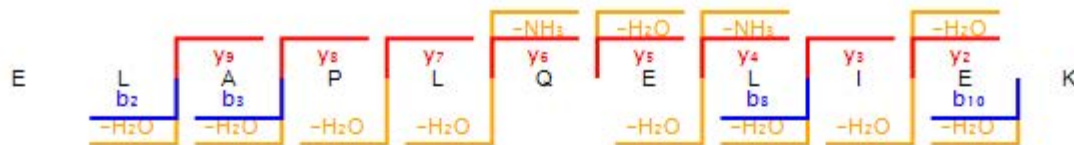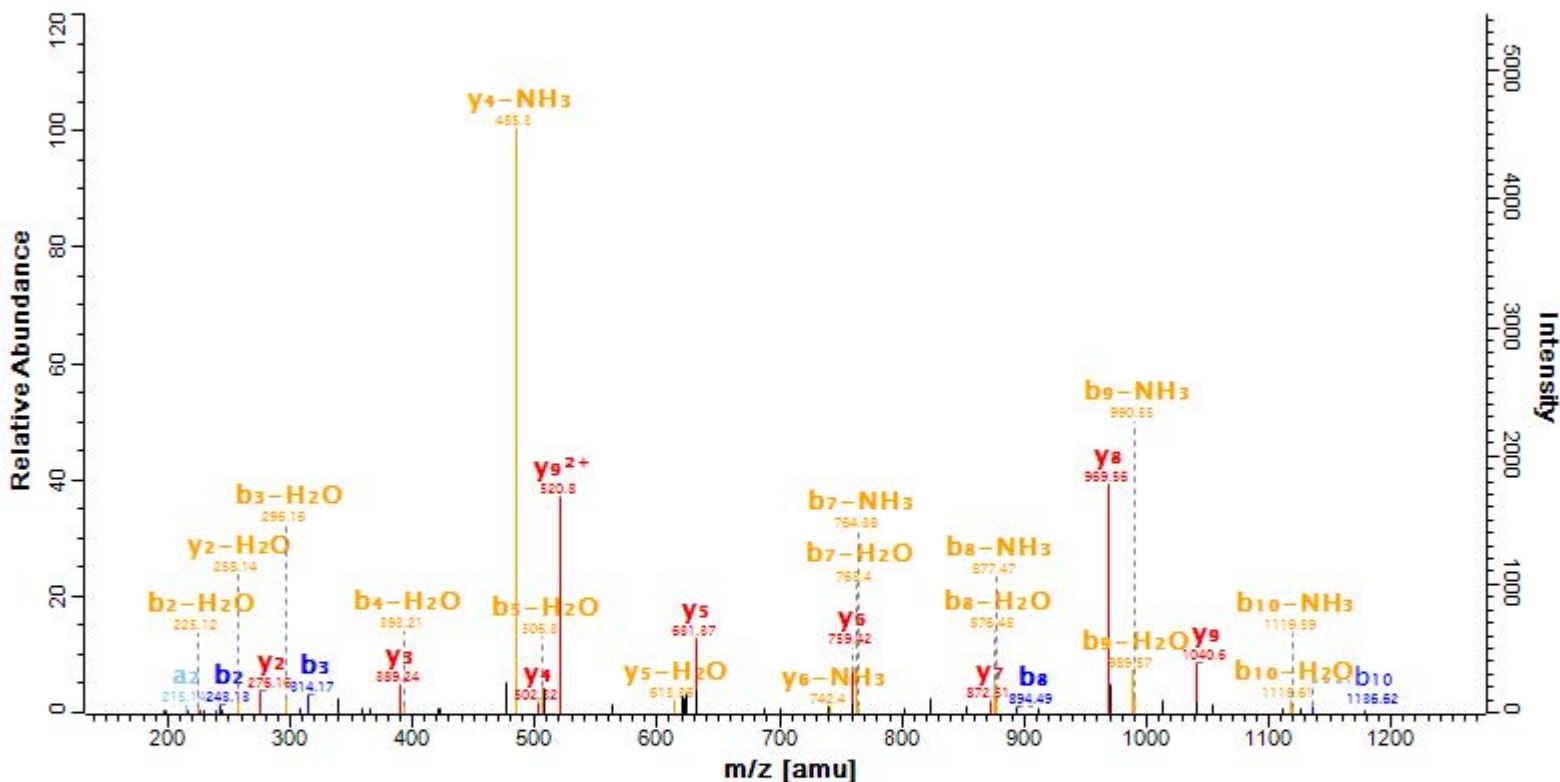

#### precursor information

|                   |                 |
|-------------------|-----------------|
| Mass:             | 1281.7182       |
| m/z:              | 641.86638       |
| Charge:           | 2+              |
| Retentiontime:    | 48.031192779541 |
| Score:            | 154.1496        |
| Mass Error [ppm]: | 0.13981         |
| PEP:              | 3.2726E-06      |
| Precursor Type:   | MULTI           |

#### general information

|                       |             |
|-----------------------|-------------|
| Annotation:           | 9 of 11     |
| AminoAcids Coverage:  | 82 %        |
| Intensity Coverage:   | 83 %        |
| Peak Coverage:        | 38 %        |
| Protein Localisation: | 205 ... 215 |

| a ion    |        | b ion    |        |    |     |          | y ion  |          | y <sup>2+</sup> ion |  |
|----------|--------|----------|--------|----|-----|----------|--------|----------|---------------------|--|
| Δ dalton | mass   | Δ dalton | mass   |    | seq | Δ dalton | mass   | Δ dalton | mass                |  |
|          | 102.05 |          | 130.05 | 1  | E   | 10       |        |          |                     |  |
| +0.0066  | 215.14 | +0.0494  | 243.13 | 2  | L   | 9        | 1153.7 |          | 1153.7              |  |
|          | 286.18 | +0.0616  | 314.17 | 3  | A   | 8        | 1040.6 | -0.074   | 520.8               |  |
|          | 383.23 |          | 411.22 | 4  | P   | 7        | 969.56 | +0.0059  | 969.56              |  |
|          | 496.31 |          | 524.31 | 5  | L   | 6        | 872.51 | -0.041   | 872.51              |  |
|          | 624.37 |          | 652.37 | 6  | Q   | 5        | 759.42 | -0.051   | 759.42              |  |
|          | 753.41 |          | 781.41 | 7  | E   | 4        | 631.37 | +0.0792  | 631.37              |  |
|          | 866.5  | -0.04    | 894.49 | 8  | L   | 3        | 502.32 | +0.1301  | 502.32              |  |
|          | 979.58 |          | 1007.6 | 9  | I   | 2        | 389.24 | -0.021   | 389.24              |  |
|          | 1108.6 | -0.302   | 1136.6 | 10 | E   | 1        | 276.16 | +0.0653  | 276.16              |  |
|          |        |          |        | 11 | K   | 0        | 147.11 |          | 147.11              |  |

Scan number 7358 Raw file LNCAP\_Silac\_23F10\_set3\_02  
 Method ITMS; CID Pepti... 210.9

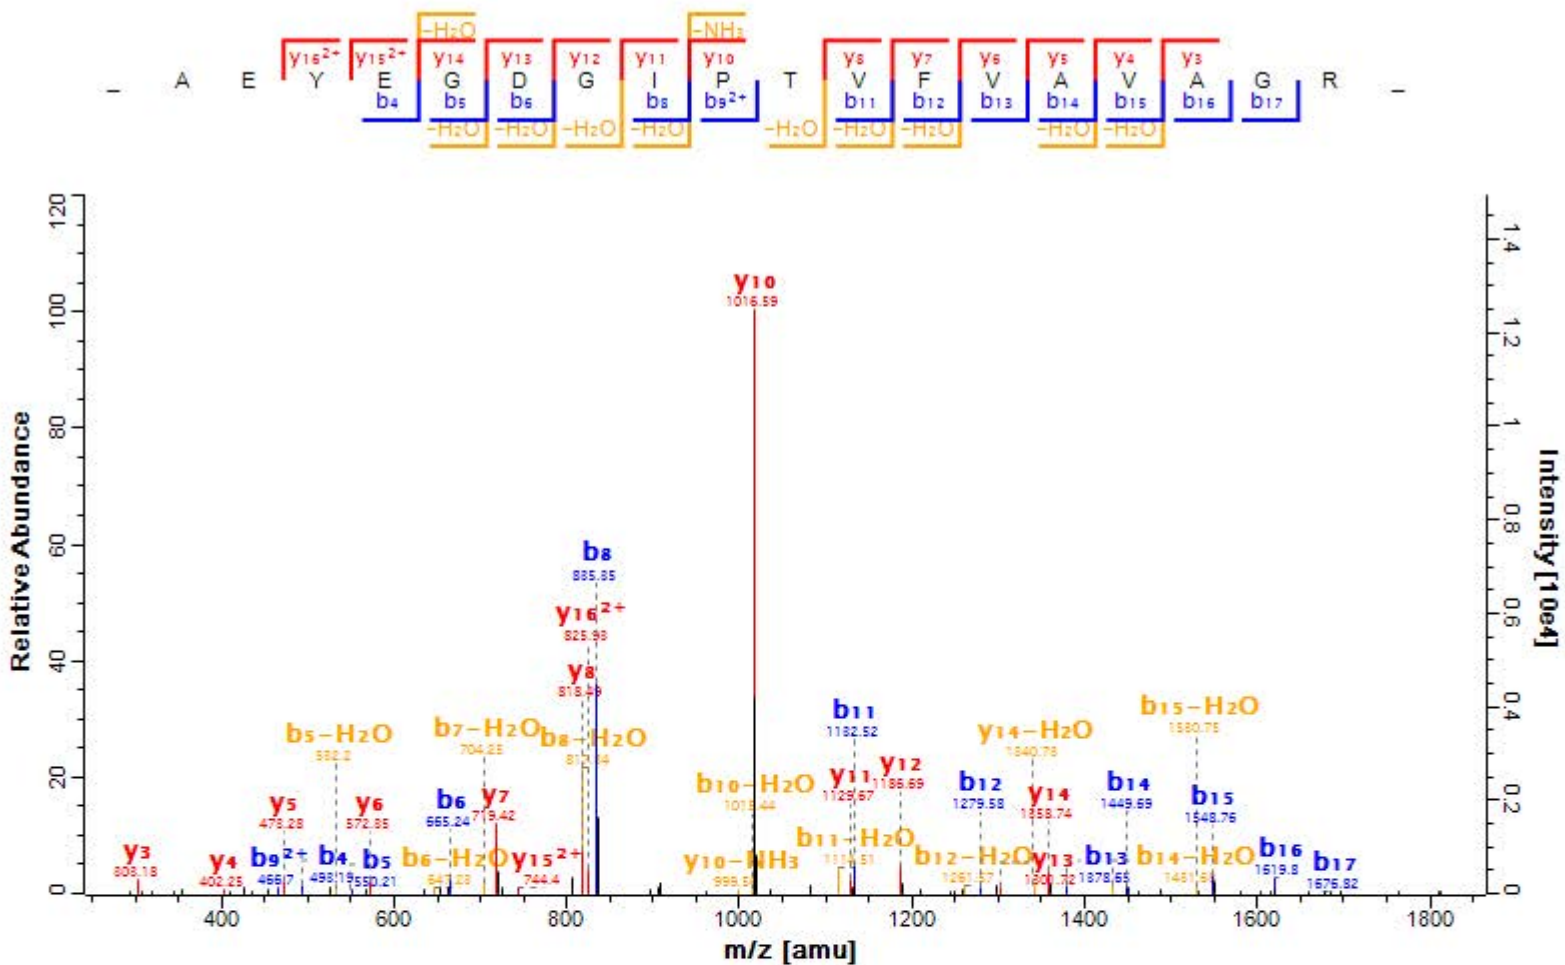

precursor information

|                   |                 |
|-------------------|-----------------|
| Mass:             | 1849.92136      |
| m/z:              | 925.96796       |
| Charge:           | 2+              |
| Retentiontime:    | 49.148559570312 |
| Score:            | 210.9049        |
| Mass Error [ppm]: | 0.17805         |
| PEP:              | 5.7362E-41      |
| Precursor Type:   | MULTI           |

general information

|                       |             |
|-----------------------|-------------|
| Annotation:           | 15 of 18    |
| AminoAcids Coverage:  | 83 %        |
| Intensity Coverage:   | 71 %        |
| Peak Coverage:        | 40 %        |
| Protein Localisation: | 340 ... 357 |

| b <sup>2+</sup> ion |        | b ion    |        | seq |   |    | y ion    |         | y <sup>2+</sup> ion |         |
|---------------------|--------|----------|--------|-----|---|----|----------|---------|---------------------|---------|
| Δ dalton            | mass   | Δ dalton | mass   |     |   |    | Δ dalton | mass    | Δ dalton            | mass    |
|                     | 72.044 | 72.044   |        | 1   | A | 17 |          |         |                     |         |
|                     | 201.09 | 201.09   |        | 2   | E | 16 | 1779.9   |         | 1779.9              |         |
|                     | 364.15 | 364.15   |        | 3   | Y | 15 | 1650.8   |         | 825.93              | +0.1782 |
|                     | 493.19 | -0.058   | 493.19 | 4   | E | 14 | 1487.8   |         | 744.4               | +0.2851 |
|                     | 550.21 | +0.1158  | 550.21 | 5   | G | 13 | 1358.7   | -0.036  | 1358.7              |         |
|                     | 665.24 | -0.048   | 665.24 | 6   | D | 12 | 1301.7   | -0.151  | 1301.7              |         |
|                     | 722.26 |          | 722.26 | 7   | G | 11 | 1186.7   | -0.066  | 1186.7              |         |
|                     | 835.35 | -0.004   | 835.35 | 8   | I | 10 | 1129.7   | -0.035  | 1129.7              |         |
| -0.286              | 466.7  |          | 932.4  | 9   | P | 9  | 1016.6   | +0.0311 | 1016.6              |         |
|                     | 1033.4 |          | 1033.4 | 10  | T | 8  | 919.54   |         | 919.54              |         |
|                     | 1132.5 | +0.0075  | 1132.5 | 11  | V | 7  | 818.49   | -0.205  | 818.49              |         |
|                     | 1279.6 | +0.2036  | 1279.6 | 12  | F | 6  | 719.42   | -0.021  | 719.42              |         |
|                     | 1378.7 | -0.169   | 1378.7 | 13  | V | 5  | 572.35   | +0.0312 | 572.35              |         |
|                     | 1449.7 | +0.1081  | 1449.7 | 14  | A | 4  | 473.28   | +0.0451 | 473.28              |         |
|                     | 1548.8 | +0.0685  | 1548.8 | 15  | V | 3  | 402.25   | -0.024  | 402.25              |         |
|                     | 1619.8 | -0.036   | 1619.8 | 16  | A | 2  | 303.18   | +0.1458 | 303.18              |         |
|                     | 1676.8 | +0.4121  | 1676.8 | 17  | G | 1  | 232.14   |         | 232.14              |         |
|                     |        |          |        | 18  | R | 0  | 175.12   |         | 175.12              |         |



Scan number 7505 Raw file LNCAP\_Silac\_23F10\_set3\_02  
 Method ITMS: CID Pepti... 112.24

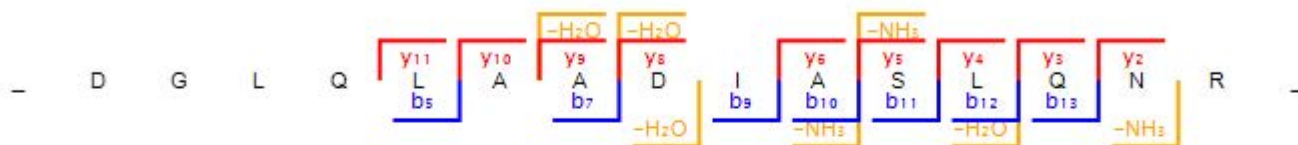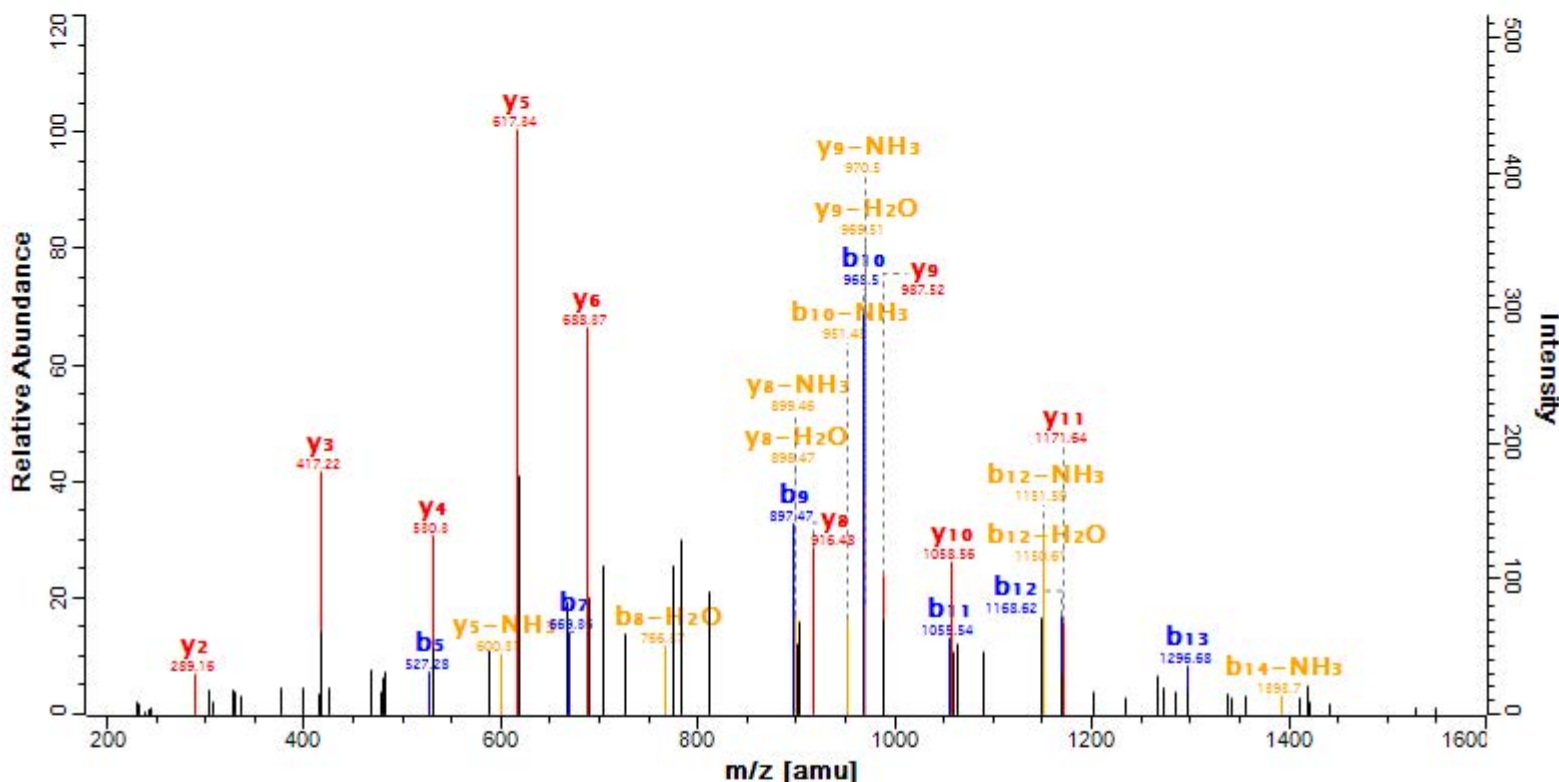

#### precursor information

|                   |                 |
|-------------------|-----------------|
| Mass:             | 1583.82749      |
| m/z:              | 792.92102       |
| Charge:           | 2+              |
| Retentiontime:    | 49.966335296630 |
| Score:            | 112.2354        |
| Mass Error [ppm]: | 0.48028         |
| PEP:              | 1.9414E-06      |
| Precursor Type:   | MULTI           |

#### general information

|                       |             |
|-----------------------|-------------|
| Annotation:           | 10 of 15    |
| AminoAcids Coverage:  | 67 %        |
| Intensity Coverage:   | 59 %        |
| Peak Coverage:        | 32 %        |
| Protein Localisation: | 143 ... 157 |

|            | b ion    |               |     | y ion    |      |
|------------|----------|---------------|-----|----------|------|
|            | Δ dalton | mass          | seq | Δ dalton | mass |
|            |          | 116.034219499 | 1   | D        | 14   |
|            |          | 173.055683222 | 2   | G        | 13   |
|            |          | 286.139747203 | 3   | L        | 12   |
|            |          | 414.198324714 | 4   | Q        | 11   |
| +0.0383511 |          | 527.282388694 | 5   | L        | 10   |
|            |          | 598.319502482 | 6   | A        | 9    |
| -0.0004761 |          | 669.35661627  | 7   | A        | 8    |
|            |          | 784.383559302 | 8   | D        | 7    |
| -0.0007654 |          | 897.467623282 | 9   | I        | 6    |
| +0.016259  |          | 968.50473707  | 10  | A        | 5    |
| -0.0296854 |          | 1055.53676548 | 11  | S        | 4    |
| -0.0502728 |          | 1168.62082946 | 12  | L        | 3    |
| +0.0680296 |          | 1296.67940697 | 13  | Q        | 2    |
|            |          | 1410.72233442 | 14  | N        | 1    |
|            |          |               | 15  | R        | 0    |

Scan number 7597 Raw file LNCAP\_Silac\_23F10\_set3\_02  
 Method ITMS; CID Pepti... 156.17

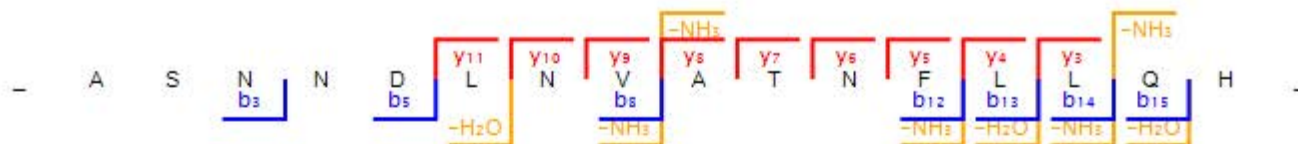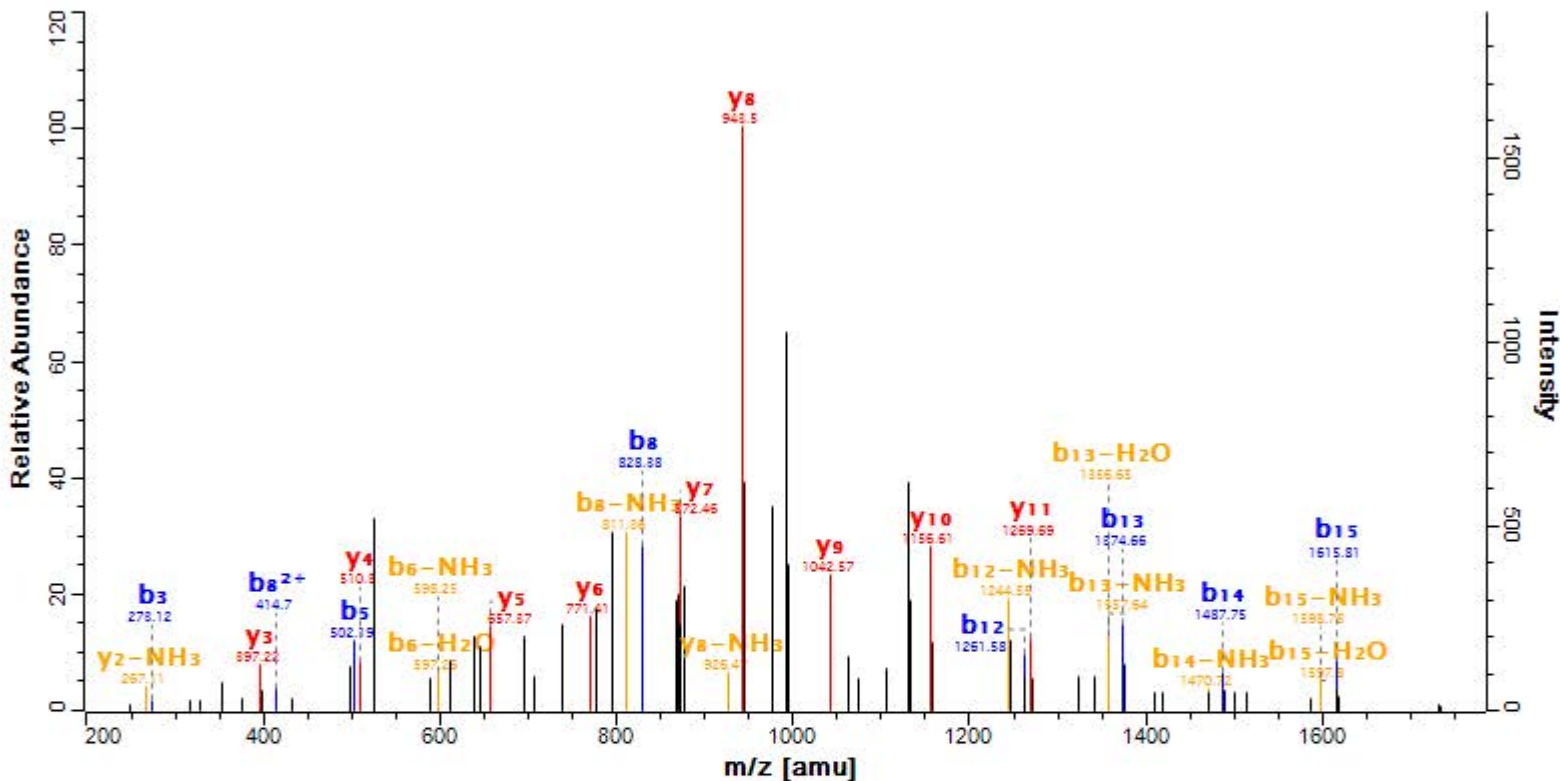

precursor information

|                   |                 |
|-------------------|-----------------|
| Mass:             | 1769.87078      |
| m/z:              | 885.94267       |
| Charge:           | 2+              |
| Retentiontime:    | 50.497425079345 |
| Score:            | 156.1734        |
| Mass Error [ppm]: | 0.63145         |
| PEP:              | 1.1038E-10      |
| Precursor Type:   | ISO             |

general information

|                       |             |
|-----------------------|-------------|
| Annotation:           | 12 of 16    |
| AminoAcids Coverag    | 75 %        |
| Intensity Coverage:   | 40 %        |
| Peak Coverage:        | 33 %        |
| Protein Localisation: | 329 ... 344 |

| b <sup>2+</sup> ion |          | b ion     |          |     | y ion    |      |          |           |
|---------------------|----------|-----------|----------|-----|----------|------|----------|-----------|
| Δ dalton            | mass     | Δ dalton  | mass     | seq | Δ dalton | mass |          |           |
|                     | 72.04439 |           | 72.04439 | 1   | A        | 15   |          |           |
|                     | 159.0764 |           | 159.0764 | 2   | S        | 14   | 1699.84  |           |
|                     | 273.1193 | +0.2006   | 273.1193 | 3   | N        | 13   | 1612.808 |           |
|                     | 387.1623 |           | 387.1623 | 4   | N        | 12   | 1498.765 |           |
|                     | 502.1892 | +0.0523   | 502.1892 | 5   | D        | 11   | 1384.722 |           |
|                     | 615.2733 |           | 615.2733 | 6   | L        | 10   | 1269.695 | +0.110789 |
|                     | 729.3162 |           | 729.3162 | 7   | N        | 9    | 1156.611 | -0.07443  |
| -0.30593            | 414.6959 | -0.10148  | 828.3846 | 8   | V        | 8    | 1042.568 | +0.099474 |
|                     | 899.4217 |           | 899.4217 | 9   | A        | 7    | 943.4996 | -0.12117  |
|                     | 1000.469 |           | 1000.469 | 10  | T        | 6    | 872.4625 | -0.03236  |
|                     | 1114.512 |           | 1114.512 | 11  | N        | 5    | 771.4148 | -0.07502  |
|                     | 1261.581 | +0.008478 | 1261.581 | 12  | F        | 4    | 657.3719 | -0.00792  |
|                     | 1374.665 | -0.04617  | 1374.665 | 13  | L        | 3    | 510.3035 | -0.00957  |
|                     | 1487.749 | -0.15513  | 1487.749 | 14  | L        | 2    | 397.2194 | +0.088162 |
|                     | 1615.807 | -0.20236  | 1615.807 | 15  | Q        | 1    | 284.1353 |           |
|                     |          |           |          | 16  | H        | 0    | 156.0768 |           |

Scan number 7642 Raw file LNCAP\_Silac\_23F10\_set3\_02  
 Method ITMS: CID Pepti... 92.06

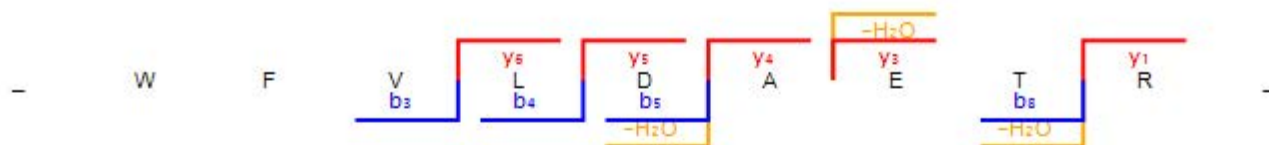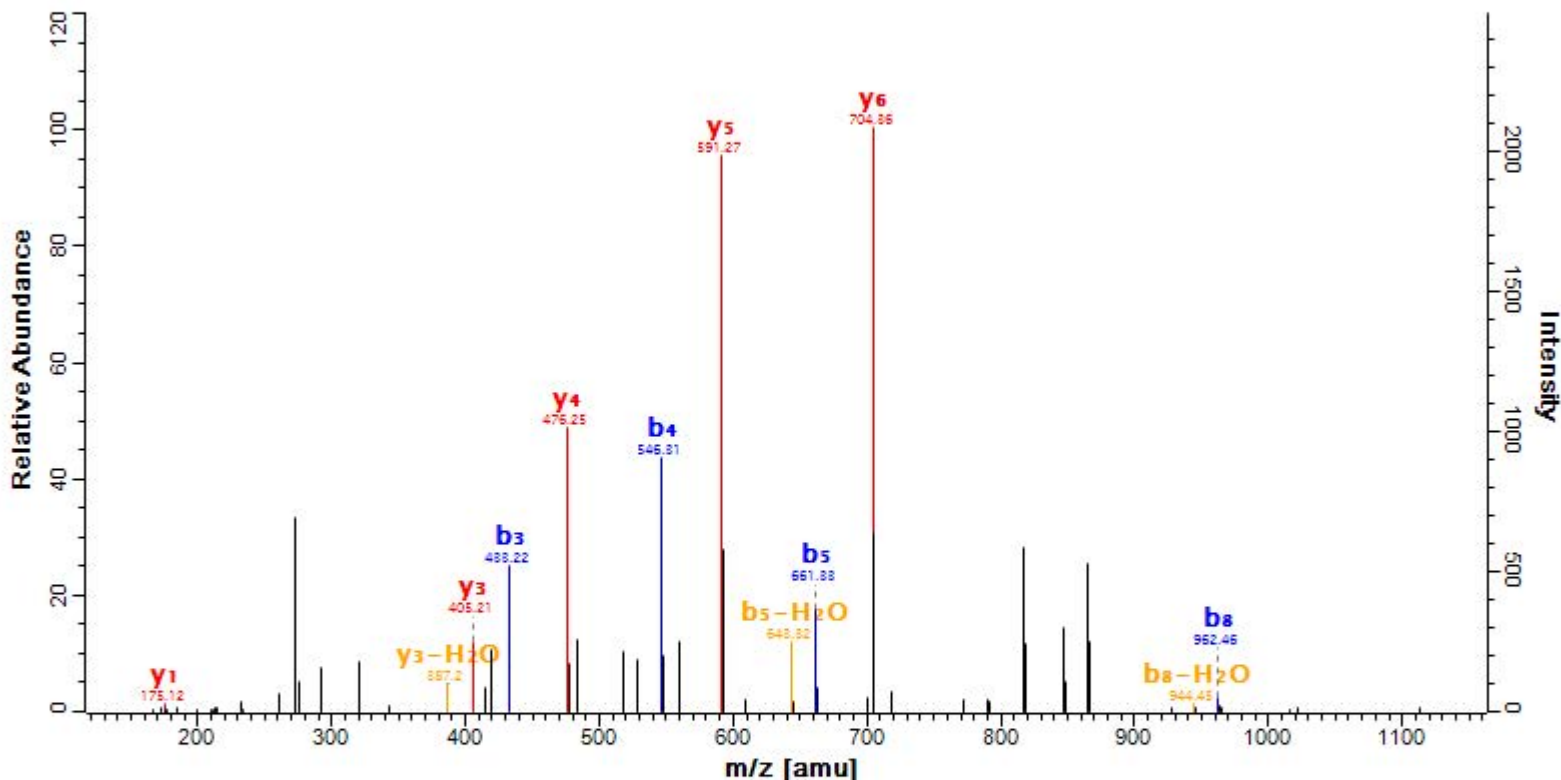

#### precursor information

|                       |                 |
|-----------------------|-----------------|
| Mass:                 | 1135.5661       |
| m/z:                  | 568.79033       |
| Charge:               | 2+              |
| Retentiontime:        | 50.746940612793 |
| Score:                | 92.06238        |
| Mass Error [ppm]:     | -0.09357        |
| PEP:                  | 0.0049099       |
| Precursor Type:       | MULTI           |
| Annotation:           | 7 of 9          |
| AminoAcids Coverage:  | 78 %            |
| Intensity Coverage:   | 53 %            |
| Peak Coverage:        | 18 %            |
| Protein Localisation: | 657 ... 665     |

| b ion      |               |     |   | y ion    |               |            |  |
|------------|---------------|-----|---|----------|---------------|------------|--|
| Δ dalton   | mass          | seq |   | Δ dalton | mass          |            |  |
|            | 187.08658942  | 1   | W | 8        |               |            |  |
|            | 334.155003336 | 2   | F | 7        | 950.494172384 |            |  |
| -0.0473919 | 433.223417253 | 3   | V | 6        | 803.425758468 |            |  |
| -0.0441145 | 546.307481233 | 4   | L | 5        | 704.357344552 | +0.037736  |  |
| -0.0061162 | 661.334424265 | 5   | D | 4        | 591.273280571 | +0.0652814 |  |
|            | 732.371538053 | 6   | A | 3        | 476.246337539 | +0.0454715 |  |
|            | 861.414131149 | 7   | E | 2        | 405.209223751 | +0.0360155 |  |
| -0.1507745 | 962.461809623 | 8   | T | 1        | 276.166630655 |            |  |
|            |               | 9   | R | 0        | 175.118952181 | +0.0798088 |  |

Scan number 8156 Raw file LNCAP\_Silac\_23F10\_set3\_02  
 Method ITMS; CID Pepti... 120.68

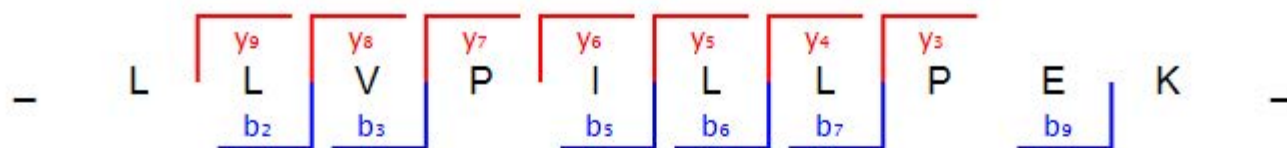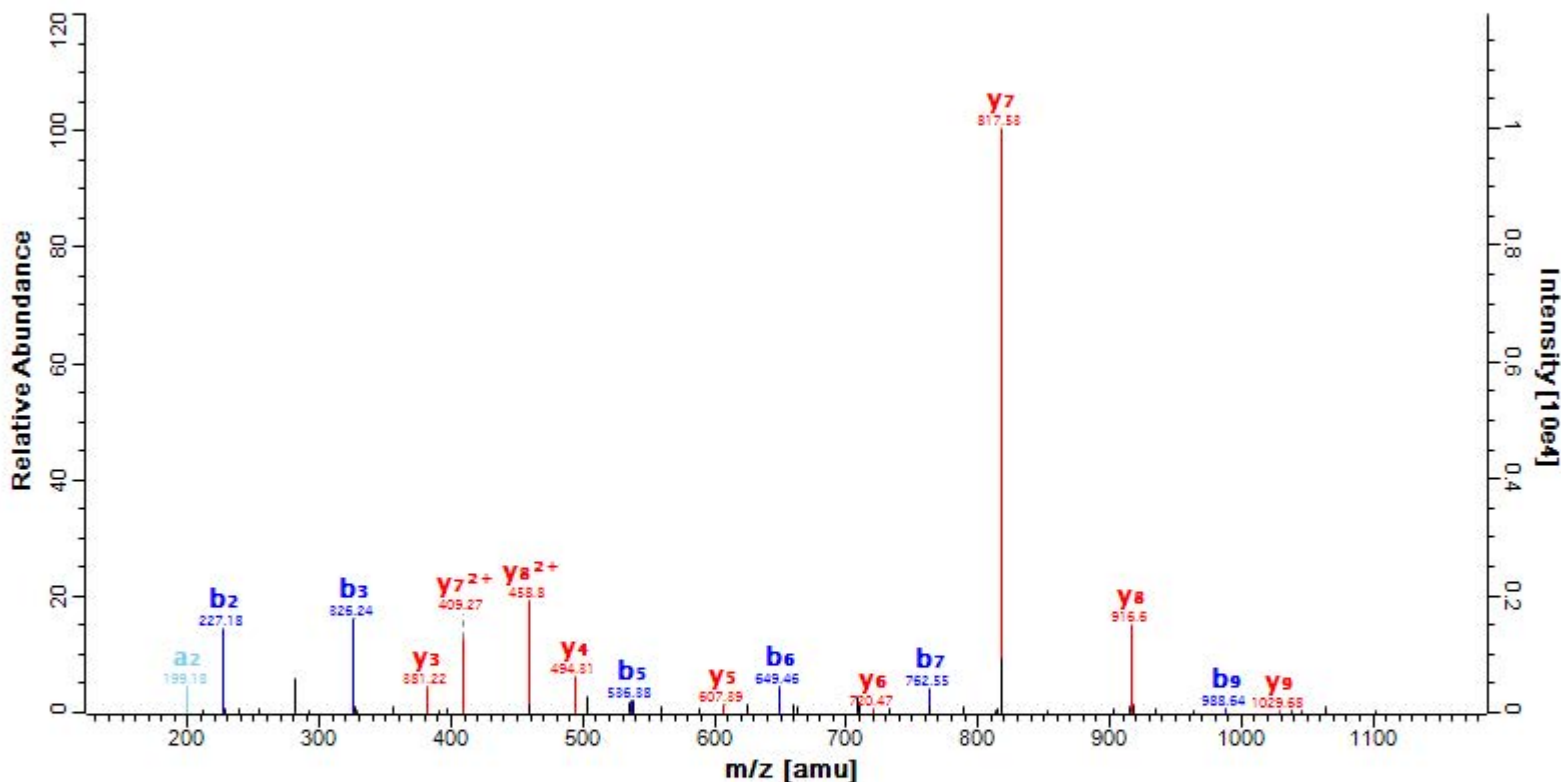

#### precursor information

|                   |                 |
|-------------------|-----------------|
| Mass:             | 1133.74254      |
| m/z:              | 567.87855       |
| Charge:           | 2+              |
| Retentiontime:    | 53.632949829101 |
| Score:            | 120.6825        |
| Mass Error [ppm]: | 0.13928         |
| PEP:              | 0.00027909      |
| Precursor Type:   | MULTI           |

|                       |           |
|-----------------------|-----------|
| Annotation:           | 8 of 10   |
| AminoAcids Coverage:  | 80 %      |
| Intensity Coverage:   | 80 %      |
| Peak Coverage:        | 22 %      |
| Protein Localisation: | 12 ... 21 |

| a ion    |        | b ion    |        |    |     |   | y ion    |         | y <sup>2+</sup> ion |         |
|----------|--------|----------|--------|----|-----|---|----------|---------|---------------------|---------|
| Δ dalton | mass   | Δ dalton | mass   |    | seq |   | Δ dalton | mass    | Δ dalton            | mass    |
|          | 86.096 |          | 114.09 | 1  | L   | 9 |          |         |                     |         |
| +0.0342  | 199.18 | +0.015   | 227.18 | 2  | L   | 8 | 1029.7   | +0.1964 | 1029.7              |         |
|          | 298.25 | -0.101   | 326.24 | 3  | V   | 7 | 916.6    | +0.005  | 458.8               | +0.0323 |
|          | 395.3  |          | 423.3  | 4  | P   | 6 | 817.53   | -0.069  | 409.27              | +0.0434 |
|          | 508.39 | -0.101   | 536.38 | 5  | I   | 5 | 720.47   | +0.171  | 720.47              |         |
|          | 621.47 | +0.0153  | 649.46 | 6  | L   | 4 | 607.39   | -0.085  | 607.39              |         |
|          | 734.55 | -0.075   | 762.55 | 7  | L   | 3 | 494.31   | +0.044  | 494.31              |         |
|          | 831.61 |          | 859.6  | 8  | P   | 2 | 381.22   | -0.022  | 381.22              |         |
|          | 960.65 | +0.2262  | 988.64 | 9  | E   | 1 | 284.17   |         | 284.17              |         |
|          |        |          |        | 10 | K   | 0 | 155.13   |         | 155.13              |         |

Scan number 8388 Raw file LNCAP\_Silac\_23F10\_set3\_02  
 Method ITMS; CID Pepti... 101.05

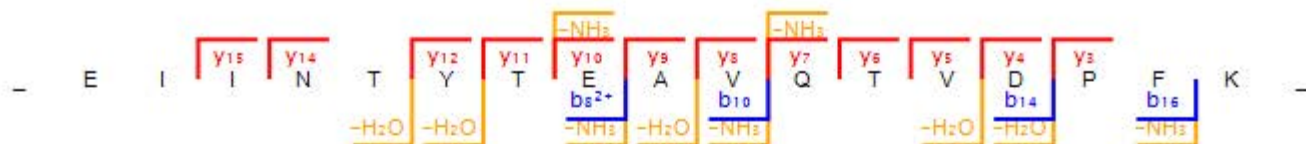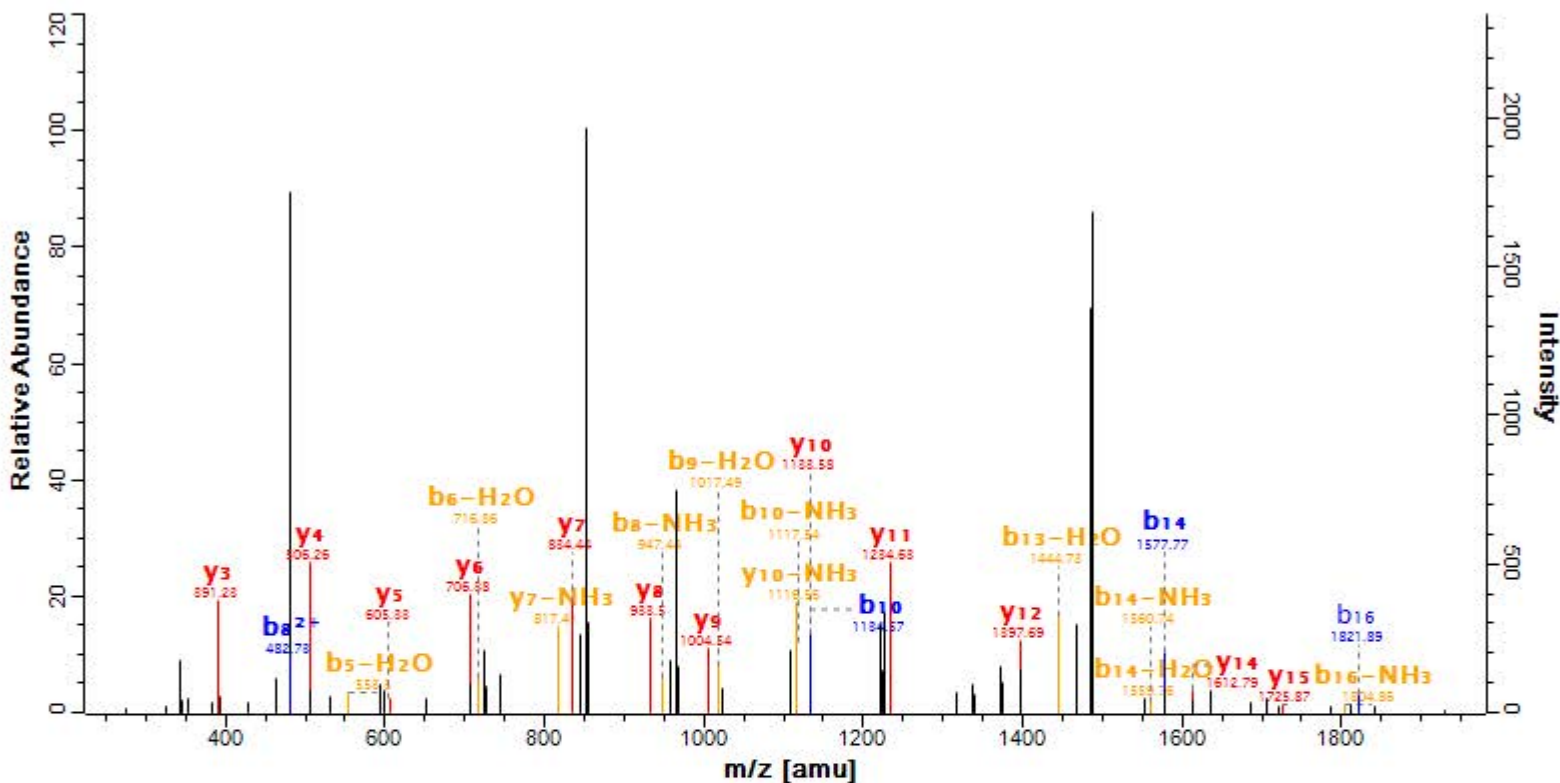

precursor information

|                   |                 |
|-------------------|-----------------|
| Mass:             | 1966.98856      |
| m/z:              | 984.50156       |
| Charge:           | 2+              |
| Retentiontime:    | 54.931945800781 |
| Score:            | 101.055         |
| Mass Error [ppm]: | -0.10881        |
| PEP:              | 0.00065698      |
| Precursor Type:   | ISO             |

general information

|                       |             |
|-----------------------|-------------|
| Annotation:           | 15 of 17    |
| AminoAcids Coverage:  | 88 %        |
| Intensity Coverage:   | 27 %        |
| Peak Coverage:        | 30 %        |
| Protein Localisation: | 373 ... 389 |

| b <sup>2+</sup> ion |          | b ion     |          |     | y ion |          |          |           |
|---------------------|----------|-----------|----------|-----|-------|----------|----------|-----------|
| Δ dalton            | mass     | Δ dalton  | mass     | seq |       | Δ dalton | mass     |           |
|                     | 130.0499 |           | 130.0499 | 1   | E     | 16       |          |           |
|                     | 243.1339 |           | 243.1339 | 2   | I     | 15       | 1838.953 |           |
|                     | 356.218  |           | 356.218  | 3   | I     | 14       | 1725.869 | -0.07142  |
|                     | 470.2609 |           | 470.2609 | 4   | N     | 13       | 1612.785 | -0.14898  |
|                     | 571.3086 |           | 571.3086 | 5   | T     | 12       | 1498.742 |           |
|                     | 734.3719 |           | 734.3719 | 6   | Y     | 11       | 1397.695 | -0.10195  |
|                     | 835.4196 |           | 835.4196 | 7   | T     | 10       | 1234.631 | -0.06804  |
| -0.42731            | 482.7347 |           | 964.4622 | 8   | E     | 9        | 1133.584 | +0.127832 |
|                     | 1035.499 |           | 1035.499 | 9   | A     | 8        | 1004.541 | +0.211563 |
|                     | 1134.568 | +0.003802 | 1134.568 | 10  | V     | 7        | 933.504  | +0.008076 |
|                     | 1262.626 |           | 1262.626 | 11  | Q     | 6        | 834.4356 | -0.00493  |
|                     | 1363.674 |           | 1363.674 | 12  | T     | 5        | 706.377  | -0.01728  |
|                     | 1462.742 |           | 1462.742 | 13  | V     | 4        | 605.3293 | +0.143317 |
|                     | 1577.769 | +0.020817 | 1577.769 | 14  | D     | 3        | 506.2609 | +0.052948 |
|                     | 1674.822 |           | 1674.822 | 15  | P     | 2        | 391.234  | +0.067288 |
|                     | 1821.891 | -0.0696   | 1821.891 | 16  | F     | 1        | 294.1812 |           |
|                     |          |           |          | 17  | K     | 0        | 147.1128 |           |

Scan number 8503 Raw file LNCAP\_Silac\_23F10\_set3\_02  
 Method ITMS; CID Pepti... 84.14

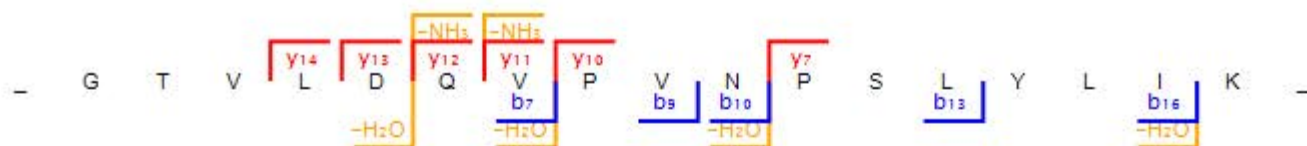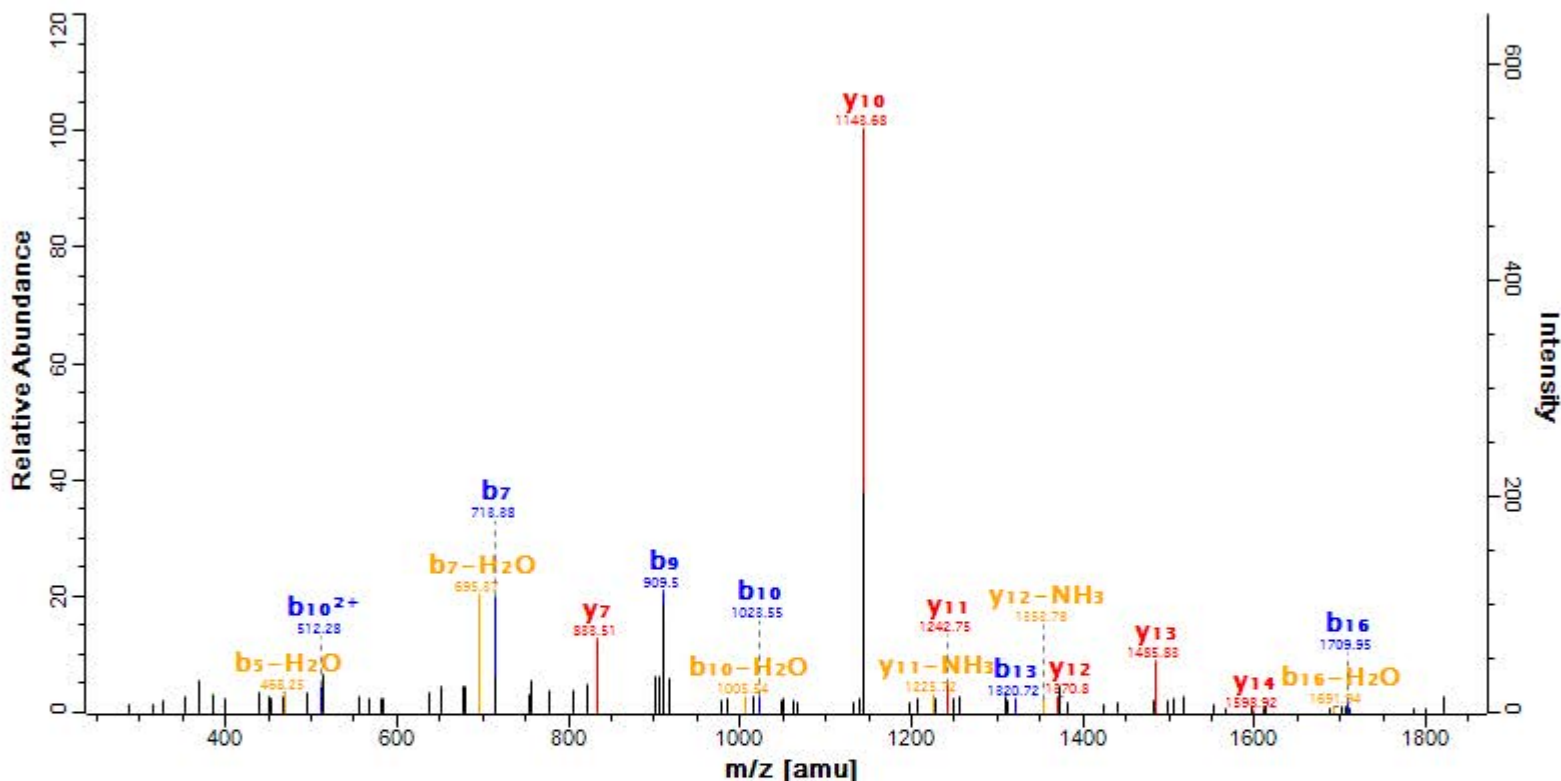

#### precursor information

|                   |                 |
|-------------------|-----------------|
| Mass:             | 1855.04504      |
| m/z:              | 928.52979       |
| Charge:           | 2+              |
| Retentiontime:    | 55.631446838378 |
| Score:            | 84.13975        |
| Mass Error [ppm]: | -0.25067        |
| PEP:              | 4.787E-05       |
| Precursor Type:   | MULTI           |

#### general information

|                       |           |
|-----------------------|-----------|
| Annotation:           | 10 of 17  |
| AminoAcids Coverage:  | 59 %      |
| Intensity Coverage:   | 46 %      |
| Peak Coverage:        | 20 %      |
| Protein Localisation: | 74 ... 90 |

| b <sup>2+</sup> ion |          | b ion     |          | seq |   | y ion    |          |
|---------------------|----------|-----------|----------|-----|---|----------|----------|
| Δ dalton            | mass     | Δ dalton  | mass     |     |   | Δ dalton | mass     |
|                     | 58.02874 |           | 58.02874 | 1   | G | 16       |          |
|                     | 159.0764 |           | 159.0764 | 2   | T | 15       | 1799.031 |
|                     | 258.1448 |           | 258.1448 | 3   | V | 14       | 1697.984 |
|                     | 371.2289 |           | 371.2289 | 4   | L | 13       | 1598.915 |
|                     | 486.2558 |           | 486.2558 | 5   | D | 12       | 1485.831 |
|                     | 614.3144 |           | 614.3144 | 6   | Q | 11       | 1370.804 |
|                     | 713.3828 | +0.052716 | 713.3828 | 7   | V | 10       | 1242.746 |
|                     | 810.4356 |           | 810.4356 | 8   | P | 9        | 1143.677 |
|                     | 909.504  | +0.150105 | 909.504  | 9   | V | 8        | 1046.624 |
| -0.10285            | 512.2771 | -0.01324  | 1023.547 | 10  | N | 7        | 947.556  |
|                     | 1120.6   |           | 1120.6   | 11  | P | 6        | 833.5131 |
|                     | 1207.632 |           | 1207.632 | 12  | S | 5        | 736.4604 |
|                     | 1320.716 | -0.077    | 1320.716 | 13  | L | 4        | 649.4283 |
|                     | 1483.779 |           | 1483.779 | 14  | Y | 3        | 536.3443 |
|                     | 1596.863 |           | 1596.863 | 15  | L | 2        | 373.2809 |
|                     | 1709.947 | -0.03783  | 1709.947 | 16  | I | 1        | 260.1969 |
|                     |          |           |          | 17  | K | 0        | 147.1128 |

Scan number 8643 Raw file LNCAP\_Silac\_23F10\_set3\_02  
 Method ITMS; CID Pepti... 106.6

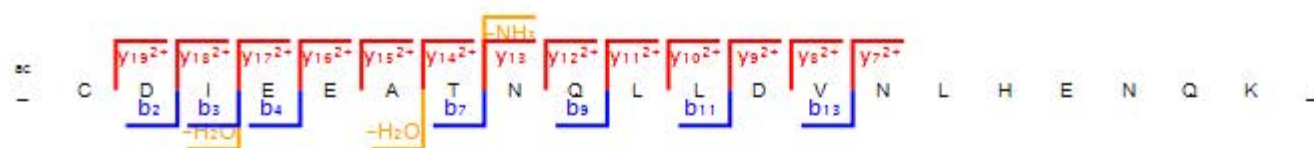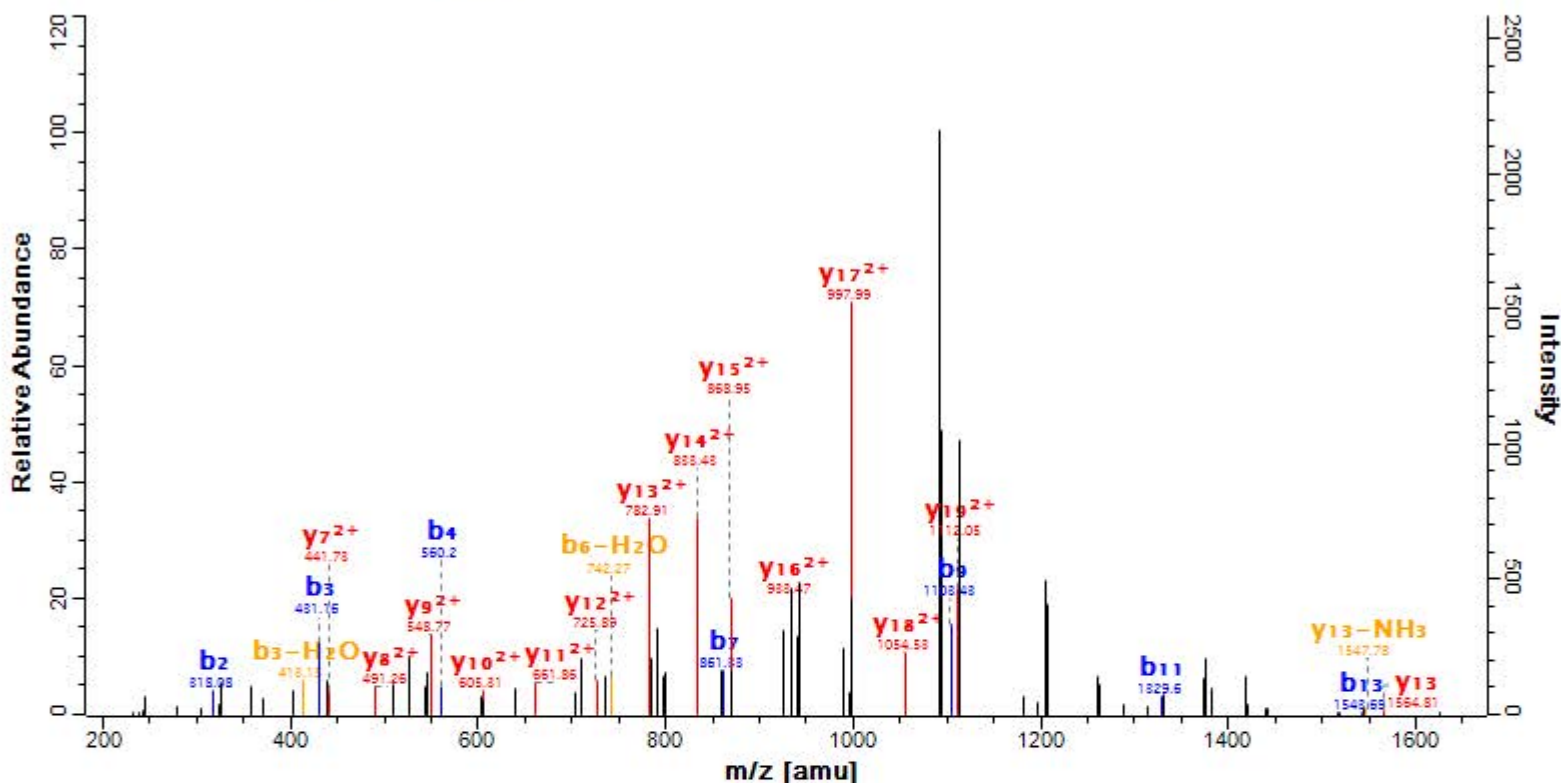

#### precursor information

|                   |                 |
|-------------------|-----------------|
| Mass:             | 1616.96155      |
| m/z:              | 809.48805       |
| Charge:           | 2+              |
| Retentiontime:    | 56.500843048095 |
| Score:            | 106.5974        |
| Mass Error [ppm]: | -0.35392        |
| PEP:              | 1.3221E-11      |
| Precursor Type:   | MULTI           |

#### general information

|                       |          |
|-----------------------|----------|
| Annotation:           | 13 of 20 |
| AminoAcids Coverage:  | 65 %     |
| Intensity Coverage:   | 36 %     |
| Peak Coverage:        | 28 %     |
| Protein Localisation: | 2 ... 21 |

| b ion     |          |     |   | y ion    |          | y <sup>2+</sup> ion |           |
|-----------|----------|-----|---|----------|----------|---------------------|-----------|
| Δ dalton  | mass     | seq |   | Δ dalton | mass     | Δ dalton            | mass      |
|           | 203.0485 | 1   | C | 19       |          |                     |           |
| -0.1021   | 318.0754 | 2   | D | 18       | 2223.089 | 1112.048            | +0.018011 |
| -0.0782   | 431.1595 | 3   | I | 17       | 2108.062 | 1054.535            | +0.330433 |
| -0.02832  | 560.2021 | 4   | E | 16       | 1994.978 | 997.9925            | +0.222502 |
|           | 689.2447 | 5   | E | 15       | 1865.935 | 933.4712            | -0.05619  |
|           | 760.2818 | 6   | A | 14       | 1736.893 | 868.9499            | +0.242512 |
| -0.04511  | 861.3295 | 7   | T | 13       | 1665.855 | 833.4314            | +0.217978 |
|           | 975.3724 | 8   | N | 12       | 1564.808 | +0.425969 782.9075  | +0.303707 |
| +0.456471 | 1103.431 | 9   | Q | 11       | 1450.765 | 725.8861            | +0.332495 |
|           | 1216.515 | 10  | L | 10       | 1322.706 | 661.8568            | +0.099332 |
| -0.2379   | 1329.599 | 11  | L | 9        | 1209.622 | 605.3148            | +0.097175 |
|           | 1444.626 | 12  | D | 8        | 1096.538 | 548.7727            | +0.30864  |
| -0.27174  | 1543.694 | 13  | V | 7        | 981.5112 | 491.2592            | +0.073455 |
|           | 1657.737 | 14  | N | 6        | 882.4428 | 441.725             | +0.006526 |
|           | 1770.821 | 15  | L | 5        | 768.3999 | 768.3999            |           |
|           | 1907.88  | 16  | H | 4        | 655.3158 | 655.3158            |           |
|           | 2036.923 | 17  | E | 3        | 518.2569 | 518.2569            |           |
|           | 2150.966 | 18  | N | 2        | 389.2143 | 389.2143            |           |
|           | 2279.024 | 19  | Q | 1        | 275.1714 | 275.1714            |           |
|           |          | 20  | K | 0        | 147.1128 | 147.1128            |           |

Scan number 8658 Raw file LNCAP\_Silac\_23F10\_set3\_02  
 Method ITMS: CID Pepti... 69.03

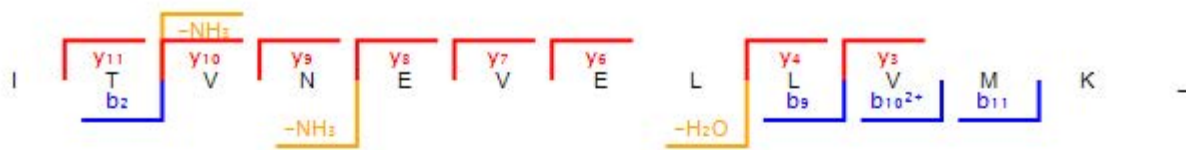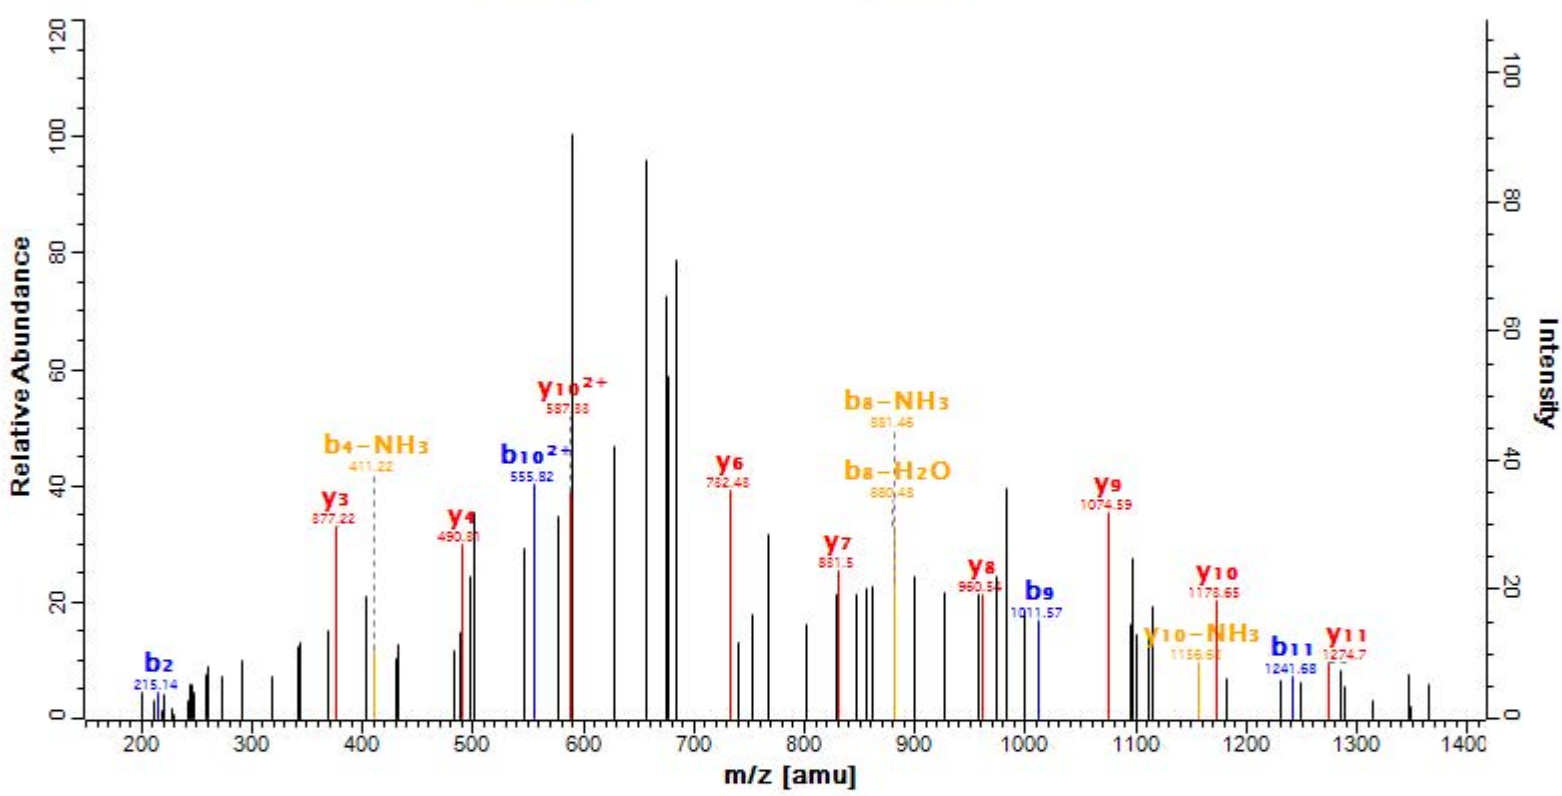

**precursor information**

|                   |                 |
|-------------------|-----------------|
| Mass:             | 1386.77958      |
| m/z:              | 694.39707       |
| Charge:           | 2+              |
| Retentiontime:    | 56.592510223388 |
| Score:            | 69.03009        |
| Mass Error [ppm]: | 0.24964         |
| PEP:              | 0.0053804       |
| Precursor Type:   | MULTI           |

**general information**

|                       |             |
|-----------------------|-------------|
| Annotation:           | 10 of 12    |
| AminoAcids Coverage:  | 83 %        |
| Intensity Coverage:   | 23 %        |
| Peak Coverage:        | 21 %        |
| Protein Localisation: | 302 ... 313 |

| b <sup>2+</sup> ion |        | b ion    |        |     | y ion |          | y <sup>2+</sup> ion |          |        |        |
|---------------------|--------|----------|--------|-----|-------|----------|---------------------|----------|--------|--------|
| Δ dalton            | mass   | Δ dalton | mass   | seq |       | Δ dalton | mass                | Δ dalton | mass   |        |
|                     | 114.09 |          | 114.09 | 1   | I     | 11       |                     |          |        |        |
|                     | 215.14 | -0.256   | 215.14 | 2   | T     | 10       | 1274.7              | -0.261   | 1274.7 |        |
|                     | 314.21 |          | 314.21 | 3   | V     | 9        | 1173.7              | +0.1543  | 587.33 | +0.041 |
|                     | 428.25 |          | 428.25 | 4   | N     | 8        | 1074.6              | -0.084   | 1074.6 |        |
|                     | 557.29 |          | 557.29 | 5   | E     | 7        | 960.54              | -0.03    | 960.54 |        |
|                     | 656.36 |          | 656.36 | 6   | V     | 6        | 831.5               | +0.0098  | 831.5  |        |
|                     | 785.4  |          | 785.4  | 7   | E     | 5        | 732.43              | +0.1371  | 732.43 |        |
|                     | 898.49 |          | 898.49 | 8   | L     | 4        | 603.39              |          | 603.39 |        |
|                     | 1011.6 | +0.009   | 1011.6 | 9   | L     | 3        | 490.31              | +0.0058  | 490.31 |        |
| +0.4506             | 555.82 |          | 1110.6 | 10  | V     | 2        | 377.22              | -0.032   | 377.22 |        |
|                     | 1241.7 | -0.143   | 1241.7 | 11  | M     | 1        | 278.15              |          | 278.15 |        |
|                     |        |          |        | 12  | K     | 0        | 147.11              |          | 147.11 |        |



Scan number 8741 Raw file LNCAP\_Silac\_23F10\_set3\_02  
 Method ITMS; CID Pepti... 37.17

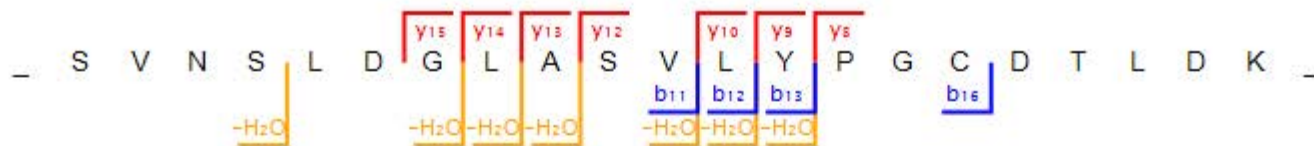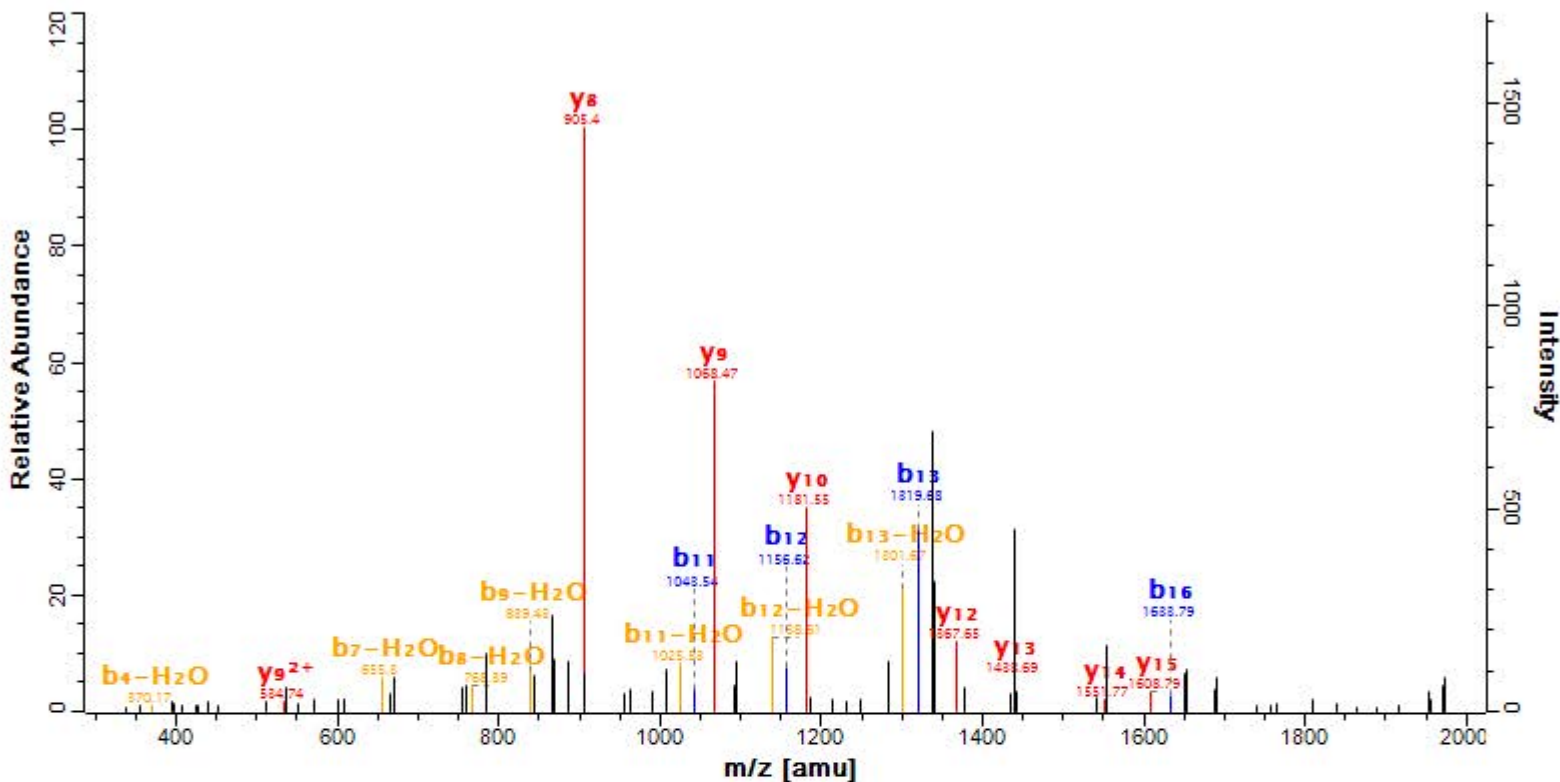

**precursor information**

|                   |                 |
|-------------------|-----------------|
| Mass:             | 2223.07274      |
| m/z:              | 1112.54365      |
| Charge:           | 2+              |
| Retentiontime:    | 57.101764678955 |
| Score:            | 37.16883        |
| Mass Error [ppm]: | -0.077351       |
| PEP:              | 0.030031        |
| Precursor Type:   | MULTI           |

**general information**

|                       |           |
|-----------------------|-----------|
| Annotation:           | 10 of 21  |
| AminoAcids Coverag    | 48 %      |
| Intensity Coverage:   | 45 %      |
| Peak Coverage:        | 20 %      |
| Protein Localisation: | 70 ... 90 |

| b ion     |          |     |   | y ion    |          | y <sup>2+</sup> ion |          |
|-----------|----------|-----|---|----------|----------|---------------------|----------|
| Δ dalton  | mass     | seq |   | Δ dalton | mass     | Δ dalton            | mass     |
|           | 88.0393  | 1   | S | 20       |          |                     |          |
|           | 187.1077 | 2   | V | 19       | 2137.048 |                     | 2137.048 |
|           | 301.1506 | 3   | N | 18       | 2037.98  |                     | 2037.98  |
|           | 388.1827 | 4   | S | 17       | 1923.937 |                     | 1923.937 |
|           | 501.2667 | 5   | L | 16       | 1836.905 |                     | 1836.905 |
|           | 616.2937 | 6   | D | 15       | 1723.821 |                     | 1723.821 |
|           | 673.3151 | 7   | G | 14       | 1608.794 | -0.04183            | 1608.794 |
|           | 786.3992 | 8   | L | 13       | 1551.772 | -0.14464            | 1551.772 |
|           | 857.4363 | 9   | A | 12       | 1438.688 | -0.15933            | 1438.688 |
|           | 944.4684 | 10  | S | 11       | 1367.651 | +0.009379           | 1367.651 |
| +0.013527 | 1043.537 | 11  | V | 10       | 1280.619 |                     | 1280.619 |
| -0.20201  | 1156.621 | 12  | L | 9        | 1181.551 | -0.09025            | 1181.551 |
| -0.23116  | 1319.684 | 13  | Y | 8        | 1068.467 | -0.06673            | 534.737  |
|           | 1416.737 | 14  | P | 7        | 905.4033 | -0.01024            | 905.4033 |
|           | 1473.758 | 15  | G | 6        | 808.3505 |                     | 808.3505 |
| -0.19528  | 1633.789 | 16  | C | 5        | 751.3291 |                     | 751.3291 |
|           | 1748.816 | 17  | D | 4        | 591.2984 |                     | 591.2984 |
|           | 1849.864 | 18  | T | 3        | 476.2715 |                     | 476.2715 |
|           | 1962.948 | 19  | L | 2        | 375.2238 |                     | 375.2238 |
|           | 2077.975 | 20  | D | 1        | 262.1397 |                     | 262.1397 |
|           |          | 21  | K | 0        | 147.1128 |                     | 147.1128 |

Scan number 8833 Raw file LNCAP\_Silac\_23F10\_set3\_02  
 Method ITMS; CID Peptide 124.63

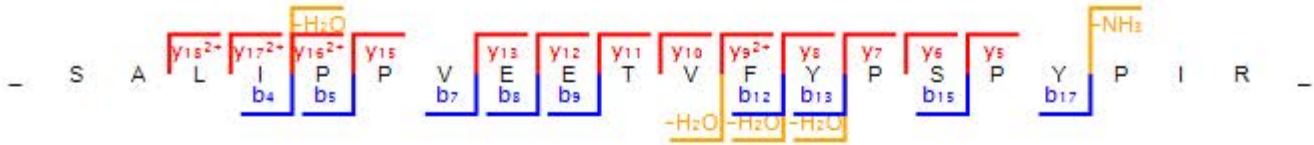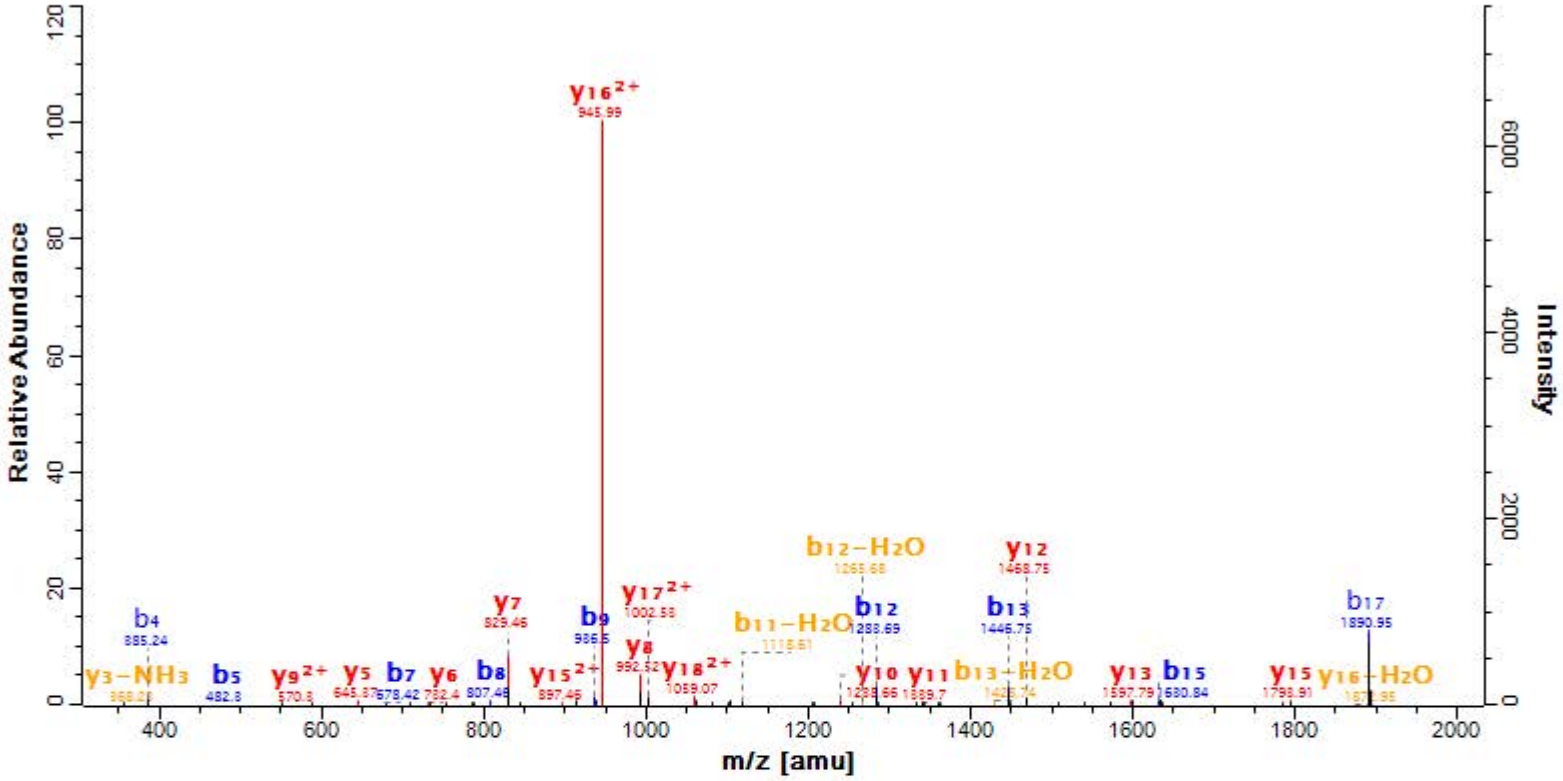

**precursor information**

|                   |                 |
|-------------------|-----------------|
| Mass:             | 2274.1937       |
| m/z:              | 1138.10413      |
| Charge:           | 2+              |
| Retentiontime:    | 57.654922485351 |
| Score:            | 124.6327        |
| Mass Error [ppm]: | 0.034701        |
| PEP:              | 6.9315E-13      |
| Precursor Type:   | MULTI           |

| b ion     |          |    |     |    | y ion    |           | y <sup>2+</sup> ion |           |
|-----------|----------|----|-----|----|----------|-----------|---------------------|-----------|
| Δ dalton  | mass     |    | seq |    | Δ dalton | mass      | Δ dalton            | mass      |
|           | 88.0393  | 1  | S   | 19 |          |           |                     |           |
|           | 159.0764 | 2  | A   | 18 | 2188.169 |           | 2188.169            |           |
|           | 272.1605 | 3  | L   | 17 | 2117.132 |           | 1059.07             | +0.478092 |
| -0.01124  | 385.2445 | 4  | I   | 16 | 2004.048 |           | 1002.527            | -0.07009  |
| +0.106498 | 482.2973 | 5  | P   | 15 | 1890.964 |           | 945.9855            | +0.360862 |
|           | 579.3501 | 6  | P   | 14 | 1793.911 | -0.15879  | 897.4591            | +0.000647 |
| +0.238494 | 678.4185 | 7  | V   | 13 | 1696.858 |           | 1696.858            |           |
| +0.109903 | 807.4611 | 8  | E   | 12 | 1597.79  | +0.039416 | 1597.79             |           |
| +0.252551 | 936.5037 | 9  | E   | 11 | 1468.747 | -0.15053  | 1468.747            |           |
|           | 1037.551 | 10 | T   | 10 | 1339.704 | -0.04251  | 1339.704            |           |
|           | 1136.62  | 11 | V   | 9  | 1238.657 | +0.211099 | 1238.657            |           |
| -0.10664  | 1283.688 | 12 | F   | 8  | 1139.588 |           | 570.2978            | +0.275889 |
| -0.13469  | 1446.752 | 13 | Y   | 7  | 992.52   | -0.05246  | 992.52              |           |
|           | 1543.804 | 14 | P   | 6  | 829.4567 | +0.006226 | 829.4567            |           |
| +0.151125 | 1630.836 | 15 | S   | 5  | 732.4039 | +0.233489 | 732.4039            |           |
|           | 1727.889 | 16 | P   | 4  | 645.3719 | +0.179275 | 645.3719            |           |
| -0.08411  | 1890.952 | 17 | Y   | 3  | 548.3191 |           | 548.3191            |           |
|           | 1988.005 | 18 | P   | 2  | 385.2558 |           | 385.2558            |           |
|           | 2101.089 | 19 | I   | 1  | 288.203  |           | 288.203             |           |
|           |          | 20 | R   | 0  | 175.119  |           | 175.119             |           |

**general information**

|                       |           |
|-----------------------|-----------|
| Annotation:           | 16 of 20  |
| AminoAcids Coverage:  | 80 %      |
| Intensity Coverage:   | 79 %      |
| Peak Coverage:        | 28 %      |
| Protein Localisation: | 77 ... 96 |

Scan number 8954 Raw file LNCAP\_Silac\_23F10\_set3\_02  
 Method ITMS: CID Pepti... 183.89

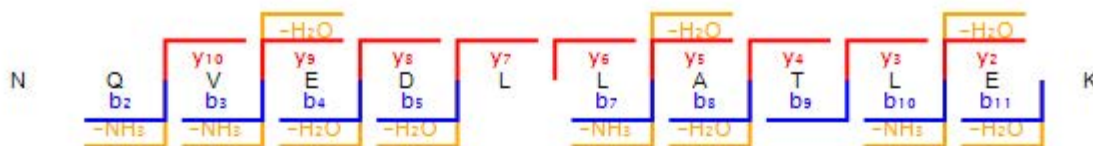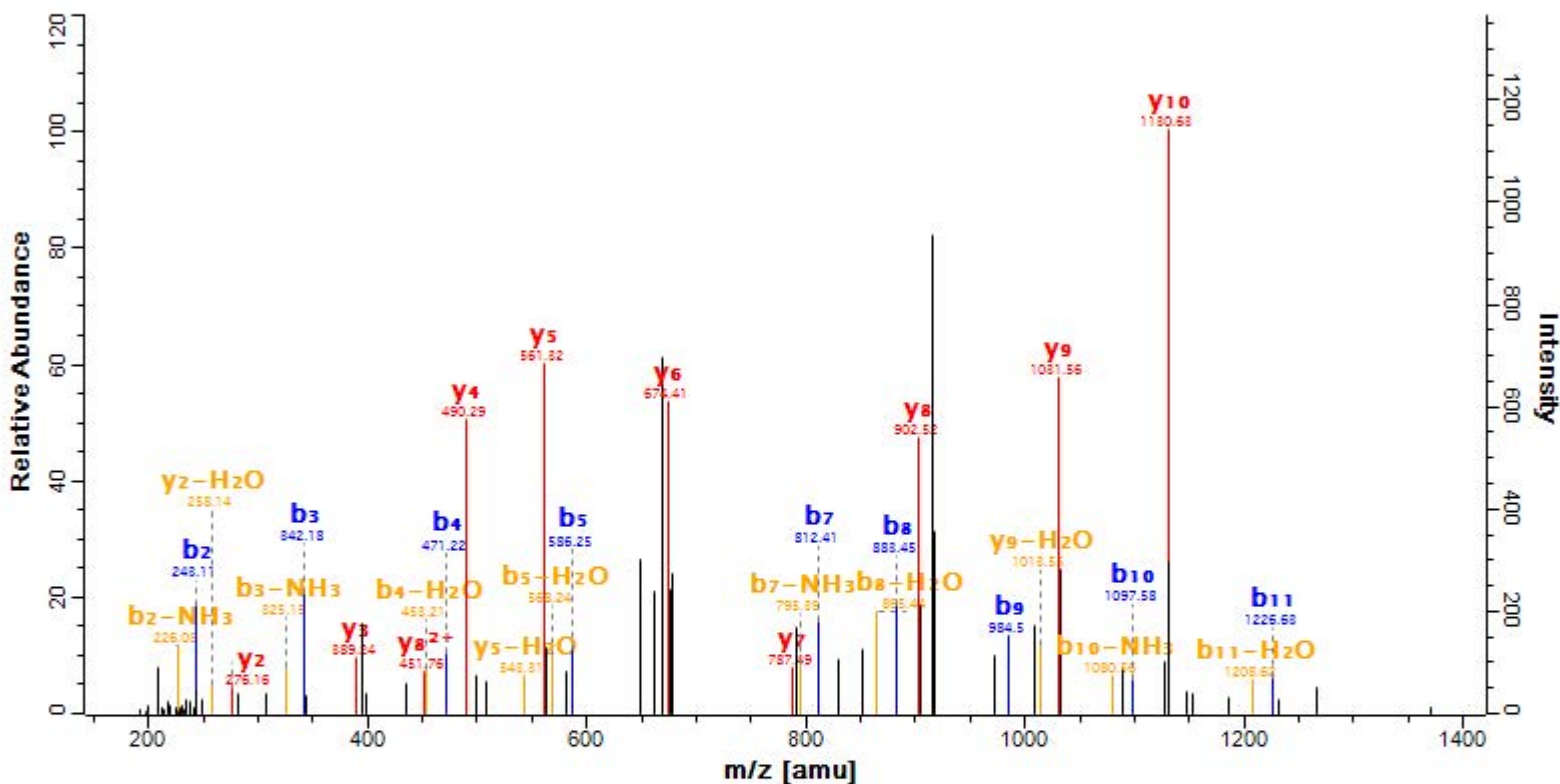

#### precursor information

|                   |                 |
|-------------------|-----------------|
| Mass:             | 1371.72436      |
| m/z:              | 686.86946       |
| Charge:           | 2+              |
| Retentiontime:    | 58.394371032714 |
| Score:            | 183.8912        |
| Mass Error [ppm]: | -0.1455         |
| PEP:              | 1.0813E-12      |
| Precursor Type:   | MULTI           |

#### general information

|                       |             |
|-----------------------|-------------|
| Annotation:           | 10 of 12    |
| AminoAcids Coverage:  | 83 %        |
| Intensity Coverage:   | 51 %        |
| Peak Coverage:        | 34 %        |
| Protein Localisation: | 392 ... 403 |

| b ion     |          |    |     |    | y ion    |           | y <sup>2+</sup> ion |          |
|-----------|----------|----|-----|----|----------|-----------|---------------------|----------|
| Δ dalton  | mass     |    | seq |    | Δ dalton | mass      | Δ dalton            | mass     |
|           | 115.0502 | 1  | N   | 11 |          |           |                     |          |
| -0.00076  | 243.1088 | 2  | Q   | 10 | 1258.689 |           | 1258.689            |          |
| -0.06394  | 342.1772 | 3  | V   | 9  | 1130.63  | -0.09249  | 1130.63             |          |
| +0.125426 | 471.2198 | 4  | E   | 8  | 1031.562 | -0.03396  | 1031.562            |          |
| -0.04672  | 586.2467 | 5  | D   | 7  | 902.5193 | +0.011742 | 451.7633            | -0.37438 |
|           | 699.3308 | 6  | L   | 6  | 787.4924 | -0.10304  | 787.4924            |          |
| +0.031918 | 812.4149 | 7  | L   | 5  | 674.4083 | -0.02013  | 674.4083            |          |
| -0.0691   | 883.452  | 8  | A   | 4  | 561.3243 | +0.051845 | 561.3243            |          |
| +0.039167 | 984.4997 | 9  | T   | 3  | 490.2871 | -0.05051  | 490.2871            |          |
| -0.06223  | 1097.584 | 10 | L   | 2  | 389.2395 | +0.207865 | 389.2395            |          |
| -0.31247  | 1226.626 | 11 | E   | 1  | 276.1554 | +0.208067 | 276.1554            |          |
|           |          | 12 | K   | 0  | 147.1128 |           | 147.1128            |          |

Scan number 9069 Raw file LNCAP\_Silac\_23F10\_set3\_02  
 Method ITMS; CID Pepti... 117.2

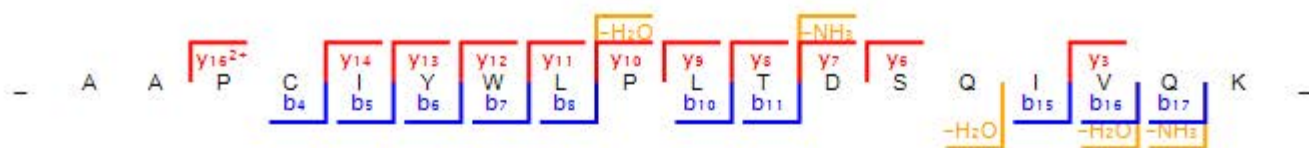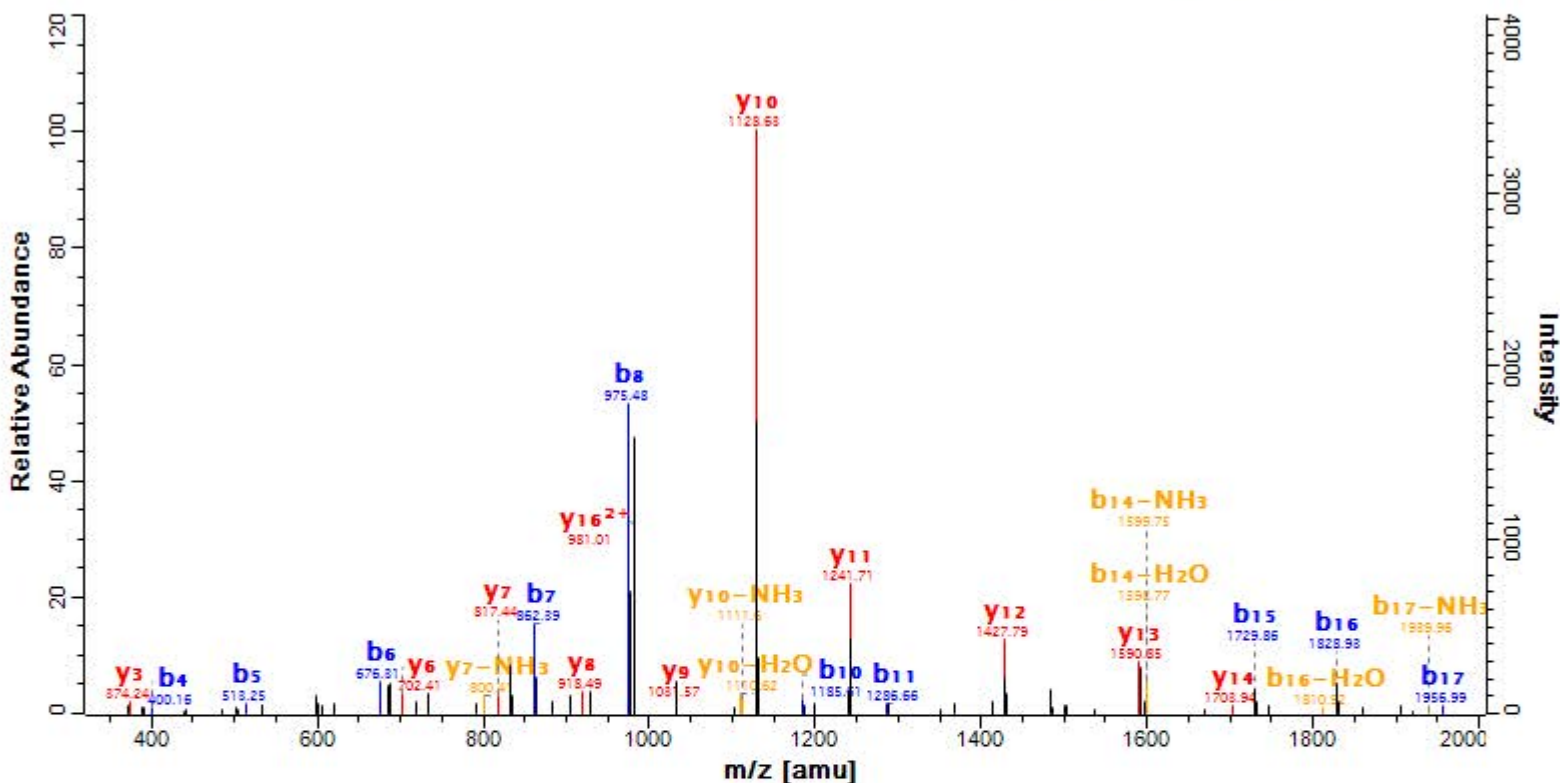

precursor information

|                   |                 |
|-------------------|-----------------|
| Mass:             | 2102.08779      |
| m/z:              | 1052.05117      |
| Charge:           | 2+              |
| Retentiontime:    | 59.104347229003 |
| Score:            | 117.1957        |
| Mass Error [ppm]: | 0.35412         |
| PEP:              | 8.1991E-09      |
| Precursor Type:   | MULTI           |

general information

|                       |               |
|-----------------------|---------------|
| Annotation:           | 15 of 18      |
| AminoAcids Coverage:  | 83 %          |
| Intensity Coverage:   | 51 %          |
| Peak Coverage:        | 31 %          |
| Protein Localisation: | 1220 ... 1237 |

| b ion     |          |    |     |    | y ion    |           | y <sup>2+</sup> ion |           |
|-----------|----------|----|-----|----|----------|-----------|---------------------|-----------|
| Δ dalton  | mass     |    | seq |    | Δ dalton | mass      | Δ dalton            | mass      |
|           | 72.04439 | 1  | A   | 17 |          |           |                     |           |
|           | 143.0815 | 2  | A   | 16 | 2032.057 |           | 2032.057            |           |
|           | 240.1343 | 3  | P   | 15 | 1961.02  |           | 981.0137            | +0.009263 |
| -0.12527  | 400.1649 | 4  | C   | 14 | 1863.967 |           | 1863.967            |           |
| +0.001996 | 513.249  | 5  | I   | 13 | 1703.937 | -0.07206  | 1703.937            |           |
| +0.080575 | 676.3123 | 6  | Y   | 12 | 1590.853 | -0.11251  | 1590.853            |           |
| -0.07375  | 862.3916 | 7  | W   | 11 | 1427.789 | -0.02989  | 1427.789            |           |
| -0.05552  | 975.4757 | 8  | L   | 10 | 1241.71  | -0.04225  | 1241.71             |           |
|           | 1072.528 | 9  | P   | 9  | 1128.626 | -0.07025  | 1128.626            |           |
| -0.39486  | 1185.613 | 10 | L   | 8  | 1031.573 | +0.007293 | 1031.573            |           |
| -0.42692  | 1286.66  | 11 | T   | 7  | 918.4891 | -0.08076  | 918.4891            |           |
|           | 1401.687 | 12 | D   | 6  | 817.4414 | +0.096677 | 817.4414            |           |
|           | 1488.719 | 13 | S   | 5  | 702.4145 | -0.01212  | 702.4145            |           |
|           | 1616.778 | 14 | Q   | 4  | 615.3824 |           | 615.3824            |           |
| -0.09825  | 1729.862 | 15 | I   | 3  | 487.3239 |           | 487.3239            |           |
| -0.13652  | 1828.93  | 16 | V   | 2  | 374.2398 | +0.130016 | 374.2398            |           |
| +0.307224 | 1956.989 | 17 | Q   | 1  | 275.1714 |           | 275.1714            |           |
|           |          | 18 | K   | 0  | 147.1128 |           | 147.1128            |           |

Scan number 9225 Raw file LNCAP\_Silac\_23F10\_set3\_02  
 Method ITMS; CID Pepti... 209.85

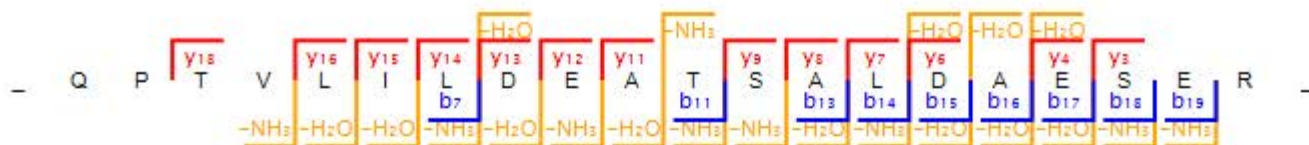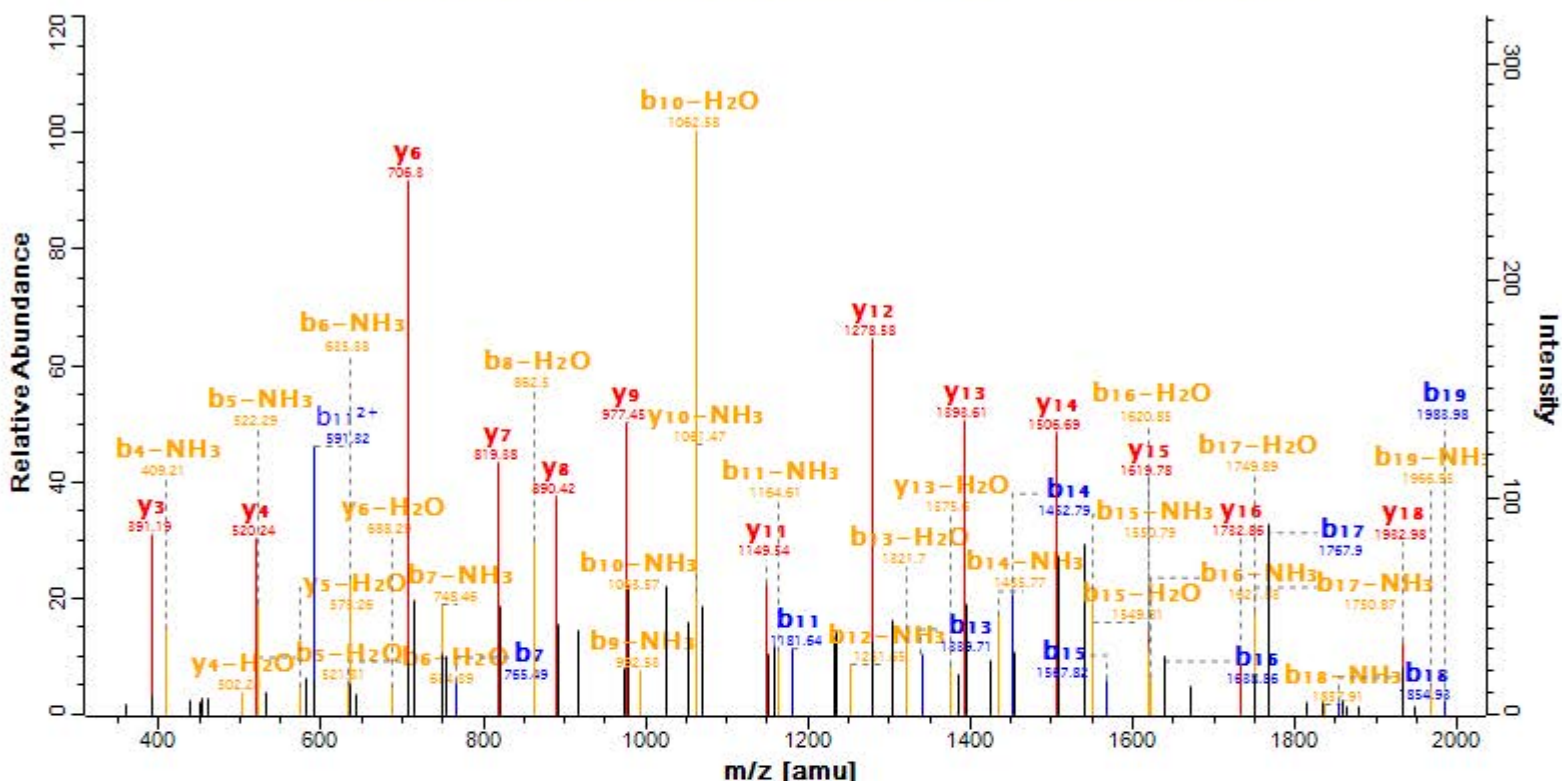

**precursor information**

|                   |                 |
|-------------------|-----------------|
| Mass:             | 2157.07982      |
| m/z:              | 1079.54719      |
| Charge:           | 2+              |
| Retentiontime:    | 60.069854736328 |
| Score:            | 209.8471        |
| Mass Error [ppm]: | -0.13192        |
| PEP:              | 6.9487E-59      |
| Precursor Type:   | MULTI           |

**general information**

|                       |             |
|-----------------------|-------------|
| Annotation:           | 17 of 20    |
| AminoAcids Coverag    | 85 %        |
| Intensity Coverage:   | 67 %        |
| Peak Coverage:        | 50 %        |
| Protein Localisation: | 629 ... 648 |

| b <sup>2+</sup> ion |          | b ion     |          |     | y ion    |      |          |
|---------------------|----------|-----------|----------|-----|----------|------|----------|
| Δ dalton            | mass     | Δ dalton  | mass     | seq | Δ dalton | mass |          |
|                     | 129.0659 |           | 129.0659 | 1   | Q        | 19   |          |
|                     | 226.1186 |           | 226.1186 | 2   | P        | 18   | 2030.029 |
|                     | 327.1663 |           | 327.1663 | 3   | T        | 17   | 1932.976 |
|                     | 426.2347 |           | 426.2347 | 4   | V        | 16   | 1831.928 |
|                     | 539.3188 |           | 539.3188 | 5   | L        | 15   | 1732.86  |
|                     | 652.4028 |           | 652.4028 | 6   | I        | 14   | 1619.776 |
|                     | 765.4869 | -0.02609  | 765.4869 | 7   | L        | 13   | 1506.692 |
|                     | 880.5138 |           | 880.5138 | 8   | D        | 12   | 1393.608 |
|                     | 1009.556 |           | 1009.556 | 9   | E        | 11   | 1278.581 |
|                     | 1080.594 |           | 1080.594 | 10  | A        | 10   | 1149.538 |
| -0.01273            | 591.3243 | -0.2019   | 1181.641 | 11  | T        | 9    | 1078.501 |
|                     | 1268.673 |           | 1268.673 | 12  | S        | 8    | 977.4534 |
|                     | 1339.71  | +0.211014 | 1339.71  | 13  | A        | 7    | 890.4214 |
|                     | 1452.794 | -0.19568  | 1452.794 | 14  | L        | 6    | 819.3843 |
|                     | 1567.821 | -0.38327  | 1567.821 | 15  | D        | 5    | 706.3002 |
|                     | 1638.858 | -0.28537  | 1638.858 | 16  | A        | 4    | 591.2733 |
|                     | 1767.901 | -0.25631  | 1767.901 | 17  | E        | 3    | 520.2362 |
|                     | 1854.933 | -0.45436  | 1854.933 | 18  | S        | 2    | 391.1936 |
|                     | 1983.976 | +0.000244 | 1983.976 | 19  | E        | 1    | 304.1615 |
|                     |          |           |          | 20  | R        | 0    | 175.119  |

Scan number 923 Raw file LNCAP\_Silac\_23F10\_set3\_02  
 Method ITMS; CID Pepti... 53.75

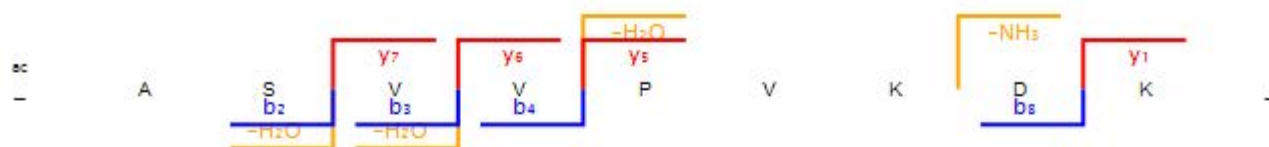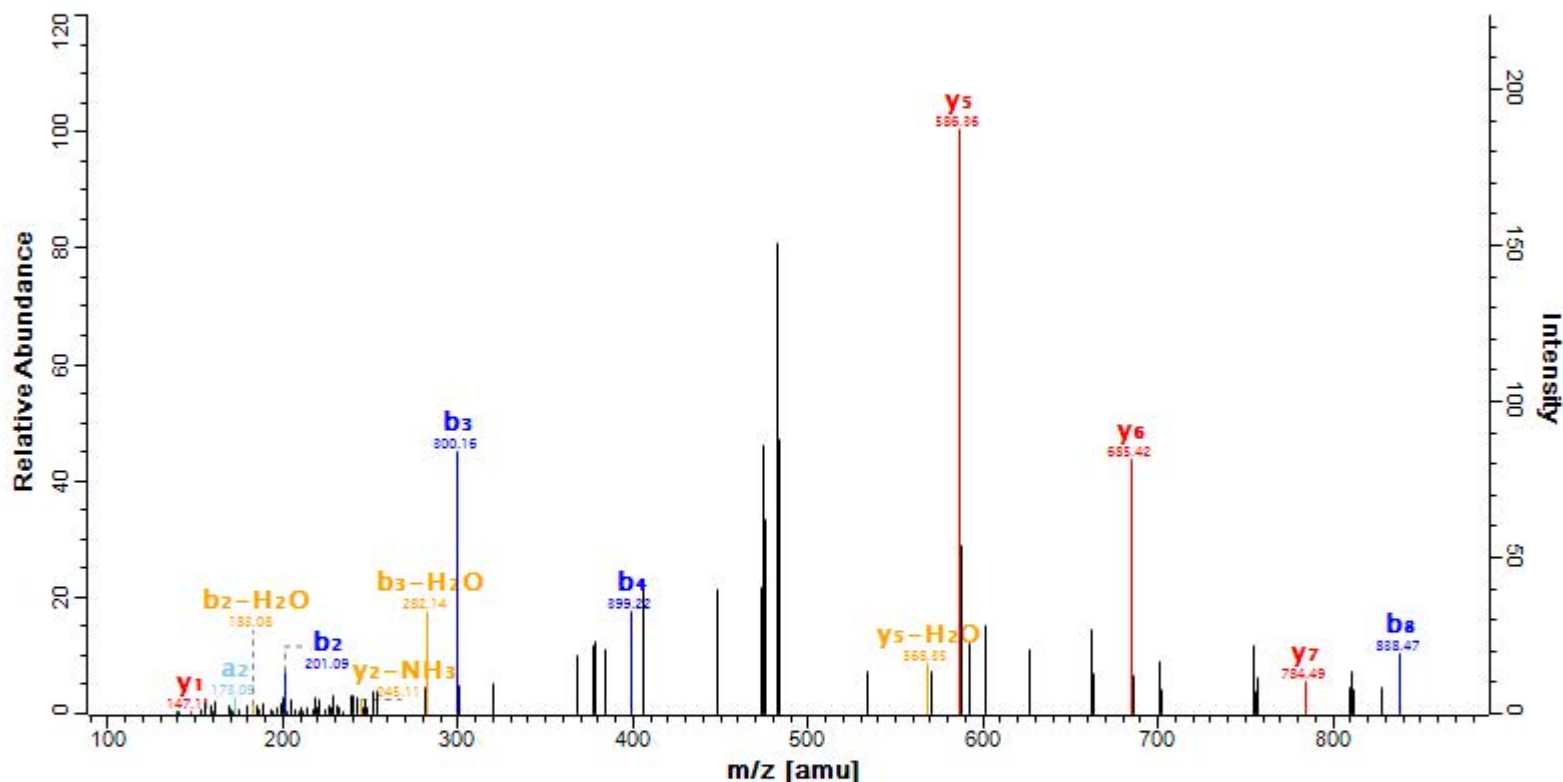

#### precursor information

|                       |                 |
|-----------------------|-----------------|
| Mass:                 | 983.56533       |
| m/z:                  | 492.78994       |
| Charge:               | 2+              |
| Retentiontime:        | 12.477801322937 |
| Score:                | 53.75107        |
| Mass Error [ppm]:     | 0.18282         |
| PEP:                  | 0.084946        |
| Precursor Type:       | MULTI           |
| Annotation:           | 6 of 9          |
| AminoAcids Coverage:  | 67 %            |
| Intensity Coverage:   | 32 %            |
| Peak Coverage:        | 14 %            |
| Protein Localisation: | 2 ... 10        |

| a ion           |          | b ion           |          | y ion |                 |      |          |           |
|-----------------|----------|-----------------|----------|-------|-----------------|------|----------|-----------|
| $\Delta$ dalton | mass     | $\Delta$ dalton | mass     | seq   | $\Delta$ dalton | mass |          |           |
|                 | 86.06004 |                 | 114.055  | 1     | A               | 8    |          |           |
| -0.01906        | 173.0921 | +0.014213       | 201.087  | 2     | S               | 7    | 871.5247 |           |
|                 | 272.1605 | +0.000456       | 300.1554 | 3     | V               | 6    | 784.4927 | +0.010519 |
|                 | 371.2289 | -0.15304        | 399.2238 | 4     | V               | 5    | 685.4243 | +0.049697 |
|                 | 468.2817 |                 | 496.2766 | 5     | P               | 4    | 586.3559 | +0.1222   |
|                 | 567.3501 |                 | 595.345  | 6     | V               | 3    | 489.3031 |           |
|                 | 695.445  |                 | 723.44   | 7     | K               | 2    | 390.2347 |           |
|                 | 810.472  | -0.03483        | 838.4669 | 8     | D               | 1    | 262.1397 |           |
|                 |          |                 |          | 9     | K               | 0    | 147.1128 | +0.149616 |

Scan number 9704 Raw file LNCAP\_Silac\_23F10\_set3\_02  
 Method ITMS; CID Pepti... 176.91

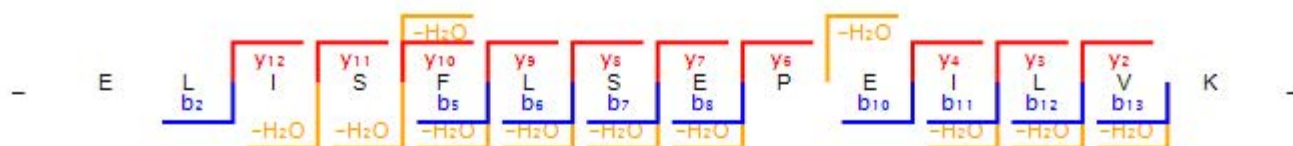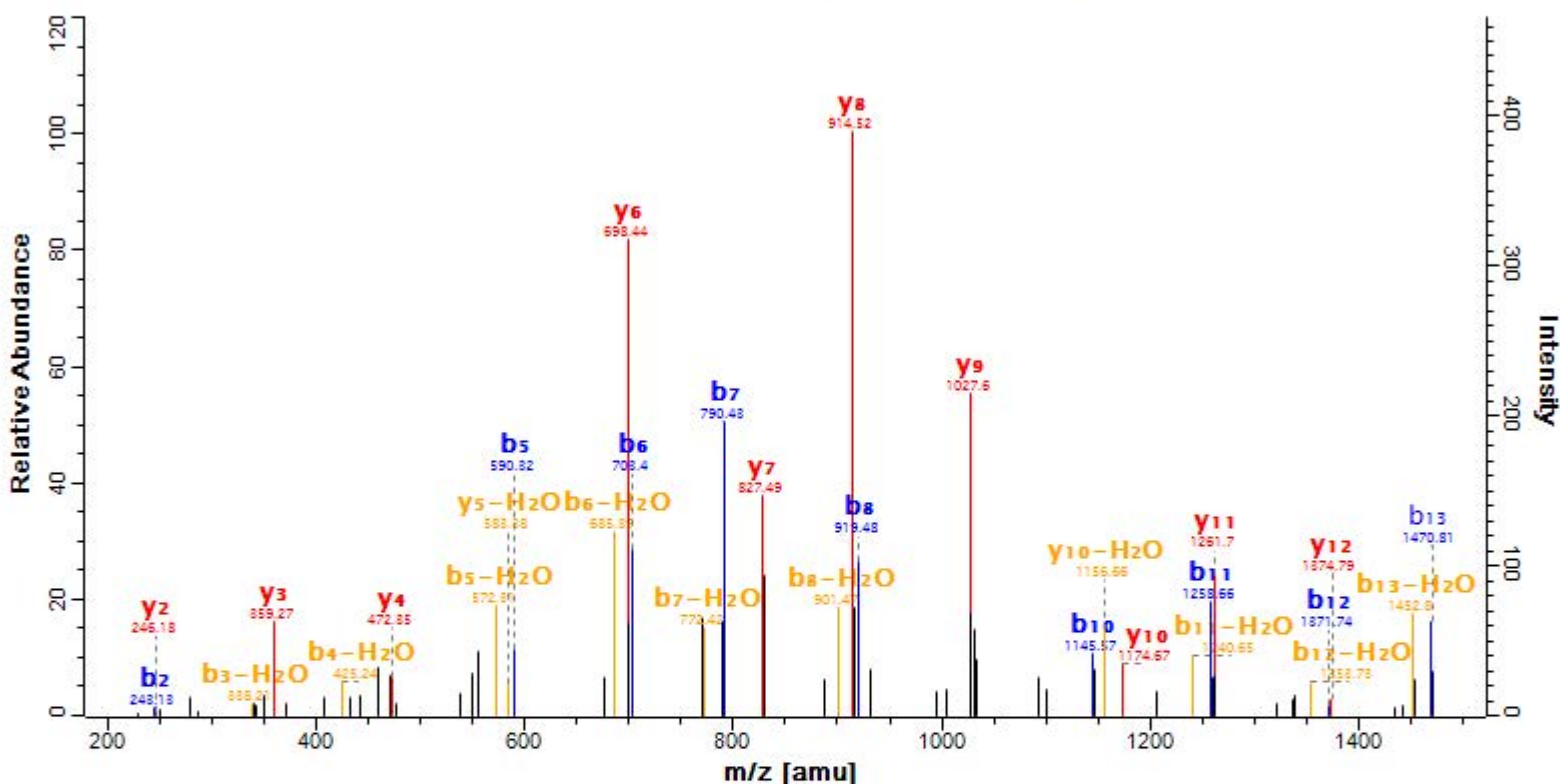

#### precursor information

|                   |                 |
|-------------------|-----------------|
| Mass:             | 1615.90752      |
| m/z:              | 808.96104       |
| Charge:           | 2+              |
| Retentiontime:    | 63.231220245361 |
| Score:            | 176.9149        |
| Mass Error [ppm]: | 0.15061         |
| PEP:              | 1.2347E-13      |
| Precursor Type:   | MULTI           |

#### general information

|                       |            |
|-----------------------|------------|
| Annotation:           | 12 of 14   |
| AminoAcids Coverage:  | 86 %       |
| Intensity Coverage:   | 68 %       |
| Peak Coverage:        | 39 %       |
| Protein Localisation: | 98 ... 111 |

| b ion      |               |     |   | y ion    |               |            |
|------------|---------------|-----|---|----------|---------------|------------|
| Δ dalton   | mass          | seq |   | Δ dalton | mass          |            |
|            | 130.049869563 | 1   | E | 13       |               |            |
| +0.0604329 | 243.133933543 | 2   | L | 12       | 1487.87195877 |            |
|            | 356.217997524 | 3   | I | 11       | 1374.78789479 | -0.1057659 |
|            | 443.250025934 | 4   | S | 10       | 1261.70383081 | +0.0012473 |
| -0.0049633 | 590.31843985  | 5   | F | 9        | 1174.6718024  | -0.0931891 |
| -0.0077895 | 703.40250383  | 6   | L | 8        | 1027.60338848 | -0.0497996 |
| +0.1662368 | 790.43453224  | 7   | S | 7        | 914.519324502 | +0.0199821 |
| -0.0083753 | 919.477125336 | 8   | E | 6        | 827.487296092 | -0.016654  |
|            | 1016.52988919 | 9   | P | 5        | 698.444702996 | +0.0072623 |
| +0.0732697 | 1145.57248228 | 10  | E | 4        | 601.391939144 |            |
| -0.1366488 | 1258.65654626 | 11  | I | 3        | 472.349346048 | +0.1240426 |
| -0.2136327 | 1371.74061025 | 12  | L | 2        | 359.265282067 | -0.0987782 |
| -0.1948884 | 1470.80902416 | 13  | V | 1        | 246.181218087 | +0.136592  |
|            |               | 14  | K | 0        | 147.112804171 |            |

Scan number 9766 Raw file LNCAP\_Silac\_23F10\_set3\_02  
 Method ITMS; CID Pepti... 173.34

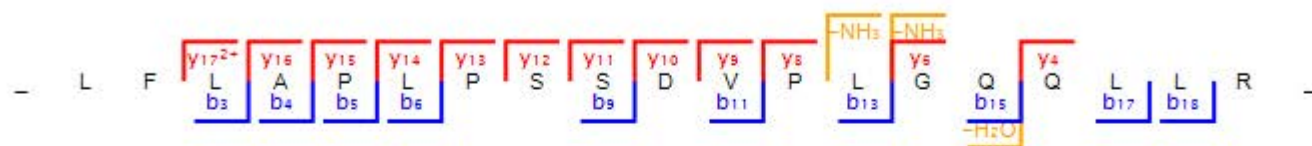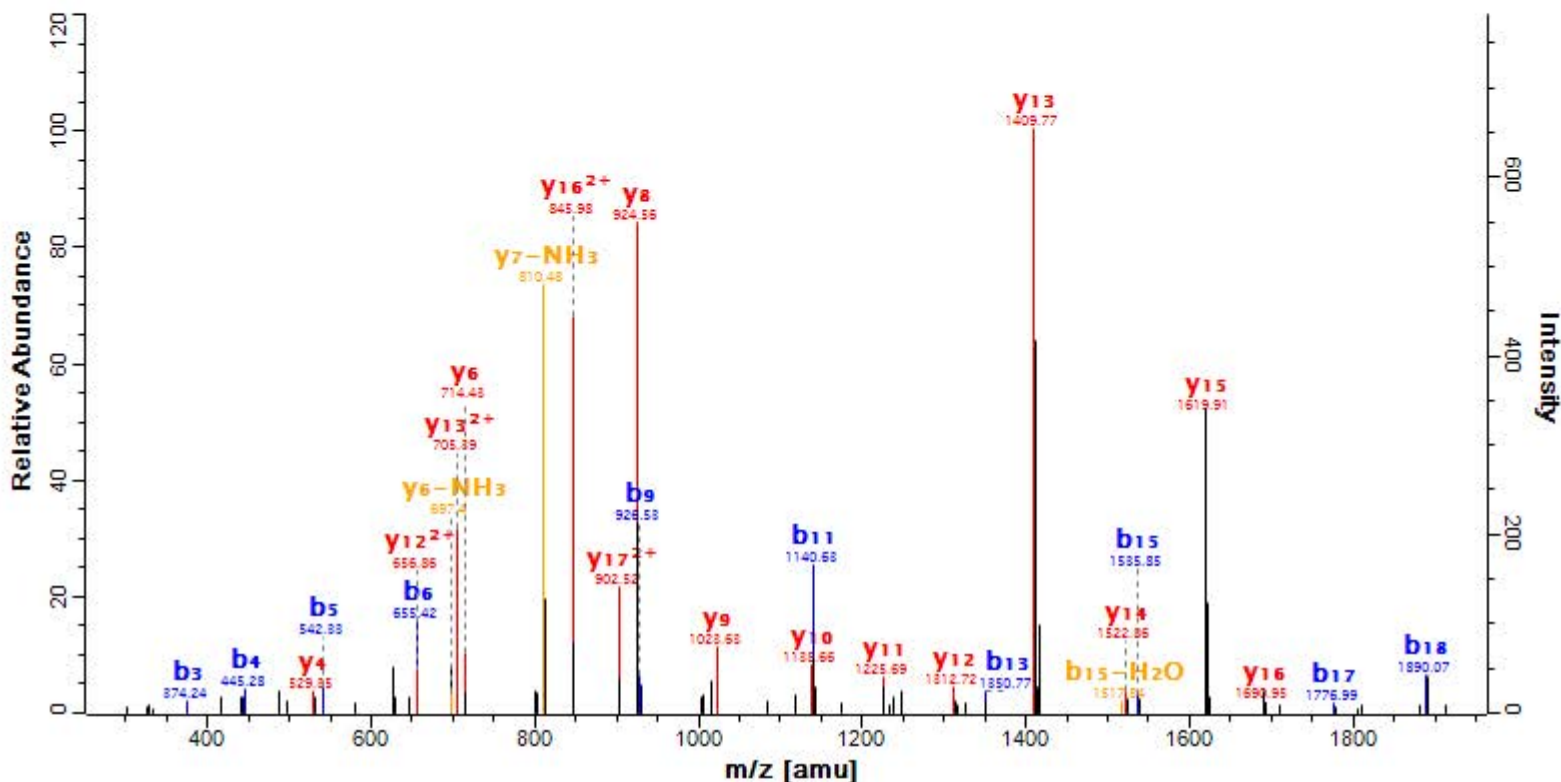

#### precursor information

|                   |                 |
|-------------------|-----------------|
| Mass:             | 2063.17847      |
| m/z:              | 1032.59651      |
| Charge:           | 2+              |
| Retentiontime:    | 63.686180114746 |
| Score:            | 173.3369        |
| Mass Error [ppm]: | 0.27299         |
| PEP:              | 3.2525E-34      |
| Precursor Type:   | MULTI           |

| b ion           |          |    |     |    | y ion           |           | $y^{2+}$ ion    |           |
|-----------------|----------|----|-----|----|-----------------|-----------|-----------------|-----------|
| $\Delta$ dalton | mass     |    | seq |    | $\Delta$ dalton | mass      | $\Delta$ dalton | mass      |
|                 | 114.0913 | 1  | L   | 18 |                 |           |                 |           |
|                 | 261.1598 | 2  | F   | 17 | 1951.101        |           | 1951.101        |           |
| -0.04021        | 374.2438 | 3  | L   | 16 | 1804.033        |           | 902.52          | +0.3334   |
| +0.091749       | 445.2809 | 4  | A   | 15 | 1690.949        | -0.29154  | 845.978         | +0.214055 |
| +0.036177       | 542.3337 | 5  | P   | 14 | 1619.912        | -0.0026   | 1619.912        |           |
| -0.04703        | 655.4178 | 6  | L   | 13 | 1522.859        | -0.11963  | 1522.859        |           |
|                 | 752.4705 | 7  | P   | 12 | 1409.775        | -0.0778   | 705.391         | +0.235597 |
|                 | 839.5026 | 8  | S   | 11 | 1312.722        | -0.0768   | 656.8646        | -0.38377  |
| +0.056972       | 926.5346 | 9  | S   | 10 | 1225.69         | -0.00205  | 1225.69         |           |
|                 | 1041.562 | 10 | D   | 9  | 1138.658        | +0.009841 | 1138.658        |           |
| +0.073676       | 1140.63  | 11 | V   | 8  | 1023.631        | -0.03084  | 1023.631        |           |
|                 | 1237.683 | 12 | P   | 7  | 924.5625        | +0.069309 | 924.5625        |           |
| -0.06962        | 1350.767 | 13 | L   | 6  | 827.5098        |           | 827.5098        |           |
|                 | 1407.788 | 14 | G   | 5  | 714.4257        | +0.009604 | 714.4257        |           |
| +0.185786       | 1535.847 | 15 | Q   | 4  | 657.4042        |           | 657.4042        |           |
|                 | 1663.905 | 16 | Q   | 3  | 529.3457        | +0.066879 | 529.3457        |           |
| -0.09113        | 1776.989 | 17 | L   | 2  | 401.2871        |           | 401.2871        |           |
| -0.4252         | 1890.074 | 18 | L   | 1  | 288.203         |           | 288.203         |           |
|                 |          | 19 | R   | 0  | 175.119         |           | 175.119         |           |

#### general information

|                       |             |
|-----------------------|-------------|
| Annotation:           | 16 of 19    |
| AminoAcids Coverage:  | 84 %        |
| Intensity Coverage:   | 57 %        |
| Peak Coverage:        | 29 %        |
| Protein Localisation: | 773 ... 791 |



Scan number 9767 Raw file LNCAP\_Silac\_23F10\_set3\_02  
 Method ITMS; CID Pepti... 110.84

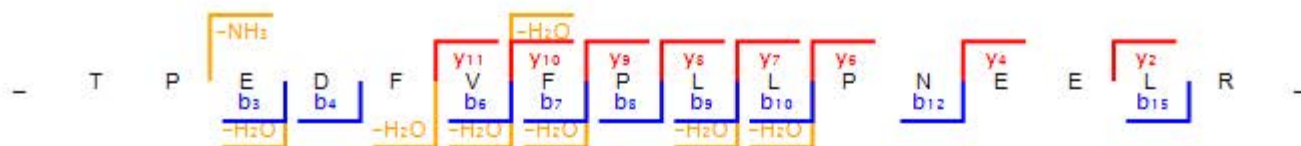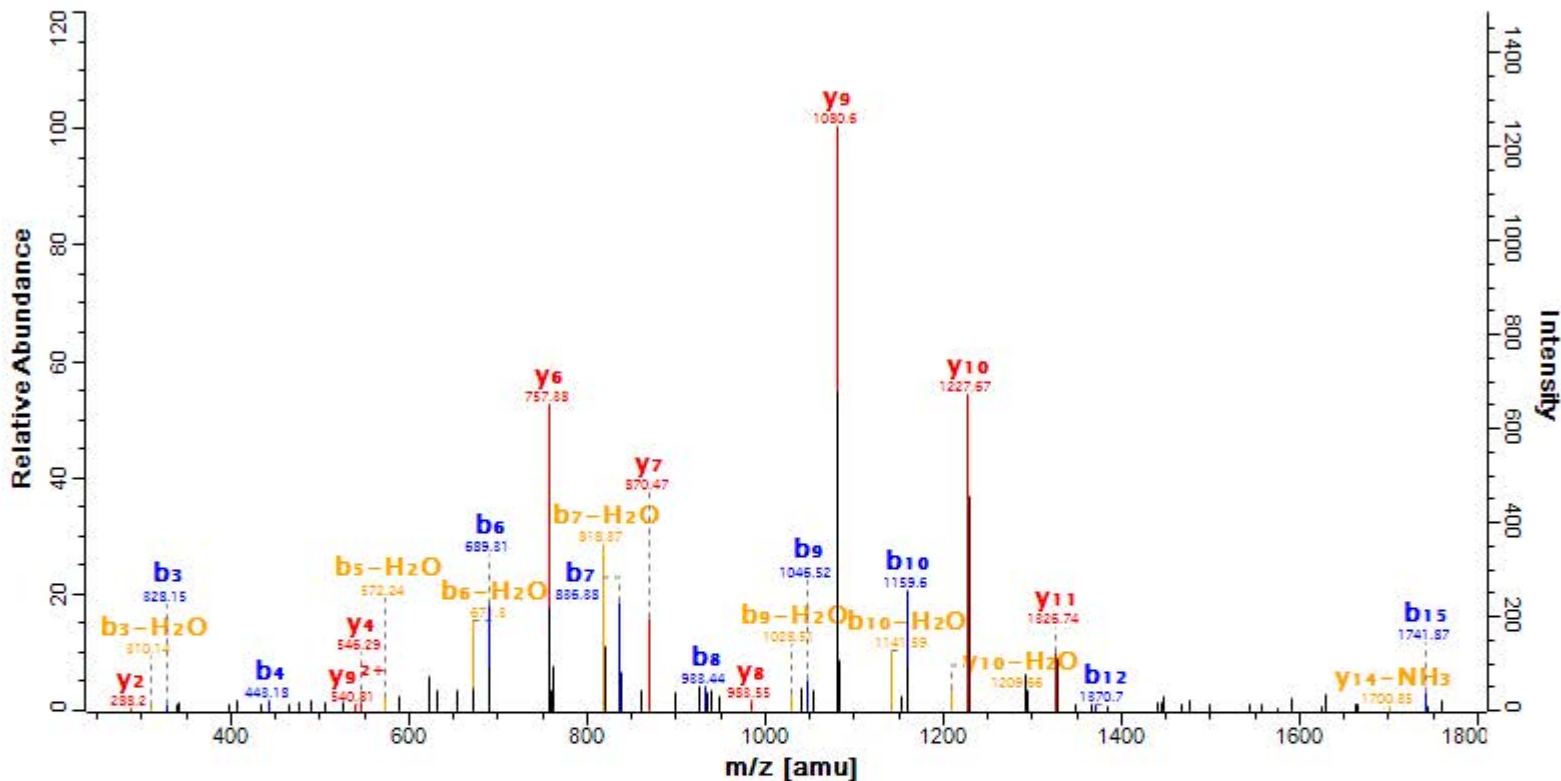

#### precursor information

|                   |                 |
|-------------------|-----------------|
| Mass:             | 1914.97331      |
| m/z:              | 958.49393       |
| Charge:           | 2+              |
| Retentiontime:    | 63.695320129394 |
| Score:            | 110.8435        |
| Mass Error [ppm]: | 0.30215         |
| PEP:              | 4.7204E-07      |
| Precursor Type:   | MULTI           |

#### general information

|                       |             |
|-----------------------|-------------|
| Annotation:           | 12 of 16    |
| AminoAcids Coverage:  | 75 %        |
| Intensity Coverage:   | 56 %        |
| Peak Coverage:        | 29 %        |
| Protein Localisation: | 192 ... 207 |

| b ion     |          |    |     |    | y ion    |           | y <sup>2+</sup> ion |          |
|-----------|----------|----|-----|----|----------|-----------|---------------------|----------|
| Δ dalton  | mass     |    | seq |    | Δ dalton | mass      | Δ dalton            | mass     |
|           | 102.055  | 1  | T   | 15 |          |           |                     |          |
|           | 199.1077 | 2  | P   | 14 | 1814.932 |           | 1814.932            |          |
| +0.175555 | 328.1503 | 3  | E   | 13 | 1717.88  |           | 1717.88             |          |
| +0.121512 | 443.1773 | 4  | D   | 12 | 1588.837 |           | 1588.837            |          |
|           | 590.2457 | 5  | F   | 11 | 1473.81  |           | 1473.81             |          |
| +0.103947 | 689.3141 | 6  | V   | 10 | 1326.742 | +0.020594 | 1326.742            |          |
| -0.0902   | 836.3825 | 7  | F   | 9  | 1227.673 | -0.00181  | 1227.673            |          |
| -0.3022   | 933.4353 | 8  | P   | 8  | 1080.605 | -0.07024  | 540.806             | -0.49121 |
| +0.068322 | 1046.519 | 9  | L   | 7  | 983.552  | -0.06148  | 983.552             |          |
| -0.15441  | 1159.603 | 10 | L   | 6  | 870.468  | -0.00305  | 870.468             |          |
|           | 1256.656 | 11 | P   | 5  | 757.3839 | -0.00908  | 757.3839            |          |
| +0.012956 | 1370.699 | 12 | N   | 4  | 660.3311 |           | 660.3311            |          |
|           | 1499.742 | 13 | E   | 3  | 546.2882 | -0.16747  | 546.2882            |          |
|           | 1628.784 | 14 | E   | 2  | 417.2456 |           | 417.2456            |          |
| +0.132402 | 1741.868 | 15 | L   | 1  | 288.203  | +0.108202 | 288.203             |          |
|           |          | 16 | R   | 0  | 175.119  |           | 175.119             |          |

Scan number 9777 Raw file LNCAP\_Silac\_23F10\_set3\_02  
 Method ITMS; CID Pepti... 104.95

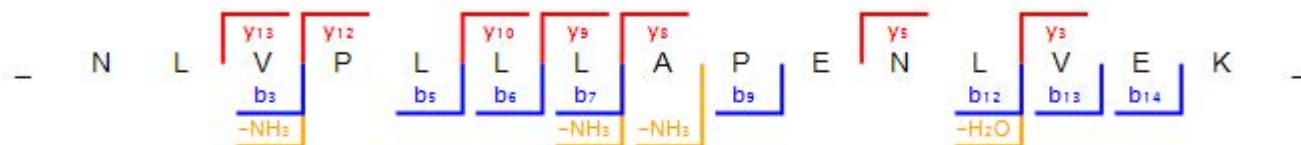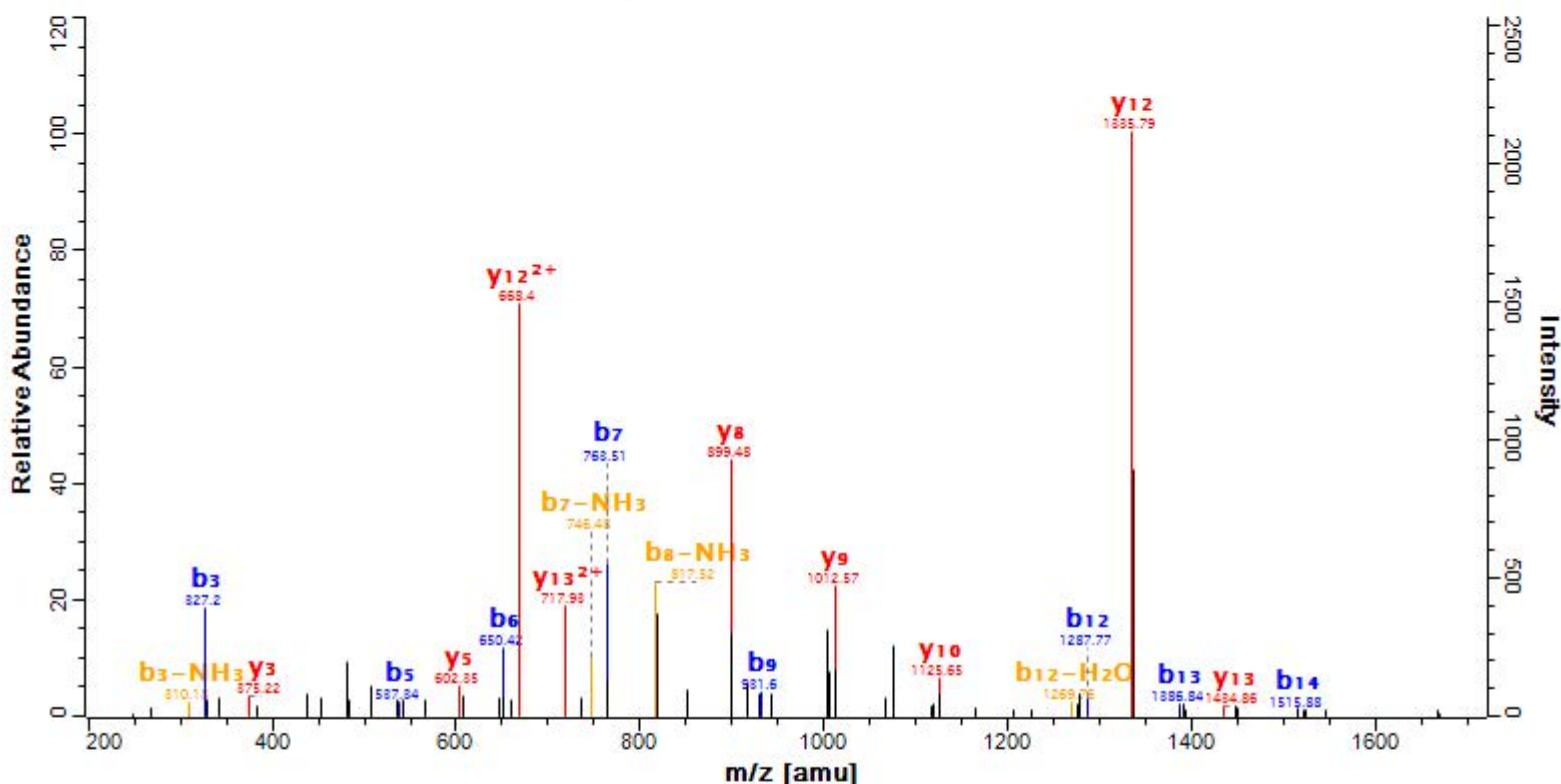

#### precursor information

|                   |                 |
|-------------------|-----------------|
| Mass:             | 1660.97683      |
| m/z:              | 831.49569       |
| Charge:           | 2+              |
| Retentiontime:    | 63.760334014892 |
| Score:            | 104.9545        |
| Mass Error [ppm]: | 0.28338         |
| PEP:              | 3.9326E-06      |
| Precursor Type:   | MULTI           |

#### general information

|                       |             |
|-----------------------|-------------|
| Annotation:           | 11 of 15    |
| AminoAcids Coverage:  | 73 %        |
| Intensity Coverage:   | 58 %        |
| Peak Coverage:        | 26 %        |
| Protein Localisation: | 326 ... 340 |

| b ion     |          |     |   | y ion    |          |           | y <sup>2+</sup> ion |           |
|-----------|----------|-----|---|----------|----------|-----------|---------------------|-----------|
| Δ dalton  | mass     | seq |   | Δ dalton | mass     | Δ dalton  | mass                |           |
|           | 115.0502 | 1   | N | 14       |          |           |                     |           |
|           | 228.1343 | 2   | L | 13       | 1547.941 | 1547.941  |                     |           |
| +0.028825 | 327.2027 | 3   | V | 12       | 1434.857 | -0.17171  | 717.932             | +0.293443 |
|           | 424.2554 | 4   | P | 11       | 1335.788 | -0.03615  | 668.3978            | +0.250318 |
| -0.2103   | 537.3395 | 5   | L | 10       | 1238.735 |           | 1238.735            |           |
| +0.052317 | 650.4236 | 6   | L | 9        | 1125.651 | +0.010952 | 1125.651            |           |
| -0.02589  | 763.5076 | 7   | L | 8        | 1012.567 | +0.000351 | 1012.567            |           |
|           | 834.5448 | 8   | A | 7        | 899.4833 | -0.00518  | 899.4833            |           |
| -0.03263  | 931.5975 | 9   | P | 6        | 828.4462 |           | 828.4462            |           |
|           | 1060.64  | 10  | E | 5        | 731.3934 |           | 731.3934            |           |
|           | 1174.683 | 11  | N | 4        | 602.3508 | +0.061307 | 602.3508            |           |
| -0.02137  | 1287.767 | 12  | L | 3        | 488.3079 |           | 488.3079            |           |
| +0.12994  | 1386.836 | 13  | V | 2        | 375.2238 | +0.160893 | 375.2238            |           |
| -0.34869  | 1515.878 | 14  | E | 1        | 276.1554 |           | 276.1554            |           |
|           |          | 15  | K | 0        | 147.1128 |           | 147.1128            |           |

Scan number 9923 Raw file LNCAP\_Silac\_23F10\_set3\_02  
 Method ITMS; CID Pepti... 127.75

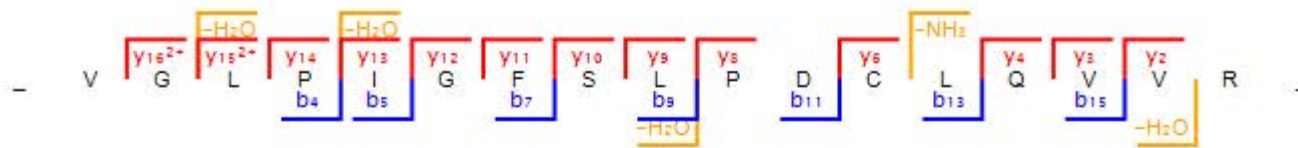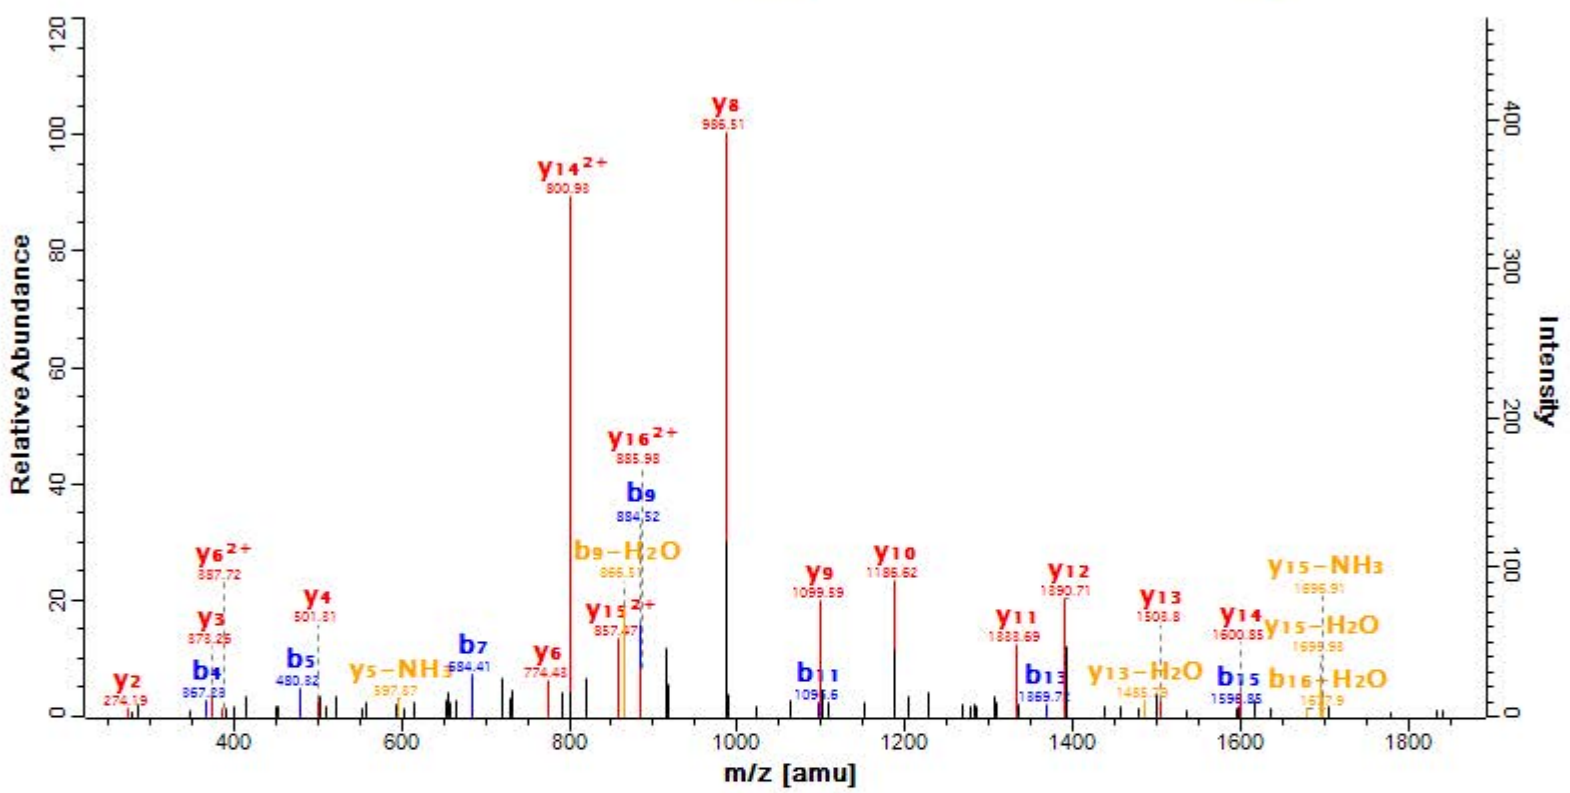

**precursor information**

|                   |                 |
|-------------------|-----------------|
| Mass:             | 1869.01824      |
| m/z:              | 935.5164        |
| Charge:           | 2+              |
| Retentiontime:    | 64.845825195312 |
| Score:            | 127.7531        |
| Mass Error [ppm]: | 0.0020786       |
| PEP:              | 3.6774E-12      |
| Precursor Type:   | MULTI           |

**general information**

|                       |            |
|-----------------------|------------|
| Annotation:           | 15 of 17   |
| AminoAcids Coverage:  | 88 %       |
| Intensity Coverage:   | 63 %       |
| Peak Coverage:        | 30 %       |
| Protein Localisation: | 98 ... 114 |

| b ion     |          |     |   | y ion    |          | y <sup>2+</sup> ion |           |           |
|-----------|----------|-----|---|----------|----------|---------------------|-----------|-----------|
| Δ dalton  | mass     | seq |   | Δ dalton | mass     | Δ dalton            | mass      |           |
|           | 100.0757 | 1   | V | 16       |          |                     |           |           |
|           | 157.0972 | 2   | G | 15       | 1770.957 | 885.9822            | -0.3766   |           |
|           | 270.1812 | 3   | L | 14       | 1713.936 | 857.4715            | +0.135903 |           |
| -0.15946  | 367.234  | 4   | P | 13       | 1600.852 | +0.00011            | 800.9294  | +0.203692 |
| -0.04662  | 480.318  | 5   | I | 12       | 1503.799 | +0.168597           | 1503.799  |           |
|           | 537.3395 | 6   | G | 11       | 1390.715 | -0.11233            | 1390.715  |           |
| -0.06326  | 684.4079 | 7   | F | 10       | 1333.693 | -0.08647            | 1333.693  |           |
|           | 771.44   | 8   | S | 9        | 1186.625 | +0.023691           | 1186.625  |           |
| +0.163728 | 884.524  | 9   | L | 8        | 1099.593 | +0.061212           | 1099.593  |           |
|           | 981.5768 | 10  | P | 7        | 986.5088 | -0.03099            | 986.5088  |           |
| -0.25289  | 1096.604 | 11  | D | 6        | 889.456  |                     | 889.456   |           |
|           | 1256.634 | 12  | C | 5        | 774.4291 | +0.059639           | 387.7182  | -0.45584  |
| +0.045603 | 1369.718 | 13  | L | 4        | 614.3984 |                     | 614.3984  |           |
|           | 1497.777 | 14  | Q | 3        | 501.3144 | +0.160252           | 501.3144  |           |
| -0.306    | 1596.845 | 15  | V | 2        | 373.2558 | +0.010761           | 373.2558  |           |
|           | 1695.914 | 16  | V | 1        | 274.1874 | +0.049572           | 274.1874  |           |
|           |          | 17  | R | 0        | 175.119  |                     | 175.119   |           |

Scan number 10008 Raw file LNCAP\_Silac\_23F10\_set3\_03  
 Method ITMS; CID Pepti... 61.41

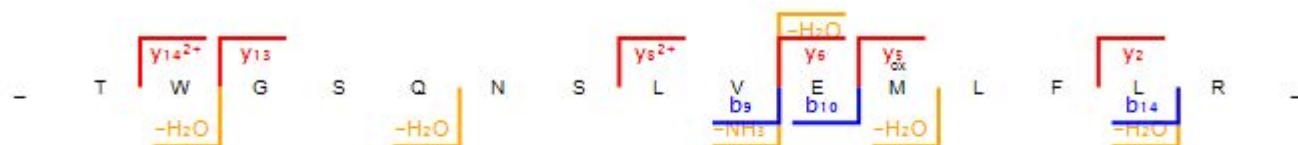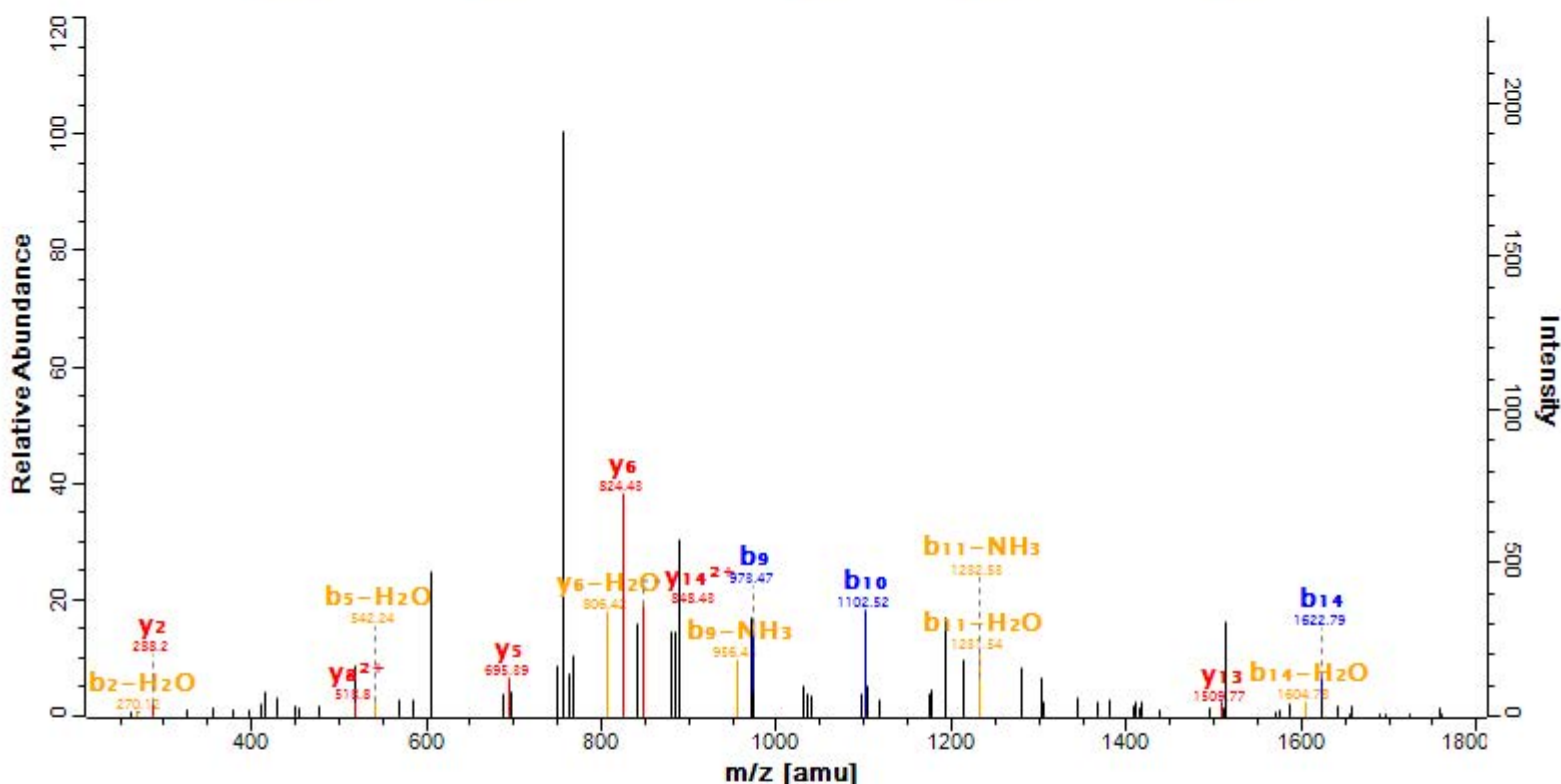

#### precursor information

|                   |                 |
|-------------------|-----------------|
| Mass:             | 1795.89199      |
| m/z:              | 898.95327       |
| Charge:           | 2+              |
| Retentiontime:    | 57.198043823242 |
| Score:            | 61.40926        |
| Mass Error [ppm]: | -0.39931        |
| PEP:              | 0.012681        |
| Precursor Type:   | MULTI           |

#### general information

|                       |               |
|-----------------------|---------------|
| Annotation:           | 9 of 15       |
| AminoAcids Coverage:  | 60 %          |
| Intensity Coverage:   | 25 %          |
| Peak Coverage:        | 18 %          |
| Protein Localisation: | 1275 ... 1289 |

| b ion     |          |     |   | y ion    |          | y <sup>2+</sup> ion |           |
|-----------|----------|-----|---|----------|----------|---------------------|-----------|
| Δ dalton  | mass     | seq |   | Δ dalton | mass     | Δ dalton            | mass      |
|           | 102.055  | 1   | T | 14       |          |                     |           |
|           | 288.1343 | 2   | W | 13       | 1695.852 | 848.4298            | +0.300435 |
|           | 345.1557 | 3   | G | 12       | 1509.773 | +0.137899           | 1509.773  |
|           | 432.1878 | 4   | S | 11       | 1452.752 |                     | 1452.752  |
|           | 560.2463 | 5   | Q | 10       | 1365.719 |                     | 1365.719  |
|           | 674.2893 | 6   | N | 9        | 1237.661 |                     | 1237.661  |
|           | 761.3213 | 7   | S | 8        | 1123.618 |                     | 1123.618  |
|           | 874.4054 | 8   | L | 7        | 1036.586 |                     | 518.7966  |
| -0.0309   | 973.4738 | 9   | V | 6        | 923.5019 |                     | 923.5019  |
| +0.062249 | 1102.516 | 10  | E | 5        | 824.4335 | -0.03133            | 824.4335  |
|           | 1249.552 | 11  | M | 4        | 695.3909 | -0.00131            | 695.3909  |
|           | 1362.636 | 12  | L | 3        | 548.3555 |                     | 548.3555  |
|           | 1509.704 | 13  | F | 2        | 435.2714 |                     | 435.2714  |
| -0.22544  | 1622.788 | 14  | L | 1        | 288.203  | +0.0497             | 288.203   |
|           |          | 15  | R | 0        | 175.119  |                     | 175.119   |

Scan number 10077 Raw file LNCAP\_Silac\_23F10\_set3\_03  
 Method ITMS; CID Peptide 191.06

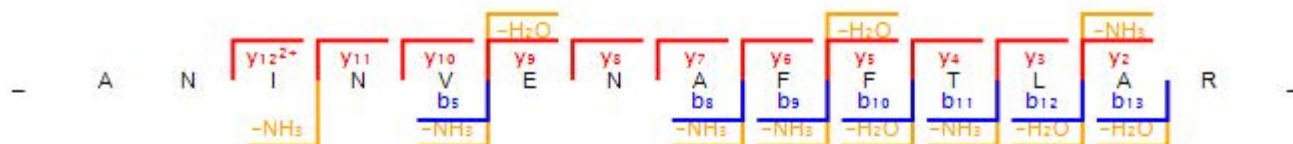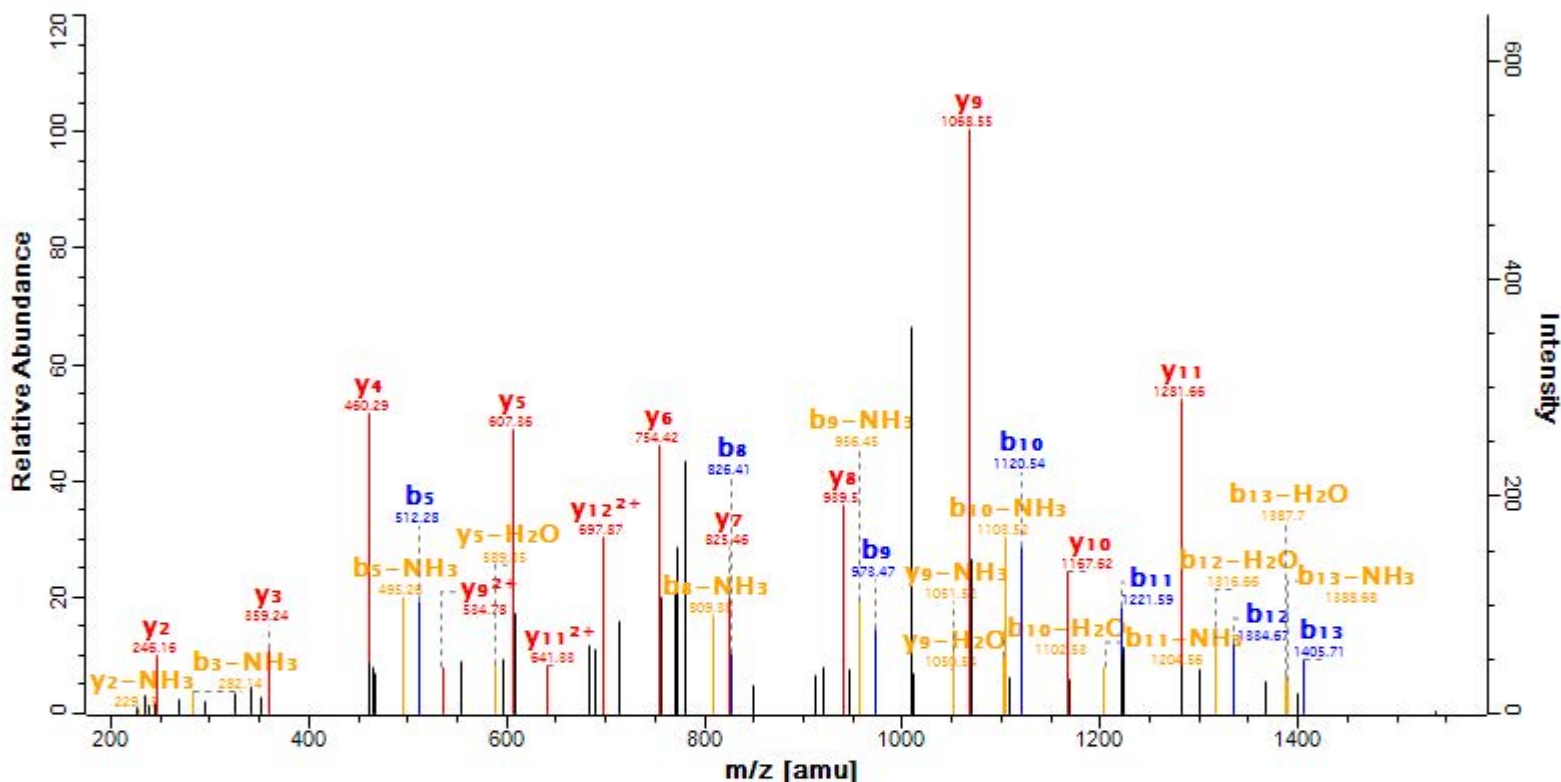

#### precursor information

|                   |                 |
|-------------------|-----------------|
| Mass:             | 1578.81498      |
| m/z:              | 790.41477       |
| Charge:           | 2+              |
| Retentiontime:    | 57.632118225097 |
| Score:            | 191.0584        |
| Mass Error [ppm]: | -0.28931        |
| PEP:              | 2.1658E-18      |
| Precursor Type:   | MULTI           |

| b ion     |          |     |   | y ion    |          | y <sup>2+</sup> ion |                    |
|-----------|----------|-----|---|----------|----------|---------------------|--------------------|
| Δ dalton  | mass     | seq |   | Δ dalton | mass     | Δ dalton            | mass               |
|           | 72.04439 | 1   | A | 13       |          |                     |                    |
|           | 186.0873 | 2   | N | 12       | 1508.786 |                     | 1508.786           |
|           | 299.1714 | 3   | I | 11       | 1394.743 |                     | 697.875 +0.260339  |
|           | 413.2143 | 4   | N | 10       | 1281.659 | -0.08036            | 641.3329 +0.165225 |
| +0.067008 | 512.2827 | 5   | V | 9        | 1167.616 | +0.102577           | 1167.616           |
|           | 641.3253 | 6   | E | 8        | 1068.547 | +0.010102           | 534.7773 +0.455026 |
|           | 755.3682 | 7   | N | 7        | 939.5047 | +0.027              | 939.5047           |
| +0.029762 | 826.4054 | 8   | A | 6        | 825.4618 | -0.04842            | 825.4618           |
| +0.046431 | 973.4738 | 9   | F | 5        | 754.4246 | +0.092515           | 754.4246           |
| -0.16889  | 1120.542 | 10  | F | 4        | 607.3562 | +0.060709           | 607.3562           |
| -0.24392  | 1221.59  | 11  | T | 3        | 460.2878 | +0.151706           | 460.2878           |
| -0.07688  | 1334.674 | 12  | L | 2        | 359.2401 | +0.09416            | 359.2401           |
| -0.19896  | 1405.711 | 13  | A | 1        | 246.1561 | -0.04692            | 246.1561           |
|           |          | 14  | R | 0        | 175.119  |                     | 175.119            |

#### general information

|                       |             |
|-----------------------|-------------|
| Annotation:           | 12 of 14    |
| AminoAcids Coverage:  | 86 %        |
| Intensity Coverage:   | 61 %        |
| Peak Coverage:        | 44 %        |
| Protein Localisation: | 154 ... 167 |

Scan number 10142 Raw file LNCAP\_Silac\_23F10\_set3\_03  
 Method ITMS; CID Peptide 128.08

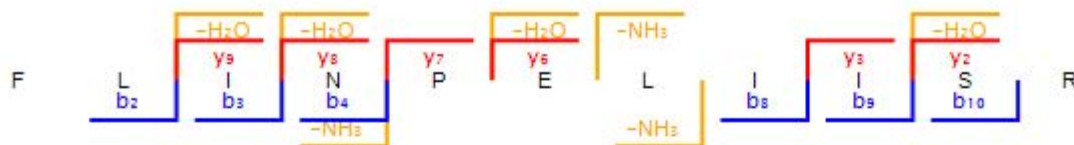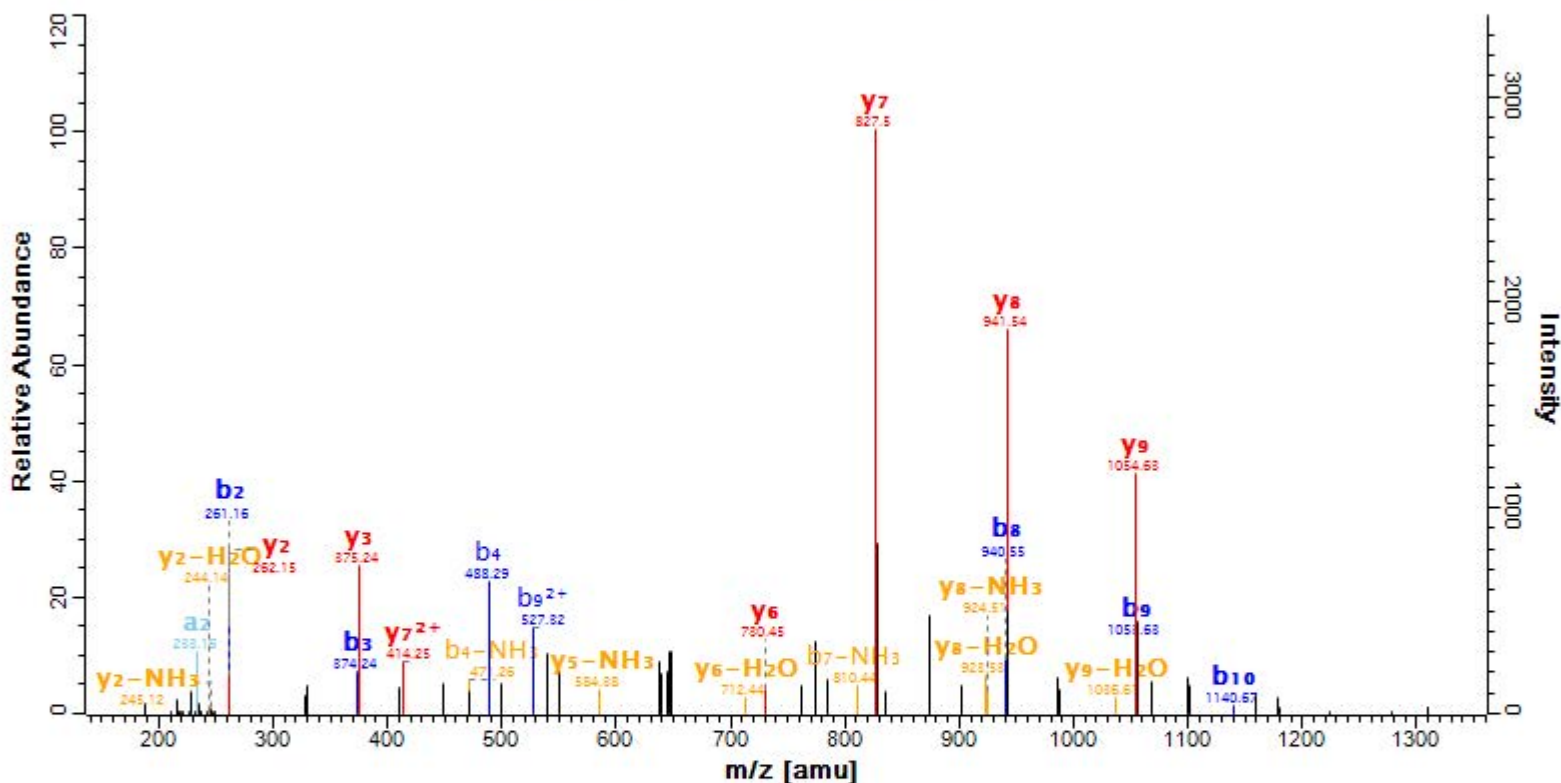

#### precursor information

|                   |                 |
|-------------------|-----------------|
| Mass:             | 1313.77077      |
| m/z:              | 657.89266       |
| Charge:           | 2+              |
| Retentiontime:    | 58.059024810791 |
| Score:            | 128.081         |
| Mass Error [ppm]: | 0.03978         |
| PEP:              | 0.00018779      |
| Precursor Type:   | MULTI           |

#### general information

|                       |             |
|-----------------------|-------------|
| Annotation:           | 9 of 11     |
| AminoAcids Coverage:  | 82 %        |
| Intensity Coverage:   | 57 %        |
| Peak Coverage:        | 27 %        |
| Protein Localisation: | 759 ... 769 |

|       | a ion         | b <sup>2+</sup> ion | b ion         |     |   | y ion         | y <sup>2+</sup> ion     |
|-------|---------------|---------------------|---------------|-----|---|---------------|-------------------------|
|       | Δ dalton mass | Δ dalton mass       | Δ dalton mass | seq |   | Δ dalton mass | Δ dalton mass           |
|       | 120.1         | 148.1               | 148.1         | 1   | F | 10            |                         |
| -0.01 | 233.2         | 261.2               | -0.01 261.2   | 2   | L | 9             | 1168                    |
|       | 346.2         | 374.2               | -0.01 374.2   | 3   | I | 8             | 1055 -0.03 1055         |
|       | 460.3         | 488.3               | -0.05 488.3   | 4   | N | 7             | 941.5 -0.02 941.5       |
|       | 557.3         | 585.3               | 585.3         | 5   | P | 6             | 827.5 +0.01 414.3 +0.03 |
|       | 686.4         | 714.4               | 714.4         | 6   | E | 5             | 730.4 -0.15 730.4       |
|       | 799.5         | 827.5               | 827.5         | 7   | L | 4             | 601.4                   |
|       | 912.6         | 940.6               | -0.26 940.6   | 8   | I | 3             | 488.3                   |
|       | 1026          | +0.09 1527.3        | -0.15 1054    | 9   | I | 2             | 375.2 +0.13 375.2       |
|       | 1113          | 1141                | +0.075 1141   | 10  | S | 1             | 262.2 -0.05 262.2       |
|       |               |                     |               | 11  | R | 0             | 175.1                   |

Scan number 10195 Raw file LNCAP\_Silac\_23F10\_set3\_03  
 Method ITMS; CID Pepti... 100.48

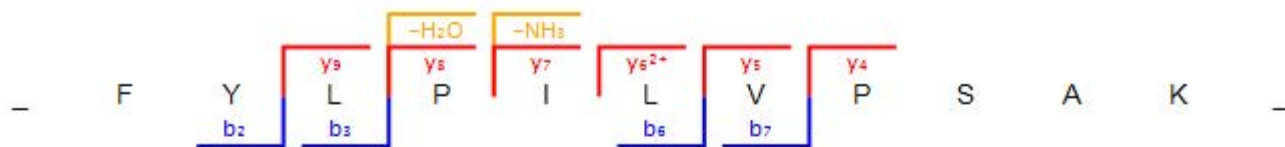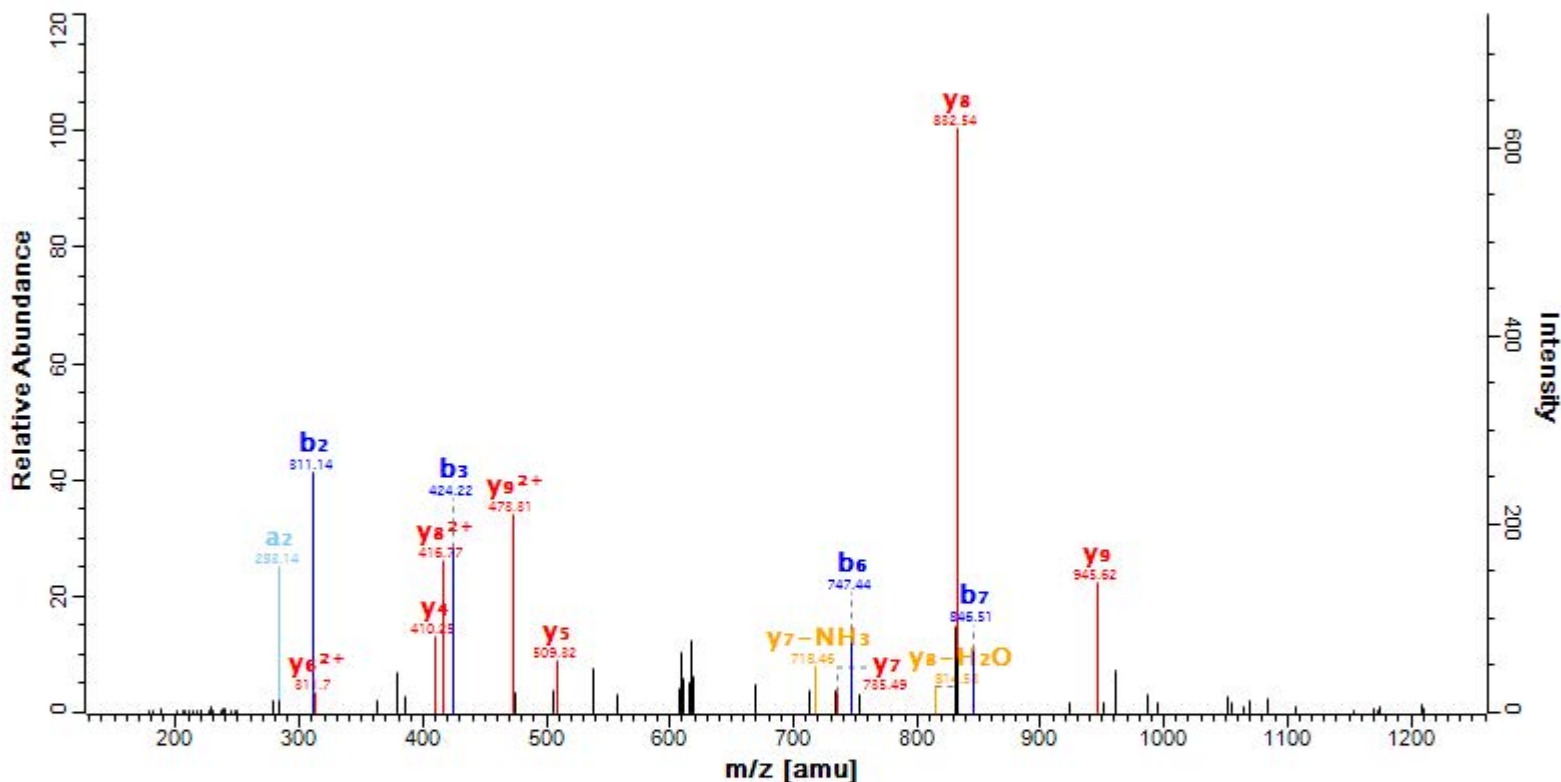

#### precursor information

|                   |                 |
|-------------------|-----------------|
| Mass:             | 1246.73294      |
| m/z:              | 624.37375       |
| Charge:           | 2+              |
| Retentiontime:    | 58.376426696777 |
| Score:            | 100.4767        |
| Mass Error [ppm]: | 0.31606         |
| PEP:              | 0.00063423      |
| Precursor Type:   | MULTI           |

#### general information

|                       |             |
|-----------------------|-------------|
| Annotation:           | 7 of 11     |
| AminoAcids Coverage:  | 64 %        |
| Intensity Coverage:   | 67 %        |
| Peak Coverage:        | 19 %        |
| Protein Localisation: | 155 ... 165 |

| a ion    |        | b ion    |        |    |     |    | y ion    |         | y <sup>2+</sup> ion |         |
|----------|--------|----------|--------|----|-----|----|----------|---------|---------------------|---------|
| Δ dalton | mass   | Δ dalton | mass   |    | seq |    | Δ dalton | mass    | Δ dalton            | mass    |
|          | 120.08 |          | 148.08 | 1  | F   | 10 |          |         |                     |         |
| +0.0027  | 283.14 | +0.0185  | 311.14 | 2  | Y   | 9  | 1108.7   |         | 1108.7              |         |
|          | 396.23 | -0.045   | 424.22 | 3  | L   | 8  | 945.62   | +0.005  | 473.31              | -0.028  |
|          | 493.28 |          | 521.28 | 4  | P   | 7  | 832.54   | +0.0237 | 416.77              | +0.0803 |
|          | 606.36 |          | 634.36 | 5  | I   | 6  | 735.49   | -0.169  | 735.49              |         |
|          | 719.45 | +0.0093  | 747.44 | 6  | L   | 5  | 622.4    |         | 311.7               | +0.3946 |
|          | 818.52 | -0.061   | 846.51 | 7  | V   | 4  | 509.32   | +0.0101 | 509.32              |         |
|          | 915.57 |          | 943.57 | 8  | P   | 3  | 410.25   | +0.0873 | 410.25              |         |
|          | 1002.6 |          | 1030.6 | 9  | S   | 2  | 313.2    |         | 313.2               |         |
|          | 1073.6 |          | 1101.6 | 10 | A   | 1  | 226.16   |         | 226.16              |         |
|          |        |          |        | 11 | K   | 0  | 155.13   |         | 155.13              |         |

Scan number 10249 Raw file LNCAP\_Silac\_23F10\_set3\_03  
 Method ITMS; CID Pepti... 190.02

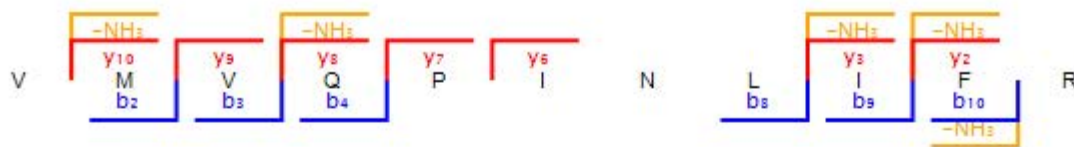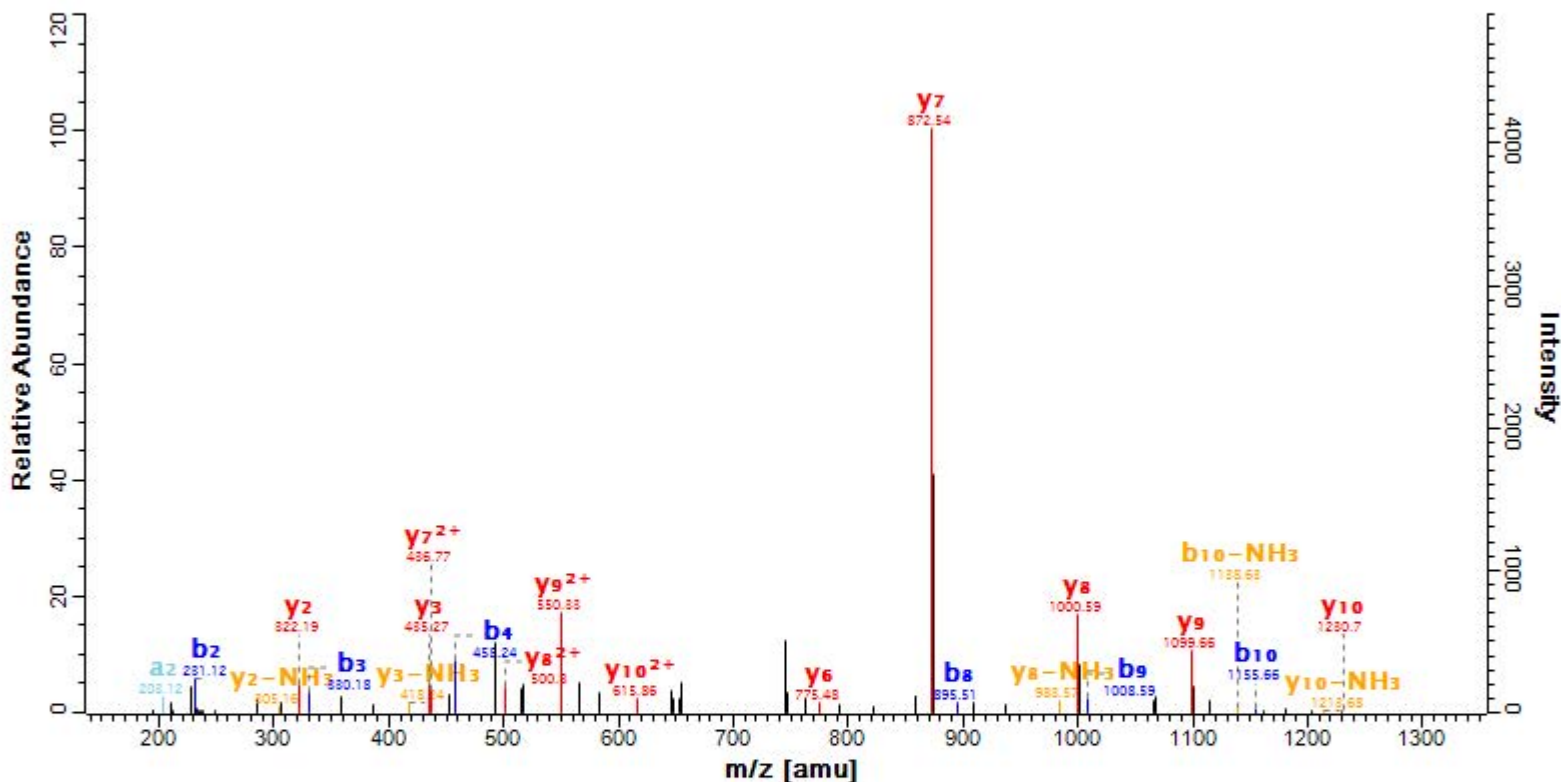

#### precursor information

|                   |                 |
|-------------------|-----------------|
| Mass:             | 1328.76425      |
| m/z:              | 665.3894        |
| Charge:           | 2+              |
| Retentiontime:    | 58.705665588378 |
| Score:            | 190.0165        |
| Mass Error [ppm]: | 0.29169         |
| PEP:              | 1.0839E-10      |
| Precursor Type:   | MULTI           |

#### general information

|                       |           |
|-----------------------|-----------|
| Annotation:           | 8 of 11   |
| AminoAcids Coverage:  | 73 %      |
| Intensity Coverage:   | 55 %      |
| Peak Coverage:        | 26 %      |
| Protein Localisation: | 13 ... 23 |

| a ion    |        | b ion    |        |    |     |          | y ion  |          | y <sup>2+</sup> ion |         |
|----------|--------|----------|--------|----|-----|----------|--------|----------|---------------------|---------|
| Δ dalton | mass   | Δ dalton | mass   |    | seq | Δ dalton | mass   | Δ dalton | mass                |         |
|          | 72.081 |          | 100.08 | 1  | V   | 10       |        |          |                     |         |
| +0.0267  | 203.12 | -0.027   | 231.12 | 2  | M   | 9        | 1230.7 | -0.059   | 615.86              | -0.035  |
|          | 302.19 | -0.165   | 330.18 | 3  | V   | 8        | 1099.7 | -0.017   | 550.33              | +0.2161 |
|          | 430.25 | -0.048   | 458.24 | 4  | Q   | 7        | 1000.6 | +0.0097  | 500.8               | +0.0677 |
|          | 527.3  |          | 555.3  | 5  | P   | 6        | 872.54 | -0.04    | 436.77              | -0.08   |
|          | 640.39 |          | 668.38 | 6  | I   | 5        | 775.48 | +0.1992  | 775.48              |         |
|          | 754.43 |          | 782.42 | 7  | N   | 4        | 662.4  |          | 662.4               |         |
|          | 867.51 | +0.1004  | 895.51 | 8  | L   | 3        | 548.36 |          | 548.36              |         |
|          | 980.6  | -0.196   | 1008.6 | 9  | I   | 2        | 435.27 | +0.0803  | 435.27              |         |
|          | 1127.7 | -0.179   | 1155.7 | 10 | F   | 1        | 322.19 | +0.1355  | 322.19              |         |
|          |        |          |        | 11 | R   | 0        | 175.12 |          | 175.12              |         |



Scan number 10406 Raw file LNCAP\_Silac\_23F10\_set3\_03  
 Method ITMS; CID Pepti... 236.35

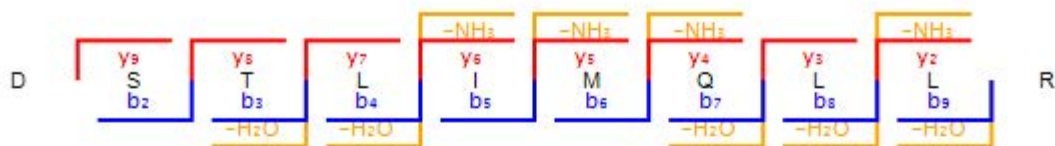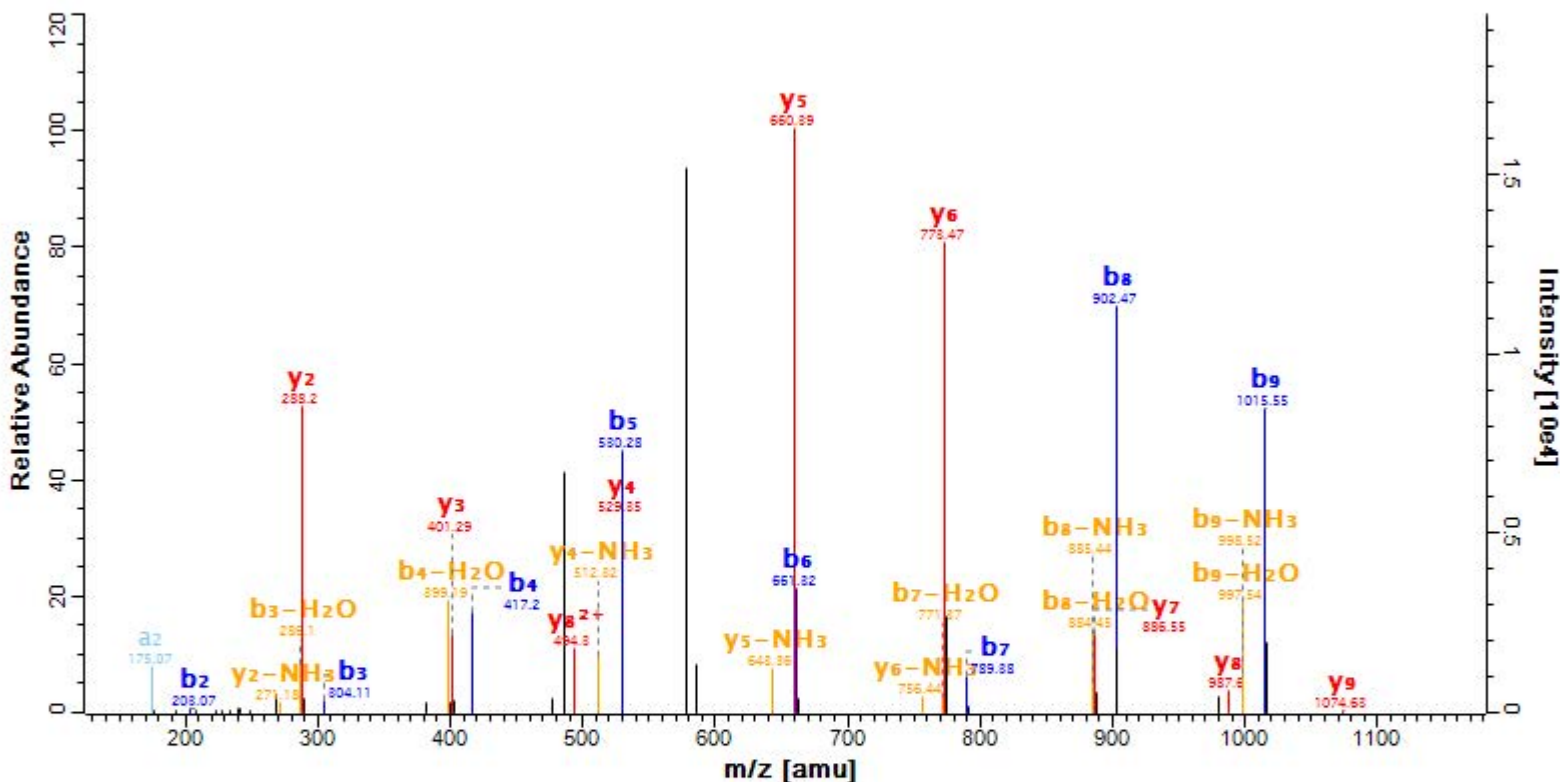

precursor information

|                   |                 |
|-------------------|-----------------|
| Mass:             | 1188.6533       |
| m/z:              | 595.33393       |
| Charge:           | 2+              |
| Retentiontime:    | 59.699569702148 |
| Score:            | 236.3472        |
| Mass Error [ppm]: | -0.28835        |
| PEP:              | 3.4842E-27      |
| Precursor Type:   | MULTI           |

|                       |             |
|-----------------------|-------------|
| Annotation:           | 9 of 10     |
| AminoAcids Coverage:  | 90 %        |
| Intensity Coverage:   | 74 %        |
| Peak Coverage:        | 47 %        |
| Protein Localisation: | 216 ... 225 |

| a ion    |        | b ion    |        |    |     |   | y ion    |         | y <sup>2+</sup> ion |        |
|----------|--------|----------|--------|----|-----|---|----------|---------|---------------------|--------|
| Δ dalton | mass   | Δ dalton | mass   |    | seq |   | Δ dalton | mass    | Δ dalton            | mass   |
|          | 88.039 |          | 116.03 | 1  | D   | 9 |          |         |                     |        |
| -0.018   | 175.07 | -0.055   | 203.07 | 2  | S   | 8 | 1074.6   | -0.416  | 1074.6              |        |
|          | 276.12 | +0.1329  | 304.11 | 3  | T   | 7 | 987.6    | +0.0853 | 494.3               | -0.012 |
|          | 389.2  | -0.096   | 417.2  | 4  | L   | 6 | 886.55   | -0.001  | 886.55              |        |
|          | 502.29 | +0.0293  | 530.28 | 5  | I   | 5 | 773.47   | +0.0228 | 773.47              |        |
|          | 633.33 | +0.0843  | 661.32 | 6  | M   | 4 | 660.39   | +0.0229 | 660.39              |        |
|          | 761.39 | -0.021   | 789.38 | 7  | Q   | 3 | 529.35   | +0.0594 | 529.35              |        |
|          | 874.47 | -0.079   | 902.47 | 8  | L   | 2 | 401.29   | +0.0722 | 401.29              |        |
|          | 987.55 | -0.158   | 1015.5 | 9  | L   | 1 | 288.2    | -0.008  | 288.2               |        |
|          |        |          |        | 10 | R   | 0 | 175.12   |         |                     | 175.12 |

Scan number 10465 Raw file LNCAP\_Silac\_23F10\_set3\_03  
 Method ITMS; CID Pepti... 126.1

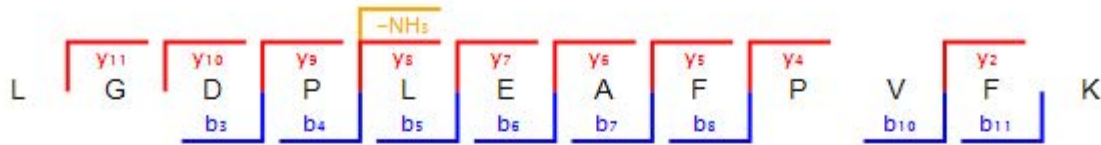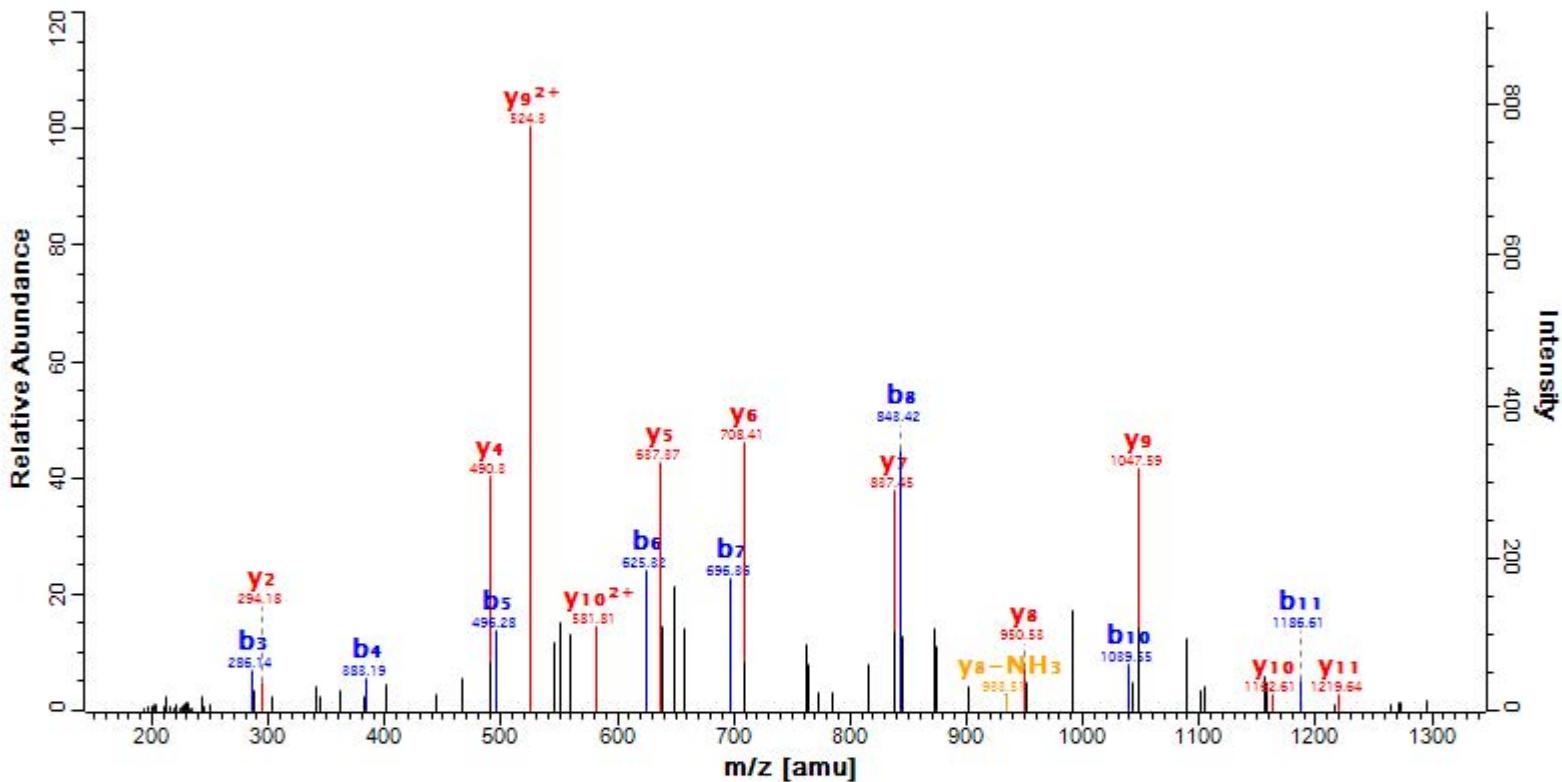

#### precursor information

|                   |                 |
|-------------------|-----------------|
| Mass:             | 1331.713        |
| m/z:              | 666.86378       |
| Charge:           | 2+              |
| Retentiontime:    | 60.100566864013 |
| Score:            | 126.1012        |
| Mass Error [ppm]: | 0.3449          |
| PEP:              | 2.2225E-05      |
| Precursor Type:   | MULTI           |

#### general information

|                       |           |
|-----------------------|-----------|
| Annotation:           | 10 of 12  |
| AminoAcids Coverage:  | 83 %      |
| Intensity Coverage:   | 58 %      |
| Peak Coverage:        | 22 %      |
| Protein Localisation: | 35 ... 46 |

| b ion     |          |    |     |    | y ion    |           | y <sup>2+</sup> ion |           |
|-----------|----------|----|-----|----|----------|-----------|---------------------|-----------|
| Δ dalton  | mass     |    | seq |    | Δ dalton | mass      | Δ dalton            | mass      |
|           | 114.0913 | 1  | L   | 11 |          |           |                     |           |
|           | 171.1128 | 2  | G   | 10 | 1219.636 | -0.18372  | 1219.636            |           |
| -0.02479  | 286.1397 | 3  | D   | 9  | 1162.614 | +0.066621 | 581.8108            | -0.03521  |
| +0.151849 | 383.1925 | 4  | P   | 8  | 1047.587 | +0.039364 | 524.2973            | +0.178153 |
| +0.036718 | 496.2766 | 5  | L   | 7  | 950.5346 | +0.097438 | 950.5346            |           |
| -0.03798  | 625.3192 | 6  | E   | 6  | 837.4505 | -0.02406  | 837.4505            |           |
| -0.02999  | 696.3563 | 7  | A   | 5  | 708.4079 | +0.012792 | 708.4079            |           |
| -0.01991  | 843.4247 | 8  | F   | 4  | 637.3708 | +0.081033 | 637.3708            |           |
|           | 940.4775 | 9  | P   | 3  | 490.3024 | +0.048251 | 490.3024            |           |
| +0.281885 | 1039.546 | 10 | V   | 2  | 393.2496 |           | 393.2496            |           |
| -0.13834  | 1186.614 | 11 | F   | 1  | 294.1812 | +0.059352 | 294.1812            |           |
|           |          | 12 | K   | 0  | 147.1128 |           | 147.1128            |           |

Scan number 10479 Raw file LNCAP\_Silac\_23F10\_set3\_03  
 Method ITMS; CID Pepti... 87.91

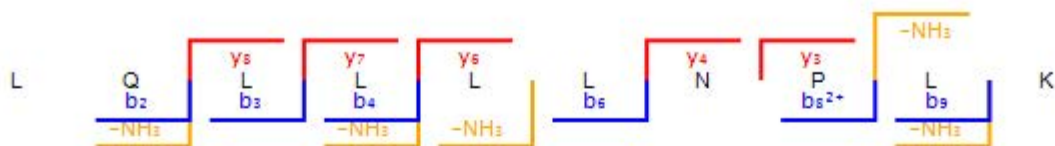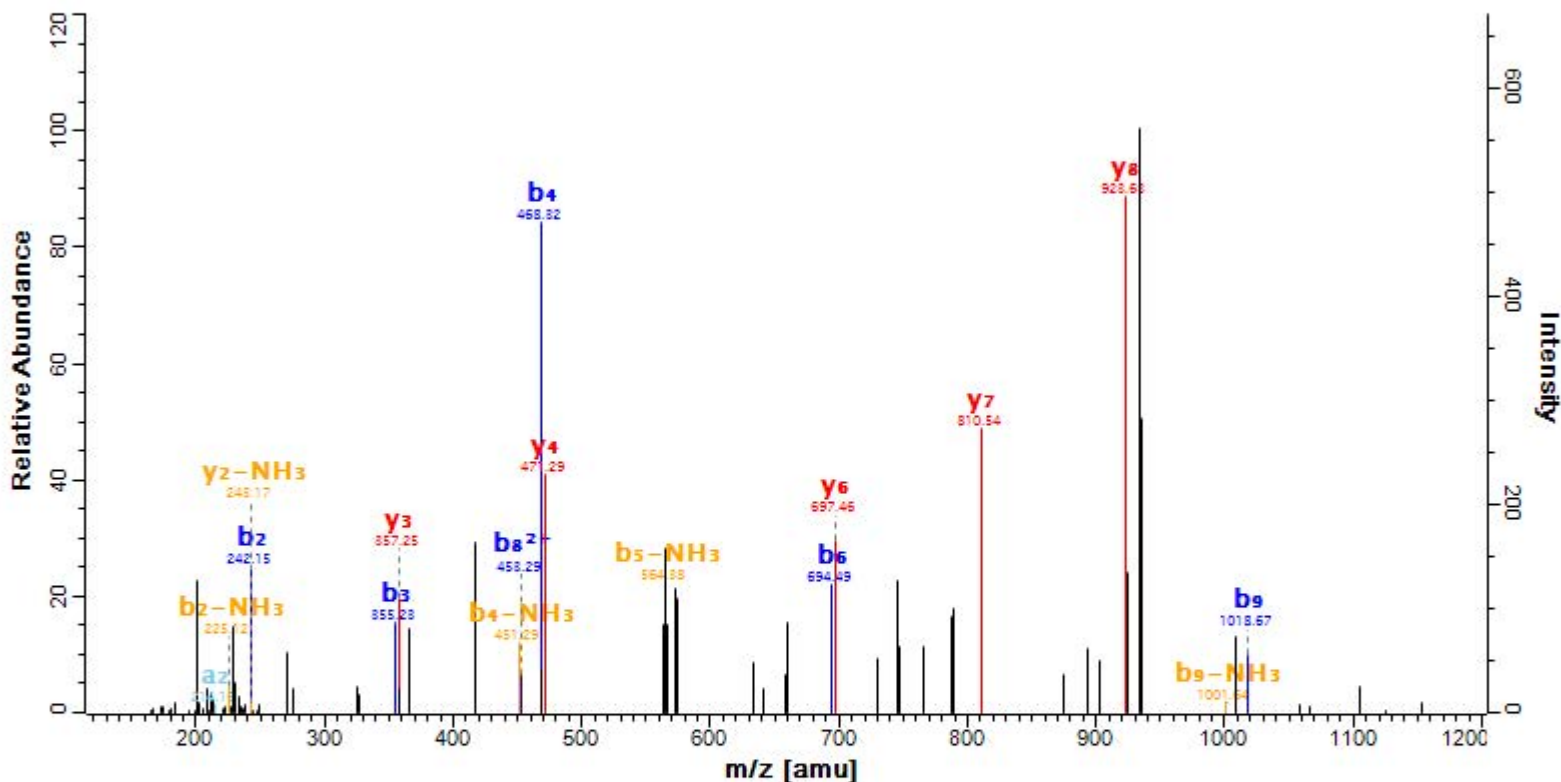

### precursor information

|                   |                 |
|-------------------|-----------------|
| Mass:             | 1163.76405      |
| m/z:              | 582.8893        |
| Charge:           | 2+              |
| Retentiontime:    | 60.200618743896 |
| Score:            | 87.91328        |
| Mass Error [ppm]: | -0.10977        |
| PEP:              | 0.0024547       |
| Precursor Type:   | MULTI           |

|                       |             |
|-----------------------|-------------|
| Annotation:           | 8 of 10     |
| AminoAcids Coverage:  | 80 %        |
| Intensity Coverage:   | 42 %        |
| Peak Coverage:        | 20 %        |
| Protein Localisation: | 862 ... 871 |

| a ion    |        | b <sup>2+</sup> ion |        | b ion    |        | y ion |          |      |                |
|----------|--------|---------------------|--------|----------|--------|-------|----------|------|----------------|
| Δ dalton | mass   | Δ dalton            | mass   | Δ dalton | mass   | seq   | Δ dalton | mass |                |
|          | 86.096 |                     | 114.09 |          | 114.09 | 1     | L        | 9    |                |
| -0.104   | 214.16 |                     | 242.15 | +0.0387  | 242.15 | 2     | Q        | 8    | 1051.7         |
|          | 327.24 |                     | 355.23 | +0.076   | 355.23 | 3     | L        | 7    | 923.63 -0.081  |
|          | 440.32 |                     | 468.32 | -0.417   | 468.32 | 4     | L        | 6    | 810.54 -0.035  |
|          | 553.41 |                     | 581.4  |          | 581.4  | 5     | L        | 5    | 697.46 +0.1655 |
|          | 666.49 |                     | 694.49 | -0.059   | 694.49 | 6     | L        | 4    | 584.38         |
|          | 780.53 |                     | 808.53 |          | 808.53 | 7     | N        | 3    | 471.29 +0.0546 |
|          | 877.59 | +0.0894             | 453.29 |          | 905.58 | 8     | P        | 2    | 357.25 -0.013  |
|          | 990.67 |                     | 1018.7 | -0.115   | 1018.7 | 9     | L        | 1    | 260.2          |
|          |        |                     |        |          |        | 10    | K        | 0    | 147.11         |

Scan number 10556 Raw file LNCAP\_Silac\_23F10\_set3\_03  
 Method ITMS; CID Pepti... 121.68

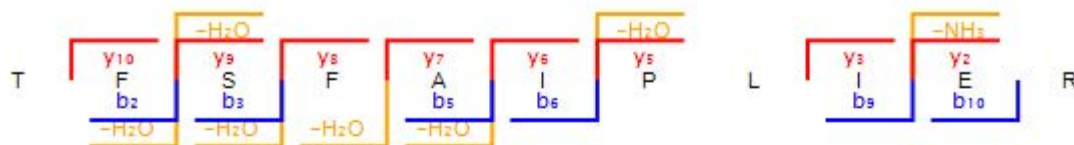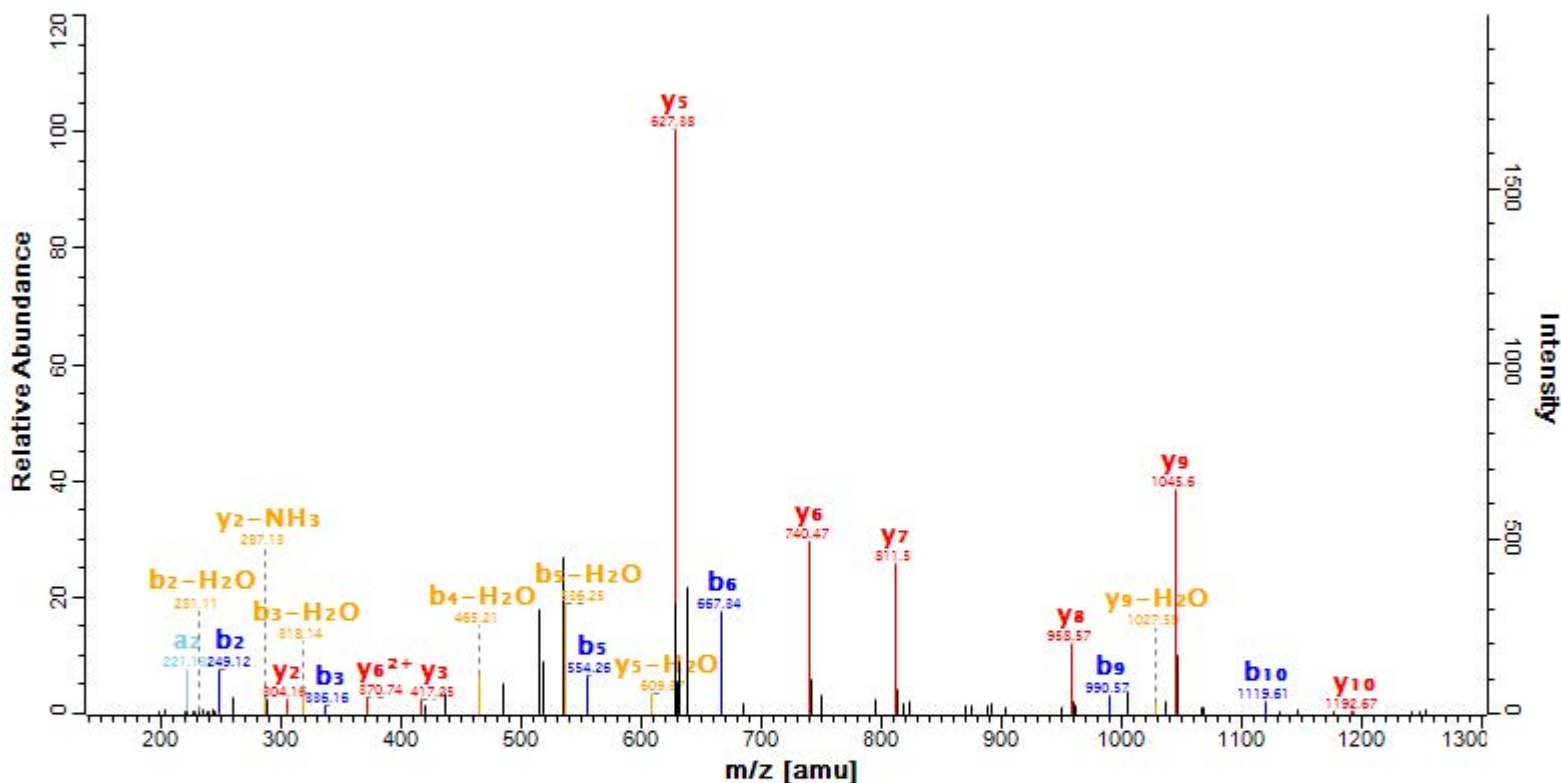

#### precursor information

|                   |                 |
|-------------------|-----------------|
| Mass:             | 1292.71322      |
| m/z:              | 647.36389       |
| Charge:           | 2+              |
| Retentiontime:    | 60.795761108398 |
| Score:            | 121.6796        |
| Mass Error [ppm]: | 0.26924         |
| PEP:              | 0.00019329      |
| Precursor Type:   | MULTI           |

#### general information

|                       |             |
|-----------------------|-------------|
| Annotation:           | 8 of 11     |
| AminoAcids Coverage:  | 73 %        |
| Intensity Coverage:   | 62 %        |
| Peak Coverage:        | 27 %        |
| Protein Localisation: | 188 ... 198 |

| a ion    |        | b ion    |        |    |     |          | y ion  |          | y <sup>2+</sup> ion |         |
|----------|--------|----------|--------|----|-----|----------|--------|----------|---------------------|---------|
| Δ dalton | mass   | Δ dalton | mass   |    | seq | Δ dalton | mass   | Δ dalton | mass                |         |
|          | 74.06  |          | 102.05 | 1  | T   |          |        |          |                     |         |
| -0.058   | 221.13 | -0.071   | 249.12 | 2  | F   | 9        | 1192.7 | +0.4339  | 1192.7              |         |
|          | 308.16 | +0.2049  | 336.16 | 3  | S   | 8        | 1045.6 | -0.021   | 1045.6              |         |
|          | 455.23 |          | 483.22 | 4  | F   | 7        | 958.57 | -0.065   | 958.57              |         |
|          | 526.27 | -0.05    | 554.26 | 5  | A   | 6        | 811.5  | +0.016   | 811.5               |         |
|          | 639.35 | -0.068   | 667.34 | 6  | I   | 5        | 740.47 | -0.054   | 370.74              | +0.4089 |
|          | 736.4  |          | 764.4  | 7  | P   | 4        | 627.38 | +0.0761  | 627.38              |         |
|          | 849.49 |          | 877.48 | 8  | L   | 3        | 530.33 |          | 530.33              |         |
|          | 962.57 | +0.0699  | 990.57 | 9  | I   | 2        | 417.25 | +0.0654  | 417.25              |         |
|          | 1091.6 | -0.252   | 1119.6 | 10 | E   | 1        | 304.16 | +0.1026  | 304.16              |         |
|          |        |          |        | 11 | R   | 0        | 175.12 |          | 175.12              |         |

Scan number 10578 Raw file LNCAP\_Silac\_23F10\_set3\_03  
 Method ITMS; CID Peptide 134.99

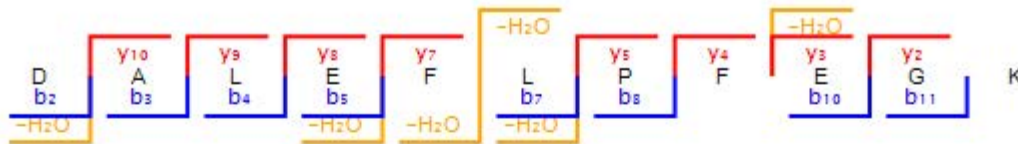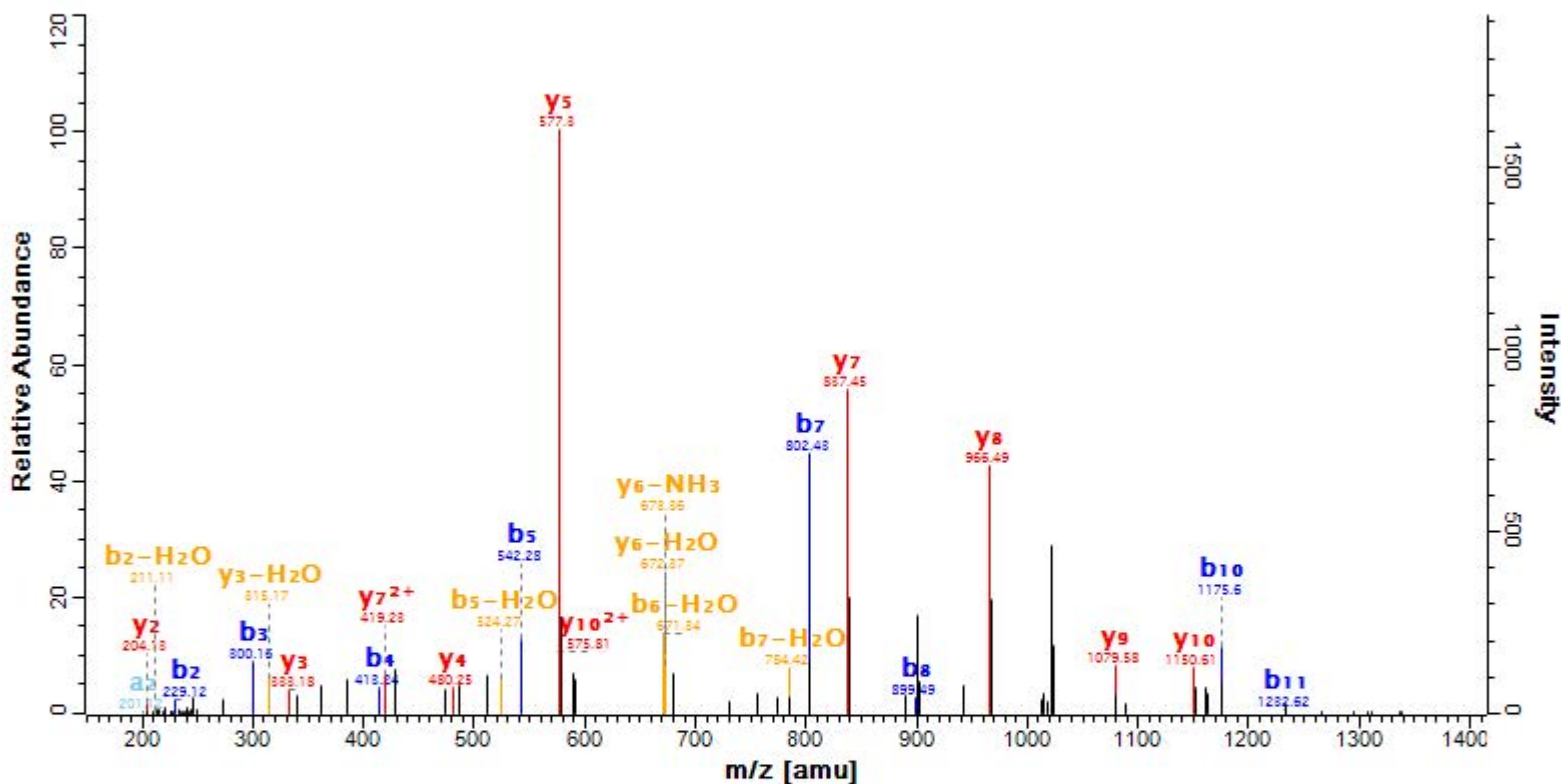

#### precursor information

|                   |                 |
|-------------------|-----------------|
| Mass:             | 1377.71867      |
| m/z:              | 689.86661       |
| Charge:           | 2+              |
| Retentiontime:    | 60.947078704834 |
| Score:            | 134.9896        |
| Mass Error [ppm]: | 0.47118         |
| PEP:              | 2.5516E-05      |
| Precursor Type:   | MULTI           |

#### general information

|                       |             |
|-----------------------|-------------|
| Annotation:           | 10 of 12    |
| AminoAcids Coverage:  | 83 %        |
| Intensity Coverage:   | 58 %        |
| Peak Coverage:        | 27 %        |
| Protein Localisation: | 128 ... 139 |

| a ion    |        | b ion    |        | seq |   |    | y ion    |         | y <sup>2+</sup> ion |         |
|----------|--------|----------|--------|-----|---|----|----------|---------|---------------------|---------|
| Δ dalton | mass   | Δ dalton | mass   |     |   |    | Δ dalton | mass    | Δ dalton            | mass    |
|          | 86.096 |          | 114.09 | 1   | I | 11 |          |         |                     |         |
| +0.1445  | 201.12 | -0.007   | 229.12 | 2   | D | 10 | 1265.6   |         | 1265.6              |         |
|          | 272.16 | +0.0306  | 300.16 | 3   | A | 9  | 1150.6   | -0.057  | 575.81              | +0.1929 |
|          | 385.24 | +0.0315  | 413.24 | 4   | L | 8  | 1079.6   | -0.05   | 1079.6              |         |
|          | 514.29 | -0.034   | 542.28 | 5   | E | 7  | 966.49   | +0.019  | 966.49              |         |
|          | 661.36 |          | 689.35 | 6   | F | 6  | 837.45   | +0.0237 | 419.23              | +0.0555 |
|          | 774.44 | -0.035   | 802.43 | 7   | L | 5  | 690.38   |         | 690.38              |         |
|          | 871.49 | -0.002   | 899.49 | 8   | P | 4  | 577.3    | -0.01   | 577.3               |         |
|          | 1018.6 |          | 1046.6 | 9   | F | 3  | 480.25   | +0.1356 | 480.25              |         |
|          | 1147.6 | -0.027   | 1175.6 | 10  | E | 2  | 333.18   | +0.1257 | 333.18              |         |
|          | 1204.6 | +0.0644  | 1232.6 | 11  | G | 1  | 204.13   | +0.0488 | 204.13              |         |
|          |        |          |        | 12  | K | 0  | 147.11   |         | 147.11              |         |

Scan number 10627 Raw file LNCAP\_Silac\_23F10\_set3\_03  
 Method ITMS; CID Pepti... 162.94

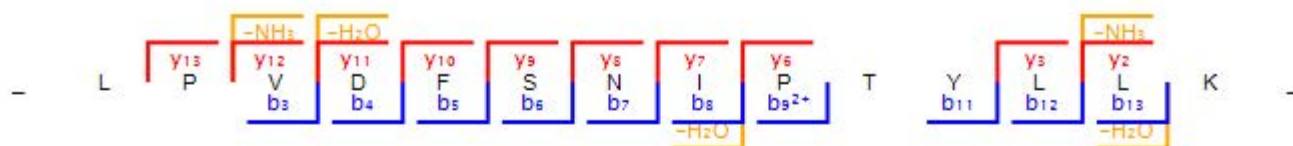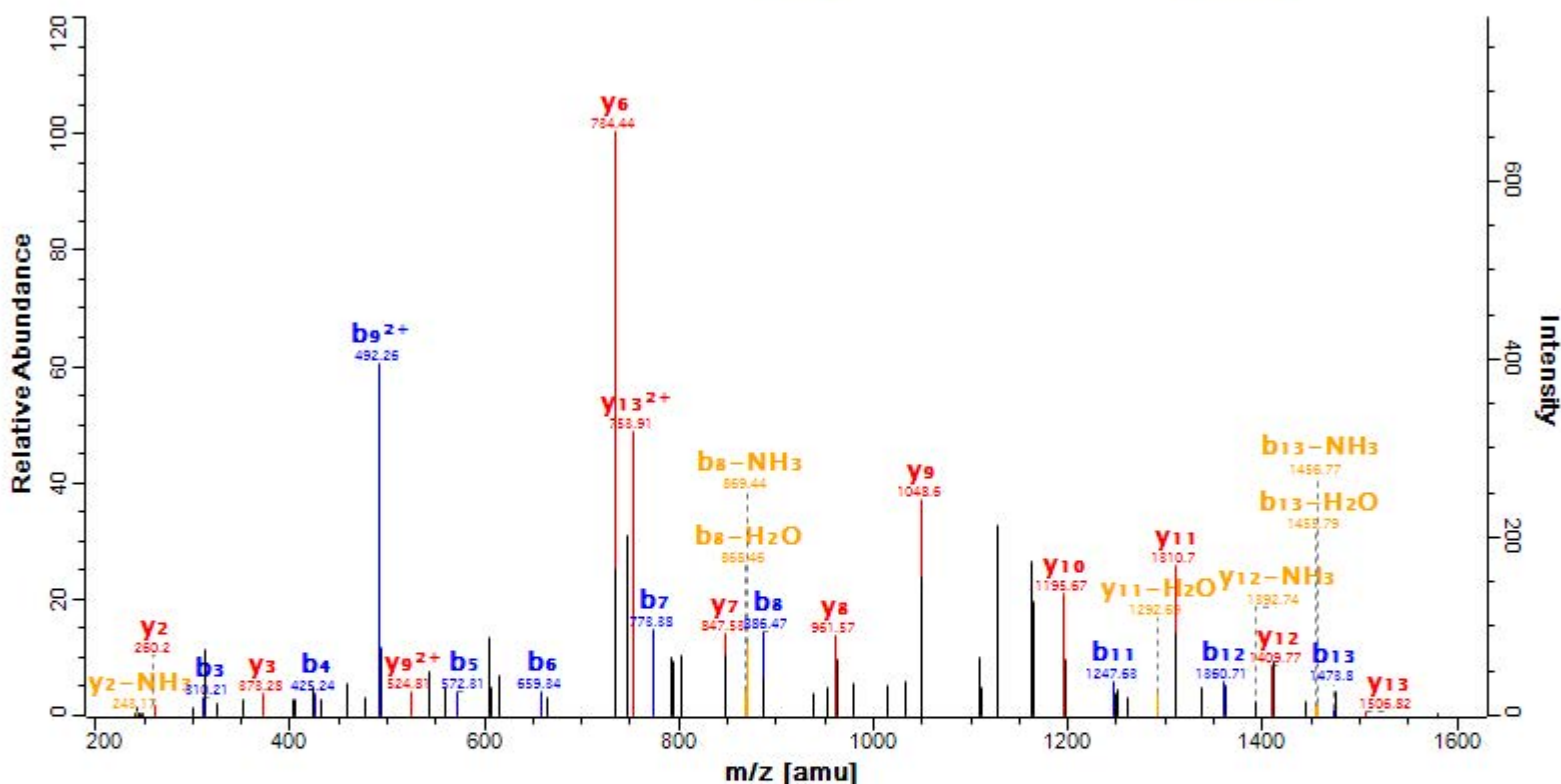

#### precursor information

|                   |                 |
|-------------------|-----------------|
| Mass:             | 1618.89684      |
| m/z:              | 810.4557        |
| Charge:           | 2+              |
| Retentiontime:    | 61.266548156738 |
| Score:            | 162.9437        |
| Mass Error [ppm]: | -0.12701        |
| PEP:              | 1.1644E-10      |
| Precursor Type:   | MULTI           |

#### general information

|                       |             |
|-----------------------|-------------|
| Annotation:           | 11 of 14    |
| AminoAcids Coverage:  | 79 %        |
| Intensity Coverage:   | 50 %        |
| Peak Coverage:        | 33 %        |
| Protein Localisation: | 177 ... 190 |

| b <sup>2+</sup> ion |        | b ion    |        | seq |   |    | y ion    |         | y <sup>2+</sup> ion |         |
|---------------------|--------|----------|--------|-----|---|----|----------|---------|---------------------|---------|
| Δ dalton            | mass   | Δ dalton | mass   |     |   |    | Δ dalton | mass    | Δ dalton            | mass    |
|                     | 114.09 |          | 114.09 | 1   | L | 13 |          |         |                     |         |
|                     | 211.14 |          | 211.14 | 2   | P | 12 | 1506.8   | -0.207  | 753.91              | +0.223  |
|                     | 310.21 | +0.1879  | 310.21 | 3   | V | 11 | 1409.8   | +0.0015 | 1409.8              |         |
|                     | 425.24 | +0.1858  | 425.24 | 4   | D | 10 | 1310.7   | -0.032  | 1310.7              |         |
|                     | 572.31 | +0.106   | 572.31 | 5   | F | 9  | 1195.7   | -0.066  | 1195.7              |         |
|                     | 659.34 | +0.0642  | 659.34 | 6   | S | 8  | 1048.6   | -0.115  | 524.81              | +0.0745 |
|                     | 773.38 | +0.0938  | 773.38 | 7   | N | 7  | 961.57   | +0.0006 | 961.57              |         |
|                     | 886.47 | +0.0235  | 886.47 | 8   | I | 6  | 847.53   | +0.0377 | 847.53              |         |
| +0.0852             | 492.26 |          | 983.52 | 9   | P | 5  | 734.44   | -0.024  | 734.44              |         |
|                     | 1084.6 |          | 1084.6 | 10  | T | 4  | 637.39   |         | 637.39              |         |
|                     | 1247.6 | +0.0386  | 1247.6 | 11  | Y | 3  | 536.34   |         | 536.34              |         |
|                     | 1360.7 | -0.006   | 1360.7 | 12  | L | 2  | 373.28   | +0.0433 | 373.28              |         |
|                     | 1473.8 | -0.199   | 1473.8 | 13  | L | 1  | 260.2    | +0.1498 | 260.2               |         |
|                     |        |          |        | 14  | K | 0  | 147.11   |         | 147.11              |         |

Scan number 10727 Raw file LNCAP\_Silac\_23F10\_set3\_03  
 Method ITMS: CID Pepti... 66.5

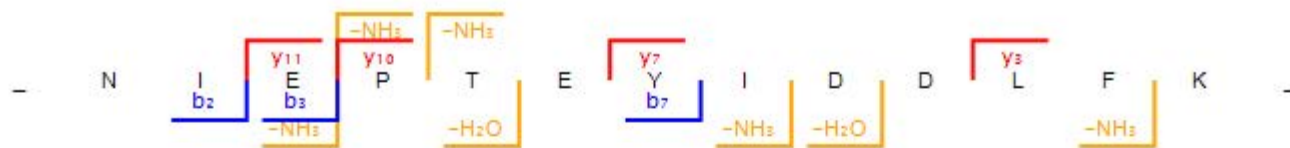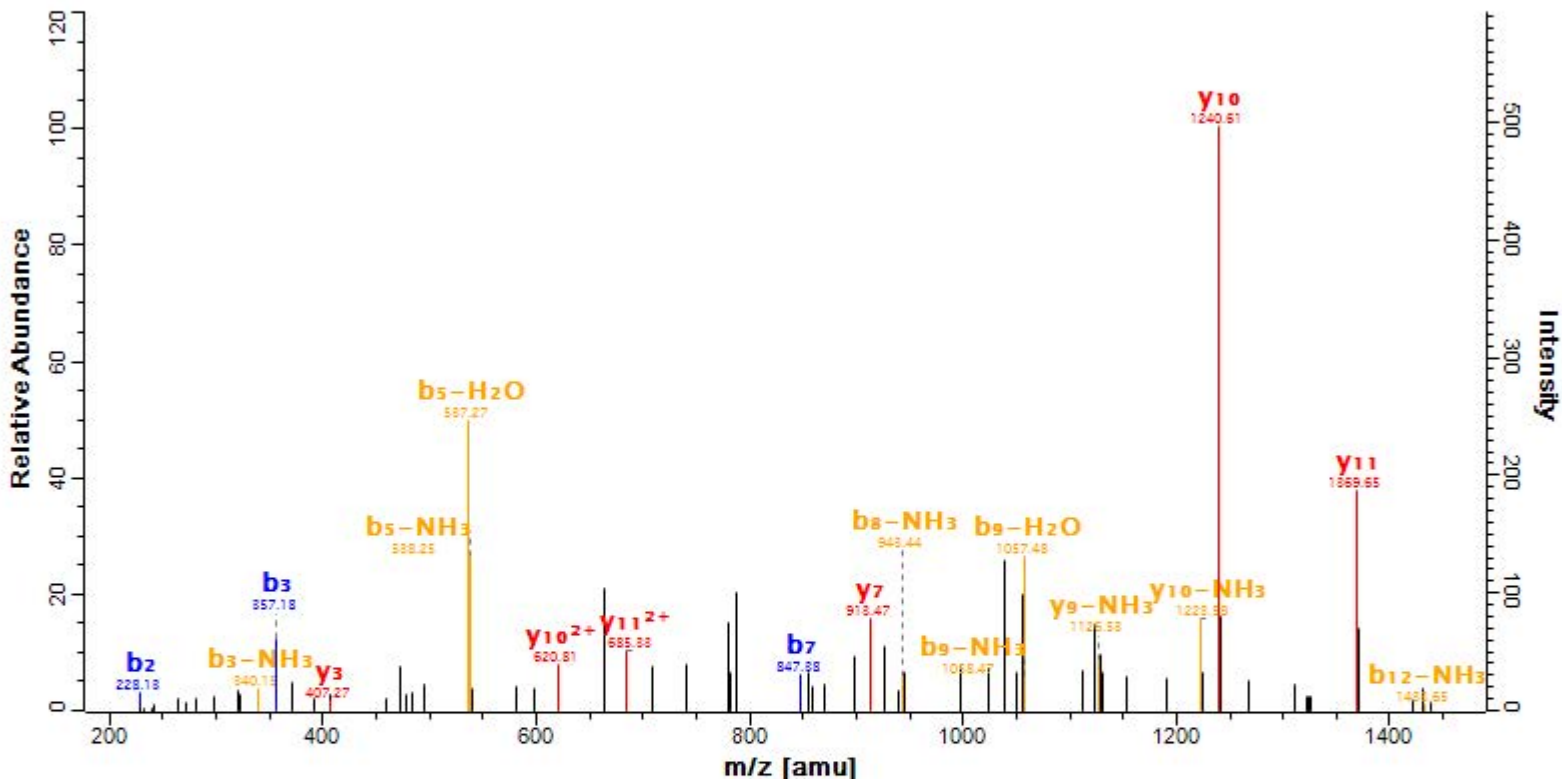

precursor information

|                   |                 |
|-------------------|-----------------|
| Mass:             | 1595.77167      |
| m/z:              | 798.89311       |
| Charge:           | 2+              |
| Retentiontime:    | 62.020004272460 |
| Score:            | 66.49754        |
| Mass Error [ppm]: | -0.14684        |
| PEP:              | 0.0045158       |
| Precursor Type:   | MULTI           |

general information

|                       |             |
|-----------------------|-------------|
| Annotation:           | 9 of 13     |
| AminoAcids Coverage:  | 69 %        |
| Intensity Coverage:   | 46 %        |
| Peak Coverage:        | 22 %        |
| Protein Localisation: | 928 ... 940 |

| b ion     |          |    |     |    | y ion    |           | y <sup>2+</sup> ion |           |
|-----------|----------|----|-----|----|----------|-----------|---------------------|-----------|
| Δ dalton  | mass     |    | seq |    | Δ dalton | mass      | Δ dalton            | mass      |
|           | 115.0502 | 1  | N   | 12 |          |           |                     |           |
| +0.051554 | 228.1343 | 2  | I   | 11 | 1482.736 |           | 1482.736            |           |
| -0.03358  | 357.1769 | 3  | E   | 10 | 1369.652 | +0.010286 | 685.3297            | +0.052836 |
|           | 454.2296 | 4  | P   | 9  | 1240.61  | -0.09385  | 620.8084            | +0.060765 |
|           | 555.2773 | 5  | T   | 8  | 1143.557 |           | 1143.557            |           |
|           | 684.3199 | 6  | E   | 7  | 1042.509 |           | 1042.509            |           |
| -0.11693  | 847.3832 | 7  | Y   | 6  | 913.4666 | -0.02607  | 913.4666            |           |
|           | 960.4673 | 8  | I   | 5  | 750.4032 |           | 750.4032            |           |
|           | 1075.494 | 9  | D   | 4  | 637.3192 |           | 637.3192            |           |
|           | 1190.521 | 10 | D   | 3  | 522.2922 |           | 522.2922            |           |
|           | 1303.605 | 11 | L   | 2  | 407.2653 | +0.210914 | 407.2653            |           |
|           | 1450.674 | 12 | F   | 1  | 294.1812 |           | 294.1812            |           |
|           |          | 13 | K   | 0  | 147.1128 |           | 147.1128            |           |

Scan number 10760 Raw file LNCAP\_Silac\_23F10\_set3\_03  
 Method ITMS; CID Pepti... 125.45

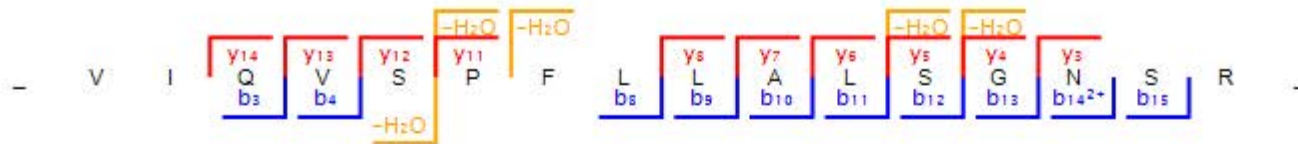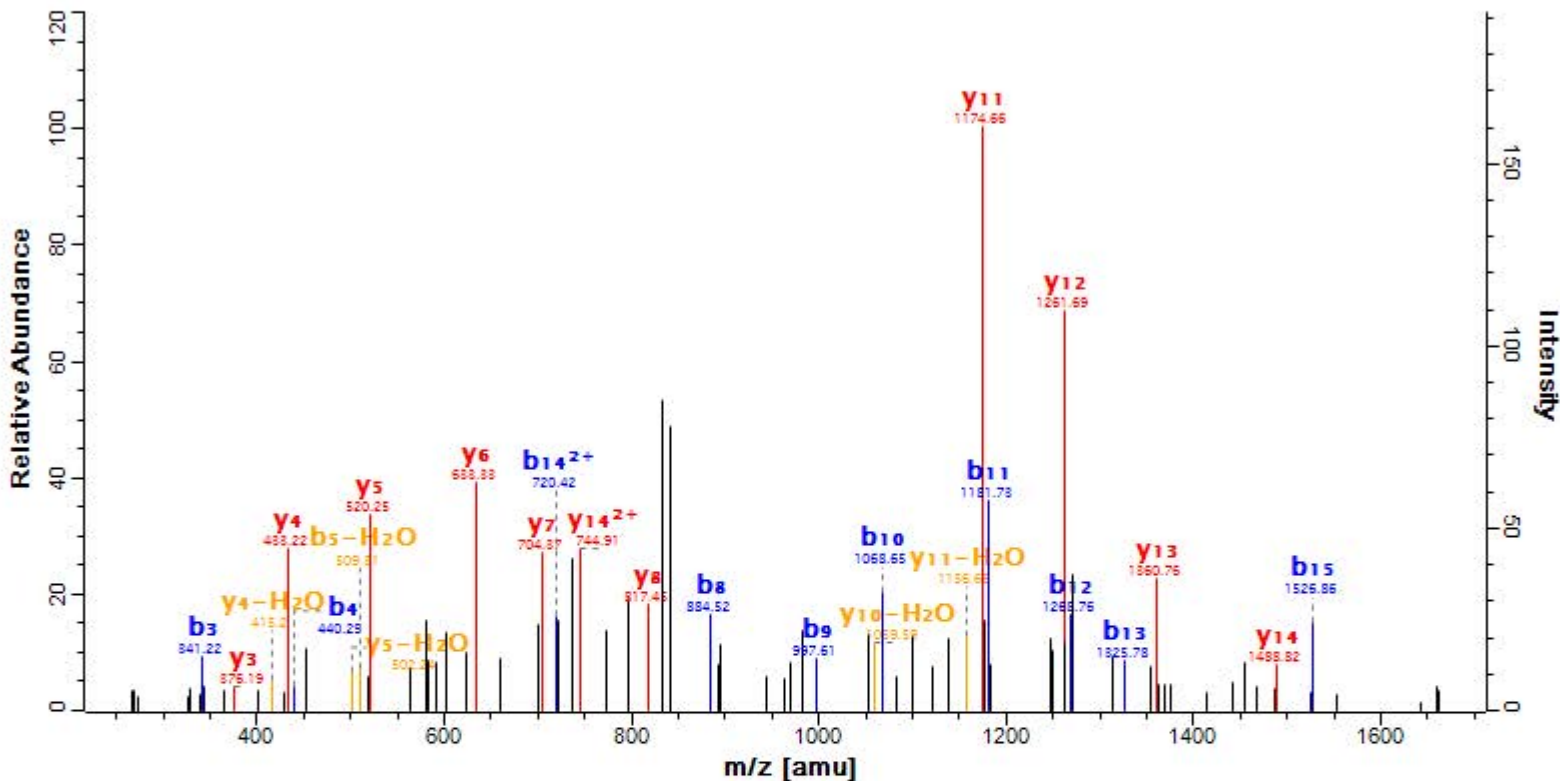

#### precursor information

|                   |                 |
|-------------------|-----------------|
| Mass:             | 1699.96206      |
| m/z:              | 850.98831       |
| Charge:           | 2+              |
| Retentiontime:    | 62.236579895019 |
| Score:            | 125.4501        |
| Mass Error [ppm]: | -0.023611       |
| PEP:              | 5.6784E-10      |
| Precursor Type:   | MULTI           |

#### general information

|                       |             |
|-----------------------|-------------|
| Annotation:           | 13 of 16    |
| AminoAcids Coverage:  | 81 %        |
| Intensity Coverage:   | 48 %        |
| Peak Coverage:        | 30 %        |
| Protein Localisation: | 104 ... 119 |

| b <sup>2+</sup> ion |        | b ion    |        | seq |   |    | y ion    |         | y <sup>2+</sup> ion |         |
|---------------------|--------|----------|--------|-----|---|----|----------|---------|---------------------|---------|
| Δ dalton            | mass   | Δ dalton | mass   |     |   |    | Δ dalton | mass    | Δ dalton            | mass    |
|                     | 100.08 |          | 100.08 | 1   | V | 15 |          |         |                     |         |
|                     | 213.16 |          | 213.16 | 2   | I | 14 | 1601.9   |         | 1601.9              |         |
|                     | 341.22 | +0.0875  | 341.22 | 3   | Q | 13 | 1488.8   | -0.089  | 744.91              | +0.0677 |
|                     | 440.29 | -0.197   | 440.29 | 4   | V | 12 | 1360.8   | -0.055  | 1360.8              |         |
|                     | 527.32 |          | 527.32 | 5   | S | 11 | 1261.7   | +0.0008 | 1261.7              |         |
|                     | 624.37 |          | 624.37 | 6   | P | 10 | 1174.7   | +0.101  | 1174.7              |         |
|                     | 771.44 |          | 771.44 | 7   | F | 9  | 1077.6   |         | 1077.6              |         |
|                     | 884.52 | +0.0942  | 884.52 | 8   | L | 8  | 930.54   |         | 930.54              |         |
|                     | 997.61 | +0.0269  | 997.61 | 9   | L | 7  | 817.45   | +0.0349 | 817.45              |         |
|                     | 1068.6 | -0.005   | 1068.6 | 10  | A | 6  | 704.37   | +0.109  | 704.37              |         |
|                     | 1181.7 | -0.198   | 1181.7 | 11  | L | 5  | 633.33   | +0.1305 | 633.33              |         |
|                     | 1268.8 | -0.231   | 1268.8 | 12  | S | 4  | 520.25   | +0.1647 | 520.25              |         |
|                     | 1325.8 | -0.269   | 1325.8 | 13  | G | 3  | 433.22   | +0.1017 | 433.22              |         |
| -0.033              | 720.42 |          | 1439.8 | 14  | N | 2  | 376.19   | +0.061  | 376.19              |         |
|                     | 1526.9 | -0.499   | 1526.9 | 15  | S | 1  | 262.15   |         | 262.15              |         |
|                     |        |          |        | 16  | R | 0  | 175.12   |         | 175.12              |         |



Scan number 11030 Raw file LNCAP\_Silac\_23F10\_set3\_03  
 Method ITMS: CID Peptide 108.47

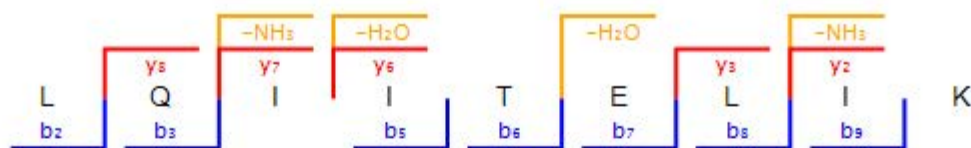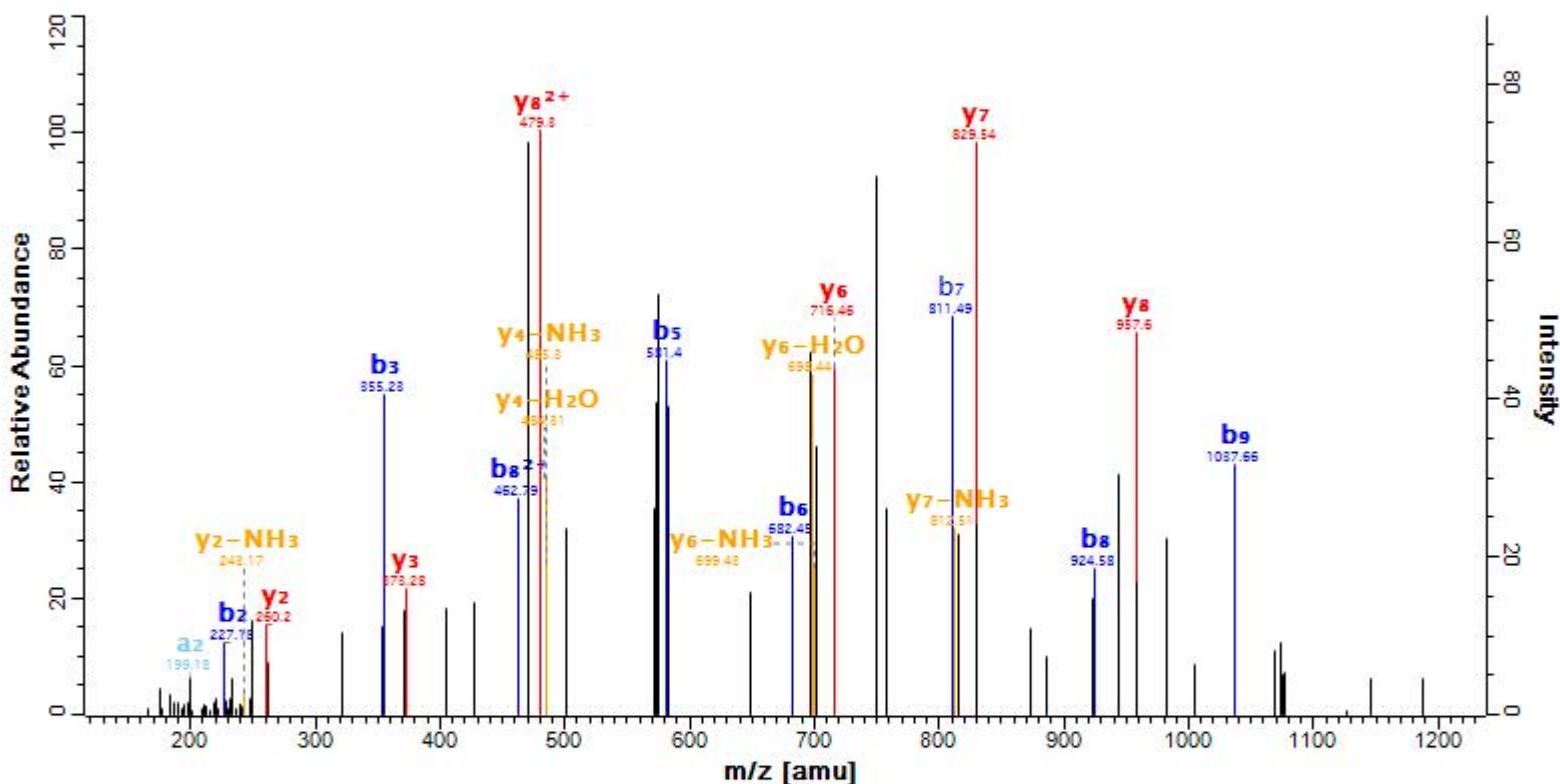

precursor information

|                   |                 |
|-------------------|-----------------|
| Mass:             | 1182.75848      |
| m/z:              | 592.38652       |
| Charge:           | 2+              |
| Retentiontime:    | 64.230033874511 |
| Score:            | 108.4698        |
| Mass Error [ppm]: | -0.2331         |
| PEP:              | 0.00058166      |
| Precursor Type:   | ISO             |

|                       |               |
|-----------------------|---------------|
| Annotation:           | 8 of 10       |
| AminoAcids Coverage:  | 80 %          |
| Intensity Coverage:   | 43 %          |
| Peak Coverage:        | 23 %          |
| Protein Localisation: | 1356 ... 1365 |

| a ion         |               | b <sup>2+</sup> ion |               | b ion |               | y ion         |       | y <sup>2+</sup> ion |              |
|---------------|---------------|---------------------|---------------|-------|---------------|---------------|-------|---------------------|--------------|
| Δ dalton mass | Δ dalton mass | Δ dalton mass       | Δ dalton mass | seq   | Δ dalton mass | Δ dalton mass |       |                     |              |
| 86.1          | 114.1         | 114.1               | 114.1         | 1     | I             | 9             |       |                     |              |
| +0.218 99.2   | 227.2         | +0.029 227.2        | 227.2         | 2     | L             | 8             | 1071  | 1071                |              |
| 327.2         | 355.2         | +0.172 355.2        | 355.2         | 3     | Q             | 7             | 957.6 | +0.015 957.6        | +0.231 957.6 |
| 440.3         | 468.3         | 468.3               | 468.3         | 4     | I             | 6             | 829.5 | -0.09 829.5         | 829.5        |
| 553.4         | 581.4         | +0.002 581.4        | 581.4         | 5     | I             | 5             | 716.5 | +0.125 716.5        | 716.5        |
| 654.5         | 682.4         | +0.005 682.4        | 682.4         | 6     | T             | 4             | 603.4 | 603.4               |              |
| 783.5         | 811.5         | -0.04 811.5         | 811.5         | 7     | E             | 3             | 502.3 | 502.3               |              |
| 896.6         | +0.379 924.6  | +0.017 924.6        | 924.6         | 8     | L             | 2             | 373.3 | +0.138 373.3        | 373.3        |
| 1010          | 1038          | -0.15 1038          | 1038          | 9     | I             | 1             | 260.2 | +0.153 260.2        | 260.2        |
|               |               |                     |               | 10    | K             | 0             | 147.1 | 147.1               |              |

Scan number 11084 Raw file LNCAP\_Silac\_23F10\_set3\_03  
 Method ITMS; CID Peptide 140.93

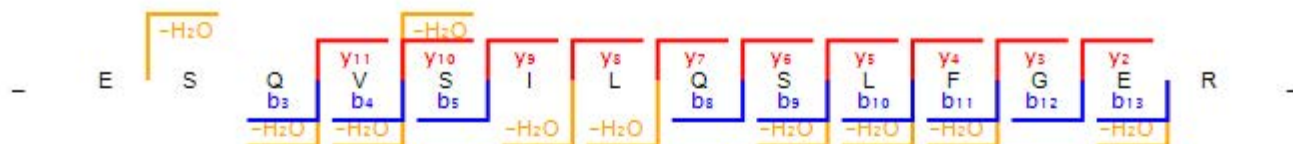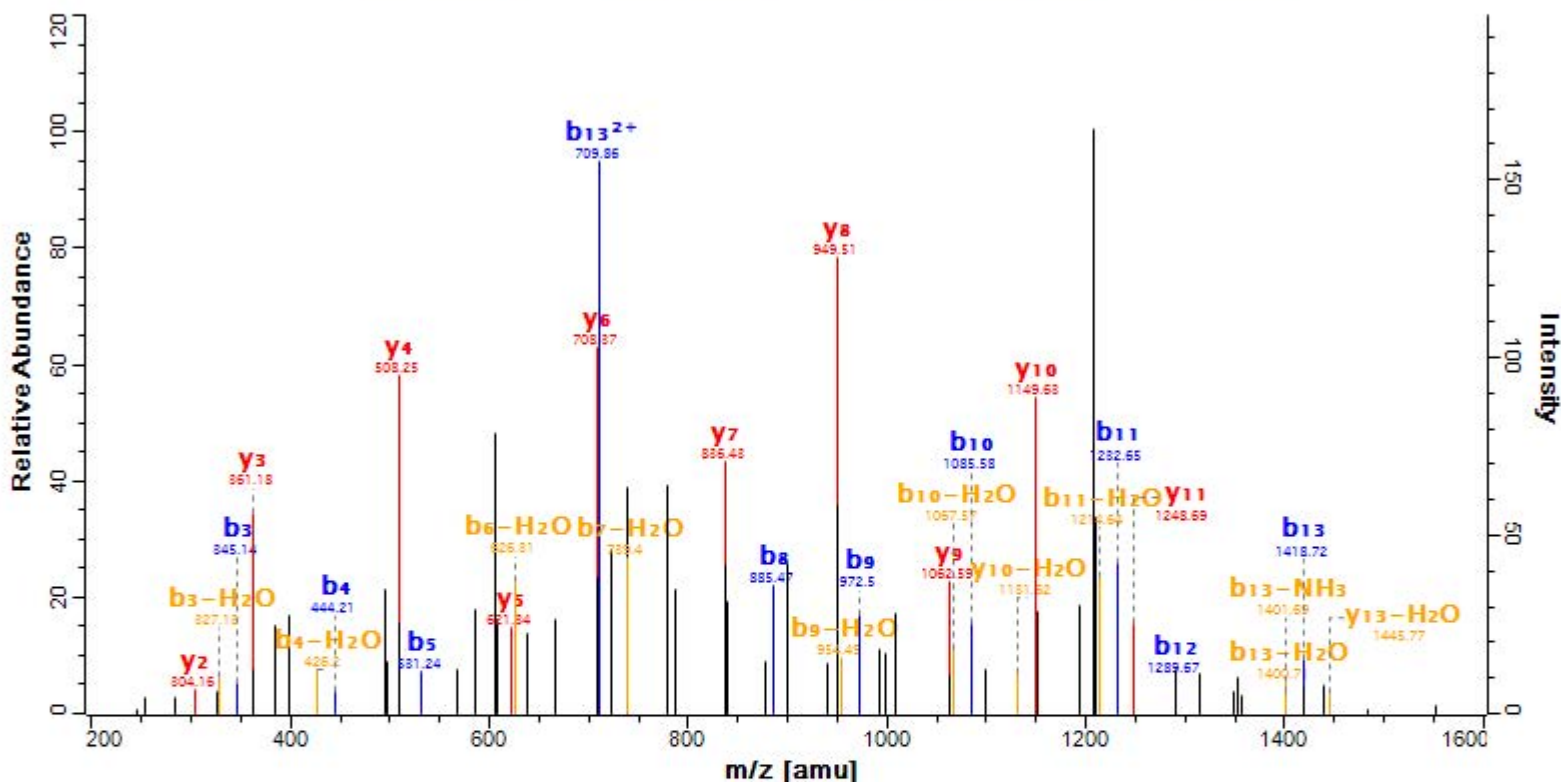

#### precursor information

|                   |                 |
|-------------------|-----------------|
| Mass:             | 1591.82115      |
| m/z:              | 796.91785       |
| Charge:           | 2+              |
| Retentiontime:    | 64.720687866210 |
| Score:            | 140.9276        |
| Mass Error [ppm]: | 0.35365         |
| PEP:              | 6.279E-09       |
| Precursor Type:   | MULTI           |

#### general information

|                       |           |
|-----------------------|-----------|
| Annotation:           | 12 of 14  |
| AminoAcids Coverage:  | 86 %      |
| Intensity Coverage:   | 48 %      |
| Peak Coverage:        | 40 %      |
| Protein Localisation: | 12 ... 25 |

| b <sup>2+</sup> ion |          | b ion     |          |     | y ion    |      |          |
|---------------------|----------|-----------|----------|-----|----------|------|----------|
| Δ dalton            | mass     | Δ dalton  | mass     | seq | Δ dalton | mass |          |
|                     | 130.0499 |           | 130.0499 | 1   | E        | 13   |          |
|                     | 217.0819 |           | 217.0819 | 2   | S        | 12   | 1463.785 |
|                     | 345.1405 | -0.0748   | 345.1405 | 3   | Q        | 11   | 1376.753 |
|                     | 444.2089 | +0.131443 | 444.2089 | 4   | V        | 10   | 1248.695 |
|                     | 531.2409 | +0.053577 | 531.2409 | 5   | S        | 9    | 1149.626 |
|                     | 644.325  |           | 644.325  | 6   | I        | 8    | 1062.594 |
|                     | 757.409  |           | 757.409  | 7   | L        | 7    | 949.5102 |
|                     | 885.4676 | -0.01505  | 885.4676 | 8   | Q        | 6    | 836.4261 |
|                     | 972.4997 | +0.113202 | 972.4997 | 9   | S        | 5    | 708.3675 |
|                     | 1085.584 | +0.262598 | 1085.584 | 10  | L        | 4    | 621.3355 |
|                     | 1232.652 | -0.13748  | 1232.652 | 11  | F        | 3    | 508.2514 |
|                     | 1289.674 | -0.21852  | 1289.674 | 12  | G        | 2    | 361.183  |
| +0.346215           | 709.8617 | +0.114258 | 1418.716 | 13  | E        | 1    | 304.1615 |
|                     |          |           |          | 14  | R        | 0    | 175.119  |

Scan number 1134 Raw file LNCAP\_Silac\_23F10\_set3\_03  
 Method ITMS; CID Pepti... 97.46

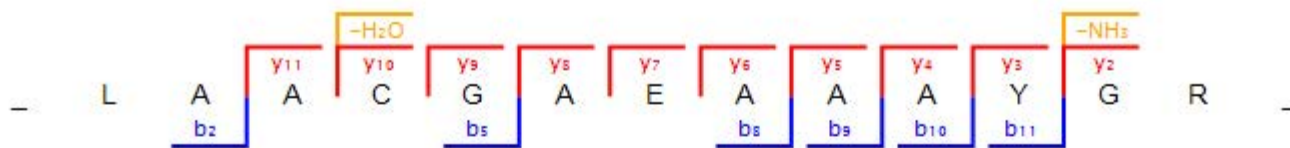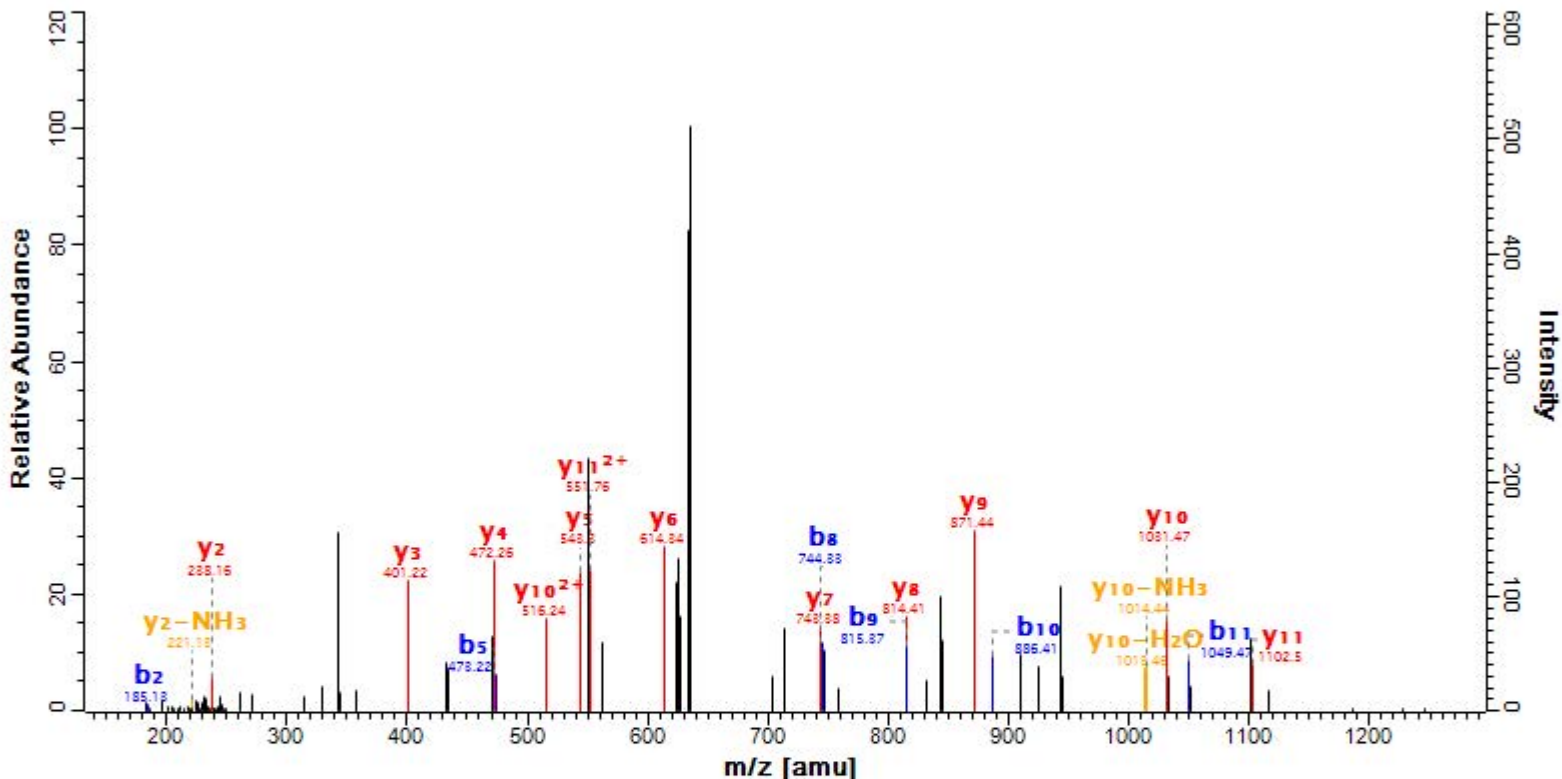

precursor information

|                   |                 |
|-------------------|-----------------|
| Mass:             | 1279.59922      |
| m/z:              | 640.80689       |
| Charge:           | 2+              |
| Retentiontime:    | 12.135979652404 |
| Score:            | 97.4631         |
| Mass Error [ppm]: | 1.0134          |
| PEP:              | 0.00012346      |
| Precursor Type:   | MULTI           |

general information

|                       |           |
|-----------------------|-----------|
| Annotation:           | 11 of 13  |
| AminoAcids Coverage:  | 85 %      |
| Intensity Coverage:   | 34 %      |
| Peak Coverage:        | 22 %      |
| Protein Localisation: | 22 ... 34 |

| b ion     |          |    |     |    | y ion    |           | y <sup>2+</sup> ion |           |
|-----------|----------|----|-----|----|----------|-----------|---------------------|-----------|
| Δ dalton  | mass     |    | seq |    | Δ dalton | mass      | Δ dalton            | mass      |
|           | 114.0913 | 1  | L   | 12 |          |           |                     |           |
| +0.133951 | 185.1285 | 2  | A   | 11 | 1173.541 |           | 1173.541            |           |
|           | 256.1656 | 3  | A   | 10 | 1102.504 | -0.00866  | 551.7557            | +0.031397 |
|           | 416.1962 | 4  | C   | 9  | 1031.467 | +0.006843 | 516.2372            | -0.00296  |
| +0.14493  | 473.2177 | 5  | G   | 8  | 871.4364 | -0.01799  | 871.4364            |           |
|           | 544.2548 | 6  | A   | 7  | 814.4149 | +0.050899 | 814.4149            |           |
|           | 673.2974 | 7  | E   | 6  | 743.3778 | +0.177063 | 743.3778            |           |
| +0.161105 | 744.3345 | 8  | A   | 5  | 614.3352 | -0.05378  | 614.3352            |           |
| +0.023344 | 815.3716 | 9  | A   | 4  | 543.2981 | +0.054499 | 543.2981            |           |
| -0.02402  | 886.4087 | 10 | A   | 3  | 472.261  | +0.092223 | 472.261             |           |
| -0.07875  | 1049.472 | 11 | Y   | 2  | 401.2239 | +0.05933  | 401.2239            |           |
|           | 1106.494 | 12 | G   | 1  | 238.1605 | +0.141671 | 238.1605            |           |
|           |          | 13 | R   | 0  | 181.1391 |           | 181.1391            |           |

Scan number 11504 Raw file LNCAP\_Silac\_23F10\_set3\_03  
 Method ITMS; CID Pepti... 74.46

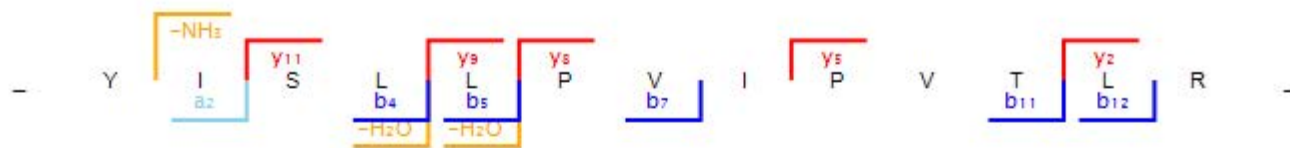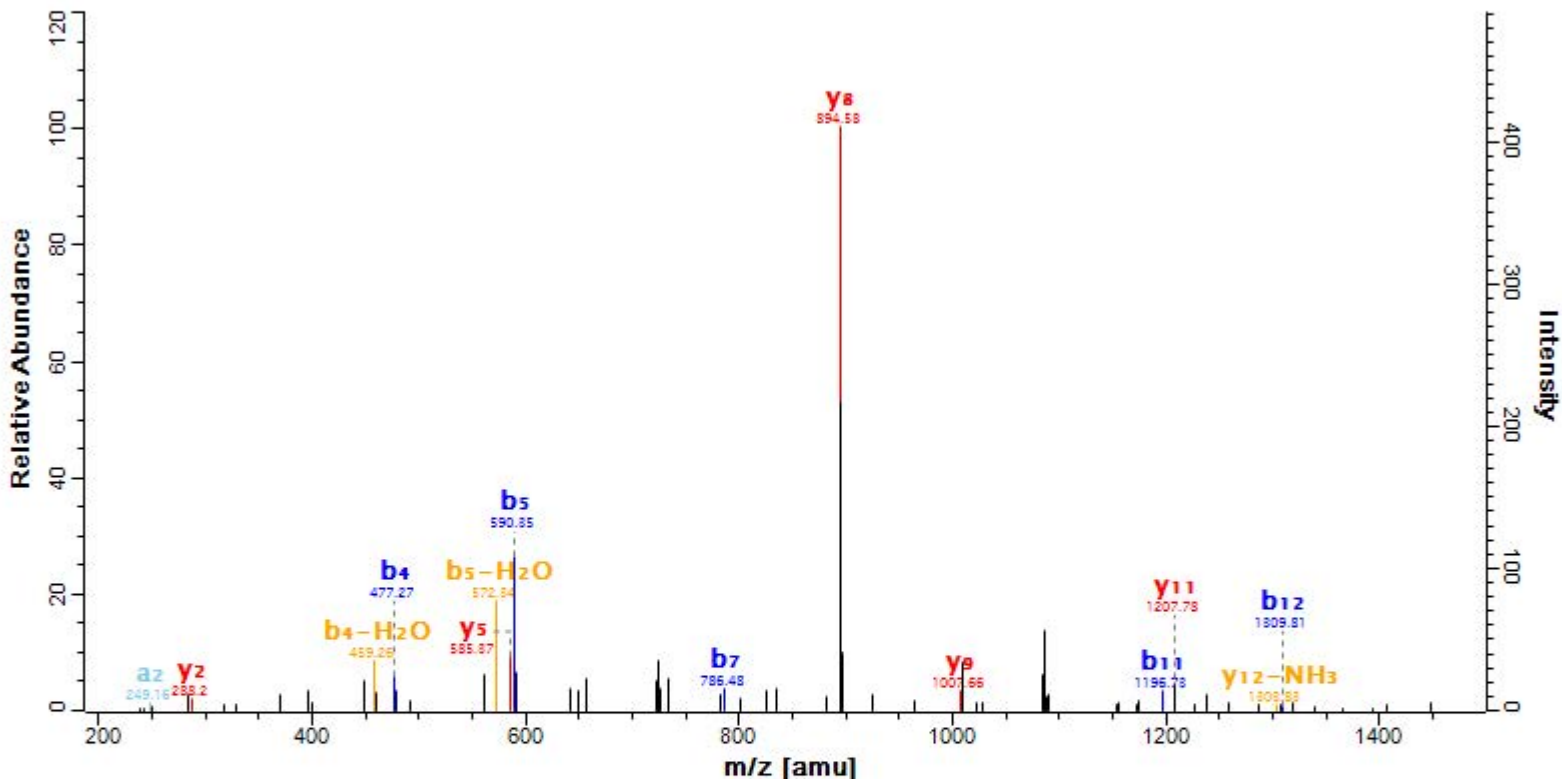

**precursor information**

|                   |                 |
|-------------------|-----------------|
| Mass:             | 1482.91739      |
| m/z:              | 742.46597       |
| Charge:           | 2+              |
| Retentiontime:    | 68.481986999511 |
| Score:            | 74.46019        |
| Mass Error [ppm]: | 0.0028744       |
| PEP:              | 0.0014861       |
| Precursor Type:   | MULTI           |

**general information**

|                       |             |
|-----------------------|-------------|
| Annotation:           | 9 of 13     |
| AminoAcids Coverage:  | 69 %        |
| Intensity Coverage:   | 44 %        |
| Peak Coverage:        | 19 %        |
| Protein Localisation: | 648 ... 660 |

| a ion     |          | b ion     |          |     | y ion |          |                    |
|-----------|----------|-----------|----------|-----|-------|----------|--------------------|
| Δ dalton  | mass     | Δ dalton  | mass     | seq |       | Δ dalton | mass               |
|           | 136.0757 |           | 164.0706 | 1   | Y     | 12       |                    |
| +0.077367 | 249.1598 |           | 277.1547 | 2   | I     | 11       | 1320.861           |
|           | 336.1918 |           | 364.1867 | 3   | S     | 10       | 1207.777 +0.053784 |
|           | 449.2758 | -0.04164  | 477.2708 | 4   | L     | 9        | 1120.745           |
|           | 562.3599 | +0.025912 | 590.3548 | 5   | L     | 8        | 1007.661 +0.034684 |
|           | 659.4127 |           | 687.4076 | 6   | P     | 7        | 894.5771 +0.0051   |
|           | 758.4811 | -0.00963  | 786.476  | 7   | V     | 6        | 797.5244           |
|           | 871.5652 |           | 899.5601 | 8   | I     | 5        | 698.4559           |
|           | 968.6179 |           | 996.6128 | 9   | P     | 4        | 585.3719 +0.053543 |
|           | 1067.686 |           | 1095.681 | 10  | V     | 3        | 488.3191           |
|           | 1168.734 | +0.171956 | 1196.729 | 11  | T     | 2        | 389.2507           |
|           | 1281.818 | +0.169312 | 1309.813 | 12  | L     | 1        | 288.203 +0.051806  |
|           |          |           |          | 13  | R     | 0        | 175.119            |

Scan number 11580 Raw file LNCAP\_Silac\_23F10\_set3\_03  
 Method ITMS; CID Pepti... 179.8

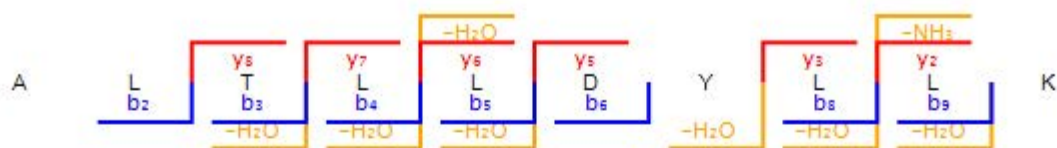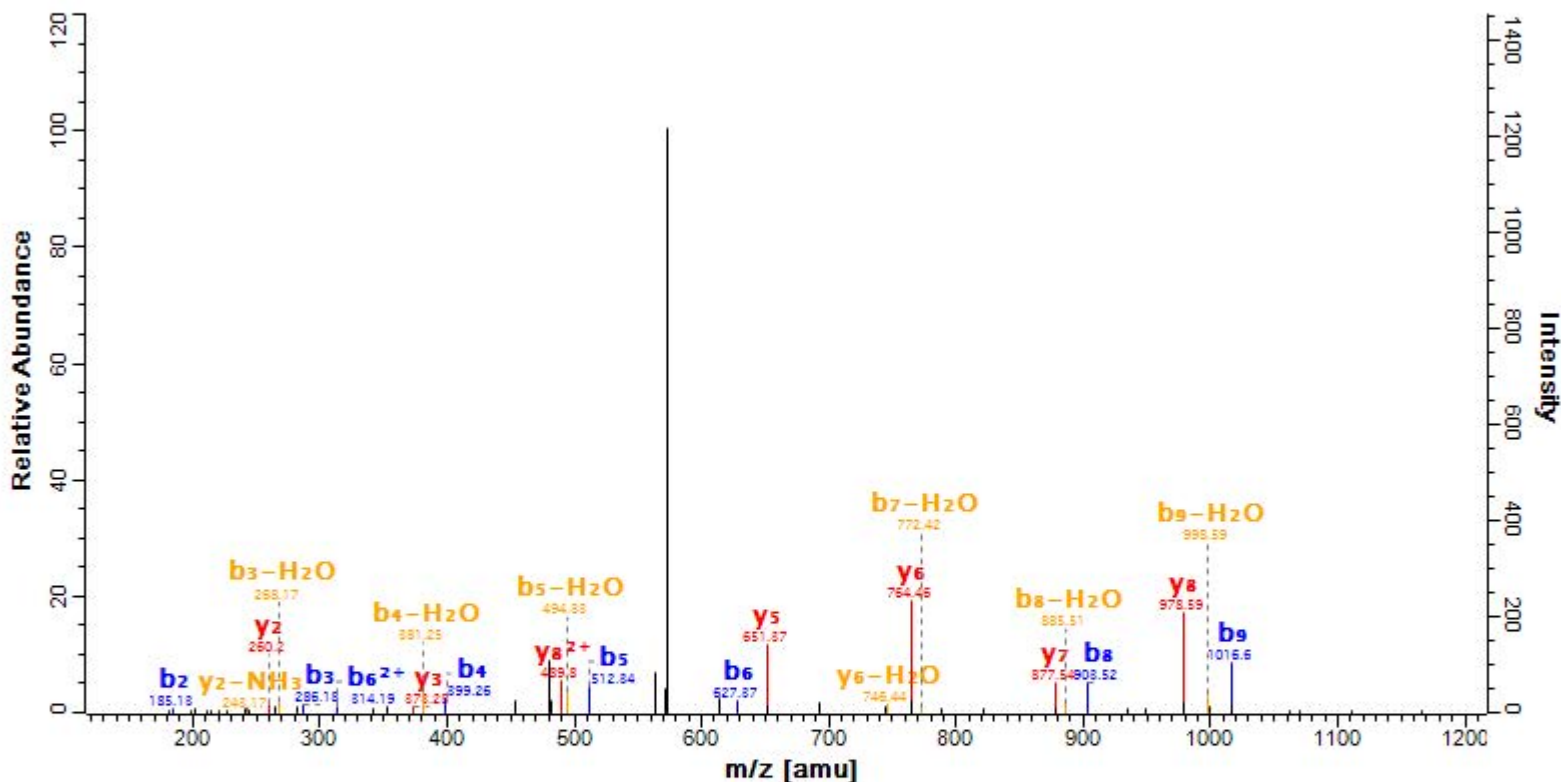

### precursor information

|                   |                 |
|-------------------|-----------------|
| Mass:             | 1161.70082      |
| m/z:              | 581.85769       |
| Charge:           | 2+              |
| Retentiontime:    | 69.236152648925 |
| Score:            | 179.8049        |
| Mass Error [ppm]: | -0.079965       |
| PEP:              | 3.1255E-06      |
| Precursor Type:   | MULTI           |

|                       |           |
|-----------------------|-----------|
| Annotation:           | 8 of 10   |
| AminoAcids Coverage:  | 80 %      |
| Intensity Coverage:   | 38 %      |
| Peak Coverage:        | 26 %      |
| Protein Localisation: | 77 ... 86 |

| b <sup>2+</sup> ion |        | b ion    |        |    |     |   | y ion    |         | y <sup>2+</sup> ion |        |
|---------------------|--------|----------|--------|----|-----|---|----------|---------|---------------------|--------|
| Δ dalton            | mass   | Δ dalton | mass   |    | seq |   | Δ dalton | mass    | Δ dalton            | mass   |
|                     | 72.044 |          | 72.044 | 1  | A   | 9 |          |         |                     |        |
|                     | 185.13 | -0.124   | 185.13 | 2  | L   | 8 | 1091.7   |         | 1091.7              |        |
|                     | 286.18 | +0.1387  | 286.18 | 3  | T   | 7 | 978.59   | -0.05   | 489.8               | -0.029 |
|                     | 399.26 | -0.227   | 399.26 | 4  | L   | 6 | 877.54   | +0.021  | 877.54              |        |
|                     | 512.34 | -0.001   | 512.34 | 5  | L   | 5 | 764.46   | -0.04   | 764.46              |        |
| -0.16               | 314.19 | +0.1582  | 627.37 | 6  | D   | 4 | 651.37   | +0.0092 | 651.37              |        |
|                     | 790.43 |          | 790.43 | 7  | Y   | 3 | 536.34   |         | 536.34              |        |
|                     | 903.52 | -0.094   | 903.52 | 8  | L   | 2 | 373.28   | -0.123  | 373.28              |        |
|                     | 1016.6 | -0.135   | 1016.6 | 9  | L   | 1 | 260.2    | +0.0148 | 260.2               |        |
|                     |        |          |        | 10 | K   | 0 | 147.11   |         | 147.11              |        |

Scan number 11674 Raw file LNCAP\_Silac\_23F10\_set3\_03  
 Method ITMS; CID Peptide 237.59

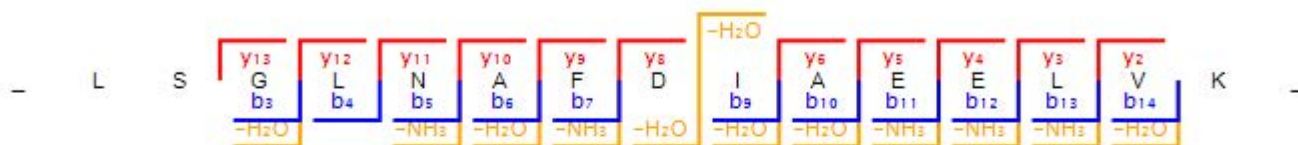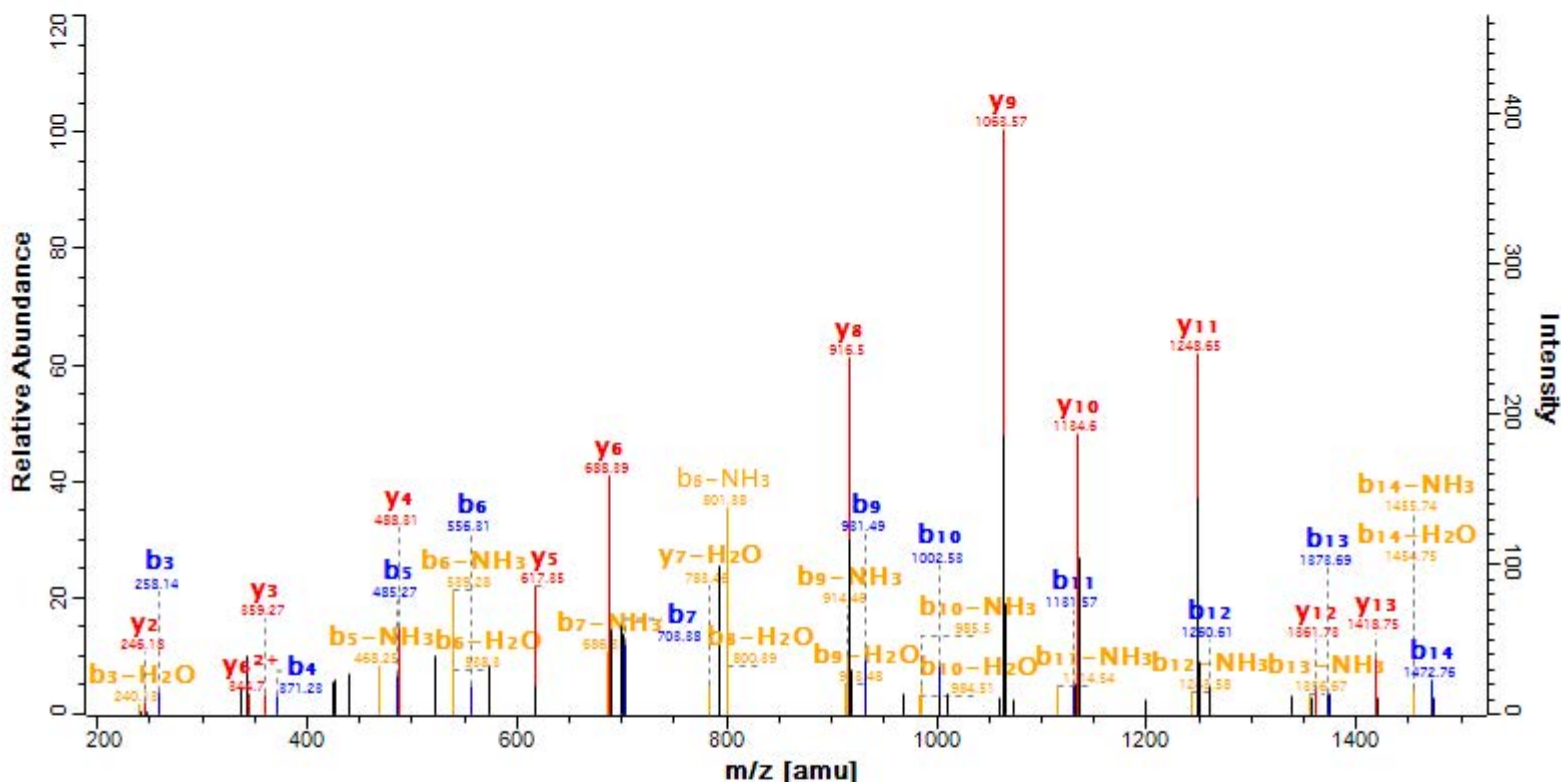

#### precursor information

|                   |                 |
|-------------------|-----------------|
| Mass:             | 1617.86109      |
| m/z:              | 809.93782       |
| Charge:           | 2+              |
| Retentiontime:    | 70.100860595703 |
| Score:            | 237.59          |
| Mass Error [ppm]: | -0.18535        |
| PEP:              | 3.2577E-46      |
| Precursor Type:   | MULTI           |

#### general information

|                       |             |
|-----------------------|-------------|
| Annotation:           | 12 of 15    |
| AminoAcids Coverage:  | 80 %        |
| Intensity Coverage:   | 62 %        |
| Peak Coverage:        | 51 %        |
| Protein Localisation: | 143 ... 157 |

| b ion     |          |     |   | y ion    |          |           | y <sup>2+</sup> ion |  |
|-----------|----------|-----|---|----------|----------|-----------|---------------------|--|
| Δ dalton  | mass     | seq |   | Δ dalton | mass     | Δ dalton  | mass                |  |
|           | 114.0913 | 1   | L | 14       |          |           |                     |  |
|           | 201.1234 | 2   | S | 13       | 1505.785 | 1505.785  |                     |  |
| -0.09613  | 258.1448 | 3   | G | 12       | 1418.753 | -0.09669  | 1418.753            |  |
| +0.12584  | 371.2289 | 4   | L | 11       | 1361.731 | -0.29422  | 1361.731            |  |
| +0.100674 | 485.2718 | 5   | N | 10       | 1248.647 | -0.12031  | 1248.647            |  |
| +0.144798 | 556.3089 | 6   | A | 9        | 1134.604 | -0.06908  | 1134.604            |  |
| -0.05844  | 703.3774 | 7   | F | 8        | 1063.567 | -0.08898  | 1063.567            |  |
|           | 818.4043 | 8   | D | 7        | 916.4986 | -0.08379  | 916.4986            |  |
| -0.06972  | 931.4884 | 9   | I | 6        | 801.4716 |           | 801.4716            |  |
| +0.058817 | 1002.525 | 10  | A | 5        | 688.3876 | -0.00605  | 344.6974            |  |
| -0.17427  | 1131.568 | 11  | E | 4        | 617.3505 | +0.016597 | 617.3505            |  |
| -0.27143  | 1260.611 | 12  | E | 3        | 488.3079 | -0.03895  | 488.3079            |  |
| -0.07265  | 1373.695 | 13  | L | 2        | 359.2653 | +0.003395 | 359.2653            |  |
| -0.07246  | 1472.763 | 14  | V | 1        | 246.1812 | +0.032649 | 246.1812            |  |
|           |          | 15  | K | 0        | 147.1128 |           | 147.1128            |  |

Scan number 11820 Raw file LNCAP\_Silac\_23F10\_set3\_03  
 Method ITMS: CID Pepti... 207.97

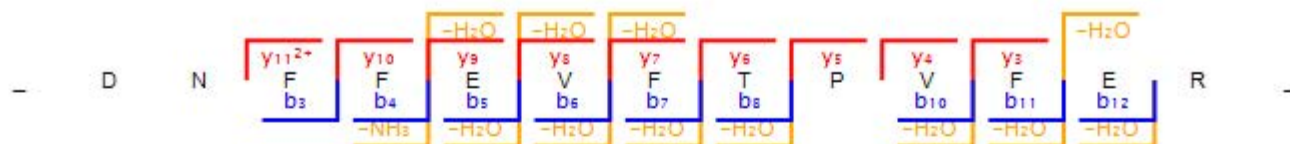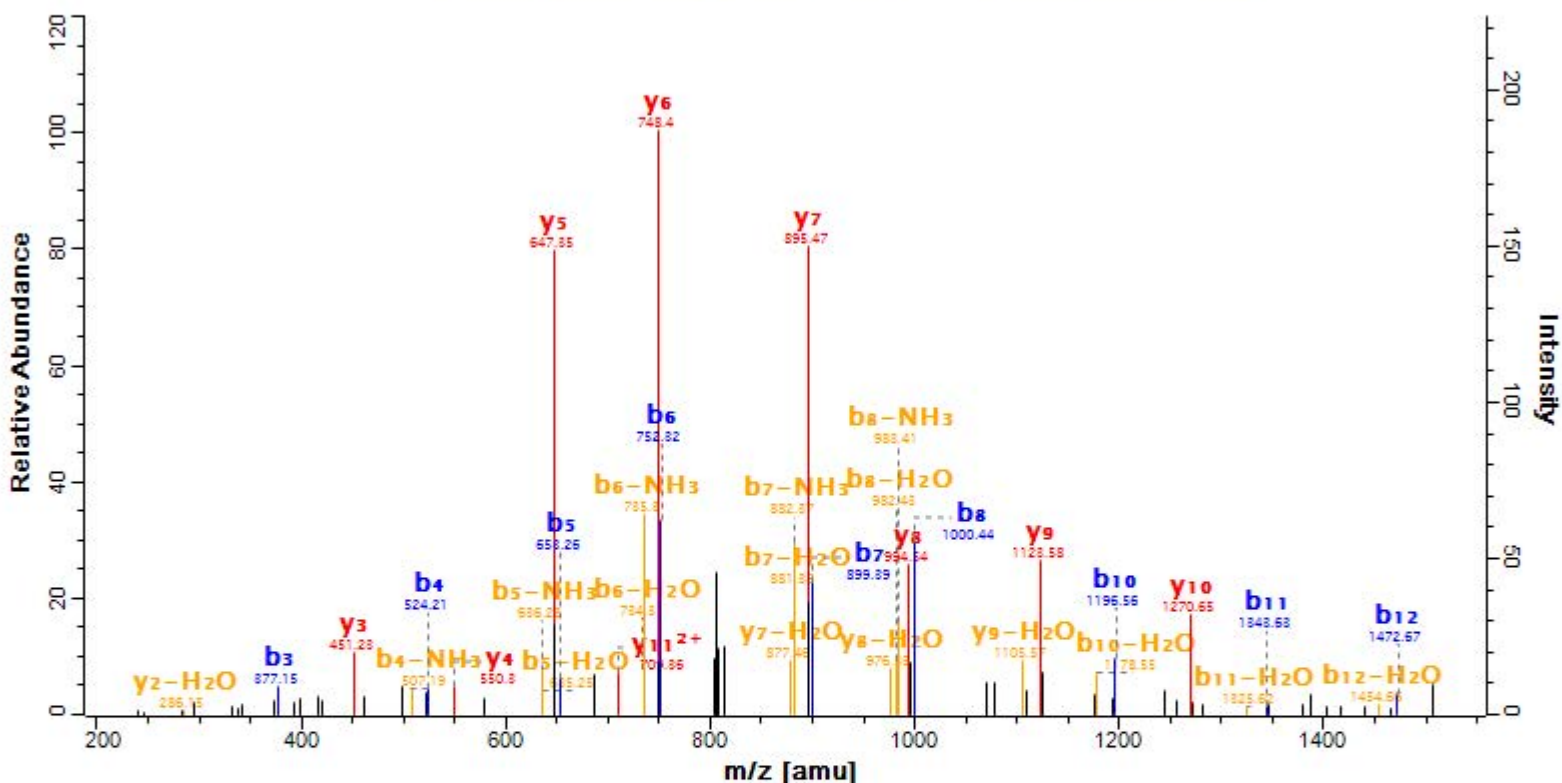

precursor information

|                   |                 |
|-------------------|-----------------|
| Mass:             | 1645.77855      |
| m/z:              | 823.89655       |
| Charge:           | 2+              |
| Retentiontime:    | 71.586006164550 |
| Score:            | 207.9742        |
| Mass Error [ppm]: | 0.54345         |
| PEP:              | 9.3064E-23      |
| Precursor Type:   | MULTI           |

general information

|                       |             |
|-----------------------|-------------|
| Annotation:           | 10 of 13    |
| AminoAcids Coverage:  | 77 %        |
| Intensity Coverage:   | 73 %        |
| Peak Coverage:        | 42 %        |
| Protein Localisation: | 176 ... 188 |

| b ion     |          |     |   | y ion    |          | y <sup>2+</sup> ion |          |
|-----------|----------|-----|---|----------|----------|---------------------|----------|
| Δ dalton  | mass     | seq |   | Δ dalton | mass     | Δ dalton            | mass     |
|           | 116.0342 | 1   | D | 12       |          |                     |          |
|           | 230.0771 | 2   | N | 11       | 1531.758 |                     | 1531.758 |
| -0.0992   | 377.1456 | 3   | F | 10       | 1417.715 |                     | 709.3612 |
| -0.02019  | 524.214  | 4   | F | 9        | 1270.647 | -0.04606            | 1270.647 |
| +0.292687 | 653.2566 | 5   | E | 8        | 1123.578 | -0.09655            | 1123.578 |
| -0.21982  | 752.325  | 6   | V | 7        | 994.5356 | -0.11407            | 994.5356 |
| -0.12869  | 899.3934 | 7   | F | 6        | 895.4672 | -0.00654            | 895.4672 |
| -0.01554  | 1000.441 | 8   | T | 5        | 748.3988 | -0.04579            | 748.3988 |
|           | 1097.494 | 9   | P | 4        | 647.3511 | +0.03546            | 647.3511 |
| -0.09704  | 1196.562 | 10  | V | 3        | 550.2984 | -0.26132            | 550.2984 |
| +0.190989 | 1343.631 | 11  | F | 2        | 451.23   | +0.124899           | 451.23   |
| -0.18608  | 1472.673 | 12  | E | 1        | 304.1615 |                     | 304.1615 |
|           |          | 13  | R | 0        | 175.119  |                     | 175.119  |

Scan number 11926 Raw file LNCAP\_Silac\_23F10\_set3\_03  
 Method ITMS; CID Pepti... 125.53

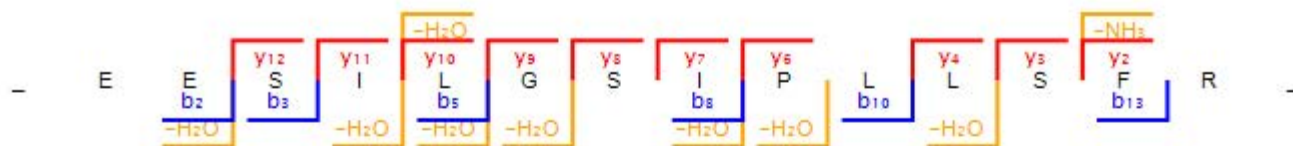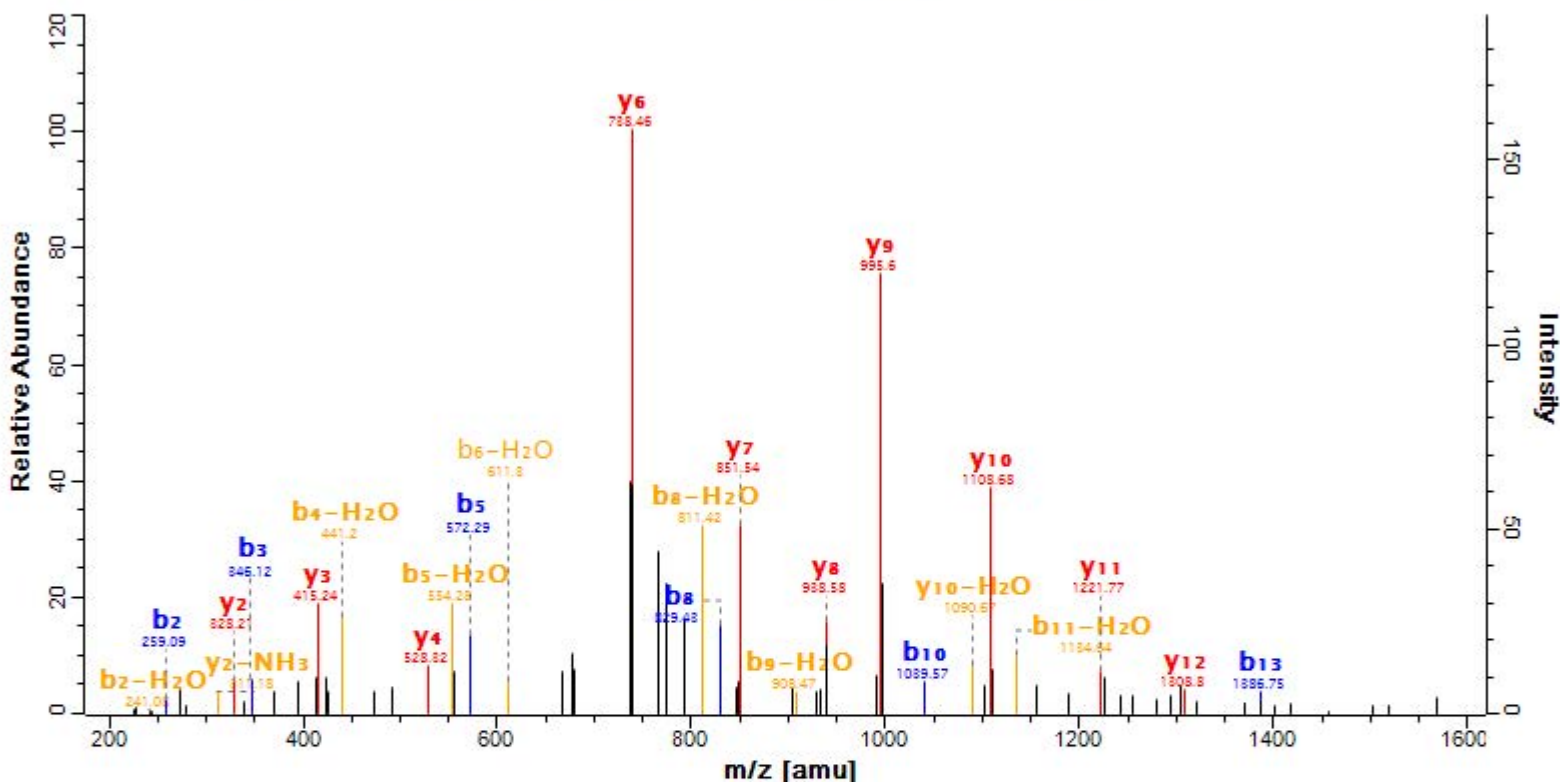

precursor information

|                   |                 |
|-------------------|-----------------|
| Mass:             | 1559.85583      |
| m/z:              | 780.93519       |
| Charge:           | 2+              |
| Retentiontime:    | 72.676673889160 |
| Score:            | 125.53          |
| Mass Error [ppm]: | -0.049209       |
| PEP:              | 1.1063E-08      |
| Precursor Type:   | MULTI           |

general information

|                       |            |
|-----------------------|------------|
| Annotation:           | 12 of 14   |
| AminoAcids Coverage:  | 86 %       |
| Intensity Coverage:   | 54 %       |
| Peak Coverage:        | 31 %       |
| Protein Localisation: | 97 ... 110 |

| b ion      |               |     |   | y ion         |            |
|------------|---------------|-----|---|---------------|------------|
| Δ dalton   | mass          | seq |   | Δ dalton      | mass       |
|            | 130.049869563 | 1   | E |               |            |
| +0.1252192 | 259.092462659 | 2   | E | 1437.84072093 |            |
| +0.2282616 | 346.124491069 | 3   | S | 1308.79812783 | -0.0193192 |
|            | 459.208555049 | 4   | I | 1221.76609942 | +0.3025041 |
| +0.0825641 | 572.29261903  | 5   | L | 1108.68203544 | -0.0453167 |
|            | 629.314082753 | 6   | G | 995.597971461 | +0.0196433 |
|            | 716.346111163 | 7   | S | 938.576507737 | -0.0356752 |
| +0.0339972 | 829.430175144 | 8   | I | 851.544479327 | +0.0147858 |
|            | 926.482938996 | 9   | P | 738.460415347 | +0.0455051 |
| -0.2054307 | 1039.56700298 | 10  | L | 641.407651495 |            |
|            | 1152.65106696 | 11  | L | 528.323587514 | -0.0243321 |
|            | 1239.68309537 | 12  | S | 415.239523534 | +0.1359037 |
| -0.0804888 | 1386.75150928 | 13  | F | 328.207495124 | -0.0260986 |
|            |               | 14  | R | 181.139081208 |            |



Scan number 12050 Raw file LNCAP\_Silac\_23F10\_set3\_03  
 Method ITMS; CID Pepti... 129.84

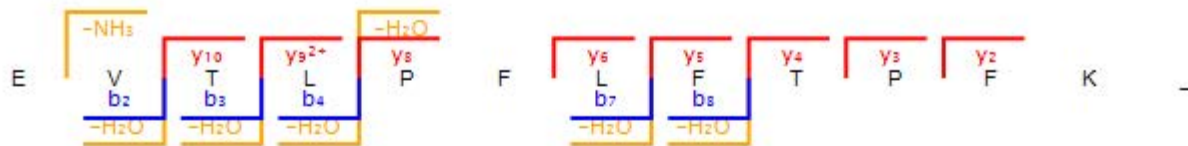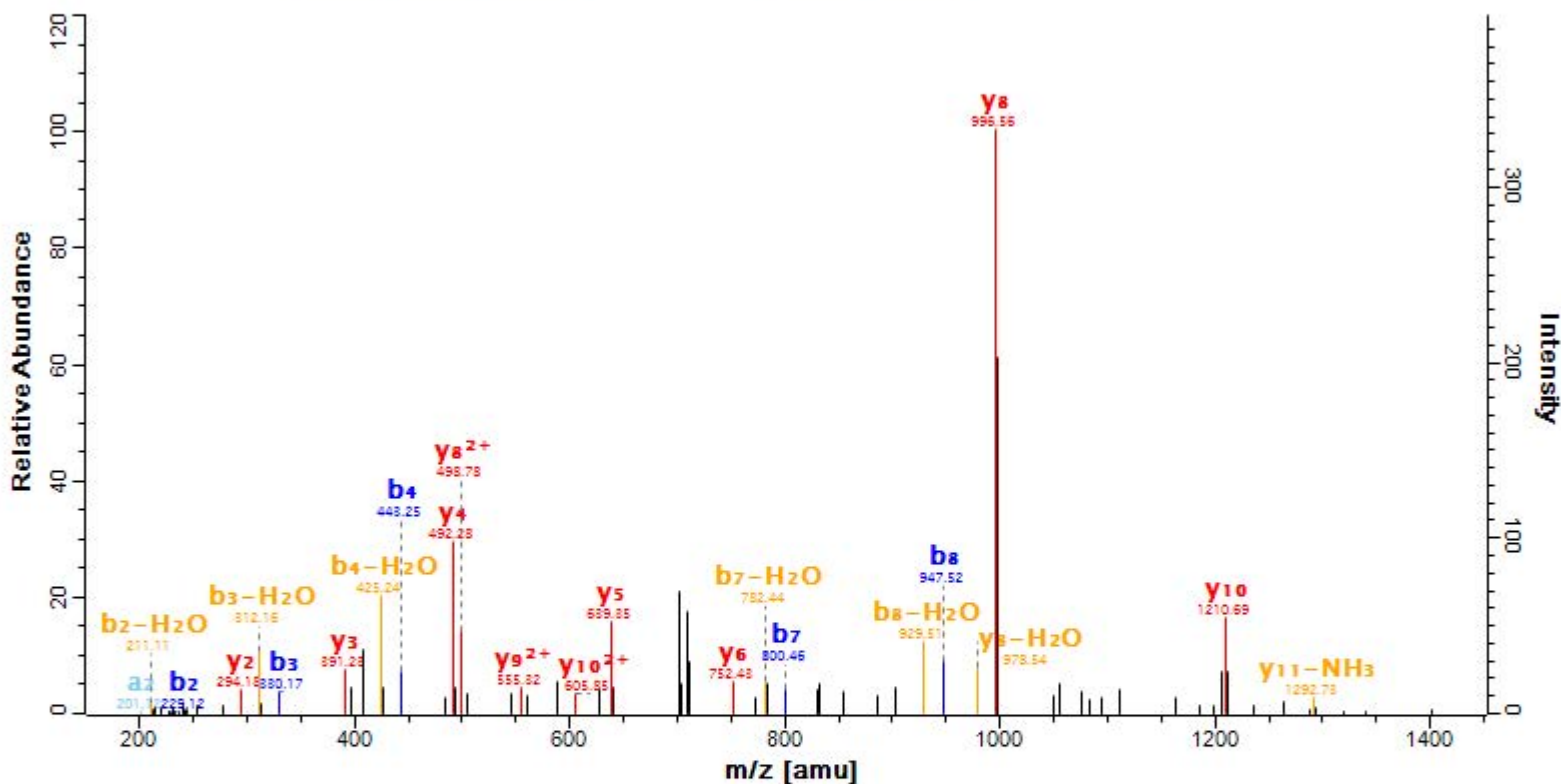

#### precursor information

|                   |                 |
|-------------------|-----------------|
| Mass:             | 1437.79092      |
| m/z:              | 719.90274       |
| Charge:           | 2+              |
| Retentiontime:    | 73.985984802246 |
| Score:            | 129.8378        |
| Mass Error [ppm]: | 0.09287         |
| PEP:              | 2.3608E-05      |
| Precursor Type:   | MULTI           |

#### general information

|                       |             |
|-----------------------|-------------|
| Annotation:           | 9 of 12     |
| AminoAcids Coverage:  | 75 %        |
| Intensity Coverage:   | 50 %        |
| Peak Coverage:        | 28 %        |
| Protein Localisation: | 381 ... 392 |

| a ion    |        | b ion    |        |     |   |          | y ion  |          | y <sup>2+</sup> ion |  |
|----------|--------|----------|--------|-----|---|----------|--------|----------|---------------------|--|
| Δ dalton | mass   | Δ dalton | mass   | seq |   | Δ dalton | mass   | Δ dalton | mass                |  |
|          | 102.05 |          | 130.05 | 1   | E | 11       |        |          |                     |  |
| +0.2829  | 201.12 | +0.0652  | 229.12 | 2   | V | 10       | 1309.8 |          | 1309.8              |  |
|          | 302.17 | +0.2492  | 330.17 | 3   | T | 9        | 1210.7 | +0.0173  | 605.85              |  |
|          | 415.26 | +0.0329  | 443.25 | 4   | L | 8        | 1109.6 |          | 555.32              |  |
|          | 512.31 |          | 540.3  | 5   | P | 7        | 996.56 | -0.023   | 498.78              |  |
|          | 659.38 |          | 687.37 | 6   | F | 6        | 899.5  |          | 899.5               |  |
|          | 772.46 | +0.0143  | 800.46 | 7   | L | 5        | 752.43 | -0.054   | 752.43              |  |
|          | 919.53 | -0.014   | 947.52 | 8   | F | 4        | 639.35 | +0.0828  | 639.35              |  |
|          | 1020.6 |          | 1048.6 | 9   | T | 3        | 492.28 | -0.001   | 492.28              |  |
|          | 1117.6 |          | 1145.6 | 10  | P | 2        | 391.23 | +0.0097  | 391.23              |  |
|          | 1264.7 |          | 1292.7 | 11  | F | 1        | 294.18 | +0.0353  | 294.18              |  |
|          |        |          |        | 12  | K | 0        | 147.11 |          | 147.11              |  |

Scan number 1238 Raw file LNCAP\_Silac\_23F10\_set3\_03  
 Method ITMS; CID Peptide 318.49

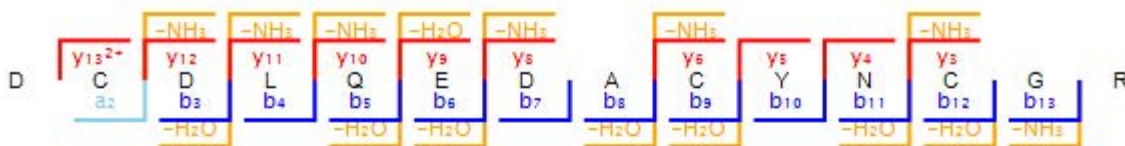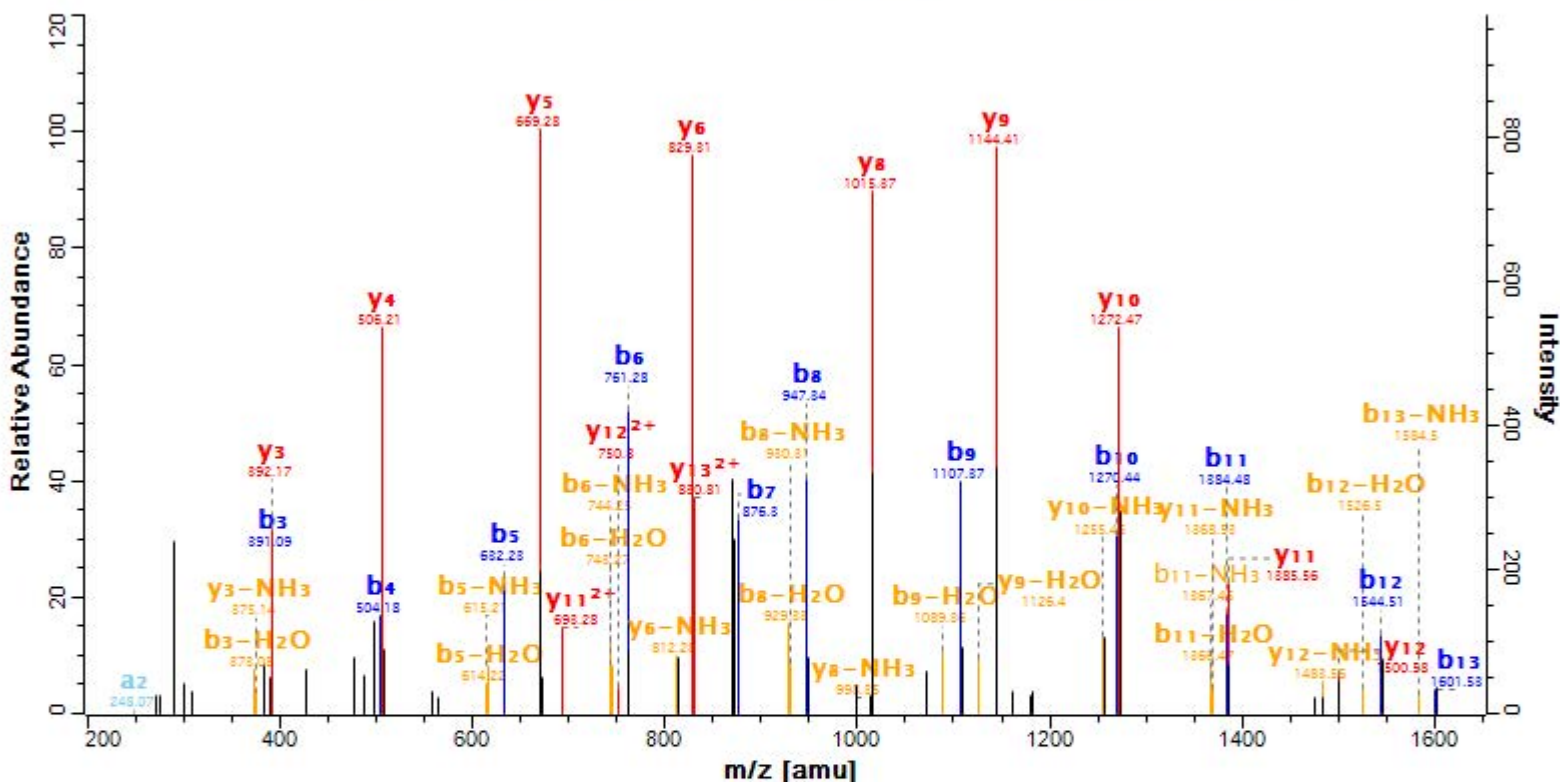

#### precursor information

|                   |                 |
|-------------------|-----------------|
| Mass:             | 1774.63456      |
| m/z:              | 888.32456       |
| Charge:           | 2+              |
| Retentiontime:    | 12.707373619079 |
| Score:            | 318.4944        |
| Mass Error [ppm]: | 0.025795        |
| PEP:              | 2.7729E-101     |
| Precursor Type:   | MULTI           |

| a ion    |        | b ion    |        | seq |   |    | y ion    |         | y <sup>2+</sup> ion |         |
|----------|--------|----------|--------|-----|---|----|----------|---------|---------------------|---------|
| Δ dalton | mass   | Δ dalton | mass   |     |   |    | Δ dalton | mass    | Δ dalton            | mass    |
|          | 88.039 |          | 116.03 | 1   | D | 13 |          |         |                     |         |
| +0.0178  | 248.07 |          | 276.06 | 2   | C | 12 | 1660.6   |         | 830.81              | -0.478  |
|          | 363.1  | +0.061   | 391.09 | 3   | D | 11 | 1500.6   | -0.099  | 750.8               | +0.0284 |
|          | 476.18 | -0.035   | 504.18 | 4   | L | 10 | 1385.6   | -0.15   | 693.28              | +0.1433 |
|          | 604.24 | -0.056   | 632.23 | 5   | Q | 9  | 1272.5   | +0.0231 | 1272.5              |         |
|          | 733.28 | -0.034   | 761.28 | 6   | E | 8  | 1144.4   | -0.022  | 1144.4              |         |
|          | 848.31 | -0.035   | 876.3  | 7   | D | 7  | 1015.4   | -0.027  | 1015.4              |         |
|          | 919.35 | -0.068   | 947.34 | 8   | A | 6  | 900.35   |         | 900.35              |         |
|          | 1079.4 | -0.059   | 1107.4 | 9   | C | 5  | 829.31   | +0.034  | 829.31              |         |
|          | 1242.4 | -0.114   | 1270.4 | 10  | Y | 4  | 669.28   | +0.0852 | 669.28              |         |
|          | 1356.5 | -0.129   | 1384.5 | 11  | N | 3  | 506.21   | +0.105  | 506.21              |         |
|          | 1516.5 | -0.166   | 1544.5 | 12  | C | 2  | 392.17   | +0.0789 | 392.17              |         |
|          | 1573.5 | -0.133   | 1601.5 | 13  | G | 1  | 232.14   |         | 232.14              |         |
|          |        |          |        | 14  | R | 0  | 175.12   |         | 175.12              |         |

#### general information

|                       |           |
|-----------------------|-----------|
| Annotation:           | 12 of 14  |
| AminoAcids Coverage:  | 86 %      |
| Intensity Coverage:   | 68 %      |
| Peak Coverage:        | 51 %      |
| Protein Localisation: | 66 ... 79 |

Scan number 1337 Raw file LNCAP\_Silac\_23F10\_set3\_03  
 Method ITMS: CID Pepti... 66.19

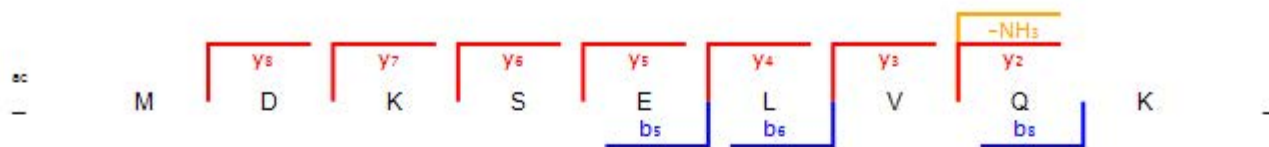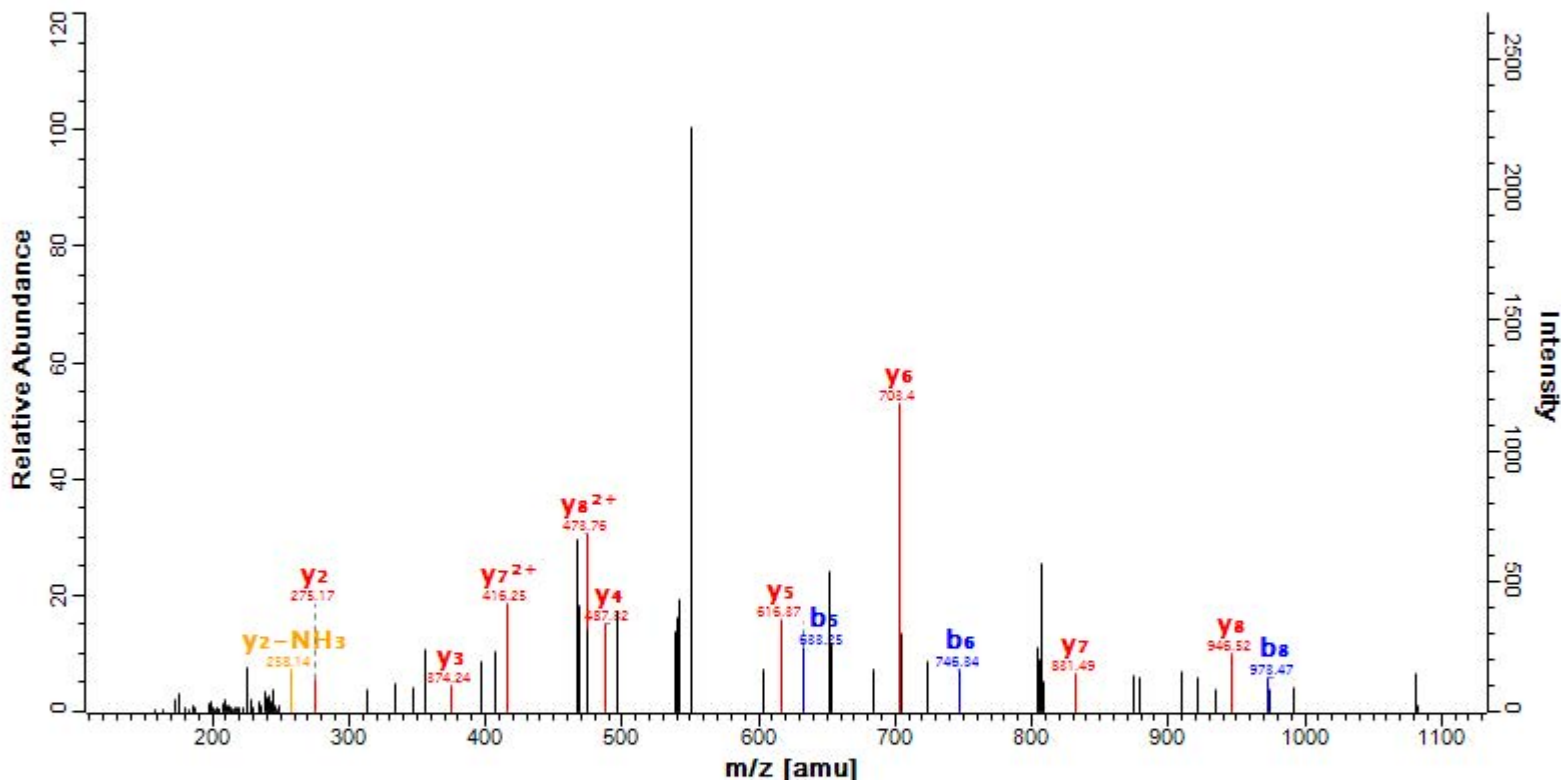

#### precursor information

|                       |                 |
|-----------------------|-----------------|
| Mass:                 | 1118.56426      |
| m/z:                  | 560.28941       |
| Charge:               | 2+              |
| Retentiontime:        | 13.228949546814 |
| Score:                | 66.18996        |
| Mass Error [ppm]:     | 0.0933          |
| PEP:                  | 0.045649        |
| Precursor Type:       | MULTI           |
| Annotation:           | 7 of 9          |
| AminoAcids Coverage:  | 78 %            |
| Intensity Coverage:   | 27 %            |
| Peak Coverage:        | 13 %            |
| Protein Localisation: | 1 ... 9         |

| b ion     |          |     |   | y ion    |          | y <sup>2+</sup> ion |          |           |
|-----------|----------|-----|---|----------|----------|---------------------|----------|-----------|
| Δ dalton  | mass     | seq |   | Δ dalton | mass     | Δ dalton            | mass     |           |
|           | 174.0583 | 1   | M | 8        |          |                     |          |           |
|           | 289.0853 | 2   | D | 7        | 946.5204 | -0.01428            | 473.7638 | +0.29226  |
|           | 417.1802 | 3   | K | 6        | 831.4934 | +0.056422           | 416.2504 | +0.170843 |
|           | 504.2123 | 4   | S | 5        | 703.3985 | -0.00609            | 703.3985 |           |
| +0.132354 | 633.2549 | 5   | E | 4        | 616.3665 | +0.00342            | 616.3665 |           |
| +0.180187 | 746.3389 | 6   | L | 3        | 487.3239 | +0.15783            | 487.3239 |           |
|           | 845.4073 | 7   | V | 2        | 374.2398 | -0.00145            | 374.2398 |           |
| -0.1788   | 973.4659 | 8   | Q | 1        | 275.1714 | +0.016423           | 275.1714 |           |
|           |          | 9   | K | 0        | 147.1128 |                     | 147.1128 |           |

Scan number 1376 Raw file LNCAP\_Silac\_23F10\_set3\_03  
 Method ITMS: CID Pepti... 237.84

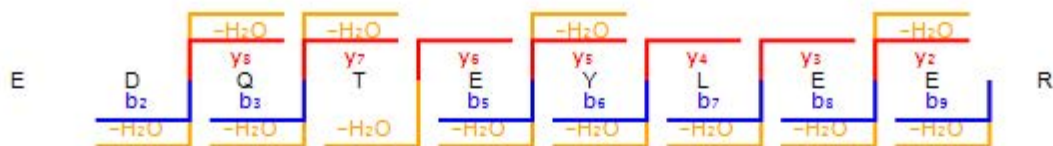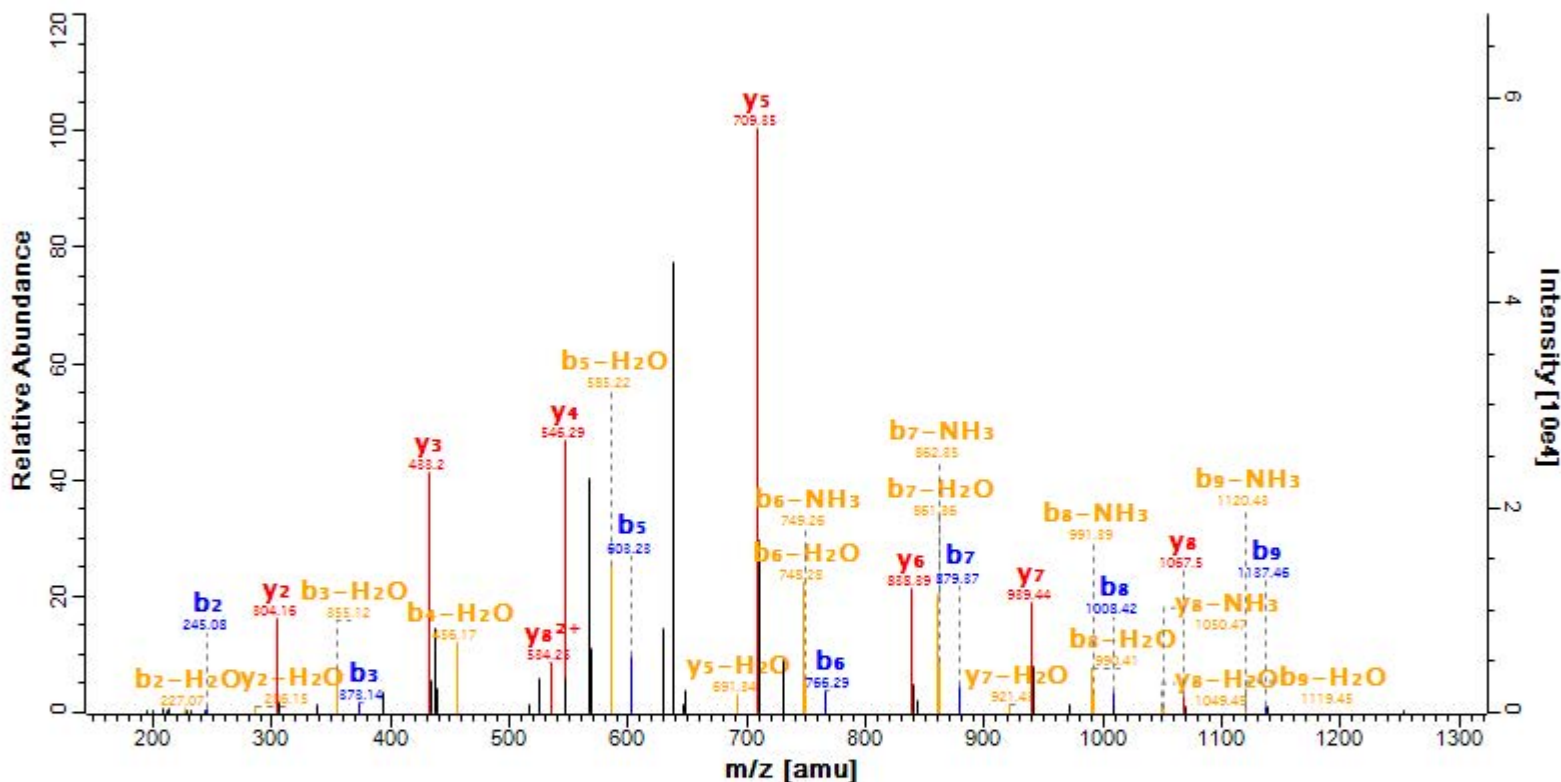

#### precursor information

|                   |                 |
|-------------------|-----------------|
| Mass:             | 1310.56269      |
| m/z:              | 656.28862       |
| Charge:           | 2+              |
| Retentiontime:    | 13.431111335754 |
| Score:            | 237.8394        |
| Mass Error [ppm]: | 0.037155        |
| PEP:              | 3.059E-27       |
| Precursor Type:   | MULTI           |

|                       |             |
|-----------------------|-------------|
| Annotation:           | 8 of 10     |
| AminoAcids Coverage:  | 80 %        |
| Intensity Coverage:   | 61 %        |
| Peak Coverage:        | 38 %        |
| Protein Localisation: | 314 ... 323 |

| b ion     |          |    |     |   | y ion    |           | y <sup>2+</sup> ion |           |
|-----------|----------|----|-----|---|----------|-----------|---------------------|-----------|
| Δ dalton  | mass     |    | seq |   | Δ dalton | mass      | Δ dalton            | mass      |
|           | 130.0499 | 1  | E   | 9 |          |           |                     |           |
| +0.094635 | 245.0768 | 2  | D   | 8 | 1182.527 |           | 1182.527            |           |
| +0.068528 | 373.1354 | 3  | Q   | 7 | 1067.5   | +0.028429 | 534.2538            | +0.113481 |
|           | 474.1831 | 4  | T   | 6 | 939.4418 | +0.003754 | 939.4418            |           |
| +0.049912 | 603.2257 | 5  | E   | 5 | 838.3941 | +0.008098 | 838.3941            |           |
| +0.047619 | 766.289  | 6  | Y   | 4 | 709.3515 | +0.04001  | 709.3515            |           |
| -0.04395  | 879.3731 | 7  | L   | 3 | 546.2882 | +0.031317 | 546.2882            |           |
| -0.08386  | 1008.416 | 8  | E   | 2 | 433.2041 | +0.022851 | 433.2041            |           |
| -0.14037  | 1137.458 | 9  | E   | 1 | 304.1615 | +0.091934 | 304.1615            |           |
|           |          | 10 | R   | 0 | 175.119  |           | 175.119             |           |

Scan number 1508 Raw file LNCAP\_Silac\_23F10\_set3\_03  
 Method ITMS; CID Pepti... 105.03

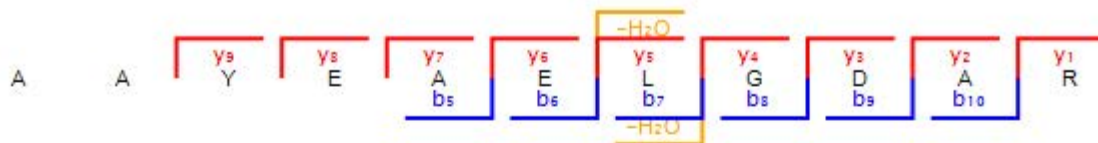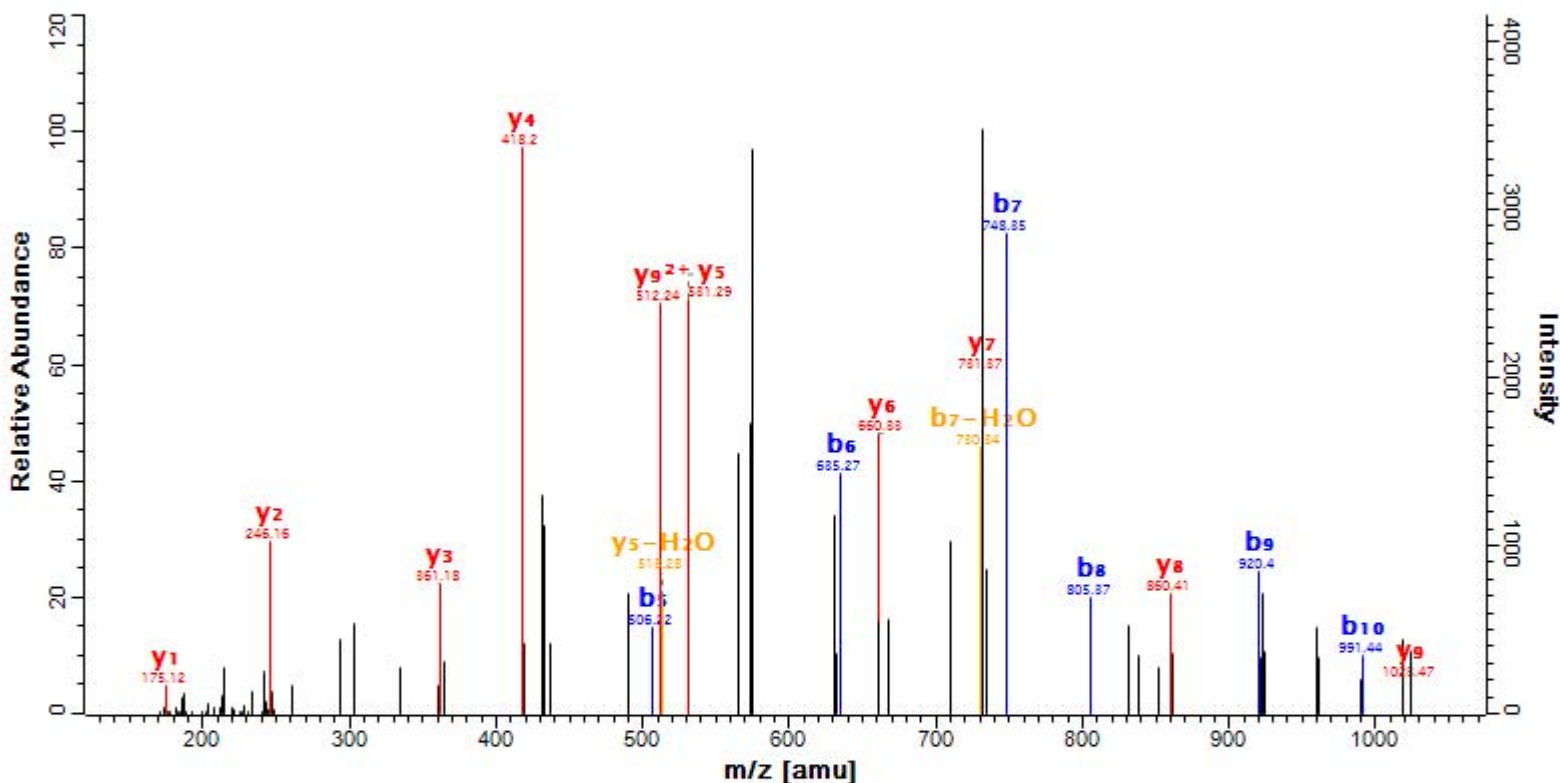

#### precursor information

|                   |                 |
|-------------------|-----------------|
| Mass:             | 1164.5402       |
| m/z:              | 583.27738       |
| Charge:           | 2+              |
| Retentiontime:    | 14.106860160827 |
| Score:            | 105.0319        |
| Mass Error [ppm]: | -0.7849         |
| PEP:              | 0.00031962      |
| Precursor Type:   | MULTI           |

#### general information

|                       |           |
|-----------------------|-----------|
| Annotation:           | 9 of 11   |
| AminoAcids Coverage:  | 82 %      |
| Intensity Coverage:   | 45 %      |
| Peak Coverage:        | 21 %      |
| Protein Localisation: | 79 ... 89 |

| b ion     |          |     |   | y ion    |          | y <sup>2+</sup> ion |          |          |
|-----------|----------|-----|---|----------|----------|---------------------|----------|----------|
| Δ dalton  | mass     | seq |   | Δ dalton | mass     | Δ dalton            | mass     |          |
|           | 72.04439 | 1   | A | 10       |          |                     |          |          |
|           | 143.0815 | 2   | A | 9        | 1094.511 | 1094.511            |          |          |
|           | 306.1448 | 3   | Y | 8        | 1023.474 | +0.049577           | 512.2407 | -0.00146 |
|           | 435.1874 | 4   | E | 7        | 860.4108 | +0.032767           | 860.4108 |          |
| +0.020273 | 506.2245 | 5   | A | 6        | 731.3682 | +0.00816            | 731.3682 |          |
| +0.005267 | 635.2671 | 6   | E | 5        | 660.3311 | +0.011705           | 660.3311 |          |
| -0.01129  | 748.3512 | 7   | L | 4        | 531.2885 | -0.10507            | 531.2885 |          |
| +0.069539 | 805.3727 | 8   | G | 3        | 418.2045 | +0.029109           | 418.2045 |          |
| -0.05982  | 920.3996 | 9   | D | 2        | 361.183  | +0.116979           | 361.183  |          |
| +0.038381 | 991.4367 | 10  | A | 1        | 246.1561 | -0.00711            | 246.1561 |          |
|           |          | 11  | R | 0        | 175.119  | +0.040105           | 175.119  |          |

Scan number 1769 Raw file LNCAP\_Silac\_23F10\_set3\_03  
 Method ITMS; CID Pepti... 126.71

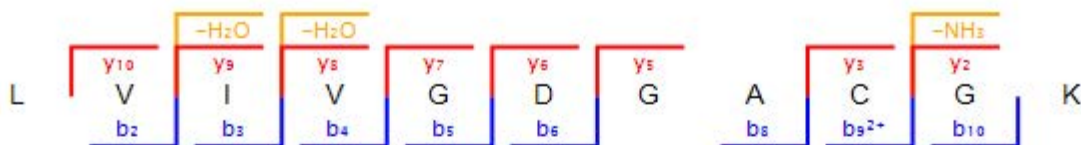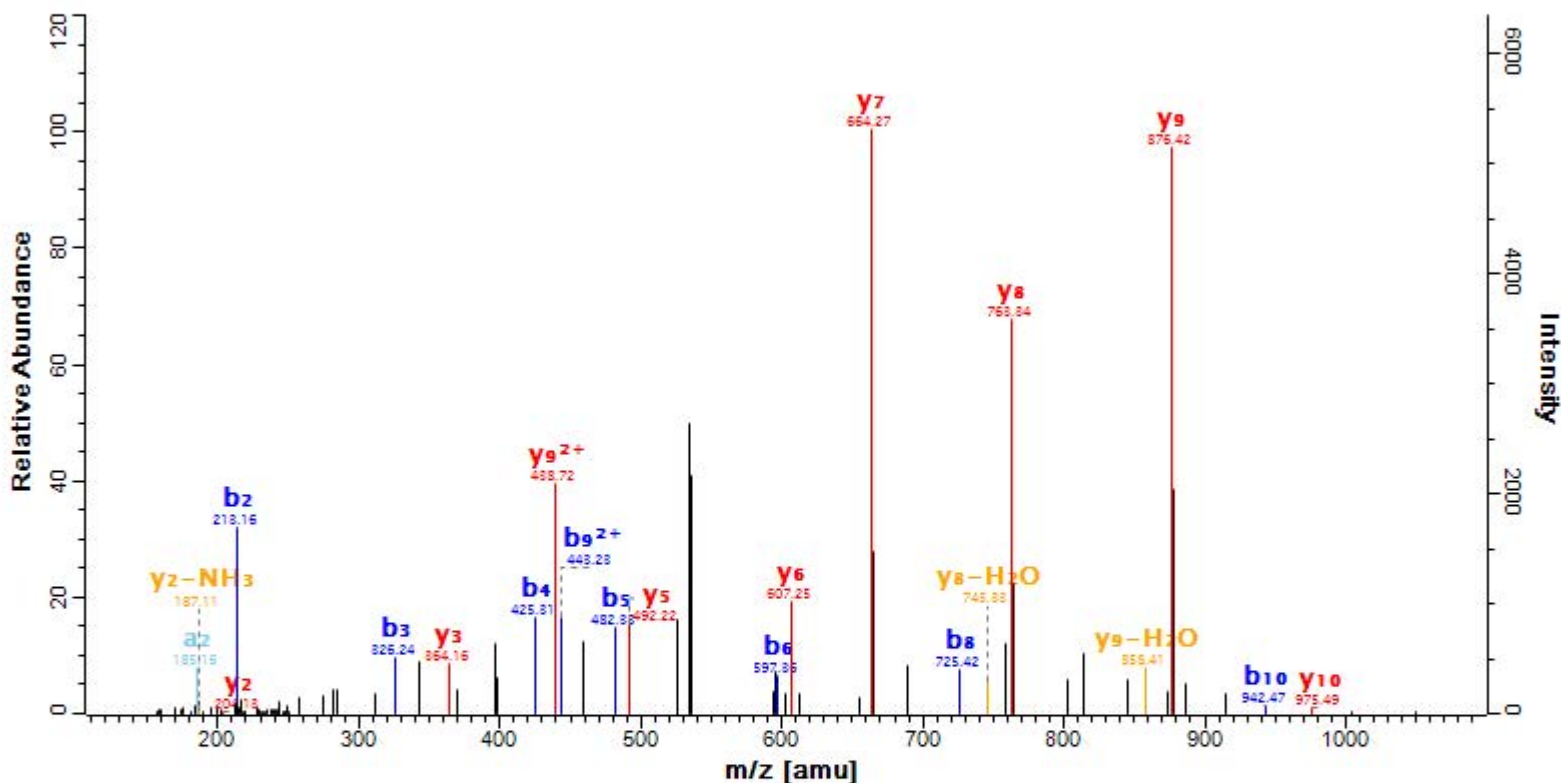

#### precursor information

|                   |                 |
|-------------------|-----------------|
| Mass:             | 1087.5696       |
| m/z:              | 544.79207       |
| Charge:           | 2+              |
| Retentiontime:    | 15.460742950439 |
| Score:            | 126.7074        |
| Mass Error [ppm]: | 0.015636        |
| PEP:              | 7.5726E-05      |
| Precursor Type:   | ISO             |

#### general information

|                       |          |
|-----------------------|----------|
| Annotation:           | 9 of 11  |
| AminoAcids Coverage:  | 82 %     |
| Intensity Coverage:   | 56 %     |
| Peak Coverage:        | 22 %     |
| Protein Localisation: | 8 ... 18 |

|        | a ion         | b <sup>2+</sup> ion | b ion         |     |   | y ion         | y <sup>2+</sup> ion     |
|--------|---------------|---------------------|---------------|-----|---|---------------|-------------------------|
|        | Δ dalton mass | Δ dalton mass       | Δ dalton mass | seq |   | Δ dalton mass | Δ dalton mass           |
|        | 86.1          | 114.1               | 114.1         | 1   | L | 10            |                         |
| +0.023 | 85.2          | 213.2               | +0.033213.2   | 2   | V | 9             | 975.5 +0.226975.5       |
|        | 298.2         | 326.2               | +0.082326.2   | 3   | I | 8             | 876.4 -0.04 438.7 +0.17 |
|        | 397.3         | 425.3               | +0.034425.3   | 4   | V | 7             | 763.3 +0.038763.3       |
|        | 454.3         | 482.3               | -0.04 482.3   | 5   | G | 6             | 664.3 +0.017664.3       |
|        | 569.4         | 597.4               | +0.089597.4   | 6   | D | 5             | 607.3 +0.065607.3       |
|        | 626.4         | 654.4               | 654.4         | 7   | G | 4             | 492.2 +0.101492.2       |
|        | 697.4         | 725.4               | +0.099725.4   | 8   | A | 3             | 435.2 435.2             |
|        | 857.5         | -0.04 443.2         | 885.4         | 9   | C | 2             | 364.2 +0.018364.2       |
|        | 914.5         | 942.5               | +0.239942.5   | 10  | G | 1             | 204.1 +0.106204.1       |
|        |               |                     |               | 11  | K | 0             | 147.1 147.1             |

Scan number 1872 Raw file LNCAP\_Silac\_23F10\_set3\_03  
 Method ITMS: CID Pepti... 99.57

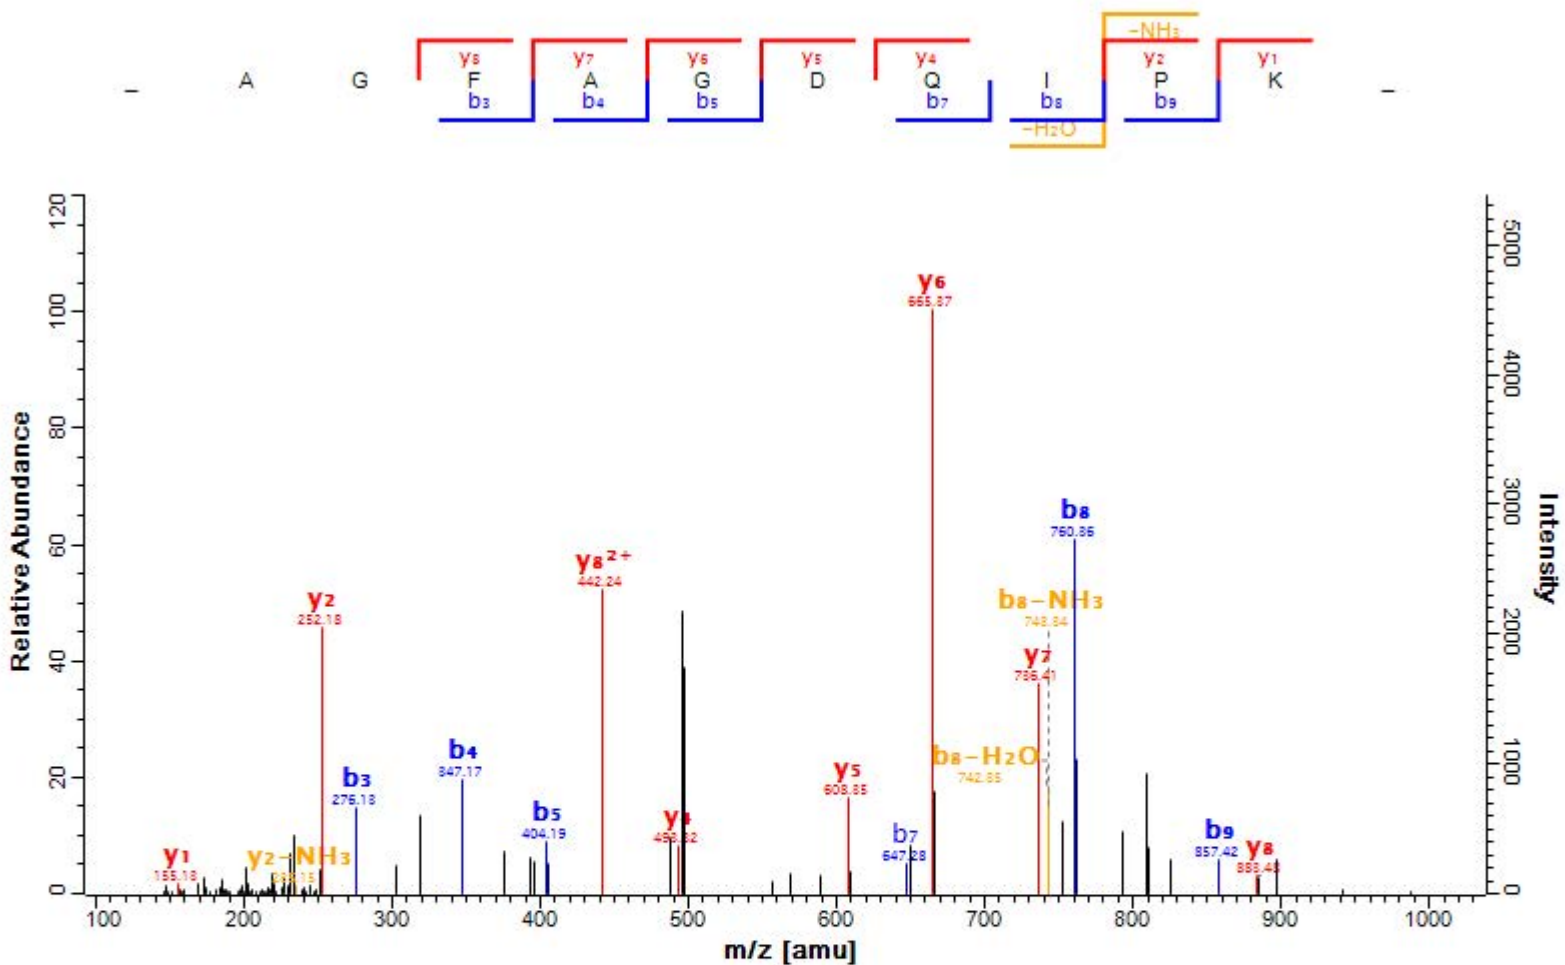

**precursor information**

|                          |                 |
|--------------------------|-----------------|
| Mass:                    | 1002.51315      |
| m/z:                     | 502.26385       |
| Charge:                  | 2+              |
| Retentiontime:           | 15.977834701538 |
| Score:                   | 99.56806        |
| Mass Error [ppm]:        | -0.29075        |
| PEP:                     | 0.0010985       |
| <b>g</b> Precursor Type: | MULTI           |
| Annotation:              | 8 of 10         |
| AminoAcids Coverage:     | 80 %            |
| Intensity Coverage:      | 53 %            |
| Peak Coverage:           | 16 %            |
| Protein Localisation:    | 23 ... 32       |

| b ion     |          |    |     |   | y ion    |           | y <sup>2+</sup> ion |           |
|-----------|----------|----|-----|---|----------|-----------|---------------------|-----------|
| Δ dalton  | mass     |    | seq |   | Δ dalton | mass      | Δ dalton            | mass      |
|           | 72.04439 | 1  | A   | 9 |          |           |                     |           |
|           | 129.0659 | 2  | G   | 8 | 940.4978 |           | 940.4978            |           |
| -0.05449  | 276.1343 | 3  | F   | 7 | 883.4763 | +0.10105  | 442.2418            | +0.196362 |
| -0.01351  | 347.1714 | 4  | A   | 6 | 736.4079 | +0.067108 | 736.4079            |           |
| -0.09571  | 404.1928 | 5  | G   | 5 | 665.3708 | +0.015843 | 665.3708            |           |
|           | 519.2198 | 6  | D   | 4 | 608.3494 | +0.093825 | 608.3494            |           |
| -0.06273  | 647.2784 | 7  | Q   | 3 | 493.3224 | -0.0133   | 493.3224            |           |
| -0.01929  | 760.3624 | 8  | I   | 2 | 365.2638 |           | 365.2638            |           |
| +0.033842 | 857.4152 | 9  | P   | 1 | 252.1798 | +0.028714 | 252.1798            |           |
|           |          | 10 | K   | 0 | 155.127  | +0.007442 | 155.127             |           |

Scan number 2395 Raw file LNCAP\_Silac\_23F10\_set3\_03  
 Method ITMS; CID Pepti... 216.03

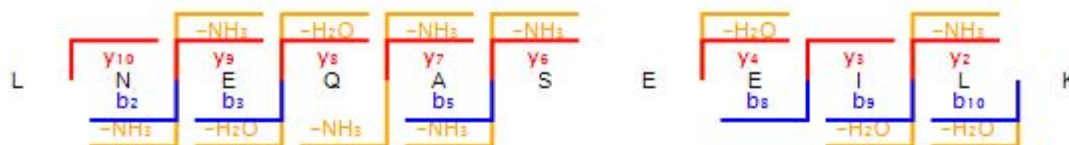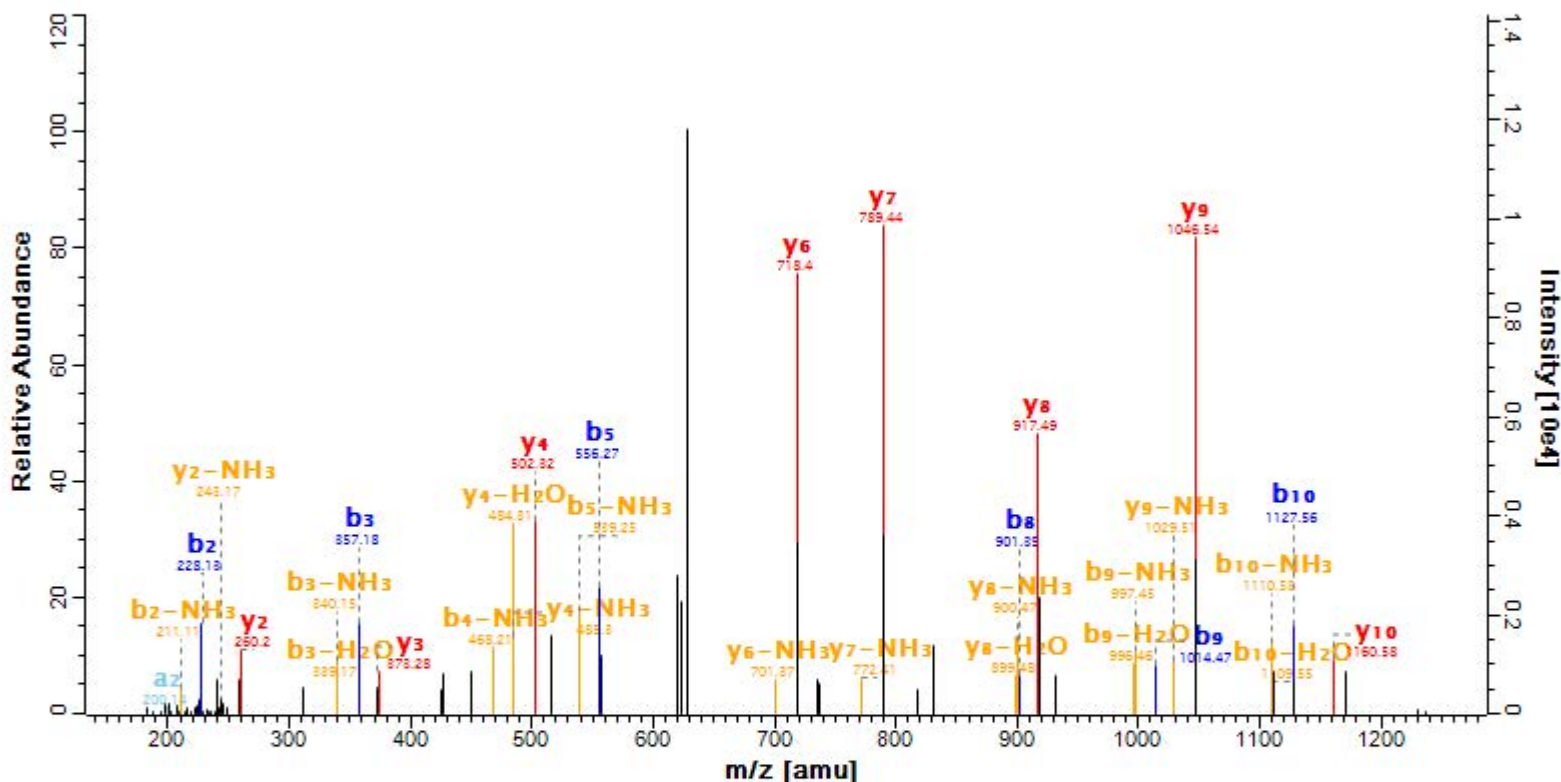

#### precursor information

|                   |                 |
|-------------------|-----------------|
| Mass:             | 1272.65531      |
| m/z:              | 637.33493       |
| Charge:           | 2+              |
| Retentiontime:    | 18.573080062866 |
| Score:            | 216.0294        |
| Mass Error [ppm]: | -0.65374        |
| PEP:              | 1.0532E-16      |
| Precursor Type:   | MULTI           |

#### general information

|                       |           |
|-----------------------|-----------|
| Annotation:           | 9 of 11   |
| AminoAcids Coverage:  | 82 %      |
| Intensity Coverage:   | 56 %      |
| Peak Coverage:        | 34 %      |
| Protein Localisation: | 45 ... 55 |

| a ion           |          | b ion           |          |     | y ion           |      |          |
|-----------------|----------|-----------------|----------|-----|-----------------|------|----------|
| $\Delta$ dalton | mass     | $\Delta$ dalton | mass     | seq | $\Delta$ dalton | mass |          |
|                 | 86.09643 | 114.0913        |          | 1   | L               | 10   |          |
| -0.30558        | 200.1394 | -0.07796        | 228.1343 | 2   | N               | 9    | 1160.579 |
|                 | 329.1819 | +0.056721       | 357.1769 | 3   | E               | 8    | 1046.536 |
|                 | 457.2405 |                 | 485.2354 | 4   | Q               | 7    | 917.4938 |
|                 | 528.2776 | -0.09769        | 556.2726 | 5   | A               | 6    | 789.4353 |
|                 | 615.3097 |                 | 643.3046 | 6   | S               | 5    | 718.3981 |
|                 | 744.3523 |                 | 772.3472 | 7   | E               | 4    | 631.3661 |
|                 | 873.3949 | +0.31171        | 901.3898 | 8   | E               | 3    | 502.3235 |
|                 | 986.4789 | -0.39552        | 1014.474 | 9   | I               | 2    | 373.2809 |
|                 | 1099.563 | -0.04325        | 1127.558 | 10  | L               | 1    | 260.1969 |
|                 |          |                 |          | 11  | K               | 0    | 147.1128 |



Scan number 2670 Raw file LNCAP\_Silac\_23F10\_set3\_03  
 Method ITMS; CID Pepti... 119.74

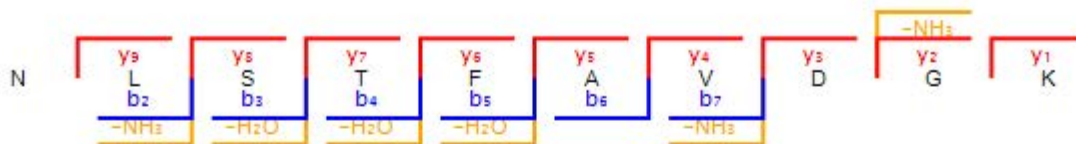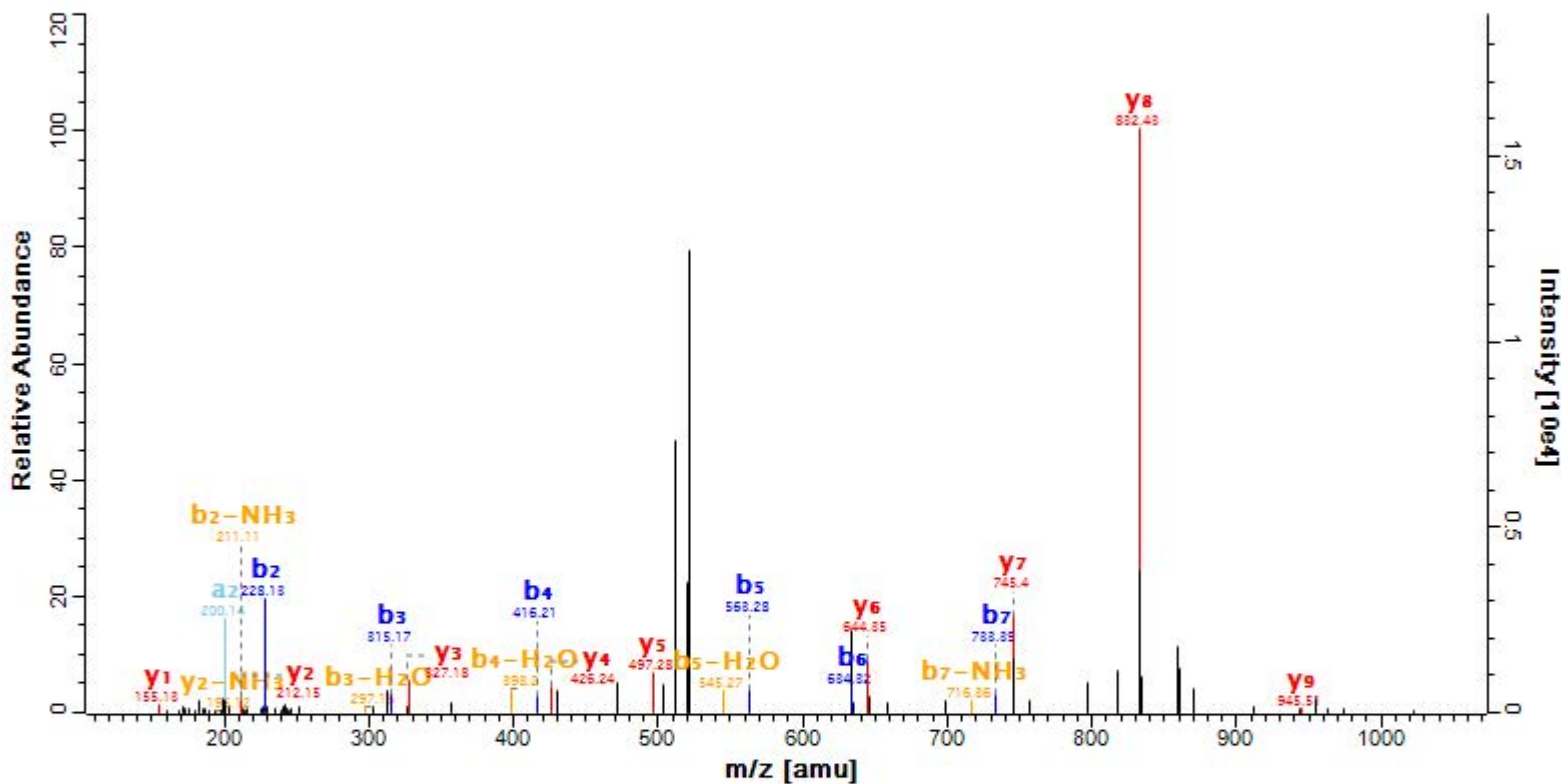

#### precursor information

|                   |                 |
|-------------------|-----------------|
| Mass:             | 1050.53466      |
| m/z:              | 526.27461       |
| Charge:           | 2+              |
| Retentiontime:    | 19.887544631958 |
| Score:            | 119.7433        |
| Mass Error [ppm]: | 0.083           |
| PEP:              | 0.00028253      |
| Precursor Type:   | MULTI           |

|                       |             |
|-----------------------|-------------|
| Annotation:           | 9 of 10     |
| AminoAcids Coverage:  | 90 %        |
| Intensity Coverage:   | 41 %        |
| Peak Coverage:        | 22 %        |
| Protein Localisation: | 142 ... 151 |

| a ion    |          | b ion     |          |     |   | y ion    |                    |
|----------|----------|-----------|----------|-----|---|----------|--------------------|
| Δ dalton | mass     | Δ dalton  | mass     | seq |   | Δ dalton | mass               |
|          | 87.05529 |           | 115.0502 | 1   | N | 9        |                    |
| -0.0214  | 200.1394 | -0.09946  | 228.1343 | 2   | L | 8        | 945.5131 +0.111573 |
|          | 287.1714 | +0.082239 | 315.1663 | 3   | S | 7        | 832.4291 -0.03306  |
|          | 388.2191 | -0.44115  | 416.214  | 4   | T | 6        | 745.397 +0.045048  |
|          | 535.2875 | +0.058554 | 563.2824 | 5   | F | 5        | 644.3494 +0.013136 |
|          | 606.3246 | -0.02006  | 634.3195 | 6   | A | 4        | 497.2809 -0.1961   |
|          | 705.393  | -0.1345   | 733.3879 | 7   | V | 3        | 426.2438 +0.017041 |
|          | 820.4199 |           | 848.4149 | 8   | D | 2        | 327.1754 +0.136053 |
|          | 877.4414 |           | 905.4363 | 9   | G | 1        | 212.1485 -0.017    |
|          |          |           |          | 10  | K | 0        | 155.127 -0.02852   |

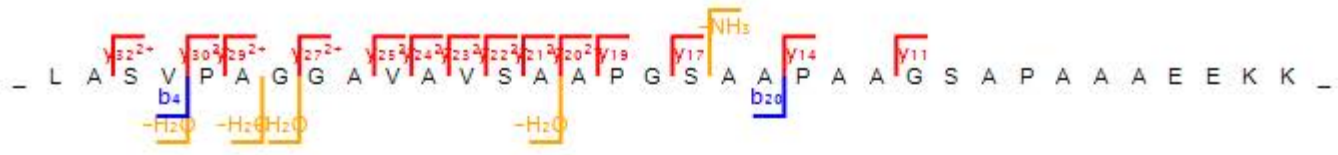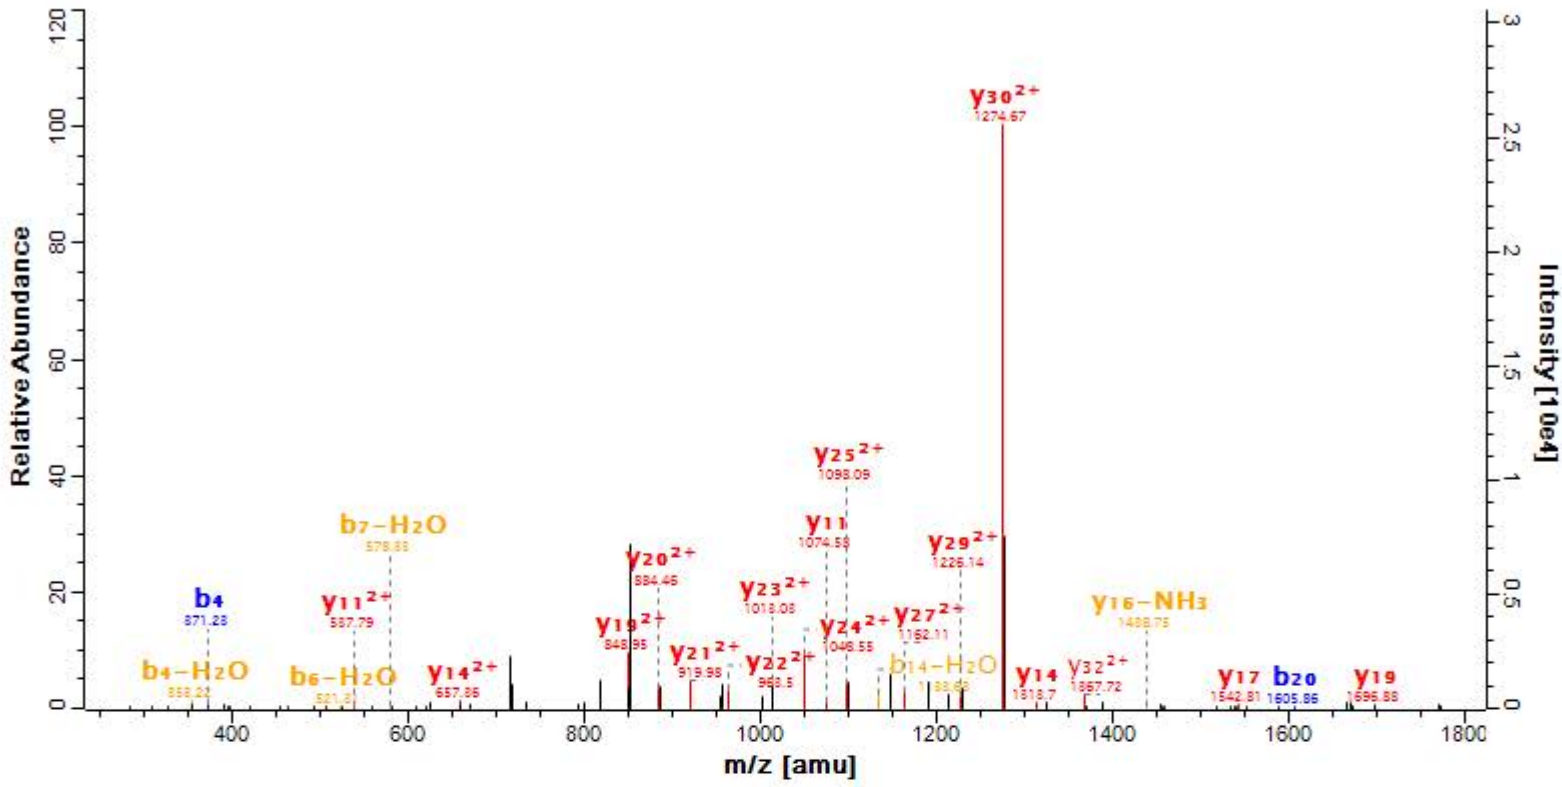

precursor information

|                   |                 |
|-------------------|-----------------|
| Mass:             | 2901.51998      |
| m/z:              | 968.1806        |
| Charge:           | 3+              |
| Retentiontime:    | 20.566749572753 |
| Score:            | 52.24911        |
| Mass Error [ppm]: | 0.13019         |
| PEP:              | 5.6141E-05      |
| Precursor Type:   | MULTI           |

| b ion     |          |     |   | y ion    |          | y <sup>2+</sup> ion |                    |
|-----------|----------|-----|---|----------|----------|---------------------|--------------------|
| Δ dalton  | mass     | seq |   | Δ dalton | mass     | Δ dalton            | mass               |
|           | 114.0913 | 1   | L | 33       |          |                     |                    |
|           | 185.1285 | 2   | A | 32       | 2805.471 |                     | 2805.471           |
|           | 272.1605 | 3   | S | 31       | 2734.434 |                     | 1367.721 +0.40883  |
| -0.10228  | 371.2289 | 4   | V | 30       | 2647.402 |                     | 2647.402           |
|           | 468.2817 | 5   | P | 29       | 2548.334 |                     | 1274.67 +0.197577  |
|           | 539.3188 | 6   | A | 28       | 2451.281 |                     | 1226.144 +0.0212   |
|           | 596.3402 | 7   | G | 27       | 2380.244 |                     | 2380.244           |
|           | 653.3617 | 8   | G | 26       | 2323.222 |                     | 1162.115 +0.241285 |
|           | 724.3988 | 9   | A | 25       | 2266.201 |                     | 2266.201           |
|           | 823.4672 | 10  | V | 24       | 2195.164 |                     | 1098.086 -0.00201  |
|           | 894.5043 | 11  | A | 23       | 2096.095 |                     | 1048.551 +0.221651 |
|           | 993.5728 | 12  | V | 22       | 2025.058 |                     | 1013.033 -0.20462  |
|           | 1080.605 | 13  | S | 21       | 1925.99  |                     | 963.4985 +0.195008 |
|           | 1151.642 | 14  | A | 20       | 1838.958 |                     | 919.9825 -0.02683  |
|           | 1222.679 | 15  | A | 19       | 1767.921 |                     | 884.464 -0.08024   |
|           | 1319.732 | 16  | P | 18       | 1696.884 | +0.031868           | 848.9454 +0.19589  |
|           | 1376.753 | 17  | G | 17       | 1599.831 |                     | 1599.831           |
|           | 1463.785 | 18  | S | 16       | 1542.809 | -0.15391            | 1542.809           |
|           | 1534.822 | 19  | A | 15       | 1455.777 |                     | 1455.777           |
| +0.141236 | 1605.859 | 20  | A | 14       | 1384.74  |                     | 1384.74            |
|           | 1702.912 | 21  | P | 13       | 1313.703 | -0.2636             | 657.3552 -0.09747  |
|           | 1773.949 | 22  | A | 12       | 1216.65  |                     | 1216.65            |
|           | 1844.986 | 23  | A | 11       | 1145.613 |                     | 1145.613           |
|           | 1902.008 | 24  | G | 10       | 1074.576 | +0.010486           | 537.7917 -0.28563  |
|           | 1989.04  | 25  | S | 9        | 1017.555 |                     | 1017.555           |
|           | 2060.077 | 26  | A | 8        | 930.5226 |                     | 930.5226           |
|           | 2157.13  | 27  | P | 7        | 859.4855 |                     | 859.4855           |
|           | 2228.167 | 28  | A | 6        | 762.4327 |                     | 762.4327           |
|           | 2299.204 | 29  | A | 5        | 691.3956 |                     | 691.3956           |
|           | 2370.241 | 30  | A | 4        | 620.3585 |                     | 620.3585           |
|           | 2499.284 | 31  | E | 3        | 549.3214 |                     | 549.3214           |
|           | 2628.326 | 32  | E | 2        | 420.2788 |                     | 420.2788           |
|           | 2764.436 | 33  | K | 1        | 291.2362 |                     | 291.2362           |
|           |          | 34  | K | 0        | 155.127  |                     | 155.127            |

general information

|                       |           |
|-----------------------|-----------|
| Annotation:           | 19 of 34  |
| AminoAcids Coverage:  | 56 %      |
| Intensity Coverage:   | 52 %      |
| Peak Coverage:        | 27 %      |
| Protein Localisation: | 62 ... 95 |

Scan number 2893 Raw file LNCAP\_Silac\_23F10\_set3\_03  
 Method ITMS: CID Pepti... 71.56

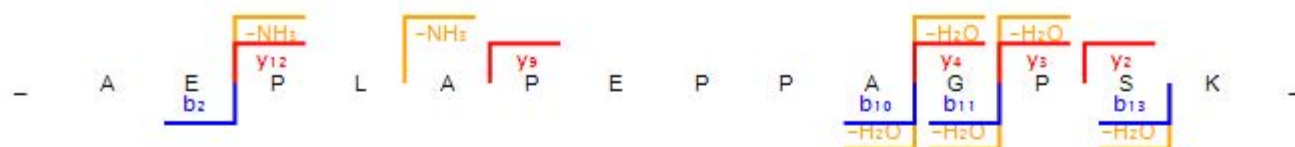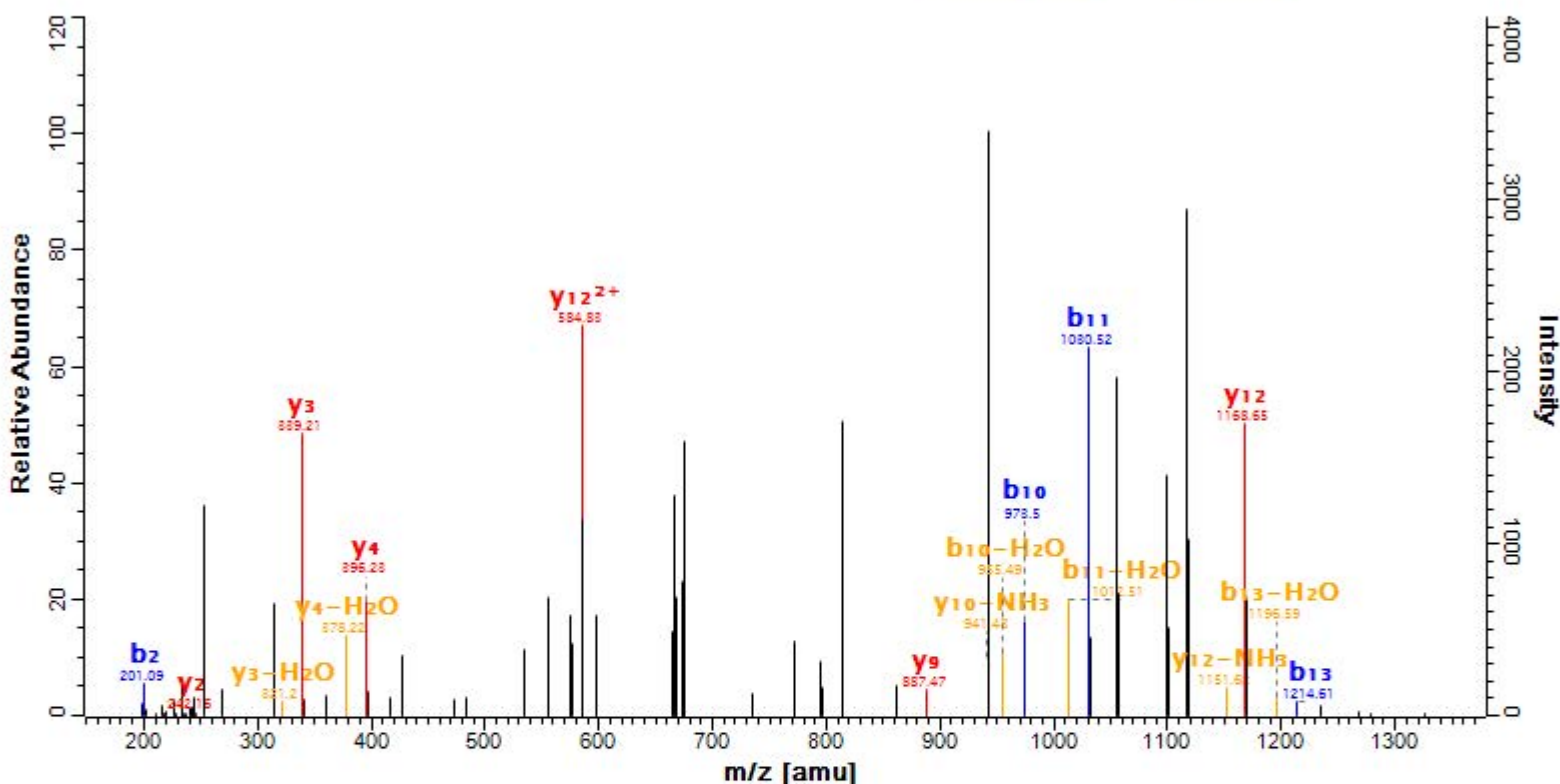

#### precursor information

|                   |                 |
|-------------------|-----------------|
| Mass:             | 1359.70337      |
| m/z:              | 680.85896       |
| Charge:           | 2+              |
| Retentiontime:    | 20.924814224243 |
| Score:            | 71.5575         |
| Mass Error [ppm]: | -0.043823       |
| PEP:              | 0.001756        |
| Precursor Type:   | MULTI           |

#### general information

|                       |          |
|-----------------------|----------|
| Annotation:           | 8 of 14  |
| AminoAcids Coverage:  | 57 %     |
| Intensity Coverage:   | 28 %     |
| Peak Coverage:        | 22 %     |
| Protein Localisation: | 1 ... 14 |

| b ion     |          |     |   | y ion    |          | y <sup>2+</sup> ion |          |
|-----------|----------|-----|---|----------|----------|---------------------|----------|
| Δ dalton  | mass     | seq |   | Δ dalton | mass     | Δ dalton            | mass     |
|           | 72.04439 | 1   | A | 13       |          |                     |          |
| +0.049613 | 201.087  | 2   | E | 12       | 1297.688 |                     | 1297.688 |
|           | 298.1397 | 3   | P | 11       | 1168.645 | -0.0346             | 584.8262 |
|           | 411.2238 | 4   | L | 10       | 1071.592 |                     | 1071.592 |
|           | 482.2609 | 5   | A | 9        | 958.5084 |                     | 958.5084 |
|           | 579.3137 | 6   | P | 8        | 887.4713 | +0.09936            | 887.4713 |
|           | 708.3563 | 7   | E | 7        | 790.4185 |                     | 790.4185 |
|           | 805.409  | 8   | P | 6        | 661.3759 |                     | 661.3759 |
|           | 902.4618 | 9   | P | 5        | 564.3231 |                     | 564.3231 |
| -0.09542  | 973.4989 | 10  | A | 4        | 467.2704 |                     | 467.2704 |
| -0.08264  | 1030.52  | 11  | G | 3        | 396.2333 | +0.042986           | 396.2333 |
|           | 1127.573 | 12  | P | 2        | 339.2118 | +0.032254           | 339.2118 |
| -0.24446  | 1214.605 | 13  | S | 1        | 242.159  | -0.04056            | 242.159  |
|           |          | 14  | K | 0        | 155.127  |                     | 155.127  |

Scan number 294 Raw file LNCAP\_Silac\_23F10\_set3\_03  
 Method ITMS; CID Pepti... 279.86

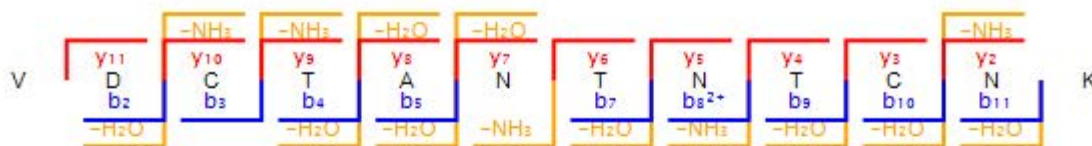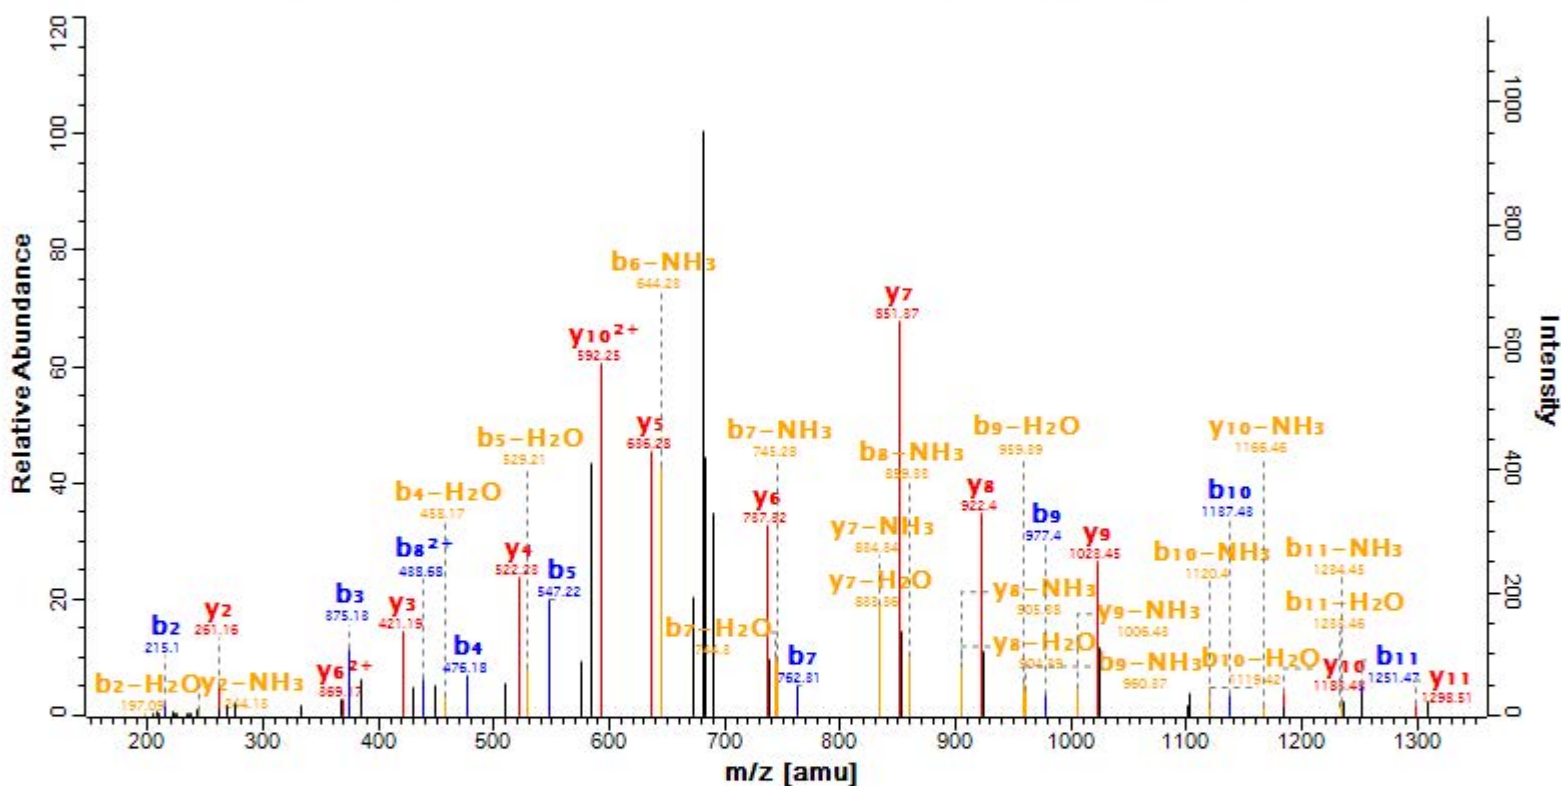

#### precursor information

|                   |                 |
|-------------------|-----------------|
| Mass:             | 1396.57091      |
| m/z:              | 699.29273       |
| Charge:           | 2+              |
| Retentiontime:    | 6.3218150138855 |
| Score:            | 279.8616        |
| Mass Error [ppm]: | -0.14383        |
| PEP:              | 2.0075E-53      |
| Precursor Type:   | MULTI           |

#### general information

|                       |           |
|-----------------------|-----------|
| Annotation:           | 10 of 12  |
| AminoAcids Coverage:  | 83 %      |
| Intensity Coverage:   | 60 %      |
| Peak Coverage:        | 45 %      |
| Protein Localisation: | 83 ... 94 |

| b <sup>2+</sup> ion |        | b ion    |        | seq |   |    | y ion    |         | y <sup>2+</sup> ion |         |
|---------------------|--------|----------|--------|-----|---|----|----------|---------|---------------------|---------|
| Δ dalton            | mass   | Δ dalton | mass   |     |   |    | Δ dalton | mass    | Δ dalton            | mass    |
|                     | 100.08 |          | 100.08 | 1   | V | 11 |          |         |                     |         |
|                     | 215.1  | +0.1085  | 215.1  | 2   | D | 10 | 1298.5   | -0.138  | 1298.5              |         |
|                     | 375.13 | +0.0479  | 375.13 | 3   | C | 9  | 1183.5   | -0.014  | 592.25              | +0.2364 |
|                     | 476.18 | -0.045   | 476.18 | 4   | T | 8  | 1023.5   | -0.023  | 1023.5              |         |
|                     | 547.22 | -0.09    | 547.22 | 5   | A | 7  | 922.4    | +0.0097 | 922.4               |         |
|                     | 661.26 |          | 661.26 | 6   | N | 6  | 851.37   | -0.03   | 851.37              |         |
|                     | 762.31 | -0.071   | 762.31 | 7   | T | 5  | 737.32   | +0.0472 | 369.17              | +0.1501 |
| -0.412              | 438.68 |          | 876.35 | 8   | N | 4  | 636.28   | -0.069  | 636.28              |         |
|                     | 977.4  | +0.2336  | 977.4  | 9   | T | 3  | 522.23   | -0.007  | 522.23              |         |
|                     | 1137.4 | +0.037   | 1137.4 | 10  | C | 2  | 421.19   | +0.0518 | 421.19              |         |
|                     | 1251.5 | +0.163   | 1251.5 | 11  | N | 1  | 261.16   | +0.0146 | 261.16              |         |
|                     |        |          |        | 12  | K | 0  | 147.11   |         | 147.11              |         |

Scan number 308 Raw file LNCAP\_Silac\_23F10\_set3\_03  
 Method ITMS; CID Pepti... 77.74

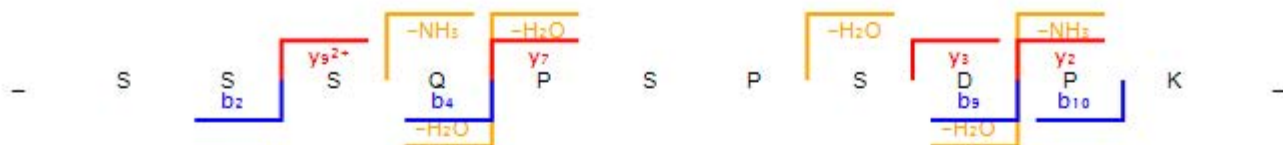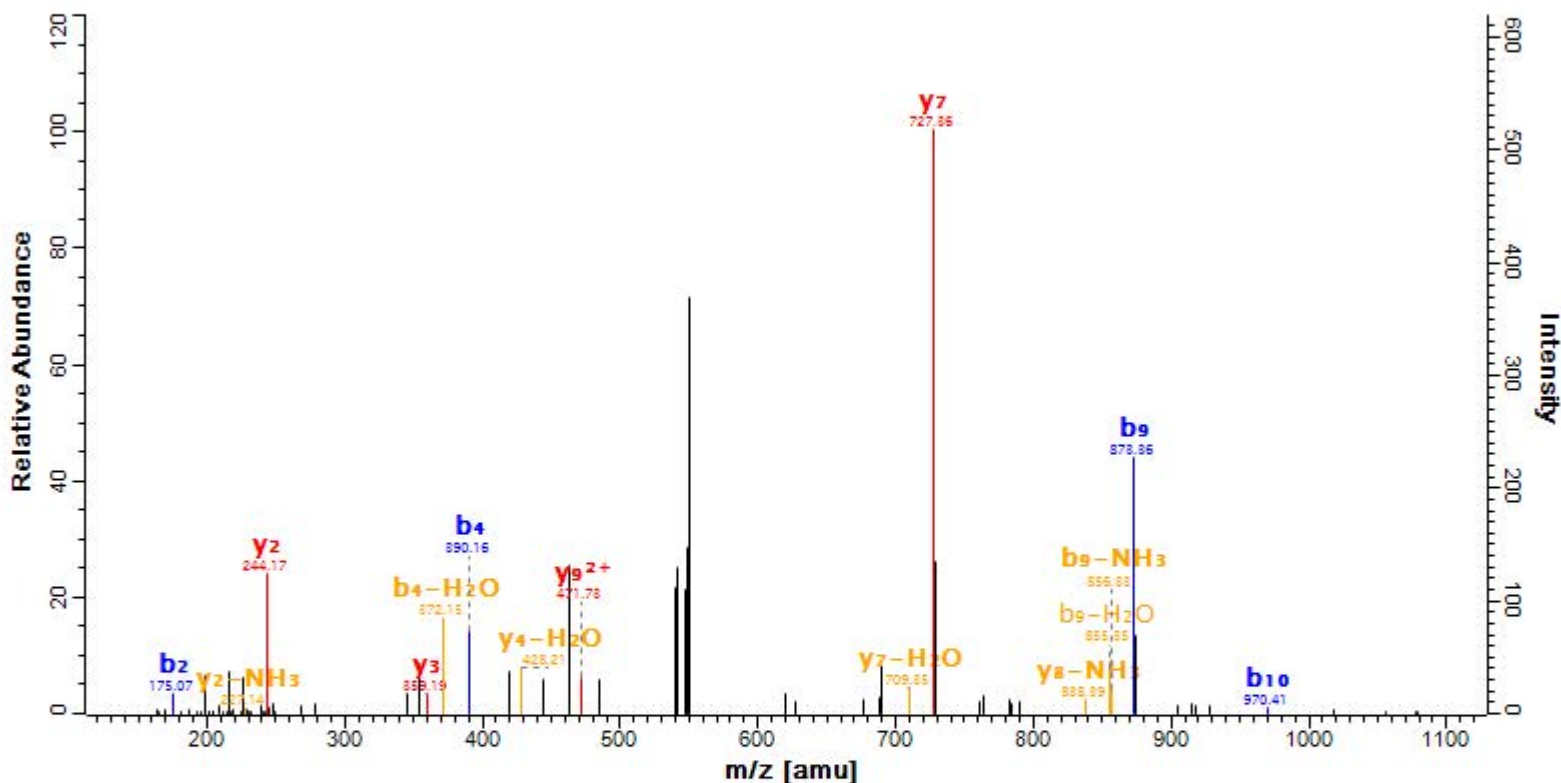

#### precursor information

|                   |                 |
|-------------------|-----------------|
| Mass:             | 1115.51014      |
| m/z:              | 558.76235       |
| Charge:           | 2+              |
| Retentiontime:    | 6.4584732055664 |
| Score:            | 77.74419        |
| Mass Error [ppm]: | 0.58877         |
| PEP:              | 0.0041087       |
| Precursor Type:   | MULTI           |

#### general information

|                       |           |
|-----------------------|-----------|
| Annotation:           | 7 of 11   |
| AminoAcids Coverage:  | 64 %      |
| Intensity Coverage:   | 40 %      |
| Peak Coverage:        | 17 %      |
| Protein Localisation: | 22 ... 32 |

| b ion     |          |    |     |    | y ion    |           |          | y <sup>2+</sup> ion |  |
|-----------|----------|----|-----|----|----------|-----------|----------|---------------------|--|
| Δ dalton  | mass     |    | seq |    | Δ dalton | mass      | Δ dalton | mass                |  |
|           | 88.0393  | 1  | S   | 10 |          |           |          |                     |  |
| -0.11012  | 175.0713 | 2  | S   | 9  | 1029.485 |           | 1029.485 |                     |  |
|           | 262.1034 | 3  | S   | 8  | 942.4527 |           | 471.73   | -0.11427            |  |
| +0.061633 | 390.1619 | 4  | Q   | 7  | 855.4207 |           | 855.4207 |                     |  |
|           | 487.2147 | 5  | P   | 6  | 727.3621 | -0.02732  | 727.3621 |                     |  |
|           | 574.2467 | 6  | S   | 5  | 630.3093 |           | 630.3093 |                     |  |
|           | 671.2995 | 7  | P   | 4  | 543.2773 |           | 543.2773 |                     |  |
|           | 758.3315 | 8  | S   | 3  | 446.2245 |           | 446.2245 |                     |  |
| -0.04432  | 873.3585 | 9  | D   | 2  | 359.1925 | +0.048334 | 359.1925 |                     |  |
| +0.224328 | 970.4112 | 10 | P   | 1  | 244.1656 | -0.0359   | 244.1656 |                     |  |
|           |          | 11 | K   | 0  | 147.1128 |           | 147.1128 |                     |  |

Scan number 3214 Raw file LNCAP\_Silac\_23F10\_set3\_03  
 Method ITMS; CID Peptide 164.53

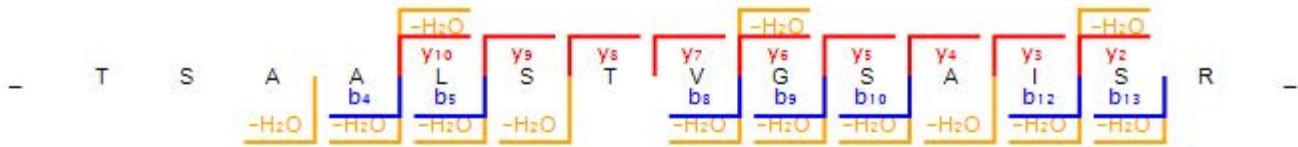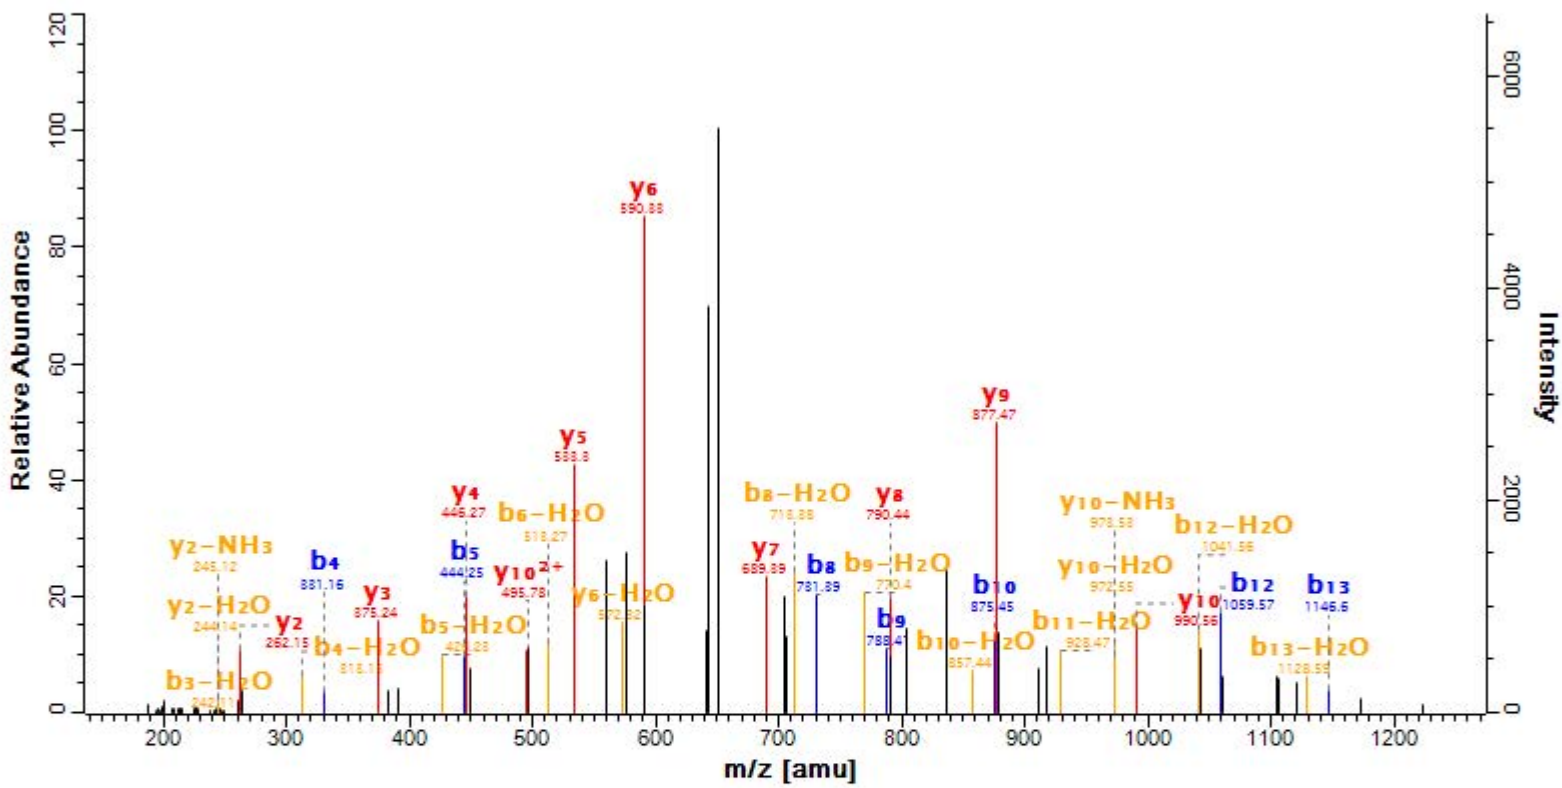

precursor information

|                   |                 |
|-------------------|-----------------|
| Mass:             | 1319.70449      |
| m/z:              | 660.85952       |
| Charge:           | 2+              |
| Retentiontime:    | 22.540279388427 |
| Score:            | 164.528         |
| Mass Error [ppm]: | -0.00075423     |
| PEP:              | 3.749E-12       |
| Precursor Type:   | ISO             |

| b ion     |          |     |   | y ion    |          | y <sup>2+</sup> ion |          |
|-----------|----------|-----|---|----------|----------|---------------------|----------|
| Δ dalton  | mass     | seq |   | Δ dalton | mass     | Δ dalton            | mass     |
|           | 102.055  | 1   | T | 13       |          |                     |          |
|           | 189.087  | 2   | S | 12       | 1219.664 |                     | 1219.664 |
|           | 260.1241 | 3   | A | 11       | 1132.632 |                     | 1132.632 |
| +0.150068 | 331.1612 | 4   | A | 10       | 1061.595 |                     | 1061.595 |
| +0.035426 | 444.2453 | 5   | L | 9        | 990.5578 | -0.02262            | 495.7826 |
|           | 531.2773 | 6   | S | 8        | 877.4738 | +0.075728           | 877.4738 |
|           | 632.325  | 7   | T | 7        | 790.4417 | +0.029143           | 790.4417 |
| +0.021887 | 731.3934 | 8   | V | 6        | 689.3941 | +0.152627           | 689.3941 |
| -0.03919  | 788.4149 | 9   | G | 5        | 590.3257 | +0.022311           | 590.3257 |
| +0.035717 | 875.4469 | 10  | S | 4        | 533.3042 | +0.024854           | 533.3042 |
|           | 946.484  | 11  | A | 3        | 446.2722 | -0.09137            | 446.2722 |
| -0.11323  | 1059.568 | 12  | I | 2        | 375.235  | +0.140932           | 375.235  |
| -0.10595  | 1146.6   | 13  | S | 1        | 262.151  | +0.033224           | 262.151  |
|           |          | 14  | R | 0        | 175.119  |                     | 175.119  |

general information

|                       |             |
|-----------------------|-------------|
| Annotation:           | 11 of 14    |
| AminoAcids Coverage:  | 79 %        |
| Intensity Coverage:   | 51 %        |
| Peak Coverage:        | 38 %        |
| Protein Localisation: | 120 ... 133 |

Scan number 3587 Raw file LNCAP\_Silac\_23F10\_set3\_03  
 Method ITMS; CID Pepti... 98.41

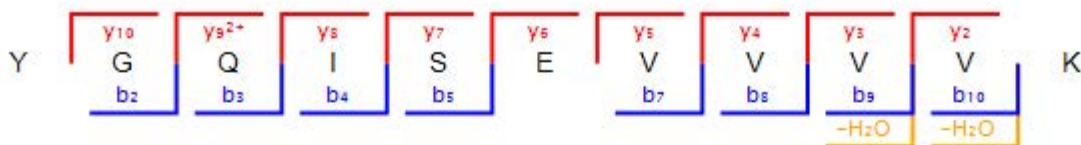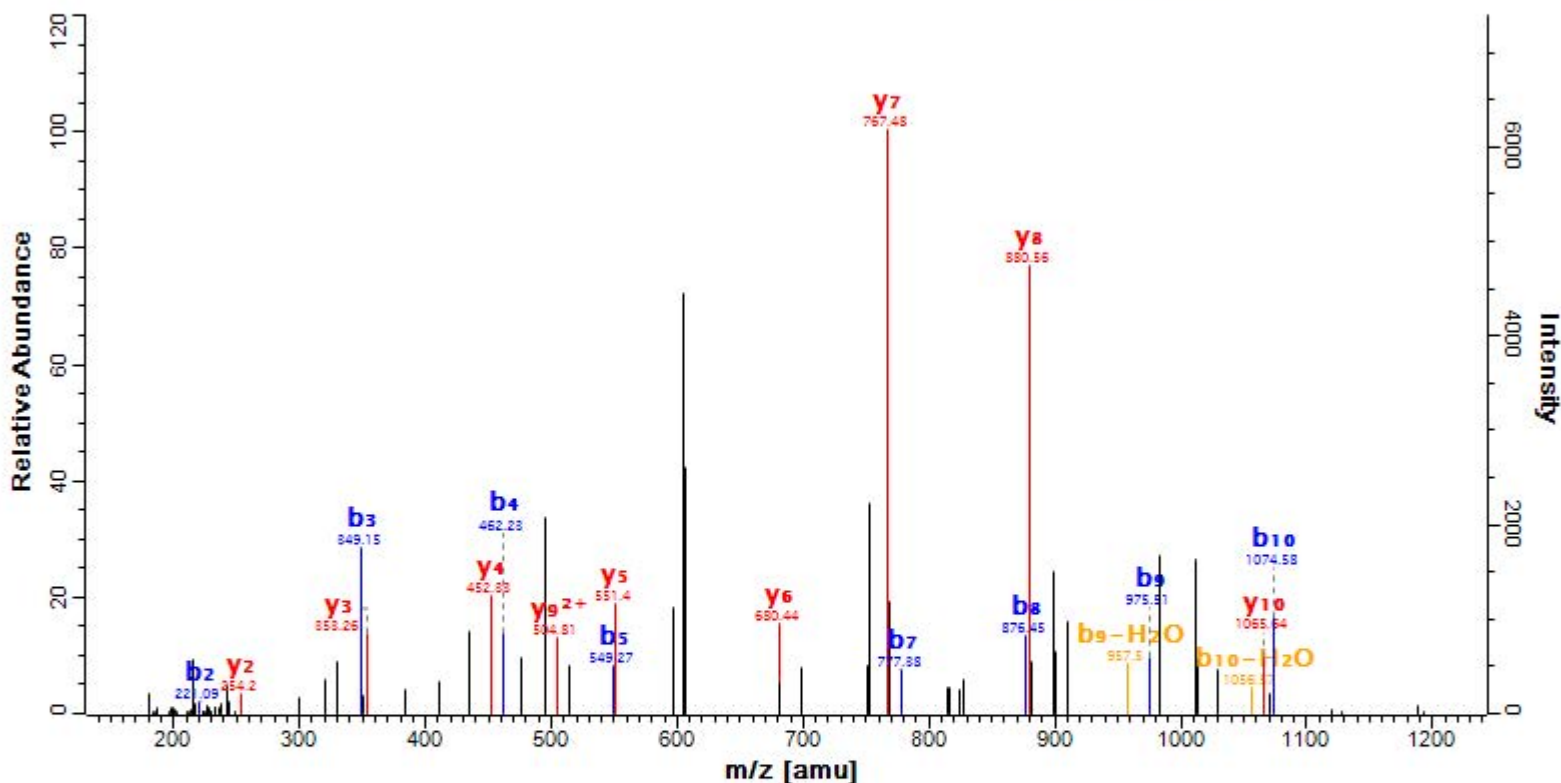

#### precursor information

|                   |                 |
|-------------------|-----------------|
| Mass:             | 1227.69539      |
| m/z:              | 614.85497       |
| Charge:           | 2+              |
| Retentiontime:    | 24.346303939819 |
| Score:            | 98.40717        |
| Mass Error [ppm]: | -0.041932       |
| PEP:              | 0.0042087       |
| Precursor Type:   | ISO             |

#### general information

|                       |           |
|-----------------------|-----------|
| Annotation:           | 9 of 11   |
| AminoAcids Coverage:  | 82 %      |
| Intensity Coverage:   | 41 %      |
| Peak Coverage:        | 21 %      |
| Protein Localisation: | 29 ... 39 |

| b ion     |          |    |     |    | y ion    |           | y <sup>2+</sup> ion |         |
|-----------|----------|----|-----|----|----------|-----------|---------------------|---------|
| Δ dalton  | mass     |    | seq |    | Δ dalton | mass      | Δ dalton            | mass    |
|           | 164.0706 | 1  | Y   | 10 |          |           |                     |         |
| -0.09561  | 221.0921 | 2  | G   | 9  | 1065.639 | -0.04759  | 1065.639            |         |
| +0.061756 | 349.1506 | 3  | Q   | 8  | 1008.618 |           | 504.8126            | -0.1005 |
| +0.000153 | 462.2347 | 4  | I   | 7  | 880.5593 | -0.07497  | 880.5593            |         |
| +0.11406  | 549.2667 | 5  | S   | 6  | 767.4753 | -0.03546  | 767.4753            |         |
|           | 678.3093 | 6  | E   | 5  | 680.4433 | +0.043626 | 680.4433            |         |
| +0.062562 | 777.3777 | 7  | V   | 4  | 551.4007 | +0.132789 | 551.4007            |         |
| +0.035774 | 876.4462 | 8  | V   | 3  | 452.3322 | +0.071503 | 452.3322            |         |
| -0.17943  | 975.5146 | 9  | V   | 2  | 353.2638 | +0.026758 | 353.2638            |         |
| +0.005147 | 1074.583 | 10 | V   | 1  | 254.1954 | -0.03398  | 254.1954            |         |
|           |          | 11 | K   | 0  | 155.127  |           | 155.127             |         |

Scan number 3600 Raw file LNCAP\_Silac\_23F10\_set3\_03  
 Method ITMS: CID Pepti... 259.08

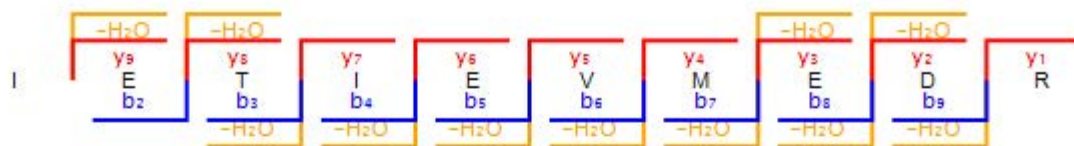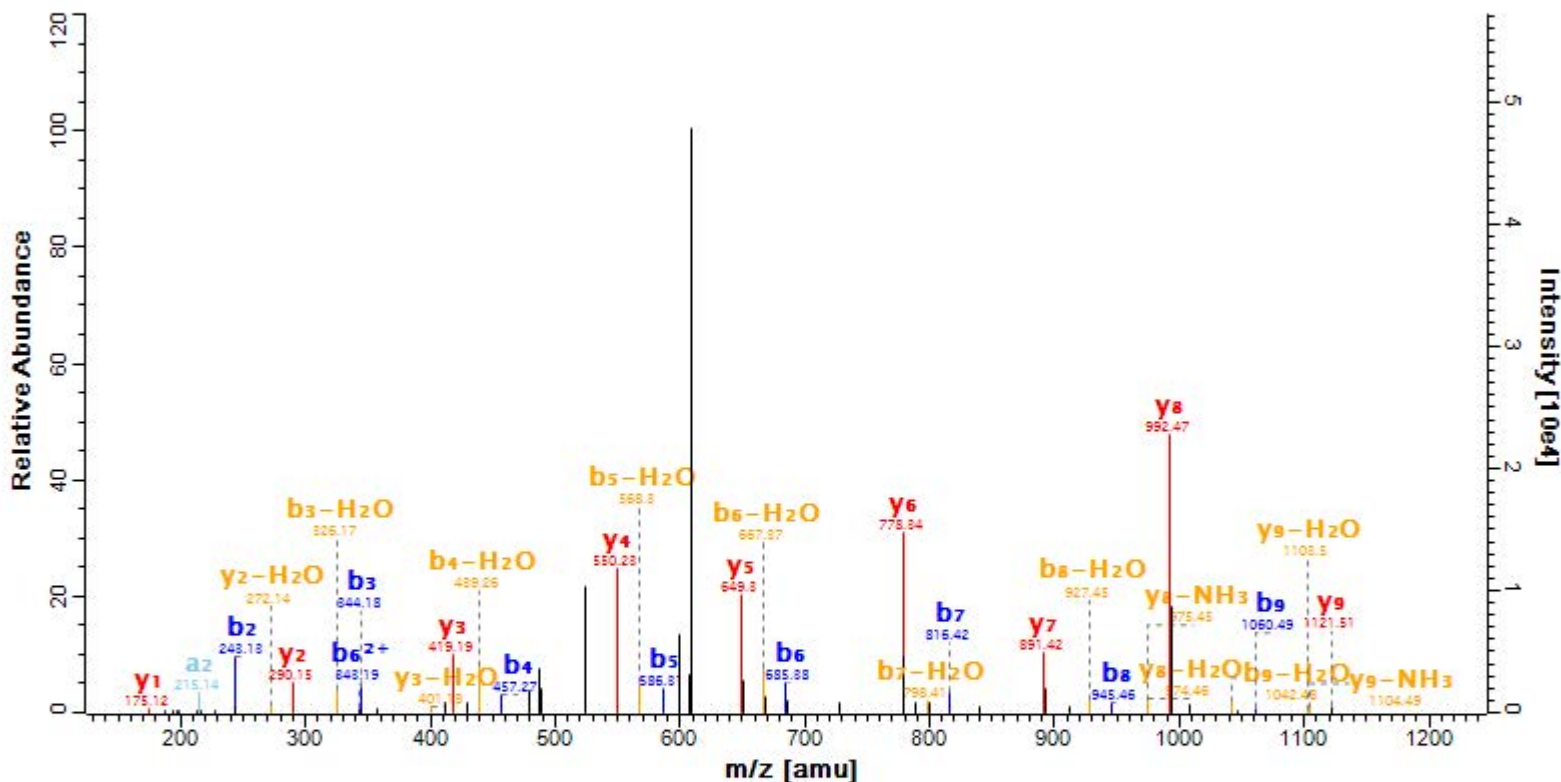

#### precursor information

|                   |                 |
|-------------------|-----------------|
| Mass:             | 1233.5912       |
| m/z:              | 617.80288       |
| Charge:           | 2+              |
| Retentiontime:    | 24.407228469848 |
| Score:            | 259.0814        |
| Mass Error [ppm]: | 0.082384        |
| PEP:              | 4.3859E-37      |
| Precursor Type:   | MULTI           |

|                       |             |
|-----------------------|-------------|
| Annotation:           | 9 of 10     |
| AminoAcids Coverage:  | 90 %        |
| Intensity Coverage:   | 51 %        |
| Peak Coverage:        | 42 %        |
| Protein Localisation: | 152 ... 161 |

| a ion    |        | b <sup>2+</sup> ion |        | b ion    |        | y ion |   |          |                |
|----------|--------|---------------------|--------|----------|--------|-------|---|----------|----------------|
| Δ dalton | mass   | Δ dalton            | mass   | Δ dalton | mass   | seq   |   | Δ dalton | mass           |
|          | 86.096 |                     | 114.09 |          | 114.09 | 1     | I | 9        |                |
| +0.042   | 215.14 |                     | 243.13 | -0.001   | 243.13 | 2     | E | 8        | 1121.5 -0.051  |
|          | 316.19 |                     | 344.18 | +0.044   | 344.18 | 3     | T | 7        | 992.47 +0.017  |
|          | 429.27 |                     | 457.27 | +0.019   | 457.27 | 4     | I | 6        | 891.42 -0.023  |
|          | 558.31 |                     | 586.31 | +0.128   | 586.31 | 5     | E | 5        | 778.34 +0.069  |
|          | 657.38 | +0.182              | 685.38 | -0.067   | 685.38 | 6     | V | 4        | 649.3 +0.0032  |
|          | 788.42 |                     | 816.42 | -0.104   | 816.42 | 7     | M | 3        | 550.23 +0.0362 |
|          | 917.46 |                     | 945.46 | -0.186   | 945.46 | 8     | E | 2        | 419.19 +0.0134 |
|          | 1032.5 |                     | 1060.5 | +0.056   | 1060.5 | 9     | D | 1        | 290.15 +0.0975 |
|          |        |                     |        |          |        | 10    | R | 0        | 175.12 -0.088  |



Scan number 3679 Raw file LNCAP\_Silac\_23F10\_set3\_03  
 Method ITMS; CID Pepti... 77.19

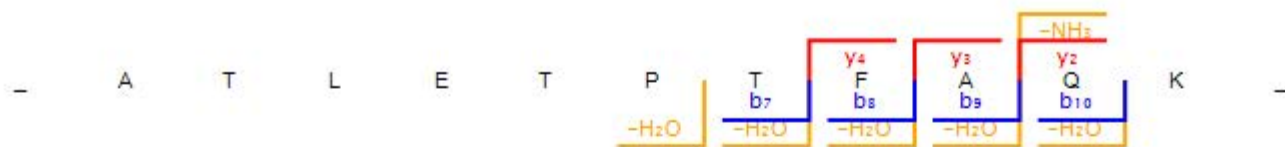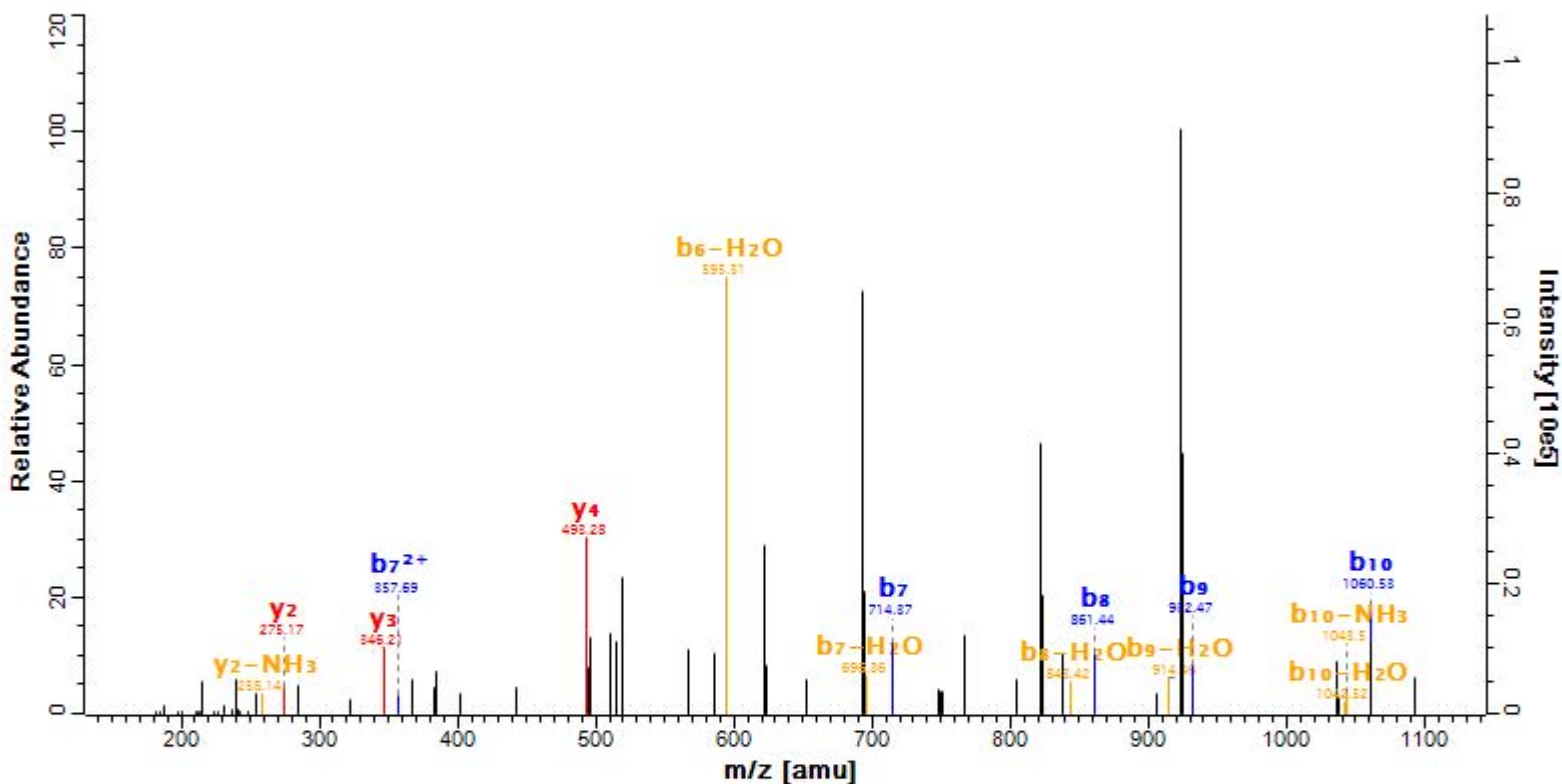

**precursor information**

|                   |                 |
|-------------------|-----------------|
| Mass:             | 1205.62945      |
| m/z:              | 603.822         |
| Charge:           | 2+              |
| Retentiontime:    | 24.794973373413 |
| Score:            | 77.19172        |
| Mass Error [ppm]: | 0.20215         |
| PEP:              | 0.0042268       |
| Precursor Type:   | MULTI           |

**general information**

|                       |             |
|-----------------------|-------------|
| Annotation:           | 5 of 11     |
| AminoAcids Coverage:  | 45 %        |
| Intensity Coverage:   | 25 %        |
| Peak Coverage:        | 19 %        |
| Protein Localisation: | 385 ... 395 |

| b <sup>2+</sup> ion |          | b ion     |          |     | y ion |          |          |           |
|---------------------|----------|-----------|----------|-----|-------|----------|----------|-----------|
| Δ dalton            | mass     | Δ dalton  | mass     | seq |       | Δ dalton | mass     |           |
|                     | 72.04439 |           | 72.04439 | 1   | A     | 10       |          |           |
|                     | 173.0921 |           | 173.0921 | 2   | T     | 9        | 1135.599 |           |
|                     | 286.1761 |           | 286.1761 | 3   | L     | 8        | 1034.552 |           |
|                     | 415.2187 |           | 415.2187 | 4   | E     | 7        | 921.4676 |           |
|                     | 516.2664 |           | 516.2664 | 5   | T     | 6        | 792.425  |           |
|                     | 613.3192 |           | 613.3192 | 6   | P     | 5        | 691.3774 |           |
| -0.3333             | 357.6871 | -0.027    | 714.3668 | 7   | T     | 4        | 594.3246 |           |
|                     | 861.4353 | -0.05245  | 861.4353 | 8   | F     | 3        | 493.2769 | +0.007392 |
|                     | 932.4724 | +0.023292 | 932.4724 | 9   | A     | 2        | 346.2085 | +0.091431 |
|                     | 1060.531 | -0.04267  | 1060.531 | 10  | Q     | 1        | 275.1714 | +0.066472 |
|                     |          |           |          | 11  | K     | 0        | 147.1128 |           |

Scan number 3756 Raw file LNCAP\_Silac\_23F10\_set3\_03  
 Method ITMS; CID Pepti... 77.6

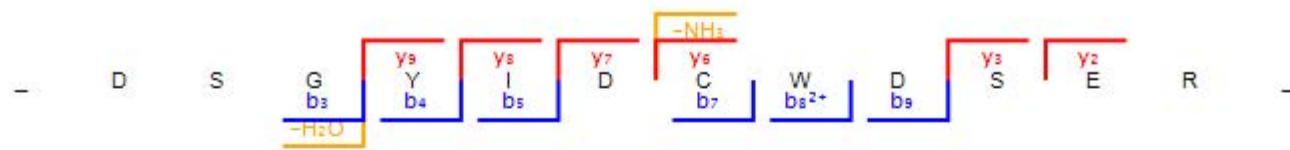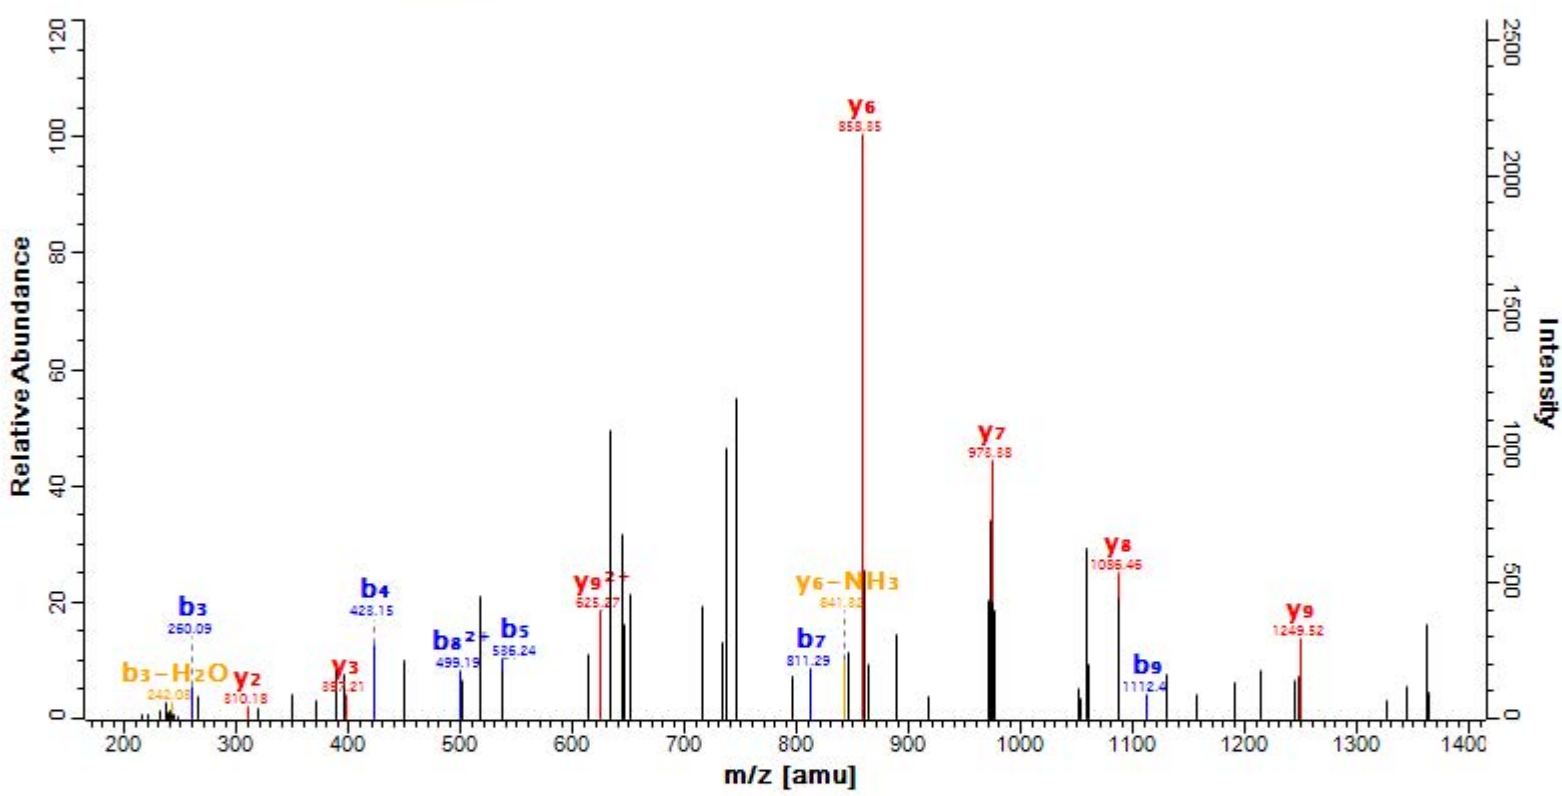

**precursor information**

|                   |                 |
|-------------------|-----------------|
| Mass:             | 1507.80685      |
| m/z:              | 754.9107        |
| Charge:           | 2+              |
| Retentiontime:    | 25.155969619751 |
| Score:            | 77.59692        |
| Mass Error [ppm]: | 0.50857         |
| PEP:              | 0.01134         |
| Precursor Type:   | ISO             |

**general information**

|                       |             |
|-----------------------|-------------|
| Annotation:           | 9 of 12     |
| AminoAcids Coverage:  | 75 %        |
| Intensity Coverage:   | 27 %        |
| Peak Coverage:        | 20 %        |
| Protein Localisation: | 176 ... 187 |

| b <sup>2+</sup> ion |        | b ion    |        |     |   |          | y ion  |          | y <sup>2+</sup> ion |  |
|---------------------|--------|----------|--------|-----|---|----------|--------|----------|---------------------|--|
| Δ dalton            | mass   | Δ dalton | mass   | seq |   | Δ dalton | mass   | Δ dalton | mass                |  |
|                     | 116.03 |          | 116.03 | 1   | D | 11       |        |          |                     |  |
|                     | 203.07 |          | 203.07 | 2   | S | 10       | 1393.6 |          | 1393.6              |  |
|                     | 260.09 | +0.0543  | 260.09 | 3   | G | 9        | 1306.5 |          | 1306.5              |  |
|                     | 423.15 | +0.0034  | 423.15 | 4   | Y | 8        | 1249.5 | -0.002   | 625.27              |  |
|                     | 536.24 | -0.023   | 536.24 | 5   | I | 7        | 1086.5 | +0.0018  | 1086.5              |  |
|                     | 651.26 |          | 651.26 | 6   | D | 6        | 973.38 | +0.1159  | 973.38              |  |
|                     | 811.29 | +0.0992  | 811.29 | 7   | C | 5        | 858.35 | +0.0915  | 858.35              |  |
| +0.262              | 499.19 |          | 997.37 | 8   | W | 4        | 698.32 |          | 698.32              |  |
|                     | 1112.4 | +0.1604  | 1112.4 | 9   | D | 3        | 512.24 |          | 512.24              |  |
|                     | 1199.4 |          | 1199.4 | 10  | S | 2        | 397.21 | -0.036   | 397.21              |  |
|                     | 1328.5 |          | 1328.5 | 11  | E | 1        | 310.18 | +0.0147  | 310.18              |  |
|                     |        |          |        | 12  | R | 0        | 181.14 |          | 181.14              |  |

Scan number 3871 Raw file LNCAP\_Silac\_23F10\_set3\_03  
 Method ITMS; CID Pepti... 121.9

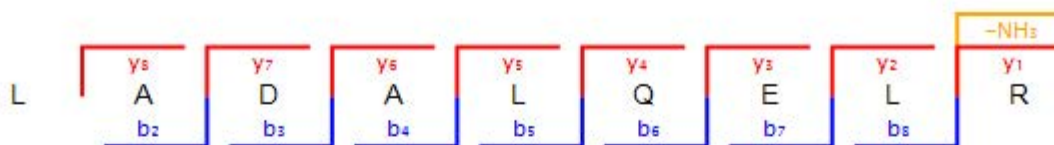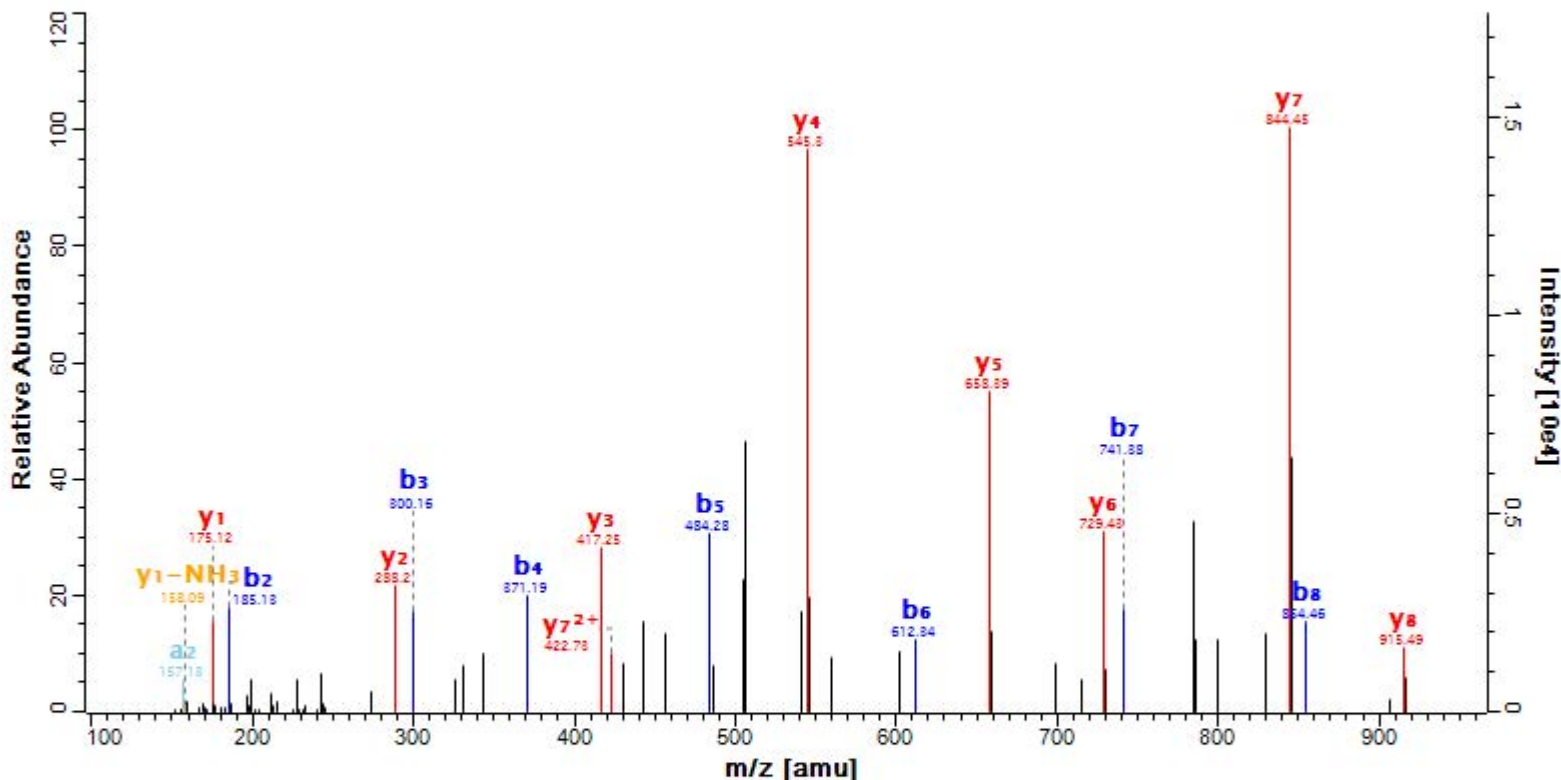

#### precursor information

|                       |                 |
|-----------------------|-----------------|
| Mass:                 | 1027.56618      |
| m/z:                  | 514.79037       |
| Charge:               | 2+              |
| Retentiontime:        | 25.721845626831 |
| Score:                | 121.8986        |
| Mass Error [ppm]:     | -0.029856       |
| PEP:                  | 0.0012825       |
| Precursor Type:       | MULTI           |
| Annotation:           | 8 of 9          |
| AminoAcids Coverage:  | 89 %            |
| Intensity Coverage:   | 56 %            |
| Peak Coverage:        | 23 %            |
| Protein Localisation: | 241 ... 249     |

| a ion    |        | b ion    |        | seq |   |   | y ion    |         | y <sup>2+</sup> ion |         |
|----------|--------|----------|--------|-----|---|---|----------|---------|---------------------|---------|
| Δ dalton | mass   | Δ dalton | mass   |     |   |   | Δ dalton | mass    | Δ dalton            | mass    |
|          | 86.096 |          | 114.09 | 1   | L | 8 |          |         |                     |         |
| +0.0685  | 157.13 | -0.018   | 185.13 | 2   | A | 7 | 915.49   | +0.0249 | 915.49              |         |
|          | 272.16 | +0.0021  | 300.16 | 3   | D | 6 | 844.45   | +0.0098 | 422.73              | +0.1155 |
|          | 343.2  | +0.0602  | 371.19 | 4   | A | 5 | 729.43   | -0.005  | 729.43              |         |
|          | 456.28 | -0.06    | 484.28 | 5   | L | 4 | 658.39   | +0.0463 | 658.39              |         |
|          | 584.34 | -0.029   | 612.34 | 6   | Q | 3 | 545.3    | +0.0227 | 545.3               |         |
|          | 713.38 | +0.0391  | 741.38 | 7   | E | 2 | 417.25   | +0.053  | 417.25              |         |
|          | 826.47 | -0.121   | 854.46 | 8   | L | 1 | 288.2    | -0.035  | 288.2               |         |
|          |        |          |        | 9   | R | 0 | 175.12   | +0.0366 | 175.12              |         |

Scan number 411 Raw file LNCAP\_Silac\_23F10\_set3\_03  
 Method ITMS: CID Pepti... 147.91

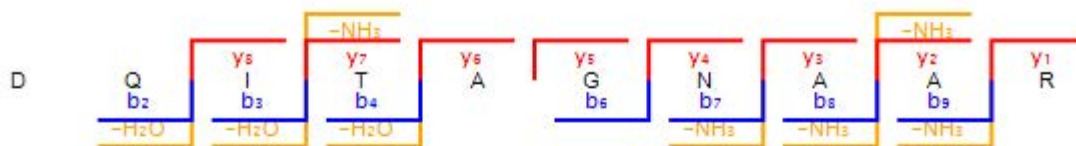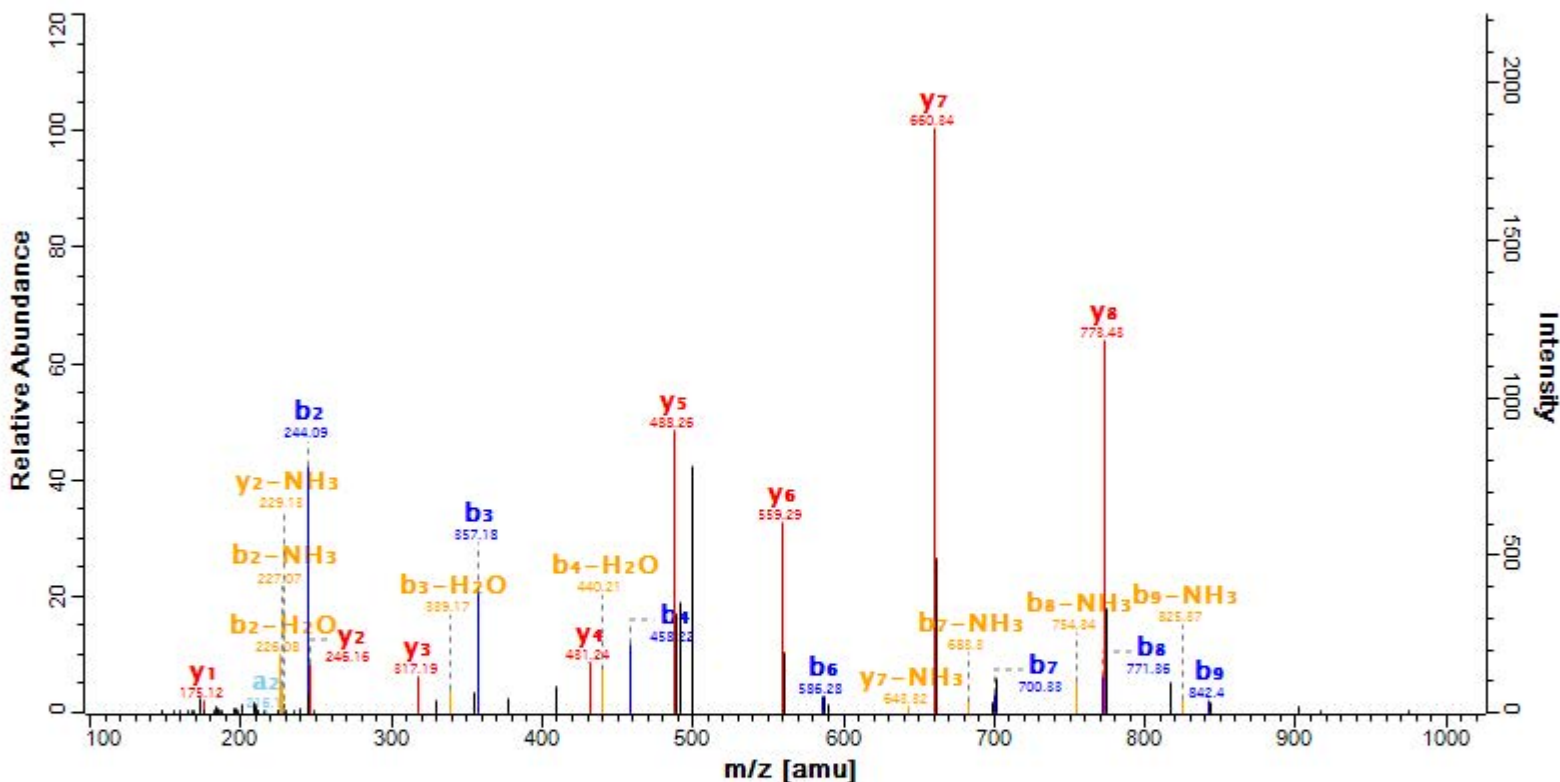

precursor information

|                   |                 |
|-------------------|-----------------|
| Mass:             | 1015.50437      |
| m/z:              | 508.75946       |
| Charge:           | 2+              |
| Retentiontime:    | 7.3429598808288 |
| Score:            | 147.9085        |
| Mass Error [ppm]: | -0.29852        |
| PEP:              | 0.0001649       |
| Precursor Type:   | MULTI           |

|                       |           |
|-----------------------|-----------|
| Annotation:           | 9 of 10   |
| AminoAcids Coverage:  | 90 %      |
| Intensity Coverage:   | 66 %      |
| Peak Coverage:        | 28 %      |
| Protein Localisation: | 63 ... 72 |

| a ion     |          | b ion     |          | y ion |          |      |          |           |
|-----------|----------|-----------|----------|-------|----------|------|----------|-----------|
| Δ dalton  | mass     | Δ dalton  | mass     | seq   | Δ dalton | mass |          |           |
|           | 88.0393  |           | 116.0342 | 1     | D        | 9    |          |           |
| +0.166034 | 216.0979 | -0.0296   | 244.0928 | 2     | Q        | 8    | 901.485  |           |
|           | 329.1819 | -0.0272   | 357.1769 | 3     | I        | 7    | 773.4264 | +0.033473 |
|           | 430.2296 | +0.049753 | 458.2245 | 4     | T        | 6    | 660.3424 | -0.02712  |
|           | 501.2667 |           | 529.2617 | 5     | A        | 5    | 559.2947 | -0.0066   |
|           | 558.2882 | -0.01468  | 586.2831 | 6     | G        | 4    | 488.2576 | +0.035825 |
|           | 672.3311 | -0.07824  | 700.326  | 7     | N        | 3    | 431.2361 | +0.08097  |
|           | 743.3682 | +0.142396 | 771.3632 | 8     | A        | 2    | 317.1932 | +0.057247 |
|           | 814.4054 | -0.02063  | 842.4003 | 9     | A        | 1    | 246.1561 | +0.025605 |
|           |          |           |          | 10    | R        | 0    | 175.119  | +0.086996 |

Scan number 4115 Raw file LNCAP\_Silac\_23F10\_set3\_03  
 Method ITMS; CID Pepti... 86.01

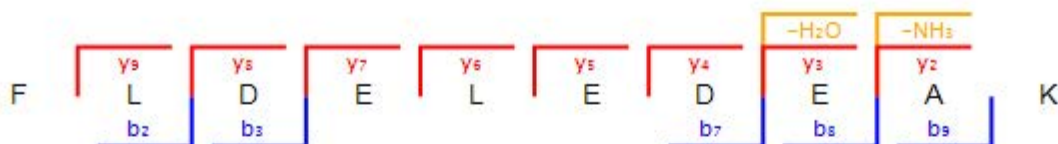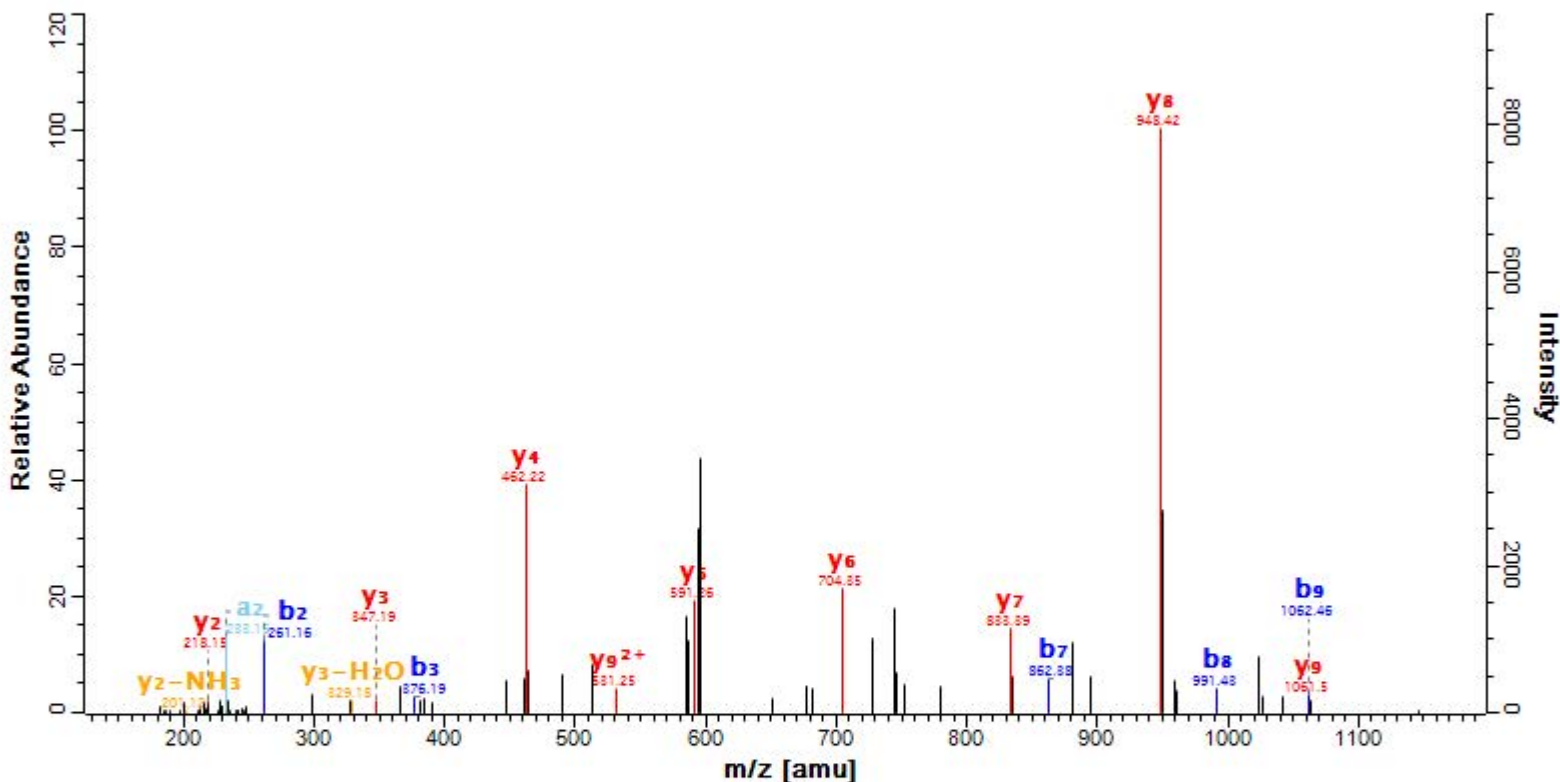

#### precursor information

|                   |                 |
|-------------------|-----------------|
| Mass:             | 1207.561        |
| m/z:              | 604.78777       |
| Charge:           | 2+              |
| Retentiontime:    | 26.875526428222 |
| Score:            | 86.01421        |
| Mass Error [ppm]: | 0.12122         |
| PEP:              | 0.0029872       |
| Precursor Type:   | MULTI           |

|                       |           |
|-----------------------|-----------|
| Annotation:           | 8 of 10   |
| AminoAcids Coverage:  | 80 %      |
| Intensity Coverage:   | 42 %      |
| Peak Coverage:        | 19 %      |
| Protein Localisation: | 84 ... 93 |

| a ion    |        | b ion    |        |    |     |   | y ion    |         | y <sup>2+</sup> ion |         |
|----------|--------|----------|--------|----|-----|---|----------|---------|---------------------|---------|
| Δ dalton | mass   | Δ dalton | mass   |    | seq |   | Δ dalton | mass    | Δ dalton            | mass    |
|          | 120.08 |          | 148.08 | 1  | F   | 9 |          |         |                     |         |
| -0.039   | 233.16 | +0.0638  | 261.16 | 2  | L   | 8 | 1061.5   | +0.0121 | 531.25              | +0.2016 |
|          | 348.19 | +0.1593  | 376.19 | 3  | D   | 7 | 948.42   | -0.057  | 948.42              |         |
|          | 477.23 |          | 505.23 | 4  | E   | 6 | 833.39   | +0.024  | 833.39              |         |
|          | 590.32 |          | 618.31 | 5  | L   | 5 | 704.35   | +0.044  | 704.35              |         |
|          | 719.36 |          | 747.36 | 6  | E   | 4 | 591.26   | +0.0936 | 591.26              |         |
|          | 834.39 | +0.0578  | 862.38 | 7  | D   | 3 | 462.22   | +0.1046 | 462.22              |         |
|          | 963.43 | +0.0305  | 991.43 | 8  | E   | 2 | 347.19   | +0.0463 | 347.19              |         |
|          | 1034.5 | +0.0229  | 1062.5 | 9  | A   | 1 | 218.15   | -0.008  | 218.15              |         |
|          |        |          |        | 10 | K   | 0 | 147.11   |         | 147.11              |         |

Scan number 4126 Raw file LNCAP\_Silac\_23F10\_set3\_03  
 Method ITMS; CID Pepti... 66.56

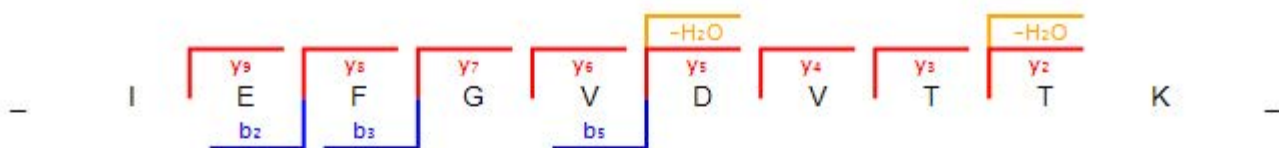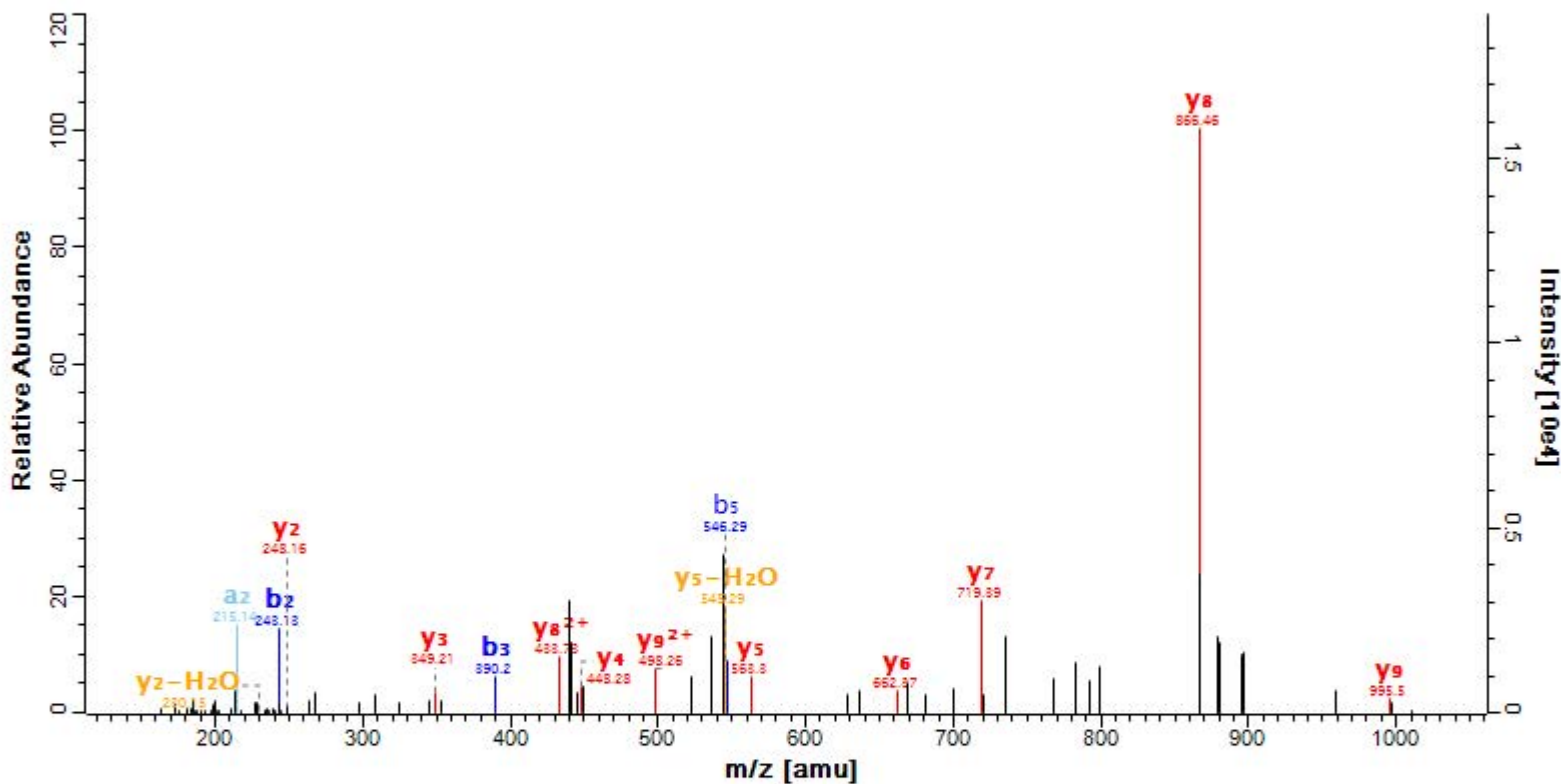

#### precursor information

|                   |                 |
|-------------------|-----------------|
| Mass:             | 1107.58138      |
| m/z:              | 554.79796       |
| Charge:           | 2+              |
| Retentiontime:    | 26.928119659423 |
| Score:            | 66.55987        |
| Mass Error [ppm]: | 0.16828         |
| PEP:              | 0.014242        |
| Precursor Type:   | MULTI           |

|                       |             |
|-----------------------|-------------|
| Annotation:           | 8 of 10     |
| AminoAcids Coverage:  | 80 %        |
| Intensity Coverage:   | 45 %        |
| Peak Coverage:        | 18 %        |
| Protein Localisation: | 218 ... 227 |

| a ion    |        | b ion    |        |    |     |   | y ion    |         | y <sup>2+</sup> ion |         |
|----------|--------|----------|--------|----|-----|---|----------|---------|---------------------|---------|
| Δ dalton | mass   | Δ dalton | mass   |    | seq |   | Δ dalton | mass    | Δ dalton            | mass    |
|          | 86.096 |          | 114.09 | 1  | I   | 9 |          |         |                     |         |
| +0.0001  | 215.14 | -0.07    | 243.13 | 2  | E   | 8 | 995.5    | -0.001  | 498.26              | -0.288  |
|          | 362.21 | -0.066   | 390.2  | 3  | F   | 7 | 866.46   | -0.048  | 433.73              | +0.0422 |
|          | 419.23 |          | 447.22 | 4  | G   | 6 | 719.39   | -0.024  | 719.39              |         |
|          | 518.3  | +0.0822  | 546.29 | 5  | V   | 5 | 662.37   | -0.005  | 662.37              |         |
|          | 633.32 |          | 661.32 | 6  | D   | 4 | 563.3    | +0.0972 | 563.3               |         |
|          | 732.39 |          | 760.39 | 7  | V   | 3 | 448.28   | -0.125  | 448.28              |         |
|          | 833.44 |          | 861.44 | 8  | T   | 2 | 349.21   | +0.0475 | 349.21              |         |
|          | 934.49 |          | 962.48 | 9  | T   | 1 | 248.16   | +0.0037 | 248.16              |         |
|          |        |          |        | 10 | K   | 0 | 147.11   |         | 147.11              |         |

Scan number 4344 Raw file LNCAP\_Silac\_23F10\_set3\_03  
 Method ITMS: CID Pepti... 117.02

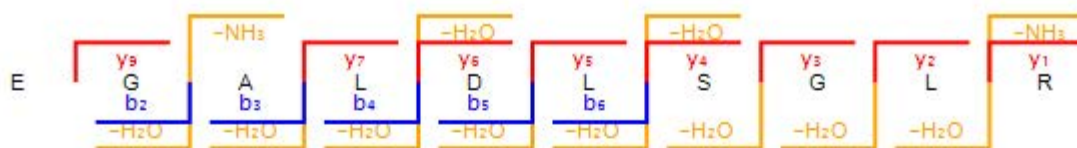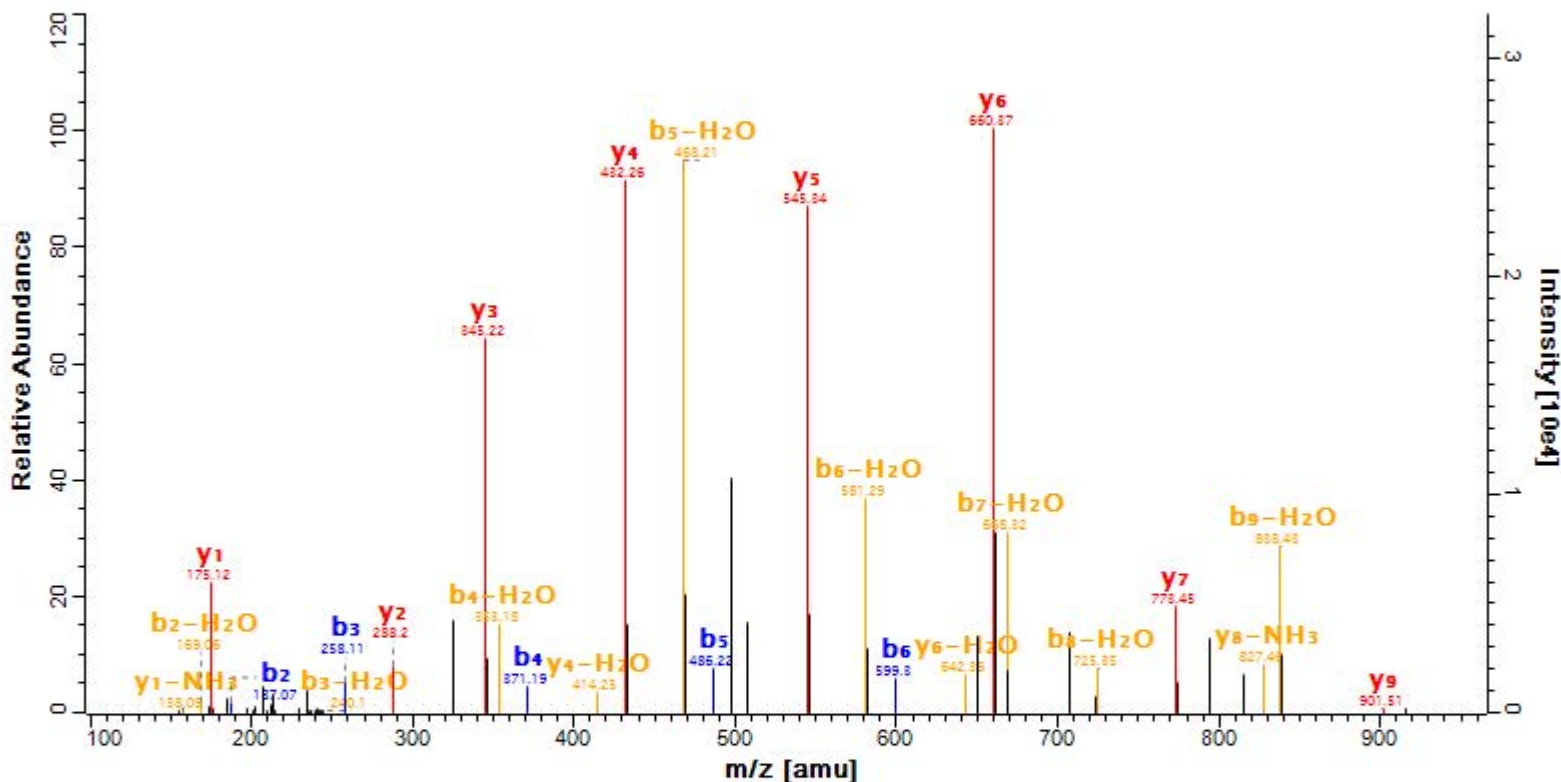

precursor information

|                   |                 |
|-------------------|-----------------|
| Mass:             | 1029.54534      |
| m/z:              | 515.77994       |
| Charge:           | 2+              |
| Retentiontime:    | 27.947154998779 |
| Score:            | 117.0223        |
| Mass Error [ppm]: | -0.13262        |
| PEP:              | 0.00034042      |
| Precursor Type:   | MULTI           |

|                       |             |
|-----------------------|-------------|
| Annotation:           | 9 of 10     |
| AminoAcids Coverage:  | 90 %        |
| Intensity Coverage:   | 71 %        |
| Peak Coverage:        | 36 %        |
| Protein Localisation: | 579 ... 588 |

| b ion      |               |     |   | y ion    |                          |
|------------|---------------|-----|---|----------|--------------------------|
| Δ dalton   | mass          | seq |   | Δ dalton | mass                     |
|            | 130.049869563 | 1   | E | 9        |                          |
| +0.0566574 | 187.071333286 | 2   | G | 8        | 901.510156799 +0.0374506 |
| -0.1877623 | 258.108447074 | 3   | A | 7        | 844.488693075            |
| +0.0897765 | 371.192511055 | 4   | L | 6        | 773.451579288 +0.0251663 |
| +0.027189  | 486.219454087 | 5   | D | 5        | 660.367515307 +0.0732806 |
| +0.0813696 | 599.303518067 | 6   | L | 4        | 545.340572275 +0.010563  |
|            | 686.335546477 | 7   | S | 3        | 432.256508295 +0.0243755 |
|            | 743.357010201 | 8   | G | 2        | 345.224479885 +0.0446852 |
|            | 856.441074181 | 9   | L | 1        | 288.203016161 +0.1246816 |
|            |               | 10  | R | 0        | 175.118952181 +0.0386711 |

Scan number 4616 Raw file LNCAP\_Silac\_23F10\_set3\_03  
 Method ITMS; CID Pepti... 111.46

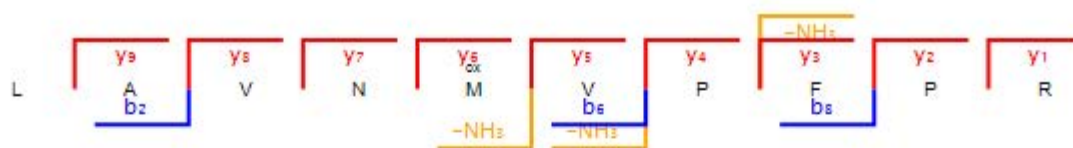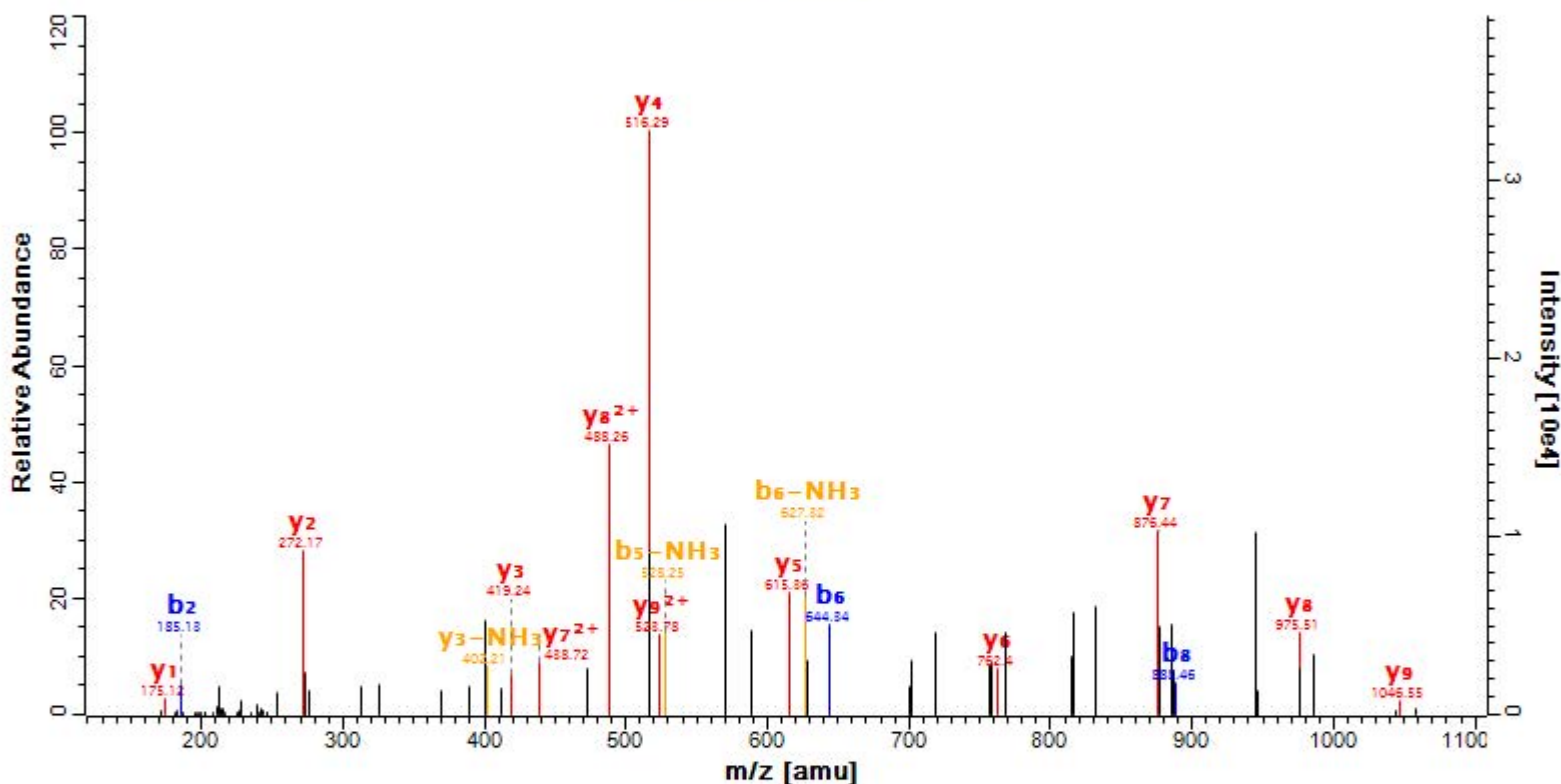

#### precursor information

|                   |                 |
|-------------------|-----------------|
| Mass:             | 1158.6222       |
| m/z:              | 580.31838       |
| Charge:           | 2+              |
| Retentiontime:    | 29.211872100830 |
| Score:            | 111.4552        |
| Mass Error [ppm]: | 0.21897         |
| PEP:              | 0.0013678       |
| Precursor Type:   | MULTI           |

|                       |             |
|-----------------------|-------------|
| Annotation:           | 9 of 10     |
| AminoAcids Coverage:  | 90 %        |
| Intensity Coverage:   | 47 %        |
| Peak Coverage:        | 20 %        |
| Protein Localisation: | 253 ... 262 |

| b ion     |          |    |     |   | y ion    |           | y <sup>2+</sup> ion |           |
|-----------|----------|----|-----|---|----------|-----------|---------------------|-----------|
| Δ dalton  | mass     |    | seq |   | Δ dalton | mass      | Δ dalton            | mass      |
|           | 114.0913 | 1  | L   | 9 |          |           |                     |           |
| +0.051477 | 185.1285 | 2  | A   | 8 | 1046.545 | +0.078617 | 523.7762            | +0.132472 |
|           | 284.1969 | 3  | V   | 7 | 975.508  | -0.07616  | 488.2577            | +0.175077 |
|           | 398.2398 | 4  | N   | 6 | 876.4396 | -0.07025  | 438.7235            | +0.348017 |
|           | 545.2752 | 5  | M   | 5 | 762.3967 | +0.129233 | 762.3967            |           |
| -0.02012  | 644.3436 | 6  | V   | 4 | 615.3613 | +0.060018 | 615.3613            |           |
|           | 741.3964 | 7  | P   | 3 | 516.2929 | -0.00829  | 516.2929            |           |
| +0.010006 | 888.4648 | 8  | F   | 2 | 419.2401 | +0.129438 | 419.2401            |           |
|           | 985.5176 | 9  | P   | 1 | 272.1717 | -0.00289  | 272.1717            |           |
|           |          | 10 | R   | 0 | 175.119  | +0.017065 | 175.119             |           |



Scan number 477 Raw file LNCAP\_Silac\_23F10\_set3\_03  
 Method ITMS: CID Pepti... 133.89

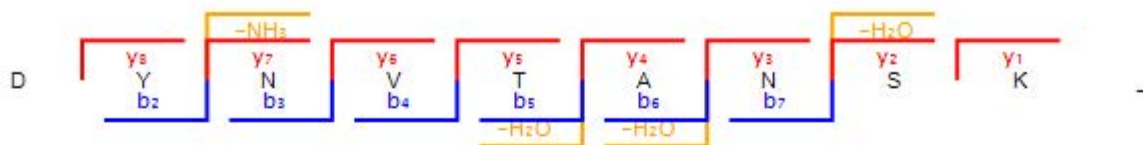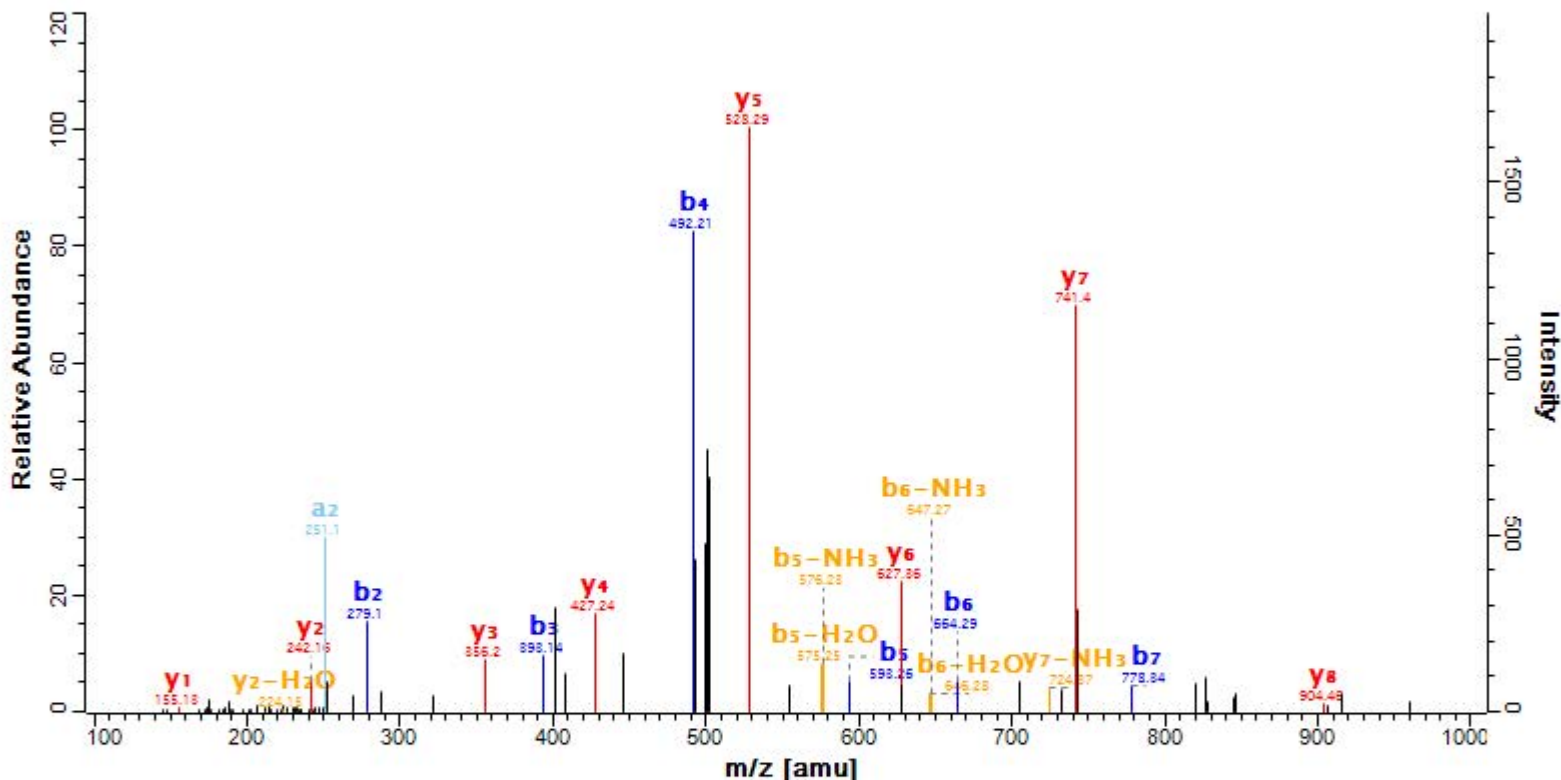

#### precursor information

|                       |                 |
|-----------------------|-----------------|
| Mass:                 | 1010.46697      |
| m/z:                  | 506.24076       |
| Charge:               | 2+              |
| Retentiontime:        | 7.8696284294128 |
| Score:                | 133.8929        |
| Mass Error [ppm]:     | 0.08114         |
| PEP:                  | 0.0010521       |
| Precursor Type:       | MULTI           |
| Annotation:           | 8 of 9          |
| AminoAcids Coverage:  | 89 %            |
| Intensity Coverage:   | 59 %            |
| Peak Coverage:        | 22 %            |
| Protein Localisation: | 111 ... 119     |

| a ion           |          | b ion           |          | seq |   | y ion           |                    |
|-----------------|----------|-----------------|----------|-----|---|-----------------|--------------------|
| $\Delta$ dalton | mass     | $\Delta$ dalton | mass     |     |   | $\Delta$ dalton | mass               |
|                 | 88.0393  |                 | 116.0342 | 1   | D | 8               |                    |
| +0.11192        | 251.1026 | -0.02217        | 279.0975 | 2   | Y | 7               | 904.4614 -0.17791  |
|                 | 365.1456 | +0.114224       | 393.1405 | 3   | N | 6               | 741.3981 -0.04183  |
|                 | 464.214  | -0.08401        | 492.2089 | 4   | V | 5               | 627.3552 -0.05823  |
|                 | 565.2617 | +0.019738       | 593.2566 | 5   | T | 4               | 528.2868 -0.02699  |
|                 | 636.2988 | +0.073689       | 664.2937 | 6   | A | 3               | 427.2391 +0.075625 |
|                 | 750.3417 | +0.001953       | 778.3366 | 7   | N | 2               | 356.202 +0.063666  |
|                 | 837.3737 |                 | 865.3686 | 8   | S | 1               | 242.159 +0.083019  |
|                 |          |                 |          | 9   | K | 0               | 155.127 +0.007198  |

Scan number 4778 Raw file LNCAP\_Silac\_23F10\_set3\_03  
 Method ITMS; CID Pepti... 57.84

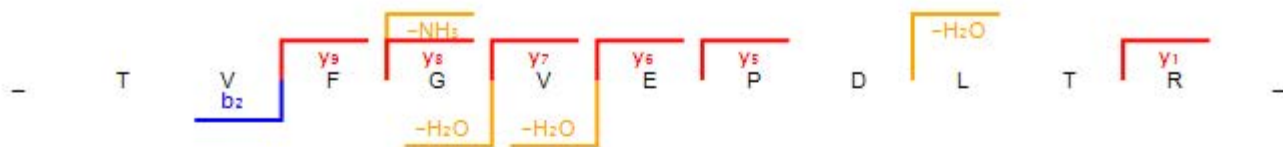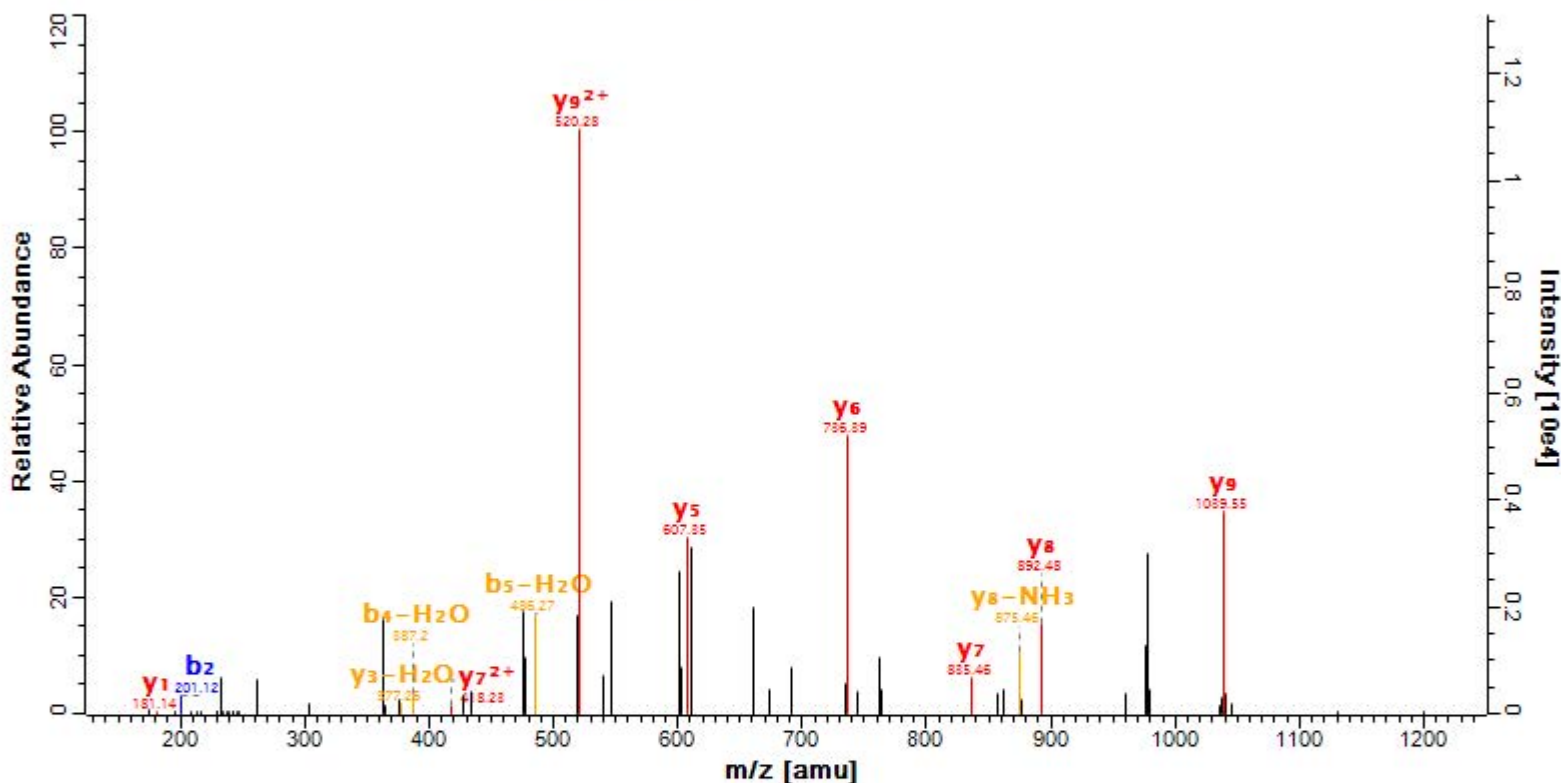

#### precursor information

|                   |                 |
|-------------------|-----------------|
| Mass:             | 1232.63973      |
| m/z:              | 617.32714       |
| Charge:           | 2+              |
| Retentiontime:    | 29.959863662719 |
| Score:            | 57.83606        |
| Mass Error [ppm]: | -0.2991         |
| PEP:              | 0.015821        |
| Precursor Type:   | MULTI           |

#### general information

|                       |             |
|-----------------------|-------------|
| Annotation:           | 8 of 11     |
| AminoAcids Coverage:  | 73 %        |
| Intensity Coverage:   | 44 %        |
| Peak Coverage:        | 14 %        |
| Protein Localisation: | 403 ... 413 |

| b ion    |          |     |   | y ion    |          | y <sup>2+</sup> ion |          |
|----------|----------|-----|---|----------|----------|---------------------|----------|
| Δ dalton | mass     | seq |   | Δ dalton | mass     | Δ dalton            | mass     |
|          | 102.055  | 1   | T | 10       |          |                     |          |
| -0.05026 | 201.1234 | 2   | V | 9        | 1138.62  | 1138.62             |          |
|          | 348.1918 | 3   | F | 8        | 1039.551 | -0.00674            | 520.2793 |
|          | 405.2132 | 4   | G | 7        | 892.483  | +0.137421           | 892.483  |
|          | 504.2817 | 5   | V | 6        | 835.4615 | +0.113719           | 418.2344 |
|          | 633.3243 | 6   | E | 5        | 736.3931 | +0.021061           | 736.3931 |
|          | 730.377  | 7   | P | 4        | 607.3505 | +0.018427           | 607.3505 |
|          | 845.404  | 8   | D | 3        | 510.2978 |                     | 510.2978 |
|          | 958.488  | 9   | L | 2        | 395.2708 |                     | 395.2708 |
|          | 1059.536 | 10  | T | 1        | 282.1868 |                     | 282.1868 |
|          |          | 11  | R | 0        | 181.1391 | +0.063098           | 181.1391 |

Scan number 4910 Raw file LNCAP\_Silac\_23F10\_set3\_03  
 Method ITMS: CID Pepti... 261.41

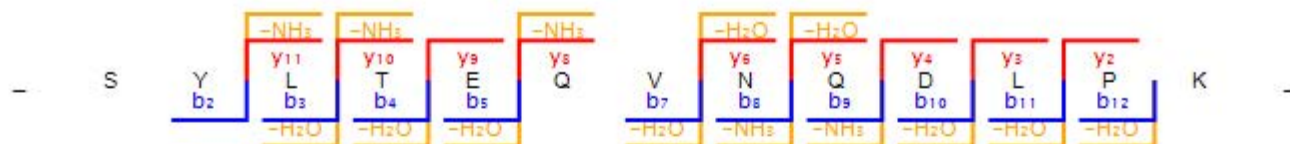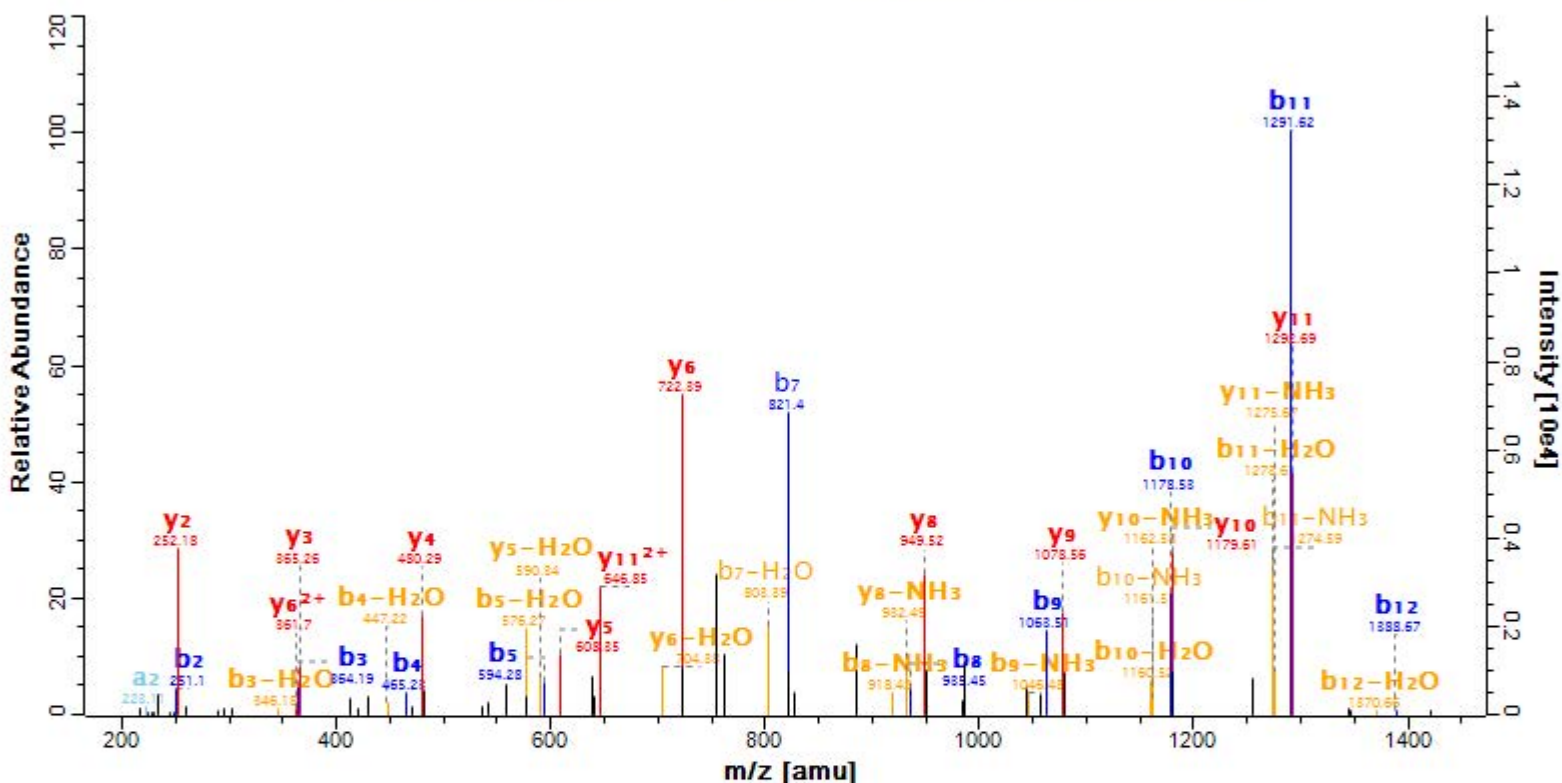

precursor information

|                   |                 |
|-------------------|-----------------|
| Mass:             | 1533.76643      |
| m/z:              | 767.89049       |
| Charge:           | 2+              |
| Retentiontime:    | 30.621631622314 |
| Score:            | 261.4087        |
| Mass Error [ppm]: | -0.68869        |
| PEP:              | 1.3112E-45      |
| Precursor Type:   | MULTI           |

general information

|                       |             |
|-----------------------|-------------|
| Annotation:           | 11 of 13    |
| AminoAcids Coverage:  | 85 %        |
| Intensity Coverage:   | 78 %        |
| Peak Coverage:        | 45 %        |
| Protein Localisation: | 612 ... 624 |

| a ion    |        | b ion    |        |    |     |    | y ion    |         | y <sup>2+</sup> ion |         |
|----------|--------|----------|--------|----|-----|----|----------|---------|---------------------|---------|
| Δ dalton | mass   | Δ dalton | mass   |    | seq |    | Δ dalton | mass    | Δ dalton            | mass    |
|          | 60.044 |          | 88.039 | 1  | S   | 12 |          |         |                     |         |
| -0.031   | 223.11 | +0.0372  | 251.1  | 2  | Y   | 11 | 1455.8   |         | 1455.8              |         |
|          | 336.19 | +0.0512  | 364.19 | 3  | L   | 10 | 1292.7   | -0.106  | 646.85              | +0.2102 |
|          | 437.24 | -0.035   | 465.23 | 4  | T   | 9  | 1179.6   | -0.015  | 1179.6              |         |
|          | 566.28 | -0.188   | 594.28 | 5  | E   | 8  | 1078.6   | -0.032  | 1078.6              |         |
|          | 694.34 |          | 722.34 | 6  | Q   | 7  | 949.52   | -0.01   | 949.52              |         |
|          | 793.41 | -0.051   | 821.4  | 7  | V   | 6  | 821.46   |         | 821.46              |         |
|          | 907.45 | +0.0554  | 935.45 | 8  | N   | 5  | 722.39   | +0.0468 | 361.7               | +0.3793 |
|          | 1035.5 | +0.0042  | 1063.5 | 9  | Q   | 4  | 608.35   | +0.1053 | 608.35              |         |
|          | 1150.5 | -0.123   | 1178.5 | 10 | D   | 3  | 480.29   | +0.1547 | 480.29              |         |
|          | 1263.6 | -0.113   | 1291.6 | 11 | L   | 2  | 365.26   | +0.1026 | 365.26              |         |
|          | 1360.7 | +0.202   | 1388.7 | 12 | P   | 1  | 252.18   | -0.007  | 252.18              |         |
|          |        |          |        | 13 | K   | 0  | 155.13   |         | 155.13              |         |

Scan number 4938 Raw file LNCAP\_Silac\_23F10\_set3\_03  
 Method ITMS; CID Peptide 129.34

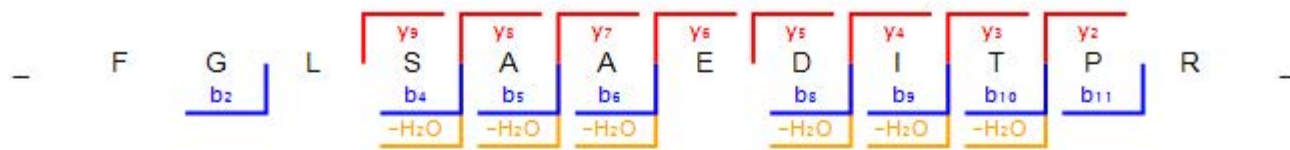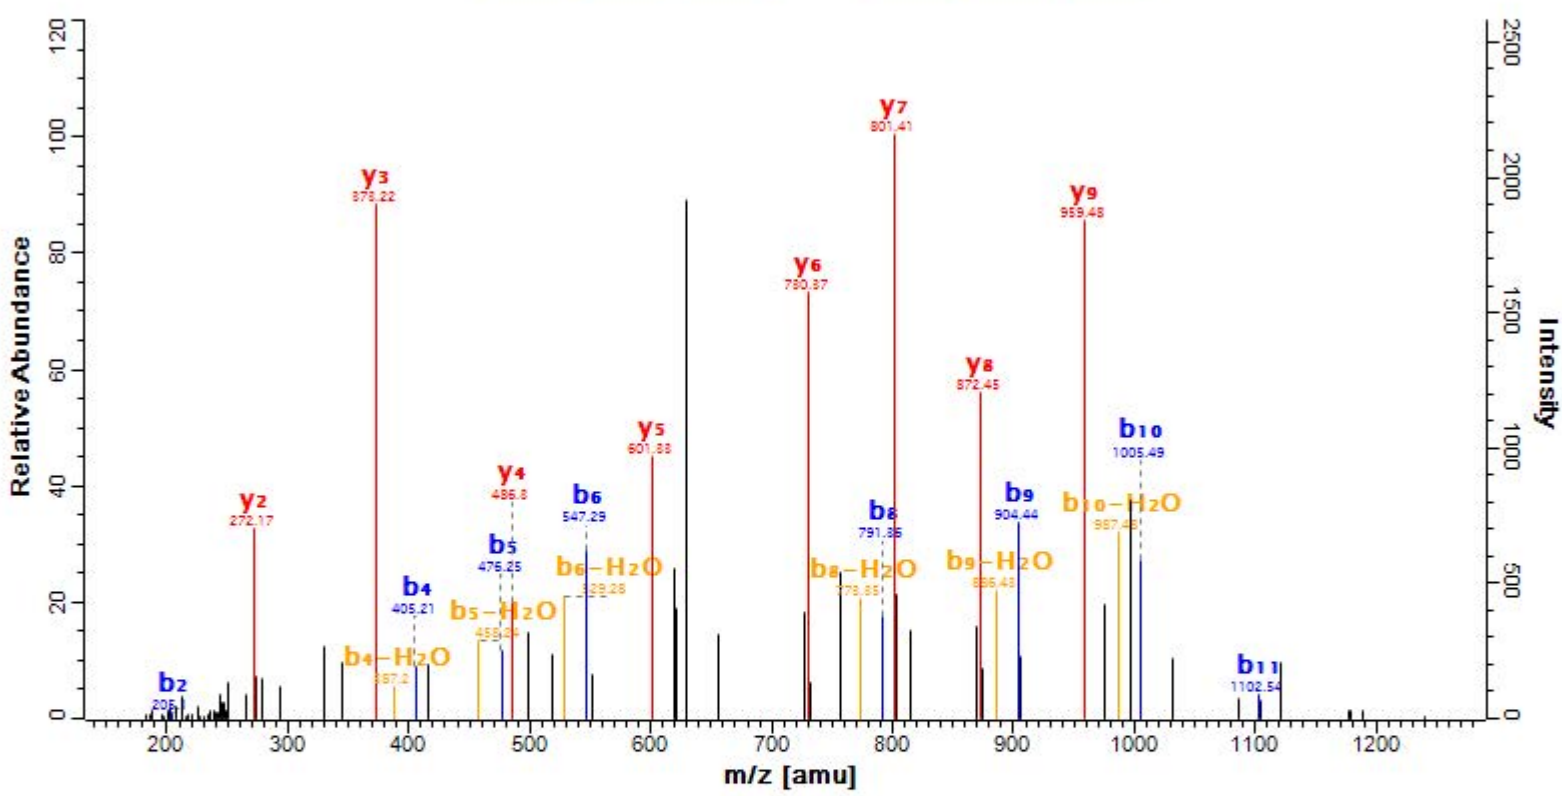

**precursor information**

|                   |                 |
|-------------------|-----------------|
| Mass:             | 1275.64614      |
| m/z:              | 638.83035       |
| Charge:           | 2+              |
| Retentiontime:    | 30.758695602417 |
| Score:            | 129.3428        |
| Mass Error [ppm]: | 0.17376         |
| PEP:              | 2.3425E-05      |
| Precursor Type:   | MULTI           |

**general information**

|                       |           |
|-----------------------|-----------|
| Annotation:           | 9 of 12   |
| AminoAcids Coverage:  | 75 %      |
| Intensity Coverage:   | 57 %      |
| Peak Coverage:        | 26 %      |
| Protein Localisation: | 64 ... 75 |

| b ion      |               |     |   |          | y ion         |            |
|------------|---------------|-----|---|----------|---------------|------------|
| Δ dalton   | mass          | seq |   | Δ dalton | mass          |            |
|            | 148.075690383 | 1   | F | 11       |               |            |
| -0.1374831 | 205.097154106 | 2   | G | 10       | 1129.58477831 |            |
|            | 318.181218087 | 3   | L | 9        | 1072.56331458 |            |
| +0.1521099 | 405.213246497 | 4   | S | 8        | 959.479250601 | +0.0529149 |
| +0.1492979 | 476.250360284 | 5   | A | 7        | 872.447222191 | +0.0364204 |
| -0.1985458 | 547.287474072 | 6   | A | 6        | 801.410108403 | -0.0093516 |
|            | 676.330067168 | 7   | E | 5        | 730.372994616 | +0.1447056 |
| +0.1141202 | 791.3570102   | 8   | D | 4        | 601.330401519 | -0.0040465 |
| -0.0152319 | 904.441074181 | 9   | I | 3        | 486.303458488 | -0.0107339 |
| -0.0094436 | 1005.48875266 | 10  | T | 2        | 373.219394507 | +0.0395166 |
| +0.329211  | 1102.54151651 | 11  | P | 1        | 272.171716033 | +0.0421206 |
|            |               | 12  | R | 0        | 175.118952181 |            |

Scan number 4967 Raw file LNCAP\_Silac\_23F10\_set3\_03  
 Method ITMS: CID Pepti... 101.38

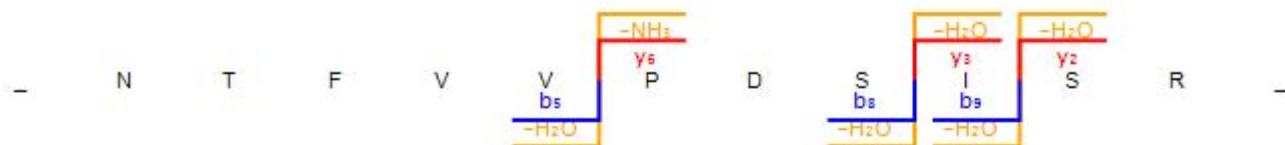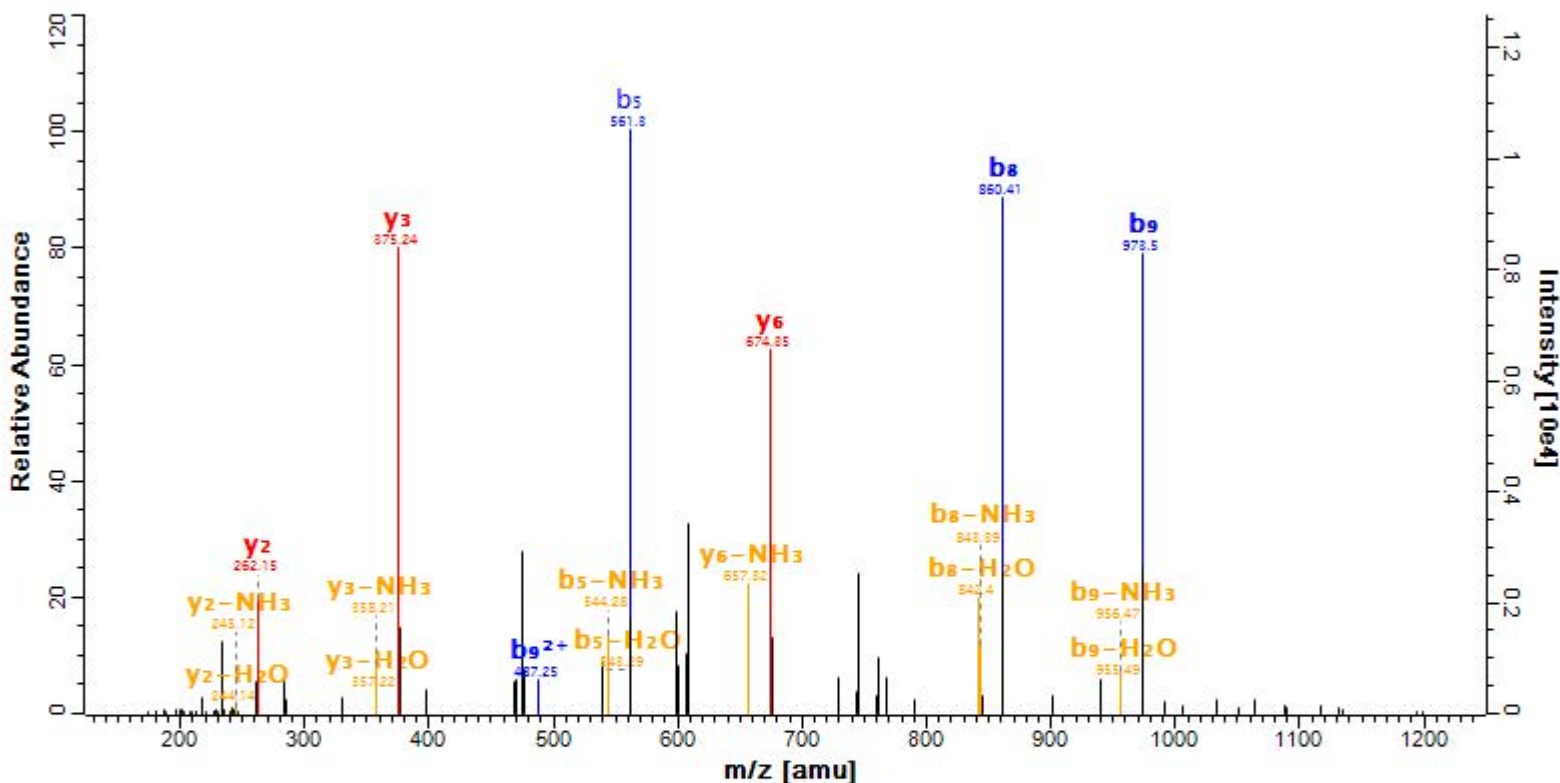

#### precursor information

|                   |                |
|-------------------|----------------|
| Mass:             | 1233.63485     |
| m/z:              | 617.8247       |
| Charge:           | 2+             |
| Retentiontime:    | 30.89404296875 |
| Score:            | 101.3808       |
| Mass Error [ppm]: | -0.40556       |
| PEP:              | 0.0030244      |
| Precursor Type:   | ISO            |

#### general information

|                       |            |
|-----------------------|------------|
| Annotation:           | 6 of 11    |
| AminoAcids Coverage:  | 55 %       |
| Intensity Coverage:   | 61 %       |
| Peak Coverage:        | 20 %       |
| Protein Localisation: | 99 ... 109 |

| b <sup>2+</sup> ion |          | b ion     |          |     | y ion |          |          |           |
|---------------------|----------|-----------|----------|-----|-------|----------|----------|-----------|
| Δ dalton            | mass     | Δ dalton  | mass     | seq |       | Δ dalton | mass     |           |
|                     | 115.0502 | 115.0502  |          | 1   | N     | 10       |          |           |
|                     | 216.0979 | 216.0979  |          | 2   | T     | 9        | 1120.6   |           |
|                     | 363.1663 | 363.1663  |          | 3   | F     | 8        | 1019.552 |           |
|                     | 462.2347 | 462.2347  |          | 4   | V     | 7        | 872.4836 |           |
|                     | 561.3031 | -0.04623  | 561.3031 | 5   | V     | 6        | 773.4152 |           |
|                     | 658.3559 |           | 658.3559 | 6   | P     | 5        | 674.3468 | +0.006919 |
|                     | 773.3828 |           | 773.3828 | 7   | D     | 4        | 577.294  |           |
|                     | 860.4149 | +0.023861 | 860.4149 | 8   | S     | 3        | 462.2671 |           |
| +0.209119           | 487.2531 | -0.02822  | 973.4989 | 9   | I     | 2        | 375.235  | -0.0246   |
|                     | 1060.531 |           | 1060.531 | 10  | S     | 1        | 262.151  | +0.015066 |
|                     |          |           |          | 11  | R     | 0        | 175.119  |           |

Scan number 5178 Raw file LNCAP\_Silac\_23F10\_set3\_03  
 Method ITMS; CID Pepti... 77.74

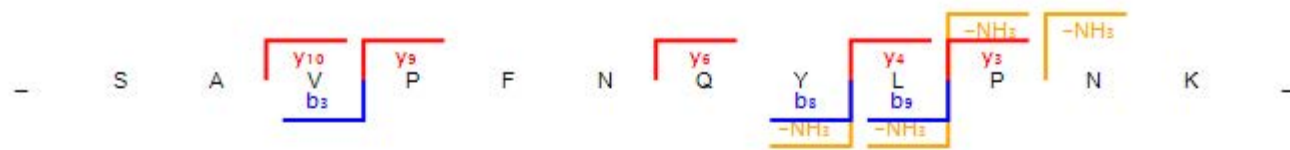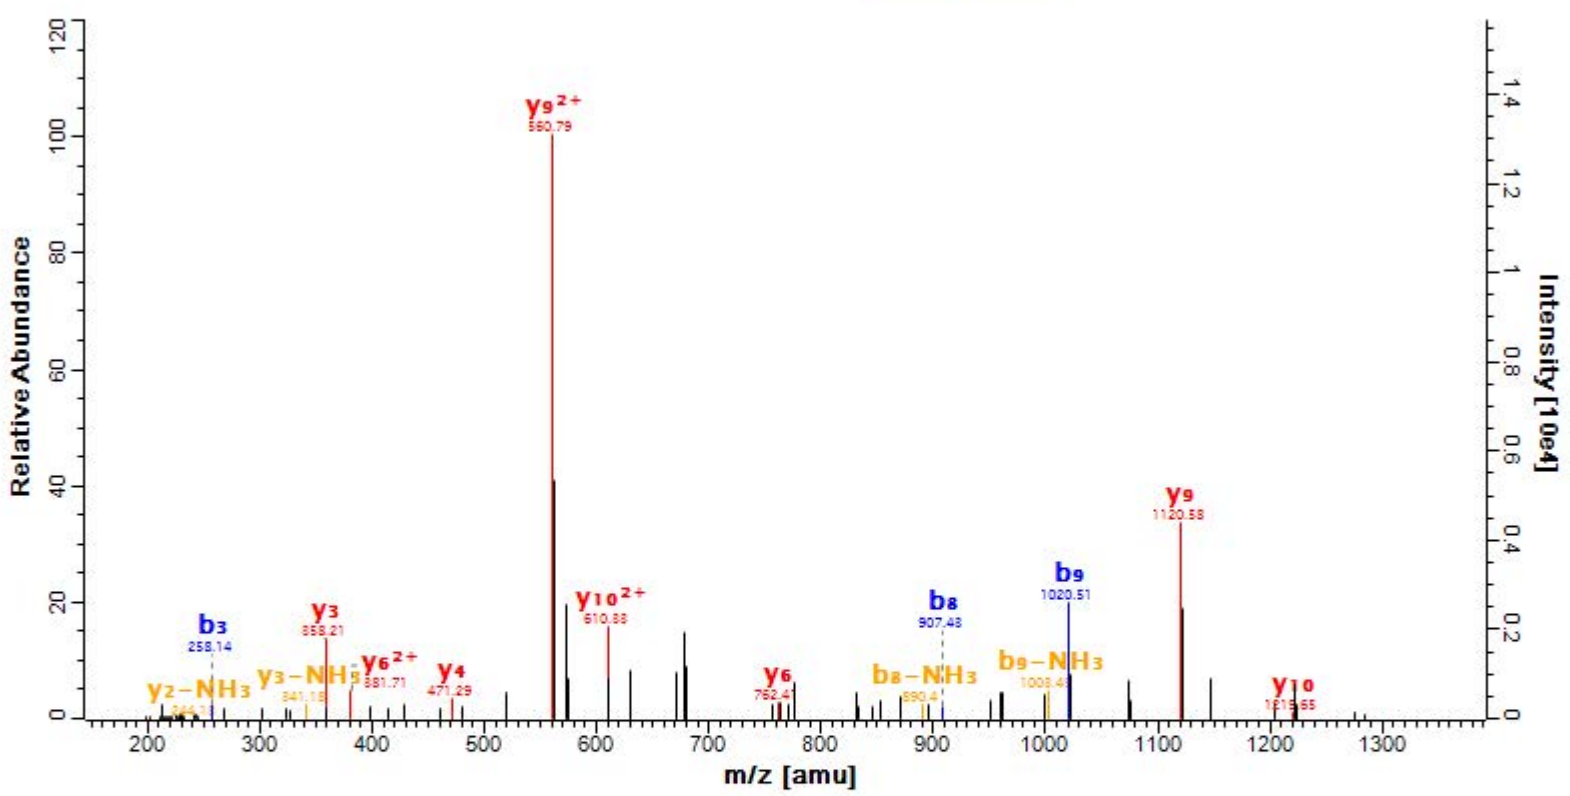

**precursor information**

|                   |                 |
|-------------------|-----------------|
| Mass:             | 1376.70848      |
| m/z:              | 689.36152       |
| Charge:           | 2+              |
| Retentiontime:    | 31.908536911010 |
| Score:            | 77.74419        |
| Mass Error [ppm]: | -0.26863        |
| PEP:              | 0.0028575       |
| Precursor Type:   | MULTI           |

**general information**

|                       |             |
|-----------------------|-------------|
| Annotation:           | 7 of 12     |
| AminoAcids Coverage:  | 58 %        |
| Intensity Coverage:   | 43 %        |
| Peak Coverage:        | 16 %        |
| Protein Localisation: | 262 ... 273 |

| b ion     |          |    |     |    | y ion    |           | y <sup>2+</sup> ion |           |
|-----------|----------|----|-----|----|----------|-----------|---------------------|-----------|
| Δ dalton  | mass     |    | seq |    | Δ dalton | mass      | Δ dalton            | mass      |
|           | 88.0393  | 1  | S   | 11 |          |           |                     |           |
|           | 159.0764 | 2  | A   | 10 | 1290.684 |           | 1290.684            |           |
| +0.025272 | 258.1448 | 3  | V   | 9  | 1219.647 | -0.10231  | 610.3271            | +0.012896 |
|           | 355.1976 | 4  | P   | 8  | 1120.579 | -0.04781  | 560.7929            | +0.06932  |
|           | 502.266  | 5  | F   | 7  | 1023.526 |           | 1023.526            |           |
|           | 616.3089 | 6  | N   | 6  | 876.4574 |           | 876.4574            |           |
|           | 744.3675 | 7  | Q   | 5  | 762.4145 | +0.10177  | 381.7109            | -0.36737  |
| +0.077152 | 907.4308 | 8  | Y   | 4  | 634.3559 |           | 634.3559            |           |
| -0.1562   | 1020.515 | 9  | L   | 3  | 471.2926 | +0.066388 | 471.2926            |           |
|           | 1117.568 | 10 | P   | 2  | 358.2085 | +0.072632 | 358.2085            |           |
|           | 1231.611 | 11 | N   | 1  | 261.1557 |           | 261.1557            |           |
|           |          | 12 | K   | 0  | 147.1128 |           | 147.1128            |           |

Scan number 5193 Raw file LNCAP\_Silac\_23F10\_set3\_03  
 Method ITMS: CID Pepti... 54.26

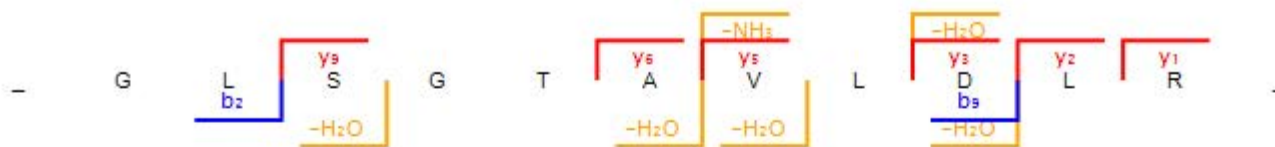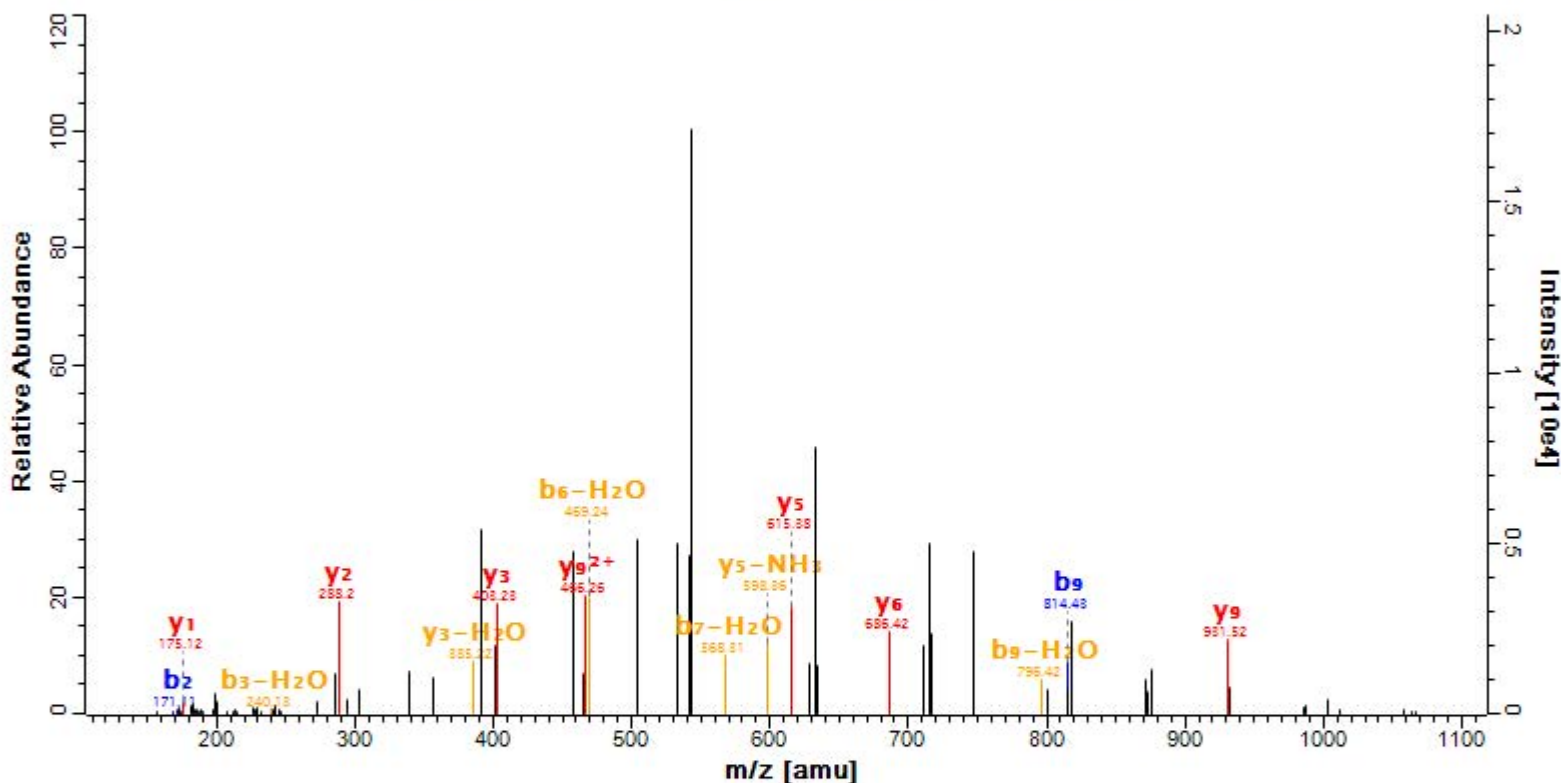

#### precursor information

|                   |                 |
|-------------------|-----------------|
| Mass:             | 1100.6188       |
| m/z:              | 551.31668       |
| Charge:           | 2+              |
| Retentiontime:    | 31.982967376709 |
| Score:            | 54.25925        |
| Mass Error [ppm]: | -0.15844        |
| PEP:              | 0.019756        |
| Precursor Type:   | MULTI           |

#### general information

|                       |           |
|-----------------------|-----------|
| Annotation:           | 7 of 11   |
| AminoAcids Coverage:  | 64 %      |
| Intensity Coverage:   | 24 %      |
| Peak Coverage:        | 16 %      |
| Protein Localisation: | 66 ... 76 |

| b ion    |          |     |   |          | y ion    |           | y <sup>2+</sup> ion |           |
|----------|----------|-----|---|----------|----------|-----------|---------------------|-----------|
| Δ dalton | mass     | seq |   | Δ dalton | mass     | Δ dalton  | mass                |           |
|          | 58.02874 | 1   | G | 10       |          |           |                     |           |
| -0.11349 | 171.1128 | 2   | L | 9        | 1044.605 | 1044.605  |                     |           |
|          | 258.1448 | 3   | S | 8        | 931.5207 | -0.00235  | 466.264             | +0.262368 |
|          | 315.1663 | 4   | G | 7        | 844.4887 |           | 844.4887            |           |
|          | 416.214  | 5   | T | 6        | 787.4672 |           | 787.4672            |           |
|          | 487.2511 | 6   | A | 5        | 686.4196 | +0.028874 | 686.4196            |           |
|          | 586.3195 | 7   | V | 4        | 615.3824 | -0.02288  | 615.3824            |           |
|          | 699.4036 | 8   | L | 3        | 516.314  |           | 516.314             |           |
| -0.01352 | 814.4305 | 9   | D | 2        | 403.23   | +8.23E-05 | 403.23              |           |
|          | 927.5146 | 10  | L | 1        | 288.203  | +0.082079 | 288.203             |           |
|          |          | 11  | R | 0        | 175.119  | +0.054418 | 175.119             |           |

Scan number 5522 Raw file LNCAP\_Silac\_23F10\_set3\_03  
 Method ITMS; CID Pepti... 181.71

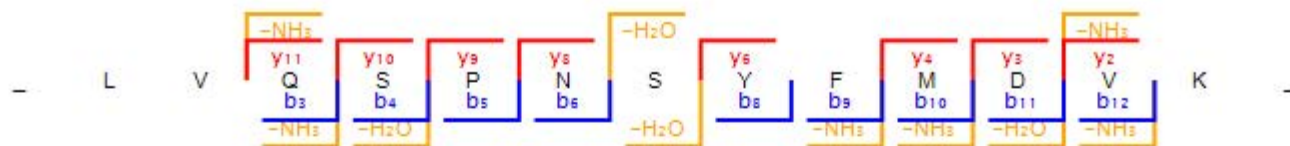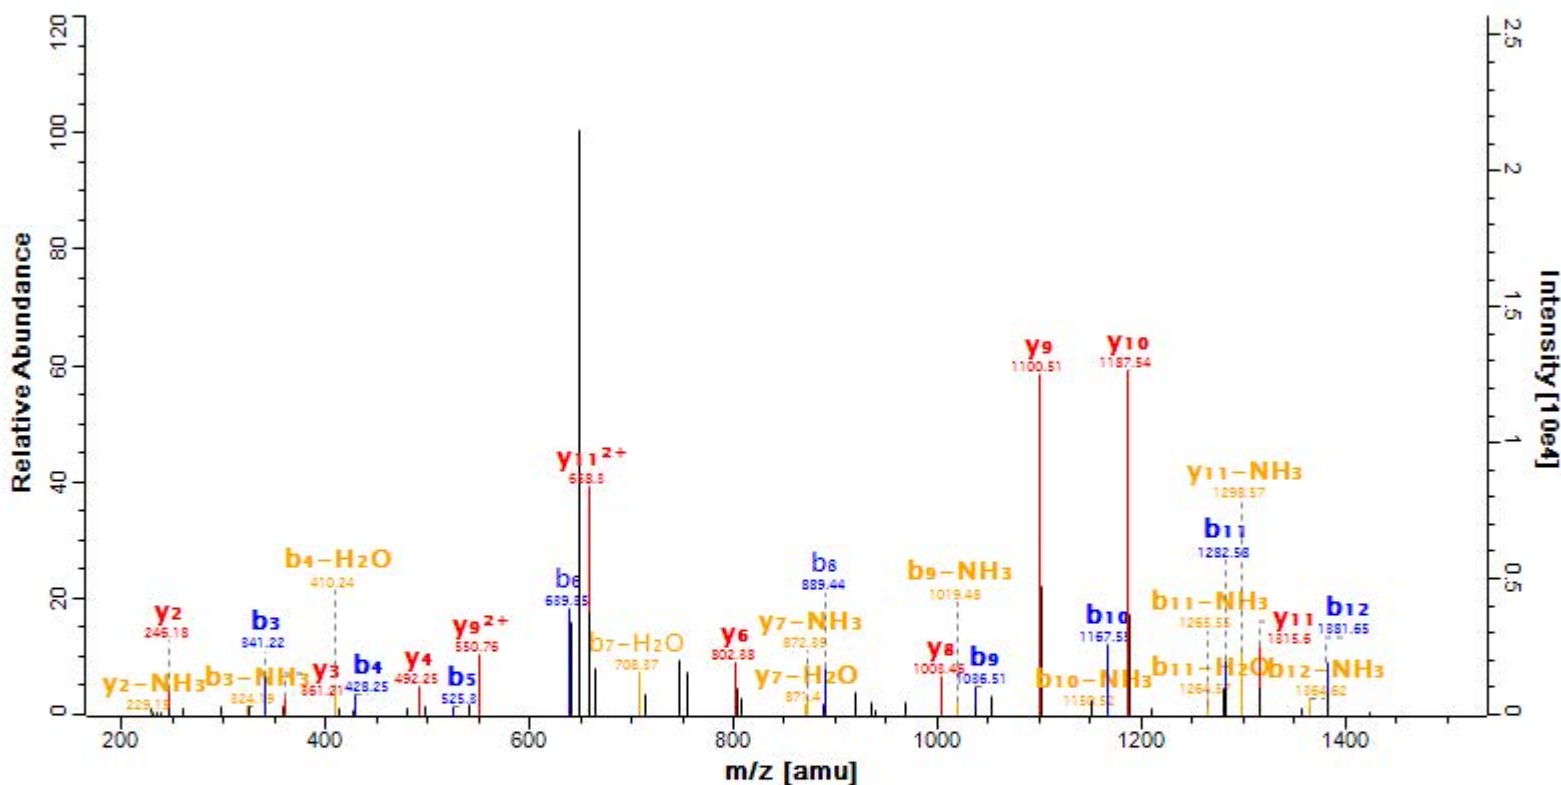

#### precursor information

|                   |                 |
|-------------------|-----------------|
| Mass:             | 1526.7436       |
| m/z:              | 764.37908       |
| Charge:           | 2+              |
| Retentiontime:    | 33.554782867431 |
| Score:            | 181.7068        |
| Mass Error [ppm]: | -0.20582        |
| PEP:              | 2.2267E-12      |
| Precursor Type:   | MULTI           |

#### general information

|                       |           |
|-----------------------|-----------|
| Annotation:           | 11 of 13  |
| AminoAcids Coverage:  | 85 %      |
| Intensity Coverage:   | 54 %      |
| Peak Coverage:        | 42 %      |
| Protein Localisation: | 24 ... 36 |

| b ion     |          |     |   | y ion    |          |           | y <sup>2+</sup> ion |           |
|-----------|----------|-----|---|----------|----------|-----------|---------------------|-----------|
| Δ dalton  | mass     | seq |   | Δ dalton | mass     | Δ dalton  | mass                |           |
|           | 114.0913 | 1   | L | 12       |          |           |                     |           |
|           | 213.1598 | 2   | V | 11       | 1414.667 |           | 1414.667            |           |
| +0.022208 | 341.2183 | 3   | Q | 10       | 1315.599 | +0.062541 | 658.303             | +0.018965 |
| +0.137396 | 428.2504 | 4   | S | 9        | 1187.54  | -0.04746  | 1187.54             |           |
| -0.18148  | 525.3031 | 5   | P | 8        | 1100.508 | -0.07549  | 550.7577            | +0.137877 |
| +0.03377  | 639.3461 | 6   | N | 7        | 1003.455 | +0.107644 | 1003.455            |           |
|           | 726.3781 | 7   | S | 6        | 889.4124 |           | 889.4124            |           |
| +0.051267 | 889.4414 | 8   | Y | 5        | 802.3804 | -0.03536  | 802.3804            |           |
| +0.108586 | 1036.51  | 9   | F | 4        | 639.3171 |           | 639.3171            |           |
| -0.04628  | 1167.55  | 10  | M | 3        | 492.2486 | +0.099133 | 492.2486            |           |
| -0.23362  | 1282.577 | 11  | D | 2        | 361.2082 | +0.050811 | 361.2082            |           |
| +0.115322 | 1381.646 | 12  | V | 1        | 246.1812 | +0.027858 | 246.1812            |           |
|           |          | 13  | K | 0        | 147.1128 |           | 147.1128            |           |



Scan number 5741 Raw file LNCAP\_Silac\_23F10\_set3\_03  
 Method ITMS; CID Pepti... 154.49

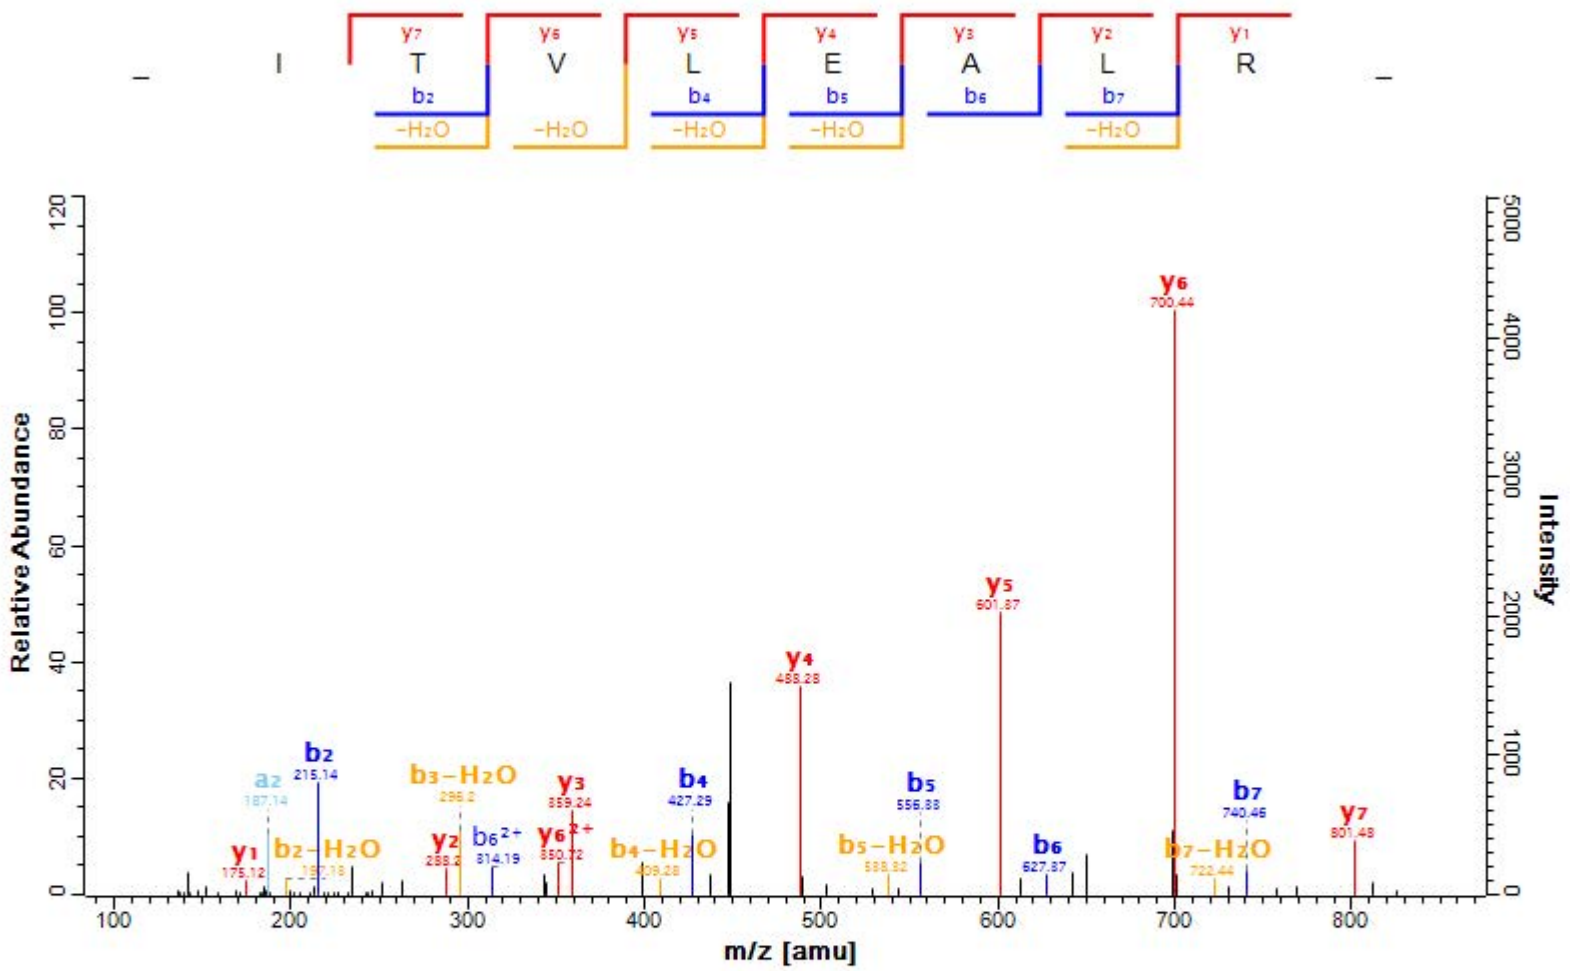

precursor information

|                       |                 |
|-----------------------|-----------------|
| Mass:                 | 913.55935       |
| m/z:                  | 457.78695       |
| Charge:               | 2+              |
| Retentiontime:        | 34.610229492187 |
| Score:                | 154.4888        |
| Mass Error [ppm]:     | -0.35153        |
| g PEP:                | 7.8078E-05      |
| Annotation:           | 7 of 8          |
| AminoAcids Coverage:  | 88 %            |
| Intensity Coverage:   | 69 %            |
| Peak Coverage:        | 24 %            |
| Protein Localisation: | 291 ... 298     |

| a ion         |               | b <sup>2+</sup> ion |               | b ion |               | y ion         |       | y <sup>2+</sup> ion |        |
|---------------|---------------|---------------------|---------------|-------|---------------|---------------|-------|---------------------|--------|
| Δ dalton mass | Δ dalton mass | Δ dalton mass       | Δ dalton mass | seq   | Δ dalton mass | Δ dalton mass |       |                     |        |
| 86.1          | 114.1         | 114.1               | 114.1         | 1     | I             | 7             |       |                     |        |
| +0.077 87.1   | 215.1         | -0.06 215.1         | 215.1         | 2     | T             | 6             | 801.5 | +0.092801.5         |        |
| 286.2         | 314.2         | 314.2               | 314.2         | 3     | V             | 5             | 700.4 | +0.011350.7         | +0.06! |
| 399.3         | 427.3         | -0.14 427.3         | 427.3         | 4     | L             | 4             | 601.4 | +0.132601.4         |        |
| 528.3         | 556.3         | -0.07 556.3         | 556.3         | 5     | E             | 3             | 488.3 | +0.015488.3         |        |
| 599.4         | -0.11 314.2   | -0.42 627.4         | 627.4         | 6     | A             | 2             | 359.2 | -0.02 359.2         |        |
| 712.5         | 740.5         | -0.04 740.5         | 740.5         | 7     | L             | 1             | 288.2 | +0.082288.2         |        |
|               |               |                     |               | 8     | R             | 0             | 175.1 | +0.029175.1         |        |

Scan number 5829 Raw file LNCAP\_Silac\_23F10\_set3\_03  
 Method ITMS; CID Pepti... 112.83

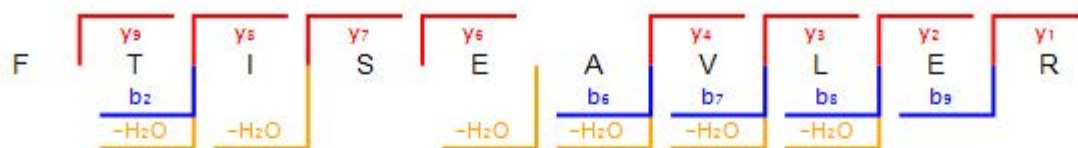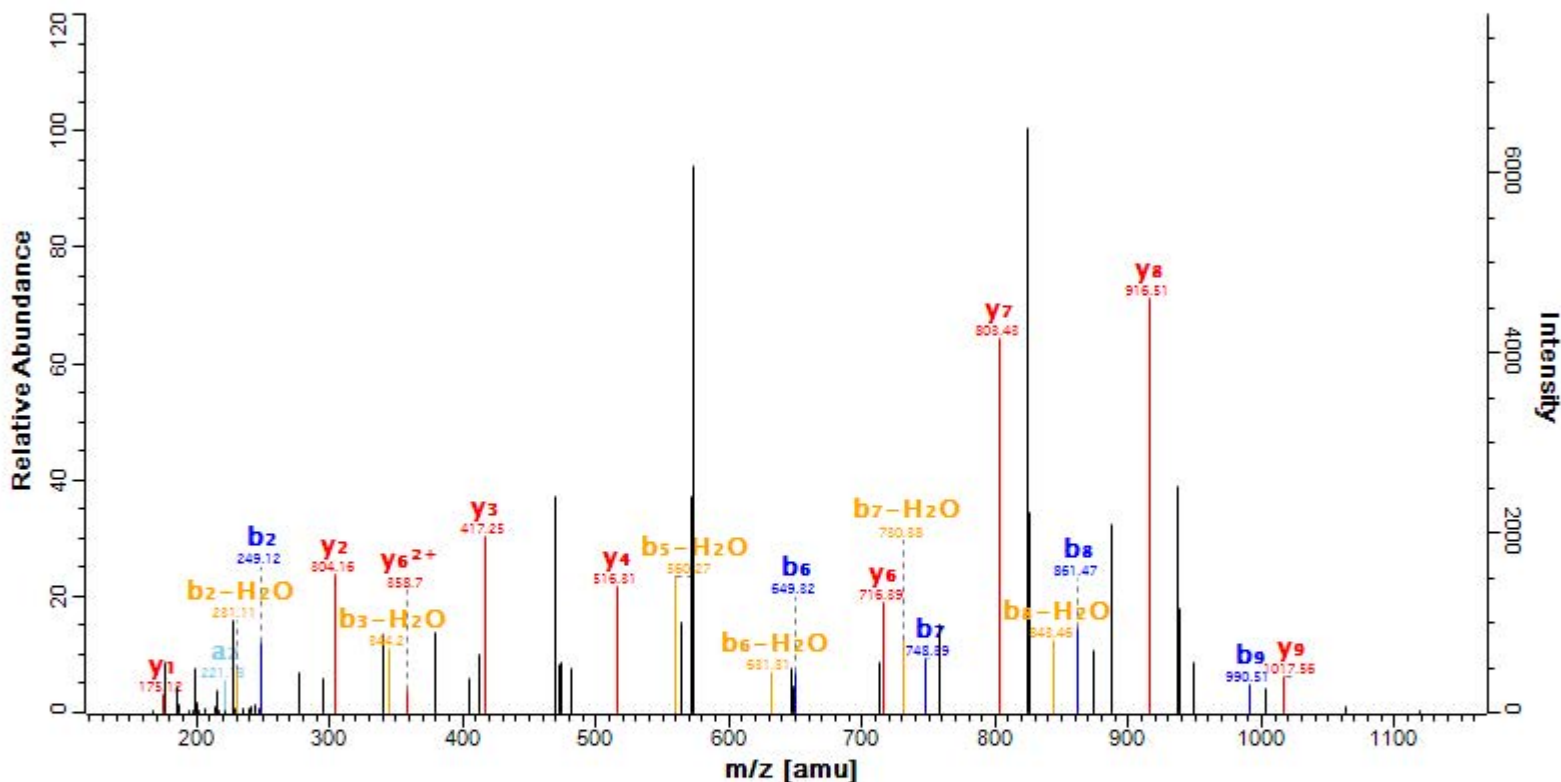

#### precursor information

|                   |                 |
|-------------------|-----------------|
| Mass:             | 1163.61807      |
| m/z:              | 582.81631       |
| Charge:           | 2+              |
| Retentiontime:    | 35.043704986572 |
| Score:            | 112.8336        |
| Mass Error [ppm]: | -0.48474        |
| PEP:              | 0.00041143      |
| Precursor Type:   | ISO             |

|                       |             |
|-----------------------|-------------|
| Annotation:           | 9 of 10     |
| AminoAcids Coverage:  | 90 %        |
| Intensity Coverage:   | 37 %        |
| Peak Coverage:        | 27 %        |
| Protein Localisation: | 450 ... 459 |

| a ion    |        | b ion    |        | seq |   |   | y ion    |         | y <sup>2+</sup> ion |        |
|----------|--------|----------|--------|-----|---|---|----------|---------|---------------------|--------|
| Δ dalton | mass   | Δ dalton | mass   |     |   |   | Δ dalton | mass    | Δ dalton            | mass   |
|          | 120.08 |          | 148.08 | 1   | F | 9 |          |         |                     |        |
| -0.052   | 221.13 | -0.062   | 249.12 | 2   | T | 8 | 1017.6   | -0.445  | 1017.6              |        |
|          | 334.21 |          | 362.21 | 3   | I | 7 | 916.51   | +0.0456 | 916.51              |        |
|          | 421.24 |          | 449.24 | 4   | S | 6 | 803.43   | +0.1078 | 803.43              |        |
|          | 550.29 |          | 578.28 | 5   | E | 5 | 716.39   | +0.1019 | 358.7               | -0.419 |
|          | 621.32 | -0.021   | 649.32 | 6   | A | 4 | 587.35   |         | 587.35              |        |
|          | 720.39 | -0.047   | 748.39 | 7   | V | 3 | 516.31   | -0.002  | 516.31              |        |
|          | 833.48 | -0.125   | 861.47 | 8   | L | 2 | 417.25   | +0.1504 | 417.25              |        |
|          | 962.52 | -0.039   | 990.51 | 9   | E | 1 | 304.16   | +0.065  | 304.16              |        |
|          |        |          |        | 10  | R | 0 | 175.12   | +0.0503 | 175.12              |        |

Scan number 5915 Raw file LNCAP\_Silac\_23F10\_set3\_03  
 Method ITMS: CID Pepti... 142.07

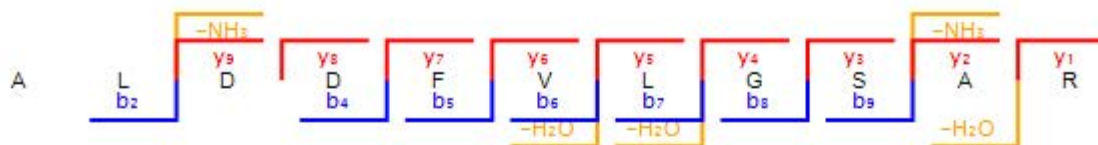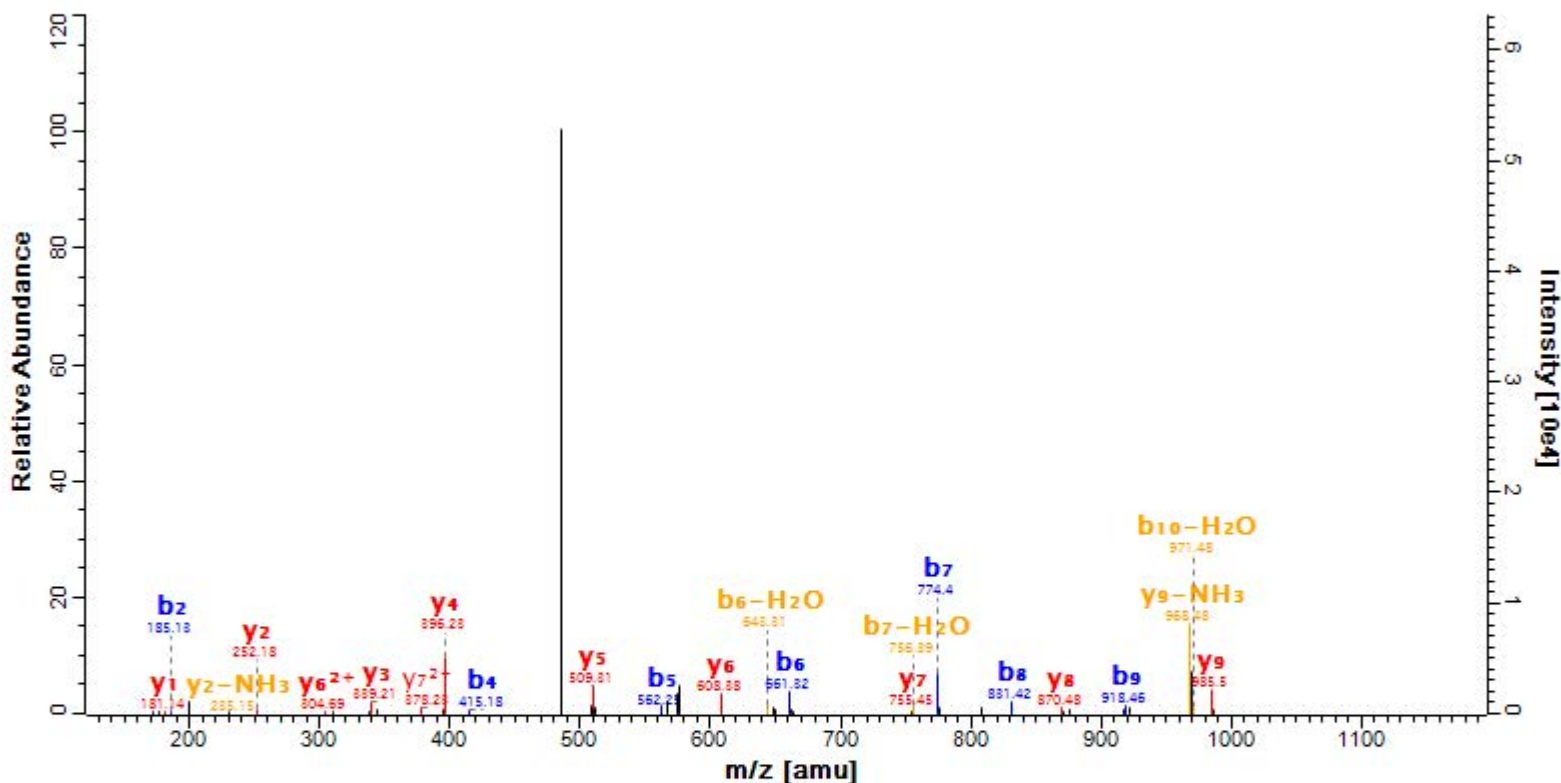

#### precursor information

|                   |                 |
|-------------------|-----------------|
| Mass:             | 0               |
| $m/z$ :           | 585.31634       |
| Charge:           | 0+              |
| Retentiontime:    | 35.460304260253 |
| Score:            | 142.0682        |
| Mass Error [ppm]: | -0.19801        |
| PEP:              | 3.0592E-06      |
| Precursor Type:   | PEAK            |

#### general information

|                       |           |
|-----------------------|-----------|
| Annotation:           | 10 of 11  |
| AminoAcids Coverage:  | 91 %      |
| Intensity Coverage:   | 30 %      |
| Peak Coverage:        | 28 %      |
| Protein Localisation: | 11 ... 21 |

| b ion           |          |    |     |    | y ion           |           | y <sup>2+</sup> ion |           |
|-----------------|----------|----|-----|----|-----------------|-----------|---------------------|-----------|
| $\Delta$ dalton | mass     |    | seq |    | $\Delta$ dalton | mass      | $\Delta$ dalton     | mass      |
|                 | 72.04439 | 1  | A   | 10 |                 |           |                     |           |
| -0.01974        | 185.1285 | 2  | L   | 9  | 1098.589        |           | 1098.589            |           |
|                 | 300.1554 | 3  | D   | 8  | 985.5045        | -0.06739  | 985.5045            |           |
| -0.04294        | 415.1823 | 4  | D   | 7  | 870.4775        | +0.098406 | 870.4775            |           |
| +0.222451       | 562.2508 | 5  | F   | 6  | 755.4506        | +0.035993 | 378.2289            | +0.080765 |
| -0.02956        | 661.3192 | 6  | V   | 5  | 608.3822        | +0.06504  | 304.6947            | -0.44619  |
| -0.05698        | 774.4032 | 7  | L   | 4  | 509.3138        | +0.082428 | 509.3138            |           |
| +0.015551       | 831.4247 | 8  | G   | 3  | 396.2297        | +0.005603 | 396.2297            |           |
| -0.03869        | 918.4567 | 9  | S   | 2  | 339.2082        | +0.103422 | 339.2082            |           |
|                 | 989.4938 | 10 | A   | 1  | 252.1762        | +0.016539 | 252.1762            |           |
|                 |          | 11 | R   | 0  | 181.1391        | -0.08032  | 181.1391            |           |

Scan number 5926 Raw file LNCAP\_Silac\_23F10\_set3\_03  
 Method ITMS; CID Pepti... 145.99

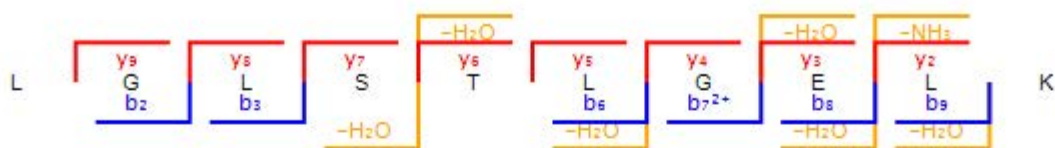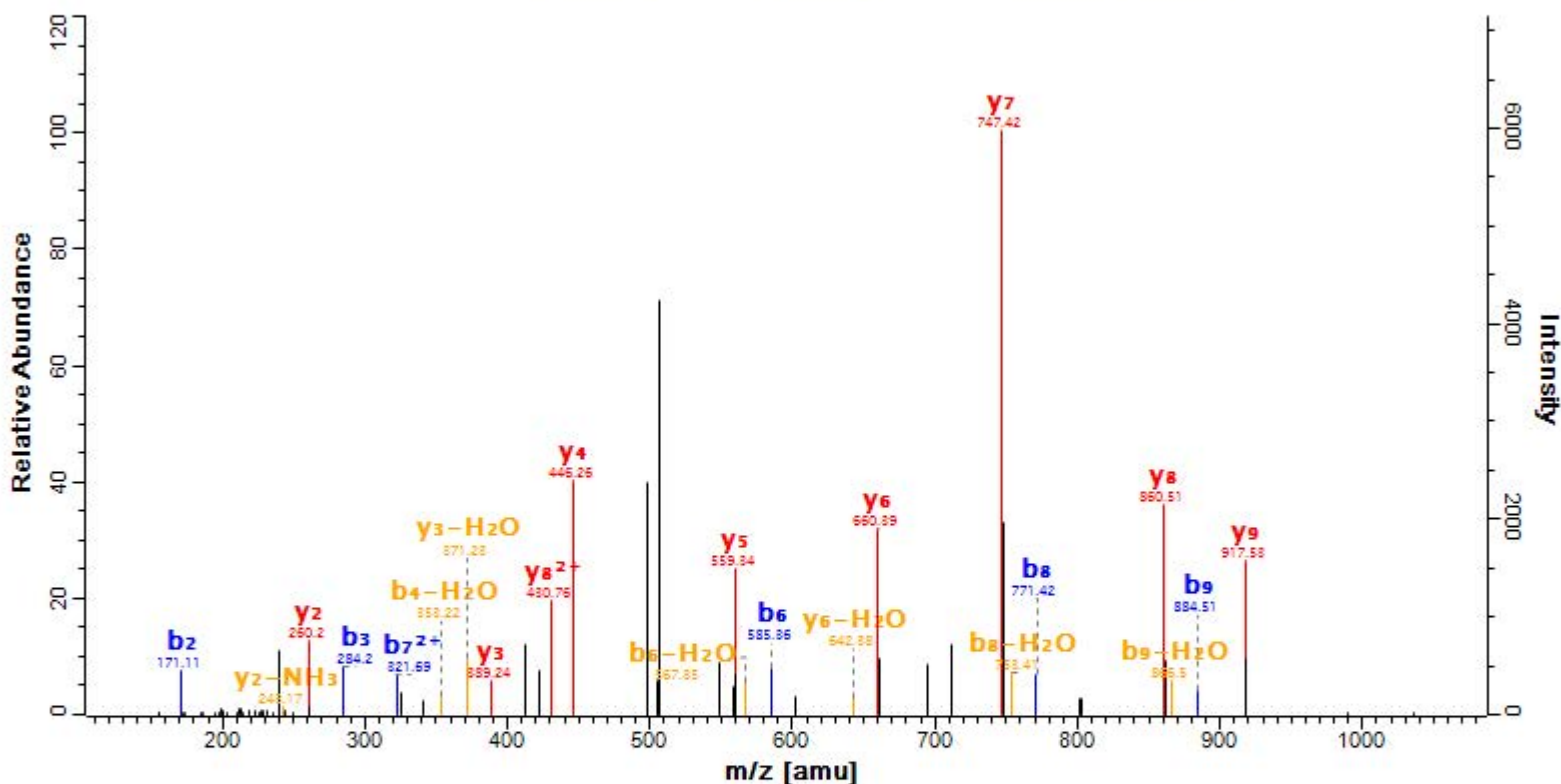

#### precursor information

|                   |                 |
|-------------------|-----------------|
| Mass:             | 1029.607        |
| m/z:              | 515.81078       |
| Charge:           | 2+              |
| Retentiontime:    | 35.512763977050 |
| Score:            | 145.9875        |
| Mass Error [ppm]: | -0.009931       |
| PEP:              | 0.00017417      |
| Precursor Type:   | MULTI           |

|                       |           |
|-----------------------|-----------|
| Annotation:           | 8 of 10   |
| AminoAcids Coverage:  | 80 %      |
| Intensity Coverage:   | 56 %      |
| Peak Coverage:        | 28 %      |
| Protein Localisation: | 81 ... 90 |

| b <sup>2+</sup> ion |        | b ion    |        | seq |   |   | y ion    |         | y <sup>2+</sup> ion |         |
|---------------------|--------|----------|--------|-----|---|---|----------|---------|---------------------|---------|
| Δ dalton            | mass   | Δ dalton | mass   |     |   |   | Δ dalton | mass    | Δ dalton            | mass    |
|                     | 114.09 |          | 114.09 | 1   | L | 9 |          |         |                     |         |
|                     | 171.11 | +0.0285  | 171.11 | 2   | G | 8 | 917.53   | +0.0201 | 917.53              |         |
|                     | 284.2  | -0.049   | 284.2  | 3   | L | 7 | 860.51   | -0.013  | 430.76              | +0.1884 |
|                     | 371.23 |          | 371.23 | 4   | S | 6 | 747.42   | +0.0054 | 747.42              |         |
|                     | 472.28 |          | 472.28 | 5   | T | 5 | 660.39   | -0.039  | 660.39              |         |
|                     | 585.36 | -0.023   | 585.36 | 6   | L | 4 | 559.34   | +0.1371 | 559.34              |         |
| +0.2933             | 321.69 |          | 642.38 | 7   | G | 3 | 446.26   | +0.0547 | 446.26              |         |
|                     | 771.42 | -0.123   | 771.42 | 8   | E | 2 | 389.24   | +0.0618 | 389.24              |         |
|                     | 884.51 | -0.135   | 884.51 | 9   | L | 1 | 260.2    | +0.0319 | 260.2               |         |
|                     |        |          |        | 10  | K | 0 | 147.11   |         | 147.11              |         |

Scan number 620 Raw file LNCAP\_Silac\_23F10\_set3\_03  
 Method ITMS; CID Pepti... 128.38

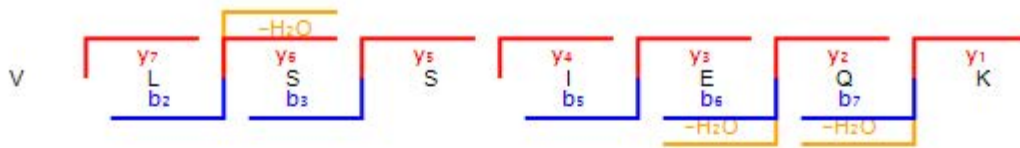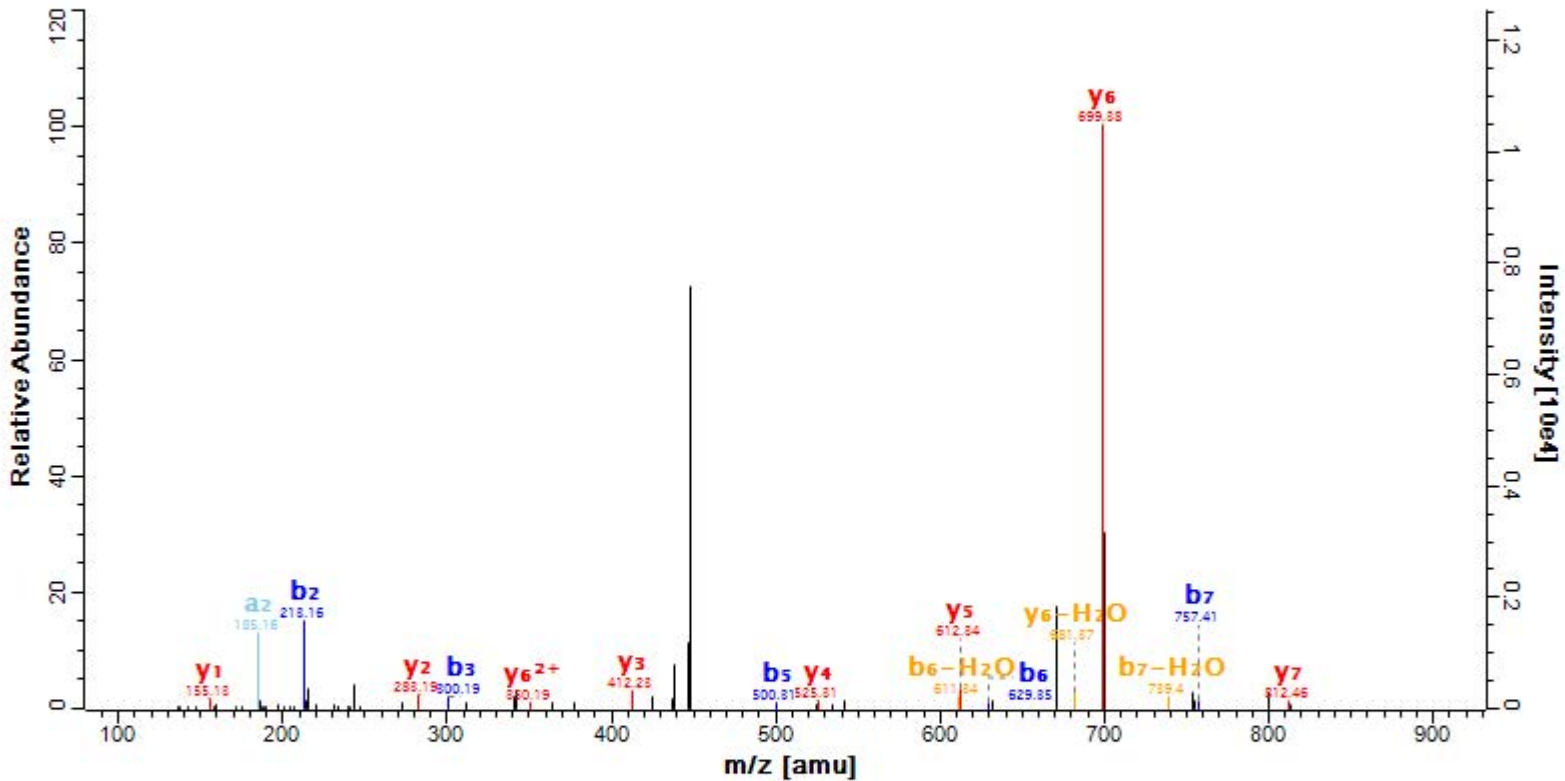

precursor information

|                       |                 |
|-----------------------|-----------------|
| Mass:                 | 902.50701       |
| m/z:                  | 452.26078       |
| Charge:               | 2+              |
| Retentiontime:        | 8.9731950759887 |
| Score:                | 128.3832        |
| Mass Error [ppm]:     | -0.31724        |
| g PEP:                | 0.00069638      |
| Annotation:           | 7 of 8          |
| AminoAcids Coverage:  | 88 %            |
| Intensity Coverage:   | 45 %            |
| Peak Coverage:        | 17 %            |
| Protein Localisation: | 61 ... 68       |

| a ion    |        | b ion    |        |   |     |          | y ion  |          | y <sup>2+</sup> ion |  |
|----------|--------|----------|--------|---|-----|----------|--------|----------|---------------------|--|
| Δ dalton | mass   | Δ dalton | mass   |   | seq | Δ dalton | mass   | Δ dalton | mass                |  |
|          | 72.081 |          | 100.08 | 1 | V   |          |        |          |                     |  |
| -0.063   | 185.16 | +0.0274  | 213.16 | 2 | L   | 6        | 812.46 | +0.0347  | 812.46              |  |
|          | 272.2  | +0.0096  | 300.19 | 3 | S   | 5        | 699.38 | +0.0392  | 350.19              |  |
|          | 359.23 |          | 387.22 | 4 | S   | 4        | 612.34 | +0.0531  | 612.34              |  |
|          | 472.31 | -0.049   | 500.31 | 5 | I   | 3        | 525.31 | +0.1518  | 525.31              |  |
|          | 601.36 | +0.1264  | 629.35 | 6 | E   | 2        | 412.23 | +0.103   | 412.23              |  |
|          | 729.41 | -0.206   | 757.41 | 7 | Q   | 1        | 283.19 | -0.17    | 283.19              |  |
|          |        |          |        | 8 | K   | 0        | 155.13 | +0.0863  | 155.13              |  |

Scan number 621 Raw file LNCAP\_Silac\_23F10\_set3\_03  
 Method ITMS; CID Pepti... 122.13

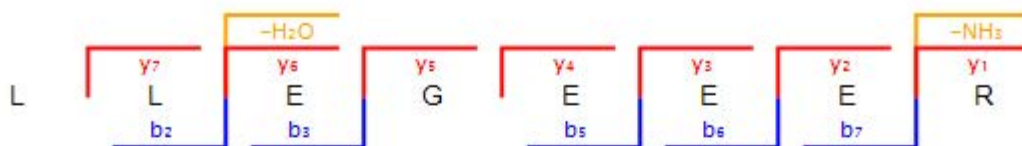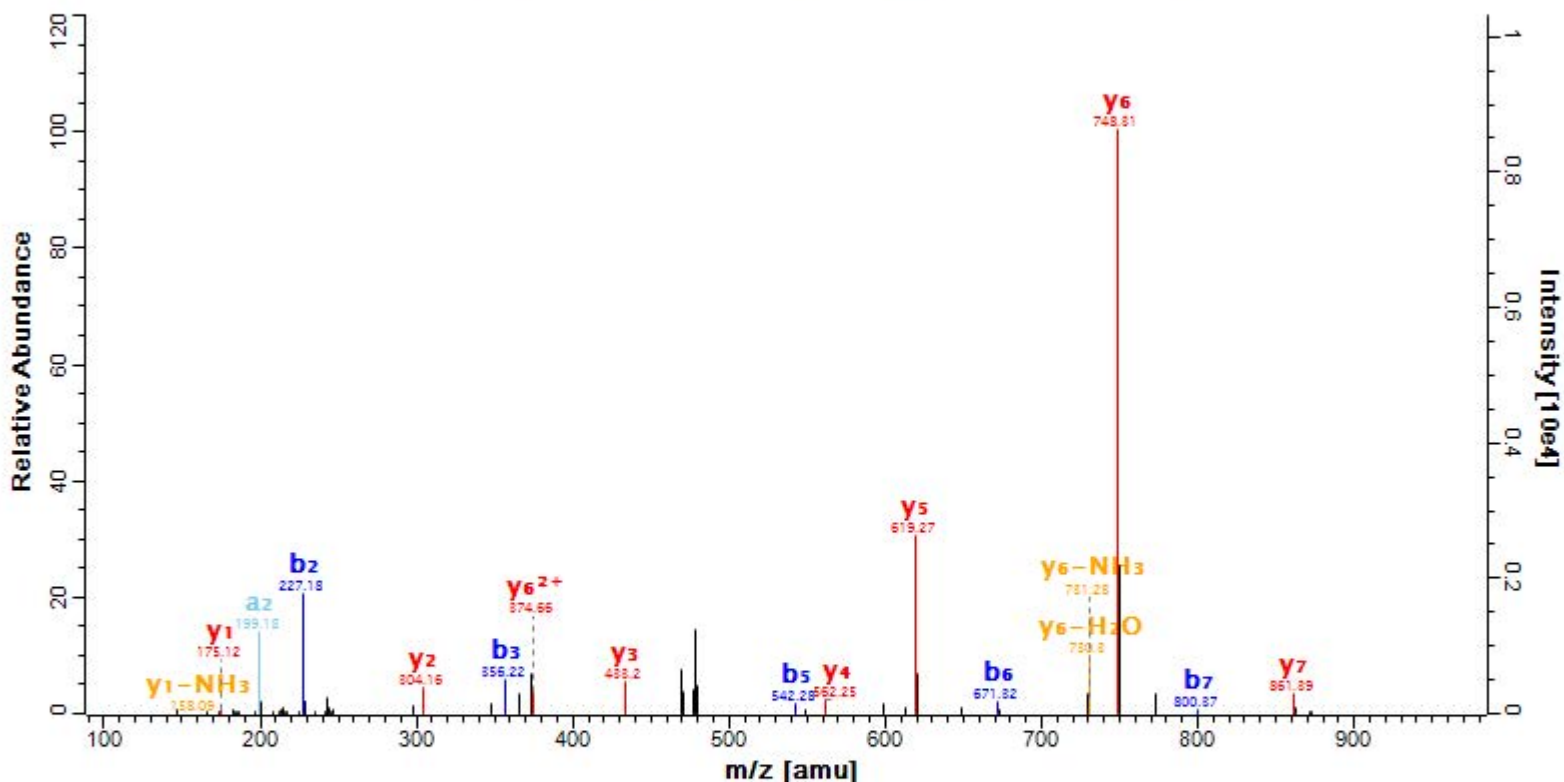

#### precursor information

|                       |                 |
|-----------------------|-----------------|
| Mass:                 | 973.47212       |
| m/z:                  | 487.74333       |
| Charge:               | 2+              |
| Retentiontime:        | 8.9777383804321 |
| Score:                | 122.1349        |
| Mass Error [ppm]:     | 0.48938         |
| g PEP:                | 0.00012892      |
| Annotation:           | 7 of 8          |
| AminoAcids Coverage:  | 88 %            |
| Intensity Coverage:   | 64 %            |
| Peak Coverage:        | 18 %            |
| Protein Localisation: | 379 ... 386     |

| a ion    |        | b ion    |        |   |     |          | y ion  |          | y <sup>2+</sup> ion |  |
|----------|--------|----------|--------|---|-----|----------|--------|----------|---------------------|--|
| Δ dalton | mass   | Δ dalton | mass   |   | seq | Δ dalton | mass   | Δ dalton | mass                |  |
|          | 86.096 |          | 114.09 | 1 | L   | 7        |        |          |                     |  |
| -0.043   | 199.18 | -0.052   | 227.18 | 2 | L   | 6        | 861.39 | +0.112   | 861.39              |  |
|          | 328.22 | +0.1481  | 356.22 | 3 | E   | 5        | 748.31 | +0.0325  | 374.66              |  |
|          | 385.24 |          | 413.24 | 4 | G   | 4        | 619.27 | +0.0522  | 2619.27             |  |
|          | 514.29 | +0.0198  | 542.28 | 5 | E   | 3        | 562.25 | +0.0203  | 562.25              |  |
|          | 643.33 | -0.095   | 671.32 | 6 | E   | 2        | 433.2  | +0.0679  | 433.2               |  |
|          | 772.37 | -0.022   | 800.37 | 7 | E   | 1        | 304.16 | +0.0394  | 304.16              |  |
|          |        |          |        | 8 | R   | 0        | 175.12 | -0.005   | 175.12              |  |

Scan number 642 Raw file LNCAP\_Silac\_23F10\_set3\_03  
 Method ITMS: CID Pepti... 158.04

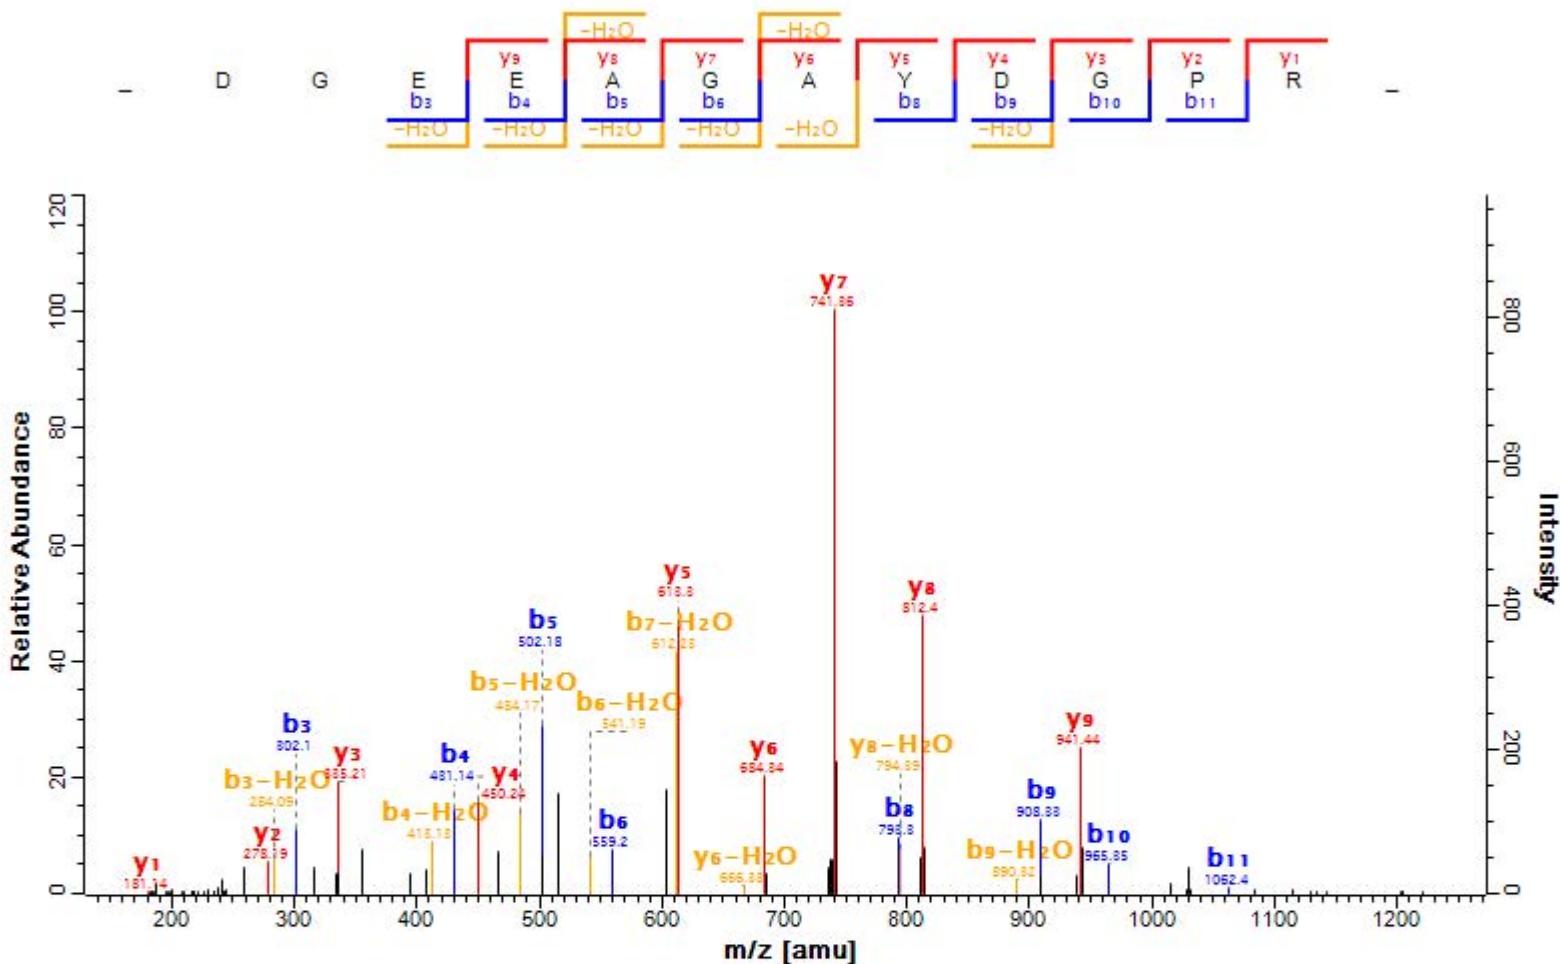

#### precursor information

|                   |                 |
|-------------------|-----------------|
| Mass:             | 1235.50555      |
| m/z:              | 618.76005       |
| Charge:           | 2+              |
| Retentiontime:    | 9.1169786453247 |
| Score:            | 158.0413        |
| Mass Error [ppm]: | 0.076572        |
| PEP:              | 3.8516E-07      |
| Precursor Type:   | MULTI           |

#### general information

|                       |             |
|-----------------------|-------------|
| Annotation:           | 10 of 12    |
| AminoAcids Coverage:  | 83 %        |
| Intensity Coverage:   | 68 %        |
| Peak Coverage:        | 24 %        |
| Protein Localisation: | 108 ... 119 |

| b ion      |               |    |     |    | y ion         |            |
|------------|---------------|----|-----|----|---------------|------------|
| Δ dalton   | mass          |    | seq |    | Δ dalton      | mass       |
|            | 116.034219499 | 1  | D   | 11 |               |            |
|            | 173.055683222 | 2  | G   | 10 | 1127.50592157 |            |
| -0.0530493 | 302.098276318 | 3  | E   | 9  | 1070.48445785 |            |
| +0.076782  | 431.140869415 | 4  | E   | 8  | 941.441864749 | -0.0244453 |
| -0.0325364 | 502.177983202 | 5  | A   | 7  | 812.399271653 | +0.0307821 |
| +0.0684364 | 559.199446926 | 6  | G   | 6  | 741.362157865 | +0.024744  |
|            | 630.236560714 | 7  | A   | 5  | 684.340694141 | -0.0405843 |
| -0.0034415 | 793.299889252 | 8  | Y   | 4  | 613.303580354 | +0.045968  |
| +0.0611682 | 908.326832284 | 9  | D   | 3  | 450.240251815 | +0.0030954 |
| -0.009673  | 965.348296008 | 10 | G   | 2  | 335.213308783 | +0.0129485 |
| +0.0514548 | 1062.40105986 | 11 | P   | 1  | 278.19184506  | +0.059925  |
|            |               | 12 | R   | 0  | 181.139081208 | +0.0210445 |

Scan number 643 Raw file LNCAP\_Silac\_23F10\_set3\_03  
 Method ITMS; CID Pepti... 145.28

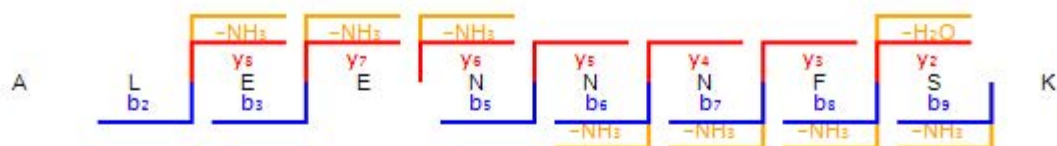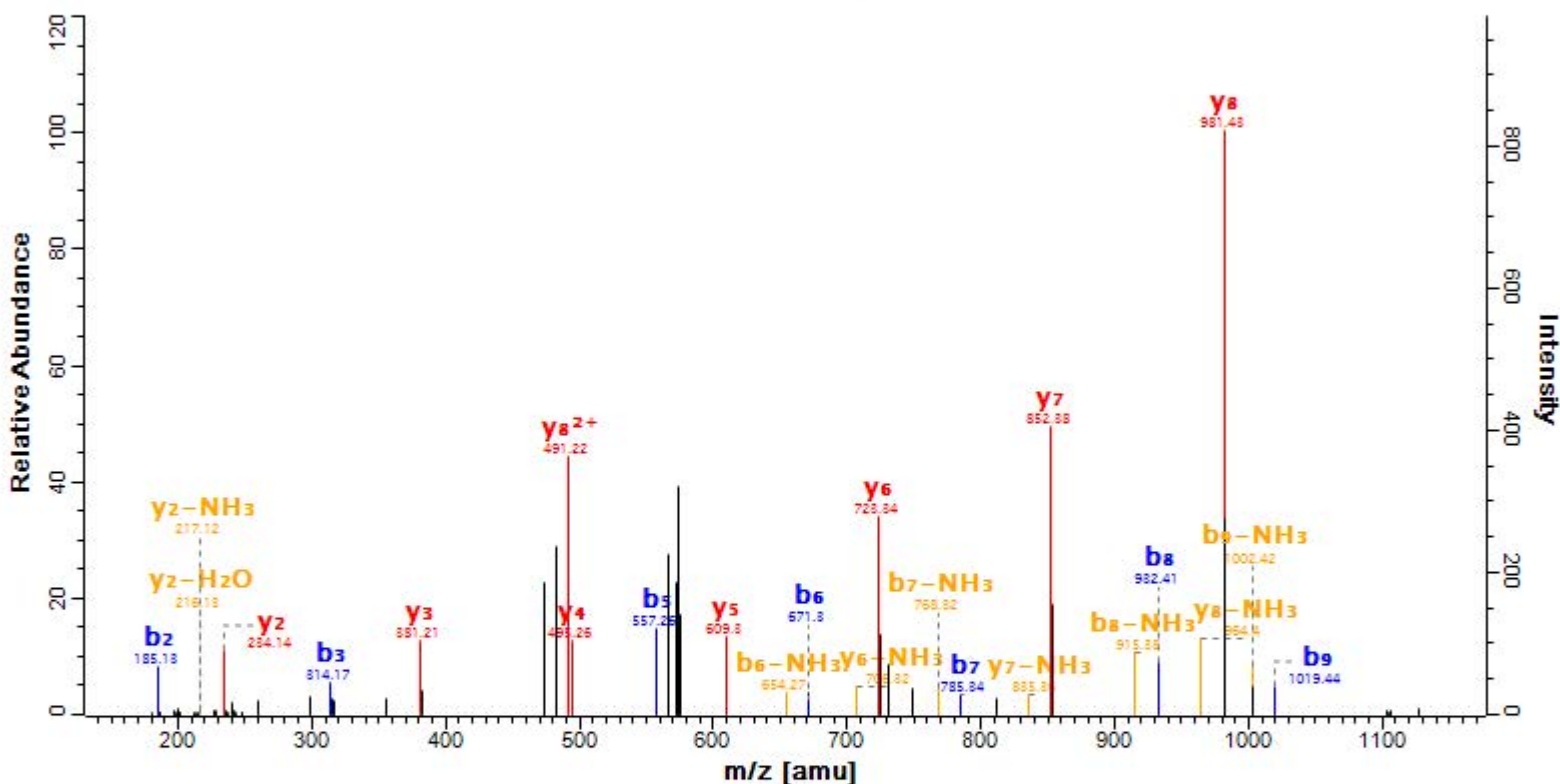

#### precursor information

|                   |                 |
|-------------------|-----------------|
| Mass:             | 1164.54119      |
| m/z:              | 583.27787       |
| Charge:           | 2+              |
| Retentiontime:    | 9.1274967193603 |
| Score:            | 145.2753        |
| Mass Error [ppm]: | 0.062441        |
| PEP:              | 0.0001776       |
| Precursor Type:   | MULTI           |

|                       |             |
|-----------------------|-------------|
| Annotation:           | 8 of 10     |
| AminoAcids Coverage:  | 80 %        |
| Intensity Coverage:   | 54 %        |
| Peak Coverage:        | 29 %        |
| Protein Localisation: | 120 ... 129 |

| b ion     |          |     |   | y ion    |           | y <sup>2+</sup> ion |           |
|-----------|----------|-----|---|----------|-----------|---------------------|-----------|
| Δ dalton  | mass     | seq |   | Δ dalton | mass      | Δ dalton            | mass      |
|           | 72.04439 | 1   | A |          |           |                     |           |
| +0.038141 | 185.1285 | 2   | L | 1094.511 |           | 1094.511            |           |
| +0.042026 | 314.171  | 3   | E | 981.4272 | +0.066498 | 491.2172            | +0.163003 |
|           | 443.2136 | 4   | E | 852.3846 | -0.03166  | 852.3846            |           |
| +0.209985 | 557.2566 | 5   | N | 723.342  | -0.05712  | 723.342             |           |
| +0.184025 | 671.2995 | 6   | N | 609.2991 | -0.00381  | 609.2991            |           |
| -0.03566  | 785.3424 | 7   | N | 495.2562 | +0.050528 | 495.2562            |           |
| -0.03224  | 932.4108 | 8   | F | 381.2132 | +0.077891 | 381.2132            |           |
| +0.042059 | 1019.443 | 9   | S | 234.1448 | +0.028126 | 234.1448            |           |
|           |          | 10  | K | 147.1128 |           | 147.1128            |           |



Scan number 6655 Raw file LNCAP\_Silac\_23F10\_set3\_03  
 Method ITMS; CID Pepti... 218.55

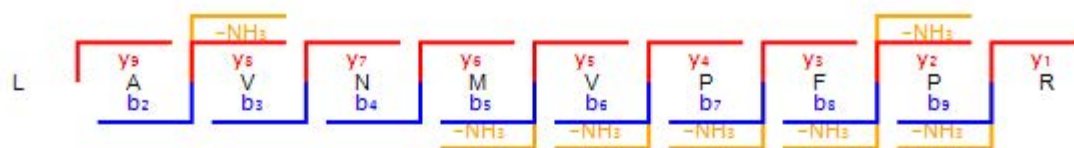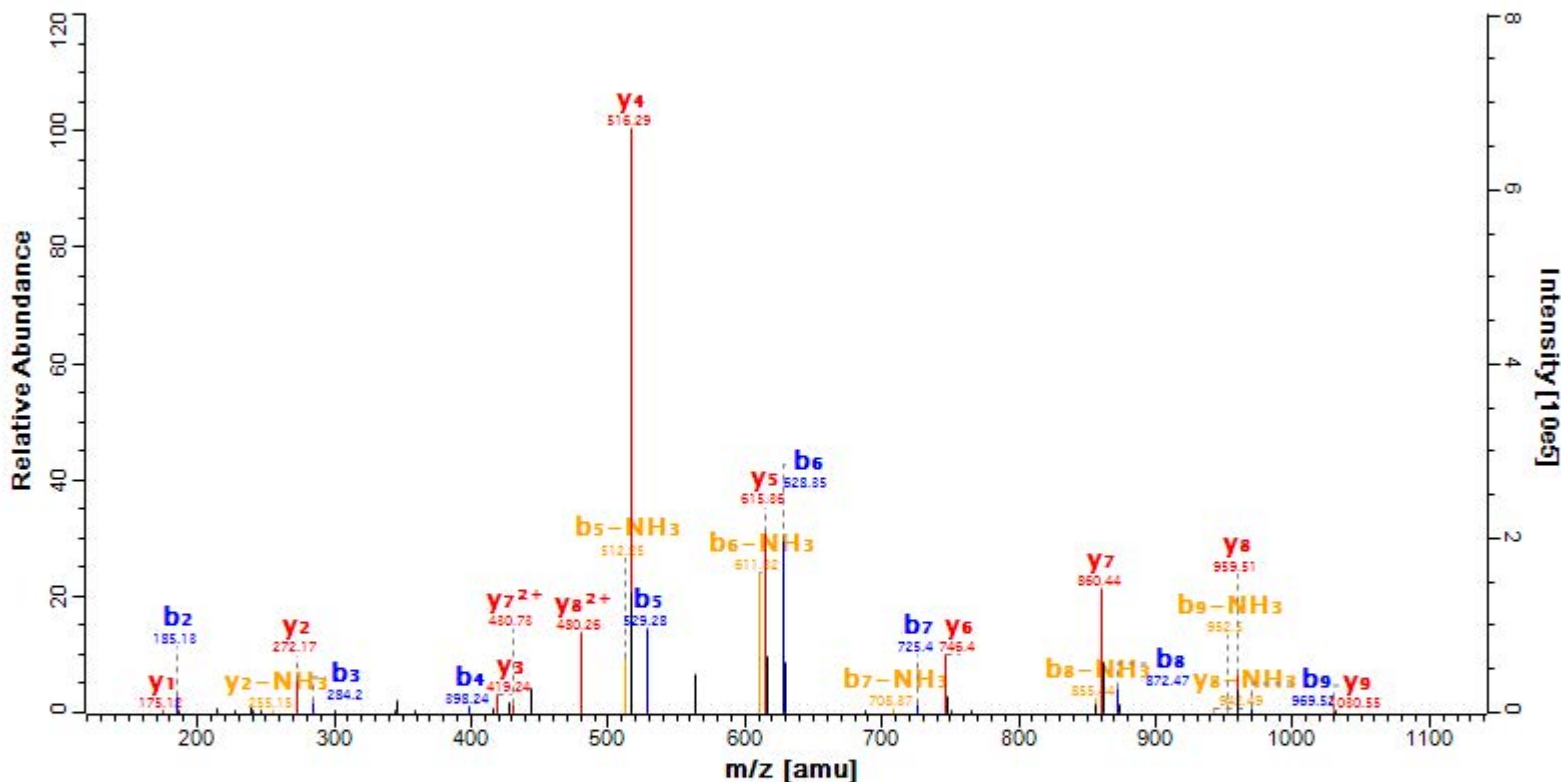

### precursor information

|                   |                 |
|-------------------|-----------------|
| Mass:             | 1142.62699      |
| m/z:              | 572.32077       |
| Charge:           | 2+              |
| Retentiontime:    | 39.089351654052 |
| Score:            | 218.5476        |
| Mass Error [ppm]: | -0.039536       |
| PEP:              | 3.5602E-19      |
| Precursor Type:   | MULTI           |

|                       |             |
|-----------------------|-------------|
| Annotation:           | 9 of 10     |
| AminoAcids Coverage:  | 90 %        |
| Intensity Coverage:   | 79 %        |
| Peak Coverage:        | 40 %        |
| Protein Localisation: | 253 ... 262 |

| b ion     |          |    |     |   | y ion    |           | y <sup>2+</sup> ion |           |
|-----------|----------|----|-----|---|----------|-----------|---------------------|-----------|
| Δ dalton  | mass     |    | seq |   | Δ dalton | mass      | Δ dalton            | mass      |
|           | 114.0913 | 1  | L   | 9 |          |           |                     |           |
| -0.02215  | 185.1285 | 2  | A   | 8 | 1030.55  | -0.34187  | 1030.55             |           |
| +0.015412 | 284.1969 | 3  | V   | 7 | 959.5131 | +0.029164 | 480.2602            | +0.251147 |
| +0.017284 | 398.2398 | 4  | N   | 6 | 860.4447 | -0.01753  | 430.726             | -0.38951  |
| -0.00483  | 529.2803 | 5  | M   | 5 | 746.4018 | +0.02051  | 746.4018            |           |
| -0.02942  | 628.3487 | 6  | V   | 4 | 615.3613 | +0.03182  | 615.3613            |           |
| -0.05661  | 725.4015 | 7  | P   | 3 | 516.2929 | +0.011733 | 516.2929            |           |
| -0.0707   | 872.4699 | 8  | F   | 2 | 419.2401 | +0.009809 | 419.2401            |           |
| +0.036874 | 969.5226 | 9  | P   | 1 | 272.1717 | +0.056128 | 272.1717            |           |
|           |          | 10 | R   | 0 | 175.119  | -0.00338  | 175.119             |           |

Scan number 6854 Raw file LNCAP\_Silac\_23F10\_set3\_03  
 Method ITMS: CID Pepti... 100.04

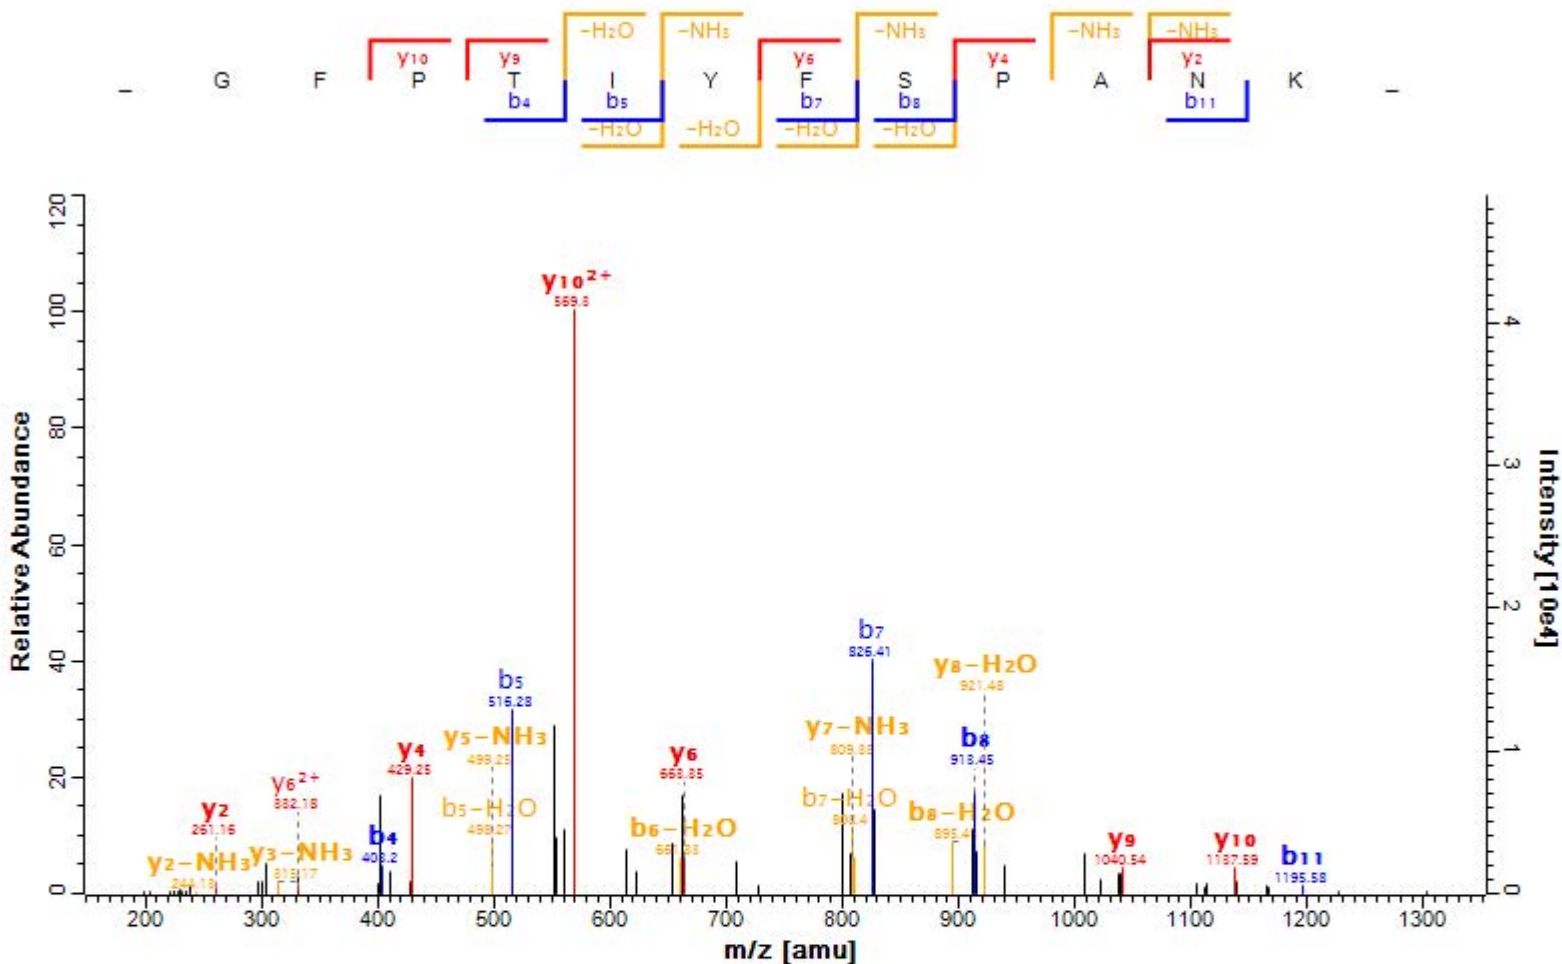

#### precursor information

|                   |                 |
|-------------------|-----------------|
| Mass:             | 1340.67604      |
| m/z:              | 671.3453        |
| Charge:           | 2+              |
| Retentiontime:    | 40.038631439209 |
| Score:            | 100.037         |
| Mass Error [ppm]: | -0.33175        |
| PEP:              | 0.00027665      |
| Precursor Type:   | MULTI           |

#### general information

|                       |             |
|-----------------------|-------------|
| Annotation:           | 9 of 12     |
| AminoAcids Coverage:  | 75 %        |
| Intensity Coverage:   | 53 %        |
| Peak Coverage:        | 26 %        |
| Protein Localisation: | 449 ... 460 |

| b ion     |          |    |     |    | y ion    |           | y <sup>2+</sup> ion |           |
|-----------|----------|----|-----|----|----------|-----------|---------------------|-----------|
| Δ dalton  | mass     |    | seq |    | Δ dalton | mass      | Δ dalton            | mass      |
|           | 58.02874 | 1  | G   | 11 |          |           |                     |           |
|           | 205.0972 | 2  | F   | 10 | 1284.662 |           | 1284.662            |           |
|           | 302.1499 | 3  | P   | 9  | 1137.594 | -0.07313  | 569.3006            | +0.229387 |
| +0.099401 | 403.1976 | 4  | T   | 8  | 1040.541 | -0.00401  | 1040.541            |           |
| +0.083513 | 516.2817 | 5  | I   | 7  | 939.4934 |           | 939.4934            |           |
|           | 679.345  | 6  | Y   | 6  | 826.4094 |           | 826.4094            |           |
| +0.009449 | 826.4134 | 7  | F   | 5  | 663.3461 | +0.083453 | 332.1767            | -0.00265  |
| +0.03046  | 913.4454 | 8  | S   | 4  | 516.2776 |           | 516.2776            |           |
|           | 1010.498 | 9  | P   | 3  | 429.2456 | +0.034359 | 429.2456            |           |
|           | 1081.535 | 10 | A   | 2  | 332.1928 |           | 332.1928            |           |
| -0.07787  | 1195.578 | 11 | N   | 1  | 261.1557 | +0.269653 | 261.1557            |           |
|           |          | 12 | K   | 0  | 147.1128 |           | 147.1128            |           |

Scan number 6929 Raw file LNCAP\_Silac\_23F10\_set3\_03  
 Method ITMS; CID Pepti... 152.07

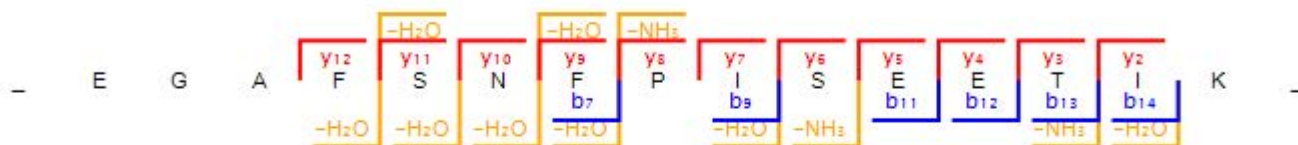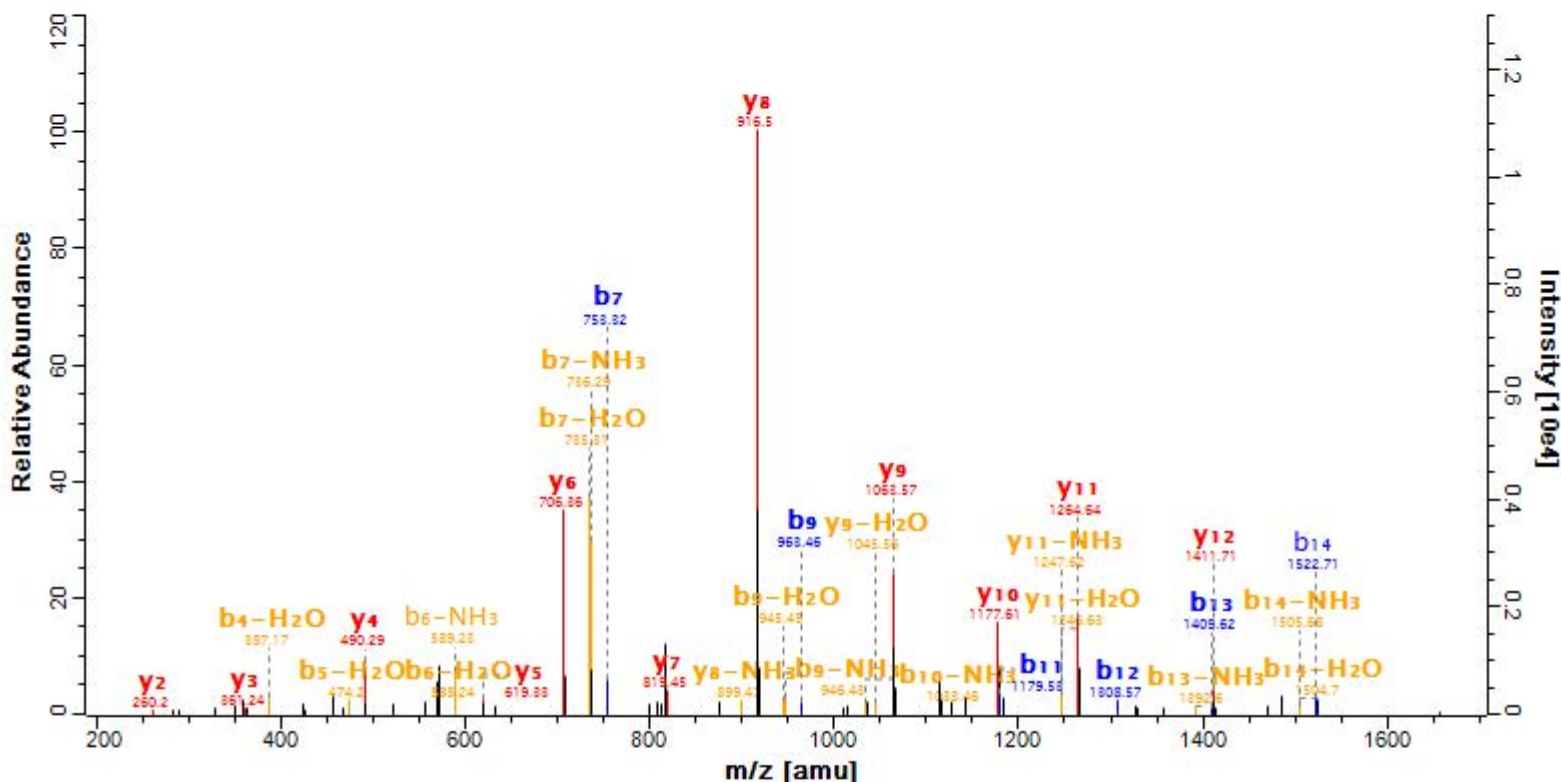

#### precursor information

|                   |                 |
|-------------------|-----------------|
| Mass:             | 1667.80435      |
| m/z:              | 834.90945       |
| Charge:           | 2+              |
| Retentiontime:    | 40.412994384765 |
| Score:            | 152.0666        |
| Mass Error [ppm]: | 0.047337        |
| PEP:              | 4.1526E-09      |
| Precursor Type:   | ISO             |

#### general information

|                       |             |
|-----------------------|-------------|
| Annotation:           | 12 of 15    |
| AminoAcids Coverage:  | 80 %        |
| Intensity Coverage:   | 63 %        |
| Peak Coverage:        | 39 %        |
| Protein Localisation: | 185 ... 199 |

| b ion      |               |     |   | y ion    |               |            |
|------------|---------------|-----|---|----------|---------------|------------|
| Δ dalton   | mass          | seq |   | Δ dalton | mass          |            |
|            | 130.049869563 | 1   | E | 14       |               |            |
|            | 187.071333286 | 2   | G | 13       | 1539.76895026 |            |
|            | 258.108447074 | 3   | A | 12       | 1482.74748654 |            |
|            | 405.17686099  | 4   | F | 11       | 1411.71037275 | -0.0630339 |
|            | 492.2088894   | 5   | S | 10       | 1264.64195883 | -0.0749422 |
|            | 606.251816848 | 6   | N | 9        | 1177.60993042 | -0.0777039 |
| +0.0348107 | 753.320230764 | 7   | F | 8        | 1063.56700298 | -0.0231797 |
|            | 850.372994616 | 8   | P | 7        | 916.49858906  | -0.0023122 |
| +0.1023286 | 963.457058596 | 9   | I | 6        | 819.445825208 | +0.0013794 |
|            | 1050.48908701 | 10  | S | 5        | 706.361761227 | +0.0288638 |
| -0.1891508 | 1179.5316801  | 11  | E | 4        | 619.329732818 | +0.027628  |
| -0.348321  | 1308.5742732  | 12  | E | 3        | 490.287139721 | -0.0578917 |
| -0.1036411 | 1409.62195167 | 13  | T | 2        | 361.244546625 | +0.1982329 |
| -0.2284766 | 1522.70601565 | 14  | I | 1        | 260.196868151 | -0.0816643 |
|            |               | 15  | K | 0        | 147.112804171 |            |

Scan number 7005 Raw file LNCAP\_Silac\_23F10\_set3\_03  
 Method ITMS: CID Pepti... 292.66

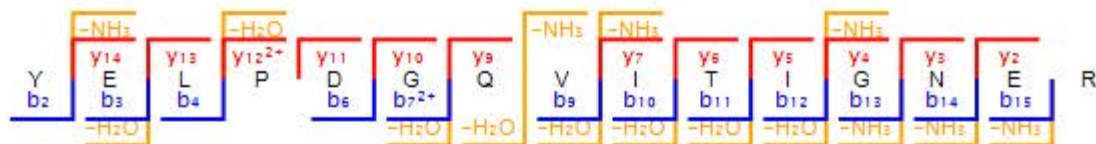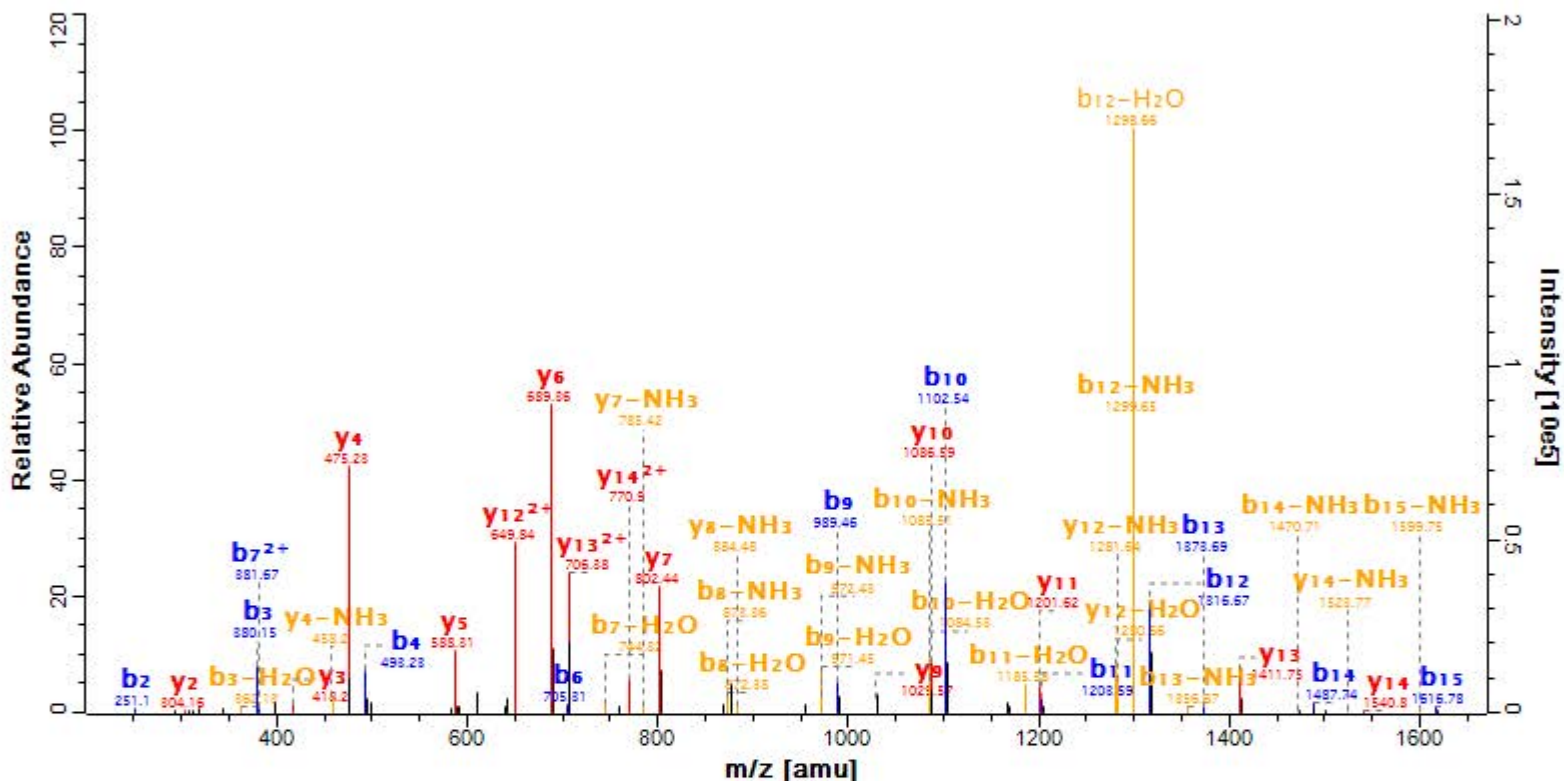

#### precursor information

|                   |                 |
|-------------------|-----------------|
| Mass:             | 1789.88459      |
| m/z:              | 895.94957       |
| Charge:           | 2+              |
| Retentiontime:    | 40.801383972168 |
| Score:            | 292.6572        |
| Mass Error [ppm]: | -0.031397       |
| PEP:              | 6.7037E-89      |
| Precursor Type:   | MULTI           |

#### general information

|                       |             |
|-----------------------|-------------|
| Annotation:           | 14 of 16    |
| AminoAcids Coverage:  | 88 %        |
| Intensity Coverage:   | 83 %        |
| Peak Coverage:        | 55 %        |
| Protein Localisation: | 239 ... 254 |

| b <sup>2+</sup> ion |        | b ion    |        | seq |   |    | y ion    |         | y <sup>2+</sup> ion |         |
|---------------------|--------|----------|--------|-----|---|----|----------|---------|---------------------|---------|
| Δ dalton            | mass   | Δ dalton | mass   |     |   |    | Δ dalton | mass    | Δ dalton            | mass    |
|                     | 88.039 |          | 88.039 | 1   | S | 15 |          |         |                     |         |
|                     | 251.1  | -0.047   | 251.1  | 2   | Y | 14 | 1703.9   |         | 1703.9              |         |
|                     | 380.15 | +0.0795  | 380.15 | 3   | E | 13 | 1540.8   | +0.1065 | 770.9               | +0.1648 |
|                     | 493.23 | +0.0055  | 493.23 | 4   | L | 12 | 1411.8   | +0.0137 | 706.38              | -0.02   |
|                     | 590.28 |          | 590.28 | 5   | P | 11 | 1298.7   |         | 649.84              | +0.2383 |
|                     | 705.31 | +0.057   | 705.31 | 6   | D | 10 | 1201.6   | -0.135  | 1201.6              |         |
| -0.5                | 381.67 |          | 762.33 | 7   | G | 9  | 1086.6   | -0.095  | 1086.6              |         |
|                     | 890.39 |          | 890.39 | 8   | Q | 8  | 1029.6   | +0.125  | 1029.6              |         |
|                     | 989.46 | -0.097   | 989.46 | 9   | V | 7  | 901.51   |         | 901.51              |         |
|                     | 1102.5 | -0.074   | 1102.5 | 10  | I | 6  | 802.44   | +0.0343 | 802.44              |         |
|                     | 1203.6 | +0.1027  | 1203.6 | 11  | T | 5  | 689.36   | -0.007  | 689.36              |         |
|                     | 1316.7 | -0.142   | 1316.7 | 12  | I | 4  | 588.31   | +0.0964 | 588.31              |         |
|                     | 1373.7 | -0.173   | 1373.7 | 13  | G | 3  | 475.23   | +0.0368 | 475.23              |         |
|                     | 1487.7 | -0.068   | 1487.7 | 14  | N | 2  | 418.2    | +0.1257 | 418.2               |         |
|                     | 1616.8 | -0.022   | 1616.8 | 15  | E | 1  | 304.16   | +0.0353 | 304.16              |         |
|                     |        |          |        | 16  | R | 0  | 175.12   |         | 175.12              |         |

Scan number 748 Raw file LNCAP\_Silac\_23F10\_set3\_03  
 Method ITMS; CID Pepti... 101.43

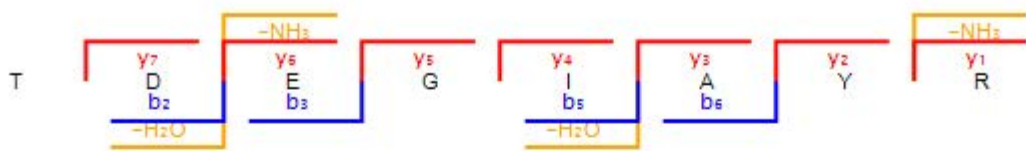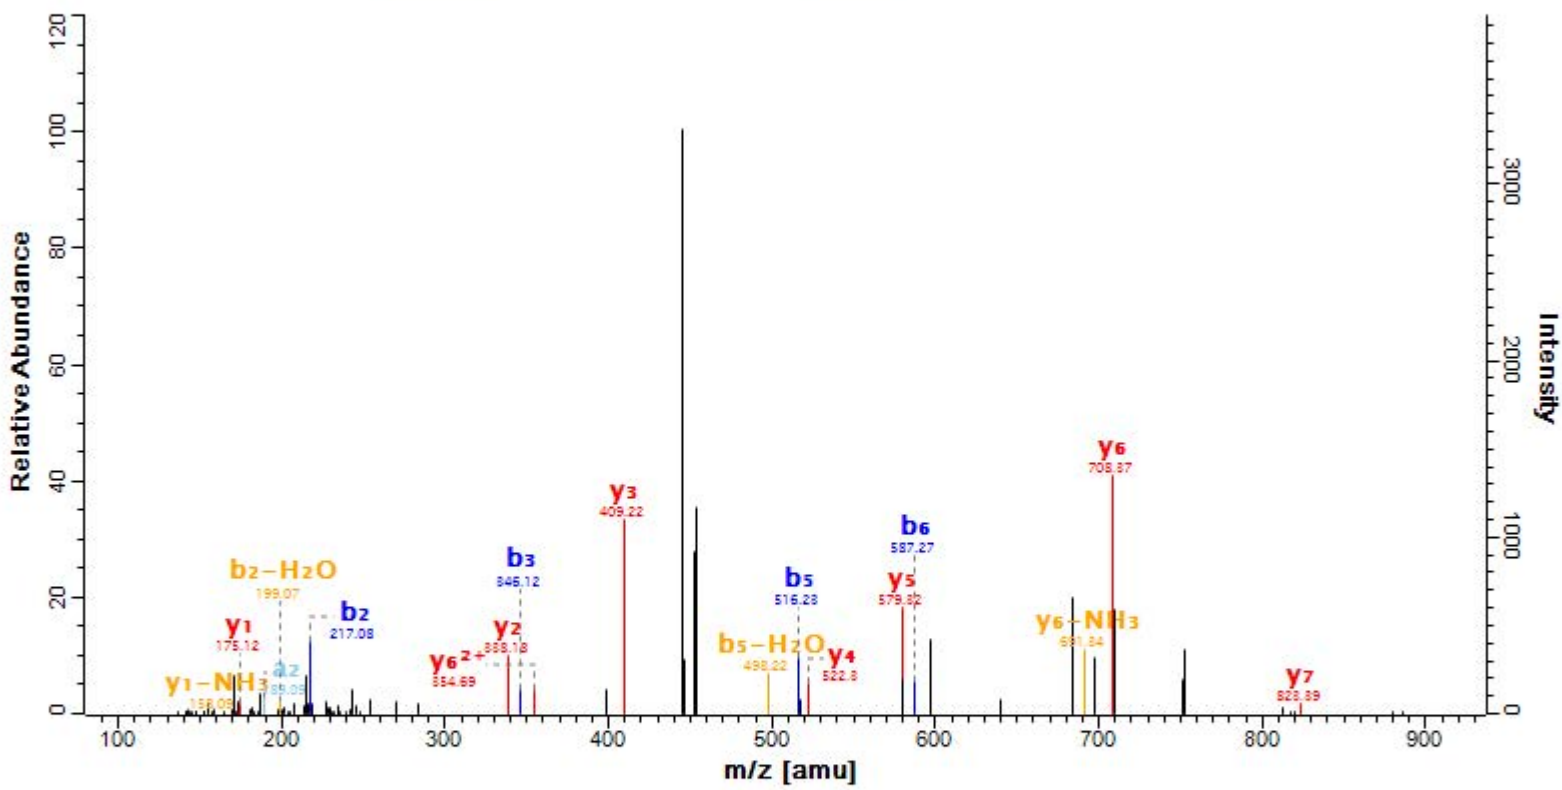

**precursor information**

|                       |                 |
|-----------------------|-----------------|
| Mass:                 | 923.43542       |
| m/z:                  | 462.72499       |
| Charge:               | 2+              |
| Retentiontime:        | 9.8094615936279 |
| Score:                | 101.4306        |
| Mass Error [ppm]:     | 0.61022         |
| g PEP:                | 0.0057725       |
| Annotation:           | 7 of 8          |
| AminoAcids Coverage:  | 88 %            |
| Intensity Coverage:   | 32 %            |
| Peak Coverage:        | 15 %            |
| Protein Localisation: | 120 ... 127     |

| a ion    |        | b ion    |        |   |     |          | y ion  |          | y <sup>2+</sup> ion |  |
|----------|--------|----------|--------|---|-----|----------|--------|----------|---------------------|--|
| Δ dalton | mass   | Δ dalton | mass   |   | seq | Δ dalton | mass   | Δ dalton | mass                |  |
|          | 74.06  |          | 102.05 | 1 | T   | 7        |        |          |                     |  |
| +0.0579  | 189.09 | +0.0077  | 217.08 | 2 | D   | 6        | 823.39 | +0.0592  | 823.39              |  |
|          | 318.13 | +0.1707  | 346.12 | 3 | E   | 5        | 708.37 | +0.0834  | 354.69              |  |
|          | 375.15 |          | 403.15 | 4 | G   | 4        | 579.32 | +0.0833  | 359.32              |  |
|          | 488.24 | -0.038   | 516.23 | 5 | I   | 3        | 522.3  | +0.0675  | 522.3               |  |
|          | 559.27 | +0.0338  | 587.27 | 6 | A   | 2        | 409.22 | -0.005   | 409.22              |  |
|          | 722.34 |          | 750.33 | 7 | Y   | 1        | 338.18 | +0.1399  | 338.18              |  |
|          |        |          |        | 8 | R   | 0        | 175.12 | +0.0046  | 175.12              |  |

Scan number 7494 Raw file LNCAP\_Silac\_23F10\_set3\_03  
 Method ITMS: CID Pepti... 74.48

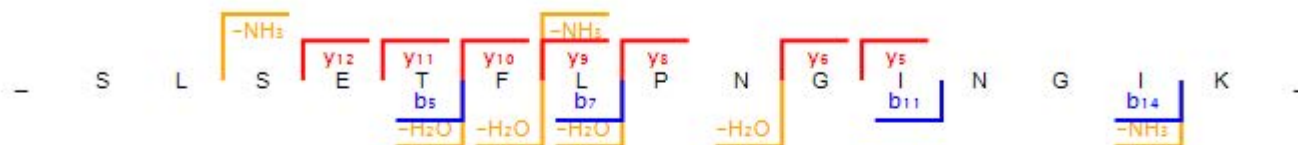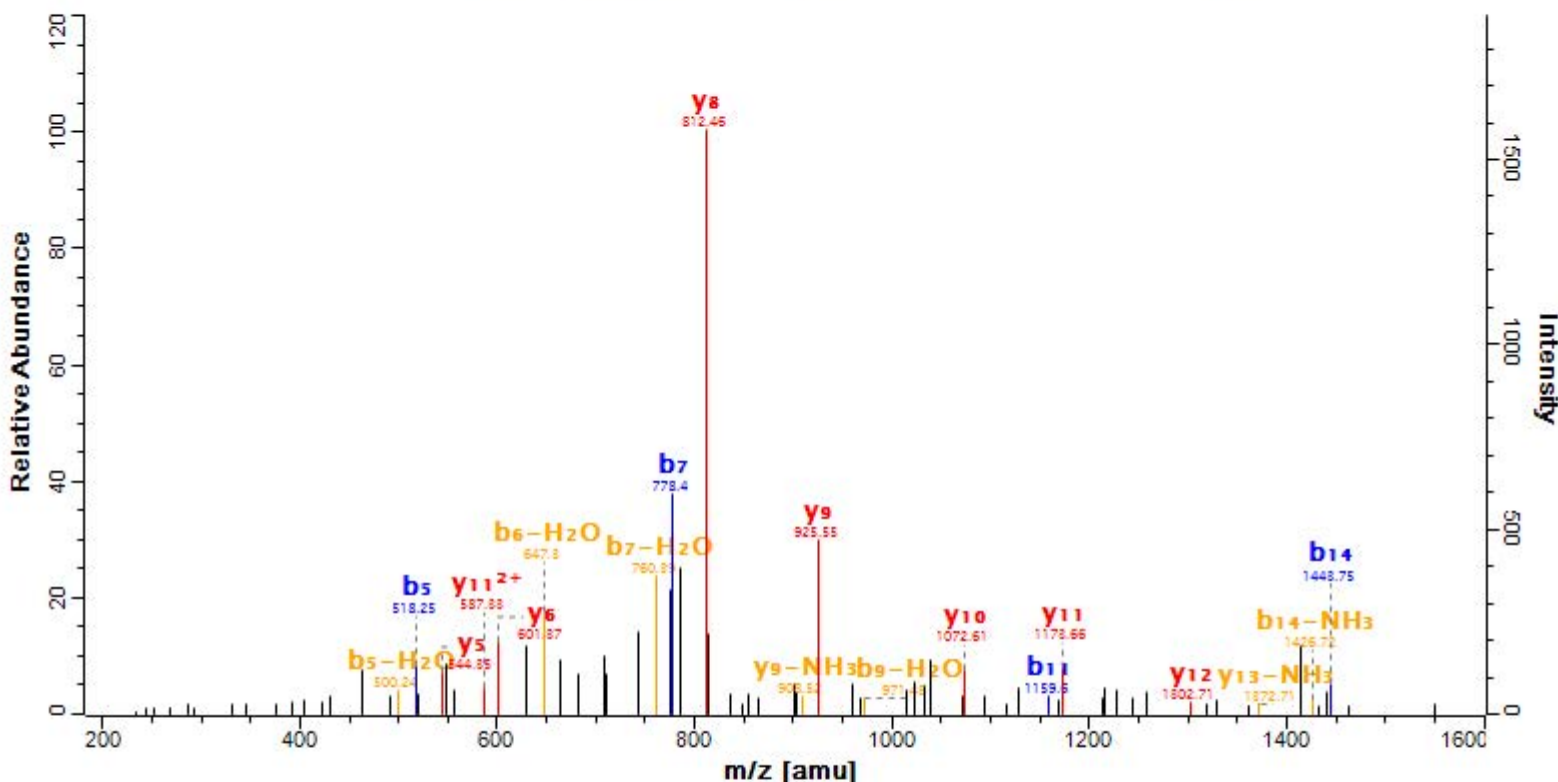

**precursor information**

|                   |                 |
|-------------------|-----------------|
| Mass:             | 1588.84597      |
| m/z:              | 795.43026       |
| Charge:           | 2+              |
| Retentiontime:    | 43.301300048828 |
| Score:            | 74.47521        |
| Mass Error [ppm]: | -0.06218        |
| PEP:              | 0.00085729      |
| Precursor Type:   | MULTI           |

**general information**

|                       |           |
|-----------------------|-----------|
| Annotation:           | 10 of 15  |
| AminoAcids Coverage:  | 67 %      |
| Intensity Coverage:   | 49 %      |
| Peak Coverage:        | 23 %      |
| Protein Localisation: | 12 ... 26 |

| b ion     |          |     |   | y ion    |          | y <sup>2+</sup> ion |          |
|-----------|----------|-----|---|----------|----------|---------------------|----------|
| Δ dalton  | mass     | seq |   | Δ dalton | mass     | Δ dalton            | mass     |
|           | 88.0393  | 1   | S | 14       |          |                     |          |
|           | 201.1234 | 2   | L | 13       | 1502.821 | 1502.821            |          |
|           | 288.1554 | 3   | S | 12       | 1389.737 | 1389.737            |          |
|           | 417.198  | 4   | E | 11       | 1302.705 | -0.09341            | 1302.705 |
| +0.00543  | 518.2457 | 5   | T | 10       | 1173.663 | +0.02633            | 587.335  |
|           | 665.3141 | 6   | F | 9        | 1072.615 | +0.027134           | 1072.615 |
| -0.16395  | 778.3981 | 7   | L | 8        | 925.5465 | +0.15701            | 925.5465 |
|           | 875.4509 | 8   | P | 7        | 812.4625 | -0.00636            | 812.4625 |
|           | 989.4938 | 9   | N | 6        | 715.4097 |                     | 715.4097 |
|           | 1046.515 | 10  | G | 5        | 601.3668 | +0.085239           | 601.3668 |
| +0.062133 | 1159.599 | 11  | I | 4        | 544.3453 | +0.31526            | 544.3453 |
|           | 1273.642 | 12  | N | 3        | 431.2613 |                     | 431.2613 |
|           | 1330.664 | 13  | G | 2        | 317.2183 |                     | 317.2183 |
| +0.254987 | 1443.748 | 14  | I | 1        | 260.1969 |                     | 260.1969 |
|           |          | 15  | K | 0        | 147.1128 |                     | 147.1128 |

Scan number 759 Raw file LNCAP\_Silac\_23F10\_set3\_03  
 Method ITMS; CID Pepti... 166.14

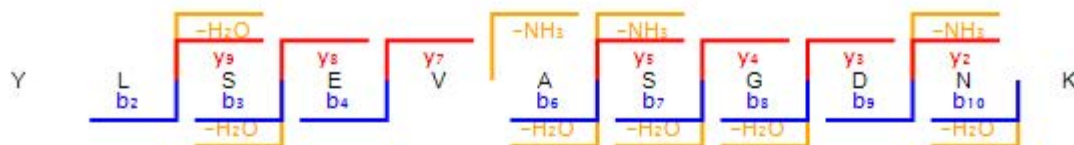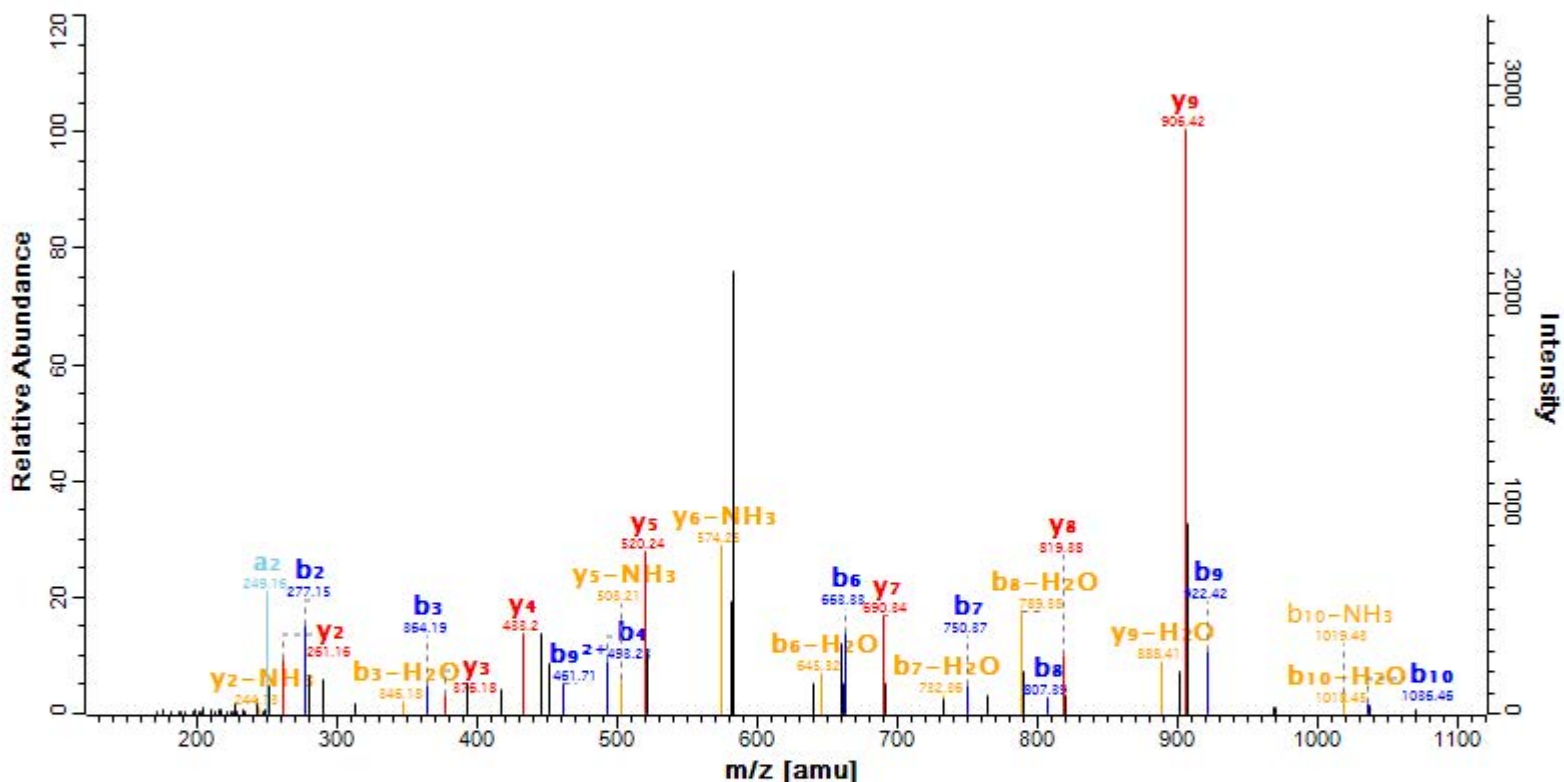

#### precursor information

|                   |                |
|-------------------|----------------|
| Mass:             | 1181.55685     |
| m/z:              | 591.7857       |
| Charge:           | 2+             |
| Retentiontime:    | 9.874436378479 |
| Score:            | 166.1414       |
| Mass Error [ppm]: | 0.35005        |
| PEP:              | 4.6127E-07     |
| Precursor Type:   | MULTI          |

#### general information

|                       |             |
|-----------------------|-------------|
| Annotation:           | 9 of 11     |
| AminoAcids Coverage:  | 82 %        |
| Intensity Coverage:   | 54 %        |
| Peak Coverage:        | 28 %        |
| Protein Localisation: | 130 ... 140 |

| a ion    |        | b <sup>2+</sup> ion |        | b ion    |        | y ion |   |          |        |
|----------|--------|---------------------|--------|----------|--------|-------|---|----------|--------|
| Δ dalton | mass   | Δ dalton            | mass   | Δ dalton | mass   | seq   |   | Δ dalton | mass   |
|          | 136.08 |                     | 164.07 |          | 164.07 | 1     | Y | 10       |        |
| +0.0443  | 249.16 |                     | 277.15 | +0.0208  | 277.15 | 2     | L | 9        | 1019.5 |
|          | 336.19 |                     | 364.19 | -0.089   | 364.19 | 3     | S | 8        | 906.42 |
|          | 465.23 |                     | 493.23 | -0.072   | 493.23 | 4     | E | 7        | 819.38 |
|          | 564.3  |                     | 592.3  |          | 592.3  | 5     | V | 6        | 690.34 |
|          | 635.34 |                     | 663.33 | -0.049   | 663.33 | 6     | A | 5        | 591.27 |
|          | 722.37 |                     | 750.37 | -0.008   | 750.37 | 7     | S | 4        | 520.24 |
|          | 779.39 |                     | 807.39 | -0.052   | 807.39 | 8     | G | 3        | 433.2  |
|          | 894.42 | -0.496              | 461.71 | -0.044   | 922.42 | 9     | D | 2        | 376.18 |
|          | 1008.5 |                     | 1036.5 | -0.049   | 1036.5 | 10    | N | 1        | 261.16 |
|          |        |                     |        |          |        | 11    | K | 0        | 147.11 |

Scan number 7686 Raw file LNCAP\_Silac\_23F10\_set3\_03  
 Method ITMS; CID Pepti... 199.15

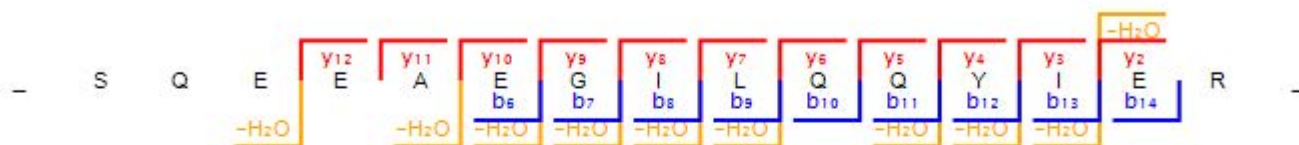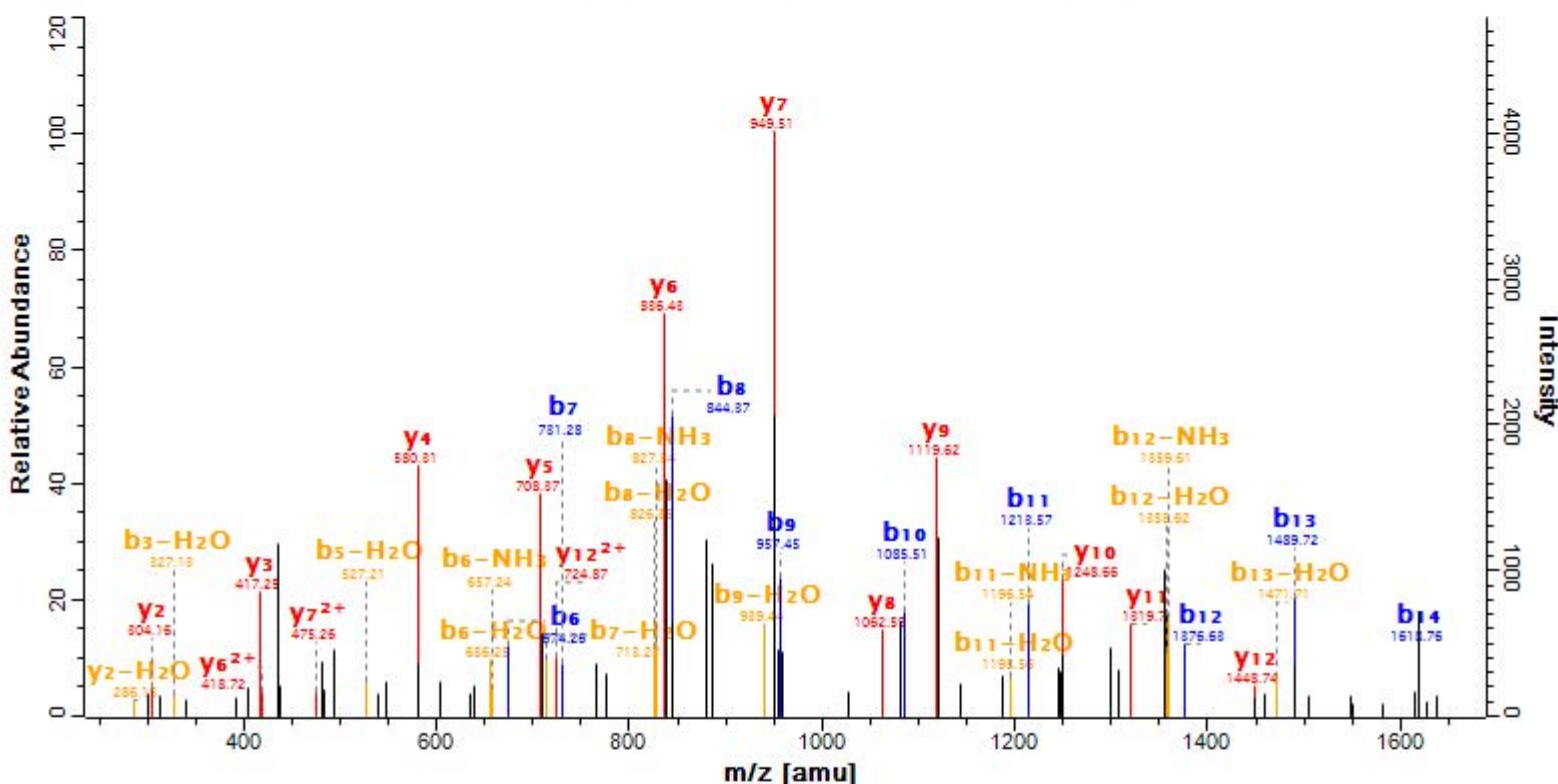

#### precursor information

|                   |                 |
|-------------------|-----------------|
| Mass:             | 1791.86514      |
| m/z:              | 896.93985       |
| Charge:           | 2+              |
| Retentiontime:    | 44.289180755615 |
| Score:            | 199.1479        |
| Mass Error [ppm]: | 0.69034         |
| PEP:              | 1.6975E-26      |
| Precursor Type:   | ISO             |

#### general information

|                       |             |
|-----------------------|-------------|
| Annotation:           | 12 of 15    |
| AminoAcids Coverage:  | 80 %        |
| Intensity Coverage:   | 56 %        |
| Peak Coverage:        | 43 %        |
| Protein Localisation: | 435 ... 449 |

| b ion     |          |     |   |          | y ion    |           | y <sup>2+</sup> ion |  |
|-----------|----------|-----|---|----------|----------|-----------|---------------------|--|
| Δ dalton  | mass     | seq |   | Δ dalton | mass     | Δ dalton  | mass                |  |
|           | 88.0393  | 1   | S | 14       |          |           |                     |  |
|           | 216.0979 | 2   | Q | 13       | 1705.839 |           | 1705.839            |  |
|           | 345.1405 | 3   | E | 12       | 1577.781 |           | 1577.781            |  |
|           | 474.1831 | 4   | E | 11       | 1448.738 | +0.016898 | 724.8726            |  |
|           | 545.2202 | 5   | A | 10       | 1319.695 | -0.07942  | 1319.695            |  |
| -0.0121   | 674.2628 | 6   | E | 9        | 1248.658 | -0.05452  | 1248.658            |  |
| -0.20288  | 731.2842 | 7   | G | 8        | 1119.616 | +0.001869 | 1119.616            |  |
| +0.016401 | 844.3683 | 8   | I | 7        | 1062.594 | -0.01976  | 1062.594            |  |
| -0.01291  | 957.4524 | 9   | L | 6        | 949.5102 | +0.042272 | 475.2587            |  |
| +0.100139 | 1085.511 | 10  | Q | 5        | 836.4261 | +0.017694 | 418.7167            |  |
| +0.048642 | 1213.57  | 11  | Q | 4        | 708.3675 | +0.01725  | 708.3675            |  |
| -0.28458  | 1376.633 | 12  | Y | 3        | 580.3089 | +0.066795 | 580.3089            |  |
| -0.10986  | 1489.717 | 13  | I | 2        | 417.2456 | +0.10284  | 417.2456            |  |
| -0.15587  | 1618.76  | 14  | E | 1        | 304.1615 | +0.081283 | 304.1615            |  |
|           |          | 15  | R | 0        | 175.119  |           | 175.119             |  |



Scan number 7928 Raw file LNCAP\_Silac\_23F10\_set3\_03  
 Method ITMS; CID Pepti... 79.69

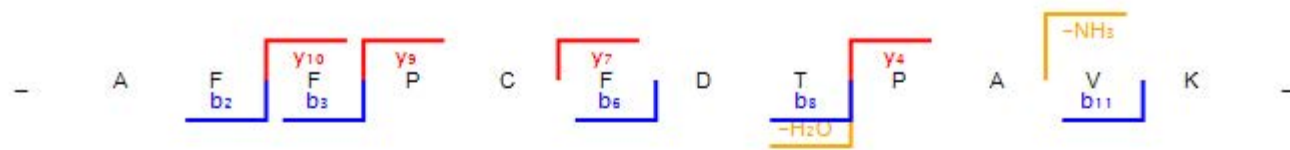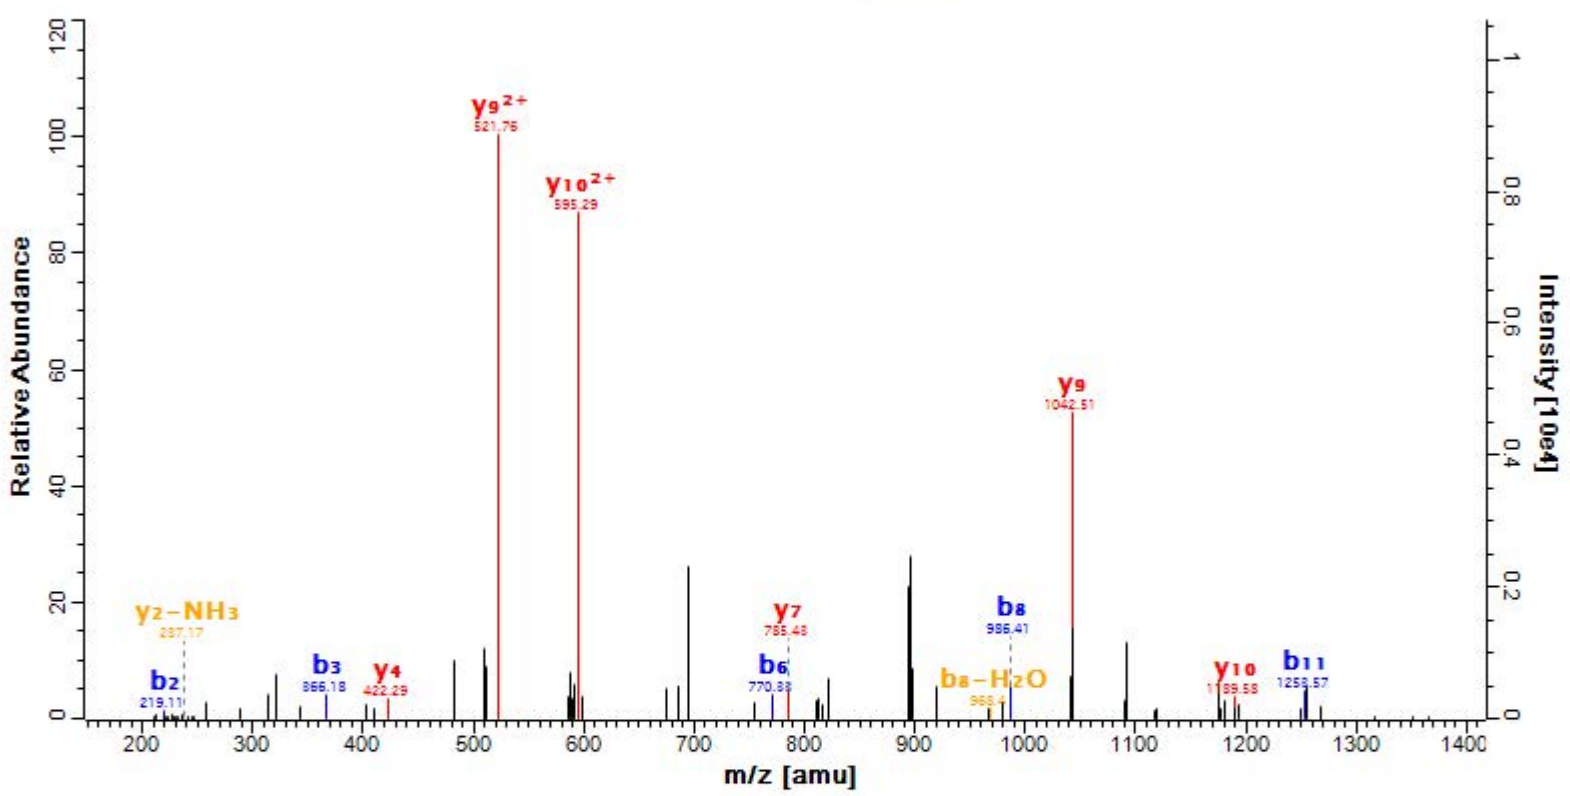

**precursor information**

|                   |                 |
|-------------------|-----------------|
| Mass:             | 1398.66418      |
| m/z:              | 700.33937       |
| Charge:           | 2+              |
| Retentiontime:    | 45.544780731201 |
| Score:            | 79.69304        |
| Mass Error [ppm]: | -0.018352       |
| PEP:              | 0.0024913       |
| Precursor Type:   | MULTI           |

**general information**

|                       |             |
|-----------------------|-------------|
| Annotation:           | 7 of 12     |
| AminoAcids Coverage:  | 58 %        |
| Intensity Coverage:   | 44 %        |
| Peak Coverage:        | 15 %        |
| Protein Localisation: | 185 ... 196 |

| b ion     |          |    |     |    | y ion    |           | y <sup>2+</sup> ion |           |
|-----------|----------|----|-----|----|----------|-----------|---------------------|-----------|
| Δ dalton  | mass     |    | seq |    | Δ dalton | mass      | Δ dalton            | mass      |
|           | 72.04439 | 1  | A   | 11 |          |           |                     |           |
| -0.08235  | 219.1128 | 2  | F   | 10 | 1336.649 |           | 1336.649            |           |
| +0.033137 | 366.1812 | 3  | F   | 9  | 1189.58  | +0.035567 | 595.2937            | +0.242417 |
|           | 463.234  | 4  | P   | 8  | 1042.512 | +0.060279 | 521.7595            | +0.150098 |
|           | 623.2646 | 5  | C   | 7  | 945.459  |           | 945.459             |           |
| +0.043909 | 770.333  | 6  | F   | 6  | 785.4283 | +0.010208 | 785.4283            |           |
|           | 885.36   | 7  | D   | 5  | 638.3599 |           | 638.3599            |           |
| -0.04121  | 986.4077 | 8  | T   | 4  | 523.333  |           | 523.333             |           |
|           | 1083.46  | 9  | P   | 3  | 422.2853 | +0.040084 | 422.2853            |           |
|           | 1154.498 | 10 | A   | 2  | 325.2325 |           | 325.2325            |           |
| -0.02677  | 1253.566 | 11 | V   | 1  | 254.1954 |           | 254.1954            |           |
|           |          | 12 | K   | 0  | 155.127  |           | 155.127             |           |

Scan number 7944 Raw file LNCAP\_Silac\_23F10\_set3\_03  
 Method ITMS; CID Pepti... 37.4

$y_{22}^{2+}$   $y_{21}^{2+}$   $y_{20}^{2+}$   $y_{19}^{2+}$   $y_{14}^{2+}$   $y_{11}^{2+}$   $y_7$   
 A F D L V P P E A V P E Q K D P D P E F P T V K  
 $b_3$   $b_4$   $b_5$   $b_{12}^{2+}$   $b_{15}^{2+}$   
 -H<sub>2</sub>O -H<sub>2</sub>O

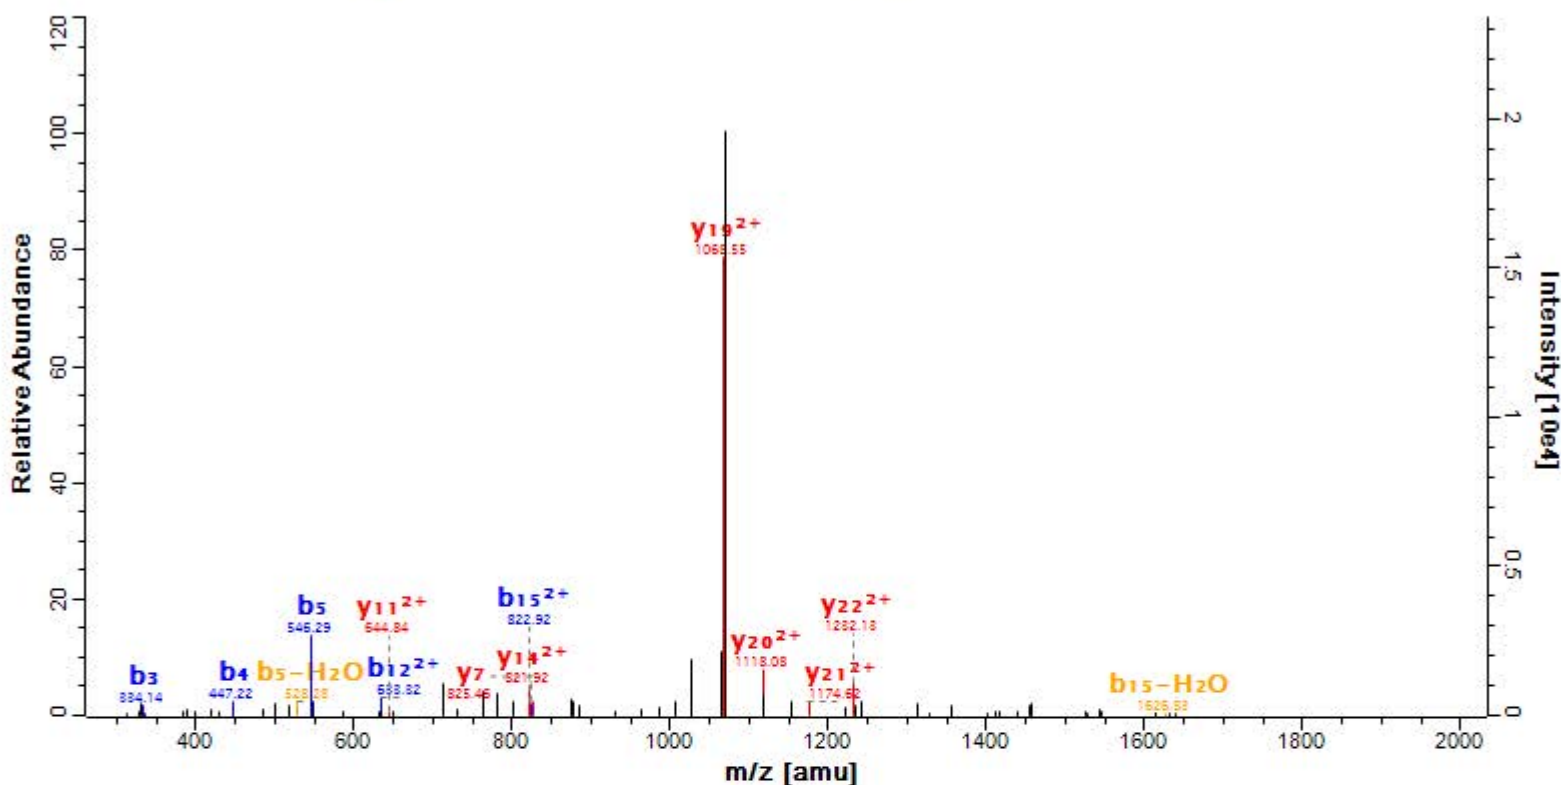

precursor information

|                   |                 |
|-------------------|-----------------|
| Mass:             | 2664.33301      |
| m/z:              | 889.11828       |
| Charge:           | 3+              |
| Retentiontime:    | 45.624668121337 |
| Score:            | 37.39959        |
| Mass Error [ppm]: | 0.26359         |
| PEP:              | 0.018085        |
| Precursor Type:   | MULTI           |

| b <sup>2+</sup> ion |        | b ion    |        |    |     |    | y ion    |         | y <sup>2+</sup> ion |         |
|---------------------|--------|----------|--------|----|-----|----|----------|---------|---------------------|---------|
| Δ dalton            | mass   | Δ dalton | mass   |    | seq |    | Δ dalton | mass    | Δ dalton            | mass    |
|                     | 72.044 |          | 72.044 | 1  | A   | 23 |          |         |                     |         |
|                     | 219.11 |          | 219.11 | 2  | F   | 22 | 2610.3   |         | 2610.3              |         |
|                     | 334.14 | +0.1922  | 334.14 | 3  | D   | 21 | 2463.3   |         | 1232.1              | +0.2204 |
|                     | 447.22 | +0.1106  | 447.22 | 4  | L   | 20 | 2348.2   |         | 1174.6              | +0.3088 |
|                     | 546.29 | -0.088   | 546.29 | 5  | V   | 19 | 2235.2   |         | 1118.1              | +0.2305 |
|                     | 643.34 |          | 643.34 | 6  | P   | 18 | 2136.1   |         | 1068.5              | -0.091  |
|                     | 740.4  |          | 740.4  | 7  | P   | 17 | 2039     |         | 2039                |         |
|                     | 869.44 |          | 869.44 | 8  | E   | 16 | 1942     |         | 1942                |         |
|                     | 940.48 |          | 940.48 | 9  | A   | 15 | 1812.9   |         | 1812.9              |         |
|                     | 1039.5 |          | 1039.5 | 10 | V   | 14 | 1741.9   |         | 1741.9              |         |
|                     | 1136.6 |          | 1136.6 | 11 | P   | 13 | 1642.8   |         | 821.92              | +0.1591 |
| +0.0724             | 633.32 |          | 1265.6 | 12 | E   | 12 | 1545.8   |         | 1545.8              |         |
|                     | 1393.7 |          | 1393.7 | 13 | Q   | 11 | 1416.7   |         | 1416.7              |         |
|                     | 1529.8 |          | 1529.8 | 14 | K   | 10 | 1288.7   |         | 644.84              | +0.09   |
| +0.174              | 822.92 |          | 1644.8 | 15 | D   | 9  | 1152.6   |         | 1152.6              |         |
|                     | 1741.9 |          | 1741.9 | 16 | P   | 8  | 1037.5   |         | 1037.5              |         |
|                     | 1856.9 |          | 1856.9 | 17 | D   | 7  | 940.49   |         | 940.49              |         |
|                     | 1954   |          | 1954   | 18 | P   | 6  | 825.46   | +0.1492 | 825.46              |         |
|                     | 2083   |          | 2083   | 19 | E   | 5  | 728.41   |         | 728.41              |         |
|                     | 2230.1 |          | 2230.1 | 20 | F   | 4  | 599.36   |         | 599.36              |         |
|                     | 2327.1 |          | 2327.1 | 21 | P   | 3  | 452.3    |         | 452.3               |         |
|                     | 2428.2 |          | 2428.2 | 22 | T   | 2  | 355.24   |         | 355.24              |         |
|                     | 2527.2 |          | 2527.2 | 23 | V   | 1  | 254.2    |         | 254.2               |         |
|                     |        |          |        | 24 | K   | 0  | 155.13   |         | 155.13              |         |

general information

|                       |             |
|-----------------------|-------------|
| Annotation:           | 9 of 24     |
| AminoAcids Coverag    | 38 %        |
| Intensity Coverage:   | 38 %        |
| Peak Coverage:        | 17 %        |
| Protein Localisation: | 269 ... 292 |

Scan number 8271 Raw file LNCAP\_Silac\_23F10\_set3\_03  
 Method ITMS; CID Pepti... 255.16

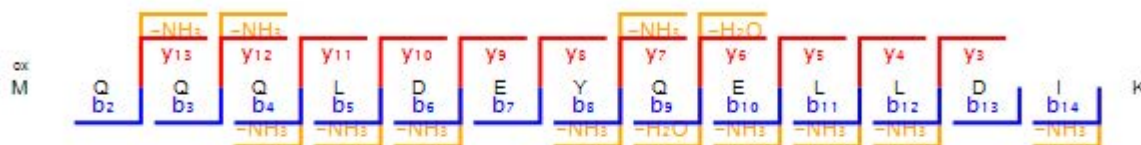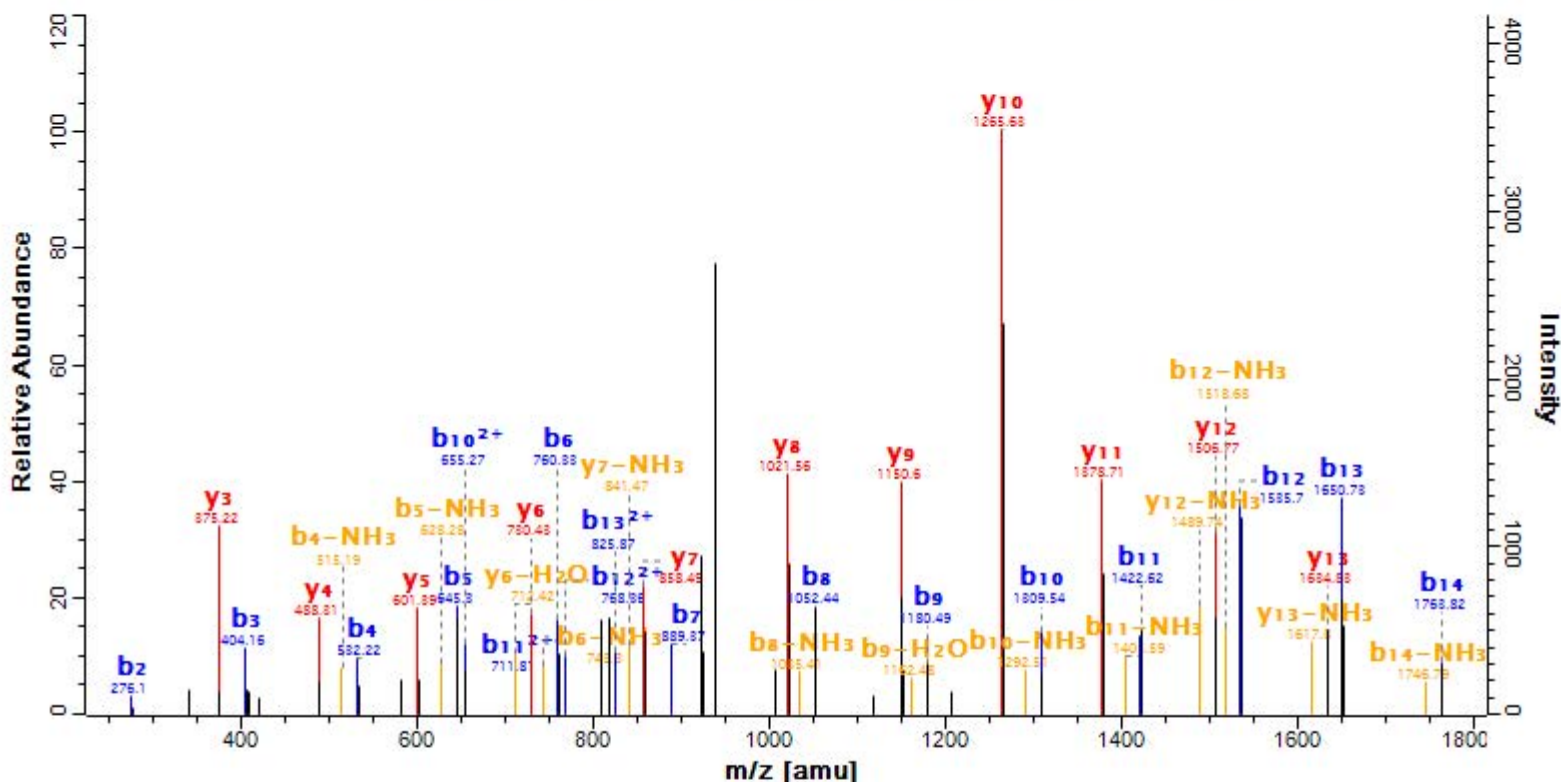

#### precursor information

|                   |                 |
|-------------------|-----------------|
| Mass:             | 1908.91427      |
| m/z:              | 955.46441       |
| Charge:           | 2+              |
| Retentiontime:    | 47.340969085693 |
| Score:            | 255.1564        |
| Mass Error [ppm]: | 0.19496         |
| PEP:              | 6.0331E-57      |
| Precursor Type:   | MULTI           |

#### general information

|                       |             |
|-----------------------|-------------|
| Annotation:           | 13 of 15    |
| AminoAcids Coverage:  | 87 %        |
| Intensity Coverage:   | 55 %        |
| Peak Coverage:        | 49 %        |
| Protein Localisation: | 352 ... 366 |

| b <sup>2+</sup> ion |          | b ion     |          | y ion |          |      |          |
|---------------------|----------|-----------|----------|-------|----------|------|----------|
| Δ dalton            | mass     | Δ dalton  | mass     | seq   | Δ dalton | mass |          |
|                     | 148.0427 |           | 148.0427 | 1     | M        | 14   |          |
|                     | 276.1013 | +0.039311 | 276.1013 | 2     | Q        | 13   | 1762.886 |
|                     | 404.1598 | +0.040792 | 404.1598 | 3     | Q        | 12   | 1634.827 |
|                     | 532.2184 | +0.045264 | 532.2184 | 4     | Q        | 11   | 1506.769 |
|                     | 645.3025 | +0.114459 | 645.3025 | 5     | L        | 10   | 1378.71  |
|                     | 760.3294 | -0.07307  | 760.3294 | 6     | D        | 9    | 1265.626 |
|                     | 889.372  | +0.062318 | 889.372  | 7     | E        | 8    | 1150.599 |
|                     | 1052.435 | -0.08622  | 1052.435 | 8     | Y        | 7    | 1021.556 |
|                     | 1180.494 | -0.15309  | 1180.494 | 9     | Q        | 6    | 858.4931 |
| +0.051961           | 655.2719 | -0.0796   | 1309.537 | 10    | E        | 5    | 730.4345 |
| +0.151469           | 711.8139 | -0.19259  | 1422.621 | 11    | L        | 4    | 601.3919 |
| +0.273988           | 768.356  | -0.12395  | 1535.705 | 12    | L        | 3    | 488.3079 |
| -0.25456            | 825.8694 | -0.05323  | 1650.732 | 13    | D        | 2    | 375.2238 |
|                     | 1763.816 | +0.013703 | 1763.816 | 14    | I        | 1    | 260.1969 |
|                     |          |           |          | 15    | K        | 0    | 147.1128 |

Scan number 842 Raw file LNCAP\_Silac\_23F10\_set3\_03  
 Method ITMS: CID Pepti... 143

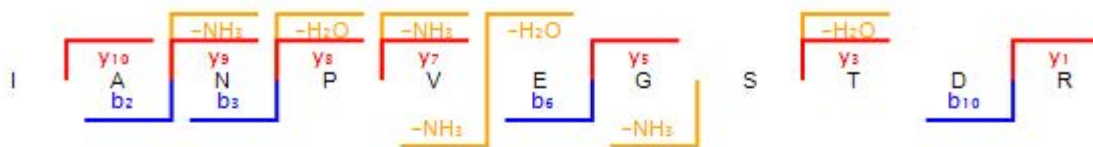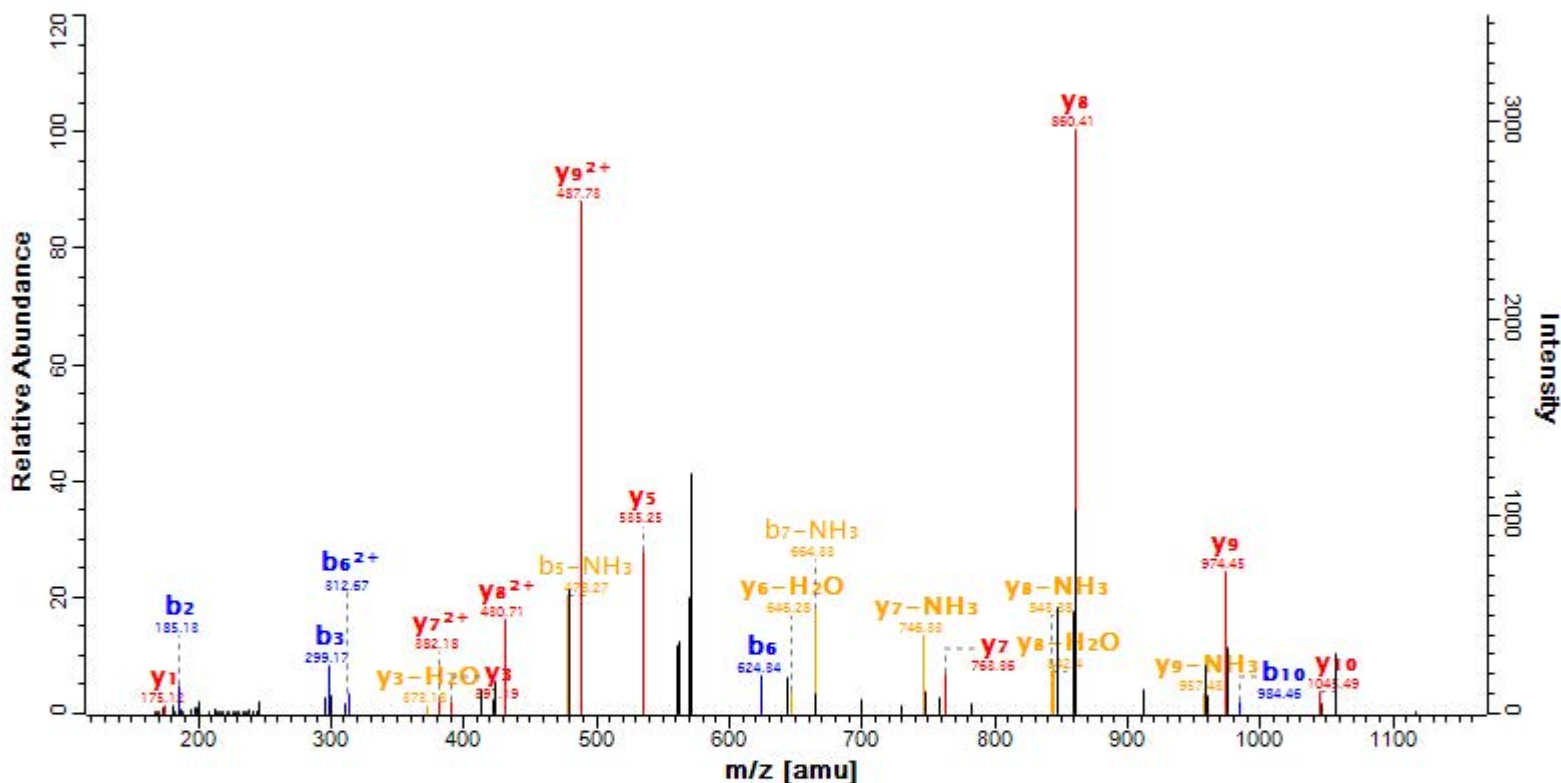

#### precursor information

|                   |                 |
|-------------------|-----------------|
| Mass:             | 1157.56726      |
| m/z:              | 579.79091       |
| Charge:           | 2+              |
| Retentiontime:    | 10.389933586120 |
| Score:            | 142.9956        |
| Mass Error [ppm]: | -0.34912        |
| PEP:              | 9.8815E-05      |
| Precursor Type:   | MULTI           |

#### general information

|                       |             |
|-----------------------|-------------|
| Annotation:           | 10 of 11    |
| AminoAcids Coverage:  | 91 %        |
| Intensity Coverage:   | 55 %        |
| Peak Coverage:        | 22 %        |
| Protein Localisation: | 324 ... 334 |

| b <sup>2+</sup> ion |         | b ion    |         |        |     |          | y ion  |          | y <sup>2+</sup> ion |  |
|---------------------|---------|----------|---------|--------|-----|----------|--------|----------|---------------------|--|
| Δ dalton            | mass    | Δ dalton | mass    |        | seq | Δ dalton | mass   | Δ dalton | mass                |  |
|                     | 114.09  |          | 114.09  | 1      | I   | 10       |        |          |                     |  |
|                     | 185.13  | -0.038   | 185.13  | 2      | A   | 9        | 1045.5 | -0.078   | 1045.5              |  |
|                     | 299.17  | +0.0271  | 299.17  | 3      | N   | 8        | 974.45 | +0.0066  | 487.73              |  |
|                     | 396.22  |          | 396.22  | 4      | P   | 7        | 860.41 | +0.0118  | 430.71              |  |
|                     | 495.29  |          | 495.29  | 5      | V   | 6        | 763.36 | +0.0525  | 382.18              |  |
|                     | +0.4797 | 312.67   | +0.1868 | 624.34 | 6   | E        | 5      | 664.29   | 664.29              |  |
|                     | 681.36  |          | 681.36  | 7      | G   | 4        | 535.25 | +0.0004  | 535.25              |  |
|                     | 768.39  |          | 768.39  | 8      | S   | 3        | 478.23 |          | 478.23              |  |
|                     | 869.44  |          | 869.44  | 9      | T   | 2        | 391.19 | +0.0677  | 391.19              |  |
|                     | 984.46  | +0.1746  | 984.46  | 10     | D   | 1        | 290.15 |          | 290.15              |  |
|                     |         |          |         | 11     | R   | 0        | 175.12 | +0.0171  | 175.12              |  |

Scan number 8485 Raw file LNCAP\_Silac\_23F10\_set3\_03  
 Method ITMS; CID Peptide 173.06

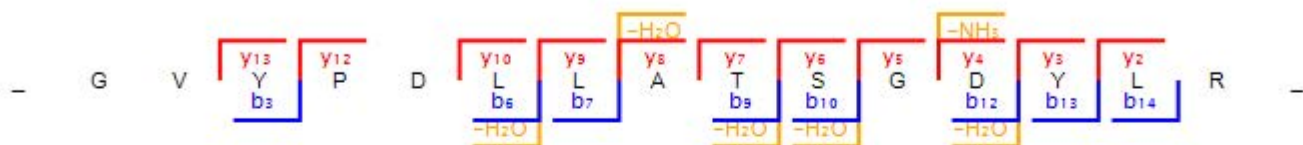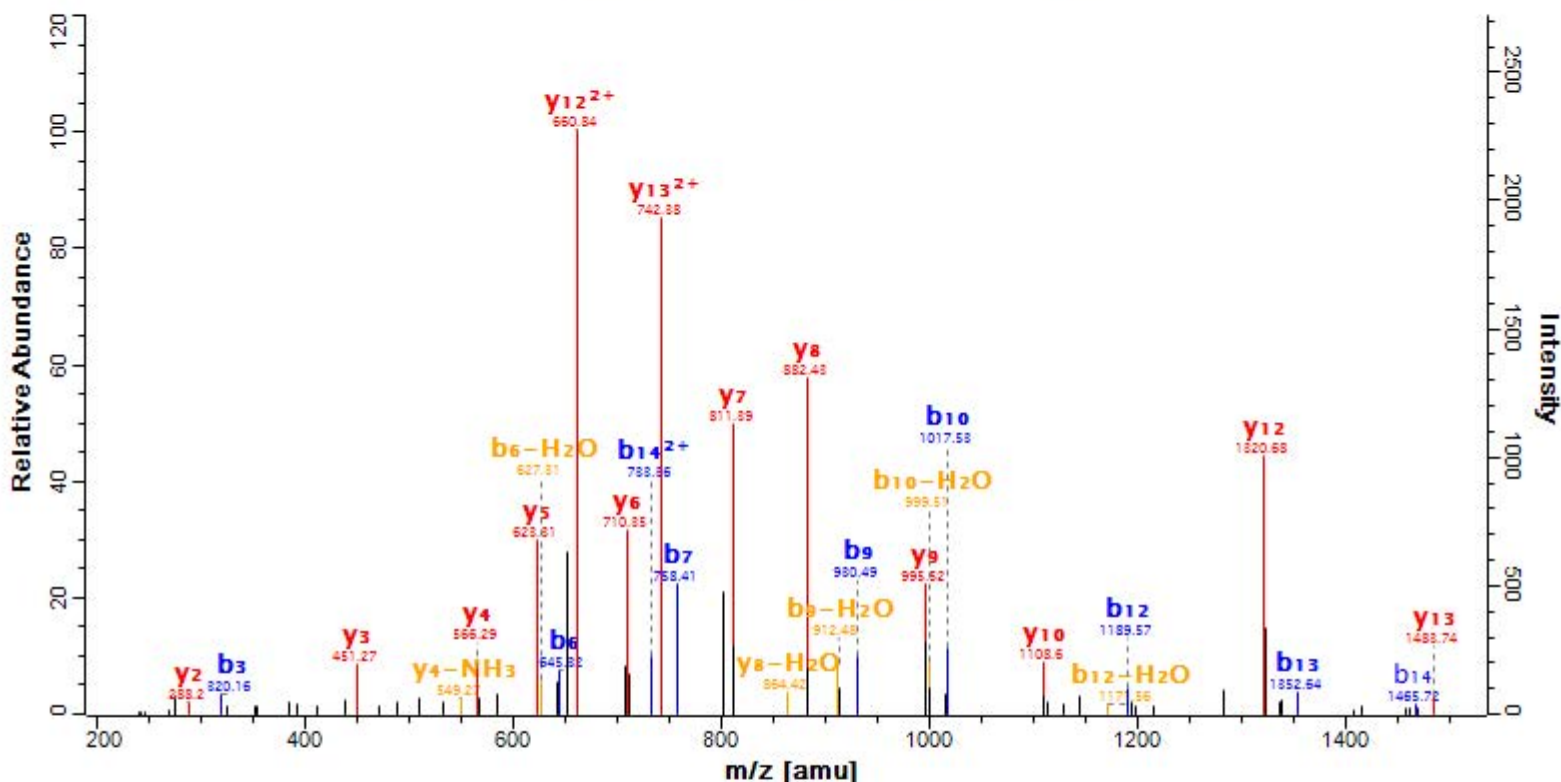

#### precursor information

|                   |                 |
|-------------------|-----------------|
| Mass:             | 1638.82562      |
| m/z:              | 820.42008       |
| Charge:           | 2+              |
| Retentiontime:    | 48.497200012207 |
| Score:            | 173.061         |
| Mass Error [ppm]: | 0.17094         |
| PEP:              | 4.861E-17       |
| Precursor Type:   | MULTI           |

#### general information

|                       |           |
|-----------------------|-----------|
| Annotation:           | 11 of 15  |
| AminoAcids Coverage:  | 73 %      |
| Intensity Coverage:   | 74 %      |
| Peak Coverage:        | 36 %      |
| Protein Localisation: | 82 ... 96 |

| b <sup>2+</sup> ion |               | b ion    |        | seq |   |    | y ion    |         | y <sup>2+</sup> ion |         |
|---------------------|---------------|----------|--------|-----|---|----|----------|---------|---------------------|---------|
| Δ dalton            | mass          | Δ dalton | mass   |     |   |    | Δ dalton | mass    | Δ dalton            | mass    |
|                     | 58.029        |          | 58.029 | 1   | G | 14 |          |         |                     |         |
|                     | 157.1         |          | 157.1  | 2   | V | 13 | 1582.8   |         | 1582.8              |         |
|                     | 320.16        | +0.055   | 320.16 | 3   | Y | 12 | 1483.7   | +0.0307 | 742.38              | +0.2487 |
|                     | 417.21        |          | 417.21 | 4   | P | 11 | 1320.7   | -0.03   | 660.84              | +0.2205 |
|                     | 532.24        |          | 532.24 | 5   | D | 10 | 1223.6   |         | 1223.6              |         |
|                     | 645.32        | +0.0471  | 645.32 | 6   | L | 9  | 1108.6   | -0.164  | 1108.6              |         |
|                     | 758.41        | -0.072   | 758.41 | 7   | L | 8  | 995.52   | +0.0043 | 995.52              |         |
|                     | 829.45        |          | 829.45 | 8   | A | 7  | 882.43   | -0.016  | 882.43              |         |
|                     | 930.49        | -0.02    | 930.49 | 9   | T | 6  | 811.39   | -0.04   | 811.39              |         |
|                     | 1017.5        | +0.0542  | 1017.5 | 10  | S | 5  | 710.35   | -0.034  | 710.35              |         |
|                     | 1074.5        |          | 1074.5 | 11  | G | 4  | 623.31   | +0.033  | 623.31              |         |
|                     | 1189.6        | -0.104   | 1189.6 | 12  | D | 3  | 566.29   | +0.0386 | 566.29              |         |
|                     | 1352.6        | -0.123   | 1352.6 | 13  | Y | 2  | 451.27   | +0.0115 | 451.27              |         |
|                     | +0.3073733.36 | -0.064   | 1465.7 | 14  | L | 1  | 288.2    | +0.0776 | 288.2               |         |
|                     |               |          |        | 15  | R | 0  | 175.12   |         | 175.12              |         |

Scan number 8516 Raw file LNCAP\_Silac\_23F10\_set3\_03  
 Method ITMS: CID Pepti... 128.68

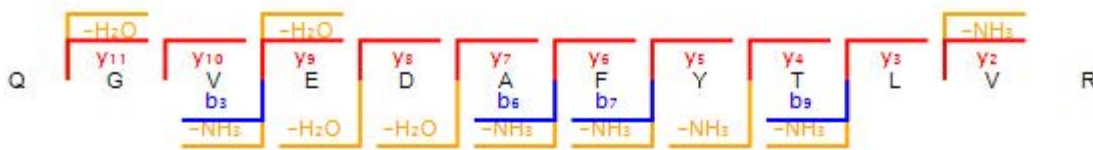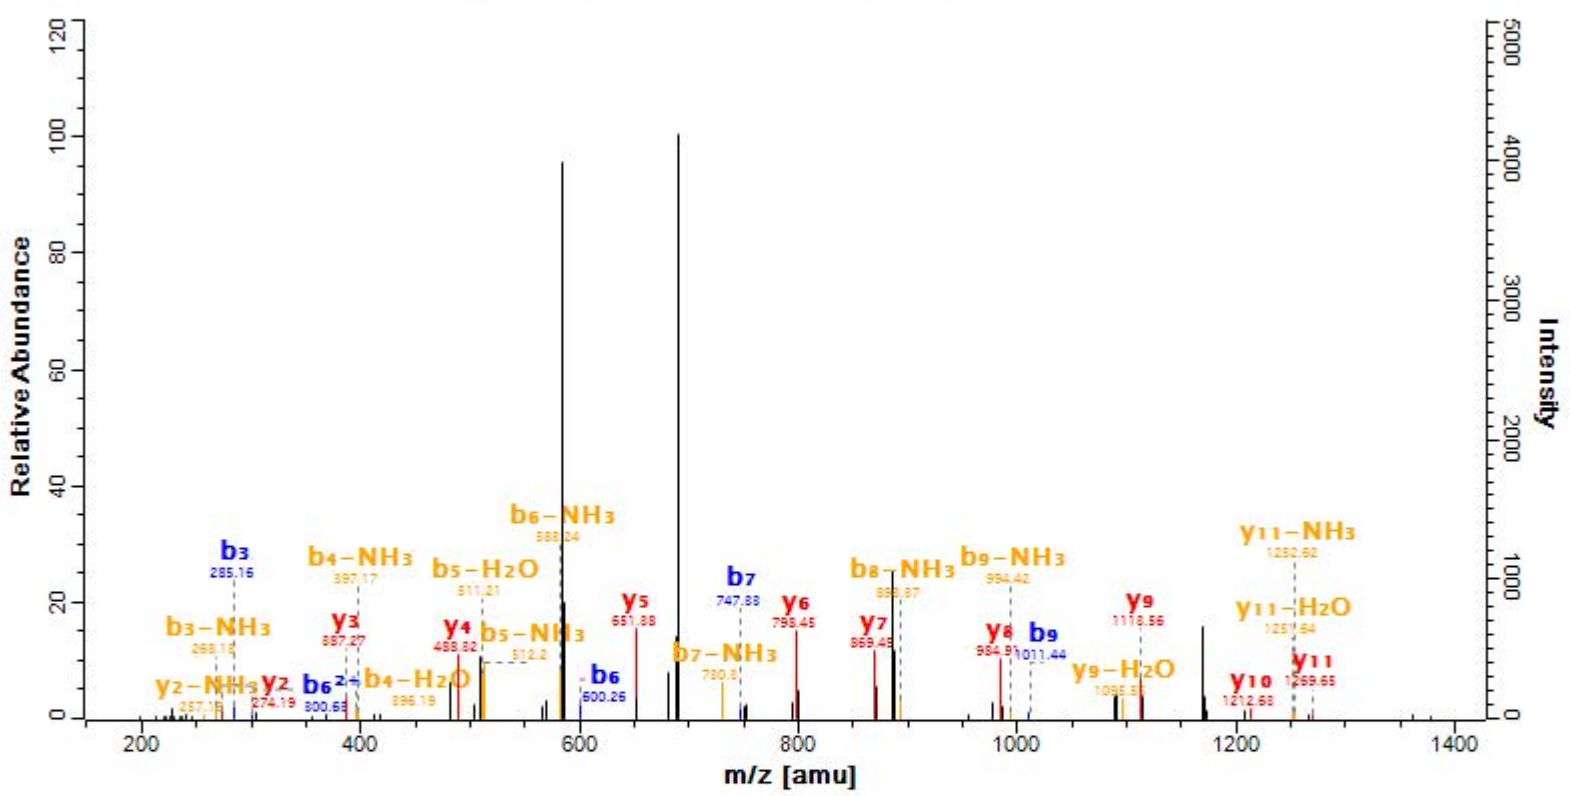

**precursor information**

|                   |                 |
|-------------------|-----------------|
| Mass:             | 1396.69989      |
| m/z:              | 699.35722       |
| Charge:           | 2+              |
| Retentiontime:    | 48.662555694580 |
| Score:            | 128.6753        |
| Mass Error [ppm]: | 0.86932         |
| PEP:              | 2.3178E-05      |
| Precursor Type:   | MULTI           |

**general information**

|                       |             |
|-----------------------|-------------|
| Annotation:           | 10 of 12    |
| AminoAcids Coverage:  | 83 %        |
| Intensity Coverage:   | 26 %        |
| Peak Coverage:        | 30 %        |
| Protein Localisation: | 150 ... 161 |

| b <sup>2+</sup> ion |          | b ion     |          |     | y ion |          |                    |
|---------------------|----------|-----------|----------|-----|-------|----------|--------------------|
| Δ dalton            | mass     | Δ dalton  | mass     | seq |       | Δ dalton | mass               |
|                     | 129.0659 |           | 129.0659 | 1   | Q     | 11       |                    |
|                     | 186.0873 |           | 186.0873 | 2   | G     | 10       | 1269.647 -0.12882  |
|                     | 285.1557 | +0.008239 | 285.1557 | 3   | V     | 9        | 1212.626 +0.099061 |
|                     | 414.1983 |           | 414.1983 | 4   | E     | 8        | 1113.558 -0.01722  |
|                     | 529.2253 |           | 529.2253 | 5   | D     | 7        | 984.5149 -0.03938  |
| -0.43076            | 300.6348 | -0.06994  | 600.2624 | 6   | A     | 6        | 869.488 +0.01057   |
|                     | 747.3308 | +0.121658 | 747.3308 | 7   | F     | 5        | 798.4509 +0.032608 |
|                     | 910.3941 |           | 910.3941 | 8   | Y     | 4        | 651.3824 +0.065073 |
|                     | 1011.442 | -0.38443  | 1011.442 | 9   | T     | 3        | 488.3191 +0.128279 |
|                     | 1124.526 |           | 1124.526 | 10  | L     | 2        | 387.2714 +0.004388 |
|                     | 1223.594 |           | 1223.594 | 11  | V     | 1        | 274.1874 +0.021984 |
|                     |          |           |          | 12  | R     | 0        | 175.119            |

Scan number 858 Raw file LNCAP\_Silac\_23F10\_set3\_03  
 Method ITMS: CID Pepti... 92.87

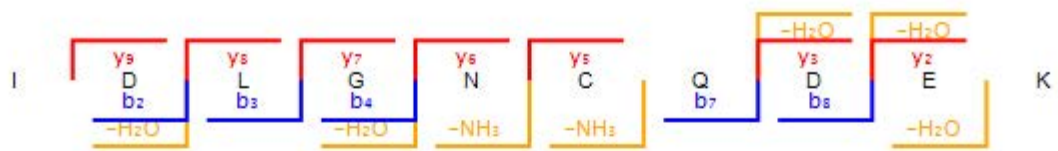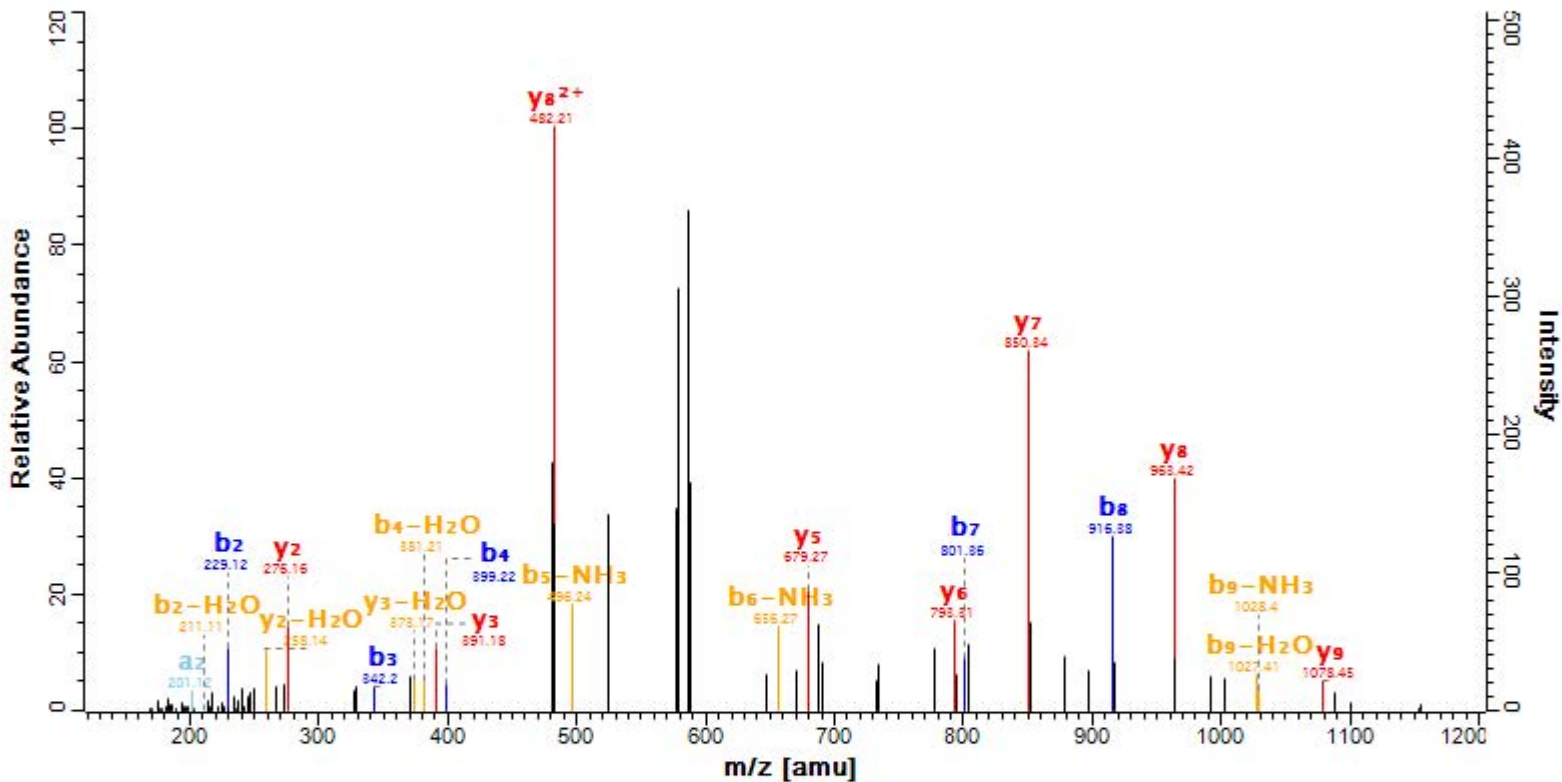

**precursor information**

|                   |                 |
|-------------------|-----------------|
| Mass:             | 1190.52333      |
| m/z:              | 596.26894       |
| Charge:           | 2+              |
| Retentiontime:    | 10.486499786377 |
| Score:            | 92.86611        |
| Mass Error [ppm]: | -0.3525         |
| PEP:              | 0.0018784       |
| Precursor Type:   | MULTI           |

|                       |             |
|-----------------------|-------------|
| Annotation:           | 8 of 10     |
| AminoAcids Coverage:  | 80 %        |
| Intensity Coverage:   | 37 %        |
| Peak Coverage:        | 23 %        |
| Protein Localisation: | 858 ... 867 |

| a ion    |        | b ion    |        | seq |   |   | y ion    |         | y <sup>2+</sup> ion |         |
|----------|--------|----------|--------|-----|---|---|----------|---------|---------------------|---------|
| Δ dalton | mass   | Δ dalton | mass   |     |   |   | Δ dalton | mass    | Δ dalton            | mass    |
|          | 86.096 |          | 114.09 | 1   | I | 9 |          |         |                     |         |
| +0.0255  | 201.12 | +0.0053  | 229.12 | 2   | D | 8 | 1078.4   | +0.404  | 1078.4              |         |
|          | 314.21 | +0.1773  | 342.2  | 3   | L | 7 | 963.42   | +0.0222 | 482.21              | +0.0512 |
|          | 371.23 | +0.0396  | 399.22 | 4   | G | 6 | 850.34   | -0.038  | 850.34              |         |
|          | 485.27 |          | 513.27 | 5   | N | 5 | 793.31   | +0.1421 | 793.31              |         |
|          | 645.3  |          | 673.3  | 6   | C | 4 | 679.27   | +0.0403 | 679.27              |         |
|          | 773.36 | -0.2     | 801.36 | 7   | Q | 3 | 519.24   |         | 519.24              |         |
|          | 888.39 | -0.063   | 916.38 | 8   | D | 2 | 391.18   | -0.061  | 391.18              |         |
|          | 1017.4 |          | 1045.4 | 9   | E | 1 | 276.16   | +0.0618 | 276.16              |         |
|          |        |          |        | 10  | K | 0 | 147.11   |         | 147.11              |         |

Scan number 8668 Raw file LNCAP\_Silac\_23F10\_set3\_03  
 Method ITMS; CID Pepti... 190.53

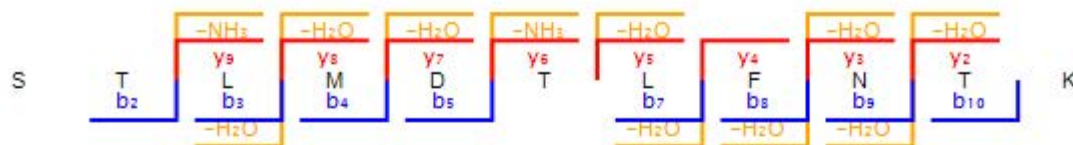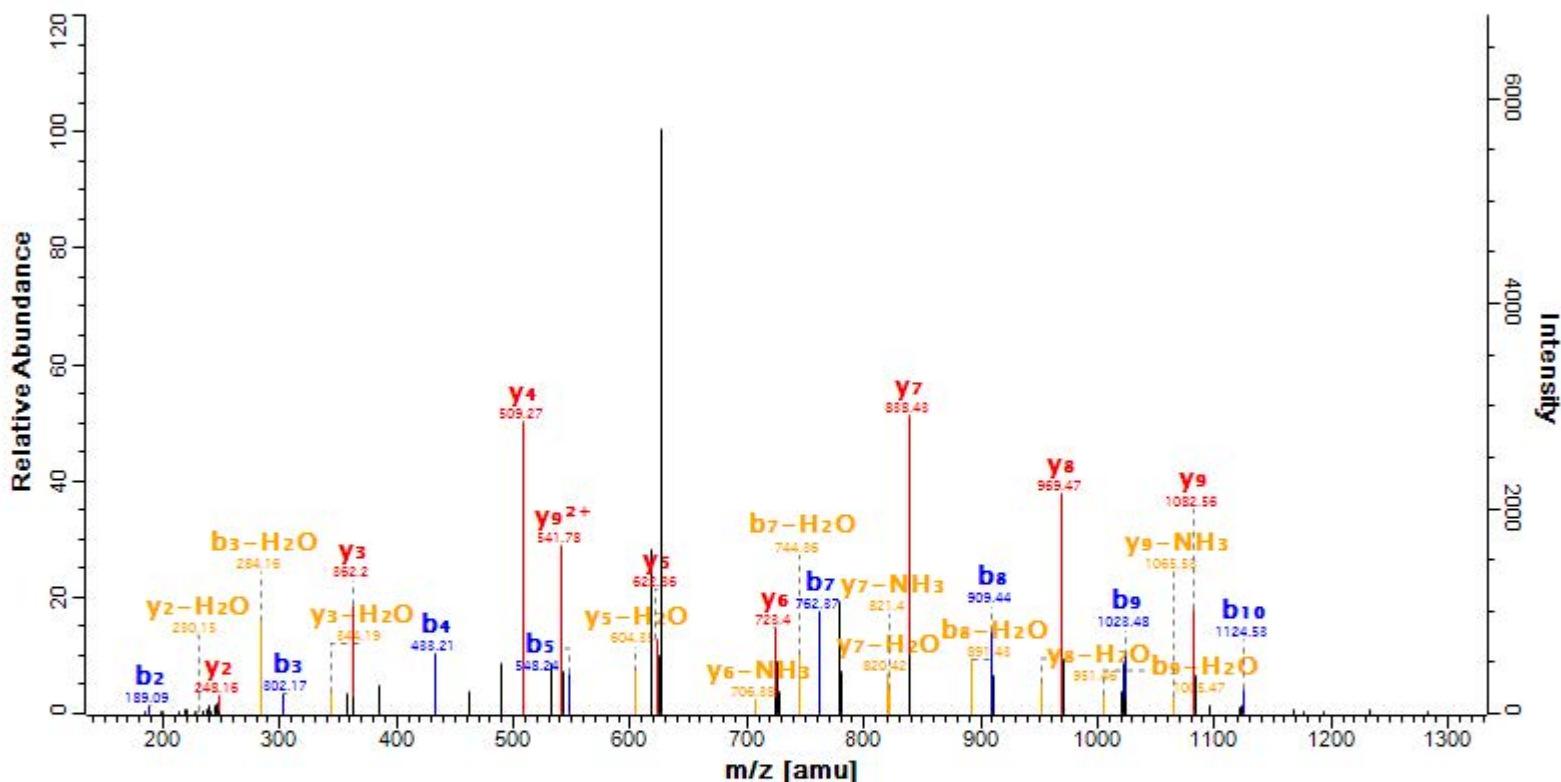

#### precursor information

|                   |                 |
|-------------------|-----------------|
| Mass:             | 1269.62757      |
| m/z:              | 635.82106       |
| Charge:           | 2+              |
| Retentiontime:    | 49.483047485351 |
| Score:            | 190.531         |
| Mass Error [ppm]: | 0.064686        |
| PEP:              | 1.0286E-10      |
| Precursor Type:   | MULTI           |

#### general information

|                       |           |
|-----------------------|-----------|
| Annotation:           | 9 of 11   |
| AminoAcids Coverage:  | 82 %      |
| Intensity Coverage:   | 55 %      |
| Peak Coverage:        | 33 %      |
| Protein Localisation: | 65 ... 75 |

| b ion     |          |    |     |    | y ion    |           | y <sup>2+</sup> ion |           |
|-----------|----------|----|-----|----|----------|-----------|---------------------|-----------|
| Δ dalton  | mass     |    | seq |    | Δ dalton | mass      | Δ dalton            | mass      |
|           | 88.0393  | 1  | S   | 10 |          |           |                     |           |
| -0.12011  | 189.087  | 2  | T   | 9  | 1183.603 |           | 1183.603            |           |
| -0.00149  | 302.171  | 3  | L   | 8  | 1082.555 | -0.07459  | 541.7812            | +0.016013 |
| +0.142289 | 433.2115 | 4  | M   | 7  | 969.471  | -0.00035  | 969.471             |           |
| +0.08373  | 548.2385 | 5  | D   | 6  | 838.4305 | +0.015596 | 838.4305            |           |
|           | 649.2862 | 6  | T   | 5  | 723.4036 | +0.045347 | 723.4036            |           |
| +0.091391 | 762.3702 | 7  | L   | 4  | 622.3559 | +0.036568 | 622.3559            |           |
| +0.11685  | 909.4386 | 8  | F   | 3  | 509.2718 | +0.036098 | 509.2718            |           |
| -0.20074  | 1023.482 | 9  | N   | 2  | 362.2034 | -0.01609  | 362.2034            |           |
| -0.00873  | 1124.529 | 10 | T   | 1  | 248.1605 | -0.00785  | 248.1605            |           |
|           |          | 11 | K   | 0  | 147.1128 |           | 147.1128            |           |



Scan number 8851 Raw file LNCAP\_Silac\_23F10\_set3\_03  
 Method ITMS: CID Pepti... 92.93

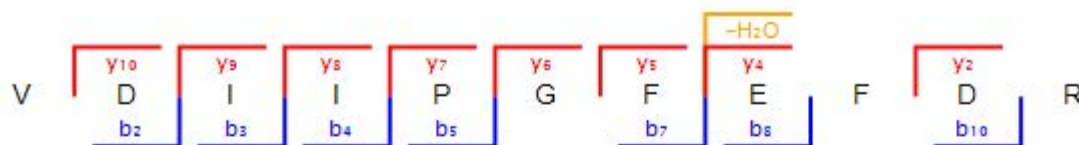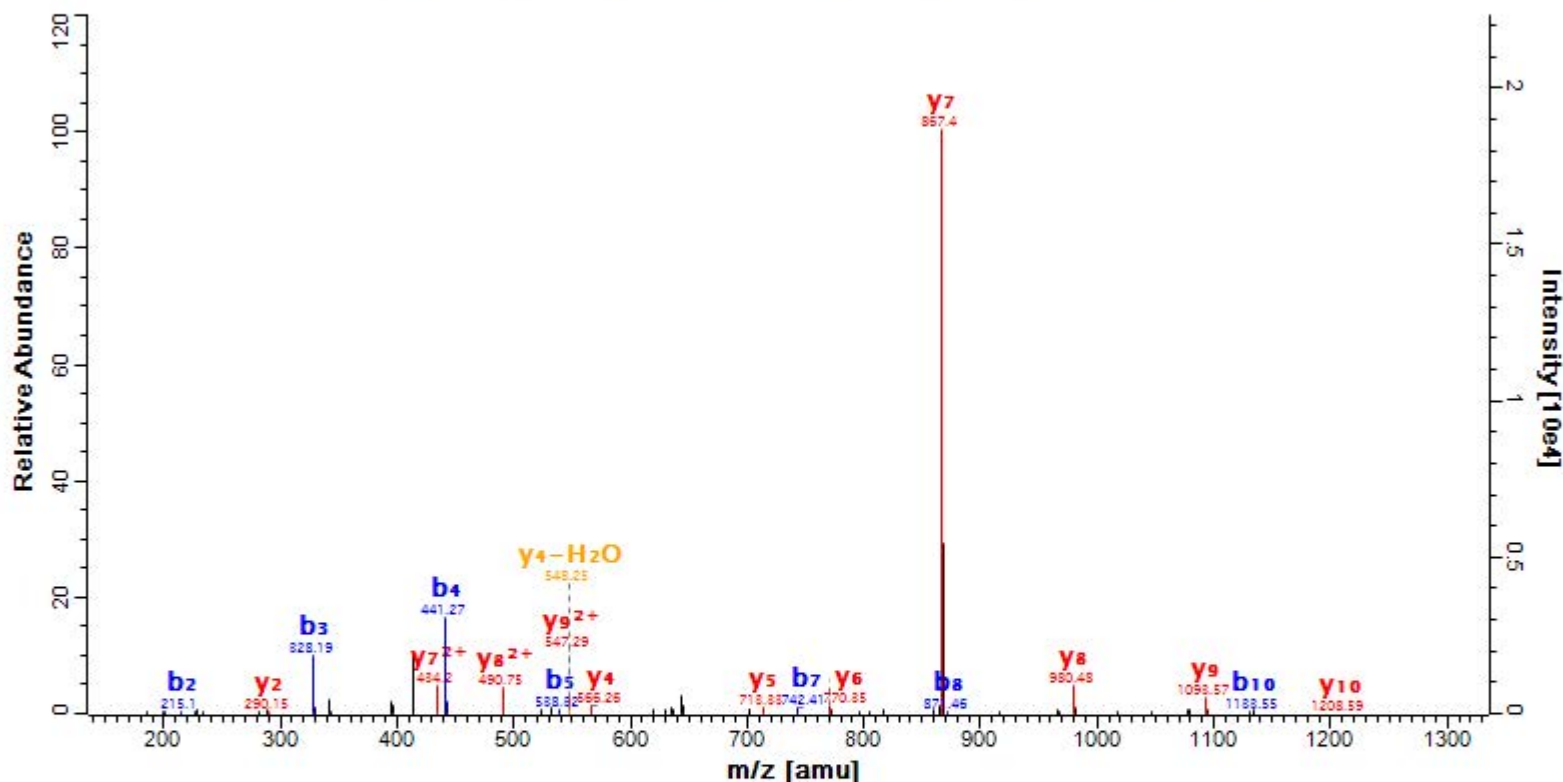

#### precursor information

|                   |                 |
|-------------------|-----------------|
| Mass:             | 1306.65566      |
| m/z:              | 654.33511       |
| Charge:           | 2+              |
| Retentiontime:    | 50.450164794921 |
| Score:            | 92.92509        |
| Mass Error [ppm]: | -0.071238       |
| PEP:              | 0.0014725       |
| Precursor Type:   | MULTI           |

#### general information

|                       |             |
|-----------------------|-------------|
| Annotation:           | 8 of 11     |
| AminoAcids Coverage:  | 73 %        |
| Intensity Coverage:   | 67 %        |
| Peak Coverage:        | 25 %        |
| Protein Localisation: | 479 ... 489 |

| b ion     |          |    |     |    | y ion    |           | y <sup>2+</sup> ion |           |
|-----------|----------|----|-----|----|----------|-----------|---------------------|-----------|
| Δ dalton  | mass     |    | seq |    | Δ dalton | mass      | Δ dalton            | mass      |
|           | 100.0757 | 1  | V   | 10 |          |           |                     |           |
| +0.074887 | 215.1026 | 2  | D   | 9  | 1208.595 | +0.071035 | 1208.595            |           |
| +0.018198 | 328.1867 | 3  | I   | 8  | 1093.568 | +0.011186 | 547.2875            | -0.28796  |
| -0.03053  | 441.2708 | 4  | I   | 7  | 980.4836 | +0.003514 | 490.7454            | +0.26115  |
| +0.123313 | 538.3235 | 5  | P   | 6  | 867.3995 | +0.02813  | 434.2034            | +0.045919 |
|           | 595.345  | 6  | G   | 5  | 770.3468 | +0.12136  | 770.3468            |           |
| +0.025013 | 742.4134 | 7  | F   | 4  | 713.3253 | +0.174867 | 713.3253            |           |
| +0.048093 | 871.456  | 8  | E   | 3  | 566.2569 | +0.181513 | 566.2569            |           |
|           | 1018.524 | 9  | F   | 2  | 437.2143 |           | 437.2143            |           |
| +0.072915 | 1133.551 | 10 | D   | 1  | 290.1459 | +0.099314 | 290.1459            |           |
|           |          | 11 | R   | 0  | 175.119  |           | 175.119             |           |

Scan number 9081 Raw file LNCAP\_Silac\_23F10\_set3\_03  
 Method ITMS; CID Pepti... 81.57

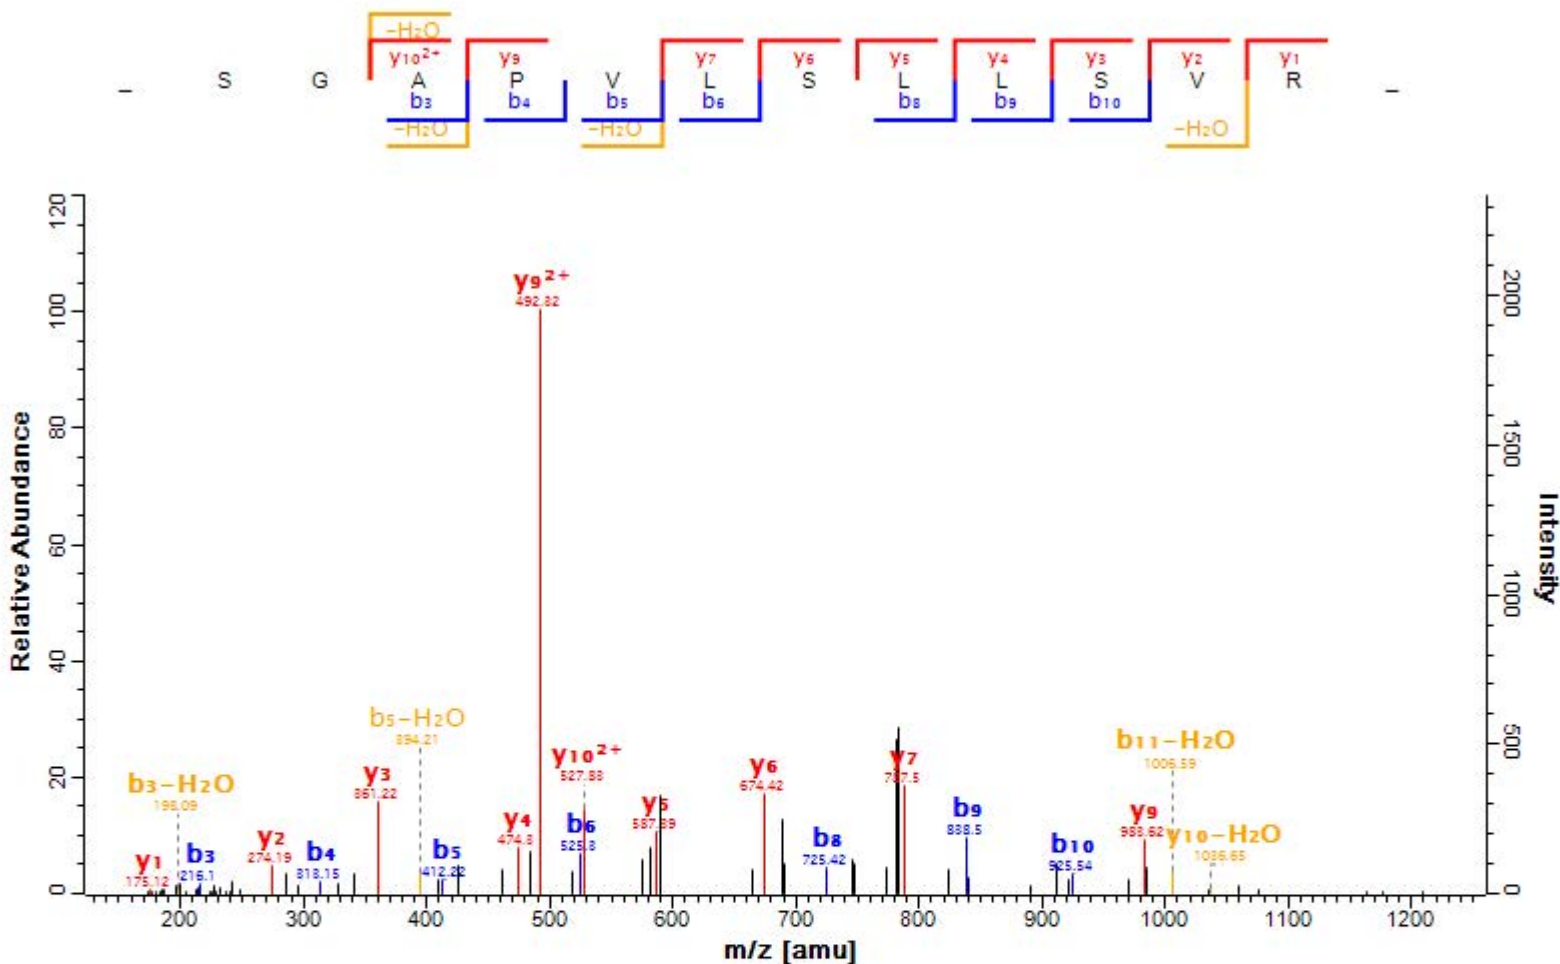

#### precursor information

|                   |                 |
|-------------------|-----------------|
| Mass:             | 1197.70845      |
| m/z:              | 599.8615        |
| Charge:           | 2+              |
| Retentiontime:    | 51.713199615478 |
| Score:            | 81.56528        |
| Mass Error [ppm]: | 0.27007         |
| PEP:              | 0.0021394       |
| Precursor Type:   | MULTI           |

#### general information

|                       |             |
|-----------------------|-------------|
| Annotation:           | 10 of 12    |
| AminoAcids Coverage:  | 83 %        |
| Intensity Coverage:   | 54 %        |
| Peak Coverage:        | 26 %        |
| Protein Localisation: | 321 ... 332 |

| b ion     |          |    |     |    | y ion    |           | y <sup>2+</sup> ion |          |
|-----------|----------|----|-----|----|----------|-----------|---------------------|----------|
| Δ dalton  | mass     |    | seq |    | Δ dalton | mass      | Δ dalton            | mass     |
|           | 88.0393  | 1  | S   | 11 |          |           |                     |          |
|           | 145.0608 | 2  | G   | 10 | 1111.683 |           | 1111.683            |          |
| -0.06419  | 216.0979 | 3  | A   | 9  | 1054.662 |           | 527.8346            | +0.0293  |
| +0.159107 | 313.1506 | 4  | P   | 8  | 983.6248 | +0.15249  | 492.316             | +0.04566 |
| +0.0097   | 412.2191 | 5  | V   | 7  | 886.572  |           | 886.572             |          |
| +0.028419 | 525.3031 | 6  | L   | 6  | 787.5036 | +0.068651 | 787.5036            |          |
|           | 612.3352 | 7  | S   | 5  | 674.4196 | +0.103948 | 674.4196            |          |
| +0.004673 | 725.4192 | 8  | L   | 4  | 587.3875 | -0.05091  | 587.3875            |          |
| -0.07451  | 838.5033 | 9  | L   | 3  | 474.3035 | +0.128976 | 474.3035            |          |
| -0.03793  | 925.5353 | 10 | S   | 2  | 361.2194 | +0.075772 | 361.2194            |          |
|           | 1024.604 | 11 | V   | 1  | 274.1874 | +0.168225 | 274.1874            |          |
|           |          | 12 | R   | 0  | 175.119  | +0.039724 | 175.119             |          |

Scan number 9412 Raw file LNCAP\_Silac\_23F10\_set3\_03  
 Method ITMS; CID Pepti... 372.64

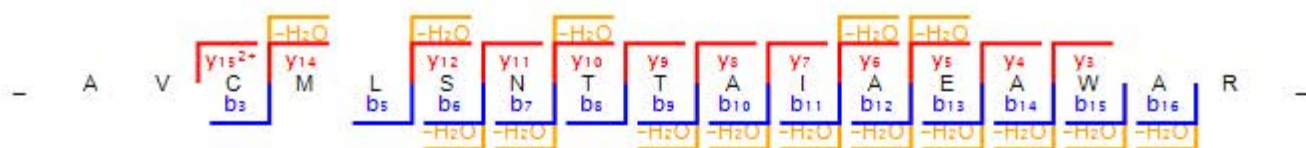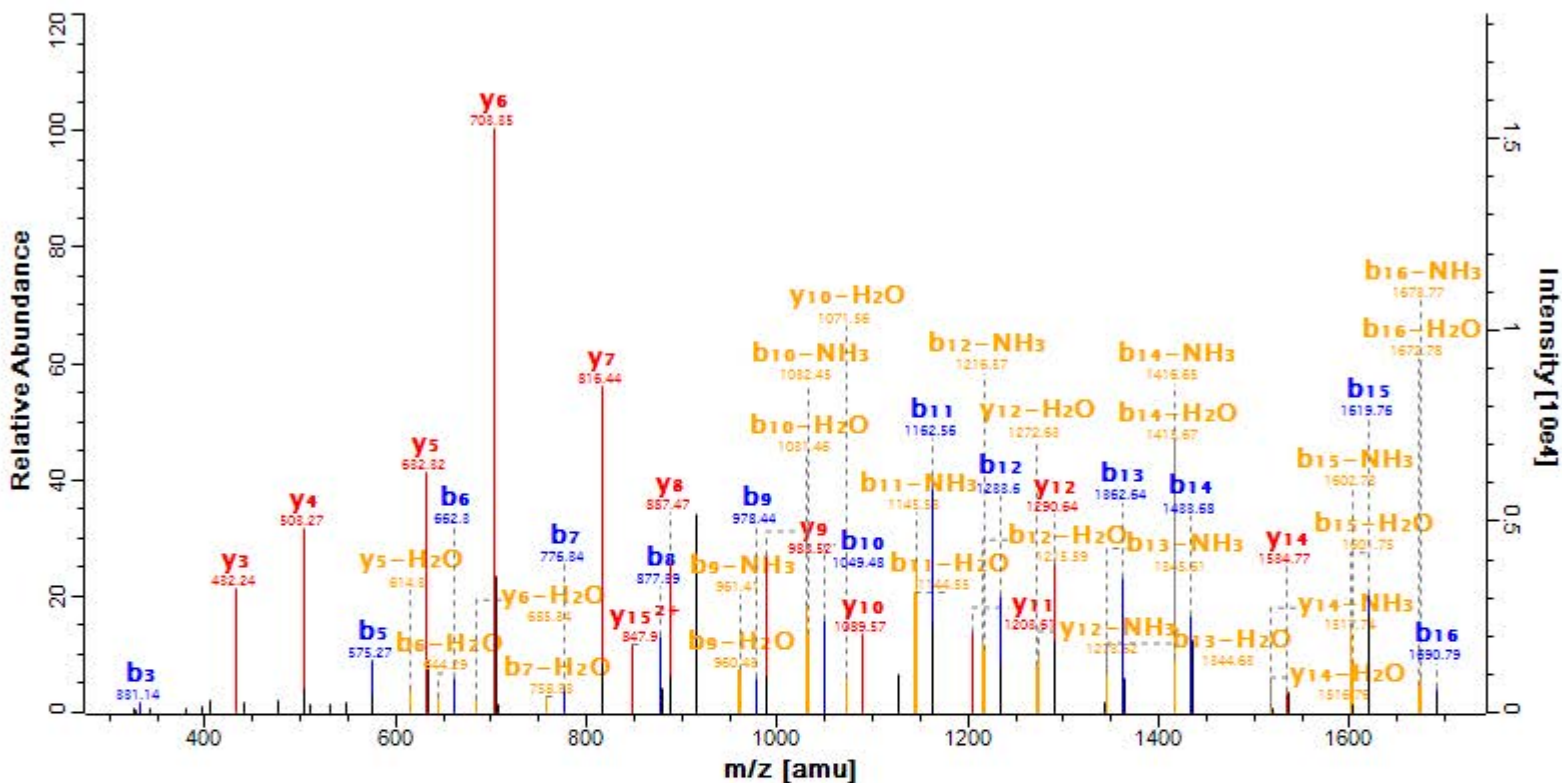

precursor information

|                   |                 |
|-------------------|-----------------|
| Mass:             | 1863.89687      |
| m/z:              | 932.95571       |
| Charge:           | 2+              |
| Retentiontime:    | 53.617969512939 |
| Score:            | 372.6425        |
| Mass Error [ppm]: | -0.14195        |
| PEP:              | 7.5303E-178     |
| Precursor Type:   | MULTI           |

general information

|                       |             |
|-----------------------|-------------|
| Annotation:           | 14 of 17    |
| AminoAcids Coverage:  | 82 %        |
| Intensity Coverage:   | 79 %        |
| Peak Coverage:        | 60 %        |
| Protein Localisation: | 374 ... 390 |

| b ion     |          |     |   | y ion    |          | y <sup>2+</sup> ion |          |
|-----------|----------|-----|---|----------|----------|---------------------|----------|
| Δ dalton  | mass     | seq |   | Δ dalton | mass     | Δ dalton            | mass     |
|           | 72.04439 | 1   | A | 16       |          |                     |          |
|           | 171.1128 | 2   | V | 15       | 1793.867 |                     | 1793.867 |
| -0.07302  | 331.1435 | 3   | C | 14       | 1694.799 | 847.9031            | -0.0196  |
|           | 462.1839 | 4   | M | 13       | 1534.768 | -0.15349            | 1534.768 |
| -0.06451  | 575.268  | 5   | L | 12       | 1403.728 |                     | 1403.728 |
| +0.009236 | 662.3    | 6   | S | 11       | 1290.644 | +0.013414           | 1290.644 |
| +0.115173 | 776.343  | 7   | N | 10       | 1203.612 | +0.050203           | 1203.612 |
| +0.004811 | 877.3906 | 8   | T | 9        | 1089.569 | +0.016959           | 1089.569 |
| -0.06704  | 978.4383 | 9   | T | 8        | 988.5211 | -0.00244            | 988.5211 |
| -0.04733  | 1049.475 | 10  | A | 7        | 887.4734 | -0.00493            | 887.4734 |
| -0.04997  | 1162.559 | 11  | I | 6        | 816.4363 | -0.01591            | 816.4363 |
| -0.05571  | 1233.597 | 12  | A | 5        | 703.3522 | +0.025425           | 703.3522 |
| -0.06535  | 1362.639 | 13  | E | 4        | 632.3151 | +0.028603           | 632.3151 |
| -0.17448  | 1433.676 | 14  | A | 3        | 503.2725 | -0.01096            | 503.2725 |
| -0.22352  | 1619.756 | 15  | W | 2        | 432.2354 | +0.140415           | 432.2354 |
| +0.127915 | 1690.793 | 16  | A | 1        | 246.1561 |                     | 246.1561 |
|           |          | 17  | R | 0        | 175.119  |                     | 175.119  |

Scan number 948 Raw file LNCAP\_Silac\_23F10\_set3\_03  
 Method ITMS: CID Pepti... 88.06

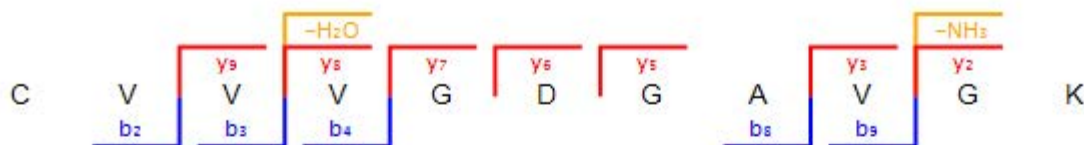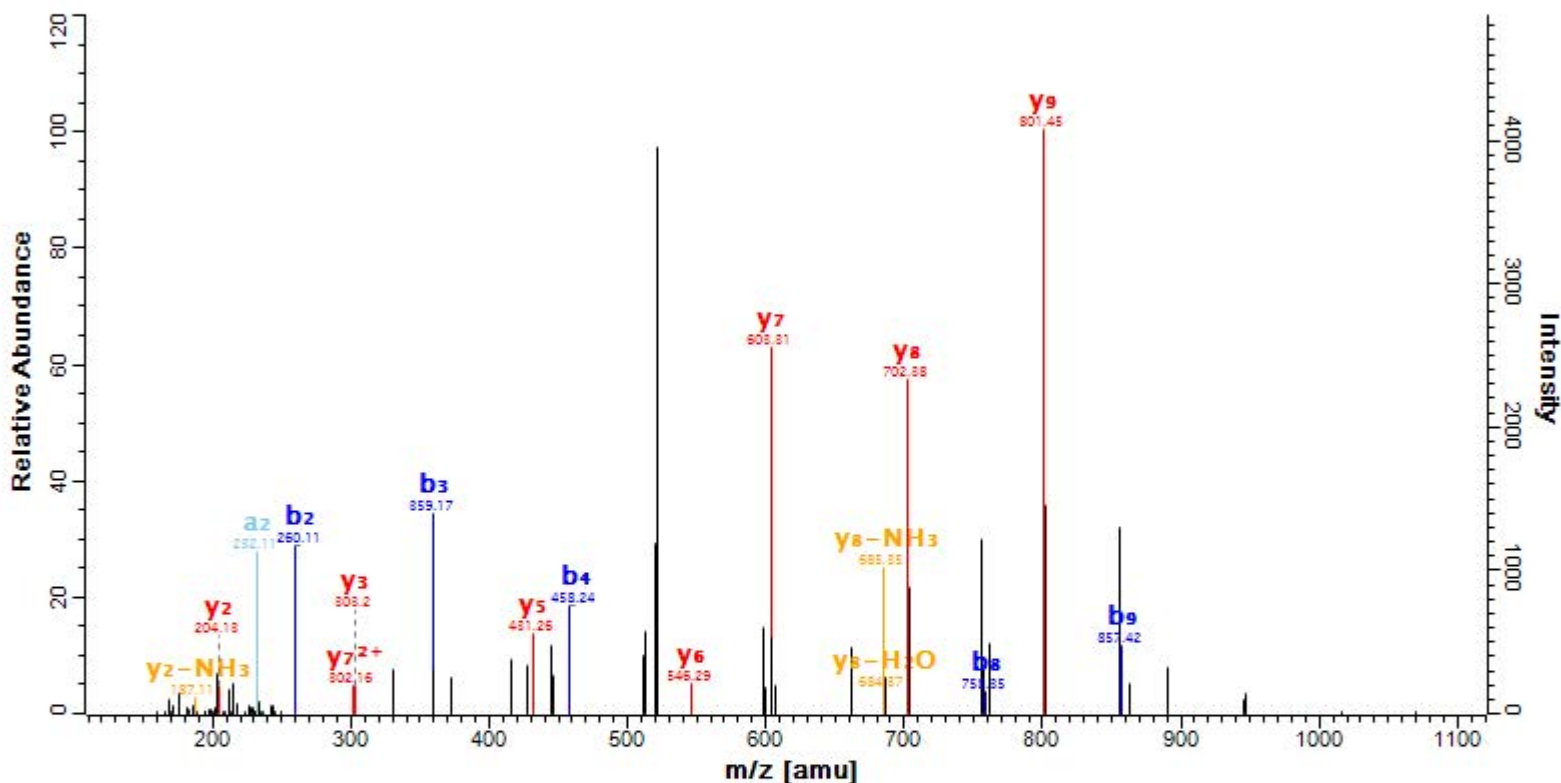

#### precursor information

|                   |                 |
|-------------------|-----------------|
| Mass:             | 1059.53817      |
| m/z:              | 530.77636       |
| Charge:           | 2+              |
| Retentiontime:    | 11.045905113220 |
| Score:            | 88.05646        |
| Mass Error [ppm]: | -0.10722        |
| PEP:              | 0.0020129       |
| Precursor Type:   | MULTI           |

#### general information

|                       |          |
|-----------------------|----------|
| Annotation:           | 9 of 11  |
| AminoAcids Coverage:  | 82 %     |
| Intensity Coverage:   | 44 %     |
| Peak Coverage:        | 18 %     |
| Protein Localisation: | 6 ... 16 |

| a ion    |        | b ion    |        |    |     |          | y ion  |          | y <sup>2+</sup> ion |  |
|----------|--------|----------|--------|----|-----|----------|--------|----------|---------------------|--|
| Δ dalton | mass   | Δ dalton | mass   |    | seq | Δ dalton | mass   | Δ dalton | mass                |  |
|          | 133.04 |          | 161.04 | 1  | C   | 10       |        |          |                     |  |
| -0.025   | 232.11 | -0.069   | 260.11 | 2  | V   | 9        | 900.51 |          | 900.51              |  |
|          | 331.18 | -0.06    | 359.17 | 3  | V   | 8        | 801.45 | -0.011   | 801.45              |  |
|          | 430.25 | -0.056   | 458.24 | 4  | V   | 7        | 702.38 | +0.0174  | 702.38              |  |
|          | 487.27 |          | 515.26 | 5  | G   | 6        | 603.31 | +0.0016  | 603.31              |  |
|          | 602.3  |          | 630.29 | 6  | D   | 5        | 546.29 | +0.0331  | 546.29              |  |
|          | 659.32 |          | 687.31 | 7  | G   | 4        | 431.26 | +0.0801  | 431.26              |  |
|          | 730.36 | +0.0687  | 758.35 | 8  | A   | 3        | 374.24 |          | 374.24              |  |
|          | 829.42 | -0.003   | 857.42 | 9  | V   | 2        | 303.2  | +0.0371  | 303.2               |  |
|          | 886.45 |          | 914.44 | 10 | G   | 1        | 204.13 | +0.0775  | 204.13              |  |
|          |        |          |        | 11 | K   | 0        | 147.11 |          | 147.11              |  |

Scan number 9587 Raw file LNCAP\_Silac\_23F10\_set3\_03  
 Method ITMS; CID Peptide 176.4

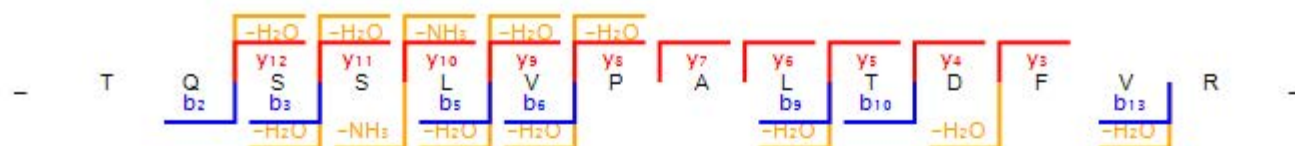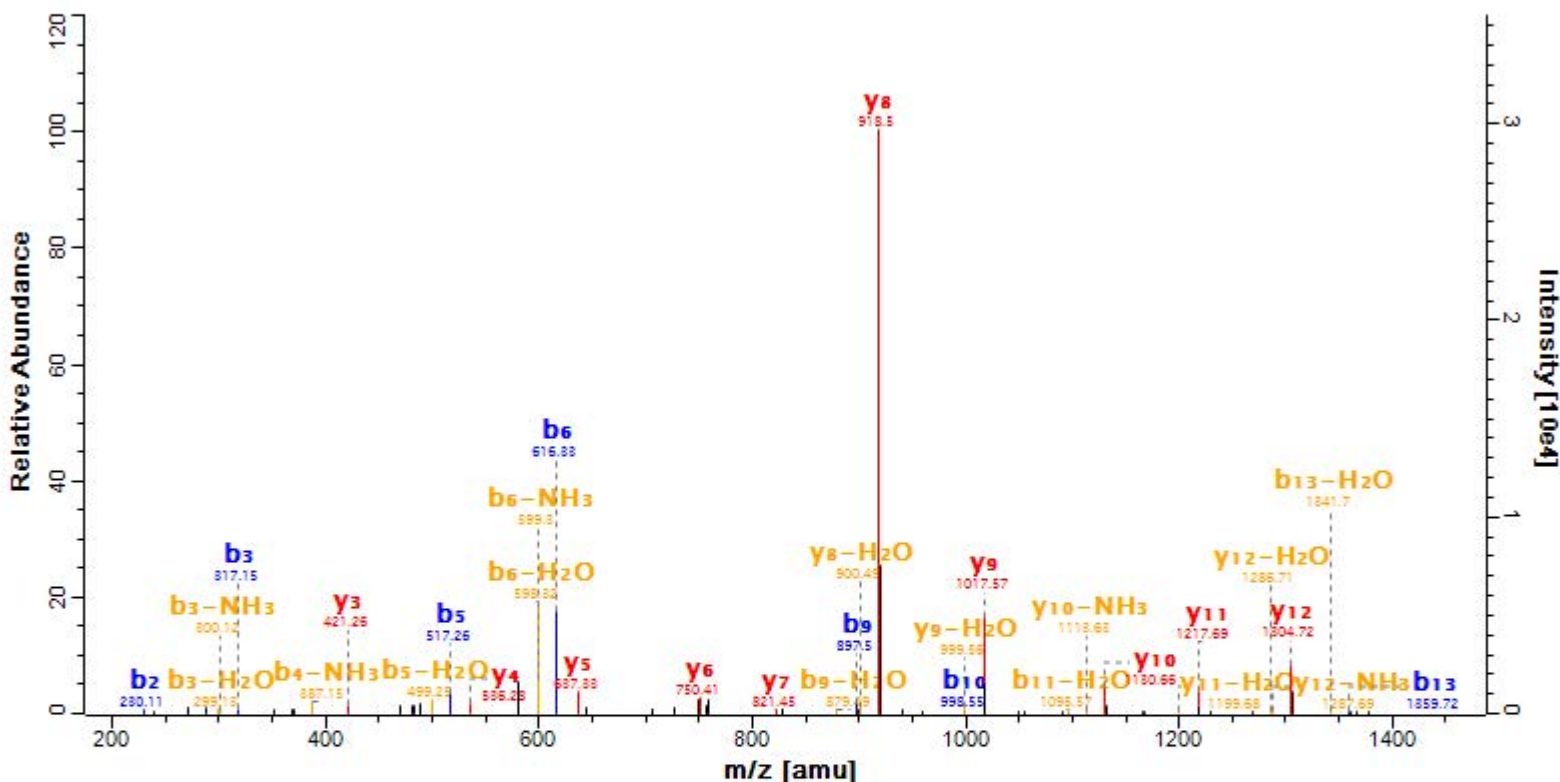

#### precursor information

|                   |                 |
|-------------------|-----------------|
| Mass:             | 1532.82028      |
| m/z:              | 767.41742       |
| Charge:           | 2+              |
| Retentiontime:    | 54.630268096923 |
| Score:            | 176.3965        |
| Mass Error [ppm]: | 0.27766         |
| PEP:              | 1.9534E-13      |
| Precursor Type:   | ISO             |

#### general information

|                       |             |
|-----------------------|-------------|
| Annotation:           | 12 of 14    |
| AminoAcids Coverage:  | 86 %        |
| Intensity Coverage:   | 73 %        |
| Peak Coverage:        | 40 %        |
| Protein Localisation: | 144 ... 157 |

| b ion      |               |     |   | y ion    |               |            |  |
|------------|---------------|-----|---|----------|---------------|------------|--|
| Δ dalton   | mass          | seq |   | Δ dalton | mass          |            |  |
|            | 102.054954941 | 1   | T | 13       |               |            |  |
| -0.0087351 | 230.113532452 | 2   | Q | 12       | 1432.77945537 |            |  |
| +0.010445  | 317.145560862 | 3   | S | 11       | 1304.72087786 | -0.0151894 |  |
|            | 404.177589272 | 4   | S | 10       | 1217.68884945 | -0.0524969 |  |
| +0.1087081 | 517.261653252 | 5   | L | 9        | 1130.65682104 | +0.0309231 |  |
| -0.0038343 | 616.330067169 | 6   | V | 8        | 1017.57275706 | -0.0189851 |  |
|            | 713.382831021 | 7   | P | 7        | 918.50434314  | +0.0007838 |  |
|            | 784.419944808 | 8   | A | 6        | 821.451579288 | +0.231221  |  |
| +0.0058179 | 897.504008789 | 9   | L | 5        | 750.4144655   | +0.0411009 |  |
| -0.0709133 | 998.551687263 | 10  | T | 4        | 637.33040152  | +0.0674867 |  |
|            | 1113.57863029 | 11  | D | 3        | 536.282723045 | +0.0603556 |  |
|            | 1260.64704421 | 12  | F | 2        | 421.255780013 | +0.1567566 |  |
| -0.1279337 | 1359.71545813 | 13  | V | 1        | 274.187366097 |            |  |
|            |               | 14  | R | 0        | 175.118952181 |            |  |

Scan number 974 Raw file LNCAP\_Silac\_23F10\_set3\_03  
 Method ITMS: CID Pepti... 57.35

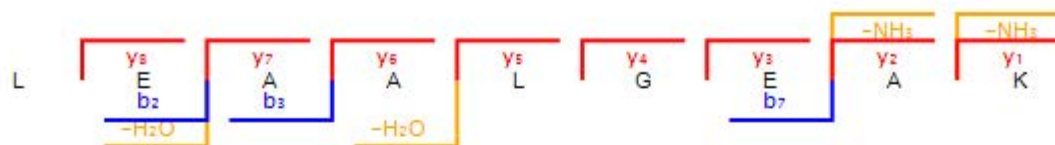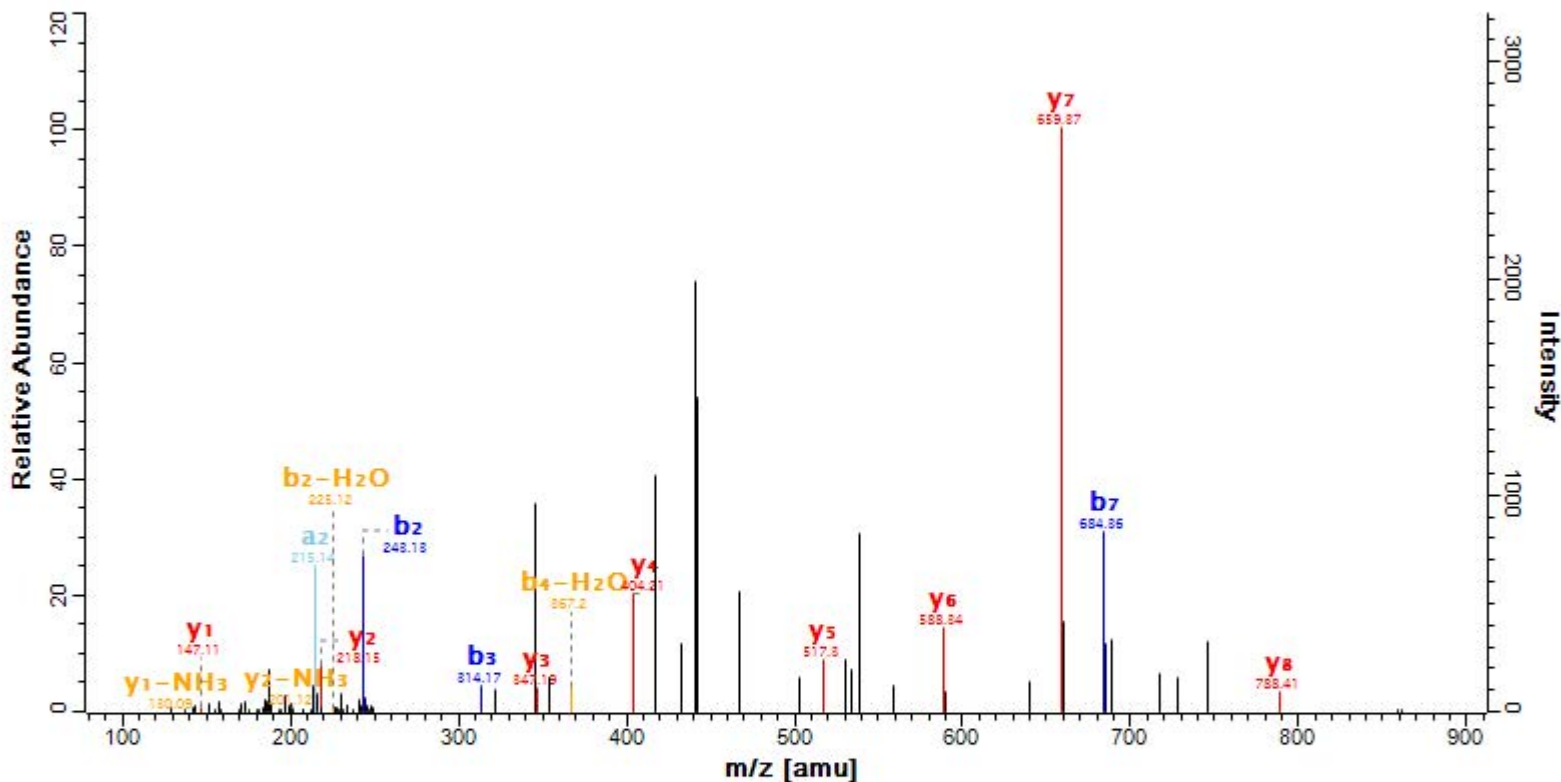

precursor information

|                       |                 |
|-----------------------|-----------------|
| Mass:                 | 900.49201       |
| m/z:                  | 451.25328       |
| Charge:               | 2+              |
| Retentiontime:        | 11.195906639099 |
| Score:                | 57.34834        |
| Mass Error [ppm]:     | 0.40126         |
| PEP:                  | 0.02988         |
| Precursor Type:       | MULTI           |
| Annotation:           | 8 of 9          |
| AminoAcids Coverage:  | 89 %            |
| Intensity Coverage:   | 37 %            |
| Peak Coverage:        | 17 %            |
| Protein Localisation: | 172 ... 180     |

| a ion           |          | b ion           |          |     | y ion           |      |                    |
|-----------------|----------|-----------------|----------|-----|-----------------|------|--------------------|
| $\Delta$ dalton | mass     | $\Delta$ dalton | mass     | seq | $\Delta$ dalton | mass |                    |
|                 | 86.09643 |                 | 114.0913 | 1   | L               | 8    |                    |
| +0.048771       | 215.139  | +0.024361       | 243.1339 | 2   | E               | 7    | 788.4149 +0.163082 |
|                 | 286.1761 | -0.06405        | 314.171  | 3   | A               | 6    | 659.3723 +0.048083 |
|                 | 357.2132 |                 | 385.2082 | 4   | A               | 5    | 588.3352 -0.05225  |
|                 | 470.2973 |                 | 498.2922 | 5   | L               | 4    | 517.298 +0.027218  |
|                 | 527.3188 |                 | 555.3137 | 6   | G               | 3    | 404.214 -0.01543   |
|                 | 656.3614 | +0.067851       | 684.3563 | 7   | E               | 2    | 347.1925 +0.096612 |
|                 | 727.3985 |                 | 755.3934 | 8   | A               | 1    | 218.1499 +0.126922 |
|                 |          |                 |          | 9   | K               | 0    | 147.1128 +0.044331 |

Scan number 9815 Raw file LNCAP\_Silac\_23F10\_set3\_03  
 Method ITMS; CID Pepti... 94.19

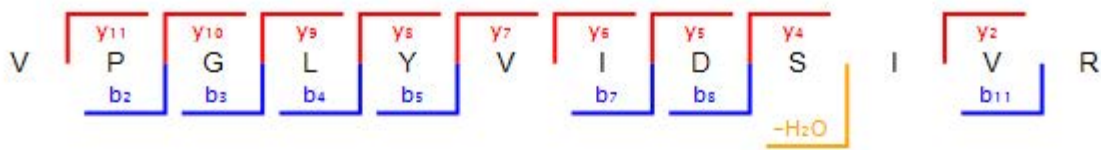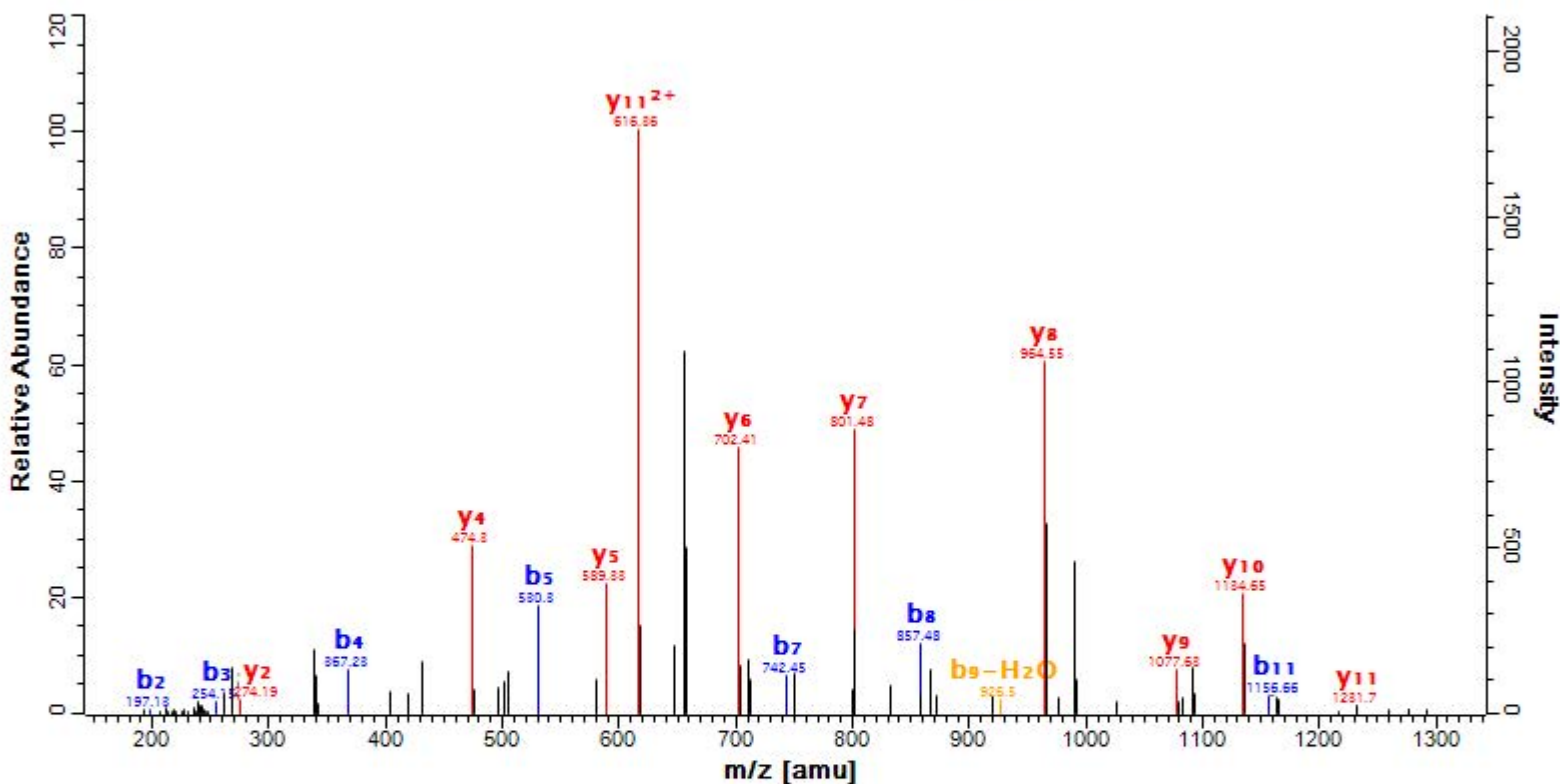

#### precursor information

|                   |                 |
|-------------------|-----------------|
| Mass:             | 1329.76491      |
| m/z:              | 665.88973       |
| Charge:           | 2+              |
| Retentiontime:    | 55.996360778808 |
| Score:            | 94.19147        |
| Mass Error [ppm]: | -0.54798        |
| PEP:              | 0.0006535       |
| Precursor Type:   | MULTI           |

#### general information

|                       |           |
|-----------------------|-----------|
| Annotation:           | 9 of 12   |
| AminoAcids Coverage:  | 75 %      |
| Intensity Coverage:   | 50 %      |
| Peak Coverage:        | 20 %      |
| Protein Localisation: | 60 ... 71 |

| b ion     |          |    |     |    | y ion    |           | y <sup>2+</sup> ion |           |
|-----------|----------|----|-----|----|----------|-----------|---------------------|-----------|
| Δ dalton  | mass     |    | seq |    | Δ dalton | mass      | Δ dalton            | mass      |
|           | 100.0757 | 1  | V   | 11 |          |           |                     |           |
| +0.046167 | 197.1285 | 2  | P   | 10 | 1231.704 | -0.06937  | 616.3559            | +0.247322 |
| -0.05426  | 254.1499 | 3  | G   | 9  | 1134.652 | +0.082639 | 1134.652            |           |
| +0.061123 | 367.234  | 4  | L   | 8  | 1077.63  | +0.052223 | 1077.63             |           |
| +0.002067 | 530.2973 | 5  | Y   | 7  | 964.5462 | +0.019466 | 964.5462            |           |
|           | 629.3657 | 6  | V   | 6  | 801.4829 | +0.049225 | 801.4829            |           |
| +0.142314 | 742.4498 | 7  | I   | 5  | 702.4145 | +0.027124 | 702.4145            |           |
| -0.1281   | 857.4767 | 8  | D   | 4  | 589.3304 | +0.125104 | 589.3304            |           |
|           | 944.5088 | 9  | S   | 3  | 474.3035 | +0.038644 | 474.3035            |           |
|           | 1057.593 | 10 | I   | 2  | 387.2714 |           | 387.2714            |           |
| -0.06053  | 1156.661 | 11 | V   | 1  | 274.1874 | +0.152783 | 274.1874            |           |
|           |          | 12 | R   | 0  | 175.119  |           | 175.119             |           |

Scan number 9822 Raw file LNCAP\_Silac\_23F10\_set3\_03  
 Method ITMS; CID Pepti... 79.09

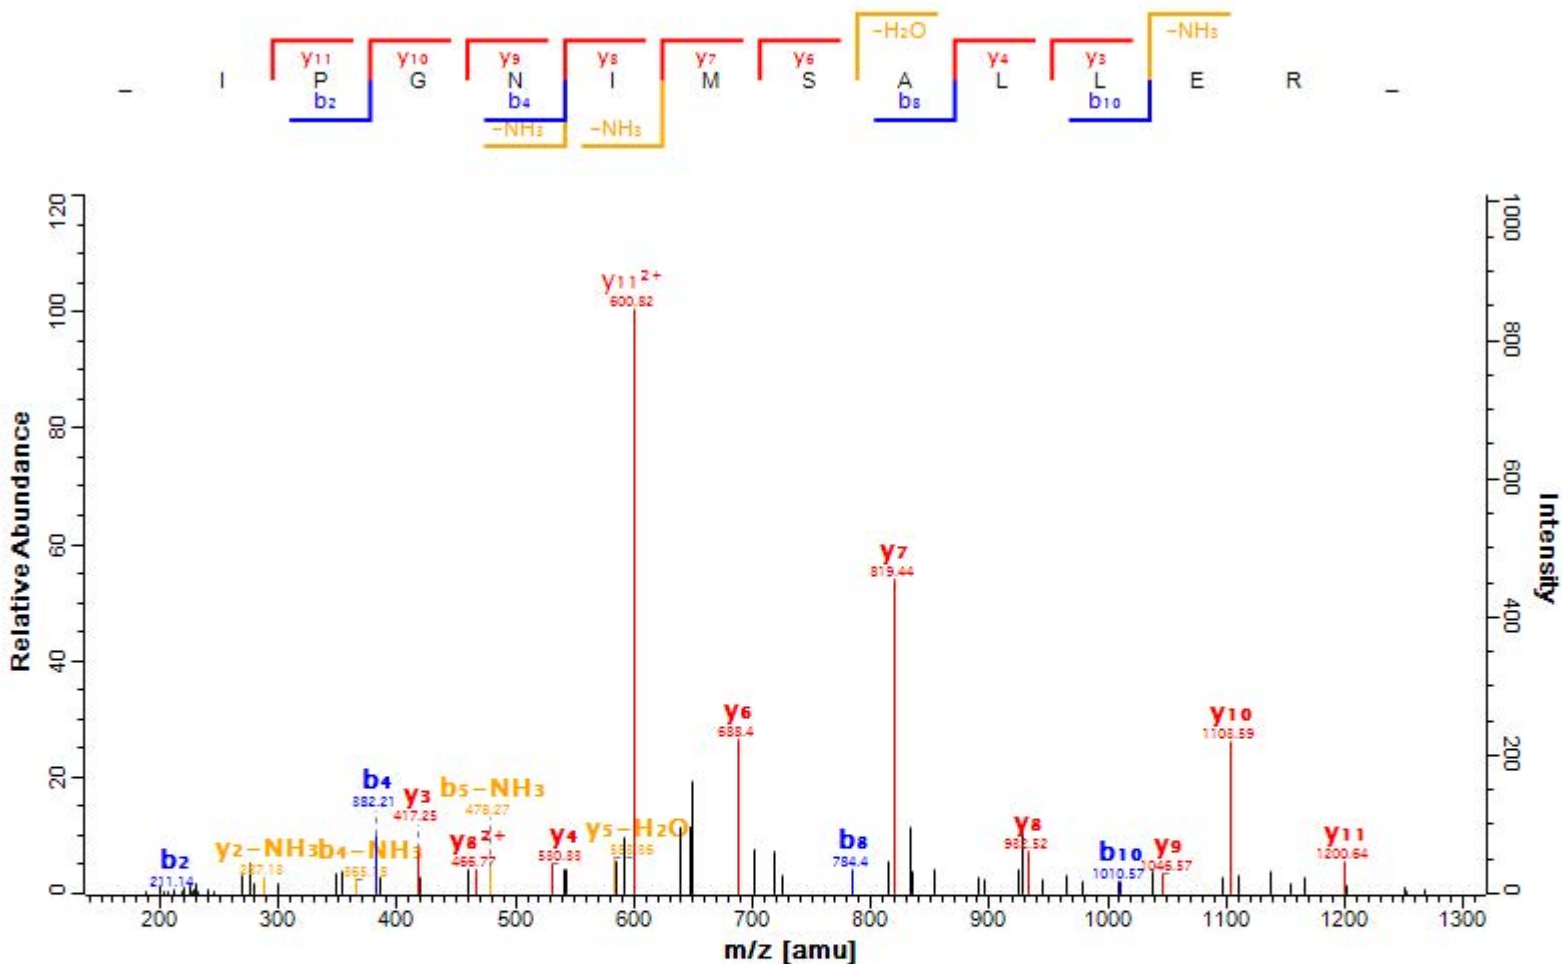

#### precursor information

|                   |                 |
|-------------------|-----------------|
| Mass:             | 1312.71876      |
| m/z:              | 657.36666       |
| Charge:           | 2+              |
| Retention time:   | 56.037448883056 |
| Score:            | 79.08858        |
| Mass Error [ppm]: | 1.1106          |
| PEP:              | 0.0026049       |
| Precursor Type:   | MULTI           |

#### general information

|                       |             |
|-----------------------|-------------|
| Annotation:           | 10 of 12    |
| AminoAcids Coverage:  | 83 %        |
| Intensity Coverage:   | 56 %        |
| Peak Coverage:        | 22 %        |
| Protein Localisation: | 311 ... 322 |

| b ion     |          |    |     |    | y ion    |           | y <sup>2+</sup> ion |           |
|-----------|----------|----|-----|----|----------|-----------|---------------------|-----------|
| Δ dalton  | mass     |    | seq |    | Δ dalton | mass      | Δ dalton            | mass      |
|           | 114.0913 | 1  | I   | 11 |          |           |                     |           |
| -0.11687  | 211.1441 | 2  | P   | 10 | 1200.641 | -0.01039  | 600.8239            | +0.097794 |
|           | 268.1656 | 3  | G   | 9  | 1103.588 | +0.009047 | 1103.588            |           |
| +0.047486 | 382.2085 | 4  | N   | 8  | 1046.566 | +0.181023 | 1046.566            |           |
|           | 495.2926 | 5  | I   | 7  | 932.5234 | -0.08147  | 466.7653            | +0.346923 |
|           | 626.333  | 6  | M   | 6  | 819.4393 | -0.00174  | 819.4393            |           |
|           | 713.3651 | 7  | S   | 5  | 688.3988 | +0.037586 | 688.3988            |           |
| +0.051732 | 784.4022 | 8  | A   | 4  | 601.3668 |           | 601.3668            |           |
|           | 897.4863 | 9  | L   | 3  | 530.3297 | +0.041115 | 530.3297            |           |
| +0.096129 | 1010.57  | 10 | L   | 2  | 417.2456 | -0.06342  | 417.2456            |           |
|           | 1139.613 | 11 | E   | 1  | 304.1615 |           | 304.1615            |           |
|           |          | 12 | R   | 0  | 175.119  |           | 175.119             |           |



Scan number 9925 Raw file LNCAP\_Silac\_23F10\_set3\_03  
 Method ITMS; CID Pepti... 76.14

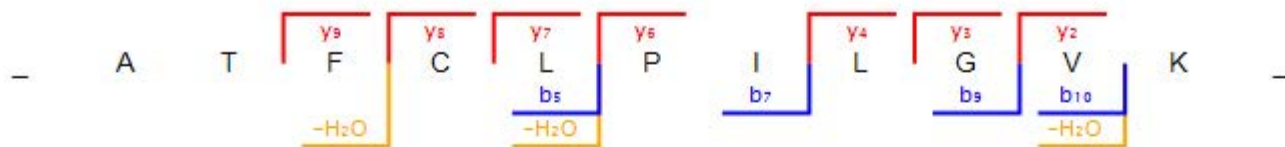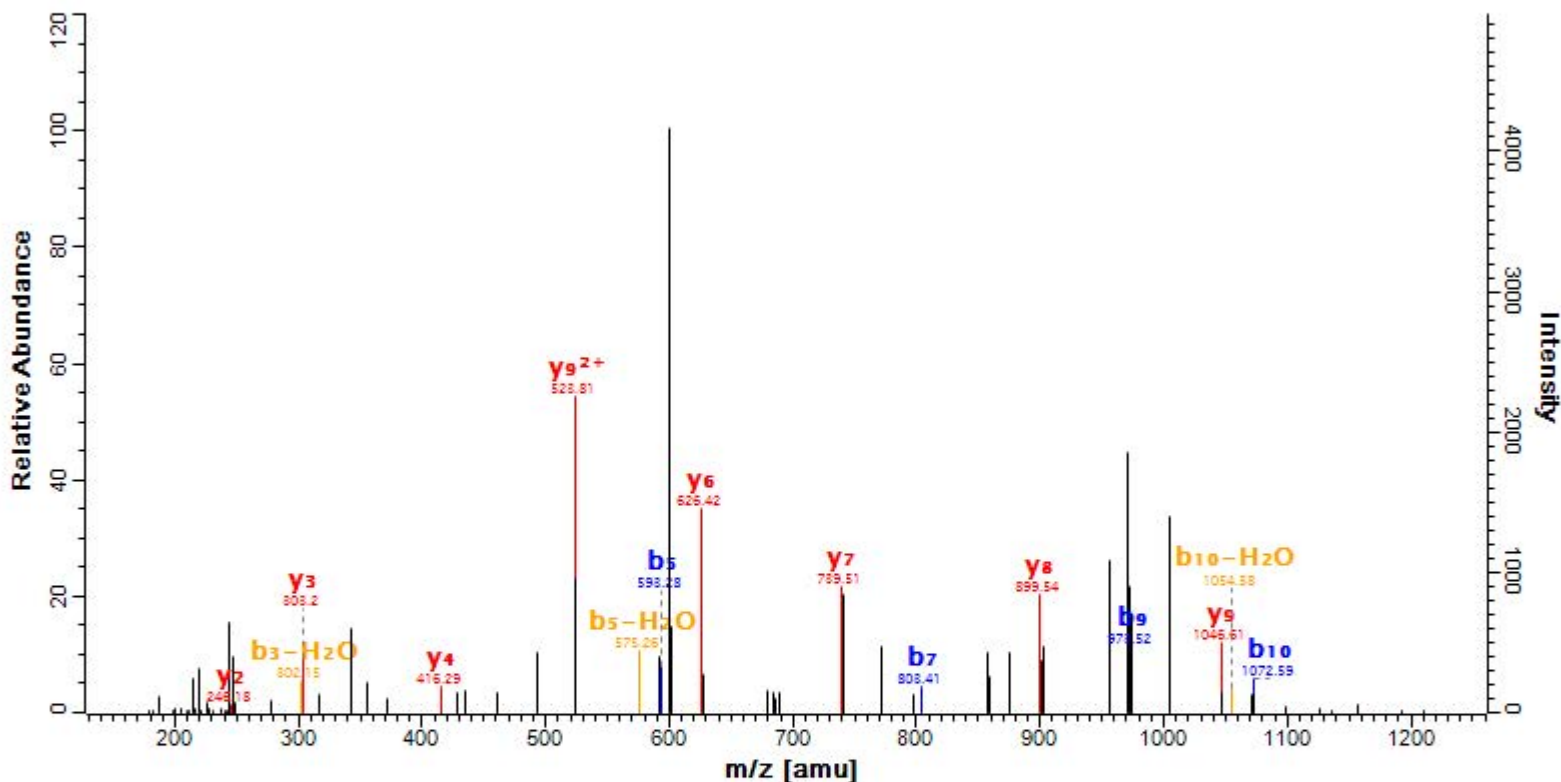

#### precursor information

|                   |                 |
|-------------------|-----------------|
| Mass:             | 1217.6843       |
| m/z:              | 609.84943       |
| Charge:           | 2+              |
| Retentiontime:    | 56.675773620605 |
| Score:            | 76.14272        |
| Mass Error [ppm]: | 0.071669        |
| PEP:              | 0.0044509       |
| Precursor Type:   | MULTI           |

#### general information

|                       |             |
|-----------------------|-------------|
| Annotation:           | 8 of 11     |
| AminoAcids Coverage:  | 73 %        |
| Intensity Coverage:   | 28 %        |
| Peak Coverage:        | 16 %        |
| Protein Localisation: | 190 ... 200 |

| b ion     |          |    |     |    | y ion    |           |          | y <sup>2+</sup> ion |  |
|-----------|----------|----|-----|----|----------|-----------|----------|---------------------|--|
| Δ dalton  | mass     |    | seq |    | Δ dalton | mass      | Δ dalton | mass                |  |
|           | 72.04439 | 1  | A   | 10 |          |           |          |                     |  |
|           | 173.0921 | 2  | T   | 9  | 1147.654 |           | 1147.654 |                     |  |
|           | 320.1605 | 3  | F   | 8  | 1046.607 | -0.07972  | 523.807  | +0.030048           |  |
|           | 480.1911 | 4  | C   | 7  | 899.5383 | -0.02632  | 899.5383 |                     |  |
| +0.046277 | 593.2752 | 5  | L   | 6  | 739.5076 | +0.065788 | 739.5076 |                     |  |
|           | 690.328  | 6  | P   | 5  | 626.4236 | +0.009837 | 626.4236 |                     |  |
| -0.10239  | 803.412  | 7  | I   | 4  | 529.3708 |           | 529.3708 |                     |  |
|           | 916.4961 | 8  | L   | 3  | 416.2867 | +0.0556   | 416.2867 |                     |  |
| +0.341092 | 973.5176 | 9  | G   | 2  | 303.2027 | +0.08516  | 303.2027 |                     |  |
| +0.123386 | 1072.586 | 10 | V   | 1  | 246.1812 | +0.0769   | 246.1812 |                     |  |
|           |          | 11 | K   | 0  | 147.1128 |           | 147.1128 |                     |  |

Scan number 9973 Raw file LNCAP\_Silac\_23F10\_set3\_03  
 Method ITMS; CID Pepti... 148.36

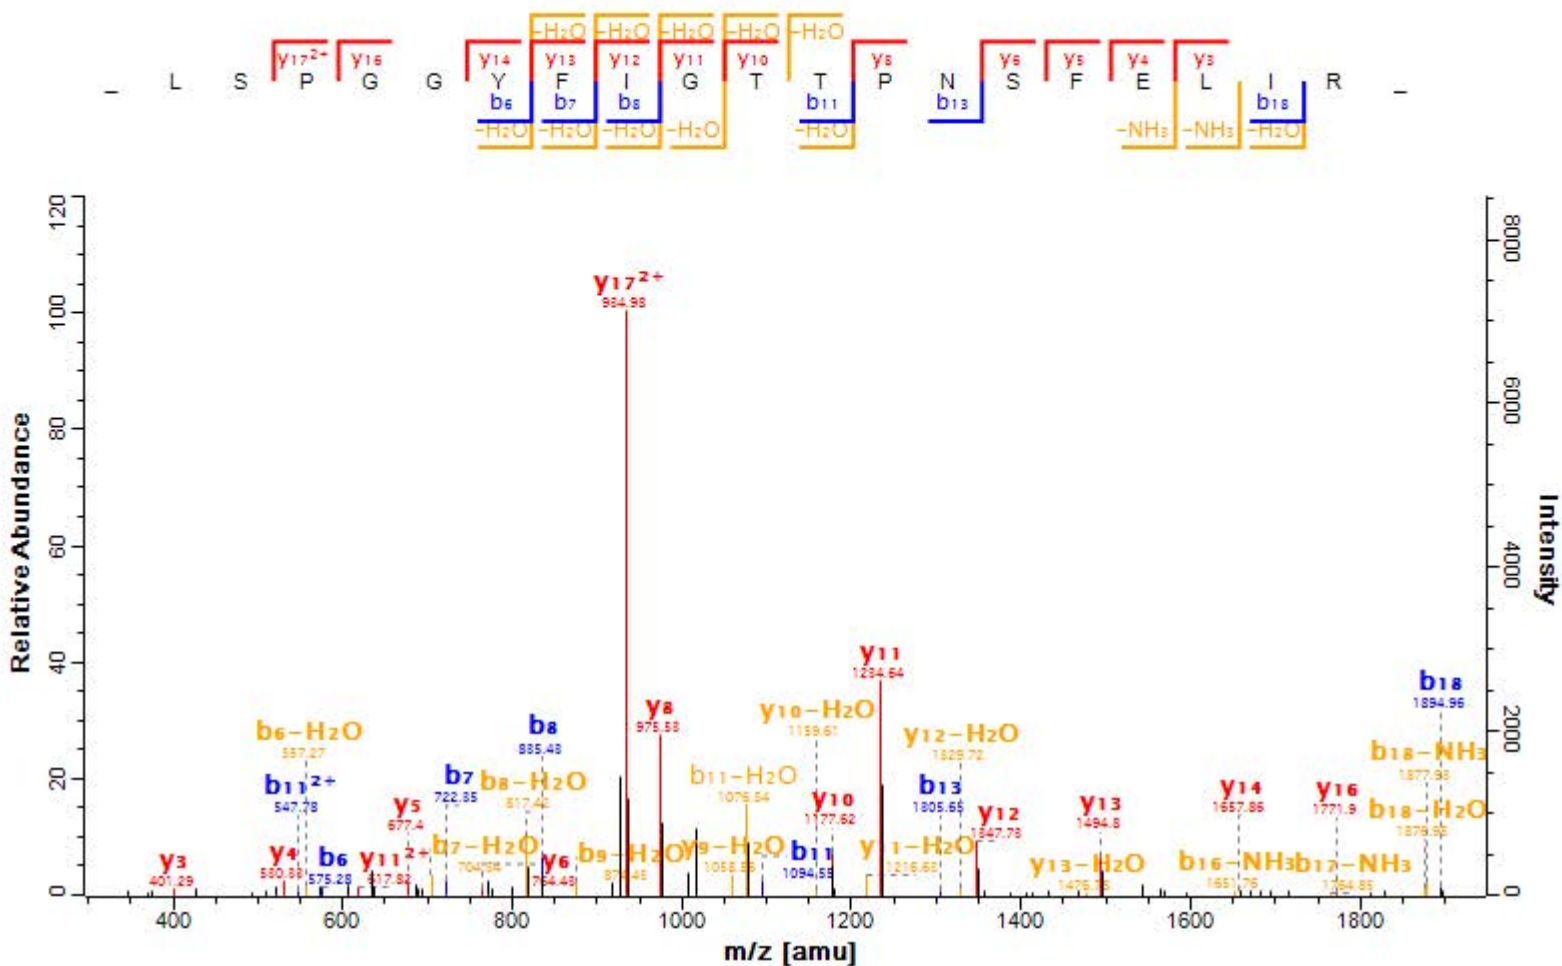

**precursor information**

|                   |                 |
|-------------------|-----------------|
| Mass:             | 2068.06299      |
| m/z:              | 1035.03877      |
| Charge:           | 2+              |
| Retentiontime:    | 56.967273712158 |
| Score:            | 148.3611        |
| Mass Error [ppm]: | 0.023279        |
| PEP:              | 2.7067E-19      |
| Precursor Type:   | MULTI           |

**general information**

|                       |             |
|-----------------------|-------------|
| Annotation:           | 15 of 19    |
| AminoAcids Coverage:  | 79 %        |
| Intensity Coverage:   | 60 %        |
| Peak Coverage:        | 37 %        |
| Protein Localisation: | 308 ... 326 |

| b <sup>2+</sup> ion |        | b ion    |        | seq |   |    | y ion    |         | y <sup>2+</sup> ion |         |
|---------------------|--------|----------|--------|-----|---|----|----------|---------|---------------------|---------|
| Δ dalton            | mass   | Δ dalton | mass   |     |   |    | Δ dalton | mass    | Δ dalton            | mass    |
|                     | 114.09 |          | 114.09 | 1   | L | 18 |          |         |                     |         |
|                     | 201.12 |          | 201.12 | 2   | S | 17 | 1956     |         | 1956                |         |
|                     | 298.18 |          | 298.18 | 3   | P | 16 | 1869     |         | 934.98              | +0.2488 |
|                     | 355.2  |          | 355.2  | 4   | G | 15 | 1771.9   | -0.172  | 1771.9              |         |
|                     | 412.22 |          | 412.22 | 5   | G | 14 | 1714.9   |         | 1714.9              |         |
|                     | 575.28 | -0.059   | 575.28 | 6   | Y | 13 | 1657.9   | +0.1978 | 1657.9              |         |
|                     | 722.35 | -0.025   | 722.35 | 7   | F | 12 | 1494.8   | -0.066  | 1494.8              |         |
|                     | 835.43 | -0.012   | 835.43 | 8   | I | 11 | 1347.7   | -0.042  | 1347.7              |         |
|                     | 892.46 |          | 892.46 | 9   | G | 10 | 1234.6   | -0.013  | 617.82              | -0.418  |
|                     | 993.5  |          | 993.5  | 10  | T | 9  | 1177.6   | -0.024  | 1177.6              |         |
| -0.458              | 547.78 | -0.117   | 1094.6 | 11  | T | 8  | 1076.6   |         | 1076.6              |         |
|                     | 1191.6 |          | 1191.6 | 12  | P | 7  | 975.53   | -0.01   | 975.53              |         |
|                     | 1305.6 | +0.0275  | 1305.6 | 13  | N | 6  | 878.47   |         | 878.47              |         |
|                     | 1392.7 |          | 1392.7 | 14  | S | 5  | 764.43   | +0.3166 | 764.43              |         |
|                     | 1539.7 |          | 1539.7 | 15  | F | 4  | 677.4    | -0.126  | 677.4               |         |
|                     | 1668.8 |          | 1668.8 | 16  | E | 3  | 530.33   | -0.06   | 530.33              |         |
|                     | 1781.9 |          | 1781.9 | 17  | L | 2  | 401.29   | -0.004  | 401.29              |         |
|                     | 1895   | +0.0743  | 1895   | 18  | I | 1  | 288.2    |         | 288.2               |         |
|                     |        |          |        | 19  | R | 0  | 175.12   |         | 175.12              |         |

Scan number 1244 Raw file LNCAP\_Silac\_23F10\_set3\_04  
 Method ITMS; CID Pepti... 55.53

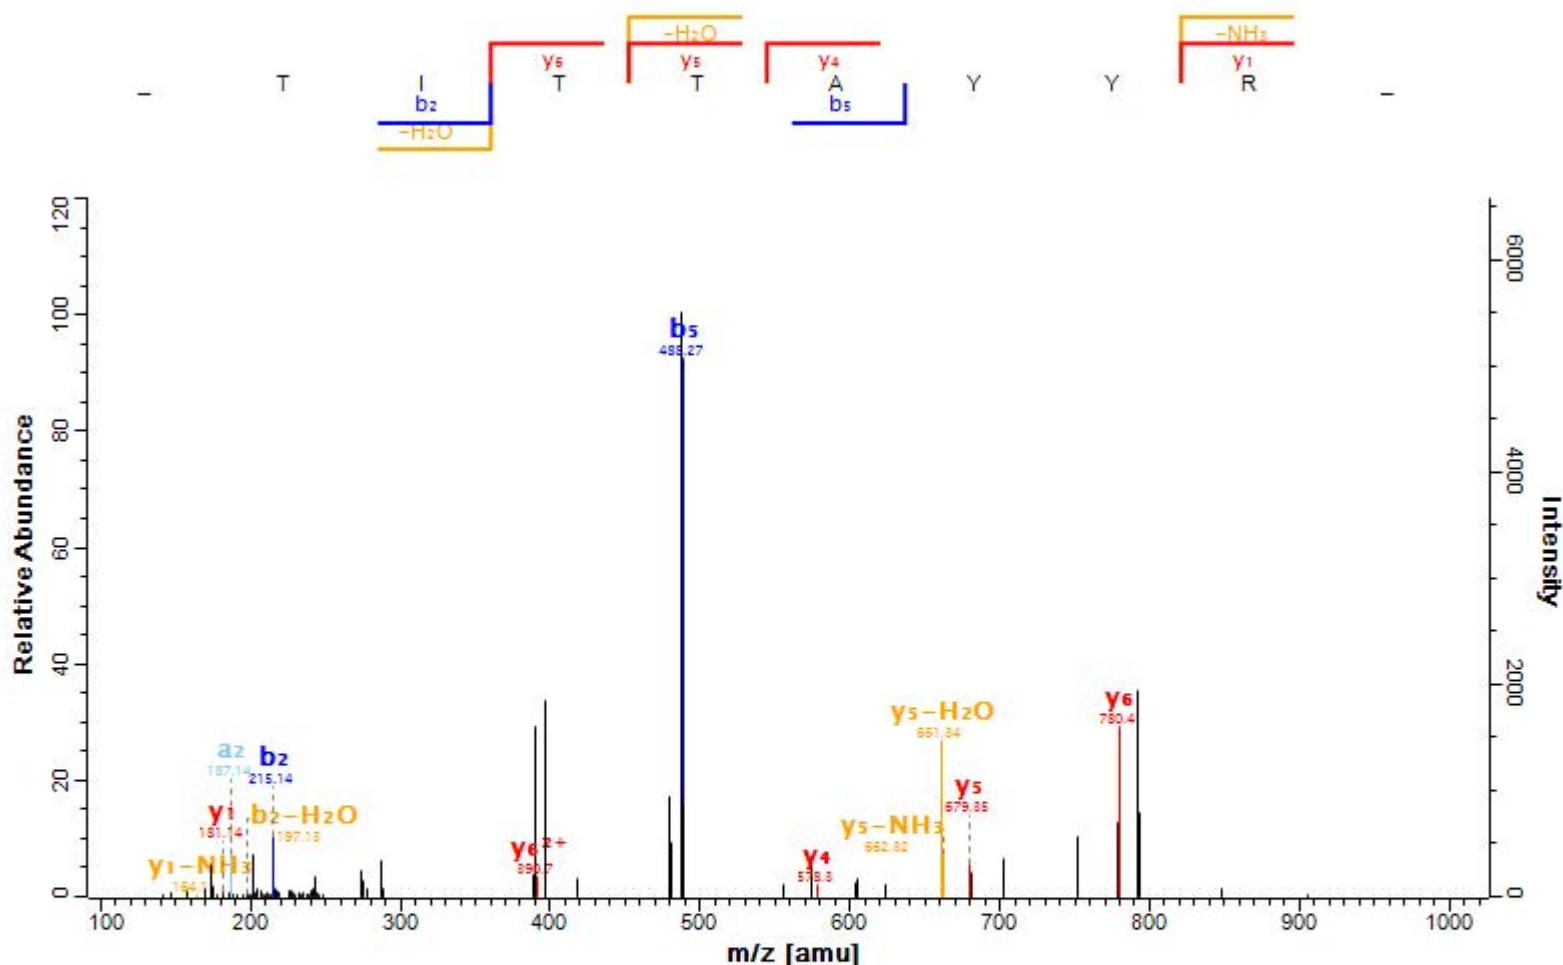

#### precursor information

|                       |                 |
|-----------------------|-----------------|
| Mass:                 | 987.50341       |
| m/z:                  | 494.75898       |
| Charge:               | 2+              |
| Retentiontime:        | 13.258616447448 |
| Score:                | 55.53053        |
| Mass Error [ppm]:     | 0.8741          |
| g PEP:                | 0.0428          |
| Annotation:           | 5 of 8          |
| AminoAcids Coverage:  | 62 %            |
| Intensity Coverage:   | 31 %            |
| Peak Coverage:        | 10 %            |
| Protein Localisation: | 196 ... 203     |

| a ion    |        | b ion    |        |   |     |   | y ion    |         | y <sup>2+</sup> ion |         |
|----------|--------|----------|--------|---|-----|---|----------|---------|---------------------|---------|
| Δ dalton | mass   | Δ dalton | mass   |   | seq |   | Δ dalton | mass    | Δ dalton            | mass    |
|          | 74.06  |          | 102.05 | 1 | T   | 7 |          |         |                     |         |
| +0.0491  | 187.14 | -0.045   | 215.14 | 2 | I   | 6 | 893.48   |         | 893.48              |         |
|          | 288.19 |          | 316.19 | 3 | T   | 5 | 780.4    | +0.0264 | 390.7               | +0.1059 |
|          | 389.24 |          | 417.23 | 4 | T   | 4 | 679.35   | +0.0372 | 679.35              |         |
|          | 460.28 | +0.2926  | 488.27 | 5 | A   | 3 | 578.3    | +0.1411 | 578.3               |         |
|          | 623.34 |          | 651.33 | 6 | Y   | 2 | 507.27   |         | 507.27              |         |
|          | 786.4  |          | 814.4  | 7 | Y   | 1 | 344.2    |         | 344.2               |         |
|          |        |          |        | 8 | R   | 0 | 181.14   | +0.0366 | 181.14              |         |

Scan number 1605 Raw file LNCAP\_Silac\_23F10\_set3\_04  
 Method ITMS; CID Pepti... 131.4

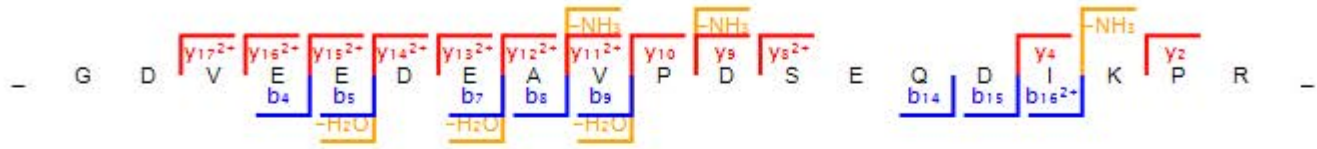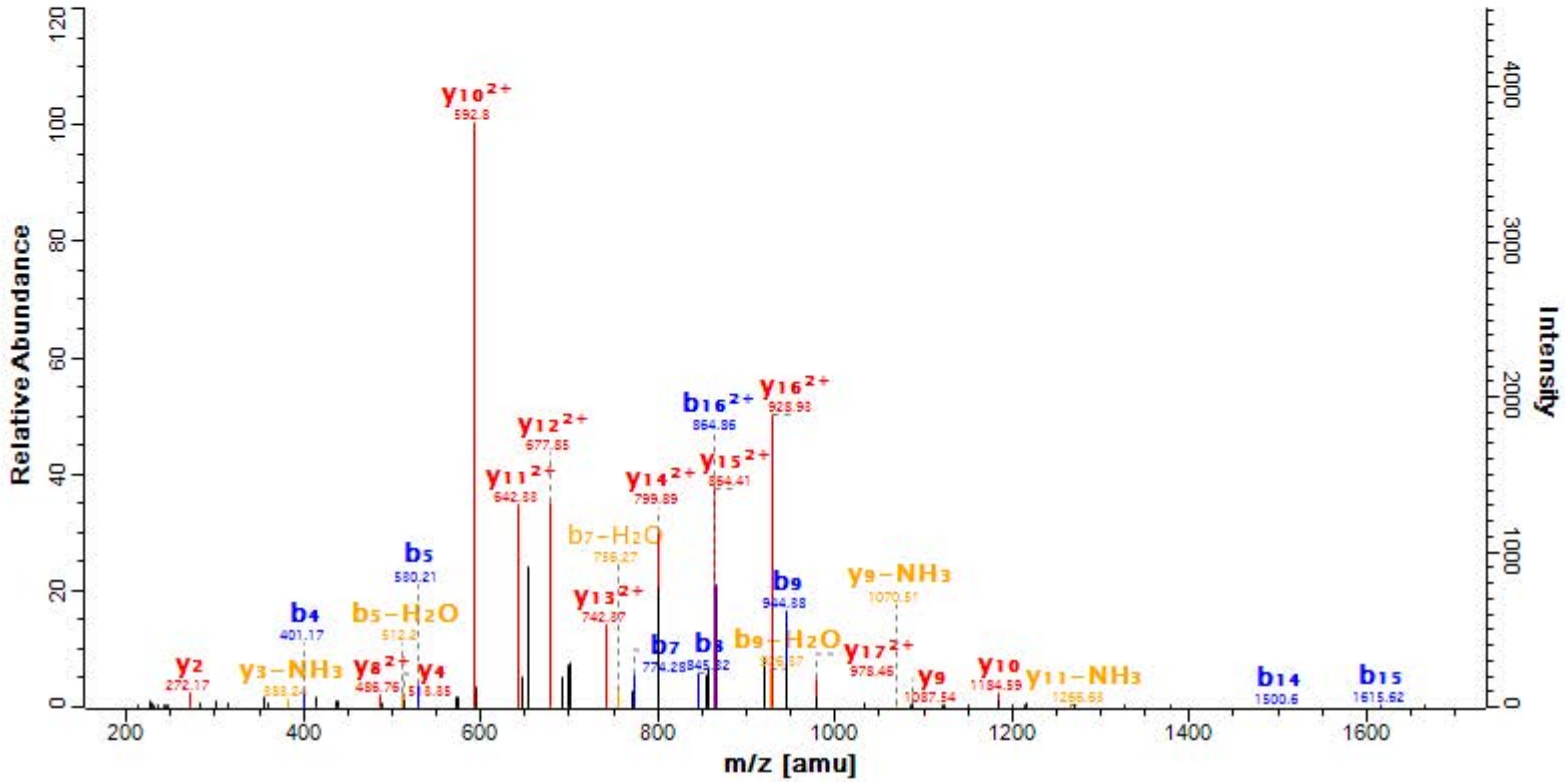

precursor information

|                   |                 |
|-------------------|-----------------|
| Mass:             | 2126.96054      |
| m/z:              | 709.99412       |
| Charge:           | 3+              |
| Retentiontime:    | 15.437981605529 |
| Score:            | 131.3965        |
| Mass Error [ppm]: | 0.07068         |
| PEP:              | 3.6296E-13      |
| Precursor Type:   | MULTI           |

general information

|                       |             |
|-----------------------|-------------|
| Annotation:           | 15 of 19    |
| AminoAcids Coverage:  | 79 %        |
| Intensity Coverage:   | 75 %        |
| Peak Coverage:        | 29 %        |
| Protein Localisation: | 318 ... 336 |

| b <sup>2+</sup> ion |        | b ion    |        | seq |   |    | y ion    |         | y <sup>2+</sup> ion |         |
|---------------------|--------|----------|--------|-----|---|----|----------|---------|---------------------|---------|
| Δ dalton            | mass   | Δ dalton | mass   |     |   |    | Δ dalton | mass    | Δ dalton            | mass    |
|                     | 58.029 |          | 58.029 | 1   | G | 18 |          |         |                     |         |
|                     | 173.06 |          | 173.06 | 2   | D | 17 | 2070.9   |         | 2070.9              |         |
|                     | 272.12 |          | 272.12 | 3   | V | 16 | 1955.9   |         | 978.46              | +0.0997 |
|                     | 401.17 | +0.0076  | 401.17 | 4   | E | 15 | 1856.9   |         | 928.93              | +0.2494 |
|                     | 530.21 | +0.0712  | 530.21 | 5   | E | 14 | 1727.8   |         | 864.41              | +0.05   |
|                     | 645.24 |          | 645.24 | 6   | D | 13 | 1598.8   |         | 799.89              | +0.0158 |
|                     | 774.28 | -0.086   | 774.28 | 7   | E | 12 | 1483.7   |         | 742.37              | +0.2573 |
|                     | 845.32 | +0.032   | 845.32 | 8   | A | 11 | 1354.7   |         | 677.85              | +0.1883 |
|                     | 944.38 | -0.047   | 944.38 | 9   | V | 10 | 1283.7   |         | 642.33              | +0.1678 |
|                     | 1041.4 |          | 1041.4 | 10  | P | 9  | 1184.6   | -0.068  | 592.8               | +0.2259 |
|                     | 1156.5 |          | 1156.5 | 11  | D | 8  | 1087.5   | -0.06   | 1087.5              |         |
|                     | 1243.5 |          | 1243.5 | 12  | S | 7  | 972.51   |         | 486.76              | -0.093  |
|                     | 1372.5 |          | 1372.5 | 13  | E | 6  | 885.48   |         | 885.48              |         |
|                     | 1500.6 | -0.258   | 1500.6 | 14  | Q | 5  | 756.44   |         | 756.44              |         |
|                     | 1615.6 | -0.107   | 1615.6 | 15  | D | 4  | 628.38   |         | 628.38              |         |
| +0.215              | 864.86 |          | 1728.7 | 16  | I | 3  | 513.35   | +0.0515 | 513.35              |         |
|                     | 1856.8 |          | 1856.8 | 17  | K | 2  | 400.27   |         | 400.27              |         |
|                     | 1953.9 |          | 1953.9 | 18  | P | 1  | 272.17   | +0.0096 | 272.17              |         |
|                     |        |          |        | 19  | R | 0  | 175.12   |         | 175.12              |         |

Scan number 2244 Raw file LNCAP\_Silac\_23F10\_set3\_04  
 Method ITMS; CID Pepti... 117.09

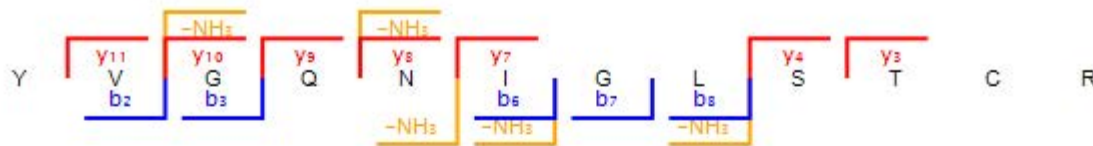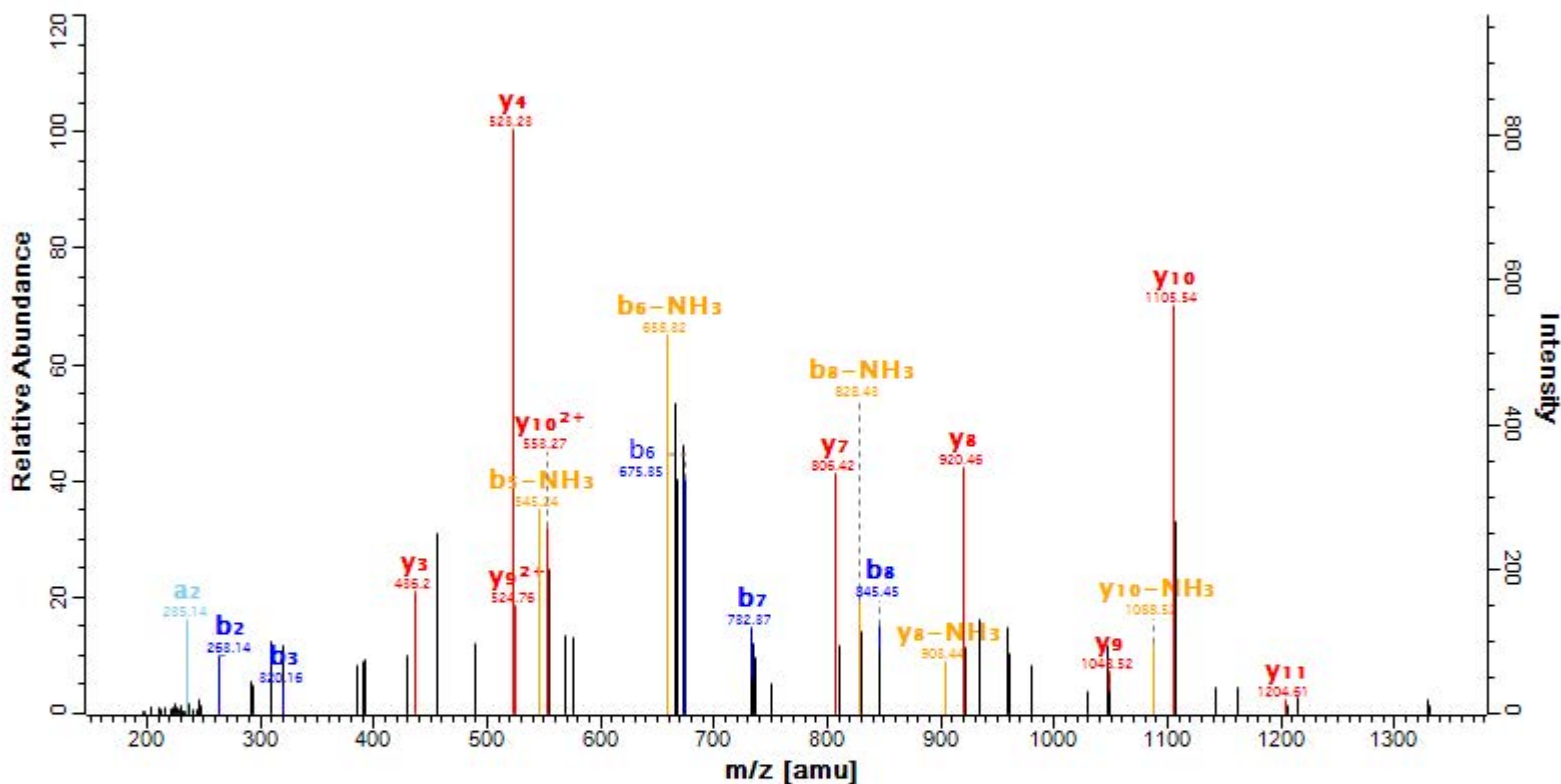

#### precursor information

|                   |                 |
|-------------------|-----------------|
| Mass:             | 1366.66655      |
| m/z:              | 684.34055       |
| Charge:           | 2+              |
| Retentiontime:    | 18.934509277343 |
| Score:            | 117.0911        |
| Mass Error [ppm]: | 0.15984         |
| PEP:              | 2.7349E-05      |
| Precursor Type:   | MULTI           |

#### general information

|                       |             |
|-----------------------|-------------|
| Annotation:           | 9 of 12     |
| AminoAcids Coverage:  | 75 %        |
| Intensity Coverage:   | 50 %        |
| Peak Coverage:        | 23 %        |
| Protein Localisation: | 243 ... 254 |

| a ion    |        | b ion    |        | seq      |      |          | y ion  |          | y <sup>2+</sup> ion |  |
|----------|--------|----------|--------|----------|------|----------|--------|----------|---------------------|--|
| Δ dalton | mass   | Δ dalton | mass   | Δ dalton | mass | Δ dalton | mass   | Δ dalton | mass                |  |
|          | 136.08 | 164.07   |        | 1        | Y    | 11       |        |          |                     |  |
| +0.0022  | 235.14 | +0.0009  | 263.14 | 2        | V    | 10       | 1204.6 | +0.0711  | 1204.6              |  |
|          | 292.17 | +0.0228  | 320.16 | 3        | G    | 9        | 1105.5 | +0.0032  | 553.27              |  |
|          | 420.22 |          | 448.22 | 4        | Q    | 8        | 1048.5 | +0.1844  | 524.76              |  |
|          | 534.27 |          | 562.26 | 5        | N    | 7        | 920.46 | -0.004   | 920.46              |  |
|          | 647.35 | +0.1353  | 675.35 | 6        | I    | 6        | 806.42 | +0.0444  | 806.42              |  |
|          | 704.37 | -0.1     | 732.37 | 7        | G    | 5        | 693.33 |          | 693.33              |  |
|          | 817.46 | -0.051   | 845.45 | 8        | L    | 4        | 636.31 |          | 636.31              |  |
|          | 904.49 |          | 932.48 | 9        | S    | 3        | 523.23 | -0.041   | 523.23              |  |
|          | 1005.5 |          | 1033.5 | 10       | T    | 2        | 436.2  | +0.0716  | 436.2               |  |
|          | 1165.6 |          | 1193.6 | 11       | C    | 1        | 335.15 |          | 335.15              |  |
|          |        |          |        | 12       | R    | 0        | 175.12 |          | 175.12              |  |

Scan number 2259 Raw file LNCAP\_Silac\_23F10\_set3\_04  
 Method ITMS; CID Pepti... 163.18

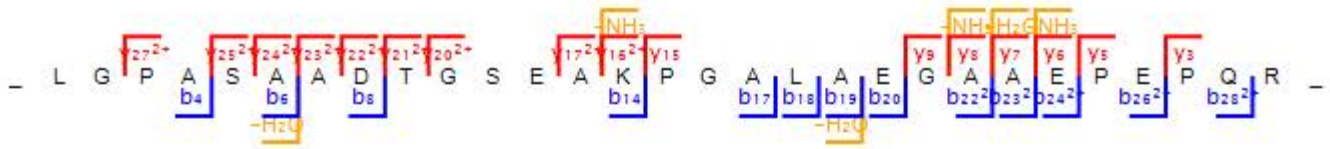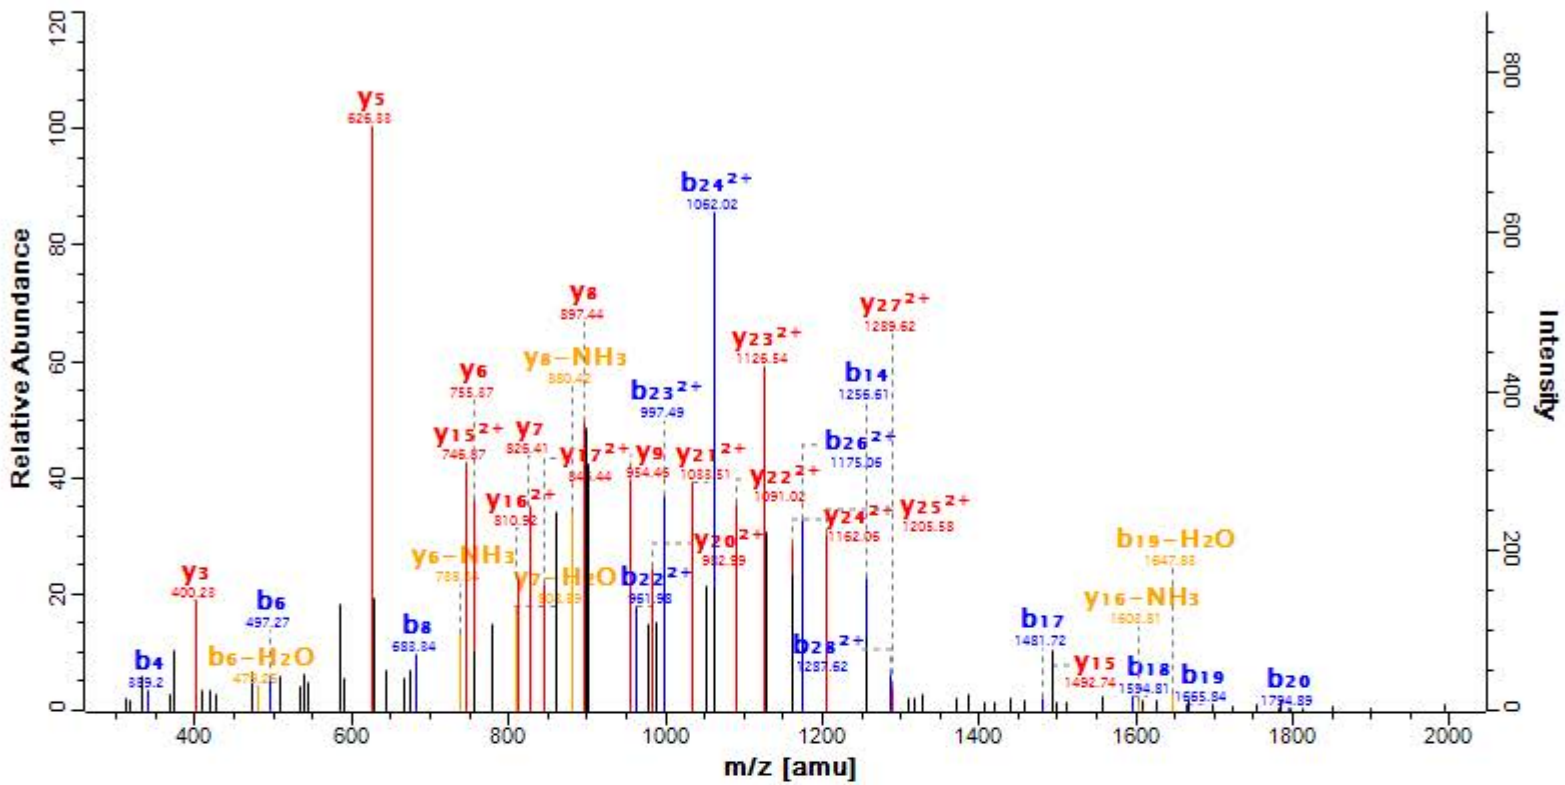

**precursor information**

|                   |                 |
|-------------------|-----------------|
| Mass:             | 2747.33534      |
| m/z:              | 916.78572       |
| Charge:           | 3+              |
| Retentiontime:    | 19.017257690429 |
| Score:            | 163.1846        |
| Mass Error [ppm]: | -0.31699        |
| PEP:              | 5.013E-32       |
| Precursor Type:   | ISO             |

| b <sup>2+</sup> ion |        | b ion    |        | seq |   |    | y ion    |         | y <sup>2+</sup> ion |         |
|---------------------|--------|----------|--------|-----|---|----|----------|---------|---------------------|---------|
| Δ dalton            | mass   | Δ dalton | mass   |     |   |    | Δ dalton | mass    | Δ dalton            | mass    |
|                     | 114.09 |          | 114.09 | 1   | L | 28 |          |         |                     |         |
|                     | 171.11 |          | 171.11 | 2   | G | 27 | 2635.3   |         | 2635.3              |         |
|                     | 268.17 |          | 268.17 | 3   | P | 26 | 2578.2   |         | 1289.6              | -0.265  |
|                     | 339.2  | +0.1034  | 339.2  | 4   | A | 25 | 2481.2   |         | 2481.2              |         |
|                     | 426.23 |          | 426.23 | 5   | S | 24 | 2410.1   |         | 1205.6              | +0.2463 |
|                     | 497.27 | -0.093   | 497.27 | 6   | A | 23 | 2323.1   |         | 1162.1              | +0.1565 |
|                     | 568.31 |          | 568.31 | 7   | A | 22 | 2252.1   |         | 1126.5              | +0.2605 |
|                     | 683.34 | -0.156   | 683.34 | 8   | D | 21 | 2181     |         | 1091                | +0.3128 |
|                     | 784.38 |          | 784.38 | 9   | T | 20 | 2066     |         | 1033.5              | +0.2241 |
|                     | 841.41 |          | 841.41 | 10  | G | 19 | 1965     |         | 982.99              | +0.2778 |
|                     | 928.44 |          | 928.44 | 11  | S | 18 | 1907.9   |         | 1907.9              |         |
|                     | 1057.5 |          | 1057.5 | 12  | E | 17 | 1820.9   |         | 1820.9              |         |
|                     | 1128.5 |          | 1128.5 | 13  | A | 16 | 1691.9   |         | 846.44              | +0.2775 |
|                     | 1256.6 | -0.05    | 1256.6 | 14  | K | 15 | 1620.8   |         | 810.92              | +0.2475 |
|                     | 1353.7 |          | 1353.7 | 15  | P | 14 | 1492.7   | -0.101  | 746.87              | +0.1887 |
|                     | 1410.7 |          | 1410.7 | 16  | G | 13 | 1395.7   |         | 1395.7              |         |
|                     | 1481.7 | -0.189   | 1481.7 | 17  | A | 12 | 1338.7   |         | 1338.7              |         |
|                     | 1594.8 | +0.1049  | 1594.8 | 18  | L | 11 | 1267.6   |         | 1267.6              |         |
|                     | 1665.8 | -0.438   | 1665.8 | 19  | A | 10 | 1154.5   |         | 1154.5              |         |
|                     | 1794.9 | -0.336   | 1794.9 | 20  | E | 9  | 1083.5   |         | 1083.5              |         |
|                     | 1851.9 |          | 1851.9 | 21  | G | 8  | 954.46   | +0.006  | 954.46              |         |
| +0.2242             | 961.98 |          | 1922.9 | 22  | A | 7  | 897.44   | -0.06   | 897.44              |         |
| +0.234              | 997.49 |          | 1994   | 23  | A | 6  | 826.41   | +0.0575 | 826.41              |         |
| +0.2904             | 1062   |          | 2123   | 24  | E | 5  | 755.37   | +0.0739 | 755.37              |         |
|                     | 2220.1 |          | 2220.1 | 25  | P | 4  | 626.33   | +0.003  | 626.33              |         |
| +0.2365             | 1175.1 |          | 2349.1 | 26  | E | 3  | 529.27   |         | 529.27              |         |
|                     | 2446.2 |          | 2446.2 | 27  | P | 2  | 400.23   | +0.089  | 400.23              |         |
| +0.1883             | 1287.6 |          | 2574.2 | 28  | Q | 1  | 303.18   |         | 303.18              |         |
|                     |        |          |        | 29  | R | 0  | 175.12   |         | 175.12              |         |

**general information**

|                       |             |
|-----------------------|-------------|
| Annotation:           | 24 of 29    |
| AminoAcids Coverage:  | 83 %        |
| Intensity Coverage:   | 65 %        |
| Peak Coverage:        | 38 %        |
| Protein Localisation: | 101 ... 129 |

Scan number 2392 Raw file LNCAP\_Silac\_23F10\_set3\_04  
 Method ITMS: CID Pepti... 222.3

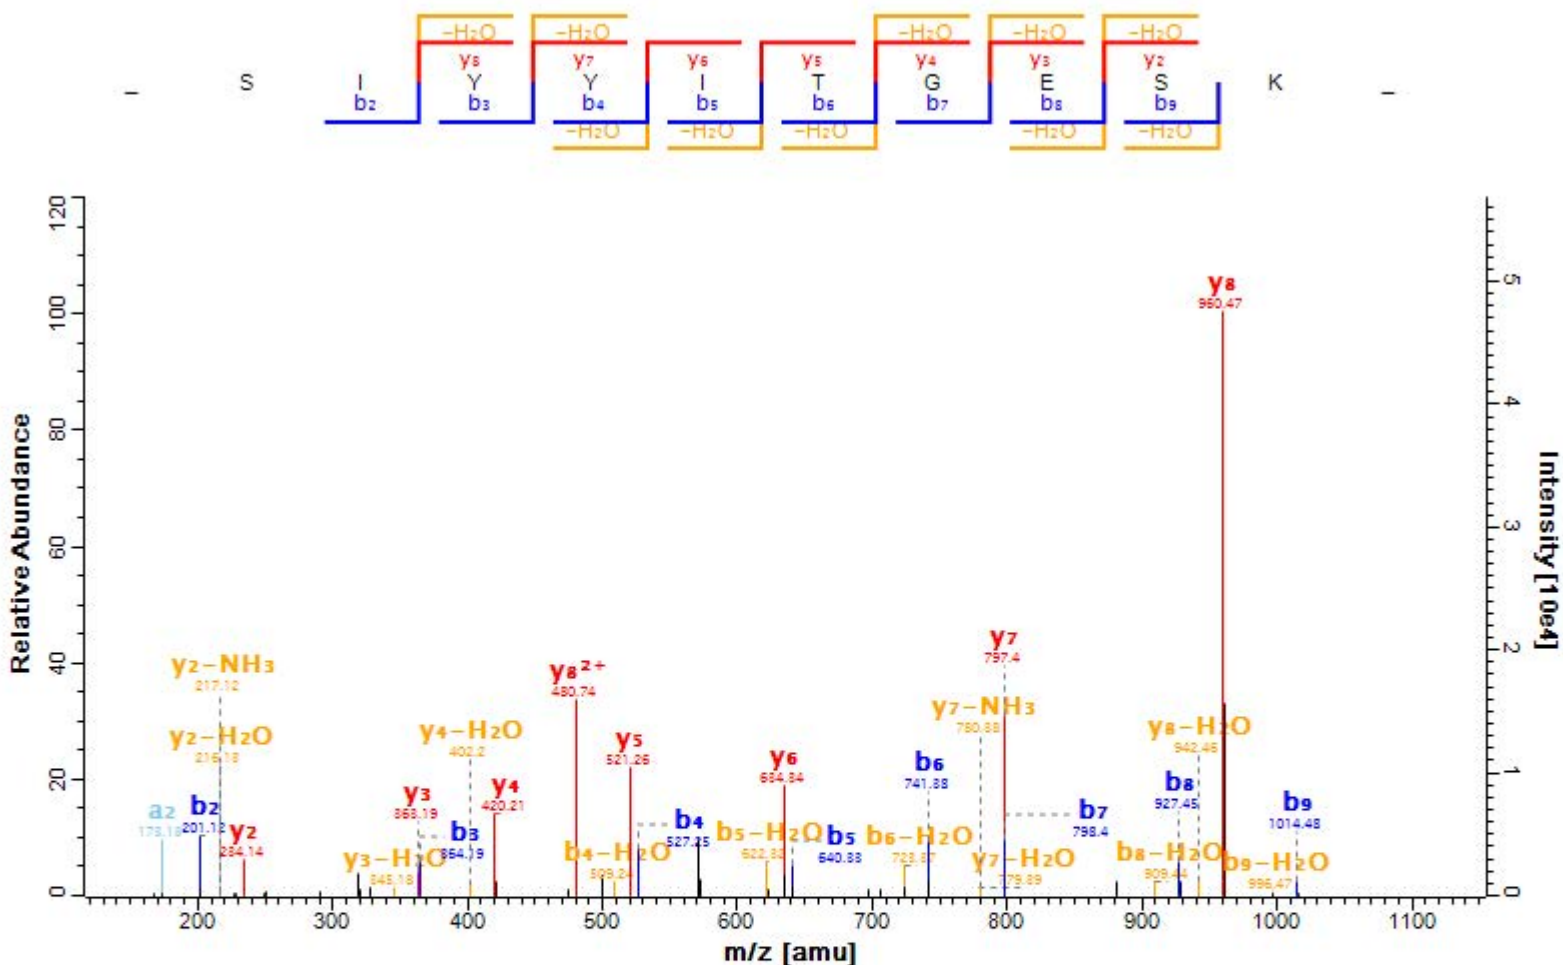

### precursor information

|                   |                 |
|-------------------|-----------------|
| Mass:             | 1159.57592      |
| m/z:              | 580.79524       |
| Charge:           | 2+              |
| Retentiontime:    | 19.751119613647 |
| Score:            | 222.296         |
| Mass Error [ppm]: | -0.15597        |
| PEP:              | 2.5981E-19      |
| Precursor Type:   | MULTI           |

|                       |             |
|-----------------------|-------------|
| Annotation:           | 8 of 10     |
| AminoAcids Coverage:  | 80 %        |
| Intensity Coverage:   | 80 %        |
| Peak Coverage:        | 48 %        |
| Protein Localisation: | 482 ... 491 |

| a ion    |        | b ion    |        | seq |   |   | y ion    |         | y <sup>2+</sup> ion |         |
|----------|--------|----------|--------|-----|---|---|----------|---------|---------------------|---------|
| Δ dalton | mass   | Δ dalton | mass   |     |   |   | Δ dalton | mass    | Δ dalton            | mass    |
|          | 60.044 |          | 88.039 | 1   | S | 9 |          |         |                     |         |
| +0.006   | 173.13 | -0.004   | 201.12 | 2   | I | 8 | 1073.6   |         |                     | 1073.6  |
|          | 336.19 | +0.0971  | 364.19 | 3   | Y | 7 | 960.47   | -0.042  | 480.74              | +0.1635 |
|          | 499.26 | -0.102   | 527.25 | 4   | Y | 6 | 797.4    | +0.0076 | 797.4               |         |
|          | 612.34 | -0.022   | 640.33 | 5   | I | 5 | 634.34   | +0.0579 | 634.34              |         |
|          | 713.39 | -0.044   | 741.38 | 6   | T | 4 | 521.26   | +0.0243 | 521.26              |         |
|          | 770.41 | +0.0791  | 798.4  | 7   | G | 3 | 420.21   | +0.0594 | 420.21              |         |
|          | 899.45 | -0.096   | 927.45 | 8   | E | 2 | 363.19   | +0.0512 | 363.19              |         |
|          | 986.48 | -0.124   | 1014.5 | 9   | S | 1 | 234.14   | +0.0408 | 234.14              |         |
|          |        |          |        | 10  | K | 0 | 147.11   |         |                     | 147.11  |

Scan number 3059 Raw file LNCAP\_Silac\_23F10\_set3\_04  
 Method ITMS; CID Pepti... 207.29

G

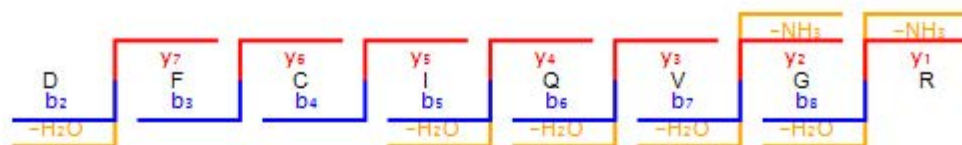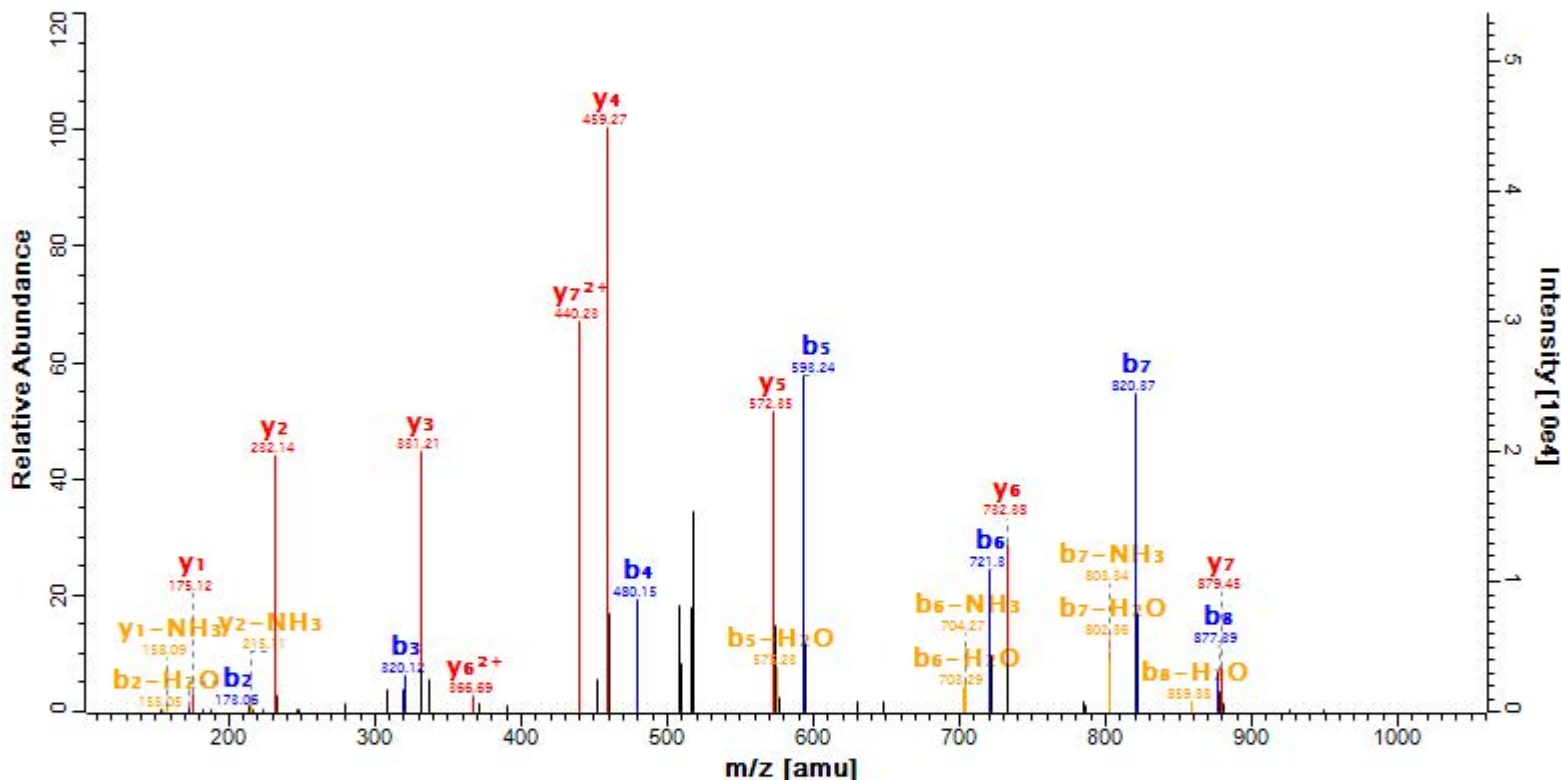

precursor information

|                       |                      |
|-----------------------|----------------------|
| Mass:                 | 1050.49156           |
| m/z:                  | 526.25306            |
| Charge:               | 2+                   |
| Retentiontime:        | 23.451385498046      |
| Score:                | 207.2877             |
| Mass Error [ppm]:     | -0.10007             |
| PEP:                  | 1.0455E-12           |
| Precursor Type:       | MULTI                |
| Annotation:           | 8 of 9               |
| AminoAcids Coverage:  | 89 %                 |
| Intensity Coverage:   | 73 %                 |
| Peak Coverage:        | 35 %                 |
| Protein Localisation: | 131 ... 139; 246 ... |

| b ion     |          | seq |   |   | y ion    |           | y <sup>2+</sup> ion |           |
|-----------|----------|-----|---|---|----------|-----------|---------------------|-----------|
| Δ dalton  | mass     |     |   |   | Δ dalton | mass      | Δ dalton            | mass      |
|           | 58.02874 | 1   | G | 8 |          |           |                     |           |
| -0.07035  | 173.0557 | 2   | D | 7 | 994.4775 |           | 994.4775            |           |
| +0.01958  | 320.1241 | 3   | F | 6 | 879.4505 | -0.08194  | 440.2289            | +0.203407 |
| -0.01467  | 480.1547 | 4   | C | 5 | 732.3821 | +0.030173 | 366.6947            | +0.191716 |
| +0.005759 | 593.2388 | 5   | I | 4 | 572.3515 | +0.056976 | 572.3515            |           |
| -0.07284  | 721.2974 | 6   | Q | 3 | 459.2674 | +0.022082 | 459.2674            |           |
| -0.0436   | 820.3658 | 7   | V | 2 | 331.2088 | +0.02762  | 331.2088            |           |
| -0.07452  | 877.3873 | 8   | G | 1 | 232.1404 | +0.009303 | 232.1404            |           |
|           |          | 9   | R | 0 | 175.119  | +0.074834 | 175.119             |           |



Scan number 316 Raw file LNCAP\_Silac\_23F10\_set3\_04  
 Method ITMS; CID Pepti... 72.48

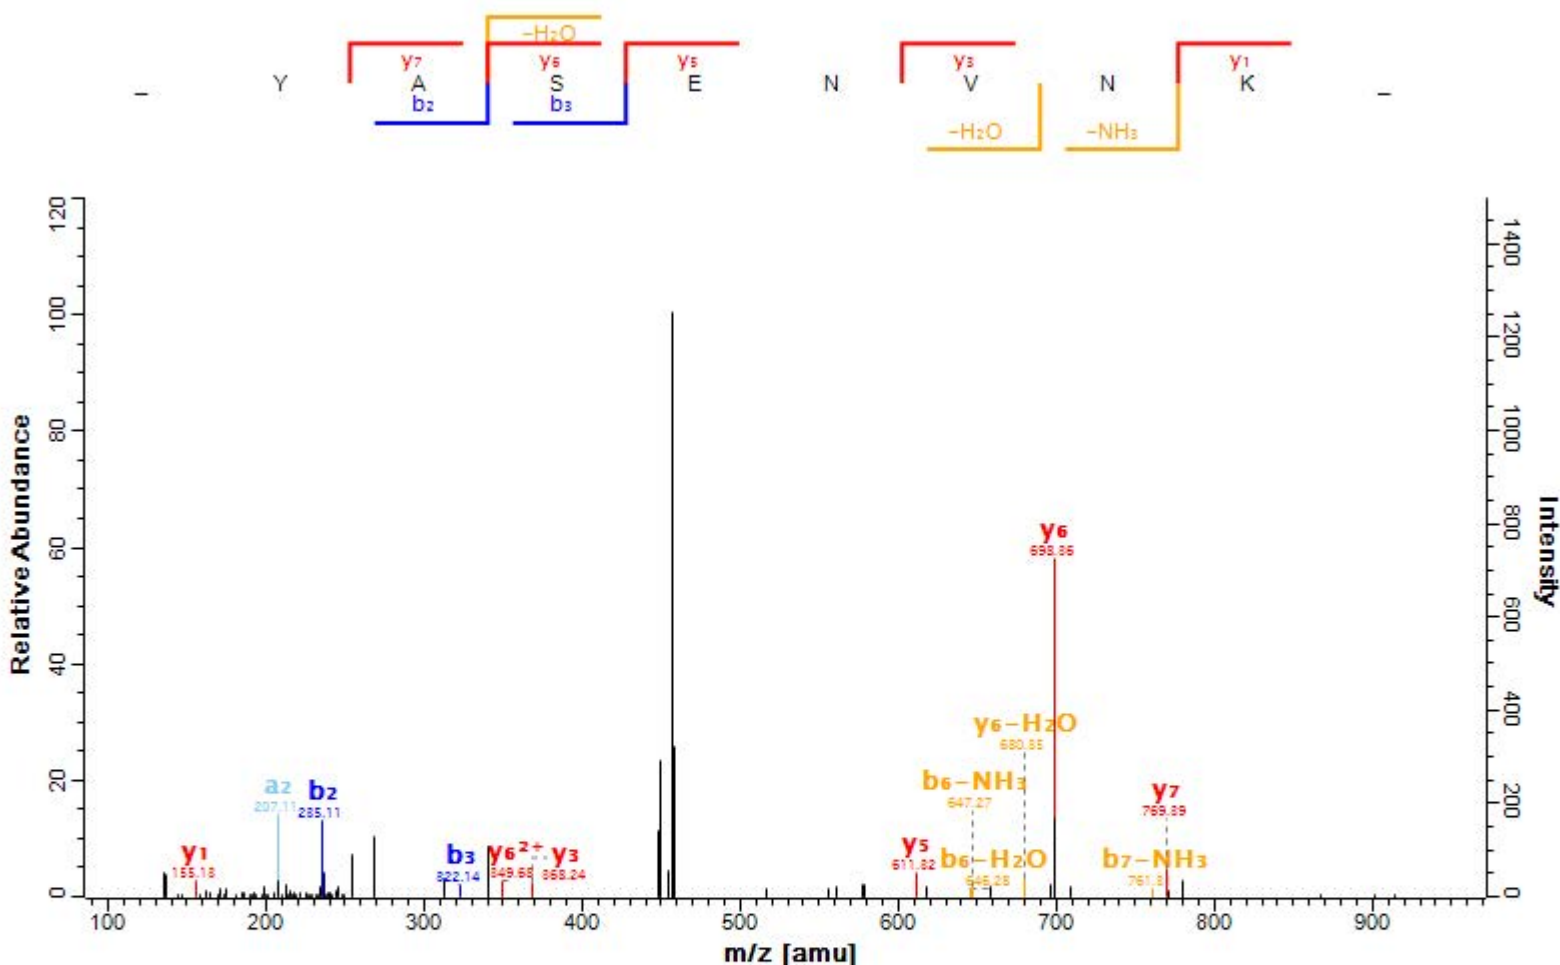

#### precursor information

|                       |                 |
|-----------------------|-----------------|
| Mass:                 | 923.43463       |
| m/z:                  | 462.72459       |
| Charge:               | 2+              |
| Retentiontime:        | 6.6418051719665 |
| Score:                | 72.4847         |
| Mass Error [ppm]:     | -0.24627        |
| g PEP:                | 0.025528        |
| Annotation:           | 6 of 8          |
| AminoAcids Coverage:  | 75 %            |
| Intensity Coverage:   | 26 %            |
| Peak Coverage:        | 12 %            |
| Protein Localisation: | 109 ... 116     |

| a ion    |        | b ion    |        |   |     |          | y ion  |          | y <sup>2+</sup> ion |  |
|----------|--------|----------|--------|---|-----|----------|--------|----------|---------------------|--|
| Δ dalton | mass   | Δ dalton | mass   |   | seq | Δ dalton | mass   | Δ dalton | mass                |  |
|          | 136.08 |          | 164.07 | 1 | Y   | 7        |        |          |                     |  |
| +0.0038  | 207.11 | -0.03    | 235.11 | 2 | A   | 6        | 769.39 | +0.1047  | 769.39              |  |
|          | 294.14 | +0.2266  | 322.14 | 3 | S   | 5        | 698.36 | -0.017   | 349.68              |  |
|          | 423.19 |          | 451.18 | 4 | E   | 4        | 611.32 | +0.0042  | 611.32              |  |
|          | 537.23 |          | 565.23 | 5 | N   | 3        | 482.28 |          | 482.28              |  |
|          | 636.3  |          | 664.29 | 6 | V   | 2        | 368.24 | +0.0895  | 368.24              |  |
|          | 750.34 |          | 778.34 | 7 | N   | 1        | 269.17 |          | 269.17              |  |
|          |        |          |        | 8 | K   | 0        | 155.13 | +0.1054  | 155.13              |  |

Scan number 3320 Raw file LNCAP\_Silac\_23F10\_set3\_04  
 Method ITMS; CID Pepti... 161.82

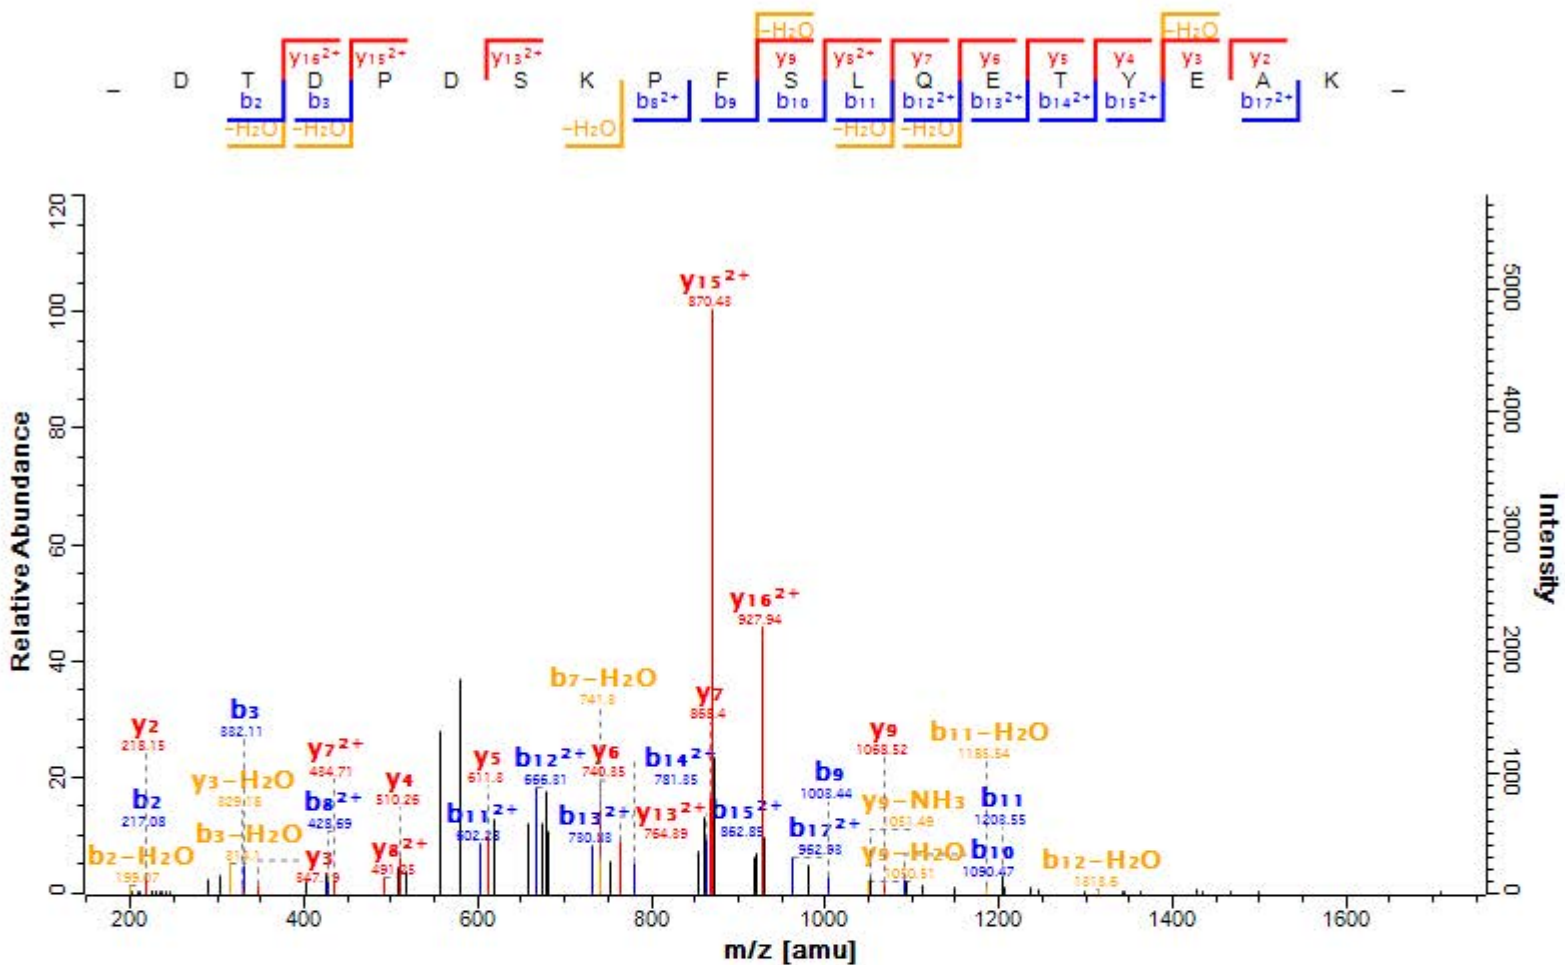

precursor information

|                   |                 |
|-------------------|-----------------|
| Mass:             | 2069.94318      |
| m/z:              | 690.98834       |
| Charge:           | 3+              |
| Retentiontime:    | 24.827289581298 |
| Score:            | 161.8241        |
| Mass Error [ppm]: | 0.11533         |
| PEP:              | 7.8318E-24      |
| Precursor Type:   | MULTI           |

general information

|                       |             |
|-----------------------|-------------|
| Annotation:           | 15 of 18    |
| AminoAcids Coverage:  | 83 %        |
| Intensity Coverage:   | 53 %        |
| Peak Coverage:        | 32 %        |
| Protein Localisation: | 319 ... 336 |

| b <sup>2+</sup> ion |        | b ion    |        |    |     |    | y ion    |         | y <sup>2+</sup> ion |         |
|---------------------|--------|----------|--------|----|-----|----|----------|---------|---------------------|---------|
| Δ dalton            | mass   | Δ dalton | mass   |    | seq |    | Δ dalton | mass    | Δ dalton            | mass    |
|                     | 116.03 |          | 116.03 | 1  | D   | 17 |          |         |                     |         |
|                     | 217.08 | +0.0454  | 217.08 | 2  | T   | 16 | 1955.9   |         | 1955.9              |         |
|                     | 332.11 | -0.017   | 332.11 | 3  | D   | 15 | 1854.9   |         | 927.94              | +0.2448 |
|                     | 429.16 |          | 429.16 | 4  | P   | 14 | 1739.8   |         | 870.43              | +0.2122 |
|                     | 544.19 |          | 544.19 | 5  | D   | 13 | 1642.8   |         | 1642.8              |         |
|                     | 631.22 |          | 631.22 | 6  | S   | 12 | 1527.8   |         | 764.39              | +0.4164 |
|                     | 759.32 |          | 759.32 | 7  | K   | 11 | 1440.7   |         | 1440.7              |         |
| -0.352              | 428.69 |          | 856.37 | 8  | P   | 10 | 1312.6   |         | 1312.6              |         |
|                     | 1003.4 | -0.031   | 1003.4 | 9  | F   | 9  | 1215.6   |         | 1215.6              |         |
|                     | 1090.5 | -0.036   | 1090.5 | 10 | S   | 8  | 1068.5   | +0.4738 | 1068.5              |         |
| +0.1527             | 602.28 | -0.162   | 1203.6 | 11 | L   | 7  | 981.49   |         | 491.25              | +0.3494 |
| +0.2404             | 666.31 |          | 1331.6 | 12 | Q   | 6  | 868.4    | -0.024  | 434.71              | -0.171  |
| +0.3241             | 730.83 |          | 1460.7 | 13 | E   | 5  | 740.35   | +0.0174 | 740.35              |         |
| +0.0342             | 781.35 |          | 1561.7 | 14 | T   | 4  | 611.3    | +0.0401 | 611.3               |         |
| -0.274              | 862.89 |          | 1724.8 | 15 | Y   | 3  | 510.26   | +0.093  | 510.26              |         |
|                     | 1853.8 |          | 1853.8 | 16 | E   | 2  | 347.19   | +0.1154 | 347.19              |         |
| -0.096              | 962.93 |          | 1924.8 | 17 | A   | 1  | 218.15   | +0.062  | 218.15              |         |
|                     |        |          |        | 18 | K   | 0  | 147.11   |         | 147.11              |         |

Scan number 3466 Raw file LNCAP\_Silac\_23F10\_set3\_04  
 Method ITMS; CID Pepti... 198.25

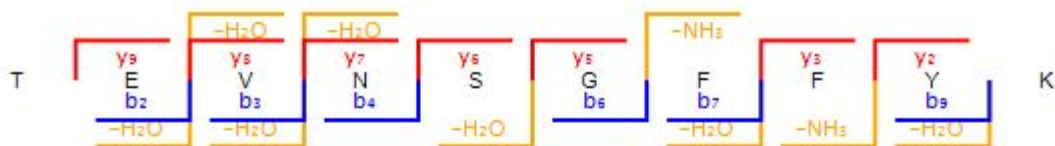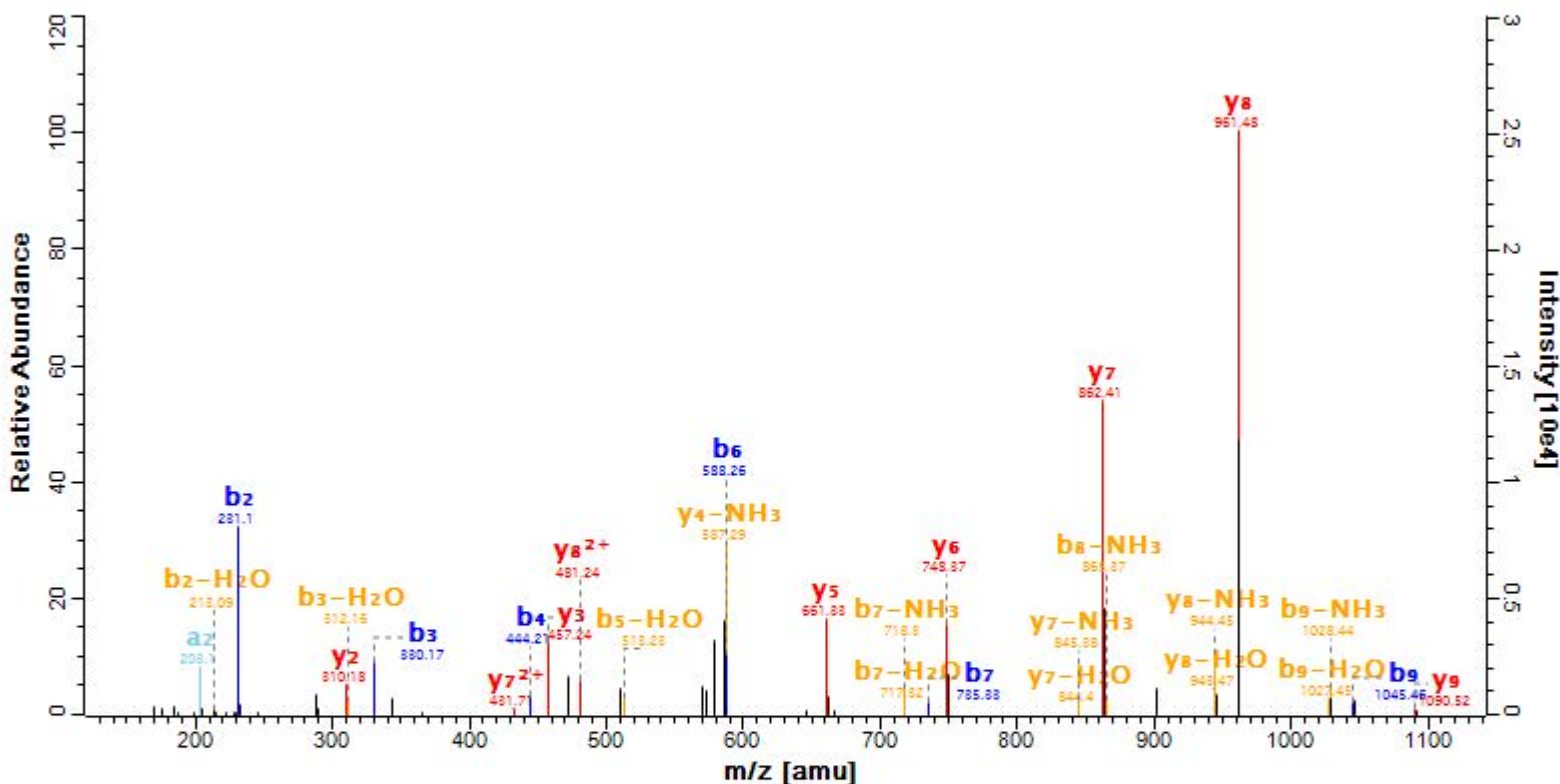

### precursor information

|                   |                 |
|-------------------|-----------------|
| Mass:             | 1190.56081      |
| m/z:              | 596.28768       |
| Charge:           | 2+              |
| Retentiontime:    | 25.563650131225 |
| Score:            | 198.2487        |
| Mass Error [ppm]: | 0.021299        |
| PEP:              | 2.3326E-09      |
| Precursor Type:   | MULTI           |

|                       |             |
|-----------------------|-------------|
| Annotation:           | 8 of 10     |
| AminoAcids Coverage:  | 80 %        |
| Intensity Coverage:   | 69 %        |
| Peak Coverage:        | 37 %        |
| Protein Localisation: | 242 ... 251 |

| a ion    |        | b ion    |        |    |     |          | y ion  |          | y <sup>2+</sup> ion |  |
|----------|--------|----------|--------|----|-----|----------|--------|----------|---------------------|--|
| Δ dalton | mass   | Δ dalton | mass   |    | seq | Δ dalton | mass   | Δ dalton | mass                |  |
|          | 74.06  |          | 102.05 | 1  | T   | 9        |        |          |                     |  |
| +0.0353  | 203.1  | +0.0381  | 231.1  | 2  | E   | 8        | 1090.5 | -0.019   | 1090.5              |  |
|          | 302.17 | +0.0067  | 330.17 | 3  | V   | 7        | 961.48 | -0.049   | 481.24              |  |
|          | 416.21 | -0.057   | 444.21 | 4  | N   | 6        | 862.41 | -0.006   | 431.71              |  |
|          | 503.25 |          | 531.24 | 5  | S   | 5        | 748.37 | -0.024   | 748.37              |  |
|          | 560.27 | -0.294   | 588.26 | 6  | G   | 4        | 661.33 | -0.001   | 661.33              |  |
|          | 707.34 | +0.0955  | 735.33 | 7  | F   | 3        | 604.31 |          | 604.31              |  |
|          | 854.4  |          | 882.4  | 8  | F   | 2        | 457.24 | +0.0568  | 457.24              |  |
|          | 1017.5 | -0.018   | 1045.5 | 9  | Y   | 1        | 310.18 | +0.0139  | 310.18              |  |
|          |        |          |        | 10 | K   | 0        | 147.11 |          | 147.11              |  |

Scan number 3656 Raw file LNCAP\_Silac\_23F10\_set3\_04  
 Method ITMS: CID Peptide 156.48

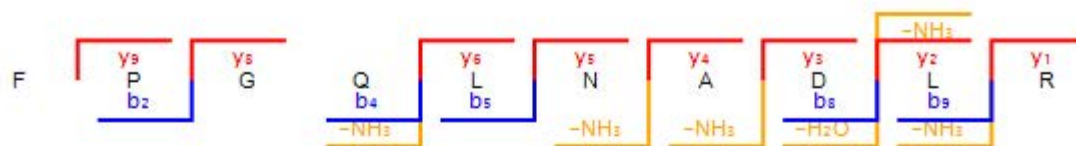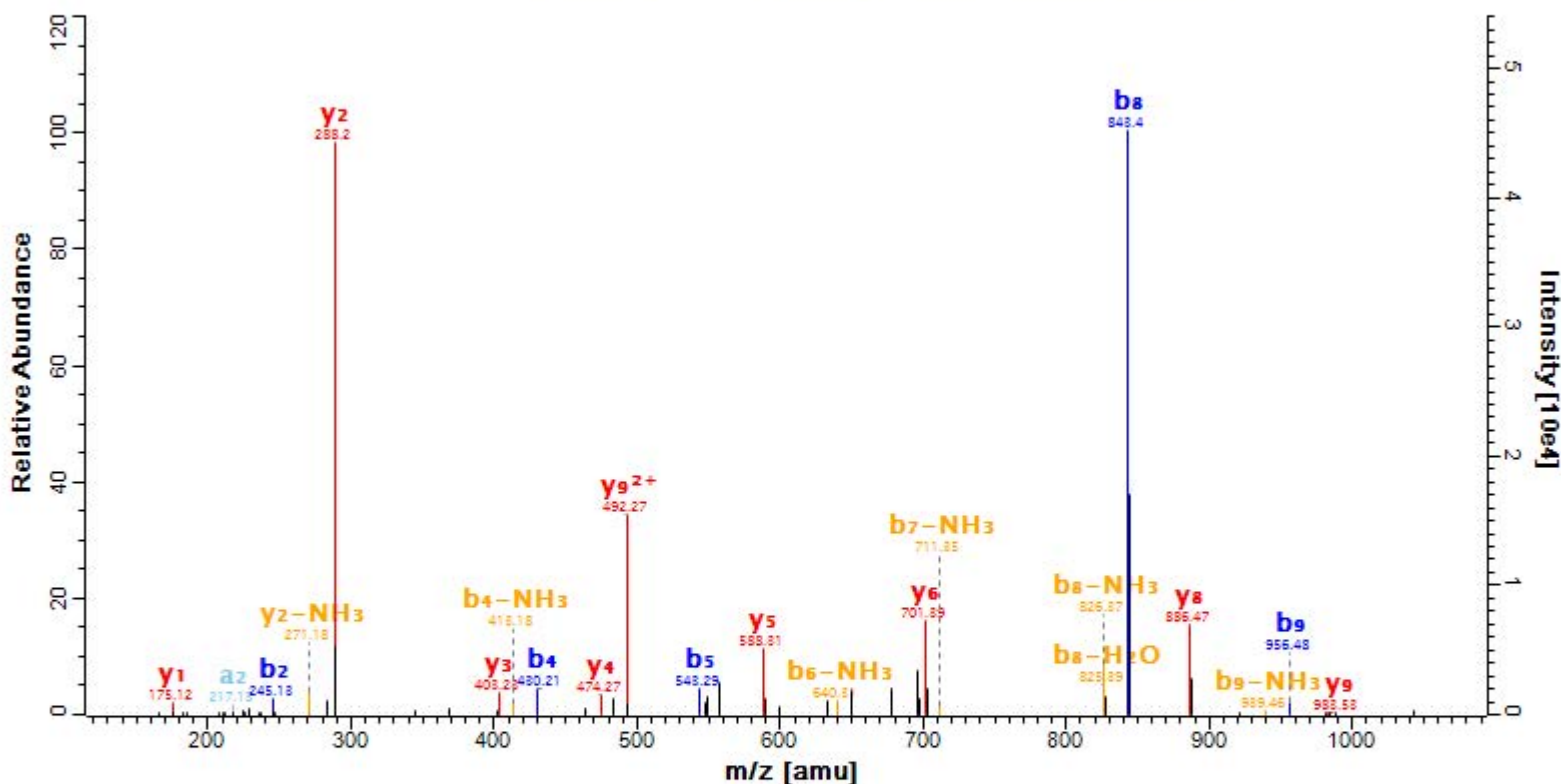

#### precursor information

|                   |                 |
|-------------------|-----------------|
| Mass:             | 1129.58775      |
| m/z:              | 565.80115       |
| Charge:           | 2+              |
| Retentiontime:    | 26.560642242431 |
| Score:            | 156.4802        |
| Mass Error [ppm]: | -0.22443        |
| PEP:              | 0.0001065       |
| Precursor Type:   | MULTI           |

|                       |             |
|-----------------------|-------------|
| Annotation:           | 9 of 10     |
| AminoAcids Coverage:  | 90 %        |
| Intensity Coverage:   | 73 %        |
| Peak Coverage:        | 28 %        |
| Protein Localisation: | 242 ... 251 |

| a ion    |        | b ion    |        |    |     |   | y ion    |         | y <sup>2+</sup> ion |         |
|----------|--------|----------|--------|----|-----|---|----------|---------|---------------------|---------|
| Δ dalton | mass   | Δ dalton | mass   |    | seq |   | Δ dalton | mass    | Δ dalton            | mass    |
|          | 120.08 |          | 148.08 | 1  | F   | 9 |          |         |                     |         |
| -0.015   | 217.13 | -0.124   | 245.13 | 2  | P   | 8 | 983.53   | +0.0085 | 492.27              | +0.2135 |
|          | 274.16 |          | 302.15 | 3  | G   | 7 | 886.47   | -0.06   | 886.47              |         |
|          | 402.21 | +0.1442  | 430.21 | 4  | Q   | 6 | 829.45   |         | 829.45              |         |
|          | 515.3  | +0.0904  | 543.29 | 5  | L   | 5 | 701.39   | -0.027  | 701.39              |         |
|          | 629.34 |          | 657.34 | 6  | N   | 4 | 588.31   | +0.0497 | 588.31              |         |
|          | 700.38 |          | 728.37 | 7  | A   | 3 | 474.27   | +0.1239 | 474.27              |         |
|          | 815.4  | -0.01    | 843.4  | 8  | D   | 2 | 403.23   | +0.1541 | 403.23              |         |
|          | 928.49 | -0.083   | 956.48 | 9  | L   | 1 | 288.2    | +0.0036 | 288.2               |         |
|          |        |          |        | 10 | R   | 0 | 175.12   | +0.034  | 175.12              |         |

Scan number 3747 Raw file LNCAP\_Silac\_23F10\_set3\_04  
 Method ITMS: CID Pepti... 76.59

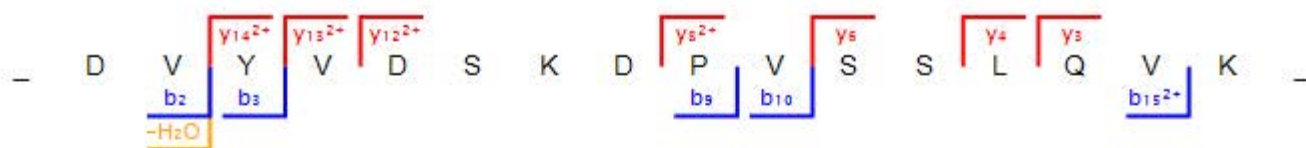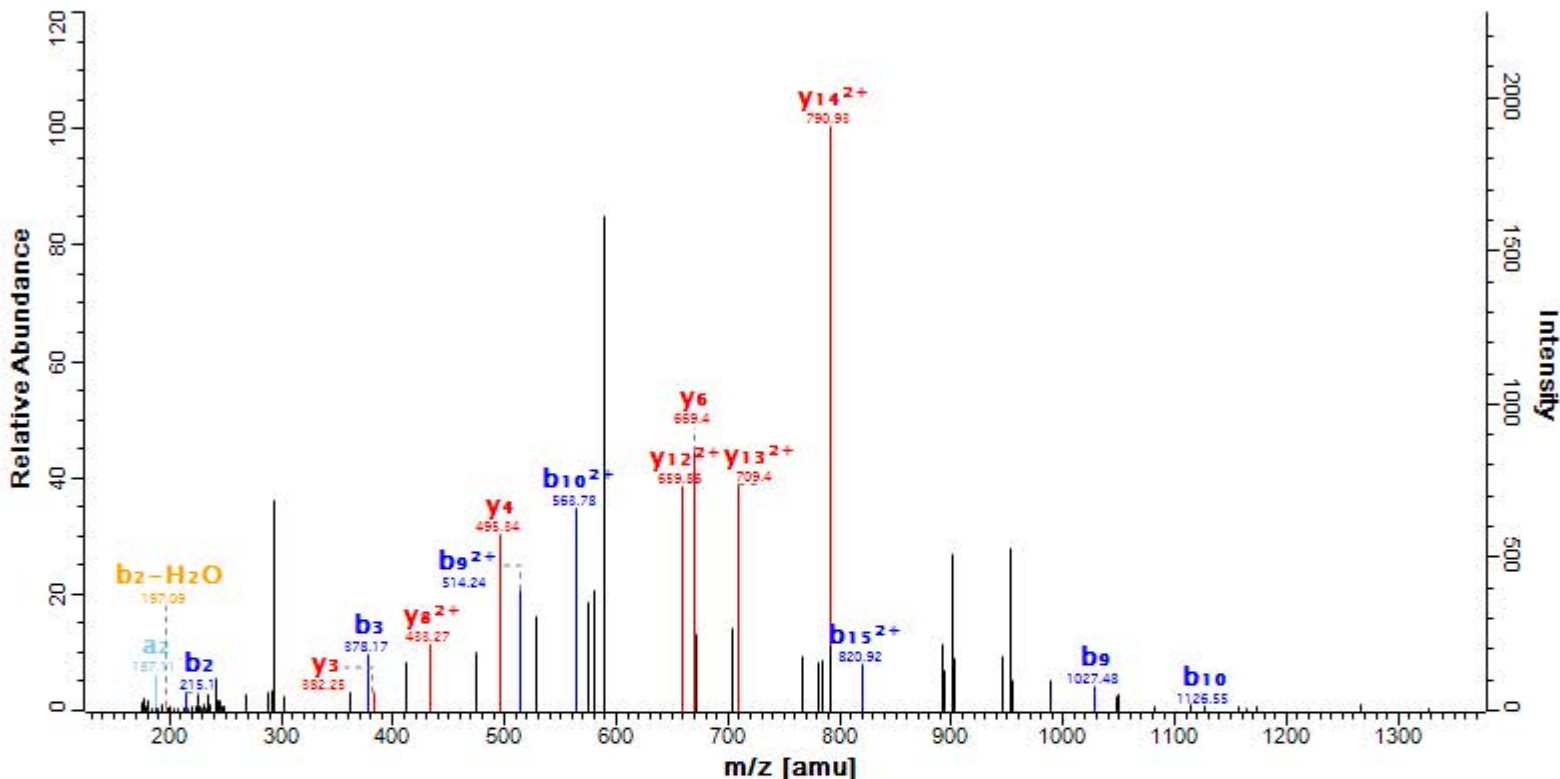

precursor information

|                   |            |
|-------------------|------------|
| Mass:             | 1777.90966 |
| m/z:              | 593.64383  |
| Charge:           | 3+         |
| Retentiontime:    | 27.0390625 |
| Score:            | 76.58804   |
| Mass Error [ppm]: | -0.075466  |
| PEP:              | 0.00024783 |
| Precursor Type:   | MULTI      |

general information

|                       |           |
|-----------------------|-----------|
| Annotation:           | 10 of 16  |
| AminoAcids Coverage:  | 62 %      |
| Intensity Coverage:   | 42 %      |
| Peak Coverage:        | 16 %      |
| Protein Localisation: | 67 ... 82 |

| a ion         | b <sup>2+</sup> ion | b ion         |    |     |    | y ion         | y <sup>2+</sup> ion |
|---------------|---------------------|---------------|----|-----|----|---------------|---------------------|
| Δ dalton mass | Δ dalton mass       | Δ dalton mass |    | seq |    | Δ dalton mass | Δ dalton mass       |
| 88.04         | 116                 | 116           | 1  | D   | 15 |               |                     |
| +0.063 87.1   | 215.1               | +0.063 215.1  | 2  | V   | 14 | 1680          | 1680                |
| 350.2         | 378.2               | -0.09 378.2   | 3  | Y   | 13 | 1581          | 790.9 -0.02         |
| 449.2         | 477.2               | 477.2         | 4  | V   | 12 | 1418          | 709.4 -0.05         |
| 564.3         | 592.3               | 592.3         | 5  | D   | 11 | 1319          | 659.9 +0.03         |
| 651.3         | 679.3               | 679.3         | 6  | S   | 10 | 1204          | 1204                |
| 787.4         | 815.4               | 815.4         | 7  | K   | 9  | 1117          | 1117                |
| 902.4         | 930.4               | 930.4         | 8  | D   | 8  | 980.6         | 980.6               |
| 999.5         | +0.092 514.2        | -0.01 1027    | 9  | P   | 7  | 865.5         | 433.3 +0.04         |
| 1099          | +0.063 563.8        | +0.06 1127    | 10 | V   | 6  | 768.5         | 768.5               |
| 1186          | 1214                | 1214          | 11 | S   | 5  | 669.4 +0.03   | 669.4               |
| 1273          | 1301                | 1301          | 12 | S   | 4  | 582.4         | 582.4               |
| 1386          | 1414                | 1414          | 13 | L   | 3  | 495.3 +0.178  | 495.3               |
| 1514          | 1542                | 1542          | 14 | Q   | 2  | 382.3 +0.378  | 382.3               |
| 1613          | +0.036 820.9        | 1641          | 15 | V   | 1  | 254.2         | 254.2               |
|               |                     |               | 16 | K   | 0  | 155.1         | 155.1               |

Scan number 4164 Raw file LNCAP\_Silac\_23F10\_set3\_04  
 Method ITMS; CID Pepti... 121.68

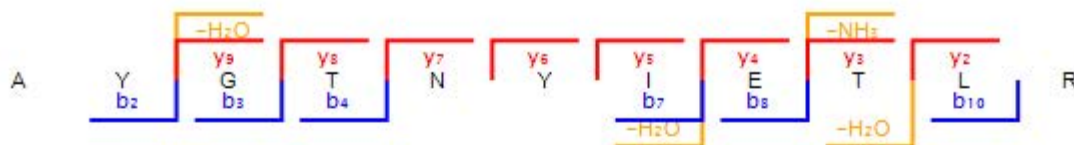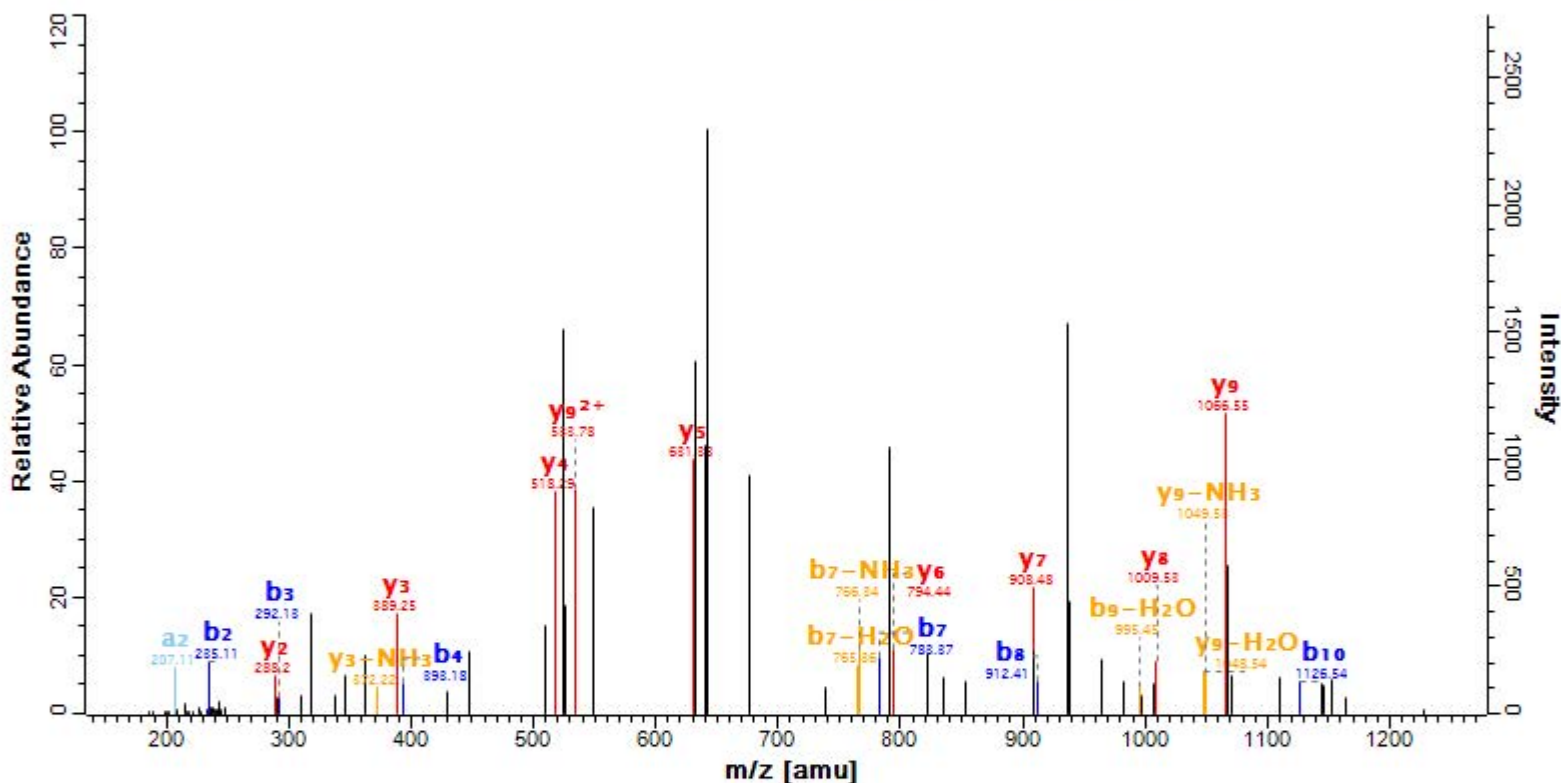

#### precursor information

|                   |                 |
|-------------------|-----------------|
| Mass:             | 1299.64733      |
| m/z:              | 650.83094       |
| Charge:           | 2+              |
| Retentiontime:    | 29.189712524414 |
| Score:            | 121.6796        |
| Mass Error [ppm]: | 1.0862          |
| PEP:              | 0.00021309      |
| Precursor Type:   | ISO             |

#### general information

|                       |             |
|-----------------------|-------------|
| Annotation:           | 9 of 11     |
| AminoAcids Coverage:  | 82 %        |
| Intensity Coverage:   | 30 %        |
| Peak Coverage:        | 25 %        |
| Protein Localisation: | 143 ... 153 |

| a ion    |        | b ion    |        |    |     |          | y ion  |          | y <sup>2+</sup> ion |  |
|----------|--------|----------|--------|----|-----|----------|--------|----------|---------------------|--|
| Δ dalton | mass   | Δ dalton | mass   |    | seq | Δ dalton | mass   | Δ dalton | mass                |  |
|          | 44.049 |          | 72.044 | 1  | A   | 10       |        |          |                     |  |
| +0.0839  | 207.11 | -0.03    | 235.11 | 2  | Y   | 9        | 1229.6 |          | 1229.6              |  |
|          | 264.13 | +0.0926  | 292.13 | 3  | G   | 8        | 1066.6 | +0.0221  | 533.78              |  |
|          | 365.18 | +0.0961  | 393.18 | 4  | T   | 7        | 1009.5 | -0.046   | 1009.5              |  |
|          | 479.22 |          | 507.22 | 5  | N   | 6        | 908.48 | -0.019   | 908.48              |  |
|          | 642.29 |          | 670.28 | 6  | Y   | 5        | 794.44 | +0.0624  | 794.44              |  |
|          | 755.37 | +0.0009  | 783.37 | 7  | I   | 4        | 631.38 | +0.0746  | 631.38              |  |
|          | 884.41 | +0       | 912.41 | 8  | E   | 3        | 518.29 | +0.0254  | 518.29              |  |
|          | 985.46 |          | 1013.5 | 9  | T   | 2        | 389.25 | +0.1442  | 389.25              |  |
|          | 1098.5 | -0.021   | 1126.5 | 10 | L   | 1        | 288.2  | -0.068   | 288.2               |  |
|          |        |          |        | 11 | R   | 0        | 175.12 |          | 175.12              |  |

Scan number 4179 Raw file LNCAP\_Silac\_23F10\_set3\_04  
 Method ITMS: CID Pepti... 98.16

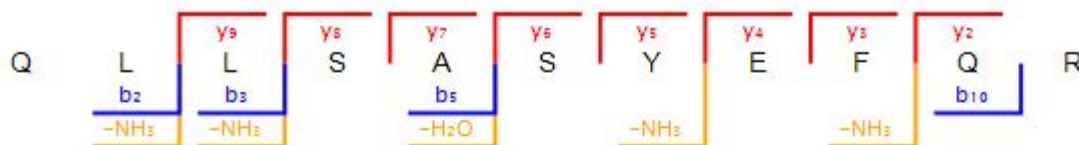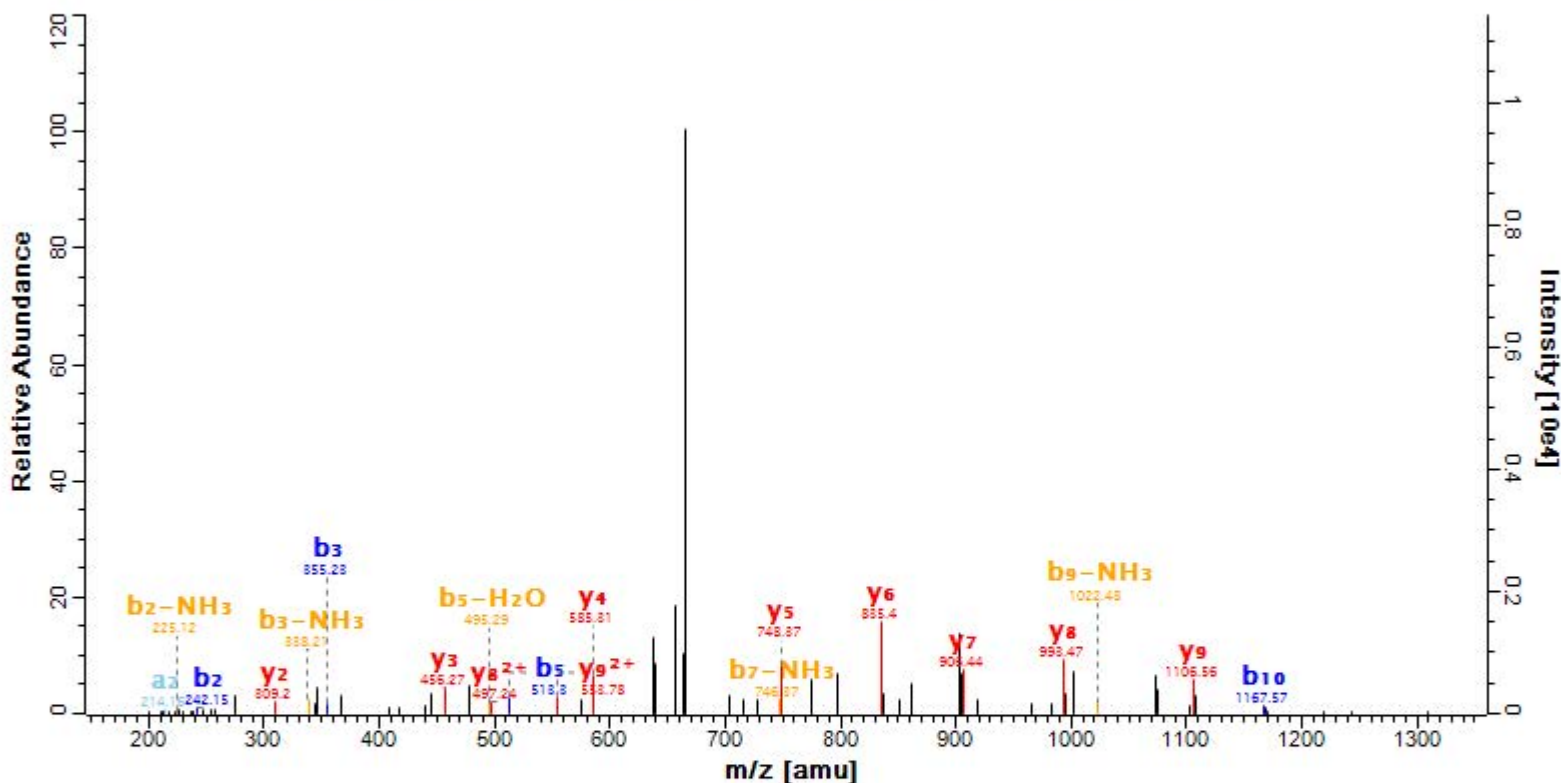

#### precursor information

|                   |                 |
|-------------------|-----------------|
| Mass:             | 1340.6719       |
| m/z:              | 671.34323       |
| Charge:           | 2+              |
| Retentiontime:    | 29.275884628295 |
| Score:            | 98.15634        |
| Mass Error [ppm]: | -0.4182         |
| PEP:              | 0.0008918       |
| Precursor Type:   | MULTI           |

#### general information

|                       |             |
|-----------------------|-------------|
| Annotation:           | 9 of 11     |
| AminoAcids Coverage:  | 82 %        |
| Intensity Coverage:   | 22 %        |
| Peak Coverage:        | 22 %        |
| Protein Localisation: | 259 ... 269 |

| a ion    |        | b ion    |        |    |     |          | y ion  |          | y <sup>2+</sup> ion |  |
|----------|--------|----------|--------|----|-----|----------|--------|----------|---------------------|--|
| Δ dalton | mass   | Δ dalton | mass   |    | seq | Δ dalton | mass   | Δ dalton | mass                |  |
|          | 101.07 |          | 129.07 | 1  | Q   | 10       |        |          |                     |  |
| +0.0706  | 214.16 | +0.3139  | 242.15 | 2  | L   | 9        | 1219.6 |          | 1219.6              |  |
|          | 327.24 | +0.0251  | 355.23 | 3  | L   | 8        | 1106.6 | +0.3034  | 553.78              |  |
|          | 414.27 |          | 442.27 | 4  | S   | 7        | 993.47 | +0.049   | 497.24              |  |
|          | 485.31 | +0.08    | 513.3  | 5  | A   | 6        | 906.44 | -0.073   | 906.44              |  |
|          | 572.34 |          | 600.34 | 6  | S   | 5        | 835.4  | +0.0131  | 835.4               |  |
|          | 735.4  |          | 763.4  | 7  | Y   | 4        | 748.37 | +0.0641  | 748.37              |  |
|          | 864.45 |          | 892.44 | 8  | E   | 3        | 585.31 | +0.1186  | 585.31              |  |
|          | 1011.5 |          | 1039.5 | 9  | F   | 2        | 456.27 | +0.0594  | 456.27              |  |
|          | 1139.6 | -0.143   | 1167.6 | 10 | Q   | 1        | 309.2  | +0.0442  | 309.2               |  |
|          |        |          |        | 11 | R   | 0        | 181.14 |          | 181.14              |  |

Scan number 4226 Raw file LNCAP\_Silac\_23F10\_set3\_04  
 Method ITMS; CID Pepti... 112.5

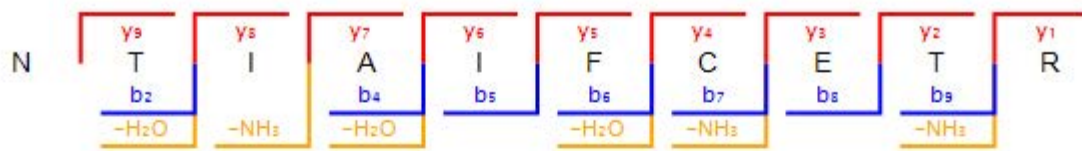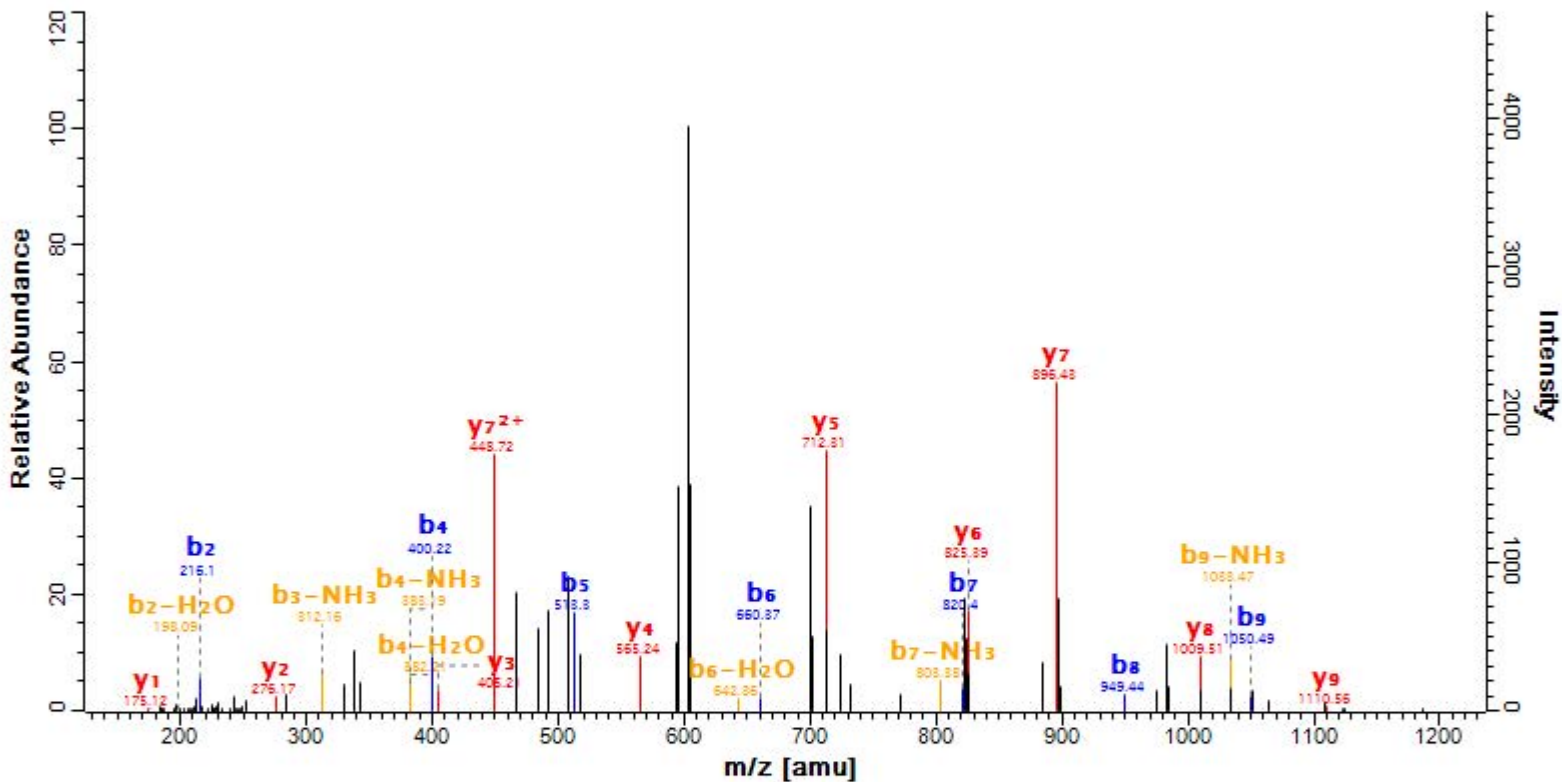

**precursor information**

|                   |                 |
|-------------------|-----------------|
| Mass:             | 1223.59689      |
| m/z:              | 612.80572       |
| Charge:           | 2+              |
| Retentiontime:    | 29.522050857543 |
| Score:            | 112.4985        |
| Mass Error [ppm]: | 0.030828        |
| PEP:              | 0.00045128      |
| Precursor Type:   | MULTI           |

|                       |             |
|-----------------------|-------------|
| Annotation:           | 9 of 10     |
| AminoAcids Coverage:  | 90 %        |
| Intensity Coverage:   | 34 %        |
| Peak Coverage:        | 24 %        |
| Protein Localisation: | 151 ... 160 |

| b ion     |          |    |     |   | y ion    |           | y <sup>2+</sup> ion |           |
|-----------|----------|----|-----|---|----------|-----------|---------------------|-----------|
| Δ dalton  | mass     |    | seq |   | Δ dalton | mass      | Δ dalton            | mass      |
|           | 115.0502 | 1  | N   | 9 |          |           |                     |           |
| -0.0142   | 216.0979 | 2  | T   | 8 | 1110.561 | -0.0407   | 1110.561            |           |
|           | 329.1819 | 3  | I   | 7 | 1009.514 | +0.053123 | 1009.514            |           |
| -0.08771  | 400.2191 | 4  | A   | 6 | 896.4295 | +0.014628 | 448.7184            | +0.192274 |
| +0.155982 | 513.3031 | 5  | I   | 5 | 825.3923 | +0.054672 | 825.3923            |           |
| +0.03697  | 660.3715 | 6  | F   | 4 | 712.3083 | +0.003115 | 712.3083            |           |
| +0.150853 | 820.4022 | 7  | C   | 3 | 565.2399 | +0.041317 | 565.2399            |           |
| -0.05251  | 949.4448 | 8  | E   | 2 | 405.2092 | +0.067143 | 405.2092            |           |
| -0.04263  | 1050.492 | 9  | T   | 1 | 276.1666 | -0.01243  | 276.1666            |           |
|           |          | 10 | R   | 0 | 175.119  | -0.07096  | 175.119             |           |



Scan number 4228 Raw file LNCAP\_Silac\_23F10\_set3\_04  
 Method ITMS; CID Peptide 231.67

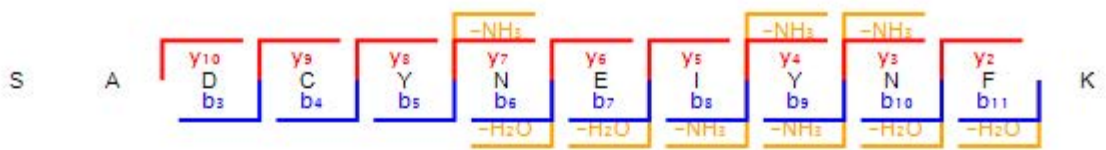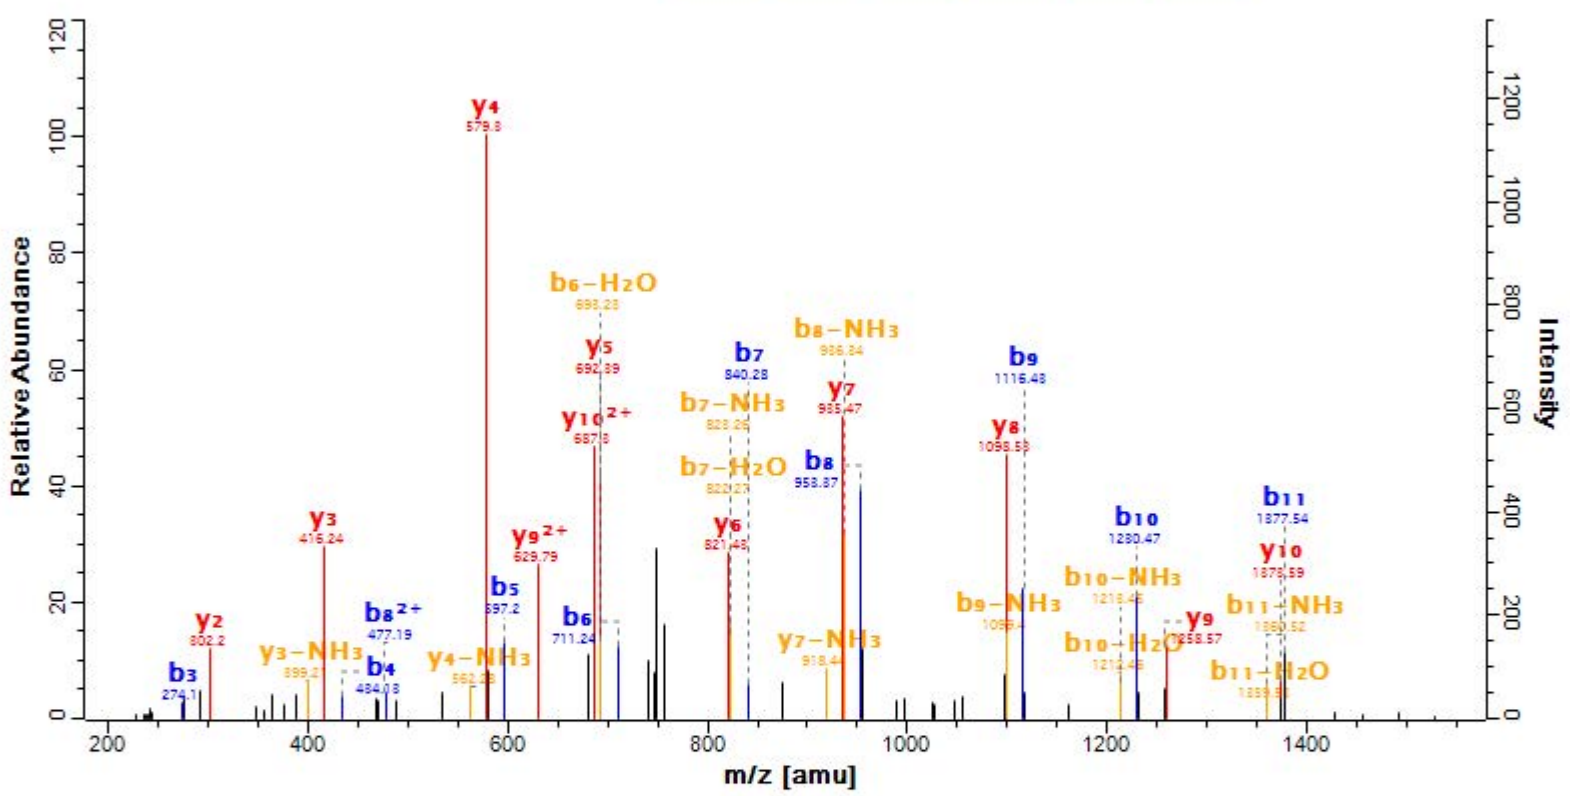

**precursor information**

|                   |                 |
|-------------------|-----------------|
| Mass:             | 1522.64009      |
| m/z:              | 762.32732       |
| Charge:           | 2+              |
| Retentiontime:    | 29.531682968139 |
| Score:            | 231.672         |
| Mass Error [ppm]: | 0.16261         |
| PEP:              | 1.3432E-25      |
| Precursor Type:   | MULTI           |

**general information**

|                       |           |
|-----------------------|-----------|
| Annotation:           | 9 of 12   |
| AminoAcids Coverage:  | 75 %      |
| Intensity Coverage:   | 74 %      |
| Peak Coverage:        | 40 %      |
| Protein Localisation: | 86 ... 97 |

| b <sup>2+</sup> ion |        | b ion    |        | seq |   |    | y ion    |         | y <sup>2+</sup> ion |         |
|---------------------|--------|----------|--------|-----|---|----|----------|---------|---------------------|---------|
| Δ dalton            | mass   | Δ dalton | mass   |     |   |    | Δ dalton | mass    | Δ dalton            | mass    |
|                     | 88.039 | 88.039   |        | 1   | S | 11 |          |         |                     |         |
|                     | 159.08 | 159.08   |        | 2   | A | 10 | 1444.6   |         | 1444.6              |         |
|                     | 274.1  | -0.021   | 274.1  | 3   | D | 9  | 1373.6   | -0.066  | 687.3               | +0.0302 |
|                     | 434.13 | +0.1345  | 434.13 | 4   | C | 8  | 1258.6   | +0.0432 | 629.79              | -0.119  |
|                     | 597.2  | +0.0418  | 597.2  | 5   | Y | 7  | 1098.5   | -0.033  | 1098.5              |         |
|                     | 711.24 | +0.0002  | 711.24 | 6   | N | 6  | 935.47   | -0.038  | 935.47              |         |
|                     | 840.28 | +0.0235  | 840.28 | 7   | E | 5  | 821.43   | +0.0676 | 821.43              |         |
| +0.3042             | 477.19 | -0.089   | 953.37 | 8   | I | 4  | 692.39   | -0.101  | 692.39              |         |
|                     | 1116.4 | -0.098   | 1116.4 | 9   | Y | 3  | 579.3    | -0.009  | 579.3               |         |
|                     | 1230.5 | +0.0103  | 1230.5 | 10  | N | 2  | 416.24   | +0.0958 | 416.24              |         |
|                     | 1377.5 | -0.162   | 1377.5 | 11  | F | 1  | 302.2    | +0.0561 | 302.2               |         |
|                     |        |          |        | 12  | K | 0  | 155.13   |         | 155.13              |         |

Scan number 4425 Raw file LNCAP\_Silac\_23F10\_set3\_04  
 Method ITMS; CID Pepti... 168.5

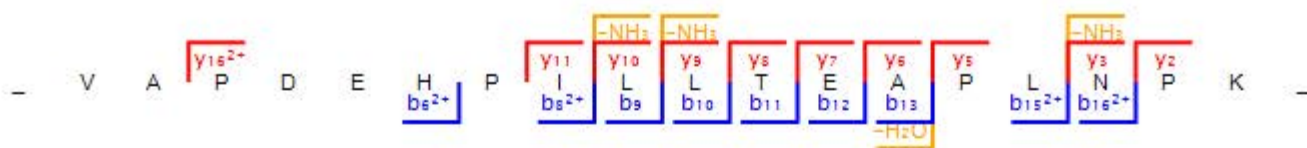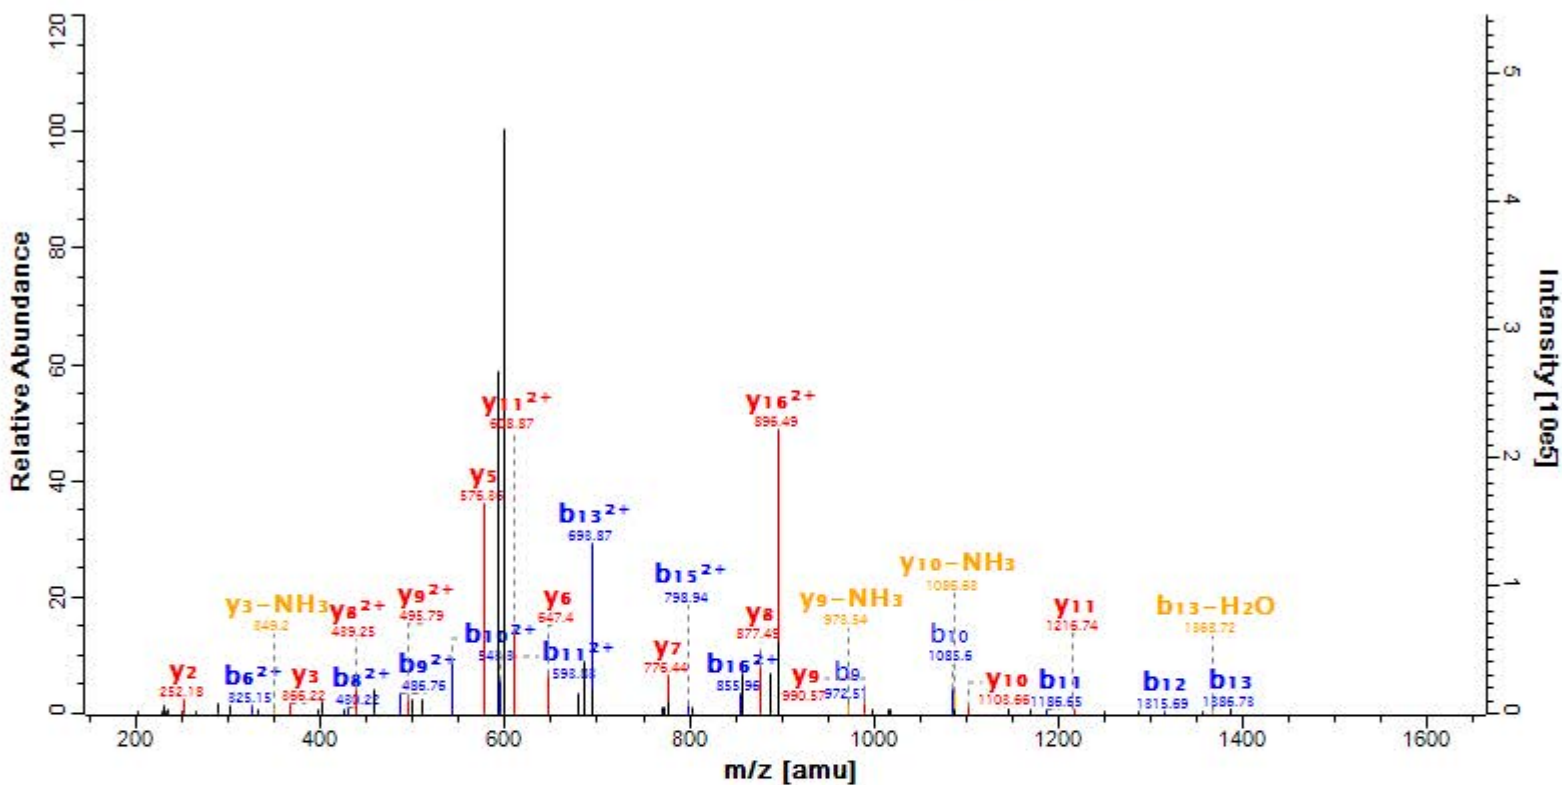

precursor information

|                   |                 |
|-------------------|-----------------|
| Mass:             | 1953.05686      |
| m/z:              | 652.02623       |
| Charge:           | 3+              |
| Retentiontime:    | 30.537631988525 |
| Score:            | 168.4953        |
| Mass Error [ppm]: | -0.13849        |
| PEP:              | 3.34E-30        |
| Precursor Type:   | MULTI           |

general information

|                       |            |
|-----------------------|------------|
| Annotation:           | 12 of 18   |
| AminoAcids Coverage:  | 67 %       |
| Intensity Coverage:   | 46 %       |
| Peak Coverage:        | 36 %       |
| Protein Localisation: | 97 ... 114 |

| b <sup>2+</sup> ion |        | b ion    |        | seq |   |    | y ion    |         | y <sup>2+</sup> ion |         |
|---------------------|--------|----------|--------|-----|---|----|----------|---------|---------------------|---------|
| Δ dalton            | mass   | Δ dalton | mass   |     |   |    | Δ dalton | mass    | Δ dalton            | mass    |
|                     | 100.08 | 100.08   |        | 1   | V | 17 |          |         |                     |         |
|                     | 171.11 | 171.11   |        | 2   | A | 16 | 1863     |         | 1863                |         |
|                     | 268.17 | 268.17   |        | 3   | P | 15 | 1792     |         | 896.49              | +0.2501 |
|                     | 383.19 | 383.19   |        | 4   | D | 14 | 1694.9   |         | 1694.9              |         |
|                     | 512.24 | 512.24   |        | 5   | E | 13 | 1579.9   |         | 1579.9              |         |
| -0.106              | 325.15 |          | 649.29 | 6   | H | 12 | 1450.9   |         | 1450.9              |         |
|                     | 746.35 |          | 746.35 | 7   | P | 11 | 1313.8   |         | 1313.8              |         |
| +0.319              | 430.22 |          | 859.43 | 8   | I | 10 | 1216.7   | +0.1239 | 608.87              | +0.0981 |
| +0.2005             | 486.76 | -0.194   | 972.51 | 9   | L | 9  | 1103.7   | +0      | 1103.7              |         |
| +0.1609             | 543.3  | -0.005   | 1085.6 | 10  | L | 8  | 990.57   | +0.0473 | 495.79              | +0.1143 |
| +0.2764             | 593.83 | -0.259   | 1186.6 | 11  | T | 7  | 877.49   | +0.0268 | 439.25              | +0.1169 |
|                     | 1315.7 | +0.3982  | 1315.7 | 12  | E | 6  | 776.44   | +0.0019 | 776.44              |         |
| +0.2142             | 693.87 | +0.0196  | 1386.7 | 13  | A | 5  | 647.4    | +0.1041 | 647.4               |         |
|                     | 1483.8 |          | 1483.8 | 14  | P | 4  | 576.36   | -0.055  | 576.36              |         |
| -0.107              | 798.94 |          | 1596.9 | 15  | L | 3  | 479.31   |         | 479.31              |         |
| -0.071              | 855.96 |          | 1710.9 | 16  | N | 2  | 366.22   | +0.1089 | 366.22              |         |
|                     | 1808   |          | 1808   | 17  | P | 1  | 252.18   | -0.046  | 252.18              |         |
|                     |        |          |        | 18  | K | 0  | 155.13   |         | 155.13              |         |

Scan number 4632 Raw file LNCAP\_Silac\_23F10\_set3\_04  
 Method ITMS; CID Pepti... 160.52

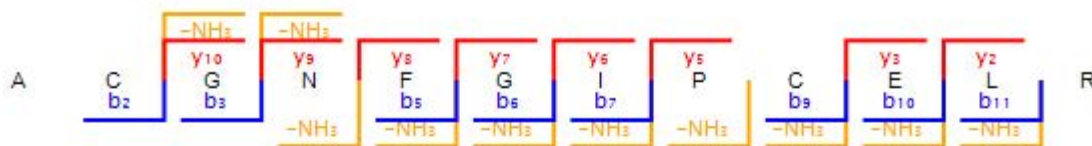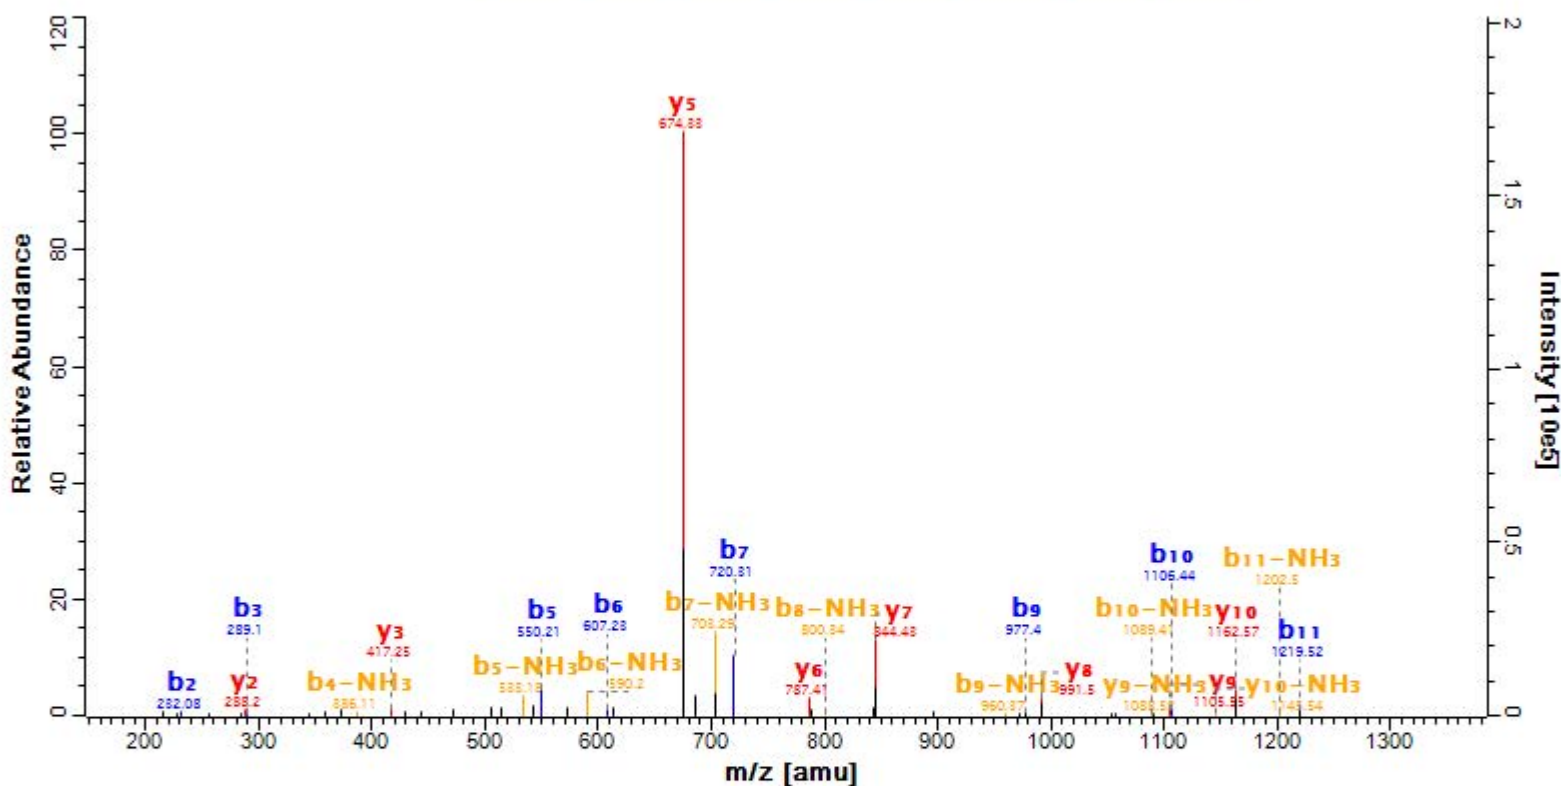

#### precursor information

|                   |                 |
|-------------------|-----------------|
| Mass:             | 1392.6272       |
| m/z:              | 697.32088       |
| Charge:           | 2+              |
| Retentiontime:    | 31.634674072265 |
| Score:            | 160.5238        |
| Mass Error [ppm]: | -0.46118        |
| PEP:              | 2.8717E-07      |
| Precursor Type:   | MULTI           |

#### general information

|                       |             |
|-----------------------|-------------|
| Annotation:           | 10 of 12    |
| AminoAcids Coverage:  | 83 %        |
| Intensity Coverage:   | 72 %        |
| Peak Coverage:        | 34 %        |
| Protein Localisation: | 313 ... 324 |

| b ion      |               |     |   | y ion    |               |            |
|------------|---------------|-----|---|----------|---------------|------------|
| Δ dalton   | mass          | seq |   | Δ dalton | mass          |            |
|            | 72.044390254  | 1   | A | 11       |               |            |
| -0.0371051 | 232.075038456 | 2   | C | 10       | 1322.5980023  |            |
| +0.0894719 | 289.096502179 | 3   | G | 9        | 1162.5673541  | -0.0424518 |
|            | 403.139429627 | 4   | N | 8        | 1105.54589038 | +0.1027913 |
| -0.0035589 | 550.207843543 | 5   | F | 7        | 991.502962931 | +0.0346347 |
| +0.1071796 | 607.229307266 | 6   | G | 6        | 844.434549015 | +0.0906585 |
| -0.0467086 | 720.313371247 | 7   | I | 5        | 787.413085291 | -0.0137933 |
|            | 817.366135099 | 8   | P | 4        | 674.329021311 | +0.0507394 |
| -0.2698912 | 977.3967833   | 9   | C | 3        | 577.276257459 |            |
| +0.208817  | 1106.4393764  | 10  | E | 2        | 417.245609258 | -0.0479164 |
| -0.1680937 | 1219.52344038 | 11  | L | 1        | 288.203016161 | +0.0634023 |
|            |               | 12  | R | 0        | 175.118952181 |            |

Scan number 4672 Raw file LNCAP\_Silac\_23F10\_set3\_04  
 Method ITMS; CID Pepti... 103.87

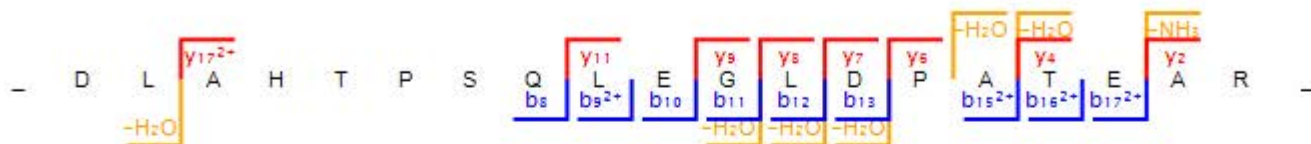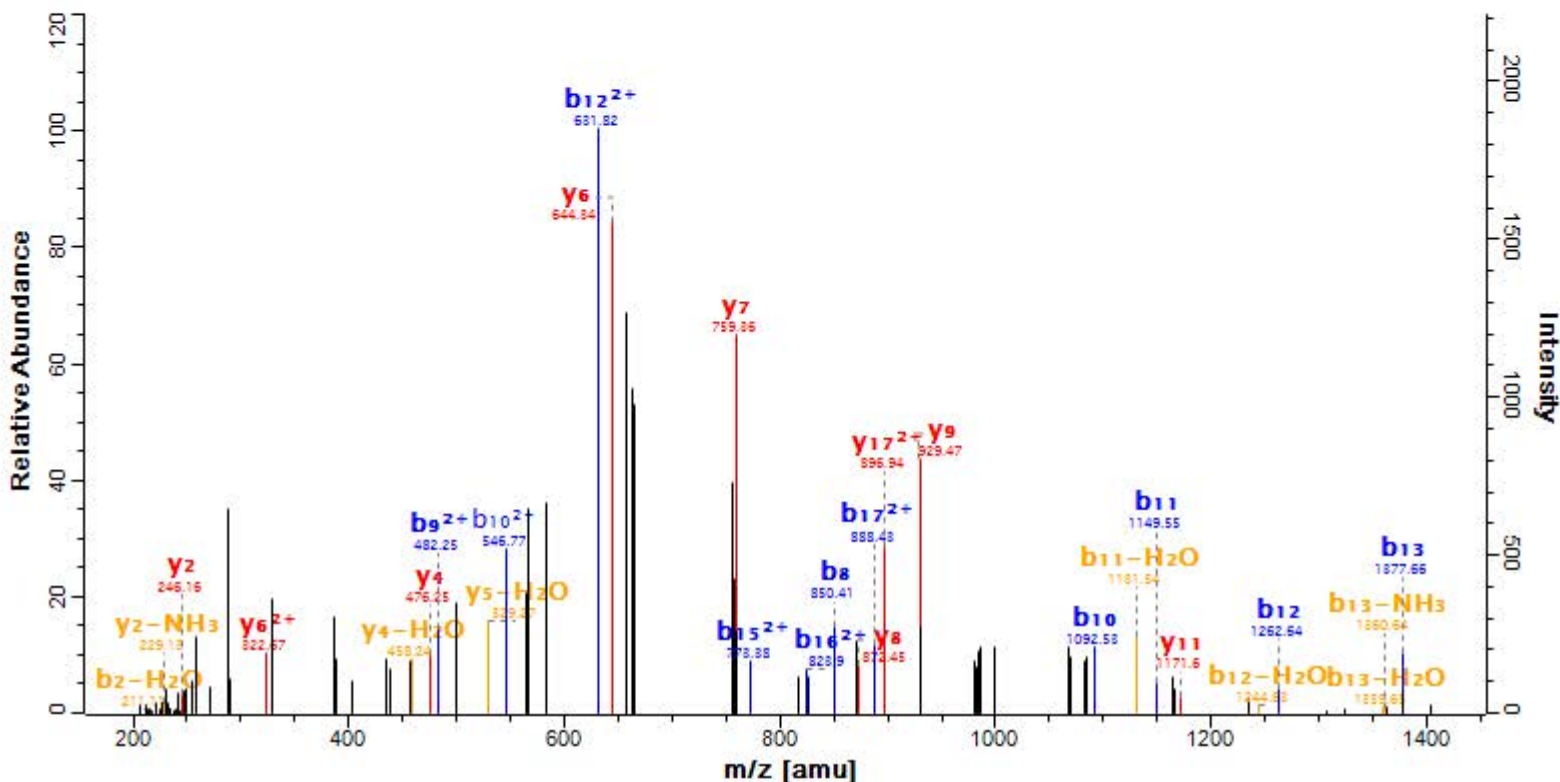

precursor information

|                   |                 |
|-------------------|-----------------|
| Mass:             | 2019.98669      |
| m/z:              | 674.33617       |
| Charge:           | 3+              |
| Retentiontime:    | 31.840959548950 |
| Score:            | 103.8651        |
| Mass Error [ppm]: | 0.26935         |
| PEP:              | 4.2353E-08      |
| Precursor Type:   | MULTI           |

general information

|                       |           |
|-----------------------|-----------|
| Annotation:           | 13 of 19  |
| AminoAcids Coverage:  | 68 %      |
| Intensity Coverage:   | 41 %      |
| Peak Coverage:        | 28 %      |
| Protein Localisation: | 30 ... 48 |

| b <sup>2+</sup> ion |        | b ion    |        | seq |   |    | y ion    |         | y <sup>2+</sup> ion |         |
|---------------------|--------|----------|--------|-----|---|----|----------|---------|---------------------|---------|
| Δ dalton            | mass   | Δ dalton | mass   |     |   |    | Δ dalton | mass    | Δ dalton            | mass    |
|                     | 116.03 |          | 116.03 | 1   | D | 18 |          |         |                     |         |
|                     | 229.12 |          | 229.12 | 2   | L | 17 | 1906     |         | 1906                |         |
|                     | 300.16 |          | 300.16 | 3   | A | 16 | 1792.9   |         | 896.94              | -0.095  |
|                     | 437.21 |          | 437.21 | 4   | H | 15 | 1721.8   |         | 1721.8              |         |
|                     | 538.26 |          | 538.26 | 5   | T | 14 | 1584.8   |         | 1584.8              |         |
|                     | 635.31 |          | 635.31 | 6   | P | 13 | 1483.7   |         | 1483.7              |         |
|                     | 722.35 |          | 722.35 | 7   | S | 12 | 1386.7   |         | 1386.7              |         |
|                     | 850.41 | -0.017   | 850.41 | 8   | Q | 11 | 1299.7   |         | 1299.7              |         |
| +0.0433             | 482.25 |          | 963.49 | 9   | L | 10 | 1171.6   | +0.0184 | 1171.6              |         |
| +0.1055             | 546.77 | -0.001   | 1092.5 | 10  | E | 9  | 1058.5   |         | 1058.5              |         |
|                     | 1149.6 | -0.012   | 1149.6 | 11  | G | 8  | 929.47   | +0.118  | 929.47              |         |
| +0.1164             | 631.82 | +0.1509  | 1262.6 | 12  | L | 7  | 872.45   | +0.0555 | 872.45              |         |
|                     | 1377.7 | -0.042   | 1377.7 | 13  | D | 6  | 759.36   | +0.0413 | 759.36              |         |
|                     | 1474.7 |          | 1474.7 | 14  | P | 5  | 644.34   | -0.042  | 322.67              | +0.0867 |
| +0.1067             | 773.38 |          | 1545.8 | 15  | A | 4  | 547.28   |         | 547.28              |         |
| -0.052              | 823.9  |          | 1646.8 | 16  | T | 3  | 476.25   | +0.2738 | 476.25              |         |
| -0.086              | 888.43 |          | 1775.8 | 17  | E | 2  | 375.2    |         | 375.2               |         |
|                     | 1846.9 |          | 1846.9 | 18  | A | 1  | 246.16   | +0.1747 | 246.16              |         |
|                     |        |          |        | 19  | R | 0  | 175.12   |         | 175.12              |         |

Scan number 4676 Raw file LNCAP\_Silac\_23F10\_set3\_04  
 Method ITMS: CID Peptide LNCAP\_Silac\_23F10\_set3\_04

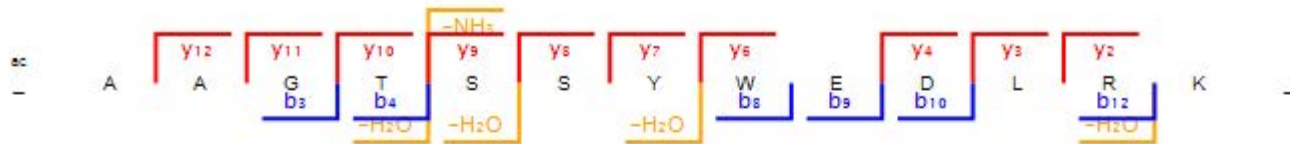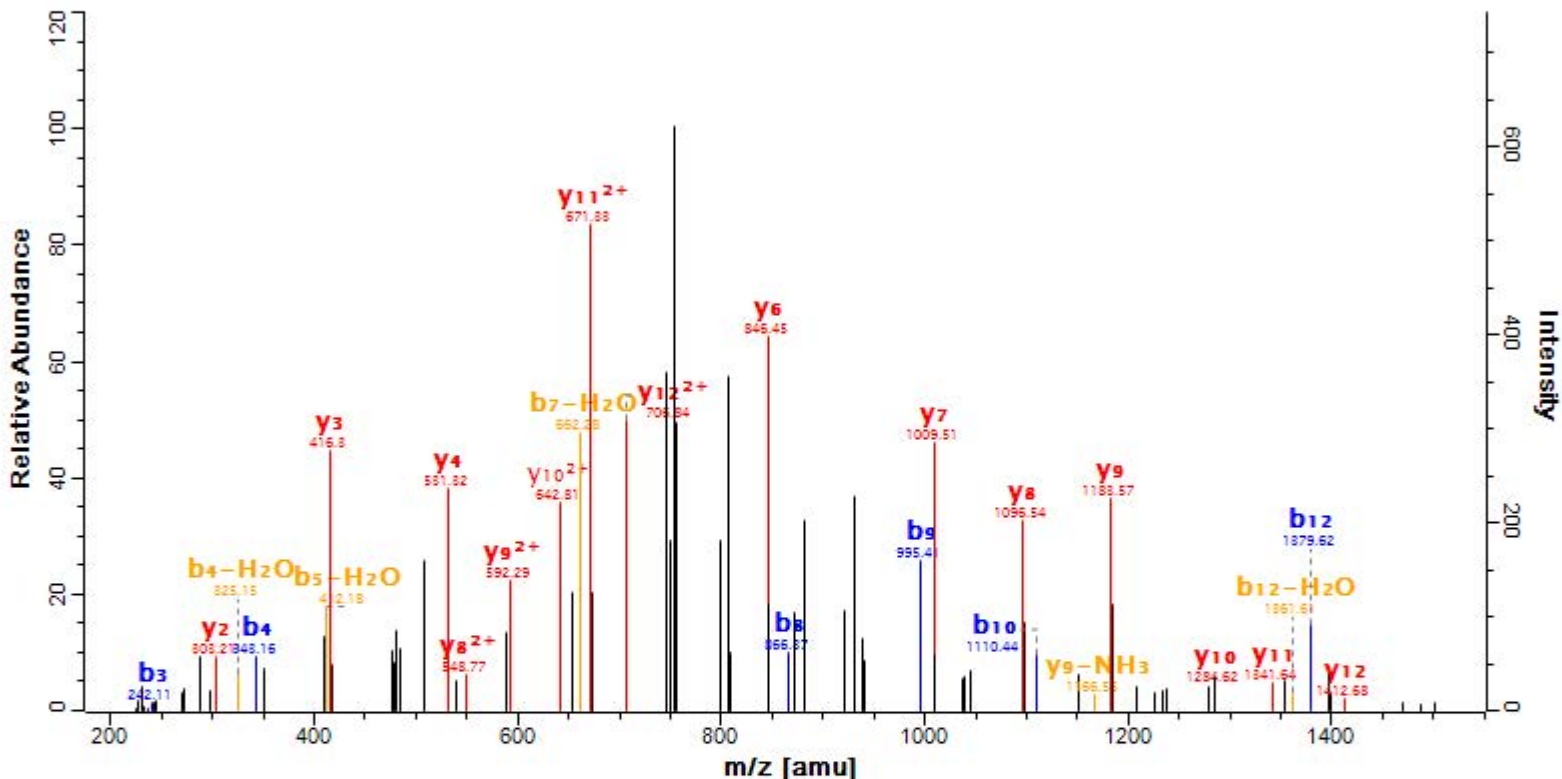

**precursor information**

|                   |                 |
|-------------------|-----------------|
| Mass:             | 1524.71668      |
| m/z:              | 763.36562       |
| Charge:           | 2+              |
| Retentiontime:    | 31.862972259521 |
| Score:            | 139.7806        |
| Mass Error [ppm]: | -2.7467         |
| PEP:              | 1.3465E-06      |
| Precursor Type:   | MULTI           |

**general information**

|                       |          |
|-----------------------|----------|
| Annotation:           | 11 of 13 |
| AminoAcids Coverage:  | 85 %     |
| Intensity Coverage:   | 43 %     |
| Peak Coverage:        | 31 %     |
| Protein Localisation: | 2 ... 14 |

| b ion     |          |     |   | y ion    |          | y <sup>2+</sup> ion |          |           |
|-----------|----------|-----|---|----------|----------|---------------------|----------|-----------|
| Δ dalton  | mass     | seq |   | Δ dalton | mass     | Δ dalton            | mass     |           |
|           | 114.055  | 1   | A | 12       |          |                     |          |           |
|           | 185.0921 | 2   | A | 11       | 1412.68  | +0.219921           | 706.8439 | +0.344176 |
| -0.43806  | 242.1135 | 3   | G | 10       | 1341.643 | -0.04582            | 671.3253 | +0.268495 |
| -0.0656   | 343.1612 | 4   | T | 9        | 1284.622 | +0.093074           | 642.8146 | -0.02522  |
|           | 430.1932 | 5   | S | 8        | 1183.574 | +0.042852           | 592.2907 | -0.1384   |
|           | 517.2253 | 6   | S | 7        | 1096.542 | +0.034231           | 548.7747 | +0.050892 |
|           | 680.2886 | 7   | Y | 6        | 1009.51  | +0.054296           | 1009.51  |           |
| +0.275035 | 866.3679 | 8   | W | 5        | 846.4468 | -0.02514            | 846.4468 |           |
| +0.206014 | 995.4105 | 9   | E | 4        | 660.3675 |                     | 660.3675 |           |
| -0.13935  | 1110.437 | 10  | D | 3        | 531.3249 | +0.052153           | 531.3249 |           |
|           | 1223.522 | 11  | L | 2        | 416.298  | +0.040339           | 416.298  |           |
| -0.08246  | 1379.623 | 12  | R | 1        | 303.2139 | +0.109296           | 303.2139 |           |
|           |          | 13  | K | 0        | 147.1128 |                     | 147.1128 |           |

Scan number 4825 Raw file LNCAP\_Silac\_23F10\_set3\_04  
 Method ITMS: CID Pepti... 150.61

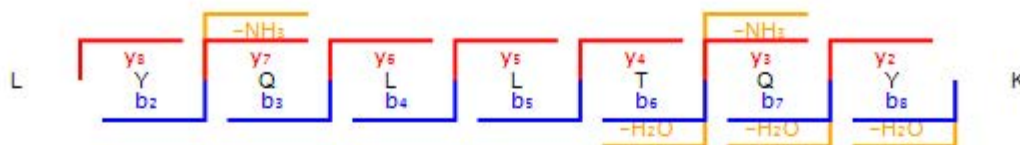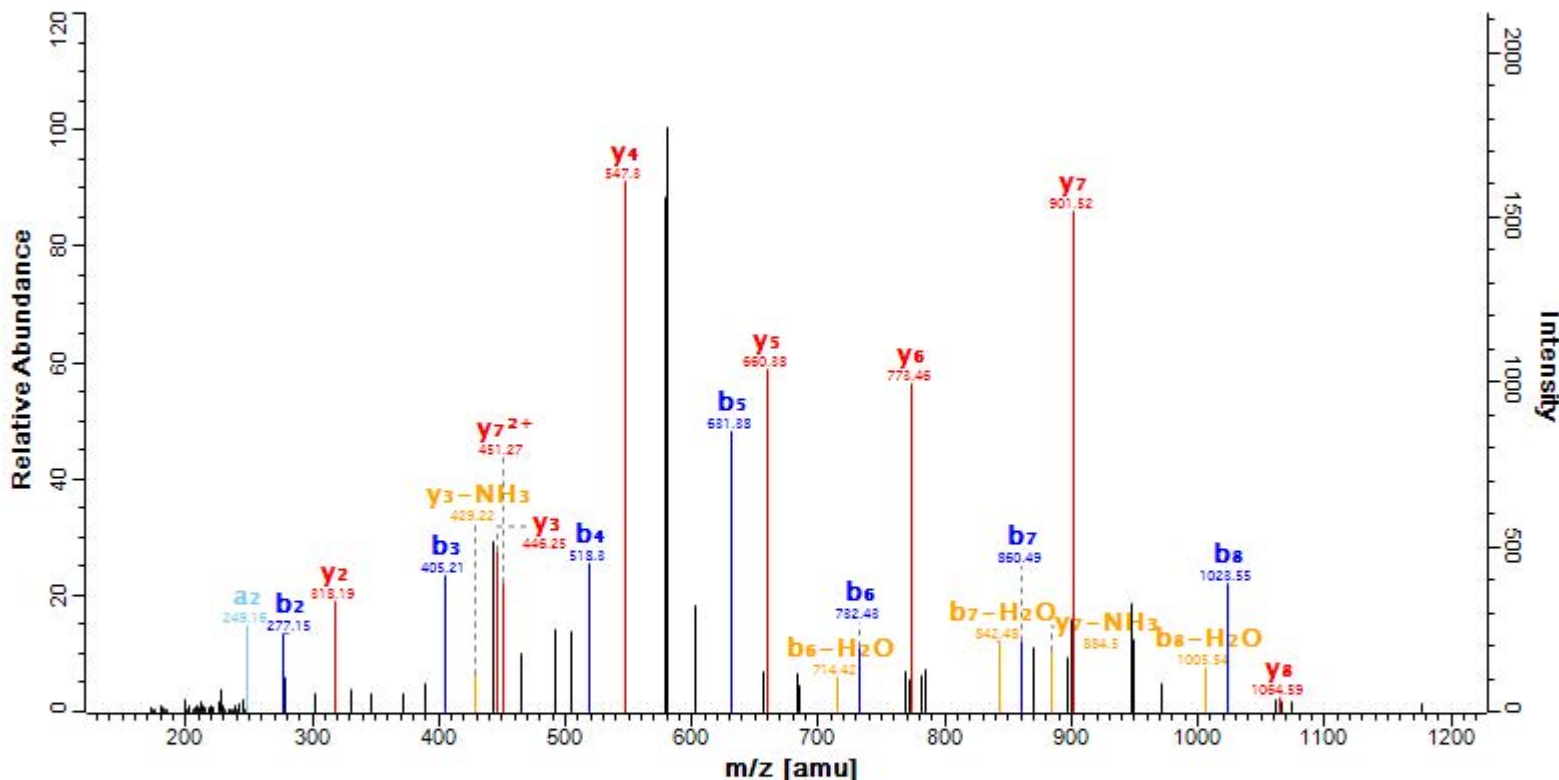

#### precursor information

|                       |                 |
|-----------------------|-----------------|
| Mass:                 | 1168.64919      |
| m/z:                  | 585.33187       |
| Charge:               | 2+              |
| Retentiontime:        | 32.630245208740 |
| Score:                | 150.6083        |
| Mass Error [ppm]:     | -0.015253       |
| PEP:                  | 0.00074841      |
| Precursor Type:       | MULTI           |
| Annotation:           | 7 of 9          |
| AminoAcids Coverage:  | 78 %            |
| Intensity Coverage:   | 53 %            |
| Peak Coverage:        | 23 %            |
| Protein Localisation: | 102 ... 110     |

| a ion    |        | b ion    |        | seq |   |   | y ion    |         | y <sup>2+</sup> ion |        |
|----------|--------|----------|--------|-----|---|---|----------|---------|---------------------|--------|
| Δ dalton | mass   | Δ dalton | mass   |     |   |   | Δ dalton | mass    | Δ dalton            | mass   |
|          | 86.096 |          | 114.09 | 1   | L | 8 |          |         |                     |        |
| +0.0154  | 249.16 | +0.0812  | 277.15 | 2   | Y | 7 | 1064.6   | -0.361  | 1064.6              |        |
|          | 377.22 | -0.008   | 405.21 | 3   | Q | 6 | 901.52   | -0.005  | 451.27              | -0.036 |
|          | 490.3  | -0.025   | 518.3  | 4   | L | 5 | 773.46   | +0.0543 | 773.46              |        |
|          | 603.39 | -0.078   | 631.38 | 5   | L | 4 | 660.38   | +0.0008 | 660.38              |        |
|          | 704.43 | +0.0023  | 732.43 | 6   | T | 3 | 547.3    | +0.1317 | 547.3               |        |
|          | 832.49 | +0.0825  | 860.49 | 7   | Q | 2 | 446.25   | +0.0686 | 446.25              |        |
|          | 995.56 | -0.021   | 1023.6 | 8   | Y | 1 | 318.19   | +0.0795 | 318.19              |        |
|          |        |          |        | 9   | K | 0 | 155.13   |         | 155.13              |        |

Scan number 5026 Raw file LNCAP\_Silac\_23F10\_set3\_04  
 Method ITMS; CID Peptide 124.42

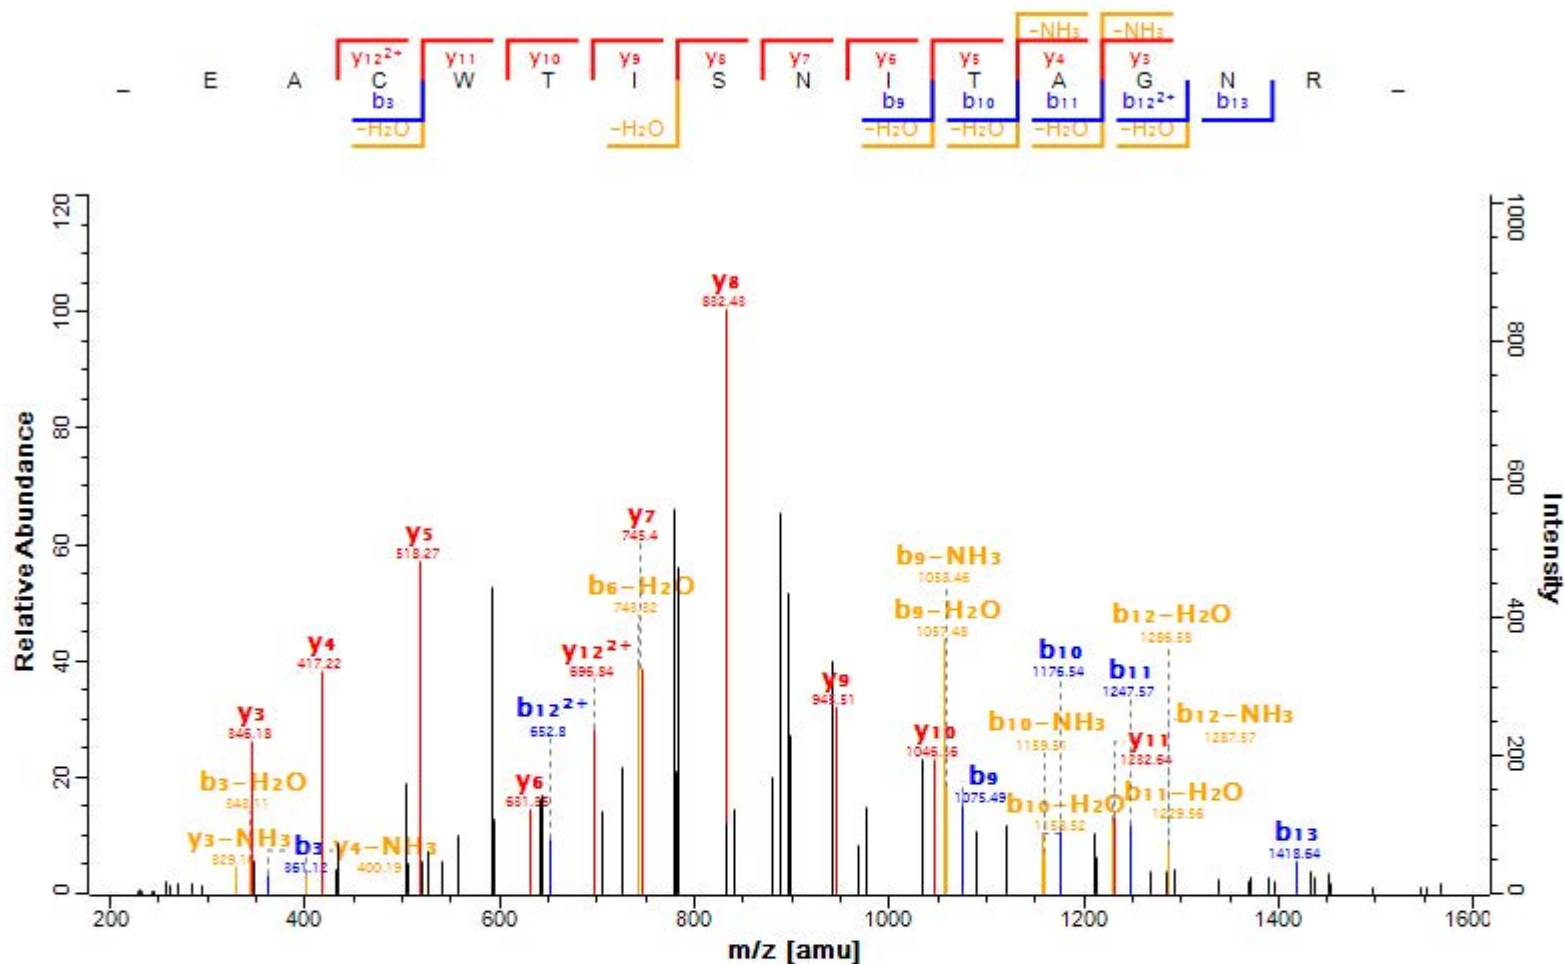

#### precursor information

|                   |                 |
|-------------------|-----------------|
| Mass:             | 1591.74134      |
| m/z:              | 796.87795       |
| Charge:           | 2+              |
| Retentiontime:    | 33.680233001709 |
| Score:            | 124.4166        |
| Mass Error [ppm]: | 0.033684        |
| PEP:              | 1.1262E-08      |
| Precursor Type:   | MULTI           |

#### general information

|                       |             |
|-----------------------|-------------|
| Annotation:           | 11 of 14    |
| AminoAcids Coverage:  | 79 %        |
| Intensity Coverage:   | 42 %        |
| Peak Coverage:        | 30 %        |
| Protein Localisation: | 357 ... 370 |

| b <sup>2+</sup> ion |        | b ion    |        | seq |   |    | y ion    |         | y <sup>2+</sup> ion |        |
|---------------------|--------|----------|--------|-----|---|----|----------|---------|---------------------|--------|
| Δ dalton            | mass   | Δ dalton | mass   |     |   |    | Δ dalton | mass    | Δ dalton            | mass   |
|                     | 130.05 |          | 130.05 | 1   | E | 13 |          |         |                     |        |
|                     | 201.09 |          | 201.09 | 2   | A | 12 | 1463.7   |         | 1463.7              |        |
|                     | 361.12 | +0.0134  | 361.12 | 3   | C | 11 | 1392.7   |         | 696.84              | -0.023 |
|                     | 547.2  |          | 547.2  | 4   | W | 10 | 1232.6   | -0.038  | 1232.6              |        |
|                     | 648.24 |          | 648.24 | 5   | T | 9  | 1046.6   | +0.0529 | 1046.6              |        |
|                     | 761.33 |          | 761.33 | 6   | I | 8  | 945.51   | +0.0152 | 945.51              |        |
|                     | 848.36 |          | 848.36 | 7   | S | 7  | 832.43   | -0.014  | 832.43              |        |
|                     | 962.4  |          | 962.4  | 8   | N | 6  | 745.4    | +0.1503 | 745.4               |        |
|                     | 1075.5 | -0.032   | 1075.5 | 9   | I | 5  | 631.35   | +0.1271 | 631.35              |        |
|                     | 1176.5 | -0.234   | 1176.5 | 10  | T | 4  | 518.27   | +0.0214 | 518.27              |        |
|                     | 1247.6 | +0.1054  | 1247.6 | 11  | A | 3  | 417.22   | +0.0954 | 417.22              |        |
| -0.499              | 652.8  |          | 1304.6 | 12  | G | 2  | 346.18   | +0.0125 | 346.18              |        |
|                     | 1418.6 | -0.232   | 1418.6 | 13  | N | 1  | 289.16   |         | 289.16              |        |
|                     |        |          |        | 14  | R | 0  | 175.12   |         | 175.12              |        |

Scan number 505 Raw file LNCAP\_Silac\_23F10\_set3\_04  
 Method ITMS; CID Pepti... 132.57

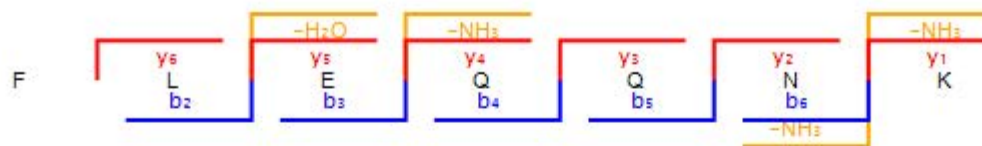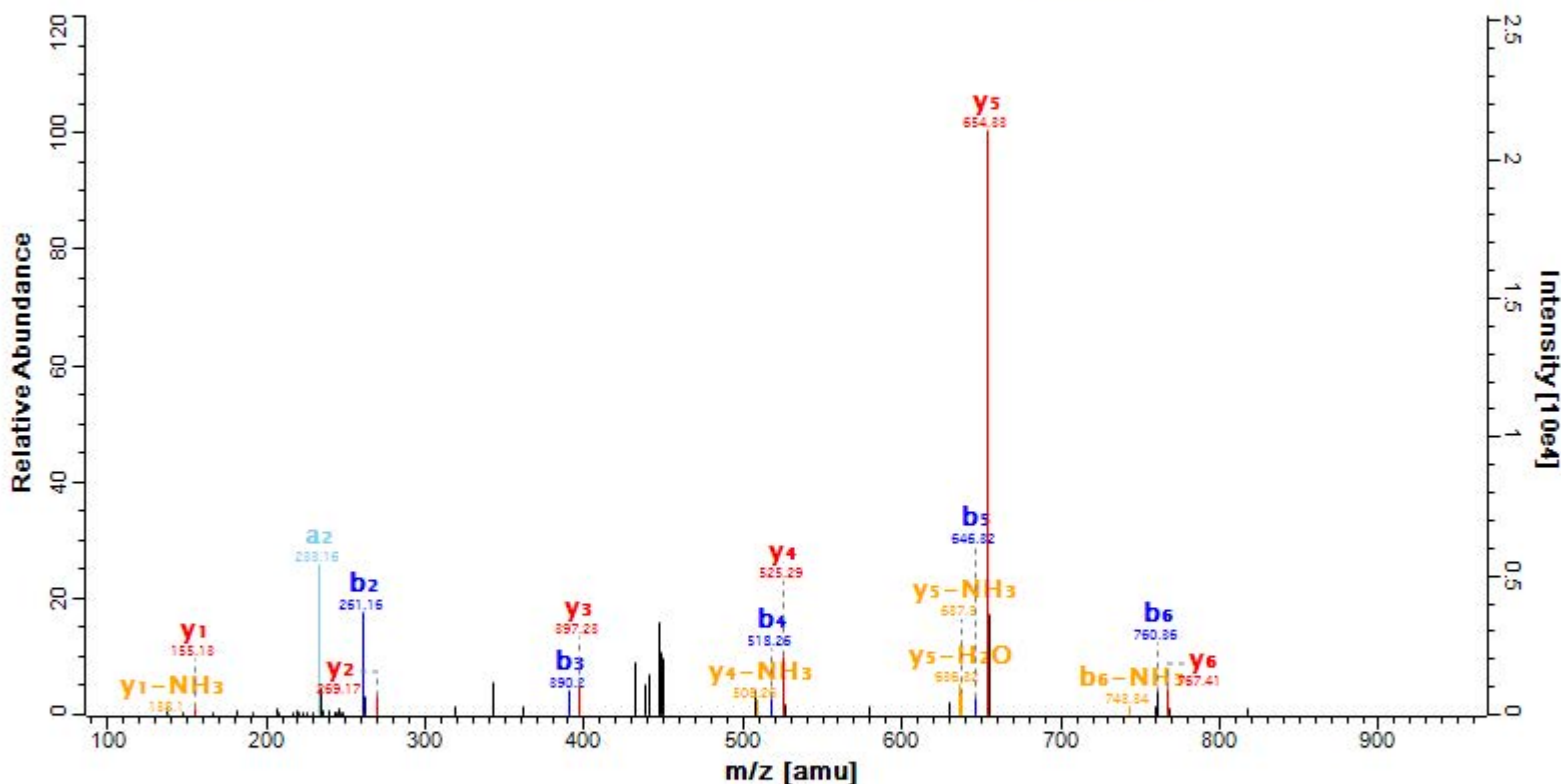

#### precursor information

|                      |                 |
|----------------------|-----------------|
| Mass:                | 905.46051       |
| m/z:                 | 453.73753       |
| Charge:              | 2+              |
| Retentiontime:       | 8.2565469741821 |
| Score:               | 132.5669        |
| g Mass Error [ppm]:  | -0.19279        |
| Annotation:          | 6 of 7          |
| AminoAcids Coverage: | 86 %            |
| Intensity Coverage:  | 62 %            |
| Peak Coverage:       | 19 %            |

| a ion     |          | b ion     |          | seq |   | y ion    |                    |
|-----------|----------|-----------|----------|-----|---|----------|--------------------|
| Δ dalton  | mass     | Δ dalton  | mass     |     |   | Δ dalton | mass               |
|           | 120.0808 |           | 148.0757 | 1   | F | 6        |                    |
| +0.051347 | 233.1648 | -0.05233  | 261.1598 | 2   | L | 5        | 767.4137 -0.06682  |
|           | 362.2074 | +0.012771 | 390.2023 | 3   | E | 4        | 654.3297 -0.04886  |
|           | 490.266  | +0.05365  | 518.2609 | 4   | Q | 3        | 525.2871 +0.00686  |
|           | 618.3246 | -0.13353  | 646.3195 | 5   | Q | 2        | 397.2285 -0.01681  |
|           | 732.3675 | +0.057553 | 760.3624 | 6   | N | 1        | 269.1699 +0.049186 |
|           |          |           |          | 7   | K | 0        | 155.127 +0.001873  |



Scan number 5098 Raw file LNCAP\_Silac\_23F10\_set3\_04  
 Method ITMS: CID Pepti... 117.25

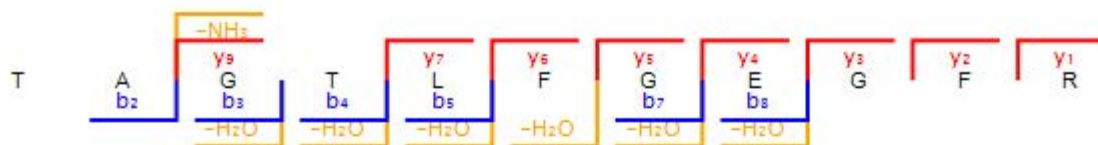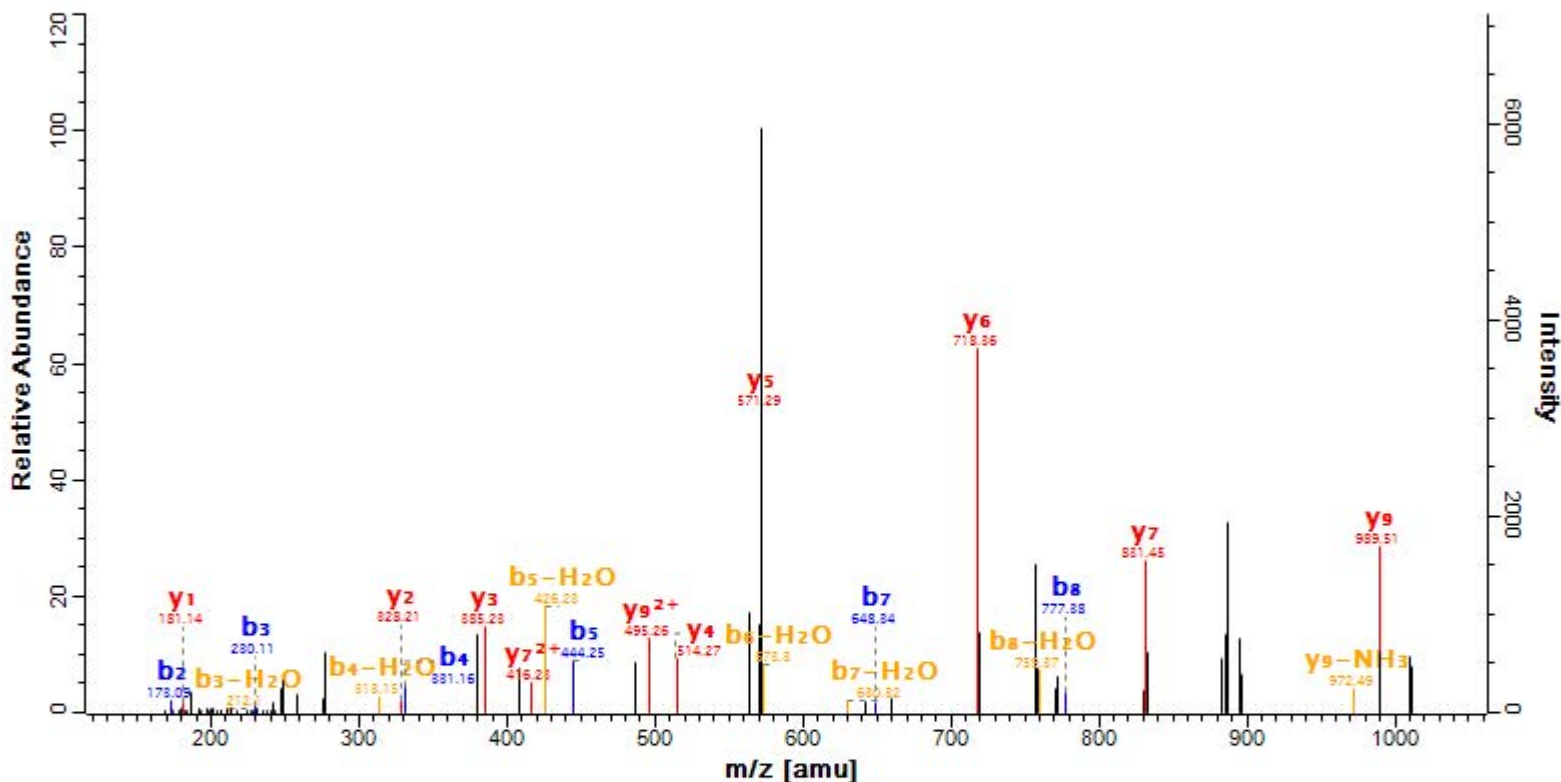

**precursor information**

|                   |                 |
|-------------------|-----------------|
| Mass:             | 1160.59235      |
| m/z:              | 581.30345       |
| Charge:           | 2+              |
| Retentiontime:    | 34.070991516113 |
| Score:            | 117.2506        |
| Mass Error [ppm]: | 0.17344         |
| PEP:              | 0.00054994      |
| Precursor Type:   | ISO             |

**general information**

|                       |             |
|-----------------------|-------------|
| Annotation:           | 10 of 11    |
| AminoAcids Coverage:  | 91 %        |
| Intensity Coverage:   | 41 %        |
| Peak Coverage:        | 24 %        |
| Protein Localisation: | 228 ... 238 |

| b ion     |          |     |   | y ion    |          | y <sup>2+</sup> ion |          |
|-----------|----------|-----|---|----------|----------|---------------------|----------|
| Δ dalton  | mass     | seq |   | Δ dalton | mass     | Δ dalton            | mass     |
|           | 102.055  | 1   | T | 10       |          |                     |          |
| -0.13926  | 173.0921 | 2   | A | 9        | 1060.552 |                     | 1060.552 |
| +0.053094 | 230.1135 | 3   | G | 8        | 989.5146 | +0.009717           | 495.261  |
| -0.03047  | 331.1612 | 4   | T | 7        | 932.4932 |                     | 932.4932 |
| -0.05668  | 444.2453 | 5   | L | 6        | 831.4455 | +0.045656           | 416.2264 |
|           | 591.3137 | 6   | F | 5        | 718.3614 | +0.030355           | 718.3614 |
| +0.059745 | 648.3352 | 7   | G | 4        | 571.293  | +0.078994           | 571.293  |
| -0.23474  | 777.3777 | 8   | E | 3        | 514.2716 | +0.381707           | 514.2716 |
|           | 834.3992 | 9   | G | 2        | 385.229  | +0.034957           | 385.229  |
|           | 981.4676 | 10  | F | 1        | 328.2075 | +0.145959           | 328.2075 |
|           |          | 11  | R | 0        | 181.1391 | +0.065539           | 181.1391 |

Scan number 516 Raw file LNCAP\_Silac\_23F10\_set3\_04  
 Method ITMS: CID Pepti... 50.8

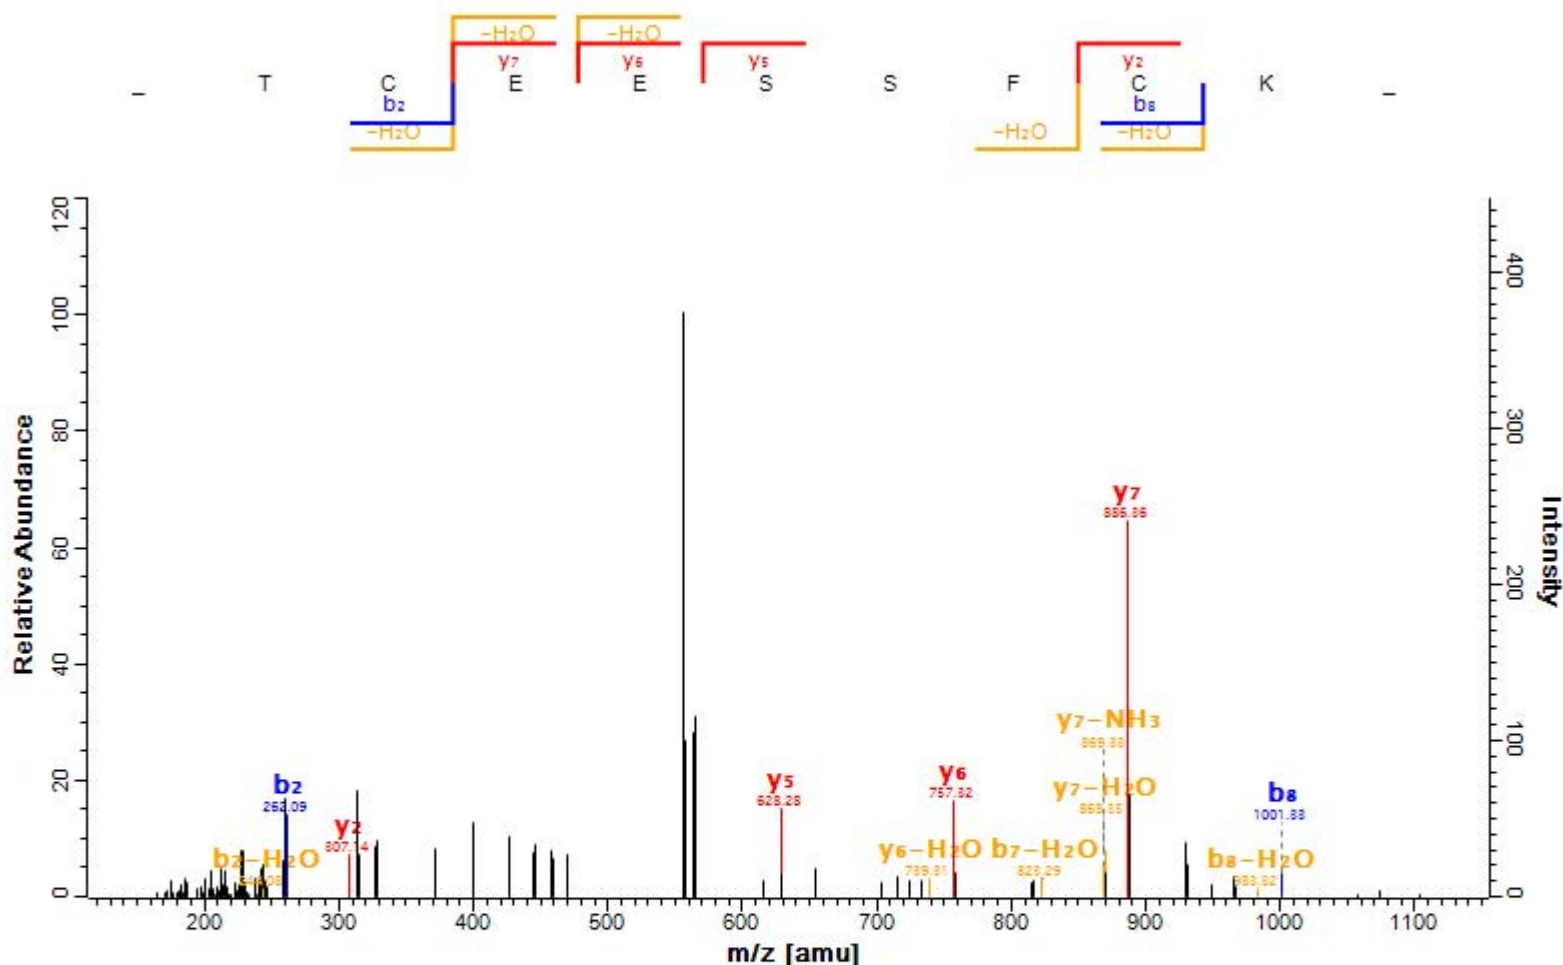

#### precursor information

|                       |                 |
|-----------------------|-----------------|
| Mass:                 | 1146.43136      |
| m/z:                  | 574.22295       |
| Charge:               | 2+              |
| Retentiontime:        | 8.3349752426147 |
| Score:                | 50.80457        |
| Mass Error [ppm]:     | -0.70013        |
| PEP:                  | 0.04876         |
| Precursor Type:       | MULTI           |
| Annotation:           | 6 of 9          |
| AminoAcids Coverage:  | 67 %            |
| Intensity Coverage:   | 20 %            |
| Peak Coverage:        | 11 %            |
| Protein Localisation: | 91 ... 99       |

| b ion      |               |     |   | y ion    |               |            |
|------------|---------------|-----|---|----------|---------------|------------|
| Δ dalton   | mass          | seq |   | Δ dalton | mass          |            |
|            | 102.054954941 | 1   | T | 8        |               |            |
| +0.0826097 | 262.085603142 | 2   | C | 7        | 1046.3917575  |            |
|            | 391.128196238 | 3   | E | 6        | 886.3611093   | +0.0043082 |
|            | 520.170789334 | 4   | E | 5        | 757.318516204 | +0.0146137 |
|            | 607.202817744 | 5   | S | 4        | 628.275923108 | +0.0735032 |
|            | 694.234846154 | 6   | S | 3        | 541.243894698 |            |
|            | 841.303260071 | 7   | F | 2        | 454.211866288 |            |
| -0.0754244 | 1001.33390827 | 8   | C | 1        | 307.143452372 | +0.1077073 |
|            |               | 9   | K | 0        | 147.112804171 |            |

Scan number 5724 Raw file LNCAP\_Silac\_23F10\_set3\_04  
 Method ITMS; CID Pepti... 109.44

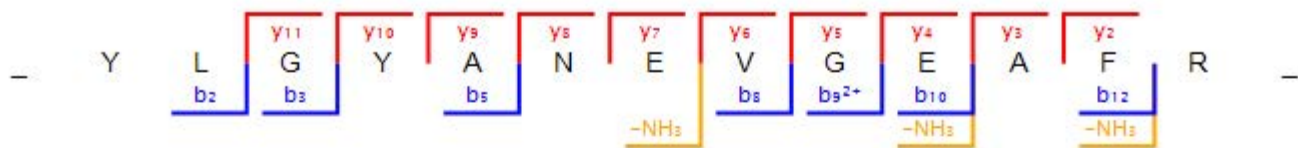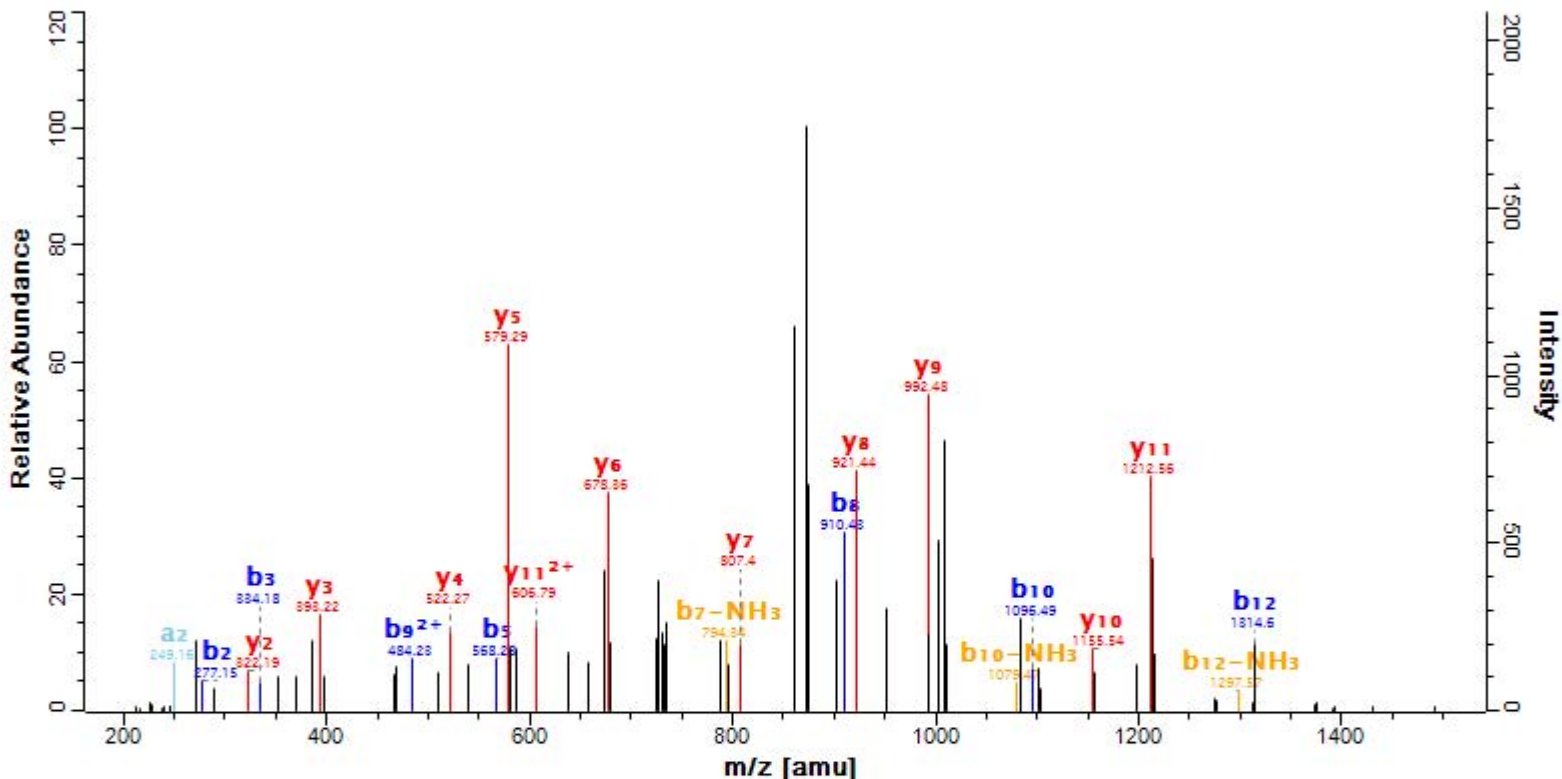

**precursor information**

|                   |                 |
|-------------------|-----------------|
| Mass:             | 1487.70549      |
| m/z:              | 744.86002       |
| Charge:           | 2+              |
| Retentiontime:    | 37.451843261718 |
| Score:            | 109.4421        |
| Mass Error [ppm]: | 0.669           |
| PEP:              | 7.3304E-06      |
| Precursor Type:   | MULTI           |

**general information**

|                       |           |
|-----------------------|-----------|
| Annotation:           | 11 of 13  |
| AminoAcids Coverage:  | 85 %      |
| Intensity Coverage:   | 36 %      |
| Peak Coverage:        | 27 %      |
| Protein Localisation: | 21 ... 33 |

| a ion         | b <sup>2+</sup> ion | b ion         |        | y ion         | y <sup>2+</sup> ion |
|---------------|---------------------|---------------|--------|---------------|---------------------|
| Δ dalton mass | Δ dalton mass       | Δ dalton mass | seq    | Δ dalton mass | Δ dalton mass       |
| 136.1         | 164.1               | 164.1         | 1 Y 12 |               |                     |
| +0.01249.2    | 277.2               | +0.084277.2   | 2 L 11 | 1326          | 1326                |
| 306.2         | 334.2               | +0.156334.2   | 3 G 10 | 1213          | -0.06 606.8 -0.12   |
| 469.2         | 497.2               | 497.2         | 4 Y 9  | 1156          | +0.1041156          |
| 540.3         | 568.3               | -0.11 568.3   | 5 A 8  | 992.5         | +0 992.5            |
| 654.3         | 682.3               | 682.3         | 6 N 7  | 921.4         | +0 921.4            |
| 783.4         | 811.4               | 811.4         | 7 E 6  | 807.4         | +0.156807.4         |
| 882.4         | 910.4               | +0.39 910.4   | 8 V 5  | 678.4         | -0.01 678.4         |
| 939.5         | -0.07 484.2         | 967.5         | 9 G 4  | 579.3         | +0.106579.3         |
| 1068          | 1096                | +0.0351096    | 10 E 3 | 522.3         | +0.029522.3         |
| 1140          | 1168                | 1168          | 11 A 2 | 393.2         | +0.123393.2         |
| 1287          | 1315                | -0.26 1315    | 12 F 1 | 322.2         | +0.074322.2         |
|               |                     |               | 13 R 0 | 175.1         | 175.1               |

Scan number 5879 Raw file LNCAP\_Silac\_23F10\_set3\_04  
 Method ITMS: CID Pepti... 88.09

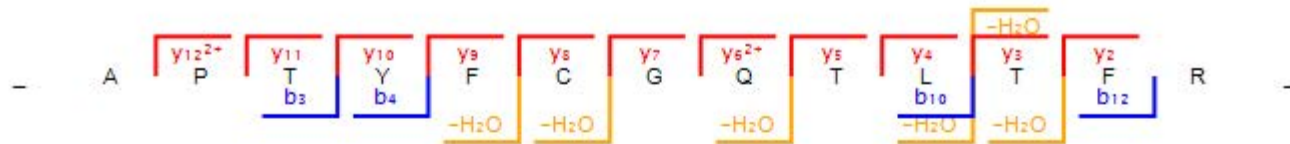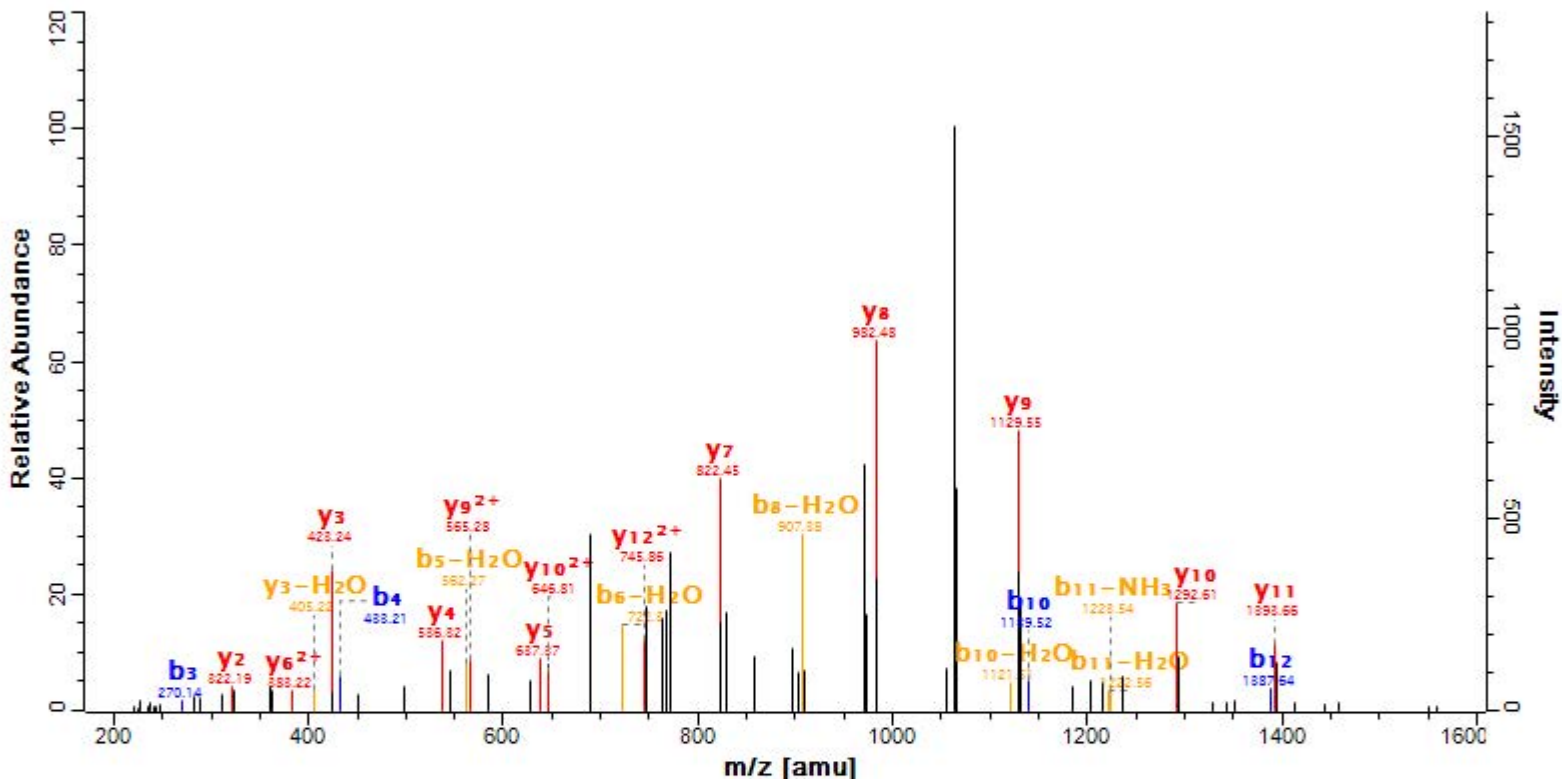

**precursor information**

|                   |                 |
|-------------------|-----------------|
| Mass:             | 1560.74063      |
| m/z:              | 781.37759       |
| Charge:           | 2+              |
| Retentiontime:    | 38.270416259765 |
| Score:            | 88.09225        |
| Mass Error [ppm]: | 0.72451         |
| PEP:              | 0.00030761      |
| Precursor Type:   | MULTI           |

**general information**

|                       |             |
|-----------------------|-------------|
| Annotation:           | 11 of 13    |
| AminoAcids Coverage:  | 85 %        |
| Intensity Coverage:   | 37 %        |
| Peak Coverage:        | 28 %        |
| Protein Localisation: | 308 ... 320 |

| b ion     |          |    |     |    | y ion    |           | y <sup>2+</sup> ion |           |
|-----------|----------|----|-----|----|----------|-----------|---------------------|-----------|
| Δ dalton  | mass     |    | seq |    | Δ dalton | mass      | Δ dalton            | mass      |
|           | 72.04439 | 1  | A   | 12 |          |           |                     |           |
|           | 169.0972 | 2  | P   | 11 | 1490.71  |           | 745.8585            | -0.09992  |
| +0.057041 | 270.1448 | 3  | T   | 10 | 1393.657 | -0.00883  | 1393.657            |           |
| +0.042022 | 433.2082 | 4  | Y   | 9  | 1292.609 | -0.03549  | 646.8082            | -0.31319  |
|           | 580.2766 | 5  | F   | 8  | 1129.546 | +0.023568 | 565.2766            | +0.057584 |
|           | 740.3072 | 6  | C   | 7  | 982.4775 | +0.013429 | 982.4775            |           |
|           | 797.3287 | 7  | G   | 6  | 822.4468 | -0.09887  | 822.4468            |           |
|           | 925.3873 | 8  | Q   | 5  | 765.4254 |           | 383.2163            | +0.192615 |
|           | 1026.435 | 9  | T   | 4  | 637.3668 | +0.100193 | 637.3668            |           |
| +0.160925 | 1139.519 | 10 | L   | 3  | 536.3191 | +0.020125 | 536.3191            |           |
|           | 1240.567 | 11 | T   | 2  | 423.235  | -0.0003   | 423.235             |           |
| +0.044466 | 1387.635 | 12 | F   | 1  | 322.1874 | +0.105236 | 322.1874            |           |
|           |          | 13 | R   | 0  | 175.119  |           | 175.119             |           |

Scan number 6125 Raw file LNCAP\_Silac\_23F10\_set3\_04  
 Method ITMS; CID Pepti... 112.42

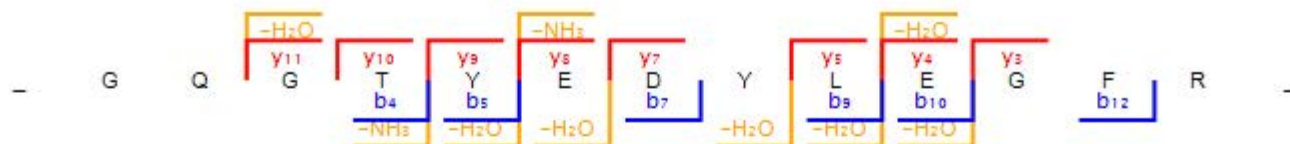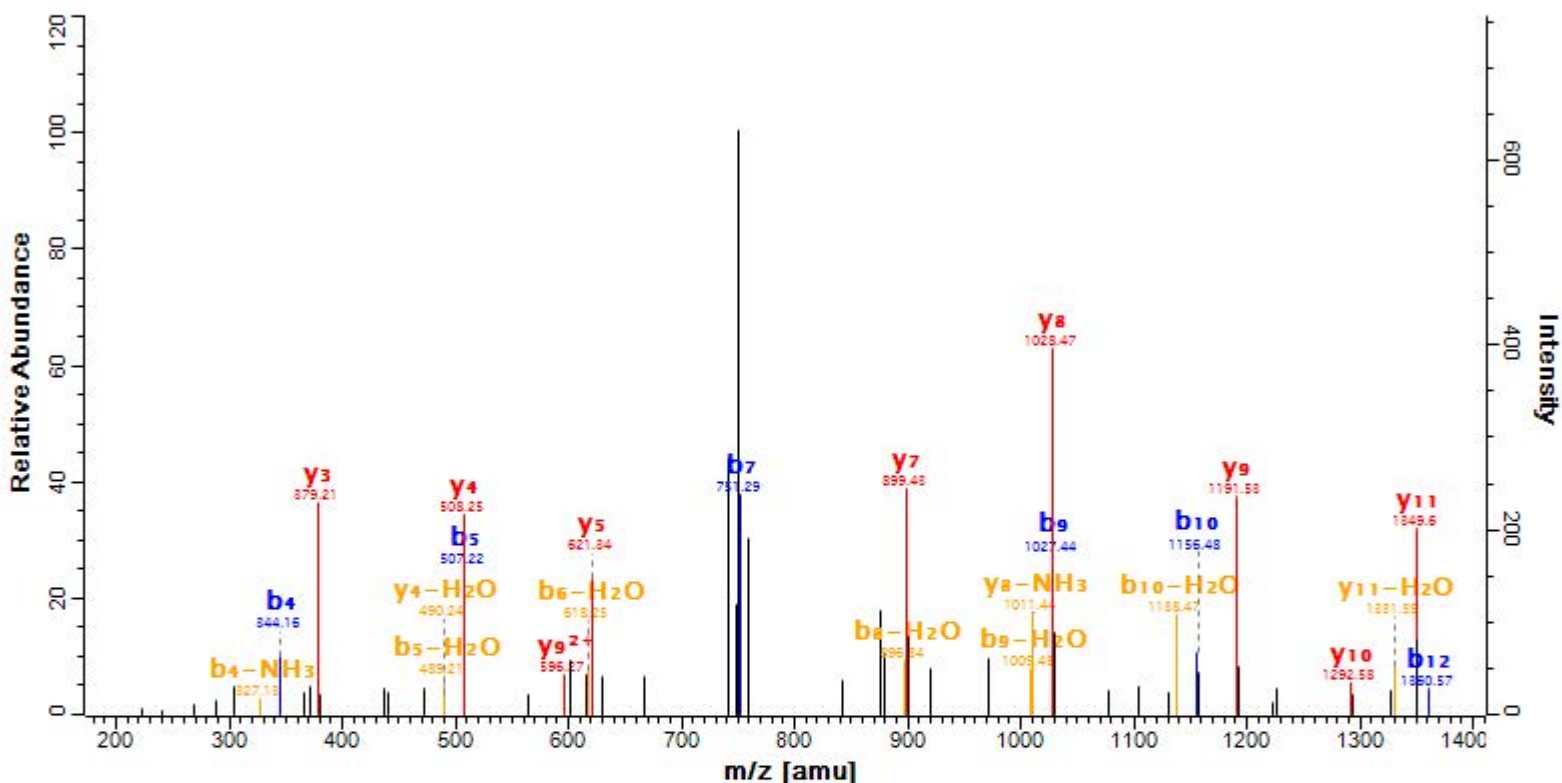

**precursor information**

|                   |                 |
|-------------------|-----------------|
| Mass:             | 1533.67408      |
| m/z:              | 767.84432       |
| Charge:           | 2+              |
| Retentiontime:    | 39.631034851074 |
| Score:            | 112.4229        |
| Mass Error [ppm]: | 0.31957         |
| PEP:              | 5.3907E-06      |
| Precursor Type:   | MULTI           |

**general information**

|                       |             |
|-----------------------|-------------|
| Annotation:           | 10 of 13    |
| AminoAcids Coverage:  | 77 %        |
| Intensity Coverage:   | 51 %        |
| Peak Coverage:        | 38 %        |
| Protein Localisation: | 139 ... 151 |

| b ion     |          |     |   | y ion    |          | y <sup>2+</sup> ion |          |           |
|-----------|----------|-----|---|----------|----------|---------------------|----------|-----------|
| Δ dalton  | mass     | seq |   | Δ dalton | mass     | Δ dalton            | mass     |           |
|           | 58.02874 | 1   | G | 12       |          |                     |          |           |
|           | 186.0873 | 2   | Q | 11       | 1477.659 |                     | 1477.659 |           |
|           | 243.1088 | 3   | G | 10       | 1349.601 | +0.036507           | 1349.601 |           |
| +0.082127 | 344.1565 | 4   | T | 9        | 1292.579 | +0.010485           | 1292.579 |           |
| +0.047973 | 507.2198 | 5   | Y | 8        | 1191.532 | +0.018125           | 596.2695 | +0.091423 |
|           | 636.2624 | 6   | E | 7        | 1028.468 | +0.105623           | 1028.468 |           |
| -0.05794  | 751.2893 | 7   | D | 6        | 899.4258 | -0.06809            | 899.4258 |           |
|           | 914.3527 | 8   | Y | 5        | 784.3988 |                     | 784.3988 |           |
| -0.15669  | 1027.437 | 9   | L | 4        | 621.3355 | +0.098229           | 621.3355 |           |
| -0.0871   | 1156.479 | 10  | E | 3        | 508.2514 | +0.08012            | 508.2514 |           |
|           | 1213.501 | 11  | G | 2        | 379.2088 | +0.021761           | 379.2088 |           |
| -0.11069  | 1360.569 | 12  | F | 1        | 322.1874 |                     | 322.1874 |           |
|           |          | 13  | R | 0        | 175.119  |                     | 175.119  |           |

Scan number 6168 Raw file LNCAP\_Silac\_23F10\_set3\_04  
 Method ITMS; CID Pepti... 99.01

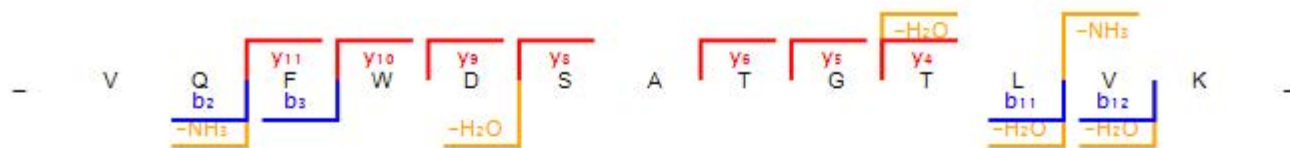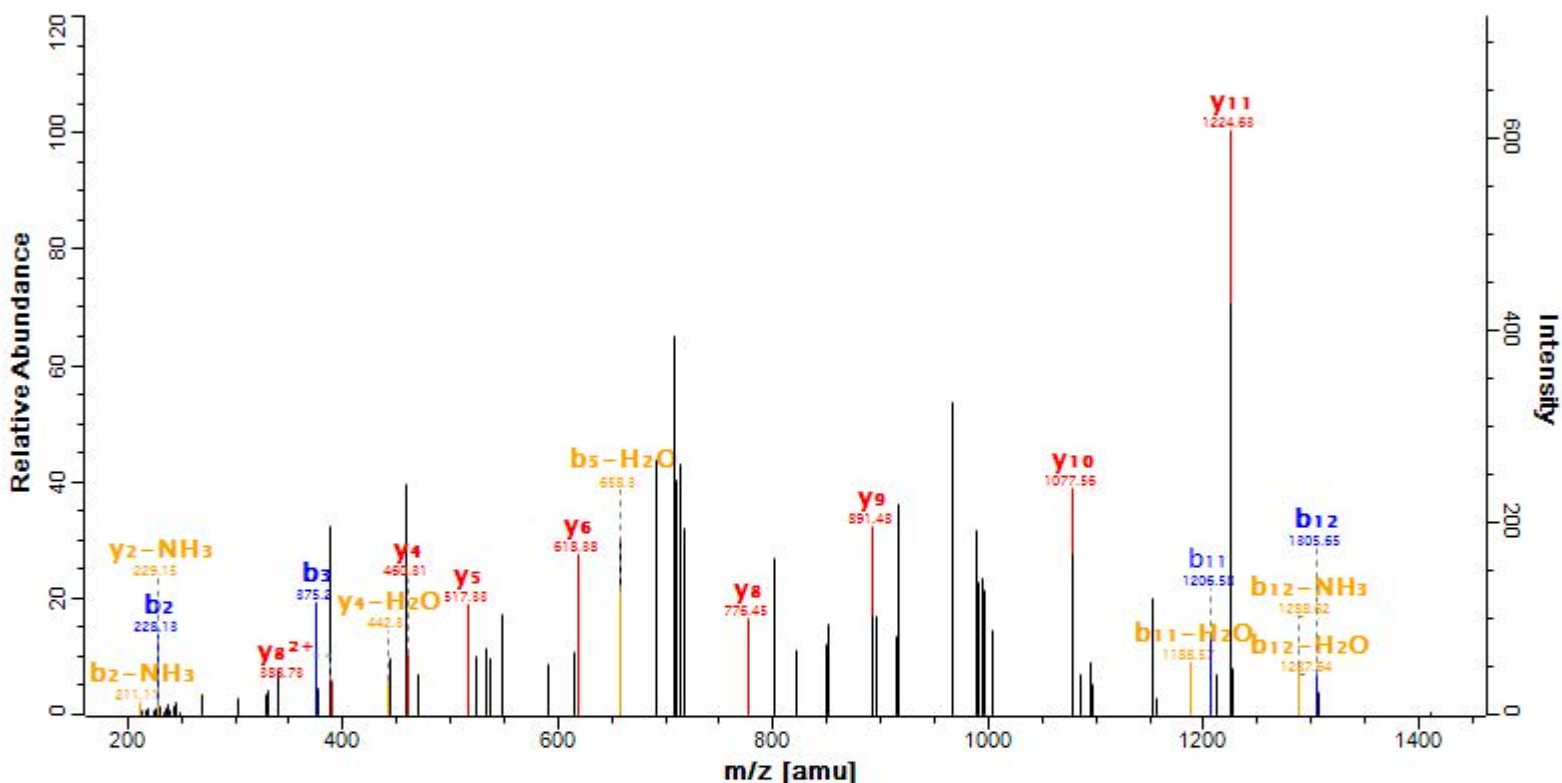

precursor information

|                   |                 |
|-------------------|-----------------|
| Mass:             | 1450.74639      |
| m/z:              | 726.38047       |
| Charge:           | 2+              |
| Retentiontime:    | 39.868671417236 |
| Score:            | 99.01066        |
| Mass Error [ppm]: | 0.52057         |
| PEP:              | 0.00381         |
| Precursor Type:   | ISO             |

general information

|                       |             |
|-----------------------|-------------|
| Annotation:           | 10 of 13    |
| AminoAcids Coverage:  | 77 %        |
| Intensity Coverage:   | 27 %        |
| Peak Coverage:        | 22 %        |
| Protein Localisation: | 218 ... 230 |

| b ion     |          |     |   | y ion    |          | y <sup>2+</sup> ion |          |           |
|-----------|----------|-----|---|----------|----------|---------------------|----------|-----------|
| Δ dalton  | mass     | seq |   | Δ dalton | mass     | Δ dalton            | mass     |           |
|           | 100.0757 | 1   | V | 12       |          |                     |          |           |
| +0.01185  | 228.1343 | 2   | Q | 11       | 1352.684 |                     | 1352.684 |           |
| +0.117753 | 375.2027 | 3   | F | 10       | 1224.626 | -0.09845            | 1224.626 |           |
|           | 561.282  | 4   | W | 9        | 1077.558 | +0.022455           | 1077.558 |           |
|           | 676.3089 | 5   | D | 8        | 891.4782 | +0.235862           | 891.4782 |           |
|           | 763.341  | 6   | S | 7        | 776.4512 | +0.045642           | 388.7293 | +0.433764 |
|           | 834.3781 | 7   | A | 6        | 689.4192 |                     | 689.4192 |           |
|           | 935.4258 | 8   | T | 5        | 618.3821 | -0.18746            | 618.3821 |           |
|           | 992.4472 | 9   | G | 4        | 517.3344 | -0.00148            | 517.3344 |           |
|           | 1093.495 | 10  | T | 3        | 460.313  | -0.10245            | 460.313  |           |
| -0.08092  | 1206.579 | 11  | L | 2        | 359.2653 |                     | 359.2653 |           |
| +0.069296 | 1305.647 | 12  | V | 1        | 246.1812 |                     | 246.1812 |           |
|           |          | 13  | K | 0        | 147.1128 |                     | 147.1128 |           |

Scan number 6567 Raw file LNCAP\_Silac\_23F10\_set3\_04  
 Method ITMS; CID Pepti... 156.13

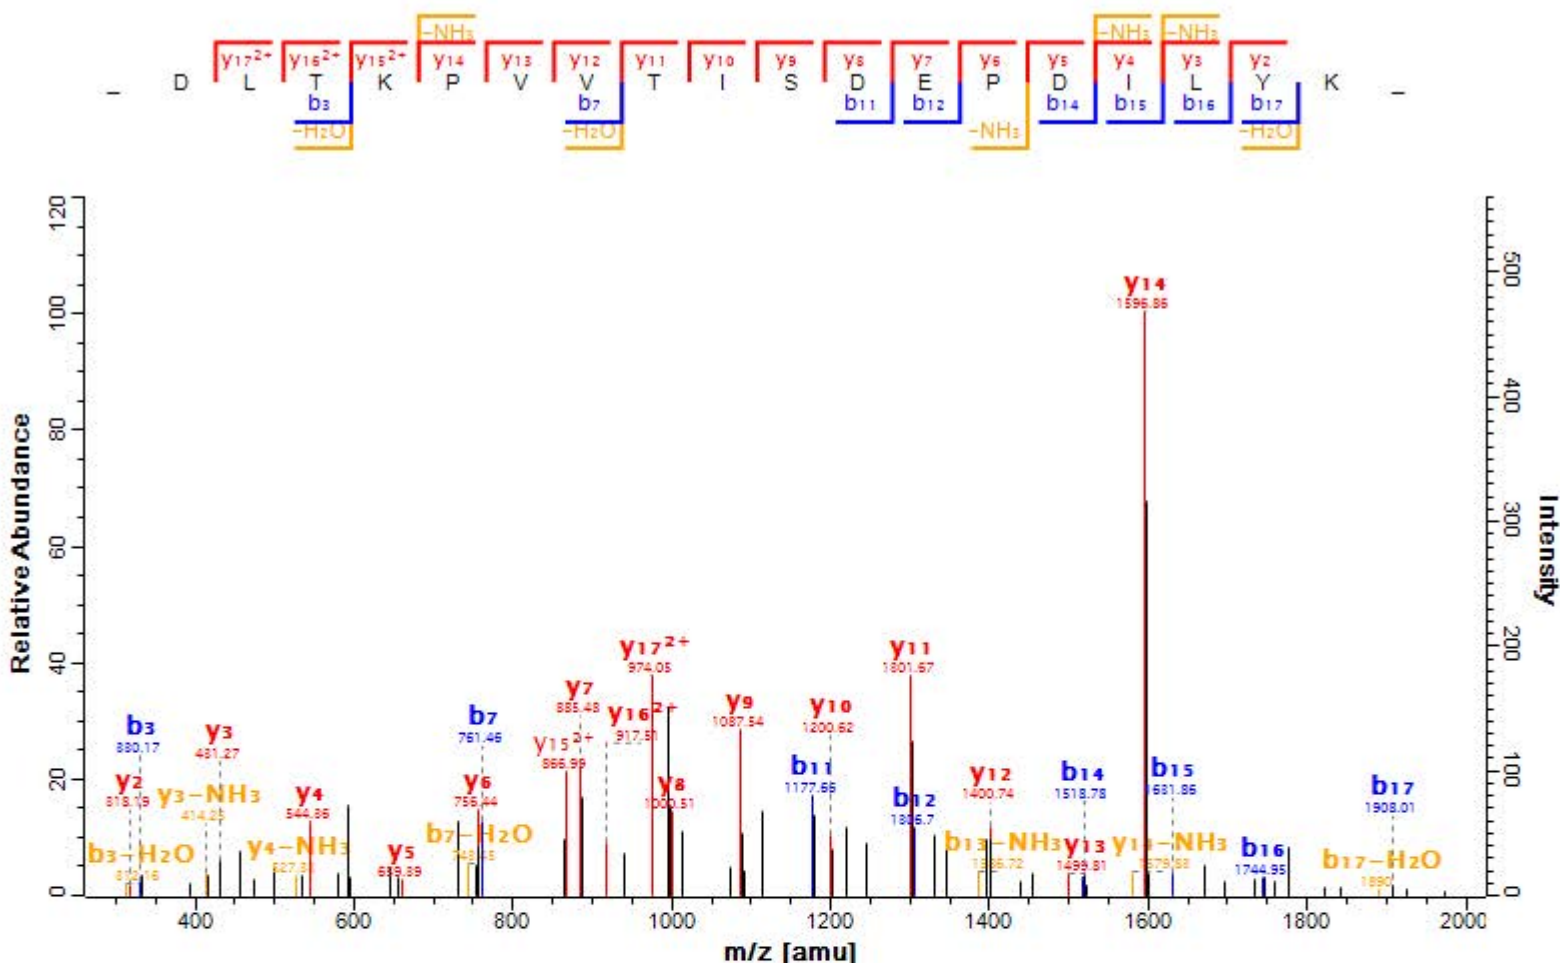

precursor information

|                   |                 |
|-------------------|-----------------|
| Mass:             | 2045.09355      |
| m/z:              | 1023.55405      |
| Charge:           | 2+              |
| Retentiontime:    | 42.148601531982 |
| Score:            | 156.13          |
| Mass Error [ppm]: | 0.15258         |
| PEP:              | 1.5305E-23      |
| Precursor Type:   | MULTI           |

general information

|                       |           |
|-----------------------|-----------|
| Annotation:           | 16 of 18  |
| AminoAcids Coverage:  | 89 %      |
| Intensity Coverage:   | 44 %      |
| Peak Coverage:        | 33 %      |
| Protein Localisation: | 57 ... 74 |

| b ion     |          |     |   | y ion    |          | y <sup>2+</sup> ion |           |
|-----------|----------|-----|---|----------|----------|---------------------|-----------|
| Δ dalton  | mass     | seq |   | Δ dalton | mass     | Δ dalton            | mass      |
|           | 116.0342 | 1   | D | 17       |          |                     |           |
|           | 229.1183 | 2   | L | 16       | 1947.102 | 974.0546            | +0.249698 |
| +0.067314 | 330.166  | 3   | T | 15       | 1834.018 | 917.5126            | -0.16469  |
|           | 466.2751 | 4   | K | 14       | 1732.97  | 866.9888            | +0.088641 |
|           | 563.3279 | 5   | P | 13       | 1596.861 | -0.18028            | 1596.861  |
|           | 662.3963 | 6   | V | 12       | 1499.808 | +0.052661           | 1499.808  |
| +0.127081 | 761.4647 | 7   | V | 11       | 1400.74  | -0.20852            | 1400.74   |
|           | 862.5124 | 8   | T | 10       | 1301.671 | -0.11129            | 1301.671  |
|           | 975.5965 | 9   | I | 9        | 1200.624 | +0.161239           | 1200.624  |
|           | 1062.628 | 10  | S | 8        | 1087.54  | -0.00811            | 1087.54   |
| +0.062344 | 1177.655 | 11  | D | 7        | 1000.508 | -0.05189            | 1000.508  |
| -0.05361  | 1306.698 | 12  | E | 6        | 885.4808 | +0.045974           | 885.4808  |
|           | 1403.751 | 13  | P | 5        | 756.4382 | +0.090764           | 756.4382  |
| -0.25905  | 1518.778 | 14  | D | 4        | 659.3854 | +0.080784           | 659.3854  |
| -0.41795  | 1631.862 | 15  | I | 3        | 544.3585 | +0.04248            | 544.3585  |
| -0.18695  | 1744.946 | 16  | L | 2        | 431.2744 | +0.002552           | 431.2744  |
| -0.42874  | 1908.009 | 17  | Y | 1        | 318.1903 | +0.019843           | 318.1903  |
|           |          | 18  | K | 0        | 155.127  |                     | 155.127   |

Scan number 6731 Raw file LNCAP\_Silac\_23F10\_set3\_04  
 Method ITMS; CID Pepti... 215.38

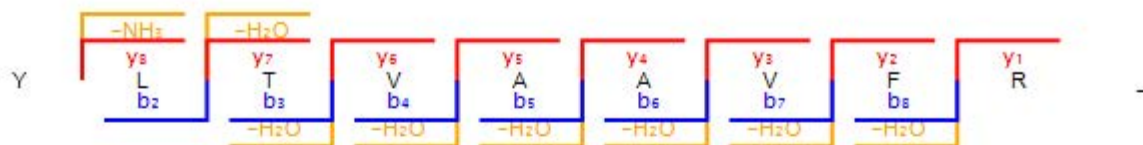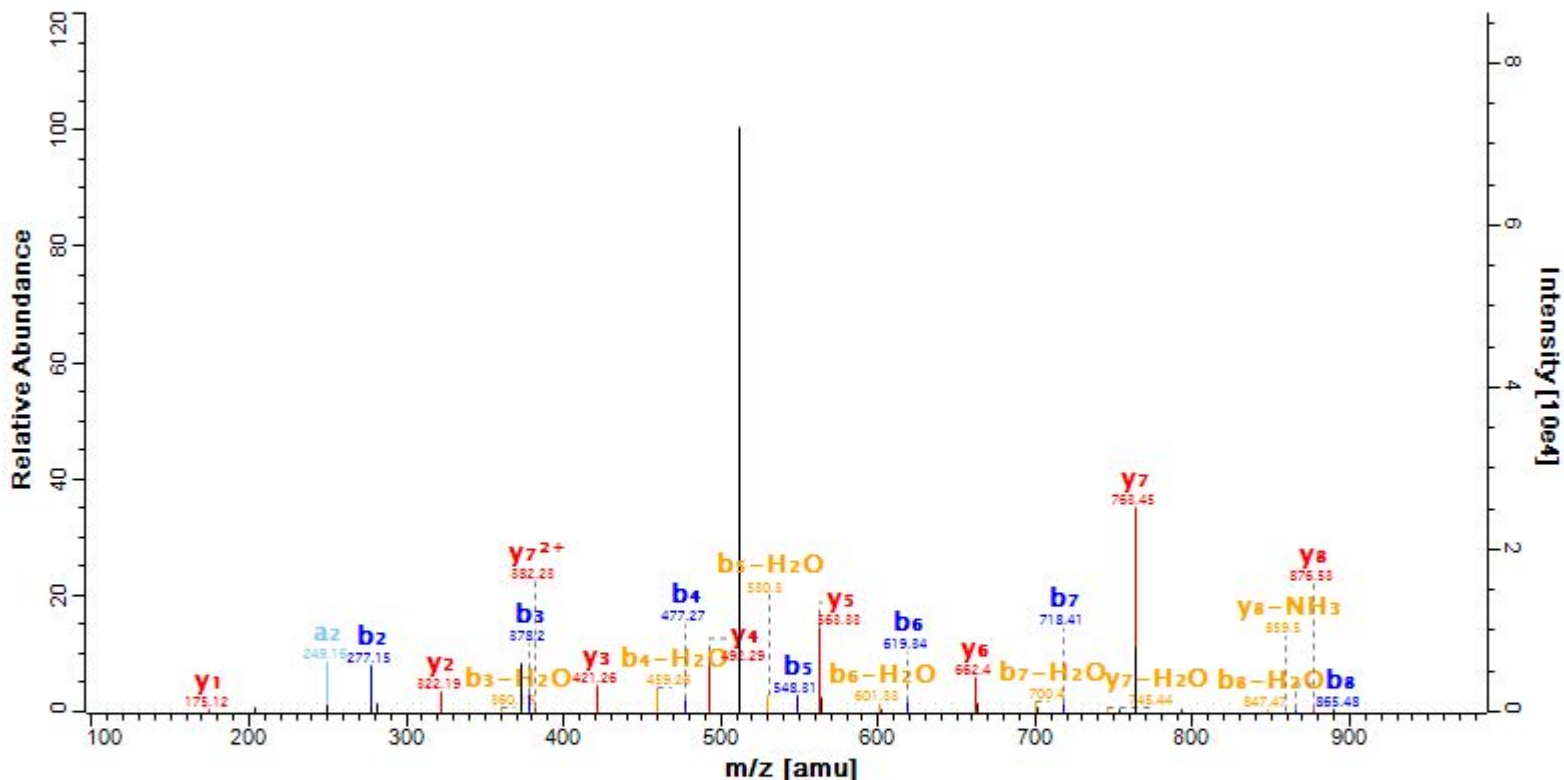

#### precursor information

|                       |                 |
|-----------------------|-----------------|
| Mass:                 | 1038.58623      |
| m/z:                  | 520.30039       |
| Charge:               | 2+              |
| Retentiontime:        | 43.083042144775 |
| Score:                | 215.3823        |
| Mass Error [ppm]:     | 0.015603        |
| PEP:                  | 1.0244E-13      |
| Precursor Type:       | MULTI           |
| Annotation:           | 8 of 9          |
| AminoAcids Coverage:  | 89 %            |
| Intensity Coverage:   | 46 %            |
| Peak Coverage:        | 40 %            |
| Protein Localisation: | 310 ... 318     |

| a ion    |        | b ion    |        |   |     |          | y ion  |          | y <sup>2+</sup> ion |  |
|----------|--------|----------|--------|---|-----|----------|--------|----------|---------------------|--|
| Δ dalton | mass   | Δ dalton | mass   |   | seq | Δ dalton | mass   | Δ dalton | mass                |  |
|          | 136.08 |          | 164.07 | 1 | Y   | 8        |        |          |                     |  |
| -0.009   | 249.16 | -0.032   | 277.15 | 2 | L   | 7        | 876.53 | -0.032   | 876.53              |  |
|          | 350.21 | -0.015   | 378.2  | 3 | T   | 6        | 763.45 | +0.0232  | 382.23              |  |
|          | 449.28 | -0.132   | 477.27 | 4 | V   | 5        | 662.4  | +0.0356  | 662.4               |  |
|          | 520.31 | -0.098   | 548.31 | 5 | A   | 4        | 563.33 | +0.013   | 563.33              |  |
|          | 591.35 | -0.034   | 619.34 | 6 | A   | 3        | 492.29 | +0.0166  | 492.29              |  |
|          | 690.42 | +0.0915  | 718.41 | 7 | V   | 2        | 421.26 | +0.0677  | 421.26              |  |
|          | 837.49 | +0.0353  | 865.48 | 8 | F   | 1        | 322.19 | +0.082   | 322.19              |  |
|          |        |          |        | 9 | R   | 0        | 175.12 | +0.0493  | 175.12              |  |



Scan number 6760 Raw file LNCAP\_Silac\_23F10\_set3\_04  
 Method ITMS; CID Pepti... 102.39

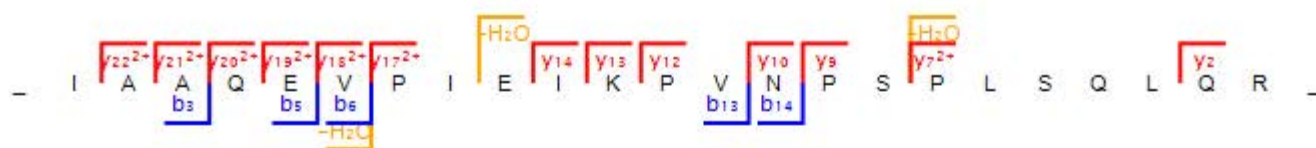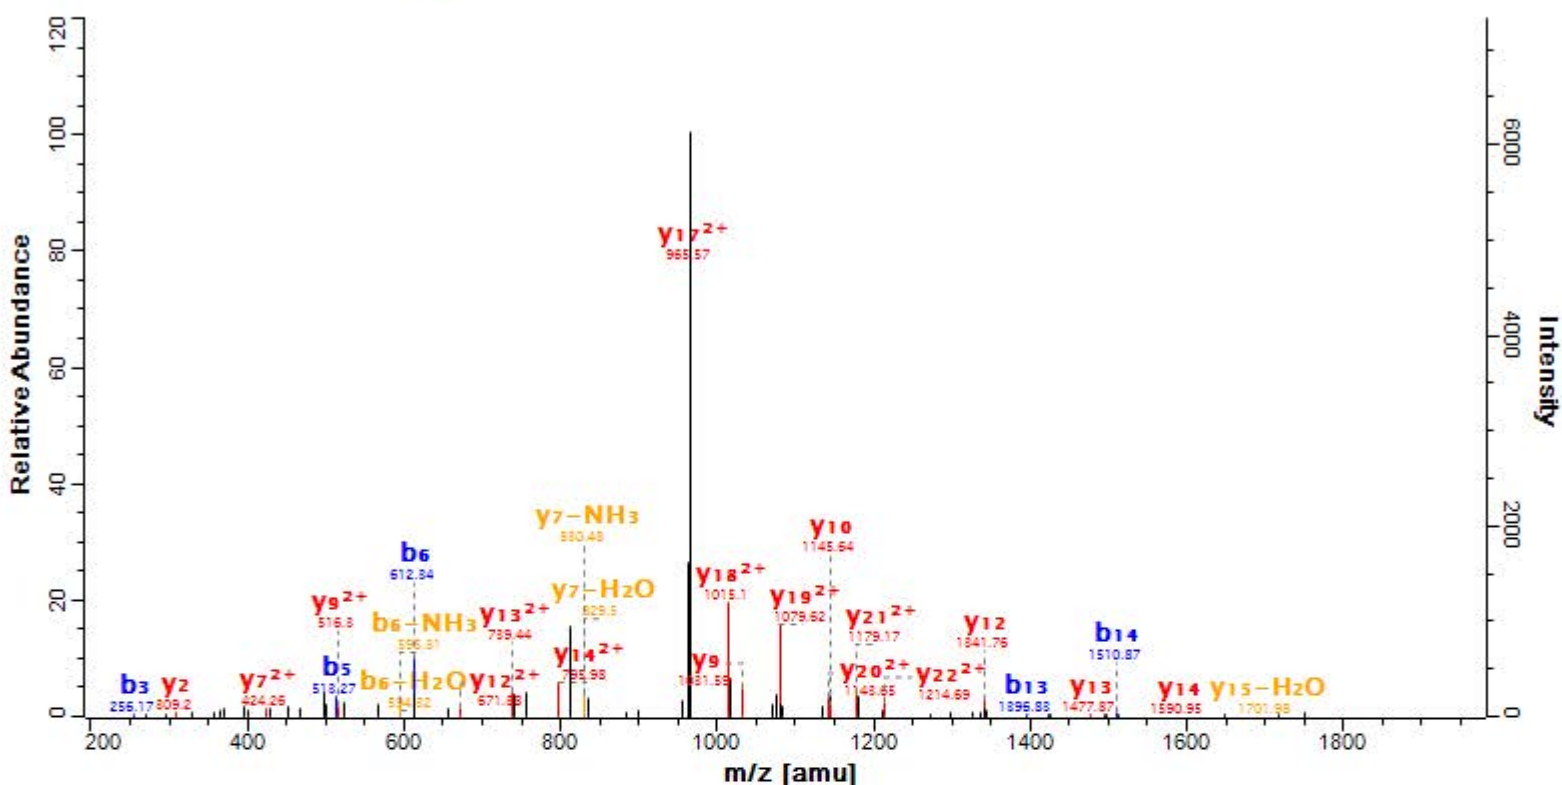

precursor information

|                   |                 |
|-------------------|-----------------|
| Mass:             | 2526.41744      |
| m/z:              | 843.14642       |
| Charge:           | 3+              |
| Retentiontime:    | 43.252574920654 |
| Score:            | 102.3903        |
| Mass Error [ppm]: | 0.18485         |
| PEP:              | 8.8874E-08      |
| Precursor Type:   | MULTI           |

general information

|                       |             |
|-----------------------|-------------|
| Annotation:           | 15 of 23    |
| AminoAcids Coverage:  | 65 %        |
| Intensity Coverage:   | 42 %        |
| Peak Coverage:        | 31 %        |
| Protein Localisation: | 178 ... 200 |

| b ion     |          |     |   | y ion    |          | y <sup>2+</sup> ion |                    |
|-----------|----------|-----|---|----------|----------|---------------------|--------------------|
| Δ dalton  | mass     | seq |   | Δ dalton | mass     | Δ dalton            | mass               |
|           | 114.0913 | 1   | I | 22       |          |                     |                    |
|           | 185.1285 | 2   | A | 21       | 2428.375 |                     | 1214.691 +0.325219 |
| -0.00984  | 256.1656 | 3   | A | 20       | 2357.337 |                     | 1179.172 -0.0676   |
|           | 384.2241 | 4   | Q | 19       | 2286.3   |                     | 1143.654 -0.14487  |
| +0.050034 | 513.2667 | 5   | E | 18       | 2158.242 |                     | 1079.624 +0.281758 |
| +0.009147 | 612.3352 | 6   | V | 17       | 2029.199 |                     | 1015.103 +0.302871 |
|           | 709.3879 | 7   | P | 16       | 1930.131 |                     | 965.569 -0.01229   |
|           | 822.472  | 8   | I | 15       | 1833.078 |                     | 1833.078           |
|           | 951.5146 | 9   | E | 14       | 1719.994 |                     | 1719.994           |
|           | 1064.599 | 10  | I | 13       | 1590.951 | -0.02391            | 795.9793 +0.192048 |
|           | 1200.708 | 11  | K | 12       | 1477.867 | -0.13052            | 739.4372 +0.03425  |
|           | 1297.761 | 12  | P | 11       | 1341.758 | +0.005008           | 671.3827 +0.343104 |
| -0.08752  | 1396.829 | 13  | V | 10       | 1244.705 |                     | 1244.705           |
| -0.04878  | 1510.872 | 14  | N | 9        | 1145.637 | +0.175013           | 1145.637           |
|           | 1607.925 | 15  | P | 8        | 1031.594 | -0.09798            | 516.3006 +0.203111 |
|           | 1694.957 | 16  | S | 7        | 934.5412 |                     | 934.5412           |
|           | 1792.009 | 17  | P | 6        | 847.5092 |                     | 424.2582 +0.048912 |
|           | 1905.094 | 18  | L | 5        | 750.4564 |                     | 750.4564           |
|           | 1992.126 | 19  | S | 4        | 637.3723 |                     | 637.3723           |
|           | 2120.184 | 20  | Q | 3        | 550.3403 |                     | 550.3403           |
|           | 2233.268 | 21  | L | 2        | 422.2817 |                     | 422.2817           |
|           | 2361.327 | 22  | Q | 1        | 309.1977 | +0.196995           | 309.1977           |
|           |          | 23  | R | 0        | 181.1391 |                     | 181.1391           |

Scan number 6776 Raw file LNCAP\_Silac\_23F10\_set3\_04  
 Method ITMS; CID Pepti... 116.77

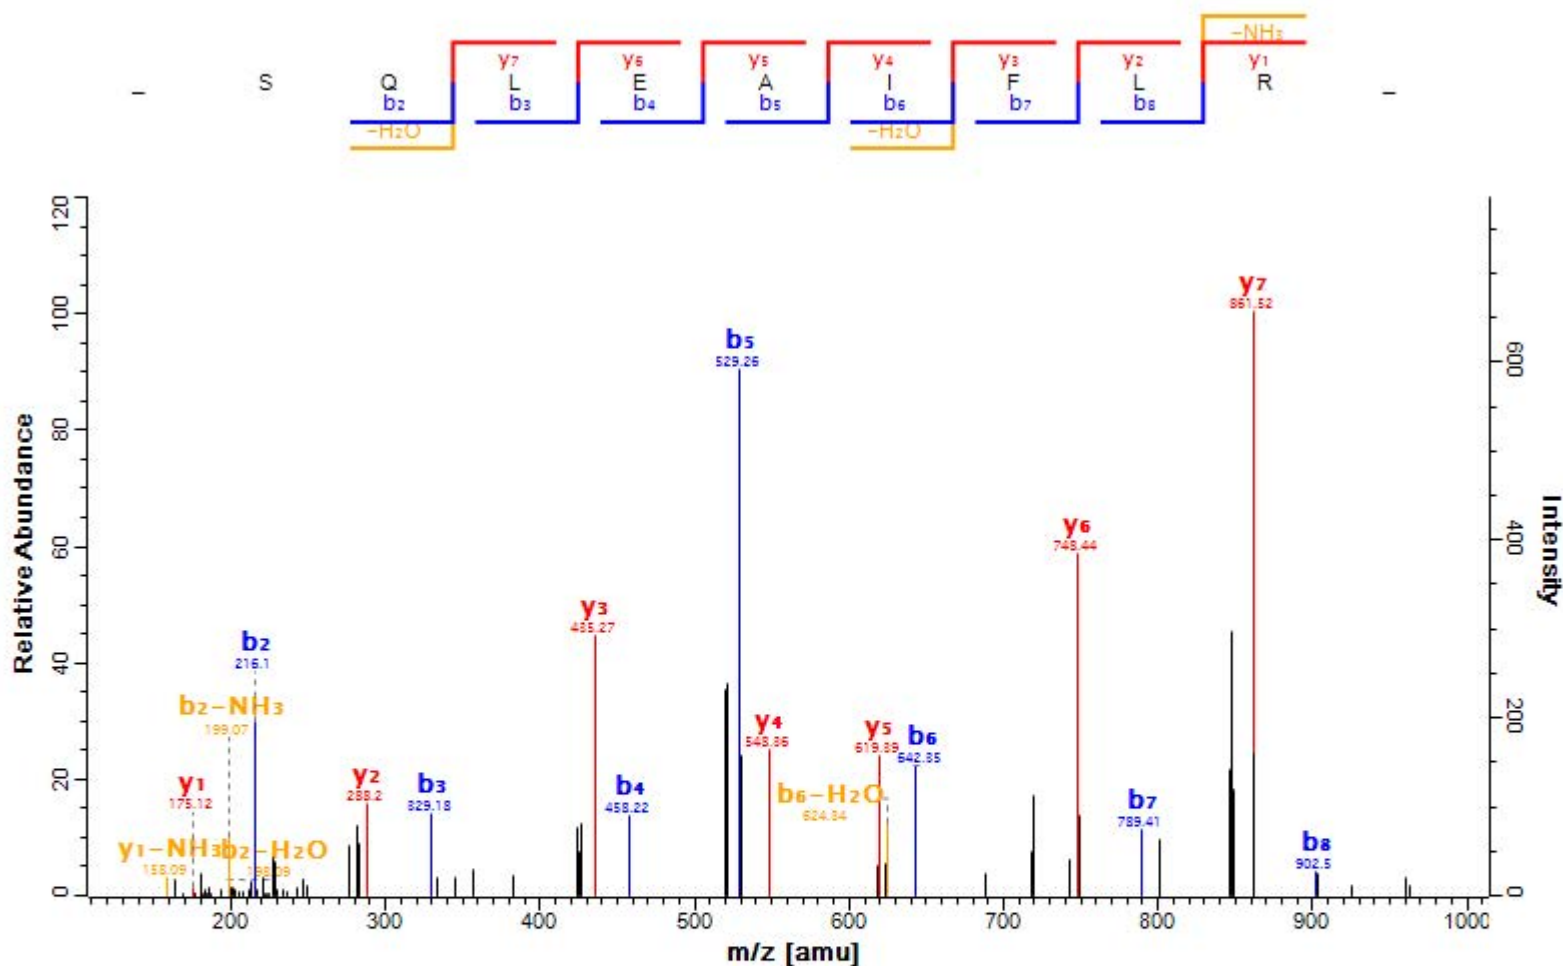

#### precursor information

|                       |                 |
|-----------------------|-----------------|
| Mass:                 | 1075.60264      |
| m/z:                  | 538.8086        |
| Charge:               | 2+              |
| Retentiontime:        | 43.347709655761 |
| Score:                | 116.7658        |
| Mass Error [ppm]:     | 0.044114        |
| PEP:                  | 0.0015824       |
| Precursor Type:       | MULTI           |
| Annotation:           | 8 of 9          |
| AminoAcids Coverage:  | 89 %            |
| Intensity Coverage:   | 52 %            |
| Peak Coverage:        | 21 %            |
| Protein Localisation: | 458 ... 466     |

| b ion           |               |     |   | y ion           |               |            |
|-----------------|---------------|-----|---|-----------------|---------------|------------|
| $\Delta$ dalton | mass          | seq |   | $\Delta$ dalton | mass          |            |
|                 | 88.039304876  | 1   | S | 8               |               |            |
| +0.0012692      | 216.097882388 | 2   | Q | 7               | 989.577842434 |            |
| +0.1137079      | 329.181946368 | 3   | L | 6               | 861.519264922 | -0.0290305 |
| +0.1048062      | 458.224539464 | 4   | E | 5               | 748.435200942 | +0.0881145 |
| +0.2426802      | 529.261653252 | 5   | A | 4               | 619.392607846 | +0.0841378 |
| +0.0962994      | 642.345717233 | 6   | I | 3               | 548.355494058 | +0.0538687 |
| +0.1506272      | 789.414131149 | 7   | F | 2               | 435.271430078 | +0.0923395 |
| -0.3163714      | 902.498195129 | 8   | L | 1               | 288.203016161 | -0.0886058 |
|                 |               | 9   | R | 0               | 175.118952181 | -0.2121834 |

Scan number 7063 Raw file LNCAP\_Silac\_23F10\_set3\_04  
 Method ITMS: CID Pepti... 130.1

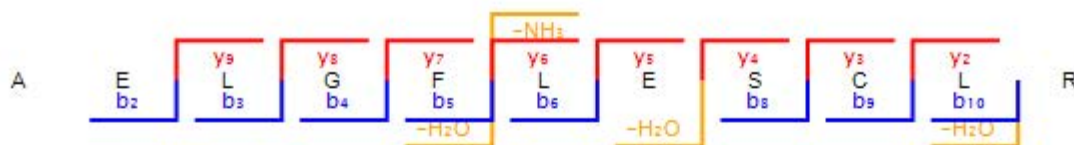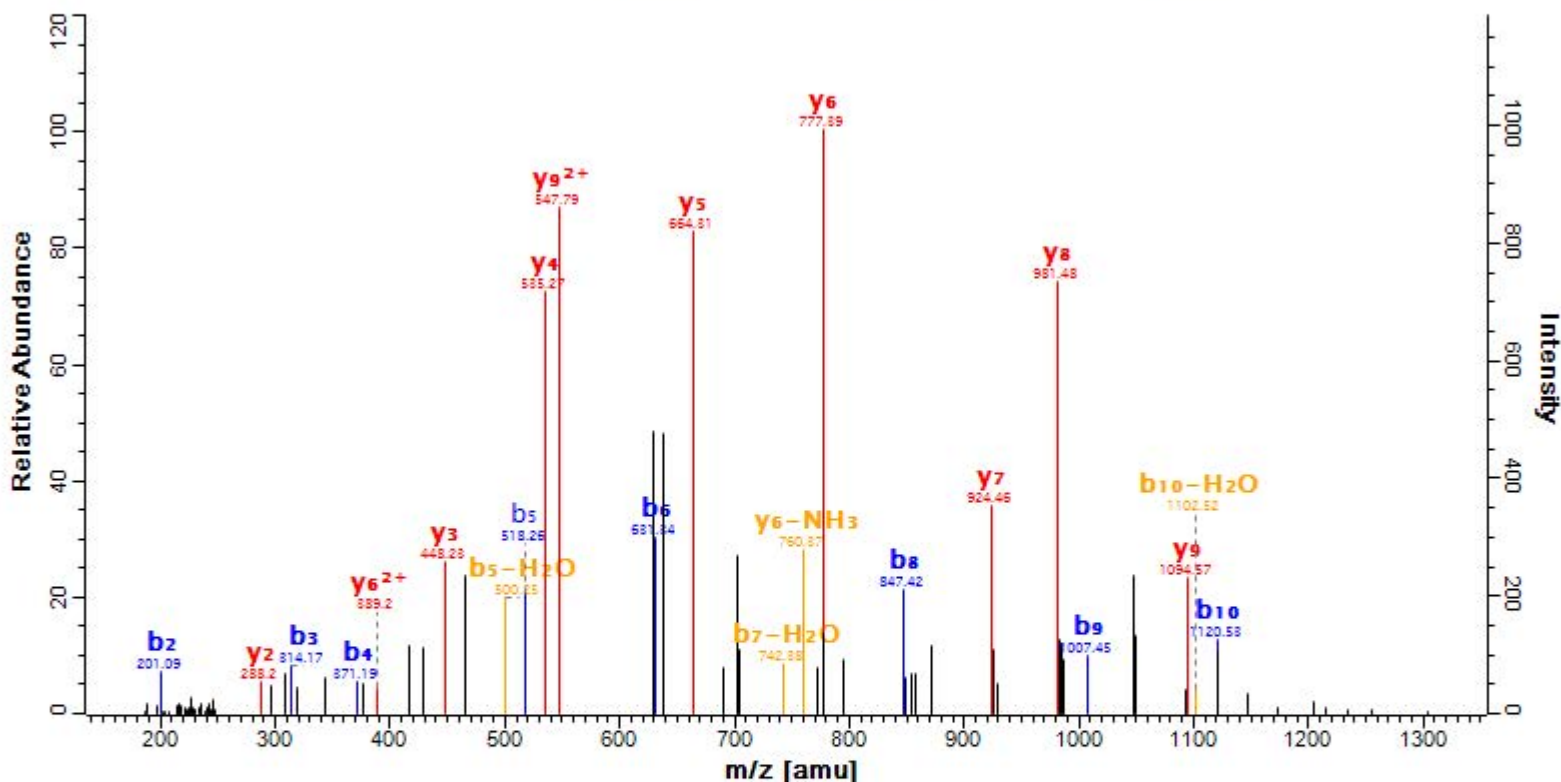

#### precursor information

|                   |                 |
|-------------------|-----------------|
| Mass:             | 1293.63858      |
| m/z:              | 647.82656       |
| Charge:           | 2+              |
| Retentiontime:    | 45.000183105468 |
| Score:            | 130.0978        |
| Mass Error [ppm]: | -0.11195        |
| PEP:              | 0.00018606      |
| Precursor Type:   | MULTI           |

#### general information

|                       |            |
|-----------------------|------------|
| Annotation:           | 9 of 11    |
| AminoAcids Coverage:  | 82 %       |
| Intensity Coverage:   | 59 %       |
| Peak Coverage:        | 24 %       |
| Protein Localisation: | 91 ... 101 |

| b ion     |          |     |   |    | y ion    |           | y <sup>2+</sup> ion |           |
|-----------|----------|-----|---|----|----------|-----------|---------------------|-----------|
| Δ dalton  | mass     | seq |   |    | Δ dalton | mass      | Δ dalton            | mass      |
|           | 72.04439 | 1   | A | 10 |          |           |                     |           |
| -0.09066  | 201.087  | 2   | E | 9  | 1223.609 |           | 1223.609            |           |
| +0.017429 | 314.171  | 3   | L | 8  | 1094.566 | +0.085808 | 547.7868            | +0.019185 |
| +0.068964 | 371.1925 | 4   | G | 7  | 981.4822 | -0.04699  | 981.4822            |           |
| +0.018372 | 518.2609 | 5   | F | 6  | 924.4608 | +0.033072 | 924.4608            |           |
| +0.155133 | 631.345  | 6   | L | 5  | 777.3923 | +0.008041 | 389.1998            | +0.051102 |
|           | 760.3876 | 7   | E | 4  | 664.3083 | +0.053225 | 664.3083            |           |
| +0.016669 | 847.4196 | 8   | S | 3  | 535.2657 | +0.072381 | 535.2657            |           |
| -0.00617  | 1007.45  | 9   | C | 2  | 448.2337 | +0.03898  | 448.2337            |           |
| -0.14126  | 1120.534 | 10  | L | 1  | 288.203  | -0.03645  | 288.203             |           |
|           |          | 11  | R | 0  | 175.119  |           | 175.119             |           |

Scan number 7125 Raw file LNCAP\_Silac\_23F10\_set3\_04  
 Method ITMS: CID Peptide 147.62

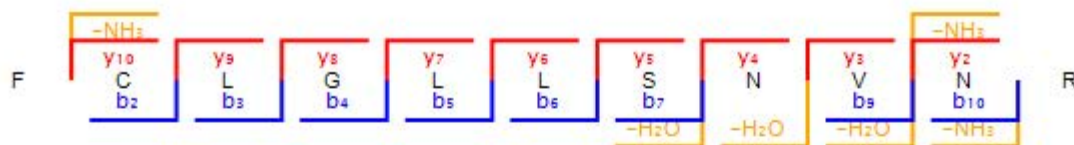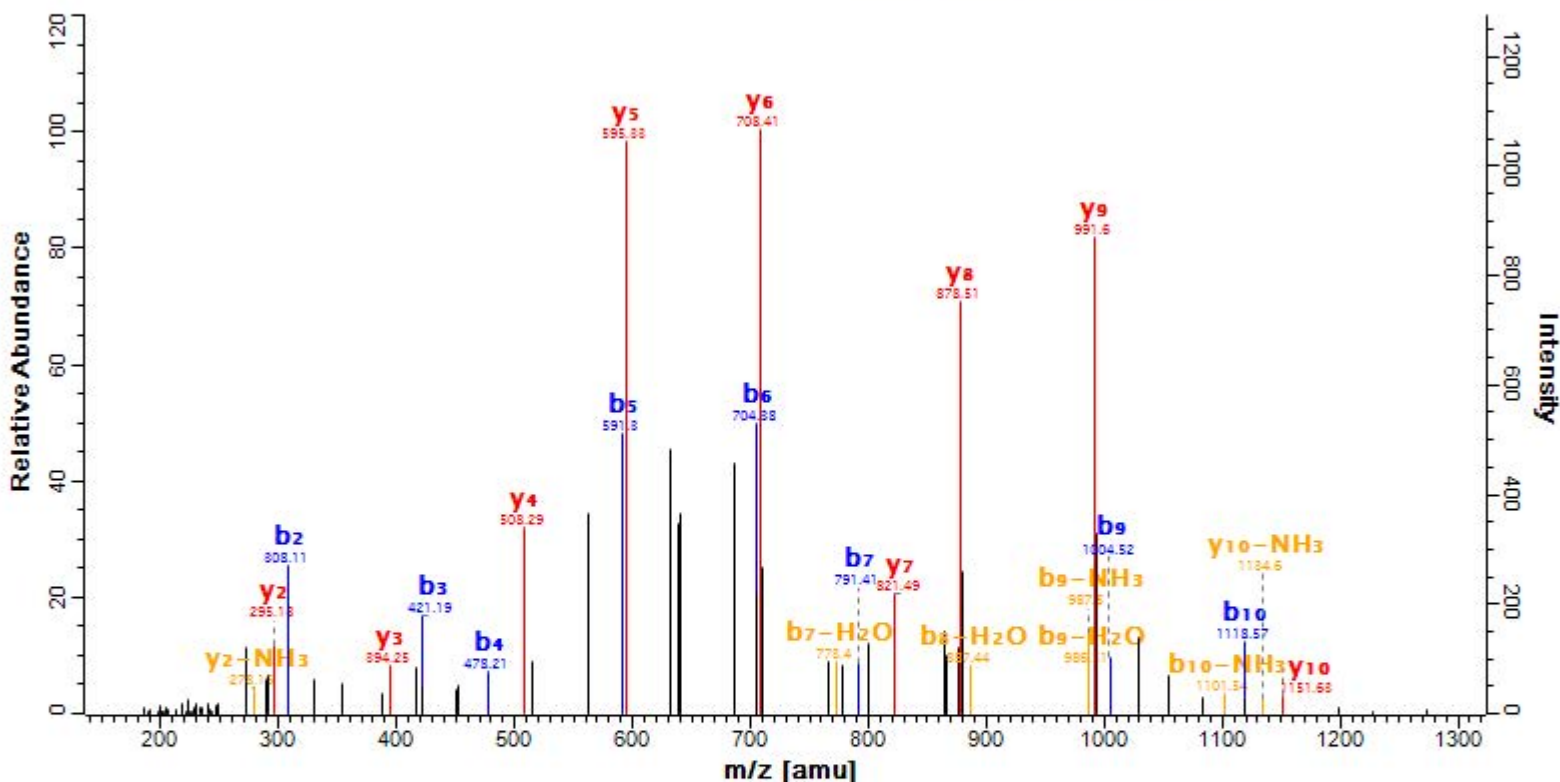

#### precursor information

|                   |                 |
|-------------------|-----------------|
| Mass:             | 1291.67074      |
| m/z:              | 646.84265       |
| Charge:           | 2+              |
| Retentiontime:    | 45.379699707031 |
| Score:            | 147.623         |
| Mass Error [ppm]: | 0.038388        |
| PEP:              | 4.7955E-05      |
| Precursor Type:   | MULTI           |

#### general information

|                       |             |
|-----------------------|-------------|
| Annotation:           | 9 of 11     |
| AminoAcids Coverage:  | 82 %        |
| Intensity Coverage:   | 58 %        |
| Peak Coverage:        | 28 %        |
| Protein Localisation: | 309 ... 319 |

| b ion      |               |    |     |    | y ion         |            |
|------------|---------------|----|-----|----|---------------|------------|
| Δ dalton   | mass          |    | seq |    | Δ dalton      | mass       |
|            | 148.075690383 | 1  | F   | 10 |               |            |
| -0.0299531 | 308.106338584 | 2  | C   | 9  | 1151.62968229 | -0.0085885 |
| +0.0837674 | 421.190402565 | 3  | L   | 8  | 991.599034093 | +0.0102799 |
| +0.0311147 | 478.211866288 | 4  | G   | 7  | 878.514970113 | +0.0272662 |
| +0.0315233 | 591.295930269 | 5  | L   | 6  | 821.493506389 | +0.0583125 |
| +0.03535   | 704.379994249 | 6  | L   | 5  | 708.409442409 | +0.0361142 |
| -0.0253649 | 791.412022659 | 7  | S   | 4  | 595.325378428 | +0.0913086 |
|            | 905.454950106 | 8  | N   | 3  | 508.293350018 | +0.0948946 |
| +0.0503664 | 1004.52336402 | 9  | V   | 2  | 394.250422571 | +0.0692796 |
| +0.0080494 | 1118.56629147 | 10 | N   | 1  | 295.182008655 | +0.124693  |
|            |               | 11 | R   | 0  | 181.139081208 |            |



Scan number 7215 Raw file LNCAP\_Silac\_23F10\_set3\_04  
 Method ITMS; CID Pepti... 95.21

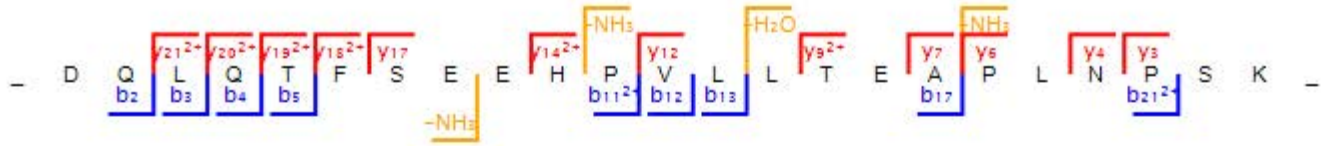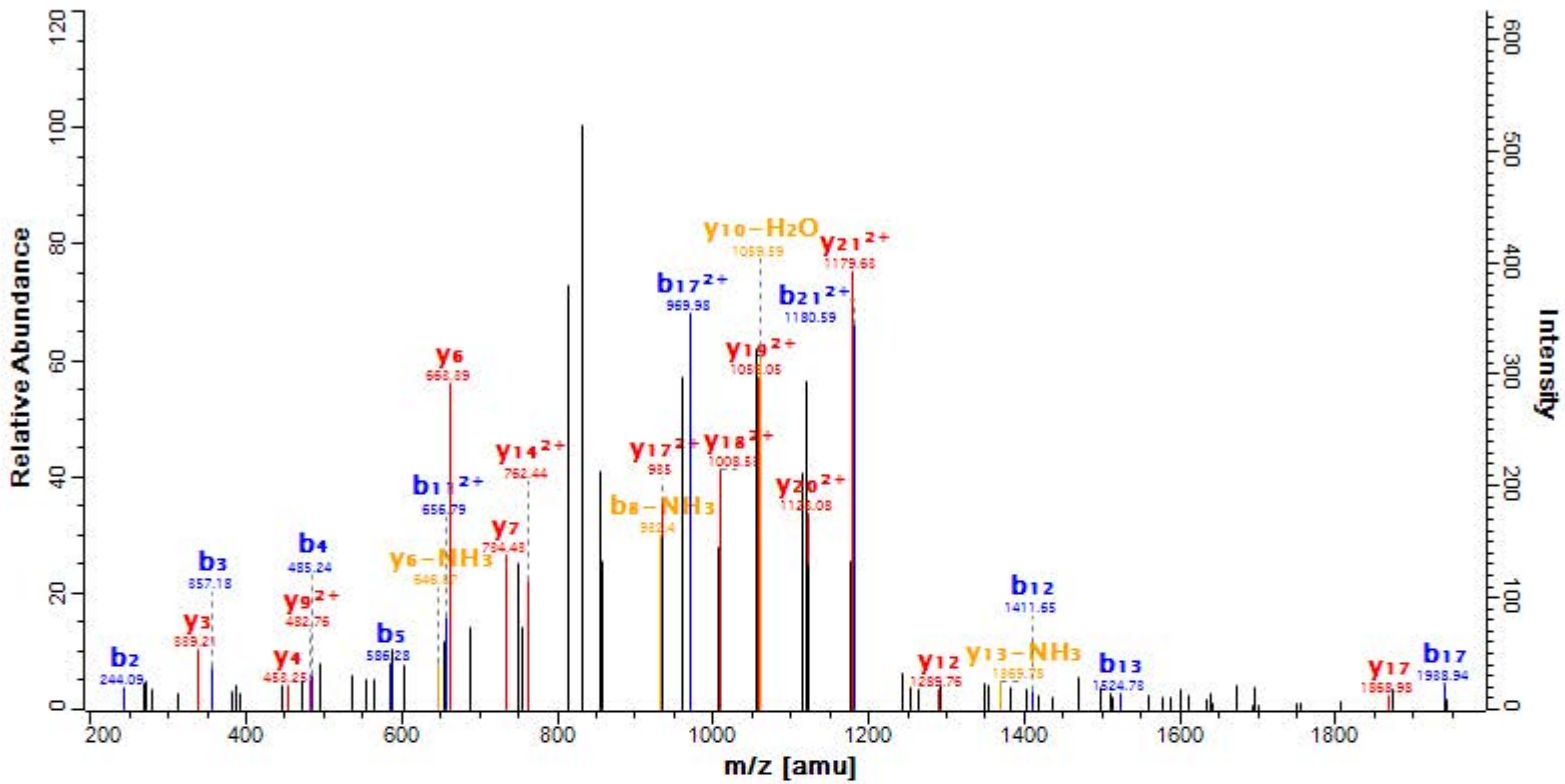

precursor information

|                   |                 |
|-------------------|-----------------|
| Mass:             | 2592.30766      |
| m/z:              | 865.10983       |
| Charge:           | 3+              |
| Retentiontime:    | 45.896591186523 |
| Score:            | 95.20565        |
| Mass Error [ppm]: | 0.19907         |
| PEP:              | 1.1119E-06      |
| Precursor Type:   | MULTI           |

general information

|                       |            |
|-----------------------|------------|
| Annotation:           | 17 of 23   |
| AminoAcids Coverage:  | 74 %       |
| Intensity Coverage:   | 42 %       |
| Peak Coverage:        | 28 %       |
| Protein Localisation: | 97 ... 119 |

| b <sup>2+</sup> ion |         | b ion    |        | seq |   |    | y ion    |         | y <sup>2+</sup> ion |         |
|---------------------|---------|----------|--------|-----|---|----|----------|---------|---------------------|---------|
| Δ dalton            | mass    | Δ dalton | mass   |     |   |    | Δ dalton | mass    | Δ dalton            | mass    |
|                     | 116.03  |          | 116.03 | 1   | D | 22 |          |         |                     |         |
|                     | 244.09  | +0.0414  | 244.09 | 2   | Q | 21 | 2486.3   |         | 2486.3              |         |
|                     | 357.18  | +0.0591  | 357.18 | 3   | L | 20 | 2358.2   |         | 1179.6              | -0.087  |
|                     | 485.24  | -0.014   | 485.24 | 4   | Q | 19 | 2245.2   |         | 1123.1              | -0.073  |
|                     | 586.28  | -0.086   | 586.28 | 5   | T | 18 | 2117.1   |         | 1059.1              | -0.159  |
|                     | 733.35  |          | 733.35 | 6   | F | 17 | 2016.1   |         | 1008.5              | +0.0554 |
|                     | 820.38  |          | 820.38 | 7   | S | 16 | 1869     | +0.3246 | 935                 | -0.003  |
|                     | 949.43  |          | 949.43 | 8   | E | 15 | 1782     |         | 1782                |         |
|                     | 1078.5  |          | 1078.5 | 9   | E | 14 | 1652.9   |         | 1652.9              |         |
|                     | 1215.5  |          | 1215.5 | 10  | H | 13 | 1523.9   |         | 762.44              | +0.1692 |
| -0.458              | 656.79  |          | 1312.6 | 11  | P | 12 | 1386.8   |         | 1386.8              |         |
|                     | 1411.6  | -0.047   | 1411.6 | 12  | V | 11 | 1289.8   | -0.006  | 1289.8              |         |
|                     | 1524.7  | -0.051   | 1524.7 | 13  | L | 10 | 1190.7   |         | 1190.7              |         |
|                     | 1637.8  |          | 1637.8 | 14  | L | 9  | 1077.6   |         | 1077.6              |         |
|                     | 1738.9  |          | 1738.9 | 15  | T | 8  | 964.52   |         | 482.76              | +0.3445 |
|                     | 1867.9  |          | 1867.9 | 16  | E | 7  | 863.47   |         | 863.47              |         |
| +0.3432             | 2969.98 | +0.0422  | 1938.9 | 17  | A | 6  | 734.43   | -0.002  | 734.43              |         |
|                     | 2036    |          | 2036   | 18  | P | 5  | 663.39   | +0.0162 | 663.39              |         |
|                     | 2149.1  |          | 2149.1 | 19  | L | 4  | 566.34   |         | 566.34              |         |
|                     | 2263.1  |          | 2263.1 | 20  | N | 3  | 453.25   | +0.482  | 453.25              |         |
| -0.225              | 1180.6  |          | 2360.2 | 21  | P | 2  | 339.21   | +0.0099 | 339.21              |         |
|                     | 2447.2  |          | 2447.2 | 22  | S | 1  | 242.16   |         | 242.16              |         |
|                     |         |          |        | 23  | K | 0  | 155.13   |         | 155.13              |         |

Scan number 7503 Raw file LNCAP\_Silac\_23F10\_set3\_04  
 Method ITMS; CID Pepti... 158.3

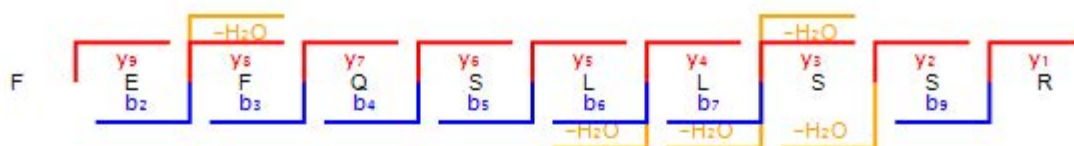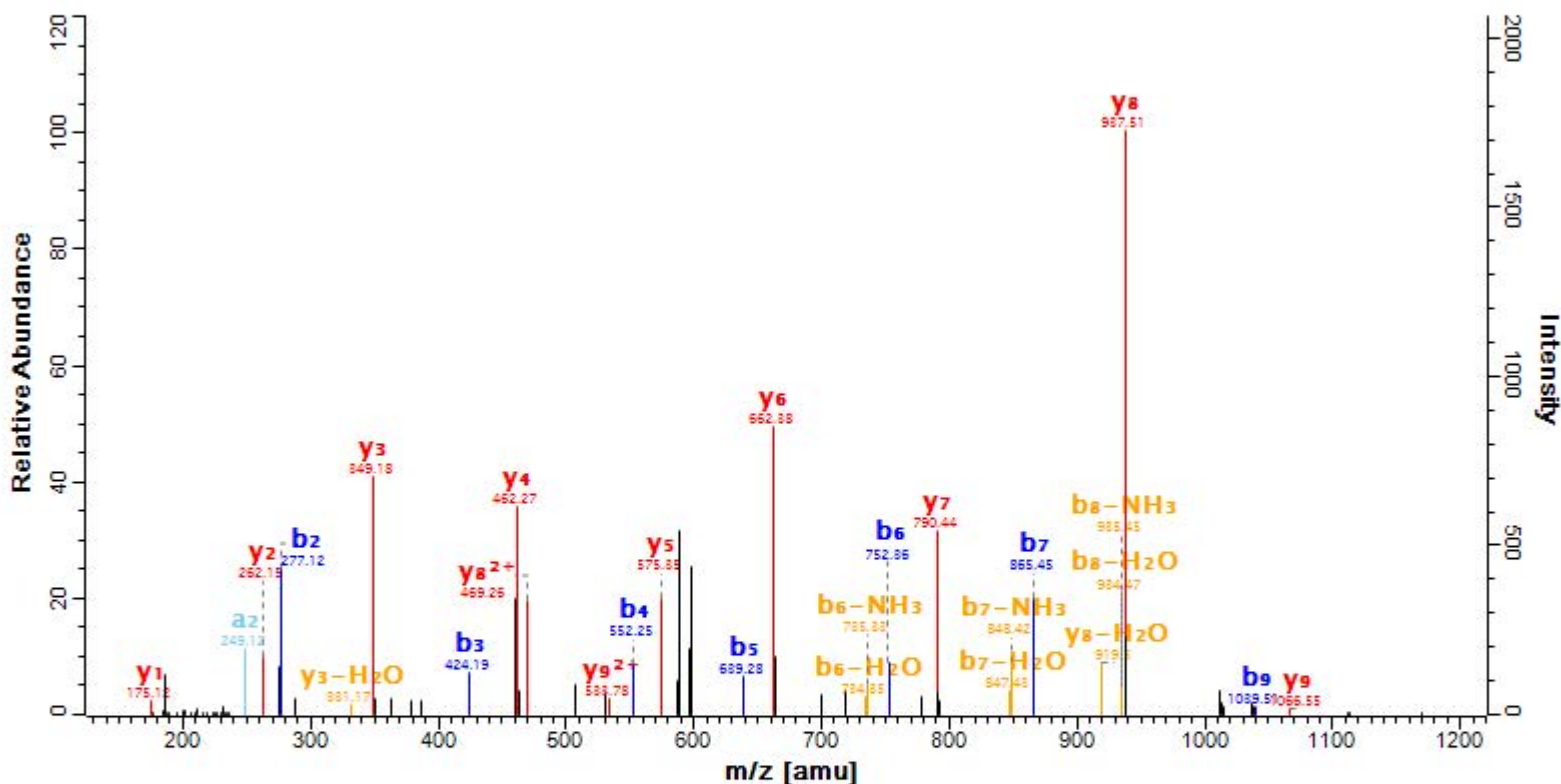

#### precursor information

|                   |                 |
|-------------------|-----------------|
| Mass:             | 1212.61404      |
| m/z:              | 607.3143        |
| Charge:           | 2+              |
| Retentiontime:    | 47.549579620361 |
| Score:            | 158.2997        |
| Mass Error [ppm]: | 0.12996         |
| PEP:              | 9.132E-05       |
| Precursor Type:   | MULTI           |

|                       |           |
|-----------------------|-----------|
| Annotation:           | 9 of 10   |
| AminoAcids Coverage:  | 90 %      |
| Intensity Coverage:   | 69 %      |
| Peak Coverage:        | 34 %      |
| Protein Localisation: | 38 ... 47 |

| a ion    |        | b ion    |        |    |     |   | y ion    |         | y <sup>2+</sup> ion |         |
|----------|--------|----------|--------|----|-----|---|----------|---------|---------------------|---------|
| Δ dalton | mass   | Δ dalton | mass   |    | seq |   | Δ dalton | mass    | Δ dalton            | mass    |
|          | 120.08 |          | 148.08 | 1  | F   | 9 |          |         |                     |         |
| +0.0191  | 249.12 | +0.0365  | 277.12 | 2  | E   | 8 | 1066.6   | -0.451  | 533.78              | -0.262  |
|          | 396.19 | +0.147   | 424.19 | 3  | F   | 7 | 937.51   | -0.033  | 469.26              | +0.1327 |
|          | 524.25 | -0.048   | 552.25 | 4  | Q   | 6 | 790.44   | +0.0009 | 790.44              |         |
|          | 611.28 | +0.1373  | 639.28 | 5  | S   | 5 | 662.38   | -0.012  | 662.38              |         |
|          | 724.37 | +0.06    | 752.36 | 6  | L   | 4 | 575.35   | -0.014  | 575.35              |         |
|          | 837.45 | +0.0209  | 865.45 | 7  | L   | 3 | 462.27   | +0.0239 | 462.27              |         |
|          | 924.48 |          | 952.48 | 8  | S   | 2 | 349.18   | +0.1198 | 349.18              |         |
|          | 1011.5 | +0.0782  | 1039.5 | 9  | S   | 1 | 262.15   | +0.0454 | 262.15              |         |
|          |        |          |        | 10 | R   | 0 | 175.12   | -0.068  | 175.12              |         |

Scan number 7666 Raw file LNCAP\_Silac\_23F10\_set3\_04  
 Method ITMS; CID Pepti... 156.48

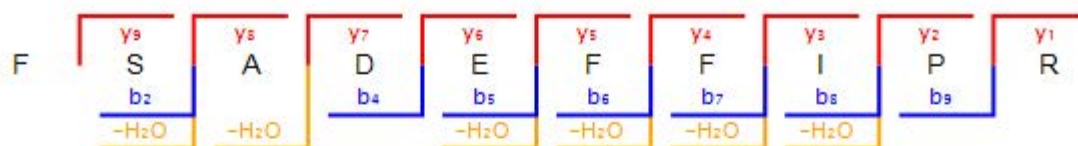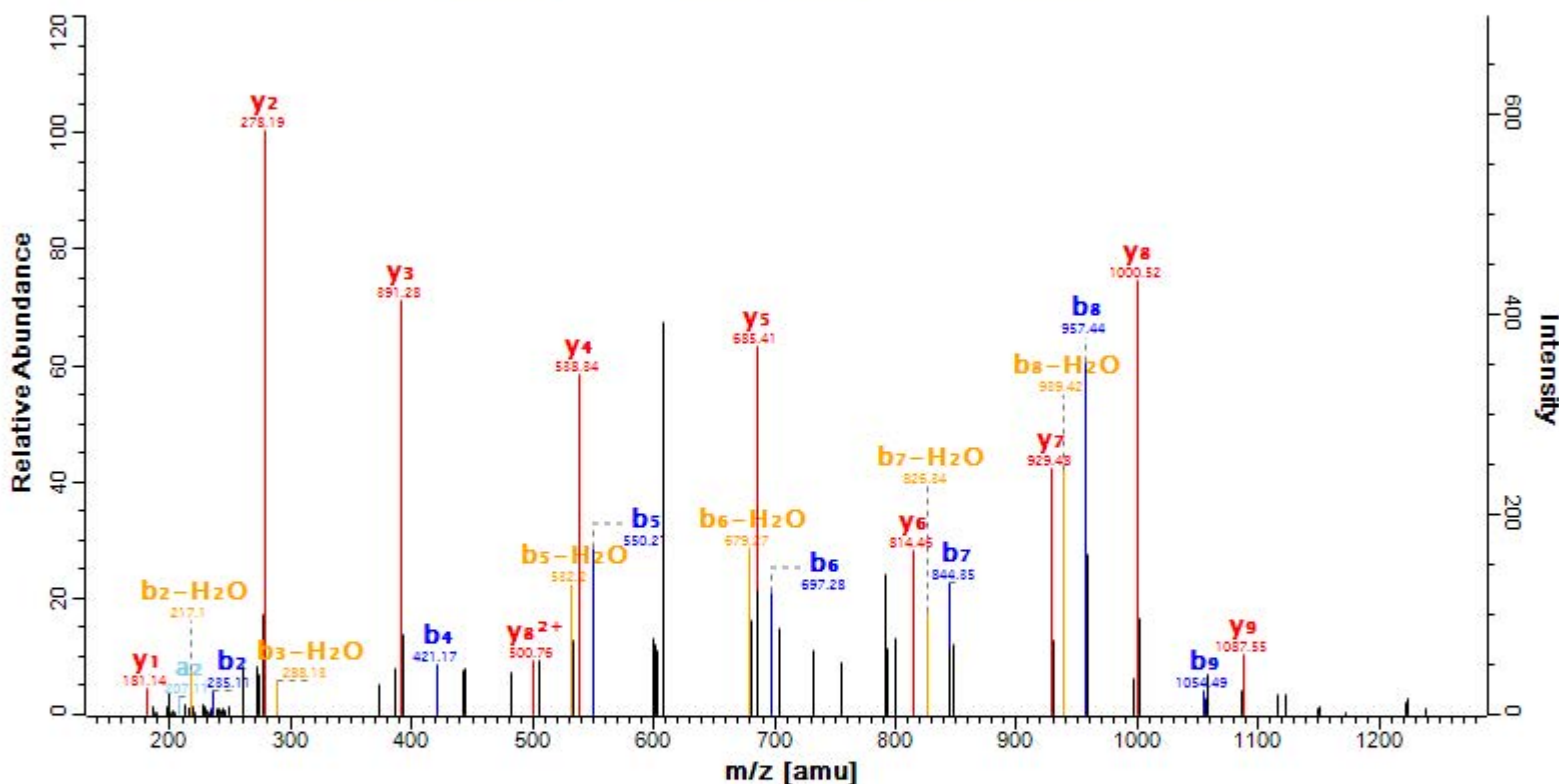

#### precursor information

|                   |                 |
|-------------------|-----------------|
| Mass:             | 1227.59254      |
| m/z:              | 614.80355       |
| Charge:           | 2+              |
| Retentiontime:    | 48.540802001953 |
| Score:            | 156.4802        |
| Mass Error [ppm]: | 0.093502        |
| PEP:              | 0.0001065       |

#### g Precursor Type: MULTI

|                       |             |
|-----------------------|-------------|
| Annotation:           | 9 of 10     |
| AminoAcids Coverage:  | 90 %        |
| Intensity Coverage:   | 57 %        |
| Peak Coverage:        | 25 %        |
| Protein Localisation: | 112 ... 121 |

| a ion    |        | b ion    |        |    |     |   | y ion    |         | y <sup>2+</sup> ion |        |
|----------|--------|----------|--------|----|-----|---|----------|---------|---------------------|--------|
| Δ dalton | mass   | Δ dalton | mass   |    | seq |   | Δ dalton | mass    | Δ dalton            | mass   |
|          | 120.08 |          | 148.08 | 1  | F   | 9 |          |         |                     |        |
| +0.0103  | 207.11 | +0.0304  | 235.11 | 2  | S   | 8 | 1087.6   | +0.0753 | 1087.6              |        |
|          | 278.15 |          | 306.14 | 3  | A   | 7 | 1000.5   | +0.0127 | 500.76              | -0.229 |
|          | 393.18 | -0.032   | 421.17 | 4  | D   | 6 | 929.48   | -0.003  | 929.48              |        |
|          | 522.22 | -0.01    | 550.21 | 5  | E   | 5 | 814.46   | -0.041  | 814.46              |        |
|          | 669.29 | -0.093   | 697.28 | 6  | F   | 4 | 685.41   | -0.098  | 685.41              |        |
|          | 816.36 | -0.185   | 844.35 | 7  | F   | 3 | 538.34   | +0.0757 | 538.34              |        |
|          | 929.44 | -0.074   | 957.44 | 8  | I   | 2 | 391.28   | +0.0808 | 391.28              |        |
|          | 1026.5 | -0.015   | 1054.5 | 9  | P   | 1 | 278.19   | +0.0297 | 278.19              |        |
|          |        |          |        | 10 | R   | 0 | 181.14   | +0.1728 | 181.14              |        |



Scan number 7897 Raw file LNCAP\_Silac\_23F10\_set3\_04  
 Method ITMS: CID Pepti... 82.26

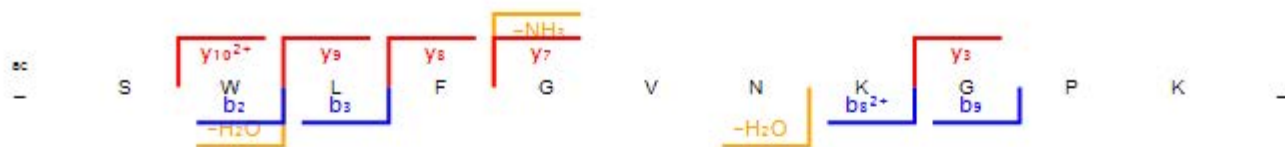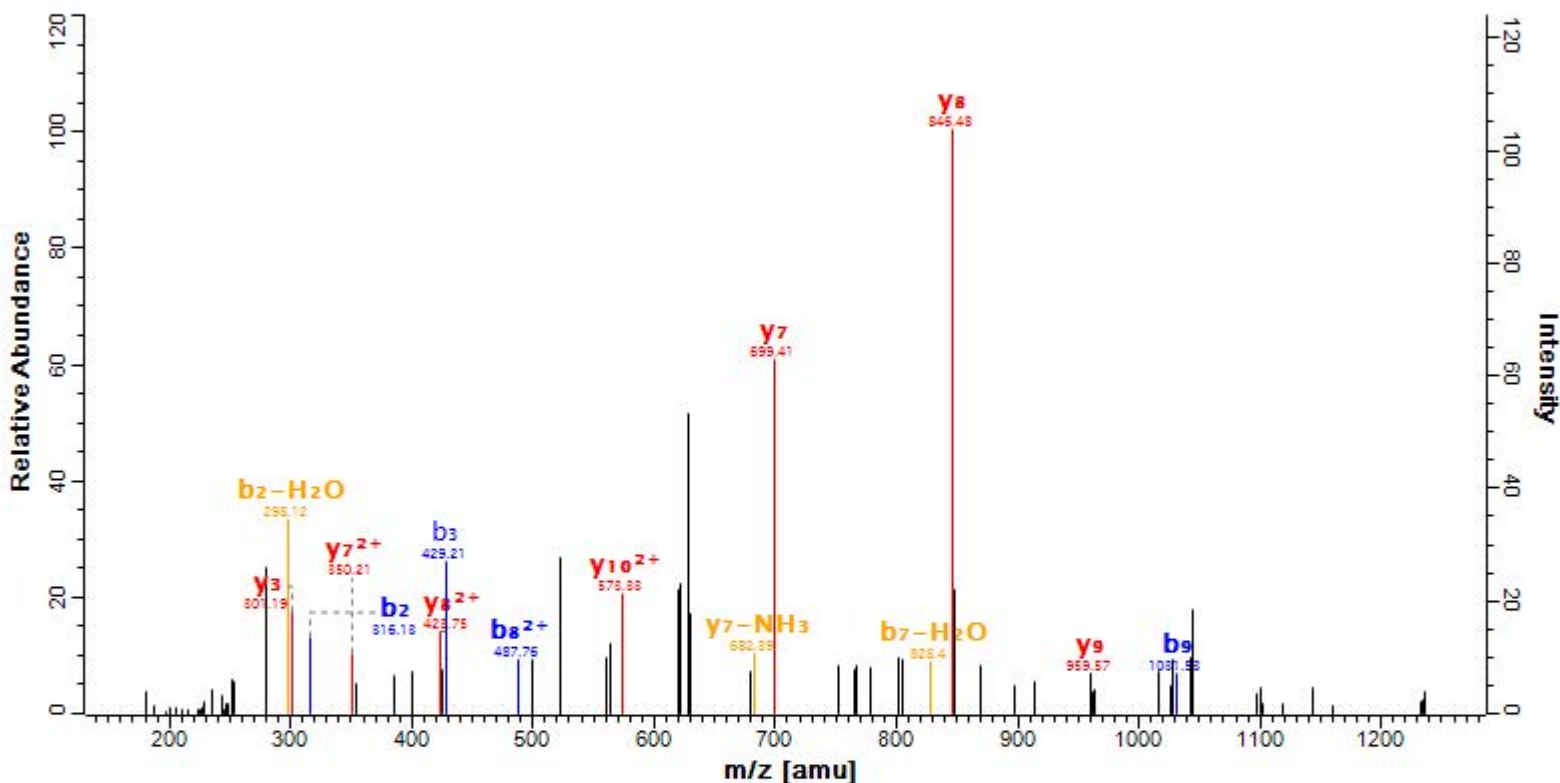

#### precursor information

|                   |                 |
|-------------------|-----------------|
| Mass:             | 0               |
| m/z:              | 637.85          |
| Charge:           | 0+              |
| Retentiontime:    | 50.003231048584 |
| Score:            | 82.26067        |
| Mass Error [ppm]: | -2.2457         |
| PEP:              | 0.094746        |
| Precursor Type:   | PEAK            |

#### general information

|                       |          |
|-----------------------|----------|
| Annotation:           | 7 of 11  |
| AminoAcids Coverage:  | 64 %     |
| Intensity Coverage:   | 41 %     |
| Peak Coverage:        | 18 %     |
| Protein Localisation: | 2 ... 12 |

| b <sup>2+</sup> ion |        | b ion    |        |    |     |          | y ion  |          | y <sup>2+</sup> ion |  |
|---------------------|--------|----------|--------|----|-----|----------|--------|----------|---------------------|--|
| Δ dalton            | mass   | Δ dalton | mass   |    | seq | Δ dalton | mass   | Δ dalton | mass                |  |
|                     | 130.05 |          | 130.05 | 1  | S   | 10       |        |          |                     |  |
|                     | 316.13 | -0.233   | 316.13 | 2  | W   | 9        | 1145.6 | 573.33   | -0.098              |  |
|                     | 429.21 | +0.0072  | 429.21 | 3  | L   | 8        | 959.57 | +0.2142  | 959.57              |  |
|                     | 576.28 |          | 576.28 | 4  | F   | 7        | 846.48 | +0.0051  | 423.75              |  |
|                     | 633.3  |          | 633.3  | 5  | G   | 6        | 699.41 | +0.0302  | 350.21              |  |
|                     | 732.37 |          | 732.37 | 6  | V   | 5        | 642.39 |          | 642.39              |  |
|                     | 846.41 |          | 846.41 | 7  | N   | 4        | 543.32 |          | 543.32              |  |
| +0.1118             | 487.76 |          | 974.51 | 8  | K   | 3        | 429.28 |          | 429.28              |  |
|                     | 1031.5 | -0.089   | 1031.5 | 9  | G   | 2        | 301.19 | +0.1428  | 301.19              |  |
|                     | 1128.6 |          | 1128.6 | 10 | P   | 1        | 244.17 |          | 244.17              |  |
|                     |        |          |        | 11 | K   | 0        | 147.11 |          | 147.11              |  |

Scan number 7977 Raw file LNCAP\_Silac\_23F10\_set3\_04  
 Method ITMS: CID Pepti... 179.68

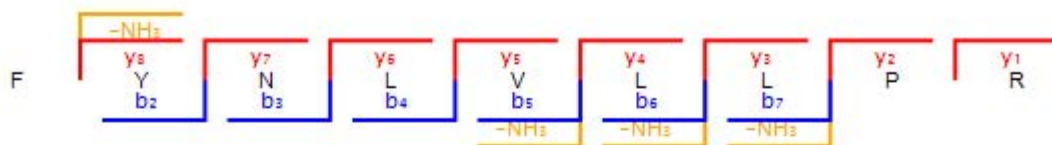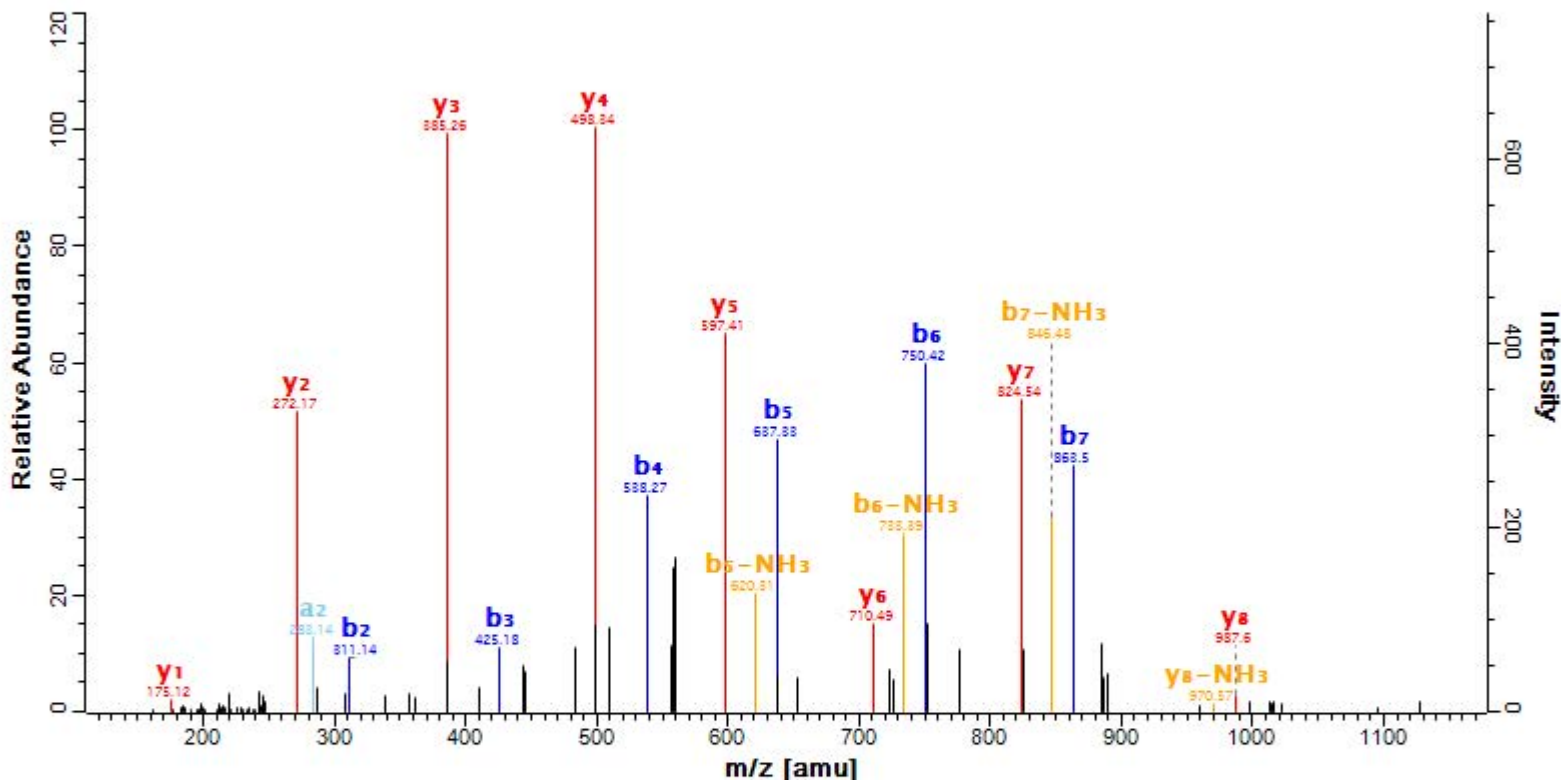

#### precursor information

|                       |                 |
|-----------------------|-----------------|
| Mass:                 | 1133.66024      |
| m/z:                  | 567.83739       |
| Charge:               | 2+              |
| Retentiontime:        | 50.483970642089 |
| Score:                | 179.6772        |
| Mass Error [ppm]:     | 0.45842         |
| PEP:                  | 1.3003E-05      |
| Precursor Type:       | MULTI           |
| Annotation:           | 8 of 9          |
| AminoAcids Coverage:  | 89 %            |
| Intensity Coverage:   | 72 %            |
| Peak Coverage:        | 21 %            |
| Protein Localisation: | 249 ... 257     |

| a ion     |          | b ion     |          | y ion |          |      |          |           |
|-----------|----------|-----------|----------|-------|----------|------|----------|-----------|
| Δ dalton  | mass     | Δ dalton  | mass     | seq   | Δ dalton | mass |          |           |
|           | 120.0808 |           | 148.0757 | 1     | F        | 8    |          |           |
| +0.050232 | 283.1441 | +0.050587 | 311.139  | 2     | Y        | 7    | 987.5986 | +0.104852 |
|           | 397.187  | +0.090454 | 425.1819 | 3     | N        | 6    | 824.5352 | +0.040312 |
|           | 510.2711 | -0.02163  | 538.266  | 4     | L        | 5    | 710.4923 | +0.115405 |
|           | 609.3395 | -0.13112  | 637.3344 | 5     | V        | 4    | 597.4083 | +0.057013 |
|           | 722.4236 | -0.08237  | 750.4185 | 6     | L        | 3    | 498.3398 | +0.03717  |
|           | 835.5076 | -0.1137   | 863.5026 | 7     | L        | 2    | 385.2558 | +0.005695 |
|           | 932.5604 |           | 960.5553 | 8     | P        | 1    | 272.1717 | -0.0003   |
|           |          |           |          | 9     | R        | 0    | 175.119  | +0.0687   |

Scan number 8185 Raw file LNCAP\_Silac\_23F10\_set3\_04  
 Method ITMS: CID Pepti... 242.8

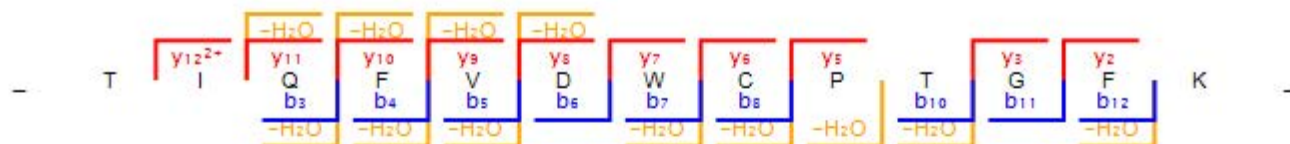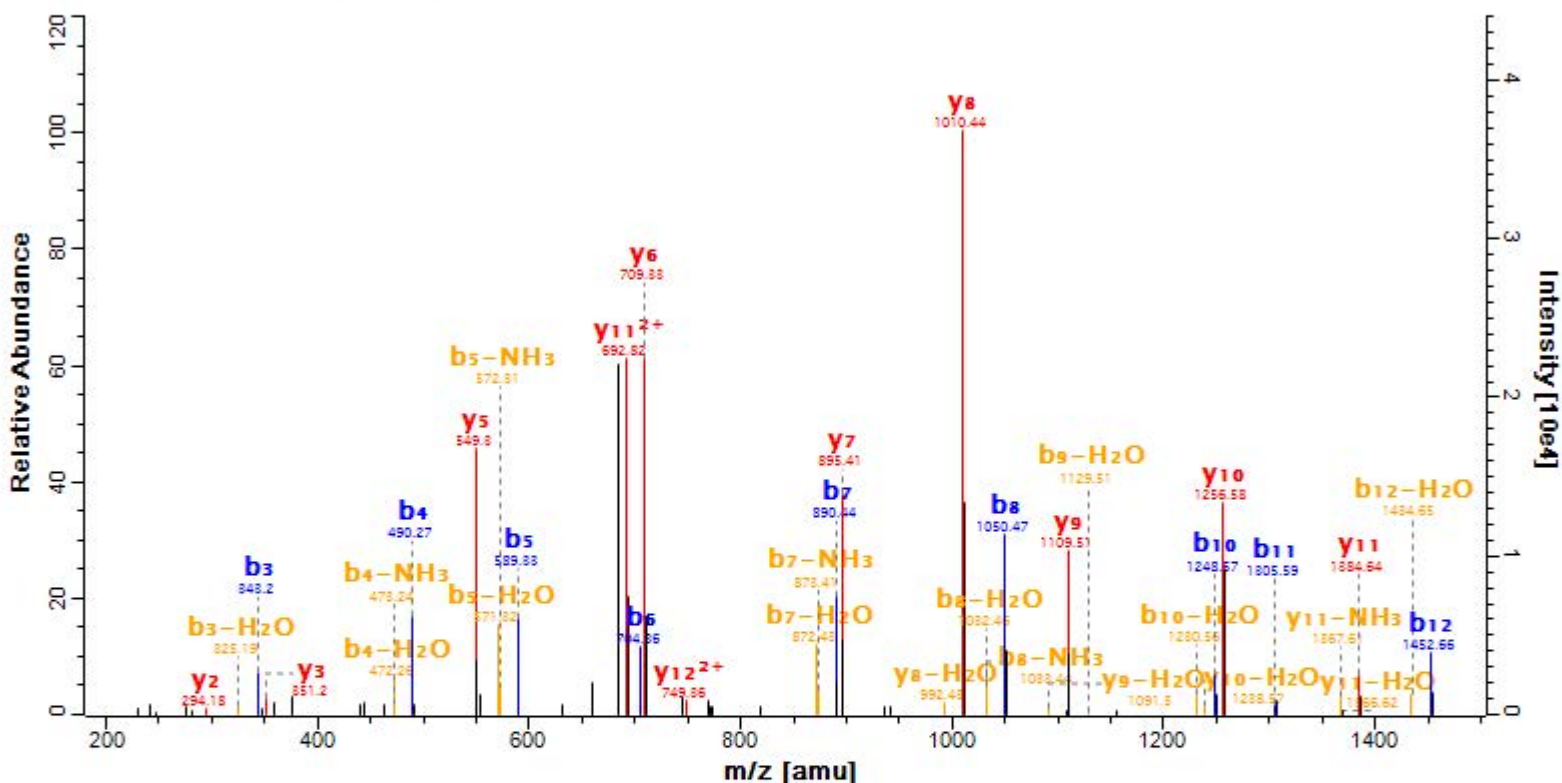

precursor information

|                   |                 |
|-------------------|-----------------|
| Mass:             | 1597.75945      |
| m/z:              | 799.887         |
| Charge:           | 2+              |
| Retentiontime:    | 51.812366485595 |
| Score:            | 242.8028        |
| Mass Error [ppm]: | -0.28347        |
| PEP:              | 3.7181E-36      |
| Precursor Type:   | MULTI           |

general information

|                       |             |
|-----------------------|-------------|
| Annotation:           | 11 of 13    |
| AminoAcids Coverage:  | 85 %        |
| Intensity Coverage:   | 69 %        |
| Peak Coverage:        | 47 %        |
| Protein Localisation: | 340 ... 352 |

| b ion     |          |     |   | y ion    |          |          | y <sup>2+</sup> ion |  |
|-----------|----------|-----|---|----------|----------|----------|---------------------|--|
| Δ dalton  | mass     | seq |   | Δ dalton | mass     | Δ dalton | mass                |  |
|           | 102.055  | 1   | T | 12       |          |          |                     |  |
|           | 215.139  | 2   | I | 11       | 1497.719 | 749.3634 | +0.162858           |  |
| +0.047094 | 343.1976 | 3   | Q | 10       | 1384.635 | 692.8214 | +0.055842           |  |
| -0.08016  | 490.266  | 4   | F | 9        | 1256.577 | 1256.577 |                     |  |
| -0.00709  | 589.3344 | 5   | V | 8        | 1109.508 | 1109.508 |                     |  |
| +0.084128 | 704.3614 | 6   | D | 7        | 1010.44  | 1010.44  |                     |  |
| -0.0727   | 890.4407 | 7   | W | 6        | 895.4131 | 895.4131 |                     |  |
| -0.05385  | 1050.471 | 8   | C | 5        | 709.3338 | 709.3338 |                     |  |
|           | 1147.524 | 9   | P | 4        | 549.3031 | 549.3031 |                     |  |
| -0.11022  | 1248.572 | 10  | T | 3        | 452.2504 | 452.2504 |                     |  |
| +0.128323 | 1305.593 | 11  | G | 2        | 351.2027 | 351.2027 |                     |  |
| -0.02542  | 1452.662 | 12  | F | 1        | 294.1812 | 294.1812 |                     |  |
|           |          | 13  | K | 0        | 147.1128 | 147.1128 |                     |  |

Scan number 8227 Raw file LNCAP\_Silac\_23F10\_set3\_04  
 Method ITMS; CID Pepti... 125.45

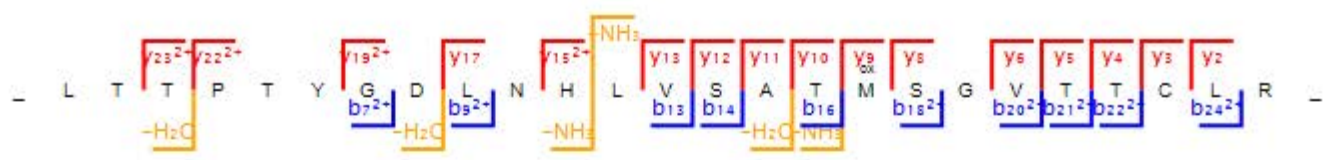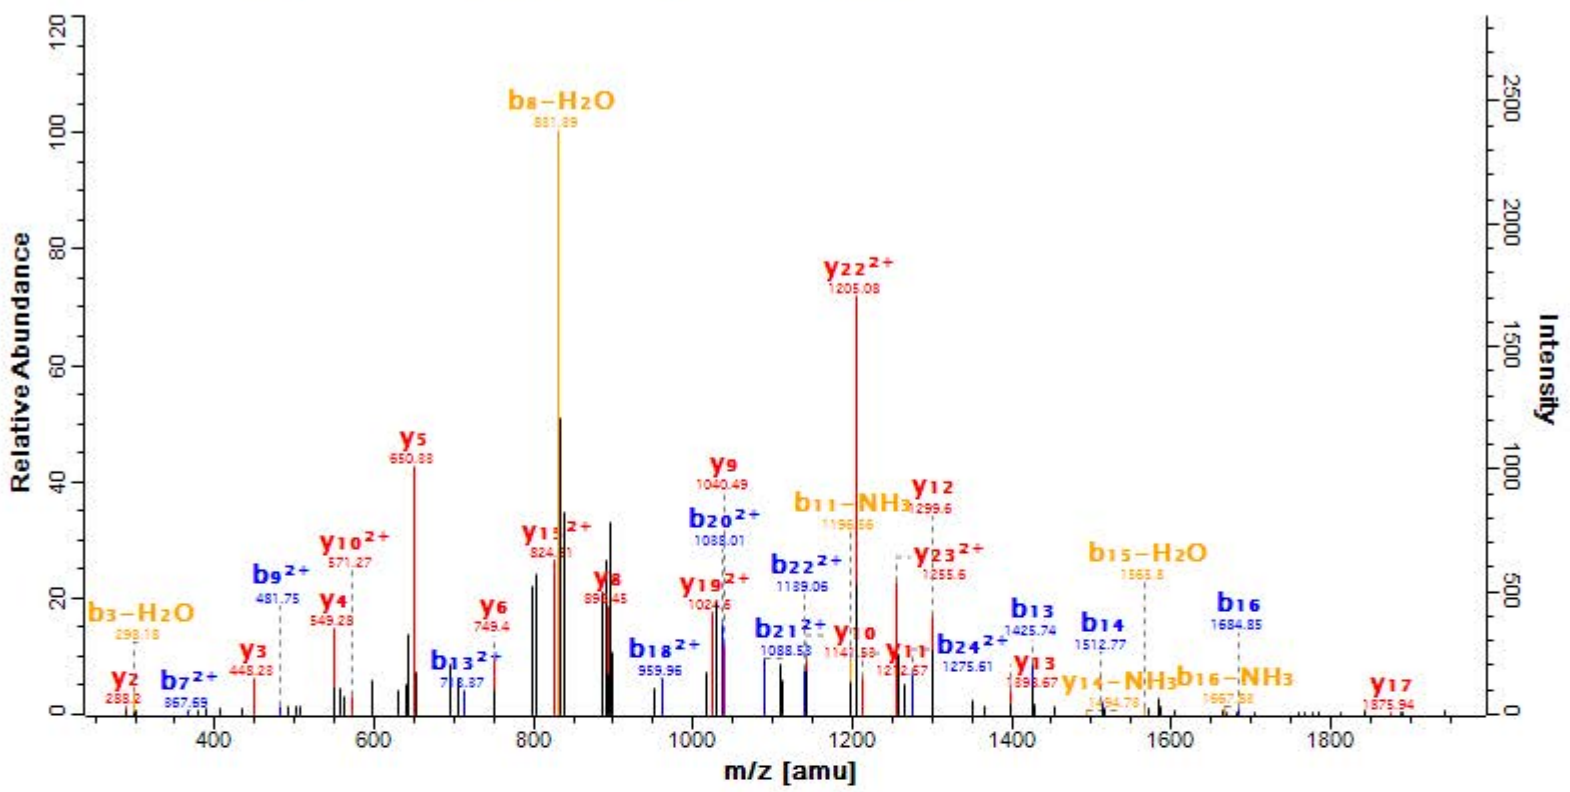

precursor information

|                   |                 |
|-------------------|-----------------|
| Mass:             | 2723.32644      |
| m/z:              | 908.78276       |
| Charge:           | 3+              |
| Retentiontime:    | 52.062042236328 |
| Score:            | 125.447         |
| Mass Error [ppm]: | 0.21532         |
| PEP:              | 9.0452E-16      |
| Precursor Type:   | MULTI           |

| b <sup>2+</sup> ion |        | b ion    |        | seq |   |    | y ion    |         | y <sup>2+</sup> ion |         |
|---------------------|--------|----------|--------|-----|---|----|----------|---------|---------------------|---------|
| Δ dalton            | mass   | Δ dalton | mass   |     |   |    | Δ dalton | mass    | Δ dalton            | mass    |
|                     | 114.09 |          | 114.09 | 1   | L | 24 |          |         |                     |         |
|                     | 215.14 |          | 215.14 | 2   | T | 23 | 2611.2   |         | 2611.2              |         |
|                     | 316.19 |          | 316.19 | 3   | T | 22 | 2510.2   |         | 1255.6              | +0.2222 |
|                     | 413.24 |          | 413.24 | 4   | P | 21 | 2409.2   |         | 1205.1              | +0.3511 |
|                     | 514.29 |          | 514.29 | 5   | T | 20 | 2312.1   |         | 2312.1              |         |
|                     | 677.35 |          | 677.35 | 6   | Y | 19 | 2211.1   |         | 2211.1              |         |
| -0.449              | 367.69 |          | 734.37 | 7   | G | 18 | 2048     |         | 1024.5              | +0.1824 |
|                     | 849.4  |          | 849.4  | 8   | D | 17 | 1991     |         | 1991                |         |
| -0.383              | 481.75 |          | 962.48 | 9   | L | 16 | 1875.9   | +0.3867 | 1875.9              |         |
|                     | 1076.5 |          | 1076.5 | 10  | N | 15 | 1762.9   |         | 1762.9              |         |
|                     | 1213.6 |          | 1213.6 | 11  | H | 14 | 1648.8   |         | 824.91              | +0.4991 |
|                     | 1326.7 |          | 1326.7 | 12  | L | 13 | 1511.8   |         | 1511.8              |         |
| -0.219              | 713.37 | -0.076   | 1425.7 | 13  | V | 12 | 1398.7   | -0.126  | 1398.7              |         |
|                     | 1512.8 | +0.2213  | 1512.8 | 14  | S | 11 | 1299.6   | -0.046  | 1299.6              |         |
|                     | 1583.8 |          | 1583.8 | 15  | A | 10 | 1212.6   | -0.084  | 1212.6              |         |
|                     | 1684.9 | -0.145   | 1684.9 | 16  | T | 9  | 1141.5   | -0.063  | 571.27              | +0.2804 |
|                     | 1831.9 |          | 1831.9 | 17  | M | 8  | 1040.5   | -0.023  | 1040.5              |         |
| +0.331              | 959.96 |          | 1918.9 | 18  | S | 7  | 893.45   | +0.0879 | 893.45              |         |
|                     | 1975.9 |          | 1975.9 | 19  | G | 6  | 806.42   |         | 806.42              |         |
| +0.0676             | 1038   |          | 2075   | 20  | V | 5  | 749.4    | +0.0694 | 749.4               |         |
| +0.2193             | 1088.5 |          | 2176.1 | 21  | T | 4  | 650.33   | +0.0069 | 650.33              |         |
| +0.2203             | 1139.1 |          | 2277.1 | 22  | T | 3  | 549.28   | +0.1001 | 549.28              |         |
|                     | 2437.1 |          | 2437.1 | 23  | C | 2  | 448.23   | -0.028  | 448.23              |         |
| +0.2923             | 1275.6 |          | 2550.2 | 24  | L | 1  | 288.2    | +0.0491 | 288.2               |         |
|                     |        |          |        | 25  | R | 0  | 175.12   |         | 175.12              |         |

general information

|                       |             |
|-----------------------|-------------|
| Annotation:           | 18 of 25    |
| AminoAcids Coverage:  | 72 %        |
| Intensity Coverage:   | 51 %        |
| Peak Coverage:        | 32 %        |
| Protein Localisation: | 217 ... 241 |

Scan number 8288 Raw file LNCAP\_Silac\_23F10\_set3\_04  
 Method ITMS: CID Pepti... 271.64

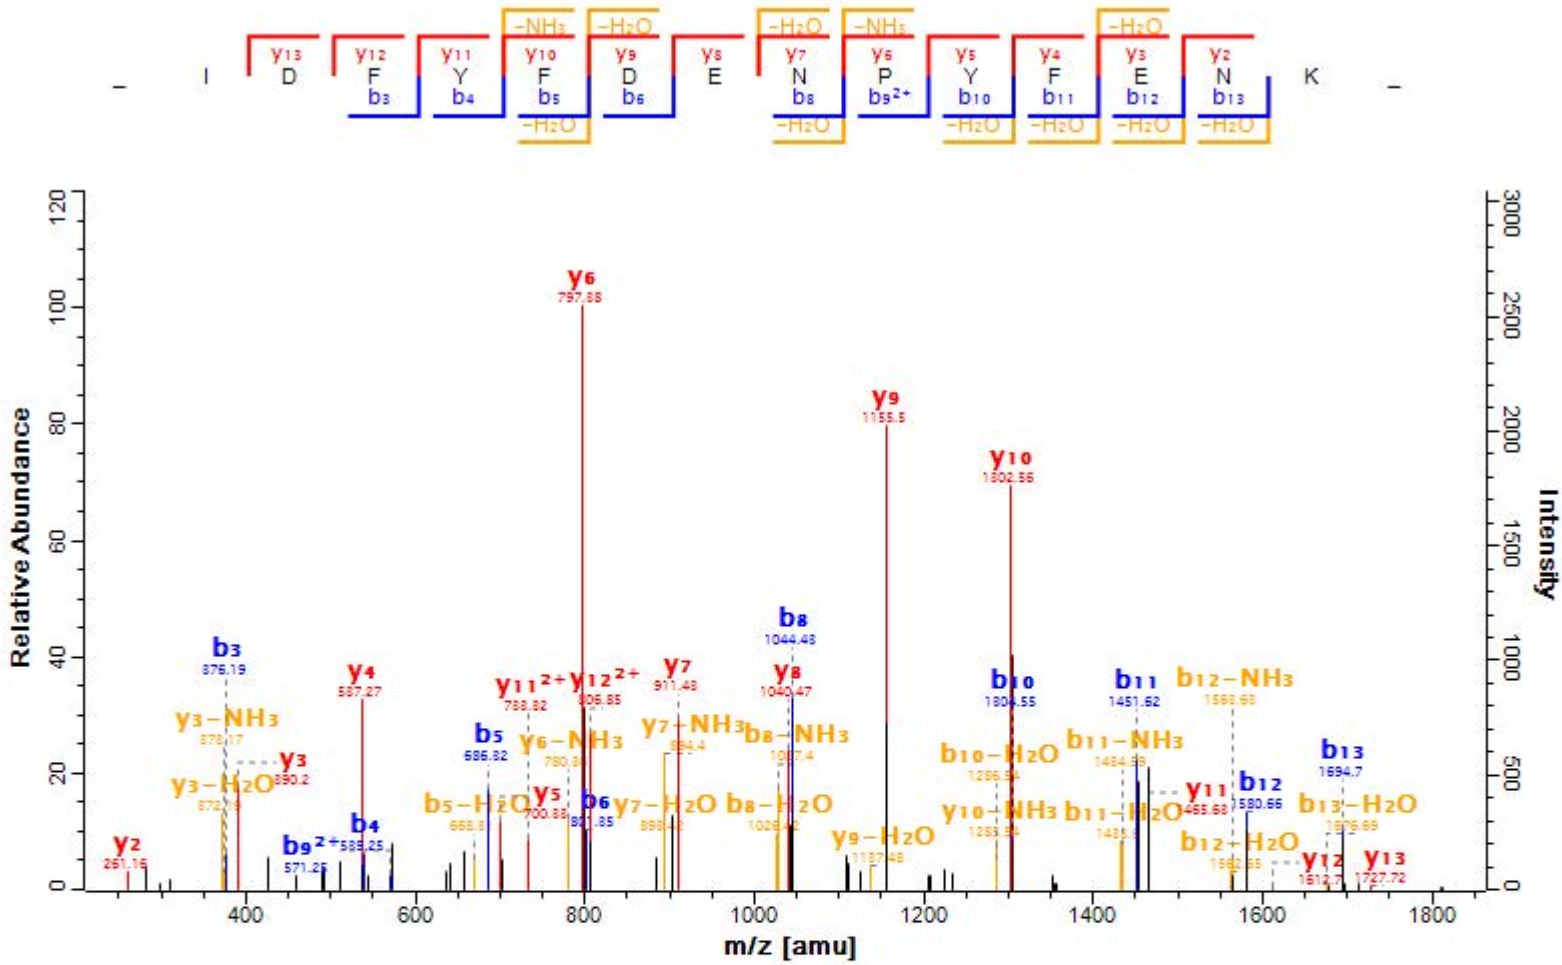

**precursor information**

|                   |                 |
|-------------------|-----------------|
| Mass:             | 1839.79934      |
| m/z:              | 920.90695       |
| Charge:           | 2+              |
| Retentiontime:    | 52.472370147705 |
| Score:            | 271.6444        |
| Mass Error [ppm]: | 0.088679        |
| PEP:              | 3.4156E-61      |
| Precursor Type:   | MULTI           |

**general information**

|                       |             |
|-----------------------|-------------|
| Annotation:           | 12 of 14    |
| AminoAcids Coverage:  | 86 %        |
| Intensity Coverage:   | 68 %        |
| Peak Coverage:        | 47 %        |
| Protein Localisation: | 124 ... 137 |

| b <sup>2+</sup> ion |         | b ion    |        | seq |   |    | y ion    |         | y <sup>2+</sup> ion |        |
|---------------------|---------|----------|--------|-----|---|----|----------|---------|---------------------|--------|
| Δ dalton            | mass    | Δ dalton | mass   |     |   |    | Δ dalton | mass    | Δ dalton            | mass   |
|                     | 114.09  |          | 114.09 | 1   | I | 13 |          |         |                     |        |
|                     | 229.12  |          | 229.12 | 2   | D | 12 | 1727.7   | +0.2296 | 1727.7              |        |
|                     | 376.19  | +0.1907  | 376.19 | 3   | F | 11 | 1612.7   | +0.3308 | 806.85              | -0.005 |
|                     | 539.25  | -0.005   | 539.25 | 4   | Y | 10 | 1465.6   | -0.247  | 733.32              | +0.152 |
|                     | 686.32  | +0.0194  | 686.32 | 5   | F | 9  | 1302.6   | -0.087  | 1302.6              |        |
|                     | 801.35  | +0.1208  | 801.35 | 6   | D | 8  | 1155.5   | -0.012  | 1155.5              |        |
|                     | 930.39  |          | 930.39 | 7   | E | 7  | 1040.5   | -0.025  | 1040.5              |        |
|                     | 1044.4  | -0.097   | 1044.4 | 8   | N | 6  | 911.43   | -0.008  | 911.43              |        |
|                     | +0.1649 | 571.25   | 1141.5 | 9   | P | 5  | 797.38   | +0.0225 | 797.38              |        |
|                     | 1304.5  | -0.003   | 1304.5 | 10  | Y | 4  | 700.33   | +0.105  | 700.33              |        |
|                     | 1451.6  | -0.106   | 1451.6 | 11  | F | 3  | 537.27   | +0.0345 | 537.27              |        |
|                     | 1580.7  | -0.191   | 1580.7 | 12  | E | 2  | 390.2    | +0.0472 | 390.2               |        |
|                     | 1694.7  | +0.0074  | 1694.7 | 13  | N | 1  | 261.16   | +0.1086 | 261.16              |        |
|                     |         |          |        | 14  | K | 0  | 147.11   |         | 147.11              |        |



Scan number 8565 Raw file LNCAP\_Silac\_23F10\_set3\_04  
 Method ITMS; CID Pepti... 49.07

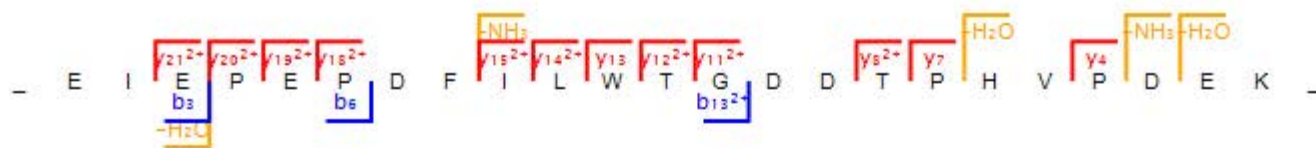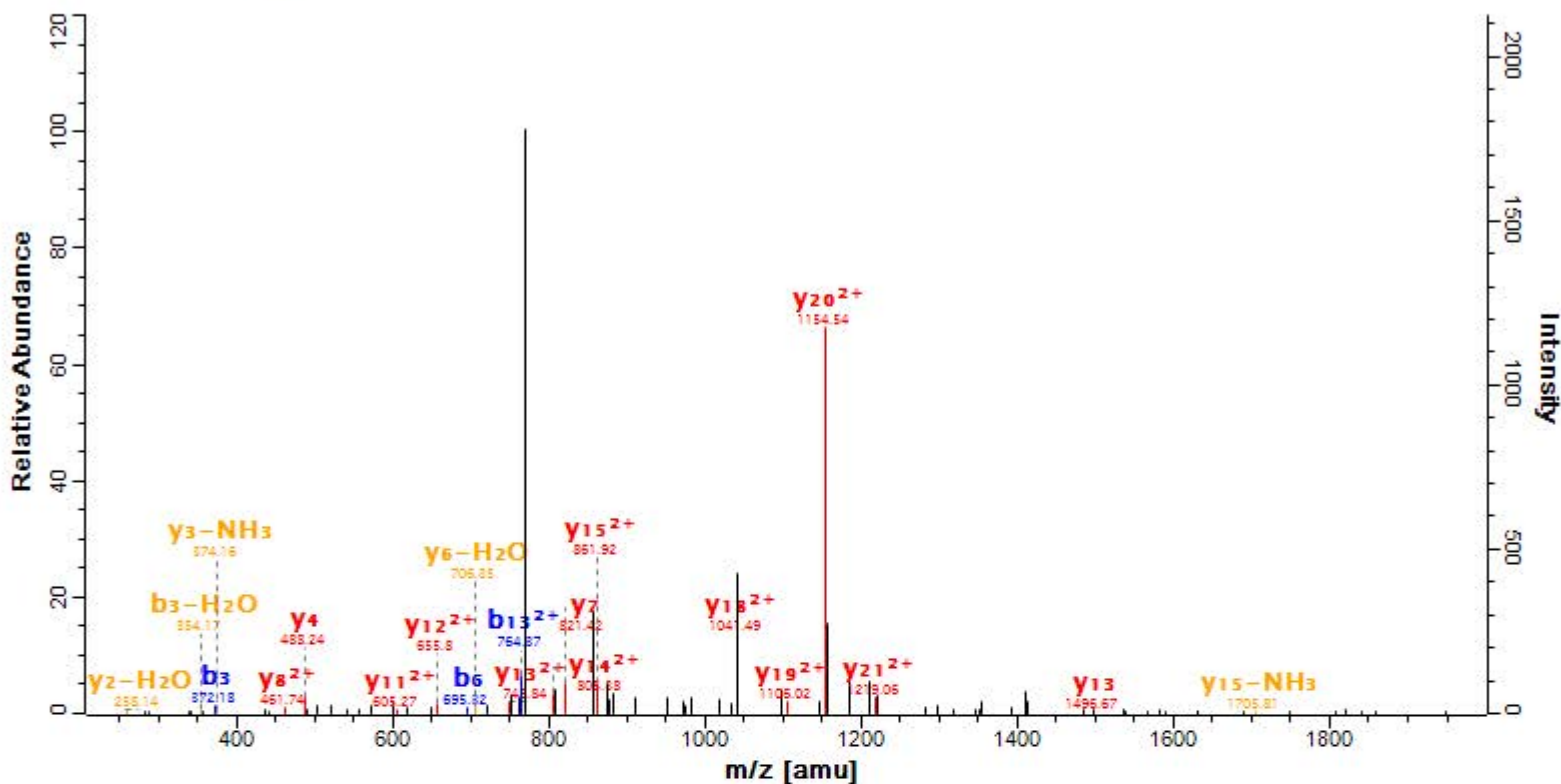

precursor information

|                   |                 |
|-------------------|-----------------|
| Mass:             | 2678.23936      |
| m/z:              | 893.75373       |
| Charge:           | 3+              |
| Retentiontime:    | 54.421859741210 |
| Score:            | 49.06598        |
| Mass Error [ppm]: | 0.21076         |
| PEP:              | 0.0049228       |
| Precursor Type:   | MULTI           |

| b <sup>2+</sup> ion |        | b ion    |        |     |   |          | y ion  |          | y <sup>2+</sup> ion |  |
|---------------------|--------|----------|--------|-----|---|----------|--------|----------|---------------------|--|
| Δ dalton            | mass   | Δ dalton | mass   | seq |   | Δ dalton | mass   | Δ dalton | mass                |  |
|                     | 130.05 |          | 130.05 | 1   | E | 22       |        |          |                     |  |
|                     | 243.13 |          | 243.13 | 2   | I | 21       | 2550.2 |          | 2550.2              |  |
|                     | 372.18 | -0.2     | 372.18 | 3   | E | 20       | 2437.1 |          | 1219.1 +0.0646      |  |
|                     | 469.23 |          | 469.23 | 4   | P | 19       | 2308.1 |          | 1154.5 +0.2656      |  |
|                     | 598.27 |          | 598.27 | 5   | E | 18       | 2211   |          | 1106 +0.4663        |  |
|                     | 695.32 | -0.256   | 695.32 | 6   | P | 17       | 2082   |          | 1041.5 -0.054       |  |
|                     | 810.35 |          | 810.35 | 7   | D | 16       | 1984.9 |          | 1984.9              |  |
|                     | 957.42 |          | 957.42 | 8   | F | 15       | 1869.9 |          | 1869.9              |  |
|                     | 1070.5 |          | 1070.5 | 9   | I | 14       | 1722.8 |          | 861.92 +0.4695      |  |
|                     | 1183.6 |          | 1183.6 | 10  | L | 13       | 1609.7 |          | 805.38 +0.1646      |  |
|                     | 1369.7 |          | 1369.7 | 11  | W | 12       | 1496.7 | +0.1717  | 748.84 +0.285       |  |
|                     | 1470.7 |          | 1470.7 | 12  | T | 11       | 1310.6 |          | 655.8 -0.011        |  |
| -0.269              | 764.37 |          | 1527.7 | 13  | G | 10       | 1209.5 |          | 605.27 +0.3938      |  |
|                     | 1642.8 |          | 1642.8 | 14  | D | 9        | 1152.5 |          | 1152.5              |  |
|                     | 1757.8 |          | 1757.8 | 15  | D | 8        | 1037.5 |          | 1037.5              |  |
|                     | 1858.8 |          | 1858.8 | 16  | T | 7        | 922.46 |          | 461.74 +0.3392      |  |
|                     | 1955.9 |          | 1955.9 | 17  | P | 6        | 821.42 | +0.0467  | 821.42              |  |
|                     | 2092.9 |          | 2092.9 | 18  | H | 5        | 724.36 |          | 724.36              |  |
|                     | 2192   |          | 2192   | 19  | V | 4        | 587.3  |          | 587.3               |  |
|                     | 2289.1 |          | 2289.1 | 20  | P | 3        | 488.24 | +0.0535  | 488.24              |  |
|                     | 2404.1 |          | 2404.1 | 21  | D | 2        | 391.18 |          | 391.18              |  |
|                     | 2533.1 |          | 2533.1 | 22  | E | 1        | 276.16 |          | 276.16              |  |
|                     |        |          |        | 23  | K | 0        | 147.11 |          | 147.11              |  |

general information

|                       |            |
|-----------------------|------------|
| Annotation:           | 16 of 23   |
| AminoAcids Coverage:  | 70 %       |
| Intensity Coverage:   | 32 %       |
| Peak Coverage:        | 22 %       |
| Protein Localisation: | 80 ... 102 |

Scan number 8770 Raw file LNCAP\_Silac\_23F10\_set3\_04  
 Method ITMS; CID Pepti... 215.72

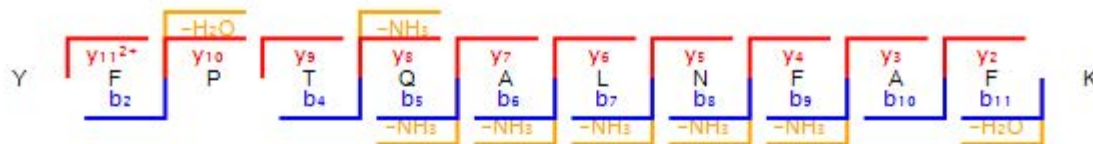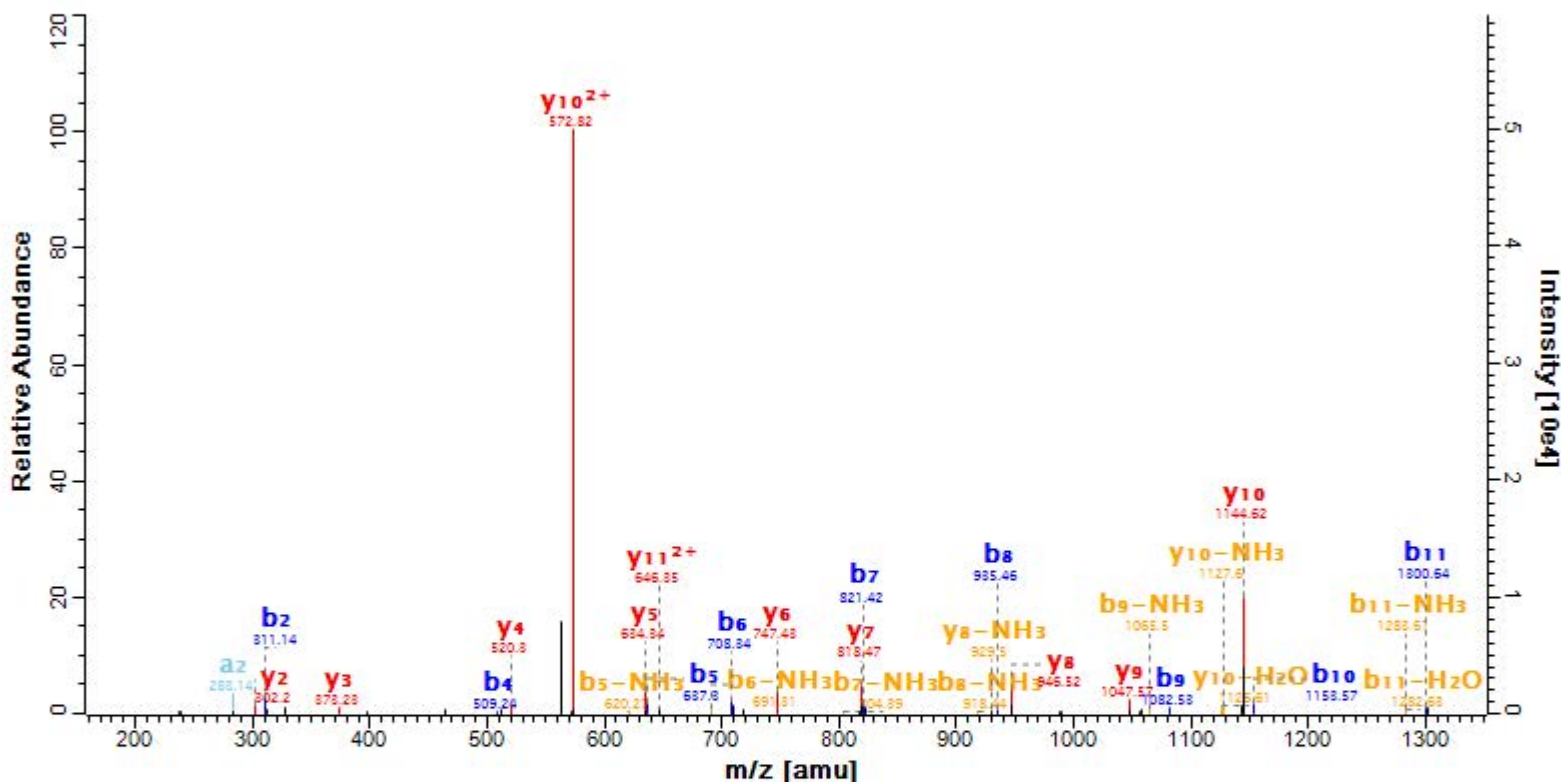

#### precursor information

|                   |                 |
|-------------------|-----------------|
| Mass:             | 1445.73408      |
| m/z:              | 723.87432       |
| Charge:           | 2+              |
| Retentiontime:    | 55.934139251709 |
| Score:            | 215.7221        |
| Mass Error [ppm]: | -0.17442        |
| PEP:              | 8.0065E-20      |
| Precursor Type:   | MULTI           |

#### general information

|                       |           |
|-----------------------|-----------|
| Annotation:           | 10 of 12  |
| AminoAcids Coverage:  | 83 %      |
| Intensity Coverage:   | 79 %      |
| Peak Coverage:        | 44 %      |
| Protein Localisation: | 81 ... 92 |

| a ion    |        | b ion    |        | seq |   |    | y ion    |         | y <sup>2+</sup> ion |         |
|----------|--------|----------|--------|-----|---|----|----------|---------|---------------------|---------|
| Δ dalton | mass   | Δ dalton | mass   |     |   |    | Δ dalton | mass    | Δ dalton            | mass    |
|          | 136.08 |          | 164.07 | 1   | Y | 11 |          |         |                     |         |
| +0.1006  | 283.14 | -0.046   | 311.14 | 2   | F | 10 | 1291.7   |         | 646.35              | +0.0407 |
|          | 380.2  |          | 408.19 | 3   | P | 9  | 1144.6   | -0.059  | 572.82              | +0.1702 |
|          | 481.24 | +0.1076  | 509.24 | 4   | T | 8  | 1047.6   | -0.147  | 1047.6              |         |
|          | 609.3  | -0.01    | 637.3  | 5   | Q | 7  | 946.52   | -0.001  | 946.52              |         |
|          | 680.34 | +0.1421  | 708.34 | 6   | A | 6  | 818.47   | +0.0779 | 818.47              |         |
|          | 793.42 | -0.134   | 821.42 | 7   | L | 5  | 747.43   | -0.006  | 747.43              |         |
|          | 907.47 | +0.0628  | 935.46 | 8   | N | 4  | 634.34   | +0.0798 | 634.34              |         |
|          | 1054.5 | +0.1173  | 1082.5 | 9   | F | 3  | 520.3    | +0.1892 | 520.3               |         |
|          | 1125.6 | -0.121   | 1153.6 | 10  | A | 2  | 373.23   | +0.0706 | 373.23              |         |
|          | 1272.6 | -0.195   | 1300.6 | 11  | F | 1  | 302.2    | +0.0932 | 302.2               |         |
|          |        |          |        | 12  | K | 0  | 155.13   |         | 155.13              |         |



Scan number 8887 Raw file LNCAP\_Silac\_23F10\_set3\_04  
 Method ITMS; CID Pepti... 113.25

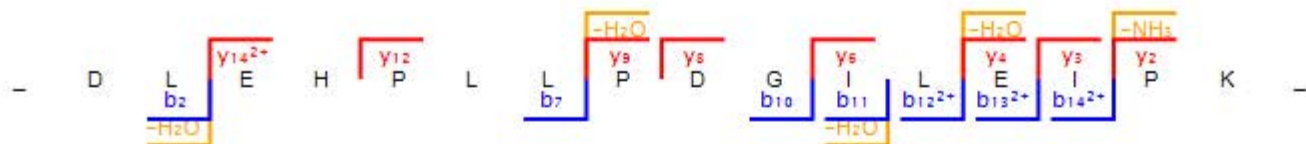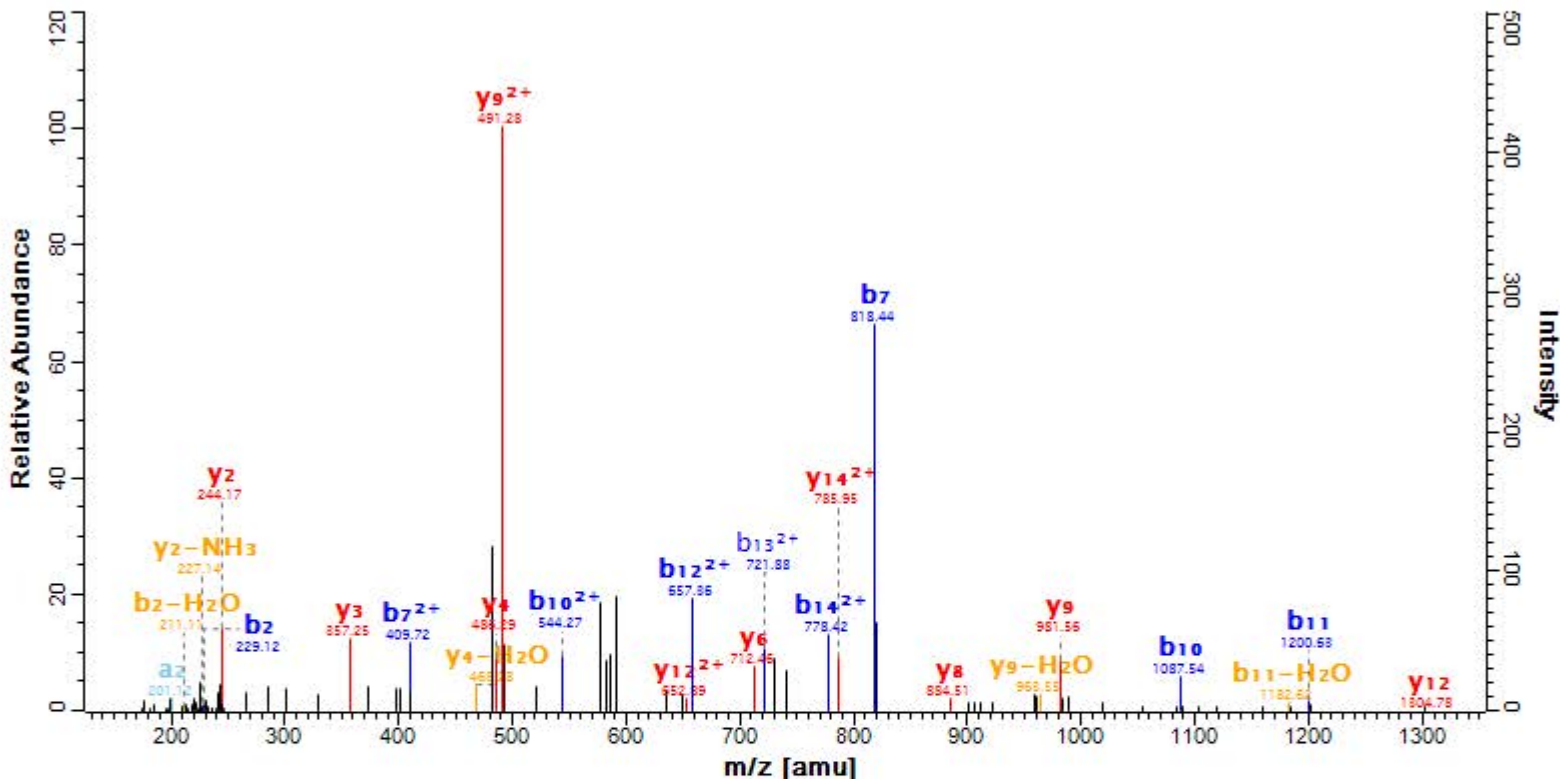

precursor information

|                   |                 |
|-------------------|-----------------|
| Mass:             | 1797.98804      |
| m/z:              | 600.33662       |
| Charge:           | 3+              |
| Retentiontime:    | 56.831237792968 |
| Score:            | 113.2528        |
| Mass Error [ppm]: | 0.21734         |
| PEP:              | 3.3815E-07      |
| Precursor Type:   | MULTI           |

general information

|                       |           |
|-----------------------|-----------|
| Annotation:           | 13 of 16  |
| AminoAcids Coverage:  | 81 %      |
| Intensity Coverage:   | 57 %      |
| Peak Coverage:        | 25 %      |
| Protein Localisation: | 63 ... 78 |

|       | a ion         | b <sup>2+</sup> ion | b ion         |       |       |    | y ion         | y <sup>2+</sup> ion |       |
|-------|---------------|---------------------|---------------|-------|-------|----|---------------|---------------------|-------|
|       | Δ dalton mass | Δ dalton mass       | Δ dalton mass |       | seq   |    | Δ dalton mass | Δ dalton mass       |       |
|       | 88.04         | 116                 | 116           | 1     | D     | 15 |               |                     |       |
| +0.15 | 201.1         | 229.1               | -0.04         | 229.1 | 2     | L  | 14            | 1684                |       |
|       | 330.2         | 358.2               |               | 358.2 | 3     | E  | 13            | 1571                |       |
|       | 467.2         | 495.2               |               | 495.2 | 4     | H  | 12            | 1442                |       |
|       | 564.3         | 592.3               |               | 592.3 | 5     | P  | 11            | 1305                |       |
|       | 677.4         | 705.4               |               | 705.4 | 6     | L  | 10            | 1208                |       |
|       | 790.4         | -0.03               | 409.7         | +0    | 818.4 | 7  | L             | 9                   | 1095  |
|       | 887.5         |                     | 915.5         |       | 915.5 | 8  | P             | 8                   | 981.6 |
|       | 1003          |                     | 1031          |       | 1031  | 9  | D             | 7                   | 884.5 |
|       | 1060          | +0.21               | 2544.3        | +0.01 | 51088 | 10 | G             | 6                   | 769.5 |
|       | 1173          |                     | 1201          | -0.01 | 1201  | 11 | I             | 5                   | 712.5 |
|       | 1286          | +0.19               | 7657.4        |       | 1314  | 12 | L             | 4                   | 599.4 |
|       | 1415          | -0.1                | 721.9         |       | 1443  | 13 | E             | 3                   | 486.3 |
|       | 1528          | +0.19               | 1778.4        |       | 1556  | 14 | I             | 2                   | 357.2 |
|       | 1625          |                     | 1653          |       | 1653  | 15 | P             | 1                   | 244.2 |
|       |               |                     |               |       |       | 16 | K             | 0                   | 147.1 |

Scan number 927 Raw file LNCAP\_Silac\_23F10\_set3\_04  
 Method ITMS: CID Pepti... 61.78

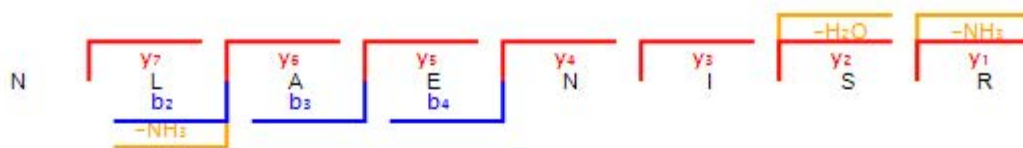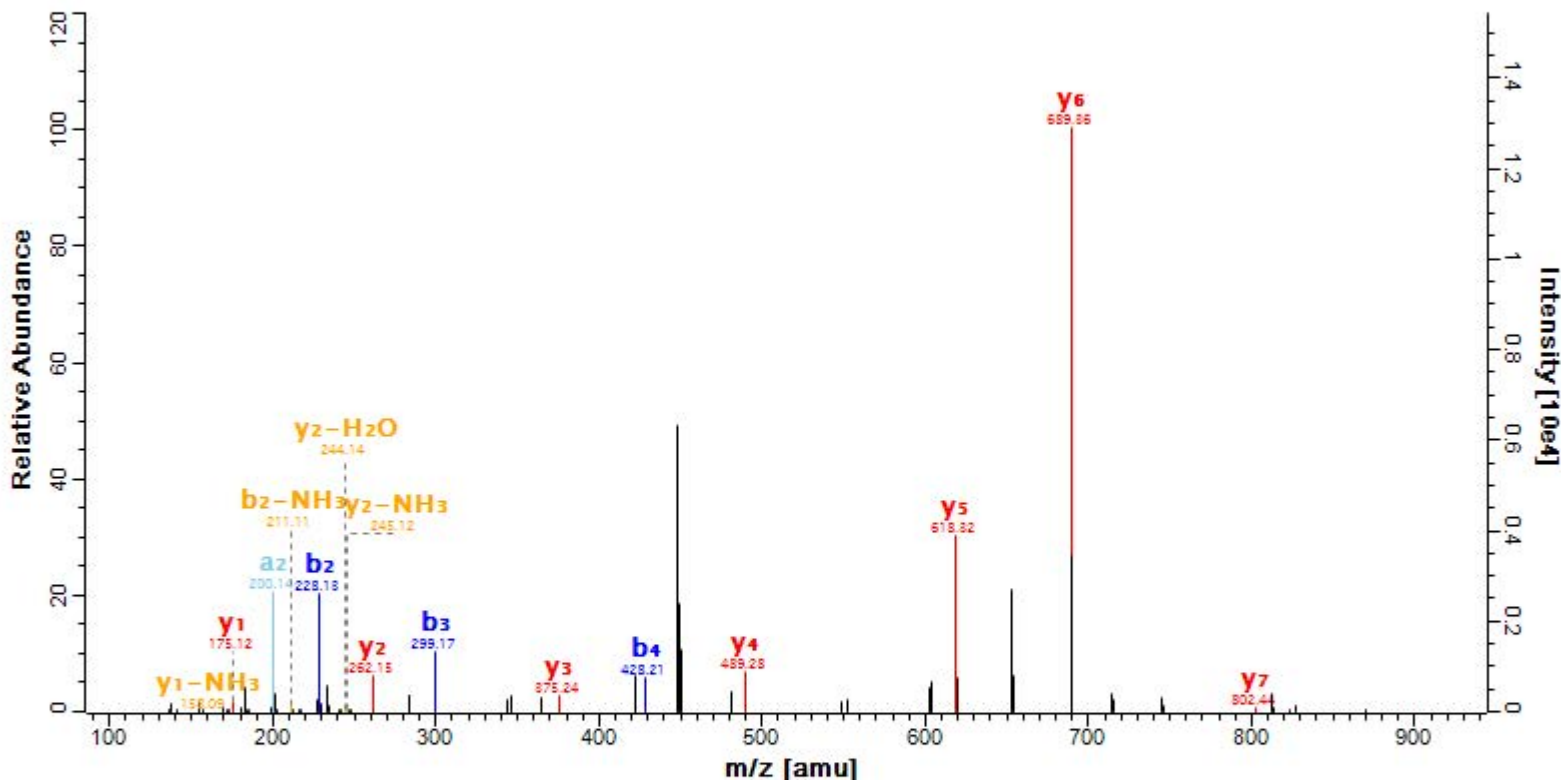

#### precursor information

|                       |                 |
|-----------------------|-----------------|
| Mass:                 | 915.47788       |
| m/z:                  | 458.74622       |
| Charge:               | 2+              |
| Retentiontime:        | 11.259828567504 |
| Score:                | 61.77951        |
| Mass Error [ppm]:     | 0.53012         |
| g PEP:                | 0.036201        |
| Annotation:           | 7 of 8          |
| AminoAcids Coverage:  | 88 %            |
| Intensity Coverage:   | 48 %            |
| Peak Coverage:        | 14 %            |
| Protein Localisation: | 271 ... 278     |

| a ion    |          | b ion    |          |     | y ion    |      |          |           |
|----------|----------|----------|----------|-----|----------|------|----------|-----------|
| Δ dalton | mass     | Δ dalton | mass     | seq | Δ dalton | mass |          |           |
|          | 87.05529 |          | 115.0502 | 1   | N        | 7    |          |           |
| -0.02856 | 200.1394 | -0.03704 | 228.1343 | 2   | L        | 6    | 802.4417 | +0.019134 |
|          | 271.1765 | -0.03103 | 299.1714 | 3   | A        | 5    | 689.3577 | -0.00514  |
|          | 400.2191 | -0.08128 | 428.214  | 4   | E        | 4    | 618.3206 | +0.010856 |
|          | 514.262  |          | 542.2569 | 5   | N        | 3    | 489.278  | +0.007611 |
|          | 627.3461 |          | 655.341  | 6   | I        | 2    | 375.235  | +0.146547 |
|          | 714.3781 |          | 742.373  | 7   | S        | 1    | 262.151  | +0.005453 |
|          |          |          |          | 8   | R        | 0    | 175.119  | -0.01977  |

Scan number 958 Raw file LNCAP\_Silac\_23F10\_set3\_04  
 Method ITMS: CID Pepti... 123.51

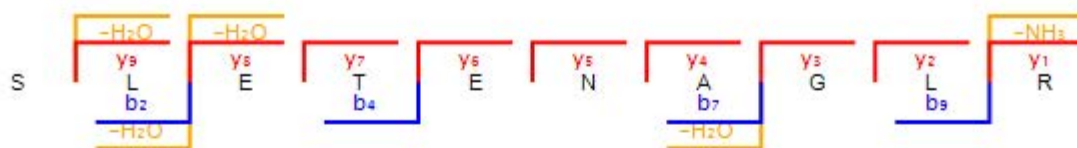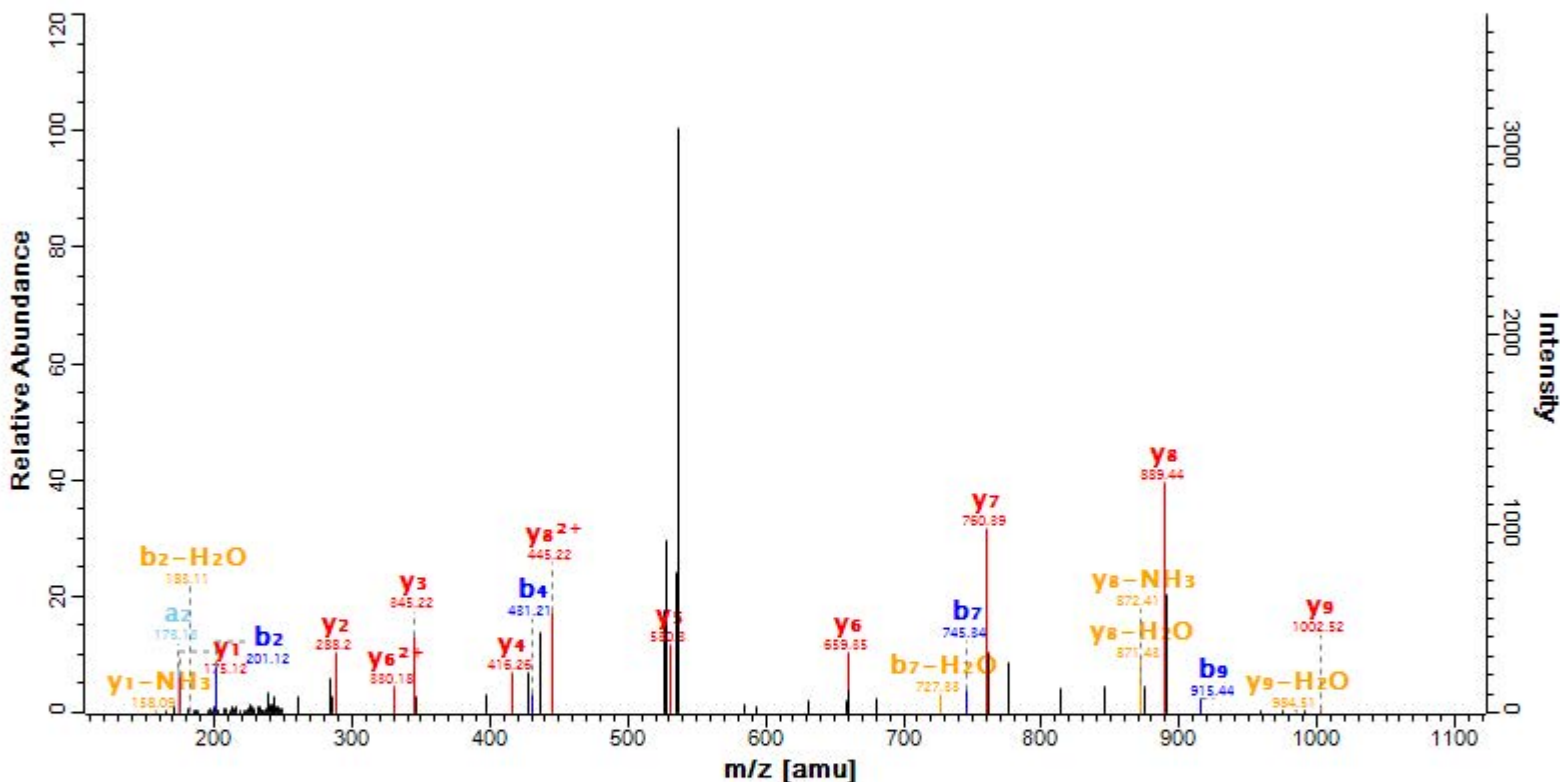

#### precursor information

|                   |                 |
|-------------------|-----------------|
| Mass:             | 1088.54598      |
| m/z:              | 545.28027       |
| Charge:           | 2+              |
| Retentiontime:    | 11.441184997558 |
| Score:            | 123.5133        |
| Mass Error [ppm]: | -0.20334        |
| PEP:              | 0.00026871      |

|                       |           |
|-----------------------|-----------|
| Precursor Type:       | MULTI     |
| Annotation:           | 9 of 10   |
| AminoAcids Coverage:  | 90 %      |
| Intensity Coverage:   | 37 %      |
| Peak Coverage:        | 20 %      |
| Protein Localisation: | 51 ... 60 |

| a ion    |        | b ion    |        |    |     |   | y ion    |         | y <sup>2+</sup> ion |         |
|----------|--------|----------|--------|----|-----|---|----------|---------|---------------------|---------|
| Δ dalton | mass   | Δ dalton | mass   |    | seq |   | Δ dalton | mass    | Δ dalton            | mass    |
|          | 60.044 |          | 88.039 | 1  | S   | 9 |          |         |                     |         |
| -0.043   | 173.13 | +0.0746  | 201.12 | 2  | L   | 8 | 1002.5   | +0.2033 | 1002.5              |         |
|          | 302.17 |          | 330.17 | 3  | E   | 7 | 889.44   | -0.04   | 445.22              | +0.2551 |
|          | 403.22 | +0.1546  | 431.21 | 4  | T   | 6 | 760.39   | +0.0848 | 760.39              |         |
|          | 532.26 |          | 560.26 | 5  | E   | 5 | 659.35   | +0.0712 | 330.18              | +0.0152 |
|          | 646.3  |          | 674.3  | 6  | N   | 4 | 530.3    | +0.1118 | 530.3               |         |
|          | 717.34 | -0.027   | 745.34 | 7  | A   | 3 | 416.26   | +0.116  | 416.26              |         |
|          | 774.36 |          | 802.36 | 8  | G   | 2 | 345.22   | +0.0555 | 345.22              |         |
|          | 887.45 | +0.0763  | 915.44 | 9  | L   | 1 | 288.2    | +0.0806 | 288.2               |         |
|          |        |          |        | 10 | R   | 0 | 175.12   | +0.0019 | 175.12              |         |

Scan number 9628 Raw file LNCAP\_Silac\_23F10\_set3\_04  
 Method ITMS; CID Pepti... 84.89

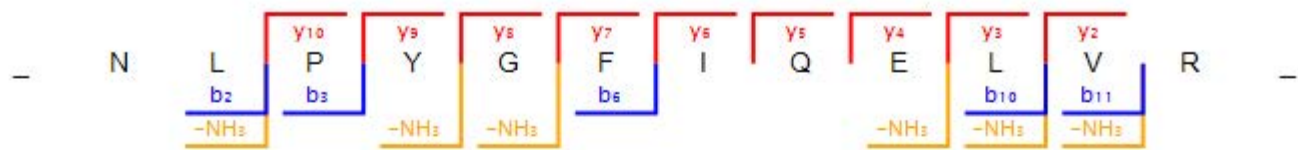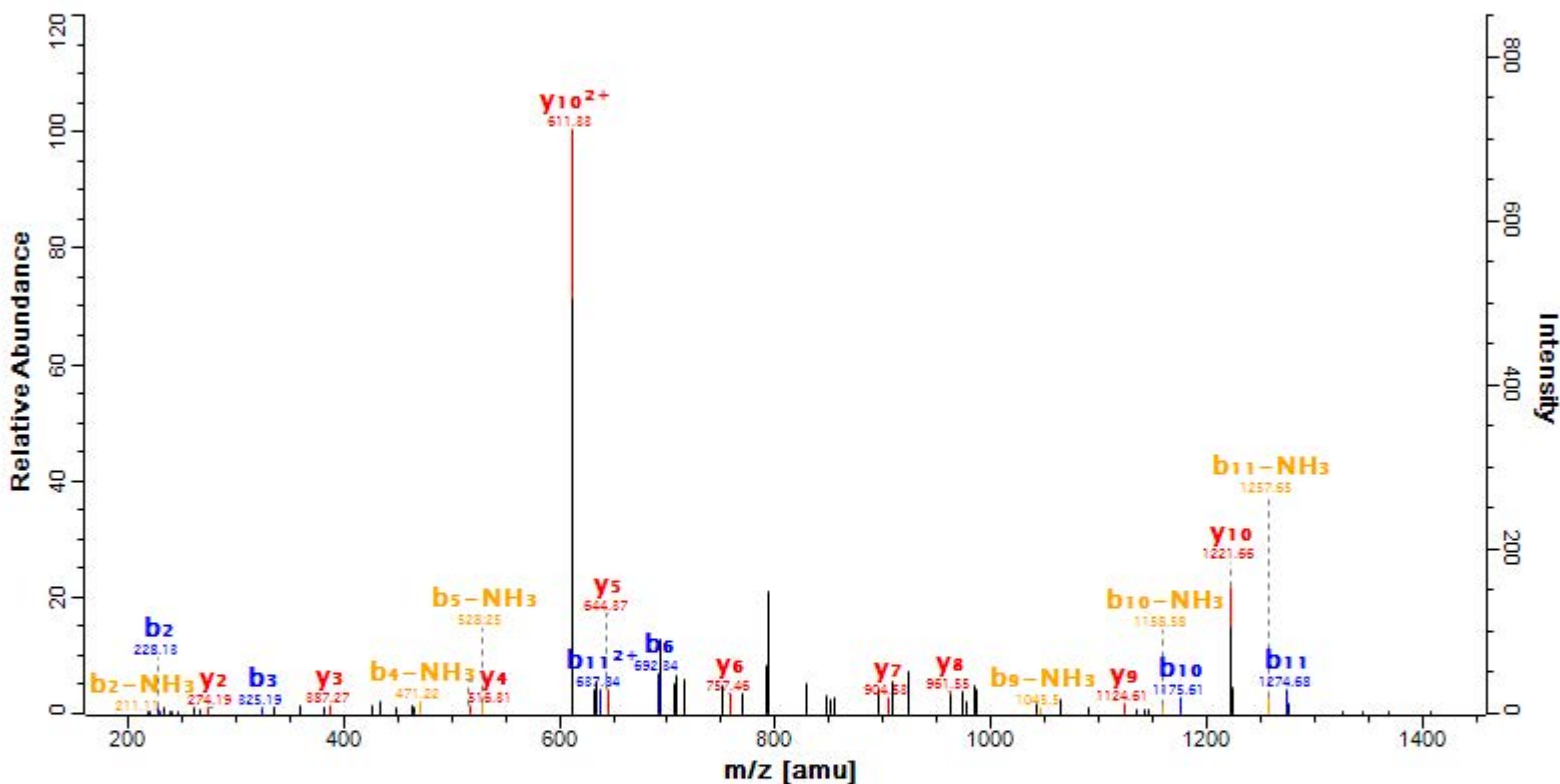

**precursor information**

|                   |                 |
|-------------------|-----------------|
| Mass:             | 1447.78181      |
| m/z:              | 724.89818       |
| Charge:           | 2+              |
| Retentiontime:    | 63.245246887207 |
| Score:            | 84.89191        |
| Mass Error [ppm]: | -0.37299        |
| PEP:              | 0.0015143       |
| Precursor Type:   | MULTI           |

**general information**

|                       |             |
|-----------------------|-------------|
| Annotation:           | 10 of 12    |
| AminoAcids Coverage:  | 83 %        |
| Intensity Coverage:   | 40 %        |
| Peak Coverage:        | 25 %        |
| Protein Localisation: | 496 ... 507 |

| b <sup>2+</sup> ion |        | b ion    |        |     | y ion |          | y <sup>2+</sup> ion |          |        |         |
|---------------------|--------|----------|--------|-----|-------|----------|---------------------|----------|--------|---------|
| Δ dalton            | mass   | Δ dalton | mass   | seq |       | Δ dalton | mass                | Δ dalton | mass   |         |
|                     | 115.05 |          | 115.05 | 1   | N     | 11       |                     |          |        |         |
|                     | 228.13 | -0.027   | 228.13 | 2   | L     | 10       | 1334.7              |          | 1334.7 |         |
|                     | 325.19 | +0.1145  | 325.19 | 3   | P     | 9        | 1221.7              | -0.057   | 611.33 | +0.0432 |
|                     | 488.25 |          | 488.25 | 4   | Y     | 8        | 1124.6              | +0.0433  | 1124.6 |         |
|                     | 545.27 |          | 545.27 | 5   | G     | 7        | 961.55              | +0.0934  | 961.55 |         |
|                     | 692.34 | -0.364   | 692.34 | 6   | F     | 6        | 904.53              | -0.033   | 904.53 |         |
|                     | 805.42 |          | 805.42 | 7   | I     | 5        | 757.46              | +0.1824  | 757.46 |         |
|                     | 933.48 |          | 933.48 | 8   | Q     | 4        | 644.37              | +0.0706  | 644.37 |         |
|                     | 1062.5 |          | 1062.5 | 9   | E     | 3        | 516.31              | +0.1254  | 516.31 |         |
|                     | 1175.6 | -0.071   | 1175.6 | 10  | L     | 2        | 387.27              | +0.1893  | 387.27 |         |
| -0.092              | 637.84 | -0.058   | 1274.7 | 11  | V     | 1        | 274.19              | -0.008   | 274.19 |         |
|                     |        |          |        | 12  | R     | 0        | 175.12              |          | 175.12 |         |

Scan number 1207 Raw file LNCAP\_Silac\_23F10\_set3\_05  
 Method ITMS; CID Pepti... 127.56

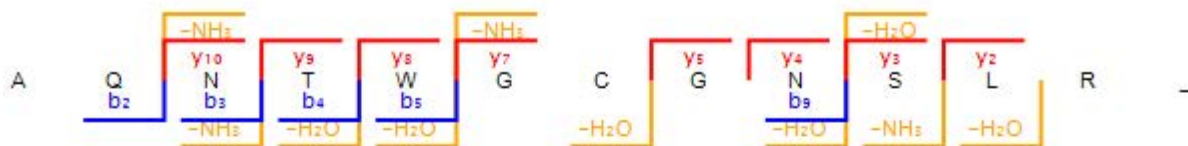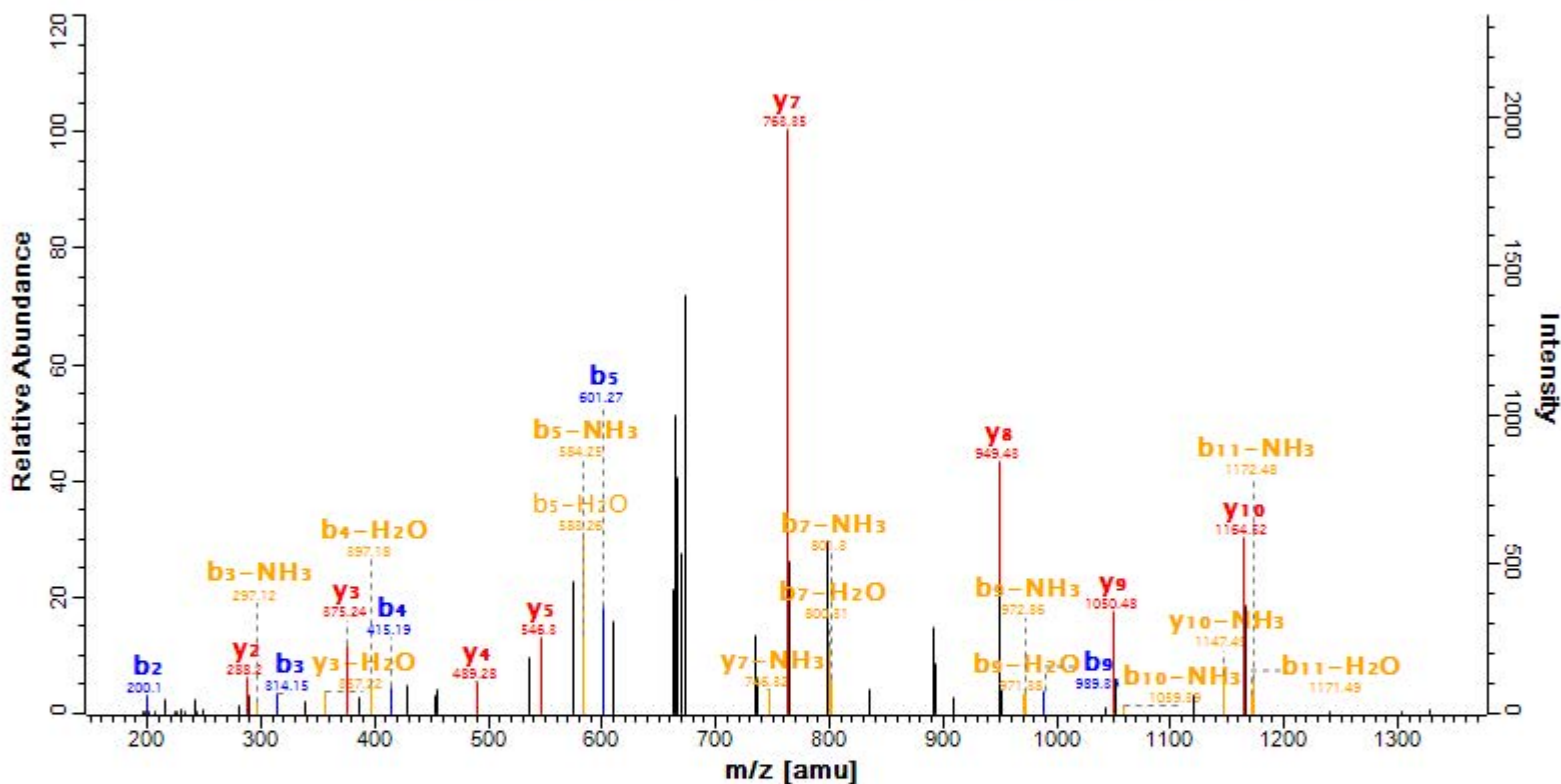

#### precursor information

|                   |                 |
|-------------------|-----------------|
| Mass:             | 1362.61074      |
| m/z:              | 682.31265       |
| Charge:           | 2+              |
| Retentiontime:    | 15.035320281982 |
| Score:            | 127.5587        |
| Mass Error [ppm]: | 0.63049         |
| PEP:              | 2.2765E-05      |
| Precursor Type:   | MULTI           |

#### general information

|                       |             |
|-----------------------|-------------|
| Annotation:           | 10 of 12    |
| AminoAcids Coverage:  | 83 %        |
| Intensity Coverage:   | 43 %        |
| Peak Coverage:        | 35 %        |
| Protein Localisation: | 516 ... 527 |

| b ion      |               |     |   | y ion    |               |
|------------|---------------|-----|---|----------|---------------|
| Δ dalton   | mass          | seq |   | Δ dalton | mass          |
|            | 72.044390254  | 1   | A | 11       |               |
| +0.0757584 | 200.102967766 | 2   | Q | 10       | 1292.58004405 |
| +0.1469515 | 314.145895213 | 3   | N | 9        | 1164.52146654 |
| +0.0755303 | 415.193573687 | 4   | T | 8        | 1050.47853909 |
| -0.1403183 | 601.272886641 | 5   | W | 7        | 949.430860621 |
|            | 658.294350364 | 6   | G | 6        | 763.351547667 |
|            | 818.324998566 | 7   | C | 5        | 706.330083944 |
|            | 875.346462289 | 8   | G | 4        | 546.299435742 |
| -0.0388648 | 989.389389736 | 9   | N | 3        | 489.277972019 |
|            | 1076.42141815 | 10  | S | 2        | 375.235044571 |
|            | 1189.50548213 | 11  | L | 1        | 288.203016161 |
|            |               | 12  | R | 0        | 175.118952181 |

Scan number 1301 Raw file LNCAP\_Silac\_23F10\_set3\_05  
 Method ITMS; CID Pepti... 238.79

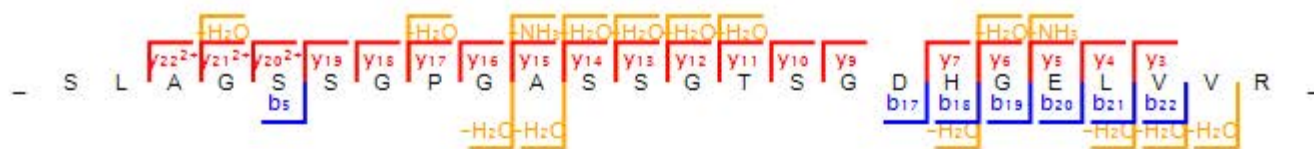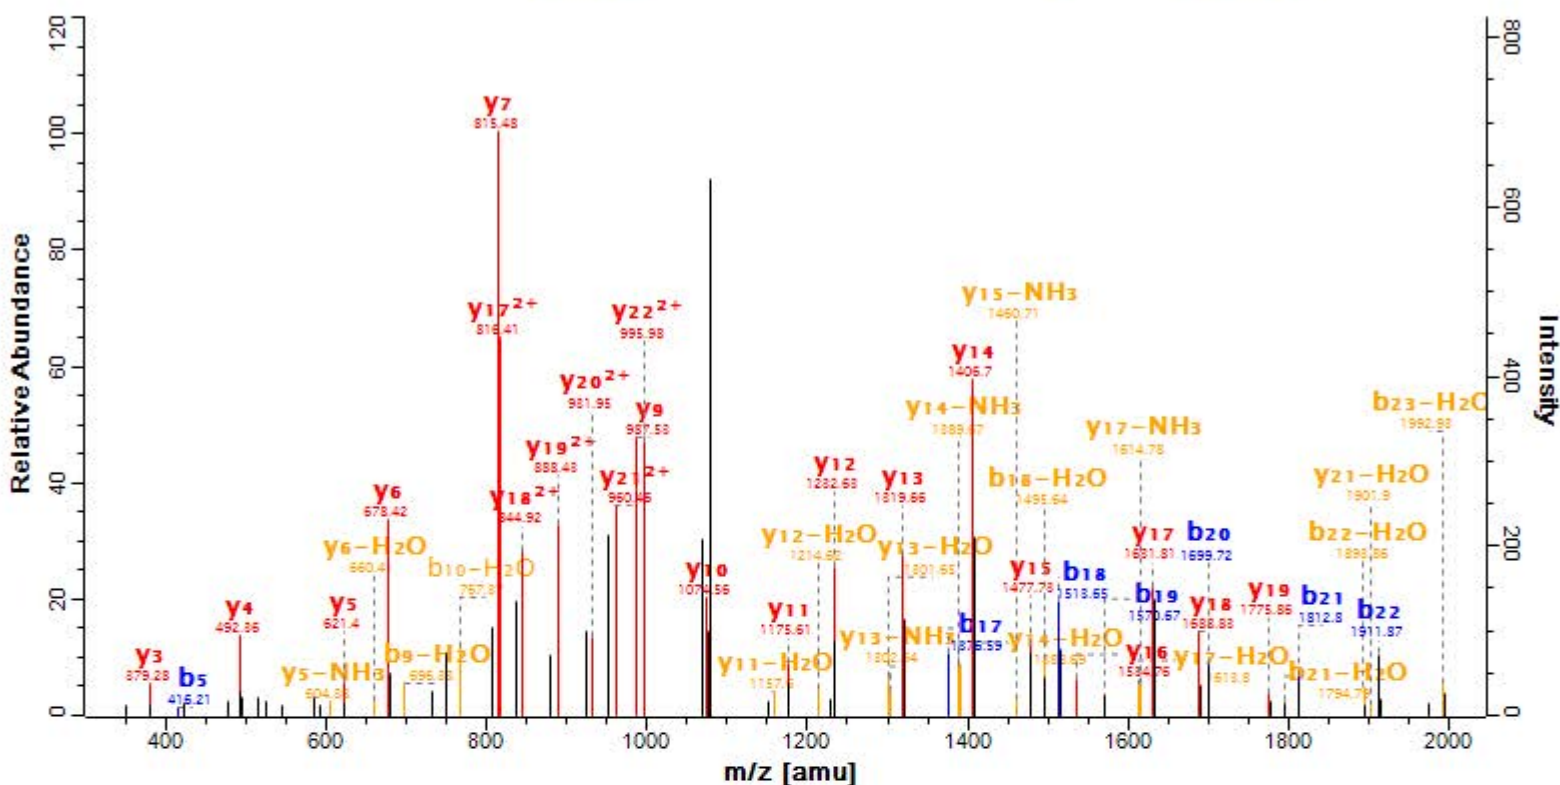

precursor information

|                   |                 |
|-------------------|-----------------|
| Mass:             | 2184.03976      |
| m/z:              | 1093.02716      |
| Charge:           | 2+              |
| Retentiontime:    | 15.715456962585 |
| Score:            | 238.791         |
| Mass Error [ppm]: | -0.42906        |
| PEP:              | 5.1872E-92      |
| Precursor Type:   | MULTI           |

| b ion     |          |     |   | y ion    |          | y <sup>2+</sup> ion |                    |
|-----------|----------|-----|---|----------|----------|---------------------|--------------------|
| Δ dalton  | mass     | seq |   | Δ dalton | mass     | Δ dalton            | mass               |
|           | 88.0393  | 1   | S | 23       |          |                     |                    |
|           | 201.1234 | 2   | L | 22       | 2104.036 |                     | 2104.036           |
|           | 272.1605 | 3   | A | 21       | 1990.952 |                     | 995.9796 +0.227141 |
|           | 329.1819 | 4   | G | 20       | 1919.915 |                     | 960.4611 +0.278291 |
| +0.11354  | 416.214  | 5   | S | 19       | 1862.893 |                     | 931.9504 -0.19682  |
|           | 503.246  | 6   | S | 18       | 1775.861 | +0.291179           | 888.4343 +0.147322 |
|           | 560.2675 | 7   | G | 17       | 1688.829 | +0.046351           | 844.9183 +0.296149 |
|           | 657.3202 | 8   | P | 16       | 1631.808 | -0.19708            | 816.4076 +0.278072 |
|           | 714.3417 | 9   | G | 15       | 1534.755 | +0.151585           | 1534.755           |
|           | 785.3788 | 10  | A | 14       | 1477.734 | -0.11101            | 1477.734           |
|           | 872.4108 | 11  | S | 13       | 1406.697 | -0.12687            | 1406.697           |
|           | 959.4429 | 12  | S | 12       | 1319.665 | -0.02258            | 1319.665           |
|           | 1016.464 | 13  | G | 11       | 1232.633 | -0.07283            | 1232.633           |
|           | 1117.512 | 14  | T | 10       | 1175.611 | -0.05429            | 1175.611           |
|           | 1204.544 | 15  | S | 9        | 1074.563 | -0.00454            | 1074.563           |
|           | 1261.565 | 16  | G | 8        | 987.5313 | -0.19614            | 987.5313           |
| -0.07938  | 1376.592 | 17  | D | 7        | 930.5099 |                     | 930.5099           |
| -0.02062  | 1513.651 | 18  | H | 6        | 815.4829 | +0.029265           | 815.4829           |
| -0.08334  | 1570.673 | 19  | G | 5        | 678.424  | +0.038128           | 678.424            |
| -0.12032  | 1699.715 | 20  | E | 4        | 621.4026 | +0.060447           | 621.4026           |
| +0.144006 | 1812.799 | 21  | L | 3        | 492.36   | +0.156445           | 492.36             |
| -0.09409  | 1911.868 | 22  | V | 2        | 379.2759 | -0.04385            | 379.2759           |
|           | 2010.936 | 23  | V | 1        | 280.2075 |                     | 280.2075           |
|           |          | 24  | R | 0        | 181.1301 |                     | 181.1301           |

general information

|                       |           |
|-----------------------|-----------|
| Annotation:           | 21 of 24  |
| AminoAcids Coverage:  | 88 %      |
| Intensity Coverage:   | 58 %      |
| Peak Coverage:        | 47 %      |
| Protein Localisation: | 60 ... 83 |

Scan number 1400 Raw file LNCAP\_Silac\_23F10\_set3\_05  
 Method ITMS: CID Pepti... 62.09

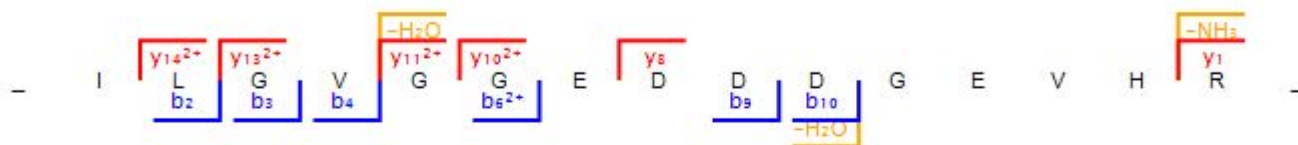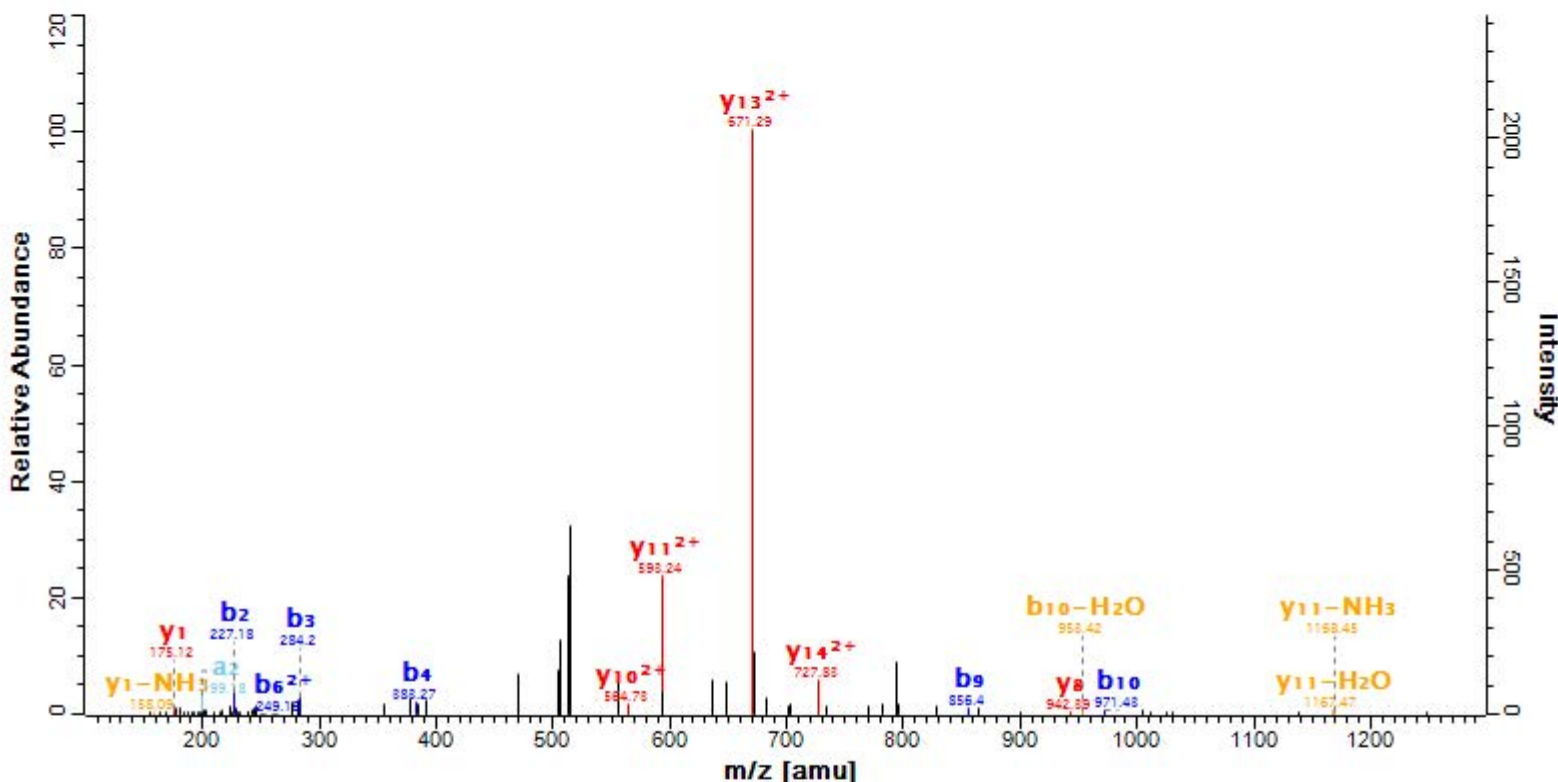

precursor information

|                   |                 |
|-------------------|-----------------|
| Mass:             | 1566.72722      |
| m/z:              | 523.24968       |
| Charge:           | 3+              |
| Retentiontime:    | 16.439025878906 |
| Score:            | 62.08793        |
| Mass Error [ppm]: | -0.12484        |
| PEP:              | 0.0041787       |
| Precursor Type:   | MULTI           |

| a ion         | b <sup>2+</sup> ion | b ion         |    |     |    | y ion         | y <sup>2+</sup> ion |
|---------------|---------------------|---------------|----|-----|----|---------------|---------------------|
| Δ dalton mass | Δ dalton mass       | Δ dalton mass |    | seq |    | Δ dalton mass | Δ dalton mass       |
| 86.1          | 114.1               | 114.1         | 1  | I   | 14 |               |                     |
| -0.05 199.2   | 227.2               | -0.1 227.2    | 2  | L   | 13 | 1455          | 727.8 +0.281        |
| 256.2         | 284.2               | -0.01 284.2   | 3  | G   | 12 | 1342          | 671.3 +0.239        |
| 355.3         | 383.3               | -0.11 383.3   | 4  | V   | 11 | 1285          | 1285                |
| 412.3         | 440.3               | 440.3         | 5  | G   | 10 | 1185          | 593.2 +0.239        |
| 469.3         | +0.07 5249.2        | 497.3         | 6  | G   | 9  | 1128          | 564.7 +0            |
| 598.4         | 626.4               | 626.4         | 7  | E   | 8  | 1071          | 1071                |
| 713.4         | 741.4               | 741.4         | 8  | D   | 7  | 942.4 +0.402  | 942.4               |
| 828.4         | 856.4               | +0.05 856.4   | 9  | D   | 6  | 827.4         | 827.4               |
| 943.4         | 971.4               | +0.31 971.4   | 10 | D   | 5  | 712.3         | 712.3               |
| 1000          | 1028                | 1028          | 11 | G   | 4  | 597.3         | 597.3               |
| 1130          | 1157                | 1157          | 12 | E   | 3  | 540.3         | 540.3               |
| 1229          | 1257                | 1257          | 13 | V   | 2  | 411.2         | 411.2               |
| 1366          | 1394                | 1394          | 14 | H   | 1  | 312.2         | 312.2               |
|               |                     |               | 15 | R   | 0  | 175.1 -0.05   | 175.1               |

general information

|                       |             |
|-----------------------|-------------|
| Annotation:           | 9 of 15     |
| AminoAcids Coverage:  | 60 %        |
| Intensity Coverage:   | 44 %        |
| Peak Coverage:        | 14 %        |
| Protein Localisation: | 175 ... 189 |

Scan number 1482 Raw file LNCAP\_Silac\_23F10\_set3\_05  
 Method ITMS; CID Pepti... 128.69

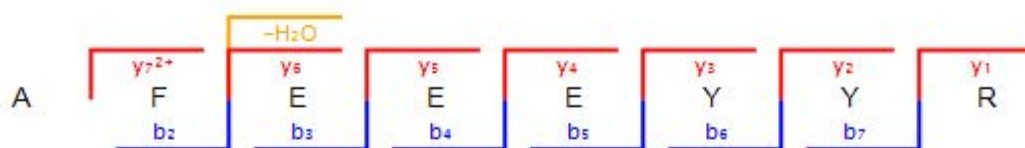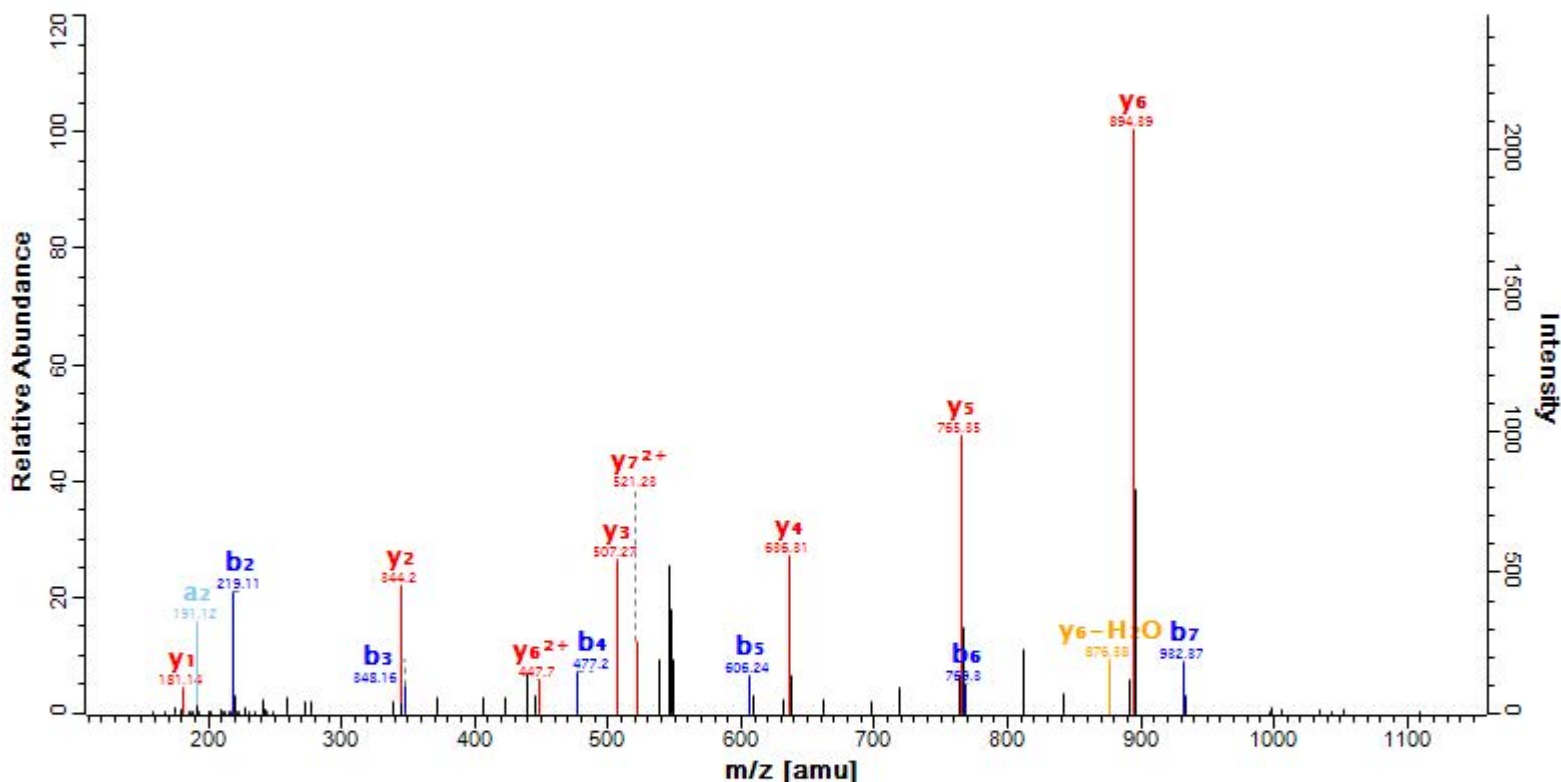

#### precursor information

|                       |                 |
|-----------------------|-----------------|
| Mass:                 | 1105.47177      |
| m/z:                  | 553.74316       |
| Charge:               | 2+              |
| Retentiontime:        | 17.031246185302 |
| Score:                | 128.6864        |
| Mass Error [ppm]:     | 0.11869         |
| g PEP:                | 0.00067315      |
| Annotation:           | 7 of 8          |
| AminoAcids Coverage:  | 88 %            |
| Intensity Coverage:   | 59 %            |
| Peak Coverage:        | 17 %            |
| Protein Localisation: | 418 ... 425     |

| a ion    |        | b ion    |        |   |     |   | y ion    |         | y <sup>2+</sup> ion |         |
|----------|--------|----------|--------|---|-----|---|----------|---------|---------------------|---------|
| Δ dalton | mass   | Δ dalton | mass   |   | seq |   | Δ dalton | mass    | Δ dalton            | mass    |
|          | 44.049 |          | 72.044 | 1 | A   | 7 |          |         |                     |         |
| -0.048   | 191.12 | -0.009   | 219.11 | 2 | F   | 6 | 1041.5   |         | 521.23              | +0.16   |
|          | 320.16 | +0.0322  | 348.16 | 3 | E   | 5 | 894.39   | -0.046  | 447.7               | +0.0582 |
|          | 449.2  | +0.0773  | 477.2  | 4 | E   | 4 | 765.35   | +0.0676 | 765.35              |         |
|          | 578.25 | +0.0989  | 606.24 | 5 | E   | 3 | 636.31   | -0.028  | 636.31              |         |
|          | 741.31 | -0.138   | 769.3  | 6 | Y   | 2 | 507.27   | -0.021  | 507.27              |         |
|          | 904.37 | -0.069   | 932.37 | 7 | Y   | 1 | 344.2    | +0.0763 | 344.2               |         |
|          |        |          |        | 8 | R   | 0 | 181.14   | +0.0135 | 181.14              |         |



Scan number 1991 Raw file LNCAP\_Silac\_23F10\_set3\_05  
 Method ITMS; CID Pepti... 93.5

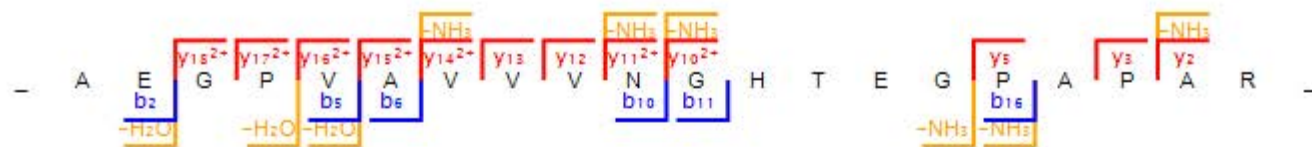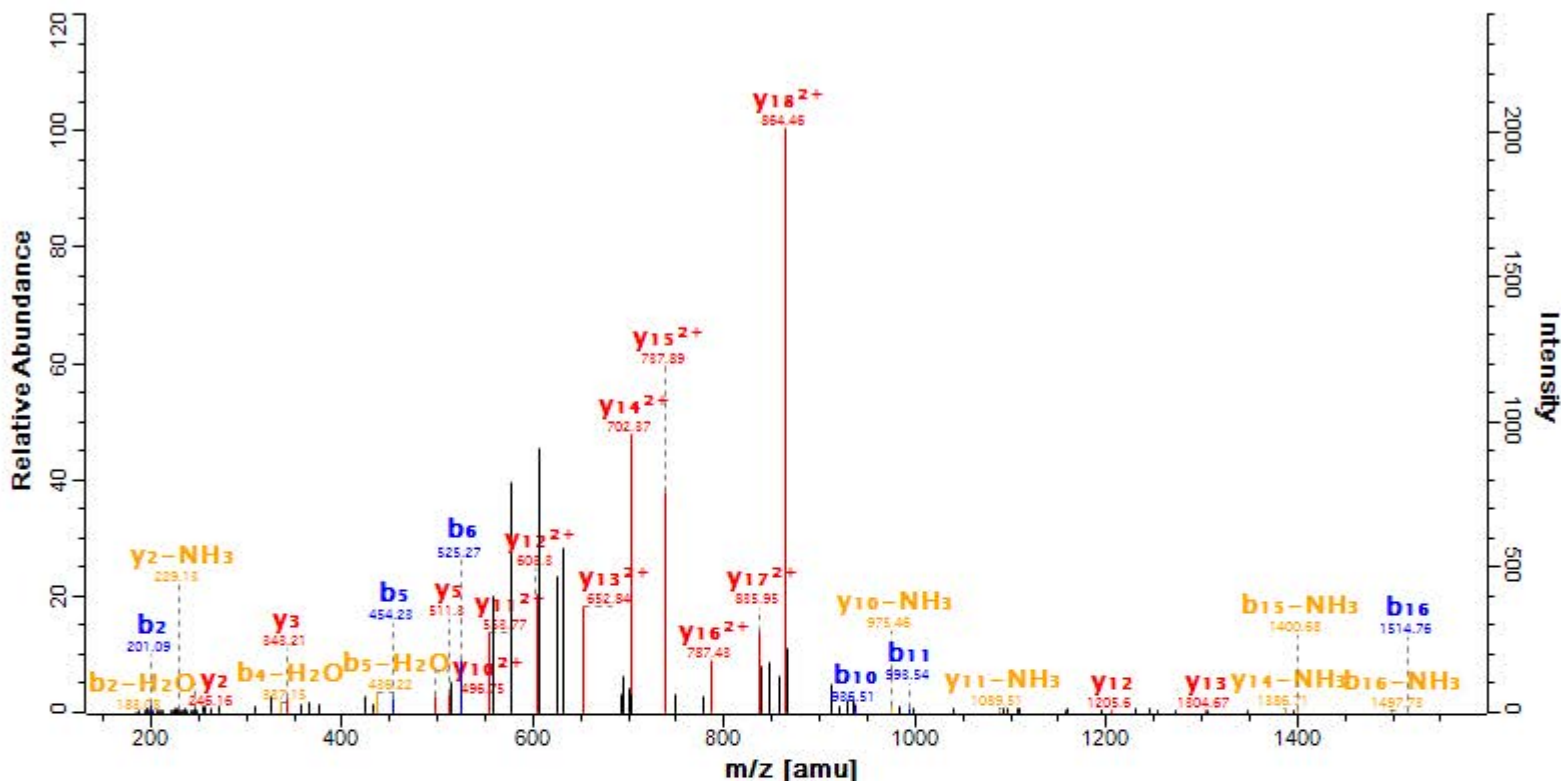

#### precursor information

|                   |                 |
|-------------------|-----------------|
| Mass:             | 1926.99212      |
| m/z:              | 643.33798       |
| Charge:           | 3+              |
| Retentiontime:    | 20.428529739379 |
| Score:            | 93.49528        |
| Mass Error [ppm]: | 0.49096         |
| PEP:              | 4.707E-06       |
| Precursor Type:   | MULTI           |

| b ion     |          |     |   | y ion    |          | y <sup>2+</sup> ion |          |
|-----------|----------|-----|---|----------|----------|---------------------|----------|
| Δ dalton  | mass     | seq |   | Δ dalton | mass     | Δ dalton            | mass     |
|           | 72.04439 | 1   | A | 19       |          |                     |          |
| -0.02982  | 201.087  | 2   | E | 18       | 1856.961 |                     | 1856.961 |
|           | 258.1084 | 3   | G | 17       | 1727.919 |                     | 864.463  |
|           | 355.1612 | 4   | P | 16       | 1670.897 |                     | 835.9523 |
| +0.003896 | 454.2296 | 5   | V | 15       | 1573.845 |                     | 787.4259 |
| +0.140793 | 525.2667 | 6   | A | 14       | 1474.776 |                     | 737.8917 |
|           | 624.3352 | 7   | V | 13       | 1403.739 |                     | 702.3731 |
|           | 723.4036 | 8   | V | 12       | 1304.671 | +0.134724           | 652.8389 |
|           | 822.472  | 9   | V | 11       | 1205.602 | -0.29173            | 603.3047 |
| +0.0681   | 936.5149 | 10  | N | 10       | 1106.534 |                     | 553.7705 |
| +0.144476 | 993.5364 | 11  | G | 9        | 992.4908 |                     | 496.749  |
|           | 1130.595 | 12  | H | 8        | 935.4694 |                     | 935.4694 |
|           | 1231.643 | 13  | T | 7        | 798.4104 |                     | 798.4104 |
|           | 1360.686 | 14  | E | 6        | 697.3628 |                     | 697.3628 |
|           | 1417.707 | 15  | G | 5        | 568.3202 |                     | 568.3202 |
| +0.332381 | 1514.76  | 16  | P | 4        | 511.2987 | -0.02997            | 511.2987 |
|           | 1585.797 | 17  | A | 3        | 414.2459 |                     | 414.2459 |
|           | 1682.85  | 18  | P | 2        | 343.2088 | -0.11819            | 343.2088 |
|           | 1753.887 | 19  | A | 1        | 246.1561 | +0.134919           | 246.1561 |
|           |          | 20  | R | 0        | 175.119  |                     | 175.119  |

#### general information

|                       |             |
|-----------------------|-------------|
| Annotation:           | 14 of 20    |
| AminoAcids Coverage:  | 70 %        |
| Intensity Coverage:   | 52 %        |
| Peak Coverage:        | 24 %        |
| Protein Localisation: | 625 ... 644 |

Scan number 2061 Raw file LNCAP\_Silac\_23F10\_set3\_05  
 Method ITMS; CID Pepti... 170.47

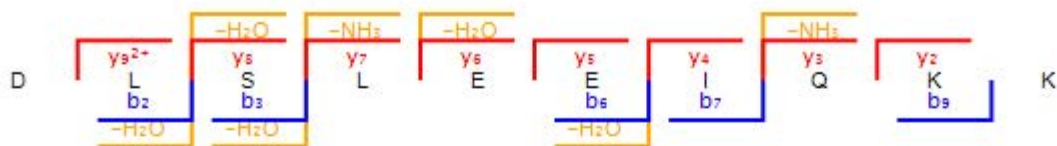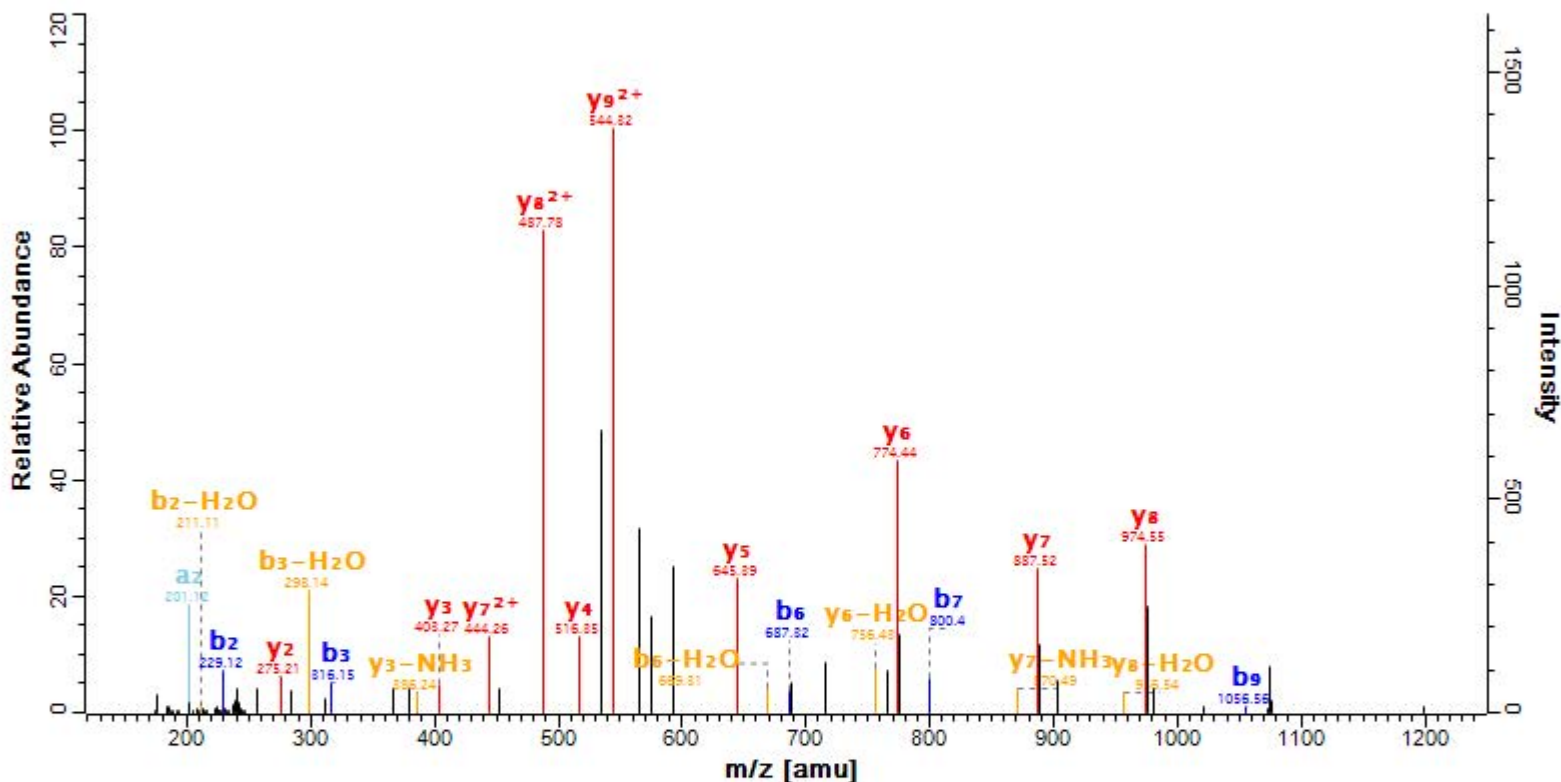

#### precursor information

|                   |                 |
|-------------------|-----------------|
| Mass:             | 1201.65574      |
| m/z:              | 601.83515       |
| Charge:           | 2+              |
| Retentiontime:    | 20.875127792358 |
| Score:            | 170.4714        |
| Mass Error [ppm]: | 0.26733         |
| PEP:              | 7.6436E-14      |
| Precursor Type:   | ISO             |

|                       |           |
|-----------------------|-----------|
| Annotation:           | 8 of 10   |
| AminoAcids Coverage:  | 80 %      |
| Intensity Coverage:   | 60 %      |
| Peak Coverage:        | 26 %      |
| Protein Localisation: | 44 ... 53 |

| a ion    |        | b ion    |        |    |     |   | y ion    |         | y <sup>2+</sup> ion |         |
|----------|--------|----------|--------|----|-----|---|----------|---------|---------------------|---------|
| Δ dalton | mass   | Δ dalton | mass   |    | seq |   | Δ dalton | mass    | Δ dalton            | mass    |
|          | 88.039 |          | 116.03 | 1  | D   | 9 |          |         |                     |         |
| +0.0533  | 201.12 | -0.137   | 229.12 | 2  | L   | 8 | 1087.6   |         | 544.32              | +0.2221 |
|          | 288.16 | +0.1218  | 316.15 | 3  | S   | 7 | 974.55   | -0.012  | 487.78              | +0.2093 |
|          | 401.24 |          | 429.23 | 4  | L   | 6 | 887.52   | -0.013  | 444.26              | +0.3566 |
|          | 530.28 |          | 558.28 | 5  | E   | 5 | 774.44   | -0.006  | 774.44              |         |
|          | 659.32 | +0.0413  | 687.32 | 6  | E   | 4 | 645.39   | +0.0758 | 645.39              |         |
|          | 772.41 | -0.182   | 800.4  | 7  | I   | 3 | 516.35   | -0.046  | 516.35              |         |
|          | 900.47 |          | 928.46 | 8  | Q   | 2 | 403.27   | +0.0499 | 403.27              |         |
|          | 1028.6 | -0.492   | 1056.6 | 9  | K   | 1 | 275.21   | +0.0698 | 275.21              |         |
|          |        |          |        | 10 | K   | 0 | 147.11   |         | 147.11              |         |

Scan number 2481 Raw file LNCAP\_Silac\_23F10\_set3\_05  
 Method ITMS; CID Pepti... 70.37

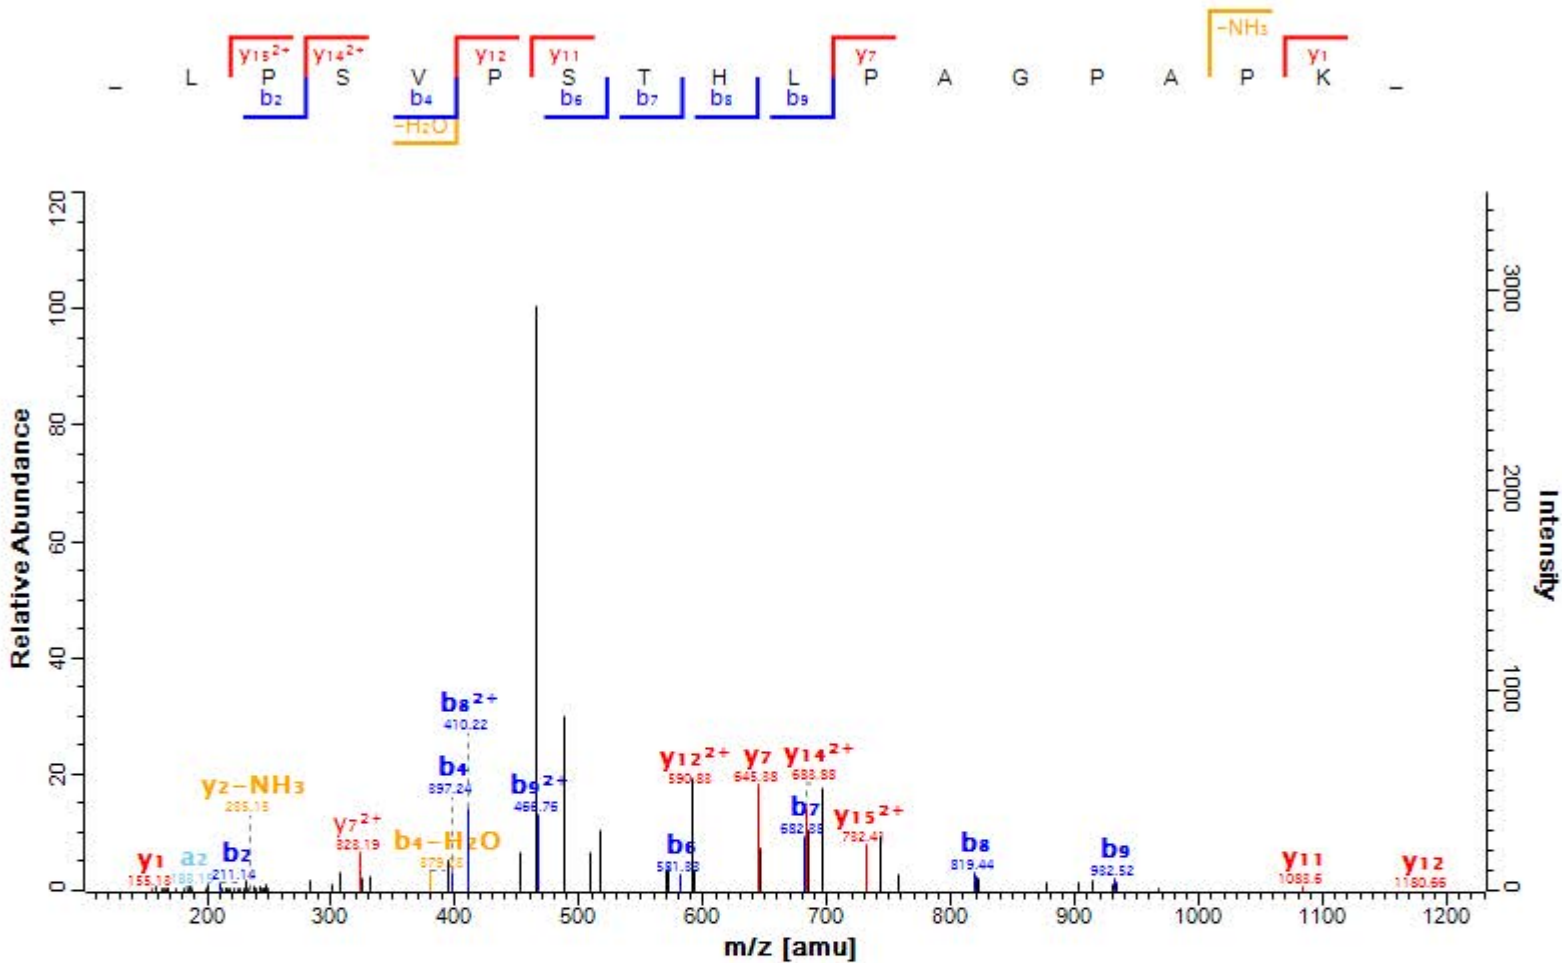

precursor information

|                   |                 |
|-------------------|-----------------|
| Mass:             | 1567.87148      |
| m/z:              | 523.6311        |
| Charge:           | 3+              |
| Retention time:   | 23.590467453002 |
| Score:            | 70.37257        |
| Mass Error [ppm]: | -0.47536        |
| PEP:              | 0.00055919      |
| Precursor Type:   | MULTI           |

general information

|                       |             |
|-----------------------|-------------|
| Annotation:           | 12 of 16    |
| AminoAcids Coverage:  | 75 %        |
| Intensity Coverage:   | 28 %        |
| Peak Coverage:        | 19 %        |
| Protein Localisation: | 234 ... 249 |

|       | a ion         | b <sup>2+</sup> ion | b ion         |    |     |    | y ion         | y <sup>2+</sup> ion |
|-------|---------------|---------------------|---------------|----|-----|----|---------------|---------------------|
|       | Δ dalton mass | Δ dalton mass       | Δ dalton mass |    | seq |    | Δ dalton mass | Δ dalton mass       |
|       | 86.1          | 114.1               | 114.1         | 1  | L   | 15 |               |                     |
| -0.02 | 183.1         | 211.1               | -0.03 211.1   | 2  | P   | 14 | 1464          | 732.4 +0.05         |
|       | 270.2         | 298.2               | 298.2         | 3  | S   | 13 | 1367          | 683.9 -0.14         |
|       | 369.2         | 397.2               | +0.04 397.2   | 4  | V   | 12 | 1280          | 1280                |
|       | 466.3         | 494.3               | 494.3         | 5  | P   | 11 | 1181          | -0.02 590.8 -0.02   |
|       | 553.3         | 581.3               | +0.28 581.3   | 6  | S   | 10 | 1084          | -0.14 1084          |
|       | 654.4         | 682.4               | +0 682.4      | 7  | T   | 9  | 996.6         | 996.6               |
|       | 791.4         | 810.2               | +0.08 819.4   | 8  | H   | 8  | 895.5         | 895.5               |
|       | 904.5         | +0.21 932.5         | -0.03 932.5   | 9  | L   | 7  | 758.5         | 758.5               |
|       | 1002          | 1030                | 1030          | 10 | P   | 6  | 645.4 +0.04   | 323.2 +0.00         |
|       | 1073          | 1101                | 1101          | 11 | A   | 5  | 548.3         | 548.3               |
|       | 1130          | 1158                | 1158          | 12 | G   | 4  | 477.3         | 477.3               |
|       | 1227          | 1255                | 1255          | 13 | P   | 3  | 420.3         | 420.3               |
|       | 1298          | 1326                | 1326          | 14 | A   | 2  | 323.2         | 323.2               |
|       | 1395          | 1423                | 1423          | 15 | P   | 1  | 252.2         | 252.2               |
|       |               |                     |               | 16 | K   | 0  | 155.1 -0.03   | 155.1               |

Scan number 2614 Raw file LNCAP\_Silac\_23F10\_set3\_05  
 Method ITMS; CID Pepti... 75.38

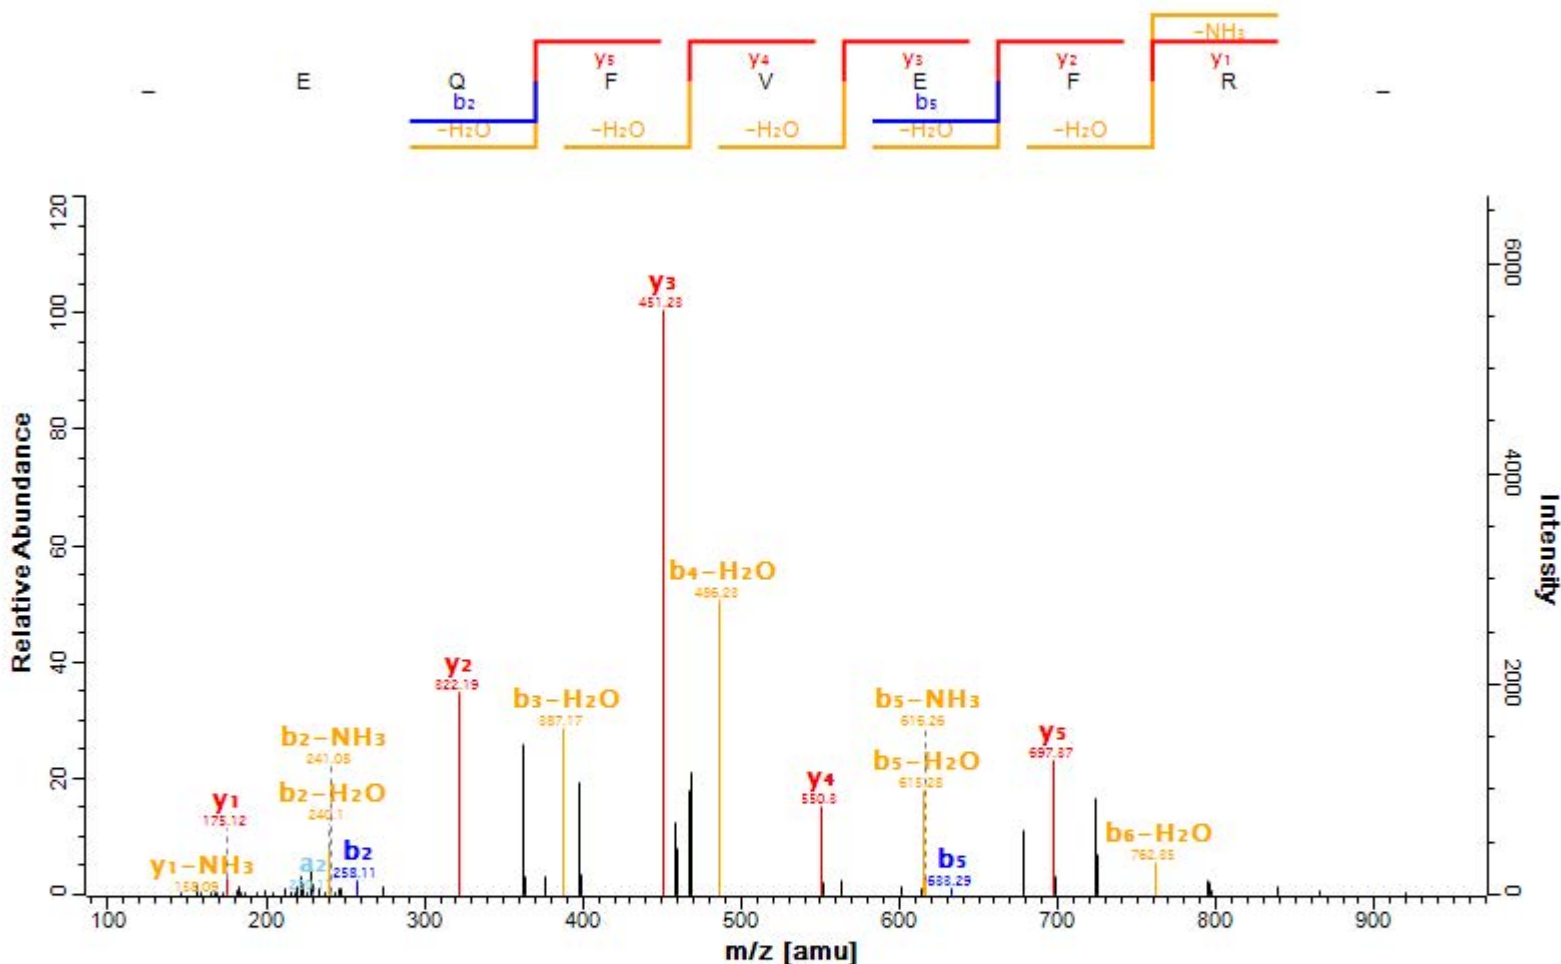

#### precursor information

|                     |                 |
|---------------------|-----------------|
| Mass:               | 953.46077       |
| m/z:                | 477.73766       |
| Charge:             | 2+              |
| Retentiontime:      | 24.406772613525 |
| Score:              | 75.37951        |
| g Mass Error [ppm]: | 0.095956        |
| Annotation:         | 6 of 7          |
| AminoAcids Coverag  | 86 %            |
| Intensity Coverage: | 60 %            |
| Peak Coverage:      | 17 %            |

| a ion     |          | b ion     |          |   |     | y ion    |                    |
|-----------|----------|-----------|----------|---|-----|----------|--------------------|
| Δ dalton  | mass     | Δ dalton  | mass     |   | seq | Δ dalton | mass               |
|           | 102.055  |           | 130.0499 | 1 | E   | 6        |                    |
| +0.182015 | 230.1135 | -0.00386  | 258.1084 | 2 | Q   | 5        | 825.4254           |
|           | 377.1819 |           | 405.1769 | 3 | F   | 4        | 697.3668 +0.042332 |
|           | 476.2504 |           | 504.2453 | 4 | V   | 3        | 550.2984 +0.054532 |
|           | 605.293  | +0.027012 | 633.2879 | 5 | E   | 2        | 451.23 -0.00282    |
|           | 752.3614 |           | 780.3563 | 6 | F   | 1        | 322.1874 +0.011578 |
|           |          |           |          | 7 | R   | 0        | 175.119 -0.04013   |

Scan number 3116 Raw file LNCAP\_Silac\_23F10\_set3\_05  
 Method ITMS; CID Pepti... 82.75

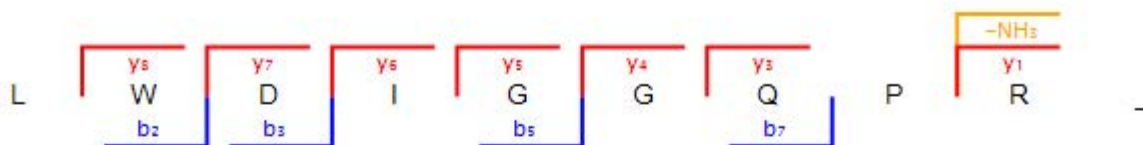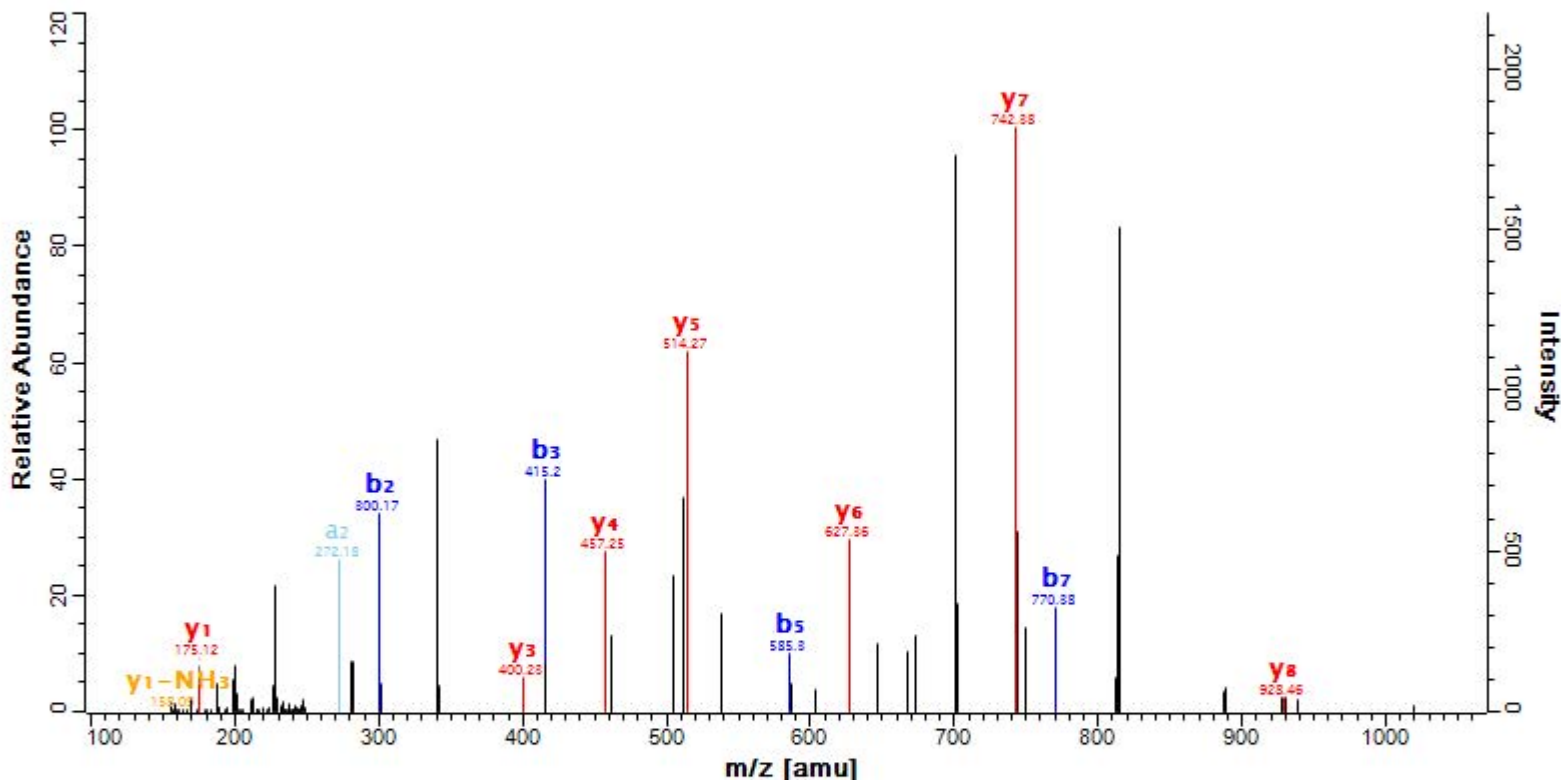

#### precursor information

|                       |                 |
|-----------------------|-----------------|
| Mass:                 | 1040.54203      |
| m/z:                  | 521.27829       |
| Charge:               | 2+              |
| Retentiontime:        | 27.332010269165 |
| Score:                | 82.74943        |
| Mass Error [ppm]:     | 1.6349          |
| PEP:                  | 0.0080846       |
| Precursor Type:       | MULTI           |
| Annotation:           | 8 of 9          |
| AminoAcids Coverage:  | 89 %            |
| Intensity Coverage:   | 36 %            |
| Peak Coverage:        | 13 %            |
| Protein Localisation: | 69 ... 77       |

| a ion     |          | b ion     |          |     |   | y ion    |                    |
|-----------|----------|-----------|----------|-----|---|----------|--------------------|
| Δ dalton  | mass     | Δ dalton  | mass     | seq |   | Δ dalton | mass               |
|           | 86.09643 |           | 114.0913 | 1   | L | 8        |                    |
| +0.038922 | 272.1757 | +0.03235  | 300.1707 | 2   | W | 7        | 928.4635 +0.301779 |
|           | 387.2027 | -0.04422  | 415.1976 | 3   | D | 6        | 742.3842 -0.01045  |
|           | 500.2867 |           | 528.2817 | 4   | I | 5        | 627.3573 +0.110427 |
|           | 557.3082 | +0.056678 | 585.3031 | 5   | G | 4        | 514.2732 +0.011691 |
|           | 614.3297 |           | 642.3246 | 6   | G | 3        | 457.2518 +0.04347  |
|           | 742.3883 | -0.00469  | 770.3832 | 7   | Q | 2        | 400.2303 +0.032036 |
|           | 839.441  |           | 867.4359 | 8   | P | 1        | 272.1717           |
|           |          |           |          | 9   | R | 0        | 175.119 +0.012212  |

Scan number 3120 Raw file LNCAP\_Silac\_23F10\_set3\_05  
 Method ITMS; CID Pepti... 81.59

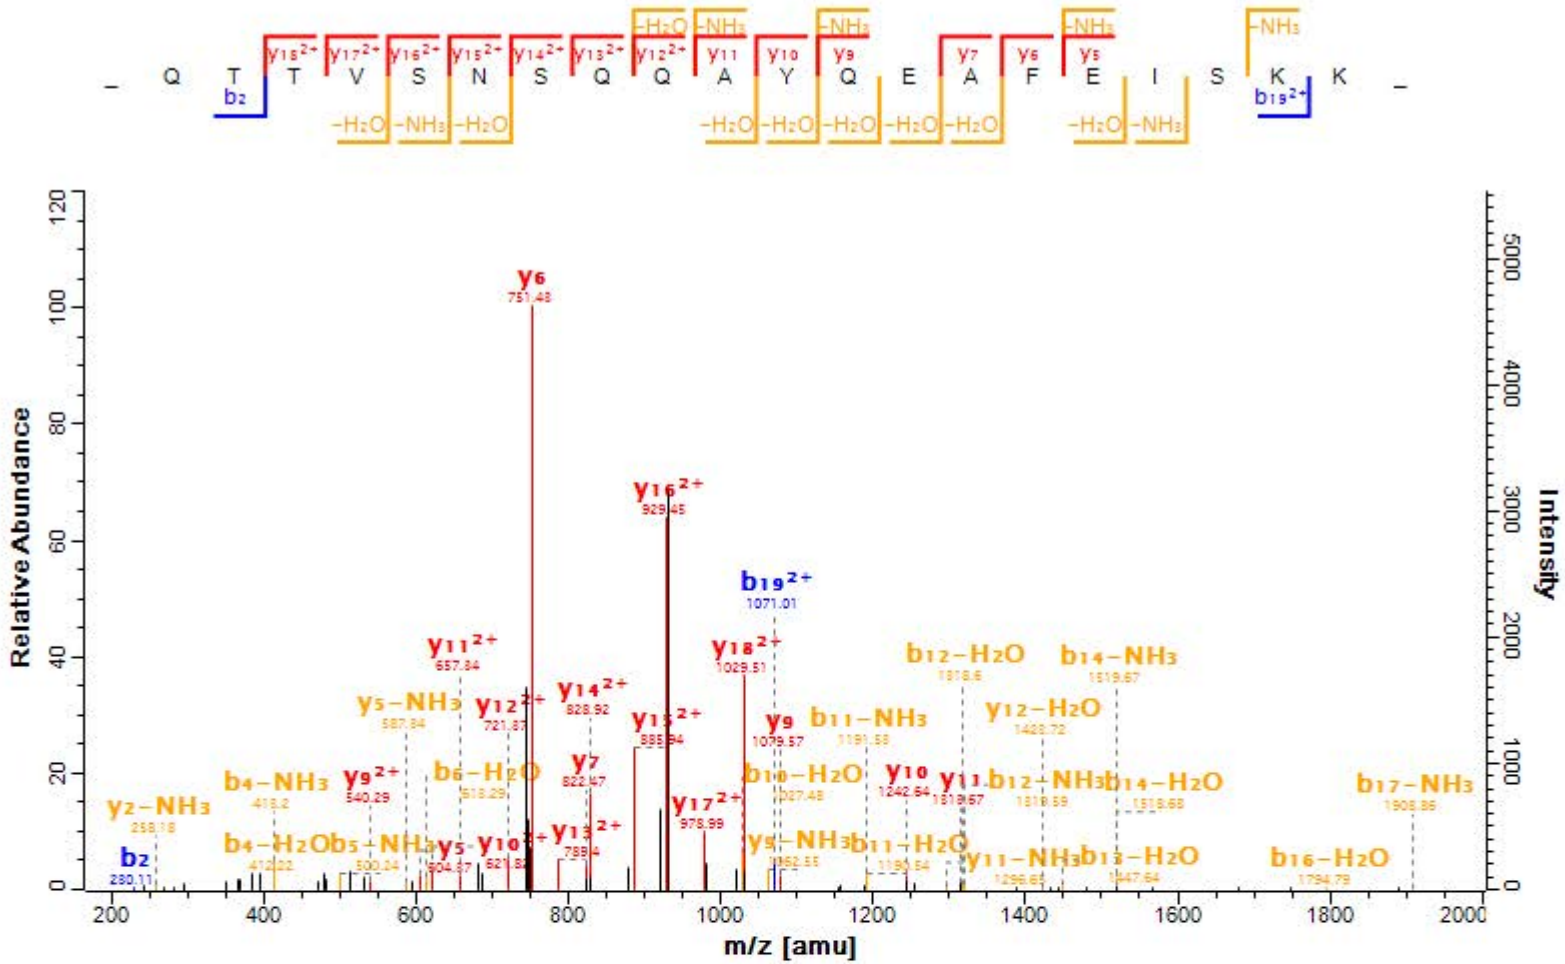

**precursor information**

|                   |                 |
|-------------------|-----------------|
| Mass:             | 2286.11289      |
| m/z:              | 763.04491       |
| Charge:           | 3+              |
| Retentiontime:    | 27.353302001953 |
| Score:            | 81.59438        |
| Mass Error [ppm]: | 0.038834        |
| PEP:              | 4.5726E-05      |
| Precursor Type:   | MULTI           |

**general information**

|                       |             |
|-----------------------|-------------|
| Annotation:           | 17 of 20    |
| AminoAcids Coverage:  | 85 %        |
| Intensity Coverage:   | 61 %        |
| Peak Coverage:        | 39 %        |
| Protein Localisation: | 141 ... 160 |

| b <sup>2+</sup> ion |        | b ion    |        | seq |   |    | y ion    |         | y <sup>2+</sup> ion |         |
|---------------------|--------|----------|--------|-----|---|----|----------|---------|---------------------|---------|
| Δ dalton            | mass   | Δ dalton | mass   |     |   |    | Δ dalton | mass    | Δ dalton            | mass    |
|                     | 129.07 |          | 129.07 | 1   | Q | 19 |          |         |                     |         |
|                     | 230.11 | +0.104   | 230.11 | 2   | T | 18 | 2159.1   |         | 2159.1              |         |
|                     | 331.16 |          | 331.16 | 3   | T | 17 | 2058     |         | 1029.5              | +0.3535 |
|                     | 430.23 |          | 430.23 | 4   | V | 16 | 1957     |         | 978.99              | +0.1248 |
|                     | 517.26 |          | 517.26 | 5   | S | 15 | 1857.9   |         | 929.45              | +0.0189 |
|                     | 631.3  |          | 631.3  | 6   | N | 14 | 1770.9   |         | 885.94              | +0.3394 |
|                     | 718.34 |          | 718.34 | 7   | S | 13 | 1656.8   |         | 828.92              | +0.1331 |
|                     | 846.4  |          | 846.4  | 8   | Q | 12 | 1569.8   |         | 785.4               | +0.2861 |
|                     | 974.45 |          | 974.45 | 9   | Q | 11 | 1441.7   |         | 721.37              | +0.297  |
|                     | 1045.5 |          | 1045.5 | 10  | A | 10 | 1313.7   | +0.0343 | 657.34              | +0.4359 |
|                     | 1208.6 |          | 1208.6 | 11  | Y | 9  | 1242.6   | +0.0348 | 621.82              | +0.1323 |
|                     | 1336.6 |          | 1336.6 | 12  | Q | 8  | 1079.6   | +0.0178 | 540.29              | +0.1818 |
|                     | 1465.7 |          | 1465.7 | 13  | E | 7  | 951.51   |         | 951.51              |         |
|                     | 1536.7 |          | 1536.7 | 14  | A | 6  | 822.47   | +0.2333 | 822.47              |         |
|                     | 1683.8 |          | 1683.8 | 15  | F | 5  | 751.43   | +0.0543 | 751.43              |         |
|                     | 1812.8 |          | 1812.8 | 16  | E | 4  | 604.37   | +0.1943 | 604.37              |         |
|                     | 1925.9 |          | 1925.9 | 17  | I | 3  | 475.32   |         | 475.32              |         |
|                     | 2012.9 |          | 2012.9 | 18  | S | 2  | 362.24   |         | 362.24              |         |
| +0.3107             | 1071   |          | 2141   | 19  | K | 1  | 275.21   |         | 275.21              |         |
|                     |        |          |        | 20  | K | 0  | 147.11   |         | 147.11              |         |

Scan number 3184 Raw file LNCAP\_Silac\_23F10\_set3\_05  
 Method ITMS; CID Pepti... 92.44

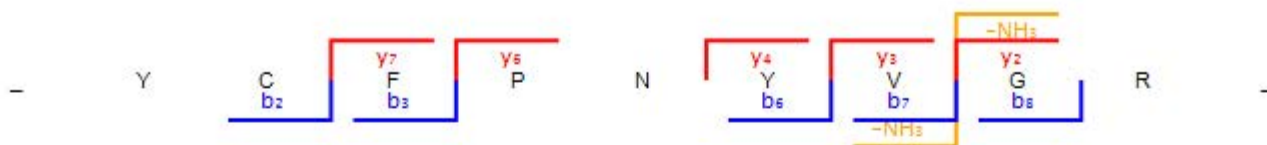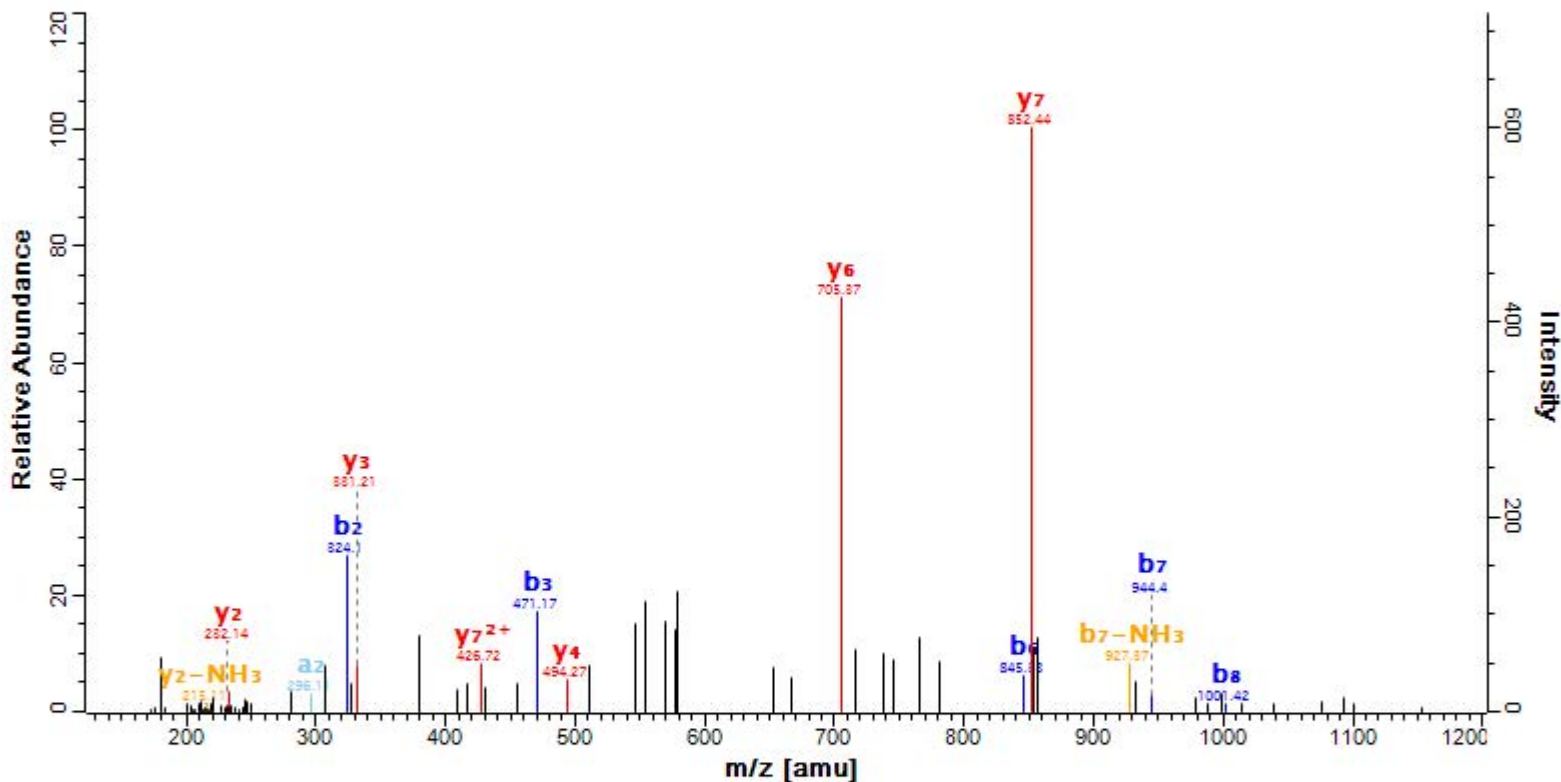

#### precursor information

|                       |                 |
|-----------------------|-----------------|
| Mass:                 | 1174.5232       |
| m/z:                  | 588.26888       |
| Charge:               | 2+              |
| Retention time:       | 27.717687606811 |
| Score:                | 92.4393         |
| Mass Error [ppm]:     | 0.20149         |
| PEP:                  | 0.0090985       |
| Precursor Type:       | ISO             |
| Annotation:           | 6 of 9          |
| AminoAcids Coverage:  | 67 %            |
| Intensity Coverage:   | 45 %            |
| Peak Coverage:        | 17 %            |
| Protein Localisation: | 33 ... 41       |

| a ion    |        | b ion    |        | seq |   |   | y ion    |         | y <sup>2+</sup> ion |         |
|----------|--------|----------|--------|-----|---|---|----------|---------|---------------------|---------|
| Δ dalton | mass   | Δ dalton | mass   |     |   |   | Δ dalton | mass    | Δ dalton            | mass    |
|          | 136.08 |          | 164.07 | 1   | Y | 8 |          |         |                     |         |
| -0.084   | 296.11 | -0.016   | 324.1  | 2   | C | 7 | 1012.5   |         | 1012.5              |         |
|          | 443.17 | +0.0139  | 471.17 | 3   | F | 6 | 852.44   | -0.006  | 426.72              | +0.1608 |
|          | 540.23 |          | 568.22 | 4   | P | 5 | 705.37   | +0.109  | 705.37              |         |
|          | 654.27 |          | 682.27 | 5   | N | 4 | 608.32   |         | 608.32              |         |
|          | 817.33 | +0.018   | 845.33 | 6   | Y | 3 | 494.27   | -0.098  | 494.27              |         |
|          | 916.4  | +0.1802  | 944.4  | 7   | V | 2 | 331.21   | -0.054  | 331.21              |         |
|          | 973.42 | +0.0463  | 1001.4 | 8   | G | 1 | 232.14   | +0.1074 | 232.14              |         |
|          |        |          |        | 9   | R | 0 | 175.12   |         | 175.12              |         |

Scan number 3700 Raw file LNCAP\_Silac\_23F10\_set3\_05  
 Method ITMS; CID Pepti... 176.94

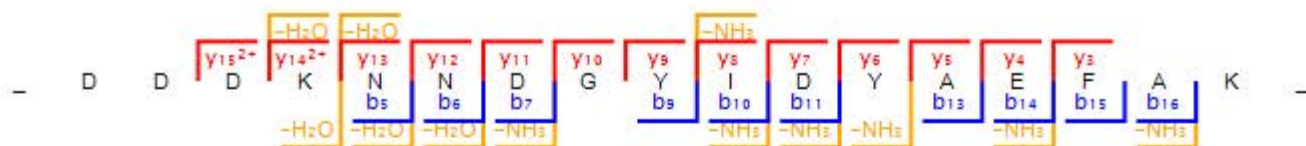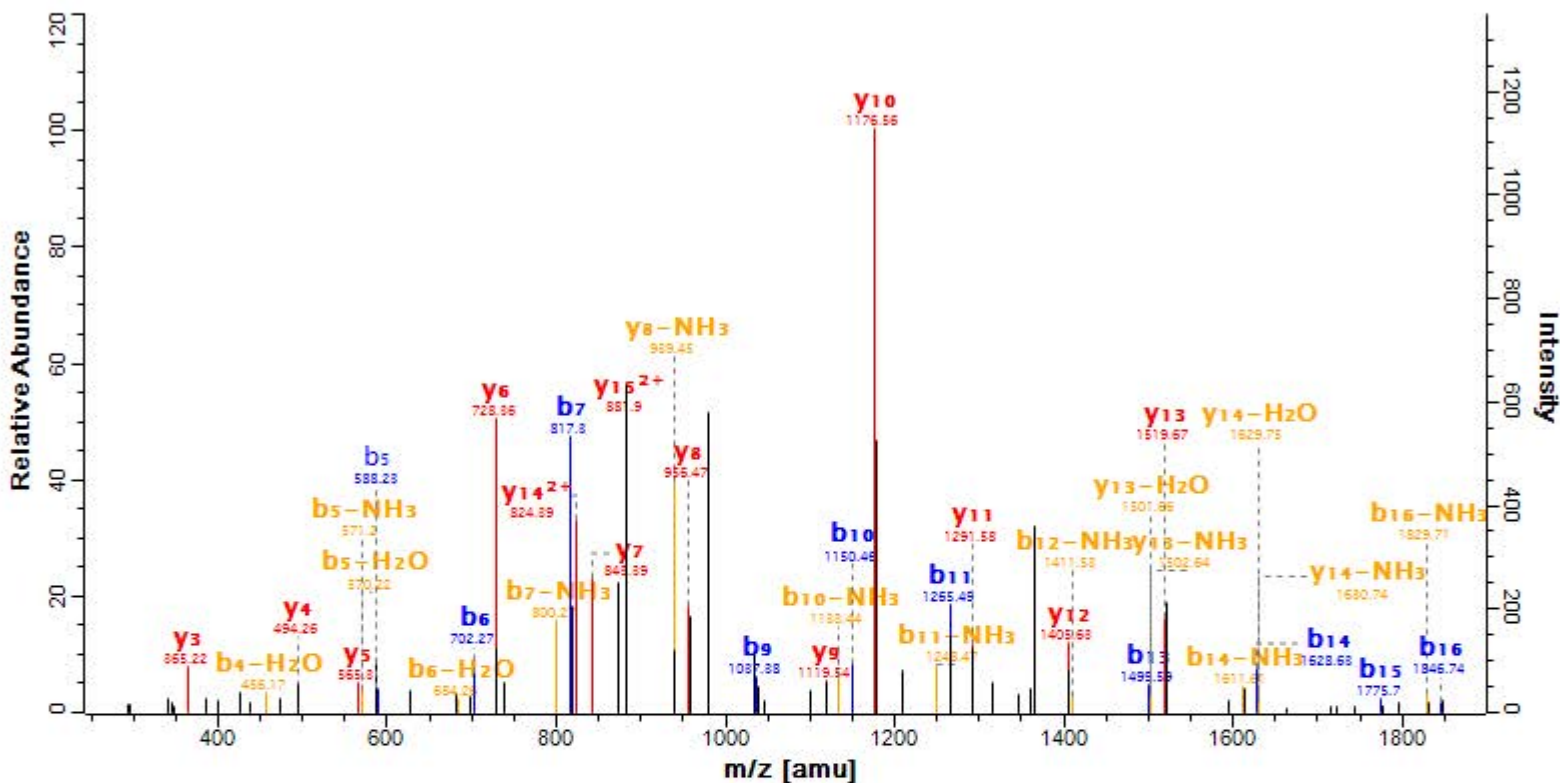

precursor information

|                   |                 |
|-------------------|-----------------|
| Mass:             | 1991.83917      |
| m/z:              | 996.92686       |
| Charge:           | 2+              |
| Retentiontime:    | 30.656839370727 |
| Score:            | 176.9393        |
| Mass Error [ppm]: | 0.34828         |
| PEP:              | 7.8068E-30      |
| Precursor Type:   | MULTI           |

general information

|                       |             |
|-----------------------|-------------|
| Annotation:           | 15 of 17    |
| AminoAcids Coverage:  | 88 %        |
| Intensity Coverage:   | 54 %        |
| Peak Coverage:        | 42 %        |
| Protein Localisation: | 127 ... 143 |

| b ion     |          |     |   | y ion    |          |           | y <sup>2+</sup> ion |  |
|-----------|----------|-----|---|----------|----------|-----------|---------------------|--|
| Δ dalton  | mass     | seq |   | Δ dalton | mass     | Δ dalton  | mass                |  |
|           | 116.0342 | 1   | D | 16       |          |           |                     |  |
|           | 231.0612 | 2   | D | 15       | 1877.819 |           | 1877.819            |  |
|           | 346.0881 | 3   | D | 14       | 1762.792 |           | 881.8996 +0.020104  |  |
|           | 474.1831 | 4   | K | 13       | 1647.765 |           | 824.3861 +0.343756  |  |
| +0.175615 | 588.226  | 5   | N | 12       | 1519.67  | -0.16118  | 1519.67             |  |
| -0.22809  | 702.2689 | 6   | N | 11       | 1405.627 | -0.1086   | 1405.627            |  |
| -0.03927  | 817.2959 | 7   | D | 10       | 1291.584 | -0.12647  | 1291.584            |  |
|           | 874.3173 | 8   | G | 9        | 1176.557 | -0.06791  | 1176.557            |  |
| -0.33256  | 1037.381 | 9   | Y | 8        | 1119.536 | -0.09894  | 1119.536            |  |
| -0.07178  | 1150.465 | 10  | I | 7        | 956.4724 | -0.04842  | 956.4724            |  |
| -0.13376  | 1265.492 | 11  | D | 6        | 843.3883 | +0.027583 | 843.3883            |  |
|           | 1428.555 | 12  | Y | 5        | 728.3614 | +0.055808 | 728.3614            |  |
| -0.20051  | 1499.592 | 13  | A | 4        | 565.298  | +0.159237 | 565.298             |  |
| -0.02594  | 1628.635 | 14  | E | 3        | 494.2609 | +0.105469 | 494.2609            |  |
| +0.016245 | 1775.703 | 15  | F | 2        | 365.2183 | +0.062735 | 365.2183            |  |
| +0.166876 | 1846.74  | 16  | A | 1        | 218.1499 |           | 218.1499            |  |
|           |          | 17  | K | 0        | 147.1128 |           | 147.1128            |  |



Scan number 3984 Raw file LNCAP\_Silac\_23F10\_set3\_05  
 Method ITMS; CID Pepti... 119.21

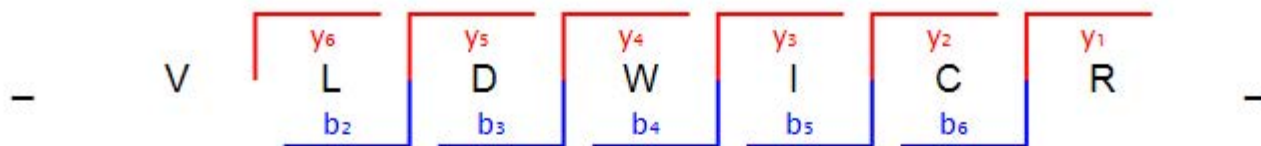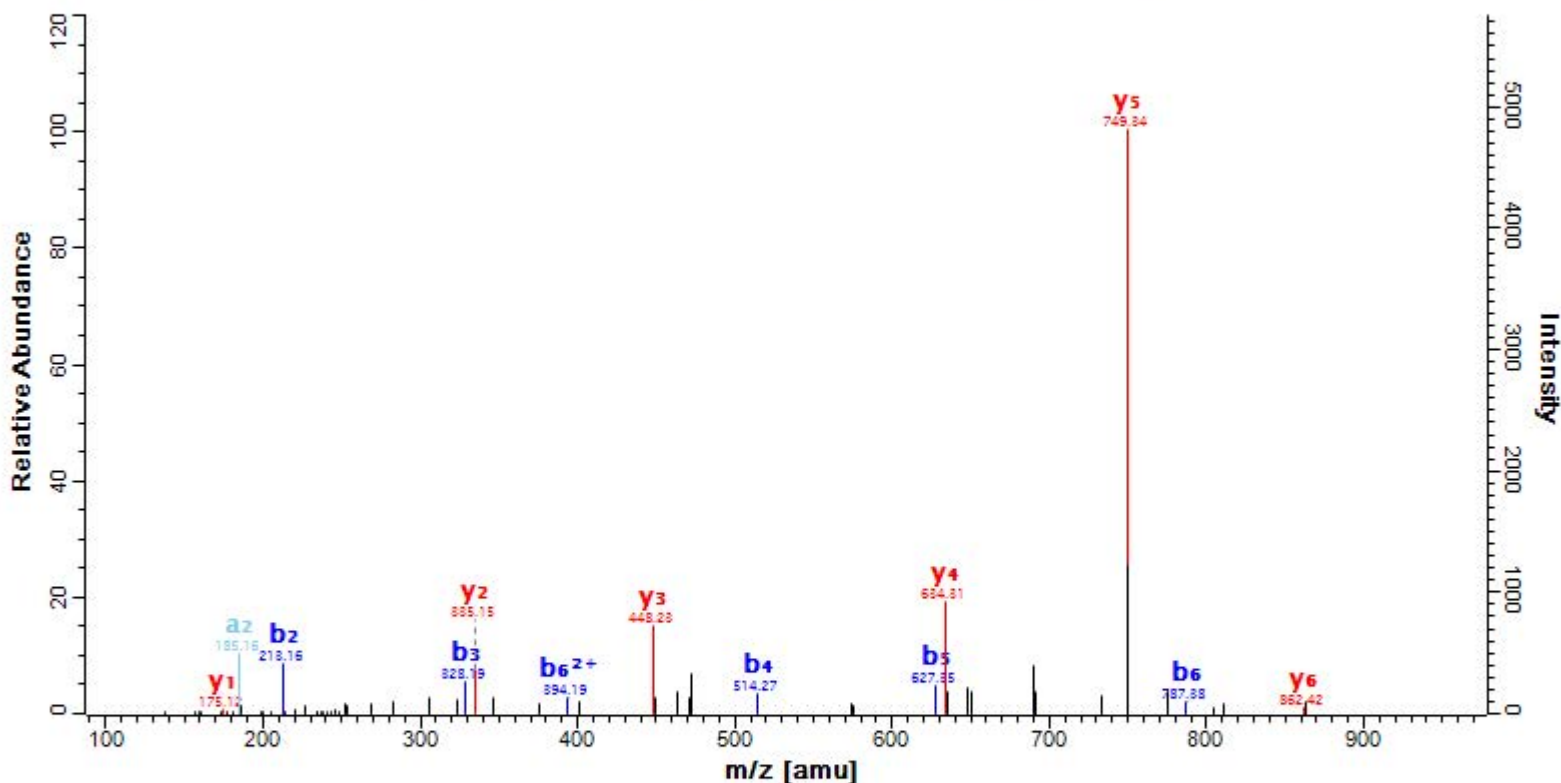

precursor information

|                     |                 |
|---------------------|-----------------|
| Mass:               | 960.48518       |
| m/z:                | 481.24986       |
| Charge:             | 2+              |
| Retentiontime:      | 32.296524047851 |
| Score:              | 119.2113        |
| g Mass Error [ppm]: | 0.057103        |
| Annotation:         | 6 of 7          |
| AminoAcids Coverag  | 86 %            |
| Intensity Coverage: | 62 %            |
| Peak Coverage:      | 15 %            |

| a ion    |        | b <sup>2+</sup> ion |        | b ion    |        | y ion |   |          |                |
|----------|--------|---------------------|--------|----------|--------|-------|---|----------|----------------|
| Δ dalton | mass   | Δ dalton            | mass   | Δ dalton | mass   | seq   |   | Δ dalton | mass           |
|          | 72.081 |                     | 100.08 |          | 100.08 | 1     | V | 6        |                |
| -0.081   | 185.16 |                     | 213.16 | -0.088   | 213.16 | 2     | L | 5        | 862.42 -0.324  |
|          | 300.19 |                     | 328.19 | +0.1541  | 328.19 | 3     | D | 4        | 749.34 +0.0044 |
|          | 486.27 |                     | 514.27 | -0.214   | 514.27 | 4     | W | 3        | 634.31 +0.0731 |
|          | 599.36 |                     | 627.35 | -0.02    | 627.35 | 5     | I | 2        | 448.23 +0.0941 |
|          | 759.39 | -0.078              | 394.19 | -0.191   | 787.38 | 6     | C | 1        | 335.15 +0.0991 |
|          |        |                     |        |          |        | 7     | R | 0        | 175.12 -0.011  |

Scan number 4141 Raw file LNCAP\_Silac\_23F10\_set3\_05  
 Method ITMS; CID Pepti... 78.81

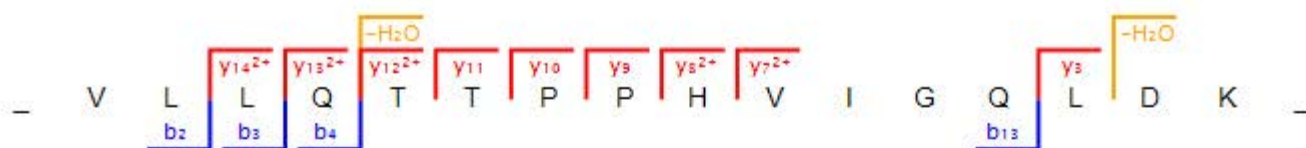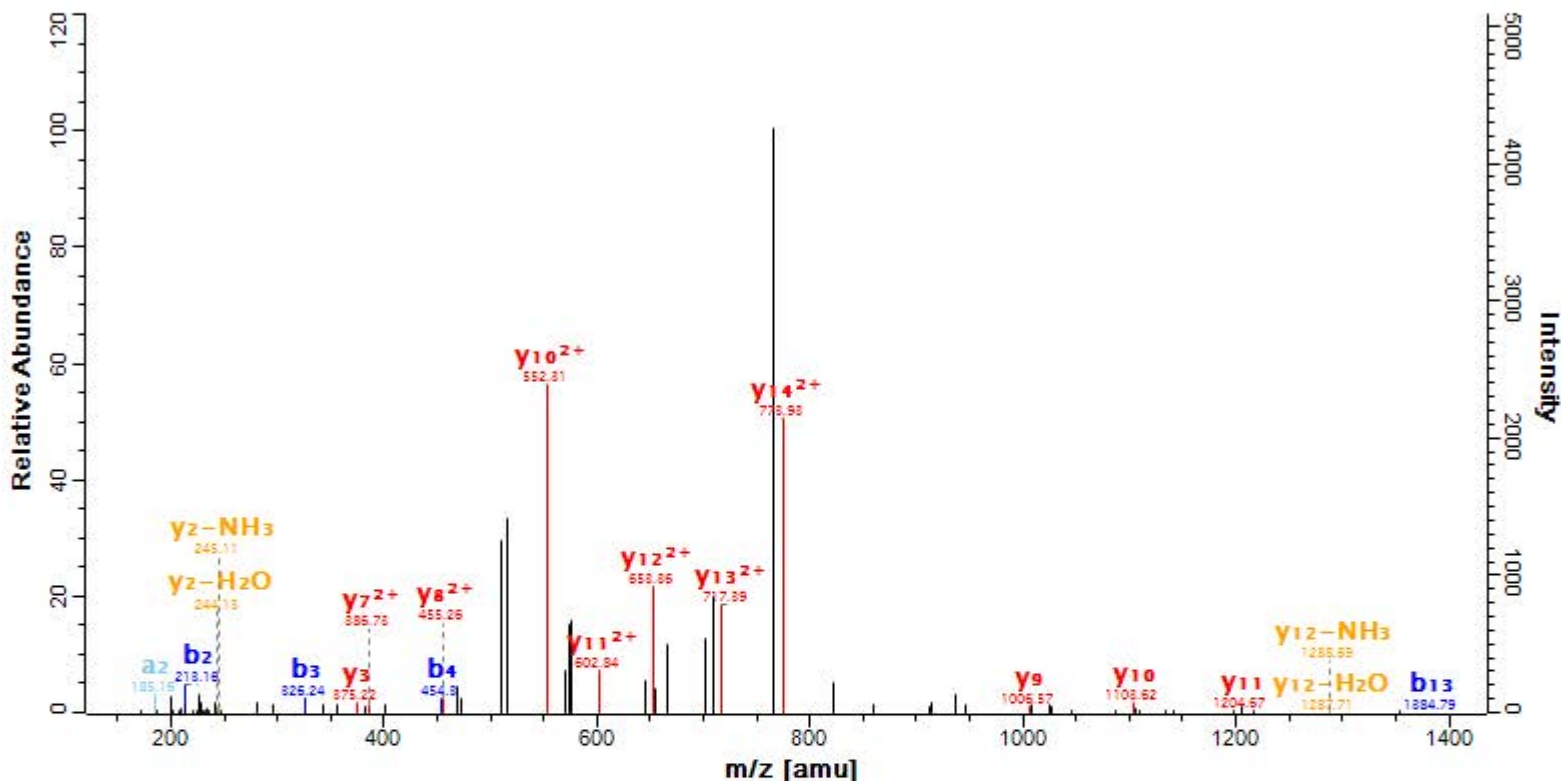

#### precursor information

|                   |                 |
|-------------------|-----------------|
| Mass:             | 1758.00369      |
| m/z:              | 587.00851       |
| Charge:           | 3+              |
| Retentiontime:    | 33.220573425293 |
| Score:            | 78.81388        |
| Mass Error [ppm]: | -0.15909        |
| PEP:              | 0.00024898      |
| Precursor Type:   | MULTI           |

#### general information

|                       |             |
|-----------------------|-------------|
| Annotation:           | 12 of 16    |
| AminoAcids Coverage:  | 75 %        |
| Intensity Coverage:   | 33 %        |
| Peak Coverage:        | 22 %        |
| Protein Localisation: | 293 ... 308 |

| a ion    |        | b ion    |        |     |   |          | y ion  |          | y <sup>2+</sup> ion |  |
|----------|--------|----------|--------|-----|---|----------|--------|----------|---------------------|--|
| Δ dalton | mass   | Δ dalton | mass   | seq |   | Δ dalton | mass   | Δ dalton | mass                |  |
|          | 72.081 |          | 100.08 | 1   | V | 15       |        |          |                     |  |
| -0.108   | 185.16 | -0.018   | 213.16 | 2   | L | 14       | 1659.9 |          | 1659.9              |  |
|          | 298.25 | +0.1398  | 326.24 | 3   | L | 13       | 1546.9 |          | 773.93 +0.3046      |  |
|          | 426.31 | -0.29    | 454.3  | 4   | Q | 12       | 1433.8 |          | 717.39 +0.2363      |  |
|          | 527.36 |          | 555.35 | 5   | T | 11       | 1305.7 |          | 653.36 +0.1957      |  |
|          | 628.4  |          | 656.4  | 6   | T | 10       | 1204.7 | +0.018   | 602.84 +0.2931      |  |
|          | 725.46 |          | 753.45 | 7   | P | 9        | 1103.6 | +0.1043  | 552.31 +0.1947      |  |
|          | 822.51 |          | 850.5  | 8   | P | 8        | 1006.6 | -0.131   | 1006.6              |  |
|          | 959.57 |          | 987.56 | 9   | H | 7        | 909.52 |          | 455.26 +0.0554      |  |
|          | 1058.6 |          | 1086.6 | 10  | V | 6        | 772.46 |          | 386.73 +0.2712      |  |
|          | 1171.7 |          | 1199.7 | 11  | I | 5        | 673.39 |          | 673.39              |  |
|          | 1228.7 |          | 1256.7 | 12  | G | 4        | 560.3  |          | 560.3               |  |
|          | 1356.8 | -0.053   | 1384.8 | 13  | Q | 3        | 503.28 |          | 503.28              |  |
|          | 1469.9 |          | 1497.9 | 14  | L | 2        | 375.22 | +0.0123  | 375.22              |  |
|          | 1584.9 |          | 1612.9 | 15  | D | 1        | 262.14 |          | 262.14              |  |
|          |        |          |        | 16  | K | 0        | 147.11 |          | 147.11              |  |

Scan number 497 Raw file LNCAP\_Silac\_23F10\_set3\_05  
 Method ITMS; CID Pepti... 126.4

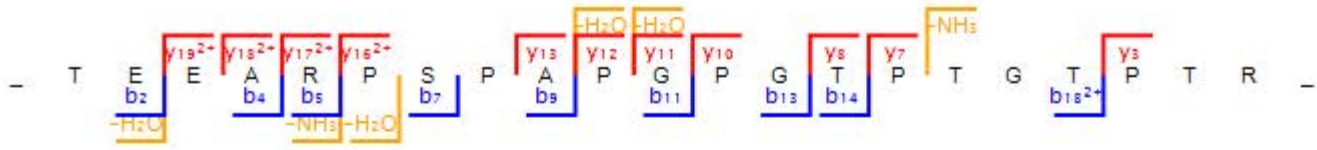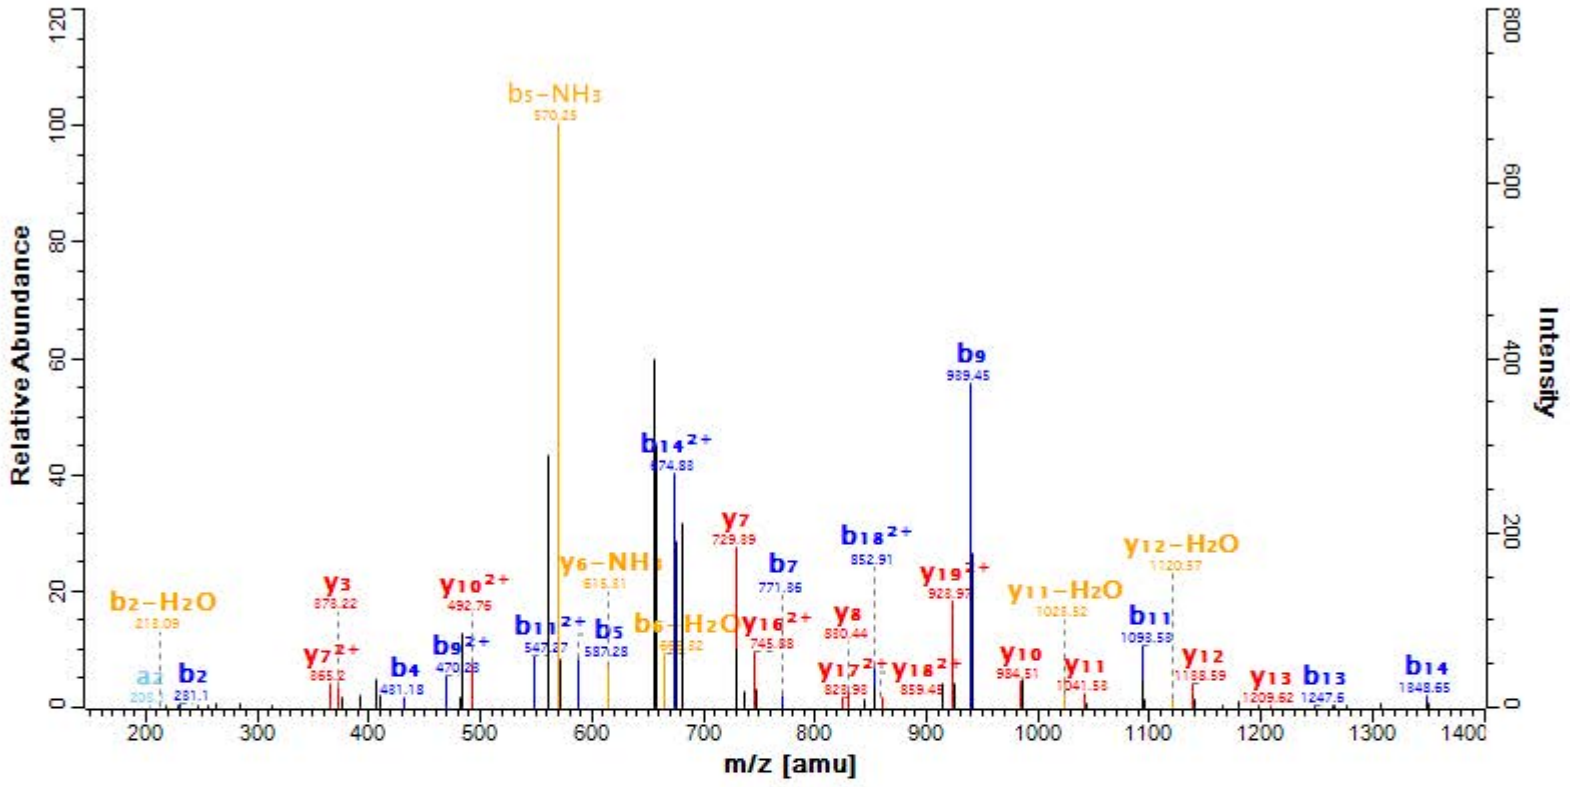

precursor information

|                   |                 |
|-------------------|-----------------|
| Mass:             | 2076.02282      |
| m/z:              | 693.01488       |
| Charge:           | 3+              |
| Retentiontime:    | 8.8006095886230 |
| Score:            | 126.3998        |
| Mass Error [ppm]: | -0.37342        |
| PEP:              | 1.5587E-13      |
| Precursor Type:   | MULTI           |

general information

|                       |             |
|-----------------------|-------------|
| Annotation:           | 16 of 21    |
| AminoAcids Coverage:  | 76 %        |
| Intensity Coverage:   | 52 %        |
| Peak Coverage:        | 40 %        |
| Protein Localisation: | 135 ... 155 |

| a ion         |               | b <sup>2+</sup> ion |               | b ion |               | y ion         |    | y <sup>2+</sup> ion |             |       |       |       |
|---------------|---------------|---------------------|---------------|-------|---------------|---------------|----|---------------------|-------------|-------|-------|-------|
| Δ dalton mass | Δ dalton mass | Δ dalton mass       | Δ dalton mass | seq   | Δ dalton mass | Δ dalton mass |    |                     |             |       |       |       |
|               | 74.06         | 102.1               | 102.1         | 1     | T             | 20            |    |                     |             |       |       |       |
| -0.03         | 203.1         | 231.1               | -0.02         | 231.1 | 2             | E             | 19 | 1976                | 1976        |       |       |       |
|               | 332.1         | 360.1               |               | 360.1 | 3             | E             | 18 | 1847                | 924 +0.35   |       |       |       |
|               | 403.2         | 431.2               | -0.06         | 431.2 | 4             | A             | 17 | 1718                | 859.5 +0.31 |       |       |       |
|               | 559.3         | 587.3               | +0.13         | 587.3 | 5             | R             | 16 | 1647                | 823.9 +0.04 |       |       |       |
|               | 656.3         | 684.3               |               | 684.3 | 6             | P             | 15 | 1491                | 745.9 +0.30 |       |       |       |
|               | 743.4         | 771.4               | -0.31         | 771.4 | 7             | S             | 14 | 1394                | 1394        |       |       |       |
|               | 840.4         | 868.4               |               | 868.4 | 8             | P             | 13 | 1307                | 1307        |       |       |       |
|               | 911.5         | -0.03               | 470.2         | -0.06 | 939.5         | 9             | A  | 12                  | 1210        | -0.12 | 1210  |       |
|               | 1009          |                     | 1037          |       | 1037          | 10            | P  | 11                  | 1139        | +0.08 | 1139  |       |
|               | 1066          | +0.24               | 7547.3        | +0.10 | 71094         | 11            | G  | 10                  | 1042        | +0.12 | 1042  |       |
|               | 1163          |                     | 1191          |       | 1191          | 12            | P  | 9                   | 984.5       | +0.00 | 984.5 | +0.22 |
|               | 1220          |                     | 1248          | +0.26 | 1248          | 13            | G  | 8                   | 887.5       |       | 887.5 |       |
|               | 1321          | -0.16               | 674.8         | -0.03 | 1349          | 14            | T  | 7                   | 830.4       | +0.00 | 830.4 |       |
|               | 1418          |                     | 1446          |       | 1446          | 15            | P  | 6                   | 729.4       | +0    | 365.2 | +0.26 |
|               | 1519          |                     | 1547          |       | 1547          | 16            | T  | 5                   | 632.3       |       | 632.3 |       |
|               | 1576          |                     | 1604          |       | 1604          | 17            | G  | 4                   | 531.3       |       | 531.3 |       |
|               | 1677          | +0.20               | 5852.9        |       | 1705          | 18            | T  | 3                   | 474.3       |       | 474.3 |       |
|               | 1774          |                     | 1802          |       | 1802          | 19            | P  | 2                   | 373.2       | +0.01 | 373.2 |       |
|               | 1875          |                     | 1903          |       | 1903          | 20            | T  | 1                   | 276.2       |       | 276.2 |       |
|               |               |                     |               |       |               | 21            | R  | 0                   | 175.1       |       | 175.1 |       |

Scan number 4989 Raw file LNCAP\_Silac\_23F10\_set3\_05  
 Method ITMS; CID Pepti... 56.6

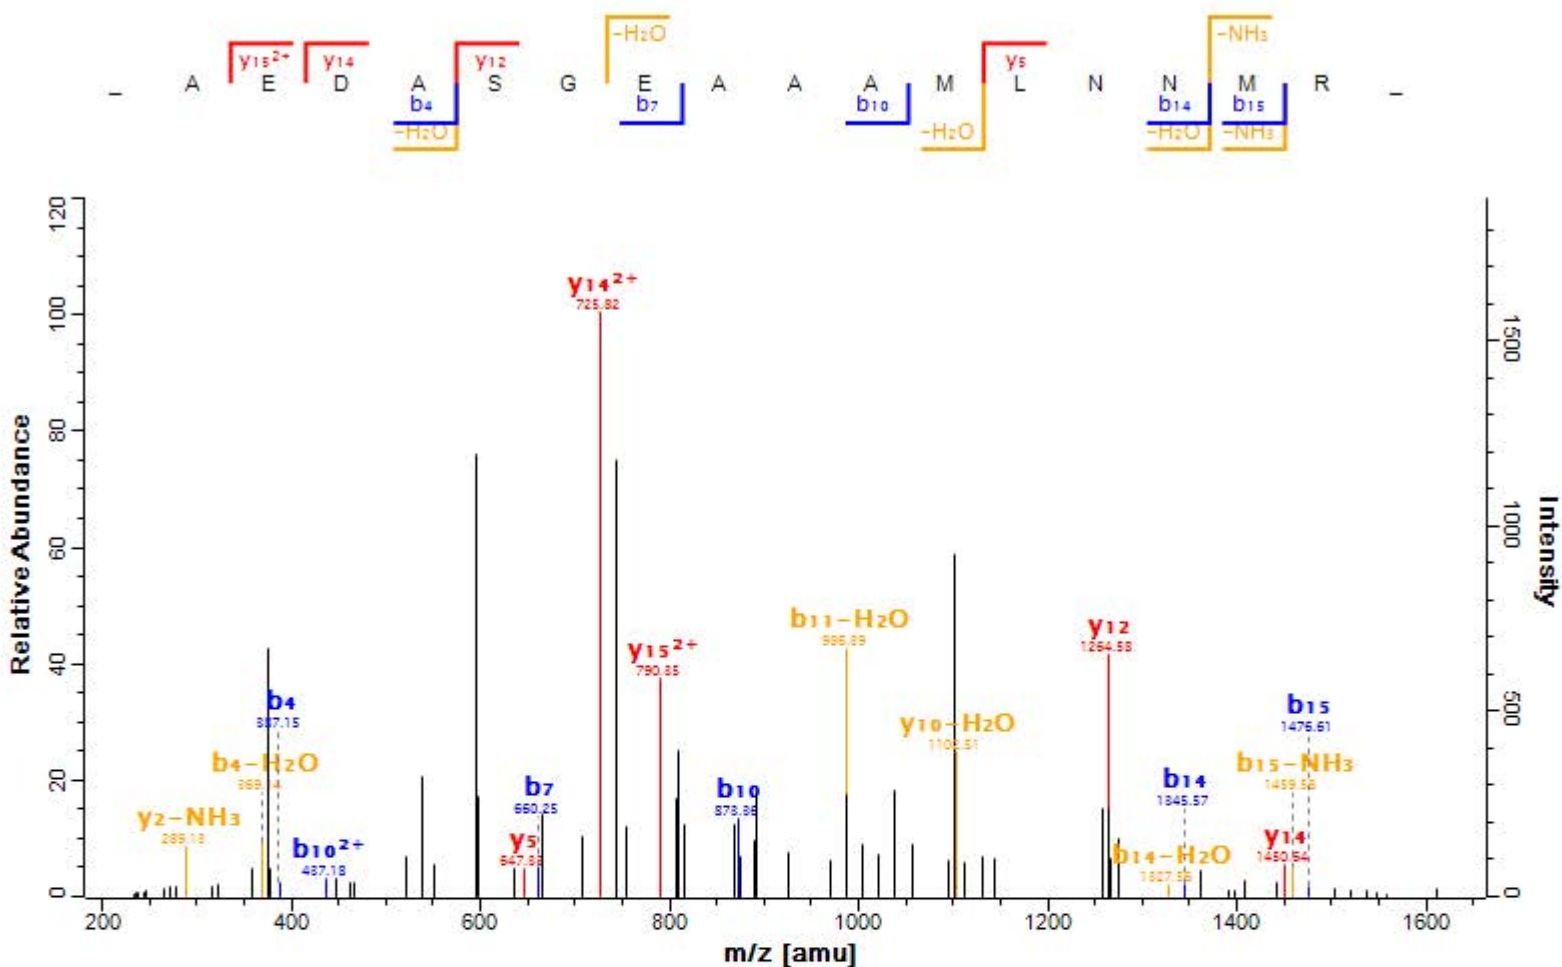

precursor information

|                   |                 |
|-------------------|-----------------|
| Mass:             | 1649.71311      |
| m/z:              | 825.86383       |
| Charge:           | 2+              |
| Retentiontime:    | 38.082763671875 |
| Score:            | 56.59909        |
| Mass Error [ppm]: | -0.3885         |
| PEP:              | 0.0038912       |
| Precursor Type:   | MULTI           |

general information

|                       |             |
|-----------------------|-------------|
| Annotation:           | 10 of 16    |
| AminoAcids Coverag    | 62 %        |
| Intensity Coverage:   | 30 %        |
| Peak Coverage:        | 20 %        |
| Protein Localisation: | 239 ... 254 |

| b <sup>2+</sup> ion |        | b ion    |        | seq |   |    | y ion    |         | y <sup>2+</sup> ion |         |
|---------------------|--------|----------|--------|-----|---|----|----------|---------|---------------------|---------|
| Δ dalton            | mass   | Δ dalton | mass   |     |   |    | Δ dalton | mass    | Δ dalton            | mass    |
|                     | 72.044 |          | 72.044 | 1   | A | 15 |          |         |                     |         |
|                     | 201.09 |          | 201.09 | 2   | E | 14 | 1579.7   |         | 790.35              | +0.2701 |
|                     | 316.11 |          | 316.11 | 3   | D | 13 | 1450.6   | -0.266  | 725.82              | +0.2313 |
|                     | 387.15 | +0.0879  | 387.15 | 4   | A | 12 | 1335.6   |         | 1335.6              |         |
|                     | 474.18 |          | 474.18 | 5   | S | 11 | 1264.6   | -0.039  | 1264.6              |         |
|                     | 531.2  |          | 531.2  | 6   | G | 10 | 1177.5   |         | 1177.5              |         |
|                     | 660.25 | +0.0619  | 660.25 | 7   | E | 9  | 1120.5   |         | 1120.5              |         |
|                     | 731.28 |          | 731.28 | 8   | A | 8  | 991.48   |         | 991.48              |         |
|                     | 802.32 |          | 802.32 | 9   | A | 7  | 920.44   |         | 920.44              |         |
| -0.239              | 437.18 | -0.048   | 873.36 | 10  | A | 6  | 849.41   |         | 849.41              |         |
|                     | 1004.4 |          | 1004.4 | 11  | M | 5  | 778.37   |         | 778.37              |         |
|                     | 1117.5 |          | 1117.5 | 12  | L | 4  | 647.33   | +0.0848 | 647.33              |         |
|                     | 1231.5 |          | 1231.5 | 13  | N | 3  | 534.25   |         | 534.25              |         |
|                     | 1345.6 | -0.095   | 1345.6 | 14  | N | 2  | 420.2    |         | 420.2               |         |
|                     | 1476.6 | -0.011   | 1476.6 | 15  | M | 1  | 306.16   |         | 306.16              |         |
|                     |        |          |        | 16  | R | 0  | 175.12   |         | 175.12              |         |

Scan number 5413 Raw file LNCAP\_Silac\_23F10\_set3\_05  
 Method ITMS; CID Peptide 108.63

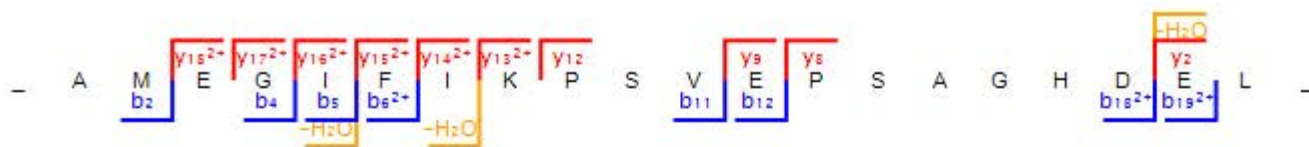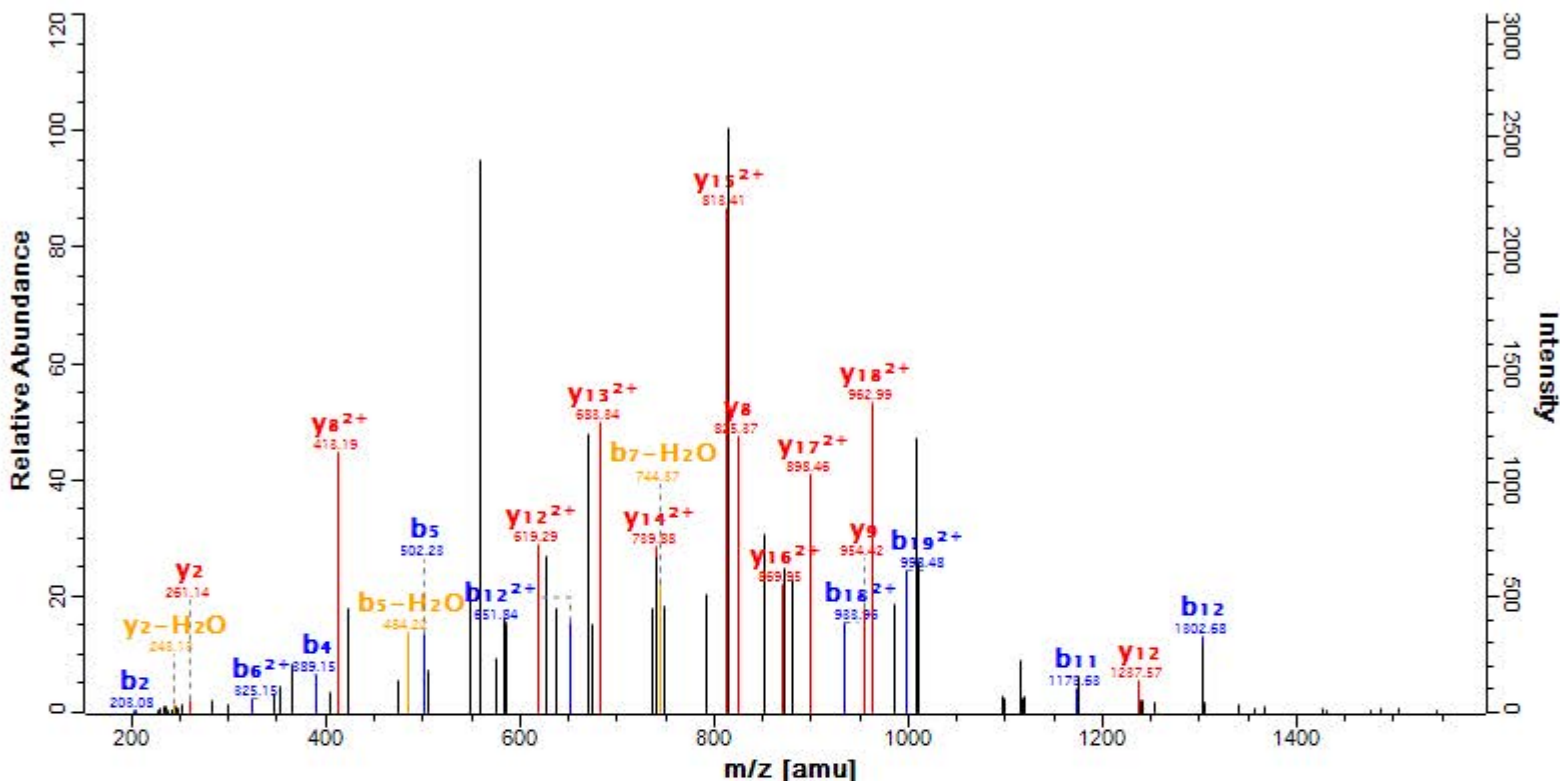

precursor information

|                   |                 |
|-------------------|-----------------|
| Mass:             | 2126.03657      |
| m/z:              | 709.68613       |
| Charge:           | 3+              |
| Retentiontime:    | 40.523056030273 |
| Score:            | 108.6344        |
| Mass Error [ppm]: | 0.54766         |
| PEP:              | 1.0433E-08      |
| Precursor Type:   | MULTI           |

| b <sup>2+</sup> ion |        | b ion    |        | seq |   |    | y ion    |         | y <sup>2+</sup> ion |         |
|---------------------|--------|----------|--------|-----|---|----|----------|---------|---------------------|---------|
| Δ dalton            | mass   | Δ dalton | mass   |     |   |    | Δ dalton | mass    | Δ dalton            | mass    |
|                     | 72.044 |          | 72.044 | 1   | A | 19 |          |         |                     |         |
|                     | 203.08 | +0.0923  | 203.08 | 2   | M | 18 | 2056     |         | 2056                |         |
|                     | 332.13 |          | 332.13 | 3   | E | 17 | 1925     |         | 962.99              | +0.1927 |
|                     | 389.15 | +0.1204  | 389.15 | 4   | G | 16 | 1795.9   |         | 898.46              | +0.1775 |
|                     | 502.23 | -0.029   | 502.23 | 5   | I | 15 | 1738.9   |         | 869.95              | +0.3717 |
| -0.068              | 325.15 |          | 649.3  | 6   | F | 14 | 1625.8   |         | 813.41              | -0.016  |
|                     | 762.39 |          | 762.39 | 7   | I | 13 | 1478.7   |         | 739.88              | -0.044  |
|                     | 890.48 |          | 890.48 | 8   | K | 12 | 1365.7   |         | 683.34              | +0.1819 |
|                     | 987.53 |          | 987.53 | 9   | P | 11 | 1237.6   | +0.1017 | 619.29              | +0.0657 |
|                     | 1074.6 |          | 1074.6 | 10  | S | 10 | 1140.5   |         | 1140.5              |         |
|                     | 1173.6 | +0.0199  | 1173.6 | 11  | V | 9  | 1053.5   |         | 1053.5              |         |
| +0.0524             | 651.84 | -0.043   | 1302.7 | 12  | E | 8  | 954.42   | -0.349  | 954.42              |         |
|                     | 1399.7 |          | 1399.7 | 13  | P | 7  | 825.37   | +0.0345 | 413.19              | +0.184  |
|                     | 1486.8 |          | 1486.8 | 14  | S | 6  | 728.32   |         | 728.32              |         |
|                     | 1557.8 |          | 1557.8 | 15  | A | 5  | 641.29   |         | 641.29              |         |
|                     | 1614.8 |          | 1614.8 | 16  | G | 4  | 570.25   |         | 570.25              |         |
|                     | 1751.9 |          | 1751.9 | 17  | H | 3  | 513.23   |         | 513.23              |         |
| +0.2729             | 933.96 |          | 1866.9 | 18  | D | 2  | 376.17   |         | 376.17              |         |
| +0.2598             | 998.48 |          | 1995.9 | 19  | E | 1  | 261.14   | +0.1141 | 261.14              |         |
|                     |        |          |        | 20  | I | 0  | 132.1    |         | 132.1               |         |

general information

|                       |             |
|-----------------------|-------------|
| Annotation:           | 13 of 20    |
| AminoAcids Coverag    | 65 %        |
| Intensity Coverage:   | 42 %        |
| Peak Coverage:        | 26 %        |
| Protein Localisation: | 600 ... 619 |

Scan number 5875 Raw file LNCAP\_Silac\_23F10\_set3\_05  
 Method ITMS; CID Pepti... 118.08

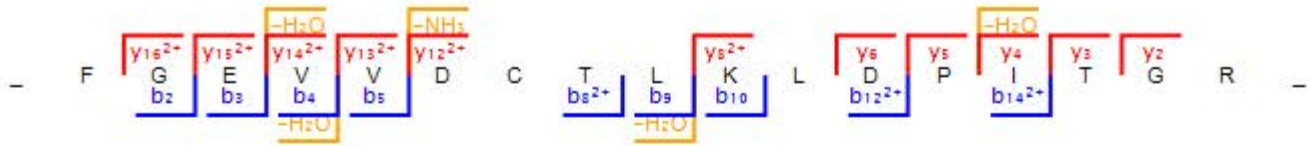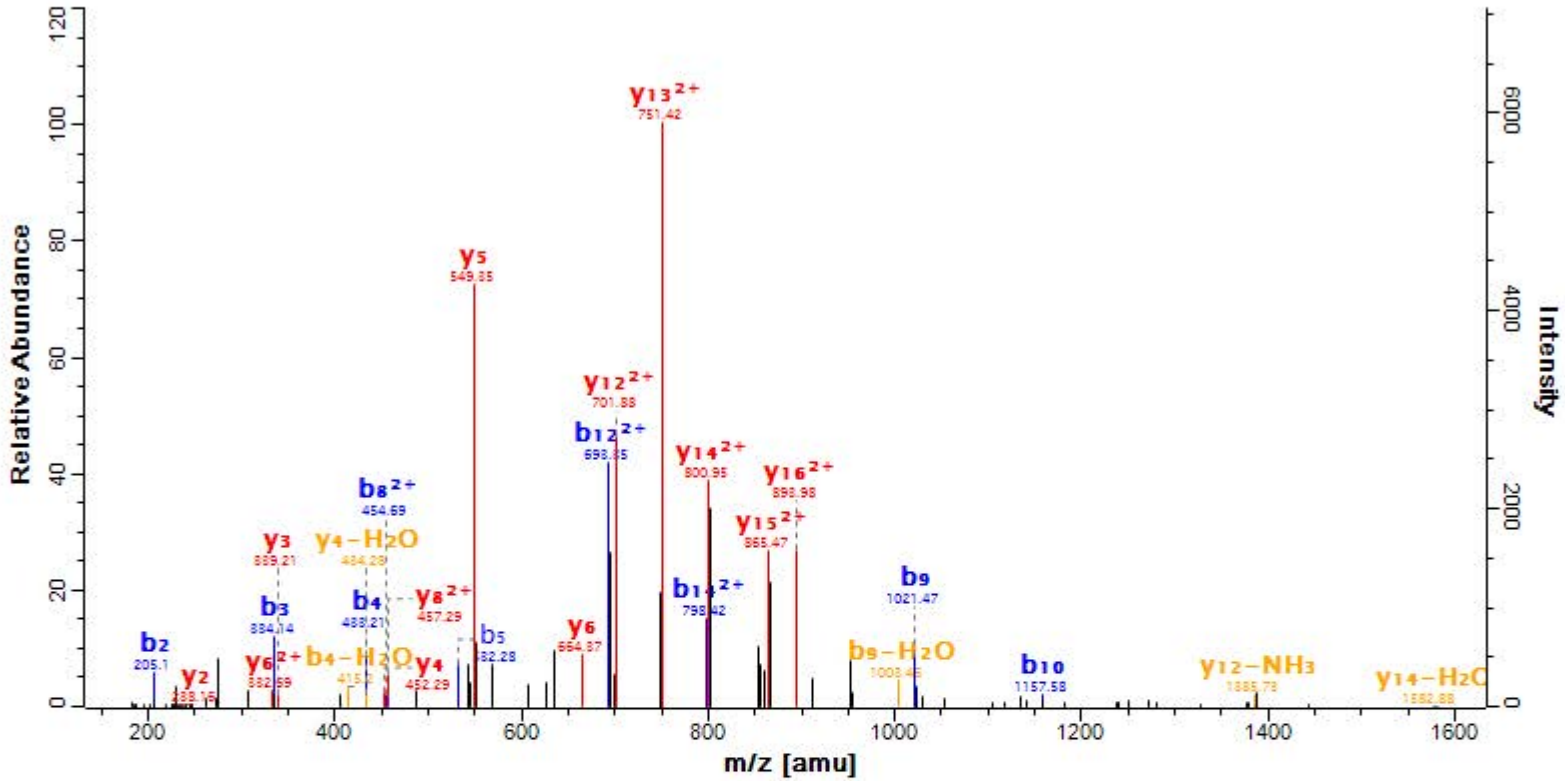

**precursor information**

|                   |                 |
|-------------------|-----------------|
| Mass:             | 1918.98175      |
| m/z:              | 640.66786       |
| Charge:           | 3+              |
| Retentiontime:    | 43.319118499755 |
| Score:            | 118.0802        |
| Mass Error [ppm]: | -0.25736        |
| PEP:              | 1.8733E-09      |
| Precursor Type:   | MULTI           |

**general information**

|                       |             |
|-----------------------|-------------|
| Annotation:           | 13 of 17    |
| AminoAcids Coverage:  | 76 %        |
| Intensity Coverage:   | 62 %        |
| Peak Coverage:        | 25 %        |
| Protein Localisation: | 101 ... 117 |

| b <sup>2+</sup> ion |        | b ion    |        | seq |   |    | y ion    |         | y <sup>2+</sup> ion |         |
|---------------------|--------|----------|--------|-----|---|----|----------|---------|---------------------|---------|
| Δ dalton            | mass   | Δ dalton | mass   |     |   |    | Δ dalton | mass    | Δ dalton            | mass    |
|                     | 148.08 |          | 148.08 | 1   | F | 16 |          |         |                     |         |
|                     | 205.1  | +0.0418  | 205.1  | 2   | G | 15 | 1787     |         | 893.98              | +0.14   |
|                     | 334.14 | +0.0897  | 334.14 | 3   | E | 14 | 1729.9   |         | 865.47              | -0.122  |
|                     | 433.21 | +0.0285  | 433.21 | 4   | V | 13 | 1600.9   |         | 800.95              | -0.006  |
|                     | 532.28 | +0.0122  | 532.28 | 5   | V | 12 | 1501.8   |         | 751.42              | +0.2738 |
|                     | 647.3  |          | 647.3  | 6   | D | 11 | 1402.8   |         | 701.88              | +0.1175 |
|                     | 807.33 |          | 807.33 | 7   | C | 10 | 1287.7   |         | 1287.7              |         |
| +0.2568             | 454.69 |          | 908.38 | 8   | T | 9  | 1127.7   |         | 1127.7              |         |
|                     | 1021.5 | -0.072   | 1021.5 | 9   | L | 8  | 1026.6   |         | 1026.6              |         |
|                     | 1157.6 | -0.064   | 1157.6 | 10  | K | 7  | 913.57   |         | 457.29              | +0.0153 |
|                     | 1270.7 |          | 1270.7 | 11  | L | 6  | 777.46   |         | 777.46              |         |
| +0.0349             | 693.35 |          | 1385.7 | 12  | D | 5  | 664.37   | +0.1136 | 332.69              | +0.211  |
|                     | 1482.7 |          | 1482.7 | 13  | P | 4  | 549.35   | -0.021  | 549.35              |         |
| -0.092              | 798.42 |          | 1595.8 | 14  | I | 3  | 452.29   | +0.0395 | 452.29              |         |
|                     | 1696.9 |          | 1696.9 | 15  | T | 2  | 339.21   | +0.1026 | 339.21              |         |
|                     | 1753.9 |          | 1753.9 | 16  | G | 1  | 238.16   | +0.1954 | 238.16              |         |
|                     |        |          |        | 17  | R | 0  | 181.14   |         | 181.14              |         |

Scan number 5876 Raw file LNCAP\_Silac\_23F10\_set3\_05  
 Method ITMS; CID Pepti... 92.68

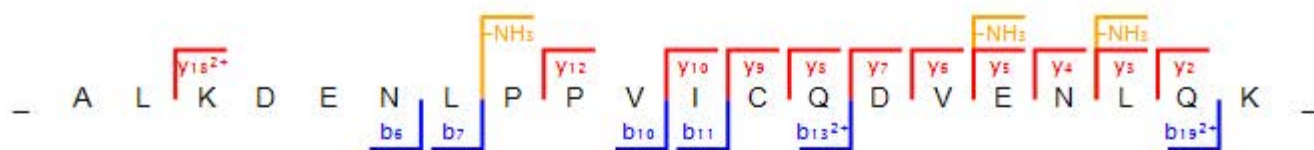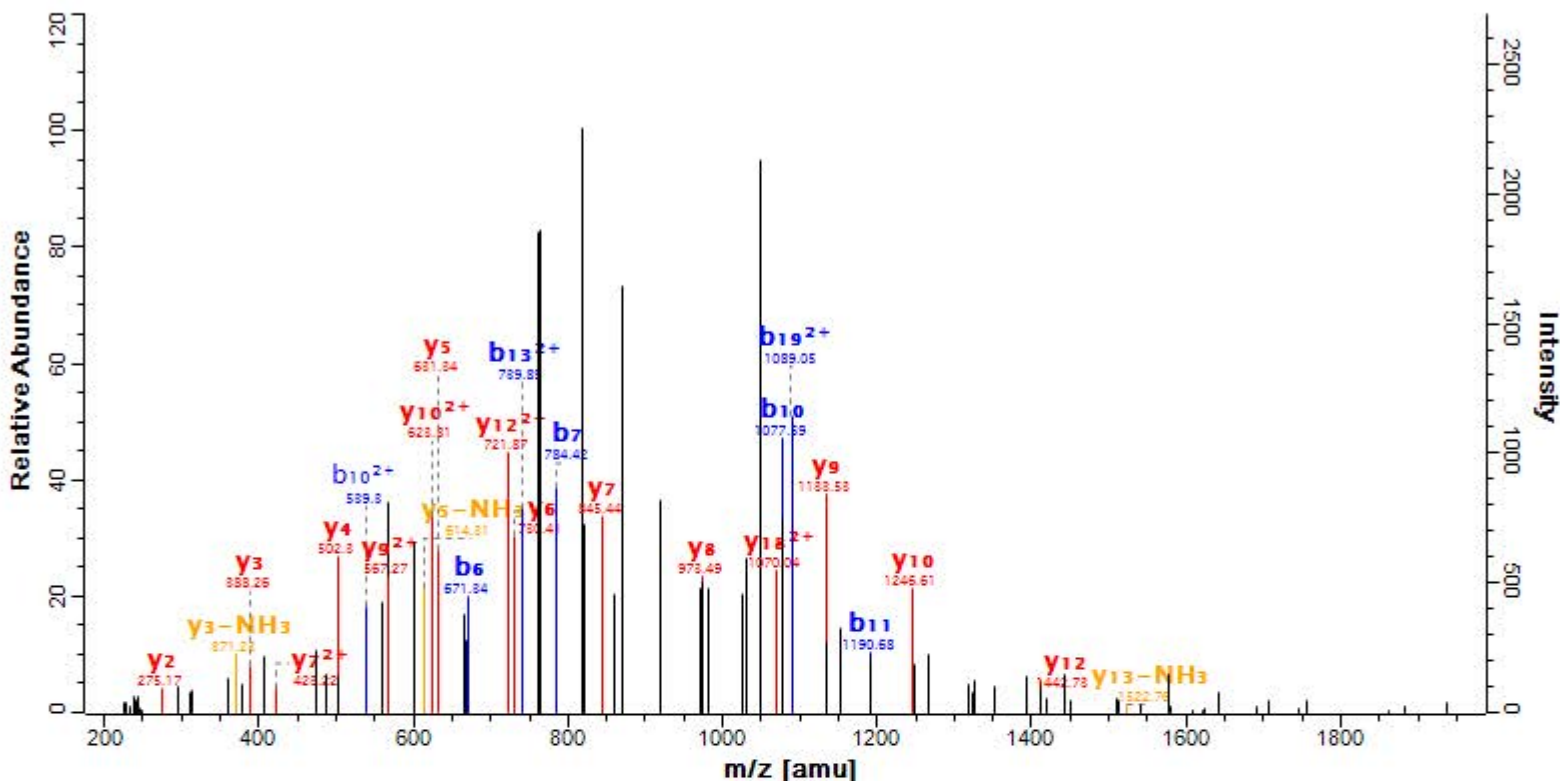

precursor information

|                   |                 |
|-------------------|-----------------|
| Mass:             | 2322.18982      |
| m/z:              | 775.07055       |
| Charge:           | 3+              |
| Retentiontime:    | 43.324348449707 |
| Score:            | 92.67941        |
| Mass Error [ppm]: | 0.37721         |
| PEP:              | 4.169E-06       |
| Precursor Type:   | MULTI           |

| b <sup>2+</sup> ion |        | b ion    |        | seq |   |    | y ion    |         | y <sup>2+</sup> ion |         |
|---------------------|--------|----------|--------|-----|---|----|----------|---------|---------------------|---------|
| Δ dalton            | mass   | Δ dalton | mass   |     |   |    | Δ dalton | mass    | Δ dalton            | mass    |
|                     | 72.044 |          | 72.044 | 1   | A | 19 |          |         |                     |         |
|                     | 185.13 |          | 185.13 | 2   | L | 18 | 2252.2   |         | 2252.2              |         |
|                     | 313.22 |          | 313.22 | 3   | K | 17 | 2139.1   |         | 1070                | +0.2071 |
|                     | 428.25 |          | 428.25 | 4   | D | 16 | 2011     |         | 2011                |         |
|                     | 557.29 |          | 557.29 | 5   | E | 15 | 1896     |         | 1896                |         |
|                     | 671.34 | +0.0725  | 671.34 | 6   | N | 14 | 1766.9   |         | 1766.9              |         |
|                     | 784.42 | -0.031   | 784.42 | 7   | L | 13 | 1652.9   |         | 1652.9              |         |
|                     | 881.47 |          | 881.47 | 8   | P | 12 | 1539.8   |         | 1539.8              |         |
|                     | 978.53 |          | 978.53 | 9   | P | 11 | 1442.7   | +0.0998 | 721.87              | +0.3267 |
| +0.2632             | 539.3  | +0.0227  | 1077.6 | 10  | V | 10 | 1345.7   |         | 1345.7              |         |
|                     | 1190.7 | -0.113   | 1190.7 | 11  | I | 9  | 1246.6   | -0.025  | 623.81              | +0.2907 |
|                     | 1350.7 |          | 1350.7 | 12  | C | 8  | 1133.5   | -0.09   | 567.27              | +0.3079 |
| -0.108              | 739.89 |          | 1478.8 | 13  | Q | 7  | 973.49   | -0.035  | 973.49              |         |
|                     | 1593.8 |          | 1593.8 | 14  | D | 6  | 845.44   | -0.118  | 423.22              | -0.199  |
|                     | 1692.9 |          | 1692.9 | 15  | V | 5  | 730.41   | +0.1405 | 730.41              |         |
|                     | 1821.9 |          | 1821.9 | 16  | E | 4  | 631.34   | -0.002  | 631.34              |         |
|                     | 1935.9 |          | 1935.9 | 17  | N | 3  | 502.3    | +0.0449 | 502.3               |         |
|                     | 2049   |          | 2049   | 18  | L | 2  | 388.26   | +0.1215 | 388.26              |         |
| +0.3431             | 1089   |          | 2177.1 | 19  | Q | 1  | 275.17   | +0.1018 | 275.17              |         |
|                     |        |          |        | 20  | K | 0  | 147.11   |         | 147.11              |         |

general information

|                       |             |
|-----------------------|-------------|
| Annotation:           | 16 of 20    |
| AminoAcids Coverage:  | 80 %        |
| Intensity Coverage:   | 35 %        |
| Peak Coverage:        | 24 %        |
| Protein Localisation: | 241 ... 260 |

Scan number 5960 Raw file LNCAP\_Silac\_23F10\_set3\_05  
 Method ITMS; CID Peptide 70.78

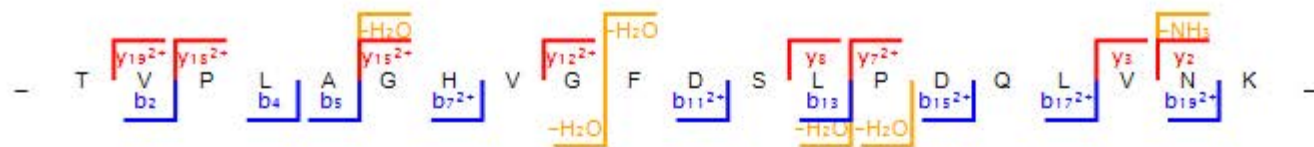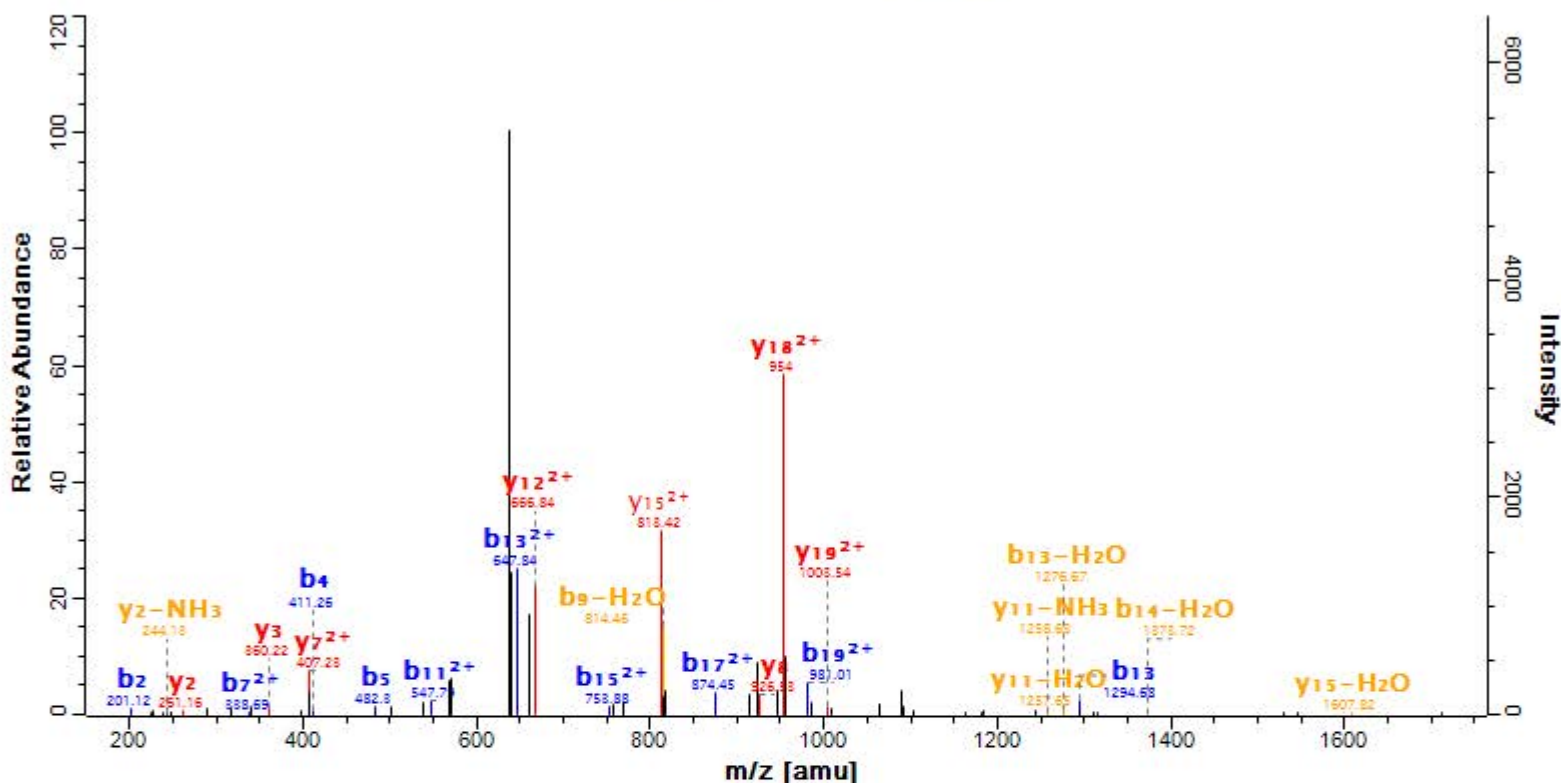

precursor information

|                   |                 |
|-------------------|-----------------|
| Mass:             | 2106.11088      |
| m/z:              | 703.04424       |
| Charge:           | 3+              |
| Retentiontime:    | 43.853218078613 |
| Score:            | 70.78362        |
| Mass Error [ppm]: | -0.034338       |
| PEP:              | 0.00025815      |
| Precursor Type:   | MULTI           |

| b <sup>2+</sup> ion |        | b ion    |        | seq |   |    | y ion    |         | y <sup>2+</sup> ion |         |
|---------------------|--------|----------|--------|-----|---|----|----------|---------|---------------------|---------|
| Δ dalton            | mass   | Δ dalton | mass   |     |   |    | Δ dalton | mass    | Δ dalton            | mass    |
|                     | 102.05 |          | 102.05 | 1   | T | 19 |          |         |                     |         |
|                     | 201.12 | +0.0139  | 201.12 | 2   | V | 18 | 2006.1   |         | 1003.5              | -0.364  |
|                     | 298.18 |          | 298.18 | 3   | P | 17 | 1907     |         | 954                 | +0.2772 |
|                     | 411.26 | +0.428   | 411.26 | 4   | L | 16 | 1809.9   |         | 1809.9              |         |
|                     | 482.3  | +0.0305  | 482.3  | 5   | A | 15 | 1696.9   |         | 1696.9              |         |
|                     | 539.32 |          | 539.32 | 6   | G | 14 | 1625.8   |         | 813.42              | -0.01   |
| -0.323              | 338.69 |          | 676.38 | 7   | H | 13 | 1568.8   |         | 1568.8              |         |
|                     | 775.45 |          | 775.45 | 8   | V | 12 | 1431.7   |         | 1431.7              |         |
|                     | 832.47 |          | 832.47 | 9   | G | 11 | 1332.7   |         | 666.84              | +0.4505 |
|                     | 979.54 |          | 979.54 | 10  | F | 10 | 1275.7   |         | 1275.7              |         |
| +0.2469             | 547.79 |          | 1094.6 | 11  | D | 9  | 1128.6   |         | 1128.6              |         |
|                     | 1181.6 |          | 1181.6 | 12  | S | 8  | 1013.6   |         | 1013.6              |         |
| +0.1176             | 647.84 | +0.0314  | 1294.7 | 13  | L | 7  | 926.53   | -0.307  | 926.53              |         |
|                     | 1391.7 |          | 1391.7 | 14  | P | 6  | 813.45   |         | 407.23              | +0.0208 |
| +0.162              | 753.88 |          | 1506.8 | 15  | D | 5  | 716.39   |         | 716.39              |         |
|                     | 1634.8 |          | 1634.8 | 16  | Q | 4  | 601.37   |         | 601.37              |         |
| +0.3842             | 874.45 |          | 1747.9 | 17  | L | 3  | 473.31   |         | 473.31              |         |
|                     | 1847   |          | 1847   | 18  | V | 2  | 360.22   | -0.037  | 360.22              |         |
| +0.4069             | 981.01 |          | 1961   | 19  | N | 1  | 261.16   | +0.1556 | 261.16              |         |
|                     |        |          |        | 20  | K | 0  | 147.11   |         | 147.11              |         |

general information

|                       |           |
|-----------------------|-----------|
| Annotation:           | 15 of 20  |
| AminoAcids Coverage:  | 75 %      |
| Intensity Coverage:   | 44 %      |
| Peak Coverage:        | 30 %      |
| Protein Localisation: | 46 ... 65 |



Scan number 5961 Raw file LNCAP\_Silac\_23F10\_set3\_05  
 Method ITMS; CID Pepti... 111.92

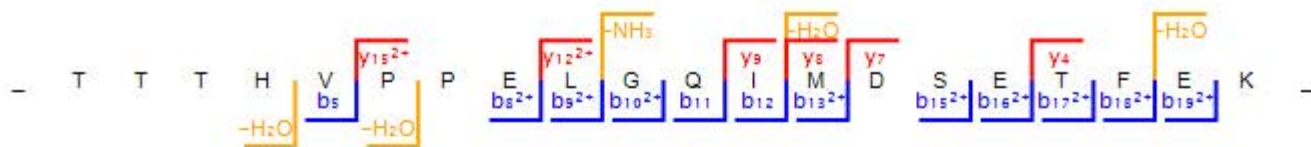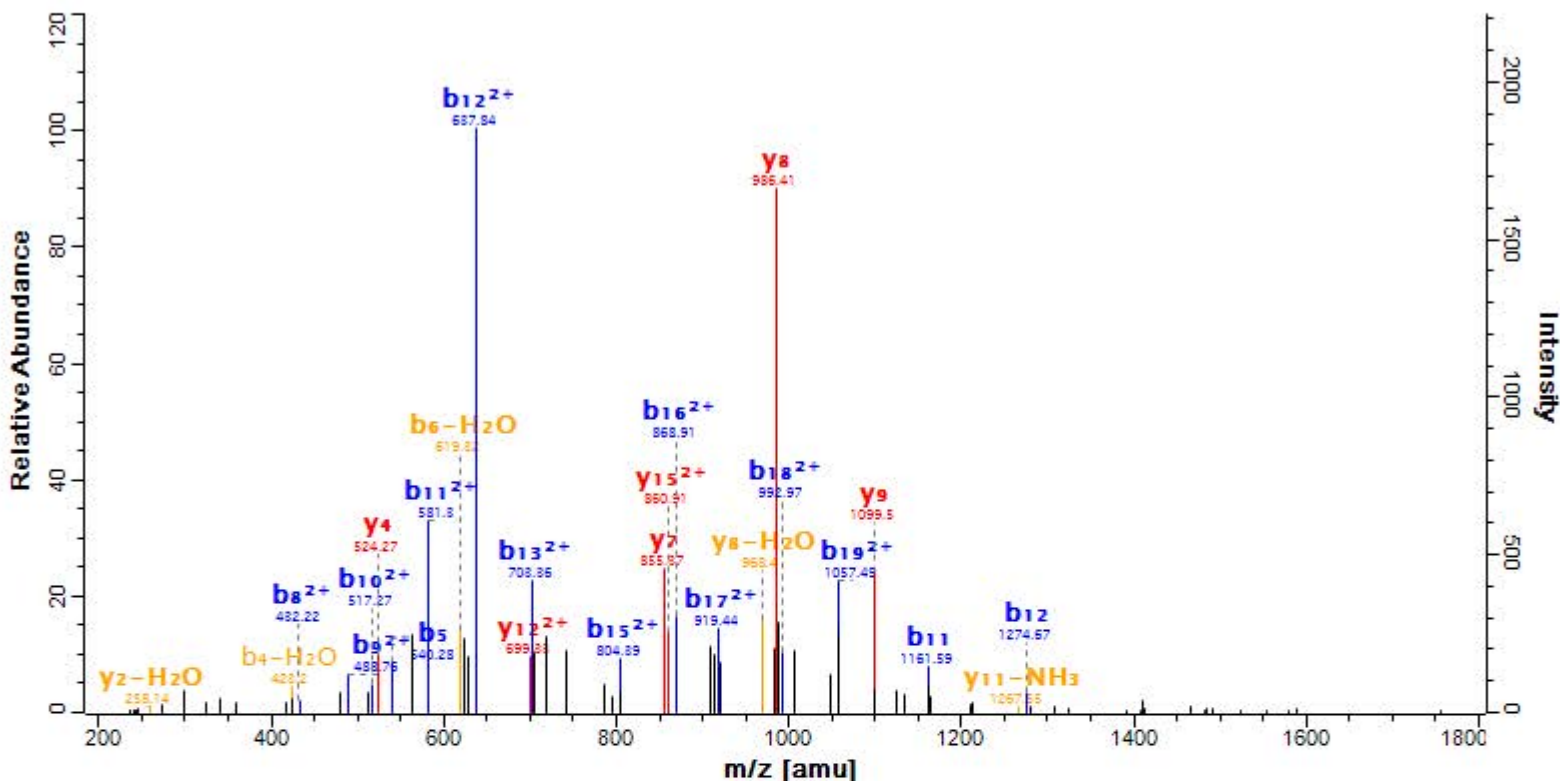

precursor information

|                   |                 |
|-------------------|-----------------|
| Mass:             | 2259.07296      |
| m/z:              | 754.0316        |
| Charge:           | 3+              |
| Retentiontime:    | 43.859085083007 |
| Score:            | 111.9249        |
| Mass Error [ppm]: | 0.022007        |
| PEP:              | 8.8382E-09      |
| Precursor Type:   | MULTI           |

| b <sup>2+</sup> ion |        | b ion    |        |    |     |    | y ion    |         | y <sup>2+</sup> ion |         |
|---------------------|--------|----------|--------|----|-----|----|----------|---------|---------------------|---------|
| Δ dalton            | mass   | Δ dalton | mass   |    | seq |    | Δ dalton | mass    | Δ dalton            | mass    |
|                     | 102.05 |          | 102.05 | 1  | T   | 19 |          |         |                     |         |
|                     | 203.1  |          | 203.1  | 2  | T   | 18 | 2159     |         | 2159                |         |
|                     | 304.15 |          | 304.15 | 3  | T   | 17 | 2058     |         | 2058                |         |
|                     | 441.21 |          | 441.21 | 4  | H   | 16 | 1956.9   |         | 1956.9              |         |
|                     | 540.28 | +0.0218  | 540.28 | 5  | V   | 15 | 1819.9   |         | 1819.9              |         |
|                     | 637.33 |          | 637.33 | 6  | P   | 14 | 1720.8   |         | 860.91              | +0.3495 |
|                     | 734.38 |          | 734.38 | 7  | P   | 13 | 1623.8   |         | 1623.8              |         |
| +0.1505             | 432.22 |          | 863.43 | 8  | E   | 12 | 1526.7   |         | 1526.7              |         |
| +0.0211             | 488.76 |          | 976.51 | 9  | L   | 11 | 1397.7   |         | 699.33              | -0.002  |
| +0.0448             | 517.27 |          | 1033.5 | 10 | G   | 10 | 1284.6   |         | 1284.6              |         |
| +0.2301             | 581.3  | +0.0349  | 1161.6 | 11 | Q   | 9  | 1227.6   |         | 1227.6              |         |
| +0.1527             | 637.84 | +0.136   | 1274.7 | 12 | I   | 8  | 1099.5   | -0.047  | 1099.5              |         |
| +0.0549             | 703.36 |          | 1405.7 | 13 | M   | 7  | 986.41   | -0.065  | 986.41              |         |
|                     | 1520.7 |          | 1520.7 | 14 | D   | 6  | 855.37   | +0.0307 | 855.37              |         |
| +0.2777             | 804.39 |          | 1607.8 | 15 | S   | 5  | 740.35   |         | 740.35              |         |
| +0.0079             | 868.91 |          | 1736.8 | 16 | E   | 4  | 653.31   |         | 653.31              |         |
| +0.0631             | 919.44 |          | 1837.9 | 17 | T   | 3  | 524.27   | +0.0276 | 524.27              |         |
| +0.2025             | 992.97 |          | 1984.9 | 18 | F   | 2  | 423.22   |         | 423.22              |         |
| +0.038              | 1057.5 |          | 2114   | 19 | E   | 1  | 276.16   |         | 276.16              |         |
|                     |        |          |        | 20 | K   | 0  | 147.11   |         | 147.11              |         |

general information

|                       |           |
|-----------------------|-----------|
| Annotation:           | 15 of 20  |
| AminoAcids Coverag    | 75 %      |
| Intensity Coverage:   | 65 %      |
| Peak Coverage:        | 29 %      |
| Protein Localisation: | 47 ... 66 |

Scan number 6056 Raw file LNCAP\_Silac\_23F10\_set3\_05  
 Method ITMS; CID Pepti... 278.72

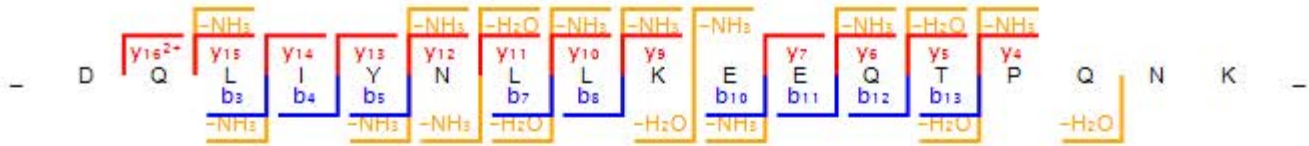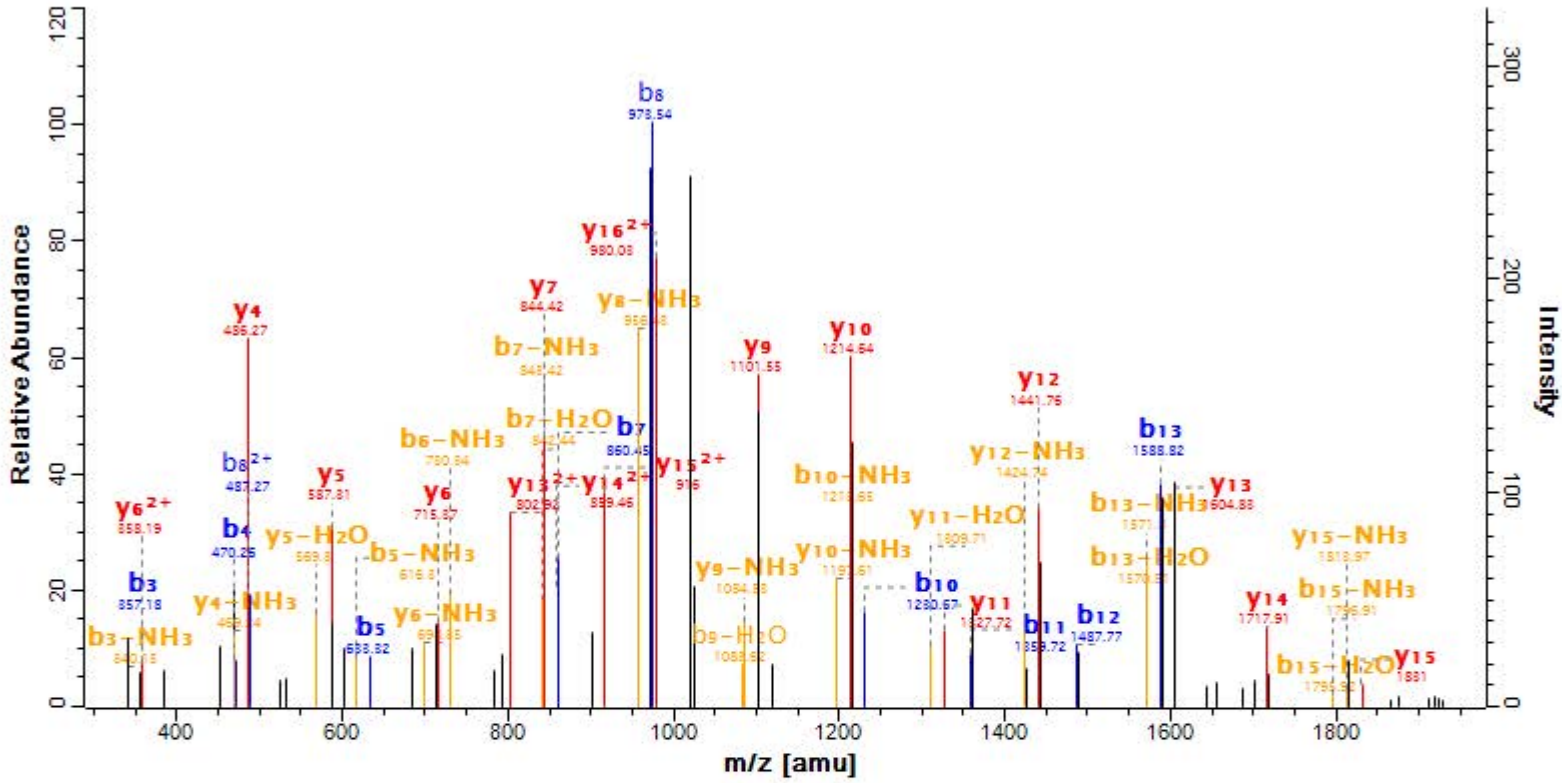

**precursor information**

|                   |                 |
|-------------------|-----------------|
| Mass:             | 2073.0751       |
| m/z:              | 1037.54483      |
| Charge:           | 2+              |
| Retentiontime:    | 44.414707183837 |
| Score:            | 278.717         |
| Mass Error [ppm]: | 0.41845         |
| PEP:              | 5.4311E-82      |
| Precursor Type:   | MULTI           |

**general information**

|                       |           |
|-----------------------|-----------|
| Annotation:           | 14 of 17  |
| AminoAcids Coverage:  | 82 %      |
| Intensity Coverage:   | 60 %      |
| Peak Coverage:        | 50 %      |
| Protein Localisation: | 35 ... 51 |

| b <sup>2+</sup> ion |        | b ion         |        | seq |   |    | y ion    |         | y <sup>2+</sup> ion |         |
|---------------------|--------|---------------|--------|-----|---|----|----------|---------|---------------------|---------|
| Δ dalton            | mass   | Δ dalton      | mass   |     |   |    | Δ dalton | mass    | Δ dalton            | mass    |
|                     | 116.03 | 116.03        |        | 1   | D | 16 |          |         |                     |         |
|                     | 244.09 | 244.09        |        | 2   | Q | 15 | 1959.1   |         | 980.03              | +0.2863 |
|                     | 357.18 | +0.2155357.18 |        | 3   | L | 14 | 1831     | +0.3205 | 916                 | +0.0856 |
|                     | 470.26 | +0.1356470.26 |        | 4   | I | 13 | 1717.9   | -0.264  | 859.46              | +0.2549 |
|                     | 633.32 | +0.0118633.32 |        | 5   | Y | 12 | 1604.8   | -0.228  | 802.92              | +0.2403 |
|                     | 747.37 | 747.37        |        | 6   | N | 11 | 1441.8   | -0.024  | 1441.8              |         |
|                     | 860.45 | +0.1561860.45 |        | 7   | L | 10 | 1327.7   | +0.2869 | 1327.7              |         |
| +0.0397             | 487.27 | -0.022        | 973.54 | 8   | L | 9  | 1214.6   | -0.084  | 1214.6              |         |
|                     | 1101.6 | 1101.6        |        | 9   | K | 8  | 1101.6   | -0.032  | 1101.6              |         |
|                     | 1230.7 | +0.18161230.7 |        | 10  | E | 7  | 973.46   |         | 973.46              |         |
|                     | 1359.7 | -0.019        | 1359.7 | 11  | E | 6  | 844.42   | +0.0446 | 844.42              |         |
|                     | 1487.8 | -0.062        | 1487.8 | 12  | Q | 5  | 715.37   | +0.1349 | 358.19              | +0.0606 |
|                     | 1588.8 | -0.242        | 1588.8 | 13  | T | 4  | 587.31   | +0.0528 | 587.31              |         |
|                     | 1685.9 | 1685.9        |        | 14  | P | 3  | 486.27   | -0.018  | 486.27              |         |
|                     | 1813.9 | 1813.9        |        | 15  | Q | 2  | 389.21   |         | 389.21              |         |
|                     | 1928   | 1928          |        | 16  | N | 1  | 261.16   |         | 261.16              |         |
|                     |        |               |        | 17  | K | 0  | 147.11   |         | 147.11              |         |

Scan number 6063 Raw file LNCAP\_Silac\_23F10\_set3\_05  
 Method ITMS; CID Pepti... 287.54

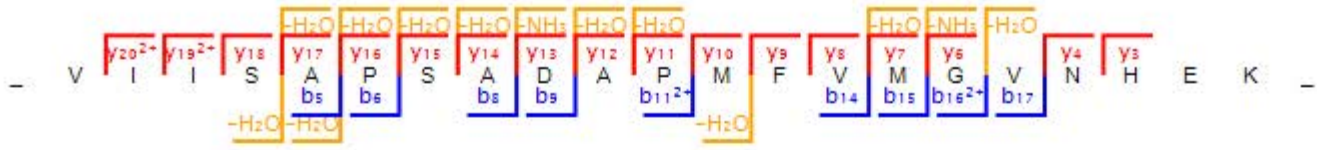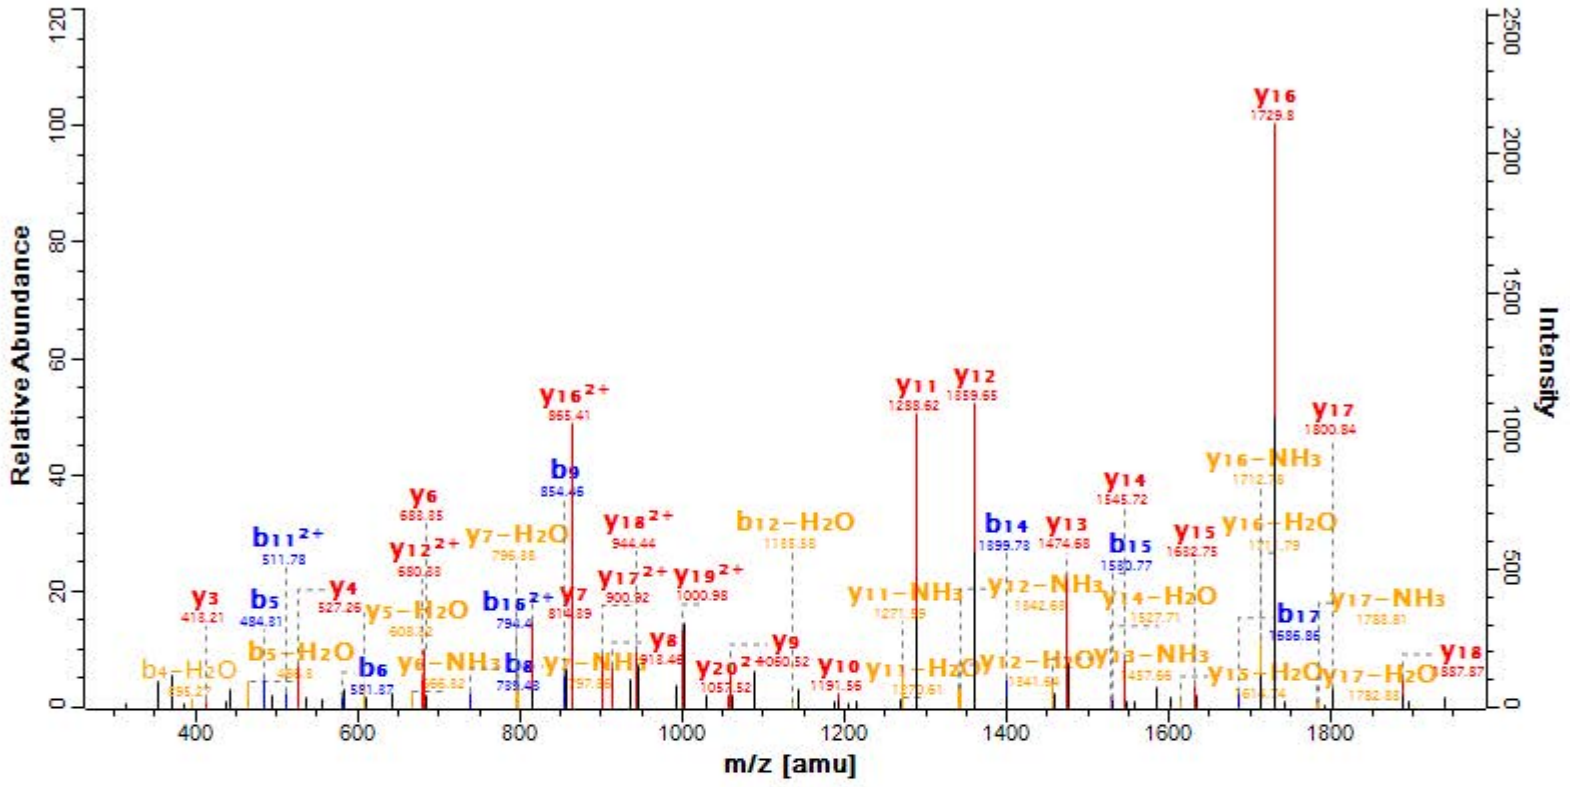

precursor information

|                   |                 |
|-------------------|-----------------|
| Mass:             | 2212.10126      |
| m/z:              | 1107.05791      |
| Charge:           | 2+              |
| Retentiontime:    | 44.461170196533 |
| Score:            | 287.5408        |
| Mass Error [ppm]: | -0.35457        |
| PEP:              | 1.2747E-112     |
| Precursor Type:   | MULTI           |

general information

|                       |             |
|-----------------------|-------------|
| Annotation:           | 18 of 21    |
| AminoAcids Coverage:  | 86 %        |
| Intensity Coverage:   | 67 %        |
| Peak Coverage:        | 47 %        |
| Protein Localisation: | 119 ... 139 |

| b <sup>2+</sup> ion |        | b ion    |        | seq |   |    | y ion    |         | y <sup>2+</sup> ion |         |
|---------------------|--------|----------|--------|-----|---|----|----------|---------|---------------------|---------|
| Δ dalton            | mass   | Δ dalton | mass   |     |   |    | Δ dalton | mass    | Δ dalton            | mass    |
|                     | 100.08 | 100.08   |        | 1   | V | 20 |          |         |                     |         |
|                     | 213.16 | 213.16   |        | 2   | I | 19 | 2114     |         | 1057.5              | +0.2015 |
|                     | 326.24 | 326.24   |        | 3   | I | 18 | 2001     |         | 1001                | -0.077  |
|                     | 413.28 | 413.28   |        | 4   | S | 17 | 1887.9   | -0.031  | 944.44              | +0.0005 |
|                     | 484.31 | -0.005   | 484.31 | 5   | A | 16 | 1800.8   | -0.116  | 900.92              | -0.007  |
|                     | 581.37 | -0.039   | 581.37 | 6   | P | 15 | 1729.8   | -0.111  | 865.41              | +0.2451 |
|                     | 668.4  |          | 668.4  | 7   | S | 14 | 1632.8   | -0.087  | 1632.8              |         |
|                     | 739.43 | +0.002   | 739.43 | 8   | A | 13 | 1545.7   | -0.2    | 1545.7              |         |
|                     | 854.46 | -0.027   | 854.46 | 9   | D | 12 | 1474.7   | -0.117  | 1474.7              |         |
|                     | 925.5  |          | 925.5  | 10  | A | 11 | 1359.7   | -0.086  | 680.33              | +0.1878 |
| -0.4                | 511.78 |          | 1022.6 | 11  | P | 10 | 1288.6   | -0.085  | 1288.6              |         |
|                     | 1153.6 |          | 1153.6 | 12  | M | 9  | 1191.6   | -0.028  | 1191.6              |         |
|                     | 1300.7 |          | 1300.7 | 13  | F | 8  | 1060.5   | +0.0495 | 1060.5              |         |
|                     | 1399.7 | -0.324   | 1399.7 | 14  | V | 7  | 913.46   | +0.034  | 913.46              |         |
|                     | 1530.8 | -0.231   | 1530.8 | 15  | M | 6  | 814.39   | -0.039  | 814.39              |         |
| +0.0527             | 794.4  |          | 1587.8 | 16  | G | 5  | 683.35   | -0.063  | 683.35              |         |
|                     | 1686.9 | -0.057   | 1686.9 | 17  | V | 4  | 626.33   |         | 626.33              |         |
|                     | 1800.9 |          | 1800.9 | 18  | N | 3  | 527.26   | +0.0669 | 527.26              |         |
|                     | 1938   |          | 1938   | 19  | H | 2  | 413.21   | -0.004  | 413.21              |         |
|                     | 2067   |          | 2067   | 20  | E | 1  | 276.16   |         | 276.16              |         |
|                     |        |          |        | 21  | K | 0  | 147.11   |         | 147.11              |         |

Scan number 615 Raw file LNCAP\_Silac\_23F10\_set3\_05  
 Method ITMS; CID Pepti... 107.72

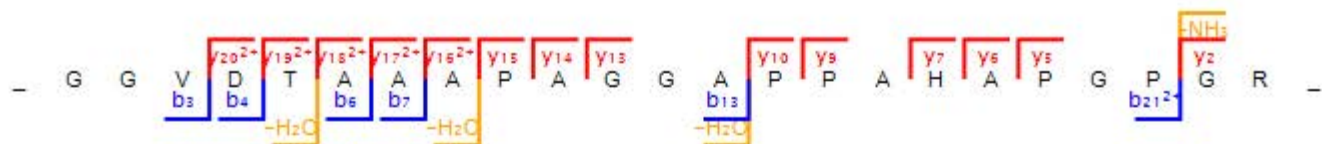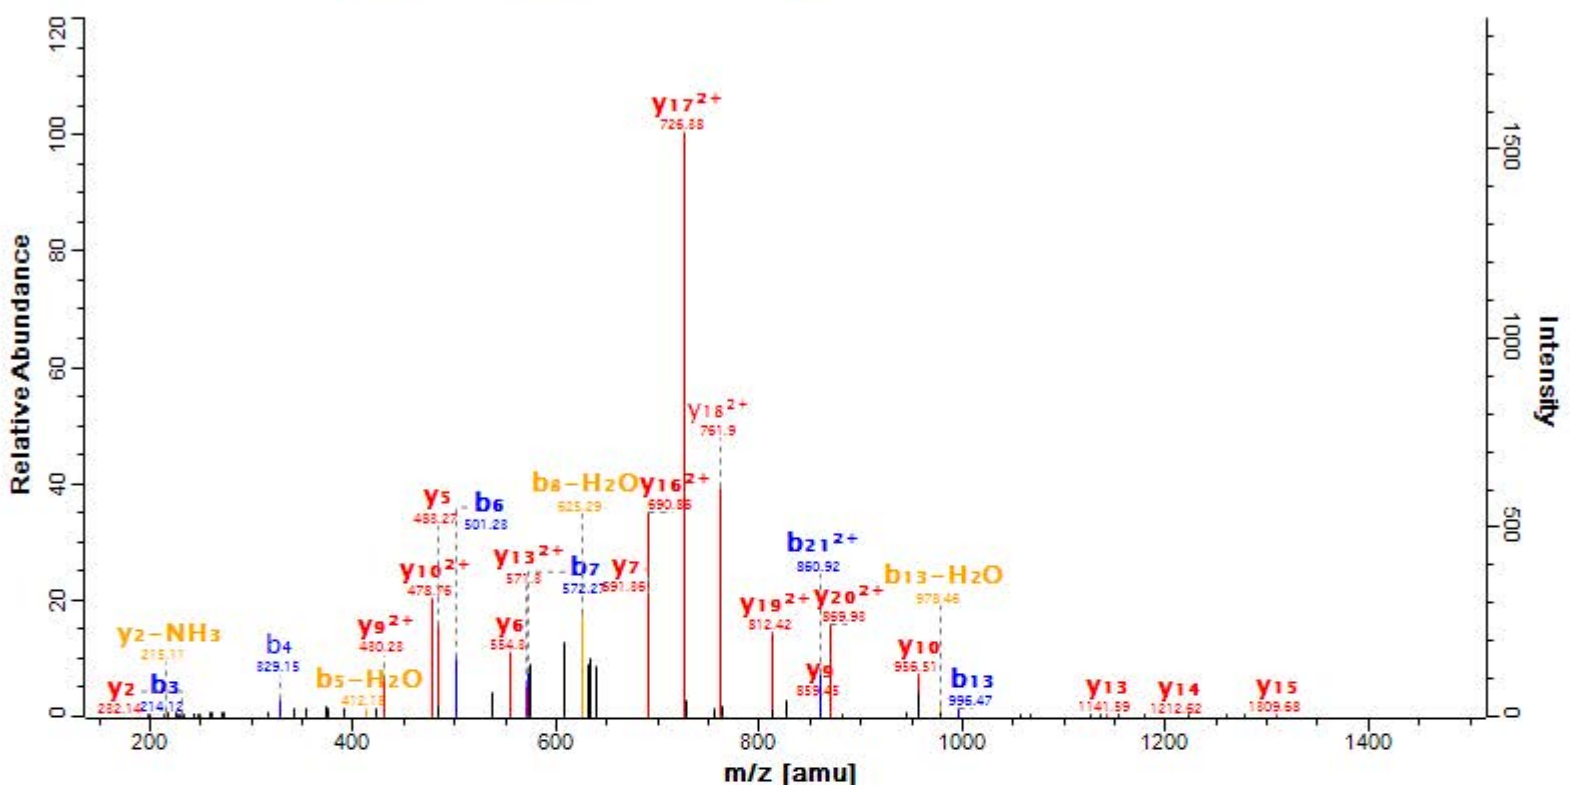

precursor information

|                   |                 |
|-------------------|-----------------|
| Mass:             | 1950.96595      |
| m/z:              | 651.32926       |
| Charge:           | 3+              |
| Retentiontime:    | 9.9336528778076 |
| Score:            | 107.7236        |
| Mass Error [ppm]: | -0.034698       |
| PEP:              | 4.753E-10       |
| Precursor Type:   | MULTI           |

general information

|                       |           |
|-----------------------|-----------|
| Annotation:           | 19 of 23  |
| AminoAcids Coverage:  | 83 %      |
| Intensity Coverage:   | 78 %      |
| Peak Coverage:        | 25 %      |
| Protein Localisation: | 25 ... 47 |

| b <sup>2+</sup> ion |        | b ion    |        | seq |   |    | y ion    |         | y <sup>2+</sup> ion |         |
|---------------------|--------|----------|--------|-----|---|----|----------|---------|---------------------|---------|
| Δ dalton            | mass   | Δ dalton | mass   |     |   |    | Δ dalton | mass    | Δ dalton            | mass    |
|                     | 58.029 |          | 58.029 | 1   | G | 22 |          |         |                     |         |
|                     | 115.05 |          | 115.05 | 2   | G | 21 | 1895     |         | 1895                |         |
|                     | 214.12 | +0.1818  | 214.12 | 3   | V | 20 | 1837.9   |         | 1837.9              |         |
|                     | 329.15 | +0.013   | 329.15 | 4   | D | 19 | 1738.9   |         | 869.93              | +0.2426 |
|                     | 430.19 |          | 430.19 | 5   | T | 18 | 1623.8   |         | 812.42              | +0.2523 |
|                     | 501.23 | +0.0586  | 501.23 | 6   | A | 17 | 1522.8   |         | 761.9               | +0.2021 |
|                     | 572.27 | -0.005   | 572.27 | 7   | A | 16 | 1451.8   |         | 726.38              | +0.2094 |
|                     | 643.3  |          | 643.3  | 8   | A | 15 | 1380.7   |         | 690.86              | +0.0189 |
|                     | 740.36 |          | 740.36 | 9   | P | 14 | 1309.7   | -0.155  | 1309.7              |         |
|                     | 811.39 |          | 811.39 | 10  | A | 13 | 1212.6   | +0.3063 | 1212.6              |         |
|                     | 868.42 |          | 868.42 | 11  | G | 12 | 1141.6   | +0.045  | 571.3               | +0.194  |
|                     | 925.44 |          | 925.44 | 12  | G | 11 | 1084.6   |         | 1084.6              |         |
|                     | 996.47 | +0.2442  | 996.47 | 13  | A | 10 | 1027.5   |         | 1027.5              |         |
|                     | 1093.5 |          | 1093.5 | 14  | P | 9  | 956.51   | -0.027  | 478.76              | +0.2076 |
|                     | 1190.6 |          | 1190.6 | 15  | P | 8  | 859.45   | +0.0618 | 430.23              | +0.0904 |
|                     | 1261.6 |          | 1261.6 | 16  | A | 7  | 762.4    |         | 762.4               |         |
|                     | 1398.7 |          | 1398.7 | 17  | H | 6  | 691.36   | +0.1396 | 691.36              |         |
|                     | 1469.7 |          | 1469.7 | 18  | A | 5  | 554.3    | +0.0102 | 554.3               |         |
|                     | 1566.8 |          | 1566.8 | 19  | P | 4  | 483.27   | +0.0102 | 483.27              |         |
|                     | 1623.8 |          | 1623.8 | 20  | G | 3  | 386.21   |         | 386.21              |         |
| +0.1979             | 860.92 |          | 1720.8 | 21  | P | 2  | 329.19   |         | 329.19              |         |
|                     | 1777.9 |          | 1777.9 | 22  | G | 1  | 232.14   | +0.0667 | 232.14              |         |
|                     |        |          |        | 23  | R | 0  | 175.12   |         | 175.12              |         |

Scan number 6466 Raw file LNCAP\_Silac\_23F10\_set3\_05  
 Method ITMS; CID Pepti... 99.07

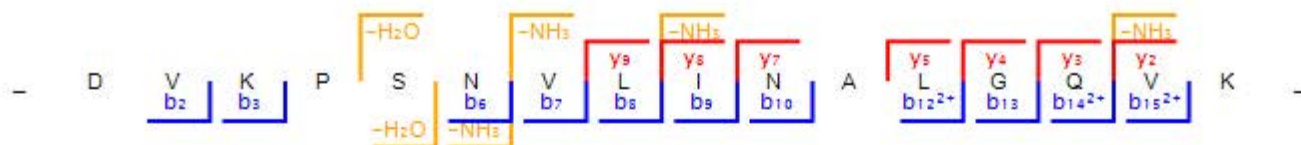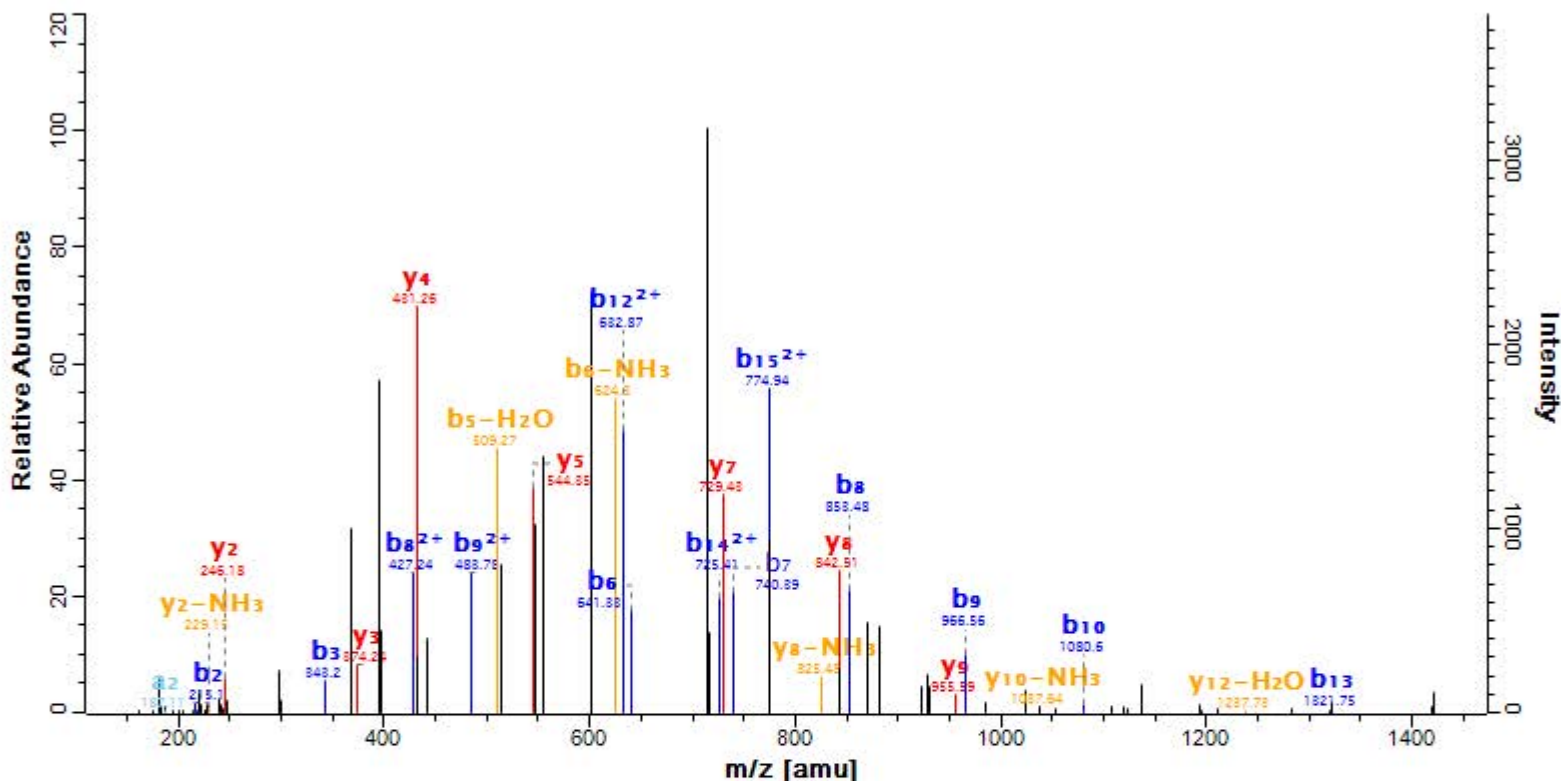

#### precursor information

|                   |                 |
|-------------------|-----------------|
| Mass:             | 1693.97277      |
| m/z:              | 565.66487       |
| Charge:           | 3+              |
| Retentiontime:    | 46.996128082275 |
| Score:            | 99.06912        |
| Mass Error [ppm]: | 0.061771        |
| PEP:              | 0.0020067       |
| Precursor Type:   | ISO             |

#### general information

|                       |             |
|-----------------------|-------------|
| Annotation:           | 12 of 16    |
| AminoAcids Coverage:  | 75 %        |
| Intensity Coverage:   | 45 %        |
| Peak Coverage:        | 27 %        |
| Protein Localisation: | 179 ... 194 |

| a ion    |        | b <sup>2+</sup> ion |        | b ion    |         |     |   |          | y ion  |         |
|----------|--------|---------------------|--------|----------|---------|-----|---|----------|--------|---------|
| Δ dalton | mass   | Δ dalton            | mass   | Δ dalton | mass    | seq |   | Δ dalton | mass   |         |
|          | 88.039 |                     | 116.03 |          | 116.03  | 1   | D | 15       |        |         |
| +0.1189  | 187.11 |                     | 215.1  | +0.0462  | 215.1   | 2   | V | 14       | 1580   |         |
|          | 315.2  |                     | 343.2  | +0.0425  | 343.2   | 3   | K | 13       | 1480.9 |         |
|          | 412.26 |                     | 440.25 |          | 440.25  | 4   | P | 12       | 1352.8 |         |
|          | 499.29 |                     | 527.28 |          | 527.28  | 5   | S | 11       | 1255.7 |         |
|          | 613.33 |                     | 641.33 | -0.106   | 641.33  | 6   | N | 10       | 1168.7 |         |
|          | 712.4  |                     | 740.39 | +0.0797  | 740.39  | 7   | V | 9        | 1054.7 |         |
|          | 825.48 | +0.197              | 427.24 | +0.0015  | 5853.48 | 8   | L | 8        | 955.59 | -0.052  |
|          | 938.57 | +0.1679             | 483.78 | -0.028   | 966.56  | 9   | I | 7        | 842.51 | -0.001  |
|          | 1052.6 |                     | 1080.6 | +0.1687  | 1080.6  | 10  | N | 6        | 729.43 | +0.0695 |
|          | 1123.6 |                     | 1151.6 |          | 1151.6  | 11  | A | 5        | 615.38 |         |
|          | 1236.7 | +0.1966             | 632.87 |          | 1264.7  | 12  | L | 4        | 544.35 | -0.031  |
|          | 1293.8 |                     | 1321.7 | -0.222   | 1321.7  | 13  | G | 3        | 431.26 | +0.0346 |
|          | 1421.8 | +0.0132             | 725.41 |          | 1449.8  | 14  | Q | 2        | 374.24 | +0.0689 |
|          | 1520.9 | -0.01               | 774.94 |          | 1548.9  | 15  | V | 1        | 246.18 | +0.0658 |
|          |        |                     |        |          |         | 16  | K | 0        | 147.11 |         |

Scan number 6577 Raw file LNCAP\_Silac\_23F10\_set3\_05  
 Method ITMS; CID Pepti... 70.26

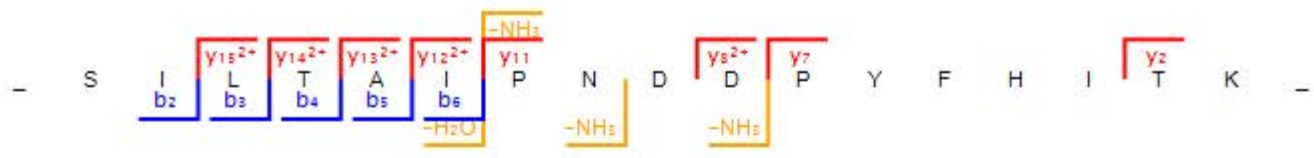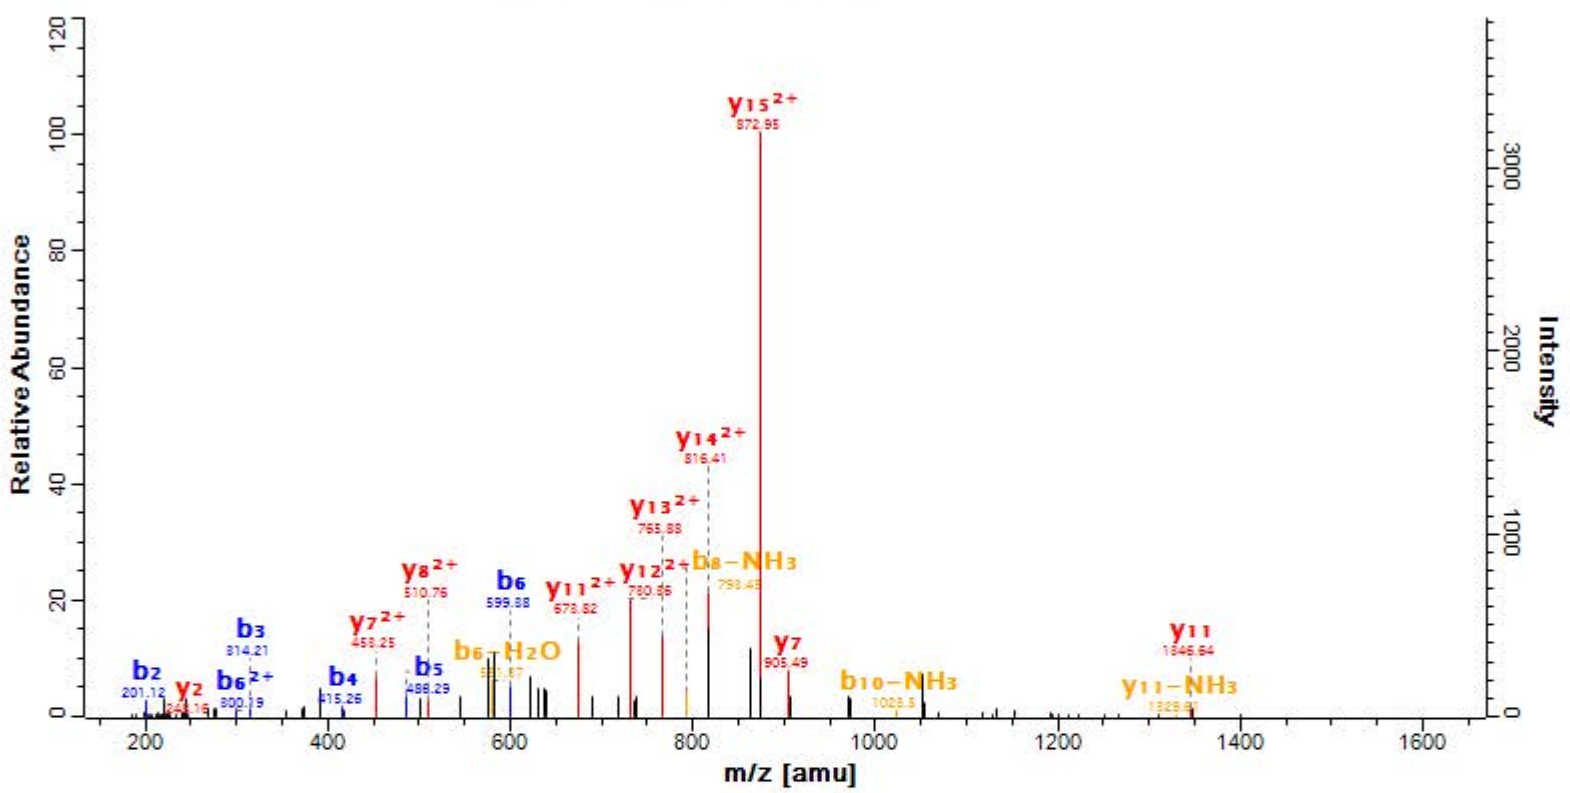

**precursor information**

|                   |                 |
|-------------------|-----------------|
| Mass:             | 1943.99997      |
| m/z:              | 649.00727       |
| Charge:           | 3+              |
| Retentiontime:    | 47.725654602050 |
| Score:            | 70.25957        |
| Mass Error [ppm]: | 0.35478         |
| PEP:              | 0.00032713      |
| Precursor Type:   | MULTI           |

**general information**

|                       |             |
|-----------------------|-------------|
| Annotation:           | 10 of 17    |
| AminoAcids Coverage:  | 59 %        |
| Intensity Coverage:   | 58 %        |
| Peak Coverage:        | 21 %        |
| Protein Localisation: | 284 ... 300 |

| b <sup>2+</sup> ion |        | b ion    |        |    |     |    | y ion    |         | y <sup>2+</sup> ion |         |
|---------------------|--------|----------|--------|----|-----|----|----------|---------|---------------------|---------|
| Δ dalton            | mass   | Δ dalton | mass   |    | seq |    | Δ dalton | mass    | Δ dalton            | mass    |
|                     | 88.039 |          | 88.039 | 1  | S   | 16 |          |         |                     |         |
|                     | 201.12 | -0.079   | 201.12 | 2  | I   | 15 | 1858     |         | 1858                |         |
|                     | 314.21 | +0.0761  | 314.21 | 3  | L   | 14 | 1744.9   |         | 872.95              | +0.2464 |
|                     | 415.26 | +0.1031  | 415.26 | 4  | T   | 13 | 1631.8   |         | 816.41              | -0.061  |
|                     | 486.29 | +0.214   | 486.29 | 5  | A   | 12 | 1530.8   |         | 765.88              | +0.3315 |
| +0.1258             | 300.19 | +0.0745  | 599.38 | 6  | I   | 11 | 1459.7   |         | 730.36              | +0.2375 |
|                     | 696.43 |          | 696.43 | 7  | P   | 10 | 1346.6   | -0.107  | 673.82              | +0.26   |
|                     | 810.47 |          | 810.47 | 8  | N   | 9  | 1249.6   |         | 1249.6              |         |
|                     | 925.5  |          | 925.5  | 9  | D   | 8  | 1135.5   |         | 1135.5              |         |
|                     | 1040.5 |          | 1040.5 | 10 | D   | 7  | 1020.5   |         | 510.76              | +0.2321 |
|                     | 1137.6 |          | 1137.6 | 11 | P   | 6  | 905.49   | -0.086  | 453.25              | +0.3082 |
|                     | 1300.6 |          | 1300.6 | 12 | Y   | 5  | 808.44   |         | 808.44              |         |
|                     | 1447.7 |          | 1447.7 | 13 | F   | 4  | 645.37   |         | 645.37              |         |
|                     | 1584.8 |          | 1584.8 | 14 | H   | 3  | 498.3    |         | 498.3               |         |
|                     | 1697.9 |          | 1697.9 | 15 | I   | 2  | 361.24   |         | 361.24              |         |
|                     | 1798.9 |          | 1798.9 | 16 | T   | 1  | 248.16   | +0.0589 | 248.16              |         |
|                     |        |          |        | 17 | K   | 0  | 147.11   |         | 147.11              |         |

Scan number 6903 Raw file LNCAP\_Silac\_23F10\_set3\_05  
 Method ITMS; CID Pepti... 118.72

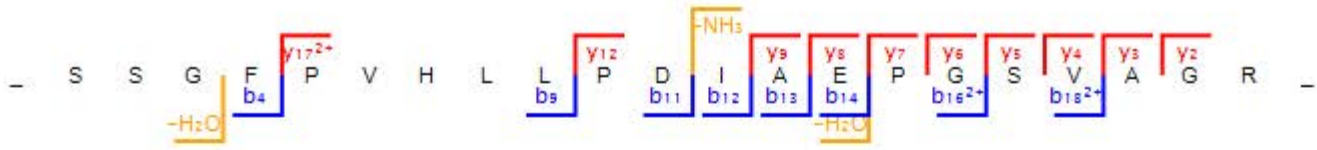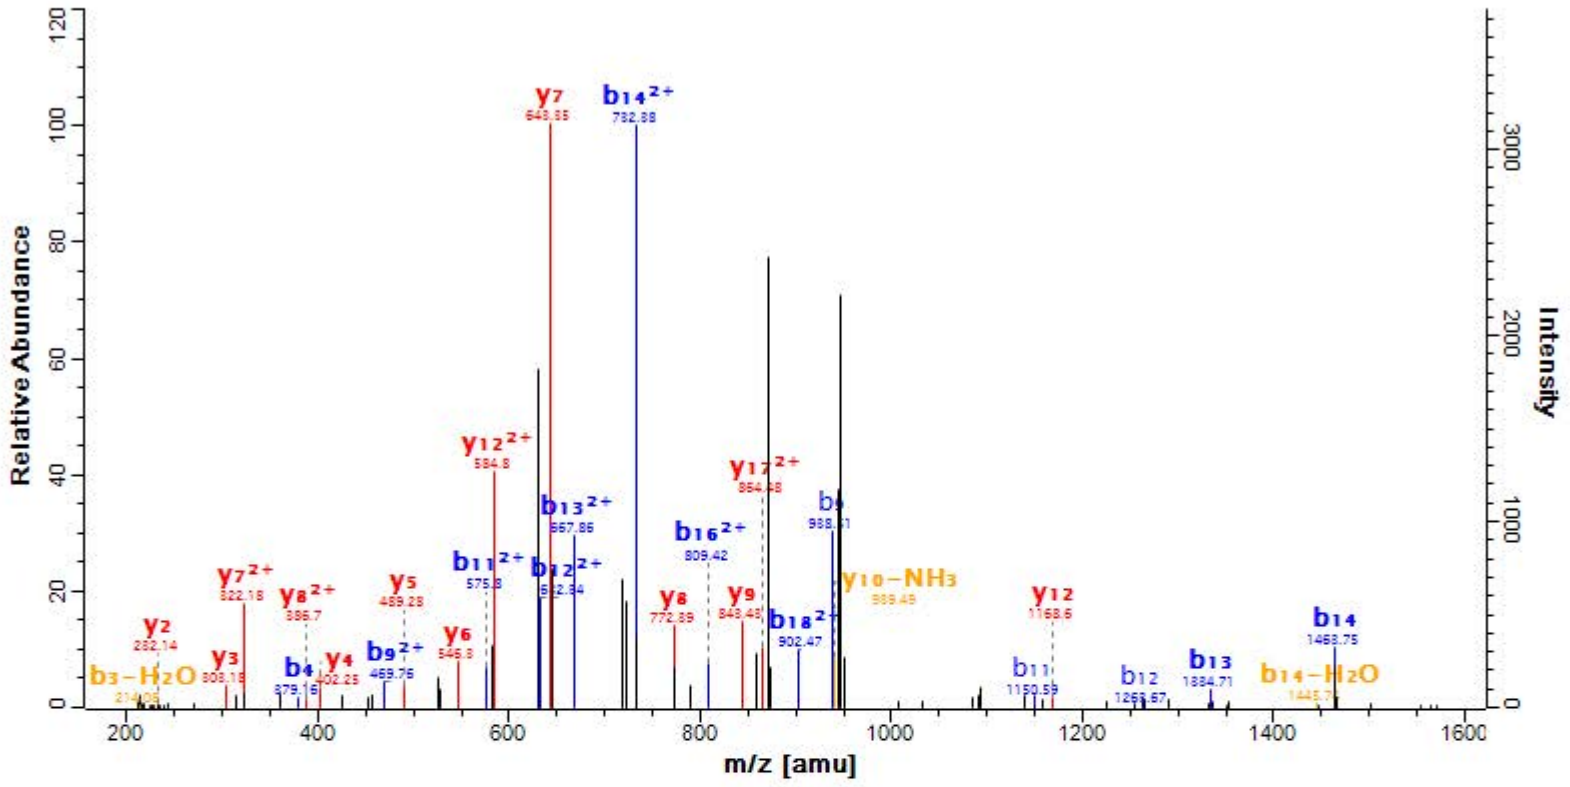

precursor information

|                   |                 |
|-------------------|-----------------|
| Mass:             | 2105.09017      |
| m/z:              | 702.704         |
| Charge:           | 3+              |
| Retentiontime:    | 49.827587127685 |
| Score:            | 118.7195        |
| Mass Error [ppm]: | -0.18292        |
| PEP:              | 2.754E-10       |
| Precursor Type:   | MULTI           |

general information

|                       |             |
|-----------------------|-------------|
| Annotation:           | 15 of 21    |
| AminoAcids Coverage:  | 71 %        |
| Intensity Coverage:   | 51 %        |
| Peak Coverage:        | 31 %        |
| Protein Localisation: | 219 ... 239 |

| b <sup>2+</sup> ion |         | b ion    |        | seq |   |    | y ion    |         | y <sup>2+</sup> ion |         |
|---------------------|---------|----------|--------|-----|---|----|----------|---------|---------------------|---------|
| Δ dalton            | mass    | Δ dalton | mass   |     |   |    | Δ dalton | mass    | Δ dalton            | mass    |
|                     | 88.039  |          | 88.039 | 1   | S | 20 |          |         |                     |         |
|                     | 175.07  |          | 175.07 | 2   | S | 19 | 2019.1   |         | 2019.1              |         |
|                     | 232.09  |          | 232.09 | 3   | G | 18 | 1932     |         | 1932                |         |
|                     | 379.16  | +0.0296  | 379.16 | 4   | F | 17 | 1875     |         | 1875                |         |
|                     | 476.21  |          | 476.21 | 5   | P | 16 | 1727.9   |         | 864.48              | +0.149  |
|                     | 575.28  |          | 575.28 | 6   | V | 15 | 1630.9   |         | 1630.9              |         |
|                     | 712.34  |          | 712.34 | 7   | H | 14 | 1531.8   |         | 1531.8              |         |
|                     | 825.43  |          | 825.43 | 8   | L | 13 | 1394.8   |         | 1394.8              |         |
| -0.026              | 469.76  | +0.0291  | 938.51 | 9   | L | 12 | 1281.7   |         | 1281.7              |         |
|                     | 1035.6  |          | 1035.6 | 10  | P | 11 | 1168.6   | -0.463  | 584.8               | +0.1804 |
| +0.1471             | 1575.8  | +0.26191 | 1150.6 | 11  | D | 10 | 1071.5   |         | 1071.5              |         |
| -0.003              | 632.34  | +0.26591 | 1263.7 | 12  | I | 9  | 956.52   |         | 956.52              |         |
| +0.2529             | 667.86  | +0.13871 | 1334.7 | 13  | A | 8  | 843.43   | +0.1053 | 843.43              |         |
| +0.2442             | 732.38  | +0.04021 | 1463.8 | 14  | E | 7  | 772.39   | +0.0746 | 386.7               | +0.3671 |
|                     | 1560.8  |          | 1560.8 | 15  | P | 6  | 643.35   | +0.0653 | 322.18              | +0.2222 |
| +0.0567             | 809.42  |          | 1617.8 | 16  | G | 5  | 546.3    | +0.0521 | 546.3               |         |
|                     | 1704.9  |          | 1704.9 | 17  | S | 4  | 489.28   | +0.2227 | 489.28              |         |
| +0.2874             | 4902.47 |          | 1803.9 | 18  | V | 3  | 402.25   | +0.0803 | 402.25              |         |
|                     | 1875    |          | 1875   | 19  | A | 2  | 303.18   | +0.1813 | 303.18              |         |
|                     | 1932    |          | 1932   | 20  | G | 1  | 232.14   | +0.0824 | 232.14              |         |
|                     |         |          |        | 21  | R | 0  | 175.12   |         | 175.12              |         |

Scan number 7124 Raw file LNCAP\_Silac\_23F10\_set3\_05  
 Method ITMS; CID Pepti... 96.6

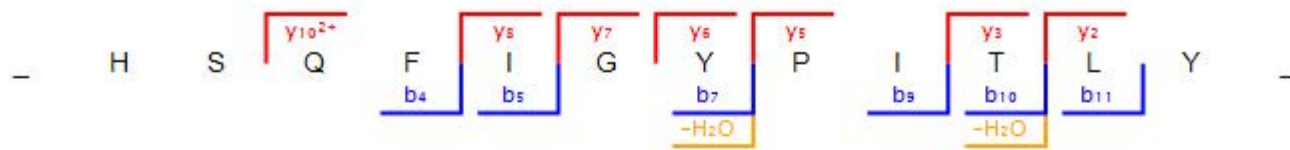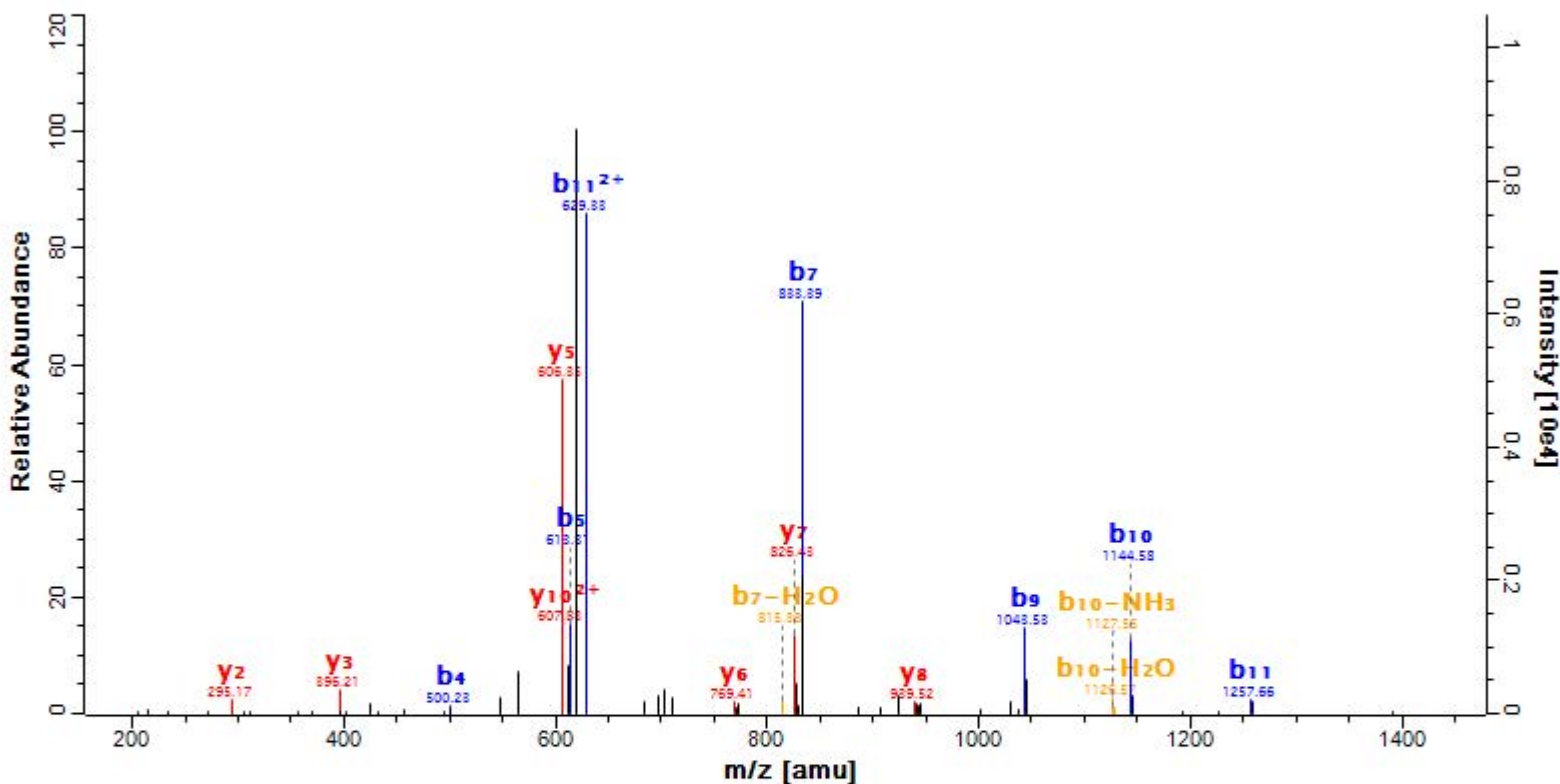

#### precursor information

|                   |                 |
|-------------------|-----------------|
| Mass:             | 1437.72927      |
| m/z:              | 719.87191       |
| Charge:           | 2+              |
| Retentiontime:    | 51.363544464111 |
| Score:            | 96.60434        |
| Mass Error [ppm]: | 0.015965        |
| PEP:              | 0.0051322       |
| Precursor Type:   | ISO             |

#### general information

|                       |             |
|-----------------------|-------------|
| Annotation:           | 9 of 12     |
| AminoAcids Coverage:  | 75 %        |
| Intensity Coverage:   | 61 %        |
| Peak Coverage:        | 23 %        |
| Protein Localisation: | 157 ... 168 |

| b <sup>2+</sup> ion |        | b ion    |        | seq |   |    | y ion    |         | y <sup>2+</sup> ion |        |
|---------------------|--------|----------|--------|-----|---|----|----------|---------|---------------------|--------|
| Δ dalton            | mass   | Δ dalton | mass   |     |   |    | Δ dalton | mass    | Δ dalton            | mass   |
|                     | 138.07 |          | 138.07 | 1   | H | 11 |          |         |                     |        |
|                     | 225.1  |          | 225.1  | 2   | S | 10 | 1301.7   |         | 1301.7              |        |
|                     | 353.16 |          | 353.16 | 3   | Q | 9  | 1214.6   |         | 607.83              | -0.479 |
|                     | 500.23 | +0.1452  | 500.23 | 4   | F | 8  | 1086.6   |         | 1086.6              |        |
|                     | 613.31 | +0.0278  | 613.31 | 5   | I | 7  | 939.52   | -0.059  | 939.52              |        |
|                     | 670.33 |          | 670.33 | 6   | G | 6  | 826.43   | -0.026  | 826.43              |        |
|                     | 833.39 | -0.005   | 833.39 | 7   | Y | 5  | 769.41   | +0.0032 | 769.41              |        |
|                     | 930.45 |          | 930.45 | 8   | P | 4  | 606.35   | +0.0173 | 606.35              |        |
|                     | 1043.5 | -0.068   | 1043.5 | 9   | I | 3  | 509.3    |         | 509.3               |        |
|                     | 1144.6 | +0.0293  | 1144.6 | 10  | T | 2  | 396.21   | -0.03   | 396.21              |        |
| +0.2152             | 629.33 | -0.101   | 1257.7 | 11  | L | 1  | 295.17   | +0.038  | 295.17              |        |
|                     |        |          |        | 12  | Y | 0  | 182.08   |         | 182.08              |        |



Scan number 7128 Raw file LNCAP\_Silac\_23F10\_set3\_05  
 Method ITMS: CID Pepti... 78.81

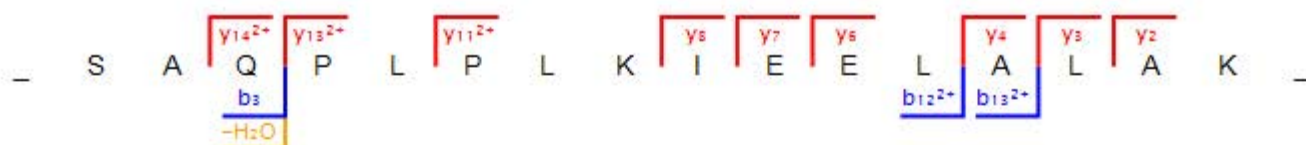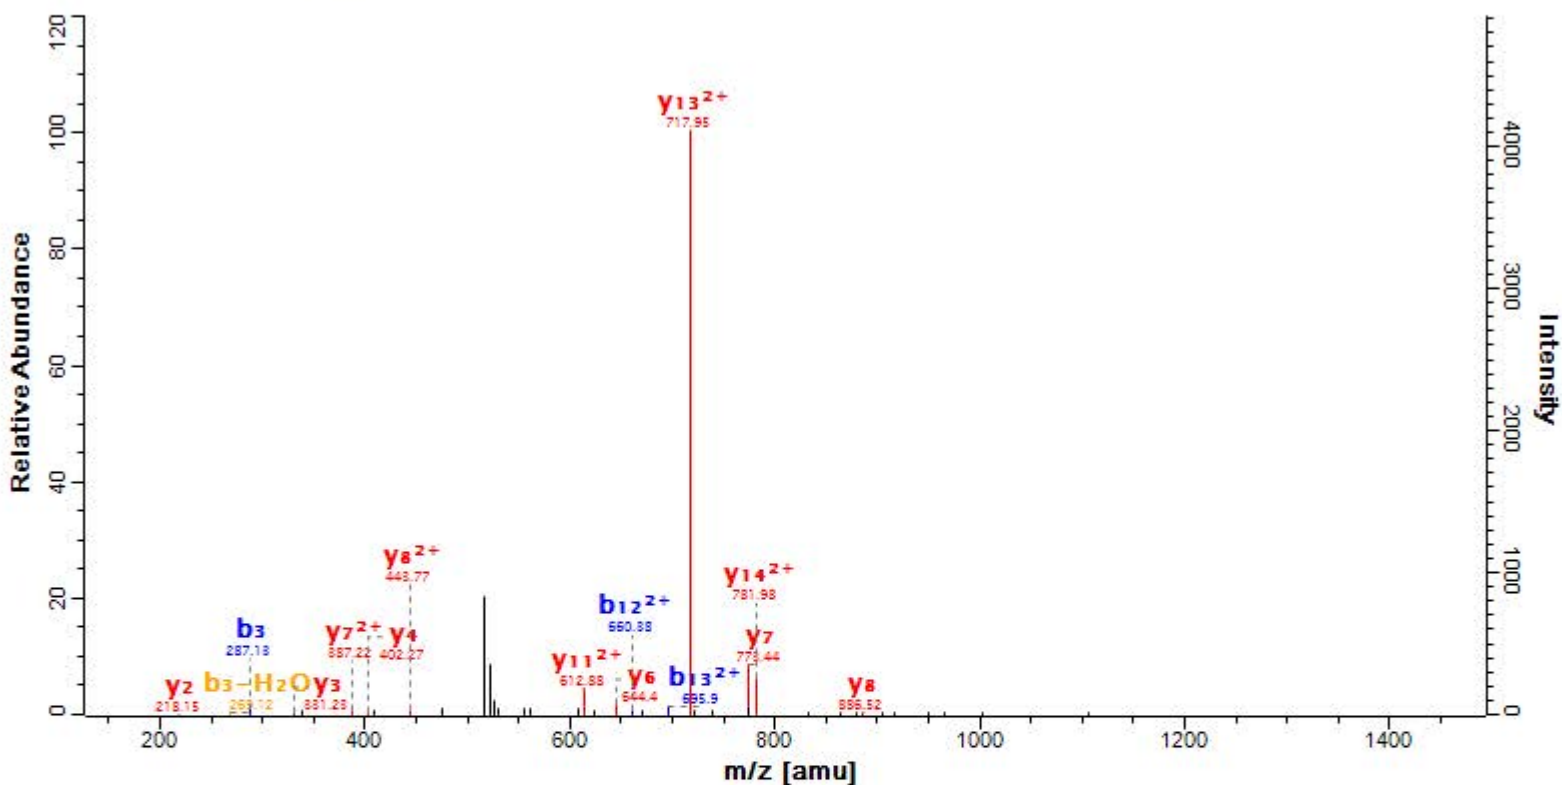

**precursor information**

|                   |                 |
|-------------------|-----------------|
| Mass:             | 1720.01327      |
| m/z:              | 574.34503       |
| Charge:           | 3+              |
| Retentiontime:    | 51.392055511474 |
| Score:            | 78.81388        |
| Mass Error [ppm]: | -0.11545        |
| PEP:              | 0.00020343      |
| Precursor Type:   | MULTI           |

**general information**

|                       |             |
|-----------------------|-------------|
| Annotation:           | 10 of 16    |
| AminoAcids Coverag    | 62 %        |
| Intensity Coverage:   | 73 %        |
| Peak Coverage:        | 20 %        |
| Protein Localisation: | 427 ... 442 |

| b <sup>2+</sup> ion |        | b ion    |        |    |     |    | y ion    |         | y <sup>2+</sup> ion |         |
|---------------------|--------|----------|--------|----|-----|----|----------|---------|---------------------|---------|
| Δ dalton            | mass   | Δ dalton | mass   |    | seq |    | Δ dalton | mass    | Δ dalton            | mass    |
|                     | 88.039 |          | 88.039 | 1  | S   | 15 |          |         |                     |         |
|                     | 159.08 |          | 159.08 | 2  | A   | 14 | 1634     |         | 1634                |         |
|                     | 287.13 | -0.07    | 287.13 | 3  | Q   | 13 | 1563     |         | 781.98              | +0.2569 |
|                     | 384.19 |          | 384.19 | 4  | P   | 12 | 1434.9   |         | 717.95              | +0.2788 |
|                     | 497.27 |          | 497.27 | 5  | L   | 11 | 1337.8   |         | 1337.8              |         |
|                     | 594.32 |          | 594.32 | 6  | P   | 10 | 1224.8   |         | 612.88              | +0.1526 |
|                     | 707.41 |          | 707.41 | 7  | L   | 9  | 1127.7   |         | 1127.7              |         |
|                     | 835.5  |          | 835.5  | 8  | K   | 8  | 1014.6   |         | 1014.6              |         |
|                     | 948.59 |          | 948.59 | 9  | I   | 7  | 886.52   | -0.176  | 443.77              | -0.292  |
|                     | 1077.6 |          | 1077.6 | 10 | E   | 6  | 773.44   | +0.1731 | 387.22              | +0.0231 |
|                     | 1206.7 |          | 1206.7 | 11 | E   | 5  | 644.4    | +0.0381 | 644.4               |         |
| +0.3883             | 660.38 |          | 1319.8 | 12 | L   | 4  | 515.36   |         | 515.36              |         |
| +0.0617             | 695.9  |          | 1390.8 | 13 | A   | 3  | 402.27   | +0.0502 | 402.27              |         |
|                     | 1503.9 |          | 1503.9 | 14 | L   | 2  | 331.23   | +0.1056 | 331.23              |         |
|                     | 1574.9 |          | 1574.9 | 15 | A   | 1  | 218.15   | +0.2458 | 218.15              |         |
|                     |        |          |        | 16 | K   | 0  | 147.11   |         | 147.11              |         |

Scan number 7750 Raw file LNCAP\_Silac\_23F10\_set3\_05  
 Method ITMS; CID Peptide 222.42

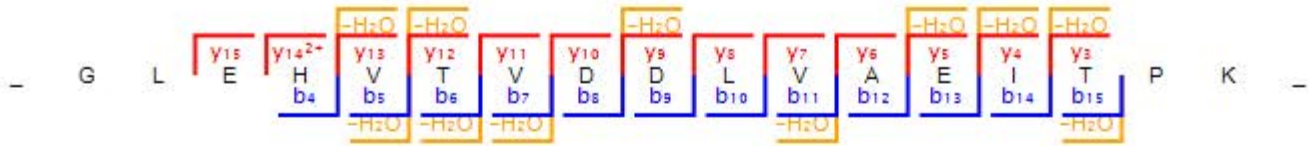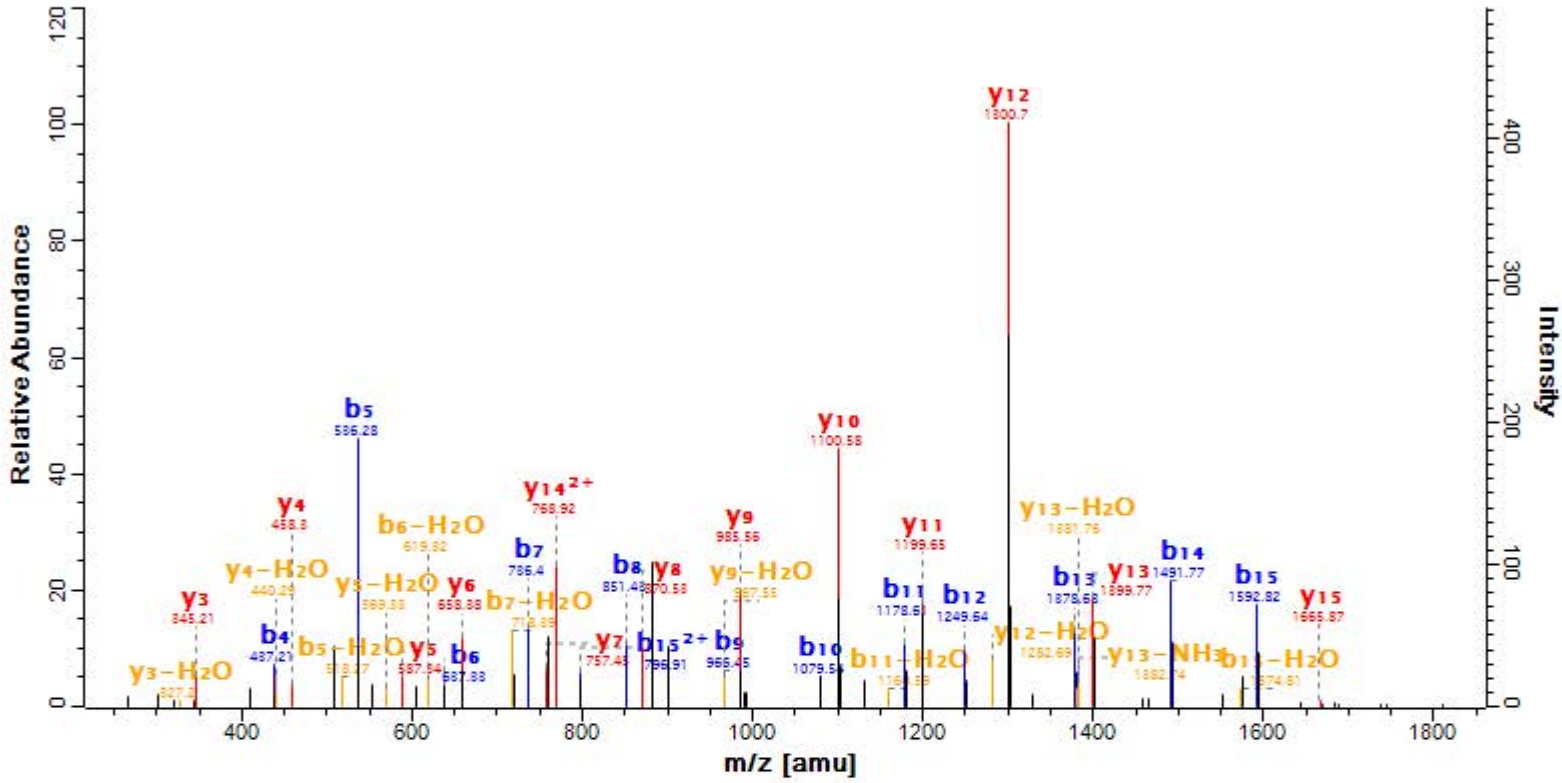

**precursor information**

|                   |                 |
|-------------------|-----------------|
| Mass:             | 1834.96776      |
| m/z:              | 918.49116       |
| Charge:           | 2+              |
| Retentiontime:    | 56.428783416748 |
| Score:            | 222.4237        |
| Mass Error [ppm]: | 0.06307         |
| PEP:              | 1.2752E-47      |
| Precursor Type:   | MULTI           |

**general information**

|                       |           |
|-----------------------|-----------|
| Annotation:           | 13 of 17  |
| AminoAcids Coverage:  | 76 %      |
| Intensity Coverage:   | 58 %      |
| Peak Coverage:        | 42 %      |
| Protein Localisation: | 58 ... 74 |

| b <sup>2+</sup> ion |        | b ion    |        | seq |   |    | y ion    |         | y <sup>2+</sup> ion |         |
|---------------------|--------|----------|--------|-----|---|----|----------|---------|---------------------|---------|
| Δ dalton            | mass   | Δ dalton | mass   |     |   |    | Δ dalton | mass    | Δ dalton            | mass    |
|                     | 58.029 |          | 58.029 | 1   | G | 16 |          |         |                     |         |
|                     | 171.11 |          | 171.11 | 2   | L | 15 | 1779     |         | 1779                |         |
|                     | 300.16 |          | 300.16 | 3   | E | 14 | 1665.9   | +0.3536 | 1665.9              |         |
|                     | 437.21 | +0.0522  | 437.21 | 4   | H | 13 | 1536.8   |         | 768.92              | +0.3753 |
|                     | 536.28 | +0.0465  | 536.28 | 5   | V | 12 | 1399.8   | -0.063  | 1399.8              |         |
|                     | 637.33 | -0.05    | 637.33 | 6   | T | 11 | 1300.7   | -0.038  | 1300.7              |         |
|                     | 736.4  | +0.1014  | 736.4  | 7   | V | 10 | 1199.7   | -0.038  | 1199.7              |         |
|                     | 851.43 | +0.0119  | 851.43 | 8   | D | 9  | 1100.6   | -0.014  | 1100.6              |         |
|                     | 966.45 | +0.0114  | 966.45 | 9   | D | 8  | 985.56   | +0.0055 | 985.56              |         |
|                     | 1079.5 | +0.0161  | 1079.5 | 10  | L | 7  | 870.53   | -0.077  | 870.53              |         |
|                     | 1178.6 | -0.116   | 1178.6 | 11  | V | 6  | 757.45   | +0.1158 | 757.45              |         |
|                     | 1249.6 | -0.031   | 1249.6 | 12  | A | 5  | 658.38   | +0.0859 | 658.38              |         |
|                     | 1378.7 | +0.0131  | 1378.7 | 13  | E | 4  | 587.34   | +0.1381 | 587.34              |         |
|                     | 1491.8 | +0.0489  | 1491.8 | 14  | I | 3  | 458.3    | +0.1036 | 458.3               |         |
| -0.137              | 796.91 | -0.056   | 1592.8 | 15  | T | 2  | 345.21   | +0.1789 | 345.21              |         |
|                     | 1689.9 |          | 1689.9 | 16  | P | 1  | 244.17   |         | 244.17              |         |
|                     |        |          |        | 17  | K | 0  | 147.11   |         | 147.11              |         |

Scan number 7762 Raw file LNCAP\_Silac\_23F10\_set3\_05  
 Method ITMS; CID Pepti... 177.42

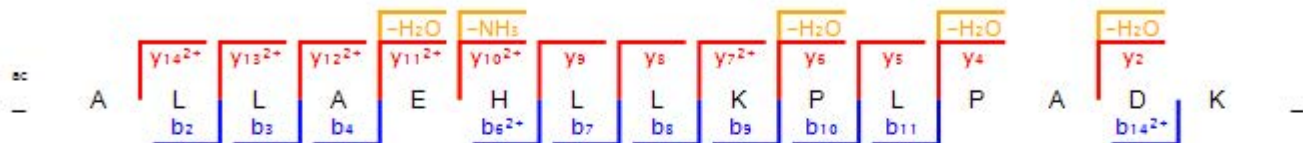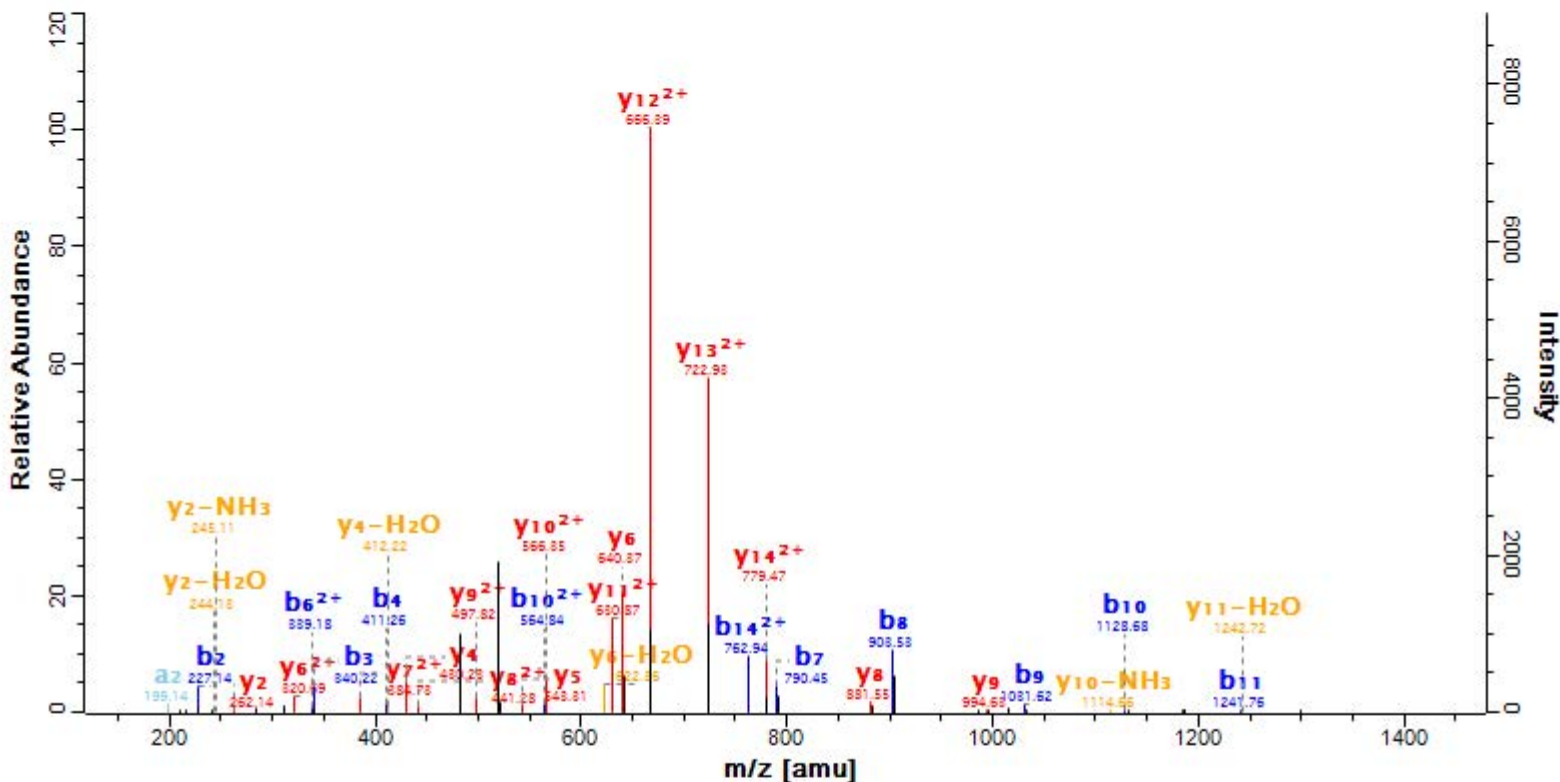

precursor information

|                   |                 |
|-------------------|-----------------|
| Mass:             | 1669.97667      |
| m/z:              | 557.66617       |
| Charge:           | 3+              |
| Retentiontime:    | 56.539184570312 |
| Score:            | 177.4186        |
| Mass Error [ppm]: | -0.010924       |
| PEP:              | 6.7368E-17      |
| Precursor Type:   | MULTI           |

| a ion         |               | b <sup>2+</sup> ion |               | b ion |               | y ion         |               | y <sup>2+</sup> ion |       |
|---------------|---------------|---------------------|---------------|-------|---------------|---------------|---------------|---------------------|-------|
| Δ dalton mass | Δ dalton mass | Δ dalton mass       | Δ dalton mass | seq   | Δ dalton mass | Δ dalton mass | Δ dalton mass | Δ dalton mass       |       |
|               | 86.06         |                     | 114.1         |       | 114.1         | 1             | A             | 14                  |       |
| -0.01         | 199.1         |                     | 227.1         | -0.01 | 227.1         | 2             | L             | 13                  | 1558  |
|               | 312.2         |                     | 340.2         | -0.05 | 340.2         | 3             | L             | 12                  | 1445  |
|               | 383.3         |                     | 411.3         | -0.04 | 411.3         | 4             | A             | 11                  | 1332  |
|               | 512.3         |                     | 540.3         |       | 540.3         | 5             | E             | 10                  | 1261  |
|               | 649.4         | -0.03               | 339.2         |       | 677.4         | 6             | H             | 9                   | 1132  |
|               | 762.5         |                     | 790.4         | -0.02 | 790.4         | 7             | L             | 8                   | 994.6 |
|               | 875.5         |                     | 903.5         | +0.02 | 903.5         | 8             | L             | 7                   | 881.5 |
|               | 1004          |                     | 1032          | +0.15 | 1032          | 9             | K             | 6                   | 768.5 |
|               | 1101          | -0.48               | 564.8         | -0.36 | 1129          | 10            | P             | 5                   | 640.4 |
|               | 1214          |                     | 1242          | -0.36 | 1242          | 11            | L             | 4                   | 543.3 |
|               | 1311          |                     | 1339          |       | 1339          | 12            | P             | 3                   | 430.2 |
|               | 1382          |                     | 1410          |       | 1410          | 13            | A             | 2                   | 333.2 |
|               | 1497          | +0.25               | 7762.9        |       | 1525          | 14            | D             | 1                   | 262.1 |
|               |               |                     |               |       |               | 15            | K             | 0                   | 147.1 |

general information

|                       |          |
|-----------------------|----------|
| Annotation:           | 12 of 15 |
| AminoAcids Coverage:  | 80 %     |
| Intensity Coverage:   | 72 %     |
| Peak Coverage:        | 35 %     |
| Protein Localisation: | 2 ... 16 |

Scan number 7869 Raw file LNCAP\_Silac\_23F10\_set3\_05  
 Method ITMS; CID Pepti... 185.33

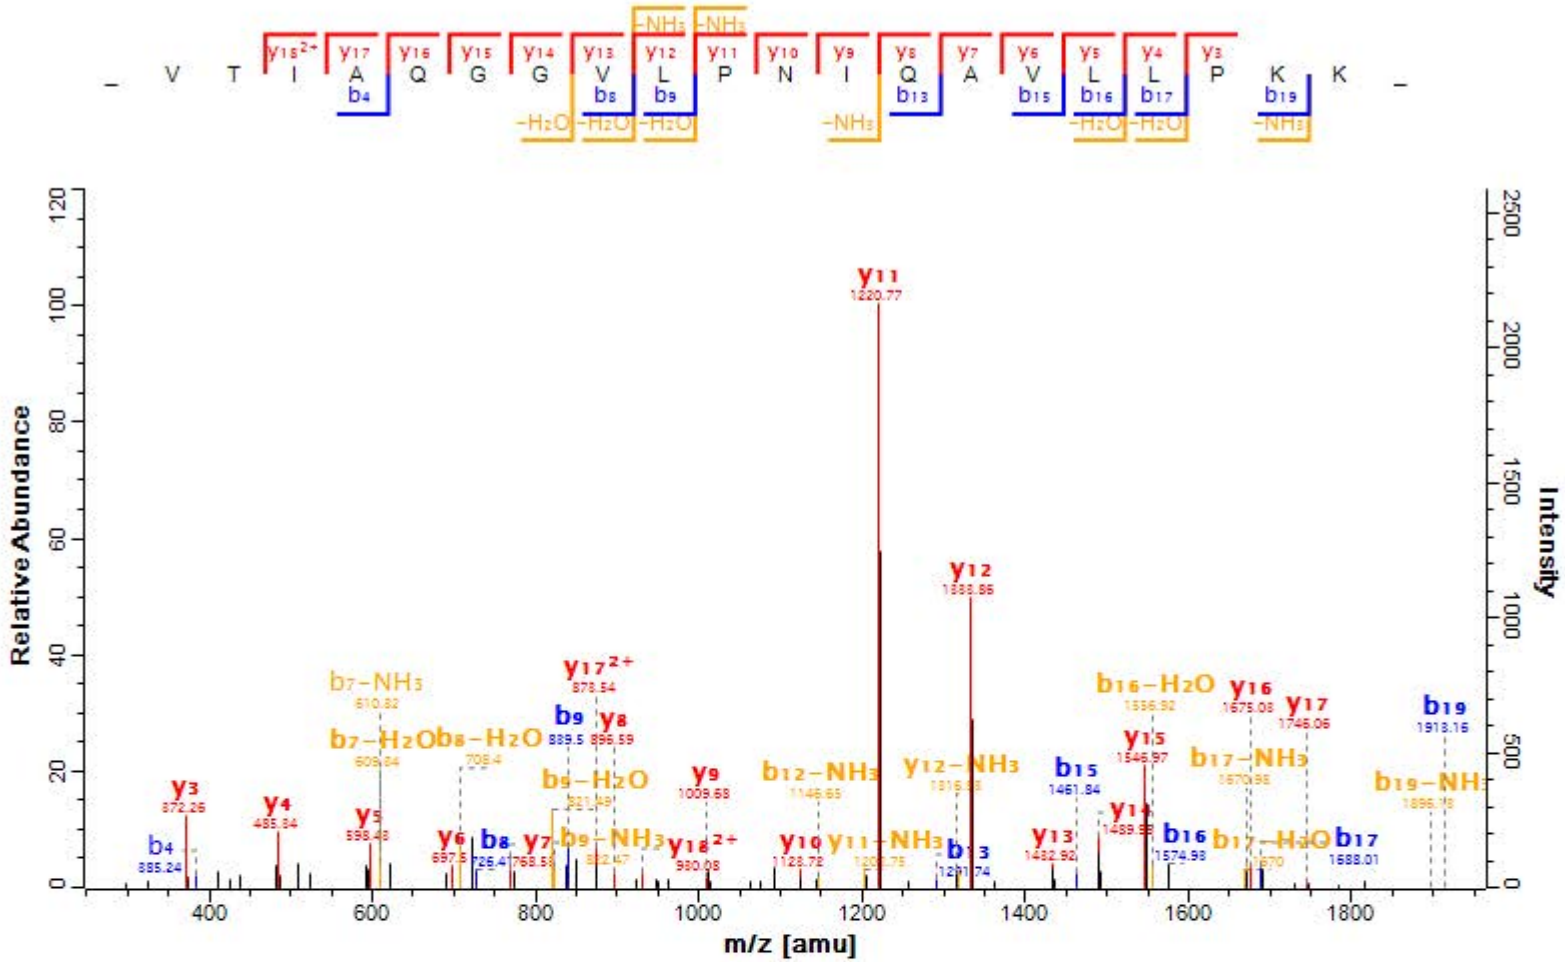

**precursor information**

|                   |                 |
|-------------------|-----------------|
| Mass:             | 2058.25563      |
| m/z:              | 1030.13509      |
| Charge:           | 2+              |
| Retentiontime:    | 57.477954864502 |
| Score:            | 185.3261        |
| Mass Error [ppm]: | -0.4193         |
| PEP:              | 1.8556E-26      |
| Precursor Type:   | ISO             |

**general information**

|                       |             |
|-----------------------|-------------|
| Annotation:           | 17 of 20    |
| AminoAcids Coverage:  | 85 %        |
| Intensity Coverage:   | 56 %        |
| Peak Coverage:        | 40 %        |
| Protein Localisation: | 101 ... 120 |

| b ion     |          |     |   | y ion    |          | y <sup>2+</sup> ion |                    |
|-----------|----------|-----|---|----------|----------|---------------------|--------------------|
| Δ dalton  | mass     | seq |   | Δ dalton | mass     | Δ dalton            | mass               |
|           | 100.0757 | 1   | V | 19       |          |                     |                    |
|           | 201.1234 | 2   | T | 18       | 1960.195 |                     | 1960.195           |
|           | 314.2074 | 3   | I | 17       | 1859.148 |                     | 930.0775 +0.152136 |
| +0.002707 | 385.2445 | 4   | A | 16       | 1746.064 | +0.017316           | 873.5354 +0.105545 |
|           | 513.3031 | 5   | Q | 15       | 1675.027 | +0.343493           | 1675.027           |
|           | 570.3246 | 6   | G | 14       | 1546.968 | -0.09012            | 1546.968           |
|           | 627.3461 | 7   | G | 13       | 1489.946 | -0.05095            | 1489.946           |
| +0.028345 | 726.4145 | 8   | V | 12       | 1432.925 | -0.16706            | 1432.925           |
| -0.08959  | 839.4985 | 9   | L | 11       | 1333.857 | -0.07106            | 1333.857           |
|           | 936.5513 | 10  | P | 10       | 1220.773 | -0.01593            | 1220.773           |
|           | 1050.594 | 11  | N | 9        | 1123.72  | -0.01053            | 1123.72            |
|           | 1163.678 | 12  | I | 8        | 1009.677 | -0.0561             | 1009.677           |
| -0.19975  | 1291.737 | 13  | Q | 7        | 896.5928 | -0.08996            | 896.5928           |
|           | 1362.774 | 14  | A | 6        | 768.5342 | +0.229607           | 768.5342           |
| -0.06956  | 1461.842 | 15  | V | 5        | 697.4971 | -0.04395            | 697.4971           |
| -0.15326  | 1574.926 | 16  | L | 4        | 598.4287 | -0.07032            | 598.4287           |
| -0.15822  | 1688.011 | 17  | L | 3        | 485.3446 | +0.075785           | 485.3446           |
|           | 1785.063 | 18  | P | 2        | 372.2605 | +0.092222           | 372.2605           |
| -0.02616  | 1913.158 | 19  | K | 1        | 275.2078 |                     | 275.2078           |
|           |          | 20  | K | 0        | 147.1128 |                     | 147.1128           |

Scan number 8128 Raw file LNCAP\_Silac\_23F10\_set3\_05  
 Method ITMS; CID Pepti... 100.02

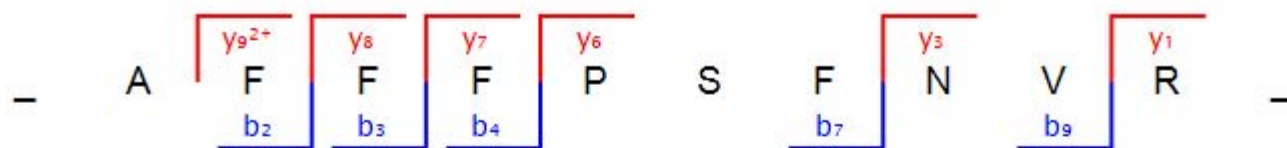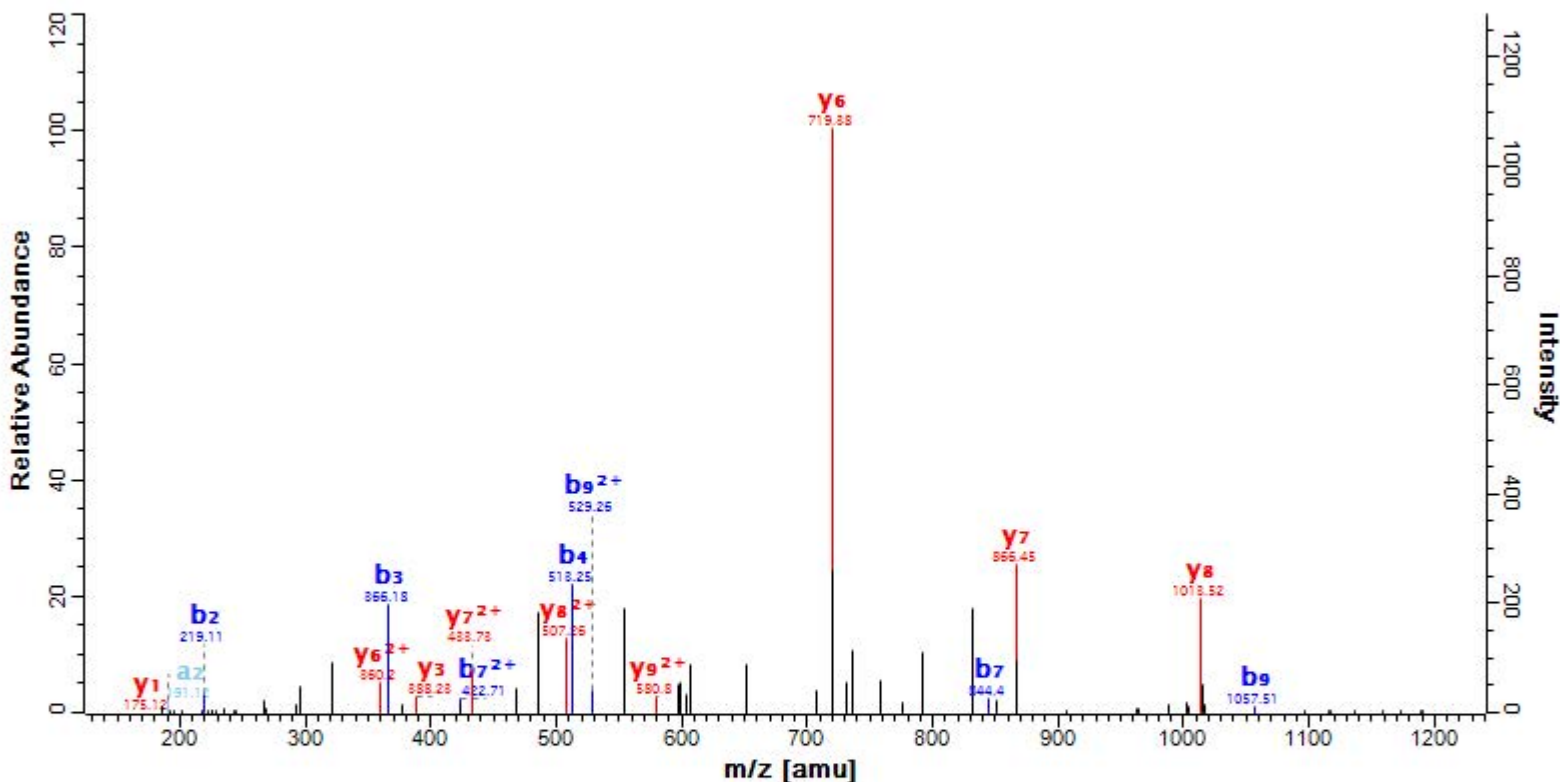

#### precursor information

|                   |                 |
|-------------------|-----------------|
| Mass:             | 1230.61876      |
| m/z:              | 616.31666       |
| Charge:           | 2+              |
| Retentiontime:    | 59.794971466064 |
| Score:            | 100.017         |
| Mass Error [ppm]: | 0.14509         |
| PEP:              | 0.0010463       |
| Precursor Type:   | MULTI           |

|                       |             |
|-----------------------|-------------|
| Annotation:           | 8 of 10     |
| AminoAcids Coverage:  | 80 %        |
| Intensity Coverage:   | 51 %        |
| Peak Coverage:        | 19 %        |
| Protein Localisation: | 193 ... 202 |

|        | a ion         | b <sup>2+</sup> ion | b ion         |     |   | y ion         | y <sup>2+</sup> ion |
|--------|---------------|---------------------|---------------|-----|---|---------------|---------------------|
|        | Δ dalton mass | Δ dalton mass       | Δ dalton mass | seq |   | Δ dalton mass | Δ dalton mass       |
|        | 44.05         | 72.04               | 72.04         | 1   | A |               |                     |
| +0.012 | 91.1          | 219.1               | -0.07         | 2   | F | 8 1161        | 580.8 -0.44         |
|        | 338.2         | 366.2               | -0.02         | 3   | F | 7 1014        | +0.06 1507.3 +0.139 |
|        | 485.3         | 513.2               | -0.08         | 4   | F | 6 866.5       | -0.06 433.7 +0.049  |
|        | 582.3         | 610.3               |               | 5   | P | 5 719.4       | +0.00 5360.2 -0.06  |
|        | 669.3         | 697.3               |               | 6   | S | 4 622.3       | 622.3               |
|        | 816.4         | +0.04 422.7         | -0.06         | 7   | F | 3 535.3       | 535.3               |
|        | 930.5         | 958.4               |               | 8   | N | 2 388.2       | +0.169 388.2        |
|        | 1030          | -0.37 529.3         | -0.15         | 9   | V | 1 274.2       | 274.2               |
|        |               |                     |               | 10  | R | 0 175.1       | -0.04 175.1         |

Scan number 8208 Raw file LNCAP\_Silac\_23F10\_set3\_05  
 Method ITMS; CID Pepti... 181.31

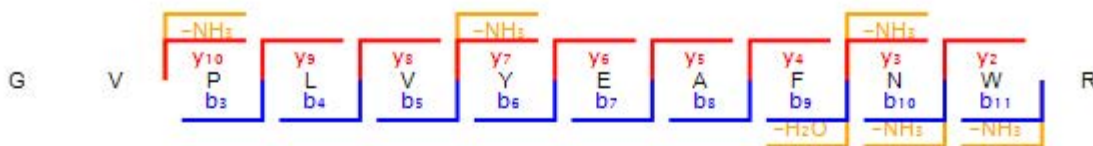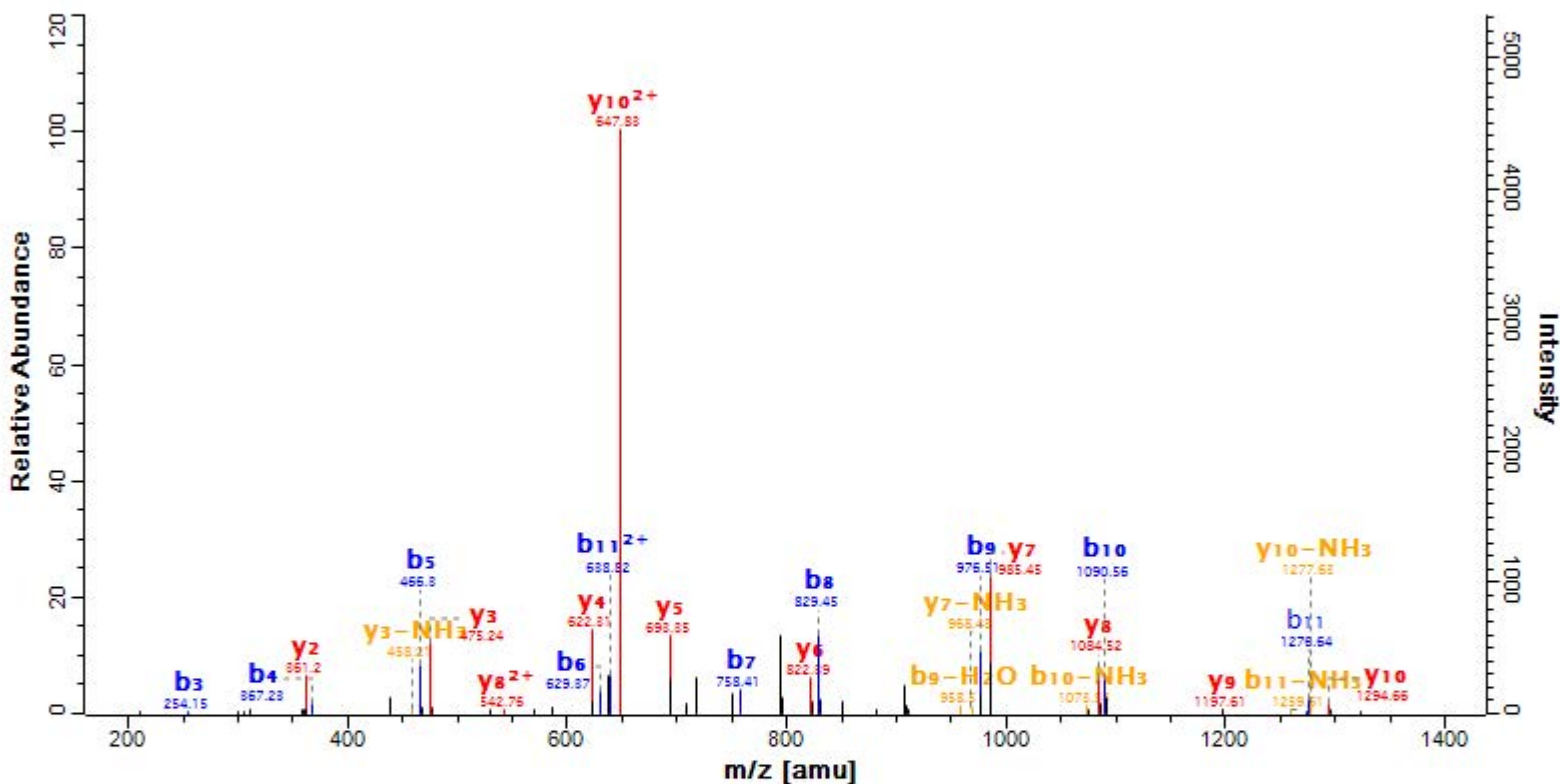

#### precursor information

|                   |                 |
|-------------------|-----------------|
| Mass:             | 1449.74097      |
| m/z:              | 725.87776       |
| Charge:           | 2+              |
| Retentiontime:    | 60.588134765625 |
| Score:            | 181.3127        |
| Mass Error [ppm]: | 0.33318         |
| PEP:              | 4.8217E-11      |
| Precursor Type:   | MULTI           |

#### general information

|                       |             |
|-----------------------|-------------|
| Annotation:           | 9 of 12     |
| AminoAcids Coverage:  | 75 %        |
| Intensity Coverage:   | 73 %        |
| Peak Coverage:        | 33 %        |
| Protein Localisation: | 458 ... 469 |

| b <sup>2+</sup> ion |         | b ion    |        | seq    |    |    | y ion    |         | y <sup>2+</sup> ion |         |
|---------------------|---------|----------|--------|--------|----|----|----------|---------|---------------------|---------|
| Δ dalton            | mass    | Δ dalton | mass   |        |    |    | Δ dalton | mass    | Δ dalton            | mass    |
|                     | 58.029  |          | 58.029 | 1      | G  | 11 |          |         |                     |         |
|                     | 157.1   |          | 157.1  | 2      | V  | 10 | 1393.7   |         | 1393.7              |         |
|                     | 254.15  | +0.0249  | 254.15 | 3      | P  | 9  | 1294.7   | +0.1145 | 647.83              | +0.2214 |
|                     | 367.23  | -0.007   | 367.23 | 4      | L  | 8  | 1197.6   | +0.0043 | 1197.6              |         |
|                     | 466.3   | +0.0543  | 466.3  | 5      | V  | 7  | 1084.5   | -0.005  | 542.76              | -0.003  |
|                     | 629.37  | +0.0423  | 629.37 | 6      | Y  | 6  | 985.45   | +0.0027 | 985.45              |         |
|                     | 758.41  | +0.0598  | 758.41 | 7      | E  | 5  | 822.39   | +0.0618 | 822.39              |         |
|                     | 829.45  | -0.059   | 829.45 | 8      | A  | 4  | 693.35   | +0.2185 | 693.35              |         |
|                     | 976.51  | -0.105   | 976.51 | 9      | F  | 3  | 622.31   | +0.0033 | 622.31              |         |
|                     | 1090.6  | -0.045   | 1090.6 | 10     | N  | 2  | 475.24   | +0.0329 | 475.24              |         |
|                     | +0.4786 | 638.82   | -0.019 | 1276.6 | 11 | W  | 1        | 361.2   | +0.0956             | 361.2   |
|                     |         |          |        | 12     | R  | 0  | 175.12   |         | 175.12              |         |

Scan number 8241 Raw file LNCAP\_Silac\_23F10\_set3\_05  
 Method ITMS; CID Pepti... 86.94

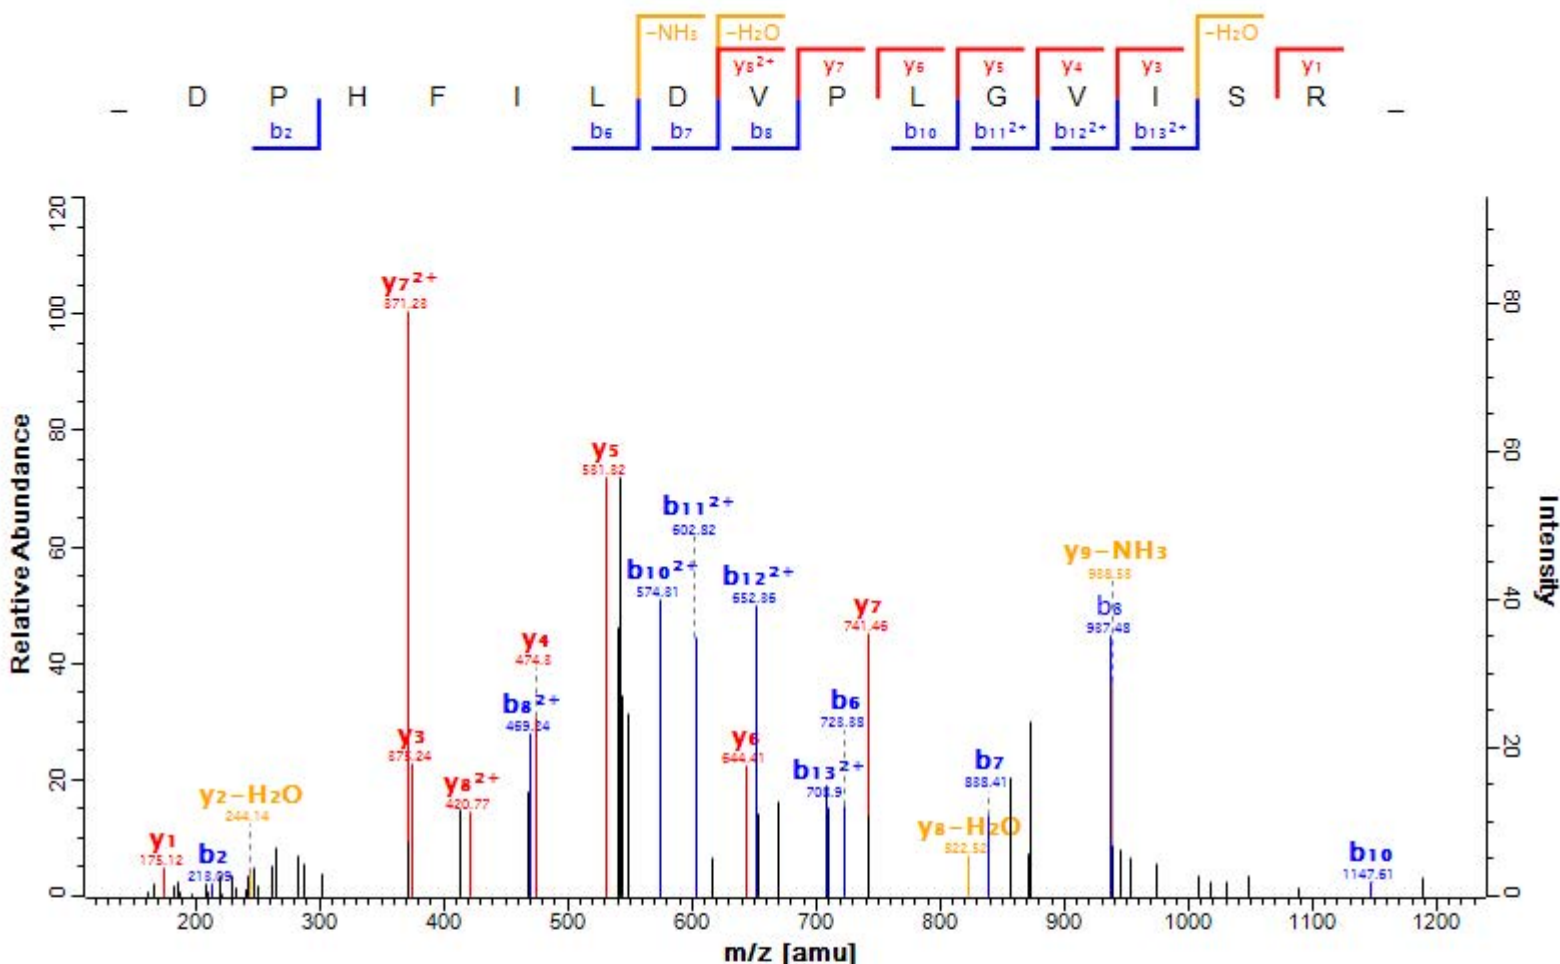

#### precursor information

|                   |                 |
|-------------------|-----------------|
| Mass:             | 1676.92571      |
| m/z:              | 559.98251       |
| Charge:           | 3+              |
| Retentiontime:    | 60.888778686523 |
| Score:            | 86.94421        |
| Mass Error [ppm]: | 0.42757         |
| PEP:              | 0.00019272      |
| Precursor Type:   | MULTI           |

#### general information

|                       |             |
|-----------------------|-------------|
| Annotation:           | 11 of 15    |
| AminoAcids Coverage:  | 73 %        |
| Intensity Coverage:   | 56 %        |
| Peak Coverage:        | 29 %        |
| Protein Localisation: | 142 ... 156 |

| b <sup>2+</sup> ion |        | b ion    |        | seq |   |    | y ion    |         | y <sup>2+</sup> ion |         |
|---------------------|--------|----------|--------|-----|---|----|----------|---------|---------------------|---------|
| Δ dalton            | mass   | Δ dalton | mass   |     |   |    | Δ dalton | mass    | Δ dalton            | mass    |
|                     | 116.03 |          | 116.03 | 1   | D | 14 |          |         |                     |         |
|                     | 213.09 | -0.009   | 213.09 | 2   | P | 13 | 1562.9   |         | 1562.9              |         |
|                     | 350.15 |          | 350.15 | 3   | H | 12 | 1465.9   |         | 1465.9              |         |
|                     | 497.21 |          | 497.21 | 4   | F | 11 | 1328.8   |         | 1328.8              |         |
|                     | 610.3  |          | 610.3  | 5   | I | 10 | 1181.7   |         | 1181.7              |         |
|                     | 723.38 | -0.46    | 723.38 | 6   | L | 9  | 1068.6   |         | 1068.6              |         |
|                     | 838.41 | -0.146   | 838.41 | 7   | D | 8  | 955.56   |         | 955.56              |         |
| +0.0854             | 469.24 | +0.0136  | 937.48 | 8   | V | 7  | 840.53   |         | 420.77              | +0.3905 |
|                     | 1034.5 |          | 1034.5 | 9   | P | 6  | 741.46   | +0.034  | 371.23              | +0.0967 |
| +0.2976             | 574.31 | -0.064   | 1147.6 | 10  | L | 5  | 644.41   | +0.0076 | 644.41              |         |
| +0.0757             | 602.82 |          | 1204.6 | 11  | G | 4  | 531.32   | +0.0658 | 531.32              |         |
| +0.293              | 652.36 |          | 1303.7 | 12  | V | 3  | 474.3    | +0.0177 | 474.3               |         |
| -0.181              | 708.9  |          | 1416.8 | 13  | I | 2  | 375.24   | -0.031  | 375.24              |         |
|                     | 1503.8 |          | 1503.8 | 14  | S | 1  | 262.15   |         | 262.15              |         |
|                     |        |          |        | 15  | R | 0  | 175.12   | +0.0187 | 175.12              |         |

Scan number 8384 Raw file LNCAP\_Silac\_23F10\_set3\_05  
 Method ITMS; CID Pepti... 138.46

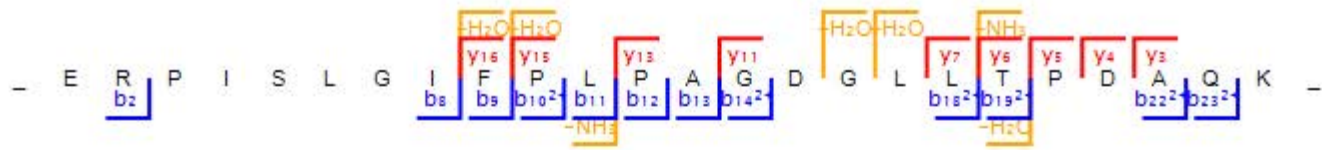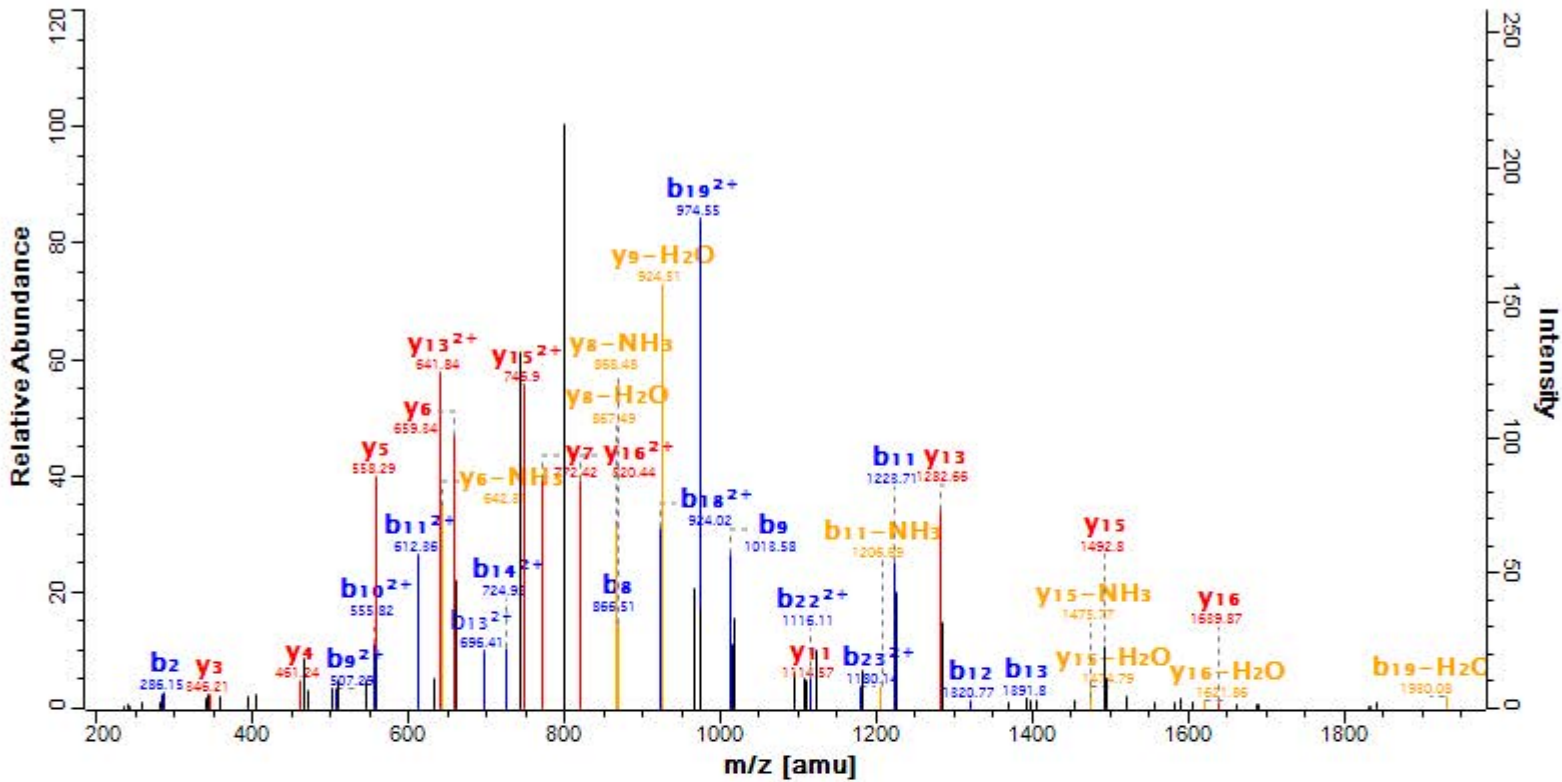

precursor information

|                   |                 |
|-------------------|-----------------|
| Mass:             | 2504.36448      |
| m/z:              | 835.79544       |
| Charge:           | 3+              |
| Retentiontime:    | 62.261711120605 |
| Score:            | 138.4552        |
| Mass Error [ppm]: | 0.24283         |
| PEP:              | 1.6789E-22      |
| Precursor Type:   | MULTI           |

general information

|                       |             |
|-----------------------|-------------|
| Annotation:           | 17 of 24    |
| AminoAcids Coverage:  | 71 %        |
| Intensity Coverage:   | 60 %        |
| Peak Coverage:        | 39 %        |
| Protein Localisation: | 199 ... 222 |

| b <sup>2+</sup> ion |         | b ion    |        | seq |   |    | y ion    |         | y <sup>2+</sup> ion |         |
|---------------------|---------|----------|--------|-----|---|----|----------|---------|---------------------|---------|
| Δ dalton            | mass    | Δ dalton | mass   |     |   |    | Δ dalton | mass    | Δ dalton            | mass    |
|                     | 130.05  |          | 130.05 | 1   | E | 23 |          |         |                     |         |
|                     | 286.15  | -0.145   | 286.15 | 2   | R | 22 | 2376.3   |         | 2376.3              |         |
|                     | 383.2   |          | 383.2  | 3   | P | 21 | 2220.2   |         | 2220.2              |         |
|                     | 496.29  |          | 496.29 | 4   | I | 20 | 2123.2   |         | 2123.2              |         |
|                     | 583.32  |          | 583.32 | 5   | S | 19 | 2010.1   |         | 2010.1              |         |
|                     | 696.4   |          | 696.4  | 6   | L | 18 | 1923.1   |         | 1923.1              |         |
|                     | 753.43  |          | 753.43 | 7   | G | 17 | 1810     |         | 1810                |         |
|                     | 866.51  | +0.1163  | 866.51 | 8   | I | 16 | 1753     |         | 1753                |         |
| +0.0918             | 8507.29 | -0.004   | 1013.6 | 9   | F | 15 | 1639.9   | -0.006  | 820.44              | +0.1734 |
| +0.0772             | 555.82  |          | 1110.6 | 10  | P | 14 | 1492.8   | -0.205  | 746.9               | +0.2944 |
| +0.3887             | 612.36  | -0.079   | 1223.7 | 11  | L | 13 | 1395.7   |         | 1395.7              |         |
|                     | 1320.8  | +0.1771  | 1320.8 | 12  | P | 12 | 1282.7   | -0.008  | 641.84              | +0.0024 |
| +0.0464             | 696.41  | +0.1376  | 1391.8 | 13  | A | 11 | 1185.6   |         | 1185.6              |         |
| +0.2189             | 724.92  |          | 1448.8 | 14  | G | 10 | 1114.6   | -0.04   | 1114.6              |         |
|                     | 1563.9  |          | 1563.9 | 15  | D | 9  | 1057.6   |         | 1057.6              |         |
|                     | 1620.9  |          | 1620.9 | 16  | G | 8  | 942.53   |         | 942.53              |         |
|                     | 1734    |          | 1734   | 17  | L | 7  | 885.5    |         | 885.5               |         |
| -0.086              | 924.02  |          | 1847   | 18  | L | 6  | 772.42   | -0.023  | 772.42              |         |
| +0.2044             | 974.55  |          | 1948.1 | 19  | T | 5  | 659.34   | +0.0475 | 659.34              |         |
|                     | 2045.1  |          | 2045.1 | 20  | P | 4  | 558.29   | +0.0228 | 558.29              |         |
|                     | 2160.2  |          | 2160.2 | 21  | D | 3  | 461.24   | +0.1675 | 461.24              |         |
| +0.3422             | 1116.1  |          | 2231.2 | 22  | A | 2  | 346.21   | +0.1056 | 346.21              |         |
| +0.0424             | 1180.1  |          | 2359.3 | 23  | Q | 1  | 275.17   |         | 275.17              |         |
|                     |         |          |        | 24  | K | 0  | 147.11   |         | 147.11              |         |



Scan number 894 Raw file LNCAP\_Silac\_23F10\_set3\_05  
 Method ITMS; CID Pepti... 49.19

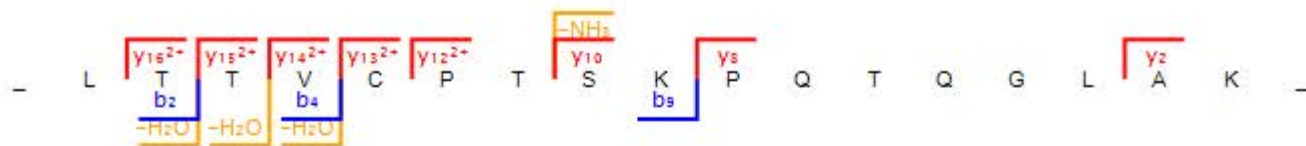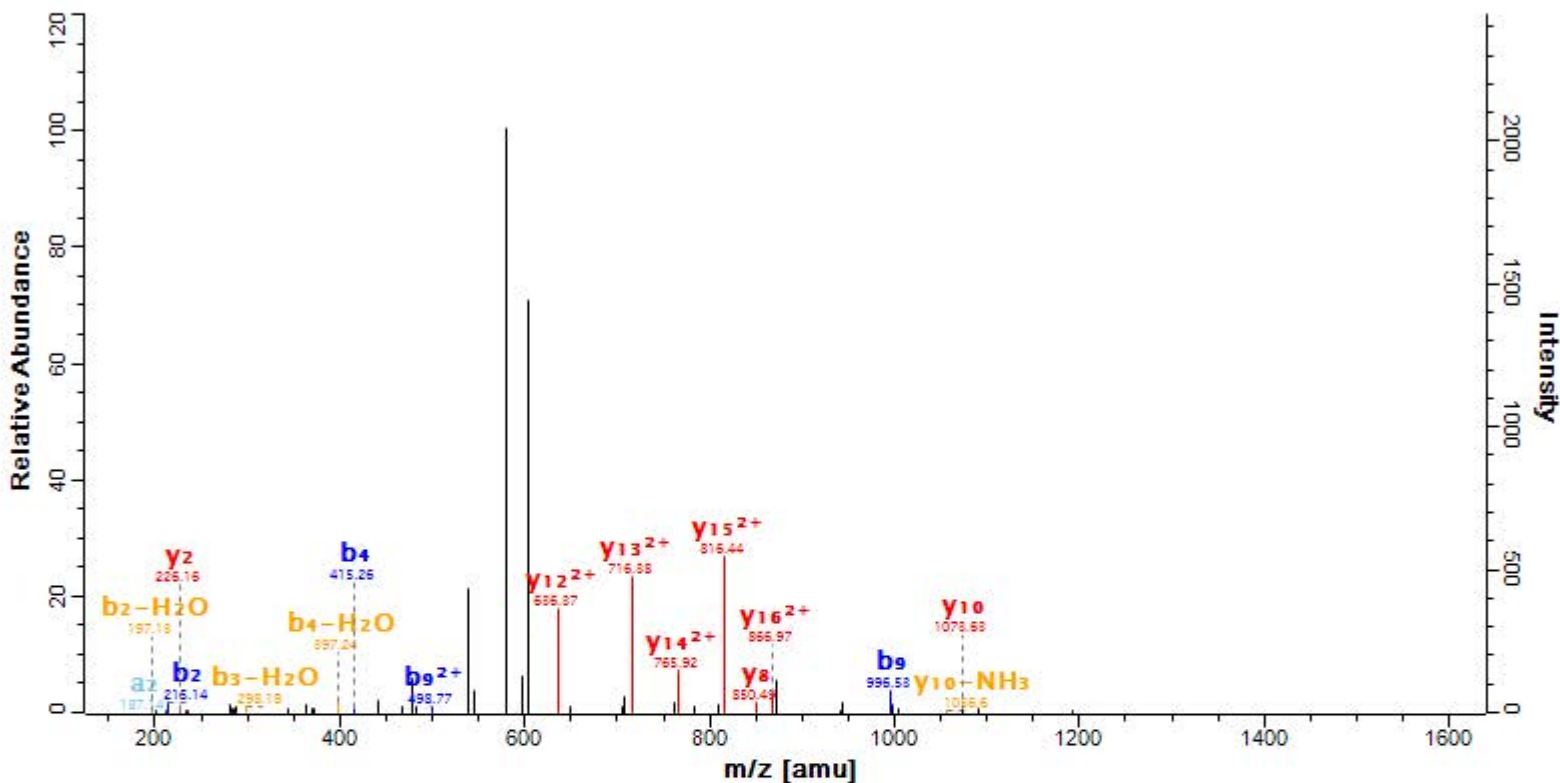

#### precursor information

|                   |                 |
|-------------------|-----------------|
| Mass:             | 1828.97207      |
| m/z:              | 610.66463       |
| Charge:           | 3+              |
| Retentiontime:    | 12.447854995727 |
| Score:            | 49.1875         |
| Mass Error [ppm]: | 0.20973         |
| PEP:              | 0.01301         |
| Precursor Type:   | MULTI           |

#### general information

|                       |             |
|-----------------------|-------------|
| Annotation:           | 9 of 17     |
| AminoAcids Coverage:  | 53 %        |
| Intensity Coverage:   | 26 %        |
| Peak Coverage:        | 22 %        |
| Protein Localisation: | 250 ... 266 |

| a ion         |               | b <sup>2+</sup> ion |               | b ion |               | y ion         |   | y <sup>2+</sup> ion |       |
|---------------|---------------|---------------------|---------------|-------|---------------|---------------|---|---------------------|-------|
| Δ dalton mass | Δ dalton mass | Δ dalton mass       | Δ dalton mass | seq   | Δ dalton mass | Δ dalton mass |   |                     |       |
|               | 86.1          |                     | 114.1         |       | 114.1         | 1             | L | 16                  |       |
| -0.01         | 187.1         |                     | 215.1         | +0.01 | 215.1         | 2             | T | 15                  | 1733  |
|               | 288.2         |                     | 316.2         |       | 316.2         | 3             | T | 14                  | 1632  |
|               | 387.3         |                     | 415.3         | -0.01 | 415.3         | 4             | V | 13                  | 1531  |
|               | 547.3         |                     | 575.3         |       | 575.3         | 5             | C | 12                  | 1432  |
|               | 644.3         |                     | 672.3         |       | 672.3         | 6             | P | 11                  | 1272  |
|               | 745.4         |                     | 773.4         |       | 773.4         | 7             | T | 10                  | 1175  |
|               | 832.4         |                     | 860.4         |       | 860.4         | 8             | S | 9                   | 1074  |
|               | 968.5         | +0.17               | 996.5         | -0.08 | 996.5         | 9             | K | 8                   | 986.6 |
|               | 1066          |                     | 1094          |       | 1094          | 10            | P | 7                   | 850.5 |
|               | 1194          |                     | 1222          |       | 1222          | 11            | Q | 6                   | 753.4 |
|               | 1295          |                     | 1323          |       | 1323          | 12            | T | 5                   | 625.4 |
|               | 1423          |                     | 1451          |       | 1451          | 13            | Q | 4                   | 524.3 |
|               | 1480          |                     | 1508          |       | 1508          | 14            | G | 3                   | 396.3 |
|               | 1593          |                     | 1621          |       | 1621          | 15            | L | 2                   | 339.2 |
|               | 1664          |                     | 1692          |       | 1692          | 16            | A | 1                   | 226.2 |
|               |               |                     |               |       |               | 17            | K | 0                   | 155.1 |



Scan number 1327 Raw file LNCAP\_Silac\_23F10\_set3\_06  
 Method ITMS; CID Peptide 107.18

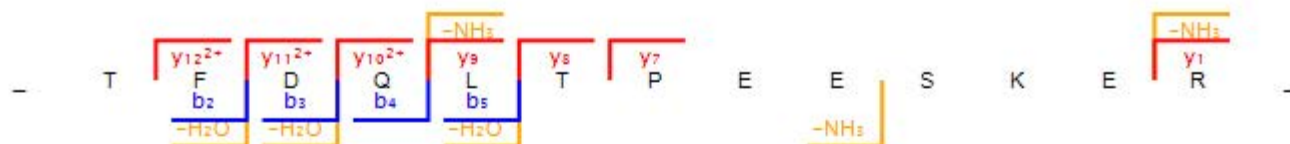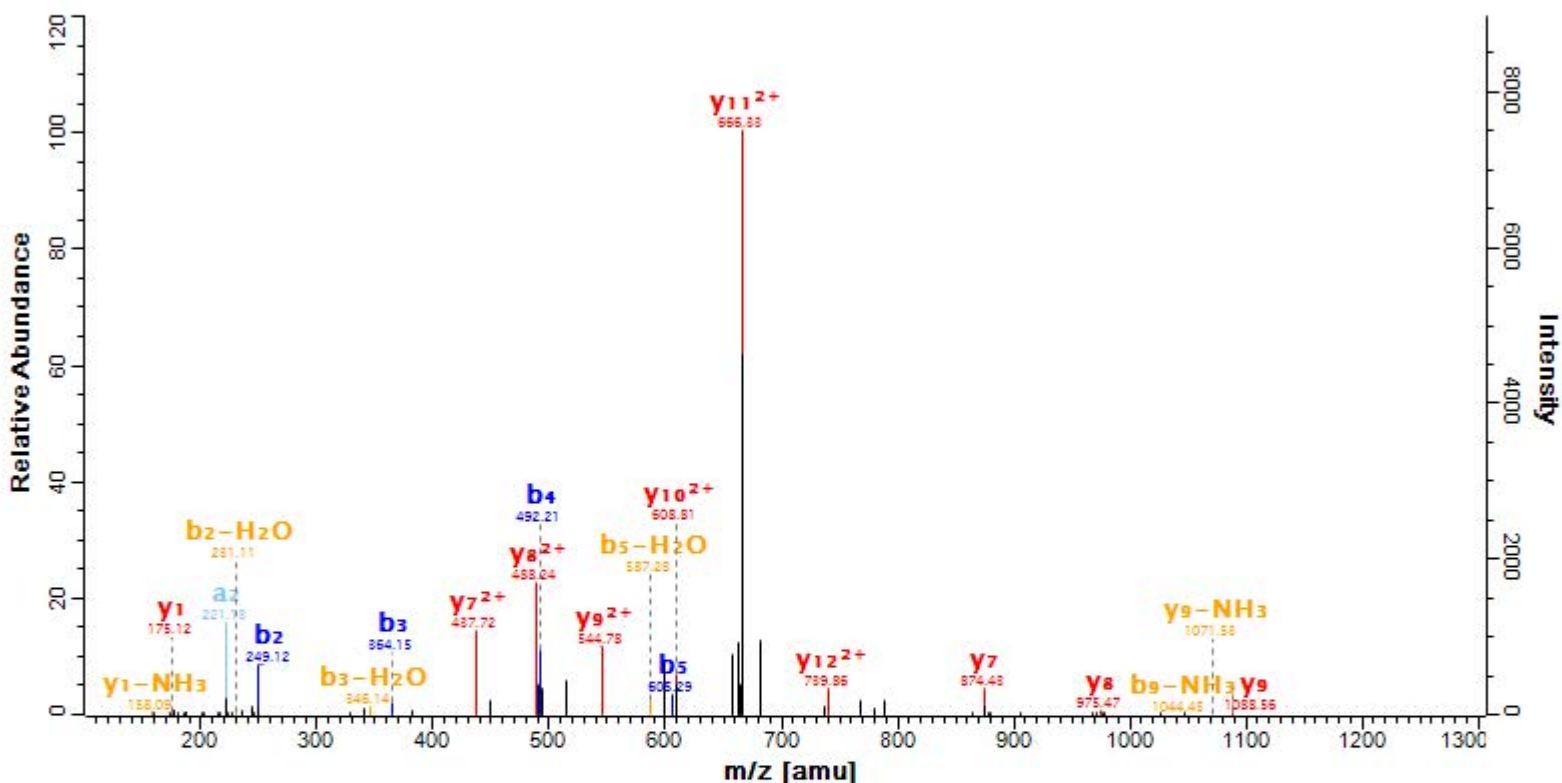

precursor information

|                   |                 |
|-------------------|-----------------|
| Mass:             | 1572.7517       |
| m/z:              | 525.25784       |
| Charge:           | 3+              |
| Retentiontime:    | 14.661073684692 |
| Score:            | 107.1756        |
| Mass Error [ppm]: | -0.21008        |
| PEP:              | 1.3946E-07      |
| Precursor Type:   | MULTI           |

general information

|                       |           |
|-----------------------|-----------|
| Annotation:           | 8 of 13   |
| AminoAcids Coverage:  | 62 %      |
| Intensity Coverage:   | 56 %      |
| Peak Coverage:        | 19 %      |
| Protein Localisation: | 68 ... 80 |

| a ion    |        | b ion    |        |    |     |    | y ion    |         | y <sup>2+</sup> ion |         |
|----------|--------|----------|--------|----|-----|----|----------|---------|---------------------|---------|
| Δ dalton | mass   | Δ dalton | mass   |    | seq |    | Δ dalton | mass    | Δ dalton            | mass    |
|          | 74.06  |          | 102.05 | 1  | T   | 12 |          |         |                     |         |
| -0.051   | 221.13 | +0.0131  | 249.12 | 2  | F   | 11 | 1478.7   |         | 739.86              | +0.1128 |
|          | 336.16 | +0.085   | 364.15 | 3  | D   | 10 | 1331.6   |         | 666.33              | -0.01   |
|          | 464.21 | -0.126   | 492.21 | 4  | Q   | 9  | 1216.6   |         | 608.81              | -0.013  |
|          | 577.3  | +0.0438  | 605.29 | 5  | L   | 8  | 1088.6   | -0.082  | 544.78              | +0.271  |
|          | 678.35 |          | 706.34 | 6  | T   | 7  | 975.47   | +0.0449 | 488.24              | +0.2223 |
|          | 775.4  |          | 803.39 | 7  | P   | 6  | 874.43   | -0.057  | 437.72              | +0.0761 |
|          | 904.44 |          | 932.44 | 8  | E   | 5  | 777.37   |         | 777.37              |         |
|          | 1033.5 |          | 1061.5 | 9  | E   | 4  | 648.33   |         | 648.33              |         |
|          | 1120.5 |          | 1148.5 | 10 | S   | 3  | 519.29   |         | 519.29              |         |
|          | 1248.6 |          | 1276.6 | 11 | K   | 2  | 432.26   |         | 432.26              |         |
|          | 1377.7 |          | 1405.6 | 12 | E   | 1  | 304.16   |         | 304.16              |         |
|          |        |          |        | 13 | R   | 0  | 175.12   | -0.006  | 175.12              |         |

Scan number 1385 Raw file LNCAP\_Silac\_23F10\_set3\_06  
 Method ITMS; CID Pepti... 110.08

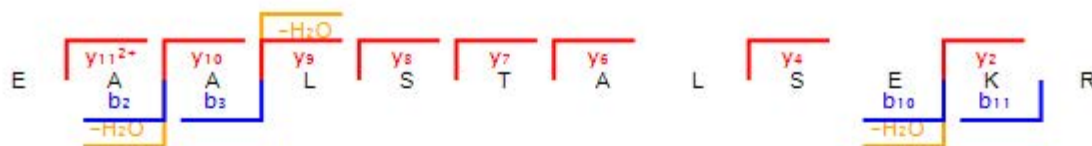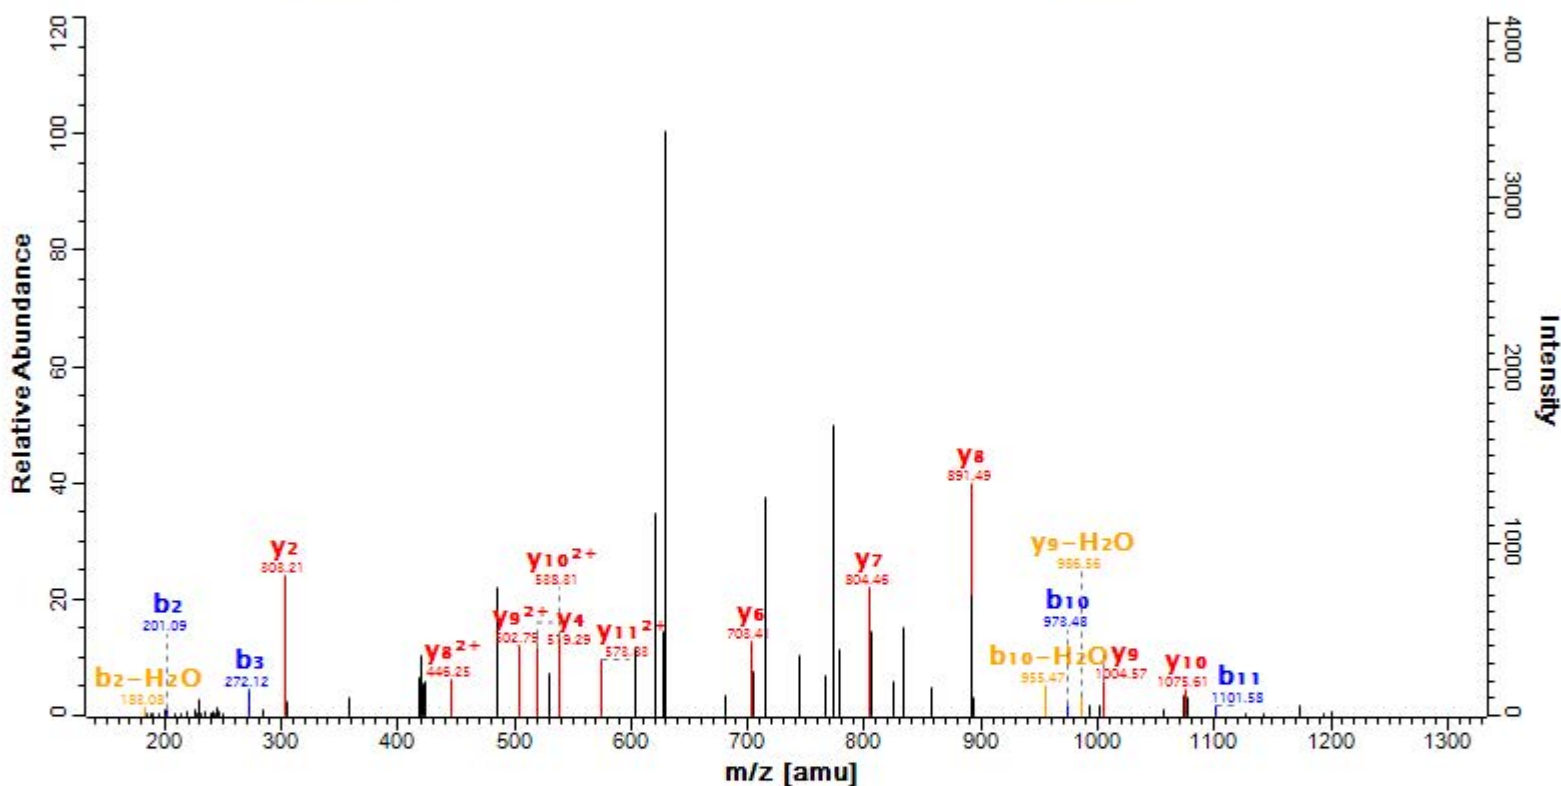

#### precursor information

|                   |                 |
|-------------------|-----------------|
| Mass:             | 1274.68305      |
| m/z:              | 638.3488        |
| Charge:           | 2+              |
| Retentiontime:    | 15.021142005920 |
| Score:            | 110.0771        |
| Mass Error [ppm]: | 0.017246        |
| PEP:              | 2.6348E-05      |
| Precursor Type:   | MULTI           |

#### general information

|                       |             |
|-----------------------|-------------|
| Annotation:           | 9 of 12     |
| AminoAcids Coverage:  | 75 %        |
| Intensity Coverage:   | 25 %        |
| Peak Coverage:        | 20 %        |
| Protein Localisation: | 145 ... 156 |

| b ion     |          |     |   | y ion    |          | y <sup>2+</sup> ion |           |           |
|-----------|----------|-----|---|----------|----------|---------------------|-----------|-----------|
| Δ dalton  | mass     | seq |   | Δ dalton | mass     | Δ dalton            | mass      |           |
|           | 130.0499 | 1   | E | 11       |          |                     |           |           |
| +0.165855 | 201.087  | 2   | A | 10       | 1146.648 | 573.8275            | +0.444417 |           |
| -0.05272  | 272.1241 | 3   | A | 9        | 1075.611 | +0.000485           | 538.3089  | +0.226951 |
|           | 385.2082 | 4   | L | 8        | 1004.573 | -0.00873            | 502.7904  | +0.398584 |
|           | 472.2402 | 5   | S | 7        | 891.4894 | +0.035176           | 446.2483  | +0.020633 |
|           | 573.2879 | 6   | T | 6        | 804.4574 | -0.07763            | 804.4574  |           |
|           | 644.325  | 7   | A | 5        | 703.4097 | -0.05333            | 703.4097  |           |
|           | 757.409  | 8   | L | 4        | 632.3726 |                     | 632.3726  |           |
|           | 844.4411 | 9   | S | 3        | 519.2885 | +0.127418           | 519.2885  |           |
| -0.03103  | 973.4837 | 10  | E | 2        | 432.2565 |                     | 432.2565  |           |
| -0.02333  | 1101.579 | 11  | K | 1        | 303.2139 | +0.061048           | 303.2139  |           |
|           |          | 12  | R | 0        | 175.119  |                     | 175.119   |           |

Scan number 1474 Raw file LNCAP\_Silac\_23F10\_set3\_06  
 Method ITMS: CID Pepti... 110.97

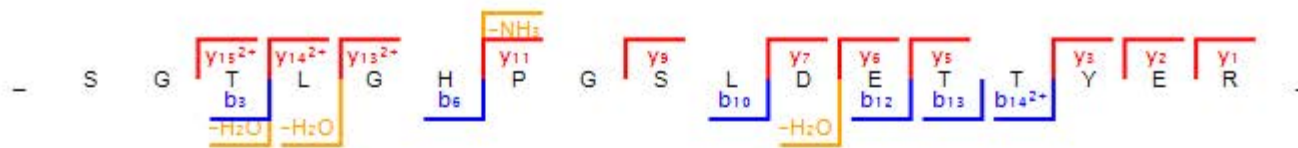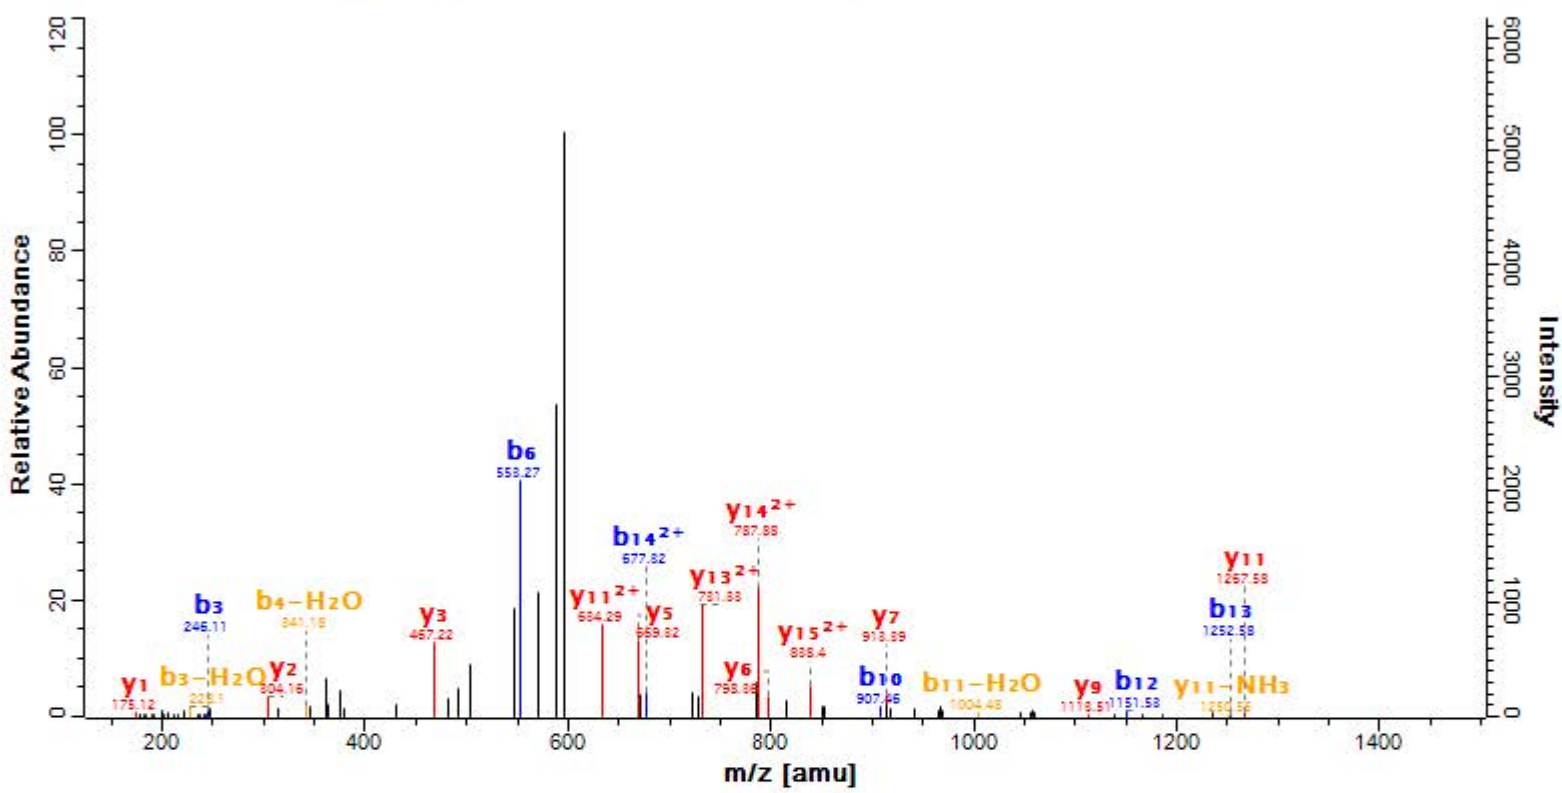

**precursor information**

|                   |                 |
|-------------------|-----------------|
| Mass:             | 1818.83808      |
| m/z:              | 607.28664       |
| Charge:           | 3+              |
| Retentiontime:    | 15.554471969604 |
| Score:            | 110.9721        |
| Mass Error [ppm]: | -0.18575        |
| PEP:              | 1.5379E-08      |
| Precursor Type:   | MULTI           |

**general information**

|                       |           |
|-----------------------|-----------|
| Annotation:           | 14 of 17  |
| AminoAcids Coverage:  | 82 %      |
| Intensity Coverage:   | 35 %      |
| Peak Coverage:        | 21 %      |
| Protein Localisation: | 81 ... 97 |

| b <sup>2+</sup> ion |        | b ion    |        |    |     |    | y ion    |         | y <sup>2+</sup> ion |         |
|---------------------|--------|----------|--------|----|-----|----|----------|---------|---------------------|---------|
| Δ dalton            | mass   | Δ dalton | mass   |    | seq |    | Δ dalton | mass    | Δ dalton            | mass    |
|                     | 88.039 |          | 88.039 | 1  | S   | 16 |          |         |                     |         |
|                     | 145.06 |          | 145.06 | 2  | G   | 15 | 1732.8   |         | 1732.8              |         |
|                     | 246.11 | -0.016   | 246.11 | 3  | T   | 14 | 1675.8   |         | 838.4               | +0.1256 |
|                     | 359.19 |          | 359.19 | 4  | L   | 13 | 1574.7   |         | 787.88              | +0.2083 |
|                     | 416.21 |          | 416.21 | 5  | G   | 12 | 1461.7   |         | 731.33              | +0.1458 |
|                     | 553.27 | +0.1627  | 553.27 | 6  | H   | 11 | 1404.6   |         | 1404.6              |         |
|                     | 650.33 |          | 650.33 | 7  | P   | 10 | 1267.6   | +0.0406 | 634.29              | +0.2378 |
|                     | 707.35 |          | 707.35 | 8  | G   | 9  | 1170.5   |         | 1170.5              |         |
|                     | 794.38 |          | 794.38 | 9  | S   | 8  | 1113.5   | -0.084  | 1113.5              |         |
|                     | 907.46 | +0.156   | 907.46 | 10 | L   | 7  | 1026.5   |         | 1026.5              |         |
|                     | 1022.5 |          | 1022.5 | 11 | D   | 6  | 913.39   | +0.1253 | 913.39              |         |
|                     | 1151.5 | +0.0121  | 1151.5 | 12 | E   | 5  | 798.36   | -0.025  | 798.36              |         |
|                     | 1252.6 | +0.1575  | 1252.6 | 13 | T   | 4  | 669.32   | -0.017  | 669.32              |         |
| +0.2028             | 677.32 |          | 1353.6 | 14 | T   | 3  | 568.27   |         | 568.27              |         |
|                     | 1516.7 |          | 1516.7 | 15 | Y   | 2  | 467.22   | -0.048  | 467.22              |         |
|                     | 1645.7 |          | 1645.7 | 16 | E   | 1  | 304.16   | +0.0873 | 304.16              |         |
|                     |        |          |        | 17 | R   | 0  | 175.12   | -0.218  | 175.12              |         |

Scan number 1688 Raw file LNCAP\_Silac\_23F10\_set3\_06  
 Method ITMS; CID Pepti... 400.96

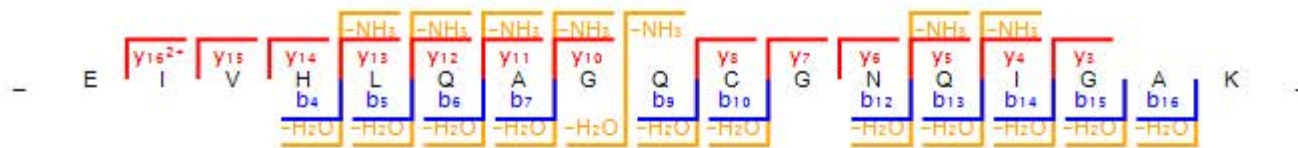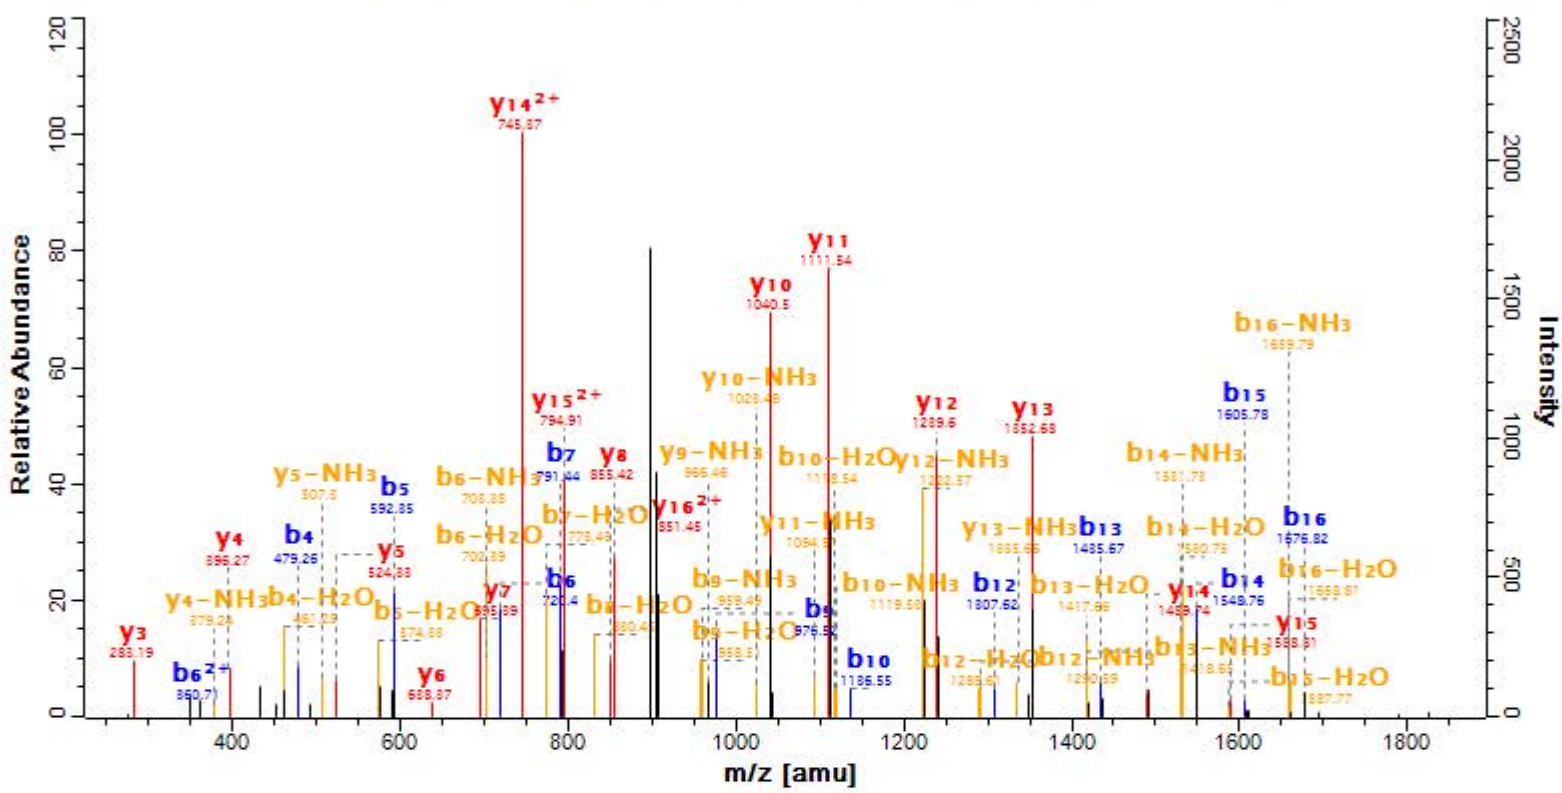

**precursor information**

|                   |                 |
|-------------------|-----------------|
| Mass:             | 1821.91581      |
| m/z:              | 911.96518       |
| Charge:           | 2+              |
| Retentiontime:    | 16.920042037963 |
| Score:            | 400.9602        |
| Mass Error [ppm]: | 0.1342          |
| PEP:              | 1.1568E-220     |
| Precursor Type:   | MULTI           |

**general information**

|                       |          |
|-----------------------|----------|
| Annotation:           | 15 of 17 |
| AminoAcids Coverage:  | 88 %     |
| Intensity Coverage:   | 68 %     |
| Peak Coverage:        | 58 %     |
| Protein Localisation: | 3 ... 19 |

| b <sup>2+</sup> ion |        | b ion    |        | seq |   |    | y ion    |         | y <sup>2+</sup> ion |         |
|---------------------|--------|----------|--------|-----|---|----|----------|---------|---------------------|---------|
| Δ dalton            | mass   | Δ dalton | mass   |     |   |    | Δ dalton | mass    | Δ dalton            | mass    |
|                     | 130.05 |          | 130.05 | 1   | E | 16 |          |         |                     |         |
|                     | 243.13 |          | 243.13 | 2   | I | 15 | 1701.9   |         | 851.45              | +0.0658 |
|                     | 342.2  |          | 342.2  | 3   | V | 14 | 1588.8   | +0.157  | 794.91              | +0.2013 |
|                     | 479.26 | +0.0844  | 479.26 | 4   | H | 13 | 1489.7   | -0.374  | 745.37              | +0.2347 |
|                     | 592.35 | +0.0422  | 592.35 | 5   | L | 12 | 1352.7   | -0.08   | 1352.7              |         |
| +0.4326             | 360.71 | -0.001   | 720.4  | 6   | Q | 11 | 1239.6   | -0.115  | 1239.6              |         |
|                     | 791.44 | +0.0568  | 791.44 | 7   | A | 10 | 1111.5   | -0.062  | 1111.5              |         |
|                     | 848.46 |          | 848.46 | 8   | G | 9  | 1040.5   | -0.029  | 1040.5              |         |
|                     | 976.52 | +0.0092  | 976.52 | 9   | Q | 8  | 983.48   |         | 983.48              |         |
|                     | 1136.6 | +0.0925  | 1136.6 | 10  | C | 7  | 855.42   | -0.048  | 855.42              |         |
|                     | 1193.6 |          | 1193.6 | 11  | G | 6  | 695.39   | -0.016  | 695.39              |         |
|                     | 1307.6 | +0.1206  | 1307.6 | 12  | N | 5  | 638.37   | +0.0123 | 638.37              |         |
|                     | 1435.7 | +0.0293  | 1435.7 | 13  | Q | 4  | 524.33   | +0.0467 | 524.33              |         |
|                     | 1548.8 | -0.121   | 1548.8 | 14  | I | 3  | 396.27   | +0.1669 | 396.27              |         |
|                     | 1605.8 | -0.124   | 1605.8 | 15  | G | 2  | 283.19   | -0.01   | 283.19              |         |
|                     | 1676.8 | -0.108   | 1676.8 | 16  | A | 1  | 226.16   |         | 226.16              |         |
|                     |        |          |        | 17  | K | 0  | 155.13   |         | 155.13              |         |

Scan number 1843 Raw file LNCAP\_Silac\_23F10\_set3\_06  
 Method ITMS; CID Peptide 264.03

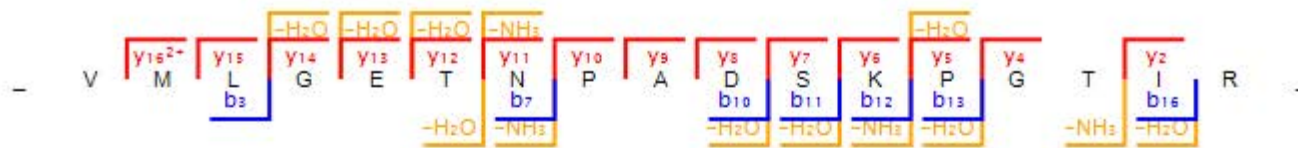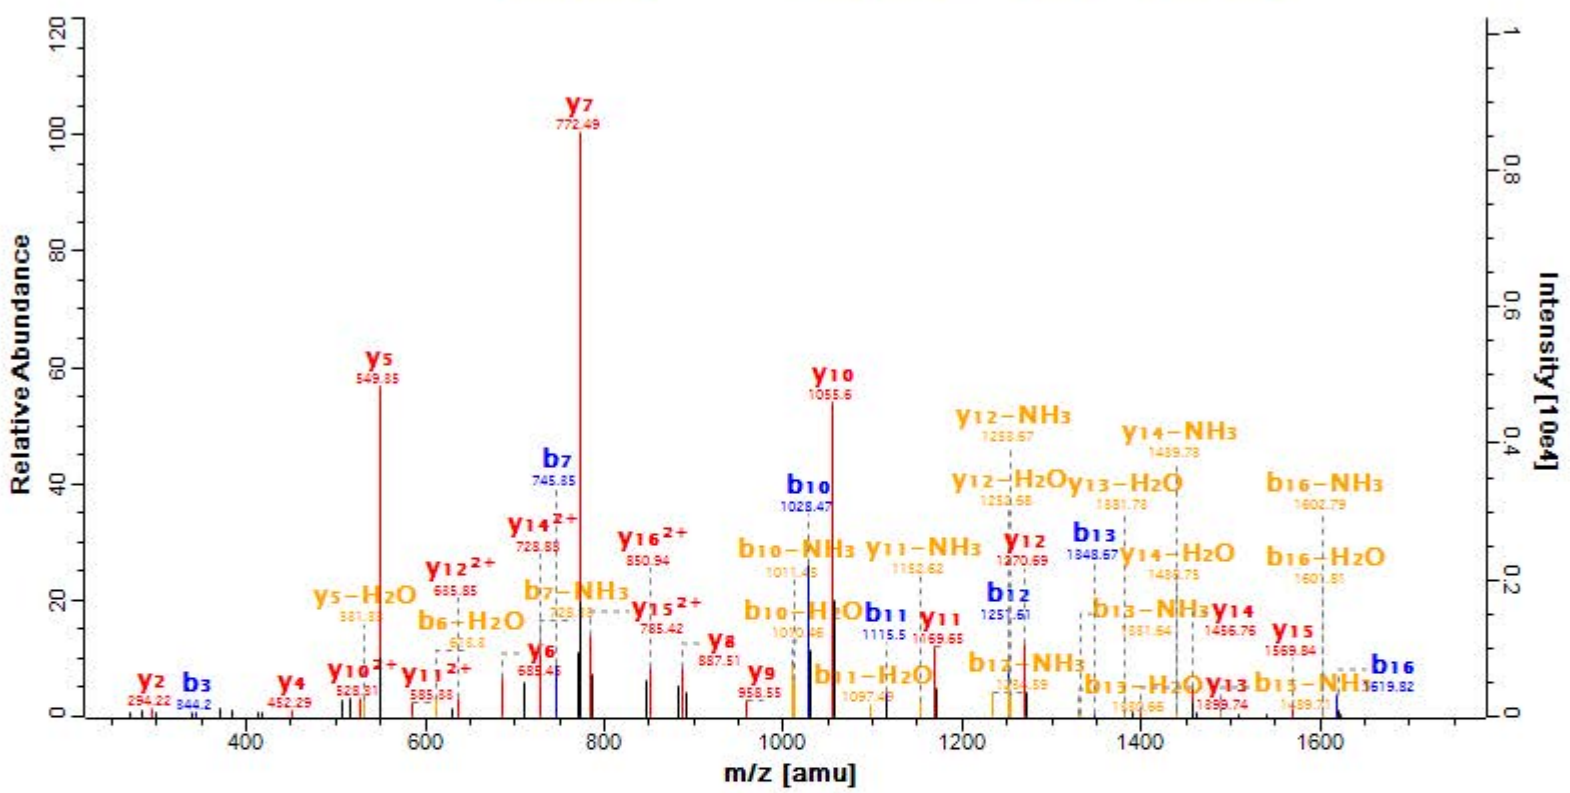

**precursor information**

|                   |                 |
|-------------------|-----------------|
| Mass:             | 1784.90874      |
| m/z:              | 893.46164       |
| Charge:           | 2+              |
| Retentiontime:    | 17.829998016357 |
| Score:            | 264.0251        |
| Mass Error [ppm]: | -0.19296        |
| PEP:              | 1.409E-69       |
| Precursor Type:   | MULTI           |

**general information**

|                       |                      |
|-----------------------|----------------------|
| Annotation:           | 15 of 17             |
| AminoAcids Coverage:  | 88 %                 |
| Intensity Coverage:   | 74 %                 |
| Peak Coverage:        | 56 %                 |
| Protein Localisation: | 114 ... 130; 229 ... |

| b ion    |          |     |   | y ion    |          | y <sup>2+</sup> ion |           |           |
|----------|----------|-----|---|----------|----------|---------------------|-----------|-----------|
| Δ dalton | mass     | seq |   | Δ dalton | mass     | Δ dalton            | mass      |           |
|          | 100.0757 | 1   | V | 16       |          |                     |           |           |
|          | 231.1162 | 2   | M | 15       | 1700.882 | 850.9448            | +0.205127 |           |
| -0.15095 | 344.2002 | 3   | L | 14       | 1569.842 | +0.020394           | 785.4245  | -0.01554  |
|          | 401.2217 | 4   | G | 13       | 1456.758 | +0.022182           | 728.8825  | +0.25727  |
|          | 530.2643 | 5   | E | 12       | 1399.736 | +0.075506           | 1399.736  |           |
|          | 631.312  | 6   | T | 11       | 1270.694 | -0.11396            | 635.8505  | -0.05879  |
| -0.0059  | 745.3549 | 7   | N | 10       | 1169.646 | +0.051764           | 585.3266  | +0.107022 |
|          | 842.4077 | 8   | P | 9        | 1055.603 | -0.04923            | 528.3052  | +0.02497  |
|          | 913.4448 | 9   | A | 8        | 958.5503 | -0.00702            | 958.5503  |           |
| -0.05436 | 1028.472 | 10  | D | 7        | 887.5132 | +0.009337           | 887.5132  |           |
| -0.05258 | 1115.504 | 11  | S | 6        | 772.4862 | +0.047999           | 772.4862  |           |
| -0.08166 | 1251.613 | 12  | K | 5        | 685.4542 | +0.029368           | 685.4542  |           |
| -0.24099 | 1348.666 | 13  | P | 4        | 549.3451 | +0.027263           | 549.3451  |           |
|          | 1405.687 | 14  | G | 3        | 452.2923 | +0.032603           | 452.2923  |           |
|          | 1506.735 | 15  | T | 2        | 395.2708 |                     | 395.2708  |           |
| -0.22745 | 1619.819 | 16  | I | 1        | 294.2231 | +0.206298           | 294.2231  |           |
|          |          | 17  | R | 0        | 181.1391 |                     | 181.1391  |           |

Scan number 2179 Raw file LNCAP\_Silac\_23F10\_set3\_06  
 Method ITMS; CID Pepti... 90.73

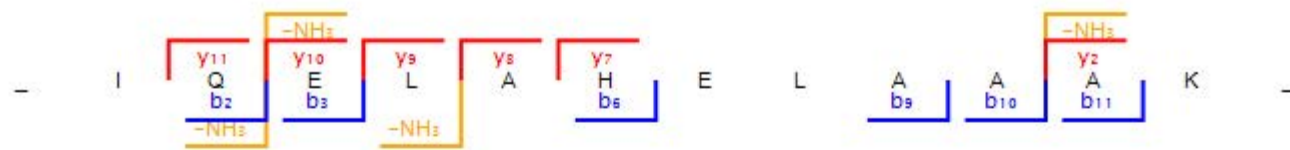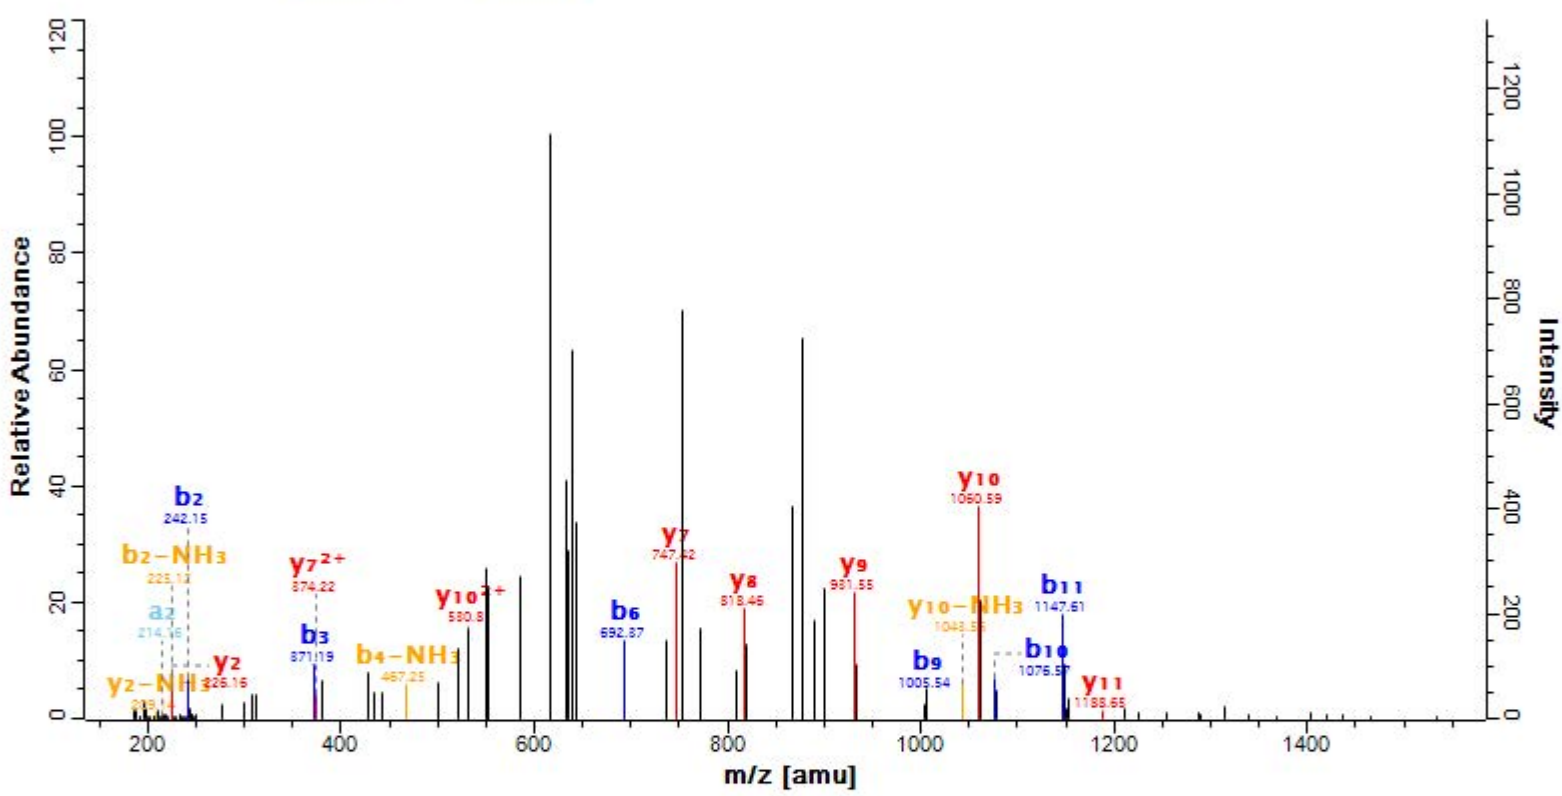

**precursor information**

|                   |                 |
|-------------------|-----------------|
| Mass:             | 1955.00332      |
| m/z:              | 652.67505       |
| Charge:           | 3+              |
| Retentiontime:    | 19.741809844970 |
| Score:            | 90.73092        |
| Mass Error [ppm]: | -0.24509        |
| PEP:              | 0.0029921       |
| Precursor Type:   | MULTI           |

**general information**

|                       |             |
|-----------------------|-------------|
| Annotation:           | 9 of 12     |
| AminoAcids Coverage:  | 75 %        |
| Intensity Coverage:   | 18 %        |
| Peak Coverage:        | 18 %        |
| Protein Localisation: | 184 ... 195 |

| a ion    |        | b ion    |        | seq |   |    | y ion    |         | y <sup>2+</sup> ion |        |
|----------|--------|----------|--------|-----|---|----|----------|---------|---------------------|--------|
| Δ dalton | mass   | Δ dalton | mass   |     |   |    | Δ dalton | mass    | Δ dalton            | mass   |
|          | 86.096 |          | 114.09 | 1   | I | 11 |          |         |                     |        |
| +0.2848  | 214.16 | +0.0089  | 242.15 | 2   | Q | 10 | 1188.6   | +0.04   | 1188.6              |        |
|          | 343.2  | +0.1565  | 371.19 | 3   | E | 9  | 1060.6   | -0.091  | 530.8               | -0.037 |
|          | 456.28 |          | 484.28 | 4   | L | 8  | 931.55   | +0.0791 | 931.55              |        |
|          | 527.32 |          | 555.31 | 5   | A | 7  | 818.46   | +0.0573 | 818.46              |        |
|          | 664.38 | +0.0249  | 692.37 | 6   | H | 6  | 747.42   | +0.0808 | 374.22              | -0.483 |
|          | 793.42 |          | 821.42 | 7   | E | 5  | 610.37   |         | 610.37              |        |
|          | 906.5  |          | 934.5  | 8   | L | 4  | 481.32   |         | 481.32              |        |
|          | 977.54 | +0.1397  | 1005.5 | 9   | A | 3  | 368.24   |         | 368.24              |        |
|          | 1048.6 | -0.162   | 1076.6 | 10  | A | 2  | 297.2    |         | 297.2               |        |
|          | 1119.6 | +0.0067  | 1147.6 | 11  | A | 1  | 226.16   | -0.02   | 226.16              |        |
|          |        |          |        | 12  | K | 0  | 155.13   |         | 155.13              |        |



Scan number 2450 Raw file LNCAP\_Silac\_23F10\_set3\_06  
 Method ITMS: CID Pepti... 81.9

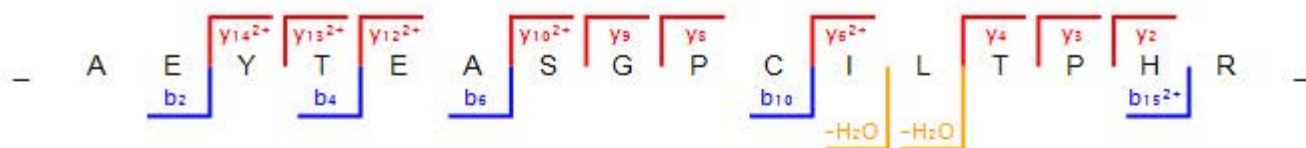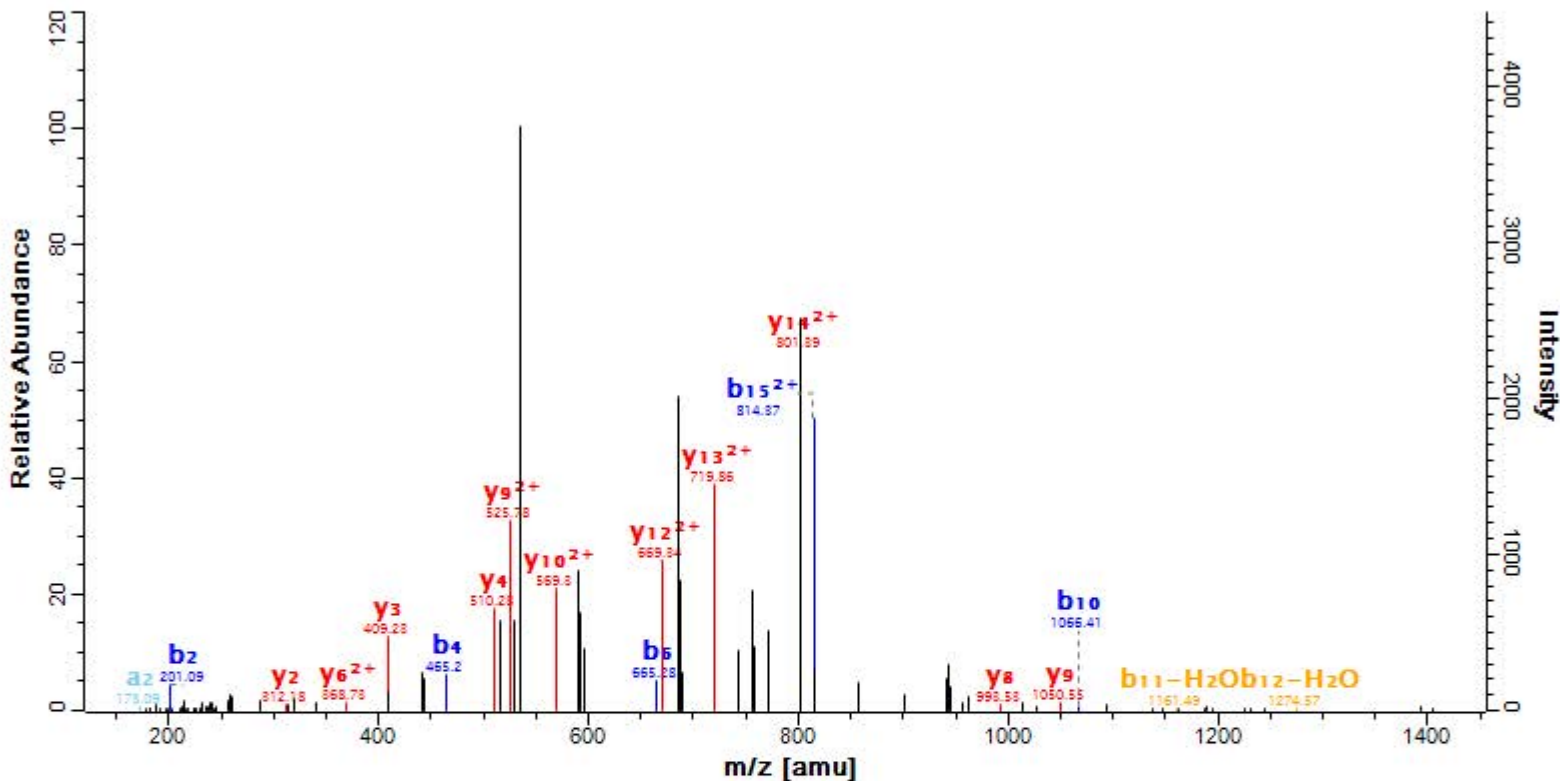

#### precursor information

|                   |                 |
|-------------------|-----------------|
| Mass:             | 1800.84771      |
| m/z:              | 601.28985       |
| Charge:           | 3+              |
| Retentiontime:    | 21.291662216186 |
| Score:            | 81.90369        |
| Mass Error [ppm]: | 0.68243         |
| PEP:              | 0.00017354      |
| Precursor Type:   | MULTI           |

#### general information

|                       |             |
|-----------------------|-------------|
| Annotation:           | 14 of 16    |
| AminoAcids Coverag    | 88 %        |
| Intensity Coverage:   | 37 %        |
| Peak Coverage:        | 18 %        |
| Protein Localisation: | 174 ... 189 |

| a ion         |               | b <sup>2+</sup> ion |               | b ion         |     |               |               |       | y ion |       | y <sup>2+</sup> ion |  |
|---------------|---------------|---------------------|---------------|---------------|-----|---------------|---------------|-------|-------|-------|---------------------|--|
| Δ dalton mass | Δ dalton mass | Δ dalton mass       | Δ dalton mass | Δ dalton mass | seq | Δ dalton mass | Δ dalton mass |       |       |       |                     |  |
| 44.05         | 72.04         |                     | 72.04         |               | 1   | A             | 15            |       |       |       |                     |  |
| -0.06         | 173.1         | 201.1               | -0.1          | 201.1         | 2   | E             | 14            | 1731  |       | 1731  |                     |  |
| 336.2         | 364.2         |                     | 364.2         |               | 3   | Y             | 13            | 1602  |       | 801.4 | +0.00               |  |
| 437.2         | 465.2         | +0.01               | 465.2         |               | 4   | T             | 12            | 1439  |       | 719.9 | +0.20               |  |
| 566.2         | 594.2         |                     | 594.2         |               | 5   | E             | 11            | 1338  |       | 669.3 | +0.23               |  |
| 637.3         | 665.3         | -0.02               | 665.3         |               | 6   | A             | 10            | 1209  |       | 1209  |                     |  |
| 724.3         | 752.3         |                     | 752.3         |               | 7   | S             | 9             | 1138  |       | 569.3 | +0.00               |  |
| 781.3         | 809.3         |                     | 809.3         |               | 8   | G             | 8             | 1051  | +0.14 | 525.8 | +0.26               |  |
| 878.4         | 906.4         |                     | 906.4         |               | 9   | P             | 7             | 993.5 | +0.28 | 993.5 |                     |  |
| 1038          | 1066          | -0.05               | 1066          |               | 10  | C             | 6             | 896.5 |       | 896.5 |                     |  |
| 1152          | 1179          |                     | 1179          |               | 11  | I             | 5             | 736.4 |       | 368.7 | -0.31               |  |
| 1265          | 1293          |                     | 1293          |               | 12  | L             | 4             | 623.4 |       | 623.4 |                     |  |
| 1366          | 1394          |                     | 1394          |               | 13  | T             | 3             | 510.3 | +0.00 | 510.3 |                     |  |
| 1463          | 1491          |                     | 1491          |               | 14  | P             | 2             | 409.2 | -0.03 | 409.2 |                     |  |
| 1600          | +0.22         | 6814.4              |               | 1628          | 15  | H             | 1             | 312.2 | -0.02 | 312.2 |                     |  |
|               |               |                     |               |               | 16  | R             | 0             | 175.1 |       | 175.1 |                     |  |

Scan number 2460 Raw file LNCAP\_Silac\_23F10\_set3\_06  
 Method ITMS; CID Pepti... 97.69

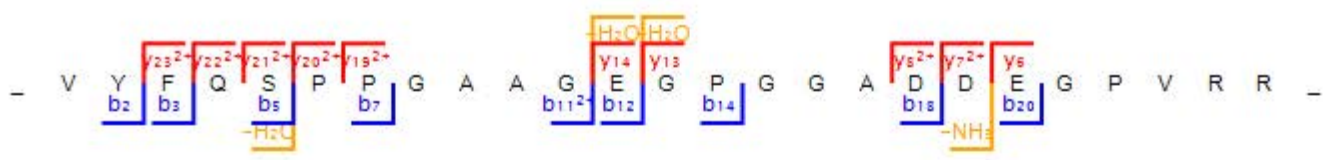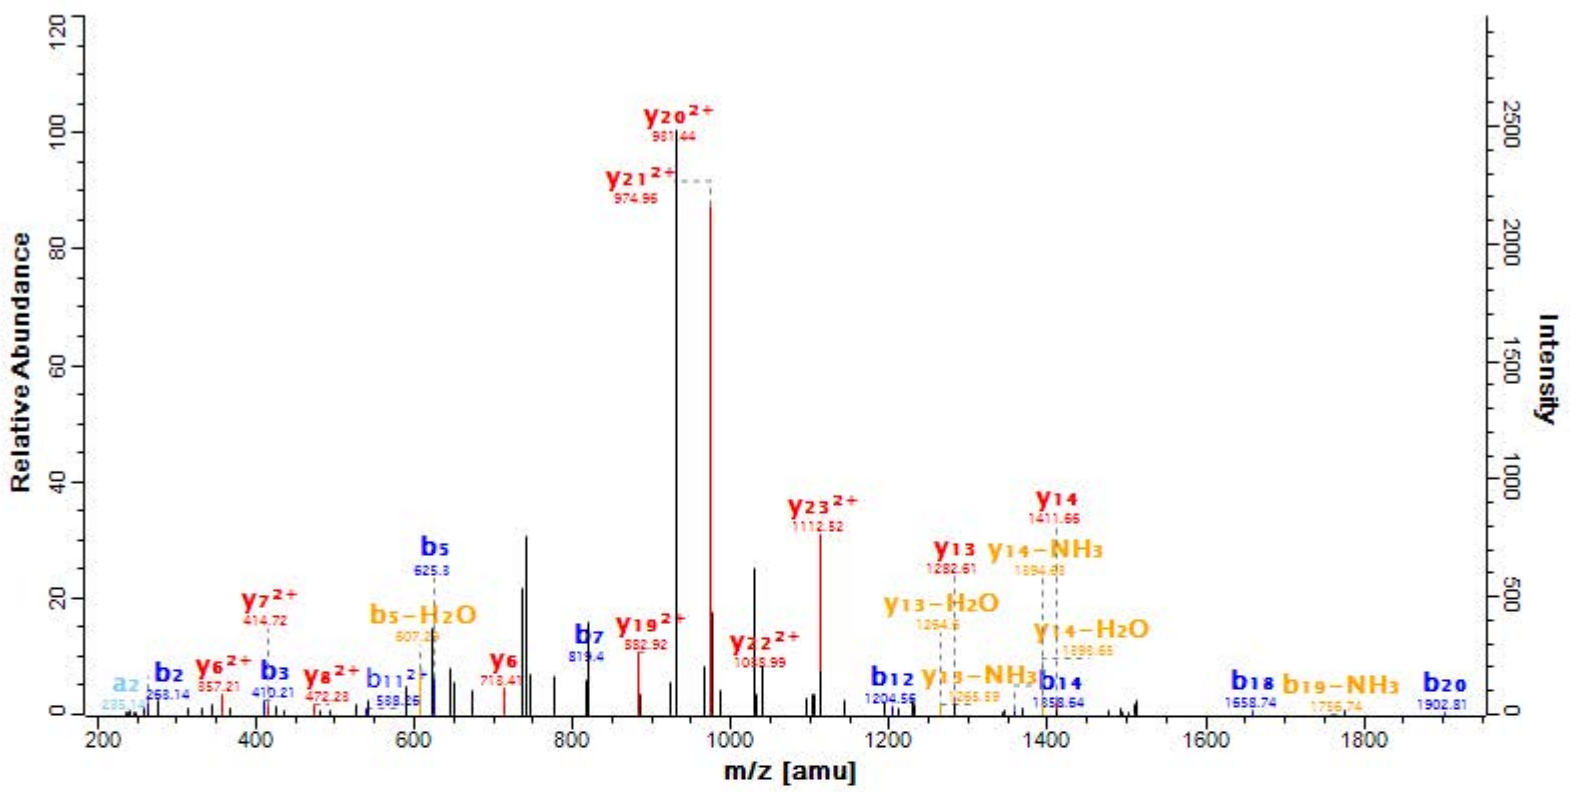

precursor information

|                   |                 |
|-------------------|-----------------|
| Mass:             | 2485.16186      |
| m/z:              | 829.39456       |
| Charge:           | 3+              |
| Retentiontime:    | 21.352262496948 |
| Score:            | 97.68987        |
| Mass Error [ppm]: | -0.14271        |
| PEP:              | 3.2518E-08      |
| Precursor Type:   | MULTI           |

| a ion         | b <sup>2+</sup> ion | b ion         |     |   |               | y ion         | y <sup>2+</sup> ion |
|---------------|---------------------|---------------|-----|---|---------------|---------------|---------------------|
| Δ dalton mass | Δ dalton mass       | Δ dalton mass | seq |   | Δ dalton mass | Δ dalton mass |                     |
| 72.08         | 100.1               | 100.1         | 1   | V | 24            |               |                     |
| +0.107235.1   | 263.1               | -0.05 263.1   | 2   | Y | 23            | 2387          | 2387                |
| 382.2         | 410.2               | +0.104410.2   | 3   | F | 22            | 2224          | 1113 +0.19          |
| 510.3         | 538.3               | 538.3         | 4   | Q | 21            | 2077          | 1039 -0.01          |
| 597.3         | 625.3               | +0.178625.3   | 5   | S | 20            | 1949          | 975 +0.25           |
| 694.4         | 722.4               | 722.4         | 6   | P | 19            | 1862          | 931.4 +0.06         |
| 791.4         | 819.4               | -0.09 819.4   | 7   | P | 18            | 1765          | 882.9 +0.21         |
| 848.4         | 876.4               | 876.4         | 8   | G | 17            | 1668          | 1668                |
| 919.5         | 947.5               | 947.5         | 9   | A | 16            | 1611          | 1611                |
| 990.5         | 1018                | 1018          | 10  | A | 15            | 1540          | 1540                |
| 1048          | -0.14 538.3         | 1076          | 11  | G | 14            | 1469          | 1469                |
| 1177          | 1205                | -0.1 1205     | 12  | E | 13            | 1412          | +0.01 51412         |
| 1234          | 1262                | 1262          | 13  | G | 12            | 1283          | -0.08 1283          |
| 1331          | 1359                | +0.1141359    | 14  | P | 11            | 1226          | 1226                |
| 1388          | 1416                | 1416          | 15  | G | 10            | 1129          | 1129                |
| 1445          | 1473                | 1473          | 16  | G | 9             | 1072          | 1072                |
| 1516          | 1544                | 1544          | 17  | A | 8             | 1014          | 1014                |
| 1631          | 1659                | +0.0091659    | 18  | D | 7             | 943.5         | 472.2 +0.23         |
| 1746          | 1774                | 1774          | 19  | D | 6             | 828.4         | 414.7 +0.08         |
| 1875          | 1903                | -0.35 1903    | 20  | E | 5             | 713.4         | +0.11 3357.2 +0.22  |
| 1932          | 1960                | 1960          | 21  | G | 4             | 584.4         | 584.4               |
| 2029          | 2057                | 2057          | 22  | P | 3             | 527.3         | 527.3               |
| 2128          | 2156                | 2156          | 23  | V | 2             | 430.3         | 430.3               |
| 2284          | 2312                | 2312          | 24  | R | 1             | 331.2         | 331.2               |
|               |                     |               | 25  | R | 0             | 175.1         | 175.1               |

general information

|                       |            |
|-----------------------|------------|
| Annotation:           | 13 of 25   |
| AminoAcids Coverage:  | 52 %       |
| Intensity Coverage:   | 44 %       |
| Peak Coverage:        | 28 %       |
| Protein Localisation: | 80 ... 104 |

Scan number 2553 Raw file LNCAP\_Silac\_23F10\_set3\_06  
 Method ITMS: CID Peptide 106.62

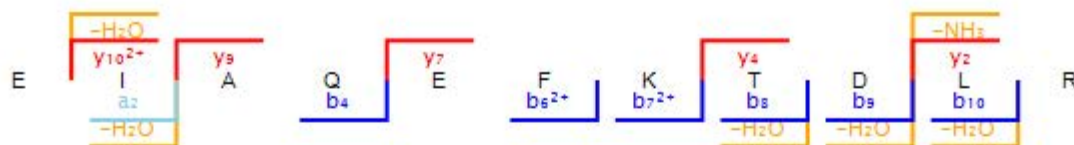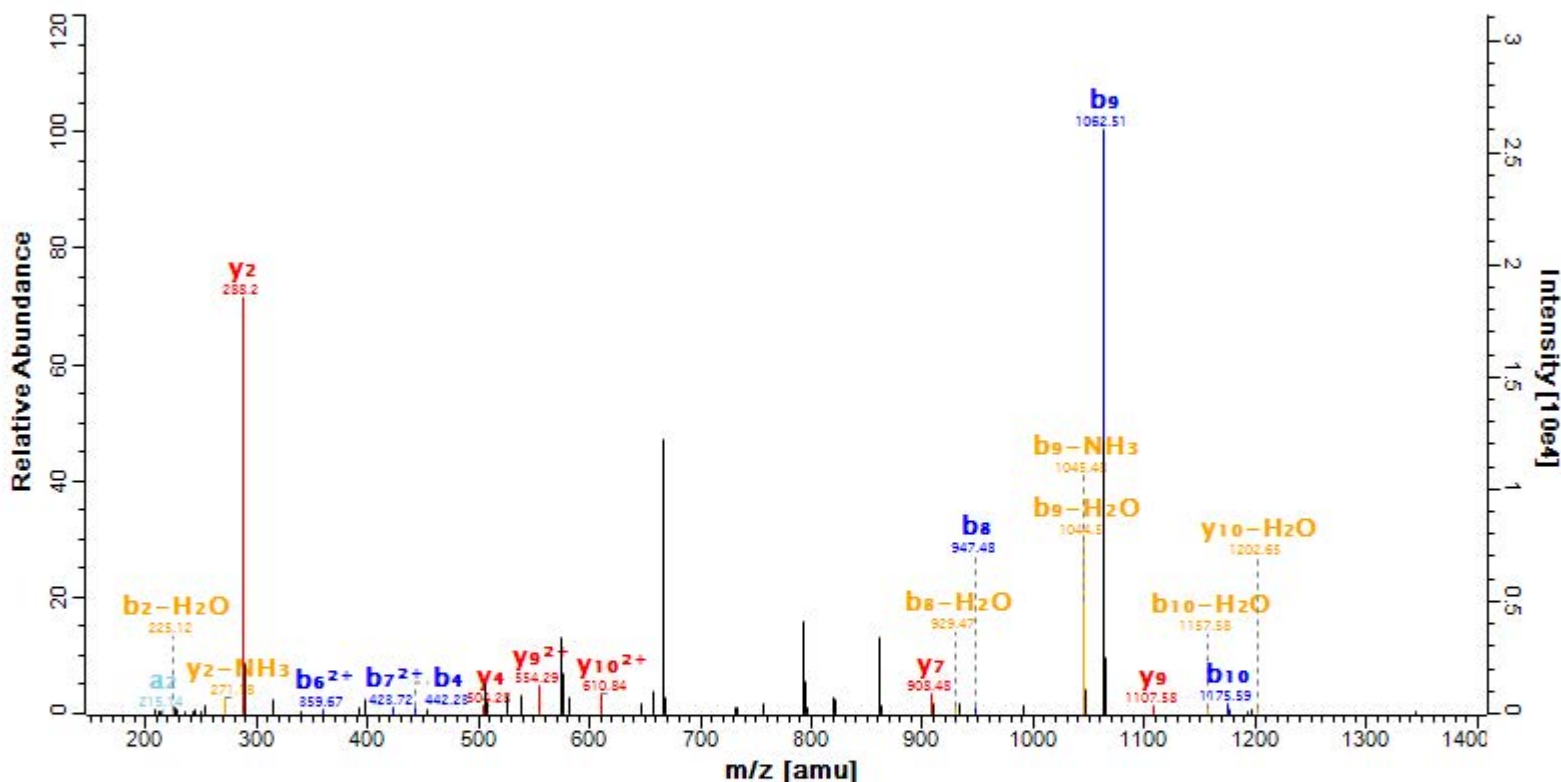

#### precursor information

|                   |                 |
|-------------------|-----------------|
| Mass:             | 1348.6988       |
| m/z:              | 675.35667       |
| Charge:           | 2+              |
| Retentiontime:    | 21.871187210083 |
| Score:            | 106.6184        |
| Mass Error [ppm]: | 0.086268        |
| PEP:              | 0.00024987      |
| Precursor Type:   | MULTI           |

#### general information

|                       |           |
|-----------------------|-----------|
| Annotation:           | 9 of 11   |
| AminoAcids Coverage:  | 82 %      |
| Intensity Coverage:   | 52 %      |
| Peak Coverage:        | 24 %      |
| Protein Localisation: | 74 ... 84 |

|        | a ion         | b <sup>2+</sup> ion | b ion         |     |   | y ion         | y <sup>2+</sup> ion    |
|--------|---------------|---------------------|---------------|-----|---|---------------|------------------------|
|        | Δ dalton mass | Δ dalton mass       | Δ dalton mass | seq |   | Δ dalton mass | Δ dalton mass          |
|        | 102.1         | 130                 | 130           | 1   | E | 10            |                        |
| +0.054 | 215.1         | 243.1               | 243.1         | 2   | I | 9             | 1221 610.8 +0.2        |
|        | 286.2         | 314.2               | 314.2         | 3   | A | 8             | 1108 -0.05 554.3 +0.24 |
|        | 414.2         | 442.2               | +0.21 442.2   | 4   | Q | 7             | 1037 1037              |
|        | 543.3         | 571.3               | 571.3         | 5   | E | 6             | 908.5 +0.02 908.5      |
|        | 690.3         | -0.45 359.7         | 718.3         | 6   | F | 5             | 779.4 779.4            |
|        | 818.4         | -0.5 423.7          | 846.4         | 7   | K | 4             | 632.4 632.4            |
|        | 919.5         | 947.5               | -0.13 947.5   | 8   | T | 3             | 504.3 -0.03 504.3      |
|        | 1035          | 1063                | +0.026 1063   | 9   | D | 2             | 403.2 403.2            |
|        | 1148          | 1176                | +0.139 1176   | 10  | L | 1             | 288.2 -0.01 288.2      |
|        |               |                     |               | 11  | R | 0             | 175.1 175.1            |

Scan number 2719 Raw file LNCAP\_Silac\_23F10\_set3\_06  
 Method ITMS; CID Pepti... 74.39

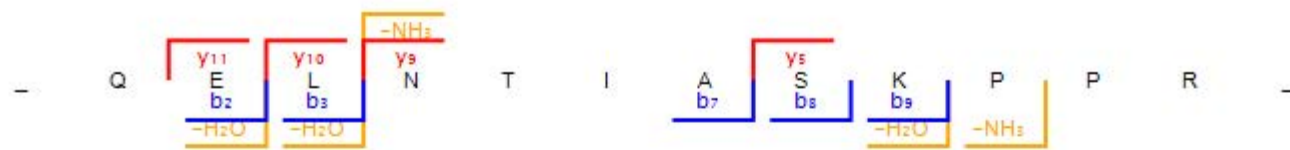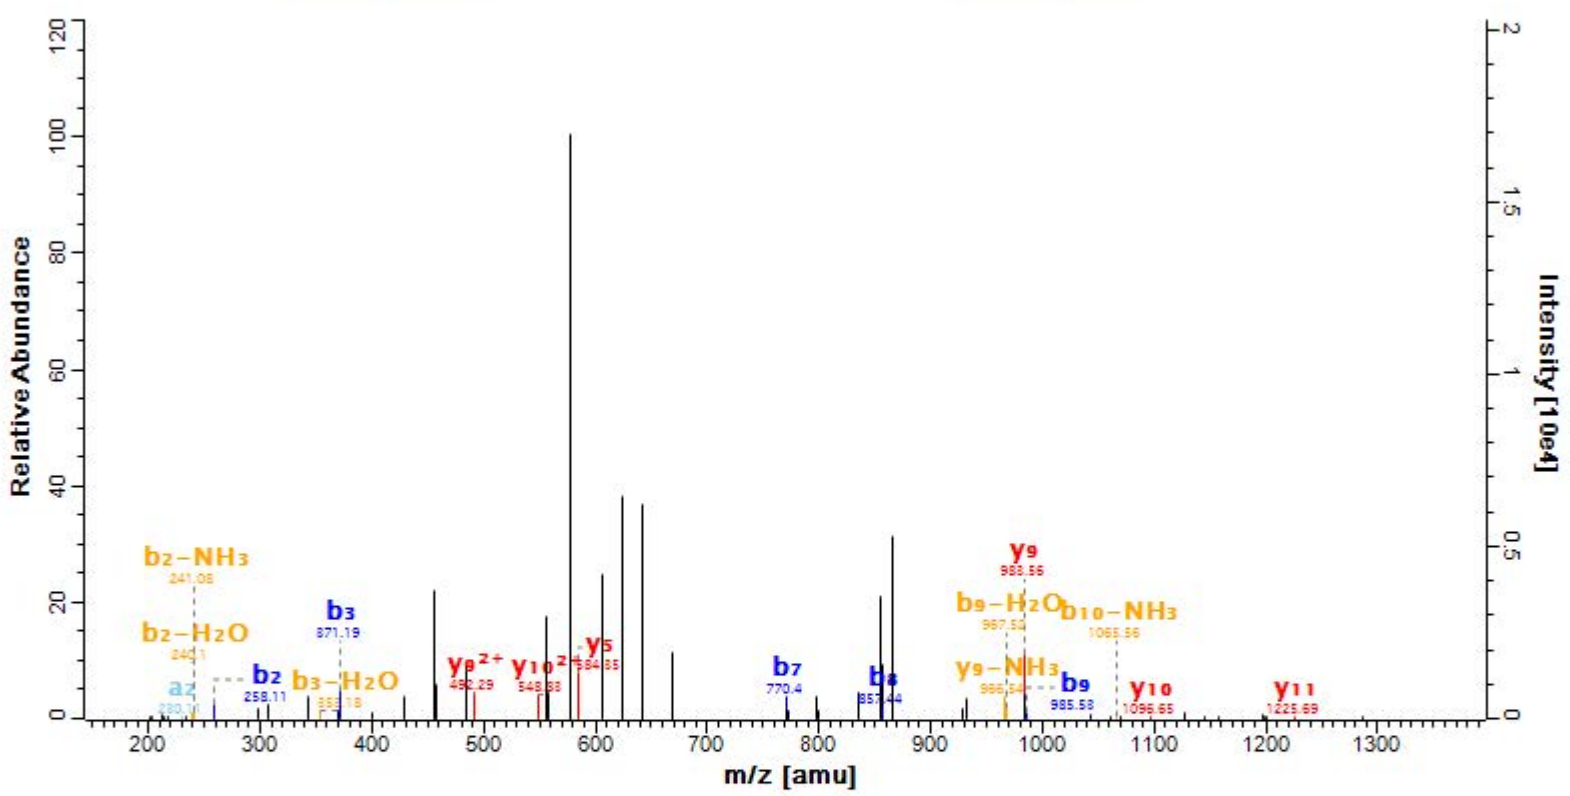

**precursor information**

|                   |                 |
|-------------------|-----------------|
| Mass:             | 1352.74119      |
| m/z:              | 677.37787       |
| Charge:           | 2+              |
| Retentiontime:    | 22.845481872558 |
| Score:            | 74.39246        |
| Mass Error [ppm]: | -0.015371       |
| PEP:              | 0.0028494       |
| Precursor Type:   | MULTI           |

**general information**

|                       |             |
|-----------------------|-------------|
| Annotation:           | 7 of 12     |
| AminoAcids Coverage:  | 58 %        |
| Intensity Coverage:   | 11 %        |
| Peak Coverage:        | 22 %        |
| Protein Localisation: | 298 ... 309 |

| a ion    |        | b ion    |        | seq |   |    | y ion    |         | y <sup>2+</sup> ion |         |
|----------|--------|----------|--------|-----|---|----|----------|---------|---------------------|---------|
| Δ dalton | mass   | Δ dalton | mass   |     |   |    | Δ dalton | mass    | Δ dalton            | mass    |
|          | 101.07 |          | 129.07 | 1   | Q | 11 |          |         |                     |         |
| +0.048   | 230.11 | -0.131   | 258.11 | 2   | E | 10 | 1225.7   | +0.3671 | 1225.7              |         |
|          | 343.2  | +0.0935  | 371.19 | 3   | L | 9  | 1096.6   | +0.109  | 548.83              | +0.3424 |
|          | 457.24 |          | 485.24 | 4   | N | 8  | 983.56   | +0.0736 | 492.29              | +0.0091 |
|          | 558.29 |          | 586.28 | 5   | T | 7  | 869.52   |         | 869.52              |         |
|          | 671.37 |          | 699.37 | 6   | I | 6  | 768.47   |         | 768.47              |         |
|          | 742.41 | -0.13    | 770.4  | 7   | A | 5  | 655.39   |         | 655.39              |         |
|          | 829.44 | +0.03    | 857.44 | 8   | S | 4  | 584.35   | +0.0953 | 584.35              |         |
|          | 957.54 | +0.1173  | 985.53 | 9   | K | 3  | 497.32   |         | 497.32              |         |
|          | 1054.6 |          | 1082.6 | 10  | P | 2  | 369.22   |         | 369.22              |         |
|          | 1151.6 |          | 1179.6 | 11  | P | 1  | 272.17   |         | 272.17              |         |
|          |        |          |        | 12  | R | 0  | 175.12   |         | 175.12              |         |

Scan number 3673 Raw file LNCAP\_Silac\_23F10\_set3\_06  
 Method ITMS: CID Pepti... 125.75

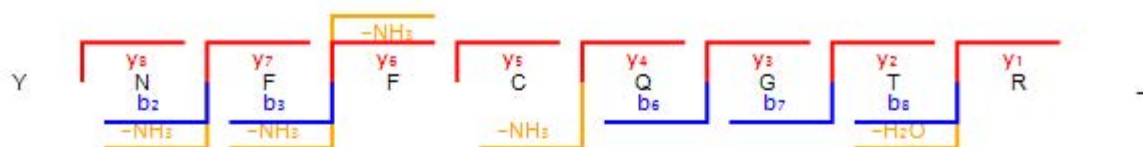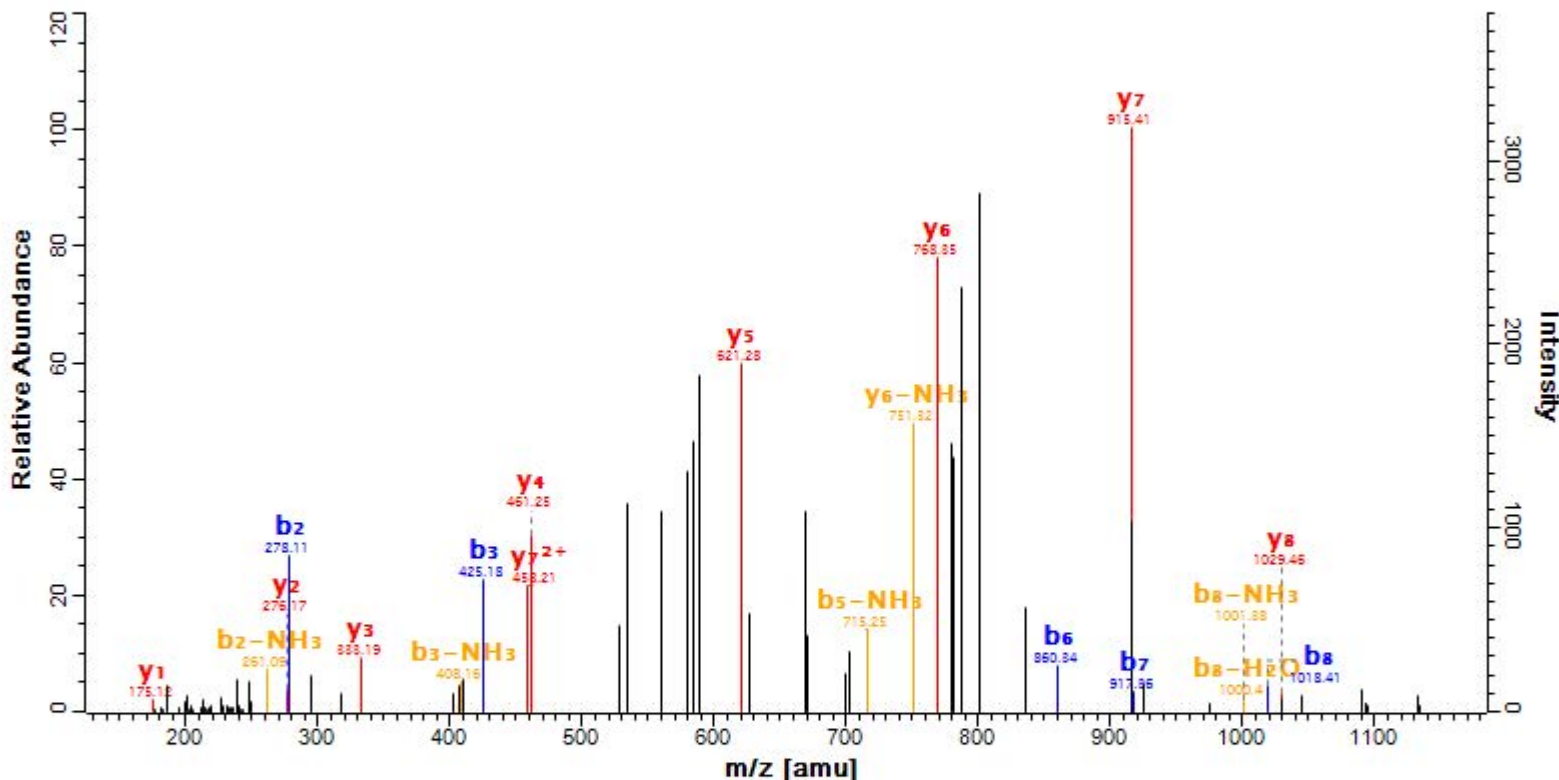

#### precursor information

|                       |                 |
|-----------------------|-----------------|
| Mass:                 | 1191.51312      |
| m/z:                  | 596.76384       |
| Charge:               | 2+              |
| Retentiontime:        | 28.098049163818 |
| Score:                | 125.7467        |
| Mass Error [ppm]:     | -0.0022455      |
| PEP:                  | 0.0012086       |
| Precursor Type:       | MULTI           |
| Annotation:           | 8 of 9          |
| AminoAcids Coverage:  | 89 %            |
| Intensity Coverage:   | 39 %            |
| Peak Coverage:        | 23 %            |
| Protein Localisation: | 119 ... 127     |

| b ion     |          | seq |   |   | y ion    |           | y <sup>2+</sup> ion |           |
|-----------|----------|-----|---|---|----------|-----------|---------------------|-----------|
| Δ dalton  | mass     |     |   |   | Δ dalton | mass      | Δ dalton            | mass      |
|           | 164.0706 | 1   | Y | 8 |          |           |                     |           |
| -0.01063  | 278.1135 | 2   | N | 7 | 1029.457 | +0.053789 | 1029.457            |           |
| -0.11304  | 425.1819 | 3   | F | 6 | 915.4141 | -0.0198   | 458.2107            | +0.113751 |
|           | 572.2504 | 4   | F | 5 | 768.3457 | +0.082428 | 768.3457            |           |
|           | 732.281  | 5   | C | 4 | 621.2773 | +0.007958 | 621.2773            |           |
| -0.13671  | 860.3396 | 6   | Q | 3 | 461.2467 | +0.020845 | 461.2467            |           |
| +0.029087 | 917.361  | 7   | G | 2 | 333.1881 | -0.00743  | 333.1881            |           |
| -0.03037  | 1018.409 | 8   | T | 1 | 276.1666 | +0.031428 | 276.1666            |           |
|           |          | 9   | R | 0 | 175.119  | +0.010442 | 175.119             |           |

Scan number 3716 Raw file LNCAP\_Silac\_23F10\_set3\_06  
 Method ITMS; CID Pepti... 122.64

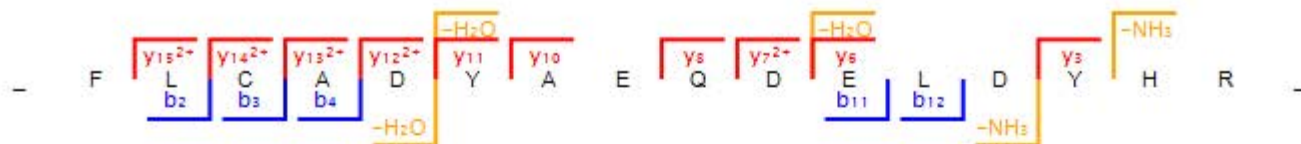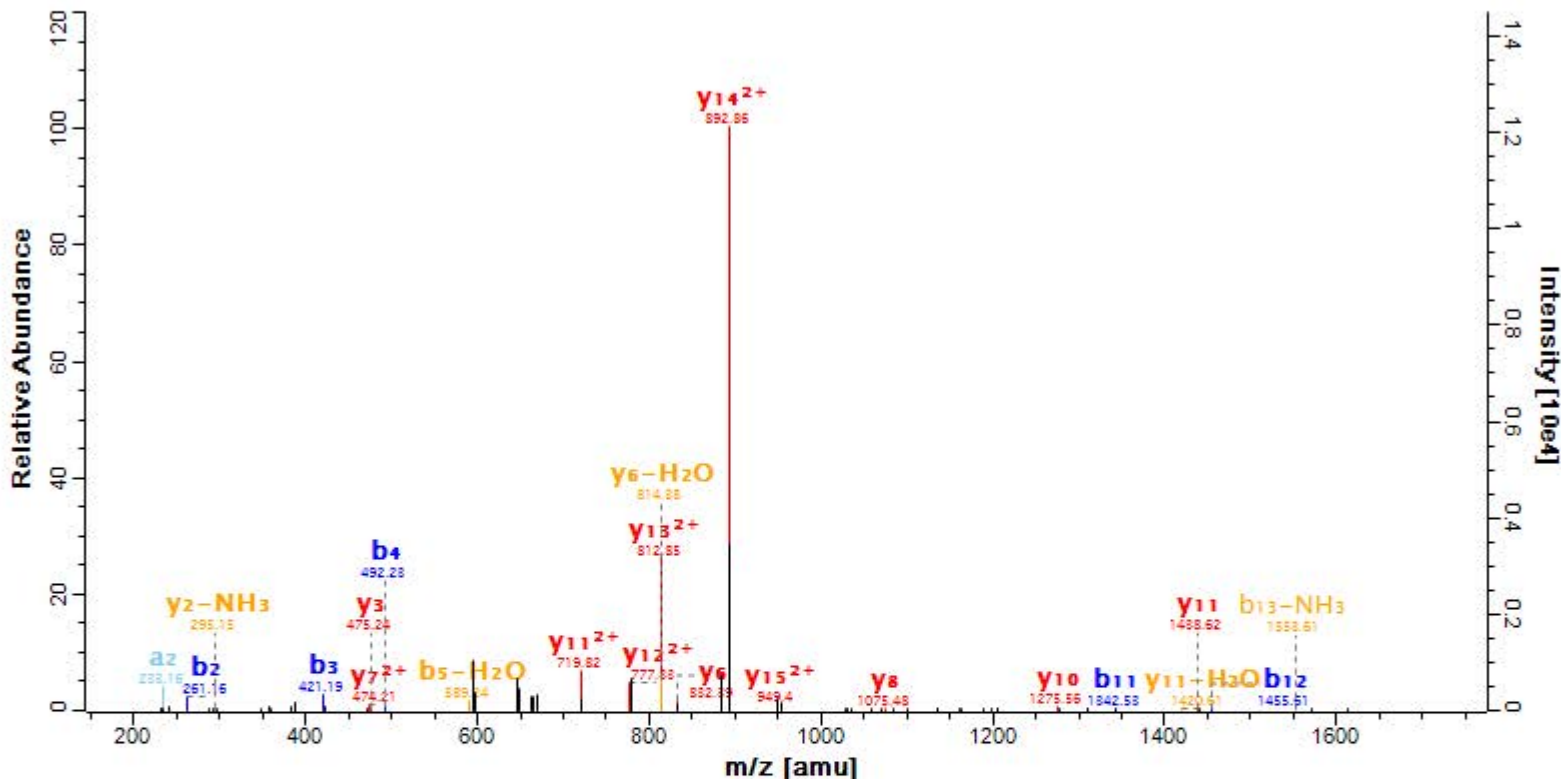

#### precursor information

|                   |                 |
|-------------------|-----------------|
| Mass:             | 2043.86304      |
| m/z:              | 682.29496       |
| Charge:           | 3+              |
| Retentiontime:    | 28.339681625366 |
| Score:            | 122.6385        |
| Mass Error [ppm]: | -0.1059         |
| PEP:              | 7.2704E-10      |
| Precursor Type:   | MULTI           |

#### general information

|                       |              |
|-----------------------|--------------|
| Annotation:           | 13 of 16     |
| AminoAcids Coverage:  | 81 %         |
| Intensity Coverage:   | 61 %         |
| Peak Coverage:        | 19 %         |
| Protein Localisation: | 985 ... 1000 |

| a ion    |        | b ion    |        | seq |   |    | y ion    |         | y <sup>2+</sup> ion |         |
|----------|--------|----------|--------|-----|---|----|----------|---------|---------------------|---------|
| Δ dalton | mass   | Δ dalton | mass   |     |   |    | Δ dalton | mass    | Δ dalton            | mass    |
|          | 120.08 |          | 148.08 | 1   | F | 15 |          |         |                     |         |
| +0.074   | 233.16 | +0.0591  | 261.16 | 2   | L | 14 | 1897.8   |         | 949.4               | -0.073  |
|          | 393.2  | +0.0271  | 421.19 | 3   | C | 13 | 1784.7   |         | 892.86              | +0.2736 |
|          | 464.23 | -0.076   | 492.23 | 4   | A | 12 | 1624.7   |         | 812.85              | +0.2819 |
|          | 579.26 |          | 607.25 | 5   | D | 11 | 1553.7   |         | 777.33              | +0.0374 |
|          | 742.32 |          | 770.32 | 6   | Y | 10 | 1438.6   | +0.476  | 719.82              | +0.1366 |
|          | 813.36 |          | 841.35 | 7   | A | 9  | 1275.6   | -0.149  | 1275.6              |         |
|          | 942.4  |          | 970.4  | 8   | E | 8  | 1204.5   |         | 1204.5              |         |
|          | 1070.5 |          | 1098.5 | 9   | Q | 7  | 1075.5   | +0.476  | 1075.5              |         |
|          | 1185.5 |          | 1213.5 | 10  | D | 6  | 947.42   |         | 474.21              | +0.0745 |
|          | 1314.5 | +0.1205  | 1342.5 | 11  | E | 5  | 832.39   | -0.148  | 832.39              |         |
|          | 1427.6 | +0.0909  | 1455.6 | 12  | L | 4  | 703.35   |         | 703.35              |         |
|          | 1542.6 |          | 1570.6 | 13  | D | 3  | 590.27   |         | 590.27              |         |
|          | 1705.7 |          | 1733.7 | 14  | Y | 2  | 475.24   | +0.2198 | 475.24              |         |
|          | 1842.8 |          | 1870.8 | 15  | H | 1  | 312.18   |         | 312.18              |         |
|          |        |          |        | 16  | R | 0  | 175.12   |         | 175.12              |         |

Scan number 380 Raw file LNCAP\_Silac\_23F10\_set3\_06  
 Method ITMS; CID Pepti... 222.25

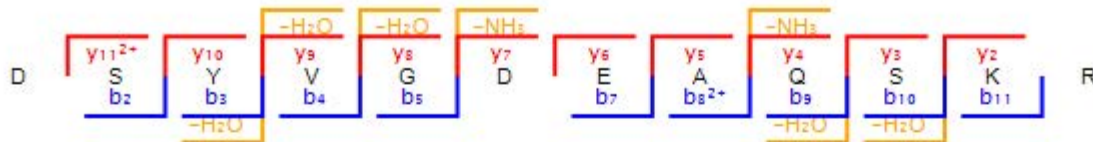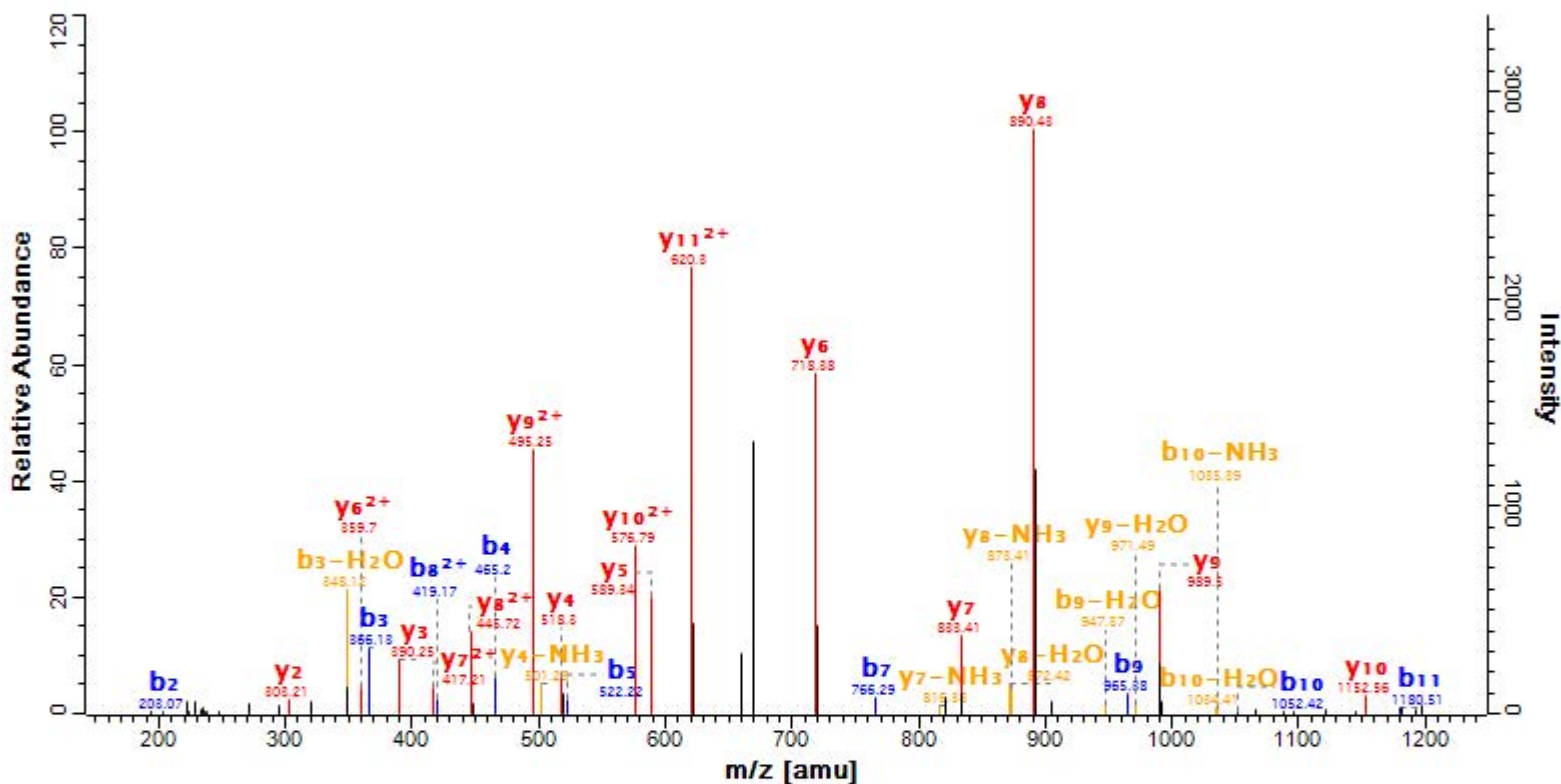

#### precursor information

|                   |                 |
|-------------------|-----------------|
| Mass:             | 1353.61554      |
| m/z:              | 677.81505       |
| Charge:           | 2+              |
| Retentiontime:    | 7.3903751373291 |
| Score:            | 222.254         |
| Mass Error [ppm]: | -0.39196        |
| PEP:              | 9.3862E-25      |
| Precursor Type:   | MULTI           |

#### general information

|                       |           |
|-----------------------|-----------|
| Annotation:           | 10 of 12  |
| AminoAcids Coverage:  | 83 %      |
| Intensity Coverage:   | 71 %      |
| Peak Coverage:        | 44 %      |
| Protein Localisation: | 51 ... 62 |

| b <sup>2+</sup> ion |        | b ion    |        | seq |   |    | y ion    |         | y <sup>2+</sup> ion |         |
|---------------------|--------|----------|--------|-----|---|----|----------|---------|---------------------|---------|
| Δ dalton            | mass   | Δ dalton | mass   |     |   |    | Δ dalton | mass    | Δ dalton            | mass    |
|                     | 116.03 |          | 116.03 | 1   | D | 11 |          |         |                     |         |
|                     | 203.07 | +0.2396  | 203.07 | 2   | S | 10 | 1239.6   |         | 620.3               | +0.2322 |
|                     | 366.13 | +0.0369  | 366.13 | 3   | Y | 9  | 1152.6   | +0.0559 | 576.79              | +0.1909 |
|                     | 465.2  | +0.0756  | 465.2  | 4   | V | 8  | 989.5    | +0.0311 | 495.25              | +0.2283 |
|                     | 522.22 | -0.092   | 522.22 | 5   | G | 7  | 890.43   | +0.0055 | 445.72              | +0.1901 |
|                     | 637.25 |          | 637.25 | 6   | D | 6  | 833.41   | +0.1234 | 417.21              | +0.2007 |
|                     | 766.29 | +0.0563  | 766.29 | 7   | E | 5  | 718.38   | +0.1132 | 359.7               | +0.2591 |
| +0.1593             | 419.17 |          | 837.33 | 8   | A | 4  | 589.34   | +0.0473 | 589.34              |         |
|                     | 965.38 | -0.013   | 965.38 | 9   | Q | 3  | 518.3    | +0.0002 | 518.3               |         |
|                     | 1052.4 | +0.1438  | 1052.4 | 10  | S | 2  | 390.25   | +0.091  | 390.25              |         |
|                     | 1180.5 | -0.043   | 1180.5 | 11  | K | 1  | 303.21   | -0.106  | 303.21              |         |
|                     |        |          |        | 12  | R | 0  | 175.12   |         | 175.12              |         |

Scan number 3888 Raw file LNCAP\_Silac\_23F10\_set3\_06  
 Method ITMS; CID Pepti... 124.62

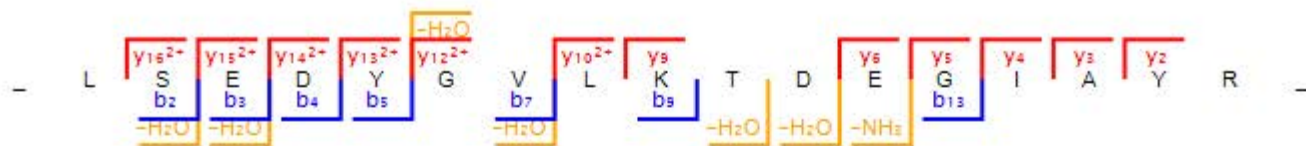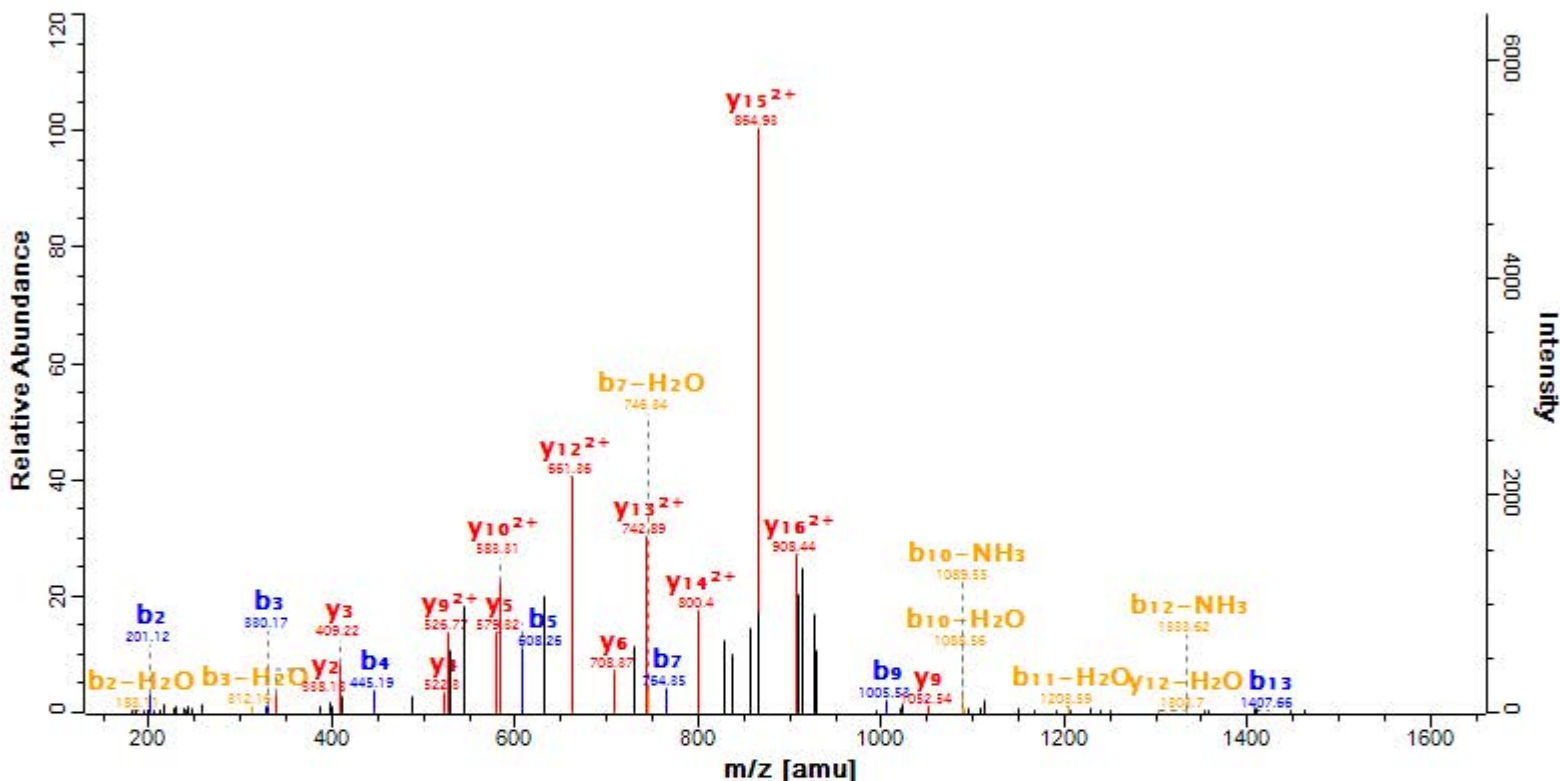

precursor information

|                   |                 |
|-------------------|-----------------|
| Mass:             | 1927.95135      |
| m/z:              | 643.65773       |
| Charge:           | 3+              |
| Retentiontime:    | 29.257268905639 |
| Score:            | 124.6202        |
| Mass Error [ppm]: | -0.71315        |
| PEP:              | 4.2231E-12      |
| Precursor Type:   | MULTI           |

general information

|                       |             |
|-----------------------|-------------|
| Annotation:           | 15 of 17    |
| AminoAcids Coverage:  | 88 %        |
| Intensity Coverage:   | 58 %        |
| Peak Coverage:        | 27 %        |
| Protein Localisation: | 111 ... 127 |

| b ion     |          |     |   |          | y ion    |           | y <sup>2+</sup> ion |           |
|-----------|----------|-----|---|----------|----------|-----------|---------------------|-----------|
| Δ dalton  | mass     | seq |   | Δ dalton | mass     | Δ dalton  | mass                |           |
|           | 114.0913 | 1   | L | 16       |          |           |                     |           |
| -0.04872  | 201.1234 | 2   | S | 15       | 1815.876 | 908.4416  | -0.00288            |           |
| +0.163506 | 330.166  | 3   | E | 14       | 1728.844 | 864.9256  | +0.217475           |           |
| +0.051907 | 445.1929 | 4   | D | 13       | 1599.801 | 800.4043  | +0.233523           |           |
| +0.097587 | 608.2562 | 5   | Y | 12       | 1484.774 | 742.8908  | +0.205551           |           |
|           | 665.2777 | 6   | G | 11       | 1321.711 | 661.3592  | +0.220858           |           |
| +0.038105 | 764.3461 | 7   | V | 10       | 1264.69  | 1264.69   |                     |           |
|           | 877.4302 | 8   | L | 9        | 1165.621 | 583.3142  | +0.181996           |           |
| -0.12279  | 1005.525 | 9   | K | 8        | 1052.537 | -0.05785  | 526.7722            | +0.311674 |
|           | 1106.573 | 10  | T | 7        | 924.4421 |           | 924.4421            |           |
|           | 1221.6   | 11  | D | 6        | 823.3945 |           | 823.3945            |           |
|           | 1350.642 | 12  | E | 5        | 708.3675 | +0.113259 | 708.3675            |           |
| -0.13318  | 1407.664 | 13  | G | 4        | 579.3249 | +0.02011  | 579.3249            |           |
|           | 1520.748 | 14  | I | 3        | 522.3035 | +0.034005 | 522.3035            |           |
|           | 1591.785 | 15  | A | 2        | 409.2194 | +0.015347 | 409.2194            |           |
|           | 1754.848 | 16  | Y | 1        | 338.1823 | +0.146272 | 338.1823            |           |
|           |          | 17  | R | 0        | 175.119  |           | 175.119             |           |



Scan number 3912 Raw file LNCAP\_Silac\_23F10\_set3\_06  
 Method ITMS; CID Pepti... 133.74

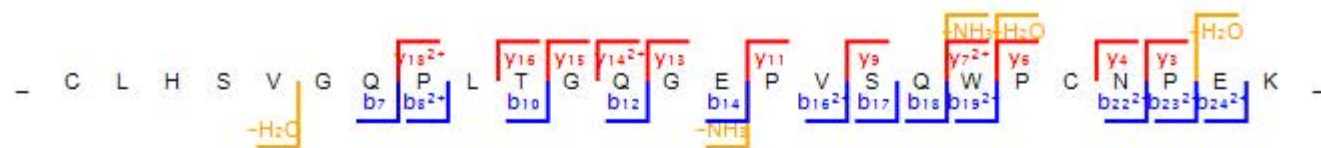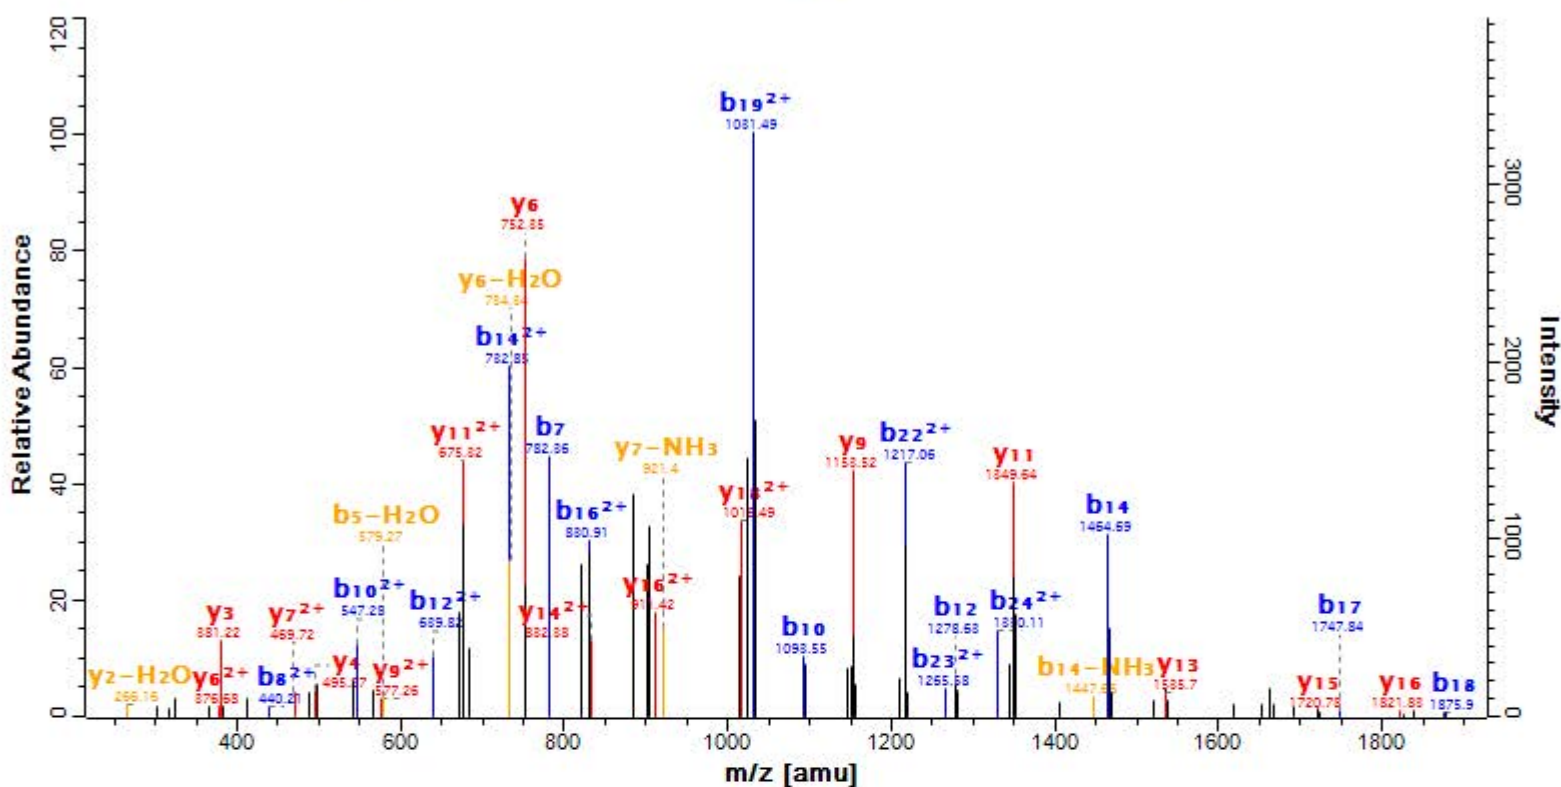

#### precursor information

|                   |                 |
|-------------------|-----------------|
| Mass:             | 2804.2998       |
| m/z:              | 935.77388       |
| Charge:           | 3+              |
| Retentiontime:    | 29.384754180908 |
| Score:            | 133.744         |
| Mass Error [ppm]: | -0.4393         |
| PEP:              | 5.4512E-17      |
| Precursor Type:   | MULTI           |

| b <sup>2+</sup> ion |        | b ion    |        | seq |   |    | y ion    |         | y <sup>2+</sup> ion |         |
|---------------------|--------|----------|--------|-----|---|----|----------|---------|---------------------|---------|
| Δ dalton            | mass   | Δ dalton | mass   |     |   |    | Δ dalton | mass    | Δ dalton            | mass    |
|                     | 161.04 |          | 161.04 | 1   | C | 24 |          |         |                     |         |
|                     | 274.12 |          | 274.12 | 2   | L | 23 | 2653.3   |         | 2653.3              |         |
|                     | 411.18 |          | 411.18 | 3   | H | 22 | 2540.2   |         | 2540.2              |         |
|                     | 498.21 |          | 498.21 | 4   | S | 21 | 2403.1   |         | 2403.1              |         |
|                     | 597.28 |          | 597.28 | 5   | V | 20 | 2316.1   |         | 2316.1              |         |
|                     | 654.3  |          | 654.3  | 6   | G | 19 | 2217     |         | 2217                |         |
|                     | 782.36 | +0.0402  | 782.36 | 7   | Q | 18 | 2160     |         | 2160                |         |
| +0.1226             | 440.21 |          | 879.41 | 8   | P | 17 | 2032     |         | 1016.5              | +0.3963 |
|                     | 992.5  |          | 992.5  | 9   | L | 16 | 1934.9   |         | 1934.9              |         |
| +0.2245             | 547.28 | +0.031   | 1093.5 | 10  | T | 15 | 1821.8   | +0.072  | 911.42              | +0.262  |
|                     | 1150.6 |          | 1150.6 | 11  | G | 14 | 1720.8   | +0.0768 | 1720.8              |         |
| +0.4844             | 639.82 | +0.0302  | 1278.6 | 12  | Q | 13 | 1663.8   |         | 832.38              | +0.2815 |
|                     | 1335.6 |          | 1335.6 | 13  | G | 12 | 1535.7   | +0.2922 | 1535.7              |         |
| +0.3243             | 732.85 | -0.043   | 1464.7 | 14  | E | 11 | 1478.7   |         | 1478.7              |         |
|                     | 1561.7 |          | 1561.7 | 15  | P | 10 | 1349.6   | -0.025  | 675.32              | +0.027  |
| +0.0633             | 830.91 |          | 1660.8 | 16  | V | 9  | 1252.6   |         | 1252.6              |         |
|                     | 1747.8 | -0.182   | 1747.8 | 17  | S | 8  | 1153.5   | -0.128  | 577.26              | +0.1806 |
|                     | 1875.9 | -0.054   | 1875.9 | 18  | Q | 7  | 1066.5   |         | 1066.5              |         |
| +0.2419             | 1031.5 |          | 2062   | 19  | W | 6  | 938.43   |         | 469.72              | +0.4473 |
|                     | 2159   |          | 2159   | 20  | P | 5  | 752.35   | +0.0224 | 376.68              | +0.3275 |
|                     | 2319.1 |          | 2319.1 | 21  | C | 4  | 655.3    |         | 655.3               |         |
| +0.3239             | 1217.1 |          | 2433.1 | 22  | N | 3  | 495.27   | +0.1302 | 495.27              |         |
| -0.053              | 1265.6 |          | 2530.2 | 23  | P | 2  | 381.22   | +0.0333 | 381.22              |         |
| +0.2851             | 1330.1 |          | 2659.2 | 24  | E | 1  | 284.17   |         | 284.17              |         |
|                     |        |          |        | 25  | K | 0  | 155.13   |         | 155.13              |         |

#### general information

|                       |             |
|-----------------------|-------------|
| Annotation:           | 17 of 25    |
| AminoAcids Coverage:  | 68 %        |
| Intensity Coverage:   | 51 %        |
| Peak Coverage:        | 36 %        |
| Protein Localisation: | 210 ... 234 |

Scan number 3990 Raw file LNCAP\_Silac\_23F10\_set3\_06  
 Method ITMS: CID Pepti... 132.86

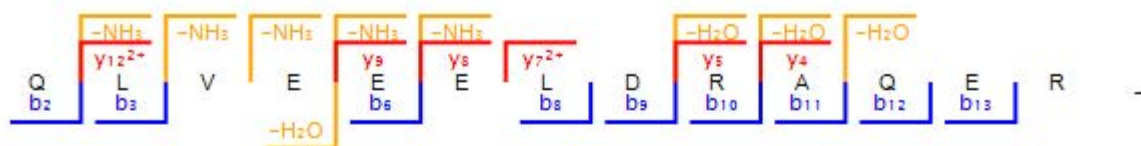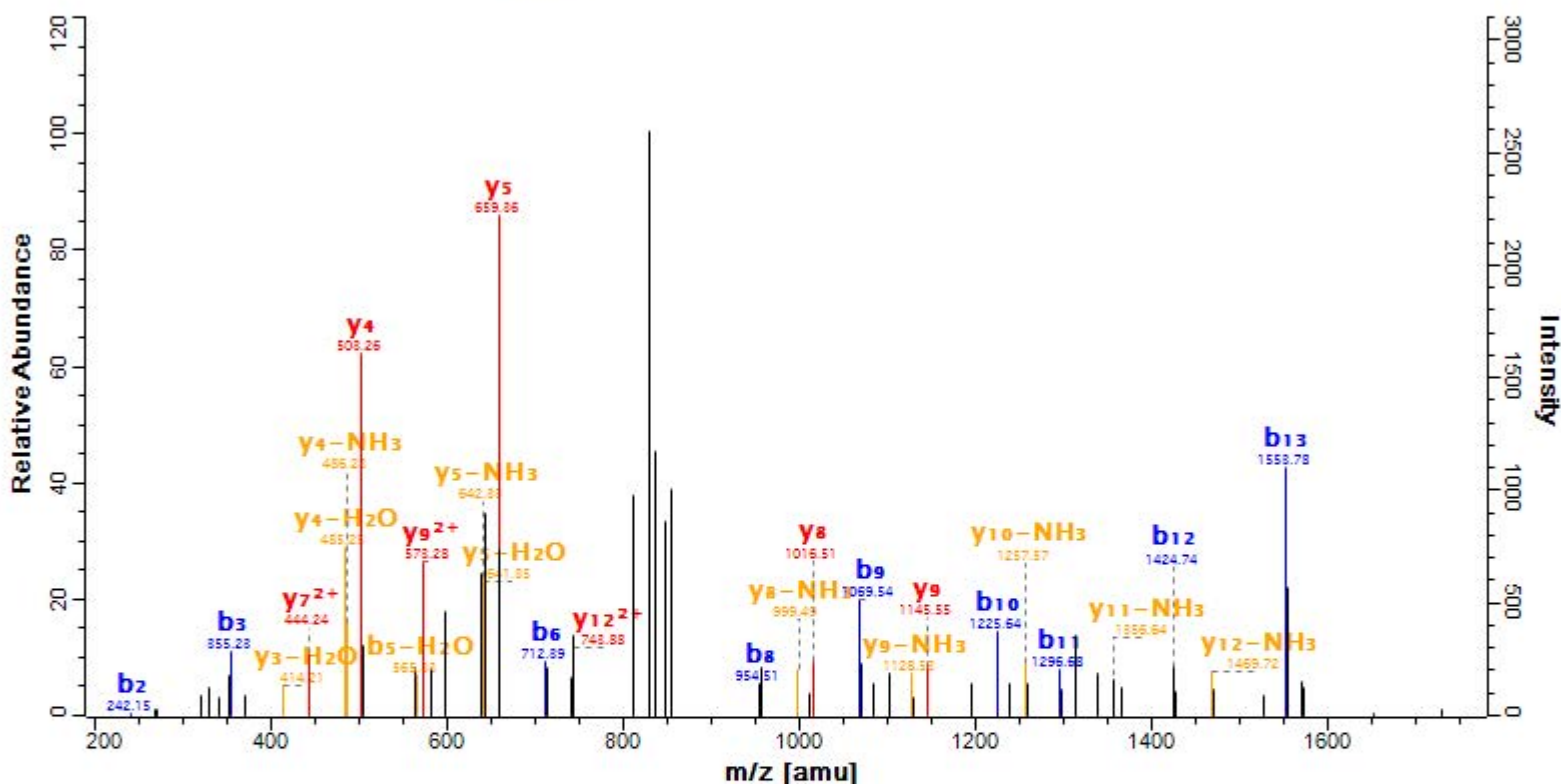

#### precursor information

|                   |                 |
|-------------------|-----------------|
| Mass:             | 1726.88553      |
| m/z:              | 864.45004       |
| Charge:           | 2+              |
| Retentiontime:    | 29.854076385498 |
| Score:            | 132.8572        |
| Mass Error [ppm]: | 0.3222          |
| PEP:              | 7.9644E-09      |
| Precursor Type:   | MULTI           |

#### general information

|                       |           |
|-----------------------|-----------|
| Annotation:           | 12 of 14  |
| AminoAcids Coverage:  | 86 %      |
| Intensity Coverage:   | 42 %      |
| Peak Coverage:        | 34 %      |
| Protein Localisation: | 56 ... 69 |

| b ion     |          |    |     |    | y ion    |           | y <sup>2+</sup> ion |           |
|-----------|----------|----|-----|----|----------|-----------|---------------------|-----------|
| Δ dalton  | mass     |    | seq |    | Δ dalton | mass      | Δ dalton            | mass      |
|           | 114.0913 | 1  | I   | 13 |          |           |                     |           |
| -0.35703  | 242.1499 | 2  | Q   | 12 | 1614.808 |           | 1614.808            |           |
| +0.084194 | 355.234  | 3  | L   | 11 | 1486.75  |           | 743.8784            | +0.230504 |
|           | 454.3024 | 4  | V   | 10 | 1373.666 |           | 1373.666            |           |
|           | 583.345  | 5  | E   | 9  | 1274.597 |           | 1274.597            |           |
| +0.144095 | 712.3876 | 6  | E   | 8  | 1145.555 | +0.056299 | 573.2809            | +0.244848 |
|           | 841.4302 | 7  | E   | 7  | 1016.512 | +0.100052 | 1016.512            |           |
| -0.00203  | 954.5142 | 8  | L   | 6  | 887.4694 |           | 444.2383            | +0.167629 |
| -0.02873  | 1069.541 | 9  | D   | 5  | 774.3853 |           | 774.3853            |           |
| +0.157145 | 1225.642 | 10 | R   | 4  | 659.3583 | +0.003164 | 659.3583            |           |
| -0.05245  | 1296.679 | 11 | A   | 3  | 503.2572 | -0.00156  | 503.2572            |           |
| -0.00861  | 1424.738 | 12 | Q   | 2  | 432.2201 |           | 432.2201            |           |
| -0.03607  | 1553.781 | 13 | E   | 1  | 304.1615 |           | 304.1615            |           |
|           |          | 14 | R   | 0  | 175.119  |           | 175.119             |           |

Scan number 4413 Raw file LNCAP\_Silac\_23F10\_set3\_06  
 Method ITMS; CID Pepti... 86.64

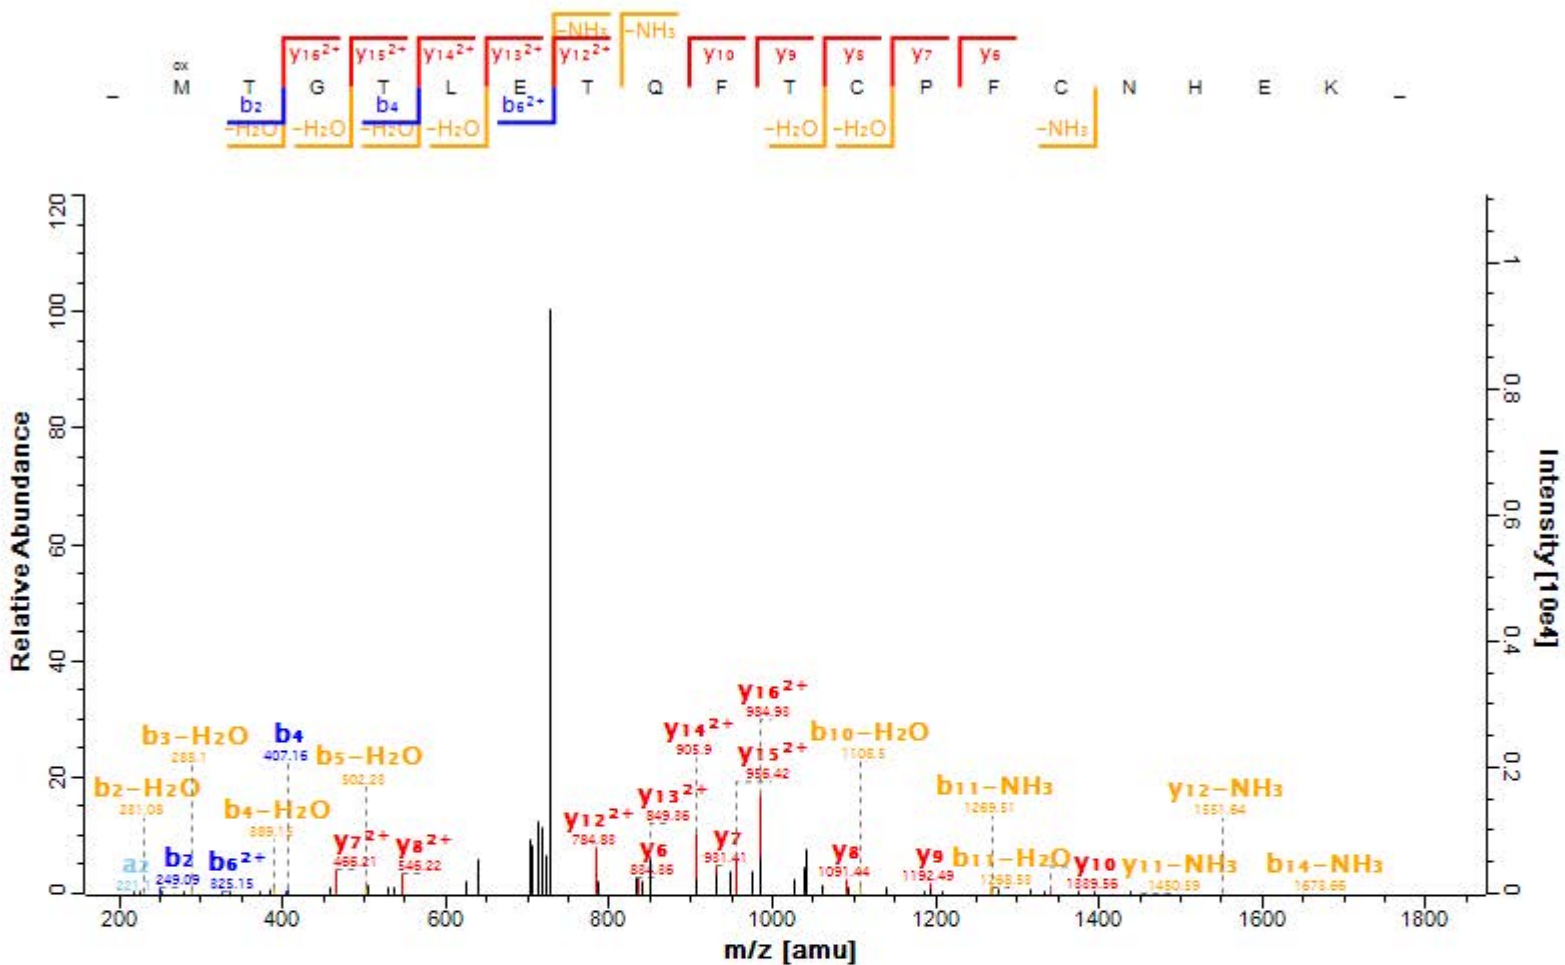

precursor information

|                   |                 |
|-------------------|-----------------|
| Mass:             | 2215.93397      |
| m/z:              | 739.65193       |
| Charge:           | 3+              |
| Retentiontime:    | 32.168930053710 |
| Score:            | 86.64148        |
| Mass Error [ppm]: | 0.14065         |
| PEP:              | 0.00011192      |
| Precursor Type:   | MULTI           |

general information

|                       |           |
|-----------------------|-----------|
| Annotation:           | 13 of 18  |
| AminoAcids Coverage:  | 72 %      |
| Intensity Coverage:   | 24 %      |
| Peak Coverage:        | 25 %      |
| Protein Localisation: | 16 ... 33 |

|       | a ion         | b <sup>2+</sup> ion | b ion         |    | seq |    | y ion         | y <sup>2+</sup> ion |
|-------|---------------|---------------------|---------------|----|-----|----|---------------|---------------------|
|       | Δ dalton mass | Δ dalton mass       | Δ dalton mass |    |     |    | Δ dalton mass | Δ dalton mass       |
|       | 120           | 148                 | 148           | 1  | M   | 17 |               |                     |
| -0.13 | 221.1         | 249.1               | +0.043249.1   | 2  | T   | 16 | 2070          | 2070                |
|       | 278.1         | 306.1               | 306.1         | 3  | G   | 15 | 1969          | 984.9 +0.33         |
|       | 379.2         | 407.2               | +0.085407.2   | 4  | T   | 14 | 1912          | 956.4 +0.15         |
|       | 492.2         | 520.2               | 520.2         | 5  | L   | 13 | 1811          | 905.9 +0.26         |
|       | 621.3         | -0.09 325.1         | 649.3         | 6  | E   | 12 | 1698          | 849.4 +0.03         |
|       | 722.3         | 750.3               | 750.3         | 7  | T   | 11 | 1569          | 784.8 +0.18         |
|       | 850.4         | 878.4               | 878.4         | 8  | Q   | 10 | 1468          | 1468                |
|       | 997.5         | 1025                | 1025          | 9  | F   | 9  | 1340 +0.06    | 1340                |
|       | 1099          | 1127                | 1127          | 10 | T   | 8  | 1192 +0       | 1192                |
|       | 1259          | 1287                | 1287          | 11 | C   | 7  | 1091 -0.06    | 546.2 +0.23         |
|       | 1356          | 1384                | 1384          | 12 | P   | 6  | 931.4 +0.007  | 466.2 +0.17         |
|       | 1503          | 1531                | 1531          | 13 | F   | 5  | 834.4 +0.238  | 834.4               |
|       | 1663          | 1691                | 1691          | 14 | C   | 4  | 687.3         | 687.3               |
|       | 1777          | 1805                | 1805          | 15 | N   | 3  | 527.3         | 527.3               |
|       | 1914          | 1942                | 1942          | 16 | H   | 2  | 413.2         | 413.2               |
|       | 2043          | 2071                | 2071          | 17 | E   | 1  | 276.2         | 276.2               |
|       |               |                     |               | 18 | K   | 0  | 147.1         | 147.1               |

Scan number 4416 Raw file LNCAP\_Silac\_23F10\_set3\_06  
 Method ITMS; CID Peptide 136.01

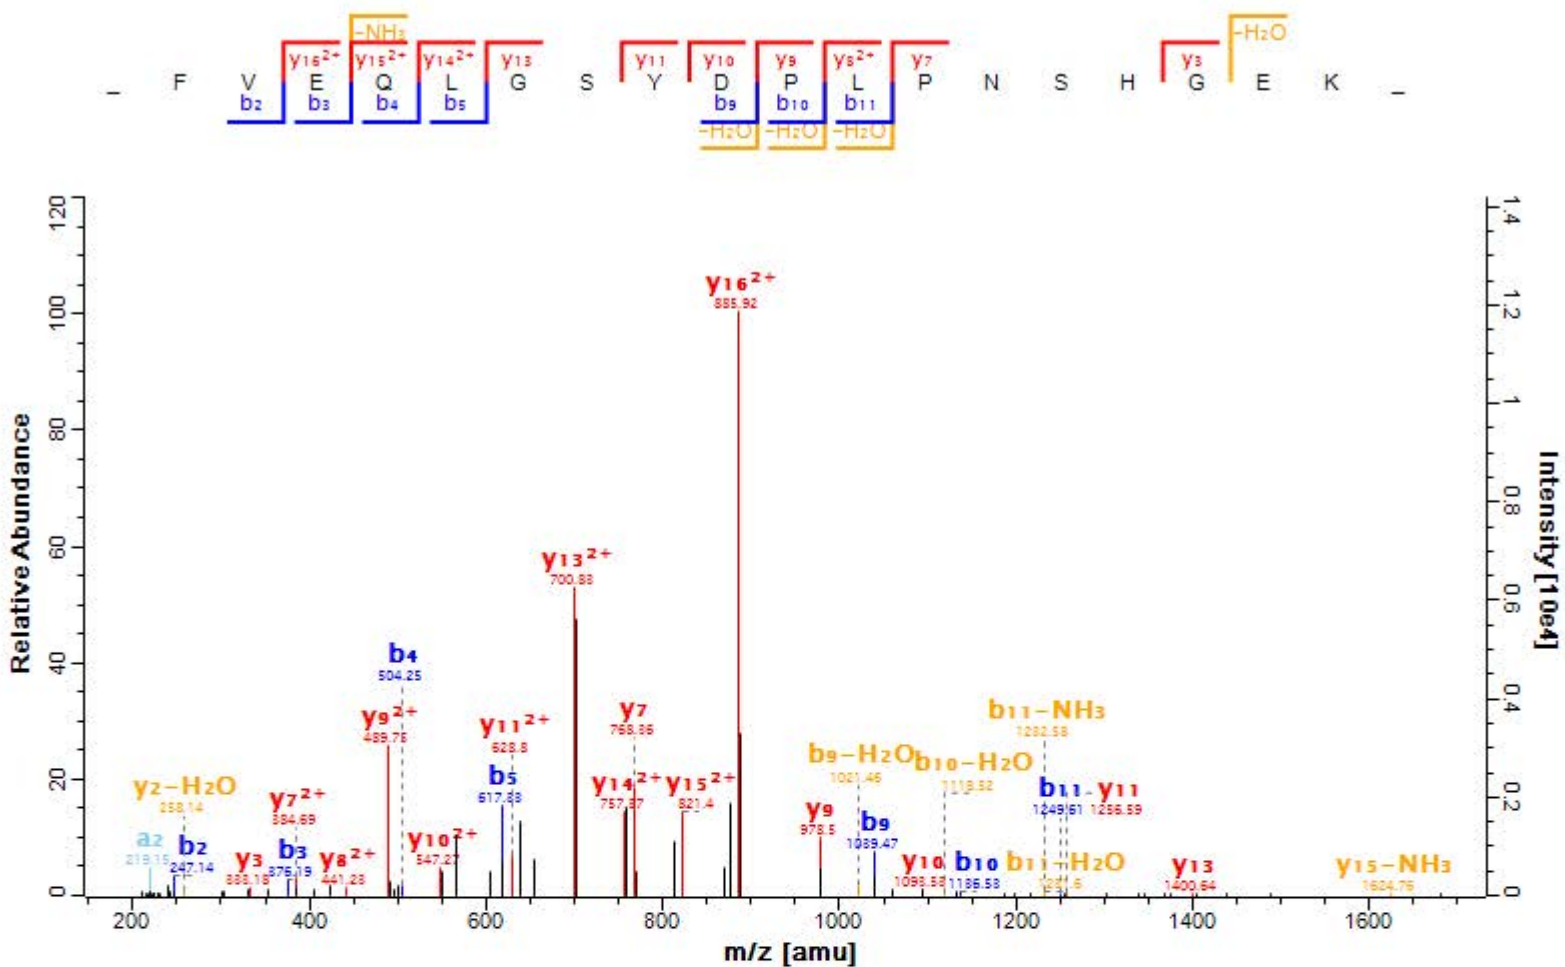

precursor information

|                   |                 |
|-------------------|-----------------|
| Mass:             | 2015.9589       |
| m/z:              | 672.99358       |
| Charge:           | 3+              |
| Retentiontime:    | 32.186531066894 |
| Score:            | 136.014         |
| Mass Error [ppm]: | 0.016002        |
| PEP:              | 3.7891E-17      |
| Precursor Type:   | MULTI           |

general information

|                       |           |
|-----------------------|-----------|
| Annotation:           | 12 of 18  |
| AminoAcids Coverage:  | 67 %      |
| Intensity Coverage:   | 56 %      |
| Peak Coverage:        | 27 %      |
| Protein Localisation: | 47 ... 64 |

| a ion    |        | b ion    |        | seq |   |    | y ion    |         | y <sup>2+</sup> ion |         |
|----------|--------|----------|--------|-----|---|----|----------|---------|---------------------|---------|
| Δ dalton | mass   | Δ dalton | mass   |     |   |    | Δ dalton | mass    | Δ dalton            | mass    |
|          | 120.08 |          | 148.08 | 1   | F | 17 |          |         |                     |         |
| -0.049   | 219.15 | -0.09    | 247.14 | 2   | V | 16 | 1869.9   |         | 1869.9              |         |
|          | 348.19 | +0.1086  | 376.19 | 3   | E | 15 | 1770.8   |         | 885.92              | +0.2406 |
|          | 476.25 | +0.0122  | 504.25 | 4   | Q | 14 | 1641.8   |         | 821.4               | +0.3283 |
|          | 589.33 | -0.031   | 617.33 | 5   | L | 13 | 1513.7   |         | 757.37              | +0.0296 |
|          | 646.36 |          | 674.35 | 6   | G | 12 | 1400.6   | -0.061  | 700.83              | +0.0442 |
|          | 733.39 |          | 761.38 | 7   | S | 11 | 1343.6   |         | 1343.6              |         |
|          | 896.45 |          | 924.45 | 8   | Y | 10 | 1256.6   | +0.0455 | 628.8               | -0.053  |
|          | 1011.5 | -0.074   | 1039.5 | 9   | D | 9  | 1093.5   | -0.048  | 547.27              | +0.1973 |
|          | 1108.5 | +0.111   | 1136.5 | 10  | P | 8  | 978.5    | +0.0072 | 489.75              | +0.2116 |
|          | 1221.6 | +0.4118  | 1249.6 | 11  | L | 7  | 881.45   |         | 441.23              | +0.2413 |
|          | 1318.7 |          | 1346.7 | 12  | P | 6  | 768.36   | +0.0284 | 384.69              | +0.0064 |
|          | 1432.7 |          | 1460.7 | 13  | N | 5  | 671.31   |         | 671.31              |         |
|          | 1519.7 |          | 1547.7 | 14  | S | 4  | 557.27   |         | 557.27              |         |
|          | 1656.8 |          | 1684.8 | 15  | H | 3  | 470.24   |         | 470.24              |         |
|          | 1713.8 |          | 1741.8 | 16  | G | 2  | 333.18   | +0.0444 | 333.18              |         |
|          | 1842.9 |          | 1870.9 | 17  | E | 1  | 276.16   |         | 276.16              |         |
|          |        |          |        | 18  | K | 0  | 147.11   |         | 147.11              |         |

Scan number 4594 Raw file LNCAP\_Silac\_23F10\_set3\_06  
 Method ITMS; CID Pepti... 81.63

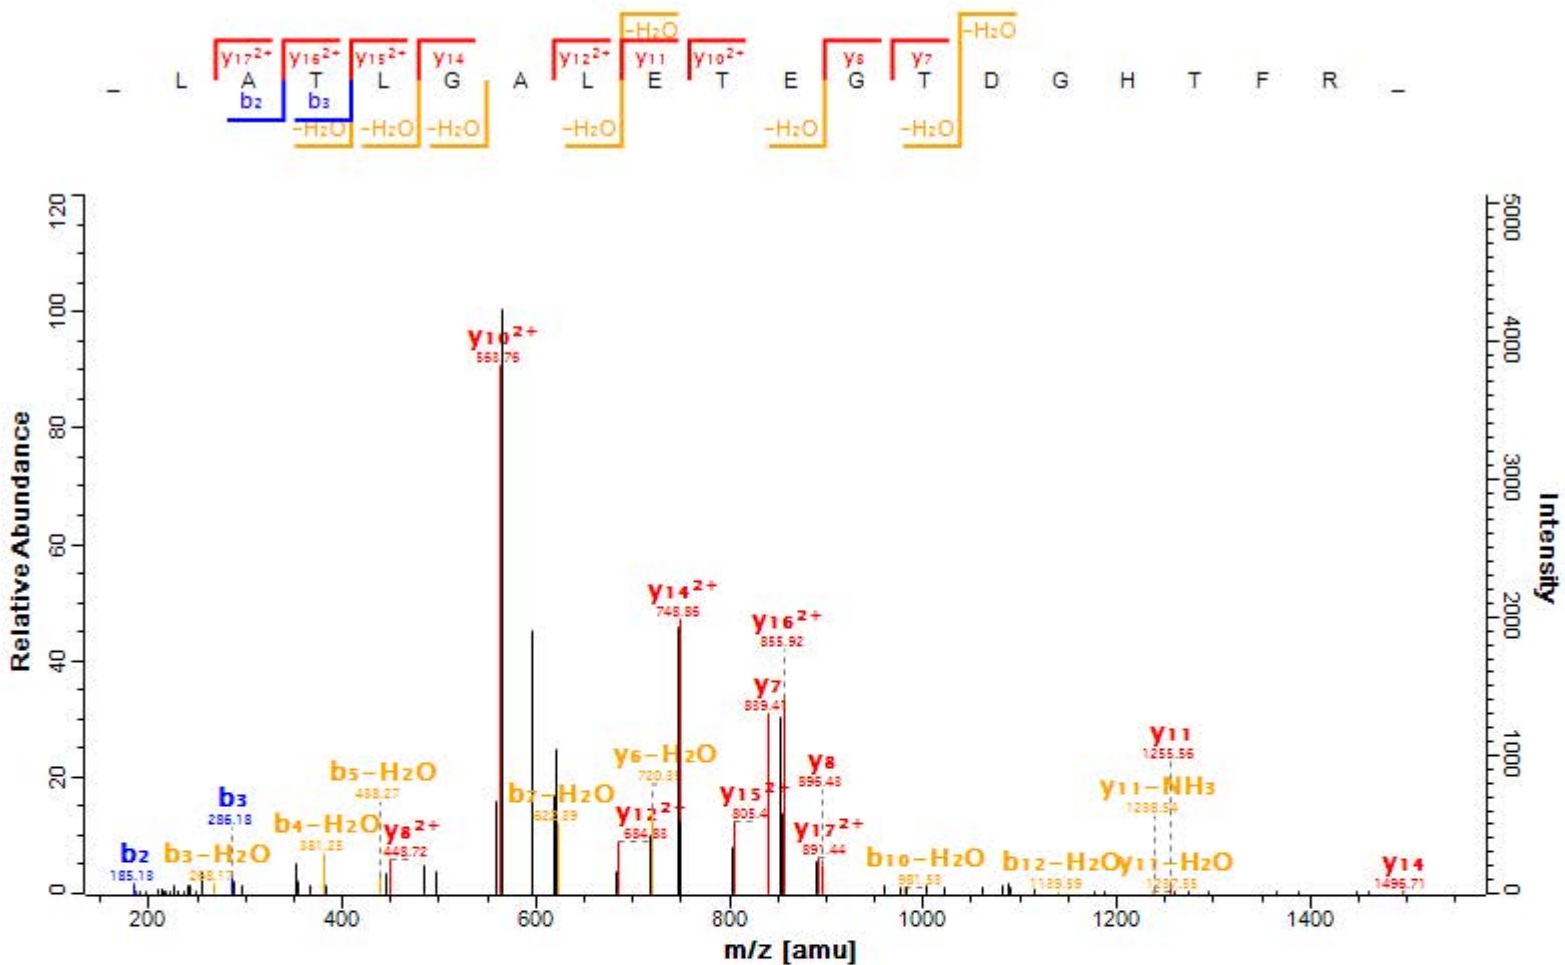

precursor information

|                   |                 |
|-------------------|-----------------|
| Mass:             | 1887.93028      |
| m/z:              | 630.31737       |
| Charge:           | 3+              |
| Retentiontime:    | 33.140731811523 |
| Score:            | 81.63164        |
| Mass Error [ppm]: | -1.2529         |
| PEP:              | 0.00014015      |
| Precursor Type:   | MULTI           |

general information

|                       |             |
|-----------------------|-------------|
| Annotation:           | 12 of 18    |
| AminoAcids Coverage:  | 67 %        |
| Intensity Coverage:   | 39 %        |
| Peak Coverage:        | 23 %        |
| Protein Localisation: | 252 ... 269 |

| b ion    |          |    |     |    | y ion    |           | y <sup>2+</sup> ion |           |
|----------|----------|----|-----|----|----------|-----------|---------------------|-----------|
| Δ dalton | mass     |    | seq |    | Δ dalton | mass      | Δ dalton            | mass      |
|          | 114.0913 | 1  | L   | 17 |          |           |                     |           |
| +0.01829 | 185.1285 | 2  | A   | 16 | 1781.876 |           | 891.4416            | -0.03935  |
| -0.22807 | 286.1761 | 3  | T   | 15 | 1710.839 |           | 855.9231            | +0.259965 |
|          | 399.2602 | 4  | L   | 14 | 1609.791 |           | 805.3992            | -0.042    |
|          | 456.2817 | 5  | G   | 13 | 1496.707 | -0.33031  | 748.8572            | -0.01547  |
|          | 527.3188 | 6  | A   | 12 | 1439.686 |           | 1439.686            |           |
|          | 640.4028 | 7  | L   | 11 | 1368.649 |           | 684.8279            | +0.010154 |
|          | 769.4454 | 8  | E   | 10 | 1255.564 | -0.00566  | 1255.564            |           |
|          | 870.4931 | 9  | T   | 9  | 1126.522 |           | 563.7646            | -0.25562  |
|          | 999.5357 | 10 | E   | 8  | 1025.474 |           | 1025.474            |           |
|          | 1056.557 | 11 | G   | 7  | 896.4316 | -0.23614  | 448.7195            | +0.277493 |
|          | 1157.605 | 12 | T   | 6  | 839.4102 | +0.097154 | 839.4102            |           |
|          | 1272.632 | 13 | D   | 5  | 738.3625 |           | 738.3625            |           |
|          | 1329.653 | 14 | G   | 4  | 623.3355 |           | 623.3355            |           |
|          | 1466.712 | 15 | H   | 3  | 566.3141 |           | 566.3141            |           |
|          | 1567.76  | 16 | T   | 2  | 429.2552 |           | 429.2552            |           |
|          | 1714.828 | 17 | F   | 1  | 328.2075 |           | 328.2075            |           |
|          |          | 18 | R   | 0  | 181.1391 |           | 181.1391            |           |

Scan number 4616 Raw file LNCAP\_Silac\_23F10\_set3\_06  
 Method ITMS; CID Pepti... 240.11

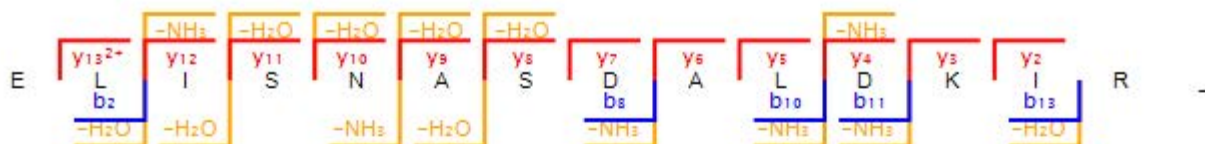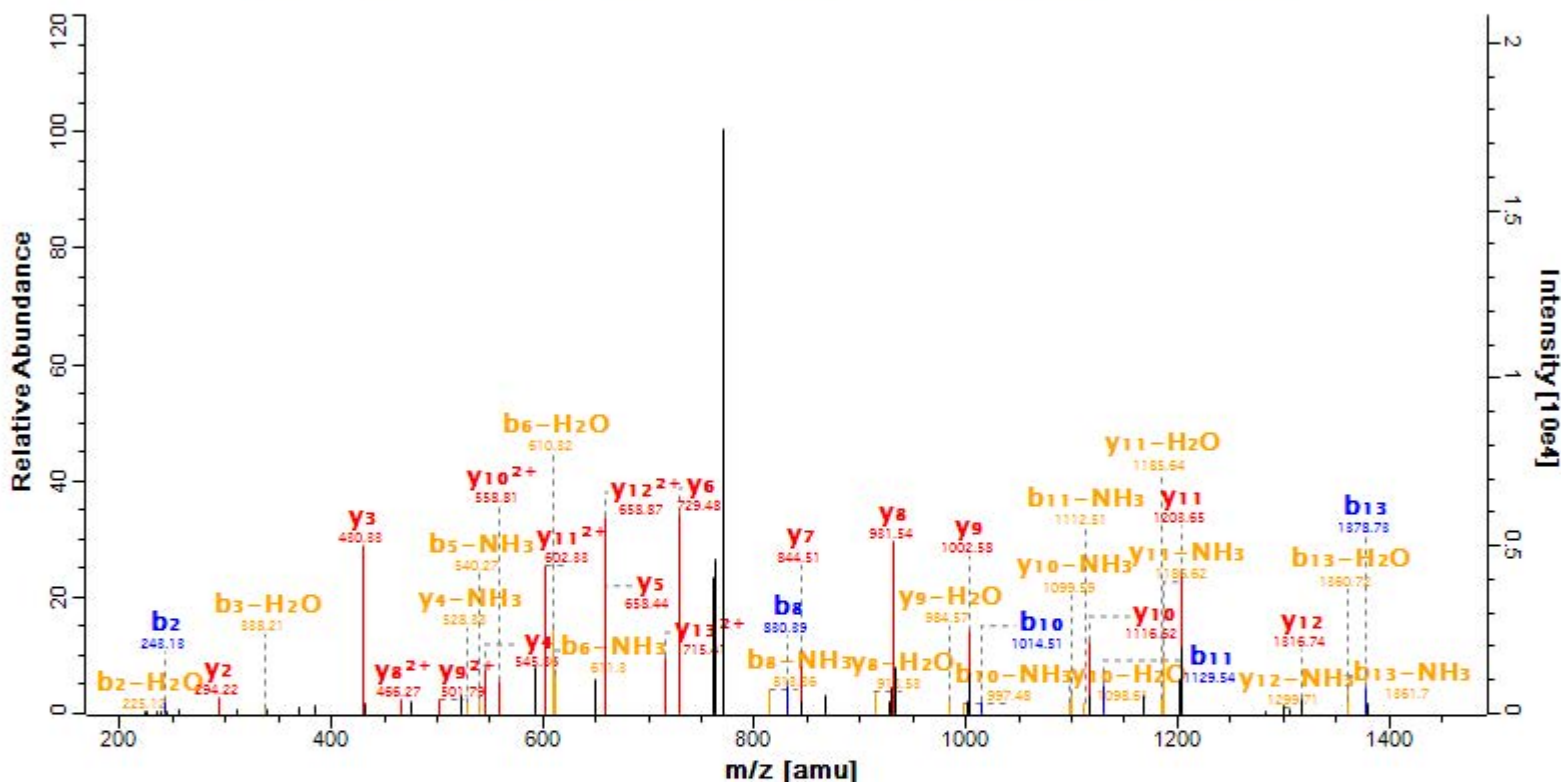

#### precursor information

|                   |                 |
|-------------------|-----------------|
| Mass:             | 1543.82064      |
| m/z:              | 772.9176        |
| Charge:           | 2+              |
| Retentiontime:    | 33.263217926025 |
| Score:            | 240.1124        |
| Mass Error [ppm]: | 0.034688        |
| PEP:              | 1.7242E-41      |
| Precursor Type:   | MULTI           |

#### general information

|                       |           |
|-----------------------|-----------|
| Annotation:           | 12 of 14  |
| AminoAcids Coverage:  | 86 %      |
| Intensity Coverage:   | 54 %      |
| Peak Coverage:        | 46 %      |
| Protein Localisation: | 42 ... 55 |

| b ion     |          |     |   | y ion    |          | y <sup>2+</sup> ion |          |           |
|-----------|----------|-----|---|----------|----------|---------------------|----------|-----------|
| Δ dalton  | mass     | seq |   | Δ dalton | mass     | Δ dalton            | mass     |           |
|           | 130.0499 | 1   | E | 13       |          |                     |          |           |
| +0.022561 | 243.1339 | 2   | L | 12       | 1429.82  | 715.4134            | +0.28035 |           |
|           | 356.218  | 3   | I | 11       | 1316.736 | -0.01532            | 658.8714 | +0.203363 |
|           | 443.25   | 4   | S | 10       | 1203.651 | +0.016988           | 602.3294 | +0.233677 |
|           | 557.293  | 5   | N | 9        | 1116.619 | -0.02264            | 558.8134 | +0.222591 |
|           | 628.3301 | 6   | A | 8        | 1002.577 | -0.0228             | 501.7919 | +0.312842 |
|           | 715.3621 | 7   | S | 7        | 931.5394 | +0.020171           | 466.2733 | +0.039956 |
| -0.02216  | 830.389  | 8   | D | 6        | 844.5074 | +0.002517           | 844.5074 |           |
|           | 901.4262 | 9   | A | 5        | 729.4804 | +0.056254           | 729.4804 |           |
| +0.097022 | 1014.51  | 10  | L | 4        | 658.4433 | -0.1664             | 658.4433 |           |
| -0.16021  | 1129.537 | 11  | D | 3        | 545.3593 | +0.005984           | 545.3593 |           |
|           | 1265.646 | 12  | K | 2        | 430.3323 | +0.027068           | 430.3323 |           |
| +0.001548 | 1378.73  | 13  | I | 1        | 294.2231 | +0.020202           | 294.2231 |           |
|           |          | 14  | R | 0        | 181.1391 |                     | 181.1391 |           |

Scan number 5485 Raw file LNCAP\_Silac\_23F10\_set3\_06  
 Method ITMS; CID Pepti... 249.32

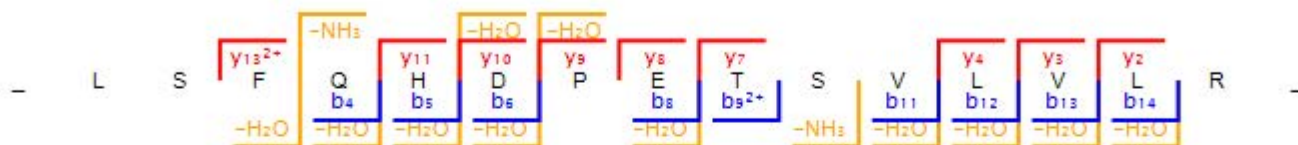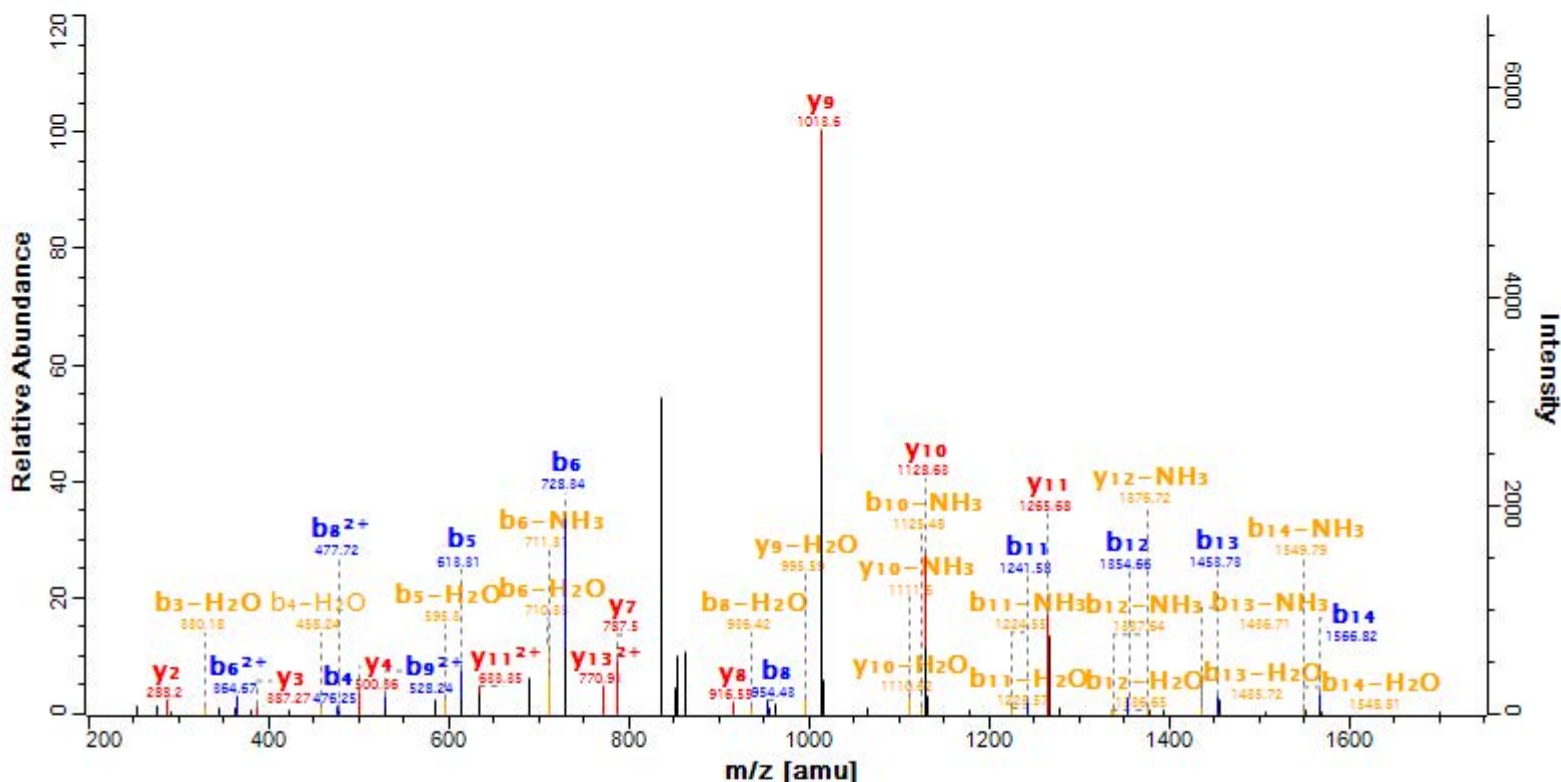

#### precursor information

|                   |                 |
|-------------------|-----------------|
| Mass:             | 1739.92073      |
| m/z:              | 870.96764       |
| Charge:           | 2+              |
| Retentiontime:    | 38.070663452148 |
| Score:            | 249.3229        |
| Mass Error [ppm]: | 0.055479        |
| PEP:              | 3.3846E-57      |
| Precursor Type:   | MULTI           |

| b <sup>2+</sup> ion |        | b ion    |        | seq |   |    | y ion    |         | y <sup>2+</sup> ion |         |
|---------------------|--------|----------|--------|-----|---|----|----------|---------|---------------------|---------|
| Δ dalton            | mass   | Δ dalton | mass   |     |   |    | Δ dalton | mass    | Δ dalton            | mass    |
|                     | 114.09 |          | 114.09 | 1   | L | 14 |          |         |                     |         |
|                     | 201.12 |          | 201.12 | 2   | S | 13 | 1627.8   |         | 1627.8              |         |
|                     | 348.19 |          | 348.19 | 3   | F | 12 | 1540.8   |         | 770.91              | +0.2651 |
|                     | 476.25 | +0.1681  | 476.25 | 4   | Q | 11 | 1393.7   |         | 1393.7              |         |
|                     | 613.31 | +0.124   | 613.31 | 5   | H | 10 | 1265.7   | -0.035  | 633.35              | +0.0758 |
| -0.394              | 364.67 | +0.039   | 728.34 | 6   | D | 9  | 1128.6   | -0.077  | 1128.6              |         |
|                     | 825.39 |          | 825.39 | 7   | P | 8  | 1013.6   | -0.018  | 1013.6              |         |
| -0.408              | 477.72 | +0.0432  | 954.43 | 8   | E | 7  | 916.55   | +0.1969 | 916.55              |         |
| +0.0005             | 528.24 |          | 1055.5 | 9   | T | 6  | 787.5    | -0.006  | 787.5               |         |
|                     | 1142.5 |          | 1142.5 | 10  | S | 5  | 686.46   |         | 686.46              |         |
|                     | 1241.6 | +0.0556  | 1241.6 | 11  | V | 4  | 599.42   |         | 599.42              |         |
|                     | 1354.7 | -0.08    | 1354.7 | 12  | L | 3  | 500.36   | +0.0163 | 500.36              |         |
|                     | 1453.7 | -0.1     | 1453.7 | 13  | V | 2  | 387.27   | +0.1696 | 387.27              |         |
|                     | 1566.8 | -0.074   | 1566.8 | 14  | L | 1  | 288.2    | -0.078  | 288.2               |         |
|                     |        |          |        | 15  | R | 0  | 175.12   |         | 175.12              |         |

#### general information

|                       |             |
|-----------------------|-------------|
| Annotation:           | 12 of 15    |
| AminoAcids Coverage:  | 80 %        |
| Intensity Coverage:   | 56 %        |
| Peak Coverage:        | 49 %        |
| Protein Localisation: | 966 ... 980 |

Scan number 6108 Raw file LNCAP\_Silac\_23F10\_set3\_06  
 Method ITMS; CID Pepti... 78.24

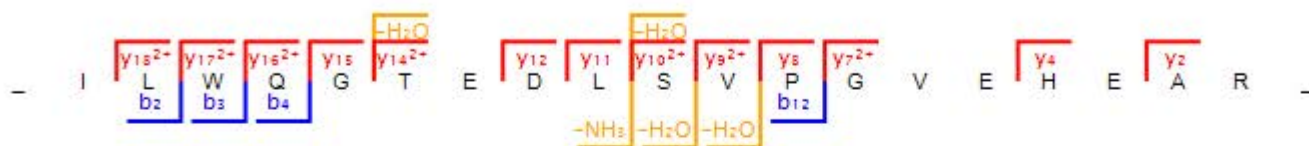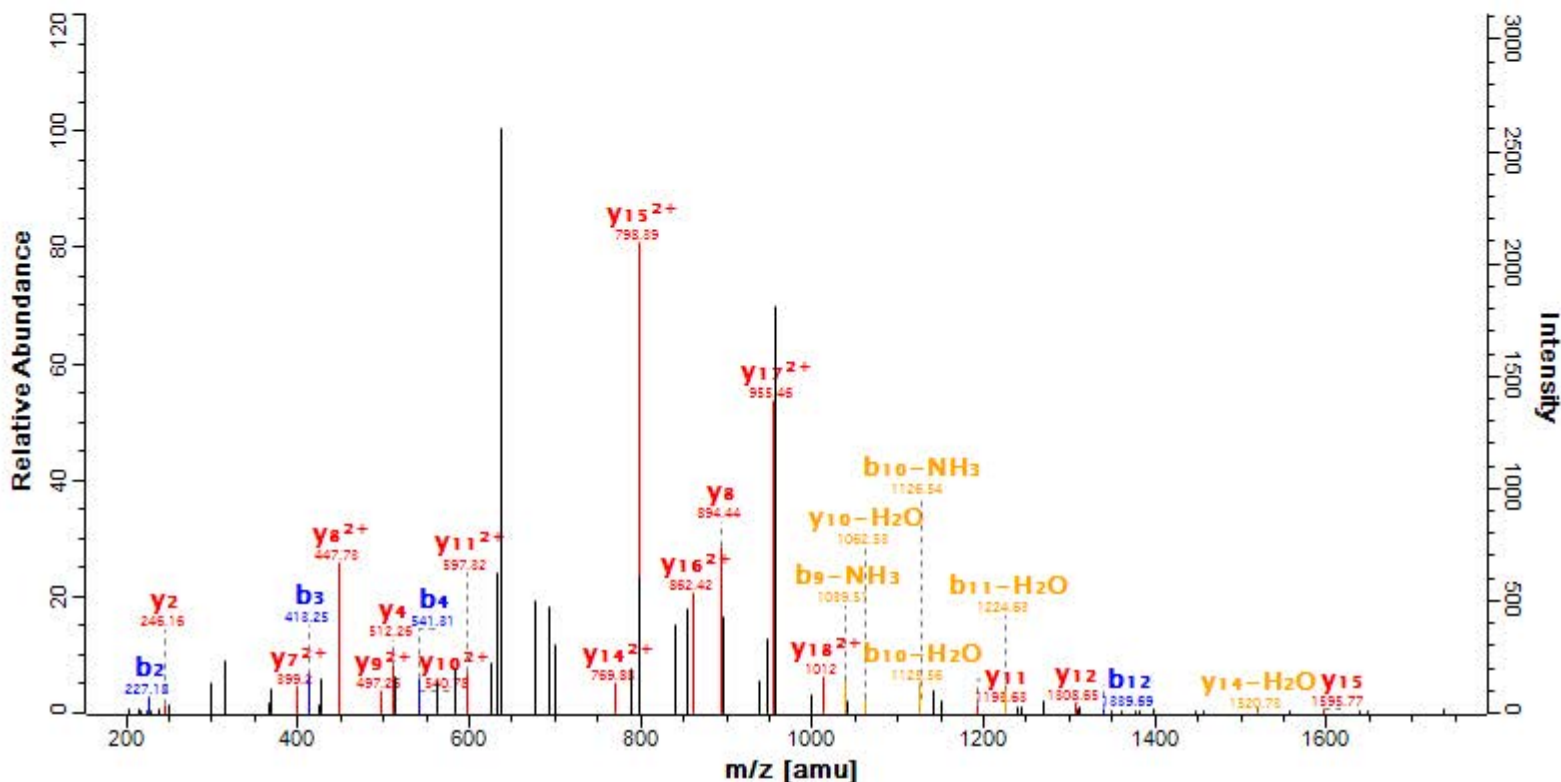

precursor information

|                   |                 |
|-------------------|-----------------|
| Mass:             | 2135.06561      |
| m/z:              | 712.69581       |
| Charge:           | 3+              |
| Retentiontime:    | 41.637187957763 |
| Score:            | 78.24441        |
| Mass Error [ppm]: | 0.4099          |
| PEP:              | 0.00016193      |
| Precursor Type:   | MULTI           |

general information

|                       |           |
|-----------------------|-----------|
| Annotation:           | 13 of 19  |
| AminoAcids Coverage:  | 68 %      |
| Intensity Coverage:   | 37 %      |
| Peak Coverage:        | 27 %      |
| Protein Localisation: | 30 ... 48 |

| b ion     |          |    |     |    | y ion    |           | y <sup>2+</sup> ion |           |
|-----------|----------|----|-----|----|----------|-----------|---------------------|-----------|
| Δ dalton  | mass     |    | seq |    | Δ dalton | mass      | Δ dalton            | mass      |
|           | 114.0913 | 1  | I   | 18 |          |           |                     |           |
| -0.03388  | 227.1754 | 2  | L   | 17 | 2022.988 |           | 1011.998            | +0.289682 |
| +0.306623 | 413.2547 | 3  | W   | 16 | 1909.904 |           | 955.4556            | +0.025623 |
| +0.117796 | 541.3133 | 4  | Q   | 15 | 1723.825 |           | 862.4159            | +0.151827 |
|           | 598.3348 | 5  | G   | 14 | 1595.766 | -0.02893  | 798.3866            | +0.309412 |
|           | 699.3824 | 6  | T   | 13 | 1538.745 |           | 769.8759            | +0.085891 |
|           | 828.425  | 7  | E   | 12 | 1437.697 |           | 1437.697            |           |
|           | 943.452  | 8  | D   | 11 | 1308.654 | -0.30941  | 1308.654            |           |
|           | 1056.536 | 9  | L   | 10 | 1193.627 | +0.145027 | 597.3173            | +0.234158 |
|           | 1143.568 | 10 | S   | 9  | 1080.543 |           | 540.7753            | -0.06243  |
|           | 1242.636 | 11 | V   | 8  | 993.5112 |           | 497.2592            | -0.00552  |
| +0.007412 | 1339.689 | 12 | P   | 7  | 894.4428 | +0.055974 | 447.725             | +0.231502 |
|           | 1396.711 | 13 | G   | 6  | 797.39   |           | 399.1987            | +0.069468 |
|           | 1495.779 | 14 | V   | 5  | 740.3686 |           | 740.3686            |           |
|           | 1624.822 | 15 | E   | 4  | 641.3002 |           | 641.3002            |           |
|           | 1761.881 | 16 | H   | 3  | 512.2576 | +0.030149 | 512.2576            |           |
|           | 1890.923 | 17 | E   | 2  | 375.1987 |           | 375.1987            |           |
|           | 1961.96  | 18 | A   | 1  | 246.1561 | +0.137361 | 246.1561            |           |
|           |          | 19 | R   | 0  | 175.119  |           | 175.119             |           |



Scan number 6710 Raw file LNCAP\_Silac\_23F10\_set3\_06  
 Method ITMS; CID Pepti... 86

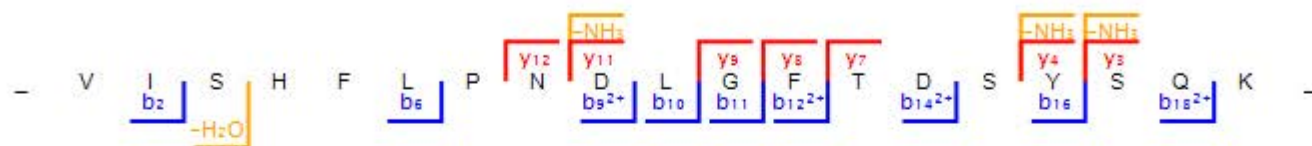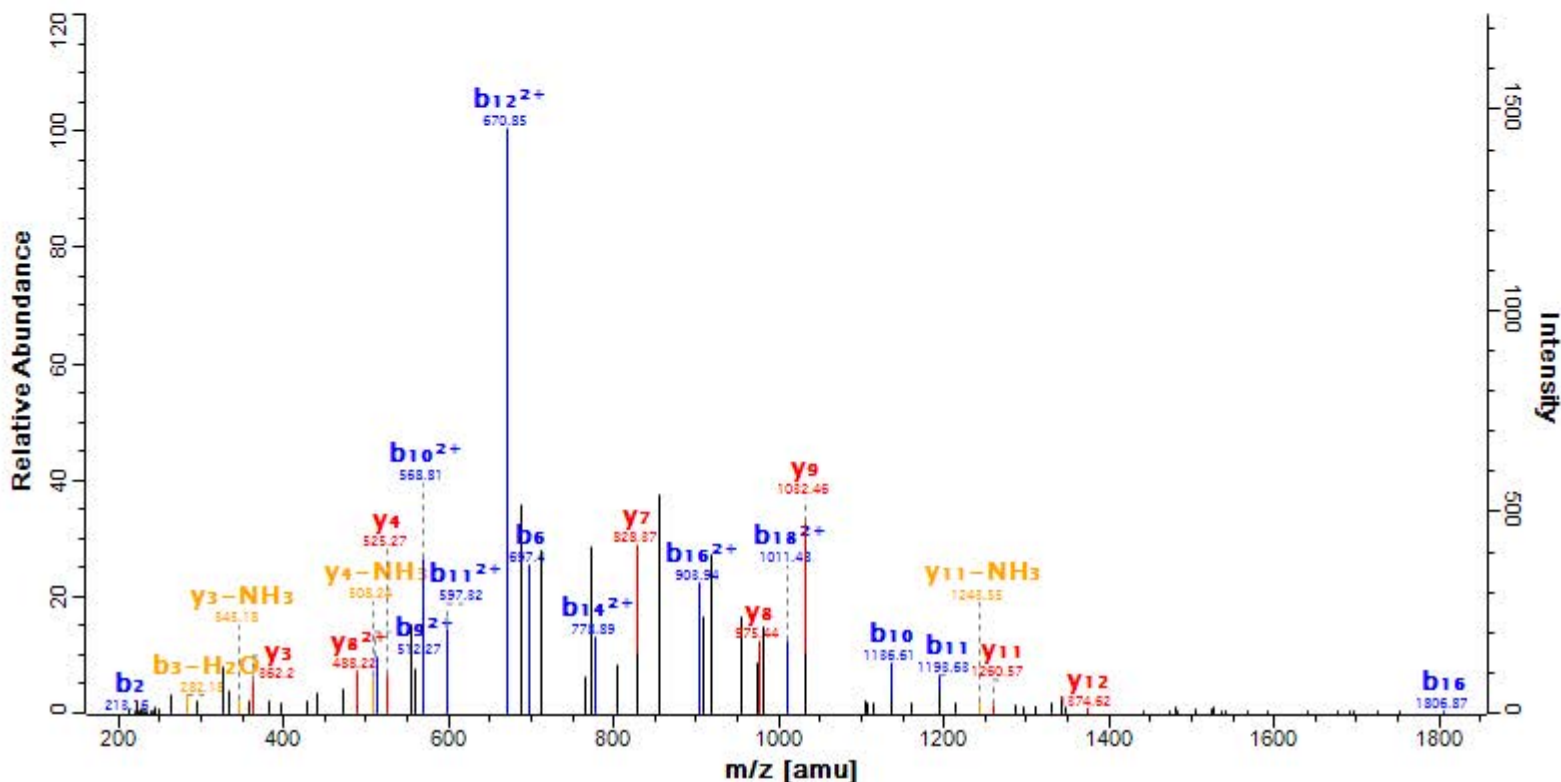

precursor information

|                   |                 |
|-------------------|-----------------|
| Mass:             | 2167.06013      |
| m/z:              | 723.36065       |
| Charge:           | 3+              |
| Retentiontime:    | 45.106575012207 |
| Score:            | 86.00483        |
| Mass Error [ppm]: | 0.71218         |
| PEP:              | 3.7085E-05      |
| Precursor Type:   | MULTI           |

general information

|                       |             |
|-----------------------|-------------|
| Annotation:           | 13 of 19    |
| AminoAcids Coverage:  | 68 %        |
| Intensity Coverage:   | 45 %        |
| Peak Coverage:        | 22 %        |
| Protein Localisation: | 156 ... 174 |

| b <sup>2+</sup> ion |        | b ion    |        | seq |   |    | y ion    |         | y <sup>2+</sup> ion |         |
|---------------------|--------|----------|--------|-----|---|----|----------|---------|---------------------|---------|
| Δ dalton            | mass   | Δ dalton | mass   |     |   |    | Δ dalton | mass    | Δ dalton            | mass    |
|                     | 100.08 |          | 100.08 | 1   | V | 18 |          |         |                     |         |
|                     | 213.16 | -0.017   | 213.16 | 2   | I | 17 | 2069     |         | 2069                |         |
|                     | 300.19 |          | 300.19 | 3   | S | 16 | 1955.9   |         | 1955.9              |         |
|                     | 437.25 |          | 437.25 | 4   | H | 15 | 1868.9   |         | 1868.9              |         |
|                     | 584.32 |          | 584.32 | 5   | F | 14 | 1731.8   |         | 1731.8              |         |
|                     | 697.4  | -0.075   | 697.4  | 6   | L | 13 | 1584.8   |         | 1584.8              |         |
|                     | 794.46 |          | 794.46 | 7   | P | 12 | 1471.7   |         | 1471.7              |         |
|                     | 908.5  |          | 908.5  | 8   | N | 11 | 1374.6   | +0.0616 | 1374.6              |         |
| +0.18785            | 112.27 |          | 1023.5 | 9   | D | 10 | 1260.6   | -0.208  | 1260.6              |         |
| +0.1334             | 568.81 | -0.045   | 1136.6 | 10  | L | 9  | 1145.5   |         | 1145.5              |         |
| +0.178              | 597.32 | +0.0309  | 1193.6 | 11  | G | 8  | 1032.5   | +0.0513 | 1032.5              |         |
| +0.2211             | 670.85 |          | 1340.7 | 12  | F | 7  | 975.44   | -0.052  | 488.22              | +0.2935 |
|                     | 1441.7 |          | 1441.7 | 13  | T | 6  | 828.37   | -0.057  | 828.37              |         |
| -0.007              | 778.89 |          | 1556.8 | 14  | D | 5  | 727.33   |         | 727.33              |         |
|                     | 1643.8 |          | 1643.8 | 15  | S | 4  | 612.3    |         | 612.3               |         |
| +0.232              | 903.94 | -0.216   | 1806.9 | 16  | Y | 3  | 525.27   | +0.1414 | 525.27              |         |
|                     | 1893.9 |          | 1893.9 | 17  | S | 2  | 362.2    | +0.1366 | 362.2               |         |
| -0.028              | 1011.5 |          | 2022   | 18  | Q | 1  | 275.17   |         | 275.17              |         |
|                     |        |          |        | 19  | K | 0  | 147.11   |         | 147.11              |         |

Scan number 6946 Raw file LNCAP\_Silac\_23F10\_set3\_06  
 Method ITMS; CID Pepti... 65.47

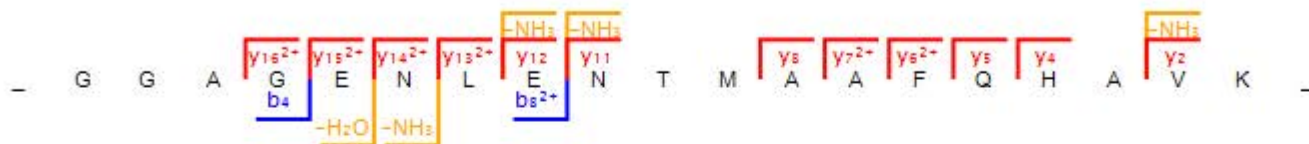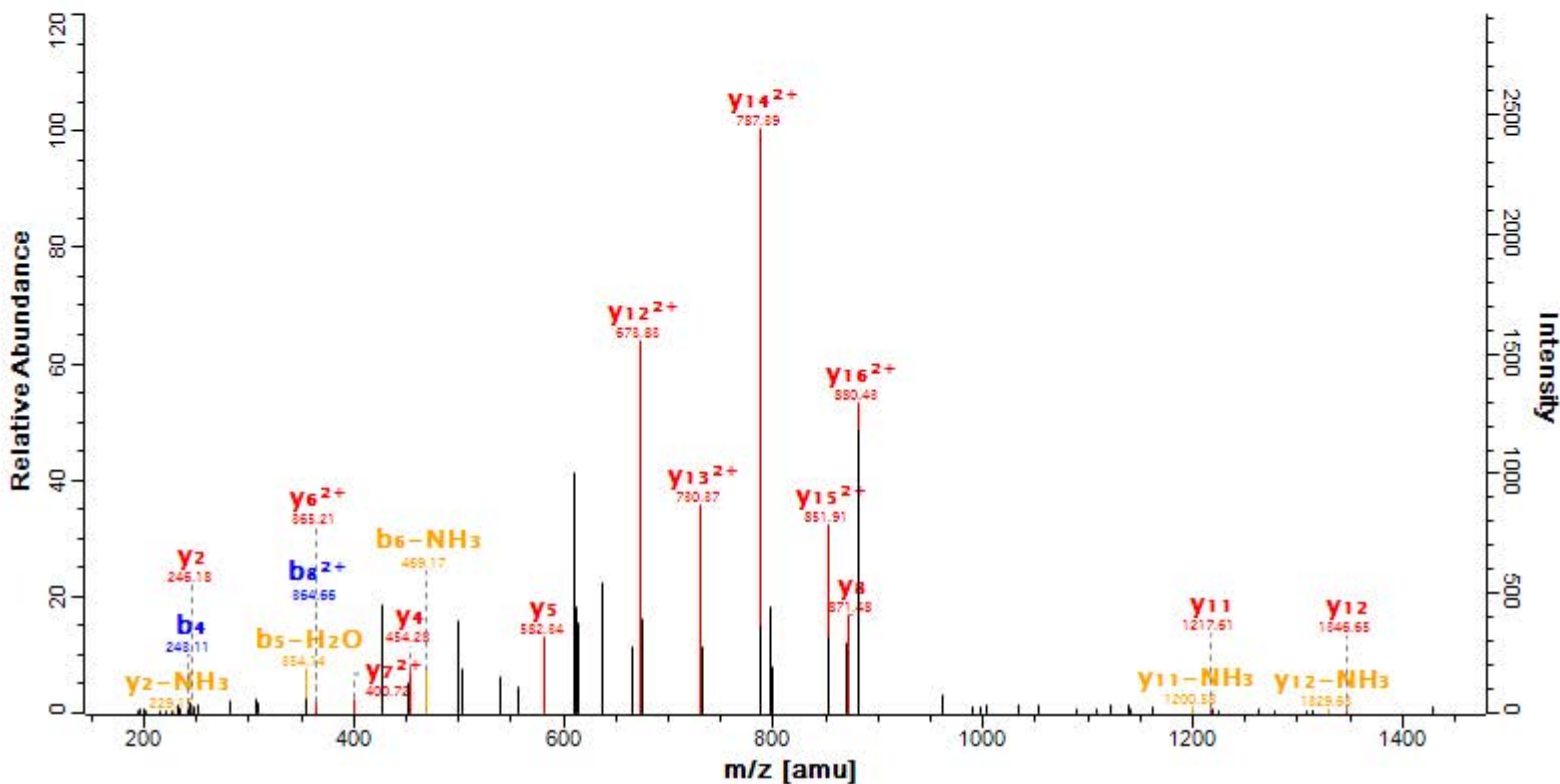

**precursor information**

|                   |                 |
|-------------------|-----------------|
| Mass:             | 1943.916        |
| m/z:              | 648.97928       |
| Charge:           | 3+              |
| Retentiontime:    | 46.484432220459 |
| Score:            | 65.467          |
| Mass Error [ppm]: | 0.022735        |
| PEP:              | 0.00098128      |
| Precursor Type:   | MULTI           |

| b <sup>2+</sup> ion |        | b ion    |        |    |     |    | y ion    |         | y <sup>2+</sup> ion |         |
|---------------------|--------|----------|--------|----|-----|----|----------|---------|---------------------|---------|
| Δ dalton            | mass   | Δ dalton | mass   |    | seq |    | Δ dalton | mass    | Δ dalton            | mass    |
|                     | 58.029 |          | 58.029 | 1  | G   | 18 |          |         |                     |         |
|                     | 115.05 |          | 115.05 | 2  | G   | 17 | 1887.9   |         | 1887.9              |         |
|                     | 186.09 |          | 186.09 | 3  | A   | 16 | 1830.9   |         | 1830.9              |         |
|                     | 243.11 | +0.1355  | 243.11 | 4  | G   | 15 | 1759.8   |         | 880.43              | +0.0093 |
|                     | 372.15 |          | 372.15 | 5  | E   | 14 | 1702.8   |         | 851.91              | +0.2669 |
|                     | 486.19 |          | 486.19 | 6  | N   | 13 | 1573.8   |         | 787.39              | +0.2636 |
|                     | 599.28 |          | 599.28 | 7  | L   | 12 | 1459.7   |         | 730.37              | +0.2536 |
| -0.118              | 364.66 |          | 728.32 | 8  | E   | 11 | 1346.7   | +0.3287 | 673.83              | +0.1813 |
|                     | 842.36 |          | 842.36 | 9  | N   | 10 | 1217.6   | -0.041  | 1217.6              |         |
|                     | 943.41 |          | 943.41 | 10 | T   | 9  | 1103.6   |         | 1103.6              |         |
|                     | 1074.5 |          | 1074.5 | 11 | M   | 8  | 1002.5   |         | 1002.5              |         |
|                     | 1145.5 |          | 1145.5 | 12 | A   | 7  | 871.48   | +0.1188 | 871.48              |         |
|                     | 1216.5 |          | 1216.5 | 13 | A   | 6  | 800.44   |         | 400.72              | -0.463  |
|                     | 1363.6 |          | 1363.6 | 14 | F   | 5  | 729.4    |         | 365.21              | -0.01   |
|                     | 1491.7 |          | 1491.7 | 15 | Q   | 4  | 582.34   | -0.034  | 582.34              |         |
|                     | 1628.7 |          | 1628.7 | 16 | H   | 3  | 454.28   | +0.0512 | 454.28              |         |
|                     | 1699.7 |          | 1699.7 | 17 | A   | 2  | 317.22   |         | 317.22              |         |
|                     | 1798.8 |          | 1798.8 | 18 | V   | 1  | 246.18   | +0.0829 | 246.18              |         |
|                     |        |          |        | 19 | K   | 0  | 147.11   |         | 147.11              |         |

**general information**

|                       |           |
|-----------------------|-----------|
| Annotation:           | 12 of 19  |
| AminoAcids Coverage:  | 63 %      |
| Intensity Coverage:   | 49 %      |
| Peak Coverage:        | 24 %      |
| Protein Localisation: | 47 ... 65 |

Scan number 7001 Raw file LNCAP\_Silac\_23F10\_set3\_06  
 Method ITMS: CID Pepti... 105.19

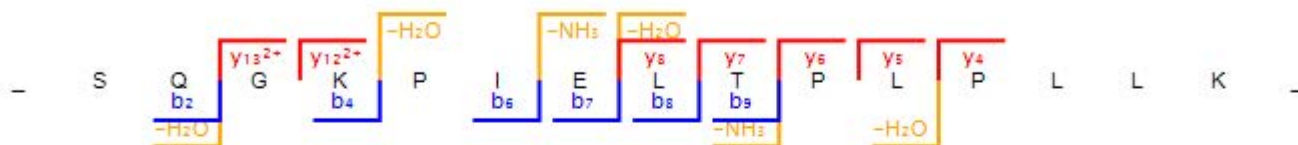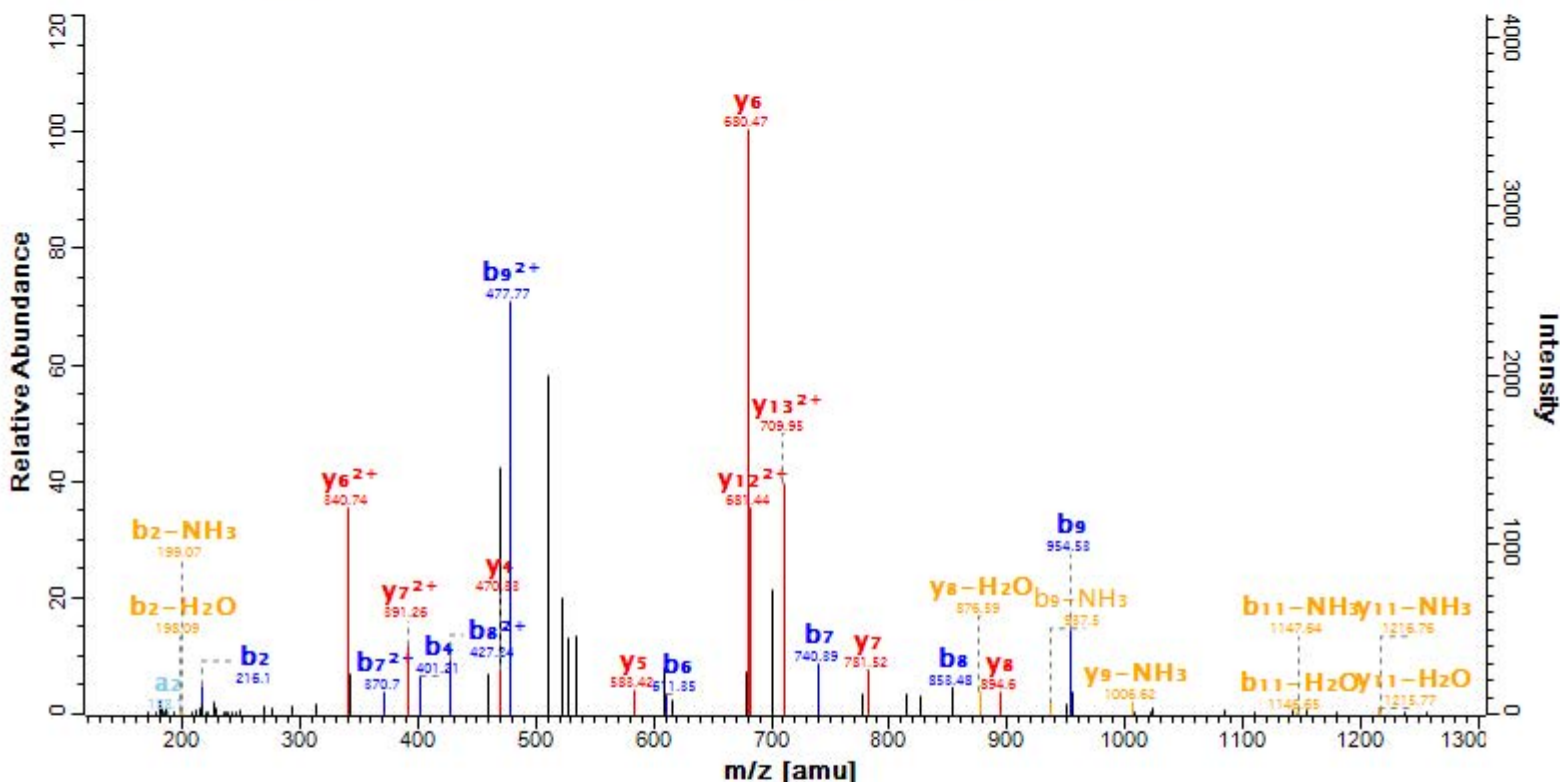

#### precursor information

|                   |                 |
|-------------------|-----------------|
| Mass:             | 1632.98132      |
| m/z:              | 545.33438       |
| Charge:           | 3+              |
| Retentiontime:    | 46.798767089843 |
| Score:            | 105.1913        |
| Mass Error [ppm]: | -0.075225       |
| PEP:              | 3.1602E-06      |
| Precursor Type:   | MULTI           |

| a ion         |               | b <sup>2+</sup> ion |               | b ion |        |               |               |      | y ion |       | y <sup>2+</sup> ion |        |
|---------------|---------------|---------------------|---------------|-------|--------|---------------|---------------|------|-------|-------|---------------------|--------|
| Δ dalton mass | Δ dalton mass | Δ dalton mass       | Δ dalton mass | seq   |        | Δ dalton mass | Δ dalton mass |      |       |       |                     |        |
| 60.04         |               | 88.04               |               | 88.04 | 1      | S             | 14            |      |       |       |                     |        |
| -0.03         | 188.1         | 216.1               | +0.01         | 216.1 | 2      | Q             | 13            | 1547 |       | 1547  |                     |        |
|               | 245.1         | 273.1               |               | 273.1 | 3      | G             | 12            | 1419 |       | 710   | +0.263              |        |
|               | 373.2         | 401.2               | +0.11         | 401.2 | 4      | K             | 11            | 1362 |       | 681.4 | +0.095              |        |
|               | 470.3         | 498.3               |               | 498.3 | 5      | P             | 10            | 1234 |       | 1234  |                     |        |
|               | 583.4         | 611.4               | +0.20         | 611.4 | 6      | I             | 9             | 1137 |       | 1137  |                     |        |
|               | 712.4         | +0.05               | 1370.7        | +0.11 | 740.4  | 7             | E             | 8    | 1024  |       | 1024                |        |
|               | 825.5         | +0.22               | 427.2         | +0.03 | 3853.5 | 8             | L             | 7    | 894.6 | +0.13 | 894.6               |        |
|               | 926.5         | +0.20               | 6477.8        | -0.02 | 954.5  | 9             | T             | 6    | 781.5 | +0.14 | 6391.3              | +0.311 |
|               | 1024          |                     | 1052          |       | 1052   | 10            | P             | 5    | 680.5 | -0.02 | 340.7               | +0.011 |
|               | 1137          |                     | 1165          |       | 1165   | 11            | L             | 4    | 583.4 | -0.1  | 583.4               |        |
|               | 1234          |                     | 1262          |       | 1262   | 12            | P             | 3    | 470.3 | +0.10 | 470.3               |        |
|               | 1347          |                     | 1375          |       | 1375   | 13            | L             | 2    | 373.3 |       | 373.3               |        |
|               | 1460          |                     | 1488          |       | 1488   | 14            | L             | 1    | 260.2 |       | 260.2               |        |
|               |               |                     |               |       |        | 15            | K             | 0    | 147.1 |       | 147.1               |        |

#### general information

|                       |           |
|-----------------------|-----------|
| Annotation:           | 11 of 15  |
| AminoAcids Coverage:  | 73 %      |
| Intensity Coverage:   | 60 %      |
| Peak Coverage:        | 31 %      |
| Protein Localisation: | 38 ... 52 |

Scan number 7034 Raw file LNCAP\_Silac\_23F10\_set3\_06  
 Method ITMS; CID Pepti... 127.61

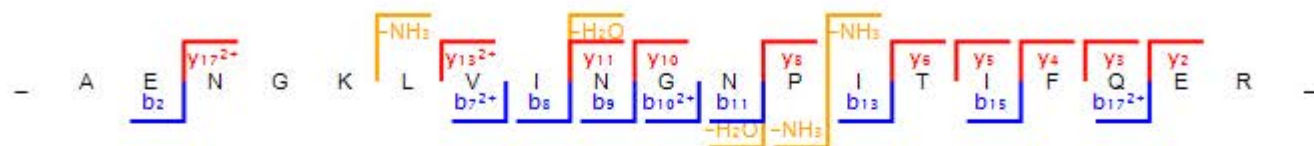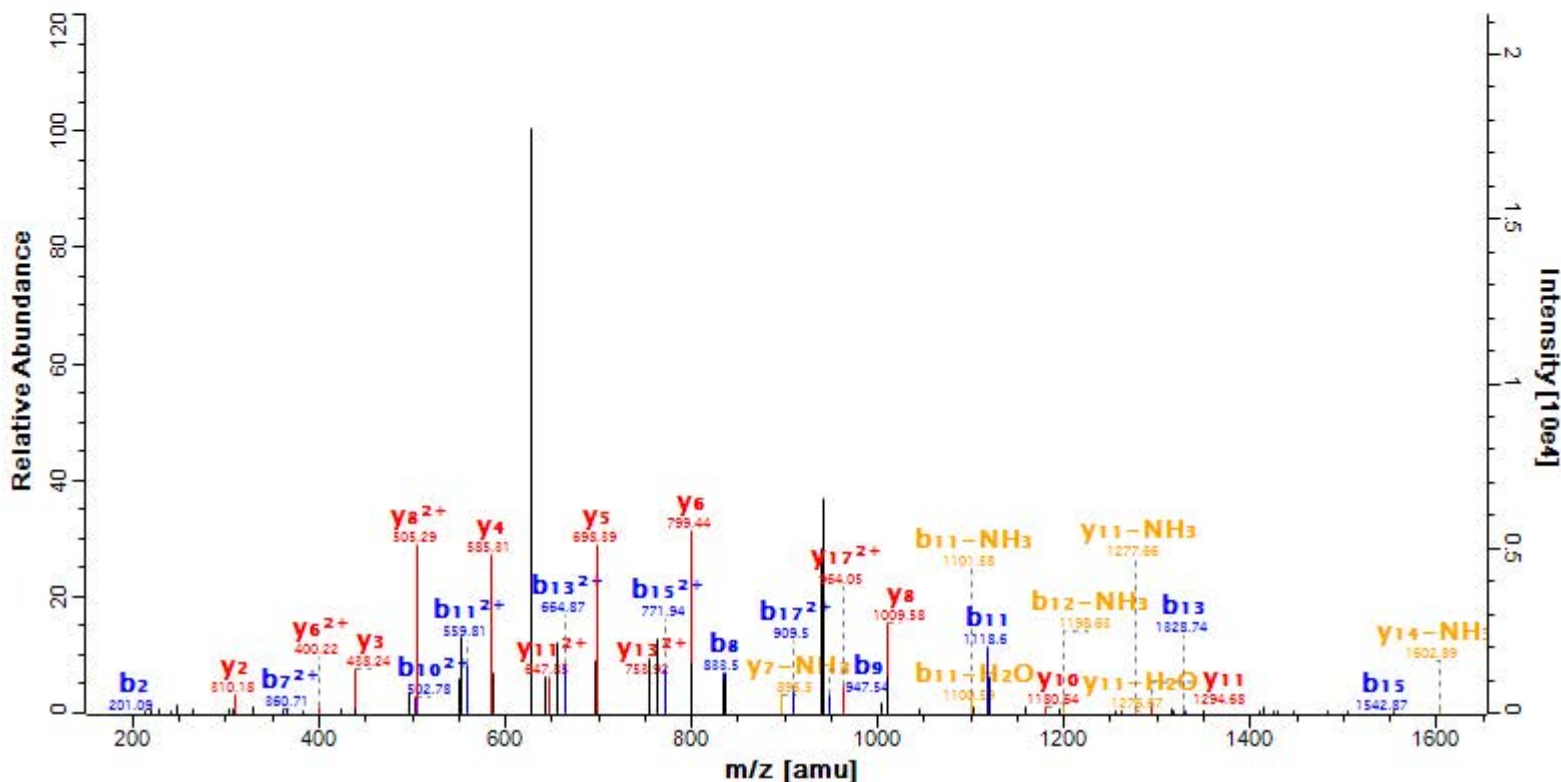

#### precursor information

|                   |                 |
|-------------------|-----------------|
| Mass:             | 2112.13236      |
| m/z:              | 705.0514        |
| Charge:           | 3+              |
| Retentiontime:    | 46.980216979980 |
| Score:            | 127.608         |
| Mass Error [ppm]: | -0.18314        |
| PEP:              | 6.9986E-13      |
| Precursor Type:   | MULTI           |

| b <sup>2+</sup> ion |        | b ion    |        | seq |   |    | y ion    |         | y <sup>2+</sup> ion |         |
|---------------------|--------|----------|--------|-----|---|----|----------|---------|---------------------|---------|
| Δ dalton            | mass   | Δ dalton | mass   |     |   |    | Δ dalton | mass    | Δ dalton            | mass    |
|                     | 72.044 |          | 72.044 | 1   | A | 18 |          |         |                     |         |
|                     | 201.09 | -0.325   | 201.09 | 2   | E | 17 | 2056.1   |         | 2056.1              |         |
|                     | 315.13 |          | 315.13 | 3   | N | 16 | 1927.1   |         | 964.05              | +0.0842 |
|                     | 372.15 |          | 372.15 | 4   | G | 15 | 1813.1   |         | 1813.1              |         |
|                     | 508.26 |          | 508.26 | 5   | K | 14 | 1756     |         | 1756                |         |
|                     | 621.34 |          | 621.34 | 6   | L | 13 | 1619.9   |         | 1619.9              |         |
| -0.359              | 360.71 |          | 720.41 | 7   | V | 12 | 1506.8   |         | 753.92              | -0.133  |
|                     | 833.5  | +0.2211  | 833.5  | 8   | I | 11 | 1407.8   |         | 1407.8              |         |
|                     | 947.54 | -0.055   | 947.54 | 9   | N | 10 | 1294.7   | -0.346  | 647.85              | -0.022  |
| +0.4361             | 502.78 |          | 1004.6 | 10  | G | 9  | 1180.6   | -0.057  | 1180.6              |         |
| +0.1888             | 559.81 | -0.036   | 1118.6 | 11  | N | 8  | 1123.6   |         | 1123.6              |         |
|                     | 1215.7 |          | 1215.7 | 12  | P | 7  | 1009.6   | -0.039  | 505.29              | +0.2425 |
| +0.0404             | 664.87 | -0.011   | 1328.7 | 13  | I | 6  | 912.52   |         | 912.52              |         |
|                     | 1429.8 |          | 1429.8 | 14  | T | 5  | 799.44   | +0.0291 | 400.22              | +0.0648 |
| +0.1621             | 771.94 | -0.197   | 1542.9 | 15  | I | 4  | 698.39   | +0.2581 | 698.39              |         |
|                     | 1689.9 |          | 1689.9 | 16  | F | 3  | 585.31   | +0.1062 | 585.31              |         |
| -0.203              | 909.5  |          | 1818   | 17  | Q | 2  | 438.24   | +0.0657 | 438.24              |         |
|                     | 1947   |          | 1947   | 18  | E | 1  | 310.18   | +0.0915 | 310.18              |         |
|                     |        |          |        | 19  | R | 0  | 181.14   |         | 181.14              |         |

#### general information

|                       |           |
|-----------------------|-----------|
| Annotation:           | 15 of 19  |
| AminoAcids Coverage:  | 79 %      |
| Intensity Coverage:   | 41 %      |
| Peak Coverage:        | 34 %      |
| Protein Localisation: | 62 ... 80 |

Scan number 7083 Raw file LNCAP\_Silac\_23F10\_set3\_06  
 Method ITMS; CID Pepti... 128.99

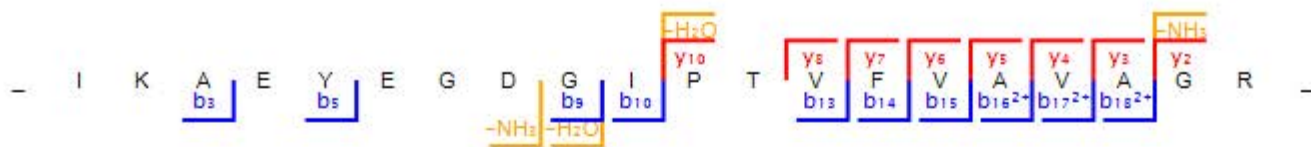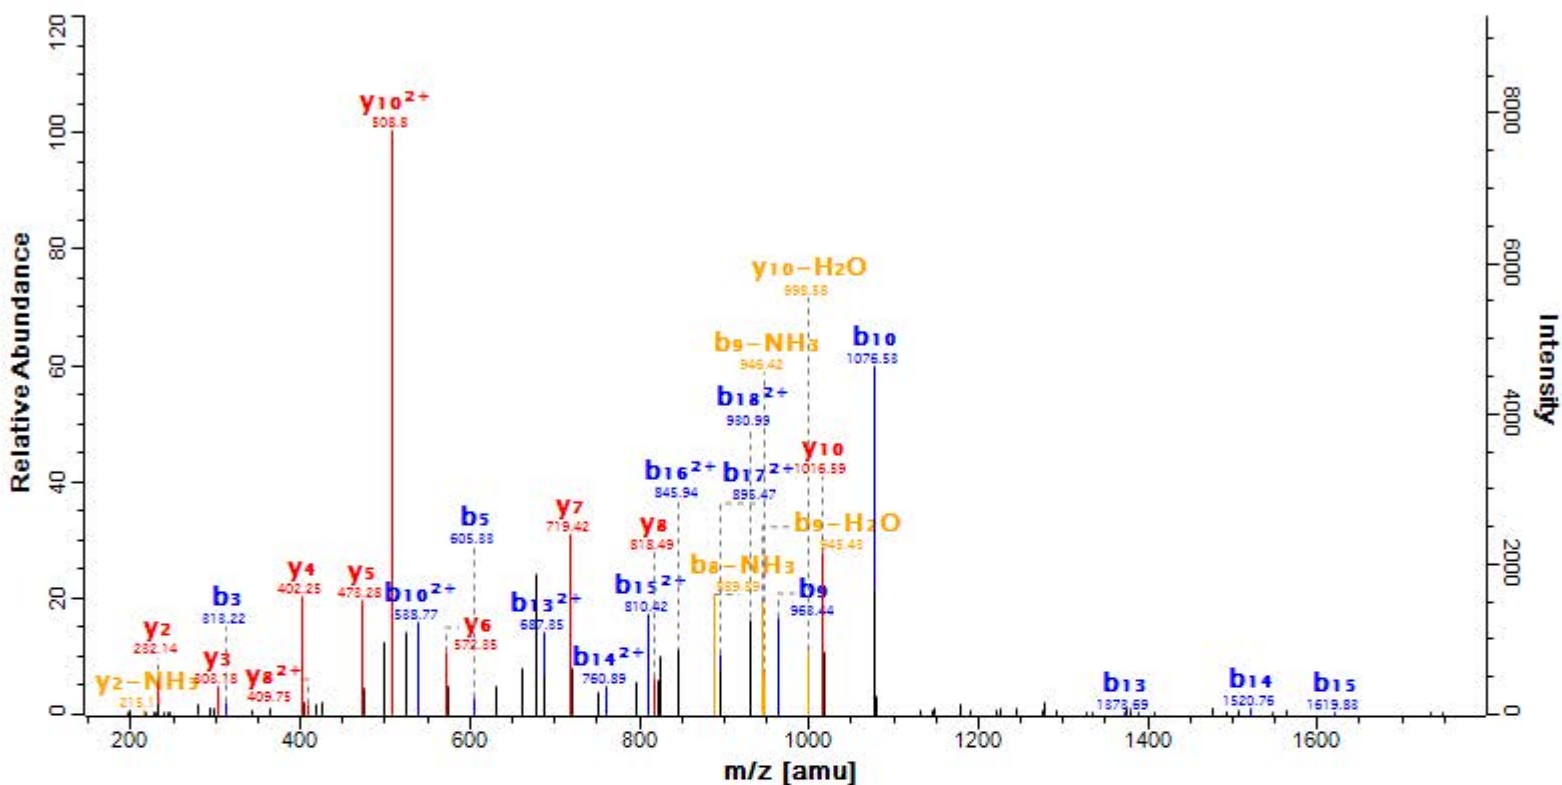

**precursor information**

|                   |                 |
|-------------------|-----------------|
| Mass:             | 2091.09994      |
| m/z:              | 698.04059       |
| Charge:           | 3+              |
| Retentiontime:    | 47.259059906005 |
| Score:            | 128.9908        |
| Mass Error [ppm]: | -0.052805       |
| PEP:              | 1.9369E-08      |
| Precursor Type:   | ISO             |

**general information**

|                       |             |
|-----------------------|-------------|
| Annotation:           | 13 of 20    |
| AminoAcids Coverage:  | 65 %        |
| Intensity Coverage:   | 66 %        |
| Peak Coverage:        | 28 %        |
| Protein Localisation: | 338 ... 357 |

| b <sup>2+</sup> ion |        | b ion    |        | seq |   |    | y ion    |         | y <sup>2+</sup> ion |         |
|---------------------|--------|----------|--------|-----|---|----|----------|---------|---------------------|---------|
| Δ dalton            | mass   | Δ dalton | mass   |     |   |    | Δ dalton | mass    | Δ dalton            | mass    |
|                     | 114.09 |          | 114.09 | 1   | I | 19 |          |         |                     |         |
|                     | 242.19 |          | 242.19 | 2   | K | 18 | 1979     |         | 1979                |         |
|                     | 313.22 | +0.1939  | 313.22 | 3   | A | 17 | 1850.9   |         | 1850.9              |         |
|                     | 442.27 |          | 442.27 | 4   | E | 16 | 1779.9   |         | 1779.9              |         |
|                     | 605.33 | +0.0729  | 605.33 | 5   | Y | 15 | 1650.8   |         | 1650.8              |         |
|                     | 734.37 |          | 734.37 | 6   | E | 14 | 1487.8   |         | 1487.8              |         |
|                     | 791.39 |          | 791.39 | 7   | G | 13 | 1358.7   |         | 1358.7              |         |
|                     | 906.42 |          | 906.42 | 8   | D | 12 | 1301.7   |         | 1301.7              |         |
|                     | 963.44 | -0.016   | 963.44 | 9   | G | 11 | 1186.7   |         | 1186.7              |         |
| +0.2672             | 538.77 | -0.038   | 1076.5 | 10  | I | 10 | 1129.7   |         | 1129.7              |         |
|                     | 1173.6 |          | 1173.6 | 11  | P | 9  | 1016.6   | +0.0267 | 508.8               | +0.195  |
|                     | 1274.6 |          | 1274.6 | 12  | T | 8  | 919.54   |         | 919.54              |         |
| +0.004              | 687.35 | -0.24    | 1373.7 | 13  | V | 7  | 818.49   | +0.0591 | 409.75              | +0.0913 |
| +0.2204             | 760.89 | -0.221   | 1520.8 | 14  | F | 6  | 719.42   | +0.026  | 719.42              |         |
| +0.1982             | 810.42 | -0.113   | 1619.8 | 15  | V | 5  | 572.35   | +0.0816 | 572.35              |         |
| -0.077              | 845.94 |          | 1690.9 | 16  | A | 4  | 473.28   | -0.037  | 473.28              |         |
| +0.3575             | 895.47 |          | 1789.9 | 17  | V | 3  | 402.25   | -0.02   | 402.25              |         |
| -0.208              | 930.99 |          | 1861   | 18  | A | 2  | 303.18   | +0.025  | 303.18              |         |
|                     | 1918   |          | 1918   | 19  | G | 1  | 232.14   | +0.0028 | 232.14              |         |
|                     |        |          |        | 20  | R | 0  | 175.12   |         | 175.12              |         |

Scan number 779 Raw file LNCAP\_Silac\_23F10\_set3\_06  
 Method ITMS; CID Pepti... 85.73

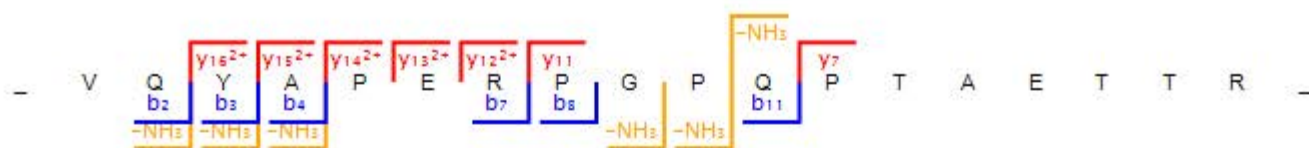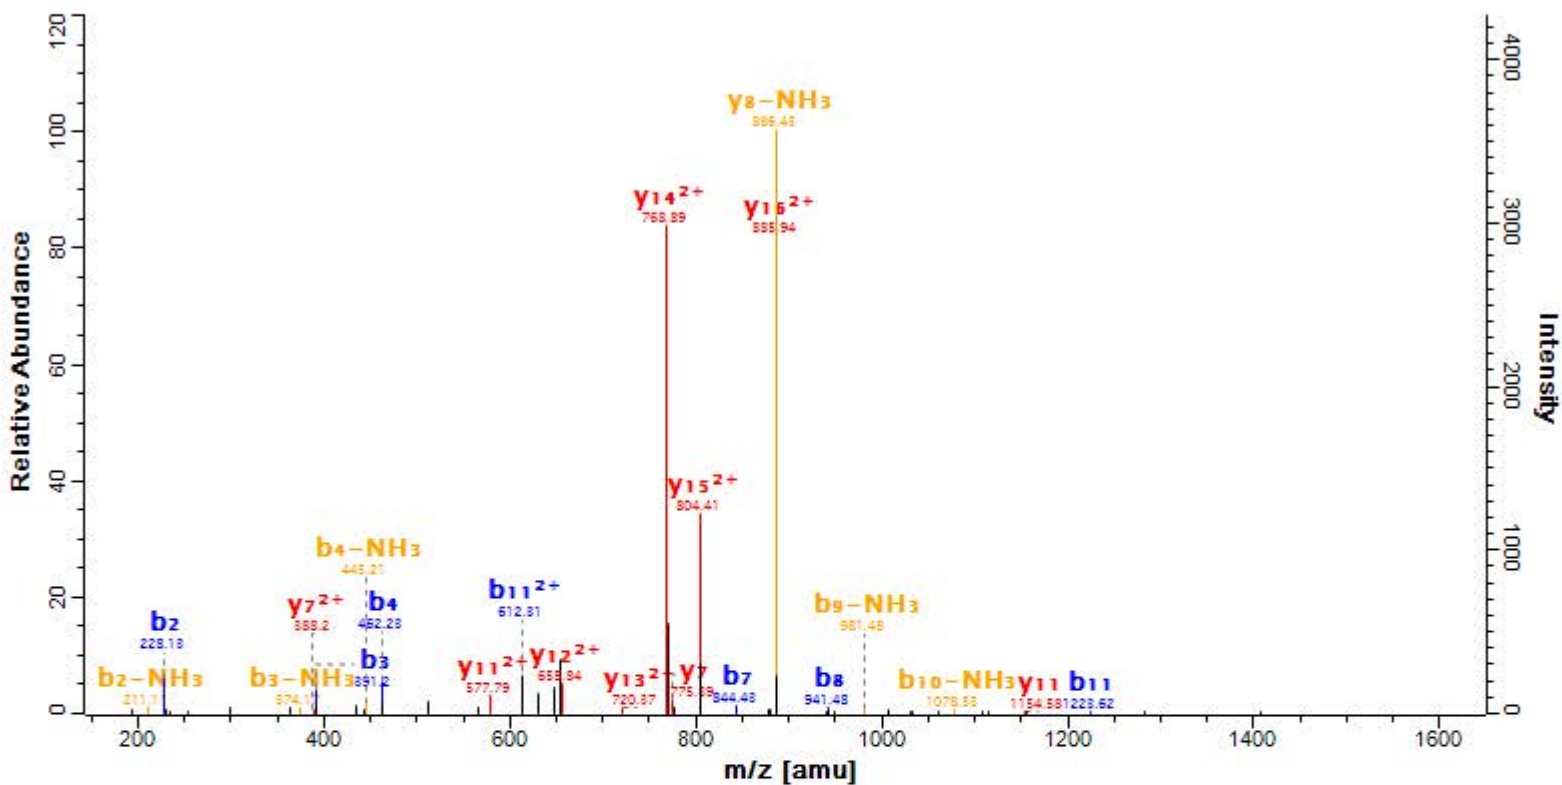

precursor information

|                   |                 |
|-------------------|-----------------|
| Mass:             | 1996.99709      |
| m/z:              | 666.67297       |
| Charge:           | 3+              |
| Retentiontime:    | 10.823862075805 |
| Score:            | 85.73382        |
| Mass Error [ppm]: | 0.22078         |
| PEP:              | 4.6849E-05      |
| Precursor Type:   | MULTI           |

general information

|                       |             |
|-----------------------|-------------|
| Annotation:           | 11 of 18    |
| AminoAcids Coverage:  | 61 %        |
| Intensity Coverage:   | 82 %        |
| Peak Coverage:        | 27 %        |
| Protein Localisation: | 171 ... 188 |

| b <sup>2+</sup> ion |        | b ion    |        |    |     |    | y ion    |         | y <sup>2+</sup> ion |         |
|---------------------|--------|----------|--------|----|-----|----|----------|---------|---------------------|---------|
| Δ dalton            | mass   | Δ dalton | mass   |    | seq |    | Δ dalton | mass    | Δ dalton            | mass    |
|                     | 100.08 |          | 100.08 | 1  | V   | 17 |          |         |                     |         |
|                     | 228.13 | -0.079   | 228.13 | 2  | Q   | 16 | 1898.9   |         | 1898.9              |         |
|                     | 391.2  | -0.019   | 391.2  | 3  | Y   | 15 | 1770.9   |         | 885.94              | +0.0385 |
|                     | 462.23 | -0.091   | 462.23 | 4  | A   | 14 | 1607.8   |         | 804.41              | +0.2202 |
|                     | 559.29 |          | 559.29 | 5  | P   | 13 | 1536.8   |         | 768.89              | +0.3115 |
|                     | 688.33 |          | 688.33 | 6  | E   | 12 | 1439.7   |         | 720.37              | -0.1    |
|                     | 844.43 | +0.0577  | 844.43 | 7  | R   | 11 | 1310.7   |         | 655.84              | +0.4083 |
|                     | 941.48 | +0.2947  | 941.48 | 8  | P   | 10 | 1154.6   | +0.0543 | 577.79              | +0.1821 |
|                     | 998.51 |          | 998.51 | 9  | G   | 9  | 1057.5   |         | 1057.5              |         |
|                     | 1095.6 |          | 1095.6 | 10 | P   | 8  | 1000.5   |         | 1000.5              |         |
| +0.2061             | 612.31 | +0.236   | 1223.6 | 11 | Q   | 7  | 903.45   |         | 903.45              |         |
|                     | 1320.7 |          | 1320.7 | 12 | P   | 6  | 775.39   | +0.1473 | 388.2               | +0.3508 |
|                     | 1421.7 |          | 1421.7 | 13 | T   | 5  | 678.34   |         | 678.34              |         |
|                     | 1492.8 |          | 1492.8 | 14 | A   | 4  | 577.29   |         | 577.29              |         |
|                     | 1621.8 |          | 1621.8 | 15 | E   | 3  | 506.26   |         | 506.26              |         |
|                     | 1722.8 |          | 1722.8 | 16 | T   | 2  | 377.21   |         | 377.21              |         |
|                     | 1823.9 |          | 1823.9 | 17 | T   | 1  | 276.17   |         | 276.17              |         |
|                     |        |          |        | 18 | R   | 0  | 175.12   |         | 175.12              |         |

Scan number 8067 Raw file LNCAP\_Silac\_23F10\_set3\_06  
 Method ITMS; CID Pepti... 89.62

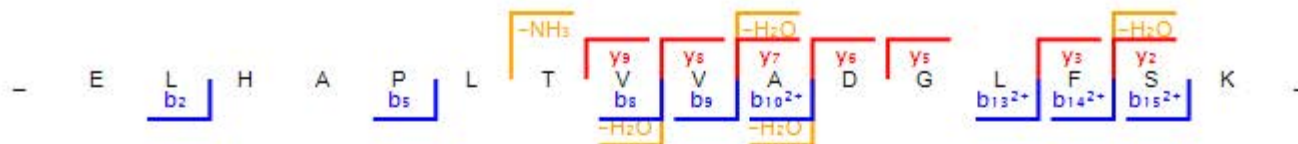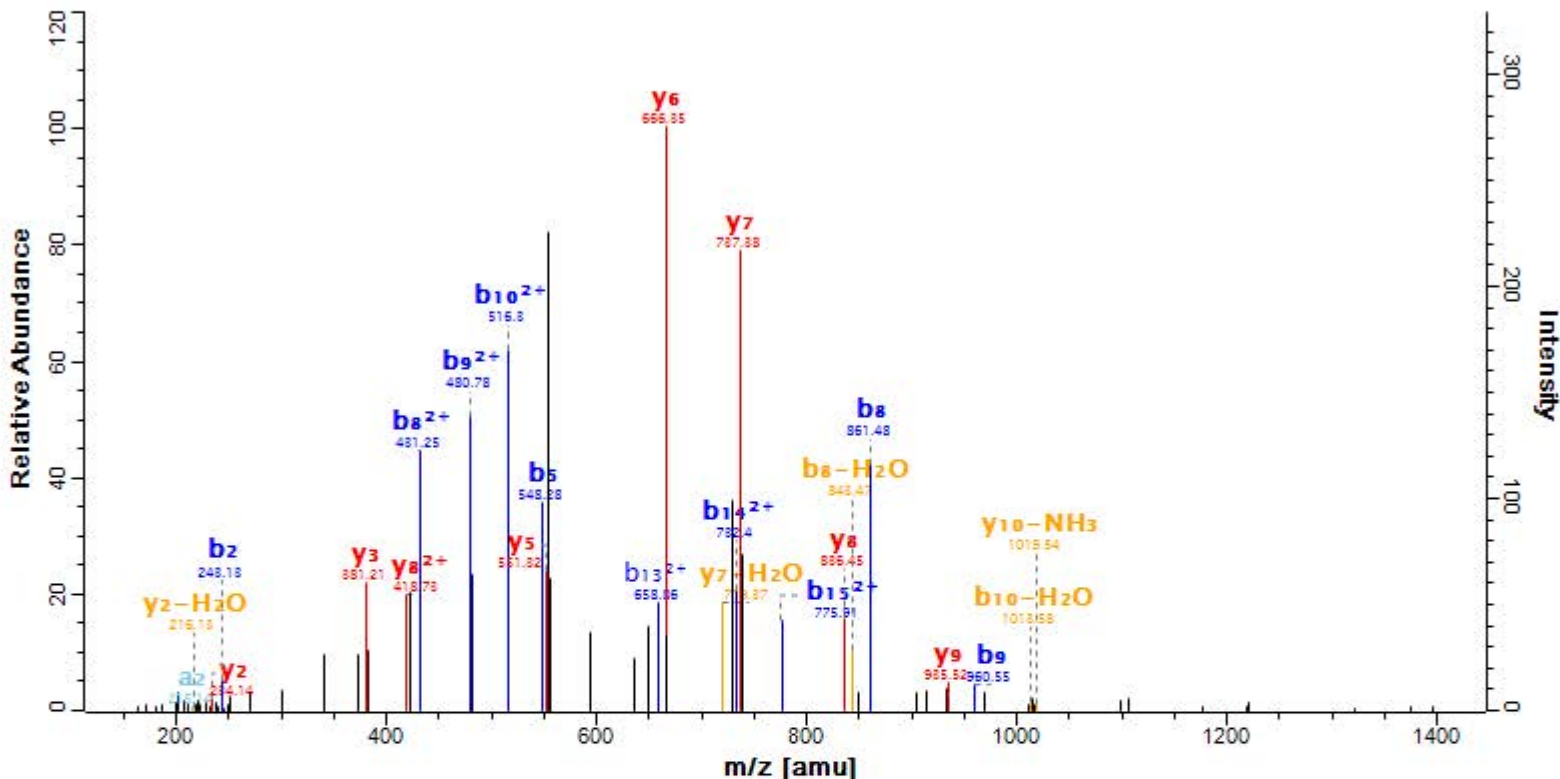

precursor information

|                   |                 |
|-------------------|-----------------|
| Mass:             | 1695.92054      |
| m/z:              | 566.31412       |
| Charge:           | 3+              |
| Retentiontime:    | 53.424930572509 |
| Score:            | 89.6238         |
| Mass Error [ppm]: | 0.57151         |
| PEP:              | 4.1144E-05      |
| Precursor Type:   | MULTI           |

general information

|                       |             |
|-----------------------|-------------|
| Annotation:           | 12 of 16    |
| AminoAcids Coverage:  | 75 %        |
| Intensity Coverage:   | 62 %        |
| Peak Coverage:        | 32 %        |
| Protein Localisation: | 275 ... 290 |

|        | a ion | b <sup>2+</sup> ion | b ion  |        |    |    | y ion | y <sup>2+</sup> ion |        |       |       |
|--------|-------|---------------------|--------|--------|----|----|-------|---------------------|--------|-------|-------|
|        | 102.1 | 130                 | 130    | 1      | E  | 15 |       |                     |        |       |       |
| +0.049 | 151.1 | 243.1               | +0.199 | 2      | L  | 14 | 1568  | 1568                |        |       |       |
|        | 352.2 | 380.2               | 380.2  | 3      | H  | 13 | 1455  | 1455                |        |       |       |
|        | 423.2 | 451.2               | 451.2  | 4      | A  | 12 | 1318  | 1318                |        |       |       |
|        | 520.3 | 548.3               | +0.083 | 5      | P  | 11 | 1247  | 1247                |        |       |       |
|        | 633.4 | 661.4               | 661.4  | 6      | L  | 10 | 1150  | 1150                |        |       |       |
|        | 734.4 | 762.4               | 762.4  | 7      | T  | 9  | 1037  | 1037                |        |       |       |
|        | 833.5 | +0.21               | 2431.2 | +0.07  | 8  | V  | 8     | 935.5               | +0.07  | 935.5 |       |
|        | 932.6 | -0.15               | 480.8  | +0.076 | 9  | V  | 7     | 836.5               | +0.115 | 418.7 | +0.15 |
|        | 1004  | +0.10               | 4516.3 |        | 10 | A  | 6     | 737.4               | +0.045 | 737.4 |       |
|        | 1119  |                     | 1147   |        | 11 | D  | 5     | 666.3               | +0     | 666.3 |       |
|        | 1176  |                     | 1204   |        | 12 | G  | 4     | 551.3               | +0.24  | 551.3 |       |
|        | 1289  | +0.067              | 658.9  |        | 13 | L  | 3     | 494.3               |        | 494.3 |       |
|        | 1436  | +0.096              | 732.4  |        | 14 | F  | 2     | 381.2               | -0.04  | 381.2 |       |
|        | 1523  | +0.225              | 775.9  |        | 15 | S  | 1     | 234.1               | +0.265 | 234.1 |       |
|        |       |                     |        |        | 16 | K  | 0     | 147.1               |        | 147.1 |       |

Scan number 9228 Raw file LNCAP\_Silac\_23F10\_set3\_06  
 Method ITMS; CID Peptide 267.38

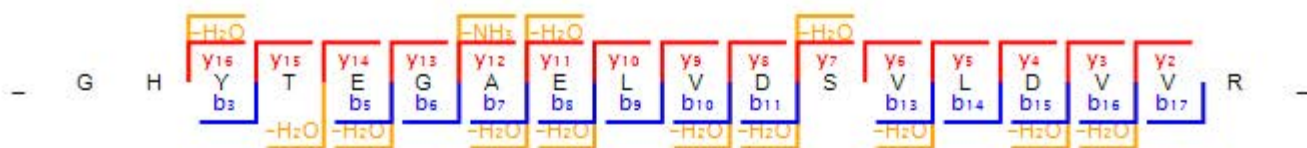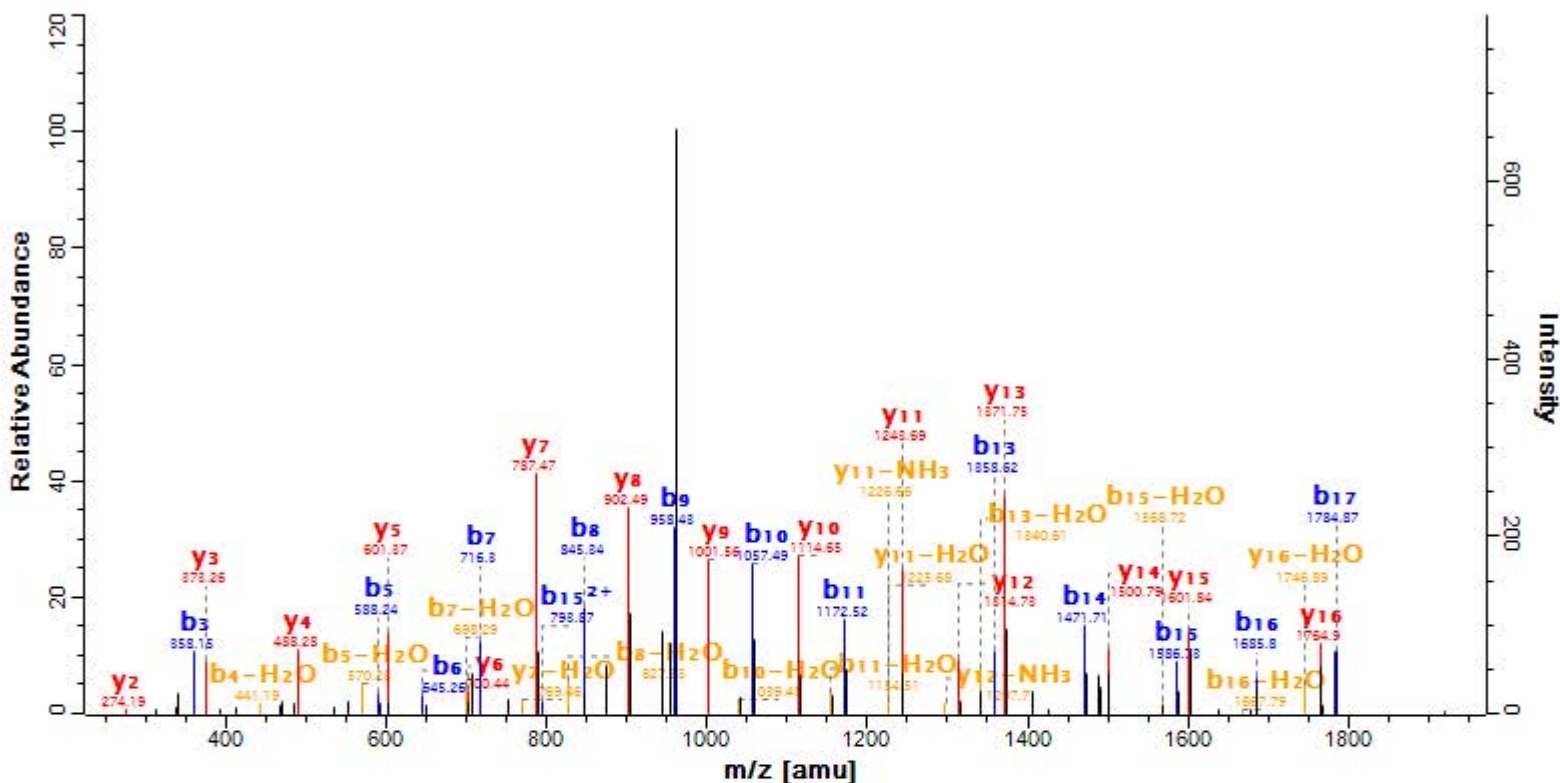

#### precursor information

|                   |                 |
|-------------------|-----------------|
| Mass:             | 1957.9748       |
| m/z:              | 979.99467       |
| Charge:           | 2+              |
| Retentiontime:    | 62.787651062011 |
| Score:            | 267.3771        |
| Mass Error [ppm]: | 0.14144         |
| PEP:              | 6.5565E-82      |
| Precursor Type:   | MULTI           |

| b <sup>2+</sup> ion |          | b ion     |          |     | y ion |          |          |
|---------------------|----------|-----------|----------|-----|-------|----------|----------|
| Δ dalton            | mass     | Δ dalton  | mass     | seq |       | Δ dalton | mass     |
|                     | 58.02874 | 58.02874  |          | 1   | G     | 17       |          |
|                     | 195.0877 | 195.0877  |          | 2   | H     | 16       | 1901.96  |
|                     | 358.151  | +0.065328 | 358.151  | 3   | Y     | 15       | 1764.901 |
|                     | 459.1987 |           | 459.1987 | 4   | T     | 14       | 1601.838 |
|                     | 588.2413 | -0.06205  | 588.2413 | 5   | E     | 13       | 1500.79  |
|                     | 645.2627 | +0.001933 | 645.2627 | 6   | G     | 12       | 1371.748 |
|                     | 716.2998 | +0.141821 | 716.2998 | 7   | A     | 11       | 1314.726 |
|                     | 845.3424 | +0.016708 | 845.3424 | 8   | E     | 10       | 1243.689 |
|                     | 958.4265 | -0.05057  | 958.4265 | 9   | L     | 9        | 1114.647 |
|                     | 1057.495 | -0.01785  | 1057.495 | 10  | V     | 8        | 1001.563 |
|                     | 1172.522 | -0.05627  | 1172.522 | 11  | D     | 7        | 902.4942 |
|                     | 1259.554 |           | 1259.554 | 12  | S     | 6        | 787.4672 |
|                     | 1358.622 | +0.00662  | 1358.622 | 13  | V     | 5        | 700.4352 |
|                     | 1471.706 | -0.0844   | 1471.706 | 14  | L     | 4        | 601.3668 |
| +0.461808           | 793.8703 | +0.192122 | 1586.733 | 15  | D     | 3        | 488.2827 |
|                     | 1685.802 | +0.034963 | 1685.802 | 16  | V     | 2        | 373.2558 |
|                     | 1784.87  | -0.1261   | 1784.87  | 17  | V     | 1        | 274.1874 |
|                     |          |           |          | 18  | R     | 0        | 175.119  |

#### general information

|                       |             |
|-----------------------|-------------|
| Annotation:           | 15 of 18    |
| AminoAcids Coverage:  | 83 %        |
| Intensity Coverage:   | 59 %        |
| Peak Coverage:        | 45 %        |
| Protein Localisation: | 104 ... 121 |



Scan number 9411 Raw file LNCAP\_Silac\_23F10\_set3\_06  
 Method ITMS; CID Pepti... 93.42

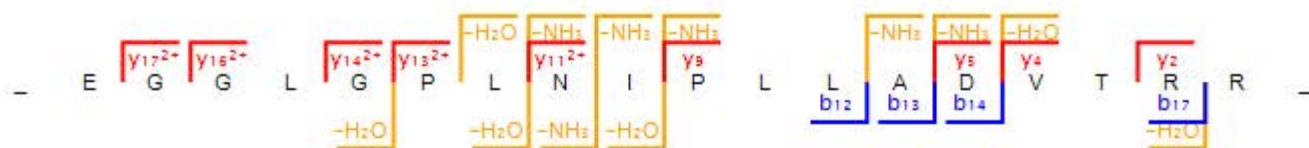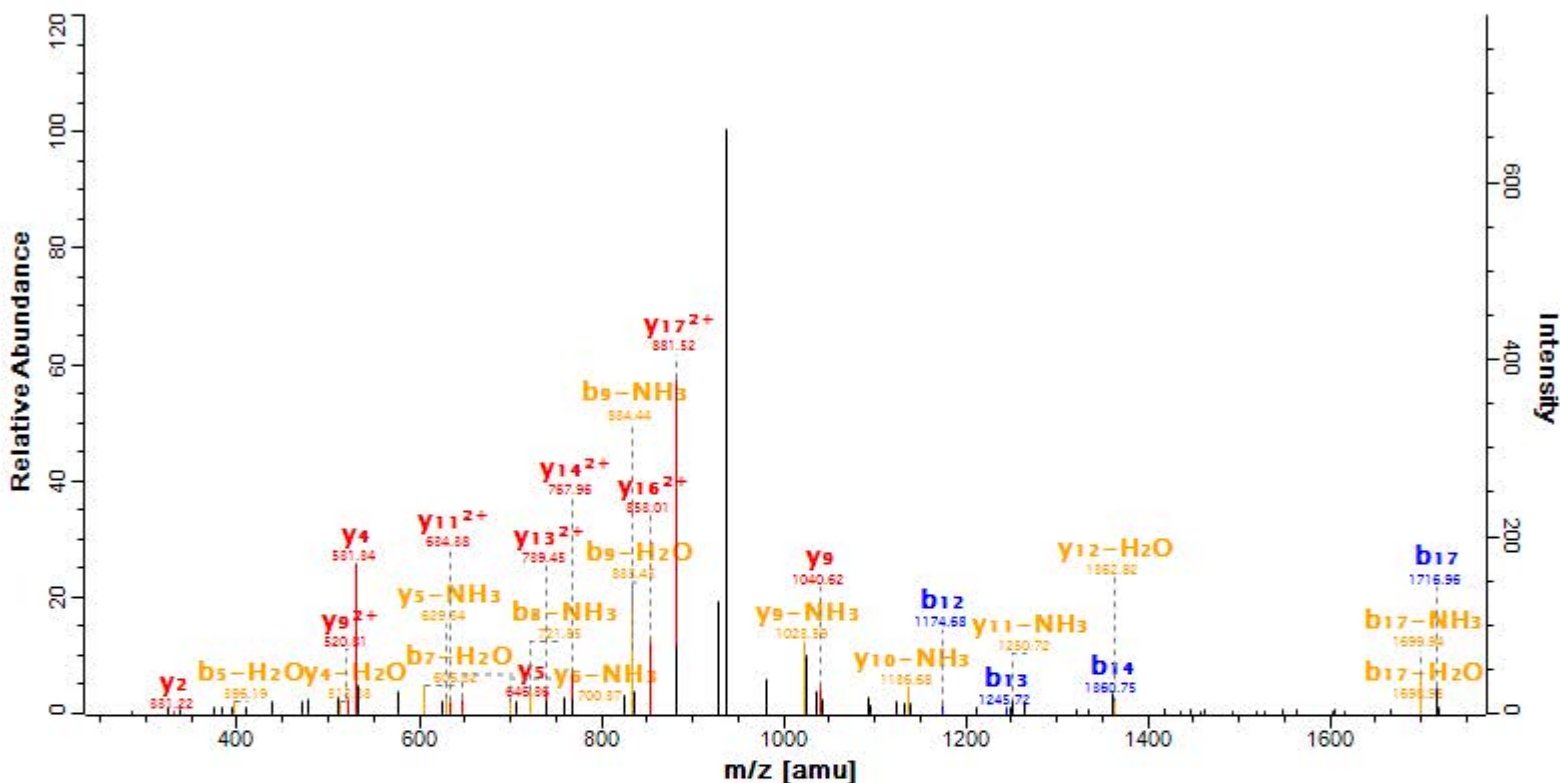

#### precursor information

|                   |                 |
|-------------------|-----------------|
| Mass:             | 1890.06858      |
| m/z:              | 946.04156       |
| Charge:           | 2+              |
| Retentiontime:    | 64.485786437988 |
| Score:            | 93.42417        |
| Mass Error [ppm]: | -0.062872       |
| PEP:              | 9.7928E-06      |
| Precursor Type:   | MULTI           |

#### general information

|                       |            |
|-----------------------|------------|
| Annotation:           | 14 of 18   |
| AminoAcids Coverag    | 78 %       |
| Intensity Coverage:   | 38 %       |
| Peak Coverage:        | 32 %       |
| Protein Localisation: | 93 ... 110 |

| b ion     |          |    |     |    | y ion    |           | y <sup>2+</sup> ion |           |
|-----------|----------|----|-----|----|----------|-----------|---------------------|-----------|
| Δ dalton  | mass     |    | seq |    | Δ dalton | mass      | Δ dalton            | mass      |
|           | 130.0499 | 1  | E   | 17 |          |           |                     |           |
|           | 187.0713 | 2  | G   | 16 | 1762.033 |           | 881.5203            | +0.260678 |
|           | 244.0928 | 3  | G   | 15 | 1705.012 |           | 853.0096            | +0.190539 |
|           | 357.1769 | 4  | L   | 14 | 1647.99  |           | 1647.99             |           |
|           | 414.1983 | 5  | G   | 13 | 1534.906 |           | 767.9568            | +0.406694 |
|           | 511.2511 | 6  | P   | 12 | 1477.885 |           | 739.4461            | +0.16944  |
|           | 624.3352 | 7  | L   | 11 | 1380.832 |           | 1380.832            |           |
|           | 738.3781 | 8  | N   | 10 | 1267.748 |           | 634.3777            | +0.203918 |
|           | 851.4621 | 9  | I   | 9  | 1153.705 |           | 1153.705            |           |
|           | 948.5149 | 10 | P   | 8  | 1040.621 | -0.0713   | 520.8142            | +0.118976 |
|           | 1061.599 | 11 | L   | 7  | 943.5683 |           | 943.5683            |           |
| -0.04607  | 1174.683 | 12 | L   | 6  | 830.4843 |           | 830.4843            |           |
| +0.030217 | 1245.72  | 13 | A   | 5  | 717.4002 |           | 717.4002            |           |
| -0.19887  | 1360.747 | 14 | D   | 4  | 646.3631 | +0.016174 | 646.3631            |           |
|           | 1459.816 | 15 | V   | 3  | 531.3362 | +0.021327 | 531.3362            |           |
|           | 1560.863 | 16 | T   | 2  | 432.2677 |           | 432.2677            |           |
| +0.025084 | 1716.964 | 17 | R   | 1  | 331.2201 | +0.220733 | 331.2201            |           |
|           |          | 18 | R   | 0  | 175.119  |           | 175.119             |           |

Scan number 9430 Raw file LNCAP\_Silac\_23F10\_set3\_06  
 Method ITMS; CID Peptide 83.63

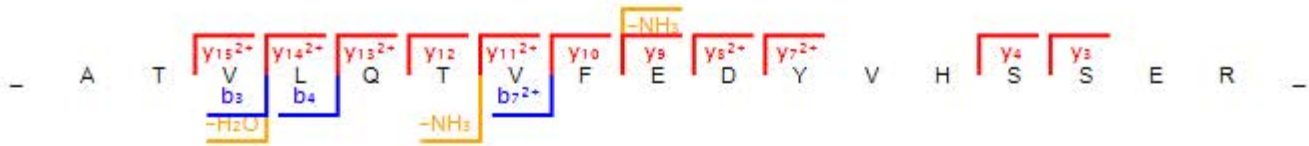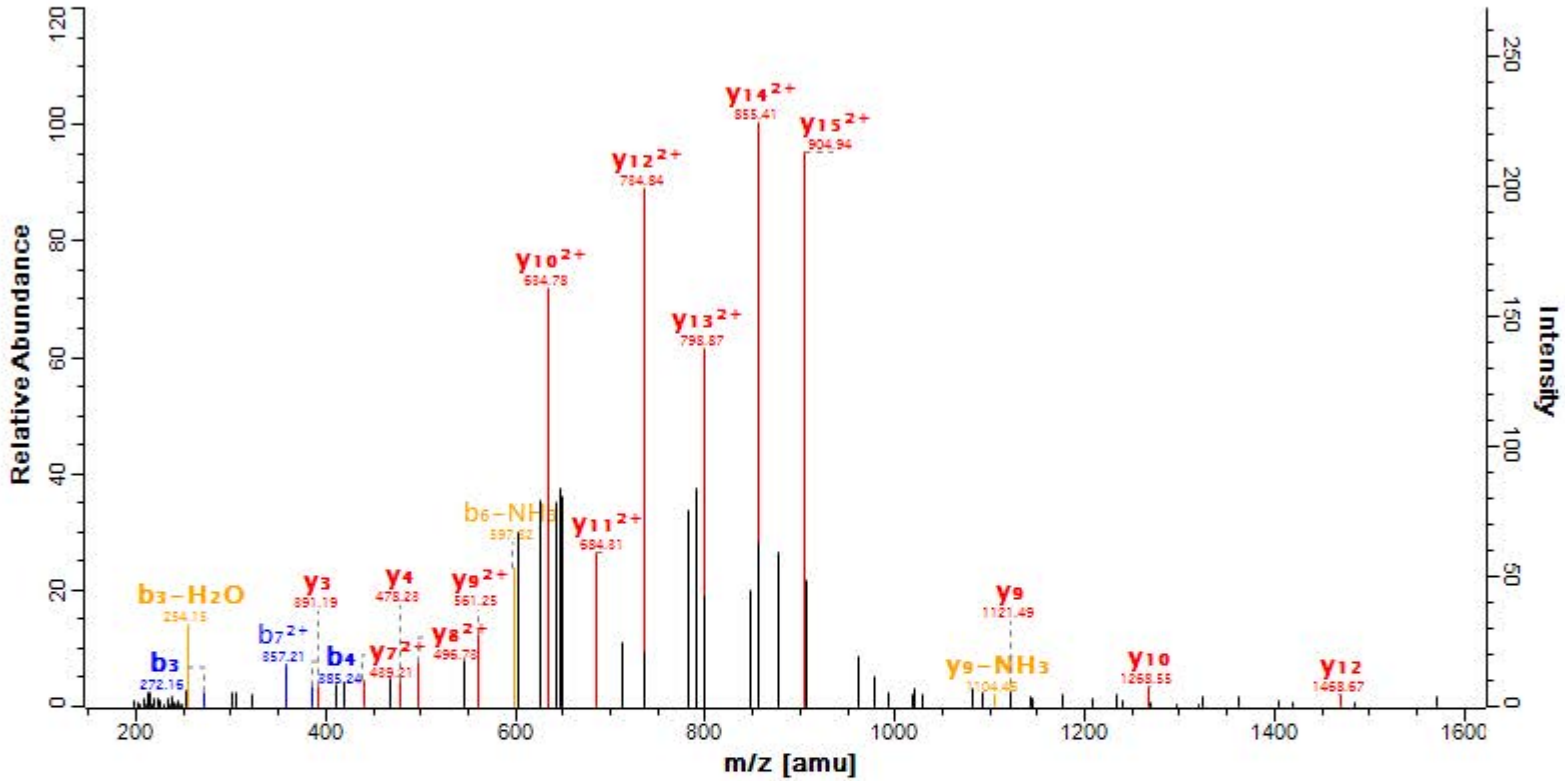

precursor information

|                   |                 |
|-------------------|-----------------|
| Mass:             | 1979.95891      |
| m/z:              | 660.99358       |
| Charge:           | 3+              |
| Retentiontime:    | 64.672149658203 |
| Score:            | 83.63316        |
| Mass Error [ppm]: | 0.018967        |
| PEP:              | 5.413E-05       |
| Precursor Type:   | MULTI           |

| b <sup>2+</sup> ion |        | b ion    |        | seq |   |    | y ion    |         | y <sup>2+</sup> ion |         |
|---------------------|--------|----------|--------|-----|---|----|----------|---------|---------------------|---------|
| Δ dalton            | mass   | Δ dalton | mass   |     |   |    | Δ dalton | mass    | Δ dalton            | mass    |
|                     | 72.044 |          | 72.044 | 1   | A | 16 |          |         |                     |         |
|                     | 173.09 |          | 173.09 | 2   | T | 15 | 1909.9   |         | 1909.9              |         |
|                     | 272.16 | -0.188   | 272.16 | 3   | V | 14 | 1808.9   |         | 904.94              | +0.3098 |
|                     | 385.24 | +0.0191  | 385.24 | 4   | L | 13 | 1709.8   |         | 855.41              | +0.241  |
|                     | 513.3  |          | 513.3  | 5   | Q | 12 | 1596.7   |         | 798.87              | +0.154  |
|                     | 614.35 |          | 614.35 | 6   | T | 11 | 1468.7   | +0.4894 | 734.84              | +0.2603 |
| +0.1864             | 357.21 |          | 713.42 | 7   | V | 10 | 1367.6   |         | 684.31              | +0.0162 |
|                     | 860.49 |          | 860.49 | 8   | F | 9  | 1268.6   | -0.187  | 634.78              | +0.253  |
|                     | 989.53 |          | 989.53 | 9   | E | 8  | 1121.5   | +0.0876 | 561.25              | +0.4641 |
|                     | 1104.6 |          | 1104.6 | 10  | D | 7  | 992.44   |         | 496.73              | -0.014  |
|                     | 1267.6 |          | 1267.6 | 11  | Y | 6  | 877.42   |         | 439.21              | +0.304  |
|                     | 1366.7 |          | 1366.7 | 12  | V | 5  | 714.35   |         | 714.35              |         |
|                     | 1503.7 |          | 1503.7 | 13  | H | 4  | 615.28   |         | 615.28              |         |
|                     | 1590.8 |          | 1590.8 | 14  | S | 3  | 478.23   | +0.138  | 478.23              |         |
|                     | 1677.8 |          | 1677.8 | 15  | S | 2  | 391.19   | +0.0718 | 391.19              |         |
|                     | 1806.9 |          | 1806.9 | 16  | E | 1  | 304.16   |         | 304.16              |         |
|                     |        |          |        | 17  | R | 0  | 175.12   |         | 175.12              |         |

general information

|                       |             |
|-----------------------|-------------|
| Annotation:           | 13 of 17    |
| AminoAcids Coverage:  | 76 %        |
| Intensity Coverage:   | 52 %        |
| Peak Coverage:        | 22 %        |
| Protein Localisation: | 690 ... 706 |

Scan number 9563 Raw file LNCAP\_Silac\_23F10\_set3\_06  
 Method ITMS; CID Pepti... 111.78

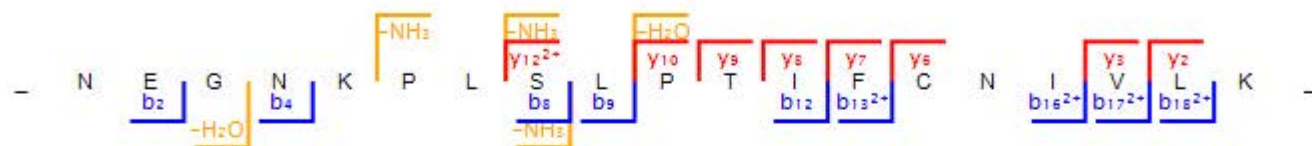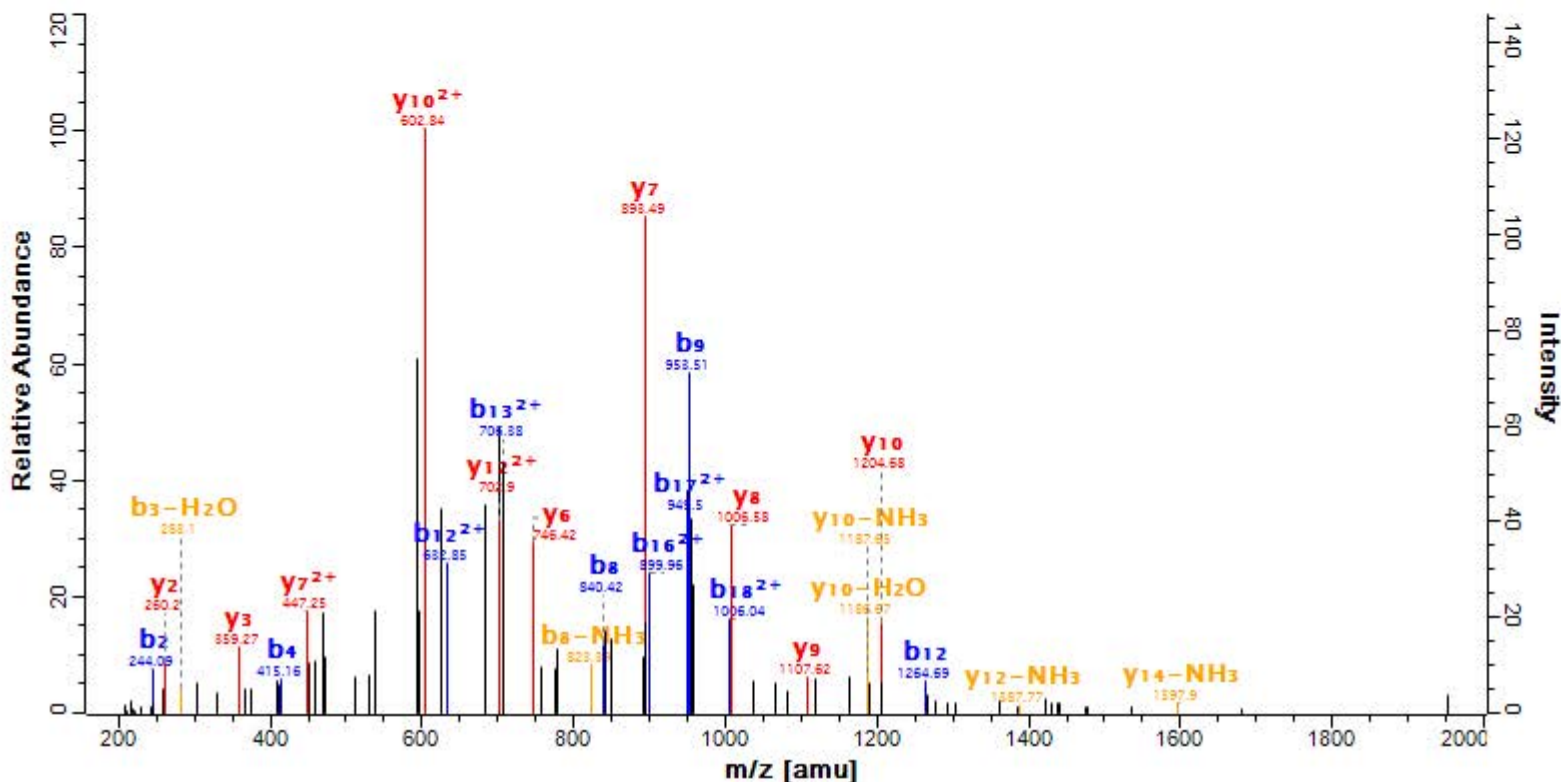

### precursor information

|                   |                 |
|-------------------|-----------------|
| Mass:             | 2156.16717      |
| m/z:              | 719.72967       |
| Charge:           | 3+              |
| Retentiontime:    | 66.051361083984 |
| Score:            | 111.776         |
| Mass Error [ppm]: | 0.37441         |
| PEP:              | 1.6894E-08      |
| Precursor Type:   | MULTI           |

| b <sup>2+</sup> ion |        | b ion    |        | seq |   |    | y ion    |         | y <sup>2+</sup> ion |         |
|---------------------|--------|----------|--------|-----|---|----|----------|---------|---------------------|---------|
| Δ dalton            | mass   | Δ dalton | mass   |     |   |    | Δ dalton | mass    | Δ dalton            | mass    |
|                     | 115.05 |          | 115.05 | 1   | N | 18 |          |         |                     |         |
|                     | 244.09 | +0.1597  | 244.09 | 2   | E | 17 | 2043.1   |         | 2043.1              |         |
|                     | 301.11 |          | 301.11 | 3   | G | 16 | 1914.1   |         | 1914.1              |         |
|                     | 415.16 | +0.1904  | 415.16 | 4   | N | 15 | 1857.1   |         | 1857.1              |         |
|                     | 543.25 |          | 543.25 | 5   | K | 14 | 1743     |         | 1743                |         |
|                     | 640.3  |          | 640.3  | 6   | P | 13 | 1614.9   |         | 1614.9              |         |
|                     | 753.39 |          | 753.39 | 7   | L | 12 | 1517.9   |         | 1517.9              |         |
|                     | 840.42 | -0.049   | 840.42 | 8   | S | 11 | 1404.8   |         | 702.9               | -0.305  |
|                     | 953.51 | -0.021   | 953.51 | 9   | L | 10 | 1317.8   |         | 1317.8              |         |
|                     | 1050.6 |          | 1050.6 | 10  | P | 9  | 1204.7   | -0.028  | 602.84              | +0.1667 |
|                     | 1151.6 |          | 1151.6 | 11  | T | 8  | 1107.6   | +0.0796 | 1107.6              |         |
| +0.3245             | 632.85 | +0.1475  | 1264.7 | 12  | I | 7  | 1006.6   | +0.2724 | 1006.6              |         |
| +0.2004             | 706.38 |          | 1411.8 | 13  | F | 6  | 893.49   | -0.069  | 447.25              | +0.2061 |
|                     | 1571.8 |          | 1571.8 | 14  | C | 5  | 746.42   | +0.1984 | 746.42              |         |
|                     | 1685.8 |          | 1685.8 | 15  | N | 4  | 586.39   |         | 586.39              |         |
| +0.463              | 899.96 |          | 1798.9 | 16  | I | 3  | 472.35   |         | 472.35              |         |
| +0.3666             | 949.5  |          | 1898   | 17  | V | 2  | 359.27   | +0.1366 | 359.27              |         |
| -0.032              | 1006   |          | 2011.1 | 18  | L | 1  | 260.2    | +0.0993 | 260.2               |         |
|                     |        |          |        | 19  | K | 0  | 147.11   |         | 147.11              |         |

### general information

|                       |             |
|-----------------------|-------------|
| Annotation:           | 14 of 19    |
| AminoAcids Coverage:  | 74 %        |
| Intensity Coverage:   | 50 %        |
| Peak Coverage:        | 29 %        |
| Protein Localisation: | 803 ... 821 |

Scan number 995 Raw file LNCAP\_Silac\_23F10\_set3\_06  
 Method ITMS: CID Pepti... 98.41

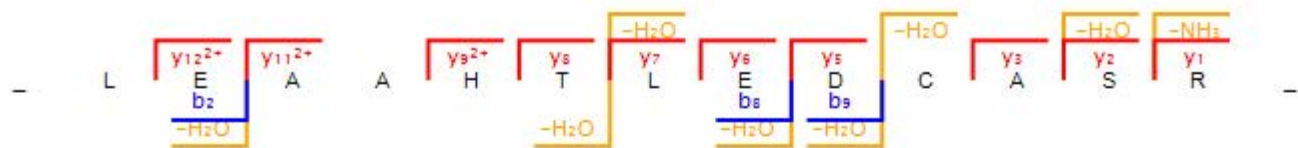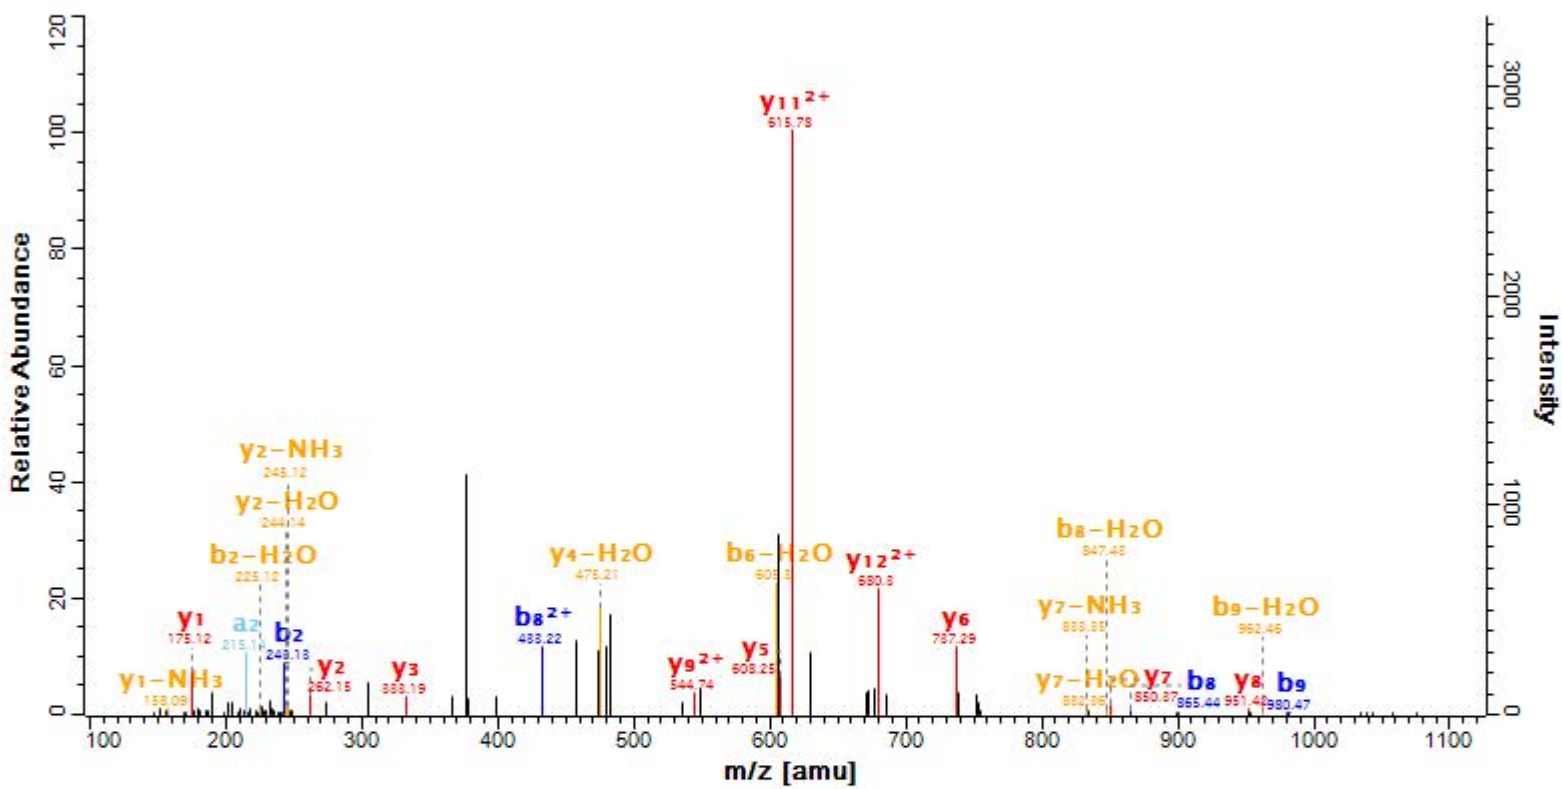

precursor information

|                   |                 |
|-------------------|-----------------|
| Mass:             | 1471.67324      |
| m/z:              | 491.56502       |
| Charge:           | 3+              |
| Retentiontime:    | 12.407801628112 |
| Score:            | 98.40717        |
| Mass Error [ppm]: | 0.47568         |
| PEP:              | 0.0040497       |
| Precursor Type:   | ISO             |

general information

|                       |             |
|-----------------------|-------------|
| Annotation:           | 11 of 13    |
| AminoAcids Coverage:  | 85 %        |
| Intensity Coverage:   | 49 %        |
| Peak Coverage:        | 20 %        |
| Protein Localisation: | 465 ... 477 |

| a ion             | b <sup>2+</sup> ion | b ion         |    |     |             | y ion         | y <sup>2+</sup> ion |
|-------------------|---------------------|---------------|----|-----|-------------|---------------|---------------------|
| Δ dalton mass     | Δ dalton mass       | Δ dalton mass |    | seq |             | Δ dalton mass | Δ dalton mass       |
| 86.1              | 114.1               | 114.1         | 1  | L   | 12          |               |                     |
| +0.027215.1       | 243.1               | +0.047243.1   | 2  | E   | 11          | 1360          | 680.3 +0.28         |
| 286.2             | 314.2               | 314.2         | 3  | A   | 10          | 1231          | 615.8 +0.14         |
| 357.2             | 385.2               | 385.2         | 4  | A   | 9           | 1160          | 1160                |
| 494.3             | 522.3               | 522.3         | 5  | H   | 8           | 1088          | 544.7 +0.19         |
| 595.3             | 623.3               | 623.3         | 6  | T   | 7           | 951.4 +0.08   | 2951.4              |
| 708.4             | 736.4               | 736.4         | 7  | L   | 6           | 850.4 +0.07   | 850.4               |
| 837.4 +0.074433.2 | +0.211865.4         | 8             | E  | 5   | 737.3 -0.15 | 737.3         |                     |
| 952.5             | 980.5 -0.03         | 980.5         | 9  | D   | 4           | 608.2 -0.01   | 608.2               |
| 1113              | 1140                | 1140          | 10 | C   | 3           | 493.2         | 493.2               |
| 1184              | 1212                | 1212          | 11 | A   | 2           | 333.2 +0.05   | 333.2               |
| 1271              | 1299                | 1299          | 12 | S   | 1           | 262.2 +0.08   | 262.2               |
|                   |                     |               | 13 | R   | 0           | 175.1 -0.03   | 175.1               |

Scan number 1143 Raw file LNCAP\_Silac\_23F10\_set3\_07  
 Method ITMS; CID Pepti... 39.18

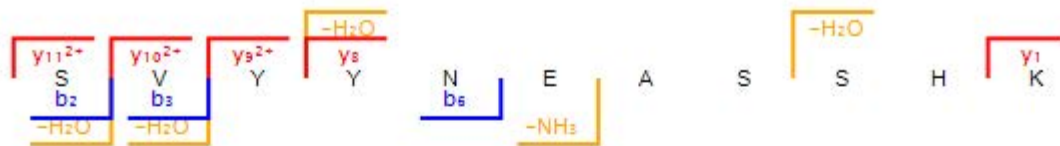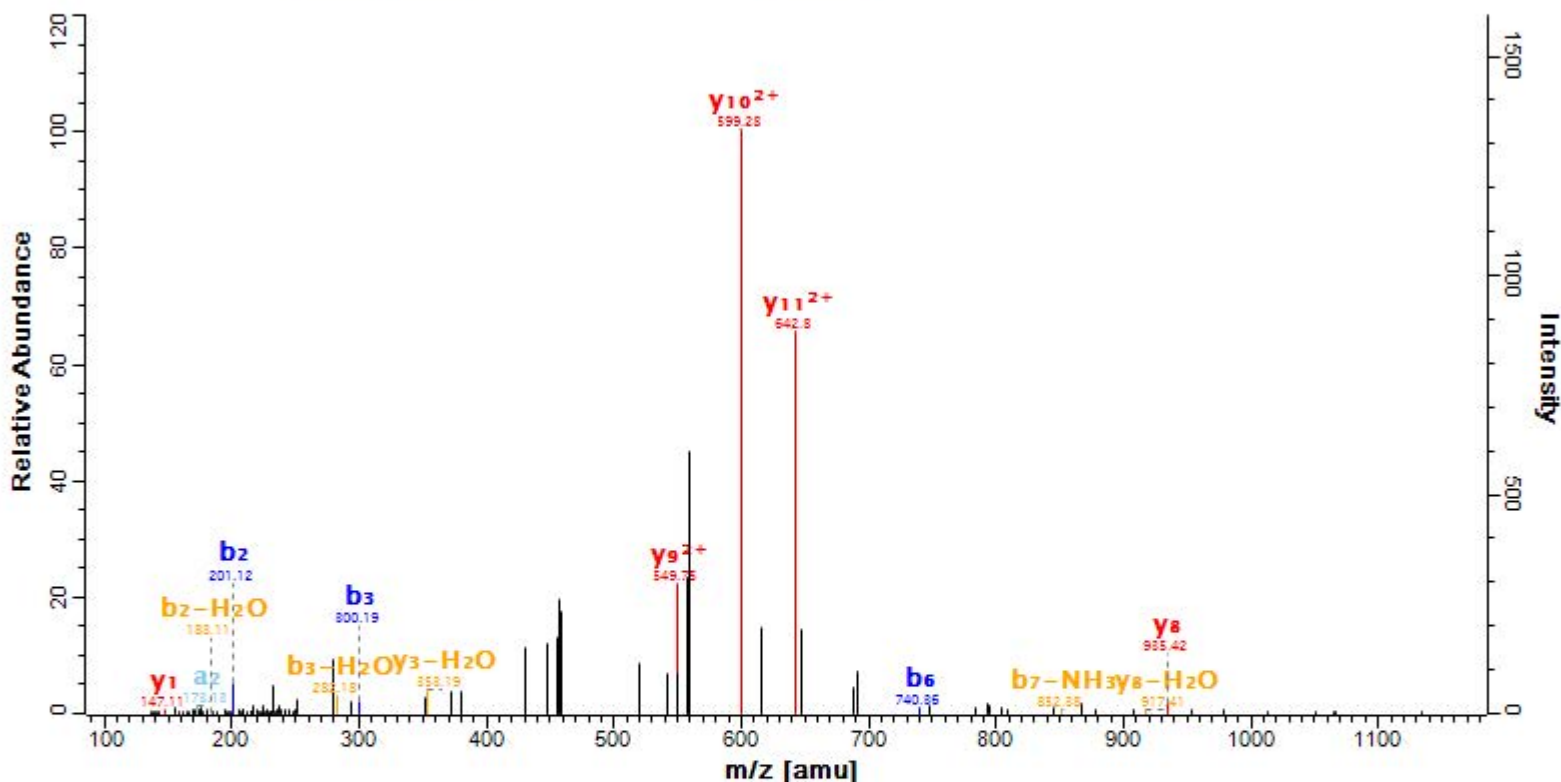

#### precursor information

|                   |                 |
|-------------------|-----------------|
| Mass:             | 1396.66225      |
| m/z:              | 466.56136       |
| Charge:           | 3+              |
| Retentiontime:    | 12.785673141479 |
| Score:            | 39.17924        |
| Mass Error [ppm]: | -0.0302         |
| PEP:              | 0.067541        |
| Precursor Type:   | MULTI           |

#### general information

|                       |             |
|-----------------------|-------------|
| Annotation:           | 8 of 12     |
| AminoAcids Coverage:  | 67 %        |
| Intensity Coverage:   | 41 %        |
| Peak Coverage:        | 11 %        |
| Protein Localisation: | 394 ... 405 |

| a ion    |        | b ion    |        | seq |   |    | y ion    |         | y <sup>2+</sup> ion |         |
|----------|--------|----------|--------|-----|---|----|----------|---------|---------------------|---------|
| Δ dalton | mass   | Δ dalton | mass   |     |   |    | Δ dalton | mass    | Δ dalton            | mass    |
|          | 86.096 | 114.09   |        | 1   | I | 11 |          |         |                     |         |
| +0.0012  | 173.13 | +0.0322  | 201.12 | 2   | S | 10 | 1284.6   |         | 642.8               | +0.1454 |
|          | 272.2  | +0.109   | 300.19 | 3   | V | 9  | 1197.6   |         | 599.28              | +0.1671 |
|          | 435.26 |          | 463.26 | 4   | Y | 8  | 1098.5   |         | 549.75              | -0.053  |
|          | 598.32 |          | 626.32 | 5   | Y | 7  | 935.42   | +0.0797 | 935.42              |         |
|          | 712.37 | +0.0332  | 740.36 | 6   | N | 6  | 772.36   |         | 772.36              |         |
|          | 841.41 |          | 869.4  | 7   | E | 5  | 658.32   |         | 658.32              |         |
|          | 912.45 |          | 940.44 | 8   | A | 4  | 529.27   |         | 529.27              |         |
|          | 999.48 |          | 1027.5 | 9   | S | 3  | 458.24   |         | 458.24              |         |
|          | 1086.5 |          | 1114.5 | 10  | S | 2  | 371.2    |         | 371.2               |         |
|          | 1223.6 |          | 1251.6 | 11  | H | 1  | 284.17   |         | 284.17              |         |
|          |        |          |        | 12  | K | 0  | 147.11   | +0.1843 | 147.11              |         |

Scan number 1154 Raw file LNCAP\_Silac\_23F10\_set3\_07  
 Method ITMS: CID Pepti... 297.16

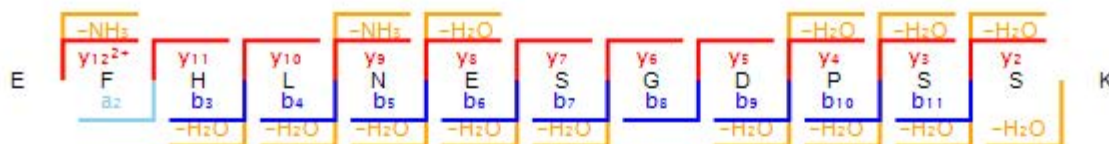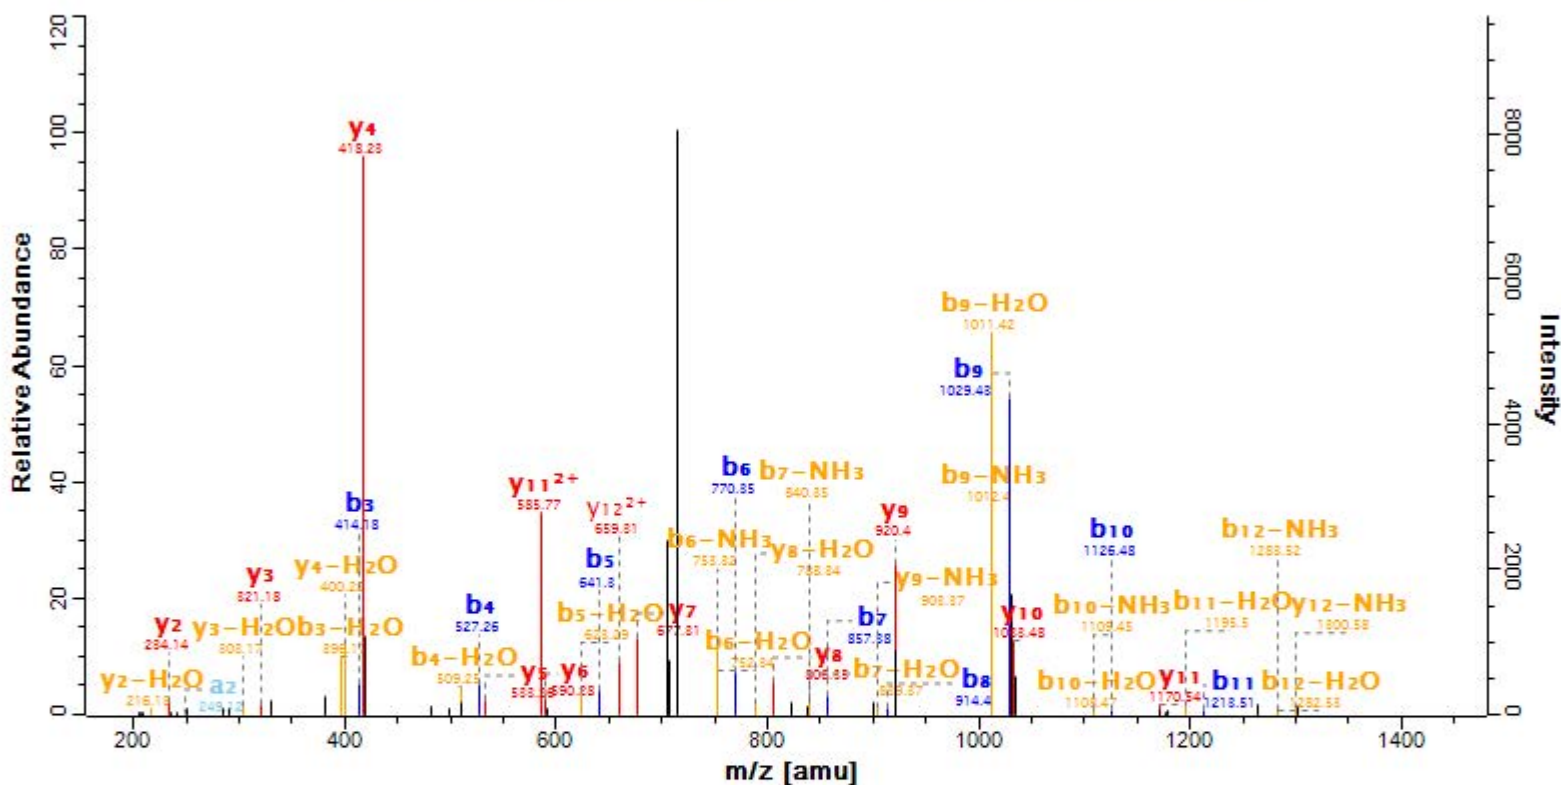

#### precursor information

|                   |                 |
|-------------------|-----------------|
| Mass:             | 1445.64261      |
| m/z:              | 723.82858       |
| Charge:           | 2+              |
| Retentiontime:    | 12.861715316772 |
| Score:            | 297.1567        |
| Mass Error [ppm]: | 0.22353         |
| PEP:              | 8.8337E-82      |
| Precursor Type:   | MULTI           |

#### general information

|                       |             |
|-----------------------|-------------|
| Annotation:           | 11 of 13    |
| AminoAcids Coverage:  | 85 %        |
| Intensity Coverage:   | 68 %        |
| Peak Coverage:        | 48 %        |
| Protein Localisation: | 142 ... 154 |

| a ion    |        | b ion    |        |    |     |    | y ion    |         | y <sup>2+</sup> ion |         |
|----------|--------|----------|--------|----|-----|----|----------|---------|---------------------|---------|
| Δ dalton | mass   | Δ dalton | mass   |    | seq |    | Δ dalton | mass    | Δ dalton            | mass    |
|          | 102.05 |          | 130.05 | 1  | E   | 12 |          |         |                     |         |
| +0.2099  | 249.12 |          | 277.12 | 2  | F   | 11 | 1317.6   |         | 659.31              | +0.2043 |
|          | 386.18 | +0.0388  | 414.18 | 3  | H   | 10 | 1170.5   | -0.085  | 585.77              | +0.2293 |
|          | 499.27 | -0.003   | 527.26 | 4  | L   | 9  | 1033.5   | -0.065  | 1033.5              |         |
|          | 613.31 | +0.1708  | 641.3  | 5  | N   | 8  | 920.4    | -0.023  | 920.4               |         |
|          | 742.35 | +0.0307  | 770.35 | 6  | E   | 7  | 806.35   | +0.0681 | 806.35              |         |
|          | 829.38 | +0.0204  | 857.38 | 7  | S   | 6  | 677.31   | +0.0488 | 677.31              |         |
|          | 886.41 | -0.002   | 914.4  | 8  | G   | 5  | 590.28   | +0.0827 | 590.28              |         |
|          | 1001.4 | -0.048   | 1029.4 | 9  | D   | 4  | 533.26   | +0.0922 | 533.26              |         |
|          | 1098.5 | +0.0745  | 1126.5 | 10 | P   | 3  | 418.23   | +0.0099 | 418.23              |         |
|          | 1185.5 | +0.0045  | 1213.5 | 11 | S   | 2  | 321.18   | +0.0951 | 321.18              |         |
|          | 1272.5 |          | 1300.5 | 12 | S   | 1  | 234.14   | +0.0599 | 234.14              |         |
|          |        |          |        | 13 | K   | 0  | 147.11   |         | 147.11              |         |

Scan number 1475 Raw file LNCAP\_Silac\_23F10\_set3\_07  
 Method ITMS; CID Pepti... 247.93

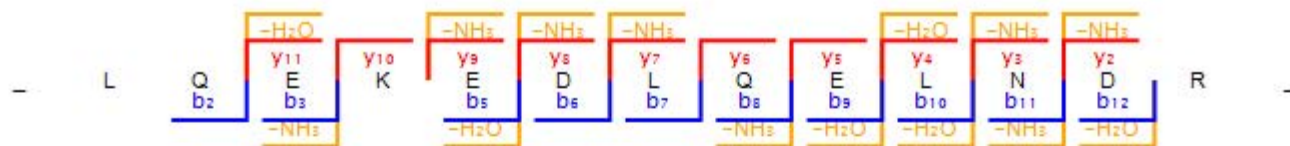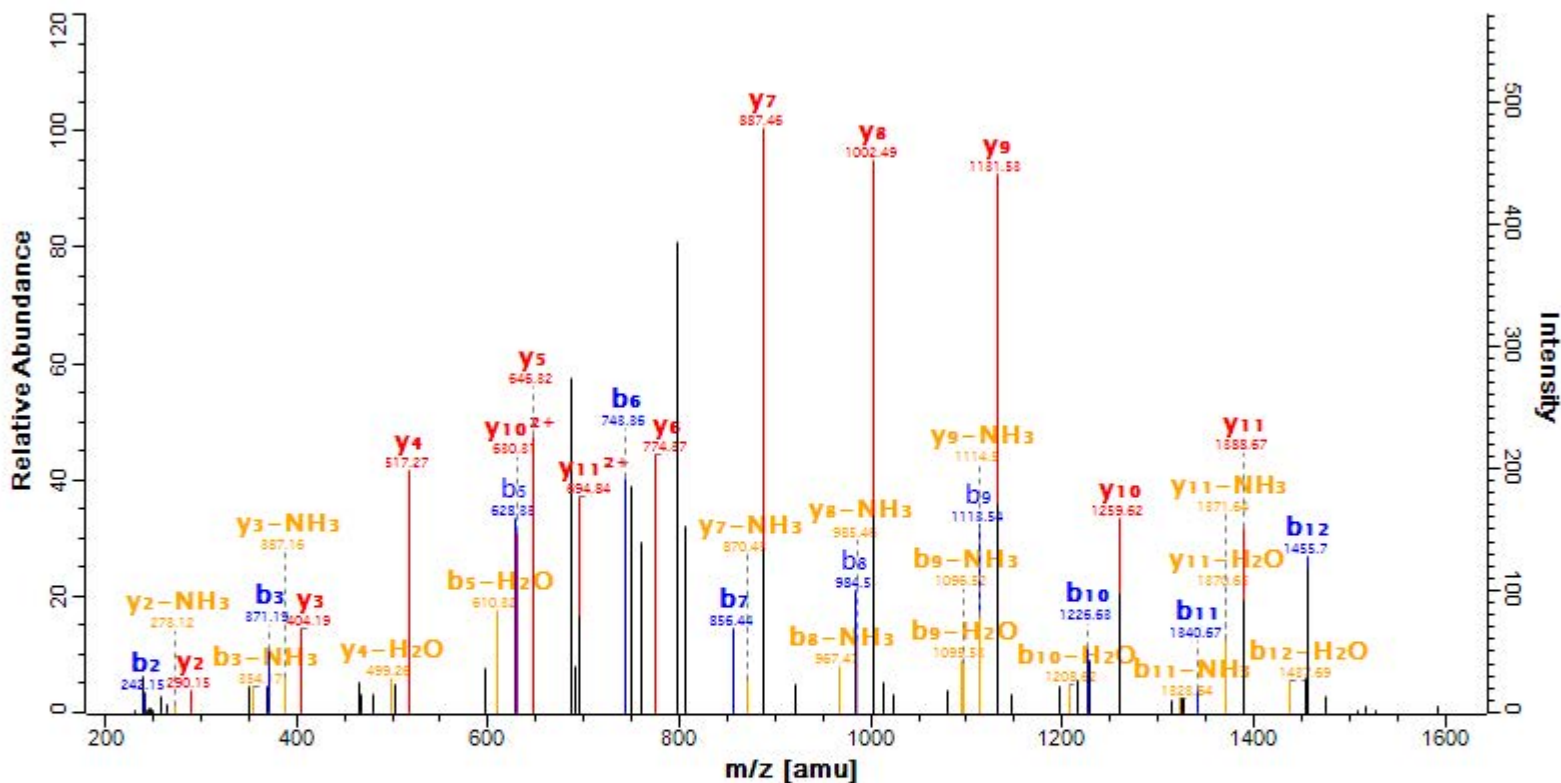

**precursor information**

|                   |                 |
|-------------------|-----------------|
| Mass:             | 1628.80016      |
| m/z:              | 815.40736       |
| Charge:           | 2+              |
| Retentiontime:    | 14.910367012023 |
| Score:            | 247.9326        |
| Mass Error [ppm]: | -0.25765        |
| PEP:              | 3.3808E-37      |
| Precursor Type:   | MULTI           |

**general information**

|                       |           |
|-----------------------|-----------|
| Annotation:           | 11 of 13  |
| AminoAcids Coverage:  | 85 %      |
| Intensity Coverage:   | 62 %      |
| Peak Coverage:        | 43 %      |
| Protein Localisation: | 29 ... 41 |

| b ion     |          |    |     |    | y ion    |           | y <sup>2+</sup> ion |           |
|-----------|----------|----|-----|----|----------|-----------|---------------------|-----------|
| Δ dalton  | mass     |    | seq |    | Δ dalton | mass      | Δ dalton            | mass      |
|           | 114.0913 | 1  | L   | 12 |          |           |                     |           |
| -0.00215  | 242.1499 | 2  | Q   | 11 | 1516.724 |           | 1516.724            |           |
| +0.058069 | 371.1925 | 3  | E   | 10 | 1388.665 | -0.04644  | 694.8362            | +0.004026 |
|           | 499.2875 | 4  | K   | 9  | 1259.623 | -0.04706  | 630.3149            | +0.337701 |
| +0.018993 | 628.3301 | 5  | E   | 8  | 1131.528 | +0.018851 | 1131.528            |           |
| +0.00737  | 743.357  | 6  | D   | 7  | 1002.485 | -0.00991  | 1002.485            |           |
| +0.055569 | 856.4411 | 7  | L   | 6  | 887.4581 | +0.052804 | 887.4581            |           |
| +0.094403 | 984.4997 | 8  | Q   | 5  | 774.3741 | +0.011014 | 774.3741            |           |
| +0.000724 | 1113.542 | 9  | E   | 4  | 646.3155 | +0.038036 | 646.3155            |           |
| -0.0704   | 1226.626 | 10 | L   | 3  | 517.2729 | +0.072389 | 517.2729            |           |
| -0.08476  | 1340.669 | 11 | N   | 2  | 404.1888 | +0.018331 | 404.1888            |           |
| -0.07264  | 1455.696 | 12 | D   | 1  | 290.1459 | +0.12211  | 290.1459            |           |
|           |          | 13 | R   | 0  | 175.119  |           | 175.119             |           |

Scan number 1656 Raw file LNCAP\_Silac\_23F10\_set3\_07  
 Method ITMS: CID Pepti... 205.83

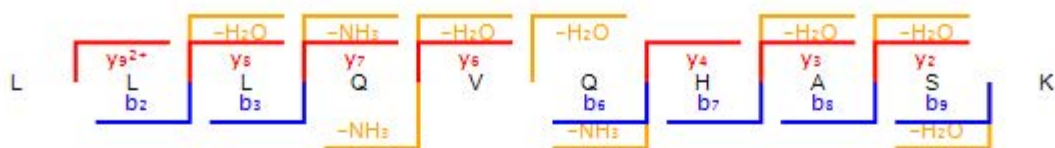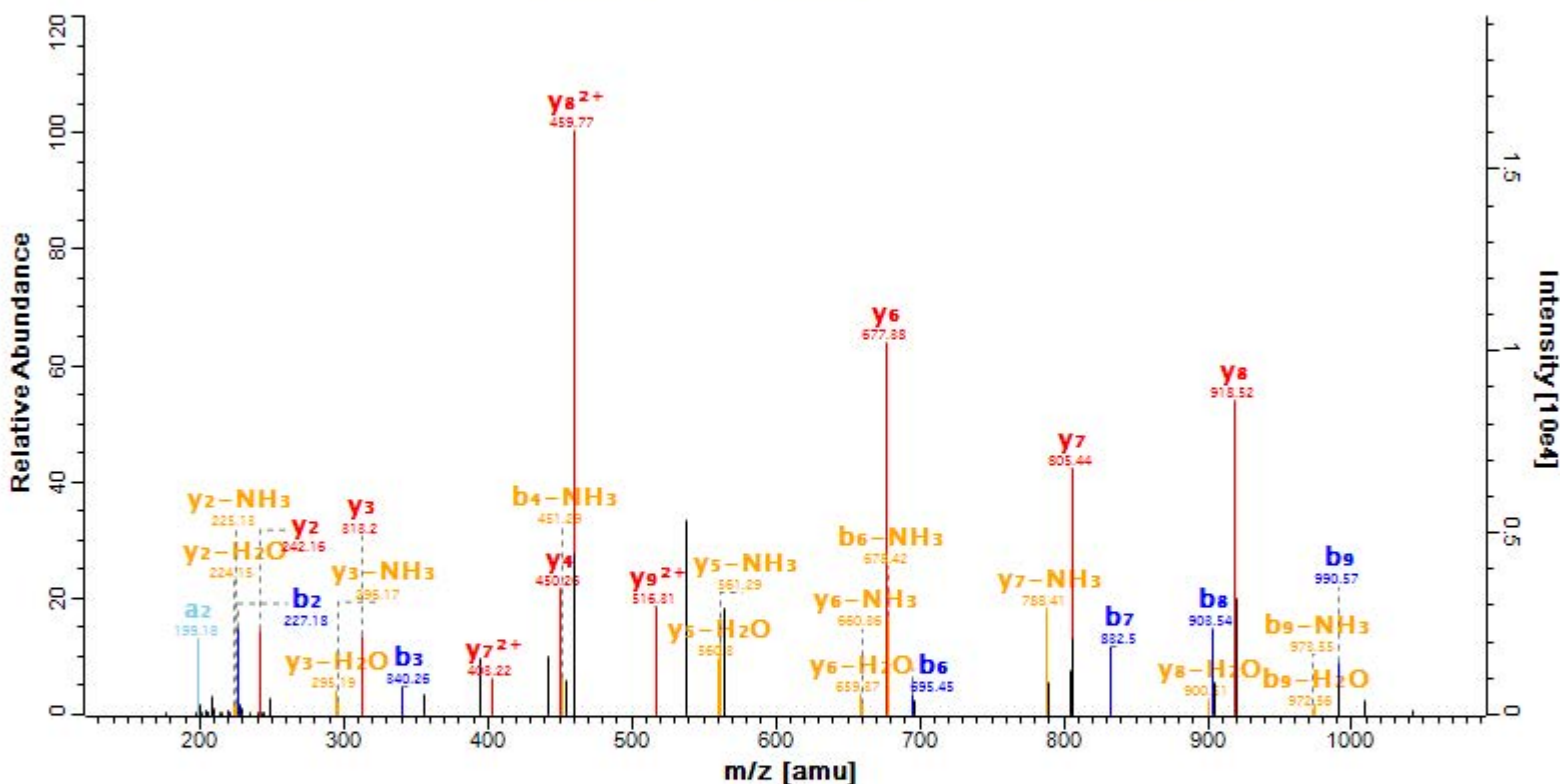

### precursor information

|                   |                 |
|-------------------|-----------------|
| Mass:             | 1135.67131      |
| m/z:              | 568.84293       |
| Charge:           | 2+              |
| Retentiontime:    | 16.003427505493 |
| Score:            | 205.8269        |
| Mass Error [ppm]: | -0.026876       |
| PEP:              | 4.1172E-13      |

### g Precursor Type: MULTI

|                       |           |
|-----------------------|-----------|
| Annotation:           | 8 of 10   |
| AminoAcids Coverage:  | 80 %      |
| Intensity Coverage:   | 70 %      |
| Peak Coverage:        | 37 %      |
| Protein Localisation: | 34 ... 43 |

| a ion    |        | b ion    |        |    |     |   | y ion    |         | y <sup>2+</sup> ion |         |
|----------|--------|----------|--------|----|-----|---|----------|---------|---------------------|---------|
| Δ dalton | mass   | Δ dalton | mass   |    | seq |   | Δ dalton | mass    | Δ dalton            | mass    |
|          | 86.096 |          | 114.09 | 1  | L   | 9 |          |         |                     |         |
| -0.03    | 199.18 | -0.066   | 227.18 | 2  | L   | 8 | 1031.6   |         | 516.31              | +0.2605 |
|          | 312.26 | -0.047   | 340.26 | 3  | L   | 7 | 918.52   | -0.046  | 459.77              | +0.0496 |
|          | 440.32 |          | 468.32 | 4  | Q   | 6 | 805.44   | +0.0279 | 403.22              | +0.1588 |
|          | 539.39 |          | 567.39 | 5  | V   | 5 | 677.38   | -0.056  | 677.38              |         |
|          | 667.45 | -0.179   | 695.45 | 6  | Q   | 4 | 578.31   |         | 578.31              |         |
|          | 804.51 | +0.111   | 832.5  | 7  | H   | 3 | 450.26   | +0.181  | 450.26              |         |
|          | 875.55 | -0.019   | 903.54 | 8  | A   | 2 | 313.2    | -0.004  | 313.2               |         |
|          | 962.58 | -0.059   | 990.57 | 9  | S   | 1 | 242.16   | +0.1233 | 242.16              |         |
|          |        |          |        | 10 | K   | 0 | 155.13   |         | 155.13              |         |



Scan number 2587 Raw file LNCAP\_Silac\_23F10\_set3\_07  
 Method ITMS; CID Pepti... 148.28

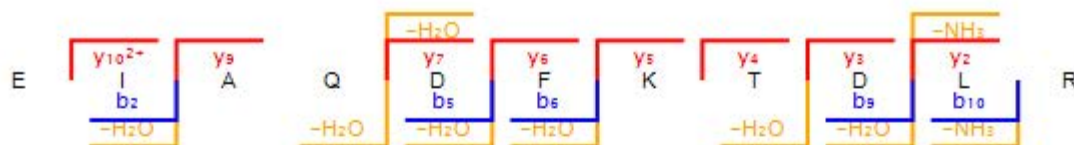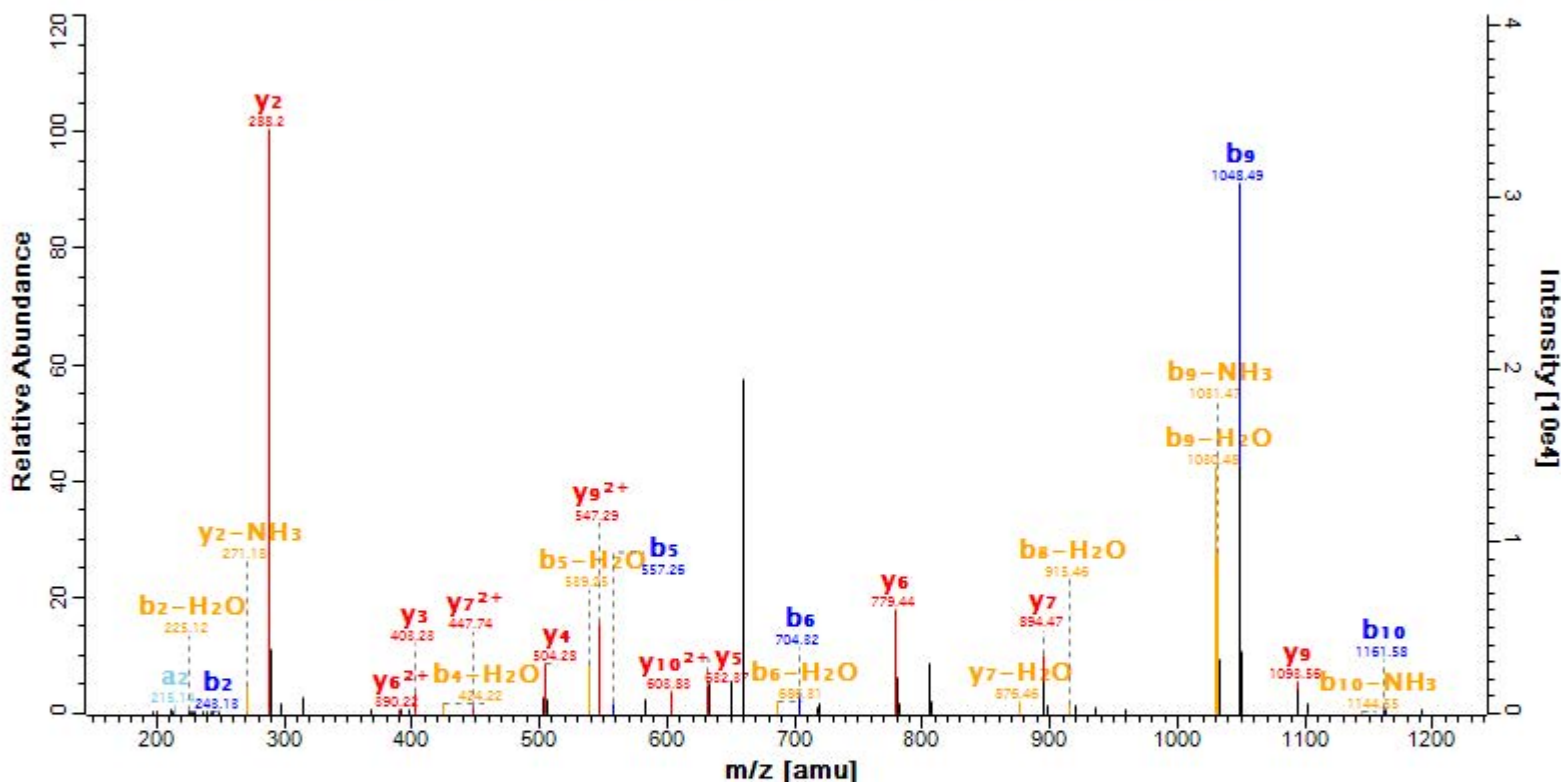

#### precursor information

|                   |                 |
|-------------------|-----------------|
| Mass:             | 1334.68298      |
| m/z:              | 668.34877       |
| Charge:           | 2+              |
| Retentiontime:    | 21.448699951171 |
| Score:            | 148.2801        |
| Mass Error [ppm]: | -0.034997       |
| PEP:              | 3.3281E-05      |
| Precursor Type:   | MULTI           |

#### general information

|                       |           |
|-----------------------|-----------|
| Annotation:           | 9 of 11   |
| AminoAcids Coverage:  | 82 %      |
| Intensity Coverage:   | 61 %      |
| Peak Coverage:        | 35 %      |
| Protein Localisation: | 74 ... 84 |

| a ion    |        | b ion    |        |    |     |          | y ion  |          | y <sup>2+</sup> ion |  |
|----------|--------|----------|--------|----|-----|----------|--------|----------|---------------------|--|
| Δ dalton | mass   | Δ dalton | mass   |    | seq | Δ dalton | mass   | Δ dalton | mass                |  |
|          | 102.05 |          | 130.05 | 1  | E   | 10       |        |          |                     |  |
| +0.0686  | 215.14 | -0.098   | 243.13 | 2  | I   | 9        | 1206.6 | 603.83   | -0.043              |  |
|          | 286.18 |          | 314.17 | 3  | A   | 8        | 1093.6 | +0.0238  | 547.29              |  |
|          | 414.23 |          | 442.23 | 4  | Q   | 7        | 1022.5 |          | 1022.5              |  |
|          | 529.26 | +0.0821  | 557.26 | 5  | D   | 6        | 894.47 | -0.038   | 447.74              |  |
|          | 676.33 | +0.0135  | 704.32 | 6  | F   | 5        | 779.44 | +0.0802  | 390.22              |  |
|          | 804.43 |          | 832.42 | 7  | K   | 4        | 632.37 | +0.0272  | 632.37              |  |
|          | 905.47 |          | 933.47 | 8  | T   | 3        | 504.28 | +0.0046  | 504.28              |  |
|          | 1020.5 | -0.051   | 1048.5 | 9  | D   | 2        | 403.23 | -0.002   | 403.23              |  |
|          | 1133.6 | -0.139   | 1161.6 | 10 | L   | 1        | 288.2  | +0.0108  | 288.2               |  |
|          |        |          |        | 11 | R   | 0        | 175.12 |          | 175.12              |  |

Scan number 2870 Raw file LNCAP\_Silac\_23F10\_set3\_07  
 Method ITMS: CID Pepti... 99.75

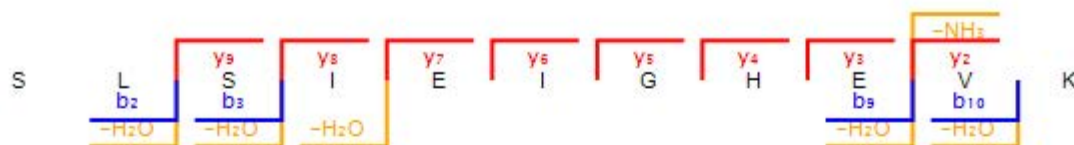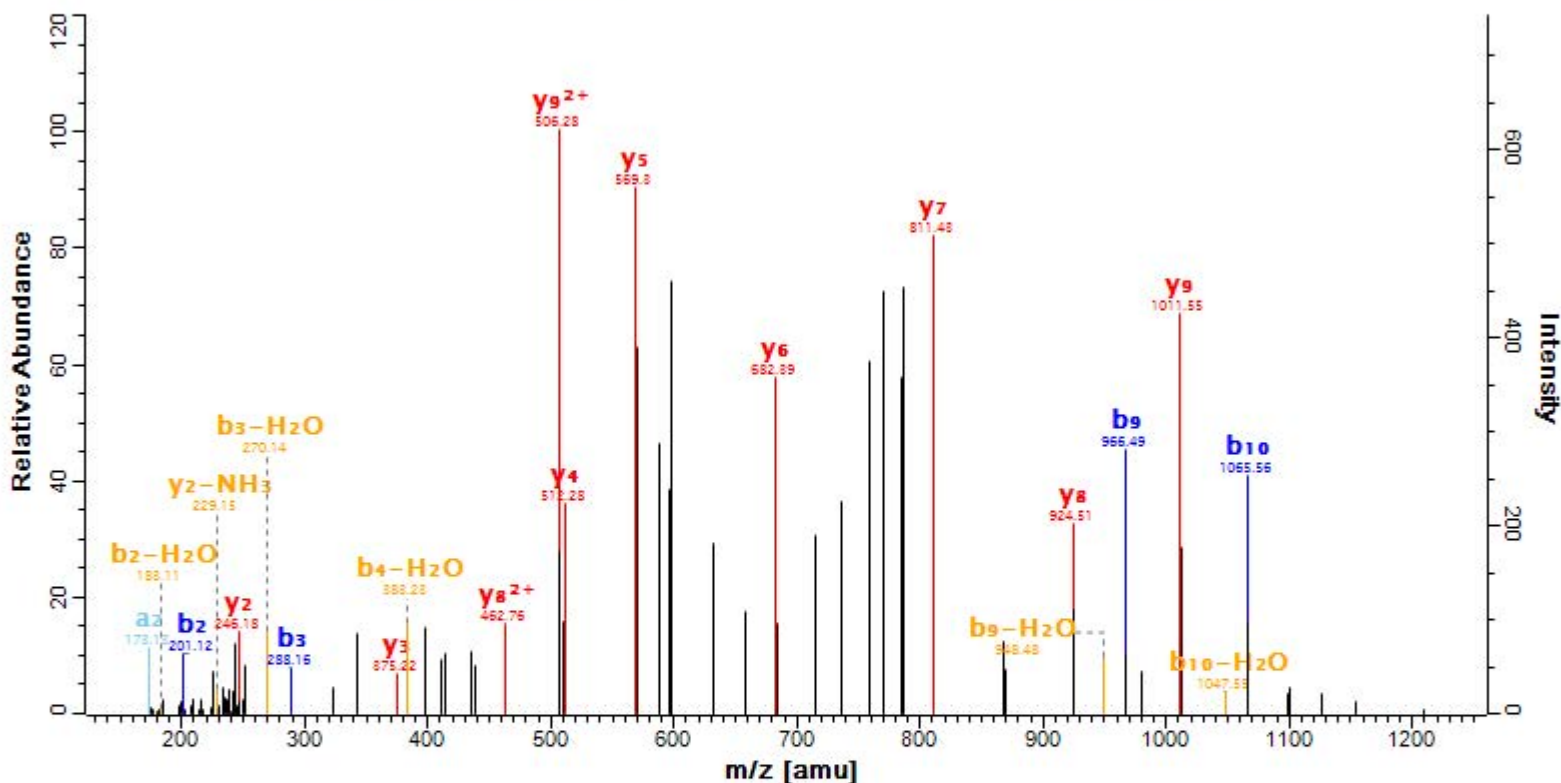

#### precursor information

|                   |                 |
|-------------------|-----------------|
| Mass:             | 1210.65543      |
| m/z:              | 606.33499       |
| Charge:           | 2+              |
| Retentiontime:    | 23.167114257812 |
| Score:            | 99.75196        |
| Mass Error [ppm]: | -0.26229        |
| PEP:              | 0.00071468      |
| Precursor Type:   | MULTI           |

#### general information

|                       |           |
|-----------------------|-----------|
| Annotation:           | 9 of 11   |
| AminoAcids Coverage:  | 82 %      |
| Intensity Coverage:   | 40 %      |
| Peak Coverage:        | 23 %      |
| Protein Localisation: | 63 ... 73 |

| a ion    |        | b ion    |        |    |     |          | y ion  |          | y <sup>2+</sup> ion |  |
|----------|--------|----------|--------|----|-----|----------|--------|----------|---------------------|--|
| Δ dalton | mass   | Δ dalton | mass   |    | seq | Δ dalton | mass   | Δ dalton | mass                |  |
|          | 60.044 |          | 88.039 | 1  | S   | 10       |        |          |                     |  |
| +0.0204  | 173.13 | -0.032   | 201.12 | 2  | L   | 9        | 1124.6 |          | 1124.6              |  |
|          | 260.16 | +0.0609  | 288.16 | 3  | S   | 8        | 1011.5 | -0.065   | 506.28              |  |
|          | 373.24 |          | 401.24 | 4  | I   | 7        | 924.51 | -0.036   | 462.76              |  |
|          | 502.29 |          | 530.28 | 5  | E   | 6        | 811.43 | +0.0162  | 811.43              |  |
|          | 615.37 |          | 643.37 | 6  | I   | 5        | 682.39 | +0.2076  | 682.39              |  |
|          | 672.39 |          | 700.39 | 7  | G   | 4        | 569.3  | +0.1816  | 569.3               |  |
|          | 809.45 |          | 837.45 | 8  | H   | 3        | 512.28 | +0.0292  | 512.28              |  |
|          | 938.49 | -0.047   | 966.49 | 9  | E   | 2        | 375.22 | -0.051   | 375.22              |  |
|          | 1037.6 | +0.0677  | 1065.6 | 10 | V   | 1        | 246.18 | -0.128   | 246.18              |  |
|          |        |          |        | 11 | K   | 0        | 147.11 |          | 147.11              |  |

Scan number 3010 Raw file LNCAP\_Silac\_23F10\_set3\_07  
 Method ITMS: CID Pepti... 47.53

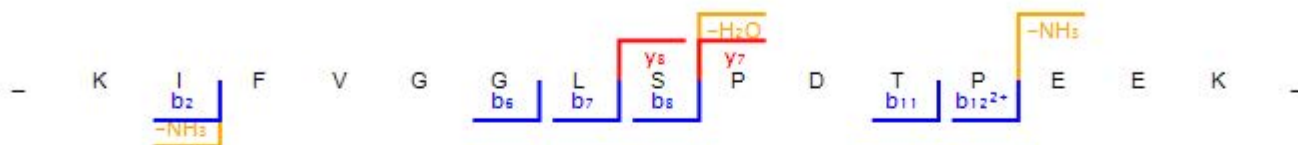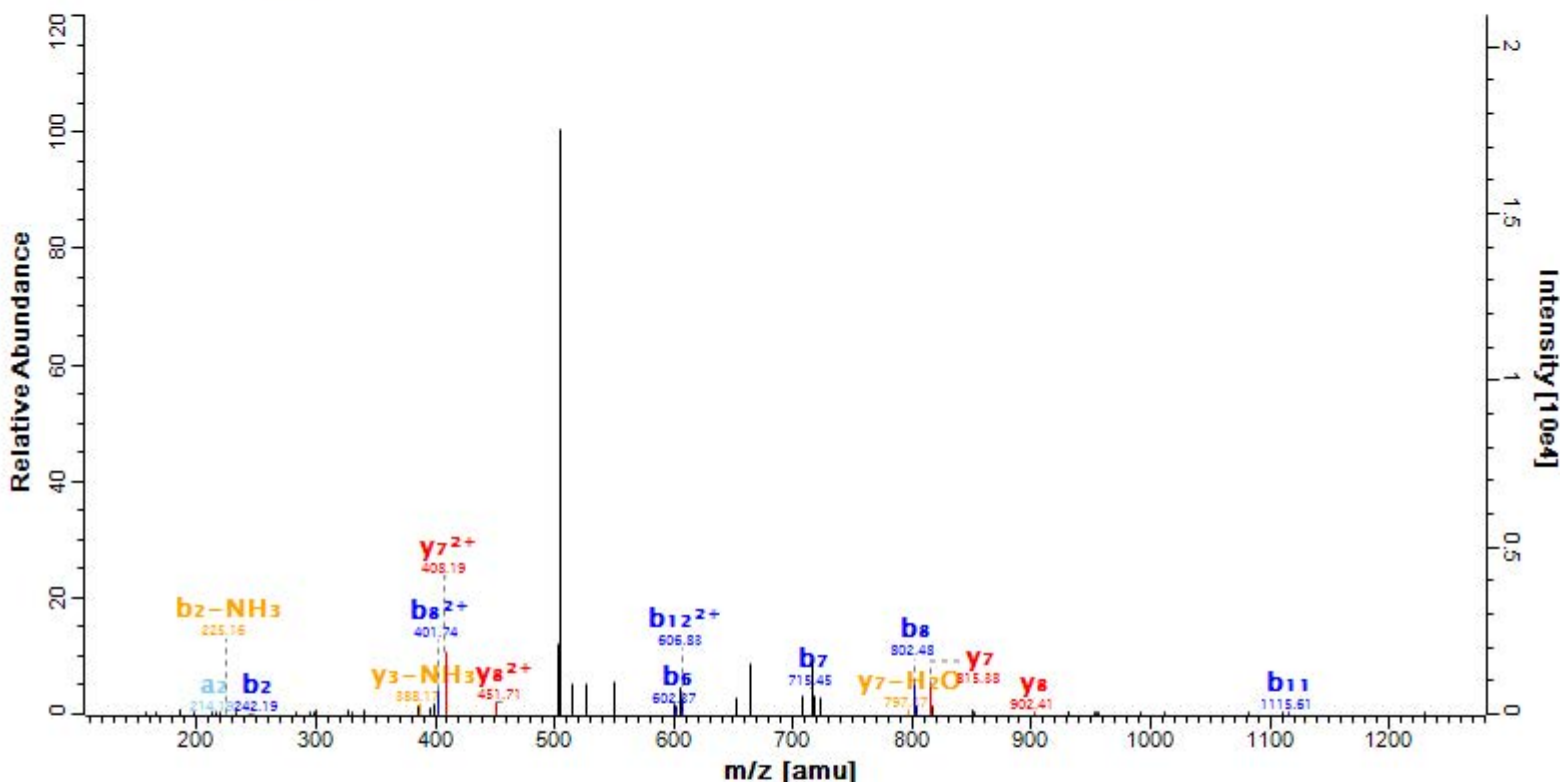

#### precursor information

|                   |                 |
|-------------------|-----------------|
| Mass:             | 1615.76894      |
| m/z:              | 539.59692       |
| Charge:           | 3+              |
| Retentiontime:    | 23.954595565795 |
| Score:            | 47.53175        |
| Mass Error [ppm]: | -0.92079        |
| PEP:              | 0.03475         |
| Precursor Type:   | MULTI           |

#### general information

|                       |             |
|-----------------------|-------------|
| Annotation:           | 8 of 15     |
| AminoAcids Coverage:  | 53 %        |
| Intensity Coverage:   | 17 %        |
| Peak Coverage:        | 16 %        |
| Protein Localisation: | 164 ... 178 |

| a ion         | b <sup>2+</sup> ion | b ion         |     |    | y ion         | y <sup>2+</sup> ion |             |        |        |
|---------------|---------------------|---------------|-----|----|---------------|---------------------|-------------|--------|--------|
| Δ dalton mass | Δ dalton mass       | Δ dalton mass | seq |    | Δ dalton mass | Δ dalton mass       |             |        |        |
| 101.1         | 129.1               | 129.1         | 1   | K  | 14            |                     |             |        |        |
| +0.097214.2   | 242.2               | +0.051242.2   | 2   | I  | 13            | 1489                | 1489        |        |        |
| 361.3         | 389.3               | 389.3         | 3   | F  | 12            | 1376                | 1376        |        |        |
| 460.3         | 488.3               | 488.3         | 4   | V  | 11            | 1229                | 1229        |        |        |
| 517.3         | 545.3               | 545.3         | 5   | G  | 10            | 1130                | 1130        |        |        |
| 574.4         | 602.4               | +0.037602.4   | 6   | G  | 9             | 1073                | 1073        |        |        |
| 687.5         | 715.5               | +0.239715.5   | 7   | L  | 8             | 1015                | 1015        |        |        |
| 774.5         | +0.101401.7         | +0.061802.5   | 8   | S  | 7             | 902.4               | +0.224451.7 | +0.246 |        |
| 871.5         | 899.5               | 899.5         | 9   | P  | 6             | 815.4               | +0.11       | 408.2  | +0.193 |
| 986.6         | 1015                | 1015          | 10  | D  | 5             | 718.3               |             | 718.3  |        |
| 1088          | 1116                | +0.2691116    | 11  | T  | 4             | 603.3               |             | 603.3  |        |
| 1185          | +0.03               | 606.8         |     | 12 | P             | 3                   | 502.3       |        | 502.3  |
| 1314          | 1342                | 1342          | 13  | E  | 2             | 405.2               |             | 405.2  |        |
| 1443          | 1471                | 1471          | 14  | E  | 1             | 276.2               |             | 276.2  |        |
|               |                     |               | 15  | K  | 0             | 147.1               |             | 147.1  |        |

Scan number 3055 Raw file LNCAP\_Silac\_23F10\_set3\_07  
 Method ITMS; CID Pepti... 65.47

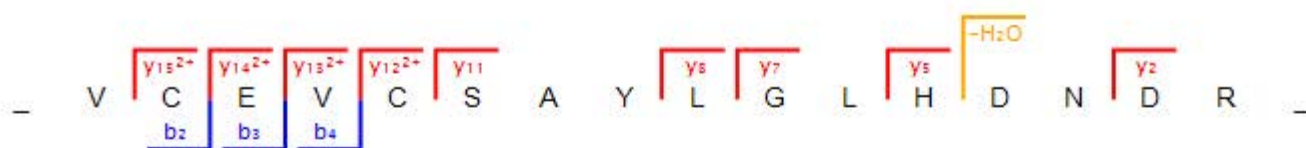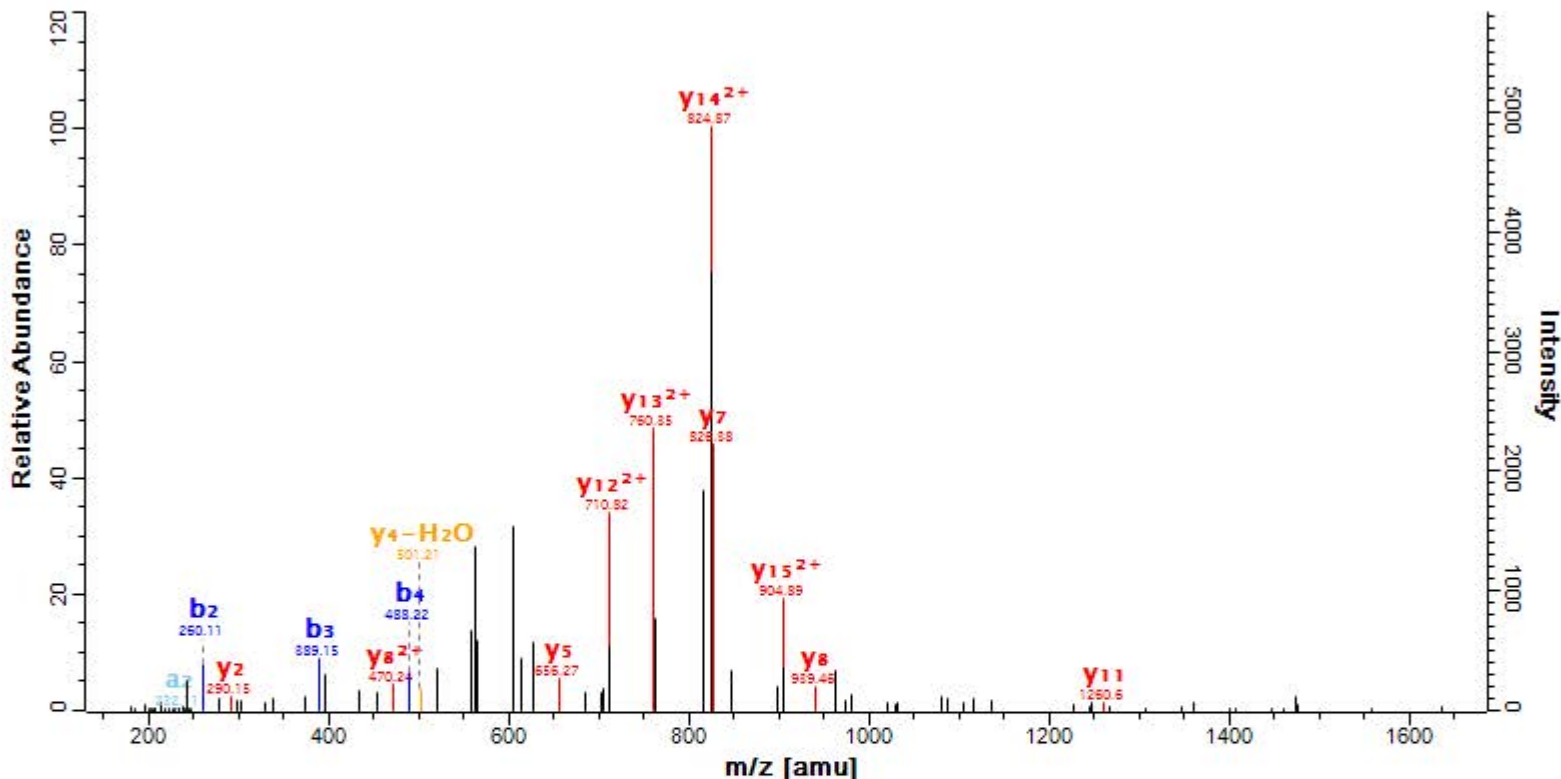

#### precursor information

|                   |                 |
|-------------------|-----------------|
| Mass:             | 1906.82915      |
| m/z:              | 636.61699       |
| Charge:           | 3+              |
| Retentiontime:    | 24.199304580688 |
| Score:            | 65.47156        |
| Mass Error [ppm]: | -0.53903        |
| PEP:              | 0.0017448       |
| Precursor Type:   | MULTI           |

#### general information

|                       |             |
|-----------------------|-------------|
| Annotation:           | 10 of 16    |
| AminoAcids Coverage:  | 62 %        |
| Intensity Coverage:   | 43 %        |
| Peak Coverage:        | 16 %        |
| Protein Localisation: | 255 ... 270 |

| a ion    |        | b ion    |        |     |   |          | y ion  |          | y <sup>2+</sup> ion |        |
|----------|--------|----------|--------|-----|---|----------|--------|----------|---------------------|--------|
| Δ dalton | mass   | Δ dalton | mass   | seq |   | Δ dalton | mass   | Δ dalton | mass                |        |
|          | 72.081 |          | 100.08 | 1   | V | 15       |        |          |                     |        |
| +0.1795  | 232.11 | -0.002   | 260.11 | 2   | C | 14       | 1808.8 | 904.89   | +0.2452             |        |
|          | 361.15 | +0.0283  | 389.15 | 3   | E | 13       | 1648.7 | 824.87   | -0.013              |        |
|          | 460.22 | +0.1885  | 488.22 | 4   | V | 12       | 1519.7 | 760.35   | +0.2235             |        |
|          | 620.25 |          | 648.25 | 5   | C | 11       | 1420.6 | 710.82   | +0.2602             |        |
|          | 707.29 |          | 735.28 | 6   | S | 10       | 1260.6 | -0.066   | 1260.6              |        |
|          | 778.32 |          | 806.32 | 7   | A | 9        | 1173.6 |          | 1173.6              |        |
|          | 941.39 |          | 969.38 | 8   | Y | 8        | 1102.5 |          | 1102.5              |        |
|          | 1054.5 |          | 1082.5 | 9   | L | 7        | 939.46 | +0.1338  | 470.24              | +0.353 |
|          | 1111.5 |          | 1139.5 | 10  | G | 6        | 826.38 | -0.222   | 826.38              |        |
|          | 1224.6 |          | 1252.6 | 11  | L | 5        | 769.36 |          | 769.36              |        |
|          | 1361.6 |          | 1389.6 | 12  | H | 4        | 656.27 | -0.017   | 656.27              |        |
|          | 1476.7 |          | 1504.7 | 13  | D | 3        | 519.22 |          | 519.22              |        |
|          | 1590.7 |          | 1618.7 | 14  | N | 2        | 404.19 |          | 404.19              |        |
|          | 1705.7 |          | 1733.7 | 15  | D | 1        | 290.15 | -0.01    | 290.15              |        |
|          |        |          |        | 16  | R | 0        | 175.12 |          | 175.12              |        |

Scan number 3142 Raw file LNCAP\_Silac\_23F10\_set3\_07  
 Method ITMS: CID Peptide LNCAP\_Silac\_23F10\_set3\_07

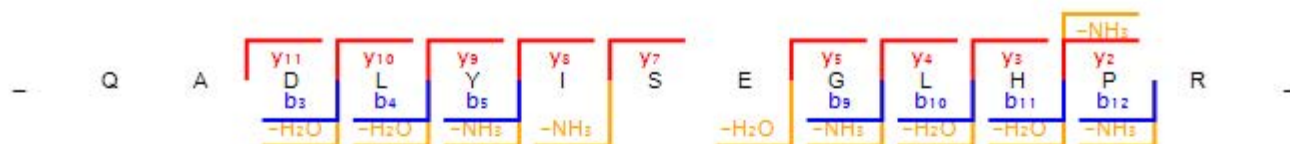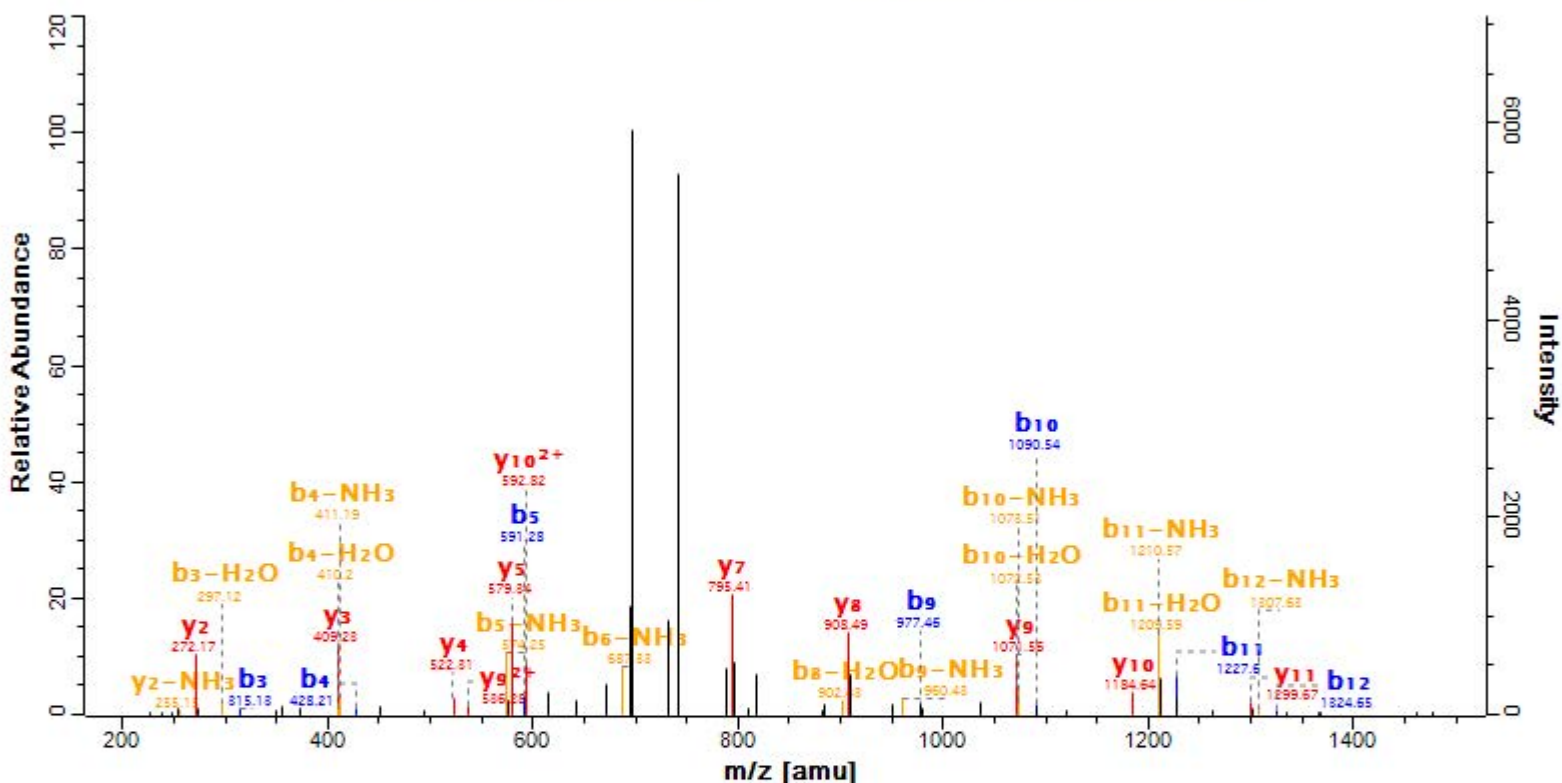

**precursor information**

|                   |                 |
|-------------------|-----------------|
| Mass:             | 1497.75747      |
| m/z:              | 749.88601       |
| Charge:           | 2+              |
| Retentiontime:    | 24.717082977294 |
| Score:            | 198.7447        |
| Mass Error [ppm]: | -0.082134       |
| PEP:              | 1.3099E-17      |
| Precursor Type:   | MULTI           |

**general information**

|                       |             |
|-----------------------|-------------|
| Annotation:           | 10 of 13    |
| AminoAcids Coverage:  | 77 %        |
| Intensity Coverage:   | 36 %        |
| Peak Coverage:        | 38 %        |
| Protein Localisation: | 105 ... 117 |

| b ion     |          |    |     |    | y ion    |           | y <sup>2+</sup> ion |           |
|-----------|----------|----|-----|----|----------|-----------|---------------------|-----------|
| Δ dalton  | mass     |    | seq |    | Δ dalton | mass      | Δ dalton            | mass      |
|           | 129.0659 | 1  | Q   | 12 |          |           |                     |           |
|           | 200.103  | 2  | A   | 11 | 1370.706 |           | 1370.706            |           |
| +0.00986  | 315.1299 | 3  | D   | 10 | 1299.669 | +0.010023 | 1299.669            |           |
| +0.117995 | 428.214  | 4  | L   | 9  | 1184.642 | +0.011941 | 592.8248            | -0.04149  |
| -0.111135 | 591.2773 | 5  | Y   | 8  | 1071.558 | +0.051938 | 536.2827            | +0.215141 |
|           | 704.3614 | 6  | I   | 7  | 908.4948 | +0.018159 | 908.4948            |           |
|           | 791.3934 | 7  | S   | 6  | 795.4108 | -0.00239  | 795.4108            |           |
|           | 920.436  | 8  | E   | 5  | 708.3787 |           | 708.3787            |           |
| -0.07171  | 977.4575 | 9  | G   | 4  | 579.3362 | +0.052577 | 579.3362            |           |
| +0.093371 | 1090.542 | 10 | L   | 3  | 522.3147 | +0.048284 | 522.3147            |           |
| -0.10299  | 1227.6   | 11 | H   | 2  | 409.2306 | +0.097497 | 409.2306            |           |
| +0.028693 | 1324.653 | 12 | P   | 1  | 272.1717 | +0.018164 | 272.1717            |           |
|           |          | 13 | R   | 0  | 175.119  |           | 175.119             |           |

Scan number 3718 Raw file LNCAP\_Silac\_23F10\_set3\_07  
 Method ITMS: CID Peptide 240.85

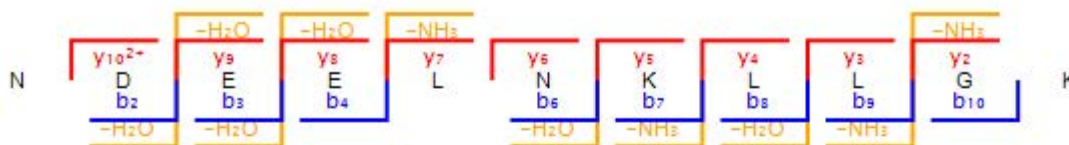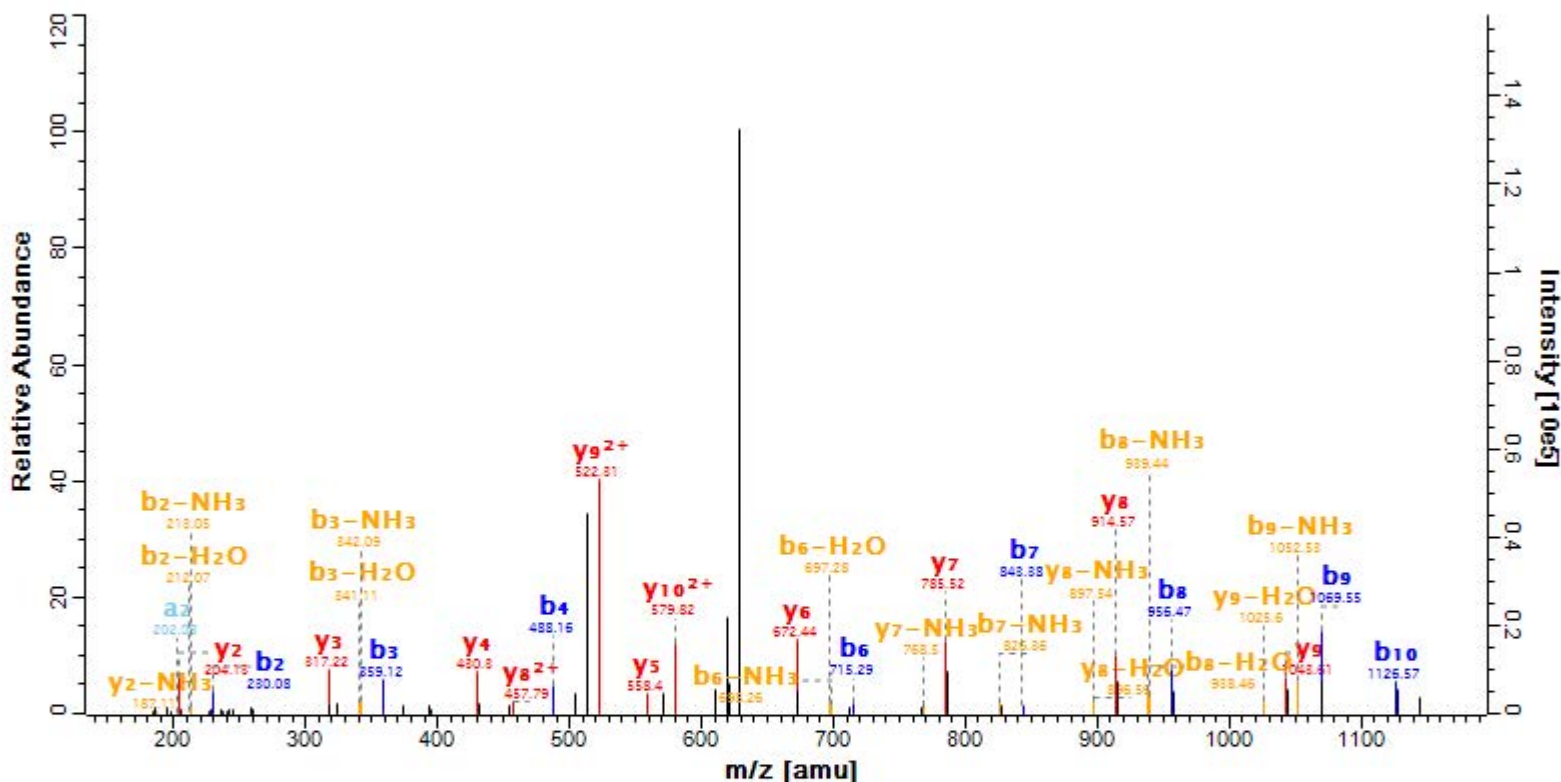

#### precursor information

|                   |                 |
|-------------------|-----------------|
| Mass:             | 1271.67211      |
| m/z:              | 636.84333       |
| Charge:           | 2+              |
| Retentiontime:    | 28.019659042358 |
| Score:            | 240.8453        |
| Mass Error [ppm]: | -0.013108       |
| PEP:              | 3.7683E-29      |
| Precursor Type:   | MULTI           |

#### general information

|                       |            |
|-----------------------|------------|
| Annotation:           | 9 of 11    |
| AminoAcids Coverage:  | 82 %       |
| Intensity Coverage:   | 45 %       |
| Peak Coverage:        | 39 %       |
| Protein Localisation: | 90 ... 100 |

| a ion    |        | b ion    |        |    |     |          | y ion  |          | y <sup>2+</sup> ion |  |
|----------|--------|----------|--------|----|-----|----------|--------|----------|---------------------|--|
| Δ dalton | mass   | Δ dalton | mass   |    | seq | Δ dalton | mass   | Δ dalton | mass                |  |
|          | 87.055 |          | 115.05 | 1  | N   | 10       |        |          |                     |  |
| +0.1986  | 202.08 | +0.1065  | 230.08 | 2  | D   | 9        | 1158.6 |          | 579.82              |  |
|          | 331.12 | +0.0635  | 359.12 | 3  | E   | 8        | 1043.6 | -0.045   | 522.31              |  |
|          | 460.17 | +0.0015  | 488.16 | 4  | E   | 7        | 914.57 | -0.052   | 457.79              |  |
|          | 573.25 |          | 601.25 | 5  | L   | 6        | 785.52 | -0.028   | 785.52              |  |
|          | 687.29 | +0.175   | 715.29 | 6  | N   | 5        | 672.44 | +0.0383  | 672.44              |  |
|          | 815.39 | +0.1803  | 843.38 | 7  | K   | 4        | 558.4  | -0.065   | 558.4               |  |
|          | 928.47 | +0.0282  | 956.47 | 8  | L   | 3        | 430.3  | +0.0497  | 430.3               |  |
|          | 1041.6 | -0.003   | 1069.6 | 9  | L   | 2        | 317.22 | -0.068   | 317.22              |  |
|          | 1098.6 | -0.025   | 1126.6 | 10 | G   | 1        | 204.13 | -0.076   | 204.13              |  |
|          |        |          |        | 11 | K   | 0        | 147.11 |          | 147.11              |  |

Scan number 4127 Raw file LNCAP\_Silac\_23F10\_set3\_07  
 Method ITMS; CID Pepti... 147.62

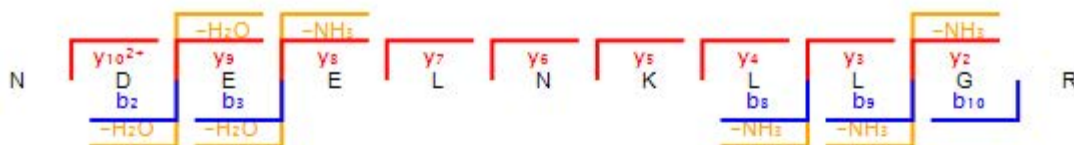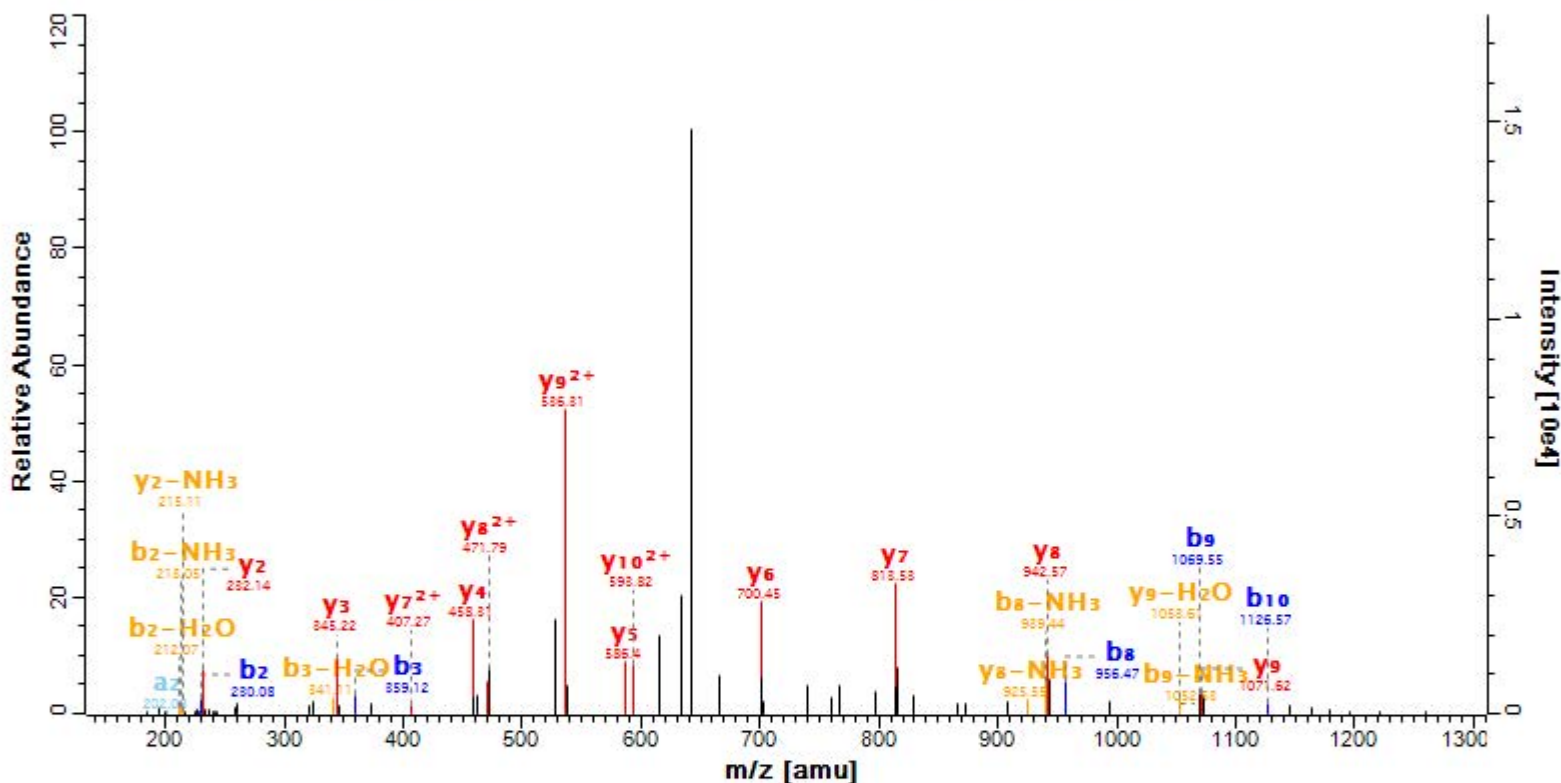

#### precursor information

|                   |                 |
|-------------------|-----------------|
| Mass:             | 1299.67815      |
| m/z:              | 650.84635       |
| Charge:           | 2+              |
| Retentiontime:    | 30.375572204589 |
| Score:            | 147.623         |
| Mass Error [ppm]: | -0.097025       |
| PEP:              | 3.9182E-05      |
| Precursor Type:   | MULTI           |

#### general information

|                       |            |
|-----------------------|------------|
| Annotation:           | 9 of 11    |
| AminoAcids Coverage:  | 82 %       |
| Intensity Coverage:   | 42 %       |
| Peak Coverage:        | 31 %       |
| Protein Localisation: | 90 ... 100 |

| a ion    |        | b ion    |        |    |     |          | y ion  |          | y <sup>2+</sup> ion |  |
|----------|--------|----------|--------|----|-----|----------|--------|----------|---------------------|--|
| Δ dalton | mass   | Δ dalton | mass   |    | seq | Δ dalton | mass   | Δ dalton | mass                |  |
|          | 87.055 |          | 115.05 | 1  | N   | 10       |        |          |                     |  |
| +0.0367  | 202.08 | -0.028   | 230.08 | 2  | D   | 9        | 1186.6 |          | 593.82              |  |
|          | 331.12 | +0.0957  | 359.12 | 3  | E   | 8        | 1071.6 | -0.064   | 536.31              |  |
|          | 460.17 |          | 488.16 | 4  | E   | 7        | 942.57 | -0.012   | 471.79              |  |
|          | 573.25 |          | 601.25 | 5  | L   | 6        | 813.53 | -0.036   | 407.27              |  |
|          | 687.29 |          | 715.29 | 6  | N   | 5        | 700.45 | +0.0694  | 700.45              |  |
|          | 815.39 |          | 843.38 | 7  | K   | 4        | 586.4  | +0.0581  | 586.4               |  |
|          | 928.47 | +0.0128  | 956.47 | 8  | L   | 3        | 458.31 | +0.0625  | 458.31              |  |
|          | 1041.6 | +0.0122  | 1069.6 | 9  | L   | 2        | 345.22 | +0.0368  | 345.22              |  |
|          | 1098.6 | +0.0902  | 1126.6 | 10 | G   | 1        | 232.14 | +0.0125  | 232.14              |  |
|          |        |          |        | 11 | R   | 0        | 175.12 |          | 175.12              |  |

Scan number 4277 Raw file LNCAP\_Silac\_23F10\_set3\_07  
 Method ITMS; CID Pepti... 178.14

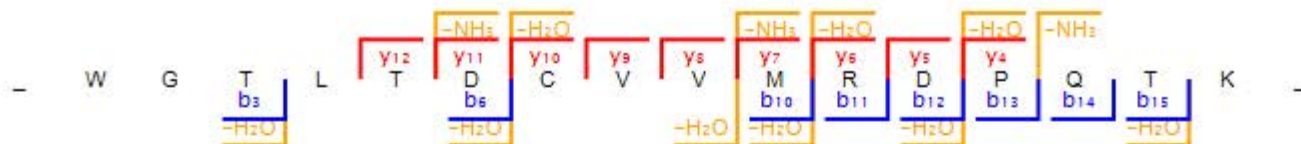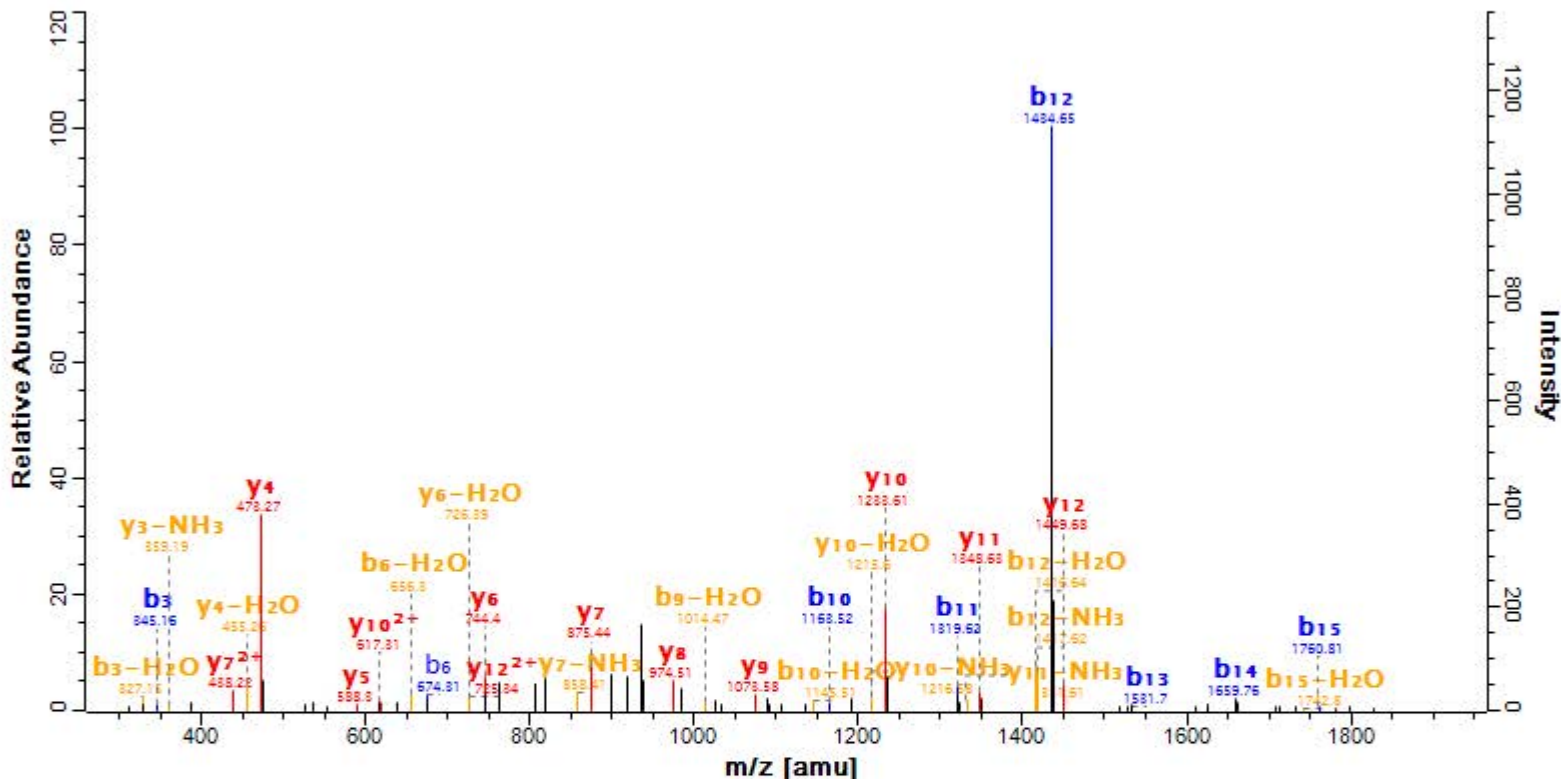

#### precursor information

|                   |                 |
|-------------------|-----------------|
| Mass:             | 1905.90812      |
| m/z:              | 953.96134       |
| Charge:           | 2+              |
| Retentiontime:    | 31.224948883056 |
| Score:            | 178.1395        |
| Mass Error [ppm]: | 0.21739         |
| PEP:              | 1.2807E-19      |
| Precursor Type:   | ISO             |

#### general information

|                       |           |
|-----------------------|-----------|
| Annotation:           | 12 of 16  |
| AminoAcids Coverage:  | 75 %      |
| Intensity Coverage:   | 54 %      |
| Peak Coverage:        | 38 %      |
| Protein Localisation: | 58 ... 73 |

| b ion     |          |    |     |    | y ion    |           | y <sup>2+</sup> ion |           |
|-----------|----------|----|-----|----|----------|-----------|---------------------|-----------|
| Δ dalton  | mass     |    | seq |    | Δ dalton | mass      | Δ dalton            | mass      |
|           | 187.0866 | 1  | W   | 15 |          |           |                     |           |
|           | 244.1081 | 2  | G   | 14 | 1720.836 |           | 1720.836            |           |
| +0.234741 | 345.1557 | 3  | T   | 13 | 1663.814 |           | 1663.814            |           |
|           | 458.2398 | 4  | L   | 12 | 1562.767 |           | 1562.767            |           |
|           | 559.2875 | 5  | T   | 11 | 1449.682 | +0.023717 | 725.3449            | -0.06673  |
| +0.162817 | 674.3144 | 6  | D   | 10 | 1348.635 | +0.053695 | 1348.635            |           |
|           | 834.3451 | 7  | C   | 9  | 1233.608 | -0.03313  | 617.3076            | +0.260985 |
|           | 933.4135 | 8  | V   | 8  | 1073.577 | +0.047809 | 1073.577            |           |
|           | 1032.482 | 9  | V   | 7  | 974.5088 | -0.06298  | 974.5088            |           |
| +0.3348   | 1163.522 | 10 | M   | 6  | 875.4404 | -0.11022  | 438.2238            | +0.074337 |
| -0.00642  | 1319.623 | 11 | R   | 5  | 744.3999 | -0.08451  | 744.3999            |           |
| -0.05973  | 1434.65  | 12 | D   | 4  | 588.2988 | +0.286682 | 588.2988            |           |
| +0.115042 | 1531.703 | 13 | P   | 3  | 473.2718 | +0.013149 | 473.2718            |           |
| -0.15179  | 1659.762 | 14 | Q   | 2  | 376.2191 |           | 376.2191            |           |
| +0.230465 | 1760.809 | 15 | T   | 1  | 248.1605 |           | 248.1605            |           |
|           |          | 16 | K   | 0  | 147.1128 |           | 147.1128            |           |



Scan number 4310 Raw file LNCAP\_Silac\_23F10\_set3\_07  
 Method ITMS; CID Pepti... 184.02

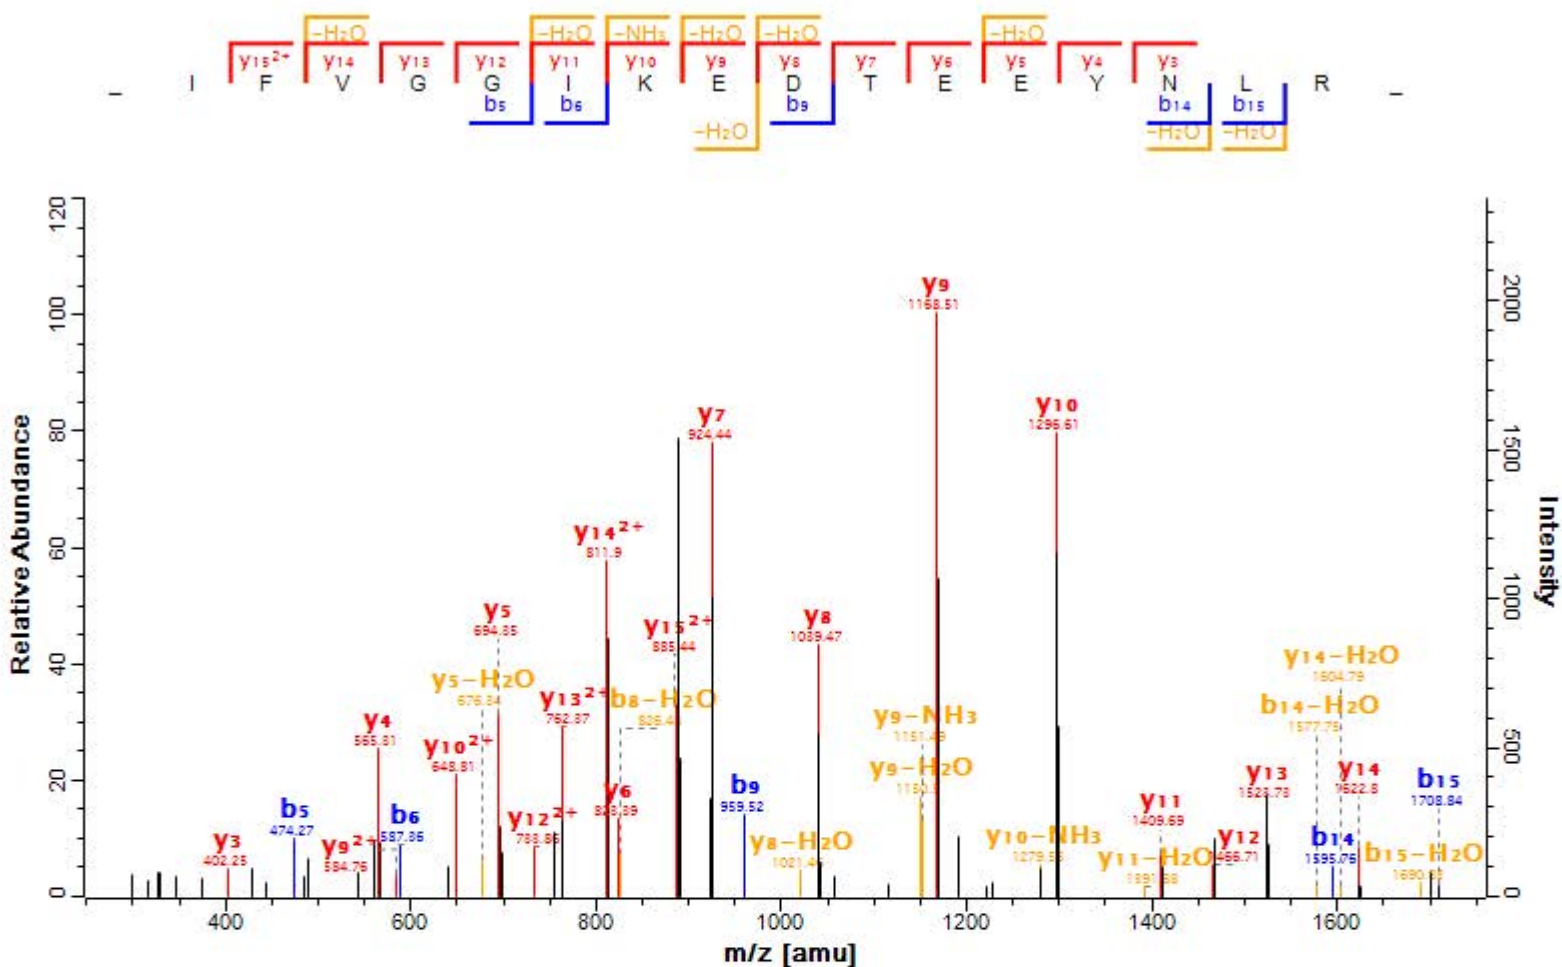

**precursor information**

|                   |                 |
|-------------------|-----------------|
| Mass:             | 1881.94716      |
| m/z:              | 941.98086       |
| Charge:           | 2+              |
| Retentiontime:    | 31.413152694702 |
| Score:            | 184.0175        |
| Mass Error [ppm]: | -0.042843       |
| PEP:              | 8.3374E-20      |
| Precursor Type:   | ISO             |

**general information**

|                       |             |
|-----------------------|-------------|
| Annotation:           | 14 of 16    |
| AminoAcids Coverage:  | 88 %        |
| Intensity Coverage:   | 52 %        |
| Peak Coverage:        | 41 %        |
| Protein Localisation: | 128 ... 143 |

| b ion     |          |     |   | y ion    |          | y <sup>2+</sup> ion |           |           |
|-----------|----------|-----|---|----------|----------|---------------------|-----------|-----------|
| Δ dalton  | mass     | seq |   | Δ dalton | mass     | Δ dalton            | mass      |           |
|           | 114.0913 | 1   | I | 15       |          |                     |           |           |
|           | 261.1598 | 2   | F | 14       | 1769.87  | 885.4389            | +0.168983 |           |
|           | 360.2282 | 3   | V | 13       | 1622.802 | +0.016196           | 811.9047  | +0.03394  |
|           | 417.2496 | 4   | G | 12       | 1523.734 | -0.12706            | 762.3705  | +0.247895 |
| -0.00022  | 474.2711 | 5   | G | 11       | 1466.712 | -0.19703            | 733.8597  | -0.23966  |
| +0.081425 | 587.3552 | 6   | I | 10       | 1409.691 | -0.1138             | 1409.691  |           |
|           | 715.4501 | 7   | K | 9        | 1296.607 | -0.04694            | 648.807   | +0.209706 |
|           | 844.4927 | 8   | E | 8        | 1168.512 | -0.00349            | 584.7595  | +0.474412 |
| -0.12678  | 959.5197 | 9   | D | 7        | 1039.469 | +0.005041           | 1039.469  |           |
|           | 1060.567 | 10  | T | 6        | 924.4421 | +0.093325           | 924.4421  |           |
|           | 1189.61  | 11  | E | 5        | 823.3945 | +0.001111           | 823.3945  |           |
|           | 1318.653 | 12  | E | 4        | 694.3519 | +0.046755           | 694.3519  |           |
|           | 1481.716 | 13  | Y | 3        | 565.3093 | -0.03815            | 565.3093  |           |
| -0.03478  | 1595.759 | 14  | N | 2        | 402.2459 | +0.034818           | 402.2459  |           |
| -0.20637  | 1708.843 | 15  | L | 1        | 288.203  |                     | 288.203   |           |
|           |          | 16  | R | 0        | 175.119  |                     | 175.119   |           |

Scan number 4411 Raw file LNCAP\_Silac\_23F10\_set3\_07  
 Method ITMS; CID Peptide 140.27

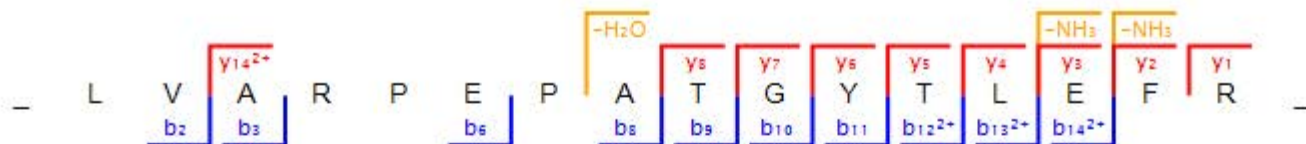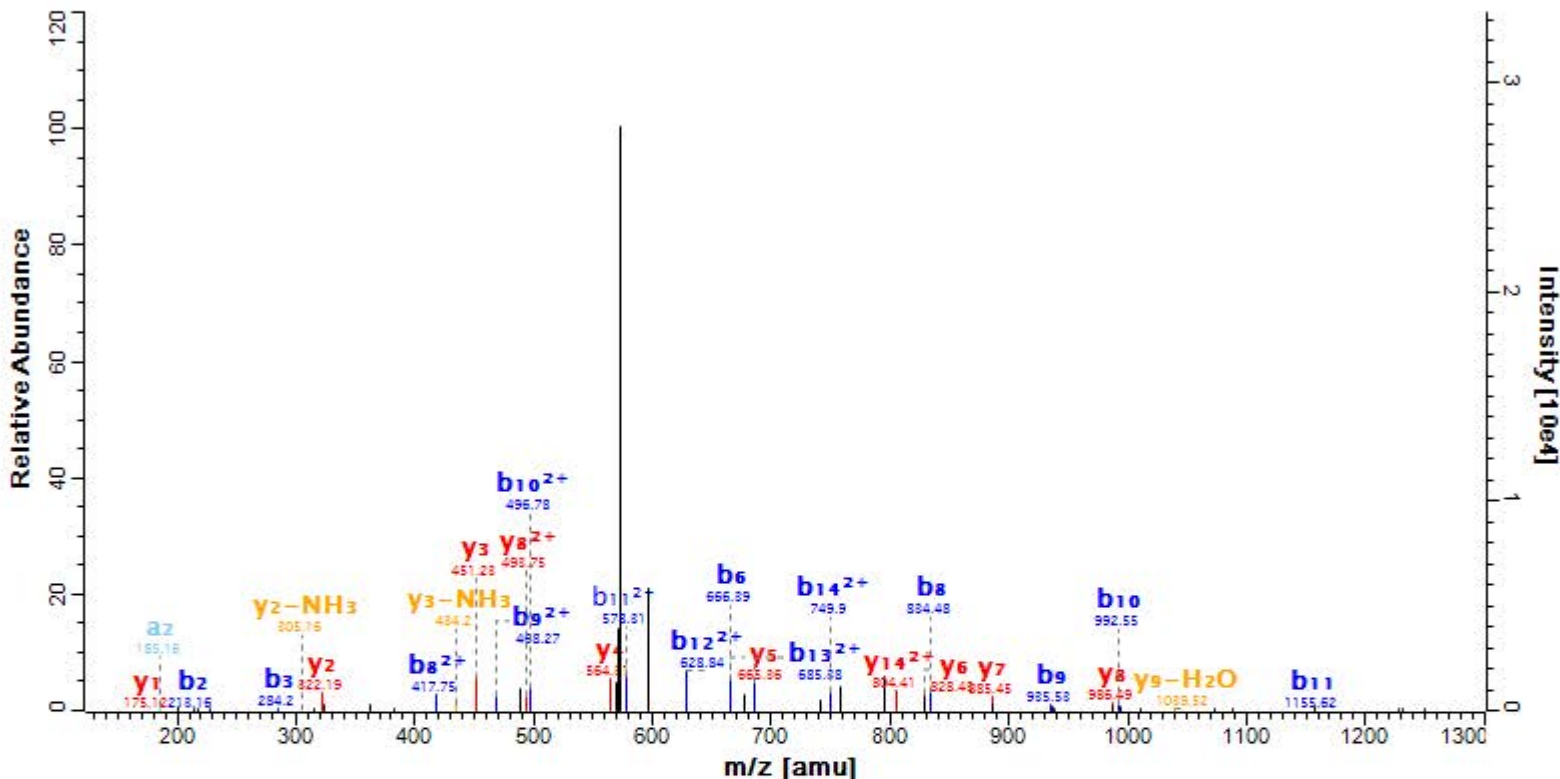

**precursor information**

|                   |                 |
|-------------------|-----------------|
| Mass:             | 1812.85396      |
| m/z:              | 605.29193       |
| Charge:           | 3+              |
| Retention time:   | 32.023139953613 |
| Score:            | 140.2742        |
| Mass Error [ppm]: | 0.42768         |
| PEP:              | 6.047E-32       |
| Precursor Type:   | MULTI           |

**general information**

|                       |             |
|-----------------------|-------------|
| Annotation:           | 13 of 16    |
| AminoAcids Coverage:  | 81 %        |
| Intensity Coverage:   | 30 %        |
| Peak Coverage:        | 37 %        |
| Protein Localisation: | 209 ... 224 |

|        | a ion         | b <sup>2+</sup> ion | b ion         |     |   |               | y ion             | y <sup>2+</sup> ion |
|--------|---------------|---------------------|---------------|-----|---|---------------|-------------------|---------------------|
|        | Δ dalton mass | Δ dalton mass       | Δ dalton mass | seq |   | Δ dalton mass | Δ dalton mass     |                     |
|        | 86.1          | 114.1               | 114.1         | 1   | L | 15            |                   |                     |
| +0.097 | 85.2          | 213.2               | +0.065213.2   | 2   | V | 14            | 1707              | 1707                |
|        | 256.2         | 284.2               | -0.03 284.2   | 3   | A | 13            | 1608              | 804.4 +0.12         |
|        | 412.3         | 440.3               | 440.3         | 4   | R | 12            | 1537              | 1537                |
|        | 509.4         | 537.4               | 537.4         | 5   | P | 11            | 1381              | 1381                |
|        | 638.4         | 666.4               | -0.04 666.4   | 6   | E | 10            | 1284              | 1284                |
|        | 735.5         | 763.4               | 763.4         | 7   | P | 9             | 1155              | 1155                |
|        | 806.5         | +0.287417.7         | +0.046834.5   | 8   | A | 8             | 1058              | 1058                |
|        | 907.5         | -0.01 468.3         | +0.319935.5   | 9   | T | 7             | 986.5 +0.077493.8 | -0.01               |
|        | 964.6         | +0.146496.8         | +0.043992.6   | 10  | G | 6             | 885.4 +0 885.4    |                     |
|        | 1128          | -0.13 578.3         | -0.14 1156    | 11  | Y | 5             | 828.4 +0.113828.4 |                     |
|        | 1229          | +0.296628.8         | 1257          | 12  | T | 4             | 665.4 +0.091665.4 |                     |
|        | 1342          | +0.199685.4         | 1370          | 13  | L | 3             | 564.3 +0.047564.3 |                     |
|        | 1471          | +0.153749.9         | 1499          | 14  | E | 2             | 451.2 +0.103451.2 |                     |
|        | 1618          | 1646                | 1646          | 15  | F | 1             | 322.2 +0.126322.2 |                     |
|        |               |                     |               | 16  | R | 0             | 175.1 -0.05 175.1 |                     |

Scan number 4435 Raw file LNCAP\_Silac\_23F10\_set3\_07  
 Method ITMS; CID Pepti... 105.65

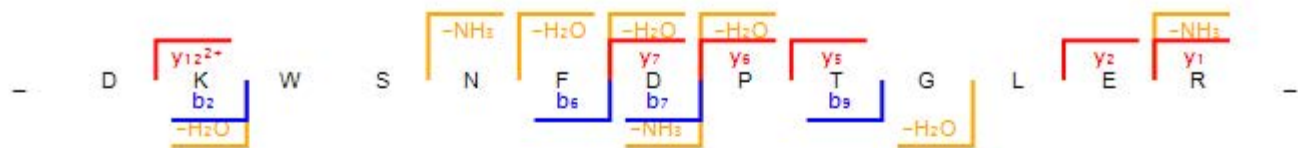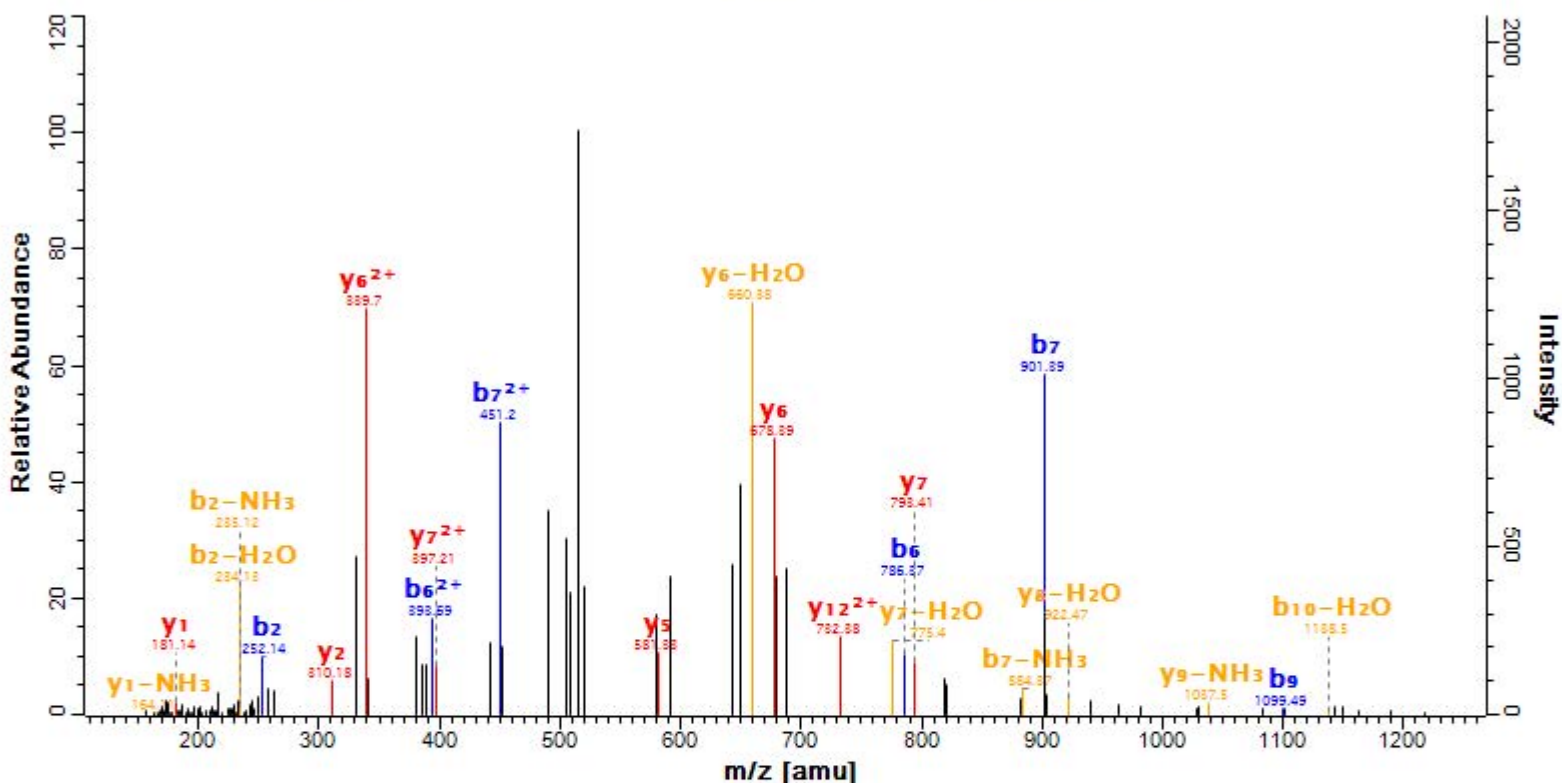

precursor information

|                   |                 |
|-------------------|-----------------|
| Mass:             | 1563.73202      |
| m/z:              | 522.25128       |
| Charge:           | 3+              |
| Retentiontime:    | 32.154285430908 |
| Score:            | 105.649         |
| Mass Error [ppm]: | 0.15589         |
| PEP:              | 8.0059E-06      |
| Precursor Type:   | MULTI           |

general information

|                       |           |
|-----------------------|-----------|
| Annotation:           | 9 of 13   |
| AminoAcids Coverage:  | 69 %      |
| Intensity Coverage:   | 43 %      |
| Peak Coverage:        | 20 %      |
| Protein Localisation: | 45 ... 57 |

| b <sup>2+</sup> ion |        | b ion    |        |    |     |    | y ion    |         | y <sup>2+</sup> ion |         |
|---------------------|--------|----------|--------|----|-----|----|----------|---------|---------------------|---------|
| Δ dalton            | mass   | Δ dalton | mass   |    | seq |    | Δ dalton | mass    | Δ dalton            | mass    |
|                     | 116.03 |          | 116.03 | 1  | D   | 12 |          |         |                     |         |
|                     | 252.14 | +0.0269  | 252.14 | 2  | K   | 11 | 1463.7   |         | 732.38              | -0.109  |
|                     | 438.22 |          | 438.22 | 3  | W   | 10 | 1327.6   |         | 1327.6              |         |
|                     | 525.25 |          | 525.25 | 4  | S   | 9  | 1141.6   |         | 1141.6              |         |
|                     | 639.3  |          | 639.3  | 5  | N   | 8  | 1054.5   |         | 1054.5              |         |
| -0.123              | 393.69 | +0.0255  | 786.37 | 6  | F   | 7  | 940.48   |         | 940.48              |         |
| -0.074              | 451.2  | -0.028   | 901.39 | 7  | D   | 6  | 793.41   | -0.046  | 397.21              | +0.0783 |
|                     | 998.45 |          | 998.45 | 8  | P   | 5  | 678.39   | +0.012  | 339.7               | +0.0077 |
|                     | 1099.5 | -0.284   | 1099.5 | 9  | T   | 4  | 581.33   | -0.424  | 581.33              |         |
|                     | 1156.5 |          | 1156.5 | 10 | G   | 3  | 480.29   |         | 480.29              |         |
|                     | 1269.6 |          | 1269.6 | 11 | L   | 2  | 423.27   |         | 423.27              |         |
|                     | 1398.6 |          | 1398.6 | 12 | E   | 1  | 310.18   | +0.0301 | 310.18              |         |
|                     |        |          |        | 13 | R   | 0  | 181.14   | +0.0755 | 181.14              |         |

Scan number 4697 Raw file LNCAP\_Silac\_23F10\_set3\_07  
 Method ITMS; CID Pepti... 88.1

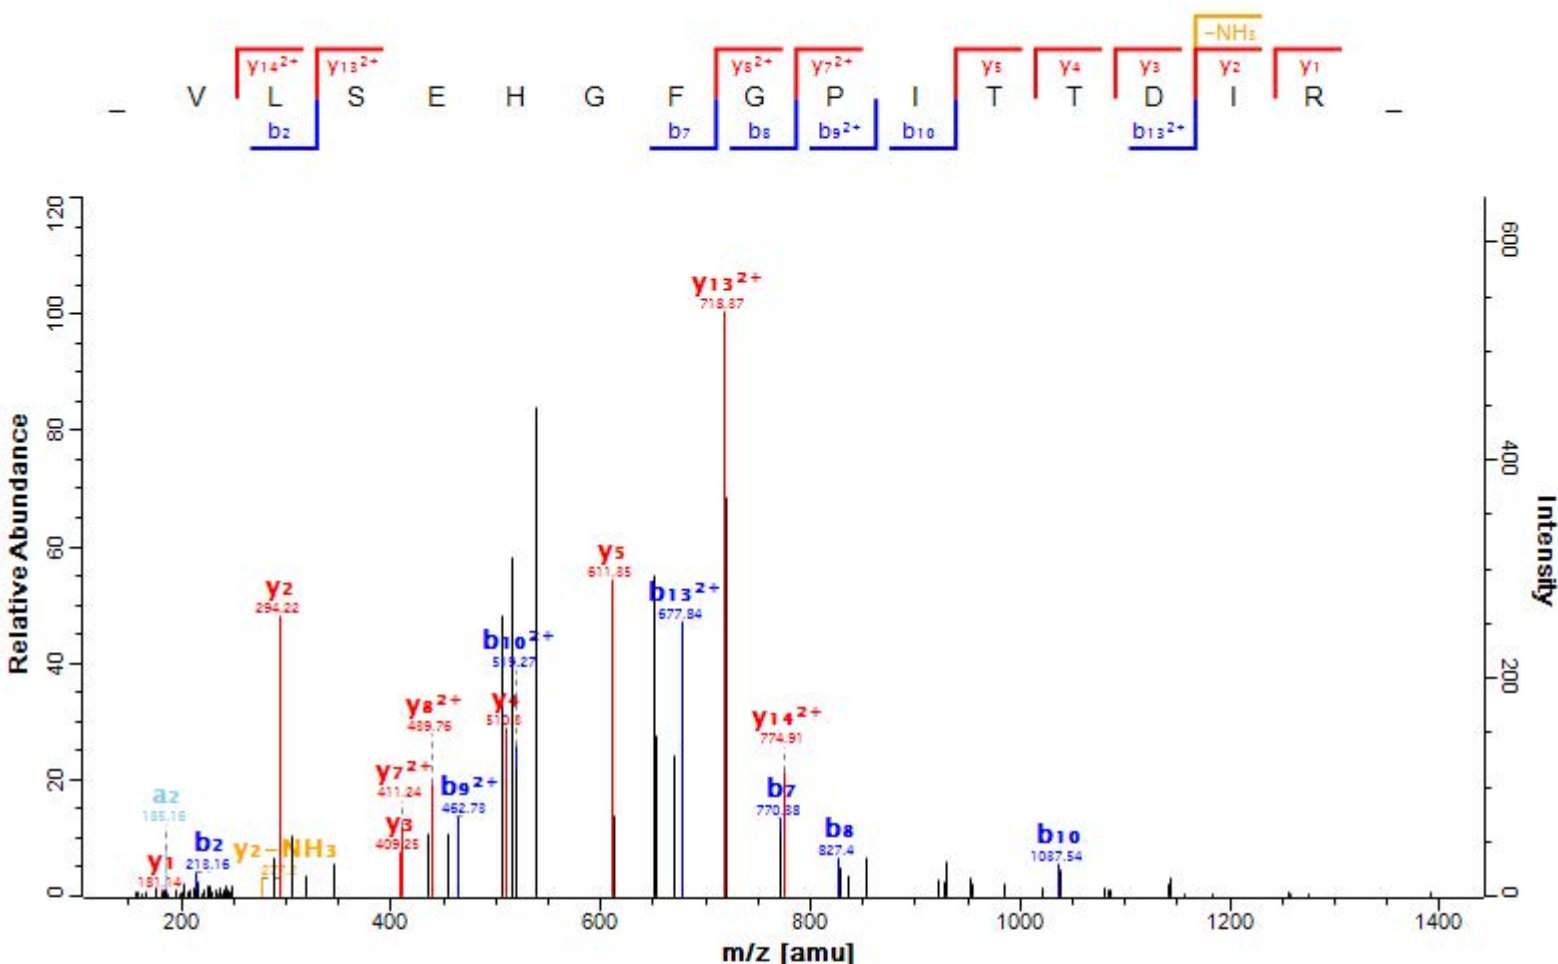

#### precursor information

|                   |                 |
|-------------------|-----------------|
| Mass:             | 1640.85167      |
| m/z:              | 547.95783       |
| Charge:           | 3+              |
| Retentiontime:    | 33.704357147216 |
| Score:            | 88.10078        |
| Mass Error [ppm]: | -0.33639        |
| PEP:              | 0.00017682      |
| Precursor Type:   | MULTI           |

#### general information

|                       |             |
|-----------------------|-------------|
| Annotation:           | 12 of 15    |
| AminoAcids Coverage:  | 80 %        |
| Intensity Coverage:   | 43 %        |
| Peak Coverage:        | 18 %        |
| Protein Localisation: | 182 ... 196 |

|       | a ion         | b <sup>2+</sup> ion | b ion         |     |   | y ion         | y <sup>2+</sup> ion |             |
|-------|---------------|---------------------|---------------|-----|---|---------------|---------------------|-------------|
|       | Δ dalton mass | Δ dalton mass       | Δ dalton mass | seq |   | Δ dalton mass | Δ dalton mass       |             |
|       | 72.08         | 100.1               | 100.1         | 1   | V | 14            |                     |             |
| -0.01 | 185.2         | 213.2               | -0.03         | 2   | L | 13            | 1549                | 774.9 +0.28 |
|       | 272.2         | 300.2               |               | 3   | S | 12            | 1436                | 718.4 -0.04 |
|       | 401.2         | 429.2               |               | 4   | E | 11            | 1349                | 1349        |
|       | 538.3         | 566.3               |               | 5   | H | 10            | 1220                | 1220        |
|       | 595.3         | 623.3               |               | 6   | G | 9             | 1083                | 1083        |
|       | 742.4         | 770.4               | +0.04         | 7   | F | 8             | 1026                | 1026        |
|       | 799.4         | 827.4               | +0.09         | 8   | G | 7             | 878.5               | 439.8 +0.25 |
|       | 896.5         | 924.5               | +0.40         | 9   | P | 6             | 821.5               | 411.2 +0.07 |
|       | 1010          | 1038                | +0.02         | 10  | I | 5             | 724.4               | 724.4       |
|       | 1111          | 1139                | +0.005        | 11  | T | 4             | 611.3               | 611.3 +0.03 |
|       | 1212          | 1240                | +0.12         | 12  | T | 3             | 510.3               | 510.3 +0.12 |
|       | 1327          | 1355                | +0.23         | 13  | D | 2             | 409.3               | 409.3 +0.12 |
|       | 1440          | 1468                |               | 14  | I | 1             | 294.2               | 294.2 -0.02 |
|       |               |                     |               | 15  | R | 0             | 181.1               | 181.1 -0.12 |

Scan number 4884 Raw file LNCAP\_Silac\_23F10\_set3\_07  
 Method ITMS; CID Pepti... 187.85

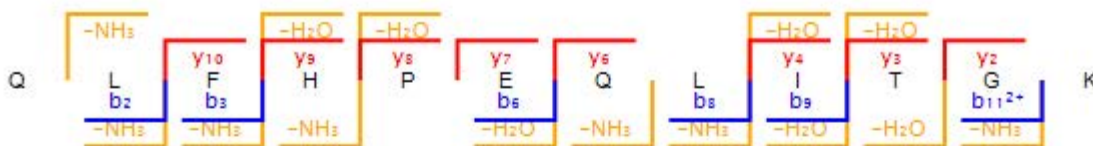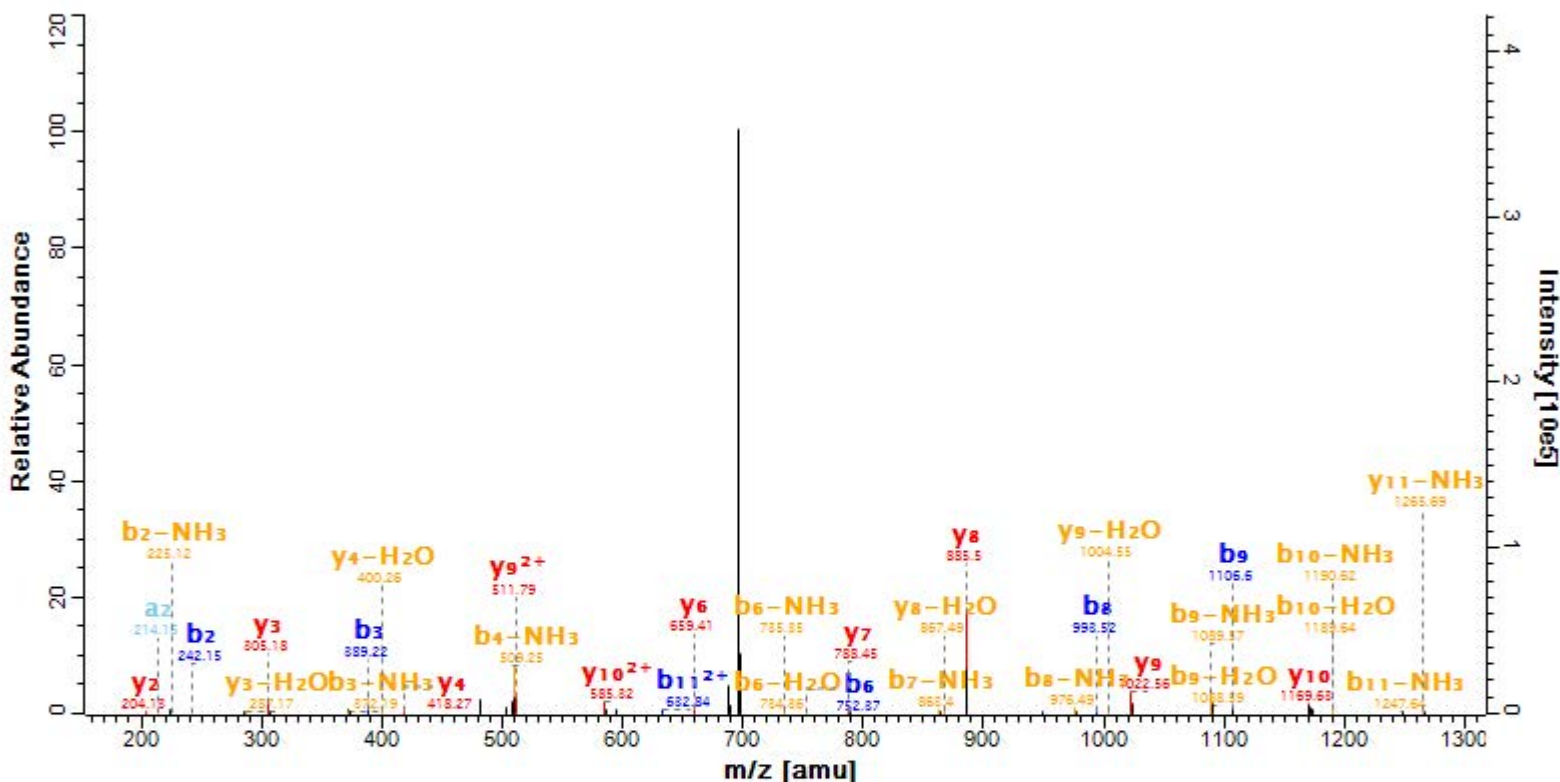

#### precursor information

|                   |                 |
|-------------------|-----------------|
| Mass:             | 1409.76672      |
| m/z:              | 705.89064       |
| Charge:           | 2+              |
| Retentiontime:    | 34.824890136718 |
| Score:            | 187.8548        |
| Mass Error [ppm]: | 0.016647        |
| PEP:              | 3.0301E-14      |
| Precursor Type:   | MULTI           |

#### general information

|                       |           |
|-----------------------|-----------|
| Annotation:           | 10 of 12  |
| AminoAcids Coverage:  | 83 %      |
| Intensity Coverage:   | 27 %      |
| Peak Coverage:        | 49 %      |
| Protein Localisation: | 85 ... 96 |

| a ion         |               | b <sup>2+</sup> ion |               | b ion |               | y ion         |               | y <sup>2+</sup> ion |               |       |
|---------------|---------------|---------------------|---------------|-------|---------------|---------------|---------------|---------------------|---------------|-------|
| Δ dalton mass | Δ dalton mass | Δ dalton mass       | Δ dalton mass | seq   | Δ dalton mass | Δ dalton mass | Δ dalton mass | Δ dalton mass       | Δ dalton mass |       |
|               | 101.1         | 129.1               | 129.1         | 1     | Q             | 11            |               |                     |               |       |
| +0.125        | 214.2         | 242.1               | +0.132        | 2     | L             | 10            | 1283          | 1283                |               |       |
|               | 361.2         | 389.2               | +0.094        | 3     | F             | 9             | 1170          | -0.08               | 585.3         | +0.18 |
|               | 498.3         | 526.3               |               | 4     | H             | 8             | 1023          | -0.05               | 511.8         | +0.22 |
|               | 595.3         | 623.3               |               | 5     | P             | 7             | 885.5         | +0                  | 885.5         |       |
|               | 724.4         | 752.4               | -0.2          | 6     | E             | 6             | 788.5         | -0.05               | 788.5         |       |
|               | 852.4         | 880.4               |               | 7     | Q             | 5             | 659.4         | +0.036              | 659.4         |       |
|               | 965.5         | 993.5               | -0.04         | 8     | L             | 4             | 531.4         |                     | 531.4         |       |
|               | 1079          | 1107                | +0.01         | 9     | I             | 3             | 418.3         | +0.18               | 418.3         |       |
|               | 1180          | 1208                |               | 10    | T             | 2             | 305.2         | -0.05               | 305.2         |       |
|               | 1237          | -0.05               | 632.8         |       |               |               | 204.1         | +0.12               | 204.1         |       |
|               |               |                     |               | 12    | K             | 0             | 147.1         |                     | 147.1         |       |

Scan number 5035 Raw file LNCAP\_Silac\_23F10\_set3\_07  
 Method ITMS; CID Pepti... 84.72

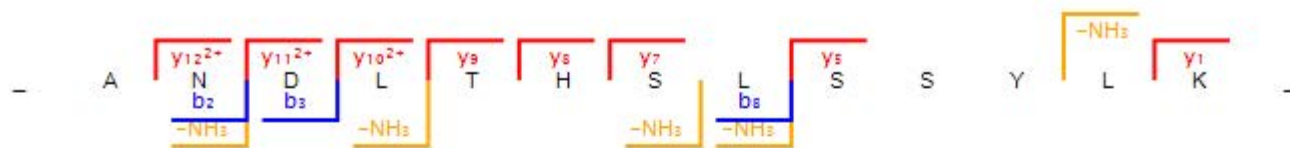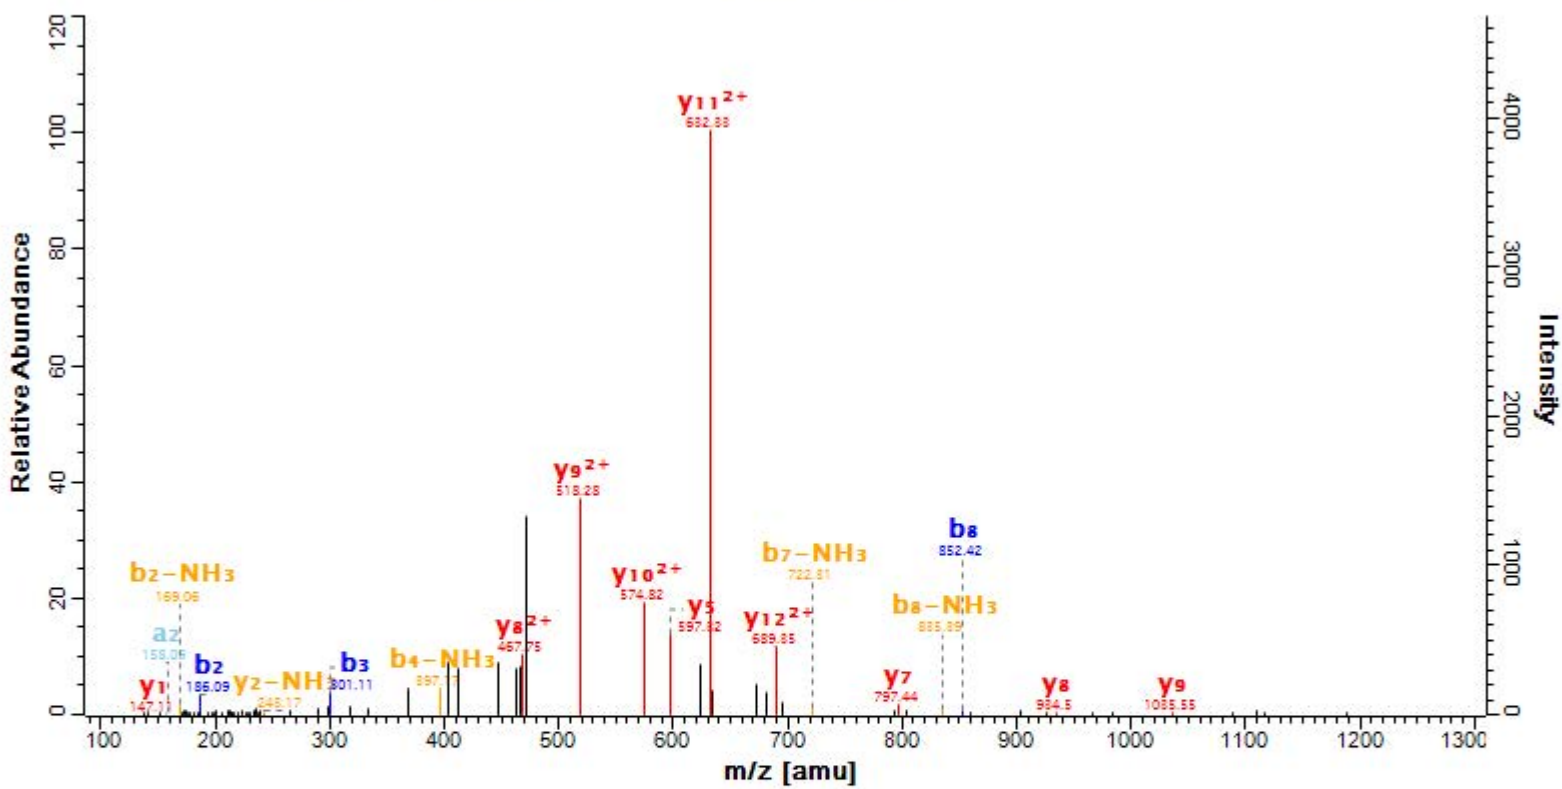

#### precursor information

|                   |                 |
|-------------------|-----------------|
| Mass:             | 1447.731        |
| m/z:              | 483.58428       |
| Charge:           | 3+              |
| Retentiontime:    | 35.715412139892 |
| Score:            | 84.71755        |
| Mass Error [ppm]: | 0.20492         |
| PEP:              | 0.00054013      |
| Precursor Type:   | MULTI           |

#### general information

|                       |             |
|-----------------------|-------------|
| Annotation:           | 10 of 13    |
| AminoAcids Coverage:  | 77 %        |
| Intensity Coverage:   | 59 %        |
| Peak Coverage:        | 18 %        |
| Protein Localisation: | 125 ... 137 |

| a ion    |        | b ion    |        |    |     |    | y ion    |         | y <sup>2+</sup> ion |         |
|----------|--------|----------|--------|----|-----|----|----------|---------|---------------------|---------|
| Δ dalton | mass   | Δ dalton | mass   |    | seq |    | Δ dalton | mass    | Δ dalton            | mass    |
|          | 44.049 |          | 72.044 | 1  | A   | 12 |          |         |                     |         |
| -0.119   | 158.09 | +0.0234  | 186.09 | 2  | N   | 11 | 1377.7   |         | 689.35              | +0.1996 |
|          | 273.12 | +0.0683  | 301.11 | 3  | D   | 10 | 1263.7   |         | 632.33              | +0.2665 |
|          | 386.2  |          | 414.2  | 4  | L   | 9  | 1148.6   |         | 574.82              | +0.2467 |
|          | 487.25 |          | 515.25 | 5  | T   | 8  | 1035.5   | +0.0761 | 518.28              | +0.1961 |
|          | 624.31 |          | 652.3  | 6  | H   | 7  | 934.5    | -0.092  | 467.75              | +0.2926 |
|          | 711.34 |          | 739.34 | 7  | S   | 6  | 797.44   | +0.0911 | 797.44              |         |
|          | 824.43 | -0.344   | 852.42 | 8  | L   | 5  | 710.41   |         | 710.41              |         |
|          | 911.46 |          | 939.45 | 9  | S   | 4  | 597.32   | +0.0143 | 597.32              |         |
|          | 998.49 |          | 1026.5 | 10 | S   | 3  | 510.29   |         | 510.29              |         |
|          | 1161.6 |          | 1189.5 | 11 | Y   | 2  | 423.26   |         | 423.26              |         |
|          | 1274.6 |          | 1302.6 | 12 | L   | 1  | 260.2    |         | 260.2               |         |
|          |        |          |        | 13 | K   | 0  | 147.11   | +0.2174 | 147.11              |         |

Scan number 5283 Raw file LNCAP\_Silac\_23F10\_set3\_07  
 Method ITMS; CID Pepti... 134.99

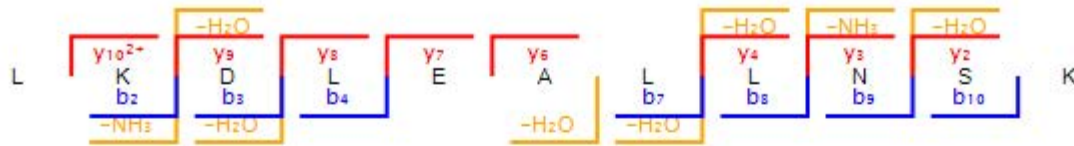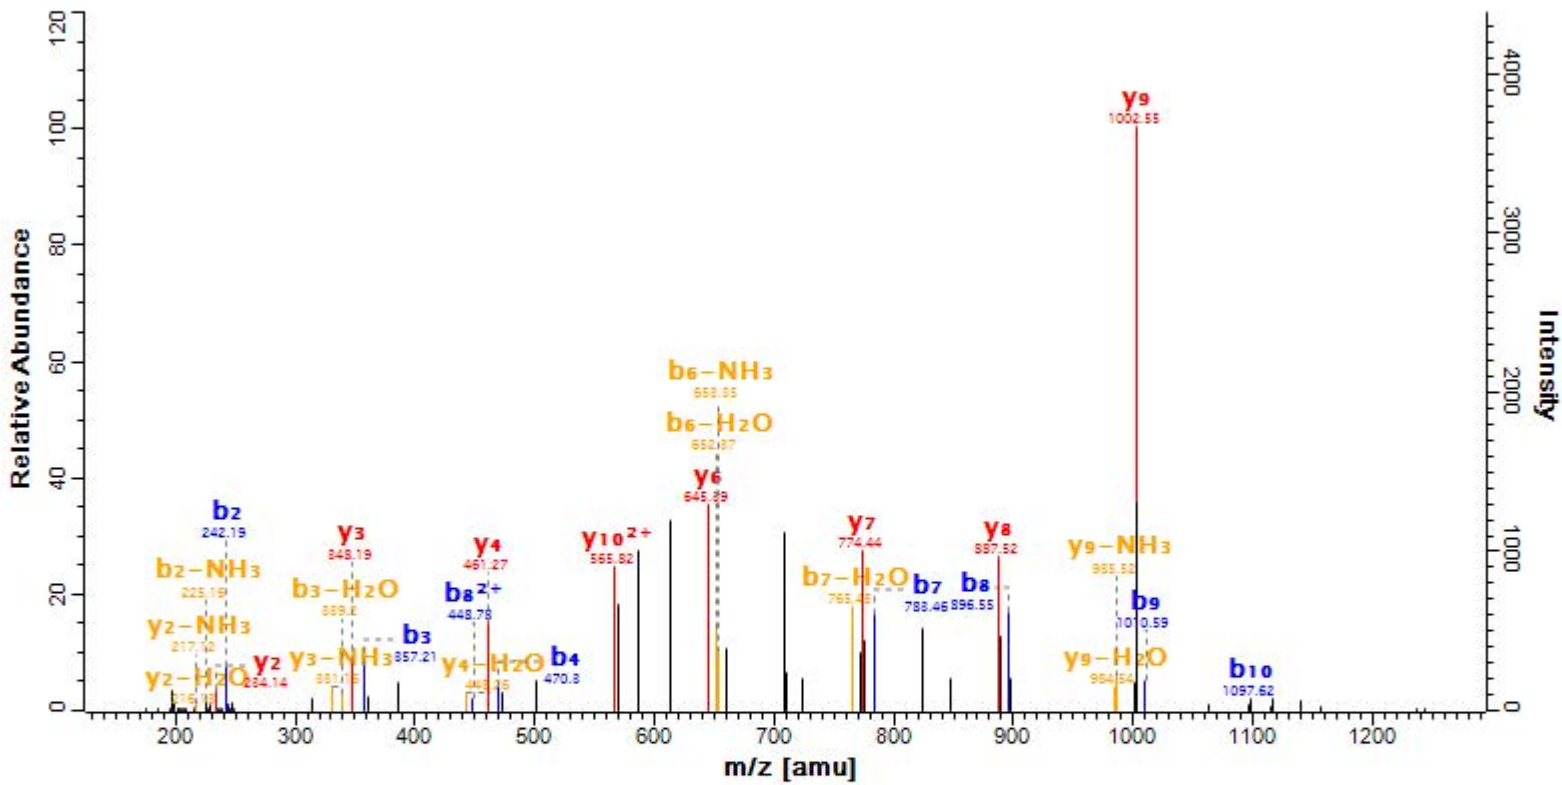

**precursor information**

|                   |                 |
|-------------------|-----------------|
| Mass:             | 1242.71868      |
| m/z:              | 622.36662       |
| Charge:           | 2+              |
| Retentiontime:    | 37.195522308349 |
| Score:            | 134.9896        |
| Mass Error [ppm]: | 0.26529         |
| PEP:              | 0.00014859      |
| Precursor Type:   | MULTI           |

**general information**

|                       |             |
|-----------------------|-------------|
| Annotation:           | 9 of 11     |
| AminoAcids Coverage:  | 82 %        |
| Intensity Coverage:   | 55 %        |
| Peak Coverage:        | 30 %        |
| Protein Localisation: | 134 ... 144 |

| b <sup>2+</sup> ion |        | b ion    |        | seq |   |    | y ion    |         | y <sup>2+</sup> ion |        |
|---------------------|--------|----------|--------|-----|---|----|----------|---------|---------------------|--------|
| Δ dalton            | mass   | Δ dalton | mass   |     |   |    | Δ dalton | mass    | Δ dalton            | mass   |
|                     | 114.09 |          | 114.09 | 1   | L | 10 |          |         |                     |        |
|                     | 242.19 | +0.0296  | 242.19 | 2   | K | 9  | 1130.6   |         | 565.82              | -0.068 |
|                     | 357.21 | -0.013   | 357.21 | 3   | D | 8  | 1002.5   | -0.017  | 1002.5              |        |
|                     | 470.3  | +0.1248  | 470.3  | 4   | L | 7  | 887.52   | -0.111  | 887.52              |        |
|                     | 599.34 |          | 599.34 | 5   | E | 6  | 774.44   | +0.0604 | 774.44              |        |
|                     | 670.38 |          | 670.38 | 6   | A | 5  | 645.39   | +0.0355 | 645.39              |        |
|                     | 783.46 | +0.0697  | 783.46 | 7   | L | 4  | 574.36   |         | 574.36              |        |
| -0.449              | 448.78 | +0.0078  | 889.55 | 8   | L | 3  | 461.27   | +0.1096 | 461.27              |        |
|                     | 1010.6 | -0.179   | 1010.6 | 9   | N | 2  | 348.19   | +0.0723 | 348.19              |        |
|                     | 1097.6 | -0.045   | 1097.6 | 10  | S | 1  | 234.14   | +0.127  | 234.14              |        |
|                     |        |          |        | 11  | K | 0  | 147.11   |         | 147.11              |        |

Scan number 5344 Raw file LNCAP\_Silac\_23F10\_set3\_07  
 Method ITMS; CID Pepti... 222.45

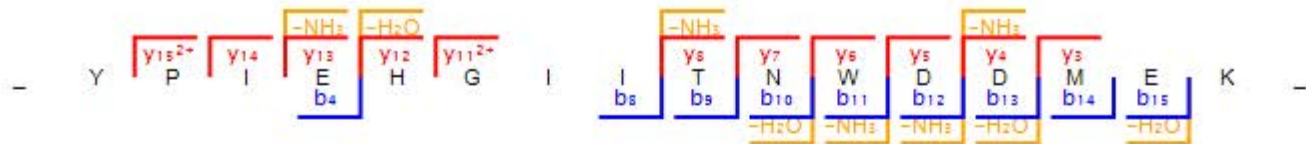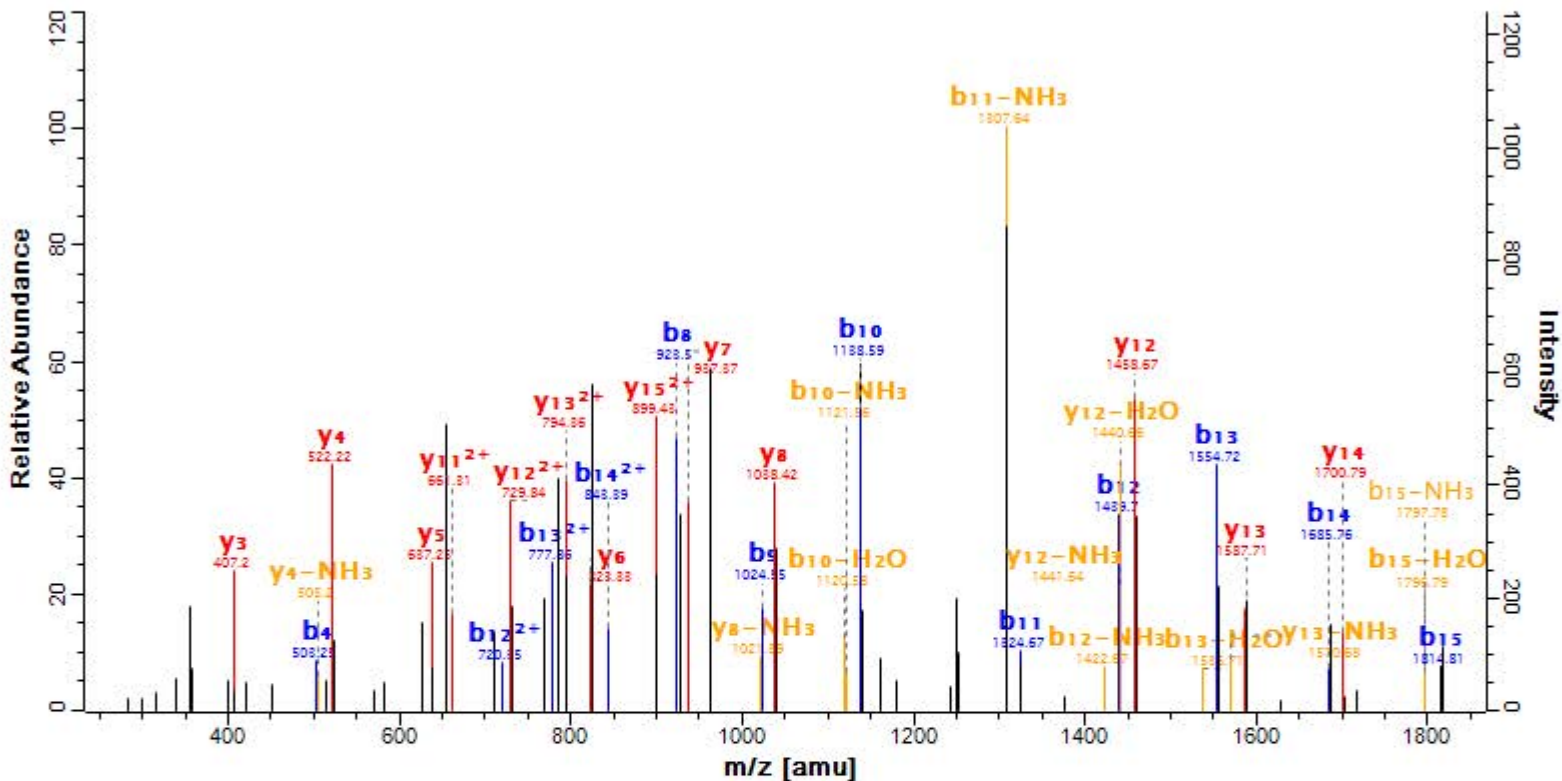

precursor information

|                   |                 |
|-------------------|-----------------|
| Mass:             | 1959.9031       |
| m/z:              | 980.95883       |
| Charge:           | 2+              |
| Retentiontime:    | 37.576763153076 |
| Score:            | 222.4475        |
| Mass Error [ppm]: | -0.28629        |
| PEP:              | 4.5551E-41      |
| Precursor Type:   | MULTI           |

general information

|                       |           |
|-----------------------|-----------|
| Annotation:           | 13 of 16  |
| AminoAcids Coverage:  | 81 %      |
| Intensity Coverage:   | 51 %      |
| Peak Coverage:        | 42 %      |
| Protein Localisation: | 71 ... 86 |

| b <sup>2+</sup> ion |        | b ion    |        | seq |   |    | y ion    |         | y <sup>2+</sup> ion |         |
|---------------------|--------|----------|--------|-----|---|----|----------|---------|---------------------|---------|
| Δ dalton            | mass   | Δ dalton | mass   |     |   |    | Δ dalton | mass    | Δ dalton            | mass    |
|                     | 164.07 |          | 164.07 | 1   | Y | 15 |          |         |                     |         |
|                     | 261.12 |          | 261.12 | 2   | P | 14 | 1797.8   |         | 899.43              | -0.022  |
|                     | 374.21 |          | 374.21 | 3   | I | 13 | 1700.8   | -0.027  | 1700.8              |         |
|                     | 503.25 | +0.3636  | 503.25 | 4   | E | 12 | 1587.7   | -0.071  | 794.36              | +0.0537 |
|                     | 640.31 |          | 640.31 | 5   | H | 11 | 1458.7   | -0.112  | 729.84              | +0.1781 |
|                     | 697.33 |          | 697.33 | 6   | G | 10 | 1321.6   |         | 661.31              | +0.1123 |
|                     | 810.41 |          | 810.41 | 7   | I | 9  | 1264.6   |         | 1264.6              |         |
|                     | 923.5  | -0.042   | 923.5  | 8   | I | 8  | 1151.5   |         | 1151.5              |         |
|                     | 1024.5 | +0.0381  | 1024.5 | 9   | T | 7  | 1038.4   | -0.02   | 1038.4              |         |
|                     | 1138.6 | -0.085   | 1138.6 | 10  | N | 6  | 937.37   | -0.036  | 937.37              |         |
|                     | 1324.7 | -0.019   | 1324.7 | 11  | W | 5  | 823.33   | +0.0676 | 823.33              |         |
| -0.332              | 720.35 | -0.122   | 1439.7 | 12  | D | 4  | 637.25   | +0.0832 | 637.25              |         |
| -0.168              | 777.86 | -0.146   | 1554.7 | 13  | D | 3  | 522.22   | +0.0151 | 522.22              |         |
| -0.126              | 843.39 | -0.168   | 1685.8 | 14  | M | 2  | 407.2    | +0.0787 | 407.2               |         |
|                     | 1814.8 | +0.0375  | 1814.8 | 15  | E | 1  | 276.16   |         | 276.16              |         |
|                     |        |          |        | 16  | K | 0  | 147.11   |         | 147.11              |         |



Scan number 5879 Raw file LNCAP\_Silac\_23F10\_set3\_07  
 Method ITMS; CID Pepti... 152.34

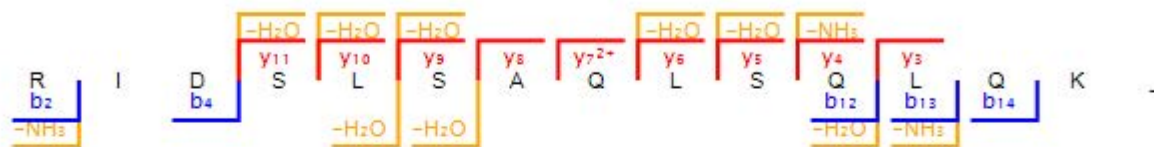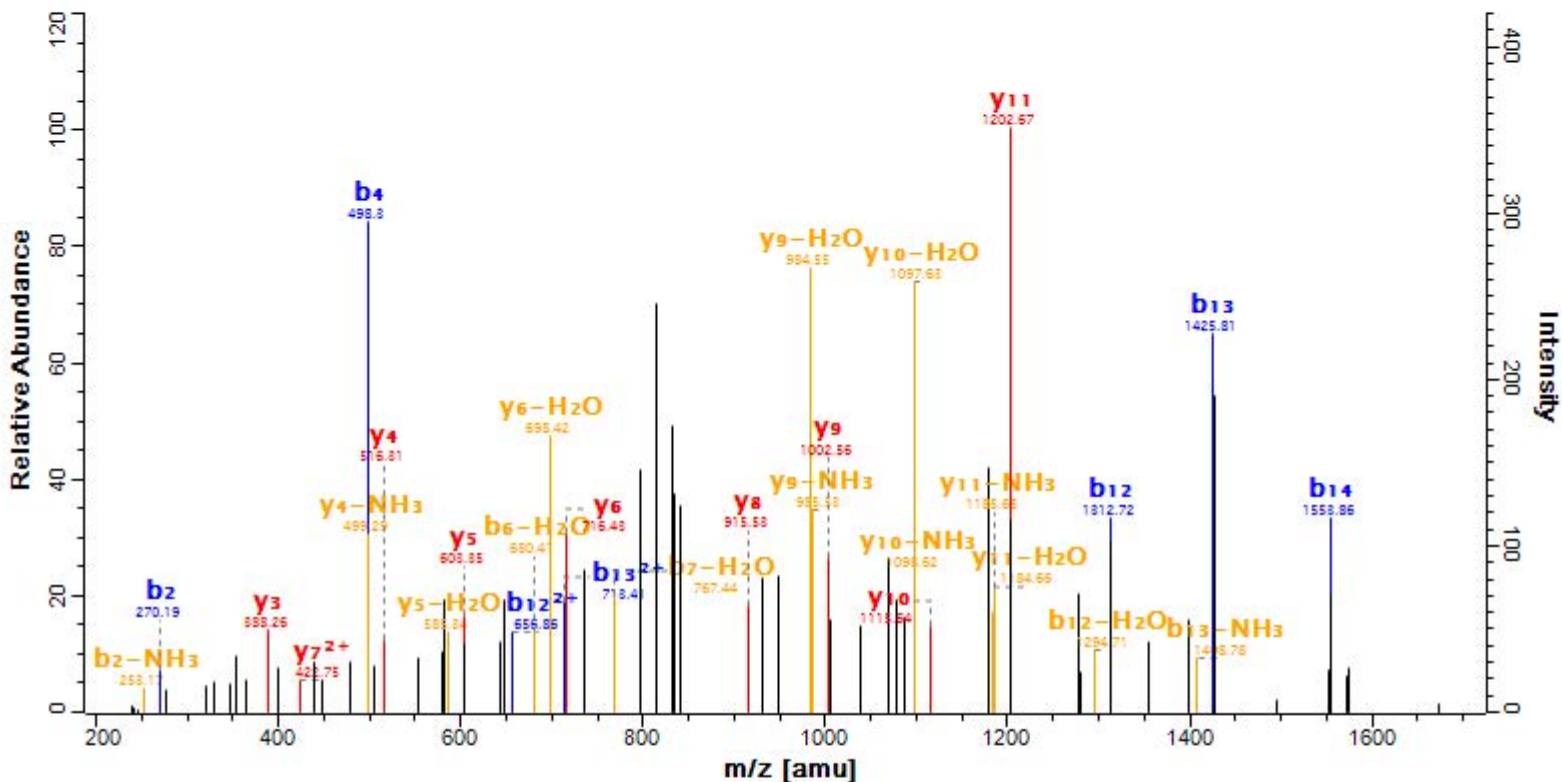

precursor information

|                   |                 |
|-------------------|-----------------|
| Mass:             | 1698.9625       |
| m/z:              | 850.48852       |
| Charge:           | 2+              |
| Retentiontime:    | 40.909805297851 |
| Score:            | 152.3377        |
| Mass Error [ppm]: | -0.19878        |
| PEP:              | 4.4813E-14      |
| Precursor Type:   | MULTI           |

general information

|                       |             |
|-----------------------|-------------|
| Annotation:           | 12 of 15    |
| AminoAcids Coverage:  | 80 %        |
| Intensity Coverage:   | 48 %        |
| Peak Coverage:        | 35 %        |
| Protein Localisation: | 297 ... 311 |

| b <sup>2+</sup> ion |        | b ion    |        | seq |   |    | y ion    |         | y <sup>2+</sup> ion |         |
|---------------------|--------|----------|--------|-----|---|----|----------|---------|---------------------|---------|
| Δ dalton            | mass   | Δ dalton | mass   |     |   |    | Δ dalton | mass    | Δ dalton            | mass    |
|                     | 114.09 |          | 114.09 | 1   | I | 14 |          |         |                     |         |
|                     | 270.19 | +0.1479  | 270.19 | 2   | R | 13 | 1586.9   |         | 1586.9              |         |
|                     | 383.28 |          | 383.28 | 3   | I | 12 | 1430.8   |         | 1430.8              |         |
|                     | 498.3  | +0.0798  | 498.3  | 4   | D | 11 | 1317.7   |         | 1317.7              |         |
|                     | 585.34 |          | 585.34 | 5   | S | 10 | 1202.7   | +0.1286 | 1202.7              |         |
|                     | 698.42 |          | 698.42 | 6   | L | 9  | 1115.6   | +0.0286 | 1115.6              |         |
|                     | 785.45 |          | 785.45 | 7   | S | 8  | 1002.6   | -0.075  | 1002.6              |         |
|                     | 856.49 |          | 856.49 | 8   | A | 7  | 915.53   | +0.158  | 915.53              |         |
|                     | 984.55 |          | 984.55 | 9   | Q | 6  | 844.49   |         | 422.75              | +0.4171 |
|                     | 1097.6 |          | 1097.6 | 10  | L | 5  | 716.43   | -0.016  | 716.43              |         |
|                     | 1184.7 |          | 1184.7 | 11  | S | 4  | 603.35   | +0.0865 | 603.35              |         |
| +0.1387             | 656.86 | -0.202   | 1312.7 | 12  | Q | 3  | 516.31   | +0.069  | 516.31              |         |
| +0.0821             | 713.41 | -0.128   | 1425.8 | 13  | L | 2  | 388.26   | +0.0229 | 388.26              |         |
|                     | 1553.9 | +0.0594  | 1553.9 | 14  | Q | 1  | 275.17   |         | 275.17              |         |
|                     |        |          |        | 15  | K | 0  | 147.11   |         | 147.11              |         |

Scan number 629 Raw file LNCAP\_Silac\_23F10\_set3\_07  
 Method ITMS; CID Pepti... 103.91

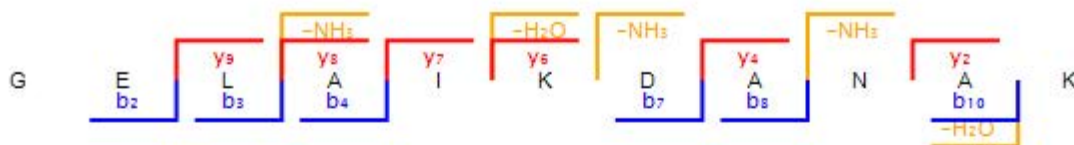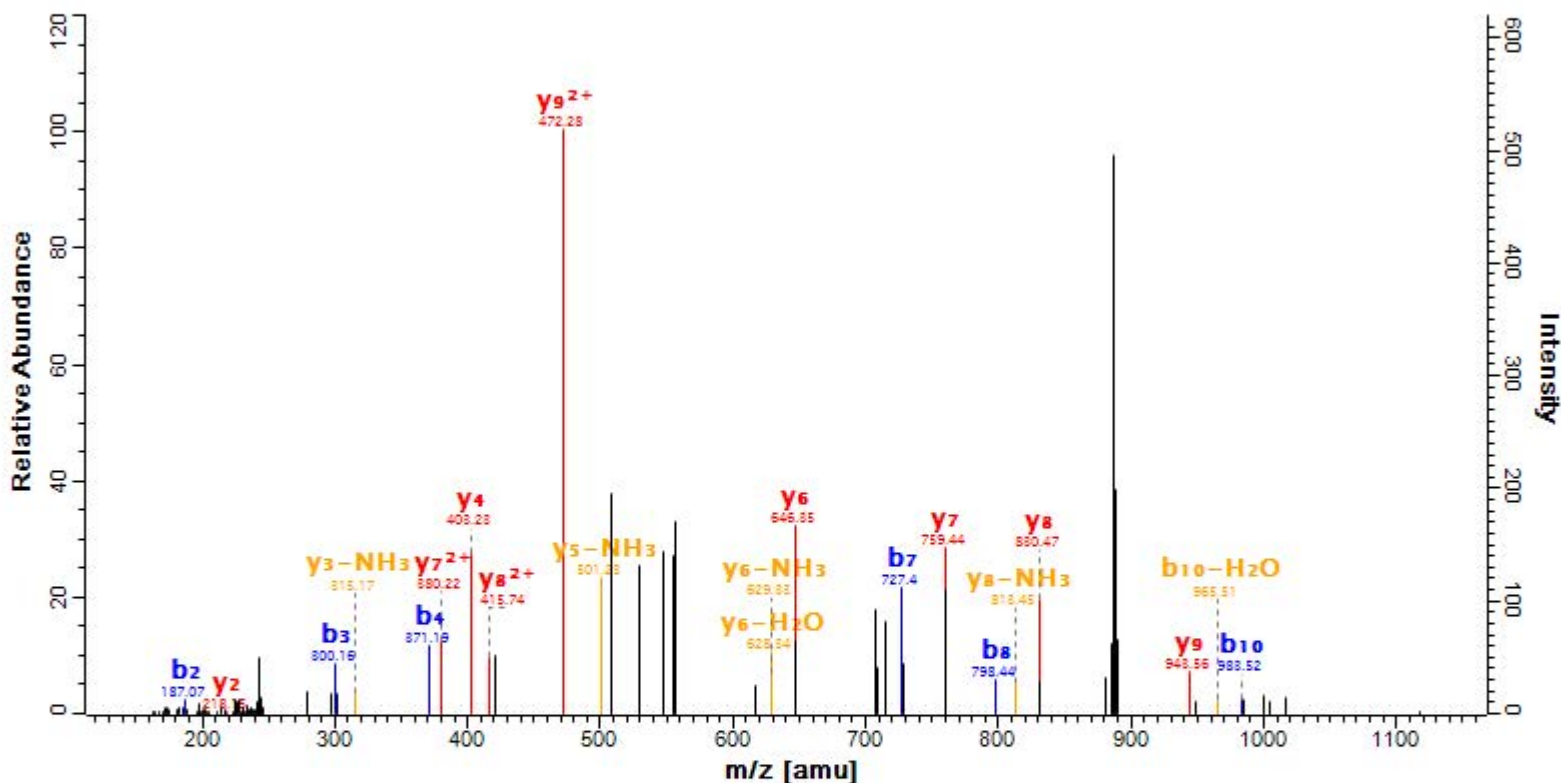

#### precursor information

|                   |                 |
|-------------------|-----------------|
| Mass:             | 1128.61446      |
| m/z:              | 565.31451       |
| Charge:           | 2+              |
| Retentiontime:    | 9.1914329528808 |
| Score:            | 103.9094        |
| Mass Error [ppm]: | 0.50687         |
| PEP:              | 0.00026912      |
| Precursor Type:   | MULTI           |

#### general information

|                       |             |
|-----------------------|-------------|
| Annotation:           | 9 of 11     |
| AminoAcids Coverage:  | 82 %        |
| Intensity Coverage:   | 40 %        |
| Peak Coverage:        | 21 %        |
| Protein Localisation: | 342 ... 352 |

| b ion     |          |     |   | y ion    |          | y <sup>2+</sup> ion |          |
|-----------|----------|-----|---|----------|----------|---------------------|----------|
| Δ dalton  | mass     | seq |   | Δ dalton | mass     | Δ dalton            | mass     |
|           | 58.02874 | 1   | G | 10       |          |                     |          |
| +0.023332 | 187.0713 | 2   | E | 9        | 1072.6   | 1072.6              |          |
| -0.06629  | 300.1554 | 3   | L | 8        | 943.5571 | +0.119102           | 472.2822 |
| +0.01452  | 371.1925 | 4   | A | 7        | 830.473  | +0.018473           | 415.7402 |
|           | 484.2766 | 5   | I | 6        | 759.4359 | +0.022872           | 380.2216 |
|           | 612.3715 | 6   | K | 5        | 646.3519 | +0.109744           | 646.3519 |
| +0.024432 | 727.3985 | 7   | D | 4        | 518.2569 |                     | 518.2569 |
| +0.072462 | 798.4356 | 8   | A | 3        | 403.23   | -0.00877            | 403.23   |
|           | 912.4785 | 9   | N | 2        | 332.1928 |                     | 332.1928 |
| -0.08442  | 983.5156 | 10  | A | 1        | 218.1499 | +0.217331           | 218.1499 |
|           |          | 11  | K | 0        | 147.1128 |                     | 147.1128 |

Scan number 6385 Raw file LNCAP\_Silac\_23F10\_set3\_07  
 Method ITMS: CID Peptide 61.24

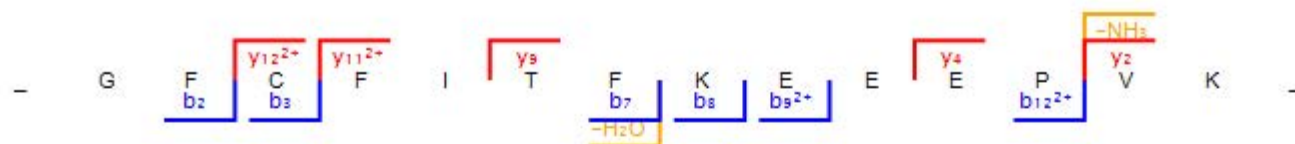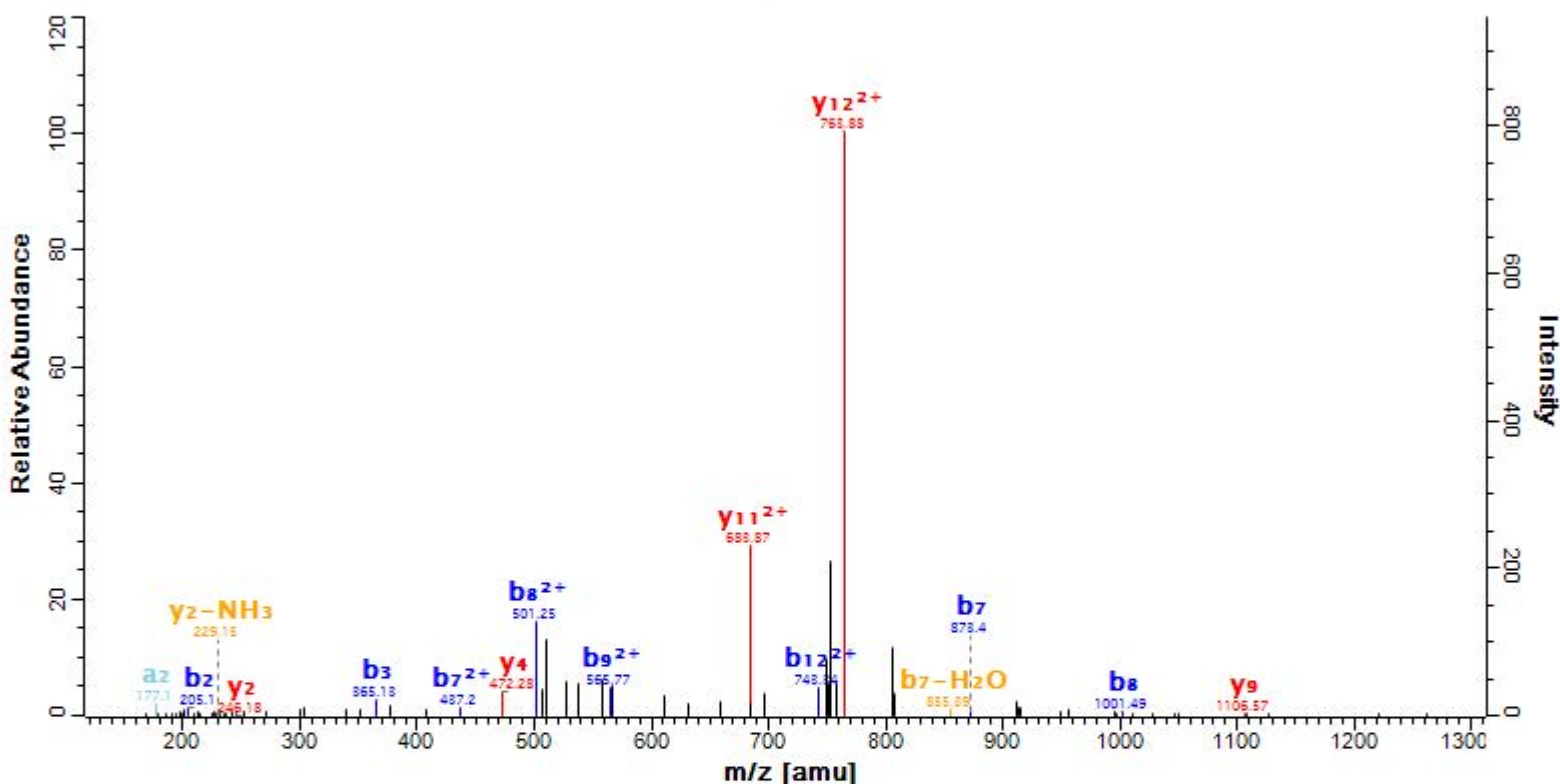

#### precursor information

|                   |                 |
|-------------------|-----------------|
| Mass:             | 1729.83862      |
| m/z:              | 577.62015       |
| Charge:           | 3+              |
| Retentiontime:    | 44.439689636230 |
| Score:            | 61.23503        |
| Mass Error [ppm]: | 0.045304        |
| PEP:              | 0.0057825       |
| Precursor Type:   | MULTI           |

|        | a ion         | b <sup>2+</sup> ion | b ion         |        |       | y ion         | y <sup>2+</sup> ion |      |        |        |       |
|--------|---------------|---------------------|---------------|--------|-------|---------------|---------------------|------|--------|--------|-------|
|        | Δ dalton mass | Δ dalton mass       | Δ dalton mass | seq    |       | Δ dalton mass | Δ dalton mass       |      |        |        |       |
|        | 30.03         | 58.03               | 58.03         | 1      | G     | 13            |                     |      |        |        |       |
| +0.037 | 177.1         | 205.1               | +0            | 205.1  | 2     | F             | 12                  | 1674 | 1674   |        |       |
|        | 337.1         | 365.1               | -0.13         | 365.1  | 3     | C             | 11                  | 1527 | 763.9  | +0.22  |       |
|        | 484.2         | 512.2               |               | 512.2  | 4     | F             | 10                  | 1367 | 683.9  | +0.25  |       |
|        | 597.3         | 625.3               |               | 625.3  | 5     | I             | 9                   | 1220 | 1220   |        |       |
|        | 698.3         | 726.3               |               | 726.3  | 6     | T             | 8                   | 1107 | +0.377 | 1107   |       |
|        | 845.4         | +0.1                | 437.2         | -0.35  | 873.4 | 7             | F                   | 7    | 1006   | 1006   |       |
|        | 973.5         | +0.477              | 501.2         | +0.424 | 1001  | 8             | K                   | 6    | 858.5  | 858.5  |       |
|        | 1103          | -0.12               | 565.8         |        | 1131  | 9             | E                   | 5    | 730.4  | 730.4  |       |
|        | 1232          |                     | 1260          |        | 1260  | 10            | E                   | 4    | 601.3  | 601.3  |       |
|        | 1361          |                     | 1389          |        | 1389  | 11            | E                   | 3    | 472.3  | -0.2   | 472.3 |
|        | 1458          | -0.34               | 743.3         |        | 1486  | 12            | P                   | 2    | 343.2  | 343.2  |       |
|        | 1557          |                     | 1585          |        | 1585  | 13            | V                   | 1    | 246.2  | +0.325 | 246.2 |
|        |               |                     |               |        |       | 14            | K                   | 0    | 147.1  | 147.1  |       |

#### general information

|                       |             |
|-----------------------|-------------|
| Annotation:           | 10 of 14    |
| AminoAcids Coverage:  | 71 %        |
| Intensity Coverage:   | 54 %        |
| Peak Coverage:        | 17 %        |
| Protein Localisation: | 205 ... 218 |

Scan number 6430 Raw file LNCAP\_Silac\_23F10\_set3\_07  
 Method ITMS: CID Peptide LNCAP\_Silac\_23F10\_set3\_07

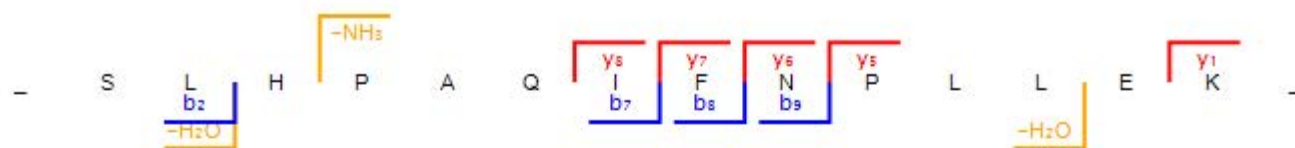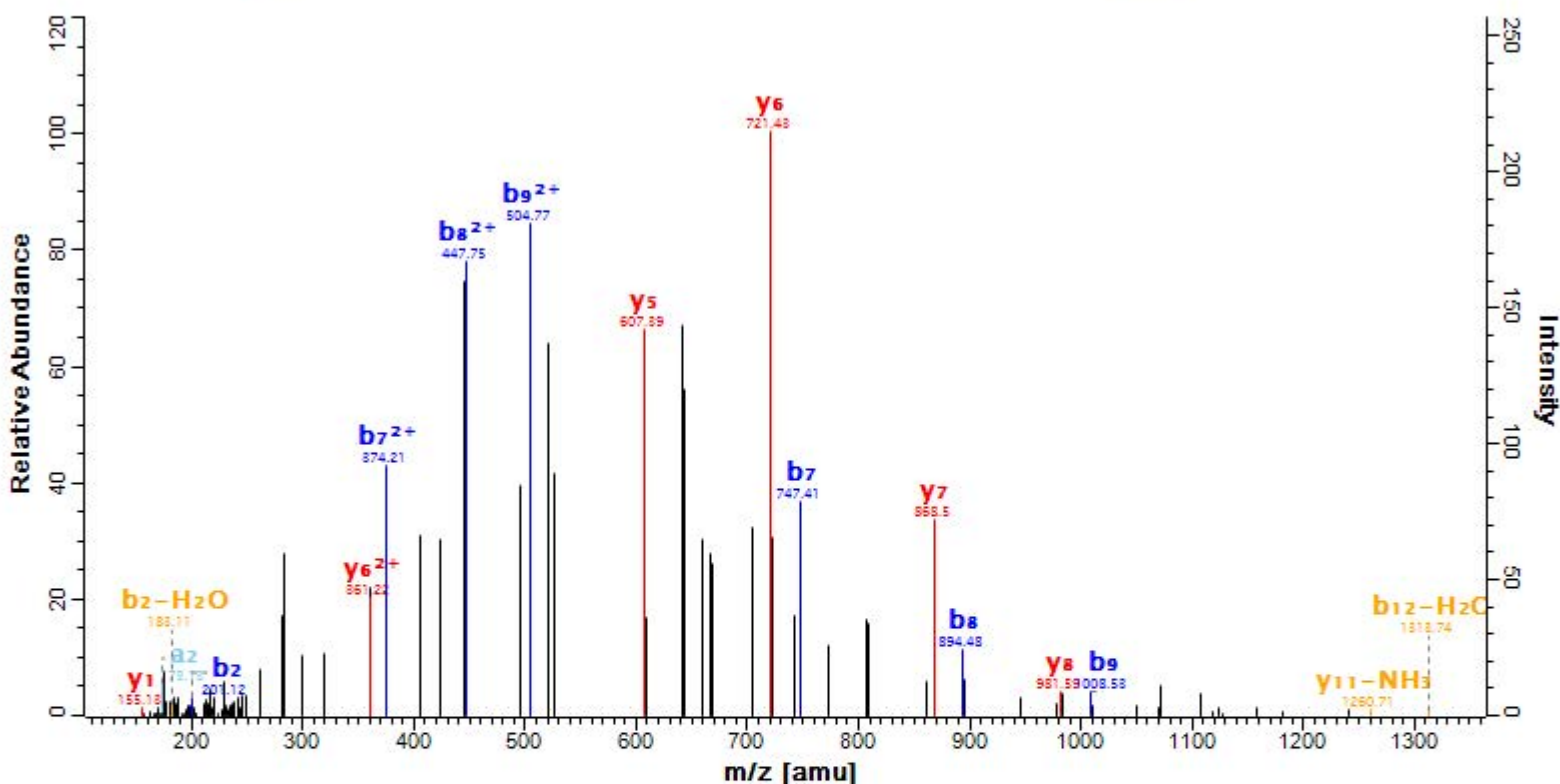

precursor information

|                   |                 |
|-------------------|-----------------|
| Mass:             | 1605.88844      |
| m/z:              | 536.30342       |
| Charge:           | 3+              |
| Retentiontime:    | 44.774169921875 |
| Score:            | 77.07824        |
| Mass Error [ppm]: | 0.34816         |
| PEP:              | 0.0012673       |
| Precursor Type:   | MULTI           |

general information

|                       |             |
|-----------------------|-------------|
| Annotation:           | 8 of 14     |
| AminoAcids Coverage:  | 57 %        |
| Intensity Coverage:   | 35 %        |
| Peak Coverage:        | 15 %        |
| Protein Localisation: | 425 ... 438 |

| a ion         |               | b <sup>2+</sup> ion |               | b ion |               | y ion         |               | y <sup>2+</sup> ion |       |       |       |
|---------------|---------------|---------------------|---------------|-------|---------------|---------------|---------------|---------------------|-------|-------|-------|
| Δ dalton mass | Δ dalton mass | Δ dalton mass       | Δ dalton mass | seq   | Δ dalton mass | Δ dalton mass | Δ dalton mass | Δ dalton mass       |       |       |       |
|               | 60.04         | 88.04               | 88.04         | 1     | S             | 13            |               |                     |       |       |       |
| +0.032        | 73.1          | 201.1               | +0.079        | 2     | L             | 12            | 1528          | 1528                |       |       |       |
|               | 310.2         | 338.2               | 338.2         | 3     | H             | 11            | 1415          | 1415                |       |       |       |
|               | 407.2         | 435.2               | 435.2         | 4     | P             | 10            | 1278          | 1278                |       |       |       |
|               | 478.3         | 506.3               | 506.3         | 5     | A             | 9             | 1181          | 1181                |       |       |       |
|               | 606.3         | 634.3               | 634.3         | 6     | Q             | 8             | 1110          | 1110                |       |       |       |
|               | 719.4         | +0.159              | 747.4         | -0.01 | 7             | I             | 7             | 981.6               | +0.01 | 981.6 |       |
|               | 866.5         | +0.17               | 447.7         | -0.09 | 8             | F             | 6             | 868.5               | -0.12 | 868.5 |       |
|               | 980.5         | +0.273              | 504.8         | -0.08 | 9             | N             | 5             | 721.4               | -0.01 | 361.2 | +0.13 |
|               | 1078          |                     | 1106          |       | 10            | P             | 4             | 607.4               | -0.02 | 607.4 |       |
|               | 1191          |                     | 1219          |       | 11            | L             | 3             | 510.3               |       | 510.3 |       |
|               | 1304          |                     | 1332          |       | 12            | L             | 2             | 397.3               |       | 397.3 |       |
|               | 1433          |                     | 1461          |       | 13            | E             | 1             | 284.2               |       | 284.2 |       |
|               |               |                     |               |       | 14            | K             | 0             | 155.1               | -0.13 | 155.1 |       |

Scan number 6781 Raw file LNCAP\_Silac\_23F10\_set3\_07  
 Method ITMS; CID Pepti... 164.88

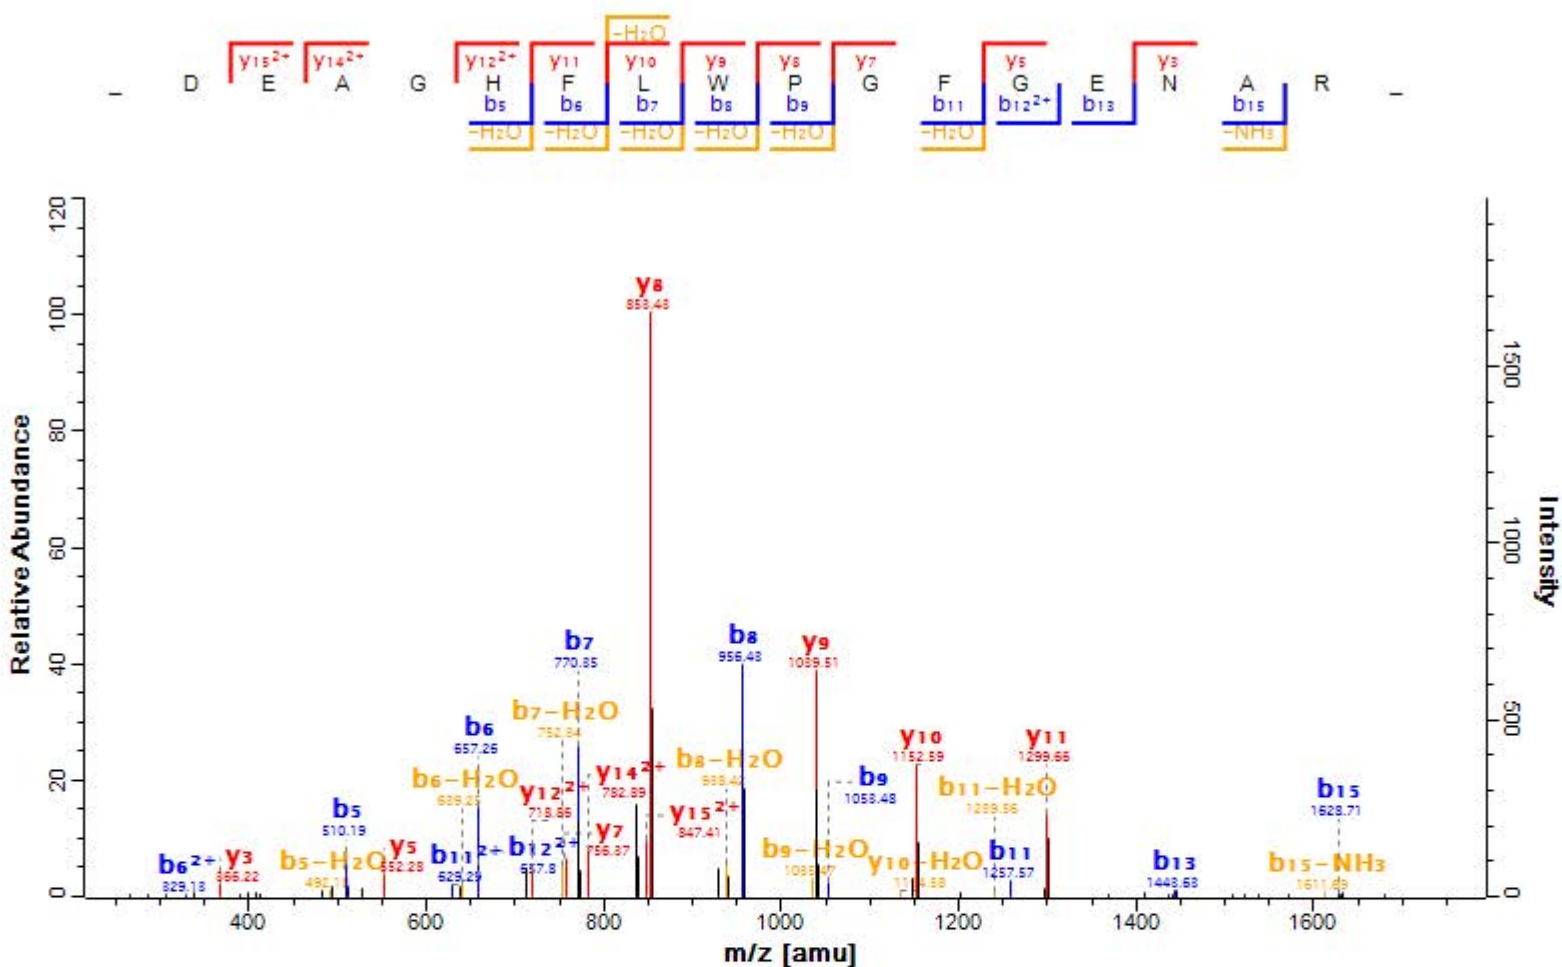

precursor information

|                   |                 |
|-------------------|-----------------|
| Mass:             | 1801.81692      |
| m/z:              | 901.91574       |
| Charge:           | 2+              |
| Retentiontime:    | 47.266506195068 |
| Score:            | 164.8837        |
| Mass Error [ppm]: | -0.17092        |
| PEP:              | 2.723E-20       |
| Precursor Type:   | MULTI           |

general information

|                       |             |
|-----------------------|-------------|
| Annotation:           | 13 of 16    |
| AminoAcids Coverage:  | 81 %        |
| Intensity Coverage:   | 60 %        |
| Peak Coverage:        | 35 %        |
| Protein Localisation: | 538 ... 553 |

| b <sup>2+</sup> ion |        | b ion    |        | seq |   |    | y ion    |         | y <sup>2+</sup> ion |         |
|---------------------|--------|----------|--------|-----|---|----|----------|---------|---------------------|---------|
| Δ dalton            | mass   | Δ dalton | mass   |     |   |    | Δ dalton | mass    | Δ dalton            | mass    |
|                     | 116.03 |          | 116.03 | 1   | D | 15 |          |         |                     |         |
|                     | 245.08 |          | 245.08 | 2   | E | 14 | 1693.8   |         | 847.41              | +0.1131 |
|                     | 316.11 |          | 316.11 | 3   | A | 13 | 1564.8   |         | 782.89              | +0.2092 |
|                     | 373.14 |          | 373.14 | 4   | G | 12 | 1493.7   |         | 1493.7              |         |
|                     | 510.19 | +0.0828  | 510.19 | 5   | H | 11 | 1436.7   |         | 718.86              | +0.2194 |
| +0.4924             | 329.13 | +0.0177  | 657.26 | 6   | F | 10 | 1299.7   | +0.0256 | 1299.7              |         |
|                     | 770.35 | +0.0024  | 770.35 | 7   | L | 9  | 1152.6   | +0.0336 | 1152.6              |         |
|                     | 956.43 | -0.04    | 956.43 | 8   | W | 8  | 1039.5   | +0.0378 | 1039.5              |         |
|                     | 1053.5 | +0.0458  | 1053.5 | 9   | P | 7  | 853.43   | -0.038  | 853.43              |         |
|                     | 1110.5 |          | 1110.5 | 10  | G | 6  | 756.37   | +0.1537 | 756.37              |         |
| +0.1604             | 629.29 | +0.1044  | 1257.6 | 11  | F | 5  | 699.35   |         | 699.35              |         |
| +0.4782             | 657.8  |          | 1314.6 | 12  | G | 4  | 552.28   | -0.069  | 552.28              |         |
|                     | 1443.6 | -0.047   | 1443.6 | 13  | E | 3  | 495.26   |         | 495.26              |         |
|                     | 1557.7 |          | 1557.7 | 14  | N | 2  | 366.22   | +0.1392 | 366.22              |         |
|                     | 1628.7 | -0.272   | 1628.7 | 15  | A | 1  | 252.18   |         | 252.18              |         |
|                     |        |          |        | 16  | R | 0  | 181.14   |         | 181.14              |         |

Scan number 7142 Raw file LNCAP\_Silac\_23F10\_set3\_07  
 Method ITMS; CID Pepti... 67.23

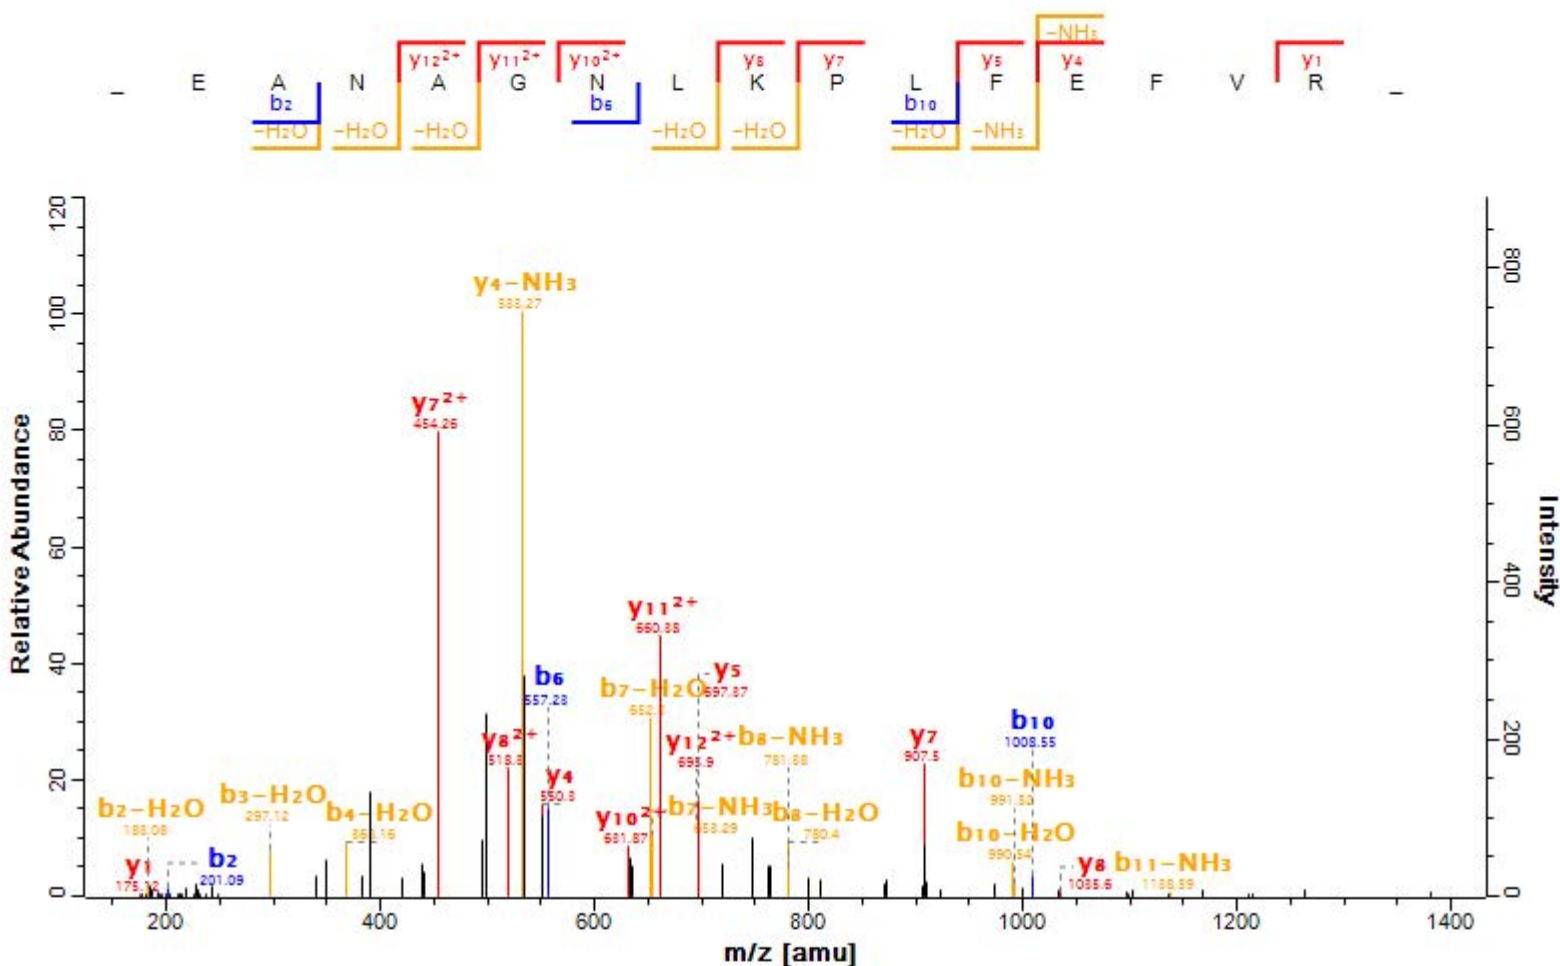

#### precursor information

|                   |                 |
|-------------------|-----------------|
| Mass:             | 1703.89943      |
| m/z:              | 568.97375       |
| Charge:           | 3+              |
| Retentiontime:    | 50.279209136962 |
| Score:            | 67.23447        |
| Mass Error [ppm]: | -0.043067       |
| PEP:              | 0.0019131       |
| Precursor Type:   | MULTI           |

#### general information

|                       |             |
|-----------------------|-------------|
| Annotation:           | 12 of 15    |
| AminoAcids Coverage:  | 80 %        |
| Intensity Coverage:   | 65 %        |
| Peak Coverage:        | 28 %        |
| Protein Localisation: | 109 ... 123 |

| b ion    |          |     |   | y ion    |          | y <sup>2+</sup> ion |           |           |
|----------|----------|-----|---|----------|----------|---------------------|-----------|-----------|
| Δ dalton | mass     | seq |   | Δ dalton | mass     | Δ dalton            | mass      |           |
|          | 130.0499 | 1   | E | 14       |          |                     |           |           |
| -0.04905 | 201.087  | 2   | A | 13       | 1575.864 | 1575.864            |           |           |
|          | 315.1299 | 3   | N | 12       | 1504.827 | 1504.827            |           |           |
|          | 386.167  | 4   | A | 11       | 1390.784 | 695.8957            | +0.207194 |           |
|          | 443.1885 | 5   | G | 10       | 1319.747 | 660.3772            | +0.199933 |           |
| -0.00174 | 557.2314 | 6   | N | 9        | 1262.726 | 631.8664            | -0.01004  |           |
|          | 670.3155 | 7   | L | 8        | 1148.683 | 1148.683            |           |           |
|          | 798.4104 | 8   | K | 7        | 1035.599 | +0.080255           | 518.3029  | +0.251882 |
|          | 895.4632 | 9   | P | 6        | 907.5036 | -0.03029            | 454.2554  | +0.234423 |
| -0.08407 | 1008.547 | 10  | L | 5        | 810.4509 |                     | 810.4509  |           |
|          | 1155.616 | 11  | F | 4        | 697.3668 | +0.003879           | 697.3668  |           |
|          | 1284.658 | 12  | E | 3        | 550.2984 | +0.023648           | 550.2984  |           |
|          | 1431.727 | 13  | F | 2        | 421.2558 |                     | 421.2558  |           |
|          | 1530.795 | 14  | V | 1        | 274.1874 |                     | 274.1874  |           |
|          |          | 15  | R | 0        | 175.119  | -0.007              | 175.119   |           |

Scan number 754 Raw file LNCAP\_Silac\_23F10\_set3\_07  
 Method ITMS; CID Peptide 222.75

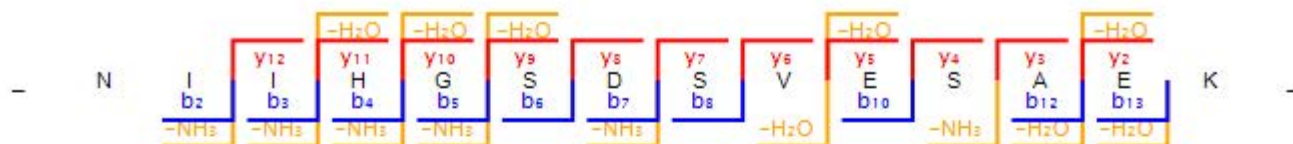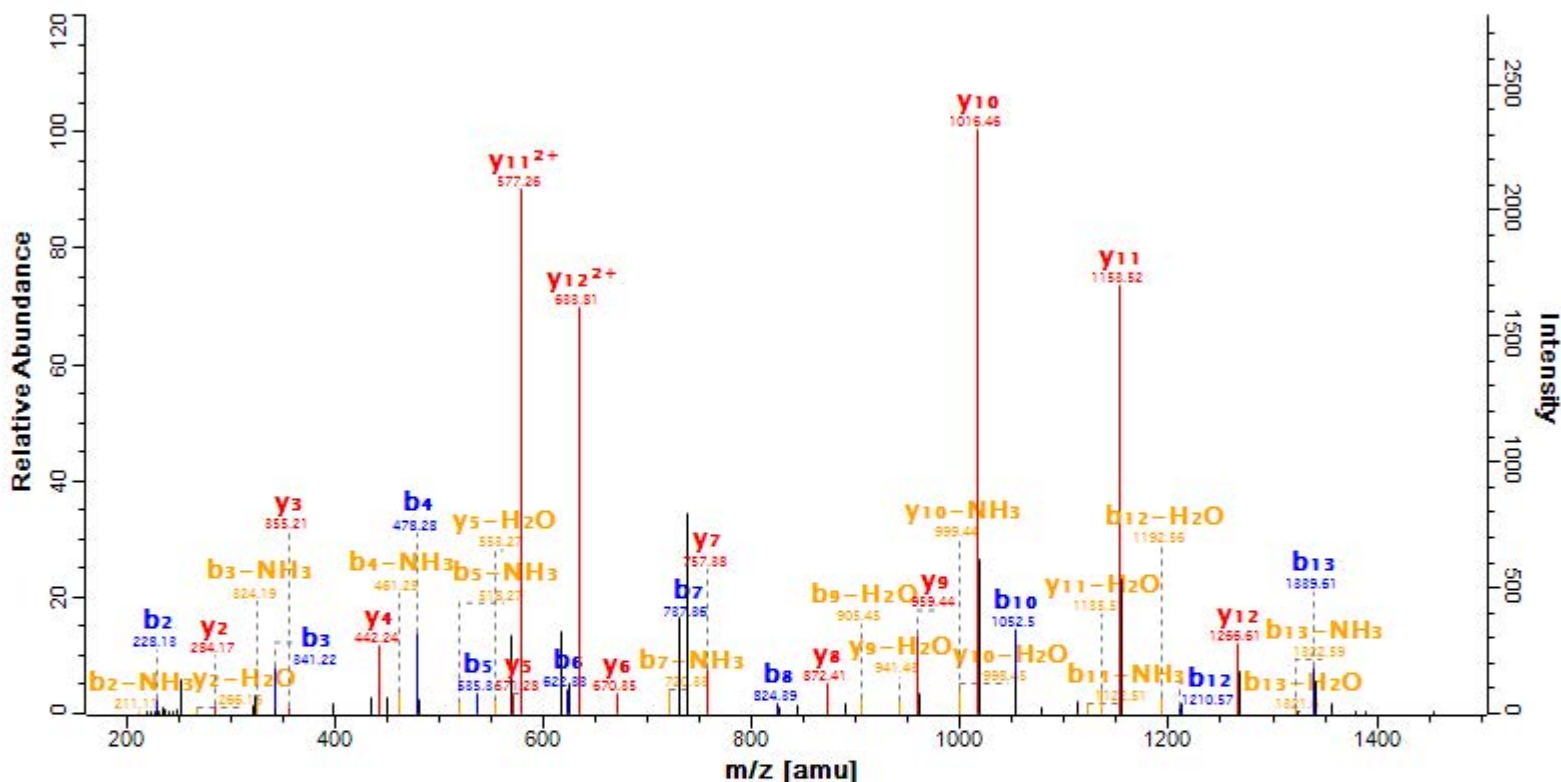

#### precursor information

|                   |                 |
|-------------------|-----------------|
| Mass:             | 1484.71035      |
| m/z:              | 743.36245       |
| Charge:           | 2+              |
| Retentiontime:    | 10.085885047912 |
| Score:            | 222.7519        |
| Mass Error [ppm]: | -0.23789        |
| PEP:              | 2.9996E-33      |
| Precursor Type:   | MULTI           |

| b ion     |          |     |   | y ion    |          | y <sup>2+</sup> ion |          |           |
|-----------|----------|-----|---|----------|----------|---------------------|----------|-----------|
| Δ dalton  | mass     | seq |   | Δ dalton | mass     | Δ dalton            | mass     |           |
|           | 115.0502 | 1   | N | 13       |          |                     |          |           |
| -0.02607  | 228.1343 | 2   | I | 12       | 1379.689 |                     | 1379.689 |           |
| +0.067374 | 341.2183 | 3   | I | 11       | 1266.605 | +0.025064           | 633.8062 | +0.15904  |
| +0.045937 | 478.2772 | 4   | H | 10       | 1153.521 | -0.02698            | 577.2642 | +0.111839 |
| -0.008    | 535.2987 | 5   | G | 9        | 1016.462 | -0.04833            | 1016.462 |           |
| -0.01781  | 622.3307 | 6   | S | 8        | 959.4407 | +0.098989           | 959.4407 |           |
| -0.02467  | 737.3577 | 7   | D | 7        | 872.4087 | -0.08541            | 872.4087 |           |
| +0.104006 | 824.3897 | 8   | S | 6        | 757.3818 | +0.198915           | 757.3818 |           |
|           | 923.4581 | 9   | V | 5        | 670.3497 | +0.00432            | 670.3497 |           |
| -0.05943  | 1052.501 | 10  | E | 4        | 571.2813 | +0.081034           | 571.2813 |           |
|           | 1139.533 | 11  | S | 3        | 442.2387 | +0.106782           | 442.2387 |           |
| +0.168181 | 1210.57  | 12  | A | 2        | 355.2067 | +0.068009           | 355.2067 |           |
| -0.02248  | 1339.612 | 13  | E | 1        | 284.1696 | +0.185842           | 284.1696 |           |
|           |          | 14  | K | 0        | 155.127  |                     | 155.127  |           |

#### general information

|                       |             |
|-----------------------|-------------|
| Annotation:           | 12 of 14    |
| AminoAcids Coverage:  | 86 %        |
| Intensity Coverage:   | 70 %        |
| Peak Coverage:        | 42 %        |
| Protein Localisation: | 140 ... 153 |

Scan number 7663 Raw file LNCAP\_Silac\_23F10\_set3\_07  
 Method ITMS; CID Pepti... 98.41

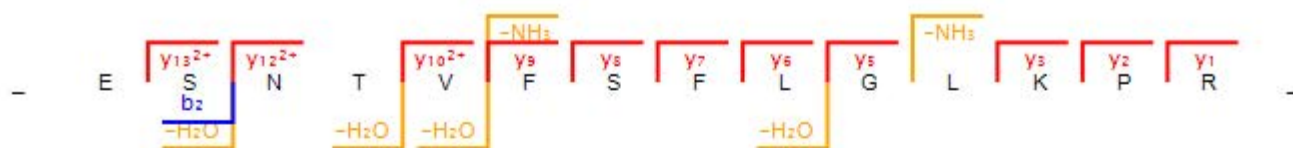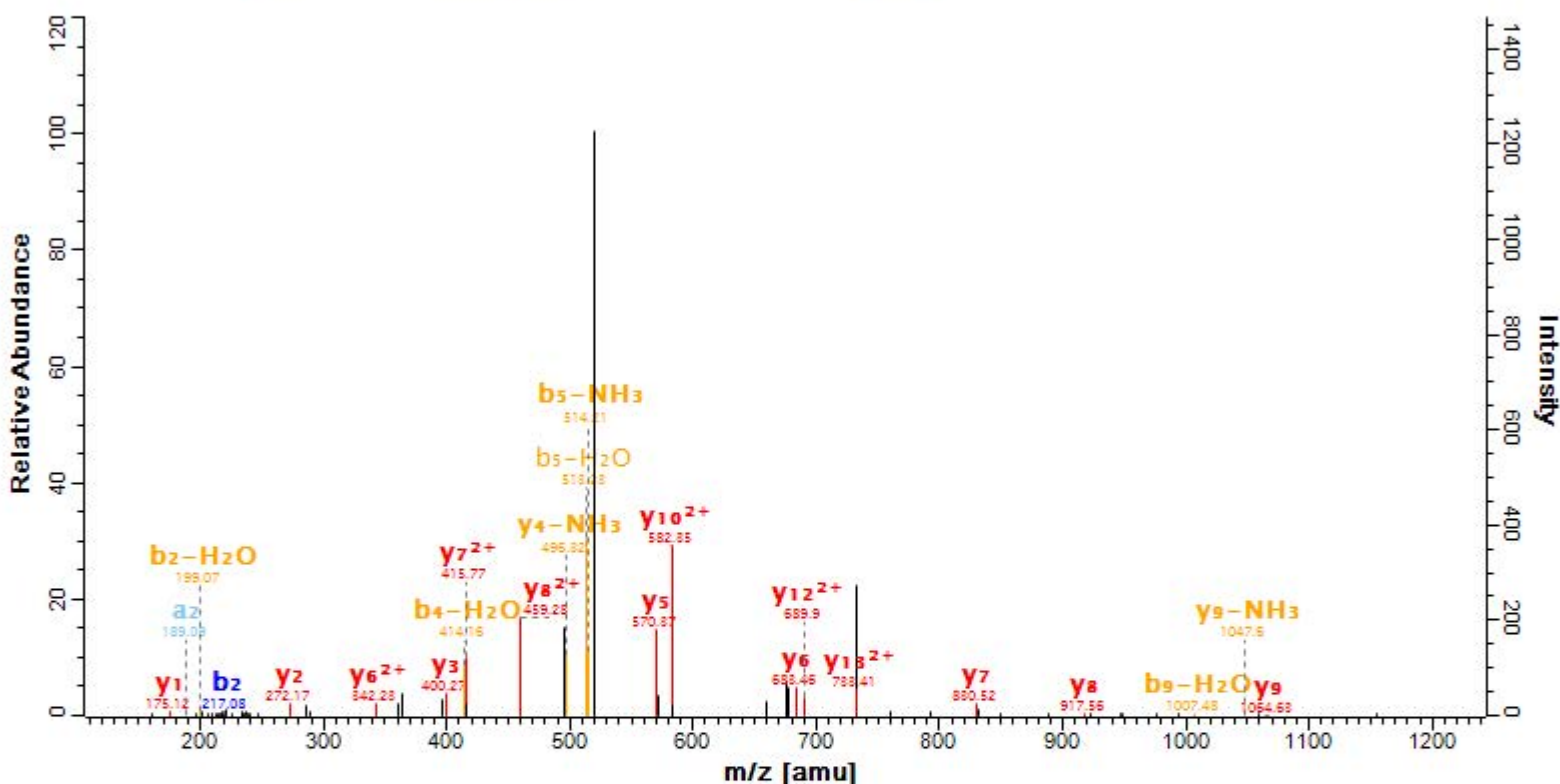

#### precursor information

|                   |                 |
|-------------------|-----------------|
| Mass:             | 1593.8518       |
| m/z:              | 532.29121       |
| Charge:           | 3+              |
| Retentiontime:    | 55.265190124511 |
| Score:            | 98.40717        |
| Mass Error [ppm]: | 0.19023         |
| PEP:              | 9.9089E-05      |
| Precursor Type:   | MULTI           |

| a ion    |        | b ion    |        |    |     |    | y ion    |         | y <sup>2+</sup> ion |         |
|----------|--------|----------|--------|----|-----|----|----------|---------|---------------------|---------|
| Δ dalton | mass   | Δ dalton | mass   |    | seq |    | Δ dalton | mass    | Δ dalton            | mass    |
|          | 102.05 |          | 130.05 | 1  | E   | 13 |          |         |                     |         |
| -0.091   | 189.09 | +0       | 217.08 | 2  | S   | 12 | 1465.8   |         | 733.41              | -0.427  |
|          | 303.13 |          | 331.12 | 3  | N   | 11 | 1378.8   |         | 689.9               | +0.1951 |
|          | 404.18 |          | 432.17 | 4  | T   | 10 | 1264.7   |         | 1264.7              |         |
|          | 503.25 |          | 531.24 | 5  | V   | 9  | 1163.7   |         | 582.35              | +0.1975 |
|          | 650.31 |          | 678.31 | 6  | F   | 8  | 1064.6   | -0.018  | 1064.6              |         |
|          | 737.35 |          | 765.34 | 7  | S   | 7  | 917.56   | +0.0427 | 459.28              | +0.2321 |
|          | 884.41 |          | 912.41 | 8  | F   | 6  | 830.52   | +0.2951 | 415.77              | -0.052  |
|          | 997.5  |          | 1025.5 | 9  | L   | 5  | 683.46   | +0.0409 | 342.23              | +0.1145 |
|          | 1054.5 |          | 1082.5 | 10 | G   | 4  | 570.37   | +0.0788 | 570.37              |         |
|          | 1167.6 |          | 1195.6 | 11 | L   | 3  | 513.35   |         | 513.35              |         |
|          | 1295.7 |          | 1323.7 | 12 | K   | 2  | 400.27   | +0.0096 | 400.27              |         |
|          | 1392.8 |          | 1420.7 | 13 | P   | 1  | 272.17   | +0.0832 | 272.17              |         |
|          |        |          |        | 14 | R   | 0  | 175.12   | +0.1385 | 175.12              |         |

#### general information

|                       |            |
|-----------------------|------------|
| Annotation:           | 13 of 14   |
| AminoAcids Coverage:  | 93 %       |
| Intensity Coverage:   | 45 %       |
| Peak Coverage:        | 23 %       |
| Protein Localisation: | 87 ... 100 |



Scan number 776 Raw file LNCAP\_Silac\_23F10\_set3\_07  
 Method ITMS; CID Pepti... 96.14

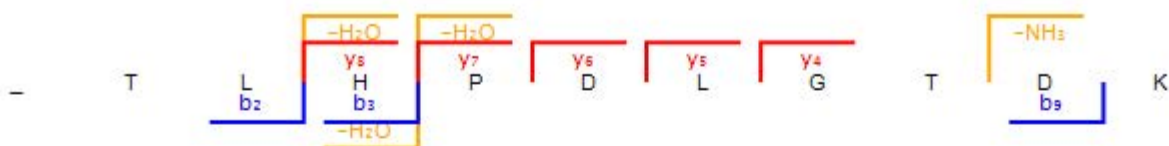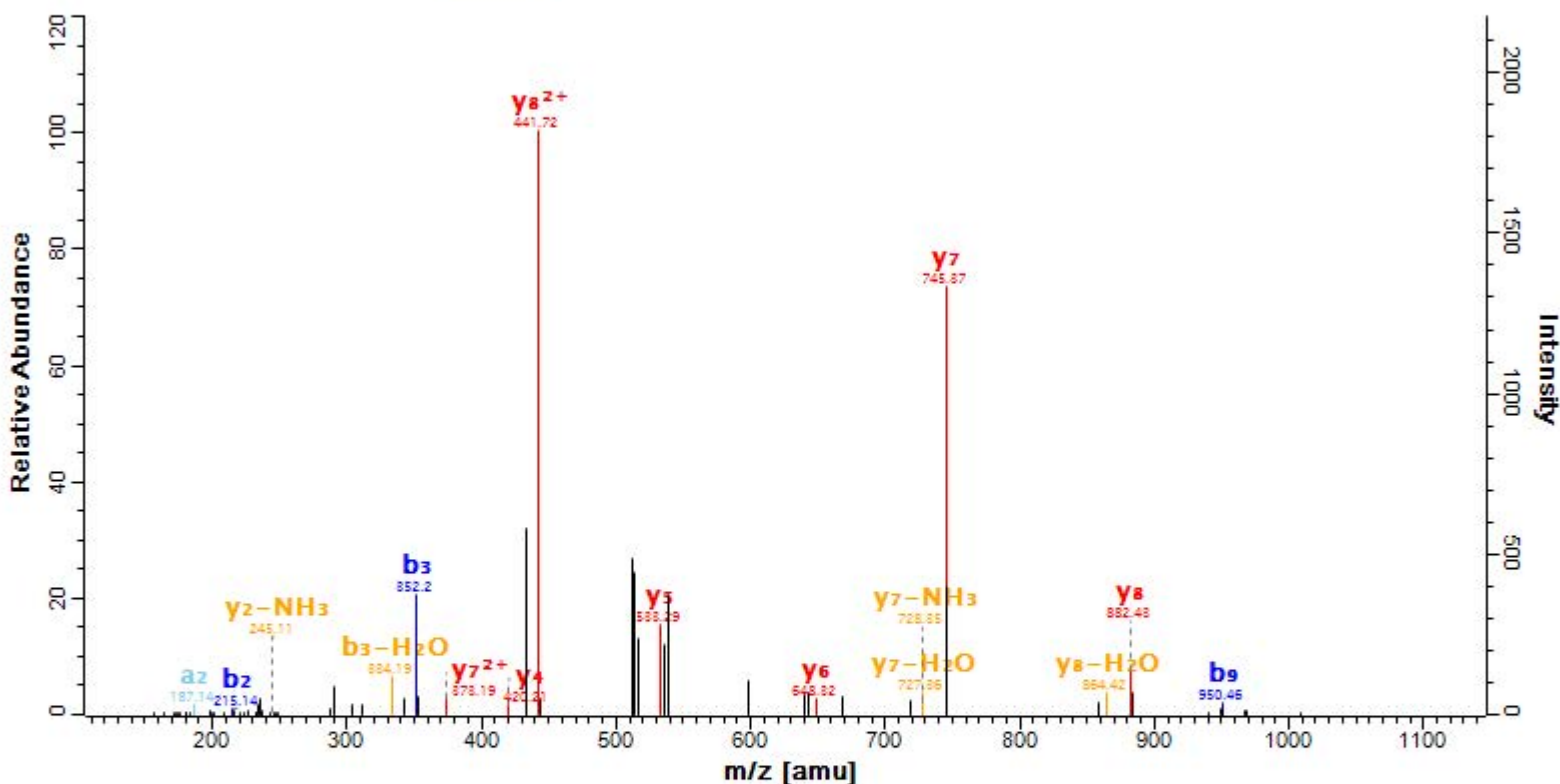

#### precursor information

|                   |                |
|-------------------|----------------|
| Mass:             | 1095.55636     |
| m/z:              | 548.78546      |
| Charge:           | 2+             |
| Retentiontime:    | 10.25439453125 |
| Score:            | 96.14293       |
| Mass Error [ppm]: | 0.29198        |
| PEP:              | 0.0014971      |
| Precursor Type:   | MULTI          |

|                       |             |
|-----------------------|-------------|
| Annotation:           | 7 of 10     |
| AminoAcids Coverage:  | 70 %        |
| Intensity Coverage:   | 53 %        |
| Peak Coverage:        | 17 %        |
| Protein Localisation: | 242 ... 251 |

| a ion    |        | b ion    |        |    |     |   | y ion    |         | y <sup>2+</sup> ion |         |
|----------|--------|----------|--------|----|-----|---|----------|---------|---------------------|---------|
| Δ dalton | mass   | Δ dalton | mass   |    | seq |   | Δ dalton | mass    | Δ dalton            | mass    |
|          | 74.06  |          | 102.05 | 1  | T   | 9 |          |         |                     |         |
| +0.0432  | 187.14 | +0.051   | 215.14 | 2  | L   | 8 | 995.52   |         | 995.52              |         |
|          | 324.2  | +0.0165  | 352.2  | 3  | H   | 7 | 882.43   | +0.0239 | 441.72              | +0.1979 |
|          | 421.26 |          | 449.25 | 4  | P   | 6 | 745.37   | +0.0122 | 373.19              | +0.2943 |
|          | 536.28 |          | 564.28 | 5  | D   | 5 | 648.32   | +0.1146 | 648.32              |         |
|          | 649.37 |          | 677.36 | 6  | L   | 4 | 533.29   | +0.0693 | 533.29              |         |
|          | 706.39 |          | 734.38 | 7  | G   | 3 | 420.21   | +0.2087 | 420.21              |         |
|          | 807.44 |          | 835.43 | 8  | T   | 2 | 363.19   |         | 363.19              |         |
|          | 922.46 | +0.0485  | 950.46 | 9  | D   | 1 | 262.14   |         | 262.14              |         |
|          |        |          |        | 10 | K   | 0 | 147.11   |         | 147.11              |         |

Scan number 936 Raw file LNCAP\_Silac\_23F10\_set3\_07  
 Method ITMS; CID Pepti... 82.85

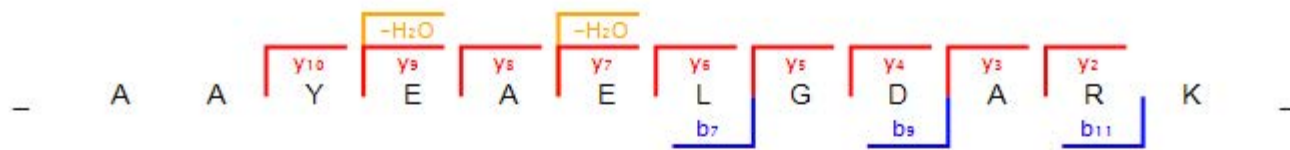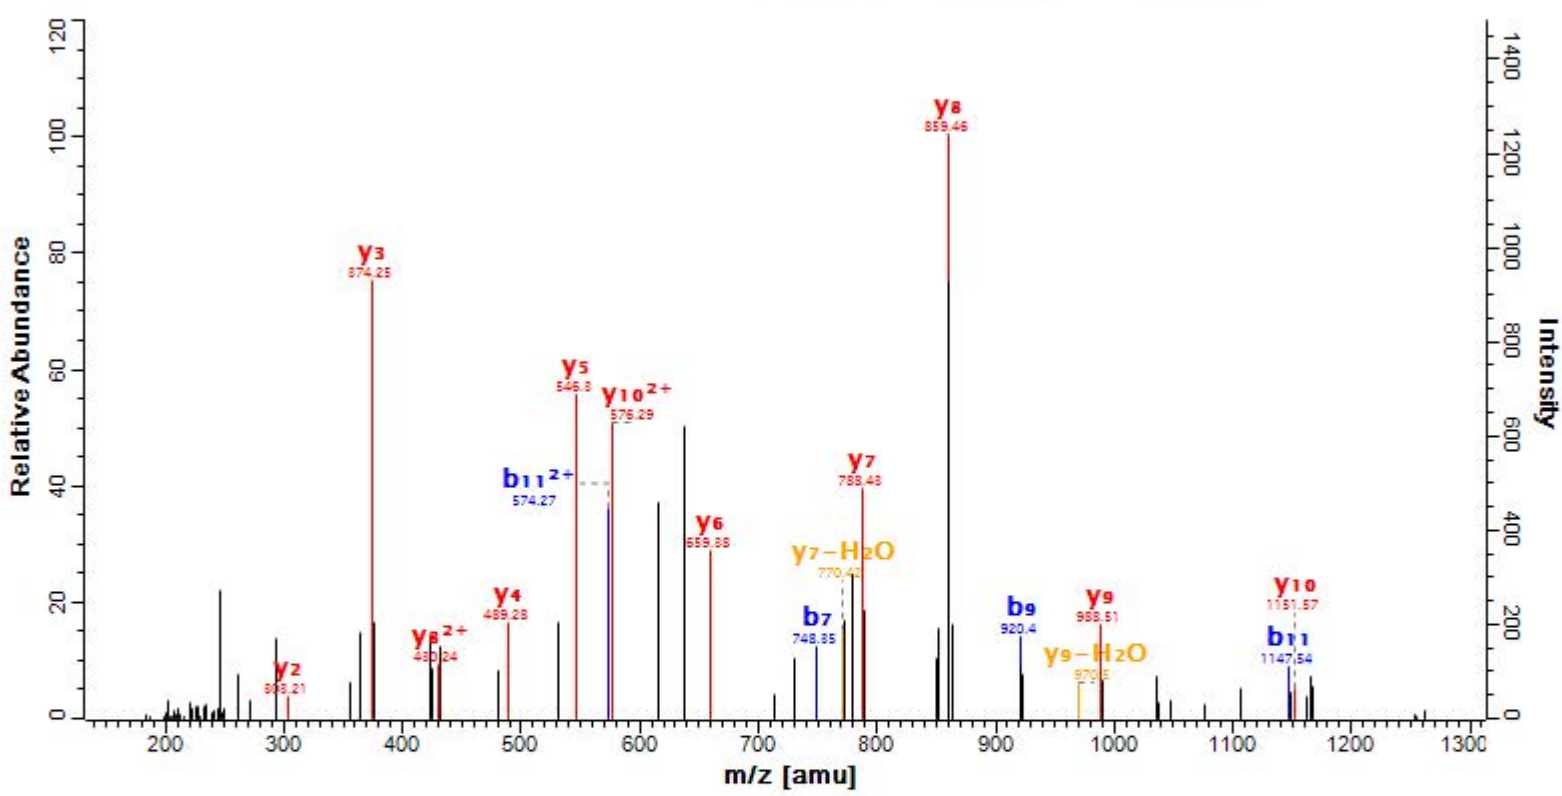

**precursor information**

|                   |                 |
|-------------------|-----------------|
| Mass:             | 1292.63602      |
| m/z:              | 647.32529       |
| Charge:           | 2+              |
| Retentiontime:    | 11.385793685913 |
| Score:            | 82.85046        |
| Mass Error [ppm]: | -0.043404       |
| PEP:              | 0.00097373      |
| Precursor Type:   | MULTI           |

**general information**

|                       |           |
|-----------------------|-----------|
| Annotation:           | 9 of 12   |
| AminoAcids Coverage:  | 75 %      |
| Intensity Coverage:   | 47 %      |
| Peak Coverage:        | 20 %      |
| Protein Localisation: | 79 ... 90 |

| b <sup>2+</sup> ion |        | b ion    |        | seq |   |    | y ion    |         | y <sup>2+</sup> ion |        |
|---------------------|--------|----------|--------|-----|---|----|----------|---------|---------------------|--------|
| Δ dalton            | mass   | Δ dalton | mass   |     |   |    | Δ dalton | mass    | Δ dalton            | mass   |
|                     | 72.044 |          | 72.044 | 1   | A | 11 |          |         |                     |        |
|                     | 143.08 |          | 143.08 | 2   | A | 10 | 1222.6   |         | 1222.6              |        |
|                     | 306.14 |          | 306.14 | 3   | Y | 9  | 1151.6   | +0.0554 | 576.29              | -0.006 |
|                     | 435.19 |          | 435.19 | 4   | E | 8  | 988.51   | +0.0828 | 988.51              |        |
|                     | 506.22 |          | 506.22 | 5   | A | 7  | 859.46   | +0.2298 | 430.24              | +0.069 |
|                     | 635.27 |          | 635.27 | 6   | E | 6  | 788.43   | -0.062  | 788.43              |        |
|                     | 748.35 | +0.0552  | 748.35 | 7   | L | 5  | 659.38   | +0.1677 | 659.38              |        |
|                     | 805.37 |          | 805.37 | 8   | G | 4  | 546.3    | +0.0806 | 546.3               |        |
|                     | 920.4  | +0.002   | 920.4  | 9   | D | 3  | 489.28   | +0.0907 | 489.28              |        |
|                     | 991.44 |          | 991.44 | 10  | A | 2  | 374.25   | +0.1403 | 374.25              |        |
| -0.485              | 574.27 | -0.021   | 1147.5 | 11  | R | 1  | 303.21   | +0.1673 | 303.21              |        |
|                     |        |          |        | 12  | K | 0  | 147.11   |         | 147.11              |        |

Scan number 1460 Raw file LNCAP\_Silac\_23F10\_set3\_08  
 Method ITMS; CID Pepti... 41.88

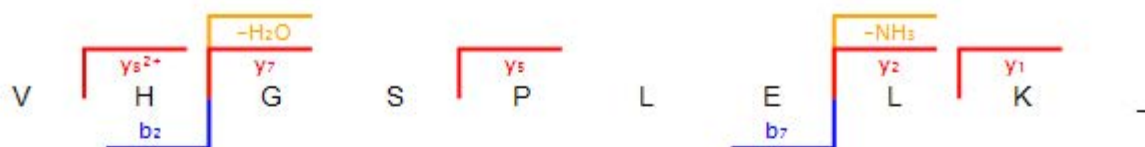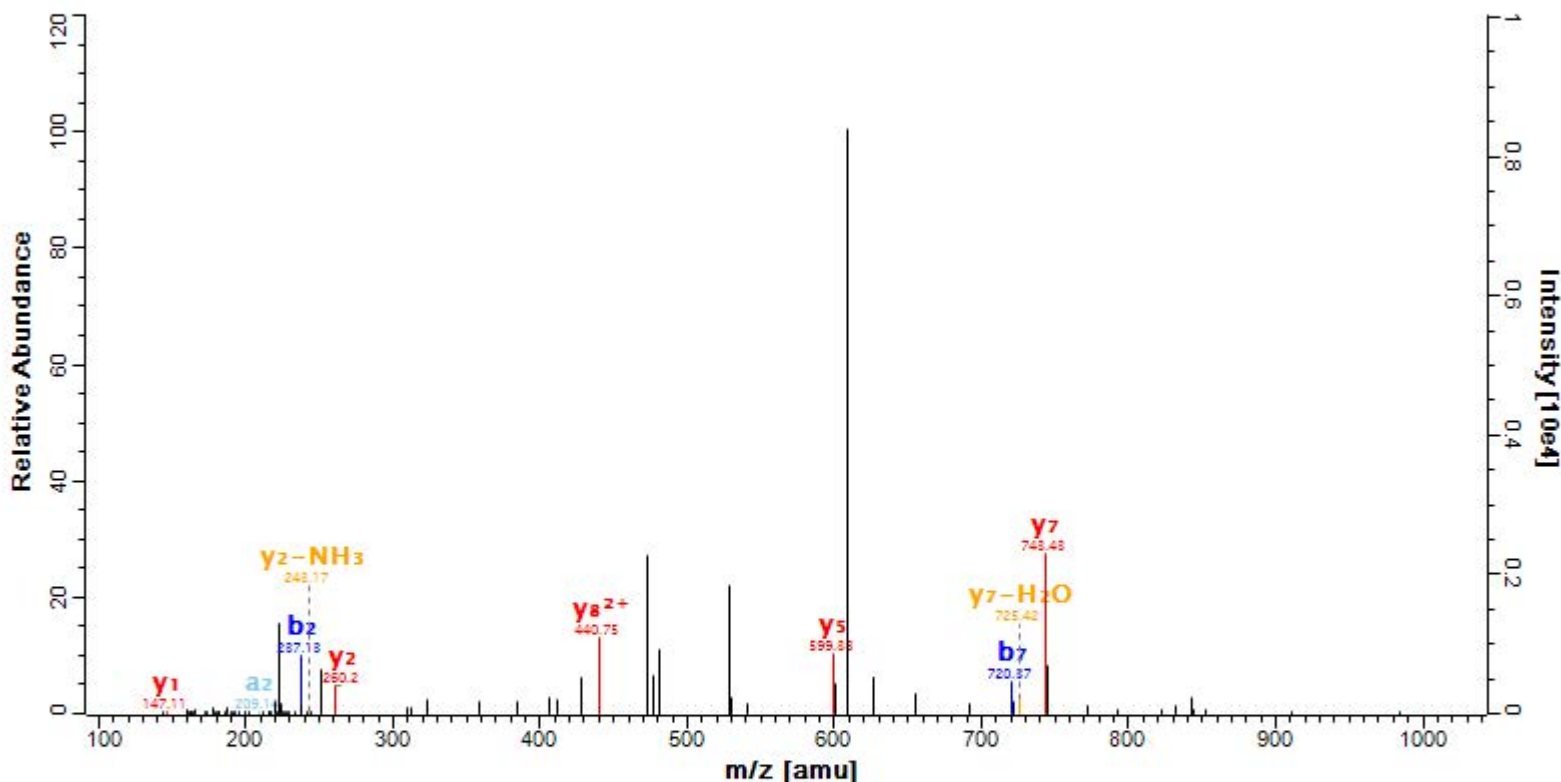

#### precursor information

|                       |                 |
|-----------------------|-----------------|
| Mass:                 | 978.54981       |
| m/z:                  | 490.28218       |
| Charge:               | 2+              |
| Retentiontime:        | 13.578907966613 |
| Score:                | 41.87606        |
| Mass Error [ppm]:     | -0.019306       |
| PEP:                  | 0.085117        |
| Precursor Type:       | MULTI           |
| Annotation:           | 6 of 9          |
| AminoAcids Coverage:  | 67 %            |
| Intensity Coverage:   | 19 %            |
| Peak Coverage:        | 9 %             |
| Protein Localisation: | 598 ... 606     |

| a ion    |        | b ion    |        | seq |   |   | y ion    |         | y <sup>2+</sup> ion |         |
|----------|--------|----------|--------|-----|---|---|----------|---------|---------------------|---------|
| Δ dalton | mass   | Δ dalton | mass   |     |   |   | Δ dalton | mass    | Δ dalton            | mass    |
|          | 72.081 |          | 100.08 | 1   | V | 8 |          |         |                     |         |
| -0.124   | 209.14 | -0.022   | 237.13 | 2   | H | 7 | 880.49   |         | 440.75              | +0.0672 |
|          | 266.16 |          | 294.16 | 3   | G | 6 | 743.43   | -0.013  | 743.43              |         |
|          | 353.19 |          | 381.19 | 4   | S | 5 | 686.41   |         | 686.41              |         |
|          | 450.25 |          | 478.24 | 5   | P | 4 | 599.38   | +0.1937 | 599.38              |         |
|          | 563.33 |          | 591.32 | 6   | L | 3 | 502.32   |         | 502.32              |         |
|          | 692.37 | +0.0251  | 720.37 | 7   | E | 2 | 389.24   |         | 389.24              |         |
|          | 805.46 |          | 833.45 | 8   | L | 1 | 260.2    | -0.044  | 260.2               |         |
|          |        |          |        | 9   | K | 0 | 147.11   | -0.113  | 147.11              |         |

Scan number 1763 Raw file LNCAP\_Silac\_23F10\_set3\_08  
 Method ITMS; CID Pepti... 122.97

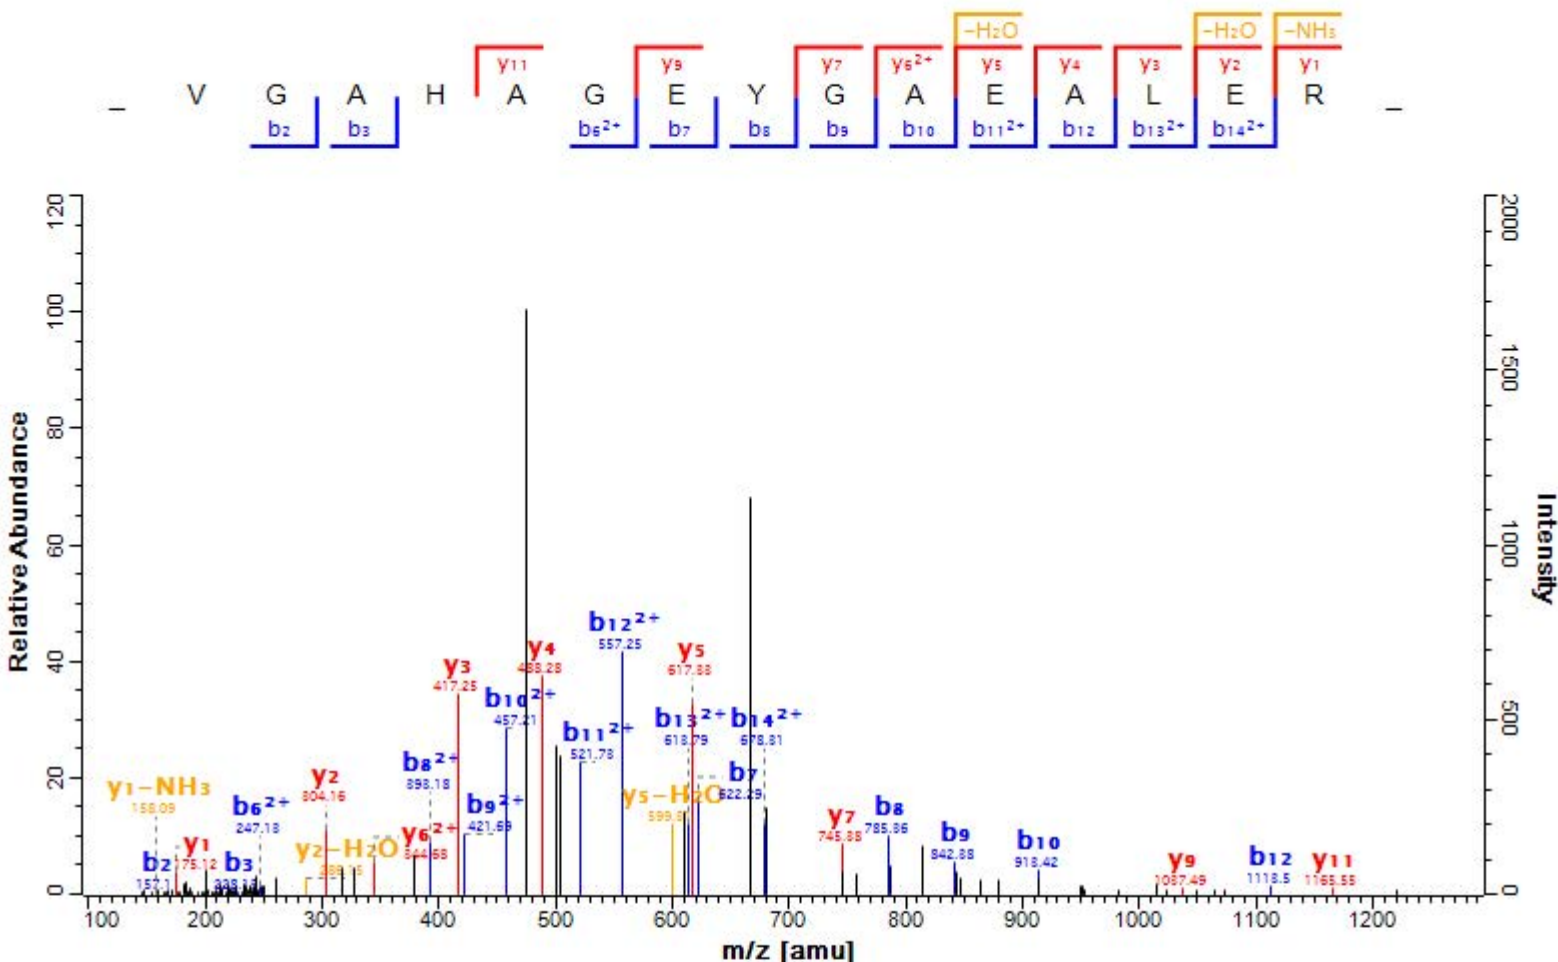

#### precursor information

|                   |                 |
|-------------------|-----------------|
| Mass:             | 1528.72693      |
| m/z:              | 510.58292       |
| Charge:           | 3+              |
| Retentiontime:    | 15.215983390808 |
| Score:            | 122.9656        |
| Mass Error [ppm]: | -0.057327       |
| PEP:              | 4.0364E-06      |
| Precursor Type:   | ISO             |

#### general information

|                       |           |
|-----------------------|-----------|
| Annotation:           | 13 of 15  |
| AminoAcids Coverage:  | 87 %      |
| Intensity Coverage:   | 47 %      |
| Peak Coverage:        | 21 %      |
| Protein Localisation: | 18 ... 32 |

| b <sup>2+</sup> ion |        | b ion    |        | seq |   |    | y ion    |         | y <sup>2+</sup> ion |         |
|---------------------|--------|----------|--------|-----|---|----|----------|---------|---------------------|---------|
| Δ dalton            | mass   | Δ dalton | mass   |     |   |    | Δ dalton | mass    | Δ dalton            | mass    |
|                     | 100.08 |          | 100.08 | 1   | V | 14 |          |         |                     |         |
|                     | 157.1  | +0.0255  | 157.1  | 2   | G | 13 | 1430.7   |         | 1430.7              |         |
|                     | 228.13 | +0.0149  | 228.13 | 3   | A | 12 | 1373.6   |         | 1373.6              |         |
|                     | 365.19 |          | 365.19 | 4   | H | 11 | 1302.6   |         | 1302.6              |         |
|                     | 436.23 |          | 436.23 | 5   | A | 10 | 1165.5   | -0.011  | 1165.5              |         |
| +0.1155             | 247.13 |          | 493.25 | 6   | G | 9  | 1094.5   |         | 1094.5              |         |
|                     | 622.29 | -0.17    | 622.29 | 7   | E | 8  | 1037.5   | -0.451  | 1037.5              |         |
| -0.057              | 393.18 | +0.0339  | 785.36 | 8   | Y | 7  | 908.45   |         | 908.45              |         |
| +0.0667             | 421.69 | -0.04    | 842.38 | 9   | G | 6  | 745.38   | +0.1093 | 745.38              |         |
| -0.111              | 457.21 | +0.1563  | 913.42 | 10  | A | 5  | 688.36   |         | 344.68              | +0.0908 |
| +0.0799             | 521.73 |          | 1042.5 | 11  | E | 4  | 617.33   | +0.0175 | 617.33              |         |
| +0.2249             | 557.25 | -0.026   | 1113.5 | 12  | A | 3  | 488.28   | +0.0848 | 488.28              |         |
| -0.081              | 613.79 |          | 1226.6 | 13  | L | 2  | 417.25   | -0.056  | 417.25              |         |
| +0.1773             | 678.31 |          | 1355.6 | 14  | E | 1  | 304.16   | +0.0509 | 304.16              |         |
|                     |        |          |        | 15  | R | 0  | 175.12   | +0.127  | 175.12              |         |

Scan number 1840 Raw file LNCAP\_Silac\_23F10\_set3\_08  
 Method ITMS; CID Pepti... 115.57

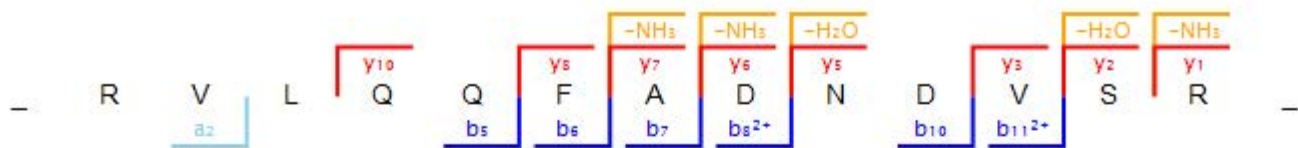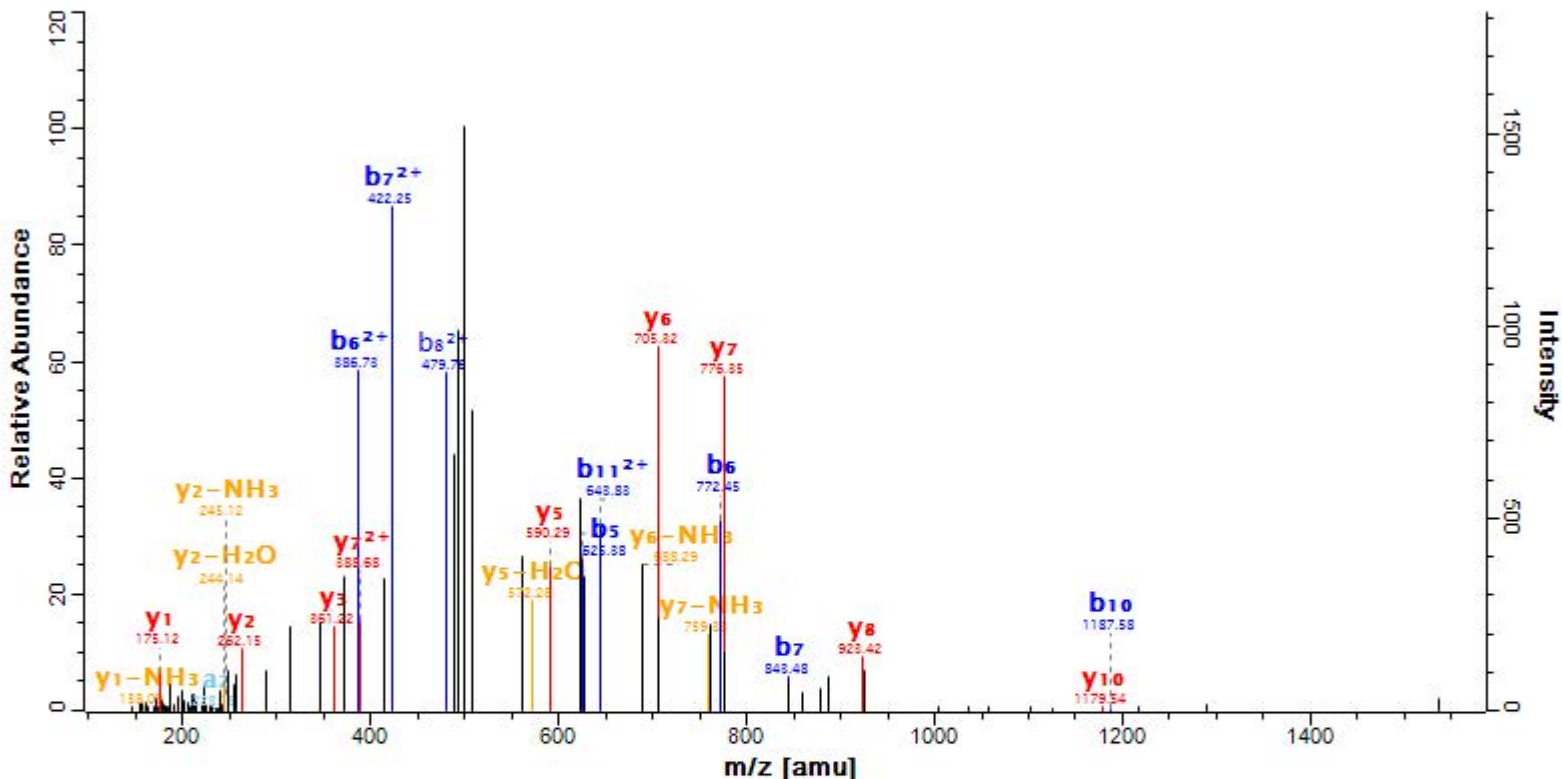

precursor information

|                   |                 |
|-------------------|-----------------|
| Mass:             | 1546.78626      |
| m/z:              | 516.6027        |
| Charge:           | 3+              |
| Retentiontime:    | 15.640502929687 |
| Score:            | 115.5744        |
| Mass Error [ppm]: | 0.68206         |
| PEP:              | 0.0017238       |
| Precursor Type:   | ISO             |

general information

|                       |             |
|-----------------------|-------------|
| Annotation:           | 11 of 13    |
| AminoAcids Coverage:  | 85 %        |
| Intensity Coverage:   | 46 %        |
| Peak Coverage:        | 23 %        |
| Protein Localisation: | 543 ... 555 |

|        | a ion         | b <sup>2+</sup> ion | b ion         |    |     |    | y ion         | y <sup>2+</sup> ion |
|--------|---------------|---------------------|---------------|----|-----|----|---------------|---------------------|
|        | Δ dalton mass | Δ dalton mass       | Δ dalton mass |    | seq |    | Δ dalton mass | Δ dalton mass       |
|        | 129.1         | 157.1               | 157.1         | 1  | R   | 12 |               |                     |
| +0.129 | 28.2          | 256.2               | 256.2         | 2  | V   | 11 | 1392          | 1392                |
|        | 341.3         | 369.3               | 369.3         | 3  | L   | 10 | 1293          | 1293                |
|        | 469.3         | 497.3               | 497.3         | 4  | Q   | 9  | 1180          | +0.02 1180          |
|        | 597.4         | 625.4               | +0.074625.4   | 5  | Q   | 8  | 1051          | 1051                |
|        | 744.5         | +0.15 386.7         | +0.168772.4   | 6  | F   | 7  | 923.4         | +0.045923.4         |
|        | 815.5         | +0.144422.2         | +0.035843.5   | 7  | A   | 6  | 776.4         | -0.02 388.7 +0.141  |
|        | 930.5         | +0.234479.8         | 958.5         | 8  | D   | 5  | 705.3         | +0.028705.3         |
|        | 1045          | 1073                | 1073          | 9  | N   | 4  | 590.3         | +0.117590.3         |
|        | 1160          | 1188                | +0.1821188    | 10 | D   | 3  | 476.2         | 476.2               |
|        | 1259          | +0.282643.8         | 1287          | 11 | V   | 2  | 361.2         | +0.045361.2         |
|        | 1346          | 1374                | 1374          | 12 | S   | 1  | 262.2         | +0.092262.2         |
|        |               |                     |               | 13 | R   | 0  | 175.1         | +0.01 175.1         |

Scan number 1869 Raw file LNCAP\_Silac\_23F10\_set3\_08  
 Method ITMS; CID Pepti... 113.01

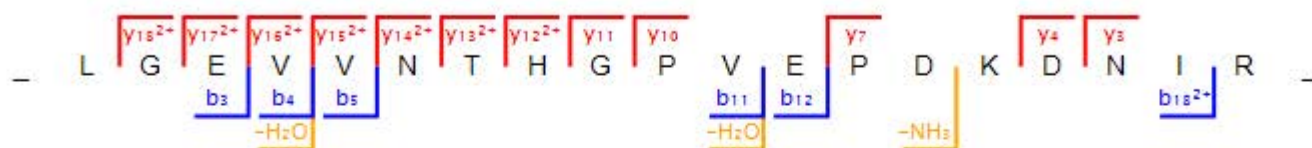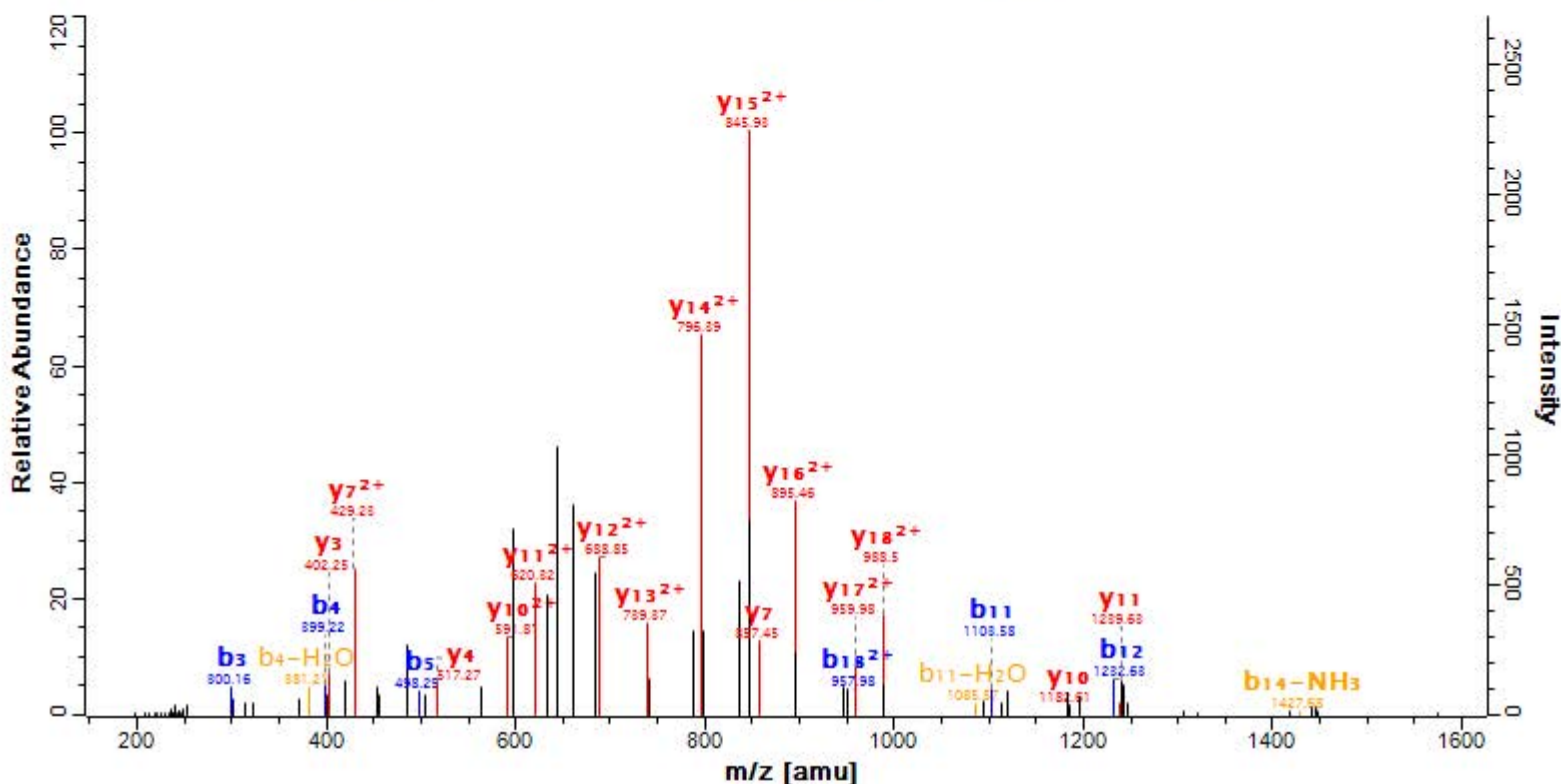

precursor information

|                   |                 |
|-------------------|-----------------|
| Mass:             | 2088.05961      |
| m/z:              | 697.02715       |
| Charge:           | 3+              |
| Retentiontime:    | 15.808485031127 |
| Score:            | 113.0145        |
| Mass Error [ppm]: | -0.1793         |
| PEP:              | 1.4121E-08      |
| Precursor Type:   | MULTI           |

| b <sup>2+</sup> ion |         | b ion    |        | seq |   |    | y ion    |         | y <sup>2+</sup> ion |         |
|---------------------|---------|----------|--------|-----|---|----|----------|---------|---------------------|---------|
| Δ dalton            | mass    | Δ dalton | mass   |     |   |    | Δ dalton | mass    | Δ dalton            | mass    |
|                     | 114.09  |          | 114.09 | 1   | L | 18 |          |         |                     |         |
|                     | 171.11  |          | 171.11 | 2   | G | 17 | 1976     |         | 988.5               | +0.2354 |
|                     | 300.16  | -0.221   | 300.16 | 3   | E | 16 | 1919     |         | 959.98              | +0.2504 |
|                     | 399.22  | +0.0694  | 399.22 | 4   | V | 15 | 1789.9   |         | 895.46              | +0.1613 |
|                     | 498.29  | -0.173   | 498.29 | 5   | V | 14 | 1690.9   |         | 845.93              | +0.174  |
|                     | 612.34  |          | 612.34 | 6   | N | 13 | 1591.8   |         | 796.39              | +0.23   |
|                     | 713.38  |          | 713.38 | 7   | T | 12 | 1477.7   |         | 739.37              | +0.2068 |
|                     | 850.44  |          | 850.44 | 8   | H | 11 | 1376.7   |         | 688.85              | -0.026  |
|                     | 907.46  |          | 907.46 | 9   | G | 10 | 1239.6   | -0.285  | 620.32              | +0.2057 |
|                     | 1004.5  |          | 1004.5 | 10  | P | 9  | 1182.6   | -0.127  | 591.81              | -0.241  |
|                     | 1103.6  | +0.0096  | 1103.6 | 11  | V | 8  | 1085.6   |         | 1085.6              |         |
|                     | 1232.6  | -0.24    | 1232.6 | 12  | E | 7  | 986.49   |         | 986.49              |         |
|                     | 1329.7  |          | 1329.7 | 13  | P | 6  | 857.45   | +0.3096 | 429.23              | +0.2687 |
|                     | 1444.7  |          | 1444.7 | 14  | D | 5  | 760.39   |         | 760.39              |         |
|                     | 1572.8  |          | 1572.8 | 15  | K | 4  | 645.37   |         | 645.37              |         |
|                     | 1687.8  |          | 1687.8 | 16  | D | 3  | 517.27   | +0.0797 | 517.27              |         |
|                     | 1801.9  |          | 1801.9 | 17  | N | 2  | 402.25   | +0.0851 | 402.25              |         |
| +0.4461             | 1957.98 |          | 1915   | 18  | I | 1  | 288.2    |         | 288.2               |         |
|                     |         |          |        | 19  | R | 0  | 175.12   |         | 175.12              |         |

general information

|                       |             |
|-----------------------|-------------|
| Annotation:           | 16 of 19    |
| AminoAcids Coverage:  | 84 %        |
| Intensity Coverage:   | 49 %        |
| Peak Coverage:        | 26 %        |
| Protein Localisation: | 128 ... 146 |

Scan number 1886 Raw file LNCAP\_Silac\_23F10\_set3\_08  
 Method ITMS: CID Peptide 193.28

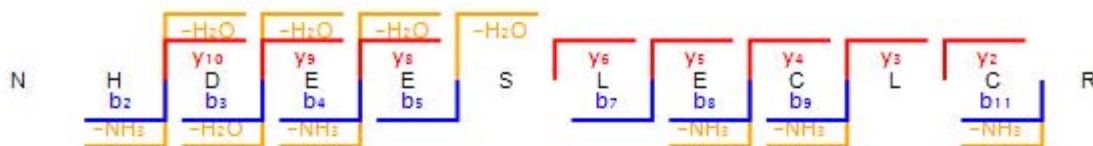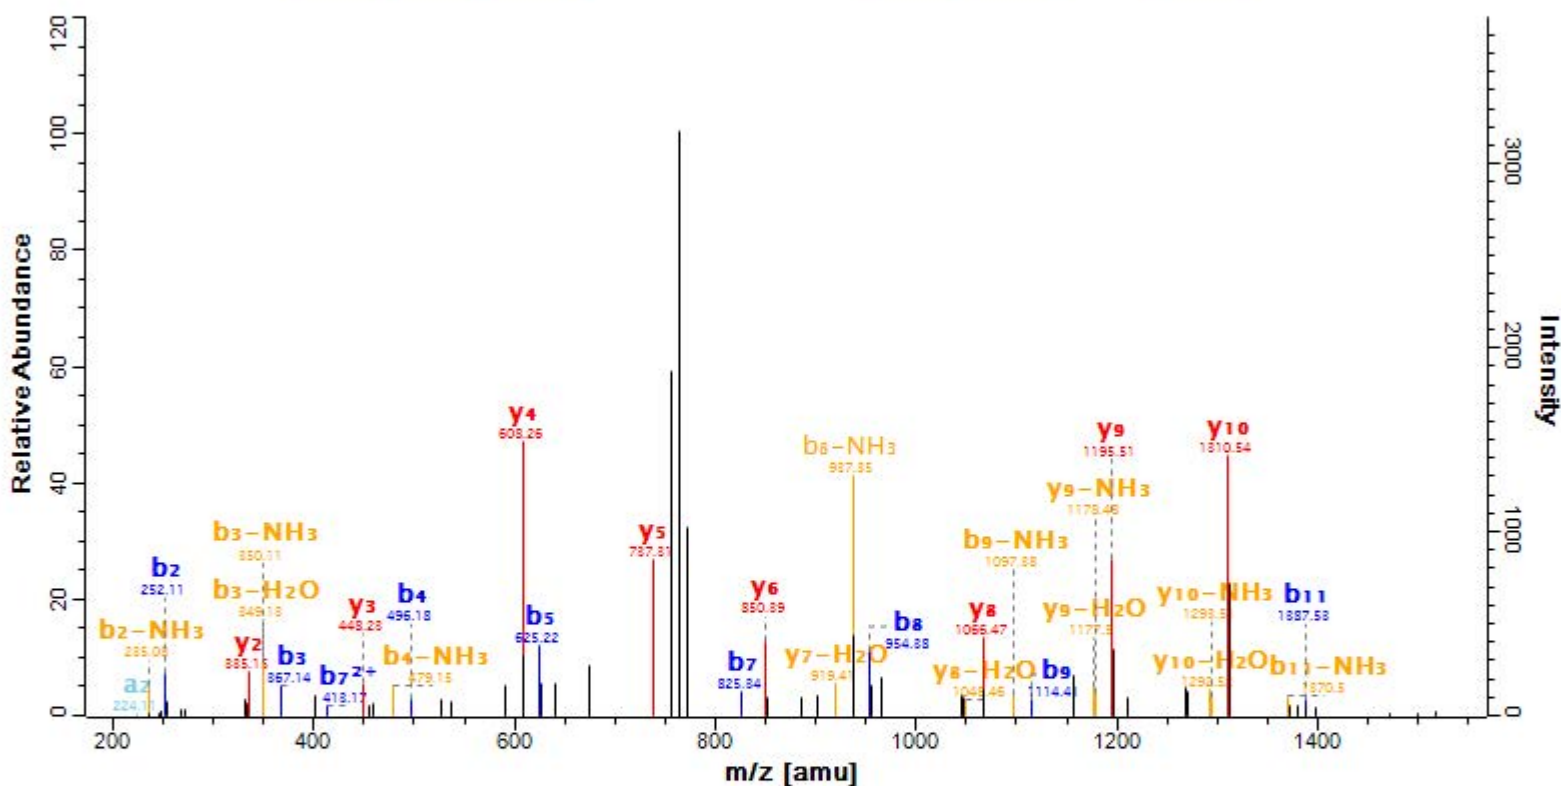

#### precursor information

|                   |                 |
|-------------------|-----------------|
| Mass:             | 1560.62915      |
| m/z:              | 781.32185       |
| Charge:           | 2+              |
| Retentiontime:    | 15.905056953430 |
| Score:            | 193.2815        |
| Mass Error [ppm]: | -0.34753        |
| PEP:              | 1.6879E-14      |
| Precursor Type:   | MULTI           |

#### general information

|                       |             |
|-----------------------|-------------|
| Annotation:           | 10 of 12    |
| AminoAcids Coverage:  | 83 %        |
| Intensity Coverage:   | 43 %        |
| Peak Coverage:        | 39 %        |
| Protein Localisation: | 933 ... 944 |

| a ion    |        | b <sup>2+</sup> ion |        | b ion    |         |     |   |          | y ion  |         |
|----------|--------|---------------------|--------|----------|---------|-----|---|----------|--------|---------|
| Δ dalton | mass   | Δ dalton            | mass   | Δ dalton | mass    | seq |   | Δ dalton | mass   |         |
|          | 87.055 |                     | 115.05 |          | 115.05  | 1   | N | 11       |        |         |
| -0.045   | 224.11 |                     | 252.11 | +0.041   | 2252.11 | 2   | H | 10       | 1447.6 |         |
|          | 339.14 |                     | 367.14 | +0.1189  | 367.14  | 3   | D | 9        | 1310.5 | -0.044  |
|          | 468.18 |                     | 496.18 | +0.1062  | 496.18  | 4   | E | 8        | 1195.5 | -0.024  |
|          | 597.23 |                     | 625.22 | +0.1076  | 625.22  | 5   | E | 7        | 1066.5 | -0.043  |
|          | 684.26 |                     | 712.25 |          | 712.25  | 6   | S | 6        | 937.42 |         |
|          | 797.34 | +0.2039             | 413.17 | -0.008   | 825.34  | 7   | L | 5        | 850.39 | +0.0805 |
|          | 926.39 |                     | 954.38 | -0.021   | 954.38  | 8   | E | 4        | 737.31 | -0.025  |
|          | 1086.4 |                     | 1114.4 | -0.149   | 1114.4  | 9   | C | 3        | 608.26 | +0.0415 |
|          | 1199.5 |                     | 1227.5 |          | 1227.5  | 10  | L | 2        | 448.23 | +0.0921 |
|          | 1359.5 |                     | 1387.5 | -0.066   | 1387.5  | 11  | C | 1        | 335.15 | +0.0436 |
|          |        |                     |        |          |         | 12  | R | 0        | 175.12 |         |

Scan number 2295 Raw file LNCAP\_Silac\_23F10\_set3\_08  
 Method ITMS; CID Pepti... 37.55

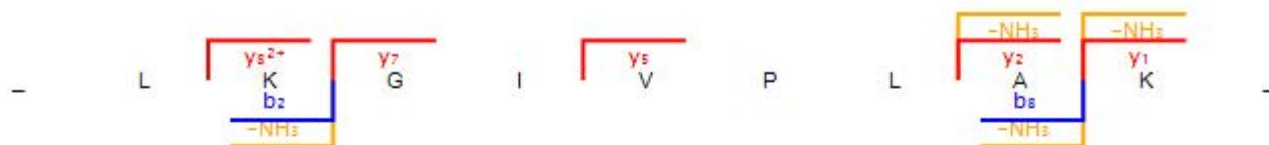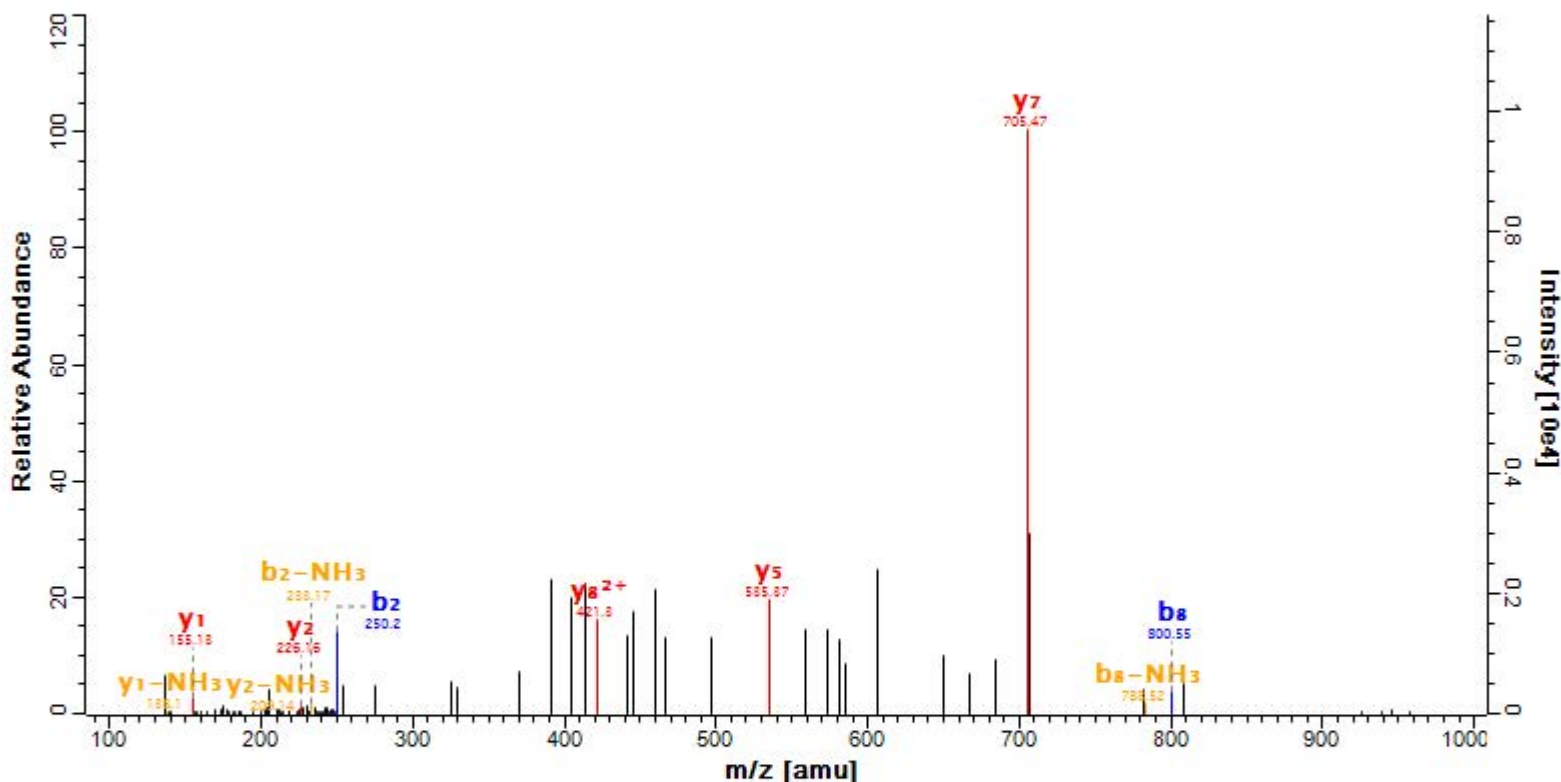

#### precursor information

|                       |                 |
|-----------------------|-----------------|
| Mass:                 | 937.63242       |
| m/z:                  | 469.82349       |
| Charge:               | 2+              |
| Retention time:       | 18.094432830810 |
| Score:                | 37.54898        |
| Mass Error [ppm]:     | -0.021496       |
| PEP:                  | 0.087777        |
| Precursor Type:       | MULTI           |
| Annotation:           | 5 of 9          |
| AminoAcids Coverage:  | 56 %            |
| Intensity Coverage:   | 31 %            |
| Peak Coverage:        | 11 %            |
| Protein Localisation: | 74 ... 82       |

| b ion     |          |   |     |   | y ion    |           | y <sup>2+</sup> ion |           |
|-----------|----------|---|-----|---|----------|-----------|---------------------|-----------|
| Δ dalton  | mass     |   | seq |   | Δ dalton | mass      | Δ dalton            | mass      |
|           | 114.0913 | 1 | L   | 8 |          |           |                     |           |
| -0.01023  | 250.2005 | 2 | K   | 7 | 841.584  |           | 421.2957            | +0.228813 |
|           | 307.222  | 3 | G   | 6 | 705.4749 | +0.021696 | 705.4749            |           |
|           | 420.306  | 4 | I   | 5 | 648.4534 |           | 648.4534            |           |
|           | 519.3744 | 5 | V   | 4 | 535.3694 | -0.13816  | 535.3694            |           |
|           | 616.4272 | 6 | P   | 3 | 436.3009 |           | 436.3009            |           |
|           | 729.5113 | 7 | L   | 2 | 339.2482 |           | 339.2482            |           |
| +0.105057 | 800.5484 | 8 | A   | 1 | 226.1641 | -0.12901  | 226.1641            |           |
|           |          | 9 | K   | 0 | 155.127  | -0.02272  | 155.127             |           |



Scan number 2423 Raw file LNCAP\_Silac\_23F10\_set3\_08  
 Method ITMS: CID Pepti... 136.02

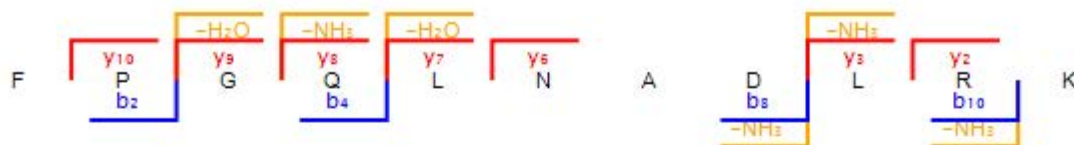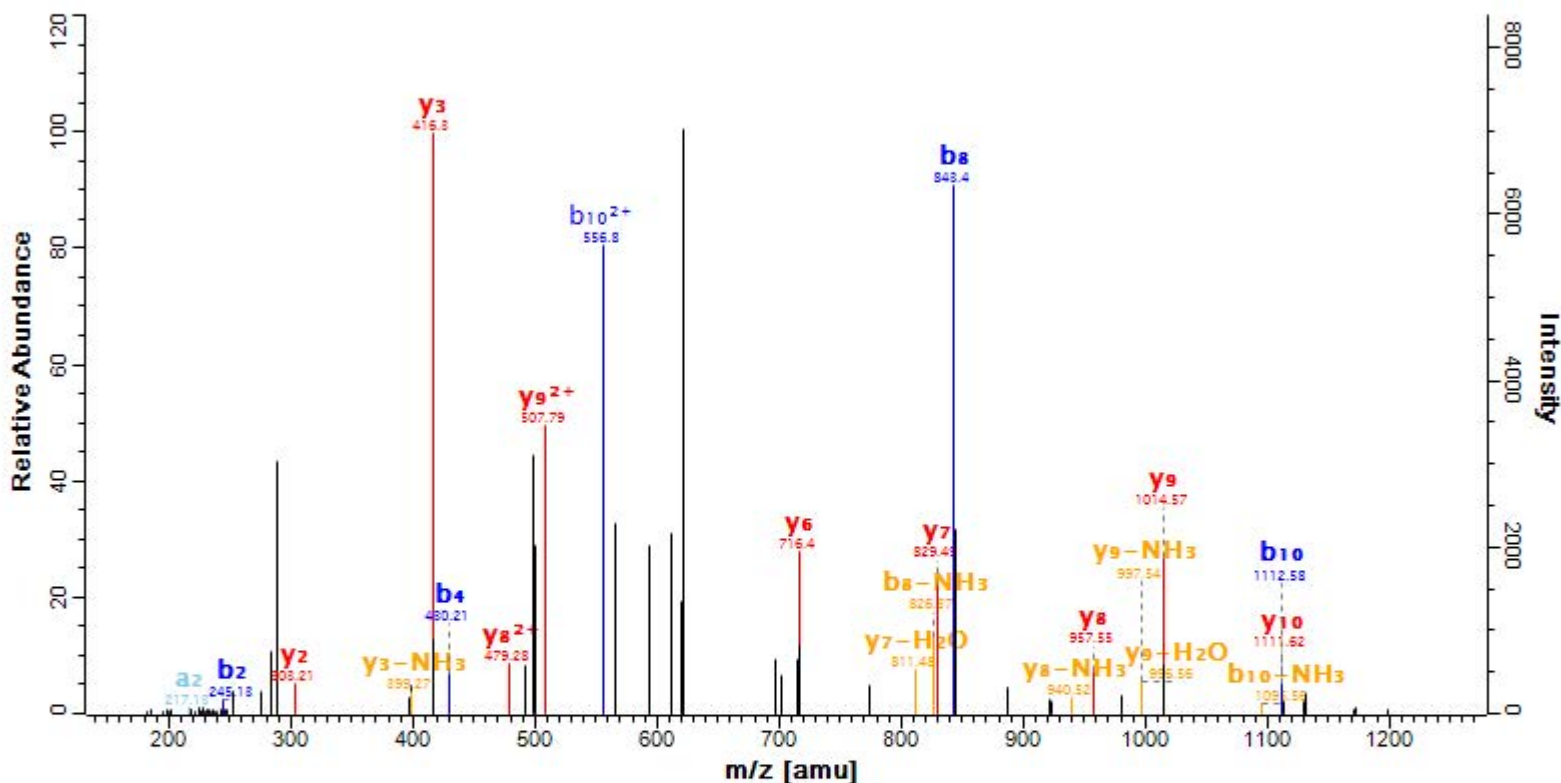

#### precursor information

|                   |                 |
|-------------------|-----------------|
| Mass:             | 1257.68282      |
| m/z:              | 629.84869       |
| Charge:           | 2+              |
| Retentiontime:    | 18.767486572265 |
| Score:            | 136.0225        |
| Mass Error [ppm]: | -0.11909        |
| PEP:              | 9.0019E-05      |
| Precursor Type:   | MULTI           |

#### general information

|                       |             |
|-----------------------|-------------|
| Annotation:           | 8 of 11     |
| AminoAcids Coverage:  | 73 %        |
| Intensity Coverage:   | 47 %        |
| Peak Coverage:        | 23 %        |
| Protein Localisation: | 242 ... 252 |

|        | a ion         | b <sup>2+</sup> ion | b ion         |     |   |               | y ion         | y <sup>2+</sup> ion |
|--------|---------------|---------------------|---------------|-----|---|---------------|---------------|---------------------|
|        | Δ dalton mass | Δ dalton mass       | Δ dalton mass | seq |   | Δ dalton mass | Δ dalton mass |                     |
|        | 120.1         | 148.1               | 148.1         | 1   | F | 10            |               |                     |
| +0.065 | 217.1         | 245.1               | -0.02 245.1   | 2   | P | 9             | 1112          | +0.085 1112         |
|        | 274.2         | 302.1               | 302.1         | 3   | G | 8             | 1015          | -0.05 507.8 +0.306  |
|        | 402.2         | 430.2               | +0.078 430.2  | 4   | Q | 7             | 957.5         | -0.05 479.3 +0.274  |
|        | 515.3         | 543.3               | 543.3         | 5   | L | 6             | 829.5         | +0.046 829.5        |
|        | 629.3         | 657.3               | 657.3         | 6   | N | 5             | 716.4         | +0.064 716.4        |
|        | 700.4         | 728.4               | 728.4         | 7   | A | 4             | 602.4         | 602.4               |
|        | 815.4         | 843.4               | +0.012 843.4  | 8   | D | 3             | 531.3         | 531.3               |
|        | 928.5         | 956.5               | 956.5         | 9   | L | 2             | 416.3         | +0.028 416.3        |
|        | 1085          | -0.23 556.8         | +0 1113       | 10  | R | 1             | 303.2         | +0.11 303.2         |
|        |               |                     |               | 11  | K | 0             | 147.1         | 147.1               |

Scan number 3099 Raw file LNCAP\_Silac\_23F10\_set3\_08  
 Method ITMS: CID Pepti... 108.74

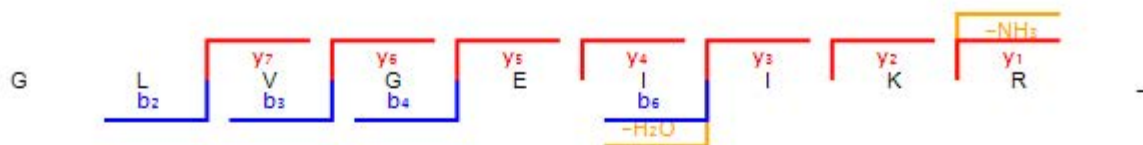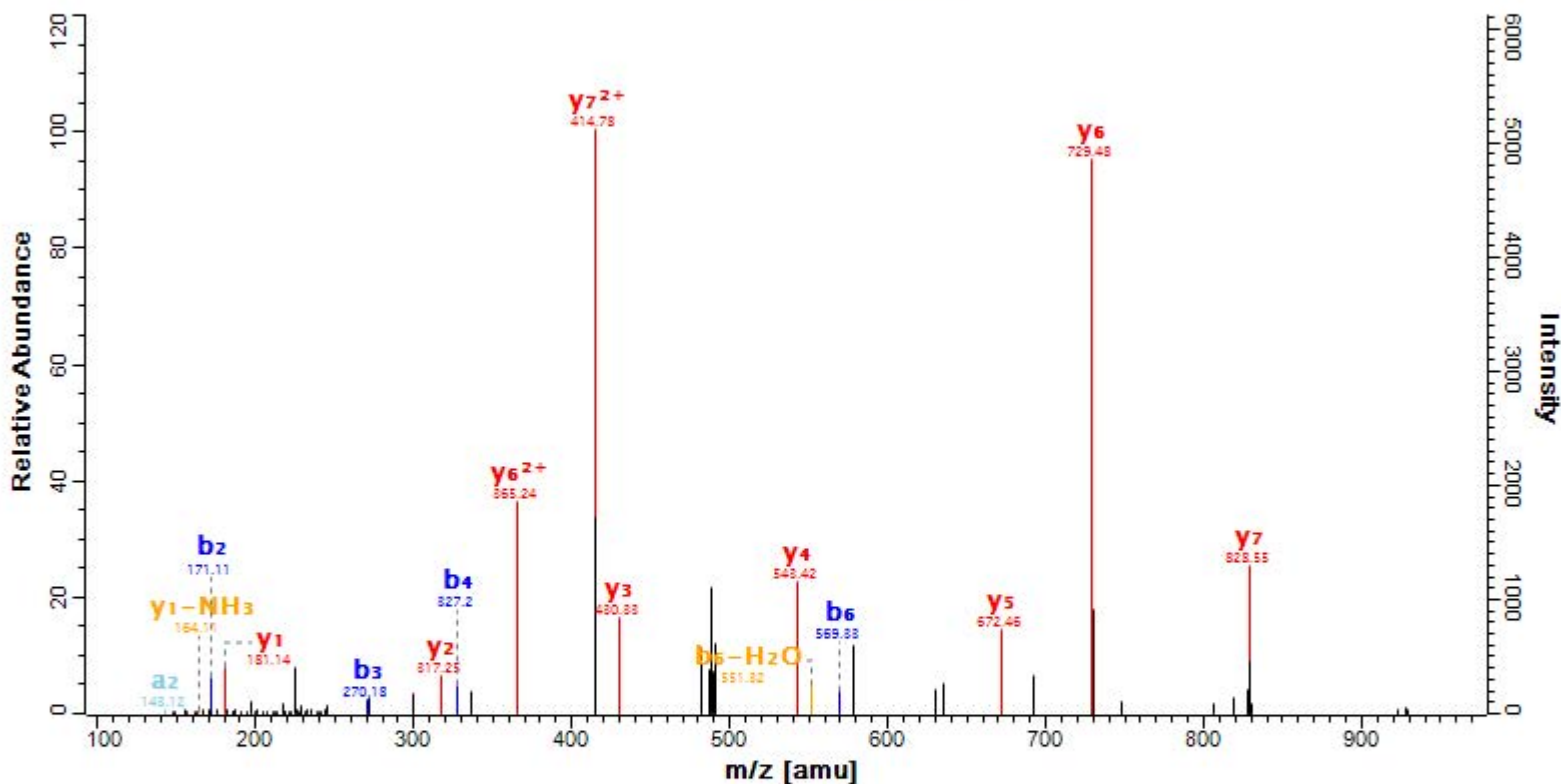

#### precursor information

|                       |                       |
|-----------------------|-----------------------|
| Mass:                 | 983.61253             |
| m/z:                  | 492.81354             |
| Charge:               | 2+                    |
| Retentiontime:        | 22.370687484741       |
| Score:                | 108.7426              |
| Mass Error [ppm]:     | -0.2395               |
| PEP:                  | 0.0012152             |
| Precursor Type:       | MULTI                 |
| Annotation:           | 8 of 9                |
| AminoAcids Coverage:  | 89 %                  |
| Intensity Coverage:   | 61 %                  |
| Peak Coverage:        | 18 %                  |
| Protein Localisation: | 44 ... 52; 159 ... 16 |

| a ion    |        | b ion    |        |   |     |   | y ion    |         | y <sup>2+</sup> ion |         |
|----------|--------|----------|--------|---|-----|---|----------|---------|---------------------|---------|
| Δ dalton | mass   | Δ dalton | mass   |   | seq |   | Δ dalton | mass    | Δ dalton            | mass    |
|          | 30.034 |          | 58.029 | 1 | G   | 8 |          |         |                     |         |
| +0.009   | 143.12 | +0.0088  | 171.11 | 2 | L   | 7 | 941.63   |         | 941.63              |         |
|          | 242.19 | +0.0646  | 270.18 | 3 | V   | 6 | 828.55   | +0.0021 | 414.78              | +0.035  |
|          | 299.21 | +0.4141  | 327.2  | 4 | G   | 5 | 729.48   | +0.0331 | 365.24              | +0.0715 |
|          | 428.25 |          | 456.25 | 5 | E   | 4 | 672.46   | +0.0122 | 672.46              |         |
|          | 541.33 | -0.029   | 569.33 | 6 | I   | 3 | 543.42   | +0.0113 | 543.42              |         |
|          | 654.42 |          | 682.41 | 7 | I   | 2 | 430.33   | +0.0442 | 430.33              |         |
|          | 790.53 |          | 818.52 | 8 | K   | 1 | 317.25   | +0.1357 | 317.25              |         |
|          |        |          |        | 9 | R   | 0 | 181.14   | -0.074  | 181.14              |         |

Scan number 3197 Raw file LNCAP\_Silac\_23F10\_set3\_08  
 Method ITMS; CID Pepti... 214.45

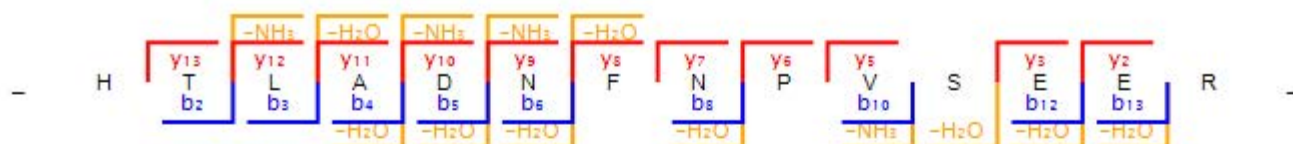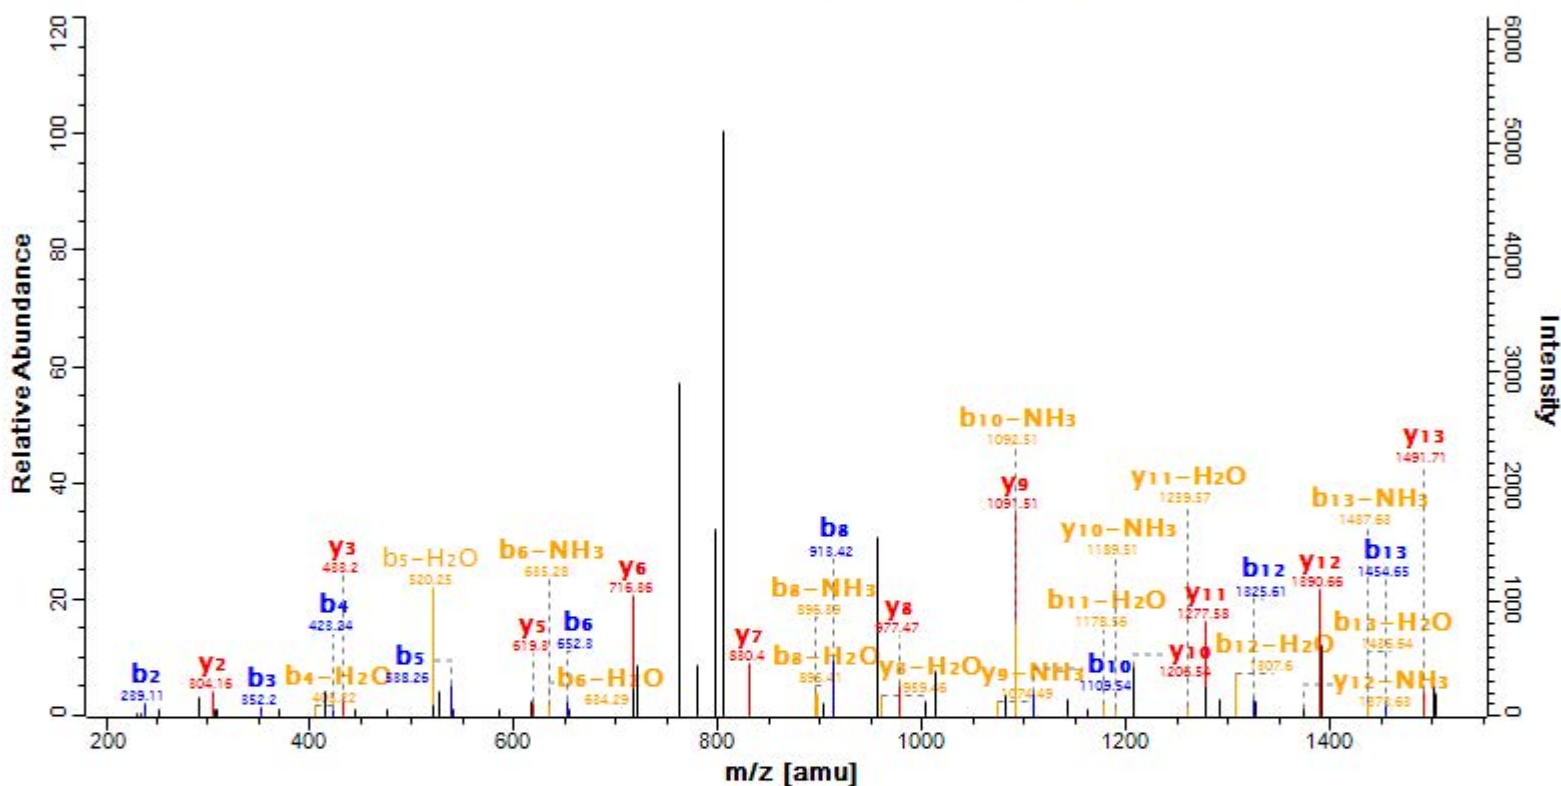

#### precursor information

|                   |                 |
|-------------------|-----------------|
| Mass:             | 1627.75963      |
| m/z:              | 814.88709       |
| Charge:           | 2+              |
| Retentiontime:    | 22.918783187866 |
| Score:            | 214.4493        |
| Mass Error [ppm]: | 0.35769         |
| PEP:              | 1.0684E-25      |
| Precursor Type:   | MULTI           |

#### general information

|                       |             |
|-----------------------|-------------|
| Annotation:           | 12 of 14    |
| AminoAcids Coverage:  | 86 %        |
| Intensity Coverage:   | 39 %        |
| Peak Coverage:        | 46 %        |
| Protein Localisation: | 148 ... 161 |

| b ion           |               |     |   |                 | y ion                    |  |
|-----------------|---------------|-----|---|-----------------|--------------------------|--|
| $\Delta$ dalton | mass          | seq |   | $\Delta$ dalton | mass                     |  |
|                 | 138.066188329 | 1   | H | 13              |                          |  |
| +0.018671       | 239.113866803 | 2   | T | 12              | 1491.70741264 +0.1087495 |  |
| +0.0768495      | 352.197930784 | 3   | L | 11              | 1390.65973416 -0.100408  |  |
| +0.1331805      | 423.235044571 | 4   | A | 10              | 1277.57567018 -0.045885  |  |
| +0.1393185      | 538.261987603 | 5   | D | 9               | 1206.53855639 -0.0840886 |  |
| +0.2619184      | 652.30491505  | 6   | N | 8               | 1091.51161336 +0.006453  |  |
|                 | 799.373328967 | 7   | F | 7               | 977.468685915 -0.0819061 |  |
| +0.0322909      | 913.416256414 | 8   | N | 6               | 830.400271999 -0.0335117 |  |
|                 | 1010.46902027 | 9   | P | 5               | 716.357344552 +0.0079509 |  |
| +0.0572924      | 1109.53743418 | 10  | V | 4               | 619.3045807 +0.3091278   |  |
|                 | 1196.56946259 | 11  | S | 3               | 520.236166783            |  |
| -0.1185254      | 1325.61205569 | 12  | E | 2               | 433.204138373 +0.1130003 |  |
| -0.1959086      | 1454.65464878 | 13  | E | 1               | 304.161545277 +0.0421596 |  |
|                 |               | 14  | R | 0               | 175.118952181            |  |

Scan number 3236 Raw file LNCAP\_Silac\_23F10\_set3\_08  
 Method ITMS; CID Pepti... 128.67

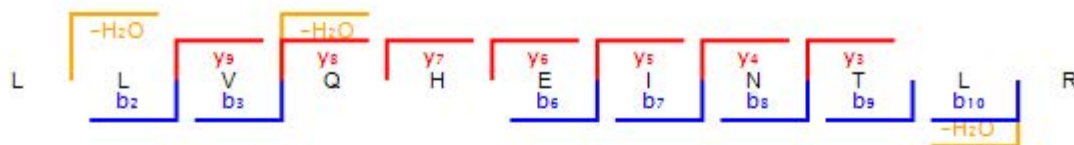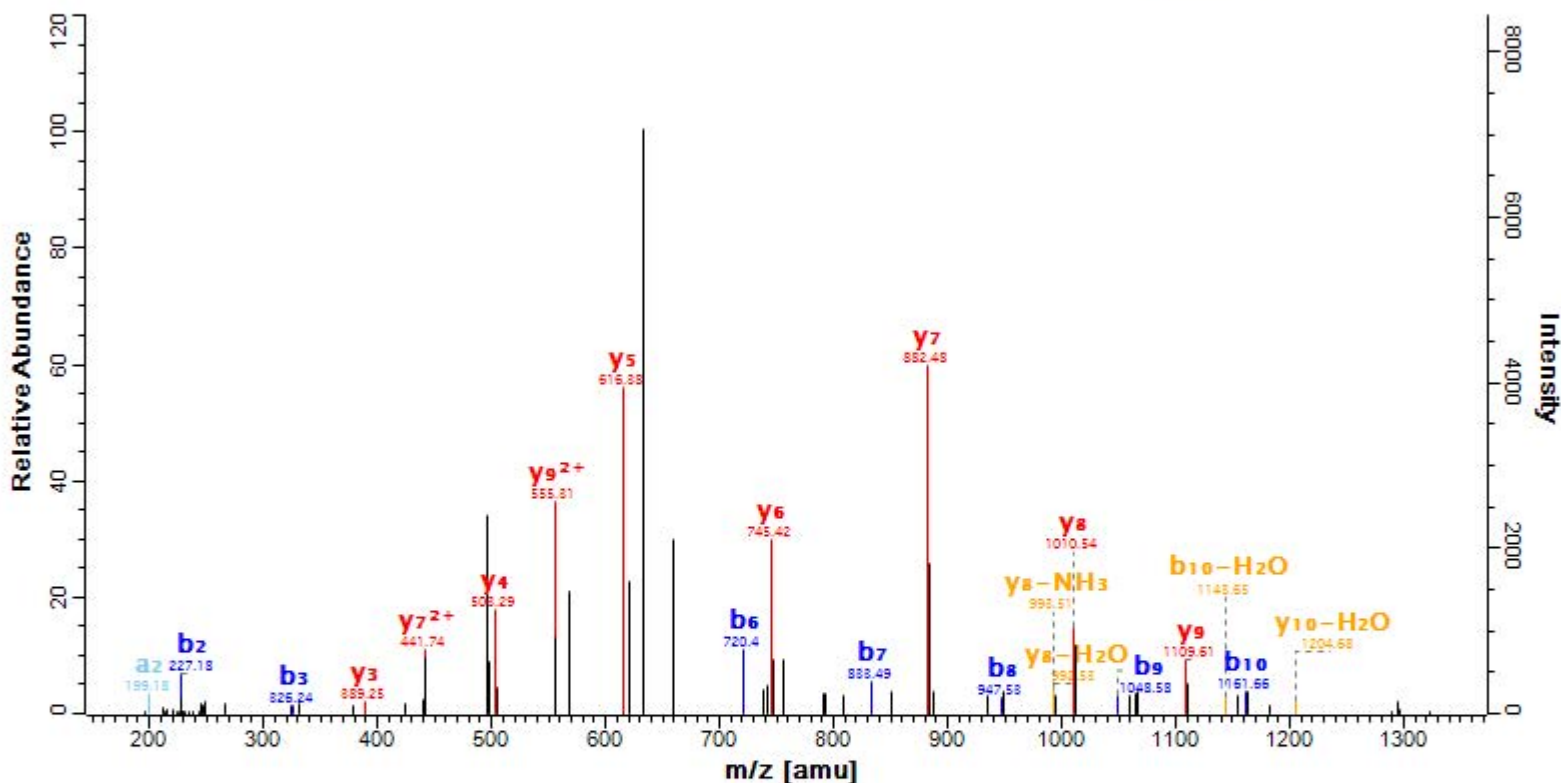

#### precursor information

|                   |                 |
|-------------------|-----------------|
| Mass:             | 1334.76714      |
| m/z:              | 668.39085       |
| Charge:           | 2+              |
| Retentiontime:    | 23.130344390869 |
| Score:            | 128.6744        |
| Mass Error [ppm]: | 0.08281         |
| PEP:              | 0.00018728      |
| Precursor Type:   | MULTI           |

#### general information

|                       |             |
|-----------------------|-------------|
| Annotation:           | 9 of 11     |
| AminoAcids Coverage:  | 82 %        |
| Intensity Coverage:   | 38 %        |
| Peak Coverage:        | 23 %        |
| Protein Localisation: | 553 ... 563 |

| a ion    |        | b ion    |        |    |     |          | y ion  |          | y <sup>2+</sup> ion |         |
|----------|--------|----------|--------|----|-----|----------|--------|----------|---------------------|---------|
| Δ dalton | mass   | Δ dalton | mass   |    | seq | Δ dalton | mass   | Δ dalton | mass                |         |
|          | 86.096 |          | 114.09 | 1  | L   | 10       |        |          |                     |         |
| -0.079   | 199.18 | -0.006   | 227.18 | 2  | L   | 9        | 1222.7 |          | 1222.7              |         |
|          | 298.25 | -0.226   | 326.24 | 3  | V   | 8        | 1109.6 | -0.019   | 555.31              | +0.0405 |
|          | 426.31 |          | 454.3  | 4  | Q   | 7        | 1010.5 | -0.047   | 1010.5              |         |
|          | 563.37 |          | 591.36 | 5  | H   | 6        | 882.48 | -0.015   | 441.74              | +0.032  |
|          | 692.41 | -0.09    | 720.4  | 6  | E   | 5        | 745.42 | +0.0275  | 745.42              |         |
|          | 805.49 | -0.032   | 833.49 | 7  | I   | 4        | 616.38 | -0.231   | 616.38              |         |
|          | 919.54 | -0.089   | 947.53 | 8  | N   | 3        | 503.29 | +0.0734  | 503.29              |         |
|          | 1020.6 | -0.047   | 1048.6 | 9  | T   | 2        | 389.25 | +0.0983  | 389.25              |         |
|          | 1133.7 | -0.08    | 1161.7 | 10 | L   | 1        | 288.2  |          | 288.2               |         |
|          |        |          |        | 11 | R   | 0        | 175.12 |          | 175.12              |         |

Scan number 3283 Raw file LNCAP\_Silac\_23F10\_set3\_08  
 Method ITMS; CID Pepti... 125.61

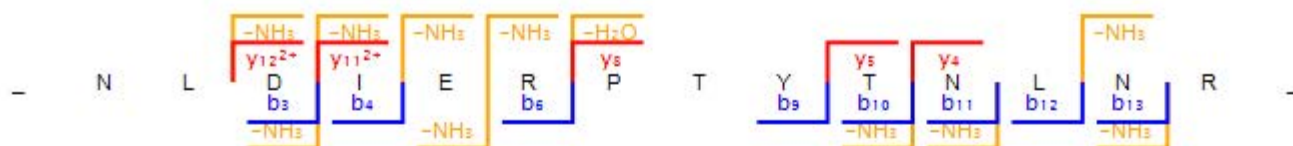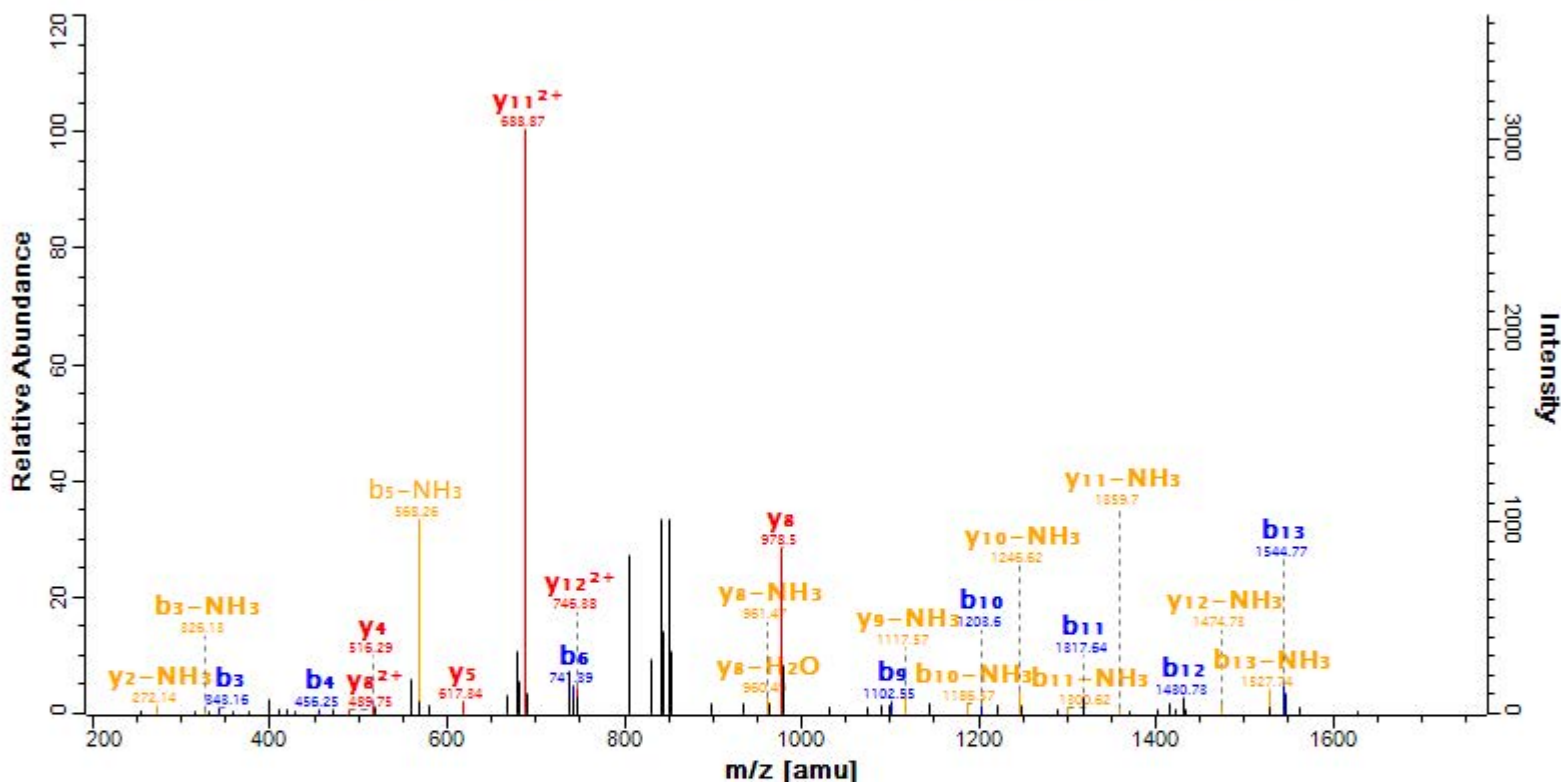

#### precursor information

|                   |                 |
|-------------------|-----------------|
| Mass:             | 1717.87424      |
| $m/z$ :           | 859.9444        |
| Charge:           | 2+              |
| Retentiontime:    | 23.378295898437 |
| Score:            | 125.6116        |
| Mass Error [ppm]: | -0.29594        |
| PEP:              | 9.0267E-09      |
| Precursor Type:   | MULTI           |

#### general information

|                       |             |
|-----------------------|-------------|
| Annotation:           | 10 of 14    |
| AminoAcids Coverage:  | 71 %        |
| Intensity Coverage:   | 48 %        |
| Peak Coverage:        | 31 %        |
| Protein Localisation: | 216 ... 229 |

| b ion           |          |     |   | y ion           |          | $y^{2+}$ ion    |           |           |
|-----------------|----------|-----|---|-----------------|----------|-----------------|-----------|-----------|
| $\Delta$ dalton | mass     | seq |   | $\Delta$ dalton | mass     | $\Delta$ dalton | mass      |           |
|                 | 115.0502 | 1   | N | 13              |          |                 |           |           |
|                 | 228.1343 | 2   | L | 12              | 1604.839 | 1604.839        |           |           |
| +0.113295       | 343.1612 | 3   | D | 11              | 1491.755 | 746.3812        | +0.008678 |           |
| +0.005885       | 456.2453 | 4   | I | 10              | 1376.728 | 688.8677        | +0.245721 |           |
|                 | 585.2879 | 5   | E | 9               | 1263.644 | 1263.644        |           |           |
| -0.03357        | 741.389  | 6   | R | 8               | 1134.601 | 1134.601        |           |           |
|                 | 838.4417 | 7   | P | 7               | 978.5003 | -0.0547         | 489.7538  | +0.271653 |
|                 | 939.4894 | 8   | T | 6               | 881.4476 |                 | 881.4476  |           |
| +0.100815       | 1102.553 | 9   | Y | 5               | 780.3999 |                 | 780.3999  |           |
| -0.1379         | 1203.6   | 10  | T | 4               | 617.3365 | +0.03076        | 617.3365  |           |
| -0.22368        | 1317.643 | 11  | N | 3               | 516.2889 | +0.157723       | 516.2889  |           |
| +0.112546       | 1430.727 | 12  | L | 2               | 402.2459 |                 | 402.2459  |           |
| -0.23251        | 1544.77  | 13  | N | 1               | 289.1619 |                 | 289.1619  |           |
|                 |          | 14  | R | 0               | 175.119  |                 | 175.119   |           |

Scan number 3461 Raw file LNCAP\_Silac\_23F10\_set3\_08  
 Method ITMS: CID Pepti... 57.8

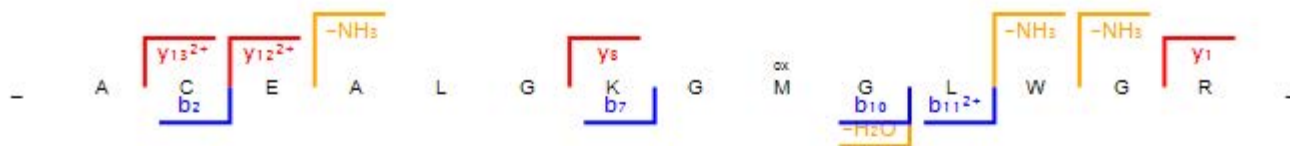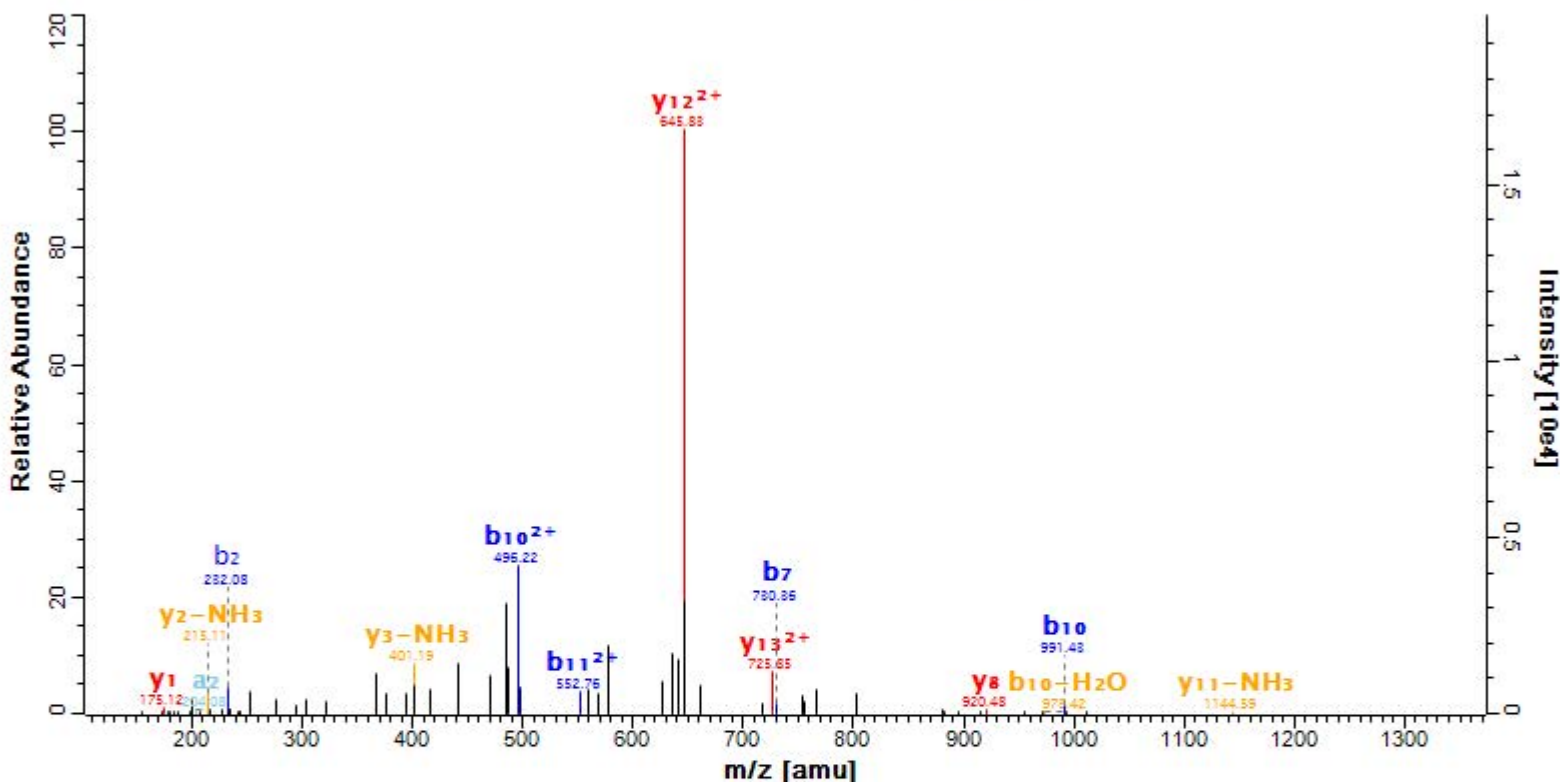

**precursor information**

|                   |                 |
|-------------------|-----------------|
| Mass:             | 1520.72223      |
| m/z:              | 507.91469       |
| Charge:           | 3+              |
| Retentiontime:    | 24.332654953002 |
| Score:            | 57.80165        |
| Mass Error [ppm]: | -0.37625        |
| PEP:              | 0.020987        |
| Precursor Type:   | MULTI           |

**general information**

|                       |           |
|-----------------------|-----------|
| Annotation:           | 9 of 14   |
| AminoAcids Coverage:  | 64 %      |
| Intensity Coverage:   | 46 %      |
| Peak Coverage:        | 14 %      |
| Protein Localisation: | 73 ... 86 |

|        | a ion         | b <sup>2+</sup> ion | b ion         |        |       |    | y ion         | y <sup>2+</sup> ion |
|--------|---------------|---------------------|---------------|--------|-------|----|---------------|---------------------|
|        | Δ dalton mass | Δ dalton mass       | Δ dalton mass |        | seq   |    | Δ dalton mass | Δ dalton mass       |
|        | 44.05         | 72.04               | 72.04         | 1      | A     | 13 |               |                     |
| +0.012 | 204.1         | 232.1               | -0.01         | 232.1  | 2     | C  | 12            | 1451                |
|        | 333.1         | 361.1               | 361.1         | 3      | E     | 11 | 1291          | 725.9               |
|        | 404.2         | 432.2               | 432.2         | 4      | A     | 10 | 1162          | 645.8               |
|        | 517.2         | 545.2               | 545.2         | 5      | L     | 9  | 1091          | 1162                |
|        | 574.3         | 602.3               | 602.3         | 6      | G     | 8  | 977.5         | 977.5               |
|        | 702.4         | 730.4               | +0.222        | 730.4  | 7     | K  | 7             | 920.5               |
|        | 759.4         | 787.4               | 787.4         | 8      | G     | 6  | 792.4         | 792.4               |
|        | 906.4         | 934.4               | 934.4         | 9      | M     | 5  | 735.4         | 735.4               |
|        | 963.4         | +0.017              | 996.2         | +0.291 | 991.4 | 10 | G             | 4                   |
|        | 1077          | +0.062              | 552.8         | 1105   | 11    | L  | 3             | 531.3               |
|        | 1263          | 1291                | 1291          | 1291   | 12    | W  | 2             | 418.2               |
|        | 1320          | 1348                | 1348          | 1348   | 13    | G  | 1             | 232.1               |
|        |               |                     |               |        | 14    | R  | 0             | 175.1               |

Scan number 3503 Raw file LNCAP\_Silac\_23F10\_set3\_08  
 Method ITMS; CID Pepti... 169.65

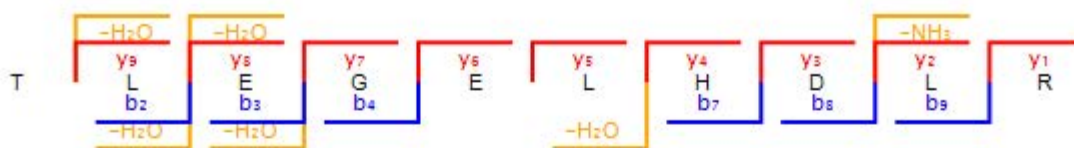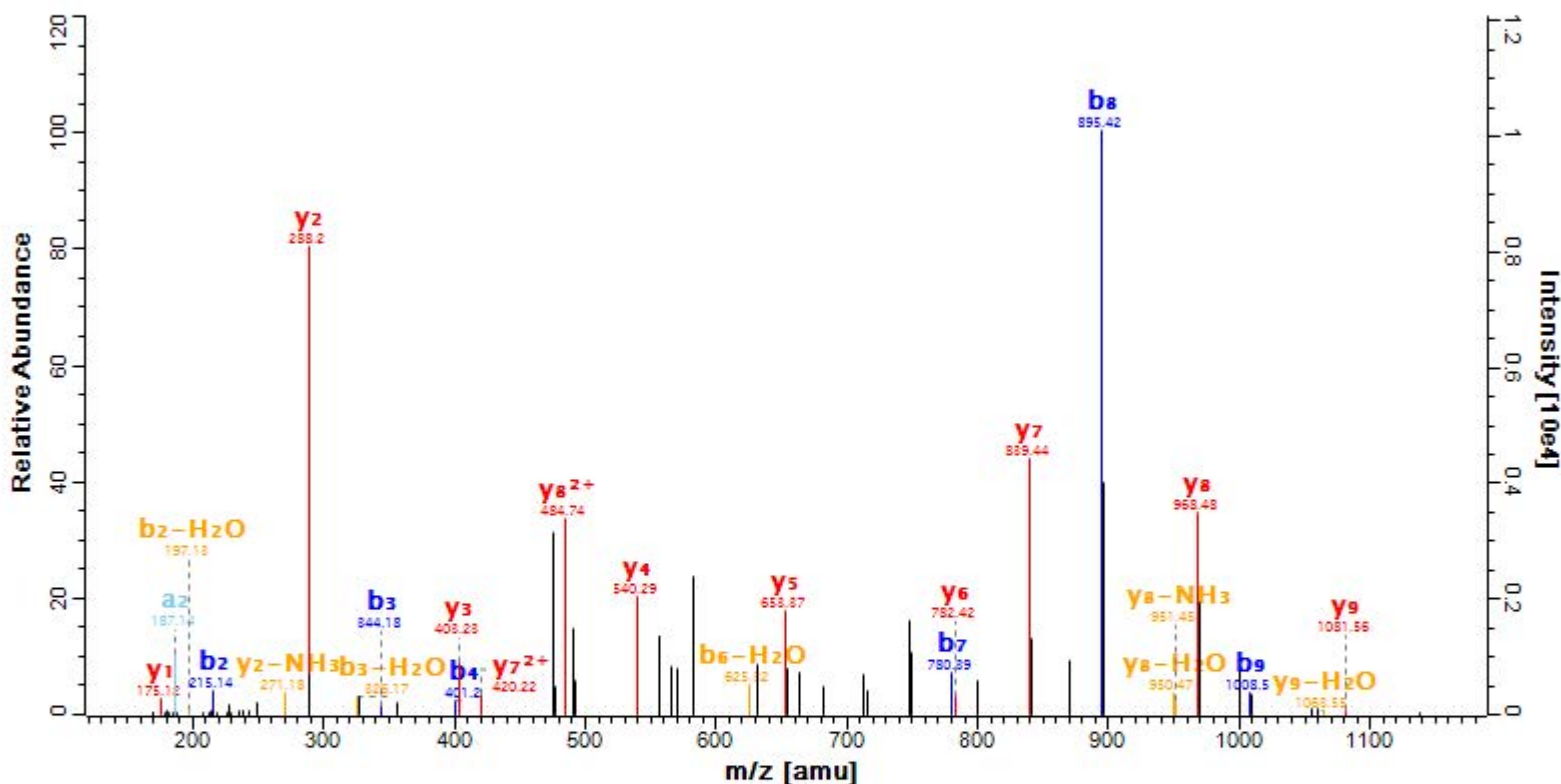

### precursor information

|                   |                 |
|-------------------|-----------------|
| Mass:             | 1181.60499      |
| m/z:              | 591.80977       |
| Charge:           | 2+              |
| Retentiontime:    | 24.565122604370 |
| Score:            | 169.6546        |
| Mass Error [ppm]: | 0.79883         |
| PEP:              | 3.2119E-14      |
| Precursor Type:   | ISO             |

|                       |             |
|-----------------------|-------------|
| Annotation:           | 9 of 10     |
| AminoAcids Coverage:  | 90 %        |
| Intensity Coverage:   | 55 %        |
| Peak Coverage:        | 28 %        |
| Protein Localisation: | 157 ... 166 |

| a ion    |        | b ion    |        |    |     |          | y ion  |          | y <sup>2+</sup> ion |  |
|----------|--------|----------|--------|----|-----|----------|--------|----------|---------------------|--|
| Δ dalton | mass   | Δ dalton | mass   |    | seq | Δ dalton | mass   | Δ dalton | mass                |  |
|          | 74.06  |          | 102.05 | 1  | T   | 9        |        |          |                     |  |
| +0.0399  | 187.14 | +0.1016  | 215.14 | 2  | L   | 8        | 1081.6 | +0.4025  | 1081.6              |  |
|          | 316.19 | +0.2265  | 344.18 | 3  | E   | 7        | 968.48 | -0.055   | 484.74              |  |
|          | 373.21 | -0.056   | 401.2  | 4  | G   | 6        | 839.44 | +0.0128  | 420.22              |  |
|          | 502.25 |          | 530.25 | 5  | E   | 5        | 782.42 | -0.022   | 782.42              |  |
|          | 615.33 |          | 643.33 | 6  | L   | 4        | 653.37 | +0.0261  | 653.37              |  |
|          | 752.39 | -0.089   | 780.39 | 7  | H   | 3        | 540.29 | -0.013   | 540.29              |  |
|          | 867.42 | -0.015   | 895.42 | 8  | D   | 2        | 403.23 | +0.0362  | 403.23              |  |
|          | 980.5  | +0.033   | 1008.5 | 9  | L   | 1        | 288.2  | -0.016   | 288.2               |  |
|          |        |          |        | 10 | R   | 0        | 175.12 | +0.0866  | 175.12              |  |

Scan number 3616 Raw file LNCAP\_Silac\_23F10\_set3\_08  
 Method ITMS; CID Pepti... 93.77

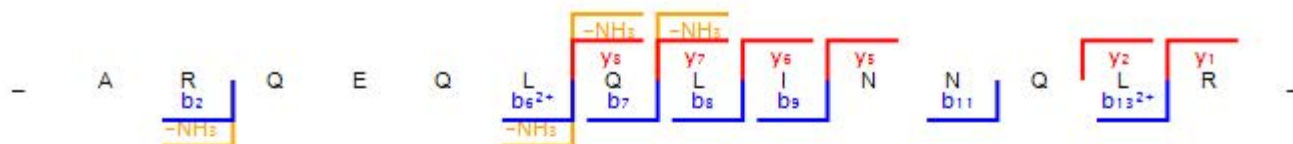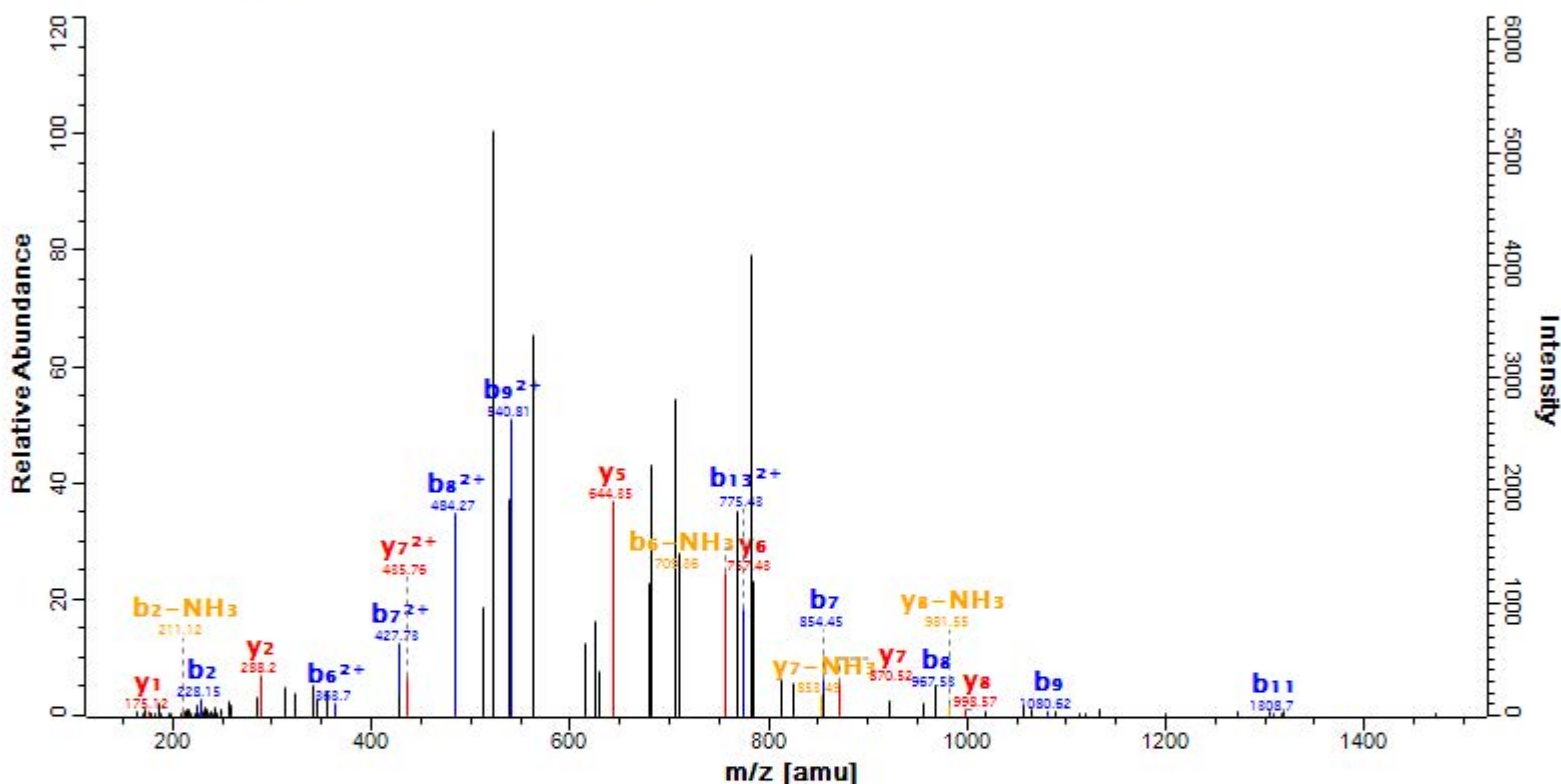

**precursor information**

|                   |                 |
|-------------------|-----------------|
| Mass:             | 1722.94952      |
| m/z:              | 575.32378       |
| Charge:           | 3+              |
| Retentiontime:    | 25.173223495483 |
| Score:            | 93.76573        |
| Mass Error [ppm]: | 0.35096         |
| PEP:              | 0.00018791      |
| Precursor Type:   | MULTI           |

| b <sup>2+</sup> ion |        | b ion    |        | seq |   |    | y ion    |         | y <sup>2+</sup> ion |        |
|---------------------|--------|----------|--------|-----|---|----|----------|---------|---------------------|--------|
| Δ dalton            | mass   | Δ dalton | mass   |     |   |    | Δ dalton | mass    | Δ dalton            | mass   |
|                     | 72.044 |          | 72.044 | 1   | A | 13 |          |         |                     |        |
|                     | 228.15 | +0.056   | 228.15 | 2   | R | 12 | 1652.9   |         | 1652.9              |        |
|                     | 356.2  |          | 356.2  | 3   | Q | 11 | 1496.8   |         | 1496.8              |        |
|                     | 485.25 |          | 485.25 | 4   | E | 10 | 1368.8   |         | 1368.8              |        |
|                     | 613.31 |          | 613.31 | 5   | Q | 9  | 1239.7   |         | 1239.7              |        |
| +0.0795             | 363.7  |          | 726.39 | 6   | L | 8  | 1111.7   |         | 1111.7              |        |
| -0.01               | 427.73 | +0.1161  | 854.45 | 7   | Q | 7  | 998.57   | +0.2051 | 998.57              |        |
| +0.1448             | 484.27 | -0.036   | 967.53 | 8   | L | 6  | 870.52   | +0.0664 | 435.76              | +0.041 |
| +0.1584             | 540.81 | +0.0629  | 1080.6 | 9   | I | 5  | 757.43   | +0.114  | 757.43              |        |
|                     | 1194.7 |          | 1194.7 | 10  | N | 4  | 644.35   | +0.0608 | 644.35              |        |
|                     | 1308.7 | +0.0221  | 1308.7 | 11  | N | 3  | 530.3    |         | 530.3               |        |
|                     | 1436.8 |          | 1436.8 | 12  | Q | 2  | 416.26   |         | 416.26              |        |
| +0.117              | 775.43 |          | 1549.8 | 13  | L | 1  | 288.2    | +0.0659 | 288.2               |        |
|                     |        |          |        | 14  | R | 0  | 175.12   | -0.04   | 175.12              |        |

**general information**

|                       |             |
|-----------------------|-------------|
| Annotation:           | 9 of 14     |
| AminoAcids Coverage:  | 64 %        |
| Intensity Coverage:   | 23 %        |
| Peak Coverage:        | 20 %        |
| Protein Localisation: | 345 ... 358 |



Scan number 3623 Raw file LNCAP\_Silac\_23F10\_set3\_08  
 Method ITMS; CID Pepti... 127.56

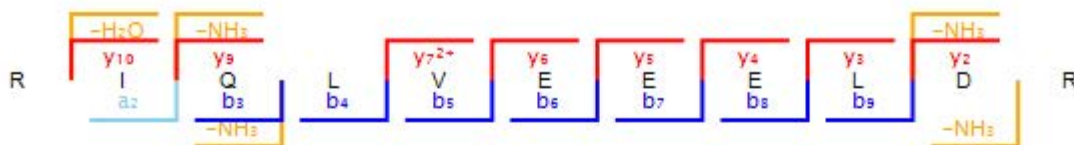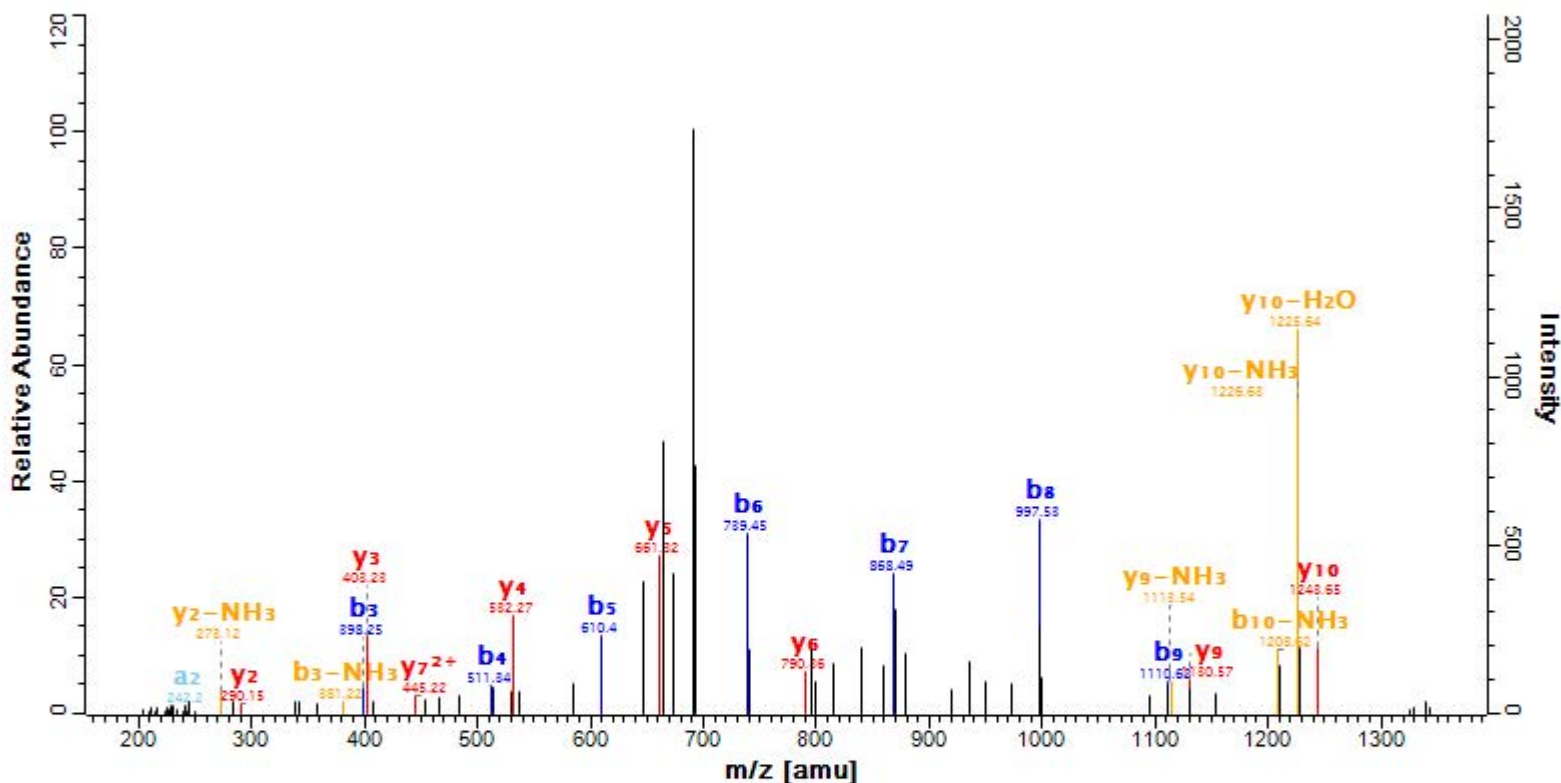

#### precursor information

|                   |                 |
|-------------------|-----------------|
| Mass:             | 1398.74706      |
| m/z:              | 700.38081       |
| Charge:           | 2+              |
| Retentiontime:    | 25.210613250732 |
| Score:            | 127.5587        |
| Mass Error [ppm]: | 0.2629          |
| PEP:              | 9.6577E-05      |
| Precursor Type:   | MULTI           |

#### general information

|                       |           |
|-----------------------|-----------|
| Annotation:           | 9 of 11   |
| AminoAcids Coverage:  | 82 %      |
| Intensity Coverage:   | 43 %      |
| Peak Coverage:        | 26 %      |
| Protein Localisation: | 55 ... 65 |

| a ion    |        | b ion    |         |    |     |          | y ion  |          | y <sup>2+</sup> ion |  |
|----------|--------|----------|---------|----|-----|----------|--------|----------|---------------------|--|
| Δ dalton | mass   | Δ dalton | mass    |    | seq | Δ dalton | mass   | Δ dalton | mass                |  |
|          | 129.11 |          | 157.11  | 1  | R   | 10       |        |          |                     |  |
| -0.083   | 242.2  |          | 270.19  | 2  | I   | 9        | 1243.7 | -0.029   | 1243.7              |  |
|          | 370.26 | +0.3014  | 4398.25 | 3  | Q   | 8        | 1130.6 | -0.035   | 1130.6              |  |
|          | 483.34 | +0.1114  | 511.34  | 4  | L   | 7        | 1002.5 |          | 1002.5              |  |
|          | 582.41 | +0.0942  | 610.4   | 5  | V   | 6        | 889.43 |          | 445.22 +0.1233      |  |
|          | 711.45 | -0.01    | 739.45  | 6  | E   | 5        | 790.36 | +0.1619  | 790.36              |  |
|          | 840.49 | +0.0184  | 868.49  | 7  | E   | 4        | 661.32 | +0.0976  | 661.32              |  |
|          | 969.54 | -0.041   | 997.53  | 8  | E   | 3        | 532.27 | +0.1652  | 532.27              |  |
|          | 1082.6 | -0.128   | 1110.6  | 9  | L   | 2        | 403.23 | +0.0155  | 403.23              |  |
|          | 1197.6 |          | 1225.6  | 10 | D   | 1        | 290.15 | +0.0523  | 290.15              |  |
|          |        |          |         | 11 | R   | 0        | 175.12 |          | 175.12              |  |

Scan number 3650 Raw file LNCAP\_Silac\_23F10\_set3\_08  
 Method ITMS; CID Pepti... 90.76

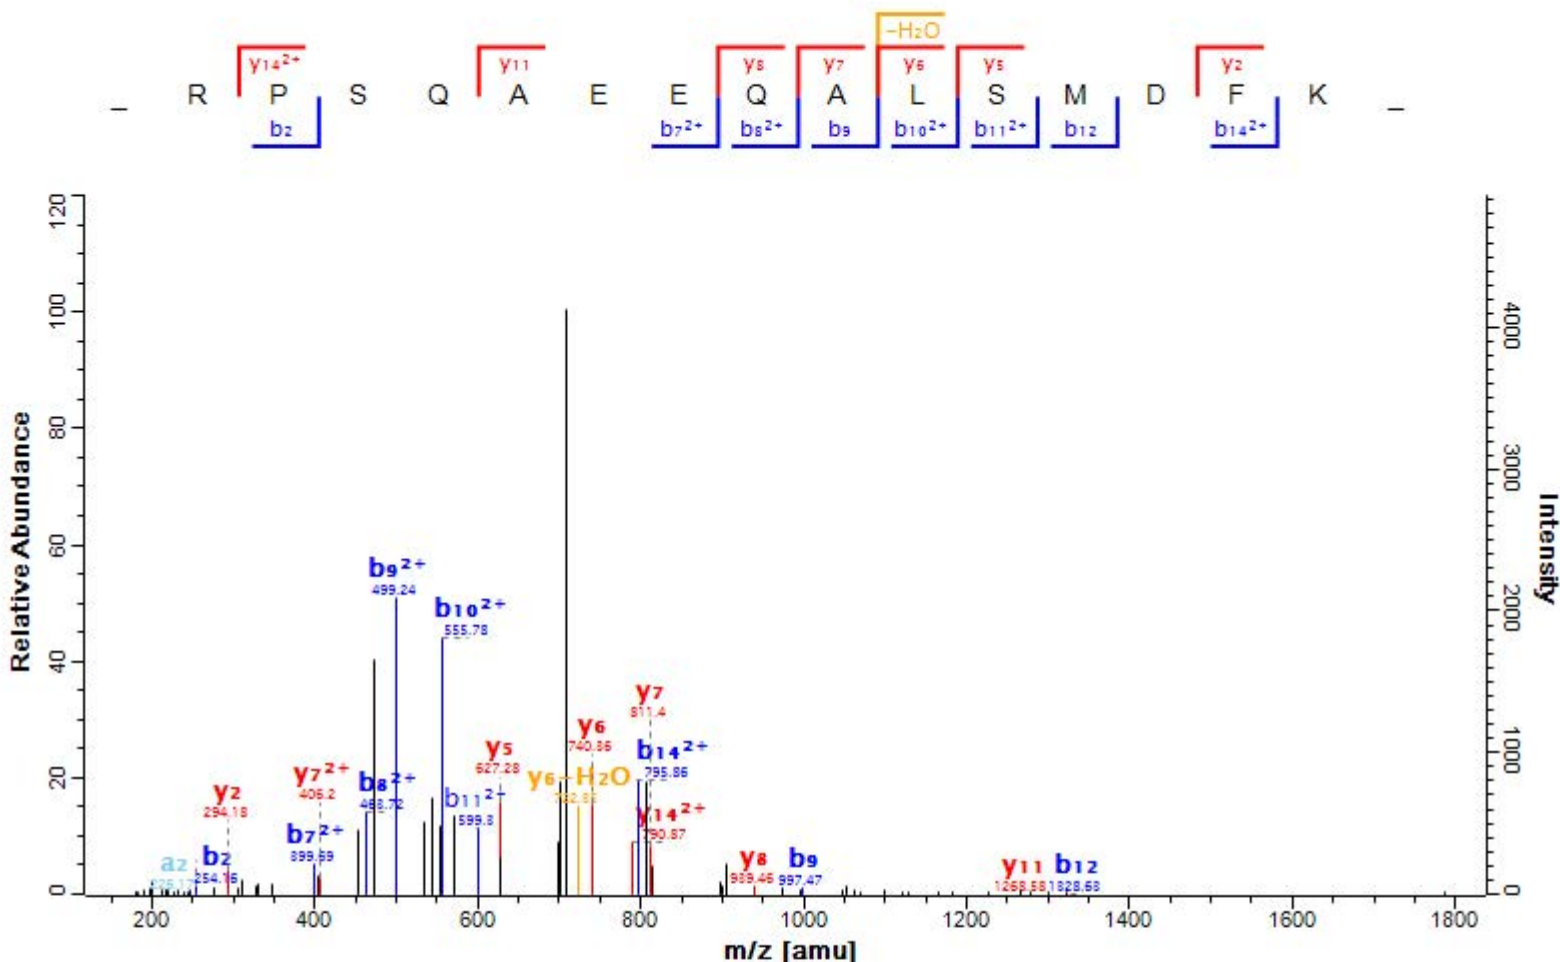

#### precursor information

|                   |                 |
|-------------------|-----------------|
| Mass:             | 2302.12671      |
| m/z:              | 576.53895       |
| Charge:           | 4+              |
| Retentiontime:    | 25.365297317504 |
| Score:            | 90.75877        |
| Mass Error [ppm]: | 0.87722         |
| PEP:              | 0.0021382       |
| Precursor Type:   | MULTI           |

#### general information

|                       |             |
|-----------------------|-------------|
| Annotation:           | 11 of 15    |
| AminoAcids Coverage:  | 73 %        |
| Intensity Coverage:   | 40 %        |
| Peak Coverage:        | 21 %        |
| Protein Localisation: | 293 ... 307 |

| a ion         |               | b <sup>2+</sup> ion |               | b ion   |    |               |               |       | y ion   |       | y <sup>2+</sup> ion |  |
|---------------|---------------|---------------------|---------------|---------|----|---------------|---------------|-------|---------|-------|---------------------|--|
| Δ dalton mass | Δ dalton mass | Δ dalton mass       | Δ dalton mass | seq     |    | Δ dalton mass | Δ dalton mass |       |         |       |                     |  |
| 129.1         |               | 157.1               |               | 157.1   | 1  | R             | 14            |       |         |       |                     |  |
| +0.1052       | 26.2          | 254.2               |               | +0.0072 | 2  | P             | 13            | 1581  |         | 790.9 | -0.19               |  |
| 313.2         |               | 341.2               |               | 341.2   | 3  | S             | 12            | 1484  |         | 1484  |                     |  |
| 441.3         |               | 469.3               |               | 469.3   | 4  | Q             | 11            | 1397  |         | 1397  |                     |  |
| 512.3         |               | 540.3               |               | 540.3   | 5  | A             | 10            | 1269  | -0.14   | 1269  |                     |  |
| 641.3         |               | 669.3               |               | 669.3   | 6  | E             | 9             | 1198  |         | 1198  |                     |  |
| 770.4         | +0.0893       | 999.7               |               | 798.4   | 7  | E             | 8             | 1069  |         | 1069  |                     |  |
| 898.4         | +0.1374       | 663.7               |               | 926.4   | 8  | Q             | 7             | 939.5 | +0.2469 | 939.5 |                     |  |
| 969.5         | +0.1724       | 99.2                |               | +0.1079 | 9  | A             | 6             | 811.4 | +0.0734 | 406.2 | +0.01               |  |
| 1083          | +0.2665       | 55.8                |               | 1111    | 10 | L             | 5             | 740.4 | -0.01   | 740.4 |                     |  |
| 1170          | +0.2025       | 99.3                |               | 1198    | 11 | S             | 4             | 627.3 | +0.0636 | 627.3 |                     |  |
| 1301          |               | 1329                | +0.1          | 1329    | 12 | M             | 3             | 540.2 |         | 540.2 |                     |  |
| 1416          |               | 1444                |               | 1444    | 13 | D             | 2             | 409.2 |         | 409.2 |                     |  |
| 1563          | +0.2777       | 95.9                |               | 1591    | 14 | F             | 1             | 294.2 | +0.13   | 294.2 |                     |  |
|               |               |                     |               |         | 15 | K             | 0             | 147.1 |         | 147.1 |                     |  |

Scan number 374 Raw file LNCAP\_Silac\_23F10\_set3\_08  
 Method ITMS; CID Pepti... 74.16

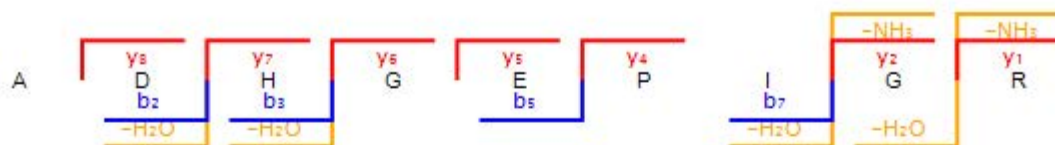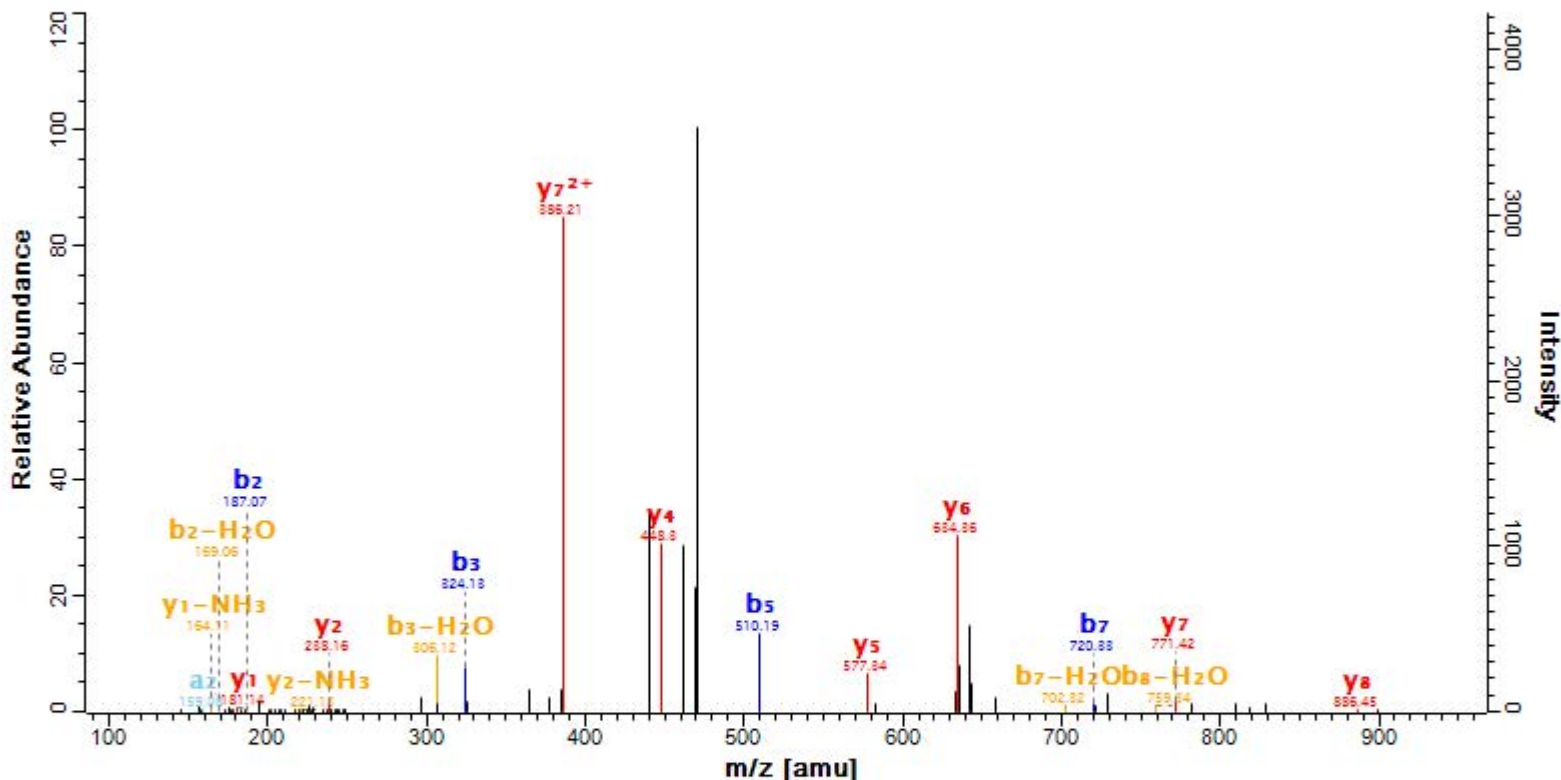

#### precursor information

|                       |                 |
|-----------------------|-----------------|
| Mass:                 | 950.45727       |
| m/z:                  | 476.23591       |
| Charge:               | 2+              |
| Retention time:       | 6.8732099533081 |
| Score:                | 74.16205        |
| Mass Error [ppm]:     | 0.29428         |
| PEP:                  | 0.012655        |
| Precursor Type:       | MULTI           |
| Annotation:           | 8 of 9          |
| AminoAcids Coverage:  | 89 %            |
| Intensity Coverage:   | 39 %            |
| Peak Coverage:        | 15 %            |
| Protein Localisation: | 169 ... 177     |

| a ion    |        | b ion    |        |   |     |   | y ion    |         | y <sup>2+</sup> ion |         |
|----------|--------|----------|--------|---|-----|---|----------|---------|---------------------|---------|
| Δ dalton | mass   | Δ dalton | mass   |   | seq |   | Δ dalton | mass    | Δ dalton            | mass    |
|          | 44.049 |          | 72.044 | 1 | A   | 8 |          |         |                     |         |
| +0.0536  | 159.08 | +0.0942  | 187.07 | 2 | D   | 7 | 886.45   | -0.229  | 886.45              |         |
|          | 296.14 | -0.014   | 324.13 | 3 | H   | 6 | 771.42   | +0.0855 | 386.21              | +0.1235 |
|          | 353.16 |          | 381.15 | 4 | G   | 5 | 634.36   | +0.0454 | 634.36              |         |
|          | 482.2  | +0.0195  | 510.19 | 5 | E   | 4 | 577.34   | -0.045  | 577.34              |         |
|          | 579.25 |          | 607.25 | 6 | P   | 3 | 448.3    | +0.063  | 448.3               |         |
|          | 692.34 | +0.0365  | 720.33 | 7 | I   | 2 | 351.24   |         | 351.24              |         |
|          | 749.36 |          | 777.35 | 8 | G   | 1 | 238.16   | +0.082  | 238.16              |         |
|          |        |          |        | 9 | R   | 0 | 181.14   | +0.0059 | 181.14              |         |



Scan number 3884 Raw file LNCAP\_Silac\_23F10\_set3\_08  
 Method ITMS; CID Pepti... 61.44

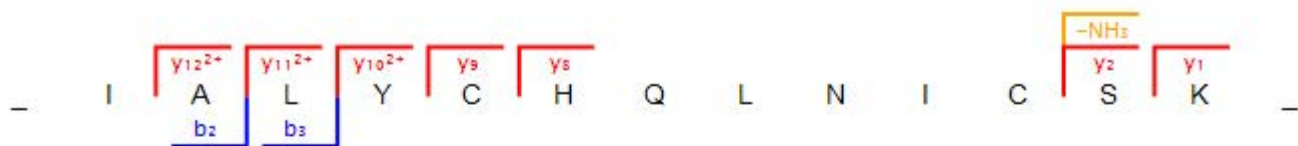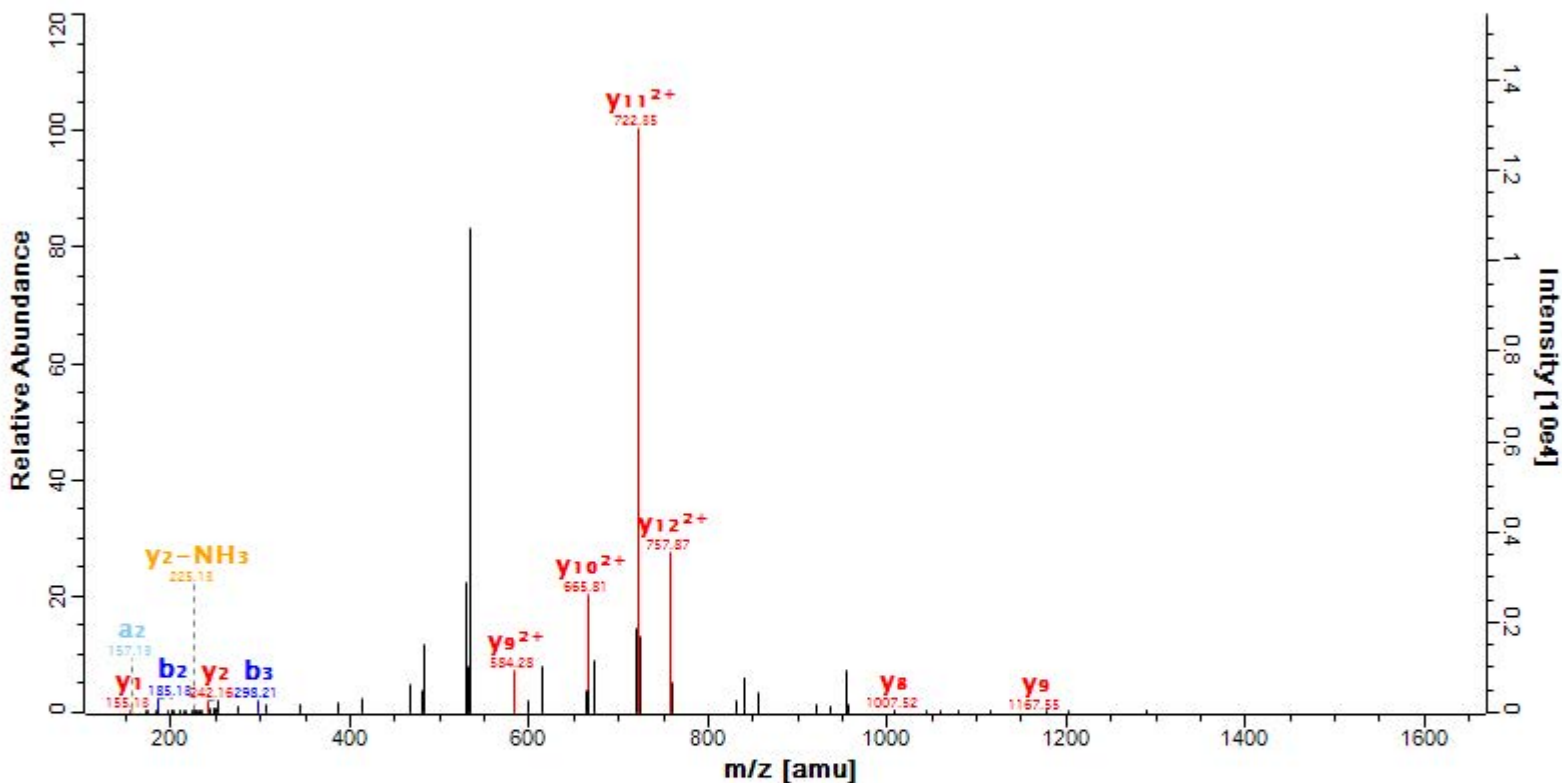

#### precursor information

|                   |                 |
|-------------------|-----------------|
| Mass:             | 1618.79647      |
| m/z:              | 540.6061        |
| Charge:           | 3+              |
| Retentiontime:    | 26.595426559448 |
| Score:            | 61.43516        |
| Mass Error [ppm]: | 0.30715         |
| PEP:              | 0.0076517       |
| Precursor Type:   | MULTI           |

#### general information

|                       |             |
|-----------------------|-------------|
| Annotation:           | 7 of 13     |
| AminoAcids Coverage:  | 54 %        |
| Intensity Coverage:   | 38 %        |
| Peak Coverage:        | 12 %        |
| Protein Localisation: | 783 ... 795 |

| a ion    |        | b ion    |        |    |     |    | y ion    |         | y <sup>2+</sup> ion |         |
|----------|--------|----------|--------|----|-----|----|----------|---------|---------------------|---------|
| Δ dalton | mass   | Δ dalton | mass   |    | seq |    | Δ dalton | mass    | Δ dalton            | mass    |
|          | 86.096 |          | 114.09 | 1  | I   | 12 |          |         |                     |         |
| -0.103   | 157.13 | -0.005   | 185.13 | 2  | A   | 11 | 1514.7   |         | 757.87              | +0.2358 |
|          | 270.22 | -0.205   | 298.21 | 3  | L   | 10 | 1443.7   |         | 722.35              | +0.1839 |
|          | 433.28 |          | 461.28 | 4  | Y   | 9  | 1330.6   |         | 665.81              | +0.2638 |
|          | 593.31 |          | 621.31 | 5  | C   | 8  | 1167.5   | +0.0651 | 584.28              | +0.256  |
|          | 730.37 |          | 758.37 | 6  | H   | 7  | 1007.5   | -0.302  | 1007.5              |         |
|          | 858.43 |          | 886.42 | 7  | Q   | 6  | 870.46   |         | 870.46              |         |
|          | 971.51 |          | 999.51 | 8  | L   | 5  | 742.4    |         | 742.4               |         |
|          | 1085.6 |          | 1113.6 | 9  | N   | 4  | 629.32   |         | 629.32              |         |
|          | 1198.6 |          | 1226.6 | 10 | I   | 3  | 515.27   |         | 515.27              |         |
|          | 1358.7 |          | 1386.7 | 11 | C   | 2  | 402.19   |         | 402.19              |         |
|          | 1445.7 |          | 1473.7 | 12 | S   | 1  | 242.16   | +0.0773 | 242.16              |         |
|          |        |          |        | 13 | K   | 0  | 155.13   | -0.051  | 155.13              |         |

Scan number 510 Raw file LNCAP\_Silac\_23F10\_set3\_08  
 Method ITMS; CID Pepti... 111.74

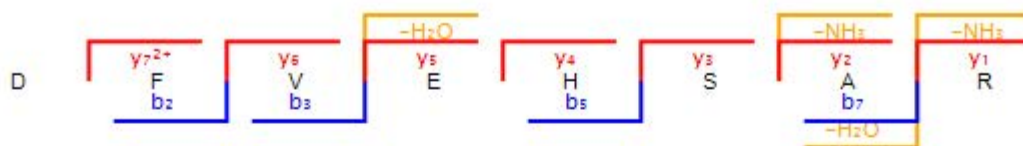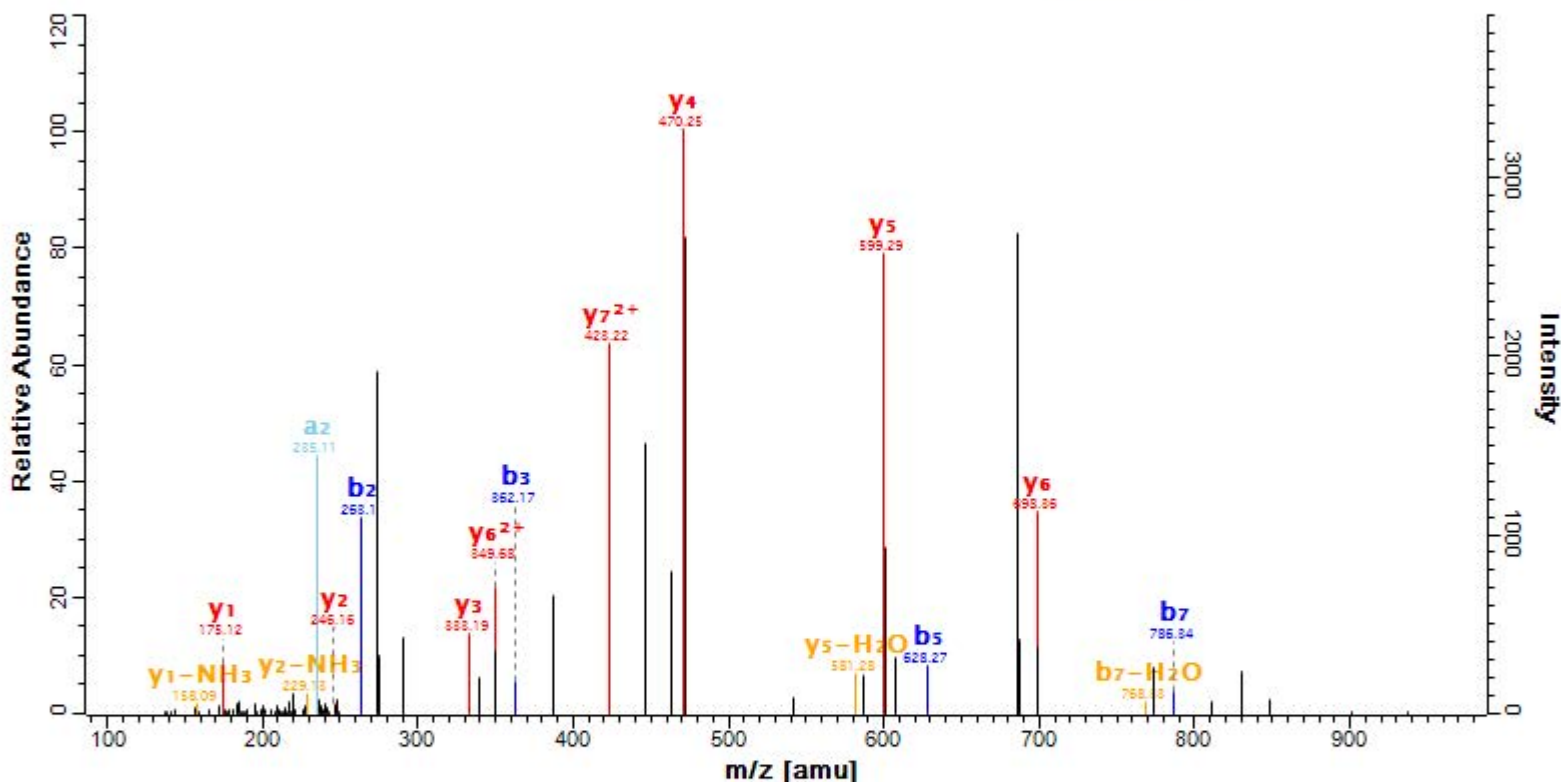

#### precursor information

|                       |                 |
|-----------------------|-----------------|
| Mass:                 | 0               |
| m/z:                  | 480.73035       |
| Charge:               | 0+              |
| Retentiontime:        | 7.8692431449890 |
| Score:                | 111.7389        |
| Mass Error [ppm]:     | 0.059275        |
| g PEP:                | 0.0020652       |
| Annotation:           | 7 of 8          |
| AminoAcids Coverage:  | 88 %            |
| Intensity Coverage:   | 42 %            |
| Peak Coverage:        | 18 %            |
| Protein Localisation: | 46 ... 53       |

| a ion    |        | b ion    |        |     |   |          | y ion  |          | y <sup>2+</sup> ion |  |
|----------|--------|----------|--------|-----|---|----------|--------|----------|---------------------|--|
| Δ dalton | mass   | Δ dalton | mass   | seq |   | Δ dalton | mass   | Δ dalton | mass                |  |
|          | 88.039 |          | 116.03 | 1   | D | 7        |        |          |                     |  |
| +0.01    | 235.11 | +0.0082  | 263.1  | 2   | F | 6        | 845.43 |          | 423.22              |  |
|          | 334.18 | -0.043   | 362.17 | 3   | V | 5        | 698.36 | +0.0759  | 349.68              |  |
|          | 463.22 |          | 491.21 | 4   | E | 4        | 599.29 | +0.0119  | 599.29              |  |
|          | 600.28 | +0.0623  | 628.27 | 5   | H | 3        | 470.25 | +0.2076  | 470.25              |  |
|          | 687.31 |          | 715.3  | 6   | S | 2        | 333.19 | +0.118   | 333.19              |  |
|          | 758.35 | +0.1253  | 786.34 | 7   | A | 1        | 246.16 | +0.0806  | 246.16              |  |
|          |        |          |        | 8   | R | 0        | 175.12 | +0.0566  | 175.12              |  |

Scan number 5130 Raw file LNCAP\_Silac\_23F10\_set3\_08  
 Method ITMS; CID Pepti... 107.06

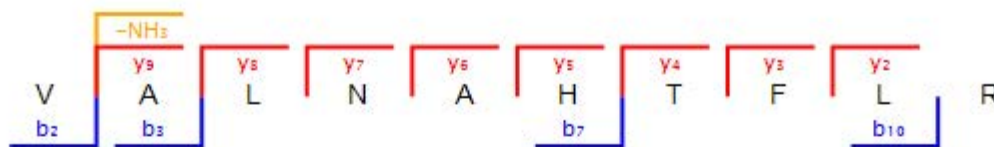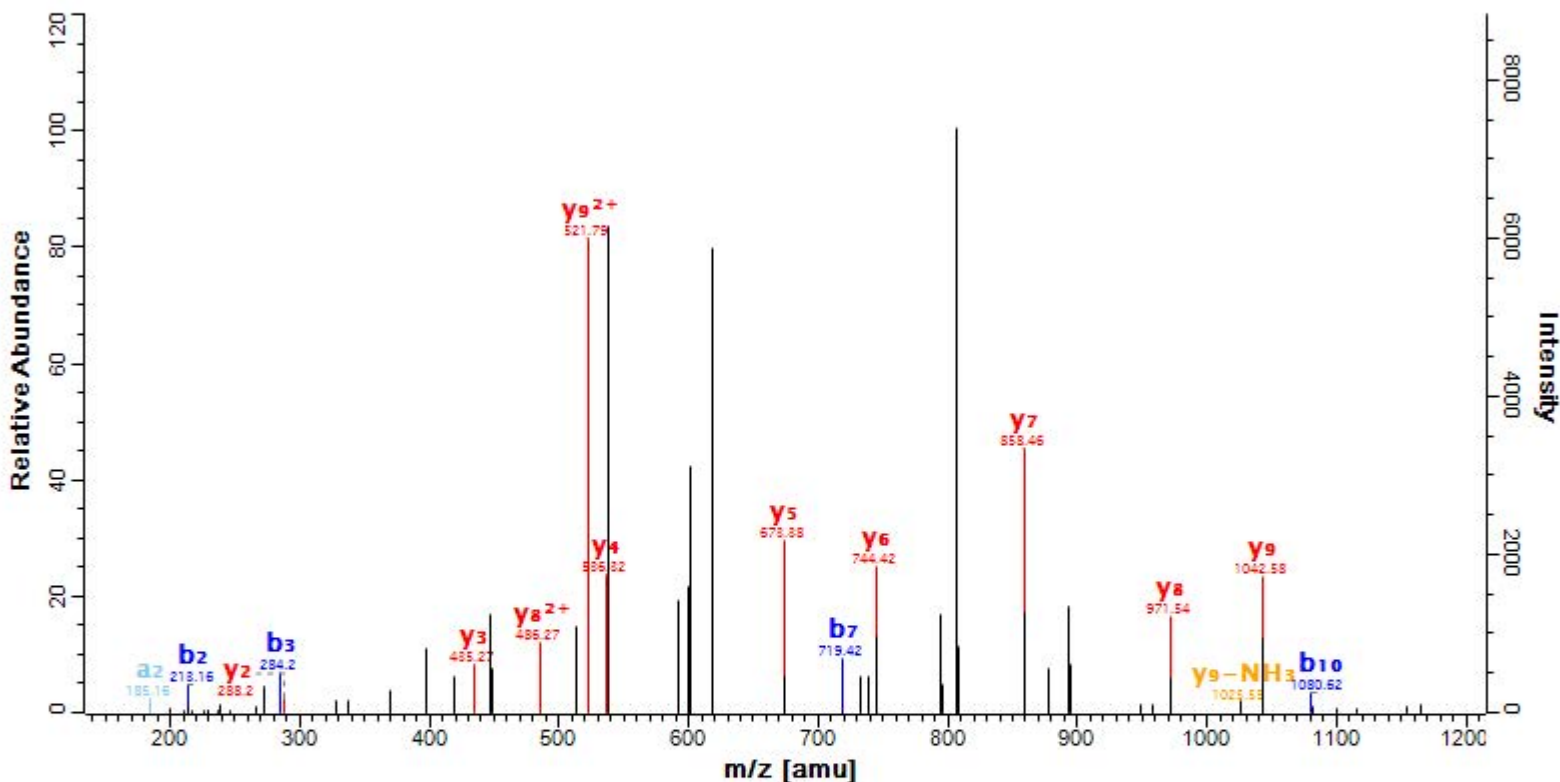

#### precursor information

|                   |                 |
|-------------------|-----------------|
| Mass:             | 1253.72503      |
| m/z:              | 627.86979       |
| Charge:           | 2+              |
| Retentiontime:    | 33.349903106689 |
| Score:            | 107.0553        |
| Mass Error [ppm]: | 0.4686          |
| PEP:              | 0.00030202      |
| Precursor Type:   | MULTI           |

#### general information

|                       |             |
|-----------------------|-------------|
| Annotation:           | 9 of 11     |
| AminoAcids Coverage:  | 82 %        |
| Intensity Coverage:   | 32 %        |
| Peak Coverage:        | 23 %        |
| Protein Localisation: | 245 ... 255 |

| a ion    |        | b ion    |        | seq |   |    | y ion    |         | y <sup>2+</sup> ion |         |
|----------|--------|----------|--------|-----|---|----|----------|---------|---------------------|---------|
| Δ dalton | mass   | Δ dalton | mass   |     |   |    | Δ dalton | mass    | Δ dalton            | mass    |
|          | 86.096 |          | 114.09 | 1   | I | 10 |          |         |                     |         |
| -0.056   | 185.16 | -0.012   | 213.16 | 2   | V | 9  | 1141.6   |         | 1141.6              |         |
|          | 256.2  | +0.0534  | 284.2  | 3   | A | 8  | 1042.6   | -0.021  | 521.79              | +0.2063 |
|          | 369.29 |          | 397.28 | 4   | L | 7  | 971.54   | +0.0084 | 486.27              | -0.036  |
|          | 483.33 |          | 511.32 | 5   | N | 6  | 858.46   | +0.0256 | 858.46              |         |
|          | 554.37 |          | 582.36 | 6   | A | 5  | 744.42   | +0.0396 | 744.42              |         |
|          | 691.42 | +0.0196  | 719.42 | 7   | H | 4  | 673.38   | +0.0547 | 673.38              |         |
|          | 792.47 |          | 820.47 | 8   | T | 3  | 536.32   | +0.061  | 536.32              |         |
|          | 939.54 |          | 967.54 | 9   | F | 2  | 435.27   | +0.1252 | 435.27              |         |
|          | 1052.6 | -0.053   | 1080.6 | 10  | L | 1  | 288.2    | +0.0872 | 288.2               |         |
|          |        |          |        | 11  | R | 0  | 175.12   |         | 175.12              |         |

Scan number 538 Raw file LNCAP\_Silac\_23F10\_set3\_08  
 Method ITMS; CID Pepti... 114.5

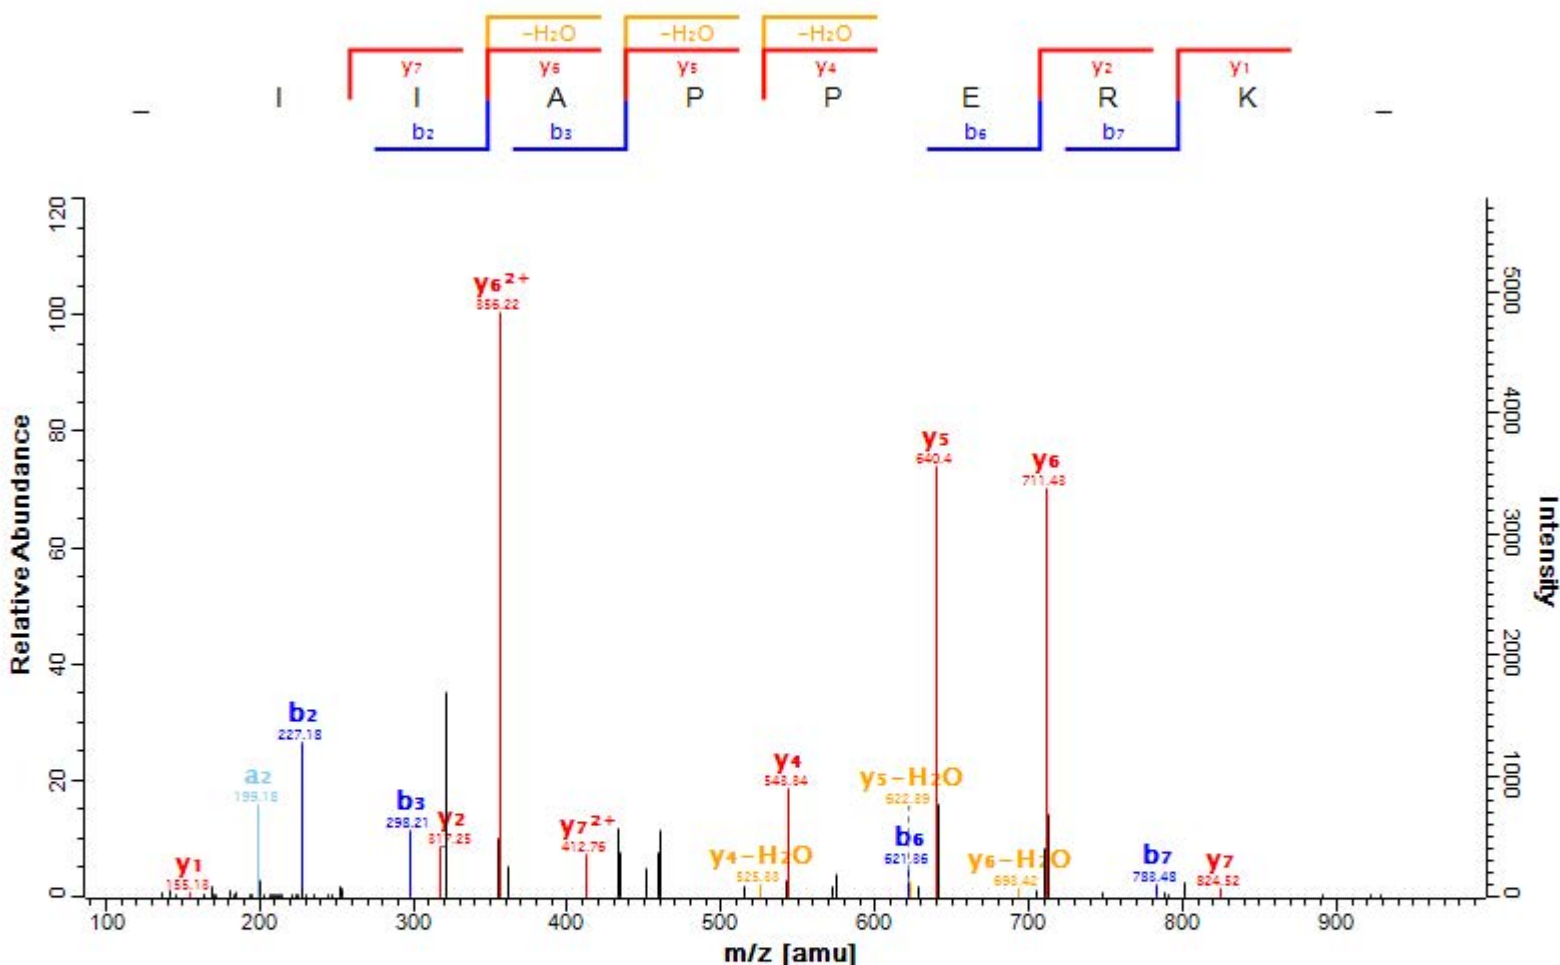

#### precursor information

|                       |                 |
|-----------------------|-----------------|
| Mass:                 | 922.56018       |
| m/z:                  | 462.28737       |
| Charge:               | 2+              |
| Retentiontime:        | 8.0570468902587 |
| Score:                | 114.4976        |
| Mass Error [ppm]:     | 0.19564         |
| g PEP:                | 0.001792        |
| Annotation:           | 7 of 8          |
| AminoAcids Coverage:  | 88 %            |
| Intensity Coverage:   | 65 %            |
| Peak Coverage:        | 15 %            |
| Protein Localisation: | 329 ... 336     |

| a ion    |        | b ion    |        |   |     |          | y ion  |          | y <sup>2+</sup> ion |  |
|----------|--------|----------|--------|---|-----|----------|--------|----------|---------------------|--|
| Δ dalton | mass   | Δ dalton | mass   |   | seq | Δ dalton | mass   | Δ dalton | mass                |  |
|          | 86.096 |          | 114.09 | 1 | I   | 7        |        |          |                     |  |
| +0.065   | 199.18 | -0.08    | 227.18 | 2 | I   | 6        | 824.52 | +0.0755  | 412.76              |  |
|          | 270.22 | -0.011   | 298.21 | 3 | A   | 5        | 711.43 | +0.0512  | 356.22              |  |
|          | 367.27 |          | 395.27 | 4 | P   | 4        | 640.4  | +0.0858  | 640.4               |  |
|          | 464.32 |          | 492.32 | 5 | P   | 3        | 543.34 | +0.0401  | 543.34              |  |
|          | 593.37 | +0.1254  | 621.36 | 6 | E   | 2        | 446.29 |          | 446.29              |  |
|          | 755.49 | -0.088   | 783.48 | 7 | R   | 1        | 317.25 | +0.0885  | 317.25              |  |
|          |        |          |        | 8 | K   | 0        | 155.13 | +0.1201  | 155.13              |  |



Scan number 5432 Raw file LNCAP\_Silac\_23F10\_set3\_08  
 Method ITMS; CID Pepti... 157.78

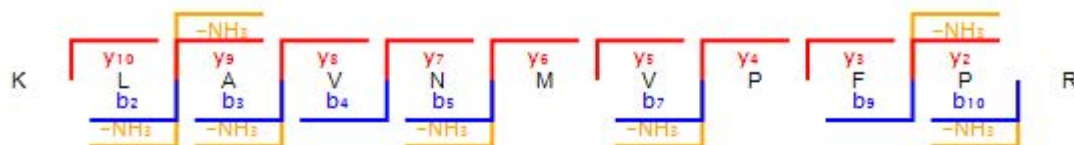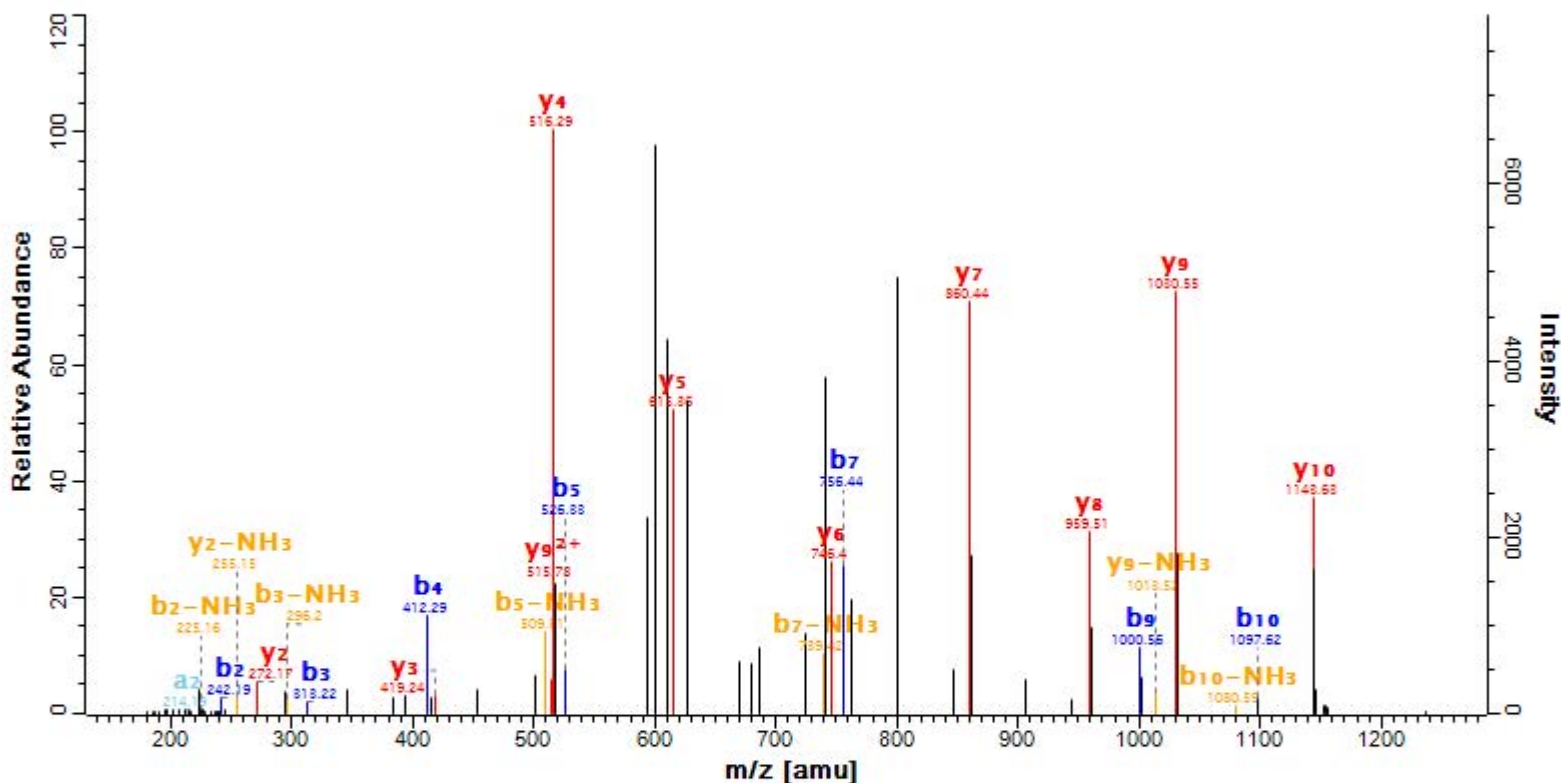

#### precursor information

|                   |                 |
|-------------------|-----------------|
| Mass:             | 1270.72208      |
| m/z:              | 636.36831       |
| Charge:           | 2+              |
| Retentiontime:    | 34.979839324951 |
| Score:            | 157.7773        |
| Mass Error [ppm]: | 0.062204        |
| PEP:              | 1.2427E-06      |
| Precursor Type:   | MULTI           |

#### general information

|                       |             |
|-----------------------|-------------|
| Annotation:           | 9 of 11     |
| AminoAcids Coverage:  | 82 %        |
| Intensity Coverage:   | 41 %        |
| Peak Coverage:        | 26 %        |
| Protein Localisation: | 252 ... 262 |

| a ion    |        | b ion    |        |    |     |          | y ion  |          | y <sup>2+</sup> ion |  |
|----------|--------|----------|--------|----|-----|----------|--------|----------|---------------------|--|
| Δ dalton | mass   | Δ dalton | mass   |    | seq | Δ dalton | mass   | Δ dalton | mass                |  |
|          | 101.11 |          | 129.1  | 1  | K   | 10       |        |          |                     |  |
| +0.0386  | 214.19 | -0.104   | 242.19 | 2  | L   | 9        | 1143.6 | +0.0389  | 1143.6              |  |
|          | 285.23 | +0.0429  | 313.22 | 3  | A   | 8        | 1030.6 | +0.0395  | 515.78              |  |
|          | 384.3  | +0.1098  | 412.29 | 4  | V   | 7        | 959.51 | +0.0264  | 959.51              |  |
|          | 498.34 | -0.464   | 526.33 | 5  | N   | 6        | 860.44 | +0.0182  | 860.44              |  |
|          | 629.38 |          | 657.38 | 6  | M   | 5        | 746.4  | -0.017   | 746.4               |  |
|          | 728.45 | -0.005   | 756.44 | 7  | V   | 4        | 615.36 | +0.045   | 615.36              |  |
|          | 825.5  |          | 853.5  | 8  | P   | 3        | 516.29 | +0.0888  | 516.29              |  |
|          | 972.57 | -0.038   | 1000.6 | 9  | F   | 2        | 419.24 | +0.0958  | 419.24              |  |
|          | 1069.6 | -0.03    | 1097.6 | 10 | P   | 1        | 272.17 | +0.0785  | 272.17              |  |
|          |        |          |        | 11 | R   | 0        | 175.12 |          | 175.12              |  |

Scan number 5524 Raw file LNCAP\_Silac\_23F10\_set3\_08  
 Method ITMS; CID Pepti... 98.68

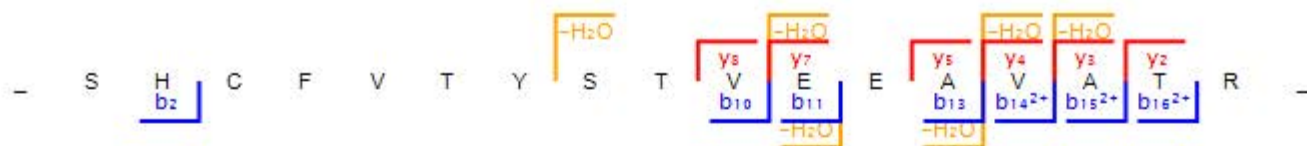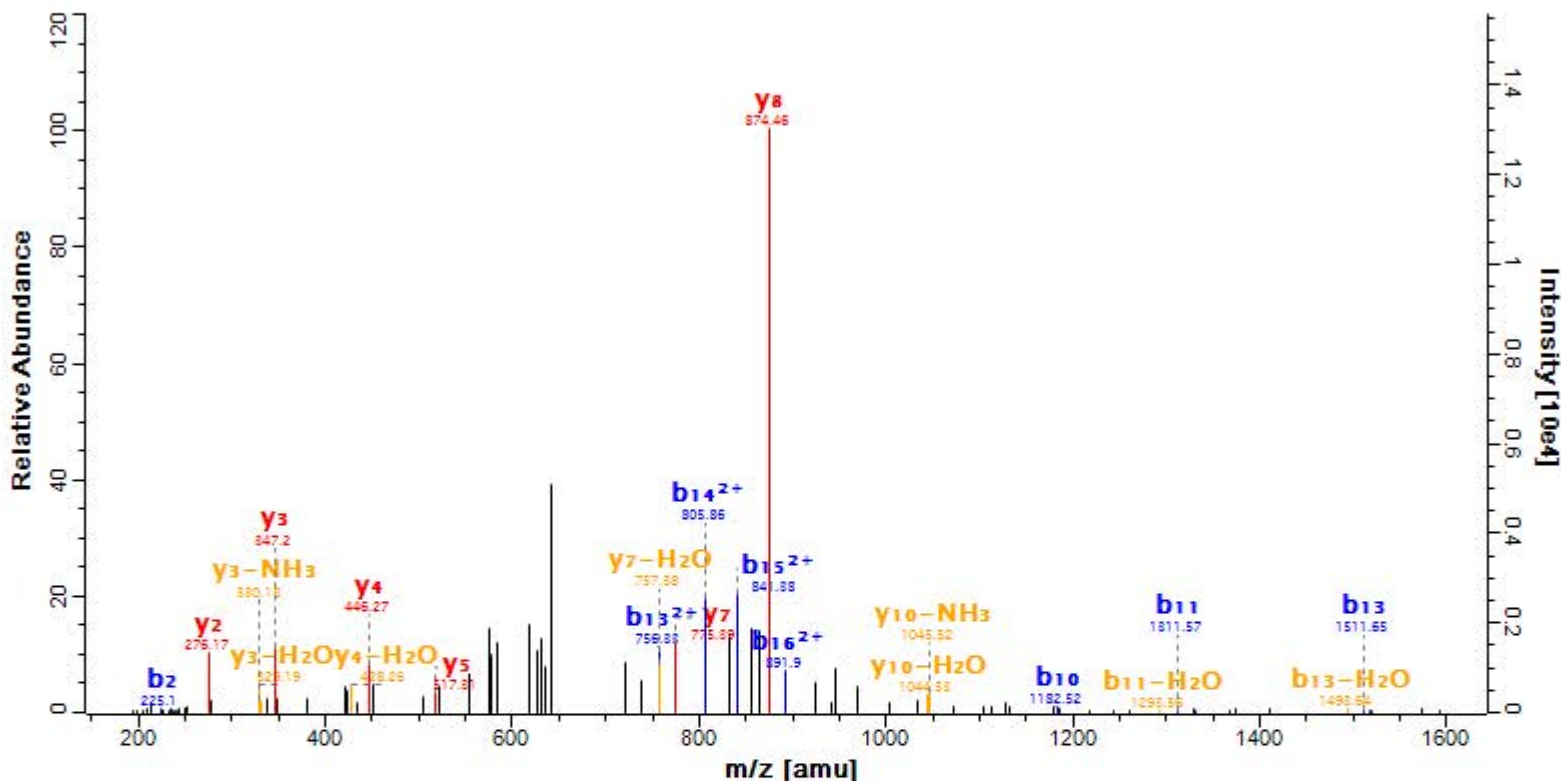

#### precursor information

|                   |                 |
|-------------------|-----------------|
| Mass:             | 1955.90571      |
| m/z:              | 652.97585       |
| Charge:           | 3+              |
| Retentiontime:    | 35.472053527832 |
| Score:            | 98.67624        |
| Mass Error [ppm]: | 0.50153         |
| PEP:              | 3.4734E-06      |
| Precursor Type:   | MULTI           |

#### general information

|                       |             |
|-----------------------|-------------|
| Annotation:           | 8 of 17     |
| AminoAcids Coverage:  | 47 %        |
| Intensity Coverage:   | 46 %        |
| Peak Coverage:        | 21 %        |
| Protein Localisation: | 954 ... 970 |

| b <sup>2+</sup> ion |          | b ion     |          |     |   | y ion    |          |           |
|---------------------|----------|-----------|----------|-----|---|----------|----------|-----------|
| Δ dalton            | mass     | Δ dalton  | mass     | seq |   | Δ dalton | mass     |           |
|                     | 88.0393  |           | 88.0393  | 1   | S | 16       |          |           |
|                     | 225.0982 | +0.178593 | 225.0982 | 2   | H | 15       | 1869.88  |           |
|                     | 385.1289 |           | 385.1289 | 3   | C | 14       | 1732.821 |           |
|                     | 532.1973 |           | 532.1973 | 4   | F | 13       | 1572.79  |           |
|                     | 631.2657 |           | 631.2657 | 5   | V | 12       | 1425.722 |           |
|                     | 732.3134 |           | 732.3134 | 6   | T | 11       | 1326.654 |           |
|                     | 895.3767 |           | 895.3767 | 7   | Y | 10       | 1225.606 |           |
|                     | 982.4087 |           | 982.4087 | 8   | S | 9        | 1062.543 |           |
|                     | 1083.456 |           | 1083.456 | 9   | T | 8        | 975.5106 |           |
|                     | 1182.525 | +0.131185 | 1182.525 | 10  | V | 7        | 874.4629 | -0.0562   |
|                     | 1311.567 | +0.231292 | 1311.567 | 11  | E | 6        | 775.3945 | -0.01818  |
|                     | 1440.61  |           | 1440.61  | 12  | E | 5        | 646.3519 |           |
| +0.16444            | 756.3272 | -0.13797  | 1511.647 | 13  | A | 4        | 517.3093 | -0.04108  |
| +0.237044           | 805.8614 |           | 1610.716 | 14  | V | 3        | 446.2722 | +0.146238 |
| +0.276898           | 841.38   |           | 1681.753 | 15  | A | 2        | 347.2037 | +0.1043   |
| +0.259101           | 891.9038 |           | 1782.8   | 16  | T | 1        | 276.1666 | +0.013972 |
|                     |          |           |          | 17  | R | 0        | 175.119  |           |

Scan number 56 Raw file LNCAP\_Silac\_23F10\_set3\_08  
 Method ITMS; CID Pepti... 154.49

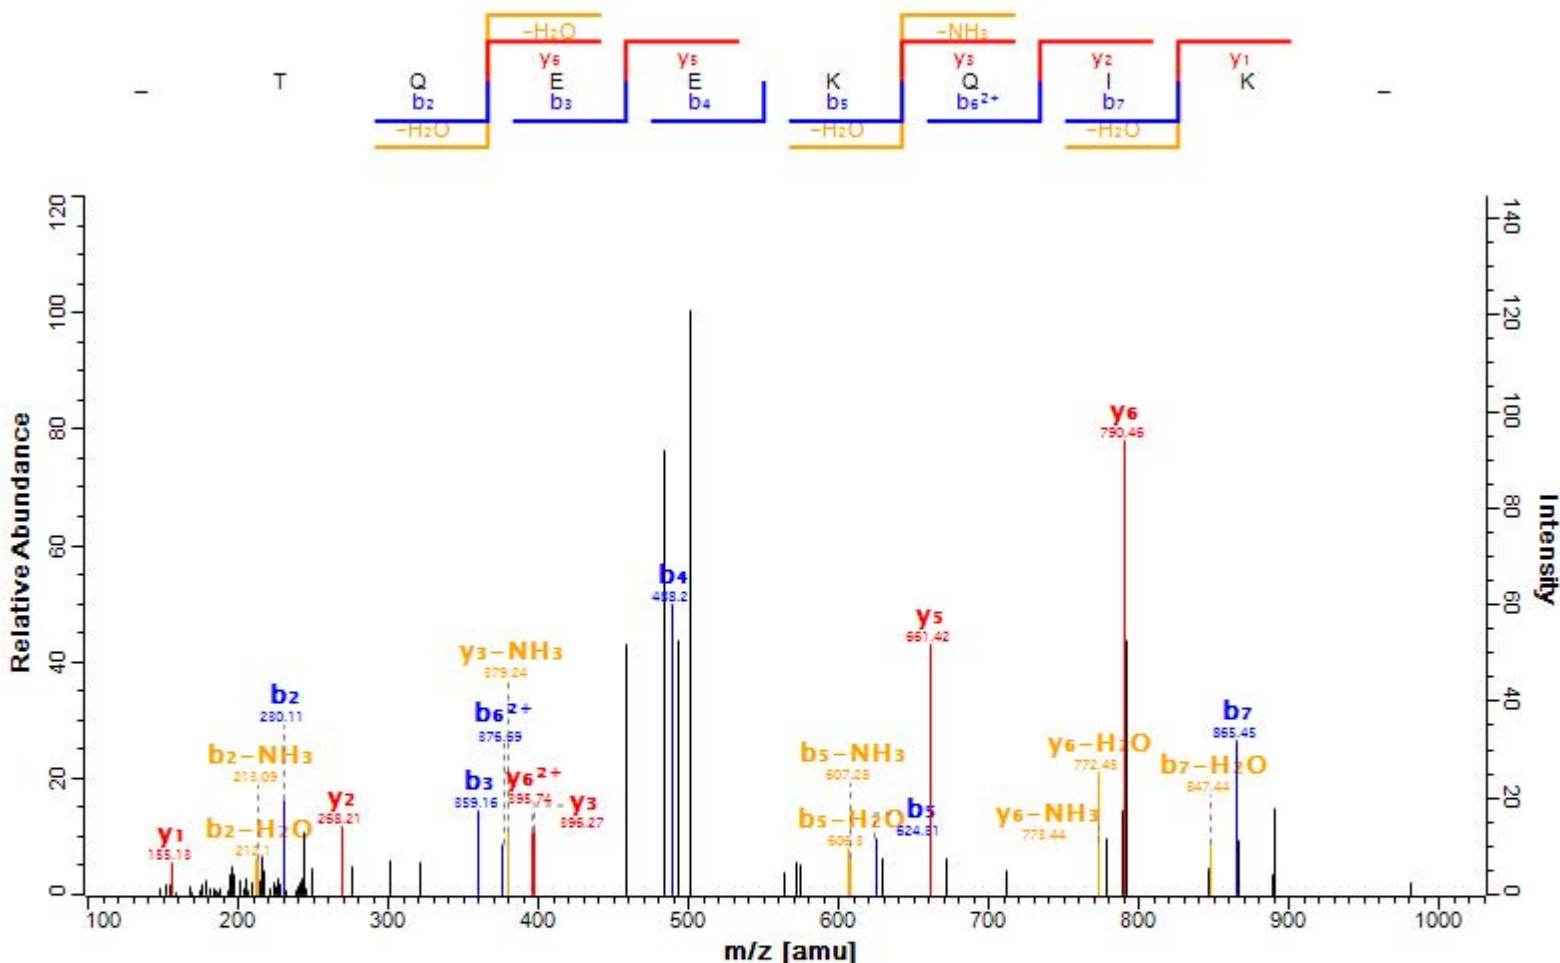

precursor information

|                       |                 |
|-----------------------|-----------------|
| Mass:                 | 1002.53376      |
| m/z:                  | 502.27416       |
| Charge:               | 2+              |
| Retentiontime:        | 1.0759166479110 |
| Score:                | 154.4888        |
| Mass Error [ppm]:     | -0.80065        |
| g PEP:                | 6.3794E-05      |
| Annotation:           | 7 of 8          |
| AminoAcids Coverag    | 88 %            |
| Intensity Coverage:   | 37 %            |
| Peak Coverage:        | 23 %            |
| Protein Localisation: | 341 ... 348     |

| b <sup>2+</sup> ion |        | b ion    |        |   |     |          | y ion  |          | y <sup>2+</sup> ion |  |
|---------------------|--------|----------|--------|---|-----|----------|--------|----------|---------------------|--|
| Δ dalton            | mass   | Δ dalton | mass   |   | seq | Δ dalton | mass   | Δ dalton | mass                |  |
|                     | 102.05 |          | 102.05 | 1 | T   | 7        |        |          |                     |  |
|                     | 230.11 | +0.0931  | 230.11 | 2 | Q   | 6        | 918.52 |          | 918.52              |  |
|                     | 359.16 | -0.17    | 359.16 | 3 | E   | 5        | 790.46 | +0.0061  | 395.74              |  |
|                     | 488.2  | +0.268   | 488.2  | 4 | E   | 4        | 661.42 | +0.071   | 661.42              |  |
|                     | 624.31 | +0.0564  | 624.31 | 5 | K   | 3        | 532.38 |          | 532.38              |  |
| -0.5                | 376.69 |          | 752.37 | 6 | Q   | 2        | 396.27 | +0.0427  | 396.27              |  |
|                     | 865.45 | -0.076   | 865.45 | 7 | I   | 1        | 268.21 | +0.0455  | 268.21              |  |
|                     |        |          |        | 8 | K   | 0        | 155.13 | +0.1081  | 155.13              |  |

Scan number 605 Raw file LNCAP\_Silac\_23F10\_set3\_08  
 Method ITMS: CID Pepti... 104.43

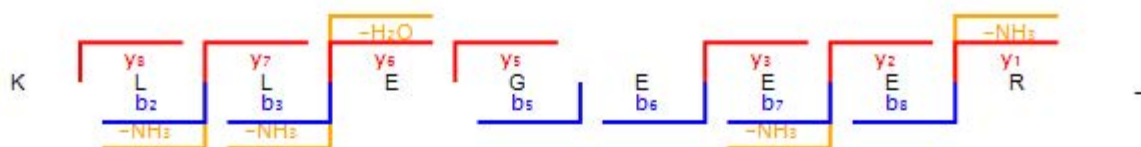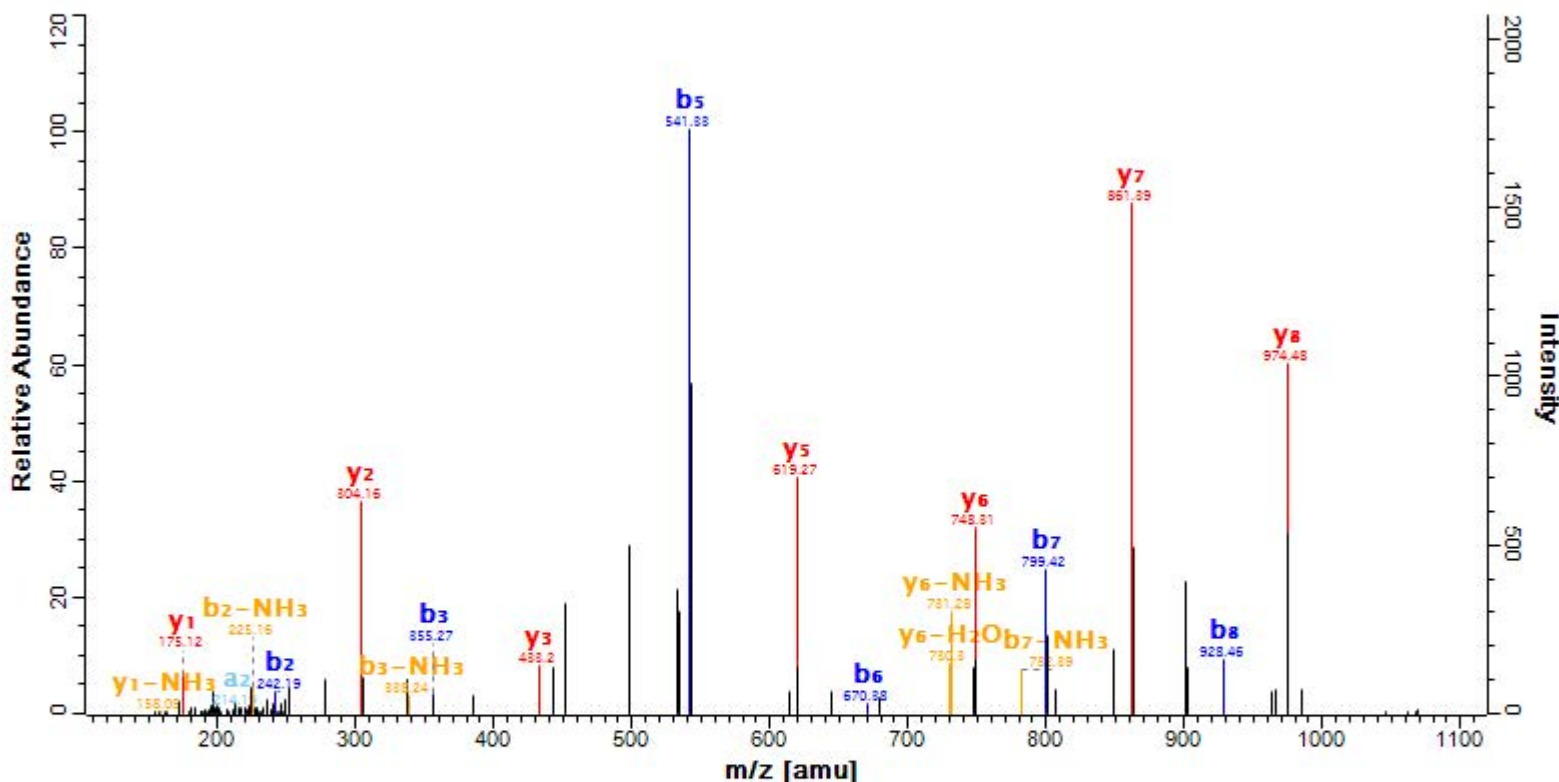

#### precursor information

|                       |                 |
|-----------------------|-----------------|
| Mass:                 | 1101.5669       |
| m/z:                  | 551.79073       |
| Charge:               | 2+              |
| Retention time:       | 8.4634513854980 |
| Score:                | 104.434         |
| Mass Error [ppm]:     | 0.27011         |
| PEP:                  | 0.0042484       |
| Precursor Type:       | ISO             |
| Annotation:           | 8 of 9          |
| AminoAcids Coverage:  | 89 %            |
| Intensity Coverage:   | 51 %            |
| Peak Coverage:        | 17 %            |
| Protein Localisation: | 378 ... 386     |

| a ion    |          | b ion     |          | seq |   | y ion    |                    |
|----------|----------|-----------|----------|-----|---|----------|--------------------|
| Δ dalton | mass     | Δ dalton  | mass     |     |   | Δ dalton | mass               |
|          | 101.1073 |           | 129.1022 | 1   | K | 8        |                    |
| -0.22856 | 214.1914 | -0.06793  | 242.1863 | 2   | L | 7        | 974.4789 -0.02976  |
|          | 327.2755 | +0.092487 | 355.2704 | 3   | L | 6        | 861.3949 +0.000106 |
|          | 456.318  |           | 484.313  | 4   | E | 5        | 748.3108 +0.07294  |
|          | 513.3395 | +0.249133 | 541.3344 | 5   | G | 4        | 619.2682 +0.041192 |
|          | 642.3821 | +0.117184 | 670.377  | 6   | E | 3        | 562.2467           |
|          | 771.4247 | -0.02978  | 799.4196 | 7   | E | 2        | 433.2041 +0.095239 |
|          | 900.4673 | +0.032669 | 928.4622 | 8   | E | 1        | 304.1615 +0.024978 |
|          |          |           |          | 9   | R | 0        | 175.119 +0.034917  |

Scan number 6637 Raw file LNCAP\_Silac\_23F10\_set3\_08  
 Method ITMS; CID Pepti... 56.09

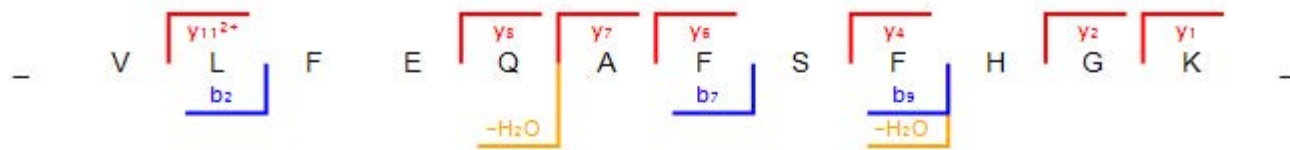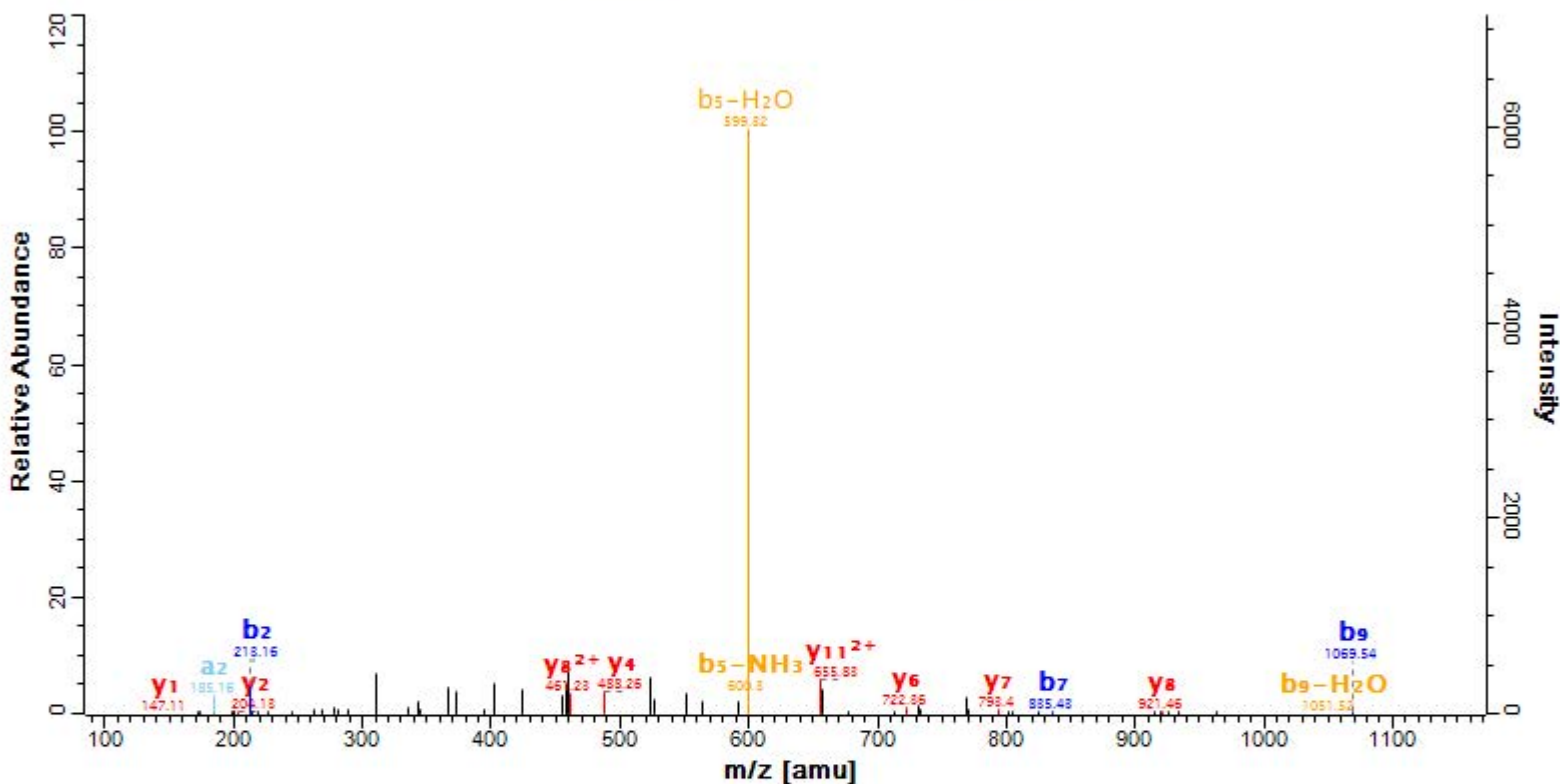

#### precursor information

|                   |                 |
|-------------------|-----------------|
| Mass:             | 1408.71365      |
| m/z:              | 470.57849       |
| Charge:           | 3+              |
| Retentiontime:    | 41.769187927246 |
| Score:            | 56.08672        |
| Mass Error [ppm]: | -0.20207        |
| PEP:              | 0.014105        |
| Precursor Type:   | MULTI           |

#### general information

|                       |             |
|-----------------------|-------------|
| Annotation:           | 8 of 12     |
| AminoAcids Coverage:  | 67 %        |
| Intensity Coverage:   | 60 %        |
| Peak Coverage:        | 16 %        |
| Protein Localisation: | 198 ... 209 |

| a ion    |        | b ion    |        |    |     |    | y ion    |         | y <sup>2+</sup> ion |         |
|----------|--------|----------|--------|----|-----|----|----------|---------|---------------------|---------|
| Δ dalton | mass   | Δ dalton | mass   |    | seq |    | Δ dalton | mass    | Δ dalton            | mass    |
|          | 72.081 |          | 100.08 | 1  | V   | 11 |          |         |                     |         |
| +0.0388  | 185.16 | +0.0126  | 213.16 | 2  | L   | 10 | 1310.7   |         | 655.83              | +0.0296 |
|          | 332.23 |          | 360.23 | 3  | F   | 9  | 1197.6   |         | 1197.6              |         |
|          | 461.28 |          | 489.27 | 4  | E   | 8  | 1050.5   |         | 1050.5              |         |
|          | 589.33 |          | 617.33 | 5  | Q   | 7  | 921.46   | +0.0891 | 461.23              | -0.206  |
|          | 660.37 |          | 688.37 | 6  | A   | 6  | 793.4    | -0.003  | 793.4               |         |
|          | 807.44 | +0.0521  | 835.43 | 7  | F   | 5  | 722.36   | -0.049  | 722.36              |         |
|          | 894.47 |          | 922.47 | 8  | S   | 4  | 575.29   |         | 575.29              |         |
|          | 1041.5 | -0.065   | 1069.5 | 9  | F   | 3  | 488.26   | +0.0204 | 488.26              |         |
|          | 1178.6 |          | 1206.6 | 10 | H   | 2  | 341.19   |         | 341.19              |         |
|          | 1235.6 |          | 1263.6 | 11 | G   | 1  | 204.13   | -0.109  | 204.13              |         |
|          |        |          |        | 12 | K   | 0  | 147.11   | +0.0289 | 147.11              |         |

Scan number 7773 Raw file LNCAP\_Silac\_23F10\_set3\_08  
 Method ITMS; CID Pepti... 39.42

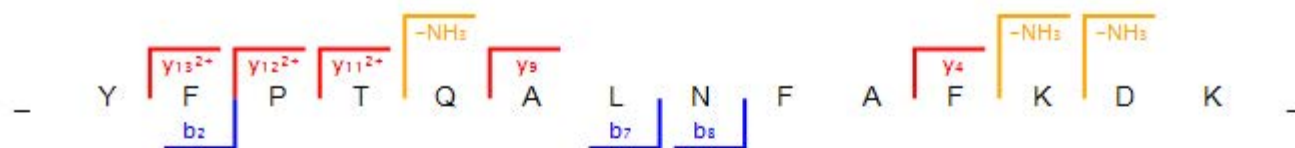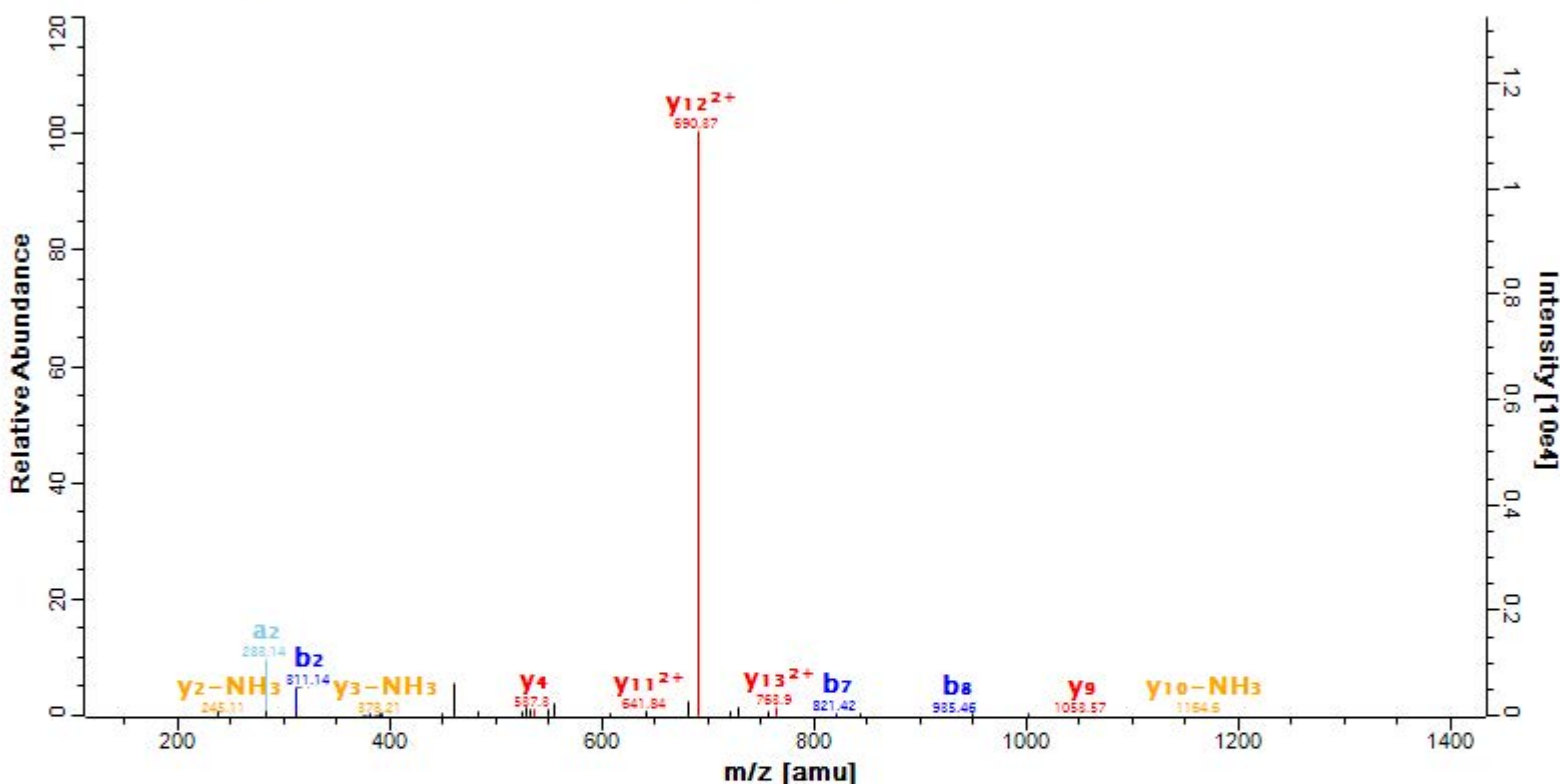

#### precursor information

|                   |                 |
|-------------------|-----------------|
| Mass:             | 1688.85606      |
| m/z:              | 563.9593        |
| Charge:           | 3+              |
| Retentiontime:    | 49.008247375488 |
| Score:            | 39.42446        |
| Mass Error [ppm]: | -0.10758        |
| PEP:              | 0.046417        |
| Precursor Type:   | MULTI           |

| a ion    |        | b ion    |        |    |     |    | y ion    |         | y <sup>2+</sup> ion |         |
|----------|--------|----------|--------|----|-----|----|----------|---------|---------------------|---------|
| Δ dalton | mass   | Δ dalton | mass   |    | seq |    | Δ dalton | mass    | Δ dalton            | mass    |
|          | 136.08 |          | 164.07 | 1  | Y   | 13 |          |         |                     |         |
| +0.0002  | 283.14 | -0.046   | 311.14 | 2  | F   | 12 | 1526.8   |         | 763.9               | +0.0039 |
|          | 380.2  |          | 408.19 | 3  | P   | 11 | 1379.7   |         | 690.37              | +0.2184 |
|          | 481.24 |          | 509.24 | 4  | T   | 10 | 1282.7   |         | 641.84              | +0.2274 |
|          | 609.3  |          | 637.3  | 5  | Q   | 9  | 1181.6   |         | 1181.6              |         |
|          | 680.34 |          | 708.34 | 6  | A   | 8  | 1053.6   | +0.4615 | 1053.6              |         |
|          | 793.42 | -0.036   | 821.42 | 7  | L   | 7  | 982.54   |         | 982.54              |         |
|          | 907.47 | -0.068   | 935.46 | 8  | N   | 6  | 869.45   |         | 869.45              |         |
|          | 1054.5 |          | 1082.5 | 9  | F   | 5  | 755.41   |         | 755.41              |         |
|          | 1125.6 |          | 1153.6 | 10 | A   | 4  | 608.34   |         | 608.34              |         |
|          | 1272.6 |          | 1300.6 | 11 | F   | 3  | 537.3    | -0.412  | 537.3               |         |
|          | 1400.7 |          | 1428.7 | 12 | K   | 2  | 390.23   |         | 390.23              |         |
|          | 1515.8 |          | 1543.8 | 13 | D   | 1  | 262.14   |         | 262.14              |         |
|          |        |          |        | 14 | K   | 0  | 147.11   |         | 147.11              |         |

#### general information

|                       |           |
|-----------------------|-----------|
| Annotation:           | 10 of 14  |
| AminoAcids Coverage:  | 71 %      |
| Intensity Coverage:   | 82 %      |
| Peak Coverage:        | 14 %      |
| Protein Localisation: | 81 ... 94 |



Scan number 7838 Raw file LNCAP\_Silac\_23F10\_set3\_08  
 Method ITMS; CID Pepti... 72.8

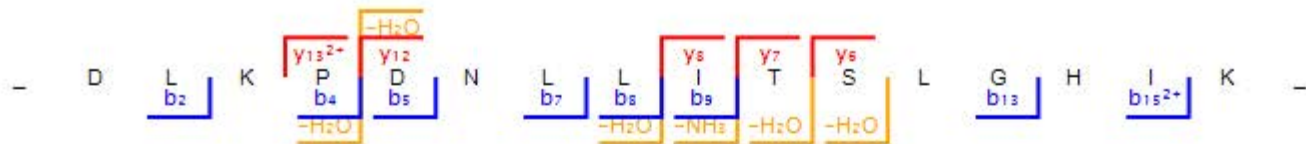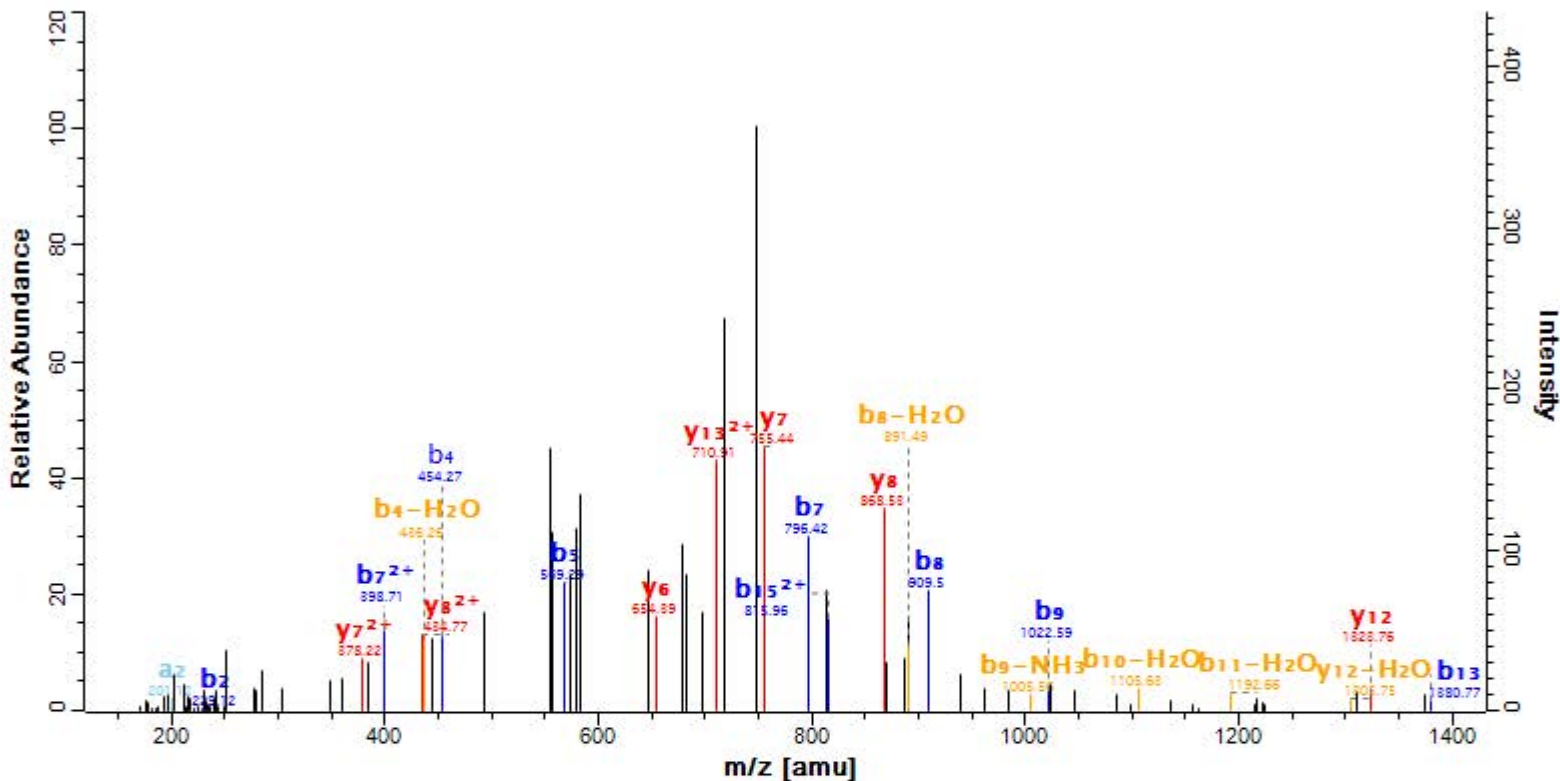

precursor information

|                   |                 |
|-------------------|-----------------|
| Mass:             | 1776.01523      |
| m/z:              | 593.01235       |
| Charge:           | 3+              |
| Retentiontime:    | 49.462863922119 |
| Score:            | 72.79709        |
| Mass Error [ppm]: | 0.39179         |
| PEP:              | 0.00032345      |
| Precursor Type:   | MULTI           |

general information

|                       |             |
|-----------------------|-------------|
| Annotation:           | 11 of 16    |
| AminoAcids Coverag    | 69 %        |
| Intensity Coverage:   | 33 %        |
| Peak Coverage:        | 25 %        |
| Protein Localisation: | 490 ... 505 |

| a ion        | b <sup>2+</sup> ion | b ion       | seq    | y ion        | y <sup>2+</sup> ion |
|--------------|---------------------|-------------|--------|--------------|---------------------|
| 88.04        | 116                 | 116         | 1 D 15 |              |                     |
| +0.134201.1  | 229.1               | -0.46 229.1 | 2 L 14 | 1662         | 1662                |
| 329.2        | 357.2               | 357.2       | 3 K 13 | 1549         | 1549                |
| 426.3        | 454.3               | -0.01 454.3 | 4 P 12 | 1421         | 710.9 +0.149        |
| 541.3        | 569.3               | -0.33 569.3 | 5 D 11 | 1324 +0.206  | 1324                |
| 655.3        | 683.3               | 683.3       | 6 N 10 | 1209         | 1209                |
| 768.4 +0.257 | 798.7               | -0.08 796.4 | 7 L 9  | 1095         | 1095                |
| 881.5        | 909.5               | +0.01 909.5 | 8 L 8  | 981.6        | 981.6               |
| 994.6        | 1023                | -0.09 1023  | 9 I 7  | 868.5 +0.004 | 434.8 +0.069        |
| 1096         | 1124                | 1124        | 10 T 6 | 755.4 +0.192 | 378.2 +0.233        |
| 1183         | 1211                | 1211        | 11 S 5 | 654.4 +0.041 | 654.4               |
| 1296         | 1324                | 1324        | 12 L 4 | 567.4        | 567.4               |
| 1353         | 1381 +0.15          | 1381        | 13 G 3 | 454.3        | 454.3               |
| 1490         | 1518                | 1518        | 14 H 2 | 397.3        | 397.3               |
| 1603 +0.258  | 1616                | 1631        | 15 I 1 | 260.2        | 260.2               |
|              |                     |             | 16 K 0 | 147.1        | 147.1               |



Scan number 7901 Raw file LNCAP\_Silac\_23F10\_set3\_08  
 Method ITMS: CID Pepti... 140.14

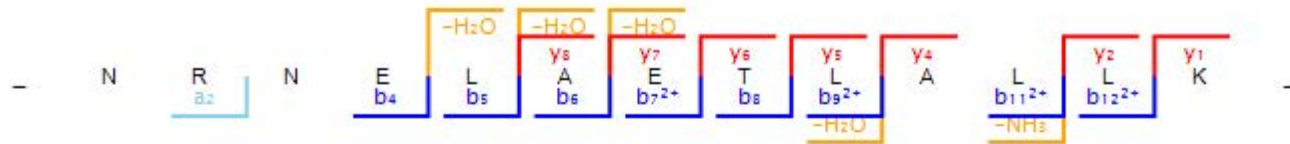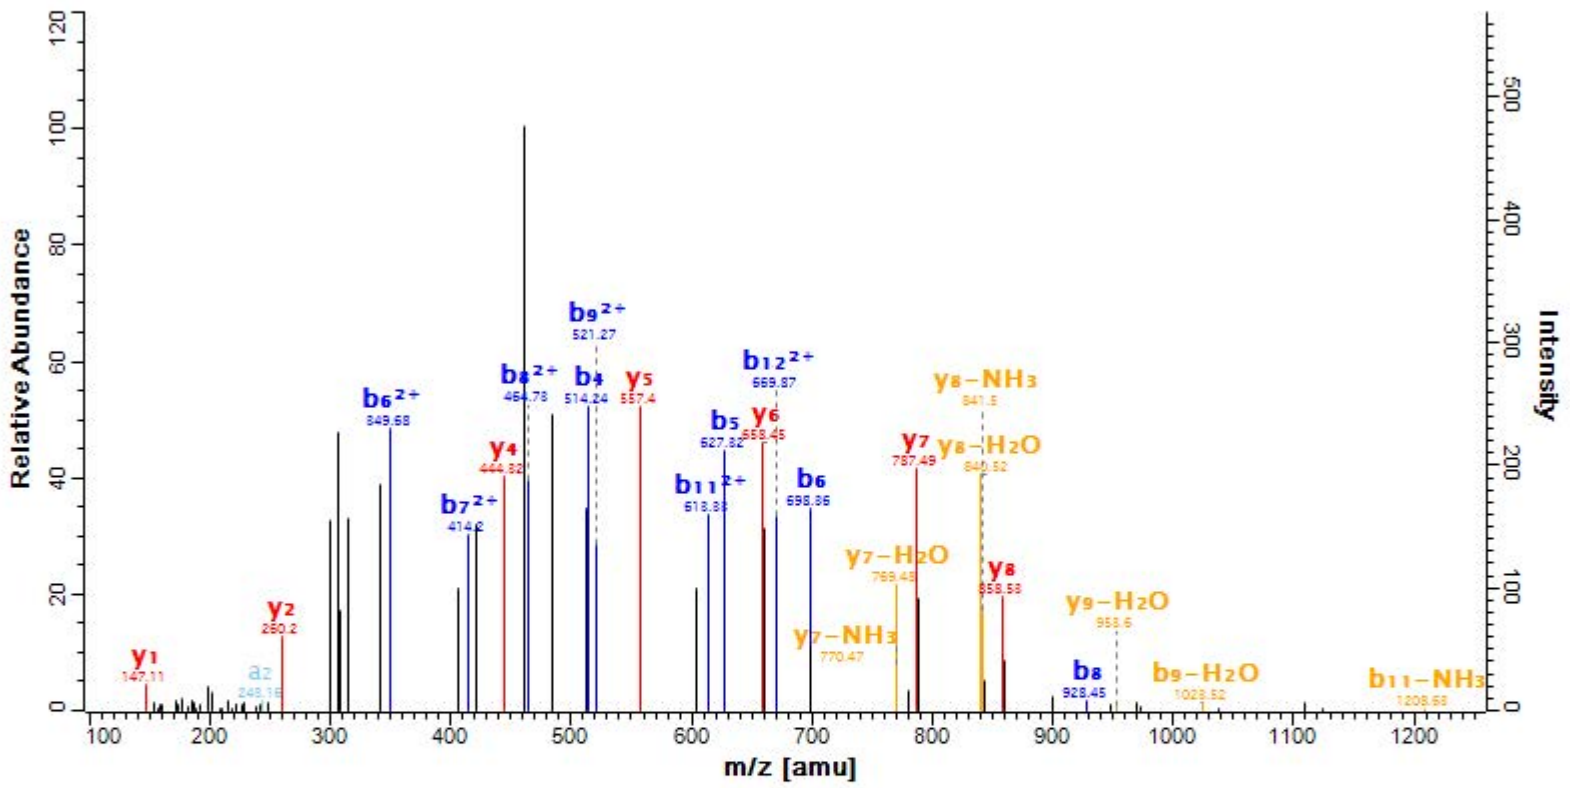

**precursor information**

|                   |                 |
|-------------------|-----------------|
| Mass:             | 1483.83564      |
| m/z:              | 495.61916       |
| Charge:           | 3+              |
| Retentiontime:    | 49.949638366699 |
| Score:            | 140.1416        |
| Mass Error [ppm]: | -0.13869        |
| PEP:              | 7.3596E-07      |
| Precursor Type:   | MULTI           |

**general information**

|                       |             |
|-----------------------|-------------|
| Annotation:           | 11 of 13    |
| AminoAcids Coverage:  | 85 %        |
| Intensity Coverage:   | 55 %        |
| Peak Coverage:        | 33 %        |
| Protein Localisation: | 194 ... 206 |

| a ion    |        | b <sup>2+</sup> ion |        | b ion    |        | y ion |   |          |        |         |
|----------|--------|---------------------|--------|----------|--------|-------|---|----------|--------|---------|
| Δ dalton | mass   | Δ dalton            | mass   | Δ dalton | mass   | seq   |   | Δ dalton | mass   |         |
|          | 87.055 |                     | 115.05 |          | 115.05 | 1     | N | 12       |        |         |
| -0.023   | 243.16 |                     | 271.15 |          | 271.15 | 2     | R | 11       | 1370.8 |         |
|          | 357.2  |                     | 385.19 |          | 385.19 | 3     | N | 10       | 1214.7 |         |
|          | 486.24 |                     | 514.24 | -0.076   | 514.24 | 4     | E | 9        | 1100.7 |         |
|          | 599.33 |                     | 627.32 | -0.006   | 627.32 | 5     | L | 8        | 971.61 |         |
|          | 670.36 | +0.0843             | 349.68 | +0.0144  | 698.36 | 6     | A | 7        | 858.53 | -0.094  |
|          | 799.41 | -0.032              | 414.2  |          | 827.4  | 7     | E | 6        | 787.49 | -0.019  |
|          | 900.45 | +0.3314             | 464.73 | -0.035   | 928.45 | 8     | T | 5        | 658.45 | +0.0298 |
|          | 1013.5 | +0.0789             | 521.27 |          | 1041.5 | 9     | L | 4        | 557.4  | -0.26   |
|          | 1084.6 |                     | 1112.6 |          | 1112.6 | 10    | A | 3        | 444.32 | +0.1113 |
|          | 1197.7 | +0.0426             | 613.33 |          | 1225.7 | 11    | L | 2        | 373.28 |         |
|          | 1310.7 | +0.0524             | 669.87 |          | 1338.7 | 12    | L | 1        | 260.2  | +0.0845 |
|          |        |                     |        |          |        | 13    | K | 0        | 147.11 | +0.067  |

Scan number 8003 Raw file LNCAP\_Silac\_23F10\_set3\_08  
 Method ITMS; CID Pepti... 44.3

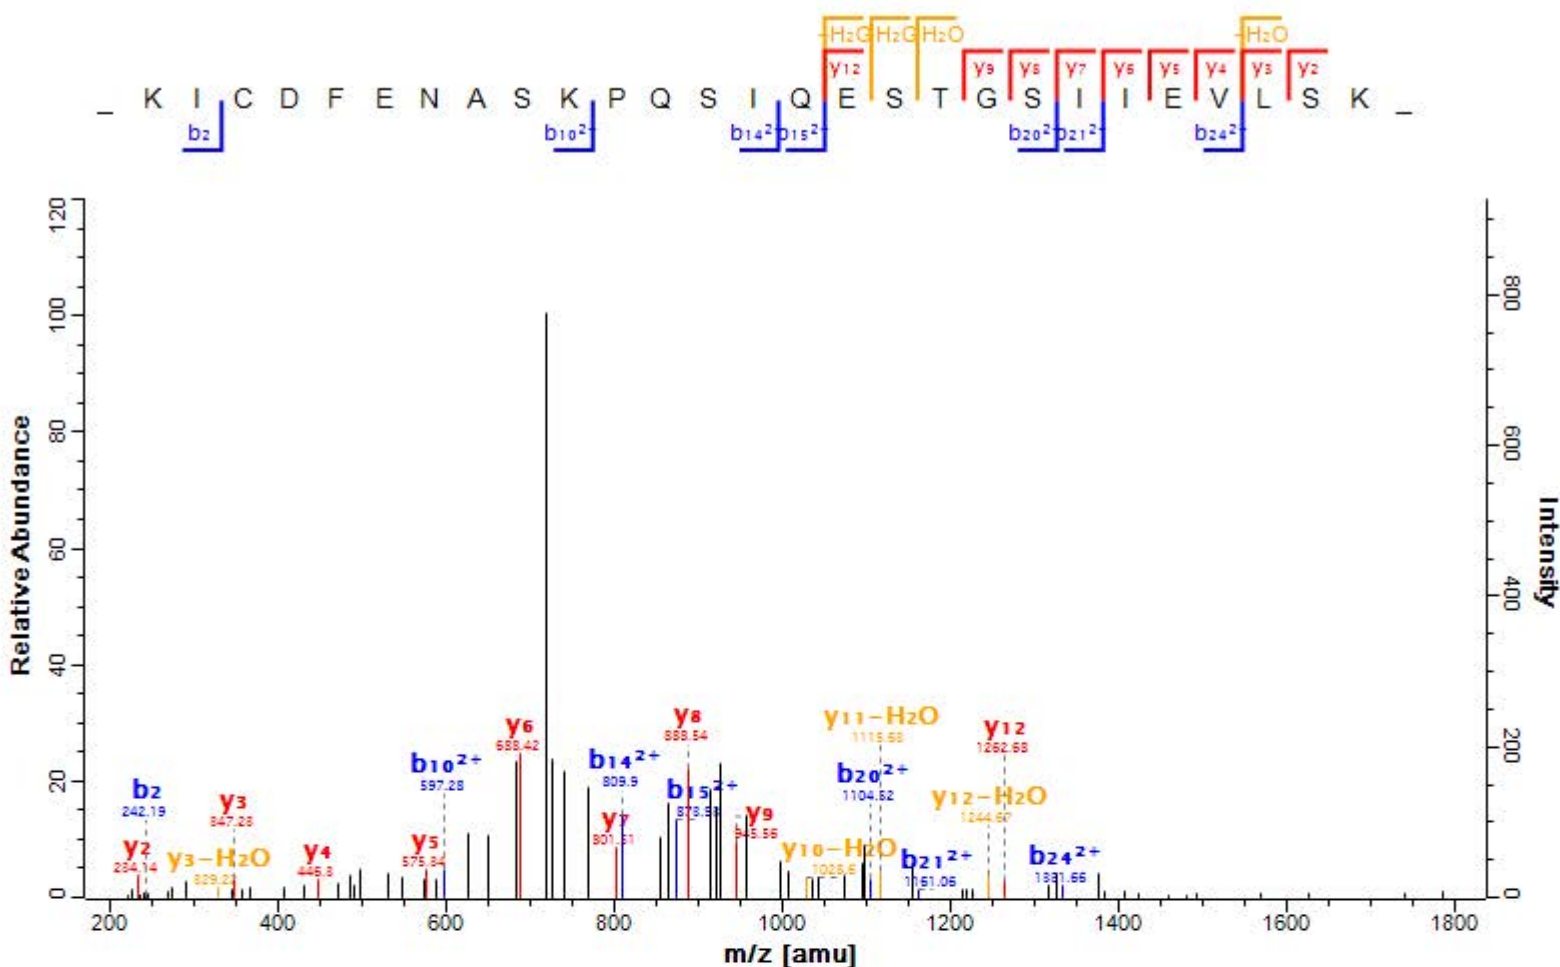

**precursor information**

|                   |                 |
|-------------------|-----------------|
| Mass:             | 3007.51589      |
| m/z:              | 752.88625       |
| Charge:           | 4+              |
| Retentiontime:    | 50.728397369384 |
| Score:            | 44.30027        |
| Mass Error [ppm]: | -0.44125        |
| PEP:              | 0.0046183       |
| Precursor Type:   | MULTI           |

| b <sup>2+</sup> ion |          | b ion     |          |     | y ion    |      |          |           |
|---------------------|----------|-----------|----------|-----|----------|------|----------|-----------|
| Δ dalton            | mass     | Δ dalton  | mass     | seq | Δ dalton | mass |          |           |
|                     | 129.1022 |           | 129.1022 | 1   | K        | 26   |          |           |
|                     | 242.1863 | +0.302924 | 242.1863 | 2   | I        | 25   | 2880.43  |           |
|                     | 402.217  |           | 402.217  | 3   | C        | 24   | 2767.345 |           |
|                     | 517.2439 |           | 517.2439 | 4   | D        | 23   | 2607.315 |           |
|                     | 664.3123 |           | 664.3123 | 5   | F        | 22   | 2492.288 |           |
|                     | 793.3549 |           | 793.3549 | 6   | E        | 21   | 2345.219 |           |
|                     | 907.3978 |           | 907.3978 | 7   | N        | 20   | 2216.177 |           |
|                     | 978.4349 |           | 978.4349 | 8   | A        | 19   | 2102.134 |           |
|                     | 1065.467 |           | 1065.467 | 9   | S        | 18   | 2031.097 |           |
| +0.338136           | 597.2846 |           | 1193.562 | 10  | K        | 17   | 1944.065 |           |
|                     | 1290.615 |           | 1290.615 | 11  | P        | 16   | 1815.97  |           |
|                     | 1418.673 |           | 1418.673 | 12  | Q        | 15   | 1718.917 |           |
|                     | 1505.705 |           | 1505.705 | 13  | S        | 14   | 1590.858 |           |
| +0.054375           | 809.8983 |           | 1618.789 | 14  | I        | 13   | 1503.826 |           |
| +0.240541           | 873.9276 |           | 1746.848 | 15  | Q        | 12   | 1390.742 |           |
|                     | 1875.891 |           | 1875.891 | 16  | E        | 11   | 1262.684 | -0.3015   |
|                     | 1962.923 |           | 1962.923 | 17  | S        | 10   | 1133.641 |           |
|                     | 2063.97  |           | 2063.97  | 18  | T        | 9    | 1046.609 |           |
|                     | 2120.992 |           | 2120.992 | 19  | G        | 8    | 945.5615 | -0.08105  |
| +0.261715           | 1104.516 |           | 2208.024 | 20  | S        | 7    | 888.5401 | -0.24001  |
| -0.36198            | 1161.058 |           | 2321.108 | 21  | I        | 6    | 801.508  | +0.29867  |
|                     | 2434.192 |           | 2434.192 | 22  | I        | 5    | 688.424  | +0.018965 |
|                     | 2563.234 |           | 2563.234 | 23  | E        | 4    | 575.3399 | -0.05347  |
| -0.09343            | 1331.655 |           | 2662.303 | 24  | V        | 3    | 446.2973 | +0.077873 |
|                     | 2775.387 |           | 2775.387 | 25  | L        | 2    | 347.2289 | -0.01579  |
|                     | 2862.419 |           | 2862.419 | 26  | S        | 1    | 234.1448 | -0.06532  |
|                     |          |           |          | 27  | K        | 0    | 147.1128 |           |

**general information**

|                       |             |
|-----------------------|-------------|
| Annotation:           | 15 of 27    |
| AminoAcids Coverage:  | 56 %        |
| Intensity Coverage:   | 23 %        |
| Peak Coverage:        | 24 %        |
| Protein Localisation: | 275 ... 301 |

Scan number 8129 Raw file LNCAP\_Silac\_23F10\_set3\_08  
 Method ITMS: CID Pepti... 176.91

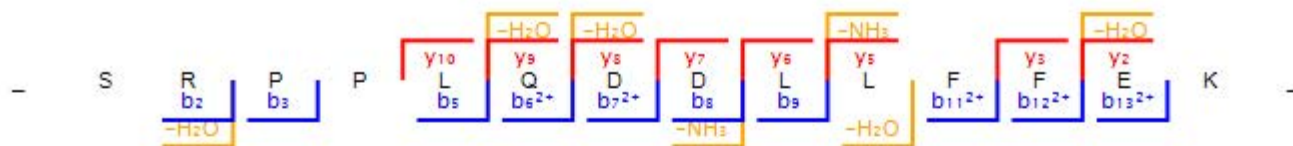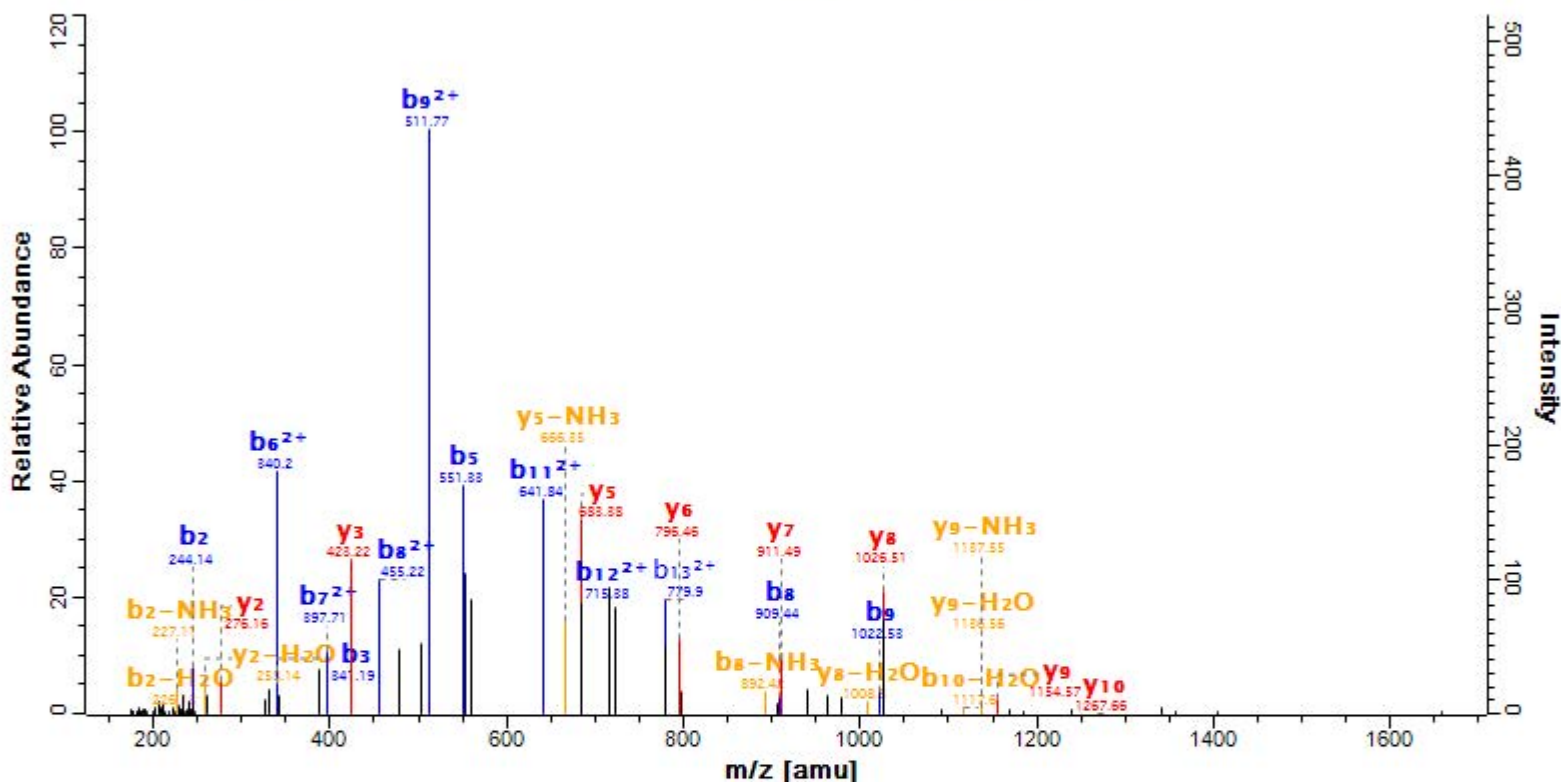

#### precursor information

|                   |                 |
|-------------------|-----------------|
| Mass:             | 0               |
| m/z:              | 568.96997       |
| Charge:           | 0+              |
| Retentiontime:    | 51.735324859619 |
| Score:            | 176.9149        |
| Mass Error [ppm]: | -0.10466        |
| PEP:              | 1.4279E-17      |
| Precursor Type:   | PEAK            |

#### general information

|                       |            |
|-----------------------|------------|
| Annotation:           | 11 of 14   |
| AminoAcids Coverage:  | 79 %       |
| Intensity Coverage:   | 64 %       |
| Peak Coverage:        | 28 %       |
| Protein Localisation: | 99 ... 112 |

| b <sup>2+</sup> ion |          | b ion     |          |     | y ion    |      |          |
|---------------------|----------|-----------|----------|-----|----------|------|----------|
| Δ dalton            | mass     | Δ dalton  | mass     | seq | Δ dalton | mass |          |
|                     | 88.0393  |           | 88.0393  | 1   | S        | 13   |          |
|                     | 244.1404 | +0.044627 | 244.1404 | 2   | R        | 12   | 1617.864 |
|                     | 341.1932 | +0.135617 | 341.1932 | 3   | P        | 11   | 1461.762 |
|                     | 438.2459 |           | 438.2459 | 4   | P        | 10   | 1364.71  |
|                     | 551.33   | -0.04467  | 551.33   | 5   | L        | 9    | 1267.657 |
| +0.152228           | 340.1979 |           | 679.3886 | 6   | Q        | 8    | 1154.573 |
| -0.04478            | 397.7114 |           | 794.4155 | 7   | D        | 7    | 1026.514 |
| +0.123454           | 455.2249 | +0.141208 | 909.4425 | 8   | D        | 6    | 911.4873 |
| +0.25055            | 511.7669 | -0.02043  | 1022.527 | 9   | L        | 5    | 796.4604 |
|                     | 1135.611 |           | 1135.611 | 10  | L        | 4    | 683.3763 |
| +0.300227           | 641.8431 |           | 1282.679 | 11  | F        | 3    | 570.2922 |
| +0.174284           | 715.3774 |           | 1429.747 | 12  | F        | 2    | 423.2238 |
| -0.09512            | 779.8986 |           | 1558.79  | 13  | E        | 1    | 276.1554 |
|                     |          |           |          | 14  | K        | 0    | 147.1128 |

Scan number 8691 Raw file LNCAP\_Silac\_23F10\_set3\_08  
 Method ITMS: CID Pepti... 112.13

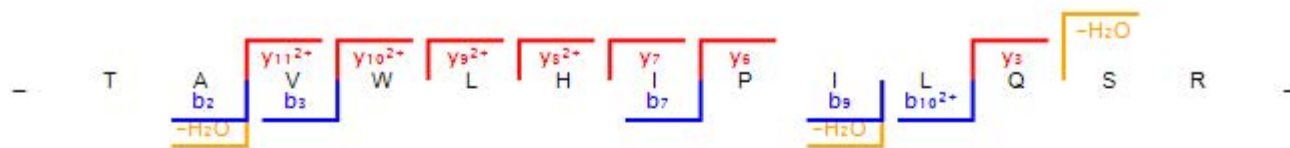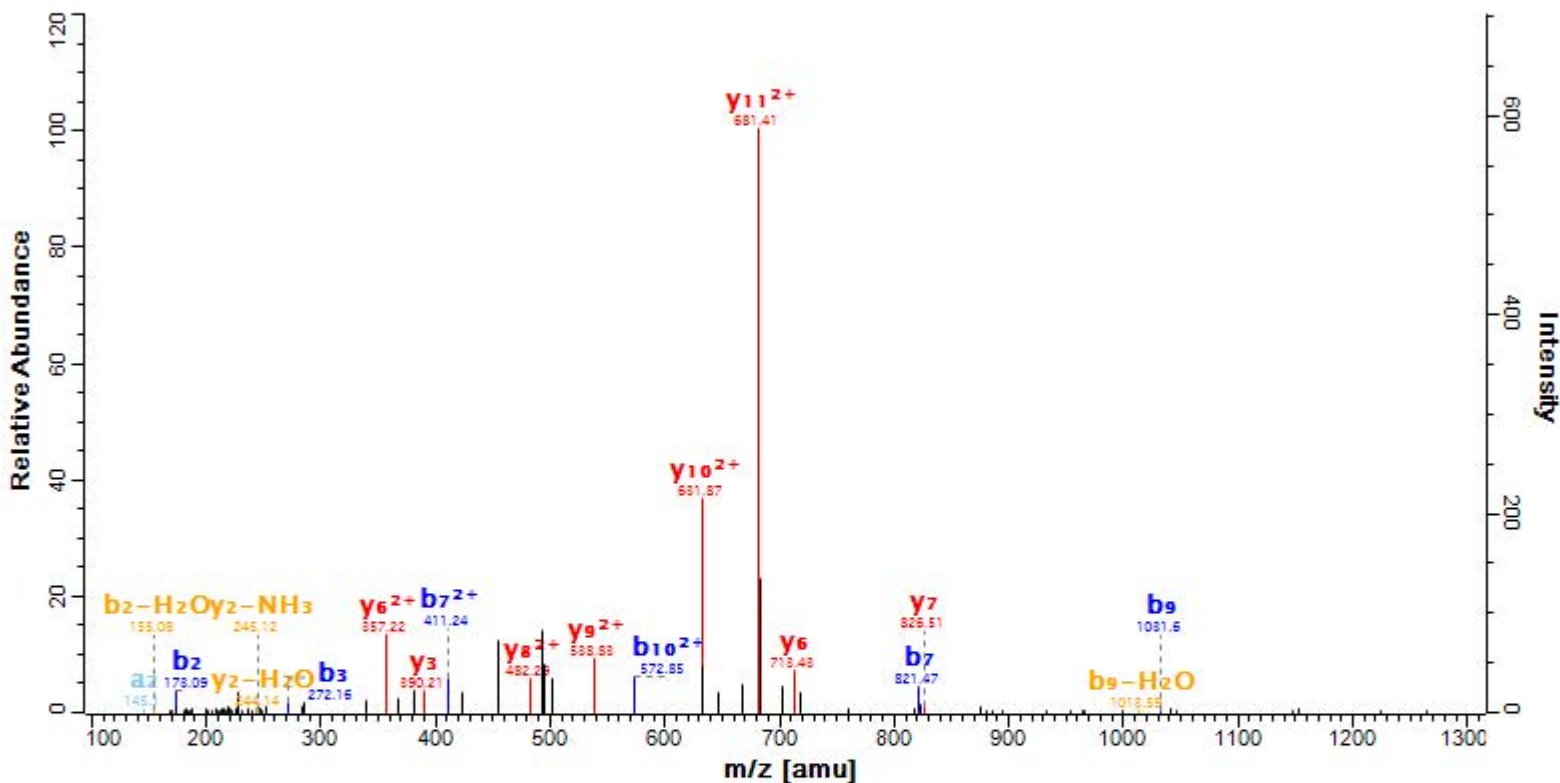

#### precursor information

|                   |                 |
|-------------------|-----------------|
| Mass:             | 1532.88238      |
| m/z:              | 511.96807       |
| Charge:           | 3+              |
| Retentiontime:    | 56.457706451416 |
| Score:            | 112.1254        |
| Mass Error [ppm]: | -0.23218        |
| PEP:              | 5.5843E-06      |
| Precursor Type:   | MULTI           |

#### general information

|                       |            |
|-----------------------|------------|
| Annotation:           | 11 of 13   |
| AminoAcids Coverage:  | 85 %       |
| Intensity Coverage:   | 60 %       |
| Peak Coverage:        | 20 %       |
| Protein Localisation: | 91 ... 103 |

| a ion         |               | b <sup>2+</sup> ion |               | b ion |   |               |               | y ion       |       | y <sup>2+</sup> ion |  |
|---------------|---------------|---------------------|---------------|-------|---|---------------|---------------|-------------|-------|---------------------|--|
| Δ dalton mass | Δ dalton mass | Δ dalton mass       | Δ dalton mass | seq   |   | Δ dalton mass | Δ dalton mass |             |       |                     |  |
| 74.06         | 102.1         | 102.1               | 102.1         | 1     | T | 12            |               |             |       |                     |  |
| +0.04 145.1   | 173.1         | +0.008 173.1        | 173.1         | 2     | A | 11            | 1433          | 1433        |       |                     |  |
| 244.2         | 272.2         | -0.11 272.2         | 272.2         | 3     | V | 10            | 1362          | 681.4       | +0.31 |                     |  |
| 430.2         | 458.2         | 458.2               | 458.2         | 4     | W | 9             | 1263          | 631.9       | +0.22 |                     |  |
| 543.3         | 571.3         | 571.3               | 571.3         | 5     | L | 8             | 1077          | 538.8       | +0.21 |                     |  |
| 680.4         | 708.4         | 708.4               | 708.4         | 6     | H | 7             | 963.6         | 482.3       | +0.31 |                     |  |
| 793.5         | +0.08 411.2   | +0.008 411.2        | 411.2         | 7     | I | 6             | 826.5         | +0.14 826.5 |       |                     |  |
| 890.5         | 918.5         | 918.5               | 918.5         | 8     | P | 5             | 713.4         | -0.02 357.2 | +0.15 |                     |  |
| 1004          | 1032          | -0.02 1032          | 1032          | 9     | I | 4             | 616.4         | 616.4       |       |                     |  |
| 1117          | +0.11 572.8   | 572.8               | 572.8         | 10    | L | 3             | 503.3         | 503.3       |       |                     |  |
| 1245          | 1273          | 1273                | 1273          | 11    | Q | 2             | 390.2         | -0.02 390.2 |       |                     |  |
| 1332          | 1360          | 1360                | 1360          | 12    | S | 1             | 262.2         | 262.2       |       |                     |  |
|               |               |                     |               | 13    | R | 0             | 175.1         | 175.1       |       |                     |  |

Scan number 8695 Raw file LNCAP\_Silac\_23F10\_set3\_08  
 Method ITMS; CID Pepti... 107.14

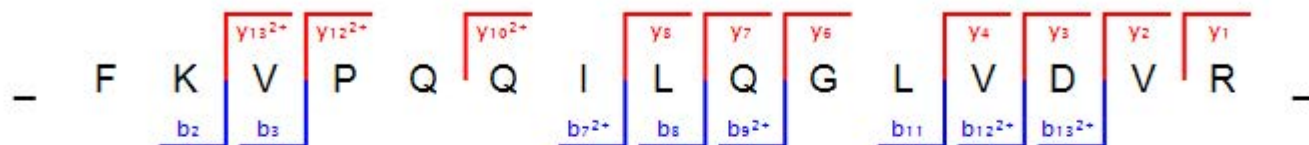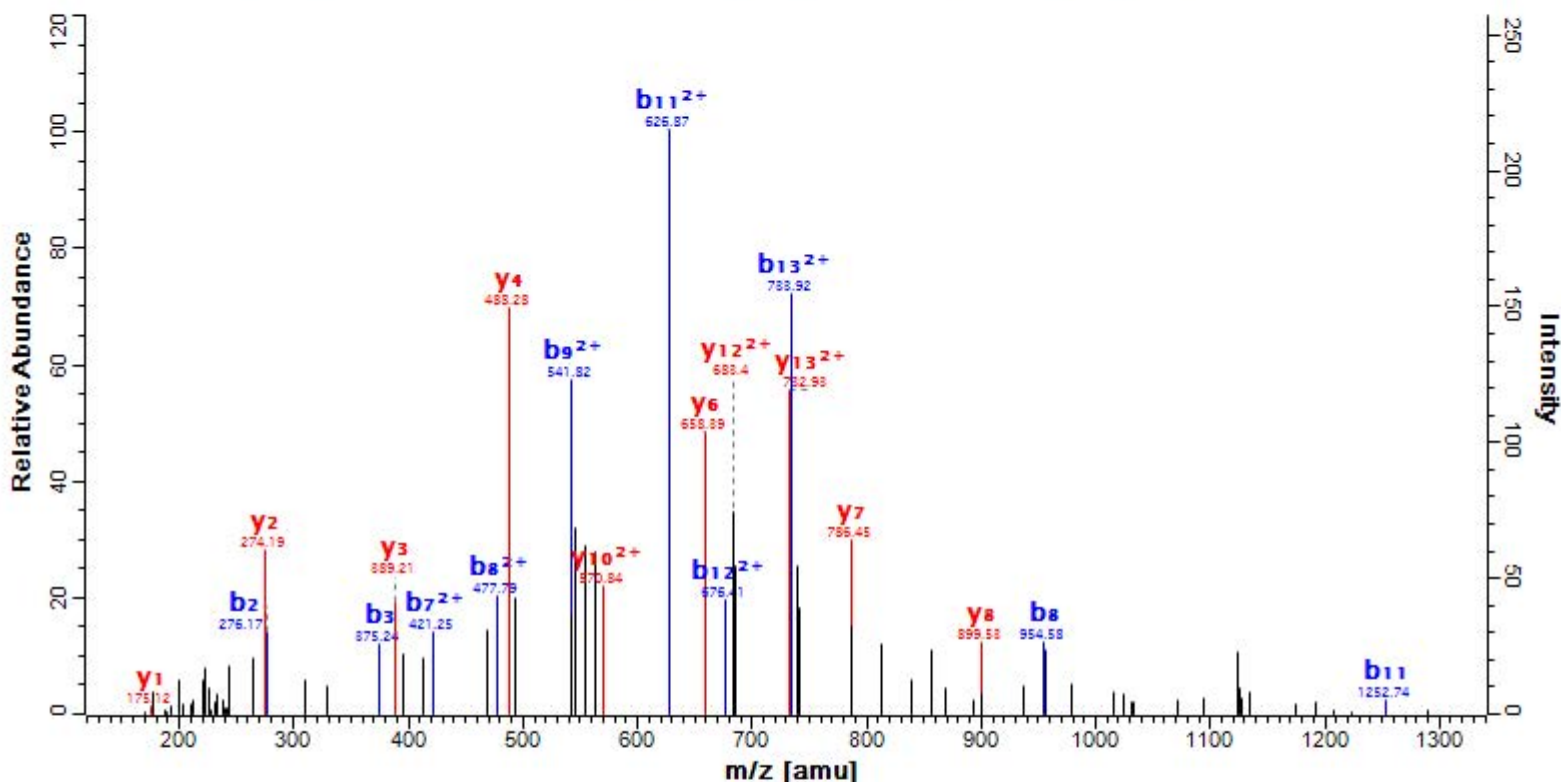

#### precursor information

|                   |                 |
|-------------------|-----------------|
| Mass:             | 1739.00914      |
| m/z:              | 580.67699       |
| Charge:           | 3+              |
| Retentiontime:    | 56.498989105224 |
| Score:            | 107.1399        |
| Mass Error [ppm]: | -0.14308        |
| PEP:              | 2.7248E-06      |
| Precursor Type:   | MULTI           |

#### general information

|                       |             |
|-----------------------|-------------|
| Annotation:           | 13 of 15    |
| AminoAcids Coverage:  | 87 %        |
| Intensity Coverage:   | 58 %        |
| Peak Coverage:        | 24 %        |
| Protein Localisation: | 222 ... 236 |

| b <sup>2+</sup> ion |        | b ion    |        |     | y ion |          | y <sup>2+</sup> ion |          |                |
|---------------------|--------|----------|--------|-----|-------|----------|---------------------|----------|----------------|
| Δ dalton            | mass   | Δ dalton | mass   | seq |       | Δ dalton | mass                | Δ dalton | mass           |
|                     | 148.08 |          | 148.08 | 1   | F     | 14       |                     |          |                |
|                     | 276.17 | -0.078   | 276.17 | 2   | K     | 13       | 1592.9              |          | 1592.9         |
|                     | 375.24 | -0.114   | 375.24 | 3   | V     | 12       | 1464.9              |          | 732.93 +0.2897 |
|                     | 472.29 |          | 472.29 | 4   | P     | 11       | 1365.8              |          | 683.4 -0.067   |
|                     | 600.35 |          | 600.35 | 5   | Q     | 10       | 1268.7              |          | 1268.7         |
|                     | 728.41 |          | 728.41 | 6   | Q     | 9        | 1140.7              |          | 570.84 -0.141  |
| +0.1733             | 421.25 |          | 841.49 | 7   | I     | 8        | 1012.6              |          | 1012.6         |
| -0.076              | 477.79 | +0.0267  | 954.58 | 8   | L     | 7        | 899.53              | +0.0414  | 899.53         |
| +0.1968             | 541.82 |          | 1082.6 | 9   | Q     | 6        | 786.45              | +0.0748  | 786.45         |
|                     | 1139.7 |          | 1139.7 | 10  | G     | 5        | 658.39              | +0.0656  | 658.39         |
| +0.1937             | 626.87 | +0.1825  | 1252.7 | 11  | L     | 4        | 601.37              |          | 601.37         |
| +0.341              | 676.41 |          | 1351.8 | 12  | V     | 3        | 488.28              | +0.0125  | 488.28         |
| +0.1688             | 733.92 |          | 1466.8 | 13  | D     | 2        | 389.21              | +0.0236  | 389.21         |
|                     | 1565.9 |          | 1565.9 | 14  | V     | 1        | 274.19              | +0.0994  | 274.19         |
|                     |        |          |        | 15  | R     | 0        | 175.12              | -0.051   | 175.12         |

Scan number 9302 Raw file LNCAP\_Silac\_23F10\_set3\_08  
 Method ITMS; CID Pepti... 79.65

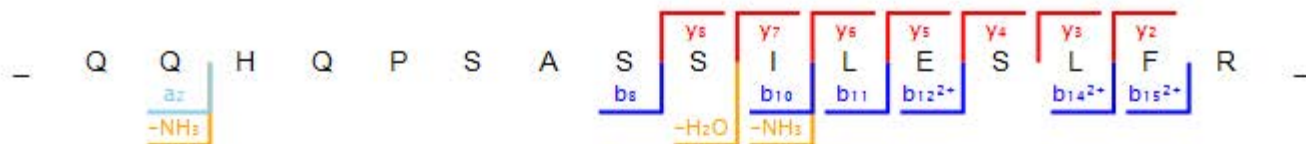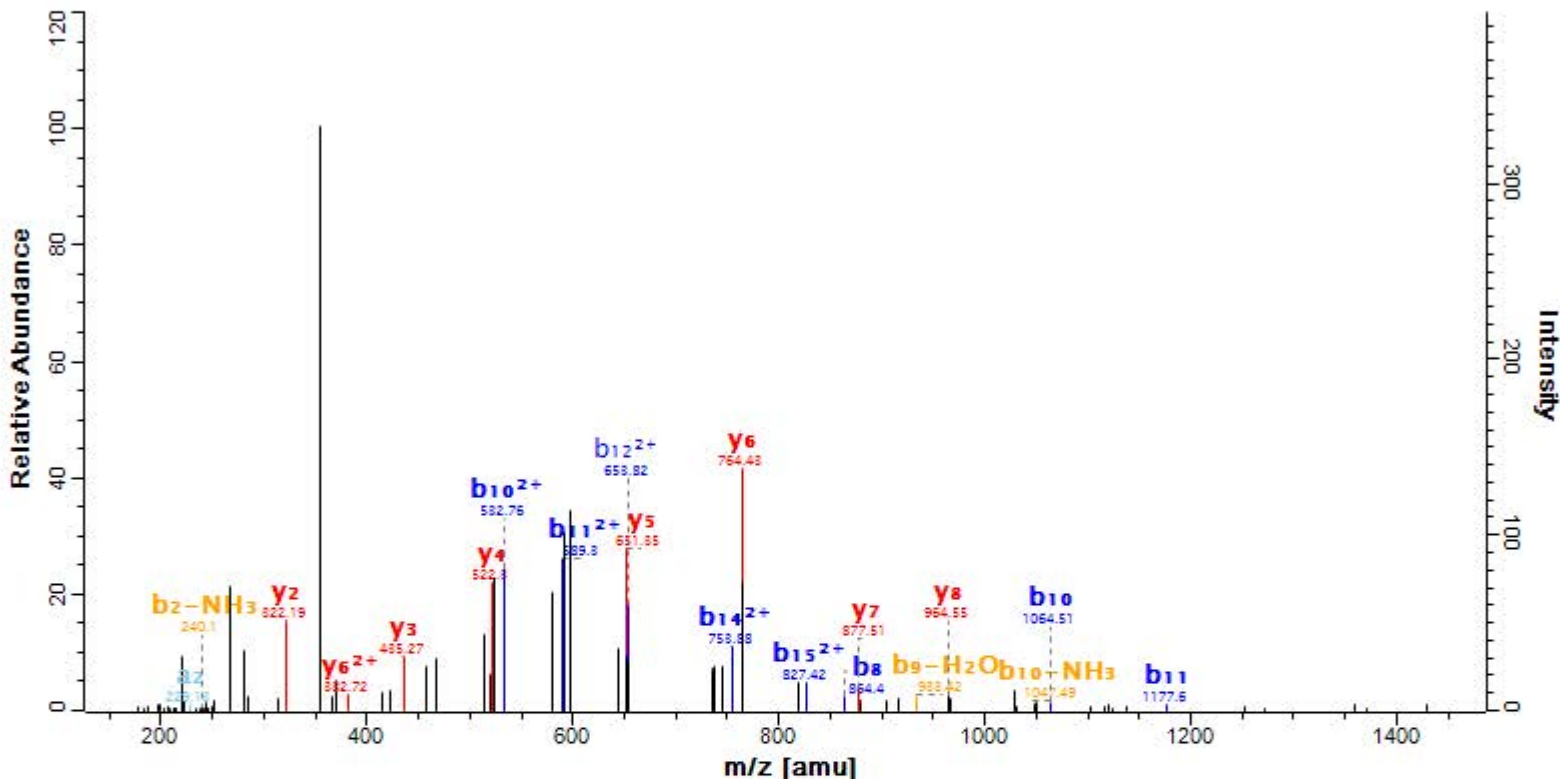

#### precursor information

|                   |                 |
|-------------------|-----------------|
| Mass:             | 1826.92761      |
| m/z:              | 609.98315       |
| Charge:           | 3+              |
| Retention time:   | 62.701122283935 |
| Score:            | 79.65154        |
| Mass Error [ppm]: | 0.054299        |
| PEP:              | 0.00022853      |
| Precursor Type:   | MULTI           |

#### general information

|                       |               |
|-----------------------|---------------|
| Annotation:           | 11 of 16      |
| AminoAcids Coverage:  | 69 %          |
| Intensity Coverage:   | 32 %          |
| Peak Coverage:        | 21 %          |
| Protein Localisation: | 1148 ... 1163 |

|       | a ion         | b <sup>2+</sup> ion | b ion         |     |   |               | y ion         | y <sup>2+</sup> ion |
|-------|---------------|---------------------|---------------|-----|---|---------------|---------------|---------------------|
|       | Δ dalton mass | Δ dalton mass       | Δ dalton mass | seq |   | Δ dalton mass | Δ dalton mass |                     |
|       | 101.1         | 129.1               | 129.1         | 1   | Q | 15            |               |                     |
| +0.16 | 229.1         | 257.1               | 257.1         | 2   | Q | 14            | 1700          | 1700                |
|       | 366.2         | 394.2               | 394.2         | 3   | H | 13            | 1572          | 1572                |
|       | 494.2         | 522.2               | 522.2         | 4   | Q | 12            | 1435          | 1435                |
|       | 591.3         | 619.3               | 619.3         | 5   | P | 11            | 1307          | 1307                |
|       | 678.3         | 706.3               | 706.3         | 6   | S | 10            | 1210          | 1210                |
|       | 749.4         | 777.4               | 777.4         | 7   | A | 9             | 1123          | 1123                |
|       | 836.4         | 864.4               | -0.01 864.4   | 8   | S | 8             | 1052          | 1052                |
|       | 923.4         | 951.4               | 951.4         | 9   | S | 7             | 964.5         | +0.109964.5         |
|       | 1037          | +0.236532.8         | -0.07 1065    | 10  | I | 6             | 877.5         | +0.201877.5         |
|       | 1150          | +0.082589.3         | -0.32 1178    | 11  | L | 5             | 764.4         | -0.03 382.7 +0.126  |
|       | 1279          | -0.1 653.8          | 1307          | 12  | E | 4             | 651.3         | +0.08 651.3         |
|       | 1366          | 1394                | 1394          | 13  | S | 3             | 522.3         | +0.029522.3         |
|       | 1479          | +0.469753.9         | 1507          | 14  | L | 2             | 435.3         | +0.138435.3         |
|       | 1626          | +0.323827.4         | 1654          | 15  | F | 1             | 322.2         | +0.102322.2         |
|       |               |                     |               | 16  | R | 0             | 175.1         | 175.1               |

Scan number 1130 Raw file LNCAP\_Silac\_23F10\_set3\_09  
 Method ITMS; CID Pepti... 97.81

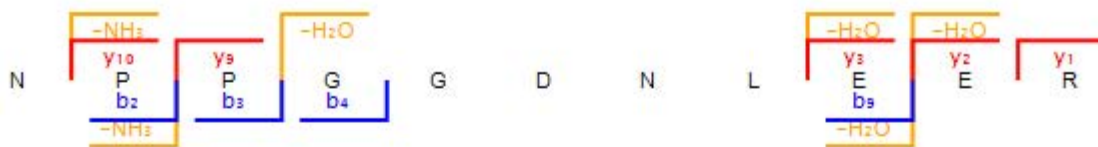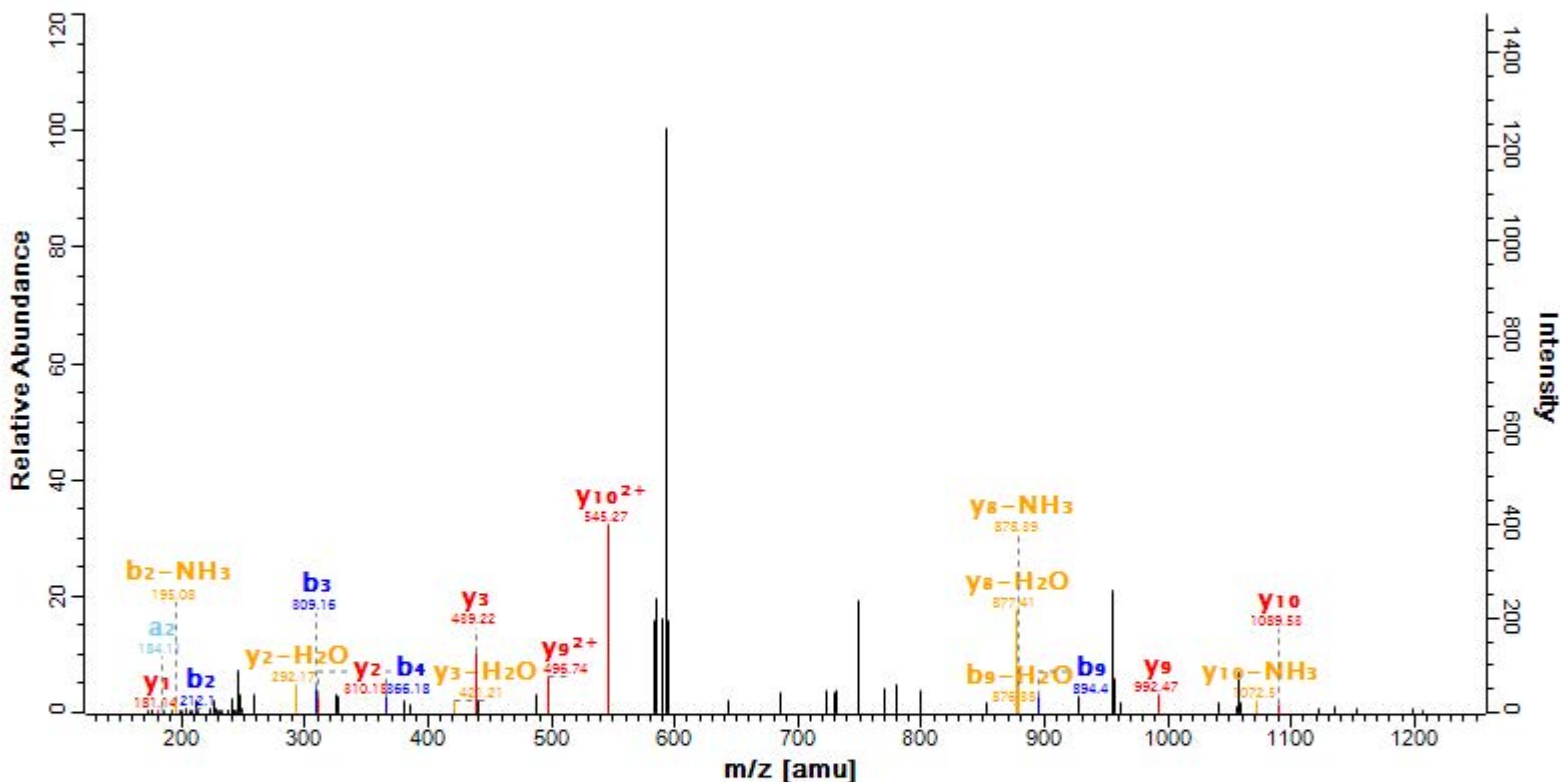

#### precursor information

|                   |                 |
|-------------------|-----------------|
| Mass:             | 1202.56139      |
| m/z:              | 602.28797       |
| Charge:           | 2+              |
| Retentiontime:    | 11.826787948608 |
| Score:            | 97.81339        |
| Mass Error [ppm]: | -0.76308        |
| PEP:              | 0.0044452       |
| Precursor Type:   | ISO             |

#### general information

|                       |             |
|-----------------------|-------------|
| Annotation:           | 6 of 11     |
| AminoAcids Coverage:  | 55 %        |
| Intensity Coverage:   | 24 %        |
| Peak Coverage:        | 21 %        |
| Protein Localisation: | 216 ... 226 |

| a ion    |        | b ion    |        |    |     |          | y ion  |          | y <sup>2+</sup> ion |         |
|----------|--------|----------|--------|----|-----|----------|--------|----------|---------------------|---------|
| Δ dalton | mass   | Δ dalton | mass   |    | seq | Δ dalton | mass   | Δ dalton | mass                |         |
|          | 87.055 |          | 115.05 | 1  | N   | 10       |        |          |                     |         |
| -0.041   | 184.11 | +0.0797  | 212.1  | 2  | P   | 9        | 1089.5 | -0.137   | 545.27              | +0.1405 |
|          | 281.16 | +0.0637  | 309.16 | 3  | P   | 8        | 992.47 | -0.046   | 496.74              | +0.0805 |
|          | 338.18 | +0.1727  | 366.18 | 4  | G   | 7        | 895.42 |          | 895.42              |         |
|          | 395.2  |          | 423.2  | 5  | G   | 6        | 838.4  |          | 838.4               |         |
|          | 510.23 |          | 538.23 | 6  | D   | 5        | 781.38 |          | 781.38              |         |
|          | 624.27 |          | 652.27 | 7  | N   | 4        | 666.35 |          | 666.35              |         |
|          | 737.36 |          | 765.35 | 8  | L   | 3        | 552.31 |          | 552.31              |         |
|          | 866.4  | +0.0015  | 894.4  | 9  | E   | 2        | 439.22 | +0.086   | 439.22              |         |
|          | 995.44 |          | 1023.4 | 10 | E   | 1        | 310.18 | +0.2119  | 310.18              |         |
|          |        |          |        | 11 | R   | 0        | 181.14 | -0.01    | 181.14              |         |

Scan number 1484 Raw file LNCAP\_Silac\_23F10\_set3\_09  
 Method ITMS; CID Pepti... 259.7

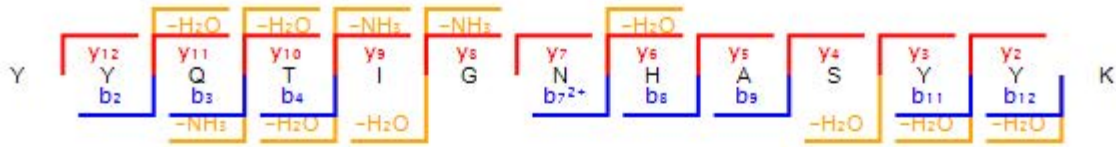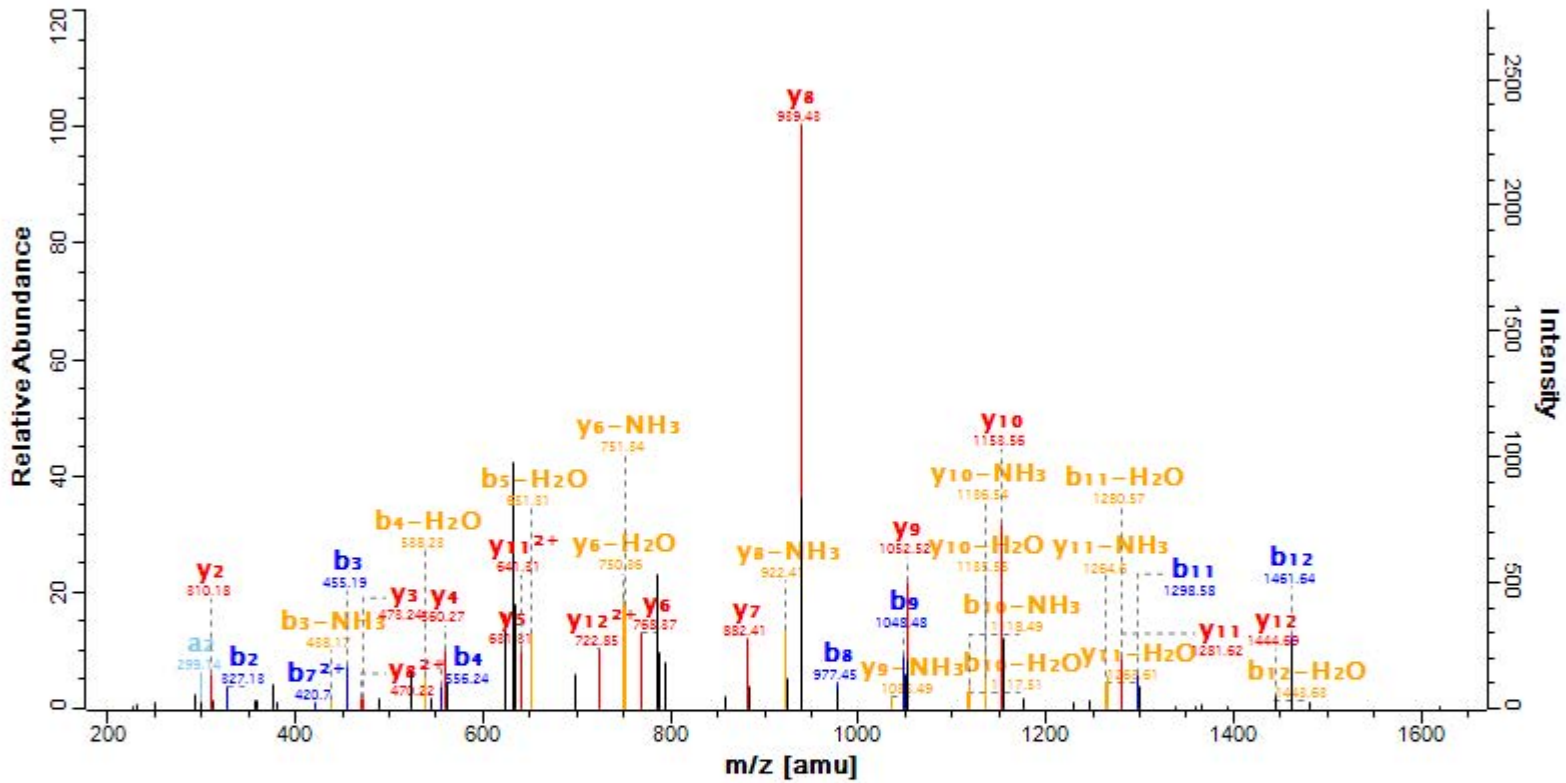

precursor information

|                   |                 |
|-------------------|-----------------|
| Mass:             | 1606.74188      |
| m/z:              | 804.37822       |
| Charge:           | 2+              |
| Retentiontime:    | 13.941345214843 |
| Score:            | 259.697         |
| Mass Error [ppm]: | 0.16983         |
| PEP:              | 1.3598E-59      |
| Precursor Type:   | ISO             |

general information

|                       |             |
|-----------------------|-------------|
| Annotation:           | 11 of 13    |
| AminoAcids Coverag    | 85 %        |
| Intensity Coverage:   | 61 %        |
| Peak Coverage:        | 45 %        |
| Protein Localisation: | 162 ... 174 |

| a ion         | b <sup>2+</sup> ion | b ion         |    |     |    | y ion         | y <sup>2+</sup> ion |
|---------------|---------------------|---------------|----|-----|----|---------------|---------------------|
| Δ dalton mass | Δ dalton mass       | Δ dalton mass |    | seq |    | Δ dalton mass | Δ dalton mass       |
| 136.1         | 164.1               | 164.1         | 1  | Y   | 12 |               |                     |
| +0.047299.1   | 327.1               | +0.117327.1   | 2  | Y   | 11 | 1445          | +0.021722.8         |
| 427.2         | 455.2               | -0.06 455.2   | 3  | Q   | 10 | 1282          | -0.01 641.3         |
| 528.2         | 556.2               | -0.05 556.2   | 4  | T   | 9  | 1154          | -0.04 1154          |
| 641.3         | 669.3               | 669.3         | 5  | I   | 8  | 1053          | -0.01 1053          |
| 698.4         | 726.3               | 726.3         | 6  | G   | 7  | 939.4         | -0.04 470.2         |
| 812.4         | -0.38 420.7         | 840.4         | 7  | N   | 6  | 882.4         | -0.02 882.4         |
| 949.5         | 977.4               | -0.06 977.4   | 8  | H   | 5  | 768.4         | +0.087768.4         |
| 1020          | 1048                | +0.0311048    | 9  | A   | 4  | 631.3         | -0.13 631.3         |
| 1108          | 1136                | 1136          | 10 | S   | 3  | 560.3         | -0.03 560.3         |
| 1271          | 1299                | -0.13 1299    | 11 | Y   | 2  | 473.2         | +0.015473.2         |
| 1434          | 1462                | -0.01 1462    | 12 | Y   | 1  | 310.2         | +0.15310.2          |
|               |                     |               | 13 | K   | 0  | 147.1         | 147.1               |





Scan number 2667 Raw file LNCAP\_Silac\_23F10\_set3\_09  
 Method ITMS; CID Pepti... 38.58

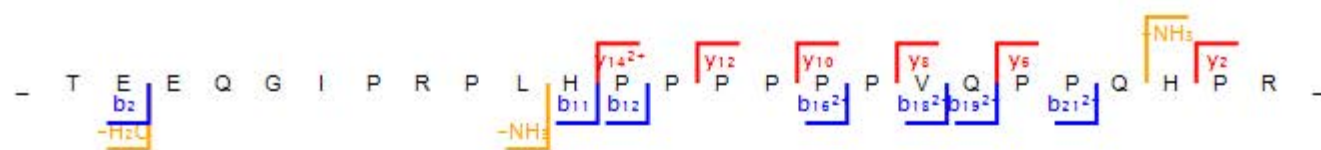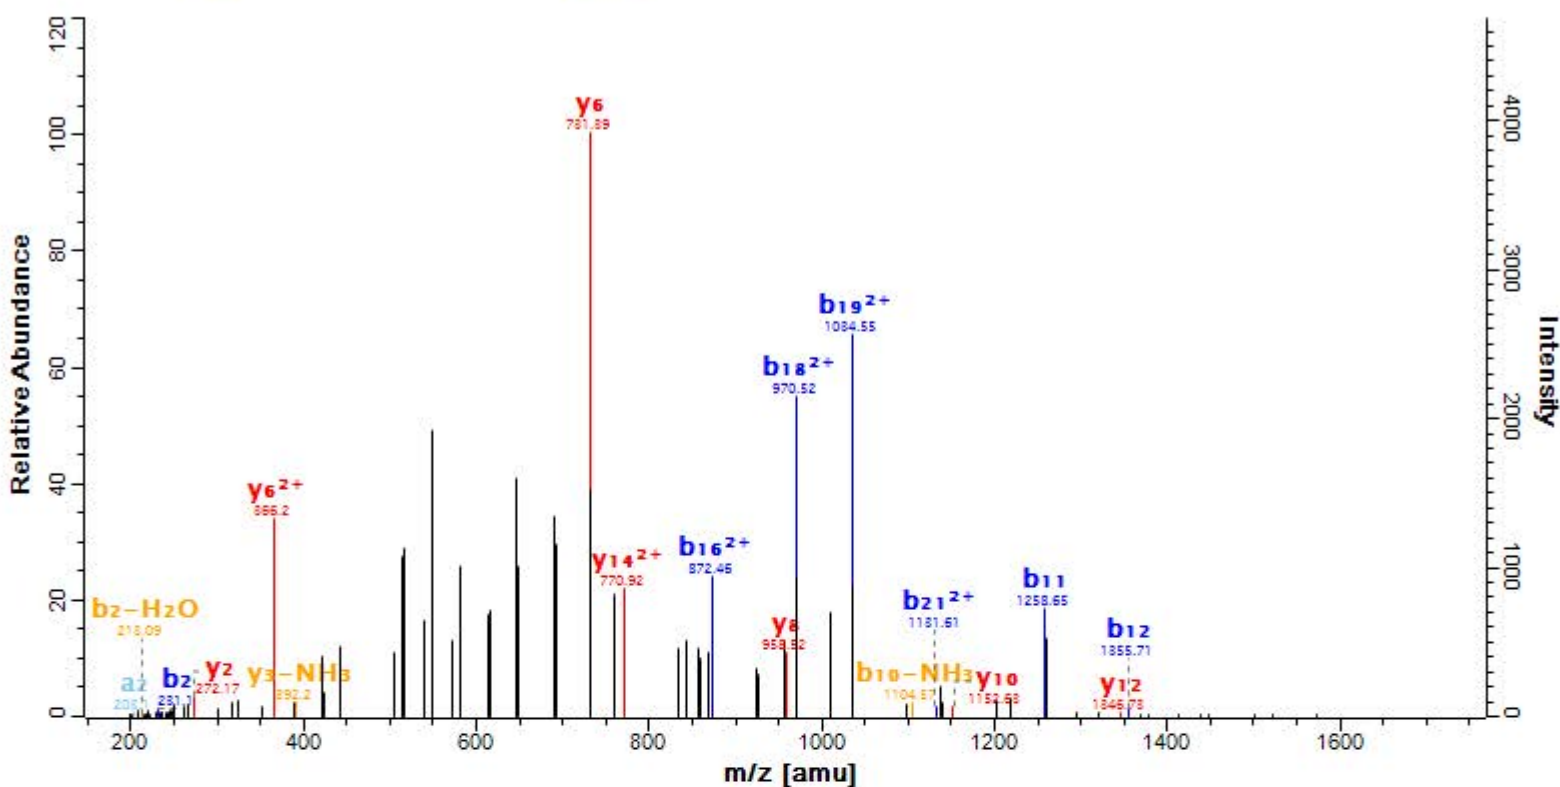

precursor information

|                   |                 |
|-------------------|-----------------|
| Mass:             | 2797.47722      |
| m/z:              | 700.37658       |
| Charge:           | 4+              |
| Retentiontime:    | 20.763109207153 |
| Score:            | 38.58278        |
| Mass Error [ppm]: | -0.14274        |
| PEP:              | 0.0099003       |
| Precursor Type:   | MULTI           |

|    | a ion         | b <sup>2+</sup> ion | b ion         |     |   | y ion               | y <sup>2+</sup> ion |
|----|---------------|---------------------|---------------|-----|---|---------------------|---------------------|
|    | Δ dalton mass | Δ dalton mass       | Δ dalton mass | seq |   | Δ dalton mass       | Δ dalton mass       |
|    | 74.06         | 102.1               | 102.1         | 1   | T |                     |                     |
| +0 | 203.1         | 231.1               | -0.03 231.1   | 2   | E | 23 2697             | 2697                |
|    | 332.1         | 360.1               | 360.1         | 3   | E | 22 2568             | 2568                |
|    | 460.2         | 488.2               | 488.2         | 4   | Q | 21 2439             | 2439                |
|    | 517.2         | 545.2               | 545.2         | 5   | G | 20 2311             | 2311                |
|    | 630.3         | 658.3               | 658.3         | 6   | I | 19 2254             | 2254                |
|    | 727.4         | 755.4               | 755.4         | 7   | P | 18 2141             | 2141                |
|    | 883.5         | 911.5               | 911.5         | 8   | R | 17 2044             | 2044                |
|    | 980.5         | 1009                | 1009          | 9   | P | 16 1888             | 1888                |
|    | 1094          | 1122                | 1122          | 10  | L | 15 1791             | 1791                |
|    | 1231          | 1259                | -0.02 1259    | 11  | H | 14 1678             | 1678                |
|    | 1328          | 1356                | -0.2 1356     | 12  | P | 13 1541             | 770.9 +0.44         |
|    | 1425          | 1453                | 1453          | 13  | P | 12 1444             | 1444                |
|    | 1522          | 1550                | 1550          | 14  | P | 11 1347 -0.28       | 1347                |
|    | 1619          | 1647                | 1647          | 15  | P | 10 1250             | 1250                |
|    | 1716          | +0.109872.5         | 1744          | 16  | P | 9 1153 -0.16        | 1153                |
|    | 1813          | 1841                | 1841          | 17  | P | 8 1056              | 1056                |
|    | 1912          | +0.197970.5         | 1940          | 18  | V | 7 958.5 -0.12       | 958.5               |
|    | 2040          | +0.3661035          | 2068          | 19  | Q | 6 859.5             | 859.5               |
|    | 2137          | 2165                | 2165          | 20  | P | 5 731.4 +0.026366.2 | +0.25               |
|    | 2234          | +0.23 1132          | 2262          | 21  | P | 4 634.3             | 634.3               |
|    | 2362          | 2390                | 2390          | 22  | Q | 3 537.3             | 537.3               |
|    | 2499          | 2527                | 2527          | 23  | H | 2 409.2             | 409.2               |
|    | 2596          | 2624                | 2624          | 24  | P | 1 272.2 +0.065272.2 |                     |
|    |               |                     |               | 25  | R | 0 175.1             | 175.1               |

general information

|                       |               |
|-----------------------|---------------|
| Annotation:           | 12 of 25      |
| AminoAcids Coverage:  | 48 %          |
| Intensity Coverage:   | 35 %          |
| Peak Coverage:        | 17 %          |
| Protein Localisation: | 1012 ... 1036 |

Scan number 2750 Raw file LNCAP\_Silac\_23F10\_set3\_09  
 Method ITMS; CID Pepti... 157.22

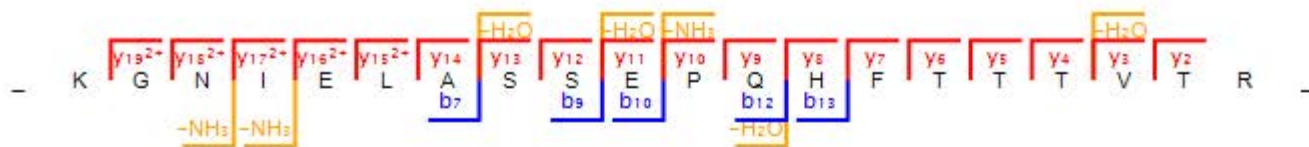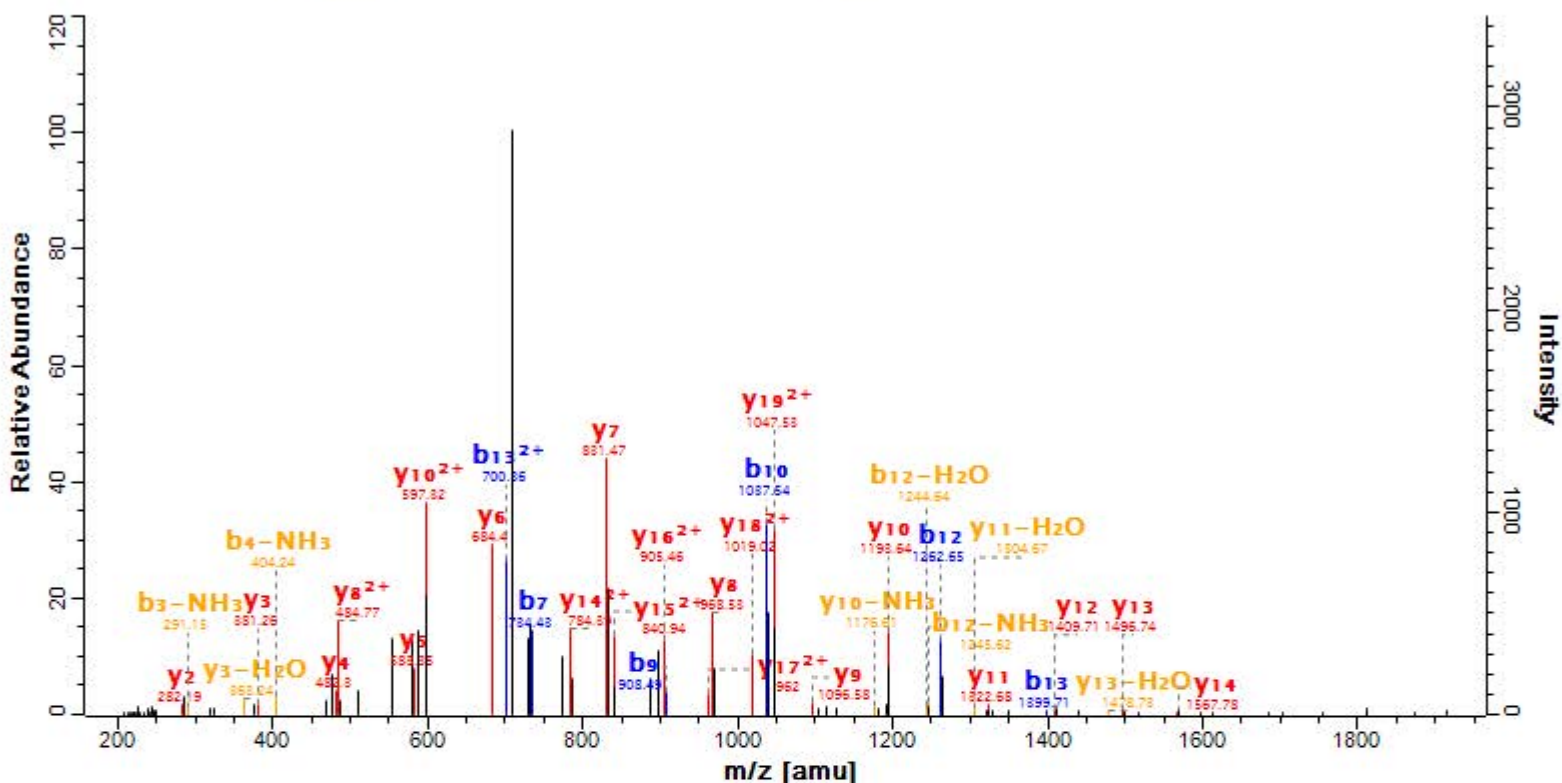

precursor information

|                   |                 |
|-------------------|-----------------|
| Mass:             | 2215.12308      |
| m/z:              | 739.38163       |
| Charge:           | 3+              |
| Retentiontime:    | 21.227899551391 |
| Score:            | 157.2171        |
| Mass Error [ppm]: | -0.10505        |
| PEP:              | 5.6593E-27      |
| Precursor Type:   | MULTI           |

general information

|                       |             |
|-----------------------|-------------|
| Annotation:           | 18 of 20    |
| AminoAcids Coverage:  | 90 %        |
| Intensity Coverage:   | 49 %        |
| Peak Coverage:        | 30 %        |
| Protein Localisation: | 649 ... 668 |

| b <sup>2+</sup> ion |        | b ion    |        | seq |   |    | y ion    |         | y <sup>2+</sup> ion |         |
|---------------------|--------|----------|--------|-----|---|----|----------|---------|---------------------|---------|
| Δ dalton            | mass   | Δ dalton | mass   |     |   |    | Δ dalton | mass    | Δ dalton            | mass    |
|                     | 137.12 |          | 137.12 | 1   | K | 19 |          |         |                     |         |
|                     | 194.14 |          | 194.14 | 2   | G | 18 | 2094.1   |         | 1047.5              | +0.1304 |
|                     | 308.18 |          | 308.18 | 3   | N | 17 | 2037     |         | 1019                | +0.2195 |
|                     | 421.26 |          | 421.26 | 4   | I | 16 | 1923     |         | 962                 | +0.3253 |
|                     | 550.31 |          | 550.31 | 5   | E | 15 | 1809.9   |         | 905.46              | +0.4265 |
|                     | 663.39 |          | 663.39 | 6   | L | 14 | 1680.9   |         | 840.94              | +0.0886 |
|                     | 734.43 | -0.222   | 734.43 | 7   | A | 13 | 1567.8   | -0.134  | 784.39              | +0.1095 |
|                     | 821.46 |          | 821.46 | 8   | S | 12 | 1496.7   | +0.0723 | 1496.7              |         |
|                     | 908.49 | +0.1051  | 908.49 | 9   | S | 11 | 1409.7   | +0.1561 | 1409.7              |         |
|                     | 1037.5 | -0.066   | 1037.5 | 10  | E | 10 | 1322.7   | -0.118  | 1322.7              |         |
|                     | 1134.6 |          | 1134.6 | 11  | P | 9  | 1193.6   | -0.07   | 597.32              | -0.016  |
|                     | 1262.6 | -0.046   | 1262.6 | 12  | Q | 8  | 1096.6   | +0.2139 | 1096.6              |         |
| +0.1933             | 1399.7 | +0.0702  | 1399.7 | 13  | H | 7  | 968.53   | +0.0454 | 484.77              | +0.1185 |
|                     | 1546.8 |          | 1546.8 | 14  | F | 6  | 831.47   | +0.0099 | 831.47              |         |
|                     | 1647.8 |          | 1647.8 | 15  | T | 5  | 684.4    | +0.0249 | 684.4               |         |
|                     | 1748.9 |          | 1748.9 | 16  | T | 4  | 583.35   | +0.0865 | 583.35              |         |
|                     | 1849.9 |          | 1849.9 | 17  | T | 3  | 482.3    | +0.1925 | 482.3               |         |
|                     | 1949   |          | 1949   | 18  | V | 2  | 381.26   | +0.0577 | 381.26              |         |
|                     | 2050   |          | 2050   | 19  | T | 1  | 282.19   | +0.1092 | 282.19              |         |
|                     |        |          |        | 20  | R | 0  | 181.14   |         | 181.14              |         |





Scan number 3084 Raw file LNCAP\_Silac\_23F10\_set3\_09  
 Method ITMS: CID Pepti... 102.52

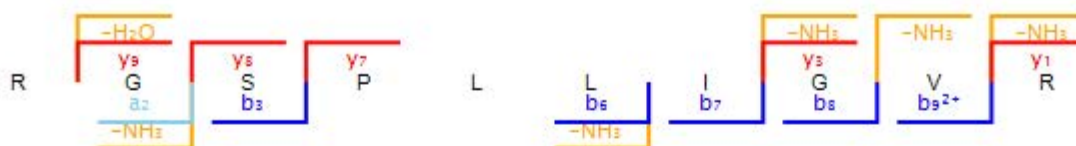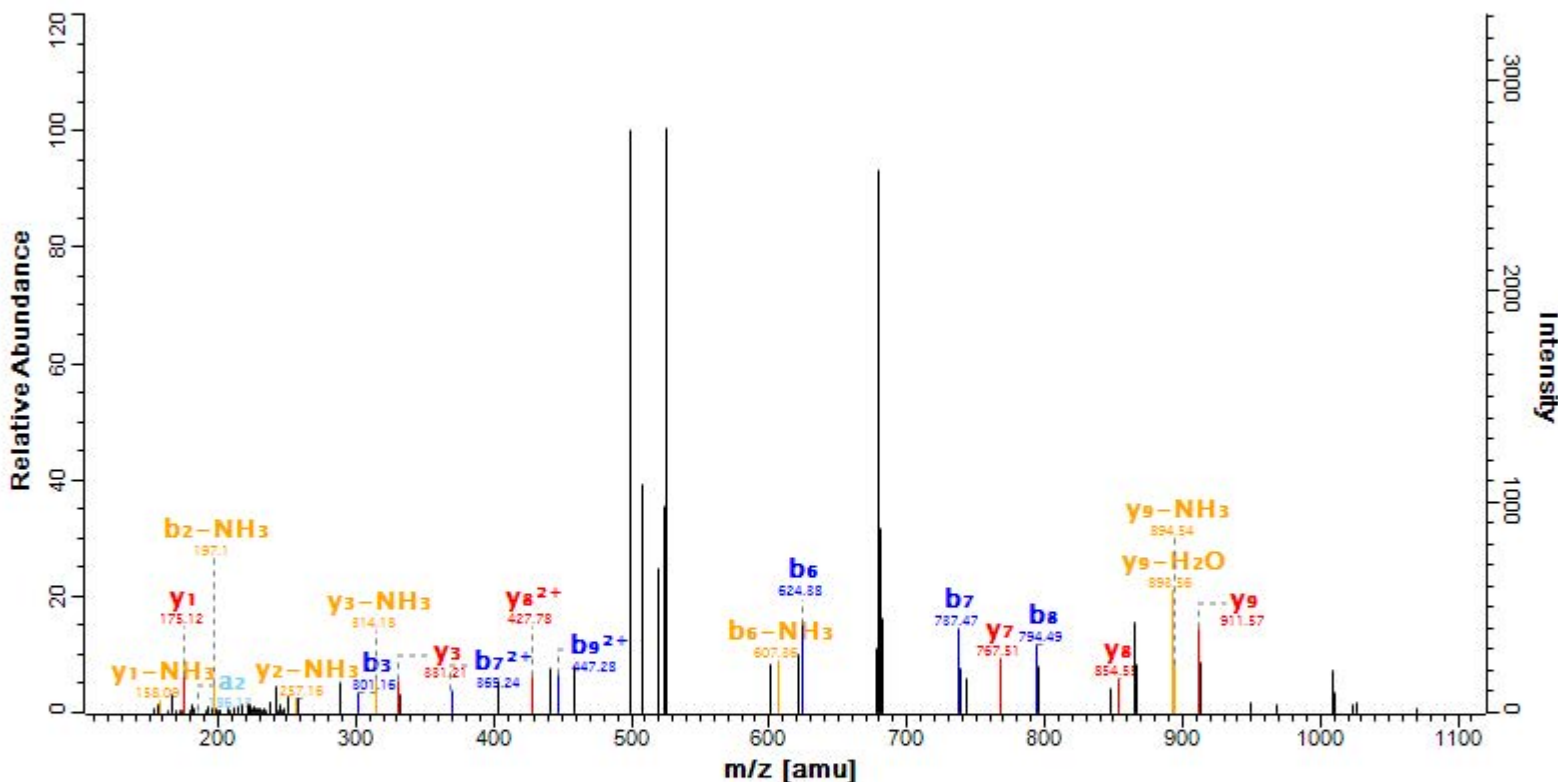

#### precursor information

|                   |                 |
|-------------------|-----------------|
| Mass:             | 1066.66144      |
| m/z:              | 534.338         |
| Charge:           | 2+              |
| Retentiontime:    | 23.273738861084 |
| Score:            | 102.5236        |
| Mass Error [ppm]: | 0.30453         |
| PEP:              | 0.0055249       |
| Precursor Type:   | ISO             |

|                       |             |
|-----------------------|-------------|
| Annotation:           | 8 of 10     |
| AminoAcids Coverage:  | 80 %        |
| Intensity Coverage:   | 19 %        |
| Peak Coverage:        | 20 %        |
| Protein Localisation: | 203 ... 212 |

|       | a ion         | b <sup>2+</sup> ion | b ion         |     |   | y ion         | y <sup>2+</sup> ion |        |
|-------|---------------|---------------------|---------------|-----|---|---------------|---------------------|--------|
|       | Δ dalton mass | Δ dalton mass       | Δ dalton mass | seq |   | Δ dalton mass | Δ dalton mass       |        |
|       | 129.1         | 157.1               | 157.1         | 1   | R |               |                     |        |
| -0.22 | 186.1         | 214.1               | 214.1         | 2   | G | 8 911.6       | +0 911.6            |        |
|       | 273.2         | 301.2               | +0.02 301.2   | 3   | S | 7 854.5       | -0.18 427.8         | +0.331 |
|       | 370.2         | 398.2               | 398.2         | 4   | P | 6 767.5       | +0.05 767.5         |        |
|       | 483.3         | 511.3               | 511.3         | 5   | L | 5 670.5       | 670.5               |        |
|       | 596.4         | 624.4               | +0.09 624.4   | 6   | L | 4 557.4       | 557.4               |        |
|       | 709.5         | +0.15 369.2         | -0.01 737.5   | 7   | I | 3 444.3       | 444.3               |        |
|       | 766.5         | 794.5               | -0.01 794.5   | 8   | G | 2 331.2       | +0.10 331.2         |        |
|       | 865.6         | -0.09 447.3         | 893.6         | 9   | V | 1 274.2       | 274.2               |        |
|       |               |                     |               | 10  | R | 0 175.1       | +0.01 175.1         |        |

Scan number 3318 Raw file LNCAP\_Silac\_23F10\_set3\_09  
 Method ITMS; CID Pepti... 49.72

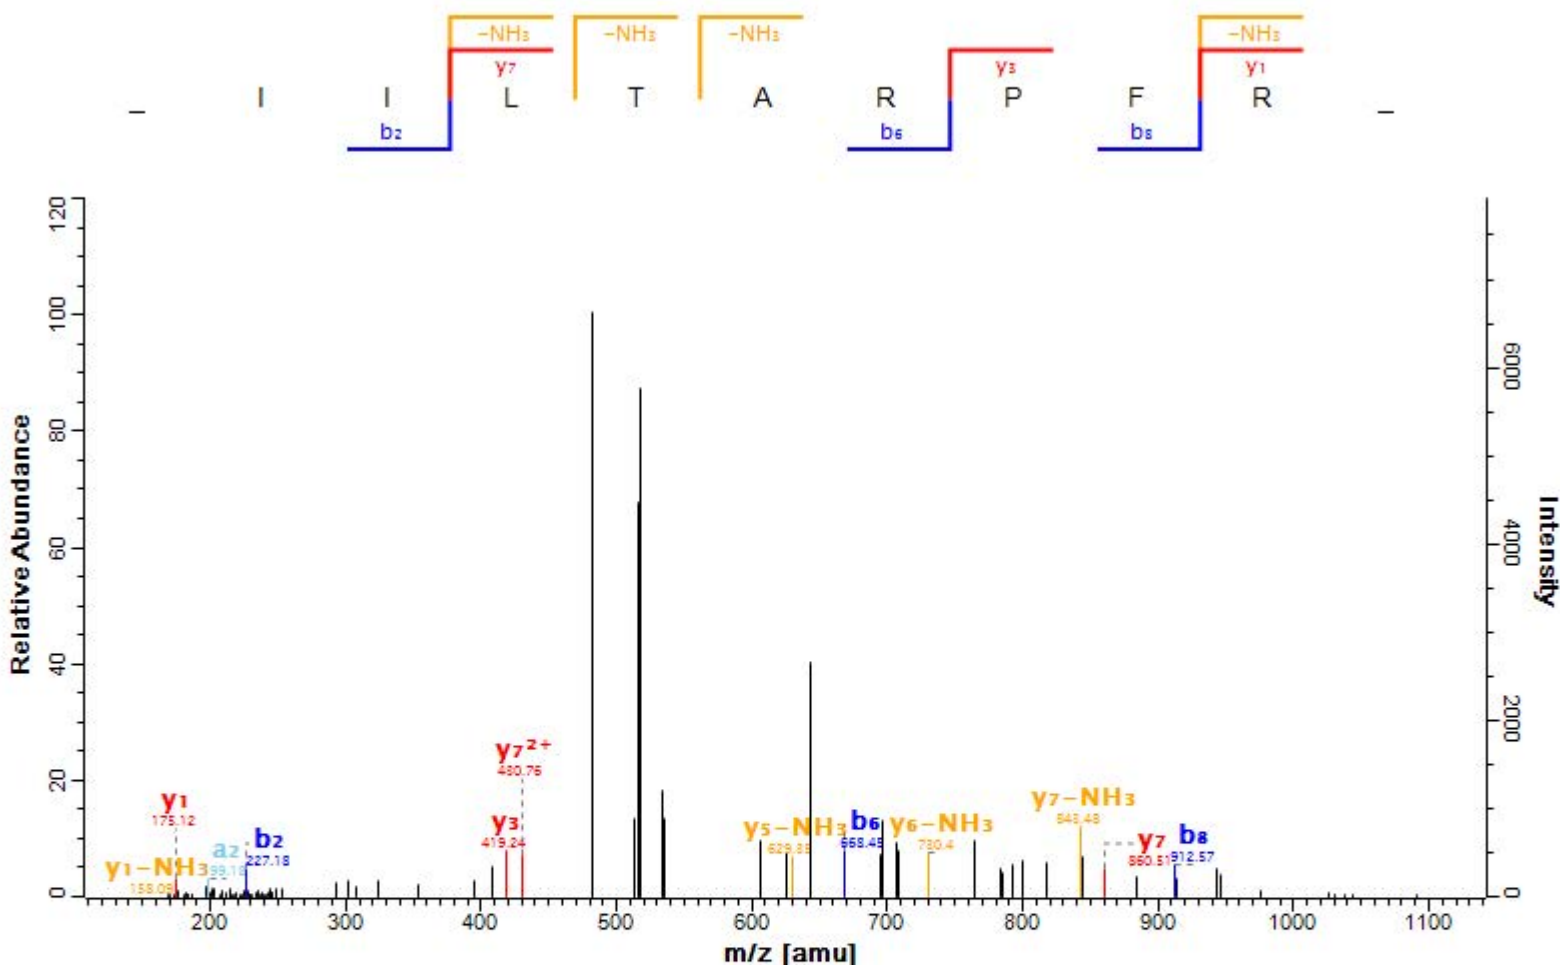

#### precursor information

|                       |                 |
|-----------------------|-----------------|
| Mass:                 | 1085.67102      |
| m/z:                  | 543.84279       |
| Charge:               | 2+              |
| Retentiontime:        | 24.581544876098 |
| Score:                | 49.71508        |
| Mass Error [ppm]:     | 0.069325        |
| PEP:                  | 0.043464        |
| Precursor Type:       | MULTI           |
| Annotation:           | 8 of 9          |
| AminoAcids Coverage:  | 89 %            |
| Intensity Coverage:   | 12 %            |
| Peak Coverage:        | 12 %            |
| Protein Localisation: | 200 ... 208     |

| a ion    |        | b ion    |        |   |     |          | y ion  |          | y <sup>2+</sup> ion |         |
|----------|--------|----------|--------|---|-----|----------|--------|----------|---------------------|---------|
| Δ dalton | mass   | Δ dalton | mass   |   | seq | Δ dalton | mass   | Δ dalton | mass                |         |
|          | 86.096 |          | 114.09 | 1 | I   | 8        |        |          |                     |         |
| -0.184   | 199.18 | -0.059   | 227.18 | 2 | I   | 7        | 973.59 |          | 973.59              |         |
|          | 312.26 |          | 340.26 | 3 | L   | 6        | 860.51 | +0.0804  | 430.76              | +0.3588 |
|          | 413.31 |          | 441.31 | 4 | T   | 5        | 747.43 |          | 747.43              |         |
|          | 484.35 |          | 512.34 | 5 | A   | 4        | 646.38 |          | 646.38              |         |
|          | 640.45 | -0.094   | 668.45 | 6 | R   | 3        | 575.34 |          | 575.34              |         |
|          | 737.5  |          | 765.5  | 7 | P   | 2        | 419.24 | +0.0348  | 419.24              |         |
|          | 884.57 | -0.085   | 912.57 | 8 | F   | 1        | 322.19 |          | 322.19              |         |
|          |        |          |        | 9 | R   | 0        | 175.12 | +0.0374  | 175.12              |         |

Scan number 3598 Raw file LNCAP\_Silac\_23F10\_set3\_09  
 Method ITMS; CID Pepti... 233.14

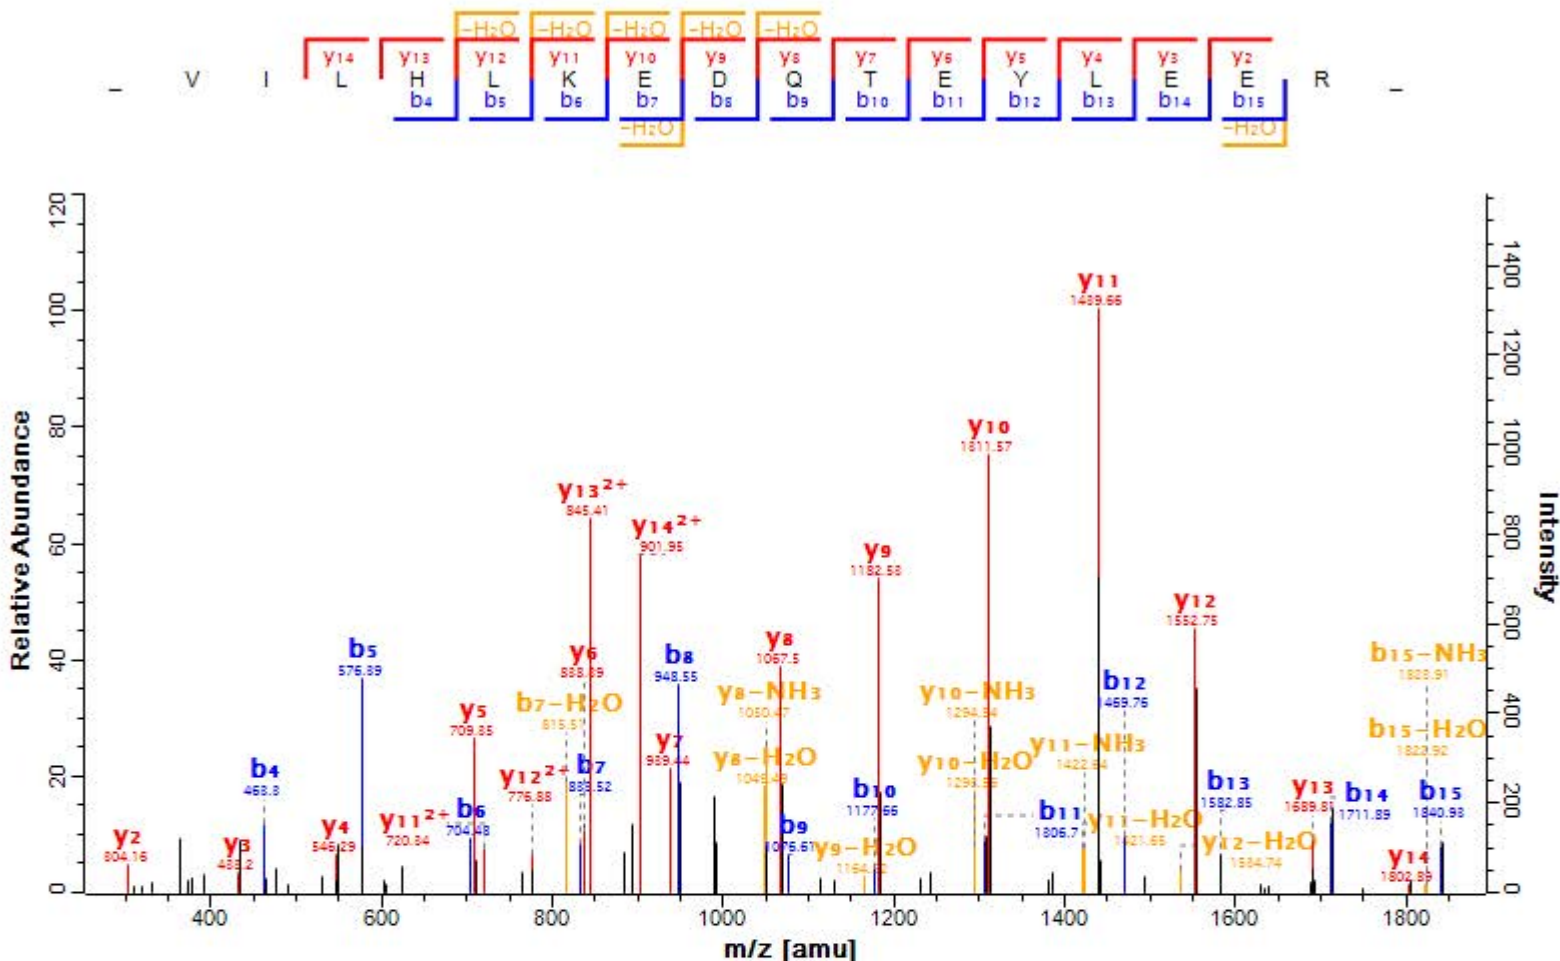

#### precursor information

|                   |                 |
|-------------------|-----------------|
| Mass:             | 2014.03627      |
| m/z:              | 1008.02541      |
| Charge:           | 2+              |
| Retentiontime:    | 26.207149505615 |
| Score:            | 233.1442        |
| Mass Error [ppm]: | -0.42035        |
| PEP:              | 1.0938E-50      |
| Precursor Type:   | MULTI           |

#### general information

|                       |             |
|-----------------------|-------------|
| Annotation:           | 13 of 16    |
| AminoAcids Coverage:  | 81 %        |
| Intensity Coverage:   | 66 %        |
| Peak Coverage:        | 40 %        |
| Protein Localisation: | 308 ... 323 |

| b ion     |          |    |     |    | y ion    |           | y <sup>2+</sup> ion |           |
|-----------|----------|----|-----|----|----------|-----------|---------------------|-----------|
| Δ dalton  | mass     |    | seq |    | Δ dalton | mass      | Δ dalton            | mass      |
|           | 100.0757 | 1  | V   | 15 |          |           |                     |           |
|           | 213.1598 | 2  | I   | 14 | 1915.976 |           | 1915.976            |           |
|           | 326.2438 | 3  | L   | 13 | 1802.892 | +0.068164 | 901.9496            | +0.264636 |
| +0.131779 | 463.3027 | 4  | H   | 12 | 1689.808 | -0.08996  | 845.4076            | +0.197293 |
| +0.042039 | 576.3868 | 5  | L   | 11 | 1552.749 | -0.0048   | 776.8781            | +0.043704 |
| +0.091363 | 704.4818 | 6  | K   | 10 | 1439.665 | -0.01962  | 720.3361            | -0.13845  |
| +0.084903 | 833.5244 | 7  | E   | 9  | 1311.57  | -0.00339  | 1311.57             |           |
| -0.04189  | 948.5513 | 8  | D   | 8  | 1182.527 | -0.02586  | 1182.527            |           |
| -0.09132  | 1076.61  | 9  | Q   | 7  | 1067.5   | -0.03383  | 1067.5              |           |
| +0.060712 | 1177.658 | 10 | T   | 6  | 939.4418 | -0.03116  | 939.4418            |           |
| -0.04438  | 1306.7   | 11 | E   | 5  | 838.3941 | -0.06563  | 838.3941            |           |
| -0.01005  | 1469.763 | 12 | Y   | 4  | 709.3515 | +0.095613 | 709.3515            |           |
| -0.03821  | 1582.848 | 13 | L   | 3  | 546.2882 | +0.128668 | 546.2882            |           |
| -0.14623  | 1711.89  | 14 | E   | 2  | 433.2041 | +0.086023 | 433.2041            |           |
| -0.27684  | 1840.933 | 15 | E   | 1  | 304.1615 | -0.002    | 304.1615            |           |
|           |          | 16 | R   | 0  | 175.119  |           | 175.119             |           |



Scan number 4168 Raw file LNCAP\_Silac\_23F10\_set3\_09  
 Method ITMS: CID Pepti... 88.06

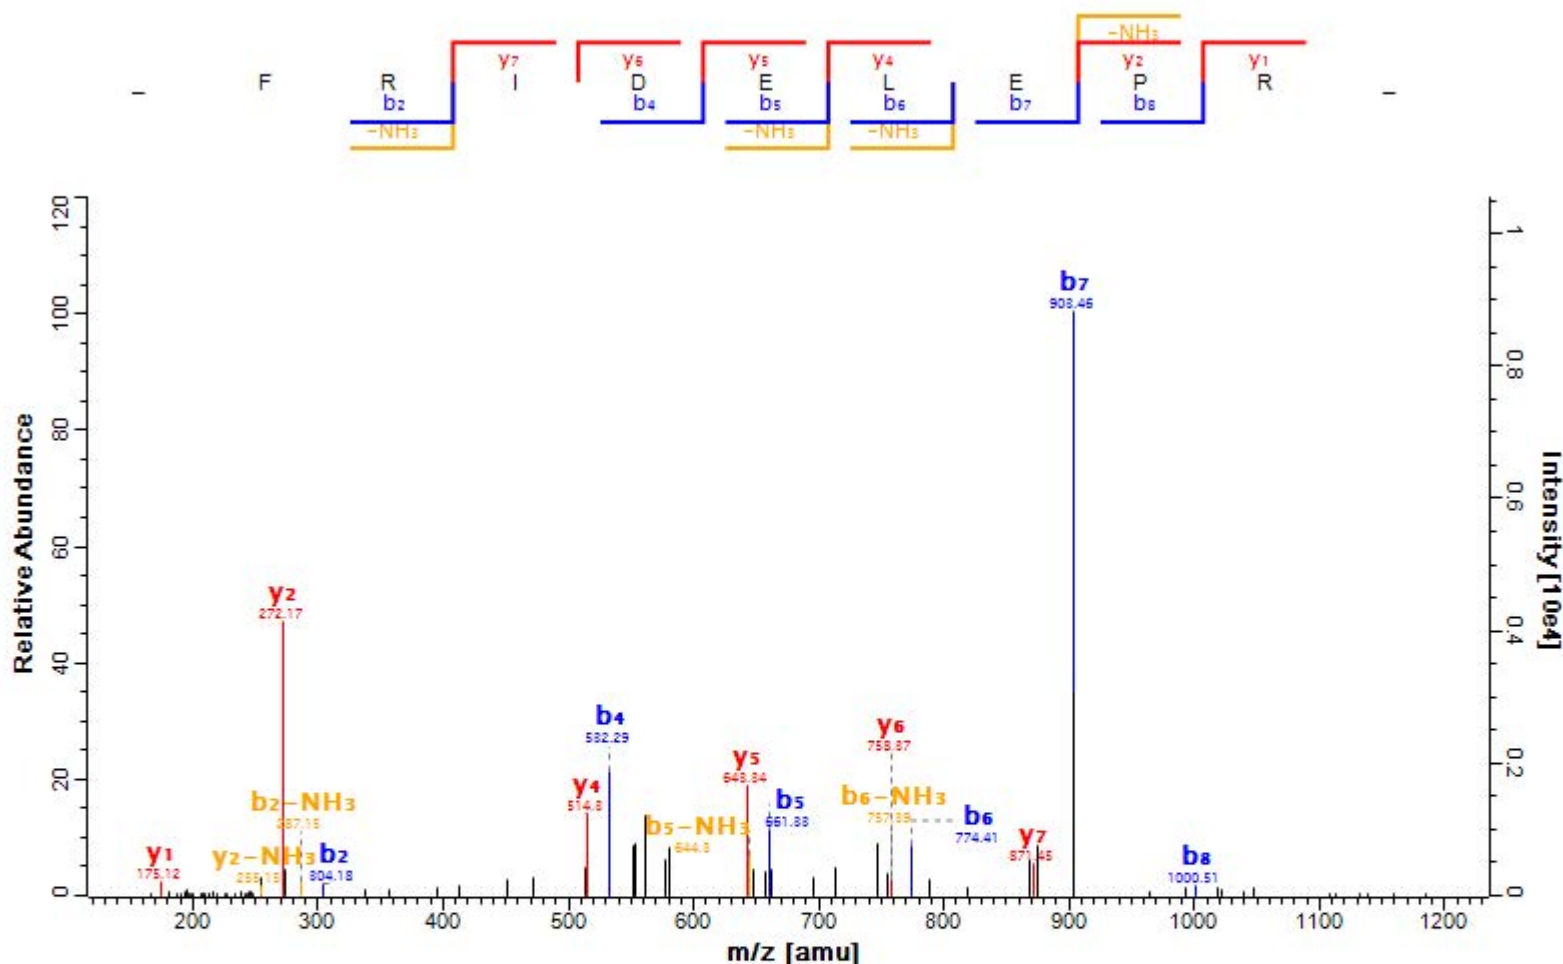

#### precursor information

|                       |                 |
|-----------------------|-----------------|
| Mass:                 | 1173.6144       |
| m/z:                  | 587.81448       |
| Charge:               | 2+              |
| Retentiontime:        | 29.449411392211 |
| Score:                | 88.05646        |
| Mass Error [ppm]:     | 0.15491         |
| PEP:                  | 0.0045997       |
| Precursor Type:       | MULTI           |
| Annotation:           | 8 of 9          |
| AminoAcids Coverag    | 89 %            |
| Intensity Coverage:   | 57 %            |
| Peak Coverage:        | 17 %            |
| Protein Localisation: | 152 ... 160     |

| b ion           |               |     |   | y ion           |               |            |
|-----------------|---------------|-----|---|-----------------|---------------|------------|
| $\Delta$ dalton | mass          | seq |   | $\Delta$ dalton | mass          |            |
|                 | 148.075690383 | 1   | F | 8               |               |            |
| +0.1174796      | 304.176801411 | 2   | R | 7               | 1027.55308425 |            |
|                 | 417.260865391 | 3   | I | 6               | 871.451973218 | +0.0777509 |
| -0.0055208      | 532.287808423 | 4   | D | 5               | 758.367909238 | +0.2805893 |
| +0.0496644      | 661.33040152  | 5   | E | 4               | 643.340966206 | +0.0021124 |
| -0.0395876      | 774.4144655   | 6   | L | 3               | 514.29837311  | +0.128934  |
| +0.0238984      | 903.457058596 | 7   | E | 2               | 401.214309129 |            |
| +0.0753826      | 1000.50982245 | 8   | P | 1               | 272.171716033 | -0.022424  |
|                 |               | 9   | R | 0               | 175.118952181 | -0.0320534 |

Scan number 4792 Raw file LNCAP\_Silac\_23F10\_set3\_09  
 Method ITMS; CID Pepti... 149.52

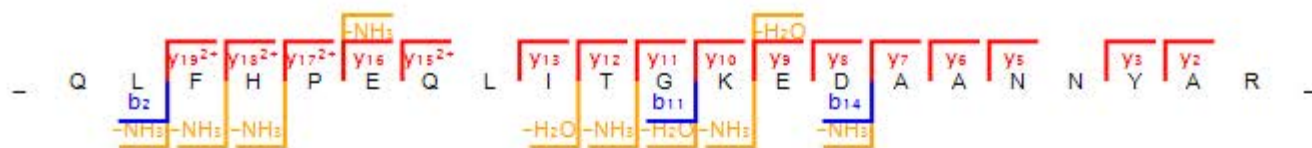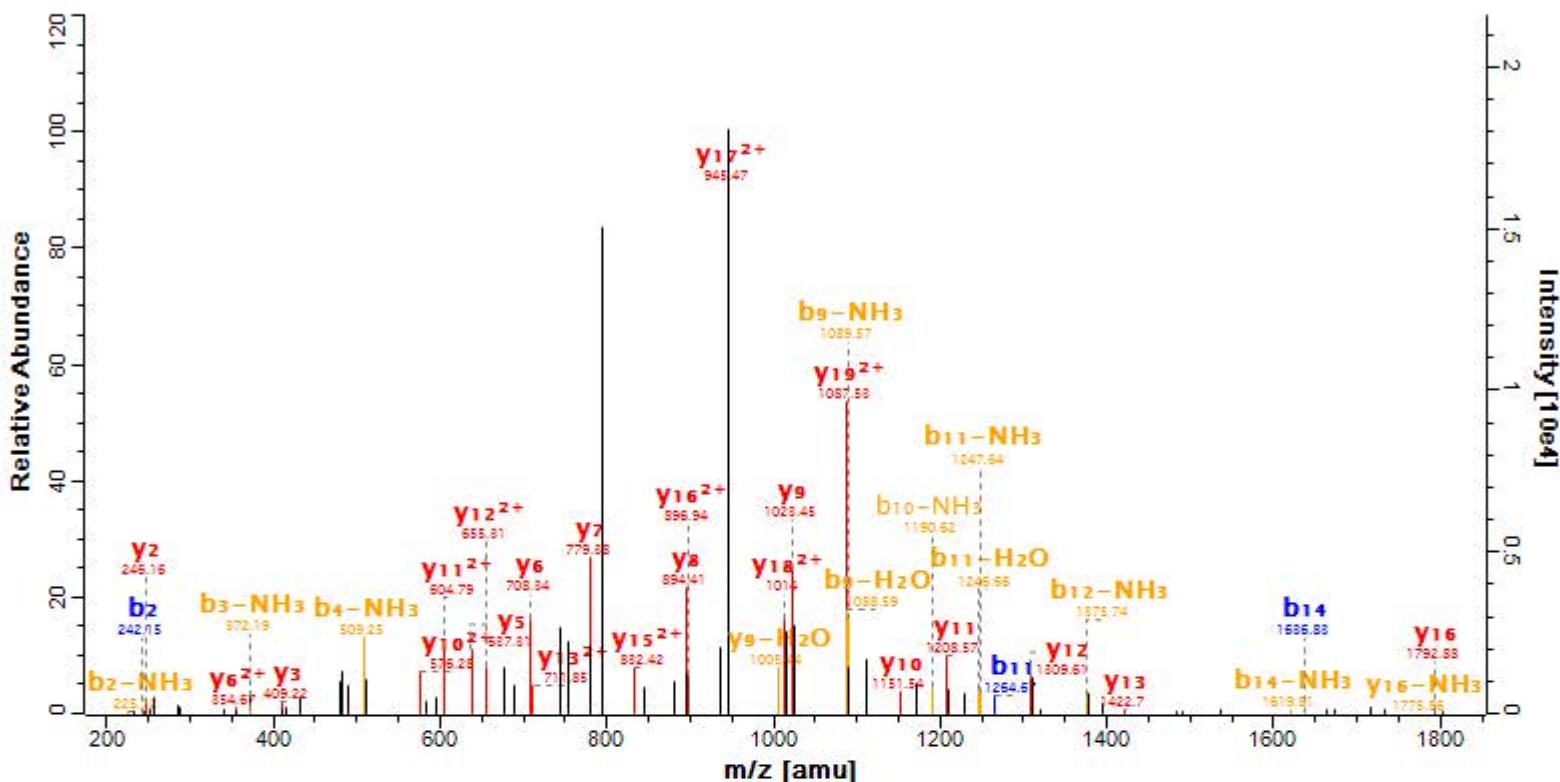

**precursor information**

|                   |                 |
|-------------------|-----------------|
| Mass:             | 2414.19793      |
| m/z:              | 805.73992       |
| Charge:           | 3+              |
| Retentiontime:    | 33.147140502929 |
| Score:            | 149.5208        |
| Mass Error [ppm]: | 0.022607        |
| PEP:              | 3.6106E-20      |
| Precursor Type:   | MULTI           |

| b ion     |          |     |   |          | y ion    |           | y <sup>2+</sup> ion |  |
|-----------|----------|-----|---|----------|----------|-----------|---------------------|--|
| Δ dalton  | mass     | seq |   | Δ dalton | mass     | Δ dalton  | mass                |  |
|           | 129.0659 | 1   | Q | 20       |          |           |                     |  |
| +0.298919 | 242.1499 | 2   | L | 19       | 2287.147 |           | 2287.147            |  |
|           | 389.2183 | 3   | F | 18       | 2174.063 |           | 1087.535 +0.34963   |  |
|           | 526.2772 | 4   | H | 17       | 2026.994 |           | 1014.001 -0.09059   |  |
|           | 623.33   | 5   | P | 16       | 1889.935 |           | 945.4712 +0.053491  |  |
|           | 752.3726 | 6   | E | 15       | 1792.882 | -0.10031  | 896.9448 +0.14872   |  |
|           | 880.4312 | 7   | Q | 14       | 1663.84  |           | 832.4236 +0.349216  |  |
|           | 993.5152 | 8   | L | 13       | 1535.781 |           | 1535.781            |  |
|           | 1106.599 | 9   | I | 12       | 1422.697 | -0.25785  | 711.8522 -0.16918   |  |
|           | 1207.647 | 10  | T | 11       | 1309.613 | -0.08761  | 655.3102 +0.1071    |  |
| +0.077279 | 1264.668 | 11  | G | 10       | 1208.565 | -0.15943  | 604.7864 +0.243915  |  |
|           | 1392.763 | 12  | K | 9        | 1151.544 | -0.01309  | 576.2756 +0.161202  |  |
|           | 1521.806 | 13  | E | 8        | 1023.449 | +0.019066 | 1023.449            |  |
| -0.34442  | 1636.833 | 14  | D | 7        | 894.4064 | +0.037733 | 894.4064            |  |
|           | 1707.87  | 15  | A | 6        | 779.3795 | +0.085306 | 779.3795            |  |
|           | 1778.907 | 16  | A | 5        | 708.3424 | +0.09593  | 354.6748 +0.103256  |  |
|           | 1892.95  | 17  | N | 4        | 637.3052 | +0.170581 | 637.3052            |  |
|           | 2006.993 | 18  | N | 3        | 523.2623 |           | 523.2623            |  |
|           | 2170.056 | 19  | Y | 2        | 409.2194 | +0.117459 | 409.2194            |  |
|           | 2241.093 | 20  | A | 1        | 246.1561 | +0.098176 | 246.1561            |  |
|           |          | 21  | R | 0        | 175.119  |           | 175.119             |  |

**general information**

|                       |            |
|-----------------------|------------|
| Annotation:           | 17 of 21   |
| AminoAcids Coverage:  | 81 %       |
| Intensity Coverage:   | 49 %       |
| Peak Coverage:        | 39 %       |
| Protein Localisation: | 85 ... 105 |

Scan number 746 Raw file LNCAP\_Silac\_23F10\_set3\_09  
 Method ITMS; CID Pepti... 73.66

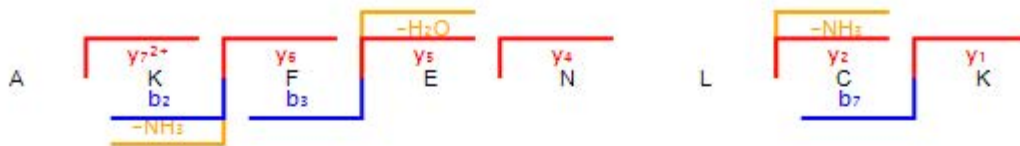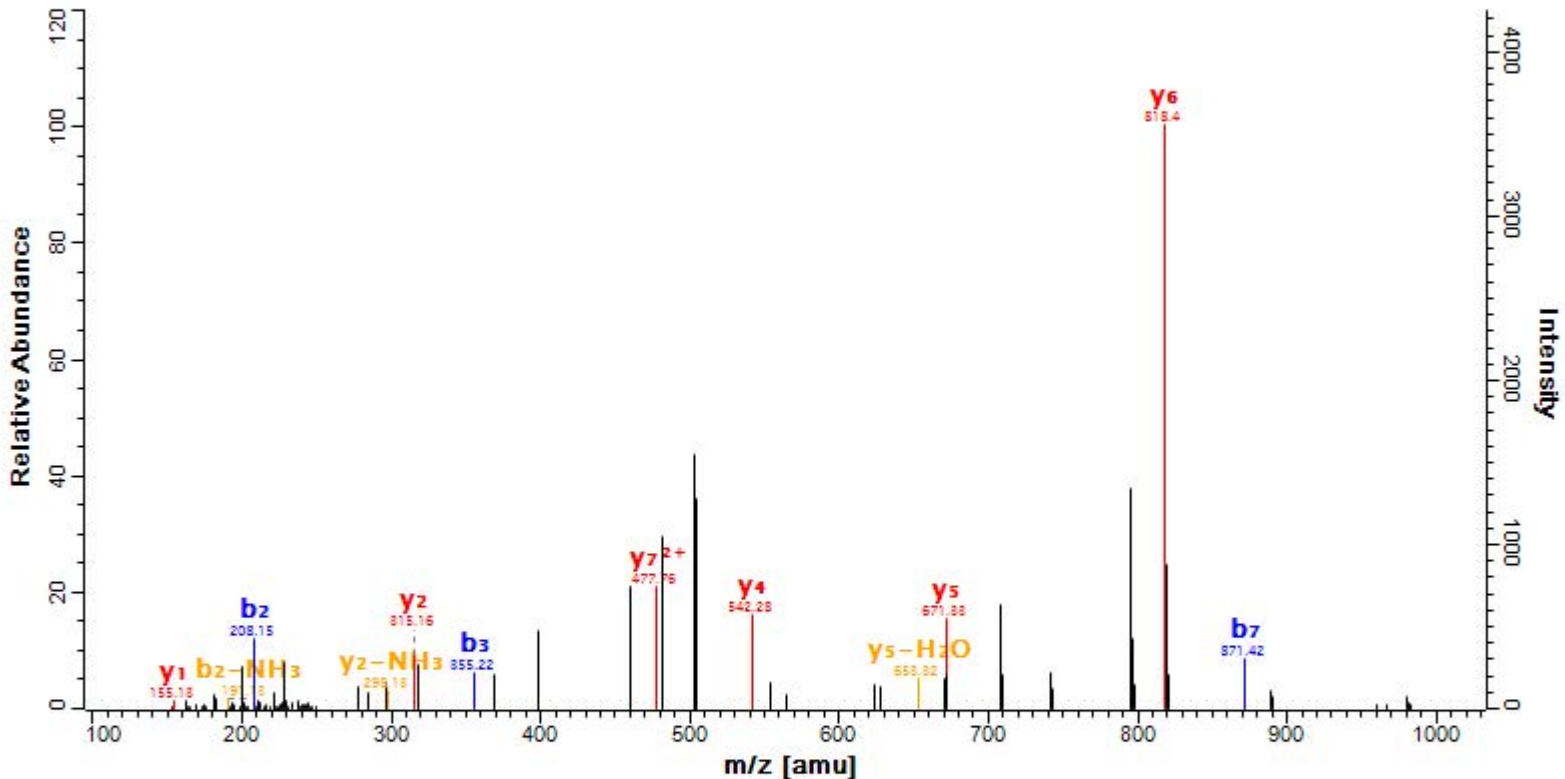

precursor information

|                       |                 |
|-----------------------|-----------------|
| Mass:                 | 1008.50636      |
| m/z:                  | 505.26045       |
| Charge:               | 2+              |
| Retentiontime:        | 9.4765253067016 |
| Score:                | 73.66463        |
| Mass Error [ppm]:     | 0.10317         |
| g PEP:                | 0.020211        |
| Annotation:           | 6 of 8          |
| AminoAcids Coverage:  | 75 %            |
| Intensity Coverage:   | 33 %            |
| Peak Coverage:        | 11 %            |
| Protein Localisation: | 558 ... 565     |

| b ion     |          |     |   | y ion    |          | y <sup>2+</sup> ion |          |
|-----------|----------|-----|---|----------|----------|---------------------|----------|
| Δ dalton  | mass     | seq |   | Δ dalton | mass     | Δ dalton            | mass     |
|           | 72.04439 | 1   | A | 7        |          |                     |          |
| +0.005994 | 208.1536 | 2   | K | 6        | 954.5048 |                     | 477.756  |
| +0.068378 | 355.222  | 3   | F | 5        | 818.3956 | -0.05587            | 818.3956 |
|           | 484.2646 | 4   | E | 4        | 671.3272 | +0.039341           | 671.3272 |
|           | 598.3075 | 5   | N | 3        | 542.2846 | +0.030116           | 542.2846 |
|           | 711.3916 | 6   | L | 2        | 428.2417 |                     | 428.2417 |
| +0.151837 | 871.4222 | 7   | C | 1        | 315.1577 | -0.052              | 315.1577 |
|           |          | 8   | K | 0        | 155.127  | -0.11863            | 155.127  |

Scan number 8166 Raw file LNCAP\_Silac\_23F10\_set3\_09  
 Method ITMS; CID Pepti... 237.46

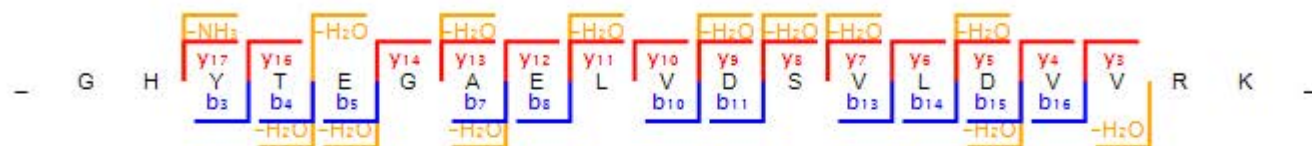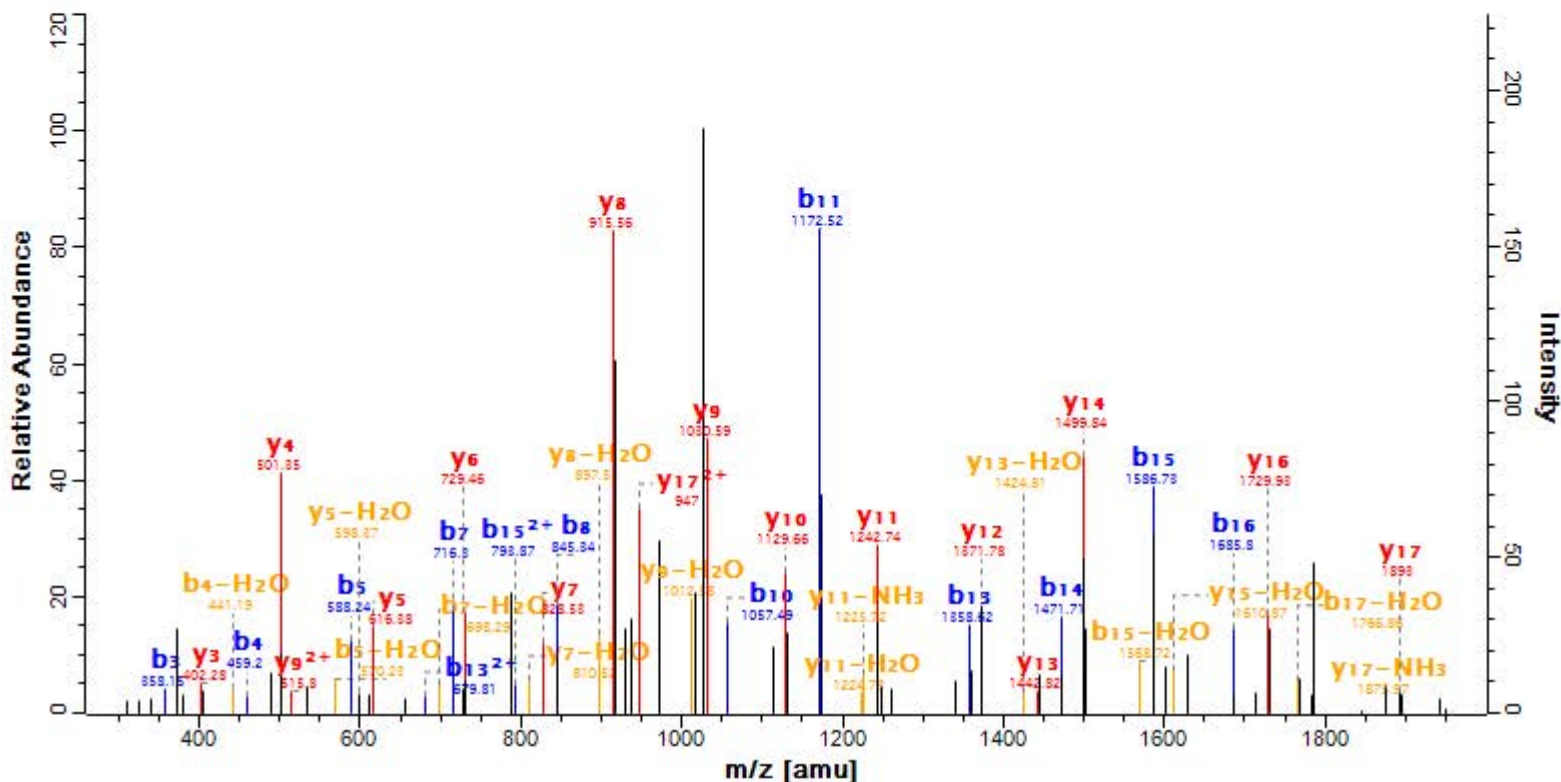

precursor information

|                   |                 |
|-------------------|-----------------|
| Mass:             | 2086.06961      |
| m/z:              | 1044.04208      |
| Charge:           | 2+              |
| Retentiontime:    | 57.943073272705 |
| Score:            | 237.4612        |
| Mass Error [ppm]: | 0.059993        |
| PEP:              | 9.0519E-66      |
| Precursor Type:   | MULTI           |

general information

|                       |             |
|-----------------------|-------------|
| Annotation:           | 15 of 19    |
| AminoAcids Coverage:  | 79 %        |
| Intensity Coverage:   | 52 %        |
| Peak Coverage:        | 44 %        |
| Protein Localisation: | 104 ... 122 |

| b <sup>2+</sup> ion |        | b ion    |        | seq |   |    | y ion    |         | y <sup>2+</sup> ion |         |
|---------------------|--------|----------|--------|-----|---|----|----------|---------|---------------------|---------|
| Δ dalton            | mass   | Δ dalton | mass   |     |   |    | Δ dalton | mass    | Δ dalton            | mass    |
|                     | 58.029 |          | 58.029 | 1   | G | 18 |          |         |                     |         |
|                     | 195.09 |          | 195.09 | 2   | H | 17 | 2030.1   |         | 2030.1              |         |
|                     | 358.15 | -0.141   | 358.15 | 3   | Y | 16 | 1893     | -0.33   | 947                 | +0.1067 |
|                     | 459.2  | +0.0435  | 459.2  | 4   | T | 15 | 1729.9   | -0.112  | 1729.9              |         |
|                     | 588.24 | +0.0799  | 588.24 | 5   | E | 14 | 1628.9   |         | 1628.9              |         |
|                     | 645.26 |          | 645.26 | 6   | G | 13 | 1499.8   | -0.004  | 1499.8              |         |
|                     | 716.3  | -0.007   | 716.3  | 7   | A | 12 | 1442.8   | -0.119  | 1442.8              |         |
|                     | 845.34 | -0.054   | 845.34 | 8   | E | 11 | 1371.8   | -0.066  | 1371.8              |         |
|                     | 958.43 |          | 958.43 | 9   | L | 10 | 1242.7   | +0.0124 | 1242.7              |         |
|                     | 1057.5 | +0.0186  | 1057.5 | 10  | V | 9  | 1129.7   | -0.127  | 1129.7              |         |
|                     | 1172.5 | -0.09    | 1172.5 | 11  | D | 8  | 1030.6   | +0.1842 | 515.8               | -0.411  |
|                     | 1259.6 |          | 1259.6 | 12  | S | 7  | 915.56   | -0.016  | 915.56              |         |
| +0.3538             | 679.81 | -0.023   | 1358.6 | 13  | V | 6  | 828.53   | -0.109  | 828.53              |         |
|                     | 1471.7 | -0.017   | 1471.7 | 14  | L | 5  | 729.46   | +0.0998 | 729.46              |         |
| -0.257              | 793.87 | -0.01    | 1586.7 | 15  | D | 4  | 616.38   | -0.119  | 616.38              |         |
|                     | 1685.8 | -0.035   | 1685.8 | 16  | V | 3  | 501.35   | +0.0542 | 501.35              |         |
|                     | 1784.9 |          | 1784.9 | 17  | V | 2  | 402.28   | +0.2242 | 402.28              |         |
|                     | 1941   |          | 1941   | 18  | R | 1  | 303.21   |         | 303.21              |         |
|                     |        |          |        | 19  | K | 0  | 147.11   |         | 147.11              |         |

Scan number 8170 Raw file LNCAP\_Silac\_23F10\_set3\_09  
 Method ITMS: CID Pepti... 206.36

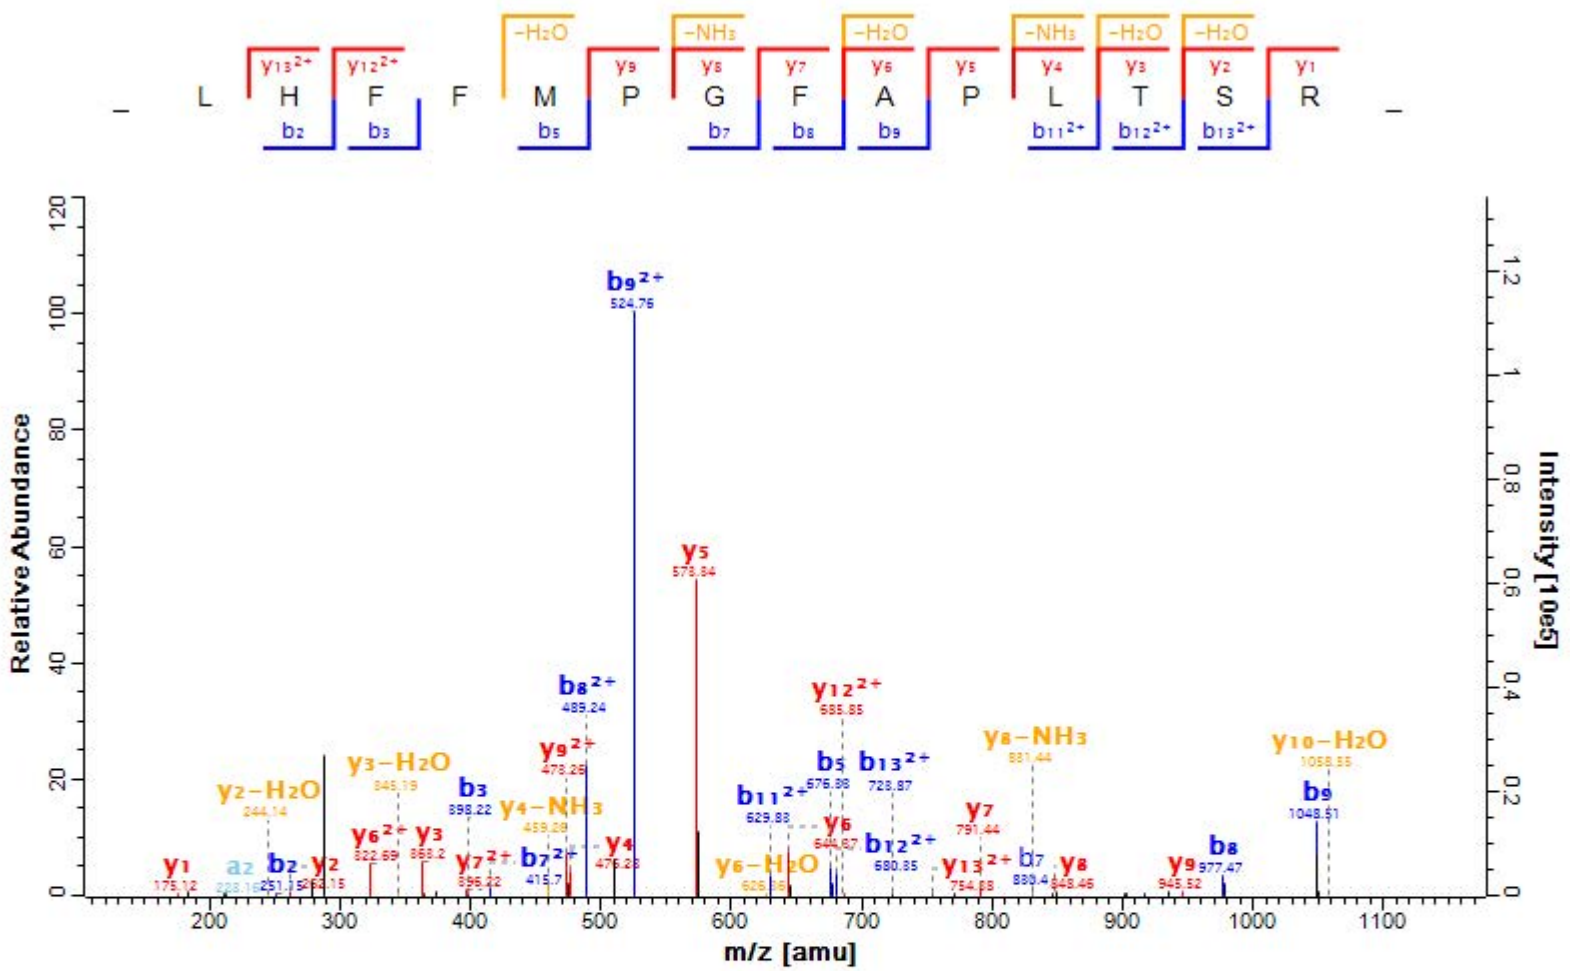

precursor information

|                   |                 |
|-------------------|-----------------|
| Mass:             | 1619.82835      |
| m/z:              | 540.95006       |
| Charge:           | 3+              |
| Retentiontime:    | 57.980754852294 |
| Score:            | 206.363         |
| Mass Error [ppm]: | 0.056618        |
| PEP:              | 5.8354E-25      |
| Precursor Type:   | MULTI           |

general information

|                       |             |
|-----------------------|-------------|
| Annotation:           | 12 of 14    |
| AminoAcids Coverage:  | 86 %        |
| Intensity Coverage:   | 79 %        |
| Peak Coverage:        | 43 %        |
| Protein Localisation: | 263 ... 276 |

| a ion         |               | b <sup>2+</sup> ion |               | b ion |               | y ion         |               | y <sup>2+</sup> ion |        |
|---------------|---------------|---------------------|---------------|-------|---------------|---------------|---------------|---------------------|--------|
| Δ dalton mass | Δ dalton mass | Δ dalton mass       | Δ dalton mass | seq   | Δ dalton mass | Δ dalton mass | Δ dalton mass | Δ dalton mass       |        |
| 86.1          | 114.1         | 114.1               | 1             | L     | 13            |               |               |                     |        |
| +0.179223.2   | 251.2         | +0.054251.2         | 2             | H     | 12            | 1508          | 754.4         | -0.24               |        |
| 370.2         | 398.2         | +0.097398.2         | 3             | F     | 11            | 1371          | 685.8         | +0.371              |        |
| 517.3         | 545.3         | 545.3               | 4             | F     | 10            | 1224          | 1224          |                     |        |
| 648.3         | 676.3         | +0.025676.3         | 5             | M     | 9             | 1077          | 1077          |                     |        |
| 745.4         | 773.4         | 773.4               | 6             | P     | 8             | 945.5         | -0.11         | 473.3               | +0.136 |
| 802.4         | +0.071415.7   | +0.01               | 7             | G     | 7             | 848.5         | +0.224        | 848.5               |        |
| 949.5         | +0.205489.2   | -0.05               | 8             | F     | 6             | 791.4         | -0.07         | 396.2               | +0.136 |
| 1021          | +0.226524.8   | -0.01               | 9             | A     | 5             | 644.4         | +0.056        | 322.7               | +0.131 |
| 1118          | 1146          | 1146                | 10            | P     | 4             | 573.3         | +0.05         | 573.3               |        |
| 1231          | +0.279629.8   |                     | 11            | L     | 3             | 476.3         | +0.192        | 476.3               |        |
| 1332          | +0.247680.3   |                     | 12            | T     | 2             | 363.2         | +0.029        | 363.2               |        |
| 1419          | +0.213723.9   |                     | 13            | S     | 1             | 262.2         | +0.033        | 262.2               |        |
|               |               |                     | 14            | R     | 0             | 175.1         | +0.221        | 175.1               |        |

Scan number 8419 Raw file LNCAP\_Silac\_23F10\_set3\_09  
 Method ITMS; CID Pepti... 69.77

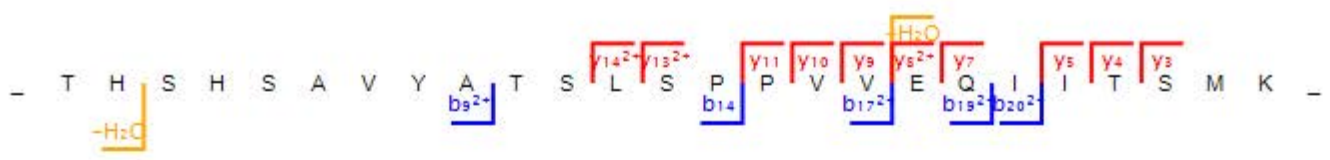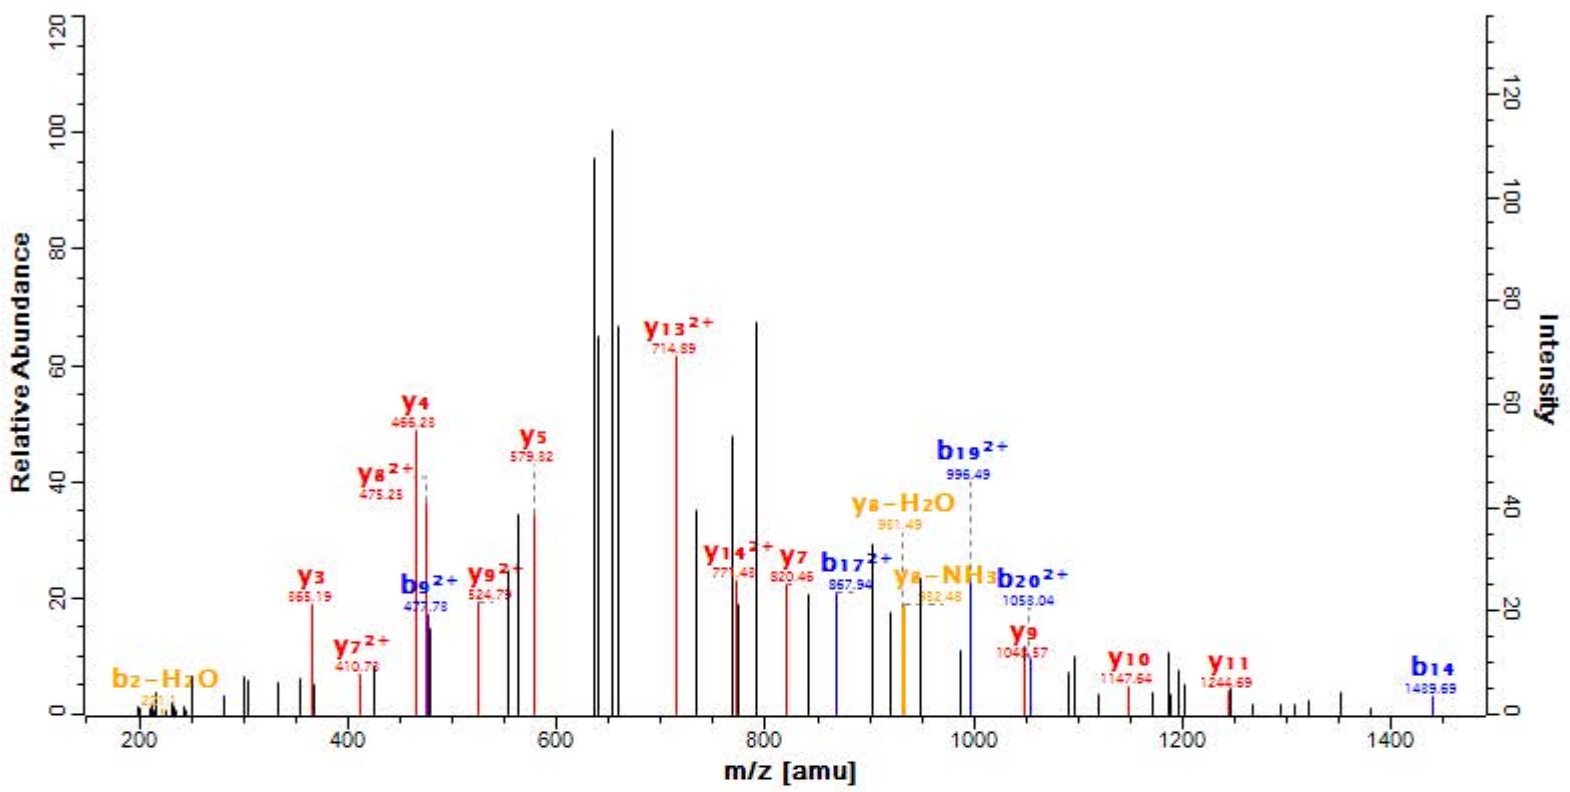

precursor information

|                   |                 |
|-------------------|-----------------|
| Mass:             | 2682.3689       |
| m/z:              | 671.5995        |
| Charge:           | 4+              |
| Retentiontime:    | 60.558139801025 |
| Score:            | 69.76527        |
| Mass Error [ppm]: | 0.074235        |
| PEP:              | 1.9491E-05      |
| Precursor Type:   | MULTI           |

| b <sup>2+</sup> ion |        | b ion    |        | seq |   |    | y ion    |         | y <sup>2+</sup> ion |         |
|---------------------|--------|----------|--------|-----|---|----|----------|---------|---------------------|---------|
| Δ dalton            | mass   | Δ dalton | mass   |     |   |    | Δ dalton | mass    | Δ dalton            | mass    |
|                     | 102.05 |          | 102.05 | 1   | T | 24 |          |         |                     |         |
|                     | 239.11 |          | 239.11 | 2   | H | 23 | 2582.3   |         | 2582.3              |         |
|                     | 326.15 |          | 326.15 | 3   | S | 22 | 2445.3   |         | 2445.3              |         |
|                     | 463.2  |          | 463.2  | 4   | H | 21 | 2358.2   |         | 2358.2              |         |
|                     | 550.24 |          | 550.24 | 5   | S | 20 | 2221.2   |         | 2221.2              |         |
|                     | 621.27 |          | 621.27 | 6   | A | 19 | 2134.1   |         | 2134.1              |         |
|                     | 720.34 |          | 720.34 | 7   | V | 18 | 2063.1   |         | 2063.1              |         |
|                     | 883.41 |          | 883.41 | 8   | Y | 17 | 1964     |         | 1964                |         |
| -0.05               | 477.73 |          | 954.44 | 9   | A | 16 | 1801     |         | 1801                |         |
|                     | 1055.5 |          | 1055.5 | 10  | T | 15 | 1729.9   |         | 1729.9              |         |
|                     | 1142.5 |          | 1142.5 | 11  | S | 14 | 1628.9   |         | 1628.9              |         |
|                     | 1255.6 |          | 1255.6 | 12  | L | 13 | 1541.9   |         | 771.43              | +0.376  |
|                     | 1342.6 |          | 1342.6 | 13  | S | 12 | 1428.8   |         | 714.89              | +0.2558 |
|                     | 1439.7 | -0.194   | 1439.7 | 14  | P | 11 | 1341.7   |         | 1341.7              |         |
|                     | 1536.7 |          | 1536.7 | 15  | P | 10 | 1244.7   | +0.0162 | 1244.7              |         |
|                     | 1635.8 |          | 1635.8 | 16  | V | 9  | 1147.6   | +0.2117 | 1147.6              |         |
| +0.2282             | 867.94 |          | 1734.9 | 17  | V | 8  | 1048.6   | +0.1815 | 524.79              | -0.391  |
|                     | 1863.9 |          | 1863.9 | 18  | E | 7  | 949.5    |         | 475.25              | -0.227  |
| -0.139              | 996.49 |          | 1992   | 19  | Q | 6  | 820.46   | +0.4533 | 410.73              | +0.4014 |
| +0.4635             | 1053   |          | 2105.1 | 20  | I | 5  | 692.4    |         | 692.4               |         |
|                     | 2218.2 |          | 2218.2 | 21  | I | 4  | 579.32   | -0.036  | 579.32              |         |
|                     | 2319.2 |          | 2319.2 | 22  | T | 3  | 466.23   | -0.026  | 466.23              |         |
|                     | 2406.2 |          | 2406.2 | 23  | S | 2  | 365.19   | +0.1493 | 365.19              |         |
|                     | 2537.3 |          | 2537.3 | 24  | M | 1  | 278.15   |         | 278.15              |         |
|                     |        |          |        | 25  | K | 0  | 147.11   |         | 147.11              |         |

general information

|                       |             |
|-----------------------|-------------|
| Annotation:           | 14 of 25    |
| AminoAcids Coverage:  | 56 %        |
| Intensity Coverage:   | 29 %        |
| Peak Coverage:        | 25 %        |
| Protein Localisation: | 400 ... 424 |

Scan number 1039 Raw file LNCAP\_Silac\_23F10\_set3\_10  
 Method ITMS; CID Pepti... 62.47

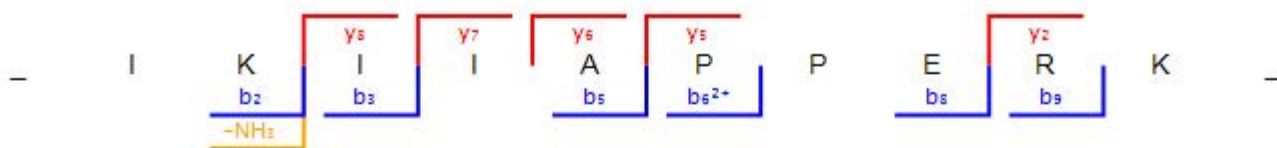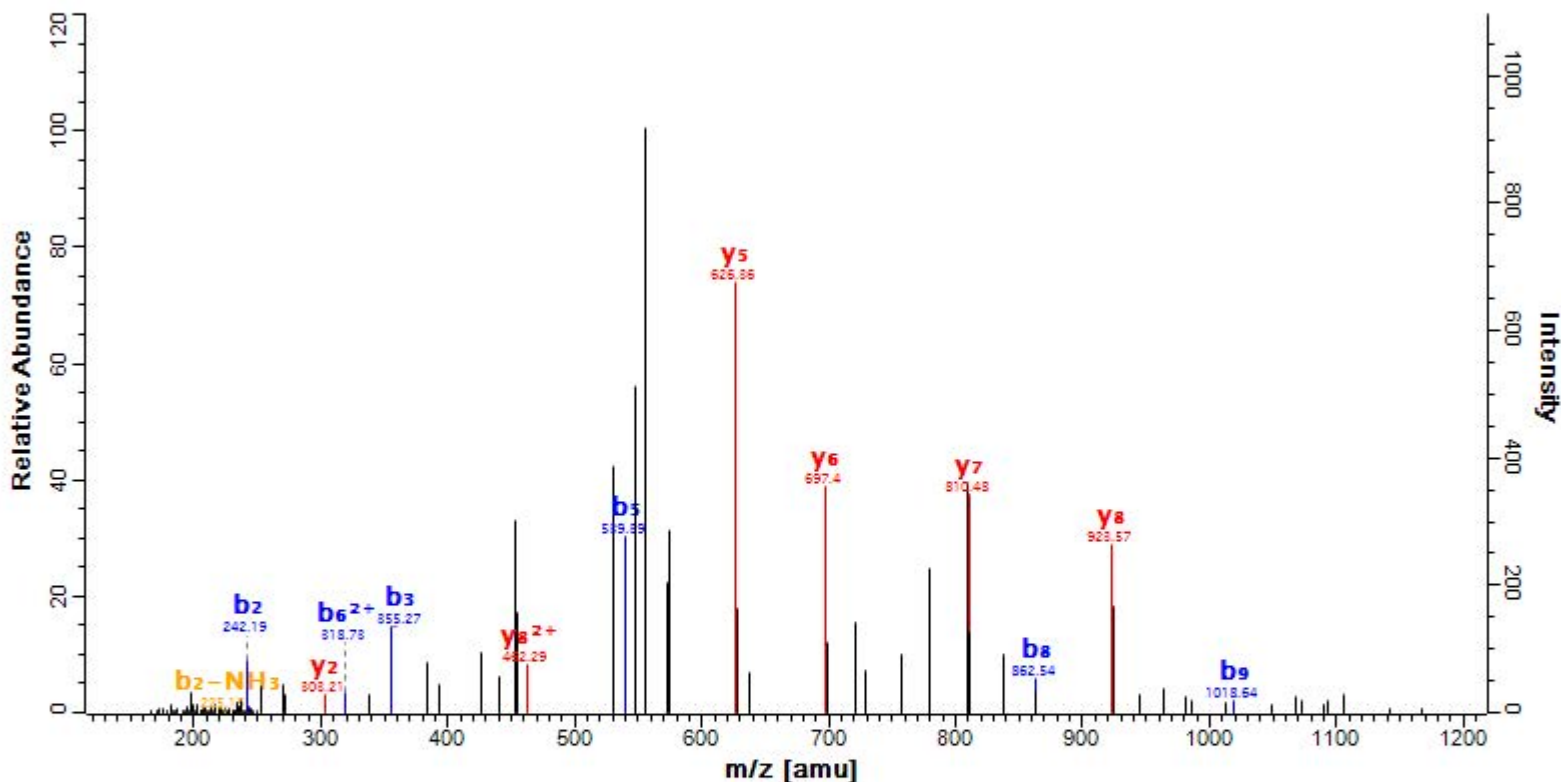

#### precursor information

|                   |                 |
|-------------------|-----------------|
| Mass:             | 1163.73925      |
| m/z:              | 582.8769        |
| Charge:           | 2+              |
| Retentiontime:    | 11.945028305053 |
| Score:            | 62.46618        |
| Mass Error [ppm]: | 0.18775         |
| PEP:              | 0.015207        |
| Precursor Type:   | MULTI           |

|                       |             |
|-----------------------|-------------|
| Annotation:           | 7 of 10     |
| AminoAcids Coverage:  | 70 %        |
| Intensity Coverage:   | 30 %        |
| Peak Coverage:        | 12 %        |
| Protein Localisation: | 327 ... 336 |

| b <sup>2+</sup> ion |        | b ion    |        |    |     |   | y ion    |         | y <sup>2+</sup> ion |         |
|---------------------|--------|----------|--------|----|-----|---|----------|---------|---------------------|---------|
| Δ dalton            | mass   | Δ dalton | mass   |    | seq |   | Δ dalton | mass    | Δ dalton            | mass    |
|                     | 114.09 |          | 114.09 | 1  | I   | 9 |          |         |                     |         |
|                     | 242.19 | +0.1024  | 242.19 | 2  | K   | 8 | 1051.7   |         | 1051.7              |         |
|                     | 355.27 | +0.1765  | 355.27 | 3  | I   | 7 | 923.57   | -0.018  | 462.29              | +0.2303 |
|                     | 468.35 |          | 468.35 | 4  | I   | 6 | 810.48   | +0.0499 | 810.48              |         |
|                     | 539.39 | +0.1211  | 539.39 | 5  | A   | 5 | 697.4    | +0.0243 | 697.4               |         |
| +0.1525             | 318.73 |          | 636.44 | 6  | P   | 4 | 626.36   | -0.019  | 626.36              |         |
|                     | 733.5  |          | 733.5  | 7  | P   | 3 | 529.31   |         | 529.31              |         |
|                     | 862.54 | -0.034   | 862.54 | 8  | E   | 2 | 432.26   |         | 432.26              |         |
|                     | 1018.6 | +0.1073  | 1018.6 | 9  | R   | 1 | 303.21   | +0.2329 | 303.21              |         |
|                     |        |          |        | 10 | K   | 0 | 147.11   |         | 147.11              |         |

Scan number 1063 Raw file LNCAP\_Silac\_23F10\_set3\_10  
 Method ITMS; CID Pepti... 69.95

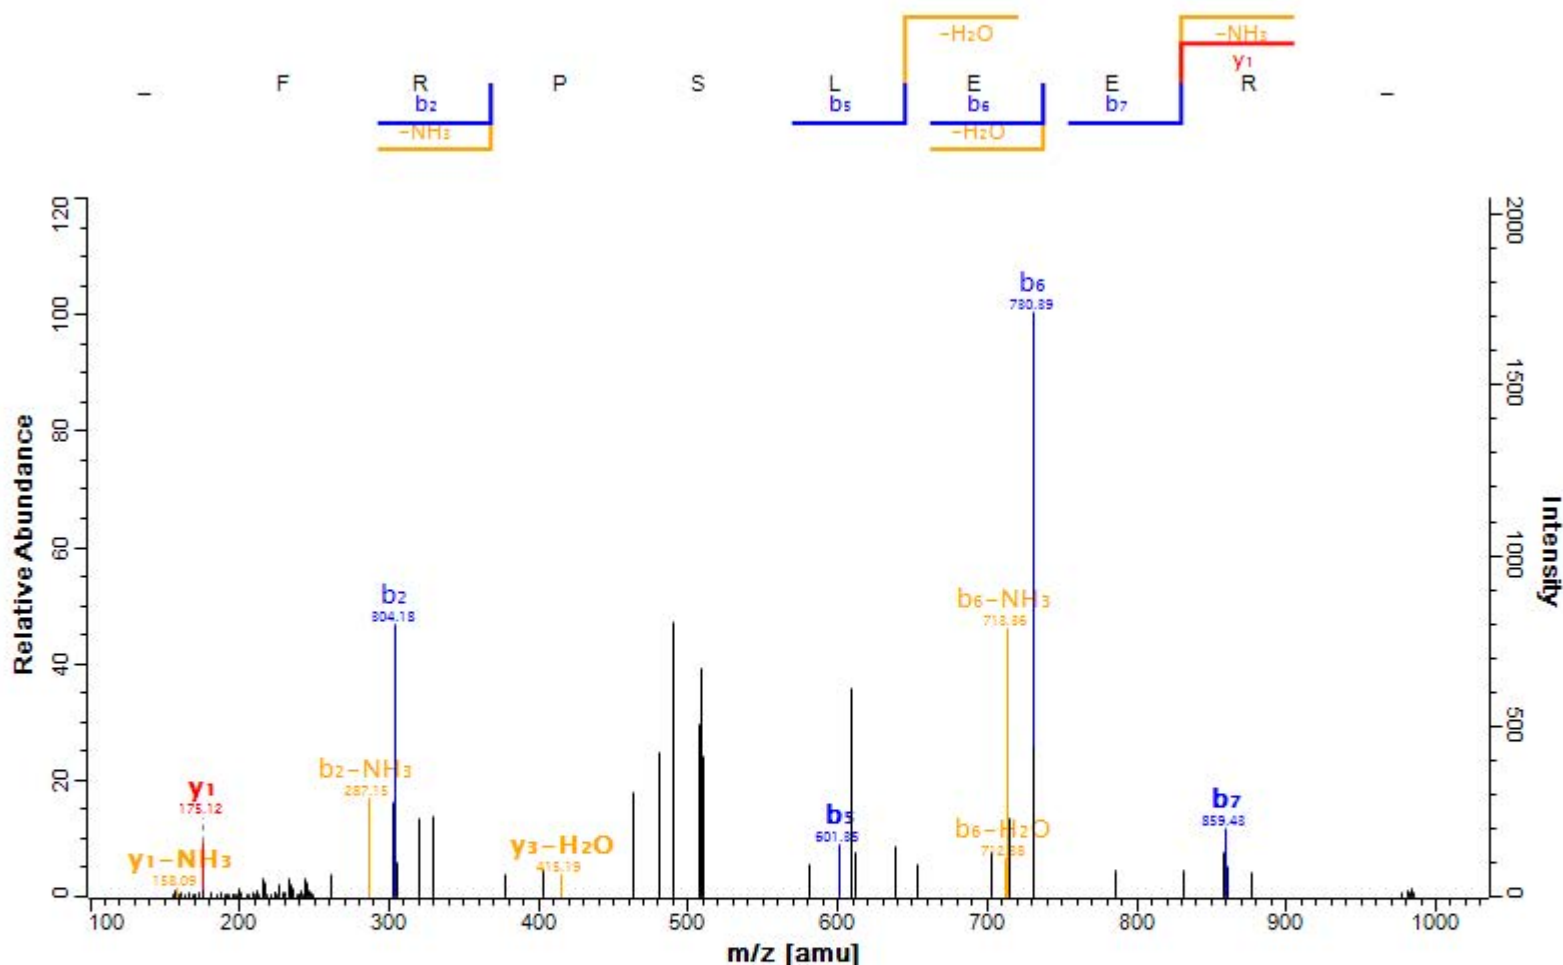

#### precursor information

|                       |                 |
|-----------------------|-----------------|
| Mass:                 | 1032.53516      |
| m/z:                  | 517.27485       |
| Charge:               | 2+              |
| Retentiontime:        | 12.100226402282 |
| Score:                | 69.95354        |
| Mass Error [ppm]:     | -0.085247       |
| g PEP:                | 0.022526        |
| Annotation:           | 6 of 8          |
| AminoAcids Coverage:  | 75 %            |
| Intensity Coverage:   | 36 %            |
| Peak Coverage:        | 9 %             |
| Protein Localisation: | 301 ... 308     |

| b ion           |               |   |     |   | y ion           |            |
|-----------------|---------------|---|-----|---|-----------------|------------|
| $\Delta$ dalton | mass          |   | seq |   | $\Delta$ dalton | mass       |
|                 | 148.075690383 | 1 | F   | 7 |                 |            |
| +0.0867484      | 304.176801411 | 2 | R   | 6 | 886.474105644   |            |
|                 | 401.229565263 | 3 | P   | 5 | 730.372994616   |            |
|                 | 488.261593673 | 4 | S   | 4 | 633.320230764   |            |
| +0.3975674      | 601.345657653 | 5 | L   | 3 | 546.288202354   |            |
| +0.0391784      | 730.388250749 | 6 | E   | 2 | 433.204138373   |            |
| +0.0425448      | 859.430843846 | 7 | E   | 1 | 304.161545277   |            |
|                 |               | 8 | R   | 0 | 175.118952181   | -0.0543465 |



Scan number 1081 Raw file LNCAP\_Silac\_23F10\_set3\_10  
 Method ITMS; CID Pepti... 80.91

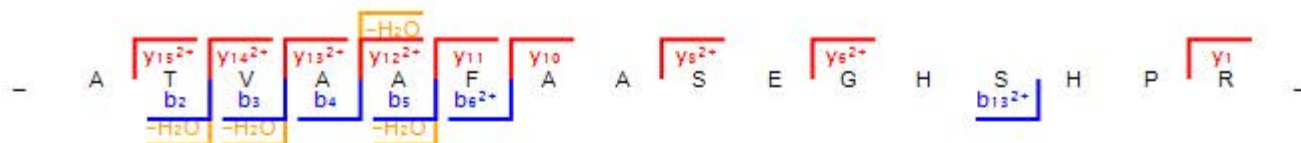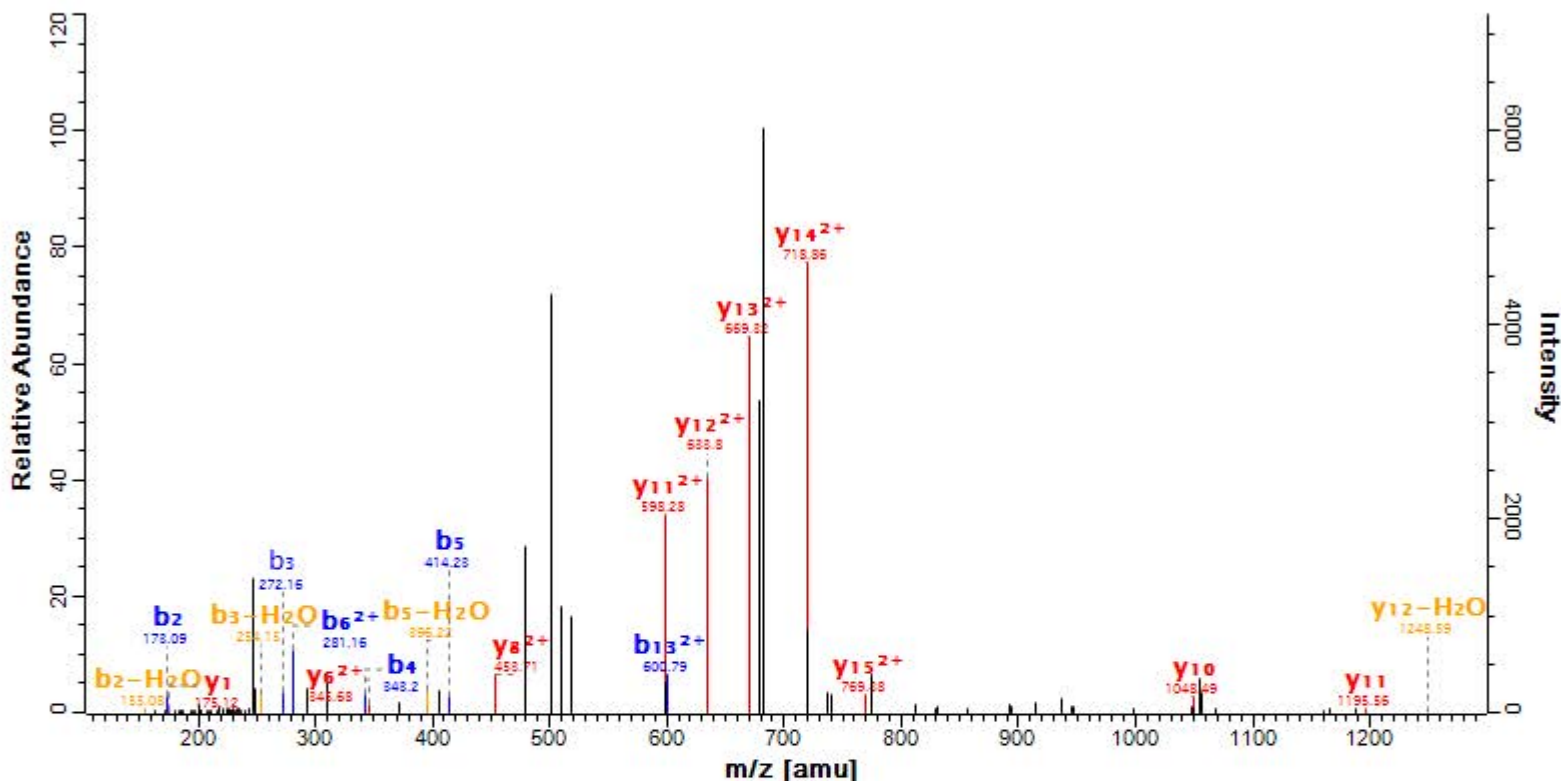

#### precursor information

|                   |                 |
|-------------------|-----------------|
| Mass:             | 1607.7803       |
| m/z:              | 536.93404       |
| Charge:           | 3+              |
| Retentiontime:    | 12.210351943969 |
| Score:            | 80.90513        |
| Mass Error [ppm]: | -0.097665       |
| PEP:              | 0.00019792      |
| Precursor Type:   | MULTI           |

#### general information

|                       |            |
|-----------------------|------------|
| Annotation:           | 12 of 16   |
| AminoAcids Coverage:  | 75 %       |
| Intensity Coverage:   | 35 %       |
| Peak Coverage:        | 20 %       |
| Protein Localisation: | 92 ... 107 |

| b <sup>2+</sup> ion |        | b ion    |        |    |     |    | y ion    |         | y <sup>2+</sup> ion |         |
|---------------------|--------|----------|--------|----|-----|----|----------|---------|---------------------|---------|
| Δ dalton            | mass   | Δ dalton | mass   |    | seq |    | Δ dalton | mass    | Δ dalton            | mass    |
|                     | 72.044 |          | 72.044 | 1  | A   | 15 |          |         |                     |         |
|                     | 173.09 | +0.0783  | 173.09 | 2  | T   | 14 | 1537.8   |         | 769.38              | +0.2456 |
|                     | 272.16 | -0.053   | 272.16 | 3  | V   | 13 | 1436.7   |         | 718.86              | +0.221  |
|                     | 343.2  | -0.002   | 343.2  | 4  | A   | 12 | 1337.6   |         | 669.32              | +0.2852 |
|                     | 414.23 | +0.0038  | 414.23 | 5  | A   | 11 | 1266.6   |         | 633.8               | +0.273  |
| -0.099              | 281.16 |          | 561.3  | 6  | F   | 10 | 1195.6   | -0.029  | 598.28              | +0.2749 |
|                     | 632.34 |          | 632.34 | 7  | A   | 9  | 1048.5   | +0.3792 | 1048.5              |         |
|                     | 703.38 |          | 703.38 | 8  | A   | 8  | 977.45   |         | 977.45              |         |
|                     | 790.41 |          | 790.41 | 9  | S   | 7  | 906.42   |         | 453.71              | +0.1842 |
|                     | 919.45 |          | 919.45 | 10 | E   | 6  | 819.39   |         | 819.39              |         |
|                     | 976.47 |          | 976.47 | 11 | G   | 5  | 690.34   |         | 345.68              | +0.3847 |
|                     | 1113.5 |          | 1113.5 | 12 | H   | 4  | 633.32   |         | 633.32              |         |
| -0.069              | 600.79 |          | 1200.6 | 13 | S   | 3  | 496.26   |         | 496.26              |         |
|                     | 1337.6 |          | 1337.6 | 14 | H   | 2  | 409.23   |         | 409.23              |         |
|                     | 1434.7 |          | 1434.7 | 15 | P   | 1  | 272.17   |         | 272.17              |         |
|                     |        |          |        | 16 | R   | 0  | 175.12   | +0.1215 | 175.12              |         |

Scan number 1214 Raw file LNCAP\_Silac\_23F10\_set3\_10  
 Method ITMS; CID Pepti... 62.29

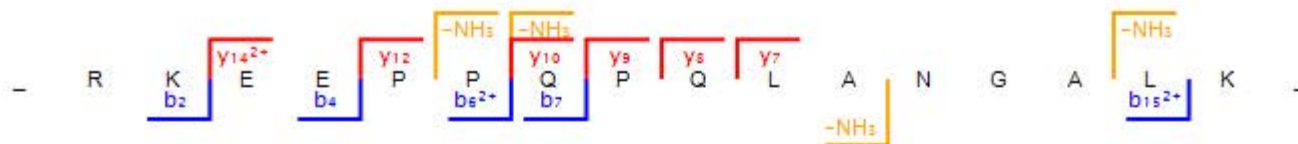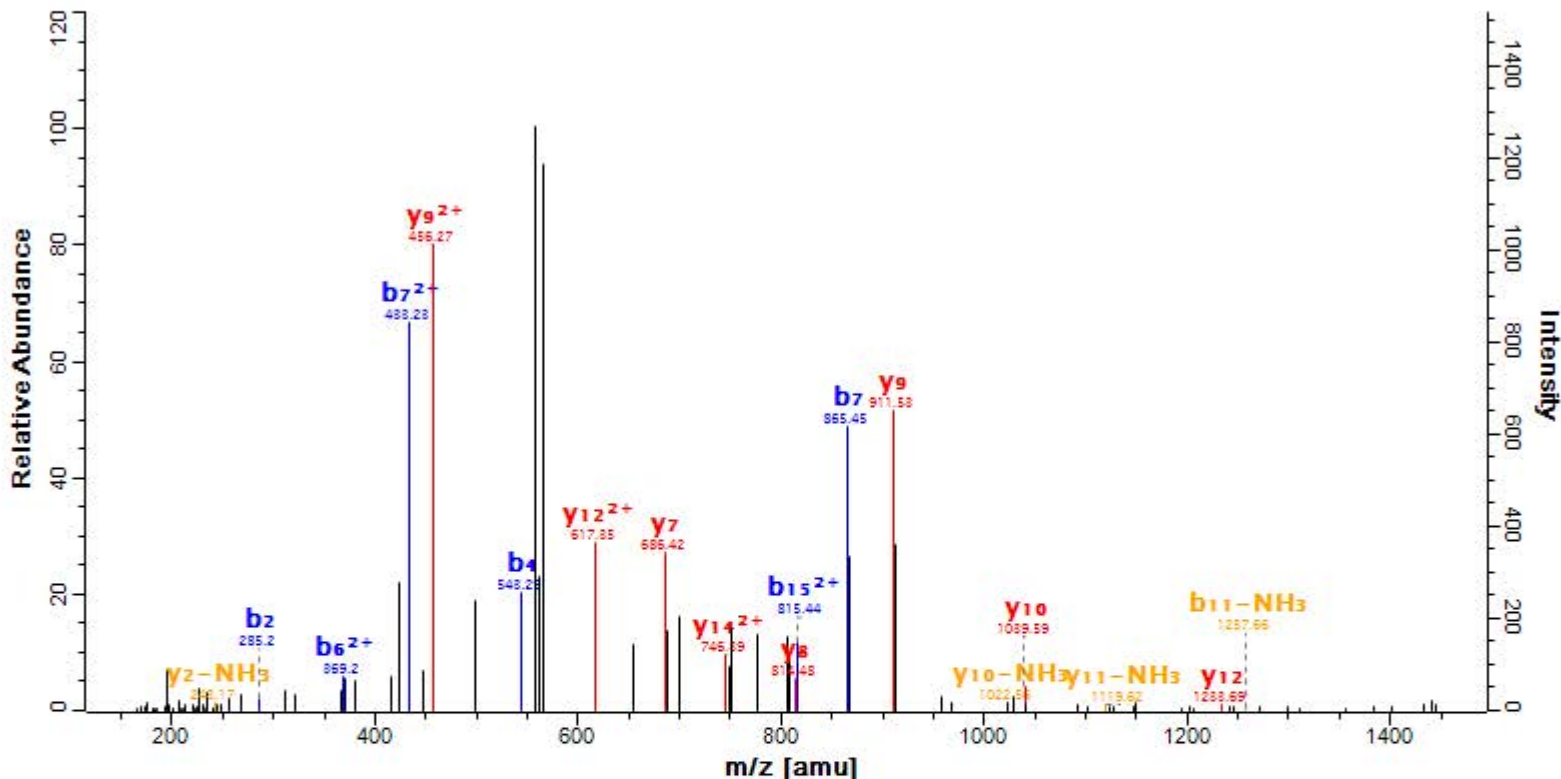

#### precursor information

|                   |                 |
|-------------------|-----------------|
| Mass:             | 1774.96952      |
| m/z:              | 592.66378       |
| Charge:           | 3+              |
| Retentiontime:    | 13.100241661071 |
| Score:            | 62.2875         |
| Mass Error [ppm]: | 0.30523         |
| PEP:              | 0.0020388       |
| Precursor Type:   | MULTI           |

#### general information

|                       |          |
|-----------------------|----------|
| Annotation:           | 11 of 16 |
| AminoAcids Coverage:  | 69 %     |
| Intensity Coverage:   | 38 %     |
| Peak Coverage:        | 17 %     |
| Protein Localisation: | 6 ... 21 |

| b <sup>2+</sup> ion |        | b ion    |        | seq |   |    | y ion    |         | y <sup>2+</sup> ion |         |
|---------------------|--------|----------|--------|-----|---|----|----------|---------|---------------------|---------|
| Δ dalton            | mass   | Δ dalton | mass   |     |   |    | Δ dalton | mass    | Δ dalton            | mass    |
|                     | 157.11 |          | 157.11 | 1   | R | 15 |          |         |                     |         |
|                     | 285.2  | -0.048   | 285.2  | 2   | K | 14 | 1619.9   |         | 1619.9              |         |
|                     | 414.25 |          | 414.25 | 3   | E | 13 | 1491.8   |         | 746.39              | -0.3    |
|                     | 543.29 | -0.023   | 543.29 | 4   | E | 12 | 1362.7   |         | 1362.7              |         |
|                     | 640.34 |          | 640.34 | 5   | P | 11 | 1233.7   | -0.198  | 617.35              | -0.049  |
| -0.273              | 369.2  |          | 737.39 | 6   | P | 10 | 1136.6   |         | 1136.6              |         |
| +0.2138             | 433.23 | +0.0225  | 865.45 | 7   | Q | 9  | 1039.6   | +0.3875 | 1039.6              |         |
|                     | 962.51 |          | 962.51 | 8   | P | 8  | 911.53   | -0.038  | 456.27              | +0.1162 |
|                     | 1090.6 |          | 1090.6 | 9   | Q | 7  | 814.48   | +0.0195 | 814.48              |         |
|                     | 1203.6 |          | 1203.6 | 10  | L | 6  | 686.42   | -0.08   | 686.42              |         |
|                     | 1274.7 |          | 1274.7 | 11  | A | 5  | 573.34   |         | 573.34              |         |
|                     | 1388.7 |          | 1388.7 | 12  | N | 4  | 502.3    |         | 502.3               |         |
|                     | 1445.7 |          | 1445.7 | 13  | G | 3  | 388.26   |         | 388.26              |         |
|                     | 1516.8 |          | 1516.8 | 14  | A | 2  | 331.23   |         | 331.23              |         |
| +0.3717             | 815.44 |          | 1629.9 | 15  | L | 1  | 260.2    |         | 260.2               |         |
|                     |        |          |        | 16  | K | 0  | 147.11   |         | 147.11              |         |

Scan number 1364 Raw file LNCAP\_Silac\_23F10\_set3\_10  
 Method ITMS; CID Pepti... 162.41

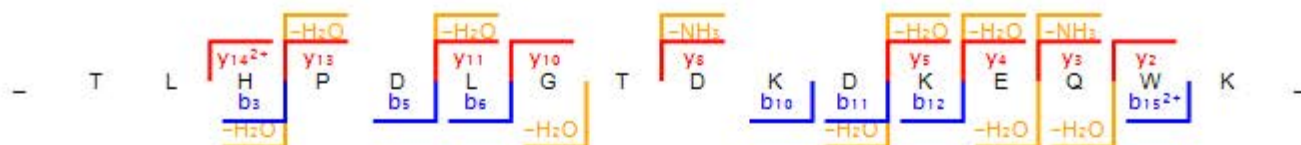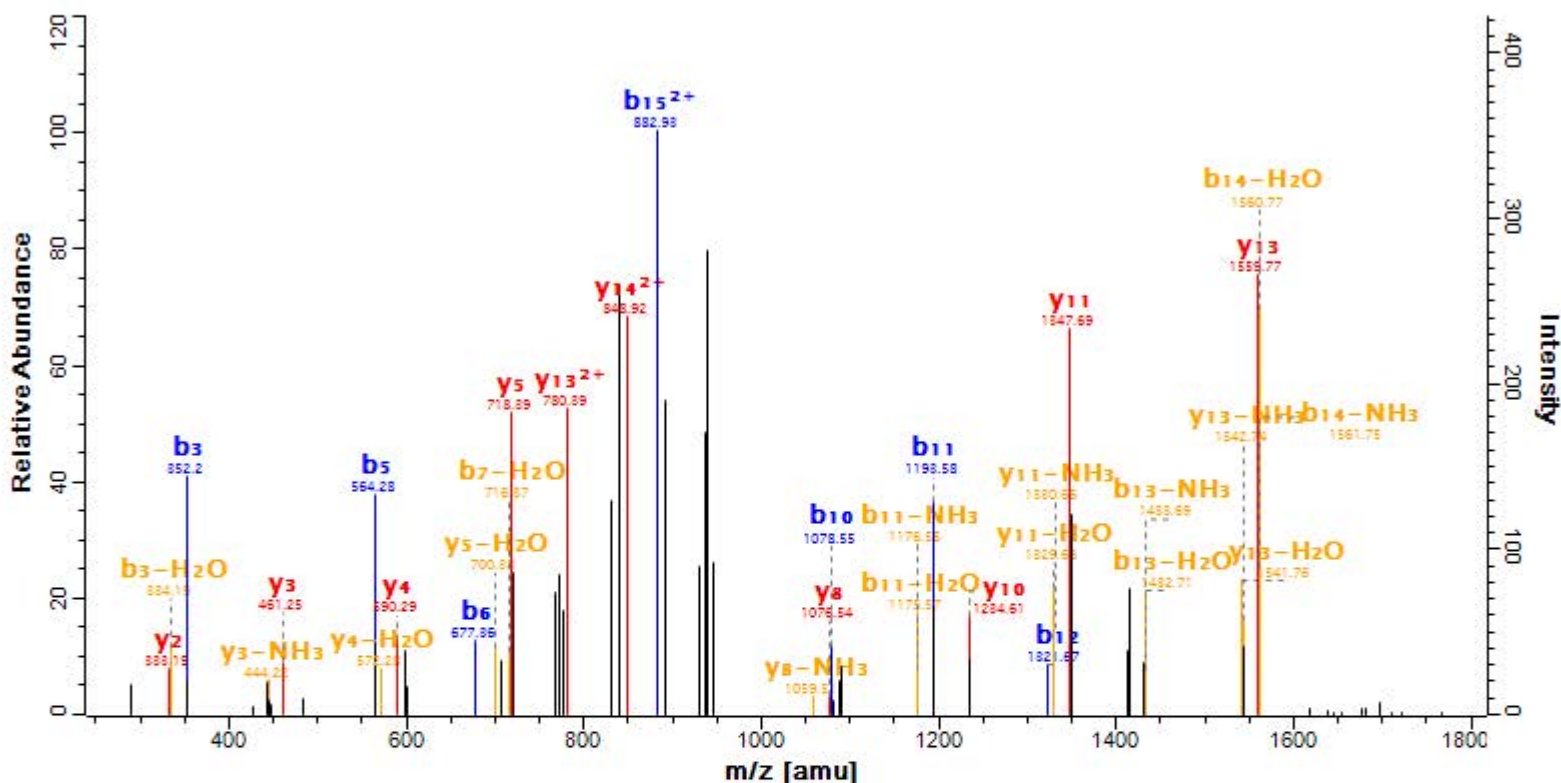

#### precursor information

|                   |                 |
|-------------------|-----------------|
| Mass:             | 1909.95409      |
| m/z:              | 955.98432       |
| Charge:           | 2+              |
| Retentiontime:    | 14.063008308410 |
| Score:            | 162.407         |
| Mass Error [ppm]: | 0.3645          |
| PEP:              | 4.0669E-20      |
| Precursor Type:   | MULTI           |

#### general information

|                       |             |
|-----------------------|-------------|
| Annotation:           | 12 of 16    |
| AminoAcids Coverage:  | 75 %        |
| Intensity Coverage:   | 56 %        |
| Peak Coverage:        | 42 %        |
| Protein Localisation: | 242 ... 257 |

| b <sup>2+</sup> ion |        | b ion    |        | seq |   |    | y ion    |         | y <sup>2+</sup> ion |         |
|---------------------|--------|----------|--------|-----|---|----|----------|---------|---------------------|---------|
| Δ dalton            | mass   | Δ dalton | mass   |     |   |    | Δ dalton | mass    | Δ dalton            | mass    |
|                     | 102.05 |          | 102.05 | 1   | T | 15 |          |         |                     |         |
|                     | 215.14 |          | 215.14 | 2   | L | 14 | 1809.9   |         | 1809.9              |         |
|                     | 352.2  | +0.0063  | 352.2  | 3   | H | 13 | 1696.8   |         | 848.92              | +0.2777 |
|                     | 449.25 |          | 449.25 | 4   | P | 12 | 1559.8   | -0.096  | 780.39              | +0.2415 |
|                     | 564.28 | -0.016   | 564.28 | 5   | D | 11 | 1462.7   |         | 1462.7              |         |
|                     | 677.36 | +0.1     | 677.36 | 6   | L | 10 | 1347.7   | +0.0006 | 1347.7              |         |
|                     | 734.38 |          | 734.38 | 7   | G | 9  | 1234.6   | +0.0898 | 1234.6              |         |
|                     | 835.43 |          | 835.43 | 8   | T | 8  | 1177.6   |         | 1177.6              |         |
|                     | 950.46 |          | 950.46 | 9   | D | 7  | 1076.5   | +0.1585 | 1076.5              |         |
|                     | 1078.6 | +0.1196  | 1078.6 | 10  | K | 6  | 961.51   |         | 961.51              |         |
|                     | 1193.6 | -0.093   | 1193.6 | 11  | D | 5  | 833.42   |         | 833.42              |         |
|                     | 1321.7 | +0.1291  | 1321.7 | 12  | K | 4  | 718.39   | +0.0065 | 718.39              |         |
|                     | 1450.7 |          | 1450.7 | 13  | E | 3  | 590.29   | -0.018  | 590.29              |         |
|                     | 1578.8 |          | 1578.8 | 14  | Q | 2  | 461.25   | +0.0816 | 461.25              |         |
| +0.2894             | 882.93 |          | 1764.9 | 15  | W | 1  | 333.19   | +0.035  | 333.19              |         |
|                     |        |          |        | 16  | K | 0  | 147.11   |         | 147.11              |         |

Scan number 2094 Raw file LNCAP\_Silac\_23F10\_set3\_10  
 Method ITMS; CID Pepti... 96.49

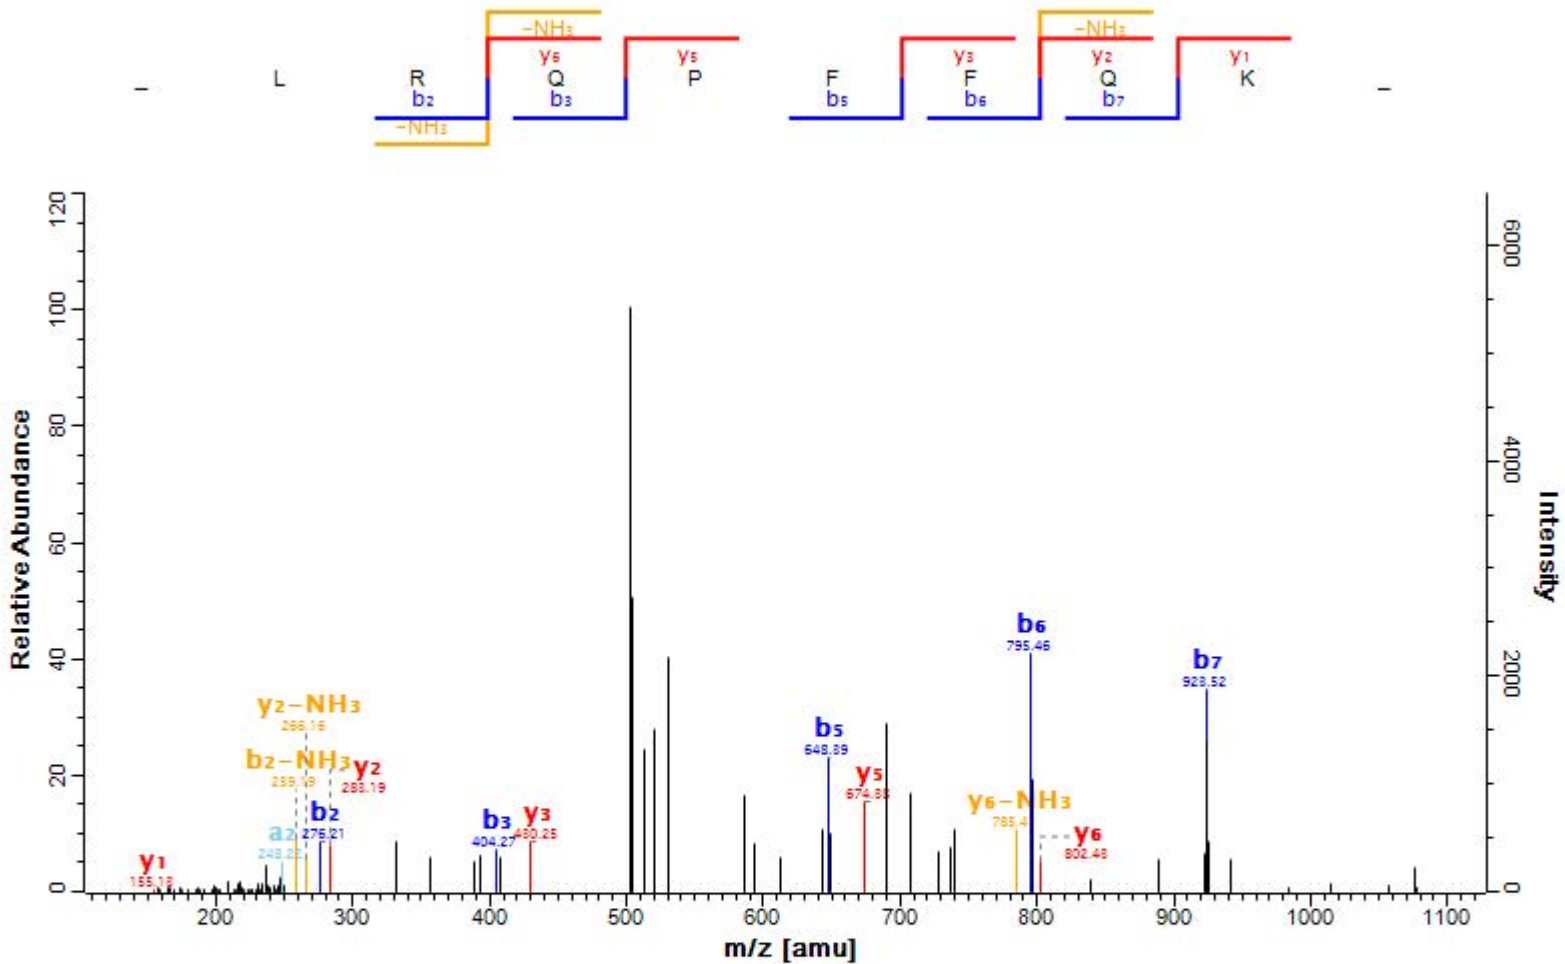

#### precursor information

|                       |                 |
|-----------------------|-----------------|
| Mass:                 | 1062.5979       |
| m/z:                  | 532.30623       |
| Charge:               | 2+              |
| Retentiontime:        | 18.693719863891 |
| Score:                | 96.49162        |
| Mass Error [ppm]:     | 0.41607         |
| g PEP:                | 0.0093753       |
| Annotation:           | 7 of 8          |
| AminoAcids Coverag    | 88 %            |
| Intensity Coverage:   | 25 %            |
| Peak Coverage:        | 14 %            |
| Protein Localisation: | 63 ... 70       |

| a ion    |          | b ion     |          |     | y ion    |      |          |           |
|----------|----------|-----------|----------|-----|----------|------|----------|-----------|
| Δ dalton | mass     | Δ dalton  | mass     | seq | Δ dalton | mass |          |           |
|          | 86.09643 |           | 114.0913 | 1   | L        | 7    |          |           |
| -0.02757 | 248.2177 | +0.01679  | 276.2126 | 2   | R        | 6    | 964.555  |           |
|          | 376.2762 | +0.016806 | 404.2712 | 3   | Q        | 5    | 802.4337 | -0.03452  |
|          | 473.329  |           | 501.3239 | 4   | P        | 4    | 674.3752 | +0.056652 |
|          | 620.3974 | -0.16864  | 648.3923 | 5   | F        | 3    | 577.3224 |           |
|          | 767.4658 | -0.02789  | 795.4607 | 6   | F        | 2    | 430.254  | +0.103305 |
|          | 895.5244 | +0.011862 | 923.5193 | 7   | Q        | 1    | 283.1856 | -0.02603  |
|          |          |           |          | 8   | K        | 0    | 155.127  | -0.06874  |

Scan number 2101 Raw file LNCAP\_Silac\_23F10\_set3\_10  
 Method ITMS; CID Pepti... 88.02

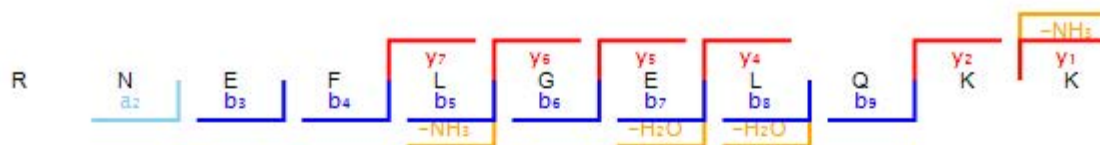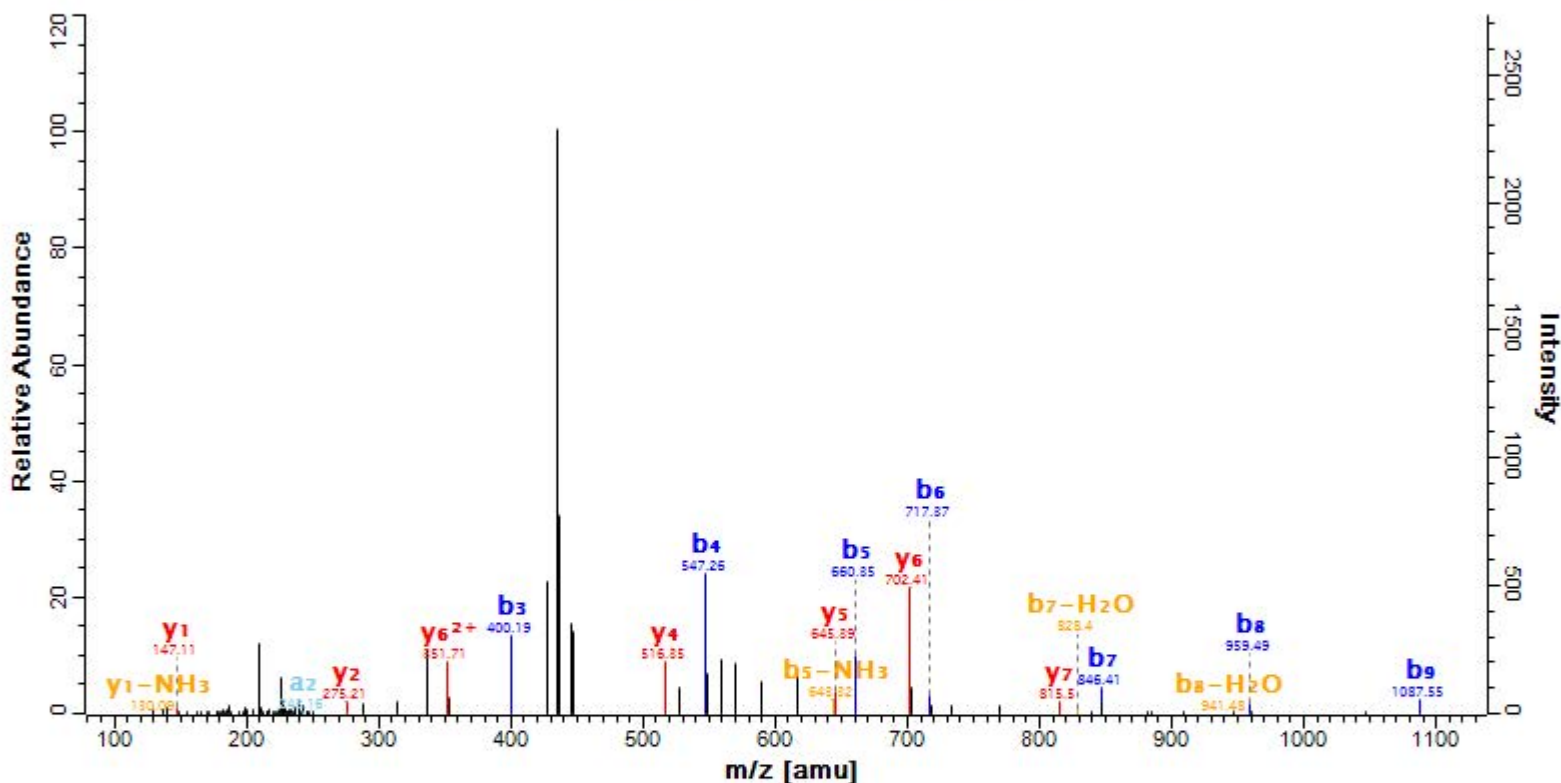

#### precursor information

|                   |                 |
|-------------------|-----------------|
| Mass:             | 1360.74666      |
| m/z:              | 454.5895        |
| Charge:           | 3+              |
| Retentiontime:    | 18.732076644897 |
| Score:            | 88.02058        |
| Mass Error [ppm]: | 0.26249         |
| PEP:              | 0.042643        |
| Precursor Type:   | ISO             |

#### general information

|                       |             |
|-----------------------|-------------|
| Annotation:           | 10 of 11    |
| AminoAcids Coverage:  | 91 %        |
| Intensity Coverage:   | 26 %        |
| Peak Coverage:        | 15 %        |
| Protein Localisation: | 337 ... 347 |

| a ion    |        | b ion    |        |    |     |          | y ion  |          | y <sup>2+</sup> ion |        |
|----------|--------|----------|--------|----|-----|----------|--------|----------|---------------------|--------|
| Δ dalton | mass   | Δ dalton | mass   |    | seq | Δ dalton | mass   | Δ dalton | mass                |        |
|          | 129.11 |          | 157.11 | 1  | R   | 10       |        |          |                     |        |
| +0.0702  | 243.16 |          | 271.15 | 2  | N   | 9        | 1205.7 |          | 1205.7              |        |
|          | 372.2  | +0.0872  | 400.19 | 3  | E   | 8        | 1091.6 |          | 1091.6              |        |
|          | 519.27 | +0.0087  | 547.26 | 4  | F   | 7        | 962.57 |          | 962.57              |        |
|          | 632.35 | -0.048   | 660.35 | 5  | L   | 6        | 815.5  | +0.0916  | 815.5               |        |
|          | 689.37 | +0.021   | 717.37 | 6  | G   | 5        | 702.41 | -0.105   | 351.71              | +0.222 |
|          | 818.42 | -0.012   | 846.41 | 7  | E   | 4        | 645.39 | -0.03    | 645.39              |        |
|          | 931.5  | +0.0085  | 959.49 | 8  | L   | 3        | 516.35 | -0.096   | 516.35              |        |
|          | 1059.6 | +0.1222  | 1087.6 | 9  | Q   | 2        | 403.27 |          | 403.27              |        |
|          | 1187.7 |          | 1215.6 | 10 | K   | 1        | 275.21 | +0.2373  | 275.21              |        |
|          |        |          |        | 11 | K   | 0        | 147.11 | -0.036   | 147.11              |        |

Scan number 2135 Raw file LNCAP\_Silac\_23F10\_set3\_10  
 Method ITMS; CID Peptide 259.7

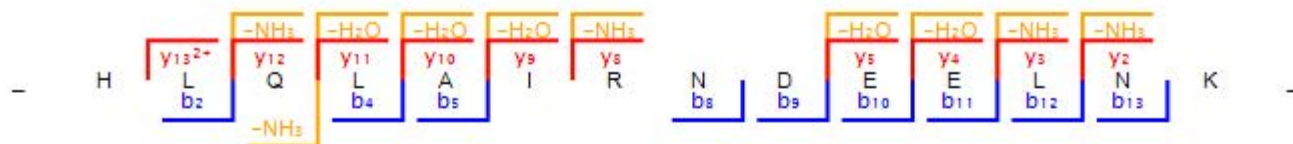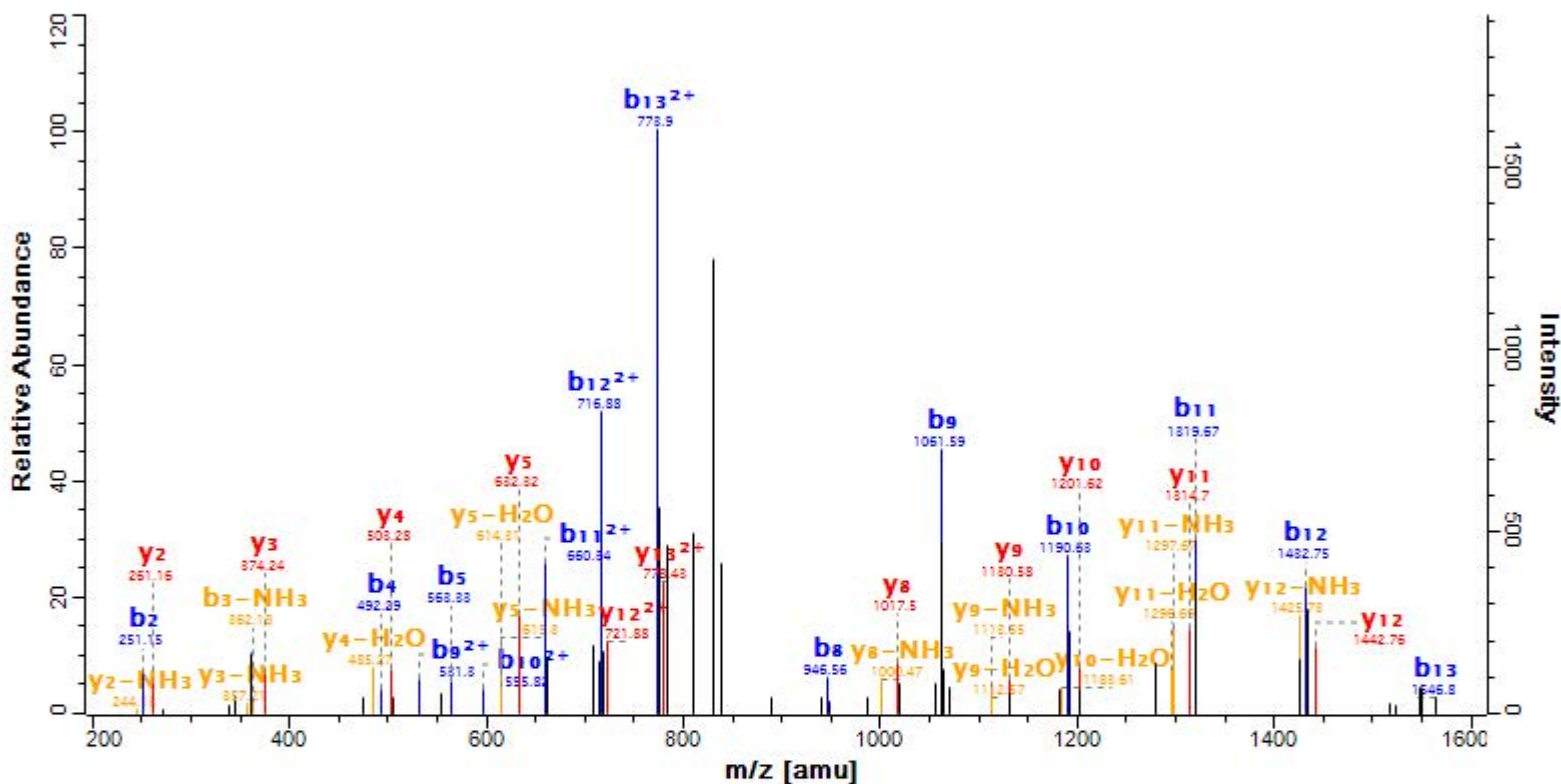

#### precursor information

|                   |                 |
|-------------------|-----------------|
| Mass:             | 1691.89588      |
| m/z:              | 846.95522       |
| Charge:           | 2+              |
| Retentiontime:    | 18.953710556030 |
| Score:            | 259.697         |
| Mass Error [ppm]: | 0.23573         |
| PEP:              | 8.791E-51       |
| Precursor Type:   | MULTI           |

#### general information

|                       |           |
|-----------------------|-----------|
| Annotation:           | 12 of 14  |
| AminoAcids Coverage:  | 86 %      |
| Intensity Coverage:   | 55 %      |
| Peak Coverage:        | 49 %      |
| Protein Localisation: | 83 ... 96 |

| b <sup>2+</sup> ion |        | b ion    |        | seq |   |    | y ion    |         | y <sup>2+</sup> ion |         |
|---------------------|--------|----------|--------|-----|---|----|----------|---------|---------------------|---------|
| Δ dalton            | mass   | Δ dalton | mass   |     |   |    | Δ dalton | mass    | Δ dalton            | mass    |
|                     | 138.07 |          | 138.07 | 1   | H | 13 |          |         |                     |         |
|                     | 251.15 | -0.015   | 251.15 | 2   | L | 12 | 1555.8   |         | 778.43              | +0.3359 |
|                     | 379.21 |          | 379.21 | 3   | Q | 11 | 1442.8   | -0.122  | 721.88              | -0.023  |
|                     | 492.29 | +0.0283  | 492.29 | 4   | L | 10 | 1314.7   | -0.058  | 1314.7              |         |
|                     | 563.33 | +0.0551  | 563.33 | 5   | A | 9  | 1201.6   | +0.0284 | 1201.6              |         |
|                     | 676.41 |          | 676.41 | 6   | I | 8  | 1130.6   | +0.0977 | 1130.6              |         |
|                     | 832.52 |          | 832.52 | 7   | R | 7  | 1017.5   | -0.157  | 1017.5              |         |
|                     | 946.56 | -0.059   | 946.56 | 8   | N | 6  | 861.39   |         | 861.39              |         |
| +0.2722             | 531.3  | +0.0103  | 1061.6 | 9   | D | 5  | 747.35   |         | 747.35              |         |
| +0.4642             | 595.82 | +0.01    | 1190.6 | 10  | E | 4  | 632.32   | +0.1076 | 632.32              |         |
| +0.1435             | 660.34 | -0.049   | 1319.7 | 11  | E | 3  | 503.28   | +0.1653 | 503.28              |         |
| +0.2025             | 716.88 | +0.0285  | 1432.8 | 12  | L | 2  | 374.24   | +0.043  | 374.24              |         |
| +0.3262             | 773.9  | +0.2241  | 1546.8 | 13  | N | 1  | 261.16   | +0.0824 | 261.16              |         |
|                     |        |          |        | 14  | K | 0  | 147.11   |         | 147.11              |         |

Scan number 2272 Raw file LNCAP\_Silac\_23F10\_set3\_10  
 Method ITMS; CID Pepti... 32.18

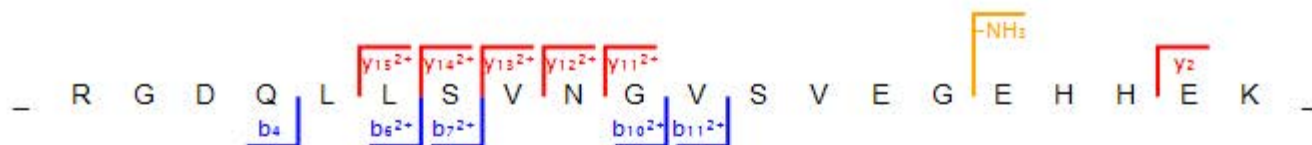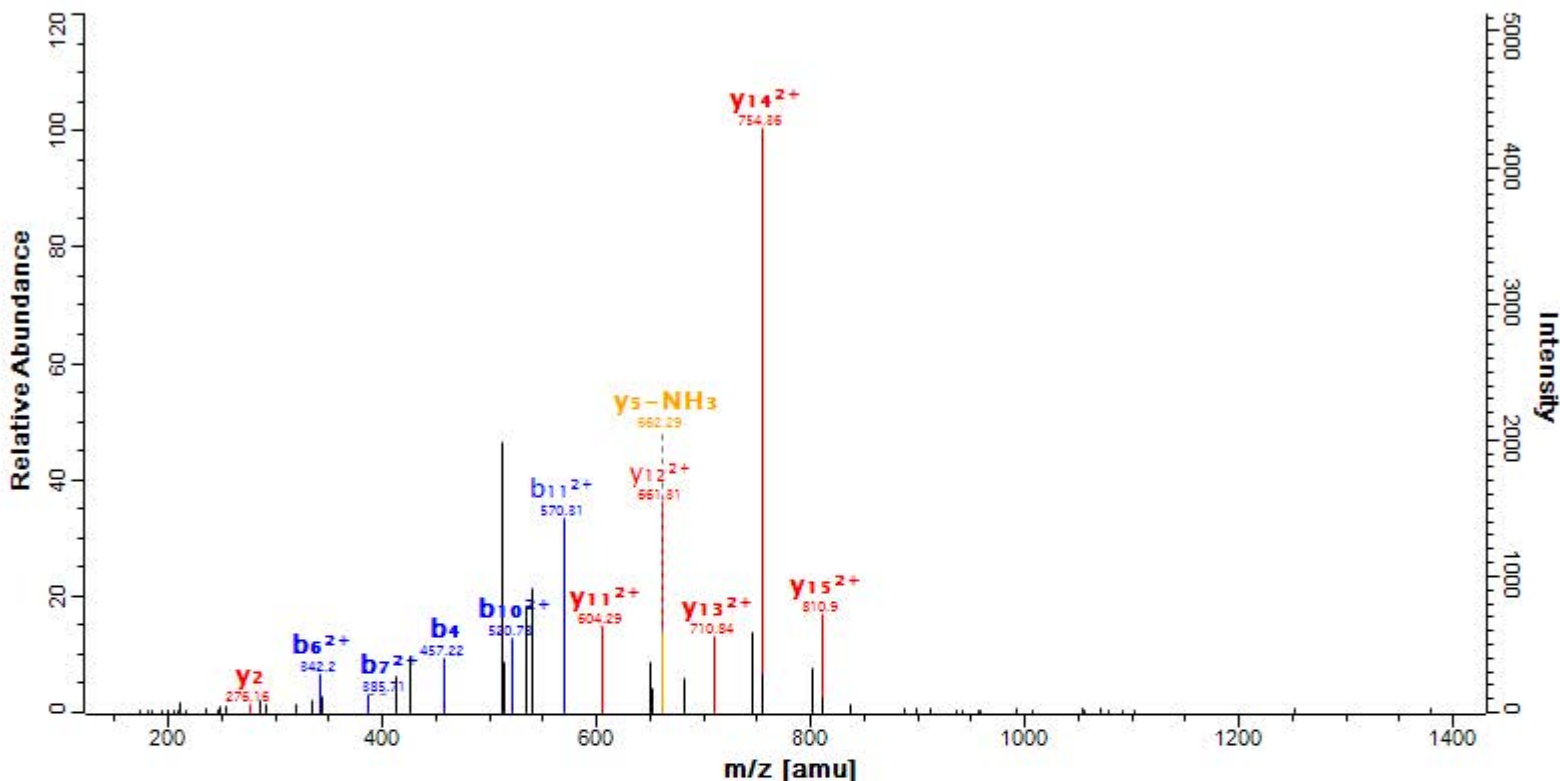

precursor information

|                   |                 |
|-------------------|-----------------|
| Mass:             | 2189.08319      |
| m/z:              | 548.27808       |
| Charge:           | 4+              |
| Retentiontime:    | 19.793272018432 |
| Score:            | 32.18085        |
| Mass Error [ppm]: | 0.31389         |
| PEP:              | 0.044459        |
| Precursor Type:   | MULTI           |

| b <sup>2+</sup> ion |        | b ion    |        |    |     |    | y ion    |        | y <sup>2+</sup> ion |         |
|---------------------|--------|----------|--------|----|-----|----|----------|--------|---------------------|---------|
| Δ dalton            | mass   | Δ dalton | mass   |    | seq |    | Δ dalton | mass   | Δ dalton            | mass    |
|                     | 157.11 |          | 157.11 | 1  | R   | 19 |          |        |                     |         |
|                     | 214.13 |          | 214.13 | 2  | G   | 18 | 2034     |        | 2034                |         |
|                     | 329.16 |          | 329.16 | 3  | D   | 17 | 1977     |        | 1977                |         |
|                     | 457.22 | +0.177   | 457.22 | 4  | Q   | 16 | 1861.9   |        | 1861.9              |         |
|                     | 570.3  |          | 570.3  | 5  | L   | 15 | 1733.9   |        | 1733.9              |         |
| +0.0085             | 342.2  |          | 683.38 | 6  | L   | 14 | 1620.8   |        | 810.9               | +0.1767 |
| +0.0381             | 385.71 |          | 770.42 | 7  | S   | 13 | 1507.7   |        | 754.36              | +0.2164 |
|                     | 869.48 |          | 869.48 | 8  | V   | 12 | 1420.7   |        | 710.84              | -0.003  |
|                     | 983.53 |          | 983.53 | 9  | N   | 11 | 1321.6   |        | 661.31              | +0.0002 |
| +0.2232             | 520.78 |          | 1040.5 | 10 | G   | 10 | 1207.6   |        | 604.29              | +0.3679 |
| +0.0318             | 570.31 |          | 1139.6 | 11 | V   | 9  | 1150.5   |        | 1150.5              |         |
|                     | 1226.6 |          | 1226.6 | 12 | S   | 8  | 1051.5   |        | 1051.5              |         |
|                     | 1325.7 |          | 1325.7 | 13 | V   | 7  | 964.45   |        | 964.45              |         |
|                     | 1454.8 |          | 1454.8 | 14 | E   | 6  | 865.38   |        | 865.38              |         |
|                     | 1511.8 |          | 1511.8 | 15 | G   | 5  | 736.34   |        | 736.34              |         |
|                     | 1640.8 |          | 1640.8 | 16 | E   | 4  | 679.32   |        | 679.32              |         |
|                     | 1777.9 |          | 1777.9 | 17 | H   | 3  | 550.27   |        | 550.27              |         |
|                     | 1914.9 |          | 1914.9 | 18 | H   | 2  | 413.21   |        | 413.21              |         |
|                     | 2044   |          | 2044   | 19 | E   | 1  | 276.16   | +0.006 | 276.16              |         |
|                     |        |          |        | 20 | K   | 0  | 147.11   |        | 147.11              |         |

general information

|                       |             |
|-----------------------|-------------|
| Annotation:           | 10 of 20    |
| AminoAcids Coverag    | 50 %        |
| Intensity Coverage:   | 57 %        |
| Peak Coverage:        | 16 %        |
| Protein Localisation: | 151 ... 170 |

Scan number 3017 Raw file LNCAP\_Silac\_23F10\_set3\_10  
 Method ITMS; CID Pepti... 218.15

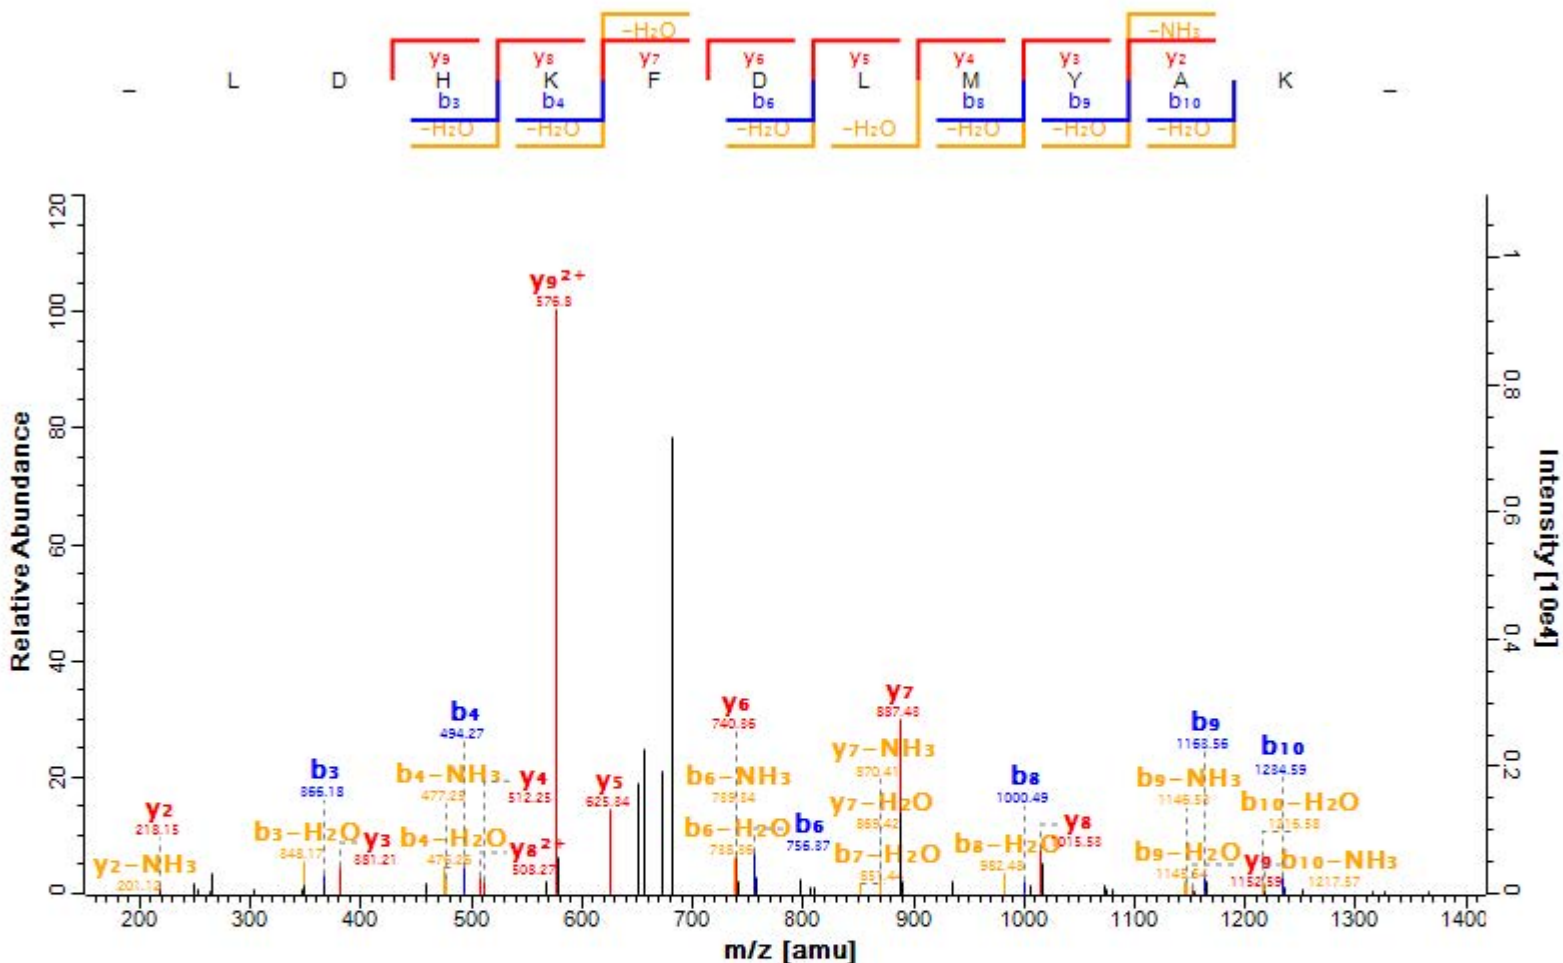

#### precursor information

|                   |                 |
|-------------------|-----------------|
| Mass:             | 1379.69094      |
| m/z:              | 690.85275       |
| Charge:           | 2+              |
| Retentiontime:    | 24.668909072876 |
| Score:            | 218.1503        |
| Mass Error [ppm]: | 0.1324          |
| PEP:              | 4.4856E-21      |
| Precursor Type:   | MULTI           |

#### general information

|                       |             |
|-----------------------|-------------|
| Annotation:           | 9 of 11     |
| AminoAcids Coverage:  | 82 %        |
| Intensity Coverage:   | 47 %        |
| Peak Coverage:        | 37 %        |
| Protein Localisation: | 391 ... 401 |

| b ion     |          |    |     |    | y ion    |           | y <sup>2+</sup> ion |           |
|-----------|----------|----|-----|----|----------|-----------|---------------------|-----------|
| Δ dalton  | mass     |    | seq |    | Δ dalton | mass      | Δ dalton            | mass      |
|           | 114.0913 | 1  | L   | 10 |          |           |                     |           |
|           | 229.1183 | 2  | D   | 9  | 1267.614 |           | 1267.614            |           |
| +0.115834 | 366.1772 | 3  | H   | 8  | 1152.587 | +0.368051 | 576.7972            | +0.252043 |
| +0.076841 | 494.2722 | 4  | K   | 7  | 1015.528 | -0.03672  | 508.2677            | +0.01215  |
|           | 641.3406 | 5  | F   | 6  | 887.4332 | -0.09325  | 887.4332            |           |
| +0.005776 | 756.3675 | 6  | D   | 5  | 740.3647 | -0.00976  | 740.3647            |           |
|           | 869.4516 | 7  | L   | 4  | 625.3378 | +0.006748 | 625.3378            |           |
| -0.03088  | 1000.492 | 8  | M   | 3  | 512.2537 | +0.089592 | 512.2537            |           |
| +0.101346 | 1163.555 | 9  | Y   | 2  | 381.2132 | +0.170176 | 381.2132            |           |
| +0.097069 | 1234.593 | 10 | A   | 1  | 218.1499 | +0.076217 | 218.1499            |           |
|           |          | 11 | K   | 0  | 147.1128 |           | 147.1128            |           |



Scan number 3451 Raw file LNCAP\_Silac\_23F10\_set3\_10  
 Method ITMS; CID Pepti... 125.86

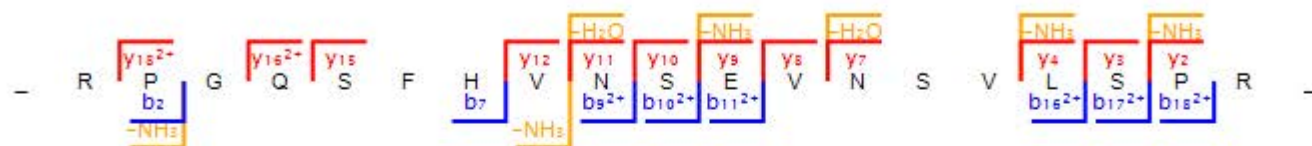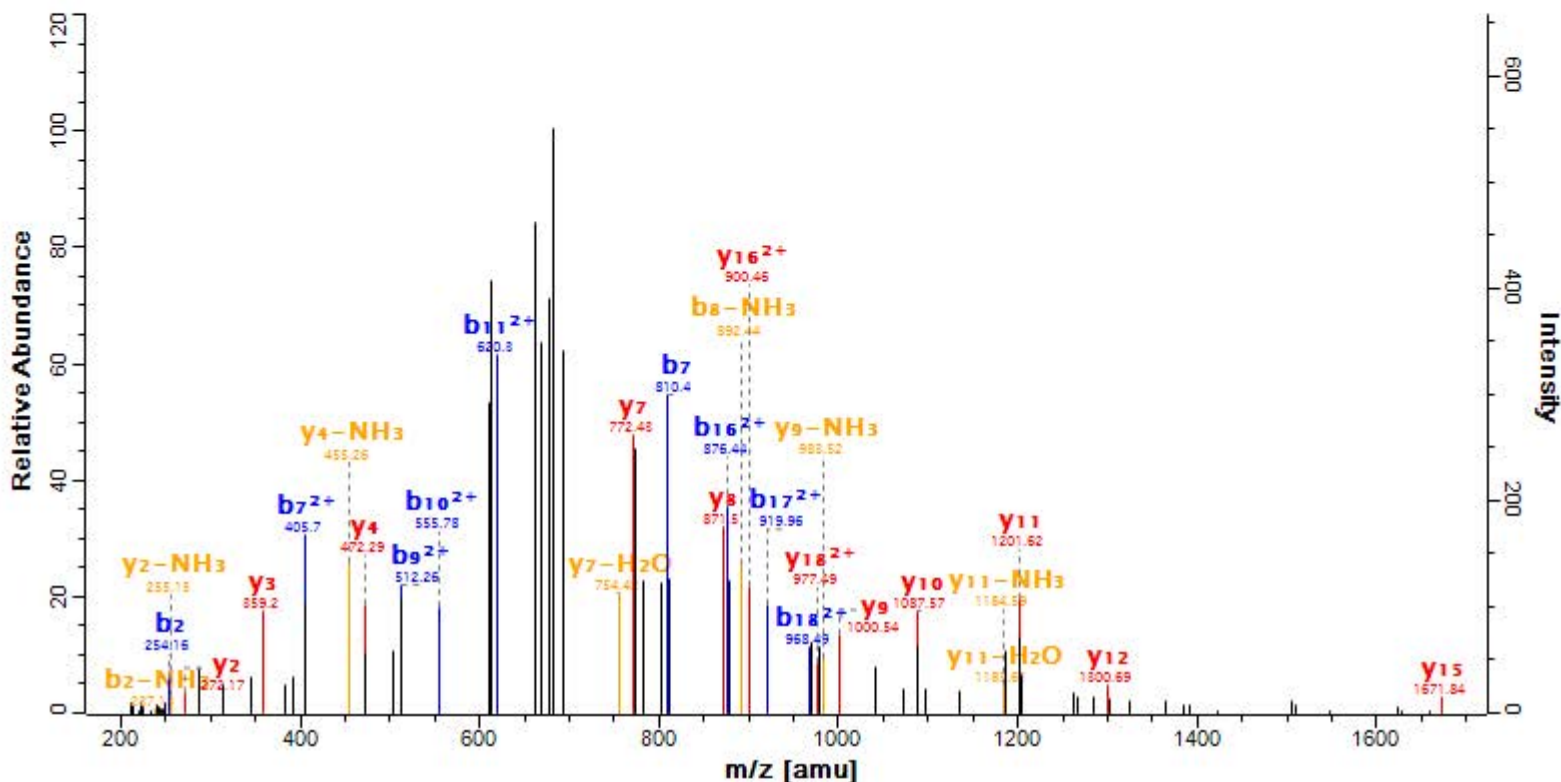

#### precursor information

|                   |                 |
|-------------------|-----------------|
| Mass:             | 2109.07027      |
| m/z:              | 704.0307        |
| Charge:           | 3+              |
| Retentiontime:    | 27.437892913818 |
| Score:            | 125.8601        |
| Mass Error [ppm]: | -0.60685        |
| PEP:              | 1.1866E-07      |
| Precursor Type:   | ISO             |

#### general information

|                       |             |
|-----------------------|-------------|
| Annotation:           | 13 of 19    |
| AminoAcids Coverage:  | 68 %        |
| Intensity Coverage:   | 37 %        |
| Peak Coverage:        | 32 %        |
| Protein Localisation: | 229 ... 247 |

| b <sup>2+</sup> ion |        | b ion    |        | seq |   |    | y ion    |         | y <sup>2+</sup> ion |         |
|---------------------|--------|----------|--------|-----|---|----|----------|---------|---------------------|---------|
| Δ dalton            | mass   | Δ dalton | mass   |     |   |    | Δ dalton | mass    | Δ dalton            | mass    |
|                     | 157.11 |          | 157.11 | 1   | R | 18 |          |         |                     |         |
|                     | 254.16 | -0.059   | 254.16 | 2   | P | 17 | 1954     |         | 977.49              | -0.024  |
|                     | 311.18 |          | 311.18 | 3   | G | 16 | 1856.9   |         | 1856.9              |         |
|                     | 439.24 |          | 439.24 | 4   | Q | 15 | 1799.9   |         | 900.46              | +0.2952 |
|                     | 526.27 |          | 526.27 | 5   | S | 14 | 1671.8   | -0.04   | 1671.8              |         |
|                     | 673.34 |          | 673.34 | 6   | F | 13 | 1584.8   |         | 1584.8              |         |
| +0.0115             | 405.7  | -0.016   | 810.4  | 7   | H | 12 | 1437.7   |         | 1437.7              |         |
|                     | 909.47 |          | 909.47 | 8   | V | 11 | 1300.7   | -0.086  | 1300.7              |         |
| +0.0851             | 512.26 |          | 1023.5 | 9   | N | 10 | 1201.6   | -0.069  | 1201.6              |         |
| +0.1706             | 555.78 |          | 1110.5 | 10  | S | 9  | 1087.6   | -0.06   | 1087.6              |         |
| +0.1669             | 620.3  |          | 1239.6 | 11  | E | 8  | 1000.5   | -0.13   | 1000.5              |         |
|                     | 1338.7 |          | 1338.7 | 12  | V | 7  | 871.5    | -0.066  | 871.5               |         |
|                     | 1452.7 |          | 1452.7 | 13  | N | 6  | 772.43   | +0.0089 | 772.43              |         |
|                     | 1539.7 |          | 1539.7 | 14  | S | 5  | 658.39   |         | 658.39              |         |
|                     | 1638.8 |          | 1638.8 | 15  | V | 4  | 571.36   |         | 571.36              |         |
| +0.104              | 876.44 |          | 1751.9 | 16  | L | 3  | 472.29   | +0.1419 | 472.29              |         |
| +0.3248             | 919.96 |          | 1838.9 | 17  | S | 2  | 359.2    | +0.0908 | 359.2               |         |
| +0.2157             | 968.49 |          | 1936   | 18  | P | 1  | 272.17   | +0.0165 | 272.17              |         |
|                     |        |          |        | 19  | R | 0  | 175.12   |         | 175.12              |         |

Scan number 428 Raw file LNCAP\_Silac\_23F10\_set3\_10  
 Method ITMS: CID Pepti... 53.45

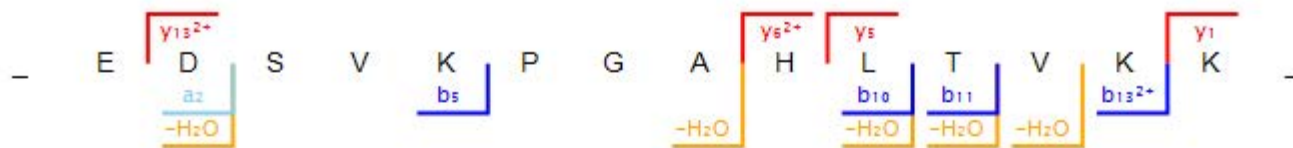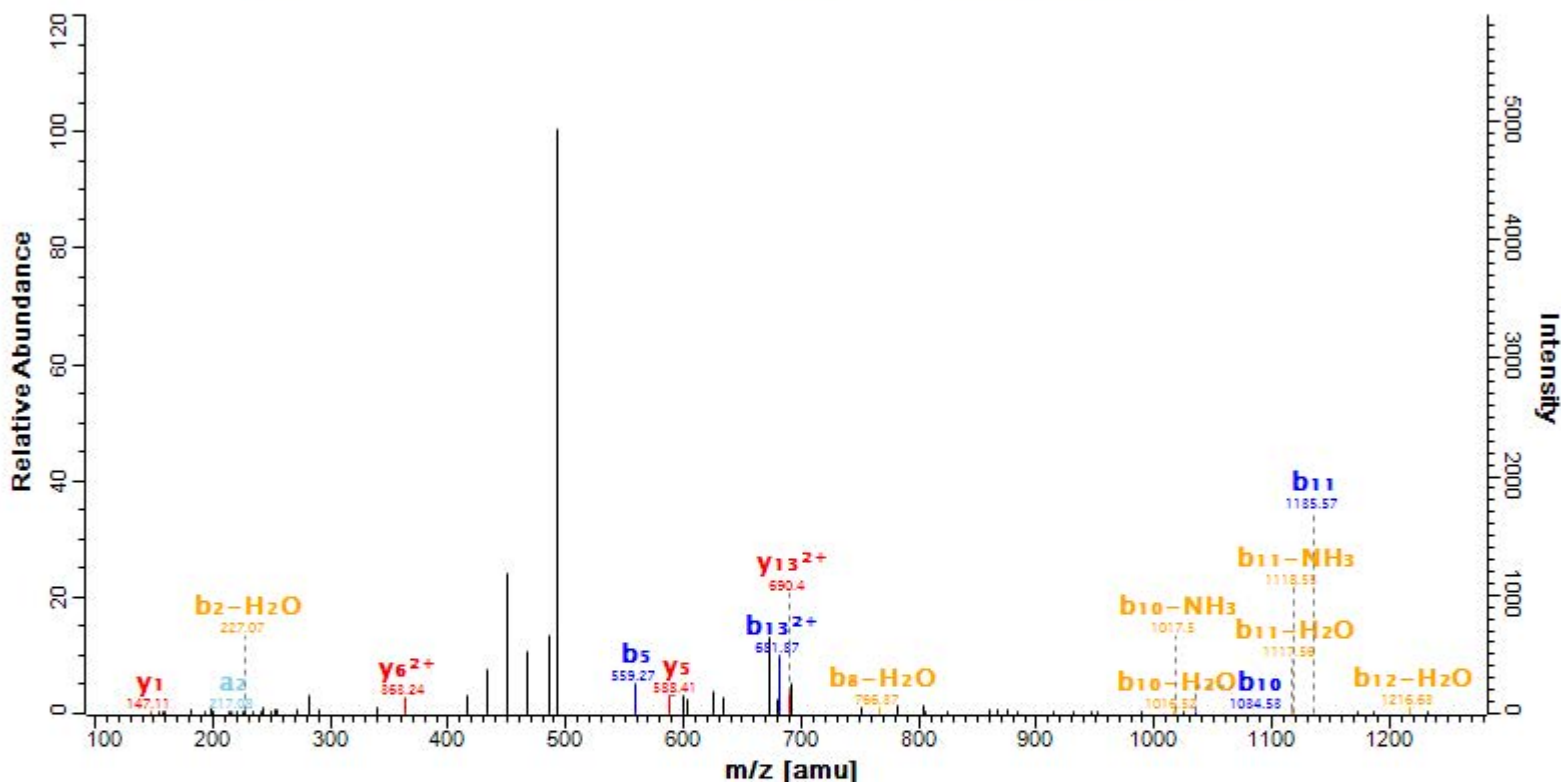

#### precursor information

|                   |                 |
|-------------------|-----------------|
| Mass:             | 1507.83598      |
| m/z:              | 503.61927       |
| Charge:           | 3+              |
| Retentiontime:    | 7.6041698455810 |
| Score:            | 53.44775        |
| Mass Error [ppm]: | 0.089547        |
| PEP:              | 0.011692        |
| Precursor Type:   | MULTI           |

| a ion         | b <sup>2+</sup> ion | b ion         |    |     |    | y ion         | y <sup>2+</sup> ion |
|---------------|---------------------|---------------|----|-----|----|---------------|---------------------|
| Δ dalton mass | Δ dalton mass       | Δ dalton mass |    | seq |    | Δ dalton mass | Δ dalton mass       |
| 102.1         | 130                 | 130           | 1  | E   | 13 |               |                     |
| +0.224 171.1  | 245.1               | 245.1         | 2  | D   | 12 | 1380          | 690.4 +0.125        |
| 304.1         | 332.1               | 332.1         | 3  | S   | 11 | 1265          | 1265                |
| 403.2         | 431.2               | 431.2         | 4  | V   | 10 | 1178          | 1178                |
| 531.3         | 559.3               | +0.219 559.3  | 5  | K   | 9  | 1079          | 1079                |
| 628.3         | 656.3               | 656.3         | 6  | P   | 8  | 950.6         | 950.6               |
| 685.4         | 713.3               | 713.3         | 7  | G   | 7  | 853.5         | 853.5               |
| 756.4         | 784.4               | 784.4         | 8  | A   | 6  | 796.5         | 796.5               |
| 893.4         | 921.4               | 921.4         | 9  | H   | 5  | 725.5         | 363.2 +0.169        |
| 1007          | 1035                | +0.408 1035   | 10 | L   | 4  | 588.4 +0.132  | 588.4               |
| 1108          | 1136                | +0.385 1136   | 11 | T   | 3  | 475.3         | 475.3               |
| 1207          | 1235                | 1235          | 12 | V   | 2  | 374.3         | 374.3               |
| 1335          | +0.226 681.9        | 1363          | 13 | K   | 1  | 275.2         | 275.2               |
|               |                     |               | 14 | K   | 0  | 147.1 +0.082  | 147.1               |

#### general information

|                       |             |
|-----------------------|-------------|
| Annotation:           | 9 of 14     |
| AminoAcids Coverage:  | 64 %        |
| Intensity Coverage:   | 11 %        |
| Peak Coverage:        | 16 %        |
| Protein Localisation: | 114 ... 127 |

Scan number 4426 Raw file LNCAP\_Silac\_23F10\_set3\_10  
 Method ITMS; CID Pepti... 127.02

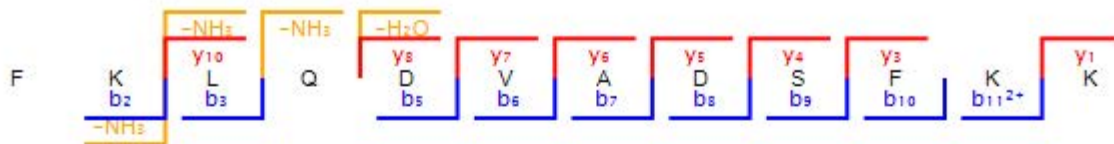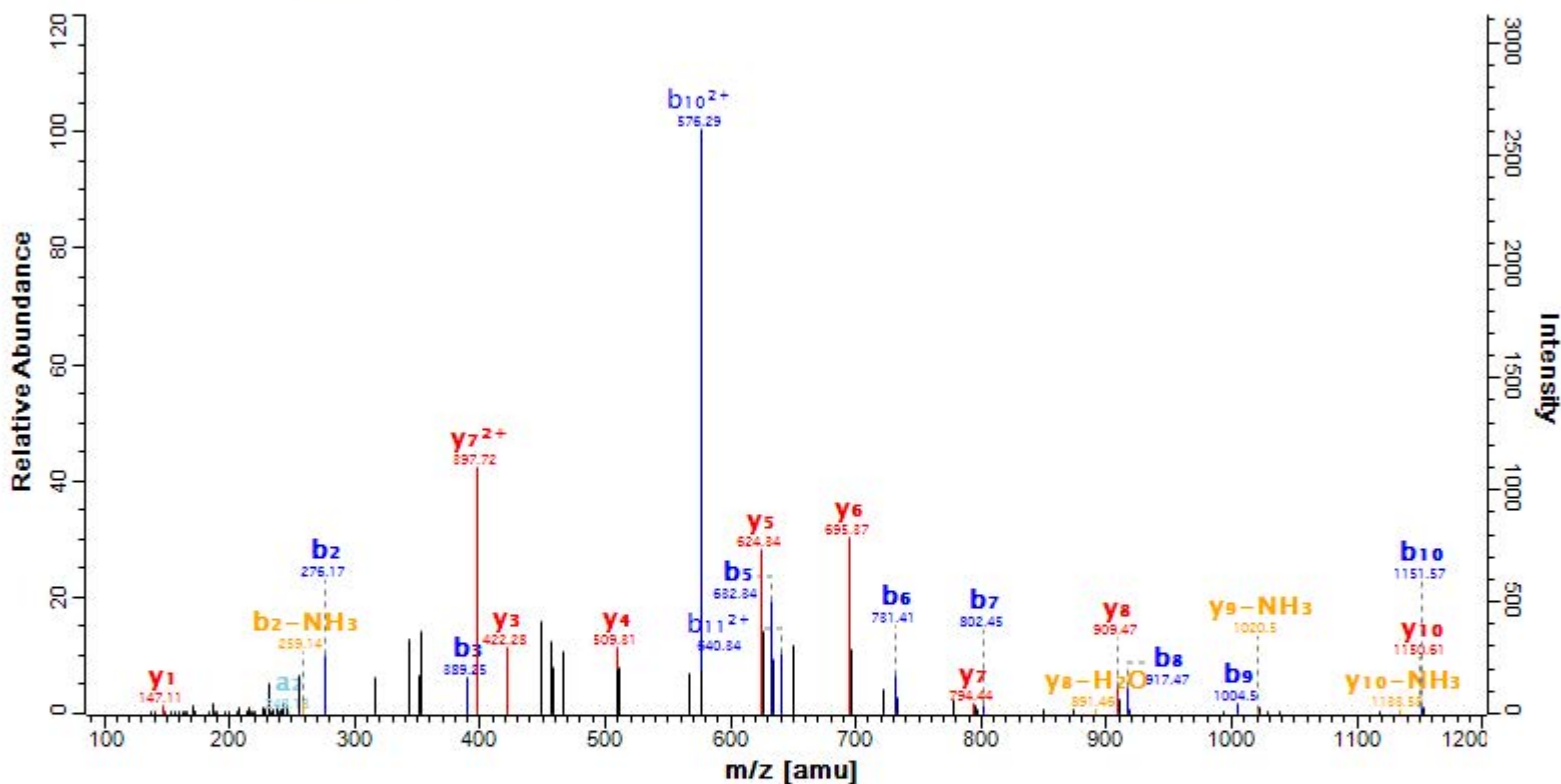

#### precursor information

|                   |                 |
|-------------------|-----------------|
| Mass:             | 1424.76596      |
| m/z:              | 475.92926       |
| Charge:           | 3+              |
| Retentiontime:    | 34.167804718017 |
| Score:            | 127.0177        |
| Mass Error [ppm]: | -0.2831         |
| PEP:              | 1.8291E-05      |
| Precursor Type:   | MULTI           |

#### general information

|                       |               |
|-----------------------|---------------|
| Annotation:           | 11 of 12      |
| AminoAcids Coverage:  | 92 %          |
| Intensity Coverage:   | 57 %          |
| Peak Coverage:        | 19 %          |
| Protein Localisation: | 2423 ... 2434 |

| a ion         |               | b <sup>2+</sup> ion |               | b ion |               | y ion         |               | y <sup>2+</sup> ion |  |
|---------------|---------------|---------------------|---------------|-------|---------------|---------------|---------------|---------------------|--|
| Δ dalton mass | Δ dalton mass | Δ dalton mass       | Δ dalton mass | seq   | Δ dalton mass | Δ dalton mass | Δ dalton mass | Δ dalton mass       |  |
| 120.1         | 148.1         | 148.1               | 148.1         | 1     | F             | 11            |               |                     |  |
| -0.05 248.2   | 276.2         | +0.07 276.2         | 276.2         | 2     | K             | 10            | 1279          | 1279                |  |
| 361.3         | 389.3         | -0.11 389.3         | 389.3         | 3     | L             | 9             | 1151          | +0.387 1151         |  |
| 489.3         | 517.3         | 517.3               | 517.3         | 4     | Q             | 8             | 1038          | 1038                |  |
| 604.3         | 632.3         | +0.058 632.3        | 632.3         | 5     | D             | 7             | 909.5         | -0.09 909.5         |  |
| 703.4         | 731.4         | +0.001 731.4        | 731.4         | 6     | V             | 6             | 794.4         | +0.125 794.4        |  |
| 774.5         | 802.4         | +0.172 802.4        | 802.4         | 7     | A             | 5             | 695.4         | +0.004 695.4        |  |
| 889.5         | 917.5         | -0.01 917.5         | 917.5         | 8     | D             | 4             | 624.3         | +0.053 624.3        |  |
| 976.5         | 1005          | -0.04 1005          | 1005          | 9     | S             | 3             | 509.3         | +0.057 509.3        |  |
| 1124          | -0.23 576.3   | +0.346 576.3        | 576.3         | 10    | F             | 2             | 422.3         | +0.007 422.3        |  |
| 1252          | -0.18 640.3   | 640.3               | 640.3         | 11    | K             | 1             | 275.2         | 275.2               |  |
|               |               |                     |               | 12    | K             | 0             | 147.1         | +0.047 147.1        |  |

Scan number 4522 Raw file LNCAP\_Silac\_23F10\_set3\_10  
 Method ITMS; CID Pepti... 92.86

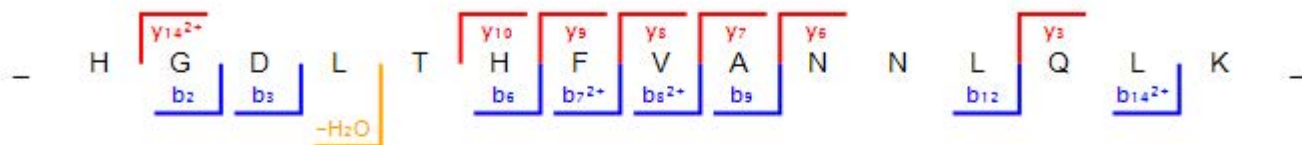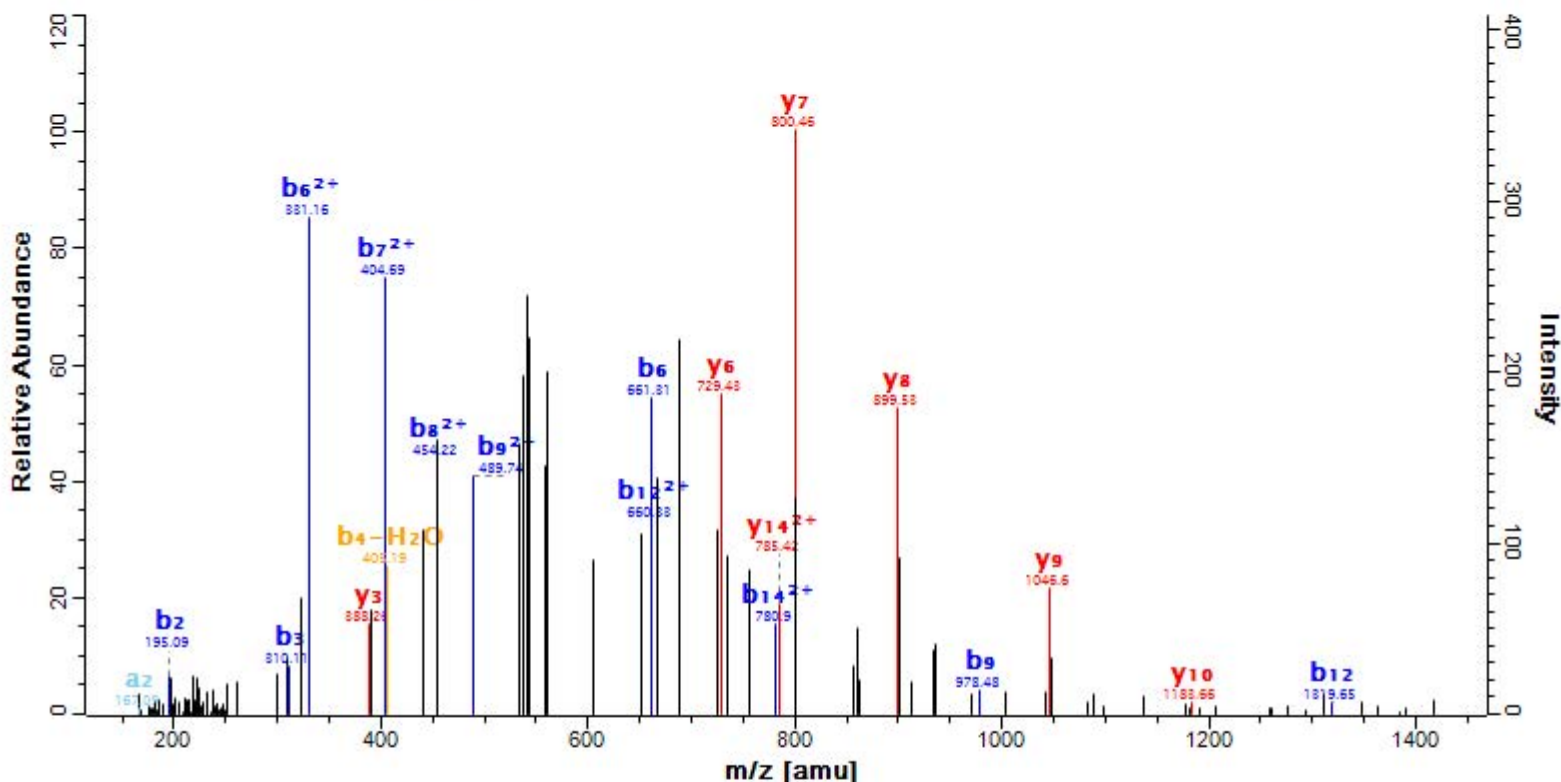

#### precursor information

|                   |                 |
|-------------------|-----------------|
| Mass:             | 1705.89239      |
| m/z:              | 569.63807       |
| Charge:           | 3+              |
| Retentiontime:    | 34.869625091552 |
| Score:            | 92.85644        |
| Mass Error [ppm]: | 1.3981          |
| PEP:              | 0.00012239      |
| Precursor Type:   | MULTI           |

| a ion         |               | b <sup>2+</sup> ion |               | b ion |               | y ion         |               | y <sup>2+</sup> ion |  |
|---------------|---------------|---------------------|---------------|-------|---------------|---------------|---------------|---------------------|--|
| Δ dalton mass | Δ dalton mass | Δ dalton mass       | Δ dalton mass | seq   | Δ dalton mass | Δ dalton mass | Δ dalton mass | Δ dalton mass       |  |
| 110.1         | 138.1         | 138.1               | 1             | H     | 14            |               |               |                     |  |
| +0.056 67.1   | 195.1         | +0.024 195.1        | 2             | G     | 13            | 1570          | 785.4         | -0.04               |  |
| 282.1         | 310.1         | +0.274 310.1        | 3             | D     | 12            | 1513          | 1513          |                     |  |
| 395.2         | 423.2         | 423.2               | 4             | L     | 11            | 1398          | 1398          |                     |  |
| 496.3         | 524.2         | 524.2               | 5             | T     | 10            | 1285          | 1285          |                     |  |
| 633.3         | +0.102 331.2  | -0.03 661.3         | 6             | H     | 9             | 1184          | -0.29 1184    |                     |  |
| 780.4         | -0.03 404.7   | 808.4               | 7             | F     | 8             | 1047          | +0.07 1047    |                     |  |
| 879.4         | -0.08 454.2   | 907.4               | 8             | V     | 7             | 899.5         | -0.03 899.5   |                     |  |
| 950.5         | +0.232 489.7  | +0.04 978.5         | 9             | A     | 6             | 800.5         | -0.04 800.5   |                     |  |
| 1065          | 1093          | 1093                | 10            | N     | 5             | 729.4         | +0.108 729.4  |                     |  |
| 1179          | 1207          | 1207                | 11            | N     | 4             | 615.4         | 615.4         |                     |  |
| 1292          | +0.119 660.3  | -0.26 1320          | 12            | L     | 3             | 501.3         | 501.3         |                     |  |
| 1420          | 1448          | 1448                | 13            | Q     | 2             | 388.3         | -0.06 388.3   |                     |  |
| 1533          | +0.104 780.9  | 1561                | 14            | L     | 1             | 260.2         | 260.2         |                     |  |
|               |               |                     | 15            | K     | 0             | 147.1         | 147.1         |                     |  |

#### general information

|                       |             |
|-----------------------|-------------|
| Annotation:           | 11 of 15    |
| AminoAcids Coverage:  | 73 %        |
| Intensity Coverage:   | 40 %        |
| Peak Coverage:        | 17 %        |
| Protein Localisation: | 210 ... 224 |

Scan number 4615 Raw file LNCAP\_Silac\_23F10\_set3\_10  
 Method ITMS; CID Pepti... 105.39

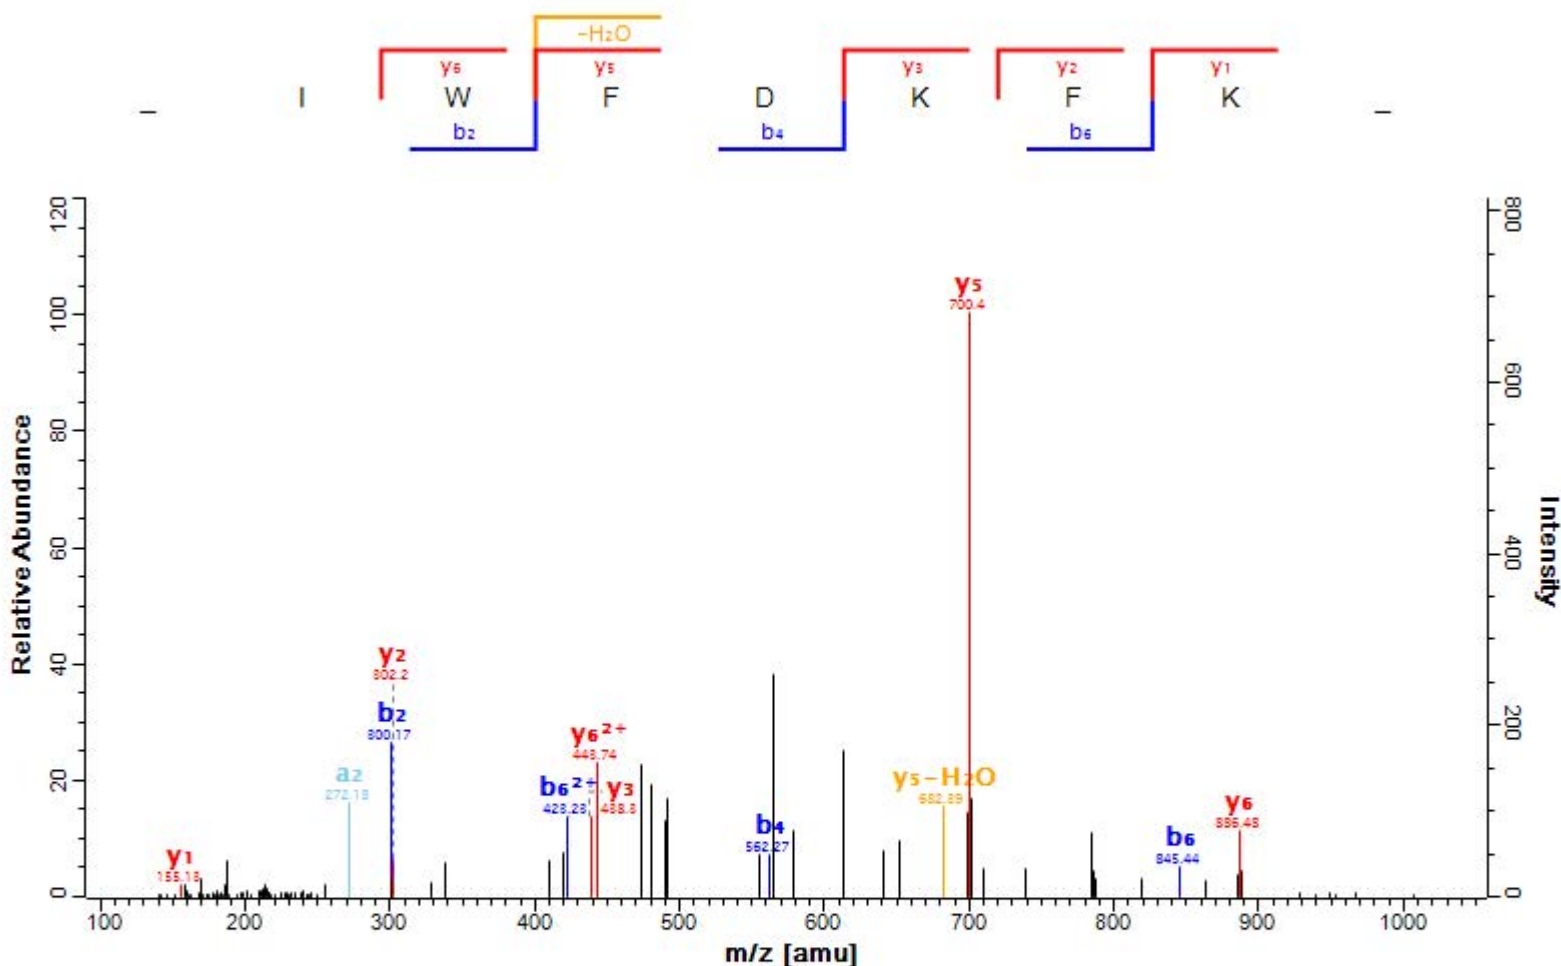

#### precursor information

|                      |                 |
|----------------------|-----------------|
| Mass:                | 982.52781       |
| m/z:                 | 492.27118       |
| Charge:              | 2+              |
| Retentiontime:       | 35.553165435791 |
| Score:               | 105.3906        |
| g Mass Error [ppm]:  | 0.17566         |
| Annotation:          | 6 of 7          |
| AminoAcids Coverage: | 86 %            |
| Intensity Coverage:  | 42 %            |
| Peak Coverage:       | 10 %            |

| a ion         | b <sup>2+</sup> ion | b ion         |     |   | y ion         | y <sup>2+</sup> ion |
|---------------|---------------------|---------------|-----|---|---------------|---------------------|
| Δ dalton mass | Δ dalton mass       | Δ dalton mass | seq |   | Δ dalton mass | Δ dalton mass       |
| 86.1          | 114.1               | 114.1         | 1   | I |               |                     |
| +0.062772.2   | 300.2               | +0.078300.2   | 2   | W | 5 886.5       | +0.163443.7         |
| 419.2         | 447.2               | 447.2         | 3   | F | 4 700.4       | +0.071700.4         |
| 534.3         | 562.3               | +0.115562.3   | 4   | D | 3 553.3       | 553.3               |
| 670.4         | 698.4               | 698.4         | 5   | K | 2 438.3       | +0.121438.3         |
| 817.4         | -0.13 423.2         | -0.06 845.4   | 6   | F | 1 302.2       | +0.057302.2         |
|               |                     |               | 7   | K | 0 155.1       | -0.01 155.1         |

Scan number 5032 Raw file LNCAP\_Silac\_23F10\_set3\_10  
 Method ITMS; CID Pepti... 128.74

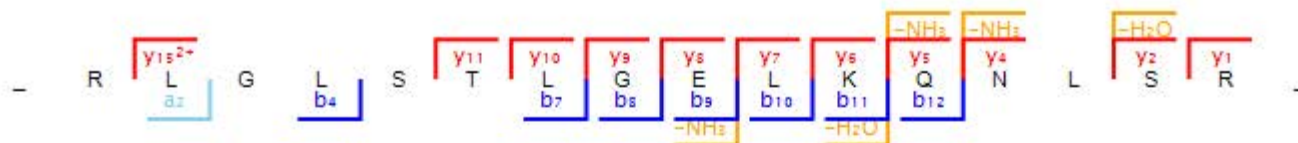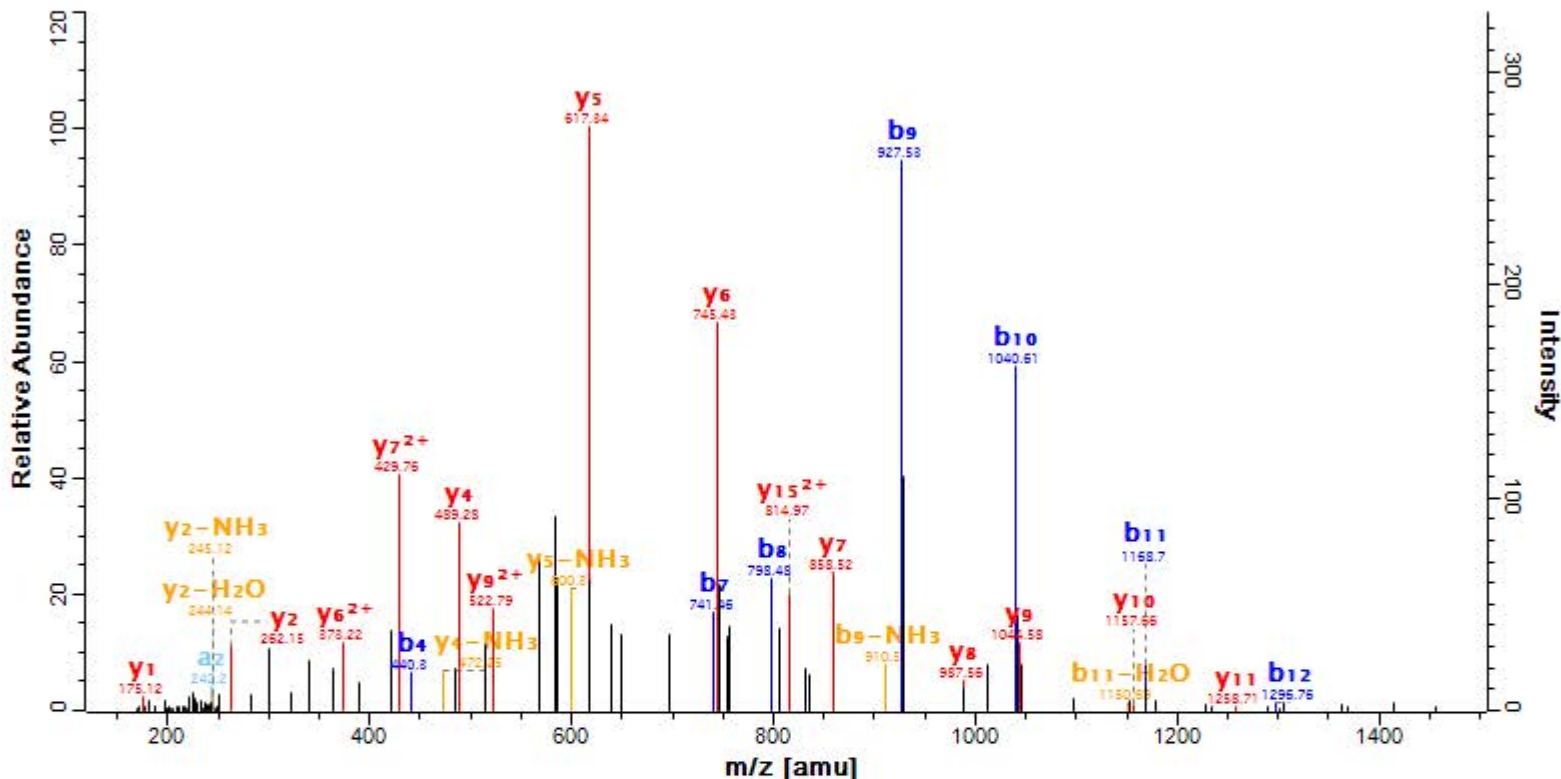

#### precursor information

|                   |                 |
|-------------------|-----------------|
| Mass:             | 1784.02692      |
| m/z:              | 595.68292       |
| Charge:           | 3+              |
| Retentiontime:    | 38.840103149414 |
| Score:            | 128.7379        |
| Mass Error [ppm]: | 0.051681        |
| PEP:              | 3.094E-10       |
| Precursor Type:   | MULTI           |

#### general information

|                       |           |
|-----------------------|-----------|
| Annotation:           | 12 of 16  |
| AminoAcids Coverag    | 75 %      |
| Intensity Coverage:   | 57 %      |
| Peak Coverage:        | 25 %      |
| Protein Localisation: | 80 ... 95 |

| a ion    |        | b ion    |        | seq |   |    | y ion    |         | y <sup>2+</sup> ion |         |
|----------|--------|----------|--------|-----|---|----|----------|---------|---------------------|---------|
| Δ dalton | mass   | Δ dalton | mass   |     |   |    | Δ dalton | mass    | Δ dalton            | mass    |
|          | 129.11 |          | 157.11 | 1   | R | 15 |          |         |                     |         |
| +0.0364  | 242.2  |          | 270.19 | 2   | L | 14 | 1628.9   |         | 814.97              | +0.0965 |
|          | 299.22 |          | 327.21 | 3   | G | 13 | 1515.8   |         | 1515.8              |         |
|          | 412.3  | +0.0137  | 440.3  | 4   | L | 12 | 1458.8   |         | 1458.8              |         |
|          | 499.34 |          | 527.33 | 5   | S | 11 | 1345.7   |         | 1345.7              |         |
|          | 600.38 |          | 628.38 | 6   | T | 10 | 1258.7   | -0.062  | 1258.7              |         |
|          | 713.47 | -0.034   | 741.46 | 7   | L | 9  | 1157.7   | -0.096  | 1157.7              |         |
|          | 770.49 | +0.0831  | 798.48 | 8   | G | 8  | 1044.6   | -0.2    | 522.79              | +0.1102 |
|          | 899.53 | +0.0272  | 927.53 | 9   | E | 7  | 987.56   | +0.1171 | 987.56              |         |
|          | 1012.6 | -0.051   | 1040.6 | 10  | L | 6  | 858.52   | +0.0779 | 429.76              | +0.1053 |
|          | 1140.7 | +0.027   | 1168.7 | 11  | K | 5  | 745.43   | +0.0245 | 373.22              | +0.2069 |
|          | 1268.8 | -0.029   | 1296.8 | 12  | Q | 4  | 617.34   | +0.0538 | 617.34              |         |
|          | 1382.8 |          | 1410.8 | 13  | N | 3  | 489.28   | -0.095  | 489.28              |         |
|          | 1495.9 |          | 1523.9 | 14  | L | 2  | 375.24   |         | 375.24              |         |
|          | 1582.9 |          | 1610.9 | 15  | S | 1  | 262.15   | +0.0329 | 262.15              |         |
|          |        |          |        | 16  | R | 0  | 175.12   | -0.154  | 175.12              |         |

Scan number 5180 Raw file LNCAP\_Silac\_23F10\_set3\_10  
 Method ITMS; CID Pepti... 92.39

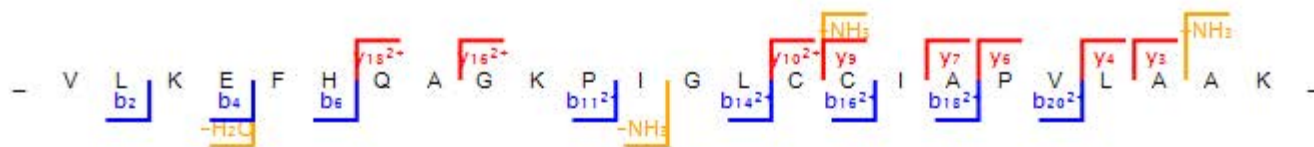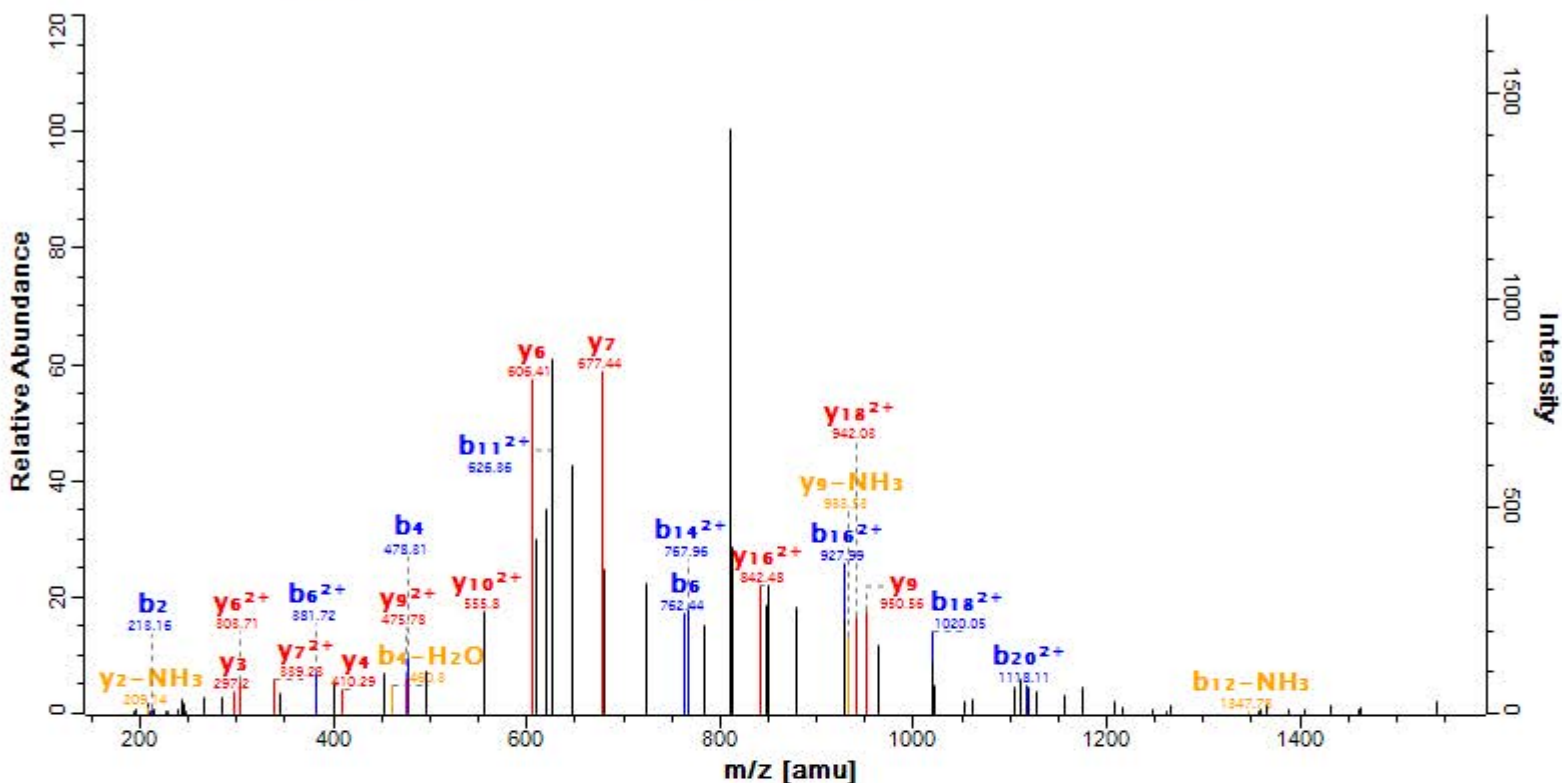

precursor information

|                   |                 |
|-------------------|-----------------|
| Mass:             | 2619.4384       |
| m/z:              | 655.86688       |
| Charge:           | 4+              |
| Retentiontime:    | 39.992404937744 |
| Score:            | 92.39011        |
| Mass Error [ppm]: | -0.34277        |
| PEP:              | 3.8864E-07      |
| Precursor Type:   | MULTI           |

| b <sup>2+</sup> ion |        | b ion    |        | seq |   |    | y ion    |         | y <sup>2+</sup> ion |         |
|---------------------|--------|----------|--------|-----|---|----|----------|---------|---------------------|---------|
| Δ dalton            | mass   | Δ dalton | mass   |     |   |    | Δ dalton | mass    | Δ dalton            | mass    |
|                     | 100.08 |          | 100.08 | 1   | V | 23 |          |         |                     |         |
|                     | 213.16 | -0.071   | 213.16 | 2   | L | 22 | 2545.4   |         | 2545.4              |         |
|                     | 349.27 |          | 349.27 | 3   | K | 21 | 2432.3   |         | 2432.3              |         |
|                     | 478.31 | +0.0962  | 478.31 | 4   | E | 20 | 2296.2   |         | 2296.2              |         |
|                     | 625.38 |          | 625.38 | 5   | F | 19 | 2167.2   |         | 2167.2              |         |
| -0.497              | 381.72 | +0.1357  | 762.44 | 6   | H | 18 | 2020.1   |         | 2020.1              |         |
|                     | 890.5  |          | 890.5  | 7   | Q | 17 | 1883.1   |         | 942.03              | +0.0349 |
|                     | 961.53 |          | 961.53 | 8   | A | 16 | 1755     |         | 1755                |         |
|                     | 1018.6 |          | 1018.6 | 9   | G | 15 | 1684     |         | 842.48              | +0.1718 |
|                     | 1154.7 |          | 1154.7 | 10  | K | 14 | 1626.9   |         | 1626.9              |         |
| +0.0018             | 626.36 |          | 1251.7 | 11  | P | 13 | 1490.8   |         | 1490.8              |         |
|                     | 1364.8 |          | 1364.8 | 12  | I | 12 | 1393.8   |         | 1393.8              |         |
|                     | 1421.8 |          | 1421.8 | 13  | G | 11 | 1280.7   |         | 1280.7              |         |
| -0.161              | 767.96 |          | 1534.9 | 14  | L | 10 | 1223.7   |         | 1223.7              |         |
|                     | 1694.9 |          | 1694.9 | 15  | C | 9  | 1110.6   |         | 555.8               | +0.0771 |
| -0.066              | 927.99 |          | 1855   | 16  | C | 8  | 950.56   | +0.2001 | 475.78              | +0.0241 |
|                     | 1968.1 |          | 1968.1 | 17  | I | 7  | 790.53   |         | 790.53              |         |
| +0.0325             | 1020   |          | 2039.1 | 18  | A | 6  | 677.44   | -0.031  | 339.23              | +0.2154 |
|                     | 2136.1 |          | 2136.1 | 19  | P | 5  | 606.41   | +0.0189 | 303.71              | +0.0747 |
| -0.172              | 1118.1 |          | 2235.2 | 20  | V | 4  | 509.35   |         | 509.35              |         |
|                     | 2348.3 |          | 2348.3 | 21  | L | 3  | 410.29   | -0.369  | 410.29              |         |
|                     | 2419.3 |          | 2419.3 | 22  | A | 2  | 297.2    | +0.0694 | 297.2               |         |
|                     | 2490.4 |          | 2490.4 | 23  | A | 1  | 226.16   |         | 226.16              |         |
|                     |        |          |        | 24  | K | 0  | 155.13   |         | 155.13              |         |

general information

|                       |             |
|-----------------------|-------------|
| Annotation:           | 16 of 24    |
| AminoAcids Coverage:  | 67 %        |
| Intensity Coverage:   | 40 %        |
| Peak Coverage:        | 29 %        |
| Protein Localisation: | 162 ... 185 |

Scan number 5362 Raw file LNCAP\_Silac\_23F10\_set3\_10  
 Method ITMS; CID Pepti... 36.29

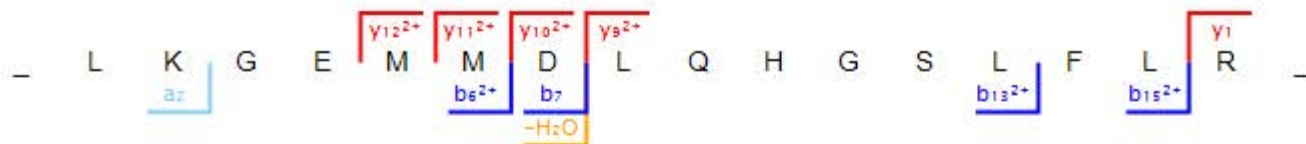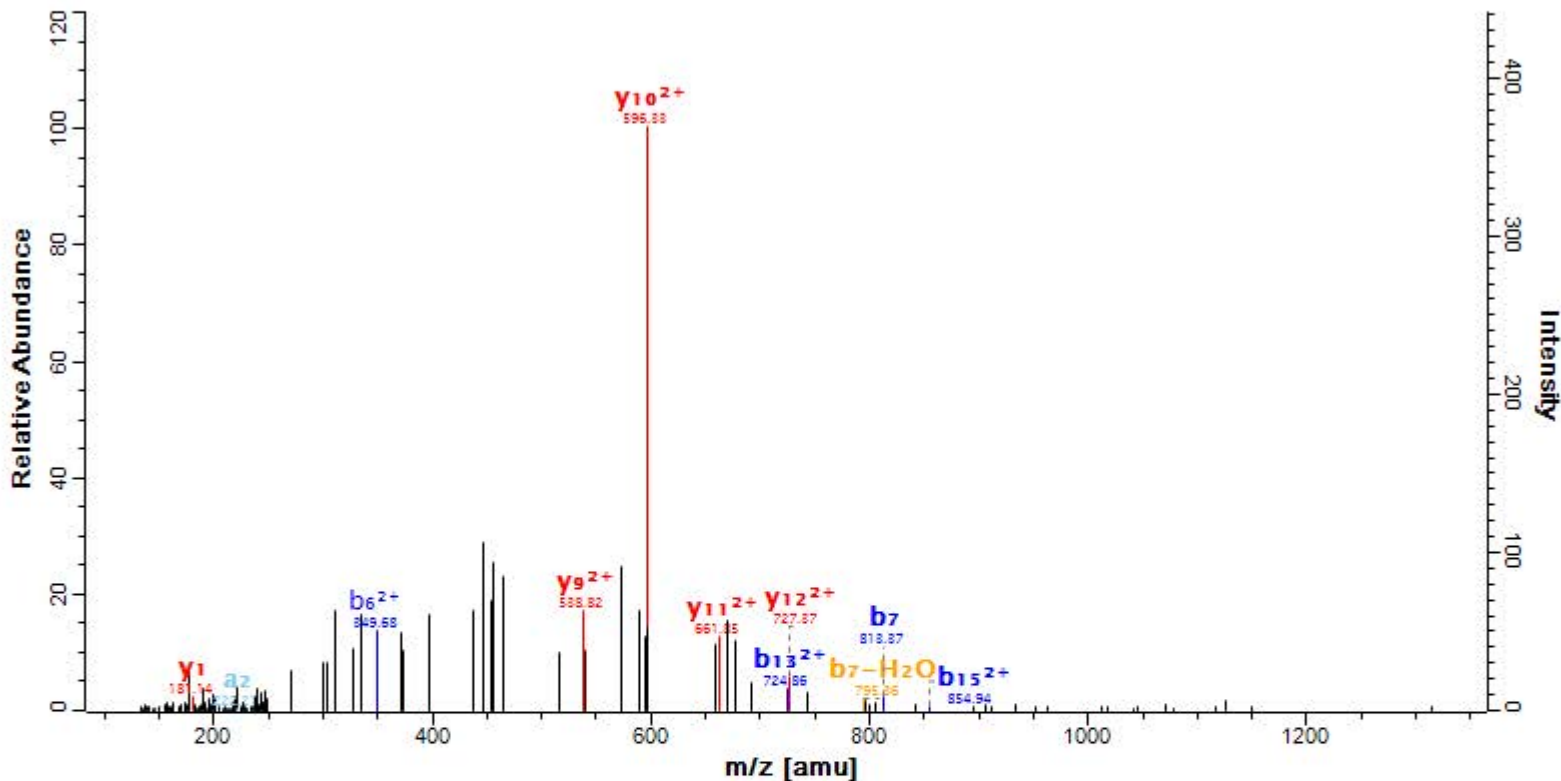

**precursor information**

|                   |                 |
|-------------------|-----------------|
| Mass:             | 1873.95413      |
| m/z:              | 469.49581       |
| Charge:           | 4+              |
| Retentiontime:    | 41.624748229980 |
| Score:            | 36.29246        |
| Mass Error [ppm]: | -0.066227       |
| PEP:              | 0.052891        |
| Precursor Type:   | MULTI           |

**general information**

|                       |            |
|-----------------------|------------|
| Annotation:           | 10 of 16   |
| AminoAcids Coverag    | 62 %       |
| Intensity Coverage:   | 24 %       |
| Peak Coverage:        | 8 %        |
| Protein Localisation: | 87 ... 102 |

|       | a ion         | b <sup>2+</sup> ion | b ion         |    |     |    | y ion         | y <sup>2+</sup> ion |
|-------|---------------|---------------------|---------------|----|-----|----|---------------|---------------------|
|       | Δ dalton mass | Δ dalton mass       | Δ dalton mass |    | seq |    | Δ dalton mass | Δ dalton mass       |
|       | 86.1          | 114.1               | 114.1         | 1  | L   | 15 |               |                     |
| -0.02 | 222.2         | 250.2               | 250.2         | 2  | K   | 14 | 1776          | 1776                |
|       | 279.2         | 307.2               | 307.2         | 3  | G   | 13 | 1640          | 1640                |
|       | 408.3         | 436.3               | 436.3         | 4  | E   | 12 | 1583          | 1583                |
|       | 539.3         | 567.3               | 567.3         | 5  | M   | 11 | 1454          | 727.4 +0.14         |
|       | 670.4         | -0.12 349.7         | 698.3         | 6  | M   | 10 | 1323          | 661.9 +0.14         |
|       | 785.4         | 813.4               | +0.10 813.4   | 7  | D   | 9  | 1192          | 596.3 +0.23         |
|       | 898.5         | 926.5               | 926.5         | 8  | L   | 8  | 1077          | 538.8 +0.04         |
|       | 1027          | 1055                | 1055          | 9  | Q   | 7  | 963.5         | 963.5               |
|       | 1164          | 1192                | 1192          | 10 | H   | 6  | 835.5         | 835.5               |
|       | 1221          | 1249                | 1249          | 11 | G   | 5  | 698.4         | 698.4               |
|       | 1308          | 1336                | 1336          | 12 | S   | 4  | 641.4         | 641.4               |
|       | 1421          | -0.03 724.9         | 1449          | 13 | L   | 3  | 554.4         | 554.4               |
|       | 1568          | 1596                | 1596          | 14 | F   | 2  | 441.3         | 441.3               |
|       | 1681          | -0.38 854.9         | 1709          | 15 | L   | 1  | 294.2         | 294.2               |
|       |               |                     |               | 16 | R   | 0  | 181.1         | +0.03 181.1         |



Scan number 5683 Raw file LNCAP\_Silac\_23F10\_set3\_10  
 Method ITMS; CID Peptide 143.79

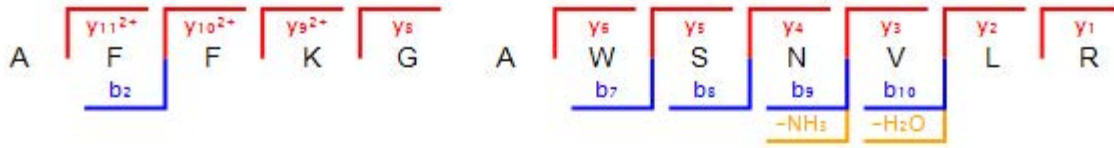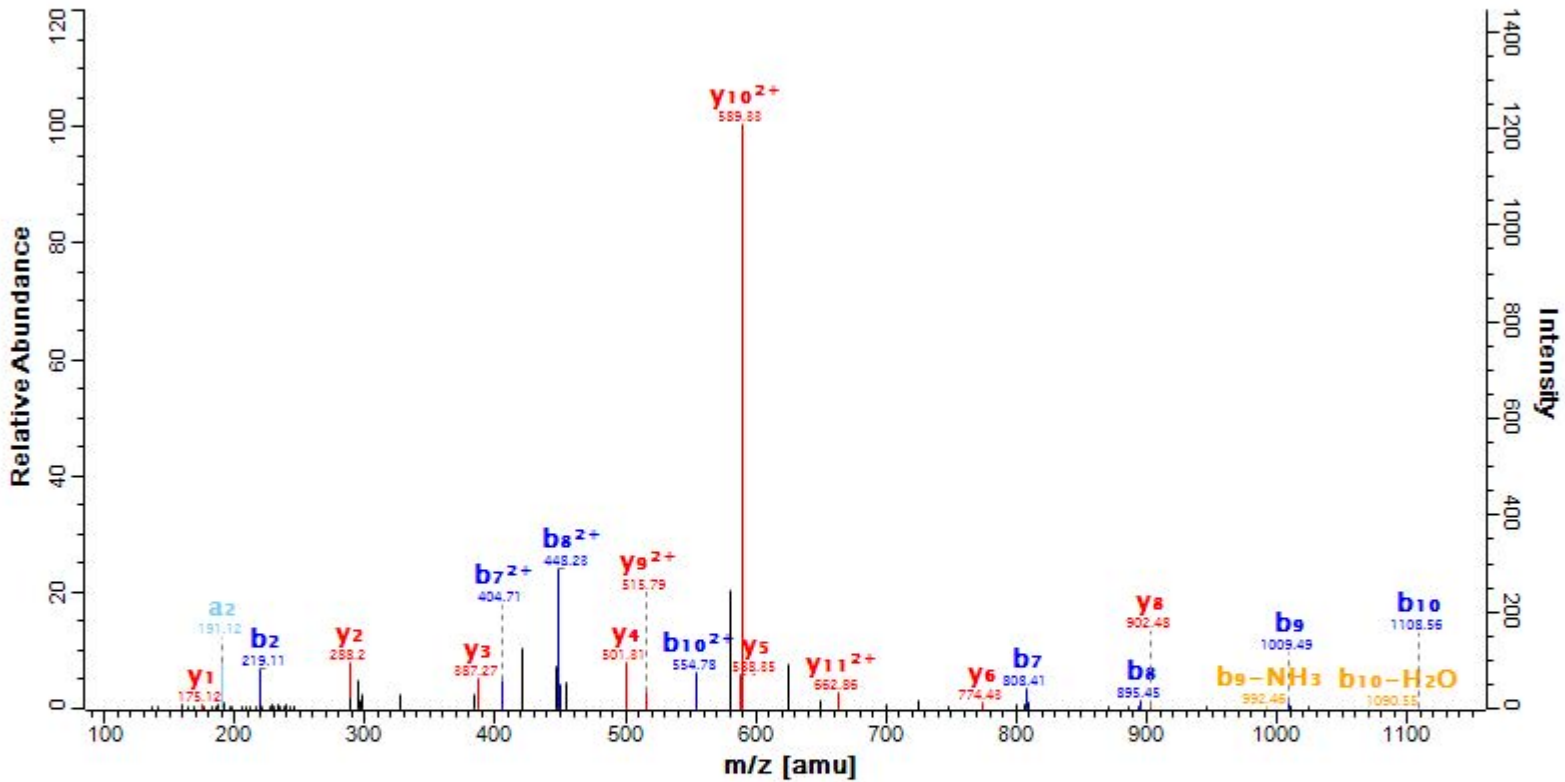

**precursor information**

|                   |                 |
|-------------------|-----------------|
| Mass:             | 1394.74599      |
| m/z:              | 465.92261       |
| Charge:           | 3+              |
| Retentiontime:    | 44.651863098144 |
| Score:            | 143.7886        |
| Mass Error [ppm]: | 0.064765        |
| PEP:              | 1.0464E-05      |
| Precursor Type:   | MULTI           |

**general information**

|                       |             |
|-----------------------|-------------|
| Annotation:           | 10 of 12    |
| AminoAcids Coverage:  | 83 %        |
| Intensity Coverage:   | 66 %        |
| Peak Coverage:        | 18 %        |
| Protein Localisation: | 269 ... 280 |

| a ion         |               | b <sup>2+</sup> ion |               | b ion  |       | seq           |               | y ion |        | y <sup>2+</sup> ion |        |
|---------------|---------------|---------------------|---------------|--------|-------|---------------|---------------|-------|--------|---------------------|--------|
| Δ dalton mass | Δ dalton mass | Δ dalton mass       | Δ dalton mass | seq    | seq   | Δ dalton mass | Δ dalton mass |       |        |                     |        |
| 44.05         |               | 72.04               |               | 72.04  | 1     | A             | 11            |       |        |                     |        |
| +0.039        | 91.1          | 219.1               | -0.08         | 219.1  | 2     | F             | 10            | 1325  |        | 662.9               | +0.083 |
|               | 338.2         | 366.2               |               | 366.2  | 3     | F             | 9             | 1178  |        | 589.3               | +0.229 |
|               | 466.3         | 494.3               |               | 494.3  | 4     | K             | 8             | 1031  |        | 515.8               | -0.06  |
|               | 523.3         | 551.3               |               | 551.3  | 5     | G             | 7             | 902.5 | +0.114 | 902.5               |        |
|               | 594.3         | 622.3               |               | 622.3  | 6     | A             | 6             | 845.5 |        | 845.5               |        |
|               | 780.4         | +0.135              | 404.7         | +0.06  | 808.4 | 7             | W             | 5     | 774.4  | +0.088              | 774.4  |
|               | 867.5         | +0                  | 448.2         | -0.02  | 895.4 | 8             | S             | 4     | 588.3  | -0.13               | 588.3  |
|               | 981.5         |                     | 1009          | +0.158 | 1009  | 9             | N             | 3     | 501.3  | +0.003              | 501.3  |
|               | 1081          | +0.003              | 554.8         | +0.214 | 1109  | 10            | V             | 2     | 387.3  | +0.094              | 387.3  |
|               | 1194          |                     | 1222          |        | 1222  | 11            | L             | 1     | 288.2  | +0.018              | 288.2  |
|               |               |                     |               |        |       | 12            | R             | 0     | 175.1  | +0.063              | 175.1  |

Scan number 6326 Raw file LNCAP\_Silac\_23F10\_set3\_10  
 Method ITMS; CID Pepti... 160.8

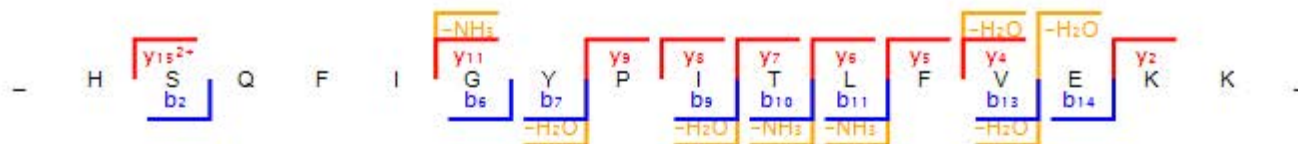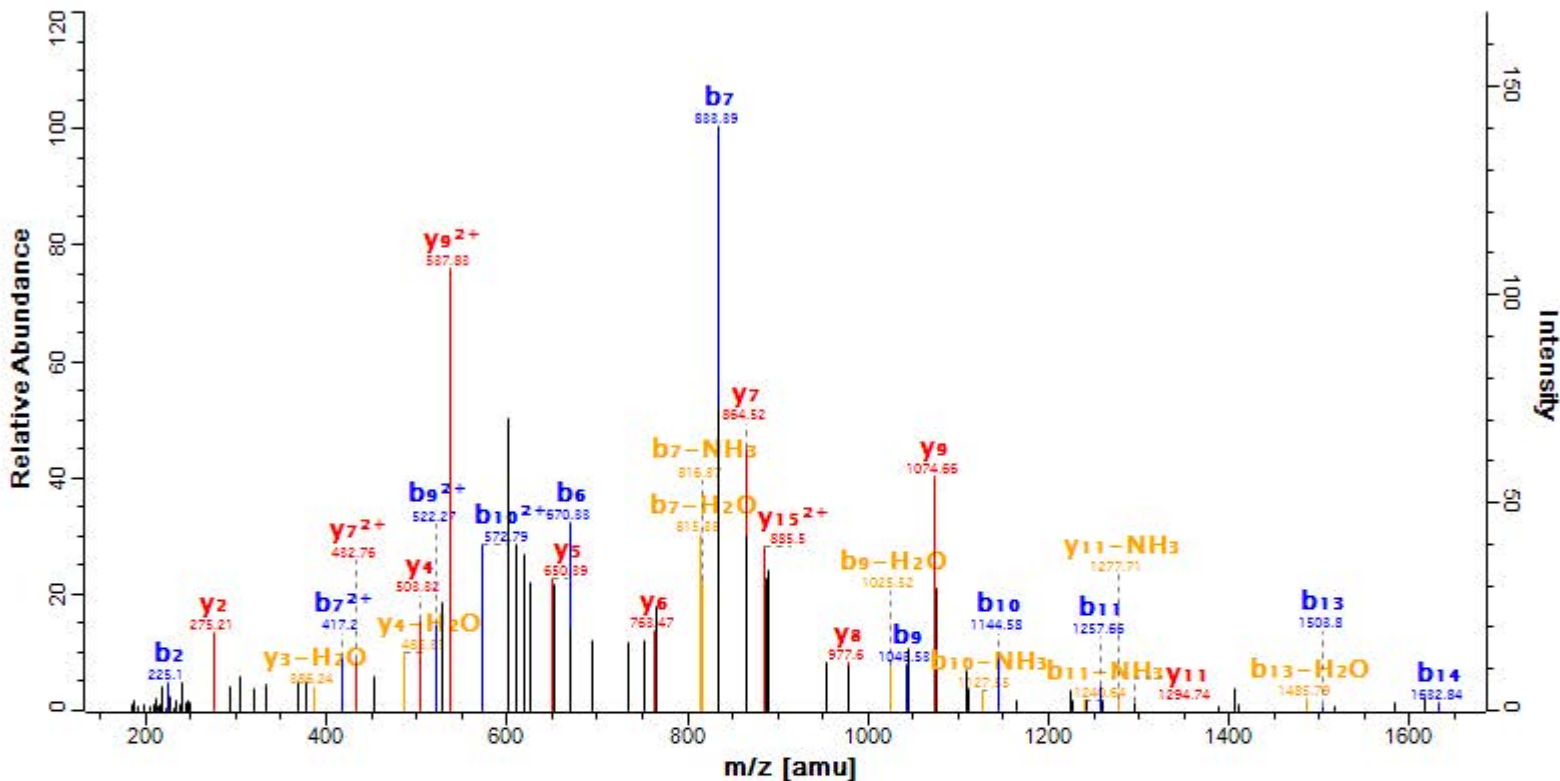

precursor information

|                   |                 |
|-------------------|-----------------|
| Mass:             | 1906.03417      |
| m/z:              | 636.352         |
| Charge:           | 3+              |
| Retentiontime:    | 51.605110168457 |
| Score:            | 160.8046        |
| Mass Error [ppm]: | -0.57609        |
| PEP:              | 1.2505E-13      |
| Precursor Type:   | ISO             |

general information

|                       |           |
|-----------------------|-----------|
| Annotation:           | 11 of 16  |
| AminoAcids Coverage:  | 69 %      |
| Intensity Coverage:   | 52 %      |
| Peak Coverage:        | 32 %      |
| Protein Localisation: | 40 ... 55 |

| b <sup>2+</sup> ion |        | b ion    |        | seq |   |    | y ion    |         | y <sup>2+</sup> ion |         |
|---------------------|--------|----------|--------|-----|---|----|----------|---------|---------------------|---------|
| Δ dalton            | mass   | Δ dalton | mass   |     |   |    | Δ dalton | mass    | Δ dalton            | mass    |
|                     | 138.07 |          | 138.07 | 1   | H | 15 |          |         |                     |         |
|                     | 225.1  | +0.1185  | 225.1  | 2   | S | 14 | 1770     |         | 885.5               | +0.2456 |
|                     | 353.16 |          | 353.16 | 3   | Q | 13 | 1683     |         | 1683                |         |
|                     | 500.23 |          | 500.23 | 4   | F | 12 | 1554.9   |         | 1554.9              |         |
|                     | 613.31 |          | 613.31 | 5   | I | 11 | 1407.8   |         | 1407.8              |         |
|                     | 670.33 | -0.091   | 670.33 | 6   | G | 10 | 1294.7   | +0.014  | 1294.7              |         |
| +0.1173             | 417.2  | +0.106   | 833.39 | 7   | Y | 9  | 1237.7   |         | 1237.7              |         |
|                     | 930.45 |          | 930.45 | 8   | P | 8  | 1074.7   | -0.035  | 537.83              | +0.2675 |
| +0.1584             | 522.27 | +0.046   | 1043.5 | 9   | I | 7  | 977.6    | +0.2484 | 977.6               |         |
| +0.2339             | 572.79 | -0.126   | 1144.6 | 10  | T | 6  | 864.52   | -0.042  | 432.76              | +0.1179 |
|                     | 1257.7 | +0.0902  | 1257.7 | 11  | L | 5  | 763.47   | +0.0463 | 763.47              |         |
|                     | 1404.7 |          | 1404.7 | 12  | F | 4  | 650.39   | -0.001  | 650.39              |         |
|                     | 1503.8 | +0.3529  | 1503.8 | 13  | V | 3  | 503.32   | +0.1051 | 503.32              |         |
|                     | 1632.8 | +0.3761  | 1632.8 | 14  | E | 2  | 404.25   |         | 404.25              |         |
|                     | 1760.9 |          | 1760.9 | 15  | K | 1  | 275.21   | +0.0912 | 275.21              |         |
|                     |        |          |        | 16  | K | 0  | 147.11   |         | 147.11              |         |

Scan number 656 Raw file LNCAP\_Silac\_23F10\_set3\_10  
 Method ITMS: CID Pepti... 256.57

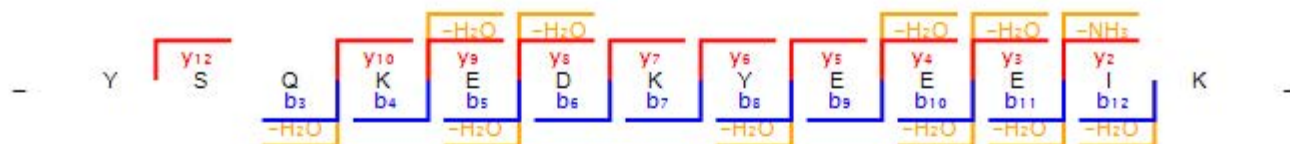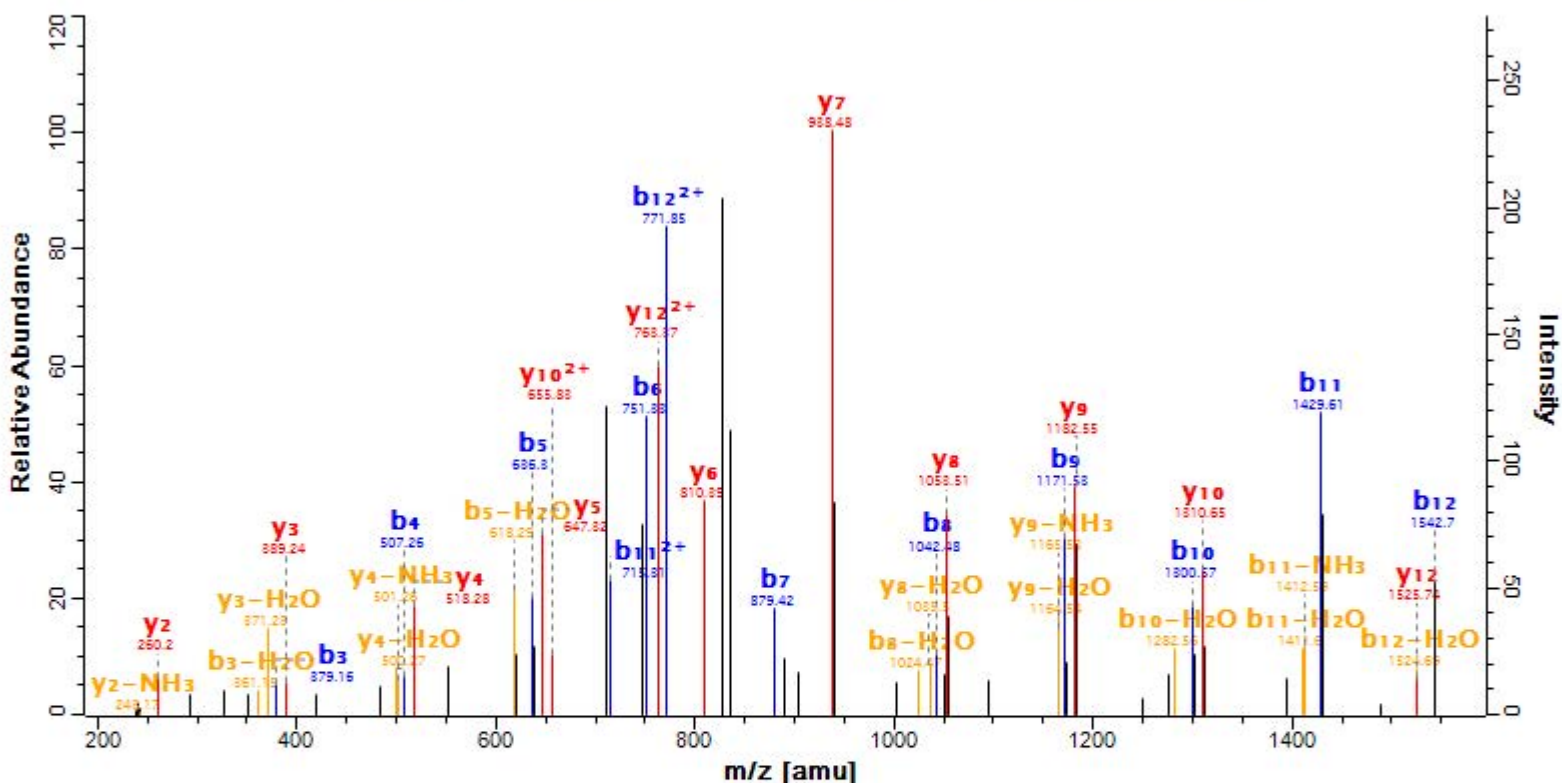

precursor information

|                   |                 |
|-------------------|-----------------|
| Mass:             | 1687.79432      |
| m/z:              | 844.90444       |
| Charge:           | 2+              |
| Retentiontime:    | 9.3358602523803 |
| Score:            | 256.5745        |
| Mass Error [ppm]: | 0.13538         |
| PEP:              | 2.6093E-45      |
| Precursor Type:   | MULTI           |

general information

|                       |             |
|-----------------------|-------------|
| Annotation:           | 11 of 13    |
| AminoAcids Coverage:  | 85 %        |
| Intensity Coverage:   | 60 %        |
| Peak Coverage:        | 51 %        |
| Protein Localisation: | 178 ... 190 |

| b <sup>2+</sup> ion |        | b ion    |        | seq |   |    | y ion    |         | y <sup>2+</sup> ion |         |
|---------------------|--------|----------|--------|-----|---|----|----------|---------|---------------------|---------|
| Δ dalton            | mass   | Δ dalton | mass   |     |   |    | Δ dalton | mass    | Δ dalton            | mass    |
|                     | 164.07 |          | 164.07 | 1   | Y | 12 |          |         |                     |         |
|                     | 251.1  |          | 251.1  | 2   | S | 11 | 1525.7   | +0.0001 | 763.37              | -0.162  |
|                     | 379.16 | +0.0927  | 379.16 | 3   | Q | 10 | 1438.7   |         | 1438.7              |         |
|                     | 507.26 | +0.1555  | 507.26 | 4   | K | 9  | 1310.6   | +0.0553 | 655.83              | +0.3145 |
|                     | 636.3  | -0.016   | 636.3  | 5   | E | 8  | 1182.6   | -0.033  | 1182.6              |         |
|                     | 751.33 | -0.007   | 751.33 | 6   | D | 7  | 1053.5   | -0.003  | 1053.5              |         |
|                     | 879.42 | -0.033   | 879.42 | 7   | K | 6  | 938.48   | -0.041  | 938.48              |         |
|                     | 1042.5 | +0.12    | 1042.5 | 8   | Y | 5  | 810.39   | +0.0002 | 810.39              |         |
|                     | 1171.5 | +0.048   | 1171.5 | 9   | E | 4  | 647.32   | +0.0193 | 647.32              |         |
|                     | 1300.6 | -0.084   | 1300.6 | 10  | E | 3  | 518.28   | +0.0544 | 518.28              |         |
| +0.0638             | 715.31 | -0.099   | 1429.6 | 11  | E | 2  | 389.24   | +0.1496 | 389.24              |         |
| +0.2379             | 771.85 | -0.086   | 1542.7 | 12  | I | 1  | 260.2    | +0.0543 | 260.2               |         |
|                     |        |          |        | 13  | K | 0  | 147.11   |         | 147.11              |         |

Scan number 823 Raw file LNCAP\_Silac\_23F10\_set3\_10  
 Method ITMS: CID Pepti... 55.45

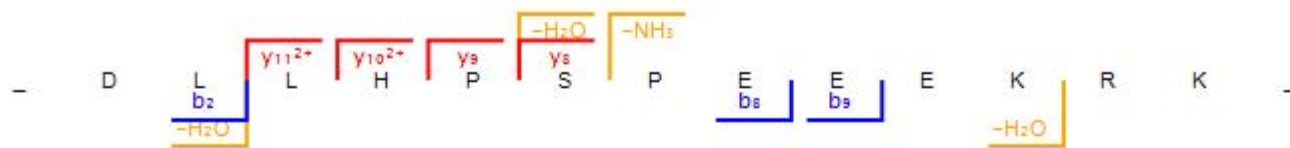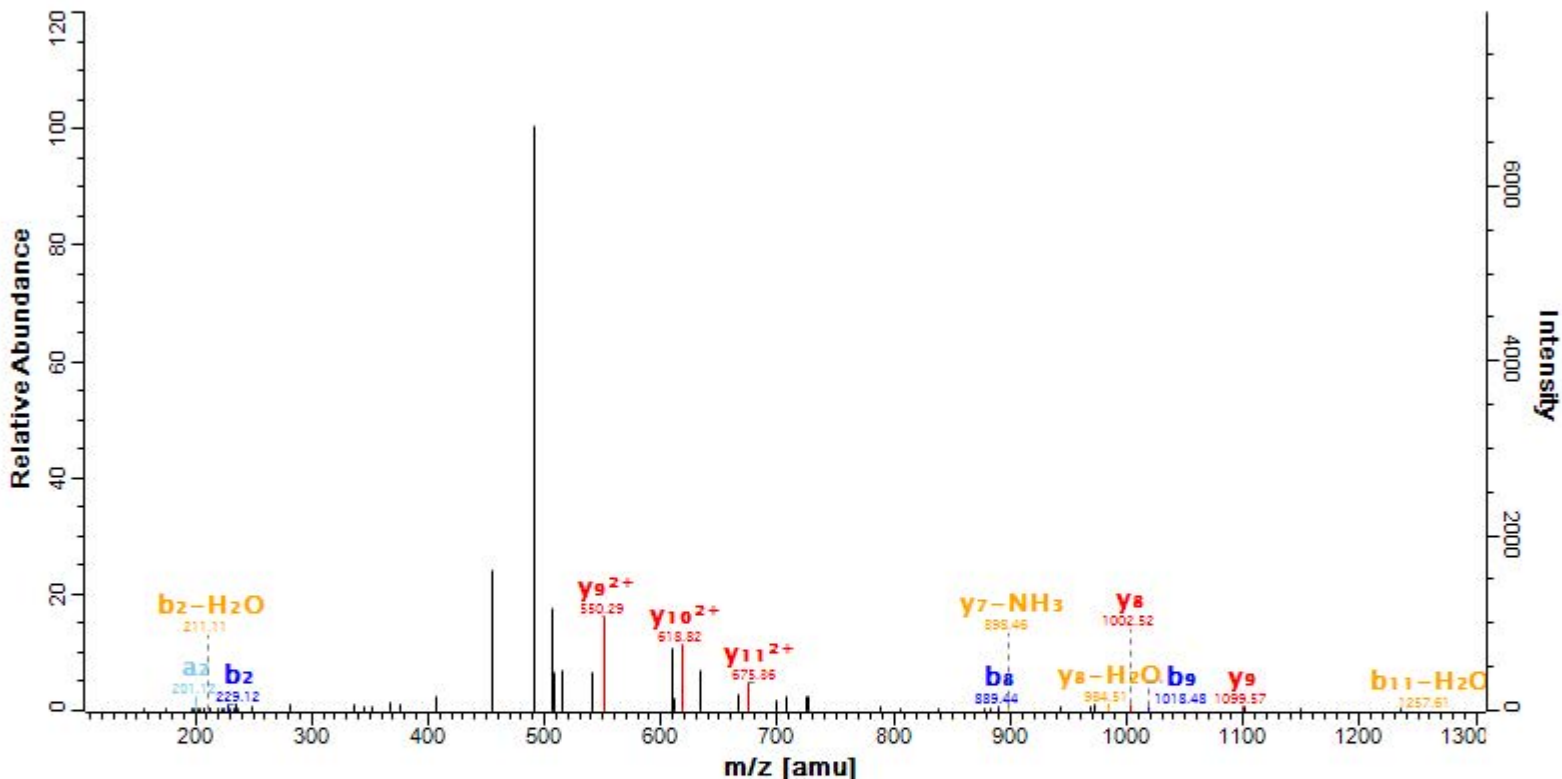

Scan number 1054 Raw file LNCAP\_Silac\_23F10\_set3\_11  
 Method ITMS; CID Peptide 172.57

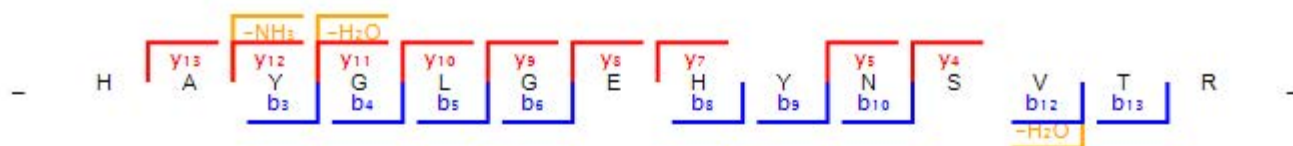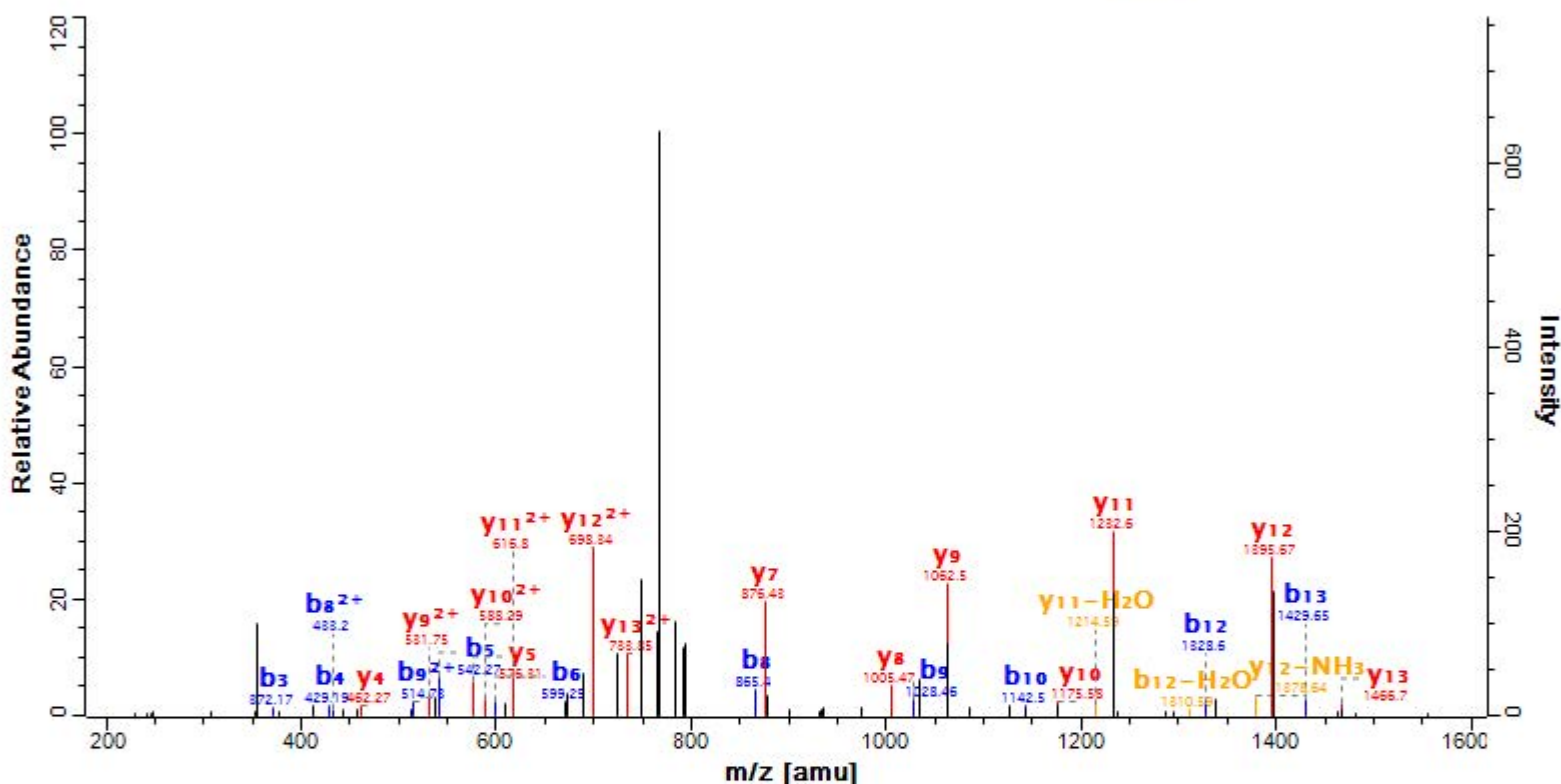

#### precursor information

|                   |                 |
|-------------------|-----------------|
| Mass:             | 1602.75533      |
| m/z:              | 802.38494       |
| Charge:           | 2+              |
| Retentiontime:    | 11.706596374511 |
| Score:            | 172.573         |
| Mass Error [ppm]: | 0.89198         |
| PEP:              | 1.3402E-12      |
| Precursor Type:   | ISO             |

| b <sup>2+</sup> ion |        | b ion    |        | seq |   |    | y ion    |         | y <sup>2+</sup> ion |         |
|---------------------|--------|----------|--------|-----|---|----|----------|---------|---------------------|---------|
| Δ dalton            | mass   | Δ dalton | mass   |     |   |    | Δ dalton | mass    | Δ dalton            | mass    |
|                     | 138.07 |          | 138.07 | 1   | H | 13 |          |         |                     |         |
|                     | 209.1  |          | 209.1  | 2   | A | 12 | 1466.7   | -0.061  | 733.85              | -0.014  |
|                     | 372.17 | -0.266   | 372.17 | 3   | Y | 11 | 1395.7   | +0.0169 | 698.34              | +0.2715 |
|                     | 429.19 | +0.0511  | 429.19 | 4   | G | 10 | 1232.6   | -0.052  | 616.8               | +0.2746 |
|                     | 542.27 | +0.0998  | 542.27 | 5   | L | 9  | 1175.6   | +0.1035 | 588.29              | +0.4547 |
|                     | 599.29 | +0.3104  | 599.29 | 6   | G | 8  | 1062.5   | -0.023  | 531.75              | +0.384  |
|                     | 728.34 |          | 728.34 | 7   | E | 7  | 1005.5   | +0.0322 | 1005.5              |         |
| +0.2539             | 433.2  | -0.114   | 865.4  | 8   | H | 6  | 876.43   | +0.0147 | 876.43              |         |
| -0.367              | 514.73 | -0.085   | 1028.5 | 9   | Y | 5  | 739.37   |         | 739.37              |         |
|                     | 1142.5 | -0.047   | 1142.5 | 10  | N | 4  | 576.31   | +0.0651 | 576.31              |         |
|                     | 1229.5 |          | 1229.5 | 11  | S | 3  | 462.27   | +0.0572 | 462.27              |         |
|                     | 1328.6 | +0.1268  | 1328.6 | 12  | V | 2  | 375.24   |         | 375.24              |         |
|                     | 1429.6 | -0.102   | 1429.6 | 13  | T | 1  | 276.17   |         | 276.17              |         |
|                     |        |          |        | 14  | R | 0  | 175.12   |         | 175.12              |         |

#### general information

|                       |             |
|-----------------------|-------------|
| Annotation:           | 12 of 14    |
| AminoAcids Coverage:  | 86 %        |
| Intensity Coverage:   | 39 %        |
| Peak Coverage:        | 34 %        |
| Protein Localisation: | 300 ... 313 |

Scan number 1856 Raw file LNCAP\_Silac\_23F10\_set3\_11  
 Method ITMS; CID Pepti... 153.74

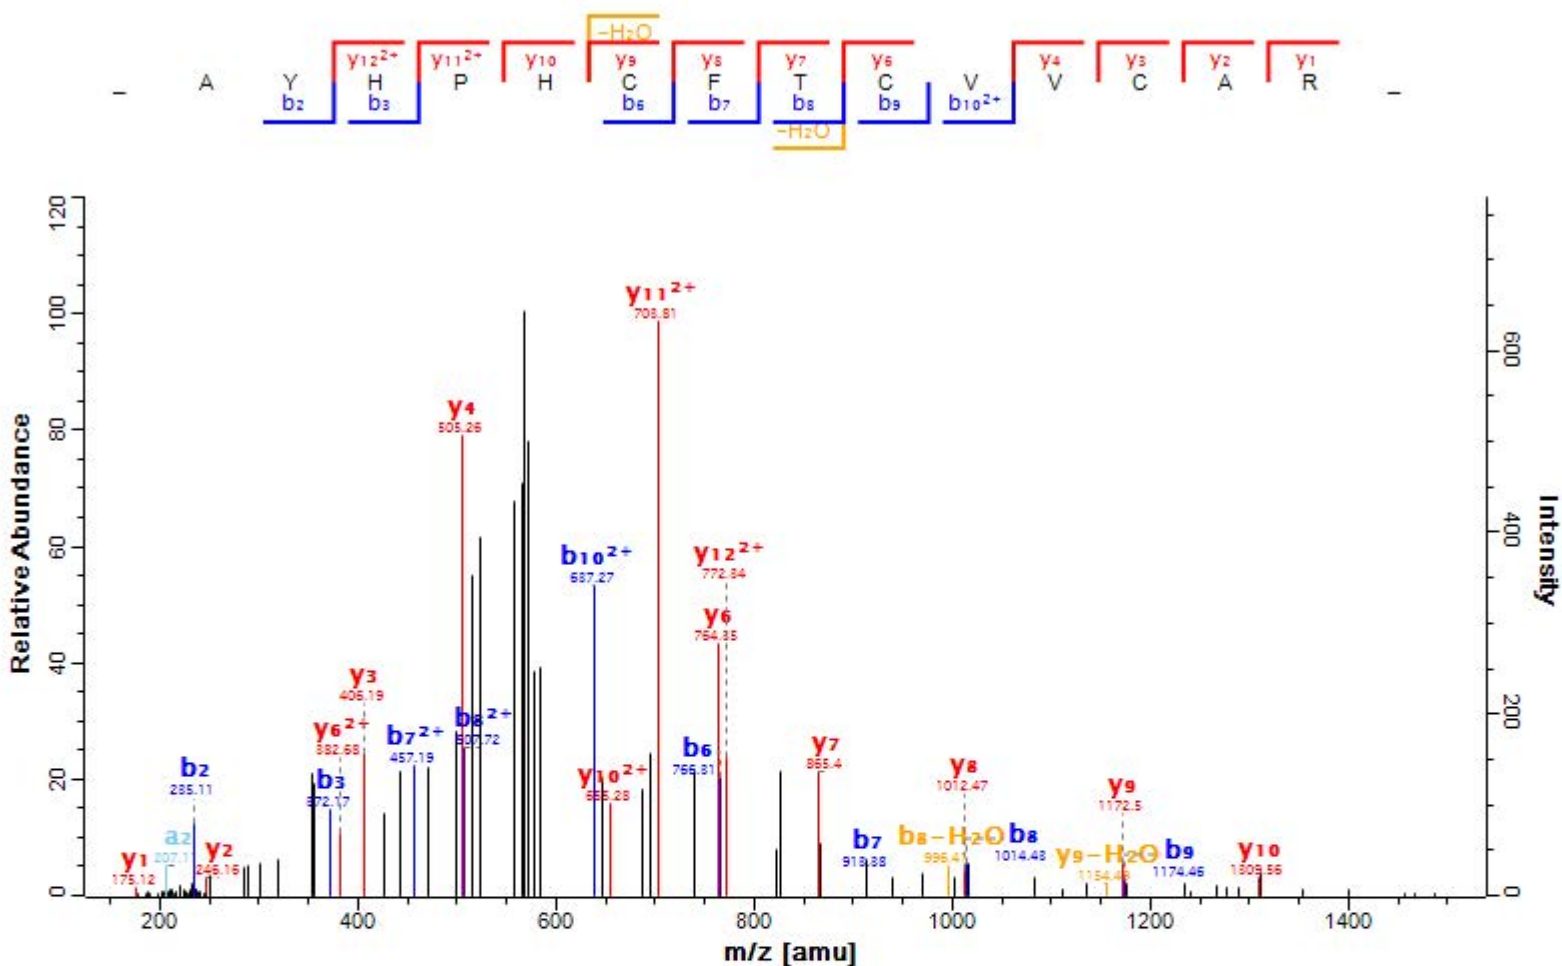

#### precursor information

|                   |                 |
|-------------------|-----------------|
| Mass:             | 1776.76486      |
| m/z:              | 593.26223       |
| Charge:           | 3+              |
| Retentiontime:    | 17.599239349365 |
| Score:            | 153.7388        |
| Mass Error [ppm]: | 0.097427        |
| PEP:              | 3.3701E-10      |
| Precursor Type:   | MULTI           |

#### general information

|                       |             |
|-----------------------|-------------|
| Annotation:           | 13 of 14    |
| AminoAcids Coverage:  | 93 %        |
| Intensity Coverage:   | 37 %        |
| Peak Coverage:        | 23 %        |
| Protein Localisation: | 471 ... 484 |

|      | a ion         | b <sup>2+</sup> ion | b ion         |    |     |    | y ion         | y <sup>2+</sup> ion |
|------|---------------|---------------------|---------------|----|-----|----|---------------|---------------------|
|      | Δ dalton mass | Δ dalton mass       | Δ dalton mass |    | seq |    | Δ dalton mass | Δ dalton mass       |
|      | 44.05         | 72.04               | 72.04         | 1  | A   | 13 |               |                     |
| -0.1 | 207.1         | 235.1               | +0.032235.1   | 2  | Y   | 12 | 1707          | 1707                |
|      | 344.2         | 372.2               | -0.03 372.2   | 3  | H   | 11 | 1544          | 772.3 +0.17         |
|      | 441.2         | 469.2               | 469.2         | 4  | P   | 10 | 1407          | 703.8 +0.28         |
|      | 578.3         | 606.3               | 606.3         | 5  | H   | 9  | 1310          | +0.012655.3 -0.09   |
|      | 738.3         | 766.3               | +0.096766.3   | 6  | C   | 8  | 1173          | -0.01 1173          |
|      | 885.4         | +0.089457.2         | -0.18 913.4   | 7  | F   | 7  | 1012          | -0.04 1012          |
|      | 986.4         | -0.11 507.7         | +0.2 1014     | 8  | T   | 6  | 865.4         | -0.02 865.4         |
|      | 1146          | 1174                | -0.03 1174    | 9  | C   | 5  | 764.4         | +0.029882.7 +0.08   |
|      | 1246          | +0.301637.3         | 1274          | 10 | V   | 4  | 604.3         | 604.3               |
|      | 1345          | 1373                | 1373          | 11 | V   | 3  | 505.3         | +0.009505.3         |
|      | 1505          | 1533                | 1533          | 12 | C   | 2  | 406.2         | +0.05 406.2         |
|      | 1576          | 1604                | 1604          | 13 | A   | 1  | 246.2         | +0 246.2            |
|      |               |                     |               | 14 | R   | 0  | 175.1         | +0.131175.1         |

Scan number 2023 Raw file LNCAP\_Silac\_23F10\_set3\_11  
 Method ITMS; CID Pepti... 69.98

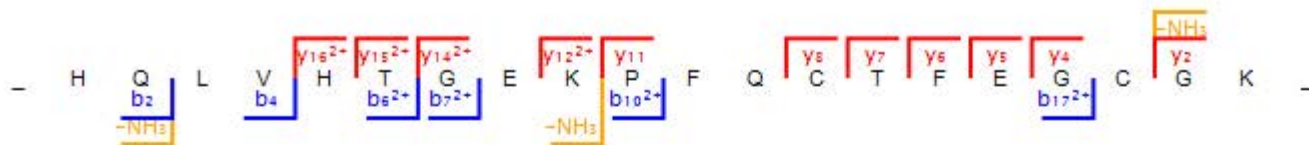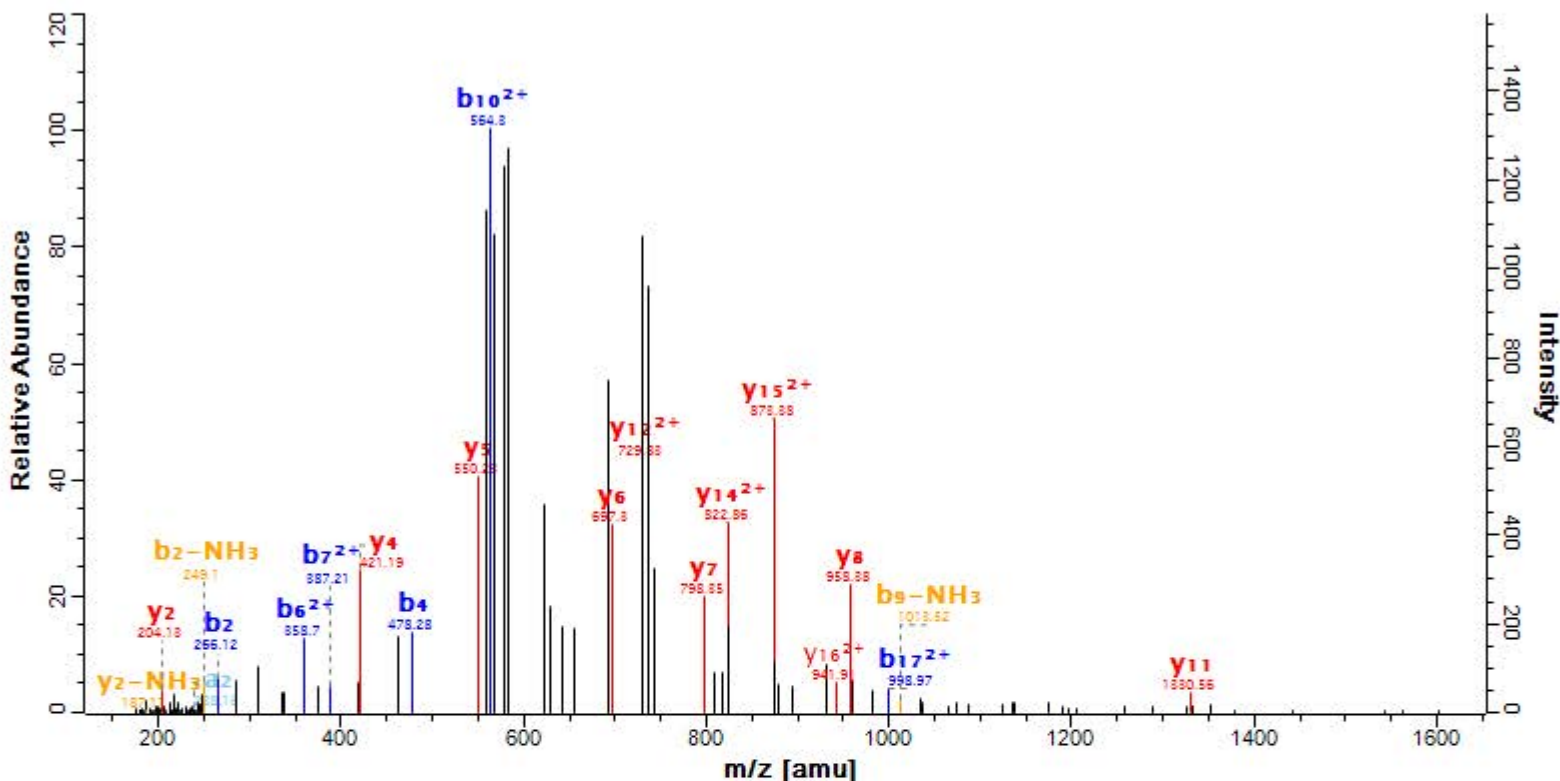

**precursor information**

|                   |                 |
|-------------------|-----------------|
| Mass:             | 2359.08434      |
| m/z:              | 590.77836       |
| Charge:           | 4+              |
| Retentiontime:    | 18.786092758178 |
| Score:            | 69.97897        |
| Mass Error [ppm]: | 0.2433          |
| PEP:              | 0.00028617      |
| Precursor Type:   | MULTI           |

**general information**

|                       |             |
|-----------------------|-------------|
| Annotation:           | 13 of 20    |
| AminoAcids Coverage:  | 65 %        |
| Intensity Coverage:   | 33 %        |
| Peak Coverage:        | 18 %        |
| Protein Localisation: | 503 ... 522 |

|        | a ion         | b <sup>2+</sup> ion | b ion         |     |   | y ion         | y <sup>2+</sup> ion |       |       |
|--------|---------------|---------------------|---------------|-----|---|---------------|---------------------|-------|-------|
|        | Δ dalton mass | Δ dalton mass       | Δ dalton mass | seq |   | Δ dalton mass | Δ dalton mass       |       |       |
|        | 110.1         | 138.1               | 138.1         | 1   | H | 19            |                     |       |       |
| +0.086 | 238.1         | 266.1               | +0.089        | 2   | Q | 18            | 2223                | 2223  |       |
|        | 351.2         | 379.2               | 379.2         | 3   | L | 17            | 2095                | 2095  |       |
|        | 450.3         | 478.3               | +0.132        | 4   | V | 16            | 1982                | 1982  |       |
|        | 587.3         | 615.3               | 615.3         | 5   | H | 15            | 1883                | 941.9 | -0.12 |
|        | 688.4         | +0.25               | 358.7         | 6   | T | 14            | 1746                | 873.4 | +0.20 |
|        | 745.4         | +0.34               | 738.2         | 7   | G | 13            | 1645                | 822.9 | +0.31 |
|        | 874.5         | 902.4               | 902.4         | 8   | E | 12            | 1588                | 1588  |       |
|        | 1003          | 1031                | 1031          | 9   | K | 11            | 1459                | 729.8 | -0.22 |
|        | 1100          | -0.47               | 564.3         | 10  | P | 10            | 1331                | -0.09 | 1331  |
|        | 1247          | 1275                | 1275          | 11  | F | 9             | 1234                | 1234  |       |
|        | 1375          | 1403                | 1403          | 12  | Q | 8             | 1086                | 1086  |       |
|        | 1535          | 1563                | 1563          | 13  | C | 7             | 958.4               | -0.05 | 958.4 |
|        | 1636          | 1664                | 1664          | 14  | T | 6             | 798.3               | +0.01 | 798.3 |
|        | 1783          | 1811                | 1811          | 15  | F | 5             | 697.3               | +0.11 | 697.3 |
|        | 1912          | 1940                | 1940          | 16  | E | 4             | 550.2               | -0.11 | 550.2 |
|        | 1969          | +0.36               | 5999          | 17  | G | 3             | 421.2               | +0.00 | 421.2 |
|        | 2129          | 2157                | 2157          | 18  | C | 2             | 364.2               |       | 364.2 |
|        | 2186          | 2214                | 2214          | 19  | G | 1             | 204.1               | +0.04 | 204.1 |
|        |               |                     |               | 20  | K | 0             | 147.1               |       | 147.1 |

Scan number 2304 Raw file LNCAP\_Silac\_23F10\_set3\_11  
 Method ITMS; CID Pepti... 83.87

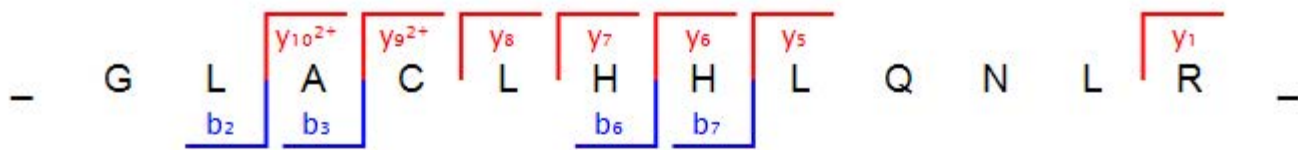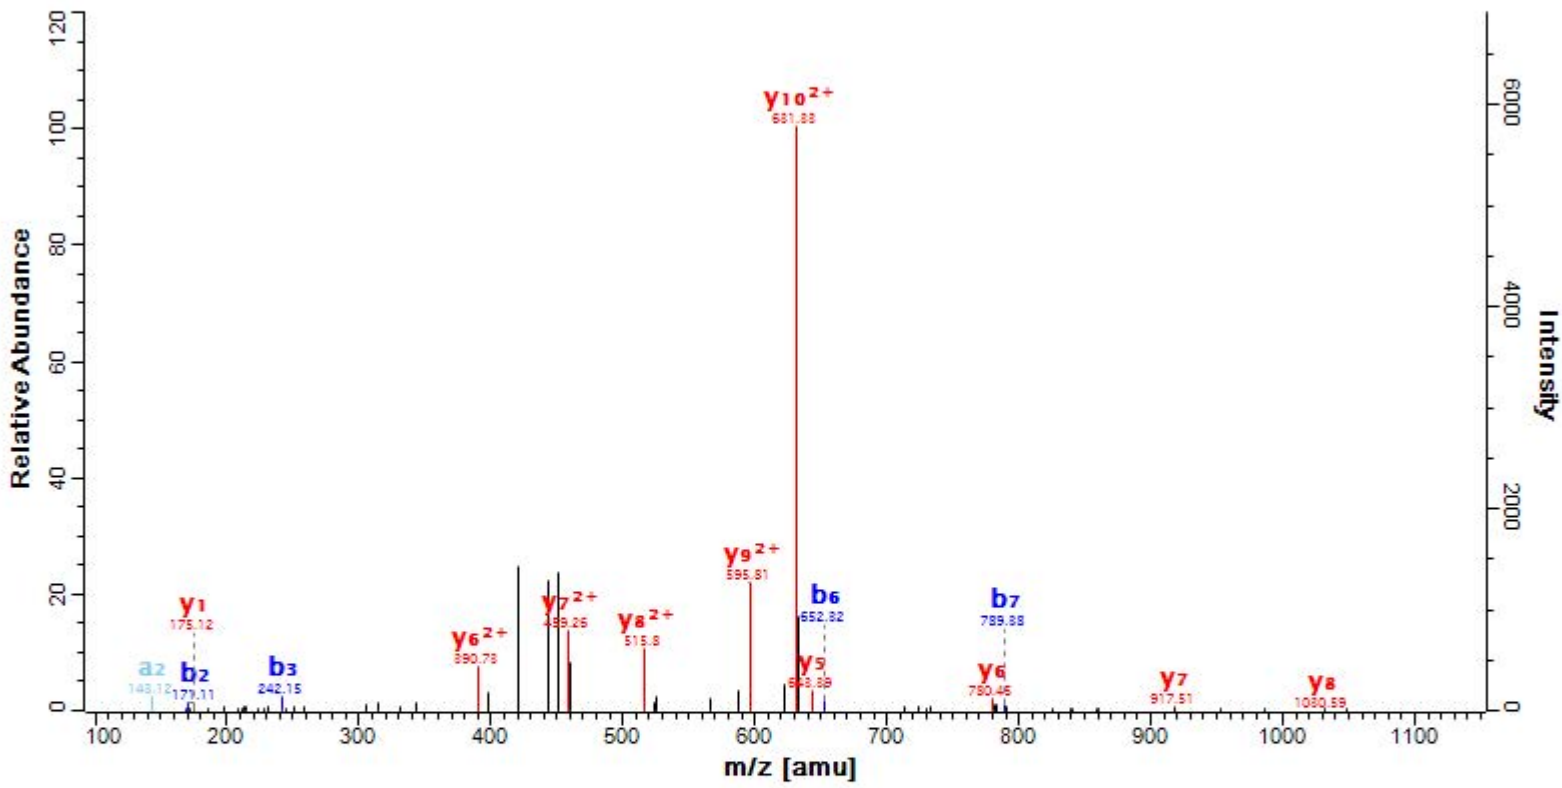

**precursor information**

|                   |                 |
|-------------------|-----------------|
| Mass:             | 1430.75624      |
| m/z:              | 477.92602       |
| Charge:           | 3+              |
| Retentiontime:    | 20.888700485229 |
| Score:            | 83.86861        |
| Mass Error [ppm]: | -0.17416        |
| PEP:              | 0.0017066       |
| Precursor Type:   | MULTI           |

**general information**

|                       |             |
|-----------------------|-------------|
| Annotation:           | 9 of 12     |
| AminoAcids Coverage:  | 75 %        |
| Intensity Coverage:   | 56 %        |
| Peak Coverage:        | 15 %        |
| Protein Localisation: | 267 ... 278 |

| a ion    |        | b ion    |        |     |   |          | y ion  |          | y <sup>2+</sup> ion |  |
|----------|--------|----------|--------|-----|---|----------|--------|----------|---------------------|--|
| Δ dalton | mass   | Δ dalton | mass   | seq |   | Δ dalton | mass   | Δ dalton | mass                |  |
|          | 30.034 |          | 58.029 | 1   | G | 11       |        |          |                     |  |
| +0.0457  | 143.12 | +0.04    | 171.11 | 2   | L | 10       | 1374.7 |          | 1374.7              |  |
|          | 214.16 | -0.334   | 242.15 | 3   | A | 9        | 1261.7 |          | 631.33 +0.2226      |  |
|          | 374.19 |          | 402.18 | 4   | C | 8        | 1190.6 |          | 595.81 +0.2952      |  |
|          | 487.27 |          | 515.26 | 5   | L | 7        | 1030.6 | +0.1957  | 515.8 +0.1842       |  |
|          | 624.33 | -0.014   | 652.32 | 6   | H | 6        | 917.51 | -0.1     | 459.26 -0.04        |  |
|          | 761.39 | +0.1802  | 789.38 | 7   | H | 5        | 780.45 | +0.1058  | 390.73 +0.231       |  |
|          | 874.47 |          | 902.47 | 8   | L | 4        | 643.39 | +0.2837  | 643.39              |  |
|          | 1002.5 |          | 1030.5 | 9   | Q | 3        | 530.3  |          | 530.3               |  |
|          | 1116.6 |          | 1144.6 | 10  | N | 2        | 402.25 |          | 402.25              |  |
|          | 1229.7 |          | 1257.7 | 11  | L | 1        | 288.2  |          | 288.2               |  |
|          |        |          |        | 12  | R | 0        | 175.12 | +0.0119  | 175.12              |  |



Scan number 291 Raw file LNCAP\_Silac\_23F10\_set3\_11  
 Method ITMS; CID Pepti... 66.43

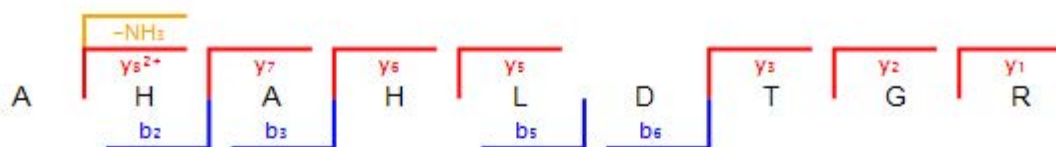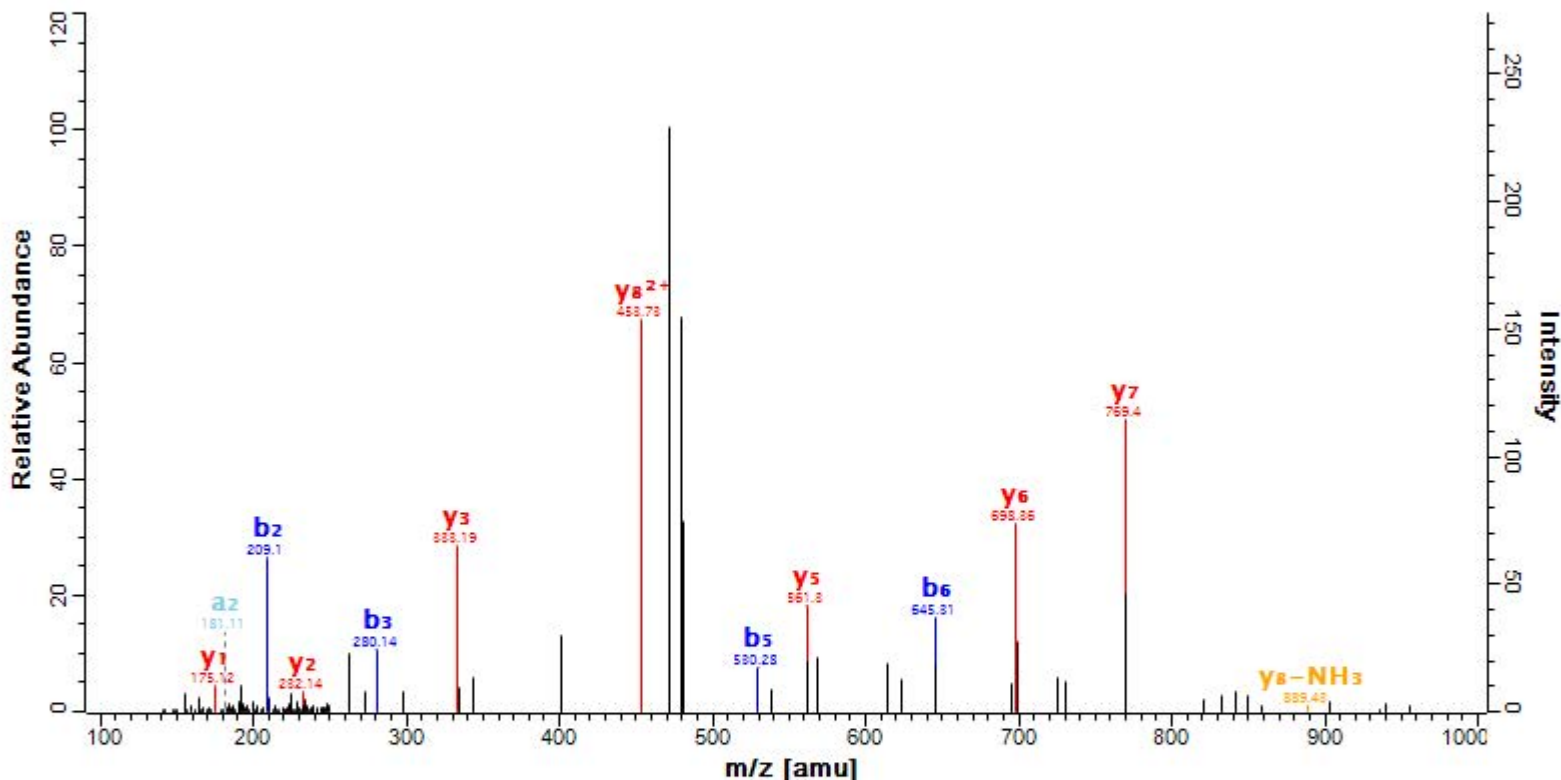

#### precursor information

|                       |                 |
|-----------------------|-----------------|
| Mass:                 | 976.4847        |
| m/z:                  | 489.24963       |
| Charge:               | 2+              |
| Retentiontime:        | 6.2669634819030 |
| Score:                | 66.43451        |
| Mass Error [ppm]:     | 0.84401         |
| PEP:                  | 0.059064        |
| Precursor Type:       | ISO             |
| Annotation:           | 8 of 9          |
| AminoAcids Coverage:  | 89 %            |
| Intensity Coverage:   | 36 %            |
| Peak Coverage:        | 12 %            |
| Protein Localisation: | 726 ... 734     |

| a ion    |        | b ion    |        | seq |   |   | y ion    |         | y <sup>2+</sup> ion |         |
|----------|--------|----------|--------|-----|---|---|----------|---------|---------------------|---------|
| Δ dalton | mass   | Δ dalton | mass   |     |   |   | Δ dalton | mass    | Δ dalton            | mass    |
|          | 44.049 |          | 72.044 | 1   | A | 8 |          |         |                     |         |
| +0.0507  | 181.11 | +0.0154  | 209.1  | 2   | H | 7 | 906.45   |         | 453.73              | +0.0028 |
|          | 252.15 | +0.1193  | 280.14 | 3   | A | 6 | 769.4    | -0.047  | 769.4               |         |
|          | 389.2  |          | 417.2  | 4   | H | 5 | 698.36   | +0.0503 | 698.36              |         |
|          | 502.29 | -0.45    | 530.28 | 5   | L | 4 | 561.3    | +0.0929 | 561.3               |         |
|          | 617.32 | +0.0249  | 645.31 | 6   | D | 3 | 448.22   |         | 448.22              |         |
|          | 718.36 |          | 746.36 | 7   | T | 2 | 333.19   | +0.0798 | 333.19              |         |
|          | 775.38 |          | 803.38 | 8   | G | 1 | 232.14   | +0.1105 | 232.14              |         |
|          |        |          |        | 9   | R | 0 | 175.12   | +0.0475 | 175.12              |         |

Scan number 3282 Raw file LNCAP\_Silac\_23F10\_set3\_11  
 Method ITMS; CID Pepti... 136.53

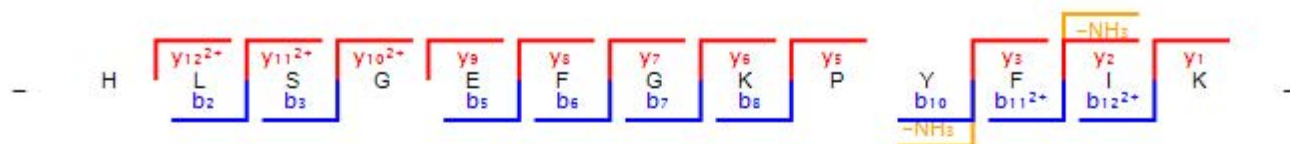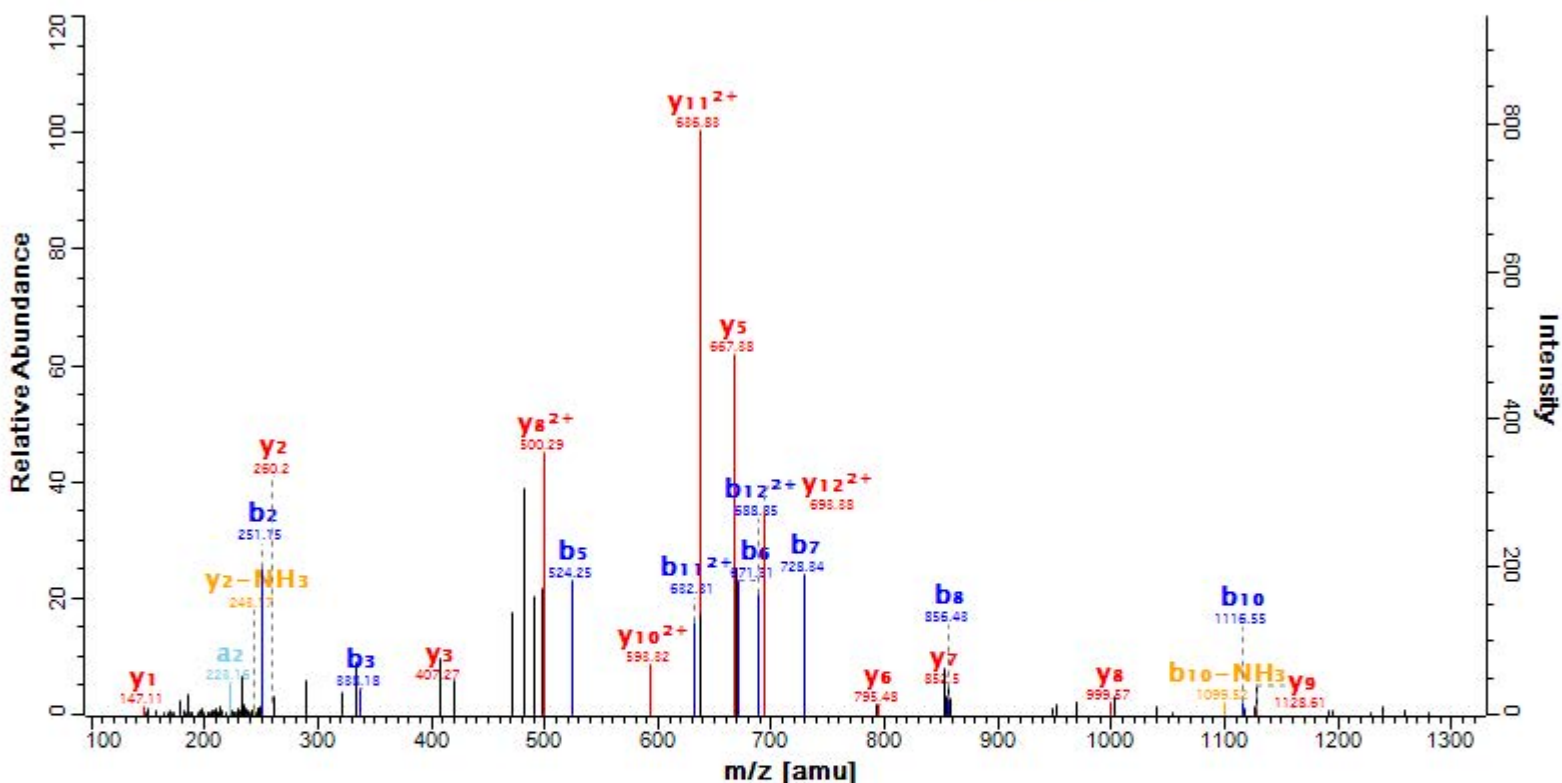

precursor information

|                   |                 |
|-------------------|-----------------|
| Mass:             | 1521.7982       |
| m/z:              | 508.27334       |
| Charge:           | 3+              |
| Retentiontime:    | 29.334287643432 |
| Score:            | 136.5304        |
| Mass Error [ppm]: | 0.13222         |
| PEP:              | 9.5866E-07      |
| Precursor Type:   | MULTI           |

general information

|                       |             |
|-----------------------|-------------|
| Annotation:           | 12 of 13    |
| AminoAcids Coverag    | 92 %        |
| Intensity Coverage:   | 61 %        |
| Peak Coverage:        | 19 %        |
| Protein Localisation: | 101 ... 113 |

|    | a ion         | b <sup>2+</sup> ion | b ion         |     |   |    | y ion         | y <sup>2+</sup> ion |
|----|---------------|---------------------|---------------|-----|---|----|---------------|---------------------|
|    | Δ dalton mass | Δ dalton mass       | Δ dalton mass | seq |   |    | Δ dalton mass | Δ dalton mass       |
|    | 110.1         | 138.1               | 138.1         | 1   | H | 12 |               |                     |
| +0 | 223.2         | 251.2               | -0.04 251.2   | 2   | L | 11 | 1386          | 693.4 +0.29%        |
|    | 310.2         | 338.2               | -0.2 338.2    | 3   | S | 10 | 1273          | 636.8 +0.21%        |
|    | 367.2         | 395.2               | 395.2         | 4   | G | 9  | 1186          | 593.3 +0.12%        |
|    | 496.3         | 524.2               | -0.03 524.2   | 5   | E | 8  | 1129          | -0.07 1129          |
|    | 643.3         | 671.3               | +0.02 671.3   | 6   | F | 7  | 999.6         | -0.02 500.3 +0.02%  |
|    | 700.3         | 728.3               | +0.01 728.3   | 7   | G | 6  | 852.5         | -0.03 852.5         |
|    | 828.4         | 856.4               | +0.25 856.4   | 8   | K | 5  | 795.5         | -0.06 795.5         |
|    | 925.5         | 953.5               | 953.5         | 9   | P | 4  | 667.4         | +0.03 667.4         |
|    | 1089          | 1117                | +0.26 1117    | 10  | Y | 3  | 570.3         | 570.3               |
|    | 1236          | 1264                | +0.28 1264    | 11  | F | 2  | 407.3         | +0.14 407.3         |
|    | 1349          | 1377                | +0.11 1377    | 12  | I | 1  | 260.2         | +0.13 260.2         |
|    |               |                     |               | 13  | K | 0  | 147.1         | +0.00 147.1         |

Scan number 3297 Raw file LNCAP\_Silac\_23F10\_set3\_11  
 Method ITMS; CID Pepti... 145.09

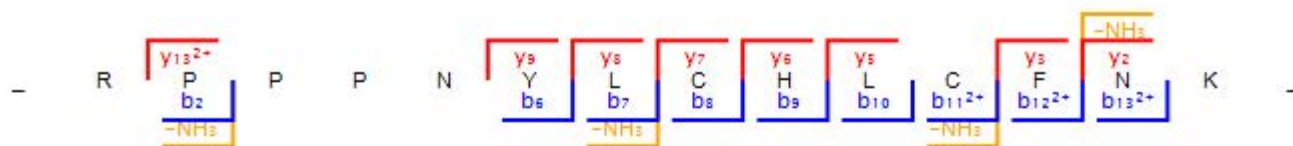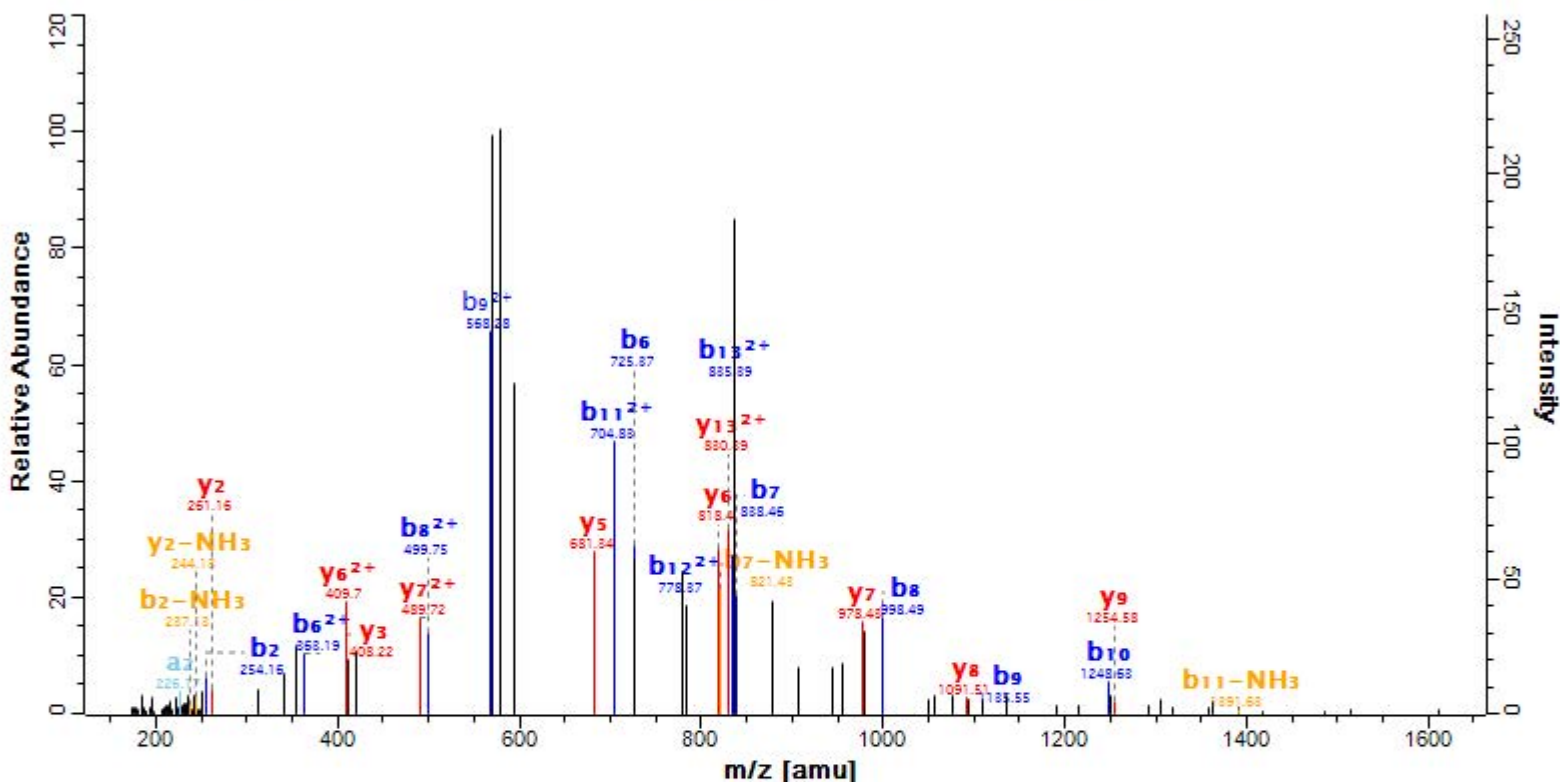

#### precursor information

|                   |                 |
|-------------------|-----------------|
| Mass:             | 1814.87043      |
| m/z:              | 605.96409       |
| Charge:           | 3+              |
| Retentiontime:    | 29.459560394287 |
| Score:            | 145.085         |
| Mass Error [ppm]: | -0.24119        |
| PEP:              | 2.0478E-09      |
| Precursor Type:   | MULTI           |

|        | a ion         | b <sup>2+</sup> ion | b ion         |     |   | y ion         | y <sup>2+</sup> ion |
|--------|---------------|---------------------|---------------|-----|---|---------------|---------------------|
|        | Δ dalton mass | Δ dalton mass       | Δ dalton mass | seq |   | Δ dalton mass | Δ dalton mass       |
|        | 129.1         | 157.1               | 157.1         | 1   | R |               |                     |
| +0.037 | 226.2         | 254.2               | 2254.2        | 2   | P | 12 1660       | 830.4 +0.23         |
|        | 323.2         | 351.2               | 351.2         | 3   | P | 11 1563       | 1563                |
|        | 420.3         | 448.3               | 448.3         | 4   | P | 10 1466       | 1466                |
|        | 534.3         | 562.3               | 562.3         | 5   | N | 9 1369        | 1369                |
|        | 697.4         | +0.104863.2         | +0.045725.4   | 6   | Y | 8 1255        | -0.08 1255          |
|        | 810.5         | 838.5               | -0.05 838.5   | 7   | L | 7 1092        | +0.0041092          |
|        | 970.5         | +0.19 499.7         | -0.06 998.5   | 8   | C | 6 978.4       | -0.08 489.7 +0.44   |
|        | 1108          | +0.247568.3         | +0.0791136    | 9   | H | 5 818.4       | +0.028409.7 +0.316  |
|        | 1221          | 1249                | -0.09 1249    | 10  | L | 4 681.3       | +0.053681.3         |
|        | 1381          | +0.273704.8         | 1409          | 11  | C | 3 568.3       | 568.3               |
|        | 1528          | +0.004778.4         | 1556          | 12  | F | 2 408.2       | +0.039408.2         |
|        | 1642          | -0.08 835.4         | 1670          | 13  | N | 1 261.2       | +0.163261.2         |
|        |               |                     |               | 14  | K | 0 147.1       | 147.1               |

#### general information

|                       |             |
|-----------------------|-------------|
| Annotation:           | 9 of 14     |
| AminoAcids Coverage:  | 64 %        |
| Intensity Coverage:   | 37 %        |
| Peak Coverage:        | 26 %        |
| Protein Localisation: | 185 ... 198 |

Scan number 340 Raw file LNCAP\_Silac\_23F10\_set3\_11  
 Method ITMS: CID Pepti... 91.9

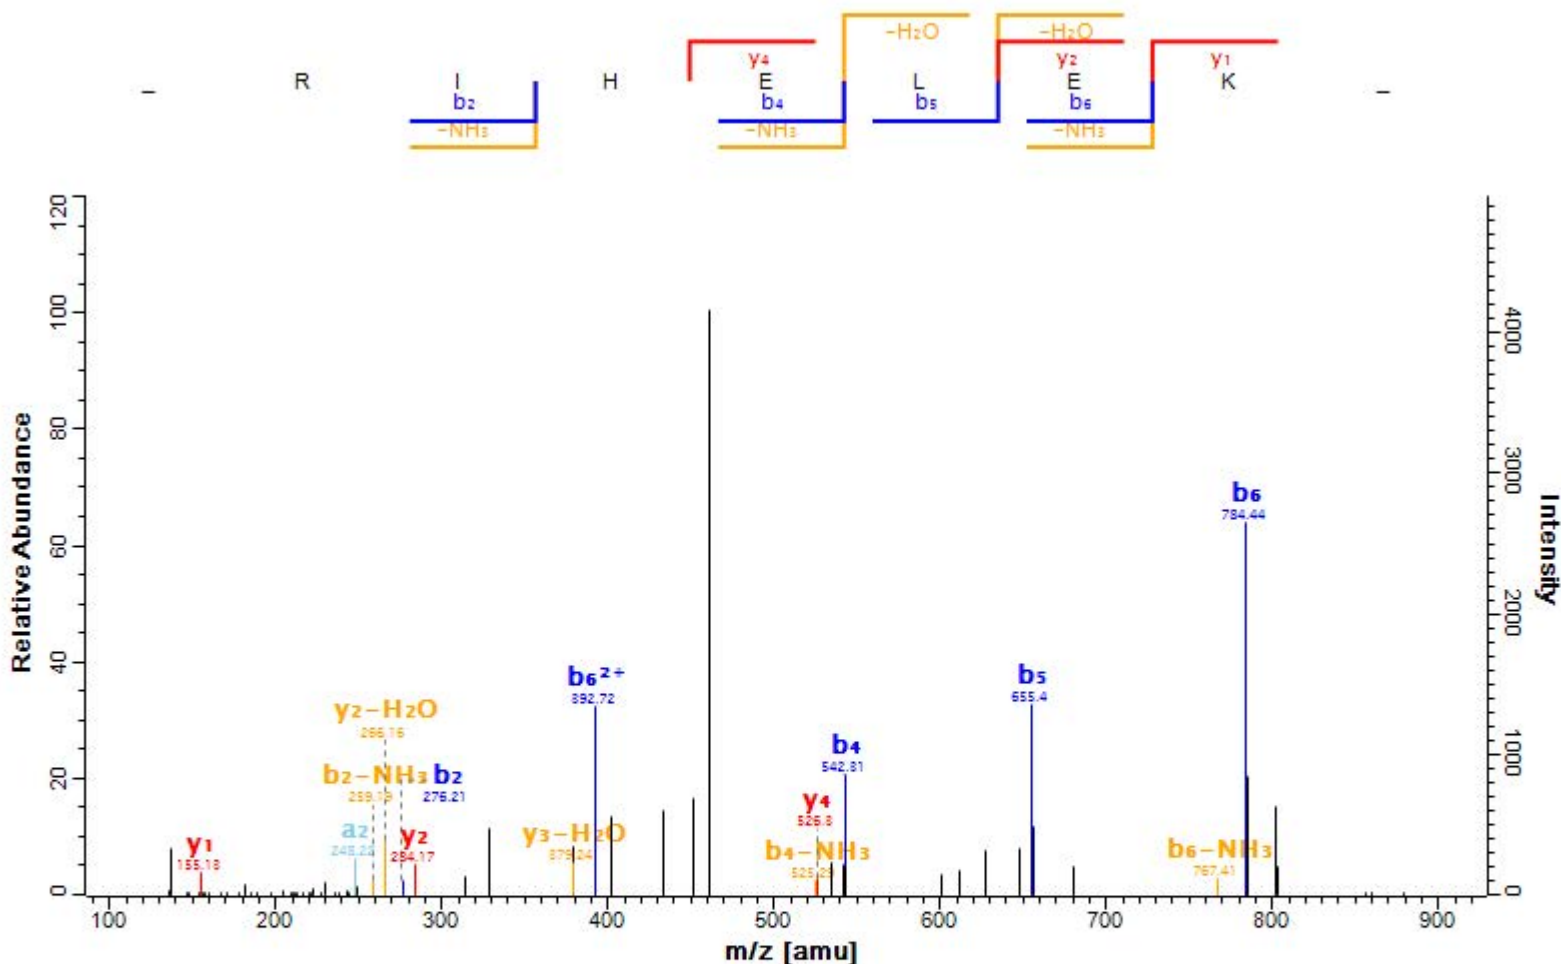

precursor information

|                      |                 |
|----------------------|-----------------|
| Mass:                | 923.51895       |
| m/z:                 | 462.76675       |
| Charge:              | 2+              |
| Retentiontime:       | 6.7090883255004 |
| Score:               | 91.90011        |
| g Mass Error [ppm]:  | 0.093856        |
| Annotation:          | 5 of 7          |
| AminoAcids Coverage: | 71 %            |
| Intensity Coverage:  | 37 %            |
| Peak Coverage:       | 14 %            |

| a ion    |        | b <sup>2+</sup> ion |        | b ion    |        | y ion |   |          |                |
|----------|--------|---------------------|--------|----------|--------|-------|---|----------|----------------|
| Δ dalton | mass   | Δ dalton            | mass   | Δ dalton | mass   | seq   |   | Δ dalton | mass           |
|          | 135.13 |                     | 163.13 |          | 163.13 | 1     | R | 6        |                |
| +0.0191  | 248.22 |                     | 276.21 | +0.0077  | 276.21 | 2     | I | 5        | 776.44         |
|          | 385.28 |                     | 413.27 |          | 413.27 | 3     | H | 4        | 663.36         |
|          | 514.32 |                     | 542.31 | +0.1774  | 542.31 | 4     | E | 3        | 526.3 +0.2386  |
|          | 627.4  |                     | 655.4  | +0.0387  | 655.4  | 5     | L | 2        | 397.25         |
|          | 756.45 | +0.2011             | 392.72 | +0.0448  | 784.44 | 6     | E | 1        | 284.17 +0.0496 |
|          |        |                     |        |          |        | 7     | K | 0        | 155.13 +0.0996 |

Scan number 558 Raw file LNCAP\_Silac\_23F10\_set3\_11  
 Method ITMS: CID Pepti... 121.5

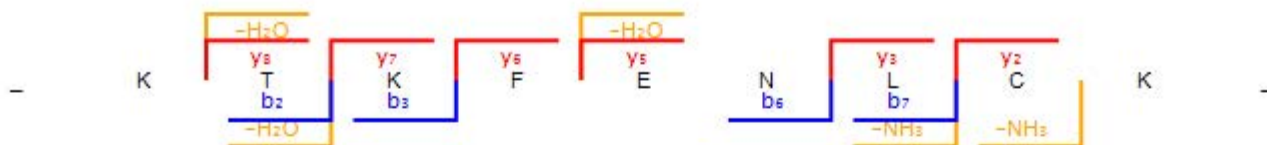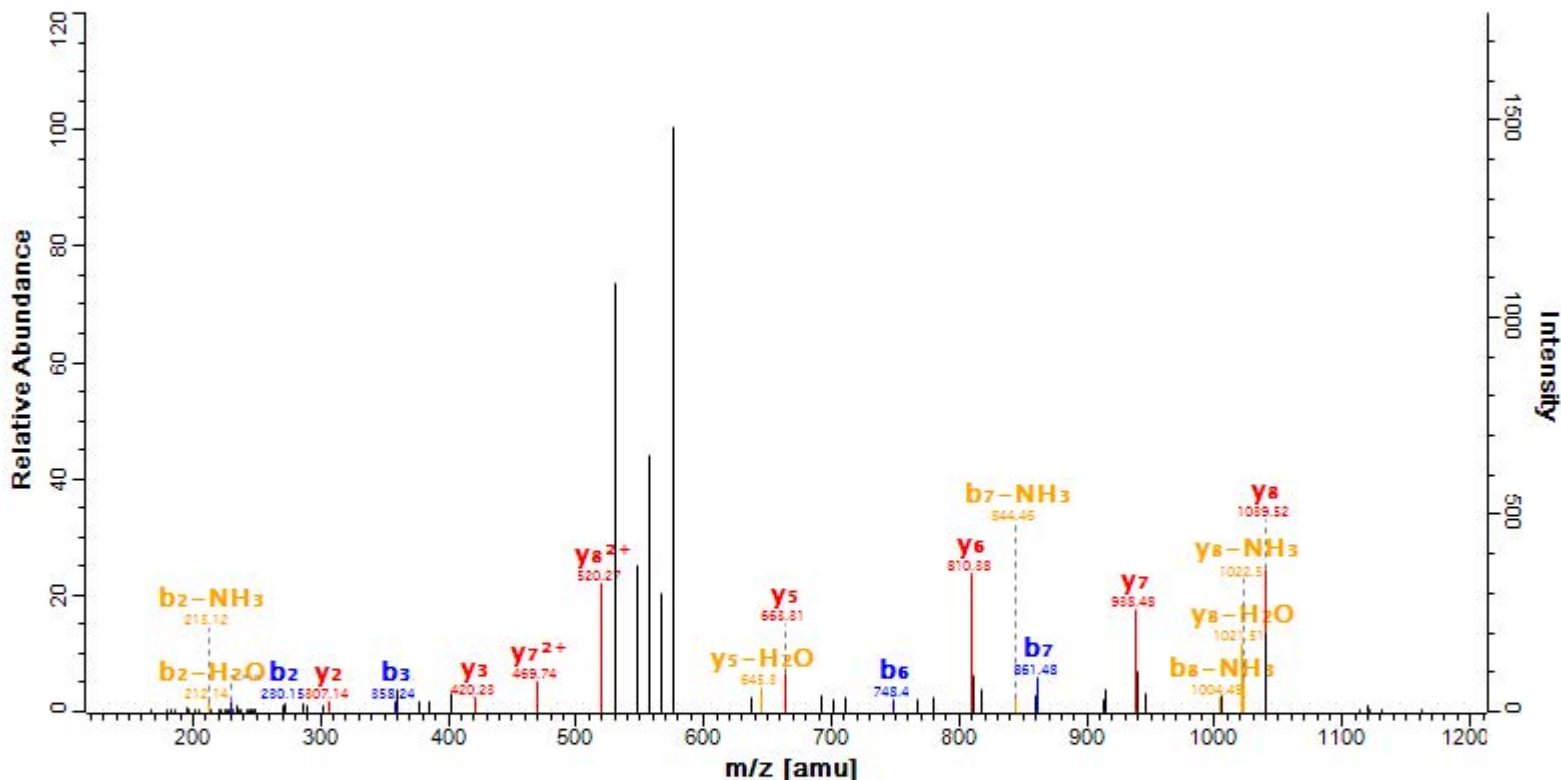

#### precursor information

|                       |                 |
|-----------------------|-----------------|
| Mass:                 | 1166.61184      |
| m/z:                  | 584.3132        |
| Charge:               | 2+              |
| Retentiontime:        | 8.1826333999633 |
| Score:                | 121.5022        |
| Mass Error [ppm]:     | 0.051785        |
| PEP:                  | 0.0010458       |
| Precursor Type:       | MULTI           |
| Annotation:           | 7 of 9          |
| AminoAcids Coverage:  | 78 %            |
| Intensity Coverage:   | 29 %            |
| Peak Coverage:        | 22 %            |
| Protein Localisation: | 687 ... 695     |

| b ion     |          | seq |   |   | y ion    |           | y <sup>2+</sup> ion |           |
|-----------|----------|-----|---|---|----------|-----------|---------------------|-----------|
| Δ dalton  | mass     |     |   |   | Δ dalton | mass      | Δ dalton            | mass      |
|           | 129.1022 | 1   | K | 8 |          |           |                     |           |
| +0.077621 | 230.1499 | 2   | T | 7 | 1039.524 | -0.05815  | 520.2657            | +0.182192 |
| +0.293815 | 358.2449 | 3   | K | 6 | 938.4764 | +0.00497  | 469.7418            | -0.02273  |
|           | 505.3133 | 4   | F | 5 | 810.3815 | +0.001789 | 810.3815            |           |
|           | 634.3559 | 5   | E | 4 | 663.313  | +0.075818 | 663.313             |           |
| -0.16969  | 748.3988 | 6   | N | 3 | 534.2704 |           | 534.2704            |           |
| +0.036896 | 861.4829 | 7   | L | 2 | 420.2275 | +0.142784 | 420.2275            |           |
|           | 1021.514 | 8   | C | 1 | 307.1435 | -0.10415  | 307.1435            |           |
|           |          | 9   | K | 0 | 147.1128 |           | 147.1128            |           |

Scan number 757 Raw file LNCAP\_Silac\_23F10\_set3\_11  
 Method ITMS; CID Pepti... 83.5

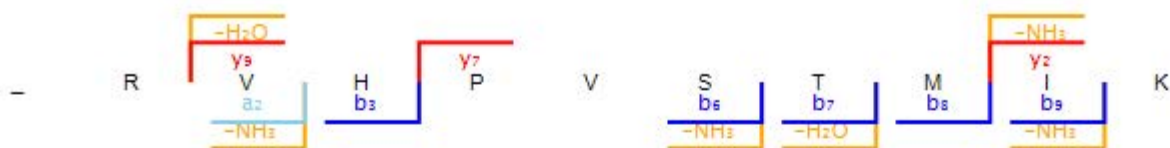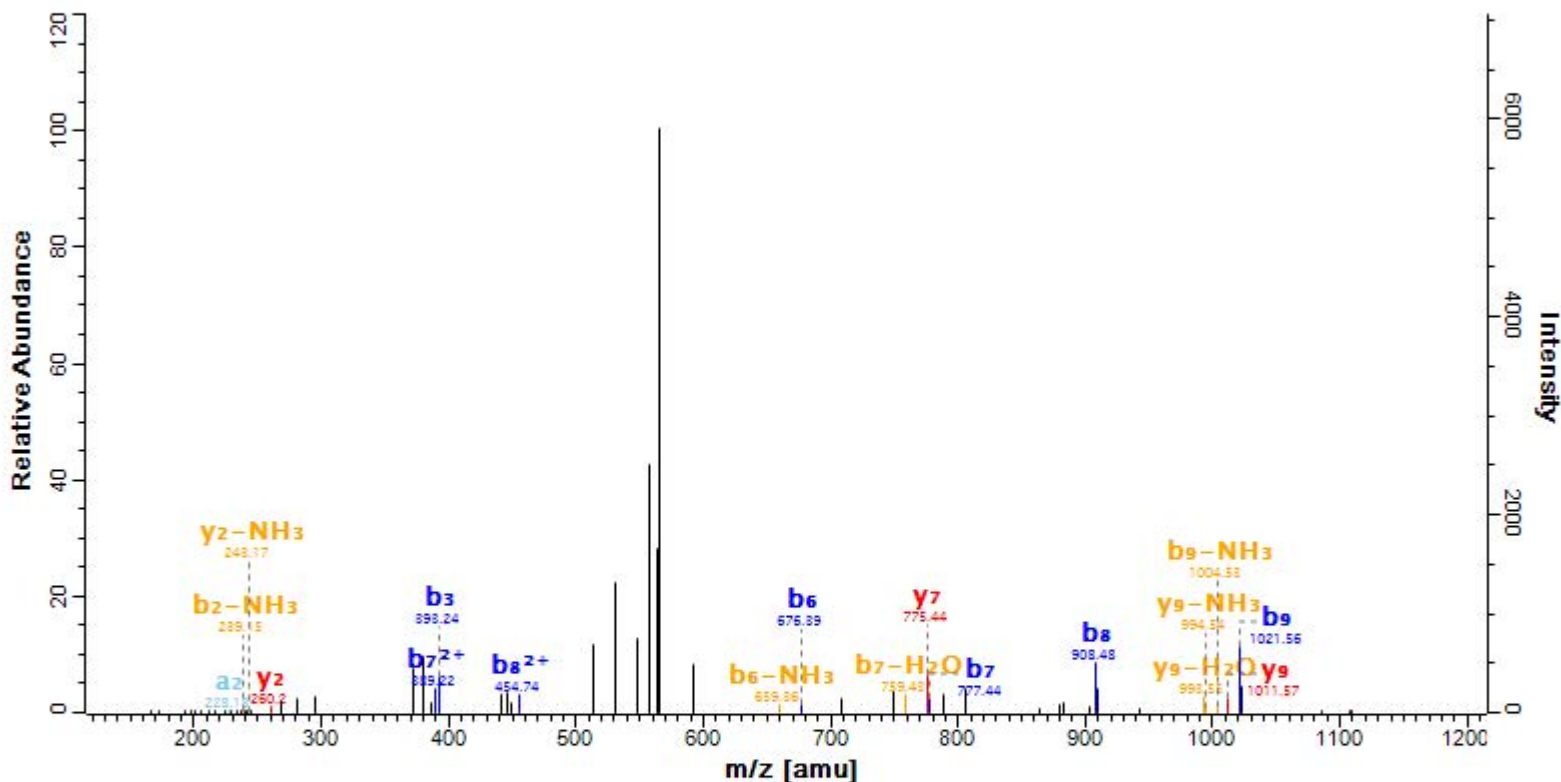

#### precursor information

|                   |                 |
|-------------------|-----------------|
| Mass:             | 1166.65962      |
| m/z:              | 584.33709       |
| Charge:           | 2+              |
| Retentiontime:    | 9.5763950347900 |
| Score:            | 83.49903        |
| Mass Error [ppm]: | 0.18859         |
| PEP:              | 0.0020873       |
| Precursor Type:   | MULTI           |

|                       |             |
|-----------------------|-------------|
| Annotation:           | 7 of 10     |
| AminoAcids Coverage:  | 70 %        |
| Intensity Coverage:   | 16 %        |
| Peak Coverage:        | 20 %        |
| Protein Localisation: | 298 ... 307 |

| a ion    |        | b <sup>2+</sup> ion |        | b ion    |        | y ion |   |          |               |
|----------|--------|---------------------|--------|----------|--------|-------|---|----------|---------------|
| Δ dalton | mass   | Δ dalton            | mass   | Δ dalton | mass   | seq   |   | Δ dalton | mass          |
|          | 129.11 |                     | 157.11 |          | 157.11 | 1     | R | 9        |               |
| -0.013   | 228.18 |                     | 256.18 |          | 256.18 | 2     | V | 8        | 1011.6 -0.066 |
|          | 365.24 |                     | 393.24 | -0.083   | 393.24 | 3     | H | 7        | 912.5         |
|          | 462.29 |                     | 490.29 |          | 490.29 | 4     | P | 6        | 775.44 -0.034 |
|          | 561.36 |                     | 589.36 |          | 589.36 | 5     | V | 5        | 678.39        |
|          | 648.39 |                     | 676.39 | +0.2062  | 676.39 | 6     | S | 4        | 579.32        |
|          | 749.44 | +0.1501             | 389.22 | +0.0327  | 777.44 | 7     | T | 3        | 492.29        |
|          | 880.48 | -0.039              | 454.74 | +0.0766  | 908.48 | 8     | M | 2        | 391.24        |
|          | 993.57 |                     | 1021.6 | -0.058   | 1021.6 | 9     | I | 1        | 260.2 +0.0301 |
|          |        |                     |        |          |        | 10    | K | 0        | 147.11        |

Scan number 3093 Raw file LNCAP\_Silac\_23F10\_set3\_13  
 Method ITMS: CID Pepti... 254.1

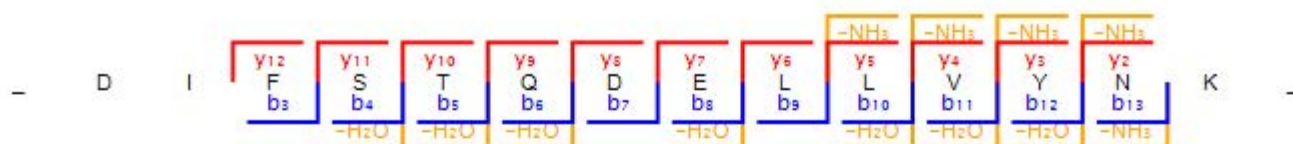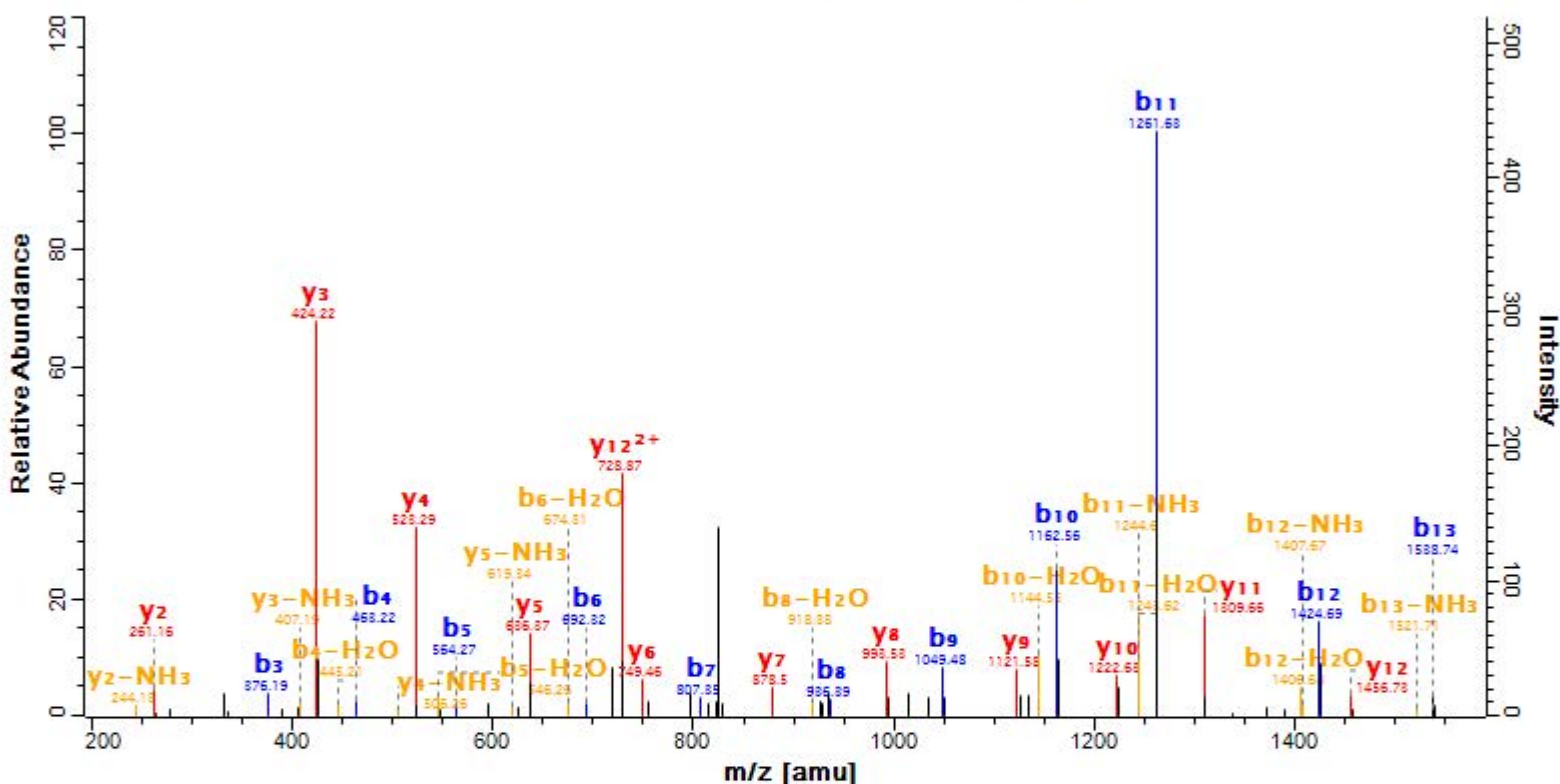

#### precursor information

|                   |                 |
|-------------------|-----------------|
| Mass:             | 1683.83543      |
| m/z:              | 842.92499       |
| Charge:           | 2+              |
| Retentiontime:    | 47.052474975585 |
| Score:            | 254.1022        |
| Mass Error [ppm]: | -0.080142       |
| PEP:              | 1.837E-59       |
| Precursor Type:   | ISO             |

| b ion     |          |     |   | y ion    |          | y <sup>2+</sup> ion |          |           |
|-----------|----------|-----|---|----------|----------|---------------------|----------|-----------|
| Δ dalton  | mass     | seq |   | Δ dalton | mass     | Δ dalton            | mass     |           |
|           | 116.0342 | 1   | D | 13       |          |                     |          |           |
|           | 229.1183 | 2   | I | 12       | 1569.816 | 1569.816            |          |           |
| -0.01269  | 376.1867 | 3   | F | 11       | 1456.732 | -0.0679             | 728.8696 | +0.051281 |
| -0.05527  | 463.2187 | 4   | S | 10       | 1309.663 | -0.01535            | 1309.663 |           |
| +0.045791 | 564.2664 | 5   | T | 9        | 1222.631 | +0.016189           | 1222.631 |           |
| -0.02475  | 692.325  | 6   | Q | 8        | 1121.584 | +0.013452           | 1121.584 |           |
| +0.379459 | 807.3519 | 7   | D | 7        | 993.5251 | -0.01714            | 993.5251 |           |
| +0.07942  | 936.3945 | 8   | E | 6        | 878.4982 | -0.02804            | 878.4982 |           |
| +0.047785 | 1049.479 | 9   | L | 5        | 749.4556 | +0.031642           | 749.4556 |           |
| -0.08767  | 1162.563 | 10  | L | 4        | 636.3715 | -0.04811            | 636.3715 |           |
| -0.16048  | 1261.631 | 11  | V | 3        | 523.2875 | -0.01953            | 523.2875 |           |
| -0.19256  | 1424.694 | 12  | Y | 2        | 424.2191 | +0.031367           | 424.2191 |           |
| +0.295277 | 1538.737 | 13  | N | 1        | 261.1557 | +0.096496           | 261.1557 |           |
|           |          | 14  | K | 0        | 147.1128 |                     | 147.1128 |           |

#### general information

|                       |             |
|-----------------------|-------------|
| Annotation:           | 11 of 14    |
| AminoAcids Coverage:  | 79 %        |
| Intensity Coverage:   | 70 %        |
| Peak Coverage:        | 48 %        |
| Protein Localisation: | 252 ... 265 |
